# Supplementary material for: Multi-tissue coexpression networks reveal unexpected subnetworks associated with disease
Source: PubMed Central journal article supplement (PMC2718521; doi:10.1186/gb-2009-10-5-r55), 2009-05-22
Supplement: gb-2009-10-5-r55-S1.pdf [file gb-2009-10-5-r55-S1.pdf]

# Supplementary Material

## Supporting Text

### Single Tissue Analysis

#### Gene selection

To construct single tissue gene-gene correlation (GGC) networks we have used Spearman correlation. The subset of genes used in this type analysis included all genes that participate in any TTC network as well as genes that have a fold change (FC) higher than 1.5 in at least 10% of samples and have at least 75% real values (i.e. the microarray spot was not flagged as undesirable). The total number of genes on the microarray is 23698 and they are summarized in Table T2 while the 9967 probes included in single tissue analysis are presented in table T3. We will call this set the "single tissue" (ST) gene set. The connectivity distribution for each GGC network is presented in Figure S1.

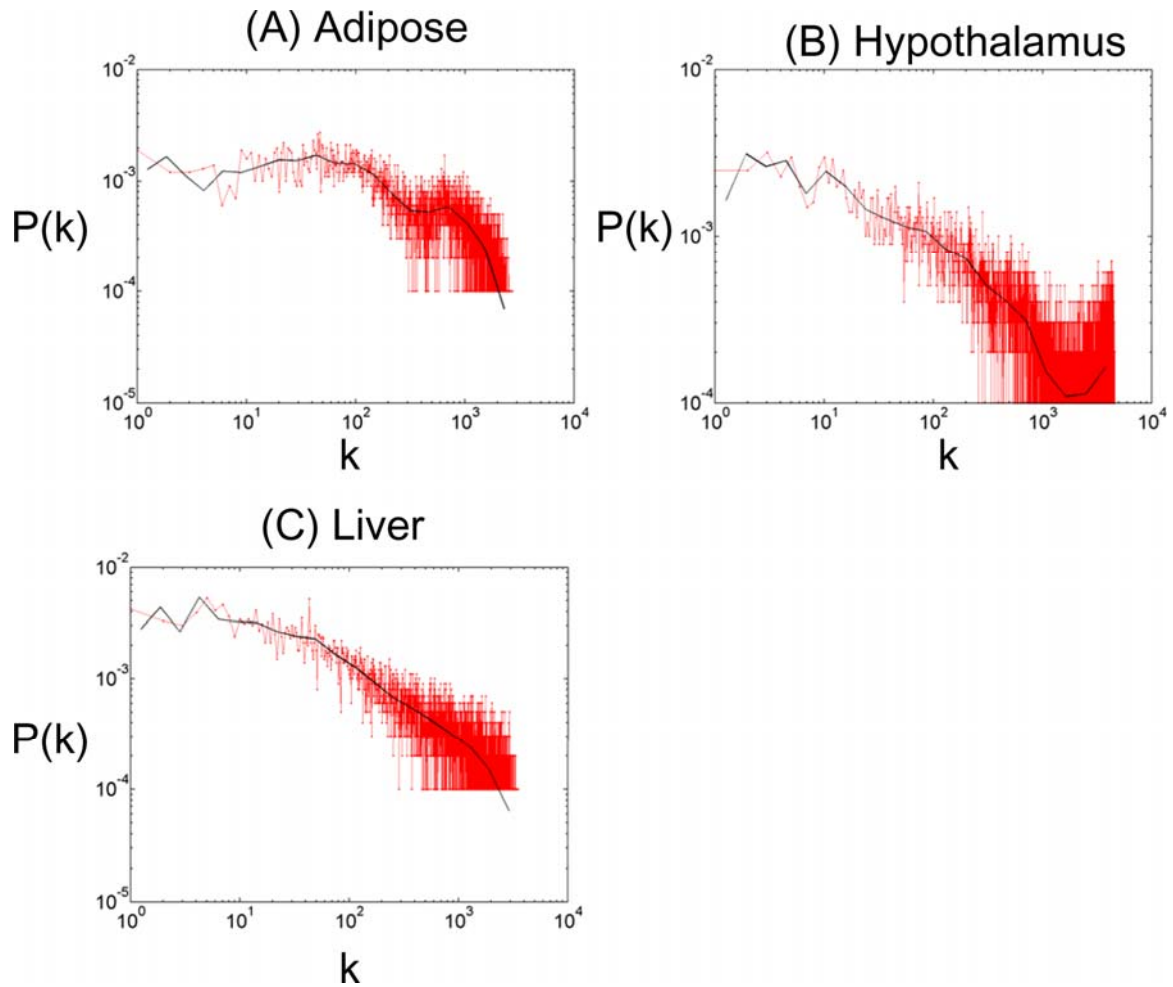

**Figure S1. Connectivity distribution  $P(k)$  for GGC networks.**

### **False Discovery Rate (FDR)**

To obtain the FDR we used permutations to generate the null distribution. Figure S2 shows the FDR curves obtained for adipose, hypothalamus and liver tissues.

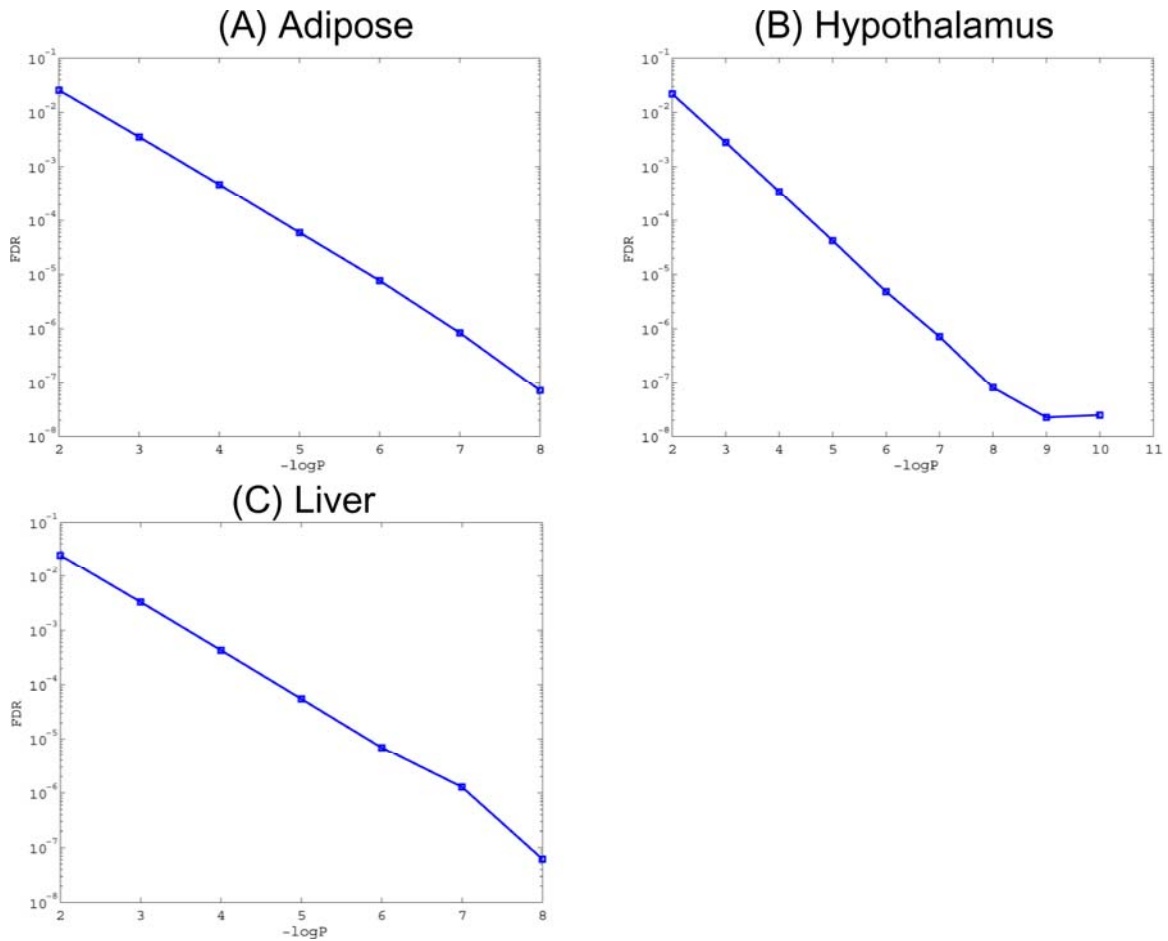

**Figure S2.** FDR curves for each tissue in the analysis.

### Modules enrichment

Modules were constructed using the algorithm described above. The heatmaps in Figure S3 show the modules detected in each tissue. Each module is marked on each heatmap by a yellow square. The heatmap colors represent the GGC coexpression network where a red dot represents a link between 2 genes while a green dot indicates that there is no link between the genes. Both x and y axis represent the genes in the ST set.

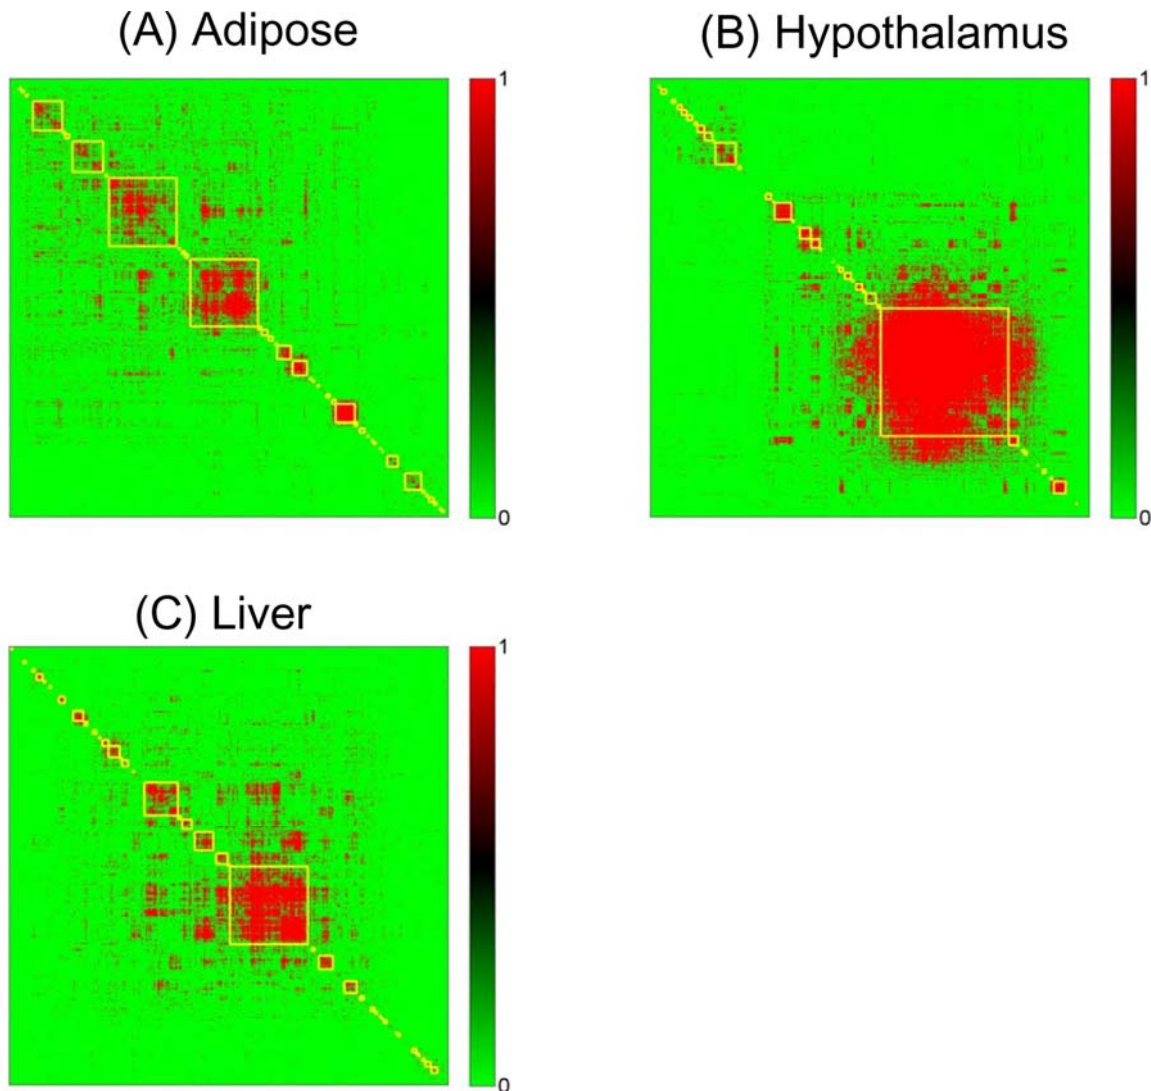

**Figure S3. Modules in single tissue GGC networks as detected by the algorithm. Each cluster is marked by the yellow rectangles.**

For each network we identified 20 topological clusters for that we tested chromosomal, cis eQTL, Gene Ontology (Biological Processes) and enrichment in genes associated with clinical traits. P values for all the overlaps are calculated

using Fischer's Exact Test (FET). To adjust for FDR due to the fact that we are testing multiple hypotheses simultaneously we have used Benjamini-Hochberg (BH) method. To determine for each tissue the genes correlated with the 64 clinical traits we computed the Spearman correlation between expression traits in each tissue and the clinical traits. The p values were BH corrected. We selected only genes at 10% FDR rate.

The cis eQTL and chromosomal enrichments are summarized in Figure S4 and show that single tissue modules are not enriched for genes on a specific chromosome nor are they enriched in cis eQTLs.

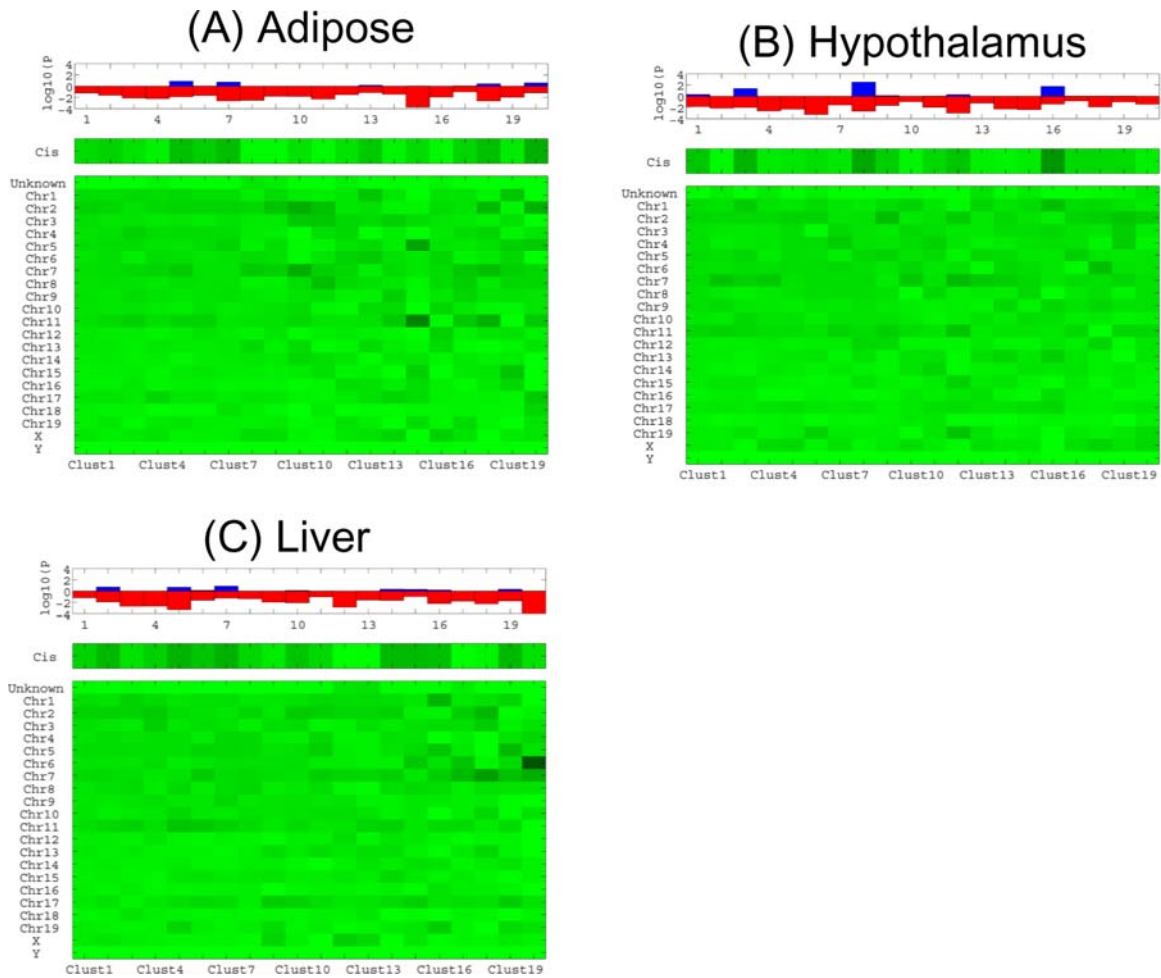

**Figure S4. Single tissue module enrichment.** Each panel has the following structure: top, p values from FET for cis-EQTLs blue bars over- and red bars under-enriched; middle, percentage overlap between module and genes with cis eQTLs; bottom percentage overlap between each module and genes on each chromosome. The scale is between green and black where green represents 0% overlap and black 100% overlap.

## Supplementary results for Tissue-to-tissue (TTC) networks

TTC networks were constructed using Spearman correlation, where we kept only pair of genes that had p values less than  $10^{-8}$ . A summary of each network size can be found in the main section of the paper.

TTC networks connectivity distribution in Figure S5 show scale-free behavior.

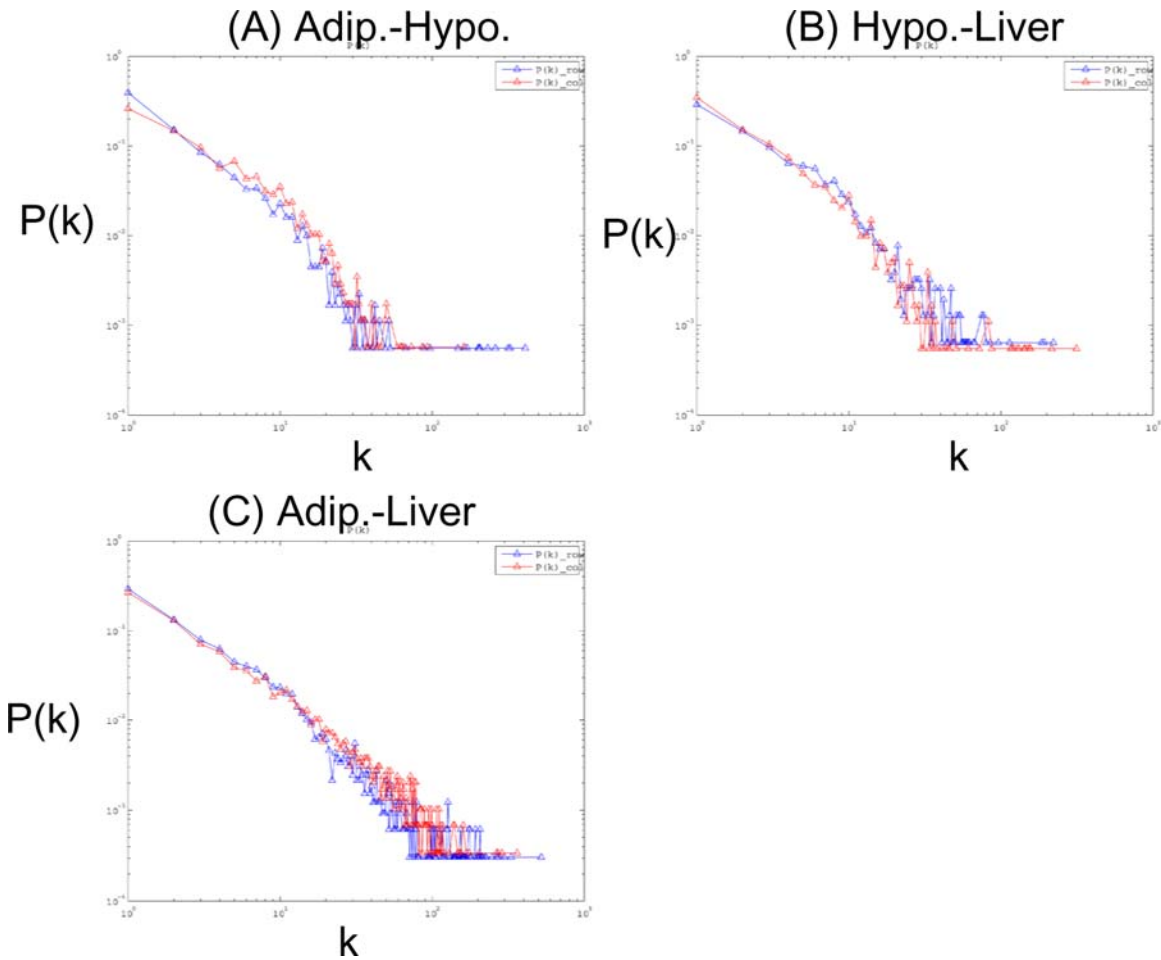

**Figure S5. Connectivity distribution for TTC networks. In each panel we show connectivity distribution for both types of genes in the TTC networks as follows: (A) blue for adipose, red for hypothalamus; (B) blue for hypothalamus, red for liver; (C) blue for adipose, red for liver.**

## TTC Networks False Discovery Rate

Using permutation we computed the FDR for each TTC network as presented in Figure S6. All 3 FDR curves are similar and for p values  $<10^{-9}$  FDR is zero. Thus we selected the p value threshold for all TTC networks to be  $10^{-8}$  which corresponds to  $FDR < 10^{-3}$  for all 3 TTC networks.

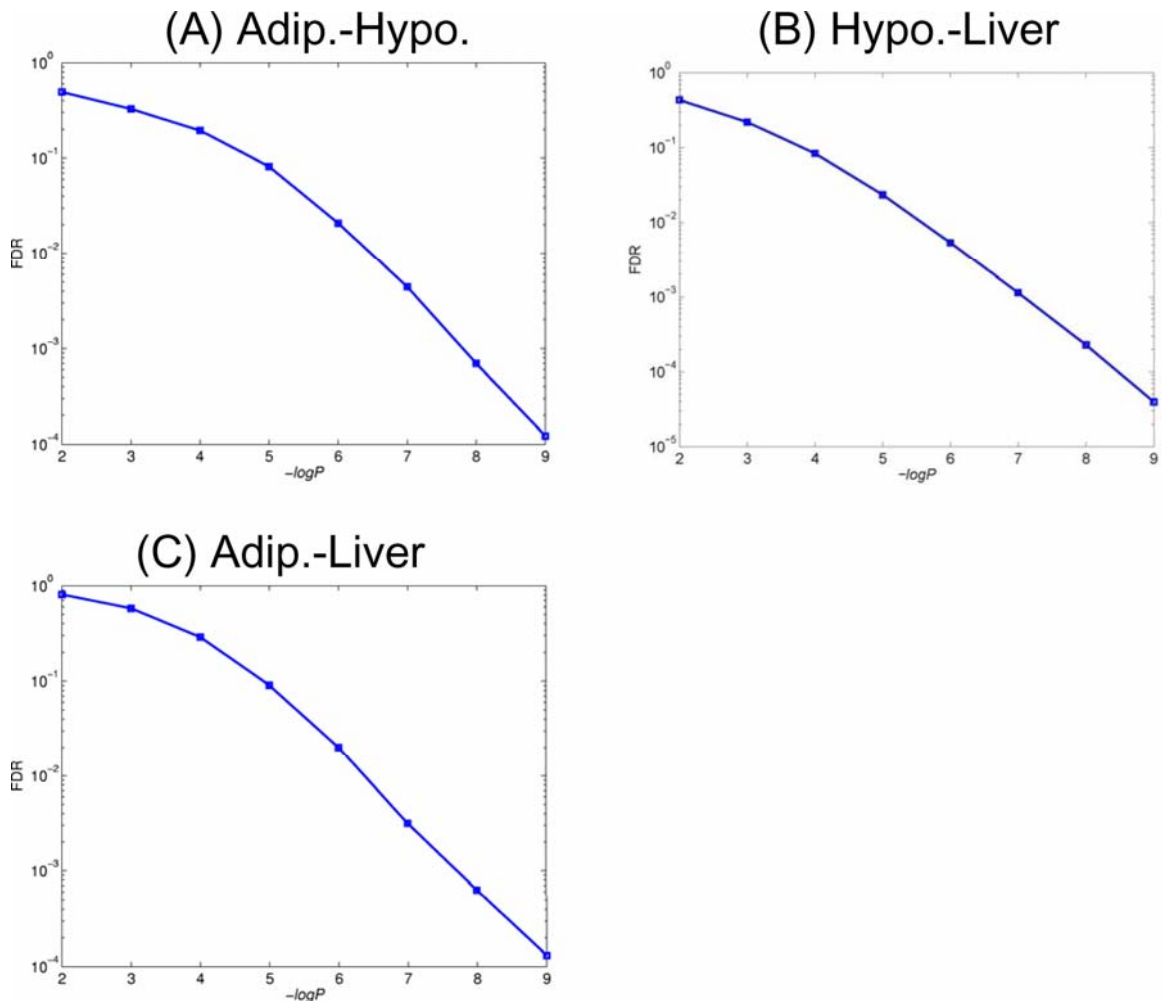

Figure S6. FDR curves for the TTC networks



## TTC Networks Summary

We present in Figures S7-9 a summary of each TTC network.

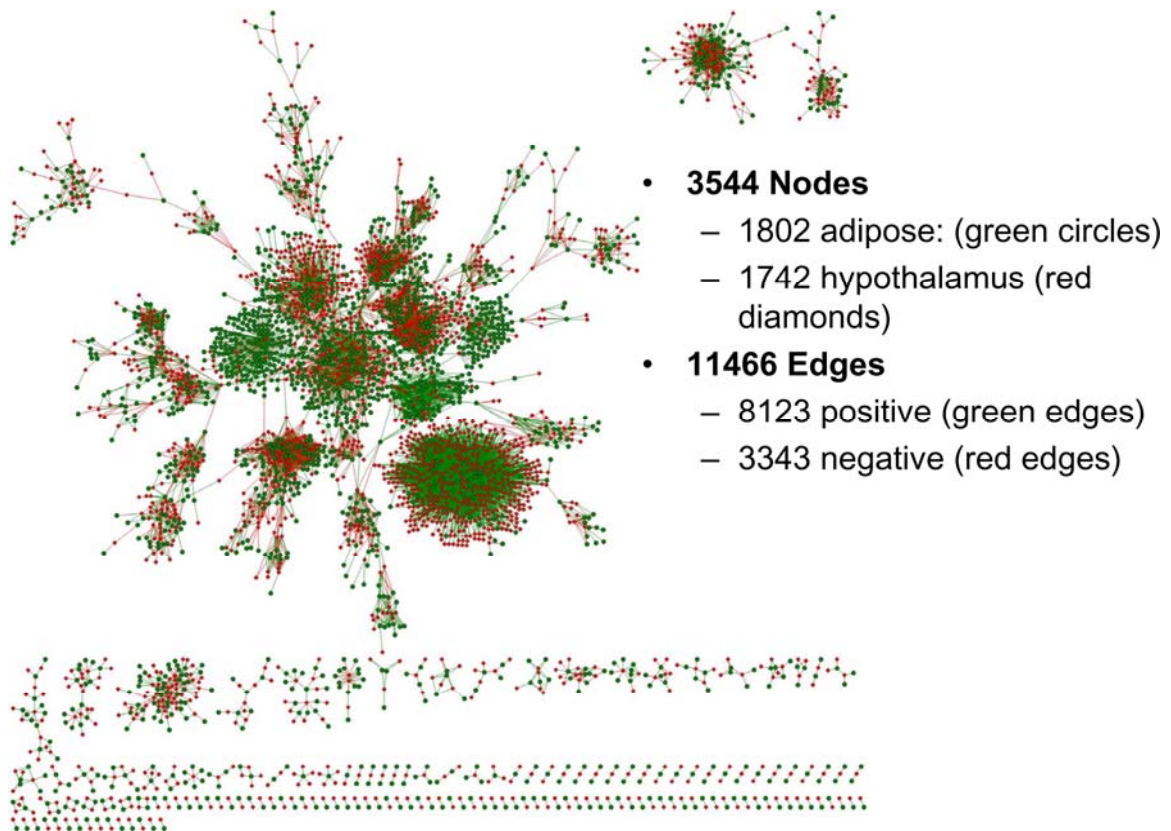

Figure S7. Adipose-Hypothalamus (AH) TTC network

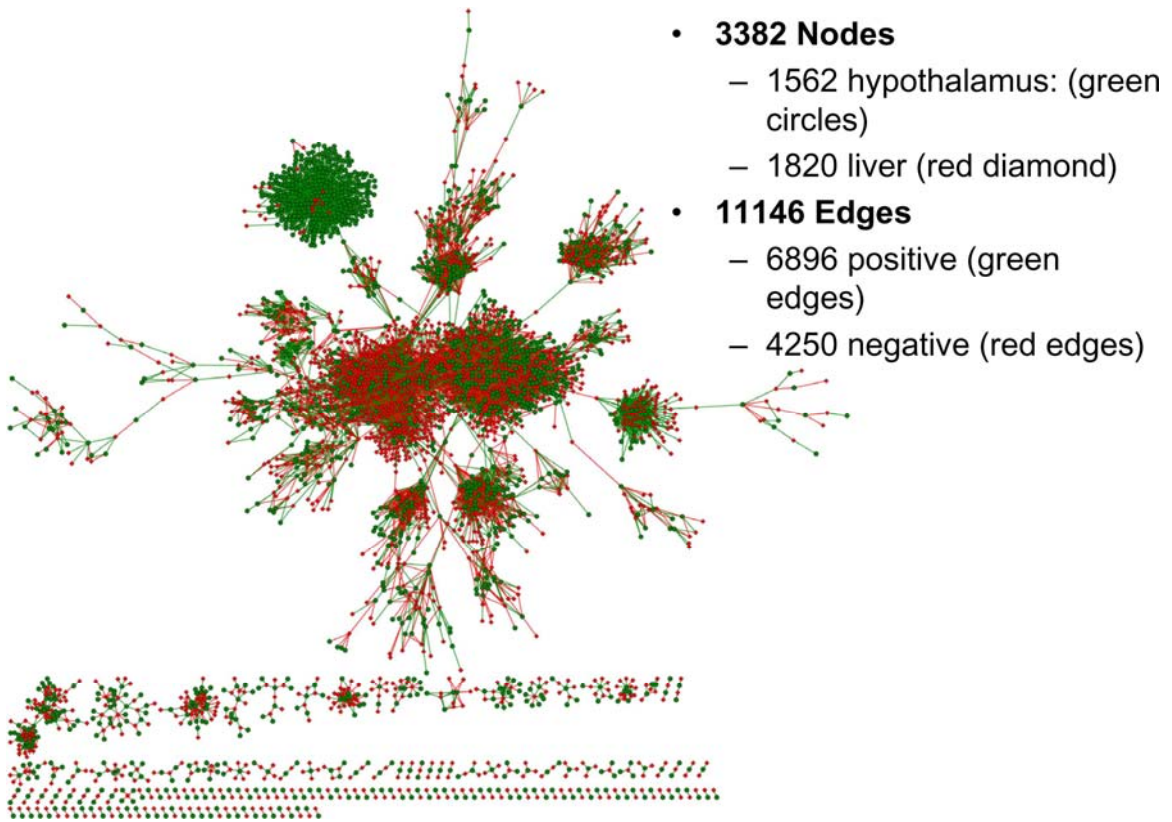

Figure S8. Hypothalamus-Liver (HL) TTC Network

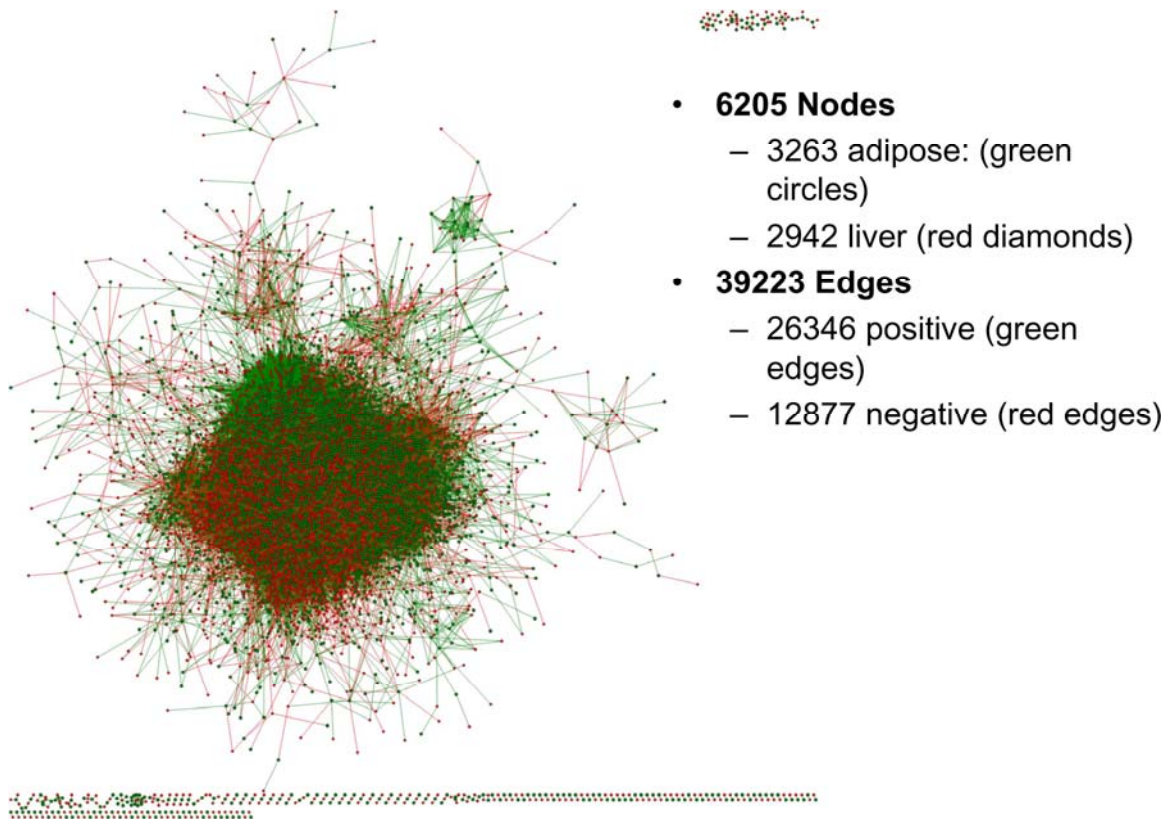

**Figure S9. Adipose-Liver (AL) TTC Network**

### **TTC Network Partitioning Algorithm**

To partition the AH TTC network we have used an algorithm based on edge betweenness (eb) as previously described(1). The algorithm removes the edge with the largest edge betweenness until no edge is left to remove in the network. To speed up the algorithm we have identified 2 types of "closed" subnetworks from which there is no need to further remove edges (otherwise the subnetwork is considered "open" for removal): 1) when the subnetwork contains only 2 nodes and 2) when the maximum path length is 2. Each time when the algorithm detects "closed" subnetworks it completely removes them for further

consideration. Each time we remove an edge we don't necessarily have to obtain 2 disconnected subnetworks thus the number of subnetworks at each removal event can either increase or stay the same. In Figure S10 we show that the total number of subnetworks (black) and "open" subnetworks at every edge removal event.

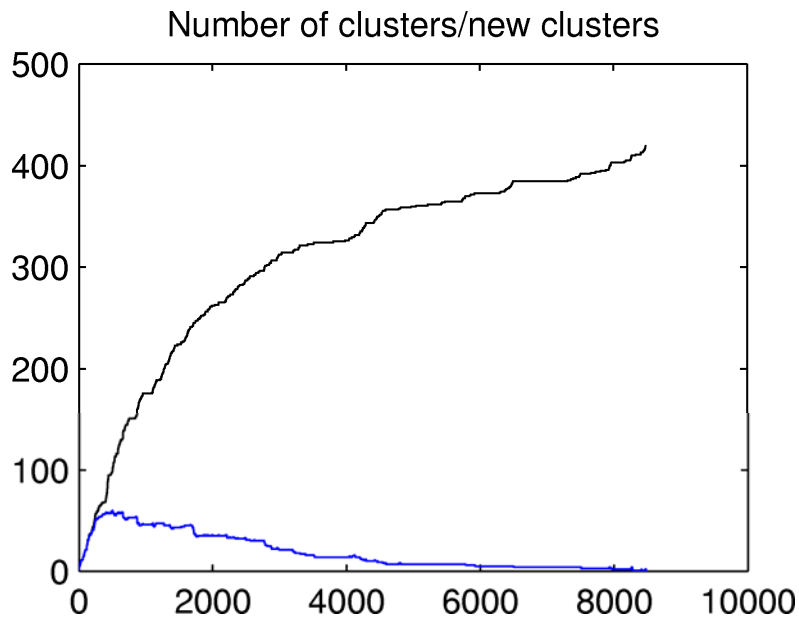

**Figure S10. Number of network partition versus edge removal time. In black we show total number of subnetworks at each edge removal step. With blue we show number of "open" subnetworks from where we can potentially remove edges. The number is obtained by subtracting from the total number of subnetwork in the partition the subnetworks defined as "closed".**

From Figure S10 we can identify the time interval during which the number of "open" subnetworks is not equal the total number of clusters. For the AH network we used the subnetworks after removing 221 edges from the network. Similar

plots can be generated for any network. We have tried several other partitioning algorithms (2, 3) that led to similar results. The subnetworks for each TTC network are highlighted in Figure S11.

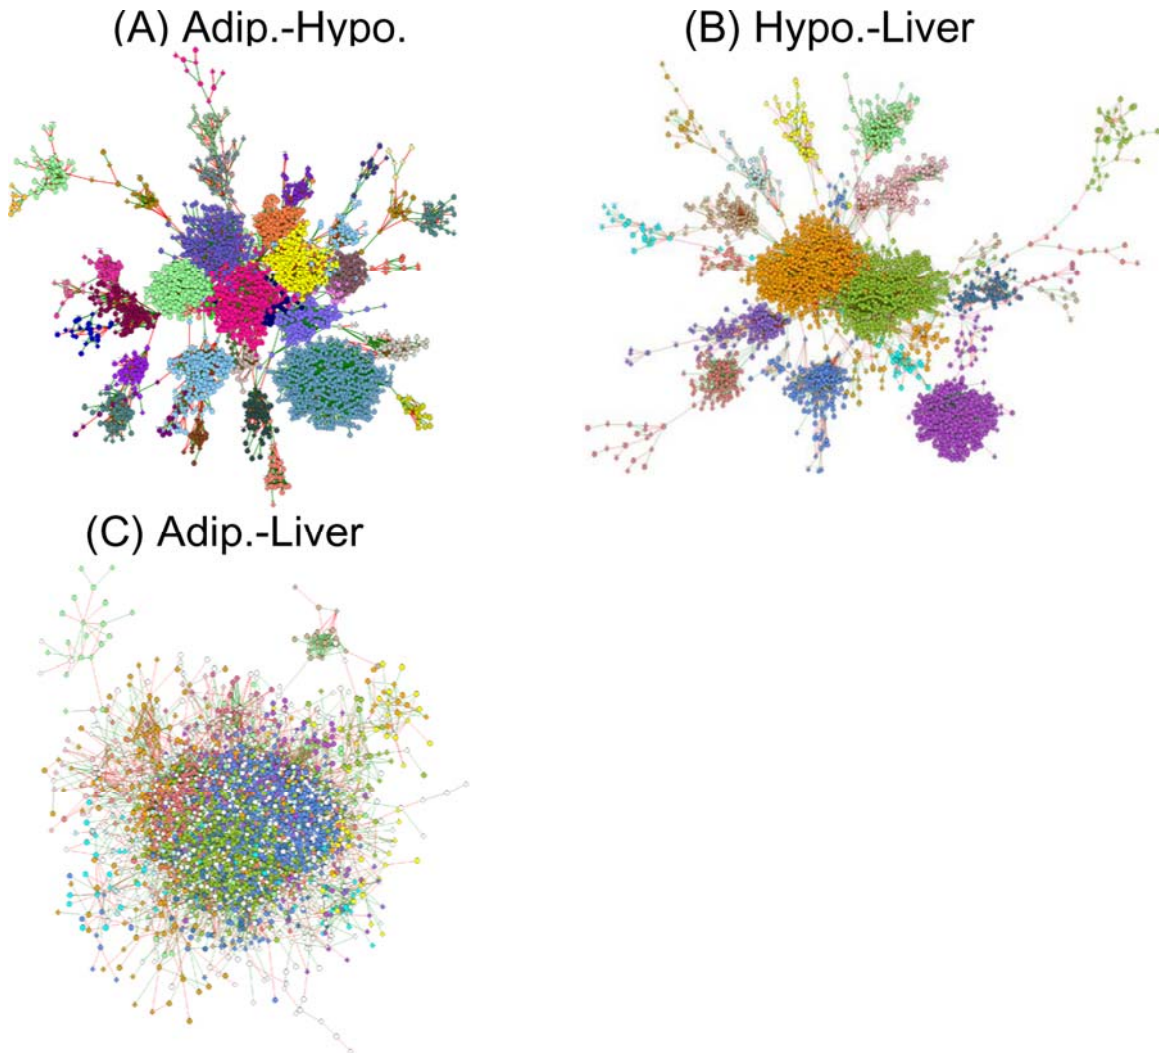

**Figure S11. TTC networks partitioning.** For each of the TTC networks we have highlighted the subnetworks obtained through partitioning. Each color represents a subnetwork. The AH and HL networks are much more modular than the AL network.

### **Subnetwork Enrichment**

Once we generated the subnetworks we computed enrichment p values using FET for each subnetwork. We separated each type of nodes in the corresponding subnetworks and calculated enrichment for each node category (i.e. in the AH TTC network for adipose and hypothalamus nodes) and in the case of chromosomal location and cis eQTLs for all genes in the subnetwork taken together. Similar to Figure S4, in Figure S11 we show cis eQTL and chromosomal location enrichments for all 3 TTC networks. The 2 types of subnetworks described in the paper –type 1 that are enriched for cis eQTLs and chromosomal location and type 2 where there is no such enrichment - can be observed for all 3 TTC networks,

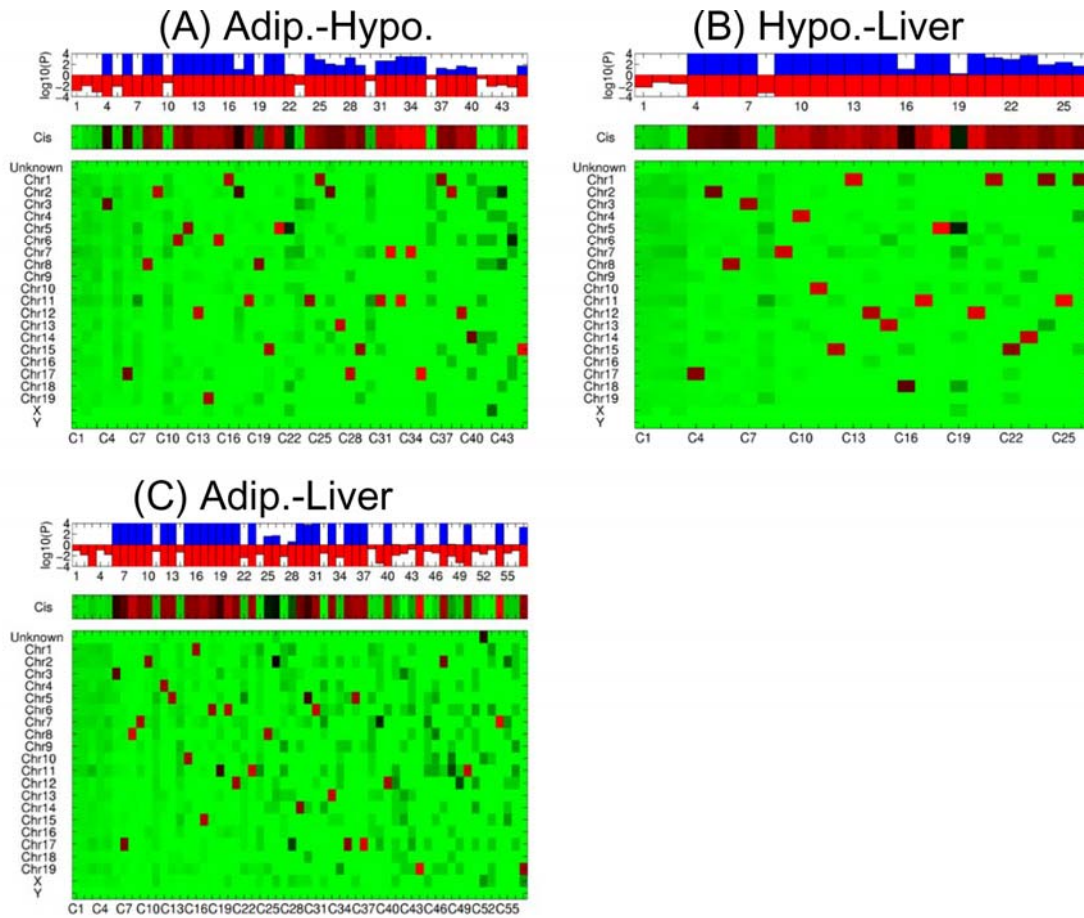

Figure S12. TTC Networks Enrichment. Each panel has the following structure: top, p values from FET for cis-EQTLs blue bars over- and red bars under-enriched; middle, percentage overlap between module and genes with cis eQTLs; bottom percentage overlap between each module and genes on each chromosome. The scale is between green and black where green represents 0% overlap and black 100% overlap.

### TTC Network Backbone

Network backbone has to be by definition the most reliable part of the network. In order to construct it we have computed the weighted edge betweenness(1) for all edges in the network. An edge connected weight is equal to the p value of the

correlation it denotes. Thus a shortest path is defined as the path between 2 genes along which the sum of edge weights is minimum. An edge is part of the backbone if its scaled edge-betweenness (defined as the total number of shortest paths that contain that edge divided to  $N-1$ , where  $N$  is the total number of nodes in the network) is larger than 1. Figure S12 depicts the backbones for the 3 TTC networks. The genes included in the backbone are thus the ones with the most robust correlations.



(A) Adip.-Hypo.

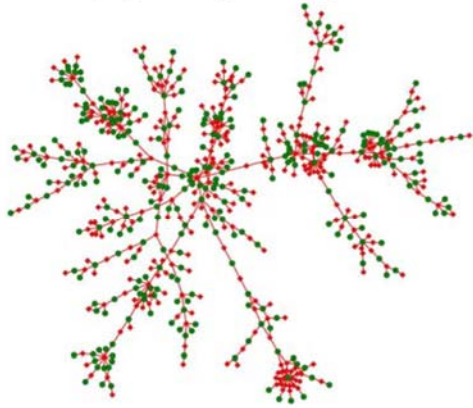

(B) Hypo.-Liver

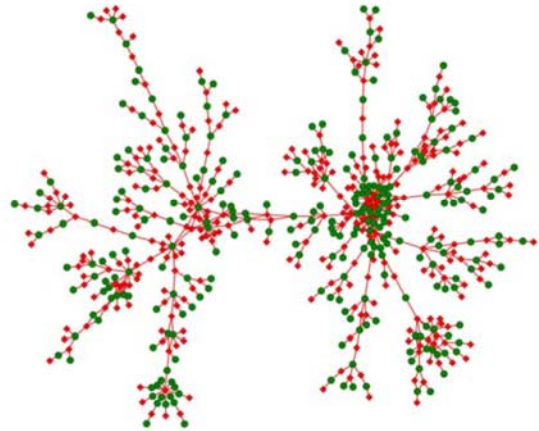

(C) Adip.-Liver

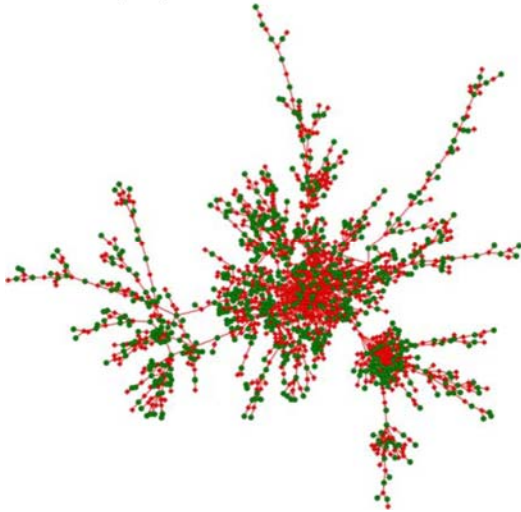

**Figure S13. TTC network backbones. Node color and symbols match the description from Figures 6-8 in the main section of the paper. Each backbone contains the most robust links from the TTC network.**

## Supporting Tables

**Table T1. Clinical traits description.**

| <b>Clinical Trait</b>     | <b>Additional Description</b>                      |
|---------------------------|----------------------------------------------------|
| 100xGonadal_Fat/Weight    |                                                    |
| 100xLiver/Weight          |                                                    |
| 100xSUBCUT./Weight        |                                                    |
| 100xlean/Weight           |                                                    |
| 100xtotal_tissue/Weight   |                                                    |
| BMC                       | Bone mineral circumference                         |
| BMD                       | Bone mineral density                               |
| Bone_area                 |                                                    |
| Glucose                   |                                                    |
| IL6                       |                                                    |
| Insulin                   |                                                    |
| Leptin                    |                                                    |
| Liver                     | Whole liver                                        |
| NMR_LEAN_MASS             |                                                    |
| SUBCUTANEOUS              | Subcutaneous fat                                   |
| TNFa                      |                                                    |
| Total_tissue              |                                                    |
| abdominal_fat             |                                                    |
| intake_act_bw,W5          | Daily intake week5 / body weight end week 5        |
| intake_act_bw,W6          | Daily intake week6 / body weight end week 6        |
| intake_act_bw,W7          | Daily intake week7 / body weight end week 7        |
| intake_act_bw,W8          | Daily intake week8 / body weight end week 8        |
| intake_act_bw_avg,Day_avg | Average daily intake/ body weight end week 8       |
| intake_amount,W5          | Total intake amount week 5                         |
| intake_amount,W6          | Total intake amount week 6                         |
| Intake_amount,W7          | Total intake amount week 7                         |
| Intake_amount,W8          | Total intake amount week 8                         |
| Intake_daily,Day_avg      | Average daily intake                               |
| Intake_metab,Day_avg      | Average daily intake/(75% weight at end of week 8) |
| Intake_total              | Total intake                                       |
| Intake_total_act_bw       | Sum of intake_act_bw,W5, W6, W7, W8                |
| Pixi_fat                  | Weight of pixi fat                                 |
| Total_fat                 | Weight of total fat                                |
| Weight                    | body weight end week 8                             |
| Weight,W3                 | body weight end week 3                             |
| Weight,W4                 | body weight end week 4                             |
| Weight,W5                 | body weight end week 5                             |
| Weight,W6                 | body weight end week 6                             |

|                    |                        |
|--------------------|------------------------|
| Weight,W7          | body weight end week 7 |
| Weight_change,Int1 | weight,W6- Weight,W3   |
| Weight_change,Int2 | Weight- Weight,W3      |
| Weight_change,Int3 | Weight- Weight,W4      |

**Table T2: Microarray probe annotation**

| Probe_ID | Gene_Symbol | Entrez_ID | Chromosomal_Location |
|----------|-------------|-----------|----------------------|
| 1        | NAN         |           |                      |
| 2        | NAN         |           |                      |
| 3        | NAN         |           |                      |
| 4        | NAN         |           |                      |
| 5        | NAN         |           |                      |
| 6        | NAN         |           |                      |
| 7        | NAN         |           |                      |
| 8        | NAN         |           |                      |
| 9        | NAN         |           |                      |
| 10       | NAN         |           |                      |
| 11       | NAN         |           |                      |
| 12       | NAN         |           |                      |
| 13       | NAN         |           |                      |
| 14       | NAN         |           |                      |
| 15       | NAN         |           |                      |
| 16       | NAN         |           |                      |
| 17       | NAN         |           |                      |
| 18       | NAN         |           |                      |
| 19       | NAN         |           |                      |
| 20       | NAN         |           |                      |
| 21       | NAN         |           |                      |
| 22       | NAN         |           |                      |
| 23       | NAN         |           |                      |
| 24       | NAN         |           |                      |
| 25       | NAN         |           |                      |
| 26       | NAN         |           |                      |
| 27       | NAN         |           |                      |
| 28       | NAN         |           |                      |
| 29       | NAN         |           |                      |
| 30       | NAN         |           |                      |
| 31       | NAN         |           |                      |
| 32       | NAN         |           |                      |
| 33       | NAN         |           |                      |
| 34       | NAN         |           |                      |
| 35       | NAN         |           |                      |
| 36       | NAN         |           |                      |
| 37       | NAN         |           |                      |
| 38       | NAN         |           |                      |
| 39       | NAN         |           |                      |
| 40       | NAN         |           |                      |
| 41       | NAN         |           |                      |
| 42       | NAN         |           |                      |
| 43       | NAN         |           |                      |
| 44       | NAN         |           |                      |
| 45       | NAN         |           |                      |
| 46       | NAN         |           |                      |
| 47       | NAN         |           |                      |
| 48       | NAN         |           |                      |
| 49       | NAN         |           |                      |

|     |     |  |  |
|-----|-----|--|--|
| 50  | NAN |  |  |
| 51  | NAN |  |  |
| 52  | NAN |  |  |
| 53  | NAN |  |  |
| 54  | NAN |  |  |
| 55  | NAN |  |  |
| 56  | NAN |  |  |
| 57  | NAN |  |  |
| 58  | NAN |  |  |
| 59  | NAN |  |  |
| 60  | NAN |  |  |
| 61  | NAN |  |  |
| 62  | NAN |  |  |
| 63  | NAN |  |  |
| 64  | NAN |  |  |
| 65  | NAN |  |  |
| 66  | NAN |  |  |
| 67  | NAN |  |  |
| 68  | NAN |  |  |
| 69  | NAN |  |  |
| 70  | NAN |  |  |
| 71  | NAN |  |  |
| 72  | NAN |  |  |
| 73  | NAN |  |  |
| 74  | NAN |  |  |
| 75  | NAN |  |  |
| 76  | NAN |  |  |
| 77  | NAN |  |  |
| 78  | NAN |  |  |
| 79  | NAN |  |  |
| 80  | NAN |  |  |
| 81  | NAN |  |  |
| 82  | NAN |  |  |
| 83  | NAN |  |  |
| 84  | NAN |  |  |
| 85  | NAN |  |  |
| 86  | NAN |  |  |
| 87  | NAN |  |  |
| 88  | NAN |  |  |
| 89  | NAN |  |  |
| 90  | NAN |  |  |
| 91  | NAN |  |  |
| 92  | NAN |  |  |
| 93  | NAN |  |  |
| 94  | NAN |  |  |
| 95  | NAN |  |  |
| 96  | NAN |  |  |
| 97  | NAN |  |  |
| 98  | NAN |  |  |
| 99  | NAN |  |  |
| 100 | NAN |  |  |

|     |               |        |                         |
|-----|---------------|--------|-------------------------|
| 101 | NAN           |        |                         |
| 102 | NAN           |        |                         |
| 103 | NAN           |        |                         |
| 104 | NAN           |        |                         |
| 105 | NAN           |        |                         |
| 106 | NAN           |        |                         |
| 107 | NAN           |        |                         |
| 108 | NAN           |        |                         |
| 109 | NAN           |        |                         |
| 110 | NAN           |        |                         |
| 111 | NAN           |        |                         |
| 112 | NAN           |        |                         |
| 113 | NAN           |        |                         |
| 114 | NAN           |        |                         |
| 115 | NAN           |        |                         |
| 116 | NAN           |        |                         |
| 117 | NAN           |        |                         |
| 118 | NAN           |        |                         |
| 119 | NAN           |        |                         |
| 120 | NAN           |        |                         |
| 121 | NAN           |        |                         |
| 122 | NAN           |        |                         |
| 123 | NAN           |        |                         |
| 124 | NAN           |        |                         |
| 125 | Zfp53         | 24132  | 17+:21616661-21646744   |
| 126 | 0610012D14Rik | 68352  | 7+:51720804-51723121    |
| 127 | Clic1         | 114584 | 17+:35187187-35195664   |
| 128 | MMT00005933   |        | 6-:6175246-6239961      |
| 129 | Podn          | 242608 | 4-:107687402-107704561  |
| 130 | Ywhaq         | 22630  | 12-:21397075-21422989   |
| 131 | Irx3          | 16373  | 8-:94322425-94325139    |
| 132 | Zic2          | 22772  | 14+:122874656-122879074 |
| 133 | Olfr313       | 258529 | 11+:58630511-58631437   |
| 134 | Peli1         | 67245  | 11+:21035471-21050325   |
| 135 | MMT00018153   |        |                         |
| 136 | 1700007N14Rik | 74215  | 14+:64713759-64716509   |
| 137 | Sorcs2        | 81840  | 5-:36359879-36740757    |
| 138 | Bcdin3d       | 75284  | 15-:99300514-99305160   |
| 139 | Mpst          | 246221 | 15+:78240468-78244435   |
| 140 | Lemd2         | 224640 | 17-:27326702-27340693   |
| 141 | Jag1          | 16449  | 2-:136908713-136942256  |
| 142 | Gata6         | 14465  | 18+:11052499-11085684   |
| 143 | Gvin1         | 74558  | 7-:113043647-113047500  |
| 144 | Krt12         | 268482 | 11-:99276979-99283570   |
| 145 | Tmem121       | 69195  | 12+:114425891-114427759 |
| 146 | Rlbp1l2       | 215890 | 10-:33232090-33344002   |
| 147 | Uox           | 22262  | 3+:146260130-146294369  |
| 148 | Trps1         | 83925  | 15-:50491996-50721587   |
| 149 | 2310007L24Rik | 75573  | 11+:106226784-106238428 |
| 150 | Rpp38         | 227522 | 2-:3246216-3249873      |
| 151 | Zfp697        | 242109 | 3+:98231389-98232553    |

|     |               |        |                         |
|-----|---------------|--------|-------------------------|
| 152 | Mark4         | 232944 | 7-:20010443-20043843    |
| 153 | 2010011I20Rik | 67017  | 2+:172171136-172179397  |
| 154 | Lmf2          | 105847 | 15-:89181435-89186047   |
| 155 | Vmn2r7        | 319217 | 3-:64351163-64528955    |
| 156 | MMT00002772   |        | 18+:51162686-51163443   |
| 157 | MMT00042458   |        | 4-:106999987-107001135  |
| 158 | Nppc          | 18159  | 1-:88566228-88567148    |
| 159 | Gen1          | 209334 | 12-:11263643-11272572   |
| 160 | MMT00078580   |        | X-:147359162-147360639  |
| 161 | MMT00011761   |        | 1-:110273614-110276016  |
| 162 | Coro2a        | 107684 | 4-:46551945-46614720    |
| 163 | Apoo          | 68316  | X+:91625258-91657834    |
| 164 | MMT00037331   |        | 6+:85105076-85106217    |
| 165 | Scn5a         | 20271  | 9-:119394347-119471790  |
| 166 | Chmp7         | 105513 | 14-:70116807-70132341   |
| 167 | Gcn5l2        | 14534  | 11-:100566551-100573718 |
| 168 | MMT00003638   |        | 14+:81374099-81374467   |
| 169 | Nkx6-2        | 14912  | 7-:146764672-146768696  |
| 170 | MMT00044003   |        | 2-:21364637-21365202    |
| 171 | MMT00025388   |        | 18-:85885324-85886049   |
| 172 | Tcra          | 21473  | 14+:54426200-54426876   |
| 173 | Vps39         | 269338 | 2-:120143770-120178723  |
| 174 | Mapkapk2      | 17164  | 1-:132950279-132955357  |
| 175 | Psmb2         | 26445  | 4+:126354998-126386942  |
| 176 | Sesn1         | 140742 | 10+:41530366-41628229   |
| 177 | Appl2         | 216190 | 10-:83062780-83111409   |
| 178 | MMT00018265   | 636126 | 12-:117106960-117248176 |
| 179 | Pcgf2         | 22658  | 11-:97551138-97561660   |
| 180 | Rbm39         | 170791 | 2-:155973371-156005876  |
| 181 | Glmn          | 170823 | 5-:107978042-108026594  |
| 182 | 5830428H23Rik | 414758 | 19-:61194718-61196414   |
| 183 | Bmp4          | 12159  | 14-:47003534-47006863   |
| 184 | Sorbs1        | 20411  | 19-:40369260-40588240   |
| 185 | Ap2b1         | 71770  | 11+:83116275-83216514   |
| 186 | Dap3          | 65111  | 3-:88727452-88753948    |
| 187 | Wdr62         | 233064 | 7-:31025159-31034896    |
| 188 | MMT00061078   |        | 1-:193098079-193129437  |
| 189 | MMT00059108   |        | X+:47726478-47727129    |
| 190 | Tal2          | 21350  | 4+:53798692-53799017    |
| 191 | Fbp2          | 14120  | 13-:62938243-62959676   |
| 192 | Eif3d         | 55944  | 15-:77789430-77801190   |
| 193 | C630028N24Rik | 235386 | 9+:54768279-54795128    |
| 194 | Nav3          | 260315 | 10-:109253309-109270103 |
| 195 | BC018242      | 235044 | 9+:21742717-21753349    |
| 196 | Nhlh2         | 18072  | 3+:101778944-101816984  |
| 197 | MMT00002471   |        | 18+:9632405-9672593     |
| 198 | Zranb2        | 53861  | 3-:157207977-157217790  |
| 199 | Gabrb3        | 14402  | 7+:64846561-65080216    |
| 200 | D0HXS9928E    | 108160 | X+:71558371-71565472    |
| 201 | B4galt4       | 56375  | 16+:38742394-38768950   |
| 202 | Naif1         | 71254  | 2+:32307958-32312474    |

|     |               |        |                         |
|-----|---------------|--------|-------------------------|
| 203 | Eif4e         | 13684  | 3+:138190241-138219424  |
| 204 | EG432649      | 432649 | 12+:36808292-36817625   |
| 205 | Cnksr1        | 194231 | 4-:133783960-133794223  |
| 206 | Dlgap2        | 244310 | 8+:14726928-14846707    |
| 207 | 2210408I21Rik | 72371  | 13+:77274810-77407113   |
| 208 | MMT00031901   | 433204 | 18+:80130659-80132771   |
| 209 | Trim14        | 74735  | 4-:46517388-46548988    |
| 210 | Scaper        | 244891 | 9-:55397686-55785917    |
| 211 | AW125753      | 105005 | 12-:14155645-14158860   |
| 212 | 1700026J04Rik | 71864  | 13-:35001832-35011798   |
| 213 | Rgs16         | 19734  | 1+:155587478-155592599  |
| 214 | Lrp1          | 16971  | 10-:126975244-127058182 |
| 215 | Bbs10         | 71769  | 10+:110735778-110741521 |
| 216 | Ighg          | 380794 | 12-:115910110-116148678 |
| 217 | Ubx2          | 67812  | 1+:130140470-130175951  |
| 218 | 4930511H11Rik | 78016  | 1+:54386983-54425580    |
| 219 | MMT00058440   |        | 12-:65977816-65978615   |
| 220 | Smr2          | 20600  | 5+:88515580-88538078    |
| 221 | 1700009P17Rik | 75472  | 1+:173051791-173057081  |
| 222 | EG210155      | 210155 | 7-:25507928-25511931    |
| 223 | Trp53inp2     | 68728  | 2+:155207575-155215575  |
| 224 | Zhx2          | 387609 | 15+:57652791-57655302   |
| 225 | MMT00073704   | 635169 | 4-:127605246-127628693  |
| 226 | A730082K24Rik | 101786 | 7+:122211497-122315904  |
| 227 | B4galt1       | 14595  | 4-:40751636-40801009    |
| 228 | MMT00046353   |        | 3-:11008847-11009612    |
| 229 | Eif4b         | 75705  | 15+:101912416-101927603 |
| 230 | MMT00000744   |        | 3+:65417429-65419248    |
| 231 | Arl3          | 56350  | 19-:46605830-46632872   |
| 232 | Pcdh9         | 211712 | 14-:94268644-94290147   |
| 233 | Sifn10        | 237887 | 11-:82843292-82849677   |
| 234 | 4930470P17Rik | 67637  | 2-:170404917-170427517  |
| 235 | Hcrtr1        | 230777 | 4-:129807808-129816631  |
| 236 | Bbs9          | 319845 | 9+:22280165-22483508    |
| 237 | Cyp2c37       | 13096  | 19+:40066929-40086733   |
| 238 | Rab12         | 19328  | 17-:66843852-66869024   |
| 239 | 2900054J07Rik | 72958  | 13+:67880690-67885428   |
| 240 | Tox4          | 268741 | 14+:52899493-52914184   |
| 241 | BC030867      | 217216 | 11+:102110213-102126492 |
| 242 | 4732471D19Rik | 319719 | 13+:54638439-54653391   |
| 243 | Spg3a         | 73991  | 12+:70993822-71035908   |
| 244 | Olf167        | 258937 | 16-:19514788-19515727   |
| 245 | Sqrdl         | 59010  | 2+:122610696-122635072  |
| 246 | MMT00053742   |        | 13-:112672463-112673919 |
| 247 | Cins1a        | 12729  | 7+:104845200-104867388  |
| 248 | MMT00059950   |        |                         |
| 249 | Mapk6         | 50772  | 9-:75235845-75246447    |
| 250 | Tubb2a-ps2    | 627110 | 12-:11888133-11889704   |
| 251 | Pkhd1         | 241035 | 1-:20107008-20418985    |
| 252 | C730027P07Rik | 245050 | 9+:121874316-121887805  |
| 253 | Slc5a8        | 216225 | 10+:88381107-88382303   |



|     |               |           |                         |
|-----|---------------|-----------|-------------------------|
| 254 | Olfr893       | 258333    | 9+:38016639-38017577    |
| 255 | Twf2          | 23999     | 9+:106105573-106117694  |
| 256 | Zbtb7a        | 16969     | 10+:80600778-80611198   |
| 257 | Sftpc         | 20389     | 14-:70920746-70923877   |
| 258 | Narg2         | 93697     | 9+:69254922-69258056    |
| 259 | Bin3          | 57784     | 14+:70499919-70537764   |
| 260 | Serpib3d      | 394252    | 1-:108974771-108980057  |
| 261 | Pgls          | 66171     | 8+:74116082-74120164    |
| 262 | Icos          | 54167     | 1+:61034770-61055963    |
| 263 | Akr1b3        | 11677     | 6-:34253935-34267421    |
| 264 | Dcakd         | 68087     | 11-:102855362-102858862 |
| 265 | Taf9          | 108143    | 13+:101420926-101436363 |
| 266 | Nr2f2         | 11819     | 7-:77498327-77505249    |
| 267 | Dync1h1       | 13424     | 12+:111839661-111905134 |
| 268 | Sys1          | 66460     | 2+:164286495-164291012  |
| 269 | Tuba1b        | 22143     | 15-:98762050-98763635   |
| 270 | Mett11d1      | 52535     | 14+:52504484-52511542   |
| 271 | 4932417H02Rik | 74370     | 11+:119465123-119760720 |
| 272 | Tgm1          | 21816     | 14-:56318872-56332312   |
| 273 | Ulk2          | 29869     | 11-:61591002-61668487   |
| 274 | Trit1         | 66966     | 4+:122693839-122732177  |
| 275 | Adam19        | 11492     | 11+:45869580-45959785   |
| 276 | Olfr1019      | 259017    | 2-:85681013-85681946    |
| 277 | MMT00073451   |           | 10-:21766000-21766840   |
| 278 | Akap1         | 11640     | 11-:88692985-88712813   |
| 279 | Fgf10         | 14165     | 13+:119504190-119578123 |
| 280 | Snai2         | 20583     | 16+:14706026-14709467   |
| 281 | MMT00063621   |           | X-:53531300-53535766    |
| 282 | Igh-VJ558     | 16061     | 12-:116026559-116027017 |
| 283 | Gmcl1l        | 71847     | X+:30732653-30734582    |
| 284 | Osr2          | 107587    | 15+:35225866-35233059   |
| 285 | Catsper1      | 225865    | 19+:5335740-5344152     |
| 286 | MMT00070509   | 100037278 | 8+:74127597-74132047    |
| 287 | MMT00023085   |           | 4+:32339197-32352800    |
| 288 | Col6a2        | 12834     | 10-:76058506-76086059   |
| 289 | Crb1          | 170788    | 1-:141094920-141273618  |
| 290 | B230118H07Rik | 68170     | 2-:101402262-101469143  |
| 291 | Sbp           | 20234     | 17+:24078962-24082567   |
| 292 | MMT00020389   |           | 1+:3044371-3045135      |
| 293 | MMT00075127   |           |                         |
| 294 | Ehhadh        | 74147     | 16-:21761365-21763011   |
| 295 | Pdlim1        | 54132     | 19-:40296730-40346025   |
| 296 | MMT00006951   |           | 5-:6426255-6429114      |
| 297 | MMT00028756   |           | 11+:57262583-57263369   |
| 298 | 9630013A20Rik | 319903    | 14-:84859476-84876230   |
| 299 | MMT00061667   |           | 1-:53641301-53693021    |
| 300 | Kcnk13        | 217826    | 12+:101204117-101300884 |
| 301 | AU014645      | 433702    | 4+:46151508-46185276    |
| 302 | Uprt          | 331487    | X+:101678261-101697244  |
| 303 | Casp8         | 12370     | 1+:58852269-58903856    |
| 304 | Pus7l         | 78895     | 15-:94353071-94373932   |

|     |               |        |                           |
|-----|---------------|--------|---------------------------|
| 305 | Cma2          | 545055 | 14+:56569816-56592866     |
| 306 | MMT00067578   |        | X+:16829153-16831523      |
| 307 | MMT00013484   |        | 5+:94167091-94170797      |
| 308 | Meig1         | 104362 | 2--3326318-3336313        |
| 309 | Slc25a11      | 67863  | 11--70457826-70460517     |
| 310 | Olfir288      | 545140 | 15--98017227-98025973     |
| 311 | Dock3         | 208869 | 9--106810842-106817008    |
| 312 | Amfr          | 23802  | 8--96495825-96536735      |
| 313 | Ppp5c         | 19060  | 7--17589996-17613248      |
| 314 | Samd12        | 320679 | 15--53489903-53551239     |
| 315 | OTTMUSG00000  | 433287 | 1--33892732-33895906      |
| 316 | 4930471G03Rik | 74966  | 18+:36265806-36269607     |
| 317 | Ceacam13      | 69785  | 7+:18595246-18604569      |
| 318 | 9130208D14Rik | 77700  | 7--:112972738-112980029   |
| 319 | MMT00032241   |        |                           |
| 320 | MMT00043952   |        |                           |
| 321 | Crbn          | 58799  | 6--:106729923-106750031   |
| 322 | Abcb5         | 77706  | 12--:120106320-120204895  |
| 323 | Tex13         | 83555  | X--:137344599-137347629   |
| 324 | 9830134C10Rik | 442827 | 17+:29282178-29285917     |
| 325 | MMT00012327   |        | 10--:21155743-21156941    |
| 326 | 4931409K22Rik | 231045 | 5--:24049250-24061227     |
| 327 | H2-Ea         | 14968  | 17--:34479878-34481590    |
| 328 | Map4k1        | 26411  | 7+:29767868-29788299      |
| 329 | Lmod1         | 93689  | 1+:137221407-137263405    |
| 330 | MMT00063866   |        | 5--:110508280-110528879   |
| 331 | Rnf141        | 67150  | 7--:117959858-117987873   |
| 332 | Accn4         | 241118 | 1+:75447024-75469922      |
| 333 | Ciapi1        | 109006 | 8--:97346460-97356595     |
| 334 | Ppp1r3f       | 54646  | X--:7136078-7151246       |
| 335 | V1ra8         | 113850 | 6+:90152810-90153650      |
| 336 | Arhgef12      | 69632  | 9--:42773841-42914463     |
| 337 | Rasgef1b      | 320292 | 5--:99646445-99681873     |
| 338 | B930006L02Rik | 319604 | 7+:107855198-107983967    |
| 339 | Hmgcs1        | 208715 | 13_random--:114708-127798 |
| 340 | Olfir610      | 259085 | 7--:110654511-110655458   |
| 341 | 1700007B14Rik | 71831  | 8+:78078740-78287008      |
| 342 | Nrbf2         | 641340 | 10--:66729439-66748031    |
| 343 | 1700123I01Rik | 76663  | 19+:6184400-6224217       |
| 344 | MMT00036566   |        | 1+:29794139-29881997      |
| 345 | MMT00078552   |        | 6+:117758315-117759614    |
| 346 | Olfir1484     | 258288 | 19+:13659795-13660741     |
| 347 | Pdcl          | 67466  | 2--:37207351-37212895     |
| 348 | Ccdc52        | 212514 | 16+:44347233-44387344     |
| 349 | BC060632      | 244654 | 8+:113250085-113264785    |
| 350 | St6galnac6    | 50935  | 2+:32462545-32475051      |
| 351 | MMT00070461   |        | 10--:41082639-41083974    |
| 352 | 4732415M23Rik | 320869 | 8+:125736748-125745944    |
| 353 | Olfir447      | 258990 | 6+:42861523-42862455      |
| 354 | MMT00007996   |        | 6--:67583076-67584137     |
| 355 | Rasef         | 242505 | 4--:73360482-73380457     |

|     |               |        |                         |
|-----|---------------|--------|-------------------------|
| 356 | Sart1         | 20227  | 19-:5380059-5388661     |
| 357 | Ftsj3         | 56095  | 11-:106110457-106117112 |
| 358 | Ercc2         | 13871  | 7+:19967627-19979792    |
| 359 | Ciita         | 12265  | 16+:10488371-10527656   |
| 360 | Igh-VJ558     | 16061  | 12-:115984439-115984952 |
| 361 | Fign          | 60344  | 2-:63815896-63936045    |
| 362 | Gng13         | 64337  | 17+:25855645-25855976   |
| 363 | Adora2a       | 11540  | 10+:74787665-74797535   |
| 364 | 0610040B09Rik | 75395  | 11-:96152349-96154868   |
| 365 | 1700019N12Rik | 67077  | 19-:6996915-6999870     |
| 366 | Adcy6         | 11512  | 15-:98420421-98435257   |
| 367 | Hoxc13        | 15422  | 15+:102751780-102757855 |
| 368 | Ccdc97        | 52132  | 7-:26496135-26504072    |
| 369 | Lcn6          | 620709 | 2+:25532303-25532741    |
| 370 | MMT00012017   |        | 19-:12407384-12410207   |
| 371 | MMT00058786   |        | 8-:109560987-109562129  |
| 372 | Txndc1        | 72736  | 12+:71554101-71569008   |
| 373 | BC066135      | 271887 | 2-:180013806-180015691  |
| 374 | Slc25a40      | 319653 | 5+:8422281-8452820      |
| 375 | MMT00077729   |        | 19+:23680345-23734472   |
| 376 | Tbc1d2b       | 67016  | 9-:90099151-90114000    |
| 377 | MMT00004099   |        | 14+:9241367-9243187     |
| 378 | Hrh4          | 225192 | 18+:13165543-13181089   |
| 379 | Nmnat1        | 66454  | 4-:148842745-148848706  |
| 380 | Fry           | 320365 | 5+:151062843-151300326  |
| 381 | Rbmxt         | 19656  | 8-:81029169-81032740    |
| 382 | Nsf           | 18195  | 11-:103684371-103815328 |
| 383 | Thoc2         | 331401 | X-:39150337-39160580    |
| 384 | Olfr668       | 259061 | 7-:112073321-112074276  |
| 385 | Cog3          | 338337 | 14-:76102158-76154245   |
| 386 | Deaf1         | 54006  | 7-:148483083-148513477  |
| 387 | Rgs10         | 67865  | 7-:135517138-135561686  |
| 388 | Chst5         | 56773  | 8-:114413035-114434099  |
| 389 | MMT00057495   |        | X+:73442850-73444156    |
| 390 | MMT00047307   | 639774 | 4+:111591992-111609723  |
| 391 | 4933416I08Rik | 71159  | X+:50989700-50994509    |
| 392 | Sec22b        | 20333  | 3+:97705203-97725429    |
| 393 | Ucp1          | 22227  | 8+:85814481-85821868    |
| 394 | Ccdc85a       | 216613 | 11-:28288819-28334158   |
| 395 | Cep27         | 66296  | 2+:120435171-120445549  |
| 396 | Sepsecs       | 211006 | 5-:53031331-53060947    |
| 397 | Ak7           | 78801  | 12+:106944326-107020654 |
| 398 | BC025446      | 223631 | 15+:75047025-75053089   |
| 399 | Cr1l          | 12946  | 1-:196930077-196957759  |
| 400 | EG434402      | 434402 | 9+:48302955-48304076    |
| 401 | MMT00061194   |        | 4+:33051752-33052247    |
| 402 | Timp3         | 21859  | 10+:85763281-85812250   |
| 403 | Leprotil      | 68192  | 8-:35200370-35209862    |
| 404 | Fcrlb         | 435653 | 1-:172837403-172842410  |
| 405 | Emr4          | 52614  | 17+:55889297-55992735   |
| 406 | Wbp2          | 22378  | 11-:115939887-115948278 |

|     |               |        |                         |
|-----|---------------|--------|-------------------------|
| 407 | Serpina6      | 12401  | 12-:104884842-104895281 |
| 408 | Fpr3          | 14294  | 17+:18024815-18108641   |
| 409 | Lxn           | 17035  | 3-:67261918-67267735    |
| 410 | MMT00048420   |        | 17+:85248800-85273194   |
| 411 | Ccdc68        | 381175 | 18+:70098496-70129265   |
| 412 | Cib4          | 73259  | 5-:30787955-30848209    |
| 413 | Acy1          | 109652 | 9-:106335326-106340567  |
| 414 | Prpf40a       | 56194  | 2-:52997511-53050221    |
| 415 | Ypel2         | 77864  | 11+:86749926-86750408   |
| 416 | Xlr5b         | 627081 | X+:70397218-70401916    |
| 417 | E030010N08Rik | 381284 | 1+:95109362-95112311    |
| 418 | MMT00068225   |        | 10+:68787954-68788417   |
| 419 | Foxk2         | 68837  | 11+:121121570-121171208 |
| 420 | Ear11         | 93726  | 14-:51875113-51875581   |
| 421 | V1rb2         | 24112  | 6-:90022080-90023012    |
| 422 | Vmn2r69       | 330581 | 7-:92555098-92561077    |
| 423 | Klhl5         | 71778  | 5+:65499025-65559424    |
| 424 | Olf1240       | 258804 | 2-:89279490-89280434    |
| 425 | MMT00064181   |        | X-:53144982-53147353    |
| 426 | Mobk3         | 19070  | 1+:55188133-55210100    |
| 427 | Smg6          | 103677 | 11+:74802858-74805687   |
| 428 | Klhl29        | 208439 | 12-:5087957-5298259     |
| 429 | 2410012H22Rik | 69747  | 11-:62080721-62082322   |
| 430 | Becn1         | 56208  | 11-:101150126-101163168 |
| 431 | MMT00010015   |        | 10-:120202829-120215942 |
| 432 | EG215974      | 215974 | 10+:44723195-44726921   |
| 433 | Pla2g12b      | 69836  | 10+:58866410-58884481   |
| 434 | Psm1          | 70247  | 1+:87961212-88035865    |
| 435 | Arpc1a        | 56443  | 5+:145844737-145869625  |
| 436 | Prnp          | 19122  | 2+:131735692-131764163  |
| 437 | Ndr1          | 17988  | 15-:66760883-66801201   |
| 438 | MMT00045243   |        | X-:23431938-23433160    |
| 439 | Ugt2b35       | 243085 | 5+:87429916-87437385    |
| 440 | Psip1         | 101739 | 4-:83101585-83131696    |
| 441 | MMT00000745   |        | 6+:41101789-41138740    |
| 442 | Ngb           | 64242  | 12-:88439267-88443286   |
| 443 | Xpo5          | 72322  | 17+:46339694-46380544   |
| 444 | Uba52         | 22186  | 8-:73032172-73033534    |
| 445 | 2610029I01Rik | 77032  | 4-:21684530-21694363    |
| 446 | MMT00020922   |        |                         |
| 447 | Cpa4          | 71791  | 6+:30523862-30542417    |
| 448 | Sh3glb2       | 227700 | 2-:30200330-30214751    |
| 449 | 1700019P21Rik | 75546  | 1-:140772851-140773554  |
| 450 | Gpr162        | 14788  | 6-:124808464-124813792  |
| 451 | Milt11        | 56772  | 3-:95023058-95032166    |
| 452 | Capzb         | 12345  | 4+:138748922-138847181  |
| 453 | Uqcr          | 66594  | 10-:79865743-79869575   |
| 454 | Klrg1         | 50928  | 6-:122220621-122232851  |
| 455 | MMT00052147   |        |                         |
| 456 | Frm1d6        | 319710 | 12+:72001195-72003219   |
| 457 | Cacng5        | 140723 | 11-:107738666-107745855 |

|     |               |        |                         |
|-----|---------------|--------|-------------------------|
| 458 | Olfir876      | 258883 | 9+:37611497-37612429    |
| 459 | Tcfap2a       | 21418  | 13-:40812269-40829150   |
| 460 | 1700011A15Rik | 66322  | 15+:101278204-101284335 |
| 461 | Zfp664        | 269704 | 5+:125343059-125369006  |
| 462 | Vdac2         | 22334  | 14+:22650782-22665099   |
| 463 | Olfir638      | 259124 | 7+:111151772-111152736  |
| 464 | 2310038E17Rik | 71903  | 8+:107482964-107483897  |
| 465 | 6430571L13Rik | 235599 | 9+:107244680-107250961  |
| 466 | Ampd3         | 11717  | 7+:117921317-117953376  |
| 467 | Ube2b         | 22210  | 11+:51798649-51799734   |
| 468 | 2610020C07Rik | 69918  | 16+:11203489-11220817   |
| 469 | Drg1          | 13494  | 11-:3149924-3166389     |
| 470 | MMT00076063   |        | 7-:14168976-14170985    |
| 471 | MMT00012978   |        | 11-:6425473-6428703     |
| 472 | EG434782      | 434782 | X-:57298120-57299423    |
| 473 | MMT00063585   |        | X-:53407721-53409696    |
| 474 | Ii20ra        | 237313 | 10+:19432400-19479459   |
| 475 | Matr3         | 17184  | 18+:35731677-35732596   |
| 476 | Lymr1         | 73919  | 7+:127039805-127060264  |
| 477 | Vmn2r3        | 637004 | 3-:64062882-64091417    |
| 478 | Sfrs9         | 108014 | 5+:115777225-115783086  |
| 479 | Best1         | 24115  | 19-:10059660-10067811   |
| 480 | Zdhhc6        | 66980  | 19-:55372790-55390516   |
| 481 | MMT00015583   |        | 3-:69370441-69371448    |
| 482 | Rnf43         | 207742 | 11+:87477636-87549040   |
| 483 | Atp5j         | 11957  | 16-:84828116-84831744   |
| 484 | Atp4a         | 11944  | 7+:31497370-31510203    |
| 485 | MMT00042797   |        | 2-:77498710-77499405    |
| 486 | Josd2         | 66124  | 7+:51723425-51727021    |
| 487 | Slc6a15       | 103098 | 10+:102830476-102882011 |
| 488 | Igh-VJ558     | 16061  | 12-:116396590-116397077 |
| 489 | Itga4         | 16401  | 2+:79095745-79166935    |
| 490 | Klf5          | 12224  | 14+:99698047-99712632   |
| 491 | MMT00030239   |        | 2+:11341818-11343062    |
| 492 | Cd37          | 12493  | 7-:52489270-52494098    |
| 493 | Acvrl1        | 11482  | 15+:100958952-100974069 |
| 494 | Tspan7        | 21912  | X+:10062293-10173728    |
| 495 | Ddx10         | 77591  | 9-:52906745-53056196    |
| 496 | Fgf1          | 14164  | 18-:38999700-39078312   |
| 497 | Myrip         | 245049 | 9+:120244714-120381985  |
| 498 | MMT00055322   |        | 10+:84776247-84777188   |
| 499 | 2310057J16Rik | 69697  | 8+:3587811-3602281      |
| 500 | OTTMUSG000000 | 791364 | 6+:52212761-52216083    |
| 501 | MMT00051491   |        | 8-:32390340-32391270    |
| 502 | Iars          | 105148 | 13+:49777445-49829628   |
| 503 | Gsto1         | 14873  | 19+:47929478-47939276   |
| 504 | Jmjd2a        | 230674 | 4-:117809563-117850181  |
| 505 | Dennd2c       | 329727 | 3+:102956187-102970422  |
| 506 | Gm207         | 240879 | 1-:165633186-165647389  |
| 507 | Leprel2       | 14789  | 6-:124791112-124807705  |
| 508 | MMT00028550   |        | 2+:83985036-83985869    |

|     |               |        |                         |
|-----|---------------|--------|-------------------------|
| 509 | MMT00046302   |        | 13-:20796215-20797275   |
| 510 | Neu1          | 18010  | 17+:35068318-35071775   |
| 511 | Itpa          | 16434  | 2+:130493550-130507349  |
| 512 | Asna1         | 56495  | 8-:87541830-87549177    |
| 513 | Krtap16-8     | 68484  | 16-:89047544-89048126   |
| 514 | Abca6         | 76184  | 11-:110038137-110113042 |
| 515 | Ica1l         | 70375  | 1-:60039332-60085073    |
| 516 | Olfr1115      | 258294 | 2+:87092095-87093075    |
| 517 | Slc17a7       | 72961  | 7+:52419167-52431507    |
| 518 | B3gnt4        | 231727 | 5+:123960582-123961635  |
| 519 | EG627299      | 627299 | X+:59083639-59085712    |
| 520 | H2-T3         | 15043  | 17-:36323516-36327073   |
| 521 | Dnajb12       | 56709  | 10+:59342365-59359523   |
| 522 | Cntln         | 338349 | 4+:84530307-84777821    |
| 523 | 1700040L02Rik | 73287  | 10-:67893701-67996666   |
| 524 | Hsd3b2        | 15493  | 3-:98515030-98528478    |
| 525 | Lyl1          | 17095  | 8+:87225442-87228591    |
| 526 | Car8          | 12319  | 4-:8070511-8166167      |
| 527 | Olfr1279      | 258388 | 2+:111146693-111147955  |
| 528 | Mrps24        | 64660  | 11-:5603985-5607688     |
| 529 | Tbx22         | 245572 | X+:104863302-104884314  |
| 530 | Mest          | 17294  | 6+:30688062-30698457    |
| 531 | E130201H02Rik | 78552  | 7+:127741134-127741791  |
| 532 | R3hdm2        | 71750  | 10+:126881331-126936427 |
| 533 | MMT00040762   |        | 2-:150222864-150225421  |
| 534 | Plrg1         | 53317  | 3+:82860692-82876092    |
| 535 | Fbxl20        | 72194  | 11+:97943867-97947256   |
| 536 | Got2          | 14719  | 8-:98388036-98412265    |
| 537 | Dmbt1         | 12945  | 7+:138175590-138265140  |
| 538 | Mpp2          | 50997  | 11-:101918332-101949816 |
| 539 | MMT00024269   |        |                         |
| 540 | Chd9          | 109151 | 8+:93456138-93507447    |
| 541 | Olfr570       | 259114 | 7+:110048882-110049819  |
| 542 | RP23-451D4.3  | 279185 | 4+:143204962-143207651  |
| 543 | Braf          | 109880 | 6-:39564111-39593219    |
| 544 | Ii16          | 16170  | 7-:90791575-90803906    |
| 545 | 4930524O08Rik | 74700  | 9+:89721353-89758866    |
| 546 | Gltscr1       | 243842 | 7-:16556611-16584843    |
| 547 | Mknk2         | 17347  | 10-:80128787-80134754   |
| 548 | Gpr109a       | 80885  | 5-:124313585-124315505  |
| 549 | 9330101J02Rik | 664857 | 7-:146866720-146869369  |
| 550 | Hars2         | 70791  | 18+:36942933-36952207   |
| 551 | Vill          | 22351  | 9+:118961915-118980455  |
| 552 | MMT00013481   |        | 5-:94124018-94126763    |
| 553 | Plekhb2       | 226971 | 1+:34906843-34936413    |
| 554 | Eml5          | 319670 | 12-:100098164-100099522 |
| 555 | MMT00074502   |        | 1-:184057951-184058631  |
| 556 | Spint2        | 20733  | 7-:30041350-30066997    |
| 557 | 0610010D20Rik | 67432  | 19+:42120340-42145429   |
| 558 | Crebl1        | 12915  | 17+:34784179-34791641   |
| 559 | Tyro3         | 22174  | 2+:119625305-119643217  |

|     |               |        |                         |
|-----|---------------|--------|-------------------------|
| 560 | Sprr2d        | 20758  | 3+:92143079-92144793    |
| 561 | Smarcd1       | 83797  | 15+:99532760-99544421   |
| 562 | Cabin1        | 104248 | 10-:75108855-75226916   |
| 563 | D4Bwg0951e    | 52829  | 4+:80557282-80600207    |
| 564 | Endogl1       | 208194 | 9+:119354069-119374623  |
| 565 | MMT00048441   |        | 17+:85917619-85934316   |
| 566 | Ccdc132       | 73288  | 6+:3505430-3553313      |
| 567 | Gpc5          | 103978 | 14+:115491542-115532530 |
| 568 | A330049M08Rik | 230822 | 4-:134925824-134954136  |
| 569 | 1700125D06Rik | 68233  | 4+:129168442-129169450  |
| 570 | Zfp371        | 170734 | 7+:6181780-6185570      |
| 571 | Cd209c        | 170776 | 8-:3940280-3945908      |
| 572 | MMT00014316   |        | 4-:84569446-84572305    |
| 573 | En1           | 13798  | 1+:122499257-122504545  |
| 574 | Zfp57         | 22715  | 17+:37139982-37147580   |
| 575 | Edn1          | 13614  | 13+:42397233-42403356   |
| 576 | MMT00057952   |        | X+:73337281-73408402    |
| 577 | Rrp12         | 107094 | 19-:41937331-41970690   |
| 578 | Gpr35         | 64095  | 1+:94869782-94881620    |
| 579 | Pcdhb7        | 93878  | 18+:37501559-37504457   |
| 580 | MMT00003547   |        | 4-:27923780-27923977    |
| 581 | Zzz3          | 108946 | 3+:152091576-152123216  |
| 582 | Pcgf1         | 69837  | 6+:83028184-83030848    |
| 583 | Taf15         | 70439  | 11+:83286586-83320246   |
| 584 | Tmem207       | 224058 | 16-:26504592-26526809   |
| 585 | Tas2r119      | 57254  | 15+:32107043-32108047   |
| 586 | Glb1l         | 74577  | 1-:75193552-75206077    |
| 587 | Sco1          | 52892  | 11+:66866168-66880942   |
| 588 | Ssxb2         | 387132 | X-:8031470-8038853      |
| 589 | Epb4.1l4b     | 54357  | 4-:57074610-57156520    |
| 590 | MMT00078555   | 238771 | 13+:93614741-93619030   |
| 591 | Slco6c1       | 74441  | 1-:98955615-99024881    |
| 592 | MMT00075676   |        | 2-:153912614-153920539  |
| 593 | Zcchc3        | 67917  | 2-:152239311-152240513  |
| 594 | Evc2          | 68525  | 5+:37729786-37815914    |
| 595 | Cdh8          | 12564  | 8-:101554282-101940011  |
| 596 | 1110019K23Rik | 665563 | 5+:91375815-91450389    |
| 597 | Xcr1          | 23832  | 9-:123764800-123765768  |
| 598 | V1rb9         | 113857 | 6+:89696417-89697407    |
| 599 | Prm1          | 19118  | 16-:10796576-10796824   |
| 600 | Pfpl          | 56093  | 19+:12502418-12505682   |
| 601 | Sytl3         | 83672  | 17+:6877959-6942184     |
| 602 | 9630041N07Rik | 214779 | 11-:50645537-50652056   |
| 603 | Cckbr         | 12426  | 7+:112574538-112583935  |
| 604 | Ppp1r15b      | 108954 | 1+:135027863-135036364  |
| 605 | Unc119b       | 106840 | 5-:115572577-115584936  |
| 606 | Vmn2r96       | 433070 | 17+:18719501-18723401   |
| 607 | Me1           | 17436  | 9-:86474982-86589830    |
| 608 | Olf1360       | 258536 | 13-:21765871-21766811   |
| 609 | MMT00060868   |        | 13-:63068834-63070096   |
| 610 | MMT00002170   |        | 3-:92121379-92212836    |

|     |               |        |                         |
|-----|---------------|--------|-------------------------|
| 611 | Tac2          | 21334  | 10+:127161533-127168823 |
| 612 | Ccr1          | 12768  | 9-:123878257-123879324  |
| 613 | Calcoco2      | 76815  | 11-:95960229-95973274   |
| 614 | C8g           | 69379  | 2-:25354166-25357244    |
| 615 | Fbxl10        | 30841  | 5-:123320689-123433155  |
| 616 | MMT00037897   |        | 11+:6142380-6142673     |
| 617 | MMT00077405   |        | 15+:62812180-62813611   |
| 618 | Trap1a        | 22037  | X+:135868221-135872704  |
| 619 | Fmnl2         | 71409  | 2+:52873836-52992905    |
| 620 | Prpf31        | 68988  | 7+:3581614-3592829      |
| 621 | Cyp2b13       | 13089  | 7+:26846513-26881215    |
| 622 | Serping1      | 12258  | 2-:84605543-84615561    |
| 623 | Lmf1          | 76483  | 17+:25716148-25799668   |
| 624 | 4931406I20Rik | 66743  | 4-:116944531-117048062  |
| 625 | Hand2         | 15111  | 8+:59800703-59802656    |
| 626 | D19Erd386e    | 52013  | 19+:42636995-42665857   |
| 627 | Eif1a         | 13664  | 18+:46767353-46767788   |
| 628 | Ccdc55        | 237859 | 11-:76858644-76951747   |
| 629 | Glipr1I3      | 544736 | 10-:111595623-111597283 |
| 630 | C1s           | 50908  | 6-:124480362-124492299  |
| 631 | Arrdc5        | 76920  | 17-:56433532-56439666   |
| 632 | Eif1ay        | 66235  | X+:155810139-155823643  |
| 633 | Ap1b1         | 11764  | 11+:4886971-4942732     |
| 634 | Usp16         | 74112  | 16+:87455300-87483756   |
| 635 | MMT00008587   |        | 2+:147493729-147494129  |
| 636 | 2310006M14Rik | 76422  | 1-:138078229-138083385  |
| 637 | Cdh23         | 22295  | 10-:59766122-60120081   |
| 638 | MMT00061457   |        | 4-:144136897-144138532  |
| 639 | Hpcal1        | 53602  | 12+:17697631-17798732   |
| 640 | MMT00065211   |        | 14+:14734306-14735766   |
| 641 | Chmp4c        | 66371  | 3+:10366972-10391003    |
| 642 | Bcas3         | 192197 | 11+:85615032-85639559   |
| 643 | Spata2        | 263876 | 2-:167306893-167311025  |
| 644 | Cd160         | 54215  | 3-:96604163-96618415    |
| 645 | MMT00040509   |        | X-:14532347-14533004    |
| 646 | Zfp346        | 26919  | 13+:55206671-55236177   |
| 647 | Rab13         | 68328  | 3+:90024738-90029885    |
| 648 | Map2k7        | 26400  | 8+:4250465-4251310      |
| 649 | Pop7          | 74097  | 5-:137942666-137943657  |
| 650 | MMT00061138   |        | X+:99850965-99852402    |
| 651 | MMT00056891   |        | X-:71749544-71750596    |
| 652 | Veph1         | 72789  | 3-:65860558-65940360    |
| 653 | Nipsnap3a     | 66536  | 4+:53024795-53034929    |
| 654 | Rassf5        | 54354  | 1-:133073356-133141736  |
| 655 | Tssk4         | 71099  | 14+:56269020-56271368   |
| 656 | Eif2c5        | 286951 | X+:137332907-137334477  |
| 657 | Fyn           | 14360  | 10+:39089891-39285178   |
| 658 | Vmn2r-ps88    | 209786 | 8+:3093456-3104954      |
| 659 | Bace1         | 23821  | 9+:45646681-45670302    |
| 660 | Slit2         | 20563  | 5+:48561392-48653904    |
| 661 | Siglec1       | 20612  | 2-:130894478-130912501  |



|     |               |        |                         |
|-----|---------------|--------|-------------------------|
| 662 | Mid1ip1       | 68041  | X+:10294715-10296811    |
| 663 | Muc19         | 239611 | 15+:91702790-91736981   |
| 664 | Mrpl23        | 19935  | 7+:149719021-149726647  |
| 665 | Slc26a1       | 231583 | 5-:109098950-109110090  |
| 666 | Lzts1         | 211134 | 8-:71658739-71664852    |
| 667 | Olfr399       | 259006 | 11-:73867323-73868259   |
| 668 | Olfr802       | 258934 | 10-:129118855-129119793 |
| 669 | MMT00014769   |        | 19+:32146396-32149418   |
| 670 | MMT00049472   |        | 2+:104377593-104378614  |
| 671 | Coro7         | 78885  | 16-:4626882-4679687     |
| 672 | Calcrl        | 54598  | 2-:84170790-84217144    |
| 673 | Tchh          | 99681  | 3+:93246251-93253000    |
| 674 | Ptgdr         | 19214  | 14-:45472900-45478928   |
| 675 | Xrn2          | 24128  | 2+:146838857-146900814  |
| 676 | Ms4a4d        | 66607  | 19+:11611290-11632952   |
| 677 | Ace2          | 70008  | X+:160578419-160626353  |
| 678 | Ncaph         | 215387 | 2-:126929566-126959641  |
| 679 | Lrpprc        | 72416  | 17-:85104590-85189855   |
| 680 | Loxl4         | 67573  | 19-:42669824-42683021   |
| 681 | Hcn1          | 15165  | 13+:118391506-118765609 |
| 682 | Klrb1c        | 17059  | 6-:128728504-128738598  |
| 683 | Olfr1450      | 258368 | 19+:13028080-13029056   |
| 684 | 1700102P08Rik | 112418 | 9+:108295164-108300094  |
| 685 | Pex7          | 18634  | 10-:19580330-19627455   |
| 686 | Lalba         | 16770  | 15-:98310831-98313114   |
| 687 | MMT00052624   |        | 3-:77366866-77367792    |
| 688 | MMT00020896   |        |                         |
| 689 | 2010004A03Rik | 76527  | 8-:113264997-113329776  |
| 690 | Lrrc9         | 78257  | 12+:73600566-73611545   |
| 691 | Vpreb2        | 22363  | 16+:17980657-17981173   |
| 692 | Pelo          | 105083 | 13-:115878571-115881033 |
| 693 | Vps13d        | 230895 | 4-:144564695-144752031  |
| 694 | Fgd1          | 14163  | X+:147482113-147523544  |
| 695 | EG232930      | 232930 | 7-:19040829-19042079    |
| 696 | MMT00037949   |        | 16+:38927463-38927965   |
| 697 | Ldb2          | 16826  | 5-:44863931-45190858    |
| 698 | MMT00071792   |        | 7+:50410632-50410682    |
| 699 | Nsl1          | 381318 | 1+:192886892-192906324  |
| 700 | 4930529C04Rik | 619677 | 3+:90875583-90880395    |
| 701 | Polr3g        | 67486  | 13-:81812841-81849966   |
| 702 | MMT00046441   |        | 8-:76273392-76274717    |
| 703 | Spryd4        | 66701  | 10-:127646969-127648855 |
| 704 | Elac1         | 114615 | 18-:73898191-73914133   |
| 705 | MMT00059766   |        |                         |
| 706 | Rad9          | 19367  | 19-:4195197-4201603     |
| 707 | Bdnf          | 12064  | 2+:109532875-109564409  |
| 708 | Ophn1         | 94190  | X-:95753590-96086120    |
| 709 | Pparg         | 19016  | 6+:115372090-115440418  |
| 710 | MMT00001859   | 329584 | 2+:181120264-181121750  |
| 711 | Cacnb3        | 12297  | 15+:98465566-98474960   |
| 712 | Foxp4         | 74123  | 17-:48004081-48061392   |

|     |               |        |                         |
|-----|---------------|--------|-------------------------|
| 713 | Psap          | 19156  | 10+:59740465-59764739   |
| 714 | Igk-V8        | 384422 | 6+:68071041-68387930    |
| 715 | Padi3         | 18601  | 4-:140341283-140366563  |
| 716 | Dbpht1        | 20749  | 15+:64648686-64649468   |
| 717 | Xpo1          | 103573 | 11+:23184334-23196903   |
| 718 | Pnkd          | 56695  | 1+:74331500-74334030    |
| 719 | Usp2          | 53376  | 9+:43897214-43901997    |
| 720 | Cryba1        | 12957  | 11-:77532233-77538795   |
| 721 | Cenpj         | 219103 | 14-:57145272-57190653   |
| 722 | MMT00013072   |        | 5-:87830341-87831925    |
| 723 | 4931433A01Rik | 78933  | 4+:111199188-111239615  |
| 724 | MMT00024988   |        | 4-:143048875-143050393  |
| 725 | BC005561      | 243171 | 5+:104946438-104951890  |
| 726 | Phkb          | 102093 | 8+:88366929-88420438    |
| 727 | Ywhae         | 22627  | 11+:75546501-75579305   |
| 728 | Tnfrsf1a      | 21937  | 6+:125300041-125312010  |
| 729 | 1700011I03Rik | 75444  | 18+:57693431-57890719   |
| 730 | Olfr894       | 258868 | 9+:38026409-38027350    |
| 731 | Lin37         | 75660  | 7-:31340459-31344665    |
| 732 | Gja8          | 14616  | 3-:96722945-96724267    |
| 733 | 4930404H21Rik | 73808  | 7-:140778705-140793842  |
| 734 | Lrrc50        | 68270  | 8+:122099134-122122354  |
| 735 | Wnt3          | 22415  | 11+:103635537-103679271 |
| 736 | Gm996         | 381353 | 2-:25433591-25435782    |
| 737 | MMT00023716   |        |                         |
| 738 | Rbp4          | 19662  | 19-:38191112-38199804   |
| 739 | Ric8b         | 237422 | 10+:84432607-84479185   |
| 740 | Txnrd3        | 232223 | 6+:89593988-89625522    |
| 741 | OTTMUSG00000  | 665998 | 11-:99647104-99647344   |
| 742 | 1110006O17Rik | 68545  | 18-:35873293-35882009   |
| 743 | Ttc24         | 214191 | 3-:87876878-87878576    |
| 744 | C230081A13Rik | 244895 | 9-:56054256-56075197    |
| 745 | Abca17        | 381072 | 17-:24415992-24465733   |
| 746 | 1700028J19Rik | 70004  | 7-:51485301-51491494    |
| 747 | 7420416P09Rik | 432677 | 12+:85989427-85991649   |
| 748 | Hs3st3a1      | 15478  | 11+:64249485-64334321   |
| 749 | Mex3c         | 240396 | 18+:73733247-73752224   |
| 750 | Det1          | 76375  | 7-:85978992-85992125    |
| 751 | Vmn2r58       | 628422 | 7-:49092475-49120704    |
| 752 | Sema7a        | 20361  | 9+:57787952-57810013    |
| 753 | 9330198N18Rik | 77516  | 2+:30496891-30543865    |
| 754 | Axin1         | 12005  | 17+:26279560-26332754   |
| 755 | Ppp1r13l      | 333654 | 7+:19946374-19963890    |
| 756 | Pou1f1        | 18736  | 16+:65520846-65535866   |
| 757 | Trip12        | 14897  | 1-:84720878-84755603    |
| 758 | V1rh12        | 171271 | 13-:23275497-23276393   |
| 759 | Bbx           | 70508  | 16-:50197274-50432494   |
| 760 | Akr1c19       | 432720 | 13+:4227945-4247604     |
| 761 | Amigo1        | 229715 | 3+:107989267-107994694  |
| 762 | Brms1         | 107392 | 19+:5041403-5049917     |
| 763 | 4933406E20Rik | 74443  | 9-:108481213-108499902  |

|     |               |        |                         |
|-----|---------------|--------|-------------------------|
| 764 | A830035A12Rik | 442842 | 11-:107393070-107409448 |
| 765 | Olf1134       | 259032 | 2-:87496138-87497076    |
| 766 | Tcf12         | 21406  | 9-:71693559-71959426    |
| 767 | Ccdc93        | 70829  | 1+:123327671-123346328  |
| 768 | Samd1         | 666704 | 8+:86522443-86524316    |
| 769 | 5430437P03Rik | 68251  | 8+:73920759-73928517    |
| 770 | Ndufs8        | 225887 | 19-:3908867-3912735     |
| 771 | Zbtb45        | 232879 | 7-:13591013-13593679    |
| 772 | Hnrnp1        | 74326  | 4+:135866911-135896587  |
| 773 | Gm514         | 208080 | 9+:65208859-65228182    |
| 774 | Bcl10         | 12042  | 3+:145587341-145597247  |
| 775 | Rps27l        | 67941  | 9+:66793924-66797316    |
| 776 | Irx6          | 64379  | 8+:95198923-95203963    |
| 777 | EG546052      | 546052 | 8-:33583843-33587801    |
| 778 | Galnt3        | 14425  | 2-:65921491-65962686    |
| 779 | Acbd3         | 170760 | 1+:182655890-182684334  |
| 780 | Cish          | 12700  | 9+:107199182-107204295  |
| 781 | Mvk           | 17855  | 5+:114895392-114910220  |
| 782 | X76971        | 634322 | 14+:53698137-53699995   |
| 783 | Ccdc66        | 320234 | 14-:28310524-28319907   |
| 784 | Actg1         | 11465  | 11-:120208395-120209809 |
| 785 | MMT00034119   |        | 5+:78903282-78911968    |
| 786 | Macrod1       | 107227 | 19+:7131532-7272547     |
| 787 | Zfp532        | 328977 | 18+:65662270-65849088   |
| 788 | 2310042D19Rik | 74183  | 4+:155587425-155589167  |
| 789 | MMT00023104   |        | 12-:99337184-99338413   |
| 790 | MMT00026414   | 83701  | 5-:137737059-137748395  |
| 791 | Il18r1        | 16182  | 1+:40522850-40557678    |
| 792 | Gyg           | 27357  | 3-:20021969-20054937    |
| 793 | Morc3         | 338467 | 16+:93832534-93876317   |
| 794 | Mrps14        | 64659  | 1+:162125378-162130567  |
| 795 | Snx27         | 76742  | 3-:94301464-94386471    |
| 796 | Olf1830       | 258559 | 9+:18679772-18680719    |
| 797 | Gpi1          | 14751  | 7-:34987176-35015281    |
| 798 | Tbccd1        | 70573  | 16-:22813292-22844715   |
| 799 | Pigp          | 56176  | 16-:94586059-94591801   |
| 800 | Nlrp9b        | 243874 | 7+:20593370-20648290    |
| 801 | Olf1295       | 258850 | 7+:93733786-93734714    |
| 802 | Src           | 20779  | 2+:157282820-157295697  |
| 803 | Lhb           | 16866  | 7+:52676322-52677147    |
| 804 | 2210407C18Rik | 78354  | 11-:58421710-58426972   |
| 805 | Reep1         | 52250  | 6+:71657831-71760532    |
| 806 | Ly96          | 17087  | 1+:16678536-16699686    |
| 807 | MMT00002637   |        | 6-:46728598-46789042    |
| 808 | Ctsc          | 13032  | 7+:95426644-95458806    |
| 809 | Olf1416       | 259040 | 1-:94376257-94377196    |
| 810 | Zzef1         | 195018 | 11+:72666660-72740612   |
| 811 | Pik3r5        | 320207 | 11+:68287309-68309522   |
| 812 | En2           | 13799  | 5+:28493019-28498710    |
| 813 | Nkd2          | 72293  | 13-:73958024-73985029   |
| 814 | Gpr64         | 237175 | X+:156828597-156935996  |

|     |               |        |                          |
|-----|---------------|--------|--------------------------|
| 815 | Hk1           | 15275  | 10-:61732609-61842631    |
| 816 | MMT00081658   |        | X-:43889040-43889672     |
| 817 | C130039O16Rik | 238317 | 12-:85490239-85500005    |
| 818 | Ppp2r3a       | 19054  | 9_random-:49190-55020    |
| 819 | Vamp2         | 22318  | 11+ :68902067-68904203   |
| 820 | 3200002M19Rik | 75430  | 7+ :109044930-109048057  |
| 821 | Dcun1d5       | 76863  | 9+ :7184515-7207045      |
| 822 | Ddah1         | 69219  | 3+ :145421689-145557242  |
| 823 | Mnd1          | 76915  | 3- :83891856-83945694    |
| 824 | Esco1         | 77805  | 18- :10566600-10594053   |
| 825 | Ccl25         | 20300  | 8+ :4349614-4360019      |
| 826 | Fezf1         | 73191  | 6- :23195050-23198148    |
| 827 | Flcn          | 216805 | 11- :59605254-59623275   |
| 828 | Flnc          | 68794  | 6+ :29409404-29411881    |
| 829 | Prodh2        | 56189  | 7+ :31278702-31297999    |
| 830 | Socs1         | 12703  | 16- :10783903-10785602   |
| 831 | Odz1          | 23963  | X- :39885576-40627963    |
| 832 | Vsig2         | 57276  | 9+ :37346959-37351726    |
| 833 | 9930013L23Rik | 80982  | 7- :91083298-91092849    |
| 834 | Zfp472        | 224691 | 17+ :33102786-33242747   |
| 835 | Dhh           | 13363  | 15- :98724366-98728703   |
| 836 | Rai12         | 54351  | 11- :69781729-69794012   |
| 837 | Rabl5         | 67286  | 5+ :137384063-137389113  |
| 838 | MMT00011949   |        | 19- :12219977-12241545   |
| 839 | Gm766         | 330440 | 6- :142734827-142762438  |
| 840 | Olfra49       | 18348  | 14- :54901630-54902568   |
| 841 | Gm53          | 193022 | 11+ :96113002-96126108   |
| 842 | Slc29a2       | 13340  | 19+ :5026105-5031964     |
| 843 | Epyc          | 13516  | 10+ :97110069-97144317   |
| 844 | Rad23a        | 19358  | 8- :87359459-87364464    |
| 845 | Myo5a         | 17918  | 9+ :74919406-75067280    |
| 846 | Hes1          | 15205  | 16+ :30065676-30067513   |
| 847 | S100a7a       | 381493 | 3+ :90458166-90461748    |
| 848 | MMT00008599   |        | 8+ :53859486-53860062    |
| 849 | Pxmp4         | 59038  | 2- :154413323-154429398  |
| 850 | Mrps30        | 59054  | 13- :119168630-119176062 |
| 851 | MMT00024065   |        | 7- :70955713-70956239    |
| 852 | Hsf2bp        | 74377  | 17- :32081714-32171439   |
| 853 | Crct1         | 74175  | 3- :92818128-92819608    |
| 854 | EG432448      | 432448 | 10+ :30967936-30970683   |
| 855 | Serpib13      | 241196 | 1+ :108878731-108897772  |
| 856 | MMT00026922   |        |                          |
| 857 | Sfrs12        | 218543 | 13- :104533165-104564597 |
| 858 | MMT00038787   |        | X+ :138414953-138416864  |
| 859 | AA467197      | 433470 | 2+ :122463557-122466925  |
| 860 | Psmb10        | 19171  | 8- :108459663-108462005  |
| 861 | Hif3a         | 53417  | 7- :17621082-17642028    |
| 862 | Ms4a4b        | 60361  | 19+ :11518090-11538036   |
| 863 | Dnajc14       | 74330  | 10+ :128242731-128254559 |
| 864 | MMT00031865   | 329122 | 1+ :37992371-38006685    |
| 865 | Npc1          | 18145  | 18- :12348370-12394867   |

|     |               |        |                         |
|-----|---------------|--------|-------------------------|
| 866 | Zfp369        | 170936 | 13+:65380235-65398890   |
| 867 | Pag1          | 94212  | 3-:9693766-9706213      |
| 868 | Lrrc9         | 78257  | 12+:73542919-73598226   |
| 869 | C330007P06Rik | 77644  | X-:34391096-34404197    |
| 870 | Rint1         | 72772  | 5+:23293529-23327653    |
| 871 | Mrps25        | 64658  | 6-:92124115-92133977    |
| 872 | MMT00004441   |        | 4+:76573197-76573933    |
| 873 | Slc22a3       | 20519  | 17-:12612841-12700570   |
| 874 | Aldh1a7       | 26358  | 19-:20767442-20802046   |
| 875 | Gm50          | 215090 | 4-:124531960-124537692  |
| 876 | Purg          | 75029  | 8+:34496915-34545314    |
| 877 | MMT00015473   |        | 19+:43618672-43619815   |
| 878 | MMT00021302   |        | 12+:88860673-88861267   |
| 879 | Plekhn1       | 231002 | 4-:155595564-155597700  |
| 880 | Atp6v0a2      | 21871  | 5+:125079736-125202515  |
| 881 | Adi1          | 104923 | 12+:29360071-29366504   |
| 882 | Olfr381       | 259024 | 11-:73299390-73300324   |
| 883 | MMT00033758   |        | 15+:13353850-13382866   |
| 884 | Kif26b        | 269152 | 1+:180751613-180862984  |
| 885 | 2210010L05Rik | 98682  | 1-:52714300-52766004    |
| 886 | Slc35a5       | 74102  | 16-:45140924-45158713   |
| 887 | MMT00078651   |        | 2+:181631355-181633754  |
| 888 | Col25a1       | 77018  | 3+:129884134-130298050  |
| 889 | Ogdh          | 18293  | 11+:6191570-6256788     |
| 890 | Tmem61        | 329909 | 4-:106171420-106175696  |
| 891 | Lmbrd2        | 320506 | 15+:9070303-9127238     |
| 892 | Nfix          | 18032  | 8-:87232512-87324039    |
| 893 | Cdc42bpg      | 240505 | 19+:6322553-6325656     |
| 894 | Ddit4         | 74747  | 10-:59412422-59414518   |
| 895 | Ccdc57        | 71276  | 11-:120780652-120783276 |
| 896 | Prpf39        | 328110 | 12+:66137349-66164372   |
| 897 | Mut           | 17850  | 17+:41073992-41098598   |
| 898 | Txndc3        | 73412  | 13-:19752366-19767699   |
| 899 | Gramd2        | 546134 | 9+:59559877-59564231    |
| 900 | Top1          | 21969  | 2+:160471965-160548447  |
| 901 | Ndufs3        | 68349  | 2-:90734784-90744984    |
| 902 | Slc30a1       | 22782  | 1+:193730738-193733694  |
| 903 | Gm106         | 226866 | 1-:15845775-15882757    |
| 904 | MMT00003579   |        | 14-:88179628-88179937   |
| 905 | Fyco1         | 17281  | 9-:123698627-123761010  |
| 906 | Olfr556       | 258749 | 7+:109818435-109819409  |
| 907 | Wbscr17       | 212996 | 5-:131352019-131782679  |
| 908 | Lypd2         | 68311  | 15-:74562676-74564745   |
| 909 | Lphn1         | 330814 | 8+:86439298-86454279    |
| 910 | Sned1         | 208777 | 1+:95192288-95194148    |
| 911 | Ngfr          | 18053  | 11-:95432077-95448870   |
| 912 | Slc30a5       | 69048  | 13+:101603172-101604342 |
| 913 | MMT00019999   |        | 11+:21853142-21853492   |
| 914 | Itga3         | 16400  | 11-:94907794-94937650   |
| 915 | 9130206N08Rik | 103406 | 10+:80702678-80713479   |
| 916 | Socs4         | 67296  | 14+:47909284-47910594   |

|     |               |           |                         |
|-----|---------------|-----------|-------------------------|
| 917 | Kal1          | 14038     | 11+:83522607-83524842   |
| 918 | Rpa2          | 19891     | 4+:132324302-132334356  |
| 919 | MMT00041659   |           | 10+:77946936-77961004   |
| 920 | A230107C01Rik | 320225    | 7-:29966548-29969768    |
| 921 | Rspry1        | 67610     | 8+:97163546-97183981    |
| 922 | MMT00059556   |           | 5+:26681977-26683672    |
| 923 | MMT00033681   |           | 14-:120043166-120048850 |
| 924 | Olfr809       | 258321    | 10+:129212926-129213912 |
| 925 | 6030458C11Rik | 77877     | 15-:12739800-12754403   |
| 926 | MMT00005746   |           | 18-:13265801-13392930   |
| 927 | Olfr113       | 258286    | 17-:37711427-37712366   |
| 928 | Ccr4          | 12773     | 9-:114400742-114405662  |
| 929 | Dusp4         | 319520    | 8+:35870424-35885009    |
| 930 | Cd55          | 13136     | 1-:132336790-132359261  |
| 931 | Ccdc147       | 381229    | 19+:48011400-48129383   |
| 932 | Chad          | 12643     | 11+:94426362-94430433   |
| 933 | Stra6         | 20897     | 9+:57977155-58001760    |
| 934 | Rara          | 19401     | 11+:98799173-98833984   |
| 935 | MMT00060809   |           | 13+:62880141-62880565   |
| 936 | Dnajc21       | 78244     | 15-:10376516-10400116   |
| 937 | Pi4ka         | 224020    | 16-:17280441-17405919   |
| 938 | Sdcbp         | 53378     | 4+:6292867-6322797      |
| 939 | Daxx          | 13163     | 17+:34047373-34052463   |
| 940 | Pramel3       | 83565     | X+:131836850-131847175  |
| 941 | MMT00010305   |           | 17+:57554875-57555404   |
| 942 | Kcna5         | 16493     | 6-:126482570-126485455  |
| 943 | 1700106J16Rik | 74297     | 11+:88107597-88108055   |
| 944 | Sla2          | 77799     | 2-:156699887-156712913  |
| 945 | Shprh         | 268281    | 10+:10869301-10877121   |
| 946 | Dnajc5        | 13002     | 2+:181281086-181284079  |
| 947 | Bud31         | 231889    | 5+:145901273-145908753  |
| 948 | Twf1          | 19230     | 15-:94410159-94420259   |
| 949 | Plekha6       | 240753    | 1+:135155585-135200013  |
| 950 | Ulk3          | 71742     | 9+:57437250-57442656    |
| 951 | Prkcb1        | 18751     | 7+:129432810-129772169  |
| 952 | 1810008K16Rik | 67366     | 5-:109206253-109224382  |
| 953 | Wnt16         | 93735     | 6+:22238506-22248229    |
| 954 | Adam25        | 23793     | 8+:41837561-41841529    |
| 955 | Pigq          | 14755     | 17-:26063372-26078889   |
| 956 | EG547447      | 547447    | X+:67766158-67773531    |
| 957 | Hras1         | 15461     | 7-:148377247-148378839  |
| 958 | Ppp2r5e       | 26932     | 12-:76550450-76694320   |
| 959 | Cckar         | 12425     | 5-:54089726-54099341    |
| 960 | 2410012M07Rik | 71979     | 9+:98756998-98766998    |
| 961 | Rwdd4a        | 192174    | 8+:48619008-48638304    |
| 962 | Khlh10        | 66720     | 11+:100303237-100318336 |
| 963 | Lrrfip2       | 71268     | 9+:111063805-111128172  |
| 964 | Rpl23         | 65019     | 11-:97639434-97643681   |
| 965 | Vmn2r2        | 100125586 | 3-:63920353-63944465    |
| 966 | Wif1          | 24117     | 10+:120471285-120537698 |
| 967 | Matr3         | 17184     | 18+:35747218-35751870   |

|      |               |        |                         |
|------|---------------|--------|-------------------------|
| 968  | Atp13a1       | 170759 | 8+:72315132-72331643    |
| 969  | MMT00054728   |        | 10+:78006018-78006876   |
| 970  | 1700021O21Rik | 75536  | 5+:39127219-39139136    |
| 971  | Prdm14        | 383491 | 1-:13104340-13115916    |
| 972  | Sri           | 109552 | 5+:8046077-8067854      |
| 973  | Cilp2         | 68709  | 8-:72408185-72411250    |
| 974  | Tgm4          | 331046 | 9+:122949489-122950710  |
| 975  | Nt5c          | 50773  | 11-:115351748-115353128 |
| 976  | Cdcp1         | 109332 | 9-:123082515-123125148  |
| 977  | Npal2         | 223473 | 15-:34504691-34608474   |
| 978  | Cd244         | 18106  | 1+:173503811-173507478  |
| 979  | Cep164        | 214552 | 9-:45600266-45602672    |
| 980  | BC067074      | 408066 | 13+:114107291-114159738 |
| 981  | 1110015M06Rik | 68511  | 12-:29209539-29215352   |
| 982  | Ccl7          | 20306  | 11+:81859233-81861023   |
| 983  | MMT00078030   |        | 13-:91400536-91402025   |
| 984  | Derl3         | 70377  | 10+:75356142-75358685   |
| 985  | Hsd3b6        | 15497  | 3-:98609427-98615031    |
| 986  | Plekkg3       | 263406 | 12+:77634569-77679454   |
| 987  | Zfp202        | 80902  | 9+:39999910-40020773    |
| 988  | Olfr491       | 258731 | 7+:115460409-115461342  |
| 989  | Phyhd1        | 227696 | 2+:30121720-30137667    |
| 990  | Fras1         | 231470 | 5+:97164216-97169877    |
| 991  | MMT00073000   |        | 8+:98101360-98102813    |
| 992  | 8430410A17Rik | 232210 | 6+:87863943-87886618    |
| 993  | Rbm22         | 66810  | 18+:60719976-60732464   |
| 994  | Arfrp1        | 76688  | 2-:181094040-181100056  |
| 995  | MMT00082379   |        | 10+:24773293-24774049   |
| 996  | Pbbp          | 57349  | 5+:91197543-91199086    |
| 997  | Olfr508       | 258769 | 7+:115773507-115774438  |
| 998  | MMT00075117   |        | 12+:37265916-37266514   |
| 999  | Gm527         | 217648 | 12+:66019160-66025579   |
| 1000 | 2900024O10Rik | 72852  | 13+:81850045-81890207   |
| 1001 | MMT00054937   | 194960 | 11+:101800814-101801213 |
| 1002 | Chrm1         | 12669  | 19+:8752422-8753803     |
| 1003 | Ext1          | 14042  | 15-:52899814-52939422   |
| 1004 | MMT00042857   |        | 7+:87574990-87575805    |
| 1005 | Tigd2         | 68140  | 6+:59160143-59161719    |
| 1006 | 2600011E07Rik | 72125  | 14+:60997188-60999841   |
| 1007 | Slc16a12      | 240638 | 19-:34746925-34821778   |
| 1008 | MMT00069490   |        | X+:71732110-71732758    |
| 1009 | Rps2          | 16898  | 17+:24857053-24858868   |
| 1010 | Prr14         | 233895 | 7+:134618657-134620271  |
| 1011 | MMT00007038   |        | 15+:52090530-52091480   |
| 1012 | Il21r         | 60504  | 7+:132746990-132777081  |
| 1013 | Smad6         | 17130  | 9-:63801330-63868831    |
| 1014 | Rtcd1         | 66368  | 3-:116191883-116211028  |
| 1015 | Nuak2         | 74137  | 1+:134212715-134230043  |
| 1016 | Adra1d        | 11550  | 2-:131317303-131388063  |
| 1017 | Dync2li1      | 213575 | 17+:85025814-85054927   |
| 1018 | MMT00071883   |        |                         |

|      |               |           |                         |
|------|---------------|-----------|-------------------------|
| 1019 | Slc26a3       | 13487     | 12+:32123165-32158584   |
| 1020 | Olfr195       | 259000    | 16+:59148677-59149602   |
| 1021 | Rhpn2         | 52428     | 7+:36119332-36177300    |
| 1022 | 6330577E15Rik | 67788     | 19+:47730282-47810077   |
| 1023 | Ccdc64b       | 212733    | 17+:23798726-23805584   |
| 1024 | Nes           | 18008     | 3+:87775050-87784369    |
| 1025 | Slc26a11      | 268512    | 11+:119216905-119238223 |
| 1026 | Ftsj2         | 68017     | 5-:140803627-140807852  |
| 1027 | Accs          | 329470    | 2-:93675574-93690099    |
| 1028 | Pgam1         | 18648     | 19+:41986453-41993149   |
| 1029 | MMT00043362   | 669021    | 1+:60957702-60958272    |
| 1030 | Fuz           | 70300     | 7+:52151461-52155982    |
| 1031 | Uros          | 22276     | 7-:140878038-140900716  |
| 1032 | MMT00060488   |           | 8+:127289089-127290039  |
| 1033 | Ube2c         | 68612     | 2+:164595428-164598402  |
| 1034 | Olfr1364      | 258533    | 13-:21665380-21666323   |
| 1035 | Rabep1        | 54189     | 11+:70658426-70754442   |
| 1036 | Dusp19        | 68082     | 2+:80457201-80471351    |
| 1037 | Kif26a        | 668303    | 12+:113410781-113419957 |
| 1038 | Ndrp2         | 29811     | 14-:52524957-52533026   |
| 1039 | Zfp207        | 22680     | 11+:80196847-80209639   |
| 1040 | Dnhd1         | 77505     | 7+:112826403-112870312  |
| 1041 | 3110049J23Rik | 67307     | 10+:62487259-62521560   |
| 1042 | Tm7sf4        | 75766     | 15+:39577475-39591168   |
| 1043 | Tbx10         | 109575    | 19+:3996644-3999424     |
| 1044 | Adamts19      | 240322    | 18+:59170656-59212295   |
| 1045 | MMT00053214   |           | 9-:100525392-100543661  |
| 1046 | MMT00005405   |           | 7+:12029339-12030685    |
| 1047 | 4932413O14Rik | 320696    | 5-:93082527-93091278    |
| 1048 | MMT00026905   |           |                         |
| 1049 | Myst1         | 67773     | 7+:135056030-135069276  |
| 1050 | MMT00044489   |           | 4-:59707420-59707804    |
| 1051 | MMT00065456   | 100041868 | 1+:100272681-100356563  |
| 1052 | Cog4          | 102339    | 8+:113370946-113406124  |
| 1053 | Wdsof1        | 223499    | 15+:38944455-38978406   |
| 1054 | Tm4sf5        | 75604     | 11+:70318778-70324674   |
| 1055 | Gm525         | 217071    | 11+:88934958-88954377   |
| 1056 | Slc17a4       | 319848    | 13-:23989637-24006874   |
| 1057 | Ap3m2         | 64933     | 8-:23897826-23916099    |
| 1058 | Olfr868       | 258552    | 9+:19905204-19906133    |
| 1059 | P2rx6         | 18440     | 16+:17562092-17571358   |
| 1060 | 6030419C18Rik | 319477    | 9+:58337474-58347473    |
| 1061 | Krt20         | 66809     | 11-:99289716-99299467   |
| 1062 | Npnt          | 114249    | 3-:132547393-132613007  |
| 1063 | Ntf5          | 78405     | 7+:52669032-52672023    |
| 1064 | MMT00058736   | 76652     | 3-:30496756-30497631    |
| 1065 | Hmgcr         | 15357     | 13-:97418921-97440804   |
| 1066 | MMT00081797   |           | 1+:12106050-12111666    |
| 1067 | Tmem50b       | 77975     | 16-:91575938-91597930   |
| 1068 | 1700129I15Rik | 78478     | X-:132253204-132255213  |
| 1069 | Cic           | 71722     | 7+:26056738-26058720    |



|      |               |        |                         |
|------|---------------|--------|-------------------------|
| 1070 | Cdr2l         | 237988 | 11+:115243231-115255778 |
| 1071 | Smcr7l        | 239555 | 15+:80064534-80082835   |
| 1072 | EG624855      | 624855 | 8+:87695403-87696165    |
| 1073 | Ppp1r7        | 66385  | 1+:95240221-95264195    |
| 1074 | Acsn3         | 20216  | 7+:126904456-126928403  |
| 1075 | Al894139      | 101197 | 6+:47893204-47927924    |
| 1076 | Megf11        | 214058 | 9+:64345146-64554489    |
| 1077 | Ap1g1         | 11765  | 8+:112326849-112384094  |
| 1078 | Ccdc14        | 239839 | 16+:34709608-34725287   |
| 1079 | Hr            | 15460  | 14+:70954578-70972201   |
| 1080 | Commd8        | 27784  | 5-:72549959-72559419    |
| 1081 | Gm608         | 207806 | 16+:44199014-44222174   |
| 1082 | H2afj         | 232440 | 6+:136755603-136757249  |
| 1083 | Ddx3y         | 26900  | Y-:597157-623024        |
| 1084 | Pros1         | 19128  | 16+:62854153-62929179   |
| 1085 | Col5a2        | 12832  | 1-:45432930-45559759    |
| 1086 | 2610205E22Rik | 66617  | 2+:30663460-30679260    |
| 1087 | Dusp12        | 80915  | 1-:172804319-172815593  |
| 1088 | Lef1          | 16842  | 3+:130813250-130927276  |
| 1089 | 1700010D01Rik | 76386  | X-:92927928-92928600    |
| 1090 | 5730409G15Rik | 70511  | 16-:5244523-5256050     |
| 1091 | Acsl5         | 433256 | 19+:55328144-55371117   |
| 1092 | MMT00024026   | 554292 | 15+:100183640-100214386 |
| 1093 | MMT00012906   |        | 3-:78695787-78696346    |
| 1094 | Cul5          | 75717  | 9-:53425801-53475204    |
| 1095 | Olf798        | 258549 | 10-:129062181-129063115 |
| 1096 | Rhd           | 19746  | 4+:134420515-134451893  |
| 1097 | Dctn6         | 22428  | 8-:35153477-35171497    |
| 1098 | 2810408M09Rik | 381406 | 2-:165316542-165318823  |
| 1099 | Ap1m1         | 11767  | 8+:74764030-74781278    |
| 1100 | Utrn          | 22288  | 10-:12101613-12588943   |
| 1101 | Sec11a        | 56529  | 7-:88060264-88092436    |
| 1102 | Abhd14b       | 76491  | 9+:106351016-106355246  |
| 1103 | Lix1l         | 280411 | 3+:96405035-96428737    |
| 1104 | Yars2         | 70120  | 16+:16303055-16309720   |
| 1105 | Crls1         | 66586  | 2+:132672401-132692502  |
| 1106 | Hira          | 15260  | 16+:18877362-18935165   |
| 1107 | Tspyl5        | 239364 | 15-:33523824-33617552   |
| 1108 | MMT00067207   |        | 14+:56868857-56870107   |
| 1109 | Snai1         | 20613  | 2+:167363775-167368309  |
| 1110 | MMT00014191   |        | 19+:25568325-25569189   |
| 1111 | Mil5          | 69188  | 5+:22938111-23009638    |
| 1112 | Ccdc56        | 52469  | 11-:101139283-101140262 |
| 1113 | Higd1b        | 75689  | 11+:102697609-102699351 |
| 1114 | Cdca7l        | 217946 | 12+:119082333-119117178 |
| 1115 | Rbbp7         | 245688 | X+:159206779-159216559  |
| 1116 | MMT00007297   |        | 8+:78817822-78819090    |
| 1117 | MMT00068790   |        | 15-:34087703-34087843   |
| 1118 | Diras1        | 208666 | 10-:80484564-80485160   |
| 1119 | Exosc6        | 72544  | 8+:113580270-113580843  |
| 1120 | Rbpms2        | 71973  | 9+:65477454-65508333    |

|      |               |        |                         |
|------|---------------|--------|-------------------------|
| 1121 | Fusip1        | 14105  | 4+:135412073-135425812  |
| 1122 | Pax3          | 18505  | 1-:78099278-78193621    |
| 1123 | Ahsa2         | 268390 | 11-:23373213-23397943   |
| 1124 | Strbp         | 20744  | 2-:37338752-37502739    |
| 1125 | Atrx          | 22589  | X-:102995491-103124681  |
| 1126 | Slc25a14      | 20523  | X+:45976754-46015469    |
| 1127 | Pomt2         | 217734 | 12-:88488120-88488849   |
| 1128 | Amtn          | 71421  | 5+:88805132-88814941    |
| 1129 | Gsta4         | 14860  | 9+:78039838-78057155    |
| 1130 | Ly75          | 17076  | 2-:60130160-60221315    |
| 1131 | Itgb7         | 16421  | 15-:102046428-102062317 |
| 1132 | Mutyh         | 70603  | 4+:116486929-116491984  |
| 1133 | MMT00012299   |        | 13+:18051600-18053324   |
| 1134 | Vmn2r19       | 232358 | 6+:123259676-123280222  |
| 1135 | Akap12        | 83397  | 10-:5987069-6080163     |
| 1136 | Kdelr3        | 105785 | 15+:79346897-79358168   |
| 1137 | Mlxip         | 208104 | 5+:123893038-123903952  |
| 1138 | Gabrg2        | 14406  | 11-:41725358-41814180   |
| 1139 | MMT00053597   |        | 12-:11767222-11767700   |
| 1140 | Rmnd5a        | 68477  | 6-:71338631-71390133    |
| 1141 | Oxr1          | 170719 | 15+:41621060-41692591   |
| 1142 | MMT00065065   | 214854 | 1-:36323205-36330256    |
| 1143 | Olfr1049      | 259018 | 2-:86094921-86095848    |
| 1144 | MMT00060803   |        | 11+:32084994-32085702   |
| 1145 | Arhgap6       | 11856  | X+:165233904-165742367  |
| 1146 | Akap4         | 11643  | X+:6645368-6655543      |
| 1147 | Add3          | 27360  | 19+:53291288-53319906   |
| 1148 | Pak1          | 18479  | 7+:104991479-105059842  |
| 1149 | MMT00052327   |        | 11+:54542178-54547974   |
| 1150 | Accn1         | 11418  | 11-:81777432-81781686   |
| 1151 | Egln1         | 112405 | 8-:127452359-127473724  |
| 1152 | Ralbp1        | 19765  | 17-:66197782-66234165   |
| 1153 | Abcc10        | 224814 | 17-:46440369-46462715   |
| 1154 | Atp7b         | 11979  | 8-:23104819-23170548    |
| 1155 | MMT00015484   |        | X+:124796305-124797382  |
| 1156 | Rbj           | 217378 | 12+:4082556-4110603     |
| 1157 | Dpt           | 56429  | 1+:166726862-166754397  |
| 1158 | Olfr206       | 258993 | 16-:59344606-59345525   |
| 1159 | Tmem104       | 320534 | 11+:115048841-115108336 |
| 1160 | Obscn         | 380698 | 11-:58876966-58904285   |
| 1161 | 4930419G24Rik | 73874  | 3+:32954619-32987529    |
| 1162 | Cpsf4         | 54188  | 5+:145928113-145942911  |
| 1163 | Olfr52        | 18352  | 2-:86021307-86022266    |
| 1164 | A930011O12Rik | 268755 | 14+:65209109-65212802   |
| 1165 | Pik3cd        | 18707  | 4-:149024748-149037393  |
| 1166 | Il21          | 60505  | 3-:37121684-37131540    |
| 1167 | Atg2a         | 329015 | 19+:6241637-6262304     |
| 1168 | Ulk1          | 22241  | 5-:111214747-111238794  |
| 1169 | Centg3        | 213990 | 5+:23957994-24007865    |
| 1170 | Faim3         | 69169  | 1+:132762337-132777421  |
| 1171 | Tmem106a      | 217203 | 11+:101443814-101452227 |

|      |               |           |                         |
|------|---------------|-----------|-------------------------|
| 1172 | MMT00014144   |           | 13+:39852661-39853335   |
| 1173 | Rbpj          | 19664     | 5+:54033326-54044857    |
| 1174 | Sgce          | 20392     | 6-:4624361-4697060      |
| 1175 | Tktl1         | 83553     | X+:71422622-71453828    |
| 1176 | MMT00046049   |           | 1+:169070214-169071790  |
| 1177 | EG545391      | 545391    | 1+:180034087-180086933  |
| 1178 | Atp5h         | 71679     | 11-:115277062-115281254 |
| 1179 | Ncdn          | 26562     | 4-:126422079-126431010  |
| 1180 | Clec4a3       | 73149     | 6+:122902683-122919897  |
| 1181 | Pkia          | 18767     | 3+:7437335-7444106      |
| 1182 | MMT00021420   |           | 2-:178755194-178755764  |
| 1183 | MMT00009390   |           |                         |
| 1184 | Pqlc3         | 217430    | 12-:17004421-17006862   |
| 1185 | Atxn2         | 20239     | 5+:122161617-122264717  |
| 1186 | Hadhb         | 231086    | 5+:30481861-30511122    |
| 1187 | MMT00075773   |           | 19+:24930589-24930857   |
| 1188 | MMT00077843   |           | 12+:52398473-52398948   |
| 1189 | Al314180      | 230249    | 4-:58811784-58924796    |
| 1190 | Sema3g        | 218877    | 14+:32033744-32041392   |
| 1191 | MMT00009498   |           | 1+:64196744-64197237    |
| 1192 | Btk           | 12229     | X-:131076922-131117655  |
| 1193 | MMT00014243   |           | 3-:13838740-13839769    |
| 1194 | Per3          | 18628     | 4-:150378820-150418698  |
| 1195 | Gip           | 14607     | 11+:95886684-95892124   |
| 1196 | MMT00014158   | 100043240 | 1+:148573286-148574672  |
| 1197 | Flvcr1        | 226844    | 1-:192835066-192850004  |
| 1198 | 4933429F08Rik | 328967    | 18-:61659358-61677796   |
| 1199 | Foxb1         | 64290     | 9-:69607076-69608053    |
| 1200 | Grm3          | 108069    | 5-:9485239-9589959      |
| 1201 | Ptger3        | 19218     | 3+:157229863-157307720  |
| 1202 | Apbb2         | 11787     | 5-:66782860-67010042    |
| 1203 | Enah          | 13800     | 1-:183835645-183949792  |
| 1204 | Pacrg         | 69310     | 17-:10783579-10823998   |
| 1205 | Rhox4b        | 57737     | X+:34847020-34851785    |
| 1206 | BC011487      | 232748    | 6-:42573041-42595040    |
| 1207 | 4930444A02Rik | 74653     | 8-:27092790-27104585    |
| 1208 | Pnrc2         | 52830     | 4-:135426843-135429742  |
| 1209 | MMT00047482   |           | 1-:133529084-133550537  |
| 1210 | MMT00011015   |           | 6+:133682134-133682248  |
| 1211 | Dpp6          | 13483     | 5-:28053379-28054040    |
| 1212 | Adora3        | 11542     | 3+:105707340-105711846  |
| 1213 | Stoml3        | 229277    | 3+:53302045-53311573    |
| 1214 | Trip13        | 69716     | 13-:74049907-74075187   |
| 1215 | Zfp280c       | 208968    | X-:45895791-45945315    |
| 1216 | Btnl7         | 195349    | 17-:34670342-34684596   |
| 1217 | MMT00008964   |           | 6+:131830700-131830893  |
| 1218 | Ms4a5         | 269063    | 19-:11351097-11358267   |
| 1219 | EG665503      | 665503    | 13-:62629440-62630551   |
| 1220 | D12Ertd553e   | 76820     | 12+:12283107-12380920   |
| 1221 | Matk          | 17179     | 10+:80720289-80725726   |
| 1222 | 2310061F22Rik | 66965     | 8+:124992597-125006021  |

|      |               |        |                         |
|------|---------------|--------|-------------------------|
| 1223 | Slc30a9       | 109108 | 5+:67698199-67747022    |
| 1224 | Nup210        | 54563  | 6-:90963063-91066788    |
| 1225 | Rpl10a        | 19896  | 17+:28465543-28467886   |
| 1226 | Ccdc14        | 239839 | 16+:34697352-34706687   |
| 1227 | 4933421I07Rik | 71162  | 7-:49700831-49703450    |
| 1228 | Rabgap1       | 227800 | 2+:37396654-37421970    |
| 1229 | MMT00072551   |        | X+:12879365-12881348    |
| 1230 | MMT00057236   | 630663 | 13-:13413093-13415645   |
| 1231 | Dbn1          | 56320  | 13-:55575376-55589427   |
| 1232 | Abhd1         | 57742  | 5+:31252444-31257456    |
| 1233 | Sidt1         | 320007 | 16-:44240015-44333081   |
| 1234 | Fbxl2         | 72179  | 9-:113887057-113927169  |
| 1235 | Cpne9         | 211232 | 6+:113232298-113254819  |
| 1236 | Ccdc113       | 244608 | 8+:98060363-98082788    |
| 1237 | Irf3          | 54131  | 7+:52253043-52257759    |
| 1238 | Habp2         | 226243 | 19+:56362427-56394578   |
| 1239 | Cerkl         | 228094 | 2-:79208838-79269162    |
| 1240 | Ddx24         | 27225  | 12-:104646190-104664057 |
| 1241 | Meox1         | 17285  | 11-:101738837-101755623 |
| 1242 | Grin2b        | 14812  | 6-:135682116-135994319  |
| 1243 | Phf3          | 213109 | 1-:30859185-30930877    |
| 1244 | Tmem150       | 232086 | 6+:72305486-72309756    |
| 1245 | MMT00029756   |        | 16-:40400621-40400995   |
| 1246 | EG434121      | 434121 | 7-:14495025-14574937    |
| 1247 | Thsd7b        | 210417 | 1+:131492038-131848145  |
| 1248 | Usp24         | 329908 | 4+:106032818-106046647  |
| 1249 | Ncapd3        | 78658  | 9+:26837760-26903085    |
| 1250 | Nol6          | 230082 | 4-:41061460-41071321    |
| 1251 | Lgi1          | 56839  | 19+:38339276-38381298   |
| 1252 | Tacc2         | 57752  | 7+:137765094-137815172  |
| 1253 | Scel          | 64929  | 14+:103912558-104012389 |
| 1254 | Lum           | 17022  | 10+:97028463-97035337   |
| 1255 | Grhpr         | 76238  | 4+:44994282-45003567    |
| 1256 | Baiap2l2      | 207495 | 15-:79088628-79115110   |
| 1257 | Slc25a45      | 107375 | 19+:5877841-5885763     |
| 1258 | Hba-a1        | 15122  | 11+:32183673-32184492   |
| 1259 | Zdhhc14       | 224454 | 17+:5731540-5753810     |
| 1260 | Islr2         | 320563 | 9-:58045540-58052127    |
| 1261 | 4932418E24Rik | 329366 | 2-:26127166-26131627    |
| 1262 | Gnpda1        | 26384  | 18-:38487211-38498605   |
| 1263 | Folh1         | 53320  | 7-:93867906-93924342    |
| 1264 | 1110004E09Rik | 68001  | 16-:90926056-90935185   |
| 1265 | Spns2         | 216892 | 11-:72264692-72303418   |
| 1266 | Olfr1246      | 258788 | 2-:89430326-89431270    |
| 1267 | Olfr1404      | 258881 | 1+:175145783-175146723  |
| 1268 | Cyb5r1        | 72017  | 1+:136302566-136308315  |
| 1269 | Paqr8         | 74229  | 1+:20912332-20927188    |
| 1270 | 1700029I01Rik | 70005  | 4+:146506142-146554953  |
| 1271 | 2810403A07Rik | 74200  | 3+:88489739-88516844    |
| 1272 | 1110008P14Rik | 73737  | 2-:32234623-32237433    |
| 1273 | MMT00067831   |        | 9+:14136348-14137544    |

|      |               |        |                         |
|------|---------------|--------|-------------------------|
| 1274 | Kbtbd8        | 243574 | 6+:95068516-95076932    |
| 1275 | Olfr1054      | 259021 | 2-:86172574-86173511    |
| 1276 | Col4a1        | 12826  | 8-:11198421-11312621    |
| 1277 | Brsk1         | 381979 | 7+:4644481-4667091      |
| 1278 | 4930430D24Rik | 194735 | X-:35367086-35414160    |
| 1279 | Ctps2         | 55936  | X+:159340115-159469249  |
| 1280 | Mesdc2        | 67943  | 7+:91040533-91047690    |
| 1281 | Alkbh3        | 69113  | 2-:93820708-93850369    |
| 1282 | Gm628         | 268816 | 15-:73591839-73594313   |
| 1283 | Tmem161a      | 234371 | 8+:72696317-72706504    |
| 1284 | Serpina3h     | 546546 | 12+:105452765-105492619 |
| 1285 | MMT00008393   |        | 5-:10236233-10236975    |
| 1286 | Rad51c        | 114714 | 11-:87192888-87217923   |
| 1287 | Acss3         | 380660 | 10-:106441719-106560639 |
| 1288 | 3110057O12Rik | 269423 | 3+:40698181-40738951    |
| 1289 | Gm94          | 225443 | 18-:43936871-43952534   |
| 1290 | Zscan12       | 22758  | 13+:21455153-21461693   |
| 1291 | Sft2d1        | 106489 | 17+:8504012-8520305     |
| 1292 | Plekhg2       | 101497 | 7-:29144622-29157596    |
| 1293 | Safb          | 224903 | 17+:56724245-56745715   |
| 1294 | MMT00016640   |        | 7+:12194645-12196115    |
| 1295 | MMT00014481   |        | 15+:60299620-60301359   |
| 1296 | 5330401P04Rik | 227094 | 1+:52694208-52708763    |
| 1297 | Phox2a        | 11859  | 7+:108967003-108971238  |
| 1298 | Trim41        | 211007 | 11-:48619905-48622632   |
| 1299 | Chst9         | 71367  | 18-:15610432-15656679   |
| 1300 | Eef1d         | 66656  | 15-:75725921-75739736   |
| 1301 | A130092J06Rik | 241303 | 2-:31924655-31938797    |
| 1302 | A530098C11Rik | 433294 | 1-:44066253-44076852    |
| 1303 | Nup43         | 69912  | 10+:7387313-7398675     |
| 1304 | H2afy         | 26914  | 13-:56174981-56236881   |
| 1305 | 4930485B16Rik | 380654 | 10-:92507829-92510823   |
| 1306 | Degs2         | 70059  | 12-:109928437-109940516 |
| 1307 | Tmem116       | 77462  | 5+:121913205-121945429  |
| 1308 | Cwf19l2       | 244672 | 9+:3430834-3479305      |
| 1309 | Defb20        | 319579 | 2+:152293129-152305669  |
| 1310 | Cabc1         | 67426  | 1-:182096745-182123597  |
| 1311 | Mpp4          | 227157 | 1-:59177778-59215512    |
| 1312 | MMT00051556   |        | X-:137356725-137392567  |
| 1313 | BC063749      | 414801 | 19-:47861069-47993777   |
| 1314 | Tas2r137      | 574417 | 6+:40441357-40442226    |
| 1315 | Tmem16j       | 71345  | 7-:148287124-148303661  |
| 1316 | Cd28          | 12487  | 1+:60803262-60827406    |
| 1317 | Fcgrt         | 14132  | 7-:52348433-52358462    |
| 1318 | Alox12        | 11684  | 11-:70055887-70068774   |
| 1319 | Vmn2r115      | 638102 | 17+:23481014-23483439   |
| 1320 | Erh           | 13877  | 12-:81735023-81744777   |
| 1321 | AW548124      | 106522 | 17+:83615139-83624400   |
| 1322 | Cep290        | 216274 | 10+:100005050-100036288 |
| 1323 | Orc2l         | 18393  | 1-:58520039-58561763    |
| 1324 | Rfc5          | 72151  | 5-:117828846-117839045  |

|      |               |        |                          |
|------|---------------|--------|--------------------------|
| 1325 | Pigu          | 228812 | 2-:155103980-155127101   |
| 1326 | Tox           | 252838 | 4-:6615494-6917657       |
| 1327 | Pitpnc1       | 71795  | 11-:107073419-107332013  |
| 1328 | 4922501L14Rik | 71845  | 3+ :154383062-154396500  |
| 1329 | 5730494N06Rik | 70612  | 2-:132065229-132073518   |
| 1330 | Fgf21         | 56636  | 7-:52869390-52870676     |
| 1331 | Map2k6        | 26399  | 11+ :110260433-110375009 |
| 1332 | Esrrb         | 26380  | 12+ :87811066-87860014   |
| 1333 | Ubqln2        | 54609  | X+ :149932773-149935068  |
| 1334 | Amacr         | 17117  | 15+ :10911604-10925359   |
| 1335 | Gria4         | 14802  | 9-:4420119-4795519       |
| 1336 | MMT00069537   |        | 14-:61214340-61215729    |
| 1337 | Pigf          | 18701  | 17-:87396598-87424741    |
| 1338 | Ebag9         | 55960  | 15+ :44456003-44471966   |
| 1339 | MMT00077775   |        | 19-:26308024-26629706    |
| 1340 | Tap2          | 21355  | 17+ :34342239-34353037   |
| 1341 | MMT00009551   |        | 1+ :71068738-71074455    |
| 1342 | Pik3ca        | 18706  | 3+ :32335127-32361752    |
| 1343 | Ankhd1        | 108857 | 18+ :36734672-36749235   |
| 1344 | Marcks        | 17118  | 10-:36854626-36858720    |
| 1345 | MMT00024601   |        |                          |
| 1346 | MMT00068311   |        | 10+ :59552212-59552735   |
| 1347 | Espnl         | 227357 | 1+ :93218709-93242311    |
| 1348 | Prl3a1        | 67000  | 13+ :27351357-27368529   |
| 1349 | Defb13        | 246083 | 8+ :23057233-23059093    |
| 1350 | MMT00064364   |        | 1+ :166392507-166394121  |
| 1351 | Whsc111       | 234135 | 8+ :26712042-26825166    |
| 1352 | Olfr1269      | 258339 | 2-:89958823-89959753     |
| 1353 | Plcg2         | 234779 | 8+ :120022087-120159043  |
| 1354 | Lsmd1         | 78304  | 11+ :69209260-69210703   |
| 1355 | MMT00047341   |        | 1-:28858362-28859394     |
| 1356 | MMT00045517   |        | Y-:1317414-1317910       |
| 1357 | Pabpn1        | 54196  | 14+ :55512992-55516891   |
| 1358 | Pappa2        | 23850  | 1-:160644843-160887569   |
| 1359 | 4931406C07Rik | 70984  | 9-:15087782-15106000     |
| 1360 | MMT00044338   |        | 17+ :19290585-19313713   |
| 1361 | 2010001M06Rik | 69812  | 5-:135487979-135489124   |
| 1362 | Avpr1a        | 54140  | 10+ :121885554-121890509 |
| 1363 | BC021767      | 545551 | 3-:94464511-94474619     |
| 1364 | Prl8a9        | 67310  | 13-:27650021-27656415    |
| 1365 | Cuta          | 67675  | 17-:27074917-27076413    |
| 1366 | Tcf23         | 69852  | 5+ :31271049-31279390    |
| 1367 | MMT00079643   |        | 13+ :78218648-78239953   |
| 1368 | Pctp          | 18559  | 11-:89845905-89864179    |
| 1369 | Zswim2        | 71861  | 2-:83755235-83781383     |
| 1370 | MMT00051564   |        | 13-:99259316-99259787    |
| 1371 | 1200009I06Rik | 74190  | 12+ :112659771-112669393 |
| 1372 | Wscd1         | 216881 | 11+ :71564874-71603145   |
| 1373 | Lin7b         | 22342  | 7-:52623261-52625934     |
| 1374 | Mdn1          | 100019 | 4+ :32771613-32780612    |
| 1375 | Strap         | 20901  | 6+ :137683646-137699610  |

|      |               |           |                         |
|------|---------------|-----------|-------------------------|
| 1376 | Mdm2          | 17246     | 10-:117127265-117146840 |
| 1377 | MMT00021279   |           | 12+:88820932-88823764   |
| 1378 | Tcra-V13.1    | 21507     | 14+:53621386-53622033   |
| 1379 | A930041C12Rik | 78443     | 5-:108059270-108062871  |
| 1380 | Sypc3         | 20962     | 10+:87922331-87935980   |
| 1381 | Txndc9        | 98258     | 1-:38044506-38054063    |
| 1382 | Vmn2r-ps57    | 110931    | 7-:49609077-49613364    |
| 1383 | Bhlhb9        | 70237     | X+:132420530-132425617  |
| 1384 | MMT00077464   | 433217    | 19+:7742776-7743282     |
| 1385 | Apba1         | 319924    | 19+:23967295-24019516   |
| 1386 | Ppid          | 67738     | 3+:79395353-79407570    |
| 1387 | Adrm1         | 56436     | 2+:179906735-179910988  |
| 1388 | Plcx3         | 239318    | 15+:4466618-4524876     |
| 1389 | Chrna9        | 231252    | 5+:66325995-66368563    |
| 1390 | AU015836      | 385493    | X+:91214066-91214923    |
| 1391 | 2410089E03Rik | 73692     | 15+:8119104-8132192     |
| 1392 | Gm1040        | 433864    | 5+:29761265-29778014    |
| 1393 | Klhl2         | 77113     | 8-:67218481-67373628    |
| 1394 | MMT00051501   |           | 17+:8005628-8006677     |
| 1395 | V1rh11        | 171270    | 13+:22615919-22616854   |
| 1396 | Rassf7        | 66985     | 7+:148401731-148404555  |
| 1397 | 2900009I07Rik | 68034     | 19-:24550939-24551933   |
| 1398 | MMT00060205   |           | 14+:31215187-31215917   |
| 1399 | Casc1         | 320662    | 6-:145123202-145140214  |
| 1400 | Fxyd6         | 59095     | 9+:45198075-45200786    |
| 1401 | Klk8          | 259277    | 7+:51052946-51059192    |
| 1402 | Cops4         | 26891     | 5+:100947477-100976792  |
| 1403 | Dak           | 225913    | 19-:10666687-10678748   |
| 1404 | Rp2h          | 19889     | X+:19941782-19975303    |
| 1405 | MMT00078938   |           | 7+:110292103-110293045  |
| 1406 | Clic3         | 69454     | 2+:25312359-25314298    |
| 1407 | Spata18       | 73472     | 5+:74042658-74070728    |
| 1408 | Hdgrp2        | 15193     | 17+:56219079-56240019   |
| 1409 | Pbp2          | 76400     | 6-:135259146-135260423  |
| 1410 | Bicc1         | 83675     | 10-:70387849-70622371   |
| 1411 | Tada3l        | 101206    | 6-:113316656-113327514  |
| 1412 | Phf17         | 269424    | 3+:41367382-41420773    |
| 1413 | Il10rb        | 16155     | 16+:91406570-91425993   |
| 1414 | Tsta3         | 22122     | 15-:75755113-75760160   |
| 1415 | Timm9         | 30056     | 12-:72224282-72237621   |
| 1416 | 6720460F02Rik | 109212    | 11+:71856011-71860873   |
| 1417 | 1110006O24Rik | 66123     | 5-:116081081-116081825  |
| 1418 | Aldh3a1       | 11670     | 11+:61022246-61031916   |
| 1419 | Olfr1121      | 258345    | 2+:87211690-87212635    |
| 1420 | 4930548H24Rik | 67656     | 5+:31788231-31790633    |
| 1421 | 2310004I24Rik | 66358     | 11-:66851406-66866096   |
| 1422 | Acadvl        | 11370     | 11-:69823686-69828935   |
| 1423 | Spdya         | 70891     | 17+:71876198-71938872   |
| 1424 | Dapk1         | 69635     | 13+:60703790-60864543   |
| 1425 | ENSMUSG00000  | 100036526 | 12-:70471471-70473508   |
| 1426 | OTTMUSG00000  | 544810    | 11-:96183694-96203518   |

|      |               |        |                         |
|------|---------------|--------|-------------------------|
| 1427 | Ahrr          | 11624  | 13-:74348565-74429757   |
| 1428 | Spty2d1       | 101685 | 7-:54245769-54263815    |
| 1429 | Strn4         | 97387  | 7+:17401704-17426284    |
| 1430 | MMT00038864   |        | 8-:48717625-48718172    |
| 1431 | Eif2s3x       | 26905  | X-:91435837-91457980    |
| 1432 | MMT00040339   | 632654 | 12-:115460975-115461465 |
| 1433 | Deb1          | 26901  | 9+:121619503-121622037  |
| 1434 | lsg20I2       | 229504 | 3+:87735517-87743639    |
| 1435 | Ptges3        | 56351  | 10+:127505742-127514045 |
| 1436 | Nfu1          | 56748  | 6+:86959897-86978409    |
| 1437 | Evc           | 59056  | 5-:37690411-37728100    |
| 1438 | Dclre1b       | 140917 | 3-:103606679-103612107  |
| 1439 | Clcn3         | 12725  | 8-:63391781-63461935    |
| 1440 | Gpr123        | 52389  | 7+:147031483-147062962  |
| 1441 | MMT00001620   |        | X+:9588913-9590834      |
| 1442 | Slc45a1       | 242773 | 4-:149955148-150026242  |
| 1443 | Znhit2        | 29805  | 19+:6061196-6062470     |
| 1444 | C1r           | 50909  | 6+:124469358-124473458  |
| 1445 | Ssbp2         | 66970  | 13+:91600701-91840840   |
| 1446 | Eno3          | 13808  | 11+:70470705-70476012   |
| 1447 | Naaa          | 67111  | 5-:92687286-92707207    |
| 1448 | Zwilch        | 68014  | 9-:63985482-64020715    |
| 1449 | Chaf1b        | 110749 | 16+:93884145-93906351   |
| 1450 | 4930565N06Rik | 68306  | 16-:36880604-36897225   |
| 1451 | 2010300C02Rik | 72097  | 1-:37668520-37694874    |
| 1452 | Gm1027        | 381538 | 4-:106353243-106382321  |
| 1453 | Gfod2         | 70575  | 8-:108240012-108282507  |
| 1454 | MMT00027959   |        | 16-:21841080-21841617   |
| 1455 | Smek1         | 68734  | 12-:102277619-102321144 |
| 1456 | Cnih3         | 72978  | 1+:183282758-183390040  |
| 1457 | Efr3b         | 668212 | 12-:3967102-4038729     |
| 1458 | Cpsf2         | 51786  | 12+:103214197-103241820 |
| 1459 | AU042671      | 269700 | 5+:121770019-121781922  |
| 1460 | Chaf1a        | 27221  | 17+:56179934-56207041   |
| 1461 | Bach2         | 12014  | 4+:32325924-32668174    |
| 1462 | Rpusd4        | 71989  | 9+:35075446-35083543    |
| 1463 | Rbbp5         | 213464 | 1+:134373920-134402243  |
| 1464 | Taf13         | 99730  | 3+:108374616-108384986  |
| 1465 | Lcn4          | 16821  | 2-:26523193-26526802    |
| 1466 | Ubap2l        | 74383  | 3-:89803505-89856403    |
| 1467 | Cnot1         | 234594 | 8-:98244306-98249987    |
| 1468 | Caprin2       | 232560 | 6-:148791006-148843713  |
| 1469 | Zfp688        | 69234  | 7-:134562478-134565536  |
| 1470 | Kcns3         | 238076 | 12-:11098027-11099502   |
| 1471 | Igfbp7        | 29817  | 5-:77778270-77837070    |
| 1472 | MMT00078790   |        | 1+:33157660-33159540    |
| 1473 | MMT00007831   |        | 8+:40369078-40370255    |
| 1474 | MMT00012859   |        | 13-:16061879-16088923   |
| 1475 | Nip7          | 66164  | 8+:109580776-109583145  |
| 1476 | 2610020H08Rik | 434234 | 7+:126937638-126992452  |
| 1477 | Nfyb          | 18045  | 10-:82212768-82226882   |



|      |               |           |                         |
|------|---------------|-----------|-------------------------|
| 1478 | Ptpn12        | 19248     | 5-:20493251-20561565    |
| 1479 | Yipf2         | 74766     | 9-:21393126-21397190    |
| 1480 | Plekhh3       | 217198    | 11-:101023995-101032616 |
| 1481 | EG329541      | 329541    | 2+:153618437-153620916  |
| 1482 | Nme5          | 75533     | 18-:34722376-34738340   |
| 1483 | V1rc19        | 171192    | 6+:56935335-56936244    |
| 1484 | Aasdhpt       | 67618     | 9-:4296039-4309451      |
| 1485 | Plek          | 56193     | 11-:16871452-16908705   |
| 1486 | Pla2g2a       | 18780     | 4+:138388576-138390946  |
| 1487 | MMT00019522   |           | 6+:147220566-147221162  |
| 1488 | MMT00065132   |           | 7+:27030918-27032915    |
| 1489 | MMT00081278   |           | 12-:62600661-62622236   |
| 1490 | Mapk1         | 26413     | 16+:16983659-17039133   |
| 1491 | Dpf3          | 70127     | 12-:84370184-84828658   |
| 1492 | Cda           | 72269     | 4-:137894337-137923895  |
| 1493 | MMT00047335   |           | 12-:10731050-10731395   |
| 1494 | Cyp2c69       | 100043108 | 19-:39917150-39961217   |
| 1495 | Zfp445        | 235682    | 9-:122758064-122771246  |
| 1496 | MMT00061267   |           | 2-:84997574-84998454    |
| 1497 | Dnaja4        | 58233     | 9+:54547190-54562571    |
| 1498 | MMT00059339   |           | 2+:120454884-120460025  |
| 1499 | MMT00018202   |           | 4+:116817861-116820827  |
| 1500 | Leprel1       | 210530    | 16-:25959375-25997389   |
| 1501 | Rnf145        | 74315     | 11+:44332196-44379023   |
| 1502 | Preli2        | 77619     | 18-:42035254-42072135   |
| 1503 | Lingo1        | 235402    | 9-:56466864-56483435    |
| 1504 | Xpo7          | 65246     | 14-:71064653-71166341   |
| 1505 | Dusp9         | 75590     | X+:70884779-70888449    |
| 1506 | OTTMUSG00000  | 791264    | X+:57736750-57802022    |
| 1507 | Tcof1         | 21453     | 18-:60974196-61008562   |
| 1508 | Tlr4          | 21898     | 4+:66488844-66503828    |
| 1509 | 6330514A18Rik | 216166    | 10+:79819233-79825910   |
| 1510 | A530058N18Rik | 320846    | 2+:113839131-113858021  |
| 1511 | Gprc2a-rs5    | 75835     | 7+:48923348-48943029    |
| 1512 | MMT00038113   |           | 17+:74886579-74887403   |
| 1513 | Gzmb          | 14939     | 14-:56877696-56881097   |
| 1514 | Dom3z         | 112403    | 17+:34974027-34976177   |
| 1515 | Med20         | 56771     | 17+:47748579-47761199   |
| 1516 | 5830418K08Rik | 319675    | 9-:15156224-15159180    |
| 1517 | Atxn2l        | 233871    | 7-:133635098-133647162  |
| 1518 | Amigo2        | 105827    | 15-:97075410-97076880   |
| 1519 | Drd1a         | 13488     | 13-:54148222-54149541   |
| 1520 | MMT00069758   |           | 6+:4308509-4309482      |
| 1521 | Copg          | 54161     | 6+:87837933-87863586    |
| 1522 | Nfkbib        | 18036     | 7-:29544062-29551512    |
| 1523 | Prl3d1        | 18775     | 13+:27186080-27192118   |
| 1524 | Krt82         | 114566    | 15-:101372139-101381034 |
| 1525 | MMT00024951   |           | 1-:121138548-121139323  |
| 1526 | Krtap16-9     | 170657    | 16-:88869379-88869642   |
| 1527 | MMT00008776   |           | 12-:73720252-73729202   |
| 1528 | Olfir67       | 18368     | 7-:110935737-110940344  |

|      |               |        |                         |
|------|---------------|--------|-------------------------|
| 1529 | Olfr139       | 259005 | 11-:73857827-73858774   |
| 1530 | Cideb         | 12684  | 14-:56372896-56377295   |
| 1531 | Uqcrc2        | 67003  | 7+:127778720-127802784  |
| 1532 | Rab20         | 19332  | 8-:11453391-11478681    |
| 1533 | BC013712      | 230787 | 4-:132337754-132352268  |
| 1534 | Fabp3         | 14077  | 4+:129986021-129992674  |
| 1535 | Vmn2r17       | 384221 | 5+:109857438-109882405  |
| 1536 | Hopx          | 74318  | 5-:77470227-77524282    |
| 1537 | 1700052K11Rik | 73431  | 11-:105041137-105042747 |
| 1538 | Olfr437       | 258293 | 6+:43117058-43117990    |
| 1539 | RP23-233B9.8  | 622665 | 4+:116270778-116273177  |
| 1540 | MMT00003107   |        | 18-:3705023-3711635     |
| 1541 | Olfr13        | 18310  | 6+:43123986-43124918    |
| 1542 | Upp1          | 22271  | 11+:9018105-9036167     |
| 1543 | Acta2         | 11475  | 19-:34316006-34329805   |
| 1544 | MMT00046046   |        | 17-:24029863-24030559   |
| 1545 | Polr2a        | 20020  | 11-:69547912-69571725   |
| 1546 | Ugcg          | 22234  | 4+:59202330-59233418    |
| 1547 | Eid1          | 58521  | 2+:125498830-125500519  |
| 1548 | Rwdd1         | 66521  | 10-:33716360-33739422   |
| 1549 | Gmfg          | 63986  | 7+:29226451-29231560    |
| 1550 | Chst12        | 59031  | 5+:140999493-141001191  |
| 1551 | MMT00011137   |        | 8+:22571492-22571863    |
| 1552 | Ppil2         | 66053  | 16-:17085628-17111350   |
| 1553 | E130112L23Rik | 268739 | 14+:52604579-52614920   |
| 1554 | Rph3al        | 380714 | 11-:75646902-75667983   |
| 1555 | D430041B17Rik | 232813 | 7-:4781237-4782699      |
| 1556 | Olfr514       | 258721 | 7-:115968578-115969511  |
| 1557 | Ikzf4         | 22781  | 10-:128070769-128081704 |
| 1558 | Adam15        | 11490  | 3-:89143567-89153893    |
| 1559 | MMT00004662   |        | 6-:24293522-24377431    |
| 1560 | Samm50        | 68653  | 15+:84022669-84045284   |
| 1561 | Aurka         | 20878  | 2-:172181690-172196042  |
| 1562 | Btg2          | 12227  | 1-:135971905-135975696  |
| 1563 | Galp          | 232836 | 7+:6154402-6165516      |
| 1564 | Lbr           | 98386  | 1-:183745473-183772463  |
| 1565 | Gas2l2        | 237891 | 11-:83240756-83242930   |
| 1566 | Kctd15        | 233107 | 7-:35424037-35437860    |
| 1567 | MMT00065763   |        | 2+:125423373-125423729  |
| 1568 | Frm4b         | 232288 | 6-:97236861-97567576    |
| 1569 | Tmco4         | 77056  | 4+:138528806-138615079  |
| 1570 | Olfr522       | 258954 | 7-:147347909-147348847  |
| 1571 | Adcyap1       | 11516  | 17+:93599353-93603467   |
| 1572 | Saa3          | 20210  | 7-:53967496-53970470    |
| 1573 | Ttc1          | 66827  | 11-:43543508-43561475   |
| 1574 | Nabl          | 74103  | 2-:17268360-17652695    |
| 1575 | AW554918      | 225289 | 18+:25333847-25623232   |
| 1576 | MMT00022934   | 433745 | 4-:112627609-112630245  |
| 1577 | 2900011O08Rik | 67254  | 16+:13986750-14101067   |
| 1578 | 4921505C17Rik | 78757  | 15+:6727929-6729266     |
| 1579 | Clca1         | 12722  | 3-:144392881-144423733  |

|      |               |        |                         |
|------|---------------|--------|-------------------------|
| 1580 | Mrs2          | 380836 | 13-:25084440-25112248   |
| 1581 | Tgif2         | 228839 | 2+:156665741-156680060  |
| 1582 | Srr           | 27364  | 11-:74721776-74722708   |
| 1583 | Specc1l       | 74392  | 10+:74674815-74775479   |
| 1584 | Dub2          | 13532  | 7+:110565231-110567651  |
| 1585 | Mif4gd        | 69674  | 11-:115469234-115474236 |
| 1586 | Sfi1          | 78887  | 11-:3064552-3077624     |
| 1587 | MMT00044543   |        | 4+:52913468-52915778    |
| 1588 | Clic5         | 224796 | 17+:44325528-44412709   |
| 1589 | Napg          | 108123 | 18+:63137516-63159102   |
| 1590 | Chst2         | 54371  | 9-:95304918-95307141    |
| 1591 | Bcl2l13       | 94044  | 6+:120786233-120838986  |
| 1592 | Amy1          | 11722  | 3-:113258871-113277680  |
| 1593 | D3Erttd300e   | 56790  | 3+:54497026-54520758    |
| 1594 | Mrpl24        | 67707  | 3+:87723465-87727586    |
| 1595 | Exosc8        | 69639  | 3-:54520866-54538960    |
| 1596 | Garnl3        | 99326  | 2-:32841742-32986128    |
| 1597 | Rbbp7         | 245688 | X+:159198364-159216559  |
| 1598 | Nhs           | 195727 | X-:158282214-158313324  |
| 1599 | Lats2         | 50523  | 14-:58309954-58353186   |
| 1600 | Csrp1         | 13007  | 1+:137635972-137647923  |
| 1601 | AA881470      | 231841 | 5+:141180979-141195330  |
| 1602 | Mina          | 67014  | 16+:59471632-59492113   |
| 1603 | Lrwd1         | 71735  | 5-:136598936-136611871  |
| 1604 | Ssbp4         | 76900  | 8-:73121389-73132172    |
| 1605 | Egfr          | 13649  | 11+:16652270-16787642   |
| 1606 | Srp14         | 20813  | 2-:118301586-118305357  |
| 1607 | Memo1         | 76890  | 17-:74600045-74694323   |
| 1608 | Rhbdd1        | 76867  | 1+:82335683-82439640    |
| 1609 | AW146154      | 101835 | 7-:48734245-48736869    |
| 1610 | Ppm1b         | 19043  | 17+:85357676-85414115   |
| 1611 | MMT00014804   | 634967 | 17+:40252300-40253014   |
| 1612 | Clec1b        | 56760  | 6+:129347603-129355294  |
| 1613 | Trim26        | 22670  | 17+:36974128-36996321   |
| 1614 | 4933402P03Rik | 108803 | 11-:69630066-69631970   |
| 1615 | Timm10        | 30059  | 2+:84667199-84670368    |
| 1616 | Dusp13        | 27389  | 14-:22552781-22559498   |
| 1617 | Trp53bp2      | 209456 | 1+:184339451-184392564  |
| 1618 | Mfap1a        | 67532  | 2-:121319443-121332385  |
| 1619 | Fbxw17        | 109082 | 13+:50513253-50527925   |
| 1620 | Htra1         | 56213  | 7+:138079748-138129167  |
| 1621 | Itln1         | 16429  | 1-:173448372-173463537  |
| 1622 | Emd           | 13726  | X+:71500177-71503085    |
| 1623 | MMT00003407   |        | 15+:80306627-80308390   |
| 1624 | Dzip3         | 224170 | 16-:48925921-48994254   |
| 1625 | AW146154      | 101835 | 7+:48745783-48746625    |
| 1626 | Fmo6          | 226565 | 1-:164846855-164867257  |
| 1627 | 2310030N02Rik | 76947  | 4-:10978197-11003334    |
| 1628 | Cdc25c        | 12532  | 18-:34892650-34911162   |
| 1629 | Gcsh          | 68133  | 8-:119505871-119517351  |
| 1630 | Antxrl        | 239029 | 14+:34866851-34868169   |

|      |               |        |                          |
|------|---------------|--------|--------------------------|
| 1631 | Aldob         | 230163 | 4-:49549296-49562357     |
| 1632 | Rnf185        | 193670 | 11-:3315985-3352290      |
| 1633 | Kars          | 85305  | 8-:114517507-114535168   |
| 1634 | MMT00022209   |        | 6-:149381664-149383119   |
| 1635 | 8430427H17Rik | 329540 | 2-:153233197-153262098   |
| 1636 | Zfp777        | 72306  | 6-:47974186-48033604     |
| 1637 | MMT00071316   |        | 1-:71760373-71761572     |
| 1638 | MMT00001787   |        | 3+ :109710332-109710788  |
| 1639 | Atp10b        | 319767 | 11+ :42968991-43067891   |
| 1640 | Reps1         | 19707  | 10+ :17809256-17844938   |
| 1641 | Hoxc11        | 109663 | 15+ :102784937-102787130 |
| 1642 | Mapk4         | 225724 | 18- :74090055-74130090   |
| 1643 | MMT00013277   |        | 3- :150178180-150179116  |
| 1644 | Loxhd1        | 240411 | 18+ :77643537-77652988   |
| 1645 | Vps13b        | 666173 | 15+ :35724059-35860983   |
| 1646 | Slc15a4       | 100561 | 5- :128076036-128097762  |
| 1647 | Olf1216       | 258895 | 2- :88853283-88854219    |
| 1648 | Gnpnat1       | 54342  | 14- :45996095-46008471   |
| 1649 | Pcolce        | 18542  | 5- :138046337-138052587  |
| 1650 | Ctdsp2        | 52468  | 10+ :126432666-126437025 |
| 1651 | V1rc29        | 171202 | 6- :57272719-57273629    |
| 1652 | MMT00027298   |        | 9- :72278992-72279648    |
| 1653 | Anxa5         | 11747  | 3- :36347847-36374620    |
| 1654 | Dhx58         | 80861  | 11- :100564073-100565585 |
| 1655 | Mgrn1         | 17237  | 16+ :4886343-4938284     |
| 1656 | Ahr           | 11622  | 12- :36182693-36219576   |
| 1657 | Olf1216       | 258806 | 9+ :38388863-38389796    |
| 1658 | Gp49a         | 14727  | 10+ :51200484-51206025   |
| 1659 | Hoxb3         | 15410  | 11+ :96205082-96207821   |
| 1660 | Zfp33b        | 69623  | 5+ :105012010-105013638  |
| 1661 | Duoxa1        | 213696 | 2- :122129288-122139429  |
| 1662 | Nos1ap        | 70729  | 1- :172248602-172320956  |
| 1663 | Fkbp4         | 14228  | 6- :128380127-128388545  |
| 1664 | Gspt1         | 14852  | 16- :11220493-11254089   |
| 1665 | Rpusd1        | 106707 | 17+ :25864672-25868400   |
| 1666 | Gp1ba         | 14723  | 11+ :70452623-70455555   |
| 1667 | Tbr1          | 21375  | 2+ :61642669-61652168    |
| 1668 | Lhx1          | 16869  | 11- :84332880-84339036   |
| 1669 | Lhfpl4        | 269788 | 6- :113121776-113145339  |
| 1670 | Ssu72         | 68991  | 4+ :155079232-155107891  |
| 1671 | 2210412E05Rik | 75690  | 7+ :50719338-50727385    |
| 1672 | Mlh1          | 17350  | 9- :111130758-111174066  |
| 1673 | Cldn16        | 114141 | 16+ :26463430-26482827   |
| 1674 | MMT00081013   |        | X- :141699601-141700072  |
| 1675 | Rest          | 19712  | 5+ :77714870-77715430    |
| 1676 | Tmem170       | 66817  | 8- :114388797-114400575  |
| 1677 | Fabp1         | 14080  | 6+ :71149881-71155016    |
| 1678 | Tcf15         | 21407  | 2+ :151969307-151974830  |
| 1679 | MMT00009278   |        | 3+ :95786885-95787446    |
| 1680 | Atp6v1f       | 66144  | 6+ :29417782-29420509    |
| 1681 | Kng2          | 385643 | 16- :22987406-23029166   |

|      |               |        |                         |
|------|---------------|--------|-------------------------|
| 1682 | MMT00072239   |        | 9+:31755961-31756616    |
| 1683 | Igh-VJ558     | 16061  | 12-:115034367-115034778 |
| 1684 | Scnn1b        | 20277  | 7+:129008624-129062029  |
| 1685 | Zcchc7        | 319885 | 4+:44773314-44775353    |
| 1686 | MMT00064576   |        |                         |
| 1687 | Gp1bb         | 14724  | 16-:18620816-18621673   |
| 1688 | Camp          | 12796  | 9-:109749900-109751963  |
| 1689 | Trim72        | 434246 | 7+:135147997-135153974  |
| 1690 | Nlrp5         | 23968  | 7+:24189120-24226935    |
| 1691 | Maml1         | 103806 | 11-:50071351-50105845   |
| 1692 | Fancm         | 104806 | 12+:66176788-66232982   |
| 1693 | Ufsp1         | 70240  | 5+:137735896-137736892  |
| 1694 | Ndufb5        | 66046  | 3+:32635983-32650486    |
| 1695 | MMT00006993   |        | 1+:31331746-31344343    |
| 1696 | V1re9         | 252904 | 7-:11165193-11166151    |
| 1697 | Sf4           | 70616  | 8+:72566711-72596244    |
| 1698 | Olf1r1428     | 258673 | 19-:12183090-12184034   |
| 1699 | Chrac1        | 93696  | 15+:72920866-72924069   |
| 1700 | Ccdc64        | 75665  | 5-:116098188-116181568  |
| 1701 | Tesk1         | 21754  | 4+:43456306-43460369    |
| 1702 | Galc          | 14420  | 12-:99442005-99497617   |
| 1703 | MMT00009122   |        | 9-:71446705-71447587    |
| 1704 | Obox5         | 252829 | 7+:16343257-16344345    |
| 1705 | Gltpd1        | 79554  | 4-:155239391-155241412  |
| 1706 | C2cd2l        | 71764  | 9-:44117963-44128368    |
| 1707 | Dock3         | 208869 | 9-:106797471-107081497  |
| 1708 | Tmem111       | 66087  | 6-:113464877-113481633  |
| 1709 | Mt2           | 17750  | 8+:96696346-96697461    |
| 1710 | 2300005B03Rik | 69462  | 15-:74573194-74573919   |
| 1711 | Grhl1         | 195733 | 12+:25265583-25302252   |
| 1712 | Rnf2          | 19821  | 1-:153316535-153348027  |
| 1713 | Nsun6         | 74455  | 2-:14917926-14976511    |
| 1714 | Ampd1         | 229665 | 3+:102877953-102903646  |
| 1715 | Spem1         | 74288  | 11-:69634389-69635682   |
| 1716 | Git1          | 216963 | 11+:77307063-77321269   |
| 1717 | Ndufs2        | 226646 | 1-:173176219-173177245  |
| 1718 | Metrn         | 70083  | 17-:25931157-25934027   |
| 1719 | Trak2         | 70827  | 1-:58957293-59030314    |
| 1720 | D630042P16Rik | 243612 | 6-:112319449-112334459  |
| 1721 | MMT00001668   |        | 5+:17849268-17857976    |
| 1722 | Iqgap1        | 29875  | 7-:87857671-87948180    |
| 1723 | Usp42         | 76800  | 5-:144474191-144488886  |
| 1724 | MMT00004378   |        | X-:92406801-92407116    |
| 1725 | MMT00045736   |        | 16-:25441098-25443404   |
| 1726 | Avp           | 11998  | 2-:130406413-130408277  |
| 1727 | Gng2          | 14702  | 14-:20695030-20710625   |
| 1728 | Car6          | 12353  | 4-:149561126-149572579  |
| 1729 | Psmc5         | 19184  | 11+:106117498-106124426 |
| 1730 | Pcnxl2        | 270109 | 8-:128386985-128389958  |
| 1731 | Rnf20         | 109331 | 4+:49644958-49670124    |
| 1732 | Hspa4         | 15525  | 11-:53075072-53113683   |

|      |               |           |                         |
|------|---------------|-----------|-------------------------|
| 1733 | Dopey2        | 70028     | 16+:93712222-93740523   |
| 1734 | Arrdc2        | 70807     | 8-:73360045-73363618    |
| 1735 | Prss16        | 54373     | 13-:22094044-22101610   |
| 1736 | Elov13        | 12686     | 19+:46206388-46210184   |
| 1737 | Gtpbp4        | 69237     | 13-:8972368-8995242     |
| 1738 | Mfap5         | 50530     | 6+:122463693-122479108  |
| 1739 | Lrrc17        | 74511     | 5+:21049376-21081718    |
| 1740 | RP23-244H7.9  | 378700    | 2+:153745371-153758732  |
| 1741 | MMT00066806   |           | X-:118290617-118291554  |
| 1742 | 4930415F15Rik | 73862     | 11+:11388510-11415191   |
| 1743 | Cisd1         | 52637     | 10-:70793466-70807623   |
| 1744 | Clec3b        | 21922     | 9+:123059966-123066545  |
| 1745 | Gas7          | 14457     | 11+:67416606-67498461   |
| 1746 | MMT00010791   |           | 6+:58411063-58411603    |
| 1747 | RP23-162H3.1  | 666581    | 4+:146753337-146753561  |
| 1748 | Rbp1          | 19659     | 9+:98323379-98346967    |
| 1749 | Hnrnpu        | 51810     | 1-:180259449-180267843  |
| 1750 | Fcer1a        | 14125     | 1-:175151414-175157345  |
| 1751 | Xdh           | 22436     | 17-:74233251-74299493   |
| 1752 | MMT00035634   |           | 19-:53842240-53842847   |
| 1753 | Slc36a4       | 234967    | 9+:15487345-15516132    |
| 1754 | Bccip         | 66165     | 7+:140901019-140912827  |
| 1755 | Ocel1         | 77090     | 8+:73895224-73897056    |
| 1756 | Usp43         | 216835    | 11-:67668032-67735384   |
| 1757 | Olf1r629      | 258818    | 7-:110888808-110889752  |
| 1758 | Cadps2        | 320405    | 6-:23446750-23638963    |
| 1759 | Rgs3          | 50780     | 4+:62220880-62320868    |
| 1760 | Nek8          | 140859    | 11-:77979607-77990118   |
| 1761 | 2010110K16Rik | 67899     | 9-:117973646-118059210  |
| 1762 | EG620986      | 620986    | 1-:9792275-9792622      |
| 1763 | Mcam          | 84004     | 9+:43942753-43950800    |
| 1764 | Tifab         | 212937    | 13-:56275845-56280014   |
| 1765 | Hist1h2af     | 319173    | 13+:23622983-23626528   |
| 1766 | Srpx2         | 68792     | X+:130443234-130466352  |
| 1767 | BC016495      | 225994    | 19+:18706505-18726505   |
| 1768 | Fmo9          | 240894    | 1-:168593079-168611977  |
| 1769 | Nr5a1         | 26423     | 2-:38548146-38570020    |
| 1770 | BC054059      | 246747    | 2+:158328347-158333934  |
| 1771 | Park2         | 50873     | 17+:11494485-11696865   |
| 1772 | Stambp        | 70527     | 6-:83493200-83522430    |
| 1773 | MMT00025876   | 100042378 | 4+:155610026-155610434  |
| 1774 | Olf1r916      | 258780    | 9-:38465042-38465975    |
| 1775 | MMT00019356   |           | 13-:114270104-114270513 |
| 1776 | 4921511C04Rik | 70853     | 1+:37210690-37244460    |
| 1777 | Slc5a4a       | 64452     | 10+:75610195-75652010   |
| 1778 | Gtf2e1        | 74197     | 16-:37509881-37539855   |
| 1779 | Myo1c         | 17913     | 11+:75471014-75486146   |
| 1780 | Ensa          | 56205     | 3+:95429041-95432629    |
| 1781 | E030010A14Rik | 226040    | 19+:24748501-24753430   |
| 1782 | Zfp650        | 68795     | 2+:69735538-69790926    |
| 1783 | Arcn1         | 213827    | 9-:44550229-44575876    |

|      |               |        |                         |
|------|---------------|--------|-------------------------|
| 1784 | Lipi          | 320355 | 16-:75560971-75574403   |
| 1785 | Slc22a8       | 19879  | 19+:8667730-8685127     |
| 1786 | Tnfsf10       | 22035  | 3+:27216022-27235019    |
| 1787 | MMT00004455   |        | 14-:63133622-63134211   |
| 1788 | Gadd45gjp1    | 102060 | 8+:87356182-87358373    |
| 1789 | Pcbp2         | 18521  | 15+:102303688-102329310 |
| 1790 | Hic1          | 15248  | 11-:74978070-74983021   |
| 1791 | Ints4         | 101861 | 7+:104629519-104689907  |
| 1792 | Zmat4         | 320158 | 8+:24858871-25125688    |
| 1793 | D3Ucla1       | 28146  | 3-:58325899-58329676    |
| 1794 | EG633692      | 633692 | 14-:53158326-53160552   |
| 1795 | Rabgap1l      | 29809  | 1-:162237110-162402248  |
| 1796 | 5033428B15Rik | 76002  | 19-:11071514-11092520   |
| 1797 | Batf2         | 74481  | 19+:6140980-6172472     |
| 1798 | Hoxc5         | 15424  | 15+:102844512-102845873 |
| 1799 | Khdrbs2       | 170771 | 1+:32229650-32714583    |
| 1800 | Retn          | 57264  | 8+:3655788-3658093      |
| 1801 | 4930474N05Rik | 218921 | 14+:36908101-36910039   |
| 1802 | lpo4          | 75751  | 14-:56244749-56254435   |
| 1803 | Ngdn          | 68966  | 14+:55639889-55643072   |
| 1804 | Tgm2          | 21817  | 2-:157943535-157972042  |
| 1805 | Tmem204       | 407831 | 17-:25194652-25218124   |
| 1806 | Nola3         | 66181  | 2+:112102125-112103055  |
| 1807 | MMT00033277   |        | 6+:50558635-50560695    |
| 1808 | Rrp1          | 18114  | 10-:77863131-77875740   |
| 1809 | Odz3          | 23965  | 8+:49311026-49311684    |
| 1810 | Pde7b         | 29863  | 10-:20119357-20444655   |
| 1811 | Rnaseh1       | 19819  | 12+:29334512-29344454   |
| 1812 | Npm2          | 328440 | 14-:71048070-71051968   |
| 1813 | Commd3        | 12238  | 2+:18594091-18597551    |
| 1814 | MMT00042573   |        | 14+:19961424-19963751   |
| 1815 | 1200015F23Rik | 67809  | 2-:118962555-118982699  |
| 1816 | Gjb2          | 14619  | 14-:57718907-57719586   |
| 1817 | Lrrc44        | 74435  | 3+:154756502-154857113  |
| 1818 | Zfp362        | 230761 | 4-:128450330-128467559  |
| 1819 | Rnf17         | 30054  | 14+:57021419-57057480   |
| 1820 | Mat2b         | 108645 | 11-:40492815-40506115   |
| 1821 | MMT00010266   |        | 4-:109076399-109078852  |
| 1822 | Dpf1          | 29861  | 7+:30089023-30102605    |
| 1823 | MMT00080166   |        | 2+:161112955-161113226  |
| 1824 | Zfp385b       | 241494 | 2-:77288196-77357669    |
| 1825 | Gga1          | 106039 | 15+:78707619-78725014   |
| 1826 | Acaa2         | 52538  | 18+:74938568-74965868   |
| 1827 | Gnb1l         | 13972  | 16+:18498912-18564614   |
| 1828 | Elmo3         | 234683 | 8+:107821623-107833891  |
| 1829 | MMT00030026   |        | 1+:193816705-193817410  |
| 1830 | Kctd10        | 330171 | 5-:114813581-114830495  |
| 1831 | Ager          | 11596  | 17+:34734833-34737878   |
| 1832 | Plekha1       | 101476 | 7+:138009423-138056815  |
| 1833 | Stard6        | 170461 | 18+:70635757-70660279   |
| 1834 | Ermap         | 27028  | 4-:118848195-118862579  |

|      |               |           |                         |
|------|---------------|-----------|-------------------------|
| 1835 | MMT00028430   |           | 5-:136119256-136120393  |
| 1836 | Igh-VJ558     | 16061     | 12-:115920819-116089872 |
| 1837 | MMT00014156   |           | 19+:24228659-24234446   |
| 1838 | Kif9          | 16578     | 9+:110412883-110413959  |
| 1839 | Igf2          | 16002     | 7-:149836673-149847765  |
| 1840 | Fpr1          | 14293     | 17-:18013596-18014689   |
| 1841 | MMT00054498   |           | 2+:31841028-31842169    |
| 1842 | V1rc15        | 171188    | 6-:66502876-66503784    |
| 1843 | Tsc2          | 22084     | 17-:24733465-24769541   |
| 1844 | Rrm2b         | 382985    | 15-:37856984-37890716   |
| 1845 | Olf1465       | 258121    | 19-:13356623-13357546   |
| 1846 | MMT00064320   |           |                         |
| 1847 | Naga          | 17939     | 15-:82160491-82168683   |
| 1848 | Tspan32       | 27027     | 7+:150191823-150204644  |
| 1849 | MMT00063181   |           | 1-:151869353-151870959  |
| 1850 | MMT00075142   |           | 5+:7856961-7857846      |
| 1851 | Tmem41a       | 66664     | 16-:21934399-21947617   |
| 1852 | MMT00041847   |           |                         |
| 1853 | Stat5a        | 20850     | 11+:100720969-100746470 |
| 1854 | Vgf           | 381677    | 5+:137506965-137509195  |
| 1855 | Prss12        | 19142     | 3+:123149830-123209512  |
| 1856 | MMT00000408   |           | 9-:108260488-108261433  |
| 1857 | Nfatc3        | 18021     | 8+:108583747-108655624  |
| 1858 | 2810432L12Rik | 67063     | 4-:49598286-49610670    |
| 1859 | Idua          | 15932     | 5+:109098394-109113573  |
| 1860 | Stau2         | 29819     | 1-:16334278-16365476    |
| 1861 | Cetn2         | 26370     | X-:70159044-70163683    |
| 1862 | Vdac1         | 22333     | 11+:52174616-52202898   |
| 1863 | MMT00052951   |           | 5-:109445281-109445937  |
| 1864 | MMT00020890   | 100041434 | 8+:73242440-73246532    |
| 1865 | Polr2f        | 69833     | 15+:78971433-78982281   |
| 1866 | 2010012O05Rik | 66439     | 19+:46764403-46776385   |
| 1867 | Bcas2         | 68183     | 3+:102975667-102982750  |
| 1868 | Atp6v0e2      | 76252     | 6+:48487613-48491793    |
| 1869 | Dkc1          | 245474    | X+:72341216-72355336    |
| 1870 | EG627821      | 627821    | 7+:6224575-6233457      |
| 1871 | Tspyl2        | 52808     | X-:148771400-148774899  |
| 1872 | MMT00039686   |           | 6+:67674907-67675754    |
| 1873 | Itgb3bp       | 67733     | 4-:99432896-99495833    |
| 1874 | Slc19a2       | 116914    | 1+:166179185-166195497  |
| 1875 | Cd19          | 12478     | 7-:133551964-133558350  |
| 1876 | Amdhd1        | 71761     | 10-:92986449-93002732   |
| 1877 | Amica1        | 270152    | 9+:44896695-44916591    |
| 1878 | MMT00047735   |           | 2+:26890199-26890933    |
| 1879 | MMT00054521   | 666814    | 1+:45658897-45659599    |
| 1880 | Vps18         | 228545    | 2+:119114463-119124188  |
| 1881 | Slc16a14      | 71781     | 1-:84908769-84931804    |
| 1882 | Kcnip4        | 80334     | 5-:48782151-48901000    |
| 1883 | MMT00048636   |           | 14+:12007493-12012887   |
| 1884 | Ppt1          | 19063     | 4+:122513497-122535625  |
| 1885 | Smr3a         | 20599     | 5+:88431573-88437558    |



|      |               |        |                         |
|------|---------------|--------|-------------------------|
| 1886 | Tcte1         | 21645  | 17+:45670001-45679629   |
| 1887 | Mapkapk3      | 102626 | 9-:107157262-107191727  |
| 1888 | Olfr1396      | 258334 | 11-:48926279-48927259   |
| 1889 | Dcun1d3       | 233805 | 7-:127000760-127039194  |
| 1890 | Nanp          | 67311  | 2-:150855452-150865091  |
| 1891 | Sv2a          | 64051  | 3+:95988908-95997838    |
| 1892 | A1bg          | 117586 | 15-:60749156-60752829   |
| 1893 | MMT00072326   | 330914 | 9+:31995218-32068816    |
| 1894 | Lrp4          | 228357 | 2+:91297664-91351916    |
| 1895 | Depdc1a       | 76131  | 3+:159158482-159192052  |
| 1896 | Vars          | 22321  | 17+:35138388-35153199   |
| 1897 | 1110034A24Rik | 109065 | 12-:70290077-70299272   |
| 1898 | Aadat         | 23923  | 8+:62984920-63024474    |
| 1899 | 1110031B06Rik | 67826  | 11-:59220652-59263458   |
| 1900 | Hlf           | 217082 | 11-:90249097-90252154   |
| 1901 | Tpp1          | 12751  | 7-:112894592-112900729  |
| 1902 | Eml2          | 72205  | 7+:19761962-19791828    |
| 1903 | Igh           | 111507 | 12-:114954877-115045958 |
| 1904 | Aanat         | 11298  | 11+:116455000-116458858 |
| 1905 | B4galnt1      | 14421  | 10+:126602932-126609276 |
| 1906 | Ssr3          | 67437  | 3-:65183578-65196475    |
| 1907 | D230010M03Rik | 241547 | 2+:91551082-91553022    |
| 1908 | Rnf213        | 629974 | 11+:119308548-119311188 |
| 1909 | Tcap          | 21393  | 11+:98245124-98246526   |
| 1910 | Krtap5-2      | 71623  | 7+:149442728-149444277  |
| 1911 | 1300007F04Rik | 67477  | 11+:77328621-77334117   |
| 1912 | MMT00048357   |        | 5-:16730336-16732695    |
| 1913 | Polr2j        | 20022  | 5+:136592606-136598809  |
| 1914 | EG384325      | 384325 | 5-:30547413-30547756    |
| 1915 | Trim47        | 217333 | 11-:115967072-115971552 |
| 1916 | Espn          | 56226  | 4-:151495231-151502918  |
| 1917 | Sh2d3c        | 27387  | 2+:32576639-32610427    |
| 1918 | Usp39         | 28035  | 6-:72268671-72295169    |
| 1919 | MMT00027062   |        |                         |
| 1920 | Oas1e         | 231699 | 5-:121236330-121245513  |
| 1921 | 4930431L04Rik | 270049 | 8-:60980148-61179845    |
| 1922 | Rell1         | 100532 | 5-:64300775-64360105    |
| 1923 | MMT00015352   |        | 9-:57981776-58003600    |
| 1924 | Pex3          | 56535  | 10-:13243926-13272871   |
| 1925 | 6430531B16Rik | 381933 | 7-:147158198-147161888  |
| 1926 | RP23-12I24.6  | 272009 | 4+:33296280-33318134    |
| 1927 | Gabbr3        | 328699 | 16+:59415094-59447946   |
| 1928 | Triml2        | 622117 | 8+:44285339-44285697    |
| 1929 | Leng8         | 232798 | 7+:4088637-4099773      |
| 1930 | Ccdc109b      | 66815  | 3-:129617878-129672997  |
| 1931 | 2310047B19Rik | 66962  | 9+:21760203-21762707    |
| 1932 | Racgap1       | 26934  | 15-:99450955-99482031   |
| 1933 | MMT00002546   |        | 18-:7842980-7845679     |
| 1934 | Ttc24         | 214191 | 3-:87873332-87875975    |
| 1935 | 2810439F02Rik | 72747  | 18+:12802308-12895558   |
| 1936 | Cbwd1         | 226043 | 19-:24994920-25036048   |

|      |               |        |                        |
|------|---------------|--------|------------------------|
| 1937 | MMT00075644   |        | 3-:26945708-26946550   |
| 1938 | Casz1         | 69743  | 4+:148178585-148264493 |
| 1939 | MMT00052169   |        |                        |
| 1940 | MMT00002367   |        | 11+:41312177-41313958  |
| 1941 | MMT00079618   |        | 6+:78998315-78998815   |
| 1942 | Hoxd1         | 15429  | 2+:74601036-74603200   |
| 1943 | Slc27a4       | 26569  | 2+:29658212-29672138   |
| 1944 | Sprr2h        | 20762  | 3+:92189634-92191241   |
| 1945 | Fut10         | 171167 | 8+:32297804-32346953   |
| 1946 | Phospho1      | 237928 | 11+:95685808-95693272  |
| 1947 | Myo9b         | 17925  | 8+:73796632-73884612   |
| 1948 | Stard7        | 99138  | 2+:127095974-127124668 |
| 1949 | BC048609      | 433215 | 19+:6080030-6080786    |
| 1950 | Bysl          | 53414  | 17-:47738502-47741320  |
| 1951 | Sema4g        | 26456  | 19+:45063833-45077884  |
| 1952 | Cntn6         | 53870  | 6+:104519032-104813220 |
| 1953 | Bard1         | 12021  | 1-:71076940-71149492   |
| 1954 | Bank1         | 242248 | 3-:135876793-135988939 |
| 1955 | Wdr48         | 67561  | 9+:119803960-119835697 |
| 1956 | Usp50         | 75083  | 2-:126587157-126609180 |
| 1957 | Mansc1        | 67729  | 6-:134559227-134582420 |
| 1958 | Bai1          | 107831 | 15+:74359586-74419886  |
| 1959 | AY074887      | 246735 | 9-:54798065-54798805   |
| 1960 | Ubr2          | 224826 | 17-:47067196-47107076  |
| 1961 | Mlf1          | 17349  | 3+:67178112-67203884   |
| 1962 | Rpgrip1       | 77945  | 14-:52762983-52763826  |
| 1963 | MMT00039783   |        | 10+:34618039-34618914  |
| 1964 | C730048C13Rik | 319800 | 19-:8145456-8479572    |
| 1965 | Ncoa2         | 17978  | 1-:13132555-13364145   |
| 1966 | OTTMUSG00000  | 433520 | 2+:177282474-177294210 |
| 1967 | Brwd1         | 93871  | 16-:96214055-96304033  |
| 1968 | Nudc          | 18221  | 4-:133088458-133101864 |
| 1969 | Cep72         | 74470  | 13-:74175282-74199722  |
| 1970 | Gpm6a         | 234267 | 8+:56122674-56146391   |
| 1971 | Kcnh5         | 238271 | 12-:76066111-76255268  |
| 1972 | Ly6g6e        | 70274  | 17+:35213711-35215749  |
| 1973 | Asb8          | 78541  | 15-:97965817-97976057  |
| 1974 | MMT00038542   |        | 10-:92005149-92006415  |
| 1975 | Dnahc9        | 237806 | 11-:65644827-65794849  |
| 1976 | Rpl31         | 114641 | 1+:39424723-39428176   |
| 1977 | Timm17b       | 21855  | X+:7476512-7484063     |
| 1978 | Ublcp1        | 79560  | 11-:44268078-44274332  |
| 1979 | Tubgcp4       | 51885  | 2+:120996903-121024358 |
| 1980 | Ahcyl1        | 229709 | 3-:107467961-107499295 |
| 1981 | Basp1         | 70350  | 15+:25293027-25307123  |
| 1982 | EG668192      | 668192 | 10+:43541036-43542042  |
| 1983 | MMT00052857   |        | 10-:38872953-38878239  |
| 1984 | Ubqln3        | 244178 | 7-:111289418-111291464 |
| 1985 | Pepd          | 18624  | 7+:35697425-35829725   |
| 1986 | Crebl2        | 232430 | 6+:134799120-134808700 |
| 1987 | BC066135      | 271887 | 2-:180016078-180024587 |

|      |               |        |                         |
|------|---------------|--------|-------------------------|
| 1988 | EG545987      | 545987 | 7-:112097690-112098949  |
| 1989 | Sp4           | 20688  | 12-:119476449-119539841 |
| 1990 | Prkg1         | 19091  | 19-:30643036-31738860   |
| 1991 | Ttc17         | 74569  | 2-:94140923-94246822    |
| 1992 | Arl8b         | 67166  | 6+:108733089-108772404  |
| 1993 | EG632649      | 632649 | 5-:152315709-152351823  |
| 1994 | Tram1l1       | 229801 | 3+:124024026-124025770  |
| 1995 | Rab6b         | 270192 | 9+:103014278-103085542  |
| 1996 | Gsdma3        | 450219 | 11+:98460132-98499247   |
| 1997 | Vamp1         | 22317  | 6+:125168591-125170083  |
| 1998 | MMT00061243   |        | 9-:22284377-22284926    |
| 1999 | Tor3a         | 30935  | 1-:158584715-158604438  |
| 2000 | Bola1         | 69168  | 3-:96000163-96001660    |
| 2001 | BC052688      | 432812 | 13+:61887326-61887574   |
| 2002 | Hapln3        | 67666  | 7-:86261914-86275906    |
| 2003 | Ppapdc1       | 71910  | 8+:26830513-26835364    |
| 2004 | 1810024B03Rik | 329509 | 2+:127030406-127030783  |
| 2005 | Rheb          | 19744  | 5-:24309068-24348231    |
| 2006 | Agbl1         | 244071 | 7+:83843594-83911353    |
| 2007 | 4933425L03Rik | 71169  | 12+:13316980-13590610   |
| 2008 | Aff3          | 16764  | 1-:38591750-38683994    |
| 2009 | Ear4          | 53877  | 14+:51823364-51823831   |
| 2010 | Fer1l6        | 631797 | 15+:58389803-58494338   |
| 2011 | Slc2a5        | 56485  | 4+:149494830-149517864  |
| 2012 | Cetn4         | 207175 | 3-:37207549-37211368    |
| 2013 | Il15ra        | 16169  | 2+:11627162-11655588    |
| 2014 | Atp6v0a4      | 140494 | 6-:37998478-38044056    |
| 2015 | Aga           | 11593  | 8+:54597057-54608774    |
| 2016 | Wdr78         | 242584 | 4-:102710674-102786829  |
| 2017 | Dock2         | 94176  | 11-:34127668-34597325   |
| 2018 | Atp7a         | 11977  | X+:103265113-103320039  |
| 2019 | Sf3a1         | 67465  | 11+:4060374-4080626     |
| 2020 | MMT00032099   |        | 19+:33062444-33073597   |
| 2021 | Atf7ip        | 54343  | 6+:136467378-136555589  |
| 2022 | Phc2          | 54383  | 4+:128382239-128430118  |
| 2023 | MMT00072215   |        | 1+:77046869-77047310    |
| 2024 | Tdgf1         | 21667  | 9-:110842106-110848571  |
| 2025 | Prssl1        | 73106  | 10-:79245663-79251669   |
| 2026 | Nrg2          | 381149 | 18-:36177313-36228471   |
| 2027 | Wnt5b         | 22419  | 6-:119383007-119398272  |
| 2028 | Isca2         | 74316  | 12+:86114218-86116035   |
| 2029 | MMT00065054   |        | 14-:80741501-80742340   |
| 2030 | Zc3h15        | 69082  | 2+:83484637-83498459    |
| 2031 | Il6           | 16193  | 5+:30339700-30346508    |
| 2032 | 1700007K13Rik | 69327  | 2-:28317375-28321853    |
| 2033 | 2010106E10Rik | 67715  | X+:109608883-109671942  |
| 2034 | Ptprk         | 19272  | 10+:27794625-28316026   |
| 2035 | Slc44a3       | 213603 | 3-:121162446-121235249  |
| 2036 | Rnf150        | 330812 | 8+:85514245-85566680    |
| 2037 | Ankrd16       | 320816 | 2+:11700151-11711955    |
| 2038 | Cacna1c       | 12288  | 6-:118542481-119058572  |

|      |               |        |                         |
|------|---------------|--------|-------------------------|
| 2039 | 9930105H17Rik | 100669 | 14+:41866897-41867955   |
| 2040 | MMT00006448   |        | 6-:4341029-4355205      |
| 2041 | Cct7          | 12468  | 6+:85409107-85418368    |
| 2042 | Schip1        | 30953  | 3+:68376482-68429779    |
| 2043 | Arl2bp        | 107566 | 8+:97190654-97198320    |
| 2044 | Hsd17b7       | 15490  | 1-:171882491-171899326  |
| 2045 | Olfr1457      | 258568 | 19-:13169184-13170136   |
| 2046 | Tmem80        | 71448  | 7+:148514028-148522710  |
| 2047 | Aig1          | 66253  | 10-:13372514-13588636   |
| 2048 | Uty           | 22290  | Y-:439205-582063        |
| 2049 | Gsta3         | 14859  | 1+:21239829-21255300    |
| 2050 | Lpl           | 16956  | 8+:71404452-71430830    |
| 2051 | Ddx27         | 228889 | 2+:166840809-166891360  |
| 2052 | Slc38a9       | 268706 | 13+:113459675-113523259 |
| 2053 | Olfr5         | 18349  | 7-:6432927-6433865      |
| 2054 | Acaa1a        | 113868 | 9+:119250595-119259412  |
| 2055 | MMT00012951   |        | 5+:84157713-84158184    |
| 2056 | Ttn           | 22138  | 2-:76705214-76709945    |
| 2057 | Pawr          | 114774 | 10+:107769727-107851885 |
| 2058 | Hk3           | 212032 | 13-:55106856-55122559   |
| 2059 | 5630401D24Rik | 71449  | 1-:164463804-164478476  |
| 2060 | Olfr1008      | 258866 | 2+:85529587-85530527    |
| 2061 | Lgi3          | 213469 | 14+:70930645-70937817   |
| 2062 | EG668830      | 668830 | 17-:81337261-81338134   |
| 2063 | EG546335      | 546335 | X+:75371334-75372453    |
| 2064 | Eps8l1        | 67425  | 7+:4416997-4430528      |
| 2065 | Aph1a         | 226548 | 3+:95697915-95701385    |
| 2066 | Olfr1256      | 258985 | 2-:89675179-89676100    |
| 2067 | Myo1a         | 432516 | 10+:127142870-127157997 |
| 2068 | EG623133      | 623133 | 8+:4652053-4653615      |
| 2069 | Rps18         | 20084  | 17-:34088944-34092586   |
| 2070 | Gnat1         | 14685  | 9-:107578218-107581879  |
| 2071 | Pih1d2        | 72614  | 9+:50425438-50429992    |
| 2072 | Olfr980       | 259110 | 9-:39813599-39814532    |
| 2073 | Sirpb1        | 320832 | 3-:15416834-15426482    |
| 2074 | Sfxn1         | 14057  | 13+:54180828-54201971   |
| 2075 | Atp6v1g1      | 66290  | 4+:63205870-63211734    |
| 2076 | Rin2          | 74030  | 2+:145686398-145712905  |
| 2077 | Olfr181       | 259001 | 16-:58925443-58926395   |
| 2078 | MMT00057419   |        | 12-:115850430-115854494 |
| 2079 | Mthfs         | 107885 | 9+:89106027-89135063    |
| 2080 | Dnahc12       | 110083 | 14+:27618049-27620521   |
| 2081 | Dlat          | 235339 | 9-:50444459-50467622    |
| 2082 | AU018778      | 234564 | 8-:95780140-95803610    |
| 2083 | 1110007C09Rik | 68480  | 13-:49298319-49311395   |
| 2084 | Pftk1         | 18647  | 5-:5373457-5380364      |
| 2085 | MMT00007546   |        | 4-:114811245-114828986  |
| 2086 | Prpf8         | 192159 | 11+:75300591-75322885   |
| 2087 | MMT00011735   |        | 17-:37106151-37108058   |
| 2088 | Ppan          | 235036 | 9+:20692700-20696622    |
| 2089 | Znrf4         | 20834  | 17-:56650670-56651839   |

|      |               |           |                         |
|------|---------------|-----------|-------------------------|
| 2090 | Rpo1-2        | 20017     | 2+:128926776-128952330  |
| 2091 | Wfdc1         | 67866     | 8+:122190395-122211892  |
| 2092 | Bcat1         | 12035     | 6-:144948782-144995886  |
| 2093 | Mbp           | 17196     | 18+:82644554-82755019   |
| 2094 | RP23-360A2.8  | 100043403 | 2-:177715240-177718683  |
| 2095 | Siglech       | 233274    | 7+:63023596-63027953    |
| 2096 | MMT00072212   | 380822    | 12-:116446282-116746212 |
| 2097 | C8a           | 230558    | 4-:104488290-104548988  |
| 2098 | 2810428J06Rik | 67058     | 3-:135088200-135089958  |
| 2099 | lft74         | 67694     | 4+:94321517-94359920    |
| 2100 | Cep68         | 216543    | 11-:20128514-20149410   |
| 2101 | Ube2r2        | 67615     | 4+:41082921-41138282    |
| 2102 | Ceacam14      | 67084     | 7+:18398030-18401012    |
| 2103 | Svopl         | 320590    | 6-:37972996-37996998    |
| 2104 | Olfr646       | 259058    | 7+:111254794-111255732  |
| 2105 | Pear1         | 73182     | 3-:87554022-87572878    |
| 2106 | 4931406H21Rik | 77592     | 14-:26406032-26413423   |
| 2107 | Mrpl4         | 66163     | 9+:20807429-20813275    |
| 2108 | Fzd3          | 14365     | 14-:65821243-65872267   |
| 2109 | Aqp2          | 11827     | 15+:99409583-99414472   |
| 2110 | Gtf2ird1      | 57080     | 5-:134833538-134932560  |
| 2111 | MMT00003004   |           | 14+:51931170-51936428   |
| 2112 | MMT00061406   |           | 7+:11396128-11398849    |
| 2113 | Rasd1         | 19416     | 11-:59776686-59778437   |
| 2114 | Coro6         | 216961    | 11+:77276083-77283293   |
| 2115 | Gpr12         | 14738     | 5-:147394327-147396408  |
| 2116 | Hyls1         | 76832     | 9-:35368410-35378190    |
| 2117 | Fibp          | 58249     | 19+:5460693-5464992     |
| 2118 | Kptn          | 70394     | 7+:16705256-16712863    |
| 2119 | Lamc3         | 23928     | 2+:31742809-31802640    |
| 2120 | Zfp791        | 244556    | 8-:87633546-87678846    |
| 2121 | Brms1l        | 52592     | 12+:56937603-56970720   |
| 2122 | Olfr954       | 258328    | 9+:39269017-39269960    |
| 2123 | EG384525      | 384525    | 7+:5970606-5971109      |
| 2124 | MMT00002232   |           | X+:10258089-10258566    |
| 2125 | MMT00008580   |           | 8-:53639725-54014209    |
| 2126 | Dgat2         | 67800     | 7-:106302951-106331081  |
| 2127 | Ldha          | 16828     | 7+:54102582-54110996    |
| 2128 | 4930447K03Rik | 432745    | 13-:34176023-34205141   |
| 2129 | MMT00046536   |           | 18-:20841057-20841503   |
| 2130 | Smcr7         | 237781    | 11+:60541924-60546442   |
| 2131 | Zdbf2         | 73884     | 1+:63319840-63350080    |
| 2132 | MMT00030693   | 100047070 | 6-:70093482-70167167    |
| 2133 | MMT00013038   |           | 11-:90716203-90731816   |
| 2134 | Pes1          | 64934     | 11+:3864039-3870699     |
| 2135 | Taf4b         | 72504     | 18+:14941751-15058151   |
| 2136 | Cnksr2        | 245684    | X-:154261433-154434622  |
| 2137 | Nexn          | 68810     | 3-:151899946-151916671  |
| 2138 | A930008G19Rik | 77938     | 7-:139906629-140028890  |
| 2139 | Zfp825        | 235956    | 13-:74617505-74631398   |
| 2140 | Myo16         | 244281    | 8+:10569452-10633649    |

|      |               |        |                         |
|------|---------------|--------|-------------------------|
| 2141 | Chmp1a        | 234852 | 8-:125728163-125736638  |
| 2142 | Phldb1        | 102693 | 9-:44494391-44535257    |
| 2143 | MMT00066022   |        | 15+:82294587-82295230   |
| 2144 | MMT00060164   |        | 18+:80155666-80156692   |
| 2145 | MMT00075271   |        | 7+:13328413-13329074    |
| 2146 | MMT00044046   |        | 18-:51277050-51414788   |
| 2147 | MMT00060230   |        | 13-:62488652-62489382   |
| 2148 | Tas2r105      | 57252  | 6-:131636578-131637481  |
| 2149 | Mtch1         | 56462  | 17-:29469653-29484732   |
| 2150 | Rragc         | 54170  | 4+:123594755-123614233  |
| 2151 | Cgnl1         | 68178  | 9-:71476623-71478903    |
| 2152 | Srfbp1        | 67222  | 18+:52625344-52643367   |
| 2153 | Ssbp1         | 381760 | 6+:40421293-40430999    |
| 2154 | Rgs9          | 19739  | 11-:109086668-109159443 |
| 2155 | Olf582        | 259055 | 7+:110189994-110190953  |
| 2156 | Tnfaip8       | 106869 | 18+:50213173-50251431   |
| 2157 | 0610007C21Rik | 381629 | 5+:31350592-31356994    |
| 2158 | Slc10a3       | 214601 | X-:71614567-71618595    |
| 2159 | Ceacam9       | 26368  | 7+:17307277-17311459    |
| 2160 | Slc6a17       | 229706 | 3-:107274099-107320936  |
| 2161 | Cd177         | 68891  | 7-:25529003-25531220    |
| 2162 | 2410042D21Rik | 72425  | 2+:112219411-112253491  |
| 2163 | 4930503E14Rik | 74954  | 14-:44740833-44749036   |
| 2164 | Olf582        | 258933 | 10-:129044604-129045535 |
| 2165 | Tmem128       | 66309  | 5+:38651613-38660857    |
| 2166 | Amd1          | 11702  | 10-:40007283-40021921   |
| 2167 | Pif1          | 208084 | 9+:65435008-65443769    |
| 2168 | Cox15         | 226139 | 19-:43809623-43827450   |
| 2169 | Lrrc56        | 70552  | 7+:148381805-148396059  |
| 2170 | Asphd1        | 233879 | 7-:134089499-134092250  |
| 2171 | Sytl4         | 27359  | X-:130470923-130516322  |
| 2172 | EG544954      | 544954 | 13+:75001727-75002729   |
| 2173 | C030048B08Rik | 269623 | 5-:3583724-3596547      |
| 2174 | MMT00053383   |        | 7+:24142108-24143830    |
| 2175 | Lin52         | 217708 | 12+:85792456-85879602   |
| 2176 | Trim59        | 66949  | 3-:68847478-68848667    |
| 2177 | Htatif2       | 53415  | 7+:57014968-57028895    |
| 2178 | Slc8a1        | 20541  | 17-:81784942-82137709   |
| 2179 | Trim3         | 55992  | 7-:112759161-112782045  |
| 2180 | 1700081D17Rik | 73523  | 14+:70240212-70251766   |
| 2181 | Slc35f1       | 215085 | 10+:52652897-52828163   |
| 2182 | Slc9a10       | 208169 | 16+:45601995-45607112   |
| 2183 | 1810035L17Rik | 380773 | 12+:88784780-88791117   |
| 2184 | MMT00043920   |        |                         |
| 2185 | Pef1          | 67898  | 4+:129784858-129805378  |
| 2186 | 2900026A02Rik | 243219 | 5-:113592213-113621205  |
| 2187 | Kif5b         | 16573  | 18-:6203086-6241342     |
| 2188 | Prpf38a       | 230596 | 4-:108237313-108251934  |
| 2189 | Mov10         | 17454  | 3-:104597753-104621160  |
| 2190 | Heyl          | 56198  | 4+:122910798-122925962  |
| 2191 | 2900075B16Rik | 78506  | 8+:41392783-41466183    |

|      |               |        |                         |
|------|---------------|--------|-------------------------|
| 2192 | Casc3         | 192160 | 11+:98666218-98695120   |
| 2193 | Oca2          | 18431  | 7+:63495140-63791887    |
| 2194 | Hectd2        | 226098 | 19+:36679657-36693329   |
| 2195 | Lgals7        | 16858  | 7+:29649849-29651210    |
| 2196 | Foxq1         | 15220  | 13+:31650785-31651987   |
| 2197 | Snap23        | 20619  | 2+:120410003-120425183  |
| 2198 | Epb4.1l5      | 226352 | 1-:121444088-121451728  |
| 2199 | Aff1          | 17355  | 5+:104283521-104284335  |
| 2200 | BC006779      | 229003 | 2-:180962318-180975622  |
| 2201 | Tssk5         | 73542  | 15-:76202383-76205370   |
| 2202 | Lcor          | 212391 | 19+:41620364-41661025   |
| 2203 | Cts3          | 117066 | 13-:61589372-61591397   |
| 2204 | Olfir284      | 258278 | 15-:98170452-98171370   |
| 2205 | Olfir1243     | 258971 | 2-:89367647-89368565    |
| 2206 | MMT00046613   |        |                         |
| 2207 | Ogn           | 18295  | 13+:49704513-49718684   |
| 2208 | Klhl32        | 212390 | 4-:24671004-24719944    |
| 2209 | Il1rap1       | 331461 | X-:83992581-84033187    |
| 2210 | Chn1          | 108699 | 2-:73450944-73463797    |
| 2211 | Ttpa          | 50500  | 4+:19935586-19957932    |
| 2212 | Vps53         | 68299  | 11-:75859801-75993132   |
| 2213 | Cox5a         | 12858  | 9+:57369115-57380231    |
| 2214 | Larp6         | 67557  | 9+:60560923-60586337    |
| 2215 | Zfp71-rs1     | 235907 | 13-:67806245-67830019   |
| 2216 | Fabp3         | 14077  | 4+:129986021-129992706  |
| 2217 | Dydc1         | 69496  | 14+:41886198-41905478   |
| 2218 | D15Mgi27      | 106073 | 15+:102110526-102112184 |
| 2219 | Rdh10         | 98711  | 1+:16095815-16123813    |
| 2220 | Cntnap1       | 53321  | 11+:101037430-101051160 |
| 2221 | Elp3          | 74195  | 14-:66149291-66211926   |
| 2222 | Tagln         | 21345  | 9-:45738056-45743980    |
| 2223 | Slc28a2       | 269346 | 2+:122267294-122286740  |
| 2224 | Oasl2         | 23962  | 5+:115346944-115362235  |
| 2225 | Ceacam11      | 66996  | 7+:18557472-18563898    |
| 2226 | Amt           | 434437 | 9+:108199212-108204964  |
| 2227 | Cenpa         | 12615  | 5+:30969274-30977197    |
| 2228 | Nox1          | 237038 | X-:130621685-130642380  |
| 2229 | Gjc1          | 14615  | 11-:102660894-102665955 |
| 2230 | Slc35d1       | 242585 | 4-:102846085-102887314  |
| 2231 | Piwil4        | 330890 | 9-:14506220-14539101    |
| 2232 | Strn          | 268980 | 17-:79054572-79135827   |
| 2233 | Elt1          | 170757 | 3+:151100850-151208044  |
| 2234 | MMT00046581   |        | 16-:55940431-55940830   |
| 2235 | Ndufv1        | 17995  | 19-:4007506-4012725     |
| 2236 | Adnp2         | 240442 | 18-:80286084-80348214   |
| 2237 | Gpr110        | 77596  | 17+:43407277-43461686   |
| 2238 | Ceacam15      | 101434 | 7-:17234660-17260961    |
| 2239 | 4930503E24Rik | 75030  | 10+:123906127-123961543 |
| 2240 | MMT00045791   |        | 16-:27343196-27343655   |
| 2241 | Trim7         | 94089  | 11+:48650972-48654917   |
| 2242 | Ptn           | 19242  | 6-:36665662-36761361    |

|      |               |           |                         |
|------|---------------|-----------|-------------------------|
| 2243 | Gcsh          | 68133     | 8-:119505729-119517349  |
| 2244 | Klre1         | 243655    | 6+:129528324-129535842  |
| 2245 | Sh2d4b        | 328381    | 14-:41673671-41706556   |
| 2246 | Syne1         | 64009     | 10+:4978236-5013130     |
| 2247 | Olig1         | 50914     | 16+:91270169-91270903   |
| 2248 | Ly6g6d        | 114654    | 17-:35208489-35211409   |
| 2249 | BB014433      | 434285    | 8-:15041449-15046069    |
| 2250 | Tdrd12        | 71981     | 7-:36278630-36322701    |
| 2251 | Ankrd1        | 107765    | 19-:36187146-36194285   |
| 2252 | MMT00020839   | 100040997 | 16+:96108180-96123331   |
| 2253 | Lysmd1        | 217779    | 3+:94938016-94943440    |
| 2254 | D0H4S114      | 27528     | 18-:33597766-33623542   |
| 2255 | Trim56        | 384309    | 5-:137588327-137592080  |
| 2256 | Serpina9      | 71907     | 12-:105234831-105251862 |
| 2257 | 2610044O15Rik | 72139     | 17-:95213644-95233933   |
| 2258 | 2510002D24Rik | 72307     | 16+:18836658-18840513   |
| 2259 | Ddx3x         | 13205     | X+:12858163-12869740    |
| 2260 | Spink10       | 328971    | 18+:62810503-62821020   |
| 2261 | MMT00028230   |           | 2-:161080144-161081236  |
| 2262 | Papss2        | 23972     | 19+:32693437-32740227   |
| 2263 | Dpy19l2       | 320752    | 9-:24361496-24500734    |
| 2264 | Alb           | 11657     | 5+:90889920-90905775    |
| 2265 | Rasgrf1       | 19417     | 9+:89804614-89921764    |
| 2266 | Angptl2       | 26360     | 2+:33083714-33101821    |
| 2267 | 2210417D09Rik | 66532     | 6+:146981058-146982007  |
| 2268 | 4732479N06Rik | 215201    | X-:130757494-130811522  |
| 2269 | Gucy1b2       | 239134    | 14-:63023323-63067105   |
| 2270 | Pter          | 19212     | 2+:12845756-12923240    |
| 2271 | Pkdrej        | 18766     | 15-:85645783-85652163   |
| 2272 | MMT00043698   |           | 13+:19431717-19444631   |
| 2273 | Haghl         | 68977     | 17-:25919769-25922278   |
| 2274 | Tnnc2         | 21925     | 2-:164602663-164605229  |
| 2275 | Cyp4b1        | 13120     | 4-:115297332-115320310  |
| 2276 | Nelf          | 56876     | 2+:24909932-24918400    |
| 2277 | Igh           | 111507    | 12-:114954754-115034779 |
| 2278 | Gtf3c1        | 233863    | 7-:132784466-132851279  |
| 2279 | MMT00043269   |           | 4-:155628563-155629374  |
| 2280 | 4930555I21Rik | 78806     | 4+:135051901-135093718  |
| 2281 | 1700013F07Rik | 75504     | 3+:108337061-108348195  |
| 2282 | Cbx8          | 30951     | 11-:118899751-118902227 |
| 2283 | MMT00029554   |           | 10+:81893449-81894588   |
| 2284 | Syt7          | 54525     | 19+:10463972-10522933   |
| 2285 | Lipf          | 67717     | 19+:34035737-34051303   |
| 2286 | MMT00034424   |           | 1-:44520616-44521136    |
| 2287 | Olfr351       | 258944    | 2-:36714935-36715866    |
| 2288 | Lyzl1         | 67328     | 18+:4165829-4182234     |
| 2289 | MMT00078995   |           | 1-:184322675-184323666  |
| 2290 | Il1rapl2      | 60367     | X+:134106087-135381494  |
| 2291 | MMT00041633   |           | 13-:61788625-61789350   |
| 2292 | Limk2         | 16886     | 11-:3244259-3309177     |
| 2293 | Adam17        | 11491     | 12-:21331136-21379293   |



|      |                |        |                         |
|------|----------------|--------|-------------------------|
| 2294 | AU040829       | 216831 | 11-:64816675-64976461   |
| 2295 | MMT00006781    |        | 11-:21089046-21090569   |
| 2296 | Oprl1          | 18389  | 2+:181449807-181454108  |
| 2297 | Syce2          | 71846  | 8+:87396009-87411294    |
| 2298 | Mtmr12         | 268783 | 15+:12160027-12201987   |
| 2299 | Ccl19          | 24047  | 4+:42248503-42250497    |
| 2300 | C330023M02Rik  | 231713 | 5+:121847982-121889265  |
| 2301 | Pcyox1         | 66881  | 6-:86336965-86347100    |
| 2302 | Prmt5          | 27374  | 14-:55126019-55136244   |
| 2303 | Al837181       | 107242 | 19+:5425156-5427312     |
| 2304 | Jund           | 16478  | 8+:73222931-73224514    |
| 2305 | 2610002M06Rik  | 67028  | X-:104982682-105011620  |
| 2306 | Gtdc1          | 227835 | 2-:44419938-44490836    |
| 2307 | MMT00001230    |        | 18-:29816873-29817413   |
| 2308 | A930005I04Rik  | 403174 | 5+:35260190-35266487    |
| 2309 | Tet2           | 214133 | 3-:133128829-133134781  |
| 2310 | Pdia3          | 14827  | 2+:121239695-121263715  |
| 2311 | RP23-336F11.32 | 213765 | 2-:112090715-112095980  |
| 2312 | MMT00035795    |        | 4-:129285121-129287721  |
| 2313 | Olfr641        | 259075 | 7+:111188311-111189249  |
| 2314 | Zswim6         | 67263  | 13-:108516172-108523916 |
| 2315 | Abcb1a         | 18671  | 5+:8660091-8748519      |
| 2316 | MMT00036506    |        |                         |
| 2317 | Ankar          | 319695 | 1-:72696779-72705377    |
| 2318 | Igh-VJ558      | 16061  | 12-:117150531-117151034 |
| 2319 | E2f1           | 13555  | 2-:154385373-154395588  |
| 2320 | Spc24          | 67629  | 9-:21560437-21564747    |
| 2321 | ENSMUSG000006  | 677044 | 9-:62689305-62690180    |
| 2322 | Tuba4a         | 22145  | 1-:75212130-75215799    |
| 2323 | Ilgav          | 16410  | 2+:83564671-83643963    |
| 2324 | Golga4         | 54214  | 9+:118415435-118491636  |
| 2325 | H2-K1          | 14972  | 17-:34133342-34137230   |
| 2326 | zfp507         | 668501 | 7-:36560979-36662496    |
| 2327 | Mrc2           | 17534  | 11+:105153996-105211283 |
| 2328 | Traf3ip1       | 74019  | 1+:93391254-93425949    |
| 2329 | Wdr6           | 83669  | 9-:108474648-108480997  |
| 2330 | Ccdc28b        | 66264  | 4-:129296518-129301144  |
| 2331 | Vezt           | 215008 | 10-:93432018-93498556   |
| 2332 | Nox3           | 224480 | 17-:3646475-3695583     |
| 2333 | MMT00064554    |        |                         |
| 2334 | Gch1           | 14528  | 14-:47775327-47809064   |
| 2335 | Gsdma2         | 76758  | 11+:98508076-98519267   |
| 2336 | Lpar3          | 65086  | 3+:145883959-145948924  |
| 2337 | Necap2         | 66147  | 4-:140623171-140634226  |
| 2338 | Olfr620        | 258808 | 7-:110759924-110760865  |
| 2339 | 5730449L18Rik  | 66637  | 1-:154217868-154233812  |
| 2340 | Unc84a         | 77053  | 5+:139676594-139725794  |
| 2341 | Pcdhb20        | 93891  | 18+:37663942-37667312   |
| 2342 | MMT00009948    |        | 7-:115671545-115672576  |
| 2343 | Reck           | 53614  | 4+:43953524-43955301    |
| 2344 | Ogt            | 108155 | X+:98835624-98877668    |

|      |               |        |                          |
|------|---------------|--------|--------------------------|
| 2345 | Olfr667       | 259062 | 7-:112064876-112065808   |
| 2346 | C630035N08Rik | 109349 | 2-:26967521-26997995     |
| 2347 | Zmynd17       | 74843  | 14-:21302091-21315905    |
| 2348 | Irak1         | 16179  | X-:71260321-71269254     |
| 2349 | Ccdc73        | 211936 | 2+ :104792062-104831938  |
| 2350 | Ruvbl1        | 56505  | 6+ :88415458-88447559    |
| 2351 | 1110008F13Rik | 67388  | 2+ :156688863-156699295  |
| 2352 | MMT00059848   |        | 17+ :3097104-3098132     |
| 2353 | Snx17         | 266781 | 5+ :31493980-31501341    |
| 2354 | Lhx1          | 16869  | 11- :84331478-84332032   |
| 2355 | 1700065I16Rik | 78462  | 15+ :63648738-63653257   |
| 2356 | Dnajc13       | 235567 | 9- :104053611-104140870  |
| 2357 | Snta1         | 20648  | 2- :154202063-154233817  |
| 2358 | 5830411N06Rik | 244234 | 7+ :147408055-147486635  |
| 2359 | Cc2d2a        | 231214 | 5+ :44053618-44130714    |
| 2360 | 6330407G11Rik | 68050  | 4- :123412602-123427504  |
| 2361 | Kcnb2         | 98741  | 1+ :15669745-15772717    |
| 2362 | Mkks          | 59030  | 2- :136699800-136716914  |
| 2363 | Stx1b         | 56216  | 7- :134950355-134968045  |
| 2364 | Spr3          | 20766  | 3- :92260740-92261457    |
| 2365 | BC031181      | 407819 | 18+ :75165582-75169494   |
| 2366 | MMT00034174   |        | 16+ :93628337-93630443   |
| 2367 | Olfr342       | 258950 | 2+ :36382933-36383871    |
| 2368 | Heatr5b       | 320473 | 17- :79148362-79150134   |
| 2369 | MMT00026815   |        | 11- :121767077-121831952 |
| 2370 | 8430408G22Rik | 213393 | 6+ :116600716-116602811  |
| 2371 | Ptch2         | 19207  | 4+ :116768960-116787436  |
| 2372 | Stx12         | 100226 | 4- :132409978-132440316  |
| 2373 | Ror1          | 26563  | 4+ :99768823-100114848   |
| 2374 | Vmn2r91       | 665210 | 17+ :18242881-18273607   |
| 2375 | Tnpo1         | 238799 | 13- :99614334-99619209   |
| 2376 | Rnase13       | 497071 | 14- :52541893-52542355   |
| 2377 | Mmd           | 67468  | 11+ :90110836-90139891   |
| 2378 | Bzw1          | 66882  | 1+ :58449979-58463392    |
| 2379 | Lyst          | 17101  | 13+ :13682675-13869707   |
| 2380 | MMT00065765   |        | 2- :89021616-89022284    |
| 2381 | Tegt          | 110213 | 15+ :99232016-99240471   |
| 2382 | Usp24         | 329908 | 4+ :106050113-106053588  |
| 2383 | 1500031H01Rik | 207740 | 16- :4874785-4879797     |
| 2384 | Micalcl       | 70877  | 7+ :119517848-119556616  |
| 2385 | Ctsd          | 13033  | 7- :149561821-149573775  |
| 2386 | Zfp42         | 22702  | 8- :44380424-44392355    |
| 2387 | Dsc1          | 72107  | 15- :54907654-54922049   |
| 2388 | Dot1l         | 208266 | 10+ :80217707-80256188   |
| 2389 | Ifna5         | 15968  | 4+ :88481428-88481997    |
| 2390 | Lcn2          | 16819  | 2- :32240172-32243290    |
| 2391 | Mov10l1       | 83456  | 15+ :88815989-88885578   |
| 2392 | Olfr551       | 258750 | 7- :109736307-109737255  |
| 2393 | Centd3        | 106952 | 18- :38132278-38156760   |
| 2394 | Tnc           | 21923  | 4- :63620821-63681760    |
| 2395 | Csn1s2b       | 12992  | 5+ :88237179-88253442    |

|      |               |        |                         |
|------|---------------|--------|-------------------------|
| 2396 | Tbc1d16       | 207592 | 11-:119070431-119071996 |
| 2397 | Rb1cc1        | 12421  | 1+:6220083-6264356      |
| 2398 | MMT00028038   |        | 2+:3604054-3604701      |
| 2399 | MMT00060167   |        | 1-:173609465-173609784  |
| 2400 | Gck           | 103988 | 11-:5801673-5815014     |
| 2401 | D630037F22Rik | 544696 | 10-:55808126-55871647   |
| 2402 | Cdc25b        | 12531  | 2+:131012814-131024201  |
| 2403 | Cfl1          | 12631  | 19+:5490505-5494032     |
| 2404 | MMT00049822   |        | 1-:113701733-113704372  |
| 2405 | Adk           | 11534  | 14+:21871854-22267766   |
| 2406 | Pfkm          | 18642  | 15+:97942550-97962878   |
| 2407 | Pgap1         | 241062 | 1-:54543313-54550250    |
| 2408 | Txndc15       | 69672  | 13+:55815998-55827591   |
| 2409 | Vmn2r4        | 637053 | 3-:64192239-64219026    |
| 2410 | Pnck          | 93843  | X-:70902016-70904586    |
| 2411 | MMT00039404   |        |                         |
| 2412 | Rab11b        | 19326  | 17-:33883542-33897242   |
| 2413 | MMT00041293   |        | X-:91917407-91935041    |
| 2414 | Prpf4b        | 19134  | 13+:34967324-34994903   |
| 2415 | Rho           | 212541 | 6+:115881944-115888847  |
| 2416 | EG436081      | 436081 | 9-:73023234-73025634    |
| 2417 | Tex261        | 21766  | 6-:83720409-83725753    |
| 2418 | 9430008C03Rik | 68108  | 2-:158181042-158187266  |
| 2419 | MMT00047859   |        | 12+:68758197-68759283   |
| 2420 | 2010016I18Rik | 69206  | 3-:106284902-106286465  |
| 2421 | Itgb5         | 16419  | 16+:33829844-33949231   |
| 2422 | Galk2         | 69976  | 2+:125691961-125810033  |
| 2423 | Polr3a        | 218832 | 14-:25267780-25306231   |
| 2424 | Unc5cl        | 76589  | 17+:48594246-48608007   |
| 2425 | Vmn2r56       | 629079 | 7-:13298281-13318461    |
| 2426 | MMT00013085   |        | 11+:92590580-92636328   |
| 2427 | Anks6         | 75691  | 4-:47030394-47069992    |
| 2428 | Car1          | 12346  | 3-:14766229-14808322    |
| 2429 | Fjx1          | 14221  | 2-:102290437-102291745  |
| 2430 | Fbxl17        | 50758  | 17-:63408817-63429912   |
| 2431 | 1700020L24Rik | 66330  | 11+:83251197-83254718   |
| 2432 | MMT00041434   |        | 2-:16900449-16901458    |
| 2433 | Armc10        | 67211  | 5+:21151801-21168410    |
| 2434 | Prr8          | 381626 | 5+:28643735-28721210    |
| 2435 | MMT00017607   |        | 11+:48408777-48409310   |
| 2436 | Fblim1        | 74202  | 4-:141132915-141151866  |
| 2437 | Lrrc23        | 16977  | 6-:124719880-124729736  |
| 2438 | Zfp759        | 268670 | 13+:67229163-67309438   |
| 2439 | Pitpnm2       | 19679  | 5-:124568699-124666427  |
| 2440 | 1500003O22Rik | 101867 | 7-:112880722-112885014  |
| 2441 | Slc10a7       | 76775  | 8+:81033276-81257898    |
| 2442 | Rab2b         | 76338  | 14-:52881440-52899222   |
| 2443 | 5033411D12Rik | 192136 | 13-:16949313-17786589   |
| 2444 | Nagpa         | 27426  | 16-:5195372-5204075     |
| 2445 | Spopl         | 76857  | 2-:23365578-23427574    |
| 2446 | Nphp3         | 74025  | 9+:103932336-103946060  |

|      |               |        |                         |
|------|---------------|--------|-------------------------|
| 2447 | Ubac1         | 98766  | 2-:25854067-25877231    |
| 2448 | Ltk           | 17005  | 2-:119577063-119584250  |
| 2449 | Mybpc2        | 233199 | 7-:51757087-51780009    |
| 2450 | Phf201        | 239510 | 15+:66409125-66476784   |
| 2451 | MMT00029755   |        |                         |
| 2452 | Obscn         | 380698 | 11-:58874345-58875740   |
| 2453 | MMT00002725   |        | 7+:90904381-90906302    |
| 2454 | MMT00045890   |        | 3-:108042224-108042877  |
| 2455 | MMT00037845   |        |                         |
| 2456 | Mrpl10        | 107732 | 11+:96902899-96910527   |
| 2457 | 1110032E23Rik | 68659  | 3+:79689909-79747306    |
| 2458 | Hhipl2        | 78772  | 1_random+:392595-410156 |
| 2459 | 9530096D07Rik | 242681 | 4-:131858177-131859208  |
| 2460 | Mctp2         | 244049 | 7-:79225674-79374356    |
| 2461 | Appbp2        | 66884  | 11-:85004860-85048327   |
| 2462 | 2610528J11Rik | 66451  | 4+:118199886-118202822  |
| 2463 | Htr3b         | 57014  | 9-:48743982-48772927    |
| 2464 | A130022J15Rik | 101351 | 6-:97059922-97085264    |
| 2465 | MMT00048312   | 632654 | 12-:115460995-115461531 |
| 2466 | Alox12b       | 11686  | 11+:68970573-68983293   |
| 2467 | MMT00074770   |        | 16+:32408620-32409281   |
| 2468 | Slc6a14       | 56774  | X+:21292027-21318388    |
| 2469 | Coasy         | 71743  | 11+:100943919-100947931 |
| 2470 | Grb7          | 14786  | 11+:98308204-98316686   |
| 2471 | Ccdc134       | 76457  | 15+:81958392-81972630   |
| 2472 | MMT00014056   |        | 14+:114879627-114879658 |
| 2473 | 4930504H06Rik | 75040  | 12+:34079717-34086135   |
| 2474 | Pot1b         | 72836  | 17-:55805709-55851928   |
| 2475 | Cyp4f13       | 170716 | 17-:33061738-33102711   |
| 2476 | Slc4a2        | 20535  | 5+:23931136-23946763    |
| 2477 | Cldn11        | 18417  | 3+:31048912-31063241    |
| 2478 | Timm50        | 66525  | 7-:29090844-29097065    |
| 2479 | Cenpo         | 52504  | 12-:4213481-4233937     |
| 2480 | MMT00000773   |        |                         |
| 2481 | EG383341      | 383341 | 18+:35676924-35696603   |
| 2482 | Mtag2         | 50994  | 7+:52622602-52623318    |
| 2483 | Gmeb1         | 56809  | 4-:131907849-131909549  |
| 2484 | Olf1024       | 257900 | 2-:85739877-85740589    |
| 2485 | Adck1         | 72113  | 12+:89598997-89700161   |
| 2486 | Ephb1         | 270190 | 9-:101824459-101969363  |
| 2487 | MMT00068537   |        | 7-:107346074-107346858  |
| 2488 | Gcc2          | 70297  | 10+:57718249-57768345   |
| 2489 | Npr3          | 18162  | 15-:11774933-11835394   |
| 2490 | MMT00070880   |        | 17+:6806524-6812615     |
| 2491 | Nhlrc3        | 212114 | 3-:53255919-53266350    |
| 2492 | 9930012K11Rik | 268759 | 14-:70556465-70559238   |
| 2493 | Apoh          | 11818  | 11+:108256626-108275705 |
| 2494 | 4933414I15Rik | 74408  | 11-:50754321-50757259   |
| 2495 | Insm2         | 56856  | 12+:56700459-56701940   |
| 2496 | 2410127L17Rik | 67383  | 19+:18745384-18778697   |
| 2497 | Slc43a2       | 215113 | 11+:75345211-75385995   |

|      |               |           |                         |
|------|---------------|-----------|-------------------------|
| 2498 | Enpp6         | 320981    | 8+:48115767-48178782    |
| 2499 | Asf1a         | 66403     | 10+:53316757-53328159   |
| 2500 | Vmn2r65       | 100009609 | 7-:92091650-92096161    |
| 2501 | Isx           | 71597     | 8+:77396613-77417405    |
| 2502 | Anapc1        | 17222     | 2-:128438442-128513116  |
| 2503 | Lmbrd1        | 68421     | 1+:24685471-24821030    |
| 2504 | MMT00007032   | 100038875 | 13+:91062780-91064329   |
| 2505 | Morf4l2       | 56397     | X-:133267491-133270156  |
| 2506 | Gm672         | 269037    | 18-:75594582-75796966   |
| 2507 | Oaf           | 102644    | 9-:43030009-43047993    |
| 2508 | Adam22        | 11496     | 5-:8082097-8368076      |
| 2509 | Esam1         | 69524     | 9+:37335712-37345898    |
| 2510 | Olfr136       | 258803    | 17+:38472103-38473041   |
| 2511 | Ltv1          | 353258    | 10-:12897947-12912946   |
| 2512 | Gan           | 209239    | 8+:119682034-119729083  |
| 2513 | RP23-225D24.3 | 383678    | 2+:25592576-25593314    |
| 2514 | Zswim4        | 212168    | 8-:86734576-86760942    |
| 2515 | Gjc2          | 118454    | 11-:58989834-58991147   |
| 2516 | 2210010B09Rik | 244721    | 9+:20385935-20420351    |
| 2517 | MMT00004296   |           | 4-:34335063-34337141    |
| 2518 | Apold1        | 381823    | 6+:134889809-134934341  |
| 2519 | Rhobtb2       | 246710    | 14-:70187010-70200626   |
| 2520 | Rgn           | 19733     | X+:20126943-20139213    |
| 2521 | Olfml3        | 99543     | 3-:103539321-103541871  |
| 2522 | Olfr1442      | 258692    | 19+:12748696-12749633   |
| 2523 | Pgs1          | 74451     | 11+:117848193-117885324 |
| 2524 | B930006L02Rik | 319604    | 7+:107983839-107990141  |
| 2525 | 9230110F15Rik | 77080     | 9-:35645912-35651736    |
| 2526 | Epc1          | 13831     | 18-:6435950-6516085     |
| 2527 | 1600012F09Rik | 67008     | 13-:18080036-18085171   |
| 2528 | MMT00074751   |           | 10-:7528018-7528584     |
| 2529 | Hmcn2         | 665700    | 2+:31235722-31316253    |
| 2530 | Pphln1        | 223828    | 15+:93228827-93321929   |
| 2531 | Hspbap1       | 66667     | 16+:35770503-35825649   |
| 2532 | Adrbk1        | 110355    | 19-:4285999-4306035     |
| 2533 | Arhgef19      | 213649    | 4+:140803761-140813467  |
| 2534 | 4921517D22Rik | 70900     | 13-:59790687-59795463   |
| 2535 | Tpk1          | 29807     | 6-:43295005-43616174    |
| 2536 | Timp4         | 110595    | 6-:115196040-115201798  |
| 2537 | MMT00072229   |           | 12-:116532265-116757993 |
| 2538 | Clec4g        | 75863     | 8-:3716071-3720645      |
| 2539 | 0610031J06Rik | 56700     | 3+:88128944-88132552    |
| 2540 | Tmem63a       | 208795    | 1+:182872648-182905234  |
| 2541 | Ppa2          | 74776     | 3+:132973079-133041031  |
| 2542 | Dck           | 13178     | 5+:89194268-89212264    |
| 2543 | MMT00001648   | 83409     | 3-:88353828-88356819    |
| 2544 | Hnf1a         | 21405     | 5-:115398370-115421047  |
| 2545 | 2210023G05Rik | 72361     | 8+:107471253-107492564  |
| 2546 | Gprin3        | 243385    | 6-:59303024-59305314    |
| 2547 | Prdm15        | 114604    | 16-:98015711-98021407   |
| 2548 | Tead2         | 21677     | 7+:52472588-52488297    |

|      |               |        |                         |
|------|---------------|--------|-------------------------|
| 2549 | MMT00038378   | 80795  | 14+:30781602-30788260   |
| 2550 | MMT00036681   |        | 15:-77234219-77236051   |
| 2551 | Iscu          | 66383  | 5+:114222820-114228289  |
| 2552 | Stac2         | 217154 | 11:-97897937-97914682   |
| 2553 | 1700025K23Rik | 66337  | 10:-38838611-38853767   |
| 2554 | Sphk1         | 20698  | 11+:116396053-116397982 |
| 2555 | MMT00033243   |        | X+:73160819-73161742    |
| 2556 | Sars2         | 71984  | 7+:29527014-29538873    |
| 2557 | Casq1         | 12372  | 1:-174140470-174149972  |
| 2558 | Tmem132b      | 208151 | 5+:126229604-126269041  |
| 2559 | Ccdc18        | 73254  | 5+:108561895-108661897  |
| 2560 | MMT00035872   |        | 5:-109302232-109320531  |
| 2561 | RP23-24J10.7  | 242285 | 4:-3923088-3943586      |
| 2562 | Nhedc2        | 97086  | 3+:134981255-135005500  |
| 2563 | Olf122        | 258285 | 17+:37908572-37909563   |
| 2564 | MMT00052902   |        | 12+:50241242-50241986   |
| 2565 | Zbtb41        | 226470 | 1+:141319727-141344171  |
| 2566 | Pigp          | 56176  | 16:-94586059-94592319   |
| 2567 | Ppef2         | 19023  | 5:-92656000-92682185    |
| 2568 | AU040320      | 100317 | 4+:126430796-126531581  |
| 2569 | Dsc3          | 13507  | 18:-20121878-20160598   |
| 2570 | Tmod4         | 50874  | 3+:94929452-94933130    |
| 2571 | Rmnd1         | 66084  | 10+:5914151-5943319     |
| 2572 | Htf9c         | 15547  | 16+:18248771-18253594   |
| 2573 | Speer4b       | 73526  | 5:-27822346-27827978    |
| 2574 | Rexo4         | 227656 | 2:-26809077-26819841    |
| 2575 | Elavl3        | 15571  | 9:-21822471-21856446    |
| 2576 | Rnf19a        | 30945  | 15:-36169688-36195771   |
| 2577 | MMT00076461   |        | 5:-151404492-151409458  |
| 2578 | Csf2rb2       | 12984  | 15:-78112939-78136033   |
| 2579 | MMT00046493   |        | 16+:50143730-50193938   |
| 2580 | Ucn3          | 83428  | 13:-3940403-3940896     |
| 2581 | Ufsp2         | 192169 | 8+:47060892-47082211    |
| 2582 | Trappc9       | 76510  | 15:-72733986-72888977   |
| 2583 | Runx1         | 12394  | 16:-92604349-92697573   |
| 2584 | Serpind1      | 15160  | 16+:17336313-17343665   |
| 2585 | 2810474O19Rik | 67246  | 6+:149257947-149278315  |
| 2586 | Als2cl        | 235633 | 9+:110785266-110801114  |
| 2587 | Speer2        | 224318 | 16:-69857117-69861969   |
| 2588 | MMT00066526   |        | 18+:24102397-24102676   |
| 2589 | Rxfp2         | 140498 | 5+:150821249-150883911  |
| 2590 | Atp5k         | 11958  | 5:-108862313-108863408  |
| 2591 | 2310005N01Rik | 70088  | 4+:124762394-124787133  |
| 2592 | Slco4a1       | 108115 | 2+:180195733-180209570  |
| 2593 | Tbc1d1        | 57915  | 5+:64551546-64741426    |
| 2594 | Hspg2         | 15530  | 4+:137063715-137063986  |
| 2595 | Acbd4         | 67131  | 11+:102964825-102973513 |
| 2596 | Vsig4         | 278180 | X:-93464386-93464955    |
| 2597 | 10-Sep        | 103080 | 10:-58629250-58684597   |
| 2598 | Naglu         | 27419  | 11+:100931438-100938965 |
| 2599 | Lsm14a        | 67070  | 7:-35129663-35174628    |

|      |               |        |                         |
|------|---------------|--------|-------------------------|
| 2600 | A430093A21Rik | 227195 | 1-:63104814-63160890    |
| 2601 | Dnajc18       | 76594  | 18-:35834684-35862745   |
| 2602 | MMT00008812   |        | Y-:201176-210147        |
| 2603 | Ipp           | 16351  | 4+:116183176-116193421  |
| 2604 | Kremen1       | 84035  | 11-:5094291-5161561     |
| 2605 | N4bp2l2       | 381695 | 5-:151449573-151465088  |
| 2606 | MMT00077133   |        |                         |
| 2607 | Olfr1467      | 258686 | 19+:13439119-13440045   |
| 2608 | Cicn2         | 12724  | 16-:20703040-20716187   |
| 2609 | Hyal4         | 77042  | 6+:24698344-24717663    |
| 2610 | EG623459      | 623459 | 9-:99129887-99136776    |
| 2611 | MMT00039586   |        | 6-:60411890-60412108    |
| 2612 | Sf3b2         | 319322 | 19-:5273934-5295425     |
| 2613 | Ubx7          | 224111 | 16+:32332372-32387083   |
| 2614 | EG546723      | 546723 | 19+:30613417-30614035   |
| 2615 | EG624862      | 624862 | 14+:44842695-44843903   |
| 2616 | Ptges2        | 96979  | 2+:32251777-32258259    |
| 2617 | Rqcd1         | 58184  | 1+:74553011-74575427    |
| 2618 | Map3k7ip3     | 66724  | X+:82877615-82879647    |
| 2619 | Zfp622        | 52521  | 15+:25914214-25927182   |
| 2620 | 2810410C14Rik | 230582 | 4+:106739614-106756998  |
| 2621 | Olfr30        | 18329  | 11-:58268502-58269449   |
| 2622 | Timd2         | 171284 | 11-:46484397-46512067   |
| 2623 | S100a6        | 20200  | 3+:90417105-90418337    |
| 2624 | MMT00056820   |        | 13+:116561568-116561707 |
| 2625 | MMT00077446   |        | 15-:73237740-73238725   |
| 2626 | MMT00013951   |        | 4+:89940729-89940760    |
| 2627 | Ccl12         | 20293  | 11+:81915379-81916793   |
| 2628 | Figla         | 26910  | 6+:85967184-85970989    |
| 2629 | 1300018J18Rik | 223776 | 15+:88919431-88930770   |
| 2630 | Il17re        | 57890  | 6+:113408827-113420368  |
| 2631 | Aldh1l1       | 107747 | 6+:90500807-90550196    |
| 2632 | Aph1a         | 226548 | 3+:95697918-95702211    |
| 2633 | MMT00063659   |        | 5-:110185266-110187176  |
| 2634 | Sgol2         | 68549  | 1+:58052862-58082741    |
| 2635 | Tmem126a      | 66271  | 7-:97599221-97605718    |
| 2636 | Tars          | 110960 | 15-:11313417-11329413   |
| 2637 | MMT00067068   |        | 10+:29731106-29733196   |
| 2638 | Cyp3a41a      | 53973  | 5-:146505625-146531712  |
| 2639 | Abhd2         | 54608  | 7+:86418161-86505287    |
| 2640 | EG383462      | 383462 | 19-:34130631-34135718   |
| 2641 | Bfar          | 67118  | 16+:13672086-13702794   |
| 2642 | Neurod2       | 18013  | 11-:98187852-98190775   |
| 2643 | Inhbe         | 16326  | 10-:126786457-126788828 |
| 2644 | Srrm2         | 75956  | 17+:23955853-23996744   |
| 2645 | Gramd1c       | 207798 | 16-:43983239-44030484   |
| 2646 | Ugt2b37       | 112417 | 5-:87669517-87683829    |
| 2647 | Lmln          | 239833 | 16+:33062529-33117325   |
| 2648 | MMT00005098   |        | 6+:22683708-22684595    |
| 2649 | Nfs1          | 18041  | 2-:155967764-155969915  |
| 2650 | Spo11         | 26972  | 2+:172805345-172819059  |

|      |               |        |                         |
|------|---------------|--------|-------------------------|
| 2651 | Ttc7          | 225049 | 17+:87681989-87781713   |
| 2652 | Imm2l         | 93757  | 12+:41751159-43056229   |
| 2653 | EG434394      | 434394 | 9-:35089103-35089420    |
| 2654 | 2310066E14Rik | 75687  | 8+:108117878-108140924  |
| 2655 | Adamdec1      | 58860  | 14-:69181444-69200129   |
| 2656 | Polrmt        | 216151 | 10-:79198869-79209308   |
| 2657 | Ints6         | 18130  | 14-:63311853-63363269   |
| 2658 | Fzd2          | 57265  | 11+:102465848-102467886 |
| 2659 | Kcng2         | 240444 | 18-:80492127-80519384   |
| 2660 | 4930558K02Rik | 75368  | 1-:163872221-163899285  |
| 2661 | Eif4g2        | 13690  | 7-:118215446-118226486  |
| 2662 | Sgpl1         | 20397  | 10-:60563471-60610346   |
| 2663 | Dlg7          | 218977 | 14-:48007454-48038082   |
| 2664 | Frem2         | 242022 | 3-:53320638-53461446    |
| 2665 | Serf1         | 20365  | 13+:100878002-100884186 |
| 2666 | Thoc7         | 66231  | 14-:14781529-14793752   |
| 2667 | Pgam1         | 18648  | 19+:41986508-41993149   |
| 2668 | C3ar1         | 12267  | 6-:122797991-122806021  |
| 2669 | Ier2          | 15936  | 8-:87185236-87186752    |
| 2670 | Igsf1         | 209268 | X-:47135720-47147957    |
| 2671 | Sh3rf1        | 59009  | 8+:63703068-63872992    |
| 2672 | Soat1         | 20652  | 1-:158359923-158396931  |
| 2673 | Zfp341        | 228807 | 2+:154447488-154472547  |
| 2674 | 1810005K13Rik | 66255  | 18-:80426804-80433600   |
| 2675 | Nfyc          | 18046  | 4-:120430782-120463086  |
| 2676 | Cables2       | 252966 | 2-:179994465-180008170  |
| 2677 | 2310057J18Rik | 67719  | 10-:28692170-28706109   |
| 2678 | Rbm9          | 93686  | 15-:76914592-76983986   |
| 2679 | BC067047      | 277360 | 2-:166392240-166539218  |
| 2680 | 4930485B16Rik | 380654 | 10-:92479179-92488296   |
| 2681 | Hectd1        | 207304 | 12-:52844708-52847097   |
| 2682 | Gjb4          | 14621  | 4-:127028590-127029390  |
| 2683 | Tpst2         | 22022  | 5+:112732919-112744375  |
| 2684 | MMT00053809   |        |                         |
| 2685 | Olf1r535      | 258956 | 7+:147678538-147679475  |
| 2686 | Sod1          | 20655  | 16+:90220990-90246462   |
| 2687 | Hdac3         | 15183  | 18-:38096632-38114582   |
| 2688 | V1re10        | 171263 | 7+:11032159-11033075    |
| 2689 | Olf1r611      | 258722 | 7-:110665926-110666896  |
| 2690 | Prokr1        | 58182  | 6-:87531213-87538855    |
| 2691 | Ube2d3        | 66105  | 3+:135101722-135129022  |
| 2692 | MMT00020697   |        | 1-:13776760-13777028    |
| 2693 | Asprv1        | 67855  | 6+:86578720-86579694    |
| 2694 | Siah2         | 20439  | 3-:58478877-58496025    |
| 2695 | 1700008I05Rik | 71841  | X-:132189243-132228330  |
| 2696 | 4930422I07Rik | 71640  | 9+:88376847-88465328    |
| 2697 | MMT00043090   |        | 13+:19302211-19308885   |
| 2698 | Defcr22       | 382059 | 8+:22301998-22302175    |
| 2699 | Hax1          | 23897  | 3-:89799378-89802574    |
| 2700 | MMT00001689   |        | 5-:17034487-17034911    |
| 2701 | Mlit6         | 246198 | 11+:97524727-97543842   |



|      |               |        |                         |
|------|---------------|--------|-------------------------|
| 2702 | MMT00070915   |        | 13-:76375711-76389252   |
| 2703 | MMT00073763   |        | 1+:163676198-163677877  |
| 2704 | Lrrc49        | 102747 | 9-:60435045-60535708    |
| 2705 | Hrbl          | 231801 | 5-:138104053-138125921  |
| 2706 | 9030625A04Rik | 210808 | 14-:77433131-77436339   |
| 2707 | Defb39        | 360214 | 8-:19037369-19064810    |
| 2708 | Sgk1          | 20393  | 10+:21714500-21719695   |
| 2709 | BC042720      | 329178 | 1+:66514919-66556142    |
| 2710 | EG666451      | 666451 | 14+:44503031-44504250   |
| 2711 | 5033411D12Rik | 192136 | 13-:17344318-17415126   |
| 2712 | MMT00007399   |        | 8-:64965610-64967124    |
| 2713 | Six1          | 20471  | 12-:74142817-74147687   |
| 2714 | 1700001K19Rik | 66323  | 12-:111905926-111920822 |
| 2715 | Der1          | 67819  | 15-:57703082-57723998   |
| 2716 | BC014805      | 236149 | 19-:7856474-7877157     |
| 2717 | MMT00076977   |        | 5+:144217636-144218441  |
| 2718 | Scrn3         | 74616  | 2+:73150627-73173922    |
| 2719 | St6galnac2    | 20446  | 11-:116538018-116555939 |
| 2720 | BC053749      | 333193 | 7-:31328766-31337287    |
| 2721 | Inmt          | 21743  | 6-:55120620-55124984    |
| 2722 | Abca5         | 217265 | 11-:110133563-110198989 |
| 2723 | 2410091C18Rik | 73694  | 17+:79344234-79346568   |
| 2724 | Tpsab1        | 17230  | 17-:25480190-25482338   |
| 2725 | Gm1614        | 381148 | 18-:35811820-35814853   |
| 2726 | Chd9          | 109151 | 8+:93513353-93578409    |
| 2727 | Stc2          | 20856  | 11-:31260080-31269908   |
| 2728 | Exoc4         | 20336  | 6+:33199123-33922332    |
| 2729 | Dcun1d4       | 100737 | 5+:73875636-73951753    |
| 2730 | Bcor          | 71458  | X-:11613868-11638772    |
| 2731 | EG434080      | 434080 | 6+:116501152-116502599  |
| 2732 | MMT00027806   |        | 18-:31508540-31510049   |
| 2733 | Tbc1d12       | 209478 | 19+:38988469-38993095   |
| 2734 | Hfm1          | 330149 | 5-:107324214-107332092  |
| 2735 | Olfr1006      | 258563 | 2-:85514368-85515330    |
| 2736 | Thoc3         | 73666  | 13-:54560878-54570180   |
| 2737 | Milt10        | 17354  | 2+:17986313-18132597    |
| 2738 | 2510039O18Rik | 77034  | 4+:147315003-147321423  |
| 2739 | MMT00046037   |        | 17-:23404485-23412778   |
| 2740 | Btnl4         | 632126 | 17-:34606513-34631428   |
| 2741 | 3230401D17Rik | 66680  | 2-:163231672-163245225  |
| 2742 | Zbed3         | 72114  | 13+:96095191-96107796   |
| 2743 | Tcf3          | 21415  | 6-:72577163-72738950    |
| 2744 | Mtus1         | 102103 | 8-:42133392-42169875    |
| 2745 | Pycrl         | 66194  | 15-:75746906-75751986   |
| 2746 | MMT00013076   |        | 3-:112281372-112281883  |
| 2747 | Enc1          | 13803  | 13+:98011206-98020697   |
| 2748 | Syt16         | 238266 | 12+:75335795-75368901   |
| 2749 | Naf1          | 234344 | 8+:69384156-69414459    |
| 2750 | MMT00062940   |        | 8-:53363981-53364825    |
| 2751 | Lrriq1        | 74978  | 10-:102633054-102698956 |
| 2752 | Fcgr1         | 14129  | 3-:96088140-96097886    |

|      |               |        |                         |
|------|---------------|--------|-------------------------|
| 2753 | Myo6          | 17920  | 9+:80012911-80157198    |
| 2754 | Zc3hav1l      | 209032 | 6-:38245057-38249315    |
| 2755 | EG382421      | 382421 | 10+:110937798-110938837 |
| 2756 | Pmvk          | 68603  | 3+:89263237-89272928    |
| 2757 | EG435927      | 435927 | 6-:141684625-141693021  |
| 2758 | Zscan29       | 99334  | 2-:120919325-120996844  |
| 2759 | V1rj2         | 171260 | 7+:13804687-13805637    |
| 2760 | Dleu2         | 328425 | 14-:62221727-62301186   |
| 2761 | P2rx3         | 228139 | 2-:84838741-84875644    |
| 2762 | Obscn         | 380698 | 11-:58919796-58943347   |
| 2763 | MMT00046393   |        | 8+:131157882-131158791  |
| 2764 | Ffar2         | 233079 | 7-:31604049-31605344    |
| 2765 | Zfp36l3       | 333473 | X-:51077245-51079422    |
| 2766 | Elp4          | 77766  | 2-:105542599-105744652  |
| 2767 | MMT00031206   |        | 6+:57138500-57139337    |
| 2768 | Oprd1         | 18386  | 4-:131668286-131700312  |
| 2769 | Al606181      | 226118 | 19+:41668209-41670648   |
| 2770 | Fbl           | 14113  | 7+:28954778-28964268    |
| 2771 | Keg1          | 64697  | 19+:12770282-12794384   |
| 2772 | Crtc2         | 74343  | 3+:90058209-90068048    |
| 2773 | Cdk5r1        | 12569  | 11+:80290867-80292181   |
| 2774 | Tmem171       | 380863 | 13-:99456193-99462746   |
| 2775 | Sec61a2       | 57743  | 2-:5792855-5816331      |
| 2776 | Magel2        | 27385  | 7+:69524349-69526524    |
| 2777 | Cntnap5c      | 620292 | 17+:58453099-58498744   |
| 2778 | Coro1a        | 12721  | 7-:133843394-133846687  |
| 2779 | MMT00061842   |        | 1+:118643188-118719334  |
| 2780 | Fes           | 14159  | 7-:87522641-87532846    |
| 2781 | Lamb2         | 16779  | 9+:108382233-108392792  |
| 2782 | Pou3f2        | 18992  | 4-:22413941-22415278    |
| 2783 | Pdzr4         | 239618 | 15+:92427591-92511021   |
| 2784 | 4933415F23Rik | 66755  | 1-:23107345-23109092    |
| 2785 | Mtf2          | 17765  | 5+:108516037-108536004  |
| 2786 | Mrps7         | 50529  | 11+:115465332-115469458 |
| 2787 | 2310011J03Rik | 66374  | 10-:79781454-79783276   |
| 2788 | Galnt10       | 171212 | 11+:57583010-57599560   |
| 2789 | Sirt5         | 68346  | 13+:43460868-43490571   |
| 2790 | MMT00004640   | 328362 | 14-:25883679-25909807   |
| 2791 | 4933421O10Rik | 71073  | 4-:33115795-33119205    |
| 2792 | Trim11        | 94091  | 11+:58791617-58804959   |
| 2793 | MMT00005644   | 497266 |                         |
| 2794 | Map3k6        | 53608  | 4+:132796732-132808843  |
| 2795 | Olfr478       | 258729 | 7-:115174910-115175855  |
| 2796 | Tmem19        | 67226  | 10-:114777797-114799301 |
| 2797 | AB041806      | 58213  | 4+:137951112-137953615  |
| 2798 | Arhgef11      | 213498 | 3+:87487407-87542077    |
| 2799 | Dsc1          | 13505  | 18-:20243946-20273194   |
| 2800 | Dusp11        | 72102  | 6-:85897507-85900556    |
| 2801 | H2-BI         | 14963  | 17-:36216993-36221404   |
| 2802 | Lin7c         | 22343  | 2+:109731034-109737862  |
| 2803 | Faah          | 14073  | 4-:115671092-115690262  |

|      |               |        |                         |
|------|---------------|--------|-------------------------|
| 2804 | Atpbd3        | 233189 | 7+:50927400-50933665    |
| 2805 | Rhog          | 56212  | 7-:109388183-109388758  |
| 2806 | Mtap7d2       | 78283  | X+:155881854-155934215  |
| 2807 | Cdh4          | 12561  | 2+:179177271-179631110  |
| 2808 | Spesp1        | 66712  | 9-:62118535-62129986    |
| 2809 | Hoxd11        | 15431  | 2+:74520449-74522194    |
| 2810 | Olf1427       | 258674 | 19-:12166567-12173992   |
| 2811 | MMT00062390   |        | 7+:144002509-144004197  |
| 2812 | MMT00031955   |        | 18+:80359546-80360255   |
| 2813 | Mrpl55        | 67212  | 11+:59016018-59019504   |
| 2814 | Olf1410       | 258702 | 11-:74147784-74148731   |
| 2815 | Eif2ak3       | 13666  | 6+:70794528-70855231    |
| 2816 | Klhdc3        | 71765  | 17-:46811502-46817853   |
| 2817 | MMT00079184   |        | 5-:89928184-89929004    |
| 2818 | Egr1          | 13653  | 18+:35020859-35024635   |
| 2819 | Kcnk5         | 16529  | 14-:20960805-21000674   |
| 2820 | Plekha7       | 233765 | 7-:123307545-123314351  |
| 2821 | Bub1b         | 12236  | 2+:118423991-118467326  |
| 2822 | Gckr          | 231103 | 5+:31599953-31629673    |
| 2823 | Sipa1l2       | 244668 | 8-:127941972-128016496  |
| 2824 | Btnl6         | 624681 | 17-:34645826-34654308   |
| 2825 | Syne1         | 64009  | 10+:5081309-5085648     |
| 2826 | Pdcd1         | 18566  | 1-:95934883-95949130    |
| 2827 | Raet1d        | 56554  | 10+:22082079-22093806   |
| 2828 | Fndc8         | 78919  | 11+:82705623-82714301   |
| 2829 | Lrfn3         | 233067 | 7-:31140503-31145817    |
| 2830 | 4632417K18Rik | 107373 | 19+:12648014-12664186   |
| 2831 | Hrh2          | 15466  | 13+:54309375-54310450   |
| 2832 | 2810021J22Rik | 69944  | 11+:58680716-58693934   |
| 2833 | Rplp2         | 67186  | 7+:148633554-148637484  |
| 2834 | Crim1         | 50766  | 17+:78743688-78775925   |
| 2835 | Gpr120        | 107221 | 19+:38171568-38188749   |
| 2836 | Wdfy4         | 545030 | 14-:33779543-33960284   |
| 2837 | H2afz         | 51788  | 3+:137528090-137529884  |
| 2838 | Stk25         | 59041  | 1-:95518484-95531962    |
| 2839 | Thoc2         | 331401 | X-:39165224-39265048    |
| 2840 | Adh6-ps1      | 71749  | 3+:138044791-138051255  |
| 2841 | Kcne4         | 57814  | 1+:78813523-78816599    |
| 2842 | Cox6b2        | 333182 | 7-:4691673-4704630      |
| 2843 | MMT00065823   |        | 7-:26789618-26800164    |
| 2844 | Slc25a12      | 78830  | 2-:71112325-71205785    |
| 2845 | Lce1d         | 69611  | 3-:92489420-92491132    |
| 2846 | MMT00002427   |        | 18+:3986542-4011157     |
| 2847 | Pscd4         | 72318  | 15+:78449725-78452443   |
| 2848 | Serpine2      | 20720  | 1-:79790897-79855211    |
| 2849 | EG227054      | 227054 | 1+:46038392-46038858    |
| 2850 | Slc16a6       | 104681 | 11-:109314053-109334523 |
| 2851 | Inpp5e        | 64436  | 2-:26252027-26264701    |
| 2852 | Nab1          | 17936  | 1-:52515863-52557170    |
| 2853 | Glipr2        | 384009 | 4+:43970561-43991988    |
| 2854 | Lingo2        | 242384 | 4-:35950865-36150286    |

|      |               |           |                         |
|------|---------------|-----------|-------------------------|
| 2855 | D330050I23Rik | 399603    | 15-:60654517-60655450   |
| 2856 | Tpd52         | 21985     | 3-:8929597-9004444      |
| 2857 | MMT00046819   |           | 5-:100942162-100942648  |
| 2858 | Arhgap20      | 244867    | 9+:51593840-51661960    |
| 2859 | Ccdc63        | 330188    | 5-:122558047-122572757  |
| 2860 | Pfn3          | 75477     | 13-:55516049-55516577   |
| 2861 | Gucy2d        | 14918     | 7+:105592117-105625801  |
| 2862 | MMT00068885   |           | 14-:79365696-79366375   |
| 2863 | MMT00007006   |           | 12-:119996497-119999465 |
| 2864 | Pmepa1        | 65112     | 2-:173053322-173101642  |
| 2865 | Sycp2         | 320558    | 2-:178080001-178142390  |
| 2866 | Clk1          | 12747     | 1-:58468844-58480848    |
| 2867 | MMT00001941   |           | 6-:39792201-39794334    |
| 2868 | Hbp1          | 73389     | 12-:32611342-32635100   |
| 2869 | Copa          | 12847     | 1+:174012669-174052460  |
| 2870 | D5ErtD577e    | 320549    | 5+:95947713-95951732    |
| 2871 | Mageb1        | 17145     | X-:89260529-89261672    |
| 2872 | EG383032      | 383032    | 15-:54143476-54143920   |
| 2873 | Usp6nl        | 98910     | 2+:6265924-6365582      |
| 2874 | Nol3          | 78688     | 8+:107800401-107803949  |
| 2875 | Wfdc2         | 67701     | 2+:164388215-164394006  |
| 2876 | 4930402E16Rik | 319518    | 8+:113618555-113663677  |
| 2877 | Pcyt2         | 68671     | 11-:120471401-120479198 |
| 2878 | MMT00006672   | 100046475 | 13+:22909126-22909829   |
| 2879 | Ptpv          | 13924     | 1-:137005090-137023649  |
| 2880 | Cd93          | 17064     | 2-:148262387-148269280  |
| 2881 | Hlf           | 217082    | 11-:90197850-90207295   |
| 2882 | MMT00052707   |           |                         |
| 2883 | MMT00048540   |           | 17-:90309276-90379134   |
| 2884 | Shc3          | 20418     | 13-:51526409-51662453   |
| 2885 | Hebp2         | 56016     | 10-:18260571-18265814   |
| 2886 | Rps15a        | 267019    | 7-:125252472-125273136  |
| 2887 | Tpo           | 22018     | 12-:30739526-30816759   |
| 2888 | Guca2a        | 14915     | 4+:119310336-119312070  |
| 2889 | Pqlc2         | 212555    | 4-:138854445-138866582  |
| 2890 | Ccdc62        | 208908    | 5+:124380707-124386564  |
| 2891 | MMT00069002   |           | 8-:74227847-74228867    |
| 2892 | MMT00046974   | 668030    | 2-:175248476-177463046  |
| 2893 | Lias          | 79464     | 5+:65782803-65800192    |
| 2894 | Gm1499        | 385109    | 6-:69176840-69193456    |
| 2895 | 2410076I21Rik | 73673     | 9-:58500635-58589403    |
| 2896 | Mbtps2        | 270669    | X-:153988863-154014120  |
| 2897 | MMT00019125   |           | X-:89133227-89134904    |
| 2898 | Sema4b        | 20352     | 7+:87343538-87370309    |
| 2899 | Psmb7         | 19177     | 2-:38443565-38499426    |
| 2900 | 6330416L07Rik | 319615    | 17-:22475663-22498377   |
| 2901 | Tmem132d      | 243274    | 5-:128263790-128276473  |
| 2902 | D4ErtD196e    | 52174     | 4-:132821961-132833702  |
| 2903 | Pacrg         | 69310     | 17-:10969999-11033054   |
| 2904 | Gzme          | 14942     | 14-:56736460-56739393   |
| 2905 | 4833413D08Rik | 71425     | 2+:154093588-154095246  |

|      |               |        |                         |
|------|---------------|--------|-------------------------|
| 2906 | EG545886      | 545886 | 6-:133714015-133717433  |
| 2907 | MMT00010854   |        | 3+:100217482-100218699  |
| 2908 | Zfy2          | 22768  | Y-:1362123-1426318      |
| 2909 | Cfdp1         | 23837  | 8-:114292372-114378210  |
| 2910 | MMT00024586   |        | 13-:25772646-25868662   |
| 2911 | Lphn1         | 330814 | 8+:86455019-86465844    |
| 2912 | Wtip          | 101543 | 7-:34894583-34918078    |
| 2913 | Actn1         | 109711 | 12-:81291564-81295430   |
| 2914 | Slc13a2       | 20500  | 11-:78210777-78235687   |
| 2915 | Nfs1          | 18041  | 2-:155949385-155969921  |
| 2916 | 4931423N10Rik | 70981  | 2+:23062993-23122638    |
| 2917 | Scly          | 50880  | 1+:93194962-93217639    |
| 2918 | Mtmr10        | 233315 | 7+:71432585-71485693    |
| 2919 | Ptprn2        | 19276  | 12+:118062776-118139520 |
| 2920 | 4922501C03Rik | 382090 | 9+:87084408-87085910    |
| 2921 | Kctd8         | 243043 | 5-:69501575-69559830    |
| 2922 | Scamp4        | 56214  | 10+:80072070-80077528   |
| 2923 | Atg4a         | 666468 | X+:137593268-137598807  |
| 2924 | Actr1a        | 54130  | 19-:46451303-46470225   |
| 2925 | Prkd3         | 75292  | 17-:79371615-79408028   |
| 2926 | Eif3i         | 54709  | 4-:129269226-129277861  |
| 2927 | AY616753      | 433899 | 5+:68501619-68559057    |
| 2928 | Igf1          | 16000  | 10+:87324073-87393619   |
| 2929 | 2510009E07Rik | 72190  | 16-:21653274-21694507   |
| 2930 | Rasef         | 242505 | 4-:73386095-73408866    |
| 2931 | Vwc2          | 319922 | 11+:11014745-11054295   |
| 2932 | Slco1a1       | 28248  | 6-:141856373-141895315  |
| 2933 | Ptrf          | 19285  | 11-:100819825-100831886 |
| 2934 | MMT00080840   | 57316  | 11+:17157593-17167233   |
| 2935 | Slc28a1       | 434203 | 7+:88269753-88313948    |
| 2936 | MMT00059870   |        | 16+:74961436-74962424   |
| 2937 | Robo2         | 268902 | 16-:73895320-74047182   |
| 2938 | H2-T23        | 15040  | 17-:36166923-36169646   |
| 2939 | Dnahc17       | 69926  | 11-:117884264-117990533 |
| 2940 | Gramd1b       | 235283 | 9-:40105460-40107681    |
| 2941 | Olf957        | 258740 | 9-:39318367-39319303    |
| 2942 | Olf69         | 18370  | 7-:110915959-110916909  |
| 2943 | Capn10        | 23830  | 1+:94831430-94844517    |
| 2944 | Zyx           | 22793  | 6+:42300255-42308393    |
| 2945 | MMT00005190   |        | X-:131362702-131363503  |
| 2946 | Tmem199       | 195040 | 11-:78320525-78325631   |
| 2947 | Bcl2a1b       | 12045  | 9+:89094066-89102664    |
| 2948 | Srcrb4d       | 109267 | 5-:136436093-136450347  |
| 2949 | MMT00076941   |        | 14+:45140310-45141329   |
| 2950 | Micall1       | 27008  | 15+:78945434-78967328   |
| 2951 | Anxa10        | 26359  | 8-:64536318-64601890    |
| 2952 | Adams17       | 233332 | 7+:74215474-74223274    |
| 2953 | Zfp770        | 228491 | 2-:114021204-114027169  |
| 2954 | AI317395      | 215929 | 10-:39722405-39744978   |
| 2955 | Cdc20b        | 238896 | 13+:113868314-113873623 |
| 2956 | Wbscr16       | 94254  | 5-:134623945-134652637  |

|      |               |        |                         |
|------|---------------|--------|-------------------------|
| 2957 | Slc24a3       | 94249  | 2+:145274241-145442449  |
| 2958 | Grik4         | 110637 | 9-:42328494-42496180    |
| 2959 | Rgs3          | 50780  | 4+:62350531-62363279    |
| 2960 | Map3k7        | 26409  | 4+:32051091-32108278    |
| 2961 | Cenpi         | 102920 | X+:130842715-130897178  |
| 2962 | AW146154      | 101835 | 7-:48722734-48754789    |
| 2963 | Tmem64        | 100201 | 4+:15193310-15213871    |
| 2964 | Hn1           | 15374  | 11-:115358668-115375684 |
| 2965 | Fgf15         | 14170  | 7+:152082436-152086854  |
| 2966 | Mobkl1b       | 232157 | 6+:83276044-83292799    |
| 2967 | Igh           | 111507 | 12-:116081854-116170993 |
| 2968 | Rab23         | 19335  | 1+:33780675-33796243    |
| 2969 | Ptpro         | 19277  | 6+:137359257-137411751  |
| 2970 | MMT00022996   |        | 10+:18821380-18822122   |
| 2971 | Slc17a2       | 218103 | 13+:23902623-23914627   |
| 2972 | Zfp3          | 193043 | 11+:70577859-70586432   |
| 2973 | 4-Sep         | 18952  | 11+:87394632-87404042   |
| 2974 | Trim28        | 21849  | 7+:13609509-13616378    |
| 2975 | Gfi1b         | 14582  | 2-:28464977-28477461    |
| 2976 | Zfp606        | 67370  | 7+:13063608-13080894    |
| 2977 | MMT00013814   |        |                         |
| 2978 | St6galnac1    | 20445  | 11-:116626339-116627586 |
| 2979 | MMT00007569   |        | 4-:114911355-114911940  |
| 2980 | Slc37a2       | 56857  | 9-:37037898-37063215    |
| 2981 | Khdrbs1       | 20218  | 4-:129393055-129419504  |
| 2982 | Mdfic         | 16543  | 6+:15670667-15720492    |
| 2983 | MMT00061530   |        | X-:149343315-149344844  |
| 2984 | MMT00029895   |        | 13-:50710320-50711479   |
| 2985 | Map2k1        | 26395  | 9-:64033594-64101139    |
| 2986 | Pkig          | 18769  | 2+:163519773-163551888  |
| 2987 | Ppapdc3       | 227721 | 2+:31951239-31966333    |
| 2988 | MMT00004204   |        | 4+:40016268-40018020    |
| 2989 | Zfp3611       | 12192  | 12-:81208994-81213931   |
| 2990 | EG384179      | 384179 | 5-:44335092-44335761    |
| 2991 | Brcc3         | 210766 | X+:72662042-72696482    |
| 2992 | Msi1          | 17690  | 5+:115879693-115904211  |
| 2993 | Gm1752        | 385658 | 16-:55843302-55895391   |
| 2994 | Cldn7         | 53624  | 11+:69779428-69781218   |
| 2995 | MMT00058834   |        | 3-:43567634-43568688    |
| 2996 | Pik3r1        | 18708  | 13-:102450519-102538126 |
| 2997 | Tnrc6b        | 213988 | 15+:80753493-80760448   |
| 2998 | Lzic          | 69151  | 4+:148859401-148870773  |
| 2999 | BC061194      | 381350 | 2+:18620696-18671374    |
| 3000 | 5330431N19Rik | 226162 | 19+:45646372-45652771   |
| 3001 | Tsga8         | 60600  | X-:80732016-80733263    |
| 3002 | Abhd12        | 76192  | 2-:150658231-150668306  |
| 3003 | 2310008H04Rik | 224008 | 16-:15889319-15936787   |
| 3004 | Calcr         | 12311  | 6-:3635733-3714602      |
| 3005 | MMT00048199   |        | 1+:90945548-90945850    |
| 3006 | Alas2         | 11656  | X+:146981966-147005166  |
| 3007 | Ints12        | 71793  | 3+:132754898-132772507  |

|      |               |        |                         |
|------|---------------|--------|-------------------------|
| 3008 | Nxt1          | 56488  | 2+:148498409-148501499  |
| 3009 | Serpina1c     | 20702  | 12-:105133137-105137037 |
| 3010 | AU042671      | 269700 | 5+:121756950-121765157  |
| 3011 | EG13909       | 13909  | 8+:107607669-107617467  |
| 3012 | Actl6a        | 56456  | 3+:32607647-32625880    |
| 3013 | 4930434E21Rik | 381693 | 5+:150332263-150402484  |
| 3014 | Rfwd3         | 234736 | 8-:113794844-113812032  |
| 3015 | Arhgef6       | 73341  | X-:54484663-54591865    |
| 3016 | Bsdc1         | 100383 | 4+:129138915-129165740  |
| 3017 | Fas           | 14102  | 19+:34365155-34402260   |
| 3018 | Sap30l        | 50724  | 11+:57615633-57623720   |
| 3019 | Frmpl1        | 666060 | 4+:45242706-45298809    |
| 3020 | C030037D09Rik | 193280 | 11+:88580108-88588954   |
| 3021 | Gdf9          | 14566  | 11+:53246879-53251402   |
| 3022 | Als2cr12      | 108812 | 1-:58714959-58752806    |
| 3023 | EG382723      | 382723 | 13-:8939578-8940223     |
| 3024 | Ptger1        | 19216  | 8+:86190538-86194002    |
| 3025 | Dmrt1         | 50796  | 19+:25580214-25677839   |
| 3026 | D10Ert610e    | 52666  | 10-:126619581-126627091 |
| 3027 | MMT00030402   |        | 8-:4812818-4813104      |
| 3028 | Uhrf1         | 18140  | 17+:56442848-56462908   |
| 3029 | Ybx1          | 22608  | 4-:118950838-118966413  |
| 3030 | Dppa2         | 73703  | 16+:48310534-48319717   |
| 3031 | Rab10         | 19325  | 12-:3249734-3309662     |
| 3032 | Ccnj          | 240665 | 19+:40906509-40920587   |
| 3033 | Kctd16        | 383348 | 18+:40390578-40484222   |
| 3034 | D11Wsu99e     | 28081  | 11-:113522633-113545346 |
| 3035 | Cd99l2        | 171486 | X-:68673246-68745820    |
| 3036 | Slamf9        | 98365  | 1+:174405535-174408538  |
| 3037 | MMT00017312   |        | 17-:15712487-15714358   |
| 3038 | Serpina12     | 68054  | 12-:105266978-105282653 |
| 3039 | S100a11       | 20195  | 3+:93324410-93330219    |
| 3040 | Bcl3          | 12051  | 7-:20393811-20408064    |
| 3041 | 2410004A20Rik | 66991  | 9+:72950266-72952250    |
| 3042 | Xrra1         | 446101 | 7+:107023664-107066330  |
| 3043 | Otop1         | 21906  | 5+:38668654-38685787    |
| 3044 | Rnf219        | 72486  | 14-:104901605-104921862 |
| 3045 | Alx3          | 11694  | 3+:107397948-107408687  |
| 3046 | 6430573F11Rik | 319582 | 8+:37521311-37576010    |
| 3047 | Cyp2d26       | 76279  | 15-:82620536-82624675   |
| 3048 | Atxn1l        | 52335  | 8-:112254993-112261594  |
| 3049 | MMT00005322   |        | 6-:14031328-14089851    |
| 3050 | Olfir900      | 258874 | 9+:38185467-38186417    |
| 3051 | Ywhah         | 22629  | 5+:33361539-33370614    |
| 3052 | 9130404D08Rik | 74549  | 8-:72542479-72566599    |
| 3053 | Ube2w         | 66799  | 1-:16558759-16609419    |
| 3054 | Hnrnpa1       | 15382  | 15+:103070935-103075386 |
| 3055 | Pde4c         | 110385 | 8+:73247962-73274318    |
| 3056 | Dbil5         | 13168  | 11+:76031129-76032832   |
| 3057 | 2610209M04Rik | 66618  | 6-:86625145-86634511    |
| 3058 | Ccdc123       | 72140  | 7+:36182074-36188189    |

|      |               |        |                         |
|------|---------------|--------|-------------------------|
| 3059 | Tctex1d2      | 66061  | 16+:32419829-32429184   |
| 3060 | Slc12a6       | 107723 | 2+:112124844-112203312  |
| 3061 | Scarf2        | 224024 | 16+:17802608-17834411   |
| 3062 | Ubr1          | 22222  | 2-:120687381-120796451  |
| 3063 | MMT00069003   |        | 8+:74219425-74220254    |
| 3064 | Rnd2          | 11858  | 11+:101329651-101332619 |
| 3065 | Prmt8         | 381813 | 6-:127639699-127718838  |
| 3066 | MMT00035562   | 545618 | 4-:44765021-44766010    |
| 3067 | Ucp3          | 22229  | 7+:107627975-107633616  |
| 3068 | Med26         | 70625  | 8-:75018157-75073665    |
| 3069 | Slitrk2       | 245450 | X+:63906180-63909619    |
| 3070 | Scgb3a2       | 117158 | 18+:43923980-43927047   |
| 3071 | Tmed10        | 68581  | 12-:86684378-86715615   |
| 3072 | MMT00002308   |        | 1-:13397087-13397792    |
| 3073 | Ptgfrn        | 19221  | 3-:100847215-100914089  |
| 3074 | EG545936      | 545936 | 7+:25623316-25624096    |
| 3075 | EG629203      | 629203 | 7-:14652905-14708339    |
| 3076 | MMT00078762   |        | 14+:53186873-53187733   |
| 3077 | Ppfibp1       | 67533  | 6+:146837182-146980547  |
| 3078 | 9630033F20Rik | 319801 | 6-:127037487-127059512  |
| 3079 | Gstt3         | 103140 | 10-:75236865-75243787   |
| 3080 | MMT00014480   |        | 15+:60575413-60578213   |
| 3081 | Dhx38         | 64340  | 8-:112071909-112089761  |
| 3082 | Olfr1044      | 259013 | 2-:86011028-86011972    |
| 3083 | Cpne7         | 102278 | 8+:125641281-125659084  |
| 3084 | Ly6d          | 17068  | 15-:74592485-74593997   |
| 3085 | 1110014N23Rik | 68505  | 19-:6067988-6077203     |
| 3086 | Tubg2         | 103768 | 11+:101017226-101023100 |
| 3087 | Tmem30c       | 71027  | 16-:57266330-57292978   |
| 3088 | Ftl2          | 14337  | 4+:124787922-125182221  |
| 3089 | Eif2s3y       | 26908  | Y+:347054-365035        |
| 3090 | Gna14         | 14675  | 19+:16511021-16684297   |
| 3091 | MMT00035674   |        | 19-:11951133-11953157   |
| 3092 | Crygd         | 12967  | 1-:65108416-65109983    |
| 3093 | Egflam        | 268780 | 15-:7156120-7348390     |
| 3094 | Clec5a        | 23845  | 6-:40527770-40535771    |
| 3095 | 4833426J09Rik | 382051 | 8+:107033260-107119017  |
| 3096 | Ugt1a6a       | 94284  | 1+:90031383-90115578    |
| 3097 | Ppp1r3g       | 76487  | 13+:36035371-36061510   |
| 3098 | MMT00081523   |        | 6-:128926735-128927990  |
| 3099 | MMT00022741   |        | 3+:122564795-122565292  |
| 3100 | MMT00082603   |        | 2+:38478445-38478784    |
| 3101 | MMT00080431   |        | 7-:7013153-7015975      |
| 3102 | 2610510H03Rik | 68215  | 2+:117075374-117093683  |
| 3103 | MMT00062748   | 625360 | Un_random-:688-21009    |
| 3104 | 4933411G11Rik | 330228 | 5+:143953957-143966747  |
| 3105 | Trib1         | 211770 | 15-:59478736-59479702   |
| 3106 | Ecel1         | 13599  | 1-:89044492-89051600    |
| 3107 | Hspb3         | 56534  | 13-:114453103-114453867 |
| 3108 | Dhx36         | 72162  | 3-:62271790-62310902    |
| 3109 | Tert          | 21752  | 13+:73764448-73786489   |



|      |               |        |                         |
|------|---------------|--------|-------------------------|
| 3110 | MMT00024045   |        | 3+:13429560-13466794    |
| 3111 | Ddefl1        | 230837 | 4+:135762433-135801229  |
| 3112 | Sgca          | 20391  | 11-:94824521-94837641   |
| 3113 | Vti1b         | 53612  | 12-:80257262-80273332   |
| 3114 | Xiap          | 11798  | X+:39446904-39458678    |
| 3115 | 1700013H16Rik | 75514  | X-:51046077-51060991    |
| 3116 | Gm1574        | 380842 | 13+:46380746-46394099   |
| 3117 | Atxn1         | 20238  | 13-:45651834-46051866   |
| 3118 | 9130404H23Rik | 74556  | 17-:66904593-66943962   |
| 3119 | Mapk10        | 26414  | 5-:103341387-103640096  |
| 3120 | D330038O06Rik | 330788 | 8-:72268358-72268582    |
| 3121 | Ptgds2        | 54486  | 6-:65069812-65094902    |
| 3122 | Chia          | 81600  | 3+:105918209-105933587  |
| 3123 | MMT00012256   |        | 13+:19504663-19505409   |
| 3124 | Olf1128       | 258346 | 2-:87384764-87385699    |
| 3125 | Olf1837       | 258558 | 9+:18941438-18942376    |
| 3126 | Grm4          | 268934 | 17-:27563728-27640110   |
| 3127 | Plcd1         | 18799  | 9-:118980647-119002614  |
| 3128 | Clec12b       | 71183  | 6-:129325531-129335521  |
| 3129 | MMT00078028   |        | 19+:33897397-33899560   |
| 3130 | Mrpl20        | 66448  | 4+:155177726-155182938  |
| 3131 | Pkd1l2        | 76645  | 8-:119589421-119592163  |
| 3132 | 5730446D14Rik | 66640  | 6+:52116563-52118757    |
| 3133 | Olf1046       | 258575 | 2-:86056916-86057865    |
| 3134 | Usp11         | 236733 | X+:20289265-20297663    |
| 3135 | Gcdh          | 270076 | 8-:87410489-87417601    |
| 3136 | Itfg1         | 71927  | 8-:88242438-88364671    |
| 3137 | Magef1        | 76222  | 16-:21332668-21333430   |
| 3138 | Espl1         | 105988 | 15+:102126691-102154789 |
| 3139 | Gba2          | 230101 | 4-:43579792-43591409    |
| 3140 | Ptpn20        | 19256  | 14+:34416291-34453940   |
| 3141 | Tmf1          | 232286 | 6-:97105257-97129094    |
| 3142 | Rdh12         | 77974  | 12+:80309902-80323649   |
| 3143 | Slc17a6       | 140919 | 7+:58877375-58924852    |
| 3144 | Ube2j2        | 140499 | 4+:155323115-155331473  |
| 3145 | Idi1          | 319554 | 13+:8885230-8891614     |
| 3146 | Hace1         | 209462 | 10+:45369686-45429800   |
| 3147 | Higd2a        | 67044  | 13+:54691591-54692493   |
| 3148 | Ankrd49       | 56503  | 9-:14584652-14587408    |
| 3149 | 1190005I06Rik | 68918  | 8-:123132502-123152417  |
| 3150 | Syne2         | 319565 | 12+:77167499-77211887   |
| 3151 | Zhx2          | 387609 | 15+:57526241-57594276   |
| 3152 | Ccdc92        | 215707 | 5-:125315348-125342524  |
| 3153 | Zdhhc15       | 108672 | X-:101735455-101793528  |
| 3154 | Mcm5          | 17218  | 8+:77633522-77651587    |
| 3155 | MMT00039886   |        | 3+:101878553-101878995  |
| 3156 | Usp13         | 72607  | 3+:32716612-32834476    |
| 3157 | BC003940      | 192173 | 11-:120404200-120412448 |
| 3158 | Smc2          | 14211  | 4+:52482785-52501129    |
| 3159 | Pld1          | 18805  | 3+:27837544-28032284    |
| 3160 | Ap1gbp1       | 217030 | 11+:83777855-83855578   |

|      |               |        |                         |
|------|---------------|--------|-------------------------|
| 3161 | Gtf2h4        | 14885  | 17-:35804683-35810625   |
| 3162 | Lep           | 16846  | 6+:29018951-29021181    |
| 3163 | MMT00039919   |        | 13-:8028796-8030700     |
| 3164 | Hsd11b1       | 15483  | 1-:195047886-195090214  |
| 3165 | Cntn3         | 18488  | 6-:102115143-102414660  |
| 3166 | Vmn2r57       | 269902 | 7-:48655329-48683582    |
| 3167 | Dym           | 69190  | 18+:75216372-75446618   |
| 3168 | Camk2a        | 12322  | 18+:61123207-61144517   |
| 3169 | Cdgap         | 12549  | 16-:38603353-38712789   |
| 3170 | Mcart1        | 230125 | 4-:45411210-45421633    |
| 3171 | Smpd1         | 20597  | 7+:112702928-112706895  |
| 3172 | 1810007E14Rik | 53906  | 2+:118598509-118603900  |
| 3173 | Glycam1       | 14663  | 15-:103393188-103395512 |
| 3174 | Acyp1         | 66204  | 12-:86613355-86621385   |
| 3175 | Sulf2         | 72043  | 2-:165899649-165981105  |
| 3176 | MMT00004863   |        | 1-:154575960-154577890  |
| 3177 | Setd8         | 67956  | 5+:124889948-124901388  |
| 3178 | Kcnb1         | 16500  | 2-:166929853-167014123  |
| 3179 | Rbm24         | 666794 | 13+:46466592-46538402   |
| 3180 | Tmprss9       | 432478 | 10+:80350128-80362084   |
| 3181 | MMT00050022   |        | 5-:123147199-123147637  |
| 3182 | Stau1         | 20853  | 2-:166773772-166821799  |
| 3183 | Eraf          | 170812 |                         |
| 3184 | Nkx2-9        | 18094  | 12-:57712385-57714261   |
| 3185 | MMT00018567   |        | 2-:22874724-22875187    |
| 3186 | Kcnj16        | 16517  | 11+:110829345-110888155 |
| 3187 | Syne2         | 319565 | 12+:76919320-76994231   |
| 3188 | Plp1          | 18823  | X+:133357289-133372867  |
| 3189 | Ndst2         | 17423  | 14-:21542962-21549549   |
| 3190 | Anxa4         | 11746  | 6-:86686840-86743550    |
| 3191 | Lamc2         | 16782  | 1-:154969888-155033148  |
| 3192 | 2310007H09Rik | 76429  | 7+:139802326-139898336  |
| 3193 | Shc1          | 20416  | 3+:89222582-89232366    |
| 3194 | Dnahc8        | 13417  | 17+:30807641-30814219   |
| 3195 | Mypn          | 68802  | 10-:62578538-62656030   |
| 3196 | Tat           | 234724 | 8+:112514356-112523700  |
| 3197 | Olf323        | 258373 | 11-:58438574-58439546   |
| 3198 | Fbxw4         | 30838  | 19-:45652746-45734683   |
| 3199 | Olf259        | 258766 | 2-:86947604-86948542    |
| 3200 | Dhodh         | 56749  | 8-:112117378-112132278  |
| 3201 | Ptcd2         | 68927  | 13-:100089605-100114651 |
| 3202 | Boc           | 117606 | 16-:44485154-44520616   |
| 3203 | Dnahc14       | 240960 | 1+:183571355-183744322  |
| 3204 | Gm24          | 195236 | 13+:22073068-22076348   |
| 3205 | Ankib1        | 70797  | 5-:3692264-3803125      |
| 3206 | Gpr160        | 71862  | 3+:30754883-30796089    |
| 3207 | MMT00020721   |        | 16+:95324010-95324804   |
| 3208 | 493051111Rik  | 67645  | 17+:28667805-28676052   |
| 3209 | Lmna          | 16905  | 3-:88287127-88297234    |
| 3210 | Gm239         | 237558 | 10-:116213587-116214511 |
| 3211 | MMT00046813   |        | 1+:144651732-144653209  |

|      |               |           |                         |
|------|---------------|-----------|-------------------------|
| 3212 | Lrrtm1        | 74342     | 6+:77192711-77195505    |
| 3213 | Prdx6         | 11758     | 1-:163171140-163181296  |
| 3214 | Dnmt3b        | 13436     | 2+:153475338-153513462  |
| 3215 | Efcab7        | 230500    | 4+:99496190-99585386    |
| 3216 | Neurog3       | 11925     | 10+:61596210-61596854   |
| 3217 | Setx          | 269254    | 2+:28981401-28994959    |
| 3218 | Grap2         | 17444     | 15+:80453912-80480727   |
| 3219 | Vps13a        | 271564    | 19-:16754499-16855407   |
| 3220 | Ap2s1         | 232910    | 7+:17328567-17334361    |
| 3221 | Mill1         | 266815    | 7+:18847759-18850227    |
| 3222 | Zbtb10        | 229055    | 3+:9251357-9285327      |
| 3223 | Ak2           | 11637     | 4+:128670545-128688054  |
| 3224 | Trpc7         | 26946     | 13-:56874468-56996949   |
| 3225 | Tmem178       | 68027     | 17+:81343971-81401150   |
| 3226 | Tnfrsf17      | 21935     | 16+:11313901-11320161   |
| 3227 | Zfp462        | 242466    | 4+:55024171-55036479    |
| 3228 | Saa1          | 20208     | 7-:53996074-53997892    |
| 3229 | Tdo2          | 56720     | 3-:81762706-81779637    |
| 3230 | Sh3bgrl       | 56726     | X+:106290892-106356950  |
| 3231 | 1700022A21Rik | 72252     | 5+:24151271-24154678    |
| 3232 | Rrh           | 20132     | 3-:129511718-129525421  |
| 3233 | Skp1a         | 21402     | 11+:52045572-52059873   |
| 3234 | Scn4a         | 110880    | 11-:106180617-106210704 |
| 3235 | BC029214      | 227622    | 2-:25310643-25316613    |
| 3236 | Tcfap4        | 83383     | 16-:4544661-4559720     |
| 3237 | Kcnj1         | 56379     | 9+:32180181-32205140    |
| 3238 | Ppp3ca        | 19055     | 3+:136460678-136600692  |
| 3239 | Zfp294        | 78913     | 16-:87376923-87432780   |
| 3240 | Mex3a         | 72640     | 3+:88339590-88341488    |
| 3241 | Gm765         | 330390    | 6-:98188084-98198226    |
| 3242 | 2700049A03Rik | 76967     | 12+:72238207-72344284   |
| 3243 | Ambn          | 11698     | 5+:88885035-88897552    |
| 3244 | Hist1h4a      | 326619    | 13-:23852716-23853026   |
| 3245 | Zfp92         | 22754     | X+:70656434-70669490    |
| 3246 | Prei4         | 74182     | 2-:132355135-132376184  |
| 3247 | MMT00011992   | 100045918 | 19-:12303010-12303680   |
| 3248 | MMT00058895   |           | 3-:49396836-49436888    |
| 3249 | Pnpla8        | 67452     | 12+:45370172-45413274   |
| 3250 | Olfm1         | 56177     | 2+:28061195-28085980    |
| 3251 | Thg1l         | 66628     | 11-:45760347-45768989   |
| 3252 | Kbtbd4        | 67136     | 2+:90744942-90750717    |
| 3253 | Tbc1d20       | 67231     | 2+:152119604-152139732  |
| 3254 | Grifin        | 77998     | 5-:141039077-141041023  |
| 3255 | Fgf11         | 14166     | 11-:69611704-69615127   |
| 3256 | Phox2b        | 18935     | 5-:67486914-67490394    |
| 3257 | Map1lc3a      | 66734     | 2+:155102079-155103807  |
| 3258 | Ascl1         | 17172     | 10-:86954651-86955910   |
| 3259 | Chrna6        | 11440     | 8-:28514848-28524254    |
| 3260 | 2900083I11Rik | 58212     | 5+:136282759-136317836  |
| 3261 | Rpap2         | 231571    | 5+:108026753-108090853  |
| 3262 | Mpa2l         | 100702    | 5-:105601034-105611307  |

|      |               |        |                         |
|------|---------------|--------|-------------------------|
| 3263 | MMT00013139   |        |                         |
| 3264 | 1810009A15Rik | 66276  | 19+:8963391-8965230     |
| 3265 | Dntt          | 21673  | 19+:41103877-41134004   |
| 3266 | Olfr347       | 258945 | 2+:36589842-36590779    |
| 3267 | Vps8          | 209018 | 16+:21495949-21644748   |
| 3268 | Olfr1366      | 258280 | 13-:21628886-21629827   |
| 3269 | Ylpm1         | 56531  | 12+:86337268-86411543   |
| 3270 | Ttc12         | 235330 | 9-:49252771-49253987    |
| 3271 | Dis3          | 72662  | 14-:99475442-99498979   |
| 3272 | Akap8         | 56399  | 17-:32441600-32458086   |
| 3273 | MMT00081689   |        | 12-:104982240-104983199 |
| 3274 | Evx1          | 14028  | 6+:52263491-52268371    |
| 3275 | OTTMUSG000000 | 627585 | 4+:145222406-146035579  |
| 3276 | MMT00075816   |        | 1+:5053614-5054041      |
| 3277 | MMT00038655   |        |                         |
| 3278 | Ggt7          | 207182 | 2-:155316122-155340563  |
| 3279 | Slc46a1       | 52466  | 11+:78279176-78285445   |
| 3280 | Tlr1          | 21897  | 5-:65316072-65323938    |
| 3281 | Slc12a3       | 20497  | 8+:96853125-96889863    |
| 3282 | Ndufs6        | 407785 | 13-:73457318-73465924   |
| 3283 | Mmp9          | 17395  | 2+:164773756-164780405  |
| 3284 | Plekha7       | 233765 | 7-:123298142-123301893  |
| 3285 | MMT00023436   |        | 1-:49456218-49456550    |
| 3286 | Alox5ap       | 11690  | 5+:150076637-150099722  |
| 3287 | MMT00036232   |        | 5+:109588434-109597282  |
| 3288 | Slc26a6       | 171429 | 9+:108757068-108815373  |
| 3289 | Adamtsl4      | 229595 | 3-:95480126-95483599    |
| 3290 | 2900042B11Rik | 72938  | 4+:106926498-106952537  |
| 3291 | Ptk2          | 14083  | 15-:73035535-73225154   |
| 3292 | MMT00014416   |        | 4-:63323392-63323872    |
| 3293 | Nup153        | 218210 | 13-:46775254-46823638   |
| 3294 | Prss23        | 76453  | 7-:96657618-96666054    |
| 3295 | 4930534B04Rik | 75216  | 12-:92452004-92505454   |
| 3296 | Olfr1143      | 258290 | 2+:87642547-87643490    |
| 3297 | Trappc4       | 60409  | 9-:44211851-44215590    |
| 3298 | Man2a1        | 17158  | 17+:64950988-65104450   |
| 3299 | EG243431      | 243431 | 6-:67892044-67892534    |
| 3300 | Commd4        | 66199  | 9-:57002847-57006106    |
| 3301 | Zcchc14       | 142682 | 8-:124123367-124175833  |
| 3302 | Dock1         | 330662 | 7+:141862388-141996340  |
| 3303 | B430119L13Rik | 320974 | 2-:132695451-132702944  |
| 3304 | Tle2          | 21886  | 10+:81038276-81053590   |
| 3305 | Gdnf          | 14573  | 15+:7761010-7787574     |
| 3306 | Rps6kb2       | 58988  | 19-:4156976-4163245     |
| 3307 | Cd8b1         | 12526  | 6+:71272805-71287445    |
| 3308 | Satb2         | 212712 | 1-:56853110-57028172    |
| 3309 | Grpel2        | 17714  | 18-:61874372-61885977   |
| 3310 | Tdrd5         | 214575 | 1-:158230724-158232736  |
| 3311 | MMT00031321   |        | 7+:127648843-127657879  |
| 3312 | 6430704M03Rik | 230235 | 4-:56975738-57003009    |
| 3313 | Gpi1          | 14751  | 7-:35000227-35015318    |

|      |               |        |                        |
|------|---------------|--------|------------------------|
| 3314 | Wars2         | 70560  | 3+:98945006-99021178   |
| 3315 | Serf2         | 378702 | 2+:121275152-121276793 |
| 3316 | Fah           | 14085  | 7-:91733682-91754260   |
| 3317 | Ak3           | 56248  | 19-:29095320-29123218  |
| 3318 | 2310003F16Rik | 67693  | 2+:121282836-121284175 |
| 3319 | Al662250      | 106639 | 17-:56853360-56856247  |
| 3320 | Cox18         | 231430 | 5-:90643752-90653013   |
| 3321 | Pla2g1b       | 18778  | 5+:115916274-115924725 |
| 3322 | Ofd1          | 237222 | X-:162828874-162878489 |
| 3323 | ldh3b         | 170718 | 2-:130105048-130110164 |
| 3324 | 4930550L24Rik | 75352  | X+:56172059-56173020   |
| 3325 | Plekhj1       | 78670  | 10-:80258842-80261303  |
| 3326 | Lysmd2        | 70082  | 9+:75473547-75485578   |
| 3327 | Trappc2       | 66226  | X+:162878732-162891070 |
| 3328 | Acsmd2        | 233799 | 7+:126705245-126739690 |
| 3329 | Car5a         | 12352  | 8-:124440045-124468804 |
| 3330 | MMT00020226   |        | 10+:98907117-98908450  |
| 3331 | A730055C05Rik | 338369 | 11+:66838680-66845740  |
| 3332 | Lrrc59        | 98238  | 11+:94491137-94506530  |
| 3333 | Npm3          | 18150  | 19-:45822225-45824053  |
| 3334 | Etl4          | 208618 | 2+:20704808-20705933   |
| 3335 | Vps29         | 56433  | 5+:122804421-122813295 |
| 3336 | Gart          | 14450  | 16-:91621653-91647198  |
| 3337 | Klra7         | 16638  | 6-:130168623-130181705 |
| 3338 | Olf1r1250     | 258967 | 2-:89496652-89497596   |
| 3339 | Dip2a         | 64451  | 10-:75780611-75807996  |
| 3340 | MMT00066654   |        | 3-:159554432-159555159 |
| 3341 | Ttc9          | 69480  | 12+:82732274-82765508  |
| 3342 | Ik            | 24010  | 18+:36904353-36917289  |
| 3343 | MMT00080053   |        | 18+:4484584-4485357    |
| 3344 | Rad1          | 19355  | 15+:10415913-10423430  |
| 3345 | EG620934      | 620934 | 7-:68694130-68694587   |
| 3346 | Sema6d        | 214968 | 2+:124436334-124479479 |
| 3347 | Mfsd1         | 66868  | 3+:67386691-67408153   |
| 3348 | Cbl           | 12402  | 9-:43959507-44042067   |
| 3349 | MMT00043953   |        |                        |
| 3350 | MMT00044519   | 670211 | 4+:55267553-55267908   |
| 3351 | Rad23b        | 19359  | 4+:55363233-55402868   |
| 3352 | Ppifos        | 68173  | 14-:26516459-26520768  |
| 3353 | Defb9         | 246079 | 8-:22992210-22995893   |
| 3354 | Ropn1l        | 252967 | 15-:31370967-31383402  |
| 3355 | Arhgap30      | 226652 | 1+:173319322-173337521 |
| 3356 | Adhfe1        | 76187  | 1+:9538150-9566987     |
| 3357 | Rev1          | 56210  | 1-:38109862-38165302   |
| 3358 | MMT00004886   |        | 4+:105250899-105251603 |
| 3359 | Pp11r         | 19011  | 15-:97541449-97551581  |
| 3360 | Foxo3a        | 56484  | 10-:41905592-41996548  |
| 3361 | Pot1a         | 101185 | 6-:25693945-25759188   |
| 3362 | Fgf8          | 14179  | 19-:45811308-45817363  |
| 3363 | MMT00033159   |        | 8-:58017542-58019101   |
| 3364 | Cyp21a1       | 13079  | 17-:34938725-34941344  |

|      |               |           |                         |
|------|---------------|-----------|-------------------------|
| 3365 | Tiam2         | 24001     | 17+:3397206-3519396     |
| 3366 | Olf22         | 258836    | 4-:52923706-52924664    |
| 3367 | Cox4i1        | 12857     | 8+:123192205-123198107  |
| 3368 | MMT00038343   |           | 5+:107670641-107671378  |
| 3369 | MMT00008524   | 100039801 | 8+:48907496-48908157    |
| 3370 | Glpr1         | 73690     | 10-:111422512-111434251 |
| 3371 | Snd1          | 56463     | 6+:28430397-28838820    |
| 3372 | Prok1         | 246691    | 3-:107038048-107041576  |
| 3373 | MMT00033504   |           | 13-:84829822-84830594   |
| 3374 | Amot          | 27494     | X-:141884974-141939558  |
| 3375 | MMT00043922   |           | 4-:155522207-155522933  |
| 3376 | Trip4         | 56404     | 9-:65681156-65732835    |
| 3377 | Cs            | 12974     | 10+:127774857-127798355 |
| 3378 | Cnfn          | 72383     | 7-:26152635-26154745    |
| 3379 | Cdo1          | 12583     | 18-:46873158-46888009   |
| 3380 | MMT00067570   |           | X-:17457996-17494616    |
| 3381 | Ctdspl        | 69274     | 9+:118835589-118953116  |
| 3382 | Fgf4          | 14175     | 7+:152047409-152048845  |
| 3383 | Cd99          | 673094    |                         |
| 3384 | Ints5         | 109077    | 19+:8969016-8972224     |
| 3385 | Wdr66         | 269701    | 5+:123738651-123776804  |
| 3386 | Clec4n        | 56620     | 6+:123179891-123197037  |
| 3387 | Llg12         | 217325    | 11+:115685421-115717092 |
| 3388 | a             | 50518     | 2+:154839266-154876747  |
| 3389 | MMT00013165   |           |                         |
| 3390 | Cbx7          | 52609     | 15-:79747712-79763057   |
| 3391 | Mfap3         | 216760    | 11+:57332208-57344384   |
| 3392 | Rnf141        | 67150     | 7-:117959026-117987883  |
| 3393 | Snhg8         | 66487     | 14-:31937673-31942116   |
| 3394 | Als2cr13      | 72750     | 1+:60005896-60042189    |
| 3395 | MMT00060664   |           | 11+:76963128-76964664   |
| 3396 | Ctage5        | 217615    | 12+:60230780-60291160   |
| 3397 | EG636127      | 636127    | 14+:53705279-53711603   |
| 3398 | Lce1a1        | 67127     | 3-:92450456-92452228    |
| 3399 | 4930550C14Rik | 75311     | 9+:53213390-53240908    |
| 3400 | Heatr6        | 217026    | 11+:83579626-83595487   |
| 3401 | BB146404      | 103511    | 10-:33811230-33816278   |
| 3402 | A930018P22Rik | 68243     | 2+:103962925-103964903  |
| 3403 | Nrxn1         | 18189     | 17-:90960080-91103707   |
| 3404 | Arhgap28      | 268970    | 17-:68199343-68245606   |
| 3405 | Map3k3        | 26406     | 11+:105869516-106017968 |
| 3406 | Slc22a9       | 207151    | 19-:7747564-7785743     |
| 3407 | Olf22         | 57250     | 7+:111728161-111729114  |
| 3408 | Cyp2c40       | 13099     | 19-:39841563-39887218   |
| 3409 | Arhgap5       | 11855     | 12+:53617234-53668323   |
| 3410 | Paqr9         | 75552     | 9+:95460377-95461504    |
| 3411 | Rabl2a        | 68708     | 15-:89412967-89422296   |
| 3412 | Olf22         | 170639    | 7-:109890553-109891515  |
| 3413 | D030013I16Rik | 328734    | 17-:3076162-3084584     |
| 3414 | MMT00059380   |           | 3+:57166891-57167200    |
| 3415 | MMT00082878   |           | 3+:129771530-129771938  |

|      |               |        |                         |
|------|---------------|--------|-------------------------|
| 3416 | Tmprss13      | 214531 | 9+:45136499-45154305    |
| 3417 | Igh-VJ558     | 16061  | 12-:117248057-117248329 |
| 3418 | MMT00009531   |        | 11+:114525933-114526409 |
| 3419 | MMT00056938   |        | X+:71252568-71252806    |
| 3420 | Ldlr          | 16835  | 9+:21528221-21552860    |
| 3421 | 2010106G01Rik | 66552  | 2-:126719868-126758971  |
| 3422 | Uchl4         | 93841  | 9+:64083007-64084169    |
| 3423 | MMT00070071   |        | 7+:12452031-12452949    |
| 3424 | Mrpl43        | 94067  | 19-:45079909-45080912   |
| 3425 | MMT00032998   |        | 7-:3284595-3285475      |
| 3426 | Hap1          | 15114  | 11-:100208643-100217391 |
| 3427 | Olf918        | 258372 | 9-:38480089-38481066    |
| 3428 | Il1r2         | 16178  | 1+:40141612-40182068    |
| 3429 | Gzmf          | 14943  | 14-:56824105-56830265   |
| 3430 | Rhof          | 23912  | 5-:123569439-123582428  |
| 3431 | Lrfn5         | 238205 | 12+:62940414-62959327   |
| 3432 | EG330963      | 330963 | 9-:65349991-65362552    |
| 3433 | Naaladl2      | 635702 | 3-:24312271-24332132    |
| 3434 | Capn1         | 12333  | 19-:5988614-6015126     |
| 3435 | MMT00006420   |        | X+:35533132-35536354    |
| 3436 | Rfx5          | 53970  | 3+:94758955-94763289    |
| 3437 | MMT00047857   |        | 5-:15004162-15004577    |
| 3438 | Plac8l1       | 69401  | 18+:42351518-42352400   |
| 3439 | Ebna1bp2      | 69072  | 4+:118293434-118298583  |
| 3440 | Prrt3         | 210673 | 6-:113443632-113451879  |
| 3441 | OTTMUSG000000 | 547428 | 14+:54464909-54465512   |
| 3442 | Refbp2        | 56009  | 1+:173433787-173434442  |
| 3443 | Mtmr7         | 54384  | 8-:41633074-41634766    |
| 3444 | MMT00077174   | 627268 | X-:163304166-163542190  |
| 3445 | Rnf25         | 57751  | 1-:74640326-74647951    |
| 3446 | Eno1          | 13806  | 4+:149611363-149622981  |
| 3447 | Fmr1          | 14265  | X+:65931874-65971134    |
| 3448 | Apobec3       | 80287  | 15+:79722855-79738344   |
| 3449 | Hes6          | 55927  | 1-:93308080-93309767    |
| 3450 | Itgb2l        | 16415  | 16-:96643897-96665206   |
| 3451 | Spint1        | 20732  | 2+:119063153-119075247  |
| 3452 | Ccrn4l        | 12457  | 3+:51028381-51055565    |
| 3453 | V1rg7         | 171242 | 7+:12737812-12738753    |
| 3454 | MMT00030912   | 545291 | 19-:43368684-43462771   |
| 3455 | Pou2af1       | 18985  | 9+:51021794-51048183    |
| 3456 | MMT00063288   |        |                         |
| 3457 | Olf1258       | 258980 | 2+:89769967-89770901    |
| 3458 | MMT00001194   |        | 4-:122952126-122952715  |
| 3459 | Nags          | 217214 | 11+:102006900-102010384 |
| 3460 | Ddb2          | 107986 | 2-:91051744-91077064    |
| 3461 | Stard4        | 170459 | 18-:33363241-33373325   |
| 3462 | Nmnat3        | 74080  | 9+:98197001-98311845    |
| 3463 | MMT00029730   |        | 10-:53018944-53020003   |
| 3464 | 1700048O20Rik | 69430  | 9+:121847232-121851112  |
| 3465 | MMT00064177   |        | X-:53098936-53099743    |
| 3466 | Darc          | 13349  | 1-:175261941-175263575  |

|      |               |           |                         |
|------|---------------|-----------|-------------------------|
| 3467 | 1700061117Rik | 433646    | 3-:116763439-116780686  |
| 3468 | MMT00009124   |           | 9+:71756669-71757359    |
| 3469 | MMT00053608   |           | 10-:39381987-39383025   |
| 3470 | Zmiz2         | 52915     | 11+:6295171-6306422     |
| 3471 | Stmn3         | 20262     | 2-:181041163-181048985  |
| 3472 | Steap3        | 68428     | 1-:122124000-122161835  |
| 3473 | Pitpna        | 18738     | 11-:75401455-75442295   |
| 3474 | Sln4          | 20558     | 11+:83000066-83003709   |
| 3475 | 2610305D13Rik | 112422    | 4-:146986047-146989538  |
| 3476 | D6Mm5e        | 110958    | 6+:82906402-82980158    |
| 3477 | Dhrs3         | 20148     | 4+:144482998-144517543  |
| 3478 | Lonp1         | 74142     | 17-:56753718-56859205   |
| 3479 | A730011L01Rik | 338371    | 11+:119352694-119367452 |
| 3480 | Pnpo          | 103711    | 11-:96799141-96805260   |
| 3481 | Zfp536        | 243937    | 7-:38263614-38355010    |
| 3482 | MMT00069653   |           | 14-:54943752-54944517   |
| 3483 | Pat1          | 225929    | 19+:11988836-12019582   |
| 3484 | Tmem176b      | 65963     | 6-:48783832-48790547    |
| 3485 | Six3os1       | 100043902 | 17-:86011912-86018156   |
| 3486 | Chmp5         | 76959     | 4+:40895585-40912335    |
| 3487 | Grm7          | 108073    | 6+:111445646-111516059  |
| 3488 | C1qtnf6       | 72709     | 15-:78353777-78360022   |
| 3489 | Atg9b         | 213948    | 5-:23889934-23894261    |
| 3490 | Tspan18       | 241556    | 2-:93044399-93174664    |
| 3491 | Btn1a1        | 12231     | 13-:23548877-23557361   |
| 3492 | Olf1549       | 259105    | 7+:109702799-109703749  |
| 3493 | Wbp4          | 22380     | 14-:79861555-79880917   |
| 3494 | Pcdh21        | 170677    | 14-:37891043-37911384   |
| 3495 | EG633752      | 633752    | 15+:68707192-68708287   |
| 3496 | Slc41a2       | 338365    | 10-:82696146-82779298   |
| 3497 | Usp47         | 74996     | 7+:119167097-119254897  |
| 3498 | Ccdc137       | 67291     | 11+:120319438-120326012 |
| 3499 | MMT00056807   |           |                         |
| 3500 | MMT00024189   |           | 2-:154594990-154595766  |
| 3501 | Raph1         | 77300     | 1-:60540030-60623608    |
| 3502 | Gde1          | 56209     | 7-:125832516-125849233  |
| 3503 | Zfp13         | 22654     | 17-:23713023-23717541   |
| 3504 | Anpep         | 16790     | 7-:86966690-86987170    |
| 3505 | MMT00031335   |           | 8+:86124188-86124576    |
| 3506 | Med13l        | 76199     | 5+:119130896-119215444  |
| 3507 | Cacna1e       | 12290     | 1-:156243081-156573486  |
| 3508 | MMT00015970   |           | 19+:60155334-60164136   |
| 3509 | Olf1584       | 259056    | 7+:110234033-110234992  |
| 3510 | MMT00034367   |           | 17+:37267832-37268733   |
| 3511 | Rnf182        | 328234    | 13+:43763343-43816877   |
| 3512 | 6530401N04Rik | 328092    | 12-:53089296-53107491   |
| 3513 | Aloxe3        | 23801     | 11+:68939878-68962616   |
| 3514 | MMT00027508   | 100046710 | 12-:115821756-115822263 |
| 3515 | EG665467      | 665467    | 2+:181022665-181028547  |
| 3516 | Elovl7        | 74559     | 13+:109004624-109073932 |
| 3517 | Pcdhga1       | 93709     | 18+:37821598-38001524   |



|      |               |        |                         |
|------|---------------|--------|-------------------------|
| 3518 | Smad5         | 17129  | 13+:56804412-56841318   |
| 3519 | Trp53         | 22059  | 11+:69393482-69405373   |
| 3520 | Lat           | 16797  | 7-:133507717-133512764  |
| 3521 | Tmprss7       | 208171 | 16-:45656429-45667722   |
| 3522 | Prpsap2       | 212627 | 11-:61543158-61575564   |
| 3523 | Trim34        | 94094  | 7+:111393077-111485295  |
| 3524 | Erc1          | 111173 | 6-:119520813-119521152  |
| 3525 | Irx5          | 54352  | 8+:94881647-94884993    |
| 3526 | Rccd1         | 269955 | 7-:87461398-87465354    |
| 3527 | 6330576A10Rik | 76198  | 14+:100858640-100878748 |
| 3528 | Il23a         | 83430  | 10-:127733195-127735140 |
| 3529 | Cyp8b1        | 13124  | 9-:121823880-121825382  |
| 3530 | Yipf5         | 67180  | 18-:40365892-40378509   |
| 3531 | Tslp          | 53603  | 18+:32975036-32979446   |
| 3532 | S100a5        | 20199  | 3+:90412443-90415698    |
| 3533 | Cacna1a       | 12286  | 8+:86939687-87162764    |
| 3534 | Slamf7        | 75345  | 1-:173564624-173579070  |
| 3535 | S100a9        | 20202  | 3-:90496554-90499613    |
| 3536 | C79127        | 232941 | 7-:19862154-19865385    |
| 3537 | F9            | 14071  | X+:57252640-57283936    |
| 3538 | 4930571C24Rik | 78217  | 2+:25143662-25144701    |
| 3539 | Iitm2b        | 16432  | 14-:73762040-73785078   |
| 3540 | MMT00015118   |        | 4-:100034062-100055849  |
| 3541 | Ache          | 11423  | 5+:137731261-137735465  |
| 3542 | Atp5j2        | 57423  | 5-:145944575-145952461  |
| 3543 | Acsm1         | 117147 | 7+:126761341-126806028  |
| 3544 | Tom40l        | 641376 | 1-:173149165-173152625  |
| 3545 | Mtrf1l        | 108853 | 10+:4522321-4533475     |
| 3546 | Dhrs13        | 70451  | 11+:77845691-77851400   |
| 3547 | Med25         | 75613  | 7-:52134757-52147737    |
| 3548 | Olfir29-ps1   | 29848  | 4-:43794360-43809977    |
| 3549 | Tbkbp1        | 73174  | 11-:96997483-97011363   |
| 3550 | Bmyc          | 107771 | 2+:25562351-25563414    |
| 3551 | Inpp4b        | 234515 | 8+:84265308-84426772    |
| 3552 | 1110017116Rik | 68527  | 2+:4897203-4906790      |
| 3553 | MMT00015497   |        | 19+:44063343-44064044   |
| 3554 | Npas3         | 27386  | 12+:54349663-55170060   |
| 3555 | Sbds          | 66711  | 5-:130721604-130731385  |
| 3556 | Al661453      | 224833 | 17+:47573587-47607092   |
| 3557 | Dcp1a         | 75901  | 14+:31292750-31336495   |
| 3558 | C85627        | 546161 | 9-:109592950-109594173  |
| 3559 | 4933433P14Rik | 66787  | 12+:106923037-106940153 |
| 3560 | Usp5          | 22225  | 6-:124765036-124779465  |
| 3561 | MMT00020644   |        | 4-:3646817-3648177      |
| 3562 | MMT00011909   |        | 10+:66467767-66503648   |
| 3563 | MMT00045357   |        | 14-:118580620-118581352 |
| 3564 | Spcs2         | 66624  | 7-:106987418-106997571  |
| 3565 | MMT00045908   |        | 5-:117442097-117452943  |
| 3566 | Rpp25         | 102614 | 9+:57351908-57353253    |
| 3567 | Pfkfb4        | 270198 | 9+:108894060-108933108  |
| 3568 | MMT00067704   |        | 10-:16144068-16144830   |

|      |               |           |                         |
|------|---------------|-----------|-------------------------|
| 3569 | ENSMUSG00000  | 100038417 | 18-:62767196-62774658   |
| 3570 | Olf821        | 258772    | 10+:129470683-129471615 |
| 3571 | Oxnad1        | 218885    | 14+:32899135-32916388   |
| 3572 | Ebi3          | 50498     | 17+:56092062-56096442   |
| 3573 | Tcp11         | 21463     | 17-:28203696-28217510   |
| 3574 | Hcn2          | 15166     | 10+:79179378-79198853   |
| 3575 | BC023179      | 232855    | 7-:7155730-7162665      |
| 3576 | Ythdc2        | 240255    | 18+:44994112-45046077   |
| 3577 | Ptplad2       | 66775     | 4-:88059863-88084813    |
| 3578 | A130090K04Rik | 320495    | 10+:3366096-3455988     |
| 3579 | Ncbp2         | 68092     | 16+:31948712-31957682   |
| 3580 | MMT00008557   | 668917    | 2+:144291073-144292697  |
| 3581 | Txndc17       | 52700     | 11+:72021052-72023513   |
| 3582 | Mmp21         | 214766    | 7-:140866088-140870760  |
| 3583 | Paqr5         | 74090     | 9-:61803147-61874611    |
| 3584 | Foxp1         | 108655    | 6-:99102052-99216516    |
| 3585 | Hint1         | 15254     | 11+:54679941-54683999   |
| 3586 | MMT00019611   |           | 3-:98483339-98492169    |
| 3587 | MMT00041940   |           | 3-:41779988-41781970    |
| 3588 | Ube4b         | 63958     | 4-:148702525-148800858  |
| 3589 | Cdc6          | 23834     | 11+:98769464-98783207   |
| 3590 | Pdzn4         | 239618    | 15+:92574001-92577131   |
| 3591 | BC018507      | 218333    | 13-:70727575-70740033   |
| 3592 | Twistnb       | 28071     | 12+:34114409-34125424   |
| 3593 | MMT00031732   |           | 4+:110962686-110963670  |
| 3594 | Rasa4         | 54153     | 5+:136559867-136587725  |
| 3595 | Vps37a        | 52348     | 8+:41633073-41634766    |
| 3596 | Bbs5          | 72569     | 2+:69485311-69505626    |
| 3597 | 6820408C15Rik | 228778    | 2+:152257979-152270063  |
| 3598 | Rpo1-3        | 20018     | 5+:147889116-147890656  |
| 3599 | MMT00035426   |           | 8+:35570238-35570761    |
| 3600 | MMT00046966   |           | 7-:14813029-14814183    |
| 3601 | Arfgef1       | 211673    | 1-:10127642-10223151    |
| 3602 | Zfp526        | 210172    | 7+:26009320-26035228    |
| 3603 | BC027231      | 212547    | 16+:44724416-44737241   |
| 3604 | 2610029G23Rik | 67683     | X+:102275133-102278823  |
| 3605 | Slc7a14       | 241919    | 3-:31107999-31156791    |
| 3606 | S100a14       | 66166     | 3+:90330791-90332755    |
| 3607 | Car15         | 80733     | 16-:17835369-17838231   |
| 3608 | Igfbp1        | 18518     | X+:97689688-97711464    |
| 3609 | Plvap         | 84094     | 8-:74021665-74035630    |
| 3610 | Rnf38         | 73469     | 4-:44139090-44200391    |
| 3611 | Agxt2l2       | 72947     | 11+:51398285-51416765   |
| 3612 | Cd2           | 12481     | 3-:101079832-101091862  |
| 3613 | 1110018J18Rik | 66129     | 13-:64393143-64414018   |
| 3614 | 2610030H06Rik | 67048     | X+:69061263-69070044    |
| 3615 | Ostm1         | 14628     | 10+:42398743-42422254   |
| 3616 | Dnajc16       | 214063    | 4-:141319050-141344970  |
| 3617 | Rasl10b       | 276952    | 11+:83232799-83234515   |
| 3618 | EG234097      | 234097    | 8+:15431223-15438175    |
| 3619 | Cdan1         | 68968     | 2-:120543922-120546814  |

|      |               |           |                         |
|------|---------------|-----------|-------------------------|
| 3620 | Bet1          | 12068     | 6-:4027877-4036899      |
| 3621 | Hoxd13        | 15433     | 2+:74506366-74508192    |
| 3622 | Trim21        | 20821     | 7-:109707349-109713948  |
| 3623 | Olfr1324      | 258289    | X-:47778673-47779671    |
| 3624 | Pygb          | 110078    | 2+:150612521-150657491  |
| 3625 | 4930563D23Rik | 75328     | 16-:92318517-92321643   |
| 3626 | Ralgps1       | 241308    | 2-:32989395-33140437    |
| 3627 | MMT00048939   |           | 16-:18944350-18944684   |
| 3628 | Scap          | 235623    | 9+:110235924-110287451  |
| 3629 | Ankrd60       | 70065     | 2-:173394105-173403754  |
| 3630 | Lgr6          | 329252    | 1-:136882644-136960275  |
| 3631 | Vps37b        | 330192    | 5-:124454649-124482254  |
| 3632 | Lctl          | 235435    | 9+:63964953-63985923    |
| 3633 | MMT00009144   |           | 8-:56165074-56167391    |
| 3634 | Mrps34        | 79044     | 17+:25032064-25033216   |
| 3635 | Ndr4          | 234593    | 8+:98226962-98238855    |
| 3636 | Tram2         | 170829    | 1-:20991459-21069280    |
| 3637 | D930014E17Rik | 57373     | 7+:116847250-116855695  |
| 3638 | Mkx           | 210719    | 18-:6992775-7002542     |
| 3639 | Alpi          | 76768     | 1-:88994578-88998110    |
| 3640 | D11Bwg0517e   | 52897     | 11-:118352177-118471514 |
| 3641 | 4930422G04Rik | 71643     | 3+:127259131-127266610  |
| 3642 | Spsb4         | 211949    | 9-:96843901-96896732    |
| 3643 | Nell2         | 54003     | 15-:95050363-95358683   |
| 3644 | Umps          | 22247     | 16-:33954879-33967394   |
| 3645 | Sipa111       | 217692    | 12+:83412332-83551902   |
| 3646 | Clcc1         | 229725    | 3+:108457164-108480927  |
| 3647 | Nucks1        | 98415     | 1+:133807070-133832744  |
| 3648 | Odf2l         | 52184     | 3+:144781563-144816849  |
| 3649 | Zfp395        | 380912    | 14+:66004224-66015602   |
| 3650 | 4931400O07Rik | 70936     | X+:59721161-59721986    |
| 3651 | Es31          | 382053    | 8+:107572495-107582310  |
| 3652 | Adm           | 11535     | 7+:117771182-117773333  |
| 3653 | Olfr1298      | 258888    | 2-:111485215-111486152  |
| 3654 | St13          | 70356     | 15-:81195474-81230124   |
| 3655 | 0610009O20Rik | 66839     | 18+:38409928-38415204   |
| 3656 | Hoxb3         | 15410     | 11-:96204379-96211416   |
| 3657 | Armcx1        | 78248     | X+:131252549-131256443  |
| 3658 | Heatr5a       | 320487    | 12-:52976803-53072331   |
| 3659 | EG236451      | 236451    | 14-:59939802-59946936   |
| 3660 | Tlk1          | 228012    | 2-:70550466-70625056    |
| 3661 | Dhx15         | 13204     | 5-:52541454-52581633    |
| 3662 | 1700081L11Rik | 76719     | 11+:104303802-104353236 |
| 3663 | Supt4h2       | 100041294 | 11+:87551101-87556815   |
| 3664 | Carhsp1       | 52502     | 16-:8661033-8664508     |
| 3665 | Zfp61         | 22719     | 7-:25076064-25084609    |
| 3666 | Tas1r1        | 110326    | 4-:151402022-151412677  |
| 3667 | MMT00003196   |           | 6+:43039921-43049586    |
| 3668 | Cbfa2t2       | 12396     | 2+:154262241-154365090  |
| 3669 | Kdsr          | 70750     | 1-:108619915-108656299  |
| 3670 | Dusp3         | 72349     | 11-:101835472-101846084 |

|      |               |        |                         |
|------|---------------|--------|-------------------------|
| 3671 | 1810033B17Rik | 69189  | 8+:3665752-3668915      |
| 3672 | Stt3b         | 68292  | 9-:115151315-115219253  |
| 3673 | Tro           | 56191  | X-:147080247-147084030  |
| 3674 | Edil3         | 13612  | 13+:89084416-89324469   |
| 3675 | Pglyrp4       | 384997 | 3+:90532548-90544383    |
| 3676 | Ucp2          | 22228  | 7+:107645261-107647959  |
| 3677 | MMT00052835   | 633387 | 10+:38918264-38918972   |
| 3678 | Fxc1          | 14356  | 7+:112788984-112789864  |
| 3679 | Rpl3          | 27367  | 15-:79908225-79913765   |
| 3680 | Acvr2b        | 11481  | 9+:119311618-119342633  |
| 3681 | Edc4          | 234699 | 8+:108404795-108417105  |
| 3682 | MMT00047887   |        | 5+:34644025-34648105    |
| 3683 | Oas2          | 246728 | 5-:121180342-121199797  |
| 3684 | Al854703      | 243373 | 6+:48576763-48580001    |
| 3685 | Apoc1         | 11812  | 7-:20274832-20277988    |
| 3686 | Psmid9        | 67151  | 5+:123696248-123698970  |
| 3687 | Bcl9          | 77578  | 3-:97007591-97009680    |
| 3688 | Apobec4       | 71281  | 1+:154597705-154604674  |
| 3689 | Adh1          | 11522  | 3+:137940608-137953654  |
| 3690 | EG232974      | 232974 | 7-:25713721-25714387    |
| 3691 | Syne1         | 64009  | 10+:5217964-5235717     |
| 3692 | BC027072      | 225004 | 17-:72093259-72099806   |
| 3693 | Adcy1         | 432530 | 11+:7000568-7069510     |
| 3694 | Ankrd44       | 329154 | 1-:54704054-54885676    |
| 3695 | 1700007H22Rik | 75484  | 16-:86139548-86150921   |
| 3696 | Elovl6        | 170439 | 3+:129235356-129341406  |
| 3697 | MMT00021930   |        | 5-:30045974-30046246    |
| 3698 | 1600014C10Rik | 72244  | 7+:38968834-38980115    |
| 3699 | Dscr3         | 13185  | 16-:94719394-94748050   |
| 3700 | Nrxn1         | 18189  | 17-:90436234-90458903   |
| 3701 | Zfp68         | 24135  | 5-:139047347-139060955  |
| 3702 | Olfir979      | 259112 | 9-:39807876-39808810    |
| 3703 | Ggcx          | 56316  | 6+:72364326-72380701    |
| 3704 | H2-Q7         | 15018  | 17+:35576165-35580297   |
| 3705 | 5730590G19Rik | 77011  | 7+:86814405-86820605    |
| 3706 | 2410002O22Rik | 66975  | 13-:104933396-104968500 |
| 3707 | Etos1         | 114660 | 7-:137914151-137916166  |
| 3708 | Thrap3        | 230753 | 4-:125856027-125879856  |
| 3709 | Mylip         | 218203 | 13+:45485109-45507382   |
| 3710 | Scamp5        | 56807  | 9-:57291453-57315828    |
| 3711 | Rufy1         | 216724 | 11-:50194999-50244901   |
| 3712 | Mrpl32        | 75398  | 13-:14702567-14705304   |
| 3713 | Acot6         | 217700 | 12+:85441455-85452294   |
| 3714 | Nobox         | 18291  | 6-:43253672-43259553    |
| 3715 | Mapk14        | 26416  | 17+:28828389-28885350   |
| 3716 | Olfir160      | 80706  | 9-:37518932-37519862    |
| 3717 | Nlrp1c        | 627984 | 11-:70905760-71094536   |
| 3718 | Brd3          | 67382  | 2-:27303349-27331141    |
| 3719 | MMT00006786   |        | 1-:55176947-55177656    |
| 3720 | Zbtb44        | 235132 | 9+:30838107-30877921    |
| 3721 | Me2           | 107029 | 18-:73929695-73975046   |

|      |               |           |                         |
|------|---------------|-----------|-------------------------|
| 3722 | MMT00004801   |           | 13+:36084134-36085158   |
| 3723 | Pcdhb12       | 93883     | 18+:37595456-37597826   |
| 3724 | Zfp260        | 26466     | 7+:30889695-30890917    |
| 3725 | OTTMUSG000000 | 666048    | 4+:114252888-114283277  |
| 3726 | MMT00052248   |           | 1-:17387369-17390781    |
| 3727 | Erdr1         | 170942    |                         |
| 3728 | Sfxn4         | 94281     | 19-:60914648-60937267   |
| 3729 | Cldn14        | 56173     | 16-:93919482-93920210   |
| 3730 | Hus1          | 15574     | 11-:8893147-8911163     |
| 3731 | MMT00060364   |           | 16+:16853156-16853572   |
| 3732 | Spata21       | 329972    | 4+:140660744-140668078  |
| 3733 | Wnt2          | 22413     | 6-:17939814-17980287    |
| 3734 | Trim37        | 68729     | 11+:86940607-87031832   |
| 3735 | Rspo2         | 239405    | 15-:42909644-43001574   |
| 3736 | 0610037P05Rik | 66086     | 16-:14299988-14317419   |
| 3737 | Thap7         | 69009     | 16-:17528071-17531151   |
| 3738 | Cadm2         | 239857    | 16-:66663339-66815707   |
| 3739 | Mef2a         | 17258     | 7-:74376969-74461806    |
| 3740 | MMT00079610   |           | 12-:47579785-47580402   |
| 3741 | Casp9         | 12371     | 4+:141349769-141369601  |
| 3742 | Chrd          | 12667     | 16+:20733199-20742458   |
| 3743 | Corin         | 53419     | 5-:72691264-72895447    |
| 3744 | Rmnd1         | 66084     | 10+:5918863-5938724     |
| 3745 | Al463229      | 100042802 | 13-:37750568-37759030   |
| 3746 | Osbpl5        | 79196     | 7-:150874667-150927868  |
| 3747 | 4932443I19Rik | 403185    | 8+:13734767-13743066    |
| 3748 | Rhox8         | 434768    | X-:35231025-35231750    |
| 3749 | Aebp1         | 11568     | 11+:5761949-5772052     |
| 3750 | Slc36a3       | 215332    | 11-:54938361-54950875   |
| 3751 | Luzp1         | 269593    | 4+:136077306-136105230  |
| 3752 | MMT00078260   |           | 12+:88878853-88879607   |
| 3753 | Setdb1        | 84505     | 3-:95127447-95161078    |
| 3754 | Dock6         | 319899    | 9-:21604303-21651716    |
| 3755 | Ndn           | 17984     | 7+:69493207-69494811    |
| 3756 | Chrne         | 11448     | 11-:70428385-70432696   |
| 3757 | Ctnnd1        | 12388     | 2-:84441482-84490669    |
| 3758 | Rab9b         | 319642    | X-:133395644-133403077  |
| 3759 | 4931406B18Rik | 74054     | 7-:50749967-50761297    |
| 3760 | Vmn2r90       | 626942    | 17+:17849235-17870742   |
| 3761 | 1700026J12Rik | 73255     | 16-:49210753-49255911   |
| 3762 | 2310045A20Rik | 231238    | 5-:53498322-53604446    |
| 3763 | MMT00052953   |           | 5+:108946197-108946551  |
| 3764 | MMT00009379   |           | 10+:125622952-125623497 |
| 3765 | 2310022B05Rik | 69551     | 8-:127159654-127187125  |
| 3766 | Gria1         | 14799     | 11+:56825272-57141293   |
| 3767 | Pnma2         | 239157    | 14+:67530073-67536686   |
| 3768 | Cyp2c44       | 226143    | 19-:44079510-44103732   |
| 3769 | MMT00048655   |           |                         |
| 3770 | Zbtb9         | 474156    | 17+:27110108-27113149   |
| 3771 | MMT00014874   |           |                         |
| 3772 | MMT00002631   |           | X-:140720262-140722876  |

|      |               |        |                         |
|------|---------------|--------|-------------------------|
| 3773 | MMT00001709   |        | 5-:16473671-16501206    |
| 3774 | Ddx18         | 66942  | 1-:123450418-123464480  |
| 3775 | Hoxa5         | 15402  | 6-:52151788-52154586    |
| 3776 | Btbd16        | 330660 | 7+:137923070-137967890  |
| 3777 | Wdr91         | 101240 | 6-:34830279-34860843    |
| 3778 | Phlpp1        | 244650 | 8+:112392518-112464807  |
| 3779 | Ghdc          | 80860  | 11-:100627647-100632271 |
| 3780 | Ryk           | 20187  | 9+:102737245-102810635  |
| 3781 | Arpc2         | 76709  | 1+:74283073-74314782    |
| 3782 | Rgs5          | 19737  | 1+:171585677-171622687  |
| 3783 | MMT00082345   |        | 6-:39777684-39778771    |
| 3784 | Mafg          | 17134  | 11-:120490597-120491167 |
| 3785 | Pten          | 19211  | 19-:32832069-32832788   |
| 3786 | Mta1          | 116870 | 12+:114336533-114375384 |
| 3787 | Myf6          | 17878  | 10-:106929915-106931785 |
| 3788 | Tcam1         | 75870  | 11+:106138035-106147071 |
| 3789 | 4833442J19Rik | 320204 | 6+:149090114-149099694  |
| 3790 | Mtss1         | 211401 | 15-:58774802-58913544   |
| 3791 | Tgfb2         | 21808  | 1-:188447523-188529868  |
| 3792 | Zan           | 22635  | 5-:137819870-137918292  |
| 3793 | Htr1a         | 15550  | 13+:106234265-106236638 |
| 3794 | Ywhab         | 54401  | 2+:163820933-163842538  |
| 3795 | Psmc6         | 67089  | 14+:45951608-45969355   |
| 3796 | D19Bwg1357e   | 52874  | 19-:27463189-27504341   |
| 3797 | Nrip2         | 60345  | 6+:128349778-128358946  |
| 3798 | Isoc2b        | 67441  | 7-:4796561-4817781      |
| 3799 | Serpinh1      | 12406  | 7-:106493887-106501606  |
| 3800 | Ltf           | 17002  | 9+:110921795-110944706  |
| 3801 | Casp8ap2      | 26885  | 4+:32702487-32740235    |
| 3802 | MMT00020288   |        | 10-:13610397-13611510   |
| 3803 | MMT00041842   | 670880 | 10+:77273492-77274612   |
| 3804 | MMT00015534   |        | 5+:7179364-7180662      |
| 3805 | Siglece       | 83382  | 7-:50906441-50915515    |
| 3806 | MMT00063223   |        | 11-:102437760-102440602 |
| 3807 | Vmn2r83       | 625029 | 10+:78940711-78943081   |
| 3808 | 2010209O12Rik | 100910 | 5+:24093855-24098306    |
| 3809 | Slc9a3        | 105243 | 13+:74258273-74303510   |
| 3810 | Fbxo2         | 230904 | 4+:147538177-147540527  |
| 3811 | MMT00052318   |        | 2+:23763958-23764363    |
| 3812 | Zfyve26       | 211978 | 12-:80333330-80374663   |
| 3813 | Nell1         | 338352 | 7+:57474942-57535402    |
| 3814 | MMT00080381   |        | 7-:4127964-4128271      |
| 3815 | Slamf1        | 27218  | 1+:173697296-173722842  |
| 3816 | Gstm5         | 14866  | 3+:107698773-107701602  |
| 3817 | Aire          | 11634  | 10-:77492775-77506325   |
| 3818 | Cep192        | 70799  | 18+:67994293-68044828   |
| 3819 | Pigo          | 56703  | 4-:43030509-43038628    |
| 3820 | MMT00002991   |        | X-:64222392-64223901    |
| 3821 | Lnp           | 69605  | 2-:74357830-74416979    |
| 3822 | Ly6g6c        | 68468  | 17+:35204334-35206478   |
| 3823 | Slc22a15      | 242126 | 3-:101663850-101728370  |

|      |               |        |                         |
|------|---------------|--------|-------------------------|
| 3824 | Tnfrsf23      | 79201  | 7-:150854400-150871752  |
| 3825 | Uaca          | 72565  | 9+:60642346-60728237    |
| 3826 | Ptplad1       | 57874  | 9-:64834791-64869516    |
| 3827 | Mical2        | 320878 | 7+:119369396-119498504  |
| 3828 | BC063749      | 414801 | 19-:47862801-47876472   |
| 3829 | Uba2          | 50995  | 7-:34925721-34953541    |
| 3830 | 4933422H20Rik | 432613 | 11+:115302394-115309583 |
| 3831 | Bmp8b         | 12164  | 4+:122782403-122802585  |
| 3832 | Sdhb          | 67680  | 4+:140517319-140535015  |
| 3833 | Atxn711       | 380753 | 12+:33832644-33936011   |
| 3834 | Calb2         | 12308  | 8-:112666424-112692105  |
| 3835 | Btbd14b       | 66830  | 8-:87195777-87211743    |
| 3836 | 2200001115Rik | 69134  | 14-:35165067-35168578   |
| 3837 | Tradd         | 71609  | 8-:107782144-107788511  |
| 3838 | Trim32        | 69807  | 4+:65266054-65277275    |
| 3839 | Phactr3       | 74189  | 2+:177910082-178071196  |
| 3840 | Gm444         | 242915 | 5+:30440465-30444916    |
| 3841 | MMT00014519   |        | 7-:49303224-49305709    |
| 3842 | Abca12        | 74591  | 1-:71408315-71461470    |
| 3843 | Ubtf          | 21429  | 11-:102167305-102177788 |
| 3844 | Speg          | 11790  | 1+:75397624-75401138    |
| 3845 | MMT00048576   |        | 17+:91505594-91508123   |
| 3846 | Ccdc32        | 269336 | 2-:118843537-118855094  |
| 3847 | Tdrd7         | 100121 | 4+:46000333-46047629    |
| 3848 | Mrpl21        | 353242 | 19+:3282918-3291200     |
| 3849 | MMT00047578   |        | 1+:111171746-111732864  |
| 3850 | Dach1         | 13134  | 14-:98188801-98568528   |
| 3851 | MMT00077752   |        | X-:154050420-154051106  |
| 3852 | Nfam1         | 74039  | 15-:82828165-82831943   |
| 3853 | Pprc1         | 226169 | 19+:46139106-46147393   |
| 3854 | MMT00008389   |        | 5+:10866071-10868776    |
| 3855 | ENSMUSG00000  | 218695 | 14-:8577304-8624164     |
| 3856 | Slc30a5       | 69048  | 13-:101572917-101584591 |
| 3857 | 1700001C19Rik | 75462  | 17-:47550324-47574327   |
| 3858 | Gcnt2         | 14538  | 13+:40982533-41054685   |
| 3859 | Fpr2          | 14289  | 17+:18029707-18030762   |
| 3860 | Mlx           | 21428  | 11+:100948632-100952829 |
| 3861 | Osbpl7        | 71240  | 11+:96912159-96930208   |
| 3862 | Gpd1          | 14555  | 15+:99548031-99554203   |
| 3863 | Scube2        | 56788  | 7-:116942162-117009168  |
| 3864 | Gpd1l         | 333433 | 9-:114808465-114843018  |
| 3865 | Acta1         | 11459  | 8-:126415661-126418675  |
| 3866 | Scyl1bp1      | 98376  | 1-:165316007-165333769  |
| 3867 | Sln           | 66402  | 9+:53697970-53702367    |
| 3868 | Ebpl          | 68177  | 14-:61959597-61979276   |
| 3869 | Zadh2         | 225791 | 18+:84264344-84266906   |
| 3870 | Olfr1312      | 258359 | 2-:111882235-111883187  |
| 3871 | MMT00067361   |        | 12-:91309251-91382876   |
| 3872 | Cltb          | 74325  | 13-:54693787-54712701   |
| 3873 | Lefty1        | 13590  | 1+:182865152-182868531  |
| 3874 | Sliitrk3      | 386750 | 3-:72852375-72860782    |

|      |               |        |                        |
|------|---------------|--------|------------------------|
| 3875 | MMT00077845   |        | 12-:45303417-45303845  |
| 3876 | Zeb2          | 24136  | 2-:44843941-44965649   |
| 3877 | Gsk3b         | 56637  | 16+:38090445-38240746  |
| 3878 | Rnps1         | 19826  | 17+:24555401-24562840  |
| 3879 | Bmp1          | 12153  | 14-:70874366-70919894  |
| 3880 | Trf           | 22041  | 9-:103111206-103132616 |
| 3881 | Sntb1         | 20649  | 15-:55470708-55738502  |
| 3882 | Itfg3         | 106581 | 17-:26349653-26381152  |
| 3883 | Wdr7          | 104082 | 18+:63868378-64147012  |
| 3884 | Icam5         | 15898  | 9+:20836533-20843480   |
| 3885 | Apol7c        | 108956 | 15-:77355282-77363746  |
| 3886 | MMT00047275   | 546271 | X+:23730763-23731986   |
| 3887 | Tcrg-V5       | 21639  | 13+:19282236-19286398  |
| 3888 | Ran           | 19384  | 5+:129526094-129528692 |
| 3889 | Wasf3         | 245880 | 5+:147196581-147282701 |
| 3890 | Sdc3          | 20970  | 4+:130348560-130378849 |
| 3891 | Usp34         | 17847  | 11+:23206973-23321366  |
| 3892 | D0H6S2654E    | 108161 | 13+:34838320-34839491  |
| 3893 | Tmem16b       | 243634 | 6+:125640433-125989428 |
| 3894 | EG435366      | 435366 | 13-:62470568-62887084  |
| 3895 | Art5          | 11875  | 7-:109245386-109251361 |
| 3896 | Rab11fip4     | 268451 | 11+:79404847-79506340  |
| 3897 | Papln         | 170721 | 12+:85104610-85133300  |
| 3898 | Zc3h3         | 223642 | 15-:75614822-75672335  |
| 3899 | MMT00029169   |        | X+:5436870-5438658     |
| 3900 | Olf166        | 259071 | 16+:19486932-19487869  |
| 3901 | F730047E07Rik | 212377 | 4+:24448387-24530093   |
| 3902 | Spag16        | 66722  | 1+:69873543-70313851   |
| 3903 | MMT00041825   |        |                        |
| 3904 | Serinc1       | 56442  | 10-:57235583-57252255  |
| 3905 | H2-Q1         | 15006  | 17+:35457506-35460984  |
| 3906 | Ppp6c         | 67857  | 2-:39052317-39081859   |
| 3907 | Dkk3          | 50781  | 7-:119260526-119302562 |
| 3908 | Fundc2        | 67391  | X+:72627760-72640322   |
| 3909 | MMT00012984   |        | 5-:87389544-87390739   |
| 3910 | Trpm7         | 58800  | 2-:126617301-126701947 |
| 3911 | Cugbp1        | 13046  | 2+:90780639-90859649   |
| 3912 | Zzef1         | 195018 | 11+:72645044-72649832  |
| 3913 | Mrpl15        | 27395  | 1-:4764014-4775808     |
| 3914 | MMT00042063   |        | 6-:124901241-124902022 |
| 3915 | Gpr125        | 70693  | 5-:50351190-50450064   |
| 3916 | Vmn2r12       | 627569 | 5-:109514910-109521231 |
| 3917 | MMT00045955   |        | 3+:107145807-107146412 |
| 3918 | Hrg           | 94175  | 16+:22951186-22961718  |
| 3919 | Ucn           | 22226  | 5-:31440362-31441268   |
| 3920 | Slc25a3       | 18674  | 10-:90579535-90586723  |
| 3921 | 2300002D11Rik | 69539  | 4-:133047015-133054050 |
| 3922 | Clec11a       | 20256  | 7-:51559624-51562264   |
| 3923 | D9Ert402e     | 382117 | 9+:122714739-122744303 |
| 3924 | Gimap5        | 317757 | 6+:48700458-48703596   |
| 3925 | Akap2         | 11641  | 4+:57867030-57906562   |



|      |               |           |                         |
|------|---------------|-----------|-------------------------|
| 3926 | Tmcc3         | 319880    | 10+:93977620-94052846   |
| 3927 | MMT00021352   |           | 15:-99385921-99386665   |
| 3928 | Polr3k        | 67005     | 2+:181599160-181604295  |
| 3929 | Sfrs11        | 69207     | 3-:157673458-157699601  |
| 3930 | D730001G18Rik | 78725     | 15:-74601346-74609289   |
| 3931 | Gatad1        | 67210     | 5-:3639964-3647957      |
| 3932 | Pyy           | 217212    | 11-:101967993-101969090 |
| 3933 | MMT00035461   |           | 13+:28021453-28022774   |
| 3934 | Dfnb59        | 381375    | 2+:76488343-76496600    |
| 3935 | Dnahc7c       | 100101919 | 1+:46571397-46703970    |
| 3936 | Pde1c         | 18575     | 6-:56031774-56312513    |
| 3937 | Pldn          | 18457     | 2+:122564340-122572412  |
| 3938 | Abt1          | 30946     | 13-:23513408-23515770   |
| 3939 | Dazap1        | 70248     | 10+:79727841-79750817   |
| 3940 | Olfra420      | 258302    | 1+:176088905-176089869  |
| 3941 | MMT00049081   |           | X+:82961759-82962076    |
| 3942 | Padi2         | 18600     | 4+:140473480-140482232  |
| 3943 | Atoh1         | 11921     | 6+:64679316-64680372    |
| 3944 | Nlgn3         | 245537    | X+:98497626-98515601    |
| 3945 | Cugbp2        | 14007     | 2-:6462915-6806015      |
| 3946 | Klk1          | 16612     | 7+:51480848-51484938    |
| 3947 | MMT00014106   | 331003    | 9+:92612292-92613916    |
| 3948 | V1rb4         | 113854    | 6+:89843267-89844199    |
| 3949 | A630007B06Rik | 213993    | 19-:56873047-56875755   |
| 3950 | Syne1         | 64009     | 10+:5089617-5091148     |
| 3951 | MMT00048877   | 623568    | 16+:17137420-17137680   |
| 3952 | Bcar1         | 12927     | 8-:114234650-114267647  |
| 3953 | MMT00077470   |           | 19+:27930028-27932990   |
| 3954 | Syne1         | 64009     | 10+:5116826-5137085     |
| 3955 | Neurod1       | 18012     | 2-:79292678-79296793    |
| 3956 | Psat1         | 107272    | 19-:15980536-15999413   |
| 3957 | Dennd1b       | 329260    | 1-:141030362-141031320  |
| 3958 | Kcnc3         | 16504     | 7+:51846489-51851933    |
| 3959 | Bzw2          | 66912     | 12-:36818848-36883368   |
| 3960 | MMT00007654   |           | 2+:117066618-117068004  |
| 3961 | Serpinb9g     | 93806     | 13+:33578399-33587146   |
| 3962 | EG629959      | 629959    | 11+:104411100-104436986 |
| 3963 | Osbp          | 76303     | 19+:12040565-12068603   |
| 3964 | Colq          | 382864    | 14-:32337492-32390504   |
| 3965 | Pwp2          | 110816    | 10-:77633654-77647874   |
| 3966 | 9330101J02Rik | 664857    | 7-:146825440-146828512  |
| 3967 | Tysnd1        | 71767     | 10+:61158261-61165516   |
| 3968 | Gsc2          | 195333    | 16-:17913206-17915135   |
| 3969 | MMT00002495   |           | 18-:9498050-9498459     |
| 3970 | 4931414P19Rik | 74359     | 14-:55202500-55224741   |
| 3971 | Ppp1r16a      | 73062     | 15+:76520597-76525347   |
| 3972 | Ube2o         | 217342    | 11+:116398987-116399889 |
| 3973 | Dmtf1         | 23857     | 5-:9119662-9161724      |
| 3974 | MMT00000792   | 100044772 | 7+:37019310-37020770    |
| 3975 | Zfp711        | 245595    | X+:109717872-109747165  |
| 3976 | MMT00025735   |           | 11+:38032595-38033343   |

|      |               |        |                         |
|------|---------------|--------|-------------------------|
| 3977 | 1110002H13Rik | 66139  | 2-:26917192-26927681    |
| 3978 | Shank2        | 210274 | 7+:151238193-151472669  |
| 3979 | MMT00037549   |        | 4+:155109506-155114102  |
| 3980 | Gkap1         | 56278  | 13-:58334711-58365534   |
| 3981 | MMT00000262   |        | 18+:56001432-56002661   |
| 3982 | Myo15         | 17910  | 11+:60282840-60341868   |
| 3983 | 4930542C12Rik | 67648  | 9-:78242762-78243965    |
| 3984 | Dclre1a       | 55947  | 19-:56603992-56621586   |
| 3985 | Gjb3          | 14620  | 4-:127002480-127006405  |
| 3986 | Ep400         | 75560  | 5-:111093125-111199611  |
| 3987 | MMT00005386   |        | 11-:32780362-32780990   |
| 3988 | 4933427G17Rik | 74466  | 7+:128126021-128158300  |
| 3989 | Wrnip1        | 78903  | 13+:32894049-32914477   |
| 3990 | Trpc6         | 22068  | 9+:8544141-8680741      |
| 3991 | Hoxb9         | 15417  | 11+:96132821-96137905   |
| 3992 | Slc5a1        | 20537  | 5+:33447105-33504504    |
| 3993 | Nlrp9c        | 330490 | 7-:27149713-27170826    |
| 3994 | Crygs         | 12970  | 16-:22805276-22811479   |
| 3995 | MMT00028835   |        | 6+:68541373-68630828    |
| 3996 | MMT00014442   |        | 4-:109427053-109427410  |
| 3997 | Eya3          | 14050  | 4+:132194999-132279392  |
| 3998 | 4930528F23Rik | 75178  | 17+:24955221-24976731   |
| 3999 | Nr3c1         | 14815  | 18-:39573930-39646901   |
| 4000 | Eif2ak1       | 15467  | 5+:144578707-144663454  |
| 4001 | Apoa4         | 11808  | 9+:46049236-46051372    |
| 4002 | Neurog1       | 18014  | 13-:56352558-56353293   |
| 4003 | 4930401O10Rik | 73816  | 11-:71741971-71753609   |
| 4004 | Thbs2         | 21826  | 17-:14804160-14831097   |
| 4005 | Ccdc19        | 71870  | 1+:174451267-174476002  |
| 4006 | Rassf4        | 213391 | 6-:116588257-116623808  |
| 4007 | C030017K20Rik | 381581 | 4+:154829715-154840508  |
| 4008 | Gnl3l         | 237107 | X-:147419697-147451866  |
| 4009 | Cotl1         | 72042  | 8-:122333124-122364440  |
| 4010 | Alkbh2        | 231642 | 5-:114573944-114578157  |
| 4011 | Kcnmb3        | 435726 | 3-:32371371-32381437    |
| 4012 | Ctsw          | 13041  | 19-:5465341-5468483     |
| 4013 | Foxa2         | 15376  | 2-:147868658-147872705  |
| 4014 | Dock1         | 330662 | 7+:142039811-142067998  |
| 4015 | Gabbr2        | 14409  | 4+:33150228-33182560    |
| 4016 | Zbtb1         | 268564 | 12+:77471558-77489727   |
| 4017 | Kcna7         | 16495  | 7+:52661329-52666751    |
| 4018 | Slc25a28      | 246696 | 19-:43738293-43749371   |
| 4019 | Tbk1          | 56480  | 10-:120983665-121021376 |
| 4020 | 5031439G07Rik | 223739 | 15-:84753565-84818377   |
| 4021 | 4833403115Rik | 74574  | 18+:47009692-47054394   |
| 4022 | Gdpd5         | 233552 | 7+:106535613-106610356  |
| 4023 | Angptl3       | 30924  | 4+:98697637-98704883    |
| 4024 | Psp           | 19194  | 2+:153834856-153841758  |
| 4025 | MMT00009397   | 625963 | 3-:35555966-35565048    |
| 4026 | Kif24         | 109242 | 4-:41401422-41411920    |
| 4027 | Exosc2        | 227715 | 2+:31526255-31536825    |

|      |               |           |                         |
|------|---------------|-----------|-------------------------|
| 4028 | 4930589M24Rik | 75906     | 10-:53332071-53470991   |
| 4029 | Samsn1        | 67742     | 16-:75859504-75909469   |
| 4030 | Prps1         | 19139     | X+:136991211-137010677  |
| 4031 | MMT00064952   |           | 14-:49454090-49454209   |
| 4032 | MMT00008594   |           | 13-:109010657-109011035 |
| 4033 | Mgst2         | 211666    | 3+:51465110-51486596    |
| 4034 | Slc6a13       | 14412     | 6+:121250313-121287735  |
| 4035 | MMT00027516   |           | 9-:63648474-63649604    |
| 4036 | Gna12         | 14673     | 5-:141235897-141306385  |
| 4037 | Sox1          | 20664     | 8+:12396360-12397536    |
| 4038 | 1200009O22Rik | 66873     | 6-:53767162-53770477    |
| 4039 | Klc3          | 232943    | 7-:19979789-19985205    |
| 4040 | Paqr3         | 231474    | 5-:97511347-97540588    |
| 4041 | MMT00051968   |           | 1+:152983499-152984964  |
| 4042 | OTTMUSG000000 | 100038451 | 2+:20890669-20891647    |
| 4043 | Dctn2         | 69654     | 10+:126703415-126721820 |
| 4044 | C230052I12Rik | 101831    | 7-:36176629-36181813    |
| 4045 | MMT00072411   | 84652     | 5-:23466847-23536487    |
| 4046 | Phb           | 18673     | 11+:95529348-95541341   |
| 4047 | Nbeal1        | 269198    | 1+:60238432-60292289    |
| 4048 | BC002230      | 217827    | 12-:101363660-101397843 |
| 4049 | MMT00053760   |           | 7-:135159956-135160734  |
| 4050 | Ctnbp2nl      | 80281     | 3-:104806662-104855833  |
| 4051 | ENSMUSG000000 | 100127434 | 7+:50352745-50355503    |
| 4052 | Csrp2bp       | 228714    | 2+:144206438-144220418  |
| 4053 | Pcdha4        | 12936     | 18+:37112342-37347311   |
| 4054 | MMT00040937   |           | 7-:96910028-96910611    |
| 4055 | Mobkl2b       | 214944    | 4-:34899953-35104715    |
| 4056 | Tnfaip8l1     | 66443     | 17+:56301952-56312440   |
| 4057 | Slc2a4        | 20528     | 11-:69756044-69761636   |
| 4058 | Mapk11        | 19094     | 15-:88974168-88979943   |
| 4059 | MMT00048362   |           | X+:87308393-87309159    |
| 4060 | Stard3        | 59045     | 11+:98219697-98242410   |
| 4061 | Apcs          | 20219     | 1-:174824092-174825172  |
| 4062 | MMT00015329   | 627626    | 17+:42639346-42640863   |
| 4063 | Upk2          | 22269     | 9-:44260808-44262850    |
| 4064 | Peg10         | 170676    | 6+:4697379-4707164      |
| 4065 | Igsf5         | 72058     | 16+:96583400-96625635   |
| 4066 | Actg2         | 11468     | 6-:83462903-83486219    |
| 4067 | MMT00016020   |           | 4-:64517954-64518804    |
| 4068 | 1110049B09Rik | 68764     | 12-:33727221-33767238   |
| 4069 | Tet3          | 194388    | 6-:83317730-83391267    |
| 4070 | Chst10        | 98388     | 1-:38920721-38954837    |
| 4071 | Ccbe1         | 320924    | 18-:66428679-66462396   |
| 4072 | Adcy2         | 210044    | 13-:68758930-69138158   |
| 4073 | Eif4e2        | 26987     | 1+:89110574-89134459    |
| 4074 | Ush2a         | 22283     | 1+:190686251-190768687  |
| 4075 | Stk11ip       | 71728     | 1+:75518150-75533600    |
| 4076 | Larp5         | 217980    | 13+:9093165-9173650     |
| 4077 | MMT00022995   | 106407    | 16-:32475622-32487776   |
| 4078 | Gpaa1         | 14731     | 15+:76161794-76165329   |

|      |               |           |                         |
|------|---------------|-----------|-------------------------|
| 4079 | Emilin3       | 280635    | 2-:160731240-160738052  |
| 4080 | Atp2a1        | 11937     | 7-:133589373-133591457  |
| 4081 | 1700030J22Rik | 69528     | 8-:119495008-119502848  |
| 4082 | Colec11       | 71693     | 12-:29279038-29308156   |
| 4083 | Olfr688       | 259161    | 7+:112382715-112437572  |
| 4084 | Asah3l        | 230379    | 4+:86520367-86566778    |
| 4085 | Cd302         | 66205     | 2-:60090049-60122475    |
| 4086 | Adams8        | 30806     | 9+:30750146-30770441    |
| 4087 | Olfr632       | 259123    | 7+:111085895-111086847  |
| 4088 | Pdcl2         | 79455     | 5-:76741291-76760158    |
| 4089 | Socs6         | 54607     | 18-:89038345-89056679   |
| 4090 | Orai3         | 269999    | 7+:134913355-134918664  |
| 4091 | Smok2a        | 27263     | 17+:13418376-13428942   |
| 4092 | D17Ert663e    | 52042     | 17+:13011442-13012476   |
| 4093 | Akp5          | 11650     | 1-:88983623-88986338    |
| 4094 | MMT00018835   |           | 16+:36778915-36779686   |
| 4095 | Trub2         | 227682    | 2-:29631630-29643170    |
| 4096 | Slc22a14      | 382113    | 9-:119078574-119090145  |
| 4097 | MMT00065861   |           | 18-:45306180-45306781   |
| 4098 | Il2ra         | 16184     | 2+:11564614-11611409    |
| 4099 | Abcc4         | 239273    | 14-:118881913-119105331 |
| 4100 | Pla2g3        | 237625    | 11+:3388354-3393064     |
| 4101 | Atf2          | 11909     | 2-:73654580-73730651    |
| 4102 | MMT00059041   |           | 1+:133113761-133114665  |
| 4103 | Gira1         | 14654     | 11-:55328315-55421235   |
| 4104 | Ift80         | 68259     | 3-:68696433-68794891    |
| 4105 | Speer5-ps1    | 70365     | 10+:43891440-43939389   |
| 4106 | MMT00041409   |           | 4-:73158398-73159655    |
| 4107 | MMT00068618   |           | 6+:126721939-126724832  |
| 4108 | Apobec2       | 11811     | 17-:48558555-48572044   |
| 4109 | Abpb          | 233099    | 7-:34797102-34798961    |
| 4110 | Gab2          | 14389     | 7+:104230260-104453546  |
| 4111 | EG238507      | 238507    | 13+:12772251-12772704   |
| 4112 | MMT00062664   | 100041265 | 7+:133630961-133634007  |
| 4113 | Nudt3         | 56409     | 17-:27716335-27760397   |
| 4114 | Parp12        | 243771    | 6-:39036411-39068158    |
| 4115 | MMT00013679   |           | 13-:55723727-55724168   |
| 4116 | Ifi205        | 226695    | 1-:175664569-175962188  |
| 4117 | MMT00007872   |           | 2-:127394837-127395484  |
| 4118 | Tnks          | 21951     | 8-:35894526-36029262    |
| 4119 | Magea7        | 17143     | X+:73592732-73592974    |
| 4120 | Mrpl3         | 94062     | 9+:104955628-104979693  |
| 4121 | Dhx33         | 216877    | 11-:70800043-70817929   |
| 4122 | Ehbp11        | 114601    | 19-:5708051-5726270     |
| 4123 | Ky            | 16716     | 9+:102408467-102448273  |
| 4124 | 1110037F02Rik | 66185     | 4+:11413147-11542956    |
| 4125 | Tmem205       | 235043    | 9-:21725236-21731973    |
| 4126 | Vti1a         | 53611     | 19+:55390850-55701007   |
| 4127 | 7-Sep         | 235072    | 9+:25058618-25085233    |
| 4128 | Grcc10        | 14790     | 6-:124689202-124691097  |
| 4129 | Taf6l         | 225895    | 19-:8848983-8860753     |

|      |               |        |                         |
|------|---------------|--------|-------------------------|
| 4130 | Itga9         | 104099 | 9+:118515826-118808057  |
| 4131 | Olfir769      | 257667 | 10-:128548541-128549479 |
| 4132 | Hrc           | 15464  | 7+:52590770-52594340    |
| 4133 | Cbr3          | 109857 | 16+:93683459-93691231   |
| 4134 | MMT00054523   |        | 1+:45234935-45235440    |
| 4135 | Pard6g        | 93737  | 18+:80243782-80314822   |
| 4136 | Ttll6         | 237930 | 11+:96017858-96020270   |
| 4137 | Pof1b         | 69693  | X-:109753196-109812262  |
| 4138 | Cited4        | 56222  | 4+:120339205-120340423  |
| 4139 | Sh2d5         | 230863 | 4+:137806379-137815136  |
| 4140 | Dmc1          | 13404  | 15-:79391929-79435514   |
| 4141 | Pank4         | 269614 | 4+:154338254-154355046  |
| 4142 | Syde1         | 71709  | 10-:78047248-78054692   |
| 4143 | Zfp286        | 192651 | 11-:62593107-62597268   |
| 4144 | Ndufb2        | 68198  | 6+:39542581-39549470    |
| 4145 | MMT00040749   |        |                         |
| 4146 | Cml1          | 66116  | 6-:85860150-85865655    |
| 4147 | Zmpste24      | 230709 | 4-:120731843-120770837  |
| 4148 | 1700034J05Rik | 73344  | 6-:146899823-146902943  |
| 4149 | 2810055G20Rik | 77994  | 16+:77556176-77595147   |
| 4150 | Isg20l1       | 68048  | 7+:86040828-86052462    |
| 4151 | 1500009C09Rik | 76505  | 15+:82086520-82091180   |
| 4152 | Lrrc33        | 224109 | 16-:32142908-32165572   |
| 4153 | Dnahc10       | 56087  | 5+:125217172-125314468  |
| 4154 | Cdh6          | 12563  | 15-:12963958-13021632   |
| 4155 | 2700062C07Rik | 68046  | 18+:24629368-24636266   |
| 4156 | A730017C20Rik | 225583 | 18+:59225484-59235555   |
| 4157 | MMT00056386   |        |                         |
| 4158 | 4933400N17Rik | 619289 | 1-:39722152-39727434    |
| 4159 | Htr5b         | 15564  | 1-:123406351-123425042  |
| 4160 | Ceacam16      | 330483 | 7-:20438920-20440532    |
| 4161 | Krt31         | 16660  | 11-:99907959-99911865   |
| 4162 | MMT00001543   |        | 7-:114342678-114349637  |
| 4163 | 5830415L20Rik | 68152  | 5+:3543835-3561044      |
| 4164 | Junb          | 16477  | 8-:87500831-87502647    |
| 4165 | Cux1          | 13047  | 5-:136748771-136849218  |
| 4166 | Cblc          | 80794  | 7-:20366318-20382131    |
| 4167 | Rgmb          | 68799  | 17-:15957568-15958170   |
| 4168 | MMT00052774   |        | 6+:41091187-41092199    |
| 4169 | Ceacam16      | 330483 | 7-:20441422-20472001    |
| 4170 | Ttc15         | 217449 | 12-:29375494-29435300   |
| 4171 | 1700023F02Rik | 69433  | 10-:65583359-65584736   |
| 4172 | Armc9         | 78795  | 1+:88051366-88172829    |
| 4173 | MMT00008170   |        | 13-:47104637-47106562   |
| 4174 | Unc13b        | 22249  | 4+:43071840-43277742    |
| 4175 | Ren2          | 19702  | 1+:135247242-135256894  |
| 4176 | MMT00040721   |        |                         |
| 4177 | MMT00076823   |        | 15-:96753247-96753838   |
| 4178 | Ntn1          | 18208  | 11-:68026507-68199622   |
| 4179 | Zfp179        | 22671  | 11-:61261945-61267388   |
| 4180 | 2010015L04Rik | 544678 | 4+:154796690-154822053  |

|      |               |        |                         |
|------|---------------|--------|-------------------------|
| 4181 | Gzf1          | 74533  | 2+:148506915-148518686  |
| 4182 | Foxd3         | 15221  | 4+:99322989-99325313    |
| 4183 | Sms           | 20603  | X-:153883582-153929961  |
| 4184 | Olfr135       | 258329 | 17+:38345191-38346129   |
| 4185 | Hmgb2         | 97165  | 8+:59991854-59993062    |
| 4186 | Car7          | 12354  | 8+:107064683-107074245  |
| 4187 | V1rc13        | 171186 | 6-:66726217-66727124    |
| 4188 | Sult1a1       | 20887  | 7-:133816384-133819871  |
| 4189 | Epb4.111      | 13821  | 2+:156246836-156366015  |
| 4190 | Arhgap8       | 109270 | 15+:84500049-84534102   |
| 4191 | Fbln2         | 14115  | 6+:91162857-91222533    |
| 4192 | Zranb1        | 360216 | 7+:140141290-140178050  |
| 4193 | Taf10         | 24075  | 7-:112891411-112892857  |
| 4194 | Dnttip2       | 99480  | 3+:121977323-121988194  |
| 4195 | Csrp2bp       | 228714 | 2+:144194758-144233390  |
| 4196 | Atg16l2       | 73683  | 7-:108438734-108450613  |
| 4197 | A930037G23Rik | 320678 | 6+:125095258-125111794  |
| 4198 | Ghr           | 14600  | 15-:3267776-3533231     |
| 4199 | B3galt5       | 93961  | 16+:96536775-96537701   |
| 4200 | Hmgcll1       | 208982 | 9+:75862881-75981671    |
| 4201 | Tubb2c        | 227613 | 2-:25077681-25080161    |
| 4202 | Nkrf          | 77286  | X-:34427463-34443529    |
| 4203 | Fermt2        | 218952 | 14-:46078471-46087081   |
| 4204 | Rapgef5       | 217944 | 12+:118772579-118995776 |
| 4205 | Rgs1          | 50778  | 1-:146091799-146096165  |
| 4206 | Nipsnap1      | 18082  | 11+:4774005-4794203     |
| 4207 | MMT00055140   |        | 9-:70701738-70702277    |
| 4208 | MMT00013996   |        | 13+:58320079-58322352   |
| 4209 | Tcfap2c       | 21420  | 2+:172375113-172384109  |
| 4210 | Cygb          | 114886 | 11-:116506910-116515627 |
| 4211 | Tlx1          | 21908  | 19+:45225405-45230605   |
| 4212 | Slco2b1       | 101488 | 7-:106806908-106844138  |
| 4213 | MMT00051158   |        | 7-:17724169-17724860    |
| 4214 | MMT00014098   |        | 13+:34653871-34654238   |
| 4215 | Olfr704       | 257902 | 7+:114008495-114009443  |
| 4216 | Ccdc89        | 70054  | 7+:97575093-97576204    |
| 4217 | Lynx1         | 23936  | 15-:74578286-74583383   |
| 4218 | Iqca          | 74918  | 1-:91938708-92049978    |
| 4219 | Ccdc120       | 54648  | X-:7308842-7315649      |
| 4220 | EG629065      | 629065 | 17-:53840190-53842391   |
| 4221 | Zfp12         | 231866 | 5+:143996841-144007562  |
| 4222 | MMT00004340   |        | 14-:53900874-53901184   |
| 4223 | Dnahc7l       | 207778 | 14+:27516798-27704888   |
| 4224 | 1110008L16Rik | 66132  | 12+:56403810-56483484   |
| 4225 | Pick1         | 18693  | 15+:79060242-79079890   |
| 4226 | 4930547N16Rik | 75317  | 10-:87555528-87609679   |
| 4227 | MMT00007944   |        |                         |
| 4228 | Mif           | 17319  | 10-:75322101-75322953   |
| 4229 | Pth           | 19226  | 7-:120529091-120532086  |
| 4230 | Snx9          | 66616  | 17+:5902447-5931033     |
| 4231 | Nrk           | 27206  | X+:135449043-135542590  |

|      |               |        |                         |
|------|---------------|--------|-------------------------|
| 4232 | B020011L13Rik | 547097 | 1+:119637961-120026240  |
| 4233 | Brpf1         | 78783  | 6+:113257220-113274854  |
| 4234 | Tshz3         | 243931 | 7+:37553639-37556852    |
| 4235 | Pfkfb3        | 170768 | 2-:11393452-11423652    |
| 4236 | Lime1         | 72699  | 2+:181115939-181118331  |
| 4237 | Dnahc5        | 110082 | 15+:28133520-28400425   |
| 4238 | Snx25         | 102141 | 8-:47118617-47209500    |
| 4239 | MMT00070824   |        | X-:75002571-75003485    |
| 4240 | Ctnna3        | 216033 | 10+:63283800-63315574   |
| 4241 | Klf7          | 93691  | 1-:64082288-64167854    |
| 4242 | Wdr25         | 212198 | 12+:110218900-110266668 |
| 4243 | Fbxo38        | 107035 | 18-:62663722-62708370   |
| 4244 | Abca17        | 381072 | 17-:24402148-24404682   |
| 4245 | Ulk4          | 209012 | 9-:120873567-121186321  |
| 4246 | Fbxw12        | 434440 | 9-:109125786-109127028  |
| 4247 | Sfpq          | 71514  | 4+:126697954-126713103  |
| 4248 | D330022A01Rik | 320169 | 9+:107894826-107895793  |
| 4249 | Fndc7         | 320181 | 3-:108665474-108679533  |
| 4250 | Papd4         | 100715 | 13-:93917355-93962238   |
| 4251 | MMT00065846   |        |                         |
| 4252 | Ikbb          | 16150  | 8-:23769684-23816679    |
| 4253 | 3830431G21Rik | 217682 | 12+:81793586-81807416   |
| 4254 | Pkm2          | 18746  | 9+:59513013-59527176    |
| 4255 | Muc4          | 140474 | 16+:32755976-32782498   |
| 4256 | EG436332      | 436332 | 16+:4230300-4231097     |
| 4257 | MMT00041230   | 677156 | 17+:32762066-32772164   |
| 4258 | Rpl5          | 19983  | 5+:108329587-108345390  |
| 4259 | Olfir203      | 258479 | 16+:59302980-59303899   |
| 4260 | Gylt1b        | 228366 | 2-:92205198-92211191    |
| 4261 | MMT00014970   |        | 12+:89573046-89574124   |
| 4262 | Stx7          | 53331  | 10+:23869192-23908031   |
| 4263 | Otof          | 83762  | 5-:30669354-30764275    |
| 4264 | MMT00054075   |        |                         |
| 4265 | Olfir1412     | 258274 | 1+:94484908-94485872    |
| 4266 | Fn1           | 14268  | 1-:71632090-71699746    |
| 4267 | BC018465      | 228802 | 2+:154049515-154066636  |
| 4268 | Tube1         | 71924  | 10+:38853833-38870551   |
| 4269 | Abca4         | 11304  | 3+:121747377-121882977  |
| 4270 | C77080        | 97130  | 4-:128896506-128916340  |
| 4271 | Rps18         | 20084  | 17-:34090402-34091507   |
| 4272 | Hsd17b6       | 27400  | 10-:127428006-127437732 |
| 4273 | MMT00052322   |        | 1+:17937133-17938561    |
| 4274 | Aof1          | 218214 | 13+:47158334-47175957   |
| 4275 | EG331392      | 331392 | X+:20938065-20940149    |
| 4276 | Chmp4b        | 75608  | 2+:154482975-154520518  |
| 4277 | MMT00042444   |        | 1+:75621414-75622277    |
| 4278 | Zfp787        | 67109  | 7-:6083089-6094832      |
| 4279 | Vmn2r117      | 619788 | 17-:23596643-23616564   |
| 4280 | Cecr6         | 94047  | 6-:120438956-120443825  |
| 4281 | Fbn2          | 14119  | 18-:58169911-58369459   |
| 4282 | RP23-100C5.8  | 241638 | 2-:130460502-130468535  |

|      |               |        |                         |
|------|---------------|--------|-------------------------|
| 4283 | Tom1          | 21968  | 8+:77557607-77594010    |
| 4284 | Irf1          | 16362  | 11+:53583579-53590825   |
| 4285 | Dnajc19       | 67713  | 3-:33976206-33980243    |
| 4286 | Ptp4a1        | 19243  | 1-:30998436-31006590    |
| 4287 | Rnf7          | 19823  | 9-:96371357-96379014    |
| 4288 | MMT00072334   |        | 15-:18995921-19295653   |
| 4289 | MMT00057248   |        | X+:16187190-16188720    |
| 4290 | Ube2g1        | 67128  | 11+:72420849-72497807   |
| 4291 | Impa1         | 55980  | 3-:10315185-10329005    |
| 4292 | 5330431K02Rik | 68189  | 13-:100272431-100274394 |
| 4293 | MMT00019701   |        | 10-:90695465-90723993   |
| 4294 | MMT00034521   |        | X-:54998947-54999480    |
| 4295 | Xcl1          | 16963  | 1-:166861778-166865641  |
| 4296 | Ppp2r2c       | 269643 | 5+:37314202-37344192    |
| 4297 | Ptdss1        | 19210  | 13+:67034358-67098944   |
| 4298 | St3gal1       | 20442  | 15-:66937849-66945371   |
| 4299 | Lsm8          | 76522  | 6+:18798634-18804052    |
| 4300 | Lasp1         | 16796  | 11+:97661044-97697650   |
| 4301 | AW049604      | 106014 | 15+:87455659-87589792   |
| 4302 | Vmn2r120      | 224916 | 17-:57648206-57665382   |
| 4303 | Phkg1         | 18682  | 5-:130339308-130354960  |
| 4304 | Tgjf1         | 21815  | 17-:71193950-71200376   |
| 4305 | Tmem51        | 214359 | 4-:141586907-141593849  |
| 4306 | Cpeb1         | 12877  | 7-:88492329-88599562    |
| 4307 | Arih2         | 23807  | 9-:108507002-108547325  |
| 4308 | Nphp3         | 74025  | 9+:103917654-103918975  |
| 4309 | MMT00010397   |        | 1+:20811386-20812224    |
| 4310 | B3gnt8        | 232984 | 7+:26412656-26414509    |
| 4311 | MMT00033987   |        | 4-:40808262-40860214    |
| 4312 | MMT00014395   |        | 4-:67179411-67179966    |
| 4313 | Ppap2b        | 67916  | 4+:104829964-104903745  |
| 4314 | 2310046A06Rik | 69642  | 9-:76986155-77091538    |
| 4315 | Rpl34         | 68436  | 3-:130429748-130433293  |
| 4316 | EG627624      | 627624 | 19+:43355265-43356647   |
| 4317 | Spire1        | 68166  | 18-:67647866-67712461   |
| 4318 | MMT00065533   |        | 10-:77144089-77153502   |
| 4319 | 1810009O10Rik | 69109  | 11-:78564413-78565164   |
| 4320 | Madcam1       | 17123  | 10+:79127331-79131281   |
| 4321 | MMT00066182   |        | 5+:52972590-52975039    |
| 4322 | MMT00045154   | 624701 | 3+:107782502-107782872  |
| 4323 | Pcdhb16       | 93887  | 18+:37637642-37640049   |
| 4324 | MMT00010259   |        | 2-:111022791-111027563  |
| 4325 | Slc16a4       | 229699 | 3+:107094209-107115026  |
| 4326 | Gtpbp3        | 70359  | 8+:74012001-74017309    |
| 4327 | Klf10         | 21847  | 15-:38224168-38230462   |
| 4328 | Spag11        | 78128  | 8+:19141376-19159577    |
| 4329 | Pbx1          | 18514  | 1-:170050129-170362087  |
| 4330 | Eif2b5        | 224045 | 16+:20498899-20509398   |
| 4331 | OTTMUSG00000  | 433779 | 4+:143951538-143953781  |
| 4332 | Sf3b1         | 81898  | 1-:55042015-55084323    |
| 4333 | Sumo3         | 20610  | 10+:77069014-77080121   |



|      |               |        |                         |
|------|---------------|--------|-------------------------|
| 4334 | Has3          | 15118  | 8+:109394141-109406802  |
| 4335 | Hsf2          | 15500  | 10+:57206203-57232264   |
| 4336 | Rbbp9         | 26450  | 2-:144369557-144376514  |
| 4337 | Myst3         | 244349 | 8+:23971985-24053489    |
| 4338 | EG328280      | 328280 | 13+:67884730-67944975   |
| 4339 | Gemin6        | 67242  | 17+:80623828-80627837   |
| 4340 | Sdk2          | 237979 | 11-:113641489-113731229 |
| 4341 | Olfr600       | 259048 | 7-:110494497-110495440  |
| 4342 | 7530428D23Rik | 319506 | 3-:21652450-21652888    |
| 4343 | Dnahc6        | 330355 | 6-:73110857-73123555    |
| 4344 | 1810073G14Rik | 67726  | 11-:57296501-57332117   |
| 4345 | MMT00074600   |        | 8-:41939180-41940429    |
| 4346 | Ccdc46        | 76380  | 11+:108543937-108721925 |
| 4347 | Mfn2          | 170731 | 4-:147247707-147278813  |
| 4348 | Nedd9         | 18003  | 13-:41406940-41582665   |
| 4349 | Mrpl27        | 94064  | 11+:94515109-94521209   |
| 4350 | Mllt4         | 17356  | 17+:13898611-14036511   |
| 4351 | Plxbn1        | 235611 | 9+:109002591-109022421  |
| 4352 | Rtn4rl1       | 237847 | 11+:75078258-75081263   |
| 4353 | ENSMUSG00000  | 553138 | 19-:29795136-29880313   |
| 4354 | 9330176C04Rik | 109280 | 9-:119129609-119140810  |
| 4355 | Pard6a        | 56513  | 8+:108225582-108227366  |
| 4356 | Rtbdn         | 234542 | 8+:87474046-87480501    |
| 4357 | Nup98         | 269966 | 7-:109268968-109344402  |
| 4358 | Apba2         | 11784  | 7+:71839929-71898255    |
| 4359 | Tmem208       | 66320  | 8+:107850282-107852955  |
| 4360 | MMT00020996   |        | 7-:79857676-79858507    |
| 4361 | BC046331      | 230967 | 4+:153353052-153382851  |
| 4362 | Krt34         | 16672  | 11-:99898664-99902868   |
| 4363 | 2810002I04Rik | 72350  | 12+:86629575-86638361   |
| 4364 | MMT00014218   |        | 3-:14163492-14164042    |
| 4365 | Tapbp         | 21356  | 17+:34056632-34063651   |
| 4366 | MMT00009414   |        | 10-:129880357-129882065 |
| 4367 | Atp6v0e       | 11974  | 17+:26813340-26836585   |
| 4368 | Ppp1r13b      | 21981  | 12-:113066662-113110644 |
| 4369 | Acot4         | 171282 | 12+:85379460-85384746   |
| 4370 | Psmc8         | 57296  | 7-:29959273-29965550    |
| 4371 | Wdr55         | 67936  | 18+:36919911-36923178   |
| 4372 | Msl2l1        | 77853  | 9+:100978479-101007283  |
| 4373 | Wdr59         | 319481 | 8-:113974794-114045887  |
| 4374 | MMT00048995   |        | 2-:39982438-39983458    |
| 4375 | Cysltr2       | 70086  | 14-:73428934-73448879   |
| 4376 | 2310015A05Rik | 72315  | 16+:17646642-17650830   |
| 4377 | Mgl2          | 216864 | 11+:69943921-69951049   |
| 4378 | 1700026D08Rik | 75556  | 7-:90924128-90943336    |
| 4379 | Glrx          | 93692  | 13+:75977354-75987416   |
| 4380 | Smrbc1        | 20587  | 10-:75359519-75384333   |
| 4381 | Mfge8         | 17304  | 7-:86278654-86293891    |
| 4382 | Gtlf3a        | 24082  | 11-:60734442-60745369   |
| 4383 | MMT00075628   |        | 12-:5596370-5597476     |
| 4384 | Gamt          | 14431  | 10-:79720943-79723757   |

|      |               |        |                         |
|------|---------------|--------|-------------------------|
| 4385 | Sfrp4         | 20379  | 13+:19715051-19724690   |
| 4386 | Sptlc1        | 268656 | 13-:53428120-53472729   |
| 4387 | Frs3          | 107971 | 17+:47832155-47841235   |
| 4388 | MMT00019672   |        | X-:96276741-96277655    |
| 4389 | MMT00037766   | 78376  | 17-:35162921-35164861   |
| 4390 | Hps5          | 246694 | 7-:54015839-54051033    |
| 4391 | Zfp467        | 68910  | 6-:48387584-48395606    |
| 4392 | 1810055G02Rik | 72056  | 19+:3708332-3717881     |
| 4393 | Otud7a        | 170711 | 7+:70589657-70903913    |
| 4394 | Tcl1b3        | 27378  | 12+:106429252-106433820 |
| 4395 | Tspo          | 12257  | 15+:83401816-83404473   |
| 4396 | MMT00071908   |        | 8+:5079224-5080930      |
| 4397 | MMT00011217   |        | X+:164425451-164426156  |
| 4398 | Aqp4          | 11829  | 18-:15551345-15561930   |
| 4399 | Olf2r2        | 18317  | 7-:114144388-114145372  |
| 4400 | 9030425E11Rik | 71566  | 9+:40494129-40591188    |
| 4401 | Olf2r1446     | 258699 | 19-:12964138-12965065   |
| 4402 | Lrrk1         | 233328 | 7-:73453546-73475703    |
| 4403 | MMT00052895   |        | 10+:88104110-88104617   |
| 4404 | Commd5        | 66398  | 15+:76730370-76731727   |
| 4405 | Wdr49         | 213248 | 3-:75253797-75255740    |
| 4406 | MMT00003918   |        | 6+:41032339-41042339    |
| 4407 | 4930429B21Rik | 67576  | 3+:32264696-32266358    |
| 4408 | MMT00080682   |        | 9+:61381221-61382055    |
| 4409 | 5430435G22Rik | 226421 | 1+:133585301-133610044  |
| 4410 | Rpl7a         | 27176  | 2+:26766524-26768831    |
| 4411 | 2310039H08Rik | 67101  | 17+:46909760-46910344   |
| 4412 | Lrrc27        | 76612  | 7+:146416101-146428874  |
| 4413 | MMT00030347   |        | 5-:12354694-12355404    |
| 4414 | 5033406O09Rik | 77675  | 12-:113180557-113182419 |
| 4415 | B230399E16Rik | 240479 | 18+:84889670-84906366   |
| 4416 | 5730446C15Rik | 226016 | 19+:21755125-21760127   |
| 4417 | Stom          | 13830  | 2-:35169510-35192529    |
| 4418 | H2-Aa         | 14960  | 17-:34419804-34424733   |
| 4419 | Alg14         | 66789  | 3+:120994734-121064928  |
| 4420 | Nedd8         | 18002  | 14-:56281101-56290710   |
| 4421 | Synj1         | 104015 | 16-:90936337-91011554   |
| 4422 | Alx1          | 216285 | 10-:102471500-102491654 |
| 4423 | Cep57         | 74360  | 9-:13612632-13631497    |
| 4424 | 9530058B02Rik | 68241  | 17-:26000644-26005683   |
| 4425 | Olf2r1346     | 258918 | 7+:6426822-6427763      |
| 4426 | Iigp2         | 54396  | 11+:58032970-58036282   |
| 4427 | Ccdc55        | 237859 | 11-:76861894-76891908   |
| 4428 | Prl8a8        | 74188  | 13-:27598940-27605082   |
| 4429 | MMT00042276   |        | 13+:7307045-7308207     |
| 4430 | Ankrd36       | 76389  | 11+:5469687-5484284     |
| 4431 | Tmem17        | 103765 | 11+:22412082-22419236   |
| 4432 | Pcdha5        | 12941  | 18+:37120093-37347311   |
| 4433 | Snrpa1        | 68981  | 7+:73205454-73219468    |
| 4434 | Snx14         | 244962 | 9-:88271585-88333777    |
| 4435 | Hat1          | 107435 | 2+:71227305-71279574    |

|      |               |           |                         |
|------|---------------|-----------|-------------------------|
| 4436 | Wwc1          | 211652    | 11-:35653727-35728798   |
| 4437 | Bat3          | 224727    | 17+:35271649-35284265   |
| 4438 | 1700017N19Rik | 66605     | 10+:100057167-100081024 |
| 4439 | Kcnip1        | 70357     | 11-:33529789-33743573   |
| 4440 | Met           | 17295     | 6+:17441240-17521822    |
| 4441 | Ccdc88b       | 78317     | 19-:6920835-6928592     |
| 4442 | Tmprss6       | 71753     | 15-:78270099-78299057   |
| 4443 | Zfp790        | 233056    | 7+:30601137-30615958    |
| 4444 | Ksr2          | 333050    | 5+:117955497-118005945  |
| 4445 | Mzf1          | 109889    | 7-:13628498-13639033    |
| 4446 | Myo5c         | 208943    | 9+:75135637-75153255    |
| 4447 | Ngrn          | 83485     | 7+:87406133-87410260    |
| 4448 | MMT00002500   |           | 18-:9496762-9497112     |
| 4449 | MMT00064573   |           |                         |
| 4450 | Brs3          | 12209     | X+:54296421-54300883    |
| 4451 | Lrrfip1       | 16978     | 1+:92950083-93025495    |
| 4452 | Phlda2        | 22113     | 7-:150687454-150688415  |
| 4453 | MMT00050565   |           | 3-:135623162-135626780  |
| 4454 | BC055107      | 268709    | 14-:9130066-9150355     |
| 4455 | Ccdc76        | 229780    | 3-:116283647-116297970  |
| 4456 | Elfn2         | 207393    | 15-:78497764-78499260   |
| 4457 | Cks2          | 66197     | 13+:51740714-51746023   |
| 4458 | 1700040I03Rik | 73327     | 6-:85396802-85401261    |
| 4459 | Crybb3        | 12962     | 5-:113504860-113509673  |
| 4460 | MMT00011069   |           | 11+:84591431-84633143   |
| 4461 | Egln1         | 112405    | 8-:127439598-127445679  |
| 4462 | Cyp1a1        | 13076     | 9+:57545419-57551629    |
| 4463 | Ncoa5         | 228869    | 2-:164825857-164860279  |
| 4464 | BC028471      | 414071    | 5+:150171612-150195061  |
| 4465 | Tmed1         | 17083     | 9-:21310001-21314629    |
| 4466 | MMT00014327   | 233575    | 7+:109371587-109386263  |
| 4467 | Ccdc126       | 57895     | 6+:49269214-49290972    |
| 4468 | MMT00052724   |           |                         |
| 4469 | Cyp3a13       | 13113     | 5-:138335222-138362823  |
| 4470 | Slc5a8        | 216225    | 10+:88348781-88398828   |
| 4471 | Sdccag8       | 76816     | 1+:178754869-178951013  |
| 4472 | MMT00074121   | 100040305 | 12-:103213872-103215162 |
| 4473 | EG628040      | 628040    | X-:8903532-8905467      |
| 4474 | EG627022      | 627022    | 6-:136434167-136435708  |
| 4475 | Rufy2         | 70432     | 10+:62442970-62479280   |
| 4476 | Rpgr          | 19893     | X-:9735348-9793839      |
| 4477 | Jph1          | 57339     | 1-:16987544-17087879    |
| 4478 | Exoc6b        | 75914     | 6-:84939320-85019468    |
| 4479 | Cdc42ep3      | 260409    | 17-:79733364-79754431   |
| 4480 | Bahcc1        | 268515    | 11+:120135297-120151196 |
| 4481 | Olfrl100      | 258587    | 2-:86817987-86818951    |
| 4482 | Klhl18        | 270201    | 9-:110328433-110379183  |
| 4483 | Syt1          | 20979     | 10-:107937005-108447898 |
| 4484 | MMT00014015   |           | 13+:61767510-61768501   |
| 4485 | Brd4          | 57261     | 17-:32333796-32390131   |
| 4486 | MMT00064996   | 100046252 | 12-:116305763-116757993 |

|      |               |        |                         |
|------|---------------|--------|-------------------------|
| 4487 | Gdpd2         | 71584  | X+:97925339-97934238    |
| 4488 | Ssx2ip        | 99167  | 3+:146067650-146103099  |
| 4489 | Tusc4         | 56032  | 9+:107444558-107448026  |
| 4490 | Msemb         | 17695  | 14+:32955240-32971510   |
| 4491 | E2f6          | 50496  | 12+:16817832-16833549   |
| 4492 | Suv420h1      | 225888 | 19+:3768145-3805463     |
| 4493 | Ptgir         | 19222  | 7+:17491838-17496243    |
| 4494 | Cplx2         | 12890  | 13+:54479948-54481562   |
| 4495 | Nid1          | 18073  | 13+:13529957-13604521   |
| 4496 | MMT00017973   |        | 12+:63270822-63538952   |
| 4497 | Myo3b         | 329421 | 2+:70076813-70152495    |
| 4498 | Cadps2        | 320405 | 6-:23788789-23789244    |
| 4499 | Enpp2         | 18606  | 15-:54670455-54751557   |
| 4500 | Usp53         | 99526  | 3-:122655472-122657473  |
| 4501 | MMT00033071   |        |                         |
| 4502 | Cdkal1        | 68916  | 13-:29417176-29947457   |
| 4503 | Abca14        | 67928  | 7+:127347517-127356540  |
| 4504 | 1700113l22Rik | 73635  | 11-:101280127-101286642 |
| 4505 | Rpl10         | 110954 | X+:71516198-71518463    |
| 4506 | Zc3h7b        | 20286  | 15+:81598389-81626700   |
| 4507 | McpH1         | 244329 | 8+:18631515-18803185    |
| 4508 | Ifit1         | 15957  | 19+:34715403-34723970   |
| 4509 | Kif14         | 381293 | 1+:138364534-138386961  |
| 4510 | Ttf1          | 22130  | 2+:28915796-28942613    |
| 4511 | P2rx1         | 18436  | 11+:72812651-72828004   |
| 4512 | Esrra         | 26379  | 19-:6985467-6996256     |
| 4513 | MMT00030775   |        | 13-:32807727-32816753   |
| 4514 | MMT00045906   |        | 5-:117799052-117799379  |
| 4515 | MMT00028055   |        | 2-:4755179-4803523      |
| 4516 | Rsad2         | 58185  | 12-:27130172-27141293   |
| 4517 | Itih3         | 16426  | 14-:31721761-31736728   |
| 4518 | Gpr65         | 14744  | 12+:99506866-99514842   |
| 4519 | Ubash3b       | 72828  | 9-:40821726-40887589    |
| 4520 | Ppp1r11       | 76497  | 17-:37086231-37088629   |
| 4521 | Helb          | 117599 | 10-:119520663-119549946 |
| 4522 | MMT00003022   |        | 10-:6352873-6354170     |
| 4523 | Ptpru         | 19273  | 4-:131324372-131394193  |
| 4524 | Usp12         | 22217  | 5-:147546398-147606583  |
| 4525 | Zfp26         | 22688  | 9-:20238133-20244718    |
| 4526 | Satb1         | 20230  | 17-:51878793-51971958   |
| 4527 | Gcn1l1        | 231659 | 5+:116015278-116072659  |
| 4528 | Lrguk         | 74354  | 6+:33979442-34084035    |
| 4529 | C130057D23Rik | 328505 | 4+:111652874-111691912  |
| 4530 | Ly9           | 17085  | 1-:173518762-173537405  |
| 4531 | EG434175      | 434175 | 7-:49361153-49362629    |
| 4532 | BC034090      | 207792 | 1-:157059602-157089407  |
| 4533 | Itgb1         | 16412  | 8+:131208845-131256651  |
| 4534 | Ndel1         | 83431  | 11-:68634950-68666555   |
| 4535 | MMT00025220   |        | 7-:94846328-94847249    |
| 4536 | BC013529      | 215751 | 10-:7487753-7500703     |
| 4537 | OlfR44        | 18343  | 9-:39291891-39292653    |

|      |               |        |                         |
|------|---------------|--------|-------------------------|
| 4538 | 9430081H08Rik | 77430  | 9-:44182824-44183333    |
| 4539 | MMT00043977   |        | 18+:56805031-56827698   |
| 4540 | Prl8a2        | 13529  | 13+:27437557-27446073   |
| 4541 | Ccdc37        | 243538 | 6-:90365692-90378474    |
| 4542 | Tchp          | 77832  | 5+:115158662-115169773  |
| 4543 | 9230112E08Rik | 320800 | 2+:180741409-180753048  |
| 4544 | MMT00054707   |        | X-:33753524-33754133    |
| 4545 | Fgd5          | 232237 | 6+:92015141-92018571    |
| 4546 | Gimap9        | 317758 | 6+:48626190-48628787    |
| 4547 | Vps13a        | 271564 | 19-:16689756-16752893   |
| 4548 | Olfr857       | 257963 | 9+:19494811-19495490    |
| 4549 | 9930012K11Rik | 268759 | 14-:70554213-70556326   |
| 4550 | Stard10       | 56018  | 7+:108465632-108494825  |
| 4551 | Cyp2e1        | 13106  | 7+:147949637-147960874  |
| 4552 | 4930441O14Rik | 68271  | 13+:67845140-67857775   |
| 4553 | Xpnp3         | 321003 | 15+:81230579-81283678   |
| 4554 | Cer1          | 12622  | 4-:82527654-82531055    |
| 4555 | Cchcr1        | 240084 | 17+:35654120-35667950   |
| 4556 | Mapk6         | 50772  | 9-:75236277-75246447    |
| 4557 | MMT00031263   |        | 12-:52234347-52235904   |
| 4558 | Alg3          | 208624 | 16-:20605545-20610817   |
| 4559 | Freq          | 14299  | 2+:31101695-31147907    |
| 4560 | 1700011F14Rik | 75645  | 19+:58586480-58627575   |
| 4561 | Itgbl1        | 223272 | 14+:124059394-124373299 |
| 4562 | Col11a2       | 12815  | 17+:34176381-34203187   |
| 4563 | Ythdc1        | 231386 | 5+:87232799-87265682    |
| 4564 | Smtnl2        | 276829 | 11-:72204658-72225229   |
| 4565 | MMT00019450   |        | 7+:54604843-54605630    |
| 4566 | MMT00078134   | 547323 | 14+:53511660-53512863   |
| 4567 | MMT00004627   |        | 9-:75222413-75223332    |
| 4568 | MMT00022640   |        | 8-:91670027-91671049    |
| 4569 | MMT00007978   | 243420 | 6+:67505614-67560601    |
| 4570 | Ikzf2         | 22779  | 1-:69585252-69732408    |
| 4571 | 3830431G21Rik | 217682 | 12+:81808158-81823368   |
| 4572 | Mrps26        | 99045  | 2+:130389076-130391129  |
| 4573 | Nrxn1         | 18189  | 17-:91391454-91488944   |
| 4574 | MMT00064324   |        | 18+:14583369-14650895   |
| 4575 | MMT00052635   |        | 18-:77457092-77457950   |
| 4576 | Chchd7        | 66433  | 4+:3866034-3870674      |
| 4577 | Ltbp4         | 108075 | 7-:28056959-28104789    |
| 4578 | Pglyrp2       | 57757  | 17-:32550305-32557920   |
| 4579 | Dpys          | 64705  | 15-:39614243-39689003   |
| 4580 | Impact        | 16210  | 18+:13130760-13151457   |
| 4581 | MMT00064145   |        | 6+:112513608-112516303  |
| 4582 | Armcx4        | 102910 | X+:131221039-131231292  |
| 4583 | Krtap14       | 23927  | 16-:88825535-88826375   |
| 4584 | MMT00022168   |        | 13+:18041731-18042930   |
| 4585 | V1re2         | 171225 | 17+:20824471-20825368   |
| 4586 | Zfp618        | 72701  | 4+:62694927-62794905    |
| 4587 | Ufm1          | 67890  | 3-:53660517-53667692    |
| 4588 | Tsr1          | 104662 | 11+:74711605-74722339   |

|      |               |        |                         |
|------|---------------|--------|-------------------------|
| 4589 | MMT00035806   |        | 1+:43842905-43843808    |
| 4590 | Arhgap21      | 71435  | 2-:20769558-20793395    |
| 4591 | Kif5c         | 16574  | 2+:49475181-49614434    |
| 4592 | Slc25a39      | 68066  | 11-:102264460-102268786 |
| 4593 | Il1b          | 16176  | 2-:129190765-129196066  |
| 4594 | Kcnt1         | 227632 | 2+:25719383-25772656    |
| 4595 | Tsr2          | 69499  | X-:147523730-147531064  |
| 4596 | MMT00050448   |        | 17-:5481575-5483005     |
| 4597 | MMT00051225   |        | 10+:3820035-3820664     |
| 4598 | Olf1052       | 259012 | 2+:86137974-86138911    |
| 4599 | MMT00030633   | 637260 | 6-:70264776-70291185    |
| 4600 | Sp2           | 78912  | 11-:96815533-96844273   |
| 4601 | Th            | 21823  | 7-:150078680-150085871  |
| 4602 | Pdzn3         | 55983  | 6-:101099608-101327891  |
| 4603 | MMT00009680   |        | 14+:29538056-29538230   |
| 4604 | Cyfp2         | 76884  | 11-:46009590-46125795   |
| 4605 | Myo1f         | 17916  | 17+:33692734-33744703   |
| 4606 | Nudt22        | 68323  | 19-:7067508-7070527     |
| 4607 | Acad11        | 102632 | 9+:103966014-104029975  |
| 4608 | Lag3          | 16768  | 6-:124854378-124861723  |
| 4609 | Cdkl4         | 381113 | 17-:80942952-80976796   |
| 4610 | F830016B08Rik | 240328 | 18+:60452634-60460520   |
| 4611 | Robo2         | 268902 | 16-:74348790-74887447   |
| 4612 | Hspa5         | 14828  | 2+:34627749-34631981    |
| 4613 | MMT00063767   |        | 19+:37858747-37860255   |
| 4614 | Slc6a18       | 22598  | 13-:73801484-73815449   |
| 4615 | Lmx1b         | 16917  | 2-:33420156-33496031    |
| 4616 | Kiss1r        | 114229 | 10+:79381418-79384748   |
| 4617 | Agpat9        | 231510 | 5+:101275149-101328115  |
| 4618 | Mrps9         | 69527  | 1+:42952194-42962278    |
| 4619 | Htra3         | 78558  | 5-:35994690-36022214    |
| 4620 | MMT00008456   |        | 8-:44785106-44809305    |
| 4621 | Slc7a6os      | 66432  | 8-:108724507-108735053  |
| 4622 | Zfp295        | 114565 | 16-:98170547-98183788   |
| 4623 | MMT00026770   |        | 9-:35396664-35396935    |
| 4624 | MMT00055457   |        | 3-:103448755-103449946  |
| 4625 | Cwc15         | 66070  | 9+:14305171-14314988    |
| 4626 | 2310046K01Rik | 69698  | 2+:151822363-151834992  |
| 4627 | Sec31a        | 69162  | 5-:100790669-100837131  |
| 4628 | MMT00040865   |        | 2+:150017591-150151534  |
| 4629 | MMT00007987   |        | 17+:80453360-80453903   |
| 4630 | Akr1c20       | 116852 | 13-:4506404-4522579     |
| 4631 | Itgb2         | 16414  | 10+:77004727-77028128   |
| 4632 | Mapk3         | 26417  | 7+:133903145-133909329  |
| 4633 | Olf125        | 258287 | 17+:37971945-37972906   |
| 4634 | Prdm6         | 225518 | 18+:53633115-53735055   |
| 4635 | MMT00023332   |        | 15+:100127548-100128056 |
| 4636 | Ebf3          | 13593  | 7-:144386923-144505669  |
| 4637 | Tsga10ip      | 78306  | 19-:5390048-5400459     |
| 4638 | Alkbh4        | 72041  | 5+:136612024-136617482  |
| 4639 | Prf1          | 18646  | 10+:60762548-60766814   |

|      |               |           |                         |
|------|---------------|-----------|-------------------------|
| 4640 | Ccdc42        | 276920    | 11+:68400537-68411451   |
| 4641 | MMT00012367   |           | 11-:87282523-87283310   |
| 4642 | Dact3         | 629378    | 7+:17460773-17472812    |
| 4643 | Mbl2          | 17195     | 19+:30307446-30314171   |
| 4644 | Gm1964        | 432628    | 12-:4872964-4878307     |
| 4645 | MMT00030322   |           |                         |
| 4646 | Adcy7         | 11513     | 8+:90796301-90852929    |
| 4647 | 9630050M13Rik | 269233    | 2+:3095502-3145064      |
| 4648 | 1700007G11Rik | 75784     | 5+:99127420-99231068    |
| 4649 | A230067G21Rik | 241694    | 2-:146070108-146269747  |
| 4650 | RP23-438H3.2  | 69357     | X+:90428631-90429280    |
| 4651 | Itgb6         | 16420     | 2-:60438541-60514123    |
| 4652 | Podxl2        | 319655    | 6-:88792551-88815283    |
| 4653 | Slc25a4       | 11739     | 8-:47292037-47296375    |
| 4654 | Myl9          | 98932     | 2+:156601152-156607393  |
| 4655 | 1810029B16Rik | 66282     | 8-:69000244-69010404    |
| 4656 | 4930505A04Rik | 75087     | 11-:30326004-30371831   |
| 4657 | C230096C10Rik | 230866    | 4+:138918044-138931841  |
| 4658 | Thada         | 240174    | 17-:84591489-84672166   |
| 4659 | Pramel6       | 347711    | 2+:87346733-87351032    |
| 4660 | MMT00011546   |           | 3+:95232484-95234360    |
| 4661 | Rprml         | 104582    | 11+:103511094-103511447 |
| 4662 | Mpzl2         | 14012     | 9+:44850645-44860408    |
| 4663 | MMT00068443   | 100047498 | X+:51397420-51399464    |
| 4664 | MMT00079290   |           | 13+:108138207-108138595 |
| 4665 | Dynll1        | 56455     | 5-:115748543-115750933  |
| 4666 | Exosc9        | 50911     | 3+:36451564-36464647    |
| 4667 | Ssh1          | 231637    | 5-:114387777-114443733  |
| 4668 | 4921511H13Rik | 207932    | 16-:90751773-90810630   |
| 4669 | H2-M10.5      | 224761    | 17+:36870567-36871698   |
| 4670 | 8430426H19Rik | 71508     | 13-:62504184-62706778   |
| 4671 | Itga7         | 16404     | 10+:128370873-128395338 |
| 4672 | Mthfr         | 17769     | 4+:147415695-147429696  |
| 4673 | Slit1         | 20562     | 19-:41674745-41818069   |
| 4674 | Cxcl12        | 20315     | 6+:117118595-117131384  |
| 4675 | Sparcl1       | 13602     | 5-:104508131-104542705  |
| 4676 | Cenph         | 26886     | 13-:101529640-101545854 |
| 4677 | BC016423      | 105203    | 13-:3565281-3574438     |
| 4678 | Kank1         | 107351    | 19+:25311462-25508987   |
| 4679 | Cxcl15        | 20309     | 5+:91223596-91230911    |
| 4680 | 4930449I24Rik | 67410     | 5+:147337699-147339343  |
| 4681 | Noxa1         | 241275    | 2-:24946011-24950699    |
| 4682 | Sertad4       | 214791    | 1-:194670625-194683097  |
| 4683 | E330013P04Rik | 107376    | 19+:60220559-60236173   |
| 4684 | MMT00006152   | 268859    | 16+:5885447-7410072     |
| 4685 | Sema4c        | 20353     | 1-:36605484-36615106    |
| 4686 | BC021785      | 215928    | 10-:39666719-39706481   |
| 4687 | Gtpbp8        | 66067     | 16-:44739098-44746472   |
| 4688 | Kazald1       | 107250    | 19+:45150580-45153752   |
| 4689 | Glp1r         | 14652     | 17+:31038821-31073478   |
| 4690 | Kif19a        | 286942    | 11+:114626827-114647960 |

|      |               |           |                         |
|------|---------------|-----------|-------------------------|
| 4691 | Tll6          | 237930    | 11+:95996324-96008894   |
| 4692 | MMT00049231   |           | 1+:10858784-10859392    |
| 4693 | Ifna11        | 15964     | 4+:88465796-88467279    |
| 4694 | MMT00046622   |           | 7-:113465907-113471636  |
| 4695 | D330027H18Rik | 101359    | 6-:29121509-29127222    |
| 4696 | Tac1          | 21333     | 6+:7505070-7512973      |
| 4697 | Cyp2a12       | 13085     | 7+:27814108-27821829    |
| 4698 | Pibf1         | 52023     | 14+:99499176-99513436   |
| 4699 | Bglap1        | 12096     | 3-:88187422-88188355    |
| 4700 | MMT00015274   |           | 9+:37493516-37494309    |
| 4701 | MMT00062346   | 236260    | 12+:17888729-17945713   |
| 4702 | Tmem39b       | 230770    | 4-:129353600-129374040  |
| 4703 | Nubpl         | 76826     | 12+:53198723-53411946   |
| 4704 | MMT00043860   |           | 13+:101162662-101164456 |
| 4705 | 2610528K11Rik | 72543     | 2-:33588690-33730043    |
| 4706 | Olf1299       | 258886    | 2+:111504397-111505321  |
| 4707 | Hsd3b5        | 15496     | 3-:98383764-98385715    |
| 4708 | Traf3ip2      | 103213    | 10+:39359186-39374629   |
| 4709 | Prune2        | 77754     | 19+:17030605-17129452   |
| 4710 | Lin7a         | 108030    | 10+:106708955-106858155 |
| 4711 | Ccdc108       | 241116    | 1-:74948646-74950020    |
| 4712 | Sdhc          | 66052     | 1-:173059295-173080733  |
| 4713 | MMT00078464   |           | 7+:137110717-137122183  |
| 4714 | Bax           | 12028     | 7-:52717232-52722145    |
| 4715 | Tmem120a      | 215210    | 5-:136173097-136220096  |
| 4716 | Tmem108       | 81907     | 9-:103386764-103402538  |
| 4717 | Cd177         | 68891     | 7-:25539571-25545331    |
| 4718 | MMT00069301   | 100044315 | X-:103477107-103478363  |
| 4719 | Col2a1        | 12824     | 15-:97806472-97834924   |
| 4720 | Ckm           | 12715     | 7+:19996442-20006932    |
| 4721 | Cdh13         | 12554     | 8+:121198909-121380107  |
| 4722 | Tmco7         | 272538    | 8+:109206994-109375028  |
| 4723 | Art3          | 109979    | 5+:92760842-92843656    |
| 4724 | MMT00033577   |           | 6+:40997339-40998100    |
| 4725 | Slc10a4       | 231290    | 5+:73398171-73404192    |
| 4726 | MMT00016896   |           | 12-:27170766-27171735   |
| 4727 | Phkg2         | 68961     | 7+:134622734-134729915  |
| 4728 | EG574403      | 574403    | 11+:34301959-34327977   |
| 4729 | Slc7a10       | 53896     | 7+:35971489-35985965    |
| 4730 | MMT00079671   |           | 13-:83885718-83901943   |
| 4731 | Zmynd12       | 332934    | 4+:119095435-119126500  |
| 4732 | Idh3a         | 67834     | 9+:54434296-54451596    |
| 4733 | Snap91        | 20616     | 9-:86659238-86775207    |
| 4734 | Ccbl2         | 229905    | 3+:142364039-142407498  |
| 4735 | Gmip          | 78816     | 8+:72332625-72345683    |
| 4736 | Stk31         | 77485     | 6+:49348194-49419500    |
| 4737 | Olf1449       | 259067    | 6+:42787881-42788817    |
| 4738 | Ppm1a         | 19042     | 12+:73884668-73894849   |
| 4739 | Nat9          | 66176     | 11-:115044143-115048583 |
| 4740 | Rxfp1         | 381489    | 3-:79448806-79509575    |
| 4741 | MMT00070324   | 100041422 | 14+:44701632-44704860   |



|      |               |        |                         |
|------|---------------|--------|-------------------------|
| 4742 | Ccne2         | 12448  | 4+:11119850-11130244    |
| 4743 | Rasl10a       | 75668  | 11+:4958308-4960067     |
| 4744 | MMT00027592   |        | 12-:116081838-116134753 |
| 4745 | Lhfp          | 108927 | 3+:53035649-53065600    |
| 4746 | 1810007M14Rik | 67367  | 16-:91015187-91034444   |
| 4747 | Mil1          | 214162 | 9-:44611444-44689131    |
| 4748 | Xylt2         | 217119 | 11-:94525166-94531854   |
| 4749 | 9230107M04Rik | 77684  | 7-:14140214-14156419    |
| 4750 | Gngt1         | 14699  | 6+:3943817-3947437      |
| 4751 | Map3k4        | 26407  | 17-:12420488-12511614   |
| 4752 | Pik3r4        | 75669  | 9+:105546566-105589978  |
| 4753 | Cdk7          | 12572  | 13-:101472587-101500928 |
| 4754 | MMT00027078   |        |                         |
| 4755 | Oifr394       | 259009 | 11-:73700941-73701872   |
| 4756 | Arx           | 11878  | X+:90531859-90542859    |
| 4757 | Mus81         | 71711  | 19-:5482893-5488151     |
| 4758 | MMT00056158   |        | 8+:3994376-3999348      |
| 4759 | Gnai2         | 14678  | 9-:107522028-107522804  |
| 4760 | MMT00038902   | 328277 | 13+:67761331-67800906   |
| 4761 | Kcnv1         | 67498  | 15-:44939367-44946463   |
| 4762 | MMT00060319   |        | 2-:64705955-64706777    |
| 4763 | Svop          | 68666  | 5-:114476977-114541544  |
| 4764 | MMT00031970   |        | 16-:43638534-43641910   |
| 4765 | 6430706D22Rik | 381280 | 1+:90131544-90133306    |
| 4766 | Kcnj6         | 16522  | 16-:94982675-95219255   |
| 4767 | Ktn1          | 16709  | 14+:48283453-48356232   |
| 4768 | Lsm10         | 116748 | 4+:125773995-125775823  |
| 4769 | Stoml2        | 66592  | 4-:43040893-43044275    |
| 4770 | 4933411G06Rik | 71090  | 10-:51475979-51477000   |
| 4771 | C2cd3         | 277939 | 7+:107578650-107592072  |
| 4772 | 2810007J24Rik | 76971  | 7-:14996067-15032119    |
| 4773 | Il20          | 58181  | 1-:132803768-132807873  |
| 4774 | Ccdc112       | 240261 | 18-:46445266-46471548   |
| 4775 | MMT00038658   |        |                         |
| 4776 | Dclk1         | 13175  | 3+:55046549-55340599    |
| 4777 | 2810459M11Rik | 72792  | 1+:87942842-87952030    |
| 4778 | Cyct          | 13067  | 2-:76192086-76198505    |
| 4779 | Dohh          | 102115 | 10+:80847255-80851095   |
| 4780 | Sfrs5         | 20384  | 12+:82047562-82051486   |
| 4781 | Hisppd1       | 227399 | 1-:99602622-99666708    |
| 4782 | Clock         | 12753  | 5-:76645723-76695871    |
| 4783 | Arhgef17      | 207212 | 7-:108020564-108080253  |
| 4784 | Slc2a2        | 20526  | 3+:28596898-28627249    |
| 4785 | ORF63         | 224419 | 16+:87553574-87595580   |
| 4786 | Psg16         | 26436  | 7+:17659431-17683864    |
| 4787 | Parn          | 74108  | 16-:13538056-13668261   |
| 4788 | Pak3          | 18481  | X+:140100287-140226353  |
| 4789 | Capns1        | 12336  | 7-:30971967-30980043    |
| 4790 | Nrg3          | 18183  | 14-:40278445-40340075   |
| 4791 | ENSMUSG00000  | 208595 | 5+:4195612-4197650      |
| 4792 | Neurod6       | 11922  | 6-:55627816-55631063    |

|      |               |           |                         |
|------|---------------|-----------|-------------------------|
| 4793 | Bbs1          | 52028     | 19-:4888746-4906638     |
| 4794 | Gsdmd         | 69146     | 15+:75692768-75697834   |
| 4795 | Trpa1         | 277328    | 1-:14863689-14871860    |
| 4796 | Rcbtb2        | 105670    | 14+:73554161-73582489   |
| 4797 | Fbxo25        | 66822     | 8+:13907805-13940521    |
| 4798 | C330011K17Rik | 238692    | 13-:67541368-67549852   |
| 4799 | Stac3         | 237611    | 10+:126940144-126945863 |
| 4800 | Phactr1       | 218194    | 13+:42776164-42805219   |
| 4801 | MMT00057721   |           | 18+:23375130-23376062   |
| 4802 | 5430433G21Rik | 319909    | 2+:139504507-139584294  |
| 4803 | Oog4          | 242737    | 4-:143027065-143030105  |
| 4804 | Sart3         | 53890     | 5-:114192454-114221658  |
| 4805 | Hspb1         | 15507     | 5+:136363928-136365307  |
| 4806 | Slc7a13       | 74087     | 4+:19745900-19769082    |
| 4807 | Fgl2          | 14190     | 5+:20878499-20882878    |
| 4808 | Apcdd1        | 494504    | 18+:63112743-63113459   |
| 4809 | Cacna1b       | 12287     | 2-:24461894-24618672    |
| 4810 | Vsig8         | 240916    | 1+:174486202-174493847  |
| 4811 | Gripap1       | 54645     | X+:7367142-7397687      |
| 4812 | Myom1         | 17929     | 17+:71368860-71476195   |
| 4813 | Agpat6        | 102247    | 8-:24284988-24293313    |
| 4814 | MMT00050024   |           | 16+:3534292-3534809     |
| 4815 | Upf1          | 19704     | 8-:72855428-72877178    |
| 4816 | Kcnmb1        | 16533     | 11+:33863012-33870749   |
| 4817 | MMT00046203   |           |                         |
| 4818 | Enpep         | 13809     | 3-:128972537-129035486  |
| 4819 | MMT00082285   |           | 14+:19363856-19365450   |
| 4820 | 2210409D07Rik | 70157     | 18-:57791732-57798242   |
| 4821 | Lrrc41        | 230654    | 4+:115748062-115769920  |
| 4822 | BC032265      | 238024    | 11+:121282744-121291028 |
| 4823 | Efhc2         | 74405     | X-:16778168-16896493    |
| 4824 | Gtsf1         | 74174     | 15-:103232891-103260837 |
| 4825 | Nfkbil1       | 18038     | 17-:35357120-35372760   |
| 4826 | Sypl2         | 17306     | 3-:108015183-108029517  |
| 4827 | Sh3bp4        | 98402     | 1+:90967036-91050367    |
| 4828 | MMT00047886   |           | 17-:77761900-77794305   |
| 4829 | Hspa2         | 15512     | 12+:77505520-77507422   |
| 4830 | Kif27         | 75050     | 13-:58388877-58456223   |
| 4831 | Ccdc57        | 71276     | 11-:120763292-120764994 |
| 4832 | Nxn12         | 75124     | 13+:51266393-51270556   |
| 4833 | Synpo2        | 118449    | 3-:122815319-122817593  |
| 4834 | 4930553D19Rik | 75266     | 12+:72212430-72224210   |
| 4835 | C1qtnf4       | 67445     | 2+:90726016-90730676    |
| 4836 | Gtf2h3        | 209357    | 5+:125029100-125046849  |
| 4837 | Ear2          | 13587     | 14+:44680551-44681022   |
| 4838 | Secisbp2      | 75420     | 13+:51747089-51779422   |
| 4839 | Cyp4a32       | 100040843 | 4+:115236254-115294212  |
| 4840 | Tmem191c      | 224019    | 16+:17276400-17278755   |
| 4841 | EG382106      | 382106    | 9-:109503630-109527466  |
| 4842 | MMT00012981   |           | 4+:105758144-105786199  |
| 4843 | Oma1          | 67013     | 4+:102986450-103039033  |

|      |               |        |                         |
|------|---------------|--------|-------------------------|
| 4844 | Zfp709        | 236193 | 8+:74406017-74415600    |
| 4845 | MMT00071334   |        | 8-:11714758-11715284    |
| 4846 | BC022623      | 224093 | 16+:30600566-30603166   |
| 4847 | Sbpl          | 638345 | 17-:24090051-24091883   |
| 4848 | Flt3          | 14255  | 5-:148142321-148211871  |
| 4849 | Zxdc          | 80292  | 6+:90319527-90333086    |
| 4850 | Fancd2        | 211651 | 6+:113481695-113547011  |
| 4851 | Gpn2          | 100210 | 4+:133140294-133147646  |
| 4852 | Kdelr2        | 66913  | 5+:144165504-144182947  |
| 4853 | Plxnc1        | 54712  | 10-:94255931-94407212   |
| 4854 | Tgfb1         | 21812  | 4+:47366183-47423796    |
| 4855 | Csrnp3        | 77771  | 2+:65683869-65716875    |
| 4856 | Mlf1ip        | 71876  | 8+:47637381-47664937    |
| 4857 | 2210010N04Rik | 70381  | 5-:144871958-144872641  |
| 4858 | V1re13        | 252910 | 7-:11333186-11334108    |
| 4859 | Mef2d         | 17261  | 3+:87946348-87972645    |
| 4860 | Mapkbp1       | 26390  | 2+:119798638-119851074  |
| 4861 | Pctk1         | 18555  | X+:20265282-20277003    |
| 4862 | MMT00048585   |        | 13-:74155983-74157632   |
| 4863 | Atad4         | 217138 | 11+:96790637-96796959   |
| 4864 | S100a16       | 67860  | 3+:90341297-90347070    |
| 4865 | Hist1h1b      | 56702  | 13-:21871751-21872423   |
| 4866 | Cnot6         | 104625 | 11-:49485008-49516159   |
| 4867 | 5830403F22Rik | 74743  | 7-:141376576-141423815  |
| 4868 | Mertk         | 17289  | 2+:128524732-128627924  |
| 4869 | 4930432H15Rik | 73866  | X+:50626609-50684362    |
| 4870 | Olf1550       | 259108 | 7+:109727010-109727959  |
| 4871 | MMT00058874   |        | 3-:46854304-46855563    |
| 4872 | Serpinc1      | 11905  | 1+:162917673-162932592  |
| 4873 | 5-Mar         | 69104  | 19+:37282057-37295555   |
| 4874 | Tbc1d9        | 71310  | 8+:85689972-85796793    |
| 4875 | Rapsn         | 19400  | 2+:90875797-90885886    |
| 4876 | Purb          | 19291  | 11-:6374791-6375920     |
| 4877 | Prss8         | 76560  | 7-:135069236-135073608  |
| 4878 | MMT00079752   |        | 2-:155284598-155286632  |
| 4879 | Olf1784       | 258724 | 10+:128824690-128825650 |
| 4880 | Gm505         | 244666 | 8+:127422057-127427362  |
| 4881 | 4930434E21Rik | 381693 | 5+:150408863-150414465  |
| 4882 | MMT00027957   |        | 7+:52852292-52854937    |
| 4883 | Lysmd3        | 80289  | 13+:81796804-81810887   |
| 4884 | Cpne2         | 234577 | 8+:97056935-97094430    |
| 4885 | Fhad1         | 329977 | 4-:141484294-141507592  |
| 4886 | Jarid1a       | 214899 | 6+:120314475-120369459  |
| 4887 | MMT00071942   | 620515 | 3+:106100602-106101941  |
| 4888 | MMT00006903   |        | X-:59064648-59065062    |
| 4889 | Bphl          | 68021  | 13+:34129509-34165943   |
| 4890 | Pex5          | 19305  | 6-:124347922-124364451  |
| 4891 | Atp6v0b       | 114143 | 4-:117556934-117559934  |
| 4892 | Zfp109        | 56869  | 7-:25012590-25022579    |
| 4893 | V1rg12        | 171268 | 7+:12890153-12891066    |
| 4894 | Cox7a2        | 12866  | 9-:79603214-79607492    |

|      |               |        |                         |
|------|---------------|--------|-------------------------|
| 4895 | Pdk3          | 236900 | X-:91009956-91077434    |
| 4896 | 4930405M20Rik | 73942  | 13-:93219577-93254049   |
| 4897 | Ciao1         | 26371  | 2-:127068300-127073496  |
| 4898 | MMT00072808   |        | 14-:114708037-114710025 |
| 4899 | Nr4a2         | 18227  | 2-:56960568-56967666    |
| 4900 | 5031426D15Rik | 68144  | 2-:6845969-6849768      |
| 4901 | MMT00073557   | 171504 | 7+:133728521-133732598  |
| 4902 | 6030498E09Rik | 77883  | X+:36311239-36315864    |
| 4903 | MMT00017132   |        | 8+:75877056-76176078    |
| 4904 | Tinf2         | 28113  | 14-:56297933-56300645   |
| 4905 | Urod          | 22275  | 4-:116662822-116666965  |
| 4906 | A830059I20Rik | 58238  | 7+:100228428-100230228  |
| 4907 | Nup155        | 170762 | 15+:8059330-8107827     |
| 4908 | 5530401N06Rik | 71386  | 1+:83057504-83058496    |
| 4909 | Olfr698       | 258595 | 7-:113895964-113896900  |
| 4910 | 5530400C23Rik | 232426 | 6+:133242234-133245807  |
| 4911 | Nme4          | 56520  | 17-:26228689-26232415   |
| 4912 | Kcnq4         | 60613  | 4-:120370499-120419715  |
| 4913 | Zfp619        | 70227  | 7+:46753549-46822953    |
| 4914 | Acan          | 11595  | 7+:86198368-86259984    |
| 4915 | Asb18         | 208372 | 1-:91849252-91911152    |
| 4916 | Gabpb1        | 14391  | 2-:126464756-126501222  |
| 4917 | MMT00081200   |        | 1-:7385719-7640787      |
| 4918 | Scara5        | 71145  | 14+:66285263-66383660   |
| 4919 | Med12l        | 329650 | 3+:58809934-58897619    |
| 4920 | Rbl1          | 19650  | 2-:156971623-157025312  |
| 4921 | MMT00014712   |        | 13-:49074183-49076609   |
| 4922 | Mmp19         | 58223  | 10+:128228028-128236524 |
| 4923 | BC059842      | 230676 | 4-:118035038-118059595  |
| 4924 | Tmprss3       | 140765 | 17-:31316214-31334694   |
| 4925 | Iah1          | 67732  | 12+:21322274-21327219   |
| 4926 | Vps4a         | 116733 | 8+:109555225-109569655  |
| 4927 | Plcb4         | 18798  | 2+:135703118-135733316  |
| 4928 | MMT00048249   |        | 3+:159154379-159154608  |
| 4929 | Usp8          | 84092  | 2+:126543780-126585017  |
| 4930 | Ankrd13c      | 433667 | 3+:157610400-157671296  |
| 4931 | EG622139      | 622139 | 3-:144524608-144552709  |
| 4932 | Cd70          | 21948  | 17-:57285420-57289200   |
| 4933 | Clec14a       | 66864  | 12-:59366922-59369883   |
| 4934 | Abca13        | 268379 | 11+:9235231-9528671     |
| 4935 | Pcdhb5        | 93876  | 18+:37480222-37482599   |
| 4936 | MMT00031931   |        | 18-:80072327-80073065   |
| 4937 | Krtap26-1     | 69533  | 16-:88647068-88648041   |
| 4938 | Mccc2         | 78038  | 13-:100718483-100785567 |
| 4939 | 1700023B02Rik | 66935  | 2-:73121928-73150560    |
| 4940 | Ss18          | 268996 | 18-:14784139-14841423   |
| 4941 | MMT00043485   |        | 3-:46249887-46251871    |
| 4942 | Kcnj12        | 16515  | 11+:60882684-60884302   |
| 4943 | Thap11        | 59016  | 8+:108379042-108380850  |
| 4944 | MMT00067472   |        |                         |
| 4945 | Grin3a        | 242443 | 4-:49676956-49857953    |

|      |               |           |                         |
|------|---------------|-----------|-------------------------|
| 4946 | Ipp           | 16351     | 4+:116202275-116210847  |
| 4947 | Erich1        | 234086    | 8-:14027908-14090291    |
| 4948 | Arl2          | 56327     | 19-:6134667-6141101     |
| 4949 | Taok2         | 381921    | 7-:134009189-134024277  |
| 4950 | Dnajb10       | 56812     | 1+:75233130-75242265    |
| 4951 | Lsm3          | 67678     | 6+:91466028-91472614    |
| 4952 | MMT00016217   |           | 4-:10365963-10366981    |
| 4953 | Etv3          | 27049     | 3+:87331177-87340618    |
| 4954 | Puf60         | 67959     | 15-:75900619-75911300   |
| 4955 | Cxcl1         | 14825     | 5+:91320335-91322141    |
| 4956 | OTTMUSG00000  | 435285    | 11+:99708285-99712796   |
| 4957 | Olf1623       | 259126    | 7-:110808809-110809762  |
| 4958 | Ndufa7        | 66416     | 17+:33961574-33975133   |
| 4959 | Optn          | 71648     | 2-:4941686-4963566      |
| 4960 | MMT00067115   |           | 17-:18048003-18049853   |
| 4961 | MMT00058801   |           | 3+:37630868-37633894    |
| 4962 | MMT00017883   | 232934    | 7+:19576667-19587112    |
| 4963 | Hyi           | 68180     | 4+:118032600-118035936  |
| 4964 | MMT00003197   |           | 17-:73048798-73049646   |
| 4965 | Kl            | 16591     | 5+:151755273-151796386  |
| 4966 | Zscan20       | 269585    | 4-:128262620-128281844  |
| 4967 | Plekhm1       | 353047    | 11-:103241432-103274027 |
| 4968 | 2510027J23Rik | 66568     | 3-:120873900-120874612  |
| 4969 | Acvr1b        | 11479     | 15+:101004566-101041941 |
| 4970 | MMT00013473   |           | 13+:51020708-51062118   |
| 4971 | Hist1h4i      | 319158    | 13-:22129747-22133192   |
| 4972 | Sec16b        | 89867     | 1+:159456300-159498196  |
| 4973 | Grik4         | 110637    | 9-:42616574-42616709    |
| 4974 | Ace           | 11421     | 11+:105829271-105851275 |
| 4975 | MMT00036512   |           |                         |
| 4976 | Psmc1         | 19179     | 12+:101350539-101361574 |
| 4977 | MMT00066891   | 666038    | 5-:134317440-134318539  |
| 4978 | Cherp         | 27967     | 8-:74983942-74999124    |
| 4979 | Vmn2r15       | 211223    | 5-:109715287-109726575  |
| 4980 | MMT00006445   |           | 6-:68966533-68993274    |
| 4981 | MMT00008799   |           | 3+:10232103-10232459    |
| 4982 | 4930449A18Rik | 74672     | 3+:59642287-59650737    |
| 4983 | Rabgef1       | 56715     | 5+:130647717-130690211  |
| 4984 | Snap29        | 67474     | 16+:17406095-17428573   |
| 4985 | RP23-36P22.5  | 100043899 | 2+:163318052-163325664  |
| 4986 | Atg3          | 67841     | 16+:45158941-45188651   |
| 4987 | Olf1218       | 258815    | 2-:88894647-88895581    |
| 4988 | 2400001E08Rik | 66508     | 7+:109054442-109060398  |
| 4989 | 4930504B08Rik | 75057     | 9-:74909101-74946994    |
| 4990 | Mmp27         | 234911    | 9+:7571944-7581415      |
| 4991 | MMT00004329   |           | 17+:22871900-22872343   |
| 4992 | MMT00070169   |           | 7+:30870365-30871036    |
| 4993 | Tsc22d1       | 21807     | 14-:76906439-76907570   |
| 4994 | Olf1264       | 258206    | 2-:89861295-89862221    |
| 4995 | Plxna4        | 243743    | 6-:32446712-32467376    |
| 4996 | Echdc3        | 67856     | 2-:6109865-6134021      |

|      |               |        |                         |
|------|---------------|--------|-------------------------|
| 4997 | Trim24        | 21848  | 6+:37820630-37916287    |
| 4998 | 2310002B06Rik | 53951  | 17+:79234797-79244701   |
| 4999 | BC022960      | 237246 | X+:165806120-165807944  |
| 5000 | Tmprss11f     | 243083 | 5-:86953136-86962861    |
| 5001 | MMT00048925   |        | 16+:17734259-17735348   |
| 5002 | Ifi202b       | 26388  | 1-:175892745-175912845  |
| 5003 | 2410081M15Rik | 73680  | 4-:129030875-129055272  |
| 5004 | MMT00073757   |        | 12+:57290478-57291884   |
| 5005 | Dnajc15       | 66148  | 14-:78226021-78274712   |
| 5006 | Enoph1        | 67870  | 5+:100469032-100497781  |
| 5007 | Cdkn3         | 72391  | 14+:47380253-47387387   |
| 5008 | Ehd1          | 13660  | 19+:6276900-6298898     |
| 5009 | MMT00054393   |        | 1+:66998402-66999410    |
| 5010 | Gnpda2        | 67980  | 5-:69964348-69982030    |
| 5011 | A930016P21Rik | 68073  | 15+:31531872-31547290   |
| 5012 | Fbxl13        | 320118 | 5-:21086998-21109530    |
| 5013 | Fanci1        | 67030  | 11+:26287201-26371876   |
| 5014 | MMT00017503   |        | 1+:7654291-7655057      |
| 5015 | MMT00027075   |        |                         |
| 5016 | Mfap4         | 76293  | 11+:61298948-61302206   |
| 5017 | Plat          | 18791  | 8+:23868239-23893316    |
| 5018 | Phf21a        | 192285 | 2+:92024494-92201050    |
| 5019 | Rnf44         | 105239 | 13-:54780772-54795197   |
| 5020 | MMT00037480   |        |                         |
| 5021 | Gdap2         | 14547  | 3+:99966440-100010904   |
| 5022 | Wwtr1         | 97064  | 3-:57262381-57379733    |
| 5023 | Spast         | 50850  | 17+:74751284-74790540   |
| 5024 | MMT00020852   |        | 10+:128052418-128053090 |
| 5025 | Atad5         | 237877 | 11+:79902903-79937633   |
| 5026 | MMT00042079   |        | 1-:97152539-97153387    |
| 5027 | Pde4b         | 18578  | 4+:101927607-102278428  |
| 5028 | Spata20       | 217116 | 11-:94340220-94341759   |
| 5029 | 1110034G24Rik | 73747  | 2+:132512673-132576943  |
| 5030 | Hirip3        | 233876 | 7+:134005965-134008887  |
| 5031 | Adipoq        | 11450  | 16+:23155297-23157666   |
| 5032 | Gm872         | 380653 | 10-:92238409-92278681   |
| 5033 | MMT00012520   |        | X-:129422743-129423698  |
| 5034 | EG621976      | 621976 | 13+:41701584-41730291   |
| 5035 | Ssrp1         | 20833  | 2+:84877620-84887267    |
| 5036 | C030003D03Rik | 77220  | 10-:25712699-25798168   |
| 5037 | MMT00044669   |        | 11+:96731662-96732158   |
| 5038 | Kif9          | 16578  | 9+:110379528-110427678  |
| 5039 | Hs3st2        | 195646 | 7+:128536243-128644549  |
| 5040 | Fktn          | 246179 | 4+:53726869-53775827    |
| 5041 | Wdr82         | 77305  | 9+:106073266-106091506  |
| 5042 | Tada1l        | 27878  | 1+:168309495-168323749  |
| 5043 | Cxcl13        | 55985  | 5+:96385957-96390086    |
| 5044 | Ifi35         | 70110  | 11+:101309794-101319776 |
| 5045 | MMT00017230   |        | 8+:36832015-36859436    |
| 5046 | Pthlh         | 19227  | 6-:147200621-147212723  |
| 5047 | Rpl5          | 19983  | 5+:108330887-108337013  |

|      |               |        |                         |
|------|---------------|--------|-------------------------|
| 5048 | Mgll          | 23945  | 6+:88674477-88778351    |
| 5049 | Emid1         | 140703 | 11-:5006268-5052225     |
| 5050 | Gnal          | 14680  | 18+:67248099-67382383   |
| 5051 | Angpt1        | 11600  | 15-:42258288-42508313   |
| 5052 | Lrrn3         | 16981  | 12-:42178781-42216157   |
| 5053 | BC002199      | 211556 | 3-:127510184-127511782  |
| 5054 | Zfp821        | 75871  | 8+:112230251-112248831  |
| 5055 | Gss           | 14854  | 2-:155388918-155418442  |
| 5056 | Tmed8         | 382620 | 12-:88512768-88522422   |
| 5057 | Prlh          | 623503 | 1+:92849684-92850588    |
| 5058 | Pemt          | 18618  | 11-:59784320-59845307   |
| 5059 | Abhd3         | 106861 | 18-:10644410-10706694   |
| 5060 | MMT00066059   |        | 4+:149583796-149602550  |
| 5061 | Myo9a         | 270163 | 9+:59598979-59773196    |
| 5062 | Dnase1l2      | 66705  | 17-:24577509-24580029   |
| 5063 | MMT00046201   |        | 2-:78353035-78353496    |
| 5064 | Tekt2         | 24084  | 4-:125999366-126002443  |
| 5065 | MMT00069141   |        | 14+:85878799-85879352   |
| 5066 | 4833439L19Rik | 97820  | 13-:54652585-54666701   |
| 5067 | Alkbh8        | 67667  | 9+:3335471-3387046      |
| 5068 | Afap1l2       | 226250 | 19-:56986849-57082667   |
| 5069 | Cdkn2aipnl    | 52626  | 11+:51781162-51789731   |
| 5070 | 2610024E20Rik | 225358 | 18-:34602005-34666477   |
| 5071 | Aff2          | 14266  | X+:66613505-67121211    |
| 5072 | MMT00052662   |        | 15+:48720103-48721563   |
| 5073 | Chst8         | 68947  | 7-:35459659-35597474    |
| 5074 | Tgm4          | 331046 | 9+:122954102-122975991  |
| 5075 | Saal1         | 78935  | 7-:53943182-53966032    |
| 5076 | Tmem57        | 66146  | 4-:134358671-134408862  |
| 5077 | Prrg1         | 546336 | X-:75698026-75794754    |
| 5078 | 1700020N15Rik | 75509  | X+:67198474-67199153    |
| 5079 | Bet1l         | 54399  | 7-:148040354-148042138  |
| 5080 | Pcdh24        | 268663 | 13+:54818970-54838029   |
| 5081 | Onecut1       | 15379  | 9+:74709934-74737457    |
| 5082 | Ibsp          | 15891  | 5+:104728315-104740484  |
| 5083 | Gprc5b        | 64297  | 7-:126115043-126128159  |
| 5084 | Gsn           | 227753 | 2+:35137961-35163414    |
| 5085 | Prdx5         | 54683  | 19-:6981308-6984135     |
| 5086 | Ccnh          | 66671  | 13+:85329041-85352512   |
| 5087 | Ush1g         | 16470  | 11-:115179295-115183170 |
| 5088 | EG229571      | 229571 | 3+:92877589-92878554    |
| 5089 | Dlx5          | 13395  | 6-:6827804-6831910      |
| 5090 | Eda           | 13607  | X+:97170944-97596098    |
| 5091 | C85492        | 215494 | 9-:121891088-122014787  |
| 5092 | Ydjc          | 69101  | 16+:17144711-17148938   |
| 5093 | Apol10b       | 328561 | 15-:77415401-77422580   |
| 5094 | Yes1          | 22612  | 5+:32913605-32989429    |
| 5095 | Jak1          | 16451  | 4-:100825650-100937838  |
| 5096 | Tecta         | 21683  | 9-:42137705-42208012    |
| 5097 | Srgap3        | 259302 | 6-:112672782-112896490  |
| 5098 | 1700029J11Rik | 76426  | 2+:172298044-172299791  |

|      |               |        |                         |
|------|---------------|--------|-------------------------|
| 5099 | MMT00056385   |        |                         |
| 5100 | Pebp1         | 23980  | 5-:117732662-117737555  |
| 5101 | Gm101         | 226356 | 1-:121819919-121832748  |
| 5102 | Cmtm5         | 67272  | 14+:55555306-55558114   |
| 5103 | EG237361      | 237361 | 10+:60772577-60773022   |
| 5104 | 1700094C09Rik | 78634  | 8+:12573048-12600738    |
| 5105 | MMT00008146   |        | 7-:88292143-88292283    |
| 5106 | Usp38         | 74841  | 8-:83511469-83539565    |
| 5107 | Gprc5c        | 70355  | 11+:114713368-114730409 |
| 5108 | 2200002D01Rik | 72275  | 7-:30032521-30033492    |
| 5109 | Cyp3a11       | 13112  | 5-:146666541-146691426  |
| 5110 | 1700001O22Rik | 73598  | 2-:30650288-30659177    |
| 5111 | Olfr380       | 259027 | 11-:73266776-73267712   |
| 5112 | MMT00071941   |        | 1-:131693185-131694546  |
| 5113 | Nxn1          | 234404 | 8-:74084454-74090500    |
| 5114 | Fbxo33        | 70611  | 12-:60301643-60320437   |
| 5115 | Usp19         | 71472  | 9+:108396960-108404028  |
| 5116 | Otop3         | 69602  | 11+:115196091-115201288 |
| 5117 | Krt83         | 406219 | 15-:101261484-101321734 |
| 5118 | Hmcn1         | 545370 | 1-:152409635-152707507  |
| 5119 | MMT00065554   |        | 18-:63703066-63704860   |
| 5120 | Alkbh7        | 66400  | 17+:57136775-57138745   |
| 5121 | Tmem93        | 66048  | 11-:72989034-72990539   |
| 5122 | Olfr525       | 258958 | 7+:147508720-147509528  |
| 5123 | Zfp191        | 59057  | 18-:24172660-24176588   |
| 5124 | Olfr424       | 258716 | 1+:176066876-176067822  |
| 5125 | Fmod          | 14264  | 1+:135934119-135944736  |
| 5126 | Fcnb          | 14134  | 2-:27931897-27940377    |
| 5127 | Kif20b        | 240641 | 19+:34996848-35050241   |
| 5128 | Rfxap         | 170767 | 3-:54608116-54611693    |
| 5129 | Olfr746       | 258295 | 14+:51272913-51273856   |
| 5130 | Phip          | 83946  | 9-:82787637-82869015    |
| 5131 | Taar1         | 111174 | 10+:23640211-23641208   |
| 5132 | 1600016N20Rik | 72000  | 7-:148395760-148396896  |
| 5133 | 6430517E21Rik | 240843 | 1-:160175400-160225908  |
| 5134 | 1190002A17Rik | 68870  | 2+:28555681-28668684    |
| 5135 | Pisd          | 320951 | 5+:33069248-33079766    |
| 5136 | MMT00023802   |        | 1-:6427687-6431345      |
| 5137 | Cdh18         | 320865 | 15+:23296607-23340575   |
| 5138 | Fau           | 14109  | 19+:6057948-6059520     |
| 5139 | Zfp101        | 22643  | 17-:33517637-33531544   |
| 5140 | Cbln3         | 56410  | 14-:56500897-56503069   |
| 5141 | 9330101J02Rik | 664857 | 7-:146828734-146832352  |
| 5142 | Eppk1         | 223650 | 15-:75949949-75950994   |
| 5143 | Ccdc13        | 434446 | 9-:121706746-121723464  |
| 5144 | MMT00058978   |        | 2+:66780612-66781514    |
| 5145 | Scn3b         | 235281 | 9+:40077125-40096767    |
| 5146 | 2810021B07Rik | 66308  | 13+:17787252-17789168   |
| 5147 | 5730455P16Rik | 70591  | 11-:80173994-80191506   |
| 5148 | MMT00050920   |        | 11+:54760936-54761388   |
| 5149 | Sirt3         | 64384  | 7-:148049572-148068208  |



|      |               |        |                         |
|------|---------------|--------|-------------------------|
| 5150 | Syf2          | 68592  | 4+:134486894-134493452  |
| 5151 | Akt2          | 11652  | 7+:28376774-28423221    |
| 5152 | Cdh10         | 320873 | 15+:18748679-18943559   |
| 5153 | MMT00072251   |        | 4-:101719173-101722109  |
| 5154 | Pcid2         | 234069 | 8-:13077183-13105453    |
| 5155 | Nwd1          | 319555 | 8+:75186045-75195006    |
| 5156 | Srm           | 20810  | 4+:147965655-147968701  |
| 5157 | Fgf20         | 80857  | 8-:41365111-41372061    |
| 5158 | Rtn4          | 68585  | 11+:29618782-29642086   |
| 5159 | MMT00020962   |        | 7-:80133985-80135027    |
| 5160 | Cdh24         | 239096 | 14-:55250950-55258381   |
| 5161 | Tbc1d1        | 57915  | 5+:64726514-64736671    |
| 5162 | Uqcrb         | 67530  | 13-:67001556-67006286   |
| 5163 | Slc5a2        | 246787 | 7+:135409200-135415713  |
| 5164 | Hoxc12        | 15421  | 15+:102767283-102768948 |
| 5165 | 4933427I04Rik | 664620 | 4+:123515473-123538243  |
| 5166 | Lix1          | 66643  | 17+:17582921-17594587   |
| 5167 | 4930478P22Rik | 74429  | 5+:35704187-35710325    |
| 5168 | Atp1b3        | 11933  | 9-:96233098-96264718    |
| 5169 | MMT00037010   |        |                         |
| 5170 | MMT00012537   |        | 11+:90270092-90381426   |
| 5171 | Adamtsl5      | 66548  | 10-:79805483-79811157   |
| 5172 | Sumo1         | 22218  | 1-:59696287-59727653    |
| 5173 | Azgp1         | 12007  | 5+:138422787-138431458  |
| 5174 | Slc5a7        | 63993  | 17-:54415843-54436461   |
| 5175 | MMT00032221   |        |                         |
| 5176 | MMT00004357   |        | 14+:69350007-69351097   |
| 5177 | Agtrap        | 11610  | 4-:147454592-147462052  |
| 5178 | Wnt2b         | 22414  | 3-:104749673-104764504  |
| 5179 | Gdpd4         | 233537 | 7+:105122890-105152908  |
| 5180 | E130304I02Rik | 78547  | 7+:36587185-36623093    |
| 5181 | 4930481B07Rik | 74937  | 3+:94819035-94820196    |
| 5182 | Pcx           | 18563  | 19+:4594357-4621697     |
| 5183 | St5           | 76954  | 7-:116667426-116760080  |
| 5184 | Tac4          | 93670  | 11+:95122842-95130573   |
| 5185 | Dus2l         | 66369  | 8+:108535394-108577739  |
| 5186 | MMT00062958   |        | 15-:36559277-36559671   |
| 5187 | Speer4f       | 70935  | 5+:16981939-16986754    |
| 5188 | Cma1          | 17228  | 14-:56560289-56563498   |
| 5189 | Capns2        | 69543  | 8+:95425383-95426126    |
| 5190 | Phkb          | 102093 | 8+:88459294-88584881    |
| 5191 | MMT00076927   | 236069 | 4+:145045535-145427380  |
| 5192 | MMT00038487   |        | 7-:66092018-66093401    |
| 5193 | Tmem32        | 236792 | X-:53838689-53851111    |
| 5194 | Nsmce2        | 68501  | 15+:59205801-59433236   |
| 5195 | Prx           | 19153  | 7+:28284342-28305233    |
| 5196 | Zfp97         | 22759  | 17+:17258378-17403111   |
| 5197 | 6430710C18Rik | 76218  | 2-:72583901-72651773    |
| 5198 | 1700029N11Rik | 69491  | 13+:44535041-44550695   |
| 5199 | Ppp2r5d       | 21770  | 17-:46819940-46821655   |
| 5200 | Tm6sf1        | 107769 | 7+:89004016-89028952    |

|      |               |        |                         |
|------|---------------|--------|-------------------------|
| 5201 | MMT00076398   |        | 11+:105634739-105636097 |
| 5202 | Bcl11a        | 14025  | 11+:23978116-24073193   |
| 5203 | MMT00001924   |        | 6+:39812256-39841710    |
| 5204 | Lifr          | 16880  | 15+:7090540-7141218     |
| 5205 | MMT00065634   |        | 10+:62137891-62165263   |
| 5206 | Igk-V         | 16080  | 6+:68469005-68469494    |
| 5207 | 1700123K08Rik | 76658  | 5-:139003067-139005922  |
| 5208 | Plod2         | 26432  | 9+:92437289-92503258    |
| 5209 | Hcfc2         | 67933  | 10+:82161883-82204138   |
| 5210 | MMT00036454   |        | 10-:15240325-15241131   |
| 5211 | Fubp3         | 320267 | 2+:31428259-31473015    |
| 5212 | Mos           | 17451  | 4-:3797930-3799104      |
| 5213 | Rhoh          | 74734  | 5+:66254217-66284779    |
| 5214 | Zadh1         | 77219  | 12+:85626355-85655031   |
| 5215 | Col6a1        | 12833  | 10-:76171536-76188789   |
| 5216 | Spnb5         | 640524 | 2-:119872115-119911478  |
| 5217 | Lpcat2        | 270084 | 8+:95379247-95414730    |
| 5218 | ENSMUSG00000  | 194612 | 17+:22825894-22884251   |
| 5219 | Fbxo22        | 71999  | 9+:55056765-55073204    |
| 5220 | MMT00037083   |        | 12+:55817773-55818252   |
| 5221 | Als2cr4       | 381259 | 1-:59157437-59177240    |
| 5222 | B630005N14Rik | 101148 | 6-:13575937-13627833    |
| 5223 | Rcan2         | 53901  | 17+:44090353-44174101   |
| 5224 | MMT00071383   |        | 10-:68154349-68154847   |
| 5225 | Maf1          | 68877  | 15+:76182432-76184802   |
| 5226 | Ovgp1         | 12659  | 3+:105776720-105790340  |
| 5227 | 2310008M10Rik | 66357  | 3-:130399068-130412335  |
| 5228 | Actr3b        | 242894 | 5+:25265902-25355764    |
| 5229 | Katna1        | 23924  | 10+:7445819-7482948     |
| 5230 | MMT00077995   |        | 6-:117423016-117423443  |
| 5231 | Dus3l         | 224907 | 17+:56904200-56909263   |
| 5232 | Arhgef16      | 230972 | 4-:153652595-153662123  |
| 5233 | Pcbd1         | 13180  | 10+:60552108-60557067   |
| 5234 | Lhx8          | 16875  | 3-:153969261-153993364  |
| 5235 | Anxa6         | 11749  | 11-:54792613-54835083   |
| 5236 | Cldn4         | 12740  | 5-:135420996-135422776  |
| 5237 | Cpa1          | 109697 | 6+:30592297-30595360    |
| 5238 | Il12b         | 16160  | 11+:44213564-44227512   |
| 5239 | 3110009E18Rik | 73103  | 1+:122017761-122084759  |
| 5240 | Atp6v1c1      | 66335  | 15+:38591708-38621638   |
| 5241 | Dlk2          | 106565 | 17+:46439666-46440218   |
| 5242 | Gata3         | 14462  | 2-:9779481-9799424      |
| 5243 | Slc25a26      | 67582  | 6+:94450324-94554141    |
| 5244 | MMT00022648   |        | X+:75636043-75636562    |
| 5245 | Cacna1h       | 58226  | 17-:25511294-25570113   |
| 5246 | MMT00039086   |        | 13-:99743252-99743775   |
| 5247 | Irak2         | 108960 | 6+:113588493-113645003  |
| 5248 | Tjp1          | 21872  | 7-:72441053-72516125    |
| 5249 | Olfir615      | 259084 | 7+:110708992-110709933  |
| 5250 | Ifit2         | 15958  | 19+:34644804-34651013   |
| 5251 | A630089N07Rik | 320586 | 16-:98286709-98303473   |

|      |               |           |                         |
|------|---------------|-----------|-------------------------|
| 5252 | Mfsd3         | 69572     | 15+:76531894-76533998   |
| 5253 | Fastkd3       | 69577     | 13+:68721122-68731155   |
| 5254 | MMT00015794   |           | 10-:41332575-41334698   |
| 5255 | Zkscan16      | 100041581 | 4+:58959022-58970725    |
| 5256 | Tnfrsf13c     | 72049     | 15-:82052173-82054764   |
| 5257 | Zfp236        | 329002    | 18-:82768338-82850148   |
| 5258 | Mcts2         | 66405     | 2+:152512883-152513682  |
| 5259 | Mat1a         | 11720     | 14+:41918669-41937699   |
| 5260 | Dnalc1        | 105000    | 12+:85455318-85479814   |
| 5261 | Gm75          | 219026    | 14+:51734137-51736753   |
| 5262 | Mecp2         | 17257     | X-:71272168-71330932    |
| 5263 | Anapc13       | 69010     | 9+:102532119-102536468  |
| 5264 | BC042720      | 329178    | 1+:66647628-66742170    |
| 5265 | A3galt2       | 215493    | 4+:128438662-128444916  |
| 5266 | Gh            | 14599     | 11-:106161614-106163124 |
| 5267 | 4933439F18Rik | 66771     | 11+:60230646-60264429   |
| 5268 | MMT00017380   |           | 19-:61042140-61043315   |
| 5269 | MMT00068783   |           | X+:99403740-99404795    |
| 5270 | Rnf8          | 58230     | 17+:29751806-29778603   |
| 5271 | Npy           | 109648    | 6+:49773596-49779502    |
| 5272 | Grk4          | 14772     | 5+:35003601-35097952    |
| 5273 | Vmn2r89       | 22301     | 14+:52071636-52080967   |
| 5274 | MMT00065196   |           | 2-:134587804-134589386  |
| 5275 | Pcsk2         | 18549     | 2+:143372142-143639765  |
| 5276 | Coro1b        | 23789     | 19+:4148662-4154034     |
| 5277 | 5033414K04Rik | 98496     | 1-:84034606-84065875    |
| 5278 | 2700078K21Rik | 101513    | 7-:149194457-149246939  |
| 5279 | MMT00079802   |           | 17+:36295759-36318102   |
| 5280 | Htr1f         | 15557     | 16-:64925523-65105610   |
| 5281 | Gpr107        | 277463    | 2+:31007845-31072047    |
| 5282 | 1700027A15Rik | 69449     | 1+:73031411-73072072    |
| 5283 | B3galt1       | 26877     | 2+:67955999-67956980    |
| 5284 | Npffr1        | 237362    | 10+:61076703-61089132   |
| 5285 | Tmc8          | 217356    | 11+:117643432-117645506 |
| 5286 | Thoc6         | 386612    | 17-:23805579-23812190   |
| 5287 | MMT00002272   |           | X-:12521523-12522092    |
| 5288 | Galnt4        | 14426     | 10+:98571048-98572785   |
| 5289 | Tln1          | 21894     | 4-:43544390-43569622    |
| 5290 | 1110028C15Rik | 68691     | 1-:66767384-66848713    |
| 5291 | Chl1          | 12661     | 6+:103460996-103679821  |
| 5292 | Adam4         | 11498     | 12-:82500780-82522832   |
| 5293 | Zdhhc8        | 27801     | 16-:18222319-18235103   |
| 5294 | C730048C13Rik | 319800    | 19-:8409849-8479572     |
| 5295 | F2r           | 14062     | 13-:96371743-96388388   |
| 5296 | Rnf181        | 66510     | 6-:72309714-72312387    |
| 5297 | MMT00079371   |           | 3-:144288366-144288703  |
| 5298 | Sbno1         | 243272    | 5-:124842977-124875577  |
| 5299 | Emilin1       | 100952    | 5+:31216158-31223639    |
| 5300 | 1300001I01Rik | 74148     | 11+:74462376-74484348   |
| 5301 | Cd38          | 12494     | 5+:44260111-44302281    |
| 5302 | Exosc4        | 109075    | 15+:76157857-76161107   |

|      |               |           |                         |
|------|---------------|-----------|-------------------------|
| 5303 | Ndufv2        | 72900     | 17-:66428550-66450866   |
| 5304 | Pdzd2         | 68070     | 15-:12291652-12388060   |
| 5305 | A730076H11Rik | 211027    | 14+:53627284-53992817   |
| 5306 | Ywhag         | 22628     | 5-:136386681-136410446  |
| 5307 | Fkbp8         | 14232     | 8+:73053425-73059221    |
| 5308 | MMT00008486   |           | 6-:50150172-50152566    |
| 5309 | D19Wsu162e    | 226178    | 19+:46673609-46730236   |
| 5310 | Ppie          | 56031     | 4-:122804621-122817175  |
| 5311 | OTTMUSG000000 | 100042922 | X+:10876349-10876876    |
| 5312 | Ccdc91        | 67015     | 6+:147424392-147581126  |
| 5313 | 9630058J23Rik | 226744    | 1+:181536593-181557605  |
| 5314 | Dnajc2        | 22791     | 5-:21263094-21290983    |
| 5315 | Slc5a4b       | 64454     | 10-:75521430-75573763   |
| 5316 | Yipf7         | 75581     | 5-:69908276-69932401    |
| 5317 | MMT00056638   |           | 2-:100466613-100468400  |
| 5318 | Fbxo45        | 268882    | 16-:32230195-32247161   |
| 5319 | Hydin         | 244653    | 8+:113110933-113134145  |
| 5320 | MMT00007643   |           | 8+:23517938-23518974    |
| 5321 | Syngr4        | 58867     | 7-:53142209-53152004    |
| 5322 | Slpi          | 20568     | 2-:164179806-164198446  |
| 5323 | Hsd1l         | 72552     | 8-:122085878-122099045  |
| 5324 | Tsga14        | 83922     | 6-:30604391-30643712    |
| 5325 | C230097I24Rik | 328918    | 18-:24122539-24130290   |
| 5326 | Frmf6         | 319710    | 12+:71965030-72000654   |
| 5327 | Senp6         | 215351    | 9+:79984179-79991975    |
| 5328 | MMT00020895   |           |                         |
| 5329 | Hpd           | 15445     | 5-:123620928-123632734  |
| 5330 | Cbfa2t3       | 12398     | 8-:125153890-125222877  |
| 5331 | Cdkn2b        | 12579     | 4-:88952963-88956706    |
| 5332 | Pdlim4        | 30794     | 11-:53868433-53882470   |
| 5333 | Ttc26         | 264134    | 6+:38331473-38377171    |
| 5334 | MMT00021505   |           | 13-:109098648-109100938 |
| 5335 | Olfir211      | 258914    | 6+:116443628-116444556  |
| 5336 | Timeless      | 21853     | 10+:127675120-127689988 |
| 5337 | Cyp24a1       | 13081     | 2-:170309826-170322576  |
| 5338 | MMT00031733   | 100045011 | 15-:84176768-84177267   |
| 5339 | 4930488E11Rik | 399591    | X-:133491272-133511389  |
| 5340 | MMT00048531   |           | X+:144181262-144199155  |
| 5341 | Gfra4         | 14588     | 2-:130865911-130868418  |
| 5342 | Eps8l3        | 99662     | 3+:107680154-107695817  |
| 5343 | Dqx1          | 93838     | 6+:83008483-83016834    |
| 5344 | MMT00019216   |           | 4-:129288154-129291525  |
| 5345 | MMT00023326   | 57435     | 17-:56240016-56249226   |
| 5346 | Hbb-bh1       | 15132     | 7-:110990267-110991624  |
| 5347 | Zfp371        | 170734    | 7+:6190171-6191018      |
| 5348 | Olfir9        | 18373     | 10+:128426969-128427907 |
| 5349 | Psd3          | 234353    | 8-:70220794-70484678    |
| 5350 | Lipt1         | 623661    | 1+:37929071-37933063    |
| 5351 | Dnahc3        | 381917    | 7-:127066352-127202904  |
| 5352 | Pdcd2l        | 68079     | 7-:34969515-34981692    |
| 5353 | MMT00047295   |           | 18-:21651271-21652423   |

|      |               |        |                         |
|------|---------------|--------|-------------------------|
| 5354 | Upk1a         | 109637 | 7-:31388099-31397755    |
| 5355 | Gpsm2         | 76123  | 3-:108482007-108525087  |
| 5356 | D15Wsu169e    | 223666 | 15-:76554282-76596543   |
| 5357 | MMT00021917   |        | 2-:174979623-174979793  |
| 5358 | Arc           | 11838  | 15-:74499513-74502982   |
| 5359 | Psmd13        | 23997  | 7+:148068331-148084287  |
| 5360 | Cep76         | 225659 | 18-:67777455-67800854   |
| 5361 | Gpr88         | 64378  | 3-:115952573-115956372  |
| 5362 | Nans          | 94181  | 4+:46502153-46515545    |
| 5363 | Phf14         | 75725  | 6+:11875880-11958012    |
| 5364 | Kif22         | 110033 | 7-:134171245-134185934  |
| 5365 | C87436        | 232196 | 6+:86388681-86420379    |
| 5366 | MMT00048276   | 544905 | 12-:115378879-115538476 |
| 5367 | Zfp629        | 320683 | 7-:134750545-134758917  |
| 5368 | Slc12a4       | 20498  | 8-:108467492-108489939  |
| 5369 | Rag1          | 19373  | 2-:101478438-101489658  |
| 5370 | Crh           | 12918  | 3-:19593437-19595485    |
| 5371 | MMT00073868   |        | 3-:37858514-37858925    |
| 5372 | Tor1a         | 30931  | 2-:30816147-30823404    |
| 5373 | Ccr111        | 12770  | 9-:123892172-123893241  |
| 5374 | Chka          | 12660  | 19+:3851913-3894367     |
| 5375 | Sec23b        | 27054  | 2+:144384956-144416109  |
| 5376 | Ncf1          | 17969  | 5-:134697620-134705474  |
| 5377 | MMT00077700   |        | X+:161986982-162118532  |
| 5378 | Tex19.1       | 73679  | 11+:121007470-121009632 |
| 5379 | Grina         | 66168  | 15+:76077252-76080334   |
| 5380 | Olfr1403      | 258645 | 1+:175200515-175201240  |
| 5381 | Scube1        | 64706  | 15-:83435438-83555336   |
| 5382 | Fbn1          | 14118  | 2-:125126331-125332121  |
| 5383 | Usmg2         | 83677  | 17+:88932377-88932547   |
| 5384 | A530064D06Rik | 328830 | 17-:48282346-48303639   |
| 5385 | Tubb2b        | 73710  | 13-:34218876-34222223   |
| 5386 | Ccnl1         | 56706  | 3-:65750075-65762103    |
| 5387 | Olfr170       | 258959 | 16-:19605818-19606759   |
| 5388 | MMT00054957   |        | 11-:101985403-101990378 |
| 5389 | Abce1         | 24015  | 8-:82207543-82235514    |
| 5390 | Otub1         | 107260 | 19-:7272695-7280774     |
| 5391 | Gdf2          | 12165  | 14+:34754223-34760383   |
| 5392 | RP23-268N22.9 | 546519 | 11+:117722065-117725672 |
| 5393 | Olfr1095      | 258725 | 2-:86690928-86691853    |
| 5394 | MMT00015556   |        | 5+:10116908-10164483    |
| 5395 | Dhx9          | 13211  | 1-:155302893-155334792  |
| 5396 | 4933425O20Rik | 66766  | 2+:130232267-130232932  |
| 5397 | Ubl5          | 66177  | 9+:20449247-20451233    |
| 5398 | 1700030F18Rik | 72277  | 15-:99758129-99758310   |
| 5399 | Usp44         | 327799 | 10+:93308434-93320831   |
| 5400 | 2610318N02Rik | 70458  | 16-:17113491-17125223   |
| 5401 | Nlrx1         | 270151 | 9-:44061274-44073930    |
| 5402 | MMT00076103   |        | 19+:3527155-3575893     |
| 5403 | Ccdc25        | 67179  | 14+:66456212-66485044   |
| 5404 | Plekhg1       | 213783 | 10-:6379147-6473615     |

|      |               |        |                         |
|------|---------------|--------|-------------------------|
| 5405 | Apbb2         | 11787  | 5-:66693061-66756362    |
| 5406 | Cd207         | 246278 | 6-:83621677-83627793    |
| 5407 | Chd2          | 244059 | 7-:80702660-80703136    |
| 5408 | Habp4         | 56541  | 13+:64263227-64287842   |
| 5409 | MMT00046838   |        | 5-:100649459-100784138  |
| 5410 | Cyp4f15       | 106648 | 17+:32822603-32840294   |
| 5411 | Pank2         | 74450  | 2+:131088184-131124862  |
| 5412 | MMT00020442   | 544737 | 10+:112365516-112365796 |
| 5413 | Flot1         | 14251  | 17+:35960301-35969732   |
| 5414 | Etnk2         | 214253 | 1+:135260359-135276200  |
| 5415 | Ube2t         | 67196  | 1+:136859153-136870714  |
| 5416 | Jhdm1d        | 338523 | 6-:39086652-39088048    |
| 5417 | Ssb           | 20823  | 2+:69699689-69709856    |
| 5418 | Cdh12         | 215654 | 15+:20614288-21288936   |
| 5419 | ENSMUSG00000  | 629141 | 7+:54238978-54243165    |
| 5420 | Mbnl1         | 56758  | 3+:60333070-60433302    |
| 5421 | Arhgef9       | 236915 | X-:92245446-92391839    |
| 5422 | 4933422A05Rik | 71133  | 9+:35090119-35093008    |
| 5423 | 1110005A23Rik | 66118  | 10+:128258974-128314673 |
| 5424 | Scpep1        | 74617  | 11-:88785576-88816756   |
| 5425 | Ung           | 22256  | 5+:114581208-114589330  |
| 5426 | Olfm2         | 244723 | 9-:20472142-20550683    |
| 5427 | Olf1301       | 258889 | 2+:111594407-111595344  |
| 5428 | Col12a1       | 12816  | 9-:79449565-79566272    |
| 5429 | 2810417H13Rik | 68026  | 9+:65738169-65751073    |
| 5430 | Ifna4         | 15967  | 4+:88487764-88488324    |
| 5431 | Fkbp6         | 94244  | 5-:135767574-135825861  |
| 5432 | EG245297      | 245297 | 12+:17999921-18072431   |
| 5433 | 2410004L22Rik | 76478  | 8-:73775023-73796275    |
| 5434 | Inpp5b        | 16330  | 4+:124428773-124478680  |
| 5435 | Lins2         | 72635  | 7+:73834840-73859630    |
| 5436 | Prl7a1        | 19113  | 13-:27725247-27734343   |
| 5437 | MMT00013238   |        | 14-:70264425-70264583   |
| 5438 | Slc25a15      | 18408  | 8-:23487758-23508932    |
| 5439 | Fuca2         | 66848  | 10+:13220892-13235422   |
| 5440 | 1810020G14Rik | 66272  | 12-:82572811-82586069   |
| 5441 | Csdc2         | 105859 | 15+:81767370-81781370   |
| 5442 | Siglecg       | 243958 | 7+:50663662-50673717    |
| 5443 | Nap1l2        | 17954  | X-:100379514-100381979  |
| 5444 | Stat4         | 20849  | 1+:52065089-52164027    |
| 5445 | 1700003E16Rik | 71837  | 6+:83106456-83112936    |
| 5446 | Atg4a         | 666468 | X+:137491356-137530185  |
| 5447 | Wdr17         | 244484 | 8-:55753703-55759051    |
| 5448 | Olf170        | 56014  | 4-:43709094-43710043    |
| 5449 | Got1          | 14718  | 19-:43574244-43598999   |
| 5450 | Nrbp1         | 192292 | 5+:31543290-31553933    |
| 5451 | MMT00073305   |        | 4+:52834325-52834950    |
| 5452 | Mogat2        | 233549 | 7-:106367595-106387078  |
| 5453 | Odf3l1        | 382075 | 9-:56696466-56699583    |
| 5454 | MMT00059595   |        | 16+:20663826-20665211   |
| 5455 | Kcnab3        | 16499  | 11+:69143825-69145645   |

|      |               |        |                         |
|------|---------------|--------|-------------------------|
| 5456 | Rabgap1l      | 29809  | 1-:162153666-162187675  |
| 5457 | BC052688      | 432812 | 13+:61758492-61759033   |
| 5458 | Nde1          | 67203  | 16+:14169567-14192659   |
| 5459 | 2510049l19Rik | 67922  | 8+:74743643-74747329    |
| 5460 | Tnrc6c        | 217351 | 11+:117575439-117622165 |
| 5461 | Rasgrp4       | 233046 | 7+:29919951-29936634    |
| 5462 | Pramel5       | 384077 | 4-:143860532-143870359  |
| 5463 | Krt14         | 16664  | 11-:100064477-100068824 |
| 5464 | Tk2           | 57813  | 8-:106750600-106772436  |
| 5465 | Slamf8        | 74748  | 1-:174511890-174520620  |
| 5466 | 2310047D13Rik | 116972 | 11+:76014676-76022918   |
| 5467 | Plxdc1        | 72324  | 11-:97785291-97847758   |
| 5468 | MMT00053630   |        | 10+:40268705-40269545   |
| 5469 | Rnf41         | 67588  | 10+:127852245-127876834 |
| 5470 | Cacna2d2      | 56808  | 9+:107302399-107429794  |
| 5471 | Plxdc2        | 67448  | 2+:16278731-16673311    |
| 5472 | Mppe1         | 225651 | 18-:67384702-67405479   |
| 5473 | Ggps1         | 14593  | 13-:14145945-14150160   |
| 5474 | Zswim1        | 71971  | 2+:164648512-164652367  |
| 5475 | Akr1c18       | 105349 | 13-:4131872-4149877     |
| 5476 | Megf9         | 230316 | 4-:70092832-70196035    |
| 5477 | 2210412D01Rik | 70178  | 7-:91257869-91300403    |
| 5478 | Scn1b         | 20266  | 7-:31901707-31911743    |
| 5479 | Ap3d1         | 11776  | 10-:80169723-80204956   |
| 5480 | Hydin         | 244653 | 8+:113095637-113098959  |
| 5481 | Tmem162       | 76415  | 7+:31758843-31774739    |
| 5482 | Cdsn          | 386463 | 17+:35689120-35693858   |
| 5483 | Gpc5          | 103978 | 14+:115768753-115798511 |
| 5484 | 2400003C14Rik | 71955  | 8-:112195228-112217164  |
| 5485 | Rnmtl1        | 67390  | 11+:76057257-76064123   |
| 5486 | Wbscr28       | 76629  | 5-:135378446-135382606  |
| 5487 | Palmd         | 114301 | 3-:116621185-116671667  |
| 5488 | C920009B18Rik | 606736 | 10+:22026526-22034002   |
| 5489 | Nek3          | 23954  | 8-:23238754-23276872    |
| 5490 | MMT00071314   |        | 1+:72134389-72135081    |
| 5491 | MMT00037875   |        | 11+:3528832-3529639     |
| 5492 | MMT00039914   |        | 13+:4247980-4249023     |
| 5493 | Dnajc4        | 57431  | 19-:7062400-7066762     |
| 5494 | Gpr101        | 245424 | X-:54753277-54754965    |
| 5495 | L3mbtl3       | 237339 | 10-:25994276-26072166   |
| 5496 | EG434025      | 434025 | 6+:67999975-68033138    |
| 5497 | Il17f         | 257630 | 1-:20767848-20769593    |
| 5498 | Trpc1         | 22063  | 9-:95607049-95650777    |
| 5499 | MMT00075646   | 666661 | 15+:77449676-77457066   |
| 5500 | 4921513D23Rik | 223989 | 16-:14111447-14163682   |
| 5501 | Dppa2         | 73703  | 16+:48310619-48318824   |
| 5502 | Tmem107       | 66910  | 11+:68884312-68886794   |
| 5503 | Mcrs1         | 51812  | 15-:99073288-99082342   |
| 5504 | Itsn1         | 16443  | 16+:91782437-91912254   |
| 5505 | Thap2         | 66816  | 10-:114808894-114821470 |
| 5506 | D17Wsu92e     | 224647 | 17-:27888201-27957304   |

|      |               |        |                         |
|------|---------------|--------|-------------------------|
| 5507 | Olfir16       | 18313  | 1+:174886927-174887855  |
| 5508 | Lrig2         | 269473 | 3-:104261050-104315822  |
| 5509 | Kcnh4         | 380728 | 11-:100605437-100620919 |
| 5510 | Gm1967        | 381411 | 2-:93701168-93709235    |
| 5511 | BC055004      | 381680 | 5+:138680464-138693315  |
| 5512 | Crtc3         | 70461  | 7-:87733090-87822341    |
| 5513 | EG639869      | 639869 | 3+:64251881-64264060    |
| 5514 | MMT00044522   | 435784 | 4-:53802397-53804328    |
| 5515 | Apobec3       | 80287  | 15+:79741603-79747835   |
| 5516 | V1rc14        | 171187 | 6-:66561646-66562562    |
| 5517 | Stx17         | 67727  | 4+:48137801-48195989    |
| 5518 | Jmjd1c        | 108829 | 10+:66590005-66719072   |
| 5519 | 1700067K01Rik | 73453  | 8+:86525432-86528667    |
| 5520 | Gltpd2        | 216871 | 11+:70332710-70334237   |
| 5521 | Perld1        | 320655 | 11-:98251110-98261750   |
| 5522 | Pink1         | 68943  | 4-:137869319-137882193  |
| 5523 | Taok1         | 216965 | 11-:77343564-77344872   |
| 5524 | Klhl7         | 52323  | 5+:23606429-23666603    |
| 5525 | Prkca         | 18750  | 11-:107799561-108205242 |
| 5526 | Ush1c         | 72088  | 7-:53450726-53493860    |
| 5527 | Zfp398        | 272347 | 6+:47785665-47818255    |
| 5528 | Rfx1          | 19724  | 8+:86590827-86619942    |
| 5529 | Setbp1        | 240427 | 18-:78952276-79120781   |
| 5530 | MMT00027303   |        | 16+:21896562-21897207   |
| 5531 | Ptk6          | 20459  | 2-:180929828-180937494  |
| 5532 | Fezf2         | 54713  | 14-:13174615-13178342   |
| 5533 | Baalc         | 118452 | 15+:38765454-38780774   |
| 5534 | 2310036O22Rik | 68544  | 8+:87550770-87554184    |
| 5535 | Olfir446      | 258292 | 6+:42877231-42878157    |
| 5536 | 5830415F09Rik | 74753  | 4-:46389379-46402540    |
| 5537 | Kcnt2         | 240776 | 1+:142247784-142506288  |
| 5538 | Slc7a3        | 11989  | X-:98274560-98280691    |
| 5539 | Eif2s2        | 67204  | 2-:154697153-154718518  |
| 5540 | Abp1          | 76507  | 6+:48845252-48859186    |
| 5541 | Bcap29        | 12033  | 12-:32280260-32319245   |
| 5542 | Il27          | 246779 | 7-:133732808-133738424  |
| 5543 | Phlpp         | 98432  | 1+:108177939-108290821  |
| 5544 | Camsap1       | 227634 | 2-:25782493-25838494    |
| 5545 | Shroom3       | 27428  | 5+:93112460-93393977    |
| 5546 | Slc5a12       | 241612 | 2+:110481878-110488763  |
| 5547 | Cd3eap        | 70333  | 7-:19942219-19944768    |
| 5548 | Fgf6          | 14177  | 6+:126965603-126977447  |
| 5549 | Zfp217        | 228913 | 2-:169935942-169945905  |
| 5550 | MMT00047096   |        | 2-:105377095-105377639  |
| 5551 | Pim1          | 18712  | 17+:29628088-29631692   |
| 5552 | Rasgrp3       | 240168 | 17+:75895692-75927270   |
| 5553 | MMT00013152   |        | 12-:72369920-72371344   |
| 5554 | Emr1          | 13733  | 17+:57498112-57622948   |
| 5555 | Fbln7         | 70370  | 2+:128703086-128722768  |
| 5556 | Ccl4          | 20303  | 11+:83476088-83478182   |
| 5557 | Tpx2          | 72119  | 2+:152673718-152719973  |



|      |               |           |                         |
|------|---------------|-----------|-------------------------|
| 5558 | V1ra9         | 113851    | 6+:90219099-90220045    |
| 5559 | Pftk1         | 18647     | 5-:4803733-5380197      |
| 5560 | Sh2b2         | 23921     | 5-:136694578-136720741  |
| 5561 | MMT00054702   | 100040158 | 1+:84960243-84961132    |
| 5562 | Arhgdia       | 192662    | 11-:120439418-120442562 |
| 5563 | Slco1a4       | 28250     | 6-:141753960-141804692  |
| 5564 | Tmprss11e     | 243084    | 5-:87136305-87174863    |
| 5565 | MMT00051106   | 546543    | 12+:89460808-89552820   |
| 5566 | 2610002J02Rik | 67513     | 4+:154623908-154630799  |
| 5567 | Mapk8ip1      | 19099     | 2-:92224326-92241310    |
| 5568 | EG627866      | 627866    | 1+:53447249-53449740    |
| 5569 | Pdgfc         | 54635     | 3+:80841161-81017954    |
| 5570 | MMT00025545   | 433776    | 4-:142831926-142833276  |
| 5571 | MMT00040490   |           | 6-:70384922-70385482    |
| 5572 | Opalin        | 226115    | 19-:41134027-41151655   |
| 5573 | MMT00043445   |           |                         |
| 5574 | Hsd3b7        | 101502    | 7+:134944182-134947312  |
| 5575 | Pign          | 27392     | 1-:107417718-107560239  |
| 5576 | Polr2e        | 66420     | 10-:79498695-79502410   |
| 5577 | MMT00009628   |           | 11+:117736358-117825335 |
| 5578 | Phactr1       | 218194    | 13+:43051984-43230728   |
| 5579 | MMT00004201   |           | 4-:40061626-40064353    |
| 5580 | 4933407P14Rik | 237958    | 11+:104047835-104049761 |
| 5581 | MMT00000722   |           | 17-:19559420-19581898   |
| 5582 | EG433387      | 433387    | 1+:186441126-186441607  |
| 5583 | Igh           | 111507    | 12-:115008053-115008508 |
| 5584 | MMT00007678   |           | 2+:118571806-118572308  |
| 5585 | Map3k14       | 53859     | 11-:103082338-103103684 |
| 5586 | OTTMUSG000000 | 433719    | 4-:72512345-73084353    |
| 5587 | Rmnd5b        | 66089     | 11-:51436993-51449499   |
| 5588 | Snx20         | 71607     | 8-:91150726-91160027    |
| 5589 | D930028F11Rik | 244853    | 9+:48200799-48207153    |
| 5590 | Centd2        | 69710     | 7+:108496655-108560407  |
| 5591 | Igsf8         | 140559    | 1+:174242069-174249971  |
| 5592 | Runx3         | 12399     | 4+:134708410-134732096  |
| 5593 | Fmn2          | 54418     | 1+:176431976-176752198  |
| 5594 | Erbp3         | 13867     | 10-:128004583-128026677 |
| 5595 | Kifap3        | 16579     | 1+:165709809-165847230  |
| 5596 | Wnt1          | 22408     | 15+:98621280-98624269   |
| 5597 | Tll4          | 67534     | 1+:74725565-74744545    |
| 5598 | Trp73         | 22062     | 4-:153430356-153516627  |
| 5599 | Tbc1d10b      | 68449     | 7-:134341309-134351337  |
| 5600 | Zfyve26       | 211978    | 12-:80388780-80397266   |
| 5601 | 4933417O08Rik | 71146     | 19+:42322061-42343631   |
| 5602 | 3222402P14Rik | 235542    | 9-:101004710-101115476  |
| 5603 | BC020535      | 228788    | 2+:152891690-152907334  |
| 5604 | Ptprb         | 19263     | 10+:115712576-115820990 |
| 5605 | Nxph1         | 18231     | 6+:9185910-9197845      |
| 5606 | Atg7          | 74244     | 6+:114593071-114812050  |
| 5607 | Ick           | 56542     | 9+:77961215-78015745    |
| 5608 | Ntrk2         | 18212     | 13+:58910089-59034481   |

|      |               |           |                         |
|------|---------------|-----------|-------------------------|
| 5609 | Gtf2a2        | 235459    | 9+:69860390-69870268    |
| 5610 | Syngap1       | 240057    | 17+:27081577-27107590   |
| 5611 | Rapgef3       | 223864    | 15-:97575386-97598097   |
| 5612 | Cdv3          | 321022    | 9-:103255487-103267828  |
| 5613 | Mrpl12        | 56282     | 11+:120345982-120350067 |
| 5614 | Cope          | 59042     | 8+:72826683-72836889    |
| 5615 | Sertad2       | 58172     | 11+:20443336-20549114   |
| 5616 | Tmod2         | 50876     | 9-:75421721-75459073    |
| 5617 | Irs4          | 16370     | X-:138156091-138159741  |
| 5618 | Phxr4         | 18689     | 9+:13234580-13235956    |
| 5619 | Rap1gds1      | 229877    | 3-:138588876-138738034  |
| 5620 | 2700038C09Rik | 66496     | 2+:180922054-180922942  |
| 5621 | Nudt9         | 74167     | 5+:104476015-104494386  |
| 5622 | Zfp655        | 72611     | 5+:145992628-146006038  |
| 5623 | Mc2r          | 17200     | 18-:68566983-68567874   |
| 5624 | Olfr763       | 258861    | 10+:128448342-128449272 |
| 5625 | MMT00035309   |           | 5-:102845385-102845885  |
| 5626 | Kremen2       | 73016     | 17-:23878166-23882796   |
| 5627 | D130051D11Rik | 319737    | 15+:85456126-85476733   |
| 5628 | MMT00035417   | 634100    | 12-:116067451-116067908 |
| 5629 | Als2          | 74018     | 1-:59219775-59294061    |
| 5630 | Fnta          | 14272     | 8-:27109439-27126067    |
| 5631 | Cited1        | 12705     | X-:99442796-99443961    |
| 5632 | Reck          | 53614     | 4+:43950178-43957675    |
| 5633 | MMT00006481   | 100044456 | 3-:93007274-93023729    |
| 5634 | Creb1         | 12912     | 1+:64579467-64644851    |
| 5635 | 4930519L02Rik | 75085     | 3+:142703460-142703714  |
| 5636 | Trmu          | 72026     | 15+:85709756-85727820   |
| 5637 | Slc17a8       | 216227    | 10-:89038954-89040773   |
| 5638 | Otud4         | 73945     | 8+:82163291-82201646    |
| 5639 | Gdpd3         | 68616     | 7+:133910686-133919157  |
| 5640 | Gpx4          | 625249    | 10+:79516232-79519182   |
| 5641 | MMT00024854   |           | 7-:109716505-109718267  |
| 5642 | Crebzf        | 233490    | 7+:97592081-97593285    |
| 5643 | Gas2l1        | 78926     | 11-:4960472-4964854     |
| 5644 | Spsb2         | 14794     | 6+:124758958-124760632  |
| 5645 | Tmem8         | 60455     | 17+:26250261-26260196   |
| 5646 | Kifc1         | 16580     | 17+:27054159-27069227   |
| 5647 | MMT00026884   |           | 9+:41459975-41463363    |
| 5648 | Zfp213        | 449521    | 17-:23693735-23701168   |
| 5649 | MMT00045864   |           | 16-:33138632-33140656   |
| 5650 | Arhgap21      | 71435     | 2-:20801969-20889034    |
| 5651 | Olfr541       | 258964    | 7+:147890151-147891088  |
| 5652 | Adam26a       | 13525     | 8-:44653631-44662020    |
| 5653 | BC050777      | 241850    | 2+:181196603-181229436  |
| 5654 | Tln2          | 70549     | 9-:67068460-67159701    |
| 5655 | OTTMUSG000000 | 194225    | 4+:143436442-143443542  |
| 5656 | 4933434I20Rik | 67555     | 8+:85872369-85903301    |
| 5657 | Arpc1b        | 11867     | 5+:145883424-145887638  |
| 5658 | Mycl1         | 16918     | 4+:122673765-122677756  |
| 5659 | MMT00053254   |           | 12+:88055935-88056393   |

|      |               |        |                         |
|------|---------------|--------|-------------------------|
| 5660 | Fat3          | 270120 | 9-:16179392-16182698    |
| 5661 | Lrrc46        | 69297  | 11-:96895911-96902658   |
| 5662 | Cyp27b1       | 13115  | 10+:126485307-126490024 |
| 5663 | Rev3l         | 19714  | 10+:39452374-39595013   |
| 5664 | Fez2          | 225020 | 17-:78777222-78817426   |
| 5665 | Nsun2         | 28114  | 13+:69754381-69773211   |
| 5666 | Vegfb         | 22340  | 19-:7056961-7062093     |
| 5667 | Ranbp3l       | 223332 | 15+:8986847-8992882     |
| 5668 | Tdp1          | 104884 | 12+:101147885-101193432 |
| 5669 | Fndc1         | 68655  | 17-:7931447-7966670     |
| 5670 | EG625253      | 625253 | X+:153978628-153979376  |
| 5671 | Pxmp2         | 19301  | 5-:110703579-110715024  |
| 5672 | Galnt4        | 233733 | 7-:118615168-118759998  |
| 5673 | 1500001A10Rik | 68955  | 5-:116894578-116932555  |
| 5674 | MMT00073552   |        | 3-:121886794-121887878  |
| 5675 | Slc5a9        | 230612 | 4-:111549856-111575348  |
| 5676 | MMT00039774   |        | 4+:90823384-90823888    |
| 5677 | Cmas          | 12764  | 6+:142705292-142724227  |
| 5678 | Recql5        | 170472 | 11-:115753990-115794320 |
| 5679 | MMT00002281   |        |                         |
| 5680 | Lrg1          | 76905  | 17-:56259102-56261312   |
| 5681 | Mbd1          | 17190  | 18+:74427957-74442339   |
| 5682 | Kcnh7         | 170738 | 2-:62541001-62715414    |
| 5683 | Arhgap1       | 228359 | 2+:91490378-91512475    |
| 5684 | Ranbp10       | 74334  | 8-:108292209-108351095  |
| 5685 | Gbx2          | 14472  | 1-:91824474-91827752    |
| 5686 | Cys1          | 12879  | 12-:25350702-25366678   |
| 5687 | Klf11         | 194655 | 12+:25336389-25347640   |
| 5688 | Cacng3        | 54376  | 7+:129815287-129912359  |
| 5689 | Dsg2          | 13511  | 18+:20716573-20763024   |
| 5690 | Rbm15         | 229700 | 3-:107128544-107135866  |
| 5691 | Csrp3         | 13009  | 7-:56085929-56103395    |
| 5692 | 2010005H15Rik | 76770  | 16+:36253090-36257530   |
| 5693 | Zfp809        | 235047 | 9+:22009228-22047796    |
| 5694 | Sp7           | 170574 | 15-:102187040-102196764 |
| 5695 | Prdm12        | 381359 | 2+:31495621-31509812    |
| 5696 | Tarbp2        | 21357  | 15+:102349551-102354105 |
| 5697 | Naca          | 17938  | 10+:127219576-127485561 |
| 5698 | Nkain1        | 67149  | 4+:130125774-130168392  |
| 5699 | MMT00042766   |        |                         |
| 5700 | Tenc1         | 209039 | 15+:101933517-101946833 |
| 5701 | Tpsg1         | 26945  | 17+:25507596-25511380   |
| 5702 | Akap14        | 434756 | X-:34689906-34704089    |
| 5703 | 4930451C15Rik | 74685  | 16-:17548781-17554525   |
| 5704 | MMT00077118   |        | 14+:43787610-43793723   |
| 5705 | Bmpr1b        | 12167  | 3-:141503331-141832182  |
| 5706 | Cyp1a2        | 13077  | 9-:57525035-57530336    |
| 5707 | MMT00017539   |        | 4-:136165086-136165774  |
| 5708 | C1ql1         | 23829  | 11-:102801047-102807775 |
| 5709 | Hnrnpa3       | 229279 | 2+:75500034-75501775    |
| 5710 | Centg2        | 347722 | 1+:91501172-91640473    |

|      |               |        |                         |
|------|---------------|--------|-------------------------|
| 5711 | Ndufc1        | 66377  | 3-:51209400-51212877    |
| 5712 | Kel           | 23925  | 6-:41636352-41654296    |
| 5713 | 1700009J07Rik | 75188  | 10+:77356172-77356908   |
| 5714 | Zmynd19       | 67187  | 2+:24805366-24814933    |
| 5715 | ENSMUSG00000  | 433237 | 19+:29141789-29143990   |
| 5716 | Intu          | 380614 | 3+:40439714-40503718    |
| 5717 | 2310007B03Rik | 71874  | 1-:95048160-95057448    |
| 5718 | Tspan2        | 70747  | 3+:102538889-102575154  |
| 5719 | 11-Sep        | 52398  | 5+:93522464-93604665    |
| 5720 | Olfr651       | 258809 | 7+:111701434-111702375  |
| 5721 | Mlc1          | 170790 | 15-:88786314-88809437   |
| 5722 | Manba         | 110173 | 3+:135148574-135234246  |
| 5723 | Dtwd2         | 68857  | 18-:49857130-49915232   |
| 5724 | BC039632      | 330657 | 7-:135028957-135039133  |
| 5725 | 2-Mar         | 224703 | 17-:33828474-33855582   |
| 5726 | MMT00024129   |        | 2-:175439916-175442156  |
| 5727 | Camk2g        | 12325  | 14-:21554097-21611844   |
| 5728 | MMT00044077   |        | 18-:47853154-47895055   |
| 5729 | 2310016C08Rik | 69573  | 6+:29222749-29225322    |
| 5730 | Tasp1         | 75812  | 2-:139659214-139736380  |
| 5731 | 1810010D01Rik | 381935 | 7-:152391729-152393991  |
| 5732 | Sh3tc2        | 225608 | 18+:62137530-62150981   |
| 5733 | B4galnt2      | 14422  | 11-:95727335-95776185   |
| 5734 | EG619653      | 619653 | 8-:128999567-129000755  |
| 5735 | Nkapl         | 66707  | 13-:21558967-21560356   |
| 5736 | Nlrp4d        | 384752 | 7-:10957389-10974325    |
| 5737 | Nkx2-2        | 18088  | 2-:147008887-147012095  |
| 5738 | St8sia1       | 20449  | 6-:142777291-142912596  |
| 5739 | Adsl          | 11564  | 15+:80778943-80799549   |
| 5740 | Efemp2        | 58859  | 19+:5475020-5481852     |
| 5741 | Zc3h10        | 103284 | 10-:127980622-127984800 |
| 5742 | Olfr782       | 257985 | 10+:128787620-128788563 |
| 5743 | L3mbtl        | 241764 | 2+:162773893-162800257  |
| 5744 | Pxt1          | 69307  | 17-:29070930-29079210   |
| 5745 | Cartpt        | 27220  | 13-:100668874-100670589 |
| 5746 | Ndufs2        | 226646 | 1-:173164990-173171276  |
| 5747 | Fbxl16        | 214931 | 17+:25953360-25956727   |
| 5748 | Brsk2         | 75770  | 7+:149136256-149184917  |
| 5749 | Ube2j2        | 140499 | 4+:155323115-155331473  |
| 5750 | 2610101N10Rik | 67958  | 9-:95360816-95412304    |
| 5751 | MMT00003389   |        | 19+:59162039-59163044   |
| 5752 | Dffa          | 13347  | 4+:148478359-148492047  |
| 5753 | 4931440F15Rik | 216622 | 11-:29723491-29725455   |
| 5754 | MMT000062691  |        | 3-:6450592-6451588      |
| 5755 | BC024978      | 414069 | 7+:27982290-27989319    |
| 5756 | Snx19         | 102607 | 9+:30235293-30274729    |
| 5757 | Arglu1        | 234023 | 8-:8666300-8690517      |
| 5758 | Tpst1         | 22021  | 5+:130577459-130611598  |
| 5759 | Trim23        | 81003  | 13+:104968876-104994498 |
| 5760 | Prl           | 19109  | 13+:27149444-27157051   |
| 5761 | Ralgps2       | 78255  | 1-:158738960-158837895  |

|      |               |           |                         |
|------|---------------|-----------|-------------------------|
| 5762 | Trpc3         | 22065     | 3-:36519494-36570525    |
| 5763 | Tnni3k        | 435766    | 3-:154601714-154756153  |
| 5764 | Ltb4dh        | 67103     | 4-:58979360-58999973    |
| 5765 | Ifitm2        | 80876     | 7-:148140737-148141860  |
| 5766 | 5033414D02Rik | 67759     | 19-:29423166-29436361   |
| 5767 | Cpne6         | 12891     | 14+:56130196-56136267   |
| 5768 | MMT00077590   |           | 18-:90480351-90481596   |
| 5769 | MMT00050131   | 100040591 | 1-:89282859-89291281    |
| 5770 | 2810485I05Rik | 72826     | 9+:13632418-13650981    |
| 5771 | Ysk4          | 22625     | 1-:129713831-129714509  |
| 5772 | Katnal2       | 71206     | 18-:77231938-77286035   |
| 5773 | 1700129C05Rik | 67932     | 14-:59751876-59761730   |
| 5774 | MMT00040053   |           | X+:100702148-100702927  |
| 5775 | Jam2          | 67374     | 16+:84774672-84823137   |
| 5776 | Rpa1          | 68275     | 11-:75113850-75161806   |
| 5777 | Dusp16        | 70686     | 6-:134665487-134742493  |
| 5778 | Map4k5        | 399510    | 12-:70904745-70993996   |
| 5779 | Olfr1311      | 258271    | 2-:111861072-111862009  |
| 5780 | Col14a1       | 12818     | 15+:55139299-55352357   |
| 5781 | Rad54l        | 19366     | 4-:115769559-115795741  |
| 5782 | MMT00042046   |           |                         |
| 5783 | 4833413O15Rik | 242286    | 4-:3989766-4004072      |
| 5784 | Tmem48        | 72787     | 4+:107040645-107088959  |
| 5785 | Fbxw10        | 213980    | 11+:62660409-62691099   |
| 5786 | Lta           | 16992     | 17-:35340107-35342128   |
| 5787 | Aff1          | 17355     | 5+:104183347-104280640  |
| 5788 | Smpdl3b       | 100340    | 4-:132288880-132313086  |
| 5789 | Pten          | 19211     | 19+:32831986-32894517   |
| 5790 | Reep3         | 28193     | 10-:66474255-66559697   |
| 5791 | Baiap211      | 66898     | 5-:145025397-145118981  |
| 5792 | Tpd52l2       | 66314     | 2+:181231905-181250603  |
| 5793 | Cpeb3         | 208922    | 19-:37098242-37249881   |
| 5794 | Ict1          | 68572     | 11+:115265079-115272227 |
| 5795 | MMT00057992   |           | 4+:41115654-41116684    |
| 5796 | MMT00013344   |           |                         |
| 5797 | MMT00034010   |           | 4-:40663118-40664024    |
| 5798 | Tcfcp2l1      | 81879     | 1+:120524530-120581744  |
| 5799 | Tlr13         | 279572    | X+:103338613-103354972  |
| 5800 | Mta3          | 116871    | 17+:84105548-84203938   |
| 5801 | MMT00042142   |           | 6-:127133424-127174210  |
| 5802 | Mad2l2        | 71890     | 4+:147514598-147519805  |
| 5803 | Tet2          | 214133    | 3-:133151131-133177138  |
| 5804 | Thrsp         | 21835     | 7-:104565560-104566013  |
| 5805 | Aak1          | 269774    | 6+:86799634-86946961    |
| 5806 | Prrx2         | 20204     | 2+:30700800-30736771    |
| 5807 | Gif           | 14603     | 19+:11822136-11837937   |
| 5808 | Myeov2        | 66915     | 1-:94533723-94538545    |
| 5809 | MMT00030928   |           | X-:79067525-79068260    |
| 5810 | 1700023F06Rik | 69441     | 11-:103061375-103069850 |
| 5811 | Col4a2        | 12827     | 8+:11312890-11449286    |
| 5812 | Dkk1          | 13380     | 19-:30621323-30623891   |

|      |               |        |                         |
|------|---------------|--------|-------------------------|
| 5813 | 1700021K10Rik | 66331  | 8-:60255021-60441361    |
| 5814 | Nrbp2         | 223649 | 15-:75916024-75920443   |
| 5815 | Ehf           | 13661  | 2-:103106667-103123917  |
| 5816 | Pdss1         | 56075  | 2+:22757272-22795711    |
| 5817 | Tbl3          | 213773 | 17-:24837590-24844551   |
| 5818 | Papola        | 18789  | 12+:107037860-107075068 |
| 5819 | Pou6f1        | 19009  | 15-:100408673-100416283 |
| 5820 | MMT00041363   |        | 6+:112942114-112942610  |
| 5821 | Pin4          | 69713  | X+:99314860-99322900    |
| 5822 | Car2          | 12349  | 3+:14886697-14900576    |
| 5823 | 6530418L21Rik | 109050 | 3+:105507591-105521076  |
| 5824 | V1rh4         | 171247 | 13+:22474406-22475508   |
| 5825 | RP23-434B7.2  | 68280  | 4-:91857427-91858446    |
| 5826 | 1700112E06Rik | 76633  | 14+:22838931-22846550   |
| 5827 | 6332401O19Rik | 319832 | 6-:24901146-24906085    |
| 5828 | MMT00048630   |        | 14+:10718704-10718927   |
| 5829 | 2810455K09Rik | 72805  | 12+:112088515-112107287 |
| 5830 | 2410066E13Rik | 68235  | 6+:54631739-54649251    |
| 5831 | Sh2b3         | 16923  | 5-:122267730-122282573  |
| 5832 | Fbxl19        | 233902 | 7+:134891763-134912995  |
| 5833 | Kcnk7         | 16530  | 19+:5704366-5707100     |
| 5834 | MMT00015240   |        | 11-:16543098-16543894   |
| 5835 | Hrh1          | 15465  | 6+:114429753-114431218  |
| 5836 | Ndufb9        | 66218  | 15+:58765357-58771305   |
| 5837 | Alg8          | 381903 | 7+:104520046-104540670  |
| 5838 | Magi1         | 14924  | 6-:93626348-93765821    |
| 5839 | Olf1045       | 259019 | 2-:86037961-86038907    |
| 5840 | Tbc1d9b       | 76795  | 11+:49944902-49986279   |
| 5841 | Atg12         | 67526  | 18-:46892080-46901211   |
| 5842 | Cldn6         | 54419  | 17+:23818030-23818689   |
| 5843 | Anks1b        | 77531  | 10+:89973340-90143666   |
| 5844 | Kctd21        | 622320 | 7+:104495831-104504545  |
| 5845 | Il18bp        | 16068  | 7-:109163590-109166669  |
| 5846 | Plscr3        | 70310  | 11+:69660396-69664545   |
| 5847 | Olf1803       | 258547 | 10-:129128168-129129095 |
| 5848 | MMT00064917   |        | 15-:37096092-37102192   |
| 5849 | 2310031A18Rik | 69627  | 8-:127264157-127275506  |
| 5850 | MMT00051577   |        | 14+:46587419-46612844   |
| 5851 | Kctd4         | 67516  | 14+:76362278-76363810   |
| 5852 | 2410019A14Rik | 229937 | 3+:145239184-145267650  |
| 5853 | Trim30        | 20128  | 7-:111557541-111613625  |
| 5854 | Kif11         | 16551  | 19+:37450840-37496351   |
| 5855 | A730020M07Rik | 319738 | 3-:121340072-121349373  |
| 5856 | Mfsd2         | 76574  | 4-:122623711-122638436  |
| 5857 | Rassf1        | 56289  | 9+:107457089-107464591  |
| 5858 | Itch          | 16396  | 2+:154959300-155052587  |
| 5859 | Ssr4          | 20832  | X+:71032400-71036161    |
| 5860 | MMT00070014   |        | 13-:9595591-9596642     |
| 5861 | Anxa3         | 11745  | 5+:97222433-97274987    |
| 5862 | MMT00053780   |        | 9+:70700765-70701863    |
| 5863 | Gm606         | 239789 | 16-:26960339-26968392   |

|      |               |        |                         |
|------|---------------|--------|-------------------------|
| 5864 | C730036D15Rik | 209186 | 4-:49392792-49396448    |
| 5865 | H2-DMb2       | 15000  | 17+:34282360-34288040   |
| 5866 | EG432502      | 432502 | 10+:110562915-110563781 |
| 5867 | Stk4          | 58231  | 2+:163899900-163977621  |
| 5868 | Zfp33b        | 69623  | 5+:105064924-105068106  |
| 5869 | MMT00058347   |        | 14+:108147699-108148978 |
| 5870 | Limd1         | 29806  | 9+:123387823-123430634  |
| 5871 | Ndst3         | 83398  | 3-:123231726-123375393  |
| 5872 | Ankle1        | 234396 | 8+:73929917-73934441    |
| 5873 | 2810471M01Rik | 72818  | 11+:28581562-28593276   |
| 5874 | Olfr808       | 258930 | 10+:129204553-129205491 |
| 5875 | Cd86          | 12524  | 16-:36606620-36666079   |
| 5876 | 1600029O15Rik | 442832 | 9+:58055194-58056247    |
| 5877 | Stx8          | 55943  | 11+:67779986-68017347   |
| 5878 | Iqgap2        | 544963 | 13-:96397129-96661872   |
| 5879 | Lmnbl1        | 16906  | 18+:56867526-56913076   |
| 5880 | Ppme1         | 72590  | 7-:107475245-107503353  |
| 5881 | Fzd4          | 14366  | 7+:96115428-96557763    |
| 5882 | Tyr           | 22173  | 7-:94575914-94641921    |
| 5883 | Olfr1087      | 258843 | 2-:86530190-86531130    |
| 5884 | Gstm2         | 14863  | 3-:107784616-107789315  |
| 5885 | Dnm1          | 13429  | 2-:32165970-32208815    |
| 5886 | Kcnq2         | 16536  | 2-:180843148-180869882  |
| 5887 | Dctn5         | 59288  | 7+:129276596-129292152  |
| 5888 | Slco4c1       | 227394 | 1-:98715153-98768749    |
| 5889 | Errfi1        | 74155  | 4+:150229199-150242988  |
| 5890 | Zfx           | 22764  | X-:91319970-91368239    |
| 5891 | Loxhd1        | 240411 | 18+:77546488-77568068   |
| 5892 | MMT00038457   |        | 13+:99383173-99384945   |
| 5893 | MMT00023658   |        |                         |
| 5894 | Wdr21         | 73828  | 12+:84867032-84882865   |
| 5895 | Fcrl6         | 677296 | 1-:174528781-174529409  |
| 5896 | Ccr8          | 12776  | 9+:120002924-120004024  |
| 5897 | MMT00013714   |        | 4+:90692200-90781826    |
| 5898 | MMT00034680   |        | 6+:122594283-122594787  |
| 5899 | Cpa3          | 12873  | 3-:20115521-20142076    |
| 5900 | Igsf21        | 230868 | 4-:139582764-139802286  |
| 5901 | Ap1g2         | 11766  | 14-:55717692-55724965   |
| 5902 | 4930563P21Rik | 75275  | 2+:113125896-113137343  |
| 5903 | Gpr135        | 238252 | 12-:73170606-73171978   |
| 5904 | Chst4         | 26887  | 8-:112553715-112554880  |
| 5905 | Nos2          | 18126  | 11+:78734360-78773626   |
| 5906 | Lmbr1l        | 74775  | 15-:98734350-98748461   |
| 5907 | BC026439      | 210463 | 15-:57075348-57095248   |
| 5908 | MMT00027552   |        | 13-:79092343-79094053   |
| 5909 | Psma6         | 26443  | 12+:56499883-56519438   |
| 5910 | 1110014J01Rik | 74778  | 15-:82946278-82953181   |
| 5911 | Cyp4a12b      | 13118  | 4+:115084260-115111200  |
| 5912 | Ccbe1         | 320924 | 18-:66220639-66244526   |
| 5913 | 1700007E06Rik | 75459  | 15-:89220593-89240649   |
| 5914 | Usp36         | 72344  | 11-:118120965-118151557 |

|      |               |        |                         |
|------|---------------|--------|-------------------------|
| 5915 | Npc1l1        | 237636 | 11-:6111019-6129360     |
| 5916 | Triml2        | 622117 | 8+:44244116-44269210    |
| 5917 | Zfp608        | 269023 | 18-:55047736-55148182   |
| 5918 | Ccl9          | 20308  | 11-:83388160-83392112   |
| 5919 | B930041F14Rik | 230991 | 4+:155042736-155069280  |
| 5920 | Las1l         | 76130  | X-:93147318-93152187    |
| 5921 | MMT00026738   |        | 9-:72454194-72454753    |
| 5922 | Hyal2         | 15587  | 9+:107471456-107475107  |
| 5923 | Vav1          | 22324  | 17+:57418607-57467126   |
| 5924 | Fras1         | 231470 | 5+:97074846-97086491    |
| 5925 | Tmem59l       | 67937  | 8-:73007757-73011236    |
| 5926 | MMT00011275   |        |                         |
| 5927 | Rshl1         | 83434  | 7+:19640042-19659795    |
| 5928 | Mizf          | 102423 | 9-:44105767-44113809    |
| 5929 | Cpz           | 242939 | 5-:35844865-35868184    |
| 5930 | Mst1r         | 19882  | 9+:107809219-107822712  |
| 5931 | 4930567K20Rik | 78056  | 10+:10468460-10477965   |
| 5932 | Arfgap2       | 77038  | 2+:91105462-91117087    |
| 5933 | Ppp1r1b       | 19049  | 11+:98210051-98219106   |
| 5934 | S100a10       | 20194  | 3+:93359085-93368565    |
| 5935 | Brwd3         | 382236 | X-:105936923-106020834  |
| 5936 | Pfn1          | 18643  | 11-:70465350-70468033   |
| 5937 | MMT00079008   |        |                         |
| 5938 | Pfn2          | 18645  | 3-:57645822-57651410    |
| 5939 | Morn3         | 74890  | 5-:123485797-123496983  |
| 5940 | Olfir521      | 258353 | 7+:106915673-106916637  |
| 5941 | Ttn           | 22138  | 2-:76673993-76674677    |
| 5942 | 2310016E02Rik | 67695  | 5-:31208891-31210098    |
| 5943 | Rp1l1         | 271209 | 14+:64649446-64652341   |
| 5944 | Sp3           | 20687  | 2-:72774485-72819017    |
| 5945 | MMT00056805   |        | 4+:115153572-115153848  |
| 5946 | MMT00048659   |        |                         |
| 5947 | BC008155      | 214917 | 17-:25927451-25929329   |
| 5948 | MMT00019326   |        | 13-:114551590-114552329 |
| 5949 | Zbp1          | 58203  | 2-:173032112-173044391  |
| 5950 | EG545052      | 545052 | 14+:55660560-55661539   |
| 5951 | Dmbx1         | 140477 | 4-:115590556-115596407  |
| 5952 | Rhoj          | 80837  | 12+:76409412-76502442   |
| 5953 | MMT00008178   |        | 5-:28186044-28186980    |
| 5954 | Lcn13         | 227627 | 2+:25555592-25558846    |
| 5955 | Six2          | 20472  | 17-:86083785-86087377   |
| 5956 | Selp          | 20344  | 1+:166053832-166079873  |
| 5957 | Tsen34        | 66078  | 7+:3646175-3652609      |
| 5958 | Mei1          | 74369  | 15+:81900575-81902435   |
| 5959 | Cdh3          | 12560  | 8+:109034779-109080047  |
| 5960 | EG381065      | 381065 | 17+:20707334-20708162   |
| 5961 | Pla2g4b       | 211429 | 2+:119853241-119858329  |
| 5962 | Olfir1356     | 258305 | 10-:78309517-78310658   |
| 5963 | 2900046G09Rik | 78408  | 16+:20693424-20703116   |
| 5964 | Cxxc4         | 319478 | 3+:133903180-133903792  |
| 5965 | Pbld          | 68371  | 10+:62524345-62539576   |



|      |               |        |                         |
|------|---------------|--------|-------------------------|
| 5966 | Cacnb4        | 12298  | 2-:52289380-52413917    |
| 5967 | Nup85         | 445007 | 11+:115425773-115430038 |
| 5968 | MMT00012419   |        | 4+:140640935-140641534  |
| 5969 | Rpn2          | 20014  | 2+:157109318-157151786  |
| 5970 | MMT00008223   |        | 2-:89592028-89592983    |
| 5971 | Ptms          | 69202  | 6-:124863703-124865616  |
| 5972 | 2700007P21Rik | 212772 | 2-:106802692-106810599  |
| 5973 | MMT00070628   |        | 14-:52249951-52254309   |
| 5974 | Arntl         | 11865  | 7+:120351092-120457638  |
| 5975 | Car13         | 71934  | 3+:14641776-14661804    |
| 5976 | Col6a3        | 12835  | 1-:92663435-92740506    |
| 5977 | BC061039      | 68222  | 2+:25074264-25077798    |
| 5978 | MMT00016241   |        | X-:128382520-128384996  |
| 5979 | Lmo2          | 16909  | 2+:103810828-103821251  |
| 5980 | Gabrb1        | 14400  | 5+:72091254-72528483    |
| 5981 | Manea         | 242362 | 4-:26254799-26268038    |
| 5982 | Rab3gap1      | 226407 | 1+:129765370-129840443  |
| 5983 | Pcolce2       | 76477  | 9+:95538046-95595968    |
| 5984 | Parva         | 57342  | 7+:119571451-119732297  |
| 5985 | Dbx1          | 13172  | 7-:56886866-56892218    |
| 5986 | Map3k15       | 270672 | X+:156478917-156555772  |
| 5987 | Lrrc14        | 223664 | 15+:76541169-76545520   |
| 5988 | 4933404O12Rik | 66752  | 5+:137395075-137409528  |
| 5989 | 2310042D19Rik | 74183  | 4+:155590823-155595417  |
| 5990 | Rhbg          | 58176  | 3-:88047046-88058606    |
| 5991 | Tsc22d2       | 72033  | 3+:58219610-58265759    |
| 5992 | Znrf2         | 387524 | 6+:54766798-54843492    |
| 5993 | Zcchc5        | 213436 | X-:104032691-104047583  |
| 5994 | Olfir609      | 259086 | 7-:110640431-110641390  |
| 5995 | Zbtb43        | 71834  | 2-:33309218-33410287    |
| 5996 | Tmod3         | 50875  | 9-:75345588-75407373    |
| 5997 | 3110057O12Rik | 269423 | 3+:40650687-40679531    |
| 5998 | Snrpd3        | 67332  | 10+:74982079-74998065   |
| 5999 | RP23-275N21.2 | 329575 | 2-:177567215-177575136  |
| 6000 | Olfir1111     | 258586 | 2-:86989878-86990816    |
| 6001 | Psemb5        | 19173  | 14-:55232956-55236832   |
| 6002 | Med24         | 23989  | 11-:98565914-98590681   |
| 6003 | MMT00014122   |        | 13-:38766153-38766537   |
| 6004 | Klra9         | 16640  | 6-:130128991-130139805  |
| 6005 | Gucy2f        | 245650 | X-:138523396-138631440  |
| 6006 | Ilf5          | 16191  | 11+:53534295-53538605   |
| 6007 | A630038E17Rik | 219065 | 14+:54694891-54765832   |
| 6008 | Lsg1          | 224092 | 16-:30561453-30587674   |
| 6009 | Jmjd5         | 77035  | 7+:132588189-132605773  |
| 6010 | 1110057K04Rik | 68832  | 12+:8214949-8283026     |
| 6011 | Fbxl13        | 320118 | 5-:20989666-21029735    |
| 6012 | Chid1         | 68038  | 7-:148681237-148725703  |
| 6013 | Epha8         | 13842  | 4-:136485334-136512731  |
| 6014 | Rnf5          | 54197  | 17-:34738514-34740418   |
| 6015 | MMT00008782   |        | 8-:83832077-83832995    |
| 6016 | A530057A03Rik | 215456 | 2+:127259321-127261826  |

|      |               |        |                         |
|------|---------------|--------|-------------------------|
| 6017 | MMT00018015   | 667716 | 11-:120388168-120393097 |
| 6018 | Lrp10         | 65107  | 14+:55083081-55088865   |
| 6019 | Gdap10        | 14546  | 12+:33506736-33511764   |
| 6020 | EG640530      | 640530 | 6+:121683047-121734773  |
| 6021 | MMT00008784   |        | 14-:93001678-93003616   |
| 6022 | Glt25d2       | 269132 | 1+:154246995-154355917  |
| 6023 | Saa4          | 20211  | 7-:53984018-53987943    |
| 6024 | Ddo           | 70503  | 10+:40349864-40369234   |
| 6025 | Il8rb         | 12765  | 1+:74200576-74206630    |
| 6026 | MMT00058578   |        | X-:151405749-151407971  |
| 6027 | Rtn3          | 20168  | 19-:7500390-7557725     |
| 6028 | Alas1         | 11655  | 9-:106137717-106150212  |
| 6029 | Fmn1          | 57778  | 11+:103032714-103059540 |
| 6030 | As3mt         | 57344  | 19+:46781962-46815562   |
| 6031 | MMT00035612   |        | 19+:11566536-11586198   |
| 6032 | Rars          | 104458 | 11-:35621884-35648008   |
| 6033 | Psd3          | 234353 | 8+:70212986-70214232    |
| 6034 | Ipo9          | 226432 | 1-:137278894-137327055  |
| 6035 | Nkd1          | 93960  | 8+:91045333-91116220    |
| 6036 | Pram1         | 378460 | 17+:33766045-33782650   |
| 6037 | Ccnl2         | 56036  | 4+:155195181-155198405  |
| 6038 | Acot1         | 26897  | 12+:85350454-85358617   |
| 6039 | Ccnbdp1       | 17151  | 2+:120834246-120842627  |
| 6040 | Nfkbie        | 18037  | 17+:45692889-45699015   |
| 6041 | Penk1         | 18619  | 4-:4060684-4065921      |
| 6042 | Oit1          | 18300  | 14-:9181462-9211277     |
| 6043 | Cyp2ab1       | 224044 | 16-:20309922-20316132   |
| 6044 | Sucnr1        | 84112  | 3+:59885790-59891481    |
| 6045 | Podxl         | 27205  | 6-:31472572-31513818    |
| 6046 | Nkain3        | 269513 | 4-:20396586-20412177    |
| 6047 | Snrpg         | 68011  | 6+:86321533-86328896    |
| 6048 | Psmid9        | 67151  | 5+:123678254-123698970  |
| 6049 | Cpeb2         | 231207 | 5+:43626124-43628829    |
| 6050 | Usp20         | 74270  | 2+:30837852-30878163    |
| 6051 | 4930511M11Rik | 75010  | 5+:3657003-3679416      |
| 6052 | Galnt1        | 14423  | 18+:24396847-24443356   |
| 6053 | MMT00017114   |        | 13-:112151452-112211476 |
| 6054 | Olf1371       | 276865 | 11-:52026553-52027499   |
| 6055 | Arhgap12      | 75415  | 18-:6024458-6135954     |
| 6056 | Ndph          | 17986  | X-:16462649-16488737    |
| 6057 | Rnf216        | 108086 | 5-:143752572-143874662  |
| 6058 | Myo1e         | 71602  | 9+:70055156-70150173    |
| 6059 | Dsn1          | 66934  | 2-:156821000-156832811  |
| 6060 | Tle6          | 114606 | 10-:81053649-81063645   |
| 6061 | Bloc1s2       | 73689  | 19-:44214172-44220906   |
| 6062 | E130308A19Rik | 230259 | 4+:59750134-59767510    |
| 6063 | Kif21a        | 16564  | 15-:90764813-90880242   |
| 6064 | EG628119      | 628119 | 10-:95135624-95135995   |
| 6065 | Plce1         | 74055  | 19+:38695004-38858367   |
| 6066 | Ppp1r1a       | 58200  | 15-:103361353-103368313 |
| 6067 | Spam1         | 20690  | 6+:24745851-24751048    |

|      |               |        |                         |
|------|---------------|--------|-------------------------|
| 6068 | MMT00046866   | 191578 | 5-:101191177-101227555  |
| 6069 | Banf1         | 23825  | 19-:5364747-5366608     |
| 6070 | D630003M21Rik | 228846 | 2-:158021486-158046331  |
| 6071 | 6720456B07Rik | 101314 | 6+ :113554765-113566944 |
| 6072 | C1qc          | 12262  | 4-:136445724-136448788  |
| 6073 | Mthfd2        | 17768  | 6-:83255699-83267598    |
| 6074 | Noc4l         | 100608 | 5-:111077600-111082438  |
| 6075 | 6530404N21Rik | 67795  | 19-:33456855-33467331   |
| 6076 | Olfr1180      | 258920 | 2-:88251884-88252813    |
| 6077 | Pik3cb        | 74769  | 9-:98938820-99022799    |
| 6078 | Actrt1        | 73360  | X+:43682183-43683522    |
| 6079 | Tmem169       | 271711 | 1+:72330942-72348101    |
| 6080 | Adam10        | 11487  | 9+:70526985-70626105    |
| 6081 | Stox2         | 71069  | 8-:48271309-48373472    |
| 6082 | Exoc2         | 66482  | 13-:30906971-31042167   |
| 6083 | Cd40lg        | 21947  | X+:54465319-54477219    |
| 6084 | MMT00049235   |        | 1+:180229452-180230499  |
| 6085 | MMT00007454   |        | 12-:64173516-64174101   |
| 6086 | Fgl1          | 234199 | 8-:42276788-42300478    |
| 6087 | MMT00074734   |        | 6+ :53727376-53728056   |
| 6088 | Bambi         | 68010  | 18+ :3507931-3512756    |
| 6089 | Tmem176a      | 66058  | 6+ :48791507-48795363   |
| 6090 | MMT00045476   |        |                         |
| 6091 | Rbbp4         | 19646  | 4-:128986753-129012583  |
| 6092 | Phlda3        | 27280  | 1+ :137662709-137665710 |
| 6093 | Sspo          | 243369 | 6+ :48399660-48448773   |
| 6094 | Otud3         | 73162  | 4-:138451297-138469949  |
| 6095 | Cdkl3         | 213084 | 11+ :51843344-51903279  |
| 6096 | Acot3         | 171281 | 12+ :85394401-85399975  |
| 6097 | Pld5          | 319455 | 1-:177893958-177975093  |
| 6098 | Ncf4          | 17972  | 15+ :78075263-78093004  |
| 6099 | Rims3         | 242662 | 4+ :120527423-120564478 |
| 6100 | Adprh1        | 234072 | 8-:13235676-13254100    |
| 6101 | Vmn2r71       | 233445 | 7+ :92767046-92773055   |
| 6102 | MMT00031107   |        | 2+ :48243555-48243901   |
| 6103 | Cyt1l         | 231162 | 5+ :38126786-38131053   |
| 6104 | Aff4          | 93736  | 11+ :53164334-53235332  |
| 6105 | Cryaa         | 12954  | 17+ :31814883-31818667  |
| 6106 | EG627828      | 627828 | 8-:114538239-114538908  |
| 6107 | Ttc30a2       | 620631 | 2-:75814228-75816223    |
| 6108 | Ndufa8        | 68375  | 2-:35891853-35904812    |
| 6109 | Hsd17b2       | 15486  | 8+ :120225884-120282774 |
| 6110 | MMT00063881   | 674274 | X-:114997327-115000503  |
| 6111 | Irgc1         | 210145 | 7-:25216945-25220554    |
| 6112 | Tmem183a      | 57439  | 1-:136242673-136258532  |
| 6113 | Sec61b        | 66212  | 4+ :47487532-47496105   |
| 6114 | Aim1l         | 230806 | 4+ :133628372-133630966 |
| 6115 | Cd164         | 53599  | 10+ :41239305-41250847  |
| 6116 | Pcgf5         | 76073  | 19+ :36534818-36535452  |
| 6117 | Atp9a         | 11981  | 2-:168459964-168567462  |
| 6118 | Slc1a4        | 55963  | 11-:20202209-20232587   |

|      |               |           |                         |
|------|---------------|-----------|-------------------------|
| 6119 | Ankrd24       | 70615     | 10+:81103683-81110352   |
| 6120 | MMT00013604   |           | 4-:103215973-103223326  |
| 6121 | Dand5         | 23863     | 8-:87339303-87356198    |
| 6122 | Tktl2         | 74419     | 8+:69035690-69037573    |
| 6123 | Tmem77        | 67171     | 3+:106350797-106377068  |
| 6124 | 1700027L20Rik | 69453     | 1+:89081327-89083008    |
| 6125 | Grm6          | 108072    | 11+:50664643-50665184   |
| 6126 | MMT00067575   |           | X-:17251959-17253344    |
| 6127 | MMT00009923   |           | 15+:76624254-76628458   |
| 6128 | 2210418O10Rik | 76958     | 2-:175456017-175468166  |
| 6129 | Msc           | 17681     | 1-:14743430-14746047    |
| 6130 | G430022H21Rik | 210529    | 3-:123071212-123089017  |
| 6131 | Garnl1        | 56784     | 12-:56713628-56796197   |
| 6132 | Zmat1         | 215693    | X-:131506819-131543751  |
| 6133 | Agp           | 11604     | 8-:108090655-108091389  |
| 6134 | Hspb8         | 80888     | 5-:116858505-116872873  |
| 6135 | Nrg1          | 211323    | 8-:32928500-33028827    |
| 6136 | Nrap          | 18175     | 19-:56394536-56464501   |
| 6137 | MMT00039830   |           | 15-:8878312-8879219     |
| 6138 | Tlr8          | 170744    | X-:163680627-163701738  |
| 6139 | Utp3          | 65961     | 5+:88983507-88985108    |
| 6140 | MMT00034067   | 100039191 | 12-:89302466-89303300   |
| 6141 | MMT00011697   |           |                         |
| 6142 | Cenpp         | 66336     | 13-:49649046-49748153   |
| 6143 | Pacsin2       | 23970     | 15-:83206547-83263249   |
| 6144 | 1700055N04Rik | 73458     | 19+:3965901-3970438     |
| 6145 | MMT00048203   |           | 3-:124291508-124292041  |
| 6146 | Ctla          | 12757     | 4+:44025555-44045717    |
| 6147 | Dirc2         | 224132    | 16-:35696991-35769403   |
| 6148 | Sp4           | 20688     | 12-:119473510-119474191 |
| 6149 | Mn1           | 433938    | 5+:111846485-111883810  |
| 6150 | Olfr1497      | 258736    | 19-:13869154-13870099   |
| 6151 | MMT00002582   |           | 18+:7512631-7549523     |
| 6152 | MMT00016029   |           | 4+:115024914-115035721  |
| 6153 | Ankfn1        | 382543    | 11-:89283939-89290375   |
| 6154 | 1700030G06Rik | 69507     | 5-:22229852-22231992    |
| 6155 | AB056442      | 171405    | 19-:7938880-8040517     |
| 6156 | Actr8         | 56249     | 14+:30791578-30806399   |
| 6157 | MMT00041452   |           | 19+:40356699-40357187   |
| 6158 | Msh2          | 17685     | 17+:88071898-88123052   |
| 6159 | MMT00002938   |           | 16-:14010955-14011768   |
| 6160 | MMT00060223   |           | 9+:102454352-102455005  |
| 6161 | Olfr1510      | 258423    | 14-:53029588-53030356   |
| 6162 | Sgsm1         | 52850     | 5-:113673165-113717919  |
| 6163 | Nudt13        | 67725     | 14+:21113943-21135981   |
| 6164 | Plekhh1       | 211945    | 12+:80141478-80183365   |
| 6165 | Hhex          | 15242     | 19+:37509359-37514294   |
| 6166 | Itpk1         | 217837    | 12-:103808035-103943081 |
| 6167 | Pitpnm3       | 327958    | 11-:71863895-71949276   |
| 6168 | AU022870      | 231874    | 5-:144748785-144775752  |
| 6169 | Nap1l5        | 58243     | 6-:58855226-58857059    |

|      |               |        |                         |
|------|---------------|--------|-------------------------|
| 6170 | Abcc6         | 27421  | 7-:53231749-53285652    |
| 6171 | Abtb2         | 99382  | 2+:103518900-103558581  |
| 6172 | Kif14         | 381293 | 1+:138392432-138424170  |
| 6173 | Fndc1         | 68655  | 17-:7981858-8020167     |
| 6174 | MMT00000714   |        | 5-:15004031-15004577    |
| 6175 | V1rg1         | 252905 | 7-:12254947-12255868    |
| 6176 | Id1           | 15901  | 2+:152562076-152562583  |
| 6177 | Thpo          | 21832  | 16-:20725239-20730599   |
| 6178 | Olfr1272      | 258982 | 2-:90121804-90122730    |
| 6179 | Cxcl5         | 20311  | 5+:91188403-91190650    |
| 6180 | Slk           | 20874  | 19+:47654508-47716944   |
| 6181 | 5430437J10Rik | 71432  | 15+:5446230-5531127     |
| 6182 | Gpr143        | 18241  | X+:149216585-149242877  |
| 6183 | Atxn10        | 54138  | 15+:85166697-85293394   |
| 6184 | MMT00000944   |        | 7+:114093791-114096155  |
| 6185 | Icam4         | 78369  | 9+:20833897-20834938    |
| 6186 | Nono          | 53610  | X+:98625053-98643928    |
| 6187 | 4930473A06Rik | 320226 | 4+:83326908-83510420    |
| 6188 | Myh7b         | 668940 | 2+:155437367-155460788  |
| 6189 | MMT00020987   |        | 11+:79710708-79712255   |
| 6190 | MMT00006494   |        | 9+:20359744-20360298    |
| 6191 | Ddost         | 13200  | 4+:137860650-137868147  |
| 6192 | Wars          | 22375  | 12-:110098522-110126696 |
| 6193 | Lactb2        | 212442 | 1-:13615982-13650590    |
| 6194 | Ube2f         | 67921  | 1+:93146887-93182317    |
| 6195 | Mtx1          | 17827  | 3-:89013010-89017827    |
| 6196 | Tpbpb         | 116913 | 13-:61002548-61006207   |
| 6197 | Lss           | 16987  | 10+:75994371-76016671   |
| 6198 | Lrrn2         | 16980  | 1+:134833775-134835966  |
| 6199 | MMT00046861   |        | 2+:84499058-84507896    |
| 6200 | Rhbdl1        | 214951 | 17-:25971410-25974072   |
| 6201 | Slc2a7        | 435818 | 4+:149526236-149542590  |
| 6202 | Hrk           | 12123  | 5+:118619772-118634966  |
| 6203 | MMT00022643   |        | X+:75869971-75870766    |
| 6204 | Rbpj          | 19664  | 5+:53981583-54047272    |
| 6205 | Ccl21b        | 18829  | 4+:42231058-42231890    |
| 6206 | MMT00063701   |        | 7-:11692356-11693726    |
| 6207 | Sh3tc2        | 225608 | 18+:62167299-62175374   |
| 6208 | Il6st         | 16195  | 13+:113262816-113294806 |
| 6209 | Dsp           | 109620 | 13+:38243178-38290443   |
| 6210 | Hmgn3         | 94353  | 9-:83003554-83040132    |
| 6211 | Arhgap24      | 231532 | 5+:102910571-103326843  |
| 6212 | E130304F04Rik | 245269 | 13_random+:66570-95207  |
| 6213 | Ccl2          | 20296  | 11+:81849075-81850728   |
| 6214 | Mmd2          | 75104  | 5-:143039439-143084739  |
| 6215 | MMT00070426   |        | 6-:8327580-8329325      |
| 6216 | Gm944         | 381126 | 18-:21286987-21458584   |
| 6217 | MMT00019564   |        | 3-:95754703-95768299    |
| 6218 | Hnrnpc        | 15381  | 14-:52694473-52723657   |
| 6219 | BC030307      | 103220 | 10+:86221002-86226783   |
| 6220 | Ifitd1        | 74071  | 6-:145491810-145562838  |

|      |               |        |                         |
|------|---------------|--------|-------------------------|
| 6221 | Gng4          | 14706  | 13+:13895950-13917682   |
| 6222 | MMT00015481   |        | 13:-56419316-56421695   |
| 6223 | Zfp597        | 71063  | 16:-3865684-3872379     |
| 6224 | Tnfrsf9       | 21942  | 4+:150299414-150319313  |
| 6225 | Trim24        | 21848  | 6:-37816220-37816435    |
| 6226 | Vmn2r77       | 546983 | 7+:93949999-93960378    |
| 6227 | 5830418K08Rik | 319675 | 9:-15121358-15122533    |
| 6228 | Csnk1g2       | 103236 | 10+:80085582-80103479   |
| 6229 | MMT00000233   |        | 7+:112305375-112306194  |
| 6230 | MMT00028343   |        | 7+:48591133-48593906    |
| 6231 | 9030622O22Rik | 71570  | 2:-147770247-147855472  |
| 6232 | BC031748      | 245622 | X+:133584167-133612027  |
| 6233 | Wnk2          | 75607  | 13:-49132968-49242559   |
| 6234 | P4ha2         | 18452  | 11+:53915017-53945150   |
| 6235 | Cyp2s1        | 74134  | 7:-26587494-26601548    |
| 6236 | MMT00024286   |        | 15+:39012214-39013022   |
| 6237 | Aup1          | 11993  | 6+:83004731-83007676    |
| 6238 | Tmem165       | 21982  | 5:-76612471-76613479    |
| 6239 | Aim1l         | 230806 | 4+:133634752-133638613  |
| 6240 | MMT00074975   |        | 15:-59499016-59523317   |
| 6241 | U2af1         | 108121 | 17:-31784159-31795641   |
| 6242 | Rnf12         | 19820  | X:-101152504-101156067  |
| 6243 | Gucy2e        | 14919  | 11:-69036537-69050147   |
| 6244 | Ing5          | 66262  | 1+:95700551-95716035    |
| 6245 | Syap1         | 67043  | X:-159294783-159326363  |
| 6246 | MMT00010299   |        | 14+:40242946-40243798   |
| 6247 | Adam5         | 11499  | 8:-25837568-25934513    |
| 6248 | MMT00022090   |        | 3:-154939019-155056148  |
| 6249 | Cep170        | 545389 | 1:-178663794-178737263  |
| 6250 | Csnk2a1       | 12995  | 2+:152052631-152104985  |
| 6251 | Ptger2        | 19217  | 14+:45608494-45622151   |
| 6252 | Mael          | 98558  | 1:-168131503-168168897  |
| 6253 | Bdkrb1        | 12061  | 12+:106842386-106843389 |
| 6254 | MMT00039993   |        | 1+:147030975-147032072  |
| 6255 | Vmn2r22       | 546913 | 6:-123598980-123622883  |
| 6256 | EG666257      | 666257 | 9+:122818108-122827887  |
| 6257 | Efcab1        | 66793  | 16+:14906738-14924615   |
| 6258 | MMT00052726   |        |                         |
| 6259 | Ms4a3         | 170813 | 19:-11703988-11715279   |
| 6260 | MMT00002928   |        | 17+:8453516-8455093     |
| 6261 | 2810026P18Rik | 72655  | 9:-88415892-88418223    |
| 6262 | Hprt1         | 15452  | X+:50341313-50374836    |
| 6263 | Slc7a4        | 224022 | 16:-17573053-17576299   |
| 6264 | MMT00078690   |        | 13:-61400625-61404287   |
| 6265 | Trdn          | 76757  | 10+:32803315-33052271   |
| 6266 | Gng10         | 14700  | 4+:59048069-59054285    |
| 6267 | Homez         | 239099 | 14:-55475583-55479304   |
| 6268 | Slc45a3       | 212980 | 1+:133867185-133879540  |
| 6269 | MMT00003834   |        | 6:-41506785-41508370    |
| 6270 | Cysltr1       | 58861  | X:-103773094-103798935  |
| 6271 | 4833409A17Rik | 74580  | 19:-42800347-42827265   |

|      |               |           |                         |
|------|---------------|-----------|-------------------------|
| 6272 | MMT00007926   |           |                         |
| 6273 | Ctcf1         | 664799    | 2-:172927382-172947226  |
| 6274 | Olfr695       | 258591    | 7-:113857245-113858193  |
| 6275 | 1700016M24Rik | 69439     | 15-:74436458-74466783   |
| 6276 | Olfr4         | 380924    | 14+:80400103-80422946   |
| 6277 | Prdm1         | 12142     | 10-:44156982-44178554   |
| 6278 | Lrrc47        | 72946     | 4+:153385924-153395619  |
| 6279 | 1700034O15Rik | 76606     | 6+:41634429-41635710    |
| 6280 | Pcf11         | 74737     | 7-:99791972-99818447    |
| 6281 | Matn3         | 17182     | 12+:8954771-8977833     |
| 6282 | Them4         | 75778     | 3+:94114087-94136460    |
| 6283 | Ptpn22        | 19260     | 3+:103664214-103716169  |
| 6284 | Cacnb2        | 12296     | 2+:14795279-14909057    |
| 6285 | 1700016C15Rik | 69428     | 1+:179659943-179683436  |
| 6286 | Rfc1          | 19687     | 5-:65653098-65726844    |
| 6287 | Rabac1        | 14470     | 7-:25754594-25757781    |
| 6288 | Metap1        | 66559     | 2-:71361968-71366010    |
| 6289 | Dab1          | 13131     | 4+:104040194-104352979  |
| 6290 | 2900079G21Rik | 331033    | 9+:112136780-112138521  |
| 6291 | Josd1         | 74158     | 15-:79504684-79518249   |
| 6292 | Sesn3         | 75747     | 9+:14080845-14131435    |
| 6293 | Pggt1b        | 225467    | 18-:46397165-46440650   |
| 6294 | Wdr20b        | 70948     | 12+:66326503-66329441   |
| 6295 | Par1          | 381038    | 16-:20279889-20302458   |
| 6296 | Slc25a32      | 69906     | 15-:38925588-38944192   |
| 6297 | 2310079F23Rik | 78890     | 5-:35899986-35917709    |
| 6298 | Insm1         | 53626     | 2+:146047839-146050149  |
| 6299 | MMT00063871   |           | 5-:110211255-110276791  |
| 6300 | RP24-87L14.2  | 100125272 | 2+:177757942-177761426  |
| 6301 | MMT00075917   |           | 7-:14024941-14025650    |
| 6302 | C030046I01Rik | 109284    | 10-:79372797-79379676   |
| 6303 | MMT00055710   |           | 12-:116148240-116216332 |
| 6304 | Mrgprf        | 211577    | 7+:152486813-152495462  |
| 6305 | MMT00012844   |           | 17-:87607995-87609589   |
| 6306 | Dab2          | 13132     | 15+:6336823-6389597     |
| 6307 | Npepl1        | 228961    | 2+:173935865-173948199  |
| 6308 | 2410075B13Rik | 223648    | 15-:75811102-75812323   |
| 6309 | Cd209e        | 170780    | 8-:3849084-3854253      |
| 6310 | Ap2s1         | 232910    | 7+:17323785-17334644    |
| 6311 | MMT00074658   |           | 7+:14066063-14066450    |
| 6312 | 1500035H01Rik | 76568     | 9+:44581063-44598976    |
| 6313 | Sim1          | 20464     | 10+:50615456-50708958   |
| 6314 | Hmcn2         | 665700    | 2+:31208128-31209377    |
| 6315 | Epc2          | 227867    | 2+:49307300-49407169    |
| 6316 | Olfr1475      | 258298    | 19-:13553743-13554686   |
| 6317 | Crip1         | 12925     | 12+:114390263-114392088 |
| 6318 | Cdc37         | 12539     | 9-:20943875-20954390    |
| 6319 | D3Bwg0562e    | 229791    | 3-:117024820-117063166  |
| 6320 | 1810055E12Rik | 67894     | 19+:60887513-60912130   |
| 6321 | EG626841      | 626841    | 3+:80770788-80805385    |
| 6322 | Pknox2        | 208076    | 9-:36698573-36776010    |

|      |               |        |                         |
|------|---------------|--------|-------------------------|
| 6323 | Rnasen        | 14000  | 15+:12754609-12865045   |
| 6324 | Zmym5         | 219105 | 14-:57410936-57411594   |
| 6325 | Cpsf3l        | 71957  | 4+:155243714-155262977  |
| 6326 | 4930579J09Rik | 67752  | 19-:10548747-10557387   |
| 6327 | BC046404      | 192976 | 11-:62419198-62461802   |
| 6328 | Maf           | 17132  | 8-:118214463-118229968  |
| 6329 | Cyp2b10       | 13088  | 7+:26682694-26711474    |
| 6330 | Dgkq          | 110524 | 5-:109075709-109089714  |
| 6331 | Tll1          | 21892  | 8-:66493728-66684790    |
| 6332 | Pmp2          | 18857  | 3-:10182120-10183819    |
| 6333 | lqcg          | 69707  | 16-:33016660-33045787   |
| 6334 | Olfr960       | 258276 | 9+:39430709-39431658    |
| 6335 | Gbp1          | 14468  | 3+:142261109-142262087  |
| 6336 | MMT00013485   |        | 3+:59669154-59681097    |
| 6337 | Trem1         | 58217  | 17+:48371947-48384102   |
| 6338 | Setd3         | 52690  | 12-:109344649-109417473 |
| 6339 | V1rc26        | 171199 | 6-:57339661-57340561    |
| 6340 | Dynlt3        | 67117  | X-:9233073-9240085      |
| 6341 | MMT00066148   |        | 15-:82501708-82509830   |
| 6342 | Dazap2        | 23994  | 15+:100446127-100451176 |
| 6343 | Slc20a1       | 20515  | 2+:129024535-129037344  |
| 6344 | Pcgf6         | 71041  | 19-:47108105-47125356   |
| 6345 | Tdrd12        | 71981  | 7-:36272550-36274374    |
| 6346 | Ppp2ca        | 19052  | 11+:51912550-51935474   |
| 6347 | Rad18         | 58186  | 6-:112570798-112646588  |
| 6348 | 4930556G01Rik | 75332  | 4+:30713971-30782894    |
| 6349 | MMT00045058   |        | 4+:117397760-117399476  |
| 6350 | Gcnt3         | 72077  | 9-:69881351-69884506    |
| 6351 | 3321401G04Rik | 77574  | 6-:42618000-42659527    |
| 6352 | Alms1         | 236266 | 6+:85537524-85652635    |
| 6353 | Spata13       | 219140 | 14+:61325636-61383386   |
| 6354 | Tlr7          | 170743 | X-:163743146-163768424  |
| 6355 | 2810046L04Rik | 212127 | 3+:53267584-53283715    |
| 6356 | Dnahc1        | 110084 | 14-:32073559-32120346   |
| 6357 | Ankrd9        | 74251  | 12-:112214633-112217206 |
| 6358 | MMT00016595   |        | 7-:12058990-12185321    |
| 6359 | Asphd2        | 72898  | 5-:112813377-112821279  |
| 6360 | D17H6S56E-3   | 27762  | 17+:35153523-35163686   |
| 6361 | Tmprss7       | 208171 | 16-:45680606-45685490   |
| 6362 | Crispld2      | 78892  | 8+:122526690-122575693  |
| 6363 | 9130014G24Rik | 215772 | 10-:10055507-10122805   |
| 6364 | Cln3          | 12752  | 7-:133715599-133726669  |
| 6365 | Rpl9          | 20005  | 5-:65779805-65782626    |
| 6366 | Arrb1         | 109689 | 7+:106684244-106750660  |
| 6367 | Lhfp          | 108927 | 3+:52845468-52847620    |
| 6368 | 4930444G20Rik | 114671 | 10-:21786690-21787855   |
| 6369 | Sh2b1         | 20399  | 7-:133610510-133616525  |
| 6370 | Aqp8          | 11833  | 7+:130605825-130611500  |
| 6371 | Dedd2         | 67379  | 7-:25987856-26004946    |
| 6372 | 1110021L09Rik | 76306  | 10+:23516786-23547773   |
| 6373 | MMT00020788   |        | 10+:129979421-129979507 |



|      |               |           |                         |
|------|---------------|-----------|-------------------------|
| 6374 | EG231885      | 231885    | 5-:145790471-145793239  |
| 6375 | MMT00012910   |           | 6-:6300745-6302275      |
| 6376 | Nle1          | 217011    | 11-:82714272-82721864   |
| 6377 | D18Ertd653e   | 52662     | 18+:68387669-68415207   |
| 6378 | EG432950      | 432950    | 15-:44803341-44847630   |
| 6379 | Asb9          | 69299     | X+:160935834-160977684  |
| 6380 | 6330569M22Rik | 229707    | 3-:107415448-107434612  |
| 6381 | Dmxl2         | 235380    | 9-:54212966-54328272    |
| 6382 | Col23a1       | 237759    | 11+:51371951-51396050   |
| 6383 | Gbp2          | 14469     | 3+:142283626-142300970  |
| 6384 | Rbm12         | 75710     | 2-:155920627-155929101  |
| 6385 | Men1          | 17283     | 19+:6335038-6340883     |
| 6386 | Por           | 18984     | 5+:136165083-136211195  |
| 6387 | MMT00042391   |           | 14+:105442696-105443405 |
| 6388 | Dhtkd1        | 209692    | 2-:5831339-5842852      |
| 6389 | Cstf2         | 108062    | X+:130593751-130618995  |
| 6390 | MMT00073452   |           | 10+:21009077-21010230   |
| 6391 | Chkb          | 12651     | 15-:89256797-89260330   |
| 6392 | Pdcl3         | 68833     | 1+:39044633-39054080    |
| 6393 | 3110043O21Rik | 73205     | 4-:35138535-35173083    |
| 6394 | Fbxo6         | 50762     | 4-:147519896-147525933  |
| 6395 | Vmn2r81       | 216144    | 10+:78729934-78756451   |
| 6396 | Zfp105        | 22646     | 9+:122832215-122840137  |
| 6397 | Slc2a9        | 117591    | 5-:38740559-38893391    |
| 6398 | Gm973         | 381260    | 1+:59605672-59639323    |
| 6399 | Wnk1          | 232341    | 6-:119873993-119988364  |
| 6400 | MMT00050153   |           | 1+:119637961-119883049  |
| 6401 | MMT00053163   | 100041639 | 17-:15132750-15147126   |
| 6402 | Npm3          | 18150     | 19-:45822225-45823640   |
| 6403 | MMT00039607   |           | 14-:26661366-26662576   |
| 6404 | Dbr1          | 83703     | 9+:99476235-99484485    |
| 6405 | B3galnt1      | 26879     | 3-:69378854-69379848    |
| 6406 | Sh3rf2        | 269016    | 18+:42213323-42313030   |
| 6407 | Tacstd2       | 56753     | 6-:67484746-67485700    |
| 6408 | Entpd8        | 72090     | 2+:24935841-24941238    |
| 6409 | Hgf           | 15234     | 5+:16059377-16125258    |
| 6410 | Psd3          | 234353    | 8-:70212983-70214044    |
| 6411 | Adcy9         | 11515     | 16-:4287544-4419587     |
| 6412 | MMT00012331   |           | 11+:84885970-84886514   |
| 6413 | Fbxo4         | 106052    | 15-:3928766-3929707     |
| 6414 | Yif1b         | 77254     | 7+:30023371-30032553    |
| 6415 | OTTMUSG00000  | 433485    | 2+:149725145-149829067  |
| 6416 | Sox18         | 20672     | 2-:181404547-181406314  |
| 6417 | Rasgef1c      | 74563     | 11+:49715351-49793724   |
| 6418 | Cc2d2b        | 668310    | 19+:40839839-40901847   |
| 6419 | MMT00028754   |           | 14+:74307464-74307769   |
| 6420 | Mipep         | 70478     | 14+:61403394-61524315   |
| 6421 | C230081A13Rik | 244895    | 9-:56075514-56107846    |
| 6422 | Grk5          | 14773     | 19+:60966242-61167953   |
| 6423 | MMT00055016   |           | 11-:109020502-109054524 |
| 6424 | Tdrd3         | 219249    | 14+:87816390-87945316   |

|      |               |           |                         |
|------|---------------|-----------|-------------------------|
| 6425 | MMT00025472   |           | X-:131159558-131160130  |
| 6426 | Mfsd4         | 213006    | 1-:133933357-133964488  |
| 6427 | C86695        | 97476     | 8+:23069200-23074775    |
| 6428 | MMT00035510   |           | 5-:30422633-30424209    |
| 6429 | Sim2          | 20465     | 16+:94085175-94348630   |
| 6430 | Slc35f5       | 74150     | 1+:127457612-127492392  |
| 6431 | Nudt15        | 214254    | 14-:73920660-73925029   |
| 6432 | 2010109K11Rik | 72123     | 12+:33064510-33065324   |
| 6433 | Arpc4         | 68089     | 6+:113328108-113339643  |
| 6434 | 1700028P14Rik | 67483     | 19-:23633249-23727302   |
| 6435 | Tmem49        | 75909     | 11-:86420573-86497338   |
| 6436 | 4933401B06Rik | 71011     | X+:104737986-104739082  |
| 6437 | Gnptg         | 214505    | 17-:25369169-25377082   |
| 6438 | Vmn2r121      | 100038941 | X-:121241111-121249525  |
| 6439 | Samsn1        | 67742     | 16-:75945468-75947596   |
| 6440 | Brunol6       | 76183     | 9+:59426184-59454125    |
| 6441 | MMT00021409   |           | 14+:17471842-17556180   |
| 6442 | Magi3         | 99470     | 3-:103819187-104023950  |
| 6443 | Polr3d        | 67065     | 14-:70838602-70842950   |
| 6444 | Cox7c         | 12867     | 13-:86184421-86186351   |
| 6445 | Milt3         | 70122     | 4-:87419819-87452166    |
| 6446 | Tead1         | 21676     | 7+:119823106-120043504  |
| 6447 | MMT00070270   |           | X+:20105275-20105960    |
| 6448 | MMT00065333   |           | 19-:8330430-8332076     |
| 6449 | 1190007F08Rik | 68859     | 4-:153397196-153399760  |
| 6450 | Arhgap29      | 214137    | 3+:121676788-121719671  |
| 6451 | Olfrc639      | 259088    | 7-:111160264-111161214  |
| 6452 | MMT00021437   |           |                         |
| 6453 | EG238395      | 238395    | 12+:105552779-105558791 |
| 6454 | MMT00056567   |           | 5-:115278442-115279261  |
| 6455 | Itgb3         | 16416     | 11+:104469369-104528689 |
| 6456 | Tyms          | 22171     | 5-:30387351-30400180    |
| 6457 | EG432951      | 432951    | 15-:45809598-45811605   |
| 6458 | Sycn          | 68416     | 7+:29325896-29327224    |
| 6459 | Cldn2         | 12738     | X+:136343199-136343989  |
| 6460 | Setd6         | 66083     | 8+:98239809-98242903    |
| 6461 | Mtmt3         | 74302     | 11-:4380873-4494789     |
| 6462 | Brip1         | 237911    | 11-:85874104-86014718   |
| 6463 | Zfp1          | 22640     | 8+:114167333-114194914  |
| 6464 | Pcbp4         | 59092     | 9+:106356282-106366340  |
| 6465 | Zfp474        | 66758     | 18+:52775568-52799484   |
| 6466 | Smarcc1       | 20588     | 9+:110034558-110141813  |
| 6467 | Fndc4         | 64339     | 5-:31595264-31596549    |
| 6468 | Sec61a1       | 53421     | 6-:88454849-88468806    |
| 6469 | 2700059D21Rik | 433693    | 4+:34498185-34513819    |
| 6470 | Arnt          | 11863     | 3+:95238458-95299492    |
| 6471 | MMT00077542   |           | 4-:135271637-135272579  |
| 6472 | MMT00005056   |           | 14+:55431701-55467410   |
| 6473 | Kcnd3         | 56543     | 3+:105261733-105472125  |
| 6474 | MMT00036909   |           | 8-:106322472-106324893  |
| 6475 | Sdc4          | 20971     | 2-:164249747-164268686  |

|      |               |           |                         |
|------|---------------|-----------|-------------------------|
| 6476 | Sntg2         | 268534    | 12-:30859858-31058095   |
| 6477 | Olf675        | 258147    | 7-:112172538-112173480  |
| 6478 | H2-Oa         | 15001     | 17+:34229376-34232179   |
| 6479 | Tcerg1        | 56070     | 18+:42671176-42734498   |
| 6480 | Lrfn5         | 238205    | 12+:62622416-62696244   |
| 6481 | Atp1a1        | 11928     | 3-:101380147-101408580  |
| 6482 | Nudt2         | 66401     | 4+:41412184-41427945    |
| 6483 | M6prbp1       | 66905     | 17-:56425632-56432296   |
| 6484 | A130010J15Rik | 319266    | 1+:194999780-195002491  |
| 6485 | Map3k7ip1     | 66513     | 15+:79963592-79992158   |
| 6486 | OTTMUSG00000  | 217066    | 11-:88826063-88826549   |
| 6487 | Slc4a4        | 54403     | 5+:89316321-89664563    |
| 6488 | Stat6         | 20852     | 10+:127080226-127097459 |
| 6489 | MMT00008763   |           | 5-:121553095-121553514  |
| 6490 | Il1r1         | 16177     | 1+:40281924-40373020    |
| 6491 | Rpl5          | 19983     | 5+:108329620-108336243  |
| 6492 | Wtap          | 60532     | 17-:13167884-13185353   |
| 6493 | Dppa5a        | 434423    | 9-:78214862-78215961    |
| 6494 | Evi5          | 14020     | 5-:108173814-108304126  |
| 6495 | MMT00069880   |           | 9+:11947176-11947306    |
| 6496 | 4932441K18Rik | 353170    | X-:159219028-159267336  |
| 6497 | Col4a3        | 12828     | 1+:82583550-82717843    |
| 6498 | MMT00016809   | 100048067 | 1+:162965293-162968668  |
| 6499 | Dtx3          | 80904     | 10-:126627434-126631688 |
| 6500 | MMT00069546   |           | 10-:78784301-78785112   |
| 6501 | Myog          | 17928     | 1+:136186589-136189125  |
| 6502 | Col15a1       | 12819     | 4+:47221223-47325161    |
| 6503 | Cep97         | 74201     | 16-:55905064-55934941   |
| 6504 | Alad          | 17025     | 4-:62170201-62175226    |
| 6505 | 9230112E08Rik | 320800    | 2+:180723595-180738188  |
| 6506 | Scyl2         | 213326    | 10-:89102808-89149011   |
| 6507 | MMT00041681   |           | 17+:38151846-38151884   |
| 6508 | Map3k15       | 270672    | X+:156559577-156561289  |
| 6509 | EG434219      | 434219    | 7-:111530579-111539097  |
| 6510 | Plcl2         | 224860    | 17+:50648932-50665916   |
| 6511 | Bhlhb3        | 79362     | 6-:145811256-145813860  |
| 6512 | Ryr2          | 20191     | 13-:11646782-12198713   |
| 6513 | Qpctl         | 67369     | 7-:19726212-19734592    |
| 6514 | U46068        | 228801    | 2+:154028301-154046079  |
| 6515 | Eif2a         | 229317    | 3+:58329960-58361422    |
| 6516 | Atf3          | 11910     | 1-:192995362-193001349  |
| 6517 | 2410017P09Rik | 69709     | 12+:4234026-4236961     |
| 6518 | MMT00073501   |           | 17+:63920248-63920797   |
| 6519 | Phldb3        | 232970    | 7+:25396363-25414316    |
| 6520 | Arnt2         | 11864     | 7-:91398290-91558424    |
| 6521 | Gpr149        | 229357    | 3-:62334457-62408369    |
| 6522 | Specc1        | 432572    | 11+:61856437-62033763   |
| 6523 | Hapln1        | 12950     | 13+:89679400-89748004   |
| 6524 | Nol1          | 110109    | 6+:125082185-125094769  |
| 6525 | Uchl5ip       | 73738     | X-:70682834-70704360    |
| 6526 | Thumpd3       | 14911     | 6+:112996326-113018171  |

|      |               |        |                         |
|------|---------------|--------|-------------------------|
| 6527 | MMT00051373   |        | 18:-83657546-83663696   |
| 6528 | Dusp15        | 252864 | 2-:152770672-152777141  |
| 6529 | Apeh          | 235606 | 9-:107987743-107996782  |
| 6530 | MMT00077317   |        | 12+:110783607-110798586 |
| 6531 | EG629557      | 629557 | 9-:51810380-51811386    |
| 6532 | Auh           | 11992  | 13-:52930492-53025034   |
| 6533 | Khsrp         | 16549  | 17-:57160473-57179396   |
| 6534 | Cript         | 56724  | 17+:87424935-87435150   |
| 6535 | Plcxd1        | 403178 | 5+:110528987-110532828  |
| 6536 | MMT00038309   |        | 11-:4130756-4131113     |
| 6537 | Kcna2         | 16490  | 3+:106904481-106906619  |
| 6538 | MMT00075456   |        | 17+:88320434-88320760   |
| 6539 | Npy2r         | 18167  | 3-:82342304-82352006    |
| 6540 | Preb          | 50907  | 5-:31257422-31262608    |
| 6541 | 1810019J16Rik | 69073  | 4+:133074949-133086704  |
| 6542 | Epqr          | 13857  | 9-:21763341-21767902    |
| 6543 | Wnt9a         | 216795 | 11+:59146527-59147043   |
| 6544 | Al790298      | 107239 | 19-:4164329-4175440     |
| 6545 | Afm           | 280662 | 5+:90947988-90982571    |
| 6546 | Tsn           | 22099  | 1-:120197215-120207709  |
| 6547 | MMT00017970   |        | 13+:48407990-48409575   |
| 6548 | MMT00047930   |        | 17+:82729178-82755264   |
| 6549 | MMT00004752   |        |                         |
| 6550 | MMT00056589   |        | 1+:159526434-159526797  |
| 6551 | Slc35b4       | 58246  | 6-:34105878-34127054    |
| 6552 | Ebf1          | 13591  | 11+:44431635-44818672   |
| 6553 | MMT00003506   |        | 17-:8758802-8759773     |
| 6554 | MMT00003845   | 670007 | 10-:99760711-99859697   |
| 6555 | Aadacl2       | 639634 | 3+:59814418-59829162    |
| 6556 | Osbpl2        | 228983 | 2+:179854077-179897163  |
| 6557 | Mybl2         | 17865  | 2+:162898359-162909405  |
| 6558 | Zfp395        | 380912 | 14-:66017248-66017752   |
| 6559 | C230078M14Rik | 241175 | 1+:102275627-102381277  |
| 6560 | Mep1a         | 17287  | 17-:43611733-43639721   |
| 6561 | Best3         | 382427 | 10+:116425670-116430409 |
| 6562 | Dnm2          | 13430  | 9+:21229419-21311570    |
| 6563 | Surf1         | 20930  | 2-:26768956-26771851    |
| 6564 | Cebpd         | 12609  | 16+:15887105-15888559   |
| 6565 | Dis3l         | 213550 | 9-:64157971-64189102    |
| 6566 | Pigu          | 228812 | 2-:155140228-155183137  |
| 6567 | Trpm3         | 226025 | 19+:22767088-23062796   |
| 6568 | MMT00001575   |        | 13+:78260330-78262038   |
| 6569 | Itih1         | 16424  | 14-:31742548-31756455   |
| 6570 | Olfr148       | 258498 | 9+:39421153-39422085    |
| 6571 | 3000004C01Rik | 70218  | 11-:102766891-102786403 |
| 6572 | Foxc1         | 17300  | 13+:31898559-31902156   |
| 6573 | Pecr          | 111175 | 1-:72305748-72330794    |
| 6574 | Ptgis         | 19223  | 2-:167028699-167065955  |
| 6575 | Kcnab1        | 16497  | 3+:64913693-65180488    |
| 6576 | Slnf2         | 20556  | 11+:82878613-82884178   |
| 6577 | Tnp1          | 21958  | 1-:73061650-73062446    |

|      |               |        |                         |
|------|---------------|--------|-------------------------|
| 6578 | Pdcd10        | 56426  | 3-:75321043-75360677    |
| 6579 | Gng7          | 14708  | 10-:80414140-80477653   |
| 6580 | Svs3b         | 329557 | 2-:164080311-164082363  |
| 6581 | Cdc42ep1      | 104445 | 15+:78673076-78681332   |
| 6582 | MMT00009037   |        | 9-:72140355-72141148    |
| 6583 | Tspyl1        | 22110  | 10+:34002031-34003486   |
| 6584 | MMT00014057   |        | 13+:33858827-33903506   |
| 6585 | Tacc1         | 320165 | 8-:26279666-26367061    |
| 6586 | Olfr678       | 258753 | 7+:112217982-112218923  |
| 6587 | Irf9          | 16391  | 14+:56223039-56228561   |
| 6588 | Rbmx          | 19655  | X-:54639519-54646158    |
| 6589 | Mafb          | 16658  | 2-:160191441-160192798  |
| 6590 | Pds5a         | 71521  | 5-:66014123-66039244    |
| 6591 | Cops7a        | 26894  | 6-:124908838-124915384  |
| 6592 | Lgals2        | 107753 | 15-:78681291-78685959   |
| 6593 | Samd10        | 229011 | 2-:181329921-181334200  |
| 6594 | Zfyve27       | 319740 | 19+:42245081-42266214   |
| 6595 | Oas1a         | 246730 | 5-:121346267-121357516  |
| 6596 | Olfr685       | 258160 | 7-:112328875-112329624  |
| 6597 | Slc9a5        | 277973 | 8+:107873232-107893244  |
| 6598 | Tgds          | 76355  | 14-:118511695-118531977 |
| 6599 | 1700020C11Rik | 67900  | 11-:3991485-3995400     |
| 6600 | Pdcd7         | 50996  | 9+:65193874-65207449    |
| 6601 | Ttc30b        | 72421  | 2-:75774471-75776464    |
| 6602 | Gaa           | 14387  | 11+:119129339-119146768 |
| 6603 | Wdr40c        | 245403 | X-:41719777-41721187    |
| 6604 | Prps2         | 110639 | X-:163786453-163820664  |
| 6605 | Gpld1         | 14756  | 13+:25035080-25082624   |
| 6606 | V1rf4         | 171235 | 17+:21423585-21424588   |
| 6607 | Reln          | 19699  | 5-:21390286-21850508    |
| 6608 | Mtap7d3       | 320923 | X-:54061020-54064726    |
| 6609 | Tor1b         | 30934  | 2+:30808503-30812761    |
| 6610 | Rbm16         | 106583 | 17+:3145074-3198855     |
| 6611 | Tbx19         | 83993  | 1-:167068600-167090855  |
| 6612 | MMT00077820   |        | 19+:27100470-27227226   |
| 6613 | Gmcl1         | 23885  | 6-:86641764-86683192    |
| 6614 | Cd300lg       | 52685  | 11+:101902823-101916930 |
| 6615 | 1810023F06Rik | 217845 | 12-:104689107-104695433 |
| 6616 | Prmt3         | 71974  | 7+:57033714-57113634    |
| 6617 | Rabepk        | 227746 | 2-:34634737-34655308    |
| 6618 | Stk32a        | 269019 | 18+:43367237-43473173   |
| 6619 | MMT00065825   |        | 1+:37180795-37194732    |
| 6620 | Gpsm1         | 67839  | 2+:26175298-26204303    |
| 6621 | Zfp521        | 225207 | 18-:13846723-14131047   |
| 6622 | Ddef1         | 13196  | 15-:63919996-64040119   |
| 6623 | Ptbp2         | 56195  | 3-:119421914-119486176  |
| 6624 | Zfp94         | 22756  | 7-:25086814-25101620    |
| 6625 | C1s           | 50908  | 6-:124487377-124492316  |
| 6626 | 9530068E07Rik | 213673 | 11+:52209943-52222232   |
| 6627 | Hmx1          | 15371  | 5+:35731765-35735519    |
| 6628 | MMT00004313   |        | 17+:48821671-48822052   |

|      |               |        |                         |
|------|---------------|--------|-------------------------|
| 6629 | Setx          | 269254 | 2+:29005539-29037990    |
| 6630 | Ufc1          | 66155  | 1-:173218694-173225113  |
| 6631 | Tmem30a       | 69981  | 9-:79616750-79641079    |
| 6632 | Dio1          | 13370  | 4-:106964078-106979748  |
| 6633 | Zfp775        | 243372 | 6+:48555559-48571530    |
| 6634 | Ptpla         | 30963  | 2-:13948458-13977514    |
| 6635 | MMT00000020   |        | X+:90773874-90775207    |
| 6636 | Ptchd2        | 242748 | 4-:147614641-147646513  |
| 6637 | MMT00054486   | 544905 | 12-:115378931-115379333 |
| 6638 | 2610018G03Rik | 70415  | X+:48194612-48245025    |
| 6639 | Fads3         | 60527  | 19+:10116095-10132739   |
| 6640 | Mt4           | 17752  | 8+:96661141-96662766    |
| 6641 | MMT00045188   |        |                         |
| 6642 | Aldh2         | 11669  | 5-:122017711-122043595  |
| 6643 | Ttll8         | 239591 | 15-:88720940-88756097   |
| 6644 | Klhl9         | 242521 | 4-:88364198-88368747    |
| 6645 | Myh6          | 17888  | 14-:55560819-55584297   |
| 6646 | 2900064A13Rik | 73024  | 2+:112295203-112307593  |
| 6647 | Samd14        | 217125 | 11+:94871672-94887397   |
| 6648 | Cenpl         | 70454  | 1+:163001095-163016851  |
| 6649 | Npvf          | 60531  | 6-:50600869-50604392    |
| 6650 | MMT00050325   |        |                         |
| 6651 | Gpx7          | 67305  | 4-:108073018-108079319  |
| 6652 | MMT00004371   |        | 17-:50352073-50353549   |
| 6653 | Zfand1        | 66361  | 3-:10339981-10351313    |
| 6654 | MMT00043194   |        | 2+:147115490-147116396  |
| 6655 | MMT00043469   |        | 1-:93385333-93386329    |
| 6656 | Pdxd1         | 94184  | 16-:13835684-13903056   |
| 6657 | Irf6          | 54139  | 1+:194979355-194998198  |
| 6658 | MMT00036759   |        | 6+:85888626-85889213    |
| 6659 | Dpy19l4       | 381510 | 4-:11223082-11248777    |
| 6660 | Mrto4         | 69902  | 4-:138903357-138908468  |
| 6661 | Hdac1         | 433759 | 4-:129193347-129219890  |
| 6662 | MMT00006703   |        | 11-:21776923-21777839   |
| 6663 | MMT00053532   |        | 10-:30500660-30500991   |
| 6664 | MMT00054031   |        | 11+:77542445-77580863   |
| 6665 | AY026312      | 170939 | 16-:88932048-88932509   |
| 6666 | MMT00037681   |        | 13-:22175327-22175657   |
| 6667 | Chat          | 12647  | 14-:33221994-33274126   |
| 6668 | 1810022K09Rik | 69126  | 3-:14606290-14611269    |
| 6669 | MMT00059316   |        | X-:7615684-7616144      |
| 6670 | Nat10         | 98956  | 2-:103561381-103601407  |
| 6671 | Pbxip1        | 229534 | 3+:89240666-89252868    |
| 6672 | Utx           | 22289  | X+:17740209-17794129    |
| 6673 | Nasp          | 50927  | 4-:116274213-116300546  |
| 6674 | MMT00016707   | 625336 | 4-:116512479-116513030  |
| 6675 | Sfrs4         | 57317  | 4+:131453645-131457615  |
| 6676 | 9530048O09Rik | 78611  | 4-:116792486-116798286  |
| 6677 | Sestd1        | 228071 | 2+:77129084-77130035    |
| 6678 | Dmxl1         | 240283 | 18+:50120711-50124079   |
| 6679 | MMT00001738   |        |                         |

|      |               |        |                         |
|------|---------------|--------|-------------------------|
| 6680 | Olfr393       | 259010 | 11-:73660686-73661625   |
| 6681 | 9130409I23Rik | 619326 | 1+:182984887-182989945  |
| 6682 | Olfr71        | 56015  | 4-:43718499-43719438    |
| 6683 | Cd59a         | 12509  | 2+:103936021-103955137  |
| 6684 | Myo1e         | 71602  | 9+:70167867-70247864    |
| 6685 | Itgam         | 16409  | 7+:135206219-135261138  |
| 6686 | Ldb3          | 24131  | 14-:35374453-35401860   |
| 6687 | Ogfod1        | 270086 | 8+:96561094-96588935    |
| 6688 | Mllt1         | 64144  | 17-:57033885-57066595   |
| 6689 | BC107230      | 260408 | 9+:110701629-110767132  |
| 6690 | MMT00027634   | 56546  | 7-:52933821-52934928    |
| 6691 | Klrb1f        | 232408 | 6+:129002474-129003277  |
| 6692 | MMT00043810   |        | 11+:96898300-96898918   |
| 6693 | MMT00057347   |        | 13-:12775382-12776280   |
| 6694 | Clpb          | 20480  | 7+:108812279-108936326  |
| 6695 | Mrpl45        | 67036  | 11+:97177161-97190420   |
| 6696 | Zfp740        | 68744  | 15+:102034999-102046031 |
| 6697 | Serpini1      | 20713  | 3+:75361494-75446276    |
| 6698 | MMT00063999   |        | X-:57959446-57960326    |
| 6699 | 4930592I03Rik | 75853  | 18-:83089332-83090009   |
| 6700 | Dleu7         | 239133 | 14-:62895069-62912005   |
| 6701 | Lrrc48        | 74665  | 11+:60188572-60191494   |
| 6702 | H1fx          | 243529 | 6-:87930496-87931285    |
| 6703 | Dbx2          | 223843 | 15-:95455200-95485193   |
| 6704 | Sall4         | 99377  | 2-:168573835-168575470  |
| 6705 | Sorbs2        | 234214 | 8+:46713537-46913253    |
| 6706 | Serpib3c      | 381286 | 1-:109167777-109174950  |
| 6707 | 1300017J02Rik | 71775  | 9-:103152859-103190627  |
| 6708 | Serpini2      | 67931  | 3-:75046293-75074002    |
| 6709 | MMT00003854   |        | 6-:41424683-41431715    |
| 6710 | MMT00022451   |        | 8+:73611709-73613824    |
| 6711 | MMT00070969   |        | 11-:40382711-40384027   |
| 6712 | Tssk1         | 22114  | 16+:17894386-17895744   |
| 6713 | Lhx6          | 16874  | 2-:35939061-35960791    |
| 6714 | Lima1         | 65970  | 15-:99608938-99650503   |
| 6715 | Usp25         | 30940  | 16+:77014167-77116824   |
| 6716 | Cd180         | 17079  | 13+:103483667-103497033 |
| 6717 | Sh3gl2        | 20404  | 4+:84851396-85034605    |
| 6718 | Rnf168        | 70238  | 16+:32277585-32301493   |
| 6719 | Cacng8        | 81905  | 7+:3394458-3415366      |
| 6720 | Adamts20      | 223838 | 15-:94116068-94233981   |
| 6721 | Fis1          | 66437  | 5+:137437957-137442102  |
| 6722 | Ppat          | 231327 | 5-:77342169-77380579    |
| 6723 | MMT00024870   |        | 7-:109525536-109526906  |
| 6724 | Gsg2          | 14841  | 11-:72948986-72951796   |
| 6725 | Cnot3         | 232791 | 7+:3596953-3612701      |
| 6726 | Meis2         | 17536  | 2-:115688829-115890783  |
| 6727 | Dtd1          | 66044  | 2+:144425720-144594455  |
| 6728 | Olfr75-ps1    | 258186 | 11-:73218945-73219881   |
| 6729 | Hnrnpa1       | 15382  | 15+:103070924-103075386 |
| 6730 | Slc24a2       | 76376  | 4-:86872786-86876329    |

|      |               |        |                         |
|------|---------------|--------|-------------------------|
| 6731 | Dennd4c       | 329877 | 4+:86448812-86451529    |
| 6732 | Olfr1038      | 259015 | 2+:85962081-85963037    |
| 6733 | Mfng          | 17305  | 15-:78586312-78603875   |
| 6734 | Ehd4          | 98878  | 2-:119915223-119980244  |
| 6735 | Fus           | 233908 | 7+:135111067-135125545  |
| 6736 | Spata4        | 69281  | 8+:55686133-55695451    |
| 6737 | Vps26b        | 69091  | 9-:26815352-26837615    |
| 6738 | Fxr1          | 14359  | 3+:33919029-33968259    |
| 6739 | Sh2d2a        | 27371  | 3+:87650676-87656693    |
| 6740 | Hp1bp3        | 15441  | 4+:137777427-137799132  |
| 6741 | Rab39b        | 67790  | X-:72819496-72823555    |
| 6742 | Kctd8         | 243043 | 5-:69671796-69732540    |
| 6743 | Ube2l3        | 22195  | 16-:17152108-17201585   |
| 6744 | Olfr1362      | 258739 | 13-:21702910-21703836   |
| 6745 | Rspo4         | 228770 | 2+:151668660-151699212  |
| 6746 | E2f8          | 108961 | 7-:56121797-56136370    |
| 6747 | Mars          | 216443 | 10-:126727867-126748827 |
| 6748 | Mare          | 17168  | 11-:32132275-32167631   |
| 6749 | Dnase1l3      | 13421  | 14-:8800262-8826662     |
| 6750 | Sstr2         | 20606  | 11+:113480794-113487209 |
| 6751 | MMT00073320   |        | 5-:81329653-81330681    |
| 6752 | Grin1a        | 28015  | 9-:71326249-71333740    |
| 6753 | Smc6          | 67241  | 12+:11272971-11292605   |
| 6754 | Trpv3         | 246788 | 11+:73081121-73110702   |
| 6755 | Wdr22         | 320808 | 12-:81439378-81537574   |
| 6756 | Sds           | 231691 | 5+:120926555-120933912  |
| 6757 | Lbx2          | 16815  | 6+:83036417-83038213    |
| 6758 | MMT00000302   |        | 8+:100287828-100400426  |
| 6759 | Sqle          | 20775  | 15+:59146794-59162747   |
| 6760 | 2810428l15Rik | 66462  | 8-:73028194-73030638    |
| 6761 | MMT00030685   |        | 6-:69942472-70056173    |
| 6762 | lfnb1         | 15977  | 4-:88167929-88168698    |
| 6763 | MMT00008804   |        | 3+:8214329-8318428      |
| 6764 | Cald1         | 109624 | 6+:34659484-34724091    |
| 6765 | Ldhb          | 16832  | 6-:142438769-142456403  |
| 6766 | Sspn          | 16651  | 6+:145882666-145913740  |
| 6767 | Erc2          | 238988 | 14+:28435693-28466669   |
| 6768 | Plekhf2       | 71801  | 4-:10915811-10934717    |
| 6769 | Banp          | 53325  | 8+:124474479-124549837  |
| 6770 | Cdh22         | 104010 | 2-:164937657-164996417  |
| 6771 | Insc          | 233752 | 7+:121912245-121993886  |
| 6772 | Lyn           | 17096  | 4+:3683437-3685481      |
| 6773 | Comt          | 12846  | 16-:18407636-18426605   |
| 6774 | Cilp          | 214425 | 9+:65113632-65128423    |
| 6775 | EG380809      | 380809 | 12-:115707262-115768307 |
| 6776 | Slc25a20      | 57279  | 9+:108564558-108586224  |
| 6777 | B3galt1       | 381694 | 5+:150511894-150563361  |
| 6778 | Grm5          | 108071 | 7+:94732883-94751711    |
| 6779 | Gbp6          | 229900 | 3+:142193333-142210014  |
| 6780 | Adamts9       | 101401 | 6-:92727386-92746439    |
| 6781 | Golga3        | 269682 | 5+:110610796-110652097  |



|      |               |        |                         |
|------|---------------|--------|-------------------------|
| 6782 | Sh3bp5        | 24056  | 14-:32188170-32249047   |
| 6783 | Zfp828        | 101994 | 8+:13869736-13881632    |
| 6784 | Al182371      | 98870  | 2-:34937379-34957037    |
| 6785 | Dpp6          | 13483  | 5+:27709291-28053492    |
| 6786 | Necab1        | 69352  | 4-:14882080-15076111    |
| 6787 | Fusip1        | 14105  | 4+:135412183-135419940  |
| 6788 | Psen2         | 19165  | 1-:182157136-182176032  |
| 6789 | Trp63         | 22061  | 16+:25802027-25892166   |
| 6790 | Zdhhc24       | 70605  | 19+:4878688-4885390     |
| 6791 | Hectd2        | 226098 | 19+:36693710-36695481   |
| 6792 | 4930444P10Rik | 75799  | 1-:16058874-16083445    |
| 6793 | Tmem16d       | 320091 | 10-:88579610-88612189   |
| 6794 | MMT00071127   |        | X+:19816516-19817413    |
| 6795 | Cdyl2         | 75796  | 8-:119092630-119095285  |
| 6796 | 2810025M15Rik | 69953  | 1+:159342907-159350364  |
| 6797 | Blvra         | 109778 | 2+:126906253-126922775  |
| 6798 | Tcea3         | 21401  | 4+:135803866-135830820  |
| 6799 | Mon1a         | 72825  | 9+:107790512-107805456  |
| 6800 | C130021I20Rik | 329385 | 2+:33498028-33501851    |
| 6801 | Zfp513        | 101023 | 5-:31501352-31504283    |
| 6802 | Siah1b        | 20438  | X-:160508634-160513981  |
| 6803 | MMT00059375   |        | 3-:56939554-56940755    |
| 6804 | Cyp2d22       | 56448  | 15-:82201909-82206451   |
| 6805 | Rrbp1         | 81910  | 2-:143811601-143836914  |
| 6806 | Agrn          | 11603  | 4-:155539402-155571448  |
| 6807 | Trappc1       | 245828 | 11+:69137367-69139295   |
| 6808 | EG433073      | 433073 | 17+:20798483-20798976   |
| 6809 | Rorc          | 19885  | 3+:94176707-94202510    |
| 6810 | Pcdhb1        | 93872  | 18+:37424651-37427106   |
| 6811 | MMT00059520   |        |                         |
| 6812 | MMT00040104   |        | 17+:3056713-3057111     |
| 6813 | Olfr697       | 258592 | 7-:113884492-113885446  |
| 6814 | V1rh7         | 171250 | 13-:22711965-22712904   |
| 6815 | Sort1         | 20661  | 3+:108087057-108159607  |
| 6816 | Slc46a3       | 71706  | 5-:148690029-148706391  |
| 6817 | Lefty2        | 320202 | 1+:182823237-182827863  |
| 6818 | BC030183      | 230766 | 4-:129254056-129255782  |
| 6819 | Cct2          | 12461  | 10-:116488054-116500821 |
| 6820 | MMT00046996   |        | 7+:14889997-14894927    |
| 6821 | Ins2          | 16334  | 7-:149864617-149865438  |
| 6822 | Ldhc          | 16833  | 7+:54116624-54133360    |
| 6823 | Yars          | 107271 | 4+:128867107-128896482  |
| 6824 | Irf7          | 54123  | 7-:148449087-148452300  |
| 6825 | 4930528G09Rik | 75172  | 5-:20798784-20930496    |
| 6826 | 2610209A20Rik | 67164  | 7+:107307786-107309875  |
| 6827 | Tnks2         | 74493  | 19+:36909027-36967961   |
| 6828 | Pigh          | 110417 | 12-:80183921-80190636   |
| 6829 | Pi4k2b        | 67073  | 5+:53132849-53160576    |
| 6830 | Rsc1a1        | 69994  | 4-:141239767-141241514  |
| 6831 | MMT00078868   |        | 17-:76683528-76684279   |
| 6832 | Aldh16a1      | 69748  | 7-:52396933-52409893    |

|      |               |        |                             |
|------|---------------|--------|-----------------------------|
| 6833 | MMT00056142   |        | 10-:96661802-96662943       |
| 6834 | MMT00048596   |        | 17+:91524542-91525858       |
| 6835 | BC026682      | 230579 | 4+:106406519-106420896      |
| 6836 | MMT00042654   | 19051  | 6+:55967523-55982203        |
| 6837 | Arhgap25      | 232201 | 6-:87409383-87446106        |
| 6838 | Nod2          | 257632 | 8+:91176763-91212304        |
| 6839 | Mrpl46        | 67308  | 7-:85920228-85927927        |
| 6840 | 4933424G06Rik | 71166  | 1+:36771346-36814802        |
| 6841 | Cpa5          | 74649  | 6+:30561009-30581521        |
| 6842 | Amotl2        | 56332  | 9+:102624863-102635741      |
| 6843 | 0610038D11Rik | 67674  | 19+:6984642-6985514         |
| 6844 | Pdzd8         | 107368 | 19-:59370579-59420273       |
| 6845 | Cyb561d1      | 72023  | 3-:107998702-108003354      |
| 6846 | Olfr1402      | 258272 | 3-:97214139-97215102        |
| 6847 | MMT00058311   |        | 19-:35126523-35126993       |
| 6848 | Letm1         | 56384  | 5-:34084000-34125353        |
| 6849 | Pigg          | 433931 | 5+:108741943-108777069      |
| 6850 | EG386506      | 386506 | 14+:53394592-53395812       |
| 6851 | Magohb        | 66441  | 6-:131234406-131243262      |
| 6852 | MMT00007193   |        | Y_random+:10231498-10250577 |
| 6853 | Hils1         | 54388  | 11+:94828974-94829768       |
| 6854 | Kcnj5         | 16521  | 9-:32125165-32130602        |
| 6855 | Ash1l         | 192195 | 3+:88785599-88882514        |
| 6856 | Tnrc6a        | 233833 | 7+:130323303-130337255      |
| 6857 | Serinc2       | 230779 | 4-:129930739-129952831      |
| 6858 | Gpatch4       | 66614  | 3+:87847029-87859909        |
| 6859 | Ppp1r9a       | 243725 | 6+:5084647-5104249          |
| 6860 | Kif23         | 71819  | 9-:61775054-61794429        |
| 6861 | Krt8          | 16691  | 15-:101827141-101834714     |
| 6862 | Olfr1055      | 259023 | 2-:86186982-86187921        |
| 6863 | Rtdr1         | 71236  | 10-:74420223-74495312       |
| 6864 | Sh3md4        | 237353 | 10+:58446668-58598735       |
| 6865 | Fgf12         | 14167  | 16-:28372990-28445823       |
| 6866 | Gls           | 14660  | 1-:52220295-52290240        |
| 6867 | Gpr171        | 229323 | 3-:58900834-58905736        |
| 6868 | Adcy1         | 432530 | 11+:6963584-6979040         |
| 6869 | Tmem163       | 72160  | 1-:129387100-129449382      |
| 6870 | Xlr4b         | 27083  | X+:70459703-70467795        |
| 6871 | Neurog2       | 11924  | 3+:127336292-127337973      |
| 6872 | Med1          | 19014  | 11-:98013476-98054574       |
| 6873 | BC023055      | 226123 | 19-:42149437-42160836       |
| 6874 | Pcdh19        | 279653 | X-:130121668-130221803      |
| 6875 | Slc14a1       | 108052 | 18-:78298387-78320015       |
| 6876 | Bmp15         | 12155  | X-:5892566-5897724          |
| 6877 | Kcnj10        | 16513  | 1+:174271486-174301017      |
| 6878 | MMT00041953   | 675689 | 11+:46375532-46375875       |
| 6879 | Lrrc16b       | 268747 | 14+:56113641-56117805       |
| 6880 | Dmrtb1        | 56296  | 4-:107348899-107356822      |
| 6881 | 5031408O05Rik | 331491 | X-:103575296-103577519      |
| 6882 | EG434078      | 434078 | 6+:113025843-113027220      |
| 6883 | MMT00049189   |        | 16-:4016871-4017072         |

|      |               |           |                         |
|------|---------------|-----------|-------------------------|
| 6884 | Hnrnpf        | 98758     | 6+:117856833-117875635  |
| 6885 | Psmg4         | 69666     | 13+:34254836-34270039   |
| 6886 | 4930473A06Rik | 320226    | 4+:83171491-83266751    |
| 6887 | Mrrf          | 67871     | 2+:35992186-36045390    |
| 6888 | Cxcl9         | 17329     | 5-:92752015-92757143    |
| 6889 | 9030624J02Rik | 71517     | 7+:125884245-125927569  |
| 6890 | Chsy3         | 78923     | 18+:59335663-59339203   |
| 6891 | Wdr57         | 66585     | 4+:130037415-130067274  |
| 6892 | Adamts6       | 108154    | 13+:105077919-105269756 |
| 6893 | Herc3         | 73998     | 6+:58781882-58854075    |
| 6894 | Rtl1          | 353326    | 12-:110828379-110833313 |
| 6895 | 3-Sep         | 24050     | 15+:82105322-82122489   |
| 6896 | MMT00078388   |           | 12+:39633174-39725375   |
| 6897 | Galk1         | 14635     | 11-:115869839-115873992 |
| 6898 | Mapk12        | 29857     | 15-:88961286-88971067   |
| 6899 | Pla2g4e       | 329502    | 2-:119992149-120002680  |
| 6900 | BC068281      | 238037    | 12+:4850180-4865055     |
| 6901 | MMT00048285   |           | 9-:66653114-66654035    |
| 6902 | Pigm          | 67556     | 1+:174306709-174308709  |
| 6903 | Acrv1         | 11451     | 9+:36500834-36506429    |
| 6904 | Sp6           | 83395     | 11+:96882631-96884720   |
| 6905 | Pkd1l3        | 244646    | 8+:112138563-112145913  |
| 6906 | 2610301B20Rik | 67157     | 4+:10801714-10826398    |
| 6907 | Usp50         | 75083     | 2-:126535090-126539157  |
| 6908 | Mmp12         | 17381     | 9+:7347457-7358683      |
| 6909 | Ctsm          | 64139     | 13-:61637624-61643170   |
| 6910 | Ly6c2         | 100093633 | 15-:74938587-74942237   |
| 6911 | C130090K23Rik | 231293    | 5+:73797488-73844515    |
| 6912 | Crym          | 12971     | 7-:127329897-127345502  |
| 6913 | MMT00056400   |           | 7-:18270473-18271665    |
| 6914 | Thrap3        | 230753    | 4-:125842644-125844308  |
| 6915 | 5830405M20Rik | 74749     | 1+:182685342-182689075  |
| 6916 | Wdr5b         | 69544     | 16+:36041360-36043058   |
| 6917 | MMT00070118   |           | 7+:13188438-13189997    |
| 6918 | Cog8          | 97484     | 8-:109570428-109572154  |
| 6919 | Zdhhc19       | 245308    | 16+:32499176-32507299   |
| 6920 | EG629059      | 629059    | 14+:63174574-63225261   |
| 6921 | Olfml1        | 244198    | 7+:114710990-114733856  |
| 6922 | Tmem86b       | 68255     | 7-:4579635-4581784      |
| 6923 | 1110017D15Rik | 73721     | 4-:41452048-41454789    |
| 6924 | Cxxc1         | 74322     | 18+:74375867-74381145   |
| 6925 | Arhgef2       | 16800     | 3+:88425059-88443458    |
| 6926 | BC059841      | 407813    | 14+:60261581-60262535   |
| 6927 | Parp6         | 67287     | 9+:59465183-59472825    |
| 6928 | Klh8          | 246293    | 5-:104291069-104340215  |
| 6929 | Nfasc         | 269116    | 1-:134465113-134638354  |
| 6930 | Efnb2         | 13642     | 8-:8619014-8660641      |
| 6931 | Hrsp12        | 15473     | 15-:34413891-34424945   |
| 6932 | Ckap4         | 216197    | 10-:83989048-83996368   |
| 6933 | Pqbp1         | 54633     | X-:7471808-7475743      |
| 6934 | Panx3         | 208098    | 9-:37468658-37476776    |

|      |               |        |                         |
|------|---------------|--------|-------------------------|
| 6935 | Arsj          | 271970 | 3+:126067769-126143293  |
| 6936 | Rxra          | 20181  | 2+:27532769-27615594    |
| 6937 | B3gnt6        | 272411 | 7-:105342086-105347990  |
| 6938 | Epha1         | 13835  | 6-:42308767-42323209    |
| 6939 | 1110006G06Rik | 73833  | 7-:29937530-29941202    |
| 6940 | Sec23a        | 20334  | 12-:60074014-60108197   |
| 6941 | Gm459         | 243451 | 6-:68860396-68860932    |
| 6942 | Ubr4          | 69116  | 4+:138944222-138952596  |
| 6943 | MMT00074478   |        | X-:111166697-111167432  |
| 6944 | EG665536      | 665536 | 8+:13887559-13896630    |
| 6945 | Lmtk3         | 381983 | 7+:53040975-53059250    |
| 6946 | Nol5          | 55989  | 1+:59741942-59768352    |
| 6947 | Lass6         | 241447 | 2+:68699506-68946649    |
| 6948 | Olfr898       | 258871 | 9+:38156669-38157619    |
| 6949 | Usp48         | 170707 | 4+:137161663-137169776  |
| 6950 | Zfp710        | 209225 | 7+:87225934-87235824    |
| 6951 | MMT00075568   |        | 2+:153239539-153240068  |
| 6952 | Ep300         | 328572 | 15+:81416575-81482506   |
| 6953 | Nlrp6         | 101613 | 7+:148108308-148114434  |
| 6954 | Defb4         | 56519  | 8+:19198724-19201413    |
| 6955 | Fut9          | 14348  | 4-:25545934-25726754    |
| 6956 | Gria2         | 14800  | 3-:80492368-80606508    |
| 6957 | BC017647      | 216971 | 11+:77929127-77969583   |
| 6958 | Sval1         | 71578  | 6+:41901628-41906097    |
| 6959 | Slc1a5        | 20514  | 7+:17366755-17383591    |
| 6960 | 4930539C22Rik | 75208  | 3-:134067105-134082477  |
| 6961 | MMT00073650   |        | 17+:64542090-64542324   |
| 6962 | Cyp1b1        | 13078  | 17-:80106293-80114381   |
| 6963 | MMT00033481   |        | 13-:85711871-85713200   |
| 6964 | 1200011M11Rik | 74133  | 11-:86891233-86899878   |
| 6965 | Nsg2          | 18197  | 11+:31900458-31959202   |
| 6966 | Mia3          | 338366 | 1_random-:300175-342929 |
| 6967 | MMT00070157   |        | 11+:69764299-69764733   |
| 6968 | Psca          | 72373  | 15+:74545268-74547499   |
| 6969 | Jub           | 16475  | 14-:55186305-55196367   |
| 6970 | Dagla         | 269060 | 19-:10321772-10330723   |
| 6971 | Gcat          | 26912  | 15+:78861345-78867893   |
| 6972 | Trspap1       | 71787  | 4-:131867679-131885431  |
| 6973 | RP23-281O10.5 | 195555 | 4-:143485120-143487828  |
| 6974 | Tmem65        | 74868  | 15-:58613824-58654683   |
| 6975 | Wdr67         | 210544 | 15+:57743754-57801626   |
| 6976 | Rbm35b        | 77411  | 8-:108653857-108692989  |
| 6977 | Lman1         | 70361  | 18-:66143346-66162274   |
| 6978 | Nat8b         | 434057 | 6-:85882726-85883343    |
| 6979 | ORF9          | 52793  | 16-:97692692-97726543   |
| 6980 | Pla2g4d       | 78390  | 2-:120091609-120103314  |
| 6981 | MMT00027115   | 544718 | 10+:89539720-89821960   |
| 6982 | Rcc1          | 100088 | 4-:131887840-131901577  |
| 6983 | BC003267      | 233987 | 8+:4613166-4629548      |
| 6984 | Gapdh         | 14433  | 6-:125112004-125113178  |
| 6985 | Ntng1         | 80883  | 3-:109946353-110040056  |

|      |               |           |                         |
|------|---------------|-----------|-------------------------|
| 6986 | Gm1821        | 624036    | 14+:46703800-46704073   |
| 6987 | Hspg2         | 15530     | 4+:137024735-137126544  |
| 6988 | Lims1         | 110829    | 10+:57786213-57885404   |
| 6989 | Klk15         | 317652    | 7+:51173842-51194953    |
| 6990 | Nr1i2         | 18171     | 16-:38248436-38294910   |
| 6991 | Prkar1b       | 19085     | 5-:139494582-139605653  |
| 6992 | Olfr172       | 259003    | 16-:58760359-58761287   |
| 6993 | Al987662      | 101202    | 6-:3407096-3437430      |
| 6994 | Glul          | 14645     | 1+:155747097-155756824  |
| 6995 | Ebp           | 13595     | X-:7762458-7770002      |
| 6996 | Zbtb16        | 235320    | 9-:48465020-48644335    |
| 6997 | Gm1568        | 380768    | 12-:81858445-81861686   |
| 6998 | EG245651      | 245651    | X-:138967983-138968278  |
| 6999 | Snx16         | 74718     | 3-:10418936-10440090    |
| 7000 | Map3k12       | 26404     | 15-:102329875-102339769 |
| 7001 | Cox7a2l       | 20463     | 17-:83901270-83913641   |
| 7002 | Lrrn1         | 16979     | 6+:107479778-107520204  |
| 7003 | MMT00008726   |           | 11+:104692598-104892629 |
| 7004 | Pzp           | 11287     | 6-:128433591-128476731  |
| 7005 | Chmp6         | 208092    | 11+:119775160-119780866 |
| 7006 | MMT00030635   | 672450    | 6+:70306118-70322028    |
| 7007 | Rab8a         | 17274     | 8+:74685242-74704035    |
| 7008 | Myo7a         | 17921     | 7-:105199838-105255617  |
| 7009 | Tmprss11c     | 435845    | 5-:86660821-86668523    |
| 7010 | Mlph          | 171531    | 1+:92811679-92847718    |
| 7011 | 1810022C23Rik | 69123     | 13-:35038661-35055678   |
| 7012 | Dennd4a       | 102442    | 9+:64686640-64767472    |
| 7013 | Atp10b        | 319767    | 11+:42965251-42966922   |
| 7014 | Fbxl22        | 74165     | 9-:66358971-66362418    |
| 7015 | Pbrm1         | 66923     | 14+:31902737-31933206   |
| 7016 | Cdc26         | 66440     | 4-:62055622-62065585    |
| 7017 | Rfc4          | 106344    | 16-:23114021-23127803   |
| 7018 | Rbm19         | 74111     | 5+:120566523-120648987  |
| 7019 | Zp3           | 22788     | 5+:136455974-136464493  |
| 7020 | Fbln5         | 23876     | 12-:102988149-103057279 |
| 7021 | Slc16a8       | 57274     | 15-:79081443-79085187   |
| 7022 | Unc5a         | 107448    | 13+:55051022-55107371   |
| 7023 | Agpat4        | 68262     | 17+:12312149-12412506   |
| 7024 | Apln          | 30878     | X-:45381477-45387682    |
| 7025 | Erc2          | 238988    | 14+:28590010-28591003   |
| 7026 | BC055324      | 381306    | 1-:165876123-165924912  |
| 7027 | 5730410I19Rik | 66622     | 12+:103996204-104015916 |
| 7028 | Olfr974       | 259111    | 9+:39749846-39750779    |
| 7029 | MMT00072012   |           | 12+:31569085-31578350   |
| 7030 | RP23-232H13.5 | 100043387 | 2+:176503994-176871927  |
| 7031 | Wipf3         | 330319    | 6+:54431778-54439607    |
| 7032 | Slc5a3        | 53881     | 16+:92077301-92079457   |
| 7033 | Rfwd3         | 234736    | 8-:113796920-113824080  |
| 7034 | MMT00067631   |           |                         |
| 7035 | 4933425L06Rik | 66763     | 13+:105872201-105911860 |
| 7036 | MMT00012416   |           | 11+:88271091-88392059   |

|      |               |           |                         |
|------|---------------|-----------|-------------------------|
| 7037 | MMT00041357   |           | 15-:93509065-93510432   |
| 7038 | Abhd5         | 67469     | 9+:122260849-122290641  |
| 7039 | Zmat3         | 22401     | 3-:32233719-32264542    |
| 7040 | 4933409G03Rik | 227998    | 2+:68439918-68454435    |
| 7041 | Sp140         | 434484    | 1+:87511062-87516733    |
| 7042 | C730007P19Rik | 20865     | 7+:14320095-14323700    |
| 7043 | Cyp11b2       | 13072     | 15-:74681468-74686655   |
| 7044 | Vbp1          | 22327     | X+:72759691-72780249    |
| 7045 | Olf1234       | 258975    | 2-:89202640-89203584    |
| 7046 | MMT00044125   |           | 18-:45445488-45463340   |
| 7047 | MMT00019310   |           | 12-:13759481-13760503   |
| 7048 | 9830169C18Rik | 217705    | 12-:85686266-85702738   |
| 7049 | Psm14         | 59029     | 2+:61549825-61638432    |
| 7050 | 1700027J05Rik | 69440     | 15-:89015244-89017852   |
| 7051 | Zfmx4         | 80892     | 3+:5241671-5414508      |
| 7052 | Arid4a        | 238247    | 12+:72116978-72199899   |
| 7053 | Mmp24         | 17391     | 2+:155601120-155642061  |
| 7054 | Trerf1        | 224829    | 17+:47450769-47496407   |
| 7055 | Eprs          | 107508    | 1+:187186957-187193555  |
| 7056 | Rad54l2       | 81000     | 9-:106594571-106691416  |
| 7057 | Stk10         | 20868     | 11+:32433304-32524587   |
| 7058 | Asns          | 27053     | 6-:7625165-7643106      |
| 7059 | MMT00031310   |           | Y-:2462130-2468679      |
| 7060 | Xpr1          | 19775     | 1-:157127914-157264459  |
| 7061 | Spsb3         | 79043     | 17+:25024425-25029092   |
| 7062 | ENSMUSG00000  | 100041269 | 15+:76124715-76127804   |
| 7063 | Cab39l        | 69008     | 14+:60059817-60204601   |
| 7064 | BC037703      | 242125    | 3-:101627185-101640073  |
| 7065 | Vmn2r110      | 224582    | 17-:20711311-20721399   |
| 7066 | Agtr1b        | 11608     | 3-:20214282-20302434    |
| 7067 | EG545758      | 545758    | 5-:72973292-72978626    |
| 7068 | Sec22c        | 215474    | 9-:121592137-121614141  |
| 7069 | Ube1l         | 74153     | 9+:107877852-107886389  |
| 7070 | Rpl11         | 67025     | 4-:135605862-135609287  |
| 7071 | Fgf5          | 14176     | 5+:98683267-98704576    |
| 7072 | Punc          | 19289     | 9+:64988995-65033675    |
| 7073 | Arhgap4       | 171207    | X-:71139697-71156568    |
| 7074 | Dcbld2        | 73379     | 16+:58460843-58465940   |
| 7075 | Pax7          | 18509     | 4-:139294001-139388817  |
| 7076 | MMT00078003   | 665032    | 5-:116251615-116252195  |
| 7077 | MMT00064540   |           | 5-:109956480-109958571  |
| 7078 | Olf1463       | 258408    | 11-:87706489-87707424   |
| 7079 | Gm884         | 380730    | 11-:103403079-103482700 |
| 7080 | 0610038F07Rik | 66072     | 19-:10576934-10599603   |
| 7081 | Wdr40a        | 68970     | 4-:41238333-41261911    |
| 7082 | MMT00068724   |           | 13-:66328085-66963054   |
| 7083 | MMT00044154   |           | 18+:44221143-44222334   |
| 7084 | Spz1          | 79401     | 13-:93344784-93345921   |
| 7085 | St8sia2       | 20450     | 7-:81084007-81158547    |
| 7086 | Calu          | 12321     | 6+:29298180-29326667    |
| 7087 | Dio2          | 13371     | 12-:91962991-91976878   |

|      |               |        |                         |
|------|---------------|--------|-------------------------|
| 7088 | Slc37a1       | 224674 | 17+:31432075-31487641   |
| 7089 | Al646023      | 192734 | 10-:75012869-75022834   |
| 7090 | 2010003O02Rik | 66434  | 4+:40216617-40217973    |
| 7091 | Myf5          | 17877  | 10-:106919966-106922987 |
| 7092 | Rom1          | 19881  | 19-:9001883-9003678     |
| 7093 | Magt1         | 67075  | X-:103165815-103207117  |
| 7094 | Cyp2c54       | 404195 | 19-:40112424-40122137   |
| 7095 | Timm8a1       | 30058  | X-:131071796-131076168  |
| 7096 | Npat          | 244879 | 9+:53345036-53382448    |
| 7097 | Dnajb6        | 23950  | 5+:30062564-30093628    |
| 7098 | Pcdhb18       | 93889  | 18+:37649272-37651650   |
| 7099 | Kcnk10        | 72258  | 12-:99694928-99812922   |
| 7100 | Tomm22        | 223696 | 15+:79501298-79504002   |
| 7101 | Gimap6        | 231931 | 6-:48651579-48658212    |
| 7102 | Hnrnpm        | 76936  | 17-:33783183-33822348   |
| 7103 | Zfp524        | 66056  | 7+:4967109-4970090      |
| 7104 | Inpp4b        | 234515 | 8+:84476077-84646686    |
| 7105 | Plac8         | 231507 | 5-:100982751-101001224  |
| 7106 | MMT00077123   |        | 14-:43798424-43800938   |
| 7107 | Olfr663       | 257914 | 7+:111852142-111853117  |
| 7108 | Adamts1       | 77739  | 4+:86061429-86072048    |
| 7109 | Bxdc2         | 67832  | 15-:10405936-10415579   |
| 7110 | Pnpla1        | 433091 | 17+:28995811-29015520   |
| 7111 | Pfdn5         | 56612  | 15+:102156603-102161905 |
| 7112 | Apbb3         | 225372 | 18-:36830813-36839020   |
| 7113 | Phf13         | 230936 | 4-:151365578-151368201  |
| 7114 | Schip1        | 30953  | 3+:68298495-68299180    |
| 7115 | CstII         | 228756 | 2+:148576543-148581127  |
| 7116 | Katnal1       | 231912 | 5-:149687626-149740223  |
| 7117 | MMT00015170   |        | 4-:99131796-99187118    |
| 7118 | BC051019      | 57355  | 7-:116855695-116867392  |
| 7119 | Dlg3          | 53310  | X+:97963090-98013747    |
| 7120 | Dusp1         | 19252  | 17-:26642536-26645406   |
| 7121 | Cc2d1a        | 212139 | 8-:86656727-86671652    |
| 7122 | Gigyf2        | 227331 | 1+:89329694-89347367    |
| 7123 | A630050E13Rik | 319701 | 11+:16853292-16854449   |
| 7124 | Dnajb13       | 69387  | 7-:107650250-107661908  |
| 7125 | 5230400G24Rik | 75734  | 1+:82721514-82748291    |
| 7126 | MMT00002620   |        | 2+:73973812-73988889    |
| 7127 | MMT00007705   |        | 2+:120064295-120064626  |
| 7128 | Gemin8        | 237221 | X+:162614904-162627732  |
| 7129 | Frat1         | 14296  | 19+:41904605-41907073   |
| 7130 | Vdr           | 22337  | 15-:97687803-97738695   |
| 7131 | 1810037117Rik | 67704  | 3+:122627317-122628654  |
| 7132 | Sp9           | 381373 | 2+:73109987-73112393    |
| 7133 | Hook2         | 170833 | 8+:87514517-87527160    |
| 7134 | Krba1         | 77827  | 6+:48345612-48366884    |
| 7135 | Ezr           | 22350  | 17-:6942812-6987069     |
| 7136 | Id3           | 15903  | 4+:135699736-135701301  |
| 7137 | Psmc2         | 19181  | 5+:21291099-21309606    |
| 7138 | Cyb561d2      | 56368  | 9-:107441890-107444442  |

|      |               |        |                         |
|------|---------------|--------|-------------------------|
| 7139 | Pld3          | 18807  | 7-:28317036-28338131    |
| 7140 | Mtbp          | 105837 | 15+:55389041-55457968   |
| 7141 | MMT00061218   | 629364 | 12-:25176464-25178595   |
| 7142 | Wdr23         | 28199  | 14+:56180060-56188901   |
| 7143 | Cxcr7         | 12778  | 1+:92100600-92112182    |
| 7144 | Zfp169        | 67911  | 13-:48584454-48586276   |
| 7145 | 2810021G02Rik | 353208 | 2-:177802399-177813224  |
| 7146 | 0610037D15Rik | 68394  | 4+:116381173-116386756  |
| 7147 | 2610307P16Rik | 72518  | 13-:28552550-28864538   |
| 7148 | Tln2          | 70549  | 9-:67165989-67245454    |
| 7149 | 9530077C05Rik | 68283  | 9+:22215922-22249127    |
| 7150 | Scg2          | 20254  | 1-:79431726-79433579    |
| 7151 | MMT00007982   |        | 6-:67684189-67685598    |
| 7152 | MMT00010289   |        | 14-:36803638-36864433   |
| 7153 | Glt6d1        | 71103  | 2-:25666520-25671357    |
| 7154 | Fbxw13        | 211305 | 9-:109085520-109087904  |
| 7155 | MMT00017420   |        | 14+:53303921-53304140   |
| 7156 | Tmem1         | 216131 | 10-:77649474-77670789   |
| 7157 | BC038822      | 239647 | 15+:97204487-97216120   |
| 7158 | Nudt16        | 75686  | 9-:105032002-105034135  |
| 7159 | 1700031F05Rik | 73300  | X-:100054526-100061695  |
| 7160 | Rbm6          | 19654  | 9-:107675895-107775029  |
| 7161 | Malt1         | 240354 | 18+:65590647-65637428   |
| 7162 | Vps72         | 21427  | 3+:94914992-94926855    |
| 7163 | Ptplb         | 70757  | 16+:35022513-35106660   |
| 7164 | Ppp1r3a       | 140491 | 6-:14663581-14705246    |
| 7165 | Nt5m          | 103850 | 11+:59661574-59690034   |
| 7166 | Tmlhe         | 192289 | X_random+:159646-334185 |
| 7167 | Ear5          | 54159  | 14+:51782138-51782606   |
| 7168 | Cep55         | 74107  | 19+:38129497-38149227   |
| 7169 | Sestd1        | 228071 | 2-:77024062-77083145    |
| 7170 | Magix         | 54634  | X-:7251753-7258173      |
| 7171 | Nmd3          | 97112  | 3+:69525976-69552966    |
| 7172 | Nme2          | 18103  | 11-:93811129-93816939   |
| 7173 | Trim59        | 66949  | 3-:68839215-68841208    |
| 7174 | Creb3l1       | 26427  | 2-:91822810-91864288    |
| 7175 | MMT00002215   |        | X+:9278279-9331284      |
| 7176 | MMT00026882   |        | 9+:39972217-39972542    |
| 7177 | 4930511M06Rik | 75084  | 18-:57705017-57711535   |
| 7178 | P4ha3         | 320452 | 7+:107465551-107467592  |
| 7179 | Rfxdc2        | 319758 | 9+:72380626-72470624    |
| 7180 | Marveld1      | 277010 | 19+:42221906-42226485   |
| 7181 | Nedd4         | 17999  | 9+:72525155-72595035    |
| 7182 | Olfr434       | 258366 | 6+:43166913-43167879    |
| 7183 | MMT00040424   |        | X-:109572654-109573976  |
| 7184 | Klhl26        | 234378 | 8-:72973402-73000878    |
| 7185 | Ostf1         | 20409  | 19-:18655244-18706299   |
| 7186 | Tatdn2        | 381801 | 6+:113647419-113660322  |
| 7187 | Aasdh         | 231326 | 5-:77311365-77316555    |
| 7188 | Atpbd4        | 66632  | 2-:114342155-114480619  |
| 7189 | MMT00064788   |        | 13-:45281845-45282781   |



|      |               |        |                         |
|------|---------------|--------|-------------------------|
| 7190 | MMT00009543   |        | 11+:114770015-114770770 |
| 7191 | Fgfr1op       | 75296  | 17+:8361897-8389343     |
| 7192 | Ttc21b        | 73668  | 2-:66022384-66090061    |
| 7193 | Cdx2          | 12591  | 5-:148113250-148118788  |
| 7194 | 9430020K01Rik | 240185 | 18+:4673044-4680423     |
| 7195 | MMT00051203   |        | 12+:33394928-33398576   |
| 7196 | Kcng1         | 241794 | 2-:168087489-168107236  |
| 7197 | MMT00059753   |        | 3-:29672396-29792155    |
| 7198 | Glod4         | 67201  | 11-:76035011-76057158   |
| 7199 | Wee1          | 22390  | 7+:117265585-117285647  |
| 7200 | Rcc2          | 108911 | 4+:140256453-140278813  |
| 7201 | Kcnh7         | 170738 | 2-:63019525-63022334    |
| 7202 | 9530003J23Rik | 77397  | 10-:116670816-116675662 |
| 7203 | Scmh1         | 29871  | 4+:120078013-120202560  |
| 7204 | V1re4         | 171227 | 17-:21050245-21051300   |
| 7205 | Phka1         | 18679  | X-:99711193-99839481    |
| 7206 | Rgma          | 244058 | 7+:80520573-80564784    |
| 7207 | Olf1203       | 258898 | 2+:88671275-88672197    |
| 7208 | Trex2         | 24102  | X-:70679268-70679978    |
| 7209 | Gpa33         | 59290  | 1+:168060590-168096640  |
| 7210 | E130012A19Rik | 103551 | 11-:97489486-97490595   |
| 7211 | 2410014A08Rik | 109154 | 5-:115593029-115608170  |
| 7212 | MMT00015229   |        | 13+:54236301-54237126   |
| 7213 | MMT00003697   |        | 7-:133944395-133952072  |
| 7214 | Itln1         | 16429  | 1-:173459251-173465426  |
| 7215 | Mip           | 17339  | 10+:127662937-127667733 |
| 7216 | MMT00063554   |        | 2+:87233613-87236461    |
| 7217 | MMT00004295   |        | 17+:23010426-23010972   |
| 7218 | Cylc2         | 74914  | 4+:51229548-51242569    |
| 7219 | Ptpn4         | 19258  | 1-:121556321-121699052  |
| 7220 | 1110018M03Rik | 67606  | 2-:110201081-110203150  |
| 7221 | Mcpt8         | 17231  | 14-:56701002-56704034   |
| 7222 | MMT00063574   |        |                         |
| 7223 | Enam          | 13801  | 5+:88916999-88933737    |
| 7224 | Pafah2        | 100163 | 4+:133953385-133983323  |
| 7225 | Tiam1         | 21844  | 16-:89787356-89961072   |
| 7226 | Defcr3        | 13237  | 8+:22427076-22427288    |
| 7227 | MMT00022763   |        | 3+:119155269-119380921  |
| 7228 | OTTMUSG000000 | 328483 | 14+:54048401-54050831   |
| 7229 | H2-DMb1       | 14999  | 17+:34282252-34297169   |
| 7230 | Pecam1        | 18613  | 11-:106516194-106576465 |
| 7231 | Setd2         | 235626 | 9+:110449709-110521131  |
| 7232 | MMT00078948   |        | 7+:146960610-146960924  |
| 7233 | 5430433E21Rik | 74492  | 9-:65238083-65239459    |
| 7234 | MMT00005439   |        | 7-:12277020-12277559    |
| 7235 | Psg29         | 114872 | 7+:17790215-17797252    |
| 7236 | L2hgdh        | 217666 | 12-:70791439-70825805   |
| 7237 | Esm1          | 71690  | 13+:114000050-114006947 |
| 7238 | Pycard        | 66824  | 7-:135136171-135137239  |
| 7239 | Zfp819        | 74400  | 7+:50862594-50873649    |
| 7240 | C730007P19Rik | 20865  | 7+:14338705-14341327    |

|      |               |        |                         |
|------|---------------|--------|-------------------------|
| 7241 | Ptpn11        | 19247  | 5-:121583799-121641283  |
| 7242 | 2210012G02Rik | 66526  | 4-:106811427-106850925  |
| 7243 | Slc4a10       | 94229  | 2+:61884650-62164782    |
| 7244 | MMT00034282   |        | 3-:120883187-120884060  |
| 7245 | Ski           | 20481  | 4-:154531449-154596629  |
| 7246 | Xkr5          | 319581 | 8-:18933494-18950933    |
| 7247 | 4930452B06Rik | 74430  | 14-:9334934-9498753     |
| 7248 | 4930562C15Rik | 78809  | 16+:4841105-4852127     |
| 7249 | Smchd1        | 74355  | 17-:71791217-71824663   |
| 7250 | Aldh1l2       | 216188 | 10-:82951991-82996805   |
| 7251 | MMT00018228   |        | 16-:16365094-16366304   |
| 7252 | Nolc1         | 70769  | 19+:46150502-46157814   |
| 7253 | Olf1593       | 258378 | 7+:110360375-110361358  |
| 7254 | Fsd2          | 244091 | 7-:88679985-88704863    |
| 7255 | EG621629      | 621629 | 13+:40873408-40947794   |
| 7256 | MMT00063357   |        | 13+:107223869-107266980 |
| 7257 | Mcf2          | 193813 | 17-:87654006-87665255   |
| 7258 | Bmp2k         | 140780 | 5+:97426707-97520066    |
| 7259 | 4930511H11Rik | 78016  | 1+:54307472-54335805    |
| 7260 | Uncx          | 22255  | 5+:140019891-140024130  |
| 7261 | Ttc7b         | 104718 | 12-:101538998-101758909 |
| 7262 | MMT00063675   |        | 7+:11668231-11674384    |
| 7263 | Narg1l        | 66897  | 14-:79735440-79790484   |
| 7264 | MMT00041369   |        | 6-:116145436-116145876  |
| 7265 | Dok1          | 13448  | 6-:82980951-82983430    |
| 7266 | Olf1354       | 258941 | 2+:36762467-36763419    |
| 7267 | Clm3          | 212070 | 7-:142705622-142720316  |
| 7268 | Slco5a1       | 240726 | 1-:12861878-12980576    |
| 7269 | Aip           | 11632  | 19-:4114447-4125827     |
| 7270 | MMT00008590   |        | 2-:147896605-147897623  |
| 7271 | Lsm11         | 72290  | 11-:45747017-45758426   |
| 7272 | Krt1          | 16678  | 15-:101675944-101681225 |
| 7273 | Rnf103        | 22644  | 6+:71443887-71460875    |
| 7274 | Laptm4b       | 114128 | 15-:34199401-34199584   |
| 7275 | Trim35        | 66854  | 14+:66915932-66928341   |
| 7276 | Rbm41         | 237073 | X-:136480231-136533073  |
| 7277 | Adrb2         | 11555  | 18-:62338151-62353069   |
| 7278 | 1810030J14Rik | 66289  | 1+:176260649-176263004  |
| 7279 | Cldn13        | 57255  | 5-:135390571-135391199  |
| 7280 | Rgs8          | 67792  | 1+:155543199-155544554  |
| 7281 | MMT00048662   |        | 1+:3977264-3977944      |
| 7282 | Ppic          | 19038  | 18-:53565994-53577661   |
| 7283 | Pnmt          | 18948  | 11+:98247945-98249410   |
| 7284 | MMT00008674   |        | 5-:121378079-121382183  |
| 7285 | Tbc1d4        | 210789 | 14-:101841584-101910783 |
| 7286 | Nox1          | 71893  | 17+:24833743-24837519   |
| 7287 | MMT00006239   |        |                         |
| 7288 | Gcet2         | 14525  | 16+:45610552-45621343   |
| 7289 | L1cam         | 16728  | X-:71100373-71115143    |
| 7290 | 2010111I01Rik | 72061  | 13+:63116526-63169645   |
| 7291 | EG639576      | 639576 | 18+:76778069-76876083   |

|      |               |        |                         |
|------|---------------|--------|-------------------------|
| 7292 | Spna1         | 20739  | 1+:176102998-176178198  |
| 7293 | Zdhhc18       | 503610 | 4-:133162627-133183290  |
| 7294 | Mbd3          | 17192  | 10-:79855285-79862224   |
| 7295 | Olf54         | 18354  | 11+:50840505-50841447   |
| 7296 | MMT00013662   |        | 4+:97803638-97813188    |
| 7297 | Cbln2         | 12405  | 18+:86881456-86887676   |
| 7298 | Mpp7          | 75739  | 18-:7350833-7561872     |
| 7299 | Pelp1         | 75273  | 11-:70216132-70223533   |
| 7300 | Olf560        | 259117 | 7-:109901496-109902441  |
| 7301 | Ubtf          | 21429  | 11+:102180046-102180517 |
| 7302 | MMT00021433   |        | 9+:21896943-21897351    |
| 7303 | Tmem182       | 381339 | 1+:40862448-40913731    |
| 7304 | 1700020N18Rik | 67086  | 1-:93301453-93302608    |
| 7305 | Olf389        | 259011 | 11-:73589890-73590827   |
| 7306 | Zcchc8        | 70650  | 5-:124149806-124170949  |
| 7307 | Agmat         | 75986  | 4+:141302582-141315177  |
| 7308 | Tmem52        | 69671  | 4+:154843221-154844966  |
| 7309 | Mpp5          | 56217  | 12+:79850007-79939068   |
| 7310 | Dagla         | 269060 | 19-:10336983-10379365   |
| 7311 | Lsm6          | 78651  | 8-:81330466-81345036    |
| 7312 | Creg2         | 263764 | 1-:39679589-39707778    |
| 7313 | Tnfsf14       | 50930  | 17-:57328914-57333600   |
| 7314 | Sgpp2         | 433323 | 1+:78387049-78390023    |
| 7315 | EG624219      | 624219 | 9+:21639938-21641788    |
| 7316 | Ifi204        | 15951  | 1-:175677426-175843051  |
| 7317 | Raver2        | 242570 | 4+:100741841-100823425  |
| 7318 | Rfpl4         | 192658 | 7-:5061468-5068498      |
| 7319 | Olf1490       | 258098 | 19+:13728920-13729886   |
| 7320 | MMT00051732   |        | 7+:148592427-148593223  |
| 7321 | Rdbp          | 27632  | 17+:34987863-34993103   |
| 7322 | D730048I06Rik | 68171  | 9-:35595694-35597668    |
| 7323 | Txk           | 22165  | 5-:73087220-73127841    |
| 7324 | Mtap          | 66902  | 4+:88783020-88826994    |
| 7325 | Cops3         | 26572  | 11-:59631307-59653269   |
| 7326 | MMT00049214   |        | X+:148089730-148090357  |
| 7327 | Fscn3         | 56223  | 6+:28377788-28388613    |
| 7328 | Atp5b         | 11947  | 10+:127520382-127527328 |
| 7329 | Tsen2         | 381802 | 6+:115497836-115528369  |
| 7330 | U2af2         | 22185  | 7+:5019631-5031534      |
| 7331 | Slc23a2       | 54338  | 2-:131882016-131927295  |
| 7332 | 1700027L20Rik | 69453  | 1+:89083238-89084979    |
| 7333 | Olf1339       | 258851 | 4+:118407135-118408082  |
| 7334 | Lor           | 16939  | 3-:91884203-91887062    |
| 7335 | Calm2         | 12314  | 17-:87833367-87842067   |
| 7336 | Cd5l          | 11801  | 3+:87161896-87174994    |
| 7337 | Usp53         | 99526  | 3+:122654204-122657473  |
| 7338 | MMT00070692   |        | 19+:8346969-8349204     |
| 7339 | Tdp1          | 104884 | 12+:101122734-101144344 |
| 7340 | Ascc3l1       | 320632 | 2+:127034132-127067416  |
| 7341 | Olf1424       | 258676 | 19-:12133300-12149054   |
| 7342 | Anp32e        | 66471  | 3+:95733504-95749494    |

|      |               |        |                         |
|------|---------------|--------|-------------------------|
| 7343 | Mcm10         | 70024  | 2-:4911213-4933778      |
| 7344 | Herc2         | 15204  | 7+:63305758-63370256    |
| 7345 | Foxo6         | 329934 | 4-:119939866-119959857  |
| 7346 | MMT00002542   |        | 1-:4246317-4250516      |
| 7347 | 1110032A04Rik | 66183  | 3-:69623462-69663796    |
| 7348 | Lce1h         | 67718  | 3-:92567136-92568987    |
| 7349 | MMT000065780  |        | 14+:15270505-15271223   |
| 7350 | Rrp15         | 67223  | 1-:188544970-188573188  |
| 7351 | Asb6          | 72323  | 2-:30678616-30685853    |
| 7352 | MMT00015446   |        | 4-:135312148-135312610  |
| 7353 | Fras1         | 231470 | 5+:96973968-97029820    |
| 7354 | Fydd1         | 69823  | 16+:32877899-32906805   |
| 7355 | Procr         | 19124  | 2+:155577078-155581194  |
| 7356 | MMT00005729   |        | 12+:116855015-116855234 |
| 7357 | MMT00006424   | 545547 | 3-:92589302-92610901    |
| 7358 | Slc1a1        | 20510  | 19+:28909655-28988449   |
| 7359 | Evi1          | 14013  | 3-:29851638-29896586    |
| 7360 | Mfi2          | 30060  | 16+:31878895-31899103   |
| 7361 | Ddx50         | 94213  | 10-:62078770-62113946   |
| 7362 | Rrm2          | 20135  | 12+:25393147-25398972   |
| 7363 | Canx          | 12330  | 11-:50109784-50125279   |
| 7364 | Prr16         | 71373  | 18+:51446101-51463018   |
| 7365 | Gpr111        | 435529 | 17-:42847008-42851425   |
| 7366 | BC008163      | 230789 | 4-:132456538-132478426  |
| 7367 | Gchfr         | 320415 | 2+:118993513-118998125  |
| 7368 | Adam8         | 11501  | 7-:147164839-147178387  |
| 7369 | AW549877      | 106064 | 15-:3932037-3942078     |
| 7370 | Spop          | 20747  | 11+:95275427-95354327   |
| 7371 | MMT000063687  |        | 5-:110546730-110547947  |
| 7372 | Fastk         | 66587  | 5-:23946857-23950188    |
| 7373 | MMT00000121   |        | 6-:85758479-85759857    |
| 7374 | Obox6         | 252830 | 7-:16418826-16420298    |
| 7375 | 1700036A12Rik | 73298  | 9+:60590923-60618081    |
| 7376 | 3110067C02Rik | 73202  | X+:146898818-146900060  |
| 7377 | Suds3         | 71954  | 5-:117541690-117566836  |
| 7378 | 1700001J03Rik | 69282  | 5-:146994023-146996876  |
| 7379 | MMT00078052   |        | 19-:37778218-37797762   |
| 7380 | MMT00077370   |        | 7-:72726907-72780800    |
| 7381 | B9d1          | 27078  | 11+:61318673-61326429   |
| 7382 | RP23-34B24.1  | 230161 | 4-:49460165-49464007    |
| 7383 | Olfcr398      | 258705 | 11-:73797163-73798108   |
| 7384 | MMT00079090   |        | 11+:48381856-48382528   |
| 7385 | Timm17a       | 21854  | 1-:137197815-137210328  |
| 7386 | Pex6          | 224824 | 17+:46848411-46862489   |
| 7387 | Pcdh7         | 54216  | 5+:58473001-58520590    |
| 7388 | Amn           | 93835  | 12+:112509308-112514469 |
| 7389 | Sfrs5         | 20384  | 12+:82047562-82051486   |
| 7390 | Ppp2r4        | 110854 | 2+:30271653-30303325    |
| 7391 | Bhlhb8        | 17341  | 5+:144951154-144952534  |
| 7392 | MMT00009784   |        | 15+:74285488-74347741   |
| 7393 | Igk-V28       | 16114  | 6+:70143469-70165974    |

|      |               |        |                         |
|------|---------------|--------|-------------------------|
| 7394 | Arid4b        | 94246  | 13+:14156971-14291870   |
| 7395 | Tmprss11d     | 231382 | 5-:86731880-86802412    |
| 7396 | Lao1          | 100470 | 4+:118634571-118641489  |
| 7397 | MMT00020969   |        | 3+:144390767-144392049  |
| 7398 | Rbmxt         | 19656  | 8-:81029168-81032738    |
| 7399 | 1700008A04Rik | 69351  | 11-:32720376-32724575   |
| 7400 | Cars2         | 71941  | 8-:11513978-11550744    |
| 7401 | Pdzk1ip1      | 67182  | 4+:114761327-114766498  |
| 7402 | Plcd4         | 18802  | 1+:74595751-74612554    |
| 7403 | Zbtb25        | 109929 | 12-:77449568-77470501   |
| 7404 | Prmp5         | 381832 | 6-:132261612-132314135  |
| 7405 | Snx31         | 66696  | 15-:36434159-36485328   |
| 7406 | Sult2a1       | 20859  | 7-:14417914-14422751    |
| 7407 | Slc9a3r1      | 26941  | 11+:115024716-115042493 |
| 7408 | 1700081L11Rik | 76719  | 11-:104194813-104218190 |
| 7409 | MMT00014691   |        | 19-:27836215-27837137   |
| 7410 | Arfp2         | 76932  | 7-:112784135-112788867  |
| 7411 | MMT00041340   |        | X-:92020117-92031365    |
| 7412 | Nkg7          | 72310  | 7+:50692673-50693466    |
| 7413 | Olf1101       | 258584 | 2-:86828400-86829331    |
| 7414 | Clpx          | 270166 | 9+:65142115-65178449    |
| 7415 | Isoc1         | 66307  | 18+:58819340-58837894   |
| 7416 | 6430548M08Rik | 234797 | 8+:122638059-122687323  |
| 7417 | MMT00011799   |        | 11+:82784682-82786238   |
| 7418 | Pkp3          | 56460  | 7+:148265676-148276408  |
| 7419 | Arid5a        | 214855 | 1+:36364625-36377372    |
| 7420 | 4833413D08Rik | 71425  | 2+:154083575-154092715  |
| 7421 | Nlrp4g        | 235779 | 9_random+:129260-148047 |
| 7422 | MMT00067092   | 637957 | 7+:127696665-127765631  |
| 7423 | Wdr74         | 107071 | 19+:8810328-8815113     |
| 7424 | Cdkn1c        | 12577  | 7-:150644615-150646883  |
| 7425 | MMT00033805   |        | 15+:3719612-3880561     |
| 7426 | Spr2b         | 20756  | 3+:92121370-92121666    |
| 7427 | Flt3l         | 14256  | 7-:52387483-52391420    |
| 7428 | Rnps1         | 19826  | 17+:24552037-24562840   |
| 7429 | Lphn2         | 99633  | 3-:148478550-148553592  |
| 7430 | Gpr137        | 107173 | 19-:7012560-7016900     |
| 7431 | Idh1          | 15926  | 1-:65205847-65221943    |
| 7432 | Abl2          | 11352  | 1+:158489179-158648878  |
| 7433 | Zfp248        | 72720  | 6-:118378172-118429270  |
| 7434 | Slc18a3       | 20508  | 14-:33276017-33277610   |
| 7435 | Fads6         | 328035 | 11-:115144834-115146800 |
| 7436 | 1700063K16Rik | 76610  | 16-:76819829-76842029   |
| 7437 | 1700003F12Rik | 75480  | 2+:154374621-154375743  |
| 7438 | MMT00046942   |        | 10-:39278404-39308263   |
| 7439 | Syt17         | 110058 | 7-:125525369-125587066  |
| 7440 | Fbxo28        | 67948  | 1-:184246493-184271788  |
| 7441 | Ppp1ca        | 19045  | 19+:4192176-4195417     |
| 7442 | Ambra1        | 228361 | 2+:91570381-91759004    |
| 7443 | Upf3a         | 67031  | 8+:13785637-13798721    |
| 7444 | Hspe1         | 15528  | 1+:55145175-55148039    |

|      |               |        |                         |
|------|---------------|--------|-------------------------|
| 7445 | Polr2h        | 245841 | 16+:20717898-20722337   |
| 7446 | Shc4          | 271849 | 2-:125454806-125549113  |
| 7447 | MMT00014979   |        | 4-:108100953-108123947  |
| 7448 | Atr           | 245000 | 9+:95758143-95852061    |
| 7449 | Creg1         | 433375 | 1+:167693910-167704160  |
| 7450 | Mfsd9         | 211798 | 1-:40830581-40847506    |
| 7451 | Mast1         | 56527  | 8-:87435804-87461235    |
| 7452 | Abcc9         | 20928  | 6-:142537652-142650793  |
| 7453 | Olf1104       | 258763 | 2-:86861768-86862699    |
| 7454 | Gnl3          | 30877  | 14-:31825259-31832222   |
| 7455 | MMT00011288   |        | 4+:151530158-151531670  |
| 7456 | Scfd2         | 212986 | 5-:74858582-74927745    |
| 7457 | Mrpl22        | 216767 | 11+:57985176-57993080   |
| 7458 | Cav1          | 12389  | 6+:17256449-17289453    |
| 7459 | 2610207O16Rik | 66620  | 1-:42763909-42770328    |
| 7460 | Krt6a         | 16687  | 15-:101520898-101524679 |
| 7461 | Mrps23        | 64656  | 11+:88017943-88023670   |
| 7462 | Sacs          | 50720  | 14+:61799781-61808635   |
| 7463 | Kcns2         | 16539  | 15+:34767512-34770271   |
| 7464 | MMT00059239   |        | 17-:3311765-3314181     |
| 7465 | MMT00014720   |        |                         |
| 7466 | Insl6         | 27356  | 19-:29395844-29399808   |
| 7467 | Dlx6          | 13396  | 6+:6813745-6817331      |
| 7468 | Hsd3b1        | 15492  | 3-:98656117-98662142    |
| 7469 | Sez6l         | 56747  | 5-:112853642-112904607  |
| 7470 | MMT00057330   |        | 13+:13129063-13131202   |
| 7471 | MMT00030575   |        | 7+:81396057-81396384    |
| 7472 | Klra1         | 16627  | 6-:130313935-130332546  |
| 7473 | Grik5         | 14809  | 7-:25794894-25857317    |
| 7474 | Tbx2          | 21385  | 11+:85646579-85654632   |
| 7475 | Wdr72         | 546144 | 9+:73982234-74058594    |
| 7476 | MMT00059569   |        | 13-:66497459-66891917   |
| 7477 | D630037F22Rik | 544696 | 10-:55921693-55948438   |
| 7478 | B230209C24Rik | 320705 | 1-:33919497-33964660    |
| 7479 | Mcf2l         | 17207  | 8+:12873825-13020508    |
| 7480 | 4930506M07Rik | 71653  | 19-:59047846-59150114   |
| 7481 | Trh           | 22044  | 6-:92192055-92193882    |
| 7482 | Tdg           | 21665  | 10+:82092625-82113018   |
| 7483 | Cyp3a25       | 56388  | 5-:146788338-146821192  |
| 7484 | Ccdc77        | 67200  | 6-:120274715-120307378  |
| 7485 | Csf3r         | 12986  | 4+:125701979-125721683  |
| 7486 | 1700019N19Rik | 67507  | 19-:58860292-58868904   |
| 7487 | MMT00067815   | 545536 | 3-:88380158-88381112    |
| 7488 | Ttn           | 22138  | 2-:76679873-76686699    |
| 7489 | Rnuxa         | 56698  | 18+:56732693-56746825   |
| 7490 | Olf1702       | 258590 | 7-:113967083-113968038  |
| 7491 | Ankrd34c      | 330998 | 9-:89624688-89633311    |
| 7492 | Adfp          | 11520  | 4-:86302617-86315898    |
| 7493 | Cngb3         | 30952  | 4+:19207996-19437768    |
| 7494 | EG232930      | 232930 | 7-:19094648-19096990    |
| 7495 | Ugt2b5        | 22238  | 5-:87553984-87569343    |

|      |               |           |                         |
|------|---------------|-----------|-------------------------|
| 7496 | Arsi          | 545260    | 18+:61071649-61078212   |
| 7497 | Ndr3          | 29812     | 2-:156763062-156763287  |
| 7498 | MMT00040284   |           | 12+:71072008-71073929   |
| 7499 | Nipa1         | 233280    | 7-:63233855-63274944    |
| 7500 | MMT00011283   | 433546    | 2-:156615456-156616113  |
| 7501 | 1700067P10Rik | 68224     | 17+:48226593-48227870   |
| 7502 | Cd3e          | 12501     | 9-:44806825-44817673    |
| 7503 | Rab11fip1     | 75767     | 8-:28251273-28285121    |
| 7504 | Olfr267       | 258922    | 4-:58797651-58798592    |
| 7505 | Kpna2         | 16647     | 11-:106849956-106858626 |
| 7506 | Tomm34        | 67145     | 2-:163879276-163896838  |
| 7507 | Ccdc136       | 232664    | 6+:29349588-29376952    |
| 7508 | 2210021J22Rik | 72355     | 15-:85637403-85642123   |
| 7509 | MMT00008937   |           | 11+:106833514-106834848 |
| 7510 | Gins3         | 78833     | 8+:98157458-98168959    |
| 7511 | MMT00058829   |           | 3-:41289079-41290298    |
| 7512 | 1110004F10Rik | 56372     | 7+:123236893-123248723  |
| 7513 | Nr5a2         | 26424     | 1-:138740852-138857025  |
| 7514 | Spnb4         | 80297     | 7-:28141402-28231610    |
| 7515 | MMT00069689   |           | 16-:51016636-51017020   |
| 7516 | MMT00018931   | 100040020 | X-:150499736-150504063  |
| 7517 | T             | 20997     | 17+:8627287-8635361     |
| 7518 | V1rf3         | 171234    | 17+:21450980-21451848   |
| 7519 | Gstm1         | 14862     | 3-:107815175-107820891  |
| 7520 | MMT00070057   |           | X+:65882566-65883524    |
| 7521 | Gmfg          | 63986     | 7+:29222490-29231560    |
| 7522 | Rb1           | 19645     | 14-:73595309-73725547   |
| 7523 | Daam1         | 208846    | 12+:72932055-73016780   |
| 7524 | Aldh4a1       | 212647    | 4+:139178825-139204933  |
| 7525 | Trim61        | 260296    | 8-:67536884-67542428    |
| 7526 | Aifm1         | 26926     | X-:45828251-45866566    |
| 7527 | Rnase10       | 75019     | 14+:51627649-51630431   |
| 7528 | Cadm1         | 54725     | 9+:47596063-47659115    |
| 7529 | Fgfr3         | 14184     | 5+:34064491-34078479    |
| 7530 | Thns12        | 232078    | 6-:71078158-71094432    |
| 7531 | Lrrc36        | 270091    | 8+:107949156-107987980  |
| 7532 | MMT00011542   |           | 13+:24412170-24412614   |
| 7533 | Pscd2         | 19158     | 7-:53063050-53069621    |
| 7534 | MMT00022070   |           | 3+:125980942-125982020  |
| 7535 | Ttc13         | 234875    | 8-:127212756-127245895  |
| 7536 | MMT00004030   | 629915    | 12-:116184137-116229792 |
| 7537 | Glce          | 93683     | 9-:61907817-61918647    |
| 7538 | Igfn1         | 226438    | 1-:137868482-137871424  |
| 7539 | Eef2          | 13629     | 10+:80627326-80645252   |
| 7540 | Olfr658       | 259051    | 7-:111792912-111793884  |
| 7541 | Eif3h         | 68135     | 15-:51618109-51697007   |
| 7542 | Ppp1r3b       | 244416    | 8+:36439708-36447917    |
| 7543 | Cct5          | 12465     | 15-:31520638-31531559   |
| 7544 | Btbd14a       | 67991     | 2-:25915420-25978304    |
| 7545 | C81431        | 98077     | 17-:34012613-34027561   |
| 7546 | Ddhd1         | 114874    | 14-:46214211-46240515   |

|      |               |        |                         |
|------|---------------|--------|-------------------------|
| 7547 | Cd24a         | 12484  | 10+:43298988-43304068   |
| 7548 | Pbk           | 52033  | 14+:66424747-66436658   |
| 7549 | Tmem154       | 320782 | 3+:84470178-84505906    |
| 7550 | Rab11fip5     | 52055  | 6-:85284958-85324456    |
| 7551 | Grik3         | 14807  | 4+:125300724-125385592  |
| 7552 | Olfr77        | 258336 | 9+:19724654-19725592    |
| 7553 | Ints8         | 72656  | 4-:11126305-11180104    |
| 7554 | Tmem146       | 106757 | 17+:56766279-56793179   |
| 7555 | AA960436      | 101985 | 8+:97856239-97871407    |
| 7556 | A530050D06Rik | 104816 | 12+:113345081-113365771 |
| 7557 | Acbd7         | 78245  | 2+:3253437-3258268      |
| 7558 | Rbm10         | 236732 | X+:20197121-20228014    |
| 7559 | Fabp6         | 16204  | 11-:43409614-43415013   |
| 7560 | Cyp2r1        | 244209 | 7-:121693702-121706471  |
| 7561 | Mmp17         | 23948  | 5+:130090093-130112569  |
| 7562 | MMT00078102   |        | 1+:19321016-19321952    |
| 7563 | Xkr8          | 381560 | 4-:132282890-132288380  |
| 7564 | P4ha3         | 320452 | 7+:107434042-107454553  |
| 7565 | Ii3           | 16187  | 11-:54078907-54080779   |
| 7566 | Olfr1297      | 258890 | 2-:111461292-111462229  |
| 7567 | Olfr1451      | 258700 | 19+:13073477-13074408   |
| 7568 | Lrp6          | 16974  | 6-:134404713-134406303  |
| 7569 | Ntn2l         | 18209  | 17-:24343401-24346087   |
| 7570 | MMT00069130   |        | 4-:81101842-81107336    |
| 7571 | Casz1         | 69743  | 4+:148275797-148327420  |
| 7572 | Ppm1l         | 242083 | 3+:69301690-69359313    |
| 7573 | Magea4        | 17140  | X+:69467355-69468302    |
| 7574 | MMT00042247   |        | 8-:82202798-82204744    |
| 7575 | Pgpep1        | 66522  | 8-:73173782-73183566    |
| 7576 | Hmox2         | 15369  | 16+:4741612-4766248     |
| 7577 | Cldn8         | 54420  | 16-:88562602-88563280   |
| 7578 | Gfpt2         | 14584  | 11+:49607690-49652115   |
| 7579 | Pip5k1c       | 18717  | 10+:80755724-80780650   |
| 7580 | Slc22a20      | 381203 | 19-:5971398-5986140     |
| 7581 | MMT00034696   |        | 1+:34424294-34425704    |
| 7582 | MMT00065786   |        | 14+:14754201-14780995   |
| 7583 | Zbtb20        | 56490  | 16+:43510420-43619182   |
| 7584 | Myoc          | 17926  | 1+:164569394-164579331  |
| 7585 | Vmn2r76       | 675969 | 7-:93377167-93379682    |
| 7586 | 5730469M10Rik | 70564  | 14-:41807028-41827064   |
| 7587 | Igh-VJ558     | 16061  | 12-:114503113-114503244 |
| 7588 | Sec14l1       | 74136  | 11+:116976562-117020535 |
| 7589 | 4933404M02Rik | 66748  | 2+:70346873-70378940    |
| 7590 | Ankrd40       | 71452  | 11+:94199602-94203160   |
| 7591 | MMT00077934   |        | 3-:94408331-94408774    |
| 7592 | Chrna5        | 110835 | 9+:54828678-54854730    |
| 7593 | Krt28         | 70843  | 11-:99226185-99228357   |
| 7594 | Sned1         | 208777 | 1+:95158194-95179565    |
| 7595 | Ccdc103       | 73293  | 11+:102742548-102745670 |
| 7596 | Tifa          | 211550 | 3+:127494298-127501306  |
| 7597 | 4933417G07Rik | 71182  | 3+:55651026-55652321    |



|      |               |        |                         |
|------|---------------|--------|-------------------------|
| 7598 | MMT00013990   |        | 19-:14673035-14739140   |
| 7599 | Olfr1273      | 258977 | 2-:90136093-90137016    |
| 7600 | Zfp382        | 233060 | 7+:30915692-30937948    |
| 7601 | Kcne3         | 57442  | 7+:107329675-107333378  |
| 7602 | Pcca          | 110821 | 14+:122933564-123289047 |
| 7603 | Sod2          | 20656  | 17+:13200859-13208205   |
| 7604 | MMT00003898   |        | 6+:41062211-41064132    |
| 7605 | MMT00047828   |        | 2-:136569883-136570094  |
| 7606 | MMT00037360   |        | 10+:120365363-120365944 |
| 7607 | Theg          | 21830  | 10-:79039124-79050077   |
| 7608 | 4931440J10Rik | 71000  | 14+:63379336-63438532   |
| 7609 | Ctrc          | 76701  | 4-:141394566-141402200  |
| 7610 | Scand1        | 19018  | 2-:156137593-156138262  |
| 7611 | Chrm4         | 12672  | 2+:91767405-91768845    |
| 7612 | MMT00014216   |        | 6-:133707411-133713096  |
| 7613 | MMT00038919   |        | 18-:28345733-28347327   |
| 7614 | Gpkow         | 209416 | X+:7274299-7283887      |
| 7615 | MMT00045521   |        | 7+:31048240-31048684    |
| 7616 | EG546101      | 546101 | 8-:108184234-108184874  |
| 7617 | Tom1l2        | 216810 | 11-:60043518-60084050   |
| 7618 | Glis2         | 83396  | 16+:4608595-4614628     |
| 7619 | Pik3ip1       | 216505 | 11+:3230382-3242971     |
| 7620 | Foxo3         | 219038 | 14+:52538462-52540381   |
| 7621 | MMT00042139   |        | 7-:26577317-26577868    |
| 7622 | Gpr155        | 68526  | 2-:73179564-73220365    |
| 7623 | 9430069I07Rik | 77358  | 15-:34284462-34286190   |
| 7624 | Mum1l1        | 245631 | X+:135769253-135771297  |
| 7625 | Krt32         | 16670  | 11-:99942170-99949429   |
| 7626 | Cebpz         | 12607  | 17-:79319185-79336377   |
| 7627 | Ppil6         | 73075  | 10+:41210280-41227371   |
| 7628 | MMT00041592   |        | 5+:152083699-152084757  |
| 7629 | Bnip1         | 224630 | 17+:26918026-26929469   |
| 7630 | Atrnl1        | 226255 | 19+:57685843-57871985   |
| 7631 | Uhrf1bp1      | 224648 | 17+:27993567-28033295   |
| 7632 | Gsdmc3        | 270328 | 15-:63689826-63691916   |
| 7633 | Pik3r6        | 104709 | 11+:68316577-68343577   |
| 7634 | 1200013P24Rik | 74763  | 16+:3884768-3904769     |
| 7635 | Syng2         | 20973  | 11+:117670994-117675595 |
| 7636 | Brunol4       | 108013 | 18-:25837903-25912250   |
| 7637 | MMT00056309   | 382035 | 8-:125144181-125146633  |
| 7638 | Hs1bp3        | 58240  | 12+:8320265-8349568     |
| 7639 | Tmem149       | 101883 | 7+:31351098-31352977    |
| 7640 | MMT00047329   |        | 4-:118345213-118346127  |
| 7641 | Cyp26a1       | 13082  | 19+:37772343-37776026   |
| 7642 | Igl-V1        | 16142  | 16-:19061844-19085553   |
| 7643 | Mrps28        | 66230  | 3-:8802156-8923814      |
| 7644 | MMT00033296   |        | 11+:76327564-76327948   |
| 7645 | MMT00045828   |        | 11+:86892275-86892785   |
| 7646 | Sfrs18        | 66625  | 4+:21775071-21803672    |
| 7647 | Pcna          | 18538  | 2-:132075022-132078916  |
| 7648 | Olfr63        | 258939 | 17+:33405670-33406619   |

|      |               |        |                         |
|------|---------------|--------|-------------------------|
| 7649 | Scyl3         | 240880 | 1+:165860157-165884147  |
| 7650 | Olfr438       | 258648 | 6+:43103305-43104237    |
| 7651 | Tmem192       | 73067  | 8+:67471079-67492933    |
| 7652 | Dnahc7b       | 227058 | 1+:46154914-46430417    |
| 7653 | 1700061J05Rik | 73376  | 15-:78208828-78226317   |
| 7654 | Ptpmt1        | 66461  | 2-:90750866-90758602    |
| 7655 | Tmem30b       | 238257 | 12-:74646264-74647326   |
| 7656 | Lonrf3        | 74365  | X+:33916422-33917017    |
| 7657 | Olfr731       | 258360 | 14-:50857579-50858558   |
| 7658 | Lce1l         | 73730  | 3-:92653870-92655208    |
| 7659 | Rab30         | 75985  | 7+:99968414-99985157    |
| 7660 | Olfr208       | 258382 | 16-:59361125-59362042   |
| 7661 | Rac1          | 19353  | 5-:144266352-144288979  |
| 7662 | Lyz1          | 17110  | 10-:116725639-116729894 |
| 7663 | 4930488L21Rik | 75809  | 8-:96335590-96337455    |
| 7664 | Mcm3          | 17215  | 1-:20804479-20805008    |
| 7665 | MMT00047694   |        | 2-:116353578-116368456  |
| 7666 | Gcgr          | 14527  | 11+:120395988-120400400 |
| 7667 | 5033414K04Rik | 98496  | 1-:84111904-84155958    |
| 7668 | Prss21        | 57256  | 17+:24005038-24010079   |
| 7669 | Pik3ap1       | 83490  | 19-:41348707-41459560   |
| 7670 | Ccdc57        | 71276  | 11-:120687844-120734986 |
| 7671 | Hoxb1         | 15407  | 11+:96227065-96228802   |
| 7672 | V1rg5         | 171240 | 7+:12432123-12433038    |
| 7673 | Mog           | 17441  | 17-:37148449-37160144   |
| 7674 | Spata7        | 104871 | 12+:99866372-99908029   |
| 7675 | Al413782      | 104799 | 12-:88579824-88607159   |
| 7676 | Jmjd2c        | 76804  | 4+:73897851-74051765    |
| 7677 | BC003885      | 225215 | 9+:72961309-72970142    |
| 7678 | Ltbr          | 17000  | 6-:125256593-125263872  |
| 7679 | Epb4.1l4b     | 54357  | 4-:57008606-57053924    |
| 7680 | EG667232      | 667232 | 16-:36569040-36580930   |
| 7681 | Abpg          | 110187 | 7-:34728017-34729983    |
| 7682 | MMT00018333   |        |                         |
| 7683 | Man1a2        | 17156  | 3-:100370339-100489150  |
| 7684 | Ppp3r1        | 19058  | 11+:17092846-17095086   |
| 7685 | Eif3b         | 27979  | 5+:140895279-140919322  |
| 7686 | Apoa5         | 66113  | 9+:46076690-46079492    |
| 7687 | BC050254      | 269630 | 5-:22889961-22939147    |
| 7688 | MMT00058344   |        | 13-:64423876-64424841   |
| 7689 | Olfr708       | 258173 | 7+:114057713-114058635  |
| 7690 | 4632417N05Rik | 74032  | 8-:120185298-120195415  |
| 7691 | Tnnc1         | 21924  | 14+:32021497-32024897   |
| 7692 | Cd84          | 12523  |                         |
| 7693 | B3galt6       | 117592 | 4-:155365330-155366731  |
| 7694 | Olfr330       | 258879 | 11-:58342539-58343486   |
| 7695 | Cpsf1         | 94230  | 15-:76426238-76437984   |
| 7696 | Pkd2l1        | 329064 | 19-:44223642-44266932   |
| 7697 | Exod1         | 71151  | 7-:126930249-126937481  |
| 7698 | Klrb1a        | 17057  | 6-:128559634-128572952  |
| 7699 | Gm885         | 380732 | 11+:106612588-106626605 |

|      |               |        |                         |
|------|---------------|--------|-------------------------|
| 7700 | Iqce          | 74239  | 5-:141139461-141178210  |
| 7701 | Sipa113       | 74206  | 7-:30105391-30185861    |
| 7702 | Wdr33         | 74320  | 18+:31986938-32066649   |
| 7703 | Tmprss11f     | 243083 | 5-:86967014-87061440    |
| 7704 | V1rk1         | 171261 | 7-:13716821-13717707    |
| 7705 | Gjb1          | 14618  | X+:98572675-98580961    |
| 7706 | MMT00031300   |        | Y+:2551480-2631669      |
| 7707 | Mil3          | 231051 | 5-:24777617-24893859    |
| 7708 | Rxra          | 20181  | 2-:27617024-27618471    |
| 7709 | Rdx           | 19684  | 9+:51856431-51896841    |
| 7710 | V1rc32        | 171205 | 6+:56985959-56986869    |
| 7711 | Slc25a23      | 66972  | 17-:57183135-57184155   |
| 7712 | Ubx3          | 212190 | 4-:138275605-138281113  |
| 7713 | 2610110G12Rik | 73242  | 17-:36036788-36046985   |
| 7714 | Cdh2          | 12558  | 18-:16747385-16967239   |
| 7715 | Slfn5         | 327978 | 11+:82773984-82775014   |
| 7716 | Sema6c        | 20360  | 3+:94968295-94977238    |
| 7717 | Pskh1         | 244631 | 8+:108424328-108455704  |
| 7718 | Pdia6         | 71853  | 12+:17273353-17291577   |
| 7719 | Myo18b        | 74376  | 5-:113121117-113307247  |
| 7720 | Sec14l3       | 380683 | 11+:3964900-3966705     |
| 7721 | MMT00000356   |        | 8-:110214319-110214744  |
| 7722 | Zfp407        | 240476 | 18-:84727718-84758898   |
| 7723 | Olf1471       | 258231 | 19+:13519635-13535485   |
| 7724 | Pmpca         | 66865  | 2+:26243766-26264701    |
| 7725 | 3230401D17Rik | 66680  | 2-:163231672-163245224  |
| 7726 | Cyp2d9        | 13105  | 15+:82282828-82287257   |
| 7727 | MMT00065667   |        | 14+:121112299-121112967 |
| 7728 | A530088H08Rik | 193003 | 11+:66725540-66739773   |
| 7729 | Vmn2r106      | 224576 | 17-:20404510-20416095   |
| 7730 | Taf1b         | 21340  | 12+:25183496-25243228   |
| 7731 | 1500001M20Rik | 68971  | 6-:114954374-114987893  |
| 7732 | Acox1         | 11430  | 11-:116033204-116060085 |
| 7733 | Hsd17b4       | 15488  | 18+:50287993-50355840   |
| 7734 | Cyp2b23       | 243881 | 7-:27450574-27471449    |
| 7735 | Traip         | 22036  | 9+:107853299-107873859  |
| 7736 | 2610036L11Rik | 66311  | 10-:29915821-29920415   |
| 7737 | Bmpr1a        | 12166  | 14-:35227673-35273740   |
| 7738 | Adam21        | 56622  | 12-:82659783-82661973   |
| 7739 | Grm8          | 14823  | 6-:27225611-28076195    |
| 7740 | Gpha2         | 170458 | 19+:6226787-6227602     |
| 7741 | Abcf3         | 27406  | 16+:20558629-20561845   |
| 7742 | Spag9         | 70834  | 11+:93857582-93987393   |
| 7743 | Foxp1         | 108655 | 6+:98875334-98877062    |
| 7744 | Cadps         | 27062  | 14-:13205099-13655559   |
| 7745 | C330016O10Rik | 212706 | 11-:51456591-51464288   |
| 7746 | Gpr61         | 229714 | 3-:107952911-107957802  |
| 7747 | Olf17         | 18314  | 7+:114240980-114241927  |
| 7748 | Chek1         | 12649  | 9-:36517410-36533464    |
| 7749 | Mul1          | 68350  | 4+:137990605-137995818  |
| 7750 | Dgcr2         | 13356  | 16-:17841402-17891689   |

|      |               |        |                         |
|------|---------------|--------|-------------------------|
| 7751 | Sgk2          | 27219  | 2+:162813281-162839862  |
| 7752 | Ugp2          | 216558 | 11-:21221798-21270480   |
| 7753 | Gfm1          | 28030  | 3+:67234045-67278989    |
| 7754 | Chst3         | 53374  | 10-:59648352-59656987   |
| 7755 | B230317C12Rik | 56279  | 2+:26483991-26492014    |
| 7756 | Edc3          | 353190 | 9+:57587690-57597973    |
| 7757 | Slc38a8       | 234788 | 8-:122009349-122025193  |
| 7758 | 1700039E15Rik | 76713  | 7+:52535253-52543227    |
| 7759 | Aktip         | 14339  | 8-:93647399-93658363    |
| 7760 | 2810012G03Rik | 66306  | 18+:34919209-34933407   |
| 7761 | Nudt19        | 110959 | 7-:36332211-36340852    |
| 7762 | MMT00037909   |        | 12-:4696207-4696758     |
| 7763 | 2010204K13Rik | 68355  | X-:6989231-7000074      |
| 7764 | Mtpn          | 14489  | 6+:35459066-35461068    |
| 7765 | Pgbd1         | 319207 | 13-:21513735-21526588   |
| 7766 | MMT00073093   |        | X+:150091149-150091642  |
| 7767 | Bai3          | 210933 | 1-:25124323-25188246    |
| 7768 | V1rd3         | 81015  | 7-:5146518-5148349      |
| 7769 | Arbp          | 11837  | 5+:116009523-116013520  |
| 7770 | Galt          | 14430  | 4+:41702375-41705553    |
| 7771 | MMT00024336   |        | 13-:64558717-64559950   |
| 7772 | Rffl          | 67338  | 11-:82619108-82642532   |
| 7773 | 1110013L07Rik | 68521  | 3+:88987489-88993214    |
| 7774 | Mc5r          | 17203  | 18+:68497256-68499376   |
| 7775 | Nif3l1        | 65102  | 1+:58501994-58518367    |
| 7776 | Ube2v1        | 66589  | 2-:167415839-167480236  |
| 7777 | MMT00022778   |        | 19+:18001042-18003100   |
| 7778 | Dnase1l1      | 69537  | X-:71518556-71527075    |
| 7779 | Slit2         | 20563  | 5+:48666501-48697803    |
| 7780 | Ankrd7        | 75196  | 6+:18816327-18829582    |
| 7781 | Pip           | 18716  | 6+:41797552-41802063    |
| 7782 | Gm114         | 228730 | 2+:146681598-146716820  |
| 7783 | Pgm2          | 72157  | 4+:99602131-99659609    |
| 7784 | Msh4          | 55993  | 3-:153520112-153569102  |
| 7785 | MMT00078891   |        | 7+:143684648-143849755  |
| 7786 | Ang3          | 11730  | 14+:44534733-44540744   |
| 7787 | MMT00043009   |        | 9-:97127501-97129284    |
| 7788 | 1600021P15Rik | 239796 | 16-:28826263-28929784   |
| 7789 | Ppt2          | 54397  | 17-:34754289-34763932   |
| 7790 | Traf2         | 22030  | 2-:25374384-25402450    |
| 7791 | Dtx4          | 207521 | 19-:12543625-12575707   |
| 7792 | 6720467C03Rik | 68099  | 4-:12080869-12098989    |
| 7793 | MMT00070312   | 668699 | 14+:103409421-103410015 |
| 7794 | Hbs1l         | 56422  | 10+:21015939-21030325   |
| 7795 | MMT00071427   |        | 7-:26204174-26204845    |
| 7796 | Olfir976      | 258364 | 9-:39763573-39764554    |
| 7797 | Ddx47         | 67755  | 6+:134961637-134973789  |
| 7798 | MMT00077178   |        | 19+:11511939-11513093   |
| 7799 | Myd88         | 17874  | 9-:119246474-119249077  |
| 7800 | Rgr           | 57811  | 14-:37850811-37862120   |
| 7801 | Zcwpw2        | 74638  | 9-:117790897-117923278  |

|      |               |           |                           |
|------|---------------|-----------|---------------------------|
| 7802 | Adcy4         | 104110    | 14-:56387929-56402856     |
| 7803 | Ttyh1         | 57776     | 7+:4071178-4085578        |
| 7804 | Pgk2          | 18663     | 17-:40343971-40345500     |
| 7805 | Trpm8         | 171382    | 1+:90199856-90285426      |
| 7806 | D1Ert53e      | 213056    | 1-:58584099-58643136      |
| 7807 | 2410004N09Rik | 69749     | 18+:33954572-33956736     |
| 7808 | Bnc2          | 242509    | 4-:83921000-84037038      |
| 7809 | Pus1          | 56361     | 5-:111202690-111208916    |
| 7810 | Trim45        | 229644    | 3+:100726399-100735625    |
| 7811 | Olfr1226      | 258969    | 2-:89033258-89034189      |
| 7812 | lpo7          | 233726    | 7+:117161785-117200388    |
| 7813 | Stac          | 20840     | 9-:111463937-111592720    |
| 7814 | Stard3nl      | 76205     | 13-:19449546-19487624     |
| 7815 | Pcdha10       | 12943     | 18+:37164973-37347311     |
| 7816 | Btnl1         | 100038862 | 17+:34514099-34522971     |
| 7817 | Lats1         | 16798     | 10+:7411300-7433444       |
| 7818 | MMT00032604   |           | Y_random-:8866783-8891515 |
| 7819 | Npas4         | 225872    | 19-:4988286-4989970       |
| 7820 | Ankar         | 319695    | 1-:72689556-72696774      |
| 7821 | MMT00042003   |           | 7-:97959541-97960744      |
| 7822 | Coq10a        | 210582    | 10-:127800149-127805773   |
| 7823 | Pdgb          | 18591     | 15-:79827003-79845407     |
| 7824 | MMT00001823   | 100044551 | 1-:82999078-83001428      |
| 7825 | Tex16         | 83556     | X+:109207128-109240935    |
| 7826 | Ephb2         | 13844     | 4-:136211031-136391932    |
| 7827 | 1700010A17Rik | 75495     | 2+:35904997-35935236      |
| 7828 | Limd2         | 67803     | 11-:106018401-106021467   |
| 7829 | Ptpn          | 19275     | 1-:75243617-75260727      |
| 7830 | Heatr5b       | 320473    | 17-:79164667-79173057     |
| 7831 | BC024479      | 235184    | 9+:37324863-37331544      |
| 7832 | MMT00036236   |           | 19-:53209519-53209803     |
| 7833 | Mcts2         | 66405     | 2+:152513081-152513683    |
| 7834 | MMT00032281   |           |                           |
| 7835 | 1110020C03Rik | 68625     | 4-:118227155-118242052    |
| 7836 | Wdr93         | 626359    | 7+:86916402-86922191      |
| 7837 | Pou3f1        | 18991     | 4+:124334895-124336413    |
| 7838 | Prl8a6        | 19112     | 13-:27524723-27530466     |
| 7839 | Asl           | 109900    | 5-:130487373-130500201    |
| 7840 | 4931433A01Rik | 78933     | 4+:111287564-111289916    |
| 7841 | MMT00018824   |           | X-:139618050-139618945    |
| 7842 | Pdk2          | 18604     | 11-:94887572-94902629     |
| 7843 | V1ri1         | 252907    | 13-:22279015-22279917     |
| 7844 | Btc           | 12223     | 5-:91787835-91831845      |
| 7845 | MMT00002915   |           | 13+:34958032-34958257     |
| 7846 | Pacs1         | 107975    | 19-:5133160-5168011       |
| 7847 | Adra2c        | 11553     | 5+:35622534-35623910      |
| 7848 | Casp12        | 12364     | 9+:5345510-5372647        |
| 7849 | 3930401K13Rik | 74022     | 16-:5014029-5049942       |
| 7850 | C8b           | 110382    | 4+:104438926-104477148    |
| 7851 | Fank1         | 66930     | 7+:140968564-141073215    |
| 7852 | Ing3          | 71777     | 6+:21900037-21923699      |

|      |               |           |                          |
|------|---------------|-----------|--------------------------|
| 7853 | MMT00033089   |           | 12-:105411512-105416134  |
| 7854 | Igh-VJ558     | 16061     | 12-:116831134-116831806  |
| 7855 | Csrnp2        | 207785    | 15-:100312190-100320016  |
| 7856 | Slc35b3       | 108652    | 13-:39024176-39052398    |
| 7857 | Myo1h         | 231646    | 5+ :114806823-114814585  |
| 7858 | 1810007P19Rik | 230751    | 4+ :125735607-125766578  |
| 7859 | Eif5b         | 226982    | 1+ :38054989-38109434    |
| 7860 | Bmp6          | 12161     | 13+ :38437584-38591597   |
| 7861 | Klhdc4        | 234825    | 8- :124320233-124353469  |
| 7862 | Cpsf4l        | 52670     | 11- :113559485-113571331 |
| 7863 | Nova1         | 664883    | 12- :47821662-47919751   |
| 7864 | Ipo11         | 76582     | 13- :107665567-107727028 |
| 7865 | MMT00062659   |           | 15- :41861949-41864525   |
| 7866 | 1810054D07Rik | 69863     | 4- :82867854-82869105    |
| 7867 | Obfc1         | 108689    | 19- :47575527-47611607   |
| 7868 | Dcdc5         | 329482    | 2+ :106209865-106225780  |
| 7869 | 4930401B11Rik | 73823     | 2- :78685555-78693415    |
| 7870 | Rsad1         | 237926    | 11- :94404194-94410521   |
| 7871 | MMT00052129   |           | 1+ :43466263-43468103    |
| 7872 | Lrrc16a       | 68732     | 13- :24104212-24233600   |
| 7873 | Steap4        | 117167    | 5+ :7960468-7982212      |
| 7874 | Prl7a2        | 19114     | 13- :27750831-27759893   |
| 7875 | Crat          | 12908     | 2- :30257505-30270980    |
| 7876 | EG625534      | 625534    | 1+ :152396446-152396808  |
| 7877 | Obfc2a        | 109019    | 1- :51526333-51535251    |
| 7878 | MMT00050705   |           | 16- :3550447-3550896     |
| 7879 | Ifitm3        | 66141     | 7- :148195488-148196643  |
| 7880 | Csf2          | 12981     | 11- :54061090-54063112   |
| 7881 | Ccdc114       | 211535    | 7+ :53195045-53204014    |
| 7882 | Sprr2e        | 20759     | 3+ :92156785-92157015    |
| 7883 | Tyrp1         | 22178     | 4+ :80480210-80497623    |
| 7884 | Catsper3      | 76856     | 13+ :55828729-55910358   |
| 7885 | MMT00035027   |           | 1+ :44268596-44269707    |
| 7886 | Dock7         | 67299     | 4- :98603550-98612008    |
| 7887 | 4930418G15Rik | 69312     | 1- :9958707-9999201      |
| 7888 | Pigz          | 239827    | 16+ :31934062-31946136   |
| 7889 | Abcb1b        | 18669     | 5+ :8798185-8866308      |
| 7890 | Atp1b4        | 67821     | X+ :35669443-35689889    |
| 7891 | Loxl2         | 94352     | 14+ :70067073-70075657   |
| 7892 | Ccr2          | 12772     | 9+ :124016921-124023289  |
| 7893 | Akr1c21       | 77337     | 13+ :4573320-4585787     |
| 7894 | MMT00029319   | 100039284 | 10+ :61246511-61247569   |
| 7895 | Tsc1          | 64930     | 2+ :28496760-28542873    |
| 7896 | Polr3e        | 26939     | 7+ :128061297-128089335  |
| 7897 | MMT00067427   | 100041449 | 5+ :146890910-146924395  |
| 7898 | Ctbp2         | 13017     | 7- :140179853-140217453  |
| 7899 | 2310079N02Rik | 66566     | 8+ :128258128-128272110  |
| 7900 | Myo18a        | 360013    | 11+ :77590766-77679482   |
| 7901 | Slc41a1       | 98396     | 1+ :133727198-133745441  |
| 7902 | Ifng          | 15978     | 10+ :117878099-117882947 |
| 7903 | V1rc23        | 171196    | 6- :57850077-57850984    |

|      |               |        |                           |
|------|---------------|--------|---------------------------|
| 7904 | Hoxb6         | 15414  | 11+:96160484-96162882     |
| 7905 | Cox4nb        | 18117  | 8-:123181732-123192007    |
| 7906 | Dll3          | 13389  | 7-:29078594-29086803      |
| 7907 | Klk1b8        | 16624  | 7+:51206051-51210308      |
| 7908 | MMT00082889   |        | 4-:127085611-127086063    |
| 7909 | Oas3          | 246727 | 5-:121203108-121227668    |
| 7910 | AK122209      | 382038 | 8+:126548955-126572397    |
| 7911 | Pik3c2g       | 18705  | 6+:139792407-139917802    |
| 7912 | Rnaseh2a      | 69724  | 8-:87481949-87491769      |
| 7913 | MMT00065558   |        | 12+:9436283-9437290       |
| 7914 | Defb2         | 13215  | 8+:22950397-22953951      |
| 7915 | Cdx4          | 12592  | X+:100516736-100525563    |
| 7916 | MMT00016293   |        | Y_random+:6427127-6429303 |
| 7917 | Sfn3          | 20557  | 11+:83004831-83028655     |
| 7918 | Rtn4ip1       | 170728 | 10+:43621898-43666734     |
| 7919 | 5330430P22Rik | 68191  | 11-:105926395-105928158   |
| 7920 | Mapk8         | 26419  | 14-:34195475-34224187     |
| 7921 | Txn14b        | 234723 | 8+:112089926-112097123    |
| 7922 | Casp7         | 12369  | 19+:56471618-56516831     |
| 7923 | MMT00055268   |        | X+:21881404-22016460      |
| 7924 | Xpc           | 22591  | 6-:91439833-91465789      |
| 7925 | Nit1          | 27045  | 1-:173272374-173275757    |
| 7926 | Kctd1         | 106931 | 18-:15127913-15147744     |
| 7927 | Gata1         | 14460  | X-:7536385-7544941        |
| 7928 | Klhl34        | 245683 | X+:154255960-154258817    |
| 7929 | Pole4         | 66979  | 6-:82596705-82602857      |
| 7930 | MMT00010123   |        | 7+:4860639-4862139        |
| 7931 | 1810014F10Rik | 69064  | 7-:147285366-147288709    |
| 7932 | Gkn2          | 66284  | 6+:87323358-87329488      |
| 7933 | Ar            | 11835  | X+:95345120-95512218      |
| 7934 | MMT00002010   |        | 13-:3136659-3139392       |
| 7935 | Mpv17         | 17527  | 5-:31443320-31456602      |
| 7936 | MMT00061970   |        | 1-:12591242-12591281      |
| 7937 | Efcab3        | 77627  | 15-:83697196-83766525     |
| 7938 | Ppp2r2b       | 72930  | 18-:42804924-43219125     |
| 7939 | Gpr37l1       | 171469 | 1-:137043383-137064195    |
| 7940 | Cyp2b9        | 13094  | 7+:26958427-26995679      |
| 7941 | Tob2          | 57259  | 15-:81681159-81682196     |
| 7942 | Ttc4          | 72354  | 4-:106334599-106351512    |
| 7943 | Rgs12         | 71729  | 5+:35292098-35382292      |
| 7944 | Al132487      | 104910 | 12+:110089344-110095023   |
| 7945 | Gpc2          | 71951  | 5-:138714888-138721195    |
| 7946 | Ly6i          | 57248  | 15-:74810331-74813782     |
| 7947 | Yif1a         | 68090  | 19+:5088005-5092855       |
| 7948 | Sarm1         | 237868 | 11-:78288415-78310960     |
| 7949 | Stub1         | 56424  | 17-:25967581-25969853     |
| 7950 | Efha1         | 68514  | 14-:58535098-58618106     |
| 7951 | Pck2          | 74551  | 14+:56159107-56168854     |
| 7952 | MMT00081715   |        | 1-:9385643-9388802        |
| 7953 | MMT00066281   |        | 11+:45643053-45643532     |
| 7954 | Ccdc12        | 72654  | 9+:110559006-110614098    |

|      |               |        |                         |
|------|---------------|--------|-------------------------|
| 7955 | Ambp          | 11699  | 4-:62804312-62815176    |
| 7956 | Pnoc          | 18155  | 14-:66020316-66044310   |
| 7957 | MMT00074126   |        | 13+:22374396-22375819   |
| 7958 | Trim9         | 94090  | 12-:71346941-71448846   |
| 7959 | Tbx5          | 21388  | 5+:120246786-120333511  |
| 7960 | Zfp827        | 622675 | 8+:81552585-81714842    |
| 7961 | Neurl         | 18011  | 19+:47253956-47332169   |
| 7962 | Ajap1         | 230959 | 4-:152747328-152856813  |
| 7963 | Rxrg          | 20183  | 1+:169528646-169569752  |
| 7964 | Al894139      | 101197 | 6+:47901319-47912631    |
| 7965 | Enpp5         | 83965  | 17+:44215817-44223508   |
| 7966 | MMT00004995   |        | 14-:56894524-56896278   |
| 7967 | Acsf2         | 264895 | 11-:94419279-94463104   |
| 7968 | MMT00015383   |        | 17-:53441468-53443732   |
| 7969 | MMT00001293   |        | 3+:8327474-8330440      |
| 7970 | Olf1294       | 258887 | 2-:111377507-111378444  |
| 7971 | Prrx1         | 18933  | 1-:165178320-165242907  |
| 7972 | Morc2b        | 240069 | 17-:33272673-33275741   |
| 7973 | Lgals9        | 16859  | 11-:78776896-78798333   |
| 7974 | Arhgef7       | 54126  | 8+:11782561-11835213    |
| 7975 | Lancl1        | 14768  | 1-:67047090-67085439    |
| 7976 | Anapc5        | 59008  | 5-:123241616-123250569  |
| 7977 | Cgrrf1        | 68755  | 14+:47451893-47460087   |
| 7978 | Gfpt1         | 14583  | 6+:87000913-87038150    |
| 7979 | Prps111       | 75456  | 12+:35669559-35670514   |
| 7980 | 4933411K20Rik | 66756  | 8+:47249083-47278200    |
| 7981 | App           | 11820  | 16-:84955470-85173941   |
| 7982 | MMT00060666   |        | 11-:76920772-76921727   |
| 7983 | Syt13         | 80976  | 2+:92755331-92793824    |
| 7984 | Cbfb          | 12400  | 8+:107694643-107741881  |
| 7985 | MMT00011502   |        | 13+:25547971-25548296   |
| 7986 | Zfp541        | 666528 | 7+:16663320-16681681    |
| 7987 | 2810048G17Rik | 72691  | 19-:47206728-47212696   |
| 7988 | Efcab5        | 319634 | 11-:76943354-76945718   |
| 7989 | 4930544D05Rik | 114144 | 11+:70429351-70430391   |
| 7990 | Nostrin       | 329416 | 2+:68973946-69027384    |
| 7991 | Gpr115        | 78249  | 17-:42793837-42829236   |
| 7992 | Rnf169        | 108937 | 7-:107074638-107091488  |
| 7993 | BC025076      | 216829 | 11+:62462947-62478834   |
| 7994 | Ipo11         | 76582  | 13-:107584526-107626382 |
| 7995 | MMT00037028   |        | 12+:55723554-55724221   |
| 7996 | Wbscr22       | 66138  | 5-:135528828-135540829  |
| 7997 | Pex5l         | 58869  | 3-:32849533-32981951    |
| 7998 | Gpr45         | 93690  | 1+:43089043-43090165    |
| 7999 | Olf1547       | 259083 | 7+:109683262-109684195  |
| 8000 | Ankrd17       | 81702  | 5-:90682739-90795590    |
| 8001 | Efr3a         | 76740  | 15+:65618619-65704121   |
| 8002 | Nfatc2ip      | 18020  | 7-:133527829-133540242  |
| 8003 | Kpna4         | 16649  | 3-:68878010-68930722    |
| 8004 | Fhod1         | 234686 | 8-:107813821-107871855  |
| 8005 | Omg           | 18377  | 11-:79314857-79317521   |



|      |               |           |                         |
|------|---------------|-----------|-------------------------|
| 8006 | Abi1          | 11308     | 2-:22795888-22850121    |
| 8007 | MMT00040041   |           | 8+:27408847-27464610    |
| 8008 | Paf1          | 54624     | 7+:29177997-29184406    |
| 8009 | Trat1         | 77647     | 16-:48733829-48750579   |
| 8010 | Gpr133        | 243277    | 5+:129638568-129685571  |
| 8011 | Pde11a        | 241489    | 2-:75829248-76176664    |
| 8012 | Mab2111       | 17116     | 3+:55586446-55588192    |
| 8013 | Nipbl         | 71175     | 15-:8239829-8394471     |
| 8014 | Bmx           | 12169     | X-:160631157-160696111  |
| 8015 | Tspan15       | 70423     | 10-:61650104-61693966   |
| 8016 | Mrpl35        | 66223     | 6-:71765101-71773764    |
| 8017 | Wdr24         | 268933    | 17+:25960598-25965669   |
| 8018 | Trem1         | 71326     | 17+:48499238-48506499   |
| 8019 | MMT00013162   |           | 11-:95038090-95067484   |
| 8020 | Nope          | 56741     | 9+:64949341-64985749    |
| 8021 | 1600002K03Rik | 69770     | 10+:79635687-79637864   |
| 8022 | MMT00004959   |           | X+:98257488-98258368    |
| 8023 | MMT00059171   |           | 10+:102282010-102282530 |
| 8024 | Ints9         | 210925    | 14+:65569108-65658665   |
| 8025 | Agpat3        | 28169     | 10-:77736355-77758141   |
| 8026 | MMT00000227   | 100041325 | 8-:95214187-95327748    |
| 8027 | Wscd2         | 320916    | 5+:114000752-114038098  |
| 8028 | MMT00007113   |           | 9-:110903868-110904461  |
| 8029 | Rpap3         | 71919     | 15-:97505535-97536253   |
| 8030 | Fgr           | 14191     | 4+:132530071-132556686  |
| 8031 | Scoc          | 56367     | 8-:85958391-85966379    |
| 8032 | Wap           | 22373     | 11-:6535491-6538652     |
| 8033 | Ldlrad3       | 241576    | 2-:101898058-102026516  |
| 8034 | Gas1          | 14451     | 13-:60275765-60278726   |
| 8035 | Frzb          | 20378     | 2-:80252333-80287350    |
| 8036 | Zfp160        | 224585    | 17+:21145937-21165823   |
| 8037 | MMT00052151   |           | 1-:43055955-43077637    |
| 8038 | MMT00037620   |           | 12-:81749624-81750359   |
| 8039 | H1foo         | 171506    | 6+:115894956-115900249  |
| 8040 | MMT00040904   |           |                         |
| 8041 | Rab6ip1       | 19347     | 7-:117037289-117079067  |
| 8042 | Smg7          | 226517    | 1-:154684126-154749777  |
| 8043 | 4930405D01Rik | 73795     | 16+:52849397-52979019   |
| 8044 | Sftpb         | 20388     | 6+:72254618-72264364    |
| 8045 | Pgam5         | 72542     | 5-:110688179-110698898  |
| 8046 | Scoc          | 56367     | 8-:85958391-85966379    |
| 8047 | 4930504E06Rik | 75007     | 3+:95085295-95100089    |
| 8048 | MMT00033146   |           | X-:72719799-72720887    |
| 8049 | Pon1          | 18979     | 6-:5118104-5143824      |
| 8050 | Egln1         | 112405    | 8-:127432495-127438057  |
| 8051 | MMT00035998   |           |                         |
| 8052 | Krt17         | 16667     | 11-:100117532-100122303 |
| 8053 | Gal           | 14419     | 19-:3410095-3414112     |
| 8054 | Smarca2       | 67155     | 19+:26822948-26852763   |
| 8055 | Ptcd3         | 69956     | 6-:71830634-71839625    |
| 8056 | EG433923      | 433923    | 5+:97693755-97694741    |

|      |               |        |                         |
|------|---------------|--------|-------------------------|
| 8057 | E130102H24Rik | 77866  | 4-:101000723-101044149  |
| 8058 | Epb4.9        | 13829  | 14-:71003509-71018209   |
| 8059 | MMT00052729   |        | 6+:41152745-41178057    |
| 8060 | EG668158      | 668158 | 12-:109512547-109513343 |
| 8061 | Sfrs2ip       | 72193  | 15-:96242131-96277025   |
| 8062 | Ppp1r12a      | 17931  | 10+:107599114-107717039 |
| 8063 | 4930471M23Rik | 74919  | 5+:30950314-30962102    |
| 8064 | Dusp27        | 240892 | 1-:167973486-168057310  |
| 8065 | Ath1          | 212974 | 7+:148128434-148133555  |
| 8066 | Sec24a        | 77371  | 11-:51510145-51569709   |
| 8067 | Taok3         | 330177 | 5+:117583626-117723866  |
| 8068 | Gm166         | 233899 | 7-:134726599-134731714  |
| 8069 | MMT00015101   |        | 4+:100253888-100254336  |
| 8070 | 2010110P09Rik | 70261  | 7+:129362984-129366521  |
| 8071 | D630002J15Rik | 77522  | 6+:38059245-38065807    |
| 8072 | Zcchc9        | 69085  | 13-:91936137-91945766   |
| 8073 | Irak1bp1      | 65099  | 9+:82723629-82740627    |
| 8074 | Creb3         | 12913  | 4+:43575200-43580499    |
| 8075 | MMT00011946   |        | 5-:73867838-73868525    |
| 8076 | Rbm20         | 73713  | 19+:53925666-53939899   |
| 8077 | Nr2c2         | 22026  | 6+:92042425-92119204    |
| 8078 | Magea5        | 17141  | X-:151487603-151496096  |
| 8079 | Pts           | 19286  | 9-:50330120-50336746    |
| 8080 | Lpar1         | 14745  | 4-:58447859-58566391    |
| 8081 | Rhot1         | 59040  | 11+:80061973-80080313   |
| 8082 | Lass4         | 67260  | 8+:4493452-4524064      |
| 8083 | Mrpl14        | 68463  | 17+:45823353-45835429   |
| 8084 | Psm10         | 53380  | X-:137483679-137491206  |
| 8085 | MMT00057439   |        | X-:136619365-136619999  |
| 8086 | Olfr1495      | 258341 | 19+:13842833-13843792   |
| 8087 | Lrrc8a        | 241296 | 2+:30093143-30117642    |
| 8088 | Negr1         | 320840 | 3+:156679145-156823707  |
| 8089 | Olfr390       | 258344 | 11+:73600441-73601376   |
| 8090 | MMT00078696   |        | 18+:67722013-67722619   |
| 8091 | Slc10a1       | 20493  | 12-:82056478-82068971   |
| 8092 | Vat1          | 26949  | 11-:101321506-101321933 |
| 8093 | MMT00023042   |        | 8+:19535501-19537741    |
| 8094 | 4930591A17Rik | 68175  | 2+:179149640-179151585  |
| 8095 | Bex2          | 12069  | X-:132601104-132602649  |
| 8096 | V1rh17        | 252912 | 13+:22179746-22180671   |
| 8097 | Prss7         | 19146  | 16-:78953252-79091337   |
| 8098 | Olfr1453      | 258695 | 19-:13101894-13102817   |
| 8099 | MMT00052332   |        | 19+:58563727-58563925   |
| 8100 | MMT00004628   |        | 6+:26780372-26781059    |
| 8101 | Lce3b         | 66344  | 3+:92736900-92738018    |
| 8102 | Hivep2        | 15273  | 10+:13847381-13870251   |
| 8103 | Cry2          | 12953  | 2-:92245077-92274193    |
| 8104 | Gja3          | 14611  | 14-:57654496-57655750   |
| 8105 | Smyd4         | 319822 | 11+:75162037-75217042   |
| 8106 | MMT00065672   |        | 14-:121214347-121214954 |
| 8107 | Nlrp4b        | 210045 | 7+:11273464-11311322    |

|      |               |           |                         |
|------|---------------|-----------|-------------------------|
| 8108 | Cpne4         | 74020     | 9+:104775001-104936875  |
| 8109 | 6330545A04Rik | 76166     | 4+:140769916-140775953  |
| 8110 | Abhd7         | 384214    | 5+:107832606-107842646  |
| 8111 | Matn1         | 17180     | 4+:130500338-130511390  |
| 8112 | Pcm1          | 18536     | 8+:42325128-42417695    |
| 8113 | Agtbp1        | 67269     | 13:-59551261-59658647   |
| 8114 | Kcnn1         | 84036     | 8:-73367056-73379484    |
| 8115 | Mbnl3         | 171170    | X:-48474134-48517806    |
| 8116 | Arhgap19      | 71085     | 19:-41844074-41876540   |
| 8117 | Ngp           | 18054     | 9+:110322352-110325514  |
| 8118 | MMT00011146   |           | 12+:78920464-78921288   |
| 8119 | B9d2          | 232987    | 7+:26466010-26471579    |
| 8120 | 5730410E15Rik | 319613    | 15:-44503406-44560694   |
| 8121 | Zfp451        | 98403     | 1:-33818388-33871415    |
| 8122 | Hexim1        | 192231    | 11+:102977638-102981036 |
| 8123 | Taf1          | 270627    | X+:98728160-98796366    |
| 8124 | Clec16a       | 74374     | 16+:10545430-10742556   |
| 8125 | Taf9          | 108143    | 13+:101425005-101425800 |
| 8126 | MMT00057246   |           | X:-133638428-133638772  |
| 8127 | Hmg20b        | 15353     | 10:-80808796-80813155   |
| 8128 | Kcnmb2        | 72413     | 3+:31801595-32098687    |
| 8129 | Gtse1         | 29870     | 15+:85690405-85707002   |
| 8130 | MMT00064307   |           |                         |
| 8131 | Btbd3         | 228662    | 2+:138104257-138110654  |
| 8132 | MMT00016884   |           | 11:-53716222-53716657   |
| 8133 | 3110003A22Rik | 68053     | 4+:6118254-6143706      |
| 8134 | AW146020      | 330361    | 6+:81889372-81909249    |
| 8135 | Agbl3         | 76223     | 6+:34730450-34764825    |
| 8136 | Ikzf3         | 22780     | 11:-98327555-98380046   |
| 8137 | Abhd12        | 76192     | 2:-150725406-150730573  |
| 8138 | Epha3         | 13837     | 16:-63545797-63653404   |
| 8139 | Tmem167       | 66074     | 13+:90229340-90246927   |
| 8140 | 4931406P16Rik | 233103    | 7:-35021405-35070979    |
| 8141 | Scnn1a        | 20276     | 6+:125271357-125294957  |
| 8142 | E330011O21Rik | 100126450 | 16+:78251108-78251848   |
| 8143 | MMT00049078   |           | X+:83516092-83564108    |
| 8144 | Hoxa9         | 15405     | 6:-52174052-52177369    |
| 8145 | Slc4a8        | 59033     | 15+:100592232-100646356 |
| 8146 | Ankrd46       | 68839     | 15:-36407423-36426628   |
| 8147 | 1700029J07Rik | 69479     | 8:-47038961-47060607    |
| 8148 | Ppp1r9a       | 243725    | 6:-4942157-4961002      |
| 8149 | Nav3          | 260315    | 10:-109121128-109207380 |
| 8150 | Pnn           | 18949     | 12+:60167971-60174404   |
| 8151 | Olfr1480      | 404339    | 19+:13587890-13605110   |
| 8152 | Ccdc110       | 212392    | 8+:47020371-47028924    |
| 8153 | Xirp1         | 22437     | 9:-119922873-119932687  |
| 8154 | Neb           | 17996     | 2:-51992182-52194317    |
| 8155 | Mark3         | 17169     | 12+:112813181-112894430 |
| 8156 | Ttll1         | 319953    | 15:-83314201-83341294   |
| 8157 | MMT00005305   |           | 6:-15477154-15588274    |
| 8158 | Smc5          | 226026    | 19:-23281403-23317224   |

|      |               |        |                         |
|------|---------------|--------|-------------------------|
| 8159 | Agpat7        | 99010  | 2+:112079411-112087267  |
| 8160 | Akr1c12       | 622402 | 13-:4267422-4278606     |
| 8161 | MMT00031928   |        | 16+:43312605-43313377   |
| 8162 | Muc16         | 73732  | 9-:18337023-18371302    |
| 8163 | MMT00041082   |        | 6-:130528251-130628277  |
| 8164 | MMT00017950   |        | 6-:142919365-142919929  |
| 8165 | Optc          | 269120 | 1-:135793776-135803749  |
| 8166 | Trpt1         | 107328 | 19+:7070620-7073261     |
| 8167 | Wipf2         | 68524  | 11+:98752013-98752926   |
| 8168 | Slc31a2       | 20530  | 4+:61947480-61959445    |
| 8169 | Akt1s1        | 67605  | 7+:52104596-52110778    |
| 8170 | Snx22         | 382083 | 9-:65914914-65917545    |
| 8171 | Spink8        | 78709  | 9+:109719158-109729137  |
| 8172 | MMT00044495   |        | 2+:155881786-155882410  |
| 8173 | Eif3eip       | 223691 | 15+:78905644-78924829   |
| 8174 | 5330426P16Rik | 68190  | 16-:50719411-50732853   |
| 8175 | Ggh           | 14590  | 4+:19969366-19993250    |
| 8176 | Stx6          | 58244  | 1+:157006022-157049145  |
| 8177 | 6330439K17Rik | 241688 | 2+:144297283-144298248  |
| 8178 | Vtcn1         | 242122 | 3+:100629411-100692700  |
| 8179 | Dnahc9        | 237806 | 11-:65803218-65982084   |
| 8180 | Atp5g2        | 67942  | 15-:102493298-102501478 |
| 8181 | Thap1         | 73754  | 8+:27268694-27274622    |
| 8182 | Tbx1          | 21380  | 16-:18581805-18587062   |
| 8183 | Ap3b2         | 11775  | 7-:88619279-88638541    |
| 8184 | Rbm26         | 74213  | 14-:105505998-105576497 |
| 8185 | Cst7          | 13011  | 2+:150396169-150404678  |
| 8186 | Wsb2          | 59043  | 5+:117807469-117827561  |
| 8187 | Gins1         | 69270  | 2+:150735322-150757012  |
| 8188 | Kcnd1         | 16506  | X+:7400968-7413628      |
| 8189 | Cflar         | 12633  | 1+:58783206-58790070    |
| 8190 | Rc3h2         | 319817 | 2-:37230577-37270266    |
| 8191 | MMT00064416   |        | 5-:110909635-110910925  |
| 8192 | MMT00082813   |        |                         |
| 8193 | Pi4k2a        | 84095  | 19+:42164975-42196520   |
| 8194 | MMT00077789   |        | X-:153450772-153452073  |
| 8195 | Pmfbp1        | 56523  | 8+:112017926-112066540  |
| 8196 | Rps6ka5       | 73086  | 12-:101786652-101916799 |
| 8197 | Lhfp13        | 269629 | 5+:22252010-22284972    |
| 8198 | 1810036I24Rik | 67510  | 11+:62693076-62708687   |
| 8199 | Olf1512       | 258719 | 7+:115856868-115857848  |
| 8200 | Dfna5h        | 54722  | 6-:50157402-50211768    |
| 8201 | Klrg2         | 74253  | 6-:38576701-38587248    |
| 8202 | Krtap3-3      | 66380  | 11-:99411445-99412177   |
| 8203 | Rnf170        | 77733  | 8+:27234312-27253102    |
| 8204 | Dmrtc1c       | 71083  | X+:99998300-100005281   |
| 8205 | Hdac9         | 79221  | 12-:35058652-35213169   |
| 8206 | Phka2         | 110094 | X+:156940155-157036801  |
| 8207 | Cd44          | 12505  | 2-:102701526-102741641  |
| 8208 | Trhr          | 22045  | 15+:44027778-44067458   |
| 8209 | MMT00072546   |        | X-:12903091-12904107    |

|      |               |        |                         |
|------|---------------|--------|-------------------------|
| 8210 | Hspa12a       | 73442  | 19:-58873309-58936058   |
| 8211 | 4930570C03Rik | 67739  | 15+:97614847-97622236   |
| 8212 | MMT00052607   |        | 3:-77889848-77891186    |
| 8213 | MMT00081182   |        | 7:-146729342-146730175  |
| 8214 | Lmx1a         | 110648 | 1+:169619905-169776891  |
| 8215 | Olfr140       | 57272  | 2:-89891571-89892479    |
| 8216 | Oxsr1         | 108737 | 9:-119147563-119231489  |
| 8217 | Bhmt          | 12116  | 13:-94387430-94407456   |
| 8218 | Cldn22        | 75677  | 8+:48909882-48910543    |
| 8219 | Nt5e          | 23959  | 9+:88222523-88265153    |
| 8220 | MMT00056600   |        | X:-12196514-12197417    |
| 8221 | Stxbp3a       | 20912  | 3:-108596097-108643420  |
| 8222 | Etfp          | 110842 | 9:-55302316-55359917    |
| 8223 | Pdlim3        | 53318  | 8+:46970814-47004769    |
| 8224 | Csn3          | 12994  | 5+:88354672-88361553    |
| 8225 | Foxi1         | 14233  | 11:-34105509-34107942   |
| 8226 | Gli1          | 14632  | 10:-126766942-126778635 |
| 8227 | MMT00033394   |        | 5:-66302818-66326785    |
| 8228 | 1600029114Rik | 69797  | 9+:99360108-99371345    |
| 8229 | Myo1d         | 338367 | 11:-80295628-80593505   |
| 8230 | Olfr56        | 18356  | 11+:48943130-48948642   |
| 8231 | Tcfcp2        | 21422  | 15:-100333227-100382378 |
| 8232 | Olfr707       | 194433 | 7:-114034697-114035705  |
| 8233 | Kif2b         | 73470  | 11:-91436763-91438769   |
| 8234 | Tbpl1         | 237336 | 10:-22425181-22451133   |
| 8235 | Tcfep         | 21425  | 17:-47874043-47888510   |
| 8236 | Nov           | 18133  | 15:-54583815-54936256   |
| 8237 | Caprin1       | 53872  | 2:-103605181-103637211  |
| 8238 | MMT00004291   |        | 4+:35383648-35421149    |
| 8239 | Gzmn          | 245839 | 14:-56784742-56786807   |
| 8240 | Polr2i        | 69920  | 7+:31016818-31018138    |
| 8241 | MMT00047047   |        | 2:-99394281-99564304    |
| 8242 | Irak3         | 73914  | 10:-119579771-119638573 |
| 8243 | Ccdc78        | 381077 | 17+:25924322-25926024   |
| 8244 | Vamp4         | 53330  | 1+:164504431-164525021  |
| 8245 | Tmprss8       | 30943  | 17:-24109094-24112160   |
| 8246 | MMT00081738   |        | 1+:9419117-9441469      |
| 8247 | Fchsd1        | 319262 | 18:-38120896-38129106   |
| 8248 | Prom2         | 192212 | 2:-127354176-127367203  |
| 8249 | Cyb5r4        | 266690 | 9+:86916882-86972599    |
| 8250 | MMT00007883   |        | 8+:41101843-41102200    |
| 8251 | 1700082M22Rik | 73534  | 8+:107182185-107182347  |
| 8252 | Plcl1         | 227120 | 1+:55752583-55808444    |
| 8253 | 1700041B20Rik | 73338  | 2:-126966294-126967936  |
| 8254 | Bbs2          | 67378  | 8:-96591853-96622323    |
| 8255 | Prkar1a       | 19084  | 11+:109510676-109530943 |
| 8256 | Tjap1         | 74094  | 17:-46394824-46419958   |
| 8257 | Aadac         | 67758  | 3+:59835709-59844079    |
| 8258 | MMT00022030   |        | 5:-42244547-42245449    |
| 8259 | Cd63          | 12512  | 10+:128346977-128349872 |
| 8260 | MMT00035935   |        | 1+:19322206-19323172    |

|      |               |        |                         |
|------|---------------|--------|-------------------------|
| 8261 | Hormad1       | 67981  | 3+:95363598-95391593    |
| 8262 | Syp           | 20977  | X+:7215836-7230377      |
| 8263 | Igk-V28       | 16114  | 6:-69714491-69714986    |
| 8264 | 6430598A04Rik | 243300 | 5-:138172910-138180946  |
| 8265 | Rps11         | 27207  | 7-:52377867-52378923    |
| 8266 | Prosc         | 114863 | 8+:28153086-28163885    |
| 8267 | Csn2          | 12991  | 5-:88121648-88128446    |
| 8268 | Kctd7         | 212919 | 5+:130620833-130630984  |
| 8269 | Ccdc11        | 74453  | 18+:74442775-74519638   |
| 8270 | Cispn         | 269582 | 4+:126234236-126271157  |
| 8271 | Adra2a        | 11551  | 19+:54120749-54122101   |
| 8272 | Ppfia2        | 327814 | 10+:106180542-106350848 |
| 8273 | Olf1013       | 258757 | 2+:85609959-85610875    |
| 8274 | Zc3h11a       | 70579  | 1-:135518092-135550589  |
| 8275 | Olf1361       | 258365 | 2-:36940298-36941266    |
| 8276 | Taldo1        | 21351  | 7+:148578061-148588866  |
| 8277 | Ccdc53        | 67282  | 10+:87663839-87708903   |
| 8278 | Dlgap1        | 224997 | 17+:71158411-71168741   |
| 8279 | Kif13a        | 16553  | 13-:46844458-47025087   |
| 8280 | Tnpo3         | 320938 | 6-:29490888-29559888    |
| 8281 | Ninj1         | 18081  | 13+:49282915-49291620   |
| 8282 | Ccnt2         | 72949  | 1+:129670784-129703477  |
| 8283 | Ihpk1         | 27399  | 9+:107926558-107948303  |
| 8284 | EG209380      | 209380 | 7-:113563185-113566144  |
| 8285 | Rgs13         | 246709 | 1-:145986631-146024499  |
| 8286 | MMT00075001   |        | 15-:60126524-60128520   |
| 8287 | MMT00061960   |        | 3-:33583147-33583747    |
| 8288 | Pou2f2        | 18987  | 7-:25877674-25917479    |
| 8289 | Cacna1d       | 12289  | 14-:30852866-31010049   |
| 8290 | Galr1         | 14427  | 18-:82562793-82576193   |
| 8291 | Lce1a2        | 73722  | 3-:92472534-92474237    |
| 8292 | Mapkap1       | 227743 | 2+:34479448-34480469    |
| 8293 | Mpi           | 110119 | 9-:57392066-57400559    |
| 8294 | Fv1           | 14349  | 4+:147243087-147244398  |
| 8295 | Hpca          | 15444  | 4-:128789672-128795985  |
| 8296 | Ammecr1l      | 225339 | 18+:31921276-31943734   |
| 8297 | Dhx37         | 208144 | 5-:125896235-125977332  |
| 8298 | Car10         | 72605  | 11+:92960629-93047277   |
| 8299 | MMT00003438   |        | 17+:54141661-54142787   |
| 8300 | MMT00043905   |        | 15-:74816454-74817477   |
| 8301 | Rab34         | 19376  | 11+:78002838-78005342   |
| 8302 | Cryzl1        | 66609  | 16-:91689704-91728844   |
| 8303 | Acn9          | 71238  | 6+:6906006-6989662      |
| 8304 | Fubp1         | 51886  | 3+:151873461-151895735  |
| 8305 | Popdc2        | 64082  | 16+:38362337-38378300   |
| 8306 | Slc13a3       | 114644 | 2-:165230795-165298689  |
| 8307 | Lhx2          | 16870  | 2+:38207104-38225108    |
| 8308 | Tdpoz2        | 399673 | 3-:93432586-93456573    |
| 8309 | Rpl17         | 319195 | 18+:75160160-75168482   |
| 8310 | Atad3a        | 108888 | 4-:155115272-155135179  |
| 8311 | Pla2g5        | 18784  | 4-:138356456-138362139  |

|      |               |        |                         |
|------|---------------|--------|-------------------------|
| 8312 | Sebox         | 18292  | 11+:78317051-78317906   |
| 8313 | Frap1         | 56717  | 4+:147822715-147931790  |
| 8314 | Armc6         | 76813  | 8-:72744089-72758367    |
| 8315 | Phactr2       | 215789 | 10-:12933209-13043929   |
| 8316 | Depdc7        | 211896 | 2-:104561945-104582958  |
| 8317 | E130311K13Rik | 329659 | 3-:63724086-63733292    |
| 8318 | E130308A19Rik | 230259 | 4+:59731495-59733554    |
| 8319 | MMT00062477   |        | 10-:14465758-14467192   |
| 8320 | Nme3          | 79059  | 17+:25033450-25034448   |
| 8321 | Oifr1120      | 259031 | 2+:87197602-87198547    |
| 8322 | Dpy19l1       | 244745 | 9-:24216219-24289576    |
| 8323 | Cbx6          | 494448 | 15-:79654328-79656137   |
| 8324 | Hemt1         | 15202  | 15+:74653494-74654866   |
| 8325 | Psme2         | 19188  | 14-:56206276-56209745   |
| 8326 | Mageh1        | 75625  | X-:149471224-149471881  |
| 8327 | 4930503B20Rik | 75015  | 3-:146312663-146314276  |
| 8328 | Klhdc8a       | 213417 | 1+:134195637-134202152  |
| 8329 | Pipox         | 19193  | 11-:77694116-77707283   |
| 8330 | MMT00027613   | 634100 | 12-:116067651-116175628 |
| 8331 | BC052688      | 432812 | 13+:61731372-61888643   |
| 8332 | Tmem206       | 66950  | 1+:193149843-193174790  |
| 8333 | Klhdc2        | 69554  | 12+:70397754-70411451   |
| 8334 | MMT00082897   |        | 6-:73478635-73479239    |
| 8335 | Cftr          | 12638  | 6+:18120686-18272767    |
| 8336 | MMT00041615   |        | 5+:152083838-152084048  |
| 8337 | Lgr4          | 107515 | 2+:109810843-109853629  |
| 8338 | Atg10         | 66795  | 13-:91074953-91363573   |
| 8339 | MMT00046482   |        | 14+:60759849-60760245   |
| 8340 | Pde1a         | 18573  | 2-:79677036-79969269    |
| 8341 | MMT00017270   |        | 6-:47926988-47927875    |
| 8342 | Cwf19l1       | 72502  | 19-:44184514-44210366   |
| 8343 | Sult1b1       | 56362  | 5-:87943740-87967190    |
| 8344 | Cfh           | 12628  | 1-:141982455-142079899  |
| 8345 | Elfn1         | 243312 | 5+:140447196-140449682  |
| 8346 | Hiat1         | 15247  | 3-:116334086-116365468  |
| 8347 | Efhc2         | 74405  | X-:16709180-16740022    |
| 8348 | Neil2         | 382913 | 14-:63802089-63810679   |
| 8349 | Rhoq          | 104215 | 17+:87362641-87399403   |
| 8350 | D8Ertcd738e   | 101966 | 8-:86770129-86773749    |
| 8351 | Zp3r          | 22789  | 1-:132473289-132526173  |
| 8352 | 4930512M02Rik | 75110  | 11-:11489225-11524715   |
| 8353 | Chd5          | 269610 | 4+:151715692-151761333  |
| 8354 | EG547412      | 547412 | X+:72388539-72389809    |
| 8355 | Pms2          | 18861  | 5+:144737915-144746584  |
| 8356 | Fbxl12        | 30843  | 9-:20442232-20447132    |
| 8357 | Siva1         | 30954  | 12+:113883122-113887355 |
| 8358 | Zbp2          | 69376  | 11+:98412431-98419977   |
| 8359 | 1190002N15Rik | 68861  | 9-:94418281-94438274    |
| 8360 | Bcl6          | 12053  | 16-:23966201-23988685   |
| 8361 | MMT00025562   |        | 9+:18231928-18233469    |
| 8362 | Fbxw8         | 231672 | 5-:118516505-118605412  |

|      |               |        |                         |
|------|---------------|--------|-------------------------|
| 8363 | MMT00006564   |        | 19-:28936820-28938254   |
| 8364 | 4930435M08Rik | 74651  | 14+:118444194-118446085 |
| 8365 | Nfatc4        | 73181  | 14+:56443736-56452780   |
| 8366 | Sema3a        | 20346  | 5+:13399847-13600084    |
| 8367 | Ccdc131       | 216345 | 10+:114845930-114869824 |
| 8368 | Rad51l3       | 19364  | 11-:82691886-82704107   |
| 8369 | Prkaca        | 18747  | 8+:86497085-86519316    |
| 8370 | Sigirr        | 24058  | 7-:148277074-148280801  |
| 8371 | Hipk2         | 15258  | 6-:38647904-38825952    |
| 8372 | Uap1          | 107652 | 1-:172072133-172105011  |
| 8373 | Cdc7          | 12545  | 5+:107393340-107413450  |
| 8374 | Copz1         | 56447  | 15+:103103348-103130293 |
| 8375 | Ankrd2        | 56642  | 19+:42110527-42119600   |
| 8376 | Pdcd2         | 18567  | 17-:15658541-15664245   |
| 8377 | Fgd5          | 232237 | 6+:92021180-92026008    |
| 8378 | Nr2c1         | 22025  | 10+:93619512-93658436   |
| 8379 | 2610024G14Rik | 56412  | 5-:77723280-77739083    |
| 8380 | Gnb2l1        | 14694  | 11+:48613869-48619581   |
| 8381 | Sncg          | 20618  | 14-:35183460-35187813   |
| 8382 | MMT00012541   |        | X-:129628360-129629513  |
| 8383 | Foxd2         | 17301  | 4-:114579897-114581493  |
| 8384 | Cst9          | 13013  | 2+:148660882-148664471  |
| 8385 | Olf1061       | 259022 | 2-:86253265-86254207    |
| 8386 | Slc17a8       | 216227 | 10-:89040645-89069613   |
| 8387 | Tcl1b5        | 27382  | 12+:106414567-106419353 |
| 8388 | Zfyve21       | 68520  | 12+:113052483-113066560 |
| 8389 | Pbsn          | 54192  | X-:75083237-75098839    |
| 8390 | Ttc16         | 338348 | 2-:32627626-32630859    |
| 8391 | Eif1          | 20918  | 11+:100181408-100182673 |
| 8392 | Asf1b         | 66929  | 8+:86479592-86494093    |
| 8393 | Wdr51a        | 70235  | 9+:106183440-106252217  |
| 8394 | Dpy19l3       | 233115 | 7-:36473861-36497237    |
| 8395 | Alg1          | 208211 | 16+:5233730-5244989     |
| 8396 | MMT00040956   |        | 18+:10928840-10929732   |
| 8397 | Arhgef18      | 102098 | 8+:3455738-3456600      |
| 8398 | ND5           | 17721  | M+:0-16297              |
| 8399 | Herpud1       | 64209  | 8+:96910399-96919258    |
| 8400 | Calm4         | 80796  | 13+:3837141-3837576     |
| 8401 | Slain1        | 105439 | 14+:104049416-104104122 |
| 8402 | Ttll13        | 269954 | 7+:87397297-87404074    |
| 8403 | Rps29         | 20090  | 12-:70258711-70260057   |
| 8404 | Fa2h          | 338521 | 8-:113869045-113917720  |
| 8405 | Slc26a10      | 216441 | 10-:126609367-126617701 |
| 8406 | Ikbkap        | 230233 | 4-:56762552-56815207    |
| 8407 | V1rc17        | 171190 | 6-:57958178-57959196    |
| 8408 | Nr1i3         | 12355  | 1+:173144166-173148975  |
| 8409 | Mid1          | 17318  | X+:166123181-166444500  |
| 8410 | EG434050      | 434050 | 6+:78165871-78167106    |
| 8411 | Phxr2         | 18687  | 10-:98587807-98588959   |
| 8412 | Tle4          | 21888  | 19-:14522561-14524034   |
| 8413 | Olf1447       | 258698 | 19-:12975340-12976268   |



|      |               |           |                          |
|------|---------------|-----------|--------------------------|
| 8414 | Calm3         | 12315     | 7-:17502141-17509306     |
| 8415 | Cyb561        | 13056     | 11-:105796687-105805477  |
| 8416 | Cdc20         | 107995    | 4-:118105506-118109854   |
| 8417 | A430084P05Rik | 327957    | 11-:70604963-70626089    |
| 8418 | MMT00006138   |           | 1-:110894603-110895383   |
| 8419 | AU042671      | 269700    | 5+ :121709813-121723808  |
| 8420 | Nos1          | 18125     | 5+ :118317127-118403820  |
| 8421 | Mbd5          | 109241    | 2+ :49101451-49169245    |
| 8422 | Adam3         | 11497     | 8- :25787704-25836297    |
| 8423 | Nhedc1        | 74446     | 3+ :135011021-135056046  |
| 8424 | Ap2m1         | 11773     | 16+ :20535576-20543979   |
| 8425 | 0610011L14Rik | 68295     | 2+ :156373331-156393892  |
| 8426 | MMT00068366   | 100041688 | 8+ :22204744-22204911    |
| 8427 | Mybpc3        | 17868     | 2+ :90958326-90976666    |
| 8428 | Sorbs3        | 20410     | 14- :70580275-70607444   |
| 8429 | Cdyl2         | 75796     | 8- :119098389-119256744  |
| 8430 | Pttg1ip       | 108705    | 10+ :77044510-77061476   |
| 8431 | Hdac2         | 15182     | 10+ :36694389-36721694   |
| 8432 | Fgf18         | 14172     | 11- :33017438-33047400   |
| 8433 | Gm364         | 245423    | X+ :54670835-54692859    |
| 8434 | Acacb         | 100705    | 5+ :114615601-114699738  |
| 8435 | 3110047P20Rik | 319807    | 5+ :64182682-64201486    |
| 8436 | Dnajb8        | 56691     | 6+ :88172261-88173250    |
| 8437 | Olfr1090      | 258844    | 2- :86593951-86594893    |
| 8438 | Mrpl48        | 52443     | 7- :107697222-107756816  |
| 8439 | Slc25a33      | 70556     | 4- :149118583-149148292  |
| 8440 | MMT00063259   |           | 7- :60335153-60945083    |
| 8441 | Tmem54        | 66260     | 4+ :128782859-128788829  |
| 8442 | Med18         | 67219     | 4- :132015188-132019836  |
| 8443 | Pola2         | 18969     | 19- :5940547-5964139     |
| 8444 | Rdh16         | 19683     | 10+ :127238209-127252895 |
| 8445 | Tmtc1         | 387314    | 6- :148233377-148374506  |
| 8446 | Cybrd1        | 73649     | 2+ :70956108-70976909    |
| 8447 | Nup107        | 103468    | 10- :117187558-117229835 |
| 8448 | Sucla2        | 20916     | 14+ :73952436-73995949   |
| 8449 | Vash2         | 226841    | 1- :192771628-192803078  |
| 8450 | Capza1        | 12340     | 3- :104627903-104667296  |
| 8451 | Nr1h2         | 22260     | 7- :51805010-51809293    |
| 8452 | Qrich1        | 69232     | 9+ :108419952-108462497  |
| 8453 | MMT00060234   |           | 13- :62301099-62301830   |
| 8454 | Lsm5          | 66373     | 6- :56651058-56654687    |
| 8455 | MMT00008022   |           | 14+ :110955659-110956508 |
| 8456 | Ftl2          | 14337     | 4+ :125180618-125181709  |
| 8457 | MMT00045470   |           |                          |
| 8458 | MMT00063985   |           | X- :57979510-57980693    |
| 8459 | Gpatch3       | 242691    | 4+ :133130674-133136626  |
| 8460 | Gle1          | 74412     | 2+ :29790943-29815156    |
| 8461 | Gpr103        | 229214    | 3- :36078346-36121210    |
| 8462 | Pkd1l1        | 171395    | 11- :8726647-8734803     |
| 8463 | EG640554      | 640554    | 9+ :54902640-54902891    |
| 8464 | Snapin        | 20615     | 3- :90292300-90294915    |

|      |               |           |                         |
|------|---------------|-----------|-------------------------|
| 8465 | BC023814      | 229503    | 3-:87727566-87734069    |
| 8466 | Pkhd1l1       | 192190    | 15+:44289098-44361649   |
| 8467 | Scfd1         | 76983     | 12+:52478565-52551094   |
| 8468 | Hrasls5       | 66727     | 19+:7687058-7713728     |
| 8469 | Sfrs6         | 67996     | 2+:162757263-162761082  |
| 8470 | Psors1c2      | 57390     | 17+:35670213-35671590   |
| 8471 | Tacstd1       | 17075     | 17+:88036047-88050467   |
| 8472 | Txndc16       | 70561     | 14-:45754125-45839043   |
| 8473 | Clint1        | 216705    | 11+:45665443-45724128   |
| 8474 | Tcl1b2        | 27381     | 12+:106385242-106393433 |
| 8475 | Cirh1a        | 21771     | 8+:109417548-109446992  |
| 8476 | Zbtb3         | 75291     | 19+:8876982-8879634     |
| 8477 | MMT00002146   | 100041835 | 11-:95934335-95936342   |
| 8478 | Clec2l        | 665180    | 6+:38613235-38630842    |
| 8479 | MMT00067202   |           | 12+:108786602-109114240 |
| 8480 | MMT00008725   |           | 3-:12893012-12893353    |
| 8481 | Sytl5         | 236643    | X+:9482643-9570223      |
| 8482 | Trip12        | 14897     | 1-:84748272-84750993    |
| 8483 | Slc25a5       | 11740     | X+:34335725-34338537    |
| 8484 | Cgref1        | 68567     | 5-:31235514-31247859    |
| 8485 | Lrrk2         | 66725     | 15+:91559373-91564538   |
| 8486 | Plod3         | 26433     | 5+:137463486-137472407  |
| 8487 | Olf1039       | 257950    | 2-:85970858-85971818    |
| 8488 | Opcml         | 330908    | 9+:28620871-28727953    |
| 8489 | Prdx3         | 11757     | 19-:60939989-60950417   |
| 8490 | Glcci1        | 170772    | 6+:8209426-8229555      |
| 8491 | Elovl4        | 83603     | 9-:83672306-83699818    |
| 8492 | EG114600      | 114600    | 6-:132064239-132314153  |
| 8493 | Gucy1a2       | 234889    | 9+:3556726-3643888      |
| 8494 | MMT00028462   |           | 6+:67789786-67864069    |
| 8495 | Lox           | 16948     | 18-:52675720-52689357   |
| 8496 | 1190005P17Rik | 66225     | 10+:119665036-119668428 |
| 8497 | MMT00069762   |           |                         |
| 8498 | 2010317E24Rik | 72080     | 2+:25227856-25233001    |
| 8499 | C430048L16Rik | 77604     | 4+:12016518-12073876    |
| 8500 | Ddit3         | 13198     | 10+:126730766-126733340 |
| 8501 | Ndufaf1       | 69702     | 2-:119481186-119488534  |
| 8502 | Olf1866       | 258551    | 9-:19831443-19832380    |
| 8503 | Olf1374       | 258335    | 8+:74633466-74634408    |
| 8504 | Tex10         | 269536    | 4-:48443272-48486397    |
| 8505 | Hif1an        | 319594    | 19+:44637367-44644827   |
| 8506 | MMT00003599   |           | 4+:16173206-16177382    |
| 8507 | 1700054F22Rik | 73398     | 4+:53006846-53008858    |
| 8508 | Myl3          | 17897     | 9+:110666184-110672304  |
| 8509 | E2f5          | 13559     | 3+:14578804-14606039    |
| 8510 | Tbl2          | 27368     | 5+:135625593-135636005  |
| 8511 | Folr4         | 64931     | 9-:14704477-14708376    |
| 8512 | Nr3c2         | 110784    | 8+:79398416-79434302    |
| 8513 | Wbscr27       | 79565     | 5+:135408263-135417101  |
| 8514 | Arntl2        | 272322    | 6+:146754950-146782043  |
| 8515 | Glcci1        | 170772    | 6+:8209449-8547480      |

|      |               |           |                         |
|------|---------------|-----------|-------------------------|
| 8516 | Plxnb2        | 140570    | 15-:88985978-88997478   |
| 8517 | 1-Mar         | 72925     | 8+:68910191-68992803    |
| 8518 | EG236844      | 236844    | X-:65569128-65569492    |
| 8519 | Gabrd         | 14403     | 4-:154759088-154772171  |
| 8520 | Rdh10         | 98711     | 1-:16094708-16095860    |
| 8521 | Ceacam1       | 26365     | 7-:26248486-26262569    |
| 8522 | Impg2         | 224224    | 16+:56205188-56271255   |
| 8523 | Ddit4l        | 73284     | 3+:137286635-137289477  |
| 8524 | Cbr1          | 12408     | 16+:93608083-93610566   |
| 8525 | 2510006D16Rik | 76799     | 4+:129277950-129285114  |
| 8526 | Cend1         | 57754     | 7-:148612347-148615248  |
| 8527 | Zc3h12a       | 230738    | 4-:124796524-124805071  |
| 8528 | EG545893      | 545893    | 6-:147022693-147035521  |
| 8529 | MMT00070318   |           | 14+:44518941-44519459   |
| 8530 | Snca          | 20617     | 6-:60681594-60779849    |
| 8531 | 4930401A09Rik | 75777     | 15-:10429897-10488405   |
| 8532 | MMT00045840   |           | 16+:31377527-31379189   |
| 8533 | Ptprcap       | 19265     | 19+:4154678-4156713     |
| 8534 | Lhcgr         | 16867     | 17-:89140889-89191316   |
| 8535 | Grm7          | 108073    | 6+:111016741-111030476  |
| 8536 | Mesp2         | 17293     | 7+:86955621-86958316    |
| 8537 | Tmem179       | 104885    | 12-:113739953-113749370 |
| 8538 | Nup62cl       | 279706    | X-:136562676-136573694  |
| 8539 | Cflar         | 12633     | 1+:58783206-58790070    |
| 8540 | Slc4a1        | 20533     | 11-:102210140-102226429 |
| 8541 | Tubb5         | 22154     | 17-:35971751-35975076   |
| 8542 | Il1rl2        | 107527    | 1+:40381474-40422313    |
| 8543 | Olfr686       | 259072    | 7-:112351902-112352855  |
| 8544 | Znhit3        | 448850    | 11-:84724019-84729870   |
| 8545 | Spink12       | 78242     | 18+:44264061-44268195   |
| 8546 | Vmn2r87       | 625131    | 10-:129908893-129934362 |
| 8547 | Gbp4          | 17472     | 5-:105546592-105568563  |
| 8548 | Tor1aip2      | 240832    | 1+:157906683-157912587  |
| 8549 | Ndufb7        | 66916     | 8+:86090656-86095522    |
| 8550 | Myh13         | 544791    | 11+:67140604-67185003   |
| 8551 | 1700113O17Rik | 68231     | 2-:17918048-17918573    |
| 8552 | Stx19         | 68159     | 16+:62814500-62822553   |
| 8553 | Ftmt          | 67634     | 18+:52491189-52492439   |
| 8554 | Letm2         | 270035    | 8-:26688963-26708024    |
| 8555 | H2-M3         | 14991     | 17+:37407206-37411431   |
| 8556 | MMT00005777   | 100040391 | 18-:14465663-14537967   |
| 8557 | MMT00035973   |           |                         |
| 8558 | Shroom4       | 208431    | X+:6097910-6210833      |
| 8559 | Rangrf        | 57785     | 11-:68785987-68787327   |
| 8560 | MMT00026471   |           | 13+:97146821-97147658   |
| 8561 | Mds1          | 17251     | 3-:30135490-30408409    |
| 8562 | 4921509B22Rik | 70859     | 14-:75484111-75529442   |
| 8563 | Leng1         | 69757     | 7-:3612684-3617072      |
| 8564 | Pld4          | 104759    | 12+:114001601-114007198 |
| 8565 | MMT00008541   |           | 2-:144190097-144191387  |
| 8566 | MMT00003532   |           | 4+:32237002-32262310    |

|      |               |        |                         |
|------|---------------|--------|-------------------------|
| 8567 | MMT00058919   | 242025 | 3+:53825085-53825724    |
| 8568 | Tnik          | 665113 | 3+:28308275-28569505    |
| 8569 | MMT00019147   |        | 17+:26038752-26039122   |
| 8570 | Ppyr1         | 19065  | 14-:34959387-34960515   |
| 8571 | Uchl3         | 50933  | 14+:102053273-102095316 |
| 8572 | Olf1r57       | 18357  | 10+:78497683-78498136   |
| 8573 | MMT00003887   |        | 6+:41068862-41069443    |
| 8574 | Top1mt        | 72960  | 15-:75487464-75509199   |
| 8575 | Vmn2r118      | 383258 | 17-:55747285-55763906   |
| 8576 | MMT00002368   |        | 8-:63073373-63073526    |
| 8577 | Stox2         | 71069  | 8+:48265405-48266707    |
| 8578 | Wdr19         | 213081 | 5+:65590979-65651651    |
| 8579 | Rngtt         | 24018  | 4+:33397404-33589583    |
| 8580 | Eps15         | 13858  | 4+:108952907-109058299  |
| 8581 | MMT00031271   |        | 2+:30014910-30016998    |
| 8582 | Igsf10        | 242050 | 3-:59121809-59140509    |
| 8583 | Atp5c1        | 11949  | 2-:9977660-10002056     |
| 8584 | Zmynd11       | 66505  | 13-:9685017-9764377     |
| 8585 | Gnptab        | 432486 | 10-:87907830-87913900   |
| 8586 | MMT00030651   |        | X+:72190268-72195309    |
| 8587 | Napepld       | 242864 | 5-:21170734-21207242    |
| 8588 | Notch4        | 18132  | 17+:34701274-34725441   |
| 8589 | Sfrs7         | 225027 | 17-:80599425-80606625   |
| 8590 | MMT00078103   | 244958 | 9+:87064359-87077665    |
| 8591 | Ii31ra        | 218624 | 13-:113313013-113370870 |
| 8592 | Olf1r510      | 258308 | 7+:115810931-115811874  |
| 8593 | 1200003C05Rik | 104771 | 12+:73187109-73201827   |
| 8594 | Myt1          | 17932  | 2+:181531011-181562437  |
| 8595 | MMT00019109   |        | X-:88531214-88531963    |
| 8596 | Sf3b3         | 101943 | 8-:113334391-113370660  |
| 8597 | Papss1        | 23971  | 3+:131227854-131306632  |
| 8598 | Ii24          | 93672  | 1-:132778651-132782573  |
| 8599 | Abl1          | 11350  | 2+:31614980-31659058    |
| 8600 | Scn10a        | 20264  | 9-:119517584-119603478  |
| 8601 | Rps5          | 20103  | 7+:13507683-13512034    |
| 8602 | Scd3          | 30049  | 19+:44277788-44316999   |
| 8603 | Slc6a3        | 13162  | 13+:73674271-73716118   |
| 8604 | V1rh13        | 171272 | 13+:23254511-23255448   |
| 8605 | 1700054F22Rik | 73398  | 4+:53010025-53013718    |
| 8606 | Cntnap5c      | 620292 | 17+:58153238-58445139   |
| 8607 | Elp2          | 58523  | 18+:24762495-24797311   |
| 8608 | Hspg2         | 15530  | 4+:137074547-137089650  |
| 8609 | Zik1          | 22775  | 7-:11073719-11080728    |
| 8610 | Padi4         | 18602  | 4-:140301779-140330098  |
| 8611 | Spred3        | 101809 | 7-:29946578-29952992    |
| 8612 | MMT00020019   |        | 11+:23913947-23977306   |
| 8613 | Pin4          | 69713  | X+:99314771-99323013    |
| 8614 | Bpil3         | 228796 | 2+:153734286-153737258  |
| 8615 | MMT00010050   |        | 10+:123633196-123656241 |
| 8616 | A730006G06Rik | 320638 | 17-:48202901-48227326   |
| 8617 | 2210412E05Rik | 75690  | 7+:50718602-50719173    |

|      |               |           |                         |
|------|---------------|-----------|-------------------------|
| 8618 | EG433865      | 433865    | 5-:30120704-30121666    |
| 8619 | MMT00077170   |           | X+:164193196-164215001  |
| 8620 | MMT00048670   |           | 1+:146800131-146801383  |
| 8621 | MMT00047655   |           | 11-:102520442-102521181 |
| 8622 | Fuk           | 234730    | 8-:113413575-113426357  |
| 8623 | MMT00015399   |           | 17-:53606287-53606659   |
| 8624 | Bnc1          | 12173     | 7-:89111546-89137182    |
| 8625 | Gsg1          | 14840     | 6-:135187349-135204233  |
| 8626 | Dph4          | 99349     | 2-:105806873-105843706  |
| 8627 | Nxf2          | 83454     | X-:131479069-131499293  |
| 8628 | MMT00058602   |           | X+:46064705-46065318    |
| 8629 | Hhat          | 226861    | 1-:194376820-194597407  |
| 8630 | Al413194      | 100620    | 5+:137581514-137581949  |
| 8631 | 9930032O22Rik | 320454    | 5-:86916423-86921315    |
| 8632 | Igfbp1        | 16006     | 11+:7097869-7102540     |
| 8633 | Rfwd3         | 234736    | 8-:113817890-113824114  |
| 8634 | MMT00047654   | 100041686 | 8-:73419313-73421275    |
| 8635 | B4galnt3      | 330406    | 6-:120166573-120244577  |
| 8636 | Cyp2j11       | 100066    | 4-:95961214-96015372    |
| 8637 | Tnpo2         | 212999    | 8+:87561130-87579566    |
| 8638 | Fkbp14        | 231997    | 6-:54527600-54543171    |
| 8639 | Map1lc3b      | 67443     | 8+:124114424-124120668  |
| 8640 | Wfdc6b        | 433502    | 2+:164440390-164542664  |
| 8641 | Slc7a2        | 11988     | 8+:41983791-42003073    |
| 8642 | Serpinb9      | 20723     | 13+:33096539-33108356   |
| 8643 | Mmp1b         | 83996     | 9-:7368240-7387993      |
| 8644 | V1rg11        | 171267    | 7-:12947158-12948113    |
| 8645 | Tcl1b4        | 27380     | 12+:106440631-106445201 |
| 8646 | Plau          | 18792     | 14+:21656300-21661671   |
| 8647 | Gpr137b-ps    | 664862    | 13-:12707324-12723020   |
| 8648 | Flnb          | 286940    | 14+:8650664-8784097     |
| 8649 | MMT00072863   | 77652     | 17+:33437886-33441602   |
| 8650 | Gpi1          | 14751     | 7-:34992623-35015310    |
| 8651 | Ccdc61        | 232933    | 7-:19476232-19495813    |
| 8652 | Krt7          | 110310    | 15+:101242855-101258235 |
| 8653 | AW124722      | 239570    | 15+:85662742-85687226   |
| 8654 | Fbxl13        | 320118    | 5-:21119810-21120312    |
| 8655 | MMT00020731   | 331000    | 9+:92100279-92102795    |
| 8656 | Ankle2        | 71782     | 5+:110660255-110684379  |
| 8657 | MMT00032815   |           | 18-:9748691-9749923     |
| 8658 | Fmo2          | 55990     | 1-:164806576-164828517  |
| 8659 | Psmb8         | 16913     | 17+:34335343-34338210   |
| 8660 | Rragb         | 245670    | X+:149574538-149604845  |
| 8661 | Grasp         | 56149     | 15+:101054674-101063186 |
| 8662 | Brca2         | 12190     | 5+:151325749-151372321  |
| 8663 | Olfr874       | 258882    | 9+:37553720-37554651    |
| 8664 | MMT00014895   |           | 8+:125113580-125114085  |
| 8665 | EG667977      | 667977    | 17-:36274132-36305471   |
| 8666 | Cerk          | 223753    | 15-:85970772-86016078   |
| 8667 | Plxna3        | 18846     | X+:71574439-71589102    |
| 8668 | Atxn7         | 246103    | 14+:14845586-14936261   |

|      |               |        |                         |
|------|---------------|--------|-------------------------|
| 8669 | 3110035E14Rik | 76982  | 1+:9591269-9614975      |
| 8670 | MMT00051613   |        | 1+:46472135-46473775    |
| 8671 | MMT00028357   |        | 8+:13086535-13087234    |
| 8672 | Tmem26        | 327766 | 10+:68213855-68241605   |
| 8673 | MMT00007012   |        | 12-:120305214-120305879 |
| 8674 | Gclm          | 14630  | 3+:121948863-121969397  |
| 8675 | Cacng1        | 12299  | 11-:107564977-107577836 |
| 8676 | MMT00030667   |        | 2+:18680603-18681551    |
| 8677 | Zbtb8os       | 67106  | 4+:129013260-129031791  |
| 8678 | Myl1          | 17901  | 1-:66972786-66978523    |
| 8679 | Tiparp        | 99929  | 3+:65332331-65359440    |
| 8680 | C1qtnf9       | 239126 | 14+:61391133-61399701   |
| 8681 | Rab9          | 56382  | X-:162895191-162917622  |
| 8682 | A930003A15Rik | 68162  | 16-:19876662-19884342   |
| 8683 | 3110002H16Rik | 76482  | 18+:12327243-12349336   |
| 8684 | Il15          | 16168  | 8-:84855524-84926444    |
| 8685 | Klrc1         | 16641  | 6-:129624877-129628928  |
| 8686 | Nkx2-5        | 18091  | 17-:26975608-26978554   |
| 8687 | AB041803      | 232685 | 6-:31115524-31168433    |
| 8688 | Suv39h1       | 20937  | X-:7638429-7651712      |
| 8689 | Ngdn          | 68966  | 14+:55634362-55635984   |
| 8690 | Cd84          | 12523  | 1+:173770734-173816561  |
| 8691 | Il17c         | 234836 | 8+:124945984-124947467  |
| 8692 | Rhbdd3        | 279766 | 11+:4998316-5006094     |
| 8693 | C130034I18Rik | 320701 | 6-:96793741-96813909    |
| 8694 | Npdc1         | 18146  | 2+:25258765-25265013    |
| 8695 | Sh3tc2        | 225608 | 18+:62112729-62134257   |
| 8696 | Tmem47        | 192216 | X+:78316049-78341230    |
| 8697 | Dpysl2        | 12934  | 14-:67424007-67487227   |
| 8698 | 1500009L16Rik | 69784  | 10+:83185640-83225505   |
| 8699 | Gzmm          | 16904  | 10+:79152155-79157995   |
| 8700 | OTTMUSG00000  | 620913 | 11-:48720630-48729864   |
| 8701 | EG633640      | 633640 | 13+:120276876-120284312 |
| 8702 | Mrpl30        | 107734 | 1+:37947397-37955178    |
| 8703 | Gstp1         | 14870  | 19-:4035410-4037912     |
| 8704 | 4933411K16Rik | 66765  | 19+:42126737-42128118   |
| 8705 | Ahdc1         | 230793 | 4+:132621123-132633140  |
| 8706 | Rab35         | 77407  | 5+:116082149-116097568  |
| 8707 | Alf47699      | 381236 | 19-:33657536-33664514   |
| 8708 | Olf992        | 258865 | 2-:85239758-85240688    |
| 8709 | Trim58        | 216781 | 11+:58453969-58459628   |
| 8710 | Cnnm3         | 94218  | 1+:36569651-36582526    |
| 8711 | 5430432M24Rik | 73847  | 2-:151795135-151805865  |
| 8712 | Olf926        | 258313 | 14-:50703389-50704354   |
| 8713 | Lrrc43        | 381741 | 5+:123939338-123958213  |
| 8714 | Pcdh20        | 219257 | 14-:88867026-88870808   |
| 8715 | Ntrk1         | 18211  | 3-:87582166-87599066    |
| 8716 | Slc22a17      | 59049  | 14-:55525568-55531877   |
| 8717 | Litaf         | 56722  | 16-:10959366-10993182   |
| 8718 | Socs3         | 12702  | 11-:117827402-117829561 |
| 8719 | Nup214        | 227720 | 2+:31830011-31907892    |

|      |               |        |                         |
|------|---------------|--------|-------------------------|
| 8720 | Ssr1          | 107513 | 13-:38069961-38086004   |
| 8721 | Tbc1d10c      | 108995 | 19-:4184355-4191049     |
| 8722 | MMT00022745   |        | X+:109579839-109580241  |
| 8723 | Oxsm          | 71147  | 14-:17073138-17081692   |
| 8724 | Tgfb3         | 21809  | 12-:87397693-87419484   |
| 8725 | Fance         | 72775  | 17+:28450510-28463511   |
| 8726 | Olfr46        | 18345  | 7+:147796066-147797021  |
| 8727 | Slc27a3       | 26568  | 3-:90189153-90193712    |
| 8728 | 4930438A08Rik | 73988  | 11+:58099996-58107798   |
| 8729 | MMT00006406   |        | 6-:69413179-69450640    |
| 8730 | MMT00008620   |        | 8+:54766414-55042434    |
| 8731 | Tmpo          | 21917  | 10-:90624502-90634280   |
| 8732 | Lce1f         | 67828  | 3-:92522606-92524272    |
| 8733 | Olfr1247      | 258968 | 2-:89449313-89450257    |
| 8734 | Etv5          | 104156 | 16-:22383086-22436564   |
| 8735 | 2210408I21Rik | 72371  | 13+:77406949-77473638   |
| 8736 | Rsb1          | 229675 | 3+:103718307-103770783  |
| 8737 | Serpina10     | 217847 | 12-:104854886-104869631 |
| 8738 | Reg4          | 67709  | 3+:98026078-98040671    |
| 8739 | MMT00054598   |        | 7-:93206490-93211909    |
| 8740 | Car5b         | 56078  | X-:160417022-160465929  |
| 8741 | Speer9-ps1    | 73949  | 7+:3097628-3150637      |
| 8742 | Tmem39a       | 67846  | 16+:38562953-38591497   |
| 8743 | Pkp4          | 227937 | 2+:58999877-59193260    |
| 8744 | Bcas1         | 76960  | 2-:170172526-170253346  |
| 8745 | Mcm2          | 17216  | 6-:88833468-88848691    |
| 8746 | MMT00018815   |        | 14+:15491999-15492518   |
| 8747 | Nme6          | 54369  | 9+:109735307-109745475  |
| 8748 | EG625055      | 625055 | 3+:86668402-86669324    |
| 8749 | Wdfy3         | 72145  | 5-:102364099-102386564  |
| 8750 | 1700010I14Rik | 66931  | 17+:9181225-9201181     |
| 8751 | Tex264        | 21767  | 9-:106561077-106588258  |
| 8752 | Stk32c        | 57740  | 7-:146289537-146374372  |
| 8753 | MMT00015209   | 434186 | 7+:58425886-58431820    |
| 8754 | Prl2c3        | 18812  | 13-:12884253-12892347   |
| 8755 | Ppm1k         | 243382 | 6-:57463934-57475248    |
| 8756 | Casq2         | 12373  | 3+:101890567-101950172  |
| 8757 | Igh-VJ558     | 16061  | 12-:117190526-117191230 |
| 8758 | 0610007P14Rik | 58520  | 12-:87156407-87165495   |
| 8759 | F8            | 14069  | X-:72418068-72625380    |
| 8760 | Tpcn1         | 252972 | 5-:120986107-121038658  |
| 8761 | Sit1          | 54390  | 4-:43494954-43496557    |
| 8762 | Lca5          | 75782  | 9-:83284961-83334705    |
| 8763 | Trpv4         | 63873  | 5-:115072163-115108396  |
| 8764 | Mylk3         | 213435 | 8-:87848351-87876829    |
| 8765 | MMT00037007   |        |                         |
| 8766 | Irs3          | 16369  | 5-:138084255-138086955  |
| 8767 | Rgl2          | 19732  | 17+:34066910-34074340   |
| 8768 | Slc25a2       | 83885  | 18-:37734819-37798128   |
| 8769 | Cenpk         | 60411  | 13+:105019467-105039695 |
| 8770 | Cpxm2         | 55987  | 7-:139235576-139346296  |

|      |               |        |                          |
|------|---------------|--------|--------------------------|
| 8771 | Foxr1         | 382074 | 9-:44241864-44243735     |
| 8772 | MMT00042479   |        | X-:65572813-65573103     |
| 8773 | MMT00027093   |        | 14-:93593417-93594940    |
| 8774 | Klf12         | 16597  | 14-:100273195-100548990  |
| 8775 | Topbp1        | 235559 | 9+ :103208426-103252755  |
| 8776 | Aox3          | 71724  | 1+ :58169979-58257289    |
| 8777 | 1700028K03Rik | 76421  | 5+ :107963728-107977396  |
| 8778 | Rnpepl1       | 108657 | 1+ :94807645-94817416    |
| 8779 | Opn5          | 353344 | 17-:42713186-42733682    |
| 8780 | Ndufb3        | 66495  | 1+ :58643442-58652792    |
| 8781 | Acpp          | 56318  | 9- :104202630-104239998  |
| 8782 | ENSMUSG000000 | 791319 | 3- :55181377-55195964    |
| 8783 | Zfyve16       | 218441 | 13-:93257085-93300754    |
| 8784 | Hgd           | 15233  | 16+ :37580306-37632104   |
| 8785 | Tbx15         | 21384  | 3+ :99057793-99158182    |
| 8786 | Rmnd1         | 66084  | 10+ :5942553-5943313     |
| 8787 | Sdf2l1        | 64136  | 16-:17130234-17132416    |
| 8788 | Olf1r53       | 258962 | 7+ :147837879-147838816  |
| 8789 | MMT00059186   |        | 10+ :101922990-101923547 |
| 8790 | Galnt2        | 108148 | 8+ :126755425-126867361  |
| 8791 | Sectm1a       | 209588 | 11-:120928716-120942420  |
| 8792 | Bop1          | 12181  | 15-:76283425-76307699    |
| 8793 | EG621100      | 621100 | 11+ :101304038-101306831 |
| 8794 | 1500011B03Rik | 66236  | 5- :115258209-115263936  |
| 8795 | EG629966      | 629966 | 11-:111474281-111542366  |
| 8796 | Pgr           | 18667  | 9+ :8900460-8965153      |
| 8797 | Snrk          | 20623  | 9+ :122041019-122078816  |
| 8798 | Tacr2         | 21337  | 10+ :61715185-61728035   |
| 8799 | Ccrl2         | 54199  | 9- :110957338-110959703  |
| 8800 | Rnf213        | 629974 | 11+ :119313824-119348731 |
| 8801 | Nlrp10        | 244202 | 7- :116067325-116073665  |
| 8802 | Brd1          | 223770 | 15-:88517464-88564662    |
| 8803 | MMT00080648   |        | 10+ :56217067-56217903   |
| 8804 | Usp46         | 69727  | 5- :74397825-74464442    |
| 8805 | Gltd1         | 71103  | 2- :25639458-25651123    |
| 8806 | Olf1r127      | 258374 | 17+ :38040492-38041462   |
| 8807 | Ankrd56       | 78088  | 5- :93470154-93473980    |
| 8808 | RP23-136K12.4 | 19062  | 11+ :75444489-75462373   |
| 8809 | Tgfb2         | 21813  | 9- :115996815-115998095  |
| 8810 | ENSMUSG000000 | 378466 | 8- :71894781-71897808    |
| 8811 | MMT00036449   |        | 3- :139779672-139780881  |
| 8812 | Zfp637        | 232337 | 6+ :117784463-117795789  |
| 8813 | 5430413K10Rik | 433492 | 2+ :154132916-154137239  |
| 8814 | Kera          | 16545  | 10+ :97069842-97076321   |
| 8815 | Mx1           | 17857  | 16-:97668643-97684512    |
| 8816 | Nfkb1a        | 18035  | 12-:56590847-56593570    |
| 8817 | Ptpn1         | 19246  | 2+ :167757865-167802467  |
| 8818 | MMT00005552   |        | 14+ :16742939-16746038   |
| 8819 | 2610204K14Rik | 67148  | 7+ :88907838-88914376    |
| 8820 | Cd200         | 17470  | 16-:45392358-45400416    |
| 8821 | Ank1          | 11733  | 8+ :24168746-24260968    |



|      |               |           |                         |
|------|---------------|-----------|-------------------------|
| 8822 | Galnt14       | 233733    | 7-:118922826-118923004  |
| 8823 | Smarcc2       | 68094     | 10-:127926395-127927193 |
| 8824 | Slc25a18      | 71803     | 6+:120734387-120743659  |
| 8825 | 4930455F23Rik | 74895     | 1+:166205727-166217975  |
| 8826 | 4933406C10Rik | 74076     | 12-:33609822-33638650   |
| 8827 | Nudt15        | 214254    | 14-:73923099-73948054   |
| 8828 | Slc30a2       | 230810    | 4+:133899201-133908442  |
| 8829 | Kndc1         | 76484     | 7+:147113581-147127435  |
| 8830 | MMT00081195   |           | 1-:7126278-7126658      |
| 8831 | Ppp1r3e       | 105651    | 14-:55494434-55496289   |
| 8832 | Tspyl3        | 241732    | 2-:153050049-153051016  |
| 8833 | 8030451F13Rik | 109272    | 10-:87981029-88067768   |
| 8834 | Lrrc4b        | 272381    | 7+:51712458-51718685    |
| 8835 | MMT00019528   |           | 3-:93961560-93962631    |
| 8836 | Zmym5         | 219105    | 14-:57412164-57416618   |
| 8837 | MMT00026538   | 544896    | 12-:114811134-115097665 |
| 8838 | 1700121N20Rik | 76639     | 12-:107680863-107685878 |
| 8839 | MMT00002660   |           | 6-:44744424-44744757    |
| 8840 | Tmem18        | 211986    | 12+:31269324-31276083   |
| 8841 | Kif17         | 16559     | 4+:137818417-137857341  |
| 8842 | Snf1lk2       | 235344    | 9-:50700904-50817178    |
| 8843 | Eil2          | 192657    | 13+:75899385-75909666   |
| 8844 | 2310037I24Rik | 69612     | 15-:98349240-98364664   |
| 8845 | 9430028L06Rik | 225617    | 18-:63169868-63267784   |
| 8846 | P2ry2         | 18442     | 7-:108145784-108160488  |
| 8847 | Cpe           | 12876     | 8-:67071362-67076365    |
| 8848 | Tes3-ps       | 54339     | 13+:49589776-49590796   |
| 8849 | Cachd1        | 320508    | 4+:100537582-100677150  |
| 8850 | Olfr157       | 100040268 | 4-:43847623-43849389    |
| 8851 | Pdcd4         | 18569     | 19+:53977958-54004340   |
| 8852 | Ndufa3        | 66091     | 7+:3568974-3571763      |
| 8853 | Ccdc103       | 73293     | 11+:102746482-102748045 |
| 8854 | Stk22s1       | 22116     | 7+:52198630-52213403    |
| 8855 | Psph          | 100678    | 5-:130271440-130285077  |
| 8856 | Npepps        | 19155     | 11-:97068246-97141877   |
| 8857 | Rab3gap2      | 98732     | 1+:187028120-187110624  |
| 8858 | MMT00046222   |           | 10-:39609828-39618820   |
| 8859 | Zdhhc12       | 66220     | 2-:29946470-29949142    |
| 8860 | Prkab2        | 108097    | 3+:97462233-97477736    |
| 8861 | Pkd1l2        | 76645     | 8-:119574929-119580355  |
| 8862 | Dpp10         | 269109    | 1-:125230309-125382552  |
| 8863 | Defcr5        | 13239     | 8+:22437117-22437959    |
| 8864 | MMT00046672   |           | 7-:112561228-112562492  |
| 8865 | Josd3         | 75316     | 9+:15110703-15116548    |
| 8866 | Angptl7       | 654812    | 4-:147870264-147874570  |
| 8867 | Shcbp1        | 20419     | 8-:4735979-4779534      |
| 8868 | Nfkbil2       | 72749     | 15-:76456665-76470364   |
| 8869 | Mtap9         | 213582    | 3+:82162117-82182930    |
| 8870 | Arid3a        | 13496     | 10+:79393377-79417448   |
| 8871 | Gm443         | 242891    | 5+:25022106-25023795    |
| 8872 | MMT00018546   |           | 12-:13442893-13444041   |

|      |               |        |                         |
|------|---------------|--------|-------------------------|
| 8873 | MMT00082610   |        | 1+:23486377-23487429    |
| 8874 | MMT00058494   |        | 2-:166912685-166913277  |
| 8875 | Wnt5a         | 22418  | 14+:29318741-29336126   |
| 8876 | Olf1107       | 258841 | 2-:86911351-86912289    |
| 8877 | 1200014M14Rik | 67463  | 13+:97158320-97185524   |
| 8878 | Kalrn         | 545156 | 16-:33975014-34392195   |
| 8879 | EG433885      | 433885 | 5+:49936904-49944507    |
| 8880 | Sox4          | 20677  | 13-:29043491-29045550   |
| 8881 | Olf1462       | 258406 | 11-:87702461-87707424   |
| 8882 | Adarb1        | 110532 | 10-:76757181-76822480   |
| 8883 | Mtap4         | 17758  | 9+:109833963-109986450  |
| 8884 | Plekho2       | 102595 | 9-:65402192-65420938    |
| 8885 | Gm590         | 235634 | 9-:110816885-110819366  |
| 8886 | Max           | 17187  | 12-:78038255-78063172   |
| 8887 | Dpep1         | 13479  | 8+:125710141-125725124  |
| 8888 | Lama4         | 16775  | 10+:38685373-38829988   |
| 8889 | Dnahc6        | 330355 | 6-:72967598-73109292    |
| 8890 | MMT00013105   |        |                         |
| 8891 | MMT00071061   |        | 13-:25673992-25675286   |
| 8892 | Arid3c        | 550619 | 4-:41672777-41677297    |
| 8893 | Slc22a18      | 18400  | 7+:150659693-150685227  |
| 8894 | Api5          | 11800  | 2-:94251890-94278230    |
| 8895 | Rab4b         | 19342  | 7-:27953451-27963902    |
| 8896 | Fasn          | 14104  | 11-:120668388-120685406 |
| 8897 | BC062115      | 408062 | 10+:81523931-81614754   |
| 8898 | Tekt5         | 70426  | 16-:10358044-10395512   |
| 8899 | Pnlip         | 69060  | 19+:58744854-58748574   |
| 8900 | Olf1307       | 258610 | 7-:93469534-93484904    |
| 8901 | Adamts10      | 224697 | 17+:33661165-33690726   |
| 8902 | Aldh3b1       | 67689  | 19-:3913492-3923904     |
| 8903 | Ssbp3         | 72475  | 4+:106584330-106722297  |
| 8904 | Trerf1        | 224829 | 17+:47497941-47498909   |
| 8905 | Trim67        | 330863 | 8+:127317710-127352161  |
| 8906 | MMT00004929   |        | 14-:58668346-58668711   |
| 8907 | Npr2          | 230103 | 4+:43644807-43664301    |
| 8908 | Wwc2          | 52357  | 8-:48912948-49075926    |
| 8909 | Ryr1          | 20190  | 7-:29788362-29805289    |
| 8910 | Ube4a         | 140630 | 9-:44754735-44773595    |
| 8911 | Ces6          | 102022 | 8+:107257927-107265373  |
| 8912 | 1520401A03Rik | 320309 | 17-:23841455-23844695   |
| 8913 | H2afz         | 51788  | 3+:137527565-137529782  |
| 8914 | Sfrs14        | 234373 | 8+:72766517-72787411    |
| 8915 | Nob1          | 67619  | 8-:109936387-109948938  |
| 8916 | Hps6          | 20170  | 19+:46078115-46080533   |
| 8917 | MMT00078736   |        | 7+:130153625-130278539  |
| 8918 | Prox2         | 73422  | 12-:86428858-86436573   |
| 8919 | BC026374      | 234677 | 8+:107655699-107674008  |
| 8920 | Nol5a         | 67134  | 2+:130100160-130105048  |
| 8921 | Dcp1b         | 319618 | 6+:119125310-119170322  |
| 8922 | Il10ra        | 16154  | 9-:45061921-45077219    |
| 8923 | Gcnt1         | 14537  | 19-:17403158-17447334   |

|      |               |        |                         |
|------|---------------|--------|-------------------------|
| 8924 | Fat1          | 14107  | 8+:46035567-46038847    |
| 8925 | MMT00026932   |        | 9+:53731827-53732372    |
| 8926 | MMT00044569   |        | 4-:52373697-52375043    |
| 8927 | Olfr1284      | 258379 | 2+:111219158-111220093  |
| 8928 | 4732418C07Rik | 230648 | 4+:115410365-115449931  |
| 8929 | D14Abb1e      | 218850 | 14+:28242017-28296389   |
| 8930 | Nyx           | 236690 | X+:13045262-13064464    |
| 8931 | Arf4          | 11843  | 14+:27457865-27475992   |
| 8932 | C430004E15Rik | 97031  | 2+:25118133-25125512    |
| 8933 | Arpc5         | 67771  | 1+:154613782-154622705  |
| 8934 | Grk6          | 26385  | 13+:55546869-55560938   |
| 8935 | MMT00067043   |        | 10+:30093305-30094323   |
| 8936 | Olfr544       | 257926 | 7-:109632628-109633632  |
| 8937 | Olfr1509      | 57271  | 14+:53070089-53071015   |
| 8938 | Klhdc5        | 232539 | 6+:147040053-147056667  |
| 8939 | MMT00024195   |        | 15-:38505007-38506470   |
| 8940 | MMT00014234   | 330787 | 8+:72186839-72188068    |
| 8941 | Asb4          | 65255  | 6+:5340608-5381045      |
| 8942 | Ncam2         | 17968  | 16+:81201059-81596759   |
| 8943 | Mtl5          | 17771  | 19+:3389378-3407784     |
| 8944 | Cdc14a        | 229776 | 3-:115996635-116126896  |
| 8945 | E030030I06Rik | 319887 | 10-:21868294-21868818   |
| 8946 | 4930463M05Rik | 74947  | 12+:102443927-102444676 |
| 8947 | MMT00024445   |        | 6+:98225937-98227187    |
| 8948 | Onecut3       | 246086 | 10+:79957752-79976890   |
| 8949 | Prkcd         | 18753  | 14-:31408554-31423498   |
| 8950 | Csf2rb        | 12983  | 15+:78156287-78179749   |
| 8951 | Cd97          | 26364  | 8-:86247268-86265068    |
| 8952 | Marco         | 17167  | 1-:122371115-122401661  |
| 8953 | Notch3        | 18131  | 17-:32257837-32303797   |
| 8954 | Obscn         | 380698 | 11-:58807761-58949898   |
| 8955 | Psenen        | 66340  | 7-:31346887-31348168    |
| 8956 | 2310046O06Rik | 78323  | 9+:57385427-57386695    |
| 8957 | Zfp511        | 69752  | 7+:147222272-147226499  |
| 8958 | Gtsf1l        | 68236  | 2-:162912766-162913586  |
| 8959 | Cd209g        | 70192  | 8+:4134775-4137705      |
| 8960 | Nrip3         | 78593  | 7-:116901569-116925059  |
| 8961 | Zcchc12       | 72693  | X+:33735982-33739145    |
| 8962 | Nisch         | 64652  | 14-:31984115-32004736   |
| 8963 | Fxyd4         | 108017 | 6-:117883577-117887353  |
| 8964 | Smad2         | 17126  | 18+:76422091-76464559   |
| 8965 | Ahcy          | 269378 | 2-:154889942-154900128  |
| 8966 | Olfr914       | 258782 | 9+:38414051-38415002    |
| 8967 | Acot12        | 74156  | 13+:91881125-91925753   |
| 8968 | EG545790      | 545790 | 5-:105417892-105418409  |
| 8969 | Spata1        | 70951  | 3-:146120166-146162717  |
| 8970 | MMT00038794   |        | 4-:12057975-12059122    |
| 8971 | Slc18a2       | 214084 | 19+:59335641-59370495   |
| 8972 | MMT00014869   |        | 19+:37944862-37945603   |
| 8973 | Slc29a4       | 243328 | 5+:143178121-143198443  |
| 8974 | Golph3l       | 229593 | 3+:95392945-95421657    |

|      |               |        |                         |
|------|---------------|--------|-------------------------|
| 8975 | C87017        | 97184  | 4-:143184676-143186619  |
| 8976 | Qser1         | 99003  | 2-:104598108-104628258  |
| 8977 | Atpaf1        | 230649 | 4+:115457589-115491486  |
| 8978 | Khdc1a        | 368204 | 1+:21339705-21360925    |
| 8979 | lhpk1         | 27399  | 9+:107949951-107951111  |
| 8980 | Plekhf1       | 72287  | 7-:39005693-39012978    |
| 8981 | Cacna1g       | 12291  | 11-:94269835-94335039   |
| 8982 | Lin28b        | 380669 | 10-:45100996-45205583   |
| 8983 | Olf134        | 258829 | 17+:38312030-38312967   |
| 8984 | Ankrd33       | 208258 | 15+:100946185-100950453 |
| 8985 | Rpap1         | 68925  | 2-:119589697-119613264  |
| 8986 | 1300010M03Rik | 67998  | 11-:100957829-100981138 |
| 8987 | F2            | 14061  | 2-:91465477-91476571    |
| 8988 | 1110007A13Rik | 210711 | 7-:135841702-135883950  |
| 8989 | Gnaq          | 14682  | 19+:16207780-16458245   |
| 8990 | Gm274         | 218304 | 13-:65146086-65153089   |
| 8991 | Itm2c         | 64294  | 1+:87791139-87805263    |
| 8992 | Trfr2         | 50765  | 5+:138011947-138028693  |
| 8993 | Ankk1         | 244859 | 9-:49223291-49230066    |
| 8994 | MMT00015463   |        | X-:129940914-129941649  |
| 8995 | Pxk           | 218699 | 14+:8930756-8997624     |
| 8996 | Timp1         | 21857  | X+:20448164-20451757    |
| 8997 | Apol6         | 71939  | 15+:76875703-76887537   |
| 8998 | Btbd7         | 238386 | 12-:104023455-104024100 |
| 8999 | Pspc1         | 66645  | 14-:57341285-57397153   |
| 9000 | Dhrs2         | 71412  | 14+:55840843-55860272   |
| 9001 | Thsd7a        | 330267 | 6-:12358804-12505726    |
| 9002 | Col24a1       | 71355  | 3+:145171603-145214975  |
| 9003 | 4933404G15Rik | 74066  | 16-:16707706-16718189   |
| 9004 | MMT00022623   |        | 3-:86826857-86827805    |
| 9005 | Mapk1ip1l     | 218975 | 14+:47917964-47936462   |
| 9006 | Paip1         | 218693 | 13+:120238761-120245886 |
| 9007 | MMT00066154   |        |                         |
| 9008 | MMT00066203   | 56304  | 6-:68581959-68582243    |
| 9009 | MMT00077097   |        | 11-:116393054-116394419 |
| 9010 | 8430419L09Rik | 74525  | 6+:135148061-135184310  |
| 9011 | Lrrk2         | 66725  | 15+:91610821-91646457   |
| 9012 | MMT00017112   |        | 8-:74807637-74808055    |
| 9013 | Abhd6         | 66082  | 14+:8835456-8888423     |
| 9014 | Dmrt3         | 240590 | 19+:25685023-25697711   |
| 9015 | Lin28         | 83557  | 4-:133559244-133574731  |
| 9016 | Itih2         | 16425  | 2-:10016217-10052290    |
| 9017 | Tnfrsf14      | 230979 | 4-:154296191-154300771  |
| 9018 | Usp15         | 14479  | 10-:122550299-122633979 |
| 9019 | Hrh3          | 99296  | 2-:179834177-179838927  |
| 9020 | Tmem2         | 83921  | 19+:21867139-21933212   |
| 9021 | Cbln4         | 228942 | 2-:171861732-171867798  |
| 9022 | Plek2         | 27260  | 12-:79989683-80007937   |
| 9023 | Fbxw19        | 235612 | 9-:109381083-109388598  |
| 9024 | Myo19         | 66196  | 11+:84714425-84724728   |
| 9025 | C030011O14Rik | 215708 | 3-:151937846-151980701  |

|      |               |        |                         |
|------|---------------|--------|-------------------------|
| 9026 | Cep135        | 381644 | 5+:77030375-77075718    |
| 9027 | EG382884      | 382884 | 14-:46177305-46198510   |
| 9028 | Unc45a        | 101869 | 7-:87470180-87485094    |
| 9029 | MMT00068959   |        | 7+:20059659-20066705    |
| 9030 | OTTMUSG000000 | 545693 | 4+:143089394-143091890  |
| 9031 | Gpr18         | 110168 | 14-:122310652-122315056 |
| 9032 | Jakmip2       | 76217  | 18-:43691062-43750330   |
| 9033 | 1810013L24Rik | 69053  | 16+:8830190-8859008     |
| 9034 | Trmt12        | 68260  | 15+:58704228-58708333   |
| 9035 | MMT00023699   |        |                         |
| 9036 | Olfr670       | 384703 | 7-:112108306-112109046  |
| 9037 | Olfr368       | 258371 | 2+:37187268-37188250    |
| 9038 | Gnb1          | 14688  | 4+:154901522-154931920  |
| 9039 | MMT00067295   |        | 12-:104264325-104266622 |
| 9040 | Olfr1499      | 258792 | 19-:13889135-13890078   |
| 9041 | Nlrp3         | 216799 | 11+:59355086-59380453   |
| 9042 | Prrg4         | 228413 | 2-:104672108-104689928  |
| 9043 | Nat2          | 17961  | 8+:70024922-70026226    |
| 9044 | MMT00014358   |        | 4+:72203729-72204031    |
| 9045 | Prkar2a       | 19087  | 9+:108594676-108652766  |
| 9046 | 4921537P18Rik | 70952  | 8+:28558141-28605422    |
| 9047 | Defb6         | 116746 | 8+:19225477-19228207    |
| 9048 | Ptpn13        | 19249  | 5+:103891151-104027370  |
| 9049 | 1810046J19Rik | 103742 | 11-:98299038-98300284   |
| 9050 | Msln          | 56047  | 17-:25885558-25891272   |
| 9051 | Kcnj2         | 16518  | 11+:110927548-110934943 |
| 9052 | A730037C10Rik | 320604 | 3+:54943958-54960979    |
| 9053 | Grm2          | 108068 | 9-:106546867-106556619  |
| 9054 | Rdh7          | 54150  | 10-:127321086-127325755 |
| 9055 | Rnf165        | 225743 | 18-:77701622-77743857   |
| 9056 | Capn9         | 73647  | 8+:127100044-127142407  |
| 9057 | Spp1          | 20750  | 5+:104865210-104870062  |
| 9058 | EG629024      | 629024 | X-:20889337-20911854    |
| 9059 | Wdr42a        | 98193  | 1+:174078210-174126526  |
| 9060 | Prom1         | 19126  | 5-:44384861-44492920    |
| 9061 | Gdap1l1       | 228858 | 2+:163264213-163279687  |
| 9062 | MMT00032325   | 620417 | 10+:9403668-9409352     |
| 9063 | MMT00010135   |        | 1-:108916761-108921902  |
| 9064 | Ttc12         | 235330 | 9-:49256031-49294315    |
| 9065 | Reep4         | 72549  | 14+:70945050-70948740   |
| 9066 | 2210020M01Rik | 66528  | 11+:115761258-115767575 |
| 9067 | Tra2a         | 101214 | 6-:49193925-49214044    |
| 9068 | Oip5          | 70645  | 2-:119435357-119444206  |
| 9069 | OTTMUSG000000 | 628923 | X+:75110096-75115370    |
| 9070 | Zfyve19       | 72008  | 2+:119034692-119042785  |
| 9071 | Plekha3       | 83435  | 2+:76513578-76533871    |
| 9072 | MMT00026795   |        | 9-:38294573-38341387    |
| 9073 | MMT00079700   |        | 13-:85757466-86004750   |
| 9074 | MMT00003693   |        | 14+:77730240-77751187   |
| 9075 | MMT00018252   |        | 1-:186434159-186453422  |
| 9076 | Ttbk2         | 140810 | 2-:120576072-120675903  |

|      |               |        |                         |
|------|---------------|--------|-------------------------|
| 9077 | Cnpy4         | 66455  | 5+:138628715-138635105  |
| 9078 | Abpz          | 233090 | 7-:34522212-34524322    |
| 9079 | Gng8          | 14709  | 7+:17480292-17480711    |
| 9080 | MMT00059751   |        | 3-:67410193-67411778    |
| 9081 | EG229746      | 229746 | 3+:112105283-112106168  |
| 9082 | Nrarp         | 67122  | 2+:25036542-25038845    |
| 9083 | MMT00011564   |        | 3-:100113318-100114295  |
| 9084 | MMT00002596   |        | 6+:47314860-47354360    |
| 9085 | MMT00056875   |        | 5+:56015371-56016830    |
| 9086 | Zfp652        | 268469 | 11+:95610313-95626488   |
| 9087 | Wdr63         | 242253 | 3-:145703485-145771002  |
| 9088 | Ppp4c         | 56420  | 7-:133929482-133936010  |
| 9089 | Sh3bgrl2      | 212531 | 9+:83441935-83494084    |
| 9090 | Pm20d1        | 212933 | 1+:133693979-133700704  |
| 9091 | 2900024C23Rik | 67266  | 5-:108338221-108416058  |
| 9092 | Akp3          | 11648  | 1+:89021582-89024485    |
| 9093 | Taf4a         | 228980 | 2-:179646857-179710159  |
| 9094 | MMT00012980   |        | 11-:6680585-6683244     |
| 9095 | Qsox1         | 104009 | 1-:157625953-157659937  |
| 9096 | B3gat1        | 76898  | 9+:26559088-26565566    |
| 9097 | Endod1        | 71946  | 9-:14158449-14185414    |
| 9098 | Rhox9         | 104384 | X-:35252275-35254947    |
| 9099 | Echs1         | 93747  | 7-:147291607-147302353  |
| 9100 | Ms4a6c        | 73656  | 19+:11543888-11555816   |
| 9101 | MMT00006945   |        | 3+:92741602-92741996    |
| 9102 | Tfpt          | 69714  | 7-:3571926-3581486      |
| 9103 | Igh-VJ558     | 16061  | 12-:115920819-116089829 |
| 9104 | Cobra1        | 58202  | 2-:25055236-25066901    |
| 9105 | Sars          | 20226  | 3-:108229343-108248184  |
| 9106 | 4931429I11Rik | 70989  | 9-:40702931-40769108    |
| 9107 | Lrrc20        | 216011 | 10+:60938561-61043655   |
| 9108 | Cyb5d1        | 327951 | 11-:69207139-69209141   |
| 9109 | BC089597      | 216454 | 10+:127303543-127314374 |
| 9110 | Hoxd12        | 15432  | 2+:74513143-74514109    |
| 9111 | BC038286      | 227298 | 1+:75139514-75144481    |
| 9112 | MMT00022850   | 629924 | 11-:99701288-99701692   |
| 9113 | Ubx5          | 67586  | 4+:133658517-133682691  |
| 9114 | Strc          | 140476 | 2-:121189464-121206676  |
| 9115 | Dhx40         | 67487  | 11-:86583255-86621139   |
| 9116 | M6prbp1       | 66905  | 17-:56418384-56429934   |
| 9117 | Tmem185b      | 226351 | 1+:121422743-121424801  |
| 9118 | Hspb6         | 243912 | 7+:31338337-31340463    |
| 9119 | Ptprg         | 19270  | 14+:12386525-13070441   |
| 9120 | Atp2c1        | 235574 | 9-:105313692-105372478  |
| 9121 | Mtap7d3       | 320923 | X-:54068701-54072116    |
| 9122 | Sepw1         | 20364  | 7-:16502558-16507675    |
| 9123 | Cdc42se1      | 57912  | 3+:95032669-95040331    |
| 9124 | BC067068      | 216292 | 10-:105263194-105278375 |
| 9125 | Ppil3         | 70225  | 1-:58487840-58502330    |
| 9126 | Mapk1         | 26413  | 16+:17045304-17047542   |
| 9127 | Mtfmt         | 69606  | 9+:65283588-65300209    |

|      |               |        |                         |
|------|---------------|--------|-------------------------|
| 9128 | Nxph1         | 18231  | 6+:8859959-8937962      |
| 9129 | Aox4          | 71872  | 1+:58267313-58325340    |
| 9130 | Centa2        | 216991 | 11+:79967616-79992949   |
| 9131 | Ranbp3l       | 223332 | 15+:8917966-8951507     |
| 9132 | Cyp7a1        | 13122  | 4-:6195359-6202718      |
| 9133 | Scrt1         | 170729 | 15-:76348781-76352362   |
| 9134 | Harbi1        | 51897  | 2-:91514782-91550733    |
| 9135 | Mbd6          | 110962 | 10-:126719013-126720699 |
| 9136 | MMT00009391   | 544749 | 10+:128748564-128755512 |
| 9137 | Hunk          | 26559  | 16+:90386641-90499796   |
| 9138 | Cox10         | 70383  | 11-:63807386-63892969   |
| 9139 | Osbpl9        | 100273 | 4-:108734259-108775177  |
| 9140 | EG623166      | 623166 | 9+:98743005-98744062    |
| 9141 | MMT00028469   |        |                         |
| 9142 | Cacng4        | 54377  | 11-:107596093-107655778 |
| 9143 | Akr1c14       | 105387 | 13+:4058836-4089663     |
| 9144 | Sc1t1         | 67161  | 3-:41430634-41546433    |
| 9145 | V1rh14        | 171273 | 13-:23205703-23206599   |
| 9146 | Ergic1        | 67458  | 17+:26698503-26793874   |
| 9147 | Il17rd        | 171463 | 14+:27880583-27901592   |
| 9148 | MMT00042539   |        | 11-:119624665-119640686 |
| 9149 | Ccdc15        | 245902 | 9-:37150020-37155974    |
| 9150 | Rab22a        | 19334  | 2+:173485361-173530173  |
| 9151 | Fhl2          | 14200  | 1-:43179922-43220695    |
| 9152 | Indo          | 15930  | 8-:25694614-25707481    |
| 9153 | Suv39h2       | 64707  | 2-:3375895-3392236      |
| 9154 | Tfg           | 21787  | 16-:56690446-56717467   |
| 9155 | Olf982        | 258853 | 9+:39881881-39882846    |
| 9156 | Klra23        | 79410  | 6-:130253385-130256445  |
| 9157 | Txnrd1        | 50493  | 10+:82321923-82360456   |
| 9158 | Pde9a         | 18585  | 17+:31523223-31613101   |
| 9159 | MMT00004659   |        | 14+:25177580-25177796   |
| 9160 | 1700026L06Rik | 69987  | 2-:28547598-28555257    |
| 9161 | Mrpl17        | 27397  | 7-:112958097-112959581  |
| 9162 | Fhad1         | 329977 | 4-:141558305-141570987  |
| 9163 | MMT00066243   |        | 2+:28332608-28333637    |
| 9164 | Uba5          | 66663  | 9-:103949844-103965449  |
| 9165 | Nnat          | 18111  | 2+:157385858-157388239  |
| 9166 | 2310067B10Rik | 71947  | 11+:115638561-115660408 |
| 9167 | Vim           | 22352  | 2+:13495974-13504403    |
| 9168 | Eif5          | 217869 | 12+:112776303-112784962 |
| 9169 | Zfp41         | 22701  | 15+:75447147-75477861   |
| 9170 | Cish          | 12700  | 9-:107194899-107195627  |
| 9171 | Il27ra        | 50931  | 8-:86554229-86566442    |
| 9172 | Tmem131       | 56030  | 1-:36849038-36996032    |
| 9173 | Arhgap15      | 76117  | 2+:43919268-44243139    |
| 9174 | Olf1213       | 258900 | 2-:88813112-88814046    |
| 9175 | MMT00081793   |        | 1+:10795325-10796347    |
| 9176 | Dach2         | 93837  | X+:110411865-110949502  |
| 9177 | Rpl37         | 67281  | 15+:5066644-5069140     |
| 9178 | Med13         | 327987 | 11-:86159360-86169010   |

|      |               |        |                        |
|------|---------------|--------|------------------------|
| 9179 | Gtl3          | 14894  | 8-:97944151-97958692   |
| 9180 | MMT00014166   |        | 19-:24363491-24363741  |
| 9181 | 1700060H10Rik | 73390  | 10+:55826735-55836676  |
| 9182 | MMT00053423   |        | 11-:70870674-70871471  |
| 9183 | Glrx3         | 30926  | 7+:144629332-144659865 |
| 9184 | Olf1370       | 258528 | 13-:21164219-21165096  |
| 9185 | MMT00019531   |        | 1-:64844975-64865381   |
| 9186 | EG333563      | 333563 | X-:103501900-103505115 |
| 9187 | MMT00031477   | 381346 | 2+:4863197-4863737     |
| 9188 | V1rc5         | 113862 | 6+:57159851-57160754   |
| 9189 | Dmgdh         | 74129  | 13+:94444392-94522778  |
| 9190 | Rbmxl2        | 76572  | 7+:114352930-114354436 |
| 9191 | Lbxcor1       | 207667 | 9-:62986004-62987935   |
| 9192 | MMT00042303   |        | 7-:17279167-17292589   |
| 9193 | Ccdc109a      | 215999 | 10-:59062612-59063441  |
| 9194 | Dynlrb2       | 75465  | 8+:119031359-119039814 |
| 9195 | Sub1          | 20024  | 15-:11911622-11925746  |
| 9196 | RP23-330D3.5  | 664987 | 2-:174887051-174889489 |
| 9197 | Slc13a5       | 237831 | 11-:72056878-72061327  |
| 9198 | EG668103      | 668103 | X-:91162043-91167301   |
| 9199 | Xlr5c         | 27084  | X-:70530535-70535854   |
| 9200 | Sdc1          | 20969  | 12+:8778201-8800491    |
| 9201 | Zkscan14      | 67235  | 5-:145955833-145962707 |
| 9202 | Fbxo47        | 72973  | 11-:97702185-97726481  |
| 9203 | Slc32a1       | 22348  | 2+:158436936-158441398 |
| 9204 | Olf1341       | 258852 | 4+:118382013-118382939 |
| 9205 | 4921532D01Rik | 70961  | 14-:64472808-64479027  |
| 9206 | A230083H22Rik | 353211 | 19+:17198260-17282817  |
| 9207 | Ddx11         | 320209 | 17+:66472926-66500068  |
| 9208 | MMT00038995   |        | 6-:102886170-102887552 |
| 9209 | Sf3a3         | 75062  | 4+:124392104-124409659 |
| 9210 | Lmo3          | 109593 | 6-:138314108-138375717 |
| 9211 | Olf1711       | 259037 | 7-:114114912-114115856 |
| 9212 | Pde6d         | 18582  | 1-:88439590-88479035   |
| 9213 | Osgin1        | 71839  | 8+:121961044-121970154 |
| 9214 | Zyg11b        | 414872 | 4-:107905168-107973645 |
| 9215 | Tnni1         | 21952  | 1+:137701629-137706310 |
| 9216 | Olf1225       | 258893 | 2-:89010433-89011367   |
| 9217 | Lrrc34        | 71827  | 3-:30523190-30546793   |
| 9218 | Npy5r         | 18168  | 8-:69203865-69211993   |
| 9219 | Mad2l1bp      | 66591  | 17-:46284337-46290485  |
| 9220 | E430004N04Rik | 210757 | 10+:28388162-28583416  |
| 9221 | Ilf2          | 67781  | 3+:90280078-90291653   |
| 9222 | MMT00005895   |        | 6+:7144561-7274017     |
| 9223 | Tnpo1         | 238799 | 13-:99611921-99696341  |
| 9224 | MMT00013510   | 227885 | 2+:50765616-50767367   |
| 9225 | MMT00001190   |        | 15-:82442288-82443404  |
| 9226 | Aim2          | 383619 | 1+:175382956-175395350 |
| 9227 | 5730470L24Rik | 66641  | 3+:102799667-102806904 |
| 9228 | Mccc1         | 72039  | 3-:35882647-35892935   |
| 9229 | Ggnbp2        | 217039 | 11-:84645861-84683653  |



|      |               |        |                         |
|------|---------------|--------|-------------------------|
| 9230 | 1700027N10Rik | 75564  | 17-:46266225-46281147   |
| 9231 | H2-M2         | 14990  | 17-:37618416-37620191   |
| 9232 | 4930430A15Rik | 67575  | 2-:111033410-111069755  |
| 9233 | Acss3         | 380660 | 10-:106374199-106425965 |
| 9234 | Arf1          | 11840  | 11-:59025627-59041716   |
| 9235 | Tnfrsf12a     | 27279  | 17-:23812413-23814411   |
| 9236 | Foxh1         | 14106  | 15-:76498738-76500303   |
| 9237 | Wdr17         | 244484 | 8-:55714974-55733780    |
| 9238 | Zfp786        | 330301 | 6-:47769541-47785897    |
| 9239 | Fiz1          | 23877  | 7-:4958661-4965813      |
| 9240 | Olfr401       | 258701 | 11+:73934792-73935739   |
| 9241 | 4930417M19Rik | 320571 | 4+:43318589-43386042    |
| 9242 | MMT00033212   |        | X-:73216791-73218523    |
| 9243 | Olfr352       | 258942 | 2+:36725087-36726034    |
| 9244 | Rabif         | 98710  | 1+:136391236-136404459  |
| 9245 | Zc3h3         | 223642 | 15-:75587044-75609986   |
| 9246 | V1re5         | 171228 | 17+:20639262-20640157   |
| 9247 | Dock5         | 68813  | 14-:68373452-68454500   |
| 9248 | Bcl11b        | 58208  | 12-:109153432-109241431 |
| 9249 | Zdhhc3        | 69035  | 9-:122987157-123022296  |
| 9250 | Sec16a        | 227648 | 2-:26264952-26296186    |
| 9251 | P2ry1         | 18441  | 3+:60807332-60810924    |
| 9252 | Slc22a2       | 20518  | 17+:12777054-12821353   |
| 9253 | Metap1        | 66559  | 2+:71291394-71363243    |
| 9254 | Cyp2j12       | 242546 | 4-:95768722-95807733    |
| 9255 | Emp3          | 13732  | 7-:53173433-53176774    |
| 9256 | Psmc4         | 19185  | 3-:94836626-94846467    |
| 9257 | MMT00021093   |        | 11-:83458548-83459123   |
| 9258 | P4ha1         | 18451  | 10+:58799791-58836050   |
| 9259 | Cln6          | 26372  | 4-:147380592-147412876  |
| 9260 | Cmtm6         | 67213  | 9+:114640320-114658461  |
| 9261 | MMT00057172   |        | 2+:106851082-106851890  |
| 9262 | MMT00053633   |        | 3-:45578522-45580136    |
| 9263 | Fbxo27        | 233040 | 7+:29383177-29484354    |
| 9264 | MMT00071053   |        | 10-:41098780-41100444   |
| 9265 | Zfp157        | 72154  | 5+:138882704-138900293  |
| 9266 | MMT00023660   |        |                         |
| 9267 | Uqcrh         | 66576  | 4-:115739569-115747653  |
| 9268 | Vps33a        | 77573  | 5-:123980755-124023007  |
| 9269 | Ptprq         | 237523 | 10-:106954844-107156535 |
| 9270 | MMT00072976   |        |                         |
| 9271 | Hspa12b       | 72630  | 2+:130953175-130971178  |
| 9272 | Btbd11        | 74007  | 10+:85009186-85123034   |
| 9273 | MMT00057004   |        | 16-:55325603-55325682   |
| 9274 | 1700028E11Rik | 70002  | 13+:62016030-62034220   |
| 9275 | Aass          | 30956  | 6-:23022501-23072733    |
| 9276 | MMT00008480   |        | 8-:44814581-44815307    |
| 9277 | Ptprh         | 545902 | 7-:4500950-4549782      |
| 9278 | Clec2i        | 93675  | 6+:128837631-128846864  |
| 9279 | MMT00066808   |        | 10+:54844229-54844592   |
| 9280 | Vps13c        | 320528 | 9+:67688233-67843934    |

|      |               |        |                         |
|------|---------------|--------|-------------------------|
| 9281 | Rnf122        | 68867  | 8+:32222313-32240138    |
| 9282 | Pcdhb13       | 93884  | 18+:37602224-37604613   |
| 9283 | Dennd1a       | 227801 | 2-:37654515-38142904    |
| 9284 | MMT00028928   |        | 12+:97530592-97531244   |
| 9285 | Mtcp1         | 17763  | X-:72650203-72661882    |
| 9286 | Zufsp         | 72580  | 10-:33638949-33669304   |
| 9287 | Trpm3         | 226025 | 19+:23066780-23067091   |
| 9288 | 4921530L21Rik | 66732  | 14+:96280484-96281994   |
| 9289 | MMT00068427   |        | 18-:90112821-90113394   |
| 9290 | Cd1d1         | 12479  | 3-:86799759-86803259    |
| 9291 | Usp52         | 103135 | 10+:127755857-127758413 |
| 9292 | 4-Mar         | 381270 | 1-:72493698-72500173    |
| 9293 | Pcdhb19       | 93890  | 18+:37656807-37659487   |
| 9294 | BC023829      | 236848 | X-:67713757-67730357    |
| 9295 | G6pd2         | 14380  | 5+:62200122-62201663    |
| 9296 | Nfic          | 18029  | 10-:80863673-80889857   |
| 9297 | Zeb1          | 21417  | 18+:5591888-5774908     |
| 9298 | MMT00010260   |        | 11-:121026773-121028707 |
| 9299 | MMT00001758   |        |                         |
| 9300 | MMT00021968   |        | 18-:15080483-15081679   |
| 9301 | MMT00050551   |        | 3-:62974251-62977961    |
| 9302 | Ctsr          | 56835  | 13-:61260577-61265549   |
| 9303 | Tesp1         | 21755  | 1+:34555274-34559907    |
| 9304 | Al449175      | 234362 | 8-:72134551-72149422    |
| 9305 | Zfp292        | 30046  | 4-:34752099-34758805    |
| 9306 | Spon1         | 233744 | 7+:120909653-121184873  |
| 9307 | Prpf4         | 70052  | 4+:62069832-62085553    |
| 9308 | MMT00054569   |        | 9-:44418453-44418806    |
| 9309 | MMT00035904   |        | 10+:22063211-22065941   |
| 9310 | Pdrg1         | 68559  | 2-:152834624-152841127  |
| 9311 | Lrrc27        | 76612  | 7+:146398908-146414909  |
| 9312 | Hyal5         | 74468  | 6+:24825942-24841959    |
| 9313 | Samd4         | 74480  | 14+:47635951-47723354   |
| 9314 | Serpina7      | 331535 | X-:135614318-135618240  |
| 9315 | Gins2         | 272551 | 8-:123102895-123112988  |
| 9316 | 9530066K23Rik | 214112 | 11-:45963649-45979863   |
| 9317 | MMT00063086   |        | 3-:14428491-14512010    |
| 9318 | C79267        | 212632 | 4+:139130633-139172985  |
| 9319 | Uqcrfs1       | 66694  | 13-:30632180-30637189   |
| 9320 | Rnf31         | 268749 | 14+:56210683-56222511   |
| 9321 | Vsx2          | 12677  | 12+:85910892-85936408   |
| 9322 | Relt          | 320100 | 7-:107994359-108001637  |
| 9323 | MMT00059222   |        | 17-:36385585-36386060   |
| 9324 | Egfl6         | 54156  | X-:162960938-163023644  |
| 9325 | C130060K24Rik | 243407 | 6+:65331097-65407013    |
| 9326 | Pgm5          | 226041 | 19-:24757505-24936279   |
| 9327 | Eif2s1        | 13665  | 12+:79967593-79986306   |
| 9328 | Gpx4          | 625249 | 10+:79516414-79519182   |
| 9329 | Serpina3m     | 20717  | 12+:105625401-105632468 |
| 9330 | Tapt1         | 231225 | 5-:44566401-44617826    |
| 9331 | Zbtb6         | 241322 | 2-:37283376-37286368    |

|      |               |        |                         |
|------|---------------|--------|-------------------------|
| 9332 | Fsd1          | 240121 | 17+:56127164-56136303   |
| 9333 | MMT00074561   |        | 1+:183212164-183214022  |
| 9334 | Syncrip       | 56403  | 9-:88350488-88375597    |
| 9335 | Chac2         | 68044  | 11-:30876723-30886334   |
| 9336 | Pomp          | 66537  | 5+:148672203-148687354  |
| 9337 | 1500010J02Rik | 68964  | 11+:68829592-68837709   |
| 9338 | Zfp313        | 81018  | 2+:167340879-167341664  |
| 9339 | Tnmd          | 64103  | X+:130385600-130400058  |
| 9340 | Cdc42ep2      | 104252 | 19-:5917559-5924803     |
| 9341 | Sephs1        | 109079 | 2+:4802813-4830569      |
| 9342 | EG628855      | 628855 | X+:18406327-18498338    |
| 9343 | lldr1         | 106347 | 16+:36694123-36726827   |
| 9344 | Tmem123       | 71929  | 9+:7764127-7794330      |
| 9345 | D19Ertd652e   | 70806  | 19-:47811808-47820093   |
| 9346 | Zfp112        | 57745  | 7+:24897332-24912971    |
| 9347 | Tcp1          | 21454  | 17+:13109379-13117431   |
| 9348 | Hspd1         | 15510  | 1-:55135126-55144638    |
| 9349 | Il6ra         | 16194  | 3-:89680732-89716964    |
| 9350 | Pcmt1         | 319263 | 1+:7079126-7163706      |
| 9351 | Zmiz1         | 328365 | 14+:26278708-26486233   |
| 9352 | Hnrpl1        | 72692  | 17-:80429682-80434896   |
| 9353 | Emilin2       | 246707 | 17-:71601513-71660256   |
| 9354 | Vps13b        | 666173 | 15+:35582009-35700296   |
| 9355 | Reep1         | 52250  | 6-:71759350-71760705    |
| 9356 | Emid2         | 140709 | 5-:137217634-137358977  |
| 9357 | Morc4         | 75746  | X-:136356173-136406193  |
| 9358 | Olf20         | 258925 | 11+:73167256-73168200   |
| 9359 | Dhx34         | 71723  | 7-:16782569-16807381    |
| 9360 | Taf1c         | 21341  | 8-:122121877-122129083  |
| 9361 | Hand1         | 15110  | 11-:57642214-57645649   |
| 9362 | Gast          | 14459  | 11+:100197796-100198213 |
| 9363 | Wisp2         | 22403  | 2+:163646634-163658880  |
| 9364 | Akr1a4        | 58810  | 4-:116309115-116324172  |
| 9365 | 4932438H23Rik | 74387  | 16-:91054179-91069390   |
| 9366 | Ccl27         | 20301  | 4+:41720061-41721015    |
| 9367 | Abp1          | 76507  | 6+:48855827-48946996    |
| 9368 | 1500019G21Rik | 66245  | 7-:4612121-4636171      |
| 9369 | Golph3        | 66629  | 15+:12251207-12279658   |
| 9370 | Rps6          | 20104  | 4-:86500567-86503253    |
| 9371 | Lrrc57        | 66606  | 2-:120429975-120435276  |
| 9372 | Psg19         | 26439  | 7-:19375142-19383859    |
| 9373 | Rpl9          | 20005  | 5-:65779603-65782233    |
| 9374 | Thbs4         | 21828  | 13-:93521542-93564713   |
| 9375 | 2210016L21Rik | 72357  | 5+:115392205-115398559  |
| 9376 | Zscan18       | 232875 | 7-:13353442-13380337    |
| 9377 | Klhdc1        | 271005 | 12+:70342803-70359170   |
| 9378 | Gtf3c5        | 70239  | 2-:28421778-28439270    |
| 9379 | Ypel2         | 77864  | 11-:86752611-86807236   |
| 9380 | Spata5        | 57815  | 3+:37319219-37478012    |
| 9381 | MMT00051394   |        | 18+:80222831-80226750   |
| 9382 | Nwd1          | 319555 | 8+:75199002-75212088    |

|      |               |        |                         |
|------|---------------|--------|-------------------------|
| 9383 | MMT00069081   |        | 9-:54942182-54942681    |
| 9384 | 4930449I24Rik | 67410  | 5+:147313974-147316759  |
| 9385 | Hmg20a        | 66867  | 9+:56266636-56344688    |
| 9386 | Bxdc5         | 70285  | 3-:146169381-146184382  |
| 9387 | Tesp2         | 21756  | 1-:34609189-34617765    |
| 9388 | Prr3          | 75210  | 17-:36109485-36115916   |
| 9389 | Rnase6        | 78416  | 14+:51748632-51751066   |
| 9390 | Olfr705       | 259034 | 7-:114016806-114017757  |
| 9391 | MMT00060086   |        | 3-:115609181-115610467  |
| 9392 | 4922505G16Rik | 629499 | 2-:157054356-157064177  |
| 9393 | Cd300a        | 217303 | 11+:114761052-114763230 |
| 9394 | Cfhr1         | 50702  | 1-:141443640-141456799  |
| 9395 | Eif4g3        | 230861 | 4+:137601252-137762982  |
| 9396 | Grif1         | 232906 | 7-:17232551-17233248    |
| 9397 | AA408865      | 99980  | 4+:148334643-148342068  |
| 9398 | Eif1ad        | 69860  | 19+:5366490-5368944     |
| 9399 | Tcfef         | 21425  | 17+:47922713-47928861   |
| 9400 | Syt10         | 54526  | 15-:89612824-89672200   |
| 9401 | Fcgr4         | 246256 | 1+:172949069-172959880  |
| 9402 | 1200016B10Rik | 66875  | 1-:153214828-153275511  |
| 9403 | V1rc11        | 171184 | 6-:66665967-66666883    |
| 9404 | Setd7         | 73251  | 3-:51325221-51364526    |
| 9405 | Aldoc         | 11676  | 11+:78137559-78141551   |
| 9406 | Calcoco1      | 67488  | 15-:102537209-102552500 |
| 9407 | Cmah          | 12763  | 13-:24417640-24423491   |
| 9408 | Hmgcs2        | 15360  | 3+:98084355-98114656    |
| 9409 | 11-Mar        | 211147 | 15+:26238841-26339328   |
| 9410 | Zmym3         | 56364  | X-:98599723-98616188    |
| 9411 | Taf7l         | 74469  | X-:130995161-131007506  |
| 9412 | Vwa3a         | 233813 | 7+:127923638-127933758  |
| 9413 | 1190020J12Rik | 233038 | 7-:29328621-29332280    |
| 9414 | Olfr178       | 258999 | 16-:58889086-58890044   |
| 9415 | MMT00075172   |        | 16+:38476685-38477609   |
| 9416 | MMT00004780   |        |                         |
| 9417 | Cd163         | 93671  | 6+:124254673-124280541  |
| 9418 | MMT00034311   |        | X-:48572007-48573190    |
| 9419 | Acox2         | 93732  | 14-:9058025-9091450     |
| 9420 | MMT00065589   |        | 10+:70781513-70782133   |
| 9421 | Serpinf2      | 18816  | 11-:75245237-75252977   |
| 9422 | Eif2b1        | 209354 | 5-:125020662-125029054  |
| 9423 | 2010107E04Rik | 70257  | 12-:113199586-113205188 |
| 9424 | Cltc          | 67300  | 11-:86507857-86570993   |
| 9425 | Gusb          | 110006 | 5-:130464891-130478698  |
| 9426 | Sned1         | 208777 | 1+:95152841-95155683    |
| 9427 | Nqo2          | 18105  | 13+:34059021-34077508   |
| 9428 | MMT00061031   |        | 1-:194705970-194715458  |
| 9429 | Dzip1         | 66573  | 14-:119278103-119282962 |
| 9430 | Tmem74        | 239408 | 15-:43698273-43699191   |
| 9431 | Snpc5         | 330959 | 9+:64027135-64030457    |
| 9432 | Mgea5         | 76055  | 19-:45826625-45857620   |
| 9433 | Pou6f2        | 218030 | 13-:18216794-18264396   |

|      |               |        |                         |
|------|---------------|--------|-------------------------|
| 9434 | Hnrnpf        | 98758  | 6+:117856816-117875022  |
| 9435 | Rab37         | 58222  | 11+:115015512-115022072 |
| 9436 | Cntnap2       | 66797  | 6+:46799032-46858778    |
| 9437 | MMT00074099   |        | 16+:64851023-64912048   |
| 9438 | Pctk3         | 18557  | 1-:134010237-134036261  |
| 9439 | Dguok         | 27369  | 6-:83430212-83456888    |
| 9440 | Zfp653        | 319601 | 9-:21859858-21875966    |
| 9441 | MMT00052383   |        |                         |
| 9442 | BC031441      | 240120 | 17-:56077799-56084682   |
| 9443 | Cml2          | 93673  | 6-:85817593-85819109    |
| 9444 | Col10a1       | 12813  | 10+:34110427-34115881   |
| 9445 | MMT00024605   |        | 13+:24280698-24298158   |
| 9446 | MMT00017417   |        | 16+:4860962-4863120     |
| 9447 | Tie1          | 21846  | 4-:118143795-118162666  |
| 9448 | Nsun7         | 70918  | 5+:66652076-66688297    |
| 9449 | Sft2d2        | 108735 | 1-:167108821-167124443  |
| 9450 | MMT00033190   |        | 9+:78243686-78271394    |
| 9451 | Gpr180        | 58245  | 14+:118536356-118562483 |
| 9452 | EG668106      | 668106 | 19-:33695425-33697158   |
| 9453 | EG637227      | 637227 | 6-:70210379-70210939    |
| 9454 | 2810426N06Rik | 67607  | 7+:48854629-48906895    |
| 9455 | Gpatch8       | 237943 | 11-:102337231-102417438 |
| 9456 | Zpbp          | 53604  | 11-:11182515-11362411   |
| 9457 | Krt16         | 16666  | 11-:100107407-100110216 |
| 9458 | Twist2        | 13345  | 1+:93698053-93744604    |
| 9459 | Ccdc73        | 211936 | 2+:104747693-104791765  |
| 9460 | Fer1l4        | 74562  | 2-:155844875-155877982  |
| 9461 | Gda           | 14544  | 19-:21459479-21547077   |
| 9462 | Ndst4         | 64580  | 3+:125140597-125427692  |
| 9463 | Zdhhc23       | 332175 | 16-:43973580-43979241   |
| 9464 | MMT00042505   |        | X-:64031616-64138129    |
| 9465 | Al427515      | 270097 | 8+:116754105-116895643  |
| 9466 | MMT00065267   |        | 2+:26505371-26507332    |
| 9467 | Aoah          | 27052  | 13+:20885981-21115571   |
| 9468 | Gtf2a1l       | 71828  | 17+:89068044-89114488   |
| 9469 | Trim71        | 636931 | 9-:114421764-114471675  |
| 9470 | A230074B11Rik | 215413 | 1+:37092471-37102053    |
| 9471 | MMT00013158   |        | 17+:16863558-16863968   |
| 9472 | Cstf3         | 228410 | 2+:104430679-104505575  |
| 9473 | Gfra3         | 14587  | 18-:34849559-34879919   |
| 9474 | Cops7b        | 26895  | 1+:88483719-88502837    |
| 9475 | Tmem16h       | 382014 | 8-:74005463-74009837    |
| 9476 | 9130005N14Rik | 68303  | 5+:65361352-65432382    |
| 9477 | Efcab2        | 68226  | 1+:180336230-180411764  |
| 9478 | Trim46        | 360213 | 3-:89038106-89049699    |
| 9479 | MMT00063832   |        | 9+:120998128-121156771  |
| 9480 | A430107O13Rik | 214642 | 6+:21935927-22019450    |
| 9481 | Ppl           | 19041  | 16-:5086823-5132514     |
| 9482 | Trpm4         | 68667  | 7-:52558588-52589110    |
| 9483 | Wdr13         | 73447  | X-:7700429-7709651      |
| 9484 | 4933434M16Rik | 71203  | 11+:112686492-112693783 |

|      |               |        |                         |
|------|---------------|--------|-------------------------|
| 9485 | 2700081O15Rik | 108899 | 19+:7495744-7497596     |
| 9486 | Coch          | 12810  | 12+:52694343-52706748   |
| 9487 | Kcng4         | 66733  | 8-:122147753-122150026  |
| 9488 | 4932413O14Rik | 320696 | 5-:93037279-93052466    |
| 9489 | Prpf40b       | 54614  | 15+:99133711-99147438   |
| 9490 | Zfp462        | 242466 | 4+:55063048-55094476    |
| 9491 | Bdkrb2        | 12062  | 12+:106829789-106830889 |
| 9492 | MMT00007123   |        | 15-:19384382-19386190   |
| 9493 | MMT00043490   |        | 3-:46888982-46889656    |
| 9494 | Cib2          | 56506  | 9-:54393158-54407886    |
| 9495 | Srms          | 20811  | 2-:180940267-180947712  |
| 9496 | Mtmr9         | 210376 | 14-:64142317-64162542   |
| 9497 | Sgms2         | 74442  | 3-:131025655-131047851  |
| 9498 | Dcst2         | 329702 | 3+:89171510-89172170    |
| 9499 | Gtpbp5        | 52856  | 2+:179805291-179820604  |
| 9500 | EG209589      | 209589 | 6-:67338861-67365006    |
| 9501 | Usp33         | 170822 | 3+:152009452-152056205  |
| 9502 | V1ri7         | 171258 | 13-:22593206-22594114   |
| 9503 | MMT00030769   |        | 2+:24448424-24450039    |
| 9504 | Sfrp1         | 20377  | 8+:24522002-24558429    |
| 9505 | Rps27         | 57294  | 3-:90016590-90017579    |
| 9506 | MMT00048675   |        | 1-:146159158-146159590  |
| 9507 | Trip6         | 22051  | 5-:137751127-137755362  |
| 9508 | Al847670      | 330050 | 5+:20930703-20961695    |
| 9509 | Rsrc1         | 66880  | 3+:66789640-67162317    |
| 9510 | Nt5c2         | 76952  | 19-:46963150-47036787   |
| 9511 | Eif5a13       | 665733 | 5+:90561229-90562320    |
| 9512 | MMT00081874   |        | 10+:110593271-110594471 |
| 9513 | Tardbp        | 230908 | 4-:147990975-148000863  |
| 9514 | Vps37a        | 52348  | 8+:41597154-41631914    |
| 9515 | Lyg2          | 332427 | 1-:37966740-37968047    |
| 9516 | 1700020N01Rik | 67692  | 10+:21312962-21342182   |
| 9517 | Med7          | 66213  | 11+:46250483-46255025   |
| 9518 | Lsm3          | 67678  | 6+:91467055-91472612    |
| 9519 | Fstl5         | 213262 | 3+:76125975-76512555    |
| 9520 | Grem1         | 23892  | 2-:113588726-113590380  |
| 9521 | Ctnnb1        | 12387  | 9+:120842695-120868894  |
| 9522 | Cidea         | 12683  | 18+:67503257-67527432   |
| 9523 | Lcor          | 212391 | 19-:41636080-41636736   |
| 9524 | Pum1          | 80912  | 4+:130219303-130337187  |
| 9525 | MMT00019383   |        | 11+:50861610-50862552   |
| 9526 | 5730528L13Rik | 66665  | 4+:48553370-48574791    |
| 9527 | Pglyrp1       | 21946  | 7+:19470038-19475787    |
| 9528 | Amelx         | 11704  | X-:165617951-165625142  |
| 9529 | Tmprss2       | 50528  | 16-:97787594-97832673   |
| 9530 | Net1          | 56349  | 13-:3882581-3917357     |
| 9531 | MMT00043554   | 670496 | 11+:99676416-99680661   |
| 9532 | MMT00050594   |        | 3+:135994449-135995957  |
| 9533 | Mdga1         | 74762  | 17-:29987436-30025362   |
| 9534 | MMT00042032   |        | 6-:122515894-122517421  |
| 9535 | MMT00069497   |        | X+:38014636-38015105    |

|      |               |        |                         |
|------|---------------|--------|-------------------------|
| 9536 | Barhl2        | 104382 | 5-:106882127-106886860  |
| 9537 | Sypl          | 19027  | 12+:33638832-33660587   |
| 9538 | MMT00039019   | 629967 | 11-:111586054-111586945 |
| 9539 | Rab14         | 68365  | 2-:35037685-35056513    |
| 9540 | Csnk1e        | 27373  | 15-:79249596-79272432   |
| 9541 | Npal3         | 74552  | 4-:135007790-135050455  |
| 9542 | Tmed10        | 68581  | 12-:86683795-86715649   |
| 9543 | MMT00046366   | 114679 | 11+:3414908-3417353     |
| 9544 | 2410018C17Rik | 74504  | 5-:33943000-33972275    |
| 9545 | Tnfai3        | 21929  | 10-:18722538-18731581   |
| 9546 | 1700023A16Rik | 69371  | 6+:146798623-146804705  |
| 9547 | MMT00006479   |        | 12+:120849421-121115281 |
| 9548 | Wdr75         | 73674  | 1+:45852294-45880468    |
| 9549 | Gpr22         | 73010  | 12-:32393576-32394845   |
| 9550 | MMT00018088   | 268885 | 16+:36093535-36162035   |
| 9551 | MMT00002569   |        | 1+:4512987-4516248      |
| 9552 | Dnmt3a        | 13435  | 12+:3807090-3908996     |
| 9553 | Alox12e       | 11685  | 11-:70129114-70136020   |
| 9554 | Hmgb2l1       | 70823  | 8+:77517580-77555876    |
| 9555 | Sp3a          | 73991  | 12+:71047163-71065073   |
| 9556 | Akna          | 100182 | 4-:63028217-63055868    |
| 9557 | Cnga3         | 12790  | 1+:37289042-37319411    |
| 9558 | Akr7a5        | 110198 | 4+:138866669-138874334  |
| 9559 | Zfpm2         | 22762  | 15+:40486817-40936131   |
| 9560 | Slc4a1ap      | 20534  | 5+:31829382-31856416    |
| 9561 | MMT00017162   |        | 5+:41733361-41734171    |
| 9562 | MMT00066167   |        | 14+:30716149-30717594   |
| 9563 | Nuak1         | 77976  | 10-:83836245-83903255   |
| 9564 | Cdh20         | 23836  | 1+:106665105-106891255  |
| 9565 | Adams17       | 233332 | 7+:73984657-74054374    |
| 9566 | MMT00078098   | 667014 | 1-:51997510-51998144    |
| 9567 | Cfl1          | 12631  | 19+:5490520-5493563     |
| 9568 | Fen1          | 14156  | 19-:10273635-10278251   |
| 9569 | Dda1          | 66498  | 8+:73993096-74000332    |
| 9570 | Creld1        | 171508 | 6+:113433562-113443332  |
| 9571 | Parp4         | 328417 | 14+:57204393-57278632   |
| 9572 | Oosp1         | 170834 | 19-:11742025-11765546   |
| 9573 | MMT00015549   |        | 4-:46256118-46271626    |
| 9574 | Mphosph10     | 67973  | 7-:71521463-71532406    |
| 9575 | MMT00011132   |        | 8+:71993967-71994296    |
| 9576 | Polr1e        | 64424  | 4+:45031517-45045231    |
| 9577 | Dusp8         | 18218  | 7-:149267402-149276175  |
| 9578 | Olfr1047      | 259014 | 2-:86068166-86069126    |
| 9579 | MMT00052106   |        | 1+:44700765-44702306    |
| 9580 | Tuba8         | 53857  | 6+:121160787-121176115  |
| 9581 | EG245347      | 245347 | X+:12229428-12229788    |
| 9582 | MMT00041407   |        | 5+:138056838-138057318  |
| 9583 | Angel1        | 68737  | 12-:88041452-88067401   |
| 9584 | Ybx2          | 53422  | 11+:69749476-69755099   |
| 9585 | Neu3          | 50877  | 7-:106959950-106976927  |
| 9586 | Mrpl53        | 68499  | 6+:83059101-83059926    |

|      |               |        |                         |
|------|---------------|--------|-------------------------|
| 9587 | Bri3bp        | 76809  | 5+:125921966-125935506  |
| 9588 | Ghrl          | 58991  | 6-:113666245-113669423  |
| 9589 | Sorcs1        | 58178  | 19-:50225469-50752975   |
| 9590 | Rapgef1       | 268480 | 11+:98698467-98712513   |
| 9591 | Bai2          | 230775 | 4+:129662479-129699886  |
| 9592 | Pitrm1        | 69617  | 13+:6547402-6579385     |
| 9593 | Olfr545       | 258837 | 7-:109642337-109643287  |
| 9594 | Asb13         | 142688 | 13+:3633323-3651018     |
| 9595 | Rftn1         | 76438  | 17-:50131581-50329998   |
| 9596 | 2610301F02Rik | 545428 | 2-:76852941-76880606    |
| 9597 | Tnfsf13b      | 24099  | 8+:10006632-10035997    |
| 9598 | EG236749      | 236749 | X+:23483390-23484621    |
| 9599 | Mrpl2         | 27398  | 17+:46783204-46787078   |
| 9600 | Gramd1b       | 235283 | 9-:40111080-40220959    |
| 9601 | Wt1           | 22431  | 2+:104966685-105013769  |
| 9602 | Pogk          | 71592  | 1-:168327974-168339463  |
| 9603 | Bnpl          | 171388 | 3-:95045216-95055024    |
| 9604 | Bscl2         | 14705  | 19+:8915702-8923074     |
| 9605 | Ncan          | 13004  | 8-:72618863-72625960    |
| 9606 | MMT00075599   |        | 14+:13700030-13700528   |
| 9607 | Ccdc114       | 211535 | 7+:53179439-53184669    |
| 9608 | MMT00021413   |        | 14+:17938189-17938654   |
| 9609 | Itln1         | 16429  | 1-:173464884-173465418  |
| 9610 | Narf          | 67608  | 11+:121098591-121114836 |
| 9611 | Ncf2          | 17970  | 1+:154655065-154683383  |
| 9612 | 4930570E03Rik | 78812  | 16+:78695277-78709324   |
| 9613 | Sap18         | 20220  | 14+:58417090-58423813   |
| 9614 | Rufy4         | 435626 | 1+:74187492-74194319    |
| 9615 | MMT00006705   |        | 8-:7000589-7002764      |
| 9616 | Al451557      | 102084 | 8+:97047048-97051165    |
| 9617 | Mrpl34        | 94065  | 8+:73988872-73989644    |
| 9618 | Snap25        | 20614  | 2+:136539238-136608152  |
| 9619 | MMT00032716   |        | 9-:25032829-25033463    |
| 9620 | Sdpr          | 20324  | 1+:51345969-51359803    |
| 9621 | Spink5        | 72432  | 18+:44174559-44181803   |
| 9622 | Rasgef1a      | 70727  | 6+:118016462-118041563  |
| 9623 | Zfp300        | 245368 | X-:20607090-20666655    |
| 9624 | Sla           | 20491  | 15-:66614046-66633071   |
| 9625 | Vmn2r97       | 627367 | 17+:19066488-19085181   |
| 9626 | 4930448C13Rik | 73972  | 12-:15004639-15056241   |
| 9627 | Cbx6          | 494448 | 15-:79656536-79664667   |
| 9628 | Spg21         | 27965  | 9+:65308777-65335260    |
| 9629 | Spnb3         | 20743  | 19+:4718840-4752350     |
| 9630 | 5830417C01Rik | 78825  | 1+:180117878-180179751  |
| 9631 | Htr4          | 15562  | 18+:62500703-62624296   |
| 9632 | Wfdc12        | 192200 | 2-:164015871-164016334  |
| 9633 | Emp1          | 13730  | 6+:135327228-135331156  |
| 9634 | Atp13a2       | 74772  | 4+:140542880-140563244  |
| 9635 | Rabggtb       | 19352  | 3-:153570417-153575023  |
| 9636 | Syne1         | 64009  | 10+:4909718-4941092     |
| 9637 | Sh3bgr        | 50795  | 16+:96422310-96442199   |



|      |               |        |                         |
|------|---------------|--------|-------------------------|
| 9638 | Tpbg          | 21983  | 9+:85737586-85738866    |
| 9639 | MMT00038421   |        | 12+:112136317-112136796 |
| 9640 | Ankrd32       | 105377 | 13:-77182354-77223645   |
| 9641 | MMT00017480   |        | 6+:94770523-94771358    |
| 9642 | Zfp628        | 232816 | 7+:4866835-4895205      |
| 9643 | Doxl2         | 243376 | 6+:48925141-48928627    |
| 9644 | Ankrd32       | 105377 | 13:-77243878-77274722   |
| 9645 | MMT00072449   |        | 5+:5749184-5799153      |
| 9646 | Rpl36al       | 66483  | 12:-70283727-70285012   |
| 9647 | Hip1          | 215114 | 5:-135883905-136020985  |
| 9648 | Csf3          | 12985  | 11+:98562626-98564943   |
| 9649 | Commd6        | 66200  | 14:-102039183-102039897 |
| 9650 | Sh3gl3        | 20408  | 7+:89319745-89455919    |
| 9651 | Cxc5          | 67393  | 18+:36018186-36021341   |
| 9652 | Igh-2         | 238447 | 12:-116055259-116055776 |
| 9653 | Acox3         | 80911  | 5+:35925861-35955256    |
| 9654 | 1810041L15Rik | 72301  | 15:-84202330-84256540   |
| 9655 | Sult2b1       | 54200  | 7:-52985353-53014892    |
| 9656 | Cenpc1        | 12617  | 5:-86441060-86494475    |
| 9657 | MMT00007450   |        | 14+:104880503-104881121 |
| 9658 | Abr           | 109934 | 11:-76230245-76384593   |
| 9659 | Tmem28        | 620592 | X+:97016638-97041361    |
| 9660 | Tnni3k        | 435766 | 3:-154449264-154519577  |
| 9661 | MMT00069511   |        | 14+:62177612-62178725   |
| 9662 | Vmn2r27       | 232367 | 6:-124095646-124121750  |
| 9663 | Arl9          | 384185 | 5+:77435465-77436432    |
| 9664 | 2700046G09Rik | 67188  | 19+:32463969-32465667   |
| 9665 | Pou3f4        | 18994  | X+:108009803-108010888  |
| 9666 | Trim62        | 67525  | 4+:128561413-128588578  |
| 9667 | MMT00024156   |        | 14:-88749180-88750210   |
| 9668 | Astn1         | 11899  | 1+:160292842-160621910  |
| 9669 | Mrpl54        | 66047  | 10:-80727466-80729671   |
| 9670 | Olf1346       | 258940 | 2+:36543523-36544452    |
| 9671 | AK129341      | 234915 | 9:-8076460-8134472      |
| 9672 | Tmem101       | 76547  | 11:-102013862-102017675 |
| 9673 | Spr2a         | 20755  | 3+:92023013-92023264    |
| 9674 | Pea15a        | 18611  | 1:-174128757-174130710  |
| 9675 | C80435        | 97813  | 12+:40601429-40602856   |
| 9676 | Usp32         | 237898 | 11:-84797933-84953270   |
| 9677 | Rttn          | 246102 | 18+:89276977-89299209   |
| 9678 | AW555464      | 217882 | 12+:113962834-113984800 |
| 9679 | Hivep3        | 16656  | 4+:119737539-119808016  |
| 9680 | Ahsa1         | 217737 | 12+:88607677-88614902   |
| 9681 | Asb12         | 70392  | X:-92665539-92673468    |
| 9682 | Pvrl4         | 71740  | 1+:173300484-173318724  |
| 9683 | Prdm8         | 77630  | 5+:98609919-98616470    |
| 9684 | Phf21b        | 271305 | 15:-84617532-84686558   |
| 9685 | Bcl9l         | 80288  | 9+:44316958-44318493    |
| 9686 | Nek4          | 23955  | 14+:31764673-31800586   |
| 9687 | Olf1494       | 258992 | 19+:13823597-13824544   |
| 9688 | MMT00045085   |        | 16+:23089518-23094398   |

|      |               |           |                         |
|------|---------------|-----------|-------------------------|
| 9689 | 4432416J03Rik | 78252     | 9-:48126088-48148880    |
| 9690 | Tex11         | 83558     | X-:98034002-98254976    |
| 9691 | Neu4          | 241159    | 1+:95919064-95922810    |
| 9692 | Ankrd26       | 232339    | 6-:118456387-118512243  |
| 9693 | Ccnb1         | 268697    | 13-:101548686-101556418 |
| 9694 | Ifi205        | 226695    | 1-:175931686-175945292  |
| 9695 | MMT00078835   |           | 7+:134295864-134299112  |
| 9696 | Setd1b        | 208043    | 5+:123592965-123618638  |
| 9697 | Mterf         | 545725    | 5-:3890581-3893927      |
| 9698 | MMT00081969   |           | 6+:19069995-19070912    |
| 9699 | Nmur2         | 216749    | 11-:55840484-55854385   |
| 9700 | Prodh         | 19125     | 16-:18071818-18089240   |
| 9701 | Prkcz         | 18762     | 4-:154636185-154735352  |
| 9702 | Stk39         | 53416     | 2-:68049808-68310013    |
| 9703 | MMT00068433   |           | 5-:15004162-15004577    |
| 9704 | Arfgap1       | 228998    | 2+:180701975-180716102  |
| 9705 | Ube2j1        | 56228     | 4+:33118477-33137000    |
| 9706 | EG630579      | 630579    | 13+:62231259-62231389   |
| 9707 | Golt1a        | 68338     | 1+:135206391-135218519  |
| 9708 | Taf2          | 319944    | 15-:54846682-54903665   |
| 9709 | Olfr969       | 258823    | 9+:39602961-39603896    |
| 9710 | Nrp2          | 18187     | 1+:62750054-62843547    |
| 9711 | AU021034      | 219170    | 14-:78482551-78488765   |
| 9712 | Cct3          | 12462     | 3+:88101056-88125688    |
| 9713 | Ykt6          | 56418     | 11+:5855888-5866078     |
| 9714 | S1pr2         | 14739     | 9-:20770394-20781216    |
| 9715 | OTTMUSG000000 | 100038514 | 4+:14865614-14880177    |
| 9716 | MMT00079592   |           | 13+:74577649-74577983   |
| 9717 | Psmb9         | 16912     | 17-:34319043-34324275   |
| 9718 | Fmo5          | 14263     | 3+:97432972-97456516    |
| 9719 | Cep152        | 99100     | 2-:125445396-125450838  |
| 9720 | Fosb          | 14282     | 7-:19888262-19895100    |
| 9721 | Rrs1          | 59014     | 1+:9535522-9537532      |
| 9722 | Ssfa2         | 70599     | 2+:79484767-79513119    |
| 9723 | Cicn7         | 26373     | 17+:25270353-25297926   |
| 9724 | Oat           | 18242     | 7-:139749161-139761813  |
| 9725 | Dok6          | 623279    | 18-:89590366-89768183   |
| 9726 | Ptchd3        | 74675     | 11+:121691557-121703932 |
| 9727 | Atp9b         | 50771     | 18-:80932752-81114580   |
| 9728 | MMT00031196   |           | X-:147848048-147849090  |
| 9729 | Got1l1        | 76615     | 8-:28307928-28313023    |
| 9730 | Olfr1501      | 258626    | 19-:13912715-13928068   |
| 9731 | Pik3r3        | 18710     | 4+:115894244-115975778  |
| 9732 | Iapp          | 15874     | 6+:142246947-142252337  |
| 9733 | 4921509E07Rik | 70897     | 12+:79792521-79835500   |
| 9734 | Wwp1          | 107568    | 4-:19536781-19605588    |
| 9735 | Rbm14         | 56275     | 19-:4800924-4811585     |
| 9736 | Shisa2        | 219134    | 14+:60244681-60250495   |
| 9737 | Zswim5        | 74464     | 4+:116549958-116659937  |
| 9738 | Cdk5rap2      | 214444    | 4-:69882772-69915753    |
| 9739 | Rpl18         | 19899     | 7+:52974660-52976194    |

|      |               |        |                         |
|------|---------------|--------|-------------------------|
| 9740 | Lyn           | 17096  | 4+:3605262-3718751      |
| 9741 | Ppp1r8        | 100336 | 4-:132382844-132399035  |
| 9742 | Ccdc129       | 232016 | 6+:55822484-55847954    |
| 9743 | Gm189         | 235952 | 6-:69525779-69526494    |
| 9744 | 9530002B09Rik | 77432  | 4+:122366609-122379627  |
| 9745 | Gadd45g       | 23882  | 13+:51942063-51943841   |
| 9746 | Dock1         | 330662 | 7+:142182204-142365320  |
| 9747 | Wnt10b        | 22410  | 15-:98602192-98608581   |
| 9748 | Rxfp3         | 239336 | 15-:10965621-10967039   |
| 9749 | Blvrb         | 233016 | 7+:28233056-28251005    |
| 9750 | Lancl3        | 236285 | X+:8777355-8842809      |
| 9751 | C1q3          | 227580 | 2-:12923232-12933441    |
| 9752 | 2410002F23Rik | 66976  | 7+:51502156-51507686    |
| 9753 | Pkhd1         | 241035 | 1-:20596410-20608085    |
| 9754 | 2010204N08Rik | 69983  | 3-:72707527-72770788    |
| 9755 | MMT00066614   | 667386 | 5-:149774774-149781471  |
| 9756 | 1500015O10Rik | 78896  | 1+:43787537-43799387    |
| 9757 | Olf1502       | 258734 | 7-:115666517-115667462  |
| 9758 | Slc39a8       | 67547  | 3+:135488242-135550020  |
| 9759 | Cenpn         | 72155  | 8+:119445639-119465403  |
| 9760 | 1700012A16Rik | 71836  | 1+:155272278-155299783  |
| 9761 | MMT00067282   |        | 11+:74136047-74136768   |
| 9762 | Snx5          | 69178  | 2-:144076790-144096607  |
| 9763 | Tuba3b        | 22147  | 6+:145564572-145569938  |
| 9764 | D330017J20Rik | 320609 | 6+:29867011-29907867    |
| 9765 | Pcnx13        | 104401 | 19-:5664640-5688149     |
| 9766 | MMT00050414   |        | 4+:119193594-119193965  |
| 9767 | Vps13b        | 666173 | 15+:35384711-35401819   |
| 9768 | MMT00025372   |        | 18-:86410461-86412975   |
| 9769 | MMT00068055   |        | 9-:120664093-120664643  |
| 9770 | Bcml1         | 63857  | 8+:119619764-119657374  |
| 9771 | Msr1          | 110265 | 14-:64741462-65059752   |
| 9772 | Gmps          | 229363 | 3+:63780043-63820699    |
| 9773 | MMT00068134   |        | 8+:107185898-107186994  |
| 9774 | Mrfap1        | 67568  | 5-:37186105-37187943    |
| 9775 | Trpd5213      | 66745  | 19+:30078279-30080508   |
| 9776 | EG433184      | 433184 | 18+:54143917-54145034   |
| 9777 | Cdh19         | 227485 | 1-:112785786-112826552  |
| 9778 | MMT00067005   |        | 4-:119191741-119192646  |
| 9779 | Laptm5        | 16792  | 4+:130469208-130490946  |
| 9780 | 4930583H14Rik | 67749  | 3-:51192337-51200431    |
| 9781 | Prune         | 229589 | 3-:95057593-95085714    |
| 9782 | Dnase2a       | 13423  | 8+:87432544-87435350    |
| 9783 | Sfrs15        | 224432 | 16-:90229201-90285751   |
| 9784 | Jakmip1       | 76071  | 5+:37419534-37534521    |
| 9785 | Olf1259       | 258338 | 2-:89783342-89784270    |
| 9786 | MMT00042592   |        | X-:86005115-86143830    |
| 9787 | Epb4.115      | 226352 | 1-:121491653-121545194  |
| 9788 | Olf1197       | 433449 | 2-:88568832-88586903    |
| 9789 | Rad51ap1      | 19362  | 6-:126874103-126889567  |
| 9790 | Tspan10       | 208634 | 11+:120304006-120308263 |

|      |               |        |                         |
|------|---------------|--------|-------------------------|
| 9791 | Gtf3a         | 66596  | 5+:147760150-147767390  |
| 9792 | Miox          | 56727  | 15+:89164904-89167442   |
| 9793 | Mrpl52        | 68836  | 14+:55045691-55048590   |
| 9794 | Med6          | 69792  | 12-:82674551-82695989   |
| 9795 | Afg3l2        | 69597  | 18-:67564420-67608824   |
| 9796 | MMT00038636   | 553095 | 13-:84164902-84204379   |
| 9797 | MMT00040567   |        | 2+:169326047-169330342  |
| 9798 | MMT00072061   |        | 16+:97807935-97808963   |
| 9799 | MMT00046199   |        |                         |
| 9800 | Phf7          | 71838  | 14-:32050881-32064404   |
| 9801 | MMT00017259   |        | 8-:36115184-36116498    |
| 9802 | Ttc22         | 230576 | 4+:106295073-106311803  |
| 9803 | Abcb8         | 74610  | 5+:23900213-23909795    |
| 9804 | Sdccag1       | 66244  | 12-:70412033-70458154   |
| 9805 | Tagap         | 72536  | 17+:8118884-8127761     |
| 9806 | Klk1b4        | 18048  | 7+:51462808-51467114    |
| 9807 | MMT00073867   |        | 11+:66377108-66377936   |
| 9808 | MMT00015612   |        | 4+:116121392-116122314  |
| 9809 | Tox2          | 269389 | 2+:163140046-163148745  |
| 9810 | Al836003      | 239650 | 15-:97998179-98000563   |
| 9811 | Olfr1145      | 258317 | 2+:87649978-87650956    |
| 9812 | Atf1          | 11908  | 15+:100058499-100091674 |
| 9813 | Cdh18         | 320865 | 15+:23103515-23191938   |
| 9814 | Nbl1          | 17965  | 4-:138638206-138648780  |
| 9815 | 1700030K09Rik | 72254  | 8+:74967818-74982668    |
| 9816 | BC005537      | 79555  | 13+:24895151-24905753   |
| 9817 | Fbxo43        | 78803  | 15-:36080958-36094575   |
| 9818 | 1810034K20Rik | 67881  | 14-:56277820-56279211   |
| 9819 | MMT00005703   |        | 12+:117053148-117053784 |
| 9820 | BC023105      | 207269 | 18+:60598948-60603504   |
| 9821 | Pmaip1        | 58801  | 18+:66618257-66625212   |
| 9822 | Celsr1        | 12614  | 15-:85729358-85864207   |
| 9823 | 2210009G21Rik | 74243  | 2+:136717998-136894129  |
| 9824 | MMT00048830   |        | 16-:8623204-8625406     |
| 9825 | MMT00007741   |        | 2+:121544265-121544901  |
| 9826 | Wdfy1         | 69368  | 1-:79722990-79758307    |
| 9827 | Pam           | 18484  | 1-:99717671-99992086    |
| 9828 | Brwd2         | 207425 | 7+:136735449-136779254  |
| 9829 | Stoml1        | 69106  | 9+:58104435-58110325    |
| 9830 | Rbks          | 71336  | 5-:31926808-32000001    |
| 9831 | Nedd4l        | 83814  | 18+:65183547-65372961   |
| 9832 | Brf1          | 72308  | 12-:114198255-114238612 |
| 9833 | Mfn1          | 67414  | 3+:32428401-32477141    |
| 9834 | Gm1140        | 382217 | X+:64948872-64959272    |
| 9835 | Fastkd1       | 320720 | 2-:69528118-69550456    |
| 9836 | Oprk1         | 18387  | 1+:5578572-5592945      |
| 9837 | Gpm6b         | 14758  | X+:162676903-162826919  |
| 9838 | Hpgd          | 15446  | 8+:58773394-58799471    |
| 9839 | Ift20         | 55978  | 11+:78345046-78354975   |
| 9840 | Dmxl1         | 240283 | 18+:49992566-50110978   |
| 9841 | MMT00050244   |        | 12+:3222416-3228151     |

|      |               |           |                         |
|------|---------------|-----------|-------------------------|
| 9842 | Qdpr          | 110391    | 5-:45825293-45841396    |
| 9843 | Olf642        | 258326    | 7-:111197922-111198866  |
| 9844 | 9230110C19Rik | 234912    | 9-:8021490-8042839      |
| 9845 | Pde6a         | 225600    | 18+:61380152-61448437   |
| 9846 | Gm1524        | 385253    | 6-:69557261-69557795    |
| 9847 | Ifi27         | 76933     | 12-:104680371-104681869 |
| 9848 | Smad3         | 17127     | 9-:63497477-63605725    |
| 9849 | 4930445E18Rik | 78115     | 15-:25225222-25262405   |
| 9850 | MMT00023282   |           | 3-:137307006-137307772  |
| 9851 | Barhl1        | 54422     | 2-:28764556-28771207    |
| 9852 | Ilkap         | 67444     | 1-:93272408-93295311    |
| 9853 | MMT00028663   | 100042811 | 7-:112838553-112839091  |
| 9854 | Enpp3         | 209558    | 10-:24536932-24555942   |
| 9855 | MMT00079728   |           | 2+:58190730-58191342    |
| 9856 | Tnf           | 21926     | 17-:35336337-35338941   |
| 9857 | Fgfbp3        | 72514     | 19-:36992954-36993691   |
| 9858 | MMT00061598   |           | X+:148867418-148868269  |
| 9859 | Cx3cl1        | 20312     | 8+:97296164-97306280    |
| 9860 | MMT00060113   |           | 9+:38881607-38883427    |
| 9861 | Serpinb6b     | 20708     | 13+:33057381-33070905   |
| 9862 | AW112010      | 107350    | 19-:11122098-11125056   |
| 9863 | MMT00020611   |           | 1+:178765656-178768379  |
| 9864 | Npy1r         | 18166     | 8+:69227746-69230007    |
| 9865 | Hhat1         | 74770     | 9-:121693139-121701502  |
| 9866 | 4930455B06Rik | 223825    | 15+:4848737-4868376     |
| 9867 | Psrc1         | 56742     | 3+:108186760-108191080  |
| 9868 | Sult4a1       | 29859     | 15-:83907820-83936057   |
| 9869 | Gstt4         | 75886     | 10-:75277690-75285265   |
| 9870 | Mgat2         | 217664    | 12+:70285199-70287227   |
| 9871 | C1qdc2        | 67389     | 4+:155336426-155340738  |
| 9872 | Fgf9          | 14180     | 14+:58691754-58728487   |
| 9873 | Ntrk3         | 18213     | 7-:85595661-85722669    |
| 9874 | MMT00056829   |           | 17+:22151966-22155540   |
| 9875 | Cdk5rap3      | 80280     | 11-:96769100-96777795   |
| 9876 | Tmem20        | 240660    | 19+:38474921-38477867   |
| 9877 | Cdc2a         | 12534     | 10-:68801052-68815664   |
| 9878 | Spaca3        | 75622     | 11+:80671863-80681321   |
| 9879 | RP23-451D4.4  | 277668    | 4-:143245211-143250501  |
| 9880 | Leo1          | 235497    | 9+:75293231-75314236    |
| 9881 | Zcchc2        | 227449    | 1+:107887759-107928183  |
| 9882 | OTTMUSG000000 | 626870    | 11+:8952696-8968736     |
| 9883 | Pou2f3        | 18988     | 9-:42935469-43013832    |
| 9884 | Hp            | 15439     | 8-:112099027-112102948  |
| 9885 | 4930401F20Rik | 243822    | 7-:4704830-4709462      |
| 9886 | Degs1         | 13244     | 1-:184206109-184212875  |
| 9887 | MMT00062394   |           | 7+:143144480-143145309  |
| 9888 | Cd200r2       | 271375    | 16+:44909258-44914783   |
| 9889 | Hecw1         | 94253     | 13-:14322916-14470933   |
| 9890 | Cdk3          | 69681     | 11+:116077853-116081599 |
| 9891 | MMT00001343   | 74100     | 9-:111967762-112090230  |
| 9892 | AU022252      | 230696    | 4-:118898347-118905280  |

|      |               |        |                         |
|------|---------------|--------|-------------------------|
| 9893 | Dph3          | 105638 | 14-:32893701-32898877   |
| 9894 | Marveld2      | 218518 | 13-:101365915-101387005 |
| 9895 | Nlgn1         | 192167 | 3-:25330763-25338999    |
| 9896 | Cdh13         | 12554  | 8+:120807644-121847354  |
| 9897 | MMT00002888   | 233637 | 7+:111969665-111970861  |
| 9898 | Traf7         | 224619 | 17-:24646475-24664793   |
| 9899 | D13Wsu177e    | 28126  | 13-:54685551-54691435   |
| 9900 | MMT00062271   |        | 14-:118774751-118775110 |
| 9901 | Edn3          | 13616  | 2+:174586119-174607492  |
| 9902 | Armc5         | 233912 | 7+:135381536-135388607  |
| 9903 | Il22          | 50929  | 10+:117641997-117647100 |
| 9904 | Hbegf         | 15200  | 18-:36664586-36675428   |
| 9905 | MMT00044357   |        | 1+:35863811-35867309    |
| 9906 | Ninj2         | 29862  | 6+:120043367-120150356  |
| 9907 | 4932442K08Rik | 67544  | 17+:15539487-15569002   |
| 9908 | Slc2a13       | 239606 | 15-:91102586-91403660   |
| 9909 | MMT00077883   |        | 3+:94257254-94258001    |
| 9910 | EG666644      | 666644 | 1+:43327668-43359076    |
| 9911 | Inpp4a        | 269180 | 1+:37414763-37465103    |
| 9912 | Ttc27         | 74196  | 17+:75117088-75262909   |
| 9913 | Tbc1d25       | 209815 | X-:7731577-7753049      |
| 9914 | Sf3b4         | 107701 | 3+:95976449-95976966    |
| 9915 | A630033H20Rik | 213438 | X+:104344375-104367431  |
| 9916 | 2510048L02Rik | 67119  | 9+:21731914-21740316    |
| 9917 | Syn3          | 27204  | 10-:85518253-85961584   |
| 9918 | Mki67         | 17345  | 7-:142881466-142907822  |
| 9919 | Gabarapl1     | 57436  | 6+:129483464-129491184  |
| 9920 | Syk           | 20963  | 13+:52678541-52744147   |
| 9921 | Sec24d        | 69608  | 3+:122970384-123068560  |
| 9922 | Inpp5f        | 101490 | 7+:135754814-135839949  |
| 9923 | Tssk6         | 83984  | 8+:72426113-72427415    |
| 9924 | MMT00068388   |        | 18-:90187323-90188462   |
| 9925 | ApoE          | 11816  | 7-:20281619-20283579    |
| 9926 | Snx18         | 170625 | 13-:114382392-114408753 |
| 9927 | Creb3l2       | 208647 | 6-:37305642-37392129    |
| 9928 | Lgmn          | 19141  | 12-:103632308-103677907 |
| 9929 | Mthfsd        | 234814 | 8-:123607721-123632284  |
| 9930 | Phyhip        | 105653 | 14+:70857337-70868627   |
| 9931 | GlT25d1       | 234407 | 8+:74134896-74148808    |
| 9932 | BC059842      | 230676 | 4-:118075007-118078156  |
| 9933 | Katnb1        | 74187  | 8+:97605101-97668834    |
| 9934 | MMT00002304   |        | X-:13504412-13506637    |
| 9935 | Prnd          | 26434  | 2+:131776597-131781865  |
| 9936 | Speer7-ps1    | 75858  | 5+:15218736-15238478    |
| 9937 | Rtp2          | 224055 | 16-:23927293-23930784   |
| 9938 | MMT00012610   |        | 19-:13176870-13177756   |
| 9939 | Pcnt          | 18541  | 10-:75847607-75905657   |
| 9940 | Tmbim1        | 69660  | 1-:74335992-74341973    |
| 9941 | RP23-394O9.3  | 58251  | 11-:118193673-118203814 |
| 9942 | AK220484      | 381157 | 18+:10458222-10557438   |
| 9943 | Itga10        | 213119 | 3+:96451002-96467319    |

|      |               |        |                          |
|------|---------------|--------|--------------------------|
| 9944 | Cntfr         | 12804  | 4-:41604529-41644072     |
| 9945 | Mrpl38        | 60441  | 11-:115993135-116000069  |
| 9946 | Stam2         | 56324  | 2-:52550083-52601198     |
| 9947 | Pramel1       | 83491  | 4+ :142984330-142990057  |
| 9948 | MMT00011685   |        | 11-:89914224-89924189    |
| 9949 | Zfp364        | 67845  | 3+ :96531603-96595075    |
| 9950 | Mgat4b        | 103534 | 11+ :50045540-50048605   |
| 9951 | Rpp21         | 67676  | 17- :36392617-36394791   |
| 9952 | Nrp1          | 18186  | 8+ :130883139-131027247  |
| 9953 | Abca16        | 233810 | 7+ :127567216-127596652  |
| 9954 | MMT00047280   |        | X- :23931485-23931605    |
| 9955 | Psmg2         | 107047 | 18+ :67801252-67813816   |
| 9956 | Lhx4          | 16872  | 1- :157548853-157572091  |
| 9957 | Ythdf2        | 213541 | 4- :131742674-131767972  |
| 9958 | 2310026E23Rik | 67621  | 4+ :111087611-111132902  |
| 9959 | Ecm1          | 13601  | 3- :95538071-95543485    |
| 9960 | Stk16         | 20872  | 1+ :75207435-75210813    |
| 9961 | Sox3          | 20675  | X- :58146309-58160279    |
| 9962 | Krt23         | 94179  | 11- :99339287-99354424   |
| 9963 | Rcn3          | 52377  | 7- :52338283-52347529    |
| 9964 | EG667705      | 667705 | 5+ :5567458-5579987      |
| 9965 | MMT00013269   |        | 11+ :98010375-98011338   |
| 9966 | Rshl3         | 212892 | 10+ :33625228-33634371   |
| 9967 | Dtymk         | 21915  | 1- :95697072-95698452    |
| 9968 | Eif3s10       | 13669  | 19- :60842234-60851681   |
| 9969 | MMT00005446   |        | 7+ :12210392-12211682    |
| 9970 | MMT00082622   |        | 2+ :40411263-40412198    |
| 9971 | Nqo1          | 18104  | 8- :109912124-109927166  |
| 9972 | Aicda         | 11628  | 6+ :122503835-122514197  |
| 9973 | Tmem5         | 216395 | 10- :121517989-121534226 |
| 9974 | MMT00023592   |        | 12- :116699302-116842584 |
| 9975 | Srfbp1        | 67222  | 18+ :52625346-52650392   |
| 9976 | Trnt1         | 70047  | 6+ :106719130-106732466  |
| 9977 | Zc3h6         | 78751  | 2+ :128823340-128844729  |
| 9978 | Lrrc16b       | 268747 | 14+ :56118294-56120430   |
| 9979 | Myo1b         | 17912  | 1- :51806832-51964160    |
| 9980 | MMT00008758   |        | 1+ :98542150-98543132    |
| 9981 | Snrpn         | 20646  | 7- :67128007-67133633    |
| 9982 | MMT00002004   |        | 1+ :12555611-12556670    |
| 9983 | Dnajc8        | 68598  | 4+ :132091475-132109659  |
| 9984 | EG215895      | 215895 | 10- :33487976-33499645   |
| 9985 | D16Ert519e    | 52645  | 16+ :70618318-70625069   |
| 9986 | Wdr35         | 74682  | 12+ :8980816-9035646     |
| 9987 | Ankrd36       | 76389  | 11+ :5528730-5545156     |
| 9988 | Akap6         | 238161 | 12+ :53896899-54243756   |
| 9989 | MMT00027411   |        | 9- :44471843-44472816    |
| 9990 | MMT00081303   |        | 5- :33773383-33774239    |
| 9991 | Dph1          | 116905 | 11- :74991145-75003976   |
| 9992 | Paqr4         | 76498  | 17- :23873429-23877218   |
| 9993 | 2210010N04Rik | 70381  | 5- :144955316-144984476  |
| 9994 | Cd209b        | 69165  | 8- :3918483-3926757      |

|       |               |           |                         |
|-------|---------------|-----------|-------------------------|
| 9995  | MMT00046202   |           | X+:91557345-91558125    |
| 9996  | Rassf9        | 237504    | 10+:101974918-102008830 |
| 9997  | Nr0b2         | 23957     | 4+:133109339-133112150  |
| 9998  | Hfm1          | 330149    | 5-:107269612-107274495  |
| 9999  | Zswim3        | 67538     | 2+:164630598-164647626  |
| 10000 | Ptger4        | 19219     | 15-:5183864-5193831     |
| 10001 | Pygm          | 19309     | 19+:6384428-6398458     |
| 10002 | Krt79         | 223917    | 15-:101759764-101770755 |
| 10003 | B4galt7       | 218271    | 13+:55701471-55711314   |
| 10004 | Nmt1          | 18107     | 11+:102889864-102927116 |
| 10005 | Dhx34         | 71723     | 7-:16783903-16784304    |
| 10006 | Ephx2         | 13850     | 14-:66703210-66743289   |
| 10007 | MMT00033070   |           | 2-:97788230-97789852    |
| 10008 | Etf1          | 225363    | 18-:35064135-35091584   |
| 10009 | MMT00033820   |           | 9+:79194550-79195363    |
| 10010 | Iqcf4         | 67320     | 9-:106470651-106473297  |
| 10011 | Brp44         | 70456     | 1+:167391338-167411345  |
| 10012 | MMT00077406   |           | 11+:94603199-94604328   |
| 10013 | 2010005J08Rik | 72046     | 11-:5613427-5641147     |
| 10014 | MMT00041851   |           |                         |
| 10015 | MMT00065088   |           | 12-:74944110-74964607   |
| 10016 | MMT00067746   |           | 15-:53866942-53867404   |
| 10017 | Wdr73         | 71968     | 7-:88035610-88046123    |
| 10018 | Olf1417       | 258938    | 19-:11902567-11903514   |
| 10019 | Spr2k         | 20765     | 3+:92237266-92237471    |
| 10020 | MMT00058547   | 435962    | 7+:34188148-34209065    |
| 10021 | Oog2          | 381570    | 4+:143780632-143786149  |
| 10022 | EG433161      | 433161    | 18+:9916922-9917757     |
| 10023 | Prkc2         | 404705    | 7-:28667425-28669553    |
| 10024 | MMT00000014   |           | 17-:50366966-50367519   |
| 10025 | A130082M07Rik | 100038850 | 14+:54787766-54843877   |
| 10026 | Ndufc2        | 68197     | 7+:104548601-104556304  |
| 10027 | Mcm9          | 71567     | 10-:53256174-53283263   |
| 10028 | Chchd6        | 66098     | 6-:89333149-89545631    |
| 10029 | Trak1         | 67095     | 9+:121273118-121384034  |
| 10030 | Gba           | 14466     | 3+:89006938-89012594    |
| 10031 | Zbtb22        | 81630     | 17+:34053827-34055743   |
| 10032 | Sele          | 20339     | 1+:165978364-165987808  |
| 10033 | Ccdc109a      | 215999    | 10-:58911228-58930623   |
| 10034 | 2010111I01Rik | 72061     | 13+:63252861-63401173   |
| 10035 | MMT00041814   |           | 8+:38217794-38218856    |
| 10036 | Nppa          | 230899    | 4+:147374756-147376234  |
| 10037 | Usp51         | 434872    | X+:149442688-149443965  |
| 10038 | Speer6-ps1    | 73266     | 13+:3148720-3188924     |
| 10039 | V1rh5         | 171248    | 13+:23126206-23127308   |
| 10040 | MMT00080694   |           | 4+:60449061-60453064    |
| 10041 | Ccdc38        | 237465    | 10+:93003356-93046117   |
| 10042 | MMT00028111   |           | 8-:100747156-100748701  |
| 10043 | Shmt1         | 20425     | 11-:60610746-60624593   |
| 10044 | 1810074P20Rik | 67490     | 4-:25177296-25208909    |
| 10045 | Kcnp2         | 80906     | 19-:45868159-45890293   |



|       |               |        |                        |
|-------|---------------|--------|------------------------|
| 10046 | MMT00015879   |        | 2-:11020493-11021905   |
| 10047 | Susd5         | 382111 | 9+:113966593-114006028 |
| 10048 | Olfr1347      | 258383 | 7-:6440624-6441583     |
| 10049 | V1rc18        | 171191 | 6-:57905636-57906525   |
| 10050 | Olfr154       | 27216  | 2-:85503634-85504589   |
| 10051 | Mylk2         | 228785 | 2+:152737775-152747890 |
| 10052 | 6530404N21Rik | 67795  | 19-:33212236-33277138  |
| 10053 | MMT00002151   |        | 14+:67587971-67588594  |
| 10054 | Fsip1         | 71313  | 2-:118030623-118082690 |
| 10055 | Tpte          | 234129 | 8+:23438115-23476478   |
| 10056 | Cmtm3         | 68119  | 8+:106864586-106871571 |
| 10057 | Sult6b1       | 73671  | 17-:79284235-79306332  |
| 10058 | Ahsg          | 11625  | 16+:22892114-22899511  |
| 10059 | Olfr1469      | 258690 | 19+:13485060-13485990  |
| 10060 | Al747448      | 99709  | 3-:144573884-144595499 |
| 10061 | Nsd1          | 18193  | 13+:55417058-55419683  |
| 10062 | Pfas          | 237823 | 11-:68801073-68817378  |
| 10063 | Mdn1          | 100019 | 4+:32743778-32753548   |
| 10064 | Mbip          | 217588 | 12-:57429306-57446855  |
| 10065 | 9030625A04Rik | 210808 | 14-:77424008-77430769  |
| 10066 | Krtap8-2      | 16704  | 16-:88896212-88896695  |
| 10067 | Ppapdc1a      | 381925 | 7+:136400356-136534568 |
| 10068 | 2310051M13Rik | 70202  | 13-:60899612-60901211  |
| 10069 | Alkbh1        | 211064 | 12-:88768070-88784785  |
| 10070 | V1rc8         | 113865 | 6-:57928387-57929296   |
| 10071 | MMT00001947   |        | 5-:73017832-73019356   |
| 10072 | Gipc2         | 54120  | 3-:151756806-151828864 |
| 10073 | 2010321M09Rik | 69882  | 9+:64808690-64834780   |
| 10074 | Adat1         | 30947  | 8-:114492145-114514296 |
| 10075 | MMT00075669   |        | 15+:77273760-77274850  |
| 10076 | Cyp2c68       | 433247 | 19-:39763326-39815544  |
| 10077 | Cep63         | 28135  | 9-:102488914-102528545 |
| 10078 | Tbc1d14       | 100855 | 5-:36835182-36928876   |
| 10079 | Abcb4         | 18670  | 5+:8893716-8959225     |
| 10080 | Top2b         | 21974  | 14+:17198146-17263301  |
| 10081 | Fth1          | 14319  | 19+:10057192-10059582  |
| 10082 | Insr          | 16337  | 8-:3155669-3279176     |
| 10083 | Med16         | 216154 | 10-:79357455-79371665  |
| 10084 | Rbm7          | 67010  | 9-:48296813-48303410   |
| 10085 | 5730590G19Rik | 77011  | 7+:86822207-86829355   |
| 10086 | Mfap3l        | 71306  | 8+:63134351-63151550   |
| 10087 | Bmp3          | 110075 | 5+:99284131-99309299   |
| 10088 | Ddc           | 13195  | 11-:11714445-11780653  |
| 10089 | MMT00006552   |        | 7-:32255955-32256416   |
| 10090 | Dpagt1        | 13478  | 9+:44135076-44141678   |
| 10091 | EG114600      | 114600 | 6-:132311063-132314138 |
| 10092 | Cdh7          | 241201 | 1+:111880220-112035766 |
| 10093 | Olfr985       | 258854 | 9-:39934609-39935544   |
| 10094 | MMT00022290   |        | 13-:65524617-65833379  |
| 10095 | Ranbp2        | 19386  | 10+:57909727-57956714  |
| 10096 | Eef1a1        | 13627  | 9-:78248867-78329479   |

|       |               |        |                         |
|-------|---------------|--------|-------------------------|
| 10097 | Smndc1        | 76479  | 19-:53453702-53465067   |
| 10098 | 2610507B11Rik | 72503  | 11+:78075293-78093420   |
| 10099 | Smyd3         | 69726  | 1-:180887389-181448165  |
| 10100 | Mterfd2       | 69821  | 1-:95197806-95201342    |
| 10101 | Frmpd3        | 245643 | X+:136900194-136969705  |
| 10102 | Lman2l        | 214895 | 1-:36480029-36502105    |
| 10103 | Asxl3         | 211961 | 18+:22610871-22684048   |
| 10104 | Tcp10a        | 21460  | 17+:13254056-13569627   |
| 10105 | A630054L15Rik | 211922 | 14+:27399063-27447894   |
| 10106 | Bglap-rs1     | 12095  | 3-:88172543-88173478    |
| 10107 | Pdx1          | 18609  | 5+:148081534-148086732  |
| 10108 | Ctsh          | 13036  | 9+:89949346-89970927    |
| 10109 | Gbp3          | 55932  | 3+:142223571-142236171  |
| 10110 | MMT00044983   |        | 17-:70742463-70742806   |
| 10111 | BC017612      | 170748 | 9+:15309938-15349701    |
| 10112 | Kcns1         | 16538  | 2-:163990041-163996825  |
| 10113 | Lrrk1         | 233328 | 7-:73404068-73410332    |
| 10114 | Rims1         | 116837 | 1-:22278447-22812563    |
| 10115 | Ptk2          | 14083  | 15-:73156178-73161446   |
| 10116 | Mettl7b       | 71664  | 10-:128395332-128398044 |
| 10117 | Vamp7         | 20955  | X_random-:18581-39151   |
| 10118 | Il3ra         | 16188  | 14+:15179008-15188004   |
| 10119 | MMT00000256   |        | 3+:22971516-22973424    |
| 10120 | C730025P13Rik | 227615 | 2+:25111189-25111600    |
| 10121 | Esrrg         | 26381  | 1+:189821815-190035141  |
| 10122 | Wdr3          | 269470 | 3-:99953787-99966256    |
| 10123 | Rbm15b        | 109095 | 9-:106782816-106788896  |
| 10124 | Samd3         | 268288 | 10+:25964286-25971719   |
| 10125 | MMT00002345   |        | X+:18689905-18690211    |
| 10126 | MMT00058622   |        | 15-:3167182-3168954     |
| 10127 | Tpm1          | 22003  | 9-:66875702-66896975    |
| 10128 | MMT00048557   |        | 17-:91191787-91193560   |
| 10129 | MMT00079932   |        | 7+:141851959-141853338  |
| 10130 | MMT00043239   |        | 5-:126505516-126506821  |
| 10131 | Gdap1         | 14545  | 1+:17135465-17154094    |
| 10132 | Ces2          | 234671 | 8+:107370985-107378367  |
| 10133 | MMT00047183   |        | 7-:118530306-118530846  |
| 10134 | Hivep3        | 16656  | 4+:119406376-119545933  |
| 10135 | MMT00002007   |        | 1+:28046952-28048558    |
| 10136 | RP23-149D11.4 | 381535 | 4+:101581725-101582688  |
| 10137 | Sdad1         | 231452 | 5-:92727212-92739053    |
| 10138 | MMT00020352   |        | 10-:110037573-110076696 |
| 10139 | Hdhd1a        | 67365  | 18-:50727309-50728324   |
| 10140 | Cdc2l6        | 78334  | 10+:40020193-40203623   |
| 10141 | Lysmd4        | 75099  | 7+:74367428-74371564    |
| 10142 | 5830405N20Rik | 67596  | 10+:129784191-129799697 |
| 10143 | Uchl1         | 22223  | 5+:67067526-67078472    |
| 10144 | Dgcr6         | 13353  | 16+:18066036-18072177   |
| 10145 | 2700038C09Rik | 66496  | 2+:180922047-180923209  |
| 10146 | Jmjd1b        | 277250 | 18+:34952657-34999023   |
| 10147 | Itgax         | 16411  | 7+:135273081-135294170  |

|       |               |        |                         |
|-------|---------------|--------|-------------------------|
| 10148 | Cecr5         | 214932 | 6-:120459512-120481317  |
| 10149 | EG631319      | 631319 | X+:92035055-92035686    |
| 10150 | Oxct1         | 67041  | 15+:3976723-4103963     |
| 10151 | 4930538K18Rik | 75180  | 4-:118877660-118890781  |
| 10152 | Ptpn2         | 19255  | 18-:67825166-67884231   |
| 10153 | Phactr3       | 74189  | 2+:177853904-177883498  |
| 10154 | Nrgn          | 64011  | 9-:37352077-37360394    |
| 10155 | Slc6a5        | 104245 | 7+:57167069-57214794    |
| 10156 | Htr2c         | 15560  | X+:143397188-143630220  |
| 10157 | MMT00060350   | 435755 | 3+:129136789-129137570  |
| 10158 | Nat1          | 17960  | 8+:70014656-70016000    |
| 10159 | Msh3          | 17686  | 13-:93110714-93123989   |
| 10160 | Olftr23       | 18321  | 11+:73753749-73754725   |
| 10161 | Jtb           | 23922  | 3+:90035534-90039771    |
| 10162 | Pde3a         | 54611  | 6+:141197789-141447872  |
| 10163 | Centg2        | 347722 | 1+:91662879-91787524    |
| 10164 | 2310004N24Rik | 69535  | 11+:116060194-116076631 |
| 10165 | Parp1         | 11545  | 1+:182499105-182531384  |
| 10166 | Rhbdd2        | 215160 | 5+:136108591-136120016  |
| 10167 | Otop3         | 69602  | 11+:115206180-115208239 |
| 10168 | Gm1604        | 381059 | 17+:7229892-7233990     |
| 10169 | 4933402J07Rik | 330820 | 8+:90109899-90113324    |
| 10170 | Trpm2         | 28240  | 10-:77372904-77431979   |
| 10171 | MMT00009402   |        | 7-:4902648-4902890      |
| 10172 | Ntf3          | 18205  | 6-:126051744-126052520  |
| 10173 | Nck1          | 17973  | 9-:100395796-100446553  |
| 10174 | Amz2          | 13929  | 11+:109287300-109298071 |
| 10175 | EG245190      | 245190 | 7-:106774004-106774675  |
| 10176 | Snrpg         | 68011  | 6+:86321537-86328896    |
| 10177 | Osgep         | 66246  | 14-:51535358-51544503   |
| 10178 | Dad1          | 13135  | 14-:54855161-54873547   |
| 10179 | EG333669      | 333669 | 10+:75429127-75441087   |
| 10180 | 5730455O13Rik | 70567  | 19-:38215869-38298795   |
| 10181 | Olftr907      | 258801 | 9+:38306255-38307186    |
| 10182 | Nrxn3         | 18191  | 12+:91407359-91572599   |
| 10183 | Tax1bp1       | 52440  | 6+:52663741-52716478    |
| 10184 | MMT00003597   |        | 14-:86889696-86911623   |
| 10185 | MMT00017571   |        | 7-:140600470-140600909  |
| 10186 | 2610003J06Rik | 72106  | 17+:25965991-25968709   |
| 10187 | Mterfd1       | 66410  | 13-:67013061-67033996   |
| 10188 | MMT00067946   |        | 17-:54486047-54486918   |
| 10189 | Cage1         | 71213  | 13-:38097917-38108361   |
| 10190 | Pcdh7         | 54216  | 5+:58109338-58120686    |
| 10191 | Ilf3          | 16201  | 9+:21173026-21209765    |
| 10192 | Narg2         | 93697  | 9+:69263523-69280675    |
| 10193 | Olftr509      | 258369 | 7-:115789123-115790088  |
| 10194 | Nrxn3         | 18191  | 12+:90033628-90041839   |
| 10195 | Klf1          | 16596  | 8+:87425826-87429186    |
| 10196 | Cebpa         | 12606  | 7+:35904437-35905626    |
| 10197 | Kif16b        | 16558  | 2-:142444110-142727165  |
| 10198 | Ddx25         | 30959  | 9-:35349516-35365333    |

|       |               |        |                          |
|-------|---------------|--------|--------------------------|
| 10199 | MMT00050019   | 675135 | 1-:58918096-58933287     |
| 10200 | Acot7         | 70025  | 4-:151551867-151552533   |
| 10201 | Slc13a5       | 237831 | 11-:72064227-72080104    |
| 10202 | Klhl32        | 212390 | 4-:24544417-24609425     |
| 10203 | Cyp4f16       | 70101  | 17+:32673573-32688741    |
| 10204 | Gpr126        | 215798 | 10-:14125152-14154203    |
| 10205 | Hagh          | 14651  | 17+:24987491-25001393    |
| 10206 | 4931428L18Rik | 70988  | 1-:31197922-31279456     |
| 10207 | MMT00012324   | 328192 | 13+:16122413-16123441    |
| 10208 | 6030446N20Rik | 338363 | 18-:12152072-12280024    |
| 10209 | Plin          | 103968 | 7-:86866051-86877780     |
| 10210 | Sgms1         | 208449 | 19-:32198262-32285470    |
| 10211 | Pfkl          | 18641  | 10-:77450651-77472470    |
| 10212 | 4933430H16Rik | 71285  | 7-:90089039-90115727     |
| 10213 | Eif3g         | 53356  | 9-:20698825-20703024     |
| 10214 | Sectm1b       | 58210  | 11-:120915844-120924852  |
| 10215 | Nampt         | 59027  | 12+:33505339-33536472    |
| 10216 | Krtap16-7     | 170656 | 16-:89403605-89404013    |
| 10217 | Ccl28         | 56838  | 13_random-:365830-393924 |
| 10218 | Vps41         | 218035 | 13+:18815054-18958681    |
| 10219 | Rpl8          | 26961  | 15+:76734528-76736742    |
| 10220 | Baiap2        | 108100 | 11+:119804414-119862782  |
| 10221 | Thsd4         | 207596 | 9-:59820204-59988943     |
| 10222 | AF366264      | 231201 | 8-:13836581-13838059     |
| 10223 | MMT00013190   | 236598 |                          |
| 10224 | Hes7          | 84653  | 11+:68933975-68936495    |
| 10225 | EG668829      | 668829 | 9-:115942871-115964997   |
| 10226 | MMT00023069   |        | 8+:19579894-19580597     |
| 10227 | Pax5          | 18507  | 4-:44544378-44723312     |
| 10228 | MMT00082629   |        | 8-:81010016-81010310     |
| 10229 | Ripk1         | 19766  | 13+:34101477-34124881    |
| 10230 | Yme1l1        | 27377  | 2+:23012055-23052877     |
| 10231 | Abca1         | 11303  | 4-:53045810-53156950     |
| 10232 | Gja10         | 14610  | 4-:32687841-32689357     |
| 10233 | Abi3bp        | 320712 | 16+:56477962-56562602    |
| 10234 | C230093N12Rik | 98952  | 2+:32390814-32423648     |
| 10235 | Gm973         | 381260 | 1+:59581191-59583821     |
| 10236 | EG665033      | 665033 | 9-:105759273-105791705   |
| 10237 | Lfng          | 16848  | 5+:141083330-141090439   |
| 10238 | Scml2         | 107815 | X+:157562199-157694816   |
| 10239 | Syt15         | 319508 | 14+:35036029-35040925    |
| 10240 | Cyp2w1        | 545817 | 5+:139828600-139833178   |
| 10241 | Prc1          | 233406 | 7+:87439402-87461144     |
| 10242 | MMT00031517   | 628236 | 19-:33574555-33590216    |
| 10243 | Rgs19         | 56470  | 2-:181423482-181428654   |
| 10244 | 1700040N02Rik | 73303  | 2+:170181859-170205935   |
| 10245 | Dus1l         | 68730  | 11-:120650515-120656813  |
| 10246 | Tm4sf20       | 66261  | 1-:82753223-82765031     |
| 10247 | V1rc20        | 171193 | 6+:56952348-56953258     |
| 10248 | Cwf19l2       | 244672 | 9+:3403830-3430474       |
| 10249 | Cd200r3       | 74603  | 16+:44943854-44966403    |

|       |               |        |                           |
|-------|---------------|--------|---------------------------|
| 10250 | Pcsk9         | 100102 | 4-:106115335-106126971    |
| 10251 | Ankrd55       | 77318  | 13+:113113259-113174201   |
| 10252 | MMT00056233   |        | X-:135057334-135058076    |
| 10253 | Rnf24         | 51902  | 2-:131128379-131178649    |
| 10254 | Spr2j         | 20764  | 3+:92222741-92223069      |
| 10255 | Muc16         | 73732  | 9-:18299897-18323792      |
| 10256 | Gmds          | 218138 | 13-:31911458-32430413     |
| 10257 | Pcyox1l       | 240334 | 18-:61856899-61867310     |
| 10258 | Cisd2         | 67006  | 3-:135069978-135086355    |
| 10259 | Kcnmb4        | 58802  | 10-:115854923-115910579   |
| 10260 | Zfp36l2       | 12193  | 17-:84585332-84586477     |
| 10261 | Lcp1          | 18826  | 14+:75597875-75629249     |
| 10262 | Nxf7          | 170722 | X-:132114092-132124009    |
| 10263 | Pip5k3        | 18711  | 1+:65233275-65320331      |
| 10264 | MMT00033776   |        | 12-:105157763-105164511   |
| 10265 | Tbce          | 70430  | 13-:14089210-14131968     |
| 10266 | 1500041N16Rik | 67836  | 8-:87598955-87604605      |
| 10267 | Setdb2        | 239122 | 14-:60020844-60059618     |
| 10268 | MMT00001907   |        | 9+:9434591-9435005        |
| 10269 | Rhot2         | 214952 | 17-:25975783-25981449     |
| 10270 | Setd1b        | 208043 | 5+:123598088-123607877    |
| 10271 | Pvrl3         | 58998  | 16-:46395117-46496887     |
| 10272 | MMT00025452   |        | X-:131216044-131216377    |
| 10273 | Gpt2          | 108682 | 8+:88016483-88051465      |
| 10274 | MMT00076184   |        | 9+:40295245-40295903      |
| 10275 | Trim12        | 76681  | 7-:111452110-111463977    |
| 10276 | Dcun1d1       | 114893 | 3-:35794141-35831888      |
| 10277 | Exoc3         | 211446 | 13-:74308609-74346138     |
| 10278 | Dusp6         | 67603  | 10+:98725864-98730118     |
| 10279 | Rnf186        | 66825  | 4+:138523118-138524274    |
| 10280 | Asnsd1        | 70396  | 1-:53401481-53409416      |
| 10281 | Slc15a1       | 56643  | 14-:121858842-121904475   |
| 10282 | Dhx57         | 106794 | 17-:80637651-80675375     |
| 10283 | Map2k7        | 26400  | 8+:4238985-4246173        |
| 10284 | Ssh2          | 237860 | 11+:77161927-77231033     |
| 10285 | MMT00048888   |        | 5+:16880161-16883486      |
| 10286 | 1700109H08Rik | 77036  | 5+:3571145-3584594        |
| 10287 | Xkrx          | 331524 | X-:130685090-130692024    |
| 10288 | Piwil2        | 57746  | 14-:70772286-70828901     |
| 10289 | Zfp313        | 81018  | 2+:167328967-167340232    |
| 10290 | Ssty1         | 20611  | Y_random-:9328876-9331261 |
| 10291 | Arl13a        | 74448  | X+:130722038-130742568    |
| 10292 | Cobl          | 12808  | 11-:12136680-12364750     |
| 10293 | Cd5           | 12507  | 19-:10792636-10813342     |
| 10294 | D630002G06Rik | 236293 | 19-:8234704-8293388       |
| 10295 | Prdm2         | 110593 | 4-:142701535-142770894    |
| 10296 | MMT00076996   |        | 5-:143898910-143927802    |
| 10297 | Lypd1         | 72585  | 1-:127768860-127807942    |
| 10298 | Olf1015       | 258564 | 2+:85625669-85626607      |
| 10299 | Rad52         | 19365  | 6+:119852731-119872840    |
| 10300 | Igfbp4        | 16010  | 11+:98902810-98912892     |

|       |               |        |                         |
|-------|---------------|--------|-------------------------|
| 10301 | Fut4          | 14345  | 9-:14555139-14556440    |
| 10302 | Rab18         | 19330  | 18+:6765258-6788718     |
| 10303 | Cyp2a22       | 233005 | 7-:27716650-27724409    |
| 10304 | MMT00040510   |        | 6-:71622516-71654758    |
| 10305 | Gabpa         | 14390  | 16+:84835361-84860995   |
| 10306 | MMT00054080   |        | 2-:173872230-173872877  |
| 10307 | Cnot1         | 234594 | 8-:98243530-98331362    |
| 10308 | Fuk           | 234730 | 8-:113406369-113413190  |
| 10309 | Hdac6         | 15185  | X-:7507255-7524370      |
| 10310 | V1rg4         | 171239 | 7-:12515661-12516634    |
| 10311 | Cpox          | 12892  | 16+:58670404-58680473   |
| 10312 | MMT00041216   |        | 6-:88832626-88833199    |
| 10313 | Ptpn23        | 104831 | 9-:110287593-110310621  |
| 10314 | Ranbp17       | 66011  | 11-:33112419-33413626   |
| 10315 | 6720457D02Rik | 77117  | 13-:62471397-62471713   |
| 10316 | MMT00078795   |        | 1+:32760098-32762064    |
| 10317 | Nmnat2        | 226518 | 1+:154920926-154963144  |
| 10318 | Cdk8          | 264064 | 5+:147043070-147114448  |
| 10319 | Pkhd111       | 192190 | 15+:44364402-44367451   |
| 10320 | Cacnb2        | 12296  | 2+:14525940-14535983    |
| 10321 | Gabra3        | 14396  | X-:69679944-69901488    |
| 10322 | Mcpt2         | 17225  | 14+:56660959-56663471   |
| 10323 | 0610009D07Rik | 66055  | 12+:4824357-4834064     |
| 10324 | Ncln          | 103425 | 10-:80948998-80959472   |
| 10325 | Prmt7         | 214572 | 8+:108734953-108775592  |
| 10326 | E330009P21Rik | 320082 | 9-:109041970-109050742  |
| 10327 | Hint2         | 68917  | 4-:43667100-43669320    |
| 10328 | Gpr182        | 11536  | 10-:127186677-127188749 |
| 10329 | MMT00077557   |        | 5+:22815623-22845021    |
| 10330 | Lrch3         | 70144  | 16+:32914205-33009522   |
| 10331 | Slc9a4        | 110895 | 1+:40637360-40681146    |
| 10332 | Gnrhr         | 14715  | 5-:86611036-86626895    |
| 10333 | MMT00004363   |        | 14+:54164640-54165341   |
| 10334 | MMT00020302   |        | 7+:34097622-34098118    |
| 10335 | Arsb          | 11881  | 13+:94711475-94712970   |
| 10336 | Sf1           | 22668  | 19+:6364087-6376424     |
| 10337 | Zmym1         | 68310  | 4-:126724836-126726950  |
| 10338 | D630045J12Rik | 330286 | 6-:38076528-38147092    |
| 10339 | Tusc3         | 80286  | 8+:40068961-40250466    |
| 10340 | Hc            | 15139  | 2-:34838850-34916916    |
| 10341 | Cdc5l         | 71702  | 17-:45544909-45552690   |
| 10342 | Polq          | 77782  | 16+:37011899-37094699   |
| 10343 | Malat1        | 72289  | 19-:5801054-5802672     |
| 10344 | Timp2         | 21858  | 11-:118164194-118216621 |
| 10345 | Camkk1        | 55984  | 11+:72832554-72855565   |
| 10346 | Rerg          | 232441 | 6-:137004017-137118214  |
| 10347 | Atp12a        | 192113 | 14+:56983864-57007387   |
| 10348 | Fut1          | 14343  | 7+:52872657-52874161    |
| 10349 | Rfxdc1        | 320995 | 10+:51397583-51435855   |
| 10350 | Itpkc         | 233011 | 7-:27992193-28013506    |
| 10351 | Clcn4-2       | 12727  | 7-:7236790-7252042      |

|       |               |        |                         |
|-------|---------------|--------|-------------------------|
| 10352 | MMT00002544   |        | 1-:4677963-4679485      |
| 10353 | Matn4         | 17183  | 2-:164215162-164230037  |
| 10354 | Stx16         | 228960 | 2-:173924479-173925271  |
| 10355 | Bbs4          | 102774 | 9-:59169781-59201261    |
| 10356 | 2810417H13Rik | 68026  | 9+ :65738235-65749410   |
| 10357 | Tm4sf1        | 17112  | 3-:57091304-57098795    |
| 10358 | Fgf3          | 14174  | 7+ :152024612-152028892 |
| 10359 | Foxf2         | 14238  | 13+ :31717647-31723271  |
| 10360 | Nrxn2         | 18190  | 19+ :6418943-6533208    |
| 10361 | MMT00008819   |        | 5-:28326713-28327260    |
| 10362 | S100a3        | 20197  | 3+ :90404136-90406624   |
| 10363 | Usp24         | 329908 | 4+ :106060316-106113935 |
| 10364 | MMT00077722   |        | X+ :156474390-156475366 |
| 10365 | Aplp1         | 11803  | 7-:31220007-31230571    |
| 10366 | 4931403E03Rik | 75718  | 4-:138124983-138179928  |
| 10367 | Coq7          | 12850  | 7-:125668576-125676827  |
| 10368 | Mphosph8      | 75339  | 14+ :57287084-57316267  |
| 10369 | Mier2         | 70427  | 10-:79002990-79004705   |
| 10370 | MMT00017441   | 623205 | 11+ :53014185-53014559  |
| 10371 | 4930485B16Rik | 380654 | 10-:92395300-92403024   |
| 10372 | MMT00073733   |        | 4-:128545718-128546688  |
| 10373 | Tmem141       | 51875  | 2-:25464153-25477523    |
| 10374 | Trim15        | 69097  | 17-:36997637-37004155   |
| 10375 | Wdr47         | 99512  | 3+ :108394353-108448634 |
| 10376 | C920025E04Rik | 667803 | 17-:36264613-36264812   |
| 10377 | A430105I19Rik | 214239 | 2-:118583232-118585443  |
| 10378 | Atg5          | 11793  | 10+ :43988297-44083108  |
| 10379 | Olf1r577      | 259113 | 7-:110121565-110122504  |
| 10380 | MMT00018157   |        | X-:143033206-143035525  |
| 10381 | Psm5          | 26442  | 3+ :108060128-108082891 |
| 10382 | Mtmr4         | 170749 | 11+ :87405718-87429798  |
| 10383 | BC023179      | 232855 | 7-:7158965-7231218      |
| 10384 | Chic2         | 74277  | 5-:75402448-75440641    |
| 10385 | Solh          | 50817  | 17-:26096501-26102450   |
| 10386 | Zfp108        | 54678  | 7+ :25039838-25046949   |
| 10387 | 4933427D06Rik | 232217 | 6+ :89046112-89058002   |
| 10388 | Ccr7          | 12775  | 11-:99005512-99016383   |
| 10389 | Entpd1        | 12495  | 19+ :40734322-40814218  |
| 10390 | Zfp708        | 432769 | 13-:67175020-67595664   |
| 10391 | Lin54         | 231506 | 5-:100871061-100929661  |
| 10392 | Gm2a          | 14667  | 11+ :54911615-54923557  |
| 10393 | Slc7a8        | 50934  | 14-:55341052-55400378   |
| 10394 | MMT00028435   |        | 7-:48581594-48582685    |
| 10395 | Abcg2         | 26357  | 6+ :58605631-58642416   |
| 10396 | MMT00072312   |        | 6+ :39156261-39157552   |
| 10397 | Gtf2e2        | 68153  | 8+ :34846203-34887452   |
| 10398 | Blk           | 12143  | 14-:63991984-64035954   |
| 10399 | Myef2         | 17876  | 2-:124907224-124949254  |
| 10400 | Pth2          | 114640 | 7+ :52436551-52437208   |
| 10401 | Heph          | 15203  | X+ :93650799-93769821   |
| 10402 | Mia1          | 12587  | 7-:27964765-27966169    |

|       |               |        |                         |
|-------|---------------|--------|-------------------------|
| 10403 | MMT00012905   |        | 13-:13934509-13937001   |
| 10404 | Dlx3          | 13393  | 11+:94981635-94985498   |
| 10405 | Hs6st3        | 50787  | 14+:119537523-120269037 |
| 10406 | Trip10        | 106628 | 17+:57388883-57402845   |
| 10407 | Gpatch3       | 242691 | 4+:133138382-133140157  |
| 10408 | Per1          | 18626  | 11+:68914143-68922861   |
| 10409 | Usp54         | 78787  | 14-:21389469-21410835   |
| 10410 | Dtx1          | 14357  | 5-:121130211-121145412  |
| 10411 | Plag1         | 56711  | 4-:3830781-3832855      |
| 10412 | Nek10         | 238944 | 14+:15697906-15698248   |
| 10413 | Olf487        | 258042 | 7-:115355096-115394259  |
| 10414 | Jagn1         | 67767  | 6+:113392628-113398221  |
| 10415 | Dcdc2a        | 195208 | 13+:25148072-25294336   |
| 10416 | Eaf2          | 106389 | 16-:36793830-36828334   |
| 10417 | Socs7         | 192157 | 11+:97223864-97254942   |
| 10418 | Fbxo17        | 50760  | 7+:29501891-29523157    |
| 10419 | Ndufaf2       | 75597  | 13-:108842780-108948810 |
| 10420 | Atoh7         | 53404  | 10+:62562903-62563351   |
| 10421 | MMT00016905   |        | 11+:53459332-53459823   |
| 10422 | Birc6         | 12211  | 17+:74927634-75102403   |
| 10423 | 1700020O03Rik | 70373  | 12+:87582822-87630305   |
| 10424 | Pin1          | 23988  | 9+:20456554-20468155    |
| 10425 | MMT00042994   |        | X+:98983274-98983779    |
| 10426 | Ly6f          | 17071  | 15+:75098850-75102555   |
| 10427 | Ccdc34        | 68201  | 2+:109862124-109884993  |
| 10428 | V1rg9         | 171244 | 7-:12845107-12846028    |
| 10429 | Olf1219       | 258901 | 2-:88914312-88915246    |
| 10430 | MMT00002908   |        | X-:36258809-36259567    |
| 10431 | Uba3          | 22200  | 6-:97134021-97155337    |
| 10432 | Pcd6ip        | 18571  | 9-:113564052-113617225  |
| 10433 | Mettl5        | 75422  | 2-:69709051-69723663    |
| 10434 | Ppp2r5a       | 226849 | 1-:193175864-193180833  |
| 10435 | Nab2          | 17937  | 10-:127097974-127103734 |
| 10436 | EG240055      | 240055 | 17+:26568731-26578740   |
| 10437 | MMT00062592   |        | X-:51119052-51123209    |
| 10438 | Mgat4c        | 67569  | 10+:101840783-101852606 |
| 10439 | Rps15         | 20054  | 10+:79755201-79756857   |
| 10440 | Olf1157       | 258846 | 2-:87802109-87803047    |
| 10441 | Lat2          | 56743  | 5-:135075891-135090876  |
| 10442 | Pla2g4a       | 18783  | 1-:151676758-151808362  |
| 10443 | Pvrl2         | 19294  | 7-:20302018-20334651    |
| 10444 | 1810020D17Rik | 66273  | 7-:104698852-104727989  |
| 10445 | Ube2s         | 77891  | 7-:4759617-4763930      |
| 10446 | Pcdhb3        | 93874  | 18+:37460636-37463632   |
| 10447 | Dynll2        | 68097  | 11-:87793034-87794338   |
| 10448 | Rac3          | 170758 | 11+:120582914-120585283 |
| 10449 | Mycbp         | 56309  | 4+:123582293-123589439  |
| 10450 | C330006K01Rik | 231855 | 5+:142950827-142953758  |
| 10451 | Olf608        | 258751 | 7+:110618554-110619503  |
| 10452 | Grn           | 14824  | 11+:102294285-102297784 |
| 10453 | MMT00015425   |        | X-:130588298-130589013  |



|       |               |           |                         |
|-------|---------------|-----------|-------------------------|
| 10454 | Dgkk          | 331374    | X+:6472630-6507098      |
| 10455 | MMT00015250   |           | X+:150217937-150218848  |
| 10456 | Sbf2          | 319934    | 7-:117451535-117758429  |
| 10457 | Olf853        | 258908    | 9-:19341454-19342372    |
| 10458 | Pabpc3        | 67543     | 17-:9859361-9862561     |
| 10459 | Rab24         | 19336     | 13-:55421464-55423015   |
| 10460 | MMT00033553   | 664779    | 19-:12838159-12853443   |
| 10461 | Mybbp1a       | 18432     | 11+ :72254870-72265051  |
| 10462 | MMT00070759   |           | 7-:12565016-12569261    |
| 10463 | 1700123L14Rik | 78482     | 6-:96114495-96116091    |
| 10464 | Zfp367        | 238673    | 13-:64235482-64254035   |
| 10465 | BC023892      | 212943    | 9-:85217149-85220900    |
| 10466 | S1pr5         | 94226     | 9-:21047360-21050653    |
| 10467 | MMT00074572   | 100038888 | 5+ :143419271-143435261 |
| 10468 | Tspan33       | 232670    | 6+ :29644255-29668558   |
| 10469 | Rogdi         | 66049     | 16-:5008842-5013612     |
| 10470 | Zmym4         | 67785     | 4-:126539069-126588529  |
| 10471 | Igh-VJ558     | 16061     | 12-:116930076-116930533 |
| 10472 | Il11ra1       | 16157     | 4+ :41714422-41715456   |
| 10473 | Klra8         | 16639     | 6-:130065555-130078178  |
| 10474 | 2410131K14Rik | 76792     | 5+ :118695269-118713115 |
| 10475 | Ccna2         | 12428     | 3-:36463787-36470860    |
| 10476 | 4930529M08Rik | 78774     | 2+ :145760439-145927787 |
| 10477 | Trpc4ap       | 56407     | 2-:155460044-155518068  |
| 10478 | Zcchc11       | 230594    | 4+ :108132030-108230109 |
| 10479 | Pld2          | 18806     | 11+ :70353665-70371612  |
| 10480 | Dcc           | 13176     | 18-:71418645-72510232   |
| 10481 | Tars2         | 71807     | 3-:95543898-95558785    |
| 10482 | Mcat          | 223722    | 15-:83377225-83379765   |
| 10483 | Crot          | 74114     | 5-:8966047-8997144      |
| 10484 | Dnajb11       | 67838     | 16+ :22869210-22872439  |
| 10485 | Pitpna        | 18738     | 11+ :75401609-75442280  |
| 10486 | 1300002K09Rik | 74152     | 4+ :45861818-45899880   |
| 10487 | MMT00016719   |           | 3-:93517601-93518479    |
| 10488 | MMT00042783   |           | 12-:108443456-108444324 |
| 10489 | Aldh1b1       | 72535     | 4+ :45811998-45817473   |
| 10490 | Peg3          | 18616     | 7-:6660217-6664362      |
| 10491 | Acpl2         | 235534    | 9-:96722838-96789843    |
| 10492 | 1810046K07Rik | 69809     | 9-:51097798-51137024    |
| 10493 | Hbq1          | 216635    | 11+ :32200065-32200873  |
| 10494 | Arhgef10l     | 72754     | 4-:140070398-140221778  |
| 10495 | Grrp1         | 72690     | 4-:133807265-133827221  |
| 10496 | Nsun5         | 100609    | 5+ :135845829-135852012 |
| 10497 | Man2b1        | 17159     | 8+ :87607228-87621415   |
| 10498 | Ube2z         | 268470    | 11-:95908740-95926641   |
| 10499 | Camkk2        | 207565    | 5-:123183212-123214303  |
| 10500 | H2-M10.5      | 224761    | 17+ :36860966-36912013  |
| 10501 | Zfp36         | 22695     | 7-:29161802-29164275    |
| 10502 | Axud1         | 215418    | 9-:119880282-119883533  |
| 10503 | MMT00043055   |           | 10+ :31358888-31360169  |
| 10504 | Ripk3         | 56532     | 14-:56403833-56407623   |

|       |               |           |                         |
|-------|---------------|-----------|-------------------------|
| 10505 | MMT00065797   |           | 8-:33993977-33995118    |
| 10506 | Rars2         | 109093    | 4+:34562218-34607659    |
| 10507 | Clec2g        | 70809     | 6+:128884398-128934489  |
| 10508 | MMT00042564   |           | X-:86000484-86002007    |
| 10509 | Olfr1431      | 258409    | 19+:12250062-12284994   |
| 10510 | Grm7          | 108073    | 6+:111157736-111204126  |
| 10511 | Tmem68        | 72098     | 4-:3476389-3501947      |
| 10512 | MMT00058467   | 238427    | 12-:115251355-115645172 |
| 10513 | Cttnbp2       | 30785     | 6-:18317370-18377886    |
| 10514 | Zp1           | 22786     | 19-:10988778-10995122   |
| 10515 | Klh4          | 237010    | X+:111588032-111673398  |
| 10516 | Prr6          | 73139     | 11-:62338444-62352764   |
| 10517 | Gpr75         | 237716    | 11+:30785442-30792717   |
| 10518 | Fntb          | 110606    | 12+:77938453-78022399   |
| 10519 | MMT00061955   |           | 5-:66111856-66113448    |
| 10520 | Xkr6          | 219149    | 14+:64413856-64438627   |
| 10521 | Ttf2          | 74044     | 3-:100742784-100773576  |
| 10522 | Zbtb40        | 230848    | 4-:136538970-136551627  |
| 10523 | Pou4f3        | 18998     | 18+:42554296-42555657   |
| 10524 | MMT00057407   |           | X+:77149783-77150153    |
| 10525 | MMT00036668   |           | X-:136980119-136980473  |
| 10526 | MMT00036239   |           | 7-:61861136-61866491    |
| 10527 | Runx1t1       | 12395     | 4+:13711928-13818264    |
| 10528 | Pip5k1b       | 18719     | 19-:24369369-24518175   |
| 10529 | O610025P10Rik | 216860    | 11+:69715378-69727318   |
| 10530 | Cmklr1        | 14747     | 5-:114063832-114105083  |
| 10531 | Mlana         | 77836     | 19+:29772311-29782937   |
| 10532 | MMT00057790   |           | X-:114777483-114778383  |
| 10533 | MMT00057494   |           | 6-:43716683-43717314    |
| 10534 | MMT00047748   |           | X-:8232324-8240974      |
| 10535 | Cby1          | 73739     | 15+:79489681-79498092   |
| 10536 | MMT00054230   |           |                         |
| 10537 | BC066028      | 407812    | 7-:147996905-148008079  |
| 10538 | MMT00051230   |           | 10-:7042944-7043492     |
| 10539 | Unc45b        | 217012    | 11+:82725180-82756641   |
| 10540 | Al851790      | 268354    | 10+:123141414-123142884 |
| 10541 | Ap2a2         | 11772     | 7+:148748107-148817541  |
| 10542 | Hao3          | 56185     | 3-:98678630-98697149    |
| 10543 | BC030307      | 103220    | 10+:86193817-86199744   |
| 10544 | Gdpd1         | 66569     | 11-:86847369-86887593   |
| 10545 | Tmem147       | 69804     | 7-:31512734-31514502    |
| 10546 | Prpf6         | 68879     | 2+:181336096-181390365  |
| 10547 | Maml3         | 433586    | 3-:51659420-51660998    |
| 10548 | MMT00028010   |           | 19-:5131907-5132748     |
| 10549 | C330005M16Rik | 101744    | 7-:29392341-29416033    |
| 10550 | Rchy1         | 68098     | 5-:92377867-92391790    |
| 10551 | Them5         | 66198     | 3+:94146020-94151266    |
| 10552 | Cd74          | 16149     | 18+:60963406-60971580   |
| 10553 | Dusp23        | 68440     | 1-:174560901-174563129  |
| 10554 | ENSMUSG00000  | 100042314 | 9+:78137728-78153330    |
| 10555 | A630007B06Rik | 213993    | 19-:56861973-56896634   |

|       |               |           |                          |
|-------|---------------|-----------|--------------------------|
| 10556 | BC025575      | 217219    | 11-:102298615-102308941  |
| 10557 | 2310022M17Rik | 69556     | 11-:31565164-31571863    |
| 10558 | Cyp2d40       | 71754     | 15-:82590264-82594613    |
| 10559 | Cntrob        | 216846    | 11-:69113007-69137364    |
| 10560 | Nudt14        | 66174     | 12-:114172503-114180354  |
| 10561 | Eln           | 13717     | 5-:135179582-135223111   |
| 10562 | Tusc2         | 80385     | 9+ :107465700-107468441  |
| 10563 | MMT00052891   |           | 19+ :13800713-13801703   |
| 10564 | Gm804         | 328121    | 12+ :71264364-71274428   |
| 10565 | Ccdc67        | 234964    | 9- :15365009-15416600    |
| 10566 | MMT00009174   |           | 8- :24068600-24069092    |
| 10567 | Lass5         | 71949     | 15- :99566021-99602873   |
| 10568 | Rage          | 26448     | 12- :112046008-112079149 |
| 10569 | Zbtb38        | 245007    | 9- :96585855-96589499    |
| 10570 | Ddi1          | 71829     | 9- :6265141-6266548      |
| 10571 | Olfr1228      | 258973    | 2- :89088879-89089849    |
| 10572 | EG384244      | 384244    | 5+ :139296797-139297521  |
| 10573 | 6230416J20Rik | 230376    | 4- :86228784-86246702    |
| 10574 | MMT00007972   |           | 6+ :67741039-67741528    |
| 10575 | MMT00036467   | 100041615 | 5+ :109402333-109404896  |
| 10576 | Xrcc3         | 74335     | 12- :113041403-113052052 |
| 10577 | 4930412O13Rik | 381347    | 2+ :9802510-9811684      |
| 10578 | Acot10        | 64833     | 15- :20594970-20596505   |
| 10579 | MMT00029650   |           | 6- :131383131-131403560  |
| 10580 | Bhlhb4        | 140489    | 2- :180510673-180511454  |
| 10581 | Slc2a8        | 56017     | 2- :32829083-32837558    |
| 10582 | Psmg3         | 66506     | 5- :140299547-140302781  |
| 10583 | Mad2l1        | 56150     | 6+ :66485472-66489946    |
| 10584 | Krtap5-1      | 50774     | 7- :149482282-149482974  |
| 10585 | MMT00038004   |           | 3+ :108684744-108685613  |
| 10586 | Tlr5          | 53791     | 1+ :184902307-184906558  |
| 10587 | Thtpa         | 105663    | 14+ :55713672-55717818   |
| 10588 | 4930578E11Rik | 78058     | 18- :29607479-29611589   |
| 10589 | Olfr159       | 29849     | 4- :43782922-43783881    |
| 10590 | Hsf1          | 15499     | 15+ :76307864-76331584   |
| 10591 | Pmp22         | 18858     | 11+ :62945013-62973048   |
| 10592 | Olig3         | 94222     | 10+ :19076344-19078411   |
| 10593 | Wdr53         | 68980     | 16+ :32247617-32257166   |
| 10594 | Tcrb-V8.3     | 21608     | 6+ :41066034-41066474    |
| 10595 | 2810422O20Rik | 69962     | 1+ :165925045-165927376  |
| 10596 | Nfrkb         | 235134    | 9+ :31193719-31228921    |
| 10597 | Gats          | 80909     | 5+ :134575580-134614427  |
| 10598 | MMT00011231   |           | X- :162920153-162921549  |
| 10599 | Ube1y1        | 22202     | Y+ :155155-180667        |
| 10600 | Olfr1414      | 259041    | 1- :94407664-94408603    |
| 10601 | D330028D13Rik | 231946    | 6+ :49317816-49339276    |
| 10602 | MMT00042056   | 623374    | 6+ :124201603-124202572  |
| 10603 | MMT00015989   |           |                          |
| 10604 | Uimc1         | 20184     | 13- :55129468-55201429   |
| 10605 | A430108E01Rik | 384382    | 8- :19994754-20020372    |
| 10606 | Apbb1ip       | 54519     | 2+ :22629960-22731172    |

|       |               |        |                         |
|-------|---------------|--------|-------------------------|
| 10607 | MMT00008516   |        | 2+:142398253-142403592  |
| 10608 | Mospd1        | 70380  | X-:50698197-50723669    |
| 10609 | Olfr464       | 258407 | 11-:87727464-87759894   |
| 10610 | Nbeal1        | 269198 | 1+:60307878-60388635    |
| 10611 | MMT00013136   |        |                         |
| 10612 | Slc24a6       | 170756 | 5+:120961200-120984028  |
| 10613 | Armc8         | 74125  | 9-:99380022-99469320    |
| 10614 | Olfr644       | 259125 | 7-:111216599-111217543  |
| 10615 | 9430073N08Rik | 77296  | 10-:51305225-51310325   |
| 10616 | Pkn1          | 320795 | 8-:86193564-86222886    |
| 10617 | Rlbp1         | 19771  | 7-:86519756-86529671    |
| 10618 | Avpr1b        | 26361  | 1+:133496317-133506322  |
| 10619 | MMT00007166   |        | X-:115811627-115812487  |
| 10620 | Hgs           | 15239  | 11+:120328998-120344892 |
| 10621 | 4833420G17Rik | 67392  | 13+:120251565-120258567 |
| 10622 | Plagl2        | 54711  | 2-:153057048-153061565  |
| 10623 | Rpl28         | 19943  | 7+:4744572-4746149      |
| 10624 | BC021381      | 212483 | 13-:55640677-55650821   |
| 10625 | Ddx49         | 234374 | 8-:72786603-72826349    |
| 10626 | Rlok3         | 66878  | 18+:12287419-12313836   |
| 10627 | MMT00010914   |        | 13-:33309118-33309544   |
| 10628 | Bpi           | 329547 | 2+:158101655-158110267  |
| 10629 | BC021614      | 225884 | 19-:4057486-4059294     |
| 10630 | Fbxw17        | 109082 | 13-:50528547-50529149   |
| 10631 | 4930455B06Rik | 223825 | 15+:4873609-4875728     |
| 10632 | Anxa8         | 11752  | 14+:34899174-34913752   |
| 10633 | MMT00021266   |        | 17-:74219824-74220690   |
| 10634 | Kitl          | 17311  | 10+:99478457-99563045   |
| 10635 | Itfg2         | 101142 | 6-:128359462-128374928  |
| 10636 | Mal2          | 105853 | 15+:54403040-54434395   |
| 10637 | Olfr495       | 258361 | 7+:115538635-115539627  |
| 10638 | Gpr97         | 54672  | 8+:97564185-97569143    |
| 10639 | Tgfr3         | 21814  | 5-:107535590-107718704  |
| 10640 | Nup93         | 71805  | 8+:96738492-96841127    |
| 10641 | Hpd1          | 242642 | 4-:116492508-116493928  |
| 10642 | Ngef          | 53972  | 1-:89373412-89406921    |
| 10643 | Gc            | 14473  | 5-:89846537-89886926    |
| 10644 | Usf2          | 22282  | 7-:31731014-31741798    |
| 10645 | Recql         | 19691  | 6-:142310669-142335556  |
| 10646 | Topors        | 106021 | 4-:40206639-40216822    |
| 10647 | MMT00032809   |        | 1+:165659708-165660713  |
| 10648 | Atp6ap2       | 70495  | X+:12165013-12193866    |
| 10649 | Nodal         | 18119  | 10+:60881047-60887383   |
| 10650 | Atf7          | 223922 | 15-:102367084-102455852 |
| 10651 | 2610044O15Rik | 72139  | 17-:95214567-95233779   |
| 10652 | Pax4          | 18506  | 6-:28392344-28438525    |
| 10653 | Olfr614       | 259104 | 7+:110700300-110701253  |
| 10654 | Lrrc16b       | 268747 | 14+:56120666-56127103   |
| 10655 | Ccdc62        | 208908 | 5+:124388158-124411347  |
| 10656 | 2900092C05Rik | 73090  | 7+:13097865-13141665    |
| 10657 | Rnf12         | 19820  | X-:101157466-101176587  |

|       |               |           |                         |
|-------|---------------|-----------|-------------------------|
| 10658 | MacroD2       | 72899     | 2+:142035834-142060074  |
| 10659 | ENSMUSG000000 | 100038725 | 10-:52997850-53099484   |
| 10660 | Gtf3c4        | 269252    | 2-:28680886-28695860    |
| 10661 | Unc5d         | 210801    | 8-:29763239-30001982    |
| 10662 | Pald          | 72333     | 8-:63990051-64069974    |
| 10663 | Sytl2         | 83671     | 7+:97497208-97558948    |
| 10664 | Txn2          | 56551     | 15-:77745477-77759387   |
| 10665 | Il2           | 16183     | 3-:37019992-37024874    |
| 10666 | Npl           | 74091     | 1-:155350145-155396844  |
| 10667 | H2-Eb1        | 14969     | 17+:34442886-34453144   |
| 10668 | Kars          | 85305     | 8-:114517343-114535168  |
| 10669 | Spry1         | 24063     | 3+:37538897-37543519    |
| 10670 | Col23a1       | 237759    | 11+:51103766-51130466   |
| 10671 | Asz1          | 74068     | 6-:18021960-18059036    |
| 10672 | BC031353      | 235493    | 9+:74800803-74880259    |
| 10673 | MMT00071544   |           | X+:117080065-117081181  |
| 10674 | Antr2         | 71914     | 5-:98313707-98459568    |
| 10675 | Mobk2a        | 208228    | 10-:80147456-80164582   |
| 10676 | Ushbp1        | 234395    | 8-:73909205-73919709    |
| 10677 | Olfr812       | 258791    | 10-:129279164-129280096 |
| 10678 | Odz2          | 23964     | 11-:35821163-36978177   |
| 10679 | MMT00028401   |           | 6-:68654503-68654990    |
| 10680 | Slc12a2       | 20496     | 18+:58038331-58106459   |
| 10681 | Dgkz          | 104418    | 2-:91772978-91803812    |
| 10682 | EG627782      | 627782    | X+:7678553-7683362      |
| 10683 | Tbrg4         | 21379     | 11-:6515601-6521080     |
| 10684 | Hmgb1         | 15289     | 5-:149860314-149861889  |
| 10685 | EG330503      | 330503    | 7+:30959943-30964222    |
| 10686 | MMT00001732   |           | 3-:11658663-11659505    |
| 10687 | Itpkb         | 320404    | 1+:182262242-182352541  |
| 10688 | Mettl3        | 56335     | 14-:52914342-52924758   |
| 10689 | Pitpnb        | 56305     | 5+:111759814-111815537  |
| 10690 | 3110039I08Rik | 73144     | 9+:41184478-41240162    |
| 10691 | Notum         | 77583     | 11-:120515124-120522180 |
| 10692 | Gcc1          | 74375     | 6-:28367828-28378390    |
| 10693 | Acd           | 497652    | 8-:108222055-108224983  |
| 10694 | MMT00075660   |           | 16-:84513293-84514457   |
| 10695 | MMT00075236   |           | 5+:67281488-67282441    |
| 10696 | Gm1123        | 382097    | 9-:98907197-98911555    |
| 10697 | Nvl           | 67459     | 1-:183022932-183074320  |
| 10698 | MMT00049072   |           |                         |
| 10699 | Pga5          | 58803     | 19-:10743561-10752470   |
| 10700 | Grwd1         | 101612    | 7-:53080584-53086157    |
| 10701 | 4933407N01Rik | 66753     | 11-:30830772-30854125   |
| 10702 | Gm687         | 272465    | 8+:13435519-13457094    |
| 10703 | Sema4d        | 20354     | 13-:51797860-51820744   |
| 10704 | ENSMUSG000000 | 408192    | 1-:32576339-32577718    |
| 10705 | MMT00033076   |           | X-:77779080-77780619    |
| 10706 | Pla2g2f       | 26971     | 4-:138307980-138313512  |
| 10707 | Abhd10        | 213012    | 16-:45731816-45743030   |
| 10708 | Msh5          | 17687     | 17-:35165551-35183567   |

|       |               |           |                         |
|-------|---------------|-----------|-------------------------|
| 10709 | Zfp804a       | 241514    | 2+:82096371-82100032    |
| 10710 | Smoc1         | 64075     | 12+:82127817-82287387   |
| 10711 | 1700108F19Rik | 73272     | 14+:77077372-77086911   |
| 10712 | Fchsd2        | 207278    | 7+:108257309-108432912  |
| 10713 | Tnfaip8l3     | 244882    | 9-:53874882-53916174    |
| 10714 | Dtnb          | 13528     | 12+:3572522-3781505     |
| 10715 | Lrrc8b        | 433926    | 5+:105908910-105911060  |
| 10716 | 2810021B07Rik | 66308     | 13+:17787251-17789095   |
| 10717 | Ranbp9        | 56705     | 13-:43498750-43576342   |
| 10718 | Klhl30        | 70788     | 1+:93247662-93258984    |
| 10719 | Zbtb17        | 22642     | 4+:141000598-141023144  |
| 10720 | Mpp1          | 17524     | X-:72355613-72376345    |
| 10721 | 1700058C13Rik | 73388     | 2+:153956079-153964092  |
| 10722 | MMT00070532   | 100037278 | 8+:74123074-74126165    |
| 10723 | 4930556N09Rik | 75301     | 10+:96498493-96523693   |
| 10724 | Colec10       | 239447    | 15+:54242323-54294138   |
| 10725 | Sfmbt1        | 54650     | 14+:31579185-31631149   |
| 10726 | MMT00015194   |           | 4+:98507653-98523417    |
| 10727 | Klra3         | 16634     | 6-:130273303-130287644  |
| 10728 | Msi2          | 76626     | 11-:88157390-88579415   |
| 10729 | Fgd2          | 26382     | 17+:29497916-29516480   |
| 10730 | MMT00076744   |           | 9-:40569329-40570451    |
| 10731 | Olf481        | 258927    | 7+:115224330-115225247  |
| 10732 | lars2         | 381314    | 1-:187126586-187153266  |
| 10733 | Kctd6         | 71393     | 14+:9046659-9056081     |
| 10734 | Limk1         | 16885     | 5-:135131922-135164271  |
| 10735 | Cox6a2        | 12862     | 7-:135349127-135349866  |
| 10736 | Cyba          | 13057     | 8-:124948675-124956827  |
| 10737 | Esr1          | 13982     | 10-:5345029-5636365     |
| 10738 | Llgl1         | 16897     | 11+:60513341-60527687   |
| 10739 | MMT00000423   |           | 8-:115461866-115463039  |
| 10740 | Klk1b16       | 16615     | 7+:51392136-51396974    |
| 10741 | MMT00044006   |           | 2+:21989389-21990730    |
| 10742 | 4930433N12Rik | 114673    | 9-:3133846-3199782      |
| 10743 | Tlr9          | 81897     | 9+:106124928-106129207  |
| 10744 | C1qtnf5       | 235312    | 9+:43909924-43917269    |
| 10745 | Gale          | 74246     | 4+:135519666-135524096  |
| 10746 | MMT00021766   |           | X+:162923611-162924285  |
| 10747 | Abcf2         | 27407     | 5-:24070271-24083143    |
| 10748 | Papolg        | 216578    | 11-:23763824-23795262   |
| 10749 | V1re12        | 171265    | 7-:27396139-27397097    |
| 10750 | Wdr43         | 72515     | 17+:71965534-72008369   |
| 10751 | Eif5          | 217869    | 12+:112776652-112782827 |
| 10752 | Dnajc5b       | 66326     | 3+:19408625-19510857    |
| 10753 | MMT00015145   |           | 4+:99224642-99320761    |
| 10754 | Styx          | 56291     | 14+:45970901-45993451   |
| 10755 | Yipf6         | 77929     | X+:96133501-96139374    |
| 10756 | Gng5          | 14707     | 3+:146162765-146168533  |
| 10757 | Cxcr6         | 80901     | 9+:123715592-123720770  |
| 10758 | Gdf1          | 14559     | 8+:72839685-72855486    |
| 10759 | Rbms1         | 56878     | 2-:60590796-60800976    |

|       |               |        |                         |
|-------|---------------|--------|-------------------------|
| 10760 | MMT00006242   |        |                         |
| 10761 | Ipo13         | 230673 | 4-:117567097-117587003  |
| 10762 | V1rc25        | 171198 | 6+:58215167-58216074    |
| 10763 | Mink1         | 50932  | 11+:70376399-70427980   |
| 10764 | Pdap1         | 231887 | 5-:145889918-145901121  |
| 10765 | Retnla        | 57262  | 16+:48842903-48844574   |
| 10766 | Usp30         | 100756 | 5+:114550443-114571796  |
| 10767 | Plscr2        | 18828  | 9+:92170673-92192544    |
| 10768 | 2310008H09Rik | 66356  | 7-:125989276-125999771  |
| 10769 | Hnrnpd        | 11991  | 5-:100390025-100407572  |
| 10770 | Sell          | 20343  | 1+:165992234-166010802  |
| 10771 | Nus1          | 52014  | 10+:52137405-52156571   |
| 10772 | Aacs          | 78894  | 5+:125956242-125997773  |
| 10773 | Al118078      | 244886 | 9+:55174754-55286148    |
| 10774 | Ehd3          | 57440  | 17+:74154211-74181428   |
| 10775 | Slc16a1       | 20501  | 3+:104442606-104461160  |
| 10776 | Olf959        | 258501 | 9-:39379908-39380842    |
| 10777 | Mobp          | 17433  | 9+:120063828-120082411  |
| 10778 | Plb1          | 665270 | 5+:32628547-32666725    |
| 10779 | Nipa2         | 93790  | 7-:63187937-63217809    |
| 10780 | Fcgr2b        | 14130  | 1-:172890716-172906164  |
| 10781 | Aof1          | 218214 | 13+:47138929-47154183   |
| 10782 | 4933403O08Rik | 71030  | X+:109276083-109284377  |
| 10783 | Brca1         | 12189  | 11-:101351082-101413157 |
| 10784 | Gabra2        | 14395  | 5-:71352677-71486839    |
| 10785 | Ctdspl2       | 329506 | 2+:121782188-121839391  |
| 10786 | Mrps36        | 66128  | 13-:101505915-101514590 |
| 10787 | Ndufb10       | 68342  | 17-:24859003-24861370   |
| 10788 | D430019H16Rik | 268595 | 12+:106692172-106726651 |
| 10789 | Exoc6         | 107371 | 19+:37624938-37758545   |
| 10790 | 4930470H14Rik | 75815  | 17-:4044656-4082095     |
| 10791 | Mettl8        | 228019 | 2-:70802620-70893584    |
| 10792 | EG436193      | 436193 | X+:8700478-8716194      |
| 10793 | MMT00080658   | 71780  | 8+:73118379-73121187    |
| 10794 | Bcl2l1        | 12048  | 2-:152607845-152656237  |
| 10795 | MMT00006025   |        | 5+:61066399-61067270    |
| 10796 | Spic          | 20728  | 10-:88138016-88145752   |
| 10797 | Mageb2        | 17146  | X+:88489482-88578695    |
| 10798 | Syne1         | 64009  | 10+:5205528-5216531     |
| 10799 | Fras1         | 231470 | 5+:97173659-97182051    |
| 10800 | MMT00050549   |        | 3+:136611545-136611919  |
| 10801 | Adam26b       | 382007 | 8-:44605469-44613492    |
| 10802 | Kcnn2         | 140492 | 18+:45719807-45845536   |
| 10803 | Wnt5a         | 22418  | 14+:29338328-29340631   |
| 10804 | Scn9a         | 20274  | 2-:66321062-66322421    |
| 10805 | 9930021J03Rik | 240613 | 19+:29789802-29790232   |
| 10806 | Rnf212        | 671564 | 5-:109158389-109178310  |
| 10807 | 1100001E04Rik | 75404  | X+:46850913-46852235    |
| 10808 | Rab7l1        | 226422 | 1+:133763868-133769462  |
| 10809 | EG232887      | 232887 | 7+:13764167-13765543    |
| 10810 | MMT00076426   |        | 11+:58660659-58673495   |

|       |               |        |                         |
|-------|---------------|--------|-------------------------|
| 10811 | Baz1a         | 217578 | 12-:55995939-56087338   |
| 10812 | 9330101J02Rik | 664857 | 7-:146845410-146847069  |
| 10813 | Kif5a         | 16572  | 10-:126665440-126700106 |
| 10814 | Vmn2r96       | 433070 | 17+:18723277-18735121   |
| 10815 | Cpe           | 12876  | 8-:67071354-67171837    |
| 10816 | Fcna          | 14133  | 2-:25480188-25483386    |
| 10817 | Ankrd10       | 102334 | 8-:11611582-11635689    |
| 10818 | Tbc1d30       | 74694  | 10-:120784158-120788433 |
| 10819 | Olfr1014      | 258562 | 2+:85616742-85617658    |
| 10820 | Dsel          | 319901 | 1-:113755758-113759391  |
| 10821 | Pkd2l2        | 53871  | 18+:34569076-34602443   |
| 10822 | E330016A19Rik | 214763 | 9-:78283247-78290696    |
| 10823 | Dyrk4         | 101320 | 6-:126826063-126844858  |
| 10824 | Vegfa         | 22339  | 17-:46155491-46168392   |
| 10825 | Psg23         | 56868  | 7-:19191691-19201850    |
| 10826 | 9230113P08Rik | 77908  | 9+:35716004-35717273    |
| 10827 | MMT00063568   |        | 2-:87040084-87041485    |
| 10828 | Rsl1d1        | 66409  | 16-:11193065-11203428   |
| 10829 | Chga          | 12652  | 12+:103793178-103803237 |
| 10830 | Rgs21         | 624910 | 1-:146366821-146384126  |
| 10831 | Dmn           | 233335 | 7-:74877489-74905060    |
| 10832 | Lamb1-1       | 16777  | 12+:31950161-32014752   |
| 10833 | MMT00002916   |        | 16-:13920403-13921492   |
| 10834 | Smurf2        | 66313  | 11-:106681370-106781568 |
| 10835 | Kcnd2         | 16508  | 6+:21166298-21677340    |
| 10836 | MMT00002878   |        | 6-:47753957-47754114    |
| 10837 | Zfp52         | 22710  | 17+:21672601-21699565   |
| 10838 | Spdef         | 30051  | 17-:27851393-27865834   |
| 10839 | MMT00037665   |        | 7+:39285425-39322096    |
| 10840 | Rpe65         | 19892  | 3+:159262196-159287762  |
| 10841 | MMT00004529   |        | 1-:153367445-153367899  |
| 10842 | Slc25a25      | 227731 | 2-:32270605-32279523    |
| 10843 | Ccar1         | 67500  | 10-:62206677-62255110   |
| 10844 | Erap1         | 80898  | 13+:74783616-74828267   |
| 10845 | Nthl1         | 18207  | 17+:24769654-24775782   |
| 10846 | Nrp2          | 18187  | 1+:62862028-62885440    |
| 10847 | Dyx1c1        | 67685  | 9+:72806624-72820873    |
| 10848 | Gbbp1         | 73274  | 13-:112215891-112280324 |
| 10849 | 9330159F19Rik | 212448 | 10+:28931498-28947150   |
| 10850 | Zap70         | 22637  | 1+:36818698-36839503    |
| 10851 | Tax1bp3       | 76281  | 11+:72990793-72995500   |
| 10852 | Sgol1         | 72415  | 17-:53815384-53828637   |
| 10853 | MMT00077065   |        | 14+:41262450-41262749   |
| 10854 | MMT00046948   |        | 15-:82608356-82612612   |
| 10855 | 5730493B19Rik | 70630  | 9-:106640861-106642631  |
| 10856 | 9930021D14Rik | 319259 | 17+:24610490-24612277   |
| 10857 | Pdha1         | 18597  | X-:156561573-156576288  |
| 10858 | MMT00014028   |        | 19-:16133958-16134518   |
| 10859 | Nphp3         | 74025  | 9+:103920432-103925135  |
| 10860 | Lrrc8c        | 100604 | 5+:105948489-106037970  |
| 10861 | Stfa2         | 20862  | 16-:36405215-36408419   |



|       |               |        |                         |
|-------|---------------|--------|-------------------------|
| 10862 | Zfp703        | 353310 | 8+:28087804-28091935    |
| 10863 | Tssc1         | 380752 | 12+:29436684-29552361   |
| 10864 | Gdf3          | 14562  | 6-:122556265-122560105  |
| 10865 | Cd248         | 70445  | 19+:5068119-5070637     |
| 10866 | Car10         | 72605  | 11+:93351802-93463016   |
| 10867 | Asb16         | 217217 | 11+:102130193-102178915 |
| 10868 | A630042L21Rik | 106894 | 18-:61290930-61336704   |
| 10869 | Hao1          | 15112  | 2-:134323097-134380088  |
| 10870 | E2f7          | 52679  | 10+:110200981-110211883 |
| 10871 | EG434197      | 434197 | 7+:75420881-75503087    |
| 10872 | 9430016H08Rik | 68115  | 1+:57463605-57472746    |
| 10873 | MMT00025861   |        |                         |
| 10874 | MMT00008912   |        | 6+:3238569-3267095      |
| 10875 | MMT00024931   |        | 15-:56614190-56614985   |
| 10876 | Steap1        | 70358  | 5-:5736321-5749309      |
| 10877 | V1re8         | 171231 | 17+:20983514-20984465   |
| 10878 | Tsnax         | 53424  | 8+:127536896-127558089  |
| 10879 | Slc9a6        | 236794 | X+:53863029-53917399    |
| 10880 | Klra8         | 16639  | 6-:130065236-130079897  |
| 10881 | Uchl5ip       | 73738  | X-:70682655-70704368    |
| 10882 | Aqp1          | 11826  | 6+:55286425-55298549    |
| 10883 | Pols          | 210106 | 13-:69636823-69646016   |
| 10884 | Add2          | 11519  | 6+:86032773-86068819    |
| 10885 | Bri3          | 55950  | 5+:145016176-145025263  |
| 10886 | Fndc3b        | 72007  | 3-:27360597-27541971    |
| 10887 | MMT00004348   |        | 17+:50070453-50076626   |
| 10888 | Eya2          | 14049  | 2+:165455841-165597226  |
| 10889 | Adamts15      | 235130 | 9-:30706738-30729822    |
| 10890 | Pot1b         | 72836  | 17-:55792703-55794170   |
| 10891 | Atp6v1a       | 11964  | 16-:44087536-44116981   |
| 10892 | Lipc          | 15450  | 9-:70646058-70782386    |
| 10893 | Gprin1        | 26913  | 13-:54838033-54841850   |
| 10894 | Ngfrap1       | 12070  | X+:132804878-132806494  |
| 10895 | Lipe          | 16890  | 7-:26164980-26173652    |
| 10896 | Cpn2          | 71756  | 16-:30258749-30267620   |
| 10897 | Olf315        | 258531 | 11+:58591630-58592559   |
| 10898 | MMT00046650   |        | 7+:113010295-113011844  |
| 10899 | Coro2b        | 235431 | 9-:62267342-62384586    |
| 10900 | MMT00008931   |        | 11-:104894552-104895058 |
| 10901 | 2810051F02Rik | 72704  | 17+:12934239-13008423   |
| 10902 | Orc3l         | 50793  | 4-:34518044-34562173    |
| 10903 | Slco2a1       | 24059  | 9+:102910949-102989098  |
| 10904 | Kri1          | 215194 | 9-:21077905-21092395    |
| 10905 | Chd2          | 244059 | 7-:80580620-80685847    |
| 10906 | Ccdc122       | 108811 | 14+:77436573-77512011   |
| 10907 | MMT00047893   |        | 18-:20707088-20707860   |
| 10908 | Hipk4         | 233020 | 7+:28308535-28314817    |
| 10909 | MMT00041265   |        | 6+:94367793-94369492    |
| 10910 | Cdc25a        | 12530  | 9+:109778493-109795283  |
| 10911 | Mcl1          | 17210  | 3+:95462730-95467099    |
| 10912 | Psme3         | 19192  | 11+:101177641-101184850 |

|       |               |        |                         |
|-------|---------------|--------|-------------------------|
| 10913 | Crlf3         | 54394  | 11-:79860001-79894457   |
| 10914 | Hoxc9         | 15427  | 15+:102811735-102814873 |
| 10915 | 2410002I01Rik | 78777  | 11-:119951654-119960016 |
| 10916 | Gm973         | 381260 | 1+:59663659-59686991    |
| 10917 | Eppk1         | 223650 | 15-:75932645-75943109   |
| 10918 | Catsperb      | 271036 | 12+:102826194-102864215 |
| 10919 | EG624446      | 624446 | 3-:28663354-28664314    |
| 10920 | Mdn1          | 100019 | 4+:32758490-32766544    |
| 10921 | 4832428D23Rik | 403183 | 1-:44263194-44275756    |
| 10922 | MMT00052412   |        | 10-:5787807-5833789     |
| 10923 | Saps2         | 71474  | 15+:89041998-89116823   |
| 10924 | Actr6         | 67019  | 10-:89174717-89195040   |
| 10925 | Cacnb1        | 12295  | 11-:97866239-97883952   |
| 10926 | P2ry13        | 74191  | 3-:59011821-59014805    |
| 10927 | Hccs          | 15159  | X-:165750740-165757523  |
| 10928 | Arid1a        | 93760  | 4-:133234924-133278954  |
| 10929 | Klk1b9        | 13648  | 7+:51231430-51235746    |
| 10930 | Efcab4b       | 381812 | 6+:127553847-127575940  |
| 10931 | Pkn3          | 263803 | 2+:29933255-29946533    |
| 10932 | Olf1r578      | 259119 | 7-:110132736-110133676  |
| 10933 | MMT00054848   |        | 1+:85158595-85165839    |
| 10934 | Ciz1          | 68379  | 2+:32218753-32233817    |
| 10935 | Chpt1         | 212862 | 10-:87951126-87966663   |
| 10936 | Rnmt          | 67897  | 18+:68460024-68481556   |
| 10937 | Rnf19b        | 75234  | 4+:128735383-128763127  |
| 10938 | Zbtb5         | 230119 | 4-:45005867-45025240    |
| 10939 | Gtf3c3        | 98488  | 1-:54453825-54495803    |
| 10940 | Dcun1d1       | 114893 | 3-:35794141-35831888    |
| 10941 | Pcdh18        | 73173  | 3-:49547422-49561184    |
| 10942 | MMT00022130   | 676542 | X-:106584174-106587483  |
| 10943 | Vmn2r59       | 628444 | 7-:49267395-49302477    |
| 10944 | Raver1        | 71766  | 9-:20871956-20896443    |
| 10945 | 5330431N19Rik | 226162 | 19+:45635096-45641977   |
| 10946 | Ifitm7        | 74482  | 16-:13982891-13984714   |
| 10947 | Acads         | 11409  | 5-:115560308-115569279  |
| 10948 | MMT00080146   |        | 2+:145717814-145718316  |
| 10949 | Smek2         | 104570 | 11+:29072995-29119129   |
| 10950 | Tmhs          | 328789 | 17+:28712676-28720448   |
| 10951 | Alox5         | 11689  | 6-:116360088-116411183  |
| 10952 | Mrpl37        | 56280  | 4-:106728487-106739450  |
| 10953 | Slc3a2        | 17254  | 19-:8782057-8788330     |
| 10954 | Ubp1          | 22221  | 9+:113840769-113886120  |
| 10955 | Cdkn2a        | 12578  | 4-:88920540-88940469    |
| 10956 | Bnip3l        | 12177  | 14-:67606223-67627687   |
| 10957 | Pgc           | 109820 | 17+:47863790-47871431   |
| 10958 | Ddx20         | 53975  | 3-:105481194-105490364  |
| 10959 | RP23-149D11.7 | 381536 | 4+:101660693-101662816  |
| 10960 | Rap2a         | 76108  | 14+:120877692-120878962 |
| 10961 | Pgd           | 110208 | 4-:148524102-148540777  |
| 10962 | Eif2b2        | 217715 | 12+:86560430-86567443   |
| 10963 | 4930562D19Rik | 216516 | 11-:4043578-4046381     |

|       |               |        |                         |
|-------|---------------|--------|-------------------------|
| 10964 | Cldn23        | 71908  | 8:-36887782-36889533    |
| 10965 | Ppp1cb        | 19046  | 5+:32761426-32796085    |
| 10966 | Ctdsp2        | 52468  | 10+:126416113-126433542 |
| 10967 | Atg4b         | 66615  | 1+:95664627-95686102    |
| 10968 | Ttyh2         | 117160 | 11+:114536838-114580517 |
| 10969 | Panx2         | 406218 | 15+:88890503-88903976   |
| 10970 | MMT00068762   |        | X+:100724363-100725599  |
| 10971 | Klk11         | 56538  | 7+:51031672-51034630    |
| 10972 | Lrig1         | 16206  | 6:-94554527-94650139    |
| 10973 | Adam2         | 11495  | 14:-66646162-66692946   |
| 10974 | Vmn2r25       | 545874 | 6:-123775203-123803157  |
| 10975 | MMT00009477   |        | 4:-109046591-109047553  |
| 10976 | Mmnr1         | 70945  | 6+:60894309-60939366    |
| 10977 | Olf1132       | 258833 | 2:-87474976-87475902    |
| 10978 | MMT00078322   |        | 6:-93599341-93599899    |
| 10979 | MMT00007806   | 673902 | 7+:21875794-21877639    |
| 10980 | C230078M14Rik | 241175 | 1+:101837219-102275846  |
| 10981 | Ppm1g         | 14208  | 5:-31505042-31522803    |
| 10982 | EG244495      | 244495 | 8:-66407836-66419976    |
| 10983 | Olf11359      | 258067 | 13+:21790705-21795811   |
| 10984 | Ptcra         | 19208  | 17:-46892611-46900661   |
| 10985 | Nefl          | 18039  | 14+:68701920-68707144   |
| 10986 | Pappa         | 18491  | 4+:64785865-65013191    |
| 10987 | Polg          | 18975  | 7:-86594267-86611080    |
| 10988 | Cbara1        | 216001 | 10+:59165382-59326868   |
| 10989 | Ptp4a3        | 19245  | 15+:73582137-73587407   |
| 10990 | Dlg2          | 23859  | 7+:98239516-99593125    |
| 10991 | Lonrf1        | 244421 | 8:-37282878-37311805    |
| 10992 | AU042671      | 269700 | 5+:121784347-121818573  |
| 10993 | Pscdbp        | 227929 | 2:-57985179-58012522    |
| 10994 | EG625253      | 625253 | X:-153978644-153979688  |
| 10995 | Ap4m1         | 11781  | 5+:138613407-138619910  |
| 10996 | Slc36a1       | 215335 | 11+:55027436-55046138   |
| 10997 | 1810013D10Rik | 66278  | 5+:53604148-53669778    |
| 10998 | 2310061C15Rik | 66531  | 8:-119413417-119445354  |
| 10999 | Fhl5          | 57756  | 4:-25127055-25169971    |
| 11000 | Rps26         | 27370  | 10:-128061592-128063296 |
| 11001 | Pou6f2        | 218030 | 13:-18453979-18480108   |
| 11002 | Smg5          | 229512 | 3+:88140232-88166259    |
| 11003 | Olf1671       | 257910 | 7:-112123555-112124497  |
| 11004 | Rhbdl3        | 246104 | 11+:80114413-80167742   |
| 11005 | MMT00007908   |        | 7:-50337498-50338028    |
| 11006 | 1700021A07Rik | 76924  | 10+:21122156-21145455   |
| 11007 | MMT00010063   |        | 1:-109188790-109198931  |
| 11008 | Gps1          | 209318 | 11+:120645828-120650416 |
| 11009 | MMT00008885   | 330256 | 6:-3283189-3291900      |
| 11010 | MMT00072204   |        | 6:-82837510-82838719    |
| 11011 | Rasgrf2       | 19418  | 13:-92024037-92901449   |
| 11012 | MMT00012665   |        | 19+:13449453-13450378   |
| 11013 | Zfand2b       | 68818  | 1+:75165319-75168199    |
| 11014 | Hibadh        | 58875  | 6:-52496224-52590294    |

|       |               |        |                         |
|-------|---------------|--------|-------------------------|
| 11015 | Olf923        | 258812 | 9+:38635277-38636230    |
| 11016 | Pcp2          | 18545  | 8-:3623376-3625252      |
| 11017 | Olf926        | 258811 | 9+:38684762-38685688    |
| 11018 | MMT00015515   |        | 4-:126261754-126262053  |
| 11019 | Hist1h2ba     | 319177 | 13-:24007627-24026025   |
| 11020 | Cyp2c38       | 13097  | 19-:39465162-39537540   |
| 11021 | MMT00000267   |        | 1-:24142519-24146519    |
| 11022 | MMT00048763   |        | 4-:110185653-110186412  |
| 11023 | Lcn12         | 77701  | 2-:25346365-25348950    |
| 11024 | MMT00049098   |        | 10-:126469961-126478497 |
| 11025 | Cd244         | 18106  | 1+:173489499-173507478  |
| 11026 | 6230416C02Rik | 545490 | 2+:174866483-175305255  |
| 11027 | Prkar2b       | 19088  | 12-:32643343-32746105   |
| 11028 | Slc39a14      | 213053 | 14-:70706103-70751225   |
| 11029 | AK129302      | 245522 | X-:92840645-92853681    |
| 11030 | Tm9sf4        | 99237  | 2+:153027872-153036199  |
| 11031 | 4921520G13Rik | 66729  | 5-:144651611-144655936  |
| 11032 | MMT00018461   |        | 9-:99847331-99847971    |
| 11033 | Egfl7         | 353156 | 2+:26436608-26448203    |
| 11034 | Kcnh2         | 16511  | 5-:23825406-23857422    |
| 11035 | EG665024      | 665024 | 6+:36906832-36908685    |
| 11036 | Trim6         | 94088  | 7+:111367324-111383662  |
| 11037 | Slc25a24      | 229731 | 3+:108926059-108971368  |
| 11038 | Atf7ip2       | 75329  | 16+:10192994-10242047   |
| 11039 | Smgc          | 223809 | 15+:91668696-91691866   |
| 11040 | 4933425B07Rik | 74458  | 14-:47222478-47257099   |
| 11041 | Vmn2r92       | 627111 | 17+:18304214-18308349   |
| 11042 | Atxn7l3       | 217218 | 11-:102149726-102156373 |
| 11043 | Hsph1         | 15505  | 5-:150419419-150438793  |
| 11044 | Pkd1l3        | 244646 | 8+:112159114-112180196  |
| 11045 | Shank3        | 58234  | 15+:89331713-89390689   |
| 11046 | Dennd1b       | 329260 | 1+:140989343-141067133  |
| 11047 | Retnlb        | 57263  | 16+:48817091-48819007   |
| 11048 | Psd2          | 74002  | 18+:36146867-36174366   |
| 11049 | Pcyt1a        | 13026  | 16+:32431045-32471928   |
| 11050 | 2210010C04Rik | 67373  | 6-:40981633-40985477    |
| 11051 | A130042E20Rik | 216119 | 10-:75930901-75931581   |
| 11052 | 4930422G04Rik | 71643  | 3+:127305315-127316475  |
| 11053 | MMT00044603   |        | 11-:102353567-102353973 |
| 11054 | Rnase4        | 58809  | 14+:51710846-51725817   |
| 11055 | Atp1a3        | 232975 | 7-:25763188-25790914    |
| 11056 | Surf4         | 20932  | 2-:26775558-26788947    |
| 11057 | MMT00032844   | 353287 | 8-:113593397-113604831  |
| 11058 | Sobp          | 109205 | 10-:42740786-42893877   |
| 11059 | Yaf2          | 67057  | 15-:93114709-93167239   |
| 11060 | Gas2          | 14453  | 7+:59134519-59249828    |
| 11061 | Gpr176        | 381413 | 2-:118104997-118199070  |
| 11062 | Olf91161      | 258845 | 2+:87864880-87865845    |
| 11063 | Phf8          | 320595 | X+:147955721-148068407  |
| 11064 | Pols          | 210106 | 13-:69648439-69672656   |
| 11065 | Mccc1         | 72039  | 3-:35858760-35899521    |

|       |               |        |                         |
|-------|---------------|--------|-------------------------|
| 11066 | MMT00022632   |        | 4+:103613563-103614546  |
| 11067 | Immp1l        | 66541  | 2+:105744841-105807343  |
| 11068 | Ncoa6         | 56406  | 2-:155216406-155263862  |
| 11069 | Bgn           | 12111  | X+:70736128-70740135    |
| 11070 | Fnbp1l        | 214459 | 3-:122241638-122272660  |
| 11071 | Pcbp1         | 23983  | 6-:86474492-86475940    |
| 11072 | 2810407C02Rik | 69227  | 3+:58380616-58395134    |
| 11073 | MMT00001696   |        | 7+:115413377-115420647  |
| 11074 | Lpgat1        | 226856 | 1+:193542327-193608139  |
| 11075 | Xrcc6bp1      | 68876  | 10-:126324304-126338404 |
| 11076 | Dzip1l        | 72507  | 9+:99529994-99543113    |
| 11077 | Olf151        | 18351  | 11+:50820475-50821399   |
| 11078 | Olf1725       | 258314 | 14-:50654112-50655076   |
| 11079 | EG544954      | 544954 | 13-:74905027-74906331   |
| 11080 | Tctn2         | 67978  | 5+:125048792-125077658  |
| 11081 | Slc35c1       | 228368 | 2-:92294352-92299348    |
| 11082 | Fbxw13        | 211305 | 9-:109081740-109084091  |
| 11083 | Kctd3         | 226823 | 1-:190794977-190831720  |
| 11084 | AF529169      | 209743 | 9-:89485561-89517946    |
| 11085 | MMT00004952   |        | 14+:57836069-57883036   |
| 11086 | Pnpla5        | 75772  | 15-:83942786-83953608   |
| 11087 | Wnt11         | 22411  | 7+:105987354-106002261  |
| 11088 | Unc84b        | 223697 | 15-:79554917-79572963   |
| 11089 | Tgfb1         | 21810  | 13+:56710969-56740698   |
| 11090 | Lycat         | 225010 | 17+:73457353-73589860   |
| 11091 | Tes           | 21753  | 6+:17036194-17055821    |
| 11092 | Pspn          | 19197  | 17-:57138880-57139438   |
| 11093 | Zdhhc1        | 70796  | 8-:107996324-108020802  |
| 11094 | Slc17a3       | 105355 | 13+:23931346-23950219   |
| 11095 | Bag3          | 29810  | 7+:135667363-135689910  |
| 11096 | Olf1654       | 258377 | 7+:111736268-111737293  |
| 11097 | Sema4f        | 20355  | 6-:82863484-82889617    |
| 11098 | Casr          | 12374  | 16-:36493782-36562220   |
| 11099 | Klhd8b        | 78267  | 9-:108349964-108363912  |
| 11100 | Lrrc4c        | 241568 | 2+:97443644-97471825    |
| 11101 | MMT00049262   | 216440 | 10-:126532704-126558204 |
| 11102 | Gtf2h2        | 23894  | 13-:101238863-101260086 |
| 11103 | 9630028I04Rik | 319720 | 17-:27372019-27374091   |
| 11104 | MMT00014375   |        | 4+:69708524-69709268    |
| 11105 | Atp11c        | 320940 | X-:57476463-57668102    |
| 11106 | Stra8         | 20899  | 6+:34870959-34889342    |
| 11107 | Klf8          | 245671 | X+:149794172-149827410  |
| 11108 | Ltbp1         | 268977 | 17+:75404907-75790666   |
| 11109 | Al931714      | 102182 | 8+:80087148-80105245    |
| 11110 | 6620401M08Rik | 75744  | 7-:59252546-59261221    |
| 11111 | Ubl7          | 69459  | 9+:57758792-57777777    |
| 11112 | Olf1131       | 258867 | 17-:38218978-38219921   |
| 11113 | MMT00006619   |        | 12-:63166201-63166660   |
| 11114 | Ddx19b        | 234733 | 8-:113531978-113545000  |
| 11115 | Cul3          | 26554  | 1-:80263633-80336895    |
| 11116 | Olf11         | 218066 | 13-:21730450-21748040   |

|       |                |           |                         |
|-------|----------------|-----------|-------------------------|
| 11117 | 1700047I17Rik2 | 100101807 | 12+:56300533-56306841   |
| 11118 | Loxl1          | 16949     | 9-:58159492-58160996    |
| 11119 | Frmd4a         | 209630    | 2+:4352241-4535076      |
| 11120 | Elf1           | 13709     | 14+:79915486-79982282   |
| 11121 | Mtmr11         | 194126    | 3+:95965934-95975636    |
| 11122 | Abcb6          | 74104     | 1-:75168413-75176937    |
| 11123 | 1600012H06Rik  | 67912     | 17+:15080212-15081174   |
| 11124 | Mboat4         | 234155    | 8+:35187193-35187771    |
| 11125 | Trim39         | 79263     | 17-:36395817-36408949   |
| 11126 | Pnkd           | 56695     | 1+:74379183-74400258    |
| 11127 | Snpc4          | 227644    | 2-:26219156-26236172    |
| 11128 | Aars           | 234734    | 8+:113570866-113579468  |
| 11129 | Ankhd1         | 108857    | 18+:36751100-36825562   |
| 11130 | Slco1c1        | 58807     | 6+:141473070-141518237  |
| 11131 | Olf15l1        | 258720    | 7-:115988578-115989522  |
| 11132 | Mbc2           | 23943     | 10-:127946802-127962935 |
| 11133 | MMT00011321    |           | 9+:113439298-113440407  |
| 11134 | Tcf7l2         | 21416     | 19+:55816821-56006583   |
| 11135 | Ascc3          | 77987     | 10+:50337582-50571006   |
| 11136 | Rnf7           | 19823     | 9-:96372153-96379001    |
| 11137 | 0910001A06Rik  | 223601    | 15-:63762498-63829524   |
| 11138 | Bbs9           | 319845    | 9+:22598193-22692722    |
| 11139 | MMT00061410    |           | 4-:144088304-144088821  |
| 11140 | Drd3           | 13490     | 16+:43762354-43822951   |
| 11141 | MMT00052073    |           | X+:63190200-63190871    |
| 11142 | Sez6l2         | 233878    | 7+:134094242-134113781  |
| 11143 | Gm962          | 381201    | 19+:5568457-5571183     |
| 11144 | Abcf3          | 27406     | 16+:20548736-20552706   |
| 11145 | Dctn3          | 53598     | 4-:41661981-41670164    |
| 11146 | Tmc8           | 217356    | 11+:117646118-117646627 |
| 11147 | Gng12          | 14701     | 6+:66846416-66967923    |
| 11148 | Htra4          | 330723    | 8-:26135400-26149395    |
| 11149 | MMT00050488    |           | 17-:5110751-5111950     |
| 11150 | Pcsk9          | 100102    | 4-:106131453-106136935  |
| 11151 | 5730472N09Rik  | 108958    | 2+:30219777-30241040    |
| 11152 | MMT00057918    |           | 12-:39095259-39095817   |
| 11153 | 1810063B05Rik  | 67892     | 8+:128946409-128950654  |
| 11154 | MMT00037611    |           | 5-:92189250-92190710    |
| 11155 | RP23-191F22.4  | 100039672 | 4-:43596135-43597140    |
| 11156 | MMT00004568    |           | 12-:116293410-116293867 |
| 11157 | Aqp12          | 208760    | 1+:94902912-94908848    |
| 11158 | Kcnk16         | 74571     | 14-:21080598-21088384   |
| 11159 | MMT00065994    |           | 10-:111526331-111527619 |
| 11160 | Pde8a          | 18584     | 7+:88358623-88479414    |
| 11161 | Gpatch2        | 67769     | 1+:189039425-189058218  |
| 11162 | Hkdc1          | 216019    | 10-:61845886-61885205   |
| 11163 | 1700011H22Rik  | 69314     | 4-:91811029-91813927    |
| 11164 | Odf4           | 252868    | 11-:68735337-68740551   |
| 11165 | V1rh18         | 171275    | 13-:22974958-22976030   |
| 11166 | Uqcc           | 56046     | 2-:155672642-155755767  |
| 11167 | Dars2          | 226539    | 1-:162970732-163000787  |

|       |               |           |                         |
|-------|---------------|-----------|-------------------------|
| 11168 | 1700019H03Rik | 228993    | 2+:180460043-180476982  |
| 11169 | MMT00078034   |           | 11+:107052394-107052843 |
| 11170 | Cpb1          | 76703     | 3-:20148982-20174638    |
| 11171 | Lnpep         | 240028    | 17-:17666454-17761562   |
| 11172 | 1110001A07Rik | 66140     | 11+:86922762-86936476   |
| 11173 | Dnahc6        | 330355    | 6-:73138304-73140444    |
| 11174 | Zfp2          | 22678     | 11-:50712214-51037872   |
| 11175 | MMT00033256   | 666185    | 13+:68051623-68053210   |
| 11176 | V1rc2         | 113859    | 6+:58257290-58258200    |
| 11177 | Phf6          | 70998     | X+:50265388-50307181    |
| 11178 | Olfr951       | 258046    | 9+:39172371-39202318    |
| 11179 | Cd244         | 18106     | 1+:173489329-173513688  |
| 11180 | MMT00004147   |           | 17-:63034950-63036348   |
| 11181 | MMT00051455   | 639628    | 18+:76998694-77139187   |
| 11182 | Rab27a        | 11891     | 9+:72912049-72945298    |
| 11183 | Pank3         | 211347    | 11+:35582985-35600014   |
| 11184 | Etfdh         | 66841     | 3-:79407733-79432636    |
| 11185 | Polr3c        | 74414     | 3-:96515448-96531733    |
| 11186 | Prkg1         | 19091     | 19-:30638998-30639748   |
| 11187 | Mettl1        | 17299     | 10+:126478987-126482517 |
| 11188 | MMT00036518   |           | 14-:41107406-41108810   |
| 11189 | D630023F18Rik | 98303     | 1-:65155291-65168012    |
| 11190 | Cd8a          | 12525     | 6+:71323419-71327605    |
| 11191 | Spert         | 67926     | 14-:75982683-75991769   |
| 11192 | Maged2        | 80884     | X-:147246358-147248858  |
| 11193 | Tsc22d1       | 21807     | 14+:76904337-76907569   |
| 11194 | Hecw2         | 329152    | 1-:53870066-54097375    |
| 11195 | Fmn1          | 14260     | 2+:113167938-113550012  |
| 11196 | Slco1b2       | 28253     | 6+:141578038-141635156  |
| 11197 | Odc1          | 18263     | 12+:17551895-17557883   |
| 11198 | Gbp1          | 14468     | 3+:142163517-142282131  |
| 11199 | Sirt7         | 209011    | 11-:120479680-120486303 |
| 11200 | MMT00034030   |           | 4-:39842197-39882912    |
| 11201 | Sunc1         | 194974    | 11-:8916056-8928120     |
| 11202 | Olfr672       | 258755    | 7-:112144478-112145416  |
| 11203 | Bag1          | 12017     | 4-:40883451-40895270    |
| 11204 | Al451617      | 209387    | 7-:111618529-111656339  |
| 11205 | Cdh5          | 12562     | 8+:106625609-106667033  |
| 11206 | Itih4         | 16427     | 14+:31699698-31715035   |
| 11207 | MMT00081058   |           | X+:133634025-133634656  |
| 11208 | Hspb1         | 15507     | 5+:136363928-136365307  |
| 11209 | E130203B14Rik | 320736    | 14+:33670097-33752220   |
| 11210 | 6430514L14Rik | 76886     | 9-:69937115-69989356    |
| 11211 | Tctex1d4      | 242646    | 4+:116799431-116801332  |
| 11212 | 1300018117Rik | 72325     | 8-:125766256-125778010  |
| 11213 | Ccr9          | 12769     | 9+:123676362-123689893  |
| 11214 | MMT00049207   |           | 1-:10544093-10545078    |
| 11215 | Arid1b        | 239985    | 17+:5040568-5127640     |
| 11216 | MMT00031221   | 100039760 | X-:147927512-147927829  |
| 11217 | Pde8b         | 218461    | 13-:95803904-95956205   |
| 11218 | Apc           | 11789     | 18+:34420676-34478258   |

|       |               |        |                         |
|-------|---------------|--------|-------------------------|
| 11219 | Mrps18a       | 68565  | 17+:46247952-46265855   |
| 11220 | AU021092      | 239691 | 16-:5211736-5222387     |
| 11221 | Isca1         | 69046  | 13-:59858216-59871065   |
| 11222 | Dcpp1         | 13184  | 17+:24017842-24019819   |
| 11223 | Pgr15l        | 245526 | X+:94271253-94273712    |
| 11224 | Mst1          | 15235  | 9+:107982809-107987331  |
| 11225 | Numbl         | 18223  | 7+:28043895-28067160    |
| 11226 | A530082C11Rik | 320541 | 4+:154975531-154993111  |
| 11227 | 1700123J19Rik | 73614  | X+:35474856-35483142    |
| 11228 | MMT00081145   |        | X-:133738139-133739045  |
| 11229 | Slc6a20b      | 22599  | 9-:123504111-123541507  |
| 11230 | Plac1         | 56096  | X-:50423488-50424008    |
| 11231 | B2m           | 12010  | 2+:121973421-121978607  |
| 11232 | Ch25h         | 12642  | 19-:34548272-34549625   |
| 11233 | Tef           | 21685  | 15+:81641909-81654413   |
| 11234 | Pygl          | 110095 | 12-:71291798-71328604   |
| 11235 | Itga2b        | 16399  | 11-:102314610-102331058 |
| 11236 | Gabrb2        | 14401  | 11+:42234760-42440737   |
| 11237 | Mycbpap       | 104601 | 11-:94362661-94382759   |
| 11238 | Klk1b24       | 16617  | 7+:51443632-51447819    |
| 11239 | Cspp1         | 211660 | 1+:10029872-10058057    |
| 11240 | Ppm1d         | 53892  | 11+:85124974-85159806   |
| 11241 | Lcn11         | 227630 | 2+:25632570-25635798    |
| 11242 | Obp1a         | 18249  | X-:75330843-75336715    |
| 11243 | L3mbtl2       | 214669 | 15+:81494415-81518709   |
| 11244 | Atp5a1        | 11946  | 18+:78012759-78021605   |
| 11245 | Sgta          | 52551  | 10-:80506817-80522899   |
| 11246 | Apex1         | 11792  | 14+:51544695-51546813   |
| 11247 | Obscn         | 380698 | 11-:58919796-58941838   |
| 11248 | Gltd1d1       | 319804 | 5+:128131052-128187392  |
| 11249 | Rnd1          | 223881 | 15-:98493852-98507883   |
| 11250 | Rsf1          | 233532 | 7+:104728420-104835187  |
| 11251 | F2r1l         | 14063  | 13-:96281686-96295154   |
| 11252 | Apoo          | 68316  | X+:91612492-91662426    |
| 11253 | MMT00059796   |        | 3-:67655294-67655676    |
| 11254 | Klrb1-ps1     | 724020 | 6+:129072981-129079463  |
| 11255 | Srpx          | 51795  | X-:9616033-9694713      |
| 11256 | H2-DMA        | 14998  | 17+:34272615-34275480   |
| 11257 | Trem3         | 58218  | 17+:48386943-48398207   |
| 11258 | Ctnna3        | 216033 | 10+:62892844-63044811   |
| 11259 | Ccdc69        | 52570  | 11-:54863232-54891630   |
| 11260 | Frem1         | 329872 | 4-:82561985-82586681    |
| 11261 | 4921505C17Rik | 78757  | 15+:6736938-6747411     |
| 11262 | 1700037C18Rik | 73261  | 16-:3905799-3908724     |
| 11263 | Mib1          | 225164 | 18+:10778192-10812206   |
| 11264 | Zcwpw1        | 381678 | 5+:138237799-138263881  |
| 11265 | Irgm          | 15944  | 11-:48678751-48684848   |
| 11266 | Gtdc1         | 227835 | 2-:44606990-44681072    |
| 11267 | Cd79b         | 15985  | 11-:106172655-106175984 |
| 11268 | Nxf1          | 53319  | 19+:8831616-8845173     |
| 11269 | Pib5pa        | 170835 | 11-:3394272-3403146     |



|       |               |        |                         |
|-------|---------------|--------|-------------------------|
| 11270 | Gabrp         | 216643 | 11-:33450860-33478931   |
| 11271 | Orc4l         | 26428  | 2-:48760726-48804747    |
| 11272 | MMT00015072   |        | 4-:101568568-101569567  |
| 11273 | Abcc8         | 20927  | 7-:53359893-53425360    |
| 11274 | Srp54a        | 24067  | 12+:56181514-56214240   |
| 11275 | Fanci         | 208836 | 7+:86537238-86595150    |
| 11276 | Zfp148        | 22661  | 16+:33380963-33497428   |
| 11277 | Capn11        | 268958 | 17-:45767401-45790682   |
| 11278 | Rph3al        | 380714 | 11-:75692442-75739393   |
| 11279 | MMT00040653   |        | 15+:9353992-9362667     |
| 11280 | Phpt1         | 75454  | 2-:25428948-25430400    |
| 11281 | Foxj1         | 15223  | 11-:116192016-116195998 |
| 11282 | Tekt1         | 21689  | 11-:72158225-72175375   |
| 11283 | Uroc1         | 243537 | 6+:90283299-90314540    |
| 11284 | Elac2         | 68626  | 11+:64792598-64815571   |
| 11285 | MMT00045951   |        | 14+:54580667-54581493   |
| 11286 | MMT00013106   |        | 3+:53257678-53261713    |
| 11287 | Trappc5       | 66682  | 8+:3676509-3679627      |
| 11288 | Cacna1i       | 239556 | 15+:80128755-80226088   |
| 11289 | MMT00038299   |        | 18+:12524307-12524757   |
| 11290 | MMT00063482   |        | 1-:57575368-57575931    |
| 11291 | 1110018H23Rik | 68509  | 17+:25259638-25262158   |
| 11292 | Nr2f6         | 13864  | 8-:73898023-73905283    |
| 11293 | Bpi           | 329547 | 2+:158086802-158100578  |
| 11294 | Cbr2          | 12409  | 11+:120627308-120628679 |
| 11295 | Rbm25         | 67039  | 12+:84973191-85024075   |
| 11296 | Ccdc33        | 382077 | 9-:57876484-57881118    |
| 11297 | BC017158      | 233913 | 7-:135414893-135441615  |
| 11298 | Rpl27         | 19942  | 11+:101303728-101306841 |
| 11299 | Gemin5        | 216766 | 11-:57933913-57982039   |
| 11300 | Usp9x         | 22284  | X+:12648662-12748912    |
| 11301 | Csrnp3        | 77771  | 2+:65787015-65861515    |
| 11302 | Bub3          | 12237  | 7+:138704223-138714687  |
| 11303 | Slc5a12       | 241612 | 2+:110437461-110481058  |
| 11304 | Clec3a        | 403395 | 8+:116941985-116949726  |
| 11305 | Galntl2       | 78754  | 14+:32842030-32875382   |
| 11306 | 1700016G14Rik | 193386 | 13+:24833101-24838460   |
| 11307 | MMT00053461   |        | 10+:24953010-24977466   |
| 11308 | Cmb1          | 69574  | 15+:31498589-31519874   |
| 11309 | Ttc30a1       | 78802  | 2-:75817799-75819794    |
| 11310 | Hydin         | 244653 | 8+:112790835-112974396  |
| 11311 | Dusp21        | 73547  | X+:17723074-17723642    |
| 11312 | 2210016H18Rik | 70125  | 18+:11016862-11017825   |
| 11313 | Vav3          | 57257  | 3+:109143930-109487231  |
| 11314 | 6330407J23Rik | 67412  | 10+:28863561-28919474   |
| 11315 | Dok3          | 27261  | 13-:55624595-55629899   |
| 11316 | Scn3a         | 20269  | 2-:65331181-65336653    |
| 11317 | 4632419K20Rik | 74349  | 7-:112529531-112548495  |
| 11318 | 3110001A13Rik | 66540  | 2+:3630764-3697415      |
| 11319 | Exoc7         | 53413  | 11-:116150496-116167987 |
| 11320 | Sin3b         | 20467  | 8+:75247179-75282098    |

|       |               |        |                         |
|-------|---------------|--------|-------------------------|
| 11321 | 2310014L17Rik | 381845 | 7+:13512767-13515332    |
| 11322 | EG625347      | 625347 | 6-:12049737-12050269    |
| 11323 | Ndn12         | 66647  | 7-:72016965-72017804    |
| 11324 | 1700012H17Rik | 242297 | 4+:5571345-5727198      |
| 11325 | MMT00004798   |        |                         |
| 11326 | Mboat1        | 218121 | 13+:30228367-30333185   |
| 11327 | Mks1          | 380718 | 11+:87666725-87676500   |
| 11328 | EG627607      | 627607 | 12+:88102600-88104745   |
| 11329 | Tspan11       | 68498  | 6+:127837601-127900061  |
| 11330 | MMT00024873   |        | 2-:19887192-19888317    |
| 11331 | Ttc28         | 209683 | 5+:111308839-111343336  |
| 11332 | 4931432M23Rik | 70993  | 8-:98082962-98099160    |
| 11333 | Gyk           | 14933  | X-:82948912-83021924    |
| 11334 | S100pbp       | 74648  | 4-:128826586-128866749  |
| 11335 | MMT00038006   |        | 2-:20970257-21041623    |
| 11336 | Aatf          | 56321  | 11-:84236357-84327003   |
| 11337 | Dhrs1         | 52585  | 14-:56357860-56364410   |
| 11338 | Vamp8         | 22320  | 6-:72335372-72340613    |
| 11339 | Eef1g         | 67160  | 19+:9041694-9052666     |
| 11340 | Syn2          | 20965  | 6+:115084919-115225094  |
| 11341 | Gpr84         | 80910  | 15-:103138666-103140869 |
| 11342 | Maoa          | 17161  | X+:16196825-16263380    |
| 11343 | Lrp1b         | 94217  | 2-:40452292-42509118    |
| 11344 | Nup37         | 69736  | 10+:87609792-87641139   |
| 11345 | Slc40a1       | 53945  | 1-:45964928-45982378    |
| 11346 | Vcl           | 22330  | 14+:21748736-21850956   |
| 11347 | MMT00076715   |        | 1+:168693032-168700418  |
| 11348 | Med20         | 56771  | 17-:47757558-47759119   |
| 11349 | Cul4b         | 72584  | X-:35886450-35918178    |
| 11350 | 9030420J04Rik | 71544  | 9-:9007965-9048974      |
| 11351 | Ctnnd2        | 18163  | 15+:30102347-30958132   |
| 11352 | V1re1         | 171224 | 17+:20951458-20952377   |
| 11353 | Ppp3cb        | 19056  | 14-:21318536-21365751   |
| 11354 | Bap1          | 104416 | 14+:32064409-32073119   |
| 11355 | Csta          | 209294 | 16-:36122257-36131328   |
| 11356 | Med27         | 68975  | 2+:29202355-29380308    |
| 11357 | 4930558O21Rik | 68307  | 3+:30543428-30571286    |
| 11358 | 2700078E11Rik | 78832  | 19-:60600608-60656902   |
| 11359 | Clstn2        | 64085  | 9-:97345274-97933534    |
| 11360 | Cbln1         | 12404  | 8-:89992767-89994967    |
| 11361 | Myl2          | 17906  | 5+:122550996-122556861  |
| 11362 | Polr2l        | 66491  | 7-:148658602-148661084  |
| 11363 | MMT00007477   | 235631 | 9+:110760484-110767053  |
| 11364 | 2610027L16Rik | 67842  | 14+:56364539-56372831   |
| 11365 | Bcor1         | 320376 | X+:45697320-45759881    |
| 11366 | Smpd4         | 77626  | 16+:17619384-17644916   |
| 11367 | 1810009A15Rik | 66276  | 19+:8963392-8965230     |
| 11368 | Sox8          | 20681  | 17-:25702836-25707820   |
| 11369 | Stx3          | 20908  | 19-:11849607-11893761   |
| 11370 | Prm2          | 19119  | 16-:10791473-10792190   |
| 11371 | Amhr2         | 110542 | 15+:102275850-102285061 |

|       |               |           |                         |
|-------|---------------|-----------|-------------------------|
| 11372 | Cic           | 71722     | 7+:26067868-26078553    |
| 11373 | Maged1        | 94275     | X-:91780814-91787413    |
| 11374 | Cct6a         | 12466     | 5+:130293260-130322231  |
| 11375 | Derl2         | 116891    | 11-:70823427-70832744   |
| 11376 | Slc7a11       | 26570     | 3+:50173828-50174687    |
| 11377 | Khdc1b        | 98582     | 1+:21373664-21376452    |
| 11378 | Ubl3          | 24109     | 5-:149316233-149364209  |
| 11379 | Dnttip1       | 76233     | 2+:164571514-164593717  |
| 11380 | Tcrb-J        | 21580     | 6+:41009441-41009881    |
| 11381 | Uimc1         | 20184     | 13+:55129637-55132382   |
| 11382 | Cdca3         | 14793     | 6+:124780121-124783313  |
| 11383 | Olfrc362      | 259053    | 2-:36960215-36961168    |
| 11384 | Cacng6        | 54378     | 7+:3425422-3435658      |
| 11385 | MMT00081444   |           | 12-:3521591-3523555     |
| 11386 | Vmn2r73       | 620928    | 7-:93006177-93020113    |
| 11387 | MMT00081255   |           | 8-:51032460-51032877    |
| 11388 | Tdrd9         | 74691     | 12+:113278635-113290222 |
| 11389 | Anapc10       | 68999     | 8+:82235631-82299302    |
| 11390 | Kctd16        | 383348    | 18+:40690303-40690757   |
| 11391 | 2310016C16Rik | 69590     | 13-:113832970-113836596 |
| 11392 | AU021838      | 328099    | 12+:58331329-58598179   |
| 11393 | A830007P12Rik | 227612    | 2-:25048485-25052246    |
| 11394 | Alpk1         | 71481     | 3-:127375277-127483433  |
| 11395 | Tcea1         | 21399     | 1+:4847983-4886725      |
| 11396 | C330043M08Rik | 330323    | 6+:55234739-55268663    |
| 11397 | Zp2           | 22787     | 7-:127275892-127288804  |
| 11398 | Zfhx3         | 11906     | 8+:111238543-111481131  |
| 11399 | Olfrc32       | 18331     | 2-:89950615-89951544    |
| 11400 | MMT00049162   |           | 10+:21844382-21845243   |
| 11401 | Ramp3         | 56089     | 11+:6558539-6577477     |
| 11402 | Pomt1         | 99011     | 2+:32092202-32110523    |
| 11403 | 2210016F16Rik | 70153     | 13-:58482608-58486790   |
| 11404 | Gnpat         | 14712     | 8+:127386966-127413803  |
| 11405 | MMT00031171   |           | 6-:70066940-70089088    |
| 11406 | Ifi203        | 15950     | 1-:175787343-175805910  |
| 11407 | MMT00077704   |           | X+:158790778-158791814  |
| 11408 | MMT00004171   | 100039478 | 4-:8383336-8426186      |
| 11409 | Phf16         | 382207    | X+:20039237-20094914    |
| 11410 | EG668804      | 668804    | 3-:123212327-123213470  |
| 11411 | Odf1          | 18285     | 15+:38148957-38156393   |
| 11412 | Abcg5         | 27409     | 17-:85057574-85082263   |
| 11413 | Phyhipl       | 70911     | 10-:70020436-70089147   |
| 11414 | Olfrc1330     | 258331    | 4+:118565689-118566636  |
| 11415 | Hnrnpul2      | 68693     | 19+:8894758-8906072     |
| 11416 | Ddr2          | 18214     | 1-:171903413-171905635  |
| 11417 | MMT00018565   |           | 17-:85941113-85942045   |
| 11418 | 6330503C03Rik | 76156     | 6-:42267784-42274579    |
| 11419 | Atrnl1        | 226255    | 19+:58116810-58207823   |
| 11420 | Pou4f1        | 18996     | 14-:104864946-104872725 |
| 11421 | MMT00034261   |           | 4+:150221175-150221376  |
| 11422 | Pltp          | 18830     | 2-:164665017-164683113  |

|       |               |           |                         |
|-------|---------------|-----------|-------------------------|
| 11423 | 6720463M24Rik | 77744     | 14+:99445437-99473757   |
| 11424 | Iqcf3         | 68265     | 9-:106445718-106463956  |
| 11425 | Evx2          | 14029     | 2-:74493672-74497476    |
| 11426 | Sipa1         | 20469     | 19-:5651415-5656265     |
| 11427 | 1810053B01Rik | 381404    | 2+:163851216-163875364  |
| 11428 | 4932438A13Rik | 229227    | 3+:36864442-36887237    |
| 11429 | Lama2         | 16773     | 10-:26701086-27187181   |
| 11430 | MMT00031124   |           | 10-:69747193-69747735   |
| 11431 | Gmpr2         | 105446    | 14+:56291136-56297578   |
| 11432 | Dynll2        | 68097     | 11-:87794585-87801001   |
| 11433 | Aldh1a2       | 19378     | 9+:71063650-71143563    |
| 11434 | MMT00038324   |           | 5-:107810464-107811099  |
| 11435 | Rnaset2a      | 100037283 | 17-:8321462-8340653     |
| 11436 | Mapre1        | 13589     | 2+:153567092-153592996  |
| 11437 | Gatm          | 67092     | 2-:122420611-122437013  |
| 11438 | Cd109         | 235505    | 9+:78484255-78564057    |
| 11439 | Slc28a3       | 114304    | 13-:58657047-58712171   |
| 11440 | Cox8c         | 75483     | 12+:104137504-104138746 |
| 11441 | AA619741      | 241051    | 1-:34692385-34735070    |
| 11442 | MMT00013104   |           | 11+:93556395-93556863   |
| 11443 | Cog2          | 76332     | 8+:127044779-127075392  |
| 11444 | Rnpep         | 215615    | 1-:137159289-137180611  |
| 11445 | Atp1a2        | 98660     | 1-:174153650-174228133  |
| 11446 | Dock8         | 76088     | 19+:25248778-25276668   |
| 11447 | Nr1h4         | 20186     | 10-:88917122-88969372   |
| 11448 | Arl1          | 104303    | 10+:88194139-88206827   |
| 11449 | Ppap2a        | 19012     | 13+:113591130-113657850 |
| 11450 | 1110039B18Rik | 68796     | 5+:31174509-31179834    |
| 11451 | Glis3         | 226075    | 19-:28358189-28391903   |
| 11452 | Ctla2a        | 13024     | 13-:61036133-61037895   |
| 11453 | Adc           | 242669    | 4-:128608484-128638804  |
| 11454 | Cdk1          | 71091     | 12-:70847650-70891697   |
| 11455 | Olfml2a       | 241327    | 2+:38787497-38806934    |
| 11456 | Las1l         | 76130     | X-:93130650-93152259    |
| 11457 | Slu7          | 193116    | 11+:43247242-43261461   |
| 11458 | Olf402        | 258703    | 11+:73968657-73969604   |
| 11459 | Mas1          | 17171     | 17-:13034426-13035400   |
| 11460 | F2rl3         | 14065     | 8+:75285801-75287406    |
| 11461 | Diap2         | 54004     | X+:126643787-126862936  |
| 11462 | Gpam          | 14732     | 19-:55142136-55201706   |
| 11463 | MMT00057138   |           | 13-:71761731-71762275   |
| 11464 | Gnat3         | 242851    | 5+:17468364-17525485    |
| 11465 | Eif3k         | 73830     | 7-:29756391-29766833    |
| 11466 | MMT00075077   |           | 15+:84838519-84839627   |
| 11467 | Ypel5         | 383295    | 17+:73193373-73198143   |
| 11468 | Fpgs          | 14287     | 2-:32537827-32559656    |
| 11469 | D16Ertd472e   | 67102     | 16-:78544256-78576902   |
| 11470 | MMT00038467   |           | 10+:91721450-91722076   |
| 11471 | Numb          | 18222     | 12-:85136388-85183293   |
| 11472 | Ckmt2         | 76722     | 13-:91992992-92016471   |
| 11473 | MMT00047279   |           | 16-:79914704-79914959   |

|       |               |           |                         |
|-------|---------------|-----------|-------------------------|
| 11474 | Bsg           | 12215     | 10+:79167103-79174716   |
| 11475 | H2-D1         | 14964     | 17+:35400836-35400949   |
| 11476 | 4921528I01Rik | 70950     | 18-:22175840-22329942   |
| 11477 | MMT00006495   |           | 12+:117389883-117390811 |
| 11478 | Olfr124       | 259064    | 17+:37942091-37943039   |
| 11479 | Tmed4         | 103694    | 11-:6170716-6174840     |
| 11480 | Olfr1245      | 258784    | 2-:89414959-89415881    |
| 11481 | Morn1         | 76866     | 4+:154460708-154519615  |
| 11482 | 4930412L05Rik | 73941     | 4-:53217937-53230435    |
| 11483 | Ephb4         | 13846     | 5+:137791657-137815537  |
| 11484 | Tusc5         | 237858    | 11+:76493797-76507798   |
| 11485 | I7Rn6         | 67669     | 7-:97067198-97089695    |
| 11486 | Tacc3         | 21335     | 5+:34001309-34014844    |
| 11487 | 1200009F10Rik | 67454     | 10+:90545815-90565352   |
| 11488 | MMT00035330   | 100040259 | 9-:14649688-14650215    |
| 11489 | Sgsh          | 27029     | 11-:119207592-119216798 |
| 11490 | Gpr133        | 243277    | 5+:129615452-129621052  |
| 11491 | OTTMUSG000000 | 327963    | 11+:73885158-73899836   |
| 11492 | Tll7          | 70892     | 3+:146593014-146642962  |
| 11493 | Hcfc1         | 15161     | X-:71189777-71211342    |
| 11494 | Olfr365       | 258656    | 2+:37056762-37063648    |
| 11495 | Rrp9          | 27966     | 9+:106379639-106387745  |
| 11496 | BC049715      | 320135    | 6+:136776416-136788645  |
| 11497 | MMT00046610   |           | 8+:13851614-13853065    |
| 11498 | Opa3          | 403187    | 7+:19813288-19841189    |
| 11499 | 1810048J11Rik | 67708     | 12+:73656109-73681159   |
| 11500 | 3300001P08Rik | 67684     | 11-:94152388-94183276   |
| 11501 | Gpr128        | 239853    | 16-:56724723-56778814   |
| 11502 | Dgat2l4       | 245532    | X-:97600345-97601035    |
| 11503 | Rangap1       | 19387     | 15-:81534683-81560305   |
| 11504 | Tpm3          | 59069     | 3+:89883653-89903532    |
| 11505 | MMT00018714   |           | 17-:93467314-93467864   |
| 11506 | Rfxank        | 19727     | 8-:72656386-72663012    |
| 11507 | Adarb2        | 94191     | 13+:8202394-8756688     |
| 11508 | 1110003E01Rik | 68552     | 5-:65841043-65884069    |
| 11509 | Ndst1         | 15531     | 18-:60848898-60872889   |
| 11510 | Plch2         | 269615    | 4-:154357224-154417264  |
| 11511 | BC020002      | 252875    | 6+:8159228-8186271      |
| 11512 | Ppil5         | 69706     | 12+:70269807-70279992   |
| 11513 | Serpinf1      | 20317     | 11-:75223532-75236013   |
| 11514 | Muc3          | 666339    |                         |
| 11515 | EG544707      | 544707    | 10+:74814968-74815776   |
| 11516 | Sfxn5         | 94282     | 6-:85165482-85283416    |
| 11517 | MMT00001765   |           |                         |
| 11518 | Tmem130       | 243339    | 5-:145504465-145522474  |
| 11519 | Slc2a10       | 170441    | 2+:165329479-165345409  |
| 11520 | Olfr1         | 258923    | 11-:73208579-73209522   |
| 11521 | Dnaja1        | 15502     | 4+:40669585-40680933    |
| 11522 | Igbp1b        | 50540     | 6-:138605610-138606965  |
| 11523 | MMT00052418   |           | 7+:17736871-17748692    |
| 11524 | MMT00080614   |           | X+:102228106-102228582  |

|       |               |           |                         |
|-------|---------------|-----------|-------------------------|
| 11525 | MMT00048506   |           | 10+:126330168-126330965 |
| 11526 | Pak6          | 214230    | 2+:118489496-118522309  |
| 11527 | MMT00042501   |           | X-:65260183-65260462    |
| 11528 | Ccdc49        | 67480     | 11-:97606928-97627870   |
| 11529 | Ceacam12      | 67315     | 7+:18651277-18657161    |
| 11530 | Glis1         | 230587    | 4+:107236545-107307665  |
| 11531 | Tcrq-V3       | 21637     | 13+:19334863-19353109   |
| 11532 | Plekhm3       | 241075    | 1-:64841339-64969056    |
| 11533 | Mpzi3         | 319742    | 9+:44863301-44883292    |
| 11534 | Ndufs4        | 17993     | 13-:115078858-115178251 |
| 11535 | MMT00080036   |           | 2+:181729661-181735699  |
| 11536 | Igj           | 16069     | 5-:88949540-88956809    |
| 11537 | MMT00040737   |           | 2+:111840271-111841717  |
| 11538 | Cntn4         | 269784    | 6+:106131769-106623967  |
| 11539 | Clmn          | 94040     | 12-:106009966-106103286 |
| 11540 | Ctps          | 51797     | 4-:120212470-120242869  |
| 11541 | Cox11         | 69802     | 11+:90499483-90507520   |
| 11542 | Taz           | 66826     | X+:71528106-71535487    |
| 11543 | Dusp14        | 56405     | 11-:83862118-83862715   |
| 11544 | Fip111        | 66899     | 5+:74931548-74988447    |
| 11545 | Ppcs          | 106564    | 4-:119091137-119094996  |
| 11546 | Rdm1          | 66599     | 11+:101489262-101497395 |
| 11547 | Nanog         | 71950     | 6+:122657609-122664649  |
| 11548 | EG625219      | 625219    | 5-:22437147-22437894    |
| 11549 | Depdc6        | 97998     | 15+:54943878-55084334   |
| 11550 | MMT00057961   |           |                         |
| 11551 | MMT00046383   |           | 13+:20840333-20840705   |
| 11552 | Col4a5        | 12830     | X+:137910004-138123735  |
| 11553 | Polk          | 27015     | 13-:97250644-97312440   |
| 11554 | V1rh10        | 171269    | 13-:22919063-22919983   |
| 11555 | Cldnd1        | 224250    | 16+:58728060-58734352   |
| 11556 | Smarca5       | 93762     | 8-:83224293-83263010    |
| 11557 | Blnk          | 17060     | 19-:41003664-41068548   |
| 11558 | Tbc1d14       | 100855    | 5-:36833257-36873150    |
| 11559 | Fem1c         | 240263    | 18-:46661403-46685381   |
| 11560 | MMT00001695   |           | 5-:76455924-76456824    |
| 11561 | A830093I24Rik | 207921    | 12-:4746694-4776038     |
| 11562 | Lrrc4         | 192198    | 6-:28779513-28781716    |
| 11563 | Prdm11        | 100042784 | 2-:92815406-92886107    |
| 11564 | Paip2         | 67869     | 18+:35758320-35776839   |
| 11565 | Serpina3c     | 16625     | 12-:105385116-105392082 |
| 11566 | Cdca2         | 108912    | 14-:68294739-68333430   |
| 11567 | Mrps31        | 57312     | 8+:23521891-23539948    |
| 11568 | Lman1l        | 235416    | 9-:57454837-57468575    |
| 11569 | Unc13d        | 70450     | 11-:115923409-115938974 |
| 11570 | Plxnb3        | 140571    | X+:71003884-71017841    |
| 11571 | Bpnt1         | 23827     | 1+:187156079-187180664  |
| 11572 | OTTMUSG000000 | 381569    | 4-:143401400-143405979  |
| 11573 | MMT00050792   |           | 10+:21844382-21845243   |
| 11574 | Gne           | 50798     | 4-:44049989-44079790    |
| 11575 | Wdr77         | 70465     | 3+:105762501-105770240  |

|       |               |        |                         |
|-------|---------------|--------|-------------------------|
| 11576 | Gm1381        | 384198 | 5+:92984096-93019689    |
| 11577 | Usp27x        | 54651  | X-:6950671-6954002      |
| 11578 | MMT00050323   |        |                         |
| 11579 | MMT00033506   |        | 7-:99842463-99910014    |
| 11580 | MMT00054669   |        | 7+:92455950-92491185    |
| 11581 | Cast          | 12380  | 13-:74830741-74946257   |
| 11582 | MMT00044915   |        | Y+:1520846-1585248      |
| 11583 | Tbp           | 21374  | 17+:15640038-15653747   |
| 11584 | Zfp592        | 233410 | 7+:88168156-88188210    |
| 11585 | Bdp1          | 544971 | 13-:100787951-100873989 |
| 11586 | MMT00070266   |        | 18+:10262204-10263318   |
| 11587 | Syt14         | 329324 | 1-:194723408-194853211  |
| 11588 | Ncapg2        | 76044  | 12+:117664318-117702003 |
| 11589 | Tead3         | 21678  | 17-:28468616-28487091   |
| 11590 | Cbx4          | 12418  | 11-:118941470-118947453 |
| 11591 | Vil1          | 22349  | 1+:74455979-74482088    |
| 11592 | C130030K03Rik | 320644 | 10-:48813784-48814526   |
| 11593 | Usf1          | 22278  | 1+:173341811-173348871  |
| 11594 | Heca          | 380629 | 10-:17618539-17635838   |
| 11595 | Zfp14         | 243906 | 7-:30821378-30872186    |
| 11596 | Zfp120        | 104348 | 2-:149941955-149962414  |
| 11597 | 2700060E02Rik | 68045  | 14-:20631121-20643035   |
| 11598 | MMT00031533   | 628236 | 19-:33484689-33492127   |
| 11599 | Coq10b        | 67876  | 1+:55109714-55129543    |
| 11600 | Igk-V24       | 16113  | 6+:67883363-67967519    |
| 11601 | Nmt2          | 18108  | 2+:3201559-3243641      |
| 11602 | Adora2b       | 11541  | 11+:62062603-62092717   |
| 11603 | EG633736      | 633736 | X+:138847269-138847552  |
| 11604 | Ptov1         | 84113  | 7-:52118438-52125158    |
| 11605 | MMT00067009   |        | 4+:118643863-118660622  |
| 11606 | Mast4         | 328329 | 13-:103523408-103643964 |
| 11607 | Mib2          | 76580  | 4-:155028791-155042923  |
| 11608 | Itgb4         | 192897 | 11+:115836020-115869725 |
| 11609 | Ccnc          | 51813  | 4+:21654872-21677693    |
| 11610 | Hey1          | 15213  | 3-:8663358-8666986      |
| 11611 | S100a13       | 20196  | 3+:90318921-90328496    |
| 11612 | Trp53bp1      | 27223  | 2-:121022428-121097105  |
| 11613 | Egr3          | 13655  | 14+:70477251-70479964   |
| 11614 | Sult1e1       | 20860  | 5-:88004994-88020619    |
| 11615 | Gfra2         | 14586  | 14+:71290661-71378297   |
| 11616 | Btf3l4        | 70533  | 4-:108486900-108506192  |
| 11617 | C130039O16Rik | 238317 | 12-:85500597-85559857   |
| 11618 | Rpl23         | 65019  | 11-:97638859-97643687   |
| 11619 | Grap          | 71520  | 11+:61466822-61486279   |
| 11620 | Zfr           | 22763  | 15+:12047607-12114218   |
| 11621 | Mixl1         | 27217  | 1-:182624750-182627143  |
| 11622 | Nell1         | 338352 | 7+:58081695-58111798    |
| 11623 | Iqcd          | 75732  | 5+:121039033-121057122  |
| 11624 | MMT00001761   |        |                         |
| 11625 | Hcctr2        | 387285 | 9-:76077764-76171311    |
| 11626 | Htatsf1       | 72459  | X+:54306745-54320356    |

|       |               |        |                         |
|-------|---------------|--------|-------------------------|
| 11627 | MMT00076264   | 278676 | 14+:52423159-52425266   |
| 11628 | Slc6a12       | 14411  | 6+:121296721-121315790  |
| 11629 | Ovol3         | 381867 | 7-:31018458-31019522    |
| 11630 | Mug-ps1       | 17835  | 6+:122086686-122198581  |
| 11631 | Ccl21c        | 65956  | 4+:41774242-41775336    |
| 11632 | MMT00001633   |        | 5-:18001747-18002965    |
| 11633 | Ier3          | 15937  | 17+:35958657-35959855   |
| 11634 | Olf1223       | 258894 | 2-:88984244-88985178    |
| 11635 | Atad2b        | 320817 | 12+:4964862-5051582     |
| 11636 | V1r1          | 171262 | 7+:11218935-11219832    |
| 11637 | Ugcg1         | 320011 | 1-:36197830-36268331    |
| 11638 | MMT00016639   |        | 7+:12034325-12035153    |
| 11639 | Rsb1l         | 242860 | 5-:20413928-20457721    |
| 11640 | Zxdb          | 668166 | X+:91970834-91972629    |
| 11641 | 2-Sep         | 18000  | 1+:95375620-95406307    |
| 11642 | Smyd1         | 12180  | 6-:71165171-71212247    |
| 11643 | D2hgdh        | 98314  | 1+:95722861-95744847    |
| 11644 | Kcnk9         | 223604 | 15-:72342841-72376728   |
| 11645 | Prtn3         | 19152  | 10+:79342420-79345720   |
| 11646 | 4930519G04Rik | 67593  | 5+:115303722-115333668  |
| 11647 | B4galt2       | 53418  | 4-:117541802-117545209  |
| 11648 | Lrfrn2        | 70530  | 17+:49209187-49236912   |
| 11649 | Hfe           | 15216  | 13-:23795884-23802655   |
| 11650 | 1700021K19Rik | 224118 | 16-:32821821-32868379   |
| 11651 | S1pr4         | 13611  | 10-:80961222-80962882   |
| 11652 | Ddx56         | 52513  | 11-:6158572-6167741     |
| 11653 | Mrpl1         | 94061  | 5+:96639175-96693434    |
| 11654 | Scrt1         | 170729 | 15-:76347323-76348073   |
| 11655 | Cd200r1       | 57781  | 16+:44766121-44794453   |
| 11656 | Prkag2        | 108099 | 5-:24368575-24606248    |
| 11657 | Olf1569       | 259092 | 7-:110035721-110036665  |
| 11658 | Grik2         | 14806  | 10-:48820794-49503215   |
| 11659 | Gm1679        | 381667 | 5+:110783159-110785108  |
| 11660 | MMT00068731   |        | 15-:102806165-102807888 |
| 11661 | Rtn1          | 104001 | 12-:73312739-73509688   |
| 11662 | Mre11a        | 17535  | 9+:14589115-14638404    |
| 11663 | Dusp5         | 240672 | 19+:53603648-53616916   |
| 11664 | Efna4         | 13639  | 3-:89138096-89141867    |
| 11665 | Hyal1         | 15586  | 9+:107479306-107482425  |
| 11666 | Eng           | 13805  | 2+:32502114-32537635    |
| 11667 | Rbpjl         | 19668  | 2+:164228693-164240948  |
| 11668 | D6Wsu163e     | 28040  | 6+:126892327-126925635  |
| 11669 | Trappc3       | 27096  | 4+:125939657-125952632  |
| 11670 | Med11         | 66172  | 11+:70265454-70267223   |
| 11671 | Postn         | 50706  | 3+:54165046-54194953    |
| 11672 | E030018N11Rik | 319622 | 7-:125633241-125634848  |
| 11673 | Pex10         | 668173 | 4+:154441090-154446543  |
| 11674 | MMT00023435   |        | 1+:48938556-48939472    |
| 11675 | MMT00017829   |        | 10+:64997375-64998191   |
| 11676 | Slc24a4       | 238384 | 12+:103369714-103505298 |
| 11677 | 5730507C01Rik | 236366 | 12+:18411527-19105834   |



|       |               |        |                         |
|-------|---------------|--------|-------------------------|
| 11678 | Fbxo44        | 230903 | 4-:147526908-147532934  |
| 11679 | Lamc1         | 226519 | 1-:155065534-155109829  |
| 11680 | Chfr          | 231600 | 5+:110552712-110600986  |
| 11681 | Pura          | 19290  | 18+:36440815-36447899   |
| 11682 | Nutf2         | 68051  | 8+:108384560-108402929  |
| 11683 | Chm           | 12662  | X-:110155054-110299124  |
| 11684 | Mif           | 17319  | 10-:75322098-75322985   |
| 11685 | Cd83          | 12522  | 13+:43880571-43898499   |
| 11686 | 5830434P21Rik | 227723 | 2+:32038031-32090160    |
| 11687 | C530008M17Rik | 320827 | 5+:77285355-77300340    |
| 11688 | Hes3          | 15207  | 4-:151660997-151661974  |
| 11689 | MMT00078109   |        | 7+:117442229-117446277  |
| 11690 | Pex1          | 71382  | 5+:3596388-3637230      |
| 11691 | Muted         | 17828  | 13-:38694575-38726978   |
| 11692 | Eif3j         | 78655  | 2+:121854327-121877833  |
| 11693 | Gpr161        | 240888 | 1+:167236268-167251981  |
| 11694 | Pip4k2b       | 108083 | 11-:97580174-97605918   |
| 11695 | MMT00081973   | 675985 | 8+:91330258-91331072    |
| 11696 | MMT00051197   |        | 2-:128863875-128873912  |
| 11697 | Rasl2-9       | 19428  | 7-:5076607-5077558      |
| 11698 | MMT00067243   |        | 13-:12517372-12517899   |
| 11699 | MMT00044175   |        | 18+:42360453-42360956   |
| 11700 | Nhej1         | 75570  | 1-:75013928-75121778    |
| 11701 | Oas1c         | 114643 | 5-:121250216-121258791  |
| 11702 | Rag2          | 19374  | 2+:101464960-101471411  |
| 11703 | MMT00024473   |        | 18+:81050660-81051464   |
| 11704 | EG668525      | 668525 | 12+:20675479-20676524   |
| 11705 | Polr3f        | 70408  | 2+:144353494-144365094  |
| 11706 | Shisa3        | 330096 | 5+:67999383-68002713    |
| 11707 | MMT00053032   |        | 18-:64240415-64241170   |
| 11708 | MMT00078566   |        | 6-:13005596-13006527    |
| 11709 | Asb2          | 65256  | 12-:104559355-104594211 |
| 11710 | Hsd17b14      | 66065  | 7+:52814758-52822687    |
| 11711 | Atp5e         | 67126  | 2-:174286575-174289590  |
| 11712 | Neil1         | 72774  | 9-:56991062-56994841    |
| 11713 | Mpdu1         | 24070  | 11-:69470205-69476079   |
| 11714 | MMT00043933   |        | 3-:38457084-38457590    |
| 11715 | Lars          | 107045 | 18-:42362003-42393473   |
| 11716 | Slco6d1       | 70866  | 1+:100317699-100405958  |
| 11717 | Wdhd1         | 218973 | 14-:47860617-47896272   |
| 11718 | Nmb           | 68039  | 7-:88047127-88049922    |
| 11719 | Clasp1        | 76707  | 1+:120286025-120506009  |
| 11720 | Cdk10         | 234854 | 8+:125748655-125756683  |
| 11721 | Usp37         | 319651 | 1-:74485061-74552396    |
| 11722 | Ccdc104       | 216618 | 11-:29121546-29147281   |
| 11723 | Dnase1        | 13419  | 16+:4037356-4040022     |
| 11724 | Tuba3a        | 22144  | 6-:125228306-125236049  |
| 11725 | Itln1         | 16429  | 1-:173448253-173465424  |
| 11726 | MMT00065091   |        | 3+:135567308-135591948  |
| 11727 | Olfir24       | 18322  | 9-:18559136-18559750    |
| 11728 | 2310043L02Rik | 69664  | 11-:99441297-99442330   |

|       |               |           |                         |
|-------|---------------|-----------|-------------------------|
| 11729 | Ncr1          | 17086     | 7+:4289336-4296362      |
| 11730 | Tcea1         | 21399     | 1+:4847972-4886725      |
| 11731 | Gpr141        | 353346    | 13-:19843305-19916097   |
| 11732 | Rundc3a       | 51799     | 11+:102254989-102263867 |
| 11733 | MMT00064839   |           | 6+:38234531-38235012    |
| 11734 | MMT00024780   | 100009600 | 9-:20866835-20870592    |
| 11735 | Thoc5         | 107829    | 11+:4795334-4828863     |
| 11736 | EG667148      | 667148    | 12-:102102291-102102649 |
| 11737 | Hgsnat        | 52120     | 8-:27054930-27056954    |
| 11738 | Tmed2         | 56334     | 5+:124990837-124999252  |
| 11739 | Ccnb1         | 268697    | 13+:101548688-101556418 |
| 11740 | Cpm           | 70574     | 10+:117066553-117122359 |
| 11741 | Slc30a10      | 226781    | 1+:187278726-187289068  |
| 11742 | Ifitm2        | 80876     | 7-:148140740-148141860  |
| 11743 | Prdx2         | 21672     | 8+:87494135-87498209    |
| 11744 | Ctnnb1        | 66642     | 2+:157563176-157716827  |
| 11745 | Ece2          | 107522    | 16+:20629982-20645992   |
| 11746 | MMT00002998   | 545600    | 4-:37086175-37086886    |
| 11747 | 4933434I06Rik | 71233     | 2-:21102357-21126992    |
| 11748 | MMT00044356   |           | 1-:36059977-36060748    |
| 11749 | Rp1h          | 19888     | 1-:4333584-4399340      |
| 11750 | MMT00034237   |           | 7-:74109913-74139054    |
| 11751 | MMT00014760   |           | 13-:49938581-50126853   |
| 11752 | MMT00061847   |           | X+:99680782-99697479    |
| 11753 | CU075549.1    | 620807    | 4+:60016418-60016983    |
| 11754 | Ddx42         | 72047     | 11+:106102972-106110453 |
| 11755 | Ii4           | 16189     | 11-:53425969-53432167   |
| 11756 | 2810011L19Rik | 69952     | 12+:106575064-106620320 |
| 11757 | Ercc3         | 13872     | 18+:32399984-32429801   |
| 11758 | S100a1        | 20193     | 3-:90315031-90318216    |
| 11759 | 3110079O15Rik | 73234     | 1+:89366832-89372058    |
| 11760 | MMT00068385   | 56716     | 17-:24612762-24615973   |
| 11761 | Ankrd37       | 654824    | 8-:47082263-47085222    |
| 11762 | Ggt5          | 23887     | 10+:75052140-75077930   |
| 11763 | Seh1l         | 72124     | 18+:67934628-67952247   |
| 11764 | Chrna2        | 110902    | 14+:66759796-66771783   |
| 11765 | Gm884         | 380730    | 11-:103461614-103462212 |
| 11766 | Plekhh2       | 213556    | 17+:84911187-85019148   |
| 11767 | Srr           | 27364     | 11-:74722017-74732999   |
| 11768 | Pcna          | 18538     | 2-:132075022-132078891  |
| 11769 | MMT00020194   |           | X-:50135871-50149863    |
| 11770 | MMT00077046   |           | 14+:40819357-40819841   |
| 11771 | Cebpe         | 110794    | 14-:55329376-55330958   |
| 11772 | Ascl3         | 56787     | 7-:116870978-116875246  |
| 11773 | Dhx35         | 71715     | 2+:158620555-158683949  |
| 11774 | 4933433C11Rik | 74472     | 2-:25067725-25070153    |
| 11775 | Phyh          | 16922     | 2+:4840076-4859770      |
| 11776 | Ifi30         | 65972     | 8-:73286873-73290530    |
| 11777 | MMT00008513   |           | 5-:44797035-44797838    |
| 11778 | Mastl         | 67121     | 2-:22973650-22995496    |
| 11779 | Irx2          | 16372     | 13+:72767251-72771641   |

|       |               |           |                         |
|-------|---------------|-----------|-------------------------|
| 11780 | Taok1         | 216965    | 11-:77351102-77369095   |
| 11781 | Erc2          | 238988    | 14+:29289261-29291715   |
| 11782 | Cenpt         | 320394    | 8-:108368563-108375902  |
| 11783 | Crim2         | 333088    | 6-:29437180-29439153    |
| 11784 | Es1           | 13884     | 8-:95622913-95655170    |
| 11785 | MMT00075578   |           | 15+:84696703-84697800   |
| 11786 | Gzmg          | 14944     | 14-:56775517-56778402   |
| 11787 | Rsf1          | 233532    | 7-:104802885-104803263  |
| 11788 | MMT00014479   |           | 15-:59761367-59761815   |
| 11789 | Ccdc90a       | 76137     | 13-:43633780-43655538   |
| 11790 | Plekha5       | 109135    | 6+:140492673-140545628  |
| 11791 | Duoxa2        | 66811     | 2+:122124635-122128621  |
| 11792 | Neu2          | 23956     | 1+:89491124-89494401    |
| 11793 | Wdr79         | 216853    | 11-:69375256-69392826   |
| 11794 | OTTMUSG000000 | 100038570 | 11+:116518498-116521429 |
| 11795 | Gps2          | 56310     | 11+:69727551-69730092   |
| 11796 | Ela3          | 67868     | 4-:136976924-136986433  |
| 11797 | Sbk1          | 104175    | 7+:133416132-133438512  |
| 11798 | A530082C11Rik | 320541    | 4+:154993303-154994621  |
| 11799 | EG636947      | 636947    | 6-:130788442-130820615  |
| 11800 | Clip3         | 76686     | 7+:31077174-31092167    |
| 11801 | Gtf2f2        | 68705     | 14-:76296735-76410735   |
| 11802 | Armc4         | 74934     | 18-:7088232-7297938     |
| 11803 | 1500032D16Rik | 78330     | 17+:31657095-31668272   |
| 11804 | MMT00071318   |           | 16-:48399565-48412399   |
| 11805 | Bat2          | 53761     | 17-:35286206-35299928   |
| 11806 | Ptprij        | 19271     | 2-:90276208-90420627    |
| 11807 | Fbxo31        | 76454     | 8-:124075915-124102555  |
| 11808 | Pck1          | 18534     | 2+:172978573-172984752  |
| 11809 | 4930534B04Rik | 75216     | 12-:92527833-92622820   |
| 11810 | Tfb2m         | 15278     | 1-:181458186-181476349  |
| 11811 | Lypla2        | 26394     | 4-:135524139-135528509  |
| 11812 | Mrpl16        | 94063     | 19+:11844904-11849434   |
| 11813 | MMT00009937   |           | 1-:48371105-48371743    |
| 11814 | Pdlim5        | 56376     | 3-:141905620-142058582  |
| 11815 | Nlrp1c        | 627984    | 11-:70969524-71074918   |
| 11816 | Ccdc99        | 70385     | 11-:34622691-34647126   |
| 11817 | Dpysl3        | 22240     | 18-:43483941-43552985   |
| 11818 | MMT00048396   |           | 2-:147468585-147468916  |
| 11819 | Mcee          | 73724     | 7+:71537531-71557000    |
| 11820 | Abcg4         | 192663    | 9-:44081271-44096206    |
| 11821 | Qsox2         | 227638    | 2-:26064408-26092885    |
| 11822 | Elovl2        | 54326     | 13-:41277867-41315762   |
| 11823 | Mmp7          | 17393     | 9+:7692089-7699584      |
| 11824 | MMT00033503   |           | 7+:101345719-101345969  |
| 11825 | MMT00024508   |           | 5+:101734596-101734896  |
| 11826 | Rps24         | 20088     | 14+:25310970-25312715   |
| 11827 | Ubn1          | 170644    | 16+:5050147-5086377     |
| 11828 | Ggps1         | 14593     | 13-:14145945-14155556   |
| 11829 | MMT00004382   |           | 4-:33288659-33289039    |
| 11830 | Zbtb48        | 100090    | 4-:151393882-151401767  |

|       |               |        |                         |
|-------|---------------|--------|-------------------------|
| 11831 | Al747699      | 381236 | 19-:33749595-33805439   |
| 11832 | Rnf11         | 29864  | 4-:109125503-109149588  |
| 11833 | Abo           | 80908  | 2-:26698708-26704510    |
| 11834 | Pja2          | 224938 | 17-:64632232-64660716   |
| 11835 | Olf338        | 258949 | 2+:36232297-36233216    |
| 11836 | Csf1r         | 12978  | 18+:61265528-61290786   |
| 11837 | Paqr6         | 68957  | 3+:88186020-88186764    |
| 11838 | MMT00005019   |        | 14+:53627284-53627815   |
| 11839 | Olf25         | 18323  | 9+:38137422-38138113    |
| 11840 | Chrdl1        | 83453  | X-:139732681-139824691  |
| 11841 | MMT00046311   |        | 13+:66737466-66737671   |
| 11842 | Rarb          | 218772 | 14-:17263355-17408109   |
| 11843 | Dusp22        | 105352 | 13+:30751964-30803092   |
| 11844 | Krt33a        | 71888  | 11-:99872515-99877526   |
| 11845 | Psme1         | 19186  | 14+:56197330-56200364   |
| 11846 | Cxcr5         | 12145  | 9-:44319924-44334461    |
| 11847 | Tmem45b       | 235135 | 9-:31233781-31271823    |
| 11848 | MMT00064912   |        | 13+:87922528-87923396   |
| 11849 | Olf648        | 258746 | 7-:111327970-111328920  |
| 11850 | Kdelc2        | 68304  | 9+:53192204-53209971    |
| 11851 | Smchd1        | 74355  | 17-:71778801-71786166   |
| 11852 | Igsf11        | 207683 | 16+:39007241-39027266   |
| 11853 | EG214403      | 214403 | 1-:141471761-141677817  |
| 11854 | Btbd1         | 83962  | 7-:88936960-88963150    |
| 11855 | 4930402F06Rik | 74854  | 2-:35231096-35252696    |
| 11856 | Centa1        | 231821 | 5-:139747830-139783826  |
| 11857 | Arv1          | 68865  | 8+:127246038-127258023  |
| 11858 | Rnf135        | 71956  | 11+:79997373-80013255   |
| 11859 | Poln          | 272158 | 5-:34349838-34452083    |
| 11860 | Hesx1         | 15209  | 14+:27813547-27815509   |
| 11861 | Dyrk3         | 226419 | 1-:133025018-133034811  |
| 11862 | Rce1          | 19671  | 19-:4622550-4625617     |
| 11863 | Srbd1         | 78586  | 17-:86535709-86544568   |
| 11864 | Dis3l         | 213550 | 9-:64154564-64156236    |
| 11865 | EG383815      | 383815 | 3+:3791896-3792295      |
| 11866 | Snx2          | 67804  | 18+:53336018-53380514   |
| 11867 | Rcor3         | 214742 | 1-:193925269-193961809  |
| 11868 | Krtcap3       | 69815  | 5+:31554088-31555570    |
| 11869 | Pcsk5         | 18552  | 19-:17507405-17729390   |
| 11870 | Apitd1        | 69928  | 4-:148502457-148511659  |
| 11871 | 4931417E11Rik | 66740  | 6-:73418575-73419661    |
| 11872 | Vamp5         | 53620  | 6-:72319026-72320326    |
| 11873 | Mmp2          | 17390  | 8+:95351480-95377318    |
| 11874 | Nucb1         | 18220  | 7-:52748477-52765219    |
| 11875 | Pgbd5         | 209966 | 8-:126894391-126957980  |
| 11876 | MMT00010256   |        | 11+:120966851-120967903 |
| 11877 | Luzp2         | 233271 | 7+:62422569-62467257    |
| 11878 | Olf1248       | 258787 | 2-:89457423-89458347    |
| 11879 | Cubn          | 65969  | 2-:13197961-13413550    |
| 11880 | Svep1         | 64817  | 4-:58055668-58219468    |
| 11881 | Mpl           | 17480  | 4-:118115019-118130076  |

|       |               |           |                         |
|-------|---------------|-----------|-------------------------|
| 11882 | Prdm4         | 72843     | 10-:85354714-85379664   |
| 11883 | Ptpn2         | 19276     | 12+:118392619-118515290 |
| 11884 | EG433225      | 433225    | 19-:15034039-15035256   |
| 11885 | 2810402E24Rik | 66465     | 14+:21429440-21460276   |
| 11886 | Cep250        | 16328     | 2+:155817369-155824609  |
| 11887 | Vps8          | 209018    | 16+:21434983-21442537   |
| 11888 | Myadm         | 50918     | 7+:3290534-3299348      |
| 11889 | Stag1         | 20842     | 9+:100543993-100857054  |
| 11890 | Il22ra1       | 230828    | 4+:135288892-135306635  |
| 11891 | Rtn2          | 20167     | 7+:19868015-19881508    |
| 11892 | D430042O09Rik | 233865    | 7+:132993891-133018305  |
| 11893 | Cdc40         | 71713     | 10-:40551425-40602915   |
| 11894 | Fstl4         | 320027    | 11+:52813698-53000515   |
| 11895 | 2810405J04Rik | 72722     | 17-:75936430-75951183   |
| 11896 | Kif6          | 319991    | 17+:49754462-49978532   |
| 11897 | ENSMUSG000000 | 100038642 | 19-:53519582-53522231   |
| 11898 | Olfr186       | 258318    | 16-:59026801-59027731   |
| 11899 | MMT00070220   |           | 9+:55797825-55875733    |
| 11900 | MMT00005346   |           |                         |
| 11901 | A730041O05Rik | 320330    | 4+:16090526-16091339    |
| 11902 | MMT00029171   |           | X-:5274662-5279002      |
| 11903 | 4933437F05Rik | 71275     | 12-:88561975-88579683   |
| 11904 | Actr5         | 109275    | 2+:158450636-158465181  |
| 11905 | Utp6          | 216987    | 11-:79749258-79775884   |
| 11906 | Nfe2l3        | 18025     | 6+:51382668-51408767    |
| 11907 | Tmeff2        | 56363     | 1+:50984403-51242552    |
| 11908 | Taf3          | 209361    | 2-:9835764-9970220      |
| 11909 | Sag           | 20215     | 1+:89700468-89741732    |
| 11910 | MMT00016683   |           | 10+:76599937-76600411   |
| 11911 | Wnt6          | 22420     | 1+:74818719-74831519    |
| 11912 | Pcdhb22       | 93893     | 18+:37678134-37680801   |
| 11913 | Stap2         | 106766    | 17-:56136503-56144991   |
| 11914 | Adam1b        | 280667    | 5-:121950694-121970451  |
| 11915 | Calm1         | 12313     | 12+:101437896-101445521 |
| 11916 | Pard6b        | 58220     | 2+:167906784-167924706  |
| 11917 | Fahd1         | 68636     | 17-:24985843-24987082   |
| 11918 | Meis2         | 17536     | 2-:115890907-115891494  |
| 11919 | Ammecr1       | 56068     | X-:139289355-139401271  |
| 11920 | D10Wsu52e     | 28088     | 10-:85401381-85420528   |
| 11921 | Ddx21         | 56200     | 10-:62042995-62061938   |
| 11922 | Cox19         | 68033     | 5-:139813467-139821171  |
| 11923 | Pde3b         | 18576     | 7+:121559071-121681693  |
| 11924 | MMT00037881   |           | 11+:4021929-4029658     |
| 11925 | Epm2aip1      | 77781     | 9+:111174345-111181593  |
| 11926 | Ampd2         | 109674    | 3-:107876981-107889568  |
| 11927 | Ghrhr         | 14602     | 6+:55326285-55338523    |
| 11928 | E330017A01Rik | 224247    | 16-:58635278-58636990   |
| 11929 | Slc22a7       | 108114    | 17-:46569133-46575380   |
| 11930 | Igh-VJ558     | 16061     | 12-:116784206-116784642 |
| 11931 | MMT00009560   |           | 1+:71901410-71901976    |
| 11932 | Pkp1          | 18772     | 1-:137767974-137815601  |

|       |               |        |                           |
|-------|---------------|--------|---------------------------|
| 11933 | EG624918      | 624918 | 7+:29541187-29542586      |
| 11934 | Rbms2         | 56516  | 10-:127570287-127613497   |
| 11935 | Nxph2         | 18232  | 2+:23177008-23255941      |
| 11936 | MMT00022429   |        | 8+:74047403-74048218      |
| 11937 | Snx10         | 71982  | 6+:51473961-51540267      |
| 11938 | Slc14a2       | 27411  | 18-:78379983-78793590     |
| 11939 | V1rd14        | 81011  | 7+:23197249-23199685      |
| 11940 | Chi3l1        | 12654  | 1+:136079041-136086612    |
| 11941 | Iqch          | 78250  | 9-:63269262-63450299      |
| 11942 | MMT00005752   |        | Y_random-:7688830-8281973 |
| 11943 | Tcf20         | 21411  | 15-:82639781-82685360     |
| 11944 | Ctla4         | 12477  | 1+:60965957-60972674      |
| 11945 | Pabpc4        | 230721 | 4+:122960606-122975336    |
| 11946 | MMT00030953   |        | 18-:31979216-31980063     |
| 11947 | MMT00018910   |        | X+:151208994-151212575    |
| 11948 | 3322402L07Rik | 74023  | 1+:193801253-193812163    |
| 11949 | Cldn3         | 12739  | 5+:135462257-135463342    |
| 11950 | Vsx1          | 114889 | 2-:150507280-150514738    |
| 11951 | Denr          | 68184  | 5+:124357283-124378841    |
| 11952 | Olf1r710      | 258594 | 7-:114087582-114091826    |
| 11953 | Gtf2b         | 229906 | 3+:142428210-142446566    |
| 11954 | MMT00003007   |        | 7-:112239215-112241355    |
| 11955 | Ccl6          | 20305  | 11-:83401393-83406492     |
| 11956 | Bmper         | 73230  | 9+:23097840-23289646      |
| 11957 | Elmod1        | 270162 | 9-:53759268-53822981      |
| 11958 | MMT00028670   |        | 3-:111124244-111125637    |
| 11959 | 4631422O05Rik | 78749  | 16+:57507661-57572911     |
| 11960 | Tm4sf4        | 229302 | 3+:57229380-57245587      |
| 11961 | Nol4          | 319211 | 18-:22853442-23198543     |
| 11962 | Inoc1         | 68142  | 2-:119198781-119257680    |
| 11963 | 1110054O05Rik | 66209  | 4-:59782524-59796739      |
| 11964 | Plch1         | 269437 | 3-:63439483-63571549      |
| 11965 | MMT00013041   |        | 5-:87805183-87807199      |
| 11966 | Zfp280b       | 64453  | 10+:75495435-75502733     |
| 11967 | Zmynd19       | 67187  | 2+:24805321-24814933      |
| 11968 | Cenpm         | 66570  | 15-:82064512-82075177     |
| 11969 | Gbas          | 14467  | 5+:130230973-130264126    |
| 11970 | AA408296      | 215193 | 1-:194933482-194956388    |
| 11971 | 1700025D03Rik | 67944  | X-:134742703-134743300    |
| 11972 | Rdh19         | 216453 | 10+:127287050-127297392   |
| 11973 | Kcnv2         | 240595 | 19+:27397240-27408326     |
| 11974 | 1700023B02Rik | 66935  | 2-:73125663-73150765      |
| 11975 | Usmg5         | 66477  | 19-:47157957-47165123     |
| 11976 | MMT00035978   |        |                           |
| 11977 | Hhip          | 15245  | 8-:82496145-82581888      |
| 11978 | She           | 214547 | 3+:89653289-89658634      |
| 11979 | 1700029F09Rik | 75623  | 1-:44142819-44159313      |
| 11980 | Otud1         | 71198  | 2+:19578345-19582207      |
| 11981 | Sh3bp2        | 24055  | 5+:34868497-34906203      |
| 11982 | MMT00035514   |        | 1-:91152714-91153562      |
| 11983 | MMT00078789   |        | 14+:54173687-54180092     |

|       |               |           |                         |
|-------|---------------|-----------|-------------------------|
| 11984 | N6amt2        | 68043     | 14-:58168434-58190406   |
| 11985 | B430211C08Rik | 627280    | 7-:15116000-15207836    |
| 11986 | E030002O03Rik | 244180    | 7-:111302277-111313343  |
| 11987 | Dmkn          | 73712     | 7+:31548778-31566086    |
| 11988 | MMT00041161   | 100042507 | 19-:39128203-39129471   |
| 11989 | Tmprss11b     | 319875    | 5-:87089456-87105392    |
| 11990 | Prkdc         | 19090     | 16+:15637980-15842342   |
| 11991 | MMT00003201   |           | 17-:73539843-73540506   |
| 11992 | Mrpl19        | 56284     | 6-:81911578-81915943    |
| 11993 | Sfxn2         | 94279     | 19+:46647913-46669540   |
| 11994 | MMT00036655   |           | 1+:35027157-35204261    |
| 11995 | Cetn1         | 26369     | 18-:9618597-9619856     |
| 11996 | MMT00020927   |           |                         |
| 11997 | MMT00082790   |           |                         |
| 11998 | 4930403N07Rik | 73936     | 12-:73222478-73286006   |
| 11999 | Slc24a1       | 214111    | 9-:64770667-64799414    |
| 12000 | Tmem16h       | 382014    | 8-:73999204-74005145    |
| 12001 | Rras2         | 66922     | 7-:121190301-121261295  |
| 12002 | Kif3c         | 16570     | 12+:3365555-3404064     |
| 12003 | Ado           | 211488    | 10-:67010751-67013180   |
| 12004 | Lgals6        | 16857     | 7+:29619148-29626651    |
| 12005 | Arhgap22      | 239027    | 14+:34084969-34183121   |
| 12006 | Sox9          | 20682     | 11+:112643595-112647449 |
| 12007 | Olfr1106      | 258747    | 2-:86888454-86889391    |
| 12008 | Dhdh          | 71755     | 7-:52728220-52744163    |
| 12009 | Gykl1         | 14625     | 18+:52853332-52855313   |
| 12010 | Foxg1         | 15228     | 12+:50483993-50487843   |
| 12011 | Wdr61         | 66317     | 9-:54564960-54582308    |
| 12012 | Cd247         | 12503     | 1+:167718853-167797565  |
| 12013 | Gsdmc1        | 83492     | 15-:63607649-63636153   |
| 12014 | Kifc2         | 16581     | 15+:76491085-76498624   |
| 12015 | Esf1          | 66580     | 2-:139945616-139996299  |
| 12016 | Dyrk1b        | 13549     | 7+:28964512-28971941    |
| 12017 | Agl           | 77559     | 3-:116445489-116511046  |
| 12018 | 1700012C15Rik | 76390     | 11+:73503781-73525936   |
| 12019 | Rnf138        | 56515     | 18+:21159841-21184774   |
| 12020 | Bglap2        | 12097     | 3-:88181657-88182620    |
| 12021 | MMT00003645   |           | 14+:80347485-80348077   |
| 12022 | MMT00048107   |           | 11-:105225403-105251015 |
| 12023 | Slc36a2       | 246049    | 11-:54971891-54998545   |
| 12024 | OTTMUSG000000 | 667373    | 19-:34667377-34673920   |
| 12025 | Sdccag3       | 68112     | 2-:26238882-26244803    |
| 12026 | MMT00035413   |           | 14-:49731841-49733154   |
| 12027 | Dnajb3        | 15504     | 1-:90101310-90102323    |
| 12028 | Capn13        | 381122    | 17-:73709723-73748599   |
| 12029 | Tcf19         | 106795    | 17-:35649679-35653699   |
| 12030 | Dsc2          | 13506     | 18-:20190518-20217805   |
| 12031 | Pcdh12        | 53601     | 18-:38428429-38444011   |
| 12032 | Cdca7         | 66953     | 2+:72314275-72324947    |
| 12033 | EG545507      | 545507    | 3+:14722415-14729015    |
| 12034 | Pip4k2a       | 18718     | 2-:18765764-18919636    |

|       |               |        |                          |
|-------|---------------|--------|--------------------------|
| 12035 | Ncoa1         | 17977  | 12-:4249454-4483976      |
| 12036 | Atp2b4        | 381290 | 1-:135608219-135649858   |
| 12037 | Pfdn1         | 67199  | 18-:36563332-36614149    |
| 12038 | Tnks1bp1      | 228140 | 2+ :84892561-84913202    |
| 12039 | Fign1         | 60530  | 11-:11700835-11706200    |
| 12040 | Commd10       | 69456  | 18+ :47118522-47247650   |
| 12041 | Lrrc55        | 241528 | 2- :85032067-85036796    |
| 12042 | Nfat5         | 54446  | 8+ :109816622-109903416  |
| 12043 | Tdrd5         | 214575 | 1- :158206691-158214615  |
| 12044 | Sycp1         | 20957  | 3- :102622421-102740222  |
| 12045 | Metap2        | 56307  | 10- :93323977-93352436   |
| 12046 | Impdh1        | 23917  | 6- :29151198-29162166    |
| 12047 | MMT00073939   |        | X- :157923523-157924269  |
| 12048 | Pdzd3         | 170761 | 9- :44055390-44059543    |
| 12049 | 1700026D11Rik | 70371  | 2+ :132316449-132334010  |
| 12050 | Zfp11         | 22648  | 5- :130162326-130177674  |
| 12051 | Pik3c3        | 225326 | 18+ :30432397-30507779   |
| 12052 | Ntsr2         | 18217  | 12+ :16660279-16667033   |
| 12053 | 2310005L22Rik | 69471  | 4+ :131864588-131866941  |
| 12054 | 2610109H07Rik | 70433  | 4- :147476436-147484265  |
| 12055 | 1810008A18Rik | 108707 | 10- :76949408-76978530   |
| 12056 | Zic3          | 22773  | X+ :55283819-55289080    |
| 12057 | Dok5          | 76829  | 2+ :170557453-170704860  |
| 12058 | Slc13a4       | 243755 | 6- :35218857-35257456    |
| 12059 | 2700049P18Rik | 108900 | 1+ :133424543-133435611  |
| 12060 | Gfm2          | 320806 | 13+ :97911881-97945000   |
| 12061 | Fbxo15        | 50764  | 18+ :85126711-85150866   |
| 12062 | Dzip1l        | 72507  | 9+ :99549973-99560194    |
| 12063 | Capn13        | 381122 | 17- :73655803-73671379   |
| 12064 | Mlt3          | 70122  | 4- :87657536-87679186    |
| 12065 | Cmpk2         | 22169  | 12+ :27154373-27162992   |
| 12066 | MMT00040000   |        | 5+ :87406182-87420763    |
| 12067 | Rab17         | 19329  | 1- :92855460-92860877    |
| 12068 | Plekha7       | 233765 | 7- :123278553-123286953  |
| 12069 | 4933438B17Rik | 71247  | 5+ :127473784-127568067  |
| 12070 | Adat2         | 66757  | 10+ :13272699-13282842   |
| 12071 | Tbc1d16       | 207592 | 11- :119008881-119070374 |
| 12072 | Rod1          | 230257 | 4- :59488132-59562146    |
| 12073 | Olf622        | 259087 | 7- :110787699-110788652  |
| 12074 | MMT00013159   |        | 17+ :17026222-17027374   |
| 12075 | Tnfrsf8       | 21941  | 4- :144858878-144905050  |
| 12076 | MMT00040312   |        | 6+ :68520756-68522348    |
| 12077 | MMT00059499   |        |                          |
| 12078 | Olf1195       | 258748 | 2- :88522962-88523887    |
| 12079 | Spred2        | 114716 | 11+ :19824084-19824883   |
| 12080 | 2410017P09Rik | 69709  | 12+ :4237478-4238583     |
| 12081 | Pex11c        | 69129  | 8- :3458816-3467648      |
| 12082 | Abcc5         | 27416  | 16- :20331378-20426408   |
| 12083 | Dcst1         | 77772  | 3- :89154141-89158141    |
| 12084 | Siva1         | 30954  | 12+ :113883133-113887354 |
| 12085 | EG214403      | 214403 | 1- :141594211-141890831  |



|       |               |           |                         |
|-------|---------------|-----------|-------------------------|
| 12086 | Cd69          | 12515     | 6-:129217339-129225387  |
| 12087 | Akap3         | 11642     | 6+:126803190-126824325  |
| 12088 | 5730416F02Rik | 70550     | X+:106066877-106197724  |
| 12089 | Scn8a         | 20273     | 15+:100766755-100871119 |
| 12090 | Nf2           | 18016     | 11-:4667667-4748998     |
| 12091 | 1810015C04Rik | 66270     | 15+:25872433-25902092   |
| 12092 | Hoxa11        | 15396     | 6-:52192105-52195766    |
| 12093 | A230106M15Rik | 231717    | 5+:122299036-122304641  |
| 12094 | Carhsp1       | 52502     | 16-:8658679-8672238     |
| 12095 | Gucy1a2       | 234889    | 9+:3759395-3894710      |
| 12096 | Nupl1         | 71844     | 14-:60824449-60870318   |
| 12097 | 9430015G10Rik | 230996    | 4+:155484097-155501370  |
| 12098 | BC003266      | 80284     | 4+:126921084-126925052  |
| 12099 | Prep          | 19072     | 10+:44787136-44878330   |
| 12100 | MMT00011598   |           | 7+:4590137-4590970      |
| 12101 | Rnf123        | 84585     | 9-:107953865-107981648  |
| 12102 | Rnh1          | 107702    | 7-:148346377-148352667  |
| 12103 | Mtr           | 238505    | 13-:12278802-12350368   |
| 12104 | MMT00063115   | 231872    | 5-:144663573-144670687  |
| 12105 | Cplx1         | 12889     | 5-:108948616-108978972  |
| 12106 | Tcirg1        | 27060     | 19-:3896051-3907097     |
| 12107 | Nck2          | 17974     | 1+:43566551-43626331    |
| 12108 | MMT00009760   |           | 15-:70930152-70930455   |
| 12109 | Smad4         | 17128     | 18-:73799654-73837885   |
| 12110 | MMT00047508   |           | 1-:130000420-130025531  |
| 12111 | AA474455      | 231151    | 5-:36816291-36826709    |
| 12112 | Tmem53        | 68777     | 4+:116924593-116941185  |
| 12113 | Disp2         | 214240    | 2+:118605475-118618561  |
| 12114 | Homer2        | 26557     | 7-:88754229-88794602    |
| 12115 | Hist1h2an     | 319170    | 13-:21878696-21879087   |
| 12116 | BC057371      | 194237    | 4-:119140443-119165078  |
| 12117 | 1700024G13Rik | 67085     | 14-:33189272-33201577   |
| 12118 | Mtrr          | 210009    | 13-:68701154-68721039   |
| 12119 | Dmd           | 13405     | X+:80194241-82450380    |
| 12120 | Rad51         | 19361     | 2+:118938600-118961459  |
| 12121 | Ren1          | 19701     | 1+:135247268-135256894  |
| 12122 | C130092O11Rik | 232035    | 6+:61735140-61761038    |
| 12123 | Slc7a11       | 26570     | 3-:50175835-50247502    |
| 12124 | Olfra459      | 258569    | 6-:41721351-41722296    |
| 12125 | MMT00004451   |           | 14-:63643966-63644689   |
| 12126 | Znfx1         | 98999     | 2-:166861298-166882441  |
| 12127 | 0610010F05Rik | 71675     | 11-:23473772-23533210   |
| 12128 | Atp11b        | 76295     | 3+:35737674-35755193    |
| 12129 | Cfi           | 12630     | 3+:129539656-129578248  |
| 12130 | Cyp3a16       | 13114     | 5-:146197177-146230563  |
| 12131 | MMT00037089   | 100046250 | 16-:19195091-19260802   |
| 12132 | Svs5          | 20944     | 2+:164158500-164160129  |
| 12133 | 7-Sep         | 235072    | 9+:25094233-25116152    |
| 12134 | Blmh          | 104184    | 11+:76759053-76800878   |
| 12135 | 5730403I07Rik | 70487     | 9-:77214221-77247302    |
| 12136 | MMT00070724   |           | 19-:8553607-8616005     |

|       |               |           |                         |
|-------|---------------|-----------|-------------------------|
| 12137 | Slc39a11      | 69806     | 11-:113231040-113427092 |
| 12138 | Svs6          | 20945     | 2+:164142482-164144187  |
| 12139 | Cmtm4         | 97487     | 8-:106877575-106919596  |
| 12140 | Mrps15        | 66407     | 4+:125724207-125732776  |
| 12141 | Terf1         | 21749     | 1+:15795746-15833512    |
| 12142 | Zc3hav1       | 78781     | 6-:38265671-38304603    |
| 12143 | Thyn1         | 77862     | 9+:26807306-26814917    |
| 12144 | Epha6         | 13840     | 16-:59653314-60605073   |
| 12145 | BC057079      | 230393    | 4+:87770340-87800645    |
| 12146 | Hddc2         | 69692     | 10+:31033212-31048008   |
| 12147 | MMT00058675   |           | 12-:83596328-83597539   |
| 12148 | Ly6k          | 76486     | 15-:74627301-74630403   |
| 12149 | MMT00000708   |           | 17+:20186006-20195358   |
| 12150 | Trim65        | 338364    | 11-:115987380-115992319 |
| 12151 | MMT00082650   |           | 8-:83721076-83722253    |
| 12152 | Trpc2         | 22064     | 7+:109224393-109244848  |
| 12153 | Lrch1         | 380916    | 14-:75155738-75347592   |
| 12154 | MMT00039105   |           | 8-:99951122-99953078    |
| 12155 | Gmfb          | 63985     | 14-:47427825-47441885   |
| 12156 | Setd4         | 224440    | 16-:93583705-93604048   |
| 12157 | Gal3st4       | 330217    | 5-:138706146-138712604  |
| 12158 | Tmub2         | 72053     | 11+:102146212-102149891 |
| 12159 | Lpp           | 210126    | 16+:24608192-24981492   |
| 12160 | Prdm13        | 230025    | 4-:21604414-21613109    |
| 12161 | MMT00006470   |           | 6+:3158183-3158405      |
| 12162 | 4930524B15Rik | 67592     | 11+:31865632-31879651   |
| 12163 | Smad9         | 55994     | 3+:54586279-54601426    |
| 12164 | Gtf2h1        | 14884     | 7+:54051635-54078659    |
| 12165 | Ppp2r1b       | 73699     | 9+:50678287-50689343    |
| 12166 | Prss28        | 114661    | 17+:25446349-25448617   |
| 12167 | MMT00014394   | 622491    | 4+:69353011-69353572    |
| 12168 | H2-Ke6        | 14979     | 17-:34162979-34165002   |
| 12169 | MMT00013125   |           | 12-:72947250-72948340   |
| 12170 | Arid3b        | 56380     | 9-:57638319-57682041    |
| 12171 | MMT00076485   | 100043803 | 5-:136626149-136637581  |
| 12172 | Adam9         | 11502     | 8-:26060104-26127260    |
| 12173 | Acbd6         | 72482     | 1+:157405251-157534362  |
| 12174 | 2610027C15Rik | 230752    | 4+:125823225-125827118  |
| 12175 | Klf15         | 66277     | 6+:90416438-90424281    |
| 12176 | Plcb3         | 18797     | 19-:7028203-7044199     |
| 12177 | Tmem35        | 67564     | X+:130829929-130840510  |
| 12178 | Slc16a2       | 20502     | X-:100892761-101017298  |
| 12179 | 6430706D22Rik | 381280    | 1+:90153225-90155289    |
| 12180 | Ank           | 11732     | 15+:27396728-27524054   |
| 12181 | Bcl2l10       | 12049     | 9+:75195592-75199447    |
| 12182 | Immt          | 76614     | 6+:71821526-71827382    |
| 12183 | MMT00028068   |           | 2-:5077312-5122574      |
| 12184 | Ncapd2        | 68298     | 6-:125118026-125141604  |
| 12185 | Cyp2d10       | 13101     | 15-:82233337-82237552   |
| 12186 | Syne2         | 319565    | 12+:77141340-77153844   |
| 12187 | Hoxb13        | 15408     | 11+:96055756-96057542   |

|       |               |           |                         |
|-------|---------------|-----------|-------------------------|
| 12188 | Chek2         | 50883     | 5+:111270231-111302765  |
| 12189 | Prh1          | 19131     | 6+:132519859-132522417  |
| 12190 | Krt18         | 16668     | 15+:101858655-101862452 |
| 12191 | Zfp704        | 170753    | 3-:9427019-9610085      |
| 12192 | 2900092E17Rik | 67278     | 7-:134158564-134160866  |
| 12193 | Aco2          | 11429     | 15+:81452911-81745561   |
| 12194 | ENSMUSG00000  | 791344    | 10-:89207144-89208581   |
| 12195 | Agbl3         | 76223     | 6+:34782464-34807932    |
| 12196 | Birc7         | 329581    | 2+:180663867-180668038  |
| 12197 | Anxa11        | 11744     | 14+:26661655-26706283   |
| 12198 | Atp13a5       | 268878    | 16-:29232754-29321829   |
| 12199 | MMT00074915   |           | 4-:8599925-8600927      |
| 12200 | Ksr1          | 16706     | 11-:78828302-78959856   |
| 12201 | Rab5b         | 19344     | 10-:128116576-128123967 |
| 12202 | Etv2          | 14008     | 7-:31418636-31420871    |
| 12203 | MMT00009475   | 100042638 | 1-:63411292-63441743    |
| 12204 | Ankmy2        | 217473    | 12+:36883776-36914800   |
| 12205 | Odz2          | 23964     | 11-:35881819-35886356   |
| 12206 | Snx12         | 55988     | X-:98407606-98417829    |
| 12207 | MMT00039890   |           | 13+:3352061-3353235     |
| 12208 | Pnpla7        | 241274    | 2+:24895025-24909577    |
| 12209 | MMT00014030   |           | 3-:59309547-59313773    |
| 12210 | Supt6h        | 20926     | 11-:78020525-78059204   |
| 12211 | Sfrs17b       | 338351    | X-:34152535-34164331    |
| 12212 | Tox2          | 269389    | 2+:163028899-163101953  |
| 12213 | Entpd5        | 12499     | 12-:85717626-85746419   |
| 12214 | Olf1271       | 258789    | 2-:90105668-90106585    |
| 12215 | 1810043G02Rik | 67884     | 10+:77441394-77447545   |
| 12216 | Tmem88        | 67020     | 11-:69210737-69211736   |
| 12217 | Dpm1          | 13480     | 2-:168036028-168055853  |
| 12218 | Slc26a5       | 80979     | 5-:21316966-21353147    |
| 12219 | Cyb5b         | 66427     | 8+:109674578-109708000  |
| 12220 | Pgam1         | 18648     | 19+:41986449-41993154   |
| 12221 | Tbc1d23       | 67581     | 16-:57170014-57191340   |
| 12222 | Tnfrsf11b     | 18383     | 15-:54083520-54109892   |
| 12223 | MMT00043745   |           | 3-:68112746-68113103    |
| 12224 | Il13ra2       | 16165     | X-:143818020-143838375  |
| 12225 | Tsr1          | 104662    | 11+:74711576-74722337   |
| 12226 | MMT00020912   |           | 8+:73649085-73650468    |
| 12227 | Glr2          | 69367     | 1+:145586777-145593741  |
| 12228 | Grpel1        | 17713     | 5+:36807831-36814345    |
| 12229 | Sash1         | 70097     | 10-:8442990-8605656     |
| 12230 | MMT00005802   |           | 18+:15571723-15573912   |
| 12231 | Gnao1         | 14681     | 8+:96335214-96492726    |
| 12232 | MMT00060943   | 100039903 |                         |
| 12233 | Mcts1         | 68995     | X+:35953834-35966699    |
| 12234 | 1700025F22Rik | 69416     | 19-:11214153-11239883   |
| 12235 | Serbp1        | 66870     | 6+:67216972-67235957    |
| 12236 | OTTMUSG00000  | 217122    | 11-:94617233-94622483   |
| 12237 | Atp8b3        | 67331     | 10-:79982329-79998145   |
| 12238 | Traf3         | 22031     | 12+:112458020-112505358 |

|       |               |        |                          |
|-------|---------------|--------|--------------------------|
| 12239 | A630077B13Rik | 215900 | 10-:33845867-33847789    |
| 12240 | MMT00009032   |        | 9-:72022327-72022787     |
| 12241 | Eif2ak4       | 27103  | 2+ :118214352-118300969  |
| 12242 | Ube2e1        | 22194  | 14-:19115262-19163650    |
| 12243 | Edar          | 13608  | 10-:58063536-58138444    |
| 12244 | Srl           | 106393 | 16-:4493770-4523053      |
| 12245 | Zfp322a       | 218100 | 13-:23446715-23461016    |
| 12246 | Plac1l        | 225922 | 19-:11721769-11735046    |
| 12247 | Son           | 20658  | 16+ :91648124-91663002   |
| 12248 | Tnp2          | 21959  | 16-:10788363-10788694    |
| 12249 | Smu1          | 74255  | 4-:40684202-40704847     |
| 12250 | P2ry14        | 140795 | 3-:58918542-58934543     |
| 12251 | Tcta          | 102791 | 9-:108205025-108208336   |
| 12252 | Gm101         | 226356 | 1-:121833818-121844695   |
| 12253 | MMT00080172   |        | 2+ :162602426-162631656  |
| 12254 | BC010304      | 218236 | 13-:48974583-49063150    |
| 12255 | Tas1r3        | 83771  | 4-:155233380-155237462   |
| 12256 | Atp10d        | 231287 | 5+ :72618907-72690004    |
| 12257 | EG212225      | 212225 | 1-:46068745-46087172     |
| 12258 | Mdn1          | 100019 | 4+ :32855625-32862191    |
| 12259 | MMT00080137   |        | 2-:155311398-155312165   |
| 12260 | MMT00010989   |        | 3+ :118133360-118176154  |
| 12261 | Bcan          | 12032  | 3-:87791452-87804152     |
| 12262 | Olfr397       | 258343 | 11+ :73778111-73779059   |
| 12263 | Atp6v0d2      | 242341 | 4-:19805063-19849754     |
| 12264 | Strm          | 20904  | 12+ :81291569-81295430   |
| 12265 | Yipf1         | 230584 | 4+ :106987035-107032427  |
| 12266 | MMT00051604   |        | 6-:145264788-145284933   |
| 12267 | Sec24b        | 99683  | 3-:129685683-129744367   |
| 12268 | Eaf1          | 74427  | 14+ :32307582-32323043   |
| 12269 | MMT00014063   |        | 16+ :15609116-15610074   |
| 12270 | Slc7a6        | 330836 | 8+ :108692772-108722610  |
| 12271 | Entpd3        | 215446 | 9+ :120448936-120476268  |
| 12272 | Fshr          | 14309  | 17-:89384511-89599952    |
| 12273 | Olfr572       | 259093 | 7+ :110076143-110077098  |
| 12274 | Erf           | 13875  | 7-:26029186-26035766     |
| 12275 | MMT00014892   |        | 19+ :40002553-40027309   |
| 12276 | Hmga1         | 15361  | 17+ :27693843-27700608   |
| 12277 | V1ri10        | 171279 | 13+ :23191017-23191913   |
| 12278 | Plxna4        | 243743 | 6-:32094332-32094929     |
| 12279 | Rpl22l1       | 68028  | 3+ :28704432-28706337    |
| 12280 | Cln5          | 211286 | 14+ :103469512-103476847 |
| 12281 | Tacc2         | 57752  | 7+ :137836069-137908218  |
| 12282 | Lce1b         | 68720  | 3-:92459571-92460848     |
| 12283 | Fbxo39        | 628100 | 11+ :72127953-72132920   |
| 12284 | Tnfrsf4       | 22163  | 4+ :155387803-155390697  |
| 12285 | Setd5         | 72895  | 6+ :113059406-113103418  |
| 12286 | EG545208      | 545208 | 17+ :47547200-47548727   |
| 12287 | 6430706D22Rik | 381280 | 1-:90165525-90174152     |
| 12288 | Olfr392       | 259008 | 11-:73627645-73628582    |
| 12289 | Ext1          | 14042  | 15-:52900093-53177500    |

|       |               |           |                         |
|-------|---------------|-----------|-------------------------|
| 12290 | 4930542N07Rik | 75185     | X+:150916544-150919225  |
| 12291 | Lim2          | 233187    | 7+:50685488-50691361    |
| 12292 | Htatip        | 81601     | 19-:5602471-5609920     |
| 12293 | E430029J22Rik | 100033459 | 1+:175613580-175626363  |
| 12294 | Hes5          | 15208     | 4+:154335104-154335783  |
| 12295 | Guf1          | 231279    | 5+:69948149-69963042    |
| 12296 | Rrad          | 56437     | 8-:107152350-107154813  |
| 12297 | Upk1b         | 22268     | 16-:38773302-38788156   |
| 12298 | Lad1          | 16763     | 1+:137715339-137729537  |
| 12299 | Thbs1         | 21825     | 2+:117938378-117949995  |
| 12300 | Zfp568        | 243905    | 7+:30769095-30784209    |
| 12301 | Atpaf2        | 246782    | 11-:60214131-60230507   |
| 12302 | Cbx1          | 12412     | 11+:96662121-96668074   |
| 12303 | Lmo4          | 16911     | 3-:143851692-143865271  |
| 12304 | Olfr109       | 258832    | 17+:37603152-37604097   |
| 12305 | Ubl4          | 27643     | X-:71612739-71613866    |
| 12306 | Vsig1         | 78789     | X+:137442158-137473497  |
| 12307 | MMT00030713   |           | 2-:22616795-22621005    |
| 12308 | MMT00005726   |           | 18-:12657194-12657622   |
| 12309 | Gimap8        | 243374    | 6+:48597252-48600842    |
| 12310 | Csn1s1        | 12990     | 5+:88096271-88111598    |
| 12311 | Rpp40         | 208366    | 13-:35988581-35998161   |
| 12312 | Ms4a6d        | 68774     | 19-:11661096-11679276   |
| 12313 | Prl7d1        | 18814     | 13-:27800891-27808606   |
| 12314 | Slc25a34      | 384071    | 4-:141176326-141179657  |
| 12315 | Sreb1         | 20787     | 11-:60013100-60016311   |
| 12316 | Mpa2l         | 100702    | 5-:105587936-105600749  |
| 12317 | Tfdp2         | 211586    | 9+:96188017-96218581    |
| 12318 | Olfr1441      | 258678    | 19+:12496800-12497757   |
| 12319 | Mfap2         | 17150     | 4+:140566595-140571889  |
| 12320 | Gstm7         | 68312     | 3-:107729253-107734635  |
| 12321 | Igh-VJ558     | 16061     | 12-:115725304-115725833 |
| 12322 | Ndufs5        | 595136    | 4-:123389953-123395404  |
| 12323 | Rgag4         | 331474    | X-:99263928-99265981    |
| 12324 | Vwa3a         | 233813    | 7+:127883542-127911745  |
| 12325 | Lsm7          | 66094     | 10-:80315578-80317954   |
| 12326 | Arhgef3       | 71704     | 14+:28149241-28217089   |
| 12327 | Ccl11         | 20292     | 11+:81871423-81876453   |
| 12328 | MMT00039977   |           | 13-:12222142-12275641   |
| 12329 | Sox6          | 20679     | 7-:122620184-123138600  |
| 12330 | Aldh6a1       | 104776    | 12-:85771672-85791900   |
| 12331 | Homer3        | 26558     | 8+:72806936-72818248    |
| 12332 | Ankrd5        | 319196    | 2+:136357918-136387834  |
| 12333 | Fcrl1         | 229499    | 3+:87180370-87189237    |
| 12334 | Gcg           | 14526     | 2-:62312577-62321790    |
| 12335 | Plcb4         | 18798     | 2+:135734080-135840679  |
| 12336 | Timm13        | 30055     | 10-:80362660-80363714   |
| 12337 | Khdrbs3       | 13992     | 15+:68758849-68923946   |
| 12338 | Snrpf         | 69878     | 10-:93046055-93052403   |
| 12339 | BC025546      | 234728    | 8+:112741888-112748197  |
| 12340 | Pcsk6         | 18553     | 7+:73007022-73195272    |

|       |               |        |                         |
|-------|---------------|--------|-------------------------|
| 12341 | EG330731      | 330731 | 8-:32847179-32850202    |
| 12342 | Neo1          | 18007  | 9-:58724347-58884115    |
| 12343 | Atf5          | 107503 | 7-:52067627-52071942    |
| 12344 | MMT00034062   |        | 4+:37976231-38331106    |
| 12345 | MMT00061111   |        | Y-:1893121-1903212      |
| 12346 | Myoz2         | 59006  | 3-:122709125-122737867  |
| 12347 | MMT00014037   |        | 13-:33668741-33688437   |
| 12348 | Rps6ka6       | 67071  | X-:108501802-108649953  |
| 12349 | Tcstv1        | 54382  | Un_random-:12669-38049  |
| 12350 | Zfp445        | 235682 | 9-:122766592-122771140  |
| 12351 | Dnm1l         | 74006  | 16-:16311997-16359075   |
| 12352 | MMT00079007   |        |                         |
| 12353 | Barx2         | 12023  | 9-:31653864-31720658    |
| 12354 | Slc26a11      | 268512 | 11+:119238563-119242361 |
| 12355 | Al507611      | 245884 | 6+:29232706-29240681    |
| 12356 | MMT00061517   |        | 16-:91539282-91540305   |
| 12357 | Wipi2         | 74781  | 5+:143105496-143145623  |
| 12358 | A430083B19Rik | 218739 | 14+:14503430-14514979   |
| 12359 | Rpl22         | 19934  | 4+:151699970-151706585  |
| 12360 | EG630825      | 630825 | X-:53208692-53213180    |
| 12361 | MMT00079310   |        | 7-:110988540-110988941  |
| 12362 | Shoc2         | 56392  | 19+:54062170-54105765   |
| 12363 | Ifitm6        | 213002 | 7-:148201597-148202803  |
| 12364 | EG637021      | 637021 | 17+:18198896-18211184   |
| 12365 | Tdrkh         | 72634  | 3+:94217184-94233380    |
| 12366 | Nwd1          | 319555 | 8+:75233395-75235772    |
| 12367 | MMT00072365   |        | X+:141282222-141283172  |
| 12368 | Prickle3      | 54630  | X+:7234519-7248450      |
| 12369 | Ubash3a       | 328795 | 17+:31346693-31379566   |
| 12370 | Gm1123        | 382097 | 9-:98914451-98936121    |
| 12371 | 1700128F08Rik | 76669  | 9+:8221888-8241987      |
| 12372 | MMT00039397   |        |                         |
| 12373 | Sirt2         | 64383  | 7+:29551785-29573677    |
| 12374 | Snx8          | 231834 | 5-:140816913-140865223  |
| 12375 | Gm941         | 381112 | 17+:80767521-80769754   |
| 12376 | MMT00011143   |        | 12-:78724038-78725029   |
| 12377 | MMT00050540   |        | 8-:49154859-49156054    |
| 12378 | MMT00075531   |        | 15-:65026999-65044593   |
| 12379 | Mon1b         | 270096 | 8+:116159730-116179433  |
| 12380 | Rftn2         | 74013  | 1-:55227005-55283624    |
| 12381 | MMT00067966   |        | 17+:54559458-54560157   |
| 12382 | 1810009J06Rik | 73626  | 6+:40914787-40918330    |
| 12383 | Ugt2a3        | 72094  | 5-:87753996-87766201    |
| 12384 | MMT00056390   |        |                         |
| 12385 | Mrpl33        | 66845  | 5+:31916344-31925014    |
| 12386 | 4930579G24Rik | 75939  | 3+:79432979-79436739    |
| 12387 | Olf1156       | 258814 | 2-:87789426-87790388    |
| 12388 | 8430406I07Rik | 74528  | 2+:144096711-144106196  |
| 12389 | MMT00022576   |        |                         |
| 12390 | Eps15l1       | 13859  | 8-:74864897-74945359    |
| 12391 | Mrpl9         | 78523  | 3+:94247239-94252629    |

|       |               |           |                         |
|-------|---------------|-----------|-------------------------|
| 12392 | MMT00003217   |           | 6+:42930688-42931172    |
| 12393 | Mtap1b        | 17755     | 13-:100194395-100286495 |
| 12394 | 5430413K10Rik | 433492    | 2+:154141922-154144629  |
| 12395 | Pdzd7         | 212684    | 19-:45102104-45120048   |
| 12396 | Zfp106        | 20402     | 2-:120358216-120365582  |
| 12397 | Ccnt1         | 12455     | 15-:98373642-98398067   |
| 12398 | Ifi44         | 99899     | 3-:151393888-151412813  |
| 12399 | Dpm2          | 13481     | 2+:32426405-32428536    |
| 12400 | Kifc5c        | 94118     | 10+:117031199-117032683 |
| 12401 | MMT00011281   |           | 2+:156994509-156995015  |
| 12402 | Th1l          | 57314     | 2+:174241304-174252998  |
| 12403 | Slc7a1        | 11987     | 5-:149143657-149211398  |
| 12404 | Col16a1       | 107581    | 4+:129774847-129776520  |
| 12405 | Cyp4f14       | 64385     | 17-:33042015-33054023   |
| 12406 | EG623818      | 623818    | 1+:138611805-138690085  |
| 12407 | Vmn2r67       | 620672    | 7-:92284870-92301404    |
| 12408 | Cryba2        | 12958     | 1-:74936517-74939709    |
| 12409 | Mab21l2       | 23937     | 3-:86349973-86351947    |
| 12410 | 2410003K15Rik | 75593     | 6+:49023841-49034716    |
| 12411 | ENSMUSG00000  | 100049172 | 11-:62563565-62564782   |
| 12412 | BC004728      | 207818    | 15-:100451772-100467643 |
| 12413 | Psmc3         | 22123     | 11+:98543867-98557291   |
| 12414 | Rap1a         | 109905    | 3-:105531200-105604175  |
| 12415 | MMT00052705   |           |                         |
| 12416 | Rps18         | 20084     | 17-:34088944-34092586   |
| 12417 | Mtap7d1       | 245877    | 4-:125909410-125917355  |
| 12418 | Ifna9         | 15972     | 4-:88237717-88238289    |
| 12419 | MMT00081393   |           | 2+:15049374-15050459    |
| 12420 | Klhl21        | 242785    | 4+:151382632-151391786  |
| 12421 | EG433643      | 433643    | 3-:112856806-112857181  |
| 12422 | Eme1          | 268465    | 11-:94505833-94512337   |
| 12423 | Cyp2g1        | 13108     | 7+:27593945-27606216    |
| 12424 | Ccdc73        | 211936    | 2+:104832333-104858060  |
| 12425 | Olfrl340      | 258301    | 4+:118398853-118399801  |
| 12426 | Dnalc4        | 54152     | 15-:79591885-79604866   |
| 12427 | MMT00052926   |           | 10-:24192657-24239774   |
| 12428 | Hdac4         | 208727    | 1-:93825357-94045073    |
| 12429 | Slitrk5       | 75409     | 14+:112078150-112082371 |
| 12430 | Fst           | 14313     | 13-:115243554-115248794 |
| 12431 | Krtap13       | 16699     | 16-:88750991-88751873   |
| 12432 | Tshz2         | 228911    | 2+:169702244-169754676  |
| 12433 | 5033413D22Rik | 75973     | 10-:41270447-41273222   |
| 12434 | Frs2          | 327826    | 10-:116509618-116585557 |
| 12435 | 0610006l08Rik | 66836     | 19+:8845485-8846965     |
| 12436 | Serinc3       | 26943     | 2-:163450407-163470807  |
| 12437 | Six6          | 20476     | 12+:74040880-74043584   |
| 12438 | Crygc         | 12966     | 1-:65118174-65120079    |
| 12439 | Bola2         | 66162     | 7+:133839489-133840857  |
| 12440 | Sult5a1       | 57429     | 8-:125666747-125682155  |
| 12441 | Rbm42         | 68035     | 7-:31438727-31449994    |
| 12442 | MMT00067811   |           | 2-:112443630-112444866  |

|       |               |        |                         |
|-------|---------------|--------|-------------------------|
| 12443 | A130030D18Rik | 228116 | 2-:82215536-82232359    |
| 12444 | Mmp20         | 30800  | 9+:7628230-7674968      |
| 12445 | A830080D01Rik | 382252 | X+:155991683-156031005  |
| 12446 | Tnfrsf21      | 94185  | 17+:43153945-43224921   |
| 12447 | MMT00005496   |        | 18-:25982074-25982882   |
| 12448 | Pofut2        | 80294  | 10+:76722054-76731444   |
| 12449 | Ube2l6        | 56791  | 2+:84639006-84649869    |
| 12450 | Pum2          | 80913  | 12+:8681486-8757144     |
| 12451 | Srd5a2        | 94224  | 17-:74367047-74397256   |
| 12452 | AU017962      | 103341 | 10+:103606933-103607996 |
| 12453 | Dnaja1        | 15502  | 4+:40670745-40671183    |
| 12454 | Zscan4d       | 545913 | 7-:11650789-11751513    |
| 12455 | Chrnd         | 11447  | 1+:89087211-89095679    |
| 12456 | Arl6ip5       | 65106  | 6+:97160797-97183308    |
| 12457 | MMT00072579   |        | 8-:114760259-114760970  |
| 12458 | AW146299      | 381686 | 5-:145750554-145768921  |
| 12459 | Olfr1130      | 258835 | 2+:87447546-87448491    |
| 12460 | Pnpla2        | 66853  | 7+:148641105-148645993  |
| 12461 | Cbx5          | 12419  | 15-:103029859-103045715 |
| 12462 | Cox7c         | 12867  | 13-:86184425-86186351   |
| 12463 | MMT00045655   |        |                         |
| 12464 | MMT00047924   | 20947  | 7+:117365324-117424850  |
| 12465 | Kcnj3         | 16519  | 2+:55289566-55447936    |
| 12466 | MMT00079257   |        | 5+:88491788-88493396    |
| 12467 | E330026B02Rik | 245026 | 9-:105598041-105688605  |
| 12468 | Cyp2d13       | 68444  | 15-:82467180-82472455   |
| 12469 | Dock10        | 210293 | 1-:80497648-80630870    |
| 12470 | Pabpc2        | 18459  | 18+:39933172-39935307   |
| 12471 | Olfr1020      | 258573 | 2+:85689610-85690563    |
| 12472 | Serpib7       | 116872 | 1+:109319265-109349265  |
| 12473 | Tmem66        | 67887  | 8+:35217691-35233897    |
| 12474 | Trim40        | 195359 | 17-:37019889-37027069   |
| 12475 | MMT00080458   |        | 7-:7047956-7050739      |
| 12476 | Spry3         | 236576 | X_random-:104590-110974 |
| 12477 | 3-Mar         | 320253 | 18-:56934808-56971749   |
| 12478 | Rhot2         | 214952 | 17-:25981719-25998028   |
| 12479 | lfrd1         | 15982  | 12-:40929716-40949751   |
| 12480 | Cdc42bpg      | 240505 | 19+:6314486-6314780     |
| 12481 | Ddx23         | 74351  | 15-:98475814-98493328   |
| 12482 | MMT00030762   |        | 2+:24039162-24040077    |
| 12483 | 5133401N09Rik | 75731  | 13+:58258917-58265746   |
| 12484 | Tcfap2e       | 332937 | 4-:126393245-126413353  |
| 12485 | Zc3h18        | 76014  | 8+:124900686-124940684  |
| 12486 | Aldh18a1      | 56454  | 19-:40624746-40662859   |
| 12487 | Tbc1d10a      | 103724 | 11+:4086835-4115507     |
| 12488 | MMT00014971   |        | 3-:157480150-157480789  |
| 12489 | Wdr8          | 59002  | 4+:153516500-153530924  |
| 12490 | Morf4l2       | 56397  | X-:133267491-133270156  |
| 12491 | Ptma          | 19231  | 1+:88423310-88427239    |
| 12492 | Ybx1          | 22608  | 4-:118950838-118966995  |
| 12493 | Ankfy1        | 11736  | 11+:72503507-72584723   |



|       |               |        |                         |
|-------|---------------|--------|-------------------------|
| 12494 | Thnsl1        | 208967 | 2+:21133243-21135307    |
| 12495 | Casp1         | 12362  | 9+:5299288-5306766      |
| 12496 | Ccl27         | 20301  | 4-:41716351-41717085    |
| 12497 | Kir3dl2       | 245615 | X-:132987795-132992336  |
| 12498 | Abcg8         | 67470  | 17+:85082571-85098138   |
| 12499 | Avpi1         | 69534  | 19-:42197770-42203483   |
| 12500 | Parp3         | 235587 | 9-:106373349-106378511  |
| 12501 | Zfand6        | 65098  | 7-:91764330-91782902    |
| 12502 | Yy1           | 22632  | 12+:110031594-110054463 |
| 12503 | 3110043J09Rik | 73167  | 15+:84550531-84602631   |
| 12504 | Ptpn3         | 545622 | 4-:57205160-57283049    |
| 12505 | MMT00013047   |        | 3-:110080052-110080403  |
| 12506 | Pask          | 269224 | 1-:95206013-95234151    |
| 12507 | Fcrls         | 80891  | 3-:87054690-87067515    |
| 12508 | MMT00071217   |        | 8+:75039113-75040786    |
| 12509 | Mtap6         | 17760  | 7+:106416531-106485511  |
| 12510 | Rs1           | 20147  | X+:157206093-157232677  |
| 12511 | Thsd3         | 217738 | 12-:88620631-88628087   |
| 12512 | Eef1e1        | 66143  | 13-:38737562-38750879   |
| 12513 | Whsc2         | 24116  | 5-:34239777-34278971    |
| 12514 | MMT00078654   |        | 2-:181687789-181687870  |
| 12515 | N4bp2         | 333789 | 5+:66177371-66218212    |
| 12516 | Pls3          | 102866 | X-:73031002-73119877    |
| 12517 | 4930573I19Rik | 104859 | 12+:112179662-112209879 |
| 12518 | Ctsl          | 13039  | 13-:64465104-64471600   |
| 12519 | Bid           | 12122  | 6-:120844113-120851770  |
| 12520 | MMT00057426   |        | X+:76031242-76040294    |
| 12521 | Sergef        | 27414  | 7-:53698544-53895160    |
| 12522 | MMT00056674   |        | 15+:24287282-24287933   |
| 12523 | 1110005A03Rik | 74319  | 11+:116704983-116711050 |
| 12524 | Dgkb          | 217480 | 12+:38810310-38954710   |
| 12525 | Vmn2r54       | 666085 | 7-:13200640-13221490    |
| 12526 | 9-Mar         | 216438 | 10-:126492652-126497031 |
| 12527 | MMT00054567   | 624112 | 14+:42092091-42102104   |
| 12528 | Zfp30         | 22693  | 7+:30569808-30579559    |
| 12529 | MMT00019851   |        | 3-:64143486-64159606    |
| 12530 | 1700120K04Rik | 68232  | 7-:134747417-134747956  |
| 12531 | Psg25         | 114868 | 7-:19106511-19150679    |
| 12532 | Palb2         | 233826 | 7-:129250777-129268441  |
| 12533 | Slc29a3       | 71279  | 10-:60177976-60215530   |
| 12534 | Nol7          | 70078  | 13+:43493761-43498230   |
| 12535 | Sfrs16        | 53609  | 7-:20169938-20188592    |
| 12536 | Ak1           | 11636  | 2+:32485023-32490572    |
| 12537 | MMT00047757   |        | 2-:128383137-128413904  |
| 12538 | Mstn          | 17700  | 1+:53118506-53124923    |
| 12539 | Galnt7        | 108150 | 8-:60004857-60131776    |
| 12540 | Smarca1       | 93761  | X-:45162876-45245719    |
| 12541 | Stx16         | 228960 | 2+:173901923-173924361  |
| 12542 | Cyp2a21-ps    | 330491 | 7+:27702397-27737314    |
| 12543 | Ube3b         | 117146 | 5+:114837102-114871146  |
| 12544 | Stxbp1        | 20910  | 2-:32643481-32702646    |

|       |               |        |                         |
|-------|---------------|--------|-------------------------|
| 12545 | Dennd2a       | 209773 | 6-:39472755-39473592    |
| 12546 | Cd7           | 12516  | 11-:120898064-120900732 |
| 12547 | Plekha7       | 233765 | 7-:123272067-123276290  |
| 12548 | Olfr1238      | 258786 | 2-:89246287-89247234    |
| 12549 | Cpsf6         | 432508 | 10-:116781727-116805049 |
| 12550 | Sctr          | 319229 | 1+:121903471-121933015  |
| 12551 | 4930443G12Rik | 74686  | 3+:108883384-108919604  |
| 12552 | Gm967         | 381217 | 19-:24047245-24105301   |
| 12553 | Kpnb1         | 16211  | 11-:97022926-97049066   |
| 12554 | Keap1         | 50868  | 9-:21035076-21043380    |
| 12555 | Zfp87         | 170763 | 13-:67616719-67774627   |
| 12556 | Ass1          | 11898  | 2+:31325818-31376149    |
| 12557 | Gmppb         | 331026 | 9+:107951622-107954460  |
| 12558 | Mrpl23        | 19935  | 7+:149719066-149726647  |
| 12559 | MMT00010105   |        | 13+:22818171-22993125   |
| 12560 | Sulf1         | 240725 | 1+:12708583-12851270    |
| 12561 | MMT00060321   |        | 2+:65115428-65116534    |
| 12562 | MMT00057239   |        | 13+:13415628-13447211   |
| 12563 | Col17a1       | 12821  | 19-:47720851-47766584   |
| 12564 | MMT00036520   |        | 1-:20434340-20434650    |
| 12565 | Grem2         | 23893  | 1-:176763915-176851950  |
| 12566 | Shpk          | 74637  | 11+:73012961-73037061   |
| 12567 | D430039N05Rik | 241520 | 2+:83652793-83720606    |
| 12568 | Lrrc37a       | 237954 | 11-:103312057-103357732 |
| 12569 | Acat1         | 110446 | 9-:53389792-53418427    |
| 12570 | Wsb1          | 78889  | 11-:79053804-79067894   |
| 12571 | Cdkn2d        | 12581  | 9-:21092935-21095415    |
| 12572 | Zfp90         | 22751  | 8+:108939300-108949628  |
| 12573 | Wbp2nl        | 74716  | 15+:82129383-82145053   |
| 12574 | Ubap2         | 68926  | 4-:41141346-41222147    |
| 12575 | Cib3          | 234421 | 8-:74728232-74734310    |
| 12576 | Kbtbd11       | 74901  | 8+:15027402-15029304    |
| 12577 | MMT00021707   |        |                         |
| 12578 | Ddx1          | 104721 | 12-:13226113-13255980   |
| 12579 | Gm534         | 218993 | 14-:49489957-49501508   |
| 12580 | Ppfibp2       | 19024  | 7+:114738779-114888398  |
| 12581 | Mpp3          | 13384  | 11-:101860977-101888219 |
| 12582 | Thada         | 240174 | 17-:84708964-84840434   |
| 12583 | D630037F22Rik | 544696 | 10-:55737227-55784363   |
| 12584 | Glt28d2       | 320302 | 3-:85675574-85691311    |
| 12585 | Olfr1508      | 57270  | 14-:53082750-53083682   |
| 12586 | G3bp2         | 23881  | 5-:92483539-92512684    |
| 12587 | Susd3         | 66329  | 13-:49326201-49343532   |
| 12588 | Vps26a        | 30930  | 10-:61918024-61949500   |
| 12589 | MMT00003619   |        | 14-:82103076-82103482   |
| 12590 | Rasgrp1       | 19419  | 2-:117108232-117168453  |
| 12591 | Cep70         | 68121  | 9+:99154671-99200361    |
| 12592 | F13a1         | 74145  | 13-:36959056-36997927   |
| 12593 | Palmd         | 114301 | 3-:116630085-116660845  |
| 12594 | 9130227C08Rik | 219094 | 14+:56473200-56516324   |
| 12595 | Atp8b2        | 54667  | 3-:89743405-89765063    |

|       |               |        |                            |
|-------|---------------|--------|----------------------------|
| 12596 | Olf1208       | 258774 | 2-:88736826-88737752       |
| 12597 | 4930572J05Rik | 223626 | 15+:74551643-74554670      |
| 12598 | Olf1801       | 258282 | 10-:129106616-129107573    |
| 12599 | Golt1b        | 66964  | 6+:142335761-142350643     |
| 12600 | Ifi204        | 15951  | 1-:175677426-175692019     |
| 12601 | Chrm5         | 213788 | 2-:112319328-112320926     |
| 12602 | Filip1        | 70598  | 9-:79662863-79825653       |
| 12603 | MMT00076813   |        | 8+:5527633-5528371         |
| 12604 | Acr           | 11434  | 15+:89398792-89404858      |
| 12605 | Nrxn1         | 18189  | 17-:90762100-90854392      |
| 12606 | MMT00003662   | 546828 | 4+:11060360-11061255       |
| 12607 | 2900005J15Rik | 67261  | 5+:24607275-24615927       |
| 12608 | Meis1         | 17268  | 11-:18780432-18918669      |
| 12609 | Tmem91        | 320208 | 7-:26454161-26460177       |
| 12610 | 9630031F12Rik | 58227  | 5-:45943802-46030664       |
| 12611 | MMT00068616   |        | 14+:33007082-33015133      |
| 12612 | Rapgef4       | 56508  | 2+:71819343-72094433       |
| 12613 | Uqcrc1        | 22273  | 9+:108838720-108851683     |
| 12614 | V1ra4         | 113846 | 6+:89971881-89972813       |
| 12615 | 5530400B01Rik | 71434  | 7+:149265392-149267338     |
| 12616 | Asgr2         | 11890  | 11+:69906270-69919686      |
| 12617 | Zfp46         | 22704  | 4+:135845707-135850238     |
| 12618 | EG628004      | 628004 | 1+:55283516-55291868       |
| 12619 | Igf2r         | 16004  | 17-:12875274-12963273      |
| 12620 | MMT00008462   |        | 2-:134555858-134556983     |
| 12621 | Mybphl        | 68753  | 3+:108167826-108182974     |
| 12622 | EG629581      | 629581 | X+:90883953-90884222       |
| 12623 | Ccdc123       | 72140  | 7+:36182111-36223703       |
| 12624 | Clptm1l       | 218335 | 13+:73741748-73758051      |
| 12625 | A1597468      | 103266 | 10+:84565484-84583363      |
| 12626 | Fut7          | 14347  | 2+:25278803-25281891       |
| 12627 | MMT00061942   |        | 12+:85226718-85227928      |
| 12628 | Akr1c13       | 27384  | 13+:4190466-4204842        |
| 12629 | MMT00027682   |        | 11+:24101416-24117601      |
| 12630 | EG667410      | 667410 | 5-:149965708-149967768     |
| 12631 | Cyp51         | 13121  | 5-:4082950-4104449         |
| 12632 | Ehmt1         | 77683  | 2-:24646291-24775104       |
| 12633 | Klk4          | 56640  | 7+:51136541-51141174       |
| 12634 | Olf1372-ps1   | 257871 | 11-:51968385-51969779      |
| 12635 | Spt2          | 20771  | Un_random+:4834599-4838176 |
| 12636 | MMT00000549   | 213043 | 1+:58340343-58415929       |
| 12637 | Itpka         | 228550 | 2+:119568072-119576988     |
| 12638 | Atp6v1b1      | 110935 | 6+:83693025-83708733       |
| 12639 | Bcas3         | 192197 | 11+:85166685-85323138      |
| 12640 | Qrich2        | 217341 | 11-:116304225-116320431    |
| 12641 | Erg           | 13876  | 16-:95581812-95751972      |
| 12642 | Tmc7          | 209760 | 7-:125693448-125704673     |
| 12643 | Fate1         | 77905  | X+:69218323-69234385       |
| 12644 | Klf14         | 619665 | 6-:30907719-30992919       |
| 12645 | MMT00039341   | 627312 | 2-:145335896-145336416     |
| 12646 | MMT00052842   |        | 6+:41221401-41221920       |

|       |               |        |                         |
|-------|---------------|--------|-------------------------|
| 12647 | 1110002N22Rik | 68550  | 11-:79950176-79955628   |
| 12648 | Nt5dc1        | 319638 | 10-:34023415-34138358   |
| 12649 | ltgad         | 381924 | 7+:135317501-135349015  |
| 12650 | Klra19        | 93971  | 6-:129963051-129976978  |
| 12651 | Tsc22d4       | 78829  | 5+:138203603-138209680  |
| 12652 | Tcte2         | 21646  | 17-:13849457-13898486   |
| 12653 | C86187        | 97402  | 7+:54223111-54231224    |
| 12654 | 4930485B16Rik | 380654 | 10-:92532577-92544642   |
| 12655 | Tmem180       | 75146  | 19+:46431425-46449741   |
| 12656 | Coq5          | 52064  | 5+:115729710-115746981  |
| 12657 | Phf19         | 74016  | 2-:34749274-34769491    |
| 12658 | MMT00081819   |        | 1+:14540512-14541476    |
| 12659 | Agk           | 69923  | 6+:40275481-40346760    |
| 12660 | MMT00029272   |        | 2+:85703569-85704519    |
| 12661 | 4932438A13Rik | 229227 | 3+:36893696-36951565    |
| 12662 | Suhw4         | 235469 | 9+:72136950-72199379    |
| 12663 | Mdm1          | 17245  | 10+:117578979-117585194 |
| 12664 | C130079G13Rik | 229333 | 3+:59732755-59740649    |
| 12665 | MMT00041311   |        | 6+:109075509-109076528  |
| 12666 | D8Ert82e      | 244418 | 8+:37162899-37165921    |
| 12667 | Slc39a2       | 214922 | 14+:52513474-52515481   |
| 12668 | Creb1         | 12912  | 1+:64646232-64648449    |
| 12669 | Mras          | 17532  | 9+:99285835-99287184    |
| 12670 | Spata511      | 214616 | 2+:122456362-122458440  |
| 12671 | Cul7          | 66515  | 17+:46799000-46801309   |
| 12672 | Nphs2         | 170484 | 1+:158240855-158256564  |
| 12673 | Cd40          | 21939  | 2+:164881199-164897149  |
| 12674 | Lyzl6         | 69444  | 11-:103492136-103500195 |
| 12675 | Rspo3         | 72780  | 10-:29219292-29227524   |
| 12676 | Nrxn3         | 18191  | 12+:90425465-90587024   |
| 12677 | Pald          | 72333  | 8-:64355709-64381460    |
| 12678 | MMT00007486   |        | 14-:124097499-124201881 |
| 12679 | Cyp4a10       | 13117  | 4+:115196847-115206259  |
| 12680 | Bptf          | 207165 | 11-:106948023-106961102 |
| 12681 | Eif2c2        | 239528 | 15-:72936136-72976998   |
| 12682 | Olf1176       | 258767 | 2+:88179723-88180669    |
| 12683 | Mgat4a        | 269181 | 1-:37542695-37592977    |
| 12684 | Trim42        | 78911  | 9-:97249984-97270377    |
| 12685 | BC088983      | 382010 | 8-:59010317-59029659    |
| 12686 | MMT00002622   |        | 18-:3858153-4009246     |
| 12687 | Zc3h8         | 57432  | 2-:128752005-128769755  |
| 12688 | Olf1922       | 258777 | 9+:38623089-38624024    |
| 12689 | Pgm3          | 109785 | 9-:86448005-86465435    |
| 12690 | Jak3          | 16453  | 8+:74202225-74214455    |
| 12691 | MMT00021912   |        | X+:32607392-32630212    |
| 12692 | Ttn           | 22138  | 2-:76688051-76688437    |
| 12693 | Zfp161        | 22666  | 17+:69734781-69738342   |
| 12694 | Riok2         | 67045  | 17+:17511539-17530935   |
| 12695 | Tfdp1         | 21781  | 8+:13339673-13377702    |
| 12696 | RP23-392P11.3 | 545481 | 2+:158356890-158369144  |
| 12697 | MMT00054375   |        | 10-:116409791-116410285 |

|       |               |           |                         |
|-------|---------------|-----------|-------------------------|
| 12698 | Mtf1          | 17764     | 4+:124479842-124521993  |
| 12699 | Vmn2r24       | 243628    | 6+:123729039-123754402  |
| 12700 | Nfia          | 18027     | 4+:97444589-97779083    |
| 12701 | Doc2b         | 13447     | 11-:75583459-75609551   |
| 12702 | Gsdmc2        | 331063    | 15-:63655906-63662422   |
| 12703 | Pcsk1         | 18548     | 13+:75227434-75269946   |
| 12704 | Camk1         | 52163     | 6-:113284118-113293916  |
| 12705 | Maob          | 109731    | X-:16286407-16394489    |
| 12706 | Plaa          | 18786     | 4-:94235310-94269945    |
| 12707 | Dmrt2         | 226049    | 19+:25748220-25753485   |
| 12708 | Fbxl21        | 213311    | 13+:56628219-56633830   |
| 12709 | Ghitm         | 66092     | 14-:37934003-37948452   |
| 12710 | Snrpb2        | 20639     | 2+:142888788-142898585  |
| 12711 | Nap1l4        | 17955     | 7-:150699483-150734995  |
| 12712 | MMT00059415   |           | 5-:138830114-138832821  |
| 12713 | MMT00007860   |           | 8-:40730424-40804227    |
| 12714 | MMT00019666   |           | X+:44740560-44990843    |
| 12715 | Cicn5         | 12728     | X-:6760914-6765817      |
| 12716 | 5830417110Rik | 76022     | 3+:88694731-88714020    |
| 12717 | 1110038F14Rik | 117171    | 15+:76779018-76781159   |
| 12718 | Dhrsx         | 236082    | 4_random+:109716-130125 |
| 12719 | Apbh          | 57426     | 7-:32075538-32076835    |
| 12720 | Rbm34         | 52202     | 8-:129472922-129494969  |
| 12721 | Tmem126b      | 68472     | 7-:97616791-97624508    |
| 12722 | EG624866      | 624866    | 3+:65469877-65587947    |
| 12723 | Fbxl7         | 448987    | 15-:26472631-26482808   |
| 12724 | D3Erttd751e   | 73852     | 3+:41548605-41560074    |
| 12725 | Bak1          | 12018     | 17-:27156756-27165572   |
| 12726 | Gpi1          | 14751     | 7-:34987176-34996825    |
| 12727 | Dpf2          | 19708     | 19-:5897376-5912823     |
| 12728 | Hax1          | 23897     | 3-:89799378-89802608    |
| 12729 | Cnih4         | 98417     | 1+:183074405-183096656  |
| 12730 | 9130019O22Rik | 78921     | 7-:134526789-134537146  |
| 12731 | Zfp366        | 238803    | 13+:99998287-100014043  |
| 12732 | Hsd17b1       | 15485     | 11+:100939724-100941819 |
| 12733 | Igfbp3        | 16009     | 11-:7108383-7113834     |
| 12734 | Zfp1          | 81909     | 19-:6080764-6084891     |
| 12735 | MMT00062371   | 236260    | 12+:17940360-18340295   |
| 12736 | Stat3         | 20848     | 11-:100750831-100772675 |
| 12737 | Map4k2        | 26412     | 19+:6341249-6353526     |
| 12738 | EG619597      | 619597    | 1+:95872496-95876993    |
| 12739 | Insl5         | 23919     | 4-:102690478-102699333  |
| 12740 | 2310021P13Rik | 268721    | 14+:21527070-21542843   |
| 12741 | Slit3         | 20564     | 11+:34985074-35048710   |
| 12742 | Pola1         | 18968     | X-:90550105-90877494    |
| 12743 | Ncan          | 13004     | 8-:72618862-72644705    |
| 12744 | 1110034B05Rik | 68736     | 1-:57445082-57463565    |
| 12745 | Spna2         | 20740     | 2+:29821362-29886968    |
| 12746 | Tbca          | 21371     | 13+:95558897-95612852   |
| 12747 | MMT00045901   | 100048110 | 16-:44802949-44805624   |
| 12748 | Bat2d         | 226562    | 1-:164650674-164670647  |

|       |               |           |                          |
|-------|---------------|-----------|--------------------------|
| 12749 | Gng3          | 14704     | 19-:8912297-8913701      |
| 12750 | Cntd1         | 68107     | 11+:101140516-101150015  |
| 12751 | Sorl1         | 20660     | 9-:41772804-41932196     |
| 12752 | MMT00064206   |           | 16-:67593029-67593470    |
| 12753 | MMT00043344   |           | 7+:49744170-49761147     |
| 12754 | E130304F04Rik | 245269    | 13_random+:108410-110864 |
| 12755 | Irx4          | 50916     | 13+:73398246-73407041    |
| 12756 | Ablim2        | 231148    | 5+:36100556-36227618     |
| 12757 | Klhl12        | 240756    | 1+:136352114-136386009   |
| 12758 | Pcgf3         | 69587     | 5+:108890319-108933828   |
| 12759 | F8a           | 14070     | X+:70473356-70475128     |
| 12760 | Esd           | 13885     | 14+:75132115-75149653    |
| 12761 | Tsc22d3       | 14605     | X-:137074075-137077710   |
| 12762 | Zfp639        | 67778     | 3+:32413323-32419660     |
| 12763 | MMT00075731   |           | 17-:34856780-34859197    |
| 12764 | Mxi1          | 17859     | 19+:53404133-53447774    |
| 12765 | 4921511H03Rik | 70920     | 5+:7304820-7305582       |
| 12766 | EG545047      | 545047    | 14-:52333319-52335815    |
| 12767 | Slurp1        | 57277     | 15-:74557075-74558456    |
| 12768 | Nxt2          | 237082    | X+:138662487-138673352   |
| 12769 | Tmem177       | 66343     | 1-:121804482-121809752   |
| 12770 | Nola2         | 52530     | 11+:51433274-51437216    |
| 12771 | Tdh           | 58865     | 14-:64111295-64127593    |
| 12772 | Axl           | 26362     | 7-:26543681-26573497     |
| 12773 | Klhl1         | 93688     | 14-:96505393-96918180    |
| 12774 | Pgm1          | 66681     | 5+:64484179-64519592     |
| 12775 | Vstm2b        | 58188     | 7+:48154647-48185335     |
| 12776 | MMT00061492   | 100045495 | 7-:11379597-11381473     |
| 12777 | Rapgef2       | 76089     | 3-:78866441-78976997     |
| 12778 | 1700024P16Rik | 242594    | 4+:104668302-104685936   |
| 12779 | Zfyve26       | 211978    | 12-:80383788-80387314    |
| 12780 | Olfr630       | 259102    | 7-:110902663-110905864   |
| 12781 | Prss1         | 114228    | 6+:41408941-41413732     |
| 12782 | MMT00056302   |           | 12-:111557461-111558341  |
| 12783 | MMT00015517   | 433743    | 4-:107432629-107433070   |
| 12784 | Nudt6         | 229228    | 3-:37303911-37318495     |
| 12785 | Jmjd2b        | 193796    | 17+:56491051-56542292    |
| 12786 | Plec1         | 18810     | 15-:76001402-76073843    |
| 12787 | Al451557      | 102084    | 8+:97043130-97046788     |
| 12788 | Trim69        | 70928     | 2+:121986435-122004762   |
| 12789 | MMT00046128   |           | 2+:68624241-68669336     |
| 12790 | Fhl1          | 14199     | X+:53984990-54046518     |
| 12791 | MMT00003726   |           | 7+:109929991-109930942   |
| 12792 | Eef1g         | 67160     | 19+:9041683-9052670      |
| 12793 | MMT00071809   |           | 5+:5082278-5082919       |
| 12794 | MMT00082139   | 100048814 | 4+:145454073-145886627   |
| 12795 | Slc20a2       | 20516     | 8+:23616945-23680089     |
| 12796 | BC048943      | 217874    | 12-:113217323-113219266  |
| 12797 | Brdt          | 114642    | 5+:107760177-107814713   |
| 12798 | Dct           | 13190     | 14-:118412028-118451407  |
| 12799 | Spon2         | 100689    | 5-:33556578-33560820     |

|       |               |        |                         |
|-------|---------------|--------|-------------------------|
| 12800 | Vav2          | 22325  | 2-:27119154-27282345    |
| 12801 | 2610301F02Rik | 545428 | 2-:76883781-77008667    |
| 12802 | Arhgef4       | 226970 | 1+:34802162-34869582    |
| 12803 | Ranbp3        | 71810  | 17+:56799593-56851183   |
| 12804 | Sugt1         | 67955  | 14+:79987472-80030597   |
| 12805 | Bmp7          | 12162  | 2-:172695190-172765673  |
| 12806 | Socs6         | 54607  | 18-:88835464-88927889   |
| 12807 | Faim          | 23873  | 9+:98892541-98902122    |
| 12808 | Fpr-rs3       | 14290  | 17-:20760809-20761841   |
| 12809 | 4933432B09Rik | 75729  | 15-:79442696-79489227   |
| 12810 | Mier1         | 71148  | 4+:102787070-102837215  |
| 12811 | Olf908        | 258872 | 9+:38323618-38324549    |
| 12812 | MMT00075804   |        | 1-:5266188-5266713      |
| 12813 | MMT00041243   |        | 6-:92514611-92606372    |
| 12814 | Hars          | 15115  | 18-:36926524-36942839   |
| 12815 | Wfikkn2       | 278507 | 11-:94098912-94103863   |
| 12816 | Zfp93         | 22755  | 7+:25055443-25061842    |
| 12817 | Mrpl39        | 27393  | 16-:84718527-84735465   |
| 12818 | MMT00048374   |        | 2+:146098882-146132125  |
| 12819 | Zfyve9        | 230597 | 4-:108310917-108453369  |
| 12820 | Slc6a16       | 381884 | 7+:52514523-52528733    |
| 12821 | Rnf157        | 217340 | 11-:116197675-116274350 |
| 12822 | 4930560E09Rik | 67737  | 17+:80615806-80617275   |
| 12823 | Rab3il1       | 74760  | 19+:10092752-10109572   |
| 12824 | Dbt           | 13171  | 3+:116216058-116252310  |
| 12825 | Gal3st3       | 545276 | 19+:5302585-5307893     |
| 12826 | Zfp354c       | 30944  | 11-:50628066-50639960   |
| 12827 | Stmn4         | 56471  | 14+:66973188-66980510   |
| 12828 | MMT00047250   |        | X-:23819283-23842045    |
| 12829 | MMT00018827   | 223286 | 15-:4938821-5013751     |
| 12830 | Cmah          | 12763  | 13+:24508768-24560510   |
| 12831 | Tm6sf2        | 107770 | 8+:72596874-72603962    |
| 12832 | 4930556L07Rik | 75283  | 2-:151573315-151575713  |
| 12833 | Drp2          | 13497  | X+:130939319-130987938  |
| 12834 | Fabp7         | 12140  | 10+:57504745-57508162   |
| 12835 | Ckmt1         | 12716  | 2+:121184376-121189472  |
| 12836 | EG629820      | 629820 | 12+:40949630-40955775   |
| 12837 | Olf800        | 258541 | 10+:129096863-129097799 |
| 12838 | Tec           | 21682  | 5-:73146978-73259722    |
| 12839 | Fh1           | 14194  | 1-:177531209-177555720  |
| 12840 | MMT00009117   |        | 2-:148244666-148245041  |
| 12841 | Defcr3        | 13237  | 8+:22427086-22767199    |
| 12842 | Gphn          | 268566 | 12+:79710182-79785754   |
| 12843 | Zfp644        | 52397  | 5-:107045761-107067654  |
| 12844 | Slc1a7        | 242607 | 4+:107640938-107686133  |
| 12845 | F11           | 109821 | 8-:46326523-46347385    |
| 12846 | MMT00016174   |        | 9-:5554270-5554398      |
| 12847 | Sar1b         | 66397  | 11+:51577208-51605423   |
| 12848 | MMT00006400   |        | 6-:68784815-68830668    |
| 12849 | Sftpd         | 20390  | 14-:41985502-41998452   |
| 12850 | Galnt13       | 271786 | 2+:54912875-54965942    |

|       |               |        |                        |
|-------|---------------|--------|------------------------|
| 12851 | Apod          | 11815  | 16-:31297205-31314535  |
| 12852 | EG432879      | 432879 | 14+:79851673-79853360  |
| 12853 | Phc3          | 241915 | 3-:30805916-30860805   |
| 12854 | Ndufa13       | 67184  | 8-:72418068-72425544   |
| 12855 | 2310022A10Rik | 66367  | 7+:28338289-28367115   |
| 12856 | Clstn3        | 232370 | 6-:124380784-124414744 |
| 12857 | MMT00054072   |        |                        |
| 12858 | Lepre1        | 56401  | 4+:118905550-118920972 |
| 12859 | Fbxw5         | 30839  | 2+:25356337-25360987   |
| 12860 | Tmem156       | 243025 | 5-:65466801-65482794   |
| 12861 | Rhcg          | 56315  | 7-:86738254-86762534   |
| 12862 | Trem2         | 83433  | 17+:48485813-48491596  |
| 12863 | Fgg           | 99571  | 3+:82811817-82818969   |
| 12864 | Myh10         | 77579  | 11+:68505609-68630129  |
| 12865 | MMT00044296   |        | 17+:18960085-18992146  |
| 12866 | 4921517L17Rik | 70873  | 2+:156138183-156201370 |
| 12867 | MMT00021210   | 667832 | 11-:54931618-54932378  |
| 12868 | Taf7          | 24074  | 18-:37801675-37803801  |
| 12869 | 0610011F06Rik | 68347  | 17+:26012069-26014109  |
| 12870 | Skiv2l        | 108077 | 17-:34976351-34987100  |
| 12871 | Scn7a         | 20272  | 2-:66512479-66622975   |
| 12872 | Rg9mtd3       | 69934  | 4+:45310031-45328353   |
| 12873 | Ndufb11       | 104130 | X-:20192452-20194383   |
| 12874 | Rhox6         | 19202  | X+:35180231-35183033   |
| 12875 | Map6d1        | 208158 | 16-:20235320-20241386  |
| 12876 | Htra2         | 64704  | 6-:83001277-83004449   |
| 12877 | Ecd           | 70601  | 14-:21139115-21167310  |
| 12878 | 5730601F06Rik | 77519  | 9-:20310419-20325927   |
| 12879 | Ermp1         | 226090 | 19-:29684692-29698148  |
| 12880 | Fgfr4         | 14186  | 13+:55254235-55270098  |
| 12881 | Lgals8        | 56048  | 13-:12533091-12553707  |
| 12882 | Tmem134       | 66990  | 19+:4125986-4132285    |
| 12883 | Saps1         | 243819 | 7-:4582459-4610589     |
| 12884 | Zfp692        | 103836 | 11+:58120611-58128127  |
| 12885 | Ccl24         | 56221  | 5-:136046664-136048842 |
| 12886 | Acp6          | 66659  | 3+:96963222-96980412   |
| 12887 | 1810018F18Rik | 69166  | 19+:58773406-58775813  |
| 12888 | AI931714      | 102182 | 8+:80073279-80086415   |
| 12889 | A630052C17Rik | 320757 | 11-:29071941-29073541  |
| 12890 | B230339M05Rik | 228850 | 2+:158246579-158323544 |
| 12891 | Fat2          | 245827 | 11-:55065089-55125759  |
| 12892 | 1700019L03Rik | 227736 | 2-:32632656-32639948   |
| 12893 | Zdhhc7        | 102193 | 8-:122604994-122611981 |
| 12894 | Tor2a         | 30933  | 2+:32612763-32645176   |
| 12895 | Rpe           | 66646  | 1+:66747466-66766379   |
| 12896 | Olfr415       | 258709 | 1+:176321201-176322122 |
| 12897 | Tsx           | 22127  | X+:100609820-100619919 |
| 12898 | BC038167      | 270150 | 9+:44048776-44055390   |
| 12899 | Slc39a7       | 14977  | 17-:34165217-34168503  |
| 12900 | Zfp54         | 22712  | 17+:21560224-21572118  |
| 12901 | Fbxl11        | 225876 | 19-:4316154-4396645    |



|       |               |        |                         |
|-------|---------------|--------|-------------------------|
| 12902 | Pip5k1a       | 18720  | 3-:94863522-94910642    |
| 12903 | AU019823      | 270156 | 9-:50415387-50425293    |
| 12904 | MMT00040704   | 676923 | 19+:40265187-40271489   |
| 12905 | Nfil3         | 18030  | 13-:53062848-53064235   |
| 12906 | Nts           | 67405  | 10-:101944807-101953047 |
| 12907 | Zkscan1       | 74570  | 5+:138547900-138549048  |
| 12908 | Jdp2          | 81703  | 12+:86940967-86980827   |
| 12909 | Olfir604      | 259073 | 7-:110531575-110532514  |
| 12910 | 1110028A07Rik | 68680  | 14+:56194503-56195789   |
| 12911 | 2210415F13Rik | 70163  | 11+:58192527-58204040   |
| 12912 | AI597479      | 98404  | 1+:43155554-43172789    |
| 12913 | MMT00046078   |        | 2-:55628810-55629028    |
| 12914 | 9430091E24Rik | 434350 | 8-:113661469-113669413  |
| 12915 | Slc7a5        | 20539  | 8-:124405051-124431532  |
| 12916 | Fkbp1a        | 14225  | 2+:151368356-151387426  |
| 12917 | Nubp1         | 26425  | 16+:10412067-10423623   |
| 12918 | Gfap          | 14580  | 11-:102748660-102758431 |
| 12919 | Nup210l       | 77595  | 3+:89908054-90014380    |
| 12920 | Mlst2         | 67420  | 7+:120657374-120711896  |
| 12921 | MMT00075833   |        | 12-:93206779-93207726   |
| 12922 | Lilrb4        | 14728  | 10+:51210780-51216415   |
| 12923 | MMT00016981   |        | 16+:10045036-10046094   |
| 12924 | Zcchc7        | 319885 | 4+:44938232-44945079    |
| 12925 | Farp1         | 223254 | 14+:121606471-121682968 |
| 12926 | Lrmp          | 16970  | 6+:145064182-145123448  |
| 12927 | Sod3          | 20657  | 5+:52759179-52759982    |
| 12928 | Abca7         | 27403  | 10+:79460359-79478315   |
| 12929 | 6330578E17Rik | 76178  | 1-:37473936-37486883    |
| 12930 | Pthr1         | 19228  | 9-:110624758-110644804  |
| 12931 | Tpt1          | 22070  | 14+:76245137-76248104   |
| 12932 | Mpv17l        | 93734  | 16+:13940787-13949450   |
| 12933 | MMT00048320   |        | 3+:134598828-134626488  |
| 12934 | Rbp7          | 63954  | 4-:148823797-148829077  |
| 12935 | Zfp454        | 237758 | 11-:50686218-50701033   |
| 12936 | Pdlim1        | 54132  | 19-:40296729-40346023   |
| 12937 | Uhrf2         | 109113 | 19+:30105092-30168212   |
| 12938 | Fhod3         | 225288 | 18+:25056137-25292001   |
| 12939 | Fzd6          | 14368  | 15+:38838799-38868310   |
| 12940 | H47           | 109815 | 7+:73224580-73234291    |
| 12941 | Elovl5        | 68801  | 9+:77765262-77832323    |
| 12942 | Btbd11        | 74007  | 10+:84849617-84851223   |
| 12943 | Slc25a27      | 74011  | 17-:43778848-43803964   |
| 12944 | Olfir631      | 258961 | 7+:111063575-111078425  |
| 12945 | Spata2L       | 78779  | 8-:125756154-125760133  |
| 12946 | Hoxd4         | 15436  | 2+:74560034-74567214    |
| 12947 | Ferd3l        | 114712 | 12+:34613354-34613860   |
| 12948 | MMT00009927   |        | 15-:77200601-77200694   |
| 12949 | Atg4d         | 235040 | 9+:21069725-21075303    |
| 12950 | Sgsm2         | 97761  | 11-:74664116-74673401   |
| 12951 | Pcdha6        | 12937  | 18+:37127284-37347311   |
| 12952 | Socs3         | 12702  | 11+:117829542-117830707 |

|       |               |        |                         |
|-------|---------------|--------|-------------------------|
| 12953 | Spin2         | 278240 | X+:150266822-150268784  |
| 12954 | Gli2          | 14633  | 1-:120730637-120786979  |
| 12955 | Atp5o         | 28080  | 16-:91925467-91931870   |
| 12956 | Wipf1         | 215280 | 2-:73272088-73367214    |
| 12957 | Ccdc101       | 75565  | 7+:133792915-133816292  |
| 12958 | Itpr2         | 16439  | 6-:146369939-146450400  |
| 12959 | Slc6a1        | 232333 | 6+:114251043-114267516  |
| 12960 | Arrdc4        | 66412  | 7-:75886496-75894089    |
| 12961 | MMT00054077   |        |                         |
| 12962 | Caly          | 68566  | 7-:147255785-147268447  |
| 12963 | Erp27         | 69187  | 6-:136855907-136870701  |
| 12964 | Dync1li1      | 235661 | 9+:114597948-114632893  |
| 12965 | Pmm1          | 29858  | 15-:81781539-81791297   |
| 12966 | Slc39a1       | 30791  | 3+:90052156-90056994    |
| 12967 | Plod1         | 18822  | 4-:147284170-147310813  |
| 12968 | Fbxw9         | 68628  | 8+:87583985-87591208    |
| 12969 | Xaf1          | 327959 | 11+:72115134-72122426   |
| 12970 | MMT00077927   |        | 12-:41610141-41611250   |
| 12971 | Dip2c         | 208440 | 13+:9549429-9666591     |
| 12972 | MMT00004439   |        | 17-:54493986-54494360   |
| 12973 | MMT00014886   |        | X-:7418772-7452419      |
| 12974 | Slc1a6        | 20513  | 10+:78243246-78277510   |
| 12975 | MMT00013656   |        | 4-:100240287-100240653  |
| 12976 | MMT00066041   |        | 2+:59972094-59973359    |
| 12977 | B4galt3       | 57370  | 1+:173200518-173207026  |
| 12978 | Efcab4a       | 213573 | 7+:148646996-148652511  |
| 12979 | OTTMUSG000000 | 433490 | 2-:152418925-152422161  |
| 12980 | Prl5a1        | 28078  | 13+:28234406-28243299   |
| 12981 | Nek6          | 59126  | 2+:38367216-38442085    |
| 12982 | Cars          | 27267  | 7-:150743610-150785961  |
| 12983 | MMT00062297   |        | 10+:95939064-95940012   |
| 12984 | Cyb5          | 109672 | 18+:85020805-85049255   |
| 12985 | B230112C05Rik | 320557 | 13+:97861771-97901149   |
| 12986 | Cox4i2        | 84682  | 2+:152579908-152590773  |
| 12987 | Krt86         | 16679  | 15+:101303900-101310414 |
| 12988 | Zfp433        | 73610  | 10+:81341710-81343322   |
| 12989 | 1190002H23Rik | 66214  | 14-:79688557-79701442   |
| 12990 | Dgke          | 56077  | 11-:88902047-88921699   |
| 12991 | MMT00065030   |        | 10-:77233378-77234070   |
| 12992 | 1700027A23Rik | 76420  | 3-:105799874-105804417  |
| 12993 | Map3k2        | 26405  | 18+:32322855-32388162   |
| 12994 | Notch1        | 18128  | 2-:26314670-26359157    |
| 12995 | Tmed9         | 67511  | 13+:55694503-55699049   |
| 12996 | Hormad2       | 75828  | 11-:4245816-4341108     |
| 12997 | Csgalnact2    | 78752  | 6-:118058206-118089158  |
| 12998 | Slc6a19       | 74338  | 13-:73818440-73838227   |
| 12999 | Igfbp6        | 16012  | 15+:101974792-101979942 |
| 13000 | 9130404D14Rik | 227737 | 2+:32731743-32780766    |
| 13001 | EG668525      | 668525 | 12+:20670547-20672246   |
| 13002 | MMT00005328   |        | 6+:12807600-12808015    |
| 13003 | Pdcd5         | 56330  | 7-:36427155-36432390    |

|       |               |        |                         |
|-------|---------------|--------|-------------------------|
| 13004 | Arhgef10      | 234094 | 8+:14940208-15001079    |
| 13005 | Dkk2          | 56811  | 3+:131748871-131842621  |
| 13006 | Akr1b7        | 11997  | 6+:34362389-34373142    |
| 13007 | 4632412N22Rik | 320159 | 17+:72066589-72079008   |
| 13008 | Adam34        | 252866 | 8-:44710646-44761093    |
| 13009 | MMT00017557   | 545339 | 9+:42771931-42774152    |
| 13010 | Cyp4b1        | 13120  | 4-:115215989-115217663  |
| 13011 | Mis12         | 67139  | 11+:70833112-70840636   |
| 13012 | Sac3d1        | 66406  | 19-:6116003-6118518     |
| 13013 | Cxcl11        | 56066  | 5-:92788572-92792303    |
| 13014 | 4733401H21Rik | 70831  | 11+:99769233-99770204   |
| 13015 | D14Ertd500e   | 219072 | 14-:55160622-55173173   |
| 13016 | Actn3         | 11474  | 19-:4861222-4877884     |
| 13017 | Rbbp6         | 19647  | 7+:130112906-130146073  |
| 13018 | AW544981      | 213956 | 15+:80502298-80530852   |
| 13019 | Als2cr2       | 227154 | 1+:59030463-59052558    |
| 13020 | Diablo        | 66593  | 5-:123961919-123974137  |
| 13021 | Rad50         | 19360  | 11-:53463078-53520799   |
| 13022 | MMT00002248   |        | X+:10797732-10799101    |
| 13023 | Adams1        | 11504  | 16-:85795647-85802904   |
| 13024 | Lpp           | 210126 | 16+:24991439-25044246   |
| 13025 | Irf2          | 16363  | 8+:47825144-47932810    |
| 13026 | Rrn3          | 106298 | 16+:13780786-13818206   |
| 13027 | Ppp2r5c       | 26931  | 12-:111714401-111716823 |
| 13028 | Mesp1         | 17292  | 7-:86937127-86938654    |
| 13029 | 4930563M21Rik | 75258  | 9-:55810395-55828739    |
| 13030 | Pcdhb10       | 93881  | 18+:37571526-37573918   |
| 13031 | Olf339        | 258951 | 2+:36276919-36277848    |
| 13032 | Gpihbp1       | 68453  | 15+:75427070-75428769   |
| 13033 | MMT00013795   |        |                         |
| 13034 | 4933437104Rik | 71246  | 2+:163886550-163888021  |
| 13035 | Spata9        | 75571  | 13+:76105186-76136416   |
| 13036 | Zdhhc13       | 243983 | 7+:56044371-56082806    |
| 13037 | Serp1nb3b     | 383548 | 1-:109050519-109057693  |
| 13038 | Hoxa13        | 15398  | 6-:52208851-52210874    |
| 13039 | Vps11         | 71732  | 9-:44155830-44169731    |
| 13040 | Mylk          | 107589 | 16+:34994949-35001449   |
| 13041 | Kpna1         | 16646  | 16+:36000272-36034095   |
| 13042 | Aldh5a1       | 214579 | 13-:25003382-25029473   |
| 13043 | Agtr1         | 23796  | 2+:84976789-84977923    |
| 13044 | 5730596K20Rik | 109168 | 19+:7569078-7608690     |
| 13045 | A330021E22Rik | 207686 | 5-:5580985-5664239      |
| 13046 | Cd80          | 12519  | 16+:38459011-38487012   |
| 13047 | Stra13        | 20892  | 11-:120572256-120575046 |
| 13048 | Angptl6       | 70726  | 9-:20678252-20684154    |
| 13049 | Sh3tc1        | 231147 | 5-:36039831-36066801    |
| 13050 | 4930578C19Rik | 75905  | X-:17995920-18038495    |
| 13051 | Rab3b         | 69908  | 4+:108562912-108613418  |
| 13052 | Tnfrsf19      | 29820  | 14-:61582711-61656787   |
| 13053 | MMT00004328   |        | 14+:70353264-70353775   |
| 13054 | Mcm4          | 17217  | 16-:15624263-15637399   |

|       |               |        |                         |
|-------|---------------|--------|-------------------------|
| 13055 | Med21         | 108098 | 6+:146591100-146599120  |
| 13056 | AW121567      | 270028 | 8-:9768259-9770658      |
| 13057 | Aspn          | 66695  | 13+:49639857-49662926   |
| 13058 | Gpx3          | 14778  | 11+:54716451-54723878   |
| 13059 | Centd1        | 212285 | 5-:62993686-63157321    |
| 13060 | Ccdc100       | 225523 | 18-:53882736-53903984   |
| 13061 | Eml5          | 319670 | 12-:100028822-100097115 |
| 13062 | MMT00016210   |        | 11+:85998819-85999238   |
| 13063 | 4931408A02Rik | 70967  | 16+:90826963-90905354   |
| 13064 | Zbbx          | 213234 | 3-:74940335-74955453    |
| 13065 | Adamts9       | 101401 | 6-:92746982-92893486    |
| 13066 | Spock1        | 20745  | 13-:57527763-58009683   |
| 13067 | MMT00074323   |        | 9-:63290972-63291889    |
| 13068 | Yap1          | 22601  | 9-:7932001-8004586      |
| 13069 | MMT00063010   |        | 19+:37308111-37308986   |
| 13070 | Slc22a23      | 73102  | 13-:34274822-34436490   |
| 13071 | MMT00010913   |        | 13-:14056735-14058127   |
| 13072 | BC022687      | 217887 | 12+:114047527-114054463 |
| 13073 | MMT00046824   |        | 5+:10068845-10070679    |
| 13074 | MMT00014847   |        | 13+:51391129-51434428   |
| 13075 | Mrps2         | 118451 | 2+:28323594-28325635    |
| 13076 | Pias4         | 59004  | 10-:80616717-80630668   |
| 13077 | Cyp2c70       | 226105 | 19-:40227852-40261761   |
| 13078 | Eps8l2        | 98845  | 7+:148524900-148548914  |
| 13079 | Lrp2          | 14725  | 2-:69277826-69424086    |
| 13080 | Olf1395       | 258877 | 11+:48961760-48962713   |
| 13081 | 6-Sep         | 56526  | X-:34453033-34529440    |
| 13082 | Egln3         | 112407 | 12-:55279968-55304835   |
| 13083 | Myo7b         | 17922  | 18-:32118889-32196615   |
| 13084 | AU042671      | 269700 | 5+:121752645-121756115  |
| 13085 | Nr0b1         | 11614  | X+:83437125-83441285    |
| 13086 | Ccdc79        | 320022 | 8-:106971480-106996847  |
| 13087 | Cxadr         | 13052  | 16+:78302000-78359992   |
| 13088 | Tspan3        | 56434  | 9-:55983694-56008671    |
| 13089 | F5            | 14067  | 1+:166082088-166149666  |
| 13090 | Rnf128        | 66889  | X+:136145158-136206853  |
| 13091 | Ccdc54        | 69339  | 16-:50589970-50591202   |
| 13092 | MMT00011921   |        | 1+:119637961-120097249  |
| 13093 | Rassf2        | 215653 | 2-:131822119-131855618  |
| 13094 | Cnn3          | 71994  | 3+:121129458-121161123  |
| 13095 | 4921528O07Rik | 78258  | 1-:164954480-165006500  |
| 13096 | Otor          | 57329  | 2+:142904218-142907436  |
| 13097 | D330045A20Rik | 102871 | X+:136015034-136088063  |
| 13098 | Kcnk1         | 16525  | 8+:128519069-128554583  |
| 13099 | Otp           | 18420  | 13+:95645581-95653629   |
| 13100 | Herpud2       | 80517  | 9-:24912576-24956075    |
| 13101 | 3110032G18Rik | 73121  | 5+:125483805-125492916  |
| 13102 | Prkaa1        | 105787 | 15+:5110586-5128977     |
| 13103 | Erlin1        | 226144 | 19-:44109437-44144239   |
| 13104 | Ccdc70        | 67929  | 8+:23080246-23084489    |
| 13105 | Gtf2f1        | 98053  | 17-:57142825-57150711   |

|       |               |        |                         |
|-------|---------------|--------|-------------------------|
| 13106 | Fbxo41        | 330369 | 6-:85422496-85425232    |
| 13107 | MMT00009003   | 546543 | 12+:89459023-89461049   |
| 13108 | Olfr749       | 56858  | 14-:51355895-51356869   |
| 13109 | Rab33a        | 19337  | X+:45872646-45883409    |
| 13110 | Lyg1          | 69541  | 1-:38003575-38014605    |
| 13111 | Nalcn         | 338370 | 14-:123769162-123999211 |
| 13112 | Ate1          | 11907  | 7-:137537655-137663038  |
| 13113 | Man2a2        | 140481 | 7-:87496182-87516071    |
| 13114 | Aff3          | 16764  | 1-:38250403-38267492    |
| 13115 | B230120H23Rik | 65964  | 2+:72136243-72280665    |
| 13116 | Actn2         | 11472  | 13-:12361698-12432767   |
| 13117 | Tmprss5       | 80893  | 9+:48910883-48925690    |
| 13118 | Sfrp2         | 20319  | 3+:83570242-83578237    |
| 13119 | MMT00016763   |        | 12+:14936606-14937394   |
| 13120 | Lactb         | 80907  | 9-:66803199-66823291    |
| 13121 | MMT00081159   |        | 1+:4601331-4602573      |
| 13122 | Alx4          | 11695  | 2+:93482590-93518093    |
| 13123 | Chd1          | 12648  | 17+:15842253-15907328   |
| 13124 | Arfgap3       | 66251  | 15-:83130169-83180593   |
| 13125 | 4930534B04Rik | 75216  | 12-:92236930-92322170   |
| 13126 | Rai1          | 19377  | 11+:59953585-60005527   |
| 13127 | Col5a1        | 12831  | 2+:27742204-27893044    |
| 13128 | MMT00007627   |        |                         |
| 13129 | Bmp8a         | 12163  | 4-:122989889-123020046  |
| 13130 | RP23-166L2.1  | 242627 | 4-:113613241-113615457  |
| 13131 | Pscd1         | 19157  | 11-:118027331-118055009 |
| 13132 | MMT00070380   |        | 14+:44864398-44866804   |
| 13133 | Tmeff1        | 230157 | 4+:48598238-48676000    |
| 13134 | Lipg          | 16891  | 18-:75100521-75120899   |
| 13135 | Ugt2a1        | 94215  | 5-:87889425-87915771    |
| 13136 | Itgb1bp3      | 69564  | 10-:80661939-80664801   |
| 13137 | 2610301G19Rik | 219158 | 14-:70537983-70540903   |
| 13138 | Olfr1030      | 258581 | 2+:85823998-85824953    |
| 13139 | Mid1          | 17318  | X+:166266090-166404099  |
| 13140 | MMT00005814   |        |                         |
| 13141 | MMT00071569   |        | 15-:3695893-3696875     |
| 13142 | Wdr81         | 192652 | 11-:75254454-75259071   |
| 13143 | Zmym6         | 100177 | 4+:126754625-126806890  |
| 13144 | Calml3        | 70405  | 13-:3802140-3803562     |
| 13145 | Dapl1         | 76747  | 2+:59322711-59343030    |
| 13146 | Pomgnt1       | 68273  | 4+:115823199-115832446  |
| 13147 | 1700023I07Rik | 76705  | X+:22038757-22039484    |
| 13148 | Xab2          | 67439  | 8-:3610089-3621296      |
| 13149 | Ifi203        | 15950  | 1-:175850535-175872523  |
| 13150 | 4921528I07Rik | 77049  | 9-:114185780-114226148  |
| 13151 | Asb14         | 142687 | 14+:27716428-27728444   |
| 13152 | MMT00053509   |        | 5-:106226341-106226732  |
| 13153 | 4930453N24Rik | 67609  | 16-:64766770-64770689   |
| 13154 | Mtap1a        | 17754  | 2+:121115336-121136104  |
| 13155 | Serpina1f     | 68348  | 12-:104927846-104932928 |
| 13156 | Ifit3         | 15959  | 19+:34658043-34663217   |

|       |               |        |                         |
|-------|---------------|--------|-------------------------|
| 13157 | Mmp16         | 17389  | 4+:17780813-18043542    |
| 13158 | Pde1b         | 18574  | 15+:103333728-103360483 |
| 13159 | Map4k4        | 26921  | 1+:39958074-40081770    |
| 13160 | Frem3         | 333315 | 8+:83135126-83219247    |
| 13161 | EG634346      | 634346 | 1+:99243005-99339300    |
| 13162 | Pcdh17        | 219228 | 14+:84845631-84934510   |
| 13163 | 2700045P11Rik | 72555  | 16+:12244699-12268195   |
| 13164 | Il4ra         | 16190  | 7+:132695800-132721481  |
| 13165 | 5730437N04Rik | 70544  | 17-:5433024-5440256     |
| 13166 | Stim2         | 116873 | 5+:54389914-54511415    |
| 13167 | Idi1          | 319554 | 13+:8885105-8891640     |
| 13168 | Col8a1        | 12837  | 16-:57627025-57632751   |
| 13169 | Clptm1        | 56457  | 7-:20218597-20250365    |
| 13170 | B4galt5       | 56336  | 2-:167126560-167174683  |
| 13171 | Cacng7        | 81904  | 7+:3336684-3366536      |
| 13172 | Epb4.1l3      | 13823  | 17+:69506149-69639325   |
| 13173 | MMT00065775   |        | 5-:151810398-151811930  |
| 13174 | MMT00032085   | 628236 | 19-:33540369-33543377   |
| 13175 | 4930432O21Rik | 74670  | 17+:22099517-22131327   |
| 13176 | Gpr85         | 64450  | 6-:13785791-13786903    |
| 13177 | Cops8         | 108679 | 1+:92500083-92509915    |
| 13178 | Slc46a2       | 30936  | 4-:59918833-59927900    |
| 13179 | Plxna2        | 18845  | 1+:196446095-196640656  |
| 13180 | Nox4          | 50490  | 7+:94395307-94545509    |
| 13181 | Lcp2          | 16822  | 11+:33947168-33991134   |
| 13182 | Tmem184b      | 223693 | 15-:79191114-79209144   |
| 13183 | Rg9mtd2       | 108943 | 3+:137806869-137817721  |
| 13184 | MMT00017268   |        | 8+:32114328-32114626    |
| 13185 | MMT00053665   |        | 12-:11672561-11673857   |
| 13186 | 3110082I17Rik | 73212  | 5-:139835693-139936467  |
| 13187 | Slc27a5       | 26459  | 7-:13573702-13583499    |
| 13188 | Sumf2         | 67902  | 5+:130322885-130339299  |
| 13189 | Dnajb4        | 67035  | 3-:151847982-151873047  |
| 13190 | Igsf6         | 80719  | 7-:128207581-128218044  |
| 13191 | Cyp4f17       | 208285 | 17+:32643457-32665838   |
| 13192 | Impg1         | 63859  | 9-:80160893-80359018    |
| 13193 | Sohlh1        | 227631 | 2-:25698522-25702372    |
| 13194 | 4922502D21Rik | 381816 | 6-:129276672-129281775  |
| 13195 | Mtif2         | 76784  | 11+:29426464-29445255   |
| 13196 | Obsl1         | 98733  | 1-:75471145-75544102    |
| 13197 | Mett5d1       | 76894  | 2-:108932456-109118447  |
| 13198 | Adcy3         | 104111 | 12+:4134325-4212786     |
| 13199 | Pold3         | 67967  | 7-:107230619-107270051  |
| 13200 | 5730449L18Rik | 66637  | 1-:154217882-154233752  |
| 13201 | Rbl2          | 19651  | 8+:93594056-93646925    |
| 13202 | Sass6         | 72776  | 3+:116297796-116332052  |
| 13203 | Ppp1r14a      | 68458  | 7+:30074340-30078410    |
| 13204 | Vmn2r42       | 22310  | 7+:9927006-9944059      |
| 13205 | EG626215      | 626215 | 12+:79298255-79299732   |
| 13206 | Qprt          | 67375  | 7-:134251284-134265543  |
| 13207 | Sptlc2        | 20773  | 12-:88650588-88729151   |

|       |               |           |                         |
|-------|---------------|-----------|-------------------------|
| 13208 | Tbx20         | 57246     | 9-:24545052-24578289    |
| 13209 | Mcm3ap        | 54387     | 10+:75931682-75978602   |
| 13210 | Nudt1         | 17766     | 5+:140807875-140814089  |
| 13211 | Sbno2         | 216161    | 10-:79519743-79603581   |
| 13212 | Tspan9        | 109246    | 6-:127911412-127984615  |
| 13213 | MMT00048024   | 100048144 | 9+:50023455-50023839    |
| 13214 | Slc12a8       | 171286    | 16+:33518431-33663487   |
| 13215 | EG626858      | 626858    | 10-:85173019-85195563   |
| 13216 | Ccdc106       | 232821    | 7+:5008798-5012384      |
| 13217 | Rnase1        | 19752     | 14-:51764854-51766442   |
| 13218 | C330043M08Rik | 330323    | 6+:55153468-55213858    |
| 13219 | Trhde         | 237553    | 10-:113836079-114238420 |
| 13220 | EG329521      | 329521    | 2-:132040704-132041033  |
| 13221 | Srd5a3        | 57357     | 5+:76569296-76584495    |
| 13222 | OTTMUSG000000 | 544922    | 13+:21570753-21576605   |
| 13223 | BC022651      | 330460    | 7-:4667145-4676683      |
| 13224 | Cp            | 12870     | 3+:19857178-19892590    |
| 13225 | Grhl2         | 252973    | 15+:37162790-37263402   |
| 13226 | Ttc32         | 75516     | 12+:9036238-9042986     |
| 13227 | Krtap15       | 26560     | 16+:88829253-88830087   |
| 13228 | Zfp830        | 66983     | 11+:82577856-82579429   |
| 13229 | Abcd1         | 11666     | X+:70961935-70983626    |
| 13230 | MMT00000808   |           | 7+:35168698-35169696    |
| 13231 | MMT00080853   |           | 11+:98046648-98047461   |
| 13232 | Olfr177       | 258998    | 16-:58872044-58872974   |
| 13233 | Oaz2          | 18247     | 9+:65524399-65537263    |
| 13234 | MMT00050170   |           | 1+:119663968-119795744  |
| 13235 | Park7         | 57320     | 4-:150271250-150283959  |
| 13236 | Pak1ip1       | 68083     | 13+:41096628-41108380   |
| 13237 | Fzd7          | 14369     | 1+:59539439-59541701    |
| 13238 | Nr1h3         | 22259     | 2-:91024267-91035273    |
| 13239 | Wiz           | 22404     | 17-:32490999-32525589   |
| 13240 | Ing1          | 26356     | 8+:11556909-11562121    |
| 13241 | Gm879         | 380702    | 11-:66316152-66339296   |
| 13242 | Sv2c          | 75209     | 13-:96731118-96902546   |
| 13243 | A230046K03Rik | 319277    | 10+:83006651-83059227   |
| 13244 | MMT00005261   |           | 6-:17660584-17672345    |
| 13245 | Gpr177        | 68151     | 3+:159502702-159597865  |
| 13246 | Klc4          | 74764     | 17-:46767579-46782093   |
| 13247 | Cspg5         | 29873     | 9+:110148101-110164724  |
| 13248 | 4833423E24Rik | 228151    | 2-:85323748-85358923    |
| 13249 | Tchhl1        | 71325     | 3+:93272675-93275902    |
| 13250 | Cst13         | 69294     | 2+:148645855-148656145  |
| 13251 | EG622268      | 622268    | 18+:15169754-15170200   |
| 13252 | Wnt9b         | 22412     | 11-:103592053-103611098 |
| 13253 | Mtvr2         | 17826     | 19-:5728087-5731713     |
| 13254 | MMT00031174   | 676175    | 6-:70407469-70408030    |
| 13255 | Samd7         | 75953     | 3+:30645285-30656383    |
| 13256 | Sh2d1b1       | 26904     | 1+:172207506-172214810  |
| 13257 | Nadk          | 192185    | 4+:154936512-154965098  |
| 13258 | Tbc1d19       | 67249     | 5+:54200906-54294771    |

|       |               |        |                         |
|-------|---------------|--------|-------------------------|
| 13259 | Rgag1         | 209540 | X+:139536971-139538840  |
| 13260 | 2210011C24Rik | 70134  | 8-:86534900-86536070    |
| 13261 | Aldh7a1       | 110695 | 18-:56685389-56732524   |
| 13262 | Zfp410        | 52708  | 12+:85658071-85684673   |
| 13263 | Chchd5        | 66170  | 2+:128955528-128959845  |
| 13264 | Camk1g        | 215303 | 1-:195172548-195196424  |
| 13265 | MMT00068882   |        | 14+:41370482-41371580   |
| 13266 | Man1c1        | 230815 | 4-:134117734-134259384  |
| 13267 | EG628822      | 628822 | 17-:53726607-53737988   |
| 13268 | 1600015110Rik | 69761  | 6+:48882536-48883679    |
| 13269 | MMT00039476   |        | 11-:29501785-29502542   |
| 13270 | Spag1         | 26942  | 15+:36109122-36165365   |
| 13271 | Idh2          | 269951 | 7-:87239735-87260194    |
| 13272 | Rcan3         | 53902  | 4-:134972304-134981349  |
| 13273 | MMT00033789   |        | 12+:105503304-105506842 |
| 13274 | Qk            | 19317  | 17-:10403051-10512719   |
| 13275 | V1ra3         | 113845 | 6-:89985927-89986835    |
| 13276 | Slc13a1       | 55961  | 6-:24038294-24118092    |
| 13277 | 9530015107Rik | 619310 | 9+:21971843-22005468    |
| 13278 | 0610025J13Rik | 78687  | 4+:97988088-97998482    |
| 13279 | lfitm1        | 68713  | 7+:148154112-148155711  |
| 13280 | MMT00038895   |        | 8-:77798373-77799290    |
| 13281 | Tmcc2         | 68875  | 1-:134252893-134287760  |
| 13282 | 2310005N03Rik | 66359  | 1+:180249289-180252824  |
| 13283 | Zdhhc2        | 70546  | 8+:41509193-41595619    |
| 13284 | Olf128        | 383243 | 17+:38060512-38084543   |
| 13285 | Cd276         | 102657 | 9-:58372105-58388663    |
| 13286 | Slc23a1       | 20522  | 18-:35779059-35786791   |
| 13287 | Dnajb14       | 70604  | 3+:137531123-137571895  |
| 13288 | AA407270      | 102371 | 9-:71352152-71440143    |
| 13289 | Dusp10        | 63953  | 1+:185858333-185898756  |
| 13290 | MMT00047906   |        | 17+:78027607-78068313   |
| 13291 | Ccdc94        | 72886  | 17+:56098596-56107704   |
| 13292 | Sntb2         | 20650  | 8+:109459651-109536882  |
| 13293 | Gsta2         | 14858  | 9-:78178848-78194952    |
| 13294 | MMT00047713   |        | 2-:118419817-118420927  |
| 13295 | EG625054      | 625054 | 17-:79250129-79251571   |
| 13296 | Aim1          | 11630  | 10-:43670440-43724696   |
| 13297 | Emb           | 13723  | 13+:118009552-118062905 |
| 13298 | Ankfn1        | 382543 | 11-:89327359-89430937   |
| 13299 | Areg          | 11839  | 5+:91568813-91575772    |
| 13300 | Pdpn          | 14726  | 4-:142857348-142889313  |
| 13301 | Hey2          | 15214  | 10-:30552165-30562589   |
| 13302 | Bche          | 12038  | 3-:73443777-73506030    |
| 13303 | 4933402E13Rik | 74437  | X+:59543538-59544839    |
| 13304 | Gadd45b       | 17873  | 10+:80392835-80394949   |
| 13305 | Mknk1         | 17346  | 4+:115511840-115550969  |
| 13306 | Cables2       | 252966 | 2-:179993249-179999181  |
| 13307 | Hsd3b4        | 15495  | 3-:98245429-98314448    |
| 13308 | Kit           | 16590  | 5+:75971048-76052744    |
| 13309 | Tgtp          | 21822  | 11-:48871734-48877545   |



|       |               |        |                        |
|-------|---------------|--------|------------------------|
| 13310 | NoI8          | 70930  | 13+:49748444-49774383  |
| 13311 | Prl3c1        | 27372  | 13+:27291192-27295616  |
| 13312 | Syne1         | 64009  | 10+:5277561-5324786    |
| 13313 | MMT00058564   |        | X-:151938548-151939467 |
| 13314 | Tnfrsf25      | 85030  | 4+:151490187-151493947 |
| 13315 | Slc24a3       | 94249  | 2+:145442334-145466095 |
| 13316 | MMT00038617   |        | 13-:84478921-84479766  |
| 13317 | Pi4kb         | 107650 | 3+:94778620-94811099   |
| 13318 | Adamtsl2      | 77794  | 2+:26937901-26964495   |
| 13319 | Gsx1          | 14842  | 5+:148000271-148002520 |
| 13320 | Olfrl56       | 29846  | 4-:43833007-43834310   |
| 13321 | MMT00003602   |        | 14-:86615858-86616158  |
| 13322 | Slc36a4       | 234967 | 9+:15527957-15543232   |
| 13323 | MMT00011678   |        | 6-:72023056-72024126   |
| 13324 | Tmem184a      | 231832 | 5-:140280915-140283666 |
| 13325 | BC043301      | 210104 | 7+:50827958-50847420   |
| 13326 | Trim33        | 94093  | 3+:103083801-103159487 |
| 13327 | Vmn2r95       | 328759 | 17+:18576804-18589286  |
| 13328 | Ly6h          | 23934  | 15-:75395507-75397244  |
| 13329 | Osbp2         | 74309  | 11-:3604079-3763870    |
| 13330 | Lamp2         | 16784  | X-:35758240-35809556   |
| 13331 | MMT00058856   |        | 3+:45081884-45101549   |
| 13332 | Hsbp1         | 68196  | 8+:121868437-121872827 |
| 13333 | MMT00048365   |        | X-:87049908-87051157   |
| 13334 | RabggtA       | 56187  | 14-:56334713-56341013  |
| 13335 | Rnf34         | 80751  | 5+:123300196-123318954 |
| 13336 | MMT00046340   |        | 11-:3544556-3549969    |
| 13337 | Pard3b        | 72823  | 1+:62056877-62391572   |
| 13338 | Mcpt1         | 17224  | 14+:56636800-56639228  |
| 13339 | D630042F21Rik | 330428 | 6+:129462572-129468713 |
| 13340 | BC056923      | 227358 | 1+:93263057-93268147   |
| 13341 | Tnip2         | 231130 | 5-:34838744-34856628   |
| 13342 | Eapp          | 66266  | 12-:55774454-55796806  |
| 13343 | V1rd6         | 81013  | 7-:5959352-5962612     |
| 13344 | 2310002L09Rik | 71886  | 4-:73585274-73596752   |
| 13345 | Mmrn2         | 105450 | 14+:35188648-35217468  |
| 13346 | MMT00052558   | 171266 | 5-:3000139-3001058     |
| 13347 | Abi3          | 66610  | 11-:95693706-95703474  |
| 13348 | Ank3          | 11735  | 10+:68996913-69487702  |
| 13349 | MMT00014600   |        | 8-:107199431-107231509 |
| 13350 | Adcy5         | 224129 | 16+:35156680-35305173  |
| 13351 | Zrsr1         | 22183  | 11+:22872036-22874908  |
| 13352 | Usp38         | 74841  | 8-:83504624-83511579   |
| 13353 | Flrt3         | 71436  | 2-:140484230-140497206 |
| 13354 | MMT00077747   |        | X-:154083345-154089083 |
| 13355 | Foxs1         | 14239  | 2-:152757642-152761001 |
| 13356 | Aldh3b2       | 621603 | 19+:3964465-3981653    |
| 13357 | Rpp14         | 67053  | 14+:8912880-8924348    |
| 13358 | Cyb5r3        | 109754 | 15-:82983925-83002608  |
| 13359 | BC043098      | 214469 | 1-:34869854-34899808   |
| 13360 | 2810006K23Rik | 72650  | 5+:124778101-124791091 |

|       |               |        |                         |
|-------|---------------|--------|-------------------------|
| 13361 | C1qtnf2       | 69183  | 11+:43287773-43299577   |
| 13362 | Ddt           | 13202  | 10-:75233977-75236119   |
| 13363 | Pcmt1         | 18537  | 10-:7350034-7383048     |
| 13364 | Nrf1          | 18181  | 6+:29998052-30101995    |
| 13365 | Pdc           | 20028  | 1+:152166546-152181035  |
| 13366 | Olfr1110      | 258765 | 2-:86975537-86976476    |
| 13367 | MMT00060916   | 624083 | 5-:138160983-138163193  |
| 13368 | Jrk           | 16469  | 15-:74536060-74538296   |
| 13369 | 1110058L19Rik | 68002  | 1-:24002784-24012479    |
| 13370 | MMT00051799   |        | 12-:116358116-116532715 |
| 13371 | Peli2         | 93834  | 14+:48740614-48876497   |
| 13372 | Slc11a1       | 18173  | 1+:74421802-74432626    |
| 13373 | Cacna2d3      | 12294  | 14-:29718128-30535050   |
| 13374 | Wipi1         | 52639  | 11-:109434841-109472695 |
| 13375 | Terf2         | 21750  | 8-:109593833-109620324  |
| 13376 | Alg2          | 56737  | 4-:47482742-47487176    |
| 13377 | Nod1          | 107607 | 6-:54873942-54899755    |
| 13378 | 0610007P08Rik | 76251  | 13+:63916639-64001605   |
| 13379 | Xpnpep1       | 170750 | 19-:53065879-53113086   |
| 13380 | 2900026A02Rik | 243219 | 5-:113519079-113592128  |
| 13381 | Dnm3          | 103967 | 1-:163920359-164161902  |
| 13382 | Bco2          | 170752 | 9-:50341256-50358807    |
| 13383 | Cybb          | 13058  | X-:9015341-9046376      |
| 13384 | Fmo3          | 14262  | 1-:164883930-164914622  |
| 13385 | Stard8        | 236920 | X+:96256066-96268538    |
| 13386 | Crisp4        | 78081  | 1-:18105284-18135985    |
| 13387 | Olfr1093      | 258363 | 2+:86625888-86626855    |
| 13388 | Klra18        | 93970  | 6-:129993762-130017276  |
| 13389 | Six6os1       | 75801  | 12-:73982095-74018752   |
| 13390 | Ddx31         | 227674 | 2+:28695846-28761087    |
| 13391 | Ovch2         | 244199 | 7-:114925483-114932246  |
| 13392 | Pramel7       | 347712 | 2-:87329241-87332575    |
| 13393 | OTTMUSG000000 | 433424 | 2+:44966657-44968822    |
| 13394 | MMT00054980   |        | 13+:8127312-8130100     |
| 13395 | Ube2m         | 22192  | 7-:13620587-13623327    |
| 13396 | MMT00077496   |        | 7+:94012953-94015158    |
| 13397 | Mlycd         | 56690  | 8+:121934085-121934987  |
| 13398 | Ccdc98        | 70681  | 5-:101243228-101244302  |
| 13399 | Slc16a3       | 80879  | 11+:120816560-120820084 |
| 13400 | Haao          | 107766 | 17-:84230495-84246089   |
| 13401 | Prap1         | 22264  | 7+:147279301-147283082  |
| 13402 | MMT00042033   |        |                         |
| 13403 | Wac           | 225131 | 18+:7868830-7927515     |
| 13404 | MMT00082585   |        | 1+:24078764-24079635    |
| 13405 | Rabep2        | 70314  | 7+:133572953-133589414  |
| 13406 | Atp1b2        | 11932  | 11-:69414703-69419019   |
| 13407 | 2310014G06Rik | 654795 | 14-:56515986-56519059   |
| 13408 | MMT00079369   |        | 14+:52689116-52689675   |
| 13409 | Stk38         | 106504 | 17-:29107831-29144882   |
| 13410 | Zfp192        | 93681  | 13-:21618291-21618880   |
| 13411 | Gpr137c       | 70713  | 14+:45840065-45898926   |

|       |               |        |                         |
|-------|---------------|--------|-------------------------|
| 13412 | Fhdc1         | 229474 | 3+:84247942-84248638    |
| 13413 | Cnih2         | 12794  | 19:-5092873-5098418     |
| 13414 | Mrgprh        | 80978  | 17+:13068899-13070708   |
| 13415 | Gucy1b3       | 54195  | 3:-81836848-81878607    |
| 13416 | Tlr6          | 21899  | 5:-65344219-65346821    |
| 13417 | 1700025G04Rik | 69399  | 1:-153739394-153937379  |
| 13418 | Lgi4          | 243914 | 7+:31844953-31855761    |
| 13419 | Stxbp6        | 217517 | 12:-45956208-46175340   |
| 13420 | MMT00065419   |        | 13+:88687340-88687792   |
| 13421 | Ahctf1        | 226747 | 1:-181658339-181670214  |
| 13422 | Usp3          | 235441 | 9:-66366146-66440896    |
| 13423 | ENSMUSG00000  | 791337 | 15:-54943897-54945279   |
| 13424 | MMT00039710   |        | 6:-67904198-67904684    |
| 13425 | Aasdh         | 231326 | 5:-77304474-77331009    |
| 13426 | BC052040      | 399568 | 2+:115407505-115602766  |
| 13427 | MMT00017298   |        | 8+:36865261-36878007    |
| 13428 | Gpr20         | 239530 | 15:-73525891-73544267   |
| 13429 | 1700063117Rik | 68223  | 7+:138478055-138480229  |
| 13430 | MMT00014656   |        | 15+:101334252-101439438 |
| 13431 | MMT00038058   |        | 13+:83971918-83973422   |
| 13432 | Nr2e3         | 23958  | 9:-59790957-59797748    |
| 13433 | Tubd1         | 56427  | 11+:86358759-86380701   |
| 13434 | Bcl2l11       | 12125  | 2+:127954368-127984064  |
| 13435 | Cdk6          | 12571  | 5+:3344311-3522225      |
| 13436 | Dsg1a         | 13510  | 18+:20469403-20478833   |
| 13437 | Zbtb33        | 56805  | X+:35543017-35547717    |
| 13438 | Btg3          | 12228  | 16:-78360106-78373669   |
| 13439 | MMT00061352   |        | 3+:30873552-30873981    |
| 13440 | Igh-VX24      | 195176 | 12:-114826474-114826943 |
| 13441 | Lipa          | 16889  | 19:-34567318-34599337   |
| 13442 | 4930500O05Rik | 242409 | 4+:43682158-43704242    |
| 13443 | MMT00053568   |        | 5:-96802525-96930214    |
| 13444 | Lrrcc1        | 71710  | 3+:14533786-14572657    |
| 13445 | Stk32b        | 64293  | 5:-37838066-38108392    |
| 13446 | Elof1         | 66126  | 9:-21917433-21921616    |
| 13447 | Optn          | 71648  | 2:-4967021-4975762      |
| 13448 | Brunol4       | 108013 | 18:-25645293-25696260   |
| 13449 | Tmem103       | 72341  | 9+:110207699-110224605  |
| 13450 | Slc26a9       | 320718 | 1+:133640596-133666373  |
| 13451 | Tbcb          | 66411  | 7:-31009158-31016797    |
| 13452 | D1Ert471e     | 27877  | 1+:168199437-168238064  |
| 13453 | Vmn2r18       | 632671 | 5:-152364236-152389509  |
| 13454 | Maged2        | 80884  | X:-147241252-147248825  |
| 13455 | Cenpe         | 229841 | 3+:134875581-134936484  |
| 13456 | Coq6          | 217707 | 12+:85702944-85717057   |
| 13457 | Hexa          | 15211  | 9+:59387379-59412914    |
| 13458 | BC050210      | 381337 | 1:-36620931-36665376    |
| 13459 | Rgs4          | 19736  | 1:-171673799-171677654  |
| 13460 | Arl6ip4       | 65105  | 5+:124566116-124568204  |
| 13461 | MMT00003593   |        | 14+:8633670-8635295     |
| 13462 | Fbxo3         | 57443  | 2+:103868016-103895190  |

|       |               |           |                         |
|-------|---------------|-----------|-------------------------|
| 13463 | Mcrs1         | 51812     | 15-:99073350-99078996   |
| 13464 | Mc4r          | 17202     | 18-:67018697-67092999   |
| 13465 | 1700008P02Rik | 69347     | 3-:6615422-6620445      |
| 13466 | MMT00046952   |           | 2-:87006843-87007477    |
| 13467 | Ndufb7        | 66916     | 8+:86094726-86095522    |
| 13468 | Zfp518b       | 100515    | 5-:39060538-39062220    |
| 13469 | Ccr1          | 252837    | 9-:104000473-104029263  |
| 13470 | Actr3         | 74117     | 1-:127289488-127332305  |
| 13471 | Cln8          | 26889     | 8+:14889045-14897938    |
| 13472 | B230219D22Rik | 78521     | 13+:55794446-55804860   |
| 13473 | Nhs1          | 215819    | 10+:18127480-18232316   |
| 13474 | Myct1         | 68632     | 10-:4740984-4752760     |
| 13475 | Morn2         | 378462    | 17+:80689549-80696815   |
| 13476 | Rin3          | 217835    | 12+:103564004-103629065 |
| 13477 | RP23-248K2.4  | 210535    | 11+:46337752-46349117   |
| 13478 | Olfr1125      | 259030    | 2+:87274645-87275600    |
| 13479 | 4632433K11Rik | 77043     | 7+:4985679-4988370      |
| 13480 | Zdhhc21       | 68268     | 4-:82450855-82505446    |
| 13481 | Gpnmb         | 93695     | 6+:48986632-49006779    |
| 13482 | Nxph4         | 104080    | 10-:126962525-126971615 |
| 13483 | MMT00017256   |           | 11+:4463600-4464526     |
| 13484 | Olfr1048      | 259016    | 2-:86076029-86076990    |
| 13485 | MMT00022214   |           | 6+:149310022-149312645  |
| 13486 | Muc5b         | 74180     | 7+:148876260-149058989  |
| 13487 | A230051G13Rik | 216792    | 11-:58970557-58977231   |
| 13488 | Art4          | 109978    | 6-:136796971-136806121  |
| 13489 | D230025D16Rik | 234678    | 8+:107749204-107776949  |
| 13490 | Vps35         | 65114     | 8-:87784292-87823415    |
| 13491 | Plk2          | 20620     | 13+:111185267-111191055 |
| 13492 | Arrdc1        | 215705    | 2-:24780872-24790723    |
| 13493 | Ring1         | 19763     | 17-:34158154-34160391   |
| 13494 | Nrcam         | 319504    | 12+:45633555-45701150   |
| 13495 | Abcb10        | 56199     | 8-:126476360-126506752  |
| 13496 | H1fnt         | 70069     | 15-:98086413-98087697   |
| 13497 | Pax8          | 18510     | 2-:24276080-24331076    |
| 13498 | Aqp9          | 64008     | 9-:70960010-71010893    |
| 13499 | St7l          | 229681    | 3+:104667477-104729823  |
| 13500 | OTTMUSG000000 | 100038464 | 3-:96361207-96361818    |
| 13501 | Prkx          | 19108     | X-:75006337-75041320    |
| 13502 | Tmem198       | 319998    | 1+:75479664-75482279    |
| 13503 | ENSMUSG000000 | 100038757 | 16-:89041165-89041697   |
| 13504 | Lair1         | 52855     | 7-:3960607-4014790      |
| 13505 | 1700018P08Rik | 73330     | 8+:119013641-119014823  |
| 13506 | Gm1815        | 211895    | 8-:42742948-42920825    |
| 13507 | Spats1        | 71020     | 17-:45585885-45611952   |
| 13508 | Ormdl1        | 227102    | 1+:53353973-53367088    |
| 13509 | Gm1323        | 383710    | 2+:68406898-68408885    |
| 13510 | MMT00078434   | 654470    | 5-:122691531-122714453  |
| 13511 | Aytl1b        | 70902     | 5+:107860567-107864059  |
| 13512 | Tmem144       | 70652     | 3-:79617600-79646601    |
| 13513 | Trim25        | 217069    | 11+:88860769-88881607   |

|       |               |        |                         |
|-------|---------------|--------|-------------------------|
| 13514 | Apol9b        | 71898  | 15+:77559508-77566811   |
| 13515 | Crabp2        | 12904  | 3+:87752609-87757294    |
| 13516 | Fibcd1        | 98970  | 2-:31671857-31701302    |
| 13517 | MMT00015234   |        | 3-:138240292-138241371  |
| 13518 | Pole          | 18973  | 5+:110715406-110766474  |
| 13519 | Sgcg          | 24053  | 14-:61840280-61877261   |
| 13520 | MMT00029899   |        | 12+:53179996-53180611   |
| 13521 | Ears2         | 67417  | 7-:129180728-129210558  |
| 13522 | Sfn5          | 327978 | 11+:82769763-82776439   |
| 13523 | Olf1179       | 258919 | 2-:88242169-88243089    |
| 13524 | EG434168      | 434168 | 7-:46701201-46701635    |
| 13525 | Dgka          | 13139  | 10-:128157451-128174146 |
| 13526 | Tnfrsf10b     | 21933  | 14+:70167338-70183142   |
| 13527 | Ctss          | 13040  | 3+:95330765-95360316    |
| 13528 | Capn12        | 60594  | 7+:29666674-29678605    |
| 13529 | Abi3bp        | 320712 | 16+:56574500-56690240   |
| 13530 | Gm93          | 225497 | 18+:50441305-50442675   |
| 13531 | Sox30         | 214105 | 11+:45793955-45805613   |
| 13532 | MMT00075762   |        | 17+:32059273-32088036   |
| 13533 | Col27a1       | 373864 | 4+:62992026-62995172    |
| 13534 | MMT00001967   |        | 14-:87841015-87841533   |
| 13535 | Rgs18         | 64214  | 1-:146600436-146622558  |
| 13536 | Vmn2r99       | 665376 | 17+:18831062-18844113   |
| 13537 | Hbb-y         | 15135  | 7-:111000388-111001666  |
| 13538 | Otc           | 18416  | X+:9829558-9897379      |
| 13539 | Tcfap2d       | 226896 | 1+:19098327-19156405    |
| 13540 | 6330409N04Rik | 66674  | 14-:62152713-62175725   |
| 13541 | Nphs1         | 54631  | 7+:31245234-31271734    |
| 13542 | Gpn3          | 68080  | 5+:122822516-122832776  |
| 13543 | Zfp617        | 170938 | 8+:74446762-74457899    |
| 13544 | Parp8         | 52552  | 13-:117643725-117666399 |
| 13545 | Tmie          | 20776  | 9-:110768550-110782587  |
| 13546 | MMT00010242   |        | 14-:33080134-33080921   |
| 13547 | Sync          | 68828  | 4+:128964928-128985630  |
| 13548 | MMT00032336   |        | 7-:3935393-3935789      |
| 13549 | Acad9         | 229211 | 3+:35964988-35990834    |
| 13550 | Mbni2         | 105559 | 14+:120724015-120830918 |
| 13551 | Zfp623        | 78834  | 15+:75771484-75779830   |
| 13552 | Slc39a9       | 328133 | 12+:81745496-81779341   |
| 13553 | Smox          | 228608 | 2+:131317678-131350908  |
| 13554 | Aqr           | 11834  | 2-:113926895-114001074  |
| 13555 | Nlrc5         | 434341 | 8+:97027982-97030650    |
| 13556 | Nlrc5         | 434341 | 8+:96999594-97021764    |
| 13557 | Olf11443      | 258693 | 19+:12754599-12755537   |
| 13558 | Klk7          | 23993  | 7+:51066836-51071435    |
| 13559 | Ctag2         | 70062  | X+:62300815-62302191    |
| 13560 | Nucb2         | 53322  | 7+:123647882-123684068  |
| 13561 | Dexi          | 58239  | 16-:10530300-10542848   |
| 13562 | Irak4         | 266632 | 15+:94374083-94387384   |
| 13563 | 9930023K05Rik | 226245 | 19+:56536134-56561215   |
| 13564 | Qrsl1         | 76563  | 10-:43593982-43621632   |

|       |               |        |                         |
|-------|---------------|--------|-------------------------|
| 13565 | Fcho2         | 218503 | 13-:99493362-99576327   |
| 13566 | EG544888      | 544888 | 12+:104521239-104554926 |
| 13567 | 1200011I18Rik | 67467  | 14-:76488238-76510602   |
| 13568 | Cad           | 69719  | 5+:31357090-31380851    |
| 13569 | 1190003M12Rik | 68888  | 6-:87333249-87338849    |
| 13570 | Olfr171       | 258960 | 16-:19624250-19625194   |
| 13571 | Samd8         | 67630  | 14+:22569752-22612510   |
| 13572 | C85627        | 546161 | 9-:109579246-109591430  |
| 13573 | MMT00075852   |        | 5+:67366914-67375378    |
| 13574 | Pth2r         | 213527 | 1+:65357832-65435811    |
| 13575 | Epo           | 13856  | 5-:137924313-137926973  |
| 13576 | Zfp820        | 75424  | 17-:21956087-21958683   |
| 13577 | Cd1d2         | 12480  | 3+:86790479-86793702    |
| 13578 | Asph          | 65973  | 4-:9376231-9596231      |
| 13579 | 1700020D05Rik | 75555  | 19-:5502867-5503751     |
| 13580 | Adamts16      | 271127 | 13-:70877361-70980688   |
| 13581 | Srxn1         | 76650  | 2+:151931470-151935536  |
| 13582 | Tnnt3         | 21957  | 7+:149684747-149701908  |
| 13583 | EG545306      | 545306 | 1-:16757094-16758874    |
| 13584 | MMT00053640   |        | 10-:87733607-87734130   |
| 13585 | Nckap1l       | 105855 | 15+:103284273-103329240 |
| 13586 | Tsfm          | 66399  | 10-:126459511-126467860 |
| 13587 | MMT00016619   |        | 7+:12197581-12199457    |
| 13588 | MMT00042387   |        | 14-:105596999-105600644 |
| 13589 | Ifnab         | 15974  | 4-:88336559-88337131    |
| 13590 | Mcart6        | 67062  | X-:133549792-133572842  |
| 13591 | Xrcc2         | 57434  | 5-:25197818-25211609    |
| 13592 | Tceal3        | 594844 | X+:133200998-133202913  |
| 13593 | 4933402D24Rik | 74426  | 1-:63801480-63815843    |
| 13594 | Ppcdc         | 66812  | 9-:57260484-57287930    |
| 13595 | Creb5         | 231991 | 6+:53554454-53644364    |
| 13596 | Zfp37         | 22696  | 4-:61852030-61853452    |
| 13597 | Rgs6          | 50779  | 12+:84086280-84259798   |
| 13598 | Reg1          | 19692  | 6+:78375976-78378660    |
| 13599 | Hbs1l         | 56422  | 10+:21027156-21088699   |
| 13600 | 1700023B02Rik | 66935  | 2-:73122123-73143964    |
| 13601 | Rnasel        | 24014  | 1+:155599113-155609750  |
| 13602 | Actl7b        | 11471  | 4-:56752971-56754228    |
| 13603 | Bahd1         | 228536 | 2+:118741623-118748308  |
| 13604 | Slc16a13      | 69309  | 11-:70030206-70034540   |
| 13605 | Osbpl10       | 74486  | 9+:114887916-115142876  |
| 13606 | Bre           | 107976 | 5+:32000422-32387112    |
| 13607 | Ifna1         | 15962  | 4+:88495990-88496559    |
| 13608 | Lrrc6         | 54562  | 15-:66211551-66332403   |
| 13609 | Olfr659       | 259052 | 7+:111819217-111820185  |
| 13610 | Btrc          | 12234  | 19+:45438257-45603783   |
| 13611 | Rnf113a2      | 66381  | 12+:85758149-85759527   |
| 13612 | Ihpk3         | 271424 | 17-:27281241-27304659   |
| 13613 | Rptn          | 20129  | 3+:93197620-93203364    |
| 13614 | Zfp60         | 22718  | 7+:28521974-28535040    |
| 13615 | Arl16         | 70317  | 11-:120326195-120328924 |

|       |               |           |                         |
|-------|---------------|-----------|-------------------------|
| 13616 | Mical3        | 194401    | 6-:120884016-120992277  |
| 13617 | Acin1         | 56215     | 14-:55261004-55305768   |
| 13618 | MMT00032504   |           | X+:11444390-11444829    |
| 13619 | Bckdha        | 12039     | 7-:26414964-26443757    |
| 13620 | Stard5        | 170460    | 7+:90780550-90789078    |
| 13621 | Pkhd1l1       | 192190    | 15+:44393316-44399908   |
| 13622 | MMT00058973   |           | 6-:55276137-55278295    |
| 13623 | Chit1         | 71884     | 1+:136035217-136048117  |
| 13624 | Ubc           | 22190     | 5-:125866427-125868631  |
| 13625 | Apobec1       | 11810     | 6-:122527809-122541380  |
| 13626 | RP23-395H4.4  | 13706     | 4-:141370877-141381918  |
| 13627 | Flrt1         | 396184    | 19-:7169646-7171670     |
| 13628 | Ehd2          | 259300    | 7-:16533580-16552887    |
| 13629 | Psm2          | 21762     | 16+:20651777-20663485   |
| 13630 | Cdkn1a        | 12575     | 17+:29235151-29236507   |
| 13631 | Gbbp1l1       | 77110     | 4+:116265626-116266309  |
| 13632 | Spock2        | 94214     | 10+:59569002-59594377   |
| 13633 | Peli3         | 240518    | 19-:4931858-4943065     |
| 13634 | Alpk2         | 225638    | 18-:65508852-65528037   |
| 13635 | Ttc25         | 74407     | 11+:100407015-100433276 |
| 13636 | Hist3h2bb     | 382522    | 11-:58767550-58768014   |
| 13637 | Lin9          | 72568     | 1+:182578425-182620819  |
| 13638 | Il11ra1       | 16157     | 4+:41709230-41716346    |
| 13639 | Cnga1         | 12788     | 5-:72994937-73035513    |
| 13640 | Atp6v0a1      | 11975     | 11+:100870795-100925025 |
| 13641 | Nfe2l2        | 18024     | 2-:75513570-75542604    |
| 13642 | Pcdhb4        | 93875     | 18+:37467292-37469645   |
| 13643 | Dlec1         | 320256    | 9+:119011683-119056811  |
| 13644 | Acsl3         | 74205     | 1+:78654387-78704313    |
| 13645 | Dek           | 110052    | 13-:47178631-47201197   |
| 13646 | MMT00034706   |           | 2+:132487977-132488328  |
| 13647 | Msx1          | 17701     | 5-:38211731-38215695    |
| 13648 | Dap           | 223453    | 15+:31154187-31204090   |
| 13649 | MMT00005723   |           | 1-:128946635-128947324  |
| 13650 | Cntn1         | 12805     | 15+:91958624-92170542   |
| 13651 | Osm           | 18413     | 11+:4138408-4140012     |
| 13652 | Ednra         | 13617     | 8-:80186110-80248351    |
| 13653 | MMT00021989   |           | 5+:30366014-30366675    |
| 13654 | Stat1         | 20846     | 1+:52179434-52216163    |
| 13655 | Foxk1         | 17425     | 5+:142877469-142936777  |
| 13656 | Ly86          | 17084     | 13+:37437213-37510813   |
| 13657 | MMT00065461   | 100040887 | 1+:100160277-100161054  |
| 13658 | Dhx30         | 72831     | 9-:109986824-110018086  |
| 13659 | Mapk15        | 332110    | 15+:75824257-75911156   |
| 13660 | Atp5f1        | 11950     | 3-:105745617-105762193  |
| 13661 | A430041B07Rik | 328108    | 12+:66066963-66123559   |
| 13662 | Magee2        | 272790    | X-:102050811-102052382  |
| 13663 | Sgip1         | 73094     | 4+:102432967-102643781  |
| 13664 | AU017455      | 105590    | 14-:79612461-79614164   |
| 13665 | Reg3g         | 19695     | 6-:78416261-78418868    |
| 13666 | MMT00039363   |           |                         |

|       |               |        |                          |
|-------|---------------|--------|--------------------------|
| 13667 | Cbs           | 12411  | 17-:31749589-31774086    |
| 13668 | Skap2         | 54353  | 6-:51809164-51962463     |
| 13669 | 5730410E15Rik | 319613 | 15-:44577786-44583734    |
| 13670 | Pa2g4         | 18813  | 10-:127995698-128003004  |
| 13671 | MMT00014009   |        | 19+ :15424103-15437161   |
| 13672 | Dnm3          | 103967 | 1-:164212697-164408127   |
| 13673 | G6pc3         | 68401  | 11+ :102050930-102055398 |
| 13674 | lfngr2        | 15980  | 16+ :91547328-91563402   |
| 13675 | C530008M07Rik | 208994 | 9-:76303579-76393590     |
| 13676 | MMT00010979   |        | 2+ :151273791-151273860  |
| 13677 | Tinagl        | 94242  | 4-:129842962-129852366   |
| 13678 | Vmn2r63       | 435975 | 7-:49867874-50183954     |
| 13679 | Loxhd1        | 240411 | 18+ :77620275-77623825   |
| 13680 | Slc12a9       | 83704  | 5-:137756179-137773864   |
| 13681 | C79407        | 217653 | 12-:66233724-66273586    |
| 13682 | BC051142      | 407788 | 17+ :34553408-34597665   |
| 13683 | 9030420J04Rik | 71544  | 9-:8997098-9006605       |
| 13684 | Abcd4         | 19300  | 12-:85943618-85958320    |
| 13685 | Ppp1r9a       | 243725 | 6+ :4853675-4856854      |
| 13686 | Ttll7         | 70892  | 3+ :146515368-146578758  |
| 13687 | Mal           | 17153  | 2-:127458963-127481907   |
| 13688 | Ppa1          | 67895  | 10+ :61111367-61136911   |
| 13689 | MMT00081177   |        | 1-:6370617-6373187       |
| 13690 | Pdgfa         | 18590  | 5-:139452930-139470786   |
| 13691 | Snx29         | 74478  | 16+ :11347963-11403925   |
| 13692 | MMT00082247   |        | 2-:170779646-170780383   |
| 13693 | Copb2         | 50797  | 9+ :98464062-98488802    |
| 13694 | Exdl1         | 241624 | 2-:119364483-119373967   |
| 13695 | Tlr3          | 142980 | 8-:46481719-46494053     |
| 13696 | Dtl           | 76843  | 1-:193362745-193399395   |
| 13697 | Arhgap26      | 71302  | 18+ :39257282-39531587   |
| 13698 | Pacsin1       | 23969  | 17+ :27792626-27848051   |
| 13699 | Fzr1          | 56371  | 10-:80829624-80841115    |
| 13700 | Olfml2a       | 241327 | 2+ :38813205-38819269    |
| 13701 | Butr1         | 192194 | 11+ :58731558-58740467   |
| 13702 | Sgk1          | 20393  | 10+ :21602237-21710209   |
| 13703 | MMT00011278   |        | 2-:156172539-156173733   |
| 13704 | MMT00048234   |        | 9-:66207972-66208407     |
| 13705 | Osbpl1a       | 64291  | 18-:12913842-13021423    |
| 13706 | Vcpip1        | 70675  | 1-:9712774-9738406       |
| 13707 | MMT00003565   |        | 4-:25793463-25795602     |
| 13708 | Aldoa         | 11674  | 7-:133938748-133942613   |
| 13709 | Wdfy3         | 72145  | 5-:102390134-102410608   |
| 13710 | MMT00013185   |        | 11-:95198261-95199922    |
| 13711 | Chuk          | 12675  | 19-:44147825-44181932    |
| 13712 | Lypd5         | 76942  | 7+ :25136535-25139268    |
| 13713 | MMT00005343   |        | 6+ :10832434-10838917    |
| 13714 | Igfals        | 16005  | 17+ :25016893-25018692   |
| 13715 | Snx33         | 235406 | 9-:56765001-56774851     |
| 13716 | D5Erttd579e   | 320661 | 5-:36943139-37064482     |
| 13717 | Slc6a6        | 21366  | 6+ :91648994-91705130    |



|       |               |           |                         |
|-------|---------------|-----------|-------------------------|
| 13718 | 9130209A04Rik | 77668     | 18+:47613734-47630522   |
| 13719 | Ak5           | 229949    | 3-:152126502-152330823  |
| 13720 | Serpina11     | 380780    | 12-:105218464-105228163 |
| 13721 | Anapc7        | 56317     | 5+:122872489-122894460  |
| 13722 | MMT00037048   |           |                         |
| 13723 | MMT00042104   |           | 4-:34887475-34888656    |
| 13724 | MMT00002755   |           | 7+:90560486-90562804    |
| 13725 | Dnaic2        | 432611    | 11+:114594206-114618558 |
| 13726 | Nlrc3         | 268857    | 16-:3948868-3954641     |
| 13727 | Art2b         | 11872     | 7-:108727373-108729675  |
| 13728 | Slc12a5       | 57138     | 2+:164793853-164822761  |
| 13729 | Smap2         | 69780     | 4-:120640993-120642227  |
| 13730 | Scin          | 20259     | 12-:40786359-40860770   |
| 13731 | 2210408F21Rik | 73652     | 6+:31170357-31286857    |
| 13732 | Tpm4          | 326618    | 8+:74659176-74677031    |
| 13733 | Setd3         | 52690     | 12-:109344641-109405608 |
| 13734 | Srp9          | 27058     | 1+:184054941-184061921  |
| 13735 | Rab3d         | 19340     | 9-:21714927-21720376    |
| 13736 | Rraga         | 68441     | 4+:86178332-86222763    |
| 13737 | Igk-V34       | 16118     | 6+:68889570-68890084    |
| 13738 | Nek5          | 330721    | 8-:23207928-23224331    |
| 13739 | Olf103        | 258830    | 17-:37473235-37474175   |
| 13740 | MMT00022502   |           | 2-:155024351-155025012  |
| 13741 | Hspa4l        | 18415     | 3+:40549540-40593502    |
| 13742 | 1700024P16Rik | 242594    | 4+:104621278-104651691  |
| 13743 | MMT00013696   |           | 4-:91773560-91773816    |
| 13744 | Ptpdc1        | 218232    | 13-:48674578-48688681   |
| 13745 | Slc35e4       | 103710    | 11-:3807022-3813971     |
| 13746 | E330013P04Rik | 107376    | 19-:60229174-60230571   |
| 13747 | Entpd2        | 12496     | 2+:25251477-25256837    |
| 13748 | MMT00017889   |           | 6-:133881935-133882427  |
| 13749 | Parp9         | 80285     | 16+:35939125-35972689   |
| 13750 | MMT00070601   |           | 14+:54136603-54139601   |
| 13751 | Klk6          | 19144     | 7+:51080819-51087156    |
| 13752 | Map3k8        | 26410     | 18-:4331324-4352951     |
| 13753 | MMT00042249   |           | 3-:104221656-104222184  |
| 13754 | Olf173        | 259002    | 16-:58796676-58797640   |
| 13755 | 1110001D15Rik | 68553     | 9-:105791410-105983039  |
| 13756 | MMT00012630   |           | 14-:85157910-85158920   |
| 13757 | Cdon          | 57810     | 9+:35259660-35311928    |
| 13758 | Ubt2          | 327900    | 11+:32355476-32418710   |
| 13759 | Olf1683       | 259047    | 7-:112291865-112292823  |
| 13760 | Lrp6          | 16974     | 6-:134400226-134516800  |
| 13761 | 1700021P22Rik | 75538     | 7+:51751961-51756503    |
| 13762 | Hspa1l        | 15482     | 17+:35109676-35116167   |
| 13763 | Dcn           | 13179     | 10+:96942216-96980365   |
| 13764 | Plcz1         | 114875    | 6-:139938242-139989952  |
| 13765 | RP23-45P4.1   | 100043757 | 2+:174469034-174472159  |
| 13766 | Slc7a9        | 30962     | 7+:36234197-36251017    |
| 13767 | Kcnk15        | 241769    | 2+:163683917-163684609  |
| 13768 | Mrps10        | 64657     | 17+:47505834-47515629   |

|       |               |        |                         |
|-------|---------------|--------|-------------------------|
| 13769 | Sap18         | 20220  | 14+:58417119-58420914   |
| 13770 | D5Wsu178e     | 28042  | 5+:30559204-30592171    |
| 13771 | Slc23a3       | 22626  | 1-:75122117-75130464    |
| 13772 | Zfp319        | 79233  | 8-:97851729-97853473    |
| 13773 | Plunc         | 18843  | 2+:153968620-153974952  |
| 13774 | Gdf15         | 23886  | 8-:73153292-73155994    |
| 13775 | MMT00051108   |        | 2+:129203160-129205119  |
| 13776 | D12Erttd551e  | 52635  | 12+:117519723-117610694 |
| 13777 | MMT00015864   | 668030 | 2-:175918911-176407018  |
| 13778 | MMT00065405   |        | 15-:81673737-81674182   |
| 13779 | 5830404H04Rik | 207781 | 16-:98078375-98144218   |
| 13780 | Pilra         | 231805 | 5-:138264513-138276946  |
| 13781 | Dnahc6        | 330355 | 6-:73141570-73155948    |
| 13782 | AV249152      | 216560 | 11+:21472320-21798637   |
| 13783 | MMT00003005   |        | 7-:112274996-112276973  |
| 13784 | Arid1b        | 239985 | 17+:5242826-5345304     |
| 13785 | MMT00032015   |        | 18+:36769557-36770424   |
| 13786 | Tha1          | 71776  | 11-:117729264-117734788 |
| 13787 | Kcnj9         | 16524  | 1-:174252217-174259413  |
| 13788 | Ankrd12       | 106585 | 17-:66386137-66426429   |
| 13789 | H2-Q8         | 15019  | 17+:35531070-35531975   |
| 13790 | Olf909        | 258873 | 9+:38331318-38332252    |
| 13791 | Zfp330        | 30932  | 8-:85287519-85298025    |
| 13792 | Slc25a35      | 71998  | 11+:68781632-68786017   |
| 13793 | Wrb           | 71446  | 16+:96367025-96376382   |
| 13794 | Higd1a        | 56295  | 9-:121758658-121766649  |
| 13795 | MMT00010159   |        | 4+:26369707-26370215    |
| 13796 | Lrch2         | 210297 | X-:143907263-143988395  |
| 13797 | MMT00046285   |        | 2+:83230285-83230752    |
| 13798 | 3110001I20Rik | 70354  | 2-:125563267-125565690  |
| 13799 | 9430031J16Rik | 241134 | 1+:81073777-81084068    |
| 13800 | Lrp5          | 16973  | 19-:3584876-3686554     |
| 13801 | Adh4          | 26876  | 3+:138078472-138093856  |
| 13802 | MMT00007459   |        | 4-:92932323-92932982    |
| 13803 | Plekhm2       | 69582  | 4-:141181649-141219835  |
| 13804 | Gm281         | 238939 | 14-:14662151-14746954   |
| 13805 | Eftud1        | 101592 | 7+:89797135-89926362    |
| 13806 | Speer3        | 71026  | 5+:13791630-13796820    |
| 13807 | B3galt4       | 54218  | 17-:34086856-34088411   |
| 13808 | Svs7          | 56872  | 9-:35415171-35419431    |
| 13809 | MMT00066585   | 57748  | 13-:94204888-94269387   |
| 13810 | 1110036O03Rik | 66180  | 11-:100269770-100276207 |
| 13811 | Fkbp7         | 14231  | 2-:76501103-76511127    |
| 13812 | MMT00072366   |        | 4-:94705730-94706343    |
| 13813 | Ktelc1        | 224143 | 16-:38525157-38550312   |
| 13814 | Thy1          | 21838  | 9+:43638105-43698878    |
| 13815 | Hoxd9         | 15438  | 2+:74536112-74537477    |
| 13816 | MMT00015290   |        | 4-:147943224-147943838  |
| 13817 | MMT00008817   |        | Y+:627407-630311        |
| 13818 | Lce1g         | 66195  | 3-:92554072-92556260    |
| 13819 | Il1a          | 16175  | 2-:129126448-129130567  |

|       |               |        |                         |
|-------|---------------|--------|-------------------------|
| 13820 | Pwwp2a        | 70802  | 11+:43495903-43536107   |
| 13821 | 10-Mar        | 632687 | 11-:105262962-105315657 |
| 13822 | Rpl41         | 67945  | 10-:127985334-127986030 |
| 13823 | Olfr1043      | 258570 | 2-:86002160-86003104    |
| 13824 | 1700012B07Rik | 69324  | 11-:109649602-109689341 |
| 13825 | Myoz1         | 59011  | 14-:21468329-21475702   |
| 13826 | Melk          | 17279  | 4+:44313851-44377166    |
| 13827 | Olfr1361      | 258534 | 13-:21750236-21750969   |
| 13828 | Armc2         | 213402 | 10-:41636625-41691006   |
| 13829 | MMT00014696   |        | 19+:29047534-29048567   |
| 13830 | MMT00030474   |        | 8-:18656608-18665326    |
| 13831 | Rhobtb2       | 246710 | 14-:70212223-70213520   |
| 13832 | MMT00077132   |        |                         |
| 13833 | Trap1         | 68015  | 16-:4039976-4077810     |
| 13834 | MMT00016791   |        | 10+:81630034-81630162   |
| 13835 | Lama1         | 16772  | 17+:68046626-68171989   |
| 13836 | Bsnd          | 140475 | 4-:106156064-106164845  |
| 13837 | MMT00073750   |        | 1+:163751993-163753167  |
| 13838 | Erbp2ip       | 59079  | 13-:104608872-104623709 |
| 13839 | Gypc          | 71683  | 18-:32687977-32719517   |
| 13840 | Isg20         | 57444  | 7+:86059232-86065047    |
| 13841 | Mxd4          | 17122  | 5-:34519640-34530222    |
| 13842 | Aurkaip1      | 66077  | 4+:155205754-155207166  |
| 13843 | Rfesd         | 218341 | 13-:76139969-76145734   |
| 13844 | Trib1         | 211770 | 15+:59480624-59487539   |
| 13845 | Ccdc28a       | 215814 | 10-:17936732-17954784   |
| 13846 | Zmym2         | 76007  | 14+:57506627-57579738   |
| 13847 | Tmigd1        | 66601  | 11+:76718046-76730088   |
| 13848 | MMT00005901   | 329358 | 2-:24999273-25000843    |
| 13849 | Klhl20        | 226541 | 1-:163019164-163020155  |
| 13850 | Tmem165       | 21982  | 5+:76612974-76638269    |
| 13851 | Zfp275        | 27081  | X+:70587973-70604301    |
| 13852 | Rasd2         | 75141  | 8+:77737071-77746627    |
| 13853 | Ccdc142       | 243510 | 6+:83052554-83057955    |
| 13854 | Akap7         | 432442 | 10-:24890858-24919851   |
| 13855 | Olfr618       | 259049 | 7+:110745831-110746787  |
| 13856 | Mapk9         | 26420  | 11+:49667761-49696812   |
| 13857 | MMT00010823   |        | 13-:21472651-21472999   |
| 13858 | Myl1          | 17901  | 1-:66970867-66991718    |
| 13859 | Lmo7          | 380928 | 14+:102129371-102318865 |
| 13860 | Cpt1b         | 12895  | 15-:89246835-89255778   |
| 13861 | Ccdc60        | 269693 | 5-:116584036-116586461  |
| 13862 | Myh15         | 667772 | 16+:49065068-49197003   |
| 13863 | Olfr1188      | 258921 | 2+:88399627-88400565    |
| 13864 | Larp1         | 73158  | 11+:57822979-57875537   |
| 13865 | Papd5         | 214627 | 8+:90767083-90783624    |
| 13866 | Nkx3-1        | 18095  | 14+:69808748-69812715   |
| 13867 | Sgcb          | 24051  | 5-:74026498-74038983    |
| 13868 | Phlpp         | 98432  | 1+:107945669-108098892  |
| 13869 | 6330442E10Rik | 268567 | 12-:80062782-80108326   |
| 13870 | 4921521F21Rik | 70861  | 1-:65059262-65079321    |

|       |               |        |                         |
|-------|---------------|--------|-------------------------|
| 13871 | 2300006N05Rik | 69464  | 11:-99670391-99671206   |
| 13872 | Cyb5r2        | 320635 | 7:-114893483-114900776  |
| 13873 | Cdkn2aip      | 70925  | 8:-48795578-48799530    |
| 13874 | Prkd1         | 18760  | 12:-51442707-51750085   |
| 13875 | Hsd17b10      | 15108  | X+:148436433-148438982  |
| 13876 | C530008M17Rik | 320827 | 5+:77239012-77271614    |
| 13877 | Btnl9         | 237754 | 11:-48982337-48996595   |
| 13878 | MMT00061131   | 331475 | X+:99273641-99278721    |
| 13879 | Anp32b        | 67628  | 4+:46463986-46485395    |
| 13880 | MMT00057535   | 631010 | 17:-22172839-22177526   |
| 13881 | Vmn2r100      | 627537 | 17+:19658845-19669024   |
| 13882 | Mcm3          | 17215  | 1:-20792640-20810358    |
| 13883 | EG627788      | 627788 | 19:-28837489-28838019   |
| 13884 | Aven          | 74268  | 2+:112333120-112471227  |
| 13885 | Clec7a        | 56644  | 6:-129411610-129422790  |
| 13886 | Hnrpd1        | 50926  | 5:-100463746-100467948  |
| 13887 | Rfx2          | 19725  | 17:-56915467-56970386   |
| 13888 | MMT00063459   | 329633 | 3+:49158747-49171281    |
| 13889 | Agpat2        | 67512  | 2:-26448579-26459748    |
| 13890 | Olf1263       | 258790 | 2+:89855088-89856007    |
| 13891 | Aqp3          | 11828  | 4:-41039838-41045202    |
| 13892 | Zfp516        | 329003 | 18+:83125094-83174661   |
| 13893 | Slc6a2        | 20538  | 8+:95485146-95520980    |
| 13894 | Ssr2          | 66256  | 3+:88383529-88392341    |
| 13895 | MMT00072628   |        | 4:-23444393-23446309    |
| 13896 | Btd12         | 52864  | 16:-3990721-3994812     |
| 13897 | Pald          | 72333  | 8:-64163528-64238883    |
| 13898 | MMT00078764   |        | 7+:131277122-131798973  |
| 13899 | Nup54         | 269113 | 5:-92844569-92864212    |
| 13900 | 4933417M04Rik | 619288 | 1:-192986567-192988323  |
| 13901 | EG667795      | 667795 | 1+:155152561-155153607  |
| 13902 | Lcn10         | 332578 | 2+:25539022-25541598    |
| 13903 | Olf1389       | 259069 | 11+:49243979-49244913   |
| 13904 | Tmc3          | 233424 | 7+:90739149-90758569    |
| 13905 | Map3k1        | 26401  | 13:-112536637-112598524 |
| 13906 | Hmgb4         | 69317  | 4:-127937456-127938137  |
| 13907 | B4galnt4      | 330671 | 7+:148247208-148258291  |
| 13908 | AU018091      | 245128 | 7:-3158177-3169106      |
| 13909 | C030010B13Rik | 77310  | 2:-173405746-173484955  |
| 13910 | V1rb1         | 113852 | 6+:90057268-90058200    |
| 13911 | Clec12a       | 232413 | 6+:129299799-129303642  |
| 13912 | MMT00048812   |        | 7:-76750882-76751774    |
| 13913 | Gm70          | 210762 | 12+:77518609-77540468   |
| 13914 | Hdac5         | 15184  | 11:-102057062-102086153 |
| 13915 | MMT00039793   |        | 4+:98795260-98796875    |
| 13916 | MMT00063984   |        | X+:58344006-58344903    |
| 13917 | Rell2         | 225392 | 18+:38115281-38118409   |
| 13918 | Elov1         | 54325  | 4+:118100745-118105222  |
| 13919 | Synpo         | 104027 | 18:-60753636-60764144   |
| 13920 | MMT00049947   |        | 16+:3601980-3602364     |
| 13921 | 9930022N03Rik | 245126 | 7:-3489961-3498596      |

|       |               |        |                         |
|-------|---------------|--------|-------------------------|
| 13922 | MMT00008875   |        | Y+:1351339-1353880      |
| 13923 | Nploc4        | 217365 | 11-:120241110-120298836 |
| 13924 | Lcmt1         | 30949  | 7+:130561755-130573862  |
| 13925 | Lmod2         | 93677  | 6+:24547811-24554654    |
| 13926 | MMT00011018   |        | 3-:84716819-84733388    |
| 13927 | MMT00007324   |        | 8-:78918991-78919632    |
| 13928 | Cdc123        | 98828  | 2-:5715712-5765995      |
| 13929 | Lamb3         | 16780  | 1+:195128219-195170070  |
| 13930 | EG620205      | 620205 | 3-:133452331-133454469  |
| 13931 | MMT00069367   | 675747 | X+:92753651-92754108    |
| 13932 | Il1f10        | 215274 | 2+:24148683-24149287    |
| 13933 | Usp26         | 83563  | X-:49107135-49150930    |
| 13934 | Hunk          | 26559  | 16+:90284122-90488156   |
| 13935 | Aldh8a1       | 237320 | 10+:21097127-21116390   |
| 13936 | Rnf166        | 68718  | 8-:124990044-124999956  |
| 13937 | A230107C01Rik | 320225 | 7-:29970455-29975654    |
| 13938 | Dcps          | 69305  | 9-:34931998-34983572    |
| 13939 | Utp15         | 105372 | 13-:99017518-99032967   |
| 13940 | 1700014N06Rik | 69389  | X+:133461861-133465708  |
| 13941 | 6430706D22Rik | 381280 | 1+:90124801-90127363    |
| 13942 | Psg21         | 72242  | 7-:19237068-19242065    |
| 13943 | Spata16       | 70862  | 3+:26536590-26826401    |
| 13944 | Brp16         | 59053  | 15+:76199327-76201833   |
| 13945 | Hivep1        | 110521 | 13+:42150871-42279880   |
| 13946 | Slc35b2       | 73836  | 17+:45701036-45705072   |
| 13947 | Crip2         | 68337  | 12+:114378757-114383715 |
| 13948 | Igh-VJ558     | 16061  | 12-:115034345-115034796 |
| 13949 | Btd           | 26363  | 14+:32454250-32481369   |
| 13950 | Fabp4         | 11770  | 3-:10204346-10208554    |
| 13951 | Fgf2          | 14173  | 3+:37247771-37303718    |
| 13952 | Spdyb         | 74673  | 5-:143977994-143987561  |
| 13953 | 4930469G21Rik | 74933  | 1-:163084688-163089666  |
| 13954 | Chst1         | 76969  | 2+:92451929-92455407    |
| 13955 | Dennd2d       | 72121  | 3+:106285489-106306662  |
| 13956 | BC035044      | 232406 | 6-:128818327-128841142  |
| 13957 | Chodl         | 246048 | 16+:78931369-78951971   |
| 13958 | Auts2         | 319974 | 5-:131913218-131952896  |
| 13959 | MMT00077196   |        | 19+:11839881-11840246   |
| 13960 | A930038C07Rik | 68169  | 6+:65646033-65656923    |
| 13961 | 2210404O07Rik | 72273  | 10+:80855806-80858243   |
| 13962 | Chd7          | 320790 | 4+:8678469-8793800      |
| 13963 | Sel1l2        | 228684 | 2-:140055593-140111042  |
| 13964 | Lpcat2        | 270084 | 8+:95433067-95442397    |
| 13965 | MMT00061510   |        | 7+:11330623-11331328    |
| 13966 | Aatk          | 11302  | 11-:119868636-119903062 |
| 13967 | Wdr41         | 218460 | 13+:95746465-95793257   |
| 13968 | Spin1         | 20729  | 13+:51196273-51244563   |
| 13969 | MMT00021905   |        | 6-:99789901-99790336    |
| 13970 | Tarbp2        | 21357  | 15+:102348889-102354105 |
| 13971 | Enox2         | 209224 | X-:46364625-46641393    |
| 13972 | Hadhb         | 231086 | 5+:30500349-30510627    |

|       |               |           |                         |
|-------|---------------|-----------|-------------------------|
| 13973 | Ubl4b         | 67591     | 3-:107356615-107357991  |
| 13974 | Flna          | 192176    | X-:71468802-71491856    |
| 13975 | Slc27a6       | 225579    | 18+:58715893-58772523   |
| 13976 | Bmi1          | 12151     | 2+:18603438-18605881    |
| 13977 | MMT00049981   |           |                         |
| 13978 | Sv2b          | 64176     | 7-:82262481-82364906    |
| 13979 | Ociad2        | 433904    | 5-:73713436-73729893    |
| 13980 | Thop1         | 50492     | 10+:80532877-80544964   |
| 13981 | 1700063D05Rik | 78500     | 9+:41014239-41025639    |
| 13982 | Tnfai6        | 21930     | 2+:51893632-51912108    |
| 13983 | Copz2         | 56358     | 11+:96711189-96722514   |
| 13984 | Thap3         | 69876     | 4-:151356744-151363547  |
| 13985 | Anapc4        | 52206     | 5+:53225320-53258285    |
| 13986 | MMT00020948   |           |                         |
| 13987 | Atp6v1d       | 73834     | 12-:79943975-79962446   |
| 13988 | Cntnap2       | 66797     | 6+:47194400-47249311    |
| 13989 | Foxp3         | 20371     | X+:7156818-7172360      |
| 13990 | MMT00040357   |           | 19+:39053872-39077776   |
| 13991 | Carf          | 241066    | 1+:60155124-60207876    |
| 13992 | MMT00045875   | 100042690 | 2+:90164353-90165283    |
| 13993 | MMT00017885   |           | 12+:73334913-73360855   |
| 13994 | Lrrtm4        | 243499    | 6+:79971636-79973159    |
| 13995 | 1700034I23Rik | 73297     | 3-:40704120-40706465    |
| 13996 | Utp18         | 217109    | 11-:93720584-93747013   |
| 13997 | MMT00033247   |           | X-:73232499-73232954    |
| 13998 | MMT00024160   |           |                         |
| 13999 | Fgf13         | 14168     | X-:56316709-56387240    |
| 14000 | Apaf1         | 11783     | 10-:90453346-90545443   |
| 14001 | Dolpp1        | 57170     | 2+:30247935-30256047    |
| 14002 | 1700055M20Rik | 73407     | 8+:97836854-97851153    |
| 14003 | MMT00075867   |           | 7+:71152654-71165816    |
| 14004 | Aspscr1       | 68938     | 11+:120534353-120570758 |
| 14005 | MMT00009841   |           | 15-:75715075-75719200   |
| 14006 | Dus4l         | 71916     | 12-:32324919-32339691   |
| 14007 | Idh3g         | 15929     | X-:71024303-71032236    |
| 14008 | Fbxw15        | 382105    | 9-:109455044-109462442  |
| 14009 | 2310030G06Rik | 66952     | 9-:50547803-50554632    |
| 14010 | Snip1         | 76793     | 4+:124743867-124751373  |
| 14011 | MMT00069899   |           | 7+:20048620-20055353    |
| 14012 | 2700023E23Rik | 70036     | 5+:74489127-74490361    |
| 14013 | MMT00017766   |           | 2-:22768812-22769369    |
| 14014 | MMT00008376   |           | 4-:97187838-97190377    |
| 14015 | Prss3         | 22073     | 6-:41323772-41327578    |
| 14016 | Znrf3         | 407821    | 11-:5176336-5238771     |
| 14017 | Ces5          | 234673    | 8+:107450183-107458567  |
| 14018 | F830045P16Rik | 228592    | 2-:129286051-129289467  |
| 14019 | Fbf1          | 217335    | 11-:116003597-116029455 |
| 14020 | Chchd3        | 66075     | 6-:32742226-33010152    |
| 14021 | Gpr113        | 381628    | 5-:30519973-30524155    |
| 14022 | Car9          | 230099    | 4+:43519878-43526597    |
| 14023 | Prkg1         | 19091     | 19-:31660056-31738771   |

|       |               |           |                         |
|-------|---------------|-----------|-------------------------|
| 14024 | C78339        | 97863     | 13+:46765117-46773430   |
| 14025 | 4930522H14Rik | 67646     | 4-:109177979-109203902  |
| 14026 | Clcnkb        | 56365     | 4-:140960274-140971896  |
| 14027 | Rpo1-1        | 20016     | 17-:46380876-46384913   |
| 14028 | 3110050N22Rik | 67306     | 3+:7503489-7553849      |
| 14029 | 2810022L02Rik | 67198     | 1+:57831768-58003808    |
| 14030 | Csrp2         | 13008     | 10+:110357231-110376550 |
| 14031 | MMT00002421   |           |                         |
| 14032 | Cog6          | 67542     | 3-:52785799-52821159    |
| 14033 | MMT00077425   |           | 6+:66466376-66478451    |
| 14034 | Tg            | 21819     | 15+:66502353-66682168   |
| 14035 | Lrrc52        | 240899    | 1-:169375931-169398144  |
| 14036 | 4833427G06Rik | 235345    | 9-:50889218-50910075    |
| 14037 | Zp4           | 664793    | 13+:11618321-11618975   |
| 14038 | 1700074P13Rik | 73481     | 6-:40870882-40890496    |
| 14039 | E230008N13Rik | 381522    | 4+:45903234-45962457    |
| 14040 | Hcst          | 23900     | 7-:31202825-31204765    |
| 14041 | Cldn1         | 12737     | 16-:26358962-26371867   |
| 14042 | MMT00046983   | 279067    | 2-:90870934-90871279    |
| 14043 | 4930455C21Rik | 76916     | 16-:38498432-38522709   |
| 14044 | Vat1          | 26949     | 11-:101319784-101327531 |
| 14045 | Rps4y2        | 66184     | 6+:148303177-148304118  |
| 14046 | Ms4a7         | 109225    | 19-:11395526-11409186   |
| 14047 | Odf2          | 18286     | 2+:29748566-29749089    |
| 14048 | Ccny          | 67974     | 18-:9315943-9449981     |
| 14049 | Fdft1         | 14137     | 14-:63765240-63796638   |
| 14050 | Il12rb1       | 16161     | 8+:73332392-73345320    |
| 14051 | Stim1         | 20866     | 7+:109416736-109585352  |
| 14052 | EG226654      | 226654    | 1+:173349231-173350486  |
| 14053 | Zfp418        | 232854    | 7+:7124083-7136262      |
| 14054 | Oplah         | 75475     | 15-:76126864-76140171   |
| 14055 | MMT00050438   |           | 4-:119006855-119008123  |
| 14056 | Opa1          | 74143     | 16+:29586094-29589836   |
| 14057 | MMT00080613   | 100041265 | 7+:133630887-133634249  |
| 14058 | Dennd4b       | 229541    | 3+:90071357-90084595    |
| 14059 | Cyp4f18       | 72054     | 8-:74512380-74533516    |
| 14060 | MMT00015243   |           | 11+:16919211-16920191   |
| 14061 | 2900053A13Rik | 554362    | 8+:3621549-3624226      |
| 14062 | Pan3          | 72587     | 5+:148341504-148360063  |
| 14063 | Syne1         | 64009     | 10+:5028587-5040787     |
| 14064 | MMT00025629   |           | 12+:20283650-20284556   |
| 14065 | D2Bwg1335e    | 52838     | 2-:26204911-26215079    |
| 14066 | Rab2a         | 59021     | 4+:8462800-8533812      |
| 14067 | Sspi1         | 20375     | 2+:90936953-90955913    |
| 14068 | B3gntl1       | 210004    | 11-:121478804-121534387 |
| 14069 | MMT00045633   |           | 9-:24905761-24905940    |
| 14070 | Oaz1          | 18245     | 10+:80289504-80291749   |
| 14071 | Marveld3      | 73608     | 8-:112476810-112486025  |
| 14072 | MMT00031664   | 635326    | 12+:116828633-116829405 |
| 14073 | Ndufa4        | 17992     | 6-:11850025-11857452    |
| 14074 | Lrrc2         | 74249     | 9+:110854048-110883467  |

|       |               |        |                         |
|-------|---------------|--------|-------------------------|
| 14075 | E030049G20Rik | 210356 | 1-:127873502-127923947  |
| 14076 | Ust           | 338362 | 10-:7927082-8110729     |
| 14077 | Trpv5         | 194352 | 6-:41603129-41626221    |
| 14078 | MMT00074838   |        | 16+:31925014-31925776   |
| 14079 | Cryga         | 12964  | 1-:65147027-65149911    |
| 14080 | 2310007F21Rik | 66939  | 9+:63450476-63489698    |
| 14081 | Tmem29        | 382245 | X-:146832316-146893678  |
| 14082 | Fosl1         | 14283  | 19+:5447697-5455938     |
| 14083 | Nup205        | 70699  | 6+:35127614-35197590    |
| 14084 | D530033C11Rik | 78581  | 15+:51709037-51714224   |
| 14085 | Cdkl2         | 53886  | 5-:92435182-92472044    |
| 14086 | 2700097O09Rik | 72658  | 12-:56146647-56181097   |
| 14087 | Ugdh          | 22235  | 5-:65804462-65826959    |
| 14088 | Kntc1         | 208628 | 5+:124199733-124271601  |
| 14089 | Acsf2         | 264895 | 11-:94419621-94420289   |
| 14090 | Pgls          | 66171  | 8-:74114795-74116156    |
| 14091 | Gata5         | 14464  | 2-:180059837-180069378  |
| 14092 | 0610007P22Rik | 68327  | 17+:25377143-25379733   |
| 14093 | Tbpl2         | 227606 | 2-:23942585-23946671    |
| 14094 | Srpk2         | 20817  | 5-:23013099-23122182    |
| 14095 | Nav1          | 215690 | 1-:137337418-137481765  |
| 14096 | MMT00000268   |        | 18+:56131887-56132960   |
| 14097 | Hs3st1        | 15476  | 5-:40005174-40146714    |
| 14098 | Txndc8        | 67402  | 4-:57996900-58021996    |
| 14099 | Nfe2          | 18022  | 15-:103078643-103085868 |
| 14100 | Ccnk          | 12454  | 12+:109417809-109440617 |
| 14101 | Zfp69         | 381549 | 4-:120602747-120620174  |
| 14102 | Evi2a         | 14017  | 11-:79340259-79341868   |
| 14103 | EG245516      | 245516 | X+:91226407-91231500    |
| 14104 | Mkrl1-ps1     | 353327 | 5-:89267019-89268425    |
| 14105 | Vcp           | 269523 | 4-:42992835-43013188    |
| 14106 | Syk           | 20963  | 13-:52743318-52744151   |
| 14107 | 1190007I07Rik | 544717 | 10-:82081432-82085948   |
| 14108 | Polr3b        | 70428  | 10+:84085028-84189922   |
| 14109 | Fads2         | 56473  | 19-:10138655-10175993   |
| 14110 | Aspm          | 12316  | 1+:141351517-141353460  |
| 14111 | 4921533I20Rik | 664619 | 18-:17392832-17394005   |
| 14112 | F630110N24Rik | 73822  | 10+:80820334-80826909   |
| 14113 | Hmgb2l1       | 70823  | 8+:77517584-77553931    |
| 14114 | Ccdc23        | 69216  | 4+:118868013-118873903  |
| 14115 | MMT00048392   |        | X-:55883578-55884361    |
| 14116 | Sp1           | 20683  | 15+:102236758-102263109 |
| 14117 | C1qb          | 12260  | 4-:136436062-136442092  |
| 14118 | Fbxw7         | 50754  | 3+:84756132-84781545    |
| 14119 | MMT00046758   |        | 15-:36049854-36050713   |
| 14120 | Med29         | 67224  | 7-:29171383-29177709    |
| 14121 | Npas1         | 18142  | 7-:17041070-17061037    |
| 14122 | Sesn2         | 230784 | 4-:132048727-132066371  |
| 14123 | Itga2         | 16398  | 13-:115626597-115722245 |
| 14124 | Clrn1         | 229320 | 3-:58594041-58730626    |
| 14125 | Rora          | 19883  | 9+:69043346-69098641    |



|       |               |        |                         |
|-------|---------------|--------|-------------------------|
| 14126 | Traf5         | 22033  | 1-:193821087-193916445  |
| 14127 | MMT00009389   | 236598 |                         |
| 14128 | Htr1d         | 15552  | 4+:135998385-135999492  |
| 14129 | 5430403G16Rik | 77200  | 5-:110103562-110104226  |
| 14130 | Aamp          | 227290 | 1-:74326420-74330543    |
| 14131 | Ubr5          | 70790  | 15-:37897082-37908789   |
| 14132 | Glo1          | 109801 | 17-:30729810-30749551   |
| 14133 | 6720456H20Rik | 218989 | 14+:49066073-49132874   |
| 14134 | Phf10         | 72057  | 17-:15082013-15093866   |
| 14135 | Eepd1         | 67484  | 9+:25289187-25411692    |
| 14136 | F7            | 14068  | 8+:13026045-13035808    |
| 14137 | Ephx1         | 13849  | 1-:182919869-182947586  |
| 14138 | Anks4b        | 72074  | 7+:127317389-127327228  |
| 14139 | 2410005O16Rik | 66302  | 4+:19502340-19533424    |
| 14140 | Ipo5          | 70572  | 14+:121316569-121347253 |
| 14141 | EG633570      | 633570 | X-:102920421-102920854  |
| 14142 | MMT00021961   |        | 5-:30157973-30158961    |
| 14143 | Preld1        | 66494  | 13+:55423393-55426631   |
| 14144 | Dbc1          | 56710  | 4-:68423044-68565988    |
| 14145 | Sgsm3         | 105835 | 15+:80808234-80842500   |
| 14146 | C230095G01Rik | 319776 | 6-:116645307-116648410  |
| 14147 | Acss2         | 60525  | 2+:155343828-155388234  |
| 14148 | Fbxl3         | 50789  | 14-:103480265-103498088 |
| 14149 | BC048562      | 434439 | 9+:108338810-108348412  |
| 14150 | V1rc6         | 113863 | 6+:57208142-57209042    |
| 14151 | Slc44a1       | 100434 | 4+:53494335-53635350    |
| 14152 | Serhl         | 68607  | 15+:82930642-82949691   |
| 14153 | 5031408O05Rik | 331491 | X-:103430592-103434573  |
| 14154 | Apof          | 103161 | 10+:127705052-127707207 |
| 14155 | Strn3         | 94186  | 12-:52710631-52792874   |
| 14156 | Med9          | 192191 | 11+:59761768-59774588   |
| 14157 | Pcdh10        | 18526  | 3+:45183095-45186401    |
| 14158 | Dld           | 13382  | 12-:32016515-32036318   |
| 14159 | 1190003K10Rik | 68880  | 13-:64582553-64599101   |
| 14160 | MMT00023287   |        | 17+:93730800-93731219   |
| 14161 | Necap1        | 67602  | 6+:122824574-122838959  |
| 14162 | Vamp3         | 22319  | 4-:150423056-150432003  |
| 14163 | H2-M10.4      | 224753 | 17-:36534664-36598925   |
| 14164 | Elf3          | 13710  | 1-:137150156-137155015  |
| 14165 | MMT00065181   |        |                         |
| 14166 | Cldn15        | 60363  | 5+:137443738-137451710  |
| 14167 | Exo1          | 26909  | 1+:177813029-177838863  |
| 14168 | MMT00060736   |        | 7-:109668988-109669502  |
| 14169 | 1700052N19Rik | 73419  | 10-:5906571-5913921     |
| 14170 | Gpr50         | 14765  | X+:68916941-68921263    |
| 14171 | Gypa          | 14934  | 8+:83017952-83033372    |
| 14172 | Olf479        | 257891 | 7+:115198626-115199480  |
| 14173 | Pik3c2a       | 18704  | 7-:123483074-123561566  |
| 14174 | Fcamr         | 64435  | 1+:132697478-132711317  |
| 14175 | Col7a1        | 12836  | 9+:108855789-108886920  |
| 14176 | 1500011H22Rik | 68948  | 5-:122814594-122822364  |

|       |               |           |                         |
|-------|---------------|-----------|-------------------------|
| 14177 | MMT00059964   |           | 3+:94948207-94949601    |
| 14178 | Hgfac         | 54426     | 5+:35384244-35391057    |
| 14179 | MMT00017967   |           | 17-:13030800-13031001   |
| 14180 | Xlr3c         | 22446     | X-:70499879-70510729    |
| 14181 | Pde5a         | 242202    | 3+:122432163-122558249  |
| 14182 | MMT00058220   |           | 15+:40368854-40369848   |
| 14183 | Gng11         | 66066     | 6+:3954226-3958443      |
| 14184 | Olfr480       | 56861     | 7-:115209281-115210310  |
| 14185 | Poldip3       | 73826     | 15-:82956398-82979739   |
| 14186 | Prpsap1       | 67763     | 11-:116332159-116351674 |
| 14187 | Zic1          | 22771     | 9-:91255338-91260383    |
| 14188 | Ttc8          | 76260     | 12+:100158784-100221442 |
| 14189 | MMT00033425   | 100042394 | 5-:66589169-66624981    |
| 14190 | Ppil1         | 68816     | 17-:29387779-29400916   |
| 14191 | Scn2b         | 72821     | 9+:44925959-44935296    |
| 14192 | Trpv2         | 22368     | 11+:62388048-62413798   |
| 14193 | Gmeb1         | 56809     | 4-:131780933-131807767  |
| 14194 | Defcr23       | 497114    | 8+:22194759-22195599    |
| 14195 | MMT00061107   |           | X-:99919367-99921281    |
| 14196 | Prtg          | 235472    | 9+:72657261-72755670    |
| 14197 | Fhod3         | 225288    | 18+:24868109-24929048   |
| 14198 | Ciqa2         | 80797     | 3-:144460402-144482448  |
| 14199 | Epn1          | 13854     | 7+:5031841-5049779      |
| 14200 | Kirrel        | 170643    | 3-:86892285-86945031    |
| 14201 | Casp3         | 12367     | 8+:47702802-47724060    |
| 14202 | Fnbp4         | 55935     | 2+:90585526-90621175    |
| 14203 | Adh7          | 11529     | 3+:137880845-137894240  |
| 14204 | Gm317         | 207209    | 17+:25307131-25308855   |
| 14205 | Ppm1m         | 67905     | 9-:106097276-106100666  |
| 14206 | C030046E11Rik | 226089    | 19+:29641974-29680373   |
| 14207 | V1rc3         | 113860    | 6+:57087346-57088246    |
| 14208 | Ech1          | 51798     | 7+:29610356-29617258    |
| 14209 | Btg3          | 12228     | 16-:78360106-78377030   |
| 14210 | Utf1          | 22286     | 7+:147129754-147131009  |
| 14211 | Hpcal4        | 170638    | 4+:122860440-122868200  |
| 14212 | Mcf2          | 109904    | X-:57309135-57400820    |
| 14213 | Rcor2         | 104383    | 19+:7344253-7349714     |
| 14214 | Ciqa4         | 229927    | 3-:144485705-144512266  |
| 14215 | Rab5a         | 271457    | 17+:53618713-53647003   |
| 14216 | Ttc14         | 67120     | 3+:33700135-33706953    |
| 14217 | Gabra1        | 14394     | 11-:41946771-41995802   |
| 14218 | Med31         | 67279     | 11-:72025227-72028534   |
| 14219 | 4930519F09Rik | 114676    | 10-:28641765-28643170   |
| 14220 | Mrps5         | 77721     | 2+:127413161-127429721  |
| 14221 | Ccdc66        | 320234    | 14-:28303848-28306311   |
| 14222 | MMT00076410   |           | 7+:115006493-115007624  |
| 14223 | 1110019N10Rik | 68523     | 8-:107163738-107165628  |
| 14224 | Hnrnpab       | 15384     | 11-:51414387-51420338   |
| 14225 | Sva           | 20939     | 6+:41988392-41992797    |
| 14226 | Rbm47         | 245945    | 5-:66410008-66489418    |
| 14227 | Lrrc39        | 109245    | 3+:116265889-116284342  |

|       |               |        |                         |
|-------|---------------|--------|-------------------------|
| 14228 | MMT00061518   |        | 1+:30826524-30829177    |
| 14229 | Smtnl1        | 68678  | 2-:84651333-84662809    |
| 14230 | Snx4          | 69150  | 16+:33251541-33299647   |
| 14231 | Baiap3        | 545192 | 17-:25380417-25393232   |
| 14232 | Mapkapk5      | 17165  | 5-:121975059-121995901  |
| 14233 | Fgfr1         | 116701 | 5+:109123520-109135915  |
| 14234 | MMT00012377   |        | X-:94080844-94083212    |
| 14235 | MMT00002524   |        | 18+:8958025-8968920     |
| 14236 | Zfp518b       | 100515 | 5-:39062650-39065728    |
| 14237 | Rac2          | 19354  | 15-:78391275-78403111   |
| 14238 | 4632404H22Rik | 78755  | X-:50596610-50622208    |
| 14239 | Acpt          | 546967 | 7-:51508457-51512388    |
| 14240 | Mettl7a1      | 70152  | 15+:100135219-100135777 |
| 14241 | C130074G19Rik | 226777 | 1-:186698121-186706870  |
| 14242 | Prss29        | 114662 | 17+:25457227-25459451   |
| 14243 | Gm600         | 239151 | 14+:66253887-66260859   |
| 14244 | Nap1l1        | 53605  | 10+:110910297-110933175 |
| 14245 | H2-Ke2        | 14976  | 17-:34075869-34077250   |
| 14246 | Nalcn         | 338370 | 14-:123677122-123723114 |
| 14247 | V1rc33        | 171206 | 6-:58165101-58166011    |
| 14248 | Olfir679      | 259046 | 7+:112234231-112235177  |
| 14249 | Lzts2         | 226154 | 19+:45095879-45101576   |
| 14250 | MMT00041856   |        |                         |
| 14251 | Efhd1         | 98363  | 1+:89160938-89207366    |
| 14252 | MMT00044012   |        | 12+:45322729-45324190   |
| 14253 | Olfir466      | 258816 | 13+:65253533-65254459   |
| 14254 | Eefsec        | 65967  | 6-:88207864-88396489    |
| 14255 | Rcsd1         | 226594 | 1-:167579076-167639891  |
| 14256 | MMT00024953   |        | 1+:121054452-121054944  |
| 14257 | Gm1673        | 381633 | 5+:34326164-34327657    |
| 14258 | Ifi47         | 15953  | 11+:48900556-48910471   |
| 14259 | Mon2          | 67074  | 10-:122431568-122513431 |
| 14260 | Mikl          | 74568  | 8-:113835699-113862078  |
| 14261 | 2310066E14Rik | 75687  | 8+:108145081-108146094  |
| 14262 | Tcfec         | 21426  | 6-:16783391-16848441    |
| 14263 | Arrdc3        | 105171 | 13+:81022595-81035299   |
| 14264 | MMT00063236   |        | 7-:61667527-61724407    |
| 14265 | Hnrnpa3       | 229279 | 2+:75499520-75500768    |
| 14266 | Sox13         | 20668  | 1-:135278879-135289795  |
| 14267 | Naaladl2      | 635702 | 3-:23703256-23780422    |
| 14268 | Rps25         | 75617  | 9+:44215755-44221097    |
| 14269 | Scgb3a1       | 68662  | 11+:49477111-49478620   |
| 14270 | Pigs          | 276846 | 11+:78141948-78156511   |
| 14271 | Cox6a1        | 12861  | 5-:115795663-115798963  |
| 14272 | Opn3          | 13603  | 1-:177592558-177622721  |
| 14273 | Stk11         | 20869  | 10+:79578946-79593422   |
| 14274 | Hadh          | 15107  | 3-:130936373-130974945  |
| 14275 | MMT00070777   |        | 7+:13030699-13054267    |
| 14276 | Cdc42         | 12540  | 4-:136875618-136913577  |
| 14277 | Pklr          | 18770  | 3+:88940063-88949554    |
| 14278 | Tpmt          | 22017  | 13+:47118979-47120361   |

|       |               |           |                         |
|-------|---------------|-----------|-------------------------|
| 14279 | 3930402G23Rik | 74027     | 8-:10924425-10928522    |
| 14280 | MMT00004656   |           | 6-:24996506-25149473    |
| 14281 | 5031414D18Rik | 271221    | 14+:75431791-75452333   |
| 14282 | Htr7          | 15566     | 19-:36034761-36131838   |
| 14283 | Vmn2r75       | 546981    | 7-:93296553-93314958    |
| 14284 | Mki67ip       | 67949     | 1+:120218453-120230164  |
| 14285 | C1qbp         | 12261     | 11-:70791356-70796467   |
| 14286 | Tram1         | 72265     | 1-:13554782-13580045    |
| 14287 | EG241041      | 241041    | 1-:21278222-21283693    |
| 14288 | Atmin         | 234776    | 8+:119467329-119484344  |
| 14289 | MMT00073214   |           | 17-:56690445-56693869   |
| 14290 | EG329055      | 329055    | 19-:33851911-33859360   |
| 14291 | ORF19         | 68767     | 17+:66460941-66469790   |
| 14292 | Htr5a         | 15563     | 5+:28168486-28177728    |
| 14293 | Col9a1        | 12839     | 1+:24184546-24258839    |
| 14294 | Cux1          | 13047     | 5-:136723928-136733999  |
| 14295 | Cnpy2         | 56530     | 10+:127759514-127764242 |
| 14296 | Slc35b1       | 110172    | 11+:95246235-95252966   |
| 14297 | MMT00040516   |           | 6+:71633291-71633877    |
| 14298 | Atp2a2        | 11938     | 5-:122903522-122951904  |
| 14299 | V1rf1         | 171232    | 17+:21365789-21366777   |
| 14300 | MMT00023851   |           | 1+:81793834-81794316    |
| 14301 | Pdcd11        | 18572     | 19+:47165232-47207289   |
| 14302 | Rnf213        | 629974    | 11+:119279387-119294942 |
| 14303 | V1ri2         | 171253    | 13+:23167660-23168561   |
| 14304 | Mrpl48        | 52443     | 7-:107697223-107699149  |
| 14305 | MMT00024654   |           | 2-:149158807-149160401  |
| 14306 | Gtf3c2        | 71752     | 5-:31459173-31482294    |
| 14307 | Kcnj8         | 16523     | 6-:142513890-142519829  |
| 14308 | Tbcd          | 108903    | 11+:121313303-121478675 |
| 14309 | Cyp3a41b      | 100041375 | 5-:146319535-146325438  |
| 14310 | MMT00073582   |           | 9+:63745916-63747639    |
| 14311 | 4933437N03Rik | 66783     | 4+:63042391-63055050    |
| 14312 | 1110012J17Rik | 68617     | 17-:66691784-66798086   |
| 14313 | Tnk1          | 83813     | 11-:69665104-69670576   |
| 14314 | 2810405K02Rik | 66469     | 4-:154270521-154273152  |
| 14315 | Ccdc39        | 51938     | 3-:33711283-33743223    |
| 14316 | MMT00012375   |           | 18-:54190446-54191079   |
| 14317 | Ccdc58        | 381045    | 16+:36071587-36092204   |
| 14318 | Vmn2r9        | 435864    | 5-:109271965-109281529  |
| 14319 | MMT00076860   |           | 7+:150782189-150782899  |
| 14320 | Paxip1        | 55982     | 5-:28068587-28118090    |
| 14321 | Drd5          | 13492     | 5+:38710904-38712161    |
| 14322 | Bat1a         | 53817     | 17+:35380184-35390443   |
| 14323 | Scarb1        | 20778     | 5-:125757461-125821444  |
| 14324 | 2410022L05Rik | 66423     | 8-:13884794-13890270    |
| 14325 | 1700029P11Rik | 66346     | 15+:81810974-81811991   |
| 14326 | Lztf1         | 93730     | 9-:123608772-123626671  |
| 14327 | MMT00033454   |           | 5-:67789474-67911179    |
| 14328 | MMT00077647   |           | X+:159915827-159916499  |
| 14329 | MMT00046641   |           | 16+:65793994-65794401   |

|       |               |        |                        |
|-------|---------------|--------|------------------------|
| 14330 | Stx11         | 74732  | 10-:12660918-12728746  |
| 14331 | Dgat2l6       | 668257 | X+:97736406-97741222   |
| 14332 | Trpm6         | 225997 | 19+:18853009-18963531  |
| 14333 | Zcchc17       | 619605 | 4-:129993147-130037207 |
| 14334 | Fxyd3         | 17178  | 7-:31855556-31861697   |
| 14335 | Olfrc33       | 18332  | 7-:109861970-109862925 |
| 14336 | Msh3          | 17686  | 13-:93019782-93036028  |
| 14337 | Slc2a12       | 353169 | 10+:22364884-22412063  |
| 14338 | Rtel1         | 269400 | 2+:181057505-181091322 |
| 14339 | Olfrc1477     | 258691 | 19+:13539382-13577780  |
| 14340 | Tmem55a       | 72519  | 4+:14791406-14841249   |
| 14341 | Ormdl3        | 66612  | 11-:98442607-98448559  |
| 14342 | 4930412F15Rik | 242408 | 4-:43677419-43679483   |
| 14343 | Hnrnpa0       | 77134  | 13-:58227829-58229945  |
| 14344 | 4921506M07Rik | 70846  | 12+:58665108-58723099  |
| 14345 | Nup37         | 69736  | 10+:87610968-87640991  |
| 14346 | V1rj3         | 252909 | 7-:13669638-13670564   |
| 14347 | Dact2         | 240025 | 17-:14332059-14340873  |
| 14348 | Chrn2         | 11444  | 3-:89560998-89568491   |
| 14349 | 1700018F24Rik | 69396  | 5+:145803858-145806547 |
| 14350 | Adams2        | 216725 | 11+:50415981-50617553  |
| 14351 | Polr2g        | 67710  | 19-:8867618-8873047    |
| 14352 | MMT00048271   |        | 17-:9514957-9515571    |
| 14353 | Slc35f2       | 72022  | 9+:53619546-53665927   |
| 14354 | Aim1l         | 230806 | 4+:133643398-133648416 |
| 14355 | Tle1          | 21885  | 4-:71779317-71861093   |
| 14356 | Olfrc244      | 404222 | 1-:176047222-176048178 |
| 14357 | Ing4          | 28019  | 6+:124989865-124999282 |
| 14358 | Wdr1          | 22388  | 5-:38918052-38952834   |
| 14359 | Hist2h2bb     | 319189 | 3+:96073674-96074054   |
| 14360 | Olfrc1220     | 258902 | 2-:88937148-88938082   |
| 14361 | Txndc12       | 66073  | 4+:108507294-108534722 |
| 14362 | S100z         | 268686 | 13-:96247257-96248610  |
| 14363 | Cxcl16        | 66102  | 11-:70268905-70272949  |
| 14364 | Robo1         | 19876  | 16+:72204862-72742697  |
| 14365 | Ctsj          | 26898  | 13-:61101638-61107272  |
| 14366 | Carm1         | 59035  | 9+:21351429-21393904   |
| 14367 | MMT00034267   |        | 6+:86234933-86237330   |
| 14368 | 9330128J19Rik | 271144 | 13-:97189619-97199839  |
| 14369 | MMT00057201   |        | X+:132862837-132863488 |
| 14370 | Ppm1e         | 320472 | 11-:87171934-87172405  |
| 14371 | Proz          | 66901  | 8+:13060964-13076022   |
| 14372 | Vmn2r26       | 56552  | 6+:123974775-124012052 |
| 14373 | Cyp2c50       | 107141 | 19+:40164185-40188440  |
| 14374 | Lect2         | 16841  | 13-:56643827-56649861  |
| 14375 | D17H6S56E-5   | 110956 | 17-:35133667-35137272  |
| 14376 | St8sia5       | 225742 | 18+:77424738-77494057  |
| 14377 | Ggn           | 243897 | 7+:29955408-29958122   |
| 14378 | 5730409E04Rik | 230757 | 4+:126286983-126289705 |
| 14379 | Car12         | 76459  | 9+:66561328-66614653   |
| 14380 | MMT00051866   |        | 2-:129203437-129205150 |

|       |               |           |                         |
|-------|---------------|-----------|-------------------------|
| 14381 | Thsd7b        | 210417    | 1+:131999647-132091876  |
| 14382 | MMT00053015   |           | 18+:64447981-64448486   |
| 14383 | MMT00047926   |           | 17-:82591397-82668297   |
| 14384 | Dnajc7        | 56354     | 11-:100444164-100480921 |
| 14385 | 2010001M09Rik | 69816     | 18-:35806925-35809021   |
| 14386 | Begain        | 380785    | 12-:110271194-110306377 |
| 14387 | Ccdc88c       | 68339     | 12-:102207553-102267119 |
| 14388 | Adam11        | 11488     | 11+:102622919-102640348 |
| 14389 | Abcc2         | 12780     | 19+:43856893-43912441   |
| 14390 | EG545216      | 545216    | 17+:58659787-58734264   |
| 14391 | MMT00017335   | 100043120 | 19-:61332778-61333797   |
| 14392 | Dcxr          | 67880     | 11-:120586714-120588594 |
| 14393 | Ms4a12        | 381213    | 19-:11290536-11305038   |
| 14394 | MMT00000133   |           | 7-:112152788-112153161  |
| 14395 | MMT00007523   |           | 14-:91599022-91599684   |
| 14396 | Hnrnpf        | 98758     | 6+:117856832-117874830  |
| 14397 | Padi2         | 18600     | 4+:140462341-140508500  |
| 14398 | Snn           | 20621     | 16+:11072324-11072677   |
| 14399 | Csnk2a1       | 12995     | 2+:152083203-152104962  |
| 14400 | Scd2          | 20250     | 19+:44368577-44381350   |
| 14401 | Muc16         | 73732     | 9-:18440957-18465571    |
| 14402 | Mrps27        | 218506    | 13+:100114741-100185517 |
| 14403 | S100g         | 12309     | X-:159399948-159402497  |
| 14404 | Pars2         | 230577    | 4+:106323725-106327163  |
| 14405 | 1700015E13Rik | 76925     | 1+:172222992-172242258  |
| 14406 | Zc3h14        | 75553     | 12+:99985176-100026156  |
| 14407 | Six3          | 20473     | 17+:86012946-86024533   |
| 14408 | 1100001H23Rik | 66857     | 6-:136560591-136610337  |
| 14409 | Olfr1378      | 258912    | 11+:50782521-50783469   |
| 14410 | Irf2bp1       | 272359    | 7+:19589785-19591540    |
| 14411 | MMT00013858   |           | 10-:41517069-41517472   |
| 14412 | 2500003M10Rik | 66511     | 3-:90302877-90313372    |
| 14413 | Kcnq1         | 16535     | 7+:150293352-150612947  |
| 14414 | Twsg1         | 65960     | 17-:66272405-66300470   |
| 14415 | MMT00011828   |           | 11-:82849878-82850424   |
| 14416 | Serpinb11     | 66957     | 1+:109258890-109277052  |
| 14417 | Grb2          | 14784     | 11-:115505459-115560622 |
| 14418 | Vcan          | 13003     | 13-:89796661-89871139   |
| 14419 | Slc24a3       | 94249     | 2+:144993646-145070825  |
| 14420 | Cfd           | 11537     | 10+:79353656-79355399   |
| 14421 | Shox2         | 20429     | 3-:66777192-66785693    |
| 14422 | Ubash3a       | 328795    | 17+:31344784-31345178   |
| 14423 | 1300012G16Rik | 71772     | 5-:120933908-120953606  |
| 14424 | MMT00015366   |           | 17-:45300176-45327522   |
| 14425 | 4930579E17Rik | 75847     | 12+:37108765-37310044   |
| 14426 | Zc3h4         | 330474    | 7+:17002121-17020859    |
| 14427 | Hoxa1         | 15394     | 6-:52105592-52108285    |
| 14428 | Atad5         | 237877    | 11+:79946476-79947689   |
| 14429 | Rasgrp2       | 19395     | 19+:6400566-6415210     |
| 14430 | D130043K22Rik | 210108    | 13+:24936981-24991666   |
| 14431 | Piwil1        | 57749     | 5+:129242155-129261348  |

|       |               |        |                         |
|-------|---------------|--------|-------------------------|
| 14432 | MMT00059141   |        | X+:151672067-151672543  |
| 14433 | Adipor1       | 72674  | 1+:136311978-136329925  |
| 14434 | Sec14l2       | 67815  | 11-:3997044-4018732     |
| 14435 | Stch          | 110920 | 16-:75755479-75767035   |
| 14436 | Al847670      | 330050 | 5+:20964975-20987943    |
| 14437 | B230206F22Rik | 78878  | X-:100802880-100817844  |
| 14438 | V1rc24        | 171197 | 6-:57875878-57876785    |
| 14439 | Ubd           | 24108  | 17+:37330506-37332782   |
| 14440 | MMT00015397   |        |                         |
| 14441 | Ywhaz         | 22631  | 15-:36700525-36723272   |
| 14442 | Ethe1         | 66071  | 7+:25378927-25393853    |
| 14443 | C3            | 12266  | 17-:57343383-57387113   |
| 14444 | Pdia4         | 12304  | 6-:47746360-47758344    |
| 14445 | Arl6          | 56297  | 16-:59613153-59638879   |
| 14446 | MMT00007789   |        | 8+:4777833-4778940      |
| 14447 | MMT00000775   | 627004 | 7-:34352273-34391071    |
| 14448 | MMT00010161   |        | 13+:22661169-22768681   |
| 14449 | Il23r         | 209590 | 6-:67372925-67441849    |
| 14450 | Alg5          | 66248  | 3+:54539460-54553717    |
| 14451 | Speer3        | 71026  | 5+:13791631-13796820    |
| 14452 | Slc5a5        | 114479 | 8-:73407400-73416623    |
| 14453 | Inpp5d        | 16331  | 1+:89516953-89617076    |
| 14454 | Sall3         | 20689  | 18-:81165207-81171368   |
| 14455 | 2700029M09Rik | 72612  | 8+:63369207-63386377    |
| 14456 | AW146242      | 232023 | 6-:57702258-57775119    |
| 14457 | 4921507P07Rik | 70821  | 6-:50523304-50546589    |
| 14458 | Tm7sf3        | 67623  | 6-:146550772-146582999  |
| 14459 | Tollip        | 54473  | 7-:149070271-149088213  |
| 14460 | EG638904      | 638904 | 6+:40736939-40807794    |
| 14461 | Cts3          | 117066 | 13-:61665990-61671426   |
| 14462 | Zfp385b       | 241494 | 2-:77248699-77254198    |
| 14463 | MMT00051367   |        | 8+:83294589-83295567    |
| 14464 | MMT00059232   |        | 12+:83644585-83645174   |
| 14465 | Hrasl3        | 225845 | 19+:7632013-7660290     |
| 14466 | MMT00057557   |        | 17-:22056771-22058139   |
| 14467 | Crtap         | 56693  | 9-:114284255-114299788  |
| 14468 | Tmtc2         | 278279 | 10-:104626034-104627073 |
| 14469 | Ripply3       | 170765 | 16+:94550026-94558540   |
| 14470 | Taf1a         | 21339  | 1_random+:362346-383535 |
| 14471 | Pdgfrl        | 68797  | 8+:42011694-42076120    |
| 14472 | Ahcy          | 269378 | 2-:154885427-154900133  |
| 14473 | 6330534C20Rik | 434778 | X+:50144385-50152668    |
| 14474 | Wdr76         | 241627 | 2+:121332504-121382132  |
| 14475 | Abcg1         | 11307  | 17+:31194685-31252717   |
| 14476 | Akr1b8        | 14187  | 6+:34304163-34318454    |
| 14477 | Stk35         | 67333  | 2+:129625234-129654216  |
| 14478 | Mdh2          | 17448  | 5+:136254559-136266259  |
| 14479 | Ada           | 11486  | 2-:163552550-163575897  |
| 14480 | Shank2        | 210274 | 7+:151581366-151607038  |
| 14481 | Csde1         | 229663 | 3+:102832743-102861048  |
| 14482 | Shfm1         | 20422  | 6-:6508289-6528586      |

|       |               |        |                         |
|-------|---------------|--------|-------------------------|
| 14483 | Dgkb          | 217480 | 12+:39056579-39165321   |
| 14484 | MMT00017000   |        | 2+:23090568-23091297    |
| 14485 | Atp8b1        | 54670  | 18-:64690606-64765032   |
| 14486 | Sox7          | 20680  | 14+:64562542-64569569   |
| 14487 | Phf2          | 18676  | 13-:48898813-48966254   |
| 14488 | Tshb          | 22094  | 3-:102581320-102586637  |
| 14489 | MMT00045030   |        | 16+:22236564-22238122   |
| 14490 | 2510003E04Rik | 72320  | 10-:62021220-62041817   |
| 14491 | Pml           | 18854  | 9-:58066367-58097488    |
| 14492 | Arhgap27      | 544817 | 11-:103192811-103193968 |
| 14493 | 6230409E13Rik | 76132  | 4+:21858508-21921302    |
| 14494 | Btnl2         | 547431 | 17+:34493166-34502406   |
| 14495 | A630018P17Rik | 245695 | X-:162940250-162941329  |
| 14496 | MMT00072975   |        |                         |
| 14497 | Xirp2         | 241431 | 2+:67343559-67364099    |
| 14498 | Layn          | 244864 | 9-:50864907-50885159    |
| 14499 | 2310065K24Rik | 102122 | 8-:97098842-97125588    |
| 14500 | Entpd4        | 67464  | 14+:69955241-69984744   |
| 14501 | Ptk7          | 71461  | 17-:46701416-46766387   |
| 14502 | MMT00033057   |        | 7-:3264574-3265223      |
| 14503 | Sh2d1b2       | 545378 | 1+:172178263-172181783  |
| 14504 | Prl2b1        | 66392  | 13-:27475215-27482715   |
| 14505 | Slc7a12       | 140918 | 3+:14480698-14505807    |
| 14506 | Slc15a3       | 65221  | 19+:10917033-10932393   |
| 14507 | Ttc13         | 234875 | 8-:127195233-127212525  |
| 14508 | Rpl21         | 19933  | 5+:147645771-147647527  |
| 14509 | Smug1         | 71726  | 15-:102983737-102993761 |
| 14510 | Olfr643       | 259081 | 7-:111207170-111208114  |
| 14511 | Sostdc1       | 66042  | 12+:37040812-37045032   |
| 14512 | Tubg1         | 103733 | 11+:100981444-100987731 |
| 14513 | Arpc3         | 56378  | 5+:122846820-122855999  |
| 14514 | Rem2          | 140743 | 14+:55095066-55099268   |
| 14515 | Shmt2         | 108037 | 10-:126954372-126959442 |
| 14516 | lhh           | 16147  | 1-:74992098-74998080    |
| 14517 | Cicn4-2       | 12727  | 7+:7251292-7252146      |
| 14518 | A430033K04Rik | 243308 | 5+:139064085-139089042  |
| 14519 | Trex1         | 22040  | 9-:108960492-108961435  |
| 14520 | Stmn1         | 16765  | 4+:134026580-134029316  |
| 14521 | MMT00050820   |        | 5+:38285934-38288479    |
| 14522 | MMT00019997   |        | 11-:20474675-20475163   |
| 14523 | Defb3         | 27358  | 8+:19293363-19295338    |
| 14524 | Rarres2       | 71660  | 6-:48519696-48522669    |
| 14525 | Pitpm1        | 18739  | 19+:4100621-4113961     |
| 14526 | Pacsin3       | 80708  | 2+:91097064-91104826    |
| 14527 | A230107C01Rik | 320225 | 7-:29983358-29998696    |
| 14528 | Slc4a7        | 218756 | 14+:15535519-15626571   |
| 14529 | Rax           | 19434  | 18-:66094291-66098731   |
| 14530 | 1190017O12Rik | 68936  | 16+:92301563-92313284   |
| 14531 | Mmel1         | 27390  | 4+:154243744-154269639  |
| 14532 | Fhl3          | 14201  | 4+:124377953-124385334  |
| 14533 | Cutc          | 66388  | 19+:43827485-43843121   |



|       |               |        |                         |
|-------|---------------|--------|-------------------------|
| 14534 | Ubx1          | 66530  | 17-:56207952-56214427   |
| 14535 | Elk1          | 13712  | X-:20512052-20527715    |
| 14536 | Hltf          | 20585  | 3+:19957987-20016608    |
| 14537 | EG546896      | 546896 | 6-:42488327-42510608    |
| 14538 | Ier3ip1       | 66191  | 18+:77168779-77180344   |
| 14539 | Rdh20         | 70061  | 10+:127335329-127348142 |
| 14540 | Tmem140       | 68487  | 6+:34818514-34824009    |
| 14541 | Gm806         | 328250 | 13+:50565045-50568494   |
| 14542 | A730069N07Rik | 244425 | 8-:38000613-38015496    |
| 14543 | Cfl2          | 12632  | 12-:55959807-55963864   |
| 14544 | Olig2         | 50913  | 16+:91226644-91227615   |
| 14545 | Exoc5         | 105504 | 14-:49631818-49686344   |
| 14546 | 1810011H11Rik | 69069  | 14+:33599146-33631153   |
| 14547 | Otoa          | 246190 | 7+:128226951-128306603  |
| 14548 | MMT00057967   |        | X+:72699908-72704798    |
| 14549 | Edf1          | 59022  | 2+:25413419-25417601    |
| 14550 | Acot7         | 70025  | 4+:151552242-151645956  |
| 14551 | MMT00047598   |        |                         |
| 14552 | Shc2          | 216148 | 10-:79083800-79100595   |
| 14553 | Bud31         | 231889 | 5+:145901243-145909085  |
| 14554 | Dll4          | 54485  | 2+:119151564-119161392  |
| 14555 | MMT00017897   |        | 19-:16565011-16565597   |
| 14556 | Txndc14       | 66958  | 2-:84511475-84518204    |
| 14557 | Pyroxd1       | 232491 | 6+:142294190-142311144  |
| 14558 | Arhgef15      | 442801 | 11-:68756656-68770365   |
| 14559 | Frrs1         | 20321  | 3+:116603514-116606667  |
| 14560 | Slc16a11      | 216867 | 11+:70027410-70029937   |
| 14561 | V1ri9         | 171259 | 13-:22310730-22311689   |
| 14562 | Sf3a2         | 20222  | 10+:80261328-80267558   |
| 14563 | Dna2          | 327762 | 10+:62409828-62436926   |
| 14564 | Mrpl49        | 18120  | 19-:6053629-6057751     |
| 14565 | Rnf207        | 433809 | 4-:151679011-151693013  |
| 14566 | 2410089E03Rik | 73692  | 15+:8137270-8152292     |
| 14567 | Cln6          | 76524  | 9+:62692376-62699809    |
| 14568 | Gm1947        | 384929 | X+:153857762-153868258  |
| 14569 | Med22         | 20933  | 2-:26760786-26766162    |
| 14570 | Erdr1         | 170942 |                         |
| 14571 | MMT00079617   |        | 2-:146580250-146581487  |
| 14572 | Epx           | 13861  | 11-:87677502-87689033   |
| 14573 | 4931406I20Rik | 66743  | 4-:117162193-117169557  |
| 14574 | Lipn          | 70166  | 19+:34141961-34159141   |
| 14575 | Slc39a10      | 227059 | 1-:46863562-46892996    |
| 14576 | Mcm8          | 66634  | 2+:132653672-132669431  |
| 14577 | Cdc37l1       | 67072  | 19+:29064983-29092059   |
| 14578 | 6720475J19Rik | 68157  | 19-:9910227-9911446     |
| 14579 | 2610015P09Rik | 212153 | 16+:43898202-43963808   |
| 14580 | Rnf32         | 56874  | 5+:29524545-29551830    |
| 14581 | Casc5         | 76464  | 2+:118872767-118929850  |
| 14582 | Mt1           | 17748  | 8+:96703210-96704092    |
| 14583 | Prss22        | 70835  | 17-:24130501-24135050   |
| 14584 | Vps24         | 66700  | 6+:71493892-71530212    |

|       |               |        |                         |
|-------|---------------|--------|-------------------------|
| 14585 | Bxdc1         | 67239  | 10-:39943302-39966808   |
| 14586 | Paics         | 67054  | 5+:77380681-77396526    |
| 14587 | Atcay         | 16467  | 10-:80667262-80693561   |
| 14588 | EG245376      | 245376 | X-:23534829-23536060    |
| 14589 | Ccdc6         | 76551  | 10+:69559868-69652151   |
| 14590 | Pri7c1        | 67505  | 13-:27866378-27868177   |
| 14591 | Wasf2         | 242687 | 4+:132686491-132755669  |
| 14592 | Thumpd2       | 72167  | 17-:81425670-81464410   |
| 14593 | Tmem25        | 71687  | 9-:44601861-44607299    |
| 14594 | MMT00024923   |        | 2-:94224134-94225281    |
| 14595 | Tmem157       | 67698  | 1+:97210231-97231102    |
| 14596 | Upf2          | 326622 | 2+:5877869-5977002      |
| 14597 | Col19a1       | 12823  | 1-:24270832-24594250    |
| 14598 | Ooep          | 67968  | 9-:78225213-78226395    |
| 14599 | 1700029M20Rik | 73937  | 4+:135182732-135184400  |
| 14600 | Pgf           | 18654  | 12-:86507592-86518230   |
| 14601 | MMT00038159   |        | 5+:13080735-13082866    |
| 14602 | Dnajb5        | 56323  | 4+:42962846-42970620    |
| 14603 | Ly6e          | 17069  | 15+:74788206-74789761   |
| 14604 | Setd1a        | 233904 | 7+:134924119-134926878  |
| 14605 | MMT00026739   |        | 9-:18583781-18680448    |
| 14606 | Ii1r1         | 17082  | 1+:40496606-40504988    |
| 14607 | Dbn1d1        | 72185  | 8-:126029587-126039252  |
| 14608 | Chmp2a        | 68953  | 7-:13617367-13620093    |
| 14609 | Cc2d1b        | 319965 | 4+:108292601-108306818  |
| 14610 | Zfp60         | 22718  | 7+:28537494-28538719    |
| 14611 | Ddx60         | 234311 | 8+:64479366-64516152    |
| 14612 | MMT00035477   |        | 19+:11453226-11464852   |
| 14613 | Olf1097       | 258840 | 2-:86730384-86731330    |
| 14614 | Gp6           | 243816 | 7-:4320315-4349320      |
| 14615 | Zfhx2         | 239102 | 14-:55681442-55694710   |
| 14616 | 4933421E11Rik | 321000 | 3+:106524843-106539492  |
| 14617 | MMT00033859   | 26930  | 19+:55920381-55923221   |
| 14618 | Ergic3        | 66366  | 2+:155833859-155844013  |
| 14619 | 4930403L05Rik | 67395  | X-:14687736-14688615    |
| 14620 | Tbc1d8        | 54610  | 1-:39428343-39459755    |
| 14621 | Six4          | 20474  | 12-:74200596-74214404   |
| 14622 | MMT00009403   | 637477 | 3+:35831963-35836963    |
| 14623 | 4933416E14Rik | 71180  | X-:9993768-9994262      |
| 14624 | Spopl         | 76857  | 2+:23364243-23365615    |
| 14625 | Prss36        | 77613  | 7-:135080083-135088839  |
| 14626 | Zbtb2         | 381990 | 10+:5971607-5979466     |
| 14627 | Ern1          | 78943  | 11-:106258933-106349110 |
| 14628 | MMT00019519   |        | 18+:35654872-35655659   |
| 14629 | Nfkb2         | 18034  | 19+:46380107-46386578   |
| 14630 | Ank2          | 109676 | 3-:126625997-126807787  |
| 14631 | Stag3         | 50878  | 5+:138721778-138753620  |
| 14632 | 2510049J12Rik | 70291  | 6-:115535135-115542593  |
| 14633 | H2afz         | 51788  | 3+:137527562-137529884  |
| 14634 | MMT00022705   |        | 4-:67963494-67964324    |
| 14635 | MMT00053491   |        | 10+:27445607-27590264   |

|       |               |        |                         |
|-------|---------------|--------|-------------------------|
| 14636 | Parg          | 26430  | 14+:33015405-33110403   |
| 14637 | Gnb2          | 14693  | 5-:137969732-137971979  |
| 14638 | Srgap2        | 14270  | 1-:133185935-133422171  |
| 14639 | Olfr691       | 259063 | 7-:112485260-112486228  |
| 14640 | Tmem97        | 69071  | 11-:78355319-78364237   |
| 14641 | MMT00000142   |        |                         |
| 14642 | Mtap1s        | 270058 | 8+:73429889-73441427    |
| 14643 | Ets2          | 23872  | 16+:95924113-95940752   |
| 14644 | Herc2         | 15204  | 7+:63376906-63487166    |
| 14645 | Mbd3l2        | 234988 | 9+:18247989-18249899    |
| 14646 | V1ri6         | 171257 | 13+:22370230-22371179   |
| 14647 | Cst3          | 13010  | 2-:148697479-148701137  |
| 14648 | Cdkn1b        | 12576  | 6+:134870720-134874325  |
| 14649 | 5430405G05Rik | 108832 | 2+:151527646-151533040  |
| 14650 | 2810433K01Rik | 66468  | 18-:74356419-74367433   |
| 14651 | Gapdhs        | 14447  | 7-:31514907-31524375    |
| 14652 | Tceb2         | 67673  | 17-:23961706-23966076   |
| 14653 | Napsa         | 16541  | 7+:51827814-51842216    |
| 14654 | Tll2          | 24087  | 19-:41157242-41281325   |
| 14655 | Tlk2          | 24086  | 11+:105040120-105143490 |
| 14656 | Grip2         | 243547 | 6-:91713442-91738438    |
| 14657 | Mefv          | 54483  | 16-:3707221-3718097     |
| 14658 | Tex19.2       | 70956  | 11-:120977530-120979991 |
| 14659 | MMT00043452   |        |                         |
| 14660 | Gnai3         | 14679  | 3-:107910198-107949063  |
| 14661 | MMT00033581   |        | 14+:17779242-17786712   |
| 14662 | MMT00070823   |        | 7+:29319790-29320109    |
| 14663 | 1700029F12Rik | 66479  | 13-:97791824-97800377   |
| 14664 | A430093A21Rik | 227195 | 1-:63004992-63104775    |
| 14665 | Ifna5         | 15968  | 4+:88481360-88488324    |
| 14666 | MMT00009515   |        | 1-:66015695-66135723    |
| 14667 | Fggy          | 75578  | 4+:95224198-95467357    |
| 14668 | Lrrc61        | 243371 | 6+:48504793-48519022    |
| 14669 | Pftk2         | 271697 | 1+:59314659-59409292    |
| 14670 | MMT00048137   |        | 4+:143261125-143261585  |
| 14671 | Ccdc105       | 70976  | 10-:78209665-78215814   |
| 14672 | EG627009      | 627009 | 4-:143962662-143967094  |
| 14673 | 4933407C03Rik | 74440  | 8+:119873067-119983616  |
| 14674 | Ppap2c        | 50784  | 10-:78990070-78996513   |
| 14675 | Tlx3          | 27140  | 11-:33101279-33103459   |
| 14676 | Mecr          | 26922  | 4+:131399385-131423682  |
| 14677 | S100b         | 20203  | 10+:75719779-75722812   |
| 14678 | Nsg1          | 18196  | 5-:38529910-38550244    |
| 14679 | Prmt6         | 99890  | 3-:110052753-110054057  |
| 14680 | MMT00005929   |        | 6-:69233745-69255130    |
| 14681 | Alg12         | 223774 | 15-:88635675-88649710   |
| 14682 | MMT00026181   |        | 6+:76071752-76072372    |
| 14683 | Dennd1c       | 70785  | 17-:57204742-57217938   |
| 14684 | Rassf3        | 192678 | 10-:120849618-120913306 |
| 14685 | Foxd1         | 15229  | 13+:99124209-99126647   |
| 14686 | Zdhhc5        | 228136 | 2-:84529108-84550781    |

|       |               |        |                          |
|-------|---------------|--------|--------------------------|
| 14687 | 330005D01Rik  | 78512  | 17+:5798652-5803239      |
| 14688 | 5730590G19Rik | 77011  | 7+:86839357-86841649     |
| 14689 | AB124611      | 382062 | 9+:21333206-21349219     |
| 14690 | Atf4          | 11911  | 15+:80085930-80087934    |
| 14691 | Nckap1        | 50884  | 2--80340681-80421133     |
| 14692 | C5ar1         | 12273  | 7--:16833386-16834440    |
| 14693 | Nat12         | 70646  | 14+:49808299-49810548    |
| 14694 | Ddx17         | 67040  | 15--:79357616-79376986   |
| 14695 | 1700025E21Rik | 75647  | 6+:30462303-30469963     |
| 14696 | Pou4f2        | 18997  | 8--:80958635-80959604    |
| 14697 | Mtrf1         | 211253 | 14+:79797662-79823395    |
| 14698 | Dnajb9        | 27362  | 12--:45306882-45311027   |
| 14699 | V1ri3         | 171254 | 13+:22446214-22447116    |
| 14700 | Tbc1d17       | 233204 | 7--:52096402-52104449    |
| 14701 | MMT00068860   |        | 14--:83255634-83256154   |
| 14702 | Krt71         | 56735  | 15--:101564380-101573528 |
| 14703 | MMT00009557   |        | 15--:14551460-14551778   |
| 14704 | MMT00046147   |        | 2+:69604238-69604849     |
| 14705 | Slc43a1       | 72401  | 2+:84679551-84703750     |
| 14706 | MMT00014463   |        | 4+:109302638-109303400   |
| 14707 | Klk14         | 317653 | 7+:50947324-50982101     |
| 14708 | Gm71          | 207965 | 12--:70678645-70684092   |
| 14709 | Rab36         | 76877  | 10+:74499827-74515671    |
| 14710 | Gipc1         | 67903  | 8+:86184891-86188166     |
| 14711 | 1700001F09Rik | 71826  | 14--:44020916-44026344   |
| 14712 | V1rh8         | 171251 | 13--:22683848-22684799   |
| 14713 | Nme7          | 171567 | 1+:166238203-166367425   |
| 14714 | Ccdc102a      | 234582 | 8--:97426769-97441331    |
| 14715 | Poldip2       | 67811  | 11+:78325813-78335410    |
| 14716 | MMT00052972   |        | 5--:107907545-107920096  |
| 14717 | Srpk3         | 56504  | X+:71019760-71024261     |
| 14718 | Meox2         | 17286  | 12+:37835141-37906115    |
| 14719 | Tbc1d2b       | 67016  | 9--:90117144-90165280    |
| 14720 | Lcn9          | 77704  | 2+:25678668-25681057     |
| 14721 | 4930517E11Rik | 74702  | 2--:123949371-123955692  |
| 14722 | Scrib         | 105782 | 15--:75877615-75900160   |
| 14723 | Cd14          | 12475  | 18--:36884722-36886177   |
| 14724 | Gm467         | 232585 | 6--:13124192-13137260    |
| 14725 | MMT00013262   |        | 2+:87366204-87366895     |
| 14726 | Slc19a1       | 20509  | 10+:76496003-76513171    |
| 14727 | Rab40c        | 224624 | 17--:26019059-26056647   |
| 14728 | Fadd          | 14082  | 7--:151765681-151768296  |
| 14729 | A530057A03Rik | 215456 | 2+:127250882-127256690   |
| 14730 | 1700008O03Rik | 69349  | 7--:51615207-51630401    |
| 14731 | BC006965      | 217294 | 11--:112548958-112572655 |
| 14732 | Mga           | 29808  | 2+:119728408-119790700   |
| 14733 | Fhit          | 14198  | 14--:10382613-11994549   |
| 14734 | Nrsn2         | 228777 | 2--:152194491-152202346  |
| 14735 | 1700008F21Rik | 75453  | 8+:131591033-131707631   |
| 14736 | Pigr          | 18703  | 1+:132723356-132748150   |
| 14737 | Cldn12        | 64945  | 5--:5505112-5514915      |

|       |               |           |                         |
|-------|---------------|-----------|-------------------------|
| 14738 | Ccl17         | 20295     | 8+:97334373-97335935    |
| 14739 | V1ra7         | 113849    | 6+:90128709-90129638    |
| 14740 | Mfap1b        | 100034361 | 2-:121286459-121299760  |
| 14741 | Cep135        | 381644    | 5+:77017741-77024559    |
| 14742 | RP23-292J1.1  | 545637    | 4-:73518124-73521297    |
| 14743 | D11Wsu47e     | 276852    | 11+:113545750-113555960 |
| 14744 | Cabp4         | 73660     | 19-:4135809-4139604     |
| 14745 | MMT00000323   |           | 8+:106595048-106595632  |
| 14746 | MMT00013045   |           | 14+:15862394-15862536   |
| 14747 | Igf2bp1       | 140486    | 11-:95824453-95867077   |
| 14748 | Crhr1         | 12921     | 11+:103994355-104036836 |
| 14749 | Mnt           | 17428     | 11+:74644482-74656988   |
| 14750 | Bves          | 23828     | 10+:45055577-45089512   |
| 14751 | MMT00011983   |           | 7+:50408538-50519624    |
| 14752 | MMT00052718   | 100041004 | 5-:143285576-143289203  |
| 14753 | Slc25a19      | 67283     | 11-:115476296-115489453 |
| 14754 | Atoh8         | 71093     | 6-:72156172-72185290    |
| 14755 | Olfra452      | 258207    | 6+:42740039-42740992    |
| 14756 | Al595406      | 237730    | 11-:35610769-35612387   |
| 14757 | Hdx           | 245596    | X+:108685773-108687484  |
| 14758 | Rims4         | 241770    | 2-:163689183-163744419  |
| 14759 | Olfra470      | 258417    | 7-:114988396-114989245  |
| 14760 | Mylc2pl       | 59310     | 5+:137169015-137176964  |
| 14761 | Kank2         | 235041    | 9-:21572520-21602947    |
| 14762 | Ndufa1        | 54405     | X-:34727595-34731158    |
| 14763 | 1110005A23Rik | 66118     | 10+:128258974-128314673 |
| 14764 | Ugt2b34       | 100727    | 5-:87318777-87335983    |
| 14765 | Flad1         | 319945    | 3-:89207315-89215575    |
| 14766 | Glcci1        | 170772    | 6-:8546256-8573973      |
| 14767 | Dpy19l3       | 233115    | 7-:36501524-36507849    |
| 14768 | 1110020G09Rik | 68646     | 15+:9001008-9040234     |
| 14769 | Thoc1         | 225160    | 18+:9957586-9994627     |
| 14770 | Cops7a        | 26894     | 6-:124909816-124912716  |
| 14771 | Pus10         | 74467     | 11+:23565696-23631525   |
| 14772 | MMT00077971   |           | 6+:117947159-117948101  |
| 14773 | Anxa13        | 69787     | 15-:58173022-58220799   |
| 14774 | Tbc1d22b      | 381085    | 17+:29686745-29741917   |
| 14775 | Rpl24         | 68193     | 16+:55966659-55971504   |
| 14776 | 4930542D17Rik | 75211     | 16+:50590614-50594005   |
| 14777 | Psmb11        | 73902     | 14+:55244154-55245070   |
| 14778 | Anln          | 68743     | 9-:22136459-22193615    |
| 14779 | Dsg3          | 13512     | 18+:20668781-20699833   |
| 14780 | D230014K01Rik | 217364    | 11+:118338299-118349248 |
| 14781 | Mars2         | 212679    | 1+:55294046-55295959    |
| 14782 | Gmppa         | 69080     | 1+:75432558-75439748    |
| 14783 | Tceb1         | 67923     | 1-:16632848-16646965    |
| 14784 | MMT00024114   |           | 9+:79851871-79853061    |
| 14785 | F3            | 14066     | 3+:121426598-121437502  |
| 14786 | BC033932      | 434325    | 8-:74079656-74082824    |
| 14787 | Gca           | 227960    | 2+:62502400-62531554    |
| 14788 | Zfp184        | 193452    | 13+:22037227-22052472   |

|       |               |           |                         |
|-------|---------------|-----------|-------------------------|
| 14789 | Cox8a         | 12868     | 19-:7289651-7292019     |
| 14790 | MMT00009373   |           | 3+:7454626-7455521      |
| 14791 | MMT00048381   |           | 2-:147106437-147106820  |
| 14792 | Rarg          | 19411     | 15-:102066291-102087753 |
| 14793 | 1700003M02Rik | 69329     | 4-:34635823-34663664    |
| 14794 | Sprr2f        | 20760     | 3+:92169796-92170364    |
| 14795 | Adams3        | 330119    | 5-:90106691-90290730    |
| 14796 | Ubr4          | 69116     | 4+:138953208-138957383  |
| 14797 | Ecsit         | 26940     | 9-:21876689-21889826    |
| 14798 | Reep2         | 225362    | 18+:35000311-35007108   |
| 14799 | 1700021K02Rik | 65971     | 10+:60638009-60643427   |
| 14800 | MMT00016856   |           | 10-:88133238-88134014   |
| 14801 | MMT00053527   |           | 10+:29501350-29501617   |
| 14802 | Fbxo16        | 50759     | 14+:65885537-65940338   |
| 14803 | Ins1          | 16333     | 19+:52339113-52339438   |
| 14804 | Naalad2       | 72560     | 9-:18127706-18151934    |
| 14805 | St3gal6       | 54613     | 16-:58470654-58523425   |
| 14806 | Ccdc45        | 320162    | 11+:106650567-106680173 |
| 14807 | Sdk1          | 330222    | 5+:142661110-142688425  |
| 14808 | Pitx3         | 18742     | 19-:46210175-46222815   |
| 14809 | MMT00064476   |           | 5+:111334261-111334760  |
| 14810 | 1700010H22Rik | 75500     | 5-:98982647-98995943    |
| 14811 | Slc12a7       | 20499     | 13+:73901144-73954186   |
| 14812 | Ppib          | 19035     | 9+:65908050-65914428    |
| 14813 | 1700113I22Rik | 73635     | 11-:101283178-101283270 |
| 14814 | MMT00013754   |           | 4+:86739237-86749704    |
| 14815 | Lpin3         | 64899     | 2+:160706468-160731528  |
| 14816 | Pcdhb9        | 93880     | 18+:37560713-37563093   |
| 14817 | Tgfa          | 21802     | 6+:86145409-86225150    |
| 14818 | Il17ra        | 16172     | 6+:120413251-120433051  |
| 14819 | Rps6ka3       | 110651    | X+:155693850-155802983  |
| 14820 | Olfr1344      | 257882    | 7+:6367878-6382275      |
| 14821 | Olfr1206      | 258896    | 2+:88704763-88705679    |
| 14822 | Nrsn1         | 22360     | 13-:25343908-25361818   |
| 14823 | Zfp583        | 213011    | 7-:6267877-6282910      |
| 14824 | 14-Sep        | 74211     | 9-:57100923-57110354    |
| 14825 | Ube2h         | 22214     | 6-:30163017-30254274    |
| 14826 | Fbxo5         | 67141     | 10+:4536590-4546998     |
| 14827 | Pbx2          | 18515     | 17+:34729415-34734286   |
| 14828 | Rab28         | 100972    | 5-:42016213-42099396    |
| 14829 | 1110007M04Rik | 68493     | 4+:24825275-24829362    |
| 14830 | Olfr421       | 258715    | 1+:176081648-176082594  |
| 14831 | Olfr806       | 258546    | 10-:129175030-129175971 |
| 14832 | Acaca         | 107476    | 11+:84160204-84215160   |
| 14833 | Rnf40         | 233900    | 7+:134732297-134747124  |
| 14834 | Upf3b         | 68134     | X-:34631671-34650299    |
| 14835 | Orc5l         | 26429     | 5-:21992307-22056136    |
| 14836 | Hsd17b3       | 15487     | 13-:64159581-64190494   |
| 14837 | MMT00049854   | 100043416 | 12-:22013714-22013834   |
| 14838 | MMT00070887   |           | 2-:41841492-41844385    |
| 14839 | Pdpk1         | 18607     | 17-:24215851-24278519   |

|       |               |           |                         |
|-------|---------------|-----------|-------------------------|
| 14840 | Lonp2         | 66887     | 8+:89148028-89240531    |
| 14841 | 2010311D03Rik | 109129    | 2-:50135402-50152197    |
| 14842 | Gipr          | 381853    | 7-:19742279-19750373    |
| 14843 | MMT00081492   |           | 14+:101743797-101744459 |
| 14844 | Gpsn2         | 106529    | 8-:86095598-86118364    |
| 14845 | Tmem188       | 382030    | 8+:90642675-90654298    |
| 14846 | MMT00053748   |           | 9+:96437743-96438277    |
| 14847 | MMT00003977   |           | 17-:54051087-54088615   |
| 14848 | Pcsk1n        | 30052     | X+:7497056-7500228      |
| 14849 | MMT00001925   |           | 9-:10285082-10290948    |
| 14850 | MMT00057793   |           | 19-:46748724-46749775   |
| 14851 | MMT00034182   |           | 7+:80518417-80518637    |
| 14852 | Otx1          | 18423     | 11-:21895568-21901191   |
| 14853 | MMT00027428   |           | 9-:47808561-47942720    |
| 14854 | MMT00017294   |           | 19+:61243042-61244660   |
| 14855 | Xylt1         | 233781    | 7+:124692097-124811132  |
| 14856 | Eif1b         | 68969     | 9+:120401758-120404445  |
| 14857 | Kctd12        | 239217    | 14-:103379782-103381851 |
| 14858 | Itpr3         | 16440     | 17+:27252928-27259167   |
| 14859 | Hspa1a        | 193740    | 17-:35106944-35108870   |
| 14860 | MMT00051231   | 100041002 | 2-:29700512-29701882    |
| 14861 | Sema6a        | 20358     | 18-:47408540-47527926   |
| 14862 | Dhrs7         | 66375     | 12-:73751342-73765766   |
| 14863 | Prm3          | 19120     | 16-:10790677-10790982   |
| 14864 | Cdk4          | 12567     | 10+:126501291-126504076 |
| 14865 | Dpysl4        | 26757     | 7+:146271960-146286991  |
| 14866 | Kctd2         | 70382     | 11+:115283286-115292592 |
| 14867 | MMT00040108   |           | 17-:3130154-3130512     |
| 14868 | Tmem159       | 233806    | 7+:127245939-127264500  |
| 14869 | S100a8        | 20201     | 3+:90473006-90473956    |
| 14870 | Capn2         | 12334     | 1-:184397390-184447655  |
| 14871 | F630043A04Rik | 219114    | 14-:58426812-58445213   |
| 14872 | 1810030O07Rik | 69155     | X-:12234986-12250699    |
| 14873 | Npm1          | 18148     | 11-:33052510-33063056   |
| 14874 | MMT00016788   |           | 12-:15871951-15872550   |
| 14875 | Cenpf         | 108000    | 1-:191464971-191511968  |
| 14876 | C330002I19Rik | 77480     | 12+:25659792-25744405   |
| 14877 | Ptx3          | 19288     | 3+:66023884-66029726    |
| 14878 | MMT00036534   |           | 1-:22019412-22020696    |
| 14879 | EG636544      | 636544    | 7-:88367247-88367760    |
| 14880 | Ms4a4c        | 64380     | 19+:11482190-11501267   |
| 14881 | Nkain4        | 58237     | 2-:180669517-180689361  |
| 14882 | Kcnk6         | 52150     | 7-:30010058-30017508    |
| 14883 | Itgal         | 16408     | 7+:134439906-134478650  |
| 14884 | Mrps22        | 64655     | 9-:98489157-98502078    |
| 14885 | 2010111I01Rik | 72061     | 13+:63341359-63341640   |
| 14886 | Olfra11       | 258704    | 11-:74160151-74161084   |
| 14887 | Gga3          | 260302    | 11-:115445567-115466186 |
| 14888 | Abca8b        | 27404     | 11-:109795579-109857163 |
| 14889 | Bpil1         | 66557     | 2+:153700808-153721006  |
| 14890 | Naprt1        | 223646    | 15-:75721386-75725203   |

|       |               |        |                         |
|-------|---------------|--------|-------------------------|
| 14891 | MMT00078932   |        | 11-:104540610-104541570 |
| 14892 | Armc3         | 70882  | 2+:19120926-19231858    |
| 14893 | Wdr36         | 225348 | 18+:33012584-33025684   |
| 14894 | G0s2          | 14373  | 1-:195098355-195099286  |
| 14895 | Wdr85         | 67228  | 2+:24817964-24828991    |
| 14896 | Fev           | 260298 | 1-:74928920-74931784    |
| 14897 | Rgs7          | 24012  | 1-:176989347-177422521  |
| 14898 | Orm1          | 18405  | 4+:63005599-63009196    |
| 14899 | 1700013B16Rik | 72219  | 13-:59802934-59806456   |
| 14900 | Hist1h1e      | 50709  | 13-:23713644-23714429   |
| 14901 | MMT00053127   |        | 11-:35136708-35137044   |
| 14902 | MMT00006351   |        | 16+:45936429-45939611   |
| 14903 | 1700012A03Rik | 76382  | 6+:32000287-32008915    |
| 14904 | Ripk4         | 72388  | 16-:97964691-97985316   |
| 14905 | Slamf6        | 30925  | 1+:173847667-173873998  |
| 14906 | Ugt1a10       | 394430 | 1+:89952056-89960769    |
| 14907 | Sox12         | 20667  | 2+:152220638-152222104  |
| 14908 | Psm2          | 19166  | 13+:14705533-14717854   |
| 14909 | Jazf1         | 231986 | 6-:52995950-53031285    |
| 14910 | Dlg5          | 71228  | 14-:24953178-25064672   |
| 14911 | 4930544G11Rik | 67653  | 6+:65902602-65904008    |
| 14912 | Gpr1          | 241070 | 1-:63229265-63260783    |
| 14913 | Yipf4         | 67864  | 17+:74888855-74899313   |
| 14914 | Rnf111        | 93836  | 9-:70273236-70351532    |
| 14915 | MMT00001646   |        | X-:10442126-10442855    |
| 14916 | Adprhl2       | 100206 | 4-:125993288-125998948  |
| 14917 | Gjb5          | 14622  | 4-:127032440-127035365  |
| 14918 | Clp1          | 98985  | 2-:84563280-84567425    |
| 14919 | Pex13         | 72129  | 11-:23548509-23565868   |
| 14920 | Folr1         | 14275  | 7-:109006845-109012659  |
| 14921 | Fbxl4         | 269514 | 4+:22284762-22361210    |
| 14922 | C130092O11Rik | 232035 | 6+:61520661-61668381    |
| 14923 | MMT00071473   |        | 9+:76944860-76947307    |
| 14924 | Hn1l          | 52009  | 17-:25079100-25097586   |
| 14925 | Tagln2        | 21346  | 1+:174430178-174437506  |
| 14926 | Olf981        | 258283 | 9+:39829979-39830911    |
| 14927 | Tcl1b1        | 27379  | 12+:106397916-106404833 |
| 14928 | Eme2          | 193838 | 17-:25029092-25032086   |
| 14929 | 2810432D09Rik | 69961  | 4-:41659066-41660535    |
| 14930 | C4bp          | 12269  | 1-:132532505-132558209  |
| 14931 | Jhdm1d        | 338523 | 6-:39091973-39157554    |
| 14932 | Tmtc4         | 70551  | 14-:123318199-123382439 |
| 14933 | MMT00053967   |        | 8+:22818344-22819193    |
| 14934 | Dcx           | 13193  | X-:140298045-140367637  |
| 14935 | Ppfia1        | 233977 | 7-:151662663-151738438  |
| 14936 | Camk4         | 12326  | 18+:33099011-33346580   |
| 14937 | Acot9         | 56360  | X+:151697138-151732050  |
| 14938 | Sfrs10        | 20462  | 16-:22245879-22265975   |
| 14939 | Adam29        | 244486 | 8-:58349924-58352214    |
| 14940 | Apba1         | 319924 | 19+:24018488-24020911   |
| 14941 | MMT00037660   |        | 7-:46529621-46531829    |



|       |               |        |                         |
|-------|---------------|--------|-------------------------|
| 14942 | Grk1          | 24013  | 8+:13405100-13416578    |
| 14943 | Pnmal2        | 434128 | 7+:17531028-17532654    |
| 14944 | Rock2         | 19878  | 12+:16901995-16984908   |
| 14945 | Mmp3          | 17392  | 9+:7445821-7455972      |
| 14946 | Txndc5        | 105245 | 13-:38592145-38620320   |
| 14947 | Ern2          | 26918  | 7-:129313468-129329689  |
| 14948 | Gbgt1         | 227671 | 2+:28353285-28360913    |
| 14949 | Bcl7c         | 12055  | 7-:134848493-134852111  |
| 14950 | Yeats4        | 64050  | 10-:116652199-116661529 |
| 14951 | Dpep3         | 71854  | 8-:108497419-108503319  |
| 14952 | Tex2          | 21763  | 11-:106363451-106441824 |
| 14953 | Actc1         | 11464  | 2-:113873024-113878547  |
| 14954 | Rab19         | 19331  | 6+:39330849-39340376    |
| 14955 | Dpp7          | 83768  | 2-:25207940-25211847    |
| 14956 | Tsga10        | 211484 | 1-:37817672-37912218    |
| 14957 | Lgr5          | 14160  | 10-:114888695-115024549 |
| 14958 | Ppp4r2        | 232314 | 6+:100783626-100819921  |
| 14959 | Cacna2d1      | 12293  | 5+:15440605-15876867    |
| 14960 | Olfr843       | 258560 | 9-:19052901-19053841    |
| 14961 | Dstn          | 56431  | 2+:143741346-143769059  |
| 14962 | Casd1         | 213819 | 6+:4579999-4593018      |
| 14963 | 4930568D16Rik | 75859  | 2-:35209737-35223250    |
| 14964 | MMT00027165   | 257663 | 2+:90240819-90241749    |
| 14965 | Csnk2b        | 13001  | 17-:35253140-35258392   |
| 14966 | Ddx51         | 69663  | 5+:111085348-111087216  |
| 14967 | Ndufa10       | 67273  | 1-:94336297-94370335    |
| 14968 | Srbd1         | 78586  | 17-:86384003-86529620   |
| 14969 | EG245506      | 245506 | X+:85975211-85977435    |
| 14970 | V1rg3         | 171238 | 7+:12778313-12779239    |
| 14971 | Wnt7b         | 22422  | 15-:85367419-85411880   |
| 14972 | Syt3          | 20981  | 7+:51641340-51654520    |
| 14973 | Shf           | 435684 | 2-:122174668-122194493  |
| 14974 | Serpib9f      | 20709  | 13+:33415924-33424148   |
| 14975 | Nsbp1         | 50887  | X-:106201382-106208630  |
| 14976 | Slc26a7       | 208890 | 4-:14432343-14548904    |
| 14977 | MMT00048238   |        | 1+:88370233-88384685    |
| 14978 | Ash2l         | 23808  | 8-:26927347-26951241    |
| 14979 | Ccnf          | 12449  | 17-:24360487-24388290   |
| 14980 | Gfra1         | 14585  | 19-:58312651-58529849   |
| 14981 | 0610012H03Rik | 74088  | 2+:105064500-105219948  |
| 14982 | Dlg1          | 13383  | 16+:31664929-31872206   |
| 14983 | MMT00069757   |        |                         |
| 14984 | MMT00037514   |        | 10+:129557418-129558263 |
| 14985 | Dspp          | 666279 | 5+:104599719-104609118  |
| 14986 | 4632412N22Rik | 320159 | 17+:72034143-72038781   |
| 14987 | MMT00027573   |        | 1-:161139261-161141196  |
| 14988 | Pdzn4         | 239618 | 15+:92227891-92232477   |
| 14989 | Map3k5        | 26408  | 10+:19654288-19861527   |
| 14990 | Serpina3b     | 271047 | 12+:105368671-105376986 |
| 14991 | Gapdh         | 14433  | 6-:125112527-125115600  |
| 14992 | Hist1h3b      | 319150 | 13+:23844248-23844657   |

|       |               |        |                         |
|-------|---------------|--------|-------------------------|
| 14993 | MMT00015245   |        |                         |
| 14994 | 1110059E24Rik | 66206  | 19-:21671802-21727281   |
| 14995 | MMT00042618   |        | X-:87989990-88001685    |
| 14996 | MMT00005425   |        | 7-:13676875-13679095    |
| 14997 | Pi4k2a        | 84095  | 19+:42175119-42187606   |
| 14998 | MMT00047701   | 241621 | 2+:116858774-116881746  |
| 14999 | MMT00068456   |        | 5-:108574243-108575926  |
| 15000 | Tbx18         | 76365  | 9-:87599499-87626020    |
| 15001 | Tm9sf2        | 68059  | 14+:122506364-122558555 |
| 15002 | Ncapg         | 54392  | 5+:46061159-46091364    |
| 15003 | Zcchc10       | 67966  | 11+:53138180-53146822   |
| 15004 | MMT00067307   | 433111 | 17+:45871454-45886306   |
| 15005 | Loxl1         | 16949  | 9-:58136405-58148560    |
| 15006 | MMT00038974   |        | 15-:68545365-68546190   |
| 15007 | MMT00030946   |        | 6-:91270533-91271029    |
| 15008 | Chrdl2        | 69121  | 7+:107155009-107183238  |
| 15009 | Phf5a         | 68479  | 15-:81695748-81702337   |
| 15010 | Kcnk4         | 16528  | 19-:7000180-7009005     |
| 15011 | Olfir657      | 258309 | 7+:111784189-111785141  |
| 15012 | MMT00030248   |        | 8-:86001064-86003137    |
| 15013 | Nfkb1         | 18033  | 3-:135247657-135354295  |
| 15014 | Mrp63         | 67840  | 14+:58445075-58447582   |
| 15015 | G3bp1         | 27041  | 11+:55283253-55314387   |
| 15016 | MMT00074608   |        | 8+:41940765-41941725    |
| 15017 | Galnt13       | 271786 | 2+:54288900-54369092    |
| 15018 | D10Ertd322e   | 67270  | 10-:94943439-94964561   |
| 15019 | Slc39a5       | 72002  | 10-:127832989-127837573 |
| 15020 | 5830435N17Rik | 76066  | 11-:96451685-96481017   |
| 15021 | Ppargc1a      | 19017  | 5-:51848896-51945100    |
| 15022 | Tmem14c       | 66154  | 13+:41111660-41117947   |
| 15023 | Mcoln2        | 68279  | 3+:145812806-145858472  |
| 15024 | 2310061J03Rik | 66391  | 16-:55973389-55974663   |
| 15025 | Flii          | 14248  | 11-:60527650-60540723   |
| 15026 | MMT00070733   |        | 7+:12556464-12557444    |
| 15027 | Brd7          | 26992  | 8-:90856210-90886052    |
| 15028 | MMT00009785   |        | 8+:102188070-102188756  |
| 15029 | Nudt16l1      | 66911  | 16+:4939110-4941023     |
| 15030 | Pdhb          | 68263  | 14-:8996872-9005548     |
| 15031 | 4930415O20Rik | 73863  | 15+:98415681-98420011   |
| 15032 | 2310033P09Rik | 67862  | 11+:59021869-59024234   |
| 15033 | Olfir126      | 258892 | 17+:37987538-37988498   |
| 15034 | Pdhx          | 27402  | 2-:102860919-102913667  |
| 15035 | EG333669      | 333669 | 10+:75448664-75467655   |
| 15036 | 2410004B18Rik | 66421  | 3+:145600995-145607237  |
| 15037 | Olfir690      | 56860  | 7-:112477757-112478720  |
| 15038 | Centb5        | 140500 | 4+:155266419-155281359  |
| 15039 | Zmynd15       | 574428 | 11+:70274407-70279701   |
| 15040 | B3galt2       | 26878  | 1+:145493257-145494526  |
| 15041 | Mark1         | 226778 | 1-:186721481-186823358  |
| 15042 | MMT00065766   |        | 7+:27523605-27524111    |
| 15043 | MMT00014281   | 636687 | 8-:72070056-72109061    |

|       |               |        |                         |
|-------|---------------|--------|-------------------------|
| 15044 | 4930483J18Rik | 67638  | 15+:81021282-81023082   |
| 15045 | Vmn2r105      | 627743 | 17-:20345193-20365002   |
| 15046 | Arl6ip2       | 56298  | 17-:80249516-80252264   |
| 15047 | MMT00028841   |        | 6+:67811145-67811719    |
| 15048 | 2310001H12Rik | 69504  | 5+:110425559-110425653  |
| 15049 | Rnf125        | 67664  | 18+:21119968-21142500   |
| 15050 | MMT00003733   |        | 14+:77126081-77376503   |
| 15051 | Nin           | 18080  | 12-:71119741-71212945   |
| 15052 | Kifc3         | 16582  | 8-:97623733-97634324    |
| 15053 | Tns4          | 217169 | 11-:98928682-98950614   |
| 15054 | Dci           | 13177  | 17+:24563647-24576147   |
| 15055 | Vgll4         | 232334 | 6-:114809371-114919976  |
| 15056 | D930020B18Rik | 216393 | 10+:121104461-121127004 |
| 15057 | Atad2         | 70472  | 15-:57925597-57966638   |
| 15058 | Foxp2         | 114142 | 6+:14851613-14899118    |
| 15059 | Mogat1        | 68393  | 1+:78508465-78534738    |
| 15060 | Ttc14         | 67120  | 3+:33707638-33709059    |
| 15061 | MMT00030104   |        | X+:111995166-111995268  |
| 15062 | P2ry5         | 67168  | 14+:73637698-73639440   |
| 15063 | MMT00059184   |        | 7-:32488798-32490780    |
| 15064 | MMT00069658   |        | 16-:51362282-51364011   |
| 15065 | Wdr17         | 244484 | 8-:55772693-55809701    |
| 15066 | Tmcc1         | 330401 | 6-:115971187-115993823  |
| 15067 | Tmbim4        | 68212  | 10+:119645881-119661953 |
| 15068 | MMT00046711   |        | 9+:30901774-30902582    |
| 15069 | MMT00014274   |        | 4-:84822378-84889932    |
| 15070 | MMT00037369   |        | 16+:3463904-3466526     |
| 15071 | Htr2b         | 15559  | 1-:87995846-88007492    |
| 15072 | Commd9        | 76501  | 2+:101726418-101741796  |
| 15073 | Lrrc45        | 217366 | 11+:120575273-120582812 |
| 15074 | Usp18         | 24110  | 6+:121195974-121220934  |
| 15075 | Ercc5         | 22592  | 1+:44204691-44238105    |
| 15076 | Stil          | 20460  | 4+:114672804-114715500  |
| 15077 | Spaca5        | 278203 | X+:20645613-20654811    |
| 15078 | Slc1a3        | 20512  | 15-:8585807-8660743     |
| 15079 | Plcd3         | 72469  | 11-:102931617-102962920 |
| 15080 | MMT00054557   |        | 3+:4211712-4213844      |
| 15081 | Asah1         | 11886  | 8-:42426018-42459981    |
| 15082 | Dsg1b         | 225256 | 18+:20381711-20630099   |
| 15083 | Phb           | 18673  | 11+:95529369-95541163   |
| 15084 | Ccl3          | 20302  | 11-:83461346-83462859   |
| 15085 | MMT00070062   |        | 1-:82816242-82819425    |
| 15086 | EG435977      | 435977 | 7-:54988387-54989356    |
| 15087 | Slc25a17      | 20524  | 15-:81149525-81191181   |
| 15088 | 2810452K22Rik | 67236  | 12-:112111374-112127309 |
| 15089 | Pla2g7        | 27226  | 17+:43705660-43748996   |
| 15090 | Psg18         | 26438  | 7-:18931193-18940224    |
| 15091 | Gm1418        | 384514 | 6-:69494270-69494886    |
| 15092 | Rhbdd2        | 215160 | 5-:136113004-136113366  |
| 15093 | Kcnh8         | 211468 | 17+:52865087-53044544   |
| 15094 | Pbx4          | 80720  | 8+:72356602-72396190    |

|       |               |        |                         |
|-------|---------------|--------|-------------------------|
| 15095 | 0610005C13Rik | 71661  | 7-:52823157-52830696    |
| 15096 | Snx15         | 69024  | 19-:6119394-6124192     |
| 15097 | Arl13b        | 68146  | 16-:62812971-62846868   |
| 15098 | MMT00024304   |        | 15+::38821688-38823208  |
| 15099 | Arhgap10      | 78514  | 8-:79774817-80041684    |
| 15100 | Ganab         | 14376  | 19+::8972600-8991151    |
| 15101 | Ythdf1        | 228994 | 2-:180639083-180655047  |
| 15102 | Lrrc16b       | 268747 | 14+::56110072-56113258  |
| 15103 | Olfr473       | 258771 | 7+::115077035-115077968 |
| 15104 | MMT00059576   |        | 5+::26584224-26589882   |
| 15105 | Crk           | 12928  | 11+::75492824-75518881  |
| 15106 | Plekha7       | 233765 | 7-:123319223-123341912  |
| 15107 | Cxcl14        | 57266  | 13-:56390004-56397912   |
| 15108 | Fuca1         | 71665  | 4+::135476679-135495193 |
| 15109 | Zfp189        | 230162 | 4+::49534096-49544409   |
| 15110 | MMT00073562   |        |                         |
| 15111 | Kctd13        | 233877 | 7+::134072385-134089123 |
| 15112 | Uba6          | 231380 | 5-:86538311-86601781    |
| 15113 | MMT00069471   |        | 9-:119802185-119803965  |
| 15114 | V1re3         | 171226 | 17-:20913218-20914218   |
| 15115 | 9030420J04Rik | 71544  | 9-:9115689-9155364      |
| 15116 | MMT00034189   |        | 7+::79445302-79819163   |
| 15117 | Rps6kc1       | 320119 | 1-:192596758-192735629  |
| 15118 | Chchd8        | 68185  | 7+::107682991-107687858 |
| 15119 | EG545921      | 545921 | 7-:16065517-16067128    |
| 15120 | Pgap1         | 241062 | 1-:54568237-54614465    |
| 15121 | Itln1         | 16429  | 1-:173448372-173461885  |
| 15122 | MMT00063982   |        | X-:57829621-57831971    |
| 15123 | Nrtn          | 18188  | 17-:56890747-56896953   |
| 15124 | Ncaph2        | 52683  | 15+::89186210-89202010  |
| 15125 | Oxtr          | 18430  | 6-:112425758-112439935  |
| 15126 | Megf8         | 269878 | 7+::26111398-26150937   |
| 15127 | Cct6b         | 12467  | 11-:82532751-82577808   |
| 15128 | St6gal2       | 240119 | 17+::55621264-55649644  |
| 15129 | MMT00030044   |        | 2+::82783788-82880349   |
| 15130 | Hnf1b         | 21410  | 11+::83664550-83718846  |
| 15131 | Atf6          | 226641 | 1-:172637344-172797903  |
| 15132 | MMT00007672   |        | 7-:110975180-110976389  |
| 15133 | 3110048E14Rik | 73225  | 15+::84867633-84893258  |
| 15134 | Nol9          | 74035  | 4+::151413444-151435603 |
| 15135 | Col5a3        | 53867  | 9-:20574493-20619478    |
| 15136 | Mkl2          | 239719 | 16+::13265169-13413348  |
| 15137 | Olfr1403      | 258645 | 1+::175200307-175201240 |
| 15138 | Rpl6          | 19988  | 5+::121656749-121658975 |
| 15139 | Dpp8          | 74388  | 9+::64880527-64932307   |
| 15140 | Slc47a1       | 67473  | 11-:61156903-61191566   |
| 15141 | MMT00074858   |        | 2+::153870210-153871525 |
| 15142 | Cnot4         | 53621  | 6-:34995982-35083704    |
| 15143 | Gp9           | 54368  | 6+::87728129-87729756   |
| 15144 | Kank4         | 242553 | 4-:98428093-98484229    |
| 15145 | Olfr286       | 629524 | 15-:98057107-98058072   |

|       |               |        |                         |
|-------|---------------|--------|-------------------------|
| 15146 | Smc5          | 226026 | 19-:23283318-23293020   |
| 15147 | Pabpc1        | 18458  | 15-:36525775-36538515   |
| 15148 | Tmem87a       | 211499 | 2-:120181051-120229806  |
| 15149 | Atp5d         | 66043  | 10+:79605109-79608556   |
| 15150 | MMT00014640   |        | 3+:90562586-90565233    |
| 15151 | Cdh11         | 12552  | 8-:105157384-105244409  |
| 15152 | F730047E07Rik | 212377 | 4+:24423642-24430557    |
| 15153 | Foxm1         | 14235  | 6+:128313108-128324304  |
| 15154 | Dhx29         | 218629 | 13+:113717662-113759639 |
| 15155 | Rnasen        | 14000  | 15+:12819369-12820308   |
| 15156 | Trim66        | 330627 | 7-:116598515-116629664  |
| 15157 | Eno1          | 13806  | 4+:149611363-149622981  |
| 15158 | Clk3          | 102414 | 9-:57598425-57612926    |
| 15159 | Timd4         | 276891 | 11+:46652762-46657820   |
| 15160 | Vezf1         | 22344  | 11+:87881863-87896043   |
| 15161 | Ppp4r1        | 70351  | 17+:66169484-66191186   |
| 15162 | Il18          | 16173  | 9+:50373472-50389942    |
| 15163 | Gm347         | 241289 | 2+:28305888-28309370    |
| 15164 | MMT00030321   |        |                         |
| 15165 | Tmem129       | 68366  | 5-:33995867-34000546    |
| 15166 | EG383080      | 383080 | 15-:81329513-81399475   |
| 15167 | MMT00007970   |        | 10+:74283466-74283958   |
| 15168 | Oxa1l         | 69089  | 14+:54980523-54989353   |
| 15169 | Scp2          | 20280  | 4-:107716445-107791112  |
| 15170 | Tspan17       | 74257  | 13+:54890821-54898129   |
| 15171 | Nr4a3         | 18124  | 4+:48064119-48096223    |
| 15172 | Cul1          | 26965  | 6+:47434858-47475631    |
| 15173 | Tmem132b      | 208151 | 5+:126102830-126179120  |
| 15174 | 3110001D03Rik | 66928  | 4-:74923261-74924191    |
| 15175 | Enthd1        | 383075 | 15-:80364938-80395589   |
| 15176 | MMT00051529   |        | 1-:46953374-47071736    |
| 15177 | Bmpr2         | 12168  | 1+:59821480-59927703    |
| 15178 | Elavl4        | 15572  | 4-:109878771-110024514  |
| 15179 | Ralb          | 64143  | 1-:121368283-121380184  |
| 15180 | Asgr1         | 11889  | 11+:69867916-69871388   |
| 15181 | Enpp4         | 224794 | 17-:44233177-44242756   |
| 15182 | Gpr112        | 236798 | X+:54210449-54233531    |
| 15183 | Slain2        | 75991  | 5+:73305612-73366085    |
| 15184 | Capn6         | 12338  | X-:140238172-140261838  |
| 15185 | Zfp119        | 104349 | 17-:56004157-56018218   |
| 15186 | D10Bwg1364e   | 216169 | 10-:80046399-80053049   |
| 15187 | Nradd         | 67169  | 9-:110523640-110526957  |
| 15188 | MMT00073131   |        | 9-:62189309-62192197    |
| 15189 | BC005764      | 216152 | 10-:79327527-79337380   |
| 15190 | MMT00046191   |        | 8+:61698114-61699740    |
| 15191 | Ankrd13b      | 268445 | 11-:77283998-77303054   |
| 15192 | Skap1         | 78473  | 11+:96325945-96442824   |
| 15193 | RP23-9A5.1    | 623270 | 2-:110974270-110993137  |
| 15194 | MMT00078831   |        | 7+:132218918-132219345  |
| 15195 | Slc25a1       | 13358  | 16-:17925310-17928291   |
| 15196 | BC053393      | 407814 | 11+:46390596-46402732   |

|       |               |        |                         |
|-------|---------------|--------|-------------------------|
| 15197 | Hmx3          | 15373  | 7+:138686696-138688439  |
| 15198 | Pstk          | 214580 | 7+:138514652-138517852  |
| 15199 | MMT00001490   |        | 7-:114131830-114133189  |
| 15200 | Gk2           | 14626  | 5-:97884179-97886027    |
| 15201 | MMT00038384   |        | 11+:14949178-14950192   |
| 15202 | 5330437102Rik | 319888 | 18+:65857922-65882277   |
| 15203 | Prss3         | 22073  | 6-:41323812-41327596    |
| 15204 | Doc2a         | 13446  | 7+:133991447-134005392  |
| 15205 | MMT00030262   |        | 2+:14642750-14644166    |
| 15206 | Wbscr18       | 66114  | 5+:135540071-135541235  |
| 15207 | Cnp           | 12799  | 11+:100436288-100443039 |
| 15208 | Tmem70        | 70397  | 1+:16655298-16668354    |
| 15209 | Ppig          | 228005 | 2+:69560874-69589727    |
| 15210 | Osr1          | 23967  | 12+:9585897-9587694     |
| 15211 | Casc4         | 319996 | 2+:121692991-121761762  |
| 15212 | Oaz3          | 53814  | 3-:94237311-94240538    |
| 15213 | Allc          | 94041  | 12-:29238624-29267348   |
| 15214 | D430042O09Rik | 233865 | 7+:132896486-132914217  |
| 15215 | Nkx1-2        | 20231  | 7-:139788354-139791298  |
| 15216 | Ttc33         | 67515  | 15+:5135717-5168328     |
| 15217 | Tgfbr2        | 21813  | 9-:115999091-116084310  |
| 15218 | V1rc27        | 171200 | 6+:57354457-57355383    |
| 15219 | 0910001L09Rik | 66096  | 5+:138696959-138700624  |
| 15220 | Ddx6          | 13209  | 9+:44415217-44445189    |
| 15221 | 2810004N23Rik | 66523  | 8-:127363256-127386891  |
| 15222 | L3mbtl4       | 320858 | 17+:68805032-68979698   |
| 15223 | MMT00004769   |        | 5+:21104556-21105366    |
| 15224 | Cyp2a4        | 13086  | 7+:26685881-27100106    |
| 15225 | Zrsr2         | 22184  | X-:160373374-160396521  |
| 15226 | Musk          | 18198  | 4+:58298983-58390288    |
| 15227 | lfng1         | 15979  | 10+:19311791-19330035   |
| 15228 | 5730588L14Rik | 329369 | 2+:26499141-26501462    |
| 15229 | MMT00008641   |        | 12+:101703793-101726600 |
| 15230 | Tgm3          | 21818  | 2+:129838084-129874297  |
| 15231 | Fem1a         | 14154  | 17+:56396331-56398295   |
| 15232 | Man1b1        | 227619 | 2+:25188301-25207730    |
| 15233 | Camta2        | 216874 | 11-:70477275-70501433   |
| 15234 | Gimap4        | 107526 | 6+:48634579-48642056    |
| 15235 | Ankrd13d      | 68423  | 19-:4270178-4283104     |
| 15236 | Slc2a3        | 20527  | 6-:122679949-122692408  |
| 15237 | Sstr1         | 20605  | 12+:59313579-59314754   |
| 15238 | Nrg1          | 211323 | 8-:33068983-33119720    |
| 15239 | Ube2q2        | 109161 | 9+:54997211-55055335    |
| 15240 | Tanc2         | 77097  | 11+:105620235-105786418 |
| 15241 | EG636752      | 636752 | 6-:69349797-69367189    |
| 15242 | Kcnk3         | 16527  | 5+:30890458-30925854    |
| 15243 | Tbc1d21       | 74286  | 9-:58207520-58218262    |
| 15244 | 6430550H21Rik | 245386 | X-:35552160-35605635    |
| 15245 | Olf1r27       | 258826 | 9+:38951686-38952602    |
| 15246 | Ccdc5         | 225745 | 18-:77996306-78006519   |
| 15247 | Cstb          | 13014  | 10+:77888536-77890183   |

|       |               |        |                         |
|-------|---------------|--------|-------------------------|
| 15248 | Egr4          | 13656  | 6-:85461115-85463536    |
| 15249 | Serpina4-ps1  | 321018 | 12+:105318854-105325131 |
| 15250 | Hoxd3         | 15434  | 2+:74581984-74585663    |
| 15251 | Olf1r60       | 18361  | 7-:147530952-147531886  |
| 15252 | MMT00019402   |        | 11+:50920177-50920984   |
| 15253 | Tmem33        | 67878  | 5+:67651915-67677763    |
| 15254 | 2600009E05Rik | 77006  | 2-:130479145-130490732  |
| 15255 | Ccl8          | 20307  | 11+:81928684-81930297   |
| 15256 | Jph2          | 59091  | 2-:163163509-163223686  |
| 15257 | Zbtb32        | 58206  | 7-:31374700-31376922    |
| 15258 | Coil          | 12812  | 11+:88835263-88852925   |
| 15259 | Grin2d        | 14814  | 7-:53088150-53121937    |
| 15260 | MMT00021250   |        | 11+:53972427-53973557   |
| 15261 | Vmn2r109      | 627814 | 17-:20677482-20692206   |
| 15262 | Timm8b        | 30057  | 9+:50412014-50413423    |
| 15263 | Cyc1          | 66445  | 15+:76173952-76176364   |
| 15264 | Flywch2       | 76917  | 17-:23913884-23923044   |
| 15265 | Prph2         | 19133  | 17+:47047433-47061875   |
| 15266 | Cnnm4         | 94220  | 1+:36528829-36563794    |
| 15267 | Mdga2         | 320772 | 12-:67572175-67790514   |
| 15268 | Syne1         | 64009  | 10+:5170624-5177854     |
| 15269 | 2310050C09Rik | 66533  | 3-:92672281-92673205    |
| 15270 | Serac1        | 321007 | 17-:6044063-6079728     |
| 15271 | Dbf4          | 27214  | 5-:8397011-8422606      |
| 15272 | MMT00057343   |        | X-:79646064-79646380    |
| 15273 | Relb          | 19698  | 7-:20191572-20214625    |
| 15274 | Ccdc100       | 225523 | 18-:53841377-53879019   |
| 15275 | Enox1         | 239188 | 14+:77907943-78121567   |
| 15276 | Eif4e         | 13684  | 3+:138190241-138220156  |
| 15277 | 2810002N01Rik | 68020  | 12+:112951481-112972402 |
| 15278 | Epha5         | 13839  | 5-:84486816-84845932    |
| 15279 | Cips          | 109791 | 17-:28695158-28697659   |
| 15280 | Cxcl10        | 15945  | 5-:92775666-92777880    |
| 15281 | V1rc22        | 171195 | 6-:58384931-58385839    |
| 15282 | Olf1r1505     | 258151 | 19+:13993625-13994461   |
| 15283 | Snx3          | 54198  | 10+:42222061-42254774   |
| 15284 | EG632778      | 632778 | 7-:26399640-26400910    |
| 15285 | Vps52         | 224705 | 17-:34117258-34117692   |
| 15286 | MMT00073158   |        | 4-:69615112-69616312    |
| 15287 | St6galnac5    | 26938  | 3-:152484007-152645174  |
| 15288 | Pet112l       | 229487 | 3+:85378048-85458085    |
| 15289 | 9130017N09Rik | 78906  | 10+:79283765-79293195   |
| 15290 | Ankzf1        | 52231  | 1+:75188766-75195955    |
| 15291 | Prss36        | 77613  | 7-:135076145-135079593  |
| 15292 | 2010107G23Rik | 69894  | 10-:61570959-61573761   |
| 15293 | MMT00001423   |        | 16+:50111185-50112217   |
| 15294 | Lrrc3         | 237387 | 10-:77363525-77365254   |
| 15295 | Agbl5         | 231093 | 5+:31192538-31209337    |
| 15296 | Mier3         | 218613 | 13+:112490993-112505883 |
| 15297 | MMT00048291   |        | 7+:76354769-76355794    |
| 15298 | 1190003J15Rik | 76974  | 7+:148020915-148023865  |

|       |               |        |                         |
|-------|---------------|--------|-------------------------|
| 15299 | Mrps21        | 66292  | 3-:95666655-95675404    |
| 15300 | Olfr1214      | 258899 | 2-:88827423-88828357    |
| 15301 | Dyrk2         | 69181  | 10-:118290436-118294066 |
| 15302 | Lypla3        | 192654 | 8+:108674386-108687235  |
| 15303 | Spcs3         | 76687  | 8-:55605785-55615329    |
| 15304 | Kin           | 16588  | 2+:10002209-10014326    |
| 15305 | Elf2          | 69257  | 3-:51059592-51129909    |
| 15306 | Dpy30         | 66310  | 17-:74698820-74715742   |
| 15307 | MMT00047381   |        | 7-:74927664-74928355    |
| 15308 | Mcc           | 328949 | 18-:44589266-44693954   |
| 15309 | Aldh3a2       | 11671  | 11-:61058357-61080614   |
| 15310 | Mlxipl        | 58805  | 5+:135582785-135613755  |
| 15311 | 2810408A11Rik | 70419  | 11-:69710967-69714489   |
| 15312 | 1700034H14Rik | 67105  | 18-:85116685-85120916   |
| 15313 | Olfr66        | 18367  | 7-:111029552-111034790  |
| 15314 | Olfr202       | 258997 | 16-:59283399-59284321   |
| 15315 | Gak           | 231580 | 5-:108997600-109058774  |
| 15316 | MMT00077385   |        | 11+:19620238-19621473   |
| 15317 | Lrrk1         | 233328 | 7-:73426513-73437307    |
| 15318 | Aars2         | 224805 | 17+:45643802-45657790   |
| 15319 | Tceb1         | 67923  | 1-:16633366-16647121    |
| 15320 | MMT00017479   |        | 1+:7167814-7169828      |
| 15321 | Pus7          | 78697  | 5-:23246467-23289513    |
| 15322 | Rasl12        | 70784  | 9+:65246282-65260509    |
| 15323 | Lysmd1        | 217779 | 3+:94938738-94942455    |
| 15324 | Tep1          | 21745  | 14-:51443730-51490217   |
| 15325 | MMT00007852   |        | 2-:127385145-127385244  |
| 15326 | Tbrg4         | 21379  | 11-:6516427-6526026     |
| 15327 | Olfr1018      | 258579 | 2+:85663129-85664063    |
| 15328 | V1rb9         | 113857 | 6+:89696524-89696571    |
| 15329 | Olfr1033      | 258571 | 2+:85881473-85882404    |
| 15330 | Exosc1        | 66583  | 19-:41998473-42007772   |
| 15331 | Pdk1          | 228026 | 2+:71711277-71738223    |
| 15332 | Ube2g2        | 22213  | 10+:77085065-77108735   |
| 15333 | Tmem190       | 78052  | 7+:4734547-4735936      |
| 15334 | Rnaseh2c      | 68209  | 19+:5601884-5602932     |
| 15335 | Rps17         | 20068  | 7-:88487620-88489897    |
| 15336 | Dpp4          | 13482  | 2-:62169775-62249965    |
| 15337 | Rgs22         | 626596 | 15-:35940439-36036876   |
| 15338 | Nav3          | 260315 | 10-:109290000-109341078 |
| 15339 | Ptges3        | 56351  | 10+:127496229-127513513 |
| 15340 | Cdk5rap1      | 66971  | 2-:154161123-154198455  |
| 15341 | MMT00043449   |        |                         |
| 15342 | Ctnnbip1      | 67087  | 4+:148892432-148940545  |
| 15343 | Rnf183        | 76072  | 4-:62088576-62095766    |
| 15344 | MMT00063326   |        |                         |
| 15345 | Tcstv3        | 236219 | Un_random-:3053-3772    |
| 15346 | Defb11        | 246081 | 8-:23015861-23016883    |
| 15347 | Pkd1          | 18763  | 17+:24686894-24733428   |
| 15348 | Eif2ak2       | 19106  | 17-:79253849-79281882   |
| 15349 | Endog         | 13804  | 2+:30027043-30029589    |



|       |               |        |                         |
|-------|---------------|--------|-------------------------|
| 15350 | Exosc5        | 27998  | 7+:26444182-26453042    |
| 15351 | AW822252      | 331578 | X-:51016490-51019923    |
| 15352 | Socs2         | 216233 | 10-:94875005-94877825   |
| 15353 | Ednrb         | 13618  | 14-:104215877-104242896 |
| 15354 | MMT00080064   |        | 9+:61699432-61699869    |
| 15355 | Capn8         | 170725 | 1+:184495142-184562483  |
| 15356 | Rfc2          | 19718  | 5+:135058640-135074197  |
| 15357 | 5133400J02Rik | 71297  | 11-:50924082-51025560   |
| 15358 | Eif5a2        | 208691 | 3+:28680929-28693600    |
| 15359 | 4930465K10Rik | 67640  | 18+:77952948-77954196   |
| 15360 | Tcfe3         | 209446 | X+:7339826-7352326      |
| 15361 | Mrm1          | 217038 | 11-:84626564-84633017   |
| 15362 | Zfp35         | 22694  | 18+:24148179-24163230   |
| 15363 | Abi3bp        | 320712 | 16+:56614801-56619786   |
| 15364 | MMT00067596   |        | 5+:147294614-147296057  |
| 15365 | Ext2          | 14043  | 2-:93535789-93662702    |
| 15366 | Ces7          | 67935  | 8-:96038094-96058612    |
| 15367 | Vegfc         | 22341  | 8+:55162979-55271803    |
| 15368 | Rhbdl2        | 230726 | 4+:123487283-123506874  |
| 15369 | MMT00004924   |        | X-:93419675-93420126    |
| 15370 | Gm249         | 216797 | 11-:59186927-59189132   |
| 15371 | 1700010C24Rik | 70363  | 15-:71275519-71356271   |
| 15372 | Gpr179        | 217143 | 11-:97210744-97212857   |
| 15373 | Olfm3         | 229759 | 3+:114783974-114825775  |
| 15374 | Chd2          | 244059 | 7+:80571532-80572744    |
| 15375 | Rnd3          | 74194  | 2-:50985960-51004631    |
| 15376 | MMT00024461   |        | 7+:4257555-4258556      |
| 15377 | Fxr2          | 23879  | 11+:69446819-69466199   |
| 15378 | Exdl2         | 97827  | 12+:81576980-81599106   |
| 15379 | Cd2bp2        | 70233  | 7-:134337189-134339475  |
| 15380 | AW209491      | 105351 | 13+:14728564-14730468   |
| 15381 | Prl8a1        | 73244  | 13-:27665790-27674040   |
| 15382 | Rhox5         | 18617  |                         |
| 15383 | MMT00043941   |        | 9+:4977904-4979576      |
| 15384 | Mat2a         | 232087 | 6-:72383693-72389492    |
| 15385 | Wdr64         | 75820  | 1+:177656519-177674017  |
| 15386 | Tex12         | 66654  | 9-:50364923-50369430    |
| 15387 | Mgl1          | 17312  | 11+:69980275-69984335   |
| 15388 | Gcap14        | 72972  | 14-:37711396-37781902   |
| 15389 | Tdg           | 21665  | 10+:82092611-82113063   |
| 15390 | Accn3         | 171209 | 5+:23919437-23923654    |
| 15391 | Abca8a        | 217258 | 11-:109886949-109947951 |
| 15392 | Adh6a         | 69117  | 3+:137985851-137994098  |
| 15393 | Sec22a        | 317717 | 16-:35313498-35349083   |
| 15394 | Olf47         | 18346  | 6+:43185608-43186574    |
| 15395 | Tmem63c       | 217733 | 12+:88367439-88430981   |
| 15396 | MMT00005917   |        | 6+:6852812-6853431      |
| 15397 | Inhbc         | 16325  | 10-:126794142-126807452 |
| 15398 | Galnt13       | 271786 | 2+:54707012-54785980    |
| 15399 | 5830408C22Rik | 74744  | 8+:26211632-26220445    |
| 15400 | Adcy8         | 11514  | 15-:64530595-64753722   |

|       |               |        |                         |
|-------|---------------|--------|-------------------------|
| 15401 | MMT00075823   |        | 15+:57953105-57953476   |
| 15402 | Zfp354b       | 27274  | 11-:50735794-50744435   |
| 15403 | C330046G03Rik | 252974 | 10+:77292211-77344030   |
| 15404 | Ireb2         | 64602  | 9+:54711590-54760298    |
| 15405 | MMT00015238   | 667659 | 11-:52291383-52293515   |
| 15406 | Mdfi          | 17240  | 17-:47952278-47970168   |
| 15407 | Kcnn3         | 140493 | 3+:89324342-89471326    |
| 15408 | Mkln1         | 27418  | 6+:31348844-31459475    |
| 15409 | Trim36        | 28105  | 18-:46326647-46372018   |
| 15410 | Pvalb         | 19293  | 15-:78021874-78036815   |
| 15411 | Alf747699     | 381236 | 19-:33834392-33836240   |
| 15412 | 2210010C17Rik | 70080  | 7-:20523404-20536094    |
| 15413 | Brp44l        | 55951  | 17+:8476721-8490506     |
| 15414 | Arhgap18      | 73910  | 10+:26492332-26638451   |
| 15415 | Olfra484      | 258492 | 7-:115252577-115268775  |
| 15416 | Alg10b        | 380959 | 15+:90054868-90058217   |
| 15417 | 5830433M19Rik | 67770  | 4-:94166775-94223770    |
| 15418 | Klhl23        | 277396 | 2+:69660004-69674707    |
| 15419 | Olfra745      | 258296 | 14+:51261957-51262943   |
| 15420 | Glod5         | 69824  | X-:7581326-7595618      |
| 15421 | Scgn          | 214189 | 13-:24045329-24083083   |
| 15422 | Ubap1         | 67123  | 4+:41296085-41336798    |
| 15423 | Tinag         | 26944  | 9-:76799591-76893530    |
| 15424 | Atp6v1g2      | 66237  | 17+:35373708-35374743   |
| 15425 | Adprh         | 11544  | 16-:38445769-38450521   |
| 15426 | 1700108M19Rik | 71156  | 12-:36934932-36979987   |
| 15427 | MMT00009375   |        | 10+:121542301-121607417 |
| 15428 | MMT00071860   |        | 8-:73565243-73565470    |
| 15429 | MMT00045518   |        | Y+:1337257-1338233      |
| 15430 | Nr4a1         | 15370  | 15+:101097292-101105223 |
| 15431 | Ezh1          | 14055  | 11-:101052429-101089262 |
| 15432 | Ppapdc2       | 74411  | 19+:29036401-29039368   |
| 15433 | Myb           | 17863  | 10-:20844741-20880790   |
| 15434 | MMT00039082   |        | 6+:102021453-102022163  |
| 15435 | MMT00016377   |        | 12-:98802695-98803278   |
| 15436 | 3000002C10Rik | 378954 | 9-:109732887-109734003  |
| 15437 | Mt3           | 17751  | 8+:96676643-96678031    |
| 15438 | Tctex1d1      | 67344  | 4+:102658986-102677173  |
| 15439 | Cdc14b        | 218294 | 13-:64296665-64376096   |
| 15440 | Edem1         | 192193 | 6+:108778553-108809951  |
| 15441 | Zbtb24        | 268294 | 10+:41170925-41185377   |
| 15442 | Scarb2        | 12492  | 5-:92873061-92934542    |
| 15443 | 6130401L20Rik | 75740  | 3+:28981494-29052525    |
| 15444 | Triml1        | 244448 | 8-:44215405-44226823    |
| 15445 | Guca1a        | 14913  | 17-:47531592-47537385   |
| 15446 | Cd320         | 54219  | 17+:33980115-33985372   |
| 15447 | Eif4a3        | 192170 | 11-:119149677-119161357 |
| 15448 | 1700018B24Rik | 66332  | 3-:48409653-48413023    |
| 15449 | Mitd1         | 69028  | 1-:37935731-37947277    |
| 15450 | Dio1          | 13370  | 4-:106974424-106979723  |
| 15451 | Ftcd          | 14317  | 10+:76038430-76052304   |

|       |               |           |                         |
|-------|---------------|-----------|-------------------------|
| 15452 | Adora3        | 11542     | 3+:105673820-105726968  |
| 15453 | Dhrs7c        | 68460     | 11+:67611687-67629499   |
| 15454 | MMT00010886   |           | 2+:111022637-111027656  |
| 15455 | Lsm4          | 50783     | 8+:73197290-73202646    |
| 15456 | Chi3l3        | 12655     | 3-:105950471-105970439  |
| 15457 | Olfr430       | 258713    | 1+:175999485-176000382  |
| 15458 | Eed           | 13626     | 7-:97103185-97129480    |
| 15459 | Man2b2        | 17160     | 5-:37198159-37221866    |
| 15460 | D130059P03Rik | 320538    | 6+:38383932-38441932    |
| 15461 | Galnt2        | 108148    | 8-:126868394-126869620  |
| 15462 | Enox1         | 239188    | 14-:77556571-77558585   |
| 15463 | Eftud2        | 20624     | 11-:102700114-102739028 |
| 15464 | Aarsd1        | 69684     | 11-:101268155-101278747 |
| 15465 | MMT00053549   |           | 10+:30908689-30929709   |
| 15466 | Gm136         | 214568    | 4-:34690809-34693907    |
| 15467 | Cfc1          | 12627     | 1+:34592492-34601156    |
| 15468 | EG545136      | 545136    | 15-:99101450-99126240   |
| 15469 | 4931428F04Rik | 74356     | 8-:107805387-107813764  |
| 15470 | Trrap         | 100683    | 5+:145619865-145620645  |
| 15471 | Mrps33        | 14548     | 6-:39751814-39761038    |
| 15472 | Tmem209       | 72649     | 6-:30447161-30459750    |
| 15473 | Foxf1a        | 15227     | 8+:123608373-123610778  |
| 15474 | Wfdc15b       | 192201    | 2-:164040190-164047396  |
| 15475 | Olfr846       | 258279    | 9-:19164859-19165797    |
| 15476 | Fem1b         | 14155     | 9-:62643837-62659186    |
| 15477 | Araf          | 11836     | X+:20425694-20438130    |
| 15478 | OTTMUSG000000 | 432552    | 11+:46218228-46221484   |
| 15479 | Pde6g         | 18588     | 11-:120309344-120314743 |
| 15480 | MMT00078167   |           | 7+:119796187-119797434  |
| 15481 | 1110067D22Rik | 216551    | 11-:20723360-20731110   |
| 15482 | Sdccag10      | 67285     | 13-:105421316-105601398 |
| 15483 | Il17rb        | 50905     | 14-:30809385-30821995   |
| 15484 | Lrrc42        | 77809     | 4-:106906120-106926138  |
| 15485 | Zfp251        | 71591     | 15-:76681720-76765960   |
| 15486 | Mlf2          | 30853     | 6+:124881493-124886156  |
| 15487 | Cyp20a1       | 77951     | 1+:60400163-60444903    |
| 15488 | E430029J22Rik | 100033459 | 1+:175603809-175631841  |
| 15489 | Tmem158       | 72309     | 9-:123168919-123217057  |
| 15490 | Mtfr1         | 67472     | 3+:19088272-19119556    |
| 15491 | Gdi2          | 14569     | 13+:3537514-3564409     |
| 15492 | Efnb1         | 13641     | X+:96331507-96343567    |
| 15493 | Zbtb39        | 320080    | 10+:127176680-127180752 |
| 15494 | Dync1li2      | 234663    | 8-:106941394-106966701  |
| 15495 | 1700034F02Rik | 73324     | 11+:29447947-29478350   |
| 15496 | Helz          | 78455     | 11+:107409239-107549129 |
| 15497 | Ftl1          | 14325     | 7-:52713317-52715205    |
| 15498 | Snrpe         | 20643     | 1+:135426046-135506785  |
| 15499 | Dact1         | 59036     | 12+:72414878-72421079   |
| 15500 | MMT00081411   |           | 2+:15318470-15319347    |
| 15501 | Smad7         | 17131     | 18+:75527182-75555581   |
| 15502 | 1700018G05Rik | 69388     | X+:100123710-100124442  |

|       |               |           |                         |
|-------|---------------|-----------|-------------------------|
| 15503 | MMT00044964   |           | 17+:65776811-65778500   |
| 15504 | Mx2           | 17858     | 16+:97757689-97782506   |
| 15505 | Rpl35         | 66489     | 2-:38857100-38860651    |
| 15506 | Ovch2         | 244199    | 7-:114932603-114938468  |
| 15507 | Shkbp1        | 192192    | 7-:28127155-28141038    |
| 15508 | 4632415L05Rik | 70808     | 3+:19794911-19797219    |
| 15509 | Gabra6        | 14399     | 11-:42119939-42134510   |
| 15510 | 4930417G10Rik | 74855     | 12-:4722224-4745238     |
| 15511 | Acin1         | 56215     | 14+:55299785-55300474   |
| 15512 | Mitf          | 17342     | 6+:97941785-97968696    |
| 15513 | Mcat          | 223722    | 15-:83382772-83386117   |
| 15514 | Msh6          | 17688     | 17+:88374423-88390403   |
| 15515 | Gpx2-ps1      | 14777     | 7+:107413059-107413756  |
| 15516 | Ctcf          | 13018     | 8+:108160440-108206821  |
| 15517 | Olf1445       | 258694    | 19+:12958372-12959315   |
| 15518 | MMT00013286   |           | 2-:87387043-87387352    |
| 15519 | Eml3          | 225898    | 19+:9004183-9016062     |
| 15520 | 1500005I02Rik | 72014     | 11-:114651726-114657212 |
| 15521 | Mast3         | 546071    | 8-:73302016-73321860    |
| 15522 | 1810011O10Rik | 69068     | 8-:25548087-25549418    |
| 15523 | Krtap5-2      | 71623     | 7-:149360439-149361910  |
| 15524 | Ccr3          | 12771     | 9+:123943361-123944441  |
| 15525 | Emp2          | 13731     | 16-:10282727-10313973   |
| 15526 | Pnliprp2      | 18947     | 19+:58834218-58852018   |
| 15527 | Olf1265       | 258340    | 2+:89877077-89878007    |
| 15528 | EG629292      | 629292    | 18+:60585836-60586861   |
| 15529 | MMT00011590   |           | 7-:110975180-110976389  |
| 15530 | Syt5          | 53420     | 7-:4491697-4497913      |
| 15531 | Prickle4      | 66119     | 17-:47823594-47825047   |
| 15532 | Map3k13       | 71751     | 16+:21892041-21928120   |
| 15533 | Olfml2b       | 320078    | 1+:172574646-172612919  |
| 15534 | V1rc28        | 171201    | 6-:57793558-57794451    |
| 15535 | Hoxa2         | 15399     | 6-:52112511-52114830    |
| 15536 | Garnl4        | 380711    | 11-:74196864-74250638   |
| 15537 | Ift88         | 21821     | 14+:58042962-58136773   |
| 15538 | B130024G19Rik | 434198    | 7+:77533734-77556033    |
| 15539 | MMT00028325   | 100040304 | X+:67653506-67655496    |
| 15540 | C2            | 12263     | 17-:34999552-35018992   |
| 15541 | Amph          | 218038    | 13+:19040268-19241712   |
| 15542 | E230028L10Rik | 242805    | 4+:155165743-155167291  |
| 15543 | Efhb          | 211482    | 17-:53538213-53602379   |
| 15544 | Ccdc71        | 72454     | 9+:108362907-108366865  |
| 15545 | Grf1          | 232906    | 7-:17082233-17150487    |
| 15546 | Abca2         | 11305     | 2+:25284289-25303719    |
| 15547 | MMT00044818   |           | 11+:3851670-3852908     |
| 15548 | Cand1         | 71902     | 10-:118637085-118677093 |
| 15549 | Ppp1r1c       | 75276     | 2+:79548330-79649583    |
| 15550 | 2010200O16Rik | 67495     | 3-:108359344-108365297  |
| 15551 | Psm5          | 66998     | 2-:34707619-34726447    |
| 15552 | AW061290      | 381110    | 17+:80014561-80092531   |
| 15553 | 4921536K21Rik | 67430     | 11-:3786202-3795101     |

|       |               |        |                        |
|-------|---------------|--------|------------------------|
| 15554 | Txndc13       | 52837  | 2-:134420219-134470214 |
| 15555 | 6030422M02Rik | 240697 | 1+:9914137-9922262     |
| 15556 | Tm7sf2        | 73166  | 19-:6062819-6067841    |
| 15557 | MMT00080723   |        | 17-:15406076-15458846  |
| 15558 | Pnp1          | 18950  | 14+:51567526-51571295  |
| 15559 | A2m           | 232345 | 6+:121586281-121629237 |
| 15560 | Lrrc25        | 211228 | 8+:73141459-73145384   |
| 15561 | Msgn1         | 56184  | 12-:11215188-11215754  |
| 15562 | Mrpl13        | 68537  | 15-:55365649-55388868  |
| 15563 | EG225058      | 225058 | 17+:88530034-88530456  |
| 15564 | Lix1          | 66643  | 17+:17539832-17594585  |
| 15565 | 2310001A20Rik | 71881  | 2-:150408816-150434259 |
| 15566 | Snn           | 20621  | 16+:11073786-11075062  |
| 15567 | 1600002H07Rik | 72016  | 17-:24352002-24357795  |
| 15568 | MMT00016706   |        | 4+:137981634-137981958 |
| 15569 | BC003331      | 226499 | 1-:152209662-152237483 |
| 15570 | MMT00017284   |        | 8+:36878364-36880464   |
| 15571 | Grid2ip       | 170935 | 5+:144125586-144153476 |
| 15572 | Dtx3l         | 209200 | 16-:35926599-35933486  |
| 15573 | Aipl1         | 114230 | 11-:71842666-71850960  |
| 15574 | MMT00017182   | 671641 | 8+:37088765-37089204   |
| 15575 | Bckdhb        | 12040  | 9+:83818761-84017846   |
| 15576 | Mboat5        | 14792  | 6+:124613145-124654196 |
| 15577 | Glt8d4        | 232313 | 6+:100683177-100755070 |
| 15578 | Lrrc3b        | 218763 | 14-:16190033-16269019  |
| 15579 | MMT00073770   |        | 12+:57151519-57152064  |
| 15580 | MMT00077001   |        | 17-:34881932-34883717  |
| 15581 | Olfr601       | 258311 | 7-:110506762-110507706 |
| 15582 | Klrk1         | 27007  | 6-:129562433-129572790 |
| 15583 | Npm1          | 18148  | 11-:33052510-33063057  |
| 15584 | MMT00027452   |        | 9-:49994212-49995150   |
| 15585 | MMT00033125   |        | 8-:58452400-58453004   |
| 15586 | Ppef1         | 237178 | X-:157061437-157131547 |
| 15587 | Actl6b        | 83766  | 5+:137994862-138010772 |
| 15588 | Kndc1         | 76484  | 7+:147081085-147113170 |
| 15589 | Hsdl2         | 72479  | 4+:59594561-59630935   |
| 15590 | Sec62         | 69276  | 3+:30691796-30719053   |
| 15591 | Tmem200b      | 623230 | 4+:131477071-131480188 |
| 15592 | Spef2         | 320277 | 15-:9507945-9678585    |
| 15593 | Rit2          | 19762  | 18-:31133968-31476722  |
| 15594 | Gm1967        | 381411 | 2-:93695519-93698127   |
| 15595 | Olfr1233      | 258974 | 2-:89179540-89180457   |
| 15596 | Pcdhb6        | 93877  | 18+:37493681-37496000  |
| 15597 | Cplx3         | 235415 | 9-:57449182-57454038   |
| 15598 | Etfb          | 110826 | 7+:50699499-50713149   |
| 15599 | MMT00019452   | 677457 | 7-:54810742-54811683   |
| 15600 | EG382156      | 382156 | 9-:109286400-109289281 |
| 15601 | Plekhm3       | 241075 | 1-:64984403-65003320   |
| 15602 | Sctr          | 319229 | 1+:121940027-121960107 |
| 15603 | MMT00013018   |        | 5-:87780494-87793844   |
| 15604 | Arl4a         | 11861  | 12-:40762408-40764005  |

|       |               |        |                         |
|-------|---------------|--------|-------------------------|
| 15605 | Cyp2c39       | 13098  | 19+:39585360-39643021   |
| 15606 | MMT00008386   |        | 2+:127515802-127516731  |
| 15607 | Klf13         | 50794  | 7-:71036394-71083735    |
| 15608 | Stxbp2        | 20911  | 8+:3631167-3642730      |
| 15609 | Mreg          | 381269 | 1-:72207087-72238778    |
| 15610 | 1110051M20Rik | 228356 | 2-:91117024-91284864    |
| 15611 | MMT00008492   |        | 2-:139641830-139642262  |
| 15612 | MMT00008662   |        | 3+:3939288-4003173      |
| 15613 | 1810037C20Rik | 66294  | X-:71630058-71638478    |
| 15614 | Tpr           | 108989 | 1+:152239964-152297434  |
| 15615 | Zfp800        | 627049 | 6-:28191311-28211926    |
| 15616 | Pon2          | 330260 | 6-:5215227-5248308      |
| 15617 | Atm           | 11920  | 9-:53247472-53342071    |
| 15618 | Sel1l         | 20338  | 12-:93079898-93087581   |
| 15619 | Spef1         | 70997  | 2-:130996769-131001439  |
| 15620 | Cenpb         | 12616  | 2-:131003813-131005612  |
| 15621 | 4632428N05Rik | 74048  | 10+:59809670-59835055   |
| 15622 | MMT00032239   |        |                         |
| 15623 | Tdrd6         | 210510 | 17-:43757374-43766867   |
| 15624 | Crcp          | 12909  | 5+:130505175-130536651  |
| 15625 | Capg          | 12332  | 6+:72494530-72512966    |
| 15626 | MMT00035685   |        | 19-:11109903-11110324   |
| 15627 | Nmral1        | 67824  | 16-:4711307-4719362     |
| 15628 | MMT00036336   |        | 10+:124949566-124950227 |
| 15629 | Asb7          | 117589 | 7-:73792673-73824176    |
| 15630 | B020004C17Rik | 432860 | 14+:57635528-57636378   |
| 15631 | Lpin1         | 14245  | 12-:16542763-16596555   |
| 15632 | Gsc           | 14836  | 12-:105709418-105711446 |
| 15633 | Wnt8b         | 22423  | 19+:44567962-44587005   |
| 15634 | C130069I09Rik | 233026 | 7-:28769902-28770553    |
| 15635 | Crks          | 69131  | 11+:98064616-98112360   |
| 15636 | Hsp90ab1      | 15516  | 17+:45709314-45710136   |
| 15637 | Vmn2r99       | 665376 | 17+:19515529-19531014   |
| 15638 | MMT00048114   |        | 4-:142011581-142180961  |
| 15639 | Clec2d        | 93694  | 6+:129130639-129136552  |
| 15640 | Ints3         | 229543 | 3-:90195323-90206332    |
| 15641 | 5230400G24Rik | 75734  | 1+:82721493-82748962    |
| 15642 | Ugt2b38       | 100559 | 5-:87838971-87853213    |
| 15643 | MMT00059954   |        |                         |
| 15644 | Diras2        | 68203  | 13-:52603039-52603638   |
| 15645 | Mrpl18        | 67681  | 17-:13104220-13108957   |
| 15646 | Tatdn3        | 68972  | 1-:192869717-192886785  |
| 15647 | MMT00032340   |        | 7+:3181089-3181960      |
| 15648 | Eif4enif1     | 74203  | 11+:3102764-3144584     |
| 15649 | 0610012G03Rik | 106264 | 16-:31947136-31948580   |
| 15650 | Lrrc26        | 227618 | 2+:25145466-25146696    |
| 15651 | Tm2d3         | 68634  | 7+:72838344-72846786    |
| 15652 | Mmp28         | 118453 | 11-:83256052-83276360   |
| 15653 | Gm73          | 218476 | 13+:97694472-97695098   |
| 15654 | 1700020A23Rik | 75656  | 2+:130231236-130231808  |
| 15655 | Bcl2l14       | 66813  | 6+:134348659-134388742  |

|       |               |        |                         |
|-------|---------------|--------|-------------------------|
| 15656 | Olfr1109      | 258762 | 2-:86932614-86933552    |
| 15657 | Zfyve28       | 231125 | 5-:34537523-34540235    |
| 15658 | Slfn8         | 276950 | 11-:82794837-82831217   |
| 15659 | MMT00074093   |        | 16-:64917105-64918916   |
| 15660 | 9130204L05Rik | 229550 | 3-:90892059-90894730    |
| 15661 | Adm2          | 223780 | 15+:89153404-89155163   |
| 15662 | Avil          | 11567  | 10+:126440440-126457619 |
| 15663 | OTTMUSG000000 | 241593 | 2-:104554463-104554942  |
| 15664 | Masp2         | 17175  | 4+:147976662-147978522  |
| 15665 | Blcap         | 53619  | 2-:157382098-157392052  |
| 15666 | Xrcc4         | 108138 | 13-:89988527-90229128   |
| 15667 | Gpr6          | 140741 | 10-:40790299-40831465   |
| 15668 | 1810032O08Rik | 66293  | 11+:116532973-116537110 |
| 15669 | Klf17         | 75753  | 4-:117430440-117438237  |
| 15670 | Pnmal1        | 71691  | 7+:17545105-17546860    |
| 15671 | St6gal1       | 20440  | 16+:23290589-23358668   |
| 15672 | Ahi1          | 52906  | 10+:20672345-20800226   |
| 15673 | Krtap16-4     | 170654 | 16-:88885030-88885334   |
| 15674 | Riok1         | 71340  | 13+:38129163-38153298   |
| 15675 | MMT00077535   | 641192 | 5-:23698515-23715426    |
| 15676 | Fads1         | 76267  | 19+:10257462-10271364   |
| 15677 | Slc9a9        | 331004 | 9+:94839907-95130859    |
| 15678 | MMT00016379   |        | 12+:99082690-99083258   |
| 15679 | MMT00004444   |        | 17+:55387084-55387395   |
| 15680 | 2810030E01Rik | 72668  | 2-:17967238-17969966    |
| 15681 | MMT00068730   |        | X+:100733627-100793674  |
| 15682 | Rnasen        | 14000  | 15+:12808398-12814790   |
| 15683 | EG234159      | 234159 | 8+:35390880-35391448    |
| 15684 | Wdr38         | 76646  | 2+:38853836-38857102    |
| 15685 | B3gnt5        | 108105 | 16+:19761146-19770714   |
| 15686 | MMT00078205   |        | 4+:46340140-46340755    |
| 15687 | Olfr1487      | 258629 | 19+:13693653-13694599   |
| 15688 | Tmem71        | 213068 | 15-:66358570-66392665   |
| 15689 | Dscam1        | 114873 | 9+:45234710-45379307    |
| 15690 | MMT00007845   |        | 2-:127271727-127272081  |
| 15691 | A930034L06Rik | 319317 | 2+:158201447-158209155  |
| 15692 | MMT00018858   |        | 17+:41482995-41483775   |
| 15693 | P2ry4         | 57385  | X-:97788545-97789629    |
| 15694 | 2310039E09Rik | 68016  | 4+:48676428-48686365    |
| 15695 | Tead4         | 21679  | 6-:128220875-128250843  |
| 15696 | Pycr2         | 69051  | 1+:182834439-182838218  |
| 15697 | Tbc1d8b       | 245638 | X+:136237690-136240027  |
| 15698 | Them2         | 66834  | 13-:24909823-24923358   |
| 15699 | Exosc3        | 66362  | 4-:45329174-45333487    |
| 15700 | Crocc         | 230872 | 4-:140572559-140603044  |
| 15701 | MMT00059157   |        | X+:20723825-20724777    |
| 15702 | MMT00047561   | 64164  | 1+:157888023-15789927   |
| 15703 | Hoxa3         | 15400  | 6-:52118988-52141702    |
| 15704 | MMT00038941   |        | 1-:24601056-24602334    |
| 15705 | Mad111        | 17120  | 5-:140484643-140797504  |
| 15706 | 4930503L19Rik | 269033 | 18-:70611866-70632412   |

|       |               |           |                             |
|-------|---------------|-----------|-----------------------------|
| 15707 | Trp53i13      | 216964    | 11-:77321605-77329249       |
| 15708 | Retsat        | 67442     | 6+:72548592-72558357        |
| 15709 | Tceal1        | 237052    | X+:133242603-133244403      |
| 15710 | MMT00050492   |           | 15+:98836486-98836800       |
| 15711 | Anxa1         | 16952     | 19-:20447921-20465163       |
| 15712 | 5033413D22Rik | 75973     | 10-:41300028-41307258       |
| 15713 | Rbm3          | 19652     | X-:7719491-7722807          |
| 15714 | MMT00017591   |           | 17+:35472853-35473227       |
| 15715 | Tnfrsf18      | 21936     | 4+:155400450-155402998      |
| 15716 | 8-Sep         | 20362     | 11+:53333397-53361925       |
| 15717 | MMT00046853   |           | 1-:140888230-140897814      |
| 15718 | MacroD2       | 72899     | 2+:142082252-142200047      |
| 15719 | BC060267      | 212516    | 6-:115760754-115773729      |
| 15720 | Trp53i11      | 277414    | 2+:93027756-93041908        |
| 15721 | MMT00007615   |           |                             |
| 15722 | Ccdc9         | 243846    | 7-:16859387-16872110        |
| 15723 | Csf1          | 12977     | 3-:107543974-107563140      |
| 15724 | Esco2         | 71988     | 14-:66437327-66452775       |
| 15725 | MMT00034976   |           | 9-:50961271-50962543        |
| 15726 | Sncaip        | 67847     | 18+:52997663-53067132       |
| 15727 | MMT00047785   |           | 2+:132503885-132505211      |
| 15728 | Ush2a         | 22283     | 1+:190377067-190402410      |
| 15729 | MMT00052703   |           |                             |
| 15730 | EG545124      | 545124    | 15+:82346706-82349153       |
| 15731 | Mfhas1        | 52065     | 8+:36651426-36740304        |
| 15732 | Usp31         | 76179     | 7-:128791261-128850416      |
| 15733 | Speer4a       | 75657     | 5-:26361229-26366043        |
| 15734 | Mkrm1         | 54484     | 6-:39347818-39370386        |
| 15735 | EG629689      | 629689    | 10+:52248325-52249842       |
| 15736 | Cox7b         | 66142     | X+:103211088-103217296      |
| 15737 | Smpdl3a       | 57319     | 10+:57514405-57531626       |
| 15738 | 2900093L17Rik | 78508     | 4-:45247601-45256865        |
| 15739 | MMT00079446   | 100045878 | 14+:53242466-53373563       |
| 15740 | 1810010H24Rik | 69066     | 11+:106889123-106891752     |
| 15741 | MMT00062445   |           | 15-:10490280-10491327       |
| 15742 | 2900062L11Rik | 76976     | X+:132528369-132529890      |
| 15743 | Hoxc6         | 15425     | 15+:102839909-102842313     |
| 15744 | Iqcf1         | 74267     | 9+:106402311-106404579      |
| 15745 | MMT00077003   |           | 5-:143614122-143614803      |
| 15746 | Calr          | 12317     | 8-:87365989-87370765        |
| 15747 | Sfrs1         | 110809    | 11+:87860314-87863106       |
| 15748 | MMT00032580   |           | Y_random-:40879070-40880061 |
| 15749 | Cd22          | 12483     | 7-:31650847-31665286        |
| 15750 | MMT00015073   |           | 14+:54063225-54074528       |
| 15751 | 9230104L09Rik | 77705     | 2-:148672452-148676673      |
| 15752 | Cyp4a14       | 13119     | 4-:115158750-115168737      |
| 15753 | MMT00014019   |           | 2-:142773461-142777220      |
| 15754 | 1700006E09Rik | 75437     | 11+:101848364-101852828     |
| 15755 | Nfam1         | 74039     | 15-:82840804-82847056       |
| 15756 | MMT00043772   |           | 3+:65197258-65199105        |
| 15757 | A830018L16Rik | 320492    | 1+:11404296-11586400        |



|       |               |        |                         |
|-------|---------------|--------|-------------------------|
| 15758 | Stx4a         | 20909  | 7+:134985552-134992164  |
| 15759 | Nkx2-3        | 18089  | 19+:43686989-43690380   |
| 15760 | Trib3         | 228775 | 2-:152163160-152169768  |
| 15761 | C6            | 12274  | 15+:4677211-4754044     |
| 15762 | Rpl12         | 269261 | 2+:32817245-32819561    |
| 15763 | Vmn2r-ps14    | 545700 | 4+:145054108-145057441  |
| 15764 | Smpd2         | 20598  | 10-:41206981-41210150   |
| 15765 | Bcr           | 110279 | 10+:74523693-74647794   |
| 15766 | Bmp2          | 12156  | 2+:133378743-133387451  |
| 15767 | Tmem174       | 68344  | 13-:99404933-99407312   |
| 15768 | Suhw4         | 235469 | 9+:72208021-72211305    |
| 15769 | Pkhd1l1       | 192190 | 15+:44413298-44432897   |
| 15770 | B3gnt7        | 227327 | 1+:88200042-88203878    |
| 15771 | F730014I05Rik | 228866 | 2+:164704898-164716876  |
| 15772 | C87977        | 97187  | 4-:143796666-143802901  |
| 15773 | MMT00069895   |        | 5+:107899726-107920599  |
| 15774 | Ppp1r16b      | 228852 | 2+:158492853-158587916  |
| 15775 | Nat11         | 70999  | 19-:7299765-7315674     |
| 15776 | Hectd2        | 226098 | 19+:36643860-36673436   |
| 15777 | Lphn3         | 319387 | 5+:81941008-82226494    |
| 15778 | MMT00061514   |        | 7+:11390635-11391334    |
| 15779 | Pln           | 18821  | 10+:53057530-53064420   |
| 15780 | Pde4d         | 238871 | 13+:110693294-110742244 |
| 15781 | Cct4          | 12464  | 11+:22890592-22903336   |
| 15782 | Eml1          | 68519  | 12+:109701736-109777821 |
| 15783 | Fasl          | 14103  | 1-:163710963-163718540  |
| 15784 | 9430070O13Rik | 77352  | 1-:158279031-158349477  |
| 15785 | Isoc2a        | 664994 | 7+:4828653-4847001      |
| 15786 | Apc2          | 23805  | 10+:79764582-79778770   |
| 15787 | Wdr92         | 103784 | 11+:17111929-17133773   |
| 15788 | E130016E03Rik | 623474 | 4+:11506880-11511348    |
| 15789 | Dnahc11       | 13411  | 12-:119116455-119437516 |
| 15790 | Slc37a3       | 72144  | 6-:39284774-39327706    |
| 15791 | Txn1          | 22166  | 4-:57956633-57969156    |
| 15792 | Use1          | 67023  | 8+:73891124-73893628    |
| 15793 | MMT00010957   |        | 13+:26286493-26287207   |
| 15794 | Olf1589       | 259054 | 7-:110303307-110304259  |
| 15795 | Col1a2        | 12843  | 6+:4455760-4490729      |
| 15796 | 4930549C01Rik | 67663  | 4+:136166351-136169128  |
| 15797 | Ppp2r5c       | 26931  | 12+:111685525-111821271 |
| 15798 | MMT00013138   |        | 11+:94143255-94147299   |
| 15799 | MMT00032080   |        | 8-:87377540-87378510    |
| 15800 | MMT00023224   | 66449  | 16-:4616474-4624937     |
| 15801 | Efna2         | 13637  | 10+:79642458-79652437   |
| 15802 | Ppy           | 19064  | 11-:101961244-101962614 |
| 15803 | Zmym4         | 67785  | 4-:126599461-126625725  |
| 15804 | MMT00056548   | 245350 | X+:12514073-12515660    |
| 15805 | Ttyh3         | 78339  | 5-:141099410-141124902  |
| 15806 | Dennd4c       | 329877 | 4+:86420141-86496504    |
| 15807 | MMT00028673   |        | 14-:99764857-99765273   |
| 15808 | Vps4b         | 20479  | 1-:108667734-108693253  |

|       |               |        |                         |
|-------|---------------|--------|-------------------------|
| 15809 | Zfp365        | 216049 | 10-:67349535-67375165   |
| 15810 | Nat3          | 17962  | 8+:70071369-70072242    |
| 15811 | Opn1mw        | 14539  | X+:71372832-71396092    |
| 15812 | Nptxr         | 73340  | 15-:79619835-79635122   |
| 15813 | Vpreb3        | 22364  | 10+:75411102-75412207   |
| 15814 | Alpk2         | 225638 | 18-:65425480-65466975   |
| 15815 | MMT00080242   |        | 15-:26658038-26659479   |
| 15816 | Fat1          | 14107  | 8+:46074281-46137609    |
| 15817 | MMT00025100   |        | 5-:115547692-115548304  |
| 15818 | Zcchc4        | 78796  | 5+:53174235-53215903    |
| 15819 | MMT00055433   | 545798 | 5-:116490544-116533256  |
| 15820 | Stard9        | 668880 | 2+:120490615-120519550  |
| 15821 | Pcp4          | 18546  | 16+:96689373-96747394   |
| 15822 | Snapc2        | 102209 | 8+:4253101-4256219      |
| 15823 | Krtap5-4      | 50775  | 7+:149489499-149490170  |
| 15824 | D19Erd721e    | 225896 | 19+:8946048-8950145     |
| 15825 | Fermt3        | 108101 | 19-:7073466-7093928     |
| 15826 | Arl4d         | 80981  | 11+:101526874-101529143 |
| 15827 | Rrm1          | 20133  | 7+:109590457-109617441  |
| 15828 | 1700060C16Rik | 73425  | 6-:143541872-143599808  |
| 15829 | Hlcs          | 110948 | 16-:94351294-94490230   |
| 15830 | Sema5a        | 20356  | 15+:32347113-32626085   |
| 15831 | Olf1217       | 258903 | 2-:88863243-88864158    |
| 15832 | Crybb2        | 12961  | 5-:113487286-113497786  |
| 15833 | 4932412H11Rik | 242838 | 5+:3858628-3866664      |
| 15834 | 9030611O19Rik | 104943 | 12+:31758858-31763850   |
| 15835 | Sar1a         | 20224  | 10+:61143078-61156042   |
| 15836 | Hpn           | 15451  | 7-:31883743-31900294    |
| 15837 | Plg           | 18815  | 17+:12571511-12612250   |
| 15838 | BC039210      | 234839 | 8-:125005617-125025879  |
| 15839 | MMT00045078   |        | 16+:23033913-23050925   |
| 15840 | H2-M9         | 14997  | 17-:36777371-36779589   |
| 15841 | Ndufb6        | 230075 | 4-:40217686-40226440    |
| 15842 | Med12l        | 329650 | 3+:59031604-59122331    |
| 15843 | Tnn           | 329278 | 1-:162015165-162077971  |
| 15844 | Klhdc9        | 68874  | 1-:173288536-173290949  |
| 15845 | Zpld1         | 239852 | 16-:55226493-55283351   |
| 15846 | 1700088E04Rik | 27660  | 15-:78965188-78971661   |
| 15847 | Gm392         | 235858 | 8-:57910790-57912361    |
| 15848 | Bst1          | 12182  | 5+:44210146-44234550    |
| 15849 | Pacs2         | 217893 | 12+:114252871-114310783 |
| 15850 | Zfp62         | 22720  | 11+:49017820-49031262   |
| 15851 | Rbbp8         | 225182 | 18+:11851520-11901712   |
| 15852 | MMT00023533   | 544896 | 12-:114899906-114900439 |
| 15853 | D430036J16Rik | 319405 | 9+:81525957-81538235    |
| 15854 | EG382109      | 382109 | 9-:109626227-109635227  |
| 15855 | Boll          | 75388  | 1-:55356913-55463474    |
| 15856 | C330019G07Rik | 215476 | 5-:33136130-33170464    |
| 15857 | Itih5         | 209378 | 2+:10075245-10173892    |
| 15858 | Snrpe         | 20643  | 1-:135500450-135506844  |
| 15859 | MMT00057272   |        | X+:135791423-135792688  |

|       |               |        |                        |
|-------|---------------|--------|------------------------|
| 15860 | BC004004      | 80748  | 17+:29405895-29438470  |
| 15861 | MMT00002080   |        | 3-:81359853-81360707   |
| 15862 | Mrap          | 77037  | 16+:90738354-90750032  |
| 15863 | Dph5          | 69740  | 3+:115591111-115632005 |
| 15864 | Rps6ka2       | 20112  | 17+:7374635-7507662    |
| 15865 | MMT00018841   |        | 9-:26766058-26770212   |
| 15866 | Cdc45l        | 12544  | 16-:18780545-18812065  |
| 15867 | Crhr2         | 12922  | 6-:55040080-55082966   |
| 15868 | 5430425J12Rik | 71390  | 13+:73837271-73847358  |
| 15869 | Amh           | 11705  | 10+:80267984-80270392  |
| 15870 | Aqp5          | 11830  | 15+:99421212-99425252  |
| 15871 | MMT00078036   |        | 13-:91023054-91038463  |
| 15872 | 4933424B01Rik | 71177  | 6-:146498154-146526281 |
| 15873 | Syne2         | 319565 | 12+:77128694-77129067  |
| 15874 | Vmn2r14       | 231591 | 5-:109644721-109650439 |
| 15875 | 1700072E05Rik | 73495  | X+:83289537-83292652   |
| 15876 | Eif4ebp2      | 13688  | 10-:60895244-60915417  |
| 15877 | Olf1491       | 258342 | 19+:13779318-13780276  |
| 15878 | MMT00001587   |        | 2-:110258323-110259773 |
| 15879 | Obp1b         | 18250  | X-:75485801-75490729   |
| 15880 | Olf1554       | 258322 | 7+:109788761-109789714 |
| 15881 | Hcn4          | 330953 | 9+:58671318-58708569   |
| 15882 | AA986860      | 212439 | 1+:132628605-132641198 |
| 15883 | Tulp3         | 22158  | 6-:128271183-128305812 |
| 15884 | Olf1395       | 259007 | 11-:73720053-73720992  |
| 15885 | Adamts7       | 108153 | 9+:90066311-90094931   |
| 15886 | Gm941         | 381112 | 17+:80734570-80748926  |
| 15887 | Lce1m         | 66203  | 3-:92821731-92822982   |
| 15888 | Cyp2d34       | 223706 | 15-:82446394-82451337  |
| 15889 | Moxd2         | 194357 | 6-:40828793-40837493   |
| 15890 | Fbxw2         | 30050  | 2-:34660864-34678701   |
| 15891 | Dgat2l3       | 245533 | X+:97767649-97773226   |
| 15892 | Slc22a5       | 20520  | 11-:53678525-53705143  |
| 15893 | Dock4         | 238130 | 12+:41362669-41571232  |
| 15894 | Rif1          | 51869  | 2+:51932712-51977899   |
| 15895 | MMT00080717   |        | 17-:15672028-15672655  |
| 15896 | Pdgfrb        | 18596  | 18+:61205094-61244713  |
| 15897 | D10Jhu81e     | 28295  | 10-:77624811-77632513  |
| 15898 | Papd1         | 67440  | 18+:4375589-4396782    |
| 15899 | MMT00058392   |        | 3-:113084762-113089679 |
| 15900 | Rasal2        | 226525 | 1-:159070130-159216985 |
| 15901 | Tpm3          | 59069  | 3+:89876658-89896047   |
| 15902 | MMT00045851   |        | 18+:9252930-9254563    |
| 15903 | Ntng1         | 80883  | 3-:109584022-109946143 |
| 15904 | Ncl           | 17975  | 1-:88247194-88255798   |
| 15905 | Gemin8        | 237221 | X+:162608419-162627682 |
| 15906 | O610010K14Rik | 104457 | 11-:70048711-70051416  |
| 15907 | Hyou1         | 12282  | 9+:44188602-44199131   |
| 15908 | Pebp1         | 23980  | 5-:117732662-117737555 |
| 15909 | Rpl9          | 20005  | 5-:65779605-65781682   |
| 15910 | Adamts1       | 77739  | 4+:85699878-86020896   |

|       |               |        |                         |
|-------|---------------|--------|-------------------------|
| 15911 | Gira4         | 14657  | X-:133292235-133310450  |
| 15912 | Hcls1         | 15163  | 16+:36935100-36963298   |
| 15913 | Ston2         | 108800 | 12-:92828718-92982320   |
| 15914 | Dapk2         | 13143  | 9+:66006039-66120046    |
| 15915 | Spata21       | 329972 | 4+:140658888-140660882  |
| 15916 | Il1rap        | 16180  | 16+:26581853-26716652   |
| 15917 | 3100002J23Rik | 75429  | 11-:58606297-58615467   |
| 15918 | Fkbp11        | 66120  | 15-:98554802-98558629   |
| 15919 | Fbxl6         | 30840  | 15-:76366160-76369165   |
| 15920 | A630001G21Rik | 319997 | 1-:87613658-87623200    |
| 15921 | Naca          | 17938  | 10+:127472690-127485692 |
| 15922 | Psd           | 73728  | 19-:46386574-46399419   |
| 15923 | Olfra652      | 259050 | 7+:111712736-111713692  |
| 15924 | Rbm38         | 56190  | 2+:172847429-172860230  |
| 15925 | Rpl19         | 19921  | 11+:97889134-97891791   |
| 15926 | Kctd20        | 66989  | 17+:29089444-29104898   |
| 15927 | Ltb4r2        | 57260  | 14+:56380760-56381843   |
| 15928 | 5830411J07Rik | 74742  | 2-:70659716-70661490    |
| 15929 | Cdc16         | 69957  | 8+:13769354-13781930    |
| 15930 | Slc38a6       | 625098 | 12+:74387766-74452883   |
| 15931 | Ces3          | 104158 | 8-:95689971-95721678    |
| 15932 | Comp          | 12845  | 8+:72897456-72905964    |
| 15933 | Serp2         | 72661  | 14-:76932621-76956512   |
| 15934 | Armcx3        | 71703  | X+:131291137-131295995  |
| 15935 | Pnpla3        | 116939 | 15+:83998266-84019944   |
| 15936 | Mid2          | 23947  | X+:137199494-137302251  |
| 15937 | Adamts4       | 240913 | 1+:173180548-173190027  |
| 15938 | Cst11         | 78240  | 2-:148594344-148597233  |
| 15939 | Nagk          | 56174  | 6+:83745049-83752549    |
| 15940 | Npr1          | 18160  | 3-:90255017-90269436    |
| 15941 | MMT00024086   |        | 9+:79421614-79422433    |
| 15942 | Lhfp12        | 218454 | 13+:94942762-94962104   |
| 15943 | Gpr89         | 67549  | 3-:96674988-96709221    |
| 15944 | Tmem62        | 96957  | 2+:120802490-120833568  |
| 15945 | 1700018L24Rik | 75528  | 8+:11840513-11855760    |
| 15946 | Nol14         | 75416  | 5-:34981185-35002772    |
| 15947 | BC057552      | 212123 | 8-:86618736-86625629    |
| 15948 | Padi1         | 18599  | 4-:140368895-140401693  |
| 15949 | MMT00060795   |        | Y-:200804-202689        |
| 15950 | Adpgk         | 72141  | 9+:59139414-59164003    |
| 15951 | C330027C09Rik | 224171 | 16+:48994297-49019814   |
| 15952 | Bai3          | 210933 | 1-:25477402-25616710    |
| 15953 | Acsf3         | 257633 | 8+:125309791-125341782  |
| 15954 | MMT00027348   |        | 19+:5324132-5325229     |
| 15955 | Inadl         | 12695  | 4+:98213424-98386293    |
| 15956 | 1700023D19Rik | 75510  | 7+:51964112-51975214    |
| 15957 | 6330548G22Rik | 76167  | 5+:124933187-124941132  |
| 15958 | Rag1ap1       | 19729  | 3-:89072167-89074480    |
| 15959 | Vmn2r101      | 627576 | 17+:19726430-19749281   |
| 15960 | MMT00074791   |        | 19+:3205603-3206071     |
| 15961 | MMT00067071   |        | 10-:29334060-29334382   |

|       |               |           |                         |
|-------|---------------|-----------|-------------------------|
| 15962 | Olfra472      | 258770    | 7+:115046232-115047165  |
| 15963 | Ush2a         | 22283     | 1+:190472154-190502567  |
| 15964 | Pglyrp3       | 242100    | 3+:91826526-91835484    |
| 15965 | Kif1a         | 16560     | 1-:94914855-94998399    |
| 15966 | Mfsd8         | 72175     | 3-:40623038-40650667    |
| 15967 | Atp2b2        | 11941     | 6-:113698287-113930577  |
| 15968 | Pknox1        | 18771     | 17+:31701745-31742991   |
| 15969 | Tnrc4         | 78784     | 3+:94282251-94296115    |
| 15970 | Npal1         | 70701     | 5+:73039050-73059555    |
| 15971 | Aifm2         | 71361     | 10+:61183389-61191059   |
| 15972 | Pygo1         | 72135     | 9+:72773453-72794527    |
| 15973 | MMT00025143   | 100045149 | 15+:62009747-62016306   |
| 15974 | Usp9y         | 107868    | Y-:639815-779046        |
| 15975 | Cnnm1         | 83674     | 19+:43515700-43570238   |
| 15976 | Nmu           | 56183     | 5-:76762520-76792802    |
| 15977 | Phca          | 66190     | 7-:105364953-105458038  |
| 15978 | Glrp1         | 14659     | 1-:90396446-90406641    |
| 15979 | Rmi1          | 74386     | 13+:58503961-58511451   |
| 15980 | Myh14         | 71960     | 7-:51861172-51920867    |
| 15981 | Adams18       | 208936    | 8-:116233373-116372813  |
| 15982 | Syne2         | 319565    | 12+:77050326-77068739   |
| 15983 | Cxx1c         | 72865     | X+:50911208-50911601    |
| 15984 | MMT00075074   |           | 16+:38483773-38484678   |
| 15985 | Nova1         | 664883    | 12-:47798886-47814563   |
| 15986 | Ahnak         | 66395     | 19+:9063770-9151410     |
| 15987 | MMT00064591   |           |                         |
| 15988 | Lbx1          | 16814     | 19-:45307781-45310226   |
| 15989 | MMT00069487   |           | X-:71380375-71381632    |
| 15990 | Dnmbp         | 71972     | 19-:43921301-43977548   |
| 15991 | Tmcc1         | 330401    | 6-:116083778-116143371  |
| 15992 | Creb3l2       | 208647    | 6-:37282425-37314142    |
| 15993 | Tcrg-V7       | 21641     | 13+:19269893-19270394   |
| 15994 | 9130213B05Rik | 231440    | 5+:91946725-92053020    |
| 15995 | Scg3          | 20255     | 9-:75491180-75531824    |
| 15996 | Grtp1         | 66790     | 8-:13176869-13200535    |
| 15997 | Tspan8        | 216350    | 10+:115254339-115286671 |
| 15998 | MMT00049642   |           | 5-:148994412-148995992  |
| 15999 | 3110039M20Rik | 67293     | 12+:50490873-50508335   |
| 16000 | Nol10         | 217431    | 12+:17355256-17436900   |
| 16001 | D330027H18Rik | 101359    | 6-:29119237-29119830    |
| 16002 | Mia2          | 338320    | 12+:60196786-60205545   |
| 16003 | Rps6kb1       | 72508     | 11-:86313645-86358258   |
| 16004 | Sfrs8         | 231769    | 5+:130007096-130077255  |
| 16005 | MMT00048275   |           | 12-:115298032-115347680 |
| 16006 | Anxa2         | 12306     | 9+:69312276-69339593    |
| 16007 | EG622589      | 622589    | 10-:128113167-128113783 |
| 16008 | MMT00081082   |           | 10+:57011200-57011671   |
| 16009 | 1110033F04Rik | 68673     | 11-:99495442-99496398   |
| 16010 | MMT00002955   |           | 13-:41330153-41330446   |
| 16011 | Zbtb37        | 240869    | 1-:162950051-162962858  |
| 16012 | AU017962      | 103341    | 10+:103607129-103607572 |

|       |               |           |                            |
|-------|---------------|-----------|----------------------------|
| 16013 | Nt5c3         | 107569    | 6-:56832398-56873823       |
| 16014 | Banf2         | 403171    | 2+:143858834-143899713     |
| 16015 | Spt1          | 20770     | Un_random-:2674949-2678403 |
| 16016 | Nfkbid        | 243910    | 7+:31208415-31212771       |
| 16017 | Ppp2r5b       | 225849    | 19-:6227763-6235843        |
| 16018 | MMT00074939   |           | 18+:87401389-87403116      |
| 16019 | 2410004P03Rik | 73667     | 12-:17011763-17018361      |
| 16020 | Ddx52         | 78394     | 11+:83755635-83776576      |
| 16021 | Phxr1         | 18686     | 2+:3349139-3349643         |
| 16022 | Efna3         | 13638     | 3-:89117826-89120674       |
| 16023 | A430060F13Rik | 100039739 | 11-:94706143-94710813      |
| 16024 | P2ry6         | 233571    | 7-:108086144-108112884     |
| 16025 | Otop2         | 237987    | 11+:115168474-115185123    |
| 16026 | Gsg1l         | 269994    | 7-:133024215-133164185     |
| 16027 | Ppp2r2d       | 52432     | 7+:146027800-146074737     |
| 16028 | Rtn4r         | 65079     | 16+:18127798-18152499      |
| 16029 | Igh-VJ558     | 16061     | 12-:117158466-117158975    |
| 16030 | Prpf3         | 70767     | 3-:95634539-95659711       |
| 16031 | Stab2         | 192188    | 10-:86303954-86470687      |
| 16032 | Cyp27a1       | 104086    | 1+:74778500-74784464       |
| 16033 | MMT00023218   |           | 13-:13988251-14047236      |
| 16034 | Dclk3         | 245038    | 9+:111370115-111391741     |
| 16035 | Chd8          | 67772     | 14-:52842273-52857247      |
| 16036 | Bin1          | 30948     | 18+:32536910-32595385      |
| 16037 | MMT00011022   |           | 3-:84355935-84357187       |
| 16038 | Sec31a        | 69162     | 5+:100844942-100929882     |
| 16039 | Erbp4         | 13869     | 1-:68086615-68127369       |
| 16040 | Slc22a1       | 20517     | 17-:12841741-12868559      |
| 16041 | Cnot2         | 72068     | 10-:115922564-116018557    |
| 16042 | Pold4         | 69745     | 19+:4231936-4233631        |
| 16043 | Sult1c2       | 69083     | 17-:53969185-53985143      |
| 16044 | Creb5         | 231991    | 6+:53237725-53397712       |
| 16045 | Rasl10b       | 276952    | 11+:83225971-83232284      |
| 16046 | Ppwd1         | 238831    | 13-:104995204-105019060    |
| 16047 | Irf8          | 15900     | 8+:123260290-123280318     |
| 16048 | Nsfl1c        | 386649    | 2+:151319921-151337038     |
| 16049 | MMT00031860   | 60315     | 15+:102162140-102168280    |
| 16050 | MMT00008777   |           | 3-:10753934-10754428       |
| 16051 | 1700001C02Rik | 75434     | 5+:30768449-30786460       |
| 16052 | Tsg101        | 22088     | 7-:54144745-54175263       |
| 16053 | Hnf4a         | 15378     | 2+:163372996-163396138     |
| 16054 | Prr15         | 78004     | 6+:54276898-54279644       |
| 16055 | Slco4c1       | 227394    | 1-:98715153-98717906       |
| 16056 | Tcf4          | 21413     | 18+:69504174-69843997      |
| 16057 | Vps36         | 70160     | 8+:23303282-23329723       |
| 16058 | MMT00019507   |           | 11+:50805294-50805723      |
| 16059 | Ttn           | 22138     | 2-:76665539-76671192       |
| 16060 | Gys2          | 232493    | 6-:142371133-142421467     |
| 16061 | Ccdc131       | 216345    | 10+:114822012-114837953    |
| 16062 | EG545741      | 545741    | X+:117274705-117275324     |
| 16063 | Ndufs5        | 595136    | 4-:123389953-123395491     |

|       |               |        |                         |
|-------|---------------|--------|-------------------------|
| 16064 | B020004J07Rik | 545662 | 4-:101508145-101510744  |
| 16065 | Ldhd          | 52815  | 8-:114150880-114154236  |
| 16066 | Coq2          | 71883  | 5-:101083745-101103265  |
| 16067 | Pcaf          | 18519  | 17+:53706654-53810192   |
| 16068 | 1700008P20Rik | 69301  | 7-:25118100-25118955    |
| 16069 | E330021D16Rik | 243676 | 6-:136350373-136351908  |
| 16070 | Tubgcp5       | 233276 | 7+:63061485-63086816    |
| 16071 | Ccdc90b       | 66365  | 7+:99710039-99730801    |
| 16072 | MMT00011155   |        | 8-:71997409-71999134    |
| 16073 | Car11         | 12348  | 7+:52955375-52959979    |
| 16074 | Prkcc         | 18752  | 7+:3303847-3330721      |
| 16075 | Bloc1s2       | 73689  | 19-:44213748-44220933   |
| 16076 | MMT00039676   |        | X-:123218651-123219246  |
| 16077 | Mocs2         | 17434  | 13+:115608493-115618932 |
| 16078 | Defb15        | 246082 | 8-:23040284-23043182    |
| 16079 | MMT00078587   |        | 6+:12515690-12516881    |
| 16080 | Prkcdbp       | 109042 | 7-:112628596-112630726  |
| 16081 | EG382450      | 382450 | 10+:10332800-10334057   |
| 16082 | Abcg4         | 192663 | 9-:44089164-44089774    |
| 16083 | Pla2g2c       | 18781  | 4+:138281661-138300488  |
| 16084 | Tns3          | 319939 | 11-:8331653-8515854     |
| 16085 | MMT00023382   |        | 19-:25870247-25871343   |
| 16086 | D18Ertd653e   | 52662  | 18+:68181136-68266346   |
| 16087 | Olfrc640      | 258819 | 7-:111169886-111170830  |
| 16088 | MMT00030639   |        | 2-:14733469-14745930    |
| 16089 | 4732474O15Rik | 238455 | 12+:120684086-120704145 |
| 16090 | Exoc1         | 69940  | 5+:76989345-76996203    |
| 16091 | Art1          | 11870  | 7+:109250256-109262447  |
| 16092 | Akt2          | 11652  | 7+:28376781-28423219    |
| 16093 | 4732473B16Rik | 100342 | 4+:133036102-133043851  |
| 16094 | MMT00082062   |        | 12-:3931470-3932059     |
| 16095 | MMT00071048   |        | 10-:4554200-4554622     |
| 16096 | Csmd3         | 239420 | 15-:48289041-48505172   |
| 16097 | Dnmt3l        | 54427  | 10+:77512586-77526366   |
| 16098 | Rps20         | 67427  | 4-:3758731-3762746      |
| 16099 | D030070L09Rik | 225280 | 18-:24263253-24280333   |
| 16100 | Tnni3         | 21954  | 7-:4469970-4473917      |
| 16101 | MMT00044631   |        | 5-:146251281-146251852  |
| 16102 | Cd72          | 12517  | 4-:43460606-43467435    |
| 16103 | Vip           | 22353  | 10-:4701475-4707323     |
| 16104 | Ugt3a2        | 223337 | 15+:9265367-9300625     |
| 16105 | Vasp          | 22323  | 7-:19842268-19868182    |
| 16106 | Ccdc36        | 434438 | 9-:108319652-108323892  |
| 16107 | Entpd6        | 12497  | 2+:150574803-150597410  |
| 16108 | MMT00077778   |        | 18+:9544546-9545478     |
| 16109 | MMT00067385   |        | 12+:89569567-89571682   |
| 16110 | Adrb1         | 11554  | 19+:56796861-56798262   |
| 16111 | EG627967      | 627967 | 7-:122070473-122071240  |
| 16112 | V1ra1         | 22296  | 6+:90078417-90080980    |
| 16113 | Zfp498        | 666311 | 5+:146041394-146052027  |
| 16114 | Lyplal1       | 226791 | 1-:187911764-187941189  |

|       |               |        |                         |
|-------|---------------|--------|-------------------------|
| 16115 | Mup3          | 17842  | 4-:61744512-61748405    |
| 16116 | Dnahc14       | 240960 | 1+:183682646-183685575  |
| 16117 | Id4           | 15904  | 13+:48356798-48359405   |
| 16118 | Cby3          | 76653  | 11+:50171254-50173205   |
| 16119 | 4930578N16Rik | 75051  | 2-:69596089-69627586    |
| 16120 | Utp11l        | 67205  | 4-:124356009-124370798  |
| 16121 | E130303B06Rik | 102124 | 8-:108227552-108232096  |
| 16122 | Lsp1          | 16985  | 7+:149657747-149680504  |
| 16123 | Sec11c        | 66286  | 18+:65960231-65977311   |
| 16124 | Mdm4          | 17248  | 1-:134888182-134921966  |
| 16125 | MMT00014025   |        | 19+:16099940-16100208   |
| 16126 | E330034G19Rik | 105418 | 14+:25115217-25129183   |
| 16127 | Dffb          | 13368  | 4-:153339476-153349098  |
| 16128 | Agbl1         | 244071 | 7+:83569540-83589879    |
| 16129 | Trafd1        | 231712 | 5-:121821735-121835582  |
| 16130 | Gosr2         | 56494  | 11-:103540550-103558972 |
| 16131 | Ptpre         | 19267  | 7+:142729604-142875038  |
| 16132 | Psat1         | 107272 | 19-:15979222-15999549   |
| 16133 | Robo3         | 19649  | 9-:37223746-37237719    |
| 16134 | Alg11         | 207958 | 8+:23171198-23178761    |
| 16135 | Srd5a2l2      | 243078 | 5-:83729908-83784025    |
| 16136 | MMT00046779   |        | 13+:66699587-66699622   |
| 16137 | Xrcc5         | 22596  | 1+:72353994-72441526    |
| 16138 | Ii12a         | 16159  | 3+:68494565-68502447    |
| 16139 | Vkorc1l1      | 69568  | 5+:130452856-130458763  |
| 16140 | Xpo6          | 74204  | 7-:133245780-133317763  |
| 16141 | Ccdc96        | 66717  | 5+:36827240-36829448    |
| 16142 | Gpr165        | 76206  | X+:93908777-93912823    |
| 16143 | Cd209d        | 170779 | 8-:3871956-3878483      |
| 16144 | Rybp          | 56353  | 6-:100182111-100237404  |
| 16145 | Olfrl449      | 258300 | 19+:13009229-13010172   |
| 16146 | Gucy1a3       | 60596  | 3-:81898547-81949774    |
| 16147 | Tlr2          | 24088  | 3-:83640194-83645475    |
| 16148 | Krt13         | 16663  | 11-:99978911-99982809   |
| 16149 | MMT00025643   |        | 12+:20280792-20281220   |
| 16150 | Snrp70        | 20637  | 7-:52631967-52647503    |
| 16151 | MMT00042117   |        | 2+:133025307-133026029  |
| 16152 | Ceacam10      | 26366  | 7+:25562279-25569670    |
| 16153 | Syngr1        | 20972  | 15+:79921781-79943870   |
| 16154 | Rgs20         | 58175  | 1-:4900325-5009507      |
| 16155 | Dusp12        | 80915  | 1-:172809790-172811172  |
| 16156 | MMT00028187   |        | 2+:160671261-160672201  |
| 16157 | D9Ert280e     | 272636 | 9-:99217063-99258936    |
| 16158 | 4930511J11Rik | 74720  | 16-:8409368-8425229     |
| 16159 | Igh-VJ558     | 16061  | 12-:116861366-116930533 |
| 16160 | Top3b         | 21976  | 16+:16877946-16893077   |
| 16161 | Lrch4         | 231798 | 5+:138070410-138081729  |
| 16162 | Myo16         | 244281 | 8+:10272533-10562269    |
| 16163 | Tmco1         | 68944  | 1+:169238391-169260921  |
| 16164 | Fdps          | 110196 | 3-:88897510-88905794    |
| 16165 | Taf5l         | 102162 | 8-:126520217-126545209  |



|       |               |        |                         |
|-------|---------------|--------|-------------------------|
| 16166 | Si            | 20431  | 10+:128143342-128157072 |
| 16167 | Stbd1         | 52331  | 5+:93032065-93035612    |
| 16168 | Crlf2         | 57914  | 5-:109983729-109987960  |
| 16169 | Tigd5         | 105734 | 15+:75740689-75742148   |
| 16170 | S100a11       | 20195  | 3+:93324418-93330208    |
| 16171 | Sncb          | 104069 | 13-:54860221-54867801   |
| 16172 | Bcl2l15       | 229672 | 3+:103636524-103656316  |
| 16173 | Lba1          | 320429 | 9+:111250291-111268242  |
| 16174 | Lba1          | 320429 | 9+:111275449-111296806  |
| 16175 | Agpat5        | 52123  | 8+:18846268-18884375    |
| 16176 | St3gal5       | 20454  | 6+:72047839-72104564    |
| 16177 | C87499        | 381590 | 4-:88274718-88276043    |
| 16178 | Myh11         | 17880  | 16-:14194992-14291456   |
| 16179 | Gulo          | 268756 | 14-:66605623-66607112   |
| 16180 | Rnaseh2a      | 69724  | 8-:87481621-87482124    |
| 16181 | MMT00078660   |        | 1-:81738169-81739463    |
| 16182 | Oasl1         | 231655 | 5+:115373414-115387920  |
| 16183 | 1110002B05Rik | 104725 | 12-:55746379-55757485   |
| 16184 | Arf6          | 11845  | 12+:70473193-70474803   |
| 16185 | Olfra414      | 258756 | 1+:176360560-176361513  |
| 16186 | Cfp           | 18636  | X-:20502649-20508888    |
| 16187 | 6530403A03Rik | 67797  | 13+:38296813-38318917   |
| 16188 | Adams16       | 271127 | 13-:70867359-70874752   |
| 16189 | Olfra807      | 258931 | 10-:129191568-129192504 |
| 16190 | Osbpl11       | 106326 | 16+:33196166-33243397   |
| 16191 | Klc1          | 16593  | 12+:112997166-113033107 |
| 16192 | MMT00013307   |        | 19-:13697166-13714196   |
| 16193 | MMT00045006   | 635992 | 16+:19028324-19028745   |
| 16194 | Alg9          | 102580 | 9+:50583434-50651631    |
| 16195 | Unk           | 217331 | 11+:115891663-115922507 |
| 16196 | Grin3b        | 170483 | 10+:79433459-79439935   |
| 16197 | MMT00065977   |        | 3-:97994426-97995001    |
| 16198 | Atp8b4        | 241633 | 2-:126148549-126306422  |
| 16199 | Samhd1        | 56045  | 2-:156925131-156960881  |
| 16200 | MMT00017071   |        | 16-:8619047-8621311     |
| 16201 | MMT00072359   |        | X+:142425310-142429203  |
| 16202 | Ccnd1         | 12443  | 7-:152115836-152125735  |
| 16203 | Tspan6        | 56496  | X-:130426278-130432874  |
| 16204 | Olfra586      | 259115 | 7-:110270343-110271296  |
| 16205 | 2810002O09Rik | 72345  | X-:92621905-92623938    |
| 16206 | Kcna2         | 16490  | 3+:106907022-106908521  |
| 16207 | Ica1          | 15893  | 6-:8580527-8708458      |
| 16208 | Ppara         | 19013  | 15+:85566560-85632163   |
| 16209 | MMT00031904   |        | 15+:95545588-95546623   |
| 16210 | Metrl         | 210029 | 11+:121563725-121577594 |
| 16211 | Accn1         | 11418  | 11-:80693683-80966405   |
| 16212 | Med19         | 381379 | 2+:84518581-84528371    |
| 16213 | 4922503N01Rik | 230603 | 4+:109079722-109117868  |
| 16214 | Ocln          | 18260  | 13-:101267721-101322673 |
| 16215 | Serpinb9d     | 20726  | 13+:33286431-33330092   |
| 16216 | MMT00068421   |        |                         |

|       |               |        |                         |
|-------|---------------|--------|-------------------------|
| 16217 | Csnk1a1       | 93687  | 18+:61715235-61747953   |
| 16218 | Rpgrip1       | 77945  | 14+:52730596-52780605   |
| 16219 | 4932415G12Rik | 67723  | 10-:94136449-94151316   |
| 16220 | MMT00074659   |        | 1+:42160134-42161004    |
| 16221 | Troap         | 78733  | 15+:98905391-98913838   |
| 16222 | Adipor2       | 68465  | 6-:119303169-119367670  |
| 16223 | Mag           | 17136  | 7-:31684201-31699851    |
| 16224 | Cdc2l5        | 69562  | 13-:17809233-17896143   |
| 16225 | Mak10         | 78689  | 13+:59686771-59736140   |
| 16226 | MMT00033542   |        | 5+:73772040-73783378    |
| 16227 | Rarres1       | 109222 | 3-:67282813-67319535    |
| 16228 | ORF34         | 207375 | X+:147778687-147905030  |
| 16229 | Abcb11        | 27413  | 2-:69076345-69180644    |
| 16230 | MMT00020946   |        |                         |
| 16231 | Rnf4          | 19822  | 5+:34692532-34696082    |
| 16232 | Dchs2         | 229459 | 3+:83074219-83160463    |
| 16233 | 1600027J07Rik | 69794  | 8-:105867777-105871435  |
| 16234 | Taf6          | 21343  | 5-:138619849-138625725  |
| 16235 | MMT00011701   |        |                         |
| 16236 | Dopey1        | 320615 | 9+:86380860-86449528    |
| 16237 | Bat5          | 193742 | 17+:35226200-35239930   |
| 16238 | Nmi           | 64685  | 2-:51804019-51828731    |
| 16239 | Vmn2r42       | 22310  | 7+:9213439-9934715      |
| 16240 | Eya1          | 14048  | 1-:14160723-14294651    |
| 16241 | MMT00003591   |        | 4+:25346490-25346553    |
| 16242 | MMT00053207   |        | 12+:86596449-86597574   |
| 16243 | Kctd19        | 279499 | 8-:107910649-107913047  |
| 16244 | 1700020C07Rik | 75642  | 2-:164652880-164654007  |
| 16245 | 4930588N13Rik | 75860  | 5+:150242290-150273296  |
| 16246 | 4930473A06Rik | 320226 | 4+:83301431-83309595    |
| 16247 | 4930596D02Rik | 239036 | 14-:36622676-36624845   |
| 16248 | Cdr2          | 12585  | 7-:128100555-128125798  |
| 16249 | Lyz2          | 17105  | 10-:116715177-116719298 |
| 16250 | MMT00069147   | 329858 | 4-:59342087-59440936    |
| 16251 | G6pc          | 14377  | 11+:101229029-101239215 |
| 16252 | Ubttd1        | 226122 | 19+:42056426-42109133   |
| 16253 | MMT00044478   |        | 1-:144989922-144991247  |
| 16254 | Lyrn5         | 67636  | 6+:145159675-145165456  |
| 16255 | Reg3b         | 18489  | 6+:78320878-78323459    |
| 16256 | Tmem132d      | 243274 | 5-:128344937-128751594  |
| 16257 | Osbpl8        | 237542 | 10+:110601872-110734303 |
| 16258 | Krt2          | 16681  | 15-:101641121-101648600 |
| 16259 | Igf1r         | 16001  | 7+:75097744-75149237    |
| 16260 | Nav2          | 78286  | 7+:56617467-56653525    |
| 16261 | Olf1r1337     | 258306 | 4-:118454242-118455188  |
| 16262 | MMT00000771   |        |                         |
| 16263 | Olf1r283      | 259038 | 15-:98208609-98209539   |
| 16264 | Zfp768        | 233890 | 7-:134486308-134488828  |
| 16265 | Prkci         | 18759  | 3+:30894897-30949368    |
| 16266 | Rnf214        | 235315 | 9-:45674647-45715556    |
| 16267 | Zfp574        | 232976 | 7+:25857663-25867502    |

|       |               |           |                         |
|-------|---------------|-----------|-------------------------|
| 16268 | Cdc34         | 216150    | 10+:79145127-79151680   |
| 16269 | Ccdc50        | 67501     | 16+:27389148-27447107   |
| 16270 | Lgals12       | 56072     | 19:-7671150-7681654     |
| 16271 | Wdr68         | 71833     | 11+:105898190-105920634 |
| 16272 | MMT00025784   |           | 2+:171926040-171926814  |
| 16273 | Ltbp3         | 16998     | 19+:5742126-5758525     |
| 16274 | Gm609         | 208166    | 16+:45411651-45412566   |
| 16275 | Mlxip         | 208104    | 5+:123844938-123890907  |
| 16276 | Tmem40        | 94346     | 6:-115679157-115708979  |
| 16277 | Olfr518       | 258303    | 7:-116024117-116025118  |
| 16278 | Ccdc148       | 227933    | 2:-58675840-58871016    |
| 16279 | BC052055      | 328643    | 16+:20594639-20605449   |
| 16280 | MMT00018773   | 677414    | 17+:40990985-40998259   |
| 16281 | 2600010E01Rik | 72446     | 2:-101554442-101679123  |
| 16282 | 6130401L20Rik | 75740     | 3+:29412809-29570549    |
| 16283 | EG627427      | 627427    | 18+:37079953-37081860   |
| 16284 | Rasl11a       | 68895     | 5+:147656630-147659301  |
| 16285 | Oscar         | 232790    | 7:-3562366-3563434      |
| 16286 | MMT00030638   | 100047024 | 6:-69808415-69913603    |
| 16287 | Extl1         | 56219     | 4:-133912288-133927694  |
| 16288 | Ctbs          | 74245     | 3+:146112763-146128796  |
| 16289 | Myocd         | 214384    | 11:-64990068-65083443   |
| 16290 | Myo5b         | 17919     | 18+:74762815-74930513   |
| 16291 | Tbrg1         | 21376     | 9:-37455560-37464910    |
| 16292 | Prpf18        | 67229     | 2:-4543266-4544429      |
| 16293 | 4933406J08Rik | 74401     | 2+:122012096-122032126  |
| 16294 | Chst7         | 60322     | X+:19636695-19674644    |
| 16295 | Nlrp14        | 76858     | 7+:114324671-114341616  |
| 16296 | MMT00003690   |           | 4+:10846226-10874044    |
| 16297 | Spr2g         | 20761     | 3+:92178561-92178792    |
| 16298 | X99384        | 27355     | 10:-60782409-60846056   |
| 16299 | Creld2        | 76737     | 15+:88650075-88657111   |
| 16300 | Gab3          | 210710    | X:-72233890-72330246    |
| 16301 | Pm20d2        | 242377    | 4:-33261701-33276355    |
| 16302 | MMT00005255   |           | 14+:28023523-28024849   |
| 16303 | Fgd4          | 224014    | 16:-16435798-16504311   |
| 16304 | MMT00056871   |           | X:-72003825-72004262    |
| 16305 | Tub           | 22141     | 7+:116154494-116173915  |
| 16306 | 1700016K13Rik | 74222     | 5:-130189265-130203812  |
| 16307 | Lemd1         | 213409    | 1+:134122889-134153947  |
| 16308 | 4931406C07Rik | 70984     | 9:-15110740-15111815    |
| 16309 | Tmem186       | 66690     | 16:-8633823-8637794     |
| 16310 | Sae1          | 56459     | 7:-16912402-16973134    |
| 16311 | A830018L16Rik | 320492    | 1+:11738033-11788647    |
| 16312 | 4930529M08Rik | 78774     | 2+:145968748-145979653  |
| 16313 | Fbxo30        | 71865     | 10+:11001167-11016896   |
| 16314 | MMT00046842   | 229687    | 3:-105819839-105831837  |
| 16315 | MMT00048401   |           | 2+:149182625-149183140  |
| 16316 | Bclaf1        | 72567     | 10+:20042768-20064434   |
| 16317 | Ugcgl2        | 66435     | 14:-119488386-119498563 |
| 16318 | Ms4a15        | 545279    | 19:-11053698-11057785   |

|       |               |        |                         |
|-------|---------------|--------|-------------------------|
| 16319 | MMT00051350   |        | 4+:54866863-54867508    |
| 16320 | Ivd           | 56357  | 2+:118687756-118706322  |
| 16321 | P2rx4         | 18438  | 5+:123157633-123179049  |
| 16322 | Lmod3         | 320502 | 6-:97188525-97202637    |
| 16323 | Smpd3         | 58994  | 8-:108779158-108789819  |
| 16324 | D2Wsu81e      | 227695 | 2-:30028966-30033965    |
| 16325 | Psmc3ip       | 19183  | 11-:100952833-100956703 |
| 16326 | MMT00070606   | 278676 | 14+:52445394-52446131   |
| 16327 | Ubfd1         | 28018  | 7+:129210935-129222646  |
| 16328 | Slc10a2       | 20494  | 8-:5085622-5105232      |
| 16329 | 0610010O12Rik | 66060  | 18+:36508407-36562631   |
| 16330 | 2310043J07Rik | 69665  | 5+:136533181-136540189  |
| 16331 | Setd8         | 67956  | 5-:124911790-124912317  |
| 16332 | Scd4          | 329065 | 19+:44408422-44419388   |
| 16333 | Wdr64         | 75820  | 1+:177697168-177745862  |
| 16334 | Parp2         | 11546  | 14+:51427613-51440875   |
| 16335 | Otop1         | 21906  | 5+:38691379-38694614    |
| 16336 | 2310040A07Rik | 69638  | 4-:41585176-41587319    |
| 16337 | Grin2c        | 14813  | 11-:115110483-115128557 |
| 16338 | Senp1         | 223870 | 15-:97872400-97917565   |
| 16339 | Bach1         | 12013  | 16+:87699193-87730946   |
| 16340 | Scrn2         | 217140 | 11+:96891307-96895272   |
| 16341 | Cmtm2a        | 73381  | 8-:106804948-106817033  |
| 16342 | Krt33a        | 71888  | 11-:99877242-99877304   |
| 16343 | Dgkh          | 380921 | 14-:78968631-79125492   |
| 16344 | Arpc5l        | 74192  | 2+:38863658-38871392    |
| 16345 | Rasip1        | 69903  | 7+:52890342-52894461    |
| 16346 | Phospho2      | 73373  | 2+:69627793-69635225    |
| 16347 | Mgp           | 17313  | 6-:136820957-136824269  |
| 16348 | Tubgcp3       | 259279 | 8-:12614274-12672101    |
| 16349 | Crybb1        | 12960  | 5+:112684840-112698599  |
| 16350 | Nadsyn1       | 78914  | 7-:150981498-151008746  |
| 16351 | MMT00019132   |        | X-:89076437-89108867    |
| 16352 | 4831426I19Rik | 212073 | 12-:106201380-106236888 |
| 16353 | EG666504      | 666504 | 15-:76363827-76364911   |
| 16354 | Abhd11        | 68758  | 5+:135485168-135488038  |
| 16355 | Rcl1          | 59028  | 19+:29175994-29217781   |
| 16356 | 9030607L17Rik | 71564  | 10+:80165051-80168118   |
| 16357 | Al480653      | 268880 | 16-:30957423-31050865   |
| 16358 | MMT00020436   |        | 7-:123947395-123947978  |
| 16359 | Fbxw11        | 103583 | 11+:32542599-32646788   |
| 16360 | Cdk5r2        | 12570  | 1+:74901671-74902781    |
| 16361 | Olfir703      | 258589 | 7+:113988126-113989084  |
| 16362 | Lymr4         | 380840 | 13-:36184665-36209213   |
| 16363 | Adh5          | 11532  | 3+:138106115-138118215  |
| 16364 | MMT00063014   |        | 15+:37350888-37352499   |
| 16365 | Ube2k         | 53323  | 5+:65928569-65986379    |
| 16366 | Glis3         | 226075 | 19-:28605362-28614898   |
| 16367 | MMT00076058   |        | 8_random+:321154-339848 |
| 16368 | Smarca4       | 20586  | 9+:21420706-21507813    |
| 16369 | Rcan1         | 54720  | 16-:92393698-92466164   |

|       |               |        |                         |
|-------|---------------|--------|-------------------------|
| 16370 | Olfr115       | 257908 | 17-:37746545-37764061   |
| 16371 | Ppp2cb        | 19053  | 8+:34710388-34729662    |
| 16372 | MMT00077009   |        | 14-:37831938-37837696   |
| 16373 | G6pc2         | 14378  | 2+:69058027-69065907    |
| 16374 | 4932431P20Rik | 114675 | 7+:30309561-30322883    |
| 16375 | MMT00080030   | 353287 | 8-:113582806-113586346  |
| 16376 | Thsd1         | 56229  | 8+:23348971-23370357    |
| 16377 | Tmem9         | 66241  | 1+:137914591-137931601  |
| 16378 | Ccl8          | 20307  | 11+:81928693-81930297   |
| 16379 | Tppp3         | 67971  | 8-:107991396-107995289  |
| 16380 | Vasn          | 246154 | 16+:4639972-4650797     |
| 16381 | Ccbp2         | 59289  | 9+:121815575-121819148  |
| 16382 | Arpc1b        | 11867  | 5+:145882527-145889054  |
| 16383 | Il20rb        | 213208 | 9-:100358138-100375368  |
| 16384 | Slc25a42      | 73095  | 8-:72709239-72736167    |
| 16385 | MMT00073590   |        | 17-:64050829-64051715   |
| 16386 | Cdyl          | 12593  | 13+:35751748-35965492   |
| 16387 | 2010316F05Rik | 67939  | 11-:29413054-29415033   |
| 16388 | EG381818      | 381818 | 6-:132388168-132391755  |
| 16389 | MMT00040811   |        |                         |
| 16390 | Plb1          | 665270 | 5+:32535080-32619909    |
| 16391 | Pde10a        | 23984  | 17+:9042849-9175265     |
| 16392 | EG627648      | 627648 | 13-:58110636-58214949   |
| 16393 | MMT00023354   |        | 1-:60579498-60579865    |
| 16394 | MMT00004253   |        | 14-:74733337-74890909   |
| 16395 | Adora2b       | 11541  | 11+:62062570-62079271   |
| 16396 | Plcb2         | 18796  | 2-:118528360-118554174  |
| 16397 | 1700112E06Rik | 76633  | 14+:23396948-23418491   |
| 16398 | EG239502      | 239502 | 15-:63322517-63324102   |
| 16399 | Izumo1        | 73456  | 7+:52877179-52882598    |
| 16400 | Nup50         | 18141  | 15+:84757807-84770277   |
| 16401 | 4932415M13Rik | 211496 | 17+:53863012-53942804   |
| 16402 | Adad2         | 75773  | 8+:122136644-122140824  |
| 16403 | Agk           | 69923  | 6+:40275493-40345860    |
| 16404 | Trappc2       | 66226  | X-:162878732-162891070  |
| 16405 | Pafah1b1      | 18472  | 11-:74487456-74538172   |
| 16406 | Mettl6        | 67011  | 14-:32292196-32308216   |
| 16407 | Mrpl44        | 69163  | 1+:79774431-79778017    |
| 16408 | Etv4          | 18612  | 11-:101631064-101646577 |
| 16409 | Eif3c         | 56347  | 7-:133690425-133709880  |
| 16410 | 2010001E11Rik | 72045  | 10-:39640187-39646731   |
| 16411 | V1rc12        | 171185 | 6-:66628793-66629678    |
| 16412 | Tank          | 21353  | 2+:61416641-61492168    |
| 16413 | Pkd1l2        | 76645  | 8-:119533469-119568514  |
| 16414 | Scrn1         | 69938  | 6-:54458967-54516406    |
| 16415 | Sult1c1       | 20888  | 17-:54101178-54129967   |
| 16416 | Commd2        | 52245  | 3-:57450281-57455629    |
| 16417 | Pitx2         | 18741  | 3+:128916889-128922506  |
| 16418 | Eef2k         | 13631  | 7+:128001933-128046903  |
| 16419 | Maml2         | 270118 | 9+:13424433-13513976    |
| 16420 | MMT00020928   |        |                         |

|       |               |        |                         |
|-------|---------------|--------|-------------------------|
| 16421 | Hrasls        | 27281  | 16+:29217697-29228320   |
| 16422 | Kctd5         | 69259  | 17-:24184402-24210411   |
| 16423 | Rreb1         | 68750  | 13+:37917834-38043871   |
| 16424 | MMT00046595   |        | 9+:39847539-39848323    |
| 16425 | Agxt2l1       | 71760  | 3+:130320492-130338666  |
| 16426 | MMT00023627   |        | 17-:92584656-92585156   |
| 16427 | Snrpb         | 20638  | 2-:129997382-130005095  |
| 16428 | Nfya          | 18044  | 17-:48527259-48549046   |
| 16429 | MMT00047901   |        | 5-:34824041-34825219    |
| 16430 | Vac14         | 234729 | 8+:113160268-113244296  |
| 16431 | Recql4        | 79456  | 15-:76534171-76540906   |
| 16432 | Ttc18         | 76670  | 14-:21213419-21271449   |
| 16433 | Asb3          | 65257  | 11+:30898325-31001241   |
| 16434 | Fhad1         | 329977 | 4-:141452341-141478346  |
| 16435 | MMT00071843   |        | 12+:32103596-32105117   |
| 16436 | Gpr39         | 71111  | 1+:127736579-127769750  |
| 16437 | Tkt           | 21881  | 14+:31362364-31386797   |
| 16438 | Igfl3         | 232925 | 7+:18761837-18767674    |
| 16439 | MMT00056625   |        | 5-:115503476-115503858  |
| 16440 | Gprc5a        | 232431 | 6+:135015701-135034723  |
| 16441 | Cant1         | 76025  | 11-:118271923-118280345 |
| 16442 | Glb1l2        | 244757 | 9-:26572686-26614060    |
| 16443 | Ccdc59        | 52713  | 10+:105278534-105284564 |
| 16444 | Sox15         | 20670  | 11+:69468874-69470121   |
| 16445 | Mktn3         | 22652  | 7-:69562478-69565042    |
| 16446 | Taf11         | 68776  | 17-:28038069-28046107   |
| 16447 | Cat           | 12359  | 2-:103294160-103325277  |
| 16448 | Vmn2r104      | 22313  | 17-:20166388-20178707   |
| 16449 | BC004044      | 80752  | 5+:139269142-139286017  |
| 16450 | EG545238      | 545238 | 18+:3447055-3473440     |
| 16451 | 2010007H12Rik | 69871  | 5+:138220145-138221335  |
| 16452 | Slc6a11       | 243616 | 6+:114081390-114197733  |
| 16453 | Olf1372-ps1   | 257871 |                         |
| 16454 | 2310038H17Rik | 67099  | 1-:64653668-64663801    |
| 16455 | Zkscan2       | 210162 | 7-:130623027-130643964  |
| 16456 | Ii33          | 77125  | 19+:29999626-30035205   |
| 16457 | BC106175      | 724112 | 12-:8485906-8487109     |
| 16458 | Olf1677       | 258355 | 7+:112204761-112205698  |
| 16459 | 2310002D06Rik | 69522  | 12+:81608190-81618940   |
| 16460 | MMT00045897   |        | 6-:131556442-131559000  |
| 16461 | Dll1          | 13388  | 17-:15504319-15512217   |
| 16462 | Dnase2b       | 56629  | 3-:146244880-146259576  |
| 16463 | MMT00036516   |        |                         |
| 16464 | Vmn2r66       | 233437 | 7-:92143318-92155743    |
| 16465 | Ccdc130       | 67736  | 8-:86781693-86794259    |
| 16466 | Syne1         | 64009  | 10+:5188781-5193442     |
| 16467 | Card10        | 105844 | 15-:78605567-78633099   |
| 16468 | MMT00079120   |        | 4+:138898053-138899246  |
| 16469 | MMT00061447   |        | 3+:87358680-87359408    |
| 16470 | Cyhr1         | 54151  | 15-:76476197-76489870   |
| 16471 | Prim1         | 19075  | 10+:127452270-127467086 |

|       |               |        |                         |
|-------|---------------|--------|-------------------------|
| 16472 | 1700015C15Rik | 75532  | 13-:64532557-64533750   |
| 16473 | Neto2         | 74513  | 8-:88160486-88224793    |
| 16474 | Bhlhb2        | 20893  | 6+:108610690-108616768  |
| 16475 | Samd5         | 320825 | 10-:9394302-9395483     |
| 16476 | E130009J12Rik | 381107 | 17-:65785602-65826120   |
| 16477 | MMT00004032   | 677563 | 12-:116625091-116625339 |
| 16478 | Chrna7        | 11441  | 7-:70243821-70357412    |
| 16479 | Pcsk7         | 18554  | 9+:45715079-45737803    |
| 16480 | Slitrk4       | 245446 | X-:61522643-61530155    |
| 16481 | Gatad2a       | 234366 | 8-:72432555-72440256    |
| 16482 | Dgcr8         | 94223  | 16-:18283778-18284509   |
| 16483 | AW551984      | 244810 | 9-:39395138-39411200    |
| 16484 | Tet1          | 52463  | 10-:62274452-62285508   |
| 16485 | Cuedc1        | 103841 | 11+:87983065-88006432   |
| 16486 | Slc25a22      | 68267  | 7-:148615650-148623517  |
| 16487 | Cggbp1        | 106143 | 16+:64851887-64859319   |
| 16488 | A330017A19Rik | 442840 | 17+:47025946-47026729   |
| 16489 | Olfr90        | 258469 | 17-:37222176-37223108   |
| 16490 | MMT00048286   |        | 13+:80300564-80301136   |
| 16491 | 6330500D04Rik | 193385 | 13+:24706495-24823952   |
| 16492 | Hk2           | 15277  | 6-:82675043-82724453    |
| 16493 | Mphosph9      | 269702 | 5-:124765197-124766180  |
| 16494 | 2310007D09Rik | 71878  | 2+:158593825-158612371  |
| 16495 | Gap43         | 14432  | 16-:42248744-42340663   |
| 16496 | Tdrd9         | 74691  | 12+:113301703-113307066 |
| 16497 | MMT00063964   |        | X-:58437015-58439320    |
| 16498 | 2410017P07Rik | 103268 | 10-:41438651-41529419   |
| 16499 | Pusl1         | 433813 | 4-:155263540-155266222  |
| 16500 | 4921539E11Rik | 70941  | 4-:102903054-102963464  |
| 16501 | Loh11cr2a     | 67776  | 9+:38525881-38550877    |
| 16502 | Chsy1         | 269941 | 7+:73254829-73318650    |
| 16503 | MMT00025844   |        |                         |
| 16504 | Srpr          | 67398  | 9+:35018761-35024598    |
| 16505 | MMT00062901   |        | 2-:23446098-23446782    |
| 16506 | MMT00082773   |        |                         |
| 16507 | A830039N20Rik | 268723 | 14-:24111516-24112033   |
| 16508 | Foxa1         | 15375  | 12-:58641620-58646949   |
| 16509 | Baat          | 12012  | 4-:49502290-49516043    |
| 16510 | Tspyl4        | 72480  | 10+:34017277-34021126   |
| 16511 | MMT00017530   |        | 11-:49940599-49941622   |
| 16512 | Ryr3          | 20192  | 2-:112471540-112797456  |
| 16513 | EG629036      | 629036 | 17+:53493810-53494533   |
| 16514 | Vps52         | 224705 | 17+:34092723-34103841   |
| 16515 | Gramd4        | 223752 | 15+:85898242-85967744   |
| 16516 | Dvl1          | 13542  | 4+:155221843-155232474  |
| 16517 | D4Wsu53e      | 27981  | 4+:134479559-134483287  |
| 16518 | 4933426G20Rik | 74460  | 15+:63746013-63757008   |
| 16519 | Igf2bp3       | 140488 | 6-:49037340-49164470    |
| 16520 | MMT00064994   | 238440 | 12-:116550353-116550843 |
| 16521 | Adar          | 56417  | 3+:89534726-89555096    |
| 16522 | Ccdc85a       | 216613 | 11-:28476390-28483542   |

|       |               |           |                         |
|-------|---------------|-----------|-------------------------|
| 16523 | Rps13         | 68052     | 7-:123475025-123477647  |
| 16524 | Arl5b         | 75869     | 2+:14977032-14998219    |
| 16525 | Lbp           | 16803     | 2+:158132280-158158032  |
| 16526 | Sftpa1        | 20387     | 14+:41945071-41947765   |
| 16527 | B230208H17Rik | 227624    | 2-:25439560-25463974    |
| 16528 | Ddr2          | 18214     | 1-:171907776-172040690  |
| 16529 | Nrn1l         | 234700    | 8+:108418265-108418917  |
| 16530 | MMT00070246   |           | 18+:9629728-9630956     |
| 16531 | 6330403K07Rik | 103712    | 11-:70845451-70846957   |
| 16532 | 2610016C23Rik | 71804     | 10+:20067630-20081125   |
| 16533 | MMT00027784   |           | 18-:30579549-30602631   |
| 16534 | Nbea          | 26422     | 3-:55429115-55895045    |
| 16535 | Kctd9         | 105440    | 14+:68334351-68360218   |
| 16536 | L1td1         | 381591    | 4+:98393497-98403953    |
| 16537 | A930021C24Rik | 77803     | 13-:105635369-105653974 |
| 16538 | Ccdc81        | 70884     | 7-:97014658-97052123    |
| 16539 | Klhl20        | 226541    | 1-:163020550-163061582  |
| 16540 | MMT00017193   |           | 8-:78235492-78404744    |
| 16541 | 1700092M07Rik | 74307     | 19+:8815243-8815707     |
| 16542 | Clstn1        | 65945     | 4+:148960746-149022008  |
| 16543 | Nek7          | 59125     | 1-:140381505-140458357  |
| 16544 | 2700045P11Rik | 72555     | 16+:11984382-11997273   |
| 16545 | Cyld          | 74256     | 8+:91221032-91272771    |
| 16546 | Ankrd45       | 73844     | 1+:163072816-163097969  |
| 16547 | 1500002O20Rik | 71997     | 7+:25184648-25207796    |
| 16548 | Atp6v1e1      | 11973     | 6-:120745720-120772632  |
| 16549 | Wtap          | 60532     | 17-:13159665-13185978   |
| 16550 | MMT00018745   |           | 17-:92771632-92772463   |
| 16551 | C1ql2         | 226359    | 1+:122237160-122239151  |
| 16552 | MMT00049458   |           | 2+:104660314-104662221  |
| 16553 | Cilp2         | 68709     | 8-:72404266-72407356    |
| 16554 | 1700049K14Rik | 73382     | 14+:64723177-64732590   |
| 16555 | BC006662      | 223267    | 14-:123290095-123312357 |
| 16556 | MMT00014805   | 100045978 | 13-:50398623-50439316   |
| 16557 | Rbpms         | 19663     | 8-:34893115-34976877    |
| 16558 | Arhgdig       | 14570     | 17-:26336127-26338127   |
| 16559 | MMT00001400   |           | 16-:50664932-50666467   |
| 16560 | Slc22a12      | 20521     | 19-:6536111-6542851     |
| 16561 | Fbxo9         | 71538     | 9-:77929306-77956432    |
| 16562 | MMT00005808   |           | 18+:7932849-7933510     |
| 16563 | Pctk2         | 237459    | 10+:92671044-92729816   |
| 16564 | Tead4         | 21679     | 6-:128174301-128202007  |
| 16565 | Arsb          | 11881     | 13+:94541638-94711181   |
| 16566 | Igfbpl1       | 75426     | 4-:45822348-45839687    |
| 16567 | Rpl14         | 67115     | 9+:120480633-120483551  |
| 16568 | 2310005G13Rik | 69457     | 16-:57038747-57071467   |
| 16569 | Scn1a         | 20265     | 2-:66110948-66156196    |
| 16570 | 2410187C16Rik | 76773     | 15+:57972960-57990207   |
| 16571 | Pqlc1         | 66943     | 18+:80453045-80489453   |
| 16572 | D14Ertd668e   | 219132    | 14-:59967567-59984283   |
| 16573 | Cryge         | 12968     | 1-:65095198-65097687    |



|       |               |        |                         |
|-------|---------------|--------|-------------------------|
| 16574 | 4732496O08Rik | 242736 | 4+:143002329-143009598  |
| 16575 | Aff3          | 16764  | 1-:38232835-38243852    |
| 16576 | Ms4a2         | 14126  | 19-:11691682-11698133   |
| 16577 | MMT00070754   |        | 11+:28856718-28857990   |
| 16578 | Wdr26         | 226757 | 1-:183107823-183129065  |
| 16579 | Rcan2         | 53901  | 17+:43938798-43973446   |
| 16580 | Tnfaip2       | 21928  | 12+:112683172-112693228 |
| 16581 | 1600027N09Rik | 73247  | 2+:180317314-180320995  |
| 16582 | Mapk8ip2      | 60597  | 15+:89284560-89292420   |
| 16583 | Kcnu1         | 16532  | 8+:26960127-27048245    |
| 16584 | Nup35         | 69482  | 2+:80478987-80499263    |
| 16585 | Syvn1         | 74126  | 19+:6047089-6053707     |
| 16586 | Adamts8       | 30806  | 9+:30750145-30751186    |
| 16587 | E130112L23Rik | 268739 | 14+:52615734-52625331   |
| 16588 | Cnbp          | 12785  | 6-:87793167-87801002    |
| 16589 | 2610019F03Rik | 72148  | 8-:13952010-13974754    |
| 16590 | C920005C14Rik | 338368 | 15+:82175460-82179500   |
| 16591 | MMT00051549   |        | 3-:6135078-6139030      |
| 16592 | Psmf1         | 228769 | 2-:151543992-151566993  |
| 16593 | Vangl1        | 229658 | 3-:101961374-102000904  |
| 16594 | Rbx1          | 56438  | 15+:81296785-81305690   |
| 16595 | Psmb1         | 19170  | 17-:15612923-15635244   |
| 16596 | Ptrf          | 19285  | 11-:100818053-100819252 |
| 16597 | Dido1         | 23856  | 2-:180357116-180436807  |
| 16598 | E430018J23Rik | 101604 | 7-:134534943-134536950  |
| 16599 | 4833424O15Rik | 75769  | 3+:117278279-117390816  |
| 16600 | C230055K05Rik | 626391 | 5-:105243910-105246095  |
| 16601 | MMT00019843   |        | 12+:107747069-107748042 |
| 16602 | Itln1         | 16429  | 1-:173460625-173463595  |
| 16603 | Nkx3-2        | 12020  | 5-:42152409-42155459    |
| 16604 | Loh12cr1      | 67774  | 6+:134591042-134661186  |
| 16605 | MMT00009297   |        | 9-:104071163-104072141  |
| 16606 | 4930579G22Rik | 69034  | 5+:130384434-130387150  |
| 16607 | Gpx2          | 14776  | 12-:77893325-77896493   |
| 16608 | MMT00026286   |        | 17-:36896490-36898247   |
| 16609 | Gucy2c        | 14917  | 6-:136645805-136730245  |
| 16610 | Rem1          | 19700  | 2+:152452765-152460499  |
| 16611 | MMT00082279   |        | 7-:35280943-35286422    |
| 16612 | Dazl          | 13164  | 17-:50420375-50432834   |
| 16613 | 1110031I02Rik | 66179  | 11-:121038906-121065962 |
| 16614 | Zscan21       | 22697  | 5+:138558268-138575444  |
| 16615 | Chdh          | 218865 | 14+:30822130-30854865   |
| 16616 | Paox          | 212503 | 7+:147311581-147320233  |
| 16617 | Sh2d4a        | 72281  | 8+:70805930-70871479    |
| 16618 | Hps3          | 12807  | 3-:19896620-19935299    |
| 16619 | Anks1         | 224650 | 17+:28111849-28199721   |
| 16620 | Cpt2          | 12896  | 4-:107576587-107596139  |
| 16621 | Btbd10        | 68815  | 7+:120495293-120512917  |
| 16622 | Incenp        | 16319  | 19-:9946835-9973959     |
| 16623 | RP23-357I14.1 | 381417 | 2+:122319954-122349283  |
| 16624 | Psma8         | 73677  | 18+:14864657-14920807   |

|       |               |        |                         |
|-------|---------------|--------|-------------------------|
| 16625 | Mrps16        | 66242  | 14-:21210452-21212777   |
| 16626 | Pip5k1        | 227733 | 2+:32430313-32431411    |
| 16627 | MMT00074583   |        | 8-:41833718-41875442    |
| 16628 | MMT00052888   |        | X-:39481500-39483061    |
| 16629 | Sall2         | 50524  | 14-:52930848-52948437   |
| 16630 | Armcx5        | 494468 | X+:132278962-132281857  |
| 16631 | Psmc12        | 66997  | 11+:107340841-107359350 |
| 16632 | MMT00062595   |        | X-:51185502-51187617    |
| 16633 | D14Ertd436e   | 218978 | 14-:48161777-48188116   |
| 16634 | Crim1         | 50766  | 17+:78600108-78734697   |
| 16635 | Spry4         | 24066  | 18-:38749257-38761069   |
| 16636 | Tmem189       | 407243 | 2-:167468725-167487033  |
| 16637 | Vmn2r85       | 623734 | 10-:129855333-129866512 |
| 16638 | Spred2        | 114716 | 11+:19824933-19921449   |
| 16639 | MMT00078937   |        | 11-:105026089-105028054 |
| 16640 | 4930408G06Rik | 68179  | 1-:59053964-59064601    |
| 16641 | Vmn2r116      | 619697 | 17+:23522878-23534725   |
| 16642 | Usp29         | 57775  | 7+:6683293-6919926      |
| 16643 | Srrm1         | 51796  | 4-:134877947-134909051  |
| 16644 | Tcrb-J        | 21580  | 6+:41012331-41013101    |
| 16645 | Aqp7          | 11832  | 4-:40981226-40995061    |
| 16646 | Rsb1l         | 242860 | 5-:20401894-20402724    |
| 16647 | D16H22S680E   | 27883  | 16-:18300919-18324536   |
| 16648 | Sema3f        | 20350  | 9-:107584760-107607873  |
| 16649 | Wasf1         | 83767  | 10+:40640081-40658375   |
| 16650 | Cd300a        | 217303 | 11+:114751675-114759133 |
| 16651 | Tnfrsf13b     | 57916  | 11+:60954336-60961143   |
| 16652 | Rab4a         | 19341  | 8+:126329924-126359187  |
| 16653 | Pdcd2         | 68070  | 15-:12518269-12528813   |
| 16654 | Oas1f         | 243262 | 5+:121297400-121307634  |
| 16655 | MMT00012959   |        | 3-:105846092-105846385  |
| 16656 | Slc33a1       | 11416  | 3-:63747171-63768112    |
| 16657 | Atp1f1        | 11983  | 4-:132086470-132089513  |
| 16658 | MMT00011796   | 632223 | 6+:136348473-136350157  |
| 16659 | Lrp12         | 239393 | 15-:39702139-39711868   |
| 16660 | Gpc6          | 23888  | 14+:117324651-118375766 |
| 16661 | Tmprss4       | 214523 | 9-:44980809-45012158    |
| 16662 | Gemin4        | 276919 | 11-:76024259-76027425   |
| 16663 | Olf818        | 258773 | 10-:129382161-129383116 |
| 16664 | Car4          | 12351  | 11+:84771344-84779541   |
| 16665 | Ppp1r3c       | 53412  | 19-:36806037-36811162   |
| 16666 | Eif4g1        | 208643 | 16+:20683685-20692954   |
| 16667 | 2900010M23Rik | 67267  | 17-:27259616-27270821   |
| 16668 | Opn4          | 30044  | 14-:35405547-35413328   |
| 16669 | Tjp2          | 21873  | 19-:24169088-24248478   |
| 16670 | Csmc2         | 329942 | 4+:127736205-128241394  |
| 16671 | MMT00081758   |        | 7-:3908044-3935099      |
| 16672 | Tmem82        | 213989 | 4-:141170149-141173939  |
| 16673 | Gm62          | 215919 | 10-:38540606-38541572   |
| 16674 | BC024814      | 239706 | 16+:8470905-8490289     |
| 16675 | Flrt2         | 399558 | 12+:96930444-97019311   |

|       |               |           |                         |
|-------|---------------|-----------|-------------------------|
| 16676 | Aspa          | 11484     | 11-:73118942-73137989   |
| 16677 | OTTMUSG000000 | 238568    | 13+:33755913-33763453   |
| 16678 | Olfr669       | 259045    | 7+:112087041-112087994  |
| 16679 | Ctsk          | 13038     | 3+:95304756-95312843    |
| 16680 | MMT00014809   | 100126778 | 17+:40590632-40591521   |
| 16681 | Rpl38         | 67671     | 11+:114529910-114533645 |
| 16682 | Lrdd          | 57913     | 7-:148624413-148629254  |
| 16683 | Cst8          | 13012     | 2+:148624572-148631330  |
| 16684 | 9830001H06Rik | 320706    | 2-:156853122-156904542  |
| 16685 | Vvf           | 22371     | 6+:125502977-125636695  |
| 16686 | Wdfy3         | 72145     | 5-:102261973-102263981  |
| 16687 | Disc1         | 244667    | 8+:127648395-127785047  |
| 16688 | Snapc3        | 77634     | 4+:83063415-83114013    |
| 16689 | MMT00070066   |           | 1+:83154587-83156002    |
| 16690 | Tjp3          | 27375     | 10-:80735972-80753979   |
| 16691 | Mast2         | 17776     | 4-:115979367-116136453  |
| 16692 | Bat4          | 81845     | 17+:35259896-35261751   |
| 16693 | Dip2a         | 64451     | 10-:75725482-75776049   |
| 16694 | Sepp1         | 20363     | 15+:3224665-3230504     |
| 16695 | Hs3st6        | 328779    | 17+:24889935-24895628   |
| 16696 | Magee1        | 107528    | X+:102316531-102318706  |
| 16697 | Abcg3         | 27405     | 5-:105364784-105411688  |
| 16698 | Sumo1         | 22218     | 1-:59696287-59727607    |
| 16699 | EG226601      | 226601    | 1-:168413874-168426148  |
| 16700 | Rad21         | 19357     | 15-:51794149-51814218   |
| 16701 | H2-M10.1      | 14985     | 17-:36460962-36463095   |
| 16702 | 2810422J05Rik | 75620     | 8-:73037296-73046994    |
| 16703 | MMT00018063   |           | 12-:58799488-58800089   |
| 16704 | Ppif          | 105675    | 14+:26513655-26519950   |
| 16705 | Plcb1         | 18795     | 2+:134612265-135298158  |
| 16706 | MMT00026784   |           | 9-:36620616-36629038    |
| 16707 | Ywhaz         | 22631     | 15-:36705259-36720745   |
| 16708 | Al846148      | 68229     | 19-:7432171-7457364     |
| 16709 | Srpk1         | 20815     | 17-:28726547-28759357   |
| 16710 | Adam12        | 11489     | 7-:141075654-141416780  |
| 16711 | MMT00062670   |           | 8+:74284115-74284388    |
| 16712 | Pnrc1         | 108767    | 4-:33332211-33335615    |
| 16713 | Ppp1r14d      | 72112     | 2-:119043858-119055588  |
| 16714 | EG625603      | 625603    | 9-:22134708-22134944    |
| 16715 | 2610034M16Rik | 69239     | 17-:59018231-59106888   |
| 16716 | Asah2         | 54447     | 19-:32059137-32177630   |
| 16717 | Stam          | 20844     | 2+:13995881-14069165    |
| 16718 | Zbtb7c        | 207259    | 18+:76219111-76306096   |
| 16719 | Slc43a3       | 58207     | 2+:84776820-84798086    |
| 16720 | Mttr7         | 54384     | 8-:41636453-41694370    |
| 16721 | Stk3          | 56274     | 15-:34806361-35085437   |
| 16722 | Gmeb2         | 229004    | 2-:180988043-181012827  |
| 16723 | Tnfsf8        | 21949     | 4-:63494204-63522205    |
| 16724 | Psmc11        | 69077     | 11+:80242115-80286367   |
| 16725 | Sry           | 21674     | Y-:1918381-1919568      |
| 16726 | MMT00033971   |           | 1-:34483861-34489235    |

|       |               |        |                         |
|-------|---------------|--------|-------------------------|
| 16727 | Gm73          | 218476 | 13+:97636285-97663054   |
| 16728 | Uhmk1         | 16589  | 1-:172130013-172145381  |
| 16729 | Smpx          | 66106  | X+:154137049-154190521  |
| 16730 | Osbp13        | 71720  | 6-:50246805-50332836    |
| 16731 | V1rb3         | 113853 | 6-:90173402-90174334    |
| 16732 | Atxn3         | 110616 | 12-:103160359-103196414 |
| 16733 | Cd81          | 12520  | 7+:150238699-150253828  |
| 16734 | Tbx4          | 21387  | 11+:85704358-85728451   |
| 16735 | Gm239         | 237558 | 10-:116216611-116233192 |
| 16736 | Olf1126       | 258834 | 2+:87297323-87298268    |
| 16737 | BC053393      | 407814 | 11+:46385110-46390997   |
| 16738 | Pmch          | 110312 | 10+:87553681-87555118   |
| 16739 | Tgfbrap1      | 73122  | 1-:43104063-43132797    |
| 16740 | MMT00032254   |        |                         |
| 16741 | MMT00079972   |        | 5+:26333464-26402521    |
| 16742 | Bbc3          | 170770 | 7+:16894986-16903682    |
| 16743 | Bad           | 12015  | 19+:7016350-7026383     |
| 16744 | Evpl          | 14027  | 11-:116081873-116082600 |
| 16745 | Ccdc37        | 243538 | 6-:90353731-90363869    |
| 16746 | Bhmt2         | 64918  | 13-:94426214-94444234   |
| 16747 | Acvr2a        | 11480  | 2+:48670221-48756173    |
| 16748 | Zfp810        | 235050 | 9-:22081191-22112082    |
| 16749 | Ivl           | 16447  | 3-:92375271-92376678    |
| 16750 | Casp6         | 12368  | 3+:129608383-129616865  |
| 16751 | 4921510H08Rik | 66716  | 10+:97155692-97157555   |
| 16752 | Hapln4        | 330790 | 8+:72607355-72613678    |
| 16753 | Hfe2          | 69585  | 3+:96331871-96333132    |
| 16754 | Hsp90aa1      | 15519  | 12-:111929240-111933891 |
| 16755 | MMT00000111   |        | 10+:24420098-24420906   |
| 16756 | MMT00047531   |        | 1-:129179371-129198052  |
| 16757 | Tmem146       | 106757 | 17+:56800664-56803877   |
| 16758 | MMT00023865   |        | 4-:17936232-17936666    |
| 16759 | Gabrq         | 57249  | X+:70070774-70083883    |
| 16760 | 1600029D21Rik | 76509  | 9+:50302629-50313238    |
| 16761 | MMT00018149   |        | 17-:92926783-92927221   |
| 16762 | Atp8a2        | 50769  | 14-:60266586-60705671   |
| 16763 | C920021L13Rik | 109149 | 3+:95675367-95691556    |
| 16764 | Ear6          | 93719  | 14+:52473672-52474140   |
| 16765 | Igfn1         | 226438 | 1-:137851146-137872643  |
| 16766 | Sharpin       | 106025 | 15-:76177467-76181534   |
| 16767 | MMT00038956   |        | 13+:64775836-64776091   |
| 16768 | Hnmt          | 140483 | 2-:23858446-23904896    |
| 16769 | Cox10         | 70383  | 11-:63777393-63789980   |
| 16770 | Krtap16-1     | 170651 | 16-:88873909-88874514   |
| 16771 | Abi2          | 329165 | 1+:60466574-60536543    |
| 16772 | MMT00010554   |        | 1-:79919112-79920001    |
| 16773 | Tmem164       | 209497 | X+:139186571-139268960  |
| 16774 | 4932438A13Rik | 229227 | 3+:36784278-36845428    |
| 16775 | Kcna10        | 242151 | 3+:106996996-106998507  |
| 16776 | 1110032O16Rik | 68742  | 7-:134029658-134066452  |
| 16777 | MMT00053707   |        | 5+:125915438-125916193  |

|       |               |        |                         |
|-------|---------------|--------|-------------------------|
| 16778 | Pik3c2b       | 240752 | 1+:134983149-135002733  |
| 16779 | MMT00018299   |        | 11+:111137342-111138308 |
| 16780 | Rel           | 19696  | 11-:23641989-23670970   |
| 16781 | Pramef12      | 77632  | 4-:143981576-143998367  |
| 16782 | 1110012N22Rik | 68515  | 11-:120507345-120509473 |
| 16783 | Vps37c        | 107305 | 19+:10718625-10789114   |
| 16784 | D330012F22Rik | 269952 | 7+:87377802-87393324    |
| 16785 | MMT00053231   |        | 12+:86758797-86796669   |
| 16786 | Rp111         | 271209 | 14+:64640747-64646886   |
| 16787 | Samd8         | 67630  | 14-:22616441-22617103   |
| 16788 | Imp3          | 102462 | 9+:56785306-56786204    |
| 16789 | Lpar2         | 53978  | 8+:72346524-72352021    |
| 16790 | EG382639      | 382639 | 12+:113917603-113918865 |
| 16791 | Rimbp3        | 239731 | 16+:17209100-17213997   |
| 16792 | Sh3yl1        | 24057  | 12+:31597051-31645021   |
| 16793 | Arl11         | 219144 | 14+:61928686-61930618   |
| 16794 | Chrbn1        | 11443  | 11-:69598122-69609382   |
| 16795 | Olfr628       | 259101 | 7+:110878864-110881902  |
| 16796 | Agt           | 11606  | 8-:127080487-127088483  |
| 16797 | MMT00016048   |        | 13-:16730403-16731326   |
| 16798 | Gpr37         | 14763  | 6-:25618107-25640729    |
| 16799 | Obscn         | 380698 | 11-:58906797-58917052   |
| 16800 | Sstr3         | 20607  | 15-:78369690-78370975   |
| 16801 | Ms4a14        | 383435 | 19-:11375985-11388823   |
| 16802 | Def8          | 23854  | 8+:125966904-125987167  |
| 16803 | Etv1          | 14009  | 12+:39506895-39593572   |
| 16804 | Hist1h4j      | 319159 | 13+:21826964-21827274   |
| 16805 | Ddx39         | 68278  | 8+:86239105-86247246    |
| 16806 | Havcr1        | 171283 | 11+:46564678-46592114   |
| 16807 | Fos           | 14281  | 12+:86814989-86817407   |
| 16808 | Elk3          | 13713  | 10-:92711629-92773782   |
| 16809 | Rxb           | 20182  | 17+:34168942-34174475   |
| 16810 | Sh3pxd2b      | 268396 | 11+:32271517-32323578   |
| 16811 | Rere          | 68703  | 4+:149780448-149996071  |
| 16812 | 1500002O10Rik | 68986  | 2-:70327999-70401416    |
| 16813 | MMT00032610   |        | 6+:114688964-114693809  |
| 16814 | AU042651      | 328258 | 13+:56539761-56575599   |
| 16815 | Tmem120b      | 330189 | 5+:123526333-123567455  |
| 16816 | Btf3          | 218490 | 13-:99079852-99086922   |
| 16817 | OTTMUSG000000 | 208820 | 4+:12834032-12908599    |
| 16818 | Abhd8         | 64296  | 8-:73980606-73987545    |
| 16819 | Lyve1         | 114332 | 7-:117995366-118006467  |
| 16820 | Bambi-ps1     | 81913  | 2+:122292625-122293240  |
| 16821 | Abcd2         | 26874  | 15-:90979314-91022230   |
| 16822 | Gadl1         | 73748  | 9+:115850391-115983465  |
| 16823 | Inhbb         | 16324  | 1-:121312041-121335320  |
| 16824 | 2310076L09Rik | 66968  | 17-:56251024-56256970   |
| 16825 | MMT00056634   |        | 1+:159526434-159526829  |
| 16826 | 4833418A01Rik | 75763  | 2+:70893789-70937198    |
| 16827 | Arhgdib       | 11857  | 6-:136872170-136890259  |
| 16828 | MMT00004165   |        | 16+:85644498-85645182   |

|       |               |        |                         |
|-------|---------------|--------|-------------------------|
| 16829 | Igh-6         | 16019  | 12-:114923646-114924126 |
| 16830 | MMT00014034   |        | 3-:59406405-59422757    |
| 16831 | Ush2a         | 22283  | 1+:190551989-190557483  |
| 16832 | Trim63        | 433766 | 4+:133871104-133879151  |
| 16833 | Lrp11         | 237253 | 10+:7309658-7345273     |
| 16834 | Hist2h4       | 97122  | 3-:96066858-96067256    |
| 16835 | MMT00062293   |        | 10-:96231541-96232476   |
| 16836 | Hip1r         | 29816  | 5+:124423657-124452855  |
| 16837 | Crabp1        | 12903  | 9+:54612614-54620916    |
| 16838 | Akap13        | 75547  | 7+:82600529-82895723    |
| 16839 | Nedd4l        | 83814  | 18+:65080784-65157076   |
| 16840 | Rpl38         | 67671  | 11+:114529837-114533645 |
| 16841 | Syt16         | 238266 | 12+:75230355-75330411   |
| 16842 | 2310003L22Rik | 69487  | 2+:139996765-140029368  |
| 16843 | Cry1          | 12952  | 10-:84595800-84647534   |
| 16844 | Ugt2b1        | 71773  | 5-:87345661-87355554    |
| 16845 | Mamdc4        | 381352 | 2-:25418636-25425881    |
| 16846 | EG638251      | 638251 | 7-:15050512-15077275    |
| 16847 | Olfr176       | 258995 | 16-:58872040-58872974   |
| 16848 | Spnb1         | 20741  | 12-:77698643-77750911   |
| 16849 | Trmt1         | 212528 | 8+:87213176-87224127    |
| 16850 | MMT00063598   |        | 11-:35606217-35606965   |
| 16851 | Slc34a2       | 20531  | 5+:53440595-53462900    |
| 16852 | Vash1         | 238328 | 12+:88029768-88036634   |
| 16853 | 4933407H18Rik | 71101  | 5+:33721874-33757557    |
| 16854 | Kif15         | 209737 | 9+:122860199-122927852  |
| 16855 | Itk           | 16428  | 11-:46138654-46202995   |
| 16856 | Hif1a         | 15251  | 12+:75009016-75047878   |
| 16857 | Perp          | 64058  | 10+:18564876-18576876   |
| 16858 | Tmem38a       | 74166  | 8+:75096001-75111181    |
| 16859 | 0610007L01Rik | 71667  | 5+:130695710-130719559  |
| 16860 | Cdc42bpa      | 226751 | 1+:181890557-182092722  |
| 16861 | Nlrc4         | 268973 | 17-:74825652-74847558   |
| 16862 | Peg12         | 27412  | 7-:69606756-69609396    |
| 16863 | 2410001C21Rik | 66404  | 2+:172266058-172295401  |
| 16864 | Tfb2m         | 15278  | 1-:181458186-181476348  |
| 16865 | Olfr273       | 258821 | 4-:52868429-52869383    |
| 16866 | Scara3        | 219151 | 14-:66538235-66557148   |
| 16867 | Stab1         | 192187 | 14-:31952204-31981758   |
| 16868 | EG667587      | 667587 | 19-:38777538-38778938   |
| 16869 | Ndufa12       | 66414  | 10+:93661753-93683693   |
| 16870 | Atic          | 108147 | 1+:71603735-71626203    |
| 16871 | MMT00072624   |        | 4+:23412430-23412994    |
| 16872 | Cntnap2       | 66797  | 6+:45870790-45965487    |
| 16873 | Klrc2         | 16642  | 6-:129599554-129610707  |
| 16874 | Fcer1g        | 14127  | 1-:173159708-173164417  |
| 16875 | Wfdc3         | 71856  | 2-:164556685-164571555  |
| 16876 | B930036G03Rik | 408070 | 12-:109444084-109449832 |
| 16877 | 5930434B04Rik | 381356 | 2+:26865097-26874805    |
| 16878 | Zbed4         | 223773 | 15+:88610370-88614980   |
| 16879 | Ltb4r1        | 16995  | 14+:56384867-56387326   |

|       |               |        |                         |
|-------|---------------|--------|-------------------------|
| 16880 | Depdc1b       | 218581 | 13+:109106560-109179775 |
| 16881 | MMT00031504   |        | 14+:114879627-114879658 |
| 16882 | Ogfr1         | 70155  | 1-:23373275-23389912    |
| 16883 | Rnf7          | 19823  | 9+:96371915-96379049    |
| 16884 | Lrat          | 79235  | 3-:82699325-82707892    |
| 16885 | MMT00040429   |        | 6-:69581633-69582172    |
| 16886 | Dpy30         | 66310  | 17-:74698813-74715789   |
| 16887 | Olf1260       | 258983 | 2+:89817936-89818868    |
| 16888 | H6pd          | 100198 | 4-:149353561-149377330  |
| 16889 | Smarcc2       | 68094  | 10+:127897962-127927641 |
| 16890 | H2-Eb2        | 381091 | 17+:34462624-34472830   |
| 16891 | Pex2          | 19302  | 3-:5560511-5576128      |
| 16892 | Syng3         | 20974  | 17-:24822706-24826886   |
| 16893 | Matr3         | 17184  | 18+:35713035-35714755   |
| 16894 | Lin7c         | 22343  | 2+:109740309-109741086  |
| 16895 | F2rl2         | 14064  | 13+:96466874-96472673   |
| 16896 | MMT00002629   |        | X-:140667303-140668026  |
| 16897 | Vps28         | 66914  | 15-:76452517-76456457   |
| 16898 | Invs          | 16348  | 4+:48292689-48444821    |
| 16899 | Atp8b3        | 67331  | 10-:79998279-80001864   |
| 16900 | 4930404K13Rik | 74845  | 14-:120183978-120215075 |
| 16901 | Pias2         | 17344  | 18+:77392289-77394446   |
| 16902 | MMT00045509   |        |                         |
| 16903 | MMT00033771   |        | 4-:131471358-131475945  |
| 16904 | Sphk2         | 56632  | 7-:52966095-52969035    |
| 16905 | Gkn1          | 66283  | 6-:87295646-87300909    |
| 16906 | EG433170      | 433170 | 18-:33543822-33544663   |
| 16907 | MMT00061537   |        | 16-:91514119-91514816   |
| 16908 | Muc13         | 17063  | 16+:33794122-33820013   |
| 16909 | Cav3          | 12391  | 6+:112409684-112422864  |
| 16910 | Ptprr         | 19279  | 10+:115455454-115711985 |
| 16911 | Pou5f1        | 18999  | 17+:35642995-35647714   |
| 16912 | Rplp2         | 67186  | 7+:148633553-148637248  |
| 16913 | Pira3         | 18726  | 7-:3860216-3867087      |
| 16914 | MMT00039379   |        |                         |
| 16915 | MMT00019508   |        | 3+:93924626-93924985    |
| 16916 | Lrrc19        | 100061 | 4-:94304832-94316837    |
| 16917 | Gpr4          | 319197 | 7+:19807503-19808600    |
| 16918 | Slc35a1       | 24060  | 4-:34611198-34634508    |
| 16919 | Pea15a        | 18611  | 1-:174126858-174128546  |
| 16920 | Acs1          | 14081  | 8+:47578185-47619832    |
| 16921 | Wee2          | 381759 | 6+:40393976-40416807    |
| 16922 | Ube2d1        | 216080 | 10-:70717727-70747981   |
| 16923 | A430048G15Rik | 381426 | 2+:133257804-133279097  |
| 16924 | Sfrp5         | 54612  | 19-:42273175-42276742   |
| 16925 | 2410016O06Rik | 71952  | 12+:85291619-85293893   |
| 16926 | Cnpy3         | 72029  | 17-:46872988-46889143   |
| 16927 | Cyp3a57       | 622127 | 5+:146106148-146131974  |
| 16928 | Sltm          | 66660  | 9+:70390559-70440037    |
| 16929 | Slc39a3       | 106947 | 10-:80491285-80496657   |
| 16930 | Hmgb1-rs17    | 628431 | 8+:34594926-34595502    |

|       |               |        |                         |
|-------|---------------|--------|-------------------------|
| 16931 | Actn4         | 60595  | 7-:29678274-29747299    |
| 16932 | Sacm1l        | 83493  | 9+:123439004-123501716  |
| 16933 | 1700012H19Rik | 76393  | 11-:112684278-112686439 |
| 16934 | Kctd19        | 279499 | 8-:107919170-107932526  |
| 16935 | Tmem16k       | 102566 | 9-:122085010-122260715  |
| 16936 | Ccdc117       | 104479 | 11-:5428410-5442571     |
| 16937 | Ubac2         | 68889  | 14+:122419329-122420255 |
| 16938 | Al662250      | 106639 | 17-:56851595-56851941   |
| 16939 | MMT00038813   |        | X-:138840619-138840986  |
| 16940 | St3gal3       | 20441  | 4-:117605601-117807021  |
| 16941 | EG434339      | 434339 | 8+:96929038-96930156    |
| 16942 | MMT00041689   |        | 13+:61824802-61825540   |
| 16943 | Gimap7        | 231932 | 6+:48668657-48674633    |
| 16944 | Zc3h3         | 223642 | 15-:75584861-75672338   |
| 16945 | Col23a1       | 237759 | 11+:51330698-51371089   |
| 16946 | Ivns1abp      | 117198 | 1+:153191645-153211388  |
| 16947 | Wfs1          | 22393  | 5-:37357345-37380148    |
| 16948 | Slco1a6       | 28254  | 6-:142034299-142134674  |
| 16949 | Iigp1         | 60440  | 18+:60549448-60552281   |
| 16950 | MMT00079465   |        | 7+:151977841-151978170  |
| 16951 | R74862        | 97423  | 7-:150219494-150238995  |
| 16952 | Pax1          | 18503  | 2+:147190795-147200782  |
| 16953 | Pdlim7        | 67399  | 13-:55608134-55614795   |
| 16954 | Sh3glb1       | 54673  | 3-:144351807-144383287  |
| 16955 | MMT00068267   |        | 10-:68885784-68886498   |
| 16956 | Slc24a5       | 317750 | 2+:124894507-124914510  |
| 16957 | MMT00046108   |        | 2+:59234728-59245772    |
| 16958 | Gpc1          | 14733  | 1+:94728262-94756772    |
| 16959 | A230072C01Rik | 320742 | X+:20539239-20563849    |
| 16960 | MMT00008703   |        | 3-:14627380-14635239    |
| 16961 | Mup1          | 17840  | 4-:60510886-60514832    |
| 16962 | 4921525H12Rik | 329738 | 3+:108568027-108578219  |
| 16963 | Tceal5        | 331532 | X-:132735489-132738394  |
| 16964 | EG666111      | 666111 | 18-:30618618-30619231   |
| 16965 | Gstt2         | 14872  | 10-:75294630-75297031   |
| 16966 | Col4a4        | 12829  | 1-:82449128-82583391    |
| 16967 | MMT00070933   |        | 13-:76339455-76372410   |
| 16968 | Epha2         | 13836  | 4+:140857176-140885292  |
| 16969 | Kcnc2         | 268345 | 10+:111892662-111900367 |
| 16970 | 1500005K14Rik | 76566  | 11-:75834138-75841286   |
| 16971 | MMT00013779   |        | 11-:98192553-98204015   |
| 16972 | Nenf          | 66208  | 1-:193130675-193141997  |
| 16973 | MMT00027196   |        | 17+:53335694-53338047   |
| 16974 | Eif2b4        | 13667  | 5-:31489940-31495458    |
| 16975 | BC030307      | 103220 | 10+:86168451-86175935   |
| 16976 | Zhx3          | 320799 | 2-:160604959-160663062  |
| 16977 | Lgals3        | 16854  | 14+:47993482-48005789   |
| 16978 | 5730536A07Rik | 68250  | 9+:65974476-65986762    |
| 16979 | Rft1          | 328370 | 14+:31467544-31503140   |
| 16980 | Syne1         | 64009  | 10+:5056968-5075683     |
| 16981 | Ms4a1         | 12482  | 19-:11325840-11419606   |



|       |               |        |                         |
|-------|---------------|--------|-------------------------|
| 16982 | 4930448N21Rik | 384817 | 8-:48498125-48531717    |
| 16983 | Pigx          | 72084  | 16-:32084507-32087594   |
| 16984 | Ctnnal1       | 54366  | 4-:56825189-56878067    |
| 16985 | Tmem16f       | 105722 | 15+ :95621327-95805904  |
| 16986 | Gpr87         | 84111  | 3-:58982844-58984007    |
| 16987 | Pex14         | 56273  | 4-:148334645-148473921  |
| 16988 | Clec4f        | 51811  | 6-:83595017-83606026    |
| 16989 | E030037K03Rik | 319836 | 1-:175511802-175529394  |
| 16990 | Sc4mol        | 66234  | 8-:67196941-67212375    |
| 16991 | Gjb6          | 14623  | 14-:57742855-57743639   |
| 16992 | Irf2bp2       | 270110 | 8-:129112197-129117090  |
| 16993 | MMT00075165   |        | 5-:7399414-7400277      |
| 16994 | Trove2        | 20822  | 1-:145602725-145624108  |
| 16995 | Dppa3         | 73708  | 6+ :122576441-122580289 |
| 16996 | MMT00059495   |        |                         |
| 16997 | Spp2          | 75396  | 1+ :90303593-90323013   |
| 16998 | Fbxl15        | 68431  | 19+ :46402698-46404933  |
| 16999 | MMT00018943   |        | 16-:11185350-11186019   |
| 17000 | 2410089E03Rik | 73692  | 15+ :8136082-8137065    |
| 17001 | Hmga1         | 15361  | 17+ :27696477-27700608  |
| 17002 | Limd2         | 67803  | 11-:106019988-106020703 |
| 17003 | V1re11        | 171264 | 7-:10859522-10860453    |
| 17004 | MMT00016962   | 634201 | 3+ :85983800-85984031   |
| 17005 | MMT00015015   |        | X+ :132874649-132875206 |
| 17006 | Igh-VJ558     | 16061  | 12-:116597327-116861676 |
| 17007 | Rundc3b       | 242819 | 5-:8494783-8622612      |
| 17008 | Ntn4          | 57764  | 10+ :93104198-93208598  |
| 17009 | Pclo          | 26875  | 5+ :14514917-14795987   |
| 17010 | Galns         | 50917  | 8-:125102309-125135308  |
| 17011 | MMT00039362   |        | 13+ :3004955-3008498    |
| 17012 | 2300002M23Rik | 69542  | 17+ :35704479-35705889  |
| 17013 | Fhl4          | 14202  | 10-:84560470-84565233   |
| 17014 | 4930403N07Rik | 73936  | 12-:73202056-73210204   |
| 17015 | Rbm25         | 67039  | 12-:85009128-85009230   |
| 17016 | Dnajc11       | 230935 | 4+ :151307798-151356233 |
| 17017 | Slmo1         | 225655 | 18+ :67624553-67639422  |
| 17018 | Galnt14       | 71685  | 17-:73843524-73924313   |
| 17019 | 1810006K21Rik | 69038  | 19+ :10278502-10281987  |
| 17020 | Tox3          | 244579 | 8-:92771740-92871848    |
| 17021 | 6720468P15Rik | 78073  | 19+ :57583075-57587259  |
| 17022 | MMT00055891   |        | 8-:67654962-67656225    |
| 17023 | Slc6a9        | 14664  | 4+ :117507940-117541909 |
| 17024 | Fgf16         | 80903  | X+ :102959879-102969517 |
| 17025 | MMT00072213   |        | 12-:116383674-116842641 |
| 17026 | Lass3         | 545975 | 7+ :73888530-73940825   |
| 17027 | lws1          | 73473  | 18+ :32227405-32257328  |
| 17028 | MMT00043846   |        | 3+ :129370553-129370683 |
| 17029 | Erc2          | 238988 | 14+ :28689772-28954565  |
| 17030 | Rpgrip1l      | 244585 | 8-:93745270-93837122    |
| 17031 | Wdr52         | 212517 | 16+ :44432072-44481900  |
| 17032 | MMT00052549   |        | 13-:75661021-75661729   |

|       |               |        |                          |
|-------|---------------|--------|--------------------------|
| 17033 | Ccdc111       | 408022 | 8-:47671696-47695979     |
| 17034 | MMT00020368   |        | 13-:36650437-36651076    |
| 17035 | Glt8d3        | 223827 | 15-:93074967-93105512    |
| 17036 | Tctn3         | 67590  | 19-:40679587-40686690    |
| 17037 | Dctn1         | 13191  | 6+ :83129847-83149964    |
| 17038 | Ppp1r12b      | 329251 | 1-:136656985-136852522   |
| 17039 | Kctd19        | 279499 | 8-:107906356-107909421   |
| 17040 | Olfr513       | 258718 | 7+ :115898371-115899301  |
| 17041 | 1700001J11Rik | 72224  | 9+ :39858207-39860507    |
| 17042 | Epas1         | 13819  | 17+ :87153439-87230934   |
| 17043 | Tmem127       | 69470  | 2+ :127074004-127086826  |
| 17044 | Gpr55         | 227326 | 1-:87837450-87907557     |
| 17045 | 1810030N24Rik | 66291  | 4-:34715920-34725586     |
| 17046 | Fggy          | 75578  | 4+ :95478798-95593636    |
| 17047 | Mlh3          | 217716 | 12-:86575478-86607234    |
| 17048 | Olfr1502      | 258793 | 19+ :13936284-13937234   |
| 17049 | Capsl         | 75568  | 15+ :9365782-9395790     |
| 17050 | Kmo           | 98256  | 1+ :177562323-177590983  |
| 17051 | Mrps36        | 66128  | 13-:101505982-101514590  |
| 17052 | Golga5        | 27277  | 12+ :103707344-103736115 |
| 17053 | MMT00068622   |        | 4+ :47466491-47468272    |
| 17054 | Jph3          | 57340  | 8+ :124254462-124314721  |
| 17055 | Brpf3         | 268936 | 17+ :28942899-28973689   |
| 17056 | Pla2g2d       | 18782  | 4+ :138331649-138338058  |
| 17057 | MMT00028474   |        | 13+ :49846022-49917765   |
| 17058 | V1rh16        | 171274 | 13-:23323983-23324910    |
| 17059 | Upp2          | 76654  | 2+ :58558178-58588063    |
| 17060 | MMT00078061   |        | 3-:116230233-116231625   |
| 17061 | MMT00028106   |        | 18-:6028476-6030437      |
| 17062 | 2900010J23Rik | 72931  | 2-:32134328-32143586     |
| 17063 | Hoxc8         | 15426  | 15+ :102820969-102823797 |
| 17064 | Cd48          | 12506  | 1+ :173612224-173635007  |
| 17065 | MMT00006878   |        |                          |
| 17066 | MMT00078909   |        | 1-:52560185-52561072     |
| 17067 | 1700057G04Rik | 78459  | 9+ :92245763-92252714    |
| 17068 | Olfr661       | 258743 | 7+ :111836530-111837488  |
| 17069 | 1500003O03Rik | 56398  | 2+ :119373531-119411035  |
| 17070 | MMT00008656   |        | 3-:4890967-4891231       |
| 17071 | Samd9l        | 209086 | 6-:3322521-3327259       |
| 17072 | Zwint         | 52696  | 10+ :72117660-72137709   |
| 17073 | 1810049H13Rik | 66431  | 11-:120317917-120319377  |
| 17074 | ENSMUSG00000  | 668178 | 15+ :100165360-100170129 |
| 17075 | Creb3l3       | 208677 | 10-:80547070-80555390    |
| 17076 | Elavl1        | 15568  | 8-:4289601-4311770       |
| 17077 | MMT00071470   |        | 7+ :24848728-24850023    |
| 17078 | Syde2         | 214804 | 3+ :145650962-145684308  |
| 17079 | Ssh3          | 245857 | 19-:4263906-4269257      |
| 17080 | Fosl2         | 14284  | 5+ :32439076-32455560    |
| 17081 | 3830406C13Rik | 218734 | 14+ :13116756-13134318   |
| 17082 | MMT00013155   |        | 17+ :16984358-16985042   |
| 17083 | Atp1b1        | 11931  | 1-:166368205-166387999   |

|       |               |        |                         |
|-------|---------------|--------|-------------------------|
| 17084 | Larp7         | 28036  | 3-:127239629-127256267  |
| 17085 | Sct           | 20287  | 7-:148464228-148465005  |
| 17086 | Olf780        | 258281 | 10+:128758680-128759618 |
| 17087 | Gulo          | 268756 | 14-:66609215-66628059   |
| 17088 | Fntb          | 110606 | 12+:77938494-78021194   |
| 17089 | Pilrb1        | 170741 | 5-:138293374-138299226  |
| 17090 | Lass2         | 76893  | 3+:95119173-95127488    |
| 17091 | Slc38a3       | 76257  | 9-:107553486-107569700  |
| 17092 | Ttn           | 22138  | 2-:76542035-76818252    |
| 17093 | Opa1          | 74143  | 16+:29579427-29652576   |
| 17094 | Map3k11       | 26403  | 19+:5690246-5702343     |
| 17095 | Slc25a21      | 217593 | 12-:57813080-57959100   |
| 17096 | Csnk1g3       | 70425  | 18+:54055203-54115187   |
| 17097 | MMT00006515   |        | 7+:32844338-33390838    |
| 17098 | Qtrt1         | 60507  | 9+:21216346-21224631    |
| 17099 | Ppp2r3c       | 59032  | 12-:56382494-56403976   |
| 17100 | Scn4b         | 399548 | 9+:44957345-44959160    |
| 17101 | MMT00060041   |        |                         |
| 17102 | Dmrt2         | 242620 | 4+:109652467-109656289  |
| 17103 | Tmem87b       | 72477  | 2+:128644074-128679996  |
| 17104 | MMT00071673   |        | 1+:77062575-77063554    |
| 17105 | Zfp1          | 22761  | 8+:124806040-124861147  |
| 17106 | Cep192        | 70799  | 18+:67988004-67989697   |
| 17107 | Prdx1         | 18477  | 4+:116358216-116372118  |
| 17108 | Olf1280       | 258910 | 2+:111155637-111156554  |
| 17109 | C430049B03Rik | 72575  | X-:50407775-50410447    |
| 17110 | MMT00063698   | 751864 | 3-:15296552-15332303    |
| 17111 | MMT00058505   |        | 12-:115717096-115717662 |
| 17112 | Dok7          | 231134 | 5+:35429196-35430479    |
| 17113 | 1700010M22Rik | 66328  | 2+:144649401-144650150  |
| 17114 | Myh7          | 140781 | 14-:55589524-55613386   |
| 17115 | 2700099C18Rik | 77022  | 17+:95151474-95174477   |
| 17116 | Tceal6        | 66104  | X-:131743227-131745226  |
| 17117 | Acrbp         | 54137  | 6+:124999992-125013261  |
| 17118 | Fxyd7         | 57780  | 7-:31827533-31836473    |
| 17119 | Gpr124        | 78560  | 8+:28196312-28233890    |
| 17120 | Wdr12         | 57750  | 1-:60134986-60155335    |
| 17121 | Fcho1         | 74015  | 8-:74232551-74249565    |
| 17122 | MMT00068814   |        | X-:96157424-96162857    |
| 17123 | Olf1511       | 258268 | 14-:53009489-53010446   |
| 17124 | Chrm2         | 243764 | 6+:35700951-36474608    |
| 17125 | Nrxn1         | 18189  | 17-:90561268-90607840   |
| 17126 | Oaz1          | 18245  | 10+:80289504-80291749   |
| 17127 | Mcpt4         | 17227  | 14-:56645502-56681147   |
| 17128 | Vmn2r88       | 669149 | 14+:52030747-52039201   |
| 17129 | Dpy19l4       | 381510 | 4-:11194759-11204093    |
| 17130 | Baiap2        | 108100 | 11+:119867419-119868093 |
| 17131 | Nat14         | 269854 | 7+:4874492-4876602      |
| 17132 | E330009J07Rik | 243780 | 6-:40351374-40352945    |
| 17133 | 2700078E11Rik | 78832  | 19-:60604949-60613395   |
| 17134 | Tssk3         | 58864  | 4-:129166263-129167986  |

|       |               |           |                         |
|-------|---------------|-----------|-------------------------|
| 17135 | Mum1          | 68114     | 10+:79697018-79706647   |
| 17136 | Slc35a4       | 67843     | 18+:36839245-36843511   |
| 17137 | Nudt4         | 71207     | 10-:95011728-95026698   |
| 17138 | Hsf4          | 26386     | 8+:107793773-107799747  |
| 17139 | Olfir921      | 258778    | 9+:38582841-38583783    |
| 17140 | Cd6           | 12511     | 19-:10863836-10904498   |
| 17141 | Il11          | 16156     | 7-:4724656-4729627      |
| 17142 | Cox7a1        | 12865     | 7+:30970095-30970985    |
| 17143 | 2010002N04Rik | 106878    | 18-:60633846-60661179   |
| 17144 | B3gat2        | 280645    | 1+:23768590-23852279    |
| 17145 | Itgam         | 16409     | 7+:135270348-135270694  |
| 17146 | EG217600      | 217600    | 12-:58733564-58734002   |
| 17147 | Tll12         | 223723    | 15-:83406072-83425871   |
| 17148 | Suclg2        | 20917     | 6-:95423816-95668769    |
| 17149 | Pms2          | 18861     | 5+:144670838-144692313  |
| 17150 | MMT00013160   |           |                         |
| 17151 | 9230105E10Rik | 319236    | 7-:111488684-111493648  |
| 17152 | Scfd2         | 212986    | 5-:74602057-74632609    |
| 17153 | Crnn          | 381457    | 3+:92948708-92953730    |
| 17154 | 2610039C10Rik | 66578     | 16-:90719557-90727618   |
| 17155 | MMT00037407   |           | 2+:102014519-102015032  |
| 17156 | MMT00067284   |           | 11-:74069532-74070133   |
| 17157 | L3mbtl4       | 320858    | 17+:69113890-69127710   |
| 17158 | Zfp113        | 56314     | 5-:138584327-138596924  |
| 17159 | Gtpbp6        | 107999    | 5-:110532991-110536454  |
| 17160 | Ccdc127       | 67433     | 13+:74487790-74495122   |
| 17161 | Lhx3          | 16871     | 2-:26056466-26063769    |
| 17162 | Cux2          | 13048     | 5-:122310316-122499860  |
| 17163 | Fmo1          | 14261     | 1-:164759781-164796502  |
| 17164 | Slc38a10      | 72055     | 11-:119989774-120012574 |
| 17165 | Psm6          | 66413     | 14-:14944701-14953451   |
| 17166 | Nudt10        | 102954    | X-:5749458-5750045      |
| 17167 | ENSMUSG00000  | 100038358 | 2-:6052947-6055037      |
| 17168 | 5730494M16Rik | 66648     | 18-:25296717-25327376   |
| 17169 | 4930543E12Rik | 75239     | 7-:120243681-120285537  |
| 17170 | Nae1          | 234664    | 8-:107034928-107058508  |
| 17171 | MMT00045847   |           | 16-:32326267-32326781   |
| 17172 | Insrr         | 23920     | 3+:87600983-87620023    |
| 17173 | MMT00054186   |           | 11+:12548078-12548279   |
| 17174 | Dmrta1a       | 70887     | X-:100098560-100104026  |
| 17175 | MMT00005925   | 100046973 | 6-:69725695-69765127    |
| 17176 | Gnl2          | 230737    | 4+:124707281-124732609  |
| 17177 | Accn2         | 11419     | 15+:99502214-99529694   |
| 17178 | Ifnar2        | 15976     | 16+:91373143-91405610   |
| 17179 | Stfa3         | 20863     | 16-:36450622-36455478   |
| 17180 | Tmem55b       | 219024    | 14-:51546888-51550512   |
| 17181 | Kbtbd10       | 228003    | 2+:69508181-69522295    |
| 17182 | C230021P08Rik | 380969    | 15-:99252465-99258598   |
| 17183 | Kbtbd3        | 69149     | 9+:4309743-4331721      |
| 17184 | Bsn           | 12217     | 9-:108005520-108092589  |
| 17185 | MMT00007403   |           | 8-:19540452-19541169    |

|       |               |        |                         |
|-------|---------------|--------|-------------------------|
| 17186 | Reep5         | 13476  | 18-:34506647-34532992   |
| 17187 | Kif20a        | 19348  | 18+:34784266-34792458   |
| 17188 | EG547263      | 547263 | 16+:30115265-30139780   |
| 17189 | Gm263         | 238333 | 12+:88541408-88549768   |
| 17190 | Ndufa5        | 68202  | 6-:24468665-24477687    |
| 17191 | Xylb          | 102448 | 9+:119266709-119302447  |
| 17192 | MMT00028284   |        | 7-:48801044-48828948    |
| 17193 | Npb           | 208990 | 11+:120469804-120470413 |
| 17194 | Cmya5         | 76469  | 13-:93810671-93868385   |
| 17195 | Magea3        | 17139  | X-:151383085-151384048  |
| 17196 | Fkrp          | 243853 | 7-:17394619-17402081    |
| 17197 | Igtp          | 16145  | 11+:58013145-58021086   |
| 17198 | Sohlh2        | 74434  | 3+:54985965-55013872    |
| 17199 | Apol8         | 239552 | 15-:77579810-77585703   |
| 17200 | Tll10         | 330010 | 4-:155408941-155422086  |
| 17201 | Tsnaxip1      | 72236  | 8+:108351608-108368814  |
| 17202 | Olfr791       | 258932 | 10+:128963284-128964223 |
| 17203 | Svs3a         | 64335  | 2+:164115018-164117225  |
| 17204 | Cask          | 12361  | X-:13098172-13423682    |
| 17205 | Tyw3          | 209584 | 3-:154242071-154260059  |
| 17206 | Lyzl4         | 69032  | 9-:121486967-121551214  |
| 17207 | 2700050L05Rik | 214764 | 7+:140843845-140863858  |
| 17208 | Ttn           | 22138  | 2-:76691907-76700231    |
| 17209 | Col18a1       | 12822  | 10-:76515783-76629283   |
| 17210 | MMT00058938   |        | 3-:47829508-47830619    |
| 17211 | OTTMUSG000000 | 194227 | 4+:143379270-143385635  |
| 17212 | Slc9a2        | 226999 | 1+:40738473-40826116    |
| 17213 | MMT00057554   |        | 17-:22321732-22323096   |
| 17214 | Surf6         | 20935  | 2-:26746292-26758316    |
| 17215 | Mvd           | 192156 | 8-:124957503-124967290  |
| 17216 | Nuf2          | 66977  | 1-:171428442-171461547  |
| 17217 | MMT00027866   |        | 1-:130416317-130427667  |
| 17218 | Cldn18        | 56492  | 9-:99591217-99610434    |
| 17219 | Asnsd1        | 70396  | 1-:53380009-53399034    |
| 17220 | Abhd9         | 71932  | 17-:32321605-32326417   |
| 17221 | Zfp264        | 116812 | 7+:6942005-6942686      |
| 17222 | Usp21         | 30941  | 1-:173212332-173217100  |
| 17223 | 4933426M11Rik | 217684 | 12+:81891226-81981791   |
| 17224 | 5430407P10Rik | 227545 | 2-:6021090-6051192      |
| 17225 | Impa2         | 114663 | 18+:67448876-67478495   |
| 17226 | Utp14a        | 72554  | X+:45610067-45635628    |
| 17227 | MMT00005015   |        | 14+:56780091-56781642   |
| 17228 | Scgb1a1       | 22287  | 19-:9158129-9162418     |
| 17229 | Olfr68        | 18369  | 7-:110925909-110926857  |
| 17230 | Cmtm2b        | 75502  | 8+:106846136-106854656  |
| 17231 | Cyp2u1        | 71519  | 3-:130994047-131006121  |
| 17232 | Nkx6-1        | 18096  | 5-:102088226-102093730  |
| 17233 | Nmur1         | 14767  | 1-:88282900-88284716    |
| 17234 | Stk33         | 117229 | 7-:116422722-116582594  |
| 17235 | 1110001J03Rik | 66117  | 6+:38484867-38489449    |
| 17236 | MMT00020437   |        | 10+:111191928-111205199 |

|       |               |           |                         |
|-------|---------------|-----------|-------------------------|
| 17237 | Med23         | 70208     | 10+:24627094-24633055   |
| 17238 | MMT00061024   |           | 1-:129901996-129903055  |
| 17239 | Rpl6          | 19988     | 5+:121655423-121658974  |
| 17240 | Gabarap       | 56486     | 11+:69805164-69808173   |
| 17241 | MMT00051399   | 620963    | 18+:80209373-80213552   |
| 17242 | Olah          | 99035     | 2-:3259261-3283841      |
| 17243 | Bcl6b         | 12029     | 11-:70037629-70043223   |
| 17244 | Myef2         | 17876     | 2-:124912302-124949398  |
| 17245 | Fgf12         | 14167     | 16-:28161705-28189725   |
| 17246 | Vmn2r47       | 100042891 | 7+:8246138-8617250      |
| 17247 | A030007L17Rik | 68252     | 6-:54935642-54942862    |
| 17248 | Rap1gap       | 110351    | 4+:137237465-137285777  |
| 17249 | Vmn2r78       | 637896    | 7+:94069358-94103540    |
| 17250 | Uhrf1bp1      | 224648    | 17+:28024415-28027141   |
| 17251 | Tulp4         | 68842     | 17+:6138743-6240621     |
| 17252 | Vmn2r94       | 665227    | 17-:18380534-18394077   |
| 17253 | RP23-157O10.7 | 56013     | 11-:97372982-97436440   |
| 17254 | Cyp2f2        | 13107     | 7+:27904993-27918678    |
| 17255 | Tm9sf1        | 74140     | 14-:56254802-56262643   |
| 17256 | MMT00046675   |           | 3-:93495972-93496781    |
| 17257 | Ube3a         | 22215     | 7+:66484581-66560302    |
| 17258 | 4930448H16Rik | 74872     | 5+:143990225-143996427  |
| 17259 | Vash1         | 238328    | 12+:88021195-88026459   |
| 17260 | Agtr2         | 11609     | X+:21061743-21065951    |
| 17261 | MMT00050554   |           | 4-:5781664-5782072      |
| 17262 | Spns3         | 77577     | 11-:72311657-72363803   |
| 17263 | Ccnb3         | 209091    | X-:6557377-6572729      |
| 17264 | Fzd9          | 14371     | 5-:135725120-135726899  |
| 17265 | MMT00006374   | 100044772 | 7+:37019362-37020487    |
| 17266 | Prl2c3        | 18812     | 13-:12883088-12892345   |
| 17267 | Agbl2         | 271813    | 2+:90623374-90653507    |
| 17268 | MMT00049308   |           | 8+:29296474-29297498    |
| 17269 | Spsb1         | 74646     | 4-:149272075-149283840  |
| 17270 | MMT00018883   | 100046275 | 12-:116886148-116886601 |
| 17271 | MMT00038682   |           |                         |
| 17272 | Dppa4         | 73693     | 16+:48283880-48294351   |
| 17273 | Psmc3         | 19182     | 2+:90894238-90899585    |
| 17274 | Pcnp          | 76302     | 16-:56015618-56029801   |
| 17275 | MMT00079760   |           | X-:74535063-74535993    |
| 17276 | Cyp4f13       | 170716    | 17-:33061632-33084306   |
| 17277 | Lrrc8d        | 231549    | 5-:106133797-106188727  |
| 17278 | Adrbk2        | 320129    | 5-:113342901-113444499  |
| 17279 | Nupl2         | 231042    | 5+:23670820-23688789    |
| 17280 | Atf2          | 11909     | 2-:73656979-73730606    |
| 17281 | MMT00066360   |           | 5-:152238600-152264468  |
| 17282 | Pdhb          | 68263     | 14-:8998850-9005446     |
| 17283 | Adss          | 11566     | 1-:179694269-179726603  |
| 17284 | D1Bwg0212e    | 52846     | 1+:39592633-39603720    |
| 17285 | 1700019E19Rik | 76411     | 12+:87423512-87503406   |
| 17286 | 1700007B13Rik | 71830     | 7-:126630100-126667003  |
| 17287 | 9030411M15Rik | 667742    | 18-:63269177-63317019   |

|       |               |        |                         |
|-------|---------------|--------|-------------------------|
| 17288 | Snai3         | 30927  | 8-:124978752-124984514  |
| 17289 | Ppm1f         | 68606  | 16+:16896559-16924502   |
| 17290 | Elmod2        | 244548 | 8-:85840215-85856346    |
| 17291 | Cct8          | 12469  | 16-:87484120-87496118   |
| 17292 | Atp6v1b2      | 11966  | 8+:71612682-71637604    |
| 17293 | Amn1          | 232566 | 6-:149106100-149137216  |
| 17294 | Krtap5-5      | 114666 | 7+:149415323-149415834  |
| 17295 | MMT00082577   |        | 2+:137221009-137221079  |
| 17296 | Mtm1          | 17772  | X+:68468256-68568440    |
| 17297 | Comtd1        | 69156  | 14-:22666277-22668156   |
| 17298 | Stk36         | 269209 | 1+:74648054-74681330    |
| 17299 | Fzd8          | 14370  | 18+:9212917-9214974     |
| 17300 | Olf1r187      | 258319 | 16-:59035634-59036561   |
| 17301 | Amdhd2        | 245847 | 17-:24299939-24300750   |
| 17302 | Dhcr24        | 74754  | 4+:106233754-106259391  |
| 17303 | C630007B19Rik | 320265 | 6+:96063236-96081942    |
| 17304 | Cdc23         | 52563  | 18-:34792365-34811389   |
| 17305 | Iitm2a        | 16431  | X-:104592534-104598699  |
| 17306 | Fgd5          | 232237 | 6+:91999909-92012898    |
| 17307 | Gpr63         | 81006  | 4+:24934424-24935701    |
| 17308 | Cpn1          | 93721  | 19-:44030799-44061010   |
| 17309 | MMT00052961   |        | 9-:101350626-101351672  |
| 17310 | MMT00068323   |        | 10-:47044924-47045517   |
| 17311 | Ddx19b        | 234733 | 8-:113527085-113528460  |
| 17312 | Sirpa         | 19261  | 2+:129419057-129456668  |
| 17313 | Slc17a5       | 235504 | 9-:78384311-78426514    |
| 17314 | Napa          | 108124 | 7+:16683991-16703324    |
| 17315 | Nhsl1         | 215819 | 10+:18244416-18253687   |
| 17316 | Nkx2-1        | 21869  | 12-:57634022-57636047   |
| 17317 | Jmjd1a        | 104263 | 6-:71538962-71582732    |
| 17318 | Igh           | 111507 | 12-:115202578-115203083 |
| 17319 | Lsm1          | 67207  | 8+:26895781-26913010    |
| 17320 | Olf1r73       | 117004 | 2-:87874354-87875294    |
| 17321 | Hepacam       | 72927  | 9+:37175187-37192680    |
| 17322 | Zfp758        | 224598 | 17+:22498488-22514247   |
| 17323 | Tubb6         | 67951  | 18+:67550372-67562402   |
| 17324 | MMT00023460   |        | 1-:49060930-49061049    |
| 17325 | 4933400A11Rik | 66747  | X-:166214309-166217567  |
| 17326 | Zranb3        | 226409 | 1-:129850761-129937582  |
| 17327 | MMT00004644   | 626904 | 6-:25926812-25927081    |
| 17328 | H2afv         | 77605  | 11-:6328105-6344429     |
| 17329 | MMT00035807   |        | 6-:140005316-140006121  |
| 17330 | Frmpr4        | 333605 | X-:163911906-164048964  |
| 17331 | Nsun4         | 72181  | 4-:115705446-115726481  |
| 17332 | Smc3          | 13006  | 19+:53702562-53719636   |
| 17333 | Slc25a10      | 27376  | 11+:120353185-120360479 |
| 17334 | Spag4l        | 76407  | 2-:153681920-153693375  |
| 17335 | Cicn1         | 12723  | 6+:42236765-42264176    |
| 17336 | Cdad1         | 71891  | 14-:60182784-60216793   |
| 17337 | 1810065E05Rik | 69864  | 11+:58234612-58239525   |
| 17338 | Mocos         | 68591  | 18+:24811986-24860074   |

|       |               |        |                         |
|-------|---------------|--------|-------------------------|
| 17339 | Acaa1b        | 235674 | 9-:119057161-119066124  |
| 17340 | MMT00014772   |        | 19+:32490002-32498118   |
| 17341 | Batf          | 53314  | 12+:87027669-87050036   |
| 17342 | Dhx32         | 101437 | 7-:140912728-140968486  |
| 17343 | Timm8a1       | 30058  | X-:131071797-131076168  |
| 17344 | Lonrf2        | 381338 | 1-:38853305-38868671    |
| 17345 | 4930519N13Rik | 78177  | 2-:150761016-150805927  |
| 17346 | Liph          | 239759 | 16-:21954350-21995556   |
| 17347 | MMT00005275   |        | 18+:13530594-13531052   |
| 17348 | Pf4           | 56744  | 5+:91201538-91202409    |
| 17349 | Raly1         | 76897  | 3+:13723415-13814618    |
| 17350 | Tbl1xr1       | 81004  | 3+:22047863-22109461    |
| 17351 | Rtkn2         | 170799 | 10+:67504148-67505262   |
| 17352 | Cebpb         | 12608  | 2+:167514414-167515920  |
| 17353 | Gtf3c6        | 67371  | 10-:39968534-39977470   |
| 17354 | Tcn2          | 21452  | 11-:3817195-3831586     |
| 17355 | Ramp2         | 54409  | 11+:101107744-101109559 |
| 17356 | Rgnf          | 110596 | 13-:98669423-98976122   |
| 17357 | 1810059H22Rik | 69820  | 5-:149765323-149766779  |
| 17358 | MMT00012966   |        | 5+:85359500-85359944    |
| 17359 | Tspan12       | 269831 | 6-:21721392-21808113    |
| 17360 | Ppm1j         | 71887  | 3+:104584004-104588937  |
| 17361 | Dhps          | 330817 | 8+:87595375-87603773    |
| 17362 | Ankrd34a      | 545554 | 3+:96401404-96402805    |
| 17363 | Aebp2         | 11569  | 6+:140572746-140626992  |
| 17364 | Mef2c         | 17260  | 13+:83643193-83802948   |
| 17365 | Isl2          | 104360 | 9+:55389013-55393986    |
| 17366 | MMT00069569   |        | 7-:147073369-147074261  |
| 17367 | MMT00064436   |        | 5+:110295640-110295832  |
| 17368 | 1700123M08Rik | 76665  | 4+:11893297-11921427    |
| 17369 | BC033915      | 70661  | 9+:45931319-46010968    |
| 17370 | Cdh12         | 215654 | 15+:21409980-21516236   |
| 17371 | Emx2          | 13797  | 19+:59533890-59538927   |
| 17372 | MMT00017409   |        | 16+:4864247-4867691     |
| 17373 | EG433016      | 433016 | 16+:36184292-36188194   |
| 17374 | Uchl5         | 56207  | 1+:145624464-145653945  |
| 17375 | Nlrp4c        | 83564  | 7+:6017316-6056750      |
| 17376 | MMT00032526   |        | 15+:71624995-71626176   |
| 17377 | Olf1504       | 258627 | 19-:13952162-13972708   |
| 17378 | 3110062M04Rik | 78412  | 6-:34824335-34825637    |
| 17379 | MMT00053584   | 545867 | 6-:95982853-95983369    |
| 17380 | Slc25a38      | 208638 | 9+:120019516-120033435  |
| 17381 | Star          | 20845  | 8+:26918945-26925195    |
| 17382 | MMT00001167   |        | X+:155271464-155272250  |
| 17383 | Pah           | 18478  | 10+:86984718-87046876   |
| 17384 | Trim27        | 19720  | 13+:21272240-21284726   |
| 17385 | Asah3         | 171168 | 17-:57094502-57121531   |
| 17386 | Vps16         | 80743  | 2+:130266049-130269468  |
| 17387 | Fastkd2       | 75619  | 1+:63777133-63799038    |
| 17388 | MMT00067636   |        |                         |
| 17389 | Pop4          | 66161  | 7-:39047838-39056367    |



|       |               |        |                         |
|-------|---------------|--------|-------------------------|
| 17390 | Nme6          | 54369  | 9+:109735704-109745132  |
| 17391 | C530028O21Rik | 319352 | 6+:124946835-124953116  |
| 17392 | MMT00047040   |        | 10-:39472168-39472692   |
| 17393 | MMT00063804   |        | 10-:35428509-35431626   |
| 17394 | E130319B15Rik | 209645 | 2+:4639202-4721960      |
| 17395 | MMT00035275   |        | 15-:27988455-27988652   |
| 17396 | Myoz3         | 170947 | 18-:60735943-60751442   |
| 17397 | MMT00047810   |        | 2+:136091275-136225438  |
| 17398 | MMT00045090   |        | 5-:117082489-117083618  |
| 17399 | 4933416C03Rik | 619332 | 10-:115549544-115550675 |
| 17400 | MMT00050193   |        | 1+:119502965-119523538  |
| 17401 | Ptgr          | 19220  | 3-:151463748-151500411  |
| 17402 | Capza2        | 12343  | 6+:17587014-17616167    |
| 17403 | N4bp1         | 80750  | 8-:89368220-89385212    |
| 17404 | Ctsb          | 13030  | 14+:63741301-63764758   |
| 17405 | Spata6        | 67946  | 4+:111392610-111501039  |
| 17406 | 4933428G09Rik | 66768  | 5+:48763582-48779586    |
| 17407 | Usp49         | 224836 | 17-:47820212-47820811   |
| 17408 | lqwd1         | 74106  | 1-:167259634-167390422  |
| 17409 | A630055G03Rik | 223970 | 16+:10835182-10840070   |
| 17410 | 1700021F07Rik | 72221  | 2+:173348114-173353996  |
| 17411 | Fert2         | 14158  | 17+:64287320-64488545   |
| 17412 | Aif1          | 11629  | 17-:35307939-35309537   |
| 17413 | MMT00043948   |        |                         |
| 17414 | MMT00059213   | 672682 | 17+:35755624-35760052   |
| 17415 | Sema5b        | 20357  | 16+:35541656-35663787   |
| 17416 | Col28a1       | 213945 | 6-:7949606-7965044      |
| 17417 | Pxn           | 19303  | 5+:115956760-116004666  |
| 17418 | D1Ert622e     | 52392  | 1-:99540485-99558542    |
| 17419 | EG432555      | 432555 | 11-:48707836-48715515   |
| 17420 | Vps13b        | 666173 | 15+:35301294-35382022   |
| 17421 | MMT00002048   |        | 2-:73797668-73798769    |
| 17422 | Dctd          | 320685 | 8+:49195522-49227013    |
| 17423 | Gna13         | 14674  | 11+:109224159-109258960 |
| 17424 | Akt1          | 11651  | 12-:113892031-113912401 |
| 17425 | MMT00007116   |        | 12-:32579491-32579840   |
| 17426 | Arid2         | 77044  | 15+:96117952-96235727   |
| 17427 | V1rc16        | 171189 | 6-:57310461-57311372    |
| 17428 | Hapln2        | 73940  | 3-:87825984-87831362    |
| 17429 | Tpi1          | 21991  | 6-:124760733-124764430  |
| 17430 | B4galt2       | 53418  | 4-:117545736-117554423  |
| 17431 | Foxc2         | 14234  | 8+:123640482-123642790  |
| 17432 | Pafah1b2      | 18475  | 9-:45776641-45792880    |
| 17433 | 4932432K03Rik | 74385  | 14+:49686169-49707032   |
| 17434 | Eda2r         | 245527 | X-:94534165-94566595    |
| 17435 | 2410003L11Rik | 69729  | 11+:97476237-97479813   |
| 17436 | Taf8          | 63856  | 17-:47625234-47639236   |
| 17437 | Il13ra1       | 16164  | X+:33652171-33709238    |
| 17438 | Gnas          | 14683  | 2+:174109831-174172241  |
| 17439 | Igsf9         | 93842  | 1+:174414619-174428668  |
| 17440 | Tex18         | 83559  | 10+:86376243-86377425   |

|       |               |        |                        |
|-------|---------------|--------|------------------------|
| 17441 | Zfp335        | 329559 | 2-:164717001-164737525 |
| 17442 | Zfp318        | 57908  | 17+:46523688-46557865  |
| 17443 | Tas1r2        | 83770  | 4+:139209452-139226192 |
| 17444 | Tuba1a        | 22142  | 15-:98762061-98781118  |
| 17445 | Anp32a        | 11737  | 9+:62189290-62225632   |
| 17446 | RP23-195K8.6  | 622404 | 4+:43506238-43508798   |
| 17447 | Ctsf          | 56464  | 19+:4855128-4860912    |
| 17448 | MMT00038194   |        | 5+:13811208-13814806   |
| 17449 | Zfp296        | 63872  | 7+:20163164-20166004   |
| 17450 | MMT00047013   | 619941 | 2-:91363426-91364026   |
| 17451 | F12           | 58992  | 13-:55519350-55528141  |
| 17452 | Tmco3         | 234076 | 8+:13287950-13321492   |
| 17453 | Foxp1         | 108655 | 6-:98880084-99113012   |
| 17454 | Klhl6         | 239743 | 16-:19946588-19983106  |
| 17455 | Lpcat1        | 210992 | 13+:73626526-73652560  |
| 17456 | Lgtn          | 16865  | 1+:133049768-133070072 |
| 17457 | MMT00026898   |        | 19+:28107984-28108635  |
| 17458 | Msr1          | 20288  | 8-:40690543-40718181   |
| 17459 | Wnt9a         | 216795 | 11+:59120467-59144878  |
| 17460 | Dpyd          | 99586  | 3+:118265022-118647253 |
| 17461 | Ripk5         | 213452 | 1+:134313989-134363536 |
| 17462 | Nat8l         | 269642 | 5+:34339739-34344192   |
| 17463 | Rgl1          | 19731  | 1-:154365952-154472285 |
| 17464 | MMT00024460   |        | 2+:53410828-53411919   |
| 17465 | Ccin          | 442829 | 4+:43994444-43998231   |
| 17466 | Fbxl18        | 231863 | 5-:143633488-143656876 |
| 17467 | Kif13b        | 16554  | 14+:65271350-65425131  |
| 17468 | Anub1         | 67492  | 6+:116216546-116280316 |
| 17469 | Sec14l3       | 380683 | 11+:3967951-3979089    |
| 17470 | Zfp784        | 654801 | 7-:4985678-4990047     |
| 17471 | Defb19        | 246700 | 2-:152401824-152406033 |
| 17472 | Cd53          | 12508  | 3-:106562851-106592970 |
| 17473 | 4930500O09Rik | 75811  | 4-:86090602-86204233   |
| 17474 | MMT00055944   |        | 8+:67461856-67467919   |
| 17475 | MMT00043153   |        | 13-:81225550-81226433  |
| 17476 | Ube2d2        | 56550  | 18+:35931260-35966815  |
| 17477 | Hook3         | 320191 | 8-:27141763-27229620   |
| 17478 | Ptpn7         | 320139 | 1+:137029885-137039830 |
| 17479 | E030049G20Rik | 210356 | 1-:127999120-128020644 |
| 17480 | Ppp1r2        | 66849  | 16-:31253317-31275310  |
| 17481 | Defb21        | 403172 | 2+:152398478-152400679 |
| 17482 | Hdlbp         | 110611 | 1-:95304344-95375381   |
| 17483 | Rab8b         | 235442 | 9-:66691423-66767461   |
| 17484 | Ercc6         | 319955 | 14+:33330142-33390247  |
| 17485 | Ndufab1       | 70316  | 7-:129230349-129245360 |
| 17486 | Cnn2          | 12798  | 10+:79451378-79458135  |
| 17487 | Mcm7          | 17220  | 5-:138605816-138613090 |
| 17488 | Gsdmc4        | 74548  | 15-:63722735-63734491  |
| 17489 | Cd79a         | 12518  | 7+:25682531-25686876   |
| 17490 | Mras          | 17532  | 9-:99288348-99312022   |
| 17491 | 4930435E12Rik | 74663  | 16-:38824441-38828858  |

|       |               |        |                         |
|-------|---------------|--------|-------------------------|
| 17492 | MMT00078159   |        | 14+:54210578-54260976   |
| 17493 | Rfx4          | 71137  | 10+:84218807-84369279   |
| 17494 | Lyrm7         | 75530  | 11-:54640369-54674419   |
| 17495 | Mmaa          | 109136 | 8-:81791806-81805547    |
| 17496 | 9030612M13Rik | 208292 | 17-:32911296-32924882   |
| 17497 | Ptges         | 64292  | 2-:30747782-30758782    |
| 17498 | MMT00008723   |        | 13+:66699587-66699622   |
| 17499 | Sirt6         | 50721  | 10-:81084534-81090395   |
| 17500 | Atad1         | 67979  | 19-:32747312-32776024   |
| 17501 | EG385499      | 385499 | X-:91853446-91854598    |
| 17502 | Gabra4        | 14397  | 5-:71961628-72049591    |
| 17503 | Cnm2          | 94219  | 19+:46836786-46953069   |
| 17504 | Nars          | 70223  | 18-:64659301-64676200   |
| 17505 | Igh-VJ558     | 16061  | 12-:115942513-115942803 |
| 17506 | Isy1          | 57905  | 6-:87768688-87788717    |
| 17507 | Olf174        | 259004 | 16-:58823607-58824533   |
| 17508 | MMT00023781   |        | 18-:16997814-16998436   |
| 17509 | Gfi1          | 14581  | 5-:108145678-108153363  |
| 17510 | Stk40         | 74178  | 4+:125806958-125818268  |
| 17511 | MMT00000525   |        | 4+:146318109-146319184  |
| 17512 | EG433216      | 433216 | 19+:6152665-6153711     |
| 17513 | Rin1          | 225870 | 19+:5050807-5057070     |
| 17514 | Thbd          | 21824  | 2-:148230206-148233839  |
| 17515 | Itln1         | 16429  | 1-:173460625-173461346  |
| 17516 | 1520402A15Rik | 68075  | 4-:115809333-115817223  |
| 17517 | Kcnh1         | 16510  | 1+:194014775-194330925  |
| 17518 | Rpl18         | 19899  | 7+:52973487-52976197    |
| 17519 | MMT00061180   |        | 9-:39493613-39494527    |
| 17520 | EG668457      | 668457 | 3+:95426160-95426733    |
| 17521 | Foxn2         | 14236  | 17+:88840078-88886897   |
| 17522 | Sufu          | 24069  | 19+:46471447-46560499   |
| 17523 | Gdf5          | 14563  | 2-:155766762-155771103  |
| 17524 | MMT00006341   |        | 1+:150823157-150826053  |
| 17525 | Ctgf          | 14219  | 10+:24315312-24318486   |
| 17526 | Olf1539       | 258963 | 7+:147853187-147854145  |
| 17527 | 2310033K02Rik | 69553  | 2-:167805663-167819135  |
| 17528 | Gmnn          | 57441  | 13-:24843714-24853724   |
| 17529 | Tnfrsf13c     | 72049  | 15-:82037384-82043239   |
| 17530 | MMT00041792   |        | 8-:38463277-38464078    |
| 17531 | OTTMUSG000000 | 668929 | 2-:151471140-151481075  |
| 17532 | Tacr3         | 21338  | 3+:134492236-134595404  |
| 17533 | Srd5a1        | 78925  | 13-:69712325-69751872   |
| 17534 | E230019M04Rik | 331537 | X+:136605670-136636249  |
| 17535 | MMT00008110   |        | 18-:88826941-88828108   |
| 17536 | Chn2          | 69993  | 6+:54144018-54251801    |
| 17537 | Piga          | 18700  | X+:160857749-160861155  |
| 17538 | 2210012G02Rik | 66526  | 4-:106806766-106807826  |
| 17539 | Olf1365       | 404335 | 13-:21646910-21647889   |
| 17540 | Ywhaz         | 22631  | 15-:36701459-36723274   |
| 17541 | Fgf22         | 67112  | 10+:79217863-79219705   |
| 17542 | MMT00044805   | 240219 | 18-:38519096-38520141   |

|       |               |        |                         |
|-------|---------------|--------|-------------------------|
| 17543 | Olf1023       | 258580 | 2+:85726958-85727892    |
| 17544 | Col4a6        | 94216  | X-:137600570-137908619  |
| 17545 | Pdha2         | 18598  | 3-:140872967-140875319  |
| 17546 | Wdsub1        | 72137  | 2-:59690422-59720642    |
| 17547 | C730007P19Rik | 20865  | 7+:14318888-14364987    |
| 17548 | Pogz          | 229584 | 3+:94657868-94686244    |
| 17549 | Exoc6b        | 75914  | 6-:84696893-84858283    |
| 17550 | Exoc8         | 102058 | 8-:127418693-127421526  |
| 17551 | Satl1         | 73809  | X-:109497914-109520365  |
| 17552 | Pdzd4         | 245469 | X-:71039556-71069805    |
| 17553 | Eif4ebp1      | 13685  | 8+:28370830-28385968    |
| 17554 | N28178        | 230085 | 4+:42946491-42953377    |
| 17555 | Tspan5        | 56224  | 3+:138405171-138567388  |
| 17556 | Dcbld1        | 66686  | 10+:51953424-52040081   |
| 17557 | Smchd1        | 74355  | 17-:71693835-71740775   |
| 17558 | Pole3         | 59001  | 4-:62184966-62186048    |
| 17559 | Olf1920       | 258783 | 9+:38563274-38564205    |
| 17560 | Tagln3        | 56370  | 16-:45711492-45724477   |
| 17561 | Slc39a13      | 68427  | 2-:90901946-90910475    |
| 17562 | Rbed1         | 232089 | 6-:72515918-72544805    |
| 17563 | Aldh11l1      | 107747 | 6+:90507191-90521989    |
| 17564 | MMT00054039   |        | 8+:41023626-41025793    |
| 17565 | Zfp185        | 22673  | X+:70242372-70275500    |
| 17566 | Olf1645       | 258247 | 7-:111232645-111233465  |
| 17567 | Supt16h       | 114741 | 14-:52780093-52816876   |
| 17568 | Rexo2         | 104444 | 9-:48276618-48288716    |
| 17569 | 1810058I24Rik | 67705  | 6+:35202686-35211982    |
| 17570 | 2810433D01Rik | 77132  | 11-:102481108-102486034 |
| 17571 | MMT00002547   |        | 6-:15749586-15814504    |
| 17572 | Krt80         | 74127  | 15-:101178753-101195009 |
| 17573 | Tnfrsf1b      | 21938  | 4-:144805681-144836790  |
| 17574 | Prdm16        | 70673  | 4-:153694400-153741421  |
| 17575 | C330001K17Rik | 77609  | 9-:21799256-21807078    |
| 17576 | Meis3         | 17537  | 7+:16760778-16771848    |
| 17577 | Med28         | 66999  | 5+:45911539-45916838    |
| 17578 | Kif19a        | 286942 | 11+:114649223-114652050 |
| 17579 | MMT00078068   |        | 19+:44925782-44926468   |
| 17580 | Ccdc3         | 74186  | 2+:5058976-5151910      |
| 17581 | Pisd          | 320951 | 5-:33078969-33128276    |
| 17582 | Plcx2         | 433022 | 16-:45964984-46009888   |
| 17583 | Per2          | 18627  | 1-:93312560-93355873    |
| 17584 | F11r          | 16456  | 1+:173367701-173394724  |
| 17585 | Gramd1a       | 52857  | 7-:31915145-31936052    |
| 17586 | Gata4         | 14463  | 14-:63818911-63864061   |
| 17587 | Tcl1          | 21432  | 12-:106454996-106460923 |
| 17588 | Bcl7b         | 12054  | 5+:135644361-135657715  |
| 17589 | Madd          | 228355 | 2-:91017805-91023994    |
| 17590 | MMT00047848   |        | 2-:140781633-140781973  |
| 17591 | D930015E06Rik | 229473 | 3-:83701577-83742090    |
| 17592 | Man1a         | 17155  | 10-:53626819-53794951   |
| 17593 | Gfer          | 11692  | 17-:24831131-24832881   |

|       |               |        |                         |
|-------|---------------|--------|-------------------------|
| 17594 | MMT00040814   |        | 5+:87426114-87427458    |
| 17595 | MMT00048325   |        | 3+:132505358-132507882  |
| 17596 | MMT00032256   |        |                         |
| 17597 | Abcf1         | 224742 | 17-:36093584-36106750   |
| 17598 | Olfr458       | 258436 | 6-:42410074-42411016    |
| 17599 | D3ErtD254e    | 241944 | 3+:36049999-36065842    |
| 17600 | Kcnq5         | 226922 | 1-:21391688-21503216    |
| 17601 | Msx2          | 17702  | 13-:53563255-53568443   |
| 17602 | Trim54        | 58522  | 5+:31419084-31439998    |
| 17603 | 4921509O07Rik | 70917  | 13-:114236495-114274865 |
| 17604 | C77370        | 245555 | X-:101278529-101283015  |
| 17605 | Usp14         | 59025  | 18-:9996096-10029926    |
| 17606 | Tmem90a       | 627191 | 12-:86019666-86039563   |
| 17607 | Orc6l         | 56452  | 8+:87823689-87831969    |
| 17608 | Shd           | 20420  | 17+:56109905-56116040   |
| 17609 | Ptpn9         | 56294  | 9+:56843305-56910609    |
| 17610 | Zfp131        | 72465  | 13_random+:31981-57600  |
| 17611 | Sec14l5       | 665119 | 16+:5165681-5184277     |
| 17612 | Vhlh          | 22346  | 6+:113574005-113580264  |
| 17613 | P2rx7         | 18439  | 5+:123094082-123131313  |
| 17614 | MMT00071219   |        | 8-:74555571-74556774    |
| 17615 | Exph5         | 320051 | 9+:53109837-53185607    |
| 17616 | Flt1          | 14254  | 5-:148373771-148537336  |
| 17617 | Atp5sl        | 66349  | 7+:26404452-26410569    |
| 17618 | Zfp458        | 238690 | 13-:67357052-67585153   |
| 17619 | Zfp551        | 619331 | 7-:13000499-13191900    |
| 17620 | Macf1         | 11426  | 4-:123026843-123231609  |
| 17621 | D930001I22Rik | 228859 | 2-:163292042-163298441  |
| 17622 | Foxo1         | 56458  | 3+:52072339-52151010    |
| 17623 | Olfr715       | 258776 | 7-:114271958-114272905  |
| 17624 | Ccdc65        | 105833 | 15+:98538643-98553733   |
| 17625 | Olfr441       | 258649 | 6+:43065940-43066674    |
| 17626 | Ryr1          | 20190  | 7-:29809011-29910146    |
| 17627 | Shisa4        | 77552  | 1-:137267637-137271659  |
| 17628 | Lrrc16a       | 68732  | 13-:24270073-24372642   |
| 17629 | Saa2          | 20209  | 7+:54007202-54009682    |
| 17630 | Fbxo40        | 207215 | 16-:36966159-36990301   |
| 17631 | Pla2r1        | 18779  | 2-:60257095-60391318    |
| 17632 | Lypd3         | 72434  | 7+:25421588-25426135    |
| 17633 | Tmem79        | 71913  | 3-:88133641-88137561    |
| 17634 | Dner          | 227325 | 1-:84472916-84582195    |
| 17635 | Mmp10         | 17384  | 9+:7502360-7510238      |
| 17636 | MMT00039631   |        | 6-:66791341-66874170    |
| 17637 | Olfr915       | 258781 | 9-:38454174-38455107    |
| 17638 | Adssl1        | 11565  | 12+:113858299-113879550 |
| 17639 | Eil3          | 269344 | 2-:121264713-121268263  |
| 17640 | Tomm70a       | 28185  | 16+:57121826-57153143   |
| 17641 | Mapk7         | 23939  | 11-:61302314-61307705   |
| 17642 | Srl           | 106393 | 16-:4482004-4492391     |
| 17643 | 6030426L16Rik | 628850 | 12-:21678265-21840135   |
| 17644 | Dse           | 212898 | 10-:33871196-33927092   |

|       |               |        |                         |
|-------|---------------|--------|-------------------------|
| 17645 | Atp5c1        | 11949  | 2-:9981126-9981889      |
| 17646 | C4b           | 12268  | 17-:34865331-34880828   |
| 17647 | MMT00074110   |        | 13+:22556164-22559725   |
| 17648 | Scrg1         | 20284  | 8+:59934719-59956382    |
| 17649 | Esx1          | 13984  | X-:133649936-133654710  |
| 17650 | Scgb1c1       | 338417 | 7+:148031470-148032667  |
| 17651 | Commd1        | 17846  | 11-:22799763-22878996   |
| 17652 | Cd36          | 12491  | 5-:17288303-17341535    |
| 17653 | MMT00039948   |        | 13-:66650716-66651678   |
| 17654 | Ppm1e         | 320472 | 11-:87044348-87062620   |
| 17655 | MMT00075835   |        | 16-:38685246-38686069   |
| 17656 | Hdhd3         | 72748  | 4-:62160087-62163234    |
| 17657 | Lrfn1         | 80749  | 7+:29239514-29247143    |
| 17658 | MMT00034425   |        | 1+:43944818-43945851    |
| 17659 | MMT00017514   |        |                         |
| 17660 | Nlrp12        | 378425 | 7-:3221915-3249524      |
| 17661 | Birc5         | 11799  | 11+:117710564-117717046 |
| 17662 | Ankrd52       | 237615 | 10+:127814197-127827681 |
| 17663 | Arhgef5       | 54324  | 6+:43215712-43222874    |
| 17664 | Jup           | 16480  | 11-:100231264-100259322 |
| 17665 | 2310056P07Rik | 70186  | 16-:36043929-36071601   |
| 17666 | Fstl1         | 14314  | 16+:37777159-37835832   |
| 17667 | Phactr1       | 218194 | 13+:43230752-43233948   |
| 17668 | 6430527G18Rik | 238330 | 12-:88221650-88225761   |
| 17669 | 2310007A19Rik | 66353  | 3-:94268904-94277513    |
| 17670 | MMT00021061   |        | 14-:72849453-72852690   |
| 17671 | Klk1b1        | 16623  | 7+:51222156-51226642    |
| 17672 | EG237412      | 237412 | 10+:81816993-81842187   |
| 17673 | Nola1         | 68147  | 3-:129527837-129534074  |
| 17674 | MMT00021031   |        | 14-:72825819-72831611   |
| 17675 | Txndc10       | 67988  | 18+:90679547-90712787   |
| 17676 | Amz1          | 231842 | 5+:141217237-141229240  |
| 17677 | MMT00040539   |        | 6+:76234406-76368044    |
| 17678 | 4933427G23Rik | 330053 | 5-:23337006-23337441    |
| 17679 | Col3a1        | 12825  | 1+:45368474-45413525    |
| 17680 | 1700069L16Rik | 73476  | 5-:114150351-114174783  |
| 17681 | Bcl2          | 12043  | 1-:108439841-108609457  |
| 17682 | Zfp386        | 56220  | 12+:117285986-117298232 |
| 17683 | MMT00010505   | 654450 | 6-:130002975-130013208  |
| 17684 | 4930572J10Rik | 75884  | 18-:43198204-43330863   |
| 17685 | Eif6          | 16418  | 2-:155645571-155652660  |
| 17686 | Fstl3         | 83554  | 10+:79240039-79245067   |
| 17687 | Cdv3          | 321022 | 9-:103255432-103268001  |
| 17688 | Znhit4        | 70020  | 6-:83071823-83075023    |
| 17689 | 4933405O20Rik | 243996 | 7+:57698992-57855779    |
| 17690 | Mtap7d3       | 320923 | X-:54051158-54054369    |
| 17691 | Kank3         | 80880  | 17+:33947467-33959859   |
| 17692 | Smc6          | 67241  | 12+:11306211-11324901   |
| 17693 | MMT00044427   |        | X-:115253343-115253599  |
| 17694 | Ppp1r14b      | 18938  | 19+:7049475-7051812     |
| 17695 | Rec8          | 56739  | 14+:56237072-56244226   |

|       |               |           |                         |
|-------|---------------|-----------|-------------------------|
| 17696 | MMT00065923   |           | X-:88791878-88792718    |
| 17697 | 1300014I06Rik | 66895     | 13-:34719709-34744550   |
| 17698 | Wwox          | 80707     | 8+:116963600-117876605  |
| 17699 | Ccdc43        | 52715     | 11-:102546001-102559039 |
| 17700 | Crim2         | 333088    | 6-:29424269-29447828    |
| 17701 | Spink6        | 433180    | 18+:44231047-44243264   |
| 17702 | Ccdc40        | 207607    | 11+:119099177-119125828 |
| 17703 | Large         | 16795     | 8-:75338497-75876455    |
| 17704 | EG620480      | 620480    | 7-:91983050-91995915    |
| 17705 | Rps7          | 20115     | 12-:29315965-29320790   |
| 17706 | Kirrel3       | 67703     | 9+:34719150-34843889    |
| 17707 | Rshl2b        | 100037282 | 17-:7109064-7152705     |
| 17708 | Reg2          | 19693     | 6+:78355148-78358091    |
| 17709 | Gnai1         | 14677     | 5-:17770951-17866446    |
| 17710 | Calcb         | 116903    | 7+:121862150-121866737  |
| 17711 | EG434609      | 434609    | 12-:117218706-117219395 |
| 17712 | Nup62         | 18226     | 7+:52071789-52086174    |
| 17713 | B4galt6       | 56386     | 18-:20844503-20904905   |
| 17714 | Ckap5         | 75786     | 2+:91366948-91460819    |
| 17715 | Ltbp2         | 16997     | 12-:86124162-86217482   |
| 17716 | Rnf10         | 50849     | 5-:115691779-115722903  |
| 17717 | Klhl15        | 236904    | X+:91480675-91518865    |
| 17718 | 2010109I03Rik | 67038     | 15-:74708771-74712134   |
| 17719 | Gm1006        | 381399    | 2+:153768456-153789588  |
| 17720 | Rap2b         | 74012     | 3+:61168522-61170953    |
| 17721 | MMT00077153   |           | 3-:141846870-141847784  |
| 17722 | MMT00014461   |           | 15-:59825986-59826492   |
| 17723 | Hsh2d         | 209488    | 8+:74713565-74724678    |
| 17724 | Sdf4          | 20318     | 4+:155367019-155384317  |
| 17725 | Trim12        | 76681     | 7-:111452110-111455902  |
| 17726 | Slc25a13      | 50799     | 6-:5991218-6167118      |
| 17727 | MMT00039356   |           |                         |
| 17728 | Cyp2b19       | 13090     | 7+:27542205-27557648    |
| 17729 | Prim2         | 19076     | 1-:33510655-33726603    |
| 17730 | MMT00058199   |           | 10+:20345591-20348727   |
| 17731 | MMT00005424   |           | 11+:33072883-33073368   |
| 17732 | Cyp2c65       | 72303     | 19+:39135519-39168436   |
| 17733 | Cdx1          | 12590     | 18-:61179379-61195548   |
| 17734 | Ghsr          | 208188    | 3+:27270718-27273843    |
| 17735 | Supt5h        | 20924     | 7-:29099916-29123738    |
| 17736 | Maml3         | 433586    | 3-:51493356-51501671    |
| 17737 | MMT00020869   |           | 14-:73378022-73379845   |
| 17738 | Acad8         | 66948     | 9-:26781719-26807128    |
| 17739 | Zzef1         | 195018    | 11+:72609798-72637776   |
| 17740 | Rpl36         | 54217     | 17+:56753036-56753657   |
| 17741 | Bnip2         | 12175     | 9+:69837421-69856018    |
| 17742 | Dscaml1       | 114873    | 9+:45469215-45561793    |
| 17743 | Phb2          | 12034     | 6+:124662353-124666936  |
| 17744 | 2310028H24Rik | 71901     | 4-:41466317-41516544    |
| 17745 | MMT00035996   |           |                         |
| 17746 | Prlr          | 19116     | 15+:10153740-10276776   |

|       |               |           |                         |
|-------|---------------|-----------|-------------------------|
| 17747 | MMT00071421   |           | 7-:144359766-144359864  |
| 17748 | Olf878        | 258794    | 9+:37726228-37727172    |
| 17749 | Btbd6         | 399566    | 12+:114214775-114217219 |
| 17750 | Hs6st2        | 50786     | X-:49033065-49034779    |
| 17751 | Olf1201       | 258897    | 2+:88634540-88635463    |
| 17752 | Chac1         | 69065     | 2+:119177025-119180058  |
| 17753 | RP23-25C1.8   | 625638    | 4-:137951914-137953615  |
| 17754 | 6720489N17Rik | 211378    | 13-:62705589-62723192   |
| 17755 | BC117090      | 100038854 | 16-:36321728-36367708   |
| 17756 | Morc1         | 17450     | 16+:48431349-48631018   |
| 17757 | Hnrnp2        | 56258     | X+:131139443-131141593  |
| 17758 | Epdr1         | 105298    | 13-:19684929-19711582   |
| 17759 | EG433862      | 433862    | 5+:28186988-28187678    |
| 17760 | Ccr6          | 12458     | 17+:8437944-8449985     |
| 17761 | 4930564B18Rik | 75272     | 14+:76042063-76066945   |
| 17762 | Tph1          | 21990     | 7-:53902500-53922718    |
| 17763 | Selplg        | 20345     | 5-:114268558-114270259  |
| 17764 | Ccdc128       | 73825     | 17+:88978069-88987705   |
| 17765 | Uck1          | 22245     | 2-:32110041-32115653    |
| 17766 | Gad1          | 14415     | 2+:70400352-70440069    |
| 17767 | 1700091H14Rik | 73553     | 14-:42668556-42674084   |
| 17768 | MMT00023753   |           | 14+:25104332-25105492   |
| 17769 | Cyp19a1       | 13075     | 9-:54013743-54041243    |
| 17770 | Ttbk1         | 106763    | 17-:46581974-46621167   |
| 17771 | Htr6          | 15565     | 4-:138617324-138630704  |
| 17772 | Flot2         | 14252     | 11+:77853805-77873933   |
| 17773 | Rfng          | 19719     | 11-:120642760-120645516 |
| 17774 | Ints1         | 68510     | 5-:140227236-140251601  |
| 17775 | MMT00025230   |           | 1-:53453188-53622529    |
| 17776 | BC043118      | 224273    | 16-:59491914-59556610   |
| 17777 | Mtap7         | 17761     | 10+:19868819-20000511   |
| 17778 | Spr1a         | 20753     | 3-:92287876-92289796    |
| 17779 | D6Wsu116e     | 28006     | 6+:116158058-116212688  |
| 17780 | Slc38a5       | 209837    | X+:7848556-7857299      |
| 17781 | EG625796      | 625796    | 15+:31206235-31207592   |
| 17782 | 5730507A09Rik | 70638     | 7-:71903397-71931683    |
| 17783 | D630012G11Rik | 320904    | 12-:74303610-74304276   |
| 17784 | Lama5         | 16776     | 2-:179905969-179960558  |
| 17785 | Grin2a        | 14811     | 16-:9577802-9612850     |
| 17786 | Cntn2         | 21367     | 1-:134413575-134417857  |
| 17787 | MMT00069688   |           | 8-:108109141-108110131  |
| 17788 | Xrcc1         | 22594     | 7+:25332201-25358453    |
| 17789 | Cnga4         | 233649    | 7+:112553402-112557251  |
| 17790 | Olf870        | 57251     | 9-:19975078-19976013    |
| 17791 | Cdkl5         | 382253    | X-:157246406-157341866  |
| 17792 | Vmn2r79       | 621430    | 7+:94150477-94186337    |
| 17793 | MMT00000967   |           | 6+:56896903-56897202    |
| 17794 | 2010203O07Rik | 72429     | 4+:59030533-59036271    |
| 17795 | Pglyrp3       | 242100    | 3+:91800353-91800990    |
| 17796 | Rims2         | 116838    | 15+:39029877-39513486   |
| 17797 | Rltpr         | 234695    | 8+:108214291-108222099  |



|       |               |        |                         |
|-------|---------------|--------|-------------------------|
| 17798 | Tmc2          | 192140 | 2+:130020929-130090181  |
| 17799 | Nsmaf         | 18201  | 4-:6323372-6381408      |
| 17800 | Lrtm1         | 319476 | 14+:29831386-29841486   |
| 17801 | Syt12         | 171180 | 19-:4447688-4467940     |
| 17802 | Gpd2          | 14571  | 2+:57090856-57220006    |
| 17803 | 1810049H19Rik | 435889 | 6-:41261231-41264710    |
| 17804 | Npffr2        | 104443 | 5+:89996840-90012489    |
| 17805 | Slc39a12      | 277468 | 2+:14317698-14416581    |
| 17806 | Gpsm3         | 106512 | 17+:34727160-34728698   |
| 17807 | Pebp1         | 23980  | 5-:117732662-117737555  |
| 17808 | Ncor2         | 20602  | 5-:125497532-125659423  |
| 17809 | Tdrd9         | 74691  | 12+:113236017-113263949 |
| 17810 | MMT00054025   |        | 13+:75940136-75940731   |
| 17811 | D10Ertd761e   | 52706  | 10+:81685763-81686514   |
| 17812 | Rnf6          | 74132  | 5-:147020779-147033013  |
| 17813 | Vmn2r16       | 384220 | 5+:109759399-109793299  |
| 17814 | Napb          | 17957  | 2-:148520513-148521861  |
| 17815 | Xpnp2         | 170745 | X+:45462051-45490158    |
| 17816 | 3110003A17Rik | 73112  | 10-:17731065-17743041   |
| 17817 | Ccnd2         | 12444  | 6-:127080252-127101046  |
| 17818 | Chchd4        | 72170  | 6-:91414270-91423417    |
| 17819 | C030006K11Rik | 223665 | 15-:76551895-76554249   |
| 17820 | Cpd           | 12874  | 11-:76595490-76660498   |
| 17821 | MMT00005082   |        | 9_random-:59600-76418   |
| 17822 | MMT00043095   |        | 13-:19396516-19429512   |
| 17823 | D2Ertd750e    | 51944  | 2+:118639738-118660375  |
| 17824 | Tmem138       | 72982  | 19-:10645374-10651587   |
| 17825 | Nudt18        | 213484 | 14+:70977709-70980333   |
| 17826 | 3300001G02Rik | 78372  | 11+:32105414-32108984   |
| 17827 | Klhl13        | 67455  | X-:22796396-22942179    |
| 17828 | Serpina3n     | 20716  | 12+:105644968-105652535 |
| 17829 | Otx2          | 18424  | 14-:49277860-49282547   |
| 17830 | Lrrc40        | 67144  | 3+:157711393-157730053  |
| 17831 | Ndufa6        | 67130  | 15-:82180592-82184667   |
| 17832 | MMT00043412   |        | 1-:93068006-93068484    |
| 17833 | Nckipsd       | 80987  | 9+:108710746-108720698  |
| 17834 | Hemgn         | 93966  | 4-:46406861-46417055    |
| 17835 | BC037112      | 231128 | 5+:34753300-34829170    |
| 17836 | Ermn          | 77767  | 2-:57898950-57905274    |
| 17837 | Polr3gl       | 69870  | 3-:96381796-96398066    |
| 17838 | Apoc3         | 11814  | 9-:46041306-46042796    |
| 17839 | Tmem132e      | 270893 | 11+:82202400-82259828   |
| 17840 | 1110029L17Rik | 68722  | 15-:72926496-72926919   |
| 17841 | Cdipt         | 52858  | 7+:134119910-134124014  |
| 17842 | Pcdh8         | 18530  | 14-:80166598-80171040   |
| 17843 | Stxbp5        | 78808  | 10-:9479736-9620772     |
| 17844 | Centb1        | 216859 | 11-:69694719-69709039   |
| 17845 | Erc1          | 111173 | 6-:119525263-119798150  |
| 17846 | Wbp11         | 60321  | 6-:136762177-136769784  |
| 17847 | Tmem16g       | 404545 | 1+:95286871-95299337    |
| 17848 | Il17b         | 56069  | 18+:61847588-61852190   |

|       |               |           |                         |
|-------|---------------|-----------|-------------------------|
| 17849 | Tfip11        | 54723     | 5+:112755388-112767091  |
| 17850 | Prg4          | 96875     | 1-:152296998-152313295  |
| 17851 | Card11        | 108723    | 5-:141348946-141476537  |
| 17852 | Cpeb2         | 231207    | 5+:43635824-43677428    |
| 17853 | Olf1353       | 259044    | 10+:78432395-78433323   |
| 17854 | Rdh11         | 17252     | 12-:80275323-80293280   |
| 17855 | Slc4a3        | 20536     | 1+:75542872-75555654    |
| 17856 | Tmem1         | 216131    | 10-:77659026-77707334   |
| 17857 | C1qtnf7       | 109323    | 5+:44000239-44007888    |
| 17858 | MMT00053971   |           | 6-:87898427-87899445    |
| 17859 | 4922505G16Rik | 629499    | 2-:157034281-157049031  |
| 17860 | Zcchc6        | 214290    | 13-:59872912-59923471   |
| 17861 | Psen1         | 19164     | 12+:85029512-85076148   |
| 17862 | Fbxo21        | 231670    | 5+:118426741-118458695  |
| 17863 | MMT00025642   | 100038927 | 8+:22274359-22274508    |
| 17864 | D930015E06Rik | 229473    | 3-:83744418-83844086    |
| 17865 | Txlnb         | 378431    | 10+:17516085-17565469   |
| 17866 | Zmat5         | 67178     | 11+:4604680-4637669     |
| 17867 | Stard13       | 243362    | 5-:151840205-151992769  |
| 17868 | Zfp316        | 54201     | 5-:144013804-144017885  |
| 17869 | Foxn4         | 116810    | 5-:114705500-114713163  |
| 17870 | Ret           | 19713     | 6-:118103872-118147151  |
| 17871 | Scamp3        | 24045     | 3+:88981499-88986685    |
| 17872 | Akap10        | 56697     | 11-:61686344-61728927   |
| 17873 | Vrk3          | 101568    | 7+:52003998-52032882    |
| 17874 | Atp6v1h       | 108664    | 1+:5073252-5152526      |
| 17875 | Cntnap5a      | 636808    | 1+:117956698-118189112  |
| 17876 | Tubb4         | 22153     | 17-:57220114-57226936   |
| 17877 | Aptx          | 66408     | 4-:40633274-40650213    |
| 17878 | Brap          | 72399     | 5+:122113363-122135606  |
| 17879 | MMT00069486   |           | 14+:70702013-70702703   |
| 17880 | Ncald         | 52589     | 15-:37296018-37389098   |
| 17881 | Mtg1          | 212508    | 7+:147323528-147336505  |
| 17882 | Ddx26b        | 236790    | X+:53708022-53761019    |
| 17883 | D730040F13Rik | 242474    | 4-:56891192-56960298    |
| 17884 | Ln timer      | 140887    | 5-:147828679-147888105  |
| 17885 | Tasp1         | 75812     | 2-:139772892-139892541  |
| 17886 | Foxl1         | 14241     | 8+:123651861-123652870  |
| 17887 | Cryl1         | 68631     | 14-:57893871-58017320   |
| 17888 | MMT00075624   | 70772     | 17+:27166212-27173320   |
| 17889 | Bbox1         | 170442    | 2-:110105240-110145882  |
| 17890 | 2610021K21Rik | 78767     | 12-:101092802-101122606 |
| 17891 | Olf1619       | 259080    | 7+:110752169-110753131  |
| 17892 | MMT00037578   |           | 19-:15746724-15747278   |
| 17893 | Nr6a1         | 14536     | 2-:38582433-38781940    |
| 17894 | Rps21         | 66481     | 2+:179992118-179993141  |
| 17895 | Smcp          | 17235     | 3-:92387805-92392919    |
| 17896 | Ttc9b         | 73032     | 7+:28438940-28441231    |
| 17897 | Gm1019        | 368202    | 3-:85798002-85804466    |
| 17898 | 4930578I06Rik | 67750     | 14-:64589917-64606630   |
| 17899 | BC016423      | 105203    | 13-:3584209-3589209     |

|       |               |        |                         |
|-------|---------------|--------|-------------------------|
| 17900 | Ift81         | 12589  | 5-:123000510-123064527  |
| 17901 | Krtap16-5     | 77918  | 16-:88877767-88878235   |
| 17902 | Slc35d2       | 70484  | 13-:64197616-64230615   |
| 17903 | MMT00073283   | 103172 | 10+:75398318-75400491   |
| 17904 | Cds1          | 74596  | 5+:102194391-102252878  |
| 17905 | Nog           | 18121  | 11-:89162635-89163334   |
| 17906 | Mdn1          | 100019 | 4+:32809155-32810076    |
| 17907 | Suz12         | 52615  | 11+:79806997-79847623   |
| 17908 | Tbcel         | 272589 | 9-:42223640-42269464    |
| 17909 | Mesdc1        | 80889  | 7-:91029558-91032829    |
| 17910 | Ints2         | 70422  | 11-:86025607-86071061   |
| 17911 | MMT00047239   |        | 6+:83981563-83982264    |
| 17912 | Mpo           | 17523  | 11+:87607085-87617895   |
| 17913 | Phtf2         | 68770  | 5-:20267481-20387897    |
| 17914 | BC052484      | 328783 | 17+:25883718-25885274   |
| 17915 | V1rh3         | 171246 | 13+:22486897-22487836   |
| 17916 | Arl10         | 56795  | 13+:54676425-54682488   |
| 17917 | Ctsq          | 104002 | 13-:61136397-61139548   |
| 17918 | Nxn           | 18230  | 11-:76212201-76212622   |
| 17919 | 6330403A02Rik | 381310 | 1-:182368446-182413633  |
| 17920 | Nlgn2         | 216856 | 11-:69636624-69694564   |
| 17921 | Lars2         | 102436 | 9+:123276052-123371785  |
| 17922 | Reg3a         | 19694  | 6+:78330702-78333833    |
| 17923 | Muc20         | 224116 | 16-:32786129-32797494   |
| 17924 | Alox8         | 11688  | 11-:68997386-69011344   |
| 17925 | F13b          | 14060  | 1+:141398303-141420333  |
| 17926 | Nptx1         | 18164  | 11-:119400685-119409139 |
| 17927 | MMT00042294   | 434130 | 7+:17579726-17581992    |
| 17928 | Pex11a        | 18631  | 7-:86882149-86887911    |
| 17929 | Atg4d         | 235040 | 9+:21076491-21078479    |
| 17930 | Cidec         | 14311  | 6-:113374624-113385754  |
| 17931 | Chrna1        | 11435  | 2-:73403855-73418367    |
| 17932 | Gosr1         | 53334  | 11-:76543199-76577076   |
| 17933 | Npsr1         | 319239 | 9+:24094240-24118633    |
| 17934 | MMT00038301   |        | 18+:12447105-12447977   |
| 17935 | Pde6c         | 110855 | 19+:38207435-38258227   |
| 17936 | Adamts12      | 239337 | 15+:11001253-11266209   |
| 17937 | MMT00069919   |        | 5+:139051966-139052547  |
| 17938 | Kcnd2         | 16508  | 6+:21664128-21679813    |
| 17939 | MMT00075513   |        | 15+:63463251-63592135   |
| 17940 | Zfp706        | 68036  | 15-:36930383-36936956   |
| 17941 | Ror2          | 26564  | 13-:53205589-53381246   |
| 17942 | Msn           | 17698  | X+:93337224-93362640    |
| 17943 | D330001F17Rik | 223658 | 15+:76220456-76283466   |
| 17944 | Zfp558        | 72230  | 9-:18260018-18282710    |
| 17945 | Cog1          | 16834  | 11+:113510859-113523714 |
| 17946 | Tmprss11a     | 194597 | 5-:86840646-86860936    |
| 17947 | MMT00008227   |        | 18-:88583938-88584464   |
| 17948 | MMT00026476   |        | 5+:98582278-98583193    |
| 17949 | Htr3a         | 15561  | 9-:48707318-48719141    |
| 17950 | Heatr5b       | 320473 | 17-:79152198-79234705   |

|       |               |        |                         |
|-------|---------------|--------|-------------------------|
| 17951 | 4833436C18Rik | 329831 | 4-:43439883-43441361    |
| 17952 | Ripk2         | 192656 | 4-:16050702-16090543    |
| 17953 | Ros1          | 19886  | 10-:51765604-51914883   |
| 17954 | Mboat7        | 77582  | 7-:3629861-3644537      |
| 17955 | MMT00038380   |        | 11-:9637155-9637430     |
| 17956 | Serpina1d     | 20703  | 12-:105001808-105011784 |
| 17957 | 1700086L19Rik | 74284  | 12+:75386502-75397160   |
| 17958 | Guca2b        | 14916  | 4-:119329221-119331550  |
| 17959 | MMT00033462   |        | 1-:181855051-181855578  |
| 17960 | Yod1          | 226418 | 1+:132612799-132616173  |
| 17961 | Ube2a         | 22209  | X+:34414352-34424210    |
| 17962 | Grm5          | 108071 | 7+:95123644-95281094    |
| 17963 | EG433319      | 433319 | 1+:72050829-72051390    |
| 17964 | Asb11         | 68854  | X+:160876032-160897032  |
| 17965 | Alpl          | 11647  | 4-:137297653-137352238  |
| 17966 | 2310021H06Rik | 67135  | 2+:153988343-153994179  |
| 17967 | B3galnt2      | 97884  | 13+:14046915-14090446   |
| 17968 | 8230402K04Rik | 268807 | 15-:58146130-58154887   |
| 17969 | BC030336      | 233812 | 7+:127821304-127877771  |
| 17970 | EG638532      | 638532 | 1+:134178781-134181385  |
| 17971 | Nudt17        | 78373  | 3-:96509129-96512638    |
| 17972 | BC023744      | 231668 | 5+:117769375-117801801  |
| 17973 | MMT00065215   |        | 14-:14610252-14610864   |
| 17974 | Tek           | 21687  | 4+:94405990-94541629    |
| 17975 | MMT00079364   |        | 5+:8179591-8181202      |
| 17976 | P2ry10        | 78826  | X+:104207740-104335105  |
| 17977 | T2            | 21331  | 17+:8589493-8615589     |
| 17978 | MMT00009316   |        | 7+:4363924-4365042      |
| 17979 | Krt42         | 68239  | 11-:100124223-100127239 |
| 17980 | EG629065      | 629065 | 17-:53839593-53882749   |
| 17981 | MMT00036029   | 268527 | 12-:16678430-16764047   |
| 17982 | 2310047O13Rik | 66960  | 2-:12269220-12341038    |
| 17983 | MMT00058803   |        | 17-:51623616-51623911   |
| 17984 | Zcrb1         | 67197  | 15-:93216543-93228721   |
| 17985 | Ntng2         | 171171 | 2-:29050340-29103560    |
| 17986 | MMT00019829   |        | 3+:64038543-64038849    |
| 17987 | Fgfr2         | 14183  | 7-:137307301-137409705  |
| 17988 | Abcb9         | 56325  | 5-:124511866-124545800  |
| 17989 | V1rf2         | 171233 | 17+:21398378-21399364   |
| 17990 | MMT00014863   |        | 13+:51440364-51441017   |
| 17991 | Fbxl20        | 72194  | 11-:97950015-98011706   |
| 17992 | Gmpr          | 66355  | 13+:45602837-45641750   |
| 17993 | MMT00013883   |        | 17+:72605761-72606658   |
| 17994 | Zh2c2         | 252876 | 1+:99666776-99689546    |
| 17995 | Hist1h4d      | 319156 | 13+:23673470-23673780   |
| 17996 | Igfbp2        | 16008  | 1+:72871153-72898734    |
| 17997 | Plp2          | 18824  | X-:7245526-7248421      |
| 17998 | Sqstm1        | 18412  | 11-:50013654-50024292   |
| 17999 | A730017L22Rik | 613258 | 2+:130706338-130707869  |
| 18000 | EG628870      | 628870 | 10-:107199418-107329314 |
| 18001 | Nrl           | 18185  | 14-:56137814-56143028   |

|       |               |        |                         |
|-------|---------------|--------|-------------------------|
| 18002 | 4930533N22Rik | 75205  | 7+:82193760-82220050    |
| 18003 | Tff3          | 21786  | 17-:31262259-31266556   |
| 18004 | Rps3          | 27050  | 7-:106627396-106632136  |
| 18005 | Chchd1        | 66121  | 14+:21522290-21523639   |
| 18006 | Wdr16         | 71860  | 11-:67738313-67779144   |
| 18007 | Mgat5         | 107895 | 1+:129203338-129380281  |
| 18008 | 1700011H14Rik | 67082  | 14-:49846033-49865070   |
| 18009 | MMT00068893   |        | 15-:103416861-103418807 |
| 18010 | Tex28         | 385380 | X-:71397630-71406955    |
| 18011 | MMT00021469   |        | 4+:74793507-74795000    |
| 18012 | Rhobtb3       | 73296  | 13-:76008585-76081246   |
| 18013 | Acot5         | 217698 | 12+:85410273-85416969   |
| 18014 | Dicer1        | 192119 | 12-:105925952-105990141 |
| 18015 | Rgs1          | 240816 | 1-:155640884-155668703  |
| 18016 | Prrg2         | 65116  | 7-:52308959-52317792    |
| 18017 | 6330514A18Rik | 216166 | 10+:79826760-79828227   |
| 18018 | Galnt11       | 231050 | 5+:24728720-24771735    |
| 18019 | MMT00049952   |        | 19+:3138928-3143133     |
| 18020 | D19Ert737e    | 76539  | 19-:60274070-60302610   |
| 18021 | Zdhhc22       | 238331 | 12-:88324330-88329626   |
| 18022 | Adams17       | 233332 | 7+:74060735-74114441    |
| 18023 | Pstpip1       | 19200  | 9+:55937775-55976685    |
| 18024 | Cdh26         | 381409 | 2+:178184681-178206504  |
| 18025 | 1810012P15Rik | 66274  | 11+:78640112-78652973   |
| 18026 | Oit3          | 18302  | 10-:58885712-58901663   |
| 18027 | 5730403B10Rik | 66626  | 16-:4766827-4789916     |
| 18028 | Diap1         | 13367  | 18-:38004480-38095065   |
| 18029 | Mpdz          | 17475  | 4-:80925503-81088576    |
| 18030 | Ndufb8        | 67264  | 19-:44624743-44629901   |
| 18031 | Pde4d         | 238871 | 13+:110530594-110562889 |
| 18032 | MMT00056397   |        | 7+:18815422-18816640    |
| 18033 | Klh17         | 231003 | 4-:155603439-155608890  |
| 18034 | 3110006E14Rik | 76980  | 13-:69841710-69878948   |
| 18035 | Pigl          | 327942 | 11+:62271778-62327405   |
| 18036 | Tmem100       | 67888  | 11+:89891661-89897819   |
| 18037 | Klf9          | 16601  | 19+:23216244-23240447   |
| 18038 | Sec24c        | 218811 | 14+:21493558-21514075   |
| 18039 | Ubx4          | 217379 | 12-:4886159-4914070     |
| 18040 | Slc25a36      | 192287 | 9-:96978176-97011452    |
| 18041 | MMT00063084   |        | 2-:48665213-48665981    |
| 18042 | Aph1c         | 68318  | 9-:66666729-66682478    |
| 18043 | Fgd3          | 30938  | 13-:49358669-49404609   |
| 18044 | Zfp568        | 243905 | 7+:30798847-30808665    |
| 18045 | Klk10         | 69540  | 7+:51036448-51040779    |
| 18046 | Ublcp1        | 79560  | 11-:44269738-44284002   |
| 18047 | Efnb3         | 13643  | 11-:69369362-69373315   |
| 18048 | MMT00008116   |        | 12+:73701105-73701841   |
| 18049 | Ribc1         | 66611  | X-:148439126-148450838  |
| 18050 | MMT00003408   | 330962 | 9-:65260522-65270741    |
| 18051 | Smad5         | 17129  | 13+:56824929-56837363   |
| 18052 | Fbn2          | 14119  | 18-:58169911-58369459   |

|       |               |        |                         |
|-------|---------------|--------|-------------------------|
| 18053 | Psmc4         | 23996  | 7-:28826735-28835062    |
| 18054 | Mrps36        | 66128  | 13-:101505915-101514543 |
| 18055 | Aes           | 14797  | 10+:81022347-81028909   |
| 18056 | 4632434I11Rik | 74041  | 7-:100006075-100022749  |
| 18057 | MMT00033947   |        | 1+:34985793-34987484    |
| 18058 | Plekho1       | 67220  | 3-:95792763-95799762    |
| 18059 | Centb2        | 78618  | 16-:31092500-31201324   |
| 18060 | Ftsj1         | 54632  | X-:7817546-7829436      |
| 18061 | MMT00002521   |        | 6+:18094868-18095708    |
| 18062 | Otog          | 18419  | 7+:53496356-53566803    |
| 18063 | Rnf146        | 68031  | 10-:29065981-29081846   |
| 18064 | MMT00035925   |        | 15-:77238201-77238877   |
| 18065 | Peo1          | 226153 | 19+:45081046-45087251   |
| 18066 | Ccdc51        | 66658  | 9+:108991850-108995006  |
| 18067 | Itgb1bp2      | 26549  | X+:98644503-98649118    |
| 18068 | Tbc1d13       | 70296  | 2+:29989387-30007533    |
| 18069 | Gpt           | 76282  | 15+:76526956-76530115   |
| 18070 | Ogg1          | 18294  | 6+:113277004-113284178  |
| 18071 | Zfp354a       | 21408  | 11+:50873573-50884764   |
| 18072 | 1110012D08Rik | 73827  | 10-:128237024-128239573 |
| 18073 | Hipk3         | 15259  | 2-:104269921-104334401  |
| 18074 | Rorb          | 225998 | 19-:19006097-19007207   |
| 18075 | EG623133      | 623133 | 8+:4641452-4643725      |
| 18076 | Cadm4         | 260299 | 7+:25267117-25288762    |
| 18077 | Clip2         | 269713 | 5-:134967761-135011040  |
| 18078 | MMT00024172   |        | 15+:38892881-38893698   |
| 18079 | Olf75-ps1     | 258186 | 11-:73201611-73202526   |
| 18080 | Olf75         | 258825 | 9-:39757421-39758354    |
| 18081 | Zic4          | 22774  | 9+:91273036-91279236    |
| 18082 | Cntn5         | 244682 | 9-:9660902-9833582      |
| 18083 | Gadd45a       | 13197  | 6-:66985089-66987401    |
| 18084 | Pak7          | 241656 | 2-:135908957-136000011  |
| 18085 | Pwwp2b        | 101631 | 7+:146434391-146764239  |
| 18086 | Olf75         | 258582 | 2+:85708750-85709696    |
| 18087 | St6galnac3    | 20447  | 3-:152865473-153388097  |
| 18088 | Alkbh6        | 233065 | 7+:31093719-31099325    |
| 18089 | Phc1          | 13619  | 6-:122267749-122287015  |
| 18090 | D10Bwg1379e   | 215821 | 10-:18308996-18384715   |
| 18091 | Rap2c         | 72065  | X-:48368146-48371312    |
| 18092 | Erbp4         | 13869  | 1-:68245415-68442889    |
| 18093 | Pfn4          | 382562 | 12+:4776099-4785611     |
| 18094 | MMT00041834   |        | 3+:18317460-18434288    |
| 18095 | P4ha3         | 320452 | 7+:107459296-107465620  |
| 18096 | Slc39a6       | 106957 | 18-:24738382-24760073   |
| 18097 | Apbb1         | 11785  | 7-:112706996-112722930  |
| 18098 | Rdh14         | 105014 | 12+:10397587-10402370   |
| 18099 | Nfx1          | 74164  | 4+:40918067-40971905    |
| 18100 | Sdsl          | 257635 | 5-:120908211-120922819  |
| 18101 | D030056L22Rik | 225995 | 19+:18787674-18792918   |
| 18102 | Mynn          | 80732  | 3+:30502424-30515751    |
| 18103 | Spaca1        | 67652  | 4-:34115288-34137040    |

|       |               |           |                         |
|-------|---------------|-----------|-------------------------|
| 18104 | Zfp687        | 78266     | 3-:94810527-94819140    |
| 18105 | Vmn2r121      | 100038941 | X-:121240948-121249519  |
| 18106 | Med10         | 28077     | 13+:69948759-69954972   |
| 18107 | Nek5          | 330721    | 8-:23204677-23207327    |
| 18108 | Il31          | 76399     | 5-:123930167-123932596  |
| 18109 | V1rc21        | 171194    | 6+:56906506-56907399    |
| 18110 | MMT00056457   |           | 3-:37498187-37499111    |
| 18111 | Renbp         | 19703     | X-:71167460-71176148    |
| 18112 | Ikzf5         | 67143     | 7-:138535151-138540367  |
| 18113 | MMT00034400   | 100047043 | 2+:80677101-80678935    |
| 18114 | Lmtk2         | 231876    | 5+:144861459-144949068  |
| 18115 | Nup62cl       | 279706    | X-:136542213-136562241  |
| 18116 | Ahctf1        | 226747    | 1-:181719263-181723954  |
| 18117 | MMT00043956   |           |                         |
| 18118 | Cacybp        | 12301     | 1-:162133047-162143001  |
| 18119 | Sin3a         | 20466     | 9+:56924182-56975959    |
| 18120 | Tmem201       | 230917    | 4-:149089490-149102165  |
| 18121 | MMT00028858   |           | 6-:68164212-68165247    |
| 18122 | Snx21         | 101113    | 2+:164611514-164618275  |
| 18123 | Plekhg6       | 213522    | 6-:125312124-125330520  |
| 18124 | Ptpst         | 19281     | 2-:161353359-162486883  |
| 18125 | MMT00040589   |           | 17+:33283596-33285270   |
| 18126 | Dyrk2         | 69181     | 10-:118296607-118316068 |
| 18127 | Mxra7         | 67622     | 11-:116664697-116689361 |
| 18128 | Tpi1          | 21991     | 6-:124761898-124764176  |
| 18129 | Fbxl5         | 242960    | 5-:44135856-44173280    |
| 18130 | Klrd1         | 16643     | 6+:129543505-129548788  |
| 18131 | Clcf1         | 56708     | 19+:4214391-4222615     |
| 18132 | Rbms3         | 207181    | 9-:116868580-117019248  |
| 18133 | Zfand5        | 22682     | 19+:21347181-21356516   |
| 18134 | Hebp1         | 15199     | 6-:135087545-135118155  |
| 18135 | Tmed3         | 66111     | 9-:89594042-89599829    |
| 18136 | Tmprss11a     | 194597    | 5-:86873131-86874909    |
| 18137 | Minpp1        | 17330     | 19+:32560258-32589843   |
| 18138 | MMT00000385   |           | 8-:112274892-112276164  |
| 18139 | 8030498B09Rik | 77547     | 9+:21194543-21195699    |
| 18140 | Atg2b         | 76559     | 12-:106854348-106861352 |
| 18141 | Camk1d        | 227541    | 2-:5219652-5366190      |
| 18142 | Ppox          | 19044     | 1-:173207122-173211291  |
| 18143 | Dnajc1        | 13418     | 2-:18138769-18314134    |
| 18144 | Dmap1         | 66233     | 4-:117347340-117354542  |
| 18145 | Rala          | 56044     | 13-:17974214-17988900   |
| 18146 | MMT00067785   |           | 12-:7886611-7890676     |
| 18147 | Nhlrc2        | 66866     | 19+:56623014-56673335   |
| 18148 | Cables1       | 63955     | 18+:11997782-12104072   |
| 18149 | Zfp13         | 22654     | 17-:23717737-23723219   |
| 18150 | D10627        | 234358    | 8+:71752915-71753096    |
| 18151 | Naip2         | 17948     | 13-:100914017-100967079 |
| 18152 | Grhl3         | 230824    | 4-:135113082-135115079  |
| 18153 | Serpinb5      | 20724     | 1+:108757779-108778684  |
| 18154 | MMT00038850   |           | 17+:38151850-38151884   |

|       |               |        |                         |
|-------|---------------|--------|-------------------------|
| 18155 | Vmn2r28       | 665255 | 7-:5435612-5445417      |
| 18156 | Olfr129       | 258324 | 17-:38191545-38192536   |
| 18157 | Dgki          | 320127 | 6-:36796881-37099658    |
| 18158 | MMT00060883   |        | 13+:62252373-62253404   |
| 18159 | MMT00082708   |        | 7+:133319530-133320085  |
| 18160 | Bace2         | 56175  | 16+:97578383-97658706   |
| 18161 | Nbn           | 27354  | 4+:15885119-15919735    |
| 18162 | BC049352      | 408059 | 9+:45004017-45056986    |
| 18163 | Raly          | 19383  | 2+:154616892-154692977  |
| 18164 | Gdf10         | 14560  | 14+:34736957-34748463   |
| 18165 | 5830482F20Rik | 320435 | 7+:29573987-29583979    |
| 18166 | Poll          | 56626  | 19-:45626767-45635033   |
| 18167 | MMT00012252   |        | 6-:130433206-130889385  |
| 18168 | Ptchd1        | 211612 | X-:152008084-152057785  |
| 18169 | Cbl1          | 104836 | 12-:32171765-32184405   |
| 18170 | MMT00057405   |        | X-:77306385-77307051    |
| 18171 | MMT00007396   |        | 14-:95684454-95738711   |
| 18172 | Nupr1         | 56312  | 7-:133766759-133768984  |
| 18173 | Arpp19        | 59046  | 9+:74885723-74904611    |
| 18174 | Stat2         | 20847  | 10+:127707631-127729905 |
| 18175 | Cicn2         | 12724  | 16-:20709951-20716041   |
| 18176 | Aqp11         | 66333  | 7-:104874888-104886758  |
| 18177 | Cyp7b1        | 13123  | 3-:17972180-18143283    |
| 18178 | Pitx1         | 18740  | 13-:55926416-55932786   |
| 18179 | Dbp           | 13170  | 7+:52960601-52965521    |
| 18180 | Gtrgeo22      | 110012 | 10+:79131717-79138877   |
| 18181 | Epb4.1l2      | 13822  | 10+:25079684-25180699   |
| 18182 | Nudt8         | 66387  | 19+:4000641-4002103     |
| 18183 | MMT00016159   |        | 9+:5397319-5398630      |
| 18184 | Klrb1b        | 80782  | 6-:128764397-128776309  |
| 18185 | Ndufb2        | 68198  | 6+:39553034-39553295    |
| 18186 | Parp14        | 547253 | 16-:35832965-35841606   |
| 18187 | Prrc1         | 73137  | 18+:57514392-57549599   |
| 18188 | Ezh2          | 14056  | 6-:47480279-47545019    |
| 18189 | Camsap1l1     | 67886  | 1-:138164700-138221442  |
| 18190 | Rcn2          | 26611  | 9+:55889666-55906648    |
| 18191 | Ccdc21        | 70012  | 4-:133685777-133690052  |
| 18192 | Tmtc3         | 237500 | 10-:99909564-99939409   |
| 18193 | Sp8           | 320145 | 12+:120086001-120088891 |
| 18194 | 5730590G19Rik | 77011  | 7+:86830662-86835889    |
| 18195 | Mafk          | 17135  | 5+:140267500-140278606  |
| 18196 | Camk2b        | 12323  | 11-:5869646-5965566     |
| 18197 | Dnd1          | 213236 | 18-:36923320-36925867   |
| 18198 | MMT00015146   |        | 7+:64281644-64282895    |
| 18199 | Cdc42ep4      | 56699  | 11-:113588163-113612632 |
| 18200 | Cd151         | 12476  | 7+:148653291-148657372  |
| 18201 | MMT00060232   |        | 13+:62914411-62916315   |
| 18202 | 4933416E03Rik | 71081  | 2+:159773073-159807024  |
| 18203 | Ablim3        | 319713 | 18-:61959049-62031357   |
| 18204 | Coro1c        | 23790  | 5-:114294078-114358686  |
| 18205 | Olfr114       | 258284 | 17-:37726357-37727296   |



|       |               |           |                        |
|-------|---------------|-----------|------------------------|
| 18206 | Raly1         | 76897     | 3+:13946396-14182281   |
| 18207 | Dnali1        | 75563     | 4-:124733752-124743903 |
| 18208 | Smoc2         | 64074     | 17+:14416541-14541771  |
| 18209 | MMT00077977   |           | 7-:114070049-114070987 |
| 18210 | Myom3         | 242702    | 4+:135318416-135320863 |
| 18211 | Folr2         | 14276     | 7-:108988503-108992340 |
| 18212 | Ttc3          | 22129     | 16+:94605518-94690828  |
| 18213 | Tomm40        | 53333     | 7-:20286673-20300605   |
| 18214 | Ankrd40       | 71452     | 11+:94189353-94196221  |
| 18215 | Gpr146        | 80290     | 5+:139856649-139869777 |
| 18216 | Atp5g3        | 228033    | 2-:73746502-73750461   |
| 18217 | Mgat1         | 17308     | 11+:49059003-49076524  |
| 18218 | Sepx1         | 27361     | 17+:24873611-24879723  |
| 18219 | Ndufa11       | 69875     | 17+:56857188-56862114  |
| 18220 | Odz1          | 23963     | X-:40765589-40783405   |
| 18221 | Ctrb1         | 66473     | 8-:114210420-114214910 |
| 18222 | Mphosph9      | 269702    | 5-:124702224-124757055 |
| 18223 | Cntn5         | 244682    | 9-:9970524-10145968    |
| 18224 | AA414992      | 102402    | 13+:68320459-68321759  |
| 18225 | Sfn           | 55948     | 4-:133156470-133157726 |
| 18226 | Olfr1496      | 258991    | 19+:13855103-13856056  |
| 18227 | Kcnq3         | 110862    | 15-:65826354-65863032  |
| 18228 | Olfr978       | 259109    | 9+:39801396-39802330   |
| 18229 | Syne2         | 319565    | 12+:77016175-77026468  |
| 18230 | 4930535B03Rik | 75137     | 3-:95587890-95622786   |
| 18231 | Kcnj4         | 16520     | 15-:79314870-79316207  |
| 18232 | Chrna4        | 11438     | 2-:180759398-180773780 |
| 18233 | Dapk3         | 13144     | 10+:80646749-80655743  |
| 18234 | Hsf5          | 327992    | 11+:87449460-87471607  |
| 18235 | Epsti1        | 108670    | 14+:78304070-78402457  |
| 18236 | MMT00052782   | 626578    | 5-:105653679-105665181 |
| 18237 | Foxp2         | 114142    | 6+:15146960-15388020   |
| 18238 | MMT00011616   |           | 13+:23148584-23149485  |
| 18239 | Golim4        | 73124     | 3-:75680112-75760779   |
| 18240 | Scrt2         | 545474    | 2+:151917707-151919599 |
| 18241 | MMT00022841   |           | 8-:71944329-71946072   |
| 18242 | St3gal2       | 20444     | 8+:113481523-113494206 |
| 18243 | Stk17b        | 98267     | 1-:53812949-53842014   |
| 18244 | Rps27a        | 78294     | 11-:29445845-29447850  |
| 18245 | Mup4          | 17843     | 4-:59969678-59973537   |
| 18246 | Ndufs3        | 68349     | 2-:90734868-90742612   |
| 18247 | Wdr69         | 71227     | 1+:83156336-83207143   |
| 18248 | Scn2a1        | 110876    | 2+:65508552-65604465   |
| 18249 | Atp5c1        | 11949     | 2-:9984912-10002059    |
| 18250 | Mmp14         | 17387     | 14+:55050530-55060059  |
| 18251 | Susd4         | 96935     | 1+:184695026-184825787 |
| 18252 | Dip2b         | 239667    | 15+:99869173-100046097 |
| 18253 | MMT00063327   | 100045681 | 12-:6501773-6505412    |
| 18254 | MMT00078950   |           | 9+:17537011-17538656   |
| 18255 | Nek11         | 208583    | 9-:105146593-105295351 |
| 18256 | Sez6          | 20370     | 11+:77744540-77791563  |

|       |               |        |                         |
|-------|---------------|--------|-------------------------|
| 18257 | MMT00055244   |        | 19+:21630172-21632356   |
| 18258 | Gm73          | 218476 | 13+:97556551-97601826   |
| 18259 | Shbg          | 20415  | 11-:69428317-69431370   |
| 18260 | Nid2          | 18074  | 14+:20570517-20631009   |
| 18261 | Olfr1221      | 258904 | 2-:88951733-88952667    |
| 18262 | Gabbr1        | 54393  | 17+:37187798-37209372   |
| 18263 | MMT00061427   |        | 14-:98064978-98065596   |
| 18264 | Tex14         | 83560  | 11+:87287905-87298367   |
| 18265 | Herc4         | 67345  | 10+:62706691-62737181   |
| 18266 | Olfr1184      | 258820 | 2+:88326890-88327824    |
| 18267 | 1810021J13Rik | 66279  | 9+:37015919-37030765    |
| 18268 | MMT00043750   |        | 3-:65310085-65319763    |
| 18269 | Smc4          | 70099  | 3+:68808699-68835833    |
| 18270 | Cecr2         | 330409 | 6+:120616437-120715401  |
| 18271 | MMT00007507   |        | 14-:124797026-124797911 |
| 18272 | 4930524B17Rik | 74725  | 6-:19154820-19269029    |
| 18273 | Surf2         | 20931  | 2+:26771945-26775332    |
| 18274 | Traf7         | 224619 | 17-:24665999-24669267   |
| 18275 | D730039F16Rik | 77996  | 2+:34729987-34747651    |
| 18276 | Apoa2         | 11807  | 1+:173155219-173156501  |
| 18277 | MMT00002597   |        | 18-:6370407-6371809     |
| 18278 | Aspm          | 12316  | 1+:141377545-141390509  |
| 18279 | Ogfr          | 72075  | 2+:180324163-180330230  |
| 18280 | Dars          | 226414 | 1-:130260284-130313891  |
| 18281 | MMT00077107   |        | 5+:105204789-105205824  |
| 18282 | Tbcc          | 72726  | 17+:47027638-47028663   |
| 18283 | 5730593F17Rik | 215512 | 11+:95224990-95243184   |
| 18284 | Arl8a         | 68724  | 1+:137043403-137052846  |
| 18285 | Mrpl11        | 66419  | 19+:4962314-4964943     |
| 18286 | Slc41a3       | 71699  | 6+:90554978-90596403    |
| 18287 | Ttc16         | 338348 | 2-:32617239-32627538    |
| 18288 | Fli1          | 14247  | 9-:32231234-32349037    |
| 18289 | Tap1          | 21354  | 17+:34324824-34333744   |
| 18290 | Kif21b        | 16565  | 1+:138028025-138070735  |
| 18291 | Crisp2        | 22024  | 17-:40901685-40931037   |
| 18292 | Fras1         | 231470 | 5+:97123892-97136514    |
| 18293 | Depdc5        | 277854 | 5+:33287621-33334320    |
| 18294 | MMT00073933   |        | 12-:24398972-25403056   |
| 18295 | Thsd4         | 207596 | 9-:60223754-60242353    |
| 18296 | Pcgf5         | 76073  | 19+:36453556-36530694   |
| 18297 | Psm7          | 26444  | 2-:179771080-179777107  |
| 18298 | Slc25a37      | 67712  | 14-:69859907-69903113   |
| 18299 | MMT00035424   |        | 8-:35370129-35370775    |
| 18300 | Arg1          | 11846  | 10-:24635322-24647233   |
| 18301 | MMT00075851   |        | 7+:70750826-70751432    |
| 18302 | Fer113        | 226101 | 19-:37973528-38097135   |
| 18303 | Mef2b         | 17259  | 8+:72663609-72691386    |
| 18304 | Astl          | 215095 | 2+:127167381-127175919  |
| 18305 | Etv5          | 104156 | 16-:22383086-22411820   |
| 18306 | 2410089E03Rik | 73692  | 15+:8194376-8221162     |
| 18307 | Tmem37        | 170706 | 1-:121964286-121970309  |

|       |               |           |                         |
|-------|---------------|-----------|-------------------------|
| 18308 | Zfp672        | 319475    | 11-:58128568-58136859   |
| 18309 | Obfc2b        | 69917     | 10-:127838779-127846855 |
| 18310 | MMT00069164   | 100042074 | 18+:43632309-43636495   |
| 18311 | Olfr1348      | 258915    | 7-:6453997-6454935      |
| 18312 | Apon          | 28194     | 10+:127691272-127692692 |
| 18313 | Prkce         | 18754     | 17+:86567929-87054029   |
| 18314 | 4631416L12Rik | 622434    | 3+:62142697-62266141    |
| 18315 | Rph3a         | 19894     | 5-:121391857-121459338  |
| 18316 | Tgm6          | 241636    | 2+:129961485-129971027  |
| 18317 | Arl13b        | 68146     | 16-:62793518-62811877   |
| 18318 | MMT00037377   |           | 6+:65382327-65383995    |
| 18319 | Pmf1          | 67037     | 3-:88198064-88214238    |
| 18320 | Fancc         | 14088     | 13-:63413062-63533033   |
| 18321 | Hydin         | 244653    | 8+:113029642-113049552  |
| 18322 | Ubx8          | 76577     | 13+:54723201-54765932   |
| 18323 | 6-Mar         | 223455    | 15-:31428328-31460235   |
| 18324 | 4930546H06Rik | 75202     | 17+:17967848-17976035   |
| 18325 | Cst10         | 58214     | 2+:149230984-149236012  |
| 18326 | Rap1b         | 215449    | 10-:117250925-117261731 |
| 18327 | Tmprss12      | 75002     | 15+:100111257-100123484 |
| 18328 | Cyfp1         | 20430     | 7+:63097644-63185841    |
| 18329 | MMT00069482   |           | 14-:71122952-71123216   |
| 18330 | Hoxc10        | 209448    | 15+:102797234-102801507 |
| 18331 | AF085738      | 192158    | 2-:174155841-174172225  |
| 18332 | Gpr19         | 14760     | 6-:134819177-134837739  |
| 18333 | Rassf8        | 71323     | 6+:145699084-145766363  |
| 18334 | Bckdk         | 12041     | 7+:135048341-135052134  |
| 18335 | Ddef2         | 211914    | 12+:21048788-21276274   |
| 18336 | Lrpap1        | 16976     | 5-:35434153-35448374    |
| 18337 | Esr2          | 13983     | 12-:77222061-77268471   |
| 18338 | Akr1e1        | 56043     | 13-:4591776-4608382     |
| 18339 | Sap30bp       | 57230     | 11+:115794980-115825962 |
| 18340 | Slc25a31      | 73333     | 3+:40512790-40530151    |
| 18341 | Msl31         | 17692     | X-:165092048-165111830  |
| 18342 | Hamp          | 84506     | 7-:31727389-31729036    |
| 18343 | Smyd2         | 226830    | 1-:191704372-191746243  |
| 18344 | Tsc22d4       | 78829     | 5+:138187484-138200975  |
| 18345 | MMT00001228   |           | 18-:30654654-30655099   |
| 18346 | Trib2         | 217410    | 12-:15800108-15822462   |
| 18347 | 2810451A06Rik | 72778     | 15+:98929889-98935536   |
| 18348 | Slc9a10       | 208169    | 16+:45555747-45599996   |
| 18349 | Olfr851       | 258907    | 9+:19301193-19302132    |
| 18350 | Tc2n          | 74413     | 12-:102884774-102947748 |
| 18351 | Nfyc          | 18046     | 4-:120430782-120463086  |
| 18352 | Olfr1094      | 258362    | 2+:86668910-86669901    |
| 18353 | MMT00075622   |           | 15-:76356906-76357461   |
| 18354 | Zfp650        | 68795     | 2+:69808193-69862648    |
| 18355 | Sec63         | 140740    | 10+:42481351-42550208   |
| 18356 | Prkrip1       | 66801     | 5-:136656954-136674824  |
| 18357 | Plekha8       | 231999    | 6+:54544890-54591293    |
| 18358 | Mdk           | 17242     | 2-:91770008-91772439    |

|       |               |           |                         |
|-------|---------------|-----------|-------------------------|
| 18359 | Otop2         | 237987    | 11+:115190292-115193610 |
| 18360 | Ntsr1         | 18216     | 2+:180234680-180279684  |
| 18361 | MMT00000729   |           | 6-:42469515-42470312    |
| 18362 | Srf           | 20807     | 17-:46683787-46693111   |
| 18363 | Dao1          | 13142     | 5+:114459844-114474914  |
| 18364 | Rgs17         | 56533     | 10+:4424202-4513768     |
| 18365 | Bcl2l12       | 75736     | 7-:52246594-52252949    |
| 18366 | Morc2a        | 74522     | 11+:3550382-3590425     |
| 18367 | 2310033E01Rik | 641361    | 7-:25326674-25331025    |
| 18368 | Mpped2        | 77015     | 2+:106533684-106707592  |
| 18369 | Tmem136       | 235300    | 9-:42919287-42924633    |
| 18370 | Col28a1       | 213945    | 6-:8025337-8025904      |
| 18371 | Sap130        | 269003    | 18+:31793931-31882715   |
| 18372 | Zfp593        | 68040     | 4-:133799221-133801443  |
| 18373 | Dnajb1        | 81489     | 8+:86132091-86135801    |
| 18374 | Lrtm2         | 211187    | 6-:119267072-119280613  |
| 18375 | 8430415E04Rik | 74521     | 12+:104770773-104852042 |
| 18376 | Pex11b        | 18632     | 3+:96439607-96448649    |
| 18377 | Zfp423        | 94187     | 8-:90185710-90383212    |
| 18378 | Igh           | 111507    | 12-:114954860-114955330 |
| 18379 | MMT00001586   |           | 5-:23370623-23382264    |
| 18380 | Tspan31       | 67125     | 10-:126504347-126507317 |
| 18381 | Dupd1         | 435391    | 14-:22495804-22522298   |
| 18382 | Dnpep         | 13437     | 1-:75305140-75313582    |
| 18383 | Mrps17        | 66258     | 5+:130221402-130224566  |
| 18384 | Klf6          | 23849     | 13+:5860791-5867031     |
| 18385 | Spc25         | 66442     | 2-:69031952-69044214    |
| 18386 | Anks3         | 72615     | 16-:4941442-4964277     |
| 18387 | MMT00012948   | 100043129 | 3+:105893920-105905725  |
| 18388 | Lnx1          | 16924     | 5-:74993204-75073817    |
| 18389 | Rbms3         | 207181    | 9-:116486426-116732014  |
| 18390 | 2310057J16Rik | 69697     | 8+:3602553-3609094      |
| 18391 | EG546347      | 546347    | X+:89735342-89736015    |
| 18392 | Kbtbd2        | 210973    | 6-:56727518-56730303    |
| 18393 | Spred1        | 114715    | 2+:116947460-117003684  |
| 18394 | Cxcr3         | 12766     | X-:98926874-98929486    |
| 18395 | Clpp          | 53895     | 17+:57129731-57135610   |
| 18396 | Laptm4a       | 17775     | 12+:8928218-8945533     |
| 18397 | Ccng1         | 12450     | 11-:40564282-40568731   |
| 18398 | Fkbp15        | 338355    | 4-:61965226-62021577    |
| 18399 | Rilpl1        | 75695     | 5-:124943088-124981030  |
| 18400 | Paip2b        | 232164    | 6-:83756057-83781658    |
| 18401 | Crebbp        | 12914     | 16-:4083548-4213324     |
| 18402 | MMT00015207   |           | 13+:54605157-54626161   |
| 18403 | Itpr1         | 16438     | 6+:108163111-108501095  |
| 18404 | Hdgfl1        | 15192     | 13-:26860658-26861988   |
| 18405 | MMT00035749   |           | 14+:111178626-111179289 |
| 18406 | Unc50         | 67387     | 1+:37487030-37495829    |
| 18407 | Tsen54        | 76265     | 11+:115676023-115684402 |
| 18408 | Styx1         | 76571     | 5-:136223518-136254161  |
| 18409 | Nicn1         | 66257     | 9+:108192782-108198021  |

|       |               |        |                         |
|-------|---------------|--------|-------------------------|
| 18410 | Socs5         | 56468  | 17+:87532973-87534582   |
| 18411 | 2610028H24Rik | 76964  | 10+:75911870-75923917   |
| 18412 | Usp7          | 252870 | 16-:8688818-8757165     |
| 18413 | Trmt5         | 76357  | 12-:74381396-74387698   |
| 18414 | Tprkb         | 69786  | 6+:85865722-85880277    |
| 18415 | Cyp4f39       | 320997 | 17+:32605405-32629423   |
| 18416 | Enpp7         | 238011 | 11+:118849530-118853652 |
| 18417 | Kbtbd7        | 211255 | 14+:79826536-79830843   |
| 18418 | Hspa1b        | 15511  | 17-:35093377-35096532   |
| 18419 | Srprb         | 20818  | 9-:103092517-103104409  |
| 18420 | Igh           | 111507 | 12-:115821756-116153281 |
| 18421 | Fpr-rs4       | 14291  | 17+:18158696-18159668   |
| 18422 | Tnfrsf11a     | 21934  | 1+:107677304-107741657  |
| 18423 | Tmem43        | 74122  | 6+:91423744-91438452    |
| 18424 | Fscn2         | 238021 | 11+:120223022-120229486 |
| 18425 | Prickle2      | 243548 | 6-:92325941-92408652    |
| 18426 | MMT00051243   |        | 10+:7205479-7207012     |
| 18427 | Serpinb1a     | 66222  | 13-:32933994-32943054   |
| 18428 | Sfrs2         | 20382  | 11-:116711220-116714396 |
| 18429 | Hmha1         | 70719  | 10+:79479486-79494214   |
| 18430 | Pxdn          | 69675  | 12+:30622998-30701175   |
| 18431 | Tnxb          | 81877  | 17+:34807479-34856571   |
| 18432 | 4933430H15Rik | 74485  | 3-:87541817-87552808    |
| 18433 | Tmc5          | 74424  | 7+:125743745-125767332  |
| 18434 | Furin         | 18550  | 7-:87534081-87547648    |
| 18435 | EG665828      | 665828 | 8+:73455580-73456894    |
| 18436 | MMT00010869   |        | 13-:15210646-15245917   |
| 18437 | Trim10        | 19824  | 17+:37006536-37014765   |
| 18438 | Map3k7ip2     | 68652  | 10-:7625937-7644660     |
| 18439 | Cd209f        | 69142  | 8-:4102793-4105764      |
| 18440 | Upk3a         | 22270  | 15+:84847657-84852962   |
| 18441 | Fshb          | 14308  | 2-:106897438-106899807  |
| 18442 | Zfp764        | 233893 | 7-:134547208-134550258  |
| 18443 | B230380D07Rik | 235461 | 9-:70450837-70504981    |
| 18444 | MMT00058658   |        | 15-:3232775-3251191     |
| 18445 | MMT00008642   |        | 3+:5595413-5611141      |
| 18446 | Zyg11a        | 230590 | 4-:107859844-107877951  |
| 18447 | Foxn3         | 71375  | 12-:100432319-100688325 |
| 18448 | Klhl11        | 217194 | 11-:100323926-100334099 |
| 18449 | MMT00015343   |        | 17+:42856677-42864986   |
| 18450 | Kdr           | 16542  | 5-:76329300-76374400    |
| 18451 | Csgalnact1    | 234356 | 8-:70881677-70985450    |
| 18452 | Uts2r         | 217369 | 11+:121021584-121023287 |
| 18453 | RP23-67E6.3   | 668066 | 2-:177171374-177173929  |
| 18454 | Tor1aip1      | 208263 | 1-:157853912-157883425  |
| 18455 | Mtnr1a        | 17773  | 8+:46154563-46173858    |
| 18456 | Uts2d         | 224065 | 16-:27353408-27370324   |
| 18457 | Gm9           | 194854 | X-:34749917-34750981    |
| 18458 | Pcyt1b        | 236899 | X+:90920749-90991620    |
| 18459 | Klhl22        | 224023 | 16+:17762900-17793473   |
| 18460 | Hnrnpul       | 232989 | 7-:26507057-26539740    |

|       |               |           |                         |
|-------|---------------|-----------|-------------------------|
| 18461 | Klra5         | 16636     | 6-:129849005-129863242  |
| 18462 | Gm1060        | 381738    | 5+:30607918-30668992    |
| 18463 | Clec1a        | 243653    | 6-:129377946-129402017  |
| 18464 | Mc3r          | 17201     | 2+:172074359-172075331  |
| 18465 | Prkacb        | 18749     | 3-:146395526-146475845  |
| 18466 | Cacna2d4      | 319734    | 6+:119186546-119191279  |
| 18467 | MMT00079660   |           | X-:67922792-67922925    |
| 18468 | Abca9         | 217262    | 11-:109962135-110029467 |
| 18469 | Olfr906       | 258799    | 9+:38295615-38296551    |
| 18470 | Stt3a         | 16430     | 9-:36539645-36575206    |
| 18471 | Aph1b         | 208117    | 9-:66626650-66643239    |
| 18472 | MMT00070953   |           | 18+:10236938-10237509   |
| 18473 | Ptar1         | 72351     | 19+:23762207-23795501   |
| 18474 | MMT00070175   | 671232    | 9+:122705181-122711247  |
| 18475 | Mmp8          | 17394     | 9+:7558462-7568028      |
| 18476 | Epm2a         | 13853     | 10+:11063201-11177521   |
| 18477 | Gnat2         | 14686     | 3+:107896161-107904194  |
| 18478 | F10           | 14058     | 8+:13037837-13055900    |
| 18479 | Olfr1368      | 258527    | 13-:21233980-21234924   |
| 18480 | Hs2st1        | 23908     | 3-:144096527-144232858  |
| 18481 | E130306D19Rik | 230098    | 4-:43509018-43512507    |
| 18482 | Nup88         | 19069     | 11-:70754833-70783463   |
| 18483 | Mthfd1        | 108156    | 12+:77356394-77420789   |
| 18484 | MMT00033535   | 665506    | 6+:41496728-41498179    |
| 18485 | Wdr31         | 71354     | 4-:62114767-62131906    |
| 18486 | Lrfrn4        | 225875    | 19-:4611785-4614504     |
| 18487 | Serpina5      | 268591    | 12+:105339358-105344342 |
| 18488 | Mapre2        | 212307    | 18+:23962504-24051278   |
| 18489 | Olfr902       | 258798    | 9+:38256458-38257387    |
| 18490 | MMT00020332   |           | 10-:105629435-105629826 |
| 18491 | Hist1h1a      | 80838     | 13+:23855536-23856282   |
| 18492 | Dhfr          | 13361     | 13+:93125158-93155635   |
| 18493 | Oas1b         | 23961     | 5+:121262643-121274167  |
| 18494 | Senp8         | 71599     | 9-:59584974-59585639    |
| 18495 | C2cd3         | 277939    | 7+:107592825-107618665  |
| 18496 | Mbd4          | 17193     | 6-:115792445-115803739  |
| 18497 | 1700065I17Rik | 67343     | 18+:56748003-56754436   |
| 18498 | Slc5a6        | 330064    | 5-:31338404-31351267    |
| 18499 | Atp2c2        | 69047     | 8+:122223945-122281620  |
| 18500 | MMT00074605   | 384806    | 8+:41878610-41882651    |
| 18501 | 1700012G19Rik | 67078     | 17+:24607355-24608510   |
| 18502 | MMT00069276   | 100044315 | X-:103478397-103480435  |
| 18503 | Serpina1b     | 282663    | 13+:33176997-33186248   |
| 18504 | 0610040J01Rik | 76261     | 5+:64203733-64290858    |
| 18505 | MMT00071192   |           | 16+:48073089-48074594   |
| 18506 | Otub2         | 68149     | 12+:104626914-104644553 |
| 18507 | Bfsp2         | 107993    | 9-:103327250-103382703  |
| 18508 | Atp4b         | 11945     | 8-:13386208-13396778    |
| 18509 | MMT00038317   |           | 18+:53112103-53112887   |
| 18510 | MMT00072943   |           | 9-:31851971-31852290    |
| 18511 | Vmn2r72       | 244114    | 7-:92886295-92899182    |

|       |               |        |                         |
|-------|---------------|--------|-------------------------|
| 18512 | Sult3a1       | 57430  | 10+:33577526-33599322   |
| 18513 | MMT00044275   |        | 10+:22511074-22512280   |
| 18514 | 4930412F15Rik | 242408 | 4-:43672494-43673626    |
| 18515 | Ddx28         | 71986  | 8-:108533521-108535333  |
| 18516 | 4932413F04Rik | 319215 | 9+:103461717-103783600  |
| 18517 | Klc2          | 16594  | 19-:5107747-5118244     |
| 18518 | Cap1          | 12331  | 4-:122537303-122563107  |
| 18519 | A4gnt         | 333424 | 9+:99512929-99521233    |
| 18520 | MMT00005421   |        | 7-:13736393-13736930    |
| 18521 | Prdm5         | 70779  | 6+:65729032-65886367    |
| 18522 | MMT00046256   |        | 2+:80442889-80443161    |
| 18523 | Lypd6         | 320343 | 2+:50021059-50046313    |
| 18524 | 2310003C23Rik | 76425  | 2+:180444968-180453436  |
| 18525 | Mpped1        | 223726 | 15+:83610509-83686877   |
| 18526 | Dydc2         | 71200  | 14-:41862407-41882498   |
| 18527 | EG632477      | 632477 | 14+:19875016-19935800   |
| 18528 | Mark2         | 13728  | 19-:7351248-7415806     |
| 18529 | MMT00006395   |        | 3+:93236987-93237855    |
| 18530 | Robo4         | 74144  | 9+:37209631-37221607    |
| 18531 | Akr1d1        | 208665 | 6+:37480172-37518392    |
| 18532 | Olfr713       | 259036 | 7+:114179649-114180622  |
| 18533 | Hmox1         | 15368  | 8+:77617520-77624484    |
| 18534 | Ovol2         | 107586 | 2-:144130915-144156781  |
| 18535 | Cntnap5a      | 636808 | 1+:118308661-118477250  |
| 18536 | MMT00074528   |        |                         |
| 18537 | Moxd1         | 59012  | 10+:23943387-24022450   |
| 18538 | Cysltr2       | 70086  | 14+:73383447-73425982   |
| 18539 | Vrk2          | 69922  | 11-:26371405-26493611   |
| 18540 | Olfr1507      | 57269  | 14-:53109696-53110637   |
| 18541 | Rab15         | 104886 | 12-:77898949-77923457   |
| 18542 | Ankra2        | 68558  | 13+:99033196-99043867   |
| 18543 | Add1          | 11518  | 5+:34916460-34974264    |
| 18544 | Rbp3          | 19661  | 14+:34767207-34777401   |
| 18545 | BC021891      | 234878 | 8+:128434353-128469215  |
| 18546 | F930017I19Rik | 791260 | 7-:109048302-109082380  |
| 18547 | Sema6d        | 214968 | 2+:124479882-124493504  |
| 18548 | 1700012P22Rik | 69364  | 4-:144008089-144028713  |
| 18549 | Robo1         | 19876  | 16+:72904868-73046337   |
| 18550 | MMT00008087   |        | 14-:122889747-122894211 |
| 18551 | Skiv2l2       | 72198  | 13-:113657989-113717588 |
| 18552 | Nr2c2ap       | 75692  | 8+:72654686-72657657    |
| 18553 | Tekt4         | 71840  | 17+:25608531-25613538   |
| 18554 | Lhx9          | 16876  | 1-:140724574-140744147  |
| 18555 | Sdcbp2        | 228765 | 2+:151398367-151415733  |
| 18556 | MMT00001956   |        | 6-:37636278-37637195    |
| 18557 | Limch1        | 77569  | 5+:67249115-67448396    |
| 18558 | Nol11         | 68979  | 11-:107027976-107050574 |
| 18559 | Csf2ra        | 12982  | 19-:61300313-61304262   |
| 18560 | Islr          | 26968  | 9-:58004082-58006312    |
| 18561 | Ngly1         | 59007  | 14+:17081841-17144050   |
| 18562 | Nup188        | 227699 | 2+:30152164-30199786    |

|       |               |        |                         |
|-------|---------------|--------|-------------------------|
| 18563 | MMT00004228   |        | 4+:39714645-39715454    |
| 18564 | E4f1          | 13560  | 17-:24580737-24588464   |
| 18565 | Barx1         | 12022  | 13+:48758663-48761888   |
| 18566 | Pcdha12       | 192164 | 18+:37179883-37344909   |
| 18567 | Ccr10         | 12777  | 11-:101034927-101036737 |
| 18568 | MMT00068464   |        | 11+:10139499-10140252   |
| 18569 | Thumpd1       | 233802 | 7-:126858609-126864279  |
| 18570 | MMT00037828   |        | 13-:22255749-22257596   |
| 18571 | Gm973         | 381260 | 1+:59689051-59693257    |
| 18572 | Stx18         | 71116  | 5+:38430471-38528056    |
| 18573 | Nphp3         | 74025  | 9+:103904657-103908025  |
| 18574 | Parc          | 78309  | 17-:46637553-46683264   |
| 18575 | Bzrap1        | 207777 | 11+:87574873-87598409   |
| 18576 | Qars          | 97541  | 9+:108410383-108418278  |
| 18577 | Btbd9         | 224671 | 17-:30357041-30551683   |
| 18578 | Vps54         | 245944 | 11+:21139283-21221136   |
| 18579 | Dr1           | 13486  | 5+:108697937-108707951  |
| 18580 | Phactr4       | 100169 | 4-:131911844-131978325  |
| 18581 | MMT00048298   |        | 12-:115434540-115492137 |
| 18582 | Krtap6-2      | 16701  | 16-:89419570-89420284   |
| 18583 | Rnf39         | 386454 | 17+:37079652-37084778   |
| 18584 | Tex21         | 80384  | 12-:77299780-77346132   |
| 18585 | MMT00020464   |        | 11+:60156743-60157666   |
| 18586 | Tns1          | 21961  | 1-:73960484-73975087    |
| 18587 | Krt35         | 53617  | 11-:99953511-99957539   |
| 18588 | 1700023A16Rik | 69371  | 6+:146798622-146819929  |
| 18589 | B3gat3        | 72727  | 19+:8995015-9001725     |
| 18590 | Fgb           | 110135 | 3-:82845783-82853733    |
| 18591 | MMT00034813   |        | 1-:155466728-155467858  |
| 18592 | Txn14a        | 27366  | 18+:80403580-80420264   |
| 18593 | Rgs7bp        | 52882  | 13-:105741382-105844984 |
| 18594 | 1200002N14Rik | 71712  | 10-:87785548-87819820   |
| 18595 | Tmem109       | 68539  | 19-:10945153-10956233   |
| 18596 | BC032203      | 210982 | 17-:46937614-46969265   |
| 18597 | Ganc          | 76051  | 2+:120229936-120287432  |
| 18598 | Git2          | 26431  | 5-:115180191-115223374  |
| 18599 | Vmn2r70       | 670940 | 7-:92707214-92713870    |
| 18600 | Guk1          | 14923  | 11-:58997611-59005274   |
| 18601 | Oxct2a        | 64059  | 4-:122999118-123000859  |
| 18602 | Wisp1         | 22402  | 15+:66722954-66754761   |
| 18603 | MMT00039662   |        | 6+:67155612-67156075    |
| 18604 | Cept1         | 99712  | 3-:106305902-106350649  |
| 18605 | Lamp1         | 16783  | 8+:13159281-13175338    |
| 18606 | A230074B11Rik | 215413 | 1+:37117216-37120491    |
| 18607 | Acat3         | 224530 | 17-:13117121-13133233   |
| 18608 | Atn1          | 13498  | 6-:124692564-124699840  |
| 18609 | Lrrc1         | 214345 | 9-:77278624-77392505    |
| 18610 | Nt5c1b        | 70881  | 12+:10376868-10396939   |
| 18611 | C1qtnf3       | 81799  | 15+:10882110-10909454   |
| 18612 | Kcnn4         | 16534  | 7+:25155415-25169882    |
| 18613 | Uqcrq         | 22272  | 11-:53241423-53244316   |



|       |               |        |                         |
|-------|---------------|--------|-------------------------|
| 18614 | Cep152        | 99100  | 2-:125389924-125444277  |
| 18615 | MMT00033780   |        | 15+:5901688-5954532     |
| 18616 | MMT00038680   |        |                         |
| 18617 | BC022224      | 192970 | 11-:84633279-84642502   |
| 18618 | Tex14         | 83560  | 11+:87299787-87369324   |
| 18619 | 2810406K13Rik | 72184  | 7+:106614474-106622527  |
| 18620 | Slmap         | 83997  | 14-:27234376-27262120   |
| 18621 | MMT00076582   |        | 9+:32315996-32324542    |
| 18622 | Pwp2          | 110816 | 10-:77633654-77639894   |
| 18623 | Ccs           | 12460  | 19-:4825497-4839235     |
| 18624 | Plagl1        | 22634  | 10+:12810714-12849691   |
| 18625 | Cit           | 12704  | 5+:116295652-116458571  |
| 18626 | Magoh         | 17149  | 4+:107552420-107560001  |
| 18627 | MMT00059478   |        | 3+:60664692-60681509    |
| 18628 | Disp1         | 68897  | 1_random-:48181-109669  |
| 18629 | 4933427E11Rik | 66769  | 15+:74539590-74540802   |
| 18630 | Epgn          | 71920  | 5+:91456542-91464236    |
| 18631 | Gja1          | 14609  | 10+:56097152-56110221   |
| 18632 | Asxl1         | 228790 | 2+:153217264-153228669  |
| 18633 | Nbeal1        | 269198 | 1+:60310239-60317219    |
| 18634 | Xrcc6         | 14375  | 15+:81846729-81870502   |
| 18635 | Hps1          | 192236 | 19-:42829701-42853135   |
| 18636 | Heg1          | 77446  | 16+:33684682-33767908   |
| 18637 | Trim29        | 72169  | 9+:43118837-43144203    |
| 18638 | Tubgcp6       | 328580 | 15-:88929660-88953247   |
| 18639 | Cdk2          | 12566  | 10-:128135001-128142035 |
| 18640 | Olf168        | 258354 | 16-:19530073-19531011   |
| 18641 | Nt5c1a        | 230718 | 4+:122878800-122893450  |
| 18642 | Hdac11        | 232232 | 6+:91106808-91124676    |
| 18643 | 1700022A22Rik | 71120  | 15+:46156103-46205445   |
| 18644 | Shprh         | 268281 | 10+:10879308-10882025   |
| 18645 | Xlr           | 22441  | X-:51086958-51100861    |
| 18646 | Abca3         | 27410  | 17+:24489086-24547530   |
| 18647 | Celsr2        | 53883  | 3-:108195549-108218412  |
| 18648 | Rnft1         | 76892  | 11+:86298200-86310049   |
| 18649 | Ccne1         | 12447  | 7-:38883004-38892349    |
| 18650 | Hiat1         | 66631  | 13-:65166453-65174937   |
| 18651 | Tulp2         | 56734  | 7+:52773313-52777750    |
| 18652 | 5830467P10Rik | 241639 | 2-:132732289-132771615  |
| 18653 | MMT00072901   |        | 19+:8798625-8800932     |
| 18654 | Rae1          | 66679  | 2+:172825635-172841238  |
| 18655 | Angpt2        | 11601  | 8-:18691330-18741488    |
| 18656 | Myo10         | 17909  | 15+:25552680-25741979   |
| 18657 | Arih1         | 23806  | 9-:59236358-59334932    |
| 18658 | Gstk1         | 76263  | 6+:42195943-42200440    |
| 18659 | Ephb6         | 13848  | 6+:41555790-41570502    |
| 18660 | Pms2          | 18861  | 5+:144720548-144722129  |
| 18661 | Scfd2         | 212986 | 5-:74712581-74793910    |
| 18662 | Batf3         | 381319 | 1+:192921726-192932825  |
| 18663 | 4930408O21Rik | 67983  | 7-:127802244-127813766  |
| 18664 | Bcl2l11       | 12125  | 2-:127951667-127953562  |

|       |               |        |                         |
|-------|---------------|--------|-------------------------|
| 18665 | Hs6st1        | 50785  | 1+:36125253-36163290    |
| 18666 | Hint3         | 66847  | 10-:30328165-30338266   |
| 18667 | Baz1b         | 22385  | 5+:135663238-135720437  |
| 18668 | Rab25         | 53868  | 3-:88345958-88352137    |
| 18669 | Fxyd5         | 18301  | 7-:31817756-31827148    |
| 18670 | MMT00045493   |        | 2+:55039890-55160219    |
| 18671 | Stag2         | 20843  | X+:39555056-39628566    |
| 18672 | Oraov1        | 72284  | 7+:152101039-152107038  |
| 18673 | Muc1          | 17829  | 3+:89032973-89037291    |
| 18674 | Spaca4        | 69363  | 7-:52980477-52981177    |
| 18675 | Ntan1         | 18203  | 16+:13819413-13835541   |
| 18676 | 5830428H23Rik | 414758 | 19-:61194460-61194588   |
| 18677 | Dlx1          | 13390  | 2+:71367501-71372037    |
| 18678 | Olf1r1413     | 259039 | 1+:94469749-94470720    |
| 18679 | Cpne8         | 66871  | 15-:90317913-90509806   |
| 18680 | EG633285      | 633285 | 3-:82667826-82670558    |
| 18681 | Hexb          | 15212  | 13-:97946362-97968225   |
| 18682 | 3110082D06Rik | 73235  | 17+:42453634-42514610   |
| 18683 | Ctsa          | 19025  | 2+:164658483-164665082  |
| 18684 | Cttn          | 13043  | 7-:151622773-151656629  |
| 18685 | MMT00004912   |        | 12+:16214507-16245517   |
| 18686 | Zfp143        | 20841  | 7+:117205269-117238741  |
| 18687 | 2310057M21Rik | 68277  | 7-:138486231-138506185  |
| 18688 | Leap2         | 259301 | 11-:53235554-53236684   |
| 18689 | Fnbp1         | 14269  | 2-:30883401-30971832    |
| 18690 | Defb7         | 246080 | 8+:19495096-19497775    |
| 18691 | Ndfip1        | 65113  | 18+:38578718-38624857   |
| 18692 | C630004H02Rik | 217310 | 11-:115209021-115229032 |
| 18693 | Klf4          | 16600  | 4-:55540140-55545338    |
| 18694 | Pkn2          | 109333 | 3-:142454523-142545246  |
| 18695 | MMT00013792   | 27278  | 5-:39097696-39267932    |
| 18696 | MMT00042876   |        | 1+:180074024-180075515  |
| 18697 | Afg3l1        | 114896 | 8+:126001820-126026077  |
| 18698 | 1700084J12Rik | 73486  | 15-:33334728-33335731   |
| 18699 | 2700089E24Rik | 381820 | 6+:132986504-133055808  |
| 18700 | Trappc2l      | 59005  | 8+:125135545-125139488  |
| 18701 | Il22ra2       | 237310 | 10+:19341833-19351589   |
| 18702 | Mrc1          | 17533  | 2+:14151040-14253416    |
| 18703 | Oog3          | 100012 | 4-:143747462-143750421  |
| 18704 | Heatr3        | 234549 | 8+:90661417-90695925    |
| 18705 | Emx1          | 13796  | 6+:85137574-85154455    |
| 18706 | Lect1         | 16840  | 14-:80037500-80061977   |
| 18707 | MMT00067242   |        | 5-:146383938-146384054  |
| 18708 | Vax1          | 22326  | 19-:59240676-59244519   |
| 18709 | Srp68         | 217337 | 11-:116106480-116124569 |
| 18710 | MMT00034179   |        | 3-:121083174-121083658  |
| 18711 | Usp10         | 22224  | 8+:122434751-122481457  |
| 18712 | Tyw1          | 100929 | 5+:130732922-130817437  |
| 18713 | 3110037I16Rik | 73172  | 4-:120593806-120597610  |
| 18714 | Farsb         | 23874  | 1-:78414532-78485434    |
| 18715 | MMT00032843   |        | 18+:9495618-9496481     |

|       |               |        |                         |
|-------|---------------|--------|-------------------------|
| 18716 | MMT00056724   |        | 4+:28280982-28281937    |
| 18717 | Slc30a3       | 22784  | 5-:31390322-31395871    |
| 18718 | Rab21         | 216344 | 10-:114726364-114752657 |
| 18719 | Al464131      | 329828 | 4-:41444511-41445602    |
| 18720 | BC002059      | 213811 | 17+:17088502-17111119   |
| 18721 | MMT00030422   |        | 5-:43354611-43355981    |
| 18722 | Polm          | 54125  | 11-:5727863-5737763     |
| 18723 | Ccdc82        | 66396  | 9_random+:372094-378682 |
| 18724 | Ramp1         | 51801  | 1+:93076615-93120256    |
| 18725 | Ccdc60        | 269693 | 5-:116575599-116581182  |
| 18726 | D630004A14Rik | 382137 | 9+:50576341-50580773    |
| 18727 | 9130221D24Rik | 77669  | 3-:132779456-132897916  |
| 18728 | MMT00044404   |        | 5+:11891549-11928596    |
| 18729 | Camta1        | 100072 | 4-:150448066-150538078  |
| 18730 | 1700019B03Rik | 76406  | 8+:3475830-3487182      |
| 18731 | Fgf17         | 14171  | 14-:71036525-71041579   |
| 18732 | MMT00041012   |        | 10-:78091450-78092970   |
| 18733 | Snx30         | 209131 | 4+:59818718-59913405    |
| 18734 | EG622175      | 622175 | 13-:74715338-74754725   |
| 18735 | Ddx18         | 66942  | 1-:123450420-123464479  |
| 18736 | Tubb3         | 22152  | 8+:125935480-125945909  |
| 18737 | Exoc1         | 69940  | 5+:76958337-76997197    |
| 18738 | Hadha         | 97212  | 5-:30445964-30474563    |
| 18739 | Hydin         | 244653 | 8+:113105859-113106705  |
| 18740 | MMT00052300   |        | 1+:46111487-46115946    |
| 18741 | Dnajc6        | 72685  | 4+:101180475-101315387  |
| 18742 | Rnf217        | 268291 | 10-:31223556-31328350   |
| 18743 | Ruvbl1        | 56505  | 6+:88415458-88447559    |
| 18744 | Tbl1x         | 21372  | X+:74756397-74908330    |
| 18745 | 4932422M17Rik | 74366  | 5-:123584634-123591095  |
| 18746 | Rhov          | 228543 | 2-:119094938-119096957  |
| 18747 | MMT00049213   |        | 10+:126750204-126751202 |
| 18748 | Chrna3        | 110834 | 9-:54860463-54874339    |
| 18749 | Il2rb         | 16185  | 15-:78310980-78325452   |
| 18750 | Thap6         | 381650 | 5+:92391409-92399608    |
| 18751 | Cpa6          | 329093 | 1-:10314807-10474144    |
| 18752 | Fgf7          | 14178  | 2+:125861450-125915295  |
| 18753 | Olf1189       | 258768 | 2+:88431962-88432881    |
| 18754 | Rbm8a         | 60365  | 3+:96433855-96436833    |
| 18755 | Klkb1         | 16621  | 8-:46355025-46393820    |
| 18756 | Tspan14       | 52588  | 14-:41719733-41780096   |
| 18757 | Vsnl1         | 26950  | 12-:11333017-11393782   |
| 18758 | Cxx1a         | 66158  | X-:50945667-50946859    |
| 18759 | Mctp1         | 78771  | 13+:76780972-77170005   |
| 18760 | Il9r          | 16199  | 11-:32088996-32100222   |
| 18761 | Rcn1          | 19672  | 2-:105227089-105239396  |
| 18762 | Herc5         | 67138  | 6+:57530984-57615108    |
| 18763 | Osgin2        | 209212 | 4-:15924373-15929268    |
| 18764 | Olf1426       | 258805 | 19-:12162344-12163280   |
| 18765 | MMT00058531   |        | 12+:34531211-34532392   |
| 18766 | Slc39a11      | 69806  | 11-:113106168-113427068 |

|       |               |        |                         |
|-------|---------------|--------|-------------------------|
| 18767 | Kcnc4         | 99738  | 3-:107241221-107261816  |
| 18768 | Elmo2         | 140579 | 2-:165115861-165141818  |
| 18769 | Zfp518        | 72672  | 19+:40916757-40990731   |
| 18770 | Rnf208        | 68846  | 2+:25098815-25099613    |
| 18771 | Tia1          | 21841  | 6+:86354404-86380721    |
| 18772 | BC048355      | 381101 | 17+:46633729-46636175   |
| 18773 | MMT00014972   |        | 12-:89522856-89524816   |
| 18774 | MMT00054062   |        | 2+:45665083-45666035    |
| 18775 | Best2         | 212989 | 8-:87531103-87537490    |
| 18776 | Crnk1         | 66877  | 2-:145743217-145760434  |
| 18777 | MMT00066855   |        | 5+:147386463-147387697  |
| 18778 | Prickle1      | 106042 | 15-:93329532-93349841   |
| 18779 | MMT00032058   |        | 1+:134573522-134590401  |
| 18780 | Olf649        | 259057 | 7-:111337781-111338719  |
| 18781 | MMT00014109   |        | 19+:23741437-23741952   |
| 18782 | Anks1b        | 77531  | 10+:90292584-90404257   |
| 18783 | 1700019M22Rik | 69423  | 12-:97284830-97285365   |
| 18784 | Sdad1         | 231452 | 5-:92720038-92726249    |
| 18785 | Angptl4       | 57875  | 17-:33911845-33918451   |
| 18786 | MMT00059421   |        | 8-:109968184-109968498  |
| 18787 | Rps23         | 66475  | 13+:91063191-91064555   |
| 18788 | Triap1        | 69076  | 5+:115791255-115793561  |
| 18789 | MMT00071096   |        | 12-:50941709-50942809   |
| 18790 | Car3          | 12350  | 3+:14863519-14871863    |
| 18791 | Dgkd          | 227333 | 1+:89776941-89842261    |
| 18792 | Hmbox1        | 219150 | 14-:65442162-65568750   |
| 18793 | Tdrd5         | 214575 | 1-:158185428-158193719  |
| 18794 | MMT00054053   |        |                         |
| 18795 | Olf1262       | 258976 | 2+:89842564-89843479    |
| 18796 | MMT00044598   |        | 11-:116995912-116996419 |
| 18797 | 1700019G24Rik | 72249  | 6-:5913899-5927361      |
| 18798 | Ndufa4l2      | 407790 | 10+:126952019-126954975 |
| 18799 | Olf1009       | 258565 | 2+:85561563-85562506    |
| 18800 | Nr2e1         | 21907  | 10-:42283036-42303432   |
| 18801 | MMT00031280   |        | 1+:134922400-134923053  |
| 18802 | Nit2          | 52633  | 16-:57156778-57167445   |
| 18803 | Shank1        | 243961 | 7+:51568028-51612814    |
| 18804 | Pllp          | 67801  | 8-:97199343-97220623    |
| 18805 | Ibtk          | 108837 | 9-:85580967-85642790    |
| 18806 | Hist3h2ba     | 78303  | 11+:58762412-58763032   |
| 18807 | Rpl37a        | 19981  | 1+:72757876-72760190    |
| 18808 | Pdcd6         | 18570  | 13-:74440968-74454711   |
| 18809 | Tmc6          | 217353 | 11-:117627302-117641922 |
| 18810 | Igh-VJ558     | 16061  | 12-:115895540-115896003 |
| 18811 | 4930519B02Rik | 75122  | 10-:12873277-12897799   |
| 18812 | Fer115        | 211430 | 1+:36441929-36479188    |
| 18813 | Chmp2b        | 68942  | 16-:65539042-65563113   |
| 18814 | Cst12         | 69362  | 2+:148615104-148619162  |
| 18815 | Hist1h1d      | 14957  | 13+:23646958-23647624   |
| 18816 | Hisppd2a      | 327655 | 2-:121136080-121176745  |
| 18817 | Zc3h13        | 67302  | 14+:75684399-75727410   |

|       |               |        |                         |
|-------|---------------|--------|-------------------------|
| 18818 | Pde4a         | 18577  | 9+:21001484-21016054    |
| 18819 | V1rb7         | 113855 | 6+:89664196-89665127    |
| 18820 | Capn7         | 12339  | 14+:32149909-32184455   |
| 18821 | Gltscr2       | 68077  | 7-:16523186-16531407    |
| 18822 | Megf6         | 230971 | 4+:153544850-153649822  |
| 18823 | Vmn2r74       | 546980 | 7-:93100378-93110018    |
| 18824 | Nrd1          | 230598 | 4+:108673369-108733755  |
| 18825 | 4933400E14Rik | 71007  | 7-:141457957-141541511  |
| 18826 | 4930427A07Rik | 104732 | 12+:114394645-114401722 |
| 18827 | Oprs1         | 18391  | 4-:41685369-41688186    |
| 18828 | MMT00042894   |        | 1+:179809871-179878451  |
| 18829 | Smarcd2       | 83796  | 11-:106124500-106128936 |
| 18830 | MMT00013368   |        | 11+:56272895-56273576   |
| 18831 | 4921524J17Rik | 66714  | 8-:87932657-87956730    |
| 18832 | Mybph         | 53311  | 1+:136090033-136097808  |
| 18833 | Rfwd2         | 26374  | 1+:161236699-161277747  |
| 18834 | Slc8a3        | 110893 | 12-:82300432-82434167   |
| 18835 | Dtwd1         | 69185  | 2+:125980276-125991012  |
| 18836 | Vmn2r27       | 232367 | 6-:124141871-124180483  |
| 18837 | Paox          | 212503 | 7+:147312287-147320051  |
| 18838 | Rdh13         | 108841 | 7-:4379216-4397243      |
| 18839 | Pcdha1        | 116731 | 18+:37089938-37347311   |
| 18840 | MMT00044904   |        | 17+:63684571-63697277   |
| 18841 | C130038G02Rik | 77521  | 5+:149114777-149125612  |
| 18842 | Phlda1        | 21664  | 10+:110943341-110945704 |
| 18843 | Rnf139        | 75841  | 15+:58726901-58731687   |
| 18844 | 1810043H04Rik | 208501 | 11+:119960247-119962017 |
| 18845 | Gna11         | 14672  | 10-:80993349-81007728   |
| 18846 | Ikbkg         | 16151  | X+:71678143-71694190    |
| 18847 | Armetl1       | 227526 | 2+:3430333-3441285      |
| 18848 | Sema3b        | 20347  | 9-:107500685-107507733  |
| 18849 | Macrod2       | 72899  | 2+:142217967-142218699  |
| 18850 | MMT00069233   |        | X-:103564204-103565634  |
| 18851 | Apip          | 56369  | 2+:102913939-102932795  |
| 18852 | MMT00001015   |        |                         |
| 18853 | Acp1          | 11431  | 12-:31580740-31596414   |
| 18854 | MMT00016808   |        | 12+:15734853-15735773   |
| 18855 | MMT00074946   |        | 17+:88349234-88349854   |
| 18856 | Hmgcl         | 15356  | 4+:135502359-135518528  |
| 18857 | 1110012L19Rik | 68618  | X+:67639087-67642591    |
| 18858 | 5830418K08Rik | 319675 | 9-:15126680-15151480    |
| 18859 | C230094A16Rik | 237711 | 11-:29644136-29664233   |
| 18860 | Traf6         | 22034  | 2+:101518743-101538095  |
| 18861 | Apoc4         | 11425  | 7-:20263496-20266729    |
| 18862 | 1300003B13Rik | 74149  | 17+:22591344-22592804   |
| 18863 | Zfp668        | 244219 | 7-:135009508-135019160  |
| 18864 | Rwdd2b        | 53858  | 16-:87433653-87440791   |
| 18865 | Ptges3        | 56351  | 10+:127496229-127514049 |
| 18866 | MMT00038112   | 670717 | 5-:13121449-13121766    |
| 18867 | 5930416I19Rik | 72440  | 6-:128307017-128313009  |
| 18868 | Mpeg1         | 17476  | 19+:12535310-12539774   |

|       |               |        |                         |
|-------|---------------|--------|-------------------------|
| 18869 | Cxcl2         | 20310  | 5+:91332924-91334964    |
| 18870 | Hnf4g         | 30942  | 3+:3508101-3657373      |
| 18871 | Al314976      | 106821 | 17+:48548706-48556593   |
| 18872 | Zfp64         | 22722  | 2-:168750870-168780759  |
| 18873 | AB041550      | 58229  | 6+:87680862-87684010    |
| 18874 | Olfrr777      | 258537 | 10-:128623667-128706035 |
| 18875 | EG636756      | 636756 | X-:37353960-37354374    |
| 18876 | Klf16         | 118445 | 10-:80029879-80040039   |
| 18877 | Trpa1         | 277328 | 1-:14871677-14900986    |
| 18878 | Pde4dip       | 83679  | 3-:97493749-97494486    |
| 18879 | Cacna2d4      | 319734 | 6+:119192795-119299757  |
| 18880 | Nxf3          | 245610 | X-:132609873-132615314  |
| 18881 | Cops6         | 26893  | 5+:138602543-138605520  |
| 18882 | Tbc1d2        | 381605 | 4-:46617271-46662964    |
| 18883 | MMT00050191   |        | 1+:119574427-119624531  |
| 18884 | Ell           | 13716  | 8+:73063600-73116723    |
| 18885 | Rps11         | 27207  | 7-:52377754-52379689    |
| 18886 | Slc18a1       | 110877 | 8-:71561611-71613089    |
| 18887 | Foxn1         | 15218  | 11-:78171789-78200060   |
| 18888 | Unc13c        | 208898 | 9-:73328396-73606484    |
| 18889 | Shq1          | 72171  | 6-:100523070-100621144  |
| 18890 | MMT00011144   |        | 11+:85763996-85764319   |
| 18891 | Frmf3         | 242506 | 4+:73659348-73848117    |
| 18892 | Cyp4f40       | 631304 | 17+:32799075-32813423   |
| 18893 | Lace1         | 215951 | 10-:42032391-42198220   |
| 18894 | MMT00030135   |        | 7-:58196157-58198524    |
| 18895 | Gcs1          | 57377  | 6+:83065574-83068700    |
| 18896 | Smad1         | 98366  | 1-:23852461-23916529    |
| 18897 | EG625835      | 625835 | 16+:23179628-23180083   |
| 18898 | Rcbtb1        | 71330  | 14+:59820317-59856101   |
| 18899 | lfnar1        | 15975  | 16+:91485493-91507682   |
| 18900 | Btbd12        | 52864  | 16-:4000711-4003748     |
| 18901 | Hpx           | 15458  | 7-:112740122-112748636  |
| 18902 | A530023O14Rik | 244183 | 7-:111505221-111511484  |
| 18903 | Crem          | 12916  | 18-:3266353-3327517     |
| 18904 | Fdx1          | 14148  | 9-:51751411-51771638    |
| 18905 | Prmt2         | 15468  | 10-:75669973-75700520   |
| 18906 | Zfand3        | 21769  | 17+:30272258-30347638   |
| 18907 | Prl4a1        | 19110  | 13+:28108091-28115412   |
| 18908 | Cldn10        | 58187  | 14+:119187129-119273746 |
| 18909 | Rfx3          | 19726  | 19-:27842811-28057438   |
| 18910 | Zfp39         | 22698  | 11-:58716243-58717720   |
| 18911 | Selenbp2      | 20342  | 3+:94497494-94508328    |
| 18912 | 1700019G17Rik | 75541  | 6-:85849044-85852527    |
| 18913 | Olfrr552      | 259106 | 7+:109752869-109753822  |
| 18914 | Ntrk2         | 18212  | 13+:59087161-59230164   |
| 18915 | Med4          | 67381  | 14+:73909854-73918355   |
| 18916 | Slbp          | 20492  | 5-:33982711-33994955    |
| 18917 | Olfrr448      | 258270 | 6+:42846451-42847383    |
| 18918 | MMT00079827   |        | 7-:111122547-111125663  |
| 18919 | 6030468B19Rik | 77727  | 11+:117659068-117667642 |

|       |               |           |                         |
|-------|---------------|-----------|-------------------------|
| 18920 | Cd2ap         | 12488     | 17-:42932787-42989477   |
| 18921 | V1rh1         | 171245    | 13+:22533140-22534031   |
| 18922 | Syce1         | 74075     | 7-:147963128-147973779  |
| 18923 | BC025816      | 234796    | 8+:122386204-122400888  |
| 18924 | Sema6b        | 20359     | 17-:56262507-56272288   |
| 18925 | Kcne1         | 16509     | 16-:92348676-92359119   |
| 18926 | MMT00070399   |           | 14+:44326413-44328553   |
| 18927 | Prl3d3        | 215029    | 13+:27213563-27254459   |
| 18928 | Ttc28         | 209683    | 5+:111529712-111716417  |
| 18929 | Klhdc7a       | 242721    | 4-:139520300-139538871  |
| 18930 | Ugt1a6b       | 394435    | 1+:89999813-90004375    |
| 18931 | MMT00014022   |           | 6+:46994898-46996404    |
| 18932 | Cebpg         | 12611     | 7-:35835402-35842310    |
| 18933 | Nmbr          | 18101     | 10+:14480094-14490361   |
| 18934 | MMT00015154   |           | 11-:120533745-120534553 |
| 18935 | D230044M03Rik | 76743     | 10-:14435432-14438023   |
| 18936 | Zfp560        | 434377    | 9-:20151747-20206511    |
| 18937 | Cass4         | 320664    | 2+:172219362-172253425  |
| 18938 | MMT00074326   | 100047309 | 10-:95332035-95333441   |
| 18939 | Matn2         | 17181     | 15+:34236439-34365993   |
| 18940 | Olfr1086      | 258585    | 2-:86516557-86517488    |
| 18941 | Ube3c         | 100763    | 5+:29896054-30002616    |
| 18942 | Hs3st3b1      | 54710     | 11-:63702535-63735734   |
| 18943 | Prr11         | 270906    | 11-:86903666-86922195   |
| 18944 | Cyp2j13       | 230459    | 4-:95711924-95744221    |
| 18945 | MMT00052502   |           | 13+:74670998-74672030   |
| 18946 | D8Ert82e      | 244418    | 8+:37166665-37210843    |
| 18947 | Ctse          | 13034     | 1+:133558522-133572084  |
| 18948 | Olfr1270      | 258987    | 2-:89989246-89990161    |
| 18949 | Rg9mtd2       | 108943    | 3+:137806004-137821240  |
| 18950 | MMT00005163   |           | 6+:20445549-20445977    |
| 18951 | MMT00063372   |           | 5+:35896362-35898566    |
| 18952 | Sfnl1         | 194219    | 4+:120207618-120209272  |
| 18953 | Rab33b        | 19338     | 3+:51287937-51300116    |
| 18954 | 2310034C09Rik | 117172    | 16+:88759091-88760034   |
| 18955 | Chgb          | 12653     | 2+:132607407-132620812  |
| 18956 | Tmco5         | 67356     | 2+:116704443-116718230  |
| 18957 | 4921505C17Rik | 78757     | 15+:6658380-6727442     |
| 18958 | MMT00024874   |           | 2-:19958403-19959035    |
| 18959 | Olfr681       | 404318    | 7+:112270098-112270918  |
| 18960 | Eif2c1        | 236511    | 4-:126020671-126210564  |
| 18961 | Arsk          | 77041     | 13-:76198329-76236009   |
| 18962 | OTTMUSG000000 | 666317    | 13+:27943546-27949657   |
| 18963 | 1700041C02Rik | 73332     | 4-:119065258-119073651  |
| 18964 | Letmd1        | 68614     | 15+:100299524-100309594 |
| 18965 | Spink4        | 20731     | 4+:40867089-40878427    |
| 18966 | Dgkg          | 110197    | 16-:22468535-22622365   |
| 18967 | MMT00011087   |           | 1+:79954536-79957431    |
| 18968 | Cst6          | 73720     | 19-:5347860-5349385     |
| 18969 | 1300010F03Rik | 219189    | 14+:79249050-79602115   |
| 18970 | Tnfsf11       | 21943     | 14-:78677258-78707841   |

|       |               |        |                         |
|-------|---------------|--------|-------------------------|
| 18971 | Dok7          | 231134 | 5+:35409211-35422923    |
| 18972 | Nat5          | 67877  | 2+:145729004-145742052  |
| 18973 | Camk2n2       | 73047  | 16-:20619291-20621293   |
| 18974 | Cse1l         | 110750 | 2+:166731595-166771763  |
| 18975 | MMT00005776   |        | X+:127059113-127059948  |
| 18976 | Gm684         | 270157 | 9-:51085521-51085926    |
| 18977 | 4933432I09Rik | 66779  | 16-:18195758-18213957   |
| 18978 | Dnahc2        | 327954 | 11-:69234312-69358058   |
| 18979 | Cd33          | 12489  | 7-:50783364-50788471    |
| 18980 | Ii7           | 16196  | 3-:7573147-7613727      |
| 18981 | MMT00007409   |        | 13-:80840857-80841345   |
| 18982 | Ascl2         | 17173  | 7-:150153823-150154894  |
| 18983 | Ifrd2         | 15983  | 9+:107490048-107495369  |
| 18984 | Pias3         | 229615 | 3+:96500391-96509886    |
| 18985 | MMT00008426   |        | X+:105642186-105644093  |
| 18986 | BC057893      | 272027 | 4-:46128379-46151605    |
| 18987 | Treh          | 58866  | 9+:44481320-44494387    |
| 18988 | MMT00012332   |        | 11-:6736286-6737306     |
| 18989 | Tff2          | 21785  | 17-:31278154-31281187   |
| 18990 | Hal           | 15109  | 10+:92951828-92979227   |
| 18991 | Gpkow         | 209416 | X+:7285053-7287396      |
| 18992 | Eif1          | 20918  | 11+:100181381-100182673 |
| 18993 | EG330513      | 330513 | 7-:46666256-46668516    |
| 18994 | Orai1         | 109305 | 5+:123464733-123480474  |
| 18995 | Capza3        | 12344  | 6+:139990101-139991115  |
| 18996 | Ahctf1        | 226747 | 1-:181692705-181713175  |
| 18997 | Qpct          | 70536  | 17+:79451502-79489715   |
| 18998 | Oc90          | 18256  | 15-:65707613-65743959   |
| 18999 | Gatad2b       | 229542 | 3+:90145575-90162042    |
| 19000 | Sfmbt2        | 353282 | 2+:10301807-10512195    |
| 19001 | Ndufs7        | 75406  | 10+:79712196-79719537   |
| 19002 | Ociad1        | 68095  | 5+:73684093-73705179    |
| 19003 | Tmed6         | 66269  | 8-:109585383-109589544  |
| 19004 | Pdk4          | 27273  | 6-:5433350-5446278      |
| 19005 | ENSMUSG00000  | 621427 | 6+:39370566-39371291    |
| 19006 | Rnf130        | 59044  | 11+:49838872-49918214   |
| 19007 | Ocl           | 320634 | X+:45265629-45319040    |
| 19008 | Krt27         | 16675  | 11-:99206879-99212408   |
| 19009 | MMT00006729   |        | 8+:10755221-10755452    |
| 19010 | Bhmt          | 12116  | 13-:94387430-94407456   |
| 19011 | Rpl3l         | 66211  | 17+:24869629-24873088   |
| 19012 | Ankrd54       | 223690 | 15-:78883523-78893289   |
| 19013 | Rpl18         | 19899  | 7+:52973476-52975823    |
| 19014 | Nsmce4a       | 67872  | 7-:137676032-137690918  |
| 19015 | MMT00042937   |        | 12-:96152582-96154135   |
| 19016 | EG625530      | 625530 | 7-:111881956-111925984  |
| 19017 | 1700017D01Rik | 69369  | 19-:11171305-11205371   |
| 19018 | 1700048O14Rik | 73433  | 19-:26116472-26120958   |
| 19019 | Timeless      | 21853  | 10+:127683139-127683516 |
| 19020 | V1rh20        | 171277 | 13-:22943469-22944364   |
| 19021 | Rtkn          | 20166  | 6+:83087082-83102570    |



|       |               |           |                         |
|-------|---------------|-----------|-------------------------|
| 19022 | Ccnb2         | 12442     | 9-:70255496-70269337    |
| 19023 | Kynu          | 70789     | 2+:43410847-43538237    |
| 19024 | Mylk3         | 213435    | 8-:87866555-87879466    |
| 19025 | Slc37a4       | 14385     | 9+:44206437-44211046    |
| 19026 | Isg15         | 53606     | 4-:155573563-155574905  |
| 19027 | MMT00058026   |           | 17-:22101212-22101549   |
| 19028 | MMT00058251   |           | 3+:22424533-22424932    |
| 19029 | Tada2l        | 217031    | 11-:83892179-83943091   |
| 19030 | MMT00011246   |           | 14-:59498087-59499113   |
| 19031 | Mms19         | 72199     | 19-:42018691-42055620   |
| 19032 | Tymp          | 72962     | 15-:89202361-89207468   |
| 19033 | Mettl9        | 59052     | 7+:128178186-128220347  |
| 19034 | Bag4          | 67384     | 8-:26877672-26895670    |
| 19035 | Atad2b        | 320817    | 12+:4924147-4961462     |
| 19036 | Ppp2r1a       | 51792     | 17+:21082469-21102434   |
| 19037 | Slc11a2       | 18174     | 15-:100218332-100253414 |
| 19038 | MMT00013556   |           | 2-:50377811-50378556    |
| 19039 | Csmd3         | 239420    | 15-:47413270-47585464   |
| 19040 | Cdk2ap1       | 13445     | 5-:124795446-124804565  |
| 19041 | 9830102E05Rik | 277898    | 6-:137965905-137992210  |
| 19042 | Bnip3l        | 12177     | 14-:67606060-67627701   |
| 19043 | Mfsd10        | 68294     | 5-:34976297-34979775    |
| 19044 | MMT00004517   |           | 6-:38495246-38499153    |
| 19045 | MMT00027514   |           | 9-:59614519-59614995    |
| 19046 | Efs           | 13644     | 14-:55535471-55544649   |
| 19047 | Olf910        | 258807    | 9+:38346481-38347412    |
| 19048 | 4933417A18Rik | 66761     | 13+:35016277-35047744   |
| 19049 | Prkag1        | 19082     | 15-:98643228-98661911   |
| 19050 | MMT00072769   | 100044229 | 5+:51071382-51073931    |
| 19051 | Podn1l        | 244550    | 8+:86650243-86656414    |
| 19052 | Mktn2         | 67027     | 6+:115551986-115568696  |
| 19053 | Rbak          | 57782     | 5-:143933867-143938342  |
| 19054 | 1700003M02Rik | 69329     | 4-:34666821-34676152    |
| 19055 | F430201B04Rik | 621239    | 17-:26080306-26085506   |
| 19056 | Zfp7          | 223669    | 15+:76709688-76722822   |
| 19057 | Cntnap2       | 66797     | 6+:46297080-46371463    |
| 19058 | Rbm4b         | 66704     | 19+:4756542-4762750     |
| 19059 | MMT00071954   |           | 12+:31703383-31704688   |
| 19060 | Adamts13      | 279028    | 2+:26831164-26862327    |
| 19061 | Dolk          | 227697    | 2-:30139946-30142274    |
| 19062 | Shh           | 20423     | 5-:28784395-28793303    |
| 19063 | Evl           | 14026     | 12+:109793166-109926634 |
| 19064 | MMT00004867   |           | 1-:154796483-154797341  |
| 19065 | Slc35f3       | 210027    | 8+:128822685-128918468  |
| 19066 | MMT00012632   |           | 3-:130631968-130633683  |
| 19067 | BC023882      | 231123    | 5-:34496549-34512073    |
| 19068 | 6030408C04Rik | 217558    | 12+:52449348-52476614   |
| 19069 | MMT00002942   | 633282    | 14-:52188567-52192792   |
| 19070 | EG436059      | 436059    | 8+:107538350-107544310  |
| 19071 | Actr10        | 56444     | 12+:72038893-72063269   |
| 19072 | MMT00068804   |           | X-:98903951-98904917    |

|       |               |        |                         |
|-------|---------------|--------|-------------------------|
| 19073 | Akap4         | 11643  | X+:6644674-6655729      |
| 19074 | Gigyf1        | 57330  | 5+:137960365-137966931  |
| 19075 | Lmnb2         | 16907  | 10-:80364108-80380906   |
| 19076 | 1500016O10Rik | 68952  | 7+:133967470-133973734  |
| 19077 | Has2          | 15117  | 15-:56497183-56526053   |
| 19078 | EG668139      | 668139 | 7-:113648313-113740829  |
| 19079 | Map3k9        | 338372 | 12-:82823025-82874170   |
| 19080 | Myc           | 17869  | 15+:61816940-61821800   |
| 19081 | 9130011E15Rik | 71617  | 19-:45892462-46039675   |
| 19082 | Alk           | 11682  | 17-:72218327-72953167   |
| 19083 | MMT00006959   |        | 12+:119841149-119841393 |
| 19084 | Mmab          | 77697  | 5-:114883022-114894034  |
| 19085 | MMT00050224   |        | 12+:3171970-3201057     |
| 19086 | MMT00029151   |        |                         |
| 19087 | Wapal         | 218914 | 14+:35486838-35559772   |
| 19088 | Rest          | 19712  | 5+:77694511-77713168    |
| 19089 | Peci          | 23986  | 13-:35069617-35085985   |
| 19090 | Slc2a1        | 20525  | 4+:118781372-118809932  |
| 19091 | Micall2       | 231830 | 5-:140182648-140212267  |
| 19092 | MMT00045362   |        | 11+:96806153-96814775   |
| 19093 | Gm1079        | 381836 | 7-:4908683-4915993      |
| 19094 | Fscn1         | 14086  | 5+:143722051-143734862  |
| 19095 | MMT00006438   |        | 6-:69009641-69061200    |
| 19096 | C87198        | 97836  | 12+:57692547-57695539   |
| 19097 | Sema3d        | 108151 | 5+:12383551-12588943    |
| 19098 | MMT00017494   |        | 17+:9605375-9615322     |
| 19099 | Olfr196       | 258775 | 16-:59167037-59167967   |
| 19100 | Prss33        | 353130 | 17-:23970832-23981007   |
| 19101 | 4921504E06Rik | 70909  | 2-:19415325-19475541    |
| 19102 | Uhrf1bp1l     | 75089  | 10+:89207779-89283216   |
| 19103 | Gm889         | 380755 | 12-:40903324-40912012   |
| 19104 | 2310057N15Rik | 69696  | 16-:88773425-88774451   |
| 19105 | Unc5c         | 22253  | 3+:141128527-141497886  |
| 19106 | Nsbp1         | 50887  | X-:106199873-106208698  |
| 19107 | Olfr1383      | 404337 | 11+:49337226-49367547   |
| 19108 | Armet         | 74840  | 9-:106791091-106794246  |
| 19109 | Nanog         | 71950  | 6+:122657733-122664643  |
| 19110 | Gm114         | 228730 | 2+:146715326-146795830  |
| 19111 | Diap3         | 56419  | 14-:87056131-87540921   |
| 19112 | Upb1          | 103149 | 10+:74869777-74902938   |
| 19113 | Ifna2         | 15965  | 4-:88329111-88329683    |
| 19114 | MMT00045204   |        | 2+:75646357-75646957    |
| 19115 | Rab32         | 67844  | 10-:10265034-10278016   |
| 19116 | Entpd3        | 215446 | 9+:120430925-120431940  |
| 19117 | Olfr1318      | 258022 | 2+:111996283-111997070  |
| 19118 | Prp2          | 83380  | 6+:132545963-132550718  |
| 19119 | Wnt7a         | 22421  | 6-:91315843-91361103    |
| 19120 | 1700073E17Rik | 381827 | 6+:145339945-145340747  |
| 19121 | Trim31        | 224762 | 17+:37035074-37047162   |
| 19122 | Rad9b         | 231724 | 5-:122775516-122804204  |
| 19123 | Bub1          | 12235  | 2-:127625935-127657783  |

|       |               |        |                         |
|-------|---------------|--------|-------------------------|
| 19124 | Pim3          | 223775 | 15+:88692623-88696155   |
| 19125 | Muc15         | 269328 | 2+:110571805-110579680  |
| 19126 | Rnf167        | 70510  | 11+:70460786-70465372   |
| 19127 | Zfp553        | 233887 | 7+:134376956-134381368  |
| 19128 | Hnrnpk        | 15387  | 13-:58493311-58503877   |
| 19129 | Serf2         | 378702 | 2+:121275152-121276793  |
| 19130 | Wasl          | 73178  | 6-:24563808-24615010    |
| 19131 | Gad2          | 14417  | 2+:22477837-22546510    |
| 19132 | Adam7         | 11500  | 14-:69115395-69151732   |
| 19133 | MMT00050037   |        | 2-:104630327-104656881  |
| 19134 | Fn3k          | 63828  | 11+:121296281-121311797 |
| 19135 | Ankrd22       | 52024  | 19-:34197111-34240393   |
| 19136 | Trim13        | 66597  | 14+:62218392-62224780   |
| 19137 | Bfsp1         | 12075  | 2-:143652402-143688667  |
| 19138 | Krtap12-1     | 16694  | 10+:77183330-77184001   |
| 19139 | Olfr112       | 258096 | 17-:37700292-37701254   |
| 19140 | EG238217      | 238217 | 12-:67384700-67385344   |
| 19141 | Gorasp1       | 74498  | 9-:119834375-119846677  |
| 19142 | Gpatch1       | 67471  | 7-:36061562-36103459    |
| 19143 | Mrpl40        | 18100  | 16-:18872310-18876730   |
| 19144 | Ndufa2        | 17991  | 18-:36902114-36904193   |
| 19145 | Acsbg1        | 94180  | 9-:54452803-54509692    |
| 19146 | N4bp2l1       | 100637 | 5-:151374223-151379566  |
| 19147 | MMT00070588   |        | 5+:138960653-138973694  |
| 19148 | Rnf144b       | 218215 | 13+:47289389-47341778   |
| 19149 | Cd34          | 12490  | 1+:196765109-196787472  |
| 19150 | Kir3dl1       | 245616 | X+:133059487-133064672  |
| 19151 | Dmp1          | 13406  | 5+:104631635-104643129  |
| 19152 | Ccdc15        | 245902 | 9-:37084943-37123472    |
| 19153 | Ptgs1         | 19224  | 2+:36086046-36107782    |
| 19154 | 3110001K24Rik | 75698  | 14-:35050222-35123702   |
| 19155 | MMT00008800   |        | 6+:29700745-29701155    |
| 19156 | Dalrd3        | 67789  | 9+:108473982-108475102  |
| 19157 | Rps19bp1      | 66538  | 15-:80091051-80094726   |
| 19158 | Dvl3          | 13544  | 16+:20517058-20531719   |
| 19159 | Epn3          | 71889  | 11-:94351996-94361257   |
| 19160 | MMT00042532   |        | X+:85633638-85634431    |
| 19161 | Cav2          | 12390  | 6+:17231357-17239004    |
| 19162 | D15Ertd621e   | 210998 | 15+:58261546-58289292   |
| 19163 | Cadps2        | 320405 | 6-:23212842-23394045    |
| 19164 | Arhgap15      | 76117  | 2+:43604369-43746048    |
| 19165 | MMT00000241   |        | 18-:55997841-55998528   |
| 19166 | Soat2         | 223920 | 15+:101981005-101993867 |
| 19167 | MMT00035949   |        |                         |
| 19168 | Sgk3          | 170755 | 1+:9788289-9888995      |
| 19169 | Atp10a        | 11982  | 7+:65913702-66084790    |
| 19170 | Ephb1         | 270190 | 9-:102096476-102134600  |
| 19171 | Tmem16d       | 320091 | 10-:88434016-88551039   |
| 19172 | Prkg2         | 19092  | 5-:99361027-99466370    |
| 19173 | Mb            | 17189  | 15-:76845918-76881098   |
| 19174 | Otud5         | 54644  | X+:7419812-7451925      |

|       |               |        |                         |
|-------|---------------|--------|-------------------------|
| 19175 | Spag6         | 50525  | 16-:16753109-16829387   |
| 19176 | 2210404J11Rik | 381062 | 17+:15123436-15201197   |
| 19177 | Gm131         | 229697 | 3-:107014209-107024635  |
| 19178 | Bhlhb5        | 59058  | 3+:17954710-17957509    |
| 19179 | Rnf187        | 108660 | 11-:58745790-58752609   |
| 19180 | Sparc         | 20692  | 11-:55208002-55233368   |
| 19181 | Slc35a3       | 229782 | 3-:116376074-116415170  |
| 19182 | Igsf2         | 630146 | 3-:100797454-100824655  |
| 19183 | Mnat1         | 17420  | 12+:74224716-74373839   |
| 19184 | Skap1         | 78473  | 11+:96563877-96620737   |
| 19185 | MMT00016747   |        | 4-:15746220-15748520    |
| 19186 | Pla2g4c       | 232889 | 7+:13910002-13941675    |
| 19187 | Chrm3         | 12671  | 13-:9876474-9878244     |
| 19188 | MMT00042824   |        | 13+:62107935-62108670   |
| 19189 | Sp100         | 20684  | 1+:87546588-87598136    |
| 19190 | MMT00077382   |        | 19-:3821822-3824584     |
| 19191 | Ccng2         | 12452  | 5+:93696620-93705221    |
| 19192 | Hist1h1c      | 50708  | 13+:23830675-23832235   |
| 19193 | Tsku          | 244152 | 7-:105500568-105509799  |
| 19194 | EG668450      | 668450 | 14+:70759826-70760251   |
| 19195 | Reep6         | 70335  | 10+:79792914-79799185   |
| 19196 | Nfe2l1        | 18023  | 11-:96678733-96689061   |
| 19197 | H2-Ob         | 15002  | 17+:34375916-34390849   |
| 19198 | D10Wsu102e    | 28109  | 10+:82822981-82831578   |
| 19199 | Gla           | 11605  | X-:131122894-131135494  |
| 19200 | Hemk1         | 69536  | 9-:107230039-107240626  |
| 19201 | 2210018M11Rik | 233545 | 7-:105736939-105805101  |
| 19202 | 1500031L02Rik | 66994  | 16+:32099887-32108140   |
| 19203 | Mettl10       | 72096  | 7-:140042268-140044329  |
| 19204 | Prr13         | 66151  | 15+:102289605-102293214 |
| 19205 | Zfp329        | 67230  | 7-:13391445-13404201    |
| 19206 | EG665186      | 665186 | 4-:133746718-133752866  |
| 19207 | B430119L13Rik | 320974 | 2-:132704970-132706628  |
| 19208 | Vps52         | 224705 | 17+:34098555-34099962   |
| 19209 | Zdhhc17       | 320150 | 10-:110379919-110423100 |
| 19210 | Jag2          | 16450  | 12-:114146811-114167706 |
| 19211 | MMT00046586   |        | 12-:21584046-21586504   |
| 19212 | Mak           | 17152  | 13-:41121683-41165828   |
| 19213 | 5730403M16Rik | 232853 | 7-:7054737-7089433      |
| 19214 | Snapc1        | 75627  | 12+:75065547-75085377   |
| 19215 | Mettl2        | 52686  | 11+:104987789-105001706 |
| 19216 | Bik           | 12124  | 15+:83357301-83375065   |
| 19217 | Cyr61         | 16007  | 3-:145309941-145312945  |
| 19218 | Mdh1          | 17449  | 11-:21457243-21471816   |
| 19219 | MMT00015104   |        | 3+:138264462-138265091  |
| 19220 | MMT00040501   | 54381  | 15+:33013002-33524259   |
| 19221 | Lrrc28        | 67867  | 7-:74658297-74790126    |
| 19222 | MMT00029634   |        | 6-:130888044-130889986  |
| 19223 | Ercc8         | 71991  | 13+:108948931-108984705 |
| 19224 | 4930430F08Rik | 68281  | 10-:100031472-100052028 |
| 19225 | Lrrk1         | 233328 | 7-:73410310-73427227    |

|       |               |        |                         |
|-------|---------------|--------|-------------------------|
| 19226 | Nras          | 18176  | 3+:102862151-102870343  |
| 19227 | MMT00058471   |        | 2-:166832485-166834547  |
| 19228 | CU075549.1    | 620807 | 4+:60018738-60019967    |
| 19229 | Sumf1         | 58911  | 6-:108057022-108135550  |
| 19230 | 1700106N22Rik | 73582  | 17+:85489942-85602361   |
| 19231 | Muc10         | 17830  | 5+:88746336-88757835    |
| 19232 | Exoc6b        | 75914  | 6-:84568480-84575233    |
| 19233 | Ankrd23       | 78321  | 1-:36587038-36604064    |
| 19234 | Nrg4          | 83961  | 9-:55074420-55130425    |
| 19235 | 4921510J17Rik | 70894  | 11+:104953531-104978851 |
| 19236 | MMT00045089   |        | 5+:117508677-117510005  |
| 19237 | Znrd1         | 66136  | 17-:37091423-37095246   |
| 19238 | Ttc35         | 66736  | 15+:43308774-43359323   |
| 19239 | Olf469        | 258418 | 7-:114966077-114966981  |
| 19240 | Ahnak2        | 382643 | 12-:114023926-114026210 |
| 19241 | Ewsr1         | 14030  | 11-:4969903-4999080     |
| 19242 | Ran           | 19384  | 5+:129526051-129529038  |
| 19243 | Olf457        | 258358 | 7+:109846753-109847721  |
| 19244 | Impdh2        | 23918  | 9+:108462864-108467849  |
| 19245 | MMT00013285   |        | 19-:13669561-13670541   |
| 19246 | MMT00061306   |        | 11-:77499897-77501385   |
| 19247 | Prelp         | 116847 | 1-:135808988-135817979  |
| 19248 | Txndc9        | 98258  | 1-:38043905-38054098    |
| 19249 | Olf4767       | 258315 | 10-:128516089-128517017 |
| 19250 | Olf483        | 258730 | 7+:115246824-115247770  |
| 19251 | Opn1sw        | 12057  | 6-:29327942-29330415    |
| 19252 | Tmsb4x        | 19241  | X-:163645026-163647081  |
| 19253 | Ddx5          | 13207  | 11-:106642861-106649790 |
| 19254 | Klhdc6        | 74589  | 6-:88567429-88577439    |
| 19255 | Wnt8a         | 20890  | 18+:34701966-34707927   |
| 19256 | AW121567      | 270028 | 8-:9207257-9233105      |
| 19257 | Omp           | 18378  | 7-:105293437-105293928  |
| 19258 | Daf2          | 13137  | 1-:132285113-132319586  |
| 19259 | Kng1          | 16644  | 16+:23058492-23081762   |
| 19260 | Nubp2         | 26426  | 17-:25019563-25023273   |
| 19261 | Olf431        | 18330  | 14+:15160626-15161579   |
| 19262 | Cd274         | 60533  | 19+:29446941-29462582   |
| 19263 | Usp35         | 244144 | 7-:104459877-104470688  |
| 19264 | Cd52          | 23833  | 4-:133649453-133650977  |
| 19265 | EG546036      | 546036 | 8+:13986085-14003560    |
| 19266 | 1700018B08Rik | 76405  | 8-:124054683-124065854  |
| 19267 | Olf4341       | 258952 | 2-:36334708-36335648    |
| 19268 | Tubb1         | 545486 | 2+:174276245-174283471  |
| 19269 | Lrrc48        | 74665  | 11+:60166881-60207835   |
| 19270 | Krit1         | 79264  | 5+:3806466-3840941      |
| 19271 | MMT00063670   |        | 5+:90794340-90799635    |
| 19272 | Ctsg          | 13035  | 14-:56718719-56721411   |
| 19273 | MMT00073897   |        | 14+:43722358-43724478   |
| 19274 | Afap1         | 70292  | 5+:36236138-36346561    |
| 19275 | Farp2         | 227377 | 1+:95408701-95518358    |
| 19276 | H28           | 15061  | 3-:151421702-151425855  |

|       |               |        |                         |
|-------|---------------|--------|-------------------------|
| 19277 | MMT00044927   |        | 17-:65411187-65415719   |
| 19278 | 1700031M16Rik | 73302  | 15+:98228875-98246699   |
| 19279 | MMT00012963   |        | 5+:84292273-84292738    |
| 19280 | Il17rd        | 171463 | 14+:27919446-27920468   |
| 19281 | MMT00054244   |        | 10-:56397990-56411502   |
| 19282 | Tbx3          | 21386  | 5+:120121701-120134727  |
| 19283 | MMT00022420   |        | 4+:32294138-32295062    |
| 19284 | Fbxo8         | 50753  | 8+:59029923-59070855    |
| 19285 | Col22a1       | 69700  | 15-:71773509-71784740   |
| 19286 | 1110012M11Rik | 73711  | 8+:74066850-74071923    |
| 19287 | Rock1         | 19877  | 18-:10067468-10181315   |
| 19288 | Olf15         | 18312  | 16+:3838974-3839912     |
| 19289 | Pofut1        | 140484 | 2+:153067298-153091715  |
| 19290 | MMT00008156   |        | 11+:115354337-115357881 |
| 19291 | MMT00032606   |        | 6-:114118922-114119518  |
| 19292 | Pold2         | 18972  | 11-:5772191-5778220     |
| 19293 | Ppil4         | 67418  | 10+:7512725-7542933     |
| 19294 | Zfp385a       | 29813  | 15-:103144318-103170515 |
| 19295 | Mto1          | 68291  | 9+:78296026-78321946    |
| 19296 | MMT00010896   |        | 17+:57881369-57882284   |
| 19297 | MMT00005272   |        | 1-:113948872-113951950  |
| 19298 | Unc93b1       | 54445  | 19+:3935193-3949337     |
| 19299 | Ptprz1        | 19283  | 6+:22825721-22954668    |
| 19300 | Pla2g4f       | 271844 | 2-:120125702-120139738  |
| 19301 | Cnrip1        | 380686 | 11+:16951584-16979374   |
| 19302 | MMT00009466   |        | 11+:107277919-107331988 |
| 19303 | Olf1122       | 259033 | 2+:87227863-87228844    |
| 19304 | MMT00065828   |        | 11-:30471232-30474683   |
| 19305 | Azin1         | 54375  | 15-:38419879-38431276   |
| 19306 | Al428936      | 233066 | 7+:31099839-31104066    |
| 19307 | Mail          | 228576 | 2-:127530941-127555668  |
| 19308 | C330006A16Rik | 109299 | 2-:25992332-25995776    |
| 19309 | Slc9a8        | 77031  | 2+:167247208-167302499  |
| 19310 | Cytc1         | 67407  | X+:108316066-108318433  |
| 19311 | Masp1         | 17174  | 16-:23449489-23520676   |
| 19312 | Vmn2r68       | 620697 | 7-:92370140-92381900    |
| 19313 | Tomm7         | 66169  | 5-:23345471-23349925    |
| 19314 | MMT00004478   |        | 14+:61061201-61072586   |
| 19315 | MMT00056434   |        | 2+:56932158-56932287    |
| 19316 | Ruvbl2        | 20174  | 7-:52677327-52689665    |
| 19317 | EG626952      | 626952 | 15-:78384613-78385361   |
| 19318 | Plk1          | 18817  | 7+:129302951-129313353  |
| 19319 | Pap0lb        | 56522  | 5-:143003709-143006030  |
| 19320 | Cyp2j7        | 546837 | 4-:95866026-95903350    |
| 19321 | 1700029115Rik | 75641  | 2+:92223210-92223725    |
| 19322 | Myo15b        | 217328 | 11+:115749673-115753902 |
| 19323 | Bnip3         | 12176  | 7-:146082933-146101152  |
| 19324 | Reps2         | 194590 | X-:158855278-159081439  |
| 19325 | MMT00015449   |        | 19-:43277530-43353488   |
| 19326 | Usp48         | 170707 | 4+:137212948-137214444  |
| 19327 | Phb           | 18673  | 11+:95528342-95541349   |

|       |               |        |                         |
|-------|---------------|--------|-------------------------|
| 19328 | Daam1         | 208846 | 12+:73037544-73091255   |
| 19329 | Usp40         | 227334 | 1-:89841340-89845171    |
| 19330 | Ascc1         | 69090  | 10+:59465566-59562739   |
| 19331 | Dtna          | 13527  | 18+:23693663-23762496   |
| 19332 | Bpnt1         | 23827  | 1+:187156079-187180664  |
| 19333 | Ccdc13        | 434446 | 9-:121736351-121743065  |
| 19334 | Gpr44         | 14764  | 19+:11014610-11015758   |
| 19335 | MMT00045767   |        | 2-:79001143-79001754    |
| 19336 | Ap4e1         | 108011 | 2+:126834457-126893220  |
| 19337 | Prelid1       | 66494  | 13+:55423391-55426511   |
| 19338 | Sipa1l2       | 244668 | 8-:127988049-128016232  |
| 19339 | Gem           | 14579  | 4+:11631603-11641896    |
| 19340 | Serpina3k     | 20714  | 12+:105578715-105582491 |
| 19341 | Tnip3         | 414084 | 6+:65540388-65564787    |
| 19342 | Cth           | 107869 | 3-:157557387-157588013  |
| 19343 | Nhlrc1        | 105193 | 13-:47108943-47110148   |
| 19344 | Hdgrp3        | 29877  | 7-:89038684-89078908    |
| 19345 | Ssh2          | 237860 | 11+:77234760-77270615   |
| 19346 | MMT00047912   |        | 17-:81645256-81646083   |
| 19347 | 1700054M17Rik | 73358  | 2+:118130648-118133897  |
| 19348 | Serpinb8      | 20725  | 1+:109486591-109503900  |
| 19349 | Psg28         | 114871 | 7-:19008239-19017214    |
| 19350 | Siglec5       | 233186 | 7+:50606774-50614839    |
| 19351 | Prkcsh        | 19089  | 9+:21807478-21818665    |
| 19352 | Vapb          | 56491  | 2+:173563193-173603722  |
| 19353 | Zfp287        | 170740 | 11-:62526788-62542595   |
| 19354 | Clu           | 12759  | 14+:66587461-66600385   |
| 19355 | MMT00065736   |        | 7+:26766835-26773474    |
| 19356 | Herc1         | 235439 | 9+:66198373-66221864    |
| 19357 | Adra1a        | 11549  | 14+:67256414-67346800   |
| 19358 | Grip1         | 74053  | 10+:119256567-119512629 |
| 19359 | Sypc1-ps1     | 20958  | 7+:19371648-19373610    |
| 19360 | Aco1          | 11428  | 4+:40090432-40146043    |
| 19361 | Fzd10         | 93897  | 5+:129107092-129108840  |
| 19362 | Gper          | 76854  | 5+:139899615-139903743  |
| 19363 | Olfrc520      | 259066 | 7+:106883654-106884604  |
| 19364 | Ubqln4        | 94232  | 3+:88357637-88373646    |
| 19365 | Myst4         | 54169  | 14+:22319089-22491354   |
| 19366 | Top3a         | 21975  | 11-:60553560-60590867   |
| 19367 | MMT00026682   |        | 16-:23717209-23717968   |
| 19368 | Rln1          | 19773  | 19-:29405665-29409100   |
| 19369 | MMT00069664   |        | 16-:50994968-50995364   |
| 19370 | Gpr34         | 23890  | X+:13216320-13217487    |
| 19371 | Fgfr1         | 14182  | 8+:26642752-26684392    |
| 19372 | Gnai2         | 14678  | 9-:107516918-107537631  |
| 19373 | MMT00018326   |        | 16-:16196394-16198862   |
| 19374 | Dclre1c       | 227525 | 2+:3341421-3371361      |
| 19375 | Inhba         | 16323  | 13+:16106307-16119044   |
| 19376 | Pet2          | 18630  | X-:86649192-86655018    |
| 19377 | 1700011E24Rik | 75467  | 17-:87788910-87827085   |
| 19378 | C1ql4         | 239659 | 15-:98914869-98918814   |

|       |               |        |                        |
|-------|---------------|--------|------------------------|
| 19379 | Lrsam1        | 227738 | 2-:32779838-32817112   |
| 19380 | Atrn          | 11990  | 2+:130732231-130853476 |
| 19381 | Tmem16e       | 233246 | 7+:58802031-58849726   |
| 19382 | Slc2a6        | 227659 | 2-:26876884-26883483   |
| 19383 | Med15         | 94112  | 16-:17651314-17722916  |
| 19384 | MMT00073448   |        | 15+:89215695-89219069  |
| 19385 | Akr1c6        | 83702  | 13+:4433636-4456642    |
| 19386 | Jazf1         | 231986 | 6-:52719256-52727707   |
| 19387 | Nol12         | 97961  | 15+:78765377-78771294  |
| 19388 | MMT00078130   |        | 7+:117665946-117670638 |
| 19389 | lqcb1         | 320299 | 16+:36829088-36872806  |
| 19390 | Ckap2         | 80986  | 8-:23278632-23296264   |
| 19391 | Apex2         | 77622  | X-:147006050-147022692 |
| 19392 | Slc25a16      | 73132  | 10+:62383409-62409239  |
| 19393 | Synpr         | 72003  | 14+:14117372-14447895  |
| 19394 | Decr1         | 67460  | 4-:15844387-15872520   |
| 19395 | Xk            | 22439  | X+:8850039-8888298     |
| 19396 | Wnt3a         | 22416  | 11-:59061545-59104254  |
| 19397 | Dis3l2        | 208718 | 1+:88641254-88946673   |
| 19398 | MMT00062467   |        | 11+:5534089-5534752    |
| 19399 | Camta1        | 100072 | 4-:150433634-150448171 |
| 19400 | Slc30a8       | 239436 | 15+:52138004-52165210  |
| 19401 | Ms4a10        | 69826  | 19-:11036784-11049155  |
| 19402 | Ddx19a        | 13680  | 8-:113498913-113521701 |
| 19403 | A830080D01Rik | 382252 | X+:155970635-155990259 |
| 19404 | MMT00004384   |        | 14-:68206664-68244531  |
| 19405 | MMT00004324   |        | 14-:72931776-72932478  |
| 19406 | lkzf1         | 22778  | 11+:11590368-11669801  |
| 19407 | Zhx1          | 22770  | 15-:57878860-57907776  |
| 19408 | MMT00042388   | 260347 | 7-:103059527-103061913 |
| 19409 | Rgs1          | 240816 | 1-:155672405-155688978 |
| 19410 | Glb1          | 12091  | 9+:114310236-114383495 |
| 19411 | Hnrnp1        | 15388  | 7+:29593556-29607285   |
| 19412 | 1700019D03Rik | 67080  | 1-:52982028-53020104   |
| 19413 | Nptx2         | 53324  | 5+:145306864-145317500 |
| 19414 | MMT00065577   |        | 2-:162807992-162809075 |
| 19415 | B3gnt2        | 53625  | 11-:22735955-22759513  |
| 19416 | Lcat          | 16816  | 8-:108463452-108467282 |
| 19417 | Pdzd11        | 72621  | X-:97818246-97821246   |
| 19418 | Igk-V19-14    | 667881 | 6-:70356439-70356998   |
| 19419 | MMT00002063   |        | 19+:8050307-8052539    |
| 19420 | Lcn8          | 78076  | 2+:25508637-25511734   |
| 19421 | Mbd2          | 17191  | 18+:70727841-70785783  |
| 19422 | Fkbp1b        | 14226  | 12-:4839993-4848345    |
| 19423 | Rif           | 109263 | 4-:120818488-120887580 |
| 19424 | Mcoln1        | 94178  | 8+:3500518-3515229     |
| 19425 | Nphp4         | 260305 | 4+:151852284-151937289 |
| 19426 | Golga7        | 57437  | 8-:24351817-24367484   |
| 19427 | Rhod          | 11854  | 19-:4425458-4439424    |
| 19428 | Tbc1d22a      | 223754 | 15+:86069578-86328933  |
| 19429 | Scx           | 20289  | 15+:76287866-76289550  |



|       |               |        |                         |
|-------|---------------|--------|-------------------------|
| 19430 | Gm626         | 268729 | 14+:34316092-34352802   |
| 19431 | Rpn1          | 103963 | 6+:88034504-88053954    |
| 19432 | MMT00068429   |        |                         |
| 19433 | Mex3b         | 108797 | 7+:90017065-90018718    |
| 19434 | MMT00071117   | 546100 | 8-:108148149-108161946  |
| 19435 | Mtdh          | 67154  | 15+:34012479-34045065   |
| 19436 | Dapp1         | 26377  | 3-:137594569-137644488  |
| 19437 | MMT00010950   |        | 13-:26991141-26991886   |
| 19438 | MMT00012923   |        | 5+:78110124-78223321    |
| 19439 | MMT00019887   |        | 12-:13794702-13795415   |
| 19440 | Anxa9         | 71790  | 3-:95100016-95111054    |
| 19441 | Armc2         | 213402 | 10-:41719615-41731828   |
| 19442 | Rad17         | 19356  | 13-:101387118-101420789 |
| 19443 | Prkab1        | 19079  | 5-:116463596-116474460  |
| 19444 | EG623519      | 623519 | 16+:16968701-16969021   |
| 19445 | Dync1i2       | 13427  | 2+:71050072-71101349    |
| 19446 | 2810453I06Rik | 67238  | 5+:144309640-144325212  |
| 19447 | MMT00004670   |        | 14+:24775161-24827036   |
| 19448 | Olf476        | 258926 | 7+:115111152-115111845  |
| 19449 | Nkx6-3        | 74561  | 8+:24263741-24269111    |
| 19450 | Tspan1        | 66805  | 4-:115835200-115840143  |
| 19451 | Armc7         | 276905 | 11+:115336999-115351783 |
| 19452 | Gm97          | 225923 | 19+:11771551-11786346   |
| 19453 | Cdk2ap2       | 52004  | 19+:4097350-4099017     |
| 19454 | Lce1i         | 76585  | 3-:92581131-92582821    |
| 19455 | Ppp1r10       | 52040  | 17+:36054139-36088876   |
| 19456 | Olf4727       | 258316 | 14+:50746253-50747226   |
| 19457 | MMT00000372   |        | 4+:122935285-122936145  |
| 19458 | Trim55        | 381485 | 3+:19544506-19574506    |
| 19459 | Frk           | 14302  | 10+:34203325-34328382   |
| 19460 | 1700024B05Rik | 75518  | 14+:42522801-42582626   |
| 19461 | Gipc3         | 209047 | 10-:80800627-80806002   |
| 19462 | 4933439C20Rik | 66776  | 11+:3027555-3059995     |
| 19463 | Nol4          | 319211 | 18-:23199643-23286824   |
| 19464 | Klra2         | 16633  | 6-:131169661-131197296  |
| 19465 | Hacl1         | 56794  | 14-:32421045-32454149   |
| 19466 | Pptc7         | 320717 | 5+:122734371-122774286  |
| 19467 | Tmem42        | 66079  | 9+:122930467-122932602  |
| 19468 | Plxna1        | 18844  | 6-:89268850-89312590    |
| 19469 | Zer1          | 227693 | 2-:29955832-29968950    |
| 19470 | Gm239         | 237558 | 10-:116240454-116271700 |
| 19471 | Olf4503       | 259143 | 7+:115686139-115688727  |
| 19472 | Olf4558       | 259097 | 7+:109857774-109858728  |
| 19473 | MMT00055742   |        | 7+:132690752-132692137  |
| 19474 | Foxred1       | 235169 | 9-:35011784-35018585    |
| 19475 | Ddhd1         | 114874 | 14-:46238932-46277686   |
| 19476 | Ift140        | 106633 | 17+:25182047-25236431   |
| 19477 | Map2k2        | 26396  | 10+:80568770-80586627   |
| 19478 | Rnaseh2b      | 67153  | 14+:62950940-62991830   |
| 19479 | Cap2          | 67252  | 13+:46597514-46744249   |
| 19480 | 0610010K06Rik | 71678  | 1_random-:249703-270618 |

|       |               |        |                         |
|-------|---------------|--------|-------------------------|
| 19481 | Stx5a         | 56389  | 19+:8816924-8829557     |
| 19482 | Efhc1         | 71877  | 1+:20941765-20980923    |
| 19483 | Depdc2        | 109294 | 1+:11079742-11279401    |
| 19484 | MMT00054524   |        | 1-:45576787-45577587    |
| 19485 | Vipr2         | 22355  | 12+:117316265-117383841 |
| 19486 | MMT00016573   |        | 6-:17885835-17886847    |
| 19487 | Adh5          | 11532  | 3+:138106106-138118264  |
| 19488 | Rnft2         | 269695 | 5-:118643549-118692992  |
| 19489 | Cldn9         | 56863  | 17-:23819963-23820616   |
| 19490 | MMT00078676   |        | 7+:35036056-35036510    |
| 19491 | Slc9a9        | 331004 | 9+:94570335-94836923    |
| 19492 | Cd96          | 84544  | 16-:46035769-46120222   |
| 19493 | Icosl         | 50723  | 10+:77532203-77542270   |
| 19494 | MMT00008749   |        | 3+:12631296-12631933    |
| 19495 | Pthr2         | 217057 | 11+:86497414-86505952   |
| 19496 | Glyctk        | 235582 | 9-:106055291-106060449  |
| 19497 | Dync2h1       | 110350 | 9-:7140888-7177020      |
| 19498 | Zc3h7a        | 106205 | 16-:11136696-11176382   |
| 19499 | A930001A20Rik | 77127  | 3-:14973810-14974552    |
| 19500 | Tcra-V8       | 21566  | 14+:53549382-53550052   |
| 19501 | Gm711         | 279029 | 2+:26800916-26804847    |
| 19502 | Fbxo24        | 71176  | 5-:138053733-138066308  |
| 19503 | Ptpla         | 30963  | 2-:13948458-13977514    |
| 19504 | Stab2         | 192188 | 10-:86465697-86470759   |
| 19505 | Card14        | 170720 | 11+:119176121-119206501 |
| 19506 | Col11a1       | 12814  | 3+:113733642-113923205  |
| 19507 | Ints10        | 70885  | 8+:71320610-71353306    |
| 19508 | Cuedc2        | 67116  | 19-:46405035-46413114   |
| 19509 | MMT00006904   |        | 5-:130061333-130061450  |
| 19510 | Mysm1         | 320713 | 4-:94613629-94619628    |
| 19511 | Pcdhb21       | 93892  | 18+:37673473-37676017   |
| 19512 | Gtf2ird2      | 114674 | 5+:134659907-134694013  |
| 19513 | Ap2a1         | 11771  | 7-:52155752-52184836    |
| 19514 | Smc1a         | 24061  | X+:148450970-148496510  |
| 19515 | Pcnx          | 54604  | 12+:83019675-83098107   |
| 19516 | Ppfia4        | 68507  | 1-:136193370-136229100  |
| 19517 | AI316807      | 102032 | 8-:23573087-23587279    |
| 19518 | Arfp1         | 99889  | 3-:84300018-84351948    |
| 19519 | BC011248      | 224823 | 17-:46804406-46811204   |
| 19520 | Uck2          | 80914  | 1-:169156218-169215254  |
| 19521 | Ighmbp2       | 20589  | 19-:3259075-3282906     |
| 19522 | Tcf21         | 21412  | 10-:22537084-22539934   |
| 19523 | Sptlc3        | 228677 | 2+:139319907-139463404  |
| 19524 | Rhag          | 19743  | 17+:40948097-40977703   |
| 19525 | Srp19         | 66384  | 18+:34490836-34496250   |
| 19526 | MMT00030710   |        | 6+:70359159-70410058    |
| 19527 | Tfam          | 21780  | 10-:70690686-70700784   |
| 19528 | Zfp503        | 218820 | 14-:22803184-22807084   |
| 19529 | V1ri5         | 171256 | 13+:23228353-23229249   |
| 19530 | Adam24        | 13526  | 8+:41764711-41767480    |
| 19531 | 1700124P09Rik | 76998  | 9-:109668565-109693151  |

|       |               |        |                         |
|-------|---------------|--------|-------------------------|
| 19532 | Med8          | 80509  | 4+:118081984-118087714  |
| 19533 | Gpr62         | 436090 | 9-:106366291-106368225  |
| 19534 | Pkp2          | 67451  | 16+:16213437-16272805   |
| 19535 | MMT00041431   |        | 2+:16191092-16192193    |
| 19536 | Csnk2a2       | 13000  | 8-:97971879-98012445    |
| 19537 | Kcnk12        | 210741 | 17-:88145166-88415053   |
| 19538 | Wdr18         | 216156 | 10+:79422896-79431081   |
| 19539 | Ptpn14        | 19250  | 1+:191610521-191694186  |
| 19540 | Zfp428        | 232969 | 7+:25292204-25300683    |
| 19541 | Glyat         | 107146 | 19+:12708022-12726227   |
| 19542 | Hspb7         | 29818  | 4+:140977642-140980114  |
| 19543 | B3gnt3        | 72297  | 8-:74215796-74217798    |
| 19544 | Cga           | 12640  | 4+:34841027-34854623    |
| 19545 | Rps9          | 76846  | 7+:3655610-3658643      |
| 19546 | Dennd2c       | 329727 | 3+:102935478-102953145  |
| 19547 | MMT00022553   |        | 12+:14501275-14502094   |
| 19548 | Mgst3         | 66447  | 1-:169302514-169323928  |
| 19549 | C330007P06Rik | 77644  | X-:34388540-34414106    |
| 19550 | Zfx           | 22764  | X-:91320427-91368239    |
| 19551 | Rab11fip2     | 74998  | 19-:59982599-60018903   |
| 19552 | Nlgn1         | 192167 | 3-:25594122-26032688    |
| 19553 | Chtf18        | 214901 | 17-:25855975-25864347   |
| 19554 | 6330549D23Rik | 229613 | 3-:96411544-96412703    |
| 19555 | Cthrc1        | 68588  | 15+:38908482-38918665   |
| 19556 | Efna1         | 13636  | 3-:89076136-89083526    |
| 19557 | Cyrr1         | 224405 | 16-:85457480-85550639   |
| 19558 | Syt11         | 229521 | 3-:88551623-88576246    |
| 19559 | Icmt          | 57295  | 4+:151671419-151681759  |
| 19560 | Trmt6         | 66926  | 2-:132629941-132641791  |
| 19561 | Farsa         | 66590  | 8+:87380883-87393157    |
| 19562 | Hdgf          | 15191  | 3+:87710488-87719615    |
| 19563 | Adam18        | 13524  | 8-:25712718-25785225    |
| 19564 | Bcam          | 57278  | 7-:20341487-20355825    |
| 19565 | EG385454      | 385454 | X-:149546947-149548891  |
| 19566 | Kcnj11        | 16514  | 7-:53353912-53355396    |
| 19567 | MMT00053547   |        | 5-:98504396-98507325    |
| 19568 | MMT00005188   |        | 6+:19735571-19739463    |
| 19569 | Mta2          | 23942  | 19+:9016534-9026767     |
| 19570 | Pomc          | 18976  | 12+:3958128-3960467     |
| 19571 | Gabrg1        | 14405  | 5-:71144860-71233458    |
| 19572 | MMT00048292   | 238427 | 12-:115595912-115630427 |
| 19573 | Serpine1      | 18787  | 5-:137537377-137548129  |
| 19574 | Gm1502        | 385120 | 6-:69217839-69218103    |
| 19575 | Ranbp1        | 19385  | 16-:18239908-18248795   |
| 19576 | Stox1         | 216021 | 10-:62128120-62187182   |
| 19577 | Rpa3          | 68240  | 6-:8205938-8209113      |
| 19578 | Aox1          | 11761  | 1+:58086847-58163254    |
| 19579 | Sirt1         | 93759  | 10-:62781808-62801765   |
| 19580 | Spns1         | 73658  | 7-:133513581-133520925  |
| 19581 | Mapk8ip3      | 30957  | 17-:25034498-25073907   |
| 19582 | Tacr1         | 21336  | 6+:82353599-82507224    |

|       |               |           |                         |
|-------|---------------|-----------|-------------------------|
| 19583 | Hcrt          | 15171     | 11-:100623006-100624245 |
| 19584 | Nav2          | 78286     | 7+:56675543-56708328    |
| 19585 | Krtap5-2      | 71623     | 7-:149420493-149437392  |
| 19586 | 1700015G11Rik | 75529     | 7-:59267050-59271089    |
| 19587 | Avpr2         | 12000     | X+:71137440-71139765    |
| 19588 | Ddb1          | 13194     | 19+:10680114-10704306   |
| 19589 | Slc16a9       | 66859     | 10+:69708023-69748699   |
| 19590 | MMT00026015   |           | 4+:82839845-82840950    |
| 19591 | Adrm1         | 56436     | 2+:179906377-179910988  |
| 19592 | Sema4a        | 20351     | 3-:88239883-88265104    |
| 19593 | 4930555F03Rik | 75359     | 8+:50456266-50587338    |
| 19594 | Ren1          | 19701     | 1+:135247268-135256894  |
| 19595 | MMT00056884   |           |                         |
| 19596 | Rltpr         | 234695    | 8+:108210046-108212440  |
| 19597 | MMT00001011   |           |                         |
| 19598 | 1110021J02Rik | 68597     | 17-:29840853-29842916   |
| 19599 | Mobkl2c       | 100465    | 4+:115503827-115506440  |
| 19600 | MMT00065551   |           | 10-:73153004-73193363   |
| 19601 | Mpp6          | 56524     | 6+:50060375-50148579    |
| 19602 | Il5ra         | 16192     | 6-:106660374-106699031  |
| 19603 | Grsf1         | 231413    | 5-:89088265-89104696    |
| 19604 | MMT00033363   |           | 1+:67632141-67633055    |
| 19605 | EG631906      | 631906    | 10-:62884149-62884487   |
| 19606 | Egr2          | 13654     | 10+:67000626-67004935   |
| 19607 | Birc3         | 11796     | 9-:7848702-7873024      |
| 19608 | Syt9          | 60510     | 7+:114514504-114650132  |
| 19609 | Cage1         | 71213     | 13-:38111033-38128996   |
| 19610 | Igh-VX24      | 195176    | 12-:114849374-114849828 |
| 19611 | Cog8          | 97484     | 8-:109572608-109580557  |
| 19612 | MMT00028216   |           | 13+:68995359-68996138   |
| 19613 | EG546387      | 546387    | X-:146657131-146657879  |
| 19614 | MMT00075215   |           | 17-:34906777-34908179   |
| 19615 | Bai3          | 210933    | 1-:25280984-25285732    |
| 19616 | Spag17        | 74362     | 3+:99910630-99946683    |
| 19617 | MMT00013143   |           |                         |
| 19618 | Snx6          | 72183     | 12-:55847343-55896649   |
| 19619 | Zfp438        | 240186    | 18-:5210033-5334438     |
| 19620 | Zfand2a       | 100494    | 5-:139947170-139960342  |
| 19621 | Cldn5         | 12741     | 16+:18777067-18778352   |
| 19622 | Bdh2          | 69772     | 3+:134944189-134967387  |
| 19623 | Myl7          | 17898     | 11-:5796638-5798782     |
| 19624 | Olf378        | 259026    | 11-:73238539-73239483   |
| 19625 | MMT00052369   | 100043120 | 19-:61308300-61308841   |
| 19626 | 2010305A19Rik | 69893     | 4+:108000751-108011404  |
| 19627 | Ilvbl         | 216136    | 10+:78037737-78047243   |
| 19628 | Impad1        | 242291    | 4-:4689638-4720241      |
| 19629 | Smarcd3       | 66993     | 5-:24098442-24107766    |
| 19630 | MMT00054560   |           | 14-:42132197-42137638   |
| 19631 | Nsmce1        | 67711     | 7-:132611167-132634957  |
| 19632 | Eif2b3        | 108067    | 4+:116692043-116759911  |
| 19633 | Gm694         | 277744    | 4-:140988587-140992031  |

|       |               |        |                         |
|-------|---------------|--------|-------------------------|
| 19634 | Slc34a3       | 142681 | 2-:25084412-25089757    |
| 19635 | Mmp23         | 26561  | 4-:155024764-155027493  |
| 19636 | Sprr1b        | 20754  | 3-:92240845-92242685    |
| 19637 | Tbx21         | 57765  | 11-:96959387-96976589   |
| 19638 | Samd3         | 268288 | 10+:25983587-25991977   |
| 19639 | Galr3         | 14429  | 15+:78872361-78873901   |
| 19640 | Tph2          | 216343 | 10-:114516768-114619955 |
| 19641 | Rps14         | 20044  | 18+:60936056-60938151   |
| 19642 | Hdac7         | 56233  | 15-:97624073-97661808   |
| 19643 | Ttc29         | 73301  | 8+:80769997-80857681    |
| 19644 | MMT00042763   | 65115  | 8+:106694787-106743021  |
| 19645 | Il12rb2       | 16162  | 6-:67242011-67326131    |
| 19646 | MMT00047746   |        | X+:8231584-8232131      |
| 19647 | Cort          | 12854  | 4-:148499301-148500771  |
| 19648 | Nlrp4a        | 243880 | 7+:27229230-27261161    |
| 19649 | Cpsf3         | 54451  | 12+:21292304-21320632   |
| 19650 | MMT00081007   |        | X-:142036241-142036860  |
| 19651 | Thex1         | 67276  | 8-:36530292-36558587    |
| 19652 | Fbxo32        | 67731  | 15-:58011633-58046429   |
| 19653 | Obfc2b        | 69917  | 10-:127838733-127846888 |
| 19654 | D930017K21Rik | 214685 | 15-:81514750-81526429   |
| 19655 | 3110040N11Rik | 67290  | 7-:88926879-88934317    |
| 19656 | Sox17         | 20671  | 1-:4481793-4486444      |
| 19657 | MMT00026309   |        | 9-:17902456-18060609    |
| 19658 | Cldnd2        | 74276  | 7+:50696149-50698697    |
| 19659 | MMT00005649   |        | X+:98899617-98921323    |
| 19660 | Gkap1         | 56278  | 13-:58334815-58357204   |
| 19661 | Epb4.1l2      | 13822  | 10+:25187897-25243320   |
| 19662 | Dlgap3        | 242667 | 4+:126870311-126914238  |
| 19663 | Tnfrsf22      | 79202  | 7-:150824191-150835503  |
| 19664 | Chrb3         | 108043 | 8+:28479253-28508452    |
| 19665 | MMT00034233   |        | 18-:59989185-60015084   |
| 19666 | MMT00012505   |        | 3+:112394525-112395469  |
| 19667 | Vps37d        | 194309 | 5-:135549669-135554069  |
| 19668 | Zfp509        | 75079  | 5-:38590835-38607860    |
| 19669 | Nub1          | 53312  | 5+:24191792-24216194    |
| 19670 | Fbxl14        | 101358 | 6+:119429803-119432631  |
| 19671 | Upp2          | 76654  | 2+:58607351-58643648    |
| 19672 | Cldn19        | 242653 | 4+:118928004-118932461  |
| 19673 | Zc3h12c       | 244871 | 9-:51923511-51952300    |
| 19674 | MMT00030712   | 16098  | 6+:70468234-70468839    |
| 19675 | Rer1          | 67830  | 4-:154448220-154460406  |
| 19676 | V1ra6         | 113848 | 6-:89794590-89795531    |
| 19677 | Nlrp2         | 232827 | 7-:5250235-5302638      |
| 19678 | Scn11a        | 24046  | 9-:119662884-119734574  |
| 19679 | Il17d         | 239114 | 14+:58144026-58162002   |
| 19680 | Gm1420        | 546213 | 6-:69598810-69701304    |
| 19681 | Fbxw16        | 320083 | 9-:109334832-109342213  |
| 19682 | Elmo1         | 140580 | 13+:20277293-20697167   |
| 19683 | Cox6c         | 12864  | 15-:35861737-35867917   |
| 19684 | A030005K14Rik | 77921  | 1-:83054860-83055950    |

|       |               |        |                         |
|-------|---------------|--------|-------------------------|
| 19685 | MMT00009602   |        | 11-:117179232-117202029 |
| 19686 | Olfr1098      | 258842 | 2-:86762741-86763665    |
| 19687 | Mbd3l1        | 73503  | 9+:18282838-18289736    |
| 19688 | Fap           | 14089  | 2-:62339001-62412078    |
| 19689 | 1110032A13Rik | 68731  | 18-:80388998-80397398   |
| 19690 | Arf5          | 11844  | 6+:28373639-28376499    |
| 19691 | Olfr1239      | 258972 | 2-:89257651-89258568    |
| 19692 | rp9           | 55934  | 9-:22252780-22272767    |
| 19693 | MMT00038173   |        | 5+:13879195-13880101    |
| 19694 | Grb14         | 50915  | 2-:64750541-64860823    |
| 19695 | C330024D12Rik | 78444  | 7-:75381569-75409121    |
| 19696 | Thoc4         | 21681  | 11-:120455829-120459679 |
| 19697 | Nek1          | 18004  | 8+:63472015-63610140    |
| 19698 | Sema3c        | 20348  | 5+:17080681-17233655    |
| 19699 | Rnf180        | 71816  | 13-:105921527-106084900 |
| 19700 | E030011K20Rik | 208613 | 3-:27764987-27785416    |
| 19701 | 9930021J17Rik | 229488 | 3-:85463981-85621216    |
| 19702 | MMT00053066   |        | 3+:9392258-9392728      |
| 19703 | Dync1i1       | 13426  | 6+:5675811-5978037      |
| 19704 | Ccdc90b       | 66365  | 7+:99709701-99721160    |
| 19705 | H2-T3         | 15043  | 17-:36323516-36327073   |
| 19706 | Vrk1          | 22367  | 12+:107274754-107313246 |
| 19707 | Timm44        | 21856  | 8-:4259737-4275895      |
| 19708 | Ly6a          | 110454 | 15-:74825416-74828330   |
| 19709 | 1-Sep         | 54204  | 7-:134357963-134361967  |
| 19710 | Olfr799       | 258929 | 10+:129084185-129085119 |
| 19711 | Eps8          | 13860  | 6-:137426697-137597790  |
| 19712 | 3010026O09Rik | 68067  | 11+:49988352-50013611   |
| 19713 | BC048599      | 232717 | 6-:40845261-40847865    |
| 19714 | Fgf14         | 14169  | 14-:124379567-124591743 |
| 19715 | St3gal4       | 20443  | 9-:34855018-34863174    |
| 19716 | Rpp30         | 54364  | 19+:36158226-36179106   |
| 19717 | Ccdc27        | 381580 | 4-:153400474-153402237  |
| 19718 | 2610002D18Rik | 69885  | 4+:134077384-134079839  |
| 19719 | EG634650      | 634650 | 5-:105752643-105775478  |
| 19720 | Cyp26c1       | 546726 | 19+:37760169-37767771   |
| 19721 | Mfsd7         | 243197 | 5-:108871140-108877915  |
| 19722 | Pvrl1         | 58235  | 9+:43612803-43614851    |
| 19723 | Pfkfb1        | 18639  | X+:147028925-147078423  |
| 19724 | Lancl2        | 71835  | 6+:57652629-57688473    |
| 19725 | Dcp2          | 70640  | 18+:44540156-44577605   |
| 19726 | Erp29         | 67397  | 5-:121894764-121902388  |
| 19727 | Ttr           | 22139  | 18+:20823913-20832818   |
| 19728 | 1110007L15Rik | 67604  | 5+:139728328-139746004  |
| 19729 | Wdr27         | 71682  | 17-:14966522-15028730   |
| 19730 | Mamdc2        | 71738  | 19-:23377098-23522931   |
| 19731 | Olfr275       | 258857 | 4+:52838270-52839228    |
| 19732 | MMT00024414   | 73980  | 1+:54738570-54793660    |
| 19733 | MMT00044118   |        | 17-:66576845-66577348   |
| 19734 | Dchs1         | 233651 | 7-:112901503-112921713  |
| 19735 | Zfp579        | 68490  | 7-:4944452-4947716      |

|       |               |        |                         |
|-------|---------------|--------|-------------------------|
| 19736 | MMT00014681   |        | 13+:41735892-41736716   |
| 19737 | Enpp1         | 18605  | 10-:24361216-24431908   |
| 19738 | Lgals3bp      | 19039  | 11-:118254065-118263245 |
| 19739 | Cmpk1         | 66588  | 4-:114633244-114659751  |
| 19740 | Gpr98         | 110789 | 13-:81234067-81581613   |
| 19741 | Acad10        | 71985  | 5-:122048298-122110499  |
| 19742 | Cdc2l1        | 12537  | 4+:154998991-155024041  |
| 19743 | Atg16l1       | 77040  | 1+:89652672-89688997    |
| 19744 | Acy3          | 71670  | 19+:3986572-3990003     |
| 19745 | MMT00047549   |        | 1+:125101729-125184245  |
| 19746 | Gira2         | 237213 | X-:161567872-161765400  |
| 19747 | Spr           | 20751  | 6-:85083679-85087812    |
| 19748 | Cpa2          | 232680 | 6+:30491656-30514477    |
| 19749 | Ric8          | 101489 | 7+:148043301-148049041  |
| 19750 | Tceb3         | 27224  | 4-:135561323-135577548  |
| 19751 | Kbtbd5        | 72330  | 9+:121686807-121692937  |
| 19752 | MMT00038877   |        | 13+:62486476-62486778   |
| 19753 | Nrg3          | 18183  | 14-:39183612-40286376   |
| 19754 | C130039O16Rik | 238317 | 12+:85520899-85534804   |
| 19755 | Eef1g         | 67160  | 19+:9041684-9052965     |
| 19756 | Pex16         | 18633  | 2+:92215654-92221373    |
| 19757 | Fkbp5         | 14229  | 17-:28536866-28578001   |
| 19758 | Snx1          | 56440  | 9-:65935945-65972693    |
| 19759 | MMT00001545   |        | 13-:78512247-78518319   |
| 19760 | Ovol1         | 18426  | 19-:5549761-5560584     |
| 19761 | Senp5         | 320213 | 16-:31960388-31961948   |
| 19762 | Pih1d1        | 68845  | 7+:52409767-52415434    |
| 19763 | Acp2          | 11432  | 2+:91042983-91052296    |
| 19764 | Nrm           | 106582 | 17+:35998262-36002344   |
| 19765 | Serpina3a     | 74069  | 12+:105350933-105360106 |
| 19766 | Slc26a4       | 23985  | 12-:32204684-32244834   |
| 19767 | Etv6          | 14011  | 6+:133985957-134216777  |
| 19768 | Eef1b2        | 55949  | 1+:63223738-63226226    |
| 19769 | Pomp          | 66537  | 5+:148672247-148687354  |
| 19770 | MMT00051974   |        | 13+:75337041-75337488   |
| 19771 | Fbp1          | 14121  | 13-:62966113-62989596   |
| 19772 | Gnmt          | 14711  | 17-:46862614-46866114   |
| 19773 | EG668838      | 668838 | 7-:54076232-54076871    |
| 19774 | Arhgap6       | 11856  | X+:165234152-165234743  |
| 19775 | Klhl31        | 244923 | 9+:77497810-77503818    |
| 19776 | Vipr1         | 22354  | 9+:121551966-121578682  |
| 19777 | Lrit1         | 239037 | 14+:37868020-37878123   |
| 19778 | OTTMUSG000000 | 624860 | 11+:58248017-58253559   |
| 19779 | Itga8         | 241226 | 2-:12029555-12223706    |
| 19780 | MMT00052614   |        | 12-:79356420-79356718   |
| 19781 | Muc6          | 353328 | 7-:148820338-148838208  |
| 19782 | Serpina1b     | 20701  | 12-:104952883-104971924 |
| 19783 | Mybl2         | 17865  | 2+:162880422-162909405  |
| 19784 | Polr2d        | 69241  | 18+:31948812-31956296   |
| 19785 | Slc25a44      | 229517 | 3-:88214420-88229022    |
| 19786 | Tpp2          | 22019  | 1+:43990851-44059816    |

|       |               |        |                         |
|-------|---------------|--------|-------------------------|
| 19787 | Tmem9b        | 56786  | 7-:116879349-116895777  |
| 19788 | Btbd12        | 52864  | 16-:3979148-3989119     |
| 19789 | Slc31a1       | 20529  | 4+:62021763-62052799    |
| 19790 | Polg2         | 50776  | 11-:106629619-106640756 |
| 19791 | E2f3          | 13557  | 13-:30001287-30077289   |
| 19792 | Hook1         | 77963  | 4+:95633987-95689115    |
| 19793 | Loxhd1        | 240411 | 18+:77669805-77680994   |
| 19794 | Rgs2          | 19735  | 1-:145848226-145851263  |
| 19795 | MMT00065928   |        | 16+:23514341-23515173   |
| 19796 | MMT00006746   |        | 8-:10808730-10858119    |
| 19797 | Coq9          | 67914  | 8+:97362295-97378793    |
| 19798 | Tnk2          | 51789  | 16+:32644946-32683578   |
| 19799 | 9530008L14Rik | 109254 | 13-:41859501-41942986   |
| 19800 | 4921524L21Rik | 70901  | 18+:6619300-6638964     |
| 19801 | Chst14        | 72136  | 2+:118752296-118754315  |
| 19802 | E130309D02Rik | 231868 | 5-:144062600-144077080  |
| 19803 | BC003993      | 80744  | 2-:77733824-77784223    |
| 19804 | Rela          | 19697  | 19+:5637774-5648130     |
| 19805 | Pfkfb2        | 18640  | 1-:132594129-132612310  |
| 19806 | 4732429D16Rik | 217305 | 11-:114843762-114851200 |
| 19807 | Eea1          | 216238 | 10+:95436612-95508144   |
| 19808 | Fetub         | 59083  | 16+:22920373-22939824   |
| 19809 | Cpvl          | 71287  | 6-:53823272-53928668    |
| 19810 | BC021395      | 225283 | 18-:24646450-24688620   |
| 19811 | Cel           | 12613  | 2-:28411339-28418882    |
| 19812 | Armcx2        | 67416  | X-:131338685-131343535  |
| 19813 | Defcr-rs1     | 13218  | 8-:22235560-22235729    |
| 19814 | 4930458L03Rik | 78124  | 13+:65018862-65138977   |
| 19815 | Tnr           | 21960  | 1+:161780177-161854606  |
| 19816 | Olfr905       | 258800 | 9+:38280333-38281264    |
| 19817 | Olfr38        | 258988 | 6+:42712052-42713005    |
| 19818 | Cndp1         | 338403 | 18-:84782142-84819417   |
| 19819 | Thy1          | 21838  | 9+:43854064-43855533    |
| 19820 | Med30         | 69790  | 15+:52543999-52561986   |
| 19821 | Vangl2        | 93840  | 1-:173934730-173957164  |
| 19822 | MMT00004881   |        | 4-:105046460-105047615  |
| 19823 | Gp5           | 14729  | 16-:30308238-30309940   |
| 19824 | Cetn3         | 12626  | 13+:81922339-81935694   |
| 19825 | Tssk2         | 22115  | 16+:17898806-17900116   |
| 19826 | Nanp          | 67311  | 2-:150855432-150865091  |
| 19827 | MMT00003831   |        | 19-:50614298-50615375   |
| 19828 | Apoa1         | 11806  | 9+:46036792-46038547    |
| 19829 | Zfp238        | 30928  | 1+:179375951-179380891  |
| 19830 | Irf4          | 16364  | 13+:30841126-30858794   |
| 19831 | Fgd6          | 13998  | 10+:93498743-93506365   |
| 19832 | MMT00062321   | 634933 | 12+:18371645-18372838   |
| 19833 | Ddah2         | 51793  | 17+:35196045-35199038   |
| 19834 | Jarid1d       | 20592  | Y+:234215-280253        |
| 19835 | Iars2         | 381314 | 1-:187108096-187121466  |
| 19836 | Prkrir        | 72981  | 7+:105851892-105866754  |
| 19837 | Angpt4        | 11602  | 2+:151737067-151770389  |



|       |               |        |                         |
|-------|---------------|--------|-------------------------|
| 19838 | Rabl3         | 67657  | 16+:37539985-37572468   |
| 19839 | EG269105      | 269105 | 1+:15057153-15057543    |
| 19840 | Kcnip3        | 56461  | 2-:127282239-127347076  |
| 19841 | Ccdc84        | 382073 | 9-:44218242-44226120    |
| 19842 | B230315N10Rik | 237411 | 10-:81687603-81704015   |
| 19843 | Rbm45         | 241490 | 2+:76208113-76221822    |
| 19844 | Ngf           | 18049  | 3+:102317877-102324928  |
| 19845 | MMT00011958   |        | 10+:67038626-67049136   |
| 19846 | Olfr62        | 18363  | 4+:118338123-118339070  |
| 19847 | Vax2          | 24113  | 6+:83661257-83688298    |
| 19848 | EG621322      | 621322 | X+:131805391-131808752  |
| 19849 | Dusp18        | 75219  | 11+:3795237-3799320     |
| 19850 | MMT00036391   |        | 6+:140368645-140369175  |
| 19851 | Gnb4          | 14696  | 3-:32483976-32501063    |
| 19852 | 1700007106Rik | 69306  | 11-:32422750-32427579   |
| 19853 | Uqcr          | 66594  | 10-:79865743-79869510   |
| 19854 | Kcnj14        | 211480 | 7-:53071837-53080117    |
| 19855 | Btbd2         | 208198 | 10-:80105369-80108153   |
| 19856 | Olfr1444      | 258697 | 19+:12936266-12937226   |
| 19857 | Rab1b         | 76308  | 19-:5099206-5106996     |
| 19858 | Lmbr1         | 56873  | 5-:29691715-29704732    |
| 19859 | Fbxo46        | 243867 | 7+:19717039-19723603    |
| 19860 | Tm9sf3        | 107358 | 19-:41288284-41338426   |
| 19861 | Lrrc7         | 242274 | 3-:157747339-158115753  |
| 19862 | Drap1         | 66556  | 19-:5422825-5424916     |
| 19863 | Olfr65        | 18365  | 7+:111051970-111056050  |
| 19864 | Olfr1406      | 258758 | 1-:175113630-175114563  |
| 19865 | MMT00005074   |        | 14+:53562438-53695496   |
| 19866 | Uso1          | 56041  | 5+:92566965-92631832    |
| 19867 | Timm22        | 56322  | 11+:76220692-76228073   |
| 19868 | Was           | 22376  | X-:7658591-7667578      |
| 19869 | MMT00038937   |        | 13-:64725573-64726139   |
| 19870 | Pcdhb15       | 93886  | 18+:37633370-37635729   |
| 19871 | MMT00065790   |        | 14-:15280277-15281554   |
| 19872 | D430028G21Rik | 228607 | 2+:131059873-131073758  |
| 19873 | Olfr1242      | 258970 | 2-:89333548-89334467    |
| 19874 | Prmt1         | 15469  | 7-:52232127-52241702    |
| 19875 | Sos1          | 20662  | 17-:80796788-80879278   |
| 19876 | 6030443O07Rik | 226151 | 19+:45005571-45058273   |
| 19877 | Ccnb1         | 268697 | 13-:101553526-101556357 |
| 19878 | Gm561         | 228715 | 2+:144419791-144421103  |
| 19879 | Slc5a11       | 233836 | 7+:130358379-130416764  |
| 19880 | MMT00046829   |        | 17+:25841993-25842766   |
| 19881 | Tle3          | 21887  | 9+:61221478-61264783    |
| 19882 | Prepl         | 213760 | 17-:85462817-85489561   |
| 19883 | MMT00033230   |        | 7+:33576622-33577703    |
| 19884 | BC067068      | 216292 | 10-:105200244-105260366 |
| 19885 | AI427122      | 102502 | 9-:95653063-95745698    |
| 19886 | MMT00015235   |        | 13+:66699587-66699622   |
| 19887 | Hba-x         | 15126  | 11+:32176663-32178006   |
| 19888 | Cadm3         | 94332  | 1-:175266130-175297770  |

|       |               |        |                         |
|-------|---------------|--------|-------------------------|
| 19889 | Ide           | 15925  | 19-:37344919-37405103   |
| 19890 | Tmem119       | 231633 | 5-:114243738-114250361  |
| 19891 | Azi1          | 12009  | 11-:119925749-119948132 |
| 19892 | EG546164      | 546164 | 9-:115346777-115347723  |
| 19893 | MMT00026027   |        | 12-:114411096-114411408 |
| 19894 | 4930488B01Rik | 75036  | 7+:17548571-17549954    |
| 19895 | Zfp612        | 234725 | 8+:112603662-112615273  |
| 19896 | MMT00006823   |        |                         |
| 19897 | Chsy3         | 78923  | 18+:59568537-59570928   |
| 19898 | Vps13b        | 666173 | 15+:35501833-35572708   |
| 19899 | Senp2         | 75826  | 16+:22009578-22047019   |
| 19900 | Serinc5       | 218442 | 13+:93430972-93481907   |
| 19901 | 1700001P01Rik | 72215  | 11-:97632793-97637195   |
| 19902 | Spats2        | 72572  | 15+:98957275-99042896   |
| 19903 | 1700041C23Rik | 67319  | 9+:57023079-57033910    |
| 19904 | Ltb           | 16994  | 17+:35331466-35333247   |
| 19905 | Ccnd3         | 12445  | 17+:47730496-47736635   |
| 19906 | Tfpi          | 21788  | 2-:84280878-84314152    |
| 19907 | Spata19       | 75469  | 9+:27204405-27209295    |
| 19908 | Olfr676       | 259099 | 7+:112183713-112184665  |
| 19909 | Sppl3         | 74585  | 5+:115461219-115548801  |
| 19910 | St6galnac1    | 20445  | 11-:116626339-116636821 |
| 19911 | MMT00045665   |        | 11+:22286427-22286910   |
| 19912 | Inpp1         | 16329  | 1-:52846265-52874381    |
| 19913 | 1810030J14Rik | 66289  | 1+:176260648-176263004  |
| 19914 | Acaca         | 107476 | 11+:84008939-84159590   |
| 19915 | Grp           | 225642 | 18+:66032453-66046244   |
| 19916 | Mxd1          | 17119  | 6-:86600520-86619048    |
| 19917 | Nek2          | 18005  | 1+:193645440-193656921  |
| 19918 | MMT00061975   | 633269 | 4-:122272938-122282148  |
| 19919 | Unc5b         | 107449 | 10-:60227343-60294329   |
| 19920 | Dph2          | 67728  | 4-:117561248-117564636  |
| 19921 | Stxbp5l       | 207227 | 16-:37115917-37385025   |
| 19922 | MMT00048460   |        | 17+:86174726-86284916   |
| 19923 | Capn3         | 12335  | 2+:120289608-120330234  |
| 19924 | Ubiad1        | 71707  | 4-:147808605-147818860  |
| 19925 | Arsa          | 11883  | 15-:89302907-89307203   |
| 19926 | Tmem22        | 245020 | 9-:100452797-100475816  |
| 19927 | Npy6r         | 18169  | 18+:44435167-44436283   |
| 19928 | Olfr1123      | 258347 | 2+:87258206-87259177    |
| 19929 | MMT00079667   |        | 13-:82517908-82518445   |
| 19930 | Gapdh         | 14433  | 6-:125112004-125115332  |
| 19931 | Lsamp         | 268890 | 16+:42134418-42175073   |
| 19932 | MMT00075591   |        | 3+:68649921-68651817    |
| 19933 | Pi16          | 74116  | 17+:29456186-29464894   |
| 19934 | MMT00079286   |        |                         |
| 19935 | Zdhhc11       | 71164  | 13+:74101296-74130437   |
| 19936 | Egf           | 13645  | 3-:129380495-129458234  |
| 19937 | 2410018G20Rik | 72083  | 16-:15848533-15863415   |
| 19938 | 4930547C10Rik | 68274  | 4+:52609145-52625035    |
| 19939 | Serpib9b      | 20706  | 13+:33119282-33132425   |

|       |               |           |                         |
|-------|---------------|-----------|-------------------------|
| 19940 | Eomes         | 13813     | 9+:118387329-118395238  |
| 19941 | 1700080E11Rik | 73532     | 9-:105045673-105047412  |
| 19942 | Mtmr1         | 53332     | X+:68617964-68672371    |
| 19943 | 1700013N18Rik | 73318     | 5+:108259271-108260361  |
| 19944 | Adad1         | 21744     | 3+:36962592-37010433    |
| 19945 | MMT00036313   |           | 9+:106267972-106270684  |
| 19946 | Elf5          | 13711     | 2+:103264233-103291142  |
| 19947 | Fcrla         | 98752     | 1-:172848025-172857671  |
| 19948 | MMT00019088   |           | 1+:103282750-103283166  |
| 19949 | Tubgcp2       | 74237     | 7-:147181894-147222165  |
| 19950 | Psmg1         | 56088     | 16-:96201541-96212510   |
| 19951 | Tmem63b       | 224807    | 17-:45797125-45823856   |
| 19952 | Tlcd1         | 68385     | 11+:77992267-77994273   |
| 19953 | 4931429L15Rik | 74361     | 9-:46111449-46124810    |
| 19954 | Abcd3         | 19299     | 3-:121463149-121518036  |
| 19955 | Cbx2          | 12416     | 11+:118884275-118890649 |
| 19956 | Mycs          | 17870     | X-:5044848-5046142      |
| 19957 | MMT00013660   |           | 4+:98769562-98770251    |
| 19958 | Rab38         | 72433     | 7+:95578840-95639983    |
| 19959 | 1700052H01Rik | 73462     | 3+:41158066-41171669    |
| 19960 | MMT00015578   |           | 5+:10558352-10559434    |
| 19961 | E430025E21Rik | 223593    | 15-:59163014-59201739   |
| 19962 | Eno2          | 13807     | 6-:124710382-124719552  |
| 19963 | Pr17c1        | 67505     | 13-:27865363-27870856   |
| 19964 | Ndufa9        | 66108     | 6-:126771972-126799143  |
| 19965 | MMT00003301   |           | 6+:42750840-42751439    |
| 19966 | Thap4         | 67026     | 1-:95601968-95647652    |
| 19967 | MMT00003872   |           | 6+:41085165-41085621    |
| 19968 | EG546337      | 546337    | X-:76100636-76103634    |
| 19969 | Dlx2          | 13392     | 2-:71381465-71384798    |
| 19970 | Mrpl36        | 94066     | 13+:73468456-73469625   |
| 19971 | B930046C15Rik | 544998    | 14+:3518337-3539523     |
| 19972 | Copg2         | 54160     | 6-:30698411-30846697    |
| 19973 | 5730507C01Rik | 236366    | 12+:18521298-18572254   |
| 19974 | Pax6          | 18508     | 2+:105516098-105537498  |
| 19975 | 1200015N20Rik | 71721     | 10+:70015790-70021477   |
| 19976 | Cyp4a10       | 13117     | 4+:115192187-115193802  |
| 19977 | Pgk1          | 18655     | X+:103382589-103390117  |
| 19978 | Rspo1         | 192199    | 4+:124663673-124686343  |
| 19979 | Inha          | 16322     | 1+:75503822-75506736    |
| 19980 | MMT00003169   |           | 6+:43072291-43073249    |
| 19981 | MMT00032188   |           | 1+:165553844-165554840  |
| 19982 | ENSMUSG00000  | 100038711 | 17-:86897071-86904579   |
| 19983 | Cox8a         | 12868     | 19-:7289692-7292025     |
| 19984 | Elk4          | 13714     | 1+:133904452-133920238  |
| 19985 | Gstcd         | 67553     | 3-:132644739-132747968  |
| 19986 | MMT00026797   |           | 16+:47075750-47076054   |
| 19987 | Tspan13       | 66109     | 12-:36741143-36769003   |
| 19988 | Shroom2       | 110380    | X-:149046924-149204442  |
| 19989 | Pip5kl1       | 227733    | 2+:32433628-32439293    |
| 19990 | 4921515J06Rik | 66715     | 3+:108743029-108763690  |

|       |               |        |                         |
|-------|---------------|--------|-------------------------|
| 19991 | MMT00032841   |        | 18:-9696469-9726641     |
| 19992 | Trpm1         | 17364  | 7+:71330475-71369634    |
| 19993 | Vps33b        | 233405 | 7+:87414579-87436466    |
| 19994 | Depdc5        | 277854 | 5+:33206416-33298949    |
| 19995 | Pwp1          | 103136 | 10+:85334609-85351841   |
| 19996 | Ankrd27       | 245886 | 7+:36371271-36394113    |
| 19997 | lkbke         | 56489  | 1:-133151177-133173153  |
| 19998 | Prl2a1        | 56635  | 13+:27893523-27900584   |
| 19999 | lft122        | 81896  | 6+:115724628-115876712  |
| 20000 | MMT00017707   |        | 13:-101783039-101783970 |
| 20001 | BC037034      | 231807 | 5:-138700887-138705060  |
| 20002 | 4932414N04Rik | 75721  | 2+:68495472-68586585    |
| 20003 | Nek10         | 238944 | 14+:15683273-15694202   |
| 20004 | 1190005F20Rik | 98685  | 1+:153275792-153305294  |
| 20005 | Dpy19l3       | 233115 | 7:-36514704-36539390    |
| 20006 | Epha7         | 13841  | 4+:28740301-28893966    |
| 20007 | Rhbdf1        | 13650  | 11:-32109586-32122198   |
| 20008 | Anapc5        | 59008  | 5:-123237735-123271294  |
| 20009 | Acot8         | 170789 | 2:-164618267-164630372  |
| 20010 | Ccdc144b      | 241943 | 3:-35916595-35952455    |
| 20011 | EG667441      | 667441 | 14+:53200268-53200931   |
| 20012 | Gm336         | 240539 | 19:-11165060-11166907   |
| 20013 | MMT00009595   |        | 14+:28527566-28529147   |
| 20014 | Bbs12         | 241950 | 3+:37201776-37235295    |
| 20015 | Il28ra        | 242700 | 4+:135242440-135259784  |
| 20016 | MMT00051462   |        | 9:-83859587-83860671    |
| 20017 | MMT00006294   |        | 17+:36294836-36296988   |
| 20018 | Ficd          | 231630 | 5+:114186958-114189139  |
| 20019 | Qdpr          | 110391 | 5:-45825813-45841419    |
| 20020 | Clgn          | 12745  | 8+:85913776-85950729    |
| 20021 | Igsf9b        | 235086 | 9+:27116988-27142318    |
| 20022 | Mei1          | 74369  | 15+:81912904-81957244   |
| 20023 | Myom3         | 242702 | 4+:135331459-135370572  |
| 20024 | Lrrc32        | 434215 | 7+:105642731-105650338  |
| 20025 | Crmp1         | 12933  | 5+:37637027-37682755    |
| 20026 | Lrrc29        | 234684 | 8:-107836166-107850154  |
| 20027 | Tcrb-J        | 21580  | 6+:41168089-41168564    |
| 20028 | Ece2          | 107522 | 16+:20611673-20619080   |
| 20029 | Mamld1        | 333639 | X+:68354656-68408087    |
| 20030 | Ncam1         | 17967  | 9:-49325611-49606834    |
| 20031 | Loxl3         | 16950  | 6+:82984198-83001317    |
| 20032 | Aaas          | 223921 | 15:-102169072-102186397 |
| 20033 | MMT00018272   |        | 17:-25463496-25464477   |
| 20034 | 9030409G11Rik | 71529  | 4:-141660706-141673118  |
| 20035 | Zbtb46        | 72147  | 2:-181145254-181194131  |
| 20036 | Olfrl342      | 258708 | 4:-118362108-118363055  |
| 20037 | Extl3         | 54616  | 14:-65673184-65697025   |
| 20038 | MMT00008174   |        | 11:-79184763-79185440   |
| 20039 | Trpc4         | 22066  | 3+:53960025-54122389    |
| 20040 | MMT00056557   |        | 2:-8962276-8978376      |
| 20041 | Fat4          | 329628 | 3+:38785862-38908252    |

|       |               |        |                         |
|-------|---------------|--------|-------------------------|
| 20042 | Zfp281        | 226442 | 1+:138521522-138526627  |
| 20043 | Grin1         | 14810  | 2-:25147767-25174499    |
| 20044 | Hnrnpa2b1     | 53379  | 6-:51412761-51419771    |
| 20045 | D4Wsu114e     | 28010  | 4-:147234900-147242571  |
| 20046 | MMT00078491   |        | 11-:48564219-48567365   |
| 20047 | Dysf          | 26903  | 6+:83958576-84161058    |
| 20048 | ORF61         | 216157 | 10-:79439865-79446894   |
| 20049 | 2310044G17Rik | 217732 | 12+:88288389-88306304   |
| 20050 | Vps25         | 28084  | 11+:101115062-101119361 |
| 20051 | V1rf5         | 171236 | 17-:21130692-21131650   |
| 20052 | MMT00028786   |        | 16-:20797298-20797855   |
| 20053 | Wnt10a        | 22409  | 1+:74838089-74850747    |
| 20054 | Spcs1         | 69019  | 14-:31813013-31814549   |
| 20055 | Ghrh          | 14601  | 2-:157155236-157159528  |
| 20056 | BC050196      | 384619 | 7-:52448829-52451020    |
| 20057 | BC048651      | 330277 | 6+:29270770-29273964    |
| 20058 | Dnaic1        | 68922  | 4+:41516825-41585578    |
| 20059 | 2610528E23Rik | 66497  | 16-:57302112-57606956   |
| 20060 | MMT00045050   |        | 16-:22639990-22703314   |
| 20061 | EG383436      | 383436 | 19+:12921355-12921695   |
| 20062 | Ankrd50       | 99696  | 3-:38352961-38382091    |
| 20063 | MMT00048272   |        | 17-:9513261-9514294     |
| 20064 | Tpmt          | 22017  | 13-:47120546-47138572   |
| 20065 | Chic1         | 12212  | X+:100551841-100585381  |
| 20066 | Psmc7         | 17463  | 8-:110104280-110112382  |
| 20067 | Parp11        | 101187 | 6+:127403690-127441809  |
| 20068 | 2610204M08Rik | 70435  | 12+:113838204-113853770 |
| 20069 | EG621542      | 621542 | X-:101577307-101577996  |
| 20070 | Med13         | 327987 | 11-:86083911-86145535   |
| 20071 | Ccdc95        | 233875 | 7-:133995704-134005876  |
| 20072 | Zfp110        | 65020  | 7+:13420411-13435917    |
| 20073 | Tcp11l1       | 320554 | 2-:104521912-104552250  |
| 20074 | Eral1         | 57837  | 11-:77886878-77893847   |
| 20075 | MMT00049252   |        | 16+:15451938-15453322   |
| 20076 | Dbnl          | 13169  | 11+:5688532-5700964     |
| 20077 | Ccdc115       | 69668  | 1-:34493514-34501514    |
| 20078 | MMT00023360   |        | 7-:10045692-10045742    |
| 20079 | MMT00019254   |        | 14-:58054555-58055353   |
| 20080 | Eya4          | 14051  | 10-:22825868-23070592   |
| 20081 | Slc19a3       | 80721  | 1-:83010371-83035023    |
| 20082 | Slc38a7       | 234595 | 8-:98360690-98377410    |
| 20083 | ENSMUSG000000 | 69717  | 17-:36278702-36279740   |
| 20084 | Zfp277        | 246196 | 12-:41041634-41172365   |
| 20085 | Lpin2         | 64898  | 17+:71533317-71596419   |
| 20086 | Clk2          | 12748  | 3+:88969004-88980517    |
| 20087 | Cd44          | 12505  | 2-:102651301-102696126  |
| 20088 | Rapgef1       | 107746 | 2+:29475306-29593850    |
| 20089 | MMT00015975   |        |                         |
| 20090 | Slc45a2       | 22293  | 15+:10930567-10958065   |
| 20091 | Cox6b1        | 110323 | 7-:31401992-31411170    |
| 20092 | Matr3         | 17184  | 18+:35731677-35732590   |

|       |               |           |                         |
|-------|---------------|-----------|-------------------------|
| 20093 | Ablim1        | 226251    | 19-:57107760-57290289   |
| 20094 | Olf1133       | 258348    | 2-:87485337-87486278    |
| 20095 | Eif4h         | 22384     | 5-:135095746-135115198  |
| 20096 | Olf1444       | 258650    | 6+ :42878371-42906429   |
| 20097 | Glp2r         | 93896     | 11-:67522834-67584374   |
| 20098 | MMT00046724   |           | Y+:2086608-2097759      |
| 20099 | MMT00019756   |           | 17+:55839839-55840883   |
| 20100 | Guca1b        | 107477    | 17+:47522341-47529914   |
| 20101 | Kcne2         | 246133    | 16+:92292633-92298374   |
| 20102 | Caskin2       | 140721    | 11-:115660692-115673494 |
| 20103 | Car14         | 23831     | 3-:95701723-95708562    |
| 20104 | BC048679      | 210321    | 7-:88639165-88643170    |
| 20105 | Dkk1          | 50722     | 7-:52462894-52467150    |
| 20106 | MMT00030605   |           | 1+:193916252-193923720  |
| 20107 | Nphp1         | 53885     | 2-:127566468-127614590  |
| 20108 | Gins4         | 109145    | 8-:24337310-24348111    |
| 20109 | Aldh1a3       | 56847     | 7-:73536754-73572311    |
| 20110 | Zfp640        | 386626    | 13+:65988506-66699883   |
| 20111 | Pdpx          | 57028     | 15+:78744458-78749947   |
| 20112 | Pla2g10       | 26565     | 16-:13715156-13730678   |
| 20113 | Spata22       | 380709    | 11+:73153717-73159427   |
| 20114 | Cndp2         | 66054     | 18-:84836861-84855015   |
| 20115 | M6pr          | 17113     | 6+:122262252-122266467  |
| 20116 | Ctnna3        | 216033    | 10+:63713445-63723713   |
| 20117 | Syt2          | 20980     | 1+:136637413-136644853  |
| 20118 | Tmem175       | 72392     | 5+:109058899-109075805  |
| 20119 | Polr3h        | 78929     | 15-:81745459-81756639   |
| 20120 | MMT00038870   | 100041430 | 13+:62375676-62376660   |
| 20121 | Asb1          | 65247     | 1+:93437729-93451450    |
| 20122 | Tmem86a       | 67893     | 7+:54306009-54310146    |
| 20123 | Ing2          | 69260     | 8-:48753877-48760041    |
| 20124 | 1700021F05Rik | 67851     | 10-:43244926-43260800   |
| 20125 | Olf1568       | 259095    | 7+:110025635-110026575  |
| 20126 | Aoc3          | 11754     | 11+:101191918-101200737 |
| 20127 | lpo8          | 320727    | 6-:148719206-148779959  |
| 20128 | Frmf5         | 228564    | 2+:121632146-121632664  |
| 20129 | Pdcd1lg2      | 58205     | 19+:29485449-29545642   |
| 20130 | Igh-6         | 16019     | 12-:114507636-114663087 |
| 20131 | Bpgm          | 12183     | 6+:34437329-34454474    |
| 20132 | Cops2         | 12848     | 2-:125657337-125684721  |
| 20133 | Aqp6          | 11831     | 15+:99431838-99434323   |
| 20134 | Ppp1r14c      | 76142     | 10-:6881567-6980391     |
| 20135 | Gramd3        | 107022    | 18+:56559990-56662493   |
| 20136 | Col13a1       | 12817     | 10-:61301245-61441856   |
| 20137 | MMT00022616   |           | 3-:86067157-86067494    |
| 20138 | MMT00054007   |           | 11+:75241420-75242154   |
| 20139 | Plxna4        | 243743    | 6-:32100442-32189537    |
| 20140 | 2010002M12Rik | 112419    | 19-:34693304-34697228   |
| 20141 | Rpl36a        | 19982     | X+:131120224-131122528  |
| 20142 | 2410025L10Rik | 381668    | 5-:110845042-110877894  |
| 20143 | Abhd13        | 68904     | 8+:9977671-9988679      |

|       |               |        |                         |
|-------|---------------|--------|-------------------------|
| 20144 | Gk5           | 235533 | 9+:96019819-96080608    |
| 20145 | Glrp          | 14658  | 3-:80648052-80717456    |
| 20146 | Tm2d1         | 94043  | 4-:98024384-98062761    |
| 20147 | Ybx1          | 22608  | 4-:118950590-118966411  |
| 20148 | Pttg1         | 30939  | 11-:43233766-43239483   |
| 20149 | Cabyr         | 71132  | 18+:12899857-12913645   |
| 20150 | Ptprc         | 19264  | 1-:139959991-140071843  |
| 20151 | MMT00052319   |        | 1-:17930905-17931239    |
| 20152 | Tmc5          | 74424  | 7+:125770667-125818596  |
| 20153 | Notch2        | 18129  | 3+:97817459-97951371    |
| 20154 | Trdn          | 76757  | 10+:33165224-33194477   |
| 20155 | Pnlcd1        | 240023 | 17-:13092398-13101992   |
| 20156 | Apoc2         | 11813  | 7-:20256933-20262111    |
| 20157 | Ets1          | 23871  | 9+:32503878-32562090    |
| 20158 | Slc38a1       | 105727 | 15-:96406706-96454601   |
| 20159 | Ccm2          | 216527 | 11+:6446958-6496745     |
| 20160 | Hist1h1t      | 107970 | 13+:23787679-23788409   |
| 20161 | Capn5         | 12337  | 7-:105272039-105326717  |
| 20162 | MMT00050725   |        | 8-:82634705-82636075    |
| 20163 | Prr7          | 432763 | 13+:55573385-55574512   |
| 20164 | MMT00004320   |        | 4-:34326761-34328211    |
| 20165 | 4933405L10Rik | 71046  | 8+:108232184-108234143  |
| 20166 | 2510012J08Rik | 70312  | 10+:80784016-80788988   |
| 20167 | Zc3h12b       | 547176 | X+:93094764-93123308    |
| 20168 | Aard          | 239435 | 15+:51871563-51877266   |
| 20169 | Ralgds        | 19730  | 2+:28368850-28408590    |
| 20170 | MMT00069463   |        | 14-:77035238-77068783   |
| 20171 | 1700008G05Rik | 75497  | 3-:10245919-10301183    |
| 20172 | 4930502E18Rik | 75013  | X+:51027999-51041617    |
| 20173 | MMT00080451   |        | X+:102677255-102678490  |
| 20174 | Ctnna2        | 12386  | 6-:76831648-77929582    |
| 20175 | Hoxb2         | 103889 | 11+:96214114-96215326   |
| 20176 | Immt          | 76614  | 6+:71781303-71802065    |
| 20177 | Tex101        | 56746  | 7-:25453031-25457061    |
| 20178 | MMT00081394   |        | 6-:52296682-52296997    |
| 20179 | EG238836      | 238836 | 13+:105708758-105709614 |
| 20180 | Hexdc         | 238023 | 11+:121065751-121085469 |
| 20181 | 4930403C10Rik | 73813  | 7+:52977550-52984859    |
| 20182 | MMT00033340   |        | 2-:86165863-86168654    |
| 20183 | MMT00011814   |        | 1+:16043390-16044000    |
| 20184 | D030016E14Rik | 320714 | 8-:48575482-48618808    |
| 20185 | Rpl39l        | 68172  | 16+:10170320-10175004   |
| 20186 | Rit1          | 19769  | 3+:88520838-88533586    |
| 20187 | Gphn          | 268566 | 12-:79326104-79328751   |
| 20188 | Cnr2          | 12802  | 4+:135451467-135476122  |
| 20189 | AV026068      | 102265 | 8-:59793245-59799627    |
| 20190 | MMT00019998   |        | 15+:71140369-71141202   |
| 20191 | Cica5         | 229933 | 3-:144734164-144762122  |
| 20192 | Wnt4          | 22417  | 4+:136833549-136852693  |
| 20193 | Olf771        | 258540 | 10-:128597084-128598038 |
| 20194 | Pnlcd1        | 240023 | 17-:13081596-13088463   |

|       |                |        |                         |
|-------|----------------|--------|-------------------------|
| 20195 | Dpm3           | 68563  | 3+:89063279-89071002    |
| 20196 | Lemd3          | 380664 | 10-:120362821-120415310 |
| 20197 | Igh            | 111507 | 12-:116152786-116153243 |
| 20198 | 1200014J11Rik  | 66874  | 11+:72861381-72893718   |
| 20199 | MMT00005037    |        | 14-:55969009-56026745   |
| 20200 | MMT00057474    |        | X-:73625838-73784724    |
| 20201 | Brd8           | 78656  | 18-:34759483-34784216   |
| 20202 | Elf4           | 56501  | X-:45766415-45777533    |
| 20203 | Olf1448        | 258696 | 19-:12993852-12994797   |
| 20204 | MMT00048665    |        | 14-:12113447-12274276   |
| 20205 | Kpna3          | 16648  | 14-:61986469-62058628   |
| 20206 | Sfi1           | 78887  | 11-:3030954-3036977     |
| 20207 | Lif            | 16878  | 11+:4166430-4174493     |
| 20208 | Bloc1s1        | 14533  | 10-:128357052-128360561 |
| 20209 | 5730557B15Rik  | 67434  | 15-:31226418-31297320   |
| 20210 | Copb1          | 70349  | 7-:121359075-121398133  |
| 20211 | Pdzk1          | 59020  | 3+:96634048-96674848    |
| 20212 | 2300009A05Rik  | 69478  | 9-:63242240-63247060    |
| 20213 | Psd3           | 234353 | 8-:70487856-70586173    |
| 20214 | MMT00082316    |        | 14-:18931766-18932622   |
| 20215 | MMT00044766    |        | 4-:144115810-144117020  |
| 20216 | BC028528       | 229600 | 3-:95688882-95695893    |
| 20217 | Rab3ip         | 216363 | 10-:116342836-116376532 |
| 20218 | MMT00015455    |        | 13+:56291929-56349550   |
| 20219 | MMT00076423    |        | 7-:115094858-115096142  |
| 20220 | MMT00080766    | 664870 | 8-:3841083-3842610      |
| 20221 | Ift57          | 73916  | 16+:49699388-49764223   |
| 20222 | Eef1a2         | 13628  | 2-:180882397-180891488  |
| 20223 | Sc5d           | 235293 | 9-:42062195-42072388    |
| 20224 | Kctd18         | 51960  | 1-:58011946-58075802    |
| 20225 | Kctd17         | 72844  | 15+:78259114-78269732   |
| 20226 | EG623402       | 623402 | 19-:8663012-8663686     |
| 20227 | Kras           | 16653  | 6-:145168331-145198729  |
| 20228 | Gpr27          | 14761  | 6+:99642672-99643811    |
| 20229 | Syne2          | 319565 | 12+:77084946-77090315   |
| 20230 | Ppp1r14b       | 18938  | 19+:7050984-7051815     |
| 20231 | 1700071K01Rik  | 237880 | 11-:81386159-81386975   |
| 20232 | Akt3           | 23797  | 1-:178955224-179178875  |
| 20233 | Krt6b          | 16688  | 15-:101506960-101524679 |
| 20234 | Tmtc2          | 278279 | 10-:104760607-104850843 |
| 20235 | Ttc21a         | 74052  | 9+:119846764-119876912  |
| 20236 | Rab43          | 69834  | 6-:87741493-87759751    |
| 20237 | RP23-433P19.11 | 574418 | 2-:121276913-121282429  |
| 20238 | H2-T9          | 15051  | 17-:36175353-36179405   |
| 20239 | Olf110         | 258325 | 17+:37635597-37636549   |
| 20240 | Bcs1l          | 66821  | 1+:74634942-74638760    |
| 20241 | Cts7           | 56092  | 13-:61453821-61459557   |
| 20242 | Prg3           | 53856  | 2+:84828371-84834043    |
| 20243 | Wfikkn1        | 215001 | 17-:26014634-26016988   |
| 20244 | Grm1           | 14816  | 10-:10799636-10802155   |
| 20245 | Arrb2          | 216869 | 11+:70246199-70254322   |



|       |               |        |                         |
|-------|---------------|--------|-------------------------|
| 20246 | Pdia5         | 72599  | 16-:35397388-35490961   |
| 20247 | MMT00051075   |        |                         |
| 20248 | BC051628      | 332713 | 2+:180954773-180957151  |
| 20249 | 2010107G12Rik | 243753 | 6-:34897507-34929055    |
| 20250 | Cog5          | 238123 | 12+:32339747-32622495   |
| 20251 | St18          | 240690 | 1+:6720036-6848893      |
| 20252 | MMT00048656   |        | 1+:3043866-3044096      |
| 20253 | Casp2         | 12366  | 6+:42215037-42232495    |
| 20254 | D12Ert551e    | 52635  | 12-:117608805-117608949 |
| 20255 | Elfn2         | 207393 | 15-:78502303-78504775   |
| 20256 | Rps6ka4       | 56613  | 19-:6903574-6915091     |
| 20257 | Actb12        | 238880 | 13+:112045340-112046471 |
| 20258 | Prrt1         | 260297 | 17+:34766630-34769203   |
| 20259 | B830045N13Rik | 215378 | 1+:148529688-148749599  |
| 20260 | Mpz           | 17528  | 1+:173085712-173090174  |
| 20261 | MMT00068974   |        | 8+:65018515-65019549    |
| 20262 | MMT00068012   |        | 1+:38964789-38965562    |
| 20263 | Pus3          | 67049  | 9+:35372366-35374723    |
| 20264 | Ccdc44        | 70207  | 11+:105927339-105935303 |
| 20265 | Rsph1         | 22092  | 17-:31391968-31414252   |
| 20266 | Insig2        | 72999  | 1-:123200930-123224339  |
| 20267 | Lgals1        | 16852  | 15+:78757154-78760625   |
| 20268 | Lyar          | 17089  | 5+:38611790-38625536    |
| 20269 | Hsd17b13      | 243168 | 5-:104392479-104406408  |
| 20270 | Gcm2          | 107889 | 13-:41196796-41205552   |
| 20271 | Igh-V3609N    | 16057  | 12-:116113670-116113960 |
| 20272 | V1rd9         | 81010  | 7+:24443334-24445681    |
| 20273 | 4733401H18Rik | 66706  | 9-:108468195-108469673  |
| 20274 | Klf2          | 16598  | 8+:74842931-74845248    |
| 20275 | Igfbp5        | 16011  | 1-:72904611-72921460    |
| 20276 | Cdcp2         | 242603 | 4+:106775073-106779676  |
| 20277 | Cul4a         | 99375  | 8+:13105742-13147775    |
| 20278 | Clybl         | 69634  | 14+:122580947-122801263 |
| 20279 | Apoa1bp       | 246703 | 3-:87860444-87862417    |
| 20280 | MMT00049741   |        | 1+:191992549-191993513  |
| 20281 | Naip1         | 17940  | 13-:101177720-101216466 |
| 20282 | Gsdma1        | 57911  | 11+:98525675-98538188   |
| 20283 | Atp6v1e2      | 74915  | 17-:87343446-87347213   |
| 20284 | Olf829        | 259070 | 9+:18661070-18662035    |
| 20285 | Nsd1          | 18193  | 13+:55314563-55416241   |
| 20286 | Btbd7         | 238386 | 12-:104022297-104076908 |
| 20287 | Atp5g2        | 67942  | 15-:102493298-102501479 |
| 20288 | MMT00004355   |        | 17-:23053924-23065128   |
| 20289 | Helt          | 234219 | 8-:47377403-47379142    |
| 20290 | Rabgap1l      | 29809  | 1-:162632496-162722916  |
| 20291 | Rasa2         | 114713 | 9-:96442863-96531912    |
| 20292 | 1810048J11Rik | 67708  | 12+:73637365-73643230   |
| 20293 | MMT00017521   |        | X-:103836719-103838010  |
| 20294 | Myod1         | 17927  | 7+:53631851-53634464    |
| 20295 | Thsd7a        | 330267 | 6-:12266760-12355224    |
| 20296 | C030027H14Rik | 77465  | 10+:121218048-121218499 |

|       |               |        |                        |
|-------|---------------|--------|------------------------|
| 20297 | Unc13a        | 382018 | 8-:74153057-74195622   |
| 20298 | Rfwd2         | 26374  | 1+:161162397-161219172 |
| 20299 | Lca5l         | 385668 | 16-:96395339-96397874  |
| 20300 | Plekhh1       | 27276  | 7-:107792410-107810879 |
| 20301 | Vmn2r23       | 435916 | 6+:123652889-123692011 |
| 20302 | Siglec15      | 620235 | 18-:78242609-78254007  |
| 20303 | EG272350      | 272350 | 7+:5310762-5311470     |
| 20304 | Ccrk          | 105278 | 13+:64533850-64540971  |
| 20305 | MMT00018250   |        | 1+:186747013-186764454 |
| 20306 | Pcdh11x       | 245578 | X+:117478438-117515506 |
| 20307 | Catsper4      | 329954 | 4-:133767884-133769733 |
| 20308 | A230106N23Rik | 329274 | 1-:157926028-157927174 |
| 20309 | MMT00079689   |        | 15+:77532357-77533543  |
| 20310 | Scye1         | 13722  | 3-:132323466-132346794 |
| 20311 | Ptprd         | 19266  | 4-:75589848-75990144   |
| 20312 | Htt           | 15194  | 5+:35104373-35252045   |
| 20313 | Rpusd2        | 271842 | 2+:118860523-118865493 |
| 20314 | Zfp212        | 232784 | 6+:47870693-47882626   |
| 20315 | MMT00072353   |        | 8-:41796986-41798641   |
| 20316 | Adams14       | 237360 | 10-:60661309-60734005  |
| 20317 | Pex5l         | 58869  | 3-:33030492-33042001   |
| 20318 | MMT00009577   |        | 1+:75632119-75633749   |
| 20319 | Syne2         | 319565 | 12+:77026619-77031717  |
| 20320 | Klf3          | 16599  | 5+:65207973-65220415   |
| 20321 | Ms4a6b        | 69774  | 19+:11593118-11604557  |
| 20322 | Ube2e3        | 22193  | 2+:78710638-78760739   |
| 20323 | Hist1h2ak     | 319169 | 13+:21813268-21813744  |
| 20324 | Tppp          | 72948  | 13+:74158590-74169146  |
| 20325 | 4921522P10Rik | 66719  | 8+:8661800-8664728     |
| 20326 | Zfp715        | 69930  | 7-:50551566-50568631   |
| 20327 | MMT00004978   |        | X+:98714191-98715062   |
| 20328 | Csl           | 71832  | 10-:99220338-99222292  |
| 20329 | Fars2         | 69955  | 13+:36209752-36629461  |
| 20330 | Foxa3         | 15377  | 7-:19598631-19608888   |
| 20331 | Lsr           | 54135  | 7-:31742448-31758463   |
| 20332 | Stau2         | 29819  | 1-:16218886-16221172   |
| 20333 | Calca         | 12310  | 7-:121776811-121779808 |
| 20334 | MMT00043907   |        | 15-:43048504-43049713  |
| 20335 | Srgn          | 19073  | 10-:61957175-61970503  |
| 20336 | MMT00037968   | 436100 | 6+:149514609-149514717 |
| 20337 | St6galnac4    | 20448  | 2+:32442602-32455214   |
| 20338 | Sav1          | 64010  | 12-:71066001-71087989  |
| 20339 | OTTMUSG000000 | 626316 | 4+:146064815-146094022 |
| 20340 | Sifn14        | 237890 | 11-:83092652-83097665  |
| 20341 | Srebf2        | 20788  | 15+:81977675-82035810  |
| 20342 | Cerkl         | 228094 | 2-:79172726-79178778   |
| 20343 | Ttc19         | 72795  | 11+:62094983-62128748  |
| 20344 | Grb10         | 14783  | 11-:11833466-11870619  |
| 20345 | Al842396      | 103844 | 11-:70501861-70513646  |
| 20346 | Gna-rs1       | 14670  | 17+:36117622-36125811  |
| 20347 | 2310009B15Rik | 69549  | 1-:140748563-140753409 |

|       |               |           |                         |
|-------|---------------|-----------|-------------------------|
| 20348 | EG210853      | 210853    | 17-:22065153-22426864   |
| 20349 | MMT00054511   |           | 9-:65888767-65890437    |
| 20350 | Pigc          | 67292     | 1+:163899357-163902461  |
| 20351 | Tfdp2         | 211586    | 9+:96096719-96174366    |
| 20352 | Slitrk1       | 76965     | 14-:109310405-109312494 |
| 20353 | Antxr1        | 69538     | 6-:87083847-87285436    |
| 20354 | Crip3         | 114570    | 17+:46565890-46568719   |
| 20355 | Zfyve28       | 231125    | 5-:34541416-34630852    |
| 20356 | Mrps35        | 232536    | 6+:146991325-147019421  |
| 20357 | Serpinb12     | 71869     | 1+:108831025-108853655  |
| 20358 | Rwdd2a        | 69519     | 9+:86465659-86468503    |
| 20359 | Spata3        | 70060     | 1+:87918527-87926533    |
| 20360 | Olfr1085      | 258583    | 2-:86497673-86498613    |
| 20361 | Mtmr14        | 97287     | 6+:113187854-113231377  |
| 20362 | Sh3bp5l       | 79566     | 11+:58145048-58161228   |
| 20363 | Dcun1d2       | 102323    | 8-:13255963-13288167    |
| 20364 | Zfp422        | 67255     | 6-:116574935-116578939  |
| 20365 | Grid1         | 14803     | 14+:35633351-36394083   |
| 20366 | Olfr1167      | 258291    | 2-:87989223-87990174    |
| 20367 | Rgs14         | 51791     | 13+:55471252-55486044   |
| 20368 | lqsec3        | 243621    | 6-:121326087-121423581  |
| 20369 | OTTMUSG000000 | 381531    | 4-:61789431-61811841    |
| 20370 | Sccpdh        | 109232    | 1+:181606521-181617318  |
| 20371 | Scnm1         | 69269     | 3-:94933639-94937935    |
| 20372 | Heatr1        | 217995    | 13+:12524927-12531159   |
| 20373 | Klhl14        | 225266    | 18-:21708881-21810869   |
| 20374 | Zfp780b       | 338354    | 7-:28695189-28790337    |
| 20375 | Gje1          | 118446    | 5-:138398440-138399216  |
| 20376 | Dnajc10       | 66861     | 2+:80159310-80194200    |
| 20377 | Grik1         | 14805     | 16-:87912660-88289860   |
| 20378 | Cyp2t4        | 384724    | 7+:27940706-27943582    |
| 20379 | MMT00002289   |           | X-:12954992-12955666    |
| 20380 | MMT00058516   |           | 11+:70171425-70174036   |
| 20381 | Vtn           | 22370     | 11+:78312787-78315825   |
| 20382 | Olfr1423      | 258675    | 19-:12110299-12111056   |
| 20383 | MMT00072890   |           | 17+:34221635-34222767   |
| 20384 | BC034069      | 100038347 | 7+:80885194-80921804    |
| 20385 | Chd1l         | 68058     | 3-:97364670-97414113    |
| 20386 | Sdk1          | 330222    | 5+:142411997-142648557  |
| 20387 | Defb1         | 13214     | 8+:22887081-22905191    |
| 20388 | Olrl          | 108078    | 6-:129435269-129457172  |
| 20389 | Clcn5         | 12728     | X-:6736673-6765840      |
| 20390 | Cd9           | 12527     | 6-:125410283-125444711  |
| 20391 | Oas1h         | 246729    | 5+:121311430-121323512  |
| 20392 | Gja4          | 14612     | 4-:126989210-126990212  |
| 20393 | 1110018G07Rik | 68497     | 12-:86259100-86284342   |
| 20394 | EG668225      | 668225    | 15-:100882896-100884841 |
| 20395 | Syt8          | 55925     | 7+:149622738-149626210  |
| 20396 | Myt1l         | 17933     | 12+:30213430-30605597   |
| 20397 | Sema3e        | 20349     | 5+:14025316-14254314    |
| 20398 | Prh1          | 19131     | 6+:132521906-132521950  |

|       |             |        |                         |
|-------|-------------|--------|-------------------------|
| 20399 | Josd1       | 74158  | 15+:79504681-79505454   |
| 20400 | Kif7        | 16576  | 7-:86842597-86859044    |
| 20401 | Lztr1       | 66863  | 16+:17509067-17526423   |
| 20402 | MMT00007367 |        | 16+:3391231-3391269     |
| 20403 | MMT00024375 |        | 14+:38535407-38536343   |
| 20404 | MMT00003113 |        | 19-:45471254-45472111   |
| 20405 | Clip1       | 56430  | 5-:124029082-124062172  |
| 20406 | Cacng2      | 12300  | 15-:77825392-77949710   |
| 20407 | Praf2       | 54637  | X+:7305696-7308189      |
| 20408 | Muc15       | 269328 | 2+:110561649-110572080  |
| 20409 | EG628904    | 628904 | 7-:52045568-52046165    |
| 20410 | MMT00028069 |        | 9-:88169814-88176034    |
| 20411 | Mpg         | 268395 | 11+:32126458-32132024   |
| 20412 | MMT00011980 |        | 9-:113233368-113261490  |
| 20413 | Wdr86       | 269633 | 5-:24218083-24218639    |
| 20414 | MMT00017740 |        | 17-:35415087-35416147   |
| 20415 | 6-Mar       | 223455 | 15-:31385655-31425957   |
| 20416 | Cnn1        | 12797  | 9+:21903711-21913169    |
| 20417 | Trappc9     | 76510  | 15-:72420050-72587793   |
| 20418 | Pvr         | 52118  | 7-:20490400-20504259    |
| 20419 | Adra1b      | 11548  | 11-:43589362-43650305   |
| 20420 | Krt33b      | 16671  | 11-:99884950-99891190   |
| 20421 | Cdkn2c      | 12580  | 4-:109333751-109338267  |
| 20422 | MMT00035096 |        | 12+:111065431-111066329 |
| 20423 | 8-Mar       | 71779  | 6+:116288399-116359556  |
| 20424 | Map2k4      | 26398  | 11-:65503147-65601750   |
| 20425 | Zbtb11      | 271377 | 16+:55973992-56008993   |
| 20426 | Tex9        | 21778  | 9-:72308908-72358729    |
| 20427 | Rps6ka1     | 20111  | 4-:133403208-133443699  |
| 20428 | MMT00026261 |        | 6-:47736147-47738382    |
| 20429 | Tmem202     | 73893  | 9-:59366461-59373259    |
| 20430 | Trio        | 223435 | 15-:27660409-27849046   |
| 20431 | Slc7a7      | 20540  | 14-:54989127-55027885   |
| 20432 | Smc1b       | 140557 | 15-:84895118-84962387   |
| 20433 | Cdca5       | 67849  | 19+:6085098-6091773     |
| 20434 | Lrp3        | 435965 | 7-:35985917-35998208    |
| 20435 | Cyp4x1      | 81906  | 4-:114781286-114806582  |
| 20436 | Mctp1       | 78771  | 13+:76521982-76598910   |
| 20437 | Gimap3      | 83408  | 6-:48714467-48720850    |
| 20438 | Wac         | 225131 | 18-:7928068-7933174     |
| 20439 | Frg1        | 14300  | 8-:42482818-42502428    |
| 20440 | MMT00078132 |        | 3+:34082230-34082983    |
| 20441 | Olf1034     | 258216 | 2+:85886874-85887572    |
| 20442 | Spag4       | 245865 | 2+:155890945-155895235  |
| 20443 | Tnfaip1     | 21927  | 11-:78338807-78343734   |
| 20444 | Ckap2l      | 70466  | 2-:129094653-129122947  |
| 20445 | MMT00010910 |        | 1+:148267549-148268382  |
| 20446 | Acadl       | 11363  | 1-:66877867-66909823    |
| 20447 | Ltc4s       | 17001  | 11-:50049973-50051973   |
| 20448 | Pom121      | 107939 | 5-:135852012-135870375  |
| 20449 | MMT00062045 |        | 3+:98624862-98626457    |

|       |               |        |                         |
|-------|---------------|--------|-------------------------|
| 20450 | Tnrc18        | 231861 | 5-:143201452-143550438  |
| 20451 | Agr2          | 23795  | 12+:36719511-36730667   |
| 20452 | Kcna6         | 16494  | 6-:126687640-126690857  |
| 20453 | Zfp235        | 56525  | 7+:24919218-24928256    |
| 20454 | MMT00018457   |        | 2-:36929746-36938002    |
| 20455 | Sympk         | 68188  | 7+:19637685-19639961    |
| 20456 | Bcap31        | 27061  | X-:70931518-70960225    |
| 20457 | Gtf2a2        | 235459 | 9+:69860348-69870672    |
| 20458 | Dync2h1       | 110350 | 9-:6928501-7137110      |
| 20459 | MMT00030019   |        | 2+:82347278-82348437    |
| 20460 | Emcn          | 59308  | 3+:137004106-137094032  |
| 20461 | H2-Ab1        | 14961  | 17+:34400256-34405429   |
| 20462 | Lrrtm2        | 107065 | 18-:35369584-35374573   |
| 20463 | AA536717      | 105428 | 14+:21167380-21202714   |
| 20464 | EG622645      | 622645 | 17+:69189667-69191715   |
| 20465 | V1re6         | 171229 | 17+:20872063-20873088   |
| 20466 | Zdhhc16       | 74168  | 19+:42008004-42018585   |
| 20467 | BC026590      | 230234 | 4+:56815222-56819844    |
| 20468 | Spa17         | 20686  | 9-:37410885-37421199    |
| 20469 | MMT00040453   |        | 4-:99096893-99097952    |
| 20470 | Scml4         | 268297 | 10+:42580672-42678541   |
| 20471 | MMT00002448   |        | 18+:9909144-9910503     |
| 20472 | A030009H04Rik | 80515  | 11+:69154318-69156141   |
| 20473 | Gpr137b-ps    | 664862 | 13-:12707324-12742647   |
| 20474 | Gnb3          | 14695  | 6-:124784257-124790293  |
| 20475 | Dbh           | 13166  | 2+:27021035-27038315    |
| 20476 | Slc35e3       | 215436 | 10-:117170537-117171737 |
| 20477 | Csn1s2a       | 12993  | 5+:88203591-88217822    |
| 20478 | MMT00009155   |        | 5-:16014199-16014689    |
| 20479 | Lipm          | 78753  | 19+:34175420-34197833   |
| 20480 | V1ri8         | 252908 | 13-:22236389-22237394   |
| 20481 | Tmem106b      | 71900  | 6+:13019855-13035064    |
| 20482 | Vwa1          | 246228 | 4-:155143412-155148640  |
| 20483 | Vgll3         | 73569  | 16+:65815877-65839984   |
| 20484 | Ces1          | 12623  | 8-:95826294-95861093    |
| 20485 | 6430520M22Rik | 319716 | 6+:145809702-145811100  |
| 20486 | C1qtnf1       | 56745  | 11+:118295166-118311276 |
| 20487 | MMT00061855   |        | 10-:26393342-26394792   |
| 20488 | Bok           | 51800  | 1+:95582278-95592339    |
| 20489 | MMT00032252   |        | 2+:90081278-90081580    |
| 20490 | Tmem143       | 70209  | 7+:53152444-53172781    |
| 20491 | 1700125H20Rik | 73634  | 11+:84983903-84994646   |
| 20492 | Gira3         | 110304 | 8+:58419700-58604145    |
| 20493 | Ankrd43       | 237761 | 11-:53291763-53301048   |
| 20494 | Tmem115       | 56395  | 9+:107436275-107440987  |
| 20495 | Tmem41b       | 233724 | 7-:117115707-117129774  |
| 20496 | Mtpn          | 14489  | 6-:35461919-35489819    |
| 20497 | Ubr2          | 224826 | 17-:47153518-47153986   |
| 20498 | Porcn         | 53627  | X-:7770977-7783627      |
| 20499 | Wdr44         | 72404  | X+:23270284-23383107    |
| 20500 | 2810441K11Rik | 68642  | 19-:10624955-10630728   |

|       |               |        |                         |
|-------|---------------|--------|-------------------------|
| 20501 | Ccl1          | 20290  | 11-:81990167-81993314   |
| 20502 | Mtus1         | 102103 | 8-:42076264-42127039    |
| 20503 | Krtdap        | 64661  | 7+:31572915-31576114    |
| 20504 | MMT00033407   |        | X+:147122692-147124227  |
| 20505 | Ttll9         | 74711  | 2+:152788241-152833076  |
| 20506 | 1700011F03Rik | 74221  | 6-:70863080-70868918    |
| 20507 | Sh2d6         | 71130  | 6-:72463636-72470621    |
| 20508 | Hic2          | 58180  | 16+:17233674-17260457   |
| 20509 | C130092O11Rik | 232035 | 6+:61260806-61373073    |
| 20510 | Prame         | 75829  | X-:132147539-132162246  |
| 20511 | Decr2         | 26378  | 17-:26218155-26227109   |
| 20512 | MMT00005340   | 93684  | 3+:144233442-144260638  |
| 20513 | Il1rapl2      | 60367  | X+:134709065-134771192  |
| 20514 | Rprm          | 67874  | 2-:53936647-53937952    |
| 20515 | Dimt1         | 66254  | 13+:107737253-107749840 |
| 20516 | Mafa          | 378435 | 15-:75577380-75577632   |
| 20517 | AK129128      | 218343 | 13+:76236242-76327774   |
| 20518 | Mtnr1b        | 244701 | 9-:15667110-15678904    |
| 20519 | Col1a1        | 12842  | 11+:94797565-94814353   |
| 20520 | EG546143      | 546143 | 9-:72827529-72833594    |
| 20521 | BC057079      | 230393 | 4+:87823985-88056913    |
| 20522 | MMT00054229   |        | 10+:56375999-56397773   |
| 20523 | Rhox2h        | 622301 | X-:35083503-35087786    |
| 20524 | Cdc27         | 217232 | 11-:104381584-104411792 |
| 20525 | Olf2l1        | 258277 | 15+:98286742-98287677   |
| 20526 | MMT00056393   |        | 7-:18222787-18232578    |
| 20527 | Actr1b        | 226977 | 1-:36756048-36766770    |
| 20528 | Etnk1         | 75320  | 6+:143115768-143152135  |
| 20529 | Nf1           | 18015  | 11+:79197269-79395110   |
| 20530 | EG640268      | 640268 | 9+:48228150-48240042    |
| 20531 | MMT00015606   |        | 3-:69123941-69124507    |
| 20532 | Rnf26         | 213211 | 9-:43919758-43921558    |
| 20533 | Pon3          | 269823 | 6-:5171509-5206226      |
| 20534 | Stk24         | 223255 | 14-:121686020-121778284 |
| 20535 | Rbm4          | 19653  | 19-:4785153-4793860     |
| 20536 | V1rd1         | 81017  | 7-:5753953-5757047      |
| 20537 | Mmp13         | 17386  | 9+:7272544-7283330      |
| 20538 | Nek10         | 238944 | 14+:15763763-15770301   |
| 20539 | Klk1b5        | 16622  | 7+:51471828-51476082    |
| 20540 | Rps6kl1       | 238323 | 12-:86476591-86492186   |
| 20541 | Vapa          | 30960  | 17-:65929393-65962836   |
| 20542 | H2-M1         | 224756 | 17-:36807185-36809142   |
| 20543 | MMT00020117   |        | 8+:40402541-40541667    |
| 20544 | 4932438A13Rik | 229227 | 3+:36762046-36776660    |
| 20545 | Skp2          | 27401  | 15-:9042165-9070073     |
| 20546 | Lrrc15        | 74488  | 16-:30272660-30283339   |
| 20547 | Pde2a         | 207728 | 7+:108599820-108661330  |
| 20548 | 1700041C02Rik | 73332  | 4-:118996446-119004224  |
| 20549 | Itsn2         | 20403  | 12+:4620083-4720002     |
| 20550 | Nrip1         | 268903 | 16-:76290984-76331013   |
| 20551 | Fzd5          | 14367  | 1-:64781416-64783174    |

|       |               |        |                         |
|-------|---------------|--------|-------------------------|
| 20552 | Cdh9          | 12565  | 15+:16707815-16786045   |
| 20553 | Echdc2        | 52430  | 4+:107838100-107851912  |
| 20554 | Numa1         | 101706 | 7+:109149689-109163472  |
| 20555 | Mlf2          | 30853  | 6+:124882097-124885436  |
| 20556 | Chst11        | 58250  | 10+:82448242-82655099   |
| 20557 | Snw1          | 66354  | 12:-88790859-88813229   |
| 20558 | EG624180      | 624180 | 13+:62136547-62137653   |
| 20559 | Nat13         | 72117  | 16+:44139996-44160092   |
| 20560 | Mef2c         | 17260  | 13:-83803698-83806683   |
| 20561 | MMT00002184   |        | X:-8643144-8643462      |
| 20562 | E130309F12Rik | 272031 | 4+:49219251-49420669    |
| 20563 | Mns1          | 17427  | 9+:72286341-72306381    |
| 20564 | Olfra433      | 258712 | 1+:175972082-175973025  |
| 20565 | MMT00065821   |        | 7:-27254261-27255255    |
| 20566 | Tnni2         | 21953  | 7+:149628372-149630310  |
| 20567 | Ggt6          | 71522  | 11+:72249027-72252065   |
| 20568 | Luc7l2        | 192196 | 6+:38501518-38559444    |
| 20569 | MMT00063637   |        | 7+:11817129-11822371    |
| 20570 | Ap3m1         | 55946  | 14:-21854031-21871407   |
| 20571 | Tmem45a       | 56277  | 16:-56806491-56885976   |
| 20572 | Rdh5          | 19682  | 10:-128350648-128356250 |
| 20573 | MMT00040001   |        | 3+:101037410-101038015  |
| 20574 | Apool         | 68117  | X+:109424971-109486297  |
| 20575 | MMT00068533   |        | 5+:93850712-93852176    |
| 20576 | 1700066M21Rik | 73467  | 1+:57434514-57442260    |
| 20577 | Dner          | 227325 | 1:-84366414-84442194    |
| 20578 | MMT00014841   |        | 13:-50587858-50588527   |
| 20579 | Zkscan3       | 72739  | 13:-21479544-21499920   |
| 20580 | Cdk9          | 107951 | 2:-32562959-32568249    |
| 20581 | V1rc7         | 113864 | 6+:57183432-57184344    |
| 20582 | MMT00026692   |        | 17+:53499221-53501373   |
| 20583 | Cdh16         | 12556  | 8:-107138047-107148161  |
| 20584 | Sirt4         | 75387  | 5:-115928022-115934307  |
| 20585 | Snx7          | 76561  | 3:-117484577-117549625  |
| 20586 | Afmid         | 71562  | 11+:117687237-117700337 |
| 20587 | Abcc1         | 17250  | 16+:14361688-14473660   |
| 20588 | Brd2          | 14312  | 17:-34248976-34256255   |
| 20589 | Frmf8         | 67457  | 19:-5851285-5875230     |
| 20590 | Actl7a        | 11470  | 4+:56756326-56757792    |
| 20591 | Ilk           | 16202  | 7+:112885261-112891432  |
| 20592 | Kcnc1         | 16502  | 7+:53652911-53683814    |
| 20593 | Ptbp1         | 19205  | 10+:79317424-79327516   |
| 20594 | Kdelr1        | 68137  | 7+:53128209-53139096    |
| 20595 | Ero1l         | 50527  | 14:-45903995-45938202   |
| 20596 | Fkbp10        | 14230  | 11+:100277010-100286139 |
| 20597 | EG226604      | 226604 | 1:-168564870-168573610  |
| 20598 | Ptgs2         | 19225  | 1+:151947229-151954943  |
| 20599 | Gsto2         | 68214  | 19+:47940292-47960795   |
| 20600 | Epha10        | 230735 | 4+:124559118-124592677  |
| 20601 | Rpo1-4        | 20019  | 6+:71859156-71929352    |
| 20602 | Prnpip1       | 140546 | 4+:117222989-117346901  |

|       |               |           |                         |
|-------|---------------|-----------|-------------------------|
| 20603 | Hcn3          | 15168     | 3-:88950698-88964079    |
| 20604 | Luc7l         | 66978     | 17+:26389903-26417664   |
| 20605 | MMT00047084   |           | 14-:79578596-79584131   |
| 20606 | MMT00042166   |           | 7-:26205542-26208082    |
| 20607 | Cdc5l         | 71702     | 17-:45528832-45570687   |
| 20608 | Zbtb26        | 320633    | 2-:37290539-37298688    |
| 20609 | Aftph         | 216549    | 11-:20585095-20641584   |
| 20610 | Ttll1         | 74410     | 2-:35606760-35835059    |
| 20611 | Map2k3        | 26397     | 11+:60745558-60766297   |
| 20612 | OTTMUSG00000  | 545667    | 4-:108049951-108056261  |
| 20613 | 4930431B09Rik | 74645     | 3-:100275528-100293078  |
| 20614 | Gna15         | 14676     | 10-:80965426-80986741   |
| 20615 | Olfir706      | 258350    | 7-:114029380-114030329  |
| 20616 | 9030404E10Rik | 71528     | 16-:30021926-30039567   |
| 20617 | MMT00077828   |           | 12+:53096148-53096573   |
| 20618 | Ctnna1        | 12385     | 18+:35278565-35414427   |
| 20619 | Mmp1a         | 83995     | 9+:7464186-7476416      |
| 20620 | MMT00013477   |           | 1-:175398434-175417003  |
| 20621 | MMT00001928   |           | 9+:15448768-15450324    |
| 20622 | Cd47          | 16423     | 16+:49855836-49911192   |
| 20623 | Vmn2r55       | 100042499 | 7-:13237054-13256130    |
| 20624 | Utp15         | 105372    | 13+:99016769-99018856   |
| 20625 | Pgam2         | 56012     | 11-:5701646-5703736     |
| 20626 | Nfxl1         | 100978    | 5-:72904542-72915468    |
| 20627 | 5530400B04Rik | 71405     | 2-:155654584-155660589  |
| 20628 | Hoxd10        | 15430     | 2+:74530036-74532425    |
| 20629 | Ctns          | 83429     | 11-:72997104-73012508   |
| 20630 | Lsamp         | 268890    | 16+:41889024-41955476   |
| 20631 | Grm1          | 14816     | 10-:10408553-10502593   |
| 20632 | Cep78         | 208518    | 19-:16029841-16059370   |
| 20633 | Thra          | 21833     | 11+:98614596-98630184   |
| 20634 | Pias1         | 56469     | 9-:62729775-62828678    |
| 20635 | Jmjd6         | 107817    | 11-:116698746-116704689 |
| 20636 | MMT00055765   |           | 1+:135061034-135066666  |
| 20637 | MMT00078257   |           | 6-:149298790-149302300  |
| 20638 | Med12         | 59024     | X+:98469599-98492792    |
| 20639 | MMT00003860   |           | 6+:41231374-41232091    |
| 20640 | 4930432E11Rik | 243900    | 7+:30359630-30362134    |
| 20641 | Icam1         | 15894     | 9+:20820478-20832389    |
| 20642 | V1rd7         | 81012     | 7+:24416996-24419385    |
| 20643 | Rcvrn         | 19674     | 11+:67508827-67516835   |
| 20644 | Lct           | 226413    | 1-:130181333-130224880  |
| 20645 | Zfp575        | 101544    | 7-:25370456-25396609    |
| 20646 | BC031781      | 208768    | 1+:182781281-182798242  |
| 20647 | Zcchc18       | 66995     | X+:133527716-133530917  |
| 20648 | B430212C06Rik | 338360    | 18-:67482672-67484375   |
| 20649 | 5830472M02Rik | 76080     | 2+:163428082-163442847  |
| 20650 | Naalad1       | 381204    | 19+:6105797-6116009     |
| 20651 | MMT00006027   |           | 5-:61212852-61213676    |
| 20652 | Dlx4          | 13394     | 11-:95001764-95006795   |
| 20653 | 1700049L16Rik | 108950    | 10-:71442840-71443382   |



|       |             |        |                         |
|-------|-------------|--------|-------------------------|
| 20654 | Maea        | 59003  | 5+:33678258-33715162    |
| 20655 | MMT00045504 |        |                         |
| 20656 | MMT00068363 |        | 13+:31101103-31105812   |
| 20657 | MMT00059805 |        | 7+:78841754-78841979    |
| 20658 | EG623757    | 623757 | 7+:149110287-149128751  |
| 20659 | Cryba4      | 12959  | 5-:112675552-112681522  |
| 20660 | Dmpk        | 13400  | 7+:19669343-19678450    |
| 20661 | Tuft1       | 22156  | 3-:94416680-94462728    |
| 20662 | MMT00066519 |        | 14-:56796839-56797941   |
| 20663 | Depdc1a     | 76131  | 3+:159158415-159192917  |
| 20664 | Rpl13a      | 22121  | 7-:52381292-52384102    |
| 20665 | Caln1       | 140904 | 5+:130924670-131316044  |
| 20666 | Mosc1       | 66112  | 1-:186610654-186635182  |
| 20667 | MMT00054056 |        |                         |
| 20668 | Rras        | 20130  | 7+:52273382-52277014    |
| 20669 | EG216185    | 216185 | 10+:82417072-82417821   |
| 20670 | Klhl25      | 207952 | 7+:82993277-83012331    |
| 20671 | Clk4        | 12750  | 11+:51076699-51094932   |
| 20672 | MMT00046375 |        | 7-:119001458-119002089  |
| 20673 | MMT00007807 |        | 8+:40367602-40367914    |
| 20674 | D17H6S53E   | 114585 | 17+:35264059-35265424   |
| 20675 | MMT00070017 |        | 13+:9222766-9224294     |
| 20676 | MMT00067648 |        | 11+:6346185-6346571     |
| 20677 | MMT00062099 |        | 8-:59759790-59770682    |
| 20678 | Cyp39a1     | 56050  | 17+:43804482-43887796   |
| 20679 | Ifna12      | 242519 | 4-:88248655-88249212    |
| 20680 | Xpo4        | 57258  | 14-:58201109-58283793   |
| 20681 | EG667683    | 667683 | 6-:69388204-69388768    |
| 20682 | Usp40       | 227334 | 1-:89846587-89905109    |
| 20683 | Foxd4       | 14237  | 19-:24973454-24975799   |
| 20684 | Twist1      | 22160  | 12+:34642676-34644691   |
| 20685 | Cacna1f     | 54652  | X+:7184229-7212319      |
| 20686 | MMT00042548 |        | 7+:149281224-149351612  |
| 20687 | Txnrd2      | 26462  | 16+:18426509-18479160   |
| 20688 | lyd         | 70337  | 10-:6791663-6806262     |
| 20689 | Cnksr3      | 215748 | 10+:3134785-3227478     |
| 20690 | Zfp276      | 57247  | 8+:125779841-125793635  |
| 20691 | Armcx6      | 278097 | X-:131283826-131285932  |
| 20692 | Fryl        | 72313  | 5-:73411427-73647908    |
| 20693 | Ssr1        | 107513 | 13+:38063269-38069327   |
| 20694 | Tbc1d30     | 74694  | 10-:120702542-120748052 |
| 20695 | Brd9        | 105246 | 13+:74075252-74098341   |
| 20696 | Kif12       | 16552  | 4-:62826670-62833169    |
| 20697 | Galnt5      | 241391 | 2+:57850800-57891637    |
| 20698 | Lman2       | 66890  | 13-:55446204-55463965   |
| 20699 | Senp7       | 66315  | 16+:56075578-56126652   |
| 20700 | Acot2       | 171210 | 12+:85328851-85334030   |
| 20701 | Rpl36al     | 66483  | 12-:70283729-70285027   |
| 20702 | Mbtps1      | 56453  | 8-:122032055-122071464  |
| 20703 | Itga11      | 319480 | 9+:62525751-62631795    |
| 20704 | Atp2a3      | 53313  | 11+:72774812-72805437   |

|       |               |           |                        |
|-------|---------------|-----------|------------------------|
| 20705 | Supv3l1       | 338359    | 10-:61891966-61913355  |
| 20706 | Exosc10       | 50912     | 4+:147932566-147956504 |
| 20707 | Ranbp6        | 240614    | 19-:29884123-29887440  |
| 20708 | Phf15         | 76901     | 11-:51630264-51662569  |
| 20709 | Enpp6         | 320981    | 8+:48072324-48074096   |
| 20710 | Prpsap2       | 212627    | 11-:61543158-61554506  |
| 20711 | E430028B21Rik | 211948    | 14-:27487724-27488939  |
| 20712 | 1700012B15Rik | 74173     | 12+:3235510-3241409    |
| 20713 | 1700054N08Rik | 73420     | 8-:126364729-126383388 |
| 20714 | MMT00015505   |           | 5+:6674890-6749370     |
| 20715 | Tmem179b      | 67706     | 19-:8847018-8848932    |
| 20716 | Tmem151a      | 381199    | 19-:5081769-5085372    |
| 20717 | Snf8          | 27681     | 11+:95896230-95908719  |
| 20718 | Fmo4          | 226564    | 1-:164724013-164742680 |
| 20719 | Sall1         | 58198     | 8-:91552278-91566326   |
| 20720 | Ptk2b         | 19229     | 14-:66772098-66899831  |
| 20721 | 4432412L15Rik | 74337     | 8+:86545367-86554191   |
| 20722 | Olfr429       | 258717    | 1+:176019172-176020110 |
| 20723 | Cdh1          | 12550     | 8+:109127267-109194146 |
| 20724 | Mdn1          | 100019    | 4+:32822192-32825745   |
| 20725 | Nudt5         | 53893     | 2+:5775859-5789410     |
| 20726 | Ei24          | 13663     | 9-:36586743-36604653   |
| 20727 | Mmp11         | 17385     | 10-:75385968-75395208  |
| 20728 | MMT00055001   |           |                        |
| 20729 | Ttc28         | 209683    | 5+:111717228-111717889 |
| 20730 | Dusp26        | 66959     | 8+:32200120-32207520   |
| 20731 | 2010100O12Rik | 67067     | 2+:155969953-155971529 |
| 20732 | MMT00004153   | 100045669 | 15-:91856199-91858037  |
| 20733 | H1f0          | 14958     | 15+:78858905-78860266  |
| 20734 | Alg6          | 320438    | 4+:99382309-99413104   |
| 20735 | Tnrc6b        | 213988    | 15+:80541488-80577903  |
| 20736 | Itgb1bp1      | 16413     | 12-:21273280-21292080  |
| 20737 | ORF28         | 246738    | 16-:91615975-91619238  |
| 20738 | MMT00010890   |           | 13+:14611270-14688167  |
| 20739 | Cabp5         | 29865     | 7+:13983543-13993318   |
| 20740 | Ola1          | 67059     | 2-:72930859-73052504   |
| 20741 | Mepe          | 94111     | 5+:104754394-104767575 |
| 20742 | Birc2         | 11797     | 9-:7818226-7835255     |
| 20743 | Trp53inp1     | 60599     | 4+:11083587-11101524   |
| 20744 | Ipmk          | 69718     | 10+:70810582-70844783  |
| 20745 | Sord          | 20322     | 2+:122060574-122091073 |
| 20746 | 2210015D19Rik | 76508     | 11+:5662128-5684713    |
| 20747 | Olfr1099      | 258764    | 2-:86798674-86799613   |
| 20748 | OTTMUSG000000 | 665229    | X+:34996289-34998578   |
| 20749 | Usp1          | 230484    | 4+:98590620-98602227   |
| 20750 | Foxo4         | 54601     | X+:98449866-98455033   |
| 20751 | Jmjd2d        | 244694    | 9-:14267624-14269004   |
| 20752 | 4930420K17Rik | 652925    | 5+:9100664-9120508     |
| 20753 | C330006K01Rik | 231855    | 5+:142939476-142950466 |
| 20754 | Crisp1        | 11571     | 17-:40430708-40456122  |
| 20755 | Mmp25         | 240047    | 17-:23767535-23781138  |

|       |               |        |                         |
|-------|---------------|--------|-------------------------|
| 20756 | Omd           | 27047  | 13+:49678115-49687978   |
| 20757 | Suclg1        | 56451  | 6+:73198666-73226876    |
| 20758 | Crtam         | 54698  | 9-:40780880-40812669    |
| 20759 | Slc17a1       | 20504  | 13+:23962182-23987568   |
| 20760 | Bnip3l        | 12177  | 14-:67606071-67627676   |
| 20761 | Caml          | 12328  | 13+:55724429-55733758   |
| 20762 | Fkbp9         | 27055  | 6+:56782069-56829351    |
| 20763 | Tnfsf9        | 21950  | 17+:57244854-57246926   |
| 20764 | Vit           | 74199  | 17+:78907512-79026729   |
| 20765 | MMT00060789   |        | 13-:62771158-62772324   |
| 20766 | V1ra2         | 22297  | 6-:89809361-89890501    |
| 20767 | Dhx8          | 217207 | 11+:101618900-101628669 |
| 20768 | Traf3ip3      | 215243 | 1-:195000787-195027689  |
| 20769 | Ube2e1        | 22194  | 14-:19115262-19164313   |
| 20770 | Mettl4        | 76781  | 17-:95125275-95147258   |
| 20771 | Slc16a10      | 72472  | 10-:39754934-39862065   |
| 20772 | Timd4         | 276891 | 11+:46629015-46631284   |
| 20773 | Cttnbp2       | 30785  | 6-:18383982-18464823    |
| 20774 | Atp6v1c2      | 68775  | 12-:17291526-17331518   |
| 20775 | Cd244         | 18106  | 1+:173489382-173507477  |
| 20776 | Nudcd2        | 52653  | 11+:40547169-40553546   |
| 20777 | MMT00010185   |        | 7-:5078280-5080880      |
| 20778 | Arf3          | 11842  | 15-:98570731-98593520   |
| 20779 | Tmem194       | 210035 | 10+:127114145-127133995 |
| 20780 | Zfp219        | 69890  | 14-:52625758-52634712   |
| 20781 | Cyp11a1       | 13070  | 9+:57862823-57874830    |
| 20782 | Kcnma1        | 16531  | 14-:24119243-24823152   |
| 20783 | Olfr689       | 258745 | 7+:112462519-112463480  |
| 20784 | Csad          | 246277 | 15-:102007428-102019474 |
| 20785 | BC051070      | 229688 | 3-:106191609-106207274  |
| 20786 | Bspry         | 192120 | 4+:62141100-62158332    |
| 20787 | Cabp2         | 29866  | 19+:4083505-4087337     |
| 20788 | Rbm43         | 71684  | 2-:51780103-51790407    |
| 20789 | Il17rd        | 171463 | 14+:27905114-27914158   |
| 20790 | Efna5         | 13640  | 17-:62956667-63230493   |
| 20791 | MMT00014813   | 667370 | 19+:34682173-34687127   |
| 20792 | MMT00032790   |        | 5-:42890113-42891653    |
| 20793 | Figf          | 14205  | X+:160811479-160840578  |
| 20794 | MMT00003639   |        | 4+:11327468-11328470    |
| 20795 | C330001K17Rik | 77609  | 9-:21794313-21797525    |
| 20796 | E130113E03Rik | 319433 | 14+:63282502-63283949   |
| 20797 | Dlc1          | 50768  | 8-:37632586-37676934    |
| 20798 | Ccpg1         | 72278  | 9+:72833391-72864140    |
| 20799 | EG619750      | 619750 | 3+:91828416-91828953    |
| 20800 | MMT00007848   |        | 3+:75195607-75196036    |
| 20801 | Mrps11        | 67994  | 7+:85928195-85937874    |
| 20802 | Cdc42se2      | 72729  | 11-:54531687-54601187   |
| 20803 | Tmem50a       | 71817  | 4-:134453760-134470915  |
| 20804 | Eno1          | 13806  | 4+:149611363-149622984  |
| 20805 | D730005E14Rik | 109361 | 15-:79720842-79722749   |
| 20806 | V1rg2         | 171237 | 7+:12341605-12342516    |

|       |               |        |                         |
|-------|---------------|--------|-------------------------|
| 20807 | MMT00017315   |        | 19+:61227777-61227862   |
| 20808 | Bms1          | 213895 | 6-:118333397-118369433  |
| 20809 | Nefh          | 380684 | 11-:4838760-4848116     |
| 20810 | Mttp          | 17777  | 3-:137753849-137794288  |
| 20811 | Dlst          | 78920  | 12+:86451788-86475795   |
| 20812 | Olfr467       | 257919 | 7+:114958099-114959019  |
| 20813 | 1700049E17Rik | 73415  | 14+:42386499-42394594   |
| 20814 | Ptpn18        | 19253  | 1+:34516602-34530622    |
| 20815 | MMT00047851   |        | 2+:143682053-143707243  |
| 20816 | Foxi3         | 504196 | 6+:70906602-70911057    |
| 20817 | EG667414      | 667414 | 1+:136005924-136006417  |
| 20818 | Gnb5          | 14697  | 9+:75159201-75192456    |
| 20819 | MMT00004365   |        | 11-:18225730-18227675   |
| 20820 | Fbxo41        | 330369 | 6-:85425387-85434017    |
| 20821 | Slco3a1       | 108116 | 7-:81429125-81699564    |
| 20822 | Smurf1        | 75788  | 5-:145637396-145663456  |
| 20823 | Cradd         | 12905  | 10-:94637379-94786731   |
| 20824 | Cd68          | 12514  | 11-:69477873-69479564   |
| 20825 | D10Ert641e    | 52717  | 10-:59450656-59465858   |
| 20826 | EG384486      | 384486 | 6-:124031714-124060668  |
| 20827 | Sccpdh        | 109232 | 1+:181598358-181600826  |
| 20828 | MMT00007878   |        | 8-:40805672-40806165    |
| 20829 | Zfp385c       | 278304 | 11-:100490145-100499206 |
| 20830 | MMT00057509   |        | 16+:53983940-53986320   |
| 20831 | MMT00057242   |        | X+:133424796-133425379  |
| 20832 | Stard9        | 668880 | 2+:120527790-120541818  |
| 20833 | MMT00022580   |        |                         |
| 20834 | C80913        | 19777  | 7-:38745949-38767967    |
| 20835 | Pgrmc1        | 53328  | X+:34138269-34146067    |
| 20836 | Park2         | 50873  | 17+:11033278-12254698   |
| 20837 | Dlgap4        | 228836 | 2+:156547622-156588828  |
| 20838 | MMT00058389   |        | 19+:34698453-34699140   |
| 20839 | Nefm          | 18040  | 14-:68738095-68742870   |
| 20840 | Rasa1         | 218397 | 13-:85355633-85396069   |
| 20841 | Def6          | 23853  | 17+:28292811-28365554   |
| 20842 | MMT00046069   |        | 6-:148647645-148648158  |
| 20843 | Arf2          | 11841  | 11+:103828086-103845595 |
| 20844 | MMT00051561   |        | 3-:6164627-6167555      |
| 20845 | Gars          | 353172 | 6+:54987960-55029496    |
| 20846 | EG667952      | 667952 | 14-:56039106-56088250   |
| 20847 | Pdik1l        | 230809 | 4-:133832574-133843142  |
| 20848 | Tceal7        | 68496  | X+:132758579-132760638  |
| 20849 | Wrn           | 22427  | 8-:34346162-34495969    |
| 20850 | Rusc1         | 72296  | 3-:88887902-88897234    |
| 20851 | Rpusd3        | 101122 | 6-:113365325-113369575  |
| 20852 | Extl2         | 58193  | 3+:115711249-115731878  |
| 20853 | Tatdn1        | 69694  | 15-:58721707-58765370   |
| 20854 | Commd7        | 99311  | 2-:153444550-153458492  |
| 20855 | Phldb2        | 208177 | 16-:45746356-45953710   |
| 20856 | Mybl1         | 17864  | 1-:9659956-9690035      |
| 20857 | Vmn2r10       | 22307  | 5-:109422430-109435490  |

|       |               |        |                         |
|-------|---------------|--------|-------------------------|
| 20858 | Duox1         | 99439  | 2+:122143654-122173706  |
| 20859 | BC063263      | 434178 | 7-:49730359-49838309    |
| 20860 | Gm1564        | 268491 | 11+:102536537-102542051 |
| 20861 | Dcst1         | 77772  | 3-:89161394-89169177    |
| 20862 | Olfr827       | 258297 | 10-:129647217-129648184 |
| 20863 | Ccdc83        | 75338  | 7-:97384270-97413942    |
| 20864 | MMT00062115   |        | 7-:149761435-149763609  |
| 20865 | Appl1         | 72993  | 14+:27732688-27733297   |
| 20866 | 2900073C17Rik | 73020  | 8+:49928797-49929962    |
| 20867 | Cnih          | 12793  | 14-:47395256-47408206   |
| 20868 | A230106M20Rik | 210094 | 7-:50731258-50736029    |
| 20869 | Nudcd3        | 209586 | 11-:6005714-6100413     |
| 20870 | 1700028K03Rik | 76421  | 5+:107926739-107940230  |
| 20871 | Pop1          | 67724  | 15+:34425077-34460392   |
| 20872 | MMT00077363   |        | 19-:3316427-3317608     |
| 20873 | Arfgef2       | 99371  | 2+:166631214-166721495  |
| 20874 | Cyp2j6        | 13110  | 4-:96184443-96220319    |
| 20875 | Olfr1335      | 435804 | 4-:118481460-118482443  |
| 20876 | Zfp239        | 22685  | 6+:117820444-117822782  |
| 20877 | Adal          | 75894  | 2+:120966164-120982404  |
| 20878 | MMT00047858   |        | 17-:74731301-74731869   |
| 20879 | Klk1b26       | 16618  | 7+:51268047-51272329    |
| 20880 | Raf1          | 110157 | 6-:115568615-115626521  |
| 20881 | 1110059G10Rik | 66202  | 9-:122856655-122860113  |
| 20882 | MMT00013663   |        |                         |
| 20883 | Gpr175        | 24100  | 6+:88855938-88862223    |
| 20884 | MMT00017334   |        |                         |
| 20885 | MMT00004673   |        | 6+:23687067-23688033    |
| 20886 | Mylpf         | 17907  | 7+:134356373-134357776  |
| 20887 | MMT00060807   |        | 7-:111840853-111841877  |
| 20888 | MMT00076579   |        | 7+:73335446-73336263    |
| 20889 | S1pr3         | 13610  | 13+:51504147-51515629   |
| 20890 | Psbm4         | 19172  | 3-:94688014-94690862    |
| 20891 | 2810055F11Rik | 67217  | 12-:73174414-73186300   |
| 20892 | C1r           | 50909  | 6+:124462649-124473124  |
| 20893 | Calb1         | 12307  | 4+:15808429-15832710    |
| 20894 | Cyp4a12a      | 277753 | 4+:114971704-115005419  |
| 20895 | MMT00009700   |        | 15+:82729583-82736246   |
| 20896 | Rasa3         | 19414  | 8-:13567217-13677572    |
| 20897 | Clca6         | 99663  | 3-:144615450-144638010  |
| 20898 | Bcl2l2        | 12050  | 14+:55502261-55507069   |
| 20899 | 0610037L13Rik | 74098  | 4+:107562503-107570407  |
| 20900 | Epb4.114a     | 13824  | 18-:33956614-34165788   |
| 20901 | MMT00043221   |        | 15-:74643886-74647626   |
| 20902 | Itln1         | 16429  | 1-:173448372-173461345  |
| 20903 | Rpia          | 19895  | 6-:70715694-70742149    |
| 20904 | Urm1          | 68205  | 2+:29682903-29699582    |
| 20905 | MMT00004364   |        | 4-:117401222-117402041  |
| 20906 | Tpbpb         | 116913 | 13-:61002548-61006208   |
| 20907 | Lims2         | 225341 | 18+:32091171-32118272   |
| 20908 | Olfr583       | 258752 | 7+:110199813-110200772  |

|       |               |        |                         |
|-------|---------------|--------|-------------------------|
| 20909 | Rnf215        | 71673  | 11+:4035204-4041175     |
| 20910 | MMT00014676   |        | 8+:107511030-107520108  |
| 20911 | Narg1         | 74838  | 3+:51246688-51277946    |
| 20912 | Chordc1       | 66917  | 9+:18096710-18118444    |
| 20913 | Osgepl1       | 72085  | 1+:53370519-53382993    |
| 20914 | Utx           | 22289  | X+:17799871-17857060    |
| 20915 | MMT00016910   |        | X+:106684015-107106737  |
| 20916 | MMT00023465   |        | 8+:71853024-71853615    |
| 20917 | Gstm6         | 14867  | 3-:107742146-107746551  |
| 20918 | Nxph3         | 104079 | 11-:95371166-95375585   |
| 20919 | Ceacam18      | 72431  | 7+:50890075-50904280    |
| 20920 | 5730412P04Rik | 70491  | X+:132639138-132649958  |
| 20921 | BC016579      | 212998 | 16-:45626960-45654231   |
| 20922 | Mxd3          | 17121  | 13-:55426841-55431106   |
| 20923 | Prkra         | 23992  | 2-:76467995-76486051    |
| 20924 | MMT00030481   | 545291 | 19-:42863436-43065771   |
| 20925 | 2810410L24Rik | 76377  | 11-:120048945-120097489 |
| 20926 | Amot1         | 75723  | 9-:14351788-14447975    |
| 20927 | MMT00002557   |        | 18+:7765902-7806511     |
| 20928 | MMT00006812   |        | 3+:64400827-64409738    |
| 20929 | MMT00053572   |        | 10-:39115519-39164664   |
| 20930 | Stc1          | 20855  | 14+:69647446-69656558   |
| 20931 | Ythdf3        | 229096 | 3+:16083277-16105424    |
| 20932 | 2610207I05Rik | 233789 | 7-:125274818-125387151  |
| 20933 | Dclk2         | 70762  | 3-:86590080-86635709    |
| 20934 | Ect2          | 13605  | 3-:26996148-27052758    |
| 20935 | Gpr83         | 14608  | 9+:14664697-14673943    |
| 20936 | Supt7l        | 72195  | 5-:31817406-31825634    |
| 20937 | Olfr494       | 258732 | 7+:115511005-115511948  |
| 20938 | Unkl          | 74154  | 17+:25326321-25368111   |
| 20939 | Il13          | 16163  | 11-:53444825-53448204   |
| 20940 | 4930455B06Rik | 223825 | 15+:4894947-4912199     |
| 20941 | Zfp28         | 22690  | 7+:6238228-6349624      |
| 20942 | MMT00006980   |        | 12-:119970961-119993457 |
| 20943 | 1700113H08Rik | 76640  | 10+:86668719-86693331   |
| 20944 | Tmem164       | 209497 | X+:139115999-139117492  |
| 20945 | Traf4         | 22032  | 11-:77972902-77979033   |
| 20946 | Nufip2        | 68564  | 11+:77420825-77526241   |
| 20947 | Neurod4       | 11923  | 10-:129705206-129708468 |
| 20948 | Cstf2t        | 83410  | 19+:31157493-31161080   |
| 20949 | Tmem195       | 319660 | 12+:37968337-38132624   |
| 20950 | 8030462N17Rik | 212163 | 18-:77873879-77952725   |
| 20951 | Pkhd1         | 241035 | 1-:20556838-20557670    |
| 20952 | Zdhhc9        | 208884 | X-:45525661-45561861    |
| 20953 | Btaf1         | 107182 | 19+:37019701-37088545   |
| 20954 | 5830403L16Rik | 240817 | 1-:155697254-155747360  |
| 20955 | Dnaja3        | 83945  | 16+:4684114-4706678     |
| 20956 | Pbx3          | 18516  | 2-:34027428-34227556    |
| 20957 | Arhgef5       | 54324  | 6+:43223588-43239320    |
| 20958 | 4933403F05Rik | 108654 | 18-:68425430-68459989   |
| 20959 | Lrrc8d        | 231549 | 5+:106240744-106243323  |

|       |               |        |                         |
|-------|---------------|--------|-------------------------|
| 20960 | Abcc3         | 76408  | 11-:94204604-94254229   |
| 20961 | Lig3          | 16882  | 11+:82594724-82615690   |
| 20962 | Txndc4        | 76299  | 4-:48207238-48292430    |
| 20963 | Ifna6         | 15969  | 4+:88473251-88474201    |
| 20964 | MMT00038797   |        | 4+:12041130-12054397    |
| 20965 | Usp28         | 235323 | 9+:48808455-48850621    |
| 20966 | MMT00014378   |        | 4+:69514980-69515718    |
| 20967 | Fabp2         | 14079  | 3+:122598295-122602423  |
| 20968 | Ube2cbp       | 70348  | 9-:86200840-86358539    |
| 20969 | Slc9a3r2      | 65962  | 17-:24776232-24787223   |
| 20970 | Slco6b1       | 67854  | 1-:98802752-98885276    |
| 20971 | Tsga13        | 116732 | 6-:30846980-30865573    |
| 20972 | MMT00031355   |        | 2-:35346729-35421930    |
| 20973 | Stx2          | 13852  | 5-:129490441-129514447  |
| 20974 | Col4a3bp      | 68018  | 13+:97312700-97407505   |
| 20975 | Actrt2        | 73353  | 4-:154040543-154041820  |
| 20976 | MMT00057291   |        | 13+:13205616-13211075   |
| 20977 | MMT00039950   |        | 15-:8479135-8479788     |
| 20978 | MMT00069660   |        | 14+:54485596-54566510   |
| 20979 | D10Jhu81e     | 28295  | 10-:77624617-77632516   |
| 20980 | Taf12         | 66464  | 4+:131830327-131849240  |
| 20981 | 4933408B17Rik | 271508 | 18-:34739227-34745985   |
| 20982 | Pomt2         | 217734 | 12-:88447820-88480685   |
| 20983 | Hlx           | 15284  | 1-:186551024-186556487  |
| 20984 | MMT00036444   |        | 18-:47574120-47575031   |
| 20985 | Fcer2a        | 14128  | 8-:3681736-3694174      |
| 20986 | Olf805        | 258548 | 10-:129159638-129160598 |
| 20987 | Fez1          | 235180 | 9+:36640392-36686508    |
| 20988 | MMT00010339   |        | 18-:48228593-48229474   |
| 20989 | MMT00007956   |        | 12-:116532196-116532715 |
| 20990 | 3300002I08Rik | 69277  | 2-:150136672-150188501  |
| 20991 | 2900093K20Rik | 68037  | 2+:163244447-163246095  |
| 20992 | Dedd          | 21945  | 1+:173268446-173271334  |
| 20993 | Snx13         | 217463 | 12+:35731873-35829228   |
| 20994 | Pcdhb17       | 93888  | 18+:37644812-37647943   |
| 20995 | Tfrc          | 22042  | 16+:32613276-32630420   |
| 20996 | Osmr          | 18414  | 15-:6763589-6824283     |
| 20997 | MMT00028135   | 631323 | 11+:57997341-58002440   |
| 20998 | Irx1          | 16371  | 13-:72095399-72100972   |
| 20999 | 1110049F12Rik | 66193  | 4-:135531518-135542320  |
| 21000 | Vmo1          | 327956 | 11-:70327044-70328104   |
| 21001 | Slc9a7        | 236727 | X-:19682826-19688913    |
| 21002 | Olf862        | 258555 | 9-:19687827-19688747    |
| 21003 | Uckl1         | 68556  | 2-:181303852-181327780  |
| 21004 | MMT00013593   |        | 7+:77635832-77636747    |
| 21005 | Wdfy2         | 268752 | 14+:63456757-63576109   |
| 21006 | Spry2         | 24064  | 14-:106291733-106296036 |
| 21007 | Rbp2          | 19660  | 9+:98390974-98410012    |
| 21008 | 4933436I01Rik | 66780  | X-:65173038-65174625    |
| 21009 | Msto1         | 229524 | 3-:88713565-88717822    |
| 21010 | Dyrk1a        | 13548  | 16+:94833014-94916917   |

|       |               |           |                         |
|-------|---------------|-----------|-------------------------|
| 21011 | Clasp2        | 76499     | 9+:113650590-113828431  |
| 21012 | MMT00064569   |           |                         |
| 21013 | Vnn3          | 26464     | 10+:23571277-23589637   |
| 21014 | Usp54         | 78787     | 14-:21368139-21380894   |
| 21015 | MMT00014048   |           | 19+:17615518-17636722   |
| 21016 | AW146020      | 330361    | 6+:81873851-81882911    |
| 21017 | Gstz1         | 14874     | 12-:88495797-88495928   |
| 21018 | Eif3m         | 98221     | 2-:104839812-104857184  |
| 21019 | Picalm        | 233489    | 7+:97279031-97357434    |
| 21020 | Rgmb          | 68799     | 17-:15944108-15955445   |
| 21021 | Npas2         | 18143     | 1+:39251056-39419031    |
| 21022 | MMT00001569   |           | 5+:23532691-23558340    |
| 21023 | 5730559C18Rik | 67313     | 1-:138120139-138124241  |
| 21024 | Zkscan6       | 52712     | 11+:65620676-65642740   |
| 21025 | 1500005A01Rik | 85308     | 14-:56200360-56204091   |
| 21026 | Vstm2a        | 211739    | 11+:16157774-16184188   |
| 21027 | Gabre         | 14404     | X-:69502770-69520060    |
| 21028 | Tmem209       | 72649     | 6-:30431229-30444838    |
| 21029 | MMT00015031   |           | 4-:103872648-104067460  |
| 21030 | Ccdc80        | 67896     | 16+:45093786-45128001   |
| 21031 | Slc44a5       | 242259    | 3+:153906493-153921473  |
| 21032 | 2310016D23Rik | 76443     | 1+:60835653-60849426    |
| 21033 | Gzmk          | 14945     | 13-:113962082-113971105 |
| 21034 | Cts8          | 56094     | 13-:61349241-61356713   |
| 21035 | 4933427E13Rik | 71234     | 11+:25226104-25267139   |
| 21036 | Rhoc          | 11853     | 3+:104591969-104597377  |
| 21037 | Nufip1        | 27275     | 14+:76510739-76534893   |
| 21038 | Exosc7        | 66446     | 9+:123022362-123045243  |
| 21039 | Pcnxl2        | 270109    | 8-:128275430-128421981  |
| 21040 | 4930533K18Rik | 75189     | 10+:70331388-70387215   |
| 21041 | Cyp17a1       | 13074     | 19-:46741672-46747363   |
| 21042 | Tbx6          | 21389     | 7+:133924996-133929061  |
| 21043 | Gns           | 75612     | 10+:120802147-120834301 |
| 21044 | Zfyve20       | 78287     | 6-:92136714-92164938    |
| 21045 | Crb3          | 224912    | 17+:57201692-57205335   |
| 21046 | 4921517D21Rik | 67722     | 9+:107830799-107834792  |
| 21047 | Morf4l1       | 21761     | 9-:89986508-90009507    |
| 21048 | Cdrt4         | 66338     | 11+:62764694-62806597   |
| 21049 | 1700129I04Rik | 330577    | 7-:89783078-89794339    |
| 21050 | MMT00072914   |           | 3-:124745178-124746241  |
| 21051 | Coq4          | 227683    | 2+:29643785-29653262    |
| 21052 | Marcksl1      | 17357     | 4+:129190887-129193218  |
| 21053 | Ypel1         | 106369    | 16+:17070321-17086434   |
| 21054 | EG620395      | 620395    | 16+:3730509-3731025     |
| 21055 | Gltp          | 56356     | 5-:115120415-115140870  |
| 21056 | Tmem92        | 544806    | 11-:94640567-94643988   |
| 21057 | Pja1          | 18744     | X-:96661454-96666011    |
| 21058 | MMT00013752   | 100044420 | 4-:88245080-88245777    |
| 21059 | Cabp7         | 192650    | 11-:4638823-4646730     |
| 21060 | Ela1          | 109901    | 15-:100504853-100518353 |
| 21061 | Mdh1b         | 76668     | 1-:63745401-63766155    |



|       |               |        |                         |
|-------|---------------|--------|-------------------------|
| 21062 | Rpl711        | 66229  | 17-:46912049-46919595   |
| 21063 | MMT00007639   |        | 6+:48931099-48931889    |
| 21064 | Mea1          | 17256  | 17+:46818085-46820052   |
| 21065 | MMT00048282   |        | 3-:140402038-140604181  |
| 21066 | Gfod1         | 328232 | 13-:43295693-43399787   |
| 21067 | MMT00077109   |        | 5-:105170617-105181507  |
| 21068 | Fbxo10        | 269529 | 4-:45048783-45097394    |
| 21069 | Tet2          | 214133 | 3-:133148475-133150801  |
| 21070 | Cnot8         | 69125  | 11+:57917730-57931348   |
| 21071 | Il4i1         | 14204  | 7+:52091658-52096178    |
| 21072 | MMT00015730   |        | 1-:29541368-29542780    |
| 21073 | Zfp51         | 22709  | 17+:21589397-21602551   |
| 21074 | Gata2         | 14461  | 6+:88143884-88157024    |
| 21075 | Gtf2h5        | 66467  | 17+:6079816-6085478     |
| 21076 | Abra          | 223513 | 15-:41697235-41701251   |
| 21077 | 6430537H07Rik | 226265 | 19+:59006387-59045903   |
| 21078 | MMT00067065   |        | 10-:29803972-29805141   |
| 21079 | Tfpi2         | 21789  | 6-:3912595-3918354      |
| 21080 | MMT00035581   |        | 13+:28163933-28180873   |
| 21081 | Mapk13        | 26415  | 17+:28906317-28915649   |
| 21082 | E330009J07Rik | 243780 | 6-:40356363-40386124    |
| 21083 | Serpinb9c     | 20707  | 13-:33241846-33249693   |
| 21084 | Nkiras2       | 71966  | 11+:100484268-100488916 |
| 21085 | MMT00021687   |        | 9-:114556710-114557164  |
| 21086 | Stat5b        | 20851  | 11-:100644293-100711798 |
| 21087 | Mepce         | 231803 | 5-:138223134-138226186  |
| 21088 | MMT00055569   |        | 1-:96365291-96366482    |
| 21089 | MMT00048642   |        | 1-:146069047-146070255  |
| 21090 | Fbxo18        | 50755  | 2-:11664200-11699154    |
| 21091 | Nup160        | 59015  | 2+:90517371-90576484    |
| 21092 | Zfp750        | 319530 | 11-:121372290-121375361 |
| 21093 | Lymr2         | 108755 | 4+:32887245-32889227    |
| 21094 | A730046J19Rik | 319764 | X+:140588263-140596777  |
| 21095 | 9130401M01Rik | 75758  | 15-:57853830-57865772   |
| 21096 | Olfir958      | 258327 | 9-:39357515-39358454    |
| 21097 | 1700055N04Rik | 73458  | 19+:3958806-3964578     |
| 21098 | Terf2ip       | 57321  | 8+:114535304-114544360  |
| 21099 | Rapgef6       | 192786 | 11+:54251798-54508080   |
| 21100 | MMT00065179   |        |                         |
| 21101 | 1110032A03Rik | 68721  | 9-:50571831-50576209    |
| 21102 | Cmtm7         | 102545 | 9-:114665954-114690947  |
| 21103 | Onecut2       | 225631 | 18+:64500627-64546284   |
| 21104 | Ppp2r2a       | 71978  | 14-:67689069-67691274   |
| 21105 | Pex26         | 74043  | 6+:121133905-121146203  |
| 21106 | Il1f5         | 54450  | 2+:24132918-24137595    |
| 21107 | Qtrtd1        | 106248 | 16-:43863142-43881326   |
| 21108 | Fndc3a        | 319448 | 14-:72937757-73109800   |
| 21109 | Col8a2        | 329941 | 4+:125986859-125991185  |
| 21110 | Emg1          | 14791  | 6-:124654404-124662145  |
| 21111 | Tmem132c      | 208213 | 5+:128031872-128045272  |
| 21112 | Pigb          | 55981  | 9-:72863502-72887506    |

|       |               |        |                         |
|-------|---------------|--------|-------------------------|
| 21113 | MMT00028787   |        | 16+:20820417-20821085   |
| 21114 | Ints7         | 77065  | 1+:193399645-193447570  |
| 21115 | MMT00082318   |        | 14-:19376517-19377691   |
| 21116 | Lrrc10        | 237560 | 10+:116482410-116483820 |
| 21117 | mCG_124640    | 624652 | 2+:38829917-38832192    |
| 21118 | D17Wsu92e     | 224647 | 17+:27921322-27922077   |
| 21119 | Apob          | 238055 | 12+:7984453-8023641     |
| 21120 | Igk-C         | 16071  | 6+:70613261-70676963    |
| 21121 | 5730590G19Rik | 77011  | 7+:86805118-86805888    |
| 21122 | Fndc7         | 320181 | 3-:108683854-108692717  |
| 21123 | 1700012I11Rik | 69334  | 15+:67058328-67208655   |
| 21124 | Hoxb5         | 15413  | 11+:96164825-96167434   |
| 21125 | Mtif3         | 76366  | 5-:147766504-147775350  |
| 21126 | Dera          | 232449 | 6+:137703061-137805860  |
| 21127 | Triobp        | 110253 | 15+:78813509-78836300   |
| 21128 | Olfir76       | 258677 | 19-:12194211-12194923   |
| 21129 | Odz4          | 23966  | 7+:103319753-104055760  |
| 21130 | MMT00011706   | 66449  | 16-:4616465-4624946     |
| 21131 | Mlst1         | 330450 | 6+:148087056-148123728  |
| 21132 | Pdss2         | 71365  | 10+:42941291-43160407   |
| 21133 | Trem12        | 328833 | 17+:48441887-48447724   |
| 21134 | Ppp2r2a       | 71978  | 14-:67634163-67657817   |
| 21135 | Gm711         | 279029 | 2+:26806073-26809014    |
| 21136 | Golga1        | 76899  | 2-:38871672-38921007    |
| 21137 | Smad1         | 17125  | 8-:81863377-81896117    |
| 21138 | Auts2         | 319974 | 5-:132503558-132526282  |
| 21139 | Olfir461      | 258380 | 6-:40494034-40494976    |
| 21140 | Prdx2         | 21672  | 8+:87493598-87498214    |
| 21141 | Asb15         | 78910  | 6+:24478143-24520984    |
| 21142 | Gm129         | 229599 | 3-:95682425-95686173    |
| 21143 | Ypel3         | 66090  | 7+:133920488-133924023  |
| 21144 | Lhfp13        | 269629 | 5+:22608229-22608707    |
| 21145 | Gm784         | 333564 | X-:103555704-103642981  |
| 21146 | Rhoa          | 11848  | 9+:108208825-108239251  |
| 21147 | Bcl7a         | 77045  | 5+:123794514-123822855  |
| 21148 | MMT00044214   |        | 14+:35329353-35329766   |
| 21149 | A230065H16Rik | 380787 | 12+:112645018-112650301 |
| 21150 | Rbm17         | 76938  | 2-:11506506-11524832    |
| 21151 | Nkap          | 67050  | X+:34666806-34688277    |
| 21152 | Gpx5          | 14780  | 13-:21378301-21384555   |
| 21153 | Mr1           | 15064  | 1-:156975029-156993821  |
| 21154 | MMT00009510   |        | 11-:30654557-30668836   |
| 21155 | Clec4b1       | 69810  | 6+:123000023-123021562  |
| 21156 | Bmper         | 73230  | 9+:23028002-23058915    |
| 21157 | Efemp1        | 216616 | 11+:28767772-28826733   |
| 21158 | Casp14        | 12365  | 10-:78174741-78180903   |
| 21159 | Pik3c2g       | 18705  | 6+:139564832-139668705  |
| 21160 | Irs2          | 384783 | 8-:10984687-11008770    |
| 21161 | Sox2          | 20674  | 3+:34549337-34550296    |
| 21162 | MMT00008728   |        | 3-:12384339-12662887    |
| 21163 | Slc16a5       | 217316 | 11+:115323818-115335706 |

|       |               |        |                         |
|-------|---------------|--------|-------------------------|
| 21164 | Tmem104       | 320534 | 11-:115107814-115108338 |
| 21165 | Hmbs          | 15288  | 9-:44144376-44150429    |
| 21166 | A930029G22Rik | 654806 | 17-:69766732-69788671   |
| 21167 | Irf5          | 27056  | 6+:29476732-29487319    |
| 21168 | Olf498        | 258304 | 7+:115608839-115609831  |
| 21169 | MMT00015992   |        |                         |
| 21170 | D6Wsu176e     | 27999  | 6-:22257890-22306081    |
| 21171 | 1700016G05Rik | 67690  | 6-:40464822-40469507    |
| 21172 | Rgl3          | 71746  | 9-:21776249-21793856    |
| 21173 | Rassf6        | 73246  | 5-:91032120-91069501    |
| 21174 | Nhlh1         | 18071  | 1-:173982423-173987682  |
| 21175 | 1700025I17Rik | 70372  | 13+:53489005-53550188   |
| 21176 | Arl15         | 218639 | 13+:114712448-114757999 |
| 21177 | Trpv6         | 64177  | 6-:41570623-41586297    |
| 21178 | MMT00020279   |        | 10-:104307609-104311543 |
| 21179 | Olf288        | 545140 | 15-:98037844-98048622   |
| 21180 | Arhgef1       | 16801  | 7+:25688074-25711608    |
| 21181 | MMT00021170   |        | 5+:11192522-11193468    |
| 21182 | Runx2         | 12393  | 17-:44744854-44951576   |
| 21183 | Zfp142        | 77264  | 1-:74612387-74636663    |
| 21184 | Svs1          | 243377 | 6+:48940928-48941731    |
| 21185 | MMT00008840   |        | Y+:992142-993278        |
| 21186 | 4930451G09Rik | 74684  | 16+:4964379-4978176     |
| 21187 | RP23-54E4.8   | 625752 | 13-:21388116-21388587   |
| 21188 | Pnkp          | 59047  | 7+:52112773-52118020    |
| 21189 | Arl5c         | 217151 | 11-:97850895-97857486   |
| 21190 | Senp5         | 320213 | 16-:31963227-31990520   |
| 21191 | Znrf1         | 170737 | 8+:114060843-114148194  |
| 21192 | 2310047A01Rik | 71918  | 14-:26531130-26588357   |
| 21193 | Lbh           | 77889  | 17+:73267644-73288909   |
| 21194 | Zfp641        | 239652 | 15-:98118903-98124234   |
| 21195 | Tbc1d7        | 67046  | 13-:43247112-43266728   |
| 21196 | MMT00072944   | 622480 | 4+:129626030-129629104  |
| 21197 | Smtn          | 29856  | 11-:3417525-3439242     |
| 21198 | Mbl1          | 17194  | 14+:41964744-41972246   |
| 21199 | Pcdh9         | 211712 | 14-:93414732-93429790   |
| 21200 | Phex          | 18675  | X-:153596617-153853210  |
| 21201 | MMT00014061   |        | 15+:101469004-101470430 |
| 21202 | Acly          | 104112 | 11-:100337671-100389186 |
| 21203 | C330018D20Rik | 77422  | 18-:57115697-57133141   |
| 21204 | 1700001L19Rik | 69315  | 13+:68736312-68752165   |
| 21205 | Pkmyt1        | 268930 | 17+:23863407-23873704   |
| 21206 | Supt3h        | 109115 | 17+:45060126-45256238   |
| 21207 | Pi15          | 94227  | 1+:17592075-17615527    |
| 21208 | MMT00077807   |        | X-:151585483-151585859  |
| 21209 | Ebf4          | 228598 | 2+:130121763-130196587  |
| 21210 | Plaur         | 18793  | 7+:25247528-25260489    |
| 21211 | 2010301N04Rik | 72103  | 6-:87579740-87622058    |
| 21212 | Klb           | 83379  | 5+:65739649-65775242    |
| 21213 | Tdrd1         | 83561  | 19+:56916758-56941130   |
| 21214 | Scd1          | 20249  | 19-:44472409-44481899   |

|       |               |        |                         |
|-------|---------------|--------|-------------------------|
| 21215 | Mep1b         | 17288  | 18+:21230844-21258681   |
| 21216 | Whsc1         | 107823 | 5+:34163500-34240608    |
| 21217 | 2010309E21Rik | 66488  | 6+:86315717-86320051    |
| 21218 | Col9a2        | 12840  | 4+:120711936-120727903  |
| 21219 | 9930039A11Rik | 320040 | 11+:68702109-68706452   |
| 21220 | Myd116        | 17872  | 7-:52778289-52781583    |
| 21221 | Otud6b        | 72201  | 4-:14739599-14753565    |
| 21222 | Fig4          | 103199 | 10-:40907977-41023047   |
| 21223 | Pira1         | 18722  | 7-:3788417-3867086      |
| 21224 | MMT00039633   |        | 8+:88348200-88348461    |
| 21225 | Zfp449        | 78619  | X+:53601457-53616391    |
| 21226 | Arid5b        | 71371  | 10-:67560371-67740935   |
| 21227 | MMT00016115   |        | 2+:150817917-150818530  |
| 21228 | A430107D22Rik | 320484 | 17-:32527175-32540328   |
| 21229 | Acss1         | 68738  | 2-:150443846-150493965  |
| 21230 | Ppp2r5c       | 26931  | 12-:111717443-111723861 |
| 21231 | Cnr1          | 12801  | 4+:34030588-34032011    |
| 21232 | Nkiras1       | 69721  | 14+:19103798-19112954   |
| 21233 | Rmi1          | 74386  | 13+:58502763-58503877   |
| 21234 | Olfr665       | 258810 | 7+:112029222-112030172  |
| 21235 | Ttn           | 22138  | 2-:76666542-76667387    |
| 21236 | Glr5          | 73046  | 12+:106270898-106279120 |
| 21237 | Poli          | 26447  | 18-:70668337-70689975   |
| 21238 | BC068110      | 383103 | 16-:10422689-10447372   |
| 21239 | Ctdp1         | 67655  | 18-:80604703-80637598   |
| 21240 | Dock11        | 75974  | X+:33428865-33616556    |
| 21241 | Fcrl1         | 229499 | 3+:87190339-87207889    |
| 21242 | Zfp654        | 72020  | 16-:64765058-64794382   |
| 21243 | BC019943      | 234138 | 8+:32261102-32270558    |
| 21244 | Nfatc1        | 18018  | 18-:80845197-80904863   |
| 21245 | Dock2         | 94176  | 11-:34501010-34597354   |
| 21246 | Telo2         | 71718  | 17-:25236521-25252720   |
| 21247 | Tmed5         | 73130  | 5-:108550665-108561610  |
| 21248 | Slc25a3       | 18674  | 10-:90579536-90586712   |
| 21249 | MMT00056913   |        | X-:71739035-71740292    |
| 21250 | Asb10         | 117590 | 5-:24038992-24046275    |
| 21251 | Cpt1a         | 12894  | 19+:3323278-3385732     |
| 21252 | Dnajc12       | 30045  | 10+:62849364-62871567   |
| 21253 | MMT00068187   |        | 4-:105808498-105810353  |
| 21254 | Bbs7          | 71492  | 3-:36474214-36512313    |
| 21255 | Kif18a        | 228421 | 2+:109120894-109181901  |
| 21256 | Tirap         | 117149 | 9-:34994369-35007459    |
| 21257 | MMT00009771   |        | 7-:106395146-106397764  |
| 21258 | 2010003K15Rik | 75606  | 10-:25247749-25256077   |
| 21259 | 5430416O09Rik | 71406  | 4+:43742922-43744950    |
| 21260 | Ropn1         | 76378  | 16+:34666781-34678566   |
| 21261 | Pax2          | 18504  | 19+:44831883-44835478   |
| 21262 | Myot          | 58916  | 18+:44493727-44515376   |
| 21263 | Thrb          | 21834  | 14+:18814088-18866287   |
| 21264 | Rn18s         | 19791  |                         |
| 21265 | Zfp712        | 78251  | 13-:67140520-67162107   |

|       |               |        |                         |
|-------|---------------|--------|-------------------------|
| 21266 | Cercam        | 99151  | 2+:29725012-29738368    |
| 21267 | 3110056O03Rik | 73218  | 10+:80318075-80331454   |
| 21268 | MMT00025084   |        | X-:38646510-38648239    |
| 21269 | A1cf          | 69865  | 19+:31943260-32021998   |
| 21270 | V1rg6         | 171241 | 7+:12465691-12466607    |
| 21271 | Pax9          | 18511  | 12+:57796657-57812216   |
| 21272 | Scnn1g        | 20278  | 7+:128878020-128911990  |
| 21273 | St14          | 19143  | 9-:30896992-30939273    |
| 21274 | BC005624      | 227707 | 2-:30828356-30837406    |
| 21275 | MMT00041364   |        | 15+:92799335-92800701   |
| 21276 | Saps3         | 52036  | 19-:3454930-3575738     |
| 21277 | Eif5a         | 276770 | 11-:69730215-69734874   |
| 21278 | MMT00072454   |        | 19-:8586378-8587816     |
| 21279 | Stk38l        | 232533 | 6+:146706970-146725074  |
| 21280 | Olfr555       | 259107 | 7+:109807336-109808284  |
| 21281 | Zfp111        | 56707  | 7-:24981895-24988602    |
| 21282 | Slc6a8        | 102857 | X+:70918488-70927837    |
| 21283 | Prl3b1        | 18776  | 13+:27334298-27341547   |
| 21284 | Cep110        | 26920  | 2+:34982885-35010909    |
| 21285 | Psg22         | 243862 | 7+:19304793-19312594    |
| 21286 | Zmat2         | 66492  | 18+:36953581-36958313   |
| 21287 | Cplx4         | 225644 | 18-:66115377-66129832   |
| 21288 | Tcp11l2       | 216198 | 10+:84039691-84077096   |
| 21289 | Dbi           | 13167  | 1-:122009975-122017592  |
| 21290 | Ttl           | 69737  | 2+:128891710-128919489  |
| 21291 | Slc39a4       | 72027  | 15-:76442814-76447322   |
| 21292 | Trdmt1        | 13434  | 2-:13432724-13466278    |
| 21293 | Fau           | 14109  | 19+:6057950-6059518     |
| 21294 | Sphkap        | 77629  | 1-:83253016-83404686    |
| 21295 | Snf1lk        | 17691  | 17-:31981201-31992723   |
| 21296 | Rpl14         | 67115  | 9+:120480633-120483770  |
| 21297 | Gcnt7         | 654821 | 2-:172276565-172280402  |
| 21298 | Psg17         | 26437  | 7-:19399342-19406956    |
| 21299 | Pcdh19        | 279653 | X+:130077915-130118104  |
| 21300 | Hdac10        | 170787 | 15-:88953735-88959624   |
| 21301 | Slc26a2       | 13521  | 18-:61356507-61371136   |
| 21302 | Scg5          | 20394  | 2-:113616521-113669226  |
| 21303 | Kcnk2         | 16526  | 1-:191031815-191167711  |
| 21304 | Prcp          | 72461  | 7+:100023781-100082255  |
| 21305 | Acmsd         | 266645 | 1+:129625971-129664151  |
| 21306 | Pvrl1         | 58235  | 9+:43552726-43612097    |
| 21307 | Krcc1         | 57896  | 6+:71232273-71235312    |
| 21308 | Lcorl         | 209707 | 5-:46113601-46247777    |
| 21309 | Olfr768       | 258863 | 10-:128530091-128531028 |
| 21310 | MMT00046273   |        |                         |
| 21311 | Zscan4-ps1    | 545912 | 7-:11653844-11655064    |
| 21312 | C430003P19Rik | 109359 | 7+:140050920-140076792  |
| 21313 | Rhou          | 69581  | 8+:126177828-126187782  |
| 21314 | Mycbp2        | 105689 | 14-:103512626-103745734 |
| 21315 | A430005L14Rik | 97159  | 4+:153331368-153336031  |
| 21316 | MMT00058095   | 385049 | 13+:13337651-13368062   |

|       |               |        |                         |
|-------|---------------|--------|-------------------------|
| 21317 | Paip1         | 218693 | 13+:120217728-120246096 |
| 21318 | MMT00000812   |        | 7+:34420180-34482717    |
| 21319 | Krt15         | 16665  | 11:-99995487-99995616   |
| 21320 | Kcne1l        | 66240  | X:-138739295-138740741  |
| 21321 | Acox1         | 74121  | 2+:127680363-127949609  |
| 21322 | Usp1          | 231915 | 5+:149996289-150027009  |
| 21323 | MMT00074228   |        | X:-76876748-76877213    |
| 21324 | Ssna1         | 68475  | 2:-25126560-25127929    |
| 21325 | Shb           | 230126 | 4:-45436150-45543625    |
| 21326 | MMT00047910   |        | 5:-39792387-39793484    |
| 21327 | Camk2d        | 108058 | 3+:126300357-126543283  |
| 21328 | MMT00040005   |        | X+:100684816-100685271  |
| 21329 | Azi2          | 27215  | 9+:117949801-117972689  |
| 21330 | Abcc12        | 244562 | 8:-89028485-89082223    |
| 21331 | Slc10a6       | 75750  | 5:-104034729-104058422  |
| 21332 | 6330439K17Rik | 241688 | 2:-144301825-144353135  |
| 21333 | Cirbp         | 12696  | 10+:79630585-79634398   |
| 21334 | Dio3          | 107585 | 12+:111517444-111518354 |
| 21335 | Trp53rk       | 76367  | 2+:166619296-166621652  |
| 21336 | Lck           | 16818  | 4:-129225593-129250851  |
| 21337 | Ldlrap1       | 100017 | 4:-134301336-134323858  |
| 21338 | Lcn3          | 16820  | 2+:25621088-25623619    |
| 21339 | Glb1l3        | 70893  | 9:-26625612-26668241    |
| 21340 | Armc1         | 74252  | 3:-19033754-19063079    |
| 21341 | Zfp59         | 22717  | 7+:28631421-28641995    |
| 21342 | Tmco2         | 69469  | 4:-120778262-120781797  |
| 21343 | Cryz          | 12972  | 3+:154259825-154286147  |
| 21344 | Iqub          | 214704 | 6:-24395447-24400852    |
| 21345 | Hells         | 15201  | 19+:39005446-39042746   |
| 21346 | Pcsk5         | 18552  | 19:-17749904-17911931   |
| 21347 | Gjd2          | 14617  | 2:-113836765-113838870  |
| 21348 | MMT00039685   |        | X:-136210588-136211975  |
| 21349 | MMT00066665   |        | X:-57735009-57735926    |
| 21350 | Lce1e         | 68694  | 3:-92511322-92512996    |
| 21351 | Shisa5        | 66940  | 9+:108941140-108960236  |
| 21352 | Dtnbp1        | 94245  | 13:-45017577-45097341   |
| 21353 | Tbc1d5        | 72238  | 17:-50875407-51164532   |
| 21354 | Xpa           | 22590  | 4:-46188113-46209183    |
| 21355 | Cyb5d2        | 192986 | 11:-72596149-72609521   |
| 21356 | Nkx2-6        | 18092  | 14+:69789789-69793597   |
| 21357 | Cd3g          | 12502  | 9:-44777771-44788507    |
| 21358 | Jarid2        | 16468  | 13+:44826206-45015476   |
| 21359 | Rabl4         | 67042  | 15:-77989894-78004532   |
| 21360 | Sox11         | 20666  | 12:-28024667-28027561   |
| 21361 | 9530082P21Rik | 638247 | 17+:23886185-23887153   |
| 21362 | Cxcr4         | 12767  | 1:-130485421-130488786  |
| 21363 | Mrrf          | 67871  | 2+:35991907-36032794    |
| 21364 | Ppm1h         | 319468 | 10+:122219238-122379594 |
| 21365 | Igh           | 111507 | 12:-116067451-116089871 |
| 21366 | 2610304G08Rik | 70470  | 2+:157854229-157903055  |
| 21367 | 1700057K13Rik | 73435  | 1:-159029277-159038782  |

|       |               |           |                         |
|-------|---------------|-----------|-------------------------|
| 21368 | Pccb          | 66904     | 9-:100882456-100935294  |
| 21369 | Cd4           | 12504     | 6-:124814710-124838227  |
| 21370 | MMT00081548   | 100043861 | 6-:128655853-128663633  |
| 21371 | Spnb2         | 20742     | 11-:30007625-30098164   |
| 21372 | Gm1661        | 381544    | 4-:116885939-116910446  |
| 21373 | MMT00077926   |           | 14-:35007630-35009003   |
| 21374 | Gal3st1       | 53897     | 11+:3896911-3899315     |
| 21375 | MMT00043149   |           | 13+:81203605-81204605   |
| 21376 | MMT00058413   |           | 3-:112133818-112134721  |
| 21377 | MMT00055233   |           | 19+:20996875-21026557   |
| 21378 | Havcr2        | 171285    | 11+:46268436-46294754   |
| 21379 | Rnf121        | 75212     | 7-:109167649-109213654  |
| 21380 | Ier5          | 15939     | 1-:156944656-156946766  |
| 21381 | Rilpl2        | 80291     | 5-:124913275-124928244  |
| 21382 | Aste1         | 66595     | 9+:105299250-105307791  |
| 21383 | MMT00003576   |           | 4-:25449652-25469072    |
| 21384 | Alg13         | 67574     | X+:140752565-140759731  |
| 21385 | BC094916      | 545384    | 1-:175450080-175466084  |
| 21386 | Pcbp3         | 59093     | 10-:76224601-76424533   |
| 21387 | Cnot7         | 18983     | 8-:41579081-41595524    |
| 21388 | Gbe1          | 74185     | 16+:70314380-70569959   |
| 21389 | Odf2          | 18286     | 2+:29745619-29778056    |
| 21390 | Cnga2         | 12789     | X+:69248605-69255573    |
| 21391 | Lgi2          | 246316    | 5-:52929102-52957519    |
| 21392 | Crx           | 12951     | 7-:16452576-16465257    |
| 21393 | Rai2          | 24004     | X+:158155100-158217789  |
| 21394 | Cdh15         | 12555     | 8+:125371865-125391297  |
| 21395 | Mast4         | 328329    | 13-:103847920-103961637 |
| 21396 | 4930451111Rik | 78118     | 7-:133973980-133974994  |
| 21397 | Nt5dc3        | 103466    | 10+:86267525-86297227   |
| 21398 | Tmco6         | 71983     | 18+:36894798-36902045   |
| 21399 | MMT00055421   | 675238    | 10-:77315396-77325187   |
| 21400 | Il1rap1       | 331461    | X-:84545923-84550289    |
| 21401 | Ankrd11       | 77087     | 8-:125407222-125498693  |
| 21402 | Pigv          | 230801    | 4-:133218168-133228533  |
| 21403 | MMT00010875   |           | 18-:75340262-75342540   |
| 21404 | Hoxa10        | 15395     | 6-:52181195-52184938    |
| 21405 | Slc39a11      | 69806     | 11-:113111766-113167274 |
| 21406 | Lrp2          | 14725     | 2-:69262392-69276531    |
| 21407 | Slc25a46      | 67453     | 18-:31741243-31769559   |
| 21408 | Svil          | 225115    | 18+:4920535-5119286     |
| 21409 | Gldc          | 104174    | 19-:30172938-30249908   |
| 21410 | Calr4         | 108802    | 4+:108908016-108927235  |
| 21411 | Lenep         | 57275     | 3-:89205920-89206579    |
| 21412 | Afap111       | 106877    | 18-:61889915-61946343   |
| 21413 | 4922501C03Rik | 382090    | 9-:87087550-87150371    |
| 21414 | BC017643      | 217370    | 11-:121083904-121090579 |
| 21415 | Has1          | 15116     | 17-:17980292-17992152   |
| 21416 | D030018L15Rik | 402773    | 15+:95903628-95906402   |
| 21417 | Psmb6         | 19175     | 11+:70338937-70341124   |
| 21418 | Nr3c2         | 110784    | 8+:79609425-79766444    |

|       |               |        |                         |
|-------|---------------|--------|-------------------------|
| 21419 | Giyd2         | 75764  | 7-:133834191-133839153  |
| 21420 | Smarcad1      | 13990  | 6+:64992523-65066042    |
| 21421 | Usp34         | 17847  | 11+:23332245-23390534   |
| 21422 | Ric8b         | 237422 | 10+:84380486-84420857   |
| 21423 | Foxl2         | 26927  | 9+:98855961-98858959    |
| 21424 | Supt3h        | 109115 | 17+:44914119-44923683   |
| 21425 | Rab6          | 19346  | 7+:107756300-107788704  |
| 21426 | 4930590J08Rik | 381798 | 6+:91866247-91900057    |
| 21427 | Tc2n          | 74413  | 12-:103074865-103151474 |
| 21428 | MMT00012296   |        | 13-:18213671-18214236   |
| 21429 | Ptpa          | 19262  | 2+:130276275-130379759  |
| 21430 | Pes1          | 64934  | 11+:3864017-3879218     |
| 21431 | Xbp1          | 22433  | 11+:5420969-5425873     |
| 21432 | Olf531        | 258955 | 7-:147586029-147586943  |
| 21433 | Ubx6          | 108159 | 8-:34730660-34753816    |
| 21434 | Nhs           | 195727 | X-:158274746-158280359  |
| 21435 | V1rc1         | 113858 | 6+:57063418-57064352    |
| 21436 | Toe1          | 68276  | 4-:116476609-116480164  |
| 21437 | Irg1          | 16365  | 14+:103446190-103455312 |
| 21438 | Plekha4       | 69217  | 7+:52781698-52809598    |
| 21439 | Il25          | 140806 | 14+:55551607-55554671   |
| 21440 | Tmsb10        | 19240  | 6-:72907346-72908393    |
| 21441 | MMT00041291   |        | 6+:100676497-100677620  |
| 21442 | Rad51l1       | 19363  | 12+:80401535-80915338   |
| 21443 | Lax1          | 240754 | 1-:135575633-135586594  |
| 21444 | Pnpt1         | 71701  | 11+:29030744-29061595   |
| 21445 | Kap           | 16483  | 6-:133799872-133803688  |
| 21446 | Ccl12         | 20293  | 11+:81915379-81916793   |
| 21447 | Adcyap1r1     | 11517  | 6+:55402288-55447164    |
| 21448 | Paqr7         | 71904  | 4+:134052892-134064725  |
| 21449 | Serp1b3a      | 20248  | 1-:108942592-108948916  |
| 21450 | Col22a1       | 69700  | 15-:71628899-71837618   |
| 21451 | Gja5          | 14613  | 3+:96854551-96855627    |
| 21452 | Tgfb1i1       | 21804  | 7+:135391531-135397225  |
| 21453 | Vmn2r108      | 627805 | 17-:20599846-20609335   |
| 21454 | MMT00068006   |        | 1+:38295963-38302553    |
| 21455 | MMT00002739   |        | 11+:100104573-100105006 |
| 21456 | Artn          | 11876  | 4-:117599198-117600288  |
| 21457 | MMT00036264   |        | 1+:62707381-62708331    |
| 21458 | Nr1h5         | 381463 | 3-:102753354-102758810  |
| 21459 | Hpse          | 15442  | 5-:101109419-101148700  |
| 21460 | MMT00008970   | 631037 | 4-:115254589-115255749  |
| 21461 | MMT00034426   |        | 17-:22016905-22018029   |
| 21462 | Klhl28        | 66689  | 12-:66043428-66066521   |
| 21463 | Gulp1         | 70676  | 1+:44608537-44845719    |
| 21464 | Pop5          | 117109 | 5+:115688043-115690975  |
| 21465 | Nxn           | 18230  | 11-:76072066-76212562   |
| 21466 | Rimbp2        | 231760 | 5-:129266555-129325722  |
| 21467 | Senp3         | 80886  | 11-:69486613-69495204   |
| 21468 | Slc44a4       | 70129  | 17+:35051431-35067180   |
| 21469 | Nsdhl         | 18194  | X+:70171674-70202952    |



|       |               |        |                         |
|-------|---------------|--------|-------------------------|
| 21470 | Lrrc18        | 67580  | 14+:33804567-33827546   |
| 21471 | Stmn2         | 20257  | 3+:8509526-8561604      |
| 21472 | Olf340        | 258953 | 2+:36308106-36309044    |
| 21473 | BC048403      | 270802 | 10+:121177001-121188566 |
| 21474 | Crispld1      | 83691  | 1+:17717502-17754829    |
| 21475 | Olf836        | 258557 | 9+:18925400-18926353    |
| 21476 | Pds5b         | 100710 | 5+:151518974-151613277  |
| 21477 | Tmem27        | 57394  | X+:160528118-160556791  |
| 21478 | Loxhd1        | 240411 | 18+:77580666-77613937   |
| 21479 | Steap2        | 74051  | 5:-5671724-5677285      |
| 21480 | Igf1r         | 16001  | 7+:75309871-75372722    |
| 21481 | Bcl2a1c       | 12046  | 9+:114239273-114239658  |
| 21482 | Plscr4        | 235527 | 9+:92367739-92385751    |
| 21483 | Ippk          | 75678  | 13+:49516638-49558430   |
| 21484 | Zc3hc1        | 232679 | 6:-30316384-30341015    |
| 21485 | Pfdn2         | 18637  | 1+:173275839-173288236  |
| 21486 | Vmn2r1        | 56544  | 3+:63885563-63909380    |
| 21487 | 1810063B07Rik | 67509  | 14:-20896343-20902363   |
| 21488 | MMT00080701   |        | 11+:98587506-98588329   |
| 21489 | Slc38a11      | 320106 | 2:-65160723-65202086    |
| 21490 | Gnaz          | 14687  | 10+:74430020-74478693   |
| 21491 | MMT00017308   |        | X:-166637383-166637413  |
| 21492 | Dvl2          | 13543  | 11+:69814127-69823611   |
| 21493 | EG385328      | 385328 | X+:13788237-13788776    |
| 21494 | Nr1d2         | 353187 | 14:-19038936-19071587   |
| 21495 | Olf656        | 259078 | 7+:111766170-111767158  |
| 21496 | Ereg          | 13874  | 5+:91503647-91522672    |
| 21497 | Pias2         | 17344  | 18+:77336331-77391865   |
| 21498 | C920005C14Rik | 338368 | 15+:82171624-82174508   |
| 21499 | Sfn3          | 20557  | 11+:83004802-83038131   |
| 21500 | MMT00018393   |        | 16+:68511115-68511943   |
| 21501 | Stmn1         | 16765  | 4+:134026575-134029316  |
| 21502 | Csk           | 12988  | 9:-57474721-57478818    |
| 21503 | Srp72         | 66661  | 5+:77403733-77428931    |
| 21504 | Dnajc17       | 69408  | 2:-118998242-119034510  |
| 21505 | Acsbg2        | 328845 | 17:-56982526-57007795   |
| 21506 | St7           | 64213  | 6+:17699232-17892965    |
| 21507 | Gltd2         | 74782  | 10:-82113176-82153397   |
| 21508 | Echdc1        | 52665  | 10+:29033429-29065463   |
| 21509 | Tekt3         | 71062  | 11+:62875158-62908462   |
| 21510 | Tmem16c       | 228432 | 2:-110498084-110725202  |
| 21511 | MMT00054100   |        |                         |
| 21512 | Gas6          | 14456  | 8:-13465375-13494506    |
| 21513 | Ccdc66        | 320234 | 14:-28295822-28299807   |
| 21514 | Rfk           | 54391  | 19+:17468572-17475825   |
| 21515 | MMT00013736   | 625574 | 4+:88863120-88863720    |
| 21516 | Crkl          | 12929  | 16+:17452236-17483959   |
| 21517 | Sil1          | 81500  | 18:-35426050-35658520   |
| 21518 | Adamts17      | 233332 | 7+:74269810-74295255    |
| 21519 | 1700012B15Rik | 74173  | 12+:3235767-3235829     |
| 21520 | Hsd17b12      | 56348  | 2:-93873693-93998045    |

|       |               |        |                         |
|-------|---------------|--------|-------------------------|
| 21521 | Prdx4         | 53381  | X-:151758463-151772997  |
| 21522 | MMT00007903   |        | 8+:43008873-43012428    |
| 21523 | Galnt1l       | 108760 | 12+:81620020-81704879   |
| 21524 | Ncoa4         | 27057  | 14+:32978989-32991030   |
| 21525 | Txlna         | 109658 | 4-:129303322-129318269  |
| 21526 | Mkl1          | 223701 | 15-:80842713-81020954   |
| 21527 | Rnf144a       | 108089 | 12-:26995417-27100113   |
| 21528 | Nup85         | 445007 | 11+:115431296-115445298 |
| 21529 | Card6         | 239319 | 15-:5049913-5058447     |
| 21530 | Ogdhl         | 239017 | 14+:33140164-33160039   |
| 21531 | Ttc23         | 67009  | 7+:74792335-74871462    |
| 21532 | Akap9         | 100986 | 5+:4070291-4080200      |
| 21533 | BC057022      | 433940 | 5+:115017437-115062113  |
| 21534 | Rnf121        | 75212  | 7-:109168378-109213654  |
| 21535 | Bmp10         | 12154  | 6+:87379026-87384486    |
| 21536 | MMT00011639   |        | 17-:37306653-37307591   |
| 21537 | MMT00014241   |        | 3+:14098101-14099213    |
| 21538 | Rg9mtd1       | 52575  | 16-:56033832-56037887   |
| 21539 | Rbm11         | 224344 | 16+:75593188-75601499   |
| 21540 | Coil          | 12812  | 11+:88833933-88834428   |
| 21541 | Brf2          | 66653  | 8-:28233055-28239108    |
| 21542 | Larp4         | 207214 | 15+:99803129-99846782   |
| 21543 | BC064033      | 208164 | 6-:35263432-35276113    |
| 21544 | MMT00004338   |        | 17-:49449519-49487258   |
| 21545 | Pcdha9        | 192161 | 18+:37157533-37347311   |
| 21546 | Orm2          | 18406  | 4+:63023520-63026911    |
| 21547 | Il10          | 16153  | 1+:132916423-132921547  |
| 21548 | MMT00052315   |        | 2+:24034090-24036471    |
| 21549 | Rtp4          | 67775  | 16+:23610021-23613819   |
| 21550 | Sgcd          | 24052  | 11-:46792765-47193024   |
| 21551 | Bmf           | 171543 | 2-:118358294-118372743  |
| 21552 | MMT00031646   |        | 12-:109679116-109679553 |
| 21553 | EG628438      | 628438 | 18+:47271792-47272216   |
| 21554 | EG627607      | 627607 | 12+:88081891-88095385   |
| 21555 | Sgsm2         | 97761  | 11-:74678587-74710383   |
| 21556 | 4930579F01Rik | 67741  | 3-:137827043-137849678  |
| 21557 | Gabbr1        | 14408  | 4+:33219530-33250563    |
| 21558 | Tgfb1         | 21803  | 7+:26472020-26490015    |
| 21559 | Rnf219        | 72486  | 14-:104876753-104878430 |
| 21560 | Apol7e        | 666348 | 15+:77542747-77548355   |
| 21561 | BC050196      | 384619 | 7-:52444703-52445476    |
| 21562 | Mocs3         | 69372  | 2+:168056119-168057516  |
| 21563 | Arhgap9       | 216445 | 10+:126760787-126767000 |
| 21564 | Cdh18         | 320865 | 15+:23366204-23404173   |
| 21565 | Pde6h         | 78600  | 6+:136907781-136911793  |
| 21566 | MMT00047754   |        | X+:8536916-8560306      |
| 21567 | 5830417110Rik | 76022  | 3+:88650290-88667534    |
| 21568 | Cdc73         | 214498 | 1-:145454629-145549814  |
| 21569 | Rbx1          | 56438  | 15+:81296785-81305690   |
| 21570 | Gpr116        | 224792 | 17+:43497366-43593662   |
| 21571 | D030074E01Rik | 75964  | 18-:20975727-21054592   |

|       |               |        |                         |
|-------|---------------|--------|-------------------------|
| 21572 | Ankrd13a      | 68420  | 5+:115254401-115255825  |
| 21573 | U90926        | 57425  | 5-:92638920-92644434    |
| 21574 | Acot11        | 329910 | 4-:106420109-106472362  |
| 21575 | Cyp2c55       | 72082  | 19+:39081508-39117177   |
| 21576 | Pigk          | 329777 | 3+:152377068-152448887  |
| 21577 | 6330408A02Rik | 321008 | 7-:13844316-13864034    |
| 21578 | P2ry12        | 70839  | 3-:59020281-59024181    |
| 21579 | Lsm12         | 268490 | 11-:102023809-102046566 |
| 21580 | MMT00027671   | 639930 | 12-:116170561-116175628 |
| 21581 | Cbx3          | 12417  | 6+:51425235-51432603    |
| 21582 | Setx          | 269254 | 2+:29000906-29003997    |
| 21583 | Gstz1         | 14874  | 12+:88488724-88505671   |
| 21584 | Pde7a         | 18583  | 3-:19125917-19164957    |
| 21585 | Hipk1         | 15257  | 3-:103547595-103595102  |
| 21586 | Palm          | 18483  | 10+:79256353-79282967   |
| 21587 | MMT00002799   |        | 5+:69852287-69854009    |
| 21588 | Snrpa         | 53607  | 7-:27972024-27981078    |
| 21589 | Sdc2          | 15529  | 15+:32850477-32964476   |
| 21590 | Rpl41         | 67945  | 10-:127985334-127986031 |
| 21591 | Hectd3        | 76608  | 4+:116667964-116677875  |
| 21592 | Wdr46         | 57315  | 17+:34077682-34086360   |
| 21593 | 8430427H17Rik | 329540 | 2-:153296421-153355498  |
| 21594 | Hbxip         | 68576  | 3+:107081774-107086997  |
| 21595 | Trpv1         | 193034 | 11+:73051727-73074008   |
| 21596 | P2rx5         | 94045  | 11+:72974026-72986187   |
| 21597 | Yeats2        | 208146 | 16+:20150514-20230977   |
| 21598 | Olf353        | 258943 | 2-:36745430-36746366    |
| 21599 | Al462493      | 107197 | 19-:8954509-8955427     |
| 21600 | MMT00069173   |        | 5-:93800966-93804715    |
| 21601 | MMT00052061   |        | 1-:45945745-45947227    |
| 21602 | V1ra5         | 113847 | 6-:89819507-89820448    |
| 21603 | Nfatc2        | 18019  | 2-:168305027-168415761  |
| 21604 | Klh124        | 75785  | 16+:20097641-20123303   |
| 21605 | Uevld         | 54122  | 7-:54203014-54213842    |
| 21606 | Prkcq         | 18761  | 2+:11094008-11222853    |
| 21607 | Aldh1a1       | 11668  | 19+:20676457-20717944   |
| 21608 | Tpcn2         | 233979 | 7-:152439963-152444960  |
| 21609 | MMT00039978   |        | X+:100232943-100233745  |
| 21610 | Gpx1          | 14775  | 9+:108241606-108242747  |
| 21611 | 1700085A12Rik | 78631  | X+:36699441-36700135    |
| 21612 | MMT00080634   |        | 5-:69423728-69424341    |
| 21613 | MMT00033404   |        | X-:148196545-148197026  |
| 21614 | A230107C01Rik | 320225 | 7-:29975745-29976724    |
| 21615 | Dip2c         | 208440 | 13+:9492341-9536111     |
| 21616 | Sh3pxd2a      | 14218  | 19-:47341402-47538899   |
| 21617 | MMT00050850   |        | 18-:82885510-82895572   |
| 21618 | MMT00041235   |        | 6+:90848276-90856207    |
| 21619 | MMT00060699   |        | 7+:107093648-107118866  |
| 21620 | Tmem166       | 232146 | 6+:81991666-82043092    |
| 21621 | MMT00071794   |        | 17-:37977249-37978796   |
| 21622 | Sprr2i        | 20763  | 3+:92212637-92212867    |

|       |               |        |                         |
|-------|---------------|--------|-------------------------|
| 21623 | Gpr98         | 110789 | 13-:81731551-81772338   |
| 21624 | Ube2b         | 22210  | 11-:51799704-51813865   |
| 21625 | MMT00008928   |        | 7+:69083122-69083724    |
| 21626 | 1700023L04Rik | 76419  | 6+:29910992-29945290    |
| 21627 | Fcgr3         | 14131  | 1-:172981325-172989466  |
| 21628 | Slc35e1       | 270066 | 8-:75007664-75016500    |
| 21629 | MMT00017186   |        | 8-:77929978-77999042    |
| 21630 | Ahcyl2        | 74340  | 6+:29718497-29720618    |
| 21631 | Diap2         | 54004  | X+:126338548-126623312  |
| 21632 | MMT00046455   |        | 9+:108062719-108063800  |
| 21633 | Krtap9-1      | 16705  | 11+:99734753-99735313   |
| 21634 | MMT00042049   |        |                         |
| 21635 | Hs6st2        | 50786  | X-:48742232-49033576    |
| 21636 | 1700127D06Rik | 76999  | 7+:51200381-51201297    |
| 21637 | Cpxm1         | 56264  | 2-:130216511-130223310  |
| 21638 | MMT00011534   |        | 6-:83652125-83654013    |
| 21639 | Hspa9         | 15526  | 18-:35097088-35113977   |
| 21640 | Hspa14        | 50497  | 2-:3406125-3430018      |
| 21641 | Gm1966        | 434223 | 7-:113742570-113747549  |
| 21642 | E130309D14Rik | 432582 | 11+:74433403-74452114   |
| 21643 | Agr1a         | 11607  | 13+:30428307-30474735   |
| 21644 | MMT00024277   |        | 1+:90047612-90048456    |
| 21645 | Slc22a6       | 18399  | 19+:8692604-8701011     |
| 21646 | Dnajb7        | 57755  | 15-:81237517-81238703   |
| 21647 | Rnf13         | 24017  | 3+:57540055-57637152    |
| 21648 | MMT00038910   |        | 13-:63548239-63548693   |
| 21649 | MMT00076721   |        | 10+:72664358-72666028   |
| 21650 | Ap4b1         | 67489  | 3+:103613552-103625946  |
| 21651 | Glipr1l2      | 67537  | 10+:111520409-111545154 |
| 21652 | Olf1r700      | 258593 | 7-:113949025-113949974  |
| 21653 | MMT00081761   |        | 3+:74618728-74619289    |
| 21654 | MMT00066017   |        | 15-:82482420-82484072   |
| 21655 | Rab40b        | 217371 | 11-:121218116-121249453 |
| 21656 | MMT00054267   |        | 11-:7083159-7086362     |
| 21657 | Etaa1         | 68145  | 11-:17839655-17853878   |
| 21658 | Oxt           | 18429  | 2+:130401945-130402667  |
| 21659 | Hydin         | 244653 | 8+:113056575-113073687  |
| 21660 | Il1rn         | 16181  | 2+:24192378-24205150    |
| 21661 | Spag17        | 74362  | 3+:99879649-99885962    |
| 21662 | A530088I07Rik | 212167 | 5+:20692130-20797531    |
| 21663 | Vta1          | 66201  | 10-:14375136-14425366   |
| 21664 | Insig1        | 231070 | 5+:28397977-28405203    |
| 21665 | Nat5          | 67877  | 2+:145729036-145742052  |
| 21666 | Ncor1         | 20185  | 11-:62131042-62233285   |
| 21667 | MMT00076649   |        | 18+:47030475-47030960   |
| 21668 | Tst           | 22117  | 15-:78230053-78236277   |
| 21669 | Zic5          | 65100  | 14-:122858381-122864892 |
| 21670 | Ggt1          | 14598  | 10+:75036337-75048927   |
| 21671 | MMT00006397   |        | 8-:37435651-37436718    |
| 21672 | Atp2b1        | 67972  | 10+:98431322-98488773   |
| 21673 | Rbm18         | 67889  | 2-:35973125-35992104    |

|       |               |        |                         |
|-------|---------------|--------|-------------------------|
| 21674 | Olfr875       | 258744 | 9+:37580245-37581176    |
| 21675 | Mosc2         | 67247  | 1-:186637572-186669709  |
| 21676 | Camkv         | 235604 | 9+:107838255-107852021  |
| 21677 | EG330129      | 330129 | 5-:93819627-93822069    |
| 21678 | Prcc          | 94315  | 3-:87662836-87689502    |
| 21679 | Pnpla6        | 50767  | 8+:3515383-3544266      |
| 21680 | Gpr3          | 14748  | 4-:132765280-132767772  |
| 21681 | 9130011J15Rik | 66818  | 8-:75089788-75094960    |
| 21682 | Med17         | 234959 | 9-:15064795-15084311    |
| 21683 | Prdm10        | 382066 | 9+:31087890-31186128    |
| 21684 | Cd82          | 12521  | 2-:93259268-93302568    |
| 21685 | Gzma          | 14938  | 13-:113884032-113891187 |
| 21686 | MMT00026800   |        | 16+:47212481-47213039   |
| 21687 | Zbtb7b        | 22724  | 3-:89183210-89185179    |
| 21688 | MMT00002470   |        | 7-:26613565-26613914    |
| 21689 | Ankrd53       | 75305  | 6+:83712677-83718319    |
| 21690 | Slc3a1        | 20532  | 17+:85427731-85463581   |
| 21691 | Olfr432       | 258711 | 1+:175980505-175981443  |
| 21692 | MMT00013924   |        | 9+:57331735-57332397    |
| 21693 | BC029169      | 208659 | 11-:109534234-109583569 |
| 21694 | OTTMUSG000000 | 433804 | 4+:146630900-146958343  |
| 21695 | Olfr493       | 258307 | 7-:115489550-115490493  |
| 21696 | Ctnna3        | 216033 | 10+:63871938-64138664   |
| 21697 | 2610208M17Rik | 108909 | 1_random+:259469-297849 |
| 21698 | 1700022C21Rik | 76416  | 17+:37095536-37102567   |
| 21699 | MMT00013188   |        | 17+:16918752-16919523   |
| 21700 | Lingo2        | 242384 | 4-:35655408-35657227    |
| 21701 | Adam23        | 23792  | 1+:63492705-63639542    |
| 21702 | Fut2          | 14344  | 7-:52905674-52906716    |
| 21703 | Tmem38b       | 52076  | 4+:53838933-53873461    |
| 21704 | MMT00074789   |        | 10+:21923206-21974036   |
| 21705 | Actb          | 11461  | 5-:143664794-143668401  |
| 21706 | Fundc1        | 72018  | X-:17133694-17149423    |
| 21707 | Tesc          | 57816  | 5+:118477926-118511876  |
| 21708 | Al413582      | 106672 | 17-:27699873-27702844   |
| 21709 | Tex22         | 75671  | 12+:114312713-114327129 |
| 21710 | Slc30a6       | 210148 | 17+:74801250-74822853   |
| 21711 | Pkhd1         | 241035 | 1-:20047858-20094758    |
| 21712 | Ttc5          | 219022 | 14-:51385085-51405190   |
| 21713 | Adnp          | 11538  | 2-:168007547-168010033  |
| 21714 | Olfr655       | 258817 | 7-:111744767-111745693  |
| 21715 | Siah1a        | 20437  | 8-:89247906-89269833    |
| 21716 | Tmem85        | 68032  | 2-:112203175-112208184  |
| 21717 | EG628893      | 628893 | X-:74962581-74963366    |
| 21718 | Creb3l4       | 78284  | 3-:90041421-90047434    |
| 21719 | Olfr633       | 258351 | 7+:111095081-111096018  |
| 21720 | Clec4d        | 17474  | 6+:123212192-123224934  |
| 21721 | Styk1         | 243659 | 6-:131249161-131262616  |
| 21722 | MMT00054655   |        | 11-:12836541-12837709   |
| 21723 | Homer1        | 26556  | 13+:94075012-94126407   |
| 21724 | Pfdn4         | 109054 | 2+:170336931-170344571  |

|       |               |           |                          |
|-------|---------------|-----------|--------------------------|
| 21725 | Sost          | 74499     | 11-:101825159-101828287  |
| 21726 | Rsu1          | 20163     | 2-:12998688-13192851     |
| 21727 | Khk           | 16548     | 5+ :31224288-31233419    |
| 21728 | MMT00024565   |           | 13+ :28457685-28609291   |
| 21729 | Hdc           | 15186     | 2-:126419402-126444379   |
| 21730 | Cntnap3       | 238680    | 13-:64842121-64989111    |
| 21731 | Agxt          | 11611     | 1+ :95031821-95041984    |
| 21732 | Prrg3         | 208748    | X+ :69211840-69212923    |
| 21733 | Rhebl1        | 69159     | 15- :98708209-98711693   |
| 21734 | Doc2g         | 60425     | 19+ :4003386-4006854     |
| 21735 | C130073F10Rik | 242574    | 4- :101562629-101566382  |
| 21736 | A430060F13Rik | 100039739 | 11- :94721829-94723105   |
| 21737 | Srst          | 20819     | 17- :83209639-83211256   |
| 21738 | Abhd14a       | 68644     | 9- :106342389-106349967  |
| 21739 | Epb4.1        | 269587    | 4- :131479017-131628013  |
| 21740 | D19Ertid652e  | 70806     | 19- :47827457-47838077   |
| 21741 | EG621605      | 621605    | 3+ :142321915-142325661  |
| 21742 | MMT00066036   | 433806    | 4- :147436378-147442601  |
| 21743 | Ccno          | 218630    | 13+ :113778105-113780986 |
| 21744 | MMT00011997   |           | 9+ :114027204-114061561  |
| 21745 | MMT00039382   |           |                          |
| 21746 | Mgat5b        | 268510    | 11+ :116780305-116846969 |
| 21747 | H2afx         | 15270     | 9+ :44142793-44144154    |
| 21748 | Ucn2          | 171530    | 9+ :108888218-108889073  |
| 21749 | Krt4          | 16682     | 15- :101748966-101755142 |
| 21750 | Rab31         | 106572    | 17- :66001069-66122021   |
| 21751 | Ptpn6         | 15170     | 6- :124670734-124683122  |
| 21752 | MMT00013098   |           | 11+ :93494227-93513235   |
| 21753 | Pcdhb14       | 93885     | 18+ :37607496-37609885   |
| 21754 | Synj2         | 20975     | 17+ :5975640-6044289     |
| 21755 | Fgd6          | 13998     | 10+ :93565986-93604749   |
| 21756 | MMT00017467   |           | X- :104540011-104550744  |
| 21757 | Kcng3         | 225030    | 17- :83987075-84030694   |
| 21758 | Dnajc9        | 108671    | 14- :21203861-21208111   |
| 21759 | 1700011L22Rik | 67687     | 8- :81737375-81772469    |
| 21760 | Crb2          | 241324    | 2+ :37638719-37652673    |
| 21761 | D14Ertid449e  | 66039     | 14- :26743655-26746694   |
| 21762 | Lage3         | 66192     | X- :71597500-71598957    |
| 21763 | Cspg4         | 121021    | 9+ :56712966-56746941    |
| 21764 | Tgm5          | 74176     | 2- :120871846-120911558  |
| 21765 | Arpp19        | 59046     | 9+ :74885723-74904611    |
| 21766 | Elavl2        | 15569     | 4- :90918936-91038745    |
| 21767 | Gm1758        | 385737    | 16+ :14502192-14507354   |
| 21768 | Necab2        | 117148    | 8+ :121970618-121996533  |
| 21769 | Loxl2         | 94352     | 14+ :70009000-70095642   |
| 21770 | MMT00042324   |           | 17+ :57152018-57158974   |
| 21771 | 1700008F21Rik | 75453     | 8+ :131599364-131702286  |
| 21772 | MMT00002494   |           | 6+ :34989351-34989622    |
| 21773 | Pcdhb2        | 93873     | 18+ :37454629-37457027   |
| 21774 | MMT00031273   |           | 4- :111463186-111481072  |
| 21775 | MMT00051649   |           | 14- :76329373-76331352   |

|       |               |        |                         |
|-------|---------------|--------|-------------------------|
| 21776 | Ppp4r1l       | 109229 | 9-:35024247-35075366    |
| 21777 | Crp           | 12944  | 1+:174628188-174630055  |
| 21778 | Tmem201       | 230917 | 4-:149102265-149112056  |
| 21779 | Ncstn         | 59287  | 1-:173996698-174012830  |
| 21780 | Ankrd35       | 213121 | 3+:96474259-96494956    |
| 21781 | 1700001G17Rik | 67503  | 1+:33726668-33727549    |
| 21782 | Spire2        | 234857 | 8+:125856730-125893421  |
| 21783 | MMT00047957   |        | 5+:123516253-123516800  |
| 21784 | Gm853         | 332942 | 4-:129887608-129897729  |
| 21785 | MMT00043723   |        | 3-:69139122-69139666    |
| 21786 | 1700016D06Rik | 76413  | 8-:11654923-11678750    |
| 21787 | MMT00008246   |        | 16+:32405920-32408101   |
| 21788 | MMT00036513   |        | 5+:109665987-109667178  |
| 21789 | Fdxr          | 14149  | 11-:115129338-115138283 |
| 21790 | Smarcal1      | 54380  | 1+:72629844-72679704    |
| 21791 | MMT00042985   |        | 9-:96714255-96717996    |
| 21792 | Ptp4a2        | 19244  | 4+:129516647-129525104  |
| 21793 | Pla2g12a      | 66350  | 3+:129581636-129597872  |
| 21794 | Pfkp          | 56421  | 13-:6580420-6647976     |
| 21795 | 0610009B22Rik | 66050  | 11-:51498886-51502136   |
| 21796 | Dhrs4         | 28200  | 14+:56097711-56106408   |
| 21797 | Dst           | 13518  | 1+:34068669-34365495    |
| 21798 | MMT00070546   |        | 16-:45426908-45427916   |
| 21799 | Cops5         | 26754  | 1-:10014913-10027979    |
| 21800 | EG626058      | 626058 | 1+:155260671-155261163  |
| 21801 | Serpinb6a     | 20719  | 13-:34009796-34027847   |
| 21802 | Nptn          | 20320  | 9+:58430215-58500678    |
| 21803 | Slc15a2       | 57738  | 16-:36750266-36785048   |
| 21804 | D4Ert22e      | 213491 | 4-:140671054-140695673  |
| 21805 | Plk3          | 12795  | 4-:116800998-116806407  |
| 21806 | MMT00064565   |        | 13-:51300538-51301473   |
| 21807 | MMT00045004   |        | 17+:71278397-71278884   |
| 21808 | BC065085      | 219148 | 14+:64071092-64081667   |
| 21809 | Chrna10       | 504186 | 7-:109260554-109264831  |
| 21810 | Pms1          | 227099 | 1-:53245487-53338936    |
| 21811 | Ak3l1         | 11639  | 4+:101092343-101139177  |
| 21812 | 4930485B16Rik | 380654 | 10-:92498164-92501994   |
| 21813 | Eif1          | 20918  | 11+:100181428-100182673 |
| 21814 | Accn5         | 58170  | 3+:81800843-81825155    |
| 21815 | Itga5         | 16402  | 15-:103175540-103197005 |
| 21816 | Trappc6a      | 67091  | 7+:20094078-20101491    |
| 21817 | MMT00028065   |        | 11-:57877313-57886415   |
| 21818 | 2010003K11Rik | 69861  | 19-:4496785-4498582     |
| 21819 | 1110008J03Rik | 100764 | 5-:121059071-121062578  |
| 21820 | Aldoat2       | 79459  | 12+:56666225-56667883   |
| 21821 | Olfr1032      | 258572 | 2+:85847934-85848865    |
| 21822 | Psme4         | 103554 | 11+:30671775-30780396   |
| 21823 | Atp6v0d1      | 11972  | 8-:108048369-108089825  |
| 21824 | 5830443L24Rik | 76074  | 5-:105443175-105447782  |
| 21825 | BC030396      | 239463 | 15+:57817457-57841594   |
| 21826 | MMT00027189   |        | 15+:96019030-96019653   |

|       |               |           |                         |
|-------|---------------|-----------|-------------------------|
| 21827 | MMT00010458   | 403088    | 6-:42537500-42547275    |
| 21828 | Cyp2c66       | 69888     | 19+:39188395-39261561   |
| 21829 | MMT00018097   |           | 12-:58619233-58620633   |
| 21830 | MMT00062008   |           | 5+:57652508-57653255    |
| 21831 | MMT00067591   |           | 14+:53741724-53775966   |
| 21832 | Lrp8          | 16975     | 4+:107474865-107546772  |
| 21833 | Acbd5         | 74159     | 2+:22923733-22970479    |
| 21834 | Best3         | 382427    | 10+:116439575-116446097 |
| 21835 | mCG_13386     | 100113398 | 10+:80065624-80070397   |
| 21836 | Sec23ip       | 207352    | 7+:135888101-135927510  |
| 21837 | BC052328      | 223433    | 15-:27586020-27611238   |
| 21838 | Ccdc116       | 76872     | 16-:17139928-17144518   |
| 21839 | Gprasp1       | 67298     | X+:132336824-132338003  |
| 21840 | Tmie          | 20776     | 9-:110769364-110770592  |
| 21841 | RP23-157O10.7 | 56013     | 11-:97372211-97372655   |
| 21842 | Abca12        | 74591     | 1-:71289663-71368425    |
| 21843 | MMT00051870   | 195576    | 4-:145059253-145070153  |
| 21844 | Ncoa7         | 211329    | 10-:30367339-30491624   |
| 21845 | Gm648         | 270599    | X-:53797243-53798334    |
| 21846 | Olfr214       | 258754    | 6+:116506444-116507407  |
| 21847 | MMT00063855   |           | X+:114000424-114000790  |
| 21848 | Mpnd          | 68047     | 17+:56148748-56156084   |
| 21849 | Icam2         | 15896     | 11-:106238970-106243955 |
| 21850 | Gtf2i         | 14886     | 5-:134713713-134790563  |
| 21851 | Ldb1          | 16825     | 19-:46107092-46114111   |
| 21852 | Clcnka        | 12733     | 4-:140940800-140954111  |
| 21853 | 5430432N15Rik | 74490     | 7+:52895344-52901137    |
| 21854 | Fkbp3         | 30795     | 12-:66163422-66174927   |
| 21855 | Mtap2         | 17756     | 1+:66368669-66485762    |
| 21856 | B430201A12Rik | 329739    | 3-:108795445-108806338  |
| 21857 | 1700061G19Rik | 78625     | 17+:57014896-57028321   |
| 21858 | Neil3         | 234258    | 8-:54672220-54724350    |
| 21859 | Fancg         | 60534     | 4-:43015817-43022982    |
| 21860 | 6230416C02Rik | 545490    | 2+:174866483-175305255  |
| 21861 | Vprbp         | 321006    | 9+:106724204-106784415  |
| 21862 | MMT00041029   |           | 10+:77250577-77277719   |
| 21863 | Dok2          | 13449     | 14+:71174187-71178300   |
| 21864 | Zdhhc20       | 75965     | 14-:58455237-58509099   |
| 21865 | 1100001E04Rik | 75404     | X+:46823736-46850728    |
| 21866 | Hhpl1         | 214305    | 12+:109544411-109566422 |
| 21867 | 4933412E14Rik | 244885    | 9+:54386770-54388886    |
| 21868 | Cpne5         | 240058    | 17-:29295941-29374733   |
| 21869 | Olfr729       | 258275    | 14-:50767576-50768547   |
| 21870 | Dut           | 110074    | 2+:125073460-125084234  |
| 21871 | Spock3        | 72902     | 8+:65430028-65835648    |
| 21872 | Stambpl1      | 76630     | 19+:34307131-34314816   |
| 21873 | Hsd11b2       | 15484     | 8+:108042753-108047417  |
| 21874 | Nppb          | 18158     | 4+:147360084-147361087  |
| 21875 | Zw10          | 26951     | 9+:48863736-48868877    |
| 21876 | Cilp2         | 68709     | 8-:72411384-72415924    |
| 21877 | Sliitrk6      | 239250    | 14-:111148972-111151495 |



|       |               |        |                          |
|-------|---------------|--------|--------------------------|
| 21878 | MMT00048839   |        | 16-:11047097-11048025    |
| 21879 | Tmem34        | 234463 | 8-:80120015-80134486     |
| 21880 | MMT00045458   |        | 2-:49182896-49183178     |
| 21881 | MMT00038325   |        | 5-:107167134-107167784   |
| 21882 | Map2k5        | 23938  | 9-:63011576-63225659     |
| 21883 | Trmt11        | 73681  | 10-:30254030-30320498    |
| 21884 | 2310035K24Rik | 69596  | 2+ :131036159-131039247  |
| 21885 | Trim38        | 214158 | 13+ :23874440-23883363   |
| 21886 | Foxj2         | 60611  | 6+ :122770201-122793115  |
| 21887 | Ankmy1        | 241158 | 1- :94767386-94796265    |
| 21888 | Kti12         | 100087 | 4+ :108520461-108522017  |
| 21889 | Mgat3         | 17309  | 15+ :80041403-80043020   |
| 21890 | Slc22a13      | 102570 | 9- :119102109-119118204  |
| 21891 | Nnt           | 18115  | 13- :120124552-120197723 |
| 21892 | Rabgef1       | 56715  | 5+ :130647739-130690205  |
| 21893 | Iqck          | 434232 | 7+ :125999288-126116769  |
| 21894 | Zfp263        | 74120  | 16+ :3744103-3750787     |
| 21895 | Crygn         | 214301 | 5- :24256871-24260148    |
| 21896 | Lce1c         | 73719  | 3+ :92483168-92484840    |
| 21897 | Akap8l        | 54194  | 17- :32458369-32487515   |
| 21898 | MMT00050545   |        | 15+ :90530472-90554430   |
| 21899 | Ccdc47        | 67163  | 11- :106061779-106077617 |
| 21900 | Dpep2         | 319446 | 8- :108508957-108514810  |
| 21901 | BC035537      | 212326 | 8- :46424429-46444058    |
| 21902 | Gemin7        | 69731  | 7- :20150297-20158692    |
| 21903 | Nr1d1         | 217166 | 11- :98629245-98636136   |
| 21904 | Svopl         | 320590 | 6- :37962290-37964868    |
| 21905 | Gpr114        | 382045 | 8+ :97461575-97466248    |
| 21906 | Jph4          | 319984 | 14- :55726464-55734283   |
| 21907 | Dynlrb1       | 67068  | 2+ :155062313-155076009  |
| 21908 | Susd2         | 71733  | 10- :75099453-75106722   |
| 21909 | Neurl2        | 415115 | 2- :164656232-164658966  |
| 21910 | P2rx2         | 231602 | 5- :110768832-110771974  |
| 21911 | Ribc2         | 67747  | 15+ :84962507-84974997   |
| 21912 | OTTMUSG000000 | 629754 | 2- :164475133-164477308  |
| 21913 | Fzd1          | 14362  | 5- :4755652-4757580      |
| 21914 | C030037F17Rik | 77475  | 8- :14745327-14747430    |
| 21915 | MMT00006856   |        | 13+ :33810144-33811373   |
| 21916 | Cdk4          | 12567  | 10+ :126501291-126504076 |
| 21917 | Taf9b         | 407786 | X- :103403659-103415105  |
| 21918 | Snx24         | 69226  | 18+ :53405422-53550574   |
| 21919 | MMT00078220   |        | 5+ :3090867-3092385      |
| 21920 | Fnip2         | 329679 | 3- :79263609-79371602    |
| 21921 | Tpm2          | 22004  | 4- :43527583-43536260    |
| 21922 | MMT00028085   |        | 2+ :5520620-5664750      |
| 21923 | Olfr585       | 259091 | 7+ :110246256-110247212  |
| 21924 | Ang2          | 11731  | 14- :51815160-51815598   |
| 21925 | Tial1         | 21843  | 7- :135585815-135604803  |
| 21926 | MMT00059984   |        | 6+ :145214919-145215296  |
| 21927 | Hoxb4         | 15412  | 11+ :96180010-96181995   |
| 21928 | Nudcd1        | 67429  | 15- :44207616-44259853   |

|       |               |        |                         |
|-------|---------------|--------|-------------------------|
| 21929 | Vldlr         | 22359  | 19+:27291921-27324109   |
| 21930 | 1700081D17Rik | 73523  | 14+:70363241-70459706   |
| 21931 | Nrxn3         | 18191  | 12+:90741461-90771454   |
| 21932 | Clec9a        | 232414 | 6+:129358880-129372991  |
| 21933 | Mylk3         | 213435 | 8--87882813-87888992    |
| 21934 | Id2           | 15902  | 12--25780183-25780875   |
| 21935 | Prok2         | 50501  | 6--99661293-99676386    |
| 21936 | Gpr158        | 241263 | 2+:21737192-21749320    |
| 21937 | MMT00015325   |        | 17+:41238748-41238994   |
| 21938 | Rab3a         | 19339  | 8+:73279754-73281986    |
| 21939 | 1110038D17Rik | 68778  | 10--74969031-74980068   |
| 21940 | Fxyd2         | 11936  | 9+:45207300-45218360    |
| 21941 | MMT00028347   |        | 1+:125653267-125654326  |
| 21942 | Fech          | 14151  | 18--64616203-64648720   |
| 21943 | Plekhn1       | 231002 | 4--155598014-155602649  |
| 21944 | MMT00008092   |        | 3+:9053800-9073101      |
| 21945 | Ccnb3         | 209091 | X--6584137-6587228      |
| 21946 | MMT00009539   |        | 11+:28855319-28857605   |
| 21947 | Cdca8         | 52276  | 4--124595709-124614153  |
| 21948 | MMT00011696   |        |                         |
| 21949 | MMT00065773   |        | 19+:57659239-57659454   |
| 21950 | Chd6          | 71389  | 2--160772721-160885717  |
| 21951 | Cypt6         | 66742  | X+:16099997-16100809    |
| 21952 | Tfb1m         | 224481 | 17--3519258-3557713     |
| 21953 | Colec12       | 140792 | 18+:9707674-9877990     |
| 21954 | BC030476      | 239368 | 15+:34400867-34402678   |
| 21955 | Atxn711       | 380753 | 12+:34000322-34053138   |
| 21956 | Olfr474       | 258488 | 7+:115098507-115099089  |
| 21957 | Olfr507       | 258738 | 7+:115765327-115766278  |
| 21958 | Slc27a1       | 26457  | 8+:74092806-74110438    |
| 21959 | Sh3gl1        | 20405  | 17--56156173-56175999   |
| 21960 | Acaca         | 107476 | 11+:84045175-84155449   |
| 21961 | Olfr1012      | 258561 | 2--85599597-85600531    |
| 21962 | Gdf11         | 14561  | 10--128321588-128328445 |
| 21963 | Edaradd       | 171211 | 13--12569967-12612705   |
| 21964 | Vwce          | 71768  | 19+:10708720-10716232   |
| 21965 | AY036118      | 170798 | 17--39985039-39985774   |
| 21966 | Pcp4l1        | 66425  | 1--173103394-173126371  |
| 21967 | Tyk2          | 54721  | 9--20908518-20935654    |
| 21968 | Zfp426        | 235028 | 9--20273992-20297186    |
| 21969 | Tk1           | 21877  | 11--117676840-117687267 |
| 21970 | Eif3f         | 66085  | 7+:116077929-116085201  |
| 21971 | Epb4.2        | 13828  | 2--120843953-120862491  |
| 21972 | Pde6b         | 18587  | 5+:108817458-108860754  |
| 21973 | Faf1          | 14084  | 4+:109349300-109634651  |
| 21974 | Ilftd1        | 74071  | 6--145345754-145383445  |
| 21975 | MMT00008417   |        | 2+:130935301-130935523  |
| 21976 | Siae          | 22619  | 9+:37421425-37455120    |
| 21977 | MMT00013499   |        | 1--175204593-175207882  |
| 21978 | Txnl1         | 53382  | 18--63823755-63851842   |
| 21979 | Fxyd1         | 56188  | 7--31836726-31840601    |

|       |               |           |                         |
|-------|---------------|-----------|-------------------------|
| 21980 | Gdf6          | 242316    | 4+:9771537-9787431      |
| 21981 | Ormdl2        | 66844     | 10-:128255550-128258662 |
| 21982 | MMT00009230   |           | 7-:105132959-105133906  |
| 21983 | C130022K22Rik | 232236    | 6+:91828061-91849832    |
| 21984 | Tshz1         | 110796    | 18-:84182418-84185648   |
| 21985 | Lrp2bp        | 67620     | 8+:47084656-47112874    |
| 21986 | Cstf1         | 67337     | 2+:172196502-172206585  |
| 21987 | Caps2         | 353025    | 10+:111612254-111652737 |
| 21988 | MMT00015654   | 675749    | 7-:3813573-3820818      |
| 21989 | Zfp167        | 382118    | 9+:122795968-122805240  |
| 21990 | MMT00030729   |           | 6-:70378917-70381216    |
| 21991 | Olf935        | 258741    | 9-:38802093-38803018    |
| 21992 | Lap3          | 66988     | 5+:45884651-45903688    |
| 21993 | D430015B01Rik | 58909     | 6-:58885369-58953507    |
| 21994 | Dbn2          | 52840     | 2+:164312076-164316774  |
| 21995 | Nktr          | 18087     | 9+:121628293-121665959  |
| 21996 | Mme           | 17380     | 3+:63104056-63184253    |
| 21997 | Phf1          | 21652     | 17+:27070276-27074834   |
| 21998 | Nomo1         | 211548    | 7+:53289087-53339752    |
| 21999 | ENSMUSG00000  | 100049171 | 14+:53666865-53667623   |
| 22000 | Pim2          | 18715     | X+:7455431-7460558      |
| 22001 | Gtlf3b        | 24083     | 11-:60716562-60727291   |
| 22002 | Dcst2         | 329702    | 3+:89177144-89177503    |
| 22003 | Zfp326        | 54367     | 5+:106305620-106344831  |
| 22004 | Gtpbp2        | 56055     | 17+:46298084-46306316   |
| 22005 | MMT00009438   |           | 10-:129906384-129907689 |
| 22006 | Rc3h1         | 381305    | 1+:162836496-162898226  |
| 22007 | Nek9          | 217718    | 12-:86640462-86680281   |
| 22008 | Rbm35a        | 207920    | 4-:11259082-11313583    |
| 22009 | Tmem14a       | 75712     | 1+:21208742-21220245    |
| 22010 | Ccdc41        | 77048     | 10+:94151398-94252790   |
| 22011 | Aldh9a1       | 56752     | 1+:169280375-169297629  |
| 22012 | Itgae         | 16407     | 11+:72904084-72960942   |
| 22013 | Usp24         | 329908    | 4+:106019139-106031079  |
| 22014 | Wbp1          | 22377     | 6-:83069038-83071417    |
| 22015 | 2410127E18Rik | 76788     | 6+:30367033-30402332    |
| 22016 | 1110019J04Rik | 68512     | 4-:45118083-45120985    |
| 22017 | MMT00041197   |           | 6+:83791675-83791944    |
| 22018 | Prima1        | 170952    | 12-:104435117-104480356 |
| 22019 | Chrng         | 11449     | 1+:89102388-89108208    |
| 22020 | Gramd2        | 546134    | 9+:59555448-59558424    |
| 22021 | Csnk1d        | 104318    | 11-:120824737-120852633 |
| 22022 | Otud7b        | 229603    | 3+:95908449-95959890    |
| 22023 | Cd3d          | 12500     | 9+:44789968-44794425    |
| 22024 | Lrrc58        | 320184    | 16+:37878372-37884355   |
| 22025 | Ccl22         | 20299     | 8+:97269489-97275599    |
| 22026 | Fgfbp1        | 14181     | 5-:44370433-44371187    |
| 22027 | A4galt        | 239559    | 15-:83057155-83082149   |
| 22028 | MMT00050637   |           | 10-:18022473-18022878   |
| 22029 | Igsf3         | 78908     | 3+:101229197-101267402  |
| 22030 | Mtmr6         | 219135    | 14+:60884107-60920502   |

|       |               |        |                         |
|-------|---------------|--------|-------------------------|
| 22031 | Vcam1         | 22329  | 3-:115813057-115832342  |
| 22032 | Kirrel3       | 67703  | 9+:34293797-34318199    |
| 22033 | MMT00018345   |        | 13-:74690636-74691860   |
| 22034 | Appl1         | 72993  | 14-:27736760-27783697   |
| 22035 | Olfrl42       | 406186 | 2-:90092226-90093143    |
| 22036 | MMT00055735   |        | 13+:99804221-99804658   |
| 22037 | Oas1g         | 23960  | 5-:121326732-121337591  |
| 22038 | Tnip1         | 57783  | 11-:54724290-54776414   |
| 22039 | Npc2          | 67963  | 12-:86097356-86113848   |
| 22040 | Rasa1         | 19415  | 5+:121099366-121129605  |
| 22041 | Kirrel2       | 243911 | 7-:31234855-31241553    |
| 22042 | Mgam          | 232714 | 6+:40594829-40719115    |
| 22043 | Rdh8          | 235033 | 9+:20622947-20629987    |
| 22044 | MMT00024365   |        | 14-:38725099-38725899   |
| 22045 | Nbr1          | 17966  | 11+:101414171-101443258 |
| 22046 | Cml4          | 68396  | 6-:85780375-85781829    |
| 22047 | 12-Sep        | 71089  | 16-:4988177-4997872     |
| 22048 | MMT00018179   |        | 16-:11189233-11191343   |
| 22049 | Wdr40b        | 245404 | X-:42141592-42143006    |
| 22050 | Vamp5         | 53620  | 6-:72318128-72318637    |
| 22051 | Cno           | 117197 | 5-:37138879-37139897    |
| 22052 | Necab3        | 56846  | 2-:154370140-154381390  |
| 22053 | Pstpip2       | 19201  | 18+:78033456-78118143   |
| 22054 | Fut1          | 14343  | 7+:52873993-52875126    |
| 22055 | Ii9           | 16198  | 13-:56580637-56583607   |
| 22056 | Nov           | 18133  | 15+:54577526-54584058   |
| 22057 | Lrrtm3        | 216028 | 10-:63550590-63561032   |
| 22058 | Slc11a2       | 18174  | 15+:100222523-100225166 |
| 22059 | Myo3a         | 667663 | 2+:22149129-22435377    |
| 22060 | Ccbl1         | 70266  | 2-:30040642-30061619    |
| 22061 | MMT00054756   |        | 8+:3105753-3105802      |
| 22062 | B230110C06Rik | 77981  | 14+:16270133-16284959   |
| 22063 | BC051227      | 234384 | 8-:73282294-73284820    |
| 22064 | MMT00075928   |        | 3-:35435737-35436751    |
| 22065 | Hes2          | 15206  | 4+:151533777-151534658  |
| 22066 | Cabp1         | 29867  | 5-:115618954-115636130  |
| 22067 | Ap1s2         | 108012 | X+:160346947-160371599  |
| 22068 | Trabd         | 67976  | 15+:88906500-88917500   |
| 22069 | Fkbpl         | 56299  | 17+:34782204-34783247   |
| 22070 | MMT00067910   |        | 15-:103275811-103277130 |
| 22071 | Hoxc4         | 15423  | 15+:102864825-102867027 |
| 22072 | MMT00078067   |        | 7+:115162595-115163186  |
| 22073 | Lrig3         | 320398 | 10+:125403204-125452414 |
| 22074 | EG212753      | 212753 | X-:98985390-98989445    |
| 22075 | C1s           | 50908  | 6-:124480644-124483991  |
| 22076 | Pgm2l1        | 70974  | 7+:107376115-107427381  |
| 22077 | MMT00057550   | 677168 | 17-:46543911-46544526   |
| 22078 | Zfp661        | 72180  | 2-:127401270-127403681  |
| 22079 | Tmem81        | 74626  | 1+:134402806-134405214  |
| 22080 | MMT00030613   |        | X+:72153071-72163420    |
| 22081 | Nme2          | 18103  | 11-:93811129-93817154   |

|       |               |           |                         |
|-------|---------------|-----------|-------------------------|
| 22082 | Cyp4a30b      | 435802    | 4+:115126939-115143665  |
| 22083 | 4933413J09Rik | 71106     | 14+:27182114-27197404   |
| 22084 | MMT00070787   |           | 9+:122656463-122659550  |
| 22085 | MMT00036089   |           | 6-:122741561-122743432  |
| 22086 | Atp11a        | 50770     | 8+:12757223-12865173    |
| 22087 | Slc30a7       | 66500     | 3-:115649581-115710132  |
| 22088 | Samd4b        | 233033    | 7-:29184568-29221211    |
| 22089 | Niban         | 63913     | 1+:153418669-153566166  |
| 22090 | Plscr1        | 22038     | 9+:92157864-92166813    |
| 22091 | Nt5c3l        | 68106     | 11-:100284062-100303122 |
| 22092 | Plekhg4       | 102075    | 8+:107898800-107905956  |
| 22093 | Zbbx          | 213234    | 3-:74841831-74916146    |
| 22094 | Rnf149        | 67702     | 1-:39608137-39634253    |
| 22095 | Mgst1         | 56615     | 6+:138096210-138104897  |
| 22096 | Slc4a9        | 240215    | 18+:36687802-36700947   |
| 22097 | Olf1r61       | 18362     | 7+:147823601-147824537  |
| 22098 | MMT00009248   |           | 7-:104740367-104740914  |
| 22099 | Cnot8         | 69125     | 11-:57910274-57911351   |
| 22100 | Lcn5          | 13863     | 2+:25513587-25517164    |
| 22101 | Wdr52         | 212517    | 16+:44421234-44430170   |
| 22102 | MMT00059646   |           | 16-:9105550-9106543     |
| 22103 | Hvcn1         | 74096     | 5+:122660295-122692282  |
| 22104 | Rnf123        | 84585     | 9-:107964083-107964976  |
| 22105 | MMT00056818   |           | 13-:116318706-116319989 |
| 22106 | Mmp15         | 17388     | 8+:97876763-97897770    |
| 22107 | MMT00064159   |           | 3+:58455445-58456762    |
| 22108 | Cdk5          | 12568     | 5-:23925046-23929357    |
| 22109 | Jarid1b       | 75605     | 1+:136456749-136528564  |
| 22110 | Olf1r1232     | 258320    | 2-:89165401-89166335    |
| 22111 | Ttn           | 22138     | 2-:76677461-76679353    |
| 22112 | Xlr4a         | 434794    | X-:70319678-70326134    |
| 22113 | MMT00030381   |           | 8-:4529593-4538223      |
| 22114 | Olf1r477      | 258928    | 7+:115134120-115134813  |
| 22115 | Ccl5          | 20304     | 11-:83339282-83343991   |
| 22116 | Fbxo42        | 213499    | 4+:140723457-140756725  |
| 22117 | Slc4a11       | 269356    | 2-:130509849-130523193  |
| 22118 | Grhl3         | 230824    | 4-:135098574-135117270  |
| 22119 | MMT00067609   | 547323    | 14+:53511585-53512490   |
| 22120 | Ccna1         | 12427     | 3-:54849396-54858977    |
| 22121 | MMT00015026   |           | 12-:89546482-89546909   |
| 22122 | MMT00042954   |           |                         |
| 22123 | MMT00046185   |           | 2+:44643947-44646204    |
| 22124 | 4921509C19Rik | 381393    | 2-:151296280-151320279  |
| 22125 | Gab1          | 14388     | 8-:83289721-83403525    |
| 22126 | RP23-303F24.3 | 622459    | 11-:53596920-53672732   |
| 22127 | Pafah1b3      | 18476     | 7-:26080067-26082974    |
| 22128 | 1810054D07Rik | 69863     | 4-:82872323-82970146    |
| 22129 | MMT00066623   | 100044382 | X+:52766936-53097329    |
| 22130 | Cks1b         | 54124     | 3-:89219394-89222213    |
| 22131 | Slc35c2       | 228875    | 2-:165102055-165113327  |
| 22132 | Ids           | 15931     | X-:67599338-67618056    |

|       |               |           |                         |
|-------|---------------|-----------|-------------------------|
| 22133 | V1rd17        | 404286    | 7+:24585865-24714375    |
| 22134 | lkzf4         | 22781     | 10-:128082775-128088395 |
| 22135 | MMT00033583   |           | 14+:17779358-17779949   |
| 22136 | Olf701        | 66786     | 7+:113957657-113964223  |
| 22137 | Nudt7         | 67528     | 8+:116657514-116676204  |
| 22138 | Ang           | 11727     | 14+:51721078-51721516   |
| 22139 | Stip1         | 20867     | 19-:7095197-7114433     |
| 22140 | Crygf         | 12969     | 1+:65973095-65974878    |
| 22141 | Rorb          | 225998    | 19-:19012131-19075607   |
| 22142 | 5830457O10Rik | 214987    | 8-:109407764-109410858  |
| 22143 | 1700006A11Rik | 71824     | 3-:124103908-124124391  |
| 22144 | Arr3          | 170735    | X+:97800894-97813831    |
| 22145 | MMT00006164   |           | 11-:21582393-21584105   |
| 22146 | Aifm2         | 71361     | 10+:61195069-61202035   |
| 22147 | Ap1s1         | 11769     | 5-:137510863-137521930  |
| 22148 | MMT00035976   |           |                         |
| 22149 | MMT00059396   |           | 3-:57521848-57522211    |
| 22150 | Fhdc1         | 229474    | 3-:84247398-84278704    |
| 22151 | Plxnd1        | 67784     | 6-:115904826-115944675  |
| 22152 | 5830411G16Rik | 78937     | 6+:56664918-56709117    |
| 22153 | Pold1         | 18971     | 7-:51788159-51798806    |
| 22154 | Agpat1        | 55979     | 17+:34742826-34749449   |
| 22155 | EG435392      | 435392    | 14-:23377353-23377678   |
| 22156 | MMT00059480   |           | 13+:15035566-15037025   |
| 22157 | Mxra8         | 74761     | 4+:155213905-155218202  |
| 22158 | Lrrc31        | 320352    | 3-:30577989-30588939    |
| 22159 | Apba3         | 57267     | 10+:80730983-80735972   |
| 22160 | Pmpcb         | 73078     | 5+:21242956-21262973    |
| 22161 | Tmem132a      | 98170     | 19-:10932322-10944221   |
| 22162 | MMT00008624   |           | 3+:7759565-7932337      |
| 22163 | MMT00001291   |           | 3-:8615431-8616422      |
| 22164 | Msrb3         | 320183    | 10-:120220946-120308216 |
| 22165 | St8sia4       | 20452     | 1-:97484260-97564171    |
| 22166 | Traf1         | 22029     | 2-:34798775-34817105    |
| 22167 | MMT00036488   |           | 6+:140003599-140004324  |
| 22168 | Uxs1          | 67883     | 1-:43806022-43884615    |
| 22169 | Ctrl          | 109660    | 8-:108455902-108457762  |
| 22170 | Chrn4         | 108015    | 9-:54877911-54896302    |
| 22171 | MMT00012636   | 100042265 | 9-:121758658-121766649  |
| 22172 | Sgpp1         | 81535     | 12-:76816691-76836666   |
| 22173 | Kcna3         | 16491     | 3+:106839340-106840925  |
| 22174 | MMT00041338   |           | 6-:112343341-112343553  |
| 22175 | Odf3          | 69287     | 7+:148033729-148036906  |
| 22176 | Klra18        | 93970     | 6-:130013122-130017276  |
| 22177 | Lepr          | 16847     | 4+:101390043-101464862  |
| 22178 | Snx26         | 233071    | 7-:31308650-31318051    |
| 22179 | Itga6         | 16403     | 2+:71625014-71694240    |
| 22180 | Nlrp9a        | 233001    | 7+:27342304-27359163    |
| 22181 | Zfp75         | 244713    | 9+:19448051-19454156    |
| 22182 | Oprm1         | 18390     | 10-:3309339-3557732     |
| 22183 | Tut1          | 70044     | 19+:9028328-9040697     |

|       |               |        |                         |
|-------|---------------|--------|-------------------------|
| 22184 | MMT00033856   |        | 11+:83614245-83615066   |
| 22185 | 4930422G04Rik | 71643  | 3+:127286935-127320939  |
| 22186 | Lpo           | 76113  | 11-:87619929-87639612   |
| 22187 | MMT00042192   |        | 6+:127308950-127361702  |
| 22188 | Top2a         | 21973  | 11-:98855077-98885429   |
| 22189 | Tmem168       | 101118 | 6-:13531097-13558044    |
| 22190 | MMT00042070   |        |                         |
| 22191 | Dhrs9         | 241452 | 2+:69230966-69235830    |
| 22192 | 9030205A07Rik | 217843 | 12+:104301314-104422208 |
| 22193 | MMT00007348   |        | 4+:14097146-14098124    |
| 22194 | Olfr39        | 258822 | 9+:20090144-20091079    |
| 22195 | Mc1r          | 17199  | 8+:125931395-125932653  |
| 22196 | Cyp3a41a      | 53973  | 5-:146529490-146531712  |
| 22197 | Ankrd28       | 105522 | 14-:32511959-32643590   |
| 22198 | Metap1        | 75624  | 3-:138121928-138152369  |
| 22199 | Acsn5         | 272428 | 7+:126669776-126687306  |
| 22200 | Adam32        | 353188 | 8-:25983043-26059280    |
| 22201 | Pard3         | 93742  | 8+:129588144-130134729  |
| 22202 | OTTMUSG00000  | 545539 | 3+:89196186-89202147    |
| 22203 | Txndc11       | 106200 | 16-:11075006-11088024   |
| 22204 | Slc6a20a      | 102680 | 9-:123545239-123587963  |
| 22205 | Dnahc1        | 110084 | 14-:32121891-32137080   |
| 22206 | V1rd2         | 81016  | 7+:5626205-5628197      |
| 22207 | Edem3         | 66967  | 1+:153602437-153669458  |
| 22208 | Me3           | 109264 | 7+:96781327-97000472    |
| 22209 | Cdc42ep5      | 58804  | 7-:4102865-4116104      |
| 22210 | 1700123O20Rik | 58248  | 14+:55305052-55309578   |
| 22211 | Vgll1         | 170828 | X+:54341282-54358623    |
| 22212 | Pex12         | 103737 | 11-:83108577-83112017   |
| 22213 | Adora1        | 11539  | 1-:136097952-136131999  |
| 22214 | Msx3          | 17703  | 7-:147232155-147234985  |
| 22215 | A630047E20Rik | 271981 | 3+:132349787-132501573  |
| 22216 | Sp5           | 64406  | 2+:70313222-70315753    |
| 22217 | Flvcr2        | 217721 | 12+:87087488-87154535   |
| 22218 | Rfc3          | 69263  | 5-:152445392-152453770  |
| 22219 | Cyp11b1       | 110115 | 15-:74665322-74672036   |
| 22220 | Ccdc22        | 54638  | X-:7170935-7182463      |
| 22221 | Dpysl5        | 65254  | 5+:31013936-31101341    |
| 22222 | Gstt1         | 14871  | 10-:75246784-75261241   |
| 22223 | Spg7          | 234847 | 8+:125589426-125621653  |
| 22224 | Svs1          | 243377 | 6+:48936900-48940688    |
| 22225 | Slc30a4       | 22785  | 2-:122506980-122528200  |
| 22226 | Pm20d1        | 212933 | 1+:133701200-133714693  |
| 22227 | Rab11a        | 53869  | 9-:64564416-64585551    |
| 22228 | MMT00013109   |        |                         |
| 22229 | Dnmt1         | 13433  | 9-:20711964-20757423    |
| 22230 | Myh9          | 17886  | 15-:77591018-77672529   |
| 22231 | Tnfrsf4       | 22164  | 1+:163325588-163348337  |
| 22232 | Krt19         | 16669  | 11-:100002128-100007228 |
| 22233 | Asrgl1        | 66514  | 19-:9186020-9210100     |
| 22234 | Tmem160       | 69094  | 7+:17038130-17040846    |

|       |               |        |                         |
|-------|---------------|--------|-------------------------|
| 22235 | Usp45         | 77593  | 4+:21694301-21761651    |
| 22236 | Panx1         | 55991  | 9-:14810230-14849520    |
| 22237 | MacroD2       | 72899  | 2+:140221189-140278828  |
| 22238 | Sardh         | 192166 | 2-:27044902-27102332    |
| 22239 | Ap3b1         | 11774  | 13+:95128985-95336270   |
| 22240 | Spen          | 56381  | 4-:141024772-141078246  |
| 22241 | Sfrs10        | 20462  | 16-:22246535-22265983   |
| 22242 | Gopc          | 94221  | 10-:52059180-52101846   |
| 22243 | Tmem16a       | 101772 | 7-:151774452-151864752  |
| 22244 | Slc16a7       | 20503  | 10-:124664541-124765591 |
| 22245 | Tmem161b      | 72745  | 13+:84361820-84435743   |
| 22246 | Kcmf1         | 74287  | 6-:72791107-72811920    |
| 22247 | Pigyl         | 66268  | 9+:21961309-21962792    |
| 22248 | OTTMUSG000000 | 329919 | 4+:112296613-112298701  |
| 22249 | Wdr3          | 269470 | 3-:99942103-99952132    |
| 22250 | Wdr45l        | 66840  | 11-:121188547-121215723 |
| 22251 | Ankrd6        | 140577 | 4-:32892891-32947564    |
| 22252 | Plekha2       | 83436  | 8-:26152997-26212226    |
| 22253 | Tpsb2         | 17229  | 17+:25503494-25506039   |
| 22254 | 4933402N03Rik | 233918 | 7-:138281225-138289809  |
| 22255 | 2900010M23Rik | 67267  | 17-:27259609-27270836   |
| 22256 | Arg2          | 11847  | 12+:80231810-80257282   |
| 22257 | Lonrf3        | 74365  | X+:33868401-33898750    |
| 22258 | Ttk           | 22137  | 9+:83728347-83765991    |
| 22259 | Sfrs12ip1     | 67288  | 13+:105607302-105628440 |
| 22260 | Slc38a4       | 69354  | 15-:96827200-96861642   |
| 22261 | 4933428G20Rik | 58996  | 11+:97351386-97363714   |
| 22262 | Mthfd1l       | 270685 | 10-:6240002-6373416     |
| 22263 | Gzmd          | 14941  | 14-:56748417-56751359   |
| 22264 | Lpxn          | 107321 | 19+:12873082-12908330   |
| 22265 | Sez6l         | 56747  | 5-:113005791-113019018  |
| 22266 | Pyhin1        | 236312 | 1+:175560995-175578005  |
| 22267 | Unc13c        | 208898 | 9-:73778403-73816781    |
| 22268 | MMT00013001   |        | 5-:87591295-87645522    |
| 22269 | Mgmt          | 17314  | 7+:144142956-144320072  |
| 22270 | Olfir74       | 117005 | 2-:87813865-87814820    |
| 22271 | Cyp2c29       | 13095  | 19+:39361600-39405189   |
| 22272 | Vpreb1        | 22362  | 16-:16868495-16869343   |
| 22273 | Zfp146        | 26465  | 7-:30946619-30954706    |
| 22274 | Slc22a16      | 70840  | 10+:40290274-40323946   |
| 22275 | Sst           | 20604  | 16-:23889666-23890930   |
| 22276 | Fbxl21        | 213311 | 13+:56638184-56638826   |
| 22277 | A030005L19Rik | 77922  | 1+:82909899-82910705    |
| 22278 | Ap4s1         | 11782  | 12+:52792023-52839918   |
| 22279 | Krr1          | 52705  | 10+:111409810-111425943 |
| 22280 | Cica3         | 23844  | 3-:144667501-144695723  |
| 22281 | Lcor          | 212391 | 19+:41558007-41602650   |
| 22282 | Rhob          | 11852  | 12-:8505848-8506438     |
| 22283 | Erlin2        | 244373 | 8+:28134300-28149896    |
| 22284 | Tcerg1l       | 70571  | 7-:145401374-145589241  |
| 22285 | MMT00043109   |        | X-:10274096-10274516    |



|       |               |        |                         |
|-------|---------------|--------|-------------------------|
| 22286 | Mmachc        | 67096  | 4-:116375039-116380926  |
| 22287 | Mylc2b        | 67938  | 17-:71323302-71339856   |
| 22288 | MMT00061717   |        |                         |
| 22289 | Smn1          | 20595  | 13+:100894848-100907645 |
| 22290 | Tubb2a        | 22151  | 13-:34166150-34169875   |
| 22291 | V1re7         | 171230 | 17-:21026681-21027615   |
| 22292 | Olfr45        | 18344  | 7+:147876805-147877739  |
| 22293 | Gprc6a        | 210198 | 10-:51334671-51348358   |
| 22294 | Ttc35         | 66736  | 15+:43308820-43359308   |
| 22295 | lqsec1        | 232227 | 6-:90609057-90666266    |
| 22296 | 1700030G06Rik | 69507  | 5-:22199664-22200709    |
| 22297 | Zfyve1        | 217695 | 12-:84887504-84916086   |
| 22298 | Zfp259        | 22687  | 9+:46081248-46089685    |
| 22299 | Heatr2        | 433956 | 5+:139646148-139662460  |
| 22300 | Ddx41         | 72935  | 13-:55631778-55637873   |
| 22301 | Cbr4          | 234309 | 8+:63966580-63982279    |
| 22302 | MMT00041810   |        | 8-:38434879-38436192    |
| 22303 | Cdt1          | 67177  | 8+:125091941-125097033  |
| 22304 | Pigt          | 78928  | 2+:164323064-164333266  |
| 22305 | Mcph1         | 244329 | 8+:18595272-18625674    |
| 22306 | Myl4          | 17896  | 11+:104438765-104447067 |
| 22307 | Sgtb          | 218544 | 13+:104899869-104931519 |
| 22308 | 2310015A10Rik | 69548  | 12-:81224570-81233832   |
| 22309 | Ptch1         | 19206  | 13-:63612841-63666828   |
| 22310 | Asb5          | 76294  | 8+:55635683-55673189    |
| 22311 | 1700037H04Rik | 67326  | 2-:130972060-130985756  |
| 22312 | Itln1         | 16429  | 1-:173448372-173461884  |
| 22313 | Prokr2        | 246313 | 2-:132197950-132207356  |
| 22314 | E2f2          | 242705 | 4+:135728307-135751074  |
| 22315 | Myo3b         | 329421 | 2+:69934353-70072535    |
| 22316 | Kcnab2        | 16498  | 4-:151767143-151809990  |
| 22317 | Al450540      | 226252 | 19+:57455727-57461427   |
| 22318 | Cox8b         | 12869  | 7-:148084841-148086296  |
| 22319 | Maff          | 17133  | 15+:79187427-79188285   |
| 22320 | MMT00047284   |        |                         |
| 22321 | Apol7a        | 75761  | 15-:77218645-77226747   |
| 22322 | Rnf151        | 67504  | 17-:24852790-24854963   |
| 22323 | MMT00051740   |        | 7-:17304466-17305259    |
| 22324 | MMT00060741   |        | 7-:109796211-109796566  |
| 22325 | Sts           | 20905  |                         |
| 22326 | MMT00014155   |        | 14-:51511064-51512974   |
| 22327 | Tyropb        | 22177  | 7+:31198857-31202427    |
| 22328 | MMT00040306   |        | 6+:68491651-68492524    |
| 22329 | Galnt5        | 67909  | 5+:24687297-24726107    |
| 22330 | Prox1         | 19130  | 1-:191946860-191986192  |
| 22331 | Cck           | 12424  | 9-:121398944-121404780  |
| 22332 | MMT00075553   |        | 15-:69892979-69894929   |
| 22333 | Hnrnp3        | 432467 | 10-:62477414-62482275   |
| 22334 | 9430023L20Rik | 68118  | 15+:101114731-101121365 |
| 22335 | Ceacam2       | 26367  | 7-:26302889-26324876    |
| 22336 | Hsd3b5        | 15496  | 3-:98422558-98434175    |

|       |               |        |                         |
|-------|---------------|--------|-------------------------|
| 22337 | Nlk           | 18099  | 11-:78381693-78510055   |
| 22338 | Unc119        | 22248  | 11+:78157006-78162544   |
| 22339 | Slc12a1       | 20495  | 2+:124979465-125021457  |
| 22340 | Lnx2          | 140887 | 5+:147828219-147830167  |
| 22341 | Hdhd2         | 76987  | 18+:77182868-77210141   |
| 22342 | MMT00008396   |        | 5-:10241751-10245340    |
| 22343 | Blm           | 12144  | 7-:87599977-87679983    |
| 22344 | Hspd1         | 15510  | 1-:55140586-55143783    |
| 22345 | Scamp2        | 24044  | 9+:57408760-57435602    |
| 22346 | 6330405D24Rik | 70715  | 2-:119698480-119704139  |
| 22347 | Gpr114        | 382045 | 8+:97457774-97459066    |
| 22348 | MMT00061474   |        | 4+:143886695-143887769  |
| 22349 | Cab39         | 12283  | 1+:87690359-87746617    |
| 22350 | Indol1        | 209176 | 8-:25642925-25686805    |
| 22351 | Fanca         | 14087  | 8-:125792201-125842476  |
| 22352 | MMT00051519   |        | 18+:74400956-74401179   |
| 22353 | A930041I02Rik | 320271 | 2-:38930304-39046241    |
| 22354 | 2010301N04Rik | 72103  | 6-:87657235-87672165    |
| 22355 | Clec4e        | 56619  | 6-:123231806-123239889  |
| 22356 | Gli3          | 14634  | 13+:15555812-15818806   |
| 22357 | Chmp1b        | 67064  | 18+:67365076-67366653   |
| 22358 | MMT00038532   |        |                         |
| 22359 | Dhrs7b        | 216820 | 11+:60644188-60671647   |
| 22360 | MMT00075564   |        | 15-:38173282-38173967   |
| 22361 | Sephs2        | 20768  | 7-:134415396-134417560  |
| 22362 | Laptm4b       | 114128 | 15+:34168078-34213134   |
| 22363 | C530044N13Rik | 223978 | 16-:11803808-11909496   |
| 22364 | Cnbp2         | 75064  | X+:100818852-100826524  |
| 22365 | Jun           | 16476  | 4-:94715745-94718878    |
| 22366 | MMT00005283   |        | 6+:16838966-16876948    |
| 22367 | Gas8          | 104346 | 8+:126042733-126060549  |
| 22368 | RP23-149D11.5 | 332923 | 4+:101613011-101615934  |
| 22369 | Spinlw1       | 75526  | 2-:164413842-164419071  |
| 22370 | 1700058G18Rik | 67342  | 10+:115855176-115858291 |
| 22371 | 1810063B05Rik | 67892  | 8-:128948313-128999049  |
| 22372 | MMT00030553   | 627908 | X+:72478193-72481092    |
| 22373 | Txnip         | 56338  | 3+:96361880-96365780    |
| 22374 | BC087945      | 432940 | 15-:27535678-27560256   |
| 22375 | MMT00053882   |        | 14+:95818909-95820406   |
| 22376 | MMT00044511   |        | 4-:18771350-18773019    |
| 22377 | Gm941         | 381112 | 17+:80770528-80787141   |
| 22378 | Wdr60         | 217935 | 12-:117445928-117471145 |
| 22379 | Gpx6          | 75512  | 13+:21404118-21411488   |
| 22380 | MMT00014053   | 676914 | 3+:59757737-59776406    |
| 22381 | Wdr37         | 207615 | 13-:8802244-8870266     |
| 22382 | Tprg          | 71338  | 16+:25286903-25422427   |
| 22383 | 2200002K05Rik | 69137  | 9+:15043486-15063837    |
| 22384 | 2410015M20Rik | 224904 | 17-:56746380-56749250   |
| 22385 | Olf1437       | 258117 | 19-:12284792-12397072   |
| 22386 | BC043118      | 224273 | 16-:59543001-59554049   |
| 22387 | Tmc7          | 209760 | 7-:125680541-125693579  |

|       |               |        |                         |
|-------|---------------|--------|-------------------------|
| 22388 | 2410018M08Rik | 71970  | 5+:130371591-130379486  |
| 22389 | AA409316      | 105732 | 15:-75831359-75843304   |
| 22390 | Dhcr7         | 13360  | 7+:151016137-151034314  |
| 22391 | Tmem16g       | 404545 | 1+:95281387-95282260    |
| 22392 | Dhdds         | 67422  | 4:-133525089-133556786  |
| 22393 | 2310044H10Rik | 69683  | 7:-51745332-51751882    |
| 22394 | Sertad3       | 170742 | 7+:28258854-28261779    |
| 22395 | Kcna1         | 16485  | 6:-126591689-126594831  |
| 22396 | Fcrl5         | 329693 | 3+:87245926-87252359    |
| 22397 | Lbxcor1       | 207667 | 9:-62992188-62994385    |
| 22398 | Nav2          | 78286  | 7+:56708439-56862513    |
| 22399 | Nell1         | 338352 | 7+:57230758-57431688    |
| 22400 | 2610036D13Rik | 75425  | 2:-157807538-157854128  |
| 22401 | Sgcz          | 244431 | 8:-38586316-39016111    |
| 22402 | MMT00071327   |        | 8:-11683460-11684248    |
| 22403 | Bank1         | 242248 | 3:-135717373-135763554  |
| 22404 | Slc22a21      | 56517  | 11:-53764325-53793529   |
| 22405 | 6030422M02Rik | 240697 | 1+:9901799-9905750      |
| 22406 | Vnn1          | 22361  | 10+:23614665-23625145   |
| 22407 | Rhbdf2        | 217344 | 11:-116459485-116485567 |
| 22408 | Calr3         | 73316  | 8:-74948450-74967677    |
| 22409 | Larp2         | 214048 | 3+:40766089-40781704    |
| 22410 | MMT00010164   |        | 4+:133559277-133560800  |
| 22411 | Reck          | 53614  | 4+:43888471-43957392    |
| 22412 | Ptpn5         | 19259  | 7:-54333171-54389054    |
| 22413 | MMT00061444   |        | 13:-61538488-61540814   |
| 22414 | Myom2         | 17930  | 8+:15057652-15133540    |
| 22415 | 2310002L13Rik | 75577  | 18:-70400083-70404239   |
| 22416 | Wdr20a        | 69641  | 12+:111976153-112042448 |
| 22417 | Mnx1          | 15285  | 5:-29799803-29805010    |
| 22418 | Snph          | 241727 | 2:-151419015-151458277  |
| 22419 | MMT00078129   |        | 14+:53627287-53627815   |
| 22420 | Fgf23         | 64654  | 6+:127023047-127030496  |
| 22421 | Cnot10        | 78893  | 9:-114494805-114549316  |
| 22422 | Gpr172b       | 52710  | 15+:76369393-76371818   |
| 22423 | MMT00037852   |        | 11:-3525481-3525851     |
| 22424 | Gm693         | 277743 | 4+:140924197-140939561  |
| 22425 | 4632415K11Rik | 74347  | 8:-122284011-122297339  |
| 22426 | Zfp282        | 101095 | 6+:47827662-47856967    |
| 22427 | MMT00049287   |        | X:-62003662-62004338    |
| 22428 | Csmd3         | 239420 | 15:-47678652-47836513   |
| 22429 | Cblb          | 208650 | 16+:52033135-52204805   |
| 22430 | Taar9         | 503558 | 10:-23821182-23829340   |
| 22431 | 1700019A02Rik | 69397  | 1:-53215420-53244461    |
| 22432 | 4922505G16Rik | 629499 | 2:-157083762-157105285  |
| 22433 | Nsun3         | 106338 | 16:-62734954-62786600   |
| 22434 | Olfr1255      | 258979 | 2+:89656484-89657415    |
| 22435 | Tmem98        | 103743 | 11+:80623916-80635533   |
| 22436 | Ksr2          | 333050 | 5+:118139568-118213328  |
| 22437 | Ankrd29       | 225187 | 18:-12412886-12454498   |
| 22438 | 6330416G13Rik | 230279 | 4+:63223489-63245850    |

|       |               |           |                         |
|-------|---------------|-----------|-------------------------|
| 22439 | 4921533L14Rik | 68187     | 1-:24018521-24036655    |
| 22440 | MMT00042948   |           | 8+:82229577-82230204    |
| 22441 | Nlrp4f        | 97895     | 13-:65278422-65296696   |
| 22442 | E130319B15Rik | 209645    | 2+:4621283-4621716      |
| 22443 | Tuba1c        | 22146     | 15+:98860808-98868535   |
| 22444 | Vgll2         | 215031    | 10+:51742488-51745169   |
| 22445 | Prkag3        | 241113    | 1-:74785498-74795530    |
| 22446 | Ccr5          | 12774     | 9+:124039100-124040164  |
| 22447 | Pcdhb11       | 93882     | 18+:37581272-37583664   |
| 22448 | MMT00023461   |           | 3+:19834373-19834864    |
| 22449 | Phf20         | 228829    | 2+:156022376-156134752  |
| 22450 | Prpf19        | 28000     | 19+:10969753-10979806   |
| 22451 | Olf1461       | 258299    | 19+:13232689-13308799   |
| 22452 | Tcfap2b       | 21419     | 1+:19199078-19224593    |
| 22453 | Spag17        | 74362     | 3+:99892204-99896975    |
| 22454 | Synj2bp       | 24071     | 12-:82601700-82633855   |
| 22455 | Gprc5d        | 93746     | 6-:135056009-135068301  |
| 22456 | Slc7a15       | 328059    | 12-:8536151-8546373     |
| 22457 | 6530401D17Rik | 76219     | X+:132567905-132569483  |
| 22458 | Spata17       | 74717     | 1-:188872280-189039346  |
| 22459 | Hnrnpa3       | 229279    | 2+:75497320-75500813    |
| 22460 | 4930430F21Rik | 73784     | 15+:30968876-30973087   |
| 22461 | Crkrs         | 69131     | 11+:98124798-98139806   |
| 22462 | MMT00026054   | 100041835 | 11-:95934335-95936342   |
| 22463 | Gorasp2       | 70231     | 2+:70499206-70529799    |
| 22464 | AU042671      | 269700    | 5+:121765763-121768774  |
| 22465 | Olf1790       | 258935    | 10+:128937941-128938909 |
| 22466 | Pdyn          | 18610     | 2-:129513736-129515604  |
| 22467 | Crhbp         | 12919     | 13-:96201332-96214728   |
| 22468 | V1ri4         | 171255    | 13+:22566486-22567387   |
| 22469 | Rtkn2         | 170799    | 10+:67489265-67498687   |
| 22470 | Ppargc1b      | 170826    | 18-:61457790-61560085   |
| 22471 | Ankrd42       | 73845     | 7-:99738615-99780172    |
| 22472 | Lin28b        | 380669    | 10-:45096435-45100883   |
| 22473 | Jsrp1         | 71912     | 10-:80271245-80276240   |
| 22474 | Ubqln1        | 56085     | 13-:58279144-58316799   |
| 22475 | Sh3bp1        | 20401     | 15+:78732786-78742473   |
| 22476 | Tspan4        | 64540     | 7+:148661375-148679315  |
| 22477 | A130034M23Rik | 320759    | 16-:30312504-30388501   |
| 22478 | Tanc1         | 66860     | 2+:59537404-59684269    |
| 22479 | Ascc2         | 75452     | 11+:4537795-4583386     |
| 22480 | MMT00056658   |           | 3-:32778162-32779534    |
| 22481 | Fmnl3         | 22379     | 15-:99147651-99168153   |
| 22482 | Vmn2r93       | 627132    | 17+:18440927-18462865   |
| 22483 | Utp20         | 70683     | 10-:88209349-88289527   |
| 22484 | MMT00043129   |           | 4-:106690539-106695105  |
| 22485 | Unc119        | 22248     | 11-:78156957-78162597   |
| 22486 | Sh3bgrl3      | 73723     | 4-:133683321-133684668  |
| 22487 | Trub1         | 72133     | 19+:57527401-57563395   |
| 22488 | Gzmc          | 14940     | 14-:56850277-56853493   |
| 22489 | BC049730      | 232972    | 7+:25494288-25497626    |

|       |               |        |                         |
|-------|---------------|--------|-------------------------|
| 22490 | Lta4h         | 16993  | 10+:92916174-92947578   |
| 22491 | Kif3b         | 16569  | 2+:153141950-153157314  |
| 22492 | Ubb           | 22187  | 11+:62365007-62366714   |
| 22493 | Slc35a2       | 22232  | X+:7461369-7471531      |
| 22494 | MMT00005811   |        | 4-:52948302-52949253    |
| 22495 | Nek5          | 330721 | 8-:23184088-23193936    |
| 22496 | Sfn1          | 20555  | 11+:82930346-82936161   |
| 22497 | 4921531P14Rik | 70960  | 18-:83462161-83475854   |
| 22498 | Krt5          | 110308 | 15-:101537502-101543322 |
| 22499 | 9030409G11Rik | 71529  | 4-:141696730-141766123  |
| 22500 | Dub1          | 13531  | 7+:112005528-112011179  |
| 22501 | Rgs5          | 19737  | 1+:171624624-171625927  |
| 22502 | Rilp          | 280408 | 11+:75323594-75326666   |
| 22503 | Cnot6l        | 231464 | 5-:96505816-96591009    |
| 22504 | Rab1          | 19324  | 11+:20101502-20125529   |
| 22505 | Ogfod2        | 66627  | 5+:124562346-124565485  |
| 22506 | Slc22a4       | 30805  | 11-:53796811-53841590   |
| 22507 | Nap1l3        | 54561  | X-:119508169-119510994  |
| 22508 | Setd8         | 67956  | 5+:124910928-124912282  |
| 22509 | MMT00038045   |        | 17-:74837565-74838004   |
| 22510 | Hnrph1        | 59013  | 11+:50191270-50200027   |
| 22511 | Shroom1       | 71774  | 11+:53270707-53281306   |
| 22512 | MMT00005785   |        | 18+:8415120-8416047     |
| 22513 | Ufd1l         | 22230  | 16+:18812404-18834853   |
| 22514 | MMT00076032   | 667804 | 2+:74590836-74591356    |
| 22515 | Ctf1          | 13019  | 7+:134856249-134861699  |
| 22516 | Zscan2        | 22691  | 7+:88008053-88021401    |
| 22517 | Ttc36         | 192653 | 9-:44607482-44611034    |
| 22518 | Narfl         | 67563  | 17+:25910751-25919793   |
| 22519 | 1700054K19Rik | 67336  | 6+:112160699-112162507  |
| 22520 | Sec13         | 110379 | 6-:113678063-113690678  |
| 22521 | Hsp90b1       | 22027  | 10-:86153585-86168189   |
| 22522 | 2010300C02Rik | 72097  | 1-:37694830-37733634    |
| 22523 | Ube2i         | 22196  | 17-:25398863-25406426   |
| 22524 | Heatr2        | 433956 | 5+:139626587-139642157  |
| 22525 | MMT00028383   |        | 7-:48922341-48923570    |
| 22526 | 8430410K20Rik | 78100  | 9+:4383536-4386863      |
| 22527 | EG668174      | 668174 | 3-:90718795-90720858    |
| 22528 | Frmf5         | 228564 | 2-:121373822-121412207  |
| 22529 | Fto           | 26383  | 8+:93837437-94192328    |
| 22530 | MMT00050654   |        | 10-:14306897-14307345   |
| 22531 | Gm484         | 243967 | 7+:52941550-52949922    |
| 22532 | MMT00026824   |        | 13+:66630311-66677023   |
| 22533 | 1200003I07Rik | 66869  | 8-:72229038-72240831    |
| 22534 | Pik3r2        | 18709  | 8-:73292077-73300580    |
| 22535 | 4933401J01Rik | 71042  | 1+:3063332-3064289      |
| 22536 | Zfat          | 380993 | 15-:67915883-68056505   |
| 22537 | MMT00049274   |        | 16+:15219036-15221648   |
| 22538 | Atp6v1g3      | 338375 | 1+:140170315-140184834  |
| 22539 | MMT00044599   |        | 4+:52049043-52254398    |
| 22540 | Blzf1         | 66352  | 1-:166221519-166237349  |

|       |               |           |                         |
|-------|---------------|-----------|-------------------------|
| 22541 | 4632413I24Rik | 74031     | 10+:7132928-7133737     |
| 22542 | MMT00040348   | 434034    | 6:-68757165-68757702    |
| 22543 | Psma4         | 26441     | 9+:54798680-54805629    |
| 22544 | Cog7          | 233824    | 7-:129066681-129155747  |
| 22545 | Uvrag         | 78610     | 7-:106036403-106289635  |
| 22546 | Tnnt1         | 21955     | 7-:4456264-4467577      |
| 22547 | Rhpn1         | 14787     | 15+:75534823-75544654   |
| 22548 | Itgb8         | 320910    | 12-:120401589-120476658 |
| 22549 | Ptdss2        | 27388     | 7+:148317300-148341418  |
| 22550 | MMT00050817   | 100039518 | 8+:83457527-83458426    |
| 22551 | Anapc11       | 66156     | 11+:120459787-120466988 |
| 22552 | MMT00007799   |           | 3-:95218849-95219391    |
| 22553 | Ms4a8a        | 64381     | 19-:11141961-11155518   |
| 22554 | Tectb         | 21684     | 19+:55255374-55270802   |
| 22555 | Ela2          | 50701     | 10+:79349079-79350843   |
| 22556 | Slc26a8       | 224661    | 17-:28786612-28826932   |
| 22557 | P4hb          | 18453     | 11-:120421355-120434500 |
| 22558 | Cd209a        | 170786    | 8-:3744084-3748906      |
| 22559 | MMT00031309   |           | 2+:34686022-34688171    |
| 22560 | Gpr56         | 14766     | 8+:97501008-97538095    |
| 22561 | Whdc1         | 434204    | 7+:88716165-88741478    |
| 22562 | Sdha          | 66945     | 13-:74459703-74487690   |
| 22563 | MMT00004885   |           | 4+:105466782-105467514  |
| 22564 | Ccdc33        | 382077    | 9-:57925346-57950105    |
| 22565 | Zgpat         | 229007    | 2+:181100140-181115489  |
| 22566 | 5330417C22Rik | 229722    | 3-:108260986-108339665  |
| 22567 | Pcdh15        | 11994     | 10+:73284630-74095409   |
| 22568 | MMT00033197   |           | 12-:105427732-105430646 |
| 22569 | Xpot          | 73192     | 10-:121024437-121063374 |
| 22570 | Phtf1         | 18685     | 3+:103772180-103811411  |
| 22571 | Hexim2        | 71059     | 11+:102991483-103000378 |
| 22572 | 5430411K18Rik | 71423     | 18+:78144888-78231764   |
| 22573 | Kif2c         | 73804     | 4-:116832742-116855189  |
| 22574 | Baz2b         | 407823    | 2-:59737428-59963868    |
| 22575 | St8sia6       | 241230    | 2-:13576566-13715147    |
| 22576 | Tlr12         | 384059    | 4-:128292690-128295264  |
| 22577 | Olf574        | 258357    | 7+:110096980-110098020  |
| 22578 | Bmp5          | 12160     | 9+:75623899-75746389    |
| 22579 | Eif4a2        | 13682     | 16+:23107828-23114019   |
| 22580 | MMT00081414   |           | 2+:15766872-15791436    |
| 22581 | 2310035C23Rik | 227446    | 1+:107560445-107651761  |
| 22582 | Gpr132        | 56696     | 12-:114090181-114099163 |
| 22583 | Vmn2r89       | 22301     | 14+:52030599-52080294   |
| 22584 | Gspt2         | 14853     | X+:91881657-91883890    |
| 22585 | MMT00004539   |           | 6-:37772702-37816091    |
| 22586 | Olf1394       | 258273    | 11+:48973517-48974456   |
| 22587 | Ocm           | 18261     | 5-:144780801-144786575  |
| 22588 | Hspb2         | 69253     | 9-:50559384-50560375    |
| 22589 | Neto1         | 246317    | 18+:86565010-86670665   |
| 22590 | Klk1b27       | 16619     | 7+:51307659-51312079    |
| 22591 | Dok4          | 114255    | 8-:97387769-97400174    |

|       |               |        |                         |
|-------|---------------|--------|-------------------------|
| 22592 | MMT00055028   |        | 12+:100742958-100747794 |
| 22593 | Spink3        | 20730  | 18-:43887737-43896848   |
| 22594 | Ppig          | 228005 | 2+:69570299-69588277    |
| 22595 | Mtmr15        | 330554 | 7-:71491644-71518242    |
| 22596 | MMT00009596   |        | 2-:177099652-177100616  |
| 22597 | Sytl1         | 269589 | 4-:132809081-132818981  |
| 22598 | 4930402H24Rik | 228602 | 2-:130629128-130629599  |
| 22599 | MMT00000084   |        | 3+:71663190-71663765    |
| 22600 | 2410018C20Rik | 67873  | 8-:86775381-86781191    |
| 22601 | Lig4          | 319583 | 8-:9971042-9973778      |
| 22602 | V1rg8         | 171243 | 7-:12906556-12907477    |
| 22603 | Il1f8         | 69677  | 2+:24008677-24016038    |
| 22604 | Zc3h6         | 78751  | 2+:128793144-128819866  |
| 22605 | MMT00030012   |        | 12+:114601948-114635798 |
| 22606 | Cds2          | 110911 | 2+:132088977-132131122  |
| 22607 | Bex1          | 19716  | X-:132748511-132749977  |
| 22608 | Ctnna3        | 216033 | 10+:64297325-64465713   |
| 22609 | Gjd3          | 353155 | 11-:98843493-98844330   |
| 22610 | Prdm9         | 213389 | 17-:15690199-15701304   |
| 22611 | Tmem5         | 216395 | 10-:121516443-121517069 |
| 22612 | 1500010J02Rik | 68964  | 11+:68840817-68849974   |
| 22613 | Atp8a1        | 11980  | 5-:68013838-68238449    |
| 22614 | MMT00005389   |        | 7-:12430599-12431453    |
| 22615 | MMT00067023   |        | 6-:10122057-10122856    |
| 22616 | A930001M12Rik | 320500 | 4+:40420256-40421336    |
| 22617 | MMT00037046   |        |                         |
| 22618 | Ccl21c        | 65956  | 4+:41774242-41775336    |
| 22619 | Noc3l         | 57753  | 19-:38380215-38893688   |
| 22620 | Olfr1408      | 258759 | 1-:175060413-175061346  |
| 22621 | Cklf          | 75458  | 8+:106774802-106787343  |
| 22622 | Prl6a1        | 19111  | 13+:27404496-27411120   |
| 22623 | Snupn         | 66069  | 9+:56798631-56831010    |
| 22624 | Kcnj15        | 16516  | 16+:95517208-95518605   |
| 22625 | Jarid1c       | 20591  | X+:148668103-148707616  |
| 22626 | Shprh         | 268281 | 10+:10884440-10935069   |
| 22627 | Adck5         | 268822 | 15+:76406735-76426238   |
| 22628 | EG626903      | 626903 | 5-:20621883-20635619    |
| 22629 | Asb17         | 66772  | 3+:153507229-153516575  |
| 22630 | MMT00034355   |        | 4+:24165577-24166314    |
| 22631 | MMT00054932   |        | 11+:101337214-101338381 |
| 22632 | Gpc4          | 14735  | X-:49406098-49518429    |
| 22633 | Ccdc124       | 234388 | 8-:73391902-73397281    |
| 22634 | Rab27b        | 80718  | 18-:70143312-70213017   |
| 22635 | Nrn1          | 68404  | 13-:36817495-36826349   |
| 22636 | Trim2         | 80890  | 3-:83964367-84024783    |
| 22637 | Angel2        | 52477  | 1+:192752398-192769672  |
| 22638 | Astn2         | 56079  | 4-:65041836-65846485    |
| 22639 | D17Wsu104e    | 28106  | 17-:56315976-56323320   |
| 22640 | Bud13         | 215051 | 9+:46091104-46106864    |
| 22641 | Kif1c         | 16562  | 11+:70514046-70545471   |
| 22642 | Uts2          | 24111  | 4+:150371205-150375918  |

|       |               |           |                         |
|-------|---------------|-----------|-------------------------|
| 22643 | Ece1          | 230857    | 4+:137469486-137519654  |
| 22644 | Dennd3        | 105841    | 15+:73343175-73402652   |
| 22645 | Zar1          | 317755    | 5-:72968354-72972376    |
| 22646 | MMT00066171   |           | 5-:148679761-148680121  |
| 22647 | Pkib          | 18768     | 10+:57351786-57456887   |
| 22648 | Mpzl1         | 68481     | 1-:167522314-167564652  |
| 22649 | MMT00042862   | 629761    | 2-:164488414-164499587  |
| 22650 | Ccdc129       | 232016    | 6+:55925581-55928732    |
| 22651 | Kif2a         | 16563     | 13-:107751339-107812194 |
| 22652 | Olfr616       | 259103    | 7-:110712839-110713791  |
| 22653 | Ric3          | 320360    | 7-:116181406-116226820  |
| 22654 | Usp4          | 22258     | 9+:108250198-108294857  |
| 22655 | Sorcs3        | 66673     | 19+:48678332-48879987   |
| 22656 | Atp6ap1       | 54411     | X+:71542517-71549477    |
| 22657 | MMT00051642   |           | 9-:54671149-54673168    |
| 22658 | BC011426      | 224893    | 17+:56031542-56038351   |
| 22659 | Pex19         | 19298     | 1+:174056904-174064739  |
| 22660 | Kif4          | 16571     | X+:97821075-97922278    |
| 22661 | Pilrb2        | 545812    | 5-:138307055-138313042  |
| 22662 | H2-T24        | 15042     | 17-:36143599-36157436   |
| 22663 | Olfr497       | 258733    | 7+:115566086-115567031  |
| 22664 | 9430020K01Rik | 240185    | 18-:4681791-4682867     |
| 22665 | Cgn           | 70737     | 3-:94571038-94590383    |
| 22666 | R3hdm1        | 226412    | 1+:129999940-130134311  |
| 22667 | Gcm1          | 14531     | 9+:77899730-77913242    |
| 22668 | Rai14         | 75646     | 15-:10500395-10620182   |
| 22669 | Ahctf1        | 226747    | 1-:181675029-181684203  |
| 22670 | Clec4a1       | 269799    | 6+:122871991-122884638  |
| 22671 | Wdr54         | 75659     | 6-:83102741-83106361    |
| 22672 | Adam33        | 110751    | 2-:130876326-130882277  |
| 22673 | Prpf38b       | 66921     | 3-:108705236-108714643  |
| 22674 | 4632411B12Rik | 226976    | 1-:36392148-36426026    |
| 22675 | Olfr133       | 258828    | 17+:38285534-38286471   |
| 22676 | 9030420J04Rik | 71544     | 9-:9180015-9239026      |
| 22677 | Prss2         | 22072     | 6+:41471786-41475078    |
| 22678 | Daglb         | 231871    | 5+:144225464-144264470  |
| 22679 | MMT00061143   | 100043315 | 15-:94927973-94979797   |
| 22680 | Kcna4         | 16492     | 2+:107135079-107137043  |
| 22681 | Gm88          | 224813    | 17+:46390464-46394264   |
| 22682 | EG245305      | 245305    | 16+:98218417-98231335   |
| 22683 | Vmn2r89       | 22301     | 14+:52030590-52080967   |
| 22684 | Slco1a5       | 108096    | 6-:142182750-142271470  |
| 22685 | Olfr370       | 258267    | 8+:86065044-86065985    |
| 22686 | Acvr1         | 11477     | 2-:58299559-58419568    |
| 22687 | Nr2f1         | 13865     | 13-:78328237-78338134   |
| 22688 | 4930432K21Rik | 74666     | 8+:86672148-86696488    |
| 22689 | 2610028A01Rik | 72400     | 14+:64479200-64538641   |
| 22690 | A230050P20Rik | 319278    | 9+:20673080-20678265    |
| 22691 | Ercc6l        | 236930    | X-:99338296-99339789    |
| 22692 | Pik3c2b       | 240752    | 1+:134962876-134982189  |
| 22693 | Trim68        | 101700    | 7-:109826100-109835764  |



|       |               |        |                         |
|-------|---------------|--------|-------------------------|
| 22694 | EG629219      | 629219 | 7-:14807826-14840218    |
| 22695 | Tgoln2        | 22135  | 6-:72560950-72566742    |
| 22696 | Ypel4         | 241525 | 2+:84574165-84578798    |
| 22697 | Skil          | 20482  | 3+:30995754-31017908    |
| 22698 | Olfr218       | 258880 | 1+:175133488-175134428  |
| 22699 | Cntnap2       | 66797  | 6+:46120168-46184329    |
| 22700 | Mrps18c       | 68735  | 5+:101227768-101233543  |
| 22701 | EG545936      | 545936 | 7+:25623291-25625277    |
| 22702 | Pdlim2        | 213019 | 14-:70564024-70577479   |
| 22703 | Olfr599       | 258726 | 7+:110486569-110487515  |
| 22704 | MMT00012998   |        | 4+:105161470-105184159  |
| 22705 | Actr2         | 66713  | 11-:19962308-20012916   |
| 22706 | D15Wsu75e     | 28075  | 15-:81824433-81846525   |
| 22707 | Olfr666       | 259100 | 7-:112041183-112042140  |
| 22708 | BC042782      | 230451 | 4+:94742350-94822970    |
| 22709 | Proc          | 19123  | 18-:32282780-32295593   |
| 22710 | MMT00075201   |        | 12+:36499659-36501226   |
| 22711 | Gabra5        | 110886 | 7-:64663978-64746231    |
| 22712 | Phf11         | 219131 | 14-:59895750-59916356   |
| 22713 | Orm3          | 18407  | 4+:63017233-63020430    |
| 22714 | Ptpn21        | 24000  | 12-:99914951-99972804   |
| 22715 | Ap3m1         | 55946  | 14-:21855721-21871402   |
| 22716 | Agr3          | 403205 | 12+:36652207-36676323   |
| 22717 | EG620161      | 620161 | 6+:112926194-112926462  |
| 22718 | 1700093K21Rik | 67358  | 11-:23416248-23419101   |
| 22719 | Resp18        | 19711  | 1-:75268776-75274955    |
| 22720 | Rpl8          | 26961  | 15+:76734528-76736374   |
| 22721 | 2200002J24Rik | 69147  | 7+:31483969-31485558    |
| 22722 | Ttc14         | 67120  | 3+:33700135-33706871    |
| 22723 | MMT00064316   |        |                         |
| 22724 | Adams13       | 279028 | 2+:26864045-26864967    |
| 22725 | 4930504O13Rik | 403200 | 11-:58259651-58266424   |
| 22726 | Cdc42bpb      | 217866 | 12-:112531187-112615571 |
| 22727 | Pdgfra        | 18595  | 5+:75548368-75594220    |
| 22728 | Spg11         | 214585 | 2-:121879262-121890679  |
| 22729 | MMT00014927   |        | 4+:135547508-135553800  |
| 22730 | Glt8d1        | 76485  | 14+:31814891-31825171   |
| 22731 | Mrpl50        | 28028  | 4-:49525381-49533953    |
| 22732 | Cyb5b         | 66427  | 8+:109674576-109708000  |
| 22733 | Alpk3         | 116904 | 7+:88202485-88250497    |
| 22734 | Ap3s2         | 11778  | 7-:87025043-87065481    |
| 22735 | MMT00007455   |        | 14-:109091411-109091860 |
| 22736 | Il2rg         | 16186  | X-:98460142-98463515    |
| 22737 | MMT00035824   |        | 8+:52964916-52965501    |
| 22738 | Atox1         | 11927  | 11-:55260143-55274633   |
| 22739 | Olfr22-ps1    | 258209 | 11+:73768545-73769129   |
| 22740 | Manbal        | 69161  | 2+:157204819-157222498  |
| 22741 | Rbck1         | 24105  | 2-:152142071-152156838  |
| 22742 | MMT00004923   |        | 14-:58731592-58731681   |
| 22743 | Igh-2         | 238447 | 12-:114496927-116384147 |
| 22744 | 9-Sep         | 53860  | 11+:117193033-117223622 |

|       |               |        |                         |
|-------|---------------|--------|-------------------------|
| 22745 | Cntnap4       | 170571 | 8+:115093985-115406322  |
| 22746 | Galnt9        | 231605 | 5+:110973424-111050392  |
| 22747 | Gpc3          | 14734  | X-:49625605-49967091    |
| 22748 | Rbm13         | 67920  | 8-:32269939-32279233    |
| 22749 | Tmem16d       | 320091 | 10-:88411776-88423519   |
| 22750 | Mupcdh        | 72040  | 7-:148454983-148462673  |
| 22751 | Nosip         | 66394  | 7+:52317862-52332786    |
| 22752 | MMT00001763   |        | 4+:38610921-38611781    |
| 22753 | Sidt2         | 214597 | 9-:45745944-45763804    |
| 22754 | Bicd2         | 76895  | 13+:49437039-49478622   |
| 22755 | Rpl32         | 19951  | 6-:115755576-115757915  |
| 22756 | Gm438         | 329993 | 4-:144367105-144370548  |
| 22757 | Slc44a2       | 68682  | 9+:21125187-21159471    |
| 22758 | 2810003C17Rik | 108897 | 2+:31805822-31828961    |
| 22759 | Btbd10        | 68815  | 7-:120459131-120513055  |
| 22760 | Rlbp111       | 74438  | 4+:9198142-9377045      |
| 22761 | Cep350        | 74081  | 1-:157787848-157820383  |
| 22762 | Slc6a4        | 15567  | 11+:76812098-76845843   |
| 22763 | Alcam         | 11658  | 16-:52249106-52310062   |
| 22764 | MMT00049130   |        | 12+:60393050-60393923   |
| 22765 | H2-M11        | 224754 | 17+:36684380-36685956   |
| 22766 | MMT00003147   |        | 6-:105013478-105014830  |
| 22767 | Nutf2         | 68051  | 8+:108384552-108403236  |
| 22768 | Isl1          | 16392  | 13-:117089651-117099762 |
| 22769 | Stx1a         | 20907  | 5+:135499441-135526969  |
| 22770 | Slc27a2       | 26458  | 2+:126378890-126413671  |
| 22771 | Dhx37         | 208144 | 5-:125894230-125895773  |
| 22772 | Gm732         | 213450 | X-:105141079-105143760  |
| 22773 | Dkk4          | 234130 | 8+:23734514-23738016    |
| 22774 | MMT00005320   | 625758 | 6+:131439062-131441511  |
| 22775 | MMT00048918   |        | 3-:96258691-96259874    |
| 22776 | Gsr           | 14782  | 8+:34764011-34807908    |
| 22777 | Duox2         | 214593 | 2-:122106173-122123963  |
| 22778 | Olfr64        | 18366  | 7-:111041325-111042985  |
| 22779 | Pik3cg        | 30955  | 12-:32860500-32893335   |
| 22780 | Gpr153        | 100129 | 4+:151653194-151659447  |
| 22781 | Hibch         | 227095 | 1+:52901889-52977704    |
| 22782 | Frrs1         | 20321  | 3+:116564609-116606559  |
| 22783 | MMT00015001   |        | 2+:72954804-72955360    |
| 22784 | Tex15         | 104271 | 8+:34681015-34696056    |
| 22785 | MMT00078758   |        |                         |
| 22786 | Mterfd3       | 74238  | 10-:84582176-84590769   |
| 22787 | Olfr1230      | 258785 | 2-:89136508-89137425    |
| 22788 | MMT00013067   |        | 11-:92567035-92654529   |
| 22789 | 2410025L10Rik | 381668 | 5-:110790773-110825094  |
| 22790 | Eif3j         | 78655  | 2+:121873198-121879365  |
| 22791 | EG668831      | 668831 | 3-:128656700-128658013  |
| 22792 | MMT00017271   |        | 8+:26350963-26537692    |
| 22793 | Cbr2          | 12409  | 11-:120590822-120593309 |
| 22794 | MMT00030143   |        | 1+:193301208-193301795  |
| 22795 | Flt4          | 14257  | 11+:49423228-49465731   |

|       |               |        |                         |
|-------|---------------|--------|-------------------------|
| 22796 | MMT00048652   |        | 1+:3522003-3522786      |
| 22797 | Prop1         | 19127  | 11:-50764307-50767134   |
| 22798 | Pigw          | 70325  | 11:-84690525-84692003   |
| 22799 | Olfr794       | 258375 | 10+:129007712-129008675 |
| 22800 | Zbtb34        | 241311 | 2--33173167-33267993    |
| 22801 | 1190005P17Rik | 66225  | 10+:119664133-119668715 |
| 22802 | Svs2          | 53878  | 2-:164062595-164063979  |
| 22803 | Coq3          | 230027 | 4+:21806832-21837899    |
| 22804 | Omt2a         | 18379  | 9-:78159809-78160890    |
| 22805 | MMT00028156   | 619973 | 4-:57425173-57426990    |
| 22806 | 6330406115Rik | 70717  | 5+:150214382-150234277  |
| 22807 | Mboat2        | 67216  | 12+:25516479-25644558   |
| 22808 | Lrba          | 80877  | 3+:86028611-86586607    |
| 22809 | Mrvi1         | 17540  | 7-:118014872-118089558  |
| 22810 | MMT00038169   |        | X+:119214523-119216090  |
| 22811 | MMT00049679   |        | 3-:63856952-63857936    |
| 22812 | Cybas3        | 225912 | 19+:10651791-10664513   |
| 22813 | MMT00052087   |        | 15+:73669856-73670337   |
| 22814 | Cacna1s       | 12292  | 1+:137949360-138016105  |
| 22815 | Gucy2g        | 73707  | 19-:55272586-55312588   |
| 22816 | Arl4c         | 320982 | 1-:90597661-90619274    |
| 22817 | 1700027D21Rik | 76573  | 10+:76025016-76032945   |
| 22818 | Mdga1         | 74762  | 17-:29969000-29986717   |
| 22819 | Fkbp2         | 14227  | 19-:7052362-7053627     |
| 22820 | MMT00010881   |        | 18-:75330068-75330553   |
| 22821 | Tmem135       | 72759  | 7-:96288714-96487270    |
| 22822 | MMT00013433   |        | 19+:13866454-13867106   |
| 22823 | Sh2d1a        | 20400  | X+:39855846-39875258    |
| 22824 | Hddc3         | 68695  | 7+:87488022-87490983    |
| 22825 | Olfr1316      | 258737 | 2-:111970029-111970972  |
| 22826 | Alox15        | 11687  | 11-:70158044-70165507   |
| 22827 | Clec4a2       | 26888  | 6+:123073333-123092947  |
| 22828 | Scyl1         | 78891  | 19-:5758427-5771401     |
| 22829 | Sval2         | 84543  | 6+:41810337-41814320    |
| 22830 | MMT00081088   |        | 10+:57106425-57107621   |
| 22831 | Fut8          | 53618  | 12+:78432909-78576546   |
| 22832 | Parp14        | 547253 | 16-:35860568-35871468   |
| 22833 | Acat2         | 110460 | 17-:13135760-13153593   |
| 22834 | Mtmr2         | 77116  | 9+:13553621-13610922    |
| 22835 | Fbln1         | 14114  | 15+:85036440-85116084   |
| 22836 | Grpr          | 14829  | X-:159951835-159987571  |
| 22837 | Acsl4         | 50790  | X-:138755080-138824926  |
| 22838 | 2310003H01Rik | 71885  | 11-:120230368-120240025 |
| 22839 | Ehmt2         | 110147 | 17+:35035443-35050990   |
| 22840 | MMT00042053   |        |                         |
| 22841 | Cib1          | 23991  | 7-:87372251-87377446    |
| 22842 | MMT00076318   |        | 15-:84980220-84990920   |
| 22843 | Trim16        | 94092  | 11+:62633730-62664284   |
| 22844 | Gabrg3        | 14407  | 7-:63979611-64642166    |
| 22845 | Olfr564       | 258356 | 7+:109951993-109952986  |
| 22846 | Sel1l         | 20338  | 12-:93044484-93071667   |

|       |               |        |                         |
|-------|---------------|--------|-------------------------|
| 22847 | Kcnh3         | 16512  | 15+:99055382-99073204   |
| 22848 | H2afy3        | 67552  | 15-:62049097-62050958   |
| 22849 | Gpn1          | 74254  | 5+:31797133-31813788    |
| 22850 | Gabbr2        | 242425 | 4-:46680356-46888674    |
| 22851 | Prhoxnb       | 231903 | 5-:148126390-148133920  |
| 22852 | Nepn          | 66650  | 10+:52111413-52124410   |
| 22853 | Olfr983       | 258824 | 9-:39899601-39900549    |
| 22854 | Defb35        | 246084 | 8+:23048823-23051350    |
| 22855 | Anapc2        | 99152  | 2+:25128025-25141434    |
| 22856 | Pak2          | 224105 | 16-:31977031-32079410   |
| 22857 | Fahd2a        | 68126  | 2-:127261951-127270277  |
| 22858 | Fbxl17        | 50758  | 17-:63706093-63840237   |
| 22859 | Rtf1          | 76246  | 2+:119500835-119561153  |
| 22860 | Dtx2          | 74198  | 5+:136470746-136508734  |
| 22861 | E430002G05Rik | 210622 | 2+:102390172-102483195  |
| 22862 | Kpna6         | 16650  | 4-:129325237-129338678  |
| 22863 | Prkd2         | 101540 | 7+:17428328-17455812    |
| 22864 | Gsx2          | 14843  | 5+:75471625-75473918    |
| 22865 | MMT00044720   |        | 6-:131556410-131558977  |
| 22866 | Lhx5          | 16873  | 5+:120881778-120891232  |
| 22867 | Vps52         | 224705 | 17+:34102597-34103979   |
| 22868 | Krt15         | 16665  | 11-:99993332-99997172   |
| 22869 | Tceal8        | 66684  | X-:132704872-132706725  |
| 22870 | MMT00060201   |        | 7+:106221765-106239266  |
| 22871 | Pgrmc2        | 70804  | 3-:40870260-40886895    |
| 22872 | Dub2a         | 384701 | 7-:110398599-110401019  |
| 22873 | Slc38a2       | 67760  | 15-:96517829-96530140   |
| 22874 | Dnaja2        | 56445  | 8-:88061538-88079164    |
| 22875 | Tmem106c      | 380967 | 15+:97794663-97800716   |
| 22876 | Sash3         | 74131  | X+:45499705-45514740    |
| 22877 | MMT00056677   |        | 15+:23419645-23420281   |
| 22878 | Nudt21        | 68219  | 8-:96543305-96560921    |
| 22879 | 1700049E22Rik | 73395  | 6+:100477392-100483461  |
| 22880 | Slc45a4       | 106068 | 15-:73410714-73436109   |
| 22881 | 1700045I19Rik | 74264  | X-:160198071-160199261  |
| 22882 | MMT00011767   | 629750 | 11-:96656754-96657157   |
| 22883 | Slc35f4       | 75288  | 14-:49918194-49942161   |
| 22884 | Mapt          | 17762  | 11+:104092865-104189533 |
| 22885 | Pank1         | 75735  | 19-:34885384-34952407   |
| 22886 | 6330527O06Rik | 76161  | 2+:135883965-135895644  |
| 22887 | 1700020I14Rik | 66602  | 2+:119420054-119427566  |
| 22888 | Adrb3         | 11556  | 8-:28337270-28338916    |
| 22889 | Foxj3         | 230700 | 4+:119213134-119300547  |
| 22890 | D1Pas1        | 110957 | 1+:188791754-188793736  |
| 22891 | MMT00041324   |        | 5+:138042787-138043419  |
| 22892 | Olfr770       | 258862 | 10-:128569887-128570822 |
| 22893 | Sip1          | 66603  | 12+:60114377-60129455   |
| 22894 | MMT00016059   |        | 6-:28311913-28313176    |
| 22895 | Gapvd1        | 66691  | 2-:34531704-34586167    |
| 22896 | Chml          | 12663  | 1-:177616618-177618484  |
| 22897 | MMT00053836   |        |                         |

|       |               |        |                         |
|-------|---------------|--------|-------------------------|
| 22898 | Cd300e        | 217306 | 11-:114914432-114995322 |
| 22899 | Zfp609        | 214812 | 9-:65543016-65643302    |
| 22900 | Olfr419       | 258710 | 1-:176180116-176181056  |
| 22901 | 7-Mar         | 57438  | 2+:60047992-60086441    |
| 22902 | 1700017G19Rik | 72227  | 3-:40403805-40421835    |
| 22903 | Mospd2        | 76763  | X-:161374111-161418262  |
| 22904 | lft172        | 67661  | 5-:31555547-31556952    |
| 22905 | MMT00020711   | 329639 | 3+:52543628-52579195    |
| 22906 | Olfr606       | 259098 | 7+:110599852-110600810  |
| 22907 | MMT00054594   |        | 6-:145264134-145265169  |
| 22908 | Slc29a1       | 63959  | 17-:45722171-45729342   |
| 22909 | Nup133        | 234865 | 8-:126423197-126473130  |
| 22910 | Olfml3        | 99543  | 3-:103526144-103538153  |
| 22911 | Cep350        | 74081  | 1-:157695219-157783011  |
| 22912 | Stap1         | 56792  | 5+:86500862-86532832    |
| 22913 | Zmynd10       | 114602 | 9+:107449787-107453366  |
| 22914 | EG626280      | 626280 | 15+:76188886-76194156   |
| 22915 | Abtb1         | 80283  | 6-:88785910-88791861    |
| 22916 | Tal1          | 21349  | 4+:114732131-114744360  |
| 22917 | G6pdx         | 14381  | X-:71654824-71674205    |
| 22918 | MMT00002192   |        | 12+:58815050-58838891   |
| 22919 | Lig1          | 16881  | 7+:13862631-13896740    |
| 22920 | Hoxb7         | 15415  | 11+:96145876-96151639   |
| 22921 | 2810038D20Rik | 67218  | 14+:45202804-45208076   |
| 22922 | 2310010M24Rik | 71897  | 2+:49643207-49804366    |
| 22923 | Zfml          | 18139  | 6+:83864360-83936855    |
| 22924 | Midn          | 59090  | 10+:79611034-79621112   |
| 22925 | Parp16        | 214424 | 9+:65062928-65087021    |
| 22926 | Ergic2        | 67456  | 6-:148128566-148160559  |
| 22927 | 1700001L05Rik | 69291  | 15-:83187963-83197643   |
| 22928 | Sdf2          | 20316  | 11+:78059504-78068981   |
| 22929 | Rnf14         | 56736  | 18+:38456342-38477457   |
| 22930 | Mro           | 71263  | 18+:74019046-74040987   |
| 22931 | Tcf25         | 66855  | 8+:125897447-125928056  |
| 22932 | Polh          | 80905  | 17-:46309020-46339579   |
| 22933 | Tssc4         | 56844  | 7+:150255272-150256992  |
| 22934 | 4932425I24Rik | 320214 | 16-:38297839-38341914   |
| 22935 | Hmga2         | 15364  | 10-:119799147-119914024 |
| 22936 | Rhobtb1       | 69288  | 10+:68675916-68752765   |
| 22937 | Glr3          | 30926  | 7+:144629332-144659865  |
| 22938 | Lrit3         | 242235 | 3-:129491208-129503728  |
| 22939 | C1galt1       | 94192  | 6+:7795263-7821454      |
| 22940 | 2310042E22Rik | 66561  | 16-:21152741-21154017   |
| 22941 | Hs6st3        | 50787  | 14+:119537453-119538340 |
| 22942 | Bzrp1         | 70026  | 17-:48587286-48590827   |
| 22943 | Tpd52l1       | 21987  | 10-:31052185-31165727   |
| 22944 | Tmem44        | 224090 | 16-:30513777-30550621   |
| 22945 | Cpb2          | 56373  | 14+:75642147-75683358   |
| 22946 | MMT00071077   |        | 10+:41023784-41077470   |
| 22947 | Zfp358        | 140482 | 8+:3493170-3497208      |
| 22948 | MMT00069572   |        | 14-:57455124-57455950   |

|       |               |        |                         |
|-------|---------------|--------|-------------------------|
| 22949 | Il1f6         | 54448  | 2+:24071366-24080115    |
| 22950 | Lsm2          | 27756  | 17+:35119103-35122834   |
| 22951 | Sstr4         | 20608  | 2+:148221206-148222363  |
| 22952 | Dppa1         | 347708 | 11-:46421955-46442779   |
| 22953 | Mvp           | 78388  | 7-:134130381-134158106  |
| 22954 | Slc25a30      | 67554  | 14-:76161805-76186844   |
| 22955 | 4930430E16Rik | 73873  | 11+:22908372-22921138   |
| 22956 | 1700034K16Rik | 73314  | 4-:14592901-14723213    |
| 22957 | 1300018I05Rik | 74157  | 17+:29797639-29839630   |
| 22958 | Vwa2          | 240675 | 19+:56980879-56983873   |
| 22959 | Zfp174        | 385674 | 16+:3847872-3854811     |
| 22960 | Olfr714       | 259035 | 7+:114217343-114218297  |
| 22961 | MMT00055950   | 665565 | 15+:59070014-59070558   |
| 22962 | MMT00013609   |        | 4+:101523329-101548604  |
| 22963 | Ctso          | 229445 | 3+:81736513-81756214    |
| 22964 | C9            | 12279  | 15+:6395332-6448476     |
| 22965 | Frmf7         | 385354 | X-:48248146-48255286    |
| 22966 | Epha4         | 13838  | 1-:77365846-77511663    |
| 22967 | Egln2         | 112406 | 7-:27943677-27951732    |
| 22968 | Jam3          | 83964  | 9-:26904969-26962965    |
| 22969 | Axin2         | 12006  | 11+:108781797-108810797 |
| 22970 | D17Ertd663e   | 52042  | 17-:13012718-13014031   |
| 22971 | Zfp644        | 52397  | 5-:107119623-107125592  |
| 22972 | 9030617O03Rik | 217830 | 12+:102024351-102110558 |
| 22973 | MMT00067195   |        | 17+:17785784-17786290   |
| 22974 | Olfr1377      | 258913 | 11+:50798204-50799128   |
| 22975 | Med14         | 26896  | X-:12321842-12338825    |
| 22976 | Parvg         | 64099  | 15+:84155191-84172205   |
| 22977 | MMT00025397   |        | 17-:80332850-80333959   |
| 22978 | MMT00043176   |        | 5+:106644617-106645918  |
| 22979 | Edem2         | 108687 | 2-:155527763-155555122  |
| 22980 | Nat6          | 56441  | 9+:107483144-107486378  |
| 22981 | Bcar3         | 29815  | 3+:122122744-122233098  |
| 22982 | Mug2          | 17837  | 6+:121956815-122035983  |
| 22983 | Ctdsp1        | 227292 | 1+:74438471-74443836    |
| 22984 | Tnnt2         | 21956  | 1+:137732981-137748837  |
| 22985 | EG665330      | 665330 | 9-:58993442-58994024    |
| 22986 | Prkg1         | 19091  | 19-:31004875-31067652   |
| 22987 | Eif2s2        | 67204  | 2-:154698172-154718511  |
| 22988 | Hscb          | 100900 | 5-:111258092-111265448  |
| 22989 | Lmcd1         | 30937  | 6+:112223811-112280418  |
| 22990 | Rps2          | 16898  | 17+:24857057-24858853   |
| 22991 | Rab11b        | 19326  | 17-:33883635-33897242   |
| 22992 | A430107O13Rik | 214642 | 6+:22038688-22187742    |
| 22993 | Syt6          | 54524  | 3+:103379300-103434850  |
| 22994 | Cpne3         | 70568  | 4-:19446401-19497257    |
| 22995 | Drd2          | 13489  | 9+:49148731-49216282    |
| 22996 | MMT00076852   |        | 14-:45341673-45344626   |
| 22997 | Gbf1          | 107338 | 19+:46227026-46360999   |
| 22998 | Ass1          | 11898  | 2+:31325821-31376149    |
| 22999 | MMT00043885   |        | 4-:155283451-155284852  |

|       |               |        |                         |
|-------|---------------|--------|-------------------------|
| 23000 | Faim2         | 72393  | 15:-99330579-99358025   |
| 23001 | Galm          | 319625 | 17+:80526793-80584441   |
| 23002 | MMT00009646   |        | 15:-75797172-75798020   |
| 23003 | EG209550      | 209550 | 12+:11462884-11469489   |
| 23004 | Ccnd3-ps      | 12446  | 4:-138900309-138902193  |
| 23005 | 4930405A21Rik | 74846  | 2:-156540273-156542803  |
| 23006 | Try4          | 22074  | 6+:41252283-41255485    |
| 23007 | 2410015N17Rik | 66422  | 7:-134400475-134404181  |
| 23008 | Ctsz          | 64138  | 2:-174252995-174264503  |
| 23009 | Amdhd2        | 245847 | 17:-24292798-24295670   |
| 23010 | MMT00047055   |        | 7:-14547637-14551245    |
| 23011 | MMT00012889   |        | 13+:15906733-15907217   |
| 23012 | Spg20         | 229285 | 3+:54916061-54939876    |
| 23013 | MMT00077564   |        | 18+:90749215-90749284   |
| 23014 | MMT00077643   |        |                         |
| 23015 | Zc3h12d       | 237256 | 10+:7559632-7587867     |
| 23016 | Atg9b         | 213948 | 5:-23895599-23896441    |
| 23017 | MMT00013118   |        | 4+:20318347-20319375    |
| 23018 | Magi2         | 50791  | 5+:19413589-20208738    |
| 23019 | ENSMUSG00000  | 791318 | 18:-5574983-5583802     |
| 23020 | Wdr34         | 71820  | 2:-29887066-29904398    |
| 23021 | Sfxn3         | 94280  | 19+:45122306-45130870   |
| 23022 | Kif3a         | 16568  | 11+:53380894-53414604   |
| 23023 | Rassf10       | 78748  | 7+:120068482-120099234  |
| 23024 | Tcra          | 21473  | 14+:54285603-54286191   |
| 23025 | Foxi2         | 270004 | 7+:142602121-142603714  |
| 23026 | Apom          | 55938  | 17:-35265942-35268697   |
| 23027 | Glud1         | 14661  | 14+:35124008-35158089   |
| 23028 | Erv3          | 71995  | 2:-131681151-131685483  |
| 23029 | Zfp27         | 22689  | 7:-30629768-30728569    |
| 23030 | Cyp26b1       | 232174 | 6:-84523974-84543912    |
| 23031 | Gria4         | 14802  | 9:-4793809-4796207      |
| 23032 | Mett10d       | 67493  | 11+:74584364-74632194   |
| 23033 | MMT00072013   |        | 15:-54596155-54597015   |
| 23034 | Slc25a29      | 214663 | 12:-110064086-110073959 |
| 23035 | Al848100      | 226551 | 1:-163746983-163806743  |
| 23036 | Stk19         | 54402  | 17:-34961223-34973821   |
| 23037 | Thbs3         | 21827  | 3+:89019128-89030738    |
| 23038 | Casp4         | 12363  | 9+:5308873-5336707      |
| 23039 | Ift52         | 245866 | 2+:162843088-162872280  |
| 23040 | Slc34a1       | 20505  | 13+:55501064-55515452   |
| 23041 | Kdelc1        | 72050  | 1:-44163895-44175380    |
| 23042 | Bloc1s3       | 232946 | 7:-20091652-20092950    |
| 23043 | Olf930        | 258269 | 9+:38737757-38738682    |
| 23044 | Ctr9          | 22083  | 7+:118172534-118199850  |
| 23045 | Oas1d         | 100535 | 5+:121364872-121371661  |
| 23046 | Zdhhc4        | 72881  | 5:-144078171-144090900  |
| 23047 | Xrn1          | 24127  | 9+:95855287-95953047    |
| 23048 | 2310002J15Rik | 67859  | 2:-25094346-25095417    |
| 23049 | 4933403O08Rik | 71030  | X+:109352657-109357462  |
| 23050 | BC065397      | 436230 | X:-133337375-133340598  |

|       |               |        |                         |
|-------|---------------|--------|-------------------------|
| 23051 | MMT00046509   |        | 17+:33896950-33897011   |
| 23052 | EG634331      | 634331 | 1+:99059343-99190012    |
| 23053 | 1700012B09Rik | 69325  | 9-:14562643-14575474    |
| 23054 | V1rb8         | 113856 | 6+:89926164-89927093    |
| 23055 | Lmo1          | 109594 | 7-:116282084-116314027  |
| 23056 | Ccdc135       | 330830 | 8+:97579794-97602039    |
| 23057 | Rpl13         | 270106 | 8+:125626332-125629061  |
| 23058 | Prph          | 19132  | 15+:98885637-98889100   |
| 23059 | Fbxl20        | 72194  | 11-:97943868-97945481   |
| 23060 | 8430422H06Rik | 74529  | 18+:14390811-14437050   |
| 23061 | Pole2         | 18974  | 12-:70302763-70329160   |
| 23062 | Tiprl         | 226591 | 1-:167145714-167167034  |
| 23063 | Rbmx2         | 209003 | X+:46048178-46063899    |
| 23064 | Myh2          | 17882  | 11+:66984720-67011014   |
| 23065 | Ppp3cc        | 19057  | 14-:70617705-70689256   |
| 23066 | Gtf2a1        | 83602  | 12-:92798108-92828019   |
| 23067 | Slc24a2       | 76376  | 4-:86636869-86722069    |
| 23068 | Rnf126        | 70294  | 10-:79221284-79229669   |
| 23069 | Tmem117       | 320709 | 15+:94709811-94925436   |
| 23070 | BC024659      | 108934 | 13+:41345546-41368403   |
| 23071 | Megf10        | 70417  | 18+:57349154-57453944   |
| 23072 | MMT00048970   |        | 5+:4764813-4765730      |
| 23073 | 4833414E09Rik | 71633  | 1-:170349770-170350960  |
| 23074 | 3021401N23Rik | 70680  | 13-:108832313-108834513 |
| 23075 | MMT00038489   |        | 10+:91947044-91947522   |
| 23076 | Kcnc2         | 268345 | 10+:111708177-111709460 |
| 23077 | Daam2         | 76441  | 17-:49597765-49638260   |
| 23078 | Msrb2         | 76467  | 2+:19293272-19316602    |
| 23079 | Spag17        | 74362  | 3+:99689353-99867396    |
| 23080 | Dmrta1        | 242523 | 4+:89355063-89358966    |
| 23081 | Golga2        | 99412  | 2+:32143875-32163432    |
| 23082 | Gria3         | 53623  | X+:38754687-39029736    |
| 23083 | Olf6          | 233670 | 7-:114099499-114100103  |
| 23084 | Vsig4         | 278180 | X-:93442546-93488775    |
| 23085 | Olf1336       | 258917 | 7+:6413221-6414165      |
| 23086 | MMT00059956   |        |                         |
| 23087 | Nusap1        | 108907 | 2+:119444452-119475512  |
| 23088 | 1700009N14Rik | 75471  | 4+:39397828-39398478    |
| 23089 | Slc1a2        | 20511  | 2+:102546594-102618263  |
| 23090 | Anxa7         | 11750  | 14-:21274498-21299038   |
| 23091 | Parvb         | 170736 | 15+:84062501-84143460   |
| 23092 | Ifih1         | 71586  | 2-:62435396-62484223    |
| 23093 | Mical1        | 171580 | 10+:41196182-41206834   |
| 23094 | Sap30         | 60406  | 8-:59961523-59966654    |
| 23095 | 2410137M14Rik | 76797  | 17-:37114645-37118182   |
| 23096 | Wdr60         | 217935 | 12-:117494300-117501482 |
| 23097 | Pip4k2c       | 117150 | 10-:126635144-126648613 |
| 23098 | Wdr4          | 57773  | 17-:31632568-31649202   |
| 23099 | Cyp2d12       | 380997 | 15+:82385503-82395648   |
| 23100 | MMT00027568   | 544718 | 10+:89495957-89533914   |
| 23101 | Pnliprp1      | 18946  | 19+:58803376-58818659   |



|       |               |        |                         |
|-------|---------------|--------|-------------------------|
| 23102 | Fbxo7         | 69754  | 10+:85484672-85511072   |
| 23103 | 4932431H17Rik | 545527 | 3-:58420233-58425256    |
| 23104 | Gp2           | 67133  | 7-:126586057-126602786  |
| 23105 | MMT00047833   |        | 17+:71306438-71307258   |
| 23106 | Rdh18         | 380674 | 10+:127261395-127278955 |
| 23107 | MMT00049669   |        | 1+:183020913-183022059  |
| 23108 | Map4k3        | 225028 | 17-:80979851-81127176   |
| 23109 | A430088P11Rik | 106059 | 15-:80526972-80528033   |
| 23110 | Prg2          | 19074  | 2+:84821494-84823674    |
| 23111 | Eml5          | 319670 | 12-:100101306-100139238 |
| 23112 | Gys1          | 14936  | 7+:52690358-52711978    |
| 23113 | Olf617        | 258838 | 7+:110732537-110733492  |
| 23114 | Fbxl8         | 50788  | 8+:107788637-107793225  |
| 23115 | Mad211        | 56150  | 6+:66485472-66489946    |
| 23116 | 2810032G03Rik | 72669  | 12+:5382675-5423111     |
| 23117 | Slc9a1        | 20544  | 4+:132926143-132979611  |
| 23118 | Ttrap         | 56196  | 13+:24923553-24934015   |
| 23119 | Cps1          | 227231 | 1+:67169601-67277833    |
| 23120 | Prrxl1        | 107751 | 14+:33412949-33442185   |
| 23121 | Agps          | 228061 | 2+:75670230-75764098    |
| 23122 | Fat3          | 270120 | 9-:15719442-15835864    |
| 23123 | Acadsb        | 66885  | 7+:138554216-138589718  |
| 23124 | 4932411E22Rik | 214604 | 11-:89253539-89280263   |
| 23125 | Mrpl51        | 66493  | 6+:125142219-125144410  |
| 23126 | 1700013G24Rik | 69380  | 4+:137009211-137011376  |
| 23127 | Ard1b         | 97243  | 5-:97820659-97821316    |
| 23128 | Fras1         | 231470 | 5+:97188474-97210999    |
| 23129 | MMT00035335   |        | 9-:14612082-14612496    |
| 23130 | Hps4          | 192232 | 5+:112773971-112807434  |
| 23131 | Pla1a         | 85031  | 16-:38396204-38432968   |
| 23132 | Mcm6          | 17219  | 1-:130228167-130256233  |
| 23133 | EG434373      | 434373 | 9+:16834410-16835649    |
| 23134 | Lce3c         | 94060  | 3+:92748407-92749649    |
| 23135 | Btg4          | 56057  | 9+:50924222-50927728    |
| 23136 | Usp48         | 170707 | 4+:137150144-137181206  |
| 23137 | MMT00015670   |        | 4-:133052889-133053426  |
| 23138 | Osbpl6        | 99031  | 2+:76386396-76434101    |
| 23139 | Ggta1         | 14594  | 2-:35255733-35316848    |
| 23140 | Galnt12       | 230145 | 4+:47104824-47135914    |
| 23141 | Ebf2          | 13592  | 14+:67853597-68048604   |
| 23142 | Sec14l1       | 74136  | 11-:117019581-117020576 |
| 23143 | Acadm         | 11364  | 3-:153585322-153607390  |
| 23144 | 9430025M13Rik | 233147 | 7+:46735274-46753703    |
| 23145 | Syne1         | 64009  | 10+:5019058-5022437     |
| 23146 | Nos3          | 18127  | 5+:23870648-23889814    |
| 23147 | Sox21         | 223227 | 14-:118633346-118635070 |
| 23148 | MMT00063766   |        | 8+:126377691-126378135  |
| 23149 | Nln           | 75805  | 13-:104813136-104899682 |
| 23150 | EG622657      | 622657 | 14+:34026276-34026984   |
| 23151 | Sdk1          | 330222 | 5+:142058245-142089195  |
| 23152 | Kif27         | 75050  | 13+:58374894-58397948   |

|       |               |        |                         |
|-------|---------------|--------|-------------------------|
| 23153 | Angptl1       | 72713  | 1+:158769072-158775746  |
| 23154 | Rbm42         | 68035  | 7-:31426020-31435184    |
| 23155 | Mycn          | 18109  | 12-:12943813-12947199   |
| 23156 | MMT00013465   | 433597 | 3+:59547517-59556206    |
| 23157 | MMT00001961   |        | 18+:6516319-6557797     |
| 23158 | Snx11         | 74479  | 11+:96628105-96630217   |
| 23159 | Myh8          | 17885  | 11+:67090934-67122132   |
| 23160 | Cdh18         | 320865 | 15+:22865462-22899521   |
| 23161 | Gclc          | 14629  | 9+:77602352-77642269    |
| 23162 | Csda          | 56449  | 6-:131314875-131338449  |
| 23163 | 1700106N22Rik | 73582  | 17+:85790911-85851667   |
| 23164 | MMT00051283   |        | 14-:66579956-66581727   |
| 23165 | Fxn           | 14297  | 19-:24335942-24355076   |
| 23166 | MMT00018155   |        | X+:142529876-142530933  |
| 23167 | Slit3         | 20564  | 11+:35321724-35525533   |
| 23168 | Tmub1         | 64295  | 5-:23951281-23953623    |
| 23169 | Pla2g2e       | 26970  | 4+:138433856-138438727  |
| 23170 | MMT00004222   |        | 4+:39770983-39771300    |
| 23171 | Reg3d         | 30053  | 6-:78325867-78328857    |
| 23172 | Atp13a4       | 224079 | 16-:29396130-29544951   |
| 23173 | Cuzd1         | 16433  | 7-:138452068-138465806  |
| 23174 | Psme2         | 19188  | 14-:56206322-56209726   |
| 23175 | Acsn4         | 233801 | 7+:126838122-126854941  |
| 23176 | Pgk1          | 18655  | X+:103382567-103398999  |
| 23177 | Il17a         | 16171  | 1+:20720998-20724534    |
| 23178 | Odz3          | 23965  | 8-:49313044-49760044    |
| 23179 | Olf575        | 259118 | 7-:110103179-110104134  |
| 23180 | Sult1d1       | 53315  | 5-:87984278-87997909    |
| 23181 | Wdr17         | 244484 | 8-:55739231-55746250    |
| 23182 | Ace3          | 217246 | 11+:105856044-105865922 |
| 23183 | Nnmt          | 18113  | 9-:48399981-48413258    |
| 23184 | 9330182L06Rik | 231014 | 5+:9380276-9479731      |
| 23185 | Ndufs1        | 227197 | 1-:63190171-63223283    |
| 23186 | 4933436H12Rik | 71244  | 7+:75562308-75571018    |
| 23187 | MMT00044007   |        | 18-:53380936-53459300   |
| 23188 | MMT00013081   |        | 3+:112822792-112826285  |
| 23189 | Rbm28         | 68272  | 6-:29075020-29108200    |
| 23190 | MMT00078777   |        | 18+:68067307-68068742   |
| 23191 | 3632451O06Rik | 67419  | 14-:50301234-50403003   |
| 23192 | EG665509      | 665509 | 18-:16433158-16649832   |
| 23193 | Akap9         | 100986 | 5+:3928282-4069207      |
| 23194 | Rab3c         | 67295  | 13-:110852024-111070226 |
| 23195 | Mysm1         | 320713 | 4-:94617616-94645794    |
| 23196 | MMT00005166   |        | 6-:20375053-20375498    |
| 23197 | Sra1          | 24068  | 18-:36826900-36829947   |
| 23198 | Moap1         | 64113  | 12-:103980440-103981498 |
| 23199 | EG435927      | 435927 | 6-:141657043-141660656  |
| 23200 | 2610206C17Rik | 72495  | 7+:91754703-91925059    |
| 23201 | S1pr1         | 13609  | 3-:115413356-115417963  |
| 23202 | Olf559        | 259116 | 7-:109872045-109873002  |
| 23203 | Drg2          | 13495  | 11+:60268118-60282207   |

|       |               |           |                          |
|-------|---------------|-----------|--------------------------|
| 23204 | 2900073G15Rik | 67268     | 17-:71342995-71351562    |
| 23205 | MMT00060665   |           | 7-:108722053-108722838   |
| 23206 | Dgat1         | 13350     | 15-:76332607-76342240    |
| 23207 | Rab7          | 19349     | 6-:87949116-87995214     |
| 23208 | Hck           | 15162     | 2+ :152934322-152977162  |
| 23209 | Immp1l        | 66541     | 2+ :105770904-105805487  |
| 23210 | Tprgl         | 67808     | 4-:153531596-153534775   |
| 23211 | Pscd3         | 19159     | 5+ :144383421-144471109  |
| 23212 | Polr2b        | 231329    | 5+ :77739505-77778522    |
| 23213 | Txndc3        | 73412     | 13-:19780805-19788919    |
| 23214 | 2610019A05Rik | 72149     | 11-:106024649-106054862  |
| 23215 | Mphosph6      | 68533     | 8-:120315544-120325829   |
| 23216 | Acvr1c        | 269275    | 2-:58127024-58168434     |
| 23217 | Acyp2         | 75572     | 11-:30532202-30549408    |
| 23218 | Rttn          | 246102    | 18+ :89215494-89265038   |
| 23219 | Wfdc5         | 209232    | 2-:164003360-164008478   |
| 23220 | Zranb2        | 53861     | 3+ :157197284-157206402  |
| 23221 | MMT00061047   |           | 1+ :193231584-193232612  |
| 23222 | MMT00008477   |           | 10-:30501081-30502184    |
| 23223 | MMT00076151   |           | 19-:3730467-3731012      |
| 23224 | C030014K22Rik | 226610    | 1+ :168931696-169009599  |
| 23225 | MMT00072643   |           |                          |
| 23226 | Suox          | 211389    | 10-:128106948-128110938  |
| 23227 | Grin2a        | 14811     | 16-:9577802-9992626      |
| 23228 | MMT00012254   |           | 5-:19011108-19011911     |
| 23229 | Phf12         | 268448    | 11+ :77796254-77844034   |
| 23230 | 1110014K08Rik | 319370    | 11+ :116294940-116300386 |
| 23231 | 1700023E05Rik | 71868     | 5+ :77445066-77490556    |
| 23232 | Crisp3        | 11572     | 17-:40358727-40379215    |
| 23233 | Npw           | 381073    | 17-:24794273-24795087    |
| 23234 | Chd3          | 216848    | 11-:69156774-69162112    |
| 23235 | Vwa2          | 240675    | 19+ :56961367-56978013   |
| 23236 | MMT00038991   |           | 6-:49493301-49716696     |
| 23237 | Irs1          | 16367     | 1-:82283372-82287068     |
| 23238 | Zfp407        | 240476    | 18-:84485197-84601826    |
| 23239 | Aadacl1       | 320024    | 3+ :27081922-27177269    |
| 23240 | Gtpbp10       | 207704    | 5-:5537463-5559535       |
| 23241 | Nkpd1         | 69547     | 7+ :20107282-20110122    |
| 23242 | Gngt2         | 14710     | 11+ :95703983-95707043   |
| 23243 | MMT00042878   |           | 1+ :179716978-179717638  |
| 23244 | MMT00006045   | 100046034 | 2-:157347388-157347807   |
| 23245 | Nfib          | 18028     | 4-:81941984-82151195     |
| 23246 | Cited2        | 17684     | 10+ :17443052-17444594   |
| 23247 | Ercc1         | 13870     | 7+ :19930454-19941871    |
| 23248 | Tesk2         | 230661    | 4+ :116393581-116476707  |
| 23249 | MMT00013167   |           |                          |
| 23250 | Plcl2         | 224860    | 17+ :50745613-50827811   |
| 23251 | A930001N09Rik | 77128     | 17+ :26852619-26908350   |
| 23252 | Snrpd1        | 20641     | 18+ :10617864-10627968   |
| 23253 | D030011O10Rik | 320560    | 6-:148941534-149049831   |
| 23254 | Wdtdc1        | 230796    | 4-:132849494-132895173   |

|       |               |        |                         |
|-------|---------------|--------|-------------------------|
| 23255 | H13           | 14950  | 2+:152495215-152530753  |
| 23256 | Olf1026       | 258577 | 2+:85763426-85764349    |
| 23257 | Igh-VJ558     | 16061  | 12-:115920833-116020075 |
| 23258 | Rhox4c        | 434759 | X+:34894882-34899631    |
| 23259 | Dnajc1        | 13418  | 2-:18135381-18136521    |
| 23260 | MMT00051542   |        | X+:135893005-135893840  |
| 23261 | Clic6         | 209195 | 16+:92498379-92541482   |
| 23262 | C530043G21Rik | 215015 | 1-:158611184-158649130  |
| 23263 | Ppm2c         | 381511 | 4-:11886961-11893565    |
| 23264 | Defb10        | 246085 | 8+:22969372-22972480    |
| 23265 | Tmem67        | 329795 | 4-:11966263-12015084    |
| 23266 | Cenpq         | 83815  | 17-:41060003-41071500   |
| 23267 | Hsd17b11      | 114664 | 5-:104419413-104450797  |
| 23268 | Patz1         | 56218  | 11+:3190303-3209324     |
| 23269 | Rnf17         | 30054  | 14+:57090127-57143240   |
| 23270 | Nutf2         | 68051  | 8+:108384552-108403237  |
| 23271 | Isca1         | 69046  | 13-:59858080-59871130   |
| 23272 | Orc1l         | 18392  | 4+:108252080-108287434  |
| 23273 | Glg1          | 20340  | 8-:113681459-113783102  |
| 23274 | 1700054O13Rik | 67334  | X+:9424072-9424626      |
| 23275 | Hoxa7         | 15404  | 6-:52165624-52168572    |
| 23276 | Evi2b         | 216984 | 11-:79328524-79337196   |
| 23277 | Suv420h2      | 232811 | 7+:4691789-4699089      |
| 23278 | Cd46          | 17221  | 1-:196868147-196918439  |
| 23279 | 9-Sep         | 53860  | 11+:117060973-117152353 |
| 23280 | Dscam         | 13508  | 16-:96814550-97391987   |
| 23281 | 1700126L10Rik | 73603  | 2-:164295801-164311797  |
| 23282 | MMT00063825   |        | X+:111775882-111915446  |
| 23283 | Mrps12        | 24030  | 7-:29524660-29526799    |
| 23284 | MMT00071882   |        | 8-:4724307-4724808      |
| 23285 | Srrd          | 70118  | 5-:112766411-112772045  |
| 23286 | Trhr2         | 170732 | 8-:124880866-124884646  |
| 23287 | Supt4h1       | 20922  | 11+:87551066-87557118   |
| 23288 | Cramp1l       | 57354  | 17-:25148246-25150969   |
| 23289 | Cyp46a1       | 13116  | 12+:109572590-109600443 |
| 23290 | MMT00061154   |        | X+:99333976-99334474    |
| 23291 | Rexo1         | 66932  | 10-:80005017-80009547   |
| 23292 | 0710008K08Rik | 69225  | 8+:11497601-11513284    |
| 23293 | N6amt1        | 67768  | 16+:87354466-87368415   |
| 23294 | MMT00035523   |        | 4+:90035421-90036411    |
| 23295 | Snx11         | 74479  | 11-:96629190-96638834   |
| 23296 | Ddx59         | 67997  | 1+:138311847-138336728  |
| 23297 | Umod          | 22242  | 7-:126606486-126621826  |
| 23298 | Pno1          | 66249  | 11-:17103204-17111556   |
| 23299 | Ubox5         | 140629 | 2-:130417067-130455700  |
| 23300 | C2cd3         | 277939 | 7+:107548176-107558960  |
| 23301 | Scamp1        | 107767 | 13-:94971265-95055382   |
| 23302 | MMT00025620   |        | 2-:94430818-94431258    |
| 23303 | Olf1302       | 258891 | 2+:111620469-111621415  |
| 23304 | Ptf1a         | 19213  | 2+:19367289-19369119    |
| 23305 | Trpm5         | 56843  | 7-:150257696-150275513  |

|       |               |        |                         |
|-------|---------------|--------|-------------------------|
| 23306 | Bag2          | 213539 | 1-:33802330-33814593    |
| 23307 | Myst2         | 217127 | 11-:95135573-95171492   |
| 23308 | Dock9         | 105445 | 14-:121941369-121980657 |
| 23309 | Vmn2r103      | 627636 | 17+:19994491-20010795   |
| 23310 | Ush2a         | 22283  | 1+:190085913-190276280  |
| 23311 | 2310010M20Rik | 69576  | 16+:32271546-32274864   |
| 23312 | Fsd1l         | 319636 | 4+:53644456-53714263    |
| 23313 | Htr1b         | 15551  | 9-:81524999-81526159    |
| 23314 | A630033E08Rik | 240041 | 17-:22851106-22989733   |
| 23315 | Olfr460       | 258381 | 6+:40521386-40522331    |
| 23316 | Adam28        | 13522  | 14-:69224139-69273840   |
| 23317 | MMT00018454   |        | 2-:36663308-36663936    |
| 23318 | Cul2          | 71745  | 18+:3383028-3436372     |
| 23319 | 6230427J02Rik | 68176  | 9-:107886552-107888211  |
| 23320 | 3110053B16Rik | 382686 | 12-:20879559-20883033   |
| 23321 | Npff          | 54615  | 15-:102354271-102355052 |
| 23322 | Ard1          | 56292  | X-:71162215-71167267    |
| 23323 | Olfr904       | 258797 | 9+:38271627-38272559    |
| 23324 | Prdx6         | 11758  | 1-:163171140-163181296  |
| 23325 | Wdr70         | 545085 | 15-:7823057-8049208     |
| 23326 | Il7r          | 16197  | 15-:9435915-9459544     |
| 23327 | Brp44l        | 55951  | 17+:8476755-8490027     |
| 23328 | Rora          | 19883  | 9+:68501608-69226833    |
| 23329 | MMT00004368   |        | 14+:53047641-53048592   |
| 23330 | Tmem110       | 69179  | 14+:31638799-31688307   |
| 23331 | Csmd1         | 94109  | 8-:15895502-17535281    |
| 23332 | Sos2          | 20663  | 12-:70684752-70759065   |
| 23333 | Abhd7         | 384214 | 5+:107848786-107859048  |
| 23334 | Olfr692       | 258352 | 7+:112516841-112517829  |
| 23335 | MMT00030313   |        | 9-:3495833-3496959      |
| 23336 | Gpr26         | 233919 | 7+:139158610-139176622  |
| 23337 | Tcf7          | 21414  | 11-:52066738-52096516   |
| 23338 | MMT00007161   |        | X+:35094607-35097311    |
| 23339 | Olfr871       | 258905 | 9+:20016794-20017729    |
| 23340 | Arhgef16      | 230972 | 4-:153665059-153674138  |
| 23341 | MMT00033853   |        | 11-:84021278-84021707   |
| 23342 | Ndfip2        | 76273  | 14+:105657864-105708513 |
| 23343 | MMT00022044   |        | 5-:42266142-42384482    |
| 23344 | Nfkbiz        | 80859  | 16-:55811490-55838967   |
| 23345 | MMT00076071   |        |                         |
| 23346 | Mtch2         | 56428  | 2+:90687413-90705547    |
| 23347 | Lingo4        | 320747 | 3+:94205753-94207534    |
| 23348 | Calml4        | 75600  | 9+:62705893-62723722    |
| 23349 | Ap1m2         | 11768  | 9-:21099901-21116751    |
| 23350 | BC048546      | 232400 | 6-:128489837-128531614  |
| 23351 | Zfp598        | 213753 | 17+:24806798-24818959   |
| 23352 | MMT00001681   |        | X+:14942325-14942614    |
| 23353 | Slmo2         | 66390  | 2-:174290600-174298399  |
| 23354 | Tshr          | 22095  | 12+:92639449-92777167   |
| 23355 | Nedd1         | 17997  | 10-:92147490-92185105   |
| 23356 | Gpr98         | 110789 | 13-:81644732-81723855   |

|       |               |           |                         |
|-------|---------------|-----------|-------------------------|
| 23357 | Ccnyl1        | 227210    | 1+:64759637-64772202    |
| 23358 | MMT00048666   | 381484    | 3-:15863318-15906322    |
| 23359 | Dusp2         | 13537     | 2+:127161973-127162641  |
| 23360 | MMT00066283   |           | 5-:52783909-52830585    |
| 23361 | Bivm          | 246229    | 1+:44176854-44201592    |
| 23362 | Aplp2         | 11804     | 9-:30957142-31019400    |
| 23363 | Wibg          | 78428     | 10+:128185581-128203617 |
| 23364 | Ina           | 226180    | 19+:47089170-47099863   |
| 23365 | Rcor1         | 217864    | 12+:112278169-112354105 |
| 23366 | ENSMUSG00000  | 100038591 | 10+:126631989-126637805 |
| 23367 | Tm2d2         | 69742     | 8+:26127751-26133731    |
| 23368 | 6330503K22Rik | 101565    | 7+:125858887-125880534  |
| 23369 | Oaz2          | 18247     | 9+:65524399-65537263    |
| 23370 | Cpeb4         | 67579     | 11+:31820408-31832197   |
| 23371 | Cfb           | 14962     | 17-:34993326-34999162   |
| 23372 | Rbm5          | 83486     | 9-:107642825-107673314  |
| 23373 | Vps13d        | 230895    | 4-:144753078-144784961  |
| 23374 | EG231836      | 231836    | 5+:140938130-140945725  |
| 23375 | MMT00055444   |           | 5-:100268536-100269009  |
| 23376 | Dlk1          | 13386     | 12+:110691715-110698828 |
| 23377 | Pdxk          | 216134    | 10-:77903349-77927724   |
| 23378 | RP23-357114.1 | 381417    | 2+:122347366-122350632  |
| 23379 | MMT00043310   |           | 7+:50122593-50151331    |
| 23380 | Dhdh2         | 72108     | 8-:26838129-26864886    |
| 23381 | MMT00003885   |           | 6+:41080121-41080591    |
| 23382 | MMT00079398   |           | 9-:98773480-98774346    |
| 23383 | Setd7         | 73251     | 3-:51320071-51322248    |
| 23384 | Grid2         | 14804     | 6+:63206850-64616272    |
| 23385 | 4833422F24Rik | 74614     | 2-:165220949-165225894  |
| 23386 | 2310002J21Rik | 66360     | 19-:54002646-54006722   |
| 23387 | Psma1         | 26440     | 7-:121407968-121419616  |
| 23388 | Olfr561       | 259096    | 7+:109923039-109923984  |
| 23389 | Ero1lb        | 67475     | 13+:12658174-12703663   |
| 23390 | MMT00057645   |           | 9-:84866668-84868520    |
| 23391 | MMT00008521   |           | 8-:48712340-48713397    |
| 23392 | 3830417A13Rik | 70696     | X+:61426723-61431936    |
| 23393 | MMT00034099   |           | 3-:120953050-120953655  |
| 23394 | Psd4          | 215632    | 2+:24223102-24264686    |
| 23395 | MMT00061495   |           | 4+:144381739-144382372  |
| 23396 | Krtap16-10    | 71369     | 16-:88962808-88963044   |
| 23397 | Ccnjl         | 380694    | 11+:43342856-43399806   |
| 23398 | Adamts5       | 23794     | 16-:85896279-85900512   |
| 23399 | Caskin1       | 268932    | 17+:24625644-24644160   |
| 23400 | BC024997      | 215723    | 11+:68369687-68371746   |
| 23401 | H2-Q2         | 15013     | 17+:35479254-35496927   |
| 23402 | Ugt2b36       | 231396    | 5-:87494950-87521610    |
| 23403 | Ndc80         | 67052     | 17-:71845444-71876197   |
| 23404 | Phf23         | 78246     | 11+:69809278-69813418   |
| 23405 | Rps9          | 76846     | 7+:3657387-3658473      |
| 23406 | 4922501K12Rik | 105511    | 14+:33647206-33649971   |
| 23407 | MMT00007320   |           | 8-:79386108-79386947    |

|       |               |           |                         |
|-------|---------------|-----------|-------------------------|
| 23408 | Clip4         | 78785     | 17+:72130638-72213550   |
| 23409 | Gm1157        | 382384    | 10-:79102639-79105438   |
| 23410 | C1qa          | 12259     | 4-:136451831-136454675  |
| 23411 | Mtx2          | 53375     | 2+:74663904-74714795    |
| 23412 | EG625690      | 625690    | 10-:84256896-84257449   |
| 23413 | Hmx2          | 15372     | 7+:138692286-138700100  |
| 23414 | Tnfaip8l2     | 69769     | 3-:94943442-94946282    |
| 23415 | Acp5          | 11433     | 9-:21931193-21935098    |
| 23416 | ENSMUSG00000  | 628709    | 13-:65498322-66077477   |
| 23417 | Gtpbp1        | 14904     | 15+:79521438-79550569   |
| 23418 | 4933402J15Rik | 74425     | 14+:74643272-74698619   |
| 23419 | Tipin         | 66131     | 9+:64129413-64152599    |
| 23420 | Ehbp1         | 216565    | 11-:21905829-22185594   |
| 23421 | Ube2q1        | 70093     | 3+:89577613-89587915    |
| 23422 | Aggf1         | 66549     | 13-:96120638-96145292   |
| 23423 | Pla2g6        | 53357     | 15-:79117181-79148399   |
| 23424 | Al450540      | 226252    | 19+:57435590-57447892   |
| 23425 | Tob1          | 22057     | 11+:94074953-94076040   |
| 23426 | Arvcf         | 11877     | 16+:18380875-18406840   |
| 23427 | MMT00054636   | 654456    | 8+:19300676-19300738    |
| 23428 | Ndufb4        | 68194     | 16-:37647687-37654454   |
| 23429 | Adck4         | 76889     | 7+:28019007-28042964    |
| 23430 | Aifm3         | 72168     | 16+:17489783-17507574   |
| 23431 | Serpinb9e     | 20710     | 13+:33341490-33352713   |
| 23432 | Rtn4rl2       | 269295    | 2-:84711487-84726849    |
| 23433 | Ugcgl2        | 66435     | 14-:119385415-119405921 |
| 23434 | ENSMUSG00000  | 623548    | 17-:32213903-32237231   |
| 23435 | Rgs11         | 50782     | 17+:26339917-26348263   |
| 23436 | Slc6a7        | 240332    | 18-:61160075-61169259   |
| 23437 | Efhd2         | 27984     | 4-:141414303-141430824  |
| 23438 | C1galt1c1     | 59048     | X-:35983961-35988230    |
| 23439 | Tmem59        | 56374     | 4+:106851283-106873597  |
| 23440 | EG243642      | 243642    | 6+:127176793-127184635  |
| 23441 | Lama3         | 16774     | 18+:12492525-12741518   |
| 23442 | MMT00047160   |           | 2+:174681781-174692362  |
| 23443 | Olf1002       | 258566    | 2-:85487519-85488476    |
| 23444 | MMT00012529   |           | 3-:108252030-108254484  |
| 23445 | Crif1         | 12931     | 8+:73017056-73027980    |
| 23446 | Acsl6         | 216739    | 11+:54117703-54175026   |
| 23447 | Smyd5         | 232187    | 6+:85381982-85395772    |
| 23448 | 9430025M13Rik | 233147    | 7+:46704890-46729636    |
| 23449 | Prelid2       | 77619     | 18-:42092246-42110876   |
| 23450 | D12Ert647e    | 52668     | 12+:104672413-104678454 |
| 23451 | MMT00059918   |           | 6+:141086547-141087128  |
| 23452 | EG434123      | 434123    | 7-:14917286-14918908    |
| 23453 | Dnajc3a       | 100037258 | 14+:119337211-119377404 |
| 23454 | Znhit1        | 70103     | 5-:137458062-137462879  |
| 23455 | Ptafr         | 19204     | 4+:132120002-132136239  |
| 23456 | Tbxa2r        | 21390     | 10+:80791574-80797916   |
| 23457 | Selenbp2      | 20342     | 3+:94497494-94508328    |
| 23458 | Clic4         | 29876     | 4-:134769886-134828675  |

|       |               |        |                         |
|-------|---------------|--------|-------------------------|
| 23459 | Mbtd1         | 103537 | 11+:93773722-93806615   |
| 23460 | Rragd         | 52187  | 4+:33070410-33109147    |
| 23461 | Mcoln3        | 171166 | 3+:145784754-145803610  |
| 23462 | Bag5          | 70369  | 12-:112947703-112951505 |
| 23463 | Gimap1        | 16205  | 6+:48692180-48693793    |
| 23464 | Srgap1        | 117600 | 10-:121222294-121368565 |
| 23465 | Afp           | 11576  | 5+:90919765-90937882    |
| 23466 | Pou2f1        | 18986  | 1-:167805606-167932738  |
| 23467 | Amac1         | 56293  | 11-:69573410-69575346   |
| 23468 | MMT00058901   |        | 3-:51206065-51207112    |
| 23469 | MMT00020032   | 620790 | 2-:174994321-174995963  |
| 23470 | Tmod1         | 21916  | 4+:46073837-46127676    |
| 23471 | Ddx46         | 212880 | 13+:55754271-55780492   |
| 23472 | Cts3          | 117066 | 13-:61589372-61669779   |
| 23473 | 4933401F05Rik | 71037  | 14-:64694273-64704232   |
| 23474 | MMT00011721   |        | 2+:83819001-83822053    |
| 23475 | Nudt12        | 67993  | 17-:59140823-59152745   |
| 23476 | Ppp1r9a       | 243725 | 6+:4995935-5110715      |
| 23477 | Uba1          | 22201  | X+:20235564-20259829    |
| 23478 | Sacs          | 50720  | 14+:61821599-61833091   |
| 23479 | Sox10         | 20665  | 15-:78985354-78995671   |
| 23480 | Eml4          | 78798  | 17+:83750306-83879678   |
| 23481 | Prkch         | 18755  | 12+:74686090-74878110   |
| 23482 | Syt4          | 20983  | 18-:31598839-31606860   |
| 23483 | Stxbp4        | 20913  | 11-:90341249-90499398   |
| 23484 | Fbxo36        | 66153  | 1+:84836429-84897059    |
| 23485 | Olfr716       | 258597 | 7+:114290831-114291775  |
| 23486 | MMT00029075   |        | 5-:112649088-112650782  |
| 23487 | Polb          | 18970  | 8-:23738737-23763886    |
| 23488 | Ier5l         | 72500  | 2-:30328167-30329718    |
| 23489 | Tbc1d15       | 66687  | 10-:114635514-114688481 |
| 23490 | Fndc3b        | 72007  | 3-:27315076-27362768    |
| 23491 | Dixdc1        | 330938 | 9-:50474092-50536043    |
| 23492 | Krtcap2       | 66059  | 3+:89050359-89053644    |
| 23493 | Tgs1          | 116940 | 4+:3502172-3542151      |
| 23494 | Tubal3        | 238463 | 13+:3927334-3932930     |
| 23495 | Cryab         | 12955  | 9+:50560862-50564738    |
| 23496 | Zfp40         | 22700  | 17-:23311845-23315506   |
| 23497 | Mchr1         | 207911 | 15+:81066203-81068541   |
| 23498 | 2010204N08Rik | 69983  | 3-:72692485-72704389    |
| 23499 | Edil3         | 13612  | 13+:89429023-89461489   |
| 23500 | BC055004      | 381680 | 5+:138671109-138693280  |
| 23501 | BC049762      | 193286 | 11-:51067149-51077146   |
| 23502 | Pcdh11x       | 245578 | X+:118019398-118024201  |
| 23503 | Zim1          | 22776  | 7-:6628727-6649140      |
| 23504 | MMT00072241   |        | 5-:64581272-64582250    |
| 23505 | Bicd1         | 12121  | 6+:149357521-149506340  |
| 23506 | Cts6          | 58518  | 13-:61296507-61304753   |
| 23507 | MMT00010687   |        | 14+:59512322-59513004   |
| 23508 | Pdgfd         | 71785  | 9+:6288469-6379261      |
| 23509 | Al595366      | 432779 | 13-:74498122-74501407   |



|       |               |        |                        |
|-------|---------------|--------|------------------------|
| 23510 | Spn           | 20737  | 7-:134278135-134280850 |
| 23511 | Sec31b        | 240667 | 19-:44591800-44620339  |
| 23512 | Olfr42        | 18341  | 13+:21221472-21225599  |
| 23513 | Il18rap       | 16174  | 1+:40572206-40606142   |
| 23514 | Hdac8         | 70315  | X-:99479978-99700702   |
| 23515 | Ptpm          | 19274  | 17-:67016882-67703727  |
| 23516 | Mrpl28        | 68611  | 17+:26260476-26263556  |
| 23517 | Pmm2          | 54128  | 16+:8637799-8657616    |
| 23518 | Abhd4         | 105501 | 14+:54878971-54888839  |
| 23519 | Cbfa2t2       | 12396  | 2+:154262338-154343468 |
| 23520 | Wdr5          | 140858 | 2+:27013770-27392053   |
| 23521 | St8sia3       | 20451  | 18+:64425058-64431875  |
| 23522 | Adcy10        | 271639 | 1+:167415311-167506900 |
| 23523 | MMT00039380   |        |                        |
| 23524 | MMT00080757   |        | 17+:14550488-14551566  |
| 23525 | Dctn4         | 67665  | 18+:60685821-60716143  |
| 23526 | Fabp7         | 12140  | 10+:57502089-57502590  |
| 23527 | MMT00021936   |        | 5-:30133239-30134698   |
| 23528 | 0610038L08Rik | 74092  | 17-:29715751-29733251  |
| 23529 | Golm1         | 105348 | 13-:59736355-59767042  |
| 23530 | Drd4          | 13491  | 7+:148477936-148480759 |
| 23531 | Foxb2         | 14240  | 19-:16946806-16948320  |
| 23532 | Adra2b        | 11552  | 2+:127189315-127190661 |
| 23533 | Ccnb1ip1      | 239083 | 14-:51408923-51413549  |
| 23534 | MMT00040702   |        |                        |
| 23535 | Yipf3         | 28064  | 17+:46385047-46388965  |
| 23536 | Tapbpl        | 213233 | 6-:125174238-125181878 |
| 23537 | Ndor1         | 78797  | 2-:25100339-25110929   |
| 23538 | MMT00081764   |        | 1-:9772263-9784342     |
| 23539 | Sntg1         | 71096  | 1-:8353556-8794024     |
| 23540 | Olfr155       | 29845  | 4+:43867163-43868335   |
| 23541 | MMT00002245   |        | 2-:110049431-110050374 |
| 23542 | Olfr895       | 258875 | 9+:38076099-38077048   |
| 23543 | Rufy3         | 52822  | 5+:89012560-89070631   |
| 23544 | Atg4c         | 242557 | 4+:98884666-98925779   |
| 23545 | Adamtsl3      | 269959 | 7+:89484204-89761006   |
| 23546 | Zzef1         | 195018 | 11+:72680105-72683429  |
| 23547 | Tmed7         | 66676  | 18-:46745311-46757190  |
| 23548 | Crtac1        | 72832  | 19-:42358019-42506123  |
| 23549 | Es22          | 13897  | 8-:95725117-95753440   |
| 23550 | Ap2m1         | 11773  | 16+:20535576-20544125  |
| 23551 | Foxe3         | 30923  | 4-:114597752-114598618 |
| 23552 | Rasl11b       | 68939  | 5+:74591259-74595495   |
| 23553 | Pcnp          | 76302  | 16-:56017305-56029779  |
| 23554 | MMT00078678   | 235106 | 9-:28816809-29005328   |
| 23555 | BC026585      | 226527 | 1+:159388863-159419213 |
| 23556 | Olfr571       | 259089 | 7-:110057382-110058351 |
| 23557 | Ppp1r12c      | 232807 | 7-:4433115-4453624     |
| 23558 | MMT00030937   |        | 15+:18409242-18409510  |
| 23559 | Al450886      | 103731 | 11+:99846715-99855465  |
| 23560 | Pms2          | 18861  | 5+:144697851-144705510 |

|       |               |           |                         |
|-------|---------------|-----------|-------------------------|
| 23561 | Sox14         | 20669     | 9-:99775382-99776103    |
| 23562 | 4933434E20Rik | 99650     | 3+:89856863-89866369    |
| 23563 | MMT00004841   |           | 11-:17873743-17874841   |
| 23564 | Vmn2r107      | 22312     | 17+:20493166-20512558   |
| 23565 | 3300001A09Rik | 75697     | 9+:67607243-67607944    |
| 23566 | Snx29         | 74478     | 16+:11405740-11755565   |
| 23567 | Tom11l        | 71943     | 11-:90506634-90548908   |
| 23568 | Ugt8a         | 22239     | 3-:125570111-125641444  |
| 23569 | Atp5s         | 68055     | 12+:70825948-70845645   |
| 23570 | Sh3kbp1       | 58194     | X+:156202000-156411097  |
| 23571 | 2410166l05Rik | 76824     | 4-:134082021-134091175  |
| 23572 | 4631426J05Rik | 77590     | 7-:139428793-139508792  |
| 23573 | Vcp           | 269523    | 4-:42992835-43013191    |
| 23574 | 5133400G04Rik | 71242     | 18-:35816349-35821809   |
| 23575 | Tmem173       | 72512     | 18-:35893374-35900172   |
| 23576 | Fabp9         | 21884     | 3-:10193625-10197222    |
| 23577 | E330001B16Rik | 546160    | 9-:109554133-109557245  |
| 23578 | Cyp2j5        | 13109     | 4-:96295837-96330742    |
| 23579 | Gm98          | 225908    | 19-:10282759-10315241   |
| 23580 | BC059842      | 230676    | 4-:118064321-118070324  |
| 23581 | 3110070M22Rik | 67304     | 13-:120276067-120277190 |
| 23582 | Slc25a37      | 67712     | 14+:69859904-69861378   |
| 23583 | Vps45         | 22365     | 3-:95803794-95862378    |
| 23584 | Adamts5       | 23794     | 16-:85862668-85900529   |
| 23585 | Mgmt          | 17314     | 7+:144086235-144143086  |
| 23586 | MMT00041086   |           | 9-:109716749-109718373  |
| 23587 | D430041D05Rik | 241589    | 2-:103988939-104145251  |
| 23588 | Anks1b        | 77531     | 10+:90411276-90434735   |
| 23589 | Akap11        | 219181    | 14-:78892075-78916264   |
| 23590 | Ptgds         | 19215     | 2-:25322221-25325546    |
| 23591 | Dlg4          | 13385     | 11+:69832365-69858270   |
| 23592 | ENSMUSG00000  | 100038614 | 16+:84972891-84973054   |
| 23593 | Eif4e3        | 66892     | 6-:99575130-99616769    |
| 23594 | Sertad1       | 55942     | 7+:28272064-28275115    |
| 23595 | Gm550         | 225852    | 19+:6095867-6098245     |
| 23596 | Cx3cr1        | 13051     | 9-:119960371-119977400  |
| 23597 | Pcdha3        | 192163    | 18+:37105860-37347311   |
| 23598 | Ctbp1         | 13016     | 5-:33590372-33617618    |
| 23599 | Ndr3          | 29812     | 2-:156753082-156817761  |
| 23600 | Dpp3          | 75221     | 19-:4907228-4927063     |
| 23601 | Piga          | 18700     | X+:160863416-160871846  |
| 23602 | Sec14l4       | 103655    | 11+:3931784-3948010     |
| 23603 | Ercc4         | 50505     | 16+:13109828-13148825   |
| 23604 | Ephb3         | 13845     | 16+:21204825-21223375   |
| 23605 | MMT00077586   |           | 18-:90491386-90492213   |
| 23606 | Cmtm8         | 70031     | 9-:114698462-114753270  |
| 23607 | MMT00040265   |           | 12+:71081867-71083890   |
| 23608 | Tas2r108      | 57253     | 6+:40443590-40444484    |
| 23609 | Trim44        | 80985     | 2-:102144500-102241004  |
| 23610 | Prkaa2        | 108079    | 4-:104706216-104782403  |
| 23611 | Wwp2          | 66894     | 8+:109960282-110081112  |

|       |               |           |                         |
|-------|---------------|-----------|-------------------------|
| 23612 | Es2el         | 27886     | 16-:17901857-17911430   |
| 23613 | Jak2          | 16452     | 19+:29326944-29386472   |
| 23614 | G630016D24Rik | 619301    | 14+:52632591-52640170   |
| 23615 | MMT00005149   |           | 6-:23105933-23106684    |
| 23616 | Fgfr1op2      | 67529     | 6+:146526456-146547712  |
| 23617 | Nme1          | 18102     | 11-:93820339-93822103   |
| 23618 | Edn2          | 13615     | 4+:119834037-119839966  |
| 23619 | Tmc1          | 13409     | 19-:20859144-21028692   |
| 23620 | Pycr1         | 209027    | 11-:120500743-120505009 |
| 23621 | 1700029H14Rik | 66501     | 8-:13550732-13562405    |
| 23622 | Arhgap17      | 70497     | 7-:130422784-130513398  |
| 23623 | 2010305C02Rik | 380712    | 11+:75281573-75284400   |
| 23624 | Patl2         | 67578     | 2-:121945843-122011925  |
| 23625 | Pkd2          | 18764     | 5+:104888655-104932705  |
| 23626 | MMT00003764   |           | 14+:75117517-75118640   |
| 23627 | Lypla1        | 18777     | 1+:4797994-4835096      |
| 23628 | Ccdc87        | 399599    | 19+:4839481-4842047     |
| 23629 | 4930552P12Rik | 77594     | 19-:55715079-55776694   |
| 23630 | Tcea2         | 21400     | 2+:181415014-181422756  |
| 23631 | MMT00039126   |           | 8+:99688153-99688772    |
| 23632 | 4930579C15Rik | 67753     | 4-:94573960-94595536    |
| 23633 | Prkcbp1       | 228880    | 2-:165609654-165610861  |
| 23634 | Zfp39         | 22698     | 11-:58703280-58706557   |
| 23635 | Htr2a         | 15558     | 14+:75041739-75106205   |
| 23636 | Bst2          | 69550     | 8-:74058160-74061335    |
| 23637 | Ptpnf         | 19268     | 4-:117882405-117950051  |
| 23638 | Ddr1          | 12305     | 17-:35818512-35840932   |
| 23639 | Tlx2          | 21909     | 6-:83018584-83020137    |
| 23640 | Bdh1          | 71911     | 16+:31422384-31458980   |
| 23641 | Zfy1          | 22767     | Y-:61649-96389          |
| 23642 | Lypd4         | 232973    | 7-:25649636-25654767    |
| 23643 | Olfr482       | 258728    | 7-:115238112-115239082  |
| 23644 | Pou3f3        | 18993     | 1+:42753990-42755483    |
| 23645 | 1700041C02Rik | 73332     | 4-:119006184-119056366  |
| 23646 | Hsp90ab1      | 15516     | 17-:45704723-45710209   |
| 23647 | Ptpns         | 19280     | 17-:56551843-56615816   |
| 23648 | Pigy          | 66459     | 6-:57639344-57642071    |
| 23649 | BC049635      | 277773    | 4-:42880876-42884992    |
| 23650 | Rtkn2         | 170799    | 10+:67442349-67468442   |
| 23651 | MMT00027295   |           | 18-:24212752-24262836   |
| 23652 | MMT00082110   |           | 12+:4226348-4228521     |
| 23653 | Zfp407        | 240476    | 18-:84378134-84381307   |
| 23654 | Sox5          | 20678     | 6-:143781348-144158000  |
| 23655 | MMT00006451   |           | 6+:3227561-3227772      |
| 23656 | MMT00054819   |           | 16+:18218851-18219215   |
| 23657 | Entpd7        | 93685     | 19+:43764274-43804989   |
| 23658 | Ncoa3         | 17979     | 2+:165860383-165895946  |
| 23659 | EG633250      | 633250    | 13+:62006047-62212827   |
| 23660 | Dpyd          | 99586     | 3+:118702087-119134638  |
| 23661 | RP23-272C1.10 | 100041488 | 11-:99471108-99476097   |
| 23662 | Serpinb2      | 18788     | 1+:109412049-109422175  |

|       |               |           |                         |
|-------|---------------|-----------|-------------------------|
| 23663 | Dab2ip        | 69601     | 2+:35477679-35586512    |
| 23664 | Btg1          | 12226     | 10+:96079538-96082262   |
| 23665 | Ccdc125       | 76041     | 13+:101439671-101466426 |
| 23666 | Dcpp1         | 13184     | 17+:24017962-24019819   |
| 23667 | Cdh17         | 12557     | 4+:11685407-11745021    |
| 23668 | Gse1          | 382034    | 8+:123012901-123105248  |
| 23669 | 1110033M05Rik | 68675     | 13+:77847953-78145733   |
| 23670 | Zscan10       | 332221    | 17+:23737757-23747988   |
| 23671 | Clec2h        | 94071     | 6+:128612426-128626718  |
| 23672 | EG545989      | 545989    | 7+:112523611-112526491  |
| 23673 | Alg13         | 67574     | X+:140780154-140808345  |
| 23674 | Exoc3l2       | 74463     | 7+:20074404-20082109    |
| 23675 | Gm266         | 212539    | 12-:112723378-112723981 |
| 23676 | Ms4a13        | 73466     | 19-:11243908-11271238   |
| 23677 | Aof2          | 99982     | 4-:136106455-136158254  |
| 23678 | 1700110M21Rik | 76627     | 14-:101597037-101598618 |
| 23679 | Ccl20         | 20297     | 1+:83113356-83115741    |
| 23680 | 5730419I09Rik | 74741     | 6-:142959447-143048638  |
| 23681 | Whrn          | 73750     | 4-:63075946-63156610    |
| 23682 | Trim8         | 93679     | 19+:46576788-46590839   |
| 23683 | Dnahc7c       | 100101919 | 1+:46706054-46864976    |
| 23684 | Al987944      | 233168    | 7-:48628294-48648697    |
| 23685 | Tbxas1        | 21391     | 6+:38868973-39034559    |
| 23686 | Il17rc        | 171095    | 6+:113421500-113433132  |
| 23687 | MMT00075954   |           | 3+:35762750-35763987    |
| 23688 | Ube2e2        | 218793    | 14-:19406090-19726141   |
| 23689 | Ptcd1         | 71799     | 5-:145908400-145927891  |
| 23690 | Mug1          | 17836     | 6+:121788628-121839074  |
| 23691 | Sh3d19        | 27059     | 3+:85844766-85932398    |
| 23692 | Safb2         | 224902    | 17-:56702368-56723946   |
| 23693 | A530016L24Rik | 319942    | 12+:113733198-113736602 |
| 23694 | Plcg1         | 18803     | 2+:160557517-160558603  |
| 23695 | 1700081L11Rik | 76719     | 11-:104229987-104287786 |
| 23696 | Galr2         | 14428     | 11+:116142799-116144973 |
| 23697 | Rrp1b         | 72462     | 17+:32173045-32197674   |
| 23698 | Trpc5         | 22067     | X-:140816214-141122723  |

**Table T3:** Probes selected for single tissue analysis

| Probe_ID | Gene_Symbol   | Entrez_ID | Chromosomal_Location    |
|----------|---------------|-----------|-------------------------|
| 10       | NAN           |           |                         |
| 83       | NAN           |           |                         |
| 98       | NAN           |           |                         |
| 115      | NAN           |           |                         |
| 126      | 0610012D14Rik | 68352     | 7+:51720804-51723121    |
| 127      | Clic1         | 114584    | 17+:35187187-35195664   |
| 129      | Podn          | 242608    | 4-:107687402-107704561  |
| 131      | Irx3          | 16373     | 8-:94322425-94325139    |
| 133      | Olfir313      | 258529    | 11+:58630511-58631437   |
| 134      | Peli1         | 67245     | 11+:21035471-21050325   |
| 137      | Sorcs2        | 81840     | 5-:36359879-36740757    |
| 139      | Mpst          | 246221    | 15+:78240468-78244435   |
| 141      | Jag1          | 16449     | 2-:136908713-136942256  |
| 143      | Gvin1         | 74558     | 7-:113043647-113047500  |
| 144      | Krt12         | 268482    | 11-:99276979-99283570   |
| 145      | Tmem121       | 69195     | 12+:114425891-114427759 |
| 146      | Rlbp1l2       | 215890    | 10-:33232090-33344002   |
| 147      | Uox           | 22262     | 3+:146260130-146294369  |
| 150      | Rpp38         | 227522    | 2-:3246216-3249873      |
| 153      | 2010011I20Rik | 67017     | 2+:172171136-172179397  |
| 160      | MMT00078580   |           | X-:147359162-147360639  |
| 165      | Scn5a         | 20271     | 9-:119394347-119471790  |
| 171      | MMT00025388   |           | 18-:85885324-85886049   |
| 173      | Vps39         | 269338    | 2-:120143770-120178723  |
| 176      | Sesn1         | 140742    | 10+:41530366-41628229   |
| 177      | App2          | 216190    | 10-:83062780-83111409   |
| 180      | Rbm39         | 170791    | 2-:155973371-156005876  |
| 183      | Bmp4          | 12159     | 14-:47003534-47006863   |
| 184      | Sorbs1        | 20411     | 19-:40369260-40588240   |
| 185      | Ap2b1         | 71770     | 11+:83116275-83216514   |
| 187      | Wdr62         | 233064    | 7-:31025159-31034896    |
| 189      | MMT00059108   |           | X+:47726478-47727129    |
| 191      | Fbp2          | 14120     | 13-:62938243-62959676   |
| 192      | Eif3d         | 55944     | 15-:77789430-77801190   |
| 193      | C630028N24Rik | 235386    | 9+:54768279-54795128    |
| 199      | Gabrb3        | 14402     | 7+:64846561-65080216    |
| 202      | Naif1         | 71254     | 2+:32307958-32312474    |
| 204      | EG432649      | 432649    | 12+:36808292-36817625   |
| 205      | Cnksr1        | 194231    | 4-:133783960-133794223  |
| 212      | 1700026J04Rik | 71864     | 13-:35001832-35011798   |
| 213      | Rgs16         | 19734     | 1+:155587478-155592599  |
| 214      | Lrp1          | 16971     | 10-:126975244-127058182 |
| 217      | Ubx2          | 67812     | 1+:130140470-130175951  |
| 218      | 4930511H11Rik | 78016     | 1+:54386983-54425580    |

|     |               |           |                         |
|-----|---------------|-----------|-------------------------|
| 219 | MMT00058440   |           | 12-:65977816-65978615   |
| 221 | 1700009P17Rik | 75472     | 1+:173051791-173057081  |
| 223 | Trp53inp2     | 68728     | 2+:155207575-155215575  |
| 225 | MMT00073704   | 635169    | 4-:127605246-127628693  |
| 227 | B4galt1       | 14595     | 4-:40751636-40801009    |
| 230 | MMT00000744   |           | 3+:65417429-65419248    |
| 232 | Pcdh9         | 211712    | 14-:94268644-94290147   |
| 236 | Bbs9          | 319845    | 9+:22280165-22483508    |
| 237 | Cyp2c37       | 13096     | 19+:40066929-40086733   |
| 242 | 4732471D19Rik | 319719    | 13+:54638439-54653391   |
| 245 | Sqrdl         | 59010     | 2+:122610696-122635072  |
| 246 | MMT00053742   |           | 13-:112672463-112673919 |
| 247 | Clns1a        | 12729     | 7+:104845200-104867388  |
| 250 | Tubb2a-ps2    | 627110    | 12-:11888133-11889704   |
| 252 | C730027P07Rik | 245050    | 9+:121874316-121887805  |
| 253 | Slc5a8        | 216225    | 10+:88381107-88382303   |
| 255 | Twf2          | 23999     | 9+:106105573-106117694  |
| 256 | Zbtb7a        | 16969     | 10+:80600778-80611198   |
| 260 | Serpib3d      | 394252    | 1-:108974771-108980057  |
| 263 | Akr1b3        | 11677     | 6-:34253935-34267421    |
| 264 | Dcakd         | 68087     | 11-:102855362-102858862 |
| 265 | Taf9          | 108143    | 13+:101420926-101436363 |
| 266 | Nr2f2         | 11819     | 7-:77498327-77505249    |
| 268 | Sys1          | 66460     | 2+:164286495-164291012  |
| 269 | Tuba1b        | 22143     | 15-:98762050-98763635   |
| 272 | Tgm1          | 21816     | 14-:56318872-56332312   |
| 274 | Trit1         | 66966     | 4+:122693839-122732177  |
| 276 | Olf1019       | 259017    | 2-:85681013-85681946    |
| 280 | Snai2         | 20583     | 16+:14706026-14709467   |
| 281 | MMT00063621   |           | X-:53531300-53535766    |
| 283 | Gmcl1l        | 71847     | X+:30732653-30734582    |
| 284 | Osr2          | 107587    | 15+:35225866-35233059   |
| 286 | MMT00070509   | 100037278 | 8+:74127597-74132047    |
| 288 | Col6a2        | 12834     | 10-:76058506-76086059   |
| 290 | B230118H07Rik | 68170     | 2-:101402262-101469143  |
| 291 | Sbp           | 20234     | 17+:24078962-24082567   |
| 294 | Ehhadh        | 74147     | 16-:21761365-21763011   |
| 295 | Pdim1         | 54132     | 19-:40296730-40346025   |
| 299 | MMT00061667   |           | 1-:53641301-53693021    |
| 300 | Kcnk13        | 217826    | 12+:101204117-101300884 |
| 301 | AU014645      | 433702    | 4+:46151508-46185276    |
| 305 | Cma2          | 545055    | 14+:56569816-56592866   |
| 308 | Meig1         | 104362    | 2-:3326318-3336313      |
| 309 | Slc25a11      | 67863     | 11-:70457826-70460517   |
| 314 | Samd12        | 320679    | 15-:53489903-53551239   |
| 316 | 4930471G03Rik | 74966     | 18+:36265806-36269607   |

|     |               |        |                          |
|-----|---------------|--------|--------------------------|
| 317 | Ceacam13      | 69785  | 7+:18595246-18604569     |
| 318 | 9130208D14Rik | 77700  | 7-:112972738-112980029   |
| 322 | Abcb5         | 77706  | 12-:120106320-120204895  |
| 326 | 4931409K22Rik | 231045 | 5-:24049250-24061227     |
| 327 | H2-Ea         | 14968  | 17-:34479878-34481590    |
| 329 | Lmod1         | 93689  | 1+:137221407-137263405   |
| 337 | Rasgef1b      | 320292 | 5-:99646445-99681873     |
| 339 | Hmgcs1        | 208715 | 13_random-:114708-127798 |
| 342 | Nrbf2         | 641340 | 10-:66729439-66748031    |
| 343 | 1700123I01Rik | 76663  | 19+:6184400-6224217      |
| 344 | MMT00036566   |        | 1+:29794139-29881997     |
| 346 | Olf1484       | 258288 | 19+:13659795-13660741    |
| 352 | 4732415M23Rik | 320869 | 8+:125736748-125745944   |
| 354 | MMT00007996   |        | 6-:67583076-67584137     |
| 357 | Ftsj3         | 56095  | 11-:106110457-106117112  |
| 359 | Ciita         | 12265  | 16+:10488371-10527656    |
| 360 | Igh-VJ558     | 16061  | 12-:115984439-115984952  |
| 361 | Fign          | 60344  | 2-:63815896-63936045     |
| 363 | Adora2a       | 11540  | 10+:74787665-74797535    |
| 364 | 0610040B09Rik | 75395  | 11-:96152349-96154868    |
| 365 | 1700019N12Rik | 67077  | 19-:6996915-6999870      |
| 366 | Adcy6         | 11512  | 15-:98420421-98435257    |
| 371 | MMT00058786   |        | 8-:109560987-109562129   |
| 372 | Txndc1        | 72736  | 12+:71554101-71569008    |
| 375 | MMT00077729   |        | 19+:23680345-23734472    |
| 379 | Nmnat1        | 66454  | 4-:148842745-148848706   |
| 380 | Fry           | 320365 | 5+:151062843-151300326   |
| 381 | Rbmxrt        | 19656  | 8-:81029169-81032740     |
| 385 | Cog3          | 338337 | 14-:76102158-76154245    |
| 387 | Rgs10         | 67865  | 7-:135517138-135561686   |
| 391 | 4933416I08Rik | 71159  | X+:50989700-50994509     |
| 392 | Sec22b        | 20333  | 3+:97705203-97725429     |
| 393 | Ucp1          | 22227  | 8+:85814481-85821868     |
| 394 | Ccdc85a       | 216613 | 11-:28288819-28334158    |
| 397 | Ak7           | 78801  | 12+:106944326-107020654  |
| 398 | BC025446      | 223631 | 15+:75047025-75053089    |
| 401 | MMT00061194   |        | 4+:33051752-33052247     |
| 402 | Timp3         | 21859  | 10+:85763281-85812250    |
| 403 | Leprotl1      | 68192  | 8-:35200370-35209862     |
| 405 | Emr4          | 52614  | 17+:55889297-55992735    |
| 407 | Serpina6      | 12401  | 12-:104884842-104895281  |
| 409 | Lxn           | 17035  | 3-:67261918-67267735     |
| 410 | MMT00048420   |        | 17+:85248800-85273194    |
| 413 | Acy1          | 109652 | 9-:106335326-106340567   |
| 415 | Ypel2         | 77864  | 11+:86749926-86750408    |
| 416 | Xlr5b         | 627081 | X+:70397218-70401916     |

|     |               |        |                         |
|-----|---------------|--------|-------------------------|
| 419 | Foxk2         | 68837  | 11+:121121570-121171208 |
| 420 | Ear11         | 93726  | 14-:51875113-51875581   |
| 423 | Klhl5         | 71778  | 5+:65499025-65559424    |
| 425 | MMT00064181   |        | X-:53144982-53147353    |
| 426 | Mobkl3        | 19070  | 1+:55188133-55210100    |
| 427 | Smg6          | 103677 | 11+:74802858-74805687   |
| 433 | Pla2g12b      | 69836  | 10+:58866410-58884481   |
| 434 | Psmc1         | 70247  | 1+:87961212-88035865    |
| 437 | Ndrp1         | 17988  | 15-:66760883-66801201   |
| 439 | Ugt2b35       | 243085 | 5+:87429916-87437385    |
| 443 | Xpo5          | 72322  | 17+:46339694-46380544   |
| 445 | 2610029I01Rik | 77032  | 4-:21684530-21694363    |
| 446 | MMT00020922   |        |                         |
| 448 | Sh3glb2       | 227700 | 2-:30200330-30214751    |
| 449 | 1700019P21Rik | 75546  | 1-:140772851-140773554  |
| 451 | Mllt11        | 56772  | 3-:95023058-95032166    |
| 458 | Olfir876      | 258883 | 9+:37611497-37612429    |
| 459 | Tcfap2a       | 21418  | 13-:40812269-40829150   |
| 461 | Zfp664        | 269704 | 5+:125343059-125369006  |
| 468 | 2610020C07Rik | 69918  | 16+:11203489-11220817   |
| 470 | MMT00076063   |        | 7-:14168976-14170985    |
| 473 | MMT00063585   |        | X-:53407721-53409696    |
| 478 | Sfrs9         | 108014 | 5+:115777225-115783086  |
| 479 | Best1         | 24115  | 19-:10059660-10067811   |
| 482 | Rnf43         | 207742 | 11+:87477636-87549040   |
| 484 | Atp4a         | 11944  | 7+:31497370-31510203    |
| 486 | Josd2         | 66124  | 7+:51723425-51727021    |
| 487 | Slc6a15       | 103098 | 10+:102830476-102882011 |
| 488 | Igh-VJ558     | 16061  | 12-:116396590-116397077 |
| 491 | MMT00030239   |        | 2+:11341818-11343062    |
| 494 | Tspan7        | 21912  | X+:10062293-10173728    |
| 495 | Ddx10         | 77591  | 9-:52906745-53056196    |
| 496 | Fgf1          | 14164  | 18-:38999700-39078312   |
| 499 | 2310057J16Rik | 69697  | 8+:3587811-3602281      |
| 502 | Iars          | 105148 | 13+:49777445-49829628   |
| 508 | MMT00028550   |        | 2+:83985036-83985869    |
| 510 | Neu1          | 18010  | 17+:35068318-35071775   |
| 511 | Itpa          | 16434  | 2+:130493550-130507349  |
| 514 | Abca6         | 76184  | 11-:110038137-110113042 |
| 523 | 1700040L02Rik | 73287  | 10-:67893701-67996666   |
| 524 | Hsd3b2        | 15493  | 3-:98515030-98528478    |
| 525 | Lyl1          | 17095  | 8+:87225442-87228591    |
| 530 | Mest          | 17294  | 6+:30688062-30698457    |
| 533 | MMT00040762   |        | 2-:150222864-150225421  |
| 534 | Plrg1         | 53317  | 3+:82860692-82876092    |
| 537 | Dmbt1         | 12945  | 7+:138175590-138265140  |



|     |               |        |                         |
|-----|---------------|--------|-------------------------|
| 538 | Mpp2          | 50997  | 11-:101918332-101949816 |
| 540 | Chd9          | 109151 | 8+:93456138-93507447    |
| 544 | Ii16          | 16170  | 7-:90791575-90803906    |
| 545 | 4930524O08Rik | 74700  | 9+:89721353-89758866    |
| 546 | Gltscr1       | 243842 | 7-:16556611-16584843    |
| 547 | Mknk2         | 17347  | 10-:80128787-80134754   |
| 548 | Gpr109a       | 80885  | 5-:124313585-124315505  |
| 550 | Hars2         | 70791  | 18+:36942933-36952207   |
| 552 | MMT00013481   |        | 5-:94124018-94126763    |
| 553 | Plekhh2       | 226971 | 1+:34906843-34936413    |
| 556 | Spint2        | 20733  | 7-:30041350-30066997    |
| 558 | Crebl1        | 12915  | 17+:34784179-34791641   |
| 563 | D4Bwg0951e    | 52829  | 4+:80557282-80600207    |
| 566 | Ccdc132       | 73288  | 6+:3505430-3553313      |
| 568 | A330049M08Rik | 230822 | 4-:134925824-134954136  |
| 569 | 1700125D06Rik | 68233  | 4+:129168442-129169450  |
| 572 | MMT00014316   |        | 4-:84569446-84572305    |
| 574 | Zfp57         | 22715  | 17+:37139982-37147580   |
| 575 | Edn1          | 13614  | 13+:42397233-42403356   |
| 577 | Rrp12         | 107094 | 19-:41937331-41970690   |
| 583 | Taf15         | 70439  | 11+:83286586-83320246   |
| 584 | Tmem207       | 224058 | 16-:26504592-26526809   |
| 585 | Tas2r119      | 57254  | 15+:32107043-32108047   |
| 589 | Epb4.114b     | 54357  | 4-:57074610-57156520    |
| 591 | Slco6c1       | 74441  | 1-:98955615-99024881    |
| 602 | 9630041N07Rik | 214779 | 11-:50645537-50652056   |
| 604 | Ppp1r15b      | 108954 | 1+:135027863-135036364  |
| 605 | Unc119b       | 106840 | 5-:115572577-115584936  |
| 607 | Me1           | 17436  | 9-:86474982-86589830    |
| 609 | MMT00060868   |        | 13-:63068834-63070096   |
| 611 | Tac2          | 21334  | 10+:127161533-127168823 |
| 612 | Ccr1          | 12768  | 9-:123878257-123879324  |
| 614 | C8g           | 69379  | 2-:25354166-25357244    |
| 617 | MMT00077405   |        | 15+:62812180-62813611   |
| 620 | Prpf31        | 68988  | 7+:3581614-3592829      |
| 621 | Cyp2b13       | 13089  | 7+:26846513-26881215    |
| 622 | Serping1      | 12258  | 2-:84605543-84615561    |
| 623 | Lmf1          | 76483  | 17+:25716148-25799668   |
| 624 | 4931406I20Rik | 66743  | 4-:116944531-117048062  |
| 626 | D19ErtD386e   | 52013  | 19+:42636995-42665857   |
| 627 | Eif1a         | 13664  | 18+:46767353-46767788   |
| 630 | C1s           | 50908  | 6-:124480362-124492299  |
| 633 | Ap1b1         | 11764  | 11+:4886971-4942732     |
| 635 | MMT00008587   |        | 2+:147493729-147494129  |
| 640 | MMT00065211   |        | 14+:14734306-14735766   |
| 649 | Pop7          | 74097  | 5-:137942666-137943657  |

|     |               |        |                         |
|-----|---------------|--------|-------------------------|
| 652 | Veph1         | 72789  | 3-:65860558-65940360    |
| 654 | Rassf5        | 54354  | 1-:133073356-133141736  |
| 658 | Vmn2r-ps88    | 209786 | 8+:3093456-3104954      |
| 659 | Bace1         | 23821  | 9+:45646681-45670302    |
| 661 | Siglec1       | 20612  | 2-:130894478-130912501  |
| 662 | Mid1ip1       | 68041  | X+:10294715-10296811    |
| 663 | Muc19         | 239611 | 15+:91702790-91736981   |
| 665 | Slc26a1       | 231583 | 5-:109098950-109110090  |
| 668 | Olf802        | 258934 | 10-:129118855-129119793 |
| 672 | Calcl         | 54598  | 2-:84170790-84217144    |
| 673 | Tchh          | 99681  | 3+:93246251-93253000    |
| 676 | Ms4a4d        | 66607  | 19+:11611290-11632952   |
| 677 | Ace2          | 70008  | X+:160578419-160626353  |
| 678 | Ncaph         | 215387 | 2-:126929566-126959641  |
| 679 | Lrpprc        | 72416  | 17-:85104590-85189855   |
| 680 | Loxl4         | 67573  | 19-:42669824-42683021   |
| 681 | Hcn1          | 15165  | 13+:118391506-118765609 |
| 683 | Olf1450       | 258368 | 19+:13028080-13029056   |
| 684 | 1700102P08Rik | 112418 | 9+:108295164-108300094  |
| 688 | MMT00020896   |        |                         |
| 689 | 2010004A03Rik | 76527  | 8-:113264997-113329776  |
| 690 | Lrrc9         | 78257  | 12+:73600566-73611545   |
| 692 | Pelo          | 105083 | 13-:115878571-115881033 |
| 696 | MMT00037949   |        | 16+:38927463-38927965   |
| 700 | 4930529C04Rik | 619677 | 3+:90875583-90880395    |
| 701 | Polr3g        | 67486  | 13-:81812841-81849966   |
| 703 | Spryd4        | 66701  | 10-:127646969-127648855 |
| 707 | Bdnf          | 12064  | 2+:109532875-109564409  |
| 708 | Ophn1         | 94190  | X-:95753590-96086120    |
| 709 | Pparg         | 19016  | 6+:115372090-115440418  |
| 714 | Igk-V8        | 384422 | 6+:68071041-68387930    |
| 715 | Padi3         | 18601  | 4-:140341283-140366563  |
| 716 | Dbpht1        | 20749  | 15+:64648686-64649468   |
| 719 | Usp2          | 53376  | 9+:43897214-43901997    |
| 725 | BC005561      | 243171 | 5+:104946438-104951890  |
| 726 | Phkb          | 102093 | 8+:88366929-88420438    |
| 727 | Ywhae         | 22627  | 11+:75546501-75579305   |
| 737 | MMT00023716   |        |                         |
| 738 | Rbp4          | 19662  | 19-:38191112-38199804   |
| 739 | Ric8b         | 237422 | 10+:84432607-84479185   |
| 740 | Txnrd3        | 232223 | 6+:89593988-89625522    |
| 749 | Mex3c         | 240396 | 18+:73733247-73752224   |
| 755 | Ppp1r13l      | 333654 | 7+:19946374-19963890    |
| 756 | Pou1f1        | 18736  | 16+:65520846-65535866   |
| 760 | Akr1c19       | 432720 | 13+:4227945-4247604     |
| 761 | Amigo1        | 229715 | 3+:107989267-107994694  |

|     |               |        |                         |
|-----|---------------|--------|-------------------------|
| 763 | 4933406E20Rik | 74443  | 9-:108481213-108499902  |
| 768 | Samd1         | 666704 | 8+:86522443-86524316    |
| 769 | 5430437P03Rik | 68251  | 8+:73920759-73928517    |
| 771 | Zbtb45        | 232879 | 7-:13591013-13593679    |
| 772 | Hnrnpr        | 74326  | 4+:135866911-135896587  |
| 778 | Galnt3        | 14425  | 2-:65921491-65962686    |
| 784 | Actg1         | 11465  | 11-:120208395-120209809 |
| 786 | Macrocl1      | 107227 | 19+:7131532-7272547     |
| 790 | MMT00026414   | 83701  | 5-:137737059-137748395  |
| 791 | Il18r1        | 16182  | 1+:40522850-40557678    |
| 793 | Morc3         | 338467 | 16+:93832534-93876317   |
| 794 | Mrps14        | 64659  | 1+:162125378-162130567  |
| 797 | Gpi1          | 14751  | 7-:34987176-35015281    |
| 801 | Olfir295      | 258850 | 7+:93733786-93734714    |
| 803 | Lhb           | 16866  | 7+:52676322-52677147    |
| 804 | 2210407C18Rik | 78354  | 11-:58421710-58426972   |
| 805 | Reep1         | 52250  | 6+:71657831-71760532    |
| 806 | Ly96          | 17087  | 1+:16678536-16699686    |
| 808 | Ctsc          | 13032  | 7+:95426644-95458806    |
| 812 | En2           | 13799  | 5+:28493019-28498710    |
| 814 | Gpr64         | 237175 | X+:156828597-156935996  |
| 817 | C130039O16Rik | 238317 | 12-:85490239-85500005   |
| 820 | 3200002M19Rik | 75430  | 7+:109044930-109048057  |
| 822 | Ddah1         | 69219  | 3+:145421689-145557242  |
| 824 | Esco1         | 77805  | 18-:10566600-10594053   |
| 826 | Fezf1         | 73191  | 6-:23195050-23198148    |
| 827 | Flcn          | 216805 | 11-:59605254-59623275   |
| 828 | Finc          | 68794  | 6+:29409404-29411881    |
| 830 | Socs1         | 12703  | 16-:10783903-10785602   |
| 838 | MMT00011949   |        | 19-:12219977-12241545   |
| 845 | Myo5a         | 17918  | 9+:74919406-75067280    |
| 848 | MMT00008599   |        | 8+:53859486-53860062    |
| 849 | Pxmp4         | 59038  | 2-:154413323-154429398  |
| 853 | Crct1         | 74175  | 3-:92818128-92819608    |
| 857 | Sfrs12        | 218543 | 13-:104533165-104564597 |
| 860 | Psemb10       | 19171  | 8-:108459663-108462005  |
| 863 | Dnajc14       | 74330  | 10+:128242731-128254559 |
| 864 | MMT00031865   | 329122 | 1+:37992371-38006685    |
| 865 | Npc1          | 18145  | 18-:12348370-12394867   |
| 866 | Zfp369        | 170936 | 13+:65380235-65398890   |
| 870 | Rint1         | 72772  | 5+:23293529-23327653    |
| 872 | MMT00004441   |        | 4+:76573197-76573933    |
| 873 | Slc22a3       | 20519  | 17-:12612841-12700570   |
| 874 | Aldh1a7       | 26358  | 19-:20767442-20802046   |
| 877 | MMT00015473   |        | 19+:43618672-43619815   |
| 880 | Atp6v0a2      | 21871  | 5+:125079736-125202515  |

|      |               |        |                         |
|------|---------------|--------|-------------------------|
| 884  | Kif26b        | 269152 | 1+:180751613-180862984  |
| 885  | 2210010L05Rik | 98682  | 1-:52714300-52766004    |
| 894  | Ddit4         | 74747  | 10-:59412422-59414518   |
| 897  | Mut           | 17850  | 17+:41073992-41098598   |
| 902  | Slc30a1       | 22782  | 1+:193730738-193733694  |
| 904  | MMT00003579   |        | 14-:88179628-88179937   |
| 905  | Fyco1         | 17281  | 9-:123698627-123761010  |
| 908  | Lypd2         | 68311  | 15-:74562676-74564745   |
| 910  | Sned1         | 208777 | 1+:95192288-95194148    |
| 915  | 9130206N08Rik | 103406 | 10+:80702678-80713479   |
| 917  | Kal1          | 14038  | 11+:83522607-83524842   |
| 923  | MMT00033681   |        | 14-:120043166-120048850 |
| 929  | Dusp4         | 319520 | 8+:35870424-35885009    |
| 930  | Cd55          | 13136  | 1-:132336790-132359261  |
| 931  | Ccdc147       | 381229 | 19+:48011400-48129383   |
| 932  | Chad          | 12643  | 11+:94426362-94430433   |
| 937  | Pi4ka         | 224020 | 16-:17280441-17405919   |
| 938  | Sdcbp         | 53378  | 4+:6292867-6322797      |
| 939  | Daxx          | 13163  | 17+:34047373-34052463   |
| 940  | Pramel3       | 83565  | X+:131836850-131847175  |
| 942  | Kcna5         | 16493  | 6-:126482570-126485455  |
| 949  | Plekha6       | 240753 | 1+:135155585-135200013  |
| 952  | 1810008K16Rik | 67366  | 5-:109206253-109224382  |
| 954  | Adam25        | 23793  | 8+:41837561-41841529    |
| 958  | Ppp2r5e       | 26932  | 12-:76550450-76694320   |
| 959  | Cckar         | 12425  | 5-:54089726-54099341    |
| 961  | Rwdd4a        | 192174 | 8+:48619008-48638304    |
| 962  | Klhl10        | 66720  | 11+:100303237-100318336 |
| 963  | Lrrfip2       | 71268  | 9+:111063805-111128172  |
| 966  | Wif1          | 24117  | 10+:120471285-120537698 |
| 967  | Matr3         | 17184  | 18+:35747218-35751870   |
| 969  | MMT00054728   |        | 10+:78006018-78006876   |
| 972  | Sri           | 109552 | 5+:8046077-8067854      |
| 981  | 1110015M06Rik | 68511  | 12-:29209539-29215352   |
| 982  | Ccl7          | 20306  | 11+:81859233-81861023   |
| 983  | MMT00078030   |        | 13-:91400536-91402025   |
| 984  | Derl3         | 70377  | 10+:75356142-75358685   |
| 985  | Hsd3b6        | 15497  | 3-:98609427-98615031    |
| 988  | Olfra91       | 258731 | 7+:115460409-115461342  |
| 989  | Phyhd1        | 227696 | 2+:30121720-30137667    |
| 992  | 8430410A17Rik | 232210 | 6+:87863943-87886618    |
| 996  | Pppb          | 57349  | 5+:91197543-91199086    |
| 1000 | 2900024O10Rik | 72852  | 13+:81850045-81890207   |
| 1006 | 2600011E07Rik | 72125  | 14+:60997188-60999841   |
| 1008 | MMT00069490   |        | X+:71732110-71732758    |
| 1009 | Rps2          | 16898  | 17+:24857053-24858868   |

|      |               |           |                         |
|------|---------------|-----------|-------------------------|
| 1014 | Rtcd1         | 66368     | 3-:116191883-116211028  |
| 1017 | Dync2li1      | 213575    | 17+:85025814-85054927   |
| 1019 | Slc26a3       | 13487     | 12+:32123165-32158584   |
| 1020 | Olfr195       | 259000    | 16+:59148677-59149602   |
| 1021 | Rhpn2         | 52428     | 7+:36119332-36177300    |
| 1023 | Ccdc64b       | 212733    | 17+:23798726-23805584   |
| 1026 | Ftsj2         | 68017     | 5-:140803627-140807852  |
| 1027 | Accs          | 329470    | 2-:93675574-93690099    |
| 1031 | Uros          | 22276     | 7-:140878038-140900716  |
| 1036 | Dusp19        | 68082     | 2+:80457201-80471351    |
| 1039 | Zfp207        | 22680     | 11+:80196847-80209639   |
| 1040 | Dnhd1         | 77505     | 7+:112826403-112870312  |
| 1041 | 3110049J23Rik | 67307     | 10+:62487259-62521560   |
| 1050 | MMT00044489   |           | 4-:59707420-59707804    |
| 1051 | MMT00065456   | 100041868 | 1+:100272681-100356563  |
| 1052 | Cog4          | 102339    | 8+:113370946-113406124  |
| 1055 | Gm525         | 217071    | 11+:88934958-88954377   |
| 1058 | Olfr868       | 258552    | 9+:19905204-19906133    |
| 1059 | P2rx6         | 18440     | 16+:17562092-17571358   |
| 1061 | Krt20         | 66809     | 11-:99289716-99299467   |
| 1065 | Hmgcr         | 15357     | 13-:97418921-97440804   |
| 1068 | 1700129I15Rik | 78478     | X-:132253204-132255213  |
| 1073 | Ppp1r7        | 66385     | 1+:95240221-95264195    |
| 1074 | Acsm3         | 20216     | 7+:126904456-126928403  |
| 1076 | Megf11        | 214058    | 9+:64345146-64554489    |
| 1079 | Hr            | 15460     | 14+:70954578-70972201   |
| 1083 | Ddx3y         | 26900     | Y-:597157-623024        |
| 1084 | Pros1         | 19128     | 16+:62854153-62929179   |
| 1085 | Col5a2        | 12832     | 1-:45432930-45559759    |
| 1086 | 2610205E22Rik | 66617     | 2+:30663460-30679260    |
| 1088 | Lef1          | 16842     | 3+:130813250-130927276  |
| 1089 | 1700010D01Rik | 76386     | X-:92927928-92928600    |
| 1090 | 5730409G15Rik | 70511     | 16-:5244523-5256050     |
| 1091 | Acsl5         | 433256    | 19+:55328144-55371117   |
| 1092 | MMT00024026   | 554292    | 15+:100183640-100214386 |
| 1093 | MMT00012906   |           | 3-:78695787-78696346    |
| 1097 | Dctn6         | 22428     | 8-:35153477-35171497    |
| 1099 | Ap1m1         | 11767     | 8+:74764030-74781278    |
| 1101 | Sec11a        | 56529     | 7-:88060264-88092436    |
| 1105 | Crls1         | 66586     | 2+:132672401-132692502  |
| 1108 | MMT00067207   |           | 14+:56868857-56870107   |
| 1109 | Snai1         | 20613     | 2+:167363775-167368309  |
| 1112 | Ccdc56        | 52469     | 11-:101139283-101140262 |
| 1114 | Cdca7l        | 217946    | 12+:119082333-119117178 |
| 1115 | Rbbp7         | 245688    | X+:159206779-159216559  |
| 1120 | Rbpm2         | 71973     | 9+:65477454-65508333    |

|      |               |        |                          |
|------|---------------|--------|--------------------------|
| 1122 | Pax3          | 18505  | 1--:78099278-78193621    |
| 1126 | Slc25a14      | 20523  | X+:45976754-46015469     |
| 1127 | Pomt2         | 217734 | 12--:88488120-88488849   |
| 1128 | Amtn          | 71421  | 5+:88805132-88814941     |
| 1129 | Gsta4         | 14860  | 9+:78039838-78057155     |
| 1130 | Ly75          | 17076  | 2--:60130160-60221315    |
| 1134 | Vmn2r19       | 232358 | 6+:123259676-123280222   |
| 1135 | Akap12        | 83397  | 10--:5987069-6080163     |
| 1136 | Kdelr3        | 105785 | 15+:79346897-79358168    |
| 1137 | Mlxip         | 208104 | 5+:123893038-123903952   |
| 1140 | Rmnd5a        | 68477  | 6--:71338631-71390133    |
| 1141 | Oxr1          | 170719 | 15+:41621060-41692591    |
| 1144 | MMT00060803   |        | 11+:32084994-32085702    |
| 1145 | Arhgap6       | 11856  | X+:165233904-165742367   |
| 1148 | Pak1          | 18479  | 7+:104991479-105059842   |
| 1156 | Rbj           | 217378 | 12+:4082556-4110603      |
| 1159 | Tmem104       | 320534 | 11+:115048841-115108336  |
| 1162 | Cpsf4         | 54188  | 5+:145928113-145942911   |
| 1163 | Olf1r52       | 18352  | 2--:86021307-86022266    |
| 1164 | A930011O12Rik | 268755 | 14+:65209109-65212802    |
| 1167 | Atg2a         | 329015 | 19+:6241637-6262304      |
| 1170 | Faim3         | 69169  | 1+:132762337-132777421   |
| 1177 | EG545391      | 545391 | 1+:180034087-180086933   |
| 1180 | Clec4a3       | 73149  | 6+:122902683-122919897   |
| 1183 | MMT00009390   |        |                          |
| 1185 | Atxn2         | 20239  | 5+:122161617-122264717   |
| 1187 | MMT00075773   |        | 19+:24930589-24930857    |
| 1194 | Per3          | 18628  | 4--:150378820-150418698  |
| 1200 | Grm3          | 108069 | 5--:9485239-9589959      |
| 1201 | Ptger3        | 19218  | 3+:157229863-157307720   |
| 1203 | Enah          | 13800  | 1--:183835645-183949792  |
| 1214 | Trip13        | 69716  | 13--:74049907-74075187   |
| 1219 | EG665503      | 665503 | 13--:62629440-62630551   |
| 1223 | Slc30a9       | 109108 | 5+:67698199-67747022     |
| 1227 | 4933421I07Rik | 71162  | 7--:49700831-49703450    |
| 1230 | MMT00057236   | 630663 | 13--:13413093-13415645   |
| 1232 | Abhd1         | 57742  | 5+:31252444-31257456     |
| 1233 | Sidt1         | 320007 | 16--:44240015-44333081   |
| 1235 | Cpne9         | 211232 | 6+:113232298-113254819   |
| 1236 | Ccdc113       | 244608 | 8+:98060363-98082788     |
| 1238 | Habp2         | 226243 | 19+:56362427-56394578    |
| 1239 | Cerkl         | 228094 | 2--:79208838-79269162    |
| 1241 | Meox1         | 17285  | 11--:101738837-101755623 |
| 1243 | Phf3          | 213109 | 1--:30859185-30930877    |
| 1244 | Tmem150       | 232086 | 6+:72305486-72309756     |
| 1246 | EG434121      | 434121 | 7--:14495025-14574937    |

|      |               |        |                         |
|------|---------------|--------|-------------------------|
| 1248 | Usp24         | 329908 | 4+:106032818-106046647  |
| 1250 | Nol6          | 230082 | 4-:41061460-41071321    |
| 1252 | Tacc2         | 57752  | 7+:137765094-137815172  |
| 1253 | Scel          | 64929  | 14+:103912558-104012389 |
| 1254 | Lum           | 17022  | 10+:97028463-97035337   |
| 1255 | Grhpr         | 76238  | 4+:44994282-45003567    |
| 1256 | Baiap2l2      | 207495 | 15-:79088628-79115110   |
| 1257 | Slc25a45      | 107375 | 19+:5877841-5885763     |
| 1258 | Hba-a1        | 15122  | 11+:32183673-32184492   |
| 1263 | Folh1         | 53320  | 7-:93867906-93924342    |
| 1270 | 1700029I01Rik | 70005  | 4+:146506142-146554953  |
| 1271 | 2810403A07Rik | 74200  | 3+:88489739-88516844    |
| 1272 | 1110008P14Rik | 73737  | 2-:32234623-32237433    |
| 1276 | Col4a1        | 12826  | 8-:11198421-11312621    |
| 1279 | Ctps2         | 55936  | X+:159340115-159469249  |
| 1280 | Mesdc2        | 67943  | 7+:91040533-91047690    |
| 1281 | Alkbh3        | 69113  | 2-:93820708-93850369    |
| 1284 | Serpina3h     | 546546 | 12+:105452765-105492619 |
| 1286 | Rad51c        | 114714 | 11-:87192888-87217923   |
| 1287 | Acss3         | 380660 | 10-:106441719-106560639 |
| 1290 | Zscan12       | 22758  | 13+:21455153-21461693   |
| 1293 | Safb          | 224903 | 17+:56724245-56745715   |
| 1294 | MMT00016640   |        | 7+:12194645-12196115    |
| 1296 | 5330401P04Rik | 227094 | 1+:52694208-52708763    |
| 1297 | Phox2a        | 11859  | 7+:108967003-108971238  |
| 1305 | 4930485B16Rik | 380654 | 10-:92507829-92510823   |
| 1307 | Tmem116       | 77462  | 5+:121913205-121945429  |
| 1310 | Cabc1         | 67426  | 1-:182096745-182123597  |
| 1311 | Mpp4          | 227157 | 1-:59177778-59215512    |
| 1312 | MMT00051556   |        | X-:137356725-137392567  |
| 1315 | Tmem16j       | 71345  | 7-:148287124-148303661  |
| 1317 | Fcgrt         | 14132  | 7-:52348433-52358462    |
| 1321 | AW548124      | 106522 | 17+:83615139-83624400   |
| 1322 | Cep290        | 216274 | 10+:100005050-100036288 |
| 1323 | Orc2l         | 18393  | 1-:58520039-58561763    |
| 1324 | Rfc5          | 72151  | 5-:117828846-117839045  |
| 1325 | Pigu          | 228812 | 2-:155103980-155127101  |
| 1326 | Tox           | 252838 | 4-:6615494-6917657      |
| 1327 | Pitpnc1       | 71795  | 11-:107073419-107332013 |
| 1329 | 5730494N06Rik | 70612  | 2-:132065229-132073518  |
| 1330 | Fgf21         | 56636  | 7-:52869390-52870676    |
| 1336 | MMT00069537   |        | 14-:61214340-61215729   |
| 1339 | MMT00077775   |        | 19-:26308024-26629706   |
| 1340 | Tap2          | 21355  | 17+:34342239-34353037   |
| 1342 | Pik3ca        | 18706  | 3+:32335127-32361752    |
| 1344 | Marcks        | 17118  | 10-:36854626-36858720   |

|      |               |        |                         |
|------|---------------|--------|-------------------------|
| 1351 | Whsc111       | 234135 | 8+:26712042-26825166    |
| 1353 | Plcg2         | 234779 | 8+:120022087-120159043  |
| 1354 | Lsmd1         | 78304  | 11+:69209260-69210703   |
| 1355 | MMT00047341   |        | 1-:28858362-28859394    |
| 1356 | MMT00045517   |        | Y-:1317414-1317910      |
| 1357 | Pabpn1        | 54196  | 14+:55512992-55516891   |
| 1358 | Pappa2        | 23850  | 1-:160644843-160887569  |
| 1359 | 4931406C07Rik | 70984  | 9-:15087782-15106000    |
| 1361 | 2010001M06Rik | 69812  | 5-:135487979-135489124  |
| 1362 | Avpr1a        | 54140  | 10+:121885554-121890509 |
| 1363 | BC021767      | 545551 | 3-:94464511-94474619    |
| 1364 | Pr18a9        | 67310  | 13-:27650021-27656415   |
| 1368 | Pctp          | 18559  | 11-:89845905-89864179   |
| 1371 | 1200009I06Rik | 74190  | 12+:112659771-112669393 |
| 1374 | Mdn1          | 100019 | 4+:32771613-32780612    |
| 1375 | Strap         | 20901  | 6+:137683646-137699610  |
| 1376 | Mdm2          | 17246  | 10-:117127265-117146840 |
| 1379 | A930041C12Rik | 78443  | 5-:108059270-108062871  |
| 1380 | Sycp3         | 20962  | 10+:87922331-87935980   |
| 1383 | Bhlhb9        | 70237  | X+:132420530-132425617  |
| 1386 | Ppid          | 67738  | 3+:79395353-79407570    |
| 1390 | AU015836      | 385493 | X+:91214066-91214923    |
| 1392 | Gm1040        | 433864 | 5+:29761265-29778014    |
| 1393 | Klh12         | 77113  | 8-:67218481-67373628    |
| 1394 | MMT00051501   |        | 17+:8005628-8006677     |
| 1396 | Rassf7        | 66985  | 7+:148401731-148404555  |
| 1397 | 2900009I07Rik | 68034  | 19-:24550939-24551933   |
| 1398 | MMT00060205   |        | 14+:31215187-31215917   |
| 1401 | Klk8          | 259277 | 7+:51052946-51059192    |
| 1405 | MMT00078938   |        | 7+:110292103-110293045  |
| 1406 | Clic3         | 69454  | 2+:25312359-25314298    |
| 1410 | Bicc1         | 83675  | 10-:70387849-70622371   |
| 1411 | Tada3l        | 101206 | 6-:113316656-113327514  |
| 1412 | Phf17         | 269424 | 3+:41367382-41420773    |
| 1415 | Timm9         | 30056  | 12-:72224282-72237621   |
| 1416 | 6720460F02Rik | 109212 | 11+:71856011-71860873   |
| 1419 | Olfr1121      | 258345 | 2+:87211690-87212635    |
| 1423 | Spdya         | 70891  | 17+:71876198-71938872   |
| 1424 | Dapk1         | 69635  | 13+:60703790-60864543   |
| 1427 | Ahrr          | 11624  | 13-:74348565-74429757   |
| 1429 | Strn4         | 97387  | 7+:17401704-17426284    |
| 1433 | Deb1          | 26901  | 9+:121619503-121622037  |
| 1435 | Ptges3        | 56351  | 10+:127505742-127514045 |
| 1436 | Nfu1          | 56748  | 6+:86959897-86978409    |
| 1438 | Dclre1b       | 140917 | 3-:103606679-103612107  |
| 1441 | MMT00001620   |        | X+:9588913-9590834      |



|      |               |           |                         |
|------|---------------|-----------|-------------------------|
| 1443 | Znhit2        | 29805     | 19+:6061196-6062470     |
| 1444 | C1r           | 50909     | 6+:124469358-124473458  |
| 1445 | Ssbp2         | 66970     | 13+:91600701-91840840   |
| 1446 | Eno3          | 13808     | 11+:70470705-70476012   |
| 1447 | Naaa          | 67111     | 5-:92687286-92707207    |
| 1448 | Zwilch        | 68014     | 9-:63985482-64020715    |
| 1451 | 2010300C02Rik | 72097     | 1-:37668520-37694874    |
| 1452 | Gm1027        | 381538    | 4-:106353243-106382321  |
| 1453 | Gfod2         | 70575     | 8-:108240012-108282507  |
| 1455 | Smek1         | 68734     | 12-:102277619-102321144 |
| 1457 | Efr3b         | 668212    | 12-:3967102-4038729     |
| 1458 | Cpsf2         | 51786     | 12+:103214197-103241820 |
| 1462 | Rpusd4        | 71989     | 9+:35075446-35083543    |
| 1464 | Taf13         | 99730     | 3+:108374616-108384986  |
| 1466 | Udap2l        | 74383     | 3-:89803505-89856403    |
| 1470 | Kcns3         | 238076    | 12-:11098027-11099502   |
| 1471 | Igfbp7        | 29817     | 5-:77778270-77837070    |
| 1472 | MMT00078790   |           | 1+:33157660-33159540    |
| 1473 | MMT00007831   |           | 8+:40369078-40370255    |
| 1476 | 2610020H08Rik | 434234    | 7+:126937638-126992452  |
| 1480 | Plekhh3       | 217198    | 11-:101023995-101032616 |
| 1482 | Nme5          | 75533     | 18-:34722376-34738340   |
| 1485 | Plek          | 56193     | 11-:16871452-16908705   |
| 1487 | MMT00019522   |           | 6+:147220566-147221162  |
| 1490 | Mapk1         | 26413     | 16+:16983659-17039133   |
| 1493 | MMT00047335   |           | 12-:10731050-10731395   |
| 1494 | Cyp2c69       | 100043108 | 19-:39917150-39961217   |
| 1495 | Zfp445        | 235682    | 9-:122758064-122771246  |
| 1496 | MMT00061267   |           | 2-:84997574-84998454    |
| 1497 | Dnaja4        | 58233     | 9+:54547190-54562571    |
| 1500 | Leprel1       | 210530    | 16-:25959375-25997389   |
| 1501 | Rnf145        | 74315     | 11+:44332196-44379023   |
| 1502 | Preli2        | 77619     | 18-:42035254-42072135   |
| 1503 | Lingo1        | 235402    | 9-:56466864-56483435    |
| 1504 | Xpo7          | 65246     | 14-:71064653-71166341   |
| 1505 | Dusp9         | 75590     | X+:70884779-70888449    |
| 1507 | Tcof1         | 21453     | 18-:60974196-61008562   |
| 1508 | Tlr4          | 21898     | 4+:66488844-66503828    |
| 1510 | A530058N18Rik | 320846    | 2+:113839131-113858021  |
| 1513 | Gzmb          | 14939     | 14-:56877696-56881097   |
| 1515 | Med20         | 56771     | 17+:47748579-47761199   |
| 1518 | Amigo2        | 105827    | 15-:97075410-97076880   |
| 1520 | MMT00069758   |           | 6+:4308509-4309482      |
| 1522 | Nfkbib        | 18036     | 7-:29544062-29551512    |
| 1525 | MMT00024951   |           | 1-:121138548-121139323  |
| 1530 | Cideb         | 12684     | 14-:56372896-56377295   |

|      |               |        |                         |
|------|---------------|--------|-------------------------|
| 1531 | Uqcrc2        | 67003  | 7+:127778720-127802784  |
| 1533 | BC013712      | 230787 | 4-:132337754-132352268  |
| 1536 | Hopx          | 74318  | 5-:77470227-77524282    |
| 1537 | 1700052K11Rik | 73431  | 11-:105041137-105042747 |
| 1543 | Acta2         | 11475  | 19-:34316006-34329805   |
| 1544 | MMT00046046   |        | 17-:24029863-24030559   |
| 1547 | Eid1          | 58521  | 2+:125498830-125500519  |
| 1549 | Gmfg          | 63986  | 7+:29226451-29231560    |
| 1550 | Chst12        | 59031  | 5+:140999493-141001191  |
| 1554 | Rph3al        | 380714 | 11-:75646902-75667983   |
| 1561 | Aurka         | 20878  | 2-:172181690-172196042  |
| 1562 | Btg2          | 12227  | 1-:135971905-135975696  |
| 1563 | Galp          | 232836 | 7+:6154402-6165516      |
| 1566 | Kctd15        | 233107 | 7-:35424037-35437860    |
| 1568 | Frmd4b        | 232288 | 6-:97236861-97567576    |
| 1569 | Tmco4         | 77056  | 4+:138528806-138615079  |
| 1570 | Olf1522       | 258954 | 7-:147347909-147348847  |
| 1572 | Saa3          | 20210  | 7-:53967496-53970470    |
| 1579 | Clca1         | 12722  | 3-:144392881-144423733  |
| 1580 | Mrs2          | 380836 | 13-:25084440-25112248   |
| 1582 | Srr           | 27364  | 11-:74721776-74722708   |
| 1585 | Mif4gd        | 69674  | 11-:115469234-115474236 |
| 1587 | MMT00044543   |        | 4+:52913468-52915778    |
| 1592 | Amy1          | 11722  | 3-:113258871-113277680  |
| 1593 | D3Ert300e     | 56790  | 3+:54497026-54520758    |
| 1594 | Mrpl24        | 67707  | 3+:87723465-87727586    |
| 1600 | Csrp1         | 13007  | 1+:137635972-137647923  |
| 1602 | Mina          | 67014  | 16+:59471632-59492113   |
| 1603 | Lrwd1         | 71735  | 5-:136598936-136611871  |
| 1604 | Ssbp4         | 76900  | 8-:73121389-73132172    |
| 1606 | Srp14         | 20813  | 2-:118301586-118305357  |
| 1607 | Memo1         | 76890  | 17-:74600045-74694323   |
| 1612 | Clec1b        | 56760  | 6+:129347603-129355294  |
| 1613 | Trim26        | 22670  | 17+:36974128-36996321   |
| 1614 | 4933402P03Rik | 108803 | 11-:69630066-69631970   |
| 1615 | Timm10        | 30059  | 2+:84667199-84670368    |
| 1618 | Mfap1a        | 67532  | 2-:121319443-121332385  |
| 1619 | Fbxw17        | 109082 | 13+:50513253-50527925   |
| 1620 | Htra1         | 56213  | 7+:138079748-138129167  |
| 1624 | Dzip3         | 224170 | 16-:48925921-48994254   |
| 1625 | AW146154      | 101835 | 7+:48745783-48746625    |
| 1627 | 2310030N02Rik | 76947  | 4-:10978197-11003334    |
| 1629 | Gcsh          | 68133  | 8-:119505871-119517351  |
| 1631 | Aldob         | 230163 | 4-:49549296-49562357    |
| 1635 | 8430427H17Rik | 329540 | 2-:153233197-153262098  |
| 1637 | MMT00071316   |        | 1-:71760373-71761572    |

|      |              |        |                         |
|------|--------------|--------|-------------------------|
| 1641 | Hoxc11       | 109663 | 15+:102784937-102787130 |
| 1646 | Slc15a4      | 100561 | 5-:128076036-128097762  |
| 1648 | Gnpnat1      | 54342  | 14-:45996095-46008471   |
| 1649 | Pcolce       | 18542  | 5-:138046337-138052587  |
| 1650 | Ctdsp2       | 52468  | 10+:126432666-126437025 |
| 1653 | Anxa5        | 11747  | 3-:36347847-36374620    |
| 1654 | Dhx58        | 80861  | 11-:100564073-100565585 |
| 1655 | Mgm1         | 17237  | 16+:4886343-4938284     |
| 1656 | Ahr          | 11622  | 12-:36182693-36219576   |
| 1660 | Zfp33b       | 69623  | 5+:105012010-105013638  |
| 1661 | Duoxa1       | 213696 | 2-:122129288-122139429  |
| 1663 | Fkbp4        | 14228  | 6-:128380127-128388545  |
| 1667 | Tbr1         | 21375  | 2+:61642669-61652168    |
| 1668 | Lhx1         | 16869  | 11-:84332880-84339036   |
| 1672 | Mlh1         | 17350  | 9-:111130758-111174066  |
| 1676 | Tmem170      | 66817  | 8-:114388797-114400575  |
| 1677 | Fabp1        | 14080  | 6+:71149881-71155016    |
| 1678 | Tcf15        | 21407  | 2+:151969307-151974830  |
| 1679 | MMT00009278  |        | 3+:95786885-95787446    |
| 1688 | Camp         | 12796  | 9-:109749900-109751963  |
| 1690 | Nlrp5        | 23968  | 7+:24189120-24226935    |
| 1693 | Ufsp1        | 70240  | 5+:137735896-137736892  |
| 1696 | V1re9        | 252904 | 7-:11165193-11166151    |
| 1697 | Sf4          | 70616  | 8+:72566711-72596244    |
| 1700 | Ccdc64       | 75665  | 5-:116098188-116181568  |
| 1702 | Galc         | 14420  | 12-:99442005-99497617   |
| 1705 | Gltpd1       | 79554  | 4-:155239391-155241412  |
| 1709 | Mt2          | 17750  | 8+:96696346-96697461    |
| 1711 | Grhl1        | 195733 | 12+:25265583-25302252   |
| 1712 | Rnf2         | 19821  | 1-:153316535-153348027  |
| 1714 | Ampd1        | 229665 | 3+:102877953-102903646  |
| 1716 | Git1         | 216963 | 11+:77307063-77321269   |
| 1717 | Ndufs2       | 226646 | 1-:173176219-173177245  |
| 1719 | Trak2        | 70827  | 1-:58957293-59030314    |
| 1722 | Iqgap1       | 29875  | 7-:87857671-87948180    |
| 1724 | MMT00004378  |        | X-:92406801-92407116    |
| 1728 | Car6         | 12353  | 4-:149561126-149572579  |
| 1731 | Rnf20        | 109331 | 4+:49644958-49670124    |
| 1732 | Hspa4        | 15525  | 11-:53075072-53113683   |
| 1734 | Arrdc2       | 70807  | 8-:73360045-73363618    |
| 1736 | Elovl3       | 12686  | 19+:46206388-46210184   |
| 1737 | Gtpbp4       | 69237  | 13-:8972368-8995242     |
| 1739 | Lrrc17       | 74511  | 5+:21049376-21081718    |
| 1740 | RP23-244H7.9 | 378700 | 2+:153745371-153758732  |
| 1744 | Clec3b       | 21922  | 9+:123059966-123066545  |
| 1745 | Gas7         | 14457  | 11+:67416606-67498461   |

|      |               |        |                         |
|------|---------------|--------|-------------------------|
| 1747 | RP23-162H3.1  | 666581 | 4+:146753337-146753561  |
| 1748 | Rbp1          | 19659  | 9+:98323379-98346967    |
| 1750 | Fcer1a        | 14125  | 1-:175151414-175157345  |
| 1751 | Xdh           | 22436  | 17-:74233251-74299493   |
| 1755 | Ocel1         | 77090  | 8+:73895224-73897056    |
| 1758 | Cadps2        | 320405 | 6-:23446750-23638963    |
| 1759 | Rgs3          | 50780  | 4+:62220880-62320868    |
| 1760 | Nek8          | 140859 | 11-:77979607-77990118   |
| 1761 | 2010110K16Rik | 67899  | 9-:117973646-118059210  |
| 1762 | EG620986      | 620986 | 1-:9792275-9792622      |
| 1764 | Tifab         | 212937 | 13-:56275845-56280014   |
| 1766 | Srpx2         | 68792  | X+:130443234-130466352  |
| 1767 | BC016495      | 225994 | 19+:18706505-18726505   |
| 1768 | Fmo9          | 240894 | 1-:168593079-168611977  |
| 1769 | Nr5a1         | 26423  | 2-:38548146-38570020    |
| 1770 | BC054059      | 246747 | 2+:158328347-158333934  |
| 1771 | Park2         | 50873  | 17+:11494485-11696865   |
| 1772 | Stambp        | 70527  | 6-:83493200-83522430    |
| 1776 | 4921511C04Rik | 70853  | 1+:37210690-37244460    |
| 1778 | Gtf2e1        | 74197  | 16-:37509881-37539855   |
| 1783 | Arcn1         | 213827 | 9-:44550229-44575876    |
| 1786 | Tnfsf10       | 22035  | 3+:27216022-27235019    |
| 1787 | MMT00004455   |        | 14-:63133622-63134211   |
| 1790 | Hic1          | 15248  | 11-:74978070-74983021   |
| 1792 | Zmat4         | 320158 | 8+:24858871-25125688    |
| 1793 | D3Ucla1       | 28146  | 3-:58325899-58329676    |
| 1795 | Rabgap1l      | 29809  | 1-:162237110-162402248  |
| 1797 | Batf2         | 74481  | 19+:6140980-6172472     |
| 1798 | Hoxc5         | 15424  | 15+:102844512-102845873 |
| 1800 | Retn          | 57264  | 8+:3655788-3658093      |
| 1802 | Ipo4          | 75751  | 14-:56244749-56254435   |
| 1804 | Tgm2          | 21817  | 2-:157943535-157972042  |
| 1805 | Tmem204       | 407831 | 17-:25194652-25218124   |
| 1806 | Nola3         | 66181  | 2+:112102125-112103055  |
| 1813 | Commd3        | 12238  | 2+:18594091-18597551    |
| 1816 | Gjb2          | 14619  | 14-:57718907-57719586   |
| 1820 | Mat2b         | 108645 | 11-:40492815-40506115   |
| 1827 | Gnb1l         | 13972  | 16+:18498912-18564614   |
| 1828 | Elmo3         | 234683 | 8+:107821623-107833891  |
| 1829 | MMT00030026   |        | 1+:193816705-193817410  |
| 1834 | Ermap         | 27028  | 4-:118848195-118862579  |
| 1839 | Igf2          | 16002  | 7-:149836673-149847765  |
| 1840 | Fpr1          | 14293  | 17-:18013596-18014689   |
| 1841 | MMT00054498   |        | 2+:31841028-31842169    |
| 1849 | MMT00063181   |        | 1-:151869353-151870959  |
| 1851 | Tmem41a       | 66664  | 16-:21934399-21947617   |

|      |               |        |                         |
|------|---------------|--------|-------------------------|
| 1853 | Stat5a        | 20850  | 11+:100720969-100746470 |
| 1855 | Prss12        | 19142  | 3+:123149830-123209512  |
| 1856 | MMT00000408   |        | 9-:108260488-108261433  |
| 1858 | 2810432L12Rik | 67063  | 4-:49598286-49610670    |
| 1862 | Vdac1         | 22333  | 11+:52174616-52202898   |
| 1863 | MMT00052951   |        | 5-:109445281-109445937  |
| 1866 | 2010012O05Rik | 66439  | 19+:46764403-46776385   |
| 1867 | Bcas2         | 68183  | 3+:102975667-102982750  |
| 1868 | Atp6v0e2      | 76252  | 6+:48487613-48491793    |
| 1870 | EG627821      | 627821 | 7+:6224575-6233457      |
| 1874 | Slc19a2       | 116914 | 1+:166179185-166195497  |
| 1876 | Amdhd1        | 71761  | 10-:92986449-93002732   |
| 1877 | Amica1        | 270152 | 9+:44896695-44916591    |
| 1881 | Slc16a14      | 71781  | 1-:84908769-84931804    |
| 1885 | Smr3a         | 20599  | 5+:88431573-88437558    |
| 1886 | Tcte1         | 21645  | 17+:45670001-45679629   |
| 1887 | Mapkapk3      | 102626 | 9-:107157262-107191727  |
| 1888 | Olf1396       | 258334 | 11-:48926279-48927259   |
| 1889 | Dcun1d3       | 233805 | 7-:127000760-127039194  |
| 1890 | Nanp          | 67311  | 2-:150855452-150865091  |
| 1892 | A1bg          | 117586 | 15-:60749156-60752829   |
| 1893 | MMT00072326   | 330914 | 9+:31995218-32068816    |
| 1894 | Lrp4          | 228357 | 2+:91297664-91351916    |
| 1899 | 1110031B06Rik | 67826  | 11-:59220652-59263458   |
| 1900 | Hlf           | 217082 | 11-:90249097-90252154   |
| 1901 | Tpp1          | 12751  | 7-:112894592-112900729  |
| 1902 | Eml2          | 72205  | 7+:19761962-19791828    |
| 1906 | Ssr3          | 67437  | 3-:65183578-65196475    |
| 1907 | D230010M03Rik | 241547 | 2+:91551082-91553022    |
| 1908 | Rnf213        | 629974 | 11+:119308548-119311188 |
| 1910 | Krtap5-2      | 71623  | 7+:149442728-149444277  |
| 1911 | 1300007F04Rik | 67477  | 11+:77328621-77334117   |
| 1913 | Polr2j        | 20022  | 5+:136592606-136598809  |
| 1918 | Usp39         | 28035  | 6-:72268671-72295169    |
| 1920 | Oas1e         | 231699 | 5-:121236330-121245513  |
| 1921 | 4930431L04Rik | 270049 | 8-:60980148-61179845    |
| 1928 | Triml2        | 622117 | 8+:44285339-44285697    |
| 1929 | Leng8         | 232798 | 7+:4088637-4099773      |
| 1930 | Ccdc109b      | 66815  | 3-:129617878-129672997  |
| 1932 | Racgap1       | 26934  | 15-:99450955-99482031   |
| 1935 | 2810439F02Rik | 72747  | 18+:12802308-12895558   |
| 1936 | Cbwd1         | 226043 | 19-:24994920-25036048   |
| 1937 | MMT00075644   |        | 3-:26945708-26946550    |
| 1940 | MMT00002367   |        | 11+:41312177-41313958   |
| 1941 | MMT00079618   |        | 6+:78998315-78998815    |
| 1947 | Myo9b         | 17925  | 8+:73796632-73884612    |

|      |               |        |                        |
|------|---------------|--------|------------------------|
| 1954 | Bank1         | 242248 | 3-:135876793-135988939 |
| 1956 | Usp50         | 75083  | 2-:126587157-126609180 |
| 1957 | Mansc1        | 67729  | 6-:134559227-134582420 |
| 1958 | Bai1          | 107831 | 15+:74359586-74419886  |
| 1960 | Ubr2          | 224826 | 17-:47067196-47107076  |
| 1961 | Mlf1          | 17349  | 3+:67178112-67203884   |
| 1963 | MMT00039783   |        | 10+:34618039-34618914  |
| 1964 | C730048C13Rik | 319800 | 19-:8145456-8479572    |
| 1967 | Brwd1         | 93871  | 16-:96214055-96304033  |
| 1968 | Nudc          | 18221  | 4-:133088458-133101864 |
| 1972 | Ly6g6e        | 70274  | 17+:35213711-35215749  |
| 1975 | Dnahc9        | 237806 | 11-:65644827-65794849  |
| 1978 | Ublcp1        | 79560  | 11-:44268078-44274332  |
| 1979 | Tubgcp4       | 51885  | 2+:120996903-121024358 |
| 1982 | EG668192      | 668192 | 10+:43541036-43542042  |
| 1984 | Ubqln3        | 244178 | 7-:111289418-111291464 |
| 1985 | Pepd          | 18624  | 7+:35697425-35829725   |
| 1986 | Crebl2        | 232430 | 6+:134799120-134808700 |
| 1991 | Ttc17         | 74569  | 2-:94140923-94246822   |
| 1995 | Rab6b         | 270192 | 9+:103014278-103085542 |
| 1996 | Gsdma3        | 450219 | 11+:98460132-98499247  |
| 1998 | MMT00061243   |        | 9-:22284377-22284926   |
| 2000 | Bola1         | 69168  | 3-:96000163-96001660   |
| 2002 | Hapln3        | 67666  | 7-:86261914-86275906   |
| 2003 | Ppapdc1       | 71910  | 8+:26830513-26835364   |
| 2005 | Rheb          | 19744  | 5-:24309068-24348231   |
| 2011 | Slc2a5        | 56485  | 4+:149494830-149517864 |
| 2012 | Cetn4         | 207175 | 3-:37207549-37211368   |
| 2013 | Il15ra        | 16169  | 2+:11627162-11655588   |
| 2016 | Wdr78         | 242584 | 4-:102710674-102786829 |
| 2017 | Dock2         | 94176  | 11-:34127668-34597325  |
| 2018 | Atp7a         | 11977  | X+:103265113-103320039 |
| 2019 | Sf3a1         | 67465  | 11+:4060374-4080626    |
| 2021 | Atf7ip        | 54343  | 6+:136467378-136555589 |
| 2023 | MMT00072215   |        | 1+:77046869-77047310   |
| 2024 | Tdgf1         | 21667  | 9-:110842106-110848571 |
| 2026 | Nrg2          | 381149 | 18-:36177313-36228471  |
| 2027 | Wnt5b         | 22419  | 6-:119383007-119398272 |
| 2028 | Isca2         | 74316  | 12+:86114218-86116035  |
| 2031 | Il6           | 16193  | 5+:30339700-30346508   |
| 2033 | 2010106E10Rik | 67715  | X+:109608883-109671942 |
| 2035 | Slc44a3       | 213603 | 3-:121162446-121235249 |
| 2037 | Ankrd16       | 320816 | 2+:11700151-11711955   |
| 2039 | 9930105H17Rik | 100669 | 14+:41866897-41867955  |
| 2041 | Cct7          | 12468  | 6+:85409107-85418368   |
| 2043 | Arl2bp        | 107566 | 8+:97190654-97198320   |

|      |               |        |                         |
|------|---------------|--------|-------------------------|
| 2044 | Hsd17b7       | 15490  | 1-:171882491-171899326  |
| 2049 | Gsta3         | 14859  | 1+:21239829-21255300    |
| 2050 | Lpl           | 16956  | 8+:71404452-71430830    |
| 2051 | Ddx27         | 228889 | 2+:166840809-166891360  |
| 2054 | Acaa1a        | 113868 | 9+:119250595-119259412  |
| 2056 | Ttn           | 22138  | 2-:76705214-76709945    |
| 2057 | Pawr          | 114774 | 10+:107769727-107851885 |
| 2058 | Hk3           | 212032 | 13-:55106856-55122559   |
| 2062 | EG668830      | 668830 | 17-:81337261-81338134   |
| 2065 | Aph1a         | 226548 | 3+:95697915-95701385    |
| 2066 | Olf1256       | 258985 | 2-:89675179-89676100    |
| 2067 | Myo1a         | 432516 | 10+:127142870-127157997 |
| 2074 | Sfxn1         | 14057  | 13+:54180828-54201971   |
| 2075 | Atp6v1g1      | 66290  | 4+:63205870-63211734    |
| 2079 | Mthfs         | 107885 | 9+:89106027-89135063    |
| 2081 | Dlat          | 235339 | 9-:50444459-50467622    |
| 2082 | AU018778      | 234564 | 8-:95780140-95803610    |
| 2084 | Pftk1         | 18647  | 5-:5373457-5380364      |
| 2086 | Prpf8         | 192159 | 11+:75300591-75322885   |
| 2088 | Ppan          | 235036 | 9+:20692700-20696622    |
| 2090 | Rpo1-2        | 20017  | 2+:128926776-128952330  |
| 2093 | Mbp           | 17196  | 18+:82644554-82755019   |
| 2095 | Siglech       | 233274 | 7+:63023596-63027953    |
| 2096 | MMT00072212   | 380822 | 12-:116446282-116746212 |
| 2097 | C8a           | 230558 | 4-:104488290-104548988  |
| 2106 | 4931406H21Rik | 77592  | 14-:26406032-26413423   |
| 2110 | Gtf2ird1      | 57080  | 5-:134833538-134932560  |
| 2113 | Rasd1         | 19416  | 11-:59776686-59778437   |
| 2115 | Gpr12         | 14738  | 5-:147394327-147396408  |
| 2118 | Kptn          | 70394  | 7+:16705256-16712863    |
| 2119 | Lamc3         | 23928  | 2+:31742809-31802640    |
| 2121 | Brms1l        | 52592  | 12+:56937603-56970720   |
| 2126 | Dgat2         | 67800  | 7-:106302951-106331081  |
| 2127 | Ldha          | 16828  | 7+:54102582-54110996    |
| 2128 | 4930447K03Rik | 432745 | 13-:34176023-34205141   |
| 2130 | Smcr7         | 237781 | 11+:60541924-60546442   |
| 2134 | Pes1          | 64934  | 11+:3864039-3870699     |
| 2141 | Chmp1a        | 234852 | 8-:125728163-125736638  |
| 2142 | Phldb1        | 102693 | 9-:44494391-44535257    |
| 2145 | MMT00075271   |        | 7+:13328413-13329074    |
| 2146 | MMT00044046   |        | 18-:51277050-51414788   |
| 2148 | Tas2r105      | 57252  | 6-:131636578-131637481  |
| 2150 | Rragc         | 54170  | 4+:123594755-123614233  |
| 2157 | 0610007C21Rik | 381629 | 5+:31350592-31356994    |
| 2162 | 2410042D21Rik | 72425  | 2+:112219411-112253491  |
| 2166 | Amd1          | 11702  | 10-:40007283-40021921   |

|      |               |        |                         |
|------|---------------|--------|-------------------------|
| 2167 | Pif1          | 208084 | 9+:65435008-65443769    |
| 2174 | MMT00053383   |        | 7+:24142108-24143830    |
| 2177 | Htati2        | 53415  | 7+:57014968-57028895    |
| 2178 | Slc8a1        | 20541  | 17-:81784942-82137709   |
| 2179 | Trim3         | 55992  | 7-:112759161-112782045  |
| 2185 | Pef1          | 67898  | 4+:129784858-129805378  |
| 2187 | Kif5b         | 16573  | 18-:6203086-6241342     |
| 2188 | Prpf38a       | 230596 | 4-:108237313-108251934  |
| 2190 | Heyl          | 56198  | 4+:122910798-122925962  |
| 2199 | Aff1          | 17355  | 5+:104283521-104284335  |
| 2200 | BC006779      | 229003 | 2-:180962318-180975622  |
| 2203 | Cts3          | 117066 | 13-:61589372-61591397   |
| 2207 | Ogn           | 18295  | 13+:49704513-49718684   |
| 2210 | Chn1          | 108699 | 2-:73450944-73463797    |
| 2211 | Ttpa          | 50500  | 4+:19935586-19957932    |
| 2214 | Larp6         | 67557  | 9+:60560923-60586337    |
| 2215 | Zfp71-rs1     | 235907 | 13-:67806245-67830019   |
| 2218 | D15Mgi27      | 106073 | 15+:102110526-102112184 |
| 2222 | Tagln         | 21345  | 9-:45738056-45743980    |
| 2223 | Slc28a2       | 269346 | 2+:122267294-122286740  |
| 2224 | Oasl2         | 23962  | 5+:115346944-115362235  |
| 2225 | Ceacam11      | 66996  | 7+:18557472-18563898    |
| 2226 | Amt           | 434437 | 9+:108199212-108204964  |
| 2227 | Cenpa         | 12615  | 5+:30969274-30977197    |
| 2228 | Nox1          | 237038 | X-:130621685-130642380  |
| 2230 | Slc35d1       | 242585 | 4-:102846085-102887314  |
| 2231 | Piwil4        | 330890 | 9-:14506220-14539101    |
| 2232 | Strn          | 268980 | 17-:79054572-79135827   |
| 2234 | MMT00046581   |        | 16-:55940431-55940830   |
| 2235 | Ndufv1        | 17995  | 19-:4007506-4012725     |
| 2237 | Gpr110        | 77596  | 17+:43407277-43461686   |
| 2239 | 4930503E24Rik | 75030  | 10+:123906127-123961543 |
| 2241 | Trim7         | 94089  | 11+:48650972-48654917   |
| 2243 | Gcsh          | 68133  | 8-:119505729-119517349  |
| 2244 | Klre1         | 243655 | 6+:129528324-129535842  |
| 2245 | Sh2d4b        | 328381 | 14-:41673671-41706556   |
| 2249 | BB014433      | 434285 | 8-:15041449-15046069    |
| 2253 | Lysmd1        | 217779 | 3+:94938016-94943440    |
| 2256 | Serpina9      | 71907  | 12-:105234831-105251862 |
| 2259 | Ddx3x         | 13205  | X+:12858163-12869740    |
| 2260 | Spink10       | 328971 | 18+:62810503-62821020   |
| 2262 | Papss2        | 23972  | 19+:32693437-32740227   |
| 2263 | Dpy19l2       | 320752 | 9-:24361496-24500734    |
| 2264 | Alb           | 11657  | 5+:90889920-90905775    |
| 2266 | Angptl2       | 26360  | 2+:33083714-33101821    |
| 2270 | Pter          | 19212  | 2+:12845756-12923240    |



|      |                  |        |                         |
|------|------------------|--------|-------------------------|
| 2273 | Hagl             | 68977  | 17-:25919769-25922278   |
| 2274 | Tnnc2            | 21925  | 2-:164602663-164605229  |
| 2276 | Nelf             | 56876  | 2+:24909932-24918400    |
| 2278 | Gtf3c1           | 233863 | 7-:132784466-132851279  |
| 2282 | Cbx8             | 30951  | 11-:118899751-118902227 |
| 2283 | MMT00029554      |        | 10+:81893449-81894588   |
| 2290 | Il1rapl2         | 60367  | X+:134106087-135381494  |
| 2291 | MMT00041633      |        | 13-:61788625-61789350   |
| 2294 | AU040829         | 216831 | 11-:64816675-64976461   |
| 2297 | Syce2            | 71846  | 8+:87396009-87411294    |
| 2301 | Pcyox1           | 66881  | 6-:86336965-86347100    |
| 2304 | Jund             | 16478  | 8+:73222931-73224514    |
| 2305 | 2610002M06Rik    | 67028  | X-:104982682-105011620  |
| 2306 | Gtdc1            | 227835 | 2-:44419938-44490836    |
| 2308 | A930005I04Rik    | 403174 | 5+:35260190-35266487    |
| 2309 | Tet2             | 214133 | 3-:133128829-133134781  |
| 2310 | Pdia3            | 14827  | 2+:121239695-121263715  |
| 2311 | RP23-336F11.32   | 213765 | 2-:112090715-112095980  |
| 2314 | Zswim6           | 67263  | 13-:108516172-108523916 |
| 2315 | Abcb1a           | 18671  | 5+:8660091-8748519      |
| 2317 | Ankar            | 319695 | 1-:72696779-72705377    |
| 2318 | Igh-VJ558        | 16061  | 12-:117150531-117151034 |
| 2319 | E2f1             | 13555  | 2-:154385373-154395588  |
| 2320 | Spc24            | 67629  | 9-:21560437-21564747    |
| 2321 | ENSMUSG000000742 | 677044 | 9-:62689305-62690180    |
| 2322 | Tuba4a           | 22145  | 1-:75212130-75215799    |
| 2325 | H2-K1            | 14972  | 17-:34133342-34137230   |
| 2326 | zfp507           | 668501 | 7-:36560979-36662496    |
| 2328 | Traf3ip1         | 74019  | 1+:93391254-93425949    |
| 2329 | Wdr6             | 83669  | 9-:108474648-108480997  |
| 2330 | Ccdc28b          | 66264  | 4-:129296518-129301144  |
| 2332 | Nox3             | 224480 | 17-:3646475-3695583     |
| 2334 | Gch1             | 14528  | 14-:47775327-47809064   |
| 2336 | Lpar3            | 65086  | 3+:145883959-145948924  |
| 2338 | Olfir620         | 258808 | 7-:110759924-110760865  |
| 2339 | 5730449L18Rik    | 66637  | 1-:154217868-154233812  |
| 2344 | Ogt              | 108155 | X+:98835624-98877668    |
| 2347 | Zmynd17          | 74843  | 14-:21302091-21315905   |
| 2348 | Irak1            | 16179  | X-:71260321-71269254    |
| 2350 | Ruvbl1           | 56505  | 6+:88415458-88447559    |
| 2351 | 1110008F13Rik    | 67388  | 2+:156688863-156699295  |
| 2356 | Dnajc13          | 235567 | 9-:104053611-104140870  |
| 2360 | 6330407G11Rik    | 68050  | 4-:123412602-123427504  |
| 2362 | Mkks             | 59030  | 2-:136699800-136716914  |
| 2365 | BC031181         | 407819 | 18+:75165582-75169494   |
| 2369 | MMT00026815      |        | 11-:121767077-121831952 |

|      |               |        |                         |
|------|---------------|--------|-------------------------|
| 2370 | 8430408G22Rik | 213393 | 6+:116600716-116602811  |
| 2372 | Stx12         | 100226 | 4-:132409978-132440316  |
| 2377 | Mmd           | 67468  | 11+:90110836-90139891   |
| 2384 | Micalcl       | 70877  | 7+:119517848-119556616  |
| 2385 | Ctsd          | 13033  | 7-:149561821-149573775  |
| 2387 | Dscc1         | 72107  | 15-:54907654-54922049   |
| 2388 | Dot1l         | 208266 | 10+:80217707-80256188   |
| 2394 | Tnc           | 21923  | 4-:63620821-63681760    |
| 2397 | Rb1cc1        | 12421  | 1+:6220083-6264356      |
| 2399 | MMT00060167   |        | 1-:173609465-173609784  |
| 2400 | Gck           | 103988 | 11-:5801673-5815014     |
| 2403 | Cfl1          | 12631  | 19+:5490505-5494032     |
| 2404 | MMT00049822   |        | 1-:113701733-113704372  |
| 2407 | Pgap1         | 241062 | 1-:54543313-54550250    |
| 2420 | 2010016I18Rik | 69206  | 3-:106284902-106286465  |
| 2421 | Itgb5         | 16419  | 16+:33829844-33949231   |
| 2424 | Unc5cl        | 76589  | 17+:48594246-48608007   |
| 2428 | Car1          | 12346  | 3-:14766229-14808322    |
| 2433 | Armc10        | 67211  | 5+:21151801-21168410    |
| 2436 | Fblim1        | 74202  | 4-:141132915-141151866  |
| 2437 | Lrrc23        | 16977  | 6-:124719880-124729736  |
| 2439 | Pitpnm2       | 19679  | 5-:124568699-124666427  |
| 2440 | 1500003O22Rik | 101867 | 7-:112880722-112885014  |
| 2442 | Rab2b         | 76338  | 14-:52881440-52899222   |
| 2443 | 5033411D12Rik | 192136 | 13-:16949313-17786589   |
| 2447 | Ubac1         | 98766  | 2-:25854067-25877231    |
| 2449 | Mybpc2        | 233199 | 7-:51757087-51780009    |
| 2454 | MMT00045890   |        | 3-:108042224-108042877  |
| 2456 | Mrpl10        | 107732 | 11+:96902899-96910527   |
| 2457 | 1110032E23Rik | 68659  | 3+:79689909-79747306    |
| 2461 | Appbp2        | 66884  | 11-:85004860-85048327   |
| 2462 | 2610528J11Rik | 66451  | 4+:118199886-118202822  |
| 2464 | A130022J15Rik | 101351 | 6-:97059922-97085264    |
| 2465 | MMT00048312   | 632654 | 12-:115460995-115461531 |
| 2469 | Coasy         | 71743  | 11+:100943919-100947931 |
| 2470 | Grb7          | 14786  | 11+:98308204-98316686   |
| 2471 | Ccdc134       | 76457  | 15+:81958392-81972630   |
| 2472 | MMT00014056   |        | 14+:114879627-114879658 |
| 2473 | 4930504H06Rik | 75040  | 12+:34079717-34086135   |
| 2475 | Cyp4f13       | 170716 | 17-:33061738-33102711   |
| 2477 | Cldn11        | 18417  | 3+:31048912-31063241    |
| 2479 | Cenpo         | 52504  | 12-:4213481-4233937     |
| 2480 | MMT00000773   |        |                         |
| 2483 | Gmeb1         | 56809  | 4-:131907849-131909549  |
| 2485 | Adck1         | 72113  | 12+:89598997-89700161   |
| 2486 | Ephb1         | 270190 | 9-:101824459-101969363  |

|      |               |           |                         |
|------|---------------|-----------|-------------------------|
| 2489 | Npr3          | 18162     | 15-:11774933-11835394   |
| 2490 | MMT00070880   |           | 17+:6806524-6812615     |
| 2493 | Apoh          | 11818     | 11+:108256626-108275705 |
| 2500 | Vmn2r65       | 100009609 | 7-:92091650-92096161    |
| 2501 | Isx           | 71597     | 8+:77396613-77417405    |
| 2507 | Oaf           | 102644    | 9-:43030009-43047993    |
| 2510 | Olfr136       | 258803    | 17+:38472103-38473041   |
| 2511 | Ltv1          | 353258    | 10-:12897947-12912946   |
| 2512 | Gan           | 209239    | 8+:119682034-119729083  |
| 2520 | Rgn           | 19733     | X+:20126943-20139213    |
| 2521 | Olflml3       | 99543     | 3-:103539321-103541871  |
| 2522 | Olfr1442      | 258692    | 19+:12748696-12749633   |
| 2523 | Pgs1          | 74451     | 11+:117848193-117885324 |
| 2527 | 1600012F09Rik | 67008     | 13-:18080036-18085171   |
| 2529 | Hmcn2         | 665700    | 2+:31235722-31316253    |
| 2533 | Arhgef19      | 213649    | 4+:140803761-140813467  |
| 2534 | 4921517D22Rik | 70900     | 13-:59790687-59795463   |
| 2538 | Clec4g        | 75863     | 8-:3716071-3720645      |
| 2541 | Ppa2          | 74776     | 3+:132973079-133041031  |
| 2542 | Dck           | 13178     | 5+:89194268-89212264    |
| 2543 | MMT00001648   | 83409     | 3-:88353828-88356819    |
| 2550 | MMT00036681   |           | 15-:77234219-77236051   |
| 2554 | Sphk1         | 20698     | 11+:116396053-116397982 |
| 2555 | MMT00033243   |           | X+:73160819-73161742    |
| 2557 | Casq1         | 12372     | 1-:174140470-174149972  |
| 2558 | Tmem132b      | 208151    | 5+:126229604-126269041  |
| 2562 | Nhedc2        | 97086     | 3+:134981255-135005500  |
| 2565 | Zbtb41        | 226470    | 1+:141319727-141344171  |
| 2570 | Tmod4         | 50874     | 3+:94929452-94933130    |
| 2571 | Rmnd1         | 66084     | 10+:5914151-5943319     |
| 2578 | Csf2rb2       | 12984     | 15-:78112939-78136033   |
| 2580 | Ucn3          | 83428     | 13-:3940403-3940896     |
| 2583 | Runx1         | 12394     | 16-:92604349-92697573   |
| 2584 | Serpind1      | 15160     | 16+:17336313-17343665   |
| 2595 | Acbd4         | 67131     | 11+:102964825-102973513 |
| 2596 | Vsig4         | 278180    | X-:93464386-93464955    |
| 2598 | Naglu         | 27419     | 11+:100931438-100938965 |
| 2599 | Lsm14a        | 67070     | 7-:35129663-35174628    |
| 2601 | Dnajc18       | 76594     | 18-:35834684-35862745   |
| 2603 | Ipp           | 16351     | 4+:116183176-116193421  |
| 2605 | N4bp2l2       | 381695    | 5-:151449573-151465088  |
| 2606 | MMT00077133   |           |                         |
| 2607 | Olfr1467      | 258686    | 19+:13439119-13440045   |
| 2608 | Clcn2         | 12724     | 16-:20703040-20716187   |
| 2612 | Sf3b2         | 319322    | 19-:5273934-5295425     |
| 2615 | EG624862      | 624862    | 14+:44842695-44843903   |

|      |               |        |                         |
|------|---------------|--------|-------------------------|
| 2618 | Map3k7ip3     | 66724  | X+:82877615-82879647    |
| 2619 | Zfp622        | 52521  | 15+:25914214-25927182   |
| 2625 | MMT00077446   |        | 15-:73237740-73238725   |
| 2626 | MMT00013951   |        | 4+:89940729-89940760    |
| 2627 | Ccl12         | 20293  | 11+:81915379-81916793   |
| 2630 | Il17re        | 57890  | 6+:113408827-113420368  |
| 2631 | Aldh1l1       | 107747 | 6+:90500807-90550196    |
| 2632 | Aph1a         | 226548 | 3+:95697918-95702211    |
| 2635 | Tmem126a      | 66271  | 7-:97599221-97605718    |
| 2636 | Tars          | 110960 | 15-:11313417-11329413   |
| 2638 | Cyp3a41a      | 53973  | 5-:146505625-146531712  |
| 2639 | Abhd2         | 54608  | 7+:86418161-86505287    |
| 2642 | Neurod2       | 18013  | 11-:98187852-98190775   |
| 2643 | Inhbe         | 16326  | 10-:126786457-126788828 |
| 2644 | Srrm2         | 75956  | 17+:23955853-23996744   |
| 2646 | Ugt2b37       | 112417 | 5-:87669517-87683829    |
| 2648 | MMT00005098   |        | 6+:22683708-22684595    |
| 2651 | Ttc7          | 225049 | 17+:87681989-87781713   |
| 2655 | Adamdec1      | 58860  | 14-:69181444-69200129   |
| 2658 | Fzd2          | 57265  | 11+:102465848-102467886 |
| 2659 | Kcng2         | 240444 | 18-:80492127-80519384   |
| 2661 | Eif4g2        | 13690  | 7-:118215446-118226486  |
| 2662 | Sgpl1         | 20397  | 10-:60563471-60610346   |
| 2668 | C3ar1         | 12267  | 6-:122797991-122806021  |
| 2669 | Ier2          | 15936  | 8-:87185236-87186752    |
| 2670 | Igsf1         | 209268 | X-:47135720-47147957    |
| 2671 | Sh3rf1        | 59009  | 8+:63703068-63872992    |
| 2674 | 1810005K13Rik | 66255  | 18-:80426804-80433600   |
| 2675 | Nfyc          | 18046  | 4-:120430782-120463086  |
| 2677 | 2310057J18Rik | 67719  | 10-:28692170-28706109   |
| 2681 | Hectd1        | 207304 | 12-:52844708-52847097   |
| 2693 | Asprv1        | 67855  | 6+:86578720-86579694    |
| 2694 | Siah2         | 20439  | 3-:58478877-58496025    |
| 2699 | Hax1          | 23897  | 3-:89799378-89802574    |
| 2703 | MMT00073763   |        | 1+:163676198-163677877  |
| 2705 | Hrbl          | 231801 | 5-:138104053-138125921  |
| 2707 | Defb39        | 360214 | 8-:19037369-19064810    |
| 2708 | Sgk1          | 20393  | 10+:21714500-21719695   |
| 2713 | Six1          | 20471  | 12-:74142817-74147687   |
| 2714 | 1700001K19Rik | 66323  | 12-:111905926-111920822 |
| 2716 | BC014805      | 236149 | 19-:7856474-7877157     |
| 2718 | Scrn3         | 74616  | 2+:73150627-73173922    |
| 2719 | St6galnac2    | 20446  | 11-:116538018-116555939 |
| 2721 | Inmt          | 21743  | 6-:55120620-55124984    |
| 2724 | Tpsab1        | 17230  | 17-:25480190-25482338   |
| 2725 | Gm1614        | 381148 | 18-:35811820-35814853   |

|      |               |        |                         |
|------|---------------|--------|-------------------------|
| 2726 | Chd9          | 109151 | 8+:93513353-93578409    |
| 2727 | Stc2          | 20856  | 11-:31260080-31269908   |
| 2728 | Exoc4         | 20336  | 6+:33199123-33922332    |
| 2729 | Dcun1d4       | 100737 | 5+:73875636-73951753    |
| 2730 | Bcor          | 71458  | X-:11613868-11638772    |
| 2737 | Mllt10        | 17354  | 2+:17986313-18132597    |
| 2741 | 3230401D17Rik | 66680  | 2-:163231672-163245225  |
| 2743 | Tcf3          | 21415  | 6-:72577163-72738950    |
| 2749 | Naf1          | 234344 | 8+:69384156-69414459    |
| 2751 | Lrriq1        | 74978  | 10-:102633054-102698956 |
| 2752 | Fcgr1         | 14129  | 3-:96088140-96097886    |
| 2753 | Myo6          | 17920  | 9+:80012911-80157198    |
| 2754 | Zc3hav1l      | 209032 | 6-:38245057-38249315    |
| 2755 | EG382421      | 382421 | 10+:110937798-110938837 |
| 2756 | Pmvk          | 68603  | 3+:89263237-89272928    |
| 2757 | EG435927      | 435927 | 6-:141684625-141693021  |
| 2764 | Ffar2         | 233079 | 7-:31604049-31605344    |
| 2766 | Elp4          | 77766  | 2-:105542599-105744652  |
| 2767 | MMT00031206   |        | 6+:57138500-57139337    |
| 2769 | Al606181      | 226118 | 19+:41668209-41670648   |
| 2770 | Fbl           | 14113  | 7+:28954778-28964268    |
| 2771 | Keg1          | 64697  | 19+:12770282-12794384   |
| 2775 | Sec61a2       | 57743  | 2-:5792855-5816331      |
| 2776 | Magel2        | 27385  | 7+:69524349-69526524    |
| 2778 | Coro1a        | 12721  | 7-:133843394-133846687  |
| 2780 | Fes           | 14159  | 7-:87522641-87532846    |
| 2781 | Lamb2         | 16779  | 9+:108382233-108392792  |
| 2783 | Pdzrn4        | 239618 | 15+:92427591-92511021   |
| 2788 | Galnt10       | 171212 | 11+:57583010-57599560   |
| 2789 | Sirt5         | 68346  | 13+:43460868-43490571   |
| 2793 | MMT00005644   | 497266 |                         |
| 2794 | Map3k6        | 53608  | 4+:132796732-132808843  |
| 2800 | Dusp11        | 72102  | 6-:85897507-85900556    |
| 2801 | H2-BI         | 14963  | 17-:36216993-36221404   |
| 2802 | Lin7c         | 22343  | 2+:109731034-109737862  |
| 2805 | Rhog          | 56212  | 7-:109388183-109388758  |
| 2808 | Spesp1        | 66712  | 9-:62118535-62129986    |
| 2811 | MMT00062390   |        | 7+:144002509-144004197  |
| 2813 | Mrpl55        | 67212  | 11+:59016018-59019504   |
| 2815 | Eif2ak3       | 13666  | 6+:70794528-70855231    |
| 2818 | Egr1          | 13653  | 18+:35020859-35024635   |
| 2819 | Kcnk5         | 16529  | 14-:20960805-21000674   |
| 2823 | Sipa1l2       | 244668 | 8-:127941972-128016496  |
| 2827 | Raet1d        | 56554  | 10+:22082079-22093806   |
| 2829 | Lrfn3         | 233067 | 7-:31140503-31145817    |
| 2830 | 4632417K18Rik | 107373 | 19+:12648014-12664186   |

|      |               |        |                         |
|------|---------------|--------|-------------------------|
| 2832 | 2810021J22Rik | 69944  | 11+:58680716-58693934   |
| 2834 | Crim1         | 50766  | 17+:78743688-78775925   |
| 2835 | Gpr120        | 107221 | 19+:38171568-38188749   |
| 2838 | Stk25         | 59041  | 1-:95518484-95531962    |
| 2841 | Kcne4         | 57814  | 1+:78813523-78816599    |
| 2845 | Lce1d         | 69611  | 3-:92489420-92491132    |
| 2847 | Pscd4         | 72318  | 15+:78449725-78452443   |
| 2848 | Serpine2      | 20720  | 1-:79790897-79855211    |
| 2850 | Slc16a6       | 104681 | 11-:109314053-109334523 |
| 2851 | Inpp5e        | 64436  | 2-:26252027-26264701    |
| 2853 | Glpr2         | 384009 | 4+:43970561-43991988    |
| 2855 | D330050I23Rik | 399603 | 15-:60654517-60655450   |
| 2858 | Arhgap20      | 244867 | 9+:51593840-51661960    |
| 2862 | MMT00068885   |        | 14-:79365696-79366375   |
| 2863 | MMT00007006   |        | 12-:119996497-119999465 |
| 2866 | Clk1          | 12747  | 1-:58468844-58480848    |
| 2867 | MMT00001941   |        | 6-:39792201-39794334    |
| 2868 | Hbp1          | 73389  | 12-:32611342-32635100   |
| 2869 | Copa          | 12847  | 1+:174012669-174052460  |
| 2870 | D5Erttd577e   | 320549 | 5+:95947713-95951732    |
| 2874 | Nol3          | 78688  | 8+:107800401-107803949  |
| 2875 | Wfdc2         | 67701  | 2+:164388215-164394006  |
| 2877 | Pcyt2         | 68671  | 11-:120471401-120479198 |
| 2879 | Ptpv          | 13924  | 1-:137005090-137023649  |
| 2880 | Cd93          | 17064  | 2-:148262387-148269280  |
| 2881 | Hlf           | 217082 | 11-:90197850-90207295   |
| 2883 | MMT00048540   |        | 17-:90309276-90379134   |
| 2885 | Hebp2         | 56016  | 10-:18260571-18265814   |
| 2889 | Pqlc2         | 212555 | 4-:138854445-138866582  |
| 2895 | 2410076I21Rik | 73673  | 9-:58500635-58589403    |
| 2900 | 6330416L07Rik | 319615 | 17-:22475663-22498377   |
| 2901 | Tmem132d      | 243274 | 5-:128263790-128276473  |
| 2902 | D4Erttd196e   | 52174  | 4-:132821961-132833702  |
| 2904 | Gzme          | 14942  | 14-:56736460-56739393   |
| 2907 | MMT00010854   |        | 3+:100217482-100218699  |
| 2912 | Wtip          | 101543 | 7-:34894583-34918078    |
| 2915 | Nfs1          | 18041  | 2-:155949385-155969921  |
| 2917 | Scly          | 50880  | 1+:93194962-93217639    |
| 2918 | Mtmr10        | 233315 | 7+:71432585-71485693    |
| 2920 | 4922501C03Rik | 382090 | 9+:87084408-87085910    |
| 2928 | Igf1          | 16000  | 10+:87324073-87393619   |
| 2932 | Slco1a1       | 28248  | 6-:141856373-141895315  |
| 2935 | Slc28a1       | 434203 | 7+:88269753-88313948    |
| 2938 | H2-T23        | 15040  | 17-:36166923-36169646   |
| 2945 | MMT00005190   |        | X-:131362702-131363503  |
| 2947 | Bcl2a1b       | 12045  | 9+:89094066-89102664    |

|      |               |        |                         |
|------|---------------|--------|-------------------------|
| 2950 | Micall1       | 27008  | 15+:78945434-78967328   |
| 2954 | Al317395      | 215929 | 10-:39722405-39744978   |
| 2958 | Grik4         | 110637 | 9-:42328494-42496180    |
| 2959 | Rgs3          | 50780  | 4+:62350531-62363279    |
| 2962 | AW146154      | 101835 | 7-:48722734-48754789    |
| 2963 | Tmem64        | 100201 | 4+:15193310-15213871    |
| 2965 | Fgf15         | 14170  | 7+:152082436-152086854  |
| 2967 | Igh           | 111507 | 12-:116081854-116170993 |
| 2969 | Ptpro         | 19277  | 6+:137359257-137411751  |
| 2970 | MMT00022996   |        | 10+:18821380-18822122   |
| 2972 | Zfp3          | 193043 | 11+:70577859-70586432   |
| 2973 | 4-Sep         | 18952  | 11+:87394632-87404042   |
| 2978 | St6galnac1    | 20445  | 11-:116626339-116627586 |
| 2980 | Slc37a2       | 56857  | 9-:37037898-37063215    |
| 2984 | MMT00029895   |        | 13-:50710320-50711479   |
| 2989 | Zfp36l1       | 12192  | 12-:81208994-81213931   |
| 2993 | Gm1752        | 385658 | 16-:55843302-55895391   |
| 2994 | Cldn7         | 53624  | 11+:69779428-69781218   |
| 2996 | Pik3r1        | 18708  | 13-:102450519-102538126 |
| 2998 | Lzic          | 69151  | 4+:148859401-148870773  |
| 2999 | BC061194      | 381350 | 2+:18620696-18671374    |
| 3006 | Alas2         | 11656  | X+:146981966-147005166  |
| 3008 | Nxt1          | 56488  | 2+:148498409-148501499  |
| 3009 | Serpina1c     | 20702  | 12-:105133137-105137037 |
| 3012 | Actl6a        | 56456  | 3+:32607647-32625880    |
| 3015 | Arhgef6       | 73341  | X-:54484663-54591865    |
| 3016 | Bsdcl         | 100383 | 4+:129138915-129165740  |
| 3017 | Fas           | 14102  | 19+:34365155-34402260   |
| 3021 | Gdf9          | 14566  | 11+:53246879-53251402   |
| 3022 | Als2cr12      | 108812 | 1-:58714959-58752806    |
| 3026 | D10Erttd610e  | 52666  | 10-:126619581-126627091 |
| 3028 | Uhrf1         | 18140  | 17+:56442848-56462908   |
| 3029 | Ybx1          | 22608  | 4-:118950838-118966413  |
| 3031 | Rab10         | 19325  | 12-:3249734-3309662     |
| 3036 | Slamf9        | 98365  | 1+:174405535-174408538  |
| 3037 | MMT00017312   |        | 17-:15712487-15714358   |
| 3038 | Serpina12     | 68054  | 12-:105266978-105282653 |
| 3039 | S100a11       | 20195  | 3+:93324410-93330219    |
| 3040 | Bcl3          | 12051  | 7-:20393811-20408064    |
| 3041 | 2410004A20Rik | 66991  | 9+:72950266-72952250    |
| 3043 | Otop1         | 21906  | 5+:38668654-38685787    |
| 3045 | Alx3          | 11694  | 3+:107397948-107408687  |
| 3046 | 6430573F11Rik | 319582 | 8+:37521311-37576010    |
| 3052 | 9130404D08Rik | 74549  | 8-:72542479-72566599    |
| 3054 | Hnrnpa1       | 15382  | 15+:103070935-103075386 |
| 3055 | Pde4c         | 110385 | 8+:73247962-73274318    |

|      |               |        |                         |
|------|---------------|--------|-------------------------|
| 3059 | Tctex1d2      | 66061  | 16+:32419829-32429184   |
| 3061 | Scarf2        | 224024 | 16+:17802608-17834411   |
| 3066 | MMT00035562   | 545618 | 4-:44765021-44766010    |
| 3067 | Ucp3          | 22229  | 7+:107627975-107633616  |
| 3072 | MMT00002308   |        | 1-:13397087-13397792    |
| 3075 | EG629203      | 629203 | 7-:14652905-14708339    |
| 3077 | Ppfibp1       | 67533  | 6+:146837182-146980547  |
| 3078 | 9630033F20Rik | 319801 | 6-:127037487-127059512  |
| 3079 | Gstt3         | 103140 | 10-:75236865-75243787   |
| 3080 | MMT00014480   |        | 15+:60575413-60578213   |
| 3086 | Tubg2         | 103768 | 11+:101017226-101023100 |
| 3088 | Ftl2          | 14337  | 4+:124787922-125182221  |
| 3089 | Eif2s3y       | 26908  | Y+:347054-365035        |
| 3093 | Egflam        | 268780 | 15-:7156120-7348390     |
| 3096 | Ugt1a6a       | 94284  | 1+:90031383-90115578    |
| 3097 | Ppp1r3g       | 76487  | 13+:36035371-36061510   |
| 3101 | MMT00080431   |        | 7-:7013153-7015975      |
| 3103 | MMT00062748   | 625360 | Un_random-:688-21009    |
| 3104 | 4933411G11Rik | 330228 | 5+:143953957-143966747  |
| 3107 | Hspb3         | 56534  | 13-:114453103-114453867 |
| 3111 | Ddefl1        | 230837 | 4+:135762433-135801229  |
| 3116 | Gm1574        | 380842 | 13+:46380746-46394099   |
| 3119 | Mapk10        | 26414  | 5-:103341387-103640096  |
| 3127 | Plcd1         | 18799  | 9-:118980647-119002614  |
| 3130 | Mrpl20        | 66448  | 4+:155177726-155182938  |
| 3134 | Usp11         | 236733 | X+:20289265-20297663    |
| 3135 | Gcdh          | 270076 | 8-:87410489-87417601    |
| 3136 | Itfg1         | 71927  | 8-:88242438-88364671    |
| 3138 | Espl1         | 105988 | 15+:102126691-102154789 |
| 3139 | Gba2          | 230101 | 4-:43579792-43591409    |
| 3140 | Ptpn20        | 19256  | 14+:34416291-34453940   |
| 3141 | Tmf1          | 232286 | 6-:97105257-97129094    |
| 3143 | Slc17a6       | 140919 | 7+:58877375-58924852    |
| 3144 | Ube2j2        | 140499 | 4+:155323115-155331473  |
| 3145 | Idi1          | 319554 | 13+:8885230-8891614     |
| 3147 | Higd2a        | 67044  | 13+:54691591-54692493   |
| 3149 | 1190005I06Rik | 68918  | 8-:123132502-123152417  |
| 3150 | Syne2         | 319565 | 12+:77167499-77211887   |
| 3154 | Mcm5          | 17218  | 8+:77633522-77651587    |
| 3156 | Usp13         | 72607  | 3+:32716612-32834476    |
| 3159 | Pld1          | 18805  | 3+:27837544-28032284    |
| 3162 | Lep           | 16846  | 6+:29018951-29021181    |
| 3163 | MMT00039919   |        | 13-:8028796-8030700     |
| 3164 | Hsd11b1       | 15483  | 1-:195047886-195090214  |
| 3166 | Vmn2r57       | 269902 | 7-:48655329-48683582    |
| 3167 | Dym           | 69190  | 18+:75216372-75446618   |



|      |               |        |                         |
|------|---------------|--------|-------------------------|
| 3168 | Camk2a        | 12322  | 18+:61123207-61144517   |
| 3170 | Mcart1        | 230125 | 4-:45411210-45421633    |
| 3173 | Glycam1       | 14663  | 15-:103393188-103395512 |
| 3174 | Acyp1         | 66204  | 12-:86613355-86621385   |
| 3177 | Setd8         | 67956  | 5+:124889948-124901388  |
| 3182 | Stau1         | 20853  | 2-:166773772-166821799  |
| 3186 | Kcnj16        | 16517  | 11+:110829345-110888155 |
| 3188 | Plp1          | 18823  | X+:133357289-133372867  |
| 3189 | Ndst2         | 17423  | 14-:21542962-21549549   |
| 3190 | Anxa4         | 11746  | 6-:86686840-86743550    |
| 3191 | Lamc2         | 16782  | 1-:154969888-155033148  |
| 3194 | Dnahc8        | 13417  | 17+:30807641-30814219   |
| 3195 | Mypn          | 68802  | 10-:62578538-62656030   |
| 3196 | Tat           | 234724 | 8+:112514356-112523700  |
| 3198 | Fbxw4         | 30838  | 19-:45652746-45734683   |
| 3201 | Ptcd2         | 68927  | 13-:100089605-100114651 |
| 3202 | Boc           | 117606 | 16-:44485154-44520616   |
| 3204 | Gm24          | 195236 | 13+:22073068-22076348   |
| 3206 | Gpr160        | 71862  | 3+:30754883-30796089    |
| 3208 | 4930511I11Rik | 67645  | 17+:28667805-28676052   |
| 3209 | Lmna          | 16905  | 3-:88287127-88297234    |
| 3211 | MMT00046813   |        | 1+:144651732-144653209  |
| 3213 | Prdx6         | 11758  | 1-:163171140-163181296  |
| 3214 | Dnmt3b        | 13436  | 2+:153475338-153513462  |
| 3219 | Vps13a        | 271564 | 19-:16754499-16855407   |
| 3220 | Ap2s1         | 232910 | 7+:17328567-17334361    |
| 3222 | Zbtb10        | 229055 | 3+:9251357-9285327      |
| 3223 | Ak2           | 11637  | 4+:128670545-128688054  |
| 3226 | Tnfrsf17      | 21935  | 16+:11313901-11320161   |
| 3228 | Saa1          | 20208  | 7-:53996074-53997892    |
| 3229 | Tdo2          | 56720  | 3-:81762706-81779637    |
| 3230 | Sh3bgrl       | 56726  | X+:106290892-106356950  |
| 3235 | BC029214      | 227622 | 2-:25310643-25316613    |
| 3236 | Tcfap4        | 83383  | 16-:4544661-4559720     |
| 3239 | Zfp294        | 78913  | 16-:87376923-87432780   |
| 3242 | 2700049A03Rik | 76967  | 12+:72238207-72344284   |
| 3246 | Prei4         | 74182  | 2-:132355135-132376184  |
| 3249 | Pnpla8        | 67452  | 12+:45370172-45413274   |
| 3250 | Olfm1         | 56177  | 2+:28061195-28085980    |
| 3253 | Tbc1d20       | 67231  | 2+:152119604-152139732  |
| 3254 | Grifin        | 77998  | 5-:141039077-141041023  |
| 3257 | Map1lc3a      | 66734  | 2+:155102079-155103807  |
| 3259 | Chrna6        | 11440  | 8-:28514848-28524254    |
| 3261 | Rpap2         | 231571 | 5+:108026753-108090853  |
| 3265 | Dntt          | 21673  | 19+:41103877-41134004   |
| 3274 | Evx1          | 14028  | 6+:52263491-52268371    |

|      |               |        |                        |
|------|---------------|--------|------------------------|
| 3277 | MMT00038655   |        |                        |
| 3279 | Slc46a1       | 52466  | 11+:78279176-78285445  |
| 3280 | Tlr1          | 21897  | 5-:65316072-65323938   |
| 3282 | Ndufs6        | 407785 | 13-:73457318-73465924  |
| 3283 | Mmp9          | 17395  | 2+:164773756-164780405 |
| 3284 | Plekha7       | 233765 | 7-:123298142-123301893 |
| 3286 | Alox5ap       | 11690  | 5+:150076637-150099722 |
| 3288 | Slc26a6       | 171429 | 9+:108757068-108815373 |
| 3291 | Ptk2          | 14083  | 15-:73035535-73225154  |
| 3293 | Nup153        | 218210 | 13-:46775254-46823638  |
| 3294 | Prss23        | 76453  | 7-:96657618-96666054   |
| 3295 | 4930534B04Rik | 75216  | 12-:92452004-92505454  |
| 3296 | Olf1143       | 258290 | 2+:87642547-87643490   |
| 3297 | Trappc4       | 60409  | 9-:44211851-44215590   |
| 3298 | Man2a1        | 17158  | 17+:64950988-65104450  |
| 3306 | Rps6kb2       | 58988  | 19-:4156976-4163245    |
| 3307 | Cd8b1         | 12526  | 6+:71272805-71287445   |
| 3308 | Satb2         | 212712 | 1-:56853110-57028172   |
| 3309 | Grpel2        | 17714  | 18-:61874372-61885977  |
| 3310 | Tdrd5         | 214575 | 1-:158230724-158232736 |
| 3312 | 6430704M03Rik | 230235 | 4-:56975738-57003009   |
| 3314 | Wars2         | 70560  | 3+:98945006-99021178   |
| 3315 | Serf2         | 378702 | 2+:121275152-121276793 |
| 3316 | Fah           | 14085  | 7-:91733682-91754260   |
| 3317 | Ak3           | 56248  | 19-:29095320-29123218  |
| 3318 | 2310003F16Rik | 67693  | 2+:121282836-121284175 |
| 3322 | Ofd1          | 237222 | X-:162828874-162878489 |
| 3323 | Idh3b         | 170718 | 2-:130105048-130110164 |
| 3325 | Plekhj1       | 78670  | 10-:80258842-80261303  |
| 3326 | Lysmd2        | 70082  | 9+:75473547-75485578   |
| 3328 | Acsm2         | 233799 | 7+:126705245-126739690 |
| 3329 | Car5a         | 12352  | 8-:124440045-124468804 |
| 3330 | MMT00020226   |        | 10+:98907117-98908450  |
| 3332 | Lrrc59        | 98238  | 11+:94491137-94506530  |
| 3337 | Klra7         | 16638  | 6-:130168623-130181705 |
| 3339 | Dip2a         | 64451  | 10-:75780611-75807996  |
| 3342 | Ik            | 24010  | 18+:36904353-36917289  |
| 3344 | Rad1          | 19355  | 15+:10415913-10423430  |
| 3345 | EG620934      | 620934 | 7-:68694130-68694587   |
| 3349 | MMT00043953   |        |                        |
| 3351 | Rad23b        | 19359  | 4+:55363233-55402868   |
| 3353 | Defb9         | 246079 | 8-:22992210-22995893   |
| 3354 | Ropn1l        | 252967 | 15-:31370967-31383402  |
| 3356 | Adhfe1        | 76187  | 1+:9538150-9566987     |
| 3357 | Rev1          | 56210  | 1-:38109862-38165302   |
| 3359 | Pp11r         | 19011  | 15-:97541449-97551581  |

|      |               |        |                         |
|------|---------------|--------|-------------------------|
| 3362 | Fgf8          | 14179  | 19-:45811308-45817363   |
| 3363 | MMT00033159   |        | 8-:58017542-58019101    |
| 3365 | Tiam2         | 24001  | 17+:3397206-3519396     |
| 3372 | Prok1         | 246691 | 3-:107038048-107041576  |
| 3376 | Trip4         | 56404  | 9-:65681156-65732835    |
| 3377 | Cs            | 12974  | 10+:127774857-127798355 |
| 3379 | Cdo1          | 12583  | 18-:46873158-46888009   |
| 3380 | MMT00067570   |        | X-:17457996-17494616    |
| 3381 | Ctdspl        | 69274  | 9+:118835589-118953116  |
| 3383 | Cd99          | 673094 |                         |
| 3388 | a             | 50518  | 2+:154839266-154876747  |
| 3389 | MMT00013165   |        |                         |
| 3391 | Mfap3         | 216760 | 11+:57332208-57344384   |
| 3393 | Snhg8         | 66487  | 14-:31937673-31942116   |
| 3394 | Als2cr13      | 72750  | 1+:60005896-60042189    |
| 3396 | Ctage5        | 217615 | 12+:60230780-60291160   |
| 3401 | BB146404      | 103511 | 10-:33811230-33816278   |
| 3402 | A930018P22Rik | 68243  | 2+:103962925-103964903  |
| 3405 | Map3k3        | 26406  | 11+:105869516-106017968 |
| 3408 | Cyp2c40       | 13099  | 19-:39841563-39887218   |
| 3410 | Paqr9         | 75552  | 9+:95460377-95461504    |
| 3411 | Rab12a        | 68708  | 15-:89412967-89422296   |
| 3412 | Olfir78       | 170639 | 7-:109890553-109891515  |
| 3414 | MMT00059380   |        | 3+:57166891-57167200    |
| 3419 | MMT00056938   |        | X+:71252568-71252806    |
| 3421 | 2010106G01Rik | 66552  | 2-:126719868-126758971  |
| 3426 | Hap1          | 15114  | 11-:100208643-100217391 |
| 3428 | Il1r2         | 16178  | 1+:40141612-40182068    |
| 3430 | Rhof          | 23912  | 5-:123569439-123582428  |
| 3431 | Lrnf5         | 238205 | 12+:62940414-62959327   |
| 3432 | EG330963      | 330963 | 9-:65349991-65362552    |
| 3433 | Naaladl2      | 635702 | 3-:24312271-24332132    |
| 3435 | MMT00006420   |        | X+:35533132-35536354    |
| 3445 | Rnf25         | 57751  | 1-:74640326-74647951    |
| 3446 | Eno1          | 13806  | 4+:149611363-149622981  |
| 3447 | Fmr1          | 14265  | X+:65931874-65971134    |
| 3448 | Apobec3       | 80287  | 15+:79722855-79738344   |
| 3449 | Hes6          | 55927  | 1-:93308080-93309767    |
| 3450 | Itgb2l        | 16415  | 16-:96643897-96665206   |
| 3451 | Spint1        | 20732  | 2+:119063153-119075247  |
| 3452 | Ccrn4l        | 12457  | 3+:51028381-51055565    |
| 3454 | MMT00030912   | 545291 | 19-:43368684-43462771   |
| 3455 | Pou2af1       | 18985  | 9+:51021794-51048183    |
| 3456 | MMT00063288   |        |                         |
| 3458 | MMT00001194   |        | 4-:122952126-122952715  |
| 3459 | Nags          | 217214 | 11+:102006900-102010384 |

|      |                  |           |                         |
|------|------------------|-----------|-------------------------|
| 3460 | Ddb2             | 107986    | 2-:91051744-91077064    |
| 3462 | Nmnat3           | 74080     | 9+:98197001-98311845    |
| 3463 | MMT00029730      |           | 10-:53018944-53020003   |
| 3464 | 1700048O20Rik    | 69430     | 9+:121847232-121851112  |
| 3465 | MMT00064177      |           | X-:53098936-53099743    |
| 3468 | MMT00009124      |           | 9+:71756669-71757359    |
| 3471 | Stmn3            | 20262     | 2-:181041163-181048985  |
| 3475 | 2610305D13Rik    | 112422    | 4-:146986047-146989538  |
| 3480 | Pnpo             | 103711    | 11-:96799141-96805260   |
| 3482 | MMT00069653      |           | 14-:54943752-54944517   |
| 3485 | Six3os1          | 100043902 | 17-:86011912-86018156   |
| 3491 | Btn1a1           | 12231     | 13-:23548877-23557361   |
| 3493 | Wbp4             | 22380     | 14-:79861555-79880917   |
| 3495 | EG633752         | 633752    | 15+:68707192-68708287   |
| 3496 | Slc41a2          | 338365    | 10-:82696146-82779298   |
| 3501 | Raph1            | 77300     | 1-:60540030-60623608    |
| 3502 | Gde1             | 56209     | 7-:125832516-125849233  |
| 3504 | Anpep            | 16790     | 7-:86966690-86987170    |
| 3511 | Rnf182           | 328234    | 13+:43763343-43816877   |
| 3512 | 6530401N04Rik    | 328092    | 12-:53089296-53107491   |
| 3513 | Aloxe3           | 23801     | 11+:68939878-68962616   |
| 3523 | Trim34           | 94094     | 7+:111393077-111485295  |
| 3524 | Erc1             | 111173    | 6-:119520813-119521152  |
| 3526 | Rccd1            | 269955    | 7-:87461398-87465354    |
| 3529 | Cyp8b1           | 13124     | 9-:121823880-121825382  |
| 3531 | Tslp             | 53603     | 18+:32975036-32979446   |
| 3532 | S100a5           | 20199     | 3+:90412443-90415698    |
| 3535 | S100a9           | 20202     | 3-:90496554-90499613    |
| 3537 | F9               | 14071     | X+:57252640-57283936    |
| 3542 | Atp5j2           | 57423     | 5-:145944575-145952461  |
| 3545 | Mtrf1l           | 108853    | 10+:4522321-4533475     |
| 3552 | 1110017116Rik    | 68527     | 2+:4897203-4906790      |
| 3554 | Npas3            | 27386     | 12+:54349663-55170060   |
| 3555 | Sbds             | 66711     | 5-:130721604-130731385  |
| 3556 | Al661453         | 224833    | 17+:47573587-47607092   |
| 3559 | 4933433P14Rik    | 66787     | 12+:106923037-106940153 |
| 3560 | Usp5             | 22225     | 6-:124765036-124779465  |
| 3561 | MMT00020644      |           | 4-:3646817-3648177      |
| 3562 | MMT00011909      |           | 10+:66467767-66503648   |
| 3563 | MMT00045357      |           | 14-:118580620-118581352 |
| 3564 | Spcs2            | 66624     | 7-:106987418-106997571  |
| 3565 | MMT00045908      |           | 5-:117442097-117452943  |
| 3569 | ENSMUSG000000735 | 100038417 | 18-:62767196-62774658   |
| 3572 | Ebi3             | 50498     | 17+:56092062-56096442   |
| 3577 | Ptplad2          | 66775     | 4-:88059863-88084813    |
| 3578 | A130090K04Rik    | 320495    | 10+:3366096-3455988     |

|      |               |        |                         |
|------|---------------|--------|-------------------------|
| 3579 | Ncbp2         | 68092  | 16+:31948712-31957682   |
| 3584 | Foxp1         | 108655 | 6-:99102052-99216516    |
| 3585 | Hint1         | 15254  | 11+:54679941-54683999   |
| 3587 | MMT00041940   |        | 3-:41779988-41781970    |
| 3594 | Rasa4         | 54153  | 5+:136559867-136587725  |
| 3598 | Rpo1-3        | 20018  | 5+:147889116-147890656  |
| 3599 | MMT00035426   |        | 8+:35570238-35570761    |
| 3603 | BC027231      | 212547 | 16+:44724416-44737241   |
| 3604 | 2610029G23Rik | 67683  | X+:102275133-102278823  |
| 3609 | Plvap         | 84094  | 8-:74021665-74035630    |
| 3610 | Rnf38         | 73469  | 4-:44139090-44200391    |
| 3612 | Cd2           | 12481  | 3-:101079832-101091862  |
| 3614 | 2610030H06Rik | 67048  | X+:69061263-69070044    |
| 3616 | Dnajc16       | 214063 | 4-:141319050-141344970  |
| 3617 | Rasl10b       | 276952 | 11+:83232799-83234515   |
| 3620 | Bet1          | 12068  | 6-:4027877-4036899      |
| 3622 | Trim21        | 20821  | 7-:109707349-109713948  |
| 3624 | Pygb          | 110078 | 2+:150612521-150657491  |
| 3626 | Ralgps1       | 241308 | 2-:32989395-33140437    |
| 3627 | MMT00048939   |        | 16-:18944350-18944684   |
| 3631 | Vps37b        | 330192 | 5-:124454649-124482254  |
| 3632 | Lctl          | 235435 | 9+:63964953-63985923    |
| 3635 | Ndrp4         | 234593 | 8+:98226962-98238855    |
| 3640 | D11Bwg0517e   | 52897  | 11-:118352177-118471514 |
| 3642 | Spsb4         | 211949 | 9-:96843901-96896732    |
| 3643 | Nell2         | 54003  | 15-:95050363-95358683   |
| 3647 | Nucks1        | 98415  | 1+:133807070-133832744  |
| 3648 | Odf2l         | 52184  | 3+:144781563-144816849  |
| 3649 | Zfp395        | 380912 | 14+:66004224-66015602   |
| 3652 | Adm           | 11535  | 7+:117771182-117773333  |
| 3654 | St13          | 70356  | 15-:81195474-81230124   |
| 3655 | 0610009O20Rik | 66839  | 18+:38409928-38415204   |
| 3657 | Armxc1        | 78248  | X+:131252549-131256443  |
| 3659 | EG236451      | 236451 | 14-:59939802-59946936   |
| 3661 | Dhx15         | 13204  | 5-:52541454-52581633    |
| 3665 | Zfp61         | 22719  | 7-:25076064-25084609    |
| 3666 | Tas1r1        | 110326 | 4-:151402022-151412677  |
| 3670 | Dusp3         | 72349  | 11-:101835472-101846084 |
| 3671 | 1810033B17Rik | 69189  | 8+:3665752-3668915      |
| 3673 | Tro           | 56191  | X-:147080247-147084030  |
| 3675 | Pglyrp4       | 384997 | 3+:90532548-90544383    |
| 3676 | Ucp2          | 22228  | 7+:107645261-107647959  |
| 3677 | MMT00052835   | 633387 | 10+:38918264-38918972   |
| 3683 | Oas2          | 246728 | 5-:121180342-121199797  |
| 3685 | Apoc1         | 11812  | 7-:20274832-20277988    |
| 3686 | Psmc9         | 67151  | 5+:123696248-123698970  |

|      |                  |        |                         |
|------|------------------|--------|-------------------------|
| 3687 | Bcl9             | 77578  | 3-:97007591-97009680    |
| 3689 | Adh1             | 11522  | 3+:137940608-137953654  |
| 3695 | 1700007H22Rik    | 75484  | 16-:86139548-86150921   |
| 3696 | Elovl6           | 170439 | 3+:129235356-129341406  |
| 3698 | 1600014C10Rik    | 72244  | 7+:38968834-38980115    |
| 3699 | Dscr3            | 13185  | 16-:94719394-94748050   |
| 3700 | Nrxn1            | 18189  | 17-:90436234-90458903   |
| 3701 | Zfp68            | 24135  | 5-:139047347-139060955  |
| 3703 | Ggcx             | 56316  | 6+:72364326-72380701    |
| 3704 | H2-Q7            | 15018  | 17+:35576165-35580297   |
| 3705 | 5730590G19Rik    | 77011  | 7+:86814405-86820605    |
| 3706 | 2410002O22Rik    | 66975  | 13-:104933396-104968500 |
| 3707 | Etos1            | 114660 | 7-:137914151-137916166  |
| 3708 | Thrap3           | 230753 | 4-:125856027-125879856  |
| 3709 | Mylip            | 218203 | 13+:45485109-45507382   |
| 3713 | Acot6            | 217700 | 12+:85441455-85452294   |
| 3715 | Mapk14           | 26416  | 17+:28828389-28885350   |
| 3717 | Nlrp1c           | 627984 | 11-:70905760-71094536   |
| 3720 | Zbtb44           | 235132 | 9+:30838107-30877921    |
| 3721 | Me2              | 107029 | 18-:73929695-73975046   |
| 3725 | OTTMUSG000000085 | 666048 | 4+:114252888-114283277  |
| 3727 | Erdr1            | 170942 |                         |
| 3728 | Sfxn4            | 94281  | 19-:60914648-60937267   |
| 3738 | Cadm2            | 239857 | 16-:66663339-66815707   |
| 3743 | Corin            | 53419  | 5-:72691264-72895447    |
| 3744 | Rmnd1            | 66084  | 10+:5918863-5938724     |
| 3746 | Osbpl5           | 79196  | 7-:150874667-150927868  |
| 3749 | Aebp1            | 11568  | 11+:5761949-5772052     |
| 3753 | Setdb1           | 84505  | 3-:95127447-95161078    |
| 3754 | Dock6            | 319899 | 9-:21604303-21651716    |
| 3755 | Ndn              | 17984  | 7+:69493207-69494811    |
| 3756 | Chrne            | 11448  | 11-:70428385-70432696   |
| 3767 | Pnma2            | 239157 | 14+:67530073-67536686   |
| 3768 | Cyp2c44          | 226143 | 19-:44079510-44103732   |
| 3776 | Btbd16           | 330660 | 7+:137923070-137967890  |
| 3777 | Wdr91            | 101240 | 6-:34830279-34860843    |
| 3779 | Ghdc             | 80860  | 11-:100627647-100632271 |
| 3780 | Ryk              | 20187  | 9+:102737245-102810635  |
| 3781 | Arpc2            | 76709  | 1+:74283073-74314782    |
| 3782 | Rgs5             | 19737  | 1+:171585677-171622687  |
| 3783 | MMT00082345      |        | 6-:39777684-39778771    |
| 3787 | Myf6             | 17878  | 10-:106929915-106931785 |
| 3789 | 4833442J19Rik    | 320204 | 6+:149090114-149099694  |
| 3790 | Mtss1            | 211401 | 15-:58774802-58913544   |
| 3794 | Ywhab            | 54401  | 2+:163820933-163842538  |
| 3795 | Psmc6            | 67089  | 14+:45951608-45969355   |

|      |               |        |                         |
|------|---------------|--------|-------------------------|
| 3796 | D19Bwg1357e   | 52874  | 19-:27463189-27504341   |
| 3797 | Nrip2         | 60345  | 6+:128349778-128358946  |
| 3799 | Serpinh1      | 12406  | 7-:106493887-106501606  |
| 3800 | Ltf           | 17002  | 9+:110921795-110944706  |
| 3801 | Casp8ap2      | 26885  | 4+:32702487-32740235    |
| 3804 | MMT00015534   |        | 5+:7179364-7180662      |
| 3806 | MMT00063223   |        | 11-:102437760-102440602 |
| 3807 | Vmn2r83       | 625029 | 10+:78940711-78943081   |
| 3808 | 2010209O12Rik | 100910 | 5+:24093855-24098306    |
| 3811 | MMT00052318   |        | 2+:23763958-23764363    |
| 3812 | Zfyve26       | 211978 | 12-:80333330-80374663   |
| 3816 | Gstm5         | 14866  | 3+:107698773-107701602  |
| 3818 | Cep192        | 70799  | 18+:67994293-68044828   |
| 3823 | Slc22a15      | 242126 | 3-:101663850-101728370  |
| 3825 | Uaca          | 72565  | 9+:60642346-60728237    |
| 3832 | Sdhd          | 67680  | 4+:140517319-140535015  |
| 3833 | Atxn711       | 380753 | 12+:33832644-33936011   |
| 3834 | Calb2         | 12308  | 8-:112666424-112692105  |
| 3836 | 2200001I15Rik | 69134  | 14-:35165067-35168578   |
| 3837 | Tradd         | 71609  | 8-:107782144-107788511  |
| 3838 | Trim32        | 69807  | 4+:65266054-65277275    |
| 3841 | MMT00014519   |        | 7-:49303224-49305709    |
| 3842 | Abca12        | 74591  | 1-:71408315-71461470    |
| 3847 | Tdrd7         | 100121 | 4+:46000333-46047629    |
| 3849 | MMT00047578   |        | 1+:111171746-111732864  |
| 3850 | Dach1         | 13134  | 14-:98188801-98568528   |
| 3856 | Slc30a5       | 69048  | 13-:101572917-101584591 |
| 3857 | 1700001C19Rik | 75462  | 17-:47550324-47574327   |
| 3858 | Gcnt2         | 14538  | 13+:40982533-41054685   |
| 3859 | Fpr2          | 14289  | 17+:18029707-18030762   |
| 3860 | Mlx           | 21428  | 11+:100948632-100952829 |
| 3862 | Gpd1          | 14555  | 15+:99548031-99554203   |
| 3865 | Acta1         | 11459  | 8-:126415661-126418675  |
| 3867 | Sln           | 66402  | 9+:53697970-53702367    |
| 3868 | Ebpl          | 68177  | 14-:61959597-61979276   |
| 3869 | Zadh2         | 225791 | 18+:84264344-84266906   |
| 3871 | MMT00067361   |        | 12-:91309251-91382876   |
| 3874 | Slitrk3       | 386750 | 3-:72852375-72860782    |
| 3875 | MMT00077845   |        | 12-:45303417-45303845   |
| 3876 | Zeb2          | 24136  | 2-:44843941-44965649    |
| 3877 | Gsk3b         | 56637  | 16+:38090445-38240746   |
| 3880 | Trf           | 22041  | 9-:103111206-103132616  |
| 3882 | Itfg3         | 106581 | 17-:26349653-26381152   |
| 3885 | Apol7c        | 108956 | 15-:77355282-77363746   |
| 3886 | MMT00047275   | 546271 | X+:23730763-23731986    |
| 3887 | Tcrg-V5       | 21639  | 13+:19282236-19286398   |

|      |               |        |                        |
|------|---------------|--------|------------------------|
| 3888 | Ran           | 19384  | 5+:129526094-129528692 |
| 3889 | Wasf3         | 245880 | 5+:147196581-147282701 |
| 3892 | D0H6S2654E    | 108161 | 13+:34838320-34839491  |
| 3895 | Art5          | 11875  | 7-:109245386-109251361 |
| 3901 | F730047E07Rik | 212377 | 4+:24448387-24530093   |
| 3904 | Serinc1       | 56442  | 10-:57235583-57252255  |
| 3905 | H2-Q1         | 15006  | 17+:35457506-35460984  |
| 3907 | Dkk3          | 50781  | 7-:119260526-119302562 |
| 3908 | Fundc2        | 67391  | X+:72627760-72640322   |
| 3909 | MMT00012984   |        | 5-:87389544-87390739   |
| 3910 | Trpm7         | 58800  | 2-:126617301-126701947 |
| 3913 | Mrpl15        | 27395  | 1-:4764014-4775808     |
| 3921 | 2300002D11Rik | 69539  | 4-:133047015-133054050 |
| 3922 | Clec11a       | 20256  | 7-:51559624-51562264   |
| 3923 | D9Ertd402e    | 382117 | 9+:122714739-122744303 |
| 3927 | MMT00021352   |        | 15-:99385921-99386665  |
| 3928 | Polr3k        | 67005  | 2+:181599160-181604295 |
| 3929 | Sfrs11        | 69207  | 3-:157673458-157699601 |
| 3938 | Abt1          | 30946  | 13-:23513408-23515770  |
| 3943 | Atoh1         | 11921  | 6+:64679316-64680372   |
| 3945 | Cugbp2        | 14007  | 2-:6462915-6806015     |
| 3946 | Klk1          | 16612  | 7+:51480848-51484938   |
| 3948 | V1rb4         | 113854 | 6+:89843267-89844199   |
| 3952 | Bcar1         | 12927  | 8-:114234650-114267647 |
| 3955 | Neurod1       | 18012  | 2-:79292678-79296793   |
| 3956 | Psat1         | 107272 | 19-:15980536-15999413  |
| 3957 | Dennd1b       | 329260 | 1-:141030362-141031320 |
| 3960 | MMT00007654   |        | 2+:117066618-117068004 |
| 3964 | Colq          | 382864 | 14-:32337492-32390504  |
| 3965 | Pwp2          | 110816 | 10-:77633654-77647874  |
| 3967 | Tysnd1        | 71767  | 10+:61158261-61165516  |
| 3970 | 4931414P19Rik | 74359  | 14-:55202500-55224741  |
| 3973 | Dmtf1         | 23857  | 5-:9119662-9161724     |
| 3980 | Gkap1         | 56278  | 13-:58334711-58365534  |
| 3983 | 4930542C12Rik | 67648  | 9-:78242762-78243965   |
| 3985 | Gjb3          | 14620  | 4-:127002480-127006405 |
| 3986 | Ep400         | 75560  | 5-:111093125-111199611 |
| 3987 | MMT00005386   |        | 11-:32780362-32780990  |
| 3988 | 4933427G17Rik | 74466  | 7+:128126021-128158300 |
| 3989 | Wrnip1        | 78903  | 13+:32894049-32914477  |
| 3991 | Hoxb9         | 15417  | 11+:96132821-96137905  |
| 3998 | 4930528F23Rik | 75178  | 17+:24955221-24976731  |
| 3999 | Nr3c1         | 14815  | 18-:39573930-39646901  |
| 4001 | Apoa4         | 11808  | 9+:46049236-46051372   |
| 4004 | Thbs2         | 21826  | 17-:14804160-14831097  |
| 4005 | Ccdc19        | 71870  | 1+:174451267-174476002 |



|      |               |        |                         |
|------|---------------|--------|-------------------------|
| 4008 | Gnl3l         | 237107 | X-:147419697-147451866  |
| 4009 | Cotl1         | 72042  | 8-:122333124-122364440  |
| 4010 | Alkbh2        | 231642 | 5-:114573944-114578157  |
| 4012 | Ctsw          | 13041  | 19-:5465341-5468483     |
| 4014 | Dock1         | 330662 | 7+:142039811-142067998  |
| 4022 | Gdpd5         | 233552 | 7+:106535613-106610356  |
| 4029 | Samsn1        | 67742  | 16-:75859504-75909469   |
| 4030 | Prps1         | 19139  | X+:136991211-137010677  |
| 4032 | MMT00008594   |        | 13-:109010657-109011035 |
| 4033 | Mgst2         | 211666 | 3+:51465110-51486596    |
| 4034 | Slc6a13       | 14412  | 6+:121250313-121287735  |
| 4038 | 1200009O22Rik | 66873  | 6-:53767162-53770477    |
| 4039 | Klc3          | 232943 | 7-:19979789-19985205    |
| 4046 | Phb           | 18673  | 11+:95529348-95541341   |
| 4047 | Nbeal1        | 269198 | 1+:60238432-60292289    |
| 4048 | BC002230      | 217827 | 12-:101363660-101397843 |
| 4049 | MMT00053760   |        | 7-:135159956-135160734  |
| 4053 | Pcdha4        | 12936  | 18+:37112342-37347311   |
| 4056 | Tnfaip8l1     | 66443  | 17+:56301952-56312440   |
| 4057 | Slc2a4        | 20528  | 11-:69756044-69761636   |
| 4059 | MMT00048362   |        | X+:87308393-87309159    |
| 4061 | Apcs          | 20219  | 1-:174824092-174825172  |
| 4065 | Igsf5         | 72058  | 16+:96583400-96625635   |
| 4066 | Actg2         | 11468  | 6-:83462903-83486219    |
| 4070 | Chst10        | 98388  | 1-:38920721-38954837    |
| 4072 | Adcy2         | 210044 | 13-:68758930-69138158   |
| 4074 | Ush2a         | 22283  | 1+:190686251-190768687  |
| 4076 | Larp5         | 217980 | 13+:9093165-9173650     |
| 4079 | Emilin3       | 280635 | 2-:160731240-160738052  |
| 4080 | Atp2a1        | 11937  | 7-:133589373-133591457  |
| 4084 | Asah3l        | 230379 | 4+:86520367-86566778    |
| 4085 | Cd302         | 66205  | 2-:60090049-60122475    |
| 4086 | Adamts8       | 30806  | 9+:30750146-30770441    |
| 4088 | Pdcl2         | 79455  | 5-:76741291-76760158    |
| 4089 | Socs6         | 54607  | 18-:89038345-89056679   |
| 4090 | Orai3         | 269999 | 7+:134913355-134918664  |
| 4093 | Akp5          | 11650  | 1-:88983623-88986338    |
| 4095 | Trub2         | 227682 | 2-:29631630-29643170    |
| 4098 | Ii2ra         | 16184  | 2+:11564614-11611409    |
| 4100 | Pla2g3        | 237625 | 11+:3388354-3393064     |
| 4105 | Speer5-ps1    | 70365  | 10+:43891440-43939389   |
| 4106 | MMT00041409   |        | 4-:73158398-73159655    |
| 4107 | MMT00068618   |        | 6+:126721939-126724832  |
| 4108 | Apobec2       | 11811  | 17-:48558555-48572044   |
| 4109 | Abpb          | 233099 | 7-:34797102-34798961    |
| 4114 | Parp12        | 243771 | 6-:39036411-39068158    |

|      |               |        |                        |
|------|---------------|--------|------------------------|
| 4116 | Ifi205        | 226695 | 1-:175664569-175962188 |
| 4119 | Magea7        | 17143  | X+:73592732-73592974   |
| 4120 | Mrpl3         | 94062  | 9+:104955628-104979693 |
| 4122 | Ehbp1l1       | 114601 | 19-:5708051-5726270    |
| 4124 | 1110037F02Rik | 66185  | 4+:11413147-11542956   |
| 4126 | Vti1a         | 53611  | 19+:55390850-55701007  |
| 4132 | Hrc           | 15464  | 7+:52590770-52594340   |
| 4133 | Cbr3          | 109857 | 16+:93683459-93691231  |
| 4137 | Pof1b         | 69693  | X-:109753196-109812262 |
| 4138 | Cited4        | 56222  | 4+:120339205-120340423 |
| 4139 | Sh2d5         | 230863 | 4+:137806379-137815136 |
| 4141 | Pank4         | 269614 | 4+:154338254-154355046 |
| 4143 | Zfp286        | 192651 | 11-:62593107-62597268  |
| 4146 | Cml1          | 66116  | 6-:85860150-85865655   |
| 4152 | Lrrc33        | 224109 | 16-:32142908-32165572  |
| 4158 | 4933400N17Rik | 619289 | 1-:39722152-39727434   |
| 4163 | 5830415L20Rik | 68152  | 5+:3543835-3561044     |
| 4165 | Cux1          | 13047  | 5-:136748771-136849218 |
| 4166 | Cblc          | 80794  | 7-:20366318-20382131   |
| 4171 | 1700023F02Rik | 69433  | 10-:65583359-65584736  |
| 4173 | MMT00008170   |        | 13-:47104637-47106562  |
| 4174 | Unc13b        | 22249  | 4+:43071840-43277742   |
| 4181 | Gzf1          | 74533  | 2+:148506915-148518686 |
| 4182 | Foxd3         | 15221  | 4+:99322989-99325313   |
| 4185 | Hmgb2         | 97165  | 8+:59991854-59993062   |
| 4186 | Car7          | 12354  | 8+:107064683-107074245 |
| 4188 | Sult1a1       | 20887  | 7-:133816384-133819871 |
| 4189 | Epb4.1l1      | 13821  | 2+:156246836-156366015 |
| 4191 | Fbln2         | 14115  | 6+:91162857-91222533   |
| 4192 | Zranb1        | 360216 | 7+:140141290-140178050 |
| 4194 | Dnttip2       | 99480  | 3+:121977323-121988194 |
| 4195 | Csrp2bp       | 228714 | 2+:144194758-144233390 |
| 4196 | Atg16l2       | 73683  | 7-:108438734-108450613 |
| 4198 | Ghr           | 14600  | 15-:3267776-3533231    |
| 4199 | B3galt5       | 93961  | 16+:96536775-96537701  |
| 4201 | Tubb2c        | 227613 | 2-:25077681-25080161   |
| 4203 | Fermt2        | 218952 | 14-:46078471-46087081  |
| 4205 | Rgs1          | 50778  | 1-:146091799-146096165 |
| 4206 | Nipsnap1      | 18082  | 11+:4774005-4794203    |
| 4214 | MMT00014098   |        | 13+:34653871-34654238  |
| 4220 | EG629065      | 629065 | 17-:53840190-53842391  |
| 4223 | Dnahc7l       | 207778 | 14+:27516798-27704888  |
| 4229 | Pth           | 19226  | 7-:120529091-120532086 |
| 4232 | B020011L13Rik | 547097 | 1+:119637961-120026240 |
| 4233 | Brpf1         | 78783  | 6+:113257220-113274854 |
| 4235 | Pfkfb3        | 170768 | 2-:11393452-11423652   |

|      |               |        |                         |
|------|---------------|--------|-------------------------|
| 4245 | Ulk4          | 209012 | 9-:120873567-121186321  |
| 4246 | Fbxw12        | 434440 | 9-:109125786-109127028  |
| 4247 | Sfpq          | 71514  | 4+:126697954-126713103  |
| 4258 | Rpl5          | 19983  | 5+:108329587-108345390  |
| 4261 | MMT00014970   |        | 12+:89573046-89574124   |
| 4266 | Fn1           | 14268  | 1-:71632090-71699746    |
| 4272 | Hsd17b6       | 27400  | 10-:127428006-127437732 |
| 4275 | EG331392      | 331392 | X+:20938065-20940149    |
| 4276 | Chmp4b        | 75608  | 2+:154482975-154520518  |
| 4282 | RP23-100C5.8  | 241638 | 2-:130460502-130468535  |
| 4284 | Irf1          | 16362  | 11+:53583579-53590825   |
| 4285 | Dnajc19       | 67713  | 3-:33976206-33980243    |
| 4286 | Ptp4a1        | 19243  | 1-:30998436-31006590    |
| 4289 | MMT00057248   |        | X+:16187190-16188720    |
| 4291 | Impa1         | 55980  | 3-:10315185-10329005    |
| 4298 | St3gal1       | 20442  | 15-:66937849-66945371   |
| 4301 | AW049604      | 106014 | 15+:87455659-87589792   |
| 4302 | Vmn2r120      | 224916 | 17-:57648206-57665382   |
| 4303 | Phkg1         | 18682  | 5-:130339308-130354960  |
| 4305 | Tmem51        | 214359 | 4-:141586907-141593849  |
| 4306 | Cpeb1         | 12877  | 7-:88492329-88599562    |
| 4308 | Nphp3         | 74025  | 9+:103917654-103918975  |
| 4310 | B3gnt8        | 232984 | 7+:26412656-26414509    |
| 4311 | MMT00033987   |        | 4-:40808262-40860214    |
| 4313 | Ppap2b        | 67916  | 4+:104829964-104903745  |
| 4319 | 1810009O10Rik | 69109  | 11-:78564413-78565164   |
| 4321 | MMT00066182   |        | 5+:52972590-52975039    |
| 4325 | Slc16a4       | 229699 | 3+:107094209-107115026  |
| 4327 | Klf10         | 21847  | 15-:38224168-38230462   |
| 4328 | Spag11        | 78128  | 8+:19141376-19159577    |
| 4332 | Sf3b1         | 81898  | 1-:55042015-55084323    |
| 4333 | Sumo3         | 20610  | 10+:77069014-77080121   |
| 4336 | Rbbp9         | 26450  | 2-:144369557-144376514  |
| 4337 | Myst3         | 244349 | 8+:23971985-24053489    |
| 4338 | EG328280      | 328280 | 13+:67884730-67944975   |
| 4340 | Sdk2          | 237979 | 11-:113641489-113731229 |
| 4344 | 1810073G14Rik | 67726  | 11-:57296501-57332117   |
| 4345 | MMT00074600   |        | 8-:41939180-41940429    |
| 4346 | Ccdc46        | 76380  | 11+:108543937-108721925 |
| 4348 | Nedd9         | 18003  | 13-:41406940-41582665   |
| 4349 | Mrpl27        | 94064  | 11+:94515109-94521209   |
| 4351 | Plxnb1        | 235611 | 9+:109002591-109022421  |
| 4352 | Rtn4r1        | 237847 | 11+:75078258-75081263   |
| 4355 | Pard6a        | 56513  | 8+:108225582-108227366  |
| 4359 | Tmem208       | 66320  | 8+:107850282-107852955  |
| 4363 | 2810002I04Rik | 72350  | 12+:86629575-86638361   |

|      |               |        |                         |
|------|---------------|--------|-------------------------|
| 4365 | Tapbp         | 21356  | 17+:34056632-34063651   |
| 4369 | Acot4         | 171282 | 12+:85379460-85384746   |
| 4375 | Cysltr2       | 70086  | 14-:73428934-73448879   |
| 4376 | 2310015A05Rik | 72315  | 16+:17646642-17650830   |
| 4378 | 1700026D08Rik | 75556  | 7-:90924128-90943336    |
| 4379 | Glrx          | 93692  | 13+:75977354-75987416   |
| 4380 | Smarcb1       | 20587  | 10-:75359519-75384333   |
| 4384 | Gamt          | 14431  | 10-:79720943-79723757   |
| 4385 | Sfrp4         | 20379  | 13+:19715051-19724690   |
| 4386 | Sptlc1        | 268656 | 13-:53428120-53472729   |
| 4387 | Frs3          | 107971 | 17+:47832155-47841235   |
| 4388 | MMT00019672   |        | X-:96276741-96277655    |
| 4391 | Zfp467        | 68910  | 6-:48387584-48395606    |
| 4392 | 1810055G02Rik | 72056  | 19+:3708332-3717881     |
| 4400 | 9030425E11Rik | 71566  | 9+:40494129-40591188    |
| 4404 | Commd5        | 66398  | 15+:76730370-76731727   |
| 4407 | 4930429B21Rik | 67576  | 3+:32264696-32266358    |
| 4409 | 5430435G22Rik | 226421 | 1+:133585301-133610044  |
| 4411 | 2310039H08Rik | 67101  | 17+:46909760-46910344   |
| 4413 | MMT00030347   |        | 5-:12354694-12355404    |
| 4414 | 5033406O09Rik | 77675  | 12-:113180557-113182419 |
| 4415 | B230399E16Rik | 240479 | 18+:84889670-84906366   |
| 4417 | Stom          | 13830  | 2-:35169510-35192529    |
| 4418 | H2-Aa         | 14960  | 17-:34419804-34424733   |
| 4421 | Synj1         | 104015 | 16-:90936337-91011554   |
| 4425 | Olf1346       | 258918 | 7+:6426822-6427763      |
| 4426 | ligp2         | 54396  | 11+:58032970-58036282   |
| 4428 | Prl8a8        | 74188  | 13-:27598940-27605082   |
| 4429 | MMT00042276   |        | 13+:7307045-7308207     |
| 4430 | Ankrd36       | 76389  | 11+:5469687-5484284     |
| 4431 | Tmem17        | 103765 | 11+:22412082-22419236   |
| 4433 | Snrpa1        | 68981  | 7+:73205454-73219468    |
| 4443 | Zfp790        | 233056 | 7+:30601137-30615958    |
| 4444 | Ksr2          | 333050 | 5+:117955497-118005945  |
| 4446 | Myo5c         | 208943 | 9+:75135637-75153255    |
| 4454 | BC055107      | 268709 | 14-:9130066-9150355     |
| 4455 | Ccdc76        | 229780 | 3-:116283647-116297970  |
| 4457 | Cks2          | 66197  | 13+:51740714-51746023   |
| 4459 | Crybb3        | 12962  | 5-:113504860-113509673  |
| 4462 | Cyp1a1        | 13076  | 9+:57545419-57551629    |
| 4463 | Ncoa5         | 228869 | 2-:164825857-164860279  |
| 4464 | BC028471      | 414071 | 5+:150171612-150195061  |
| 4466 | MMT00014327   | 233575 | 7+:109371587-109386263  |
| 4468 | MMT00052724   |        |                         |
| 4469 | Cyp3a13       | 13113  | 5-:138335222-138362823  |
| 4470 | Slc5a8        | 216225 | 10+:88348781-88398828   |

|      |               |           |                         |
|------|---------------|-----------|-------------------------|
| 4471 | Sdccag8       | 76816     | 1+:178754869-178951013  |
| 4472 | MMT00074121   | 100040305 | 12-:103213872-103215162 |
| 4473 | EG628040      | 628040    | X-:8903532-8905467      |
| 4474 | EG627022      | 627022    | 6-:136434167-136435708  |
| 4480 | Bahcc1        | 268515    | 11+:120135297-120151196 |
| 4481 | Olf1100       | 258587    | 2-:86817987-86818951    |
| 4484 | MMT00014015   |           | 13+:61767510-61768501   |
| 4487 | Gdpd2         | 71584     | X+:97925339-97934238    |
| 4492 | Suv420h1      | 225888    | 19+:3768145-3805463     |
| 4493 | Ptgir         | 19222     | 7+:17491838-17496243    |
| 4495 | Nid1          | 18073     | 13+:13529957-13604521   |
| 4499 | Enpp2         | 18606     | 15-:54670455-54751557   |
| 4500 | Usp53         | 99526     | 3-:122655472-122657473  |
| 4501 | MMT00033071   |           |                         |
| 4504 | 1700113I22Rik | 73635     | 11-:101280127-101286642 |
| 4506 | Zc3h7b        | 20286     | 15+:81598389-81626700   |
| 4508 | Ifit1         | 15957     | 19+:34715403-34723970   |
| 4510 | Ttf1          | 22130     | 2+:28915796-28942613    |
| 4512 | Esrra         | 26379     | 19-:6985467-6996256     |
| 4514 | MMT00045906   |           | 5-:117799052-117799379  |
| 4516 | Rsad2         | 58185     | 12-:27130172-27141293   |
| 4517 | Itih3         | 16426     | 14-:31721761-31736728   |
| 4518 | Gpr65         | 14744     | 12+:99506866-99514842   |
| 4523 | Ptpru         | 19273     | 4-:131324372-131394193  |
| 4524 | Usp12         | 22217     | 5-:147546398-147606583  |
| 4526 | Satb1         | 20230     | 17-:51878793-51971958   |
| 4531 | EG434175      | 434175    | 7-:49361153-49362629    |
| 4532 | BC034090      | 207792    | 1-:157059602-157089407  |
| 4533 | Itgb1         | 16412     | 8+:131208845-131256651  |
| 4534 | Ndel1         | 83431     | 11-:68634950-68666555   |
| 4535 | MMT00025220   |           | 7-:94846328-94847249    |
| 4536 | BC013529      | 215751    | 10-:7487753-7500703     |
| 4537 | Olf144        | 18343     | 9-:39291891-39292653    |
| 4540 | Prl8a2        | 13529     | 13+:27437557-27446073   |
| 4549 | 9930012K11Rik | 268759    | 14-:70554213-70556326   |
| 4550 | Stard10       | 56018     | 7+:108465632-108494825  |
| 4551 | Cyp2e1        | 13106     | 7+:147949637-147960874  |
| 4553 | Xpnpep3       | 321003    | 15+:81230579-81283678   |
| 4555 | Cchcr1        | 240084    | 17+:35654120-35667950   |
| 4557 | MMT00031263   |           | 12-:52234347-52235904   |
| 4558 | Alg3          | 208624    | 16-:20605545-20610817   |
| 4560 | 1700011F14Rik | 75645     | 19+:58586480-58627575   |
| 4561 | Itgb1         | 223272    | 14+:124059394-124373299 |
| 4565 | MMT00019450   |           | 7+:54604843-54605630    |
| 4566 | MMT00078134   | 547323    | 14+:53511660-53512863   |
| 4573 | Nrxn1         | 18189     | 17-:91391454-91488944   |

|      |               |        |                         |
|------|---------------|--------|-------------------------|
| 4574 | MMT00064324   |        | 18+:14583369-14650895   |
| 4576 | Chchd7        | 66433  | 4+:3866034-3870674      |
| 4577 | Ltbp4         | 108075 | 7-:28056959-28104789    |
| 4578 | Pglyrp2       | 57757  | 17-:32550305-32557920   |
| 4579 | Dpys          | 64705  | 15-:39614243-39689003   |
| 4580 | Impact        | 16210  | 18+:13130760-13151457   |
| 4582 | Armcx4        | 102910 | X+:131221039-131231292  |
| 4583 | Krtap14       | 23927  | 16-:88825535-88826375   |
| 4584 | MMT00022168   |        | 13+:18041731-18042930   |
| 4586 | Zfp618        | 72701  | 4+:62694927-62794905    |
| 4590 | Arhgap21      | 71435  | 2-:20769558-20793395    |
| 4597 | MMT00051225   |        | 10+:3820035-3820664     |
| 4601 | Th            | 21823  | 7-:150078680-150085871  |
| 4602 | Pdzrn3        | 55983  | 6-:101099608-101327891  |
| 4603 | MMT00009680   |        | 14+:29538056-29538230   |
| 4605 | Myo1f         | 17916  | 17+:33692734-33744703   |
| 4607 | Acad11        | 102632 | 9+:103966014-104029975  |
| 4608 | Lag3          | 16768  | 6-:124854378-124861723  |
| 4612 | Hspa5         | 14828  | 2+:34627749-34631981    |
| 4617 | Agpat9        | 231510 | 5+:101275149-101328115  |
| 4619 | Htra3         | 78558  | 5-:35994690-36022214    |
| 4625 | Cwc15         | 66070  | 9+:14305171-14314988    |
| 4626 | 2310046K01Rik | 69698  | 2+:151822363-151834992  |
| 4628 | MMT00040865   |        | 2+:150017591-150151534  |
| 4630 | Akr1c20       | 116852 | 13-:4506404-4522579     |
| 4631 | Itgb2         | 16414  | 10+:77004727-77028128   |
| 4633 | Olfrl25       | 258287 | 17+:37971945-37972906   |
| 4635 | MMT00023332   |        | 15+:100127548-100128056 |
| 4638 | Alkbh4        | 72041  | 5+:136612024-136617482  |
| 4642 | Dact3         | 629378 | 7+:17460773-17472812    |
| 4643 | Mbl2          | 17195  | 19+:30307446-30314171   |
| 4645 | MMT00030322   |        |                         |
| 4648 | 1700007G11Rik | 75784  | 5+:99127420-99231068    |
| 4650 | RP23-438H3.2  | 69357  | X+:90428631-90429280    |
| 4654 | Myl9          | 98932  | 2+:156601152-156607393  |
| 4655 | 1810029B16Rik | 66282  | 8-:69000244-69010404    |
| 4657 | C230096C10Rik | 230866 | 4+:138918044-138931841  |
| 4664 | MMT00079290   |        | 13+:108138207-108138595 |
| 4665 | Dynll1        | 56455  | 5-:115748543-115750933  |
| 4666 | Exosc9        | 50911  | 3+:36451564-36464647    |
| 4669 | H2-M10.5      | 224761 | 17+:36870567-36871698   |
| 4670 | 8430426H19Rik | 71508  | 13-:62504184-62706778   |
| 4671 | Itga7         | 16404  | 10+:128370873-128395338 |
| 4674 | Cxcl12        | 20315  | 6+:117118595-117131384  |
| 4675 | Sparcl1       | 13602  | 5-:104508131-104542705  |
| 4676 | Cenph         | 26886  | 13-:101529640-101545854 |

|      |               |           |                        |
|------|---------------|-----------|------------------------|
| 4677 | BC016423      | 105203    | 13-:3565281-3574438    |
| 4678 | Kank1         | 107351    | 19+:25311462-25508987  |
| 4682 | Sertad4       | 214791    | 1-:194670625-194683097 |
| 4683 | E330013P04Rik | 107376    | 19+:60220559-60236173  |
| 4684 | MMT00006152   | 268859    | 16+:5885447-7410072    |
| 4686 | BC021785      | 215928    | 10-:39666719-39706481  |
| 4687 | Gtpbp8        | 66067     | 16-:44739098-44746472  |
| 4692 | MMT00049231   |           | 1+:10858784-10859392   |
| 4694 | MMT00046622   |           | 7-:113465907-113471636 |
| 4695 | D330027H18Rik | 101359    | 6-:29121509-29127222   |
| 4697 | Cyp2a12       | 13085     | 7+:27814108-27821829   |
| 4701 | MMT00062346   | 236260    | 12+:17888729-17945713  |
| 4702 | Tmem39b       | 230770    | 4-:129353600-129374040 |
| 4707 | Hsd3b5        | 15496     | 3-:98383764-98385715   |
| 4708 | Traf3ip2      | 103213    | 10+:39359186-39374629  |
| 4709 | Prune2        | 77754     | 19+:17030605-17129452  |
| 4715 | Tmem120a      | 215210    | 5-:136173097-136220096 |
| 4717 | Cd177         | 68891     | 7-:25539571-25545331   |
| 4719 | Col2a1        | 12824     | 15-:97806472-97834924  |
| 4720 | Ckm           | 12715     | 7+:19996442-20006932   |
| 4723 | Art3          | 109979    | 5+:92760842-92843656   |
| 4729 | Slc7a10       | 53896     | 7+:35971489-35985965   |
| 4731 | Zmynd12       | 332934    | 4+:119095435-119126500 |
| 4732 | ldh3a         | 67834     | 9+:54434296-54451596   |
| 4734 | Ccbl2         | 229905    | 3+:142364039-142407498 |
| 4737 | Olf449        | 259067    | 6+:42787881-42788817   |
| 4738 | Ppm1a         | 19042     | 12+:73884668-73894849  |
| 4741 | MMT00070324   | 100041422 | 14+:44701632-44704860  |
| 4745 | Lhfp          | 108927    | 3+:53035649-53065600   |
| 4746 | 1810007M14Rik | 67367     | 16-:91015187-91034444  |
| 4748 | Xylt2         | 217119    | 11-:94525166-94531854  |
| 4749 | 9230107M04Rik | 77684     | 7-:14140214-14156419   |
| 4752 | Pik3r4        | 75669     | 9+:105546566-105589978 |
| 4767 | Ktn1          | 16709     | 14+:48283453-48356232  |
| 4768 | Lsm10         | 116748    | 4+:125773995-125775823 |
| 4772 | 2810007J24Rik | 76971     | 7-:14996067-15032119   |
| 4774 | Ccdc112       | 240261    | 18-:46445266-46471548  |
| 4776 | Dclk1         | 13175     | 3+:55046549-55340599   |
| 4778 | Cyct          | 13067     | 2-:76192086-76198505   |
| 4780 | Sfrs5         | 20384     | 12+:82047562-82051486  |
| 4784 | Slc2a2        | 20526     | 3+:28596898-28627249   |
| 4785 | ORF63         | 224419    | 16+:87553574-87595580  |
| 4787 | Parn          | 74108     | 16-:13538056-13668261  |
| 4788 | Pak3          | 18481     | X+:140100287-140226353 |
| 4790 | Nrg3          | 18183     | 14-:40278445-40340075  |
| 4792 | Neurod6       | 11922     | 6-:55627816-55631063   |

|      |               |           |                         |
|------|---------------|-----------|-------------------------|
| 4793 | Bbs1          | 52028     | 19-:4888746-4906638     |
| 4794 | Gsdmd         | 69146     | 15+:75692768-75697834   |
| 4796 | Rcbtb2        | 105670    | 14+:73554161-73582489   |
| 4797 | Fbxo25        | 66822     | 8+:13907805-13940521    |
| 4801 | MMT00057721   |           | 18+:23375130-23376062   |
| 4802 | 5430433G21Rik | 319909    | 2+:139504507-139584294  |
| 4805 | Hspb1         | 15507     | 5+:136363928-136365307  |
| 4807 | Fgl2          | 14190     | 5+:20878499-20882878    |
| 4810 | Vsig8         | 240916    | 1+:174486202-174493847  |
| 4811 | Gripap1       | 54645     | X+:7367142-7397687      |
| 4812 | Myom1         | 17929     | 17+:71368860-71476195   |
| 4813 | Agpat6        | 102247    | 8-:24284988-24293313    |
| 4815 | Upf1          | 19704     | 8-:72855428-72877178    |
| 4817 | MMT00046203   |           |                         |
| 4818 | Enpep         | 13809     | 3-:128972537-129035486  |
| 4819 | MMT00082285   |           | 14+:19363856-19365450   |
| 4825 | Nfkbil1       | 18038     | 17-:35357120-35372760   |
| 4826 | Sypl2         | 17306     | 3-:108015183-108029517  |
| 4832 | Nxn12         | 75124     | 13+:51266393-51270556   |
| 4833 | Synpo2        | 118449    | 3-:122815319-122817593  |
| 4836 | Gtf2h3        | 209357    | 5+:125029100-125046849  |
| 4837 | Ear2          | 13587     | 14+:44680551-44681022   |
| 4839 | Cyp4a32       | 100040843 | 4+:115236254-115294212  |
| 4843 | Oma1          | 67013     | 4+:102986450-103039033  |
| 4847 | Sbpl          | 638345    | 17-:24090051-24091883   |
| 4848 | Flt3          | 14255     | 5-:148142321-148211871  |
| 4849 | Zxdc          | 80292     | 6+:90319527-90333086    |
| 4850 | Fancd2        | 211651    | 6+:113481695-113547011  |
| 4851 | Gpn2          | 100210    | 4+:133140294-133147646  |
| 4855 | Csrnp3        | 77771     | 2+:65683869-65716875    |
| 4863 | Atad4         | 217138    | 11+:96790637-96796959   |
| 4864 | S100a16       | 67860     | 3+:90341297-90347070    |
| 4868 | Mertk         | 17289     | 2+:128524732-128627924  |
| 4870 | Olfir550      | 259108    | 7+:109727010-109727959  |
| 4879 | Olfir784      | 258724    | 10+:128824690-128825650 |
| 4881 | 4930434E21Rik | 381693    | 5+:150408863-150414465  |
| 4885 | Fhad1         | 329977    | 4-:141484294-141507592  |
| 4886 | Jarid1a       | 214899    | 6+:120314475-120369459  |
| 4896 | 4930405M20Rik | 73942     | 13-:93219577-93254049   |
| 4897 | Ciao1         | 26371     | 2-:127068300-127073496  |
| 4898 | MMT00072808   |           | 14-:114708037-114710025 |
| 4899 | Nr4a2         | 18227     | 2-:56960568-56967666    |
| 4900 | 5031426D15Rik | 68144     | 2-:6845969-6849768      |
| 4901 | MMT00073557   | 171504    | 7+:133728521-133732598  |
| 4904 | Tinf2         | 28113     | 14-:56297933-56300645   |
| 4906 | A830059I20Rik | 58238     | 7+:100228428-100230228  |



|      |               |        |                         |
|------|---------------|--------|-------------------------|
| 4910 | 5530400C23Rik | 232426 | 6+:133242234-133245807  |
| 4913 | Zfp619        | 70227  | 7+:46753549-46822953    |
| 4915 | Asb18         | 208372 | 1-:91849252-91911152    |
| 4918 | Scara5        | 71145  | 14+:66285263-66383660   |
| 4920 | Rbl1          | 19650  | 2-:156971623-157025312  |
| 4932 | Cd70          | 21948  | 17-:57285420-57289200   |
| 4933 | Clec14a       | 66864  | 12-:59366922-59369883   |
| 4934 | Abca13        | 268379 | 11+:9235231-9528671     |
| 4936 | MMT00031931   |        | 18-:80072327-80073065   |
| 4938 | Mccc2         | 78038  | 13-:100718483-100785567 |
| 4939 | 1700023B02Rik | 66935  | 2-:73121928-73150560    |
| 4949 | Taok2         | 381921 | 7-:134009189-134024277  |
| 4950 | Dnajb10       | 56812  | 1+:75233130-75242265    |
| 4955 | Cxcl1         | 14825  | 5+:91320335-91322141    |
| 4958 | Ndufa7        | 66416  | 17+:33961574-33975133   |
| 4959 | Optn          | 71648  | 2-:4941686-4963566      |
| 4960 | MMT00067115   |        | 17-:18048003-18049853   |
| 4965 | Kl            | 16591  | 5+:151755273-151796386  |
| 4966 | Zscan20       | 269585 | 4-:128262620-128281844  |
| 4967 | Plekhm1       | 353047 | 11-:103241432-103274027 |
| 4971 | Hist1h4i      | 319158 | 13-:22129747-22133192   |
| 4973 | Grik4         | 110637 | 9-:42616574-42616709    |
| 4980 | MMT00006445   |        | 6-:68966533-68993274    |
| 4982 | 4930449A18Rik | 74672  | 3+:59642287-59650737    |
| 4983 | Rabgef1       | 56715  | 5+:130647717-130690211  |
| 4988 | 2400001E08Rik | 66508  | 7+:109054442-109060398  |
| 4993 | Tsc22d1       | 21807  | 14-:76906439-76907570   |
| 4996 | Echdc3        | 67856  | 2-:6109865-6134021      |
| 4997 | Trim24        | 21848  | 6+:37820630-37916287    |
| 5002 | Ifi202b       | 26388  | 1-:175892745-175912845  |
| 5003 | 2410081M15Rik | 73680  | 4-:129030875-129055272  |
| 5010 | Gnpda2        | 67980  | 5-:69964348-69982030    |
| 5011 | A930016P21Rik | 68073  | 15+:31531872-31547290   |
| 5013 | Fanci         | 67030  | 11+:26287201-26371876   |
| 5014 | MMT00017503   |        | 1+:7654291-7655057      |
| 5017 | Plat          | 18791  | 8+:23868239-23893316    |
| 5018 | Phf21a        | 192285 | 2+:92024494-92201050    |
| 5021 | Gdap2         | 14547  | 3+:99966440-100010904   |
| 5023 | Spast         | 50850  | 17+:74751284-74790540   |
| 5024 | MMT00020852   |        | 10+:128052418-128053090 |
| 5027 | Pde4b         | 18578  | 4+:101927607-102278428  |
| 5029 | 1110034G24Rik | 73747  | 2+:132512673-132576943  |
| 5032 | Gm872         | 380653 | 10-:92238409-92278681   |
| 5033 | MMT00012520   |        | X-:129422743-129423698  |
| 5034 | EG621976      | 621976 | 13+:41701584-41730291   |
| 5036 | C030003D03Rik | 77220  | 10-:25712699-25798168   |

|      |               |        |                         |
|------|---------------|--------|-------------------------|
| 5043 | Cxcl13        | 55985  | 5+:96385957-96390086    |
| 5044 | Ifi35         | 70110  | 11+:101309794-101319776 |
| 5046 | Pthlh         | 19227  | 6-:147200621-147212723  |
| 5048 | Mgll          | 23945  | 6+:88674477-88778351    |
| 5051 | Angpt1        | 11600  | 15-:42258288-42508313   |
| 5052 | Lrrn3         | 16981  | 12-:42178781-42216157   |
| 5053 | BC002199      | 211556 | 3-:127510184-127511782  |
| 5054 | Zfp821        | 75871  | 8+:112230251-112248831  |
| 5060 | MMT00066059   |        | 4+:149583796-149602550  |
| 5061 | Myo9a         | 270163 | 9+:59598979-59773196    |
| 5063 | MMT00046201   |        | 2-:78353035-78353496    |
| 5064 | Tekt2         | 24084  | 4-:125999366-126002443  |
| 5068 | Afap1l2       | 226250 | 19-:56986849-57082667   |
| 5071 | Aff2          | 14266  | X+:66613505-67121211    |
| 5072 | MMT00052662   |        | 15+:48720103-48721563   |
| 5076 | Tmem57        | 66146  | 4-:134358671-134408862  |
| 5082 | Ibsp          | 15891  | 5+:104728315-104740484  |
| 5083 | Gprc5b        | 64297  | 7-:126115043-126128159  |
| 5084 | Gsn           | 227753 | 2+:35137961-35163414    |
| 5086 | Ccnh          | 66671  | 13+:85329041-85352512   |
| 5092 | Ydjc          | 69101  | 16+:17144711-17148938   |
| 5094 | Yes1          | 22612  | 5+:32913605-32989429    |
| 5098 | 1700029J11Rik | 76426  | 2+:172298044-172299791  |
| 5099 | MMT00056385   |        |                         |
| 5100 | Pebp1         | 23980  | 5-:117732662-117737555  |
| 5101 | Gm101         | 226356 | 1-:121819919-121832748  |
| 5103 | EG237361      | 237361 | 10+:60772577-60773022   |
| 5104 | 1700094C09Rik | 78634  | 8+:12573048-12600738    |
| 5106 | Usp38         | 74841  | 8-:83511469-83539565    |
| 5107 | Gprc5c        | 70355  | 11+:114713368-114730409 |
| 5108 | 2200002D01Rik | 72275  | 7-:30032521-30033492    |
| 5109 | Cyp3a11       | 13112  | 5-:146666541-146691426  |
| 5113 | Nxn1l         | 234404 | 8-:74084454-74090500    |
| 5114 | Fbxo33        | 70611  | 12-:60301643-60320437   |
| 5118 | Hmcn1         | 545370 | 1-:152409635-152707507  |
| 5120 | Alkbh7        | 66400  | 17+:57136775-57138745   |
| 5123 | Zfp191        | 59057  | 18-:24172660-24176588   |
| 5125 | Fmod          | 14264  | 1+:135934119-135944736  |
| 5126 | Fcnb          | 14134  | 2-:27931897-27940377    |
| 5127 | Kif20b        | 240641 | 19+:34996848-35050241   |
| 5132 | 1600016N20Rik | 72000  | 7-:148395760-148396896  |
| 5133 | 6430517E21Rik | 240843 | 1-:160175400-160225908  |
| 5135 | Pisd          | 320951 | 5+:33069248-33079766    |
| 5142 | Eppk1         | 223650 | 15-:75949949-75950994   |
| 5145 | Scn3b         | 235281 | 9+:40077125-40096767    |
| 5147 | 5730455P16Rik | 70591  | 11-:80173994-80191506   |

|      |                  |           |                        |
|------|------------------|-----------|------------------------|
| 5149 | Sirt3            | 64384     | 7-:148049572-148068208 |
| 5152 | Cdh10            | 320873    | 15+:18748679-18943559  |
| 5153 | MMT00072251      |           | 4-:101719173-101722109 |
| 5156 | Srm              | 20810     | 4+:147965655-147968701 |
| 5158 | Rtn4             | 68585     | 11+:29618782-29642086  |
| 5159 | MMT00020962      |           | 7-:80133985-80135027   |
| 5161 | Tbc1d1           | 57915     | 5+:64726514-64736671   |
| 5169 | MMT00037010      |           |                        |
| 5172 | Sumo1            | 22218     | 1-:59696287-59727653   |
| 5173 | Azgp1            | 12007     | 5+:138422787-138431458 |
| 5175 | MMT00032221      |           |                        |
| 5180 | E130304I02Rik    | 78547     | 7+:36587185-36623093   |
| 5181 | 4930481B07Rik    | 74937     | 3+:94819035-94820196   |
| 5182 | Pcx              | 18563     | 19+:4594357-4621697    |
| 5183 | St5              | 76954     | 7-:116667426-116760080 |
| 5185 | Dus2l            | 66369     | 8+:108535394-108577739 |
| 5187 | Speer4f          | 70935     | 5+:16981939-16986754   |
| 5188 | Cma1             | 17228     | 14-:56560289-56563498  |
| 5200 | Tm6sf1           | 107769    | 7+:89004016-89028952   |
| 5205 | MMT00065634      |           | 10+:62137891-62165263  |
| 5208 | Plod2            | 26432     | 9+:92437289-92503258   |
| 5211 | Fubp3            | 320267    | 2+:31428259-31473015   |
| 5215 | Col6a1           | 12833     | 10-:76171536-76188789  |
| 5216 | Spnb5            | 640524    | 2-:119872115-119911478 |
| 5218 | ENSMUSG000000460 | 194612    | 17+:22825894-22884251  |
| 5220 | MMT00037083      |           | 12+:55817773-55818252  |
| 5222 | B630005N14Rik    | 101148    | 6-:13575937-13627833   |
| 5224 | MMT00071383      |           | 10-:68154349-68154847  |
| 5225 | Maf1             | 68877     | 15+:76182432-76184802  |
| 5227 | 2310008M10Rik    | 66357     | 3-:130399068-130412335 |
| 5228 | Actr3b           | 242894    | 5+:25265902-25355764   |
| 5229 | Katna1           | 23924     | 10+:7445819-7482948    |
| 5230 | MMT00077995      |           | 6-:117423016-117423443 |
| 5232 | Arhgef16         | 230972    | 4-:153652595-153662123 |
| 5233 | Pcbd1            | 13180     | 10+:60552108-60557067  |
| 5234 | Lhx8             | 16875     | 3-:153969261-153993364 |
| 5237 | Cpa1             | 109697    | 6+:30592297-30595360   |
| 5238 | Il12b            | 16160     | 11+:44213564-44227512  |
| 5242 | Gata3            | 14462     | 2-:9779481-9799424     |
| 5244 | MMT00022648      |           | X+:75636043-75636562   |
| 5245 | Cacna1h          | 58226     | 17-:25511294-25570113  |
| 5247 | Irak2            | 108960    | 6+:113588493-113645003 |
| 5249 | Olfir615         | 259084    | 7+:110708992-110709933 |
| 5250 | Ifit2            | 15958     | 19+:34644804-34651013  |
| 5252 | Mfsd3            | 69572     | 15+:76531894-76533998  |
| 5255 | Zkscan16         | 100041581 | 4+:58959022-58970725   |

|      |               |        |                         |
|------|---------------|--------|-------------------------|
| 5256 | Tnfrsf13c     | 72049  | 15-:82052173-82054764   |
| 5258 | Mcts2         | 66405  | 2+:152512883-152513682  |
| 5259 | Mat1a         | 11720  | 14+:41918669-41937699   |
| 5262 | Mecp2         | 17257  | X-:71272168-71330932    |
| 5263 | Anapc13       | 69010  | 9+:102532119-102536468  |
| 5265 | A3galt2       | 215493 | 4+:128438662-128444916  |
| 5270 | Rnf8          | 58230  | 17+:29751806-29778603   |
| 5271 | Npy           | 109648 | 6+:49773596-49779502    |
| 5272 | Grk4          | 14772  | 5+:35003601-35097952    |
| 5273 | Vmn2r89       | 22301  | 14+:52071636-52080967   |
| 5274 | MMT00065196   |        | 2-:134587804-134589386  |
| 5283 | B3galt1       | 26877  | 2+:67955999-67956980    |
| 5284 | Npffr1        | 237362 | 10+:61076703-61089132   |
| 5285 | Tmc8          | 217356 | 11+:117643432-117645506 |
| 5291 | Chl1          | 12661  | 6+:103460996-103679821  |
| 5294 | C730048C13Rik | 319800 | 19-:8409849-8479572     |
| 5295 | F2r           | 14062  | 13-:96371743-96388388   |
| 5296 | Rnf181        | 66510  | 6-:72309714-72312387    |
| 5298 | Sbno1         | 243272 | 5-:124842977-124875577  |
| 5303 | Ndufv2        | 72900  | 17-:66428550-66450866   |
| 5306 | Ywhag         | 22628  | 5-:136386681-136410446  |
| 5313 | 9630058J23Rik | 226744 | 1+:181536593-181557605  |
| 5319 | Hydin         | 244653 | 8+:113110933-113134145  |
| 5320 | MMT00007643   |        | 8+:23517938-23518974    |
| 5322 | Slpi          | 20568  | 2-:164179806-164198446  |
| 5325 | C230097I24Rik | 328918 | 18-:24122539-24130290   |
| 5328 | MMT00020895   |        |                         |
| 5330 | Cbfa2t3       | 12398  | 8-:125153890-125222877  |
| 5332 | Pdlim4        | 30794  | 11-:53868433-53882470   |
| 5334 | MMT00021505   |        | 13-:109098648-109100938 |
| 5336 | Timeless      | 21853  | 10+:127675120-127689988 |
| 5339 | 4930488E11Rik | 399591 | X-:133491272-133511389  |
| 5340 | MMT00048531   |        | X+:144181262-144199155  |
| 5342 | Eps8l3        | 99662  | 3+:107680154-107695817  |
| 5345 | MMT00023326   | 57435  | 17-:56240016-56249226   |
| 5352 | Pdcd2l        | 68079  | 7-:34969515-34981692    |
| 5355 | Gpsm2         | 76123  | 3-:108482007-108525087  |
| 5357 | MMT00021917   |        | 2-:174979623-174979793  |
| 5360 | Cep76         | 225659 | 18-:67777455-67800854   |
| 5362 | Nans          | 94181  | 4+:46502153-46515545    |
| 5364 | Kif22         | 110033 | 7-:134171245-134185934  |
| 5365 | C87436        | 232196 | 6+:86388681-86420379    |
| 5369 | Rag1          | 19373  | 2-:101478438-101489658  |
| 5370 | Crh           | 12918  | 3-:19593437-19595485    |
| 5372 | Tor1a         | 30931  | 2-:30816147-30823404    |
| 5374 | Chka          | 12660  | 19+:3851913-3894367     |

|      |               |        |                         |
|------|---------------|--------|-------------------------|
| 5375 | Sec23b        | 27054  | 2+:144384956-144416109  |
| 5377 | MMT00077700   |        | X+:161986982-162118532  |
| 5380 | Olfr1403      | 258645 | 1+:175200515-175201240  |
| 5382 | Fbn1          | 14118  | 2-:125126331-125332121  |
| 5385 | Tubb2b        | 73710  | 13-:34218876-34222223   |
| 5389 | Abce1         | 24015  | 8-:82207543-82235514    |
| 5406 | Cd207         | 246278 | 6-:83621677-83627793    |
| 5410 | Cyp4f15       | 106648 | 17+:32822603-32840294   |
| 5413 | Flot1         | 14251  | 17+:35960301-35969732   |
| 5414 | Etnk2         | 214253 | 1+:135260359-135276200  |
| 5416 | Jhdm1d        | 338523 | 6-:39086652-39088048    |
| 5417 | Ssb           | 20823  | 2+:69699689-69709856    |
| 5420 | Mbnl1         | 56758  | 3+:60333070-60433302    |
| 5422 | 4933422A05Rik | 71133  | 9+:35090119-35093008    |
| 5425 | Ung           | 22256  | 5+:114581208-114589330  |
| 5431 | Fkbp6         | 94244  | 5-:135767574-135825861  |
| 5433 | 2410004L22Rik | 76478  | 8-:73775023-73796275    |
| 5434 | Inpp5b        | 16330  | 4+:124428773-124478680  |
| 5435 | Lins2         | 72635  | 7+:73834840-73859630    |
| 5436 | Prl7a1        | 19113  | 13-:27725247-27734343   |
| 5438 | Slc25a15      | 18408  | 8-:23487758-23508932    |
| 5440 | 1810020G14Rik | 66272  | 12-:82572811-82586069   |
| 5443 | Nap1l2        | 17954  | X-:100379514-100381979  |
| 5445 | 1700003E16Rik | 71837  | 6+:83106456-83112936    |
| 5449 | Got1          | 14718  | 19-:43574244-43598999   |
| 5450 | Nrbp1         | 192292 | 5+:31543290-31553933    |
| 5452 | Mogat2        | 233549 | 7-:106367595-106387078  |
| 5453 | Odf3l1        | 382075 | 9-:56696466-56699583    |
| 5455 | Kcnab3        | 16499  | 11+:69143825-69145645   |
| 5456 | Rabgap1l      | 29809  | 1-:162153666-162187675  |
| 5463 | Krt14         | 16664  | 11-:100064477-100068824 |
| 5465 | Slamf8        | 74748  | 1-:174511890-174520620  |
| 5466 | 2310047D13Rik | 116972 | 11+:76014676-76022918   |
| 5468 | MMT00053630   |        | 10+:40268705-40269545   |
| 5472 | Mppe1         | 225651 | 18-:67384702-67405479   |
| 5475 | Akr1c18       | 105349 | 13-:4131872-4149877     |
| 5477 | 2210412D01Rik | 70178  | 7-:91257869-91300403    |
| 5482 | Cdsn          | 386463 | 17+:35689120-35693858   |
| 5483 | Gpc5          | 103978 | 14+:115768753-115798511 |
| 5487 | Palmd         | 114301 | 3-:116621185-116671667  |
| 5488 | C920009B18Rik | 606736 | 10+:22026526-22034002   |
| 5492 | MMT00039914   |        | 13+:4247980-4249023     |
| 5494 | Gpr101        | 245424 | X-:54753277-54754965    |
| 5504 | Itsn1         | 16443  | 16+:91782437-91912254   |
| 5505 | Thap2         | 66816  | 10-:114808894-114821470 |
| 5508 | Lrig2         | 269473 | 3-:104261050-104315822  |

|      |                  |        |                         |
|------|------------------|--------|-------------------------|
| 5511 | BC055004         | 381680 | 5+:138680464-138693315  |
| 5517 | Stx17            | 67727  | 4+:48137801-48195989    |
| 5518 | Jmjd1c           | 108829 | 10+:66590005-66719072   |
| 5522 | Pink1            | 68943  | 4-:137869319-137882193  |
| 5523 | Taok1            | 216965 | 11-:77343564-77344872   |
| 5524 | Klhl7            | 52323  | 5+:23606429-23666603    |
| 5525 | Prkca            | 18750  | 11-:107799561-108205242 |
| 5526 | Ush1c            | 72088  | 7-:53450726-53493860    |
| 5527 | Zfp398           | 272347 | 6+:47785665-47818255    |
| 5528 | Rfx1             | 19724  | 8+:86590827-86619942    |
| 5530 | MMT00027303      |        | 16+:21896562-21897207   |
| 5531 | Ptk6             | 20459  | 2-:180929828-180937494  |
| 5536 | 5830415F09Rik    | 74753  | 4-:46389379-46402540    |
| 5539 | Eif2s2           | 67204  | 2-:154697153-154718518  |
| 5541 | Bcap29           | 12033  | 12-:32280260-32319245   |
| 5544 | Camsap1          | 227634 | 2-:25782493-25838494    |
| 5548 | Fgf6             | 14177  | 6+:126965603-126977447  |
| 5552 | Rasgrp3          | 240168 | 17+:75895692-75927270   |
| 5553 | MMT00013152      |        | 12-:72369920-72371344   |
| 5554 | Emr1             | 13733  | 17+:57498112-57622948   |
| 5555 | Fbln7            | 70370  | 2+:128703086-128722768  |
| 5556 | Ccl4             | 20303  | 11+:83476088-83478182   |
| 5558 | V1ra9            | 113851 | 6+:90219099-90220045    |
| 5563 | Slco1a4          | 28250  | 6-:141753960-141804692  |
| 5566 | 2610002J02Rik    | 67513  | 4+:154623908-154630799  |
| 5567 | Mapk8ip1         | 19099  | 2-:92224326-92241310    |
| 5569 | Pdgfc            | 54635  | 3+:80841161-81017954    |
| 5572 | Opalin           | 226115 | 19-:41134027-41151655   |
| 5574 | Hsd3b7           | 101502 | 7+:134944182-134947312  |
| 5577 | MMT00009628      |        | 11+:117736358-117825335 |
| 5578 | Phactr1          | 218194 | 13+:43051984-43230728   |
| 5583 | Igh              | 111507 | 12-:115008053-115008508 |
| 5586 | OTTMUSG000000012 | 433719 | 4-:72512345-73084353    |
| 5587 | Rmnd5b           | 66089  | 11-:51436993-51449499   |
| 5588 | Snx20            | 71607  | 8-:91150726-91160027    |
| 5591 | Igsf8            | 140559 | 1+:174242069-174249971  |
| 5594 | ErbB3            | 13867  | 10-:128004583-128026677 |
| 5597 | Ttll4            | 67534  | 1+:74725565-74744545    |
| 5598 | Trp73            | 22062  | 4-:153430356-153516627  |
| 5601 | 4933417O08Rik    | 71146  | 19+:42322061-42343631   |
| 5603 | BC020535         | 228788 | 2+:152891690-152907334  |
| 5609 | Gtf2a2           | 235459 | 9+:69860390-69870268    |
| 5610 | Syngap1          | 240057 | 17+:27081577-27107590   |
| 5611 | Rapgef3          | 223864 | 15-:97575386-97598097   |
| 5613 | Mrpl12           | 56282  | 11+:120345982-120350067 |
| 5614 | Cope             | 59042  | 8+:72826683-72836889    |

|      |                  |        |                         |
|------|------------------|--------|-------------------------|
| 5615 | Sertad2          | 58172  | 11+:20443336-20549114   |
| 5619 | Rap1gds1         | 229877 | 3-:138588876-138738034  |
| 5629 | Als2             | 74018  | 1-:59219775-59294061    |
| 5632 | Reck             | 53614  | 4+:43950178-43957675    |
| 5634 | Creb1            | 12912  | 1+:64579467-64644851    |
| 5636 | Trmu             | 72026  | 15+:85709756-85727820   |
| 5639 | Gdpd3            | 68616  | 7+:133910686-133919157  |
| 5642 | Crebzf           | 233490 | 7+:97592081-97593285    |
| 5644 | Spsb2            | 14794  | 6+:124758958-124760632  |
| 5645 | Tmem8            | 60455  | 17+:26250261-26260196   |
| 5646 | Kifc1            | 16580  | 17+:27054159-27069227   |
| 5648 | Zfp213           | 449521 | 17-:23693735-23701168   |
| 5652 | Adam26a          | 13525  | 8-:44653631-44662020    |
| 5656 | 4933434I20Rik    | 67555  | 8+:85872369-85903301    |
| 5657 | Arpc1b           | 11867  | 5+:145883424-145887638  |
| 5661 | Lrrc46           | 69297  | 11-:96895911-96902658   |
| 5664 | Fez2             | 225020 | 17-:78777222-78817426   |
| 5666 | Vegfb            | 22340  | 19-:7056961-7062093     |
| 5669 | Fndc1            | 68655  | 17-:7931447-7966670     |
| 5670 | EG625253         | 625253 | X+:153978628-153979376  |
| 5672 | Galnt4           | 233733 | 7-:118615168-118759998  |
| 5674 | MMT00073552      |        | 3-:121886794-121887878  |
| 5677 | Cmas             | 12764  | 6+:142705292-142724227  |
| 5680 | Lrg1             | 76905  | 17-:56259102-56261312   |
| 5681 | Mbd1             | 17190  | 18+:74427957-74442339   |
| 5684 | Ranbp10          | 74334  | 8-:108292209-108351095  |
| 5685 | Gbx2             | 14472  | 1-:91824474-91827752    |
| 5686 | Cys1             | 12879  | 12-:25350702-25366678   |
| 5687 | Klf11            | 194655 | 12+:25336389-25347640   |
| 5689 | Dsg2             | 13511  | 18+:20716573-20763024   |
| 5691 | Csrp3            | 13009  | 7-:56085929-56103395    |
| 5692 | 2010005H15Rik    | 76770  | 16+:36253090-36257530   |
| 5693 | Zfp809           | 235047 | 9+:22009228-22047796    |
| 5694 | Sp7              | 170574 | 15-:102187040-102196764 |
| 5700 | Tenc1            | 209039 | 15+:101933517-101946833 |
| 5706 | Cyp1a2           | 13077  | 9-:57525035-57530336    |
| 5707 | MMT00017539      |        | 4-:136165086-136165774  |
| 5715 | ENSMUSG000000529 | 433237 | 19+:29141789-29143990   |
| 5718 | Tspan2           | 70747  | 3+:102538889-102575154  |
| 5721 | Mlc1             | 170790 | 15-:88786314-88809437   |
| 5725 | 2-Mar            | 224703 | 17-:33828474-33855582   |
| 5727 | Camk2g           | 12325  | 14-:21554097-21611844   |
| 5728 | MMT00044077      |        | 18-:47853154-47895055   |
| 5729 | 2310016C08Rik    | 69573  | 6+:29222749-29225322    |
| 5730 | Tasp1            | 75812  | 2-:139659214-139736380  |
| 5733 | B4galnt2         | 14422  | 11-:95727335-95776185   |

|      |               |        |                         |
|------|---------------|--------|-------------------------|
| 5734 | EG619653      | 619653 | 8-:128999567-129000755  |
| 5735 | Nkapl         | 66707  | 13-:21558967-21560356   |
| 5737 | Nkx2-2        | 18088  | 2-:147008887-147012095  |
| 5740 | Efemp2        | 58859  | 19+:5475020-5481852     |
| 5742 | Olfir782      | 257985 | 10+:128787620-128788563 |
| 5745 | Cartpt        | 27220  | 13-:100668874-100670589 |
| 5747 | Fbxl16        | 214931 | 17+:25953360-25956727   |
| 5748 | Brsk2         | 75770  | 7+:149136256-149184917  |
| 5749 | Ube2j2        | 140499 | 4+:155323115-155331473  |
| 5750 | 2610101N10Rik | 67958  | 9-:95360816-95412304    |
| 5752 | Dffa          | 13347  | 4+:148478359-148492047  |
| 5758 | Tpst1         | 22021  | 5+:130577459-130611598  |
| 5760 | Prl           | 19109  | 13+:27149444-27157051   |
| 5761 | Ralgps2       | 78255  | 1-:158738960-158837895  |
| 5762 | Trpc3         | 22065  | 3-:36519494-36570525    |
| 5764 | Ltb4dh        | 67103  | 4-:58979360-58999973    |
| 5765 | Ifitm2        | 80876  | 7-:148140737-148141860  |
| 5766 | 5033414D02Rik | 67759  | 19-:29423166-29436361   |
| 5768 | MMT00077590   |        | 18-:90480351-90481596   |
| 5773 | 1700129C05Rik | 67932  | 14-:59751876-59761730   |
| 5776 | Rpa1          | 68275  | 11-:75113850-75161806   |
| 5780 | Col14a1       | 12818  | 15+:55139299-55352357   |
| 5783 | 4833413O15Rik | 242286 | 4-:3989766-4004072      |
| 5786 | Lta           | 16992  | 17-:35340107-35342128   |
| 5788 | Smpdl3b       | 100340 | 4-:132288880-132313086  |
| 5791 | Baiap2l1      | 66898  | 5-:145025397-145118981  |
| 5792 | Tpd52l2       | 66314  | 2+:181231905-181250603  |
| 5795 | MMT00057992   |        | 4+:41115654-41116684    |
| 5797 | MMT00034010   |        | 4-:40663118-40664024    |
| 5801 | MMT00042142   |        | 6-:127133424-127174210  |
| 5802 | Mad2l2        | 71890  | 4+:147514598-147519805  |
| 5804 | Thrsp         | 21835  | 7-:104565560-104566013  |
| 5806 | Prrx2         | 20204  | 2+:30700800-30736771    |
| 5809 | MMT00030928   |        | X-:79067525-79068260    |
| 5811 | Col4a2        | 12827  | 8+:11312890-11449286    |
| 5814 | Nrbp2         | 223649 | 15-:75916024-75920443   |
| 5815 | Ehf           | 13661  | 2-:103106667-103123917  |
| 5822 | Car2          | 12349  | 3+:14886697-14900576    |
| 5827 | 6332401O19Rik | 319832 | 6-:24901146-24906085    |
| 5829 | 2810455K09Rik | 72805  | 12+:112088515-112107287 |
| 5831 | Sh2b3         | 16923  | 5-:122267730-122282573  |
| 5833 | Kcnk7         | 16530  | 19+:5704366-5707100     |
| 5837 | Alg8          | 381903 | 7+:104520046-104540670  |
| 5839 | Olfir1045     | 259019 | 2-:86037961-86038907    |
| 5840 | Tbc1d9b       | 76795  | 11+:49944902-49986279   |
| 5841 | Atg12         | 67526  | 18-:46892080-46901211   |



|      |               |        |                         |
|------|---------------|--------|-------------------------|
| 5842 | Cldn6         | 54419  | 17+:23818030-23818689   |
| 5843 | Anks1b        | 77531  | 10+:89973340-90143666   |
| 5845 | Ii18bp        | 16068  | 7-:109163590-109166669  |
| 5849 | 2310031A18Rik | 69627  | 8-:127264157-127275506  |
| 5850 | MMT00051577   |        | 14+:46587419-46612844   |
| 5853 | Trim30        | 20128  | 7-:111557541-111613625  |
| 5854 | Kif11         | 16551  | 19+:37450840-37496351   |
| 5856 | Mfsd2         | 76574  | 4-:122623711-122638436  |
| 5858 | Itch          | 16396  | 2+:154959300-155052587  |
| 5861 | Anxa3         | 11745  | 5+:97222433-97274987    |
| 5864 | C730036D15Rik | 209186 | 4-:49392792-49396448    |
| 5866 | EG432502      | 432502 | 10+:110562915-110563781 |
| 5869 | MMT00058347   |        | 14+:108147699-108148978 |
| 5870 | Limd1         | 29806  | 9+:123387823-123430634  |
| 5875 | Cd86          | 12524  | 16-:36606620-36666079   |
| 5876 | 1600029O15Rik | 442832 | 9+:58055194-58056247    |
| 5878 | Iqgap2        | 544963 | 13-:96397129-96661872   |
| 5879 | Lmnb1         | 16906  | 18+:56867526-56913076   |
| 5880 | Ppme1         | 72590  | 7-:107475245-107503353  |
| 5881 | Fzd4          | 14366  | 7+:96115428-96557763    |
| 5883 | Olf1087       | 258843 | 2-:86530190-86531130    |
| 5884 | Gstm2         | 14863  | 3-:107784616-107789315  |
| 5889 | Errfi1        | 74155  | 4+:150229199-150242988  |
| 5890 | Zfx           | 22764  | X-:91319970-91368239    |
| 5892 | MMT00038457   |        | 13+:99383173-99384945   |
| 5899 | Cpa3          | 12873  | 3-:20115521-20142076    |
| 5900 | Igsf21        | 230868 | 4-:139582764-139802286  |
| 5902 | 4930563P21Rik | 75275  | 2+:113125896-113137343  |
| 5905 | Nos2          | 18126  | 11+:78734360-78773626   |
| 5908 | MMT00027552   |        | 13-:79092343-79094053   |
| 5910 | 1110014J01Rik | 74778  | 15-:82946278-82953181   |
| 5913 | 1700007E06Rik | 75459  | 15-:89220593-89240649   |
| 5918 | Ccl9          | 20308  | 11-:83388160-83392112   |
| 5919 | B930041F14Rik | 230991 | 4+:155042736-155069280  |
| 5920 | Las1l         | 76130  | X-:93147318-93152187    |
| 5921 | MMT00026738   |        | 9-:72454194-72454753    |
| 5922 | Hyal2         | 15587  | 9+:107471456-107475107  |
| 5923 | Vav1          | 22324  | 17+:57418607-57467126   |
| 5925 | Tmem59l       | 67937  | 8-:73007757-73011236    |
| 5929 | Cpz           | 242939 | 5-:35844865-35868184    |
| 5930 | Mst1r         | 19882  | 9+:107809219-107822712  |
| 5934 | S100a10       | 20194  | 3+:93359085-93368565    |
| 5938 | Pfn2          | 18645  | 3-:57645822-57651410    |
| 5941 | Ttn           | 22138  | 2-:76673993-76674677    |
| 5944 | Sp3           | 20687  | 2-:72774485-72819017    |
| 5946 | MMT00048659   |        |                         |

|      |               |        |                         |
|------|---------------|--------|-------------------------|
| 5949 | Zbp1          | 58203  | 2-:173032112-173044391  |
| 5953 | MMT00008178   |        | 5-:28186044-28186980    |
| 5954 | Lcn13         | 227627 | 2+:25555592-25558846    |
| 5959 | Cdh3          | 12560  | 8+:109034779-109080047  |
| 5960 | EG381065      | 381065 | 17+:20707334-20708162   |
| 5965 | Pbld          | 68371  | 10+:62524345-62539576   |
| 5966 | Cacnb4        | 12298  | 2-:52289380-52413917    |
| 5967 | Nup85         | 445007 | 11+:115425773-115430038 |
| 5968 | MMT00012419   |        | 4+:140640935-140641534  |
| 5973 | MMT00070628   |        | 14-:52249951-52254309   |
| 5974 | Arntl         | 11865  | 7+:120351092-120457638  |
| 5975 | Car13         | 71934  | 3+:14641776-14661804    |
| 5976 | Col6a3        | 12835  | 1-:92663435-92740506    |
| 5979 | Lmo2          | 16909  | 2+:103810828-103821251  |
| 5980 | Gabrb1        | 14400  | 5+:72091254-72528483    |
| 5982 | Rab3gap1      | 226407 | 1+:129765370-129840443  |
| 5983 | Pcolce2       | 76477  | 9+:95538046-95595968    |
| 5984 | Parva         | 57342  | 7+:119571451-119732297  |
| 5989 | 2310042D19Rik | 74183  | 4+:155590823-155595417  |
| 5990 | Rhbg          | 58176  | 3-:88047046-88058606    |
| 5991 | Tsc22d2       | 72033  | 3+:58219610-58265759    |
| 5994 | Olfir609      | 259086 | 7-:110640431-110641390  |
| 5996 | Tmod3         | 50875  | 9-:75345588-75407373    |
| 5998 | Snrpd3        | 67332  | 10+:74982079-74998065   |
| 5999 | RP23-275N21.2 | 329575 | 2-:177567215-177575136  |
| 6002 | Med24         | 23989  | 11-:98565914-98590681   |
| 6005 | Gucy2f        | 245650 | X-:138523396-138631440  |
| 6011 | Fbxl13        | 320118 | 5-:20989666-21029735    |
| 6012 | Chid1         | 68038  | 7-:148681237-148725703  |
| 6016 | A530057A03Rik | 215456 | 2+:127259321-127261826  |
| 6017 | MMT00018015   | 667716 | 11-:120388168-120393097 |
| 6019 | Gdap10        | 14546  | 12+:33506736-33511764   |
| 6020 | EG640530      | 640530 | 6+:121683047-121734773  |
| 6021 | MMT00008784   |        | 14-:93001678-93003616   |
| 6023 | Saa4          | 20211  | 7-:53984018-53987943    |
| 6024 | Ddo           | 70503  | 10+:40349864-40369234   |
| 6026 | MMT00058578   |        | X-:151405749-151407971  |
| 6028 | Alas1         | 11655  | 9-:106137717-106150212  |
| 6030 | As3mt         | 57344  | 19+:46781962-46815562   |
| 6031 | MMT00035612   |        | 19+:11566536-11586198   |
| 6035 | Nkd1          | 93960  | 8+:91045333-91116220    |
| 6036 | Pram1         | 378460 | 17+:33766045-33782650   |
| 6037 | Ccnl2         | 56036  | 4+:155195181-155198405  |
| 6038 | Acot1         | 26897  | 12+:85350454-85358617   |
| 6041 | Penk1         | 18619  | 4-:4060684-4065921      |
| 6043 | Cyp2ab1       | 224044 | 16-:20309922-20316132   |

|      |               |        |                         |
|------|---------------|--------|-------------------------|
| 6044 | Sucnr1        | 84112  | 3+:59885790-59891481    |
| 6048 | Psmid9        | 67151  | 5+:123678254-123698970  |
| 6049 | Cpeb2         | 231207 | 5+:43626124-43628829    |
| 6059 | Dsn1          | 66934  | 2-:156821000-156832811  |
| 6060 | Tle6          | 114606 | 10-:81053649-81063645   |
| 6063 | Kif21a        | 16564  | 15-:90764813-90880242   |
| 6065 | Plce1         | 74055  | 19+:38695004-38858367   |
| 6066 | Ppp1r1a       | 58200  | 15-:103361353-103368313 |
| 6067 | Spam1         | 20690  | 6+:24745851-24751048    |
| 6070 | D630003M21Rik | 228846 | 2-:158021486-158046331  |
| 6072 | C1qc          | 12262  | 4-:136445724-136448788  |
| 6073 | Mthfd2        | 17768  | 6-:83255699-83267598    |
| 6077 | Pik3cb        | 74769  | 9-:98938820-99022799    |
| 6078 | Actrt1        | 73360  | X+:43682183-43683522    |
| 6079 | Tmem169       | 271711 | 1+:72330942-72348101    |
| 6085 | MMT00007454   |        | 12-:64173516-64174101   |
| 6086 | Fgl1          | 234199 | 8-:42276788-42300478    |
| 6088 | Bambi         | 68010  | 18+:3507931-3512756     |
| 6091 | Rbbp4         | 19646  | 4-:128986753-129012583  |
| 6092 | Phlda3        | 27280  | 1+:137662709-137665710  |
| 6096 | Acot3         | 171281 | 12+:85394401-85399975   |
| 6098 | Ncf4          | 17972  | 15+:78075263-78093004   |
| 6101 | Vmn2r71       | 233445 | 7+:92767046-92773055    |
| 6103 | Cyt11         | 231162 | 5+:38126786-38131053    |
| 6105 | Cryaa         | 12954  | 17+:31814883-31818667   |
| 6107 | Ttc30a2       | 620631 | 2-:75814228-75816223    |
| 6109 | Hsd17b2       | 15486  | 8+:120225884-120282774  |
| 6111 | Irgc1         | 210145 | 7-:25216945-25220554    |
| 6112 | Tmem183a      | 57439  | 1-:136242673-136258532  |
| 6115 | Cd164         | 53599  | 10+:41239305-41250847   |
| 6116 | Pcgf5         | 76073  | 19+:36534818-36535452   |
| 6117 | Atp9a         | 11981  | 2-:168459964-168567462  |
| 6118 | Slc1a4        | 55963  | 11-:20202209-20232587   |
| 6119 | Ankrd24       | 70615  | 10+:81103683-81110352   |
| 6122 | Tktl2         | 74419  | 8+:69035690-69037573    |
| 6125 | Grm6          | 108072 | 11+:50664643-50665184   |
| 6126 | MMT00067575   |        | X-:17251959-17253344    |
| 6128 | 2210418O10Rik | 76958  | 2-:175456017-175468166  |
| 6130 | G430022H21Rik | 210529 | 3-:123071212-123089017  |
| 6133 | Agrp          | 11604  | 8-:108090655-108091389  |
| 6134 | Hspb8         | 80888  | 5-:116858505-116872873  |
| 6135 | Nrg1          | 211323 | 8-:32928500-33028827    |
| 6143 | Pacsin2       | 23970  | 15-:83206547-83263249   |
| 6144 | 1700055N04Rik | 73458  | 19+:3965901-3970438     |
| 6145 | MMT00048203   |        | 3-:124291508-124292041  |
| 6147 | Dirc2         | 224132 | 16-:35696991-35769403   |

|      |               |        |                        |
|------|---------------|--------|------------------------|
| 6154 | 1700030G06Rik | 69507  | 5-:22229852-22231992   |
| 6155 | AB056442      | 171405 | 19-:7938880-8040517    |
| 6157 | MMT00041452   |        | 19+:40356699-40357187  |
| 6158 | Msh2          | 17685  | 17+:88071898-88123052  |
| 6163 | Nudt13        | 67725  | 14+:21113943-21135981  |
| 6165 | Hhex          | 15242  | 19+:37509359-37514294  |
| 6169 | Nap1l5        | 58243  | 6-:58855226-58857059   |
| 6171 | Abtb2         | 99382  | 2+:103518900-103558581 |
| 6174 | MMT00000714   |        | 5-:15004031-15004577   |
| 6177 | Thpo          | 21832  | 16-:20725239-20730599  |
| 6179 | Cxcl5         | 20311  | 5+:91188403-91190650   |
| 6183 | Atxn10        | 54138  | 15+:85166697-85293394  |
| 6184 | MMT00000944   |        | 7+:114093791-114096155 |
| 6185 | Icam4         | 78369  | 9+:20833897-20834938   |
| 6188 | Myh7b         | 668940 | 2+:155437367-155460788 |
| 6189 | MMT00020987   |        | 11+:79710708-79712255  |
| 6191 | Ddost         | 13200  | 4+:137860650-137868147 |
| 6193 | Lactb2        | 212442 | 1-:13615982-13650590   |
| 6196 | Tpbpb         | 116913 | 13-:61002548-61006207  |
| 6197 | Lss           | 16987  | 10+:75994371-76016671  |
| 6202 | Hrk           | 12123  | 5+:118619772-118634966 |
| 6205 | Ccl21b        | 18829  | 4+:42231058-42231890   |
| 6206 | MMT00063701   |        | 7-:11692356-11693726   |
| 6209 | Dsp           | 109620 | 13+:38243178-38290443  |
| 6211 | Arhgap24      | 231532 | 5+:102910571-103326843 |
| 6213 | Ccl2          | 20296  | 11+:81849075-81850728  |
| 6214 | Mmd2          | 75104  | 5-:143039439-143084739 |
| 6216 | Gm944         | 381126 | 18-:21286987-21458584  |
| 6218 | Hnrnpc        | 15381  | 14-:52694473-52723657  |
| 6226 | Vmn2r77       | 546983 | 7+:93949999-93960378   |
| 6231 | 9030622O22Rik | 71570  | 2-:147770247-147855472 |
| 6233 | Wnk2          | 75607  | 13-:49132968-49242559  |
| 6234 | P4ha2         | 18452  | 11+:53915017-53945150  |
| 6236 | MMT00024286   |        | 15+:39012214-39013022  |
| 6241 | U2af1         | 108121 | 17-:31784159-31795641  |
| 6245 | Syap1         | 67043  | X-:159294783-159326363 |
| 6248 | MMT00022090   |        | 3-:154939019-155056148 |
| 6249 | Cep170        | 545389 | 1-:178663794-178737263 |
| 6250 | Csnk2a1       | 12995  | 2+:152052631-152104985 |
| 6251 | Ptger2        | 19217  | 14+:45608494-45622151  |
| 6258 | MMT00052726   |        |                        |
| 6260 | MMT00002928   |        | 17+:8453516-8455093    |
| 6261 | 2810026P18Rik | 72655  | 9-:88415892-88418223   |
| 6262 | Hprt1         | 15452  | X+:50341313-50374836   |
| 6263 | Slc7a4        | 224022 | 16-:17573053-17576299  |
| 6265 | Trdn          | 76757  | 10+:32803315-33052271  |

|      |               |           |                         |
|------|---------------|-----------|-------------------------|
| 6266 | Gng10         | 14700     | 4+:59048069-59054285    |
| 6268 | Slc45a3       | 212980    | 1+:133867185-133879540  |
| 6270 | Cysltr1       | 58861     | X-:103773094-103798935  |
| 6277 | Prdm1         | 12142     | 10-:44156982-44178554   |
| 6282 | Them4         | 75778     | 3+:94114087-94136460    |
| 6283 | Ptpn22        | 19260     | 3+:103664214-103716169  |
| 6284 | Cacnb2        | 12296     | 2+:14795279-14909057    |
| 6286 | Rfc1          | 19687     | 5-:65653098-65726844    |
| 6293 | Pggt1b        | 225467    | 18-:46397165-46440650   |
| 6295 | Parl          | 381038    | 16-:20279889-20302458   |
| 6297 | 2310079F23Rik | 78890     | 5-:35899986-35917709    |
| 6299 | MMT00063871   |           | 5-:110211255-110276791  |
| 6300 | RP24-87L14.2  | 100125272 | 2+:177757942-177761426  |
| 6304 | Mrgprf        | 211577    | 7+:152486813-152495462  |
| 6305 | MMT00012844   |           | 17-:87607995-87609589   |
| 6306 | Dab2          | 13132     | 15+:6336823-6389597     |
| 6308 | 2410075B13Rik | 223648    | 15-:75811102-75812323   |
| 6311 | MMT00074658   |           | 7+:14066063-14066450    |
| 6313 | Sim1          | 20464     | 10+:50615456-50708958   |
| 6320 | 1810055E12Rik | 67894     | 19+:60887513-60912130   |
| 6322 | Pknox2        | 208076    | 9-:36698573-36776010    |
| 6325 | Cpsf3l        | 71957     | 4+:155243714-155262977  |
| 6329 | Cyp2b10       | 13088     | 7+:26682694-26711474    |
| 6330 | Dgkq          | 110524    | 5-:109075709-109089714  |
| 6333 | Iqcg          | 69707     | 16-:33016660-33045787   |
| 6338 | Setd3         | 52690     | 12-:109344649-109417473 |
| 6343 | Slc20a1       | 20515     | 2+:129024535-129037344  |
| 6347 | Rad18         | 58186     | 6-:112570798-112646588  |
| 6351 | 3321401G04Rik | 77574     | 6-:42618000-42659527    |
| 6353 | Spata13       | 219140    | 14+:61325636-61383386   |
| 6356 | Dnahc1        | 110084    | 14-:32073559-32120346   |
| 6357 | Ankrd9        | 74251     | 12-:112214633-112217206 |
| 6360 | D17H6S56E-3   | 27762     | 17+:35153523-35163686   |
| 6362 | Crispld2      | 78892     | 8+:122526690-122575693  |
| 6363 | 9130014G24Rik | 215772    | 10-:10055507-10122805   |
| 6365 | Rpl9          | 20005     | 5-:65779805-65782626    |
| 6367 | Lhfp          | 108927    | 3+:52845468-52847620    |
| 6370 | Aqp8          | 11833     | 7+:130605825-130611500  |
| 6371 | Dedd2         | 67379     | 7-:25987856-26004946    |
| 6372 | 1110021L09Rik | 76306     | 10+:23516786-23547773   |
| 6376 | Nle1          | 217011    | 11-:82714272-82721864   |
| 6377 | D18Ert653e    | 52662     | 18+:68387669-68415207   |
| 6379 | Asb9          | 69299     | X+:160935834-160977684  |
| 6380 | 6330569M22Rik | 229707    | 3-:107415448-107434612  |
| 6381 | Dmxl2         | 235380    | 9-:54212966-54328272    |
| 6382 | Col23a1       | 237759    | 11+:51371951-51396050   |

|      |               |           |                         |
|------|---------------|-----------|-------------------------|
| 6383 | Gbp2          | 14469     | 3+:142283626-142300970  |
| 6384 | Rbm12         | 75710     | 2-:155920627-155929101  |
| 6386 | Por           | 18984     | 5+:136165083-136211195  |
| 6387 | MMT00042391   |           | 14+:105442696-105443405 |
| 6390 | MMT00073452   |           | 10+:21009077-21010230   |
| 6392 | Pdcl3         | 68833     | 1+:39044633-39054080    |
| 6393 | 3110043O21Rik | 73205     | 4-:35138535-35173083    |
| 6394 | Fbxo6         | 50762     | 4-:147519896-147525933  |
| 6396 | Zfp105        | 22646     | 9+:122832215-122840137  |
| 6397 | Slc2a9        | 117591    | 5-:38740559-38893391    |
| 6400 | MMT00050153   |           | 1+:119637961-119883049  |
| 6401 | MMT00053163   | 100041639 | 17-:15132750-15147126   |
| 6402 | Npm3          | 18150     | 19-:45822225-45823640   |
| 6403 | MMT00039607   |           | 14-:26661366-26662576   |
| 6404 | Dbr1          | 83703     | 9+:99476235-99484485    |
| 6405 | B3galnt1      | 26879     | 3-:69378854-69379848    |
| 6406 | Sh3rf2        | 269016    | 18+:42213323-42313030   |
| 6410 | Psd3          | 234353    | 8-:70212983-70214044    |
| 6413 | Fbxo4         | 106052    | 15-:3928766-3929707     |
| 6417 | Rasgef1c      | 74563     | 11+:49715351-49793724   |
| 6420 | Mipep         | 70478     | 14+:61403394-61524315   |
| 6421 | C230081A13Rik | 244895    | 9-:56075514-56107846    |
| 6422 | Grk5          | 14773     | 19+:60966242-61167953   |
| 6426 | Mfsd4         | 213006    | 1-:133933357-133964488  |
| 6428 | MMT00035510   |           | 5-:30422633-30424209    |
| 6429 | Sim2          | 20465     | 16+:94085175-94348630   |
| 6432 | 2010109K11Rik | 72123     | 12+:33064510-33065324   |
| 6436 | 4933401B06Rik | 71011     | X+:104737986-104739082  |
| 6437 | Gnptg         | 214505    | 17-:25369169-25377082   |
| 6438 | Vmn2r121      | 100038941 | X-:121241111-121249525  |
| 6445 | Mllt3         | 70122     | 4-:87419819-87452166    |
| 6449 | 1190007F08Rik | 68859     | 4-:153397196-153399760  |
| 6456 | Tyms          | 22171     | 5-:30387351-30400180    |
| 6458 | Sycn          | 68416     | 7+:29325896-29327224    |
| 6461 | Mtmt3         | 74302     | 11-:4380873-4494789     |
| 6462 | Brip1         | 237911    | 11-:85874104-86014718   |
| 6464 | Pcbp4         | 59092     | 9+:106356282-106366340  |
| 6465 | Zfp474        | 66758     | 18+:52775568-52799484   |
| 6470 | Arnt          | 11863     | 3+:95238458-95299492    |
| 6475 | Sdc4          | 20971     | 2-:164249747-164268686  |
| 6476 | Sntg2         | 268534    | 12-:30859858-31058095   |
| 6479 | Tcerg1        | 56070     | 18+:42671176-42734498   |
| 6480 | Lrfn5         | 238205    | 12+:62622416-62696244   |
| 6481 | Atp1a1        | 11928     | 3-:101380147-101408580  |
| 6482 | Nudt2         | 66401     | 4+:41412184-41427945    |
| 6484 | A130010J15Rik | 319266    | 1+:194999780-195002491  |

|      |                  |           |                         |
|------|------------------|-----------|-------------------------|
| 6485 | Map3k7ip1        | 66513     | 15+:79963592-79992158   |
| 6486 | OTTMUSG000000013 | 217066    | 11-:88826063-88826549   |
| 6487 | Slc4a4           | 54403     | 5+:89316321-89664563    |
| 6488 | Stat6            | 20852     | 10+:127080226-127097459 |
| 6489 | MMT00008763      |           | 5-:121553095-121553514  |
| 6490 | Il1r1            | 16177     | 1+:40281924-40373020    |
| 6491 | Rpl5             | 19983     | 5+:108329620-108336243  |
| 6494 | Evi5             | 14020     | 5-:108173814-108304126  |
| 6498 | MMT00016809      | 100048067 | 1+:162965293-162968668  |
| 6500 | MMT00069546      |           | 10-:78784301-78785112   |
| 6502 | Col15a1          | 12819     | 4+:47221223-47325161    |
| 6503 | Cep97            | 74201     | 16-:55905064-55934941   |
| 6504 | Alad             | 17025     | 4-:62170201-62175226    |
| 6506 | Scyl2            | 213326    | 10-:89102808-89149011   |
| 6510 | Plcl2            | 224860    | 17+:50648932-50665916   |
| 6512 | Ryr2             | 20191     | 13-:11646782-12198713   |
| 6513 | Qpctl            | 67369     | 7-:19726212-19734592    |
| 6519 | Phldb3           | 232970    | 7+:25396363-25414316    |
| 6520 | Arnt2            | 11864     | 7-:91398290-91558424    |
| 6523 | Hapln1           | 12950     | 13+:89679400-89748004   |
| 6525 | Uchl5ip          | 73738     | X-:70682834-70704360    |
| 6526 | Thumpd3          | 14911     | 6+:112996326-113018171  |
| 6528 | Dusp15           | 252864    | 2-:152770672-152777141  |
| 6529 | Apeh             | 235606    | 9-:107987743-107996782  |
| 6531 | EG629557         | 629557    | 9-:51810380-51811386    |
| 6532 | Auh              | 11992     | 13-:52930492-53025034   |
| 6534 | Cript            | 56724     | 17+:87424935-87435150   |
| 6539 | Npy2r            | 18167     | 3-:82342304-82352006    |
| 6541 | 1810019J16Rik    | 69073     | 4+:133074949-133086704  |
| 6542 | Epor             | 13857     | 9-:21763341-21767902    |
| 6544 | Al790298         | 107239    | 19-:4164329-4175440     |
| 6545 | Afm              | 280662    | 5+:90947988-90982571    |
| 6550 | MMT00056589      |           | 1+:159526434-159526797  |
| 6551 | Slc35b4          | 58246     | 6-:34105878-34127054    |
| 6554 | MMT00003845      | 670007    | 10-:99760711-99859697   |
| 6555 | Aadacl2          | 639634    | 3+:59814418-59829162    |
| 6564 | Cebpdl           | 12609     | 16+:15887105-15888559   |
| 6567 | Trpm3            | 226025    | 19+:22767088-23062796   |
| 6569 | Itih1            | 16424     | 14-:31742548-31756455   |
| 6570 | Olfrl48          | 258498    | 9+:39421153-39422085    |
| 6571 | 3000004C01Rik    | 70218     | 11-:102766891-102786403 |
| 6572 | Foxc1            | 17300     | 13+:31898559-31902156   |
| 6573 | Pecr             | 111175    | 1-:72305748-72330794    |
| 6576 | Slnf2            | 20556     | 11+:82878613-82884178   |
| 6578 | Pdcd10           | 56426     | 3-:75321043-75360677    |
| 6581 | Cdc42ep1         | 104445    | 15+:78673076-78681332   |

|      |               |        |                         |
|------|---------------|--------|-------------------------|
| 6585 | Tacc1         | 320165 | 8-:26279666-26367061    |
| 6587 | Irf9          | 16391  | 14+:56223039-56228561   |
| 6588 | Rbmx          | 19655  | X-:54639519-54646158    |
| 6589 | Mafb          | 16658  | 2-:160191441-160192798  |
| 6590 | Pds5a         | 71521  | 5-:66014123-66039244    |
| 6592 | Lgals2        | 107753 | 15-:78681291-78685959   |
| 6594 | Zfyve27       | 319740 | 19+:42245081-42266214   |
| 6595 | Oas1a         | 246730 | 5-:121346267-121357516  |
| 6597 | Slc9a5        | 277973 | 8+:107873232-107893244  |
| 6599 | 1700020C11Rik | 67900  | 11-:3991485-3995400     |
| 6601 | Ttc30b        | 72421  | 2-:75774471-75776464    |
| 6605 | Gpld1         | 14756  | 13+:25035080-25082624   |
| 6607 | Reln          | 19699  | 5-:21390286-21850508    |
| 6608 | Mtap7d3       | 320923 | X-:54061020-54064726    |
| 6609 | Tor1b         | 30934  | 2+:30808503-30812761    |
| 6612 | MMT00077820   |        | 19+:27100470-27227226   |
| 6614 | Cd300lg       | 52685  | 11+:101902823-101916930 |
| 6615 | 1810023F06Rik | 217845 | 12-:104689107-104695433 |
| 6616 | Prmt3         | 71974  | 7+:57033714-57113634    |
| 6621 | Zfp521        | 225207 | 18-:13846723-14131047   |
| 6623 | Ptbp2         | 56195  | 3-:119421914-119486176  |
| 6625 | C1s           | 50908  | 6-:124487377-124492316  |
| 6628 | MMT00004313   |        | 17+:48821671-48822052   |
| 6631 | Tmem30a       | 69981  | 9-:79616750-79641079    |
| 6632 | Dio1          | 13370  | 4-:106964078-106979748  |
| 6636 | Ptchd2        | 242748 | 4-:147614641-147646513  |
| 6638 | 2610018G03Rik | 70415  | X+:48194612-48245025    |
| 6639 | Fads3         | 60527  | 19+:10116095-10132739   |
| 6642 | Aldh2         | 11669  | 5-:122017711-122043595  |
| 6644 | Klhl9         | 242521 | 4-:88364198-88368747    |
| 6648 | Cenpl         | 70454  | 1+:163001095-163016851  |
| 6650 | MMT00050325   |        |                         |
| 6651 | Gpx7          | 67305  | 4-:108073018-108079319  |
| 6652 | MMT00004371   |        | 17-:50352073-50353549   |
| 6655 | MMT00043469   |        | 1-:93385333-93386329    |
| 6657 | Irf6          | 54139  | 1+:194979355-194998198  |
| 6659 | Dpy19l4       | 381510 | 4-:11223082-11248777    |
| 6661 | Hdac1         | 433759 | 4-:129193347-129219890  |
| 6665 | AY026312      | 170939 | 16-:88932048-88932509   |
| 6670 | Nat10         | 98956  | 2-:103561381-103601407  |
| 6673 | Nasp          | 50927  | 4-:116274213-116300546  |
| 6675 | Sfrs4         | 57317  | 4+:131453645-131457615  |
| 6678 | Dmxl1         | 240283 | 18+:50120711-50124079   |
| 6680 | Olfir393      | 259010 | 11-:73660686-73661625   |
| 6681 | 9130409I23Rik | 619326 | 1+:182984887-182989945  |
| 6683 | Cd59a         | 12509  | 2+:103936021-103955137  |



|      |               |        |                         |
|------|---------------|--------|-------------------------|
| 6685 | Itgam         | 16409  | 7+:135206219-135261138  |
| 6686 | Ldb3          | 24131  | 14-:35374453-35401860   |
| 6687 | Ogfod1        | 270086 | 8+:96561094-96588935    |
| 6696 | Zfp740        | 68744  | 15+:102034999-102046031 |
| 6697 | Serpini1      | 20713  | 3+:75361494-75446276    |
| 6699 | 4930592I03Rik | 75853  | 18-:83089332-83090009   |
| 6705 | Sorbs2        | 234214 | 8+:46713537-46913253    |
| 6708 | Serpini2      | 67931  | 3-:75046293-75074002    |
| 6709 | MMT00003854   |        | 6-:41424683-41431715    |
| 6710 | MMT00022451   |        | 8+:73611709-73613824    |
| 6714 | Lima1         | 65970  | 15-:99608938-99650503   |
| 6716 | Cd180         | 17079  | 13+:103483667-103497033 |
| 6718 | Rnf168        | 70238  | 16+:32277585-32301493   |
| 6719 | Cacng8        | 81905  | 7+:3394458-3415366      |
| 6726 | Meis2         | 17536  | 2-:115688829-115890783  |
| 6728 | Olf75-ps1     | 258186 | 11-:73218945-73219881   |
| 6729 | Hnrnpa1       | 15382  | 15+:103070924-103075386 |
| 6732 | Olf1038       | 259015 | 2+:85962081-85963037    |
| 6733 | Mfng          | 17305  | 15-:78586312-78603875   |
| 6734 | Ehd4          | 98878  | 2-:119915223-119980244  |
| 6735 | Fus           | 233908 | 7+:135111067-135125545  |
| 6738 | Fxr1          | 14359  | 3+:33919029-33968259    |
| 6746 | E2f8          | 108961 | 7-:56121797-56136370    |
| 6749 | Dnase1l3      | 13421  | 14-:8800262-8826662     |
| 6754 | Trpv3         | 246788 | 11+:73081121-73110702   |
| 6755 | Wdr22         | 320808 | 12-:81439378-81537574   |
| 6756 | Sds           | 231691 | 5+:120926555-120933912  |
| 6759 | Sqle          | 20775  | 15+:59146794-59162747   |
| 6760 | 2810428I15Rik | 66462  | 8-:73028194-73030638    |
| 6761 | MMT00030685   |        | 6-:69942472-70056173    |
| 6764 | Cald1         | 109624 | 6+:34659484-34724091    |
| 6765 | Ldhb          | 16832  | 6-:142438769-142456403  |
| 6766 | Sspn          | 16651  | 6+:145882666-145913740  |
| 6767 | Erc2          | 238988 | 14+:28435693-28466669   |
| 6768 | Plekhf2       | 71801  | 4-:10915811-10934717    |
| 6769 | Banp          | 53325  | 8+:124474479-124549837  |
| 6771 | Insc          | 233752 | 7+:121912245-121993886  |
| 6774 | Cilp          | 214425 | 9+:65113632-65128423    |
| 6777 | B3gatl        | 381694 | 5+:150511894-150563361  |
| 6779 | Gbp6          | 229900 | 3+:142193333-142210014  |
| 6784 | Al182371      | 98870  | 2-:34937379-34957037    |
| 6788 | Psen2         | 19165  | 1-:182157136-182176032  |
| 6789 | Trp63         | 22061  | 16+:25802027-25892166   |
| 6795 | Cdyl2         | 75796  | 8-:119092630-119095285  |
| 6797 | Blvra         | 109778 | 2+:126906253-126922775  |
| 6798 | Tcea3         | 21401  | 4+:135803866-135830820  |

|      |               |           |                             |
|------|---------------|-----------|-----------------------------|
| 6804 | Cyp2d22       | 56448     | 15-:82201909-82206451       |
| 6805 | Rrbp1         | 81910     | 2-:143811601-143836914      |
| 6806 | Agrn          | 11603     | 4-:155539402-155571448      |
| 6808 | EG433073      | 433073    | 17+:20798483-20798976       |
| 6809 | Rorc          | 19885     | 3+:94176707-94202510        |
| 6812 | MMT00040104   |           | 17+:3056713-3057111         |
| 6815 | Sort1         | 20661     | 3+:108087057-108159607      |
| 6816 | Slc46a3       | 71706     | 5-:148690029-148706391      |
| 6818 | BC030183      | 230766    | 4-:129254056-129255782      |
| 6819 | Cct2          | 12461     | 10-:116488054-116500821     |
| 6820 | MMT00046996   |           | 7+:14889997-14894927        |
| 6822 | Ldhc          | 16833     | 7+:54116624-54133360        |
| 6823 | Yars          | 107271    | 4+:128867107-128896482      |
| 6824 | Irf7          | 54123     | 7-:148449087-148452300      |
| 6825 | 4930528G09Rik | 75172     | 5-:20798784-20930496        |
| 6828 | Pigh          | 110417    | 12-:80183921-80190636       |
| 6830 | Rsc1a1        | 69994     | 4-:141239767-141241514      |
| 6837 | Arhgap25      | 232201    | 6-:87409383-87446106        |
| 6838 | Nod2          | 257632    | 8+:91176763-91212304        |
| 6839 | Mrpl46        | 67308     | 7-:85920228-85927927        |
| 6842 | Amotl2        | 56332     | 9+:102624863-102635741      |
| 6845 | Cyb561d1      | 72023     | 3-:107998702-108003354      |
| 6846 | Olf1402       | 258272    | 3-:97214139-97215102        |
| 6847 | MMT00058311   |           | 19-:35126523-35126993       |
| 6852 | MMT00007193   |           | Y_random+:10231498-10250577 |
| 6855 | Ash1l         | 192195    | 3+:88785599-88882514        |
| 6856 | Tnrc6a        | 233833    | 7+:130323303-130337255      |
| 6857 | Serinc2       | 230779    | 4-:129930739-129952831      |
| 6861 | Krt8          | 16691     | 15-:101827141-101834714     |
| 6864 | Sh3md4        | 237353    | 10+:58446668-58598735       |
| 6866 | Gls           | 14660     | 1-:52220295-52290240        |
| 6870 | Xlr4b         | 27083     | X+:70459703-70467795        |
| 6873 | BC023055      | 226123    | 19-:42149437-42160836       |
| 6878 | MMT00041953   | 675689    | 11+:46375532-46375875       |
| 6880 | Dmrtb1        | 56296     | 4-:107348899-107356822      |
| 6884 | Hnrnpf        | 98758     | 6+:117856833-117875635      |
| 6888 | Cxcl9         | 17329     | 5-:92752015-92757143        |
| 6899 | Pla2g4e       | 329502    | 2-:119992149-120002680      |
| 6901 | MMT00048285   |           | 9-:66653114-66654035        |
| 6905 | Pkd1l3        | 244646    | 8+:112138563-112145913      |
| 6906 | 2610301B20Rik | 67157     | 4+:10801714-10826398        |
| 6907 | Usp50         | 75083     | 2-:126535090-126539157      |
| 6908 | Mmp12         | 17381     | 9+:7347457-7358683          |
| 6910 | Ly6c2         | 100093633 | 15-:74938587-74942237       |
| 6911 | C130090K23Rik | 231293    | 5+:73797488-73844515        |
| 6912 | Crym          | 12971     | 7-:127329897-127345502      |

|      |               |           |                         |
|------|---------------|-----------|-------------------------|
| 6914 | Thrap3        | 230753    | 4-:125842644-125844308  |
| 6916 | Wdr5b         | 69544     | 16+:36041360-36043058   |
| 6917 | MMT00070118   |           | 7+:13188438-13189997    |
| 6918 | Cog8          | 97484     | 8-:109570428-109572154  |
| 6921 | Olfml1        | 244198    | 7+:114710990-114733856  |
| 6922 | Tmem86b       | 68255     | 7-:4579635-4581784      |
| 6928 | Klhl8         | 246293    | 5-:104291069-104340215  |
| 6931 | Hrsp12        | 15473     | 15-:34413891-34424945   |
| 6932 | Ckap4         | 216197    | 10-:83989048-83996368   |
| 6934 | Panx3         | 208098    | 9-:37468658-37476776    |
| 6935 | Arsj          | 271970    | 3+:126067769-126143293  |
| 6946 | Nol5          | 55989     | 1+:59741942-59768352    |
| 6950 | Zfp710        | 209225    | 7+:87225934-87235824    |
| 6956 | Gria2         | 14800     | 3-:80492368-80606508    |
| 6959 | Slc1a5        | 20514     | 7+:17366755-17383591    |
| 6962 | Cyp1b1        | 13078     | 17-:80106293-80114381   |
| 6966 | Mia3          | 338366    | 1_random-:300175-342929 |
| 6972 | Trspap1       | 71787     | 4-:131867679-131885431  |
| 6974 | Tmem65        | 74868     | 15-:58613824-58654683   |
| 6975 | Wdr67         | 210544    | 15+:57743754-57801626   |
| 6976 | Rbm35b        | 77411     | 8-:108653857-108692989  |
| 6985 | Ntng1         | 80883     | 3-:109946353-110040056  |
| 6990 | Nr1i2         | 18171     | 16-:38248436-38294910   |
| 6992 | Olf1r172      | 259003    | 16-:58760359-58761287   |
| 6994 | Glul          | 14645     | 1+:155747097-155756824  |
| 6998 | EG245651      | 245651    | X-:138967983-138968278  |
| 7002 | Lrrn1         | 16979     | 6+:107479778-107520204  |
| 7003 | MMT00008726   |           | 11+:104692598-104892629 |
| 7010 | Mlph          | 171531    | 1+:92811679-92847718    |
| 7011 | 1810022C23Rik | 69123     | 13-:35038661-35055678   |
| 7012 | Dennd4a       | 102442    | 9+:64686640-64767472    |
| 7020 | Fbln5         | 23876     | 12-:102988149-103057279 |
| 7021 | Slc16a8       | 57274     | 15-:79081443-79085187   |
| 7029 | MMT00072012   |           | 12+:31569085-31578350   |
| 7030 | RP23-232H13.5 | 100043387 | 2+:176503994-176871927  |
| 7033 | Rfwd3         | 234736    | 8-:113796920-113824080  |
| 7035 | 4933425L06Rik | 66763     | 13+:105872201-105911860 |
| 7039 | Zmat3         | 22401     | 3-:32233719-32264542    |
| 7041 | Sp140         | 434484    | 1+:87511062-87516733    |
| 7042 | C730007P19Rik | 20865     | 7+:14320095-14323700    |
| 7043 | Cyp11b2       | 13072     | 15-:74681468-74686655   |
| 7044 | Vbp1          | 22327     | X+:72759691-72780249    |
| 7047 | MMT00019310   |           | 12-:13759481-13760503   |
| 7049 | Psmd14        | 59029     | 2+:61549825-61638432    |
| 7054 | Trerf1        | 224829    | 17+:47450769-47496407   |
| 7057 | Stk10         | 20868     | 11+:32433304-32524587   |

|      |               |        |                        |
|------|---------------|--------|------------------------|
| 7058 | Asns          | 27053  | 6-:7625165-7643106     |
| 7061 | Spsb3         | 79043  | 17+:25024425-25029092  |
| 7066 | Agtr1b        | 11608  | 3-:20214282-20302434   |
| 7069 | Ube1l         | 74153  | 9+:107877852-107886389 |
| 7073 | Arhgap4       | 171207 | X-:71139697-71156568   |
| 7074 | Dcbl2         | 73379  | 16+:58460843-58465940  |
| 7078 | Olfr463       | 258408 | 11-:87706489-87707424  |
| 7083 | MMT00044154   |        | 18+:44221143-44222334  |
| 7084 | Spz1          | 79401  | 13-:93344784-93345921  |
| 7085 | St8sia2       | 20450  | 7-:81084007-81158547   |
| 7087 | Dio2          | 13371  | 12-:91962991-91976878  |
| 7088 | Slc37a1       | 224674 | 17+:31432075-31487641  |
| 7089 | Al646023      | 192734 | 10-:75012869-75022834  |
| 7093 | Magt1         | 67075  | X-:103165815-103207117 |
| 7094 | Cyp2c54       | 404195 | 19-:40112424-40122137  |
| 7095 | Timm8a1       | 30058  | X-:131071796-131076168 |
| 7097 | Dnajb6        | 23950  | 5+:30062564-30093628   |
| 7099 | Kcnk10        | 72258  | 12-:99694928-99812922  |
| 7100 | Tom22         | 223696 | 15+:79501298-79504002  |
| 7101 | Gimap6        | 231931 | 6-:48651579-48658212   |
| 7102 | Hnrnpm        | 76936  | 17-:33783183-33822348  |
| 7105 | Plac8         | 231507 | 5-:100982751-101001224 |
| 7108 | Adamts1       | 77739  | 4+:86061429-86072048   |
| 7109 | Bxdc2         | 67832  | 15-:10405936-10415579  |
| 7112 | Apbb3         | 225372 | 18-:36830813-36839020  |
| 7116 | Katnal1       | 231912 | 5-:149687626-149740223 |
| 7118 | BC051019      | 57355  | 7-:116855695-116867392 |
| 7120 | Dusp1         | 19252  | 17-:26642536-26645406  |
| 7122 | Gigyf2        | 227331 | 1+:89329694-89347367   |
| 7124 | Dnajb13       | 69387  | 7-:107650250-107661908 |
| 7126 | MMT00002620   |        | 2+:73973812-73988889   |
| 7128 | Gemin8        | 237221 | X+:162614904-162627732 |
| 7131 | 1810037117Rik | 67704  | 3+:122627317-122628654 |
| 7132 | Sp9           | 381373 | 2+:73109987-73112393   |
| 7133 | Hook2         | 170833 | 8+:87514517-87527160   |
| 7134 | Krba1         | 77827  | 6+:48345612-48366884   |
| 7135 | Ezr           | 22350  | 17-:6942812-6987069    |
| 7136 | Id3           | 15903  | 4+:135699736-135701301 |
| 7139 | Pld3          | 18807  | 7-:28317036-28338131   |
| 7140 | Mtbp          | 105837 | 15+:55389041-55457968  |
| 7141 | MMT00061218   | 629364 | 12-:25176464-25178595  |
| 7143 | Cxcr7         | 12778  | 1+:92100600-92112182   |
| 7145 | 2810021G02Rik | 353208 | 2-:177802399-177813224 |
| 7149 | 9530077C05Rik | 68283  | 9+:22215922-22249127   |
| 7151 | MMT00007982   |        | 6-:67684189-67685598   |
| 7153 | Glt6d1        | 71103  | 2-:25666520-25671357   |

|      |                  |        |                         |
|------|------------------|--------|-------------------------|
| 7154 | Fbxw13           | 211305 | 9-:109085520-109087904  |
| 7155 | MMT00017420      |        | 14+:53303921-53304140   |
| 7156 | Tmem1            | 216131 | 10-:77649474-77670789   |
| 7159 | 1700031F05Rik    | 73300  | X-:100054526-100061695  |
| 7163 | Ptplb            | 70757  | 16+:35022513-35106660   |
| 7165 | Nt5m             | 103850 | 11+:59661574-59690034   |
| 7173 | Trim59           | 66949  | 3-:68839215-68841208    |
| 7181 | Nedd4            | 17999  | 9+:72525155-72595035    |
| 7185 | Ostf1            | 20409  | 19-:18655244-18706299   |
| 7188 | Atpbd4           | 66632  | 2-:114342155-114480619  |
| 7191 | Fgfr1op          | 75296  | 17+:8361897-8389343     |
| 7192 | Ttc21b           | 73668  | 2-:66022384-66090061    |
| 7199 | Wee1             | 22390  | 7+:117265585-117285647  |
| 7206 | Rgma             | 244058 | 7+:80520573-80564784    |
| 7209 | Gpa33            | 59290  | 1+:168060590-168096640  |
| 7211 | 2410014A08Rik    | 109154 | 5-:115593029-115608170  |
| 7218 | Cylc2            | 74914  | 4+:51229548-51242569    |
| 7220 | 1110018M03Rik    | 67606  | 2-:110201081-110203150  |
| 7224 | Pafah2           | 100163 | 4+:133953385-133983323  |
| 7225 | Tiam1            | 21844  | 16-:89787356-89961072   |
| 7228 | OTTMUSG000000151 | 328483 | 14+:54048401-54050831   |
| 7229 | H2-DMb1          | 14999  | 17+:34282252-34297169   |
| 7232 | MMT00078948      |        | 7+:146960610-146960924  |
| 7234 | MMT00005439      |        | 7-:12277020-12277559    |
| 7238 | Pycard           | 66824  | 7-:135136171-135137239  |
| 7240 | C730007P19Rik    | 20865  | 7+:14338705-14341327    |
| 7241 | Ptpn11           | 19247  | 5-:121583799-121641283  |
| 7243 | Slc4a10          | 94229  | 2+:61884650-62164782    |
| 7245 | Ski              | 20481  | 4-:154531449-154596629  |
| 7251 | MMT00018228      |        | 16-:16365094-16366304   |
| 7252 | Nolc1            | 70769  | 19+:46150502-46157814   |
| 7253 | Olfm593          | 258378 | 7+:110360375-110361358  |
| 7256 | MMT00063357      |        | 13+:107223869-107266980 |
| 7258 | Bmp2k            | 140780 | 5+:97426707-97520066    |
| 7261 | Ttc7b            | 104718 | 12-:101538998-101758909 |
| 7263 | Narg1l           | 66897  | 14-:79735440-79790484   |
| 7265 | Dok1             | 13448  | 6-:82980951-82983430    |
| 7273 | Rnf103           | 22644  | 6+:71443887-71460875    |
| 7274 | Laptm4b          | 114128 | 15-:34199401-34199584   |
| 7278 | 1810030J14Rik    | 66289  | 1+:176260649-176263004  |
| 7279 | Cldn13           | 57255  | 5-:135390571-135391199  |
| 7282 | Ppic             | 19038  | 18-:53565994-53577661   |
| 7284 | MMT00008674      |        | 5-:121378079-121382183  |
| 7285 | Tbc1d4           | 210789 | 14-:101841584-101910783 |
| 7286 | Noxo1            | 71893  | 17+:24833743-24837519   |
| 7289 | L1cam            | 16728  | X-:71100373-71115143    |

|      |               |        |                         |
|------|---------------|--------|-------------------------|
| 7292 | Spna1         | 20739  | 1+:176102998-176178198  |
| 7300 | Olfr560       | 259117 | 7-:109901496-109902441  |
| 7303 | Tmem182       | 381339 | 1+:40862448-40913731    |
| 7307 | Agmat         | 75986  | 4+:141302582-141315177  |
| 7308 | Tmem52        | 69671  | 4+:154843221-154844966  |
| 7309 | Mpp5          | 56217  | 12+:79850007-79939068   |
| 7311 | Lsm6          | 78651  | 8-:81330466-81345036    |
| 7315 | EG624219      | 624219 | 9+:21639938-21641788    |
| 7316 | Ifi204        | 15951  | 1-:175677426-175843051  |
| 7318 | Rfpl4         | 192658 | 7-:5061468-5068498      |
| 7320 | MMT00051732   |        | 7+:148592427-148593223  |
| 7321 | Rdbp          | 27632  | 17+:34987863-34993103   |
| 7322 | D730048I06Rik | 68171  | 9-:35595694-35597668    |
| 7328 | Atp5b         | 11947  | 10+:127520382-127527328 |
| 7332 | 1700027L20Rik | 69453  | 1+:89083238-89084979    |
| 7334 | Lor           | 16939  | 3-:91884203-91887062    |
| 7335 | Calm2         | 12314  | 17-:87833367-87842067   |
| 7336 | Cd5l          | 11801  | 3+:87161896-87174994    |
| 7338 | MMT00070692   |        | 19+:8346969-8349204     |
| 7339 | Tdp1          | 104884 | 12+:101122734-101144344 |
| 7340 | Ascc3l1       | 320632 | 2+:127034132-127067416  |
| 7341 | Olfr1424      | 258676 | 19-:12133300-12149054   |
| 7342 | Anp32e        | 66471  | 3+:95733504-95749494    |
| 7343 | Mcm10         | 70024  | 2-:4911213-4933778      |
| 7347 | 1110032A04Rik | 66183  | 3-:69623462-69663796    |
| 7349 | MMT00065780   |        | 14+:15270505-15271223   |
| 7355 | Procr         | 19124  | 2+:155577078-155581194  |
| 7360 | Mfi2          | 30060  | 16+:31878895-31899103   |
| 7362 | Rrm2          | 20135  | 12+:25393147-25398972   |
| 7367 | Gchfr         | 320415 | 2+:118993513-118998125  |
| 7368 | Adam8         | 11501  | 7-:147164839-147178387  |
| 7370 | Spop          | 20747  | 11+:95275427-95354327   |
| 7371 | MMT00063687   |        | 5-:110546730-110547947  |
| 7372 | Fastk         | 66587  | 5-:23946857-23950188    |
| 7377 | Suds3         | 71954  | 5-:117541690-117566836  |
| 7378 | 1700001J03Rik | 69282  | 5-:146994023-146996876  |
| 7379 | MMT00078052   |        | 19-:37778218-37797762   |
| 7382 | RP23-34B24.1  | 230161 | 4-:49460165-49464007    |
| 7386 | Pex6          | 224824 | 17+:46848411-46862489   |
| 7388 | Amn           | 93835  | 12+:112509308-112514469 |
| 7389 | Sfrs5         | 20384  | 12+:82047562-82051486   |
| 7391 | Bhlhb8        | 17341  | 5+:144951154-144952534  |
| 7393 | Igk-V28       | 16114  | 6+:70143469-70165974    |
| 7396 | Lao1          | 100470 | 4+:118634571-118641489  |
| 7397 | MMT00020969   |        | 3+:144390767-144392049  |
| 7398 | Rbmxrt        | 19656  | 8-:81029168-81032738    |

|      |               |        |                         |
|------|---------------|--------|-------------------------|
| 7400 | Cars2         | 71941  | 8-:11513978-11550744    |
| 7401 | Pdzk1ip1      | 67182  | 4+:114761327-114766498  |
| 7404 | Prpmp5        | 381832 | 6-:132261612-132314135  |
| 7405 | Snx31         | 66696  | 15-:36434159-36485328   |
| 7406 | Sult2a1       | 20859  | 7-:14417914-14422751    |
| 7407 | Slc9a3r1      | 26941  | 11+:115024716-115042493 |
| 7408 | 1700081L11Rik | 76719  | 11-:104194813-104218190 |
| 7409 | MMT00014691   |        | 19-:27836215-27837137   |
| 7413 | Olf1101       | 258584 | 2-:86828400-86829331    |
| 7414 | Clpx          | 270166 | 9+:65142115-65178449    |
| 7415 | Isoc1         | 66307  | 18+:58819340-58837894   |
| 7416 | 6430548M08Rik | 234797 | 8+:122638059-122687323  |
| 7418 | Pkp3          | 56460  | 7+:148265676-148276408  |
| 7419 | Arid5a        | 214855 | 1+:36364625-36377372    |
| 7424 | Cdkn1c        | 12577  | 7-:150644615-150646883  |
| 7430 | Gpr137        | 107173 | 19-:7012560-7016900     |
| 7431 | ldh1          | 15926  | 1-:65205847-65221943    |
| 7436 | 1700063K16Rik | 76610  | 16-:76819829-76842029   |
| 7439 | Syt17         | 110058 | 7-:125525369-125587066  |
| 7444 | Hspe1         | 15528  | 1+:55145175-55148039    |
| 7449 | Creg1         | 433375 | 1+:167693910-167704160  |
| 7452 | Abcc9         | 20928  | 6-:142537652-142650793  |
| 7455 | MMT00011288   |        | 4+:151530158-151531670  |
| 7457 | Mrpl22        | 216767 | 11+:57985176-57993080   |
| 7458 | Cav1          | 12389  | 6+:17256449-17289453    |
| 7459 | 2610207O16Rik | 66620  | 1-:42763909-42770328    |
| 7460 | Krt6a         | 16687  | 15-:101520898-101524679 |
| 7464 | MMT00059239   |        | 17-:3311765-3314181     |
| 7466 | Insl6         | 27356  | 19-:29395844-29399808   |
| 7468 | Hsd3b1        | 15492  | 3-:98656117-98662142    |
| 7469 | Sez6l         | 56747  | 5-:112853642-112904607  |
| 7472 | Klra1         | 16627  | 6-:130313935-130332546  |
| 7476 | MMT00059569   |        | 13-:66497459-66891917   |
| 7479 | Mcf2l         | 17207  | 8+:12873825-13020508    |
| 7480 | 4930506M07Rik | 71653  | 19-:59047846-59150114   |
| 7481 | Trh           | 22044  | 6-:92192055-92193882    |
| 7482 | Tdg           | 21665  | 10+:82092625-82113018   |
| 7483 | Cyp3a25       | 56388  | 5-:146788338-146821192  |
| 7492 | Adfp          | 11520  | 4-:86302617-86315898    |
| 7493 | Cngb3         | 30952  | 4+:19207996-19437768    |
| 7495 | Ugt2b5        | 22238  | 5-:87553984-87569343    |
| 7496 | Arsi          | 545260 | 18+:61071649-61078212   |
| 7498 | MMT00040284   |        | 12+:71072008-71073929   |
| 7499 | Nipa1         | 233280 | 7-:63233855-63274944    |
| 7500 | MMT00011283   | 433546 | 2-:156615456-156616113  |
| 7503 | Rab11fip1     | 75767  | 8-:28251273-28285121    |

|      |               |           |                         |
|------|---------------|-----------|-------------------------|
| 7507 | Ccdc136       | 232664    | 6+:29349588-29376952    |
| 7510 | Gins3         | 78833     | 8+:98157458-98168959    |
| 7513 | Nr5a2         | 26424     | 1-:138740852-138857025  |
| 7516 | MMT00018931   | 100040020 | X-:150499736-150504063  |
| 7517 | T             | 20997     | 17+:8627287-8635361     |
| 7519 | Gstm1         | 14862     | 3-:107815175-107820891  |
| 7520 | MMT00070057   |           | X+:65882566-65883524    |
| 7522 | Rb1           | 19645     | 14-:73595309-73725547   |
| 7523 | Daam1         | 208846    | 12+:72932055-73016780   |
| 7524 | Aldh4a1       | 212647    | 4+:139178825-139204933  |
| 7525 | Trim61        | 260296    | 8-:67536884-67542428    |
| 7527 | Rnase10       | 75019     | 14+:51627649-51630431   |
| 7528 | Cadm1         | 54725     | 9+:47596063-47659115    |
| 7537 | Glce          | 93683     | 9-:61907817-61918647    |
| 7539 | Eef2          | 13629     | 10+:80627326-80645252   |
| 7540 | Olfir658      | 259051    | 7-:111792912-111793884  |
| 7543 | Cct5          | 12465     | 15-:31520638-31531559   |
| 7544 | Btbd14a       | 67991     | 2-:25915420-25978304    |
| 7545 | C81431        | 98077     | 17-:34012613-34027561   |
| 7546 | Ddhd1         | 114874    | 14-:46214211-46240515   |
| 7550 | Rab11fip5     | 52055     | 6-:85284958-85324456    |
| 7551 | Grik3         | 14807     | 4+:125300724-125385592  |
| 7556 | A530050D06Rik | 104816    | 12+:113345081-113365771 |
| 7558 | Rbm10         | 236732    | X+:20197121-20228014    |
| 7560 | Cyp2r1        | 244209    | 7-:121693702-121706471  |
| 7572 | Ppm1l         | 242083    | 3+:69301690-69359313    |
| 7577 | Cldn8         | 54420     | 16-:88562602-88563280   |
| 7580 | Slc22a20      | 381203    | 19-:5971398-5986140     |
| 7582 | MMT00065786   |           | 14+:14754201-14780995   |
| 7586 | 5730469M10Rik | 70564     | 14-:41807028-41827064   |
| 7589 | 4933404M02Rik | 66748     | 2+:70346873-70378940    |
| 7590 | Ankrd40       | 71452     | 11+:94199602-94203160   |
| 7596 | Tifa          | 211550    | 3+:127494298-127501306  |
| 7600 | Zfp382        | 233060    | 7+:30915692-30937948    |
| 7601 | Kcne3         | 57442     | 7+:107329675-107333378  |
| 7602 | Pcca          | 110821    | 14+:122933564-123289047 |
| 7603 | Sod2          | 20656     | 17+:13200859-13208205   |
| 7609 | Ctrc          | 76701     | 4-:141394566-141402200  |
| 7610 | Scand1        | 19018     | 2-:156137593-156138262  |
| 7612 | MMT00014216   |           | 6-:133707411-133713096  |
| 7618 | Glis2         | 83396     | 16+:4608595-4614628     |
| 7619 | Pik3ip1       | 216505    | 11+:3230382-3242971     |
| 7620 | Foxo3         | 219038    | 14+:52538462-52540381   |
| 7624 | Mum11l        | 245631    | X+:135769253-135771297  |
| 7637 | MMT00056309   | 382035    | 8-:125144181-125146633  |
| 7641 | Cyp26a1       | 13082     | 19+:37772343-37776026   |



|      |               |        |                         |
|------|---------------|--------|-------------------------|
| 7642 | Igl-V1        | 16142  | 16-:19061844-19085553   |
| 7643 | Mrps28        | 66230  | 3-:8802156-8923814      |
| 7644 | MMT00033296   |        | 11+:76327564-76327948   |
| 7646 | Sfrs18        | 66625  | 4+:21775071-21803672    |
| 7654 | Ptpmt1        | 66461  | 2-:90750866-90758602    |
| 7656 | Lonrf3        | 74365  | X+:33916422-33917017    |
| 7657 | Olf731        | 258360 | 14-:50857579-50858558   |
| 7658 | Lce1l         | 73730  | 3-:92653870-92655208    |
| 7659 | Rab30         | 75985  | 7+:99968414-99985157    |
| 7661 | Rac1          | 19353  | 5-:144266352-144288979  |
| 7662 | Lyz1          | 17110  | 10-:116725639-116729894 |
| 7663 | 4930488L21Rik | 75809  | 8-:96335590-96337455    |
| 7670 | Ccdc57        | 71276  | 11-:120687844-120734986 |
| 7674 | Spata7        | 104871 | 12+:99866372-99908029   |
| 7676 | Jmjd2c        | 76804  | 4+:73897851-74051765    |
| 7678 | Ltbr          | 17000  | 6-:125256593-125263872  |
| 7680 | EG667232      | 667232 | 16-:36569040-36580930   |
| 7683 | Man1a2        | 17156  | 3-:100370339-100489150  |
| 7686 | Apoa5         | 66113  | 9+:46076690-46079492    |
| 7688 | MMT00058344   |        | 13-:64423876-64424841   |
| 7690 | 4632417N05Rik | 74032  | 8-:120185298-120195415  |
| 7691 | Tnnc1         | 21924  | 14+:32021497-32024897   |
| 7693 | B3galt6       | 117592 | 4-:155365330-155366731  |
| 7695 | Cpsf1         | 94230  | 15-:76426238-76437984   |
| 7698 | Klrb1a        | 17057  | 6-:128559634-128572952  |
| 7700 | Iqce          | 74239  | 5-:141139461-141178210  |
| 7707 | Mil3          | 231051 | 5-:24777617-24893859    |
| 7718 | Pdia6         | 71853  | 12+:17273353-17291577   |
| 7721 | MMT00000356   |        | 8-:110214319-110214744  |
| 7725 | 3230401D17Rik | 66680  | 2-:163231672-163245224  |
| 7726 | Cyp2d9        | 13105  | 15+:82282828-82287257   |
| 7727 | MMT00065667   |        | 14+:121112299-121112967 |
| 7731 | 1500001M20Rik | 68971  | 6-:114954374-114987893  |
| 7734 | Cyp2b23       | 243881 | 7-:27450574-27471449    |
| 7735 | Traip         | 22036  | 9+:107853299-107873859  |
| 7739 | Grm8          | 14823  | 6-:27225611-28076195    |
| 7742 | Spag9         | 70834  | 11+:93857582-93987393   |
| 7745 | C330016O10Rik | 212706 | 11-:51456591-51464288   |
| 7749 | Mul1          | 68350  | 4+:137990605-137995818  |
| 7751 | Sgk2          | 27219  | 2+:162813281-162839862  |
| 7752 | Ugp2          | 216558 | 11-:21221798-21270480   |
| 7753 | Gfm1          | 28030  | 3+:67234045-67278989    |
| 7755 | B230317C12Rik | 56279  | 2+:26483991-26492014    |
| 7756 | Edc3          | 353190 | 9+:57587690-57597973    |
| 7761 | Nudt19        | 110959 | 7-:36332211-36340852    |
| 7763 | 2010204K13Rik | 68355  | X-:6989231-7000074      |

|      |               |           |                         |
|------|---------------|-----------|-------------------------|
| 7767 | Bai3          | 210933    | 1-:25124323-25188246    |
| 7770 | Galt          | 14430     | 4+:41702375-41705553    |
| 7775 | Nif3l1        | 65102     | 1+:58501994-58518367    |
| 7779 | Slit2         | 20563     | 5+:48666501-48697803    |
| 7781 | Pip           | 18716     | 6+:41797552-41802063    |
| 7782 | Gm114         | 228730    | 2+:146681598-146716820  |
| 7784 | Msh4          | 55993     | 3-:153520112-153569102  |
| 7787 | MMT00043009   |           | 9-:97127501-97129284    |
| 7788 | 1600021P15Rik | 239796    | 16-:28826263-28929784   |
| 7791 | Dtx4          | 207521    | 19-:12543625-12575707   |
| 7792 | 6720467C03Rik | 68099     | 4-:12080869-12098989    |
| 7793 | MMT00070312   | 668699    | 14+:103409421-103410015 |
| 7794 | Hbs1l         | 56422     | 10+:21015939-21030325   |
| 7795 | MMT00071427   |           | 7-:26204174-26204845    |
| 7797 | Ddx47         | 67755     | 6+:134961637-134973789  |
| 7798 | MMT00077178   |           | 19+:11511939-11513093   |
| 7800 | Rgr           | 57811     | 14-:37850811-37862120   |
| 7802 | Adcy4         | 104110    | 14-:56387929-56402856   |
| 7803 | Ttyh1         | 57776     | 7+:4071178-4085578      |
| 7806 | D1Ert53e      | 213056    | 1-:58584099-58643136    |
| 7807 | 2410004N09Rik | 69749     | 18+:33954572-33956736   |
| 7808 | Bnc2          | 242509    | 4-:83921000-84037038    |
| 7810 | Trim45        | 229644    | 3+:100726399-100735625  |
| 7813 | Stac          | 20840     | 9-:111463937-111592720  |
| 7821 | MMT00042003   |           | 7-:97959541-97960744    |
| 7824 | MMT00001823   | 100044551 | 1-:82999078-83001428    |
| 7827 | 1700010A17Rik | 75495     | 2+:35904997-35935236    |
| 7837 | Pou3f1        | 18991     | 4+:124334895-124336413  |
| 7839 | Asl           | 109900    | 5-:130487373-130500201  |
| 7842 | Pdk2          | 18604     | 11-:94887572-94902629   |
| 7843 | V1ri1         | 252907    | 13-:22279015-22279917   |
| 7844 | Btc           | 12223     | 5-:91787835-91831845    |
| 7848 | Casp12        | 12364     | 9+:5345510-5372647      |
| 7851 | Fank1         | 66930     | 7+:140968564-141073215  |
| 7860 | Bmp6          | 12161     | 13+:38437584-38591597   |
| 7861 | Klhdc4        | 234825    | 8-:124320233-124353469  |
| 7862 | Cpsf4l        | 52670     | 11-:113559485-113571331 |
| 7865 | MMT00062659   |           | 15-:41861949-41864525   |
| 7873 | Steap4        | 117167    | 5+:7960468-7982212      |
| 7875 | Crat          | 12908     | 2-:30257505-30270980    |
| 7876 | EG625534      | 625534    | 1+:152396446-152396808  |
| 7877 | Obfc2a        | 109019    | 1-:51526333-51535251    |
| 7879 | Ifitm3        | 66141     | 7-:148195488-148196643  |
| 7887 | 4930418G15Rik | 69312     | 1-:9958707-9999201      |
| 7888 | Pigz          | 239827    | 16+:31934062-31946136   |
| 7892 | Ccr2          | 12772     | 9+:124016921-124023289  |

|      |               |           |                           |
|------|---------------|-----------|---------------------------|
| 7894 | MMT00029319   | 100039284 | 10+:61246511-61247569     |
| 7896 | Polr3e        | 26939     | 7+:128061297-128089335    |
| 7897 | MMT00067427   | 100041449 | 5+:146890910-146924395    |
| 7900 | Myo18a        | 360013    | 11+:77590766-77679482     |
| 7901 | Slc41a1       | 98396     | 1+:133727198-133745441    |
| 7907 | Klk1b8        | 16624     | 7+:51206051-51210308      |
| 7908 | MMT00082889   |           | 4-:127085611-127086063    |
| 7909 | Oas3          | 246727    | 5-:121203108-121227668    |
| 7910 | AK122209      | 382038    | 8+:126548955-126572397    |
| 7911 | Pik3c2g       | 18705     | 6+:139792407-139917802    |
| 7913 | MMT00065558   |           | 12+:9436283-9437290       |
| 7915 | Cdx4          | 12592     | X+:100516736-100525563    |
| 7916 | MMT00016293   |           | Y_random+:6427127-6429303 |
| 7918 | Rtn4ip1       | 170728    | 10+:43621898-43666734     |
| 7922 | Casp7         | 12369     | 19+:56471618-56516831     |
| 7929 | Pole4         | 66979     | 6-:82596705-82602857      |
| 7934 | MMT00002010   |           | 13-:3136659-3139392       |
| 7936 | MMT00061970   |           | 1-:12591242-12591281      |
| 7938 | Ppp2r2b       | 72930     | 18-:42804924-43219125     |
| 7940 | Cyp2b9        | 13094     | 7+:26958427-26995679      |
| 7944 | Al132487      | 104910    | 12+:110089344-110095023   |
| 7945 | Gpc2          | 71951     | 5-:138714888-138721195    |
| 7950 | Efha1         | 68514     | 14-:58535098-58618106     |
| 7953 | MMT00066281   |           | 11+:45643053-45643532     |
| 7954 | Ccdc12        | 72654     | 9+:110559006-110614098    |
| 7956 | Pnoc          | 18155     | 14-:66020316-66044310     |
| 7957 | MMT00074126   |           | 13+:22374396-22375819     |
| 7959 | Tbx5          | 21388     | 5+:120246786-120333511    |
| 7962 | Ajap1         | 230959    | 4-:152747328-152856813    |
| 7963 | Rxrg          | 20183     | 1+:169528646-169569752    |
| 7965 | Enpp5         | 83965     | 17+:44215817-44223508     |
| 7969 | MMT00001293   |           | 3+:8327474-8330440        |
| 7973 | Lgals9        | 16859     | 11-:78776896-78798333     |
| 7974 | Arhgef7       | 54126     | 8+:11782561-11835213      |
| 7975 | Lancl1        | 14768     | 1-:67047090-67085439      |
| 7976 | Anapc5        | 59008     | 5-:123241616-123250569    |
| 7983 | Syt13         | 80976     | 2+:92755331-92793824      |
| 7990 | Nostrin       | 329416    | 2+:68973946-69027384      |
| 7991 | Gpr115        | 78249     | 17-:42793837-42829236     |
| 8001 | Efr3a         | 76740     | 15+:65618619-65704121     |
| 8005 | Omg           | 18377     | 11-:79314857-79317521     |
| 8007 | MMT00040041   |           | 8+:27408847-27464610      |
| 8009 | Trat1         | 77647     | 16-:48733829-48750579     |
| 8016 | Mrpl35        | 66223     | 6-:71765101-71773764      |
| 8020 | Nope          | 56741     | 9+:64949341-64985749      |
| 8021 | 1600002K03Rik | 69770     | 10+:79635687-79637864     |

|      |               |        |                         |
|------|---------------|--------|-------------------------|
| 8022 | MMT00004959   |        | X+:98257488-98258368    |
| 8031 | Scoc          | 56367  | 8-:85958391-85966379    |
| 8034 | Gas1          | 14451  | 13-:60275765-60278726   |
| 8035 | Frzb          | 20378  | 2-:80252333-80287350    |
| 8036 | Zfp160        | 224585 | 17+:21145937-21165823   |
| 8037 | MMT00052151   |        | 1-:43055955-43077637    |
| 8039 | H1foo         | 171506 | 6+:115894956-115900249  |
| 8043 | 4930405D01Rik | 73795  | 16+:52849397-52979019   |
| 8045 | Pgam5         | 72542  | 5-:110688179-110698898  |
| 8049 | Pon1          | 18979  | 6-:5118104-5143824      |
| 8051 | MMT00035998   |        |                         |
| 8053 | Gal           | 14419  | 19-:3410095-3414112     |
| 8054 | Smarca2       | 67155  | 19+:26822948-26852763   |
| 8055 | Ptcd3         | 69956  | 6-:71830634-71839625    |
| 8056 | EG433923      | 433923 | 5+:97693755-97694741    |
| 8058 | Epb4.9        | 13829  | 14-:71003509-71018209   |
| 8067 | Taok3         | 330177 | 5+:117583626-117723866  |
| 8071 | D630002J15Rik | 77522  | 6+:38059245-38065807    |
| 8072 | Zcchc9        | 69085  | 13-:91936137-91945766   |
| 8073 | Irak1bp1      | 65099  | 9+:82723629-82740627    |
| 8075 | MMT00011946   |        | 5-:73867838-73868525    |
| 8079 | Pts           | 19286  | 9-:50330120-50336746    |
| 8080 | Lpar1         | 14745  | 4-:58447859-58566391    |
| 8081 | Rhot1         | 59040  | 11+:80061973-80080313   |
| 8084 | Psmc10        | 53380  | X-:137483679-137491206  |
| 8085 | MMT00057439   |        | X-:136619365-136619999  |
| 8088 | Negr1         | 320840 | 3+:156679145-156823707  |
| 8091 | Slc10a1       | 20493  | 12-:82056478-82068971   |
| 8094 | 4930591A17Rik | 68175  | 2+:179149640-179151585  |
| 8095 | Bex2          | 12069  | X-:132601104-132602649  |
| 8096 | V1rh17        | 252912 | 13+:22179746-22180671   |
| 8099 | MMT00052332   |        | 19+:58563727-58563925   |
| 8102 | Hivep2        | 15273  | 10+:13847381-13870251   |
| 8106 | MMT00065672   |        | 14-:121214347-121214954 |
| 8108 | Cpne4         | 74020  | 9+:104775001-104936875  |
| 8109 | 6330545A04Rik | 76166  | 4+:140769916-140775953  |
| 8110 | Abhd7         | 384214 | 5+:107832606-107842646  |
| 8114 | Kcnn1         | 84036  | 8-:73367056-73379484    |
| 8117 | Ngp           | 18054  | 9+:110322352-110325514  |
| 8118 | MMT00011146   |        | 12+:78920464-78921288   |
| 8120 | 5730410E15Rik | 319613 | 15-:44503406-44560694   |
| 8122 | Hexim1        | 192231 | 11+:102977638-102981036 |
| 8127 | Hmg20b        | 15353  | 10-:80808796-80813155   |
| 8129 | Gtse1         | 29870  | 15+:85690405-85707002   |
| 8136 | Ikzf3         | 22780  | 11-:98327555-98380046   |
| 8141 | Scnn1a        | 20276  | 6+:125271357-125294957  |

|      |               |        |                         |
|------|---------------|--------|-------------------------|
| 8147 | 1700029J07Rik | 69479  | 8-:47038961-47060607    |
| 8148 | Ppp1r9a       | 243725 | 6-:4942157-4961002      |
| 8149 | Nav3          | 260315 | 10-:109121128-109207380 |
| 8150 | Pnn           | 18949  | 12+:60167971-60174404   |
| 8154 | Neb           | 17996  | 2-:51992182-52194317    |
| 8155 | Mark3         | 17169  | 12+:112813181-112894430 |
| 8156 | Ttll1         | 319953 | 15-:83314201-83341294   |
| 8157 | MMT00005305   |        | 6-:15477154-15588274    |
| 8158 | Smc5          | 226026 | 19-:23281403-23317224   |
| 8160 | Akr1c12       | 622402 | 13-:4267422-4278606     |
| 8161 | MMT00031928   |        | 16+:43312605-43313377   |
| 8162 | Muc16         | 73732  | 9-:18337023-18371302    |
| 8164 | MMT00017950   |        | 6-:142919365-142919929  |
| 8170 | Snx22         | 382083 | 9-:65914914-65917545    |
| 8171 | Spink8        | 78709  | 9+:109719158-109729137  |
| 8174 | 5330426P16Rik | 68190  | 16-:50719411-50732853   |
| 8176 | Stx6          | 58244  | 1+:157006022-157049145  |
| 8181 | Thap1         | 73754  | 8+:27268694-27274622    |
| 8182 | Tbx1          | 21380  | 16-:18581805-18587062   |
| 8184 | Rbm26         | 74213  | 14-:105505998-105576497 |
| 8187 | Gins1         | 69270  | 2+:150735322-150757012  |
| 8189 | Cflar         | 12633  | 1+:58783206-58790070    |
| 8190 | Rc3h2         | 319817 | 2-:37230577-37270266    |
| 8193 | Pi4k2a        | 84095  | 19+:42164975-42196520   |
| 8194 | MMT00077789   |        | X-:153450772-153452073  |
| 8200 | Dfna5h        | 54722  | 6-:50157402-50211768    |
| 8203 | Rnf170        | 77733  | 8+:27234312-27253102    |
| 8209 | MMT00072546   |        | X-:12903091-12904107    |
| 8210 | Hspa12a       | 73442  | 19-:58873309-58936058   |
| 8212 | MMT00052607   |        | 3-:77889848-77891186    |
| 8217 | Bhmt          | 12116  | 13-:94387430-94407456   |
| 8221 | Stxbp3a       | 20912  | 3-:108596097-108643420  |
| 8222 | Etf1          | 110842 | 9-:55302316-55359917    |
| 8223 | Pdlim3        | 53318  | 8+:46970814-47004769    |
| 8226 | Gli1          | 14632  | 10-:126766942-126778635 |
| 8231 | Tcfcp2        | 21422  | 15-:100333227-100382378 |
| 8234 | Tbpl1         | 237336 | 10-:22425181-22451133   |
| 8237 | Caprin1       | 53872  | 2-:103605181-103637211  |
| 8241 | MMT00047047   |        | 2-:99394281-99564304    |
| 8244 | Vamp4         | 53330  | 1+:164504431-164525021  |
| 8252 | Plcl1         | 227120 | 1+:55752583-55808444    |
| 8254 | Bbs2          | 67378  | 8-:96591853-96622323    |
| 8255 | Prkar1a       | 19084  | 11+:109510676-109530943 |
| 8256 | Tjap1         | 74094  | 17-:46394824-46419958   |
| 8257 | Aadac         | 67758  | 3+:59835709-59844079    |
| 8262 | Syp           | 20977  | X+:7215836-7230377      |

|      |               |        |                         |
|------|---------------|--------|-------------------------|
| 8266 | Prosc         | 114863 | 8+:28153086-28163885    |
| 8268 | Kctd7         | 212919 | 5+:130620833-130630984  |
| 8269 | Ccdc11        | 74453  | 18+:74442775-74519638   |
| 8270 | Clspn         | 269582 | 4+:126234236-126271157  |
| 8274 | Zc3h11a       | 70579  | 1-:135518092-135550589  |
| 8278 | Dlgap1        | 224997 | 17+:71158411-71168741   |
| 8279 | Kif13a        | 16553  | 13-:46844458-47025087   |
| 8284 | EG209380      | 209380 | 7-:113563185-113566144  |
| 8291 | Lce1a2        | 73722  | 3-:92472534-92474237    |
| 8292 | Mapkap1       | 227743 | 2+:34479448-34480469    |
| 8293 | Mpi           | 110119 | 9-:57392066-57400559    |
| 8297 | Dhx37         | 208144 | 5-:125896235-125977332  |
| 8300 | MMT00043905   |        | 15-:74816454-74817477   |
| 8304 | Fubp1         | 51886  | 3+:151873461-151895735  |
| 8313 | Frap1         | 56717  | 4+:147822715-147931790  |
| 8314 | Armc6         | 76813  | 8-:72744089-72758367    |
| 8317 | E130311K13Rik | 329659 | 3-:63724086-63733292    |
| 8319 | MMT00062477   |        | 10-:14465758-14467192   |
| 8320 | Nme3          | 79059  | 17+:25033450-25034448   |
| 8321 | Olf1120       | 259031 | 2+:87197602-87198547    |
| 8323 | Cbx6          | 494448 | 15-:79654328-79656137   |
| 8325 | Psme2         | 19188  | 14-:56206276-56209745   |
| 8327 | 4930503B20Rik | 75015  | 3-:146312663-146314276  |
| 8328 | Klhdc8a       | 213417 | 1+:134195637-134202152  |
| 8329 | Pipox         | 19193  | 11-:77694116-77707283   |
| 8331 | BC052688      | 432812 | 13+:61731372-61888643   |
| 8332 | Tmem206       | 66950  | 1+:193149843-193174790  |
| 8334 | MMT00082897   |        | 6-:73478635-73479239    |
| 8335 | Cftr          | 12638  | 6+:18120686-18272767    |
| 8336 | MMT00041615   |        | 5+:152083838-152084048  |
| 8337 | Lgr4          | 107515 | 2+:109810843-109853629  |
| 8339 | MMT00046482   |        | 14+:60759849-60760245   |
| 8340 | Pde1a         | 18573  | 2-:79677036-79969269    |
| 8341 | MMT00017270   |        | 6-:47926988-47927875    |
| 8342 | Cwf19l1       | 72502  | 19-:44184514-44210366   |
| 8344 | Cfh           | 12628  | 1-:141982455-142079899  |
| 8345 | Elfn1         | 243312 | 5+:140447196-140449682  |
| 8346 | Hiat1         | 15247  | 3-:116334086-116365468  |
| 8349 | Rhoq          | 104215 | 17+:87362641-87399403   |
| 8355 | Pms2          | 18861  | 5+:144737915-144746584  |
| 8356 | Fbxl12        | 30843  | 9-:20442232-20447132    |
| 8357 | Siva1         | 30954  | 12+:113883122-113887355 |
| 8359 | 1190002N15Rik | 68861  | 9-:94418281-94438274    |
| 8361 | MMT00025562   |        | 9+:18231928-18233469    |
| 8363 | MMT00006564   |        | 19-:28936820-28938254   |
| 8366 | Sema3a        | 20346  | 5+:13399847-13600084    |

|      |               |           |                         |
|------|---------------|-----------|-------------------------|
| 8368 | Rad51l3       | 19364     | 11-:82691886-82704107   |
| 8371 | Hipk2         | 15258     | 6-:38647904-38825952    |
| 8372 | Uap1          | 107652    | 1-:172072133-172105011  |
| 8388 | Zfyve21       | 68520     | 12+:113052483-113066560 |
| 8392 | Asf1b         | 66929     | 8+:86479592-86494093    |
| 8394 | Dpy19l3       | 233115    | 7-:36473861-36497237    |
| 8396 | MMT00040956   |           | 18+:10928840-10929732   |
| 8398 | ND5           | 17721     | M+:0-16297              |
| 8399 | Herpud1       | 64209     | 8+:96910399-96919258    |
| 8400 | Calm4         | 80796     | 13+:3837141-3837576     |
| 8401 | Slain1        | 105439    | 14+:104049416-104104122 |
| 8403 | Rps29         | 20090     | 12-:70258711-70260057   |
| 8404 | Fa2h          | 338521    | 8-:113869045-113917720  |
| 8408 | Nr1i3         | 12355     | 1+:173144166-173148975  |
| 8409 | Mid1          | 17318     | X+:166123181-166444500  |
| 8416 | Cdc20         | 107995    | 4-:118105506-118109854  |
| 8421 | Mbd5          | 109241    | 2+:49101451-49169245    |
| 8428 | Sorbs3        | 20410     | 14-:70580275-70607444   |
| 8430 | Pttg1ip       | 108705    | 10+:77044510-77061476   |
| 8432 | Fgf18         | 14172     | 11-:33017438-33047400   |
| 8438 | Mrpl48        | 52443     | 7-:107697222-107756816  |
| 8439 | Slc25a33      | 70556     | 4-:149118583-149148292  |
| 8441 | Tmem54        | 66260     | 4+:128782859-128788829  |
| 8443 | Pola2         | 18969     | 19-:5940547-5964139     |
| 8444 | Rdh16         | 19683     | 10+:127238209-127252895 |
| 8446 | Cybrd1        | 73649     | 2+:70956108-70976909    |
| 8448 | Sucla2        | 20916     | 14+:73952436-73995949   |
| 8449 | Vash2         | 226841    | 1-:192771628-192803078  |
| 8456 | Ftl2          | 14337     | 4+:125180618-125181709  |
| 8458 | MMT00063985   |           | X-:57979510-57980693    |
| 8464 | Snapin        | 20615     | 3-:90292300-90294915    |
| 8465 | BC023814      | 229503    | 3-:87727566-87734069    |
| 8467 | Scfd1         | 76983     | 12+:52478565-52551094   |
| 8469 | Sfrs6         | 67996     | 2+:162757263-162761082  |
| 8471 | Tacstd1       | 17075     | 17+:88036047-88050467   |
| 8472 | Txndc16       | 70561     | 14-:45754125-45839043   |
| 8473 | Clint1        | 216705    | 11+:45665443-45724128   |
| 8477 | MMT00002146   | 100041835 | 11-:95934335-95936342   |
| 8484 | Cgref1        | 68567     | 5-:31235514-31247859    |
| 8486 | Plod3         | 26433     | 5+:137463486-137472407  |
| 8488 | Opcml         | 330908    | 9+:28620871-28727953    |
| 8494 | MMT00028462   |           | 6+:67789786-67864069    |
| 8495 | Lox           | 16948     | 18-:52675720-52689357   |
| 8499 | C430048L16Rik | 77604     | 4+:12016518-12073876    |
| 8500 | Ddit3         | 13198     | 10+:126730766-126733340 |
| 8506 | MMT00003599   |           | 4+:16173206-16177382    |

|      |               |           |                         |
|------|---------------|-----------|-------------------------|
| 8507 | 1700054F22Rik | 73398     | 4+:53006846-53008858    |
| 8508 | Myl3          | 17897     | 9+:110666184-110672304  |
| 8510 | Tbl2          | 27368     | 5+:135625593-135636005  |
| 8514 | Arntl2        | 272322    | 6+:146754950-146782043  |
| 8515 | Glcci1        | 170772    | 6+:8209449-8547480      |
| 8516 | Plxnb2        | 140570    | 15-:88985978-88997478   |
| 8521 | Ceacam1       | 26365     | 7-:26248486-26262569    |
| 8523 | Ddit4l        | 73284     | 3+:137286635-137289477  |
| 8524 | Cbr1          | 12408     | 16+:93608083-93610566   |
| 8525 | 2510006D16Rik | 76799     | 4+:129277950-129285114  |
| 8529 | MMT00070318   |           | 14+:44518941-44519459   |
| 8530 | Snca          | 20617     | 6-:60681594-60779849    |
| 8533 | Ptprcap       | 19265     | 19+:4154678-4156713     |
| 8534 | Lhcgr         | 16867     | 17-:89140889-89191316   |
| 8541 | Tubb5         | 22154     | 17-:35971751-35975076   |
| 8545 | Spink12       | 78242     | 18+:44264061-44268195   |
| 8546 | Vmn2r87       | 625131    | 10-:129908893-129934362 |
| 8547 | Gbp4          | 17472     | 5-:105546592-105568563  |
| 8548 | Tor1aip2      | 240832    | 1+:157906683-157912587  |
| 8554 | Letm2         | 270035    | 8-:26688963-26708024    |
| 8555 | H2-M3         | 14991     | 17+:37407206-37411431   |
| 8559 | Rangrf        | 57785     | 11-:68785987-68787327   |
| 8563 | Leng1         | 69757     | 7-:3612684-3617072      |
| 8564 | Plid4         | 104759    | 12+:114001601-114007198 |
| 8568 | Tnik          | 665113    | 3+:28308275-28569505    |
| 8574 | Top1mt        | 72960     | 15-:75487464-75509199   |
| 8578 | Wdr19         | 213081    | 5+:65590979-65651651    |
| 8582 | Igsf10        | 242050    | 3-:59121809-59140509    |
| 8588 | Notch4        | 18132     | 17+:34701274-34725441   |
| 8589 | Sfrs7         | 225027    | 17-:80599425-80606625   |
| 8595 | MMT00019109   |           | X-:88531214-88531963    |
| 8597 | Paps1         | 23971     | 3+:131227854-131306632  |
| 8600 | Scn10a        | 20264     | 9-:119517584-119603478  |
| 8603 | Slc6a3        | 13162     | 13+:73674271-73716118   |
| 8606 | Cntnap5c      | 620292    | 17+:58153238-58445139   |
| 8610 | Padi4         | 18602     | 4-:140301779-140330098  |
| 8617 | 2210412E05Rik | 75690     | 7+:50718602-50719173    |
| 8618 | EG433865      | 433865    | 5-:30120704-30121666    |
| 8620 | MMT00048670   |           | 1+:146800131-146801383  |
| 8623 | MMT00015399   |           | 17-:53606287-53606659   |
| 8624 | Bnc1          | 12173     | 7-:89111546-89137182    |
| 8628 | MMT00058602   |           | X+:46064705-46065318    |
| 8632 | Igfbp1        | 16006     | 11+:7097869-7102540     |
| 8634 | MMT00047654   | 100041686 | 8-:73419313-73421275    |
| 8636 | Cyp2j11       | 100066    | 4-:95961214-96015372    |
| 8637 | Tnpo2         | 212999    | 8+:87561130-87579566    |



|      |               |        |                         |
|------|---------------|--------|-------------------------|
| 8638 | Fkbp14        | 231997 | 6-:54527600-54543171    |
| 8639 | Map1lc3b      | 67443  | 8+:124114424-124120668  |
| 8641 | Slc7a2        | 11988  | 8+:41983791-42003073    |
| 8642 | Serpinb9      | 20723  | 13+:33096539-33108356   |
| 8643 | Mmp1b         | 83996  | 9-:7368240-7387993      |
| 8644 | V1rg11        | 171267 | 7-:12947158-12948113    |
| 8648 | Flnb          | 286940 | 14+:8650664-8784097     |
| 8649 | MMT00072863   | 77652  | 17+:33437886-33441602   |
| 8652 | Krt7          | 110310 | 15+:101242855-101258235 |
| 8653 | AW124722      | 239570 | 15+:85662742-85687226   |
| 8654 | Fbxl13        | 320118 | 5-:21119810-21120312    |
| 8658 | Fmo2          | 55990  | 1-:164806576-164828517  |
| 8659 | Psmb8         | 16913  | 17+:34335343-34338210   |
| 8660 | Rragb         | 245670 | X+:149574538-149604845  |
| 8662 | Brca2         | 12190  | 5+:151325749-151372321  |
| 8664 | MMT00014895   |        | 8+:125113580-125114085  |
| 8667 | Plxna3        | 18846  | X+:71574439-71589102    |
| 8670 | MMT00051613   |        | 1+:46472135-46473775    |
| 8674 | Gclm          | 14630  | 3+:121948863-121969397  |
| 8677 | Zbtb8os       | 67106  | 4+:129013260-129031791  |
| 8679 | Tiparp        | 99929  | 3+:65332331-65359440    |
| 8680 | C1qtnf9       | 239126 | 14+:61391133-61399701   |
| 8683 | 3110002H16Rik | 76482  | 18+:12327243-12349336   |
| 8684 | Il15          | 16168  | 8-:84855524-84926444    |
| 8687 | AB041803      | 232685 | 6-:31115524-31168433    |
| 8690 | Cd84          | 12523  | 1+:173770734-173816561  |
| 8701 | EG633640      | 633640 | 13+:120276876-120284312 |
| 8702 | Mrpl30        | 107734 | 1+:37947397-37955178    |
| 8703 | Gstp1         | 14870  | 19-:4035410-4037912     |
| 8705 | Ahdc1         | 230793 | 4+:132621123-132633140  |
| 8706 | Rab35         | 77407  | 5+:116082149-116097568  |
| 8707 | Al747699      | 381236 | 19-:33657536-33664514   |
| 8708 | Olf992        | 258865 | 2-:85239758-85240688    |
| 8709 | Trim58        | 216781 | 11+:58453969-58459628   |
| 8711 | 5430432M24Rik | 73847  | 2-:151795135-151805865  |
| 8717 | Litaf         | 56722  | 16-:10959366-10993182   |
| 8721 | Tbc1d10c      | 108995 | 19-:4184355-4191049     |
| 8722 | MMT00022745   |        | X+:109579839-109580241  |
| 8724 | Tgfb3         | 21809  | 12-:87397693-87419484   |
| 8727 | Slc27a3       | 26568  | 3-:90189153-90193712    |
| 8728 | 4930438A08Rik | 73988  | 11+:58099996-58107798   |
| 8730 | MMT00008620   |        | 8+:54766414-55042434    |
| 8736 | Rsb1          | 229675 | 3+:103718307-103770783  |
| 8738 | Reg4          | 67709  | 3+:98026078-98040671    |
| 8739 | MMT00054598   |        | 7-:93206490-93211909    |
| 8740 | Car5b         | 56078  | X-:160417022-160465929  |

|      |                  |        |                         |
|------|------------------|--------|-------------------------|
| 8742 | Tmem39a          | 67846  | 16+:38562953-38591497   |
| 8743 | Pkp4             | 227937 | 2+:58999877-59193260    |
| 8745 | Mcm2             | 17216  | 6-:88833468-88848691    |
| 8747 | Nme6             | 54369  | 9+:109735307-109745475  |
| 8748 | EG625055         | 625055 | 3+:86668402-86669324    |
| 8749 | Wdfy3            | 72145  | 5-:102364099-102386564  |
| 8750 | 1700010I14Rik    | 66931  | 17+:9181225-9201181     |
| 8752 | Stk32c           | 57740  | 7-:146289537-146374372  |
| 8765 | MMT00037007      |        |                         |
| 8766 | Irs3             | 16369  | 5-:138084255-138086955  |
| 8767 | Rgl2             | 19732  | 17+:34066910-34074340   |
| 8769 | Cenpk            | 60411  | 13+:105019467-105039695 |
| 8770 | Cpxm2            | 55987  | 7-:139235576-139346296  |
| 8772 | MMT00042479      |        | X-:65572813-65573103    |
| 8773 | MMT00027093      |        | 14-:93593417-93594940   |
| 8776 | Aox3             | 71724  | 1+:58169979-58257289    |
| 8777 | 1700028K03Rik    | 76421  | 5+:107963728-107977396  |
| 8782 | ENSMUSG000000488 | 791319 | 3-:55181377-55195964    |
| 8783 | Zfyve16          | 218441 | 13-:93257085-93300754   |
| 8784 | Hgd              | 15233  | 16+:37580306-37632104   |
| 8785 | Tbx15            | 21384  | 3+:99057793-99158182    |
| 8786 | Rmnd1            | 66084  | 10+:5942553-5943313     |
| 8787 | Sdf2l1           | 64136  | 16-:17130234-17132416   |
| 8789 | MMT00059186      |        | 10+:101922990-101923547 |
| 8790 | Galnt2           | 108148 | 8+:126755425-126867361  |
| 8791 | Sectm1a          | 209588 | 11-:120928716-120942420 |
| 8792 | Bop1             | 12181  | 15-:76283425-76307699   |
| 8794 | 1500011B03Rik    | 66236  | 5-:115258209-115263936  |
| 8795 | EG629966         | 629966 | 11-:111474281-111542366 |
| 8797 | Snrk             | 20623  | 9+:122041019-122078816  |
| 8800 | Rnf213           | 629974 | 11+:119313824-119348731 |
| 8803 | MMT00080648      |        | 10+:56217067-56217903   |
| 8807 | Ankrd56          | 78088  | 5-:93470154-93473980    |
| 8808 | RP23-136K12.4    | 19062  | 11+:75444489-75462373   |
| 8809 | Tgfr2            | 21813  | 9-:115996815-115998095  |
| 8815 | Mx1              | 17857  | 16-:97668643-97684512   |
| 8816 | Nfkbia           | 18035  | 12-:56590847-56593570   |
| 8817 | Ptpn1            | 19246  | 2+:167757865-167802467  |
| 8822 | Galnt4           | 233733 | 7-:118922826-118923004  |
| 8826 | 4933406C10Rik    | 74076  | 12-:33609822-33638650   |
| 8828 | Slc30a2          | 230810 | 4+:133899201-133908442  |
| 8829 | Kndc1            | 76484  | 7+:147113581-147127435  |
| 8836 | Zmym5            | 219105 | 14-:57412164-57416618   |
| 8840 | Tmem18           | 211986 | 12+:31269324-31276083   |
| 8843 | Eil2             | 192657 | 13+:75899385-75909666   |
| 8844 | 2310037I24Rik    | 69612  | 15-:98349240-98364664   |

|      |               |        |                         |
|------|---------------|--------|-------------------------|
| 8847 | Cpe           | 12876  | 8-:67071362-67076365    |
| 8849 | Cachd1        | 320508 | 4+:100537582-100677150  |
| 8851 | Pdcd4         | 18569  | 19+:53977958-54004340   |
| 8855 | Psph          | 100678 | 5-:130271440-130285077  |
| 8856 | Npepps        | 19155  | 11-:97068246-97141877   |
| 8857 | Rab3gap2      | 98732  | 1+:187028120-187110624  |
| 8860 | Prkab2        | 108097 | 3+:97462233-97477736    |
| 8863 | Defcr5        | 13239  | 8+:22437117-22437959    |
| 8864 | MMT00046672   |        | 7-:112561228-112562492  |
| 8867 | Shcbp1        | 20419  | 8-:4735979-4779534      |
| 8870 | Arid3a        | 13496  | 10+:79393377-79417448   |
| 8871 | Gm443         | 242891 | 5+:25022106-25023795    |
| 8872 | MMT00018546   |        | 12-:13442893-13444041   |
| 8881 | Olf462        | 258406 | 11-:87702461-87707424   |
| 8882 | Adarb1        | 110532 | 10-:76757181-76822480   |
| 8883 | Mtap4         | 17758  | 9+:109833963-109986450  |
| 8884 | Plekho2       | 102595 | 9-:65402192-65420938    |
| 8887 | Dpep1         | 13479  | 8+:125710141-125725124  |
| 8889 | Dnahc6        | 330355 | 6-:72967598-73109292    |
| 8891 | MMT00071061   |        | 13-:25673992-25675286   |
| 8893 | Slc22a18      | 18400  | 7+:150659693-150685227  |
| 8896 | Fasn          | 14104  | 11-:120668388-120685406 |
| 8897 | BC062115      | 408062 | 10+:81523931-81614754   |
| 8900 | Olf307        | 258610 | 7-:93469534-93484904    |
| 8902 | Aldh3b1       | 67689  | 19-:3913492-3923904     |
| 8904 | Trerf1        | 224829 | 17+:47497941-47498909   |
| 8905 | Trim67        | 330863 | 8+:127317710-127352161  |
| 8906 | MMT00004929   |        | 14-:58668346-58668711   |
| 8907 | Npr2          | 230103 | 4+:43644807-43664301    |
| 8909 | Ryr1          | 20190  | 7-:29788362-29805289    |
| 8910 | Ube4a         | 140630 | 9-:44754735-44773595    |
| 8911 | Ces6          | 102022 | 8+:107257927-107265373  |
| 8915 | Nob1          | 67619  | 8-:109936387-109948938  |
| 8919 | BC026374      | 234677 | 8+:107655699-107674008  |
| 8920 | Nol5a         | 67134  | 2+:130100160-130105048  |
| 8922 | Il10ra        | 16154  | 9-:45061921-45077219    |
| 8925 | MMT00026932   |        | 9+:53731827-53732372    |
| 8926 | MMT00044569   |        | 4-:52373697-52375043    |
| 8931 | Arf4          | 11843  | 14+:27457865-27475992   |
| 8932 | C430004E15Rik | 97031  | 2+:25118133-25125512    |
| 8933 | Arpc5         | 67771  | 1+:154613782-154622705  |
| 8939 | MMT00024195   |        | 15-:38505007-38506470   |
| 8945 | E030030I06Rik | 319887 | 10-:21868294-21868818   |
| 8949 | Prkcd         | 18753  | 14-:31408554-31423498   |
| 8951 | Cd97          | 26364  | 8-:86247268-86265068    |
| 8952 | Marco         | 17167  | 1-:122371115-122401661  |

|      |               |        |                         |
|------|---------------|--------|-------------------------|
| 8957 | Zfp511        | 69752  | 7+:147222272-147226499  |
| 8959 | Cd209g        | 70192  | 8+:4134775-4137705      |
| 8962 | Nisch         | 64652  | 14-:31984115-32004736   |
| 8964 | Smad2         | 17126  | 18+:76422091-76464559   |
| 8965 | Ahcy          | 269378 | 2-:154889942-154900128  |
| 8967 | Acot12        | 74156  | 13+:91881125-91925753   |
| 8971 | Slc18a2       | 214084 | 19+:59335641-59370495   |
| 8972 | MMT00014869   |        | 19+:37944862-37945603   |
| 8980 | Plekhf1       | 72287  | 7-:39005693-39012978    |
| 8981 | Cacna1g       | 12291  | 11-:94269835-94335039   |
| 8986 | 1300010M03Rik | 67998  | 11-:100957829-100981138 |
| 8987 | F2            | 14061  | 2-:91465477-91476571    |
| 8988 | 1110007A13Rik | 210711 | 7-:135841702-135883950  |
| 8991 | Itm2c         | 64294  | 1+:87791139-87805263    |
| 8992 | Trfr2         | 50765  | 5+:138011947-138028693  |
| 8995 | Pxk           | 218699 | 14+:8930756-8997624     |
| 8996 | Timp1         | 21857  | X+:20448164-20451757    |
| 8999 | Pspc1         | 66645  | 14-:57341285-57397153   |
| 9002 | Col24a1       | 71355  | 3+:145171603-145214975  |
| 9005 | Mapk1ip1l     | 218975 | 14+:47917964-47936462   |
| 9006 | Paip1         | 218693 | 13+:120238761-120245886 |
| 9007 | MMT00066154   |        |                         |
| 9010 | 8430419L09Rik | 74525  | 6+:135148061-135184310  |
| 9011 | Lrrk2         | 66725  | 15+:91610821-91646457   |
| 9012 | MMT00017112   |        | 8-:74807637-74808055    |
| 9016 | Itih2         | 16425  | 2-:10016217-10052290    |
| 9018 | Usp15         | 14479  | 10-:122550299-122633979 |
| 9021 | Cbln4         | 228942 | 2-:171861732-171867798  |
| 9022 | Plek2         | 27260  | 12-:79989683-80007937   |
| 9026 | Cep135        | 381644 | 5+:77030375-77075718    |
| 9028 | Unc45a        | 101869 | 7-:87470180-87485094    |
| 9032 | Jakmip2       | 76217  | 18-:43691062-43750330   |
| 9033 | 1810013L24Rik | 69053  | 16+:8830190-8859008     |
| 9043 | Nat2          | 17961  | 8+:70024922-70026226    |
| 9046 | 4921537P18Rik | 70952  | 8+:28558141-28605422    |
| 9049 | 1810046J19Rik | 103742 | 11-:98299038-98300284   |
| 9050 | Msln          | 56047  | 17-:25885558-25891272   |
| 9052 | A730037C10Rik | 320604 | 3+:54943958-54960979    |
| 9053 | Grm2          | 108068 | 9-:106546867-106556619  |
| 9054 | Rdh7          | 54150  | 10-:127321086-127325755 |
| 9057 | Spp1          | 20750  | 5+:104865210-104870062  |
| 9060 | Prom1         | 19126  | 5-:44384861-44492920    |
| 9065 | Reep4         | 72549  | 14+:70945050-70948740   |
| 9066 | 2210020M01Rik | 66528  | 11+:115761258-115767575 |
| 9067 | Tra2a         | 101214 | 6-:49193925-49214044    |
| 9068 | Oip5          | 70645  | 2-:119435357-119444206  |

|      |               |        |                         |
|------|---------------|--------|-------------------------|
| 9074 | MMT00003693   |        | 14+:77730240-77751187   |
| 9075 | MMT00018252   |        | 1-:186434159-186453422  |
| 9077 | Cnpy4         | 66455  | 5+:138628715-138635105  |
| 9078 | Abpz          | 233090 | 7-:34522212-34524322    |
| 9081 | EG229746      | 229746 | 3+:112105283-112106168  |
| 9082 | Nrarp         | 67122  | 2+:25036542-25038845    |
| 9084 | MMT00002596   |        | 6+:47314860-47354360    |
| 9087 | Wdr63         | 242253 | 3-:145703485-145771002  |
| 9090 | Pm20d1        | 212933 | 1+:133693979-133700704  |
| 9097 | Endod1        | 71946  | 9-:14158449-14185414    |
| 9098 | Rhox9         | 104384 | X-:35252275-35254947    |
| 9100 | Ms4a6c        | 73656  | 19+:11543888-11555816   |
| 9103 | Igh-VJ558     | 16061  | 12-:115920819-116089829 |
| 9104 | Cobra1        | 58202  | 2-:25055236-25066901    |
| 9107 | Lrrc20        | 216011 | 10+:60938561-61043655   |
| 9109 | BC089597      | 216454 | 10+:127303543-127314374 |
| 9111 | BC038286      | 227298 | 1+:75139514-75144481    |
| 9116 | M6prbp1       | 66905  | 17-:56418384-56429934   |
| 9120 | Atp2c1        | 235574 | 9-:105313692-105372478  |
| 9121 | Mtap7d3       | 320923 | X-:54068701-54072116    |
| 9122 | Sepw1         | 20364  | 7-:16502558-16507675    |
| 9123 | Cdc42se1      | 57912  | 3+:95032669-95040331    |
| 9127 | Mtfmt         | 69606  | 9+:65283588-65300209    |
| 9128 | Nxph1         | 18231  | 6+:8859959-8937962      |
| 9132 | Cyp7a1        | 13122  | 4-:6195359-6202718      |
| 9135 | Mbd6          | 110962 | 10-:126719013-126720699 |
| 9137 | Hunk          | 26559  | 16+:90386641-90499796   |
| 9140 | EG623166      | 623166 | 9+:98743005-98744062    |
| 9141 | MMT00028469   |        |                         |
| 9143 | Akr1c14       | 105387 | 13+:4058836-4089663     |
| 9145 | V1rh14        | 171273 | 13-:23205703-23206599   |
| 9146 | Ergic1        | 67458  | 17+:26698503-26793874   |
| 9149 | Ccdc15        | 245902 | 9-:37150020-37155974    |
| 9152 | Indo          | 15930  | 8-:25694614-25707481    |
| 9154 | Tfg           | 21787  | 16-:56690446-56717467   |
| 9156 | Klra23        | 79410  | 6-:130253385-130256445  |
| 9157 | Txnrd1        | 50493  | 10+:82321923-82360456   |
| 9158 | Pde9a         | 18585  | 17+:31523223-31613101   |
| 9161 | Mrpl17        | 27397  | 7-:112958097-112959581  |
| 9164 | Uba5          | 66663  | 9-:103949844-103965449  |
| 9165 | Nnat          | 18111  | 2+:157385858-157388239  |
| 9167 | Vim           | 22352  | 2+:13495974-13504403    |
| 9172 | Tmem131       | 56030  | 1-:36849038-36996032    |
| 9173 | Arhgap15      | 76117  | 2+:43919268-44243139    |
| 9175 | MMT00081793   |        | 1+:10795325-10796347    |
| 9181 | 1700060H10Rik | 73390  | 10+:55826735-55836676   |

|      |               |        |                         |
|------|---------------|--------|-------------------------|
| 9190 | Rbmxl2        | 76572  | 7+:114352930-114354436  |
| 9191 | Lbxcor1       | 207667 | 9-:62986004-62987935    |
| 9192 | MMT00042303   |        | 7-:17279167-17292589    |
| 9194 | Dynlrb2       | 75465  | 8+:119031359-119039814  |
| 9195 | Sub1          | 20024  | 15-:11911622-11925746   |
| 9200 | Sdc1          | 20969  | 12+:8778201-8800491     |
| 9208 | MMT00038995   |        | 6-:102886170-102887552  |
| 9212 | Pde6d         | 18582  | 1-:88439590-88479035    |
| 9213 | Osgin1        | 71839  | 8+:121961044-121970154  |
| 9217 | Lrrc34        | 71827  | 3-:30523190-30546793    |
| 9218 | Npy5r         | 18168  | 8-:69203865-69211993    |
| 9219 | Mad2l1bp      | 66591  | 17-:46284337-46290485   |
| 9221 | Ilf2          | 67781  | 3+:90280078-90291653    |
| 9224 | MMT00013510   | 227885 | 2+:50765616-50767367    |
| 9226 | Aim2          | 383619 | 1+:175382956-175395350  |
| 9230 | 1700027N10Rik | 75564  | 17-:46266225-46281147   |
| 9232 | 4930430A15Rik | 67575  | 2-:111033410-111069755  |
| 9233 | Acss3         | 380660 | 10-:106374199-106425965 |
| 9234 | Arf1          | 11840  | 11-:59025627-59041716   |
| 9235 | Tnfrsf12a     | 27279  | 17-:23812413-23814411   |
| 9240 | Olfra401      | 258701 | 11+:73934792-73935739   |
| 9244 | Rabif         | 98710  | 1+:136391236-136404459  |
| 9245 | Zc3h3         | 223642 | 15-:75587044-75609986   |
| 9251 | P2ry1         | 18441  | 3+:60807332-60810924    |
| 9252 | Slc22a2       | 20518  | 17+:12777054-12821353   |
| 9255 | Emp3          | 13732  | 7-:53173433-53176774    |
| 9256 | Psmc4         | 19185  | 3-:94836626-94846467    |
| 9258 | P4ha1         | 18451  | 10+:58799791-58836050   |
| 9260 | Cmtm6         | 67213  | 9+:114640320-114658461  |
| 9262 | MMT00053633   |        | 3-:45578522-45580136    |
| 9263 | Fbxo27        | 233040 | 7+:29383177-29484354    |
| 9270 | MMT00072976   |        |                         |
| 9273 | MMT00057004   |        | 16-:55325603-55325682   |
| 9275 | Aass          | 30956  | 6-:23022501-23072733    |
| 9276 | MMT00008480   |        | 8-:44814581-44815307    |
| 9278 | Clec2i        | 93675  | 6+:128837631-128846864  |
| 9279 | MMT00066808   |        | 10+:54844229-54844592   |
| 9281 | Rnf122        | 68867  | 8+:32222313-32240138    |
| 9285 | Mtcp1         | 17763  | X-:72650203-72661882    |
| 9287 | Trpm3         | 226025 | 19+:23066780-23067091   |
| 9290 | Cd1d1         | 12479  | 3-:86799759-86803259    |
| 9298 | MMT00010260   |        | 11-:121026773-121028707 |
| 9301 | MMT00050551   |        | 3-:62974251-62977961    |
| 9304 | Al449175      | 234362 | 8-:72134551-72149422    |
| 9305 | Zfp292        | 30046  | 4-:34752099-34758805    |
| 9306 | Spon1         | 233744 | 7+:120909653-121184873  |

|      |               |        |                         |
|------|---------------|--------|-------------------------|
| 9309 | MMT00035904   |        | 10+:22063211-22065941   |
| 9310 | Pdrg1         | 68559  | 2-:152834624-152841127  |
| 9312 | Hyal5         | 74468  | 6+:24825942-24841959    |
| 9318 | C79267        | 212632 | 4+:139130633-139172985  |
| 9320 | Rnf31         | 268749 | 14+:56210683-56222511   |
| 9321 | Vsx2          | 12677  | 12+:85910892-85936408   |
| 9322 | Relt          | 320100 | 7-:107994359-108001637  |
| 9324 | Egfl6         | 54156  | X-:162960938-163023644  |
| 9326 | Pgm5          | 226041 | 19-:24757505-24936279   |
| 9329 | Serpina3m     | 20717  | 12+:105625401-105632468 |
| 9330 | Tapt1         | 231225 | 5-:44566401-44617826    |
| 9335 | Chac2         | 68044  | 11-:30876723-30886334   |
| 9338 | Zfp313        | 81018  | 2+:167340879-167341664  |
| 9339 | Tnmd          | 64103  | X+:130385600-130400058  |
| 9340 | Cdc42ep2      | 104252 | 19-:5917559-5924803     |
| 9343 | Ildr1         | 106347 | 16+:36694123-36726827   |
| 9344 | Tmem123       | 71929  | 9+:7764127-7794330      |
| 9350 | Pcmdt1        | 319263 | 1+:7079126-7163706      |
| 9352 | Hnrpl1        | 72692  | 17-:80429682-80434896   |
| 9353 | Emilin2       | 246707 | 17-:71601513-71660256   |
| 9354 | Vps13b        | 666173 | 15+:35582009-35700296   |
| 9355 | Reep1         | 52250  | 6-:71759350-71760705    |
| 9356 | Emid2         | 140709 | 5-:137217634-137358977  |
| 9359 | Dhx34         | 71723  | 7-:16782569-16807381    |
| 9360 | Taf1c         | 21341  | 8-:122121877-122129083  |
| 9361 | Hand1         | 15110  | 11-:57642214-57645649   |
| 9362 | Gast          | 14459  | 11+:100197796-100198213 |
| 9363 | Wisp2         | 22403  | 2+:163646634-163658880  |
| 9374 | Thbs4         | 21828  | 13-:93521542-93564713   |
| 9376 | Zscan18       | 232875 | 7-:13353442-13380337    |
| 9379 | Ypel2         | 77864  | 11-:86752611-86807236   |
| 9380 | Spata5        | 57815  | 3+:37319219-37478012    |
| 9385 | Hmg20a        | 66867  | 9+:56266636-56344688    |
| 9392 | 4922505G16Rik | 629499 | 2-:157054356-157064177  |
| 9393 | Cd300a        | 217303 | 11+:114761052-114763230 |
| 9394 | Cfhr1         | 50702  | 1-:141443640-141456799  |
| 9396 | Grif1         | 232906 | 7-:17232551-17233248    |
| 9401 | Fcgr4         | 246256 | 1+:172949069-172959880  |
| 9402 | 1200016B10Rik | 66875  | 1-:153214828-153275511  |
| 9405 | Aldoc         | 11676  | 11+:78137559-78141551   |
| 9406 | Calcoco1      | 67488  | 15-:102537209-102552500 |
| 9407 | Cmah          | 12763  | 13-:24417640-24423491   |
| 9408 | Hmgcs2        | 15360  | 3+:98084355-98114656    |
| 9409 | 11-Mar        | 211147 | 15+:26238841-26339328   |
| 9410 | Zmym3         | 56364  | X-:98599723-98616188    |
| 9411 | Taf7l         | 74469  | X-:130995161-131007506  |

|      |               |        |                         |
|------|---------------|--------|-------------------------|
| 9413 | 1190020J12Rik | 233038 | 7-:29328621-29332280    |
| 9414 | Olfr178       | 258999 | 16-:58889086-58890044   |
| 9417 | Cd163         | 93671  | 6+:124254673-124280541  |
| 9418 | MMT00034311   |        | X-:48572007-48573190    |
| 9419 | Acox2         | 93732  | 14-:9058025-9091450     |
| 9421 | Serpinf2      | 18816  | 11-:75245237-75252977   |
| 9424 | Cltc          | 67300  | 11-:86507857-86570993   |
| 9425 | Gusb          | 110006 | 5-:130464891-130478698  |
| 9427 | Nqo2          | 18105  | 13+:34059021-34077508   |
| 9436 | Cntnap2       | 66797  | 6+:46799032-46858778    |
| 9438 | Pctk3         | 18557  | 1-:134010237-134036261  |
| 9440 | Zfp653        | 319601 | 9-:21859858-21875966    |
| 9446 | MMT00017417   |        | 16+:4860962-4863120     |
| 9449 | Sft2d2        | 108735 | 1-:167108821-167124443  |
| 9451 | Gpr180        | 58245  | 14+:118536356-118562483 |
| 9454 | 2810426N06Rik | 67607  | 7+:48854629-48906895    |
| 9459 | Ccdc73        | 211936 | 2+:104747693-104791765  |
| 9460 | Fer1l4        | 74562  | 2-:155844875-155877982  |
| 9463 | Zdhhc23       | 332175 | 16-:43973580-43979241   |
| 9467 | Aoah          | 27052  | 13+:20885981-21115571   |
| 9468 | Gtf2a1l       | 71828  | 17+:89068044-89114488   |
| 9473 | Gfra3         | 14587  | 18-:34849559-34879919   |
| 9474 | Cops7b        | 26895  | 1+:88483719-88502837    |
| 9476 | 9130005N14Rik | 68303  | 5+:65361352-65432382    |
| 9480 | A430107O13Rik | 214642 | 6+:21935927-22019450    |
| 9481 | Ppl           | 19041  | 16-:5086823-5132514     |
| 9485 | 2700081O15Rik | 108899 | 19+:7495744-7497596     |
| 9494 | Cib2          | 56506  | 9-:54393158-54407886    |
| 9495 | Srms          | 20811  | 2-:180940267-180947712  |
| 9504 | Sfrp1         | 20377  | 8+:24522002-24558429    |
| 9505 | Rps27         | 57294  | 3-:90016590-90017579    |
| 9507 | Trip6         | 22051  | 5-:137751127-137755362  |
| 9510 | Nt5c2         | 76952  | 19-:46963150-47036787   |
| 9512 | MMT00081874   |        | 10+:110593271-110594471 |
| 9513 | Tardbp        | 230908 | 4-:147990975-148000863  |
| 9514 | Vps37a        | 52348  | 8+:41597154-41631914    |
| 9517 | Med7          | 66213  | 11+:46250483-46255025   |
| 9519 | Fstl5         | 213262 | 3+:76125975-76512555    |
| 9521 | Ctnnb1        | 12387  | 9+:120842695-120868894  |
| 9522 | Cidea         | 12683  | 18+:67503257-67527432   |
| 9524 | Pum1          | 80912  | 4+:130219303-130337187  |
| 9528 | Amelx         | 11704  | X-:165617951-165625142  |
| 9529 | Tmprss2       | 50528  | 16-:97787594-97832673   |
| 9531 | MMT00043554   | 670496 | 11+:99676416-99680661   |
| 9532 | MMT00050594   |        | 3+:135994449-135995957  |
| 9534 | MMT00042032   |        | 6-:122515894-122517421  |



|      |               |        |                         |
|------|---------------|--------|-------------------------|
| 9535 | MMT00069497   |        | X+:38014636-38015105    |
| 9537 | Sypl          | 19027  | 12+:33638832-33660587   |
| 9540 | Csnk1e        | 27373  | 15-:79249596-79272432   |
| 9541 | Npal3         | 74552  | 4-:135007790-135050455  |
| 9544 | 2410018C17Rik | 74504  | 5-:33943000-33972275    |
| 9547 | MMT00006479   |        | 12+:120849421-121115281 |
| 9552 | Dnmt3a        | 13435  | 12+:3807090-3908996     |
| 9554 | Hmgb2l1       | 70823  | 8+:77517580-77555876    |
| 9558 | Akr7a5        | 110198 | 4+:138866669-138874334  |
| 9559 | Zfpm2         | 22762  | 15+:40486817-40936131   |
| 9567 | Cfl1          | 12631  | 19+:5490520-5493563     |
| 9569 | Dda1          | 66498  | 8+:73993096-74000332    |
| 9570 | Creld1        | 171508 | 6+:113433562-113443332  |
| 9574 | Mphosph10     | 67973  | 7-:71521463-71532406    |
| 9575 | MMT00011132   |        | 8+:71993967-71994296    |
| 9576 | Polr1e        | 64424  | 4+:45031517-45045231    |
| 9577 | Dusp8         | 18218  | 7-:149267402-149276175  |
| 9580 | Tuba8         | 53857  | 6+:121160787-121176115  |
| 9582 | MMT00041407   |        | 5+:138056838-138057318  |
| 9585 | Neu3          | 50877  | 7-:106959950-106976927  |
| 9586 | Mrpl53        | 68499  | 6+:83059101-83059926    |
| 9587 | Bri3bp        | 76809  | 5+:125921966-125935506  |
| 9588 | Ghrl          | 58991  | 6-:113666245-113669423  |
| 9594 | Asb13         | 142688 | 13+:3633323-3651018     |
| 9597 | Tnfsf13b      | 24099  | 8+:10006632-10035997    |
| 9601 | Wt1           | 22431  | 2+:104966685-105013769  |
| 9610 | Narf          | 67608  | 11+:121098591-121114836 |
| 9611 | Ncf2          | 17970  | 1+:154655065-154683383  |
| 9616 | Al451557      | 102084 | 8+:97047048-97051165    |
| 9620 | Sdpr          | 20324  | 1+:51345969-51359803    |
| 9622 | Rasgef1a      | 70727  | 6+:118016462-118041563  |
| 9627 | Cbx6          | 494448 | 15-:79656536-79664667   |
| 9629 | Spnb3         | 20743  | 19+:4718840-4752350     |
| 9630 | 5830417C01Rik | 78825  | 1+:180117878-180179751  |
| 9634 | Atp13a2       | 74772  | 4+:140542880-140563244  |
| 9635 | Rabggtb       | 19352  | 3-:153570417-153575023  |
| 9644 | Ankrd32       | 105377 | 13-:77243878-77274722   |
| 9650 | Sh3gl3        | 20408  | 7+:89319745-89455919    |
| 9651 | Cxc5          | 67393  | 18+:36018186-36021341   |
| 9654 | 1810041L15Rik | 72301  | 15-:84202330-84256540   |
| 9655 | Sult2b1       | 54200  | 7-:52985353-53014892    |
| 9656 | Cenpc1        | 12617  | 5-:86441060-86494475    |
| 9658 | Abr           | 109934 | 11-:76230245-76384593   |
| 9671 | AK129341      | 234915 | 9-:8076460-8134472      |
| 9672 | Tmem101       | 76547  | 11-:102013862-102017675 |
| 9674 | Pea15a        | 18611  | 1-:174128757-174130710  |

|      |                  |           |                         |
|------|------------------|-----------|-------------------------|
| 9676 | Usp32            | 237898    | 11-:84797933-84953270   |
| 9678 | AW555464         | 217882    | 12+:113962834-113984800 |
| 9680 | Ahsa1            | 217737    | 12+:88607677-88614902   |
| 9683 | Prdm8            | 77630     | 5+:98609919-98616470    |
| 9684 | Phf21b           | 271305    | 15-:84617532-84686558   |
| 9685 | Bcl9l            | 80288     | 9+:44316958-44318493    |
| 9686 | Nek4             | 23955     | 14+:31764673-31800586   |
| 9689 | 4432416J03Rik    | 78252     | 9-:48126088-48148880    |
| 9696 | Setd1b           | 208043    | 5+:123592965-123618638  |
| 9697 | Mterf            | 545725    | 5-:3890581-3893927      |
| 9698 | MMT00081969      |           | 6+:19069995-19070912    |
| 9700 | Prodh            | 19125     | 16-:18071818-18089240   |
| 9701 | Prkcz            | 18762     | 4-:154636185-154735352  |
| 9702 | Stk39            | 53416     | 2-:68049808-68310013    |
| 9707 | Golt1a           | 68338     | 1+:135206391-135218519  |
| 9710 | Nrp2             | 18187     | 1+:62750054-62843547    |
| 9712 | Cct3             | 12462     | 3+:88101056-88125688    |
| 9713 | Ykt6             | 56418     | 11+:5855888-5866078     |
| 9715 | OTTMUSG000000045 | 100038514 | 4+:14865614-14880177    |
| 9717 | Psmb9            | 16912     | 17-:34319043-34324275   |
| 9718 | Fmo5             | 14263     | 3+:97432972-97456516    |
| 9721 | Rrs1             | 59014     | 1+:9535522-9537532      |
| 9724 | Oat              | 18242     | 7-:139749161-139761813  |
| 9725 | Dok6             | 623279    | 18-:89590366-89768183   |
| 9729 | Got1l1           | 76615     | 8-:28307928-28313023    |
| 9730 | Olf1501          | 258626    | 19-:13912715-13928068   |
| 9732 | Iapp             | 15874     | 6+:142246947-142252337  |
| 9733 | 4921509E07Rik    | 70897     | 12+:79792521-79835500   |
| 9734 | Wwp1             | 107568    | 4-:19536781-19605588    |
| 9736 | Shisa2           | 219134    | 14+:60244681-60250495   |
| 9738 | Cdk5rap2         | 214444    | 4-:69882772-69915753    |
| 9743 | Gm189            | 235952    | 6-:69525779-69526494    |
| 9744 | 9530002B09Rik    | 77432     | 4+:122366609-122379627  |
| 9745 | Gadd45g          | 23882     | 13+:51942063-51943841   |
| 9751 | C1q13            | 227580    | 2-:12923232-12933441    |
| 9755 | MMT00066614      | 667386    | 5-:149774774-149781471  |
| 9756 | 1500015O10Rik    | 78896     | 1+:43787537-43799387    |
| 9757 | Olf1502          | 258734    | 7-:115666517-115667462  |
| 9759 | Cenpn            | 72155     | 8+:119445639-119465403  |
| 9762 | Snx5             | 69178     | 2-:144076790-144096607  |
| 9763 | Tuba3b           | 22147     | 6+:145564572-145569938  |
| 9766 | MMT00050414      |           | 4+:119193594-119193965  |
| 9768 | MMT00025372      |           | 18-:86410461-86412975   |
| 9770 | Bcmo1            | 63857     | 8+:119619764-119657374  |
| 9773 | MMT00068134      |           | 8+:107185898-107186994  |
| 9777 | Cdh19            | 227485    | 1-:112785786-112826552  |

|      |               |        |                         |
|------|---------------|--------|-------------------------|
| 9779 | Laptm5        | 16792  | 4+:130469208-130490946  |
| 9780 | 4930583H14Rik | 67749  | 3-:51192337-51200431    |
| 9781 | Prune         | 229589 | 3-:95057593-95085714    |
| 9782 | Dnase2a       | 13423  | 8+:87432544-87435350    |
| 9787 | Epb4.1l5      | 226352 | 1-:121491653-121545194  |
| 9790 | Tspan10       | 208634 | 11+:120304006-120308263 |
| 9792 | Miox          | 56727  | 15+:89164904-89167442   |
| 9798 | MMT00072061   |        | 16+:97807935-97808963   |
| 9800 | Phf7          | 71838  | 14-:32050881-32064404   |
| 9805 | Tagap         | 72536  | 17+:8118884-8127761     |
| 9812 | Atf1          | 11908  | 15+:100058499-100091674 |
| 9813 | Cdh18         | 320865 | 15+:23103515-23191938   |
| 9814 | Nbl1          | 17965  | 4-:138638206-138648780  |
| 9820 | BC023105      | 207269 | 18+:60598948-60603504   |
| 9821 | Pmaip1        | 58801  | 18+:66618257-66625212   |
| 9822 | Celsr1        | 12614  | 15-:85729358-85864207   |
| 9825 | MMT00007741   |        | 2+:121544265-121544901  |
| 9827 | Pam           | 18484  | 1-:99717671-99992086    |
| 9829 | Stoml1        | 69106  | 9+:58104435-58110325    |
| 9830 | Rbks          | 71336  | 5-:31926808-32000001    |
| 9831 | Nedd4l        | 83814  | 18+:65183547-65372961   |
| 9832 | Brf1          | 72308  | 12-:114198255-114238612 |
| 9834 | Gm1140        | 382217 | X+:64948872-64959272    |
| 9835 | Fastkd1       | 320720 | 2-:69528118-69550456    |
| 9836 | Oprk1         | 18387  | 1+:5578572-5592945      |
| 9837 | Gpm6b         | 14758  | X+:162676903-162826919  |
| 9838 | Hpgd          | 15446  | 8+:58773394-58799471    |
| 9839 | Ift20         | 55978  | 11+:78345046-78354975   |
| 9841 | MMT00050244   |        | 12+:3222416-3228151     |
| 9842 | Qdpr          | 110391 | 5-:45825293-45841396    |
| 9843 | Olfir642      | 258326 | 7-:111197922-111198866  |
| 9847 | Ift27         | 76933  | 12-:104680371-104681869 |
| 9849 | 4930445E18Rik | 78115  | 15-:25225222-25262405   |
| 9852 | Ilkap         | 67444  | 1-:93272408-93295311    |
| 9856 | Tnf           | 21926  | 17-:35336337-35338941   |
| 9859 | Cx3cl1        | 20312  | 8+:97296164-97306280    |
| 9860 | MMT00060113   |        | 9+:38881607-38883427    |
| 9861 | Serpinb6b     | 20708  | 13+:33057381-33070905   |
| 9862 | AW112010      | 107350 | 19-:11122098-11125056   |
| 9867 | Psrc1         | 56742  | 3+:108186760-108191080  |
| 9868 | Sult4a1       | 29859  | 15-:83907820-83936057   |
| 9869 | Gstt4         | 75886  | 10-:75277690-75285265   |
| 9870 | Mgat2         | 217664 | 12+:70285199-70287227   |
| 9871 | C1qdc2        | 67389  | 4+:155336426-155340738  |
| 9875 | Cdk5rap3      | 80280  | 11-:96769100-96777795   |
| 9877 | Cdc2a         | 12534  | 10-:68801052-68815664   |

|      |                  |        |                         |
|------|------------------|--------|-------------------------|
| 9880 | Leo1             | 235497 | 9+:75293231-75314236    |
| 9882 | OTTMUSG000000051 | 626870 | 11+:8952696-8968736     |
| 9884 | Hp               | 15439  | 8-:112099027-112102948  |
| 9885 | 4930401F20Rik    | 243822 | 7-:4704830-4709462      |
| 9886 | Degs1            | 13244  | 1-:184206109-184212875  |
| 9887 | MMT00062394      |        | 7+:143144480-143145309  |
| 9891 | MMT00001343      | 74100  | 9-:111967762-112090230  |
| 9892 | AU022252         | 230696 | 4-:118898347-118905280  |
| 9895 | Nlgn1            | 192167 | 3-:25330763-25338999    |
| 9899 | D13Wsu177e       | 28126  | 13-:54685551-54691435   |
| 9900 | MMT00062271      |        | 14-:118774751-118775110 |
| 9903 | Il22             | 50929  | 10+:117641997-117647100 |
| 9904 | Hbegf            | 15200  | 18-:36664586-36675428   |
| 9906 | Ninj2            | 29862  | 6+:120043367-120150356  |
| 9907 | 4932442K08Rik    | 67544  | 17+:15539487-15569002   |
| 9909 | MMT00077883      |        | 3+:94257254-94258001    |
| 9910 | EG666644         | 666644 | 1+:43327668-43359076    |
| 9912 | Ttc27            | 74196  | 17+:75117088-75262909   |
| 9913 | Tbc1d25          | 209815 | X-:7731577-7753049      |
| 9918 | Mki67            | 17345  | 7-:142881466-142907822  |
| 9919 | Gabarapl1        | 57436  | 6+:129483464-129491184  |
| 9920 | Syk              | 20963  | 13+:52678541-52744147   |
| 9921 | Sec24d           | 69608  | 3+:122970384-123068560  |
| 9923 | Tssk6            | 83984  | 8+:72426113-72427415    |
| 9925 | Apoe             | 11816  | 7-:20281619-20283579    |
| 9926 | Snx18            | 170625 | 13-:114382392-114408753 |
| 9927 | Creb3l2          | 208647 | 6-:37305642-37392129    |
| 9928 | Lgmn             | 19141  | 12-:103632308-103677907 |
| 9930 | Phyhip           | 105653 | 14+:70857337-70868627   |
| 9931 | Glit25d1         | 234407 | 8+:74134896-74148808    |
| 9934 | MMT00002304      |        | X-:13504412-13506637    |
| 9935 | Prnd             | 26434  | 2+:131776597-131781865  |
| 9938 | MMT00012610      |        | 19-:13176870-13177756   |
| 9939 | Pcnt             | 18541  | 10-:75847607-75905657   |
| 9944 | Cntfr            | 12804  | 4-:41604529-41644072    |
| 9946 | Stam2            | 56324  | 2-:52550083-52601198    |
| 9951 | Rpp21            | 67676  | 17-:36392617-36394791   |
| 9954 | MMT00047280      |        | X-:23931485-23931605    |
| 9955 | Psmg2            | 107047 | 18+:67801252-67813816   |
| 9962 | Krt23            | 94179  | 11-:99339287-99354424   |
| 9963 | Rcn3             | 52377  | 7-:52338283-52347529    |
| 9968 | Eif3s10          | 13669  | 19-:60842234-60851681   |
| 9970 | MMT00082622      |        | 2+:40411263-40412198    |
| 9972 | Aicda            | 11628  | 6+:122503835-122514197  |
| 9973 | Tmem5            | 216395 | 10-:121517989-121534226 |
| 9976 | Trnt1            | 70047  | 6+:106719130-106732466  |

|       |               |           |                         |
|-------|---------------|-----------|-------------------------|
| 9979  | Myo1b         | 17912     | 1-:51806832-51964160    |
| 9980  | MMT00008758   |           | 1+:98542150-98543132    |
| 9981  | Snrpn         | 20646     | 7-:67128007-67133633    |
| 9982  | MMT00002004   |           | 1+:12555611-12556670    |
| 9984  | EG215895      | 215895    | 10-:33487976-33499645   |
| 9985  | D16Ert519e    | 52645     | 16+:70618318-70625069   |
| 9990  | MMT00081303   |           | 5-:33773383-33774239    |
| 9994  | Cd209b        | 69165     | 8-:3918483-3926757      |
| 9996  | Rassf9        | 237504    | 10+:101974918-102008830 |
| 9997  | Nr0b2         | 23957     | 4+:133109339-133112150  |
| 9998  | Hfm1          | 330149    | 5-:107269612-107274495  |
| 9999  | Zswim3        | 67538     | 2+:164630598-164647626  |
| 10002 | Krt79         | 223917    | 15-:101759764-101770755 |
| 10003 | B4galt7       | 218271    | 13+:55701471-55711314   |
| 10006 | Ephx2         | 13850     | 14-:66703210-66743289   |
| 10007 | MMT00033070   |           | 2-:97788230-97789852    |
| 10008 | Etf1          | 225363    | 18-:35064135-35091584   |
| 10011 | Brp44         | 70456     | 1+:167391338-167411345  |
| 10014 | MMT00041851   |           |                         |
| 10017 | Wdr73         | 71968     | 7-:88035610-88046123    |
| 10024 | MMT00000014   |           | 17-:50366966-50367519   |
| 10025 | A130082M07Rik | 100038850 | 14+:54787766-54843877   |
| 10026 | Ndufc2        | 68197     | 7+:104548601-104556304  |
| 10027 | Mcm9          | 71567     | 10-:53256174-53283263   |
| 10028 | Chchd6        | 66098     | 6-:89333149-89545631    |
| 10029 | Trak1         | 67095     | 9+:121273118-121384034  |
| 10032 | Sele          | 20339     | 1+:165978364-165987808  |
| 10035 | MMT00041814   |           | 8+:38217794-38218856    |
| 10037 | Usp51         | 434872    | X+:149442688-149443965  |
| 10040 | MMT00080694   |           | 4+:60449061-60453064    |
| 10042 | MMT00028111   |           | 8-:100747156-100748701  |
| 10050 | Olf154        | 27216     | 2-:85503634-85504589    |
| 10052 | 6530404N21Rik | 67795     | 19-:33212236-33277138   |
| 10053 | MMT00002151   |           | 14+:67587971-67588594   |
| 10054 | Fsip1         | 71313     | 2-:118030623-118082690  |
| 10055 | Tpte          | 234129    | 8+:23438115-23476478    |
| 10056 | Cmtm3         | 68119     | 8+:106864586-106871571  |
| 10057 | Sult6b1       | 73671     | 17-:79284235-79306332   |
| 10058 | Ahsg          | 11625     | 16+:22892114-22899511   |
| 10061 | Nsd1          | 18193     | 13+:55417058-55419683   |
| 10065 | 9030625A04Rik | 210808    | 14-:77424008-77430769   |
| 10072 | Gipc2         | 54120     | 3-:151756806-151828864  |
| 10073 | 2010321M09Rik | 69882     | 9+:64808690-64834780    |
| 10077 | Cep63         | 28135     | 9-:102488914-102528545  |
| 10078 | Tbc1d14       | 100855    | 5-:36835182-36928876    |
| 10080 | Top2b         | 21974     | 14+:17198146-17263301   |

|       |               |        |                         |
|-------|---------------|--------|-------------------------|
| 10081 | Fth1          | 14319  | 19+:10057192-10059582   |
| 10084 | Rbm7          | 67010  | 9-:48296813-48303410    |
| 10087 | Bmp3          | 110075 | 5+:99284131-99309299    |
| 10088 | Ddc           | 13195  | 11-:11714445-11780653   |
| 10092 | Cdh7          | 241201 | 1+:111880220-112035766  |
| 10093 | Olf985        | 258854 | 9-:39934609-39935544    |
| 10094 | MMT00022290   |        | 13-:65524617-65833379   |
| 10095 | Ranbp2        | 19386  | 10+:57909727-57956714   |
| 10098 | 2610507B11Rik | 72503  | 11+:78075293-78093420   |
| 10099 | Smyd3         | 69726  | 1-:180887389-181448165  |
| 10100 | Mterfd2       | 69821  | 1-:95197806-95201342    |
| 10102 | Lman2l        | 214895 | 1-:36480029-36502105    |
| 10106 | Bglap-rs1     | 12095  | 3-:88172543-88173478    |
| 10108 | Ctsh          | 13036  | 9+:89949346-89970927    |
| 10109 | Gbp3          | 55932  | 3+:142223571-142236171  |
| 10112 | Kcns1         | 16538  | 2-:163990041-163996825  |
| 10115 | Ptk2          | 14083  | 15-:73156178-73161446   |
| 10116 | Mettl7b       | 71664  | 10-:128395332-128398044 |
| 10121 | Esrrg         | 26381  | 1+:189821815-190035141  |
| 10127 | Tpm1          | 22003  | 9-:66875702-66896975    |
| 10130 | MMT00043239   |        | 5-:126505516-126506821  |
| 10131 | Gdap1         | 14545  | 1+:17135465-17154094    |
| 10132 | Ces2          | 234671 | 8+:107370985-107378367  |
| 10133 | MMT00047183   |        | 7-:118530306-118530846  |
| 10134 | Hivep3        | 16656  | 4+:119406376-119545933  |
| 10136 | RP23-149D11.4 | 381535 | 4+:101581725-101582688  |
| 10139 | Hdhd1a        | 67365  | 18-:50727309-50728324   |
| 10140 | Cdc2l6        | 78334  | 10+:40020193-40203623   |
| 10142 | 5830405N20Rik | 67596  | 10+:129784191-129799697 |
| 10143 | Uchl1         | 22223  | 5+:67067526-67078472    |
| 10147 | Itgax         | 16411  | 7+:135273081-135294170  |
| 10150 | Oxct1         | 67041  | 15+:3976723-4103963     |
| 10156 | Htr2c         | 15560  | X+:143397188-143630220  |
| 10164 | 2310004N24Rik | 69535  | 11+:116060194-116076631 |
| 10166 | Rhbdd2        | 215160 | 5+:136108591-136120016  |
| 10173 | Nck1          | 17973  | 9-:100395796-100446553  |
| 10176 | Snrpg         | 68011  | 6+:86321537-86328896    |
| 10177 | Osgep         | 66246  | 14-:51535358-51544503   |
| 10183 | Tax1bp1       | 52440  | 6+:52663741-52716478    |
| 10189 | Cage1         | 71213  | 13-:38097917-38108361   |
| 10190 | Pcdh7         | 54216  | 5+:58109338-58120686    |
| 10195 | Klf1          | 16596  | 8+:87425826-87429186    |
| 10199 | MMT00050019   | 675135 | 1-:58918096-58933287    |
| 10203 | Cyp4f16       | 70101  | 17+:32673573-32688741   |
| 10207 | MMT00012324   | 328192 | 13+:16122413-16123441   |
| 10209 | Plin          | 103968 | 7-:86866051-86877780    |

|       |               |        |                         |
|-------|---------------|--------|-------------------------|
| 10210 | Sgms1         | 208449 | 19-:32198262-32285470   |
| 10214 | Sectm1b       | 58210  | 11-:120915844-120924852 |
| 10215 | Nampt         | 59027  | 12+:33505339-33536472   |
| 10218 | Vps41         | 218035 | 13+:18815054-18958681   |
| 10222 | AF366264      | 231201 | 8-:13836581-13838059    |
| 10223 | MMT00013190   | 236598 |                         |
| 10228 | MMT00082629   |        | 8-:81010016-81010310    |
| 10229 | Ripk1         | 19766  | 13+:34101477-34124881   |
| 10230 | Yme111        | 27377  | 2+:23012055-23052877    |
| 10233 | Abi3bp        | 320712 | 16+:56477962-56562602   |
| 10234 | C230093N12Rik | 98952  | 2+:32390814-32423648    |
| 10236 | EG665033      | 665033 | 9-:105759273-105791705  |
| 10240 | Cyp2w1        | 545817 | 5+:139828600-139833178  |
| 10245 | Dus1l         | 68730  | 11-:120650515-120656813 |
| 10247 | V1rc20        | 171193 | 6+:56952348-56953258    |
| 10248 | Cwf19l2       | 244672 | 9+:3403830-3430474      |
| 10250 | Pcsk9         | 100102 | 4-:106115335-106126971  |
| 10255 | Muc16         | 73732  | 9-:18299897-18323792    |
| 10256 | Gmds          | 218138 | 13-:31911458-32430413   |
| 10259 | Kcnmb4        | 58802  | 10-:115854923-115910579 |
| 10260 | Zfp36l2       | 12193  | 17-:84585332-84586477   |
| 10267 | Setdb2        | 239122 | 14-:60020844-60059618   |
| 10273 | Gpt2          | 108682 | 8+:88016483-88051465    |
| 10274 | MMT00076184   |        | 9+:40295245-40295903    |
| 10275 | Trim12        | 76681  | 7-:111452110-111463977  |
| 10276 | Dcun1d1       | 114893 | 3-:35794141-35831888    |
| 10278 | Dusp6         | 67603  | 10+:98725864-98730118   |
| 10279 | Rnf186        | 66825  | 4+:138523118-138524274  |
| 10281 | Slc15a1       | 56643  | 14-:121858842-121904475 |
| 10292 | Cobl          | 12808  | 11-:12136680-12364750   |
| 10298 | Olf1015       | 258564 | 2+:85625669-85626607    |
| 10299 | Rad52         | 19365  | 6+:119852731-119872840  |
| 10300 | Igfbp4        | 16010  | 11+:98902810-98912892   |
| 10302 | Rab18         | 19330  | 18+:6765258-6788718     |
| 10303 | Cyp2a22       | 233005 | 7-:27716650-27724409    |
| 10308 | Fuk           | 234730 | 8-:113406369-113413190  |
| 10311 | Cpox          | 12892  | 16+:58670404-58680473   |
| 10318 | Cdk8          | 264064 | 5+:147043070-147114448  |
| 10321 | Gabra3        | 14396  | X-:69679944-69901488    |
| 10327 | Hint2         | 68917  | 4-:43667100-43669320    |
| 10328 | Gpr182        | 11536  | 10-:127186677-127188749 |
| 10332 | Gnrhr         | 14715  | 5-:86611036-86626895    |
| 10337 | Zmym1         | 68310  | 4-:126724836-126726950  |
| 10340 | Hc            | 15139  | 2-:34838850-34916916    |
| 10343 | Malat1        | 72289  | 19-:5801054-5802672     |
| 10345 | Camkk1        | 55984  | 11+:72832554-72855565   |

|       |               |        |                         |
|-------|---------------|--------|-------------------------|
| 10351 | Clcn4-2       | 12727  | 7-:7236790-7252042      |
| 10353 | Matn4         | 17183  | 2-:164215162-164230037  |
| 10356 | 2810417H13Rik | 68026  | 9+:65738235-65749410    |
| 10357 | Tm4sf1        | 17112  | 3-:57091304-57098795    |
| 10359 | Foxf2         | 14238  | 13+:31717647-31723271   |
| 10360 | Nrxn2         | 18190  | 19+:6418943-6533208     |
| 10365 | Aplp1         | 11803  | 7-:31220007-31230571    |
| 10366 | 4931403E03Rik | 75718  | 4-:138124983-138179928  |
| 10367 | Coq7          | 12850  | 7-:125668576-125676827  |
| 10370 | MMT00017441   | 623205 | 11+:53014185-53014559   |
| 10373 | Tmem141       | 51875  | 2-:25464153-25477523    |
| 10374 | Trim15        | 69097  | 17-:36997637-37004155   |
| 10376 | C920025E04Rik | 667803 | 17-:36264613-36264812   |
| 10377 | A430105I19Rik | 214239 | 2-:118583232-118585443  |
| 10380 | MMT00018157   |        | X-:143033206-143035525  |
| 10382 | Mtmr4         | 170749 | 11+:87405718-87429798   |
| 10384 | Chic2         | 74277  | 5-:75402448-75440641    |
| 10387 | 4933427D06Rik | 232217 | 6+:89046112-89058002    |
| 10393 | Slc7a8        | 50934  | 14-:55341052-55400378   |
| 10394 | MMT00028435   |        | 7-:48581594-48582685    |
| 10395 | Abcg2         | 26357  | 6+:58605631-58642416    |
| 10396 | MMT00072312   |        | 6+:39156261-39157552    |
| 10397 | Gtf2e2        | 68153  | 8+:34846203-34887452    |
| 10402 | Mia1          | 12587  | 7-:27964765-27966169    |
| 10406 | Trip10        | 106628 | 17+:57388883-57402845   |
| 10407 | Gpatch3       | 242691 | 4+:133138382-133140157  |
| 10408 | Per1          | 18626  | 11+:68914143-68922861   |
| 10413 | Olf487        | 258042 | 7-:115355096-115394259  |
| 10415 | Dcdc2a        | 195208 | 13+:25148072-25294336   |
| 10416 | Eaf2          | 106389 | 16-:36793830-36828334   |
| 10421 | MMT00016905   |        | 11+:53459332-53459823   |
| 10426 | Ly6f          | 17071  | 15+:75098850-75102555   |
| 10434 | Ppp2r5a       | 226849 | 1-:193175864-193180833  |
| 10435 | Nab2          | 17937  | 10-:127097974-127103734 |
| 10437 | MMT00062592   |        | X-:51119052-51123209    |
| 10442 | Pla2g4a       | 18783  | 1-:151676758-151808362  |
| 10443 | Pvrl2         | 19294  | 7-:20302018-20334651    |
| 10444 | 1810020D17Rik | 66273  | 7-:104698852-104727989  |
| 10447 | Dynll2        | 68097  | 11-:87793034-87794338   |
| 10448 | Rac3          | 170758 | 11+:120582914-120585283 |
| 10450 | C330006K01Rik | 231855 | 5+:142950827-142953758  |
| 10452 | Grn           | 14824  | 11+:102294285-102297784 |
| 10455 | MMT00015250   |        | X+:150217937-150218848  |
| 10457 | Olf853        | 258908 | 9-:19341454-19342372    |
| 10462 | MMT00070759   |        | 7-:12565016-12569261    |
| 10465 | BC023892      | 212943 | 9-:85217149-85220900    |



|       |                 |           |                         |
|-------|-----------------|-----------|-------------------------|
| 10466 | S1pr5           | 94226     | 9-:21047360-21050653    |
| 10467 | MMT00074572     | 100038888 | 5+:143419271-143435261  |
| 10468 | Tspan33         | 232670    | 6+:29644255-29668558    |
| 10470 | Zmym4           | 67785     | 4-:126539069-126588529  |
| 10471 | Igh-VJ558       | 16061     | 12-:116930076-116930533 |
| 10475 | Ccna2           | 12428     | 3-:36463787-36470860    |
| 10482 | Mcat            | 223722    | 15-:83377225-83379765   |
| 10483 | Crot            | 74114     | 5-:8966047-8997144      |
| 10484 | Dnajb11         | 67838     | 16+:22869210-22872439   |
| 10486 | 1300002K09Rik   | 74152     | 4+:45861818-45899880    |
| 10487 | MMT00016719     |           | 3-:93517601-93518479    |
| 10489 | Aldh1b1         | 72535     | 4+:45811998-45817473    |
| 10490 | Peg3            | 18616     | 7-:6660217-6664362      |
| 10491 | Acpl2           | 235534    | 9-:96722838-96789843    |
| 10492 | 1810046K07Rik   | 69809     | 9-:51097798-51137024    |
| 10497 | Man2b1          | 17159     | 8+:87607228-87621415    |
| 10498 | Ube2z           | 268470    | 11-:95908740-95926641   |
| 10499 | Camkk2          | 207565    | 5-:123183212-123214303  |
| 10502 | Axud1           | 215418    | 9-:119880282-119883533  |
| 10503 | MMT00043055     |           | 10+:31358888-31360169   |
| 10504 | Ripk3           | 56532     | 14-:56403833-56407623   |
| 10511 | Tmem68          | 72098     | 4-:3476389-3501947      |
| 10519 | MMT00061955     |           | 5-:66111856-66113448    |
| 10520 | Xkr6            | 219149    | 14+:64413856-64438627   |
| 10521 | Ttf2            | 74044     | 3-:100742784-100773576  |
| 10525 | MMT00036668     |           | X-:136980119-136980473  |
| 10526 | MMT00036239     |           | 7-:61861136-61866491    |
| 10528 | Pip5k1b         | 18719     | 19-:24369369-24518175   |
| 10531 | Mlana           | 77836     | 19+:29772311-29782937   |
| 10532 | MMT00057790     |           | X-:114777483-114778383  |
| 10539 | Unc45b          | 217012    | 11+:82725180-82756641   |
| 10541 | Ap2a2           | 11772     | 7+:148748107-148817541  |
| 10542 | Hao3            | 56185     | 3-:98678630-98697149    |
| 10544 | Gdpd1           | 66569     | 11-:86847369-86887593   |
| 10545 | Tmem147         | 69804     | 7-:31512734-31514502    |
| 10546 | Prpf6           | 68879     | 2+:181336096-181390365  |
| 10550 | Rchy1           | 68098     | 5-:92377867-92391790    |
| 10553 | Dusp23          | 68440     | 1-:174560901-174563129  |
| 10554 | ENSMUSG00000074 | 100042314 | 9+:78137728-78153330    |
| 10558 | Cyp2d40         | 71754     | 15-:82590264-82594613   |
| 10561 | Eln             | 13717     | 5-:135179582-135223111  |
| 10568 | Rage            | 26448     | 12-:112046008-112079149 |
| 10574 | MMT00007972     |           | 6+:67741039-67741528    |
| 10576 | Xrcc3           | 74335     | 12-:113041403-113052052 |
| 10582 | Psmg3           | 66506     | 5-:140299547-140302781  |
| 10591 | Pmp22           | 18858     | 11+:62945013-62973048   |

|       |                  |           |                         |
|-------|------------------|-----------|-------------------------|
| 10593 | Wdr53            | 68980     | 16+:32247617-32257166   |
| 10596 | Nfrkb            | 235134    | 9+:31193719-31228921    |
| 10598 | MMT00011231      |           | X-:162920153-162921549  |
| 10606 | Apbb1ip          | 54519     | 2+:22629960-22731172    |
| 10610 | Nbeal1           | 269198    | 1+:60307878-60388635    |
| 10612 | Slc24a6          | 170756    | 5+:120961200-120984028  |
| 10621 | 4833420G17Rik    | 67392     | 13+:120251565-120258567 |
| 10629 | BC021614         | 225884    | 19-:4057486-4059294     |
| 10634 | Kitl             | 17311     | 10+:99478457-99563045   |
| 10635 | Itfg2            | 101142    | 6-:128359462-128374928  |
| 10636 | Mal2             | 105853    | 15+:54403040-54434395   |
| 10638 | Gpr97            | 54672     | 8+:97564185-97569143    |
| 10639 | Tgfbr3           | 21814     | 5-:107535590-107718704  |
| 10641 | Hpd1             | 242642    | 4-:116492508-116493928  |
| 10642 | Ngef             | 53972     | 1-:89373412-89406921    |
| 10643 | Gc               | 14473     | 5-:89846537-89886926    |
| 10650 | Atf7             | 223922    | 15-:102367084-102455852 |
| 10651 | 2610044O15Rik    | 72139     | 17-:95214567-95233779   |
| 10656 | 2900092C05Rik    | 73090     | 7+:13097865-13141665    |
| 10657 | Rnf12            | 19820     | X-:101157466-101176587  |
| 10658 | Macrod2          | 72899     | 2+:142035834-142060074  |
| 10659 | ENSMUSG000000385 | 100038725 | 10-:52997850-53099484   |
| 10663 | Syl2             | 83671     | 7+:97497208-97558948    |
| 10667 | H2-Eb1           | 14969     | 17+:34442886-34453144   |
| 10668 | Kars             | 85305     | 8-:114517343-114535168  |
| 10671 | Asz1             | 74068     | 6-:18021960-18059036    |
| 10672 | BC031353         | 235493    | 9+:74800803-74880259    |
| 10673 | MMT00071544      |           | X+:117080065-117081181  |
| 10674 | Antxr2           | 71914     | 5-:98313707-98459568    |
| 10675 | Mobkl2a          | 208228    | 10-:80147456-80164582   |
| 10681 | Dgkz             | 104418    | 2-:91772978-91803812    |
| 10684 | Hmgb1            | 15289     | 5-:149860314-149861889  |
| 10686 | MMT00001732      |           | 3-:11658663-11659505    |
| 10687 | Itpkb            | 320404    | 1+:182262242-182352541  |
| 10689 | Pitpnb           | 56305     | 5+:111759814-111815537  |
| 10700 | Grwd1            | 101612    | 7-:53080584-53086157    |
| 10710 | Smoc1            | 64075     | 12+:82127817-82287387   |
| 10711 | 1700108F19Rik    | 73272     | 14+:77077372-77086911   |
| 10712 | Fchsd2           | 207278    | 7+:108257309-108432912  |
| 10713 | Tnfaip8l3        | 244882    | 9-:53874882-53916174    |
| 10717 | Ranbp9           | 56705     | 13-:43498750-43576342   |
| 10723 | 4930556N09Rik    | 75301     | 10+:96498493-96523693   |
| 10727 | Klra3            | 16634     | 6-:130273303-130287644  |
| 10729 | Fgd2             | 26382     | 17+:29497916-29516480   |
| 10732 | lars2            | 381314    | 1-:187126586-187153266  |
| 10733 | Kctd6            | 71393     | 14+:9046659-9056081     |

|       |               |        |                         |
|-------|---------------|--------|-------------------------|
| 10734 | Limk1         | 16885  | 5-:135131922-135164271  |
| 10735 | Cox6a2        | 12862  | 7-:135349127-135349866  |
| 10736 | Cyba          | 13057  | 8-:124948675-124956827  |
| 10741 | MMT00044006   |        | 2+:21989389-21990730    |
| 10745 | Gale          | 74246  | 4+:135519666-135524096  |
| 10747 | Abcf2         | 27407  | 5-:24070271-24083143    |
| 10751 | Eif5          | 217869 | 12+:112776652-112782827 |
| 10752 | Dnajc5b       | 66326  | 3+:19408625-19510857    |
| 10758 | Gdf1          | 14559  | 8+:72839685-72855486    |
| 10759 | Rbms1         | 56878  | 2-:60590796-60800976    |
| 10765 | Retnla        | 57262  | 16+:48842903-48844574   |
| 10767 | Plscr2        | 18828  | 9+:92170673-92192544    |
| 10769 | Hnrnpd        | 11991  | 5-:100390025-100407572  |
| 10770 | Sell          | 20343  | 1+:165992234-166010802  |
| 10772 | Aacs          | 78894  | 5+:125956242-125997773  |
| 10774 | Ehd3          | 57440  | 17+:74154211-74181428   |
| 10775 | Slc16a1       | 20501  | 3+:104442606-104461160  |
| 10780 | Fcgr2b        | 14130  | 1-:172890716-172906164  |
| 10782 | 4933403O08Rik | 71030  | X+:109276083-109284377  |
| 10785 | Ctdspl2       | 329506 | 2+:121782188-121839391  |
| 10788 | D430019H16Rik | 268595 | 12+:106692172-106726651 |
| 10790 | 4930470H14Rik | 75815  | 17-:4044656-4082095     |
| 10796 | Spic          | 20728  | 10-:88138016-88145752   |
| 10797 | Mageb2        | 17146  | X+:88489482-88578695    |
| 10802 | Kcnn2         | 140492 | 18+:45719807-45845536   |
| 10803 | Wnt5a         | 22418  | 14+:29338328-29340631   |
| 10806 | Rnf212        | 671564 | 5-:109158389-109178310  |
| 10808 | Rab711        | 226422 | 1+:133763868-133769462  |
| 10812 | 9330101J02Rik | 664857 | 7-:146845410-146847069  |
| 10815 | Cpe           | 12876  | 8-:67071354-67171837    |
| 10816 | Fcna          | 14133  | 2-:25480188-25483386    |
| 10817 | Ankrd10       | 102334 | 8-:11611582-11635689    |
| 10820 | Dsel          | 319901 | 1-:113755758-113759391  |
| 10821 | Pkd2l2        | 53871  | 18+:34569076-34602443   |
| 10822 | E330016A19Rik | 214763 | 9-:78283247-78290696    |
| 10824 | Vegfa         | 22339  | 17-:46155491-46168392   |
| 10827 | MMT00063568   |        | 2-:87040084-87041485    |
| 10829 | Chga          | 12652  | 12+:103793178-103803237 |
| 10830 | Rgs21         | 624910 | 1-:146366821-146384126  |
| 10831 | Dmn           | 233335 | 7-:74877489-74905060    |
| 10835 | Kcnd2         | 16508  | 6+:21166298-21677340    |
| 10836 | MMT00002878   |        | 6-:47753957-47754114    |
| 10838 | Spdef         | 30051  | 17-:27851393-27865834   |
| 10842 | Slc25a25      | 227731 | 2-:32270605-32279523    |
| 10843 | Ccar1         | 67500  | 10-:62206677-62255110   |
| 10844 | Erap1         | 80898  | 13+:74783616-74828267   |

|       |               |        |                         |
|-------|---------------|--------|-------------------------|
| 10848 | Gbbp1         | 73274  | 13-:112215891-112280324 |
| 10849 | 9330159F19Rik | 212448 | 10+:28931498-28947150   |
| 10851 | Tax1bp3       | 76281  | 11+:72990793-72995500   |
| 10852 | Sgol1         | 72415  | 17-:53815384-53828637   |
| 10853 | MMT00077065   |        | 14+:41262450-41262749   |
| 10862 | Zfp703        | 353310 | 8+:28087804-28091935    |
| 10863 | Tssc1         | 380752 | 12+:29436684-29552361   |
| 10865 | Cd248         | 70445  | 19+:5068119-5070637     |
| 10869 | Hao1          | 15112  | 2-:134323097-134380088  |
| 10871 | EG434197      | 434197 | 7+:75420881-75503087    |
| 10876 | Steap1        | 70358  | 5-:5736321-5749309      |
| 10878 | Tsnax         | 53424  | 8+:127536896-127558089  |
| 10879 | Slc9a6        | 236794 | X+:53863029-53917399    |
| 10880 | Klra8         | 16639  | 6-:130065236-130079897  |
| 10881 | Uchl5ip       | 73738  | X-:70682655-70704368    |
| 10883 | Pols          | 210106 | 13-:69636823-69646016   |
| 10884 | Add2          | 11519  | 6+:86032773-86068819    |
| 10885 | Bri3          | 55950  | 5+:145016176-145025263  |
| 10886 | Fndc3b        | 72007  | 3-:27360597-27541971    |
| 10888 | Eya2          | 14049  | 2+:165455841-165597226  |
| 10889 | Adamts15      | 235130 | 9-:30706738-30729822    |
| 10891 | Atp6v1a       | 11964  | 16-:44087536-44116981   |
| 10894 | Ngfrap1       | 12070  | X+:132804878-132806494  |
| 10901 | 2810051F02Rik | 72704  | 17+:12934239-13008423   |
| 10902 | Orc3l         | 50793  | 4-:34518044-34562173    |
| 10908 | Hipk4         | 233020 | 7+:28308535-28314817    |
| 10910 | Cdc25a        | 12530  | 9+:109778493-109795283  |
| 10911 | Mcl1          | 17210  | 3+:95462730-95467099    |
| 10916 | Gm973         | 381260 | 1+:59663659-59686991    |
| 10919 | EG624446      | 624446 | 3-:28663354-28664314    |
| 10920 | Mdn1          | 100019 | 4+:32758490-32766544    |
| 10924 | Actr6         | 67019  | 10-:89174717-89195040   |
| 10925 | Cacnb1        | 12295  | 11-:97866239-97883952   |
| 10926 | P2ry13        | 74191  | 3-:59011821-59014805    |
| 10928 | Arid1a        | 93760  | 4-:133234924-133278954  |
| 10931 | Pkn3          | 263803 | 2+:29933255-29946533    |
| 10932 | Olf1r578      | 259119 | 7-:110132736-110133676  |
| 10935 | Chpt1         | 212862 | 10-:87951126-87966663   |
| 10938 | Zbtb5         | 230119 | 4-:45005867-45025240    |
| 10940 | Dcun1d1       | 114893 | 3-:35794141-35831888    |
| 10941 | Pcdh18        | 73173  | 3-:49547422-49561184    |
| 10946 | Ifitm7        | 74482  | 16-:13982891-13984714   |
| 10949 | Smek2         | 104570 | 11+:29072995-29119129   |
| 10954 | Ubp1          | 22221  | 9+:113840769-113886120  |
| 10955 | Cdkn2a        | 12578  | 4-:88920540-88940469    |
| 10957 | Pgc           | 109820 | 17+:47863790-47871431   |

|       |               |        |                         |
|-------|---------------|--------|-------------------------|
| 10960 | Rap2a         | 76108  | 14+:120877692-120878962 |
| 10961 | Pgd           | 110208 | 4-:148524102-148540777  |
| 10964 | Cldn23        | 71908  | 8-:36887782-36889533    |
| 10965 | Ppp1cb        | 19046  | 5+:32761426-32796085    |
| 10972 | Lrig1         | 16206  | 6-:94554527-94650139    |
| 10974 | Vmn2r25       | 545874 | 6-:123775203-123803157  |
| 10978 | MMT00078322   |        | 6-:93599341-93599899    |
| 10986 | Pappa         | 18491  | 4+:64785865-65013191    |
| 10994 | EG625253      | 625253 | X-:153978644-153979688  |
| 10995 | Ap4m1         | 11781  | 5+:138613407-138619910  |
| 10998 | 2310061C15Rik | 66531  | 8-:119413417-119445354  |
| 11001 | Pou6f2        | 218030 | 13-:18453979-18480108   |
| 11002 | Smg5          | 229512 | 3+:88140232-88166259    |
| 11009 | MMT00008885   | 330256 | 6-:3283189-3291900      |
| 11012 | MMT00012665   |        | 19+:13449453-13450378   |
| 11013 | Zfand2b       | 68818  | 1+:75165319-75168199    |
| 11014 | Hibadh        | 58875  | 6-:52496224-52590294    |
| 11016 | Pcp2          | 18545  | 8-:3623376-3625252      |
| 11017 | Olf926        | 258811 | 9+:38684762-38685688    |
| 11023 | Lcn12         | 77701  | 2-:25346365-25348950    |
| 11024 | MMT00049098   |        | 10-:126469961-126478497 |
| 11025 | Cd244         | 18106  | 1+:173489499-173507478  |
| 11027 | Prkar2b       | 19088  | 12-:32643343-32746105   |
| 11034 | Kcnh2         | 16511  | 5-:23825406-23857422    |
| 11038 | Atf7ip2       | 75329  | 16+:10192994-10242047   |
| 11040 | 4933425B07Rik | 74458  | 14-:47222478-47257099   |
| 11041 | Vmn2r92       | 627111 | 17+:18304214-18308349   |
| 11043 | Hsph1         | 15505  | 5-:150419419-150438793  |
| 11050 | 2210010C04Rik | 67373  | 6-:40981633-40985477    |
| 11051 | A130042E20Rik | 216119 | 10-:75930901-75931581   |
| 11054 | Rnase4        | 58809  | 14+:51710846-51725817   |
| 11056 | Surf4         | 20932  | 2-:26775558-26788947    |
| 11057 | MMT00032844   | 353287 | 8-:113593397-113604831  |
| 11060 | Gas2          | 14453  | 7+:59134519-59249828    |
| 11063 | Phf8          | 320595 | X+:147955721-148068407  |
| 11065 | Mccc1         | 72039  | 3-:35858760-35899521    |
| 11071 | Pcbp1         | 23983  | 6-:86474492-86475940    |
| 11074 | Lpgat1        | 226856 | 1+:193542327-193608139  |
| 11075 | Xrcc6bp1      | 68876  | 10-:126324304-126338404 |
| 11083 | Kctd3         | 226823 | 1-:190794977-190831720  |
| 11084 | AF529169      | 209743 | 9-:89485561-89517946    |
| 11086 | Pnpla5        | 75772  | 15-:83942786-83953608   |
| 11087 | Wnt11         | 22411  | 7+:105987354-106002261  |
| 11090 | Lycat         | 225010 | 17+:73457353-73589860   |
| 11093 | Zdhhc1        | 70796  | 8-:107996324-108020802  |
| 11094 | Slc17a3       | 105355 | 13+:23931346-23950219   |

|       |               |        |                         |
|-------|---------------|--------|-------------------------|
| 11095 | Bag3          | 29810  | 7+:135667363-135689910  |
| 11096 | Olfr654       | 258377 | 7+:111736268-111737293  |
| 11098 | Casr          | 12374  | 16-:36493782-36562220   |
| 11099 | Klhdc8b       | 78267  | 9-:108349964-108363912  |
| 11102 | Gtf2h2        | 23894  | 13-:101238863-101260086 |
| 11104 | MMT00014375   |        | 4+:69708524-69709268    |
| 11105 | Atp11c        | 320940 | X-:57476463-57668102    |
| 11108 | Ltbp1         | 268977 | 17+:75404907-75790666   |
| 11109 | Al931714      | 102182 | 8+:80087148-80105245    |
| 11112 | Olfr131       | 258867 | 17-:38218978-38219921   |
| 11116 | Olfr11        | 218066 | 13-:21730450-21748040   |
| 11119 | Frmd4a        | 209630 | 2+:4352241-4535076      |
| 11120 | Elf1          | 13709  | 14+:79915486-79982282   |
| 11121 | Mtmr11        | 194126 | 3+:95965934-95975636    |
| 11125 | Trim39        | 79263  | 17-:36395817-36408949   |
| 11128 | Aars          | 234734 | 8+:113570866-113579468  |
| 11129 | Ankhd1        | 108857 | 18+:36751100-36825562   |
| 11130 | Slco1c1       | 58807  | 6+:141473070-141518237  |
| 11134 | Tcf7l2        | 21416  | 19+:55816821-56006583   |
| 11137 | 0910001A06Rik | 223601 | 15-:63762498-63829524   |
| 11145 | Dctn3         | 53598  | 4-:41661981-41670164    |
| 11147 | Gng12         | 14701  | 6+:66846416-66967923    |
| 11148 | Htra4         | 330723 | 8-:26135400-26149395    |
| 11149 | MMT00050488   |        | 17-:5110751-5111950     |
| 11153 | 1810063B05Rik | 67892  | 8+:128946409-128950654  |
| 11154 | MMT00037611   |        | 5-:92189250-92190710    |
| 11156 | MMT00004568   |        | 12-:116293410-116293867 |
| 11161 | Gpatch2       | 67769  | 1+:189039425-189058218  |
| 11162 | Hkdc1         | 216019 | 10-:61845886-61885205   |
| 11163 | 1700011H22Rik | 69314  | 4-:91811029-91813927    |
| 11164 | Odf4          | 252868 | 11-:68735337-68740551   |
| 11166 | Uqcc          | 56046  | 2-:155672642-155755767  |
| 11167 | Dars2         | 226539 | 1-:162970732-163000787  |
| 11168 | 1700019H03Rik | 228993 | 2+:180460043-180476982  |
| 11169 | MMT00078034   |        | 11+:107052394-107052843 |
| 11170 | Cpb1          | 76703  | 3-:20148982-20174638    |
| 11183 | Pank3         | 211347 | 11+:35582985-35600014   |
| 11186 | Prkg1         | 19091  | 19-:30638998-30639748   |
| 11193 | Tsc22d1       | 21807  | 14+:76904337-76907569   |
| 11195 | Fmn1          | 14260  | 2+:113167938-113550012  |
| 11196 | Slco1b2       | 28253  | 6+:141578038-141635156  |
| 11198 | Gbp1          | 14468  | 3+:142163517-142282131  |
| 11199 | Sirt7         | 209011 | 11-:120479680-120486303 |
| 11201 | Sunc1         | 194974 | 11-:8916056-8928120     |
| 11204 | Al451617      | 209387 | 7-:111618529-111656339  |
| 11208 | Hspb1         | 15507  | 5+:136363928-136365307  |

|       |               |        |                         |
|-------|---------------|--------|-------------------------|
| 11211 | Tctex1d4      | 242646 | 4+:116799431-116801332  |
| 11212 | 1300018I17Rik | 72325  | 8-:125766256-125778010  |
| 11214 | MMT00049207   |        | 1-:10544093-10545078    |
| 11218 | Apc           | 11789  | 18+:34420676-34478258   |
| 11219 | Mrps18a       | 68565  | 17+:46247952-46265855   |
| 11220 | AU021092      | 239691 | 16-:5211736-5222387     |
| 11231 | B2m           | 12010  | 2+:121973421-121978607  |
| 11232 | Ch25h         | 12642  | 19-:34548272-34549625   |
| 11233 | Tef           | 21685  | 15+:81641909-81654413   |
| 11234 | Pygl          | 110095 | 12-:71291798-71328604   |
| 11235 | Itga2b        | 16399  | 11-:102314610-102331058 |
| 11237 | Mycbpap       | 104601 | 11-:94362661-94382759   |
| 11240 | Ppm1d         | 53892  | 11+:85124974-85159806   |
| 11246 | Apex1         | 11792  | 14+:51544695-51546813   |
| 11248 | Glt1d1        | 319804 | 5+:128131052-128187392  |
| 11255 | Srpx          | 51795  | X-:9616033-9694713      |
| 11256 | H2-DMa        | 14998  | 17+:34272615-34275480   |
| 11257 | Trem3         | 58218  | 17+:48386943-48398207   |
| 11259 | Ccdc69        | 52570  | 11-:54863232-54891630   |
| 11260 | Frem1         | 329872 | 4-:82561985-82586681    |
| 11264 | Zcwpw1        | 381678 | 5+:138237799-138263881  |
| 11265 | Irgm          | 15944  | 11-:48678751-48684848   |
| 11267 | Cd79b         | 15985  | 11-:106172655-106175984 |
| 11274 | Srp54a        | 24067  | 12+:56181514-56214240   |
| 11275 | Fanci         | 208836 | 7+:86537238-86595150    |
| 11281 | Foxj1         | 15223  | 11-:116192016-116195998 |
| 11282 | Tekt1         | 21689  | 11-:72158225-72175375   |
| 11283 | Uroc1         | 243537 | 6+:90283299-90314540    |
| 11285 | MMT00045951   |        | 14+:54580667-54581493   |
| 11291 | 1110018H23Rik | 68509  | 17+:25259638-25262158   |
| 11292 | Nr2f6         | 13864  | 8-:73898023-73905283    |
| 11301 | Csrnp3        | 77771  | 2+:65787015-65861515    |
| 11303 | Slc5a12       | 241612 | 2+:110437461-110481058  |
| 11305 | Galnt12       | 78754  | 14+:32842030-32875382   |
| 11306 | 1700016G14Rik | 193386 | 13+:24833101-24838460   |
| 11308 | Cmb1          | 69574  | 15+:31498589-31519874   |
| 11311 | Dusp21        | 73547  | X+:17723074-17723642    |
| 11312 | 2210016H18Rik | 70125  | 18+:11016862-11017825   |
| 11313 | Vav3          | 57257  | 3+:109143930-109487231  |
| 11315 | Dok3          | 27261  | 13-:55624595-55629899   |
| 11321 | 2310014L17Rik | 381845 | 7+:13512767-13515332    |
| 11330 | MMT00024873   |        | 2-:19887192-19888317    |
| 11332 | 4931432M23Rik | 70993  | 8-:98082962-98099160    |
| 11333 | Gyk           | 14933  | X-:82948912-83021924    |
| 11338 | Vamp8         | 22320  | 6-:72335372-72340613    |
| 11339 | Eef1g         | 67160  | 19+:9041694-9052666     |

|       |               |           |                         |
|-------|---------------|-----------|-------------------------|
| 11340 | Syn2          | 20965     | 6+:115084919-115225094  |
| 11345 | Slc40a1       | 53945     | 1-:45964928-45982378    |
| 11348 | Med20         | 56771     | 17-:47757558-47759119   |
| 11350 | 9030420J04Rik | 71544     | 9-:9007965-9048974      |
| 11355 | Csta          | 209294    | 16-:36122257-36131328   |
| 11356 | Med27         | 68975     | 2+:29202355-29380308    |
| 11357 | 4930558O21Rik | 68307     | 3+:30543428-30571286    |
| 11359 | Clstn2        | 64085     | 9-:97345274-97933534    |
| 11361 | MyI2          | 17906     | 5+:122550996-122556861  |
| 11369 | Stx3          | 20908     | 19-:11849607-11893761   |
| 11370 | Prm2          | 19119     | 16-:10791473-10792190   |
| 11371 | Amhr2         | 110542    | 15+:102275850-102285061 |
| 11375 | Derl2         | 116891    | 11-:70823427-70832744   |
| 11376 | Slc7a11       | 26570     | 3+:50173828-50174687    |
| 11378 | Ubl3          | 24109     | 5-:149316233-149364209  |
| 11379 | Dnttip1       | 76233     | 2+:164571514-164593717  |
| 11382 | Cdca3         | 14793     | 6+:124780121-124783313  |
| 11385 | MMT00081444   |           | 12-:3521591-3523555     |
| 11388 | Tdrd9         | 74691     | 12+:113278635-113290222 |
| 11391 | 2310016C16Rik | 69590     | 13-:113832970-113836596 |
| 11392 | AU021838      | 328099    | 12+:58331329-58598179   |
| 11393 | A830007P12Rik | 227612    | 2-:25048485-25052246    |
| 11395 | Tcea1         | 21399     | 1+:4847983-4886725      |
| 11397 | Zp2           | 22787     | 7-:127275892-127288804  |
| 11401 | Ramp3         | 56089     | 11+:6558539-6577477     |
| 11403 | 2210016F16Rik | 70153     | 13-:58482608-58486790   |
| 11404 | Gnpat         | 14712     | 8+:127386966-127413803  |
| 11406 | Ifi203        | 15950     | 1-:175787343-175805910  |
| 11409 | Phf16         | 382207    | X+:20039237-20094914    |
| 11411 | Odf1          | 18285     | 15+:38148957-38156393   |
| 11412 | Abcg5         | 27409     | 17-:85057574-85082263   |
| 11416 | Ddr2          | 18214     | 1-:171903413-171905635  |
| 11419 | Atrnl1        | 226255    | 19+:58116810-58207823   |
| 11421 | MMT00034261   |           | 4+:150221175-150221376  |
| 11422 | Pltp          | 18830     | 2-:164665017-164683113  |
| 11423 | 6720463M24Rik | 77744     | 14+:99445437-99473757   |
| 11424 | Iqcf3         | 68265     | 9-:106445718-106463956  |
| 11425 | Evx2          | 14029     | 2-:74493672-74497476    |
| 11428 | 4932438A13Rik | 229227    | 3+:36864442-36887237    |
| 11429 | Lama2         | 16773     | 10-:26701086-27187181   |
| 11432 | Dynll2        | 68097     | 11-:87794585-87801001   |
| 11435 | Rnaset2a      | 100037283 | 17-:8321462-8340653     |
| 11436 | Mapre1        | 13589     | 2+:153567092-153592996  |
| 11437 | Gatm          | 67092     | 2-:122420611-122437013  |
| 11440 | Cox8c         | 75483     | 12+:104137504-104138746 |
| 11444 | Rnpep         | 215615    | 1-:137159289-137180611  |



|       |               |        |                         |
|-------|---------------|--------|-------------------------|
| 11445 | Atp1a2        | 98660  | 1-:174153650-174228133  |
| 11446 | Dock8         | 76088  | 19+:25248778-25276668   |
| 11447 | Nr1h4         | 20186  | 10-:88917122-88969372   |
| 11448 | Arl1          | 104303 | 10+:88194139-88206827   |
| 11449 | Ppap2a        | 19012  | 13+:113591130-113657850 |
| 11453 | Adc           | 242669 | 4-:128608484-128638804  |
| 11459 | Mas1          | 17171  | 17-:13034426-13035400   |
| 11462 | Gpam          | 14732  | 19-:55142136-55201706   |
| 11463 | MMT00057138   |        | 13-:71761731-71762275   |
| 11464 | Gnat3         | 242851 | 5+:17468364-17525485    |
| 11465 | Eif3k         | 73830  | 7-:29756391-29766833    |
| 11467 | Ypel5         | 383295 | 17+:73193373-73198143   |
| 11472 | Ckmt2         | 76722  | 13-:91992992-92016471   |
| 11475 | H2-D1         | 14964  | 17+:35400836-35400949   |
| 11481 | Morn1         | 76866  | 4+:154460708-154519615  |
| 11486 | Tacc3         | 21335  | 5+:34001309-34014844    |
| 11500 | 3300001P08Rik | 67684  | 11-:94152388-94183276   |
| 11503 | Rangap1       | 19387  | 15-:81534683-81560305   |
| 11504 | Tpm3          | 59069  | 3+:89883653-89903532    |
| 11506 | Rfxank        | 19727  | 8-:72656386-72663012    |
| 11507 | Adarb2        | 94191  | 13+:8202394-8756688     |
| 11513 | Serpinf1      | 20317  | 11-:75223532-75236013   |
| 11514 | Muc3          | 666339 |                         |
| 11515 | EG544707      | 544707 | 10+:74814968-74815776   |
| 11516 | Sfxn5         | 94282  | 6-:85165482-85283416    |
| 11519 | Slc2a10       | 170441 | 2+:165329479-165345409  |
| 11521 | Dnaja1        | 15502  | 4+:40669585-40680933    |
| 11522 | Igbp1b        | 50540  | 6-:138605610-138606965  |
| 11525 | MMT00048506   |        | 10+:126330168-126330965 |
| 11534 | Ndufs4        | 17993  | 13-:115078858-115178251 |
| 11536 | Igj           | 16069  | 5-:88949540-88956809    |
| 11540 | Ctps          | 51797  | 4-:120212470-120242869  |
| 11542 | Taz           | 66826  | X+:71528106-71535487    |
| 11545 | Ppcs          | 106564 | 4-:119091137-119094996  |
| 11549 | Depdc6        | 97998  | 15+:54943878-55084334   |
| 11551 | MMT00046383   |        | 13+:20840333-20840705   |
| 11557 | Blnk          | 17060  | 19-:41003664-41068548   |
| 11560 | MMT00001695   |        | 5-:76455924-76456824    |
| 11565 | Serpina3c     | 16625  | 12-:105385116-105392082 |
| 11571 | Bpnt1         | 23827  | 1+:187156079-187180664  |
| 11574 | Gne           | 50798  | 4-:44049989-44079790    |
| 11576 | Gm1381        | 384198 | 5+:92984096-93019689    |
| 11581 | Cast          | 12380  | 13-:74830741-74946257   |
| 11585 | Bdp1          | 544971 | 13-:100787951-100873989 |
| 11586 | MMT00070266   |        | 18+:10262204-10263318   |
| 11587 | Syt14         | 329324 | 1-:194723408-194853211  |

|       |               |        |                         |
|-------|---------------|--------|-------------------------|
| 11588 | Ncapg2        | 76044  | 12+:117664318-117702003 |
| 11590 | Cbx4          | 12418  | 11-:118941470-118947453 |
| 11591 | Vil1          | 22349  | 1+:74455979-74482088    |
| 11593 | Usf1          | 22278  | 1+:173341811-173348871  |
| 11596 | Zfp120        | 104348 | 2-:149941955-149962414  |
| 11598 | MMT00031533   | 628236 | 19-:33484689-33492127   |
| 11599 | Coq10b        | 67876  | 1+:55109714-55129543    |
| 11606 | Mast4         | 328329 | 13-:103523408-103643964 |
| 11610 | Hey1          | 15213  | 3-:8663358-8666986      |
| 11611 | S100a13       | 20196  | 3+:90318921-90328496    |
| 11614 | Sult1e1       | 20860  | 5-:88004994-88020619    |
| 11620 | Zfr           | 22763  | 15+:12047607-12114218   |
| 11621 | Mixl1         | 27217  | 1-:182624750-182627143  |
| 11627 | MMT00076264   | 278676 | 14+:52423159-52425266   |
| 11628 | Slc6a12       | 14411  | 6+:121296721-121315790  |
| 11630 | Mug-ps1       | 17835  | 6+:122086686-122198581  |
| 11633 | Ier3          | 15937  | 17+:35958657-35959855   |
| 11641 | 2-Sep         | 18000  | 1+:95375620-95406307    |
| 11645 | Prtn3         | 19152  | 10+:79342420-79345720   |
| 11648 | Lrfn2         | 70530  | 17+:49209187-49236912   |
| 11649 | Hfe           | 15216  | 13-:23795884-23802655   |
| 11651 | S1pr4         | 13611  | 10-:80961222-80962882   |
| 11652 | Ddx56         | 52513  | 11-:6158572-6167741     |
| 11655 | Cd200r1       | 57781  | 16+:44766121-44794453   |
| 11656 | Prkag2        | 108099 | 5-:24368575-24606248    |
| 11662 | Mre11a        | 17535  | 9+:14589115-14638404    |
| 11663 | Dusp5         | 240672 | 19+:53603648-53616916   |
| 11665 | Hyal1         | 15586  | 9+:107479306-107482425  |
| 11668 | D6Wsu163e     | 28040  | 6+:126892327-126925635  |
| 11671 | Postn         | 50706  | 3+:54165046-54194953    |
| 11677 | 5730507C01Rik | 236366 | 12+:18411527-19105834   |
| 11682 | Nutf2         | 68051  | 8+:108384560-108402929  |
| 11685 | Cd83          | 12522  | 13+:43880571-43898499   |
| 11689 | MMT00078109   |        | 7+:117442229-117446277  |
| 11695 | MMT00081973   | 675985 | 8+:91330258-91331072    |
| 11697 | Rasl2-9       | 19428  | 7-:5076607-5077558      |
| 11699 | MMT00044175   |        | 18+:42360453-42360956   |
| 11701 | Oas1c         | 114643 | 5-:121250216-121258791  |
| 11705 | Polr3f        | 70408  | 2+:144353494-144365094  |
| 11709 | Asb2          | 65256  | 12-:104559355-104594211 |
| 11713 | Mpdu1         | 24070  | 11-:69470205-69476079   |
| 11716 | Slco6d1       | 70866  | 1+:100317699-100405958  |
| 11717 | Wdhd1         | 218973 | 14-:47860617-47896272   |
| 11718 | Nmb           | 68039  | 7-:88047127-88049922    |
| 11722 | Ccdc104       | 216618 | 11-:29121546-29147281   |
| 11724 | Tuba3a        | 22144  | 6-:125228306-125236049  |

|       |               |        |                         |
|-------|---------------|--------|-------------------------|
| 11725 | Itln1         | 16429  | 1-:173448253-173465424  |
| 11727 | Olfir24       | 18322  | 9-:18559136-18559750    |
| 11729 | Ncr1          | 17086  | 7+:4289336-4296362      |
| 11735 | Thoc5         | 107829 | 11+:4795334-4828863     |
| 11738 | Tmed2         | 56334  | 5+:124990837-124999252  |
| 11740 | Cpm           | 70574  | 10+:117066553-117122359 |
| 11741 | Slc30a10      | 226781 | 1+:187278726-187289068  |
| 11743 | Prdx2         | 21672  | 8+:87494135-87498209    |
| 11744 | Ctnnb1        | 66642  | 2+:157563176-157716827  |
| 11747 | 4933434I06Rik | 71233  | 2-:21102357-21126992    |
| 11753 | CU075549.1    | 620807 | 4+:60016418-60016983    |
| 11756 | 2810011L19Rik | 69952  | 12+:106575064-106620320 |
| 11758 | S100a1        | 20193  | 3-:90315031-90318216    |
| 11759 | 3110079O15Rik | 73234  | 1+:89366832-89372058    |
| 11761 | Ankrd37       | 654824 | 8-:47082263-47085222    |
| 11762 | Ggt5          | 23887  | 10+:75052140-75077930   |
| 11764 | Chrna2        | 110902 | 14+:66759796-66771783   |
| 11765 | Gm884         | 380730 | 11-:103461614-103462212 |
| 11775 | Phyh          | 16922  | 2+:4840076-4859770      |
| 11776 | Ifi30         | 65972  | 8-:73286873-73290530    |
| 11777 | MMT00008513   |        | 5-:44797035-44797838    |
| 11779 | Irx2          | 16372  | 13+:72767251-72771641   |
| 11780 | Taok1         | 216965 | 11-:77351102-77369095   |
| 11784 | Es1           | 13884  | 8-:95622913-95655170    |
| 11785 | MMT00075578   |        | 15+:84696703-84697800   |
| 11787 | Rsf1          | 233532 | 7-:104802885-104803263  |
| 11789 | Ccdc90a       | 76137  | 13-:43633780-43655538   |
| 11791 | Duoxa2        | 66811  | 2+:122124635-122128621  |
| 11795 | Gps2          | 56310  | 11+:69727551-69730092   |
| 11796 | Ela3          | 67868  | 4-:136976924-136986433  |
| 11797 | Sbk1          | 104175 | 7+:133416132-133438512  |
| 11798 | A530082C11Rik | 320541 | 4+:154993303-154994621  |
| 11800 | Clip3         | 76686  | 7+:31077174-31092167    |
| 11802 | Armc4         | 74934  | 18-:7088232-7297938     |
| 11803 | 1500032D16Rik | 78330  | 17+:31657095-31668272   |
| 11805 | Bat2          | 53761  | 17-:35286206-35299928   |
| 11807 | Fbxo31        | 76454  | 8-:124075915-124102555  |
| 11808 | Pck1          | 18534  | 2+:172978573-172984752  |
| 11809 | 4930534B04Rik | 75216  | 12-:92527833-92622820   |
| 11812 | Mrpl16        | 94063  | 19+:11844904-11849434   |
| 11814 | Pdim5         | 56376  | 3-:141905620-142058582  |
| 11816 | Ccdc99        | 70385  | 11-:34622691-34647126   |
| 11817 | Dpysl3        | 22240  | 18-:43483941-43552985   |
| 11818 | MMT00048396   |        | 2-:147468585-147468916  |
| 11819 | Mcee          | 73724  | 7+:71537531-71557000    |
| 11820 | Abcg4         | 192663 | 9-:44081271-44096206    |

|       |               |        |                         |
|-------|---------------|--------|-------------------------|
| 11822 | Elovl2        | 54326  | 13-:41277867-41315762   |
| 11823 | Mmp7          | 17393  | 9+:7692089-7699584      |
| 11825 | MMT00024508   |        | 5+:101734596-101734896  |
| 11831 | A1747699      | 381236 | 19-:33749595-33805439   |
| 11832 | Rnf11         | 29864  | 4-:109125503-109149588  |
| 11834 | Pja2          | 224938 | 17-:64632232-64660716   |
| 11836 | Csf1r         | 12978  | 18+:61265528-61290786   |
| 11837 | Paqr6         | 68957  | 3+:88186020-88186764    |
| 11840 | Chrdl1        | 83453  | X-:139732681-139824691  |
| 11843 | Dusp22        | 105352 | 13+:30751964-30803092   |
| 11844 | Krt33a        | 71888  | 11-:99872515-99877526   |
| 11845 | Psme1         | 19186  | 14+:56197330-56200364   |
| 11846 | Cxcr5         | 12145  | 9-:44319924-44334461    |
| 11847 | Tmem45b       | 235135 | 9-:31233781-31271823    |
| 11849 | Olf648        | 258746 | 7-:111327970-111328920  |
| 11853 | EG214403      | 214403 | 1-:141471761-141677817  |
| 11854 | Btbd1         | 83962  | 7-:88936960-88963150    |
| 11855 | 4930402F06Rik | 74854  | 2-:35231096-35252696    |
| 11857 | Arv1          | 68865  | 8+:127246038-127258023  |
| 11859 | Poln          | 272158 | 5-:34349838-34452083    |
| 11861 | Dyrk3         | 226419 | 1-:133025018-133034811  |
| 11863 | Srbd1         | 78586  | 17-:86535709-86544568   |
| 11864 | Dis3l         | 213550 | 9-:64154564-64156236    |
| 11867 | Rcor3         | 214742 | 1-:193925269-193961809  |
| 11869 | Pcsk5         | 18552  | 19-:17507405-17729390   |
| 11870 | Apitd1        | 69928  | 4-:148502457-148511659  |
| 11871 | 4931417E11Rik | 66740  | 6-:73418575-73419661    |
| 11872 | Vamp5         | 53620  | 6-:72319026-72320326    |
| 11873 | Mmp2          | 17390  | 8+:95351480-95377318    |
| 11880 | Svep1         | 64817  | 4-:58055668-58219468    |
| 11881 | Mpl           | 17480  | 4-:118115019-118130076  |
| 11882 | Prdm4         | 72843  | 10-:85354714-85379664   |
| 11886 | Cep250        | 16328  | 2+:155817369-155824609  |
| 11888 | Myadm         | 50918  | 7+:3290534-3299348      |
| 11891 | Rtn2          | 20167  | 7+:19868015-19881508    |
| 11892 | D430042O09Rik | 233865 | 7+:132993891-133018305  |
| 11893 | Cdc40         | 71713  | 10-:40551425-40602915   |
| 11895 | 2810405J04Rik | 72722  | 17-:75936430-75951183   |
| 11896 | Kif6          | 319991 | 17+:49754462-49978532   |
| 11899 | MMT00070220   |        | 9+:55797825-55875733    |
| 11902 | MMT00029171   |        | X-:5274662-5279002      |
| 11903 | 4933437F05Rik | 71275  | 12-:88561975-88579683   |
| 11906 | Nfe2l3        | 18025  | 6+:51382668-51408767    |
| 11907 | Tmeff2        | 56363  | 1+:50984403-51242552    |
| 11911 | Wnt6          | 22420  | 1+:74818719-74831519    |
| 11915 | Calm1         | 12313  | 12+:101437896-101445521 |

|       |                  |        |                         |
|-------|------------------|--------|-------------------------|
| 11917 | Fahd1            | 68636  | 17-:24985843-24987082   |
| 11920 | D10Wsu52e        | 28088  | 10-:85401381-85420528   |
| 11921 | Ddx21            | 56200  | 10-:62042995-62061938   |
| 11922 | Cox19            | 68033  | 5-:139813467-139821171  |
| 11923 | Pde3b            | 18576  | 7+:121559071-121681693  |
| 11925 | Epm2aip1         | 77781  | 9+:111174345-111181593  |
| 11926 | Ampd2            | 109674 | 3-:107876981-107889568  |
| 11929 | Slc22a7          | 108114 | 17-:46569133-46575380   |
| 11930 | Igh-VJ558        | 16061  | 12-:116784206-116784642 |
| 11932 | Pkp1             | 18772  | 1-:137767974-137815601  |
| 11937 | Snx10            | 71982  | 6+:51473961-51540267    |
| 11940 | Chi3l1           | 12654  | 1+:136079041-136086612  |
| 11946 | MMT00030953      |        | 18-:31979216-31980063   |
| 11949 | Cldn3            | 12739  | 5+:135462257-135463342  |
| 11951 | Denr             | 68184  | 5+:124357283-124378841  |
| 11953 | Gtf2b            | 229906 | 3+:142428210-142446566  |
| 11955 | Ccl6             | 20305  | 11-:83401393-83406492   |
| 11956 | Bmper            | 73230  | 9+:23097840-23289646    |
| 11957 | Elmod1           | 270162 | 9-:53759268-53822981    |
| 11959 | 4631422O05Rik    | 78749  | 16+:57507661-57572911   |
| 11960 | Tm4sf4           | 229302 | 3+:57229380-57245587    |
| 11961 | Nol4             | 319211 | 18-:22853442-23198543   |
| 11965 | MMT00013041      |        | 5-:87805183-87807199    |
| 11966 | Zfp280b          | 64453  | 10+:75495435-75502733   |
| 11968 | Cenpm            | 66570  | 15-:82064512-82075177   |
| 11970 | AA408296         | 215193 | 1-:194933482-194956388  |
| 11971 | 1700025D03Rik    | 67944  | X-:134742703-134743300  |
| 11974 | 1700023B02Rik    | 66935  | 2-:73125663-73150765    |
| 11975 | Usmg5            | 66477  | 19-:47157957-47165123   |
| 11981 | Sh3bp2           | 24055  | 5+:34868497-34906203    |
| 11982 | MMT00035514      |        | 1-:91152714-91153562    |
| 11984 | N6amt2           | 68043  | 14-:58168434-58190406   |
| 11987 | Dmkn             | 73712  | 7+:31548778-31566086    |
| 11992 | Mrpl19           | 56284  | 6-:81911578-81915943    |
| 12000 | Tmem16h          | 382014 | 8-:73999204-74005145    |
| 12004 | Lgals6           | 16857  | 7+:29619148-29626651    |
| 12010 | Foxg1            | 15228  | 12+:50483993-50487843   |
| 12012 | Cd247            | 12503  | 1+:167718853-167797565  |
| 12013 | Gsdmc1           | 83492  | 15-:63607649-63636153   |
| 12015 | Esf1             | 66580  | 2-:139945616-139996299  |
| 12018 | 1700012C15Rik    | 76390  | 11+:73503781-73525936   |
| 12020 | Bglap2           | 12097  | 3-:88181657-88182620    |
| 12024 | OTTMUSG000000166 | 667373 | 19-:34667377-34673920   |
| 12027 | Dnajb3           | 15504  | 1-:90101310-90102323    |
| 12029 | Tcf19            | 106795 | 17-:35649679-35653699   |
| 12032 | Cdca7            | 66953  | 2+:72314275-72324947    |

|       |               |        |                         |
|-------|---------------|--------|-------------------------|
| 12035 | Ncoa1         | 17977  | 12-:4249454-4483976     |
| 12038 | Tnks1bp1      | 228140 | 2+:84892561-84913202    |
| 12040 | Commd10       | 69456  | 18+:47118522-47247650   |
| 12041 | Lrrc55        | 241528 | 2-:85032067-85036796    |
| 12045 | Metap2        | 56307  | 10-:93323977-93352436   |
| 12046 | Impdh1        | 23917  | 6-:29151198-29162166    |
| 12053 | 2310005L22Rik | 69471  | 4+:131864588-131866941  |
| 12055 | 1810008A18Rik | 108707 | 10-:76949408-76978530   |
| 12056 | Zic3          | 22773  | X+:55283819-55289080    |
| 12059 | 2700049P18Rik | 108900 | 1+:133424543-133435611  |
| 12062 | Dzip1l        | 72507  | 9+:99549973-99560194    |
| 12063 | Capn13        | 381122 | 17-:73655803-73671379   |
| 12066 | MMT00040000   |        | 5+:87406182-87420763    |
| 12070 | Adat2         | 66757  | 10+:13272699-13282842   |
| 12073 | Olf622        | 259087 | 7-:110787699-110788652  |
| 12084 | Siva1         | 30954  | 12+:113883133-113887354 |
| 12085 | EG214403      | 214403 | 1-:141594211-141890831  |
| 12088 | 5730416F02Rik | 70550  | X+:106066877-106197724  |
| 12091 | 1810015C04Rik | 66270  | 15+:25872433-25902092   |
| 12092 | Hoxa11        | 15396  | 6-:52192105-52195766    |
| 12097 | 9430015G10Rik | 230996 | 4+:155484097-155501370  |
| 12104 | MMT00063115   | 231872 | 5-:144663573-144670687  |
| 12109 | Smad4         | 17128  | 18-:73799654-73837885   |
| 12111 | AA474455      | 231151 | 5-:36816291-36826709    |
| 12112 | Tmem53        | 68777  | 4+:116924593-116941185  |
| 12114 | Homer2        | 26557  | 7-:88754229-88794602    |
| 12115 | Hist1h2an     | 319170 | 13-:21878696-21879087   |
| 12117 | 1700024G13Rik | 67085  | 14-:33189272-33201577   |
| 12118 | Mtrr          | 210009 | 13-:68701154-68721039   |
| 12119 | Dmd           | 13405  | X+:80194241-82450380    |
| 12120 | Rad51         | 19361  | 2+:118938600-118961459  |
| 12122 | C130092O11Rik | 232035 | 6+:61735140-61761038    |
| 12126 | Znfx1         | 98999  | 2-:166861298-166882441  |
| 12127 | 0610010F05Rik | 71675  | 11-:23473772-23533210   |
| 12129 | Cfi           | 12630  | 3+:129539656-129578248  |
| 12130 | Cyp3a16       | 13114  | 5-:146197177-146230563  |
| 12133 | 7-Sep         | 235072 | 9+:25094233-25116152    |
| 12139 | Cmtm4         | 97487  | 8-:106877575-106919596  |
| 12140 | Mrps15        | 66407  | 4+:125724207-125732776  |
| 12143 | Thyn1         | 77862  | 9+:26807306-26814917    |
| 12146 | Hddc2         | 69692  | 10+:31033212-31048008   |
| 12151 | MMT00082650   |        | 8-:83721076-83722253    |
| 12155 | Gmfb          | 63985  | 14-:47427825-47441885   |
| 12156 | Setd4         | 224440 | 16-:93583705-93604048   |
| 12157 | Gal3st4       | 330217 | 5-:138706146-138712604  |
| 12164 | Gtf2h1        | 14884  | 7+:54051635-54078659    |

|       |                  |           |                         |
|-------|------------------|-----------|-------------------------|
| 12165 | Ppp2r1b          | 73699     | 9+:50678287-50689343    |
| 12168 | H2-Ke6           | 14979     | 17-:34162979-34165002   |
| 12169 | MMT00013125      |           | 12-:72947250-72948340   |
| 12172 | Adam9            | 11502     | 8-:26060104-26127260    |
| 12173 | Acbd6            | 72482     | 1+:157405251-157534362  |
| 12174 | 2610027C15Rik    | 230752    | 4+:125823225-125827118  |
| 12177 | Tmem35           | 67564     | X+:130829929-130840510  |
| 12178 | Slc16a2          | 20502     | X-:100892761-101017298  |
| 12180 | Ank              | 11732     | 15+:27396728-27524054   |
| 12181 | Bcl2l10          | 12049     | 9+:75195592-75199447    |
| 12182 | Immt             | 76614     | 6+:71821526-71827382    |
| 12185 | Cyp2d10          | 13101     | 15-:82233337-82237552   |
| 12188 | Chek2            | 50883     | 5+:111270231-111302765  |
| 12190 | Krt18            | 16668     | 15+:101858655-101862452 |
| 12191 | Zfp704           | 170753    | 3-:9427019-9610085      |
| 12193 | Aco2             | 11429     | 15+:81452911-81745561   |
| 12194 | ENSMUSG000000545 | 791344    | 10-:89207144-89208581   |
| 12198 | Atp13a5          | 268878    | 16-:29232754-29321829   |
| 12203 | MMT00009475      | 100042638 | 1-:63411292-63441743    |
| 12204 | Ankmy2           | 217473    | 12+:36883776-36914800   |
| 12208 | Pnpla7           | 241274    | 2+:24895025-24909577    |
| 12213 | Entpd5           | 12499     | 12-:85717626-85746419   |
| 12214 | Olf1271          | 258789    | 2-:90105668-90106585    |
| 12219 | Cyb5b            | 66427     | 8+:109674578-109708000  |
| 12220 | Pgam1            | 18648     | 19+:41986449-41993154   |
| 12221 | Tbc1d23          | 67581     | 16-:57170014-57191340   |
| 12225 | Tsr1             | 104662    | 11+:74711576-74722337   |
| 12228 | Grpel1           | 17713     | 5+:36807831-36814345    |
| 12229 | Sash1            | 70097     | 10-:8442990-8605656     |
| 12230 | MMT00005802      |           | 18+:15571723-15573912   |
| 12232 | MMT00060943      | 100039903 |                         |
| 12235 | Serbp1           | 66870     | 6+:67216972-67235957    |
| 12238 | Traf3            | 22031     | 12+:112458020-112505358 |
| 12239 | A630077B13Rik    | 215900    | 10-:33845867-33847789   |
| 12242 | Ube2e1           | 22194     | 14-:19115262-19163650   |
| 12243 | Edar             | 13608     | 10-:58063536-58138444   |
| 12245 | Zfp322a          | 218100    | 13-:23446715-23461016   |
| 12248 | Tnp2             | 21959     | 16-:10788363-10788694   |
| 12250 | P2ry14           | 140795    | 3-:58918542-58934543    |
| 12256 | Atp10d           | 231287    | 5+:72618907-72690004    |
| 12259 | MMT00080137      |           | 2-:155311398-155312165  |
| 12261 | Bcan             | 12032     | 3-:87791452-87804152    |
| 12263 | Atp6v0d2         | 242341    | 4-:19805063-19849754    |
| 12270 | Slc7a6           | 330836    | 8+:108692772-108722610  |
| 12272 | Fshr             | 14309     | 17-:89384511-89599952   |
| 12276 | Hmga1            | 15361     | 17+:27693843-27700608   |

|       |               |        |                         |
|-------|---------------|--------|-------------------------|
| 12278 | Plxna4        | 243743 | 6-:32094332-32094929    |
| 12280 | Cln5          | 211286 | 14+:103469512-103476847 |
| 12281 | Tacc2         | 57752  | 7+:137836069-137908218  |
| 12285 | Setd5         | 72895  | 6+:113059406-113103418  |
| 12288 | Olfir392      | 259008 | 11-:73627645-73628582   |
| 12289 | Ext1          | 14042  | 15-:52900093-53177500   |
| 12290 | 4930542N07Rik | 75185  | X+:150916544-150919225  |
| 12291 | Lim2          | 233187 | 7+:50685488-50691361    |
| 12296 | Rrad          | 56437  | 8-:107152350-107154813  |
| 12297 | Upk1b         | 22268  | 16-:38773302-38788156   |
| 12298 | Lad1          | 16763  | 1+:137715339-137729537  |
| 12299 | Thbs1         | 21825  | 2+:117938378-117949995  |
| 12302 | Cbx1          | 12412  | 11+:96662121-96668074   |
| 12303 | Lmo4          | 16911  | 3-:143851692-143865271  |
| 12312 | Ms4a6d        | 68774  | 19-:11661096-11679276   |
| 12315 | Srebf1        | 20787  | 11-:60013100-60016311   |
| 12316 | Mpa2l         | 100702 | 5-:105587936-105600749  |
| 12319 | Mfap2         | 17150  | 4+:140566595-140571889  |
| 12327 | Ccl11         | 20292  | 11+:81871423-81876453   |
| 12329 | Sox6          | 20679  | 7-:122620184-123138600  |
| 12330 | Aldh6a1       | 104776 | 12-:85771672-85791900   |
| 12333 | Fcrl1         | 229499 | 3+:87180370-87189237    |
| 12335 | Plcb4         | 18798  | 2+:135734080-135840679  |
| 12336 | Timm13        | 30055  | 10-:80362660-80363714   |
| 12341 | EG330731      | 330731 | 8-:32847179-32850202    |
| 12343 | Atf5          | 107503 | 7-:52067627-52071942    |
| 12344 | MMT00034062   |        | 4+:37976231-38331106    |
| 12346 | Myoz2         | 59006  | 3-:122709125-122737867  |
| 12347 | MMT00014037   |        | 13-:33668741-33688437   |
| 12352 | MMT00079007   |        |                         |
| 12355 | A1507611      | 245884 | 6+:29232706-29240681    |
| 12358 | A430083B19Rik | 218739 | 14+:14503430-14514979   |
| 12360 | EG630825      | 630825 | X-:53208692-53213180    |
| 12363 | Ifitm6        | 213002 | 7-:148201597-148202803  |
| 12367 | MMT00072365   |        | X+:141282222-141283172  |
| 12371 | 1700128F08Rik | 76669  | 9+:8221888-8241987      |
| 12372 | MMT00039397   |        |                         |
| 12376 | MMT00011143   |        | 12-:78724038-78725029   |
| 12377 | MMT00050540   |        | 8-:49154859-49156054    |
| 12380 | Rftn2         | 74013  | 1-:55227005-55283624    |
| 12383 | Ugt2a3        | 72094  | 5-:87753996-87766201    |
| 12384 | MMT00056390   |        |                         |
| 12385 | Mrpl33        | 66845  | 5+:31916344-31925014    |
| 12386 | 4930579G24Rik | 75939  | 3+:79432979-79436739    |
| 12387 | Olfir1156     | 258814 | 2-:87789426-87790388    |
| 12388 | 8430406I07Rik | 74528  | 2+:144096711-144106196  |



|       |               |        |                         |
|-------|---------------|--------|-------------------------|
| 12391 | Mrpl9         | 78523  | 3+:94247239-94252629    |
| 12398 | Ifi44         | 99899  | 3-:151393888-151412813  |
| 12399 | Dpm2          | 13481  | 2+:32426405-32428536    |
| 12401 | MMT00011281   |        | 2+:156994509-156995015  |
| 12402 | Th1l          | 57314  | 2+:174241304-174252998  |
| 12404 | Col16a1       | 107581 | 4+:129774847-129776520  |
| 12405 | Cyp4f14       | 64385  | 17-:33042015-33054023   |
| 12412 | BC004728      | 207818 | 15-:100451772-100467643 |
| 12414 | Rap1a         | 109905 | 3-:105531200-105604175  |
| 12415 | MMT00052705   |        |                         |
| 12417 | Mtap7d1       | 245877 | 4-:125909410-125917355  |
| 12419 | MMT00081393   |        | 2+:15049374-15050459    |
| 12420 | Kihl21        | 242785 | 4+:151382632-151391786  |
| 12422 | Eme1          | 268465 | 11-:94505833-94512337   |
| 12423 | Cyp2g1        | 13108  | 7+:27593945-27606216    |
| 12425 | Olfr1340      | 258301 | 4+:118398853-118399801  |
| 12430 | Fst           | 14313  | 13-:115243554-115248794 |
| 12433 | 5033413D22Rik | 75973  | 10-:41270447-41273222   |
| 12434 | Frs2          | 327826 | 10-:116509618-116585557 |
| 12436 | Serinc3       | 26943  | 2-:163450407-163470807  |
| 12437 | Six6          | 20476  | 12+:74040880-74043584   |
| 12440 | Sult5a1       | 57429  | 8-:125666747-125682155  |
| 12445 | A830080D01Rik | 382252 | X+:155991683-156031005  |
| 12451 | Srd5a2        | 94224  | 17-:74367047-74397256   |
| 12453 | Dnaja1        | 15502  | 4+:40670745-40671183    |
| 12454 | Zscan4d       | 545913 | 7-:11650789-11751513    |
| 12456 | Arl6ip5       | 65106  | 6+:97160797-97183308    |
| 12457 | MMT00072579   |        | 8-:114760259-114760970  |
| 12460 | Pnpla2        | 66853  | 7+:148641105-148645993  |
| 12464 | MMT00047924   | 20947  | 7+:117365324-117424850  |
| 12466 | MMT00079257   |        | 5+:88491788-88493396    |
| 12468 | Cyp2d13       | 68444  | 15-:82467180-82472455   |
| 12469 | Dock10        | 210293 | 1-:80497648-80630870    |
| 12471 | Olfr1020      | 258573 | 2+:85689610-85690563    |
| 12477 | 3-Mar         | 320253 | 18-:56934808-56971749   |
| 12478 | Rhot2         | 214952 | 17-:25981719-25998028   |
| 12479 | lfrd1         | 15982  | 12-:40929716-40949751   |
| 12480 | Cdc42bpg      | 240505 | 19+:6314486-6314780     |
| 12482 | MMT00030762   |        | 2+:24039162-24040077    |
| 12483 | 5133401N09Rik | 75731  | 13+:58258917-58265746   |
| 12484 | Tcfap2e       | 332937 | 4-:126393245-126413353  |
| 12485 | Zc3h18        | 76014  | 8+:124900686-124940684  |
| 12486 | Aldh18a1      | 56454  | 19-:40624746-40662859   |
| 12487 | Tbc1d10a      | 103724 | 11+:4086835-4115507     |
| 12489 | Wdr8          | 59002  | 4+:153516500-153530924  |
| 12491 | Ptma          | 19231  | 1+:88423310-88427239    |

|       |               |        |                         |
|-------|---------------|--------|-------------------------|
| 12492 | Ybx1          | 22608  | 4-:118950838-118966995  |
| 12493 | Ankfy1        | 11736  | 11+:72503507-72584723   |
| 12494 | Thnsl1        | 208967 | 2+:21133243-21135307    |
| 12495 | Casp1         | 12362  | 9+:5299288-5306766      |
| 12497 | Kir3dl2       | 245615 | X-:132987795-132992336  |
| 12498 | Abcg8         | 67470  | 17+:85082571-85098138   |
| 12499 | Avpi1         | 69534  | 19-:42197770-42203483   |
| 12501 | Zfand6        | 65098  | 7-:91764330-91782902    |
| 12502 | Yy1           | 22632  | 12+:110031594-110054463 |
| 12507 | Fcrls         | 80891  | 3-:87054690-87067515    |
| 12510 | Rs1           | 20147  | X+:157206093-157232677  |
| 12512 | Eef1e1        | 66143  | 13-:38737562-38750879   |
| 12513 | Whsc2         | 24116  | 5-:34239777-34278971    |
| 12514 | MMT00078654   |        | 2-:181687789-181687870  |
| 12515 | N4bp2         | 333789 | 5+:66177371-66218212    |
| 12516 | Pls3          | 102866 | X-:73031002-73119877    |
| 12517 | 4930573I19Rik | 104859 | 12+:112179662-112209879 |
| 12518 | Ctsl          | 13039  | 13-:64465104-64471600   |
| 12519 | Bid           | 12122  | 6-:120844113-120851770  |
| 12520 | MMT00057426   |        | X+:76031242-76040294    |
| 12534 | Nol7          | 70078  | 13+:43493761-43498230   |
| 12540 | Smarca1       | 93761  | X-:45162876-45245719    |
| 12541 | Stx16         | 228960 | 2+:173901923-173924361  |
| 12546 | Cd7           | 12516  | 11-:120898064-120900732 |
| 12552 | Gm967         | 381217 | 19-:24047245-24105301   |
| 12553 | Kpnb1         | 16211  | 11-:97022926-97049066   |
| 12556 | Ass1          | 11898  | 2+:31325818-31376149    |
| 12560 | Sulf1         | 240725 | 1+:12708583-12851270    |
| 12563 | Col17a1       | 12821  | 19-:47720851-47766584   |
| 12564 | MMT00036520   |        | 1-:20434340-20434650    |
| 12565 | Grem2         | 23893  | 1-:176763915-176851950  |
| 12568 | Lrrc37a       | 237954 | 11-:103312057-103357732 |
| 12570 | Wsb1          | 78889  | 11-:79053804-79067894   |
| 12571 | Cdkn2d        | 12581  | 9-:21092935-21095415    |
| 12572 | Zfp90         | 22751  | 8+:108939300-108949628  |
| 12575 | Cib3          | 234421 | 8-:74728232-74734310    |
| 12578 | Ddx1          | 104721 | 12-:13226113-13255980   |
| 12581 | Mpp3          | 13384  | 11-:101860977-101888219 |
| 12586 | G3bp2         | 23881  | 5-:92483539-92512684    |
| 12587 | Susd3         | 66329  | 13-:49326201-49343532   |
| 12592 | F13a1         | 74145  | 13-:36959056-36997927   |
| 12594 | 9130227C08Rik | 219094 | 14+:56473200-56516324   |
| 12598 | Olfir801      | 258282 | 10-:129106616-129107573 |
| 12599 | Golt1b        | 66964  | 6+:142335761-142350643  |
| 12600 | Ifi204        | 15951  | 1-:175677426-175692019  |
| 12602 | Filip1        | 70598  | 9-:79662863-79825653    |

|       |               |        |                         |
|-------|---------------|--------|-------------------------|
| 12604 | Acr           | 11434  | 15+:89398792-89404858   |
| 12611 | MMT00068616   |        | 14+:33007082-33015133   |
| 12612 | Rapgef4       | 56508  | 2+:71819343-72094433    |
| 12617 | Zfp46         | 22704  | 4+:135845707-135850238  |
| 12619 | Igf2r         | 16004  | 17-:12875274-12963273   |
| 12623 | Ccdc123       | 72140  | 7+:36182111-36223703    |
| 12624 | Clptm1l       | 218335 | 13+:73741748-73758051   |
| 12625 | Al597468      | 103266 | 10+:84565484-84583363   |
| 12626 | Fut7          | 14347  | 2+:25278803-25281891    |
| 12631 | Cyp51         | 13121  | 5-:4082950-4104449      |
| 12633 | Klk4          | 56640  | 7+:51136541-51141174    |
| 12634 | Olfrl372-ps1  | 257871 | 11-:51968385-51969779   |
| 12636 | MMT00000549   | 213043 | 1+:58340343-58415929    |
| 12637 | Itpka         | 228550 | 2+:119568072-119576988  |
| 12645 | MMT00039341   | 627312 | 2-:145335896-145336416  |
| 12648 | Nt5dc1        | 319638 | 10-:34023415-34138358   |
| 12649 | Ilgad         | 381924 | 7+:135317501-135349015  |
| 12651 | Tsc22d4       | 78829  | 5+:138203603-138209680  |
| 12654 | 4930485B16Rik | 380654 | 10-:92532577-92544642   |
| 12655 | Tmem180       | 75146  | 19+:46431425-46449741   |
| 12656 | Coq5          | 52064  | 5+:115729710-115746981  |
| 12659 | Agk           | 69923  | 6+:40275481-40346760    |
| 12660 | MMT00029272   |        | 2+:85703569-85704519    |
| 12661 | 4932438A13Rik | 229227 | 3+:36893696-36951565    |
| 12667 | Slc39a2       | 214922 | 14+:52513474-52515481   |
| 12668 | Creb1         | 12912  | 1+:64646232-64648449    |
| 12672 | Nphs2         | 170484 | 1+:158240855-158256564  |
| 12674 | Lyzl6         | 69444  | 11-:103492136-103500195 |
| 12676 | Nrxn3         | 18191  | 12+:90425465-90587024   |
| 12679 | Cyp4a10       | 13117  | 4+:115196847-115206259  |
| 12681 | Eif2c2        | 239528 | 15-:72936136-72976998   |
| 12687 | Zc3h8         | 57432  | 2-:128752005-128769755  |
| 12691 | MMT00021912   |        | X+:32607392-32630212    |
| 12692 | Ttn           | 22138  | 2-:76688051-76688437    |
| 12694 | Riok2         | 67045  | 17+:17511539-17530935   |
| 12696 | RP23-392P11.3 | 545481 | 2+:158356890-158369144  |
| 12700 | Nfia          | 18027  | 4+:97444589-97779083    |
| 12703 | Pcsk1         | 18548  | 13+:75227434-75269946   |
| 12705 | Maob          | 109731 | X-:16286407-16394489    |
| 12707 | Dmrt2         | 226049 | 19+:25748220-25753485   |
| 12709 | Ghitm         | 66092  | 14-:37934003-37948452   |
| 12711 | Nap1l4        | 17955  | 7-:150699483-150734995  |
| 12712 | MMT00059415   |        | 5-:138830114-138832821  |
| 12716 | 5830417l10Rik | 76022  | 3+:88694731-88714020    |
| 12718 | Dhrsx         | 236082 | 4_random+:109716-130125 |
| 12722 | EG624866      | 624866 | 3+:65469877-65587947    |

|       |               |           |                          |
|-------|---------------|-----------|--------------------------|
| 12725 | Bak1          | 12018     | 17-:27156756-27165572    |
| 12728 | Hax1          | 23897     | 3-:89799378-89802608     |
| 12730 | 9130019O22Rik | 78921     | 7-:134526789-134537146   |
| 12732 | Hsd17b1       | 15485     | 11+:100939724-100941819  |
| 12736 | Stat3         | 20848     | 11-:100750831-100772675  |
| 12739 | Insl5         | 23919     | 4-:102690478-102699333   |
| 12742 | Pola1         | 18968     | X-:90550105-90877494     |
| 12744 | 1110034B05Rik | 68736     | 1-:57445082-57463565     |
| 12745 | Spna2         | 20740     | 2+:29821362-29886968     |
| 12748 | Bat2d         | 226562    | 1-:164650674-164670647   |
| 12751 | Sorl1         | 20660     | 9-:41772804-41932196     |
| 12753 | MMT00043344   |           | 7+:49744170-49761147     |
| 12754 | E130304F04Rik | 245269    | 13_random+:108410-110864 |
| 12761 | Tsc22d3       | 14605     | X-:137074075-137077710   |
| 12766 | EG545047      | 545047    | 14-:52333319-52335815    |
| 12768 | Nxt2          | 237082    | X+:138662487-138673352   |
| 12769 | Tmem177       | 66343     | 1-:121804482-121809752   |
| 12770 | Nola2         | 52530     | 11+:51433274-51437216    |
| 12772 | Axl           | 26362     | 7-:26543681-26573497     |
| 12773 | Klhl1         | 93688     | 14-:96505393-96918180    |
| 12775 | Vstm2b        | 58188     | 7+:48154647-48185335     |
| 12776 | MMT00061492   | 100045495 | 7-:11379597-11381473     |
| 12778 | 1700024P16Rik | 242594    | 4+:104668302-104685936   |
| 12780 | Olf630        | 259102    | 7-:110902663-110905864   |
| 12781 | Prss1         | 114228    | 6+:41408941-41413732     |
| 12784 | Nudt6         | 229228    | 3-:37303911-37318495     |
| 12788 | Trim69        | 70928     | 2+:121986435-122004762   |
| 12790 | Fhl1          | 14199     | X+:53984990-54046518     |
| 12794 | MMT00082139   | 100048814 | 4+:145454073-145886627   |
| 12795 | Slc20a2       | 20516     | 8+:23616945-23680089     |
| 12797 | Brdt          | 114642    | 5+:107760177-107814713   |
| 12798 | Dct           | 13190     | 14-:118412028-118451407  |
| 12799 | Spon2         | 100689    | 5-:33556578-33560820     |
| 12801 | 2610301F02Rik | 545428    | 2-:76883781-77008667     |
| 12803 | Ranbp3        | 71810     | 17+:56799593-56851183    |
| 12805 | Bmp7          | 12162     | 2-:172695190-172765673   |
| 12807 | Faim          | 23873     | 9+:98892541-98902122     |
| 12813 | MMT00041243   |           | 6-:92514611-92606372     |
| 12823 | Rab3il1       | 74760     | 19+:10092752-10109572    |
| 12824 | Dbt           | 13171     | 3+:116216058-116252310   |
| 12825 | Gal3st3       | 545276    | 19+:5302585-5307893      |
| 12826 | Zfp354c       | 30944     | 11-:50628066-50639960    |
| 12827 | Stmn4         | 56471     | 14+:66973188-66980510    |
| 12828 | MMT00047250   |           | X-:23819283-23842045     |
| 12829 | MMT00018827   | 223286    | 15-:4938821-5013751      |
| 12833 | Drp2          | 13497     | X+:130939319-130987938   |

|       |               |        |                         |
|-------|---------------|--------|-------------------------|
| 12834 | Fabp7         | 12140  | 10+:57504745-57508162   |
| 12836 | EG629820      | 629820 | 12+:40949630-40955775   |
| 12837 | Olfir800      | 258541 | 10+:129096863-129097799 |
| 12838 | Tec           | 21682  | 5-:73146978-73259722    |
| 12839 | Fh1           | 14194  | 1-:177531209-177555720  |
| 12845 | F11           | 109821 | 8-:46326523-46347385    |
| 12847 | Sar1b         | 66397  | 11+:51577208-51605423   |
| 12851 | Apod          | 11815  | 16-:31297205-31314535   |
| 12853 | Phc3          | 241915 | 3-:30805916-30860805    |
| 12854 | Ndufa13       | 67184  | 8-:72418068-72425544    |
| 12856 | Clstn3        | 232370 | 6-:124380784-124414744  |
| 12858 | Lepre1        | 56401  | 4+:118905550-118920972  |
| 12860 | Tmem156       | 243025 | 5-:65466801-65482794    |
| 12861 | Rhcg          | 56315  | 7-:86738254-86762534    |
| 12862 | Trem2         | 83433  | 17+:48485813-48491596   |
| 12863 | Fgg           | 99571  | 3+:82811817-82818969    |
| 12864 | Myh10         | 77579  | 11+:68505609-68630129   |
| 12866 | 4921517L17Rik | 70873  | 2+:156138183-156201370  |
| 12867 | MMT00021210   | 667832 | 11-:54931618-54932378   |
| 12869 | 0610011F06Rik | 68347  | 17+:26012069-26014109   |
| 12871 | Scn7a         | 20272  | 2-:66512479-66622975    |
| 12872 | Rg9mtd3       | 69934  | 4+:45310031-45328353    |
| 12879 | Ermp1         | 226090 | 19-:29684692-29698148   |
| 12881 | Lgals8        | 56048  | 13-:12533091-12553707   |
| 12885 | Ccl24         | 56221  | 5-:136046664-136048842  |
| 12886 | Acp6          | 66659  | 3+:96963222-96980412    |
| 12888 | A1931714      | 102182 | 8+:80073279-80086415    |
| 12892 | 1700019L03Rik | 227736 | 2-:32632656-32639948    |
| 12904 | MMT00040704   | 676923 | 19+:40265187-40271489   |
| 12905 | Nfil3         | 18030  | 13-:53062848-53064235   |
| 12906 | Nts           | 67405  | 10-:101944807-101953047 |
| 12907 | Zkscan1       | 74570  | 5+:138547900-138549048  |
| 12908 | Jdp2          | 81703  | 12+:86940967-86980827   |
| 12909 | Olfir604      | 259073 | 7-:110531575-110532514  |
| 12910 | 1110028A07Rik | 68680  | 14+:56194503-56195789   |
| 12911 | 2210415F13Rik | 70163  | 11+:58192527-58204040   |
| 12913 | MMT00046078   |        | 2-:55628810-55629028    |
| 12915 | Slc7a5        | 20539  | 8-:124405051-124431532  |
| 12916 | Fkbp1a        | 14225  | 2+:151368356-151387426  |
| 12917 | Nubp1         | 26425  | 16+:10412067-10423623   |
| 12919 | Nup210l       | 77595  | 3+:89908054-90014380    |
| 12922 | Lilrb4        | 14728  | 10+:51210780-51216415   |
| 12925 | Farp1         | 223254 | 14+:121606471-121682968 |
| 12926 | Lrmp          | 16970  | 6+:145064182-145123448  |
| 12929 | 6330578E17Rik | 76178  | 1-:37473936-37486883    |
| 12930 | Pthr1         | 19228  | 9-:110624758-110644804  |

|       |               |        |                         |
|-------|---------------|--------|-------------------------|
| 12934 | Rbp7          | 63954  | 4-:148823797-148829077  |
| 12936 | Pdlim1        | 54132  | 19-:40296729-40346023   |
| 12937 | Uhrf2         | 109113 | 19+:30105092-30168212   |
| 12938 | Fhod3         | 225288 | 18+:25056137-25292001   |
| 12941 | Elovl5        | 68801  | 9+:77765262-77832323    |
| 12943 | Slc25a27      | 74011  | 17-:43778848-43803964   |
| 12948 | MMT00009927   |        | 15-:77200601-77200694   |
| 12951 | Pcdha6        | 12937  | 18+:37127284-37347311   |
| 12953 | Spin2         | 278240 | X+:150266822-150268784  |
| 12954 | Gli2          | 14633  | 1-:120730637-120786979  |
| 12955 | Atp5o         | 28080  | 16-:91925467-91931870   |
| 12958 | Itpr2         | 16439  | 6-:146369939-146450400  |
| 12959 | Slc6a1        | 232333 | 6+:114251043-114267516  |
| 12960 | Arrdc4        | 66412  | 7-:75886496-75894089    |
| 12961 | MMT00054077   |        |                         |
| 12965 | Pmm1          | 29858  | 15-:81781539-81791297   |
| 12966 | Slc39a1       | 30791  | 3+:90052156-90056994    |
| 12968 | Fbxw9         | 68628  | 8+:87583985-87591208    |
| 12969 | Xaf1          | 327959 | 11+:72115134-72122426   |
| 12974 | Slc1a6        | 20513  | 10+:78243246-78277510   |
| 12975 | MMT00013656   |        | 4-:100240287-100240653  |
| 12976 | MMT00066041   |        | 2+:59972094-59973359    |
| 12981 | Nek6          | 59126  | 2+:38367216-38442085    |
| 12982 | Cars          | 27267  | 7-:150743610-150785961  |
| 12984 | Cyb5          | 109672 | 18+:85020805-85049255   |
| 12986 | Cox4i2        | 84682  | 2+:152579908-152590773  |
| 12989 | 1190002H23Rik | 66214  | 14-:79688557-79701442   |
| 12994 | Notch1        | 18128  | 2-:26314670-26359157    |
| 12995 | Tmed9         | 67511  | 13+:55694503-55699049   |
| 12997 | Csgalnact2    | 78752  | 6-:118058206-118089158  |
| 12999 | Igfbp6        | 16012  | 15+:101974792-101979942 |
| 13000 | 9130404D14Rik | 227737 | 2+:32731743-32780766    |
| 13004 | Arhgef10      | 234094 | 8+:14940208-15001079    |
| 13005 | Dkk2          | 56811  | 3+:131748871-131842621  |
| 13006 | Akr1b7        | 11997  | 6+:34362389-34373142    |
| 13007 | 4632412N22Rik | 320159 | 17+:72066589-72079008   |
| 13009 | MMT00017557   | 545339 | 9+:42771931-42774152    |
| 13010 | Cyp4b1        | 13120  | 4-:115215989-115217663  |
| 13015 | D14Erted500e  | 219072 | 14-:55160622-55173173   |
| 13016 | Actn3         | 11474  | 19-:4861222-4877884     |
| 13018 | AW544981      | 213956 | 15+:80502298-80530852   |
| 13019 | Als2cr2       | 227154 | 1+:59030463-59052558    |
| 13023 | Adamts1       | 11504  | 16-:85795647-85802904   |
| 13025 | Irf2          | 16363  | 8+:47825144-47932810    |
| 13027 | Ppp2r5c       | 26931  | 12-:111714401-111716823 |
| 13028 | Mesp1         | 17292  | 7-:86937127-86938654    |

|       |               |        |                         |
|-------|---------------|--------|-------------------------|
| 13032 | Gpihbp1       | 68453  | 15+:75427070-75428769   |
| 13033 | MMT00013795   |        |                         |
| 13034 | 4933437I04Rik | 71246  | 2+:163886550-163888021  |
| 13037 | Serpinb3b     | 383548 | 1-:109050519-109057693  |
| 13040 | Mylk          | 107589 | 16+:34994949-35001449   |
| 13044 | 5730596K20Rik | 109168 | 19+:7569078-7608690     |
| 13045 | A330021E22Rik | 207686 | 5-:5580985-5664239      |
| 13049 | Sh3tc1        | 231147 | 5-:36039831-36066801    |
| 13052 | Tnfrsf19      | 29820  | 14-:61582711-61656787   |
| 13054 | Mcm4          | 17217  | 16-:15624263-15637399   |
| 13057 | Aspn          | 66695  | 13+:49639857-49662926   |
| 13058 | Gpx3          | 14778  | 11+:54716451-54723878   |
| 13059 | Centd1        | 212285 | 5-:62993686-63157321    |
| 13067 | MMT00074323   |        | 9-:63290972-63291889    |
| 13068 | Yap1          | 22601  | 9-:7932001-8004586      |
| 13072 | BC022687      | 217887 | 12+:114047527-114054463 |
| 13075 | Mrps2         | 118451 | 2+:28323594-28325635    |
| 13077 | Cyp2c70       | 226105 | 19-:40227852-40261761   |
| 13078 | Eps8l2        | 98845  | 7+:148524900-148548914  |
| 13083 | Myo7b         | 17922  | 18-:32118889-32196615   |
| 13086 | Ccdc79        | 320022 | 8-:106971480-106996847  |
| 13087 | Cxadr         | 13052  | 16+:78302000-78359992   |
| 13088 | Tspan3        | 56434  | 9-:55983694-56008671    |
| 13090 | Rnf128        | 66889  | X+:136145158-136206853  |
| 13094 | Cnn3          | 71994  | 3+:121129458-121161123  |
| 13096 | Otor          | 57329  | 2+:142904218-142907436  |
| 13098 | Kcnk1         | 16525  | 8+:128519069-128554583  |
| 13102 | Prkaa1        | 105787 | 15+:5110586-5128977     |
| 13103 | Erlin1        | 226144 | 19-:44109437-44144239   |
| 13104 | Ccdc70        | 67929  | 8+:23080246-23084489    |
| 13113 | Man2a2        | 140481 | 7-:87496182-87516071    |
| 13115 | B230120H23Rik | 65964  | 2+:72136243-72280665    |
| 13116 | Actn2         | 11472  | 13-:12361698-12432767   |
| 13117 | Tmprss5       | 80893  | 9+:48910883-48925690    |
| 13118 | Sfrp2         | 20319  | 3+:83570242-83578237    |
| 13120 | Lactb         | 80907  | 9-:66803199-66823291    |
| 13124 | Arfgap3       | 66251  | 15-:83130169-83180593   |
| 13127 | Col5a1        | 12831  | 2+:27742204-27893044    |
| 13129 | Bmp8a         | 12163  | 4-:122989889-123020046  |
| 13131 | Pscd1         | 19157  | 11-:118027331-118055009 |
| 13132 | MMT00070380   |        | 14+:44864398-44866804   |
| 13133 | Tmeff1        | 230157 | 4+:48598238-48676000    |
| 13134 | Lipg          | 16891  | 18-:75100521-75120899   |
| 13136 | Itgb1bp3      | 69564  | 10-:80661939-80664801   |
| 13137 | 2610301G19Rik | 219158 | 14-:70537983-70540903   |
| 13138 | Olfir1030     | 258581 | 2+:85823998-85824953    |

|       |               |        |                         |
|-------|---------------|--------|-------------------------|
| 13139 | Mid1          | 17318  | X+:166266090-166404099  |
| 13140 | MMT00005814   |        |                         |
| 13141 | MMT00071569   |        | 15-:3695893-3696875     |
| 13142 | Wdr81         | 192652 | 11-:75254454-75259071   |
| 13143 | Zmym6         | 100177 | 4+:126754625-126806890  |
| 13144 | Calml3        | 70405  | 13-:3802140-3803562     |
| 13145 | Dapl1         | 76747  | 2+:59322711-59343030    |
| 13149 | Ifi203        | 15950  | 1-:175850535-175872523  |
| 13150 | 4921528I07Rik | 77049  | 9-:114185780-114226148  |
| 13151 | Asb14         | 142687 | 14+:27716428-27728444   |
| 13156 | Ifit3         | 15959  | 19+:34658043-34663217   |
| 13159 | Map4k4        | 26921  | 1+:39958074-40081770    |
| 13160 | Frem3         | 333315 | 8+:83135126-83219247    |
| 13161 | EG634346      | 634346 | 1+:99243005-99339300    |
| 13162 | Pcdh17        | 219228 | 14+:84845631-84934510   |
| 13164 | Il4ra         | 16190  | 7+:132695800-132721481  |
| 13167 | Idi1          | 319554 | 13+:8885105-8891640     |
| 13168 | Col8a1        | 12837  | 16-:57627025-57632751   |
| 13172 | Epb4.1l3      | 13823  | 17+:69506149-69639325   |
| 13174 | MMT00032085   | 628236 | 19-:33540369-33543377   |
| 13175 | 4930432O21Rik | 74670  | 17+:22099517-22131327   |
| 13179 | Plxna2        | 18845  | 1+:196446095-196640656  |
| 13180 | Nox4          | 50490  | 7+:94395307-94545509    |
| 13181 | Lcp2          | 16822  | 11+:33947168-33991134   |
| 13183 | Rg9mtd2       | 108943 | 3+:137806869-137817721  |
| 13184 | MMT00017268   |        | 8+:32114328-32114626    |
| 13186 | 3110082I17Rik | 73212  | 5-:139835693-139936467  |
| 13188 | Sumf2         | 67902  | 5+:130322885-130339299  |
| 13189 | Dnajb4        | 67035  | 3-:151847982-151873047  |
| 13190 | Igsf6         | 80719  | 7-:128207581-128218044  |
| 13192 | Impg1         | 63859  | 9-:80160893-80359018    |
| 13195 | Mtif2         | 76784  | 11+:29426464-29445255   |
| 13200 | 5730449L18Rik | 66637  | 1-:154217882-154233752  |
| 13201 | Rbl2          | 19651  | 8+:93594056-93646925    |
| 13202 | Sass6         | 72776  | 3+:116297796-116332052  |
| 13205 | EG626215      | 626215 | 12+:79298255-79299732   |
| 13206 | Qprt          | 67375  | 7-:134251284-134265543  |
| 13207 | Sptlc2        | 20773  | 12-:88650588-88729151   |
| 13209 | Mcm3ap        | 54387  | 10+:75931682-75978602   |
| 13210 | Nudt1         | 17766  | 5+:140807875-140814089  |
| 13211 | Sbno2         | 216161 | 10-:79519743-79603581   |
| 13214 | Slc12a8       | 171286 | 16+:33518431-33663487   |
| 13216 | Ccdc106       | 232821 | 7+:5008798-5012384      |
| 13217 | Rnase1        | 19752  | 14-:51764854-51766442   |
| 13218 | C330043M08Rik | 330323 | 6+:55153468-55213858    |
| 13219 | Trhde         | 237553 | 10-:113836079-114238420 |



|       |               |        |                         |
|-------|---------------|--------|-------------------------|
| 13221 | Srd5a3        | 57357  | 5+:76569296-76584495    |
| 13223 | BC022651      | 330460 | 7-:4667145-4676683      |
| 13224 | Cp            | 12870  | 3+:19857178-19892590    |
| 13225 | Grhl2         | 252973 | 15+:37162790-37263402   |
| 13231 | MMT00080853   |        | 11+:98046648-98047461   |
| 13233 | Oaz2          | 18247  | 9+:65524399-65537263    |
| 13236 | Pak1ip1       | 68083  | 13+:41096628-41108380   |
| 13238 | Nr1h3         | 22259  | 2-:91024267-91035273    |
| 13240 | Ing1          | 26356  | 8+:11556909-11562121    |
| 13245 | Gpr177        | 68151  | 3+:159502702-159597865  |
| 13246 | Klc4          | 74764  | 17-:46767579-46782093   |
| 13248 | 4833423E24Rik | 228151 | 2-:85323748-85358923    |
| 13251 | EG622268      | 622268 | 18+:15169754-15170200   |
| 13253 | Mtvr2         | 17826  | 19-:5728087-5731713     |
| 13257 | Nadk          | 192185 | 4+:154936512-154965098  |
| 13261 | Aldh7a1       | 110695 | 18-:56685389-56732524   |
| 13263 | Chchd5        | 66170  | 2+:128955528-128959845  |
| 13266 | Man1c1        | 230815 | 4-:134117734-134259384  |
| 13268 | 1600015I10Rik | 69761  | 6+:48882536-48883679    |
| 13269 | MMT00039476   |        | 11-:29501785-29502542   |
| 13271 | ldh2          | 269951 | 7-:87239735-87260194    |
| 13272 | Rcan3         | 53902  | 4-:134972304-134981349  |
| 13273 | MMT00033789   |        | 12+:105503304-105506842 |
| 13274 | Qk            | 19317  | 17-:10403051-10512719   |
| 13277 | 9530015I07Rik | 619310 | 9+:21971843-22005468    |
| 13279 | Ifitm1        | 68713  | 7+:148154112-148155711  |
| 13281 | Tmcc2         | 68875  | 1-:134252893-134287760  |
| 13282 | 2310005N03Rik | 66359  | 1+:180249289-180252824  |
| 13285 | Cd276         | 102657 | 9-:58372105-58388663    |
| 13286 | Slc23a1       | 20522  | 18-:35779059-35786791   |
| 13287 | Dnajb14       | 70604  | 3+:137531123-137571895  |
| 13288 | AA407270      | 102371 | 9-:71352152-71440143    |
| 13289 | Dusp10        | 63953  | 1+:185858333-185898756  |
| 13293 | Gsta2         | 14858  | 9-:78178848-78194952    |
| 13296 | Aim1          | 11630  | 10-:43670440-43724696   |
| 13297 | Emb           | 13723  | 13+:118009552-118062905 |
| 13299 | Areg          | 11839  | 5+:91568813-91575772    |
| 13302 | Bche          | 12038  | 3-:73443777-73506030    |
| 13304 | Gadd45b       | 17873  | 10+:80392835-80394949   |
| 13306 | Cables2       | 252966 | 2-:179993249-179999181  |
| 13308 | Kit           | 16590  | 5+:75971048-76052744    |
| 13309 | Tgtp          | 21822  | 11-:48871734-48877545   |
| 13311 | Prl3c1        | 27372  | 13+:27291192-27295616   |
| 13318 | Adamtsl2      | 77794  | 2+:26937901-26964495    |
| 13324 | Tmem184a      | 231832 | 5-:140280915-140283666  |
| 13325 | BC043301      | 210104 | 7+:50827958-50847420    |

|       |                  |        |                         |
|-------|------------------|--------|-------------------------|
| 13327 | Vmn2r95          | 328759 | 17+:18576804-18589286   |
| 13328 | Ly6h             | 23934  | 15-:75395507-75397244   |
| 13329 | Osbp2            | 74309  | 11-:3604079-3763870     |
| 13333 | MMT00048365      |        | X-:87049908-87051157    |
| 13337 | Pard3b           | 72823  | 1+:62056877-62391572    |
| 13339 | D630042F21Rik    | 330428 | 6+:129462572-129468713  |
| 13341 | Tnip2            | 231130 | 5-:34838744-34856628    |
| 13345 | Mmrn2            | 105450 | 14+:35188648-35217468   |
| 13347 | Abi3             | 66610  | 11-:95693706-95703474   |
| 13348 | Ank3             | 11735  | 10+:68996913-69487702   |
| 13349 | MMT00014600      |        | 8-:107199431-107231509  |
| 13351 | Zrsr1            | 22183  | 11+:22872036-22874908   |
| 13355 | Foxs1            | 14239  | 2-:152757642-152761001  |
| 13356 | Aldh3b2          | 621603 | 19+:3964465-3981653     |
| 13357 | Rpp14            | 67053  | 14+:8912880-8924348     |
| 13362 | Ddt              | 13202  | 10-:75233977-75236119   |
| 13367 | MMT00060916      | 624083 | 5-:138160983-138163193  |
| 13371 | Peli2            | 93834  | 14+:48740614-48876497   |
| 13372 | Slc11a1          | 18173  | 1+:74421802-74432626    |
| 13374 | Wipi1            | 52639  | 11-:109434841-109472695 |
| 13376 | Alg2             | 56737  | 4-:47482742-47487176    |
| 13377 | Nod1             | 107607 | 6-:54873942-54899755    |
| 13381 | Dnm3             | 103967 | 1-:163920359-164161902  |
| 13382 | Bco2             | 170752 | 9-:50341256-50358807    |
| 13383 | Cybb             | 13058  | X-:9015341-9046376      |
| 13384 | Fmo3             | 14262  | 1-:164883930-164914622  |
| 13387 | Olf1093          | 258363 | 2+:86625888-86626855    |
| 13388 | Klra18           | 93970  | 6-:129993762-130017276  |
| 13389 | Six6os1          | 75801  | 12-:73982095-74018752   |
| 13390 | Ddx31            | 227674 | 2+:28695846-28761087    |
| 13393 | OTTMUSG000000123 | 433424 | 2+:44966657-44968822    |
| 13394 | MMT00054980      |        | 13+:8127312-8130100     |
| 13395 | Ube2m            | 22192  | 7-:13620587-13623327    |
| 13404 | MMT00082585      |        | 1+:24078764-24079635    |
| 13405 | Rabep2           | 70314  | 7+:133572953-133589414  |
| 13408 | MMT00079369      |        | 14+:52689116-52689675   |
| 13413 | Cnih2            | 12794  | 19-:5092873-5098418     |
| 13417 | 1700025G04Rik    | 69399  | 1-:153739394-153937379  |
| 13418 | Lgi4             | 243914 | 7+:31844953-31855761    |
| 13422 | Usp3             | 235441 | 9-:66366146-66440896    |
| 13423 | ENSMUSG000000537 | 791337 | 15-:54943897-54945279   |
| 13424 | MMT00039710      |        | 6-:67904198-67904684    |
| 13428 | Gpr20            | 239530 | 15-:73525891-73544267   |
| 13431 | MMT00038058      |        | 13+:83971918-83973422   |
| 13438 | Btg3             | 12228  | 16-:78360106-78373669   |
| 13445 | Stk32b           | 64293  | 5-:37838066-38108392    |

|       |               |        |                         |
|-------|---------------|--------|-------------------------|
| 13449 | Tmem103       | 72341  | 9+:110207699-110224605  |
| 13451 | Tbcb          | 66411  | 7-:31009158-31016797    |
| 13455 | Cenpe         | 229841 | 3+:134875581-134936484  |
| 13457 | Hexa          | 15211  | 9+:59387379-59412914    |
| 13459 | Rgs4          | 19736  | 1-:171673799-171677654  |
| 13464 | Mc4r          | 17202  | 18-:67018697-67092999   |
| 13465 | 1700008P02Rik | 69347  | 3-:6615422-6620445      |
| 13469 | Ccr11         | 252837 | 9-:104000473-104029263  |
| 13470 | Actr3         | 74117  | 1-:127289488-127332305  |
| 13471 | Cln8          | 26889  | 8+:14889045-14897938    |
| 13472 | B230219D22Rik | 78521  | 13+:55794446-55804860   |
| 13475 | Morn2         | 378462 | 17+:80689549-80696815   |
| 13478 | Olf1125       | 259030 | 2+:87274645-87275600    |
| 13481 | Gpnmb         | 93695  | 6+:48986632-49006779    |
| 13487 | A230051G13Rik | 216792 | 11-:58970557-58977231   |
| 13488 | Art4          | 109978 | 6-:136796971-136806121  |
| 13489 | D230025D16Rik | 234678 | 8+:107749204-107776949  |
| 13490 | Vps35         | 65114  | 8-:87784292-87823415    |
| 13491 | Plk2          | 20620  | 13+:111185267-111191055 |
| 13493 | Ring1         | 19763  | 17-:34158154-34160391   |
| 13494 | Nrcam         | 319504 | 12+:45633555-45701150   |
| 13495 | Abcb10        | 56199  | 8-:126476360-126506752  |
| 13496 | H1fnt         | 70069  | 15-:98086413-98087697   |
| 13499 | St1l          | 229681 | 3+:104667477-104729823  |
| 13501 | Prkx          | 19108  | X-:75006337-75041320    |
| 13504 | Lair1         | 52855  | 7-:3960607-4014790      |
| 13505 | 1700018P08Rik | 73330  | 8+:119013641-119014823  |
| 13507 | Spats1        | 71020  | 17-:45585885-45611952   |
| 13511 | Aytl1b        | 70902  | 5+:107860567-107864059  |
| 13512 | Tmem144       | 70652  | 3-:79617600-79646601    |
| 13513 | Trim25        | 217069 | 11+:88860769-88881607   |
| 13514 | Apol9b        | 71898  | 15+:77559508-77566811   |
| 13515 | Crabp2        | 12904  | 3+:87752609-87757294    |
| 13516 | Fibcd1        | 98970  | 2-:31671857-31701302    |
| 13521 | Ears2         | 67417  | 7-:129180728-129210558  |
| 13522 | Sfn5          | 327978 | 11+:82769763-82776439   |
| 13523 | Olf1179       | 258919 | 2-:88242169-88243089    |
| 13527 | Ctss          | 13040  | 3+:95330765-95360316    |
| 13528 | Capn12        | 60594  | 7+:29666674-29678605    |
| 13529 | Abi3bp        | 320712 | 16+:56574500-56690240   |
| 13533 | Col27a1       | 373864 | 4+:62992026-62995172    |
| 13534 | MMT00001967   |        | 14-:87841015-87841533   |
| 13535 | Rgs18         | 64214  | 1-:146600436-146622558  |
| 13543 | Zfp617        | 170938 | 8+:74446762-74457899    |
| 13544 | Parp8         | 52552  | 13-:117643725-117666399 |
| 13545 | Tmie          | 20776  | 9-:110768550-110782587  |

|       |               |           |                         |
|-------|---------------|-----------|-------------------------|
| 13550 | Mbnl2         | 105559    | 14+:120724015-120830918 |
| 13551 | Zfp623        | 78834     | 15+:75771484-75779830   |
| 13554 | Aqr           | 11834     | 2-:113926895-114001074  |
| 13558 | Klk7          | 23993     | 7+:51066836-51071435    |
| 13559 | Ctag2         | 70062     | X+:62300815-62302191    |
| 13560 | Nucb2         | 53322     | 7+:123647882-123684068  |
| 13561 | Dexi          | 58239     | 16-:10530300-10542848   |
| 13563 | 9930023K05Rik | 226245    | 19+:56536134-56561215   |
| 13564 | Qrs1          | 76563     | 10-:43593982-43621632   |
| 13565 | Fcho2         | 218503    | 13-:99493362-99576327   |
| 13568 | Cad           | 69719     | 5+:31357090-31380851    |
| 13569 | 1190003M12Rik | 68888     | 6-:87333249-87338849    |
| 13570 | Olfr171       | 258960    | 16-:19624250-19625194   |
| 13571 | Samd8         | 67630     | 14+:22569752-22612510   |
| 13573 | MMT00075852   |           | 5+:67366914-67375378    |
| 13576 | Zfp820        | 75424     | 17-:21956087-21958683   |
| 13578 | Asph          | 65973     | 4-:9376231-9596231      |
| 13579 | 1700020D05Rik | 75555     | 19-:5502867-5503751     |
| 13581 | Srxn1         | 76650     | 2+:151931470-151935536  |
| 13582 | Tnnt3         | 21957     | 7+:149684747-149701908  |
| 13585 | Nckap1l       | 105855    | 15+:103284273-103329240 |
| 13588 | MMT00042387   |           | 14-:105596999-105600644 |
| 13590 | Mcart6        | 67062     | X-:133549792-133572842  |
| 13591 | Xrcc2         | 57434     | 5-:25197818-25211609    |
| 13592 | Tceal3        | 594844    | X+:133200998-133202913  |
| 13598 | Reg1          | 19692     | 6+:78375976-78378660    |
| 13608 | Lrrc6         | 54562     | 15-:66211551-66332403   |
| 13613 | Rptn          | 20129     | 3+:93197620-93203364    |
| 13614 | Zfp60         | 22718     | 7+:28521974-28535040    |
| 13615 | Arl16         | 70317     | 11-:120326195-120328924 |
| 13617 | Acin1         | 56215     | 14-:55261004-55305768   |
| 13624 | Ubc           | 22190     | 5-:125866427-125868631  |
| 13625 | Apobec1       | 11810     | 6-:122527809-122541380  |
| 13626 | RP23-395H4.4  | 13706     | 4-:141370877-141381918  |
| 13630 | Cdkn1a        | 12575     | 17+:29235151-29236507   |
| 13637 | Lin9          | 72568     | 1+:182578425-182620819  |
| 13639 | Cnga1         | 12788     | 5-:72994937-73035513    |
| 13640 | Atp6v0a1      | 11975     | 11+:100870795-100925025 |
| 13643 | Dlec1         | 320256    | 9+:119011683-119056811  |
| 13644 | Acs13         | 74205     | 1+:78654387-78704313    |
| 13646 | MMT00034706   |           | 2+:132487977-132488328  |
| 13648 | Dap           | 223453    | 15+:31154187-31204090   |
| 13650 | Cntn1         | 12805     | 15+:91958624-92170542   |
| 13654 | Stat1         | 20846     | 1+:52179434-52216163    |
| 13656 | Ly86          | 17084     | 13+:37437213-37510813   |
| 13657 | MMT00065461   | 100040887 | 1+:100160277-100161054  |

|       |               |        |                         |
|-------|---------------|--------|-------------------------|
| 13661 | A430041B07Rik | 328108 | 12+:66066963-66123559   |
| 13663 | Sgip1         | 73094  | 4+:102432967-102643781  |
| 13664 | AU017455      | 105590 | 14-:79612461-79614164   |
| 13665 | Reg3g         | 19695  | 6-:78416261-78418868    |
| 13666 | MMT00039363   |        |                         |
| 13667 | Cbs           | 12411  | 17-:31749589-31774086   |
| 13676 | MMT00010979   |        | 2+:151273791-151273860  |
| 13677 | Tinagl        | 94242  | 4-:129842962-129852366  |
| 13682 | BC051142      | 407788 | 17+:34553408-34597665   |
| 13684 | Abcd4         | 19300  | 12-:85943618-85958320   |
| 13687 | Mal           | 17153  | 2-:127458963-127481907  |
| 13688 | Ppa1          | 67895  | 10+:61111367-61136911   |
| 13692 | MMT00082247   |        | 2-:170779646-170780383  |
| 13693 | Copb2         | 50797  | 9+:98464062-98488802    |
| 13695 | Tlr3          | 142980 | 8-:46481719-46494053    |
| 13700 | Olfml2a       | 241327 | 2+:38813205-38819269    |
| 13703 | MMT00011278   |        | 2-:156172539-156173733  |
| 13704 | MMT00048234   |        | 9-:66207972-66208407    |
| 13705 | Osbp1a        | 64291  | 18-:12913842-13021423   |
| 13708 | Aldoa         | 11674  | 7-:133938748-133942613  |
| 13711 | Chuk          | 12675  | 19-:44147825-44181932   |
| 13712 | Lypd5         | 76942  | 7+:25136535-25139268    |
| 13714 | Igfals        | 16005  | 17+:25016893-25018692   |
| 13716 | D5Ert579e     | 320661 | 5-:36943139-37064482    |
| 13717 | Slc6a6        | 21366  | 6+:91648994-91705130    |
| 13718 | 9130209A04Rik | 77668  | 18+:47613734-47630522   |
| 13720 | Serpina11     | 380780 | 12-:105218464-105228163 |
| 13724 | MMT00002755   |        | 7+:90560486-90562804    |
| 13731 | 2210408F21Rik | 73652  | 6+:31170357-31286857    |
| 13732 | Tpm4          | 326618 | 8+:74659176-74677031    |
| 13733 | Setd3         | 52690  | 12-:109344641-109405608 |
| 13734 | Srp9          | 27058  | 1+:184054941-184061921  |
| 13737 | Igk-V34       | 16118  | 6+:68889570-68890084    |
| 13738 | Nek5          | 330721 | 8-:23207928-23224331    |
| 13740 | MMT00022502   |        | 2-:155024351-155025012  |
| 13741 | Hspa4l        | 18415  | 3+:40549540-40593502    |
| 13742 | 1700024P16Rik | 242594 | 4+:104621278-104651691  |
| 13746 | E330013P04Rik | 107376 | 19-:60229174-60230571   |
| 13747 | Entpd2        | 12496  | 2+:25251477-25256837    |
| 13749 | Parp9         | 80285  | 16+:35939125-35972689   |
| 13751 | Klk6          | 19144  | 7+:51080819-51087156    |
| 13753 | MMT00042249   |        | 3-:104221656-104222184  |
| 13758 | Ubt2          | 327900 | 11+:32355476-32418710   |
| 13763 | Dcn           | 13179  | 10+:96942216-96980365   |
| 13766 | Slc7a9        | 30962  | 7+:36234197-36251017    |
| 13767 | Kcnk15        | 241769 | 2+:163683917-163684609  |

|       |               |        |                         |
|-------|---------------|--------|-------------------------|
| 13768 | Mrps10        | 64657  | 17+:47505834-47515629   |
| 13769 | Sap18         | 20220  | 14+:58417119-58420914   |
| 13770 | D5Wsu178e     | 28042  | 5+:30559204-30592171    |
| 13773 | Plunc         | 18843  | 2+:153968620-153974952  |
| 13774 | Gdf15         | 23886  | 8-:73153292-73155994    |
| 13776 | D12Erd551e    | 52635  | 12+:117519723-117610694 |
| 13777 | MMT00015864   | 668030 | 2-:175918911-176407018  |
| 13780 | Pilra         | 231805 | 5-:138264513-138276946  |
| 13785 | MMT00032015   |        | 18+:36769557-36770424   |
| 13789 | H2-Q8         | 15019  | 17+:35531070-35531975   |
| 13790 | Olf909        | 258873 | 9+:38331318-38332252    |
| 13792 | Slc25a35      | 71998  | 11+:68781632-68786017   |
| 13793 | Wrb           | 71446  | 16+:96367025-96376382   |
| 13794 | Higd1a        | 56295  | 9-:121758658-121766649  |
| 13797 | MMT00046285   |        | 2+:83230285-83230752    |
| 13798 | 3110001I20Rik | 70354  | 2-:125563267-125565690  |
| 13799 | 9430031J16Rik | 241134 | 1+:81073777-81084068    |
| 13800 | Lrp5          | 16973  | 19-:3584876-3686554     |
| 13801 | Adh4          | 26876  | 3+:138078472-138093856  |
| 13810 | 1110036O03Rik | 66180  | 11-:100269770-100276207 |
| 13811 | Fkbp7         | 14231  | 2-:76501103-76511127    |
| 13813 | Ktelc1        | 224143 | 16-:38525157-38550312   |
| 13816 | MMT00015290   |        | 4-:147943224-147943838  |
| 13823 | Olf1043       | 258570 | 2-:86002160-86003104    |
| 13825 | Myoz1         | 59011  | 14-:21468329-21475702   |
| 13826 | Melk          | 17279  | 4+:44313851-44377166    |
| 13835 | Lama1         | 16772  | 17+:68046626-68171989   |
| 13838 | Erb2ip        | 59079  | 13-:104608872-104623709 |
| 13839 | Gypc          | 71683  | 18-:32687977-32719517   |
| 13842 | Aurkaip1      | 66077  | 4+:155205754-155207166  |
| 13844 | Trib1         | 211770 | 15+:59480624-59487539   |
| 13845 | Ccdc28a       | 215814 | 10-:17936732-17954784   |
| 13847 | Tmigd1        | 66601  | 11+:76718046-76730088   |
| 13850 | Tmem165       | 21982  | 5+:76612974-76638269    |
| 13858 | Myl1          | 17901  | 1-:66970867-66991718    |
| 13860 | Cpt1b         | 12895  | 15-:89246835-89255778   |
| 13862 | Myh15         | 667772 | 16+:49065068-49197003   |
| 13864 | Larp1         | 73158  | 11+:57822979-57875537   |
| 13865 | Papd5         | 214627 | 8+:90767083-90783624    |
| 13867 | Sgcb          | 24051  | 5-:74026498-74038983    |
| 13870 | 4921521F21Rik | 70861  | 1-:65059262-65079321    |
| 13874 | Prkd1         | 18760  | 12-:51442707-51750085   |
| 13875 | Hsd17b10      | 15108  | X+:148436433-148438982  |
| 13876 | C530008M17Rik | 320827 | 5+:77239012-77271614    |
| 13877 | Btnl9         | 237754 | 11-:48982337-48996595   |
| 13881 | Vmn2r100      | 627537 | 17+:19658845-19669024   |

|       |               |        |                         |
|-------|---------------|--------|-------------------------|
| 13883 | EG627788      | 627788 | 19-:28837489-28838019   |
| 13884 | Aven          | 74268  | 2+:112333120-112471227  |
| 13885 | Clec7a        | 56644  | 6-:129411610-129422790  |
| 13886 | Hnrpd1        | 50926  | 5-:100463746-100467948  |
| 13888 | MMT00063459   | 329633 | 3+:49158747-49171281    |
| 13889 | Agpat2        | 67512  | 2-:26448579-26459748    |
| 13890 | Olfr1263      | 258790 | 2+:89855088-89856007    |
| 13893 | Slc6a2        | 20538  | 8+:95485146-95520980    |
| 13895 | MMT00072628   |        | 4-:23444393-23446309    |
| 13897 | Pald          | 72333  | 8-:64163528-64238883    |
| 13900 | 4933417M04Rik | 619288 | 1-:192986567-192988323  |
| 13901 | EG667795      | 667795 | 1+:155152561-155153607  |
| 13906 | Hmgb4         | 69317  | 4-:127937456-127938137  |
| 13907 | B4galnt4      | 330671 | 7+:148247208-148258291  |
| 13913 | Gm70          | 210762 | 12+:77518609-77540468   |
| 13914 | Hdac5         | 15184  | 11-:102057062-102086153 |
| 13915 | MMT00039793   |        | 4+:98795260-98796875    |
| 13919 | Synpo         | 104027 | 18-:60753636-60764144   |
| 13922 | MMT00008875   |        | Y+:1351339-1353880      |
| 13923 | Nploc4        | 217365 | 11-:120241110-120298836 |
| 13929 | Lamb3         | 16780  | 1+:195128219-195170070  |
| 13930 | EG620205      | 620205 | 3-:133452331-133454469  |
| 13934 | Hunk          | 26559  | 16+:90284122-90488156   |
| 13935 | Aldh8a1       | 237320 | 10+:21097127-21116390   |
| 13937 | A230107C01Rik | 320225 | 7-:29970455-29975654    |
| 13942 | Psg21         | 72242  | 7-:19237068-19242065    |
| 13946 | Slc35b2       | 73836  | 17+:45701036-45705072   |
| 13947 | Crip2         | 68337  | 12+:114378757-114383715 |
| 13950 | Fabp4         | 11770  | 3-:10204346-10208554    |
| 13953 | 4930469G21Rik | 74933  | 1-:163084688-163089666  |
| 13954 | Chst1         | 76969  | 2+:92451929-92455407    |
| 13955 | Dennd2d       | 72121  | 3+:106285489-106306662  |
| 13956 | BC035044      | 232406 | 6-:128818327-128841142  |
| 13960 | A930038C07Rik | 68169  | 6+:65646033-65656923    |
| 13962 | Chd7          | 320790 | 4+:8678469-8793800      |
| 13964 | Lpcat2        | 270084 | 8+:95433067-95442397    |
| 13965 | MMT00061510   |        | 7+:11330623-11331328    |
| 13966 | Aatk          | 11302  | 11-:119868636-119903062 |
| 13972 | Hadhb         | 231086 | 5+:30500349-30510627    |
| 13975 | Slc27a6       | 225579 | 18+:58715893-58772523   |
| 13976 | Bmi1          | 12151  | 2+:18603438-18605881    |
| 13977 | MMT00049981   |        |                         |
| 13979 | Ociad2        | 433904 | 5-:73713436-73729893    |
| 13982 | Tnfaip6       | 21930  | 2+:51893632-51912108    |
| 13983 | Copz2         | 56358  | 11+:96711189-96722514   |
| 13984 | Thap3         | 69876  | 4-:151356744-151363547  |

|       |               |        |                         |
|-------|---------------|--------|-------------------------|
| 13988 | Cntnap2       | 66797  | 6+:47194400-47249311    |
| 13989 | Foxp3         | 20371  | X+:7156818-7172360      |
| 13990 | MMT00040357   |        | 19+:39053872-39077776   |
| 13998 | MMT00024160   |        |                         |
| 14002 | 1700055M20Rik | 73407  | 8+:97836854-97851153    |
| 14006 | Dus4l         | 71916  | 12-:32324919-32339691   |
| 14009 | 2310030G06Rik | 66952  | 9-:50547803-50554632    |
| 14013 | MMT00017766   |        | 2-:22768812-22769369    |
| 14014 | MMT00008376   |        | 4-:97187838-97190377    |
| 14015 | Prss3         | 22073  | 6-:41323772-41327578    |
| 14017 | Ces5          | 234673 | 8+:107450183-107458567  |
| 14018 | F830045P16Rik | 228592 | 2-:129286051-129289467  |
| 14019 | Fbf1          | 217335 | 11-:116003597-116029455 |
| 14022 | Car9          | 230099 | 4+:43519878-43526597    |
| 14025 | 4930522H14Rik | 67646  | 4-:109177979-109203902  |
| 14027 | Rpo1-1        | 20016  | 17-:46380876-46384913   |
| 14029 | 2810022L02Rik | 67198  | 1+:57831768-58003808    |
| 14030 | Csrp2         | 13008  | 10+:110357231-110376550 |
| 14032 | Cog6          | 67542  | 3-:52785799-52821159    |
| 14035 | Lrrc52        | 240899 | 1-:169375931-169398144  |
| 14041 | Cldn1         | 12737  | 16-:26358962-26371867   |
| 14042 | MMT00046983   | 279067 | 2-:90870934-90871279    |
| 14043 | 4930455C21Rik | 76916  | 16-:38498432-38522709   |
| 14045 | Rps4y2        | 66184  | 6+:148303177-148304118  |
| 14046 | Ms4a7         | 109225 | 19-:11395526-11409186   |
| 14048 | Ccny          | 67974  | 18-:9315943-9449981     |
| 14049 | Fdft1         | 14137  | 14-:63765240-63796638   |
| 14050 | Il12rb1       | 16161  | 8+:73332392-73345320    |
| 14052 | EG226654      | 226654 | 1+:173349231-173350486  |
| 14055 | MMT00050438   |        | 4-:119006855-119008123  |
| 14056 | Opa1          | 74143  | 16+:29586094-29589836   |
| 14059 | Cyp4f18       | 72054  | 8-:74512380-74533516    |
| 14062 | Pan3          | 72587  | 5+:148341504-148360063  |
| 14071 | Marveld3      | 73608  | 8-:112476810-112486025  |
| 14074 | Lrrc2         | 74249  | 9+:110854048-110883467  |
| 14075 | E030049G20Rik | 210356 | 1-:127873502-127923947  |
| 14077 | Trpv5         | 194352 | 6-:41603129-41626221    |
| 14082 | Fosl1         | 14283  | 19+:5447697-5455938     |
| 14084 | D530033C11Rik | 78581  | 15+:51709037-51714224   |
| 14085 | Cdkl2         | 53886  | 5-:92435182-92472044    |
| 14087 | Ugdh          | 22235  | 5-:65804462-65826959    |
| 14093 | Tbpl2         | 227606 | 2-:23942585-23946671    |
| 14094 | Srpk2         | 20817  | 5-:23013099-23122182    |
| 14095 | Nav1          | 215690 | 1-:137337418-137481765  |
| 14099 | Nfe2          | 18022  | 15-:103078643-103085868 |
| 14100 | Ccnk          | 12454  | 12+:109417809-109440617 |



|       |               |        |                         |
|-------|---------------|--------|-------------------------|
| 14101 | Zfp69         | 381549 | 4-:120602747-120620174  |
| 14102 | Evi2a         | 14017  | 11-:79340259-79341868   |
| 14108 | Polr3b        | 70428  | 10+:84085028-84189922   |
| 14110 | Aspm          | 12316  | 1+:141351517-141353460  |
| 14114 | Ccdc23        | 69216  | 4+:118868013-118873903  |
| 14115 | MMT00048392   |        | X-:55883578-55884361    |
| 14116 | Sp1           | 20683  | 15+:102236758-102263109 |
| 14117 | C1qb          | 12260  | 4-:136436062-136442092  |
| 14127 | MMT00009389   | 236598 |                         |
| 14129 | 5430403G16Rik | 77200  | 5-:110103562-110104226  |
| 14132 | Glo1          | 109801 | 17-:30729810-30749551   |
| 14134 | Phf10         | 72057  | 17-:15082013-15093866   |
| 14135 | Eepd1         | 67484  | 9+:25289187-25411692    |
| 14136 | F7            | 14068  | 8+:13026045-13035808    |
| 14138 | Anks4b        | 72074  | 7+:127317389-127327228  |
| 14139 | 2410005O16Rik | 66302  | 4+:19502340-19533424    |
| 14140 | Ipo5          | 70572  | 14+:121316569-121347253 |
| 14142 | MMT00021961   |        | 5-:30157973-30158961    |
| 14145 | Sgsm3         | 105835 | 15+:80808234-80842500   |
| 14147 | Acss2         | 60525  | 2+:155343828-155388234  |
| 14148 | Fbxl3         | 50789  | 14-:103480265-103498088 |
| 14149 | BC048562      | 434439 | 9+:108338810-108348412  |
| 14151 | Slc44a1       | 100434 | 4+:53494335-53635350    |
| 14154 | Apof          | 103161 | 10+:127705052-127707207 |
| 14156 | Med9          | 192191 | 11+:59761768-59774588   |
| 14167 | Exo1          | 26909  | 1+:177813029-177838863  |
| 14169 | 1700052N19Rik | 73419  | 10-:5906571-5913921     |
| 14172 | Olf479        | 257891 | 7+:115198626-115199480  |
| 14176 | 1500011H22Rik | 68948  | 5-:122814594-122822364  |
| 14180 | Xlr3c         | 22446  | X-:70499879-70510729    |
| 14183 | Gng11         | 66066  | 6+:3954226-3958443      |
| 14185 | Poldip3       | 73826  | 15-:82956398-82979739   |
| 14187 | Zic1          | 22771  | 9-:91255338-91260383    |
| 14188 | Ttc8          | 76260  | 12+:100158784-100221442 |
| 14190 | Ppil1         | 68816  | 17-:29387779-29400916   |
| 14191 | Scn2b         | 72821  | 9+:44925959-44935296    |
| 14192 | Trpv2         | 22368  | 11+:62388048-62413798   |
| 14200 | Kirrel        | 170643 | 3-:86892285-86945031    |
| 14202 | Fnbp4         | 55935  | 2+:90585526-90621175    |
| 14204 | Gm317         | 207209 | 17+:25307131-25308855   |
| 14208 | Ech1          | 51798  | 7+:29610356-29617258    |
| 14209 | Btg3          | 12228  | 16-:78360106-78377030   |
| 14213 | Rcor2         | 104383 | 19+:7344253-7349714     |
| 14215 | Rab5a         | 271457 | 17+:53618713-53647003   |
| 14222 | MMT00076410   |        | 7+:115006493-115007624  |
| 14225 | Sva           | 20939  | 6+:41988392-41992797    |

|       |               |           |                         |
|-------|---------------|-----------|-------------------------|
| 14226 | Rbm47         | 245945    | 5-:66410008-66489418    |
| 14227 | Lrrc39        | 109245    | 3+:116265889-116284342  |
| 14229 | Smtnl1        | 68678     | 2-:84651333-84662809    |
| 14233 | Fgfr1         | 116701    | 5+:109123520-109135915  |
| 14235 | MMT00002524   |           | 18+:8958025-8968920     |
| 14237 | Rac2          | 19354     | 15-:78391275-78403111   |
| 14241 | C130074G19Rik | 226777    | 1-:186698121-186706870  |
| 14242 | Prss29        | 114662    | 17+:25457227-25459451   |
| 14244 | Nap111        | 53605     | 10+:110910297-110933175 |
| 14245 | H2-Ke2        | 14976     | 17-:34075869-34077250   |
| 14249 | Lzts2         | 226154    | 19+:45095879-45101576   |
| 14251 | Efhd1         | 98363     | 1+:89160938-89207366    |
| 14253 | Olfra466      | 258816    | 13+:65253533-65254459   |
| 14256 | MMT00024953   |           | 1+:121054452-121054944  |
| 14258 | Ifi47         | 15953     | 11+:48900556-48910471   |
| 14260 | Mikl          | 74568     | 8-:113835699-113862078  |
| 14261 | 2310066E14Rik | 75687     | 8+:108145081-108146094  |
| 14262 | Tcfec         | 21426     | 6-:16783391-16848441    |
| 14263 | Arrdc3        | 105171    | 13+:81022595-81035299   |
| 14265 | Hnrnpa3       | 229279    | 2+:75499520-75500768    |
| 14266 | Sox13         | 20668     | 1-:135278879-135289795  |
| 14267 | Naaladl2      | 635702    | 3-:23703256-23780422    |
| 14271 | Cox6a1        | 12861     | 5-:115795663-115798963  |
| 14279 | 3930402G23Rik | 74027     | 8-:10924425-10928522    |
| 14280 | MMT00004656   |           | 6-:24996506-25149473    |
| 14281 | 5031414D18Rik | 271221    | 14+:75431791-75452333   |
| 14285 | C1qbp         | 12261     | 11-:70791356-70796467   |
| 14288 | Atmin         | 234776    | 8+:119467329-119484344  |
| 14293 | Col9a1        | 12839     | 1+:24184546-24258839    |
| 14296 | Slc35b1       | 110172    | 11+:95246235-95252966   |
| 14297 | MMT00040516   |           | 6+:71633291-71633877    |
| 14298 | Atp2a2        | 11938     | 5-:122903522-122951904  |
| 14303 | V1ri2         | 171253    | 13+:23167660-23168561   |
| 14304 | Mrpl48        | 52443     | 7-:107697223-107699149  |
| 14305 | MMT00024654   |           | 2-:149158807-149160401  |
| 14307 | Kcnj8         | 16523     | 6-:142513890-142519829  |
| 14309 | Cyp3a41b      | 100041375 | 5-:146319535-146325438  |
| 14310 | MMT00073582   |           | 9+:63745916-63747639    |
| 14312 | 1110012J17Rik | 68617     | 17-:66691784-66798086   |
| 14313 | Tnk1          | 83813     | 11-:69665104-69670576   |
| 14314 | 2810405K02Rik | 66469     | 4-:154270521-154273152  |
| 14316 | MMT00012375   |           | 18-:54190446-54191079   |
| 14322 | Bat1a         | 53817     | 17+:35380184-35390443   |
| 14323 | Scarb1        | 20778     | 5-:125757461-125821444  |
| 14331 | Dgat2l6       | 668257    | X+:97736406-97741222    |
| 14333 | Zcchc17       | 619605    | 4-:129993147-130037207  |

|       |               |           |                         |
|-------|---------------|-----------|-------------------------|
| 14334 | Fxyd3         | 17178     | 7-:31855556-31861697    |
| 14335 | Olfir33       | 18332     | 7-:109861970-109862925  |
| 14342 | 4930412F15Rik | 242408    | 4-:43677419-43679483    |
| 14343 | Hnrnpa0       | 77134     | 13-:58227829-58229945   |
| 14344 | 4921506M07Rik | 70846     | 12+:58665108-58723099   |
| 14347 | Dact2         | 240025    | 17-:14332059-14340873   |
| 14350 | Adamts2       | 216725    | 11+:50415981-50617553   |
| 14353 | Slc35f2       | 72022     | 9+:53619546-53665927    |
| 14355 | Tle1          | 21885     | 4-:71779317-71861093    |
| 14357 | Ing4          | 28019     | 6+:124989865-124999282  |
| 14358 | Wdr1          | 22388     | 5-:38918052-38952834    |
| 14359 | Hist2h2bb     | 319189    | 3+:96073674-96074054    |
| 14361 | Txndc12       | 66073     | 4+:108507294-108534722  |
| 14362 | S100z         | 268686    | 13-:96247257-96248610   |
| 14363 | Cxcl16        | 66102     | 11-:70268905-70272949   |
| 14364 | Robo1         | 19876     | 16+:72204862-72742697   |
| 14368 | 9330128J19Rik | 271144    | 13-:97189619-97199839   |
| 14369 | MMT00057201   |           | X+:132862837-132863488  |
| 14373 | Cyp2c50       | 107141    | 19+:40164185-40188440   |
| 14375 | D17H6S56E-5   | 110956    | 17-:35133667-35137272   |
| 14379 | Car12         | 76459     | 9+:66561328-66614653    |
| 14380 | MMT00051866   |           | 2-:129203437-129205150  |
| 14384 | Dnajc7        | 56354     | 11-:100444164-100480921 |
| 14385 | 2010001M09Rik | 69816     | 18-:35806925-35809021   |
| 14387 | Ccdc88c       | 68339     | 12-:102207553-102267119 |
| 14390 | EG545216      | 545216    | 17+:58659787-58734264   |
| 14391 | MMT00017335   | 100043120 | 19-:61332778-61333797   |
| 14395 | MMT00007523   |           | 14-:91599022-91599684   |
| 14397 | Padi2         | 18600     | 4+:140462341-140508500  |
| 14398 | Snn           | 20621     | 16+:11072324-11072677   |
| 14399 | Csnk2a1       | 12995     | 2+:152083203-152104962  |
| 14400 | Scd2          | 20250     | 19+:44368577-44381350   |
| 14403 | S100g         | 12309     | X-:159399948-159402497  |
| 14405 | 1700015E13Rik | 76925     | 1+:172222992-172242258  |
| 14406 | Zc3h14        | 75553     | 12+:99985176-100026156  |
| 14407 | Six3          | 20473     | 17+:86012946-86024533   |
| 14408 | 1100001H23Rik | 66857     | 6-:136560591-136610337  |
| 14414 | Twsg1         | 65960     | 17-:66272405-66300470   |
| 14416 | Serpinb11     | 66957     | 1+:109258890-109277052  |
| 14418 | Vcan          | 13003     | 13-:89796661-89871139   |
| 14420 | Cfd           | 11537     | 10+:79353656-79355399   |
| 14421 | Shox2         | 20429     | 3-:66777192-66785693    |
| 14424 | MMT00015366   |           | 17-:45300176-45327522   |
| 14427 | Hoxa1         | 15394     | 6-:52105592-52108285    |
| 14428 | Atad5         | 237877    | 11+:79946476-79947689   |
| 14431 | Piwil1        | 57749     | 5+:129242155-129261348  |

|       |               |        |                         |
|-------|---------------|--------|-------------------------|
| 14434 | Sec14l2       | 67815  | 11-:3997044-4018732     |
| 14435 | Stch          | 110920 | 16-:75755479-75767035   |
| 14438 | V1rc24        | 171197 | 6-:57875878-57876785    |
| 14439 | Ubd           | 24108  | 17+:37330506-37332782   |
| 14440 | MMT00015397   |        |                         |
| 14442 | Ethe1         | 66071  | 7+:25378927-25393853    |
| 14443 | C3            | 12266  | 17-:57343383-57387113   |
| 14444 | Pdia4         | 12304  | 6-:47746360-47758344    |
| 14445 | Arl6          | 56297  | 16-:59613153-59638879   |
| 14447 | MMT00000775   | 627004 | 7-:34352273-34391071    |
| 14449 | Il23r         | 209590 | 6-:67372925-67441849    |
| 14453 | Inpp5d        | 16331  | 1+:89516953-89617076    |
| 14454 | Sall3         | 20689  | 18-:81165207-81171368   |
| 14455 | 2700029M09Rik | 72612  | 8+:63369207-63386377    |
| 14457 | 4921507P07Rik | 70821  | 6-:50523304-50546589    |
| 14460 | EG638904      | 638904 | 6+:40736939-40807794    |
| 14462 | Zfp385b       | 241494 | 2-:77248699-77254198    |
| 14463 | MMT00051367   |        | 8+:83294589-83295567    |
| 14464 | MMT00059232   |        | 12+:83644585-83645174   |
| 14466 | MMT00057557   |        | 17-:22056771-22058139   |
| 14468 | Tmtc2         | 278279 | 10-:104626034-104627073 |
| 14469 | Ripply3       | 170765 | 16+:94550026-94558540   |
| 14470 | Taf1a         | 21339  | 1_random+:362346-383535 |
| 14471 | Pdgfrl        | 68797  | 8+:42011694-42076120    |
| 14472 | Ahcy          | 269378 | 2-:154885427-154900133  |
| 14473 | 6330534C20Rik | 434778 | X+:50144385-50152668    |
| 14475 | Abcg1         | 11307  | 17+:31194685-31252717   |
| 14476 | Akr1b8        | 14187  | 6+:34304163-34318454    |
| 14479 | Ada           | 11486  | 2-:163552550-163575897  |
| 14481 | Csde1         | 229663 | 3+:102832743-102861048  |
| 14486 | Sox7          | 20680  | 14+:64562542-64569569   |
| 14488 | Tshb          | 22094  | 3-:102581320-102586637  |
| 14495 | A630018P17Rik | 245695 | X-:162940250-162941329  |
| 14496 | MMT00072975   |        |                         |
| 14497 | Xirp2         | 241431 | 2+:67343559-67364099    |
| 14498 | Layn          | 244864 | 9-:50864907-50885159    |
| 14503 | Sh2d1b2       | 545378 | 1+:172178263-172181783  |
| 14506 | Slc15a3       | 65221  | 19+:10917033-10932393   |
| 14507 | Ttc13         | 234875 | 8-:127195233-127212525  |
| 14510 | Olfir643      | 259081 | 7-:111207170-111208114  |
| 14511 | Sostdc1       | 66042  | 12+:37040812-37045032   |
| 14512 | Tubg1         | 103733 | 11+:100981444-100987731 |
| 14513 | Arpc3         | 56378  | 5+:122846820-122855999  |
| 14517 | Cln4-2        | 12727  | 7+:7251292-7252146      |
| 14519 | Trex1         | 22040  | 9-:108960492-108961435  |
| 14520 | Stmn1         | 16765  | 4+:134026580-134029316  |

|       |               |        |                        |
|-------|---------------|--------|------------------------|
| 14524 | Rarres2       | 71660  | 6-:48519696-48522669   |
| 14526 | Pacsin3       | 80708  | 2+:91097064-91104826   |
| 14529 | Rax           | 19434  | 18-:66094291-66098731  |
| 14531 | Mmel1         | 27390  | 4+:154243744-154269639 |
| 14540 | Tmem140       | 68487  | 6+:34818514-34824009   |
| 14543 | Cfl2          | 12632  | 12-:55959807-55963864  |
| 14546 | 1810011H11Rik | 69069  | 14+:33599146-33631153  |
| 14550 | Acot7         | 70025  | 4+:151552242-151645956 |
| 14554 | Dll4          | 54485  | 2+:119151564-119161392 |
| 14556 | Txndc14       | 66958  | 2-:84511475-84518204   |
| 14557 | Pyroxd1       | 232491 | 6+:142294190-142311144 |
| 14558 | Arhgef15      | 442801 | 11-:68756656-68770365  |
| 14559 | Frrs1         | 20321  | 3+:116603514-116606667 |
| 14560 | Slc16a11      | 216867 | 11+:70027410-70029937  |
| 14563 | Dna2          | 327762 | 10+:62409828-62436926  |
| 14564 | Mrpl49        | 18120  | 19-:6053629-6057751    |
| 14565 | Rnf207        | 433809 | 4-:151679011-151693013 |
| 14570 | Erdr1         | 170942 |                        |
| 14571 | MMT00079617   |        | 2-:146580250-146581487 |
| 14575 | Slc39a10      | 227059 | 1-:46863562-46892996   |
| 14577 | Cdc3711       | 67072  | 19+:29064983-29092059  |
| 14578 | 6720475J19Rik | 68157  | 19-:9910227-9911446    |
| 14579 | 2610015P09Rik | 212153 | 16+:43898202-43963808  |
| 14581 | Casc5         | 76464  | 2+:118872767-118929850 |
| 14582 | Mt1           | 17748  | 8+:96703210-96704092   |
| 14584 | Vps24         | 66700  | 6+:71493892-71530212   |
| 14585 | Bxdc1         | 67239  | 10-:39943302-39966808  |
| 14593 | Tmem25        | 71687  | 9-:44601861-44607299   |
| 14597 | Col19a1       | 12823  | 1-:24270832-24594250   |
| 14600 | Pgf           | 18654  | 12-:86507592-86518230  |
| 14601 | MMT00038159   |        | 5+:13080735-13082866   |
| 14603 | Ly6e          | 17069  | 15+:74788206-74789761  |
| 14607 | Dbnnd1        | 72185  | 8-:126029587-126039252 |
| 14611 | Ddx60         | 234311 | 8+:64479366-64516152   |
| 14616 | 4933421E11Rik | 321000 | 3+:106524843-106539492 |
| 14617 | MMT00033859   | 26930  | 19+:55920381-55923221  |
| 14619 | 4930403L05Rik | 67395  | X-:14687736-14688615   |
| 14620 | Tbc1d8        | 54610  | 1-:39428343-39459755   |
| 14621 | Six4          | 20474  | 12-:74200596-74214404  |
| 14626 | Zbtb2         | 381990 | 10+:5971607-5979466    |
| 14628 | MMT00019519   |        | 18+:35654872-35655659  |
| 14629 | Nfkb2         | 18034  | 19+:46380107-46386578  |
| 14631 | Stag3         | 50878  | 5+:138721778-138753620 |
| 14636 | Parg          | 26430  | 14+:33015405-33110403  |
| 14640 | Tmem97        | 69071  | 11-:78355319-78364237  |
| 14641 | MMT00000142   |        |                        |

|       |               |           |                         |
|-------|---------------|-----------|-------------------------|
| 14643 | Ets2          | 23872     | 16+:95924113-95940752   |
| 14645 | Mbd3l2        | 234988    | 9+:18247989-18249899    |
| 14647 | Cst3          | 13010     | 2-:148697479-148701137  |
| 14648 | Cdkn1b        | 12576     | 6+:134870720-134874325  |
| 14649 | 5430405G05Rik | 108832    | 2+:151527646-151533040  |
| 14650 | 2810433K01Rik | 66468     | 18-:74356419-74367433   |
| 14656 | Grip2         | 243547    | 6-:91713442-91738438    |
| 14657 | Mefv          | 54483     | 16-:3707221-3718097     |
| 14662 | MMT00070823   |           | 7+:29319790-29320109    |
| 14664 | A430093A21Rik | 227195    | 1-:63004992-63104775    |
| 14667 | Fggy          | 75578     | 4+:95224198-95467357    |
| 14669 | Pftk2         | 271697    | 1+:59314659-59409292    |
| 14676 | Mecr          | 26922     | 4+:131399385-131423682  |
| 14677 | S100b         | 20203     | 10+:75719779-75722812   |
| 14681 | Alg12         | 223774    | 15-:88635675-88649710   |
| 14683 | Dennd1c       | 70785     | 17-:57204742-57217938   |
| 14684 | Rassf3        | 192678    | 10-:120849618-120913306 |
| 14685 | Foxd1         | 15229     | 13+:99124209-99126647   |
| 14690 | Atf4          | 11911     | 15+:80085930-80087934   |
| 14691 | Nckap1        | 50884     | 2-:80340681-80421133    |
| 14695 | 1700025E21Rik | 75647     | 6+:30462303-30469963    |
| 14697 | Mtrf1         | 211253    | 14+:79797662-79823395   |
| 14698 | Dnajb9        | 27362     | 12-:45306882-45311027   |
| 14699 | V1ri3         | 171254    | 13+:22446214-22447116   |
| 14702 | Krt71         | 56735     | 15-:101564380-101573528 |
| 14705 | Slc43a1       | 72401     | 2+:84679551-84703750    |
| 14706 | MMT00014463   |           | 4+:109302638-109303400  |
| 14709 | Rab36         | 76877     | 10+:74499827-74515671   |
| 14714 | Ccdc102a      | 234582    | 8-:97426769-97441331    |
| 14717 | Srpk3         | 56504     | X+:71019760-71024261    |
| 14718 | Meox2         | 17286     | 12+:37835141-37906115   |
| 14720 | Lcn9          | 77704     | 2+:25678668-25681057    |
| 14725 | MMT00013262   |           | 2+:87366204-87366895    |
| 14726 | Slc19a1       | 20509     | 10+:76496003-76513171   |
| 14731 | BC006965      | 217294    | 11-:112548958-112572655 |
| 14733 | Fhit          | 14198     | 14-:10382613-11994549   |
| 14734 | Nrsn2         | 228777    | 2-:152194491-152202346  |
| 14736 | Pigr          | 18703     | 1+:132723356-132748150  |
| 14737 | Cldn12        | 64945     | 5-:5505112-5514915      |
| 14740 | Mfap1b        | 100034361 | 2-:121286459-121299760  |
| 14750 | Bves          | 23828     | 10+:45055577-45089512   |
| 14752 | MMT00052718   | 100041004 | 5-:143285576-143289203  |
| 14753 | Slc25a19      | 67283     | 11-:115476296-115489453 |
| 14754 | Atoh8         | 71093     | 6-:72156172-72185290    |
| 14757 | Hdx           | 245596    | X+:108685773-108687484  |
| 14760 | Mylc2pl       | 59310     | 5+:137169015-137176964  |

|       |               |           |                         |
|-------|---------------|-----------|-------------------------|
| 14761 | Kank2         | 235041    | 9-:21572520-21602947    |
| 14764 | Ugt2b34       | 100727    | 5-:87318777-87335983    |
| 14767 | Dpy19l3       | 233115    | 7-:36501524-36507849    |
| 14768 | 1110020G09Rik | 68646     | 15+:9001008-9040234     |
| 14770 | Cops7a        | 26894     | 6-:124909816-124912716  |
| 14773 | Anxa13        | 69787     | 15-:58173022-58220799   |
| 14778 | Anln          | 68743     | 9-:22136459-22193615    |
| 14779 | Dsg3          | 13512     | 18+:20668781-20699833   |
| 14781 | Mars2         | 212679    | 1+:55294046-55295959    |
| 14785 | F3            | 14066     | 3+:121426598-121437502  |
| 14793 | 1700003M02Rik | 69329     | 4-:34635823-34663664    |
| 14794 | Sprr2f        | 20760     | 3+:92169796-92170364    |
| 14797 | Ecsit         | 26940     | 9-:21876689-21889826    |
| 14798 | Reep2         | 225362    | 18+:35000311-35007108   |
| 14802 | Fbxo16        | 50759     | 14+:65885537-65940338   |
| 14804 | Naalad2       | 72560     | 9-:18127706-18151934    |
| 14806 | Ccdc45        | 320162    | 11+:106650567-106680173 |
| 14810 | 1700010H22Rik | 75500     | 5-:98982647-98995943    |
| 14811 | Slc12a7       | 20499     | 13+:73901144-73954186   |
| 14815 | Lpin3         | 64899     | 2+:160706468-160731528  |
| 14816 | Pcdhb9        | 93880     | 18+:37560713-37563093   |
| 14818 | Il17ra        | 16172     | 6+:120413251-120433051  |
| 14822 | Nrsn1         | 22360     | 13-:25343908-25361818   |
| 14825 | Ube2h         | 22214     | 6-:30163017-30254274    |
| 14829 | 1110007M04Rik | 68493     | 4+:24825275-24829362    |
| 14830 | Olf421        | 258715    | 1+:176081648-176082594  |
| 14831 | Olf806        | 258546    | 10-:129175030-129175971 |
| 14832 | Acaca         | 107476    | 11+:84160204-84215160   |
| 14838 | MMT00070887   |           | 2-:41841492-41844385    |
| 14842 | Gipr          | 381853    | 7-:19742279-19750373    |
| 14843 | MMT00081492   |           | 14+:101743797-101744459 |
| 14845 | Tmem188       | 382030    | 8+:90642675-90654298    |
| 14847 | MMT00003977   |           | 17-:54051087-54088615   |
| 14850 | MMT00057793   |           | 19-:46748724-46749775   |
| 14854 | MMT00017294   |           | 19+:61243042-61244660   |
| 14858 | Itpr3         | 16440     | 17+:27252928-27259167   |
| 14859 | Hspa1a        | 193740    | 17-:35106944-35108870   |
| 14860 | MMT00051231   | 100041002 | 2-:29700512-29701882    |
| 14862 | Dhrs7         | 66375     | 12-:73751342-73765766   |
| 14864 | Cdk4          | 12567     | 10+:126501291-126504076 |
| 14866 | Kctd2         | 70382     | 11+:115283286-115292592 |
| 14867 | MMT00040108   |           | 17-:3130154-3130512     |
| 14868 | Tmem159       | 233806    | 7+:127245939-127264500  |
| 14869 | S100a8        | 20201     | 3+:90473006-90473956    |
| 14870 | Capn2         | 12334     | 1-:184397390-184447655  |
| 14877 | Ptx3          | 19288     | 3+:66023884-66029726    |

|       |               |        |                         |
|-------|---------------|--------|-------------------------|
| 14878 | MMT00036534   |        | 1-:22019412-22020696    |
| 14879 | EG636544      | 636544 | 7-:88367247-88367760    |
| 14880 | Ms4a4c        | 64380  | 19+:11482190-11501267   |
| 14883 | Itgal         | 16408  | 7+:134439906-134478650  |
| 14884 | Mrps22        | 64655  | 9-:98489157-98502078    |
| 14888 | Abca8b        | 27404  | 11-:109795579-109857163 |
| 14891 | MMT00078932   |        | 11-:104540610-104541570 |
| 14892 | Armc3         | 70882  | 2+:19120926-19231858    |
| 14894 | G0s2          | 14373  | 1-:195098355-195099286  |
| 14898 | Orm1          | 18405  | 4+:63005599-63009196    |
| 14905 | Slamf6        | 30925  | 1+:173847667-173873998  |
| 14909 | Jazf1         | 231986 | 6-:52995950-53031285    |
| 14911 | 4930544G11Rik | 67653  | 6+:65902602-65904008    |
| 14912 | Gpr1          | 241070 | 1-:63229265-63260783    |
| 14913 | Yipf4         | 67864  | 17+:74888855-74899313   |
| 14914 | Rnf111        | 93836  | 9-:70273236-70351532    |
| 14915 | MMT00001646   |        | X-:10442126-10442855    |
| 14917 | Gjb5          | 14622  | 4-:127032440-127035365  |
| 14919 | Pex13         | 72129  | 11-:23548509-23565868   |
| 14920 | Folr1         | 14275  | 7-:109006845-109012659  |
| 14924 | Hn1l          | 52009  | 17-:25079100-25097586   |
| 14928 | Eme2          | 193838 | 17-:25029092-25032086   |
| 14929 | 2810432D09Rik | 69961  | 4-:41659066-41660535    |
| 14930 | C4bp          | 12269  | 1-:132532505-132558209  |
| 14934 | Dcx           | 13193  | X-:140298045-140367637  |
| 14935 | Ppfia1        | 233977 | 7-:151662663-151738438  |
| 14938 | Sfrs10        | 20462  | 16-:22245879-22265975   |
| 14945 | Mmp3          | 17392  | 9+:7445821-7455972      |
| 14946 | Txndc5        | 105245 | 13-:38592145-38620320   |
| 14951 | Dpep3         | 71854  | 8-:108497419-108503319  |
| 14952 | Tex2          | 21763  | 11-:106363451-106441824 |
| 14953 | Actc1         | 11464  | 2-:113873024-113878547  |
| 14954 | Rab19         | 19331  | 6+:39330849-39340376    |
| 14957 | Lgr5          | 14160  | 10-:114888695-115024549 |
| 14959 | Cacna2d1      | 12293  | 5+:15440605-15876867    |
| 14962 | Casd1         | 213819 | 6+:4579999-4593018      |
| 14963 | 4930568D16Rik | 75859  | 2-:35209737-35223250    |
| 14965 | Csnk2b        | 13001  | 17-:35253140-35258392   |
| 14966 | Ddx51         | 69663  | 5+:111085348-111087216  |
| 14969 | EG245506      | 245506 | X+:85975211-85977435    |
| 14973 | Shf           | 435684 | 2-:122174668-122194493  |
| 14974 | Serpib9f      | 20709  | 13+:33415924-33424148   |
| 14985 | Dspp          | 666279 | 5+:104599719-104609118  |
| 14989 | Map3k5        | 26408  | 10+:19654288-19861527   |
| 14993 | MMT00015245   |        |                         |
| 14995 | MMT00042618   |        | X-:87989990-88001685    |



|       |               |        |                         |
|-------|---------------|--------|-------------------------|
| 15000 | Tbx18         | 76365  | 9-:87599499-87626020    |
| 15002 | Ncapg         | 54392  | 5+:46061159-46091364    |
| 15004 | MMT00067307   | 433111 | 17+:45871454-45886306   |
| 15005 | Loxl1         | 16949  | 9-:58136405-58148560    |
| 15007 | MMT00030946   |        | 6-:91270533-91271029    |
| 15008 | Chrdl2        | 69121  | 7+:107155009-107183238  |
| 15013 | Nfkb1         | 18033  | 3-:135247657-135354295  |
| 15014 | Mrp63         | 67840  | 14+:58445075-58447582   |
| 15015 | G3bp1         | 27041  | 11+:55283253-55314387   |
| 15016 | MMT00074608   |        | 8+:41940765-41941725    |
| 15017 | Galnt13       | 271786 | 2+:54288900-54369092    |
| 15021 | Ppargc1a      | 19017  | 5-:51848896-51945100    |
| 15022 | Tmem14c       | 66154  | 13+:41111660-41117947   |
| 15024 | 2310061J03Rik | 66391  | 16-:55973389-55974663   |
| 15027 | Brd7          | 26992  | 8-:90856210-90886052    |
| 15028 | MMT00009785   |        | 8+:102188070-102188756  |
| 15029 | Nudt16l1      | 66911  | 16+:4939110-4941023     |
| 15031 | 4930415O20Rik | 73863  | 15+:98415681-98420011   |
| 15033 | Olf126        | 258892 | 17+:37987538-37988498   |
| 15036 | 2410004B18Rik | 66421  | 3+:145600995-145607237  |
| 15039 | Zmynd15       | 574428 | 11+:70274407-70279701   |
| 15046 | Arl6ip2       | 56298  | 17-:80249516-80252264   |
| 15047 | MMT00028841   |        | 6+:67811145-67811719    |
| 15049 | Rnf125        | 67664  | 18+:21119968-21142500   |
| 15051 | Nin           | 18080  | 12-:71119741-71212945   |
| 15052 | Kifc3         | 16582  | 8-:97623733-97634324    |
| 15056 | D930020B18Rik | 216393 | 10+:121104461-121127004 |
| 15057 | Atad2         | 70472  | 15-:57925597-57966638   |
| 15059 | Mogat1        | 68393  | 1+:78508465-78534738    |
| 15062 | P2ry5         | 67168  | 14+:73637698-73639440   |
| 15066 | Tmcc1         | 330401 | 6-:115971187-115993823  |
| 15069 | MMT00014274   |        | 4-:84822378-84889932    |
| 15072 | Commd9        | 76501  | 2+:101726418-101741796  |
| 15074 | Usp18         | 24110  | 6+:121195974-121220934  |
| 15078 | Slc1a3        | 20512  | 15-:8585807-8660743     |
| 15079 | Plcd3         | 72469  | 11-:102931617-102962920 |
| 15080 | MMT00054557   |        | 3+:4211712-4213844      |
| 15084 | Ccl3          | 20302  | 11-:83461346-83462859   |
| 15086 | EG435977      | 435977 | 7-:54988387-54989356    |
| 15088 | 2810452K22Rik | 67236  | 12-:112111374-112127309 |
| 15089 | Pla2g7        | 27226  | 17+:43705660-43748996   |
| 15094 | Pbx4          | 80720  | 8+:72356602-72396190    |
| 15095 | 0610005C13Rik | 71661  | 7-:52823157-52830696    |
| 15097 | Arl13b        | 68146  | 16-:62812971-62846868   |
| 15103 | Olf1473       | 258771 | 7+:115077035-115077968  |
| 15107 | Cxcl14        | 57266  | 13-:56390004-56397912   |

|       |               |        |                         |
|-------|---------------|--------|-------------------------|
| 15108 | Fuca1         | 71665  | 4+:135476679-135495193  |
| 15115 | 9030420J04Rik | 71544  | 9-:9115689-9155364      |
| 15119 | EG545921      | 545921 | 7-:16065517-16067128    |
| 15121 | Itln1         | 16429  | 1-:173448372-173461885  |
| 15122 | MMT00063982   |        | X-:57829621-57831971    |
| 15125 | Oxtr          | 18430  | 6-:112425758-112439935  |
| 15126 | Megf8         | 269878 | 7+:26111398-26150937    |
| 15127 | Cct6b         | 12467  | 11-:82532751-82577808   |
| 15129 | MMT00030044   |        | 2+:82783788-82880349    |
| 15131 | Atf6          | 226641 | 1-:172637344-172797903  |
| 15132 | MMT00007672   |        | 7-:110975180-110976389  |
| 15135 | Col5a3        | 53867  | 9-:20574493-20619478    |
| 15137 | Olf1403       | 258645 | 1+:175200307-175201240  |
| 15140 | Slc47a1       | 67473  | 11-:61156903-61191566   |
| 15151 | Cdh11         | 12552  | 8-:105157384-105244409  |
| 15152 | F730047E07Rik | 212377 | 4+:24423642-24430557    |
| 15153 | Foxm1         | 14235  | 6+:128313108-128324304  |
| 15154 | Dhx29         | 218629 | 13+:113717662-113759639 |
| 15157 | Eno1          | 13806  | 4+:149611363-149622981  |
| 15159 | Timd4         | 276891 | 11+:46652762-46657820   |
| 15160 | Vezf1         | 22344  | 11+:87881863-87896043   |
| 15161 | Ppp4r1        | 70351  | 17+:66169484-66191186   |
| 15162 | Il18          | 16173  | 9+:50373472-50389942    |
| 15164 | MMT00030321   |        |                         |
| 15167 | MMT00007970   |        | 10+:74283466-74283958   |
| 15169 | Scp2          | 20280  | 4-:107716445-107791112  |
| 15170 | Tspan17       | 74257  | 13+:54890821-54898129   |
| 15172 | Cul1          | 26965  | 6+:47434858-47475631    |
| 15174 | 3110001D03Rik | 66928  | 4-:74923261-74924191    |
| 15177 | Bmpr2         | 12168  | 1+:59821480-59927703    |
| 15180 | Asgr1         | 11889  | 11+:69867916-69871388   |
| 15181 | Enpp4         | 224794 | 17-:44233177-44242756   |
| 15187 | Nradd         | 67169  | 9-:110523640-110526957  |
| 15189 | BC005764      | 216152 | 10-:79327527-79337380   |
| 15194 | MMT00078831   |        | 7+:132218918-132219345  |
| 15195 | Slc25a1       | 13358  | 16-:17925310-17928291   |
| 15200 | Gk2           | 14626  | 5-:97884179-97886027    |
| 15203 | Prss3         | 22073  | 6-:41323812-41327596    |
| 15205 | MMT00030262   |        | 2+:14642750-14644166    |
| 15208 | Tmem70        | 70397  | 1+:16655298-16668354    |
| 15210 | Osr1          | 23967  | 12+:9585897-9587694     |
| 15211 | Casc4         | 319996 | 2+:121692991-121761762  |
| 15212 | Oaz3          | 53814  | 3-:94237311-94240538    |
| 15218 | V1rc27        | 171200 | 6+:57354457-57355383    |
| 15219 | 0910001L09Rik | 66096  | 5+:138696959-138700624  |
| 15223 | MMT00004769   |        | 5+:21104556-21105366    |

|       |               |        |                         |
|-------|---------------|--------|-------------------------|
| 15224 | Cyp2a4        | 13086  | 7+:26685881-27100106    |
| 15225 | Zrsr2         | 22184  | X-:160373374-160396521  |
| 15227 | Ifngr1        | 15979  | 10+:19311791-19330035   |
| 15229 | MMT00008641   |        | 12+:101703793-101726600 |
| 15235 | Ankrd13d      | 68423  | 19-:4270178-4283104     |
| 15239 | Ube2q2        | 109161 | 9+:54997211-55055335    |
| 15241 | EG636752      | 636752 | 6-:69349797-69367189    |
| 15247 | Cstb          | 13014  | 10+:77888536-77890183   |
| 15248 | Egr4          | 13656  | 6-:85461115-85463536    |
| 15249 | Serpina4-ps1  | 321018 | 12+:105318854-105325131 |
| 15250 | Hoxd3         | 15434  | 2+:74581984-74585663    |
| 15252 | MMT00019402   |        | 11+:50920177-50920984   |
| 15255 | Ccl8          | 20307  | 11+:81928684-81930297   |
| 15257 | Zbtb32        | 58206  | 7-:31374700-31376922    |
| 15258 | Coil          | 12812  | 11+:88835263-88852925   |
| 15260 | MMT00021250   |        | 11+:53972427-53973557   |
| 15261 | Vmn2r109      | 627814 | 17-:20677482-20692206   |
| 15264 | Flywch2       | 76917  | 17-:23913884-23923044   |
| 15266 | Cnm4          | 94220  | 1+:36528829-36563794    |
| 15267 | Mdga2         | 320772 | 12-:67572175-67790514   |
| 15271 | Dbf4          | 27214  | 5-:8397011-8422606      |
| 15273 | Relb          | 19698  | 7-:20191572-20214625    |
| 15276 | Eif4e         | 13684  | 3+:138190241-138220156  |
| 15277 | 2810002N01Rik | 68020  | 12+:112951481-112972402 |
| 15279 | Clps          | 109791 | 17-:28695158-28697659   |
| 15280 | Cxcl10        | 15945  | 5-:92775666-92777880    |
| 15281 | V1rc22        | 171195 | 6-:58384931-58385839    |
| 15284 | EG632778      | 632778 | 7-:26399640-26400910    |
| 15286 | MMT00073158   |        | 4-:69615112-69616312    |
| 15287 | St6galnac5    | 26938  | 3-:152484007-152645174  |
| 15288 | Pet112l       | 229487 | 3+:85378048-85458085    |
| 15292 | 2010107G23Rik | 69894  | 10-:61570959-61573761   |
| 15293 | MMT00001423   |        | 16+:50111185-50112217   |
| 15295 | Agbl5         | 231093 | 5+:31192538-31209337    |
| 15296 | Mier3         | 218613 | 13+:112490993-112505883 |
| 15297 | MMT00048291   |        | 7+:76354769-76355794    |
| 15298 | 1190003J15Rik | 76974  | 7+:148020915-148023865  |
| 15299 | Mrps21        | 66292  | 3-:95666655-95675404    |
| 15301 | Dyrk2         | 69181  | 10-:118290436-118294066 |
| 15303 | Spcs3         | 76687  | 8-:55605785-55615329    |
| 15304 | Kin           | 16588  | 2+:10002209-10014326    |
| 15306 | Dpy30         | 66310  | 17-:74698820-74715742   |
| 15308 | Mcc           | 328949 | 18-:44589266-44693954   |
| 15309 | Aldh3a2       | 11671  | 11-:61058357-61080614   |
| 15310 | Mlxipl        | 58805  | 5+:135582785-135613755  |
| 15314 | Olfir202      | 258997 | 16-:59283399-59284321   |

|       |               |        |                         |
|-------|---------------|--------|-------------------------|
| 15316 | MMT00077385   |        | 11+:19620238-19621473   |
| 15317 | Lrrk1         | 233328 | 7-:73426513-73437307    |
| 15318 | Aars2         | 224805 | 17+:45643802-45657790   |
| 15320 | MMT00017479   |        | 1+:7167814-7169828      |
| 15321 | Pus7          | 78697  | 5-:23246467-23289513    |
| 15322 | Rasl12        | 70784  | 9+:65246282-65260509    |
| 15324 | Tep1          | 21745  | 14-:51443730-51490217   |
| 15325 | MMT00007852   |        | 2-:127385145-127385244  |
| 15327 | Olf1018       | 258579 | 2+:85663129-85664063    |
| 15329 | Olf1033       | 258571 | 2+:85881473-85882404    |
| 15334 | Rnaseh2c      | 68209  | 19+:5601884-5602932     |
| 15336 | Dpp4          | 13482  | 2-:62169775-62249965    |
| 15339 | Ptges3        | 56351  | 10+:127496229-127513513 |
| 15340 | Cdk5rap1      | 66971  | 2-:154161123-154198455  |
| 15345 | Tcstv3        | 236219 | Un_random-:3053-3772    |
| 15348 | Eif2ak2       | 19106  | 17-:79253849-79281882   |
| 15352 | Socs2         | 216233 | 10-:94875005-94877825   |
| 15353 | Ednrb         | 13618  | 14-:104215877-104242896 |
| 15360 | Tcfe3         | 209446 | X+:7339826-7352326      |
| 15361 | Mrm1          | 217038 | 11-:84626564-84633017   |
| 15365 | Ext2          | 14043  | 2-:93535789-93662702    |
| 15366 | Ces7          | 67935  | 8-:96038094-96058612    |
| 15367 | Vegfc         | 22341  | 8+:55162979-55271803    |
| 15375 | Rnd3          | 74194  | 2-:50985960-51004631    |
| 15378 | Exdl2         | 97827  | 12+:81576980-81599106   |
| 15380 | AW209491      | 105351 | 13+:14728564-14730468   |
| 15384 | Mat2a         | 232087 | 6-:72383693-72389492    |
| 15386 | Tex12         | 66654  | 9-:50364923-50369430    |
| 15387 | Mgl1          | 17312  | 11+:69980275-69984335   |
| 15388 | Gcap14        | 72972  | 14-:37711396-37781902   |
| 15393 | Sec22a        | 317717 | 16-:35313498-35349083   |
| 15396 | MMT00005917   |        | 6+:6852812-6853431      |
| 15400 | Adcy8         | 11514  | 15-:64530595-64753722   |
| 15403 | C330046G03Rik | 252974 | 10+:77292211-77344030   |
| 15404 | Ireb2         | 64602  | 9+:54711590-54760298    |
| 15406 | Mdfi          | 17240  | 17-:47952278-47970168   |
| 15407 | Kcnn3         | 140493 | 3+:89324342-89471326    |
| 15408 | Mkln1         | 27418  | 6+:31348844-31459475    |
| 15413 | Brp44l        | 55951  | 17+:8476721-8490506     |
| 15414 | Arhgap18      | 73910  | 10+:26492332-26638451   |
| 15417 | 5830433M19Rik | 67770  | 4-:94166775-94223770    |
| 15423 | Tinag         | 26944  | 9-:76799591-76893530    |
| 15424 | Atp6v1g2      | 66237  | 17+:35373708-35374743   |
| 15425 | Adprh         | 11544  | 16-:38445769-38450521   |
| 15426 | 1700108M19Rik | 71156  | 12-:36934932-36979987   |
| 15427 | MMT00009375   |        | 10+:121542301-121607417 |

|       |               |           |                         |
|-------|---------------|-----------|-------------------------|
| 15433 | Myb           | 17863     | 10-:20844741-20880790   |
| 15436 | 3000002C10Rik | 378954    | 9-:109732887-109734003  |
| 15438 | Tctex1d1      | 67344     | 4+:102658986-102677173  |
| 15445 | Guca1a        | 14913     | 17-:47531592-47537385   |
| 15446 | Cd320         | 54219     | 17+:33980115-33985372   |
| 15447 | Eif4a3        | 192170    | 11-:119149677-119161357 |
| 15449 | Mitd1         | 69028     | 1-:37935731-37947277    |
| 15451 | Ftcd          | 14317     | 10+:76038430-76052304   |
| 15452 | Adora3        | 11542     | 3+:105673820-105726968  |
| 15454 | MMT00010886   |           | 2+:111022637-111027656  |
| 15455 | Lsm4          | 50783     | 8+:73197290-73202646    |
| 15456 | Chi3l3        | 12655     | 3-:105950471-105970439  |
| 15457 | Olf430        | 258713    | 1+:175999485-176000382  |
| 15460 | D130059P03Rik | 320538    | 6+:38383932-38441932    |
| 15461 | Galnt2        | 108148    | 8-:126868394-126869620  |
| 15466 | Gm136         | 214568    | 4-:34690809-34693907    |
| 15467 | Cfc1          | 12627     | 1+:34592492-34601156    |
| 15474 | Wfdc15b       | 192201    | 2-:164040190-164047396  |
| 15476 | Fem1b         | 14155     | 9-:62643837-62659186    |
| 15479 | Pde6g         | 18588     | 11-:120309344-120314743 |
| 15480 | MMT00078167   |           | 7+:119796187-119797434  |
| 15481 | 1110067D22Rik | 216551    | 11-:20723360-20731110   |
| 15483 | Il17rb        | 50905     | 14-:30809385-30821995   |
| 15484 | Lrrc42        | 77809     | 4-:106906120-106926138  |
| 15485 | Zfp251        | 71591     | 15-:76681720-76765960   |
| 15489 | Tmem158       | 72309     | 9-:123168919-123217057  |
| 15492 | Efnb1         | 13641     | X+:96331507-96343567    |
| 15497 | Ftl1          | 14325     | 7-:52713317-52715205    |
| 15499 | Dact1         | 59036     | 12+:72414878-72421079   |
| 15500 | MMT00081411   |           | 2+:15318470-15319347    |
| 15501 | Smad7         | 17131     | 18+:75527182-75555581   |
| 15504 | Mx2           | 17858     | 16+:97757689-97782506   |
| 15508 | 4632415L05Rik | 70808     | 3+:19794911-19797219    |
| 15509 | Gabra6        | 14399     | 11-:42119939-42134510   |
| 15512 | Mitf          | 17342     | 6+:97941785-97968696    |
| 15521 | Mast3         | 546071    | 8-:73302016-73321860    |
| 15522 | 1810011O10Rik | 69068     | 8-:25548087-25549418    |
| 15523 | Krtap5-2      | 71623     | 7-:149360439-149361910  |
| 15526 | Pnliprp2      | 18947     | 19+:58834218-58852018   |
| 15529 | MMT00011590   |           | 7-:110975180-110976389  |
| 15531 | Prickle4      | 66119     | 17-:47823594-47825047   |
| 15533 | Olfml2b       | 320078    | 1+:172574646-172612919  |
| 15536 | Garnl4        | 380711    | 11-:74196864-74250638   |
| 15538 | B130024G19Rik | 434198    | 7+:77533734-77556033    |
| 15539 | MMT00028325   | 100040304 | X+:67653506-67655496    |
| 15540 | C2            | 12263     | 17-:34999552-35018992   |

|       |               |        |                         |
|-------|---------------|--------|-------------------------|
| 15544 | Ccdc71        | 72454  | 9+:108362907-108366865  |
| 15550 | 2010200O16Rik | 67495  | 3-:108359344-108365297  |
| 15557 | MMT00080723   |        | 17-:15406076-15458846   |
| 15558 | Pnp1          | 18950  | 14+:51567526-51571295   |
| 15559 | A2m           | 232345 | 6+:121586281-121629237  |
| 15560 | Lrrc25        | 211228 | 8+:73141459-73145384    |
| 15565 | 2310001A20Rik | 71881  | 2-:150408816-150434259  |
| 15566 | Snn           | 20621  | 16+:11073786-11075062   |
| 15567 | 1600002H07Rik | 72016  | 17-:24352002-24357795   |
| 15569 | BC003331      | 226499 | 1-:152209662-152237483  |
| 15570 | MMT00017284   |        | 8+:36878364-36880464    |
| 15572 | Dtx3l         | 209200 | 16-:35926599-35933486   |
| 15573 | Aipl1         | 114230 | 11-:71842666-71850960   |
| 15575 | Bckdhb        | 12040  | 9+:83818761-84017846    |
| 15576 | Mboat5        | 14792  | 6+:124613145-124654196  |
| 15577 | Glt8d4        | 232313 | 6+:100683177-100755070  |
| 15578 | Lrrc3b        | 218763 | 14-:16190033-16269019   |
| 15580 | MMT00077001   |        | 17-:34881932-34883717   |
| 15581 | Olfr601       | 258311 | 7-:110506762-110507706  |
| 15582 | Klrk1         | 27007  | 6-:129562433-129572790  |
| 15585 | MMT00033125   |        | 8-:58452400-58453004    |
| 15587 | Actl6b        | 83766  | 5+:137994862-138010772  |
| 15588 | Kndc1         | 76484  | 7+:147081085-147113170  |
| 15593 | Rit2          | 19762  | 18-:31133968-31476722   |
| 15594 | Gm1967        | 381411 | 2-:93695519-93698127    |
| 15597 | Cplx3         | 235415 | 9-:57449182-57454038    |
| 15601 | Plekhm3       | 241075 | 1-:64984403-65003320    |
| 15602 | Sctr          | 319229 | 1+:121940027-121960107  |
| 15604 | Arl4a         | 11861  | 12-:40762408-40764005   |
| 15605 | Cyp2c39       | 13098  | 19+:39585360-39643021   |
| 15606 | MMT00008386   |        | 2+:127515802-127516731  |
| 15607 | Klf13         | 50794  | 7-:71036394-71083735    |
| 15609 | Mreg          | 381269 | 1-:72207087-72238778    |
| 15614 | Tpr           | 108989 | 1+:152239964-152297434  |
| 15615 | Zfp800        | 627049 | 6-:28191311-28211926    |
| 15616 | Pon2          | 330260 | 6-:5215227-5248308      |
| 15617 | Atm           | 11920  | 9-:53247472-53342071    |
| 15618 | Sel1l         | 20338  | 12-:93079898-93087581   |
| 15620 | Cenpb         | 12616  | 2-:131003813-131005612  |
| 15624 | Crcp          | 12909  | 5+:130505175-130536651  |
| 15625 | Capg          | 12332  | 6+:72494530-72512966    |
| 15626 | MMT00035685   |        | 19-:11109903-11110324   |
| 15629 | Asb7          | 117589 | 7-:73792673-73824176    |
| 15631 | Lpin1         | 14245  | 12-:16542763-16596555   |
| 15632 | Gsc           | 14836  | 12-:105709418-105711446 |
| 15635 | Crks          | 69131  | 11+:98064616-98112360   |

|       |               |        |                         |
|-------|---------------|--------|-------------------------|
| 15641 | 5230400G24Rik | 75734  | 1+:82721493-82748962    |
| 15642 | Ugt2b38       | 100559 | 5-:87838971-87853213    |
| 15645 | Mrpl18        | 67681  | 17-:13104220-13108957   |
| 15657 | Zfyve28       | 231125 | 5-:34537523-34540235    |
| 15658 | Slnf8         | 276950 | 11-:82794837-82831217   |
| 15659 | MMT00074093   |        | 16-:64917105-64918916   |
| 15664 | Masp2         | 17175  | 4+:147976662-147978522  |
| 15665 | Blcap         | 53619  | 2-:157382098-157392052  |
| 15668 | 1810032O08Rik | 66293  | 11+:116532973-116537110 |
| 15670 | Pnmal1        | 71691  | 7+:17545105-17546860    |
| 15672 | Ahi1          | 52906  | 10+:20672345-20800226   |
| 15674 | Riok1         | 71340  | 13+:38129163-38153298   |
| 15675 | MMT00077535   | 641192 | 5-:23698515-23715426    |
| 15676 | Fads1         | 76267  | 19+:10257462-10271364   |
| 15677 | Slc9a9        | 331004 | 9+:94839907-95130859    |
| 15678 | MMT00016379   |        | 12+:99082690-99083258   |
| 15680 | 2810030E01Rik | 72668  | 2-:17967238-17969966    |
| 15688 | Tmem71        | 213068 | 15-:66358570-66392665   |
| 15695 | Tead4         | 21679  | 6-:128220875-128250843  |
| 15696 | Pycr2         | 69051  | 1+:182834439-182838218  |
| 15697 | Tbc1d8b       | 245638 | X+:136237690-136240027  |
| 15698 | Them2         | 66834  | 13-:24909823-24923358   |
| 15700 | Crocc         | 230872 | 4-:140572559-140603044  |
| 15702 | MMT00047561   | 64164  | 1+:157888023-157899927  |
| 15704 | MMT00038941   |        | 1-:24601056-24602334    |
| 15706 | 4930503L19Rik | 269033 | 18-:70611866-70632412   |
| 15708 | Retsat        | 67442  | 6+:72548592-72558357    |
| 15709 | Tceal1        | 237052 | X+:133242603-133244403  |
| 15711 | Anxa1         | 16952  | 19-:20447921-20465163   |
| 15713 | Rbm3          | 19652  | X-:7719491-7722807      |
| 15715 | Tnfrsf18      | 21936  | 4+:155400450-155402998  |
| 15718 | Macrod2       | 72899  | 2+:142082252-142200047  |
| 15719 | BC060267      | 212516 | 6-:115760754-115773729  |
| 15720 | Trp53i11      | 277414 | 2+:93027756-93041908    |
| 15721 | MMT00007615   |        |                         |
| 15722 | Ccdc9         | 243846 | 7-:16859387-16872110    |
| 15723 | Csf1          | 12977  | 3-:107543974-107563140  |
| 15729 | MMT00052703   |        |                         |
| 15731 | Mfhas1        | 52065  | 8+:36651426-36740304    |
| 15738 | 2900093L17Rik | 78508  | 4-:45247601-45256865    |
| 15740 | 1810010H24Rik | 69066  | 11+:106889123-106891752 |
| 15742 | 2900062L11Rik | 76976  | X+:132528369-132529890  |
| 15743 | Hoxc6         | 15425  | 15+:102839909-102842313 |
| 15744 | lqcf1         | 74267  | 9+:106402311-106404579  |
| 15745 | MMT00077003   |        | 5-:143614122-143614803  |
| 15746 | Calr          | 12317  | 8-:87365989-87370765    |

|       |               |        |                             |
|-------|---------------|--------|-----------------------------|
| 15747 | Sfrs1         | 110809 | 11+:87860314-87863106       |
| 15748 | MMT00032580   |        | Y_random-:40879070-40880061 |
| 15749 | Cd22          | 12483  | 7-:31650847-31665286        |
| 15752 | Cyp4a14       | 13119  | 4-:115158750-115168737      |
| 15756 | MMT00043772   |        | 3+:65197258-65199105        |
| 15758 | Stx4a         | 20909  | 7+:134985552-134992164      |
| 15760 | Trib3         | 228775 | 2-:152163160-152169768      |
| 15763 | Vmn2r-ps14    | 545700 | 4+:145054108-145057441      |
| 15766 | Bmp2          | 12156  | 2+:133378743-133387451      |
| 15767 | Tmem174       | 68344  | 13-:99404933-99407312       |
| 15768 | Suhw4         | 235469 | 9+:72208021-72211305        |
| 15769 | Pkhd111       | 192190 | 15+:44413298-44432897       |
| 15773 | MMT00069895   |        | 5+:107899726-107920599      |
| 15775 | Nat11         | 70999  | 19-:7299765-7315674         |
| 15776 | Hectd2        | 226098 | 19+:36643860-36673436       |
| 15778 | MMT00061514   |        | 7+:11390635-11391334        |
| 15780 | Pde4d         | 238871 | 13+:110693294-110742244     |
| 15787 | Wdr92         | 103784 | 11+:17111929-17133773       |
| 15789 | Dnahc11       | 13411  | 12-:119116455-119437516     |
| 15792 | Use1          | 67023  | 8+:73891124-73893628        |
| 15794 | Olf589        | 259054 | 7-:110303307-110304259      |
| 15795 | Col1a2        | 12843  | 6+:4455760-4490729          |
| 15800 | MMT00023224   | 66449  | 16-:4616474-4624937         |
| 15801 | Efna2         | 13637  | 10+:79642458-79652437       |
| 15806 | Dennd4c       | 329877 | 4+:86420141-86496504        |
| 15809 | Zfp365        | 216049 | 10-:67349535-67375165       |
| 15813 | Vpreb3        | 22364  | 10+:75411102-75412207       |
| 15815 | MMT00080242   |        | 15-:26658038-26659479       |
| 15819 | MMT00055433   | 545798 | 5-:116490544-116533256      |
| 15820 | Stard9        | 668880 | 2+:120490615-120519550      |
| 15821 | Pcp4          | 18546  | 16+:96689373-96747394       |
| 15824 | D19Ert721e    | 225896 | 19+:8946048-8950145         |
| 15825 | Fermt3        | 108101 | 19-:7073466-7093928         |
| 15826 | Arl4d         | 80981  | 11+:101526874-101529143     |
| 15827 | Rrm1          | 20133  | 7+:109590457-109617441      |
| 15830 | Sema5a        | 20356  | 15+:32347113-32626085       |
| 15832 | Crybb2        | 12961  | 5-:113487286-113497786      |
| 15834 | 9030611O19Rik | 104943 | 12+:31758858-31763850       |
| 15835 | Sar1a         | 20224  | 10+:61143078-61156042       |
| 15836 | Hpn           | 15451  | 7-:31883743-31900294        |
| 15837 | Plg           | 18815  | 17+:12571511-12612250       |
| 15839 | MMT00045078   |        | 16+:23033913-23050925       |
| 15841 | Ndufb6        | 230075 | 4-:40217686-40226440        |
| 15842 | Med12l        | 329650 | 3+:59031604-59122331        |
| 15843 | Tnn           | 329278 | 1-:162015165-162077971      |
| 15844 | Klhdc9        | 68874  | 1-:173288536-173290949      |



|       |               |        |                         |
|-------|---------------|--------|-------------------------|
| 15847 | Gm392         | 235858 | 8-:57910790-57912361    |
| 15849 | Pacs2         | 217893 | 12+:114252871-114310783 |
| 15853 | D430036J16Rik | 319405 | 9+:81525957-81538235    |
| 15859 | MMT00057272   |        | X+:135791423-135792688  |
| 15860 | BC004004      | 80748  | 17+:29405895-29438470   |
| 15862 | Mrap          | 77037  | 16+:90738354-90750032   |
| 15864 | Rps6ka2       | 20112  | 17+:7374635-7507662     |
| 15870 | Aqp5          | 11830  | 15+:99421212-99425252   |
| 15872 | 4933424B01Rik | 71177  | 6-:146498154-146526281  |
| 15875 | 1700072E05Rik | 73495  | X+:83289537-83292652    |
| 15876 | Eif4ebp2      | 13688  | 10-:60895244-60915417   |
| 15881 | Hcn4          | 330953 | 9+:58671318-58708569    |
| 15882 | AA986860      | 212439 | 1+:132628605-132641198  |
| 15883 | Tulp3         | 22158  | 6-:128271183-128305812  |
| 15884 | Olfrc395      | 259007 | 11-:73720053-73720992   |
| 15885 | Adamts7       | 108153 | 9+:90066311-90094931    |
| 15887 | Lce1m         | 66203  | 3-:92821731-92822982    |
| 15890 | Fbxw2         | 30050  | 2-:34660864-34678701    |
| 15892 | Slc22a5       | 20520  | 11-:53678525-53705143   |
| 15895 | MMT00080717   |        | 17-:15672028-15672655   |
| 15896 | Pdgfrb        | 18596  | 18+:61205094-61244713   |
| 15897 | D10Jhu81e     | 28295  | 10-:77624811-77632513   |
| 15899 | MMT00058392   |        | 3-:113084762-113089679  |
| 15901 | Tpm3          | 59069  | 3+:89876658-89896047    |
| 15904 | Ncl           | 17975  | 1-:88247194-88255798    |
| 15907 | Hyou1         | 12282  | 9+:44188602-44199131    |
| 15908 | Pebp1         | 23980  | 5-:117732662-117737555  |
| 15911 | Glra4         | 14657  | X-:133292235-133310450  |
| 15914 | Dapk2         | 13143  | 9+:66006039-66120046    |
| 15915 | Spata21       | 329972 | 4+:140658888-140660882  |
| 15916 | Il1rap        | 16180  | 16+:26581853-26716652   |
| 15917 | 3100002J23Rik | 75429  | 11-:58606297-58615467   |
| 15918 | Fkbp11        | 66120  | 15-:98554802-98558629   |
| 15920 | A630001G21Rik | 319997 | 1-:87613658-87623200    |
| 15922 | Psd           | 73728  | 19-:46386574-46399419   |
| 15924 | Rbm38         | 56190  | 2+:172847429-172860230  |
| 15926 | Kctd20        | 66989  | 17+:29089444-29104898   |
| 15931 | Ces3          | 104158 | 8-:95689971-95721678    |
| 15934 | Armxc3        | 71703  | X+:131291137-131295995  |
| 15935 | Pnpla3        | 116939 | 15+:83998266-84019944   |
| 15937 | Adamts4       | 240913 | 1+:173180548-173190027  |
| 15938 | Cst11         | 78240  | 2-:148594344-148597233  |
| 15941 | MMT00024086   |        | 9+:79421614-79422433    |
| 15945 | 1700018L24Rik | 75528  | 8+:11840513-11855760    |
| 15951 | C330027C09Rik | 224171 | 16+:48994297-49019814   |
| 15952 | Bai3          | 210933 | 1-:25477402-25616710    |

|       |               |           |                         |
|-------|---------------|-----------|-------------------------|
| 15953 | Acsf3         | 257633    | 8+:125309791-125341782  |
| 15955 | Inadl         | 12695     | 4+:98213424-98386293    |
| 15956 | 1700023D19Rik | 75510     | 7+:51964112-51975214    |
| 15964 | Pglyrp3       | 242100    | 3+:91826526-91835484    |
| 15967 | Atp2b2        | 11941     | 6-:113698287-113930577  |
| 15969 | Tnrc4         | 78784     | 3+:94282251-94296115    |
| 15970 | Npal1         | 70701     | 5+:73039050-73059555    |
| 15971 | Aifm2         | 71361     | 10+:61183389-61191059   |
| 15973 | MMT00025143   | 100045149 | 15+:62009747-62016306   |
| 15975 | Cnm1          | 83674     | 19+:43515700-43570238   |
| 15977 | Phca          | 66190     | 7-:105364953-105458038  |
| 15979 | Rmi1          | 74386     | 13+:58503961-58511451   |
| 15982 | Syne2         | 319565    | 12+:77050326-77068739   |
| 15984 | MMT00075074   |           | 16+:38483773-38484678   |
| 15985 | Nova1         | 664883    | 12-:47798886-47814563   |
| 15986 | Ahnak         | 66395     | 19+:9063770-9151410     |
| 15989 | MMT00069487   |           | X-:71380375-71381632    |
| 15990 | Dnmbp         | 71972     | 19-:43921301-43977548   |
| 15994 | 9130213B05Rik | 231440    | 5+:91946725-92053020    |
| 15995 | Scg3          | 20255     | 9-:75491180-75531824    |
| 15996 | Grtp1         | 66790     | 8-:13176869-13200535    |
| 15997 | Tspan8        | 216350    | 10+:115254339-115286671 |
| 15999 | 3110039M20Rik | 67293     | 12+:50490873-50508335   |
| 16000 | Nol10         | 217431    | 12+:17355256-17436900   |
| 16001 | D330027H18Rik | 101359    | 6-:29119237-29119830    |
| 16002 | Mia2          | 338320    | 12+:60196786-60205545   |
| 16003 | Rps6kb1       | 72508     | 11-:86313645-86358258   |
| 16006 | Anxa2         | 12306     | 9+:69312276-69339593    |
| 16013 | Nt5c3         | 107569    | 6-:56832398-56873823    |
| 16018 | MMT00074939   |           | 18+:87401389-87403116   |
| 16024 | P2ry6         | 233571    | 7-:108086144-108112884  |
| 16027 | Ppp2r2d       | 52432     | 7+:146027800-146074737  |
| 16028 | Rtn4r         | 65079     | 16+:18127798-18152499   |
| 16029 | Igh-VJ558     | 16061     | 12-:117158466-117158975 |
| 16030 | Prpf3         | 70767     | 3-:95634539-95659711    |
| 16031 | Stab2         | 192188    | 10-:86303954-86470687   |
| 16032 | Cyp27a1       | 104086    | 1+:74778500-74784464    |
| 16034 | Dclk3         | 245038    | 9+:111370115-111391741  |
| 16035 | Chd8          | 67772     | 14-:52842273-52857247   |
| 16037 | MMT00011022   |           | 3-:84355935-84357187    |
| 16040 | Slc22a1       | 20517     | 17-:12841741-12868559   |
| 16043 | Sult1c2       | 69083     | 17-:53969185-53985143   |
| 16046 | Ppwd1         | 238831    | 13-:104995204-105019060 |
| 16047 | Irf8          | 15900     | 8+:123260290-123280318  |
| 16048 | Nsfl1c        | 386649    | 2+:151319921-151337038  |
| 16051 | 1700001C02Rik | 75434     | 5+:30768449-30786460    |

|       |               |        |                         |
|-------|---------------|--------|-------------------------|
| 16052 | Tsg101        | 22088  | 7-:54144745-54175263    |
| 16055 | Slco4c1       | 227394 | 1-:98715153-98717906    |
| 16060 | Gys2          | 232493 | 6-:142371133-142421467  |
| 16062 | EG545741      | 545741 | X+:117274705-117275324  |
| 16066 | Coq2          | 71883  | 5-:101083745-101103265  |
| 16067 | Pcaf          | 18519  | 17+:53706654-53810192   |
| 16068 | 1700008P20Rik | 69301  | 7-:25118100-25118955    |
| 16072 | MMT00011155   |        | 8-:71997409-71999134    |
| 16073 | Car11         | 12348  | 7+:52955375-52959979    |
| 16074 | Prkcc         | 18752  | 7+:3303847-3330721      |
| 16076 | MMT00039676   |        | X-:123218651-123219246  |
| 16077 | Mocs2         | 17434  | 13+:115608493-115618932 |
| 16078 | Defb15        | 246082 | 8-:23040284-23043182    |
| 16079 | MMT00078587   |        | 6+:12515690-12516881    |
| 16080 | Prkcdbp       | 109042 | 7-:112628596-112630726  |
| 16082 | Abcg4         | 192663 | 9-:44089164-44089774    |
| 16083 | Pla2g2c       | 18781  | 4+:138281661-138300488  |
| 16089 | 4732474O15Rik | 238455 | 12+:120684086-120704145 |
| 16093 | 4732473B16Rik | 100342 | 4+:133036102-133043851  |
| 16094 | MMT00082062   |        | 12-:3931470-3932059     |
| 16096 | Csmd3         | 239420 | 15-:48289041-48505172   |
| 16097 | Dnmt3l        | 54427  | 10+:77512586-77526366   |
| 16098 | Rps20         | 67427  | 4-:3758731-3762746      |
| 16100 | Tnni3         | 21954  | 7-:4469970-4473917      |
| 16102 | Cd72          | 12517  | 4-:43460606-43467435    |
| 16104 | Ugt3a2        | 223337 | 15+:9265367-9300625     |
| 16107 | Entpd6        | 12497  | 2+:150574803-150597410  |
| 16112 | V1ra1         | 22296  | 6+:90078417-90080980    |
| 16114 | Lyp1a1        | 226791 | 1-:187911764-187941189  |
| 16115 | Mup3          | 17842  | 4-:61744512-61748405    |
| 16117 | Id4           | 15904  | 13+:48356798-48359405   |
| 16118 | Cby3          | 76653  | 11+:50171254-50173205   |
| 16123 | Sec11c        | 66286  | 18+:65960231-65977311   |
| 16128 | Agbl1         | 244071 | 7+:83569540-83589879    |
| 16129 | Trafd1        | 231712 | 5-:121821735-121835582  |
| 16130 | Gosr2         | 56494  | 11-:103540550-103558972 |
| 16131 | Ptpre         | 19267  | 7+:142729604-142875038  |
| 16136 | MMT00046779   |        | 13+:66699587-66699622   |
| 16137 | Xrcc5         | 22596  | 1+:72353994-72441526    |
| 16139 | Vkorc111      | 69568  | 5+:130452856-130458763  |
| 16141 | Ccdc96        | 66717  | 5+:36827240-36829448    |
| 16143 | Cd209d        | 170779 | 8-:3871956-3878483      |
| 16145 | Olf1449       | 258300 | 19+:13009229-13010172   |
| 16146 | Gucy1a3       | 60596  | 3-:81898547-81949774    |
| 16147 | Tlr2          | 24088  | 3-:83640194-83645475    |
| 16152 | Ceacam10      | 26366  | 7+:25562279-25569670    |

|       |               |        |                         |
|-------|---------------|--------|-------------------------|
| 16153 | Syngn1        | 20972  | 15+:79921781-79943870   |
| 16155 | Dusp12        | 80915  | 1-:172809790-172811172  |
| 16157 | D9Ertd280e    | 272636 | 9-:99217063-99258936    |
| 16159 | Igh-VJ558     | 16061  | 12-:116861366-116930533 |
| 16163 | Tmco1         | 68944  | 1+:169238391-169260921  |
| 16164 | Fdps          | 110196 | 3-:88897510-88905794    |
| 16167 | Stbd1         | 52331  | 5+:93032065-93035612    |
| 16168 | Crif2         | 57914  | 5-:109983729-109987960  |
| 16170 | S100a11       | 20195  | 3+:93324418-93330208    |
| 16176 | St3gal5       | 20454  | 6+:72047839-72104564    |
| 16178 | Myh11         | 17880  | 16-:14194992-14291456   |
| 16179 | Gulo          | 268756 | 14-:66605623-66607112   |
| 16181 | MMT00078660   |        | 1-:81738169-81739463    |
| 16182 | Oasl1         | 231655 | 5+:115373414-115387920  |
| 16186 | Cfp           | 18636  | X-:20502649-20508888    |
| 16187 | 6530403A03Rik | 67797  | 13+:38296813-38318917   |
| 16190 | Osbp11        | 106326 | 16+:33196166-33243397   |
| 16191 | Klc1          | 16593  | 12+:112997166-113033107 |
| 16192 | MMT00013307   |        | 19-:13697166-13714196   |
| 16197 | MMT00065977   |        | 3-:97994426-97995001    |
| 16198 | Atp8b4        | 241633 | 2-:126148549-126306422  |
| 16199 | Samhd1        | 56045  | 2-:156925131-156960881  |
| 16201 | MMT00072359   |        | X+:142425310-142429203  |
| 16202 | Ccnd1         | 12443  | 7-:152115836-152125735  |
| 16203 | Tspan6        | 56496  | X-:130426278-130432874  |
| 16204 | Olfir586      | 259115 | 7-:110270343-110271296  |
| 16205 | 2810002O09Rik | 72345  | X-:92621905-92623938    |
| 16208 | Ppara         | 19013  | 15+:85566560-85632163   |
| 16210 | Metrl1        | 210029 | 11+:121563725-121577594 |
| 16212 | Med19         | 381379 | 2+:84518581-84528371    |
| 16214 | Ocln          | 18260  | 13-:101267721-101322673 |
| 16218 | Rpgrip1       | 77945  | 14+:52730596-52780605   |
| 16219 | 4932415G12Rik | 67723  | 10-:94136449-94151316   |
| 16220 | MMT00074659   |        | 1+:42160134-42161004    |
| 16222 | Adipor2       | 68465  | 6-:119303169-119367670  |
| 16224 | Cdc2l5        | 69562  | 13-:17809233-17896143   |
| 16225 | Mak10         | 78689  | 13+:59686771-59736140   |
| 16226 | MMT00033542   |        | 5+:73772040-73783378    |
| 16227 | Rarres1       | 109222 | 3-:67282813-67319535    |
| 16229 | Abcb11        | 27413  | 2-:69076345-69180644    |
| 16230 | MMT00020946   |        |                         |
| 16231 | Rnf4          | 19822  | 5+:34692532-34696082    |
| 16233 | 1600027J07Rik | 69794  | 8-:105867777-105871435  |
| 16238 | Nmi           | 64685  | 2-:51804019-51828731    |
| 16241 | MMT00003591   |        | 4+:25346490-25346553    |
| 16242 | MMT00053207   |        | 12+:86596449-86597574   |

|       |               |        |                         |
|-------|---------------|--------|-------------------------|
| 16248 | Cdr2          | 12585  | 7-:128100555-128125798  |
| 16250 | MMT00069147   | 329858 | 4-:59342087-59440936    |
| 16251 | G6pc          | 14377  | 11+:101229029-101239215 |
| 16252 | Ubttd1        | 226122 | 19+:42056426-42109133   |
| 16253 | MMT00044478   |        | 1-:144989922-144991247  |
| 16255 | Reg3b         | 18489  | 6+:78320878-78323459    |
| 16256 | Tmem132d      | 243274 | 5-:128344937-128751594  |
| 16257 | Osbpl8        | 237542 | 10+:110601872-110734303 |
| 16265 | Prkci         | 18759  | 3+:30894897-30949368    |
| 16270 | Lgals12       | 56072  | 19-:7671150-7681654     |
| 16283 | EG627427      | 627427 | 18+:37079953-37081860   |
| 16284 | Rasl11a       | 68895  | 5+:147656630-147659301  |
| 16287 | Extl1         | 56219  | 4-:133912288-133927694  |
| 16289 | Myocd         | 214384 | 11-:64990068-65083443   |
| 16292 | Prpf18        | 67229  | 2-:4543266-4544429      |
| 16294 | Chst7         | 60322  | X+:19636695-19674644    |
| 16295 | Nlrp14        | 76858  | 7+:114324671-114341616  |
| 16299 | Creld2        | 76737  | 15+:88650075-88657111   |
| 16300 | Gab3          | 210710 | X-:72233890-72330246    |
| 16307 | Lemd1         | 213409 | 1+:134122889-134153947  |
| 16310 | Sae1          | 56459  | 7-:16912402-16973134    |
| 16315 | MMT00048401   |        | 2+:149182625-149183140  |
| 16318 | Ms4a15        | 545279 | 19-:11053698-11057785   |
| 16322 | Lmod3         | 320502 | 6-:97188525-97202637    |
| 16323 | Smpd3         | 58994  | 8-:108779158-108789819  |
| 16327 | Ubfd1         | 28018  | 7+:129210935-129222646  |
| 16328 | Slc10a2       | 20494  | 8-:5085622-5105232      |
| 16330 | 2310043J07Rik | 69665  | 5+:136533181-136540189  |
| 16331 | Setd8         | 67956  | 5-:124911790-124912317  |
| 16333 | Wdr64         | 75820  | 1+:177697168-177745862  |
| 16334 | Parp2         | 11546  | 14+:51427613-51440875   |
| 16335 | Otop1         | 21906  | 5+:38691379-38694614    |
| 16336 | 2310040A07Rik | 69638  | 4-:41585176-41587319    |
| 16337 | Grin2c        | 14813  | 11-:115110483-115128557 |
| 16338 | Senp1         | 223870 | 15-:97872400-97917565   |
| 16339 | Bach1         | 12013  | 16+:87699193-87730946   |
| 16340 | Scrn2         | 217140 | 11+:96891307-96895272   |
| 16343 | Dgkh          | 380921 | 14-:78968631-79125492   |
| 16344 | Arpc5l        | 74192  | 2+:38863658-38871392    |
| 16346 | Phospho2      | 73373  | 2+:69627793-69635225    |
| 16347 | Mgp           | 17313  | 6-:136820957-136824269  |
| 16348 | Tubgcp3       | 259279 | 8-:12614274-12672101    |
| 16355 | Rcl1          | 59028  | 19+:29175994-29217781   |
| 16356 | 9030607L17Rik | 71564  | 10+:80165051-80168118   |
| 16358 | MMT00020436   |        | 7-:123947395-123947978  |
| 16361 | Olf703        | 258589 | 7+:113988126-113989084  |

|       |               |        |                         |
|-------|---------------|--------|-------------------------|
| 16363 | Adh5          | 11532  | 3+:138106115-138118215  |
| 16366 | Glis3         | 226075 | 19-:28605362-28614898   |
| 16367 | MMT00076058   |        | 8_random+:321154-339848 |
| 16370 | Olf115        | 257908 | 17-:37746545-37764061   |
| 16371 | Ppp2cb        | 19053  | 8+:34710388-34729662    |
| 16372 | MMT00077009   |        | 14-:37831938-37837696   |
| 16378 | Ccl8          | 20307  | 11+:81928693-81930297   |
| 16379 | Tppp3         | 67971  | 8-:107991396-107995289  |
| 16380 | Vasn          | 246154 | 16+:4639972-4650797     |
| 16382 | Arpc1b        | 11867  | 5+:145882527-145889054  |
| 16383 | Ii20rb        | 213208 | 9-:100358138-100375368  |
| 16385 | MMT00073590   |        | 17-:64050829-64051715   |
| 16387 | 2010316F05Rik | 67939  | 11-:29413054-29415033   |
| 16388 | EG381818      | 381818 | 6-:132388168-132391755  |
| 16389 | MMT00040811   |        |                         |
| 16390 | Plb1          | 665270 | 5+:32535080-32619909    |
| 16392 | EG627648      | 627648 | 13-:58110636-58214949   |
| 16393 | MMT00023354   |        | 1-:60579498-60579865    |
| 16397 | 1700112E06Rik | 76633  | 14+:23396948-23418491   |
| 16399 | Izumo1        | 73456  | 7+:52877179-52882598    |
| 16401 | 4932415M13Rik | 211496 | 17+:53863012-53942804   |
| 16404 | Trappc2       | 66226  | X-:162878732-162891070  |
| 16406 | Mettl6        | 67011  | 14-:32292196-32308216   |
| 16411 | V1rc12        | 171185 | 6-:66628793-66629678    |
| 16412 | Tank          | 21353  | 2+:61416641-61492168    |
| 16416 | Commd2        | 52245  | 3-:57450281-57455629    |
| 16417 | Pitx2         | 18741  | 3+:128916889-128922506  |
| 16419 | Maml2         | 270118 | 9+:13424433-13513976    |
| 16420 | MMT00020928   |        |                         |
| 16421 | Hrasls        | 27281  | 16+:29217697-29228320   |
| 16422 | Kctd5         | 69259  | 17-:24184402-24210411   |
| 16424 | MMT00046595   |        | 9+:39847539-39848323    |
| 16425 | Agxt211       | 71760  | 3+:130320492-130338666  |
| 16426 | MMT00023627   |        | 17-:92584656-92585156   |
| 16430 | Vac14         | 234729 | 8+:113160268-113244296  |
| 16434 | Fhad1         | 329977 | 4-:141452341-141478346  |
| 16435 | MMT00071843   |        | 12+:32103596-32105117   |
| 16436 | Gpr39         | 71111  | 1+:127736579-127769750  |
| 16437 | Tkt           | 21881  | 14+:31362364-31386797   |
| 16438 | Igfl3         | 232925 | 7+:18761837-18767674    |
| 16440 | Gprc5a        | 232431 | 6+:135015701-135034723  |
| 16443 | Ccdc59        | 52713  | 10+:105278534-105284564 |
| 16447 | Cat           | 12359  | 2-:103294160-103325277  |
| 16448 | Vmn2r104      | 22313  | 17-:20166388-20178707   |
| 16449 | BC004044      | 80752  | 5+:139269142-139286017  |
| 16451 | 2010007H12Rik | 69871  | 5+:138220145-138221335  |

|       |               |        |                         |
|-------|---------------|--------|-------------------------|
| 16453 | Olfr1372-ps1  | 257871 |                         |
| 16454 | 2310038H17Rik | 67099  | 1-:64653668-64663801    |
| 16456 | Il33          | 77125  | 19+:29999626-30035205   |
| 16457 | BC106175      | 724112 | 12-:8485906-8487109     |
| 16460 | MMT00045897   |        | 6-:131556442-131559000  |
| 16461 | Dll1          | 13388  | 17-:15504319-15512217   |
| 16463 | MMT00036516   |        |                         |
| 16465 | Ccdc130       | 67736  | 8-:86781693-86794259    |
| 16467 | Card10        | 105844 | 15-:78605567-78633099   |
| 16472 | 1700015C15Rik | 75532  | 13-:64532557-64533750   |
| 16474 | Bhlhb2        | 20893  | 6+:108610690-108616768  |
| 16479 | Pcsk7         | 18554  | 9+:45715079-45737803    |
| 16485 | Cuedc1        | 103841 | 11+:87983065-88006432   |
| 16486 | Slc25a22      | 68267  | 7-:148615650-148623517  |
| 16490 | MMT00048286   |        | 13+:80300564-80301136   |
| 16491 | 6330500D04Rik | 193385 | 13+:24706495-24823952   |
| 16492 | Hk2           | 15277  | 6-:82675043-82724453    |
| 16493 | Mphosph9      | 269702 | 5-:124765197-124766180  |
| 16494 | 2310007D09Rik | 71878  | 2+:158593825-158612371  |
| 16495 | Gap43         | 14432  | 16-:42248744-42340663   |
| 16497 | MMT00063964   |        | X-:58437015-58439320    |
| 16501 | Loh11cr2a     | 67776  | 9+:38525881-38550877    |
| 16502 | Chsy1         | 269941 | 7+:73254829-73318650    |
| 16503 | MMT00025844   |        |                         |
| 16507 | A830039N20Rik | 268723 | 14-:24111516-24112033   |
| 16508 | Foxa1         | 15375  | 12-:58641620-58646949   |
| 16510 | Tspyl4        | 72480  | 10+:34017277-34021126   |
| 16514 | Vps52         | 224705 | 17+:34092723-34103841   |
| 16515 | Gramd4        | 223752 | 15+:85898242-85967744   |
| 16517 | D4Wsu53e      | 27981  | 4+:134479559-134483287  |
| 16518 | 4933426G20Rik | 74460  | 15+:63746013-63757008   |
| 16519 | Igf2bp3       | 140488 | 6-:49037340-49164470    |
| 16520 | MMT00064994   | 238440 | 12-:116550353-116550843 |
| 16521 | Adar          | 56417  | 3+:89534726-89555096    |
| 16522 | Ccdc85a       | 216613 | 11-:28476390-28483542   |
| 16525 | Lbp           | 16803  | 2+:158132280-158158032  |
| 16526 | Sftpa1        | 20387  | 14+:41945071-41947765   |
| 16528 | Ddr2          | 18214  | 1-:171907776-172040690  |
| 16531 | 6330403K07Rik | 103712 | 11-:70845451-70846957   |
| 16534 | Nbea          | 26422  | 3-:55429115-55895045    |
| 16535 | Kctd9         | 105440 | 14+:68334351-68360218   |
| 16539 | Klhl20        | 226541 | 1-:163020550-163061582  |
| 16540 | MMT00017193   |        | 8-:78235492-78404744    |
| 16547 | 1500002O20Rik | 71997  | 7+:25184648-25207796    |
| 16548 | Atp6v1e1      | 11973  | 6-:120745720-120772632  |
| 16549 | Wtap          | 60532  | 17-:13159665-13185978   |

|       |               |        |                         |
|-------|---------------|--------|-------------------------|
| 16553 | Cilp2         | 68709  | 8-:72404266-72407356    |
| 16557 | Rbpms         | 19663  | 8-:34893115-34976877    |
| 16559 | MMT00001400   |        | 16-:50664932-50666467   |
| 16562 | MMT00005808   |        | 18+:7932849-7933510     |
| 16564 | Tead4         | 21679  | 6-:128174301-128202007  |
| 16566 | Igfbpl1       | 75426  | 4-:45822348-45839687    |
| 16567 | Rpl14         | 67115  | 9+:120480633-120483551  |
| 16569 | Scn1a         | 20265  | 2-:66110948-66156196    |
| 16571 | Pqlc1         | 66943  | 18+:80453045-80489453   |
| 16572 | D14ErtD668e   | 219132 | 14-:59967567-59984283   |
| 16573 | Cryge         | 12968  | 1-:65095198-65097687    |
| 16576 | Ms4a2         | 14126  | 19-:11691682-11698133   |
| 16579 | Rcan2         | 53901  | 17+:43938798-43973446   |
| 16580 | Tnfaip2       | 21928  | 12+:112683172-112693228 |
| 16584 | Nup35         | 69482  | 2+:80478987-80499263    |
| 16585 | Syvn1         | 74126  | 19+:6047089-6053707     |
| 16586 | Adamts8       | 30806  | 9+:30750145-30751186    |
| 16588 | Cnbp          | 12785  | 6-:87793167-87801002    |
| 16591 | MMT00051549   |        | 3-:6135078-6139030      |
| 16592 | Psmf1         | 228769 | 2-:151543992-151566993  |
| 16598 | E430018J23Rik | 101604 | 7-:134534943-134536950  |
| 16606 | 4930579G22Rik | 69034  | 5+:130384434-130387150  |
| 16607 | Gpx2          | 14776  | 12-:77893325-77896493   |
| 16608 | MMT00026286   |        | 17-:36896490-36898247   |
| 16609 | Gucy2c        | 14917  | 6-:136645805-136730245  |
| 16613 | 1110031I02Rik | 66179  | 11-:121038906-121065962 |
| 16614 | Zscan21       | 22697  | 5+:138558268-138575444  |
| 16615 | Chdh          | 218865 | 14+:30822130-30854865   |
| 16616 | Paox          | 212503 | 7+:147311581-147320233  |
| 16617 | Sh2d4a        | 72281  | 8+:70805930-70871479    |
| 16618 | Hps3          | 12807  | 3-:19896620-19935299    |
| 16619 | Anks1         | 224650 | 17+:28111849-28199721   |
| 16624 | Psm8          | 73677  | 18+:14864657-14920807   |
| 16627 | MMT00074583   |        | 8-:41833718-41875442    |
| 16629 | Sall2         | 50524  | 14-:52930848-52948437   |
| 16630 | Armcx5        | 494468 | X+:132278962-132281857  |
| 16632 | MMT00062595   |        | X-:51185502-51187617    |
| 16636 | Tmem189       | 407243 | 2-:167468725-167487033  |
| 16637 | Vmn2r85       | 623734 | 10-:129855333-129866512 |
| 16639 | MMT00078937   |        | 11-:105026089-105028054 |
| 16640 | 4930408G06Rik | 68179  | 1-:59053964-59064601    |
| 16644 | Tcrb-J        | 21580  | 6+:41012331-41013101    |
| 16647 | D16H22S680E   | 27883  | 16-:18300919-18324536   |
| 16650 | Cd300a        | 217303 | 11+:114751675-114759133 |
| 16654 | Oas1f         | 243262 | 5+:121297400-121307634  |
| 16656 | Slc33a1       | 11416  | 3-:63747171-63768112    |



|       |               |        |                         |
|-------|---------------|--------|-------------------------|
| 16657 | Atpif1        | 11983  | 4-:132086470-132089513  |
| 16658 | MMT00011796   | 632223 | 6+:136348473-136350157  |
| 16660 | Gpc6          | 23888  | 14+:117324651-118375766 |
| 16661 | Tmprss4       | 214523 | 9-:44980809-45012158    |
| 16664 | Car4          | 12351  | 11+:84771344-84779541   |
| 16669 | Tjp2          | 21873  | 19-:24169088-24248478   |
| 16670 | Csmd2         | 329942 | 4+:127736205-128241394  |
| 16671 | MMT00081758   |        | 7-:3908044-3935099      |
| 16672 | Tmem82        | 213989 | 4-:141170149-141173939  |
| 16675 | Flrt2         | 399558 | 12+:96930444-97019311   |
| 16676 | Aspa          | 11484  | 11-:73118942-73137989   |
| 16678 | Olf669        | 259045 | 7+:112087041-112087994  |
| 16679 | Ctsk          | 13038  | 3+:95304756-95312843    |
| 16683 | Cst8          | 13012  | 2+:148624572-148631330  |
| 16685 | Vwf           | 22371  | 6+:125502977-125636695  |
| 16690 | Tjp3          | 27375  | 10-:80735972-80753979   |
| 16692 | Bat4          | 81845  | 17+:35259896-35261751   |
| 16693 | Dip2a         | 64451  | 10-:75725482-75776049   |
| 16694 | Sepp1         | 20363  | 15+:3224665-3230504     |
| 16695 | Hs3st6        | 328779 | 17+:24889935-24895628   |
| 16696 | Magee1        | 107528 | X+:102316531-102318706  |
| 16697 | Abcg3         | 27405  | 5-:105364784-105411688  |
| 16698 | Sumo1         | 22218  | 1-:59696287-59727607    |
| 16701 | H2-M10.1      | 14985  | 17-:36460962-36463095   |
| 16702 | 2810422J05Rik | 75620  | 8-:73037296-73046994    |
| 16704 | Ppif          | 105675 | 14+:26513655-26519950   |
| 16706 | MMT00026784   |        | 9-:36620616-36629038    |
| 16712 | Pnrc1         | 108767 | 4-:33332211-33335615    |
| 16715 | 2610034M16Rik | 69239  | 17-:59018231-59106888   |
| 16718 | Zbtb7c        | 207259 | 18+:76219111-76306096   |
| 16719 | Slc43a3       | 58207  | 2+:84776820-84798086    |
| 16720 | Mtmt7         | 54384  | 8-:41636453-41694370    |
| 16721 | Stk3          | 56274  | 15-:34806361-35085437   |
| 16723 | Tnfrsf8       | 21949  | 4-:63494204-63522205    |
| 16729 | Smpx          | 66106  | X+:154137049-154190521  |
| 16730 | Osbpl3        | 71720  | 6-:50246805-50332836    |
| 16738 | Pmch          | 110312 | 10+:87553681-87555118   |
| 16742 | Bbc3          | 170770 | 7+:16894986-16903682    |
| 16743 | Bad           | 12015  | 19+:7016350-7026383     |
| 16747 | Acvr2a        | 11480  | 2+:48670221-48756173    |
| 16748 | Zfp810        | 235050 | 9-:22081191-22112082    |
| 16749 | Ivl           | 16447  | 3-:92375271-92376678    |
| 16750 | Casp6         | 12368  | 3+:129608383-129616865  |
| 16753 | Hfe2          | 69585  | 3+:96331871-96333132    |
| 16754 | Hsp90aa1      | 15519  | 12-:111929240-111933891 |
| 16755 | MMT00000111   |        | 10+:24420098-24420906   |

|       |               |        |                         |
|-------|---------------|--------|-------------------------|
| 16756 | MMT00047531   |        | 1-:129179371-129198052  |
| 16757 | Tmem146       | 106757 | 17+:56800664-56803877   |
| 16760 | 1600029D21Rik | 76509  | 9+:50302629-50313238    |
| 16761 | MMT00018149   |        | 17-:92926783-92927221   |
| 16762 | Atp8a2        | 50769  | 14-:60266586-60705671   |
| 16768 | Hnmt          | 140483 | 2-:23858446-23904896    |
| 16770 | Krtap16-1     | 170651 | 16-:88873909-88874514   |
| 16772 | MMT00010554   |        | 1-:79919112-79920001    |
| 16774 | 4932438A13Rik | 229227 | 3+:36784278-36845428    |
| 16775 | Kcna10        | 242151 | 3+:106996996-106998507  |
| 16776 | 1110032O16Rik | 68742  | 7-:134029658-134066452  |
| 16777 | MMT00053707   |        | 5+:125915438-125916193  |
| 16781 | Pramef12      | 77632  | 4-:143981576-143998367  |
| 16782 | 1110012N22Rik | 68515  | 11-:120507345-120509473 |
| 16784 | D330012F22Rik | 269952 | 7+:87377802-87393324    |
| 16788 | Imp3          | 102462 | 9+:56785306-56786204    |
| 16792 | Sh3yl1        | 24057  | 12+:31597051-31645021   |
| 16793 | Arl11         | 219144 | 14+:61928686-61930618   |
| 16794 | Chrnbl        | 11443  | 11-:69598122-69609382   |
| 16796 | Agt           | 11606  | 8-:127080487-127088483  |
| 16802 | Def8          | 23854  | 8+:125966904-125987167  |
| 16809 | Rxb           | 20182  | 17+:34168942-34174475   |
| 16811 | Rere          | 68703  | 4+:149780448-149996071  |
| 16814 | AU042651      | 328258 | 13+:56539761-56575599   |
| 16819 | Lyve1         | 114332 | 7-:117995366-118006467  |
| 16820 | Bambi-ps1     | 81913  | 2+:122292625-122293240  |
| 16821 | Abcd2         | 26874  | 15-:90979314-91022230   |
| 16823 | Inhbb         | 16324  | 1-:121312041-121335320  |
| 16824 | 2310076L09Rik | 66968  | 17-:56251024-56256970   |
| 16825 | MMT00056634   |        | 1+:159526434-159526829  |
| 16827 | Arhgdib       | 11857  | 6-:136872170-136890259  |
| 16829 | Igh-6         | 16019  | 12-:114923646-114924126 |
| 16830 | MMT00014034   |        | 3-:59406405-59422757    |
| 16832 | Trim63        | 433766 | 4+:133871104-133879151  |
| 16835 | MMT00062293   |        | 10-:96231541-96232476   |
| 16838 | Akap13        | 75547  | 7+:82600529-82895723    |
| 16842 | 2310003L22Rik | 69487  | 2+:139996765-140029368  |
| 16843 | Cry1          | 12952  | 10-:84595800-84647534   |
| 16844 | Ugt2b1        | 71773  | 5-:87345661-87355554    |
| 16849 | Trmt1         | 212528 | 8+:87213176-87224127    |
| 16851 | Slc34a2       | 20531  | 5+:53440595-53462900    |
| 16852 | Vash1         | 238328 | 12+:88029768-88036634   |
| 16854 | Kif15         | 209737 | 9+:122860199-122927852  |
| 16855 | Itk           | 16428  | 11-:46138654-46202995   |
| 16856 | Hif1a         | 15251  | 12+:75009016-75047878   |
| 16857 | Perp          | 64058  | 10+:18564876-18576876   |

|       |               |        |                         |
|-------|---------------|--------|-------------------------|
| 16858 | Tmem38a       | 74166  | 8+:75096001-75111181    |
| 16859 | O610007L01Rik | 71667  | 5+:130695710-130719559  |
| 16860 | Cdc42bpa      | 226751 | 1+:181890557-182092722  |
| 16861 | Nlrc4         | 268973 | 17-:74825652-74847558   |
| 16863 | 2410001C21Rik | 66404  | 2+:172266058-172295401  |
| 16864 | Tfb2m         | 15278  | 1-:181458186-181476348  |
| 16865 | Olfir273      | 258821 | 4-:52868429-52869383    |
| 16866 | Scara3        | 219151 | 14-:66538235-66557148   |
| 16871 | MMT00072624   |        | 4+:23412430-23412994    |
| 16874 | Fcer1g        | 14127  | 1-:173159708-173164417  |
| 16878 | Zbed4         | 223773 | 15+:88610370-88614980   |
| 16879 | Ltb4r1        | 16995  | 14+:56384867-56387326   |
| 16880 | Depdc1b       | 218581 | 13+:109106560-109179775 |
| 16881 | MMT00031504   |        | 14+:114879627-114879658 |
| 16882 | Ogfr1l        | 70155  | 1-:23373275-23389912    |
| 16884 | Lrat          | 79235  | 3-:82699325-82707892    |
| 16886 | Dpy30         | 66310  | 17-:74698813-74715789   |
| 16888 | H6pd          | 100198 | 4-:149353561-149377330  |
| 16890 | H2-Eb2        | 381091 | 17+:34462624-34472830   |
| 16891 | Pex2          | 19302  | 3-:5560511-5576128      |
| 16894 | Lin7c         | 22343  | 2+:109740309-109741086  |
| 16898 | Invs          | 16348  | 4+:48292689-48444821    |
| 16904 | Sphk2         | 56632  | 7-:52966095-52969035    |
| 16909 | Cav3          | 12391  | 6+:112409684-112422864  |
| 16910 | Ptprr         | 19279  | 10+:115455454-115711985 |
| 16912 | Rplp2         | 67186  | 7+:148633553-148637248  |
| 16913 | Pira3         | 18726  | 7-:3860216-3867087      |
| 16915 | MMT00019508   |        | 3+:93924626-93924985    |
| 16916 | Lrrc19        | 100061 | 4-:94304832-94316837    |
| 16919 | Pea15a        | 18611  | 1-:174126858-174128546  |
| 16920 | Acs1l         | 14081  | 8+:47578185-47619832    |
| 16927 | Cyp3a57       | 622127 | 5+:146106148-146131974  |
| 16930 | Hmgb1-rs17    | 628431 | 8+:34594926-34595502    |
| 16931 | Actn4         | 60595  | 7-:29678274-29747299    |
| 16932 | Sacm1l        | 83493  | 9+:123439004-123501716  |
| 16933 | 1700012H19Rik | 76393  | 11-:112684278-112686439 |
| 16940 | St3gal3       | 20441  | 4-:117605601-117807021  |
| 16941 | EG434339      | 434339 | 8+:96929038-96930156    |
| 16942 | MMT00041689   |        | 13+:61824802-61825540   |
| 16946 | Ivns1abp      | 117198 | 1+:153191645-153211388  |
| 16947 | Wfs1          | 22393  | 5-:37357345-37380148    |
| 16949 | Iigp1         | 60440  | 18+:60549448-60552281   |
| 16950 | MMT00079465   |        | 7+:151977841-151978170  |
| 16951 | R74862        | 97423  | 7-:150219494-150238995  |
| 16952 | Pax1          | 18503  | 2+:147190795-147200782  |
| 16954 | Sh3glb1       | 54673  | 3-:144351807-144383287  |

|       |               |        |                         |
|-------|---------------|--------|-------------------------|
| 16955 | MMT00068267   |        | 10:-68885784-68886498   |
| 16956 | Slc24a5       | 317750 | 2+:124894507-124914510  |
| 16957 | MMT00046108   |        | 2+:59234728-59245772    |
| 16958 | Gpc1          | 14733  | 1+:94728262-94756772    |
| 16959 | A230072C01Rik | 320742 | X+:20539239-20563849    |
| 16961 | Mup1          | 17840  | 4:-60510886-60514832    |
| 16963 | Tceal5        | 331532 | X-:132735489-132738394  |
| 16965 | Gstt2         | 14872  | 10:-75294630-75297031   |
| 16966 | Col4a4        | 12829  | 1-:82449128-82583391    |
| 16968 | Epha2         | 13836  | 4+:140857176-140885292  |
| 16972 | Nenf          | 66208  | 1-:193130675-193141997  |
| 16973 | MMT00027196   |        | 17+:53335694-53338047   |
| 16974 | Eif2b4        | 13667  | 5-:31489940-31495458    |
| 16976 | Zhx3          | 320799 | 2-:160604959-160663062  |
| 16983 | Pigx          | 72084  | 16-:32084507-32087594   |
| 16988 | Clec4f        | 51811  | 6-:83595017-83606026    |
| 16990 | Sc4mol        | 66234  | 8-:67196941-67212375    |
| 16991 | Gjb6          | 14623  | 14-:57742855-57743639   |
| 16992 | Irf2bp2       | 270110 | 8-:129112197-129117090  |
| 16994 | Trove2        | 20822  | 1-:145602725-145624108  |
| 16995 | Dppa3         | 73708  | 6+:122576441-122580289  |
| 16996 | MMT00059495   |        |                         |
| 16999 | MMT00018943   |        | 16-:11185350-11186019   |
| 17000 | 2410089E03Rik | 73692  | 15+:8136082-8137065     |
| 17001 | Hmga1         | 15361  | 17+:27696477-27700608   |
| 17004 | MMT00016962   | 634201 | 3+:85983800-85984031    |
| 17005 | MMT00015015   |        | X+:132874649-132875206  |
| 17006 | Igh-VJ558     | 16061  | 12-:116597327-116861676 |
| 17007 | Rundc3b       | 242819 | 5-:8494783-8622612      |
| 17008 | Ntn4          | 57764  | 10+:93104198-93208598   |
| 17010 | Galns         | 50917  | 8-:125102309-125135308  |
| 17016 | Dnajc11       | 230935 | 4+:151307798-151356233  |
| 17020 | Tox3          | 244579 | 8-:92771740-92871848    |
| 17022 | MMT00055891   |        | 8-:67654962-67656225    |
| 17031 | Wdr52         | 212517 | 16+:44432072-44481900   |
| 17036 | Tctn3         | 67590  | 19-:40679587-40686690   |
| 17043 | Tmem127       | 69470  | 2+:127074004-127086826  |
| 17044 | Gpr55         | 227326 | 1-:87837450-87907557    |
| 17046 | Fggy          | 75578  | 4+:95478798-95593636    |
| 17049 | Capsl         | 75568  | 15+:9365782-9395790     |
| 17053 | MMT00068622   |        | 4+:47466491-47468272    |
| 17054 | Jph3          | 57340  | 8+:124254462-124314721  |
| 17058 | V1rh16        | 171274 | 13-:23323983-23324910   |
| 17059 | Upp2          | 76654  | 2+:58558178-58588063    |
| 17062 | 2900010J23Rik | 72931  | 2-:32134328-32143586    |
| 17063 | Hoxc8         | 15426  | 15+:102820969-102823797 |

|       |               |        |                         |
|-------|---------------|--------|-------------------------|
| 17064 | Cd48          | 12506  | 1+:173612224-173635007  |
| 17067 | 1700057G04Rik | 78459  | 9+:92245763-92252714    |
| 17068 | Olfr661       | 258743 | 7+:111836530-111837488  |
| 17071 | Samd9l        | 209086 | 6-:3322521-3327259      |
| 17073 | 1810049H13Rik | 66431  | 11-:120317917-120319377 |
| 17078 | Syde2         | 214804 | 3+:145650962-145684308  |
| 17081 | 3830406C13Rik | 218734 | 14+:13116756-13134318   |
| 17082 | MMT00013155   |        | 17+:16984358-16985042   |
| 17083 | Atp1b1        | 11931  | 1-:166368205-166387999  |
| 17086 | Olfr780       | 258281 | 10+:128758680-128759618 |
| 17087 | Gulo          | 268756 | 14-:66609215-66628059   |
| 17089 | Pilrb1        | 170741 | 5-:138293374-138299226  |
| 17090 | Lass2         | 76893  | 3+:95119173-95127488    |
| 17091 | Slc38a3       | 76257  | 9-:107553486-107569700  |
| 17092 | Ttn           | 22138  | 2-:76542035-76818252    |
| 17093 | Opa1          | 74143  | 16+:29579427-29652576   |
| 17098 | Qtrt1         | 60507  | 9+:21216346-21224631    |
| 17099 | Ppp2r3c       | 59032  | 12-:56382494-56403976   |
| 17101 | MMT00060041   |        |                         |
| 17106 | Cep192        | 70799  | 18+:67988004-67989697   |
| 17109 | C430049B03Rik | 72575  | X-:50407775-50410447    |
| 17112 | Dok7          | 231134 | 5+:35429196-35430479    |
| 17114 | Myh7          | 140781 | 14-:55589524-55613386   |
| 17115 | 2700099C18Rik | 77022  | 17+:95151474-95174477   |
| 17116 | Tceal6        | 66104  | X-:131743227-131745226  |
| 17119 | Gpr124        | 78560  | 8+:28196312-28233890    |
| 17122 | MMT00068814   |        | X-:96157424-96162857    |
| 17123 | Olfr1511      | 258268 | 14-:53009489-53010446   |
| 17125 | Nrxn1         | 18189  | 17-:90561268-90607840   |
| 17128 | Vmn2r88       | 669149 | 14+:52030747-52039201   |
| 17130 | Baiap2        | 108100 | 11+:119867419-119868093 |
| 17135 | Mum1          | 68114  | 10+:79697018-79706647   |
| 17136 | Slc35a4       | 67843  | 18+:36839245-36843511   |
| 17137 | Nudt4         | 71207  | 10-:95011728-95026698   |
| 17143 | 2010002N04Rik | 106878 | 18-:60633846-60661179   |
| 17144 | B3gat2        | 280645 | 1+:23768590-23852279    |
| 17146 | EG217600      | 217600 | 12-:58733564-58734002   |
| 17147 | Ttll12        | 223723 | 15-:83406072-83425871   |
| 17149 | Pms2          | 18861  | 5+:144670838-144692313  |
| 17150 | MMT00013160   |        |                         |
| 17152 | Scfd2         | 212986 | 5-:74602057-74632609    |
| 17157 | L3mbtl4       | 320858 | 17+:69113890-69127710   |
| 17158 | Zfp113        | 56314  | 5-:138584327-138596924  |
| 17159 | Gtpbp6        | 107999 | 5-:110532991-110536454  |
| 17160 | Ccdc127       | 67433  | 13+:74487790-74495122   |
| 17162 | Cux2          | 13048  | 5-:122310316-122499860  |

|       |               |        |                         |
|-------|---------------|--------|-------------------------|
| 17163 | Fmo1          | 14261  | 1-:164759781-164796502  |
| 17164 | Slc38a10      | 72055  | 11-:119989774-120012574 |
| 17169 | 4930543E12Rik | 75239  | 7-:120243681-120285537  |
| 17171 | MMT00045847   |        | 16-:32326267-32326781   |
| 17172 | Insr          | 23920  | 3+:87600983-87620023    |
| 17174 | Dmrtc1a       | 70887  | X-:100098560-100104026  |
| 17177 | Accn2         | 11419  | 15+:99502214-99529694   |
| 17178 | Ifnar2        | 15976  | 16+:91373143-91405610   |
| 17179 | Stfa3         | 20863  | 16-:36450622-36455478   |
| 17181 | Kbtbd10       | 228003 | 2+:69508181-69522295    |
| 17182 | C230021P08Rik | 380969 | 15-:99252465-99258598   |
| 17188 | EG547263      | 547263 | 16+:30115265-30139780   |
| 17189 | Gm263         | 238333 | 12+:88541408-88549768   |
| 17191 | Xylb          | 102448 | 9+:119266709-119302447  |
| 17193 | Npb           | 208990 | 11+:120469804-120470413 |
| 17194 | Cmya5         | 76469  | 13-:93810671-93868385   |
| 17195 | Magea3        | 17139  | X-:151383085-151384048  |
| 17196 | Fkrp          | 243853 | 7-:17394619-17402081    |
| 17197 | Igtp          | 16145  | 11+:58013145-58021086   |
| 17201 | Tsnaxip1      | 72236  | 8+:108351608-108368814  |
| 17202 | Olf791        | 258932 | 10+:128963284-128964223 |
| 17203 | Svs3a         | 64335  | 2+:164115018-164117225  |
| 17207 | 2700050L05Rik | 214764 | 7+:140843845-140863858  |
| 17212 | Slc9a2        | 226999 | 1+:40738473-40826116    |
| 17213 | MMT00057554   |        | 17-:22321732-22323096   |
| 17214 | Surf6         | 20935  | 2-:26746292-26758316    |
| 17215 | Mvd           | 192156 | 8-:124957503-124967290  |
| 17216 | Nuf2          | 66977  | 1-:171428442-171461547  |
| 17219 | Asnsd1        | 70396  | 1-:53380009-53399034    |
| 17221 | Zfp264        | 116812 | 7+:6942005-6942686      |
| 17223 | 4933426M11Rik | 217684 | 12+:81891226-81981791   |
| 17224 | 5430407P10Rik | 227545 | 2-:6021090-6051192      |
| 17225 | Impa2         | 114663 | 18+:67448876-67478495   |
| 17226 | Utp14a        | 72554  | X+:45610067-45635628    |
| 17233 | Nmur1         | 14767  | 1-:88282900-88284716    |
| 17234 | Stk33         | 117229 | 7-:116422722-116582594  |
| 17239 | Rpl6          | 19988  | 5+:121655423-121658974  |
| 17243 | Bcl6b         | 12029  | 11-:70037629-70043223   |
| 17244 | Myef2         | 17876  | 2-:124912302-124949398  |
| 17247 | A030007L17Rik | 68252  | 6-:54935642-54942862    |
| 17248 | Rap1gap       | 110351 | 4+:137237465-137285777  |
| 17252 | Vmn2r94       | 665227 | 17-:18380534-18394077   |
| 17254 | Cyp2f2        | 13107  | 7+:27904993-27918678    |
| 17257 | Ube3a         | 22215  | 7+:66484581-66560302    |
| 17263 | Ccnb3         | 209091 | X-:6557377-6572729      |
| 17267 | Agbl2         | 271813 | 2+:90623374-90653507    |

|       |               |        |                         |
|-------|---------------|--------|-------------------------|
| 17269 | Spsb1         | 74646  | 4-:149272075-149283840  |
| 17273 | Psmc3         | 19182  | 2+:90894238-90899585    |
| 17280 | Atf2          | 11909  | 2-:73656979-73730606    |
| 17282 | Pdhb          | 68263  | 14-:8998850-9005446     |
| 17284 | D1Bwg0212e    | 52846  | 1+:39592633-39603720    |
| 17285 | 1700019E19Rik | 76411  | 12+:87423512-87503406   |
| 17287 | 9030411M15Rik | 667742 | 18-:63269177-63317019   |
| 17291 | Cct8          | 12469  | 16-:87484120-87496118   |
| 17292 | Atp6v1b2      | 11966  | 8+:71612682-71637604    |
| 17295 | MMT00082577   |        | 2+:137221009-137221079  |
| 17296 | Mtm1          | 17772  | X+:68468256-68568440    |
| 17297 | Comtd1        | 69156  | 14-:22666277-22668156   |
| 17302 | Dhcr24        | 74754  | 4+:106233754-106259391  |
| 17305 | Itm2a         | 16431  | X-:104592534-104598699  |
| 17312 | Sirpa         | 19261  | 2+:129419057-129456668  |
| 17314 | Napa          | 108124 | 7+:16683991-16703324    |
| 17316 | Nkx2-1        | 21869  | 12-:57634022-57636047   |
| 17317 | Jmjd1a        | 104263 | 6-:71538962-71582732    |
| 17321 | Hepacam       | 72927  | 9+:37175187-37192680    |
| 17322 | Zfp758        | 224598 | 17+:22498488-22514247   |
| 17323 | Tubb6         | 67951  | 18+:67550372-67562402   |
| 17324 | MMT00023460   |        | 1-:49060930-49061049    |
| 17325 | 4933400A11Rik | 66747  | X-:166214309-166217567  |
| 17327 | MMT00004644   | 626904 | 6-:25926812-25927081    |
| 17328 | H2afv         | 77605  | 11-:6328105-6344429     |
| 17329 | MMT00035807   |        | 6-:140005316-140006121  |
| 17332 | Smc3          | 13006  | 19+:53702562-53719636   |
| 17333 | Slc25a10      | 27376  | 11+:120353185-120360479 |
| 17337 | 1810065E05Rik | 69864  | 11+:58234612-58239525   |
| 17338 | Mocos         | 68591  | 18+:24811986-24860074   |
| 17339 | Acaa1b        | 235674 | 9-:119057161-119066124  |
| 17342 | Dhx32         | 101437 | 7-:140912728-140968486  |
| 17343 | Timm8a1       | 30058  | X-:131071797-131076168  |
| 17344 | Lonrf2        | 381338 | 1-:38853305-38868671    |
| 17348 | Pf4           | 56744  | 5+:91201538-91202409    |
| 17351 | Rtkn2         | 170799 | 10+:67504148-67505262   |
| 17352 | Cebpb         | 12608  | 2+:167514414-167515920  |
| 17355 | Ramp2         | 54409  | 11+:101107744-101109559 |
| 17356 | Rgnf          | 110596 | 13-:98669423-98976122   |
| 17363 | Aebp2         | 11569  | 6+:140572746-140626992  |
| 17364 | Mef2c         | 17260  | 13+:83643193-83802948   |
| 17365 | Isl2          | 104360 | 9+:55389013-55393986    |
| 17366 | MMT00069569   |        | 7-:147073369-147074261  |
| 17368 | 1700123M08Rik | 76665  | 4+:11893297-11921427    |
| 17370 | Cdh12         | 215654 | 15+:21409980-21516236   |
| 17371 | Emx2          | 13797  | 19+:59533890-59538927   |

|       |               |        |                         |
|-------|---------------|--------|-------------------------|
| 17373 | EG433016      | 433016 | 16+:36184292-36188194   |
| 17376 | MMT00032526   |        | 15+:71624995-71626176   |
| 17381 | Star          | 20845  | 8+:26918945-26925195    |
| 17383 | Pah           | 18478  | 10+:86984718-87046876   |
| 17385 | Asah3         | 171168 | 17-:57094502-57121531   |
| 17386 | Vps16         | 80743  | 2+:130266049-130269468  |
| 17389 | Pop4          | 66161  | 7-:39047838-39056367    |
| 17391 | C530028O21Rik | 319352 | 6+:124946835-124953116  |
| 17393 | MMT00063804   |        | 10-:35428509-35431626   |
| 17396 | Myoz3         | 170947 | 18-:60735943-60751442   |
| 17397 | MMT00047810   |        | 2+:136091275-136225438  |
| 17398 | MMT00045090   |        | 5-:117082489-117083618  |
| 17399 | 4933416C03Rik | 619332 | 10-:115549544-115550675 |
| 17400 | MMT00050193   |        | 1+:119502965-119523538  |
| 17401 | Ptgfr         | 19220  | 3-:151463748-151500411  |
| 17403 | N4bp1         | 80750  | 8-:89368220-89385212    |
| 17404 | Ctsb          | 13030  | 14+:63741301-63764758   |
| 17406 | 4933428G09Rik | 66768  | 5+:48763582-48779586    |
| 17408 | lqwd1         | 74106  | 1-:167259634-167390422  |
| 17412 | Aif1          | 11629  | 17-:35307939-35309537   |
| 17413 | MMT00043948   |        |                         |
| 17416 | Col28a1       | 213945 | 6-:7949606-7965044      |
| 17417 | Pxn           | 19303  | 5+:115956760-116004666  |
| 17418 | D1Ert622e     | 52392  | 1-:99540485-99558542    |
| 17419 | EG432555      | 432555 | 11-:48707836-48715515   |
| 17420 | Vps13b        | 666173 | 15+:35301294-35382022   |
| 17421 | MMT00002048   |        | 2-:73797668-73798769    |
| 17422 | Dctd          | 320685 | 8+:49195522-49227013    |
| 17423 | Gna13         | 14674  | 11+:109224159-109258960 |
| 17429 | Tpi1          | 21991  | 6-:124760733-124764430  |
| 17431 | Foxc2         | 14234  | 8+:123640482-123642790  |
| 17436 | Taf8          | 63856  | 17-:47625234-47639236   |
| 17440 | Tex18         | 83559  | 10+:86376243-86377425   |
| 17444 | Tuba1a        | 22142  | 15-:98762061-98781118   |
| 17447 | Ctsf          | 56464  | 19+:4855128-4860912     |
| 17449 | Zfp296        | 63872  | 7+:20163164-20166004    |
| 17453 | Foxp1         | 108655 | 6-:98880084-99113012    |
| 17456 | Lgtn          | 16865  | 1+:133049768-133070072  |
| 17458 | Msr1          | 20288  | 8-:40690543-40718181    |
| 17461 | Ripk5         | 213452 | 1+:134313989-134363536  |
| 17463 | Rgl1          | 19731  | 1-:154365952-154472285  |
| 17468 | Anubl1        | 67492  | 6+:116216546-116280316  |
| 17472 | Cd53          | 12508  | 3-:106562851-106592970  |
| 17481 | Defb21        | 403172 | 2+:152398478-152400679  |
| 17485 | Ndufab1       | 70316  | 7-:129230349-129245360  |
| 17486 | Cnn2          | 12798  | 10+:79451378-79458135   |



|       |               |        |                         |
|-------|---------------|--------|-------------------------|
| 17492 | MMT00078159   |        | 14+:54210578-54260976   |
| 17493 | Rfx4          | 71137  | 10+:84218807-84369279   |
| 17497 | Ptges         | 64292  | 2-:30747782-30758782    |
| 17498 | MMT00008723   |        | 13+:66699587-66699622   |
| 17503 | Cnm2          | 94219  | 19+:46836786-46953069   |
| 17511 | MMT00000525   |        | 4+:146318109-146319184  |
| 17512 | EG433216      | 433216 | 19+:6152665-6153711     |
| 17513 | Rin1          | 225870 | 19+:5050807-5057070     |
| 17514 | Thbd          | 21824  | 2-:148230206-148233839  |
| 17515 | Itln1         | 16429  | 1-:173460625-173461346  |
| 17520 | EG668457      | 668457 | 3+:95426160-95426733    |
| 17523 | Gdf5          | 14563  | 2-:155766762-155771103  |
| 17524 | MMT00006341   |        | 1+:150823157-150826053  |
| 17525 | Ctgf          | 14219  | 10+:24315312-24318486   |
| 17527 | 2310033K02Rik | 69553  | 2-:167805663-167819135  |
| 17528 | Gmn           | 57441  | 13-:24843714-24853724   |
| 17529 | Tnfrsf13c     | 72049  | 15-:82037384-82043239   |
| 17530 | MMT00041792   |        | 8-:38463277-38464078    |
| 17533 | Srd5a1        | 78925  | 13-:69712325-69751872   |
| 17535 | MMT00008110   |        | 18-:88826941-88828108   |
| 17536 | Chn2          | 69993  | 6+:54144018-54251801    |
| 17537 | Piga          | 18700  | X+:160857749-160861155  |
| 17540 | Ywhaz         | 22631  | 15-:36701459-36723274   |
| 17542 | MMT00044805   | 240219 | 18-:38519096-38520141   |
| 17543 | Olf1023       | 258580 | 2+:85726958-85727892    |
| 17547 | C730007P19Rik | 20865  | 7+:14318888-14364987    |
| 17551 | Sat1          | 73809  | X-:109497914-109520365  |
| 17553 | Eif4ebp1      | 13685  | 8+:28370830-28385968    |
| 17558 | Pole3         | 59001  | 4-:62184966-62186048    |
| 17559 | Olf920        | 258783 | 9+:38563274-38564205    |
| 17562 | Rbed1         | 232089 | 6-:72515918-72544805    |
| 17563 | Aldh11l       | 107747 | 6+:90507191-90521989    |
| 17566 | Olf645        | 258247 | 7-:111232645-111233465  |
| 17568 | Rexo2         | 104444 | 9-:48276618-48288716    |
| 17569 | 1810058I24Rik | 67705  | 6+:35202686-35211982    |
| 17572 | Krt80         | 74127  | 15-:101178753-101195009 |
| 17574 | Prdm16        | 70673  | 4-:153694400-153741421  |
| 17575 | C330001K17Rik | 77609  | 9-:21799256-21807078    |
| 17577 | Med28         | 66999  | 5+:45911539-45916838    |
| 17578 | Kif19a        | 286942 | 11+:114649223-114652050 |
| 17579 | MMT00078068   |        | 19+:44925782-44926468   |
| 17581 | Pisd          | 320951 | 5-:33078969-33128276    |
| 17583 | Per2          | 18627  | 1-:93312560-93355873    |
| 17584 | F11r          | 16456  | 1+:173367701-173394724  |
| 17585 | Gramd1a       | 52857  | 7-:31915145-31936052    |
| 17589 | Madd          | 228355 | 2-:91017805-91023994    |

|       |               |        |                         |
|-------|---------------|--------|-------------------------|
| 17590 | MMT00047848   |        | 2-:140781633-140781973  |
| 17591 | D930015E06Rik | 229473 | 3-:83701577-83742090    |
| 17593 | Gfer          | 11692  | 17-:24831131-24832881   |
| 17594 | MMT00040814   |        | 5+:87426114-87427458    |
| 17595 | MMT00048325   |        | 3+:132505358-132507882  |
| 17596 | MMT00032256   |        |                         |
| 17600 | Kcnq5         | 226922 | 1-:21391688-21503216    |
| 17603 | 4921509O07Rik | 70917  | 13-:114236495-114274865 |
| 17606 | Tmem90a       | 627191 | 12-:86019666-86039563   |
| 17609 | Ptpn9         | 56294  | 9+:56843305-56910609    |
| 17612 | Vhlh          | 22346  | 6+:113574005-113580264  |
| 17613 | P2rx7         | 18439  | 5+:123094082-123131313  |
| 17614 | MMT00071219   |        | 8-:74555571-74556774    |
| 17615 | Exph5         | 320051 | 9+:53109837-53185607    |
| 17616 | Flt1          | 14254  | 5-:148373771-148537336  |
| 17617 | Atp5sl        | 66349  | 7+:26404452-26410569    |
| 17618 | Zfp458        | 238690 | 13-:67357052-67585153   |
| 17619 | Zfp551        | 619331 | 7-:13000499-13191900    |
| 17620 | Macf1         | 11426  | 4-:123026843-123231609  |
| 17621 | D930001I22Rik | 228859 | 2-:163292042-163298441  |
| 17622 | Foxo1         | 56458  | 3+:52072339-52151010    |
| 17623 | Olf1r715      | 258776 | 7-:114271958-114272905  |
| 17626 | Ryr1          | 20190  | 7-:29809011-29910146    |
| 17628 | Lrrc16a       | 68732  | 13-:24270073-24372642   |
| 17629 | Saa2          | 20209  | 7+:54007202-54009682    |
| 17631 | Pla2r1        | 18779  | 2-:60257095-60391318    |
| 17632 | Lypd3         | 72434  | 7+:25421588-25426135    |
| 17635 | Mmp10         | 17384  | 9+:7502360-7510238      |
| 17638 | Adssl1        | 11565  | 12+:113858299-113879550 |
| 17641 | Mapk7         | 23939  | 11-:61302314-61307705   |
| 17643 | 6030426L16Rik | 628850 | 12-:21678265-21840135   |
| 17644 | Dse           | 212898 | 10-:33871196-33927092   |
| 17645 | Atp5c1        | 11949  | 2-:9981126-9981889      |
| 17646 | C4b           | 12268  | 17-:34865331-34880828   |
| 17648 | Scrg1         | 20284  | 8+:59934719-59956382    |
| 17650 | Scgb1c1       | 338417 | 7+:148031470-148032667  |
| 17651 | Commd1        | 17846  | 11-:22799763-22878996   |
| 17652 | Cd36          | 12491  | 5-:17288303-17341535    |
| 17653 | MMT00039948   |        | 13-:66650716-66651678   |
| 17656 | Hdhd3         | 72748  | 4-:62160087-62163234    |
| 17659 | MMT00017514   |        |                         |
| 17660 | Nlrp12        | 378425 | 7-:3221915-3249524      |
| 17661 | Birc5         | 11799  | 11+:117710564-117717046 |
| 17664 | Jup           | 16480  | 11-:100231264-100259322 |
| 17666 | Fstl1         | 14314  | 16+:37777159-37835832   |
| 17667 | Phactr1       | 218194 | 13+:43230752-43233948   |

|       |               |           |                         |
|-------|---------------|-----------|-------------------------|
| 17668 | 6430527G18Rik | 238330    | 12-:88221650-88225761   |
| 17669 | 2310007A19Rik | 66353     | 3-:94268904-94277513    |
| 17672 | EG237412      | 237412    | 10+:81816993-81842187   |
| 17673 | Nola1         | 68147     | 3-:129527837-129534074  |
| 17676 | Amz1          | 231842    | 5+:141217237-141229240  |
| 17679 | Col3a1        | 12825     | 1+:45368474-45413525    |
| 17680 | 1700069L16Rik | 73476     | 5-:114150351-114174783  |
| 17682 | Zfp386        | 56220     | 12+:117285986-117298232 |
| 17683 | MMT00010505   | 654450    | 6-:130002975-130013208  |
| 17687 | Cdv3          | 321022    | 9-:103255432-103268001  |
| 17689 | 4933405O20Rik | 243996    | 7+:57698992-57855779    |
| 17690 | Mtap7d3       | 320923    | X-:54051158-54054369    |
| 17691 | Kank3         | 80880     | 17+:33947467-33959859   |
| 17692 | Smc6          | 67241     | 12+:11306211-11324901   |
| 17693 | MMT00044427   |           | X-:115253343-115253599  |
| 17694 | Ppp1r14b      | 18938     | 19+:7049475-7051812     |
| 17695 | Rec8          | 56739     | 14+:56237072-56244226   |
| 17696 | MMT00065923   |           | X-:88791878-88792718    |
| 17697 | 1300014I06Rik | 66895     | 13-:34719709-34744550   |
| 17701 | Spink6        | 433180    | 18+:44231047-44243264   |
| 17702 | Ccdc40        | 207607    | 11+:119099177-119125828 |
| 17703 | Large         | 16795     | 8-:75338497-75876455    |
| 17707 | Rshl2b        | 100037282 | 17-:7109064-7152705     |
| 17708 | Reg2          | 19693     | 6+:78355148-78358091    |
| 17712 | Nup62         | 18226     | 7+:52071789-52086174    |
| 17715 | Ltbp2         | 16997     | 12-:86124162-86217482   |
| 17716 | Rnf10         | 50849     | 5-:115691779-115722903  |
| 17717 | Klhl15        | 236904    | X+:91480675-91518865    |
| 17720 | Rap2b         | 74012     | 3+:61168522-61170953    |
| 17721 | MMT00077153   |           | 3-:141846870-141847784  |
| 17725 | Trim12        | 76681     | 7-:111452110-111455902  |
| 17727 | MMT00039356   |           |                         |
| 17729 | Prim2         | 19076     | 1-:33510655-33726603    |
| 17730 | MMT00058199   |           | 10+:20345591-20348727   |
| 17731 | MMT00005424   |           | 11+:33072883-33073368   |
| 17735 | Supt5h        | 20924     | 7-:29099916-29123738    |
| 17743 | Phb2          | 12034     | 6+:124662353-124666936  |
| 17746 | Prlr          | 19116     | 15+:10153740-10276776   |
| 17747 | MMT00071421   |           | 7-:144359766-144359864  |
| 17748 | Olfir878      | 258794    | 9+:37726228-37727172    |
| 17750 | Hs6st2        | 50786     | X-:49033065-49034779    |
| 17751 | Olfir1201     | 258897    | 2+:88634540-88635463    |
| 17752 | Chac1         | 69065     | 2+:119177025-119180058  |
| 17754 | 6720489N17Rik | 211378    | 13-:62705589-62723192   |
| 17756 | Morc1         | 17450     | 16+:48431349-48631018   |
| 17757 | Hnrnp2        | 56258     | X+:131139443-131141593  |

|       |               |        |                         |
|-------|---------------|--------|-------------------------|
| 17759 | EG433862      | 433862 | 5+:28186988-28187678    |
| 17760 | Ccr6          | 12458  | 17+:8437944-8449985     |
| 17775 | MMT00025230   |        | 1-:53453188-53622529    |
| 17776 | BC043118      | 224273 | 16-:59491914-59556610   |
| 17777 | Mtap7         | 17761  | 10+:19868819-20000511   |
| 17780 | Slc38a5       | 209837 | X+:7848556-7857299      |
| 17781 | EG625796      | 625796 | 15+:31206235-31207592   |
| 17783 | D630012G11Rik | 320904 | 12-:74303610-74304276   |
| 17787 | MMT00069688   |        | 8-:108109141-108110131  |
| 17788 | Xrcc1         | 22594  | 7+:25332201-25358453    |
| 17789 | Cnga4         | 233649 | 7+:112553402-112557251  |
| 17790 | Olfir870      | 57251  | 9-:19975078-19976013    |
| 17792 | Vmn2r79       | 621430 | 7+:94150477-94186337    |
| 17793 | MMT00000967   |        | 6+:56896903-56897202    |
| 17794 | 2010203O07Rik | 72429  | 4+:59030533-59036271    |
| 17800 | Lrtm1         | 319476 | 14+:29831386-29841486   |
| 17801 | Syt12         | 171180 | 19-:4447688-4467940     |
| 17802 | Gpd2          | 14571  | 2+:57090856-57220006    |
| 17803 | 1810049H19Rik | 435889 | 6-:41261231-41264710    |
| 17804 | Npffr2        | 104443 | 5+:89996840-90012489    |
| 17805 | Slc39a12      | 277468 | 2+:14317698-14416581    |
| 17806 | Gpsm3         | 106512 | 17+:34727160-34728698   |
| 17807 | Pebp1         | 23980  | 5-:117732662-117737555  |
| 17808 | Ncor2         | 20602  | 5-:125497532-125659423  |
| 17810 | MMT00054025   |        | 13+:75940136-75940731   |
| 17811 | D10Ertd761e   | 52706  | 10+:81685763-81686514   |
| 17814 | Napb          | 17957  | 2-:148520513-148521861  |
| 17816 | 3110003A17Rik | 73112  | 10-:17731065-17743041   |
| 17818 | Chchd4        | 72170  | 6-:91414270-91423417    |
| 17819 | C030006K11Rik | 223665 | 15-:76551895-76554249   |
| 17820 | Cpd           | 12874  | 11-:76595490-76660498   |
| 17822 | MMT00043095   |        | 13-:19396516-19429512   |
| 17823 | D2Ert750e     | 51944  | 2+:118639738-118660375  |
| 17826 | 3300001G02Rik | 78372  | 11+:32105414-32108984   |
| 17827 | Klhl13        | 67455  | X-:22796396-22942179    |
| 17828 | Serpina3n     | 20716  | 12+:105644968-105652535 |
| 17831 | Ndufa6        | 67130  | 15-:82180592-82184667   |
| 17832 | MMT00043412   |        | 1-:93068006-93068484    |
| 17834 | Hemgn         | 93966  | 4-:46406861-46417055    |
| 17837 | Polr3gl       | 69870  | 3-:96381796-96398066    |
| 17838 | Apoc3         | 11814  | 9-:46041306-46042796    |
| 17840 | 1110029L17Rik | 68722  | 15-:72926496-72926919   |
| 17842 | Pcdh8         | 18530  | 14-:80166598-80171040   |
| 17847 | Tmem16g       | 404545 | 1+:95286871-95299337    |
| 17850 | Prg4          | 96875  | 1-:152296998-152313295  |
| 17852 | Cpeb2         | 231207 | 5+:43635824-43677428    |

|       |               |           |                         |
|-------|---------------|-----------|-------------------------|
| 17854 | Rdh11         | 17252     | 12-:80275323-80293280   |
| 17857 | C1qtnf7       | 109323    | 5+:44000239-44007888    |
| 17862 | Fbxo21        | 231670    | 5+:118426741-118458695  |
| 17863 | MMT00025642   | 100038927 | 8+:22274359-22274508    |
| 17865 | Txlnb         | 378431    | 10+:17516085-17565469   |
| 17872 | Akap10        | 56697     | 11-:61686344-61728927   |
| 17874 | Atp6v1h       | 108664    | 1+:5073252-5152526      |
| 17875 | Cntnap5a      | 636808    | 1+:117956698-118189112  |
| 17876 | Tubb4         | 22153     | 17-:57220114-57226936   |
| 17878 | Brap          | 72399     | 5+:122113363-122135606  |
| 17879 | MMT00069486   |           | 14+:70702013-70702703   |
| 17880 | Ncald         | 52589     | 15-:37296018-37389098   |
| 17882 | Ddx26b        | 236790    | X+:53708022-53761019    |
| 17883 | D730040F13Rik | 242474    | 4-:56891192-56960298    |
| 17884 | Lnx2          | 140887    | 5-:147828679-147888105  |
| 17887 | Cryl1         | 68631     | 14-:57893871-58017320   |
| 17888 | MMT00075624   | 70772     | 17+:27166212-27173320   |
| 17890 | 2610021K21Rik | 78767     | 12-:101092802-101122606 |
| 17891 | Olfir619      | 259080    | 7+:110752169-110753131  |
| 17892 | MMT00037578   |           | 19-:15746724-15747278   |
| 17895 | Smcp          | 17235     | 3-:92387805-92392919    |
| 17897 | Gm1019        | 368202    | 3-:85798002-85804466    |
| 17899 | BC016423      | 105203    | 13-:3584209-3589209     |
| 17900 | Ift81         | 12589     | 5-:123000510-123064527  |
| 17901 | Krtap16-5     | 77918     | 16-:88877767-88878235   |
| 17903 | MMT00073283   | 103172    | 10+:75398318-75400491   |
| 17904 | Cds1          | 74596     | 5+:102194391-102252878  |
| 17909 | Mesdc1        | 80889     | 7-:91029558-91032829    |
| 17910 | Ints2         | 70422     | 11-:86025607-86071061   |
| 17911 | MMT00047239   |           | 6+:83981563-83982264    |
| 17912 | Mpo           | 17523     | 11+:87607085-87617895   |
| 17915 | V1rh3         | 171246    | 13+:22486897-22487836   |
| 17920 | Nlgn2         | 216856    | 11-:69636624-69694564   |
| 17922 | Reg3a         | 19694     | 6+:78330702-78333833    |
| 17925 | F13b          | 14060     | 1+:141398303-141420333  |
| 17926 | Nptx1         | 18164     | 11-:119400685-119409139 |
| 17927 | MMT00042294   | 434130    | 7+:17579726-17581992    |
| 17928 | Pex11a        | 18631     | 7-:86882149-86887911    |
| 17929 | Atg4d         | 235040    | 9+:21076491-21078479    |
| 17930 | Cidec         | 14311     | 6-:113374624-113385754  |
| 17933 | Npsr1         | 319239    | 9+:24094240-24118633    |
| 17934 | MMT00038301   |           | 18+:12447105-12447977   |
| 17935 | Pde6c         | 110855    | 19+:38207435-38258227   |
| 17937 | MMT00069919   |           | 5+:139051966-139052547  |
| 17938 | Kcnd2         | 16508     | 6+:21664128-21679813    |
| 17940 | Zfp706        | 68036     | 15-:36930383-36936956   |

|       |               |        |                         |
|-------|---------------|--------|-------------------------|
| 17941 | Ror2          | 26564  | 13-:53205589-53381246   |
| 17944 | Zfp558        | 72230  | 9-:18260018-18282710    |
| 17946 | Tmprss11a     | 194597 | 5-:86840646-86860936    |
| 17947 | MMT00008227   |        | 18-:88583938-88584464   |
| 17951 | 4833436C18Rik | 329831 | 4-:43439883-43441361    |
| 17952 | Ripk2         | 192656 | 4-:16050702-16090543    |
| 17955 | MMT00038380   |        | 11-:9637155-9637430     |
| 17956 | Serpina1d     | 20703  | 12-:105001808-105011784 |
| 17957 | 1700086L19Rik | 74284  | 12+:75386502-75397160   |
| 17960 | Yod1          | 226418 | 1+:132612799-132616173  |
| 17964 | Asb11         | 68854  | X+:160876032-160897032  |
| 17969 | BC030336      | 233812 | 7+:127821304-127877771  |
| 17975 | MMT00079364   |        | 5+:8179591-8181202      |
| 17981 | MMT00036029   | 268527 | 12-:16678430-16764047   |
| 17987 | Fgfr2         | 14183  | 7-:137307301-137409705  |
| 17991 | Fbxl20        | 72194  | 11-:97950015-98011706   |
| 17992 | Gmpr          | 66355  | 13+:45602837-45641750   |
| 17994 | Zh2c2         | 252876 | 1+:99666776-99689546    |
| 17995 | Hist1h4d      | 319156 | 13+:23673470-23673780   |
| 17996 | Igfbp2        | 16008  | 1+:72871153-72898734    |
| 17999 | A730017L22Rik | 613258 | 2+:130706338-130707869  |
| 18001 | Nrl           | 18185  | 14-:56137814-56143028   |
| 18003 | Tff3          | 21786  | 17-:31262259-31266556   |
| 18006 | Wdr16         | 71860  | 11-:67738313-67779144   |
| 18008 | 1700011H14Rik | 67082  | 14-:49846033-49865070   |
| 18010 | Tex28         | 385380 | X-:71397630-71406955    |
| 18018 | Galnt11       | 231050 | 5+:24728720-24771735    |
| 18019 | MMT00049952   |        | 19+:3138928-3143133     |
| 18020 | D19ErtD737e   | 76539  | 19-:60274070-60302610   |
| 18022 | Adamts17      | 233332 | 7+:74060735-74114441    |
| 18027 | 5730403B10Rik | 66626  | 16-:4766827-4789916     |
| 18033 | Klhl17        | 231003 | 4-:155603439-155608890  |
| 18034 | 3110006E14Rik | 76980  | 13-:69841710-69878948   |
| 18036 | Tmem100       | 67888  | 11+:89891661-89897819   |
| 18037 | Klf9          | 16601  | 19+:23216244-23240447   |
| 18038 | Sec24c        | 218811 | 14+:21493558-21514075   |
| 18042 | Aph1c         | 68318  | 9-:66666729-66682478    |
| 18045 | Klk10         | 69540  | 7+:51036448-51040779    |
| 18046 | Ublcp1        | 79560  | 11-:44269738-44284002   |
| 18049 | Ribc1         | 66611  | X-:148439126-148450838  |
| 18050 | MMT00003408   | 330962 | 9-:65260522-65270741    |
| 18053 | Psmc4         | 23996  | 7-:28826735-28835062    |
| 18059 | Centb2        | 78618  | 16-:31092500-31201324   |
| 18061 | MMT00002521   |        | 6+:18094868-18095708    |
| 18062 | Otog          | 18419  | 7+:53496356-53566803    |
| 18063 | Rnf146        | 68031  | 10-:29065981-29081846   |

|       |             |           |                         |
|-------|-------------|-----------|-------------------------|
| 18064 | MMT00035925 |           | 15-:77238201-77238877   |
| 18065 | Peo1        | 226153    | 19+:45081046-45087251   |
| 18069 | Gpt         | 76282     | 15+:76526956-76530115   |
| 18070 | Ogg1        | 18294     | 6+:113277004-113284178  |
| 18073 | Hipk3       | 15259     | 2-:104269921-104334401  |
| 18078 | MMT00024172 |           | 15+:38892881-38893698   |
| 18083 | Gadd45a     | 13197     | 6-:66985089-66987401    |
| 18086 | Olfr1022    | 258582    | 2+:85708750-85709696    |
| 18088 | Alkbh6      | 233065    | 7+:31093719-31099325    |
| 18090 | D10Bwg1379e | 215821    | 10-:18308996-18384715   |
| 18096 | Slc39a6     | 106957    | 18-:24738382-24760073   |
| 18099 | Nfx1        | 74164     | 4+:40918067-40971905    |
| 18100 | Sdsl        | 257635    | 5-:120908211-120922819  |
| 18103 | Spaca1      | 67652     | 4-:34115288-34137040    |
| 18105 | Vmn2r121    | 100038941 | X-:121240948-121249519  |
| 18107 | Nek5        | 330721    | 8-:23204677-23207327    |
| 18108 | Ii31        | 76399     | 5-:123930167-123932596  |
| 18109 | V1rc21      | 171194    | 6+:56906506-56907399    |
| 18112 | Ikzf5       | 67143     | 7-:138535151-138540367  |
| 18113 | MMT00034400 | 100047043 | 2+:80677101-80678935    |
| 18114 | Lmtk2       | 231876    | 5+:144861459-144949068  |
| 18116 | Ahctf1      | 226747    | 1-:181719263-181723954  |
| 18118 | Cacybp      | 12301     | 1-:162133047-162143001  |
| 18120 | Tmem201     | 230917    | 4-:149089490-149102165  |
| 18122 | Snx21       | 101113    | 2+:164611514-164618275  |
| 18124 | Ptptrt      | 19281     | 2-:161353359-162486883  |
| 18126 | Dyrk2       | 69181     | 10-:118296607-118316068 |
| 18127 | Mxra7       | 67622     | 11-:116664697-116689361 |
| 18128 | Tpi1        | 21991     | 6-:124761898-124764176  |
| 18130 | Klrd1       | 16643     | 6+:129543505-129548788  |
| 18132 | Rbms3       | 207181    | 9-:116868580-117019248  |
| 18135 | Tmed3       | 66111     | 9-:89594042-89599829    |
| 18136 | Tmprss11a   | 194597    | 5-:86873131-86874909    |
| 18138 | MMT00000385 |           | 8-:112274892-112276164  |
| 18140 | Atg2b       | 76559     | 12-:106854348-106861352 |
| 18143 | Dnajc1      | 13418     | 2-:18138769-18314134    |
| 18144 | Dmap1       | 66233     | 4-:117347340-117354542  |
| 18147 | Nhlrc2      | 66866     | 19+:56623014-56673335   |
| 18148 | Cables1     | 63955     | 18+:11997782-12104072   |
| 18151 | Naip2       | 17948     | 13-:100914017-100967079 |
| 18153 | Serpinb5    | 20724     | 1+:108757779-108778684  |
| 18159 | MMT00082708 |           | 7+:133319530-133320085  |
| 18160 | Bace2       | 56175     | 16+:97578383-97658706   |
| 18162 | BC049352    | 408059    | 9+:45004017-45056986    |
| 18163 | Raly        | 19383     | 2+:154616892-154692977  |
| 18164 | Gdf10       | 14560     | 14+:34736957-34748463   |

|       |               |        |                         |
|-------|---------------|--------|-------------------------|
| 18165 | 5830482F20Rik | 320435 | 7+:29573987-29583979    |
| 18167 | MMT00012252   |        | 6-:130433206-130889385  |
| 18168 | Ptchd1        | 211612 | X-:152008084-152057785  |
| 18169 | Cbll1         | 104836 | 12-:32171765-32184405   |
| 18171 | MMT00007396   |        | 14-:95684454-95738711   |
| 18172 | Nupr1         | 56312  | 7-:133766759-133768984  |
| 18173 | Arpp19        | 59046  | 9+:74885723-74904611    |
| 18174 | Stat2         | 20847  | 10+:127707631-127729905 |
| 18176 | Aqp11         | 66333  | 7-:104874888-104886758  |
| 18177 | Cyp7b1        | 13123  | 3-:17972180-18143283    |
| 18178 | Pitx1         | 18740  | 13-:55926416-55932786   |
| 18179 | Dbp           | 13170  | 7+:52960601-52965521    |
| 18181 | Epb4.1l2      | 13822  | 10+:25079684-25180699   |
| 18183 | MMT00016159   |        | 9+:5397319-5398630      |
| 18184 | Klrb1b        | 80782  | 6-:128764397-128776309  |
| 18185 | Ndufb2        | 68198  | 6+:39553034-39553295    |
| 18186 | Parp14        | 547253 | 16-:35832965-35841606   |
| 18187 | Prrc1         | 73137  | 18+:57514392-57549599   |
| 18190 | Rcn2          | 26611  | 9+:55889666-55906648    |
| 18195 | Mafk          | 17135  | 5+:140267500-140278606  |
| 18196 | Camk2b        | 12323  | 11-:5869646-5965566     |
| 18201 | MMT00060232   |        | 13+:62914411-62916315   |
| 18203 | Ablim3        | 319713 | 18-:61959049-62031357   |
| 18204 | Coro1c        | 23790  | 5-:114294078-114358686  |
| 18205 | Olf114        | 258284 | 17-:37726357-37727296   |
| 18207 | Dnali1        | 75563  | 4-:124733752-124743903  |
| 18208 | Smoc2         | 64074  | 17+:14416541-14541771   |
| 18209 | MMT00077977   |        | 7-:114070049-114070987  |
| 18211 | Folr2         | 14276  | 7-:108988503-108992340  |
| 18212 | Ttc3          | 22129  | 16+:94605518-94690828   |
| 18213 | Tomm40        | 53333  | 7-:20286673-20300605    |
| 18214 | Ankrd40       | 71452  | 11+:94189353-94196221   |
| 18215 | Gpr146        | 80290  | 5+:139856649-139869777  |
| 18218 | Sepx1         | 27361  | 17+:24873611-24879723   |
| 18220 | Odz1          | 23963  | X-:40765589-40783405    |
| 18221 | Ctrb1         | 66473  | 8-:114210420-114214910  |
| 18235 | Epsti1        | 108670 | 14+:78304070-78402457   |
| 18239 | Golim4        | 73124  | 3-:75680112-75760779    |
| 18240 | Scrt2         | 545474 | 2+:151917707-151919599  |
| 18243 | Stk17b        | 98267  | 1-:53812949-53842014    |
| 18245 | Mup4          | 17843  | 4-:59969678-59973537    |
| 18247 | Wdr69         | 71227  | 1+:83156336-83207143    |
| 18248 | Scn2a1        | 110876 | 2+:65508552-65604465    |
| 18249 | Atp5c1        | 11949  | 2-:9984912-10002059     |
| 18250 | Mmp14         | 17387  | 14+:55050530-55060059   |
| 18251 | Susd4         | 96935  | 1+:184695026-184825787  |



|       |               |        |                         |
|-------|---------------|--------|-------------------------|
| 18258 | Gm73          | 218476 | 13+:97556551-97601826   |
| 18260 | Nid2          | 18074  | 14+:20570517-20631009   |
| 18262 | Gabbr1        | 54393  | 17+:37187798-37209372   |
| 18268 | MMT00043750   |        | 3-:65310085-65319763    |
| 18269 | Smc4          | 70099  | 3+:68808699-68835833    |
| 18271 | MMT00007507   |        | 14-:124797026-124797911 |
| 18275 | D730039F16Rik | 77996  | 2+:34729987-34747651    |
| 18276 | Apoa2         | 11807  | 1+:173155219-173156501  |
| 18278 | Aspm          | 12316  | 1+:141377545-141390509  |
| 18279 | Ogfr          | 72075  | 2+:180324163-180330230  |
| 18280 | Dars          | 226414 | 1-:130260284-130313891  |
| 18281 | MMT00077107   |        | 5+:105204789-105205824  |
| 18282 | Tbcc          | 72726  | 17+:47027638-47028663   |
| 18283 | 5730593F17Rik | 215512 | 11+:95224990-95243184   |
| 18286 | Slc41a3       | 71699  | 6+:90554978-90596403    |
| 18289 | Tap1          | 21354  | 17+:34324824-34333744   |
| 18295 | Thsd4         | 207596 | 9-:60223754-60242353    |
| 18296 | Pcgf5         | 76073  | 19+:36453556-36530694   |
| 18297 | Psma7         | 26444  | 2-:179771080-179777107  |
| 18298 | Slc25a37      | 67712  | 14-:69859907-69903113   |
| 18299 | MMT00035424   |        | 8-:35370129-35370775    |
| 18300 | Arg1          | 11846  | 10-:24635322-24647233   |
| 18305 | Etv5          | 104156 | 16-:22383086-22411820   |
| 18308 | Zfp672        | 319475 | 11-:58128568-58136859   |
| 18312 | Apon          | 28194  | 10+:127691272-127692692 |
| 18314 | 4631416L12Rik | 622434 | 3+:62142697-62266141    |
| 18317 | Arl13b        | 68146  | 16-:62793518-62811877   |
| 18318 | MMT00037377   |        | 6+:65382327-65383995    |
| 18321 | Hydin         | 244653 | 8+:113029642-113049552  |
| 18324 | 4930546H06Rik | 75202  | 17+:17967848-17976035   |
| 18325 | Cst10         | 58214  | 2+:149230984-149236012  |
| 18327 | Tmprss12      | 75002  | 15+:100111257-100123484 |
| 18330 | Hoxc10        | 209448 | 15+:102797234-102801507 |
| 18332 | Gpr19         | 14760  | 6-:134819177-134837739  |
| 18333 | Rassf8        | 71323  | 6+:145699084-145766363  |
| 18336 | Lrpap1        | 16976  | 5-:35434153-35448374    |
| 18338 | Akr1e1        | 56043  | 13-:4591776-4608382     |
| 18342 | Hamp          | 84506  | 7-:31727389-31729036    |
| 18346 | Trib2         | 217410 | 12-:15800108-15822462   |
| 18347 | 2810451A06Rik | 72778  | 15+:98929889-98935536   |
| 18350 | Tc2n          | 74413  | 12-:102884774-102947748 |
| 18351 | Nfyc          | 18046  | 4-:120430782-120463086  |
| 18352 | Olfr1094      | 258362 | 2+:86668910-86669901    |
| 18359 | Otop2         | 237987 | 11+:115190292-115193610 |
| 18365 | Bcl2l12       | 75736  | 7-:52246594-52252949    |
| 18368 | Mpped2        | 77015  | 2+:106533684-106707592  |

|       |               |        |                         |
|-------|---------------|--------|-------------------------|
| 18369 | Tmem136       | 235300 | 9-:42919287-42924633    |
| 18371 | Sap130        | 269003 | 18+:31793931-31882715   |
| 18373 | Dnajb1        | 81489  | 8+:86132091-86135801    |
| 18375 | 8430415E04Rik | 74521  | 12+:104770773-104852042 |
| 18376 | Pex11b        | 18632  | 3+:96439607-96448649    |
| 18384 | Klf6          | 23849  | 13+:5860791-5867031     |
| 18388 | Ln timer      | 16924  | 5-:74993204-75073817    |
| 18391 | EG546347      | 546347 | X+:89735342-89736015    |
| 18392 | Kbtbd2        | 210973 | 6-:56727518-56730303    |
| 18394 | Cxcr3         | 12766  | X-:98926874-98929486    |
| 18397 | Ccng1         | 12450  | 11-:40564282-40568731   |
| 18398 | Fkbp15        | 338355 | 4-:61965226-62021577    |
| 18401 | Crebbp        | 12914  | 16-:4083548-4213324     |
| 18403 | Itpr1         | 16438  | 6+:108163111-108501095  |
| 18405 | MMT00035749   |        | 14+:111178626-111179289 |
| 18409 | Nicn1         | 66257  | 9+:108192782-108198021  |
| 18416 | Enpp7         | 238011 | 11+:118849530-118853652 |
| 18417 | Kbtbd7        | 211255 | 14+:79826536-79830843   |
| 18418 | Hspa1b        | 15511  | 17-:35093377-35096532   |
| 18419 | Sprb          | 20818  | 9-:103092517-103104409  |
| 18420 | Igh           | 111507 | 12-:115821756-116153281 |
| 18425 | Prickle2      | 243548 | 6-:92325941-92408652    |
| 18427 | Serpina1      | 66222  | 13-:32933994-32943054   |
| 18428 | Sfrs2         | 20382  | 11-:116711220-116714396 |
| 18429 | Hmha1         | 70719  | 10+:79479486-79494214   |
| 18432 | 4933430H15Rik | 74485  | 3-:87541817-87552808    |
| 18438 | Map3k7ip2     | 68652  | 10-:7625937-7644660     |
| 18439 | Cd209f        | 69142  | 8-:4102793-4105764      |
| 18440 | Upk3a         | 22270  | 15+:84847657-84852962   |
| 18442 | Zfp764        | 233893 | 7-:134547208-134550258  |
| 18443 | B230380D07Rik | 235461 | 9-:70450837-70504981    |
| 18444 | MMT00058658   |        | 15-:3232775-3251191     |
| 18448 | Klh11         | 217194 | 11-:100323926-100334099 |
| 18450 | Kdr           | 16542  | 5-:76329300-76374400    |
| 18451 | Csgalnact1    | 234356 | 8-:70881677-70985450    |
| 18453 | RP23-67E6.3   | 668066 | 2-:177171374-177173929  |
| 18454 | Tor1aip1      | 208263 | 1-:157853912-157883425  |
| 18455 | Mtnr1a        | 17773  | 8+:46154563-46173858    |
| 18461 | Klra5         | 16636  | 6-:129849005-129863242  |
| 18462 | Gm1060        | 381738 | 5+:30607918-30668992    |
| 18471 | Aph1b         | 208117 | 9-:66626650-66643239    |
| 18474 | MMT00070175   | 671232 | 9+:122705181-122711247  |
| 18478 | F10           | 14058  | 8+:13037837-13055900    |
| 18479 | Olfir1368     | 258527 | 13-:21233980-21234924   |
| 18482 | Nup88         | 19069  | 11-:70754833-70783463   |
| 18483 | Mthfd1        | 108156 | 12+:77356394-77420789   |

|       |               |        |                         |
|-------|---------------|--------|-------------------------|
| 18485 | Wdr31         | 71354  | 4-:62114767-62131906    |
| 18486 | Lrfn4         | 225875 | 19-:4611785-4614504     |
| 18487 | Serpina5      | 268591 | 12+:105339358-105344342 |
| 18490 | MMT00020332   |        | 10-:105629435-105629826 |
| 18492 | Dhfr          | 13361  | 13+:93125158-93155635   |
| 18495 | C2cd3         | 277939 | 7+:107592825-107618665  |
| 18496 | Mbd4          | 17193  | 6-:115792445-115803739  |
| 18498 | Slc5a6        | 330064 | 5-:31338404-31351267    |
| 18500 | MMT00074605   | 384806 | 8+:41878610-41882651    |
| 18501 | 1700012G19Rik | 67078  | 17+:24607355-24608510   |
| 18504 | 0610040J01Rik | 76261  | 5+:64203733-64290858    |
| 18505 | MMT00071192   |        | 16+:48073089-48074594   |
| 18506 | Otub2         | 68149  | 12+:104626914-104644553 |
| 18507 | Bfsp2         | 107993 | 9-:103327250-103382703  |
| 18509 | MMT00038317   |        | 18+:53112103-53112887   |
| 18512 | Sult3a1       | 57430  | 10+:33577526-33599322   |
| 18513 | MMT00044275   |        | 10+:22511074-22512280   |
| 18514 | 4930412F15Rik | 242408 | 4-:43672494-43673626    |
| 18515 | Ddx28         | 71986  | 8-:108533521-108535333  |
| 18516 | 4932413F04Rik | 319215 | 9+:103461717-103783600  |
| 18517 | Klc2          | 16594  | 19-:5107747-5118244     |
| 18518 | Cap1          | 12331  | 4-:122537303-122563107  |
| 18520 | MMT00005421   |        | 7-:13736393-13736930    |
| 18525 | Mpped1        | 223726 | 15+:83610509-83686877   |
| 18526 | Dydc2         | 71200  | 14-:41862407-41882498   |
| 18531 | Akr1d1        | 208665 | 6+:37480172-37518392    |
| 18533 | Hmox1         | 15368  | 8+:77617520-77624484    |
| 18534 | Ovol2         | 107586 | 2-:144130915-144156781  |
| 18537 | Moxd1         | 59012  | 10+:23943387-24022450   |
| 18541 | Rab15         | 104886 | 12-:77898949-77923457   |
| 18542 | Ankra2        | 68558  | 13+:99033196-99043867   |
| 18548 | 1700012P22Rik | 69364  | 4-:144008089-144028713  |
| 18549 | Robo1         | 19876  | 16+:72904868-73046337   |
| 18552 | Nr2c2ap       | 75692  | 8+:72654686-72657657    |
| 18553 | Tekt4         | 71840  | 17+:25608531-25613538   |
| 18554 | Lhx9          | 16876  | 1-:140724574-140744147  |
| 18555 | Sdcbp2        | 228765 | 2+:151398367-151415733  |
| 18556 | MMT00001956   |        | 6-:37636278-37637195    |
| 18557 | Limch1        | 77569  | 5+:67249115-67448396    |
| 18558 | Nol11         | 68979  | 11-:107027976-107050574 |
| 18559 | Csf2ra        | 12982  | 19-:61300313-61304262   |
| 18560 | Islr          | 26968  | 9-:58004082-58006312    |
| 18561 | Ngly1         | 59007  | 14+:17081841-17144050   |
| 18562 | Nup188        | 227699 | 2+:30152164-30199786    |
| 18572 | Stx18         | 71116  | 5+:38430471-38528056    |
| 18574 | Parc          | 78309  | 17-:46637553-46683264   |

|       |               |        |                         |
|-------|---------------|--------|-------------------------|
| 18577 | Btbd9         | 224671 | 17-:30357041-30551683   |
| 18580 | Phactr4       | 100169 | 4-:131911844-131978325  |
| 18581 | MMT00048298   |        | 12-:115434540-115492137 |
| 18582 | Krtap6-2      | 16701  | 16-:89419570-89420284   |
| 18586 | Tns1          | 21961  | 1-:73960484-73975087    |
| 18590 | Fgb           | 110135 | 3-:82845783-82853733    |
| 18591 | MMT00034813   |        | 1-:155466728-155467858  |
| 18592 | Txn14a        | 27366  | 18+:80403580-80420264   |
| 18593 | Rgs7bp        | 52882  | 13-:105741382-105844984 |
| 18594 | 1200002N14Rik | 71712  | 10-:87785548-87819820   |
| 18597 | Ganc          | 76051  | 2+:120229936-120287432  |
| 18602 | Wisp1         | 22402  | 15+:66722954-66754761   |
| 18606 | A230074B11Rik | 215413 | 1+:37117216-37120491    |
| 18607 | Acat3         | 224530 | 17-:13117121-13133233   |
| 18608 | Atn1          | 13498  | 6-:124692564-124699840  |
| 18609 | Lrrc1         | 214345 | 9-:77278624-77392505    |
| 18611 | C1qtnf3       | 81799  | 15+:10882110-10909454   |
| 18618 | Tex14         | 83560  | 11+:87299787-87369324   |
| 18619 | 2810406K13Rik | 72184  | 7+:106614474-106622527  |
| 18620 | Slmap         | 83997  | 14-:27234376-27262120   |
| 18622 | Pwp2          | 110816 | 10-:77633654-77639894   |
| 18624 | Plagl1        | 22634  | 10+:12810714-12849691   |
| 18625 | Cit           | 12704  | 5+:116295652-116458571  |
| 18627 | MMT00059478   |        | 3+:60664692-60681509    |
| 18631 | Gja1          | 14609  | 10+:56097152-56110221   |
| 18632 | Asx1          | 228790 | 2+:153217264-153228669  |
| 18633 | Nbeal1        | 269198 | 1+:60310239-60317219    |
| 18635 | Hps1          | 192236 | 19-:42829701-42853135   |
| 18642 | Hdac11        | 232232 | 6+:91106808-91124676    |
| 18645 | Xlr           | 22441  | X-:51086958-51100861    |
| 18648 | Rnft1         | 76892  | 11+:86298200-86310049   |
| 18649 | Ccne1         | 12447  | 7-:38883004-38892349    |
| 18650 | Hiat1         | 66631  | 13-:65166453-65174937   |
| 18651 | Tulp2         | 56734  | 7+:52773313-52777750    |
| 18653 | MMT00072901   |        | 19+:8798625-8800932     |
| 18655 | Angpt2        | 11601  | 8-:18691330-18741488    |
| 18658 | Gstk1         | 76263  | 6+:42195943-42200440    |
| 18662 | Batf3         | 381319 | 1+:192921726-192932825  |
| 18665 | Hs6st1        | 50785  | 1+:36125253-36163290    |
| 18666 | Hint3         | 66847  | 10-:30328165-30338266   |
| 18669 | Fxyd5         | 18301  | 7-:31817756-31827148    |
| 18671 | Stag2         | 20843  | X+:39555056-39628566    |
| 18672 | Oraov1        | 72284  | 7+:152101039-152107038  |
| 18673 | Muc1          | 17829  | 3+:89032973-89037291    |
| 18679 | Cpne8         | 66871  | 15-:90317913-90509806   |
| 18680 | EG633285      | 633285 | 3-:82667826-82670558    |

|       |               |        |                         |
|-------|---------------|--------|-------------------------|
| 18681 | Hexb          | 15212  | 13-:97946362-97968225   |
| 18683 | Ctsa          | 19025  | 2+:164658483-164665082  |
| 18684 | Cttn          | 13043  | 7-:151622773-151656629  |
| 18686 | Zfp143        | 20841  | 7+:117205269-117238741  |
| 18688 | Leap2         | 259301 | 11-:53235554-53236684   |
| 18693 | Klf4          | 16600  | 4-:55540140-55545338    |
| 18694 | Pkn2          | 109333 | 3-:142454523-142545246  |
| 18696 | MMT00042876   |        | 1+:180074024-180075515  |
| 18697 | Afg3l1        | 114896 | 8+:126001820-126026077  |
| 18699 | 2700089E24Rik | 381820 | 6+:132986504-133055808  |
| 18700 | Trappc2l      | 59005  | 8+:125135545-125139488  |
| 18701 | Il22ra2       | 237310 | 10+:19341833-19351589   |
| 18702 | Mrc1          | 17533  | 2+:14151040-14253416    |
| 18703 | Oog3          | 100012 | 4-:143747462-143750421  |
| 18706 | Lect1         | 16840  | 14-:80037500-80061977   |
| 18709 | Srp68         | 217337 | 11-:116106480-116124569 |
| 18711 | Usp10         | 22224  | 8+:122434751-122481457  |
| 18713 | 3110037I16Rik | 73172  | 4-:120593806-120597610  |
| 18714 | Farsb         | 23874  | 1-:78414532-78485434    |
| 18715 | MMT00032843   |        | 18+:9495618-9496481     |
| 18720 | BC002059      | 213811 | 17+:17088502-17111119   |
| 18724 | Ramp1         | 51801  | 1+:93076615-93120256    |
| 18726 | D630004A14Rik | 382137 | 9+:50576341-50580773    |
| 18727 | 9130221D24Rik | 77669  | 3-:132779456-132897916  |
| 18728 | MMT00044404   |        | 5+:11891549-11928596    |
| 18731 | Fgf17         | 14171  | 14-:71036525-71041579   |
| 18732 | MMT00041012   |        | 10-:78091450-78092970   |
| 18734 | EG622175      | 622175 | 13-:74715338-74754725   |
| 18737 | Exoc1         | 69940  | 5+:76958337-76997197    |
| 18738 | Hadha         | 97212  | 5-:30445964-30474563    |
| 18740 | MMT00052300   |        | 1+:46111487-46115946    |
| 18742 | Rnf217        | 268291 | 10-:31223556-31328350   |
| 18743 | Ruvbl1        | 56505  | 6+:88415458-88447559    |
| 18746 | Rhov          | 228543 | 2-:119094938-119096957  |
| 18749 | Il2rb         | 16185  | 15-:78310980-78325452   |
| 18750 | Thap6         | 381650 | 5+:92391409-92399608    |
| 18751 | Cpa6          | 329093 | 1-:10314807-10474144    |
| 18752 | Fgf7          | 14178  | 2+:125861450-125915295  |
| 18754 | Rbm8a         | 60365  | 3+:96433855-96436833    |
| 18756 | Tspan14       | 52588  | 14-:41719733-41780096   |
| 18757 | Vsnl1         | 26950  | 12-:11333017-11393782   |
| 18762 | Herc5         | 67138  | 6+:57530984-57615108    |
| 18764 | Olf1426       | 258805 | 19-:12162344-12163280   |
| 18769 | Zfp518        | 72672  | 19+:40916757-40990731   |
| 18772 | BC048355      | 381101 | 17+:46633729-46636175   |
| 18773 | MMT00014972   |        | 12-:89522856-89524816   |

|       |               |        |                         |
|-------|---------------|--------|-------------------------|
| 18774 | MMT00054062   |        | 2+:45665083-45666035    |
| 18775 | Best2         | 212989 | 8-:87531103-87537490    |
| 18776 | Crnkl1        | 66877  | 2-:145743217-145760434  |
| 18778 | Prickle1      | 106042 | 15-:93329532-93349841   |
| 18781 | MMT00014109   |        | 19+:23741437-23741952   |
| 18782 | Anks1b        | 77531  | 10+:90292584-90404257   |
| 18783 | 1700019M22Rik | 69423  | 12-:97284830-97285365   |
| 18784 | Sdad1         | 231452 | 5-:92720038-92726249    |
| 18785 | Angptl4       | 57875  | 17-:33911845-33918451   |
| 18789 | MMT00071096   |        | 12-:50941709-50942809   |
| 18790 | Car3          | 12350  | 3+:14863519-14871863    |
| 18797 | 1700019G24Rik | 72249  | 6-:5913899-5927361      |
| 18798 | Ndufa4l2      | 407790 | 10+:126952019-126954975 |
| 18802 | Nit2          | 52633  | 16-:57156778-57167445   |
| 18804 | Pllp          | 67801  | 8-:97199343-97220623    |
| 18806 | Hist3h2ba     | 78303  | 11+:58762412-58763032   |
| 18827 | Oprs1         | 18391  | 4-:41685369-41688186    |
| 18832 | Mybph         | 53311  | 1+:136090033-136097808  |
| 18835 | Dtwd1         | 69185  | 2+:125980276-125991012  |
| 18836 | Vmn2r27       | 232367 | 6-:124141871-124180483  |
| 18839 | Pcdha1        | 116731 | 18+:37089938-37347311   |
| 18841 | C130038G02Rik | 77521  | 5+:149114777-149125612  |
| 18842 | Phlda1        | 21664  | 10+:110943341-110945704 |
| 18846 | lkbkg         | 16151  | X+:71678143-71694190    |
| 18847 | Armet1        | 227526 | 2+:3430333-3441285      |
| 18848 | Sema3b        | 20347  | 9-:107500685-107507733  |
| 18849 | Macrod2       | 72899  | 2+:142217967-142218699  |
| 18850 | MMT00069233   |        | X-:103564204-103565634  |
| 18851 | Apip          | 56369  | 2+:102913939-102932795  |
| 18852 | MMT00001015   |        |                         |
| 18856 | Hmgcl         | 15356  | 4+:135502359-135518528  |
| 18859 | C230094A16Rik | 237711 | 11-:29644136-29664233   |
| 18862 | 1300003B13Rik | 74149  | 17+:22591344-22592804   |
| 18865 | Ptges3        | 56351  | 10+:127496229-127514049 |
| 18866 | MMT00038112   | 670717 | 5-:13121449-13121766    |
| 18868 | Mpeg1         | 17476  | 19+:12535310-12539774   |
| 18869 | Cxcl2         | 20310  | 5+:91332924-91334964    |
| 18871 | Al314976      | 106821 | 17+:48548706-48556593   |
| 18873 | AB041550      | 58229  | 6+:87680862-87684010    |
| 18874 | Olf777        | 258537 | 10-:128623667-128706035 |
| 18875 | EG636756      | 636756 | X-:37353960-37354374    |
| 18876 | Klf16         | 118445 | 10-:80029879-80040039   |
| 18878 | Pde4dip       | 83679  | 3-:97493749-97494486    |
| 18881 | Cops6         | 26893  | 5+:138602543-138605520  |
| 18882 | Tbc1d2        | 381605 | 4-:46617271-46662964    |
| 18884 | Eil           | 13716  | 8+:73063600-73116723    |

|       |               |           |                         |
|-------|---------------|-----------|-------------------------|
| 18886 | Slc18a1       | 110877    | 8-:71561611-71613089    |
| 18889 | Shq1          | 72171     | 6-:100523070-100621144  |
| 18892 | Cyp4f40       | 631304    | 17+:32799075-32813423   |
| 18893 | Lace1         | 215951    | 10-:42032391-42198220   |
| 18894 | MMT00030135   |           | 7-:58196157-58198524    |
| 18901 | Hpx           | 15458     | 7-:112740122-112748636  |
| 18903 | Crem          | 12916     | 18-:3266353-3327517     |
| 18905 | Prmt2         | 15468     | 10-:75669973-75700520   |
| 18906 | Zfand3        | 21769     | 17+:30272258-30347638   |
| 18908 | Cldn10        | 58187     | 14+:119187129-119273746 |
| 18911 | Selenbp2      | 20342     | 3+:94497494-94508328    |
| 18922 | Syce1         | 74075     | 7-:147963128-147973779  |
| 18923 | BC025816      | 234796    | 8+:122386204-122400888  |
| 18925 | Kcne1         | 16509     | 16-:92348676-92359119   |
| 18926 | MMT00070399   |           | 14+:44326413-44328553   |
| 18927 | Prl3d3        | 215029    | 13+:27213563-27254459   |
| 18928 | Ttc28         | 209683    | 5+:111529712-111716417  |
| 18931 | MMT00014022   |           | 6+:46994898-46996404    |
| 18932 | Cebpg         | 12611     | 7-:35835402-35842310    |
| 18934 | MMT00015154   |           | 11-:120533745-120534553 |
| 18935 | D230044M03Rik | 76743     | 10-:14435432-14438023   |
| 18936 | Zfp560        | 434377    | 9-:20151747-20206511    |
| 18937 | Cass4         | 320664    | 2+:172219362-172253425  |
| 18938 | MMT00074326   | 100047309 | 10-:95332035-95333441   |
| 18939 | Matn2         | 17181     | 15+:34236439-34365993   |
| 18940 | Olf1086       | 258585    | 2-:86516557-86517488    |
| 18942 | Hs3st3b1      | 54710     | 11-:63702535-63735734   |
| 18943 | Prr11         | 270906    | 11-:86903666-86922195   |
| 18944 | Cyp2j13       | 230459    | 4-:95711924-95744221    |
| 18947 | Ctse          | 13034     | 1+:133558522-133572084  |
| 18948 | Olf1270       | 258987    | 2-:89989246-89990161    |
| 18955 | Chgb          | 12653     | 2+:132607407-132620812  |
| 18963 | 1700041C02Rik | 73332     | 4-:119065258-119073651  |
| 18966 | Dgkg          | 110197    | 16-:22468535-22622365   |
| 18970 | Tnfsf11       | 21943     | 14-:78677258-78707841   |
| 18971 | Dok7          | 231134    | 5+:35409211-35422923    |
| 18972 | Nat5          | 67877     | 2+:145729004-145742052  |
| 18974 | Cse1l         | 110750    | 2+:166731595-166771763  |
| 18978 | Dnahc2        | 327954    | 11-:69234312-69358058   |
| 18980 | Ii7           | 16196     | 3-:7573147-7613727      |
| 18983 | Ifrd2         | 15983     | 9+:107490048-107495369  |
| 18984 | Pias3         | 229615    | 3+:96500391-96509886    |
| 18987 | Treh          | 58866     | 9+:44481320-44494387    |
| 18988 | MMT00012332   |           | 11-:6736286-6737306     |
| 18989 | Tff2          | 21785     | 17-:31278154-31281187   |
| 18990 | Hal           | 15109     | 10+:92951828-92979227   |

|       |               |        |                         |
|-------|---------------|--------|-------------------------|
| 18996 | Ahctf1        | 226747 | 1-:181692705-181713175  |
| 18997 | Qpct          | 70536  | 17+:79451502-79489715   |
| 19000 | Sfmbt2        | 353282 | 2+:10301807-10512195    |
| 19002 | Ociad1        | 68095  | 5+:73684093-73705179    |
| 19004 | Pdk4          | 27273  | 6-:5433350-5446278      |
| 19010 | Bhmt          | 12116  | 13-:94387430-94407456   |
| 19011 | Rpl3l         | 66211  | 17+:24869629-24873088   |
| 19020 | V1rh20        | 171277 | 13-:22943469-22944364   |
| 19022 | Ccnb2         | 12442  | 9-:70255496-70269337    |
| 19023 | Kynu          | 70789  | 2+:43410847-43538237    |
| 19025 | Slc37a4       | 14385  | 9+:44206437-44211046    |
| 19026 | lsg15         | 53606  | 4-:155573563-155574905  |
| 19027 | MMT00058026   |        | 17-:22101212-22101549   |
| 19030 | MMT00011246   |        | 14-:59498087-59499113   |
| 19031 | Mms19         | 72199  | 19-:42018691-42055620   |
| 19032 | Tymp          | 72962  | 15-:89202361-89207468   |
| 19034 | Bag4          | 67384  | 8-:26877672-26895670    |
| 19036 | Ppp2r1a       | 51792  | 17+:21082469-21102434   |
| 19037 | Slc11a2       | 18174  | 15-:100218332-100253414 |
| 19038 | MMT00013556   |        | 2-:50377811-50378556    |
| 19040 | Cdk2ap1       | 13445  | 5-:124795446-124804565  |
| 19041 | 9830102E05Rik | 277898 | 6-:137965905-137992210  |
| 19044 | MMT00004517   |        | 6-:38495246-38499153    |
| 19045 | MMT00027514   |        | 9-:59614519-59614995    |
| 19048 | 4933417A18Rik | 66761  | 13+:35016277-35047744   |
| 19051 | Podnl1        | 244550 | 8+:86650243-86656414    |
| 19052 | Mkrn2         | 67027  | 6+:115551986-115568696  |
| 19056 | Zfp7          | 223669 | 15+:76709688-76722822   |
| 19057 | Cntnap2       | 66797  | 6+:46297080-46371463    |
| 19060 | Adamts13      | 279028 | 2+:26831164-26862327    |
| 19063 | Evl           | 14026  | 12+:109793166-109926634 |
| 19064 | MMT00004867   |        | 1-:154796483-154797341  |
| 19066 | MMT00012632   |        | 3-:130631968-130633683  |
| 19067 | BC023882      | 231123 | 5-:34496549-34512073    |
| 19070 | EG436059      | 436059 | 8+:107538350-107544310  |
| 19071 | Actr10        | 56444  | 12+:72038893-72063269   |
| 19075 | Lmnb2         | 16907  | 10-:80364108-80380906   |
| 19077 | Has2          | 15117  | 15-:56497183-56526053   |
| 19078 | EG668139      | 668139 | 7-:113648313-113740829  |
| 19080 | Myc           | 17869  | 15+:61816940-61821800   |
| 19084 | Mmab          | 77697  | 5-:114883022-114894034  |
| 19086 | MMT00029151   |        |                         |
| 19087 | Wapal         | 218914 | 14+:35486838-35559772   |
| 19089 | Peci          | 23986  | 13-:35069617-35085985   |
| 19092 | MMT00045362   |        | 11+:96806153-96814775   |
| 19094 | Fscn1         | 14086  | 5+:143722051-143734862  |



|       |               |        |                         |
|-------|---------------|--------|-------------------------|
| 19095 | MMT00006438   |        | 6-:69009641-69061200    |
| 19097 | Sema3d        | 108151 | 5+:12383551-12588943    |
| 19098 | MMT00017494   |        | 17+:9605375-9615322     |
| 19099 | Olfr196       | 258775 | 16-:59167037-59167967   |
| 19101 | 4921504E06Rik | 70909  | 2-:19415325-19475541    |
| 19102 | Uhrf1bp1l     | 75089  | 10+:89207779-89283216   |
| 19106 | Nsbp1         | 50887  | X-:106199873-106208698  |
| 19108 | Armet         | 74840  | 9-:106791091-106794246  |
| 19110 | Gm114         | 228730 | 2+:146715326-146795830  |
| 19112 | Upb1          | 103149 | 10+:74869777-74902938   |
| 19115 | Rab32         | 67844  | 10-:10265034-10278016   |
| 19116 | Entpd3        | 215446 | 9+:120430925-120431940  |
| 19117 | Olfr1318      | 258022 | 2+:111996283-111997070  |
| 19124 | Pim3          | 223775 | 15+:88692623-88696155   |
| 19125 | Muc15         | 269328 | 2+:110571805-110579680  |
| 19129 | Serf2         | 378702 | 2+:121275152-121276793  |
| 19131 | Gad2          | 14417  | 2+:22477837-22546510    |
| 19132 | Adam7         | 11500  | 14-:69115395-69151732   |
| 19134 | Fn3k          | 63828  | 11+:121296281-121311797 |
| 19135 | Ankrd22       | 52024  | 19-:34197111-34240393   |
| 19136 | Trim13        | 66597  | 14+:62218392-62224780   |
| 19139 | Olfr112       | 258096 | 17-:37700292-37701254   |
| 19141 | Gorasp1       | 74498  | 9-:119834375-119846677  |
| 19142 | Gpatch1       | 67471  | 7-:36061562-36103459    |
| 19143 | Mrpl40        | 18100  | 16-:18872310-18876730   |
| 19145 | Acsbg1        | 94180  | 9-:54452803-54509692    |
| 19146 | N4bp2l1       | 100637 | 5-:151374223-151379566  |
| 19148 | Rnf144b       | 218215 | 13+:47289389-47341778   |
| 19151 | Dmp1          | 13406  | 5+:104631635-104643129  |
| 19153 | Ptgs1         | 19224  | 2+:36086046-36107782    |
| 19154 | 3110001K24Rik | 75698  | 14-:35050222-35123702   |
| 19157 | Rps19bp1      | 66538  | 15-:80091051-80094726   |
| 19159 | Epn3          | 71889  | 11-:94351996-94361257   |
| 19160 | MMT00042532   |        | X+:85633638-85634431    |
| 19161 | Cav2          | 12390  | 6+:17231357-17239004    |
| 19163 | Cadps2        | 320405 | 6-:23212842-23394045    |
| 19164 | Arhgap15      | 76117  | 2+:43604369-43746048    |
| 19169 | Atp10a        | 11982  | 7+:65913702-66084790    |
| 19171 | Tmem16d       | 320091 | 10-:88434016-88551039   |
| 19172 | Prkg2         | 19092  | 5-:99361027-99466370    |
| 19173 | Mb            | 17189  | 15-:76845918-76881098   |
| 19175 | Spag6         | 50525  | 16-:16753109-16829387   |
| 19176 | 2210404J11Rik | 381062 | 17+:15123436-15201197   |
| 19178 | Bhlhb5        | 59058  | 3+:17954710-17957509    |
| 19182 | Igsf2         | 630146 | 3-:100797454-100824655  |
| 19184 | Skap1         | 78473  | 11+:96563877-96620737   |

|       |               |        |                         |
|-------|---------------|--------|-------------------------|
| 19186 | Pla2g4c       | 232889 | 7+:13910002-13941675    |
| 19187 | Chrm3         | 12671  | 13-:9876474-9878244     |
| 19188 | MMT00042824   |        | 13+:62107935-62108670   |
| 19189 | Sp100         | 20684  | 1+:87546588-87598136    |
| 19190 | MMT00077382   |        | 19-:3821822-3824584     |
| 19191 | Ccng2         | 12452  | 5+:93696620-93705221    |
| 19192 | Hist1h1c      | 50708  | 13+:23830675-23832235   |
| 19194 | EG668450      | 668450 | 14+:70759826-70760251   |
| 19195 | Reep6         | 70335  | 10+:79792914-79799185   |
| 19196 | Nfe2l1        | 18023  | 11-:96678733-96689061   |
| 19199 | Gla           | 11605  | X-:131122894-131135494  |
| 19200 | Hemk1         | 69536  | 9-:107230039-107240626  |
| 19201 | 2210018M11Rik | 233545 | 7-:105736939-105805101  |
| 19202 | 1500031L02Rik | 66994  | 16+:32099887-32108140   |
| 19204 | Prr13         | 66151  | 15+:102289605-102293214 |
| 19205 | Zfp329        | 67230  | 7-:13391445-13404201    |
| 19211 | MMT00046586   |        | 12-:21584046-21586504   |
| 19214 | Snape1        | 75627  | 12+:75065547-75085377   |
| 19216 | Bik           | 12124  | 15+:83357301-83375065   |
| 19217 | Cyr61         | 16007  | 3-:145309941-145312945  |
| 19218 | Mdh1          | 17449  | 11-:21457243-21471816   |
| 19219 | MMT00015104   |        | 3+:138264462-138265091  |
| 19220 | MMT00040501   | 54381  | 15+:33013002-33524259   |
| 19222 | MMT00029634   |        | 6-:130888044-130889986  |
| 19223 | Ercc8         | 71991  | 13+:108948931-108984705 |
| 19226 | Nras          | 18176  | 3+:102862151-102870343  |
| 19227 | MMT00058471   |        | 2-:166832485-166834547  |
| 19228 | CU075549.1    | 620807 | 4+:60018738-60019967    |
| 19230 | 1700106N22Rik | 73582  | 17+:85489942-85602361   |
| 19233 | Ankrd23       | 78321  | 1-:36587038-36604064    |
| 19234 | Nrg4          | 83961  | 9-:55074420-55130425    |
| 19235 | 4921510J17Rik | 70894  | 11+:104953531-104978851 |
| 19236 | MMT00045089   |        | 5+:117508677-117510005  |
| 19238 | Ttc35         | 66736  | 15+:43308774-43359323   |
| 19242 | Ran           | 19384  | 5+:129526051-129529038  |
| 19243 | Olf1557       | 258358 | 7+:109846753-109847721  |
| 19244 | Impdh2        | 23918  | 9+:108462864-108467849  |
| 19247 | Pre1p         | 116847 | 1-:135808988-135817979  |
| 19249 | Olf1767       | 258315 | 10-:128516089-128517017 |
| 19250 | Olf1483       | 258730 | 7+:115246824-115247770  |
| 19252 | Tmsb4x        | 19241  | X-:163645026-163647081  |
| 19259 | Kng1          | 16644  | 16+:23058492-23081762   |
| 19262 | Cd274         | 60533  | 19+:29446941-29462582   |
| 19265 | EG546036      | 546036 | 8+:13986085-14003560    |
| 19267 | Olf1341       | 258952 | 2-:36334708-36335648    |
| 19269 | Lrrc48        | 74665  | 11+:60166881-60207835   |

|       |               |        |                         |
|-------|---------------|--------|-------------------------|
| 19270 | Krit1         | 79264  | 5+:3806466-3840941      |
| 19271 | MMT00063670   |        | 5+:90794340-90799635    |
| 19273 | MMT00073897   |        | 14+:43722358-43724478   |
| 19275 | Farp2         | 227377 | 1+:95408701-95518358    |
| 19276 | H28           | 15061  | 3-:151421702-151425855  |
| 19277 | MMT00044927   |        | 17-:65411187-65415719   |
| 19278 | 1700031M16Rik | 73302  | 15+:98228875-98246699   |
| 19282 | Tbx3          | 21386  | 5+:120121701-120134727  |
| 19284 | Fbxo8         | 50753  | 8+:59029923-59070855    |
| 19286 | 1110012M11Rik | 73711  | 8+:74066850-74071923    |
| 19287 | Rock1         | 19877  | 18-:10067468-10181315   |
| 19289 | Pofut1        | 140484 | 2+:153067298-153091715  |
| 19291 | MMT00032606   |        | 6-:114118922-114119518  |
| 19298 | Unc93b1       | 54445  | 19+:3935193-3949337     |
| 19299 | Pptrz1        | 19283  | 6+:22825721-22954668    |
| 19305 | Azin1         | 54375  | 15-:38419879-38431276   |
| 19306 | Al428936      | 233066 | 7+:31099839-31104066    |
| 19308 | C330006A16Rik | 109299 | 2-:25992332-25995776    |
| 19309 | Slc9a8        | 77031  | 2+:167247208-167302499  |
| 19311 | Masp1         | 17174  | 16-:23449489-23520676   |
| 19317 | EG626952      | 626952 | 15-:78384613-78385361   |
| 19318 | Plk1          | 18817  | 7+:129302951-129313353  |
| 19320 | Cyp2j7        | 546837 | 4-:95866026-95903350    |
| 19322 | Myo15b        | 217328 | 11+:115749673-115753902 |
| 19323 | Bnip3         | 12176  | 7-:146082933-146101152  |
| 19326 | Usp48         | 170707 | 4+:137212948-137214444  |
| 19332 | Bpnt1         | 23827  | 1+:187156079-187180664  |
| 19333 | Ccdc13        | 434446 | 9-:121736351-121743065  |
| 19334 | Gpr44         | 14764  | 19+:11014610-11015758   |
| 19339 | Gem           | 14579  | 4+:11631603-11641896    |
| 19340 | Serpina3k     | 20714  | 12+:105578715-105582491 |
| 19342 | Cth           | 107869 | 3-:157557387-157588013  |
| 19344 | Hdgfrp3       | 29877  | 7-:89038684-89078908    |
| 19345 | Ssh2          | 237860 | 11+:77234760-77270615   |
| 19347 | 1700054M17Rik | 73358  | 2+:118130648-118133897  |
| 19349 | Psg28         | 114871 | 7-:19008239-19017214    |
| 19350 | Siglec5       | 233186 | 7+:50606774-50614839    |
| 19351 | Prkcsh        | 19089  | 9+:21807478-21818665    |
| 19354 | Clu           | 12759  | 14+:66587461-66600385   |
| 19356 | Herc1         | 235439 | 9+:66198373-66221864    |
| 19358 | Grip1         | 74053  | 10+:119256567-119512629 |
| 19359 | Sycp1-ps1     | 20958  | 7+:19371648-19373610    |
| 19360 | Aco1          | 11428  | 4+:40090432-40146043    |
| 19362 | Gper          | 76854  | 5+:139899615-139903743  |
| 19372 | Gnai2         | 14678  | 9-:107516918-107537631  |
| 19373 | MMT00018326   |        | 16-:16196394-16198862   |

|       |               |        |                         |
|-------|---------------|--------|-------------------------|
| 19374 | Dclre1c       | 227525 | 2+:3341421-3371361      |
| 19375 | Inhba         | 16323  | 13+:16106307-16119044   |
| 19382 | Slc2a6        | 227659 | 2-:26876884-26883483    |
| 19385 | Akr1c6        | 83702  | 13+:4433636-4456642     |
| 19389 | lqcb1         | 320299 | 16+:36829088-36872806   |
| 19391 | Apex2         | 77622  | X-:147006050-147022692  |
| 19392 | Slc25a16      | 73132  | 10+:62383409-62409239   |
| 19393 | Synpr         | 72003  | 14+:14117372-14447895   |
| 19394 | Decr1         | 67460  | 4-:15844387-15872520    |
| 19399 | Camta1        | 100072 | 4-:150433634-150448171  |
| 19401 | Ms4a10        | 69826  | 19-:11036784-11049155   |
| 19402 | Ddx19a        | 13680  | 8-:113498913-113521701  |
| 19406 | lkzf1         | 22778  | 11+:11590368-11669801   |
| 19407 | Zhx1          | 22770  | 15-:57878860-57907776   |
| 19408 | MMT00042388   | 260347 | 7-:103059527-103061913  |
| 19410 | Glb1          | 12091  | 9+:114310236-114383495  |
| 19414 | MMT00065577   |        | 2-:162807992-162809075  |
| 19415 | B3gnt2        | 53625  | 11-:22735955-22759513   |
| 19419 | MMT00002063   |        | 19+:8050307-8052539     |
| 19420 | Lcn8          | 78076  | 2+:25508637-25511734    |
| 19421 | Mbd2          | 17191  | 18+:70727841-70785783   |
| 19422 | Fkbp1b        | 14226  | 12-:4839993-4848345     |
| 19423 | Rlf           | 109263 | 4-:120818488-120887580  |
| 19424 | Mcoln1        | 94178  | 8+:3500518-3515229      |
| 19426 | Golga7        | 57437  | 8-:24351817-24367484    |
| 19429 | Scx           | 20289  | 15+:76287866-76289550   |
| 19432 | MMT00068429   |        |                         |
| 19433 | Mex3b         | 108797 | 7+:90017065-90018718    |
| 19436 | Dapp1         | 26377  | 3-:137594569-137644488  |
| 19440 | Anxa9         | 71790  | 3-:95100016-95111054    |
| 19443 | Prkab1        | 19079  | 5-:116463596-116474460  |
| 19444 | EG623519      | 623519 | 16+:16968701-16969021   |
| 19447 | MMT00004670   |        | 14+:24775161-24827036   |
| 19451 | Armc7         | 276905 | 11+:115336999-115351783 |
| 19452 | Gm97          | 225923 | 19+:11771551-11786346   |
| 19453 | Cdk2ap2       | 52004  | 19+:4097350-4099017     |
| 19456 | Olf727        | 258316 | 14+:50746253-50747226   |
| 19459 | Frk           | 14302  | 10+:34203325-34328382   |
| 19462 | 4933439C20Rik | 66776  | 11+:3027555-3059995     |
| 19465 | Hacl1         | 56794  | 14-:32421045-32454149   |
| 19466 | Pptc7         | 320717 | 5+:122734371-122774286  |
| 19478 | Rnaseh2b      | 67153  | 14+:62950940-62991830   |
| 19482 | Efhc1         | 71877  | 1+:20941765-20980923    |
| 19483 | Depdc2        | 109294 | 1+:11079742-11279401    |
| 19487 | Adh5          | 11532  | 3+:138106106-138118264  |
| 19490 | MMT00078676   |        | 7+:35036056-35036510    |

|       |               |        |                         |
|-------|---------------|--------|-------------------------|
| 19493 | Icosl         | 50723  | 10+:77532203-77542270   |
| 19496 | Glyctk        | 235582 | 9-:106055291-106060449  |
| 19497 | Dync2h1       | 110350 | 9-:7140888-7177020      |
| 19502 | Fbxo24        | 71176  | 5-:138053733-138066308  |
| 19511 | Pcdhb21       | 93892  | 18+:37673473-37676017   |
| 19516 | Ppfia4        | 68507  | 1-:136193370-136229100  |
| 19519 | BC011248      | 224823 | 17-:46804406-46811204   |
| 19520 | Uck2          | 80914  | 1-:169156218-169215254  |
| 19522 | Tcf21         | 21412  | 10-:22537084-22539934   |
| 19524 | Rhag          | 19743  | 17+:40948097-40977703   |
| 19528 | Zfp503        | 218820 | 14-:22803184-22807084   |
| 19532 | Med8          | 80509  | 4+:118081984-118087714  |
| 19533 | Gpr62         | 436090 | 9-:106366291-106368225  |
| 19535 | MMT00041431   |        | 2+:16191092-16192193    |
| 19540 | Zfp428        | 232969 | 7+:25292204-25300683    |
| 19541 | Glyat         | 107146 | 19+:12708022-12726227   |
| 19542 | Hspb7         | 29818  | 4+:140977642-140980114  |
| 19543 | B3gnt3        | 72297  | 8-:74215796-74217798    |
| 19544 | Cga           | 12640  | 4+:34841027-34854623    |
| 19545 | Rps9          | 76846  | 7+:3655610-3658643      |
| 19547 | MMT00022553   |        | 12+:14501275-14502094   |
| 19548 | Mgst3         | 66447  | 1-:169302514-169323928  |
| 19550 | Zfx           | 22764  | X-:91320427-91368239    |
| 19551 | Rab11fip2     | 74998  | 19-:59982599-60018903   |
| 19552 | Nlgn1         | 192167 | 3-:25594122-26032688    |
| 19553 | Chtf18        | 214901 | 17-:25855975-25864347   |
| 19554 | 6330549D23Rik | 229613 | 3-:96411544-96412703    |
| 19555 | Cthrc1        | 68588  | 15+:38908482-38918665   |
| 19556 | Efna1         | 13636  | 3-:89076136-89083526    |
| 19559 | Icmt          | 57295  | 4+:151671419-151681759  |
| 19560 | Trmt6         | 66926  | 2-:132629941-132641791  |
| 19563 | Adam18        | 13524  | 8-:25712718-25785225    |
| 19564 | Bcam          | 57278  | 7-:20341487-20355825    |
| 19565 | EG385454      | 385454 | X-:149546947-149548891  |
| 19567 | MMT00053547   |        | 5-:98504396-98507325    |
| 19570 | Pomc          | 18976  | 12+:3958128-3960467     |
| 19573 | Serpine1      | 18787  | 5-:137537377-137548129  |
| 19574 | Gm1502        | 385120 | 6-:69217839-69218103    |
| 19577 | Rpa3          | 68240  | 6-:8205938-8209113      |
| 19578 | Aox1          | 11761  | 1+:58086847-58163254    |
| 19579 | Sirt1         | 93759  | 10-:62781808-62801765   |
| 19583 | Hcrt          | 15171  | 11-:100623006-100624245 |
| 19584 | Nav2          | 78286  | 7+:56675543-56708328    |
| 19587 | Avpr2         | 12000  | X+:71137440-71139765    |
| 19589 | Slc16a9       | 66859  | 10+:69708023-69748699   |
| 19590 | MMT00026015   |        | 4+:82839845-82840950    |

|       |               |        |                         |
|-------|---------------|--------|-------------------------|
| 19595 | MMT00056884   |        |                         |
| 19597 | MMT00001011   |        |                         |
| 19602 | Il5ra         | 16192  | 6-:106660374-106699031  |
| 19606 | Egr2          | 13654  | 10+:67000626-67004935   |
| 19607 | Birc3         | 11796  | 9-:7848702-7873024      |
| 19610 | Igh-VX24      | 195176 | 12-:114849374-114849828 |
| 19611 | Cog8          | 97484  | 8-:109572608-109580557  |
| 19612 | MMT00028216   |        | 13+:68995359-68996138   |
| 19613 | EG546387      | 546387 | X-:146657131-146657879  |
| 19617 | MMT00013143   |        |                         |
| 19618 | Snx6          | 72183  | 12-:55847343-55896649   |
| 19619 | Zfp438        | 240186 | 18-:5210033-5334438     |
| 19620 | Zfand2a       | 100494 | 5-:139947170-139960342  |
| 19621 | Cldn5         | 12741  | 16+:18777067-18778352   |
| 19622 | Bdh2          | 69772  | 3+:134944189-134967387  |
| 19623 | Myl7          | 17898  | 11-:5796638-5798782     |
| 19624 | Olfir378      | 259026 | 11-:73238539-73239483   |
| 19629 | Smarcd3       | 66993  | 5-:24098442-24107766    |
| 19631 | Nsmce1        | 67711  | 7-:132611167-132634957  |
| 19633 | Gm694         | 277744 | 4-:140988587-140992031  |
| 19638 | Samd3         | 268288 | 10+:25983587-25991977   |
| 19640 | Tph2          | 216343 | 10-:114516768-114619955 |
| 19641 | Rps14         | 20044  | 18+:60936056-60938151   |
| 19644 | MMT00042763   | 65115  | 8+:106694787-106743021  |
| 19645 | Il12rb2       | 16162  | 6-:67242011-67326131    |
| 19647 | Cort          | 12854  | 4-:148499301-148500771  |
| 19651 | Thex1         | 67276  | 8-:36530292-36558587    |
| 19655 | 3110040N11Rik | 67290  | 7-:88926879-88934317    |
| 19658 | Cldnd2        | 74276  | 7+:50696149-50698697    |
| 19659 | MMT00005649   |        | X+:98899617-98921323    |
| 19660 | Gkap1         | 56278  | 13-:58334815-58357204   |
| 19661 | Epb4.1l2      | 13822  | 10+:25187897-25243320   |
| 19663 | Tnfrsf22      | 79202  | 7-:150824191-150835503  |
| 19665 | MMT00034233   |        | 18-:59989185-60015084   |
| 19666 | MMT00012505   |        | 3+:112394525-112395469  |
| 19668 | Zfp509        | 75079  | 5-:38590835-38607860    |
| 19670 | Fbxl14        | 101358 | 6+:119429803-119432631  |
| 19671 | Upp2          | 76654  | 2+:58607351-58643648    |
| 19672 | Cldn19        | 242653 | 4+:118928004-118932461  |
| 19674 | MMT00030712   | 16098  | 6+:70468234-70468839    |
| 19675 | Rer1          | 67830  | 4-:154448220-154460406  |
| 19678 | Scn11a        | 24046  | 9-:119662884-119734574  |
| 19680 | Gm1420        | 546213 | 6-:69598810-69701304    |
| 19685 | MMT00009602   |        | 11-:117179232-117202029 |
| 19688 | Fap           | 14089  | 2-:62339001-62412078    |
| 19689 | 1110032A13Rik | 68731  | 18-:80388998-80397398   |

|       |               |        |                         |
|-------|---------------|--------|-------------------------|
| 19690 | Arf5          | 11844  | 6+:28373639-28376499    |
| 19694 | Grb14         | 50915  | 2-:64750541-64860823    |
| 19696 | Thoc4         | 21681  | 11-:120455829-120459679 |
| 19697 | Nek1          | 18004  | 8+:63472015-63610140    |
| 19698 | Sema3c        | 20348  | 5+:17080681-17233655    |
| 19699 | Rnf180        | 71816  | 13-:105921527-106084900 |
| 19700 | E030011K20Rik | 208613 | 3-:27764987-27785416    |
| 19701 | 9930021J17Rik | 229488 | 3-:85463981-85621216    |
| 19705 | H2-T3         | 15043  | 17-:36323516-36327073   |
| 19708 | Ly6a          | 110454 | 15-:74825416-74828330   |
| 19709 | 1-Sep         | 54204  | 7-:134357963-134361967  |
| 19713 | BC048599      | 232717 | 6-:40845261-40847865    |
| 19716 | Rpp30         | 54364  | 19+:36158226-36179106   |
| 19717 | Ccdc27        | 381580 | 4-:153400474-153402237  |
| 19719 | EG634650      | 634650 | 5-:105752643-105775478  |
| 19720 | Cyp26c1       | 546726 | 19+:37760169-37767771   |
| 19722 | Pvr1l         | 58235  | 9+:43612803-43614851    |
| 19723 | Pfkfb1        | 18639  | X+:147028925-147078423  |
| 19724 | Lancl2        | 71835  | 6+:57652629-57688473    |
| 19725 | Dcp2          | 70640  | 18+:44540156-44577605   |
| 19726 | Erp29         | 67397  | 5-:121894764-121902388  |
| 19727 | Ttr           | 22139  | 18+:20823913-20832818   |
| 19728 | 1110007L15Rik | 67604  | 5+:139728328-139746004  |
| 19730 | Mamdc2        | 71738  | 19-:23377098-23522931   |
| 19731 | Olfir275      | 258857 | 4+:52838270-52839228    |
| 19732 | MMT00024414   | 73980  | 1+:54738570-54793660    |
| 19734 | Dchs1         | 233651 | 7-:112901503-112921713  |
| 19737 | Enpp1         | 18605  | 10-:24361216-24431908   |
| 19738 | Lgals3bp      | 19039  | 11-:118254065-118263245 |
| 19739 | Cmpk1         | 66588  | 4-:114633244-114659751  |
| 19740 | Gpr98         | 110789 | 13-:81234067-81581613   |
| 19742 | Cdc2l1        | 12537  | 4+:154998991-155024041  |
| 19743 | Atg16l1       | 77040  | 1+:89652672-89688997    |
| 19744 | Acy3          | 71670  | 19+:3986572-3990003     |
| 19747 | Spr           | 20751  | 6-:85083679-85087812    |
| 19748 | Cpa2          | 232680 | 6+:30491656-30514477    |
| 19751 | Kbtbd5        | 72330  | 9+:121686807-121692937  |
| 19757 | Fkbp5         | 14229  | 17-:28536866-28578001   |
| 19758 | Snx1          | 56440  | 9-:65935945-65972693    |
| 19762 | Pih1d1        | 68845  | 7+:52409767-52415434    |
| 19763 | Acp2          | 11432  | 2+:91042983-91052296    |
| 19766 | Slc26a4       | 23985  | 12-:32204684-32244834   |
| 19767 | Etv6          | 14011  | 6+:133985957-134216777  |
| 19771 | Fbp1          | 14121  | 13-:62966113-62989596   |
| 19772 | Gnmt          | 14711  | 17-:46862614-46866114   |
| 19773 | EG668838      | 668838 | 7-:54076232-54076871    |

|       |               |        |                         |
|-------|---------------|--------|-------------------------|
| 19775 | Klhl31        | 244923 | 9+:77497810-77503818    |
| 19777 | Lrit1         | 239037 | 14+:37868020-37878123   |
| 19780 | MMT00052614   |        | 12-:79356420-79356718   |
| 19790 | Polg2         | 50776  | 11-:106629619-106640756 |
| 19791 | E2f3          | 13557  | 13-:30001287-30077289   |
| 19792 | Hook1         | 77963  | 4+:95633987-95689115    |
| 19794 | Rgs2          | 19735  | 1-:145848226-145851263  |
| 19797 | Coq9          | 67914  | 8+:97362295-97378793    |
| 19798 | Tnk2          | 51789  | 16+:32644946-32683578   |
| 19799 | 9530008L14Rik | 109254 | 13-:41859501-41942986   |
| 19803 | BC003993      | 80744  | 2-:77733824-77784223    |
| 19806 | 4732429D16Rik | 217305 | 11-:114843762-114851200 |
| 19808 | Fetub         | 59083  | 16+:22920373-22939824   |
| 19809 | Cpvl          | 71287  | 6-:53823272-53928668    |
| 19811 | Cel           | 12613  | 2-:28411339-28418882    |
| 19812 | Armcx2        | 67416  | X-:131338685-131343535  |
| 19814 | 4930458L03Rik | 78124  | 13+:65018862-65138977   |
| 19822 | MMT00004881   |        | 4-:105046460-105047615  |
| 19823 | Gp5           | 14729  | 16-:30308238-30309940   |
| 19824 | Cetn3         | 12626  | 13+:81922339-81935694   |
| 19826 | Nanp          | 67311  | 2-:150855432-150865091  |
| 19827 | MMT00003831   |        | 19-:50614298-50615375   |
| 19828 | Apoa1         | 11806  | 9+:46036792-46038547    |
| 19830 | Irf4          | 16364  | 13+:30841126-30858794   |
| 19831 | Fgd6          | 13998  | 10+:93498743-93506365   |
| 19833 | Ddah2         | 51793  | 17+:35196045-35199038   |
| 19834 | Jarid1d       | 20592  | Y+:234215-280253        |
| 19835 | Iars2         | 381314 | 1-:187108096-187121466  |
| 19839 | EG269105      | 269105 | 1+:15057153-15057543    |
| 19840 | Kcnip3        | 56461  | 2-:127282239-127347076  |
| 19842 | B230315N10Rik | 237411 | 10-:81687603-81704015   |
| 19843 | Rbm45         | 241490 | 2+:76208113-76221822    |
| 19844 | Ngf           | 18049  | 3+:102317877-102324928  |
| 19850 | MMT00036391   |        | 6+:140368645-140369175  |
| 19851 | Gnb4          | 14696  | 3-:32483976-32501063    |
| 19854 | Kcnj14        | 211480 | 7-:53071837-53080117    |
| 19857 | Rab1b         | 76308  | 19-:5099206-5106996     |
| 19861 | Lrrc7         | 242274 | 3-:157747339-158115753  |
| 19866 | Uso1          | 56041  | 5+:92566965-92631832    |
| 19868 | Was           | 22376  | X-:7658591-7667578      |
| 19870 | Pcdhb15       | 93886  | 18+:37633370-37635729   |
| 19871 | MMT00065790   |        | 14-:15280277-15281554   |
| 19874 | Prmt1         | 15469  | 7-:52232127-52241702    |
| 19876 | 6030443O07Rik | 226151 | 19+:45005571-45058273   |
| 19885 | A1427122      | 102502 | 9-:95653063-95745698    |
| 19890 | Tmem119       | 231633 | 5-:114243738-114250361  |



|       |               |        |                         |
|-------|---------------|--------|-------------------------|
| 19891 | Azi1          | 12009  | 11-:119925749-119948132 |
| 19892 | EG546164      | 546164 | 9-:115346777-115347723  |
| 19897 | Chsy3         | 78923  | 18+:59568537-59570928   |
| 19900 | Serinc5       | 218442 | 13+:93430972-93481907   |
| 19904 | Ltb           | 16994  | 17+:35331466-35333247   |
| 19906 | Tfpi          | 21788  | 2-:84280878-84314152    |
| 19907 | Spata19       | 75469  | 9+:27204405-27209295    |
| 19908 | Olf676        | 259099 | 7+:112183713-112184665  |
| 19910 | St6galnac1    | 20445  | 11-:116626339-116636821 |
| 19912 | Inpp1         | 16329  | 1-:52846265-52874381    |
| 19913 | 1810030J14Rik | 66289  | 1+:176260648-176263004  |
| 19914 | Acaca         | 107476 | 11+:84008939-84159590   |
| 19917 | Nek2          | 18005  | 1+:193645440-193656921  |
| 19919 | Unc5b         | 107449 | 10-:60227343-60294329   |
| 19920 | Dph2          | 67728  | 4-:117561248-117564636  |
| 19921 | Stxbp5l       | 207227 | 16-:37115917-37385025   |
| 19923 | Capn3         | 12335  | 2+:120289608-120330234  |
| 19924 | Ubiad1        | 71707  | 4-:147808605-147818860  |
| 19925 | Arsa          | 11883  | 15-:89302907-89307203   |
| 19929 | MMT00079667   |        | 13-:82517908-82518445   |
| 19932 | MMT00075591   |        | 3+:68649921-68651817    |
| 19933 | Pi16          | 74116  | 17+:29456186-29464894   |
| 19934 | MMT00079286   |        |                         |
| 19935 | Zdhhc11       | 71164  | 13+:74101296-74130437   |
| 19936 | Egf           | 13645  | 3-:129380495-129458234  |
| 19939 | Serpinb9b     | 20706  | 13+:33119282-33132425   |
| 19940 | Eomes         | 13813  | 9+:118387329-118395238  |
| 19941 | 1700080E11Rik | 73532  | 9-:105045673-105047412  |
| 19946 | Elf5          | 13711  | 2+:103264233-103291142  |
| 19947 | Fcrla         | 98752  | 1-:172848025-172857671  |
| 19949 | Tubgcp2       | 74237  | 7-:147181894-147222165  |
| 19951 | Tmem63b       | 224807 | 17-:45797125-45823856   |
| 19952 | Tlcd1         | 68385  | 11+:77992267-77994273   |
| 19954 | Abcd3         | 19299  | 3-:121463149-121518036  |
| 19955 | Cbx2          | 12416  | 11+:118884275-118890649 |
| 19958 | Rab38         | 72433  | 7+:95578840-95639983    |
| 19960 | MMT00015578   |        | 5+:10558352-10559434    |
| 19964 | Ndufa9        | 66108  | 6-:126771972-126799143  |
| 19966 | Thap4         | 67026  | 1-:95601968-95647652    |
| 19970 | Mrpl36        | 94066  | 13+:73468456-73469625   |
| 19971 | B930046C15Rik | 544998 | 14+:3518337-3539523     |
| 19972 | Copg2         | 54160  | 6-:30698411-30846697    |
| 19974 | Pax6          | 18508  | 2+:105516098-105537498  |
| 19975 | 1200015N20Rik | 71721  | 10+:70015790-70021477   |
| 19976 | Cyp4a10       | 13117  | 4+:115192187-115193802  |
| 19978 | Rspo1         | 192199 | 4+:124663673-124686343  |

|       |                  |           |                         |
|-------|------------------|-----------|-------------------------|
| 19979 | Inha             | 16322     | 1+:75503822-75506736    |
| 19982 | ENSMUSG000000710 | 100038711 | 17-:86897071-86904579   |
| 19985 | Gstcd            | 67553     | 3-:132644739-132747968  |
| 19986 | MMT00026797      |           | 16+:47075750-47076054   |
| 19987 | Tspan13          | 66109     | 12-:36741143-36769003   |
| 19990 | 4921515J06Rik    | 66715     | 3+:108743029-108763690  |
| 19995 | Pwp1             | 103136    | 10+:85334609-85351841   |
| 19997 | lkbke            | 56489     | 1-:133151177-133173153  |
| 19999 | lft122           | 81896     | 6+:115724628-115876712  |
| 20003 | Nek10            | 238944    | 14+:15683273-15694202   |
| 20004 | 1190005F20Rik    | 98685     | 1+:153275792-153305294  |
| 20005 | Dpy19l3          | 233115    | 7-:36514704-36539390    |
| 20012 | Gm336            | 240539    | 19-:11165060-11166907   |
| 20017 | MMT00006294      |           | 17+:36294836-36296988   |
| 20019 | Qdpr             | 110391    | 5-:45825813-45841419    |
| 20022 | Mei1             | 74369     | 15+:81912904-81957244   |
| 20024 | Lrrc32           | 434215    | 7+:105642731-105650338  |
| 20035 | Zbtb46           | 72147     | 2-:181145254-181194131  |
| 20036 | Olfr1342         | 258708    | 4-:118362108-118363055  |
| 20037 | Extl3            | 54616     | 14-:65673184-65697025   |
| 20038 | MMT00008174      |           | 11-:79184763-79185440   |
| 20039 | Trpc4            | 22066     | 3+:53960025-54122389    |
| 20045 | D4Wsu114e        | 28010     | 4-:147234900-147242571  |
| 20047 | Dysf             | 26903     | 6+:83958576-84161058    |
| 20049 | 2310044G17Rik    | 217732    | 12+:88288389-88306304   |
| 20053 | Wnt10a           | 22409     | 1+:74838089-74850747    |
| 20055 | Ghrh             | 14601     | 2-:157155236-157159528  |
| 20058 | Dnaic1           | 68922     | 4+:41516825-41585578    |
| 20061 | EG383436         | 383436    | 19+:12921355-12921695   |
| 20068 | 2610204M08Rik    | 70435     | 12+:113838204-113853770 |
| 20076 | Dbnl             | 13169     | 11+:5688532-5700964     |
| 20077 | Ccdc115          | 69668     | 1-:34493514-34501514    |
| 20078 | MMT00023360      |           | 7-:10045692-10045742    |
| 20079 | MMT00019254      |           | 14-:58054555-58055353   |
| 20083 | ENSMUSG000000734 | 69717     | 17-:36278702-36279740   |
| 20085 | Lpin2            | 64898     | 17+:71533317-71596419   |
| 20086 | Clk2             | 12748     | 3+:88969004-88980517    |
| 20087 | Cd44             | 12505     | 2-:102651301-102696126  |
| 20088 | Rapgef1          | 107746    | 2+:29475306-29593850    |
| 20089 | MMT00015975      |           |                         |
| 20090 | Slc45a2          | 22293     | 15+:10930567-10958065   |
| 20092 | Matr3            | 17184     | 18+:35731677-35732590   |
| 20093 | Ablim1           | 226251    | 19-:57107760-57290289   |
| 20096 | Olfr444          | 258650    | 6+:42878371-42906429    |
| 20098 | MMT00046724      |           | Y+:2086608-2097759      |
| 20099 | MMT00019756      |           | 17+:55839839-55840883   |

|       |               |        |                         |
|-------|---------------|--------|-------------------------|
| 20100 | Guca1b        | 107477 | 17+:47522341-47529914   |
| 20102 | Caskin2       | 140721 | 11-:115660692-115673494 |
| 20103 | Car14         | 23831  | 3-:95701723-95708562    |
| 20104 | BC048679      | 210321 | 7-:88639165-88643170    |
| 20106 | MMT00030605   |        | 1+:193916252-193923720  |
| 20113 | Spata22       | 380709 | 11+:73153717-73159427   |
| 20118 | Tmem175       | 72392  | 5+:109058899-109075805  |
| 20119 | Polr3h        | 78929  | 15-:81745459-81756639   |
| 20122 | Tmem86a       | 67893  | 7+:54306009-54310146    |
| 20124 | 1700021F05Rik | 67851  | 10-:43244926-43260800   |
| 20126 | Aoc3          | 11754  | 11+:101191918-101200737 |
| 20127 | Ipo8          | 320727 | 6-:148719206-148779959  |
| 20132 | Cops2         | 12848  | 2-:125657337-125684721  |
| 20134 | Ppp1r14c      | 76142  | 10-:6881567-6980391     |
| 20135 | Gramd3        | 107022 | 18+:56559990-56662493   |
| 20136 | Col13a1       | 12817  | 10-:61301245-61441856   |
| 20143 | Abhd13        | 68904  | 8+:9977671-9988679      |
| 20145 | Glrp          | 14658  | 3-:80648052-80717456    |
| 20147 | Ybx1          | 22608  | 4-:118950590-118966411  |
| 20148 | Pttg1         | 30939  | 11-:43233766-43239483   |
| 20149 | Cabyr         | 71132  | 18+:12899857-12913645   |
| 20150 | Ptprc         | 19264  | 1-:139959991-140071843  |
| 20151 | MMT00052319   |        | 1-:17930905-17931239    |
| 20152 | Tmc5          | 74424  | 7+:125770667-125818596  |
| 20154 | Trdn          | 76757  | 10+:33165224-33194477   |
| 20156 | Apoc2         | 11813  | 7-:20256933-20262111    |
| 20157 | Ets1          | 23871  | 9+:32503878-32562090    |
| 20158 | Slc38a1       | 105727 | 15-:96406706-96454601   |
| 20162 | MMT00050725   |        | 8-:82634705-82636075    |
| 20163 | Prr7          | 432763 | 13+:55573385-55574512   |
| 20168 | Aard          | 239435 | 15+:51871563-51877266   |
| 20169 | Ralgds        | 19730  | 2+:28368850-28408590    |
| 20171 | 1700008G05Rik | 75497  | 3-:10245919-10301183    |
| 20172 | 4930502E18Rik | 75013  | X+:51027999-51041617    |
| 20174 | Ctnna2        | 12386  | 6-:76831648-77929582    |
| 20175 | Hoxb2         | 103889 | 11+:96214114-96215326   |
| 20179 | EG238836      | 238836 | 13+:105708758-105709614 |
| 20181 | 4930403C10Rik | 73813  | 7+:52977550-52984859    |
| 20183 | MMT00011814   |        | 1+:16043390-16044000    |
| 20185 | Rpl39l        | 68172  | 16+:10170320-10175004   |
| 20187 | Gphn          | 268566 | 12-:79326104-79328751   |
| 20190 | MMT00019998   |        | 15+:71140369-71141202   |
| 20191 | Clca5         | 229933 | 3-:144734164-144762122  |
| 20193 | Olfir771      | 258540 | 10-:128597084-128598038 |
| 20194 | Pnlcd1        | 240023 | 17-:13081596-13088463   |
| 20197 | Igh           | 111507 | 12-:116152786-116153243 |

|       |                |        |                         |
|-------|----------------|--------|-------------------------|
| 20209 | 5730557B15Rik  | 67434  | 15-:31226418-31297320   |
| 20210 | Copb1          | 70349  | 7-:121359075-121398133  |
| 20211 | Pdzk1          | 59020  | 3+:96634048-96674848    |
| 20213 | Psd3           | 234353 | 8-:70487856-70586173    |
| 20215 | MMT00044766    |        | 4-:144115810-144117020  |
| 20216 | BC028528       | 229600 | 3-:95688882-95695893    |
| 20217 | Rab3ip         | 216363 | 10-:116342836-116376532 |
| 20219 | MMT00076423    |        | 7-:115094858-115096142  |
| 20220 | MMT00080766    | 664870 | 8-:3841083-3842610      |
| 20221 | Ift57          | 73916  | 16+:49699388-49764223   |
| 20223 | Sc5d           | 235293 | 9-:42062195-42072388    |
| 20226 | EG623402       | 623402 | 19-:8663012-8663686     |
| 20227 | Kras           | 16653  | 6-:145168331-145198729  |
| 20230 | Ppp1r14b       | 18938  | 19+:7050984-7051815     |
| 20233 | Krt6b          | 16688  | 15-:101506960-101524679 |
| 20237 | RP23-433P19.11 | 574418 | 2-:121276913-121282429  |
| 20238 | H2-T9          | 15051  | 17-:36175353-36179405   |
| 20241 | Cts7           | 56092  | 13-:61453821-61459557   |
| 20243 | Wfikkn1        | 215001 | 17-:26014634-26016988   |
| 20246 | Pdia5          | 72599  | 16-:35397388-35490961   |
| 20254 | D12Ert551e     | 52635  | 12-:117608805-117608949 |
| 20255 | Elfn2          | 207393 | 15-:78502303-78504775   |
| 20259 | B830045N13Rik  | 215378 | 1+:148529688-148749599  |
| 20265 | Rsph1          | 22092  | 17-:31391968-31414252   |
| 20266 | Insig2         | 72999  | 1-:123200930-123224339  |
| 20267 | Lgals1         | 16852  | 15+:78757154-78760625   |
| 20269 | Hsd17b13       | 243168 | 5-:104392479-104406408  |
| 20273 | 4733401H18Rik  | 66706  | 9-:108468195-108469673  |
| 20274 | Klf2           | 16598  | 8+:74842931-74845248    |
| 20275 | Igfbp5         | 16011  | 1-:72904611-72921460    |
| 20279 | Apoa1bp        | 246703 | 3-:87860444-87862417    |
| 20281 | Naip1          | 17940  | 13-:101177720-101216466 |
| 20283 | Atp6v1e2       | 74915  | 17-:87343446-87347213   |
| 20285 | Nsd1           | 18193  | 13+:55314563-55416241   |
| 20291 | Rasa2          | 114713 | 9-:96442863-96531912    |
| 20292 | 1810048J11Rik  | 67708  | 12+:73637365-73643230   |
| 20293 | MMT00017521    |        | X-:103836719-103838010  |
| 20296 | C030027H14Rik  | 77465  | 10+:121218048-121218499 |
| 20300 | Plekha1        | 27276  | 7-:107792410-107810879  |
| 20303 | EG272350       | 272350 | 7+:5310762-5311470      |
| 20304 | Ccrk           | 105278 | 13+:64533850-64540971   |
| 20309 | MMT00079689    |        | 15+:77532357-77533543   |
| 20312 | Htt            | 15194  | 5+:35104373-35252045    |
| 20313 | Rpusd2         | 271842 | 2+:118860523-118865493  |
| 20317 | Pex5l          | 58869  | 3-:33030492-33042001    |
| 20319 | Syne2          | 319565 | 12+:77026619-77031717   |

|       |                 |           |                         |
|-------|-----------------|-----------|-------------------------|
| 20321 | Ms4a6b          | 69774     | 19+:11593118-11604557   |
| 20324 | Tppp            | 72948     | 13+:74158590-74169146   |
| 20325 | 4921522P10Rik   | 66719     | 8+:8661800-8664728      |
| 20328 | Csl             | 71832     | 10-:99220338-99222292   |
| 20330 | Foxa3           | 15377     | 7-:19598631-19608888    |
| 20332 | Stau2           | 29819     | 1-:16218886-16221172    |
| 20333 | Calca           | 12310     | 7-:121776811-121779808  |
| 20335 | Srgn            | 19073     | 10-:61957175-61970503   |
| 20337 | St6galnac4      | 20448     | 2+:32442602-32455214    |
| 20339 | OTTMUSG00000010 | 626316    | 4+:146064815-146094022  |
| 20340 | Slfn14          | 237890    | 11-:83092652-83097665   |
| 20341 | Srebf2          | 20788     | 15+:81977675-82035810   |
| 20343 | Ttc19           | 72795     | 11+:62094983-62128748   |
| 20345 | Al842396        | 103844    | 11-:70501861-70513646   |
| 20346 | Gna-rs1         | 14670     | 17+:36117622-36125811   |
| 20348 | EG210853        | 210853    | 17-:22065153-22426864   |
| 20349 | MMT00054511     |           | 9-:65888767-65890437    |
| 20350 | Pigc            | 67292     | 1+:163899357-163902461  |
| 20353 | Antxr1          | 69538     | 6-:87083847-87285436    |
| 20355 | Zfyve28         | 231125    | 5-:34541416-34630852    |
| 20356 | Mrps35          | 232536    | 6+:146991325-147019421  |
| 20361 | Mtmr14          | 97287     | 6+:113187854-113231377  |
| 20362 | Sh3bp5l         | 79566     | 11+:58145048-58161228   |
| 20363 | Dcun1d2         | 102323    | 8-:13255963-13288167    |
| 20364 | Zfp422          | 67255     | 6-:116574935-116578939  |
| 20370 | Sccpdh          | 109232    | 1+:181606521-181617318  |
| 20372 | Heatr1          | 217995    | 13+:12524927-12531159   |
| 20373 | Klhl14          | 225266    | 18-:21708881-21810869   |
| 20374 | Zfp780b         | 338354    | 7-:28695189-28790337    |
| 20380 | MMT00058516     |           | 11+:70171425-70174036   |
| 20381 | Vtn             | 22370     | 11+:78312787-78315825   |
| 20384 | BC034069        | 100038347 | 7+:80885194-80921804    |
| 20385 | Chd1l           | 68058     | 3-:97364670-97414113    |
| 20387 | Defb1           | 13214     | 8+:22887081-22905191    |
| 20388 | Olr1            | 108078    | 6-:129435269-129457172  |
| 20390 | Cd9             | 12527     | 6-:125410283-125444711  |
| 20391 | Oas1h           | 246729    | 5+:121311430-121323512  |
| 20393 | 1110018G07Rik   | 68497     | 12-:86259100-86284342   |
| 20394 | EG668225        | 668225    | 15-:100882896-100884841 |
| 20397 | Sema3e          | 20349     | 5+:14025316-14254314    |
| 20398 | Prh1            | 19131     | 6+:132521906-132521950  |
| 20400 | Kif7            | 16576     | 7-:86842597-86859044    |
| 20402 | MMT00007367     |           | 16+:3391231-3391269     |
| 20403 | MMT00024375     |           | 14+:38535407-38536343   |
| 20404 | MMT00003113     |           | 19-:45471254-45472111   |
| 20405 | Clip1           | 56430     | 5-:124029082-124062172  |

|       |               |        |                         |
|-------|---------------|--------|-------------------------|
| 20406 | Cacng2        | 12300  | 15-:77825392-77949710   |
| 20410 | MMT00028069   |        | 9-:88169814-88176034    |
| 20413 | Wdr86         | 269633 | 5-:24218083-24218639    |
| 20416 | Cnn1          | 12797  | 9+:21903711-21913169    |
| 20417 | Trappc9       | 76510  | 15-:72420050-72587793   |
| 20419 | Adra1b        | 11548  | 11-:43589362-43650305   |
| 20421 | Cdkn2c        | 12580  | 4-:109333751-109338267  |
| 20423 | 8-Mar         | 71779  | 6+:116288399-116359556  |
| 20425 | Zbtb11        | 271377 | 16+:55973992-56008993   |
| 20428 | MMT00026261   |        | 6-:47736147-47738382    |
| 20429 | Tmem202       | 73893  | 9-:59366461-59373259    |
| 20430 | Trio          | 223435 | 15-:27660409-27849046   |
| 20431 | Slc7a7        | 20540  | 14-:54989127-55027885   |
| 20432 | Smc1b         | 140557 | 15-:84895118-84962387   |
| 20433 | Cdca5         | 67849  | 19+:6085098-6091773     |
| 20436 | Mctp1         | 78771  | 13+:76521982-76598910   |
| 20441 | Olf1034       | 258216 | 2+:85886874-85887572    |
| 20444 | Ckap2l        | 70466  | 2-:129094653-129122947  |
| 20449 | MMT00062045   |        | 3+:98624862-98626457    |
| 20451 | Agr2          | 23795  | 12+:36719511-36730667   |
| 20454 | MMT00018457   |        | 2-:36929746-36938002    |
| 20457 | Gtf2a2        | 235459 | 9+:69860348-69870672    |
| 20458 | Dync2h1       | 110350 | 9-:6928501-7137110      |
| 20459 | MMT00030019   |        | 2+:82347278-82348437    |
| 20460 | Emcn          | 59308  | 3+:137004106-137094032  |
| 20461 | H2-Ab1        | 14961  | 17+:34400256-34405429   |
| 20462 | Lrrtm2        | 107065 | 18-:35369584-35374573   |
| 20468 | Spa17         | 20686  | 9-:37410885-37421199    |
| 20470 | Scml4         | 268297 | 10+:42580672-42678541   |
| 20473 | Gpr137b-ps    | 664862 | 13-:12707324-12742647   |
| 20474 | Gnb3          | 14695  | 6-:124784257-124790293  |
| 20481 | Tmem106b      | 71900  | 6+:13019855-13035064    |
| 20482 | Vwa1          | 246228 | 4-:155143412-155148640  |
| 20484 | Ces1          | 12623  | 8-:95826294-95861093    |
| 20485 | 6430520M22Rik | 319716 | 6+:145809702-145811100  |
| 20486 | C1qtnf1       | 56745  | 11+:118295166-118311276 |
| 20488 | Bok           | 51800  | 1+:95582278-95592339    |
| 20490 | Tmem143       | 70209  | 7+:53152444-53172781    |
| 20491 | 1700125H20Rik | 73634  | 11+:84983903-84994646   |
| 20492 | Glra3         | 110304 | 8+:58419700-58604145    |
| 20496 | Mtpn          | 14489  | 6-:35461919-35489819    |
| 20498 | Porcn         | 53627  | X-:7770977-7783627      |
| 20499 | Wdr44         | 72404  | X+:23270284-23383107    |
| 20500 | 2810441K11Rik | 68642  | 19-:10624955-10630728   |
| 20503 | Krtdap        | 64661  | 7+:31572915-31576114    |
| 20505 | Ttll9         | 74711  | 2+:152788241-152833076  |

|       |               |        |                         |
|-------|---------------|--------|-------------------------|
| 20506 | 1700011F03Rik | 74221  | 6-:70863080-70868918    |
| 20507 | Sh2d6         | 71130  | 6-:72463636-72470621    |
| 20510 | Prme          | 75829  | X-:132147539-132162246  |
| 20511 | Decr2         | 26378  | 17-:26218155-26227109   |
| 20513 | Il1rapl2      | 60367  | X+:134709065-134771192  |
| 20514 | Rprm          | 67874  | 2-:53936647-53937952    |
| 20515 | Dimt1         | 66254  | 13+:107737253-107749840 |
| 20519 | Col1a1        | 12842  | 11+:94797565-94814353   |
| 20520 | EG546143      | 546143 | 9-:72827529-72833594    |
| 20521 | BC057079      | 230393 | 4+:87823985-88056913    |
| 20522 | MMT00054229   |        | 10+:56375999-56397773   |
| 20524 | Cdc27         | 217232 | 11-:104381584-104411792 |
| 20528 | Etnk1         | 75320  | 6+:143115768-143152135  |
| 20530 | EG640268      | 640268 | 9+:48228150-48240042    |
| 20531 | MMT00015606   |        | 3-:69123941-69124507    |
| 20532 | Rnf26         | 213211 | 9-:43919758-43921558    |
| 20534 | Stk24         | 223255 | 14-:121686020-121778284 |
| 20535 | Rbm4          | 19653  | 19-:4785153-4793860     |
| 20537 | Mmp13         | 17386  | 9+:7272544-7283330      |
| 20539 | Klk1b5        | 16622  | 7+:51471828-51476082    |
| 20541 | Vapa          | 30960  | 17-:65929393-65962836   |
| 20544 | 4932438A13Rik | 229227 | 3+:36762046-36776660    |
| 20548 | 1700041C02Rik | 73332  | 4-:118996446-119004224  |
| 20552 | Cdh9          | 12565  | 15+:16707815-16786045   |
| 20553 | Echdc2        | 52430  | 4+:107838100-107851912  |
| 20559 | Nat13         | 72117  | 16+:44139996-44160092   |
| 20563 | Mns1          | 17427  | 9+:72286341-72306381    |
| 20565 | MMT00065821   |        | 7-:27254261-27255255    |
| 20566 | Tnni2         | 21953  | 7+:149628372-149630310  |
| 20567 | Ggt6          | 71522  | 11+:72249027-72252065   |
| 20570 | Ap3m1         | 55946  | 14-:21854031-21871407   |
| 20571 | Tmem45a       | 56277  | 16-:56806491-56885976   |
| 20572 | Rdh5          | 19682  | 10-:128350648-128356250 |
| 20573 | MMT00040001   |        | 3+:101037410-101038015  |
| 20574 | Apool         | 68117  | X+:109424971-109486297  |
| 20579 | Zkscan3       | 72739  | 13-:21479544-21499920   |
| 20581 | V1rc7         | 113864 | 6+:57183432-57184344    |
| 20583 | Cdh16         | 12556  | 8-:107138047-107148161  |
| 20585 | Snx7          | 76561  | 3-:117484577-117549625  |
| 20587 | Abcc1         | 17250  | 16+:14361688-14473660   |
| 20588 | Brd2          | 14312  | 17-:34248976-34256255   |
| 20589 | Frmd8         | 67457  | 19-:5851285-5875230     |
| 20592 | Kcnc1         | 16502  | 7+:53652911-53683814    |
| 20594 | Kdelr1        | 68137  | 7+:53128209-53139096    |
| 20601 | Rpo1-4        | 20019  | 6+:71859156-71929352    |
| 20606 | MMT00042166   |        | 7-:26205542-26208082    |

|       |               |        |                         |
|-------|---------------|--------|-------------------------|
| 20610 | Ttll11        | 74410  | 2-:35606760-35835059    |
| 20611 | Map2k3        | 26397  | 11+:60745558-60766297   |
| 20613 | 4930431B09Rik | 74645  | 3-:100275528-100293078  |
| 20622 | Cd47          | 16423  | 16+:49855836-49911192   |
| 20624 | Utp15         | 105372 | 13+:99016769-99018856   |
| 20625 | Pgam2         | 56012  | 11-:5701646-5703736     |
| 20628 | Hoxd10        | 15430  | 2+:74530036-74532425    |
| 20632 | Cep78         | 208518 | 19-:16029841-16059370   |
| 20635 | Jmjd6         | 107817 | 11-:116698746-116704689 |
| 20636 | MMT00055765   |        | 1+:135061034-135066666  |
| 20642 | V1rd7         | 81012  | 7+:24416996-24419385    |
| 20643 | Rcvrn         | 19674  | 11+:67508827-67516835   |
| 20644 | Lct           | 226413 | 1-:130181333-130224880  |
| 20648 | B430212C06Rik | 338360 | 18-:67482672-67484375   |
| 20649 | 5830472M02Rik | 76080  | 2+:163428082-163442847  |
| 20650 | Naaladl1      | 381204 | 19+:6105797-6116009     |
| 20652 | Dlx4          | 13394  | 11-:95001764-95006795   |
| 20653 | 1700049L16Rik | 108950 | 10-:71442840-71443382   |
| 20654 | Maea          | 59003  | 5+:33678258-33715162    |
| 20657 | MMT00059805   |        | 7+:78841754-78841979    |
| 20661 | Tuft1         | 22156  | 3-:94416680-94462728    |
| 20663 | Depdc1a       | 76131  | 3+:159158415-159192917  |
| 20664 | Rpl13a        | 22121  | 7-:52381292-52384102    |
| 20666 | Mosc1         | 66112  | 1-:186610654-186635182  |
| 20667 | MMT00054056   |        |                         |
| 20668 | Rras          | 20130  | 7+:52273382-52277014    |
| 20670 | Klhl25        | 207952 | 7+:82993277-83012331    |
| 20674 | D17H6S53E     | 114585 | 17+:35264059-35265424   |
| 20676 | MMT00067648   |        | 11+:6346185-6346571     |
| 20678 | Cyp39a1       | 56050  | 17+:43804482-43887796   |
| 20680 | Xpo4          | 57258  | 14-:58201109-58283793   |
| 20681 | EG667683      | 667683 | 6-:69388204-69388768    |
| 20682 | Usp40         | 227334 | 1-:89846587-89905109    |
| 20683 | Foxd4         | 14237  | 19-:24973454-24975799   |
| 20684 | Twist1        | 22160  | 12+:34642676-34644691   |
| 20688 | lyd           | 70337  | 10-:6791663-6806262     |
| 20689 | Cnksr3        | 215748 | 10+:3134785-3227478     |
| 20690 | Zfp276        | 57247  | 8+:125779841-125793635  |
| 20697 | Galnt5        | 241391 | 2+:57850800-57891637    |
| 20703 | Itga11        | 319480 | 9+:62525751-62631795    |
| 20705 | Supv3l1       | 338359 | 10-:61891966-61913355   |
| 20714 | MMT00015505   |        | 5+:6674890-6749370      |
| 20715 | Tmem179b      | 67706  | 19-:8847018-8848932     |
| 20717 | Snf8          | 27681  | 11+:95896230-95908719   |
| 20719 | Sall1         | 58198  | 8-:91552278-91566326    |
| 20720 | Ptk2b         | 19229  | 14-:66772098-66899831   |



|       |               |        |                         |
|-------|---------------|--------|-------------------------|
| 20721 | 4432412L15Rik | 74337  | 8+:86545367-86554191    |
| 20723 | Cdh1          | 12550  | 8+:109127267-109194146  |
| 20725 | Nudt5         | 53893  | 2+:5775859-5789410      |
| 20726 | Ei24          | 13663  | 9-:36586743-36604653    |
| 20727 | Mmp11         | 17385  | 10-:75385968-75395208   |
| 20728 | MMT00055001   |        |                         |
| 20729 | Ttc28         | 209683 | 5+:111717228-111717889  |
| 20730 | Dusp26        | 66959  | 8+:32200120-32207520    |
| 20735 | Tnrc6b        | 213988 | 15+:80541488-80577903   |
| 20736 | Itgb1bp1      | 16413  | 12-:21273280-21292080   |
| 20740 | Ola1          | 67059  | 2-:72930859-73052504    |
| 20742 | Birc2         | 11797  | 9-:7818226-7835255      |
| 20743 | Trp53inp1     | 60599  | 4+:11083587-11101524    |
| 20744 | lpmk          | 69718  | 10+:70810582-70844783   |
| 20745 | Sord          | 20322  | 2+:122060574-122091073  |
| 20746 | 2210015D19Rik | 76508  | 11+:5662128-5684713     |
| 20749 | Usp1          | 230484 | 4+:98590620-98602227    |
| 20750 | Foxo4         | 54601  | X+:98449866-98455033    |
| 20754 | Crisp1        | 11571  | 17-:40430708-40456122   |
| 20756 | Omd           | 27047  | 13+:49678115-49687978   |
| 20757 | Suc1g1        | 56451  | 6+:73198666-73226876    |
| 20759 | Slc17a1       | 20504  | 13+:23962182-23987568   |
| 20764 | Vit           | 74199  | 17+:78907512-79026729   |
| 20765 | MMT00060789   |        | 13-:62771158-62772324   |
| 20769 | Ube2e1        | 22194  | 14-:19115262-19164313   |
| 20771 | Slc16a10      | 72472  | 10-:39754934-39862065   |
| 20774 | Atp6v1c2      | 68775  | 12-:17291526-17331518   |
| 20775 | Cd244         | 18106  | 1+:173489382-173507477  |
| 20777 | MMT00010185   |        | 7-:5078280-5080880      |
| 20784 | Csad          | 246277 | 15-:102007428-102019474 |
| 20786 | Bspry         | 192120 | 4+:62141100-62158332    |
| 20790 | Efna5         | 13640  | 17-:62956667-63230493   |
| 20791 | MMT00014813   | 667370 | 19+:34682173-34687127   |
| 20792 | MMT00032790   |        | 5-:42890113-42891653    |
| 20796 | E130113E03Rik | 319433 | 14+:63282502-63283949   |
| 20798 | Ccpg1         | 72278  | 9+:72833391-72864140    |
| 20800 | MMT00007848   |        | 3+:75195607-75196036    |
| 20801 | Mrps11        | 67994  | 7+:85928195-85937874    |
| 20802 | Cdc42se2      | 72729  | 11-:54531687-54601187   |
| 20803 | Tmem50a       | 71817  | 4-:134453760-134470915  |
| 20804 | Eno1          | 13806  | 4+:149611363-149622984  |
| 20808 | Bms1          | 213895 | 6-:118333397-118369433  |
| 20810 | Mttp          | 17777  | 3-:137753849-137794288  |
| 20811 | Dlst          | 78920  | 12+:86451788-86475795   |
| 20813 | 1700049E17Rik | 73415  | 14+:42386499-42394594   |
| 20814 | Ptpn18        | 19253  | 1+:34516602-34530622    |

|       |               |        |                         |
|-------|---------------|--------|-------------------------|
| 20822 | Smurf1        | 75788  | 5-:145637396-145663456  |
| 20828 | MMT00007878   |        | 8-:40805672-40806165    |
| 20829 | Zfp385c       | 278304 | 11-:100490145-100499206 |
| 20830 | MMT00057509   |        | 16+:53983940-53986320   |
| 20831 | MMT00057242   |        | X+:133424796-133425379  |
| 20833 | MMT00022580   |        |                         |
| 20835 | Pgrmc1        | 53328  | X+:34138269-34146067    |
| 20837 | Dlgap4        | 228836 | 2+:156547622-156588828  |
| 20839 | Nefm          | 18040  | 14-:68738095-68742870   |
| 20840 | Rasa1         | 218397 | 13-:85355633-85396069   |
| 20842 | MMT00046069   |        | 6-:148647645-148648158  |
| 20847 | Pdik1l        | 230809 | 4-:133832574-133843142  |
| 20852 | Extl2         | 58193  | 3+:115711249-115731878  |
| 20853 | Tatdn1        | 69694  | 15-:58721707-58765370   |
| 20854 | Commd7        | 99311  | 2-:153444550-153458492  |
| 20855 | Phldb2        | 208177 | 16-:45746356-45953710   |
| 20858 | Duox1         | 99439  | 2+:122143654-122173706  |
| 20860 | Gm1564        | 268491 | 11+:102536537-102542051 |
| 20861 | Dcst1         | 77772  | 3-:89161394-89169177    |
| 20862 | Olfir827      | 258297 | 10-:129647217-129648184 |
| 20865 | Appl1         | 72993  | 14+:27732688-27733297   |
| 20867 | Cnih          | 12793  | 14-:47395256-47408206   |
| 20870 | 1700028K03Rik | 76421  | 5+:107926739-107940230  |
| 20871 | Pop1          | 67724  | 15+:34425077-34460392   |
| 20880 | Raf1          | 110157 | 6-:115568615-115626521  |
| 20885 | MMT00004673   |        | 6+:23687067-23688033    |
| 20886 | Mylpf         | 17907  | 7+:134356373-134357776  |
| 20887 | MMT00060807   |        | 7-:111840853-111841877  |
| 20890 | Psemb4        | 19172  | 3-:94688014-94690862    |
| 20892 | C1r           | 50909  | 6+:124462649-124473124  |
| 20894 | Cyp4a12a      | 277753 | 4+:114971704-115005419  |
| 20896 | Rasa3         | 19414  | 8-:13567217-13677572    |
| 20897 | Clca6         | 99663  | 3-:144615450-144638010  |
| 20900 | Epb4.1l4a     | 13824  | 18-:33956614-34165788   |
| 20902 | Itln1         | 16429  | 1-:173448372-173461345  |
| 20903 | Rpia          | 19895  | 6-:70715694-70742149    |
| 20906 | Tpbpb         | 116913 | 13-:61002548-61006208   |
| 20907 | Lims2         | 225341 | 18+:32091171-32118272   |
| 20908 | Olfir583      | 258752 | 7+:110199813-110200772  |
| 20911 | Narg1         | 74838  | 3+:51246688-51277946    |
| 20912 | Chordc1       | 66917  | 9+:18096710-18118444    |
| 20913 | Osgepl1       | 72085  | 1+:53370519-53382993    |
| 20914 | Utx           | 22289  | X+:17799871-17857060    |
| 20917 | Gstm6         | 14867  | 3-:107742146-107746551  |
| 20918 | Nxph3         | 104079 | 11-:95371166-95375585   |
| 20919 | Ceacam18      | 72431  | 7+:50890075-50904280    |

|       |               |        |                         |
|-------|---------------|--------|-------------------------|
| 20925 | 2810410L24Rik | 76377  | 11-:120048945-120097489 |
| 20935 | Gpr83         | 14608  | 9+:14664697-14673943    |
| 20939 | Il13          | 16163  | 11-:53444825-53448204   |
| 20941 | Zfp28         | 22690  | 7+:6238228-6349624      |
| 20942 | MMT00006980   |        | 12-:119970961-119993457 |
| 20943 | 1700113H08Rik | 76640  | 10+:86668719-86693331   |
| 20944 | Tmem164       | 209497 | X+:139115999-139117492  |
| 20945 | Traf4         | 22032  | 11-:77972902-77979033   |
| 20946 | Nufip2        | 68564  | 11+:77420825-77526241   |
| 20952 | Zdhhc9        | 208884 | X-:45525661-45561861    |
| 20954 | 5830403L16Rik | 240817 | 1-:155697254-155747360  |
| 20957 | Arhgef5       | 54324  | 6+:43223588-43239320    |
| 20958 | 4933403F05Rik | 108654 | 18-:68425430-68459989   |
| 20960 | Abcc3         | 76408  | 11-:94204604-94254229   |
| 20961 | Lig3          | 16882  | 11+:82594724-82615690   |
| 20963 | Ifna6         | 15969  | 4+:88473251-88474201    |
| 20965 | Usp28         | 235323 | 9+:48808455-48850621    |
| 20966 | MMT00014378   |        | 4+:69514980-69515718    |
| 20967 | Fabp2         | 14079  | 3+:122598295-122602423  |
| 20970 | Slco6b1       | 67854  | 1-:98802752-98885276    |
| 20971 | Tsga13        | 116732 | 6-:30846980-30865573    |
| 20972 | MMT00031355   |        | 2-:35346729-35421930    |
| 20973 | Stx2          | 13852  | 5-:129490441-129514447  |
| 20979 | D10Jhu81e     | 28295  | 10-:77624617-77632516   |
| 20980 | Taf12         | 66464  | 4+:131830327-131849240  |
| 20983 | Hlx           | 15284  | 1-:186551024-186556487  |
| 20984 | MMT00036444   |        | 18-:47574120-47575031   |
| 20986 | Olfir805      | 258548 | 10-:129159638-129160598 |
| 20988 | MMT00010339   |        | 18-:48228593-48229474   |
| 20991 | 2900093K20Rik | 68037  | 2+:163244447-163246095  |
| 20994 | Pcdhb17       | 93888  | 18+:37644812-37647943   |
| 20997 | MMT00028135   | 631323 | 11+:57997341-58002440   |
| 20999 | 1110049F12Rik | 66193  | 4-:135531518-135542320  |
| 21000 | Vmo1          | 327956 | 11-:70327044-70328104   |
| 21003 | Uck1          | 68556  | 2-:181303852-181327780  |
| 21008 | 4933436I01Rik | 66780  | X-:65173038-65174625    |
| 21012 | MMT00064569   |        |                         |
| 21013 | Vnn3          | 26464  | 10+:23571277-23589637   |
| 21014 | Usp54         | 78787  | 14-:21368139-21380894   |
| 21015 | MMT00014048   |        | 19+:17615518-17636722   |
| 21017 | Gstz1         | 14874  | 12-:88495797-88495928   |
| 21018 | Eif3m         | 98221  | 2-:104839812-104857184  |
| 21019 | Picalm        | 233489 | 7+:97279031-97357434    |
| 21020 | Rgmb          | 68799  | 17-:15944108-15955445   |
| 21030 | Ccdc80        | 67896  | 16+:45093786-45128001   |
| 21039 | Pcnxl2        | 270109 | 8-:128275430-128421981  |

|       |               |        |                         |
|-------|---------------|--------|-------------------------|
| 21041 | Cyp17a1       | 13074  | 19-:46741672-46747363   |
| 21045 | Crb3          | 224912 | 17+:57201692-57205335   |
| 21048 | Cdrt4         | 66338  | 11+:62764694-62806597   |
| 21049 | 1700129I04Rik | 330577 | 7-:89783078-89794339    |
| 21052 | Marcksl1      | 17357  | 4+:129190887-129193218  |
| 21053 | Ypel1         | 106369 | 16+:17070321-17086434   |
| 21055 | Gltf          | 56356  | 5-:115120415-115140870  |
| 21060 | Ela1          | 109901 | 15-:100504853-100518353 |
| 21062 | Rpl7l1        | 66229  | 17-:46912049-46919595   |
| 21067 | MMT00077109   |        | 5-:105170617-105181507  |
| 21069 | Tet2          | 214133 | 3-:133148475-133150801  |
| 21070 | Cnot8         | 69125  | 11+:57917730-57931348   |
| 21071 | Il4i1         | 14204  | 7+:52091658-52096178    |
| 21075 | Gtf2h5        | 66467  | 17+:6079816-6085478     |
| 21076 | Abra          | 223513 | 15-:41697235-41701251   |
| 21078 | MMT00067065   |        | 10-:29803972-29805141   |
| 21079 | Tfpi2         | 21789  | 6-:3912595-3918354      |
| 21080 | MMT00035581   |        | 13+:28163933-28180873   |
| 21083 | Serpina9c     | 20707  | 13-:33241846-33249693   |
| 21084 | Nkiras2       | 71966  | 11+:100484268-100488916 |
| 21089 | MMT00048642   |        | 1-:146069047-146070255  |
| 21091 | Nup160        | 59015  | 2+:90517371-90576484    |
| 21092 | Zfp750        | 319530 | 11-:121372290-121375361 |
| 21095 | 9130401M01Rik | 75758  | 15-:57853830-57865772   |
| 21098 | Terf2ip       | 57321  | 8+:114535304-114544360  |
| 21099 | Rapgef6       | 192786 | 11+:54251798-54508080   |
| 21100 | MMT00065179   |        |                         |
| 21101 | 1110032A03Rik | 68721  | 9-:50571831-50576209    |
| 21102 | Cmtm7         | 102545 | 9-:114665954-114690947  |
| 21105 | Pex26         | 74043  | 6+:121133905-121146203  |
| 21106 | Il1f5         | 54450  | 2+:24132918-24137595    |
| 21108 | Fndc3a        | 319448 | 14-:72937757-73109800   |
| 21109 | Col8a2        | 329941 | 4+:125986859-125991185  |
| 21110 | Emg1          | 14791  | 6-:124654404-124662145  |
| 21111 | Tmem132c      | 208213 | 5+:128031872-128045272  |
| 21115 | MMT00082318   |        | 14-:19376517-19377691   |
| 21119 | Apob          | 238055 | 12+:7984453-8023641     |
| 21120 | Igk-C         | 16071  | 6+:70613261-70676963    |
| 21122 | Fndc7         | 320181 | 3-:108683854-108692717  |
| 21125 | Mtif3         | 76366  | 5-:147766504-147775350  |
| 21126 | Dera          | 232449 | 6+:137703061-137805860  |
| 21127 | Triobp        | 110253 | 15+:78813509-78836300   |
| 21130 | MMT00011706   | 66449  | 16-:4616465-4624946     |
| 21134 | Ppp2r2a       | 71978  | 14-:67634163-67657817   |
| 21135 | Gm711         | 279029 | 2+:26806073-26809014    |
| 21138 | Auts2         | 319974 | 5-:132503558-132526282  |

|       |               |        |                         |
|-------|---------------|--------|-------------------------|
| 21142 | Gm129         | 229599 | 3-:95682425-95686173    |
| 21143 | Ypel3         | 66090  | 7+:133920488-133924023  |
| 21149 | A230065H16Rik | 380787 | 12+:112645018-112650301 |
| 21151 | Nkap          | 67050  | X+:34666806-34688277    |
| 21153 | Mr1           | 15064  | 1-:156975029-156993821  |
| 21157 | Efemp1        | 216616 | 11+:28767772-28826733   |
| 21159 | Pik3c2g       | 18705  | 6+:139564832-139668705  |
| 21160 | Irs2          | 384783 | 8-:10984687-11008770    |
| 21162 | MMT00008728   |        | 3-:12384339-12662887    |
| 21163 | Slc16a5       | 217316 | 11+:115323818-115335706 |
| 21165 | Hmbs          | 15288  | 9-:44144376-44150429    |
| 21167 | Irf5          | 27056  | 6+:29476732-29487319    |
| 21168 | Olf498        | 258304 | 7+:115608839-115609831  |
| 21171 | 1700016G05Rik | 67690  | 6-:40464822-40469507    |
| 21173 | Rassf6        | 73246  | 5-:91032120-91069501    |
| 21175 | 1700025I17Rik | 70372  | 13+:53489005-53550188   |
| 21182 | Runx2         | 12393  | 17-:44744854-44951576   |
| 21187 | RP23-54E4.8   | 625752 | 13-:21388116-21388587   |
| 21188 | Pnkp          | 59047  | 7+:52112773-52118020    |
| 21189 | Arl5c         | 217151 | 11-:97850895-97857486   |
| 21191 | Znrf1         | 170737 | 8+:114060843-114148194  |
| 21192 | 2310047A01Rik | 71918  | 14-:26531130-26588357   |
| 21195 | Tbc1d7        | 67046  | 13-:43247112-43266728   |
| 21199 | Pcdh9         | 211712 | 14-:93414732-93429790   |
| 21202 | Acly          | 104112 | 11-:100337671-100389186 |
| 21203 | C330018D20Rik | 77422  | 18-:57115697-57133141   |
| 21205 | Pkmyt1        | 268930 | 17+:23863407-23873704   |
| 21207 | Pi15          | 94227  | 1+:17592075-17615527    |
| 21209 | Ebf4          | 228598 | 2+:130121763-130196587  |
| 21211 | 2010301N04Rik | 72103  | 6-:87579740-87622058    |
| 21212 | Klb           | 83379  | 5+:65739649-65775242    |
| 21214 | Scd1          | 20249  | 19-:44472409-44481899   |
| 21218 | Col9a2        | 12840  | 4+:120711936-120727903  |
| 21223 | Pira1         | 18722  | 7-:3788417-3867086      |
| 21225 | Zfp449        | 78619  | X+:53601457-53616391    |
| 21228 | A430107D22Rik | 320484 | 17-:32527175-32540328   |
| 21229 | Acss1         | 68738  | 2-:150443846-150493965  |
| 21232 | Nkiras1       | 69721  | 14+:19103798-19112954   |
| 21234 | Olf665        | 258810 | 7+:112029222-112030172  |
| 21236 | Glr5          | 73046  | 12+:106270898-106279120 |
| 21237 | Poli          | 26447  | 18-:70668337-70689975   |
| 21239 | Ctdp1         | 67655  | 18-:80604703-80637598   |
| 21240 | Dock11        | 75974  | X+:33428865-33616556    |
| 21242 | Zfp654        | 72020  | 16-:64765058-64794382   |
| 21244 | Nfatc1        | 18018  | 18-:80845197-80904863   |
| 21245 | Dock2         | 94176  | 11-:34501010-34597354   |

|       |               |        |                         |
|-------|---------------|--------|-------------------------|
| 21246 | Telo2         | 71718  | 17-:25236521-25252720   |
| 21247 | Tmed5         | 73130  | 5-:108550665-108561610  |
| 21249 | MMT00056913   |        | X-:71739035-71740292    |
| 21251 | Cpt1a         | 12894  | 19+:3323278-3385732     |
| 21253 | MMT00068187   |        | 4-:105808498-105810353  |
| 21254 | Bbs7          | 71492  | 3-:36474214-36512313    |
| 21255 | Kif18a        | 228421 | 2+:109120894-109181901  |
| 21256 | Tirap         | 117149 | 9-:34994369-35007459    |
| 21257 | MMT00009771   |        | 7-:106395146-106397764  |
| 21258 | 2010003K15Rik | 75606  | 10-:25247749-25256077   |
| 21259 | 5430416O09Rik | 71406  | 4+:43742922-43744950    |
| 21260 | Ropn1         | 76378  | 16+:34666781-34678566   |
| 21261 | Pax2          | 18504  | 19+:44831883-44835478   |
| 21262 | Myot          | 58916  | 18+:44493727-44515376   |
| 21265 | Zfp712        | 78251  | 13-:67140520-67162107   |
| 21266 | Cercam        | 99151  | 2+:29725012-29738368    |
| 21270 | V1rg6         | 171241 | 7+:12465691-12466607    |
| 21271 | Pax9          | 18511  | 12+:57796657-57812216   |
| 21272 | Scnn1g        | 20278  | 7+:128878020-128911990  |
| 21273 | St14          | 19143  | 9-:30896992-30939273    |
| 21278 | MMT00072454   |        | 19-:8586378-8587816     |
| 21287 | Cplx4         | 225644 | 18-:66115377-66129832   |
| 21288 | Tcp11l2       | 216198 | 10+:84039691-84077096   |
| 21291 | Slc39a4       | 72027  | 15-:76442814-76447322   |
| 21295 | Snf1lk        | 17691  | 17-:31981201-31992723   |
| 21296 | Rpl14         | 67115  | 9+:120480633-120483770  |
| 21298 | Psg17         | 26437  | 7-:19399342-19406956    |
| 21300 | Hdac10        | 170787 | 15-:88953735-88959624   |
| 21303 | Kcnk2         | 16526  | 1-:191031815-191167711  |
| 21306 | Pvr1l         | 58235  | 9+:43552726-43612097    |
| 21307 | Krcc1         | 57896  | 6+:71232273-71235312    |
| 21313 | Rhou          | 69581  | 8+:126177828-126187782  |
| 21314 | Mycbp2        | 105689 | 14-:103512626-103745734 |
| 21315 | A430005L14Rik | 97159  | 4+:153331368-153336031  |
| 21318 | MMT00000812   |        | 7+:34420180-34482717    |
| 21320 | Kcne1l        | 66240  | X-:138739295-138740741  |
| 21322 | Usp1l         | 231915 | 5+:149996289-150027009  |
| 21323 | MMT00074228   |        | X-:76876748-76877213    |
| 21326 | MMT00047910   |        | 5-:39792387-39793484    |
| 21329 | Azi2          | 27215  | 9+:117949801-117972689  |
| 21331 | Slc10a6       | 75750  | 5-:104034729-104058422  |
| 21333 | Cirbp         | 12696  | 10+:79630585-79634398   |
| 21335 | Trp53rk       | 76367  | 2+:166619296-166621652  |
| 21340 | Armc1         | 74252  | 3-:19033754-19063079    |
| 21348 | MMT00039685   |        | X-:136210588-136211975  |
| 21351 | Shisa5        | 66940  | 9+:108941140-108960236  |

|       |             |        |                         |
|-------|-------------|--------|-------------------------|
| 21352 | Dtnbp1      | 94245  | 13-:45017577-45097341   |
| 21354 | Xpa         | 22590  | 4-:46188113-46209183    |
| 21356 | Nkx2-6      | 18092  | 14+:69789789-69793597   |
| 21357 | Cd3g        | 12502  | 9-:44777771-44788507    |
| 21360 | Sox11       | 20666  | 12-:28024667-28027561   |
| 21364 | Ppm1h       | 319468 | 10+:122219238-122379594 |
| 21369 | Cd4         | 12504  | 6-:124814710-124838227  |
| 21371 | Spnb2       | 20742  | 11-:30007625-30098164   |
| 21375 | MMT00043149 |        | 13+:81203605-81204605   |
| 21376 | MMT00058413 |        | 3-:112133818-112134721  |
| 21378 | Havcr2      | 171285 | 11+:46268436-46294754   |
| 21380 | Ier5        | 15939  | 1-:156944656-156946766  |
| 21381 | Rilpl2      | 80291  | 5-:124913275-124928244  |
| 21387 | Cnot7       | 18983  | 8-:41579081-41595524    |
| 21388 | Gbe1        | 74185  | 16+:70314380-70569959   |
| 21389 | Odf2        | 18286  | 2+:29745619-29778056    |
| 21390 | Cnga2       | 12789  | X+:69248605-69255573    |
| 21391 | Lgi2        | 246316 | 5-:52929102-52957519    |
| 21394 | Cdh15       | 12555  | 8+:125371865-125391297  |
| 21398 | Tmco6       | 71983  | 18+:36894798-36902045   |
| 21400 | Ii1rap1     | 331461 | X-:84545923-84550289    |
| 21404 | Hoxa10      | 15395  | 6-:52181195-52184938    |
| 21406 | Lrp2        | 14725  | 2-:69262392-69276531    |
| 21408 | Svil        | 225115 | 18+:4920535-5119286     |
| 21409 | Gldc        | 104174 | 19-:30172938-30249908   |
| 21412 | Afap111     | 106877 | 18-:61889915-61946343   |
| 21414 | BC017643    | 217370 | 11-:121083904-121090579 |
| 21415 | Has1        | 15116  | 17-:17980292-17992152   |
| 21421 | Usp34       | 17847  | 11+:23332245-23390534   |
| 21424 | Supt3h      | 109115 | 17+:44914119-44923683   |
| 21425 | Rab6        | 19346  | 7+:107756300-107788704  |
| 21427 | Tc2n        | 74413  | 12-:103074865-103151474 |
| 21428 | MMT00012296 |        | 13-:18213671-18214236   |
| 21431 | Xbp1        | 22433  | 11+:5420969-5425873     |
| 21433 | Ubx6        | 108159 | 8-:34730660-34753816    |
| 21438 | Plekha4     | 69217  | 7+:52781698-52809598    |
| 21439 | Ii25        | 140806 | 14+:55551607-55554671   |
| 21440 | Tmsb10      | 19240  | 6-:72907346-72908393    |
| 21441 | MMT00041291 |        | 6+:100676497-100677620  |
| 21442 | Rad51l1     | 19363  | 12+:80401535-80915338   |
| 21444 | Pnpt1       | 71701  | 11+:29030744-29061595   |
| 21446 | Ccl12       | 20293  | 11+:81915379-81916793   |
| 21448 | Paqr7       | 71904  | 4+:134052892-134064725  |
| 21449 | Serpib3a    | 20248  | 1-:108942592-108948916  |
| 21450 | Col22a1     | 69700  | 15-:71628899-71837618   |
| 21451 | Gja5        | 14613  | 3+:96854551-96855627    |

|       |               |        |                         |
|-------|---------------|--------|-------------------------|
| 21453 | Vmn2r108      | 627805 | 17-:20599846-20609335   |
| 21454 | MMT00068006   |        | 1+:38295963-38302553    |
| 21457 | MMT00036264   |        | 1+:62707381-62708331    |
| 21459 | Hpse          | 15442  | 5-:101109419-101148700  |
| 21461 | MMT00034426   |        | 17-:22016905-22018029   |
| 21465 | Nxn           | 18230  | 11-:76072066-76212562   |
| 21466 | Rimbp2        | 231760 | 5-:129266555-129325722  |
| 21471 | Stmn2         | 20257  | 3+:8509526-8561604      |
| 21477 | Tmem27        | 57394  | X+:160528118-160556791  |
| 21478 | Loxhd1        | 240411 | 18+:77580666-77613937   |
| 21479 | Steap2        | 74051  | 5-:5671724-5677285      |
| 21481 | Bcl2a1c       | 12046  | 9+:114239273-114239658  |
| 21483 | Ippk          | 75678  | 13+:49516638-49558430   |
| 21491 | MMT00017308   |        | X-:166637383-166637413  |
| 21497 | Pias2         | 17344  | 18+:77336331-77391865   |
| 21500 | MMT00018393   |        | 16+:68511115-68511943   |
| 21501 | Stmn1         | 16765  | 4+:134026575-134029316  |
| 21505 | Acsbg2        | 328845 | 17-:56982526-57007795   |
| 21506 | St7           | 64213  | 6+:17699232-17892965    |
| 21508 | Echdc1        | 52665  | 10+:29033429-29065463   |
| 21509 | Tekt3         | 71062  | 11+:62875158-62908462   |
| 21511 | MMT00054100   |        |                         |
| 21512 | Gas6          | 14456  | 8-:13465375-13494506    |
| 21517 | Sil1          | 81500  | 18-:35426050-35658520   |
| 21518 | Adamts17      | 233332 | 7+:74269810-74295255    |
| 21519 | 1700012B15Rik | 74173  | 12+:3235767-3235829     |
| 21524 | Ncoa4         | 27057  | 14+:32978989-32991030   |
| 21526 | Mkl1          | 223701 | 15-:80842713-81020954   |
| 21528 | Nup85         | 445007 | 11+:115431296-115445298 |
| 21531 | Ttc23         | 67009  | 7+:74792335-74871462    |
| 21536 | MMT00011639   |        | 17-:37306653-37307591   |
| 21538 | Rg9mtd1       | 52575  | 16-:56033832-56037887   |
| 21539 | Rbm11         | 224344 | 16+:75593188-75601499   |
| 21540 | Coil          | 12812  | 11+:88833933-88834428   |
| 21541 | Brf2          | 66653  | 8-:28233055-28239108    |
| 21542 | Larp4         | 207214 | 15+:99803129-99846782   |
| 21545 | Pcdha9        | 192161 | 18+:37157533-37347311   |
| 21547 | Il10          | 16153  | 1+:132916423-132921547  |
| 21548 | MMT00052315   |        | 2+:24034090-24036471    |
| 21549 | Rtp4          | 67775  | 16+:23610021-23613819   |
| 21550 | Sgcd          | 24052  | 11-:46792765-47193024   |
| 21551 | Bmf           | 171543 | 2-:118358294-118372743  |
| 21552 | MMT00031646   |        | 12-:109679116-109679553 |
| 21553 | EG628438      | 628438 | 18+:47271792-47272216   |
| 21554 | EG627607      | 627607 | 12+:88081891-88095385   |
| 21556 | 4930579F01Rik | 67741  | 3-:137827043-137849678  |



|       |               |        |                         |
|-------|---------------|--------|-------------------------|
| 21560 | Apol7e        | 666348 | 15+:77542747-77548355   |
| 21563 | Arhgap9       | 216445 | 10+:126760787-126767000 |
| 21564 | Cdh18         | 320865 | 15+:23366204-23404173   |
| 21565 | Pde6h         | 78600  | 6+:136907781-136911793  |
| 21568 | Cdc73         | 214498 | 1-:145454629-145549814  |
| 21571 | D030074E01Rik | 75964  | 18-:20975727-21054592   |
| 21574 | Acot11        | 329910 | 4-:106420109-106472362  |
| 21575 | Cyp2c55       | 72082  | 19+:39081508-39117177   |
| 21579 | Lsm12         | 268490 | 11-:102023809-102046566 |
| 21581 | Cbx3          | 12417  | 6+:51425235-51432603    |
| 21582 | Setx          | 269254 | 2+:29000906-29003997    |
| 21583 | Gstz1         | 14874  | 12+:88488724-88505671   |
| 21585 | Hipk1         | 15257  | 3-:103547595-103595102  |
| 21587 | MMT00002799   |        | 5+:69852287-69854009    |
| 21588 | Snrpa         | 53607  | 7-:27972024-27981078    |
| 21591 | Hectd3        | 76608  | 4+:116667964-116677875  |
| 21592 | Wdr46         | 57315  | 17+:34077682-34086360   |
| 21594 | Hbxip         | 68576  | 3+:107081774-107086997  |
| 21595 | Trpv1         | 193034 | 11+:73051727-73074008   |
| 21596 | P2rx5         | 94045  | 11+:72974026-72986187   |
| 21602 | V1ra5         | 113847 | 6-:89819507-89820448    |
| 21604 | Klhl24        | 75785  | 16+:20097641-20123303   |
| 21605 | Uevld         | 54122  | 7-:54203014-54213842    |
| 21607 | Aldh1a1       | 11668  | 19+:20676457-20717944   |
| 21608 | Tpcn2         | 233979 | 7-:152439963-152444960  |
| 21609 | MMT00039978   |        | X+:100232943-100233745  |
| 21611 | 1700085A12Rik | 78631  | X+:36699441-36700135    |
| 21617 | MMT00050850   |        | 18-:82885510-82895572   |
| 21618 | MMT00041235   |        | 6+:90848276-90856207    |
| 21619 | MMT00060699   |        | 7+:107093648-107118866  |
| 21620 | Tmem166       | 232146 | 6+:81991666-82043092    |
| 21621 | MMT00071794   |        | 17-:37977249-37978796   |
| 21623 | Gpr98         | 110789 | 13-:81731551-81772338   |
| 21627 | Fcgr3         | 14131  | 1-:172981325-172989466  |
| 21630 | Ahcyl2        | 74340  | 6+:29718497-29720618    |
| 21632 | MMT00046455   |        | 9+:108062719-108063800  |
| 21634 | MMT00042049   |        |                         |
| 21636 | 1700127D06Rik | 76999  | 7+:51200381-51201297    |
| 21637 | Cpxm1         | 56264  | 2-:130216511-130223310  |
| 21639 | Hspa9         | 15526  | 18-:35097088-35113977   |
| 21640 | Hspa14        | 50497  | 2-:3406125-3430018      |
| 21643 | Agtr1a        | 11607  | 13+:30428307-30474735   |
| 21645 | Slc22a6       | 18399  | 19+:8692604-8701011     |
| 21649 | MMT00076721   |        | 10+:72664358-72666028   |
| 21650 | Ap4b1         | 67489  | 3+:103613552-103625946  |
| 21651 | Glipr1l2      | 67537  | 10+:111520409-111545154 |

|       |               |        |                         |
|-------|---------------|--------|-------------------------|
| 21652 | Olfir700      | 258593 | 7-:113949025-113949974  |
| 21655 | Rab40b        | 217371 | 11-:121218116-121249453 |
| 21656 | MMT00054267   |        | 11-:7083159-7086362     |
| 21657 | Etaa1         | 68145  | 11-:17839655-17853878   |
| 21658 | Oxt           | 18429  | 2+:130401945-130402667  |
| 21660 | Il1rn         | 16181  | 2+:24192378-24205150    |
| 21662 | A530088I07Rik | 212167 | 5+:20692130-20797531    |
| 21664 | Insig1        | 231070 | 5+:28397977-28405203    |
| 21665 | Nat5          | 67877  | 2+:145729036-145742052  |
| 21666 | Ncor1         | 20185  | 11-:62131042-62233285   |
| 21667 | MMT00076649   |        | 18+:47030475-47030960   |
| 21669 | Zic5          | 65100  | 14-:122858381-122864892 |
| 21670 | Ggt1          | 14598  | 10+:75036337-75048927   |
| 21675 | Mosc2         | 67247  | 1-:186637572-186669709  |
| 21681 | 9130011J15Rik | 66818  | 8-:75089788-75094960    |
| 21682 | Med17         | 234959 | 9-:15064795-15084311    |
| 21683 | Prdm10        | 382066 | 9+:31087890-31186128    |
| 21684 | Cd82          | 12521  | 2-:93259268-93302568    |
| 21685 | Gzma          | 14938  | 13-:113884032-113891187 |
| 21686 | MMT00026800   |        | 16+:47212481-47213039   |
| 21687 | Zbtb7b        | 22724  | 3-:89183210-89185179    |
| 21692 | MMT00013924   |        | 9+:57331735-57332397    |
| 21693 | BC029169      | 208659 | 11-:109534234-109583569 |
| 21703 | Tmem38b       | 52076  | 4+:53838933-53873461    |
| 21707 | Tesc          | 57816  | 5+:118477926-118511876  |
| 21710 | Slc30a6       | 210148 | 17+:74801250-74822853   |
| 21712 | Ttc5          | 219022 | 14-:51385085-51405190   |
| 21713 | Adnp          | 11538  | 2-:168007547-168010033  |
| 21715 | Siah1a        | 20437  | 8-:89247906-89269833    |
| 21716 | Tmem85        | 68032  | 2-:112203175-112208184  |
| 21717 | EG628893      | 628893 | X-:74962581-74963366    |
| 21720 | Clec4d        | 17474  | 6+:123212192-123224934  |
| 21721 | Styk1         | 243659 | 6-:131249161-131262616  |
| 21722 | MMT00054655   |        | 11-:12836541-12837709   |
| 21723 | Homer1        | 26556  | 13+:94075012-94126407   |
| 21727 | Khk           | 16548  | 5+:31224288-31233419    |
| 21729 | Hdc           | 15186  | 2-:126419402-126444379  |
| 21733 | Rheb1         | 69159  | 15-:98708209-98711693   |
| 21735 | C130073F10Rik | 242574 | 4-:101562629-101566382  |
| 21737 | Srst          | 20819  | 17-:83209639-83211256   |
| 21739 | Epb4.1        | 269587 | 4-:131479017-131628013  |
| 21743 | Ccno          | 218630 | 13+:113778105-113780986 |
| 21745 | MMT00039382   |        |                         |
| 21747 | H2afx         | 15270  | 9+:44142793-44144154    |
| 21750 | Rab31         | 106572 | 17-:66001069-66122021   |
| 21751 | Ptpn6         | 15170  | 6-:124670734-124683122  |

|       |               |        |                         |
|-------|---------------|--------|-------------------------|
| 21753 | Pcdhb14       | 93885  | 18+:37607496-37609885   |
| 21754 | Synj2         | 20975  | 17+:5975640-6044289     |
| 21761 | D14Ert449e    | 66039  | 14-:26743655-26746694   |
| 21762 | Lage3         | 66192  | X-:71597500-71598957    |
| 21764 | Tgm5          | 74176  | 2-:120871846-120911558  |
| 21765 | Arpp19        | 59046  | 9+:74885723-74904611    |
| 21767 | Gm1758        | 385737 | 16+:14502192-14507354   |
| 21769 | Loxl2         | 94352  | 14+:70009000-70095642   |
| 21772 | MMT00002494   |        | 6+:34989351-34989622    |
| 21773 | Pcdhb2        | 93873  | 18+:37454629-37457027   |
| 21774 | MMT00031273   |        | 4-:111463186-111481072  |
| 21775 | MMT00051649   |        | 14-:76329373-76331352   |
| 21780 | Ankrd35       | 213121 | 3+:96474259-96494956    |
| 21785 | MMT00043723   |        | 3-:69139122-69139666    |
| 21788 | MMT00036513   |        | 5+:109665987-109667178  |
| 21790 | Smarcal1      | 54380  | 1+:72629844-72679704    |
| 21791 | MMT00042985   |        | 9-:96714255-96717996    |
| 21793 | Pla2g12a      | 66350  | 3+:129581636-129597872  |
| 21794 | Pfkip         | 56421  | 13-:6580420-6647976     |
| 21795 | 0610009B22Rik | 66050  | 11-:51498886-51502136   |
| 21797 | Dst           | 13518  | 1+:34068669-34365495    |
| 21799 | Cops5         | 26754  | 1-:10014913-10027979    |
| 21800 | EG626058      | 626058 | 1+:155260671-155261163  |
| 21801 | Serpib6a      | 20719  | 13-:34009796-34027847   |
| 21803 | Slc15a2       | 57738  | 16-:36750266-36785048   |
| 21805 | Plk3          | 12795  | 4-:116800998-116806407  |
| 21806 | MMT00064565   |        | 13-:51300538-51301473   |
| 21811 | Ak3l1         | 11639  | 4+:101092343-101139177  |
| 21814 | Accn5         | 58170  | 3+:81800843-81825155    |
| 21817 | MMT00028065   |        | 11-:57877313-57886415   |
| 21818 | 2010003K11Rik | 69861  | 19-:4496785-4498582     |
| 21821 | Olf1032       | 258572 | 2+:85847934-85848865    |
| 21823 | Atp6v0d1      | 11972  | 8-:108048369-108089825  |
| 21824 | 5830443L24Rik | 76074  | 5-:105443175-105447782  |
| 21827 | MMT00010458   | 403088 | 6-:42537500-42547275    |
| 21837 | BC052328      | 223433 | 15-:27586020-27611238   |
| 21839 | Gprasp1       | 67298  | X+:132336824-132338003  |
| 21840 | Tmie          | 20776  | 9-:110769364-110770592  |
| 21841 | RP23-157O10.7 | 56013  | 11-:97372211-97372655   |
| 21844 | Ncoa7         | 211329 | 10-:30367339-30491624   |
| 21845 | Gm648         | 270599 | X-:53797243-53798334    |
| 21847 | MMT00063855   |        | X+:114000424-114000790  |
| 21849 | Icam2         | 15896  | 11-:106238970-106243955 |
| 21853 | 5430432N15Rik | 74490  | 7+:52895344-52901137    |
| 21854 | Fkbp3         | 30795  | 12-:66163422-66174927   |
| 21858 | Neil3         | 234258 | 8-:54672220-54724350    |

|       |                 |        |                         |
|-------|-----------------|--------|-------------------------|
| 21859 | Fancg           | 60534  | 4-:43015817-43022982    |
| 21863 | Dok2            | 13449  | 14+:71174187-71178300   |
| 21866 | Hhip1           | 214305 | 12+:109544411-109566422 |
| 21871 | Spock3          | 72902  | 8+:65430028-65835648    |
| 21872 | Stambpl1        | 76630  | 19+:34307131-34314816   |
| 21874 | Nppb            | 18158  | 4+:147360084-147361087  |
| 21877 | Slitrk6         | 239250 | 14-:111148972-111151495 |
| 21881 | MMT00038325     |        | 5-:107167134-107167784  |
| 21888 | Kti12           | 100087 | 4+:108520461-108522017  |
| 21889 | Mgat3           | 17309  | 15+:80041403-80043020   |
| 21891 | Nnt             | 18115  | 13-:120124552-120197723 |
| 21896 | Lce1c           | 73719  | 3+:92483168-92484840    |
| 21898 | MMT00050545     |        | 15+:90530472-90554430   |
| 21901 | BC035537        | 212326 | 8-:46424429-46444058    |
| 21903 | Nr1d1           | 217166 | 11-:98629245-98636136   |
| 21907 | Dynlrb1         | 67068  | 2+:155062313-155076009  |
| 21909 | Neurl2          | 415115 | 2-:164656232-164658966  |
| 21912 | OTTMUSG00000010 | 629754 | 2-:164475133-164477308  |
| 21914 | C030037F17Rik   | 77475  | 8-:14745327-14747430    |
| 21915 | MMT00006856     |        | 13+:33810144-33811373   |
| 21916 | Cdk4            | 12567  | 10+:126501291-126504076 |
| 21917 | Taf9b           | 407786 | X-:103403659-103415105  |
| 21918 | Snx24           | 69226  | 18+:53405422-53550574   |
| 21919 | MMT00078220     |        | 5+:3090867-3092385      |
| 21920 | Fnip2           | 329679 | 3-:79263609-79371602    |
| 21922 | MMT00028085     |        | 2+:5520620-5664750      |
| 21923 | Olf1585         | 259091 | 7+:110246256-110247212  |
| 21924 | Ang2            | 11731  | 14-:51815160-51815598   |
| 21926 | MMT00059984     |        | 6+:145214919-145215296  |
| 21929 | Vldlr           | 22359  | 19+:27291921-27324109   |
| 21931 | Nrxn3           | 18191  | 12+:90741461-90771454   |
| 21934 | Id2             | 15902  | 12-:25780183-25780875   |
| 21935 | Prok2           | 50501  | 6-:99661293-99676386    |
| 21937 | MMT00015325     |        | 17+:41238748-41238994   |
| 21941 | MMT00028347     |        | 1+:125653267-125654326  |
| 21946 | MMT00009539     |        | 11+:28855319-28857605   |
| 21947 | Cdca8           | 52276  | 4-:124595709-124614153  |
| 21951 | Cypt6           | 66742  | X+:16099997-16100809    |
| 21952 | Tfb1m           | 224481 | 17-:3519258-3557713     |
| 21953 | Colec12         | 140792 | 18+:9707674-9877990     |
| 21955 | Atxn711         | 380753 | 12+:34000322-34053138   |
| 21960 | Acaca           | 107476 | 11+:84045175-84155449   |
| 21963 | Edaradd         | 171211 | 13-:12569967-12612705   |
| 21964 | Vwce            | 71768  | 19+:10708720-10716232   |
| 21965 | AY036118        | 170798 | 17-:39985039-39985774   |
| 21966 | Pcp4l1          | 66425  | 1-:173103394-173126371  |

|       |               |        |                         |
|-------|---------------|--------|-------------------------|
| 21967 | Tyk2          | 54721  | 9-:20908518-20935654    |
| 21969 | Tk1           | 21877  | 11-:117676840-117687267 |
| 21970 | Eif3f         | 66085  | 7+:116077929-116085201  |
| 21971 | Epb4.2        | 13828  | 2-:120843953-120862491  |
| 21973 | Faf1          | 14084  | 4+:109349300-109634651  |
| 21974 | lfltd1        | 74071  | 6-:145345754-145383445  |
| 21975 | MMT00008417   |        | 2+:130935301-130935523  |
| 21978 | Txn1          | 53382  | 18-:63823755-63851842   |
| 21981 | Ormdl2        | 66844  | 10-:128255550-128258662 |
| 21983 | C130022K22Rik | 232236 | 6+:91828061-91849832    |
| 21986 | Cstf1         | 67337  | 2+:172196502-172206585  |
| 21988 | MMT00015654   | 675749 | 7-:3813573-3820818      |
| 21989 | Zfp167        | 382118 | 9+:122795968-122805240  |
| 21991 | Olf935        | 258741 | 9-:38802093-38803018    |
| 21992 | Lap3          | 66988  | 5+:45884651-45903688    |
| 21993 | D430015B01Rik | 58909  | 6-:58885369-58953507    |
| 21995 | Nktr          | 18087  | 9+:121628293-121665959  |
| 21996 | Mme           | 17380  | 3+:63104056-63184253    |
| 21997 | Phf1          | 21652  | 17+:27070276-27074834   |
| 21998 | Nomo1         | 211548 | 7+:53289087-53339752    |
| 22001 | Gtlf3b        | 24083  | 11-:60716562-60727291   |
| 22004 | Gtpbp2        | 56055  | 17+:46298084-46306316   |
| 22008 | Rbm35a        | 207920 | 4-:11259082-11313583    |
| 22009 | Tmem14a       | 75712  | 1+:21208742-21220245    |
| 22010 | Ccdc41        | 77048  | 10+:94151398-94252790   |
| 22012 | Itgae         | 16407  | 11+:72904084-72960942   |
| 22015 | 2410127E18Rik | 76788  | 6+:30367033-30402332    |
| 22019 | Chrng         | 11449  | 1+:89102388-89108208    |
| 22021 | Csnk1d        | 104318 | 11-:120824737-120852633 |
| 22024 | Lrrc58        | 320184 | 16+:37878372-37884355   |
| 22026 | Fgfbp1        | 14181  | 5-:44370433-44371187    |
| 22030 | Mtmr6         | 219135 | 14+:60884107-60920502   |
| 22031 | Vcam1         | 22329  | 3-:115813057-115832342  |
| 22032 | Kirrel3       | 67703  | 9+:34293797-34318199    |
| 22034 | Appl1         | 72993  | 14-:27736760-27783697   |
| 22035 | Olf142        | 406186 | 2-:90092226-90093143    |
| 22037 | Oas1g         | 23960  | 5-:121326732-121337591  |
| 22038 | Tnip1         | 57783  | 11-:54724290-54776414   |
| 22039 | Npc2          | 67963  | 12-:86097356-86113848   |
| 22042 | Mgam          | 232714 | 6+:40594829-40719115    |
| 22043 | Rdh8          | 235033 | 9+:20622947-20629987    |
| 22046 | Cml4          | 68396  | 6-:85780375-85781829    |
| 22050 | Vamp5         | 53620  | 6-:72318128-72318637    |
| 22062 | B230110C06Rik | 77981  | 14+:16270133-16284959   |
| 22073 | Lrig3         | 320398 | 10+:125403204-125452414 |
| 22075 | C1s           | 50908  | 6-:124480644-124483991  |

|       |               |        |                         |
|-------|---------------|--------|-------------------------|
| 22076 | Pgm2l1        | 70974  | 7+:107376115-107427381  |
| 22077 | MMT00057550   | 677168 | 17-:46543911-46544526   |
| 22079 | Tmem81        | 74626  | 1+:134402806-134405214  |
| 22080 | MMT00030613   |        | X+:72153071-72163420    |
| 22083 | 4933413J09Rik | 71106  | 14+:27182114-27197404   |
| 22084 | MMT00070787   |        | 9+:122656463-122659550  |
| 22085 | MMT00036089   |        | 6-:122741561-122743432  |
| 22087 | Slc30a7       | 66500  | 3-:115649581-115710132  |
| 22089 | Niban         | 63913  | 1+:153418669-153566166  |
| 22090 | Plscr1        | 22038  | 9+:92157864-92166813    |
| 22091 | Nt5c3l        | 68106  | 11-:100284062-100303122 |
| 22092 | Plekhg4       | 102075 | 8+:107898800-107905956  |
| 22093 | Zbbx          | 213234 | 3-:74841831-74916146    |
| 22094 | Rnf149        | 67702  | 1-:39608137-39634253    |
| 22095 | Mgst1         | 56615  | 6+:138096210-138104897  |
| 22098 | MMT00009248   |        | 7-:104740367-104740914  |
| 22099 | Cnot8         | 69125  | 11-:57910274-57911351   |
| 22100 | Lcn5          | 13863  | 2+:25513587-25517164    |
| 22103 | Hvcn1         | 74096  | 5+:122660295-122692282  |
| 22104 | Rnf123        | 84585  | 9-:107964083-107964976  |
| 22106 | Mmp15         | 17388  | 8+:97876763-97897770    |
| 22111 | Ttn           | 22138  | 2-:76677461-76679353    |
| 22112 | Xlr4a         | 434794 | X-:70319678-70326134    |
| 22115 | Ccl5          | 20304  | 11-:83339282-83343991   |
| 22116 | Fbxo42        | 213499 | 4+:140723457-140756725  |
| 22117 | Slc4a11       | 269356 | 2-:130509849-130523193  |
| 22120 | Ccna1         | 12427  | 3-:54849396-54858977    |
| 22122 | MMT00042954   |        |                         |
| 22125 | Gab1          | 14388  | 8-:83289721-83403525    |
| 22126 | RP23-303F24.3 | 622459 | 11-:53596920-53672732   |
| 22130 | Cks1b         | 54124  | 3-:89219394-89222213    |
| 22135 | MMT00033583   |        | 14+:17779358-17779949   |
| 22136 | Olf701        | 66786  | 7+:113957657-113964223  |
| 22137 | Nudt7         | 67528  | 8+:116657514-116676204  |
| 22138 | Ang           | 11727  | 14+:51721078-51721516   |
| 22139 | Stip1         | 20867  | 19-:7095197-7114433     |
| 22141 | Rorb          | 225998 | 19-:19012131-19075607   |
| 22142 | 5830457O10Rik | 214987 | 8-:109407764-109410858  |
| 22146 | Aifm2         | 71361  | 10+:61195069-61202035   |
| 22147 | Ap1s1         | 11769  | 5-:137510863-137521930  |
| 22148 | MMT00035976   |        |                         |
| 22149 | MMT00059396   |        | 3-:57521848-57522211    |
| 22150 | Fhdc1         | 229474 | 3-:84247398-84278704    |
| 22151 | Plxnd1        | 67784  | 6-:115904826-115944675  |
| 22152 | 5830411G16Rik | 78937  | 6+:56664918-56709117    |
| 22157 | Mxra8         | 74761  | 4+:155213905-155218202  |

|       |                  |           |                         |
|-------|------------------|-----------|-------------------------|
| 22161 | Tmem132a         | 98170     | 19-:10932322-10944221   |
| 22164 | Msrp3            | 320183    | 10-:120220946-120308216 |
| 22165 | St8sia4          | 20452     | 1-:97484260-97564171    |
| 22166 | Traf1            | 22029     | 2-:34798775-34817105    |
| 22169 | Ctrl             | 109660    | 8-:108455902-108457762  |
| 22171 | MMT00012636      | 100042265 | 9-:121758658-121766649  |
| 22180 | Nlrp9a           | 233001    | 7+:27342304-27359163    |
| 22184 | MMT00033856      |           | 11+:83614245-83615066   |
| 22188 | Top2a            | 21973     | 11-:98855077-98885429   |
| 22191 | Dhrs9            | 241452    | 2+:69230966-69235830    |
| 22192 | 9030205A07Rik    | 217843    | 12+:104301314-104422208 |
| 22193 | MMT00007348      |           | 4+:14097146-14098124    |
| 22194 | Olfr39           | 258822    | 9+:20090144-20091079    |
| 22196 | Cyp3a41a         | 53973     | 5-:146529490-146531712  |
| 22197 | Ankrd28          | 105522    | 14-:32511959-32643590   |
| 22199 | Acsn5            | 272428    | 7+:126669776-126687306  |
| 22201 | Pard3            | 93742     | 8+:129588144-130134729  |
| 22202 | OTTMUSG000000212 | 545539    | 3+:89196186-89202147    |
| 22203 | Txndc11          | 106200    | 16-:11075006-11088024   |
| 22204 | Slc6a20a         | 102680    | 9-:123545239-123587963  |
| 22208 | Me3              | 109264    | 7+:96781327-97000472    |
| 22213 | Adora1           | 11539     | 1-:136097952-136131999  |
| 22215 | A630047E20Rik    | 271981    | 3+:132349787-132501573  |
| 22216 | Sp5              | 64406     | 2+:70313222-70315753    |
| 22217 | Flvcr2           | 217721    | 12+:87087488-87154535   |
| 22218 | Rfc3             | 69263     | 5-:152445392-152453770  |
| 22219 | Cyp11b1          | 110115    | 15-:74665322-74672036   |
| 22222 | Gstt1            | 14871     | 10-:75246784-75261241   |
| 22224 | Svs1             | 243377    | 6+:48936900-48940688    |
| 22226 | Pm20d1           | 212933    | 1+:133701200-133714693  |
| 22228 | MMT00013109      |           |                         |
| 22229 | Dnmt1            | 13433     | 9-:20711964-20757423    |
| 22230 | Myh9             | 17886     | 15-:77591018-77672529   |
| 22232 | Krt19            | 16669     | 11-:100002128-100007228 |
| 22238 | Sardh            | 192166    | 2-:27044902-27102332    |
| 22239 | Ap3b1            | 11774     | 13+:95128985-95336270   |
| 22241 | Sfrs10           | 20462     | 16-:22246535-22265983   |
| 22244 | Slc16a7          | 20503     | 10-:124664541-124765591 |
| 22247 | Pigyl            | 66268     | 9+:21961309-21962792    |
| 22250 | Wdr45l           | 66840     | 11-:121188547-121215723 |
| 22255 | 2900010M23Rik    | 67267     | 17-:27259609-27270836   |
| 22256 | Arg2             | 11847     | 12+:80231810-80257282   |
| 22257 | Lonrf3           | 74365     | X+:33868401-33898750    |
| 22258 | Ttk              | 22137     | 9+:83728347-83765991    |
| 22260 | Slc38a4          | 69354     | 15-:96827200-96861642   |
| 22263 | Gzmd             | 14941     | 14-:56748417-56751359   |

|       |               |        |                         |
|-------|---------------|--------|-------------------------|
| 22271 | Cyp2c29       | 13095  | 19+:39361600-39405189   |
| 22272 | Vpreb1        | 22362  | 16-:16868495-16869343   |
| 22273 | Zfp146        | 26465  | 7-:30946619-30954706    |
| 22279 | Krr1          | 52705  | 10+:111409810-111425943 |
| 22284 | Tcerg1l       | 70571  | 7-:145401374-145589241  |
| 22286 | Mmachc        | 67096  | 4-:116375039-116380926  |
| 22288 | MMT00061717   |        |                         |
| 22289 | Smn1          | 20595  | 13+:100894848-100907645 |
| 22290 | Tubb2a        | 22151  | 13-:34166150-34169875   |
| 22291 | V1re7         | 171230 | 17-:21026681-21027615   |
| 22293 | Gprc6a        | 210198 | 10-:51334671-51348358   |
| 22294 | Ttc35         | 66736  | 15+:43308820-43359308   |
| 22297 | Zfyve1        | 217695 | 12-:84887504-84916086   |
| 22298 | Zfp259        | 22687  | 9+:46081248-46089685    |
| 22302 | MMT00041810   |        | 8-:38434879-38436192    |
| 22303 | Cdt1          | 67177  | 8+:125091941-125097033  |
| 22304 | Pigt          | 78928  | 2+:164323064-164333266  |
| 22305 | McpH1         | 244329 | 8+:18595272-18625674    |
| 22306 | Myl4          | 17896  | 11+:104438765-104447067 |
| 22307 | Sgtb          | 218544 | 13+:104899869-104931519 |
| 22310 | Asb5          | 76294  | 8+:55635683-55673189    |
| 22312 | Itln1         | 16429  | 1-:173448372-173461884  |
| 22314 | E2f2          | 242705 | 4+:135728307-135751074  |
| 22315 | Myo3b         | 329421 | 2+:69934353-70072535    |
| 22318 | Cox8b         | 12869  | 7-:148084841-148086296  |
| 22320 | MMT00047284   |        |                         |
| 22321 | Apol7a        | 75761  | 15-:77218645-77226747   |
| 22322 | Rnf151        | 67504  | 17-:24852790-24854963   |
| 22323 | MMT00051740   |        | 7-:17304466-17305259    |
| 22324 | MMT00060741   |        | 7-:109796211-109796566  |
| 22327 | Tyrobp        | 22177  | 7+:31198857-31202427    |
| 22329 | Galnt5        | 67909  | 5+:24687297-24726107    |
| 22333 | HnrnpH3       | 432467 | 10-:62477414-62482275   |
| 22334 | 9430023L20Rik | 68118  | 15+:101114731-101121365 |
| 22336 | Hsd3b5        | 15496  | 3-:98422558-98434175    |
| 22337 | Nlk           | 18099  | 11-:78381693-78510055   |
| 22338 | Unc119        | 22248  | 11+:78157006-78162544   |
| 22339 | Slc12a1       | 20495  | 2+:124979465-125021457  |
| 22340 | LnX2          | 140887 | 5+:147828219-147830167  |
| 22342 | MMT00008396   |        | 5-:10241751-10245340    |
| 22343 | Blm           | 12144  | 7-:87599977-87679983    |
| 22349 | Cab39         | 12283  | 1+:87690359-87746617    |
| 22351 | Fanca         | 14087  | 8-:125792201-125842476  |
| 22354 | 2010301N04Rik | 72103  | 6-:87657235-87672165    |
| 22355 | Clec4e        | 56619  | 6-:123231806-123239889  |
| 22358 | MMT00038532   |        |                         |



|       |               |           |                         |
|-------|---------------|-----------|-------------------------|
| 22361 | Sephs2        | 20768     | 7-:134415396-134417560  |
| 22362 | Laptm4b       | 114128    | 15+:34168078-34213134   |
| 22364 | Cnbp2         | 75064     | X+:100818852-100826524  |
| 22365 | Jun           | 16476     | 4-:94715745-94718878    |
| 22366 | MMT00005283   |           | 6+:16838966-16876948    |
| 22370 | 1700058G18Rik | 67342     | 10+:115855176-115858291 |
| 22371 | 1810063B05Rik | 67892     | 8-:128948313-128999049  |
| 22372 | MMT00030553   | 627908    | X+:72478193-72481092    |
| 22373 | Txnip         | 56338     | 3+:96361880-96365780    |
| 22375 | MMT00053882   |           | 14+:95818909-95820406   |
| 22383 | 2200002K05Rik | 69137     | 9+:15043486-15063837    |
| 22385 | Olfr1437      | 258117    | 19-:12284792-12397072   |
| 22388 | 2410018M08Rik | 71970     | 5+:130371591-130379486  |
| 22390 | Dhcr7         | 13360     | 7+:151016137-151034314  |
| 22395 | Kcna1         | 16485     | 6-:126591689-126594831  |
| 22396 | Fcrl5         | 329693    | 3+:87245926-87252359    |
| 22398 | Nav2          | 78286     | 7+:56708439-56862513    |
| 22402 | MMT00071327   |           | 8-:11683460-11684248    |
| 22403 | Bank1         | 242248    | 3-:135717373-135763554  |
| 22406 | Vnn1          | 22361     | 10+:23614665-23625145   |
| 22407 | Rhbdf2        | 217344    | 11-:116459485-116485567 |
| 22408 | Calr3         | 73316     | 8-:74948450-74967677    |
| 22409 | Larp2         | 214048    | 3+:40766089-40781704    |
| 22411 | Reck          | 53614     | 4+:43888471-43957392    |
| 22412 | Ptpn5         | 19259     | 7-:54333171-54389054    |
| 22427 | MMT00049287   |           | X-:62003662-62004338    |
| 22430 | Taar9         | 503558    | 10-:23821182-23829340   |
| 22434 | Olfr1255      | 258979    | 2+:89656484-89657415    |
| 22435 | Tmem98        | 103743    | 11+:80623916-80635533   |
| 22439 | 4921533L14Rik | 68187     | 1-:24018521-24036655    |
| 22440 | MMT00042948   |           | 8+:82229577-82230204    |
| 22443 | Tuba1c        | 22146     | 15+:98860808-98868535   |
| 22445 | Prkag3        | 241113    | 1-:74785498-74795530    |
| 22446 | Ccr5          | 12774     | 9+:124039100-124040164  |
| 22448 | MMT00023461   |           | 3+:19834373-19834864    |
| 22450 | Prpf19        | 28000     | 19+:10969753-10979806   |
| 22451 | Olfr1461      | 258299    | 19+:13232689-13308799   |
| 22452 | Tcfap2b       | 21419     | 1+:19199078-19224593    |
| 22453 | Spag17        | 74362     | 3+:99892204-99896975    |
| 22454 | Synj2bp       | 24071     | 12-:82601700-82633855   |
| 22455 | Gprc5d        | 93746     | 6-:135056009-135068301  |
| 22457 | 6530401D17Rik | 76219     | X+:132567905-132569483  |
| 22458 | Spata17       | 74717     | 1-:188872280-189039346  |
| 22460 | 4930430F21Rik | 73784     | 15+:30968876-30973087   |
| 22462 | MMT00026054   | 100041835 | 11-:95934335-95936342   |
| 22463 | Gorasp2       | 70231     | 2+:70499206-70529799    |

|       |               |        |                         |
|-------|---------------|--------|-------------------------|
| 22465 | Olf790        | 258935 | 10+:128937941-128938909 |
| 22470 | Ppargc1b      | 170826 | 18-:61457790-61560085   |
| 22474 | Ubqln1        | 56085  | 13-:58279144-58316799   |
| 22475 | Sh3bp1        | 20401  | 15+:78732786-78742473   |
| 22476 | Tspan4        | 64540  | 7+:148661375-148679315  |
| 22478 | Tanc1         | 66860  | 2+:59537404-59684269    |
| 22479 | Ascc2         | 75452  | 11+:4537795-4583386     |
| 22482 | Vmn2r93       | 627132 | 17+:18440927-18462865   |
| 22486 | Sh3bgrl3      | 73723  | 4-:133683321-133684668  |
| 22487 | Trub1         | 72133  | 19+:57527401-57563395   |
| 22492 | Ubb           | 22187  | 11+:62365007-62366714   |
| 22493 | Slc35a2       | 22232  | X+:7461369-7471531      |
| 22494 | MMT00005811   |        | 4-:52948302-52949253    |
| 22495 | Nek5          | 330721 | 8-:23184088-23193936    |
| 22496 | Sfn1          | 20555  | 11+:82930346-82936161   |
| 22499 | 9030409G11Rik | 71529  | 4-:141696730-141766123  |
| 22503 | Cnot6l        | 231464 | 5-:96505816-96591009    |
| 22506 | Slc22a4       | 30805  | 11-:53796811-53841590   |
| 22507 | Nap1l3        | 54561  | X-:119508169-119510994  |
| 22508 | Setd8         | 67956  | 5+:124910928-124912282  |
| 22514 | MMT00076032   | 667804 | 2+:74590836-74591356    |
| 22519 | 1700054K19Rik | 67336  | 6+:112160699-112162507  |
| 22520 | Sec13         | 110379 | 6-:113678063-113690678  |
| 22521 | Hsp90b1       | 22027  | 10-:86153585-86168189   |
| 22522 | 2010300C02Rik | 72097  | 1-:37694830-37733634    |
| 22528 | Frdm5         | 228564 | 2-:121373822-121412207  |
| 22531 | Gm484         | 243967 | 7+:52941550-52949922    |
| 22534 | Pik3r2        | 18709  | 8-:73292077-73300580    |
| 22539 | MMT00044599   |        | 4+:52049043-52254398    |
| 22541 | 4632413I24Rik | 74031  | 10+:7132928-7133737     |
| 22546 | Tnnt1         | 21955  | 7-:4456264-4467577      |
| 22551 | Anapc11       | 66156  | 11+:120459787-120466988 |
| 22553 | Ms4a8a        | 64381  | 19-:11141961-11155518   |
| 22555 | Ela2          | 50701  | 10+:79349079-79350843   |
| 22556 | Slc26a8       | 224661 | 17-:28786612-28826932   |
| 22557 | P4hb          | 18453  | 11-:120421355-120434500 |
| 22559 | MMT00031309   |        | 2+:34686022-34688171    |
| 22560 | Gpr56         | 14766  | 8+:97501008-97538095    |
| 22561 | Whdc1         | 434204 | 7+:88716165-88741478    |
| 22562 | Sdha          | 66945  | 13-:74459703-74487690   |
| 22563 | MMT00004885   |        | 4+:105466782-105467514  |
| 22568 | MMT00033197   |        | 12-:105427732-105430646 |
| 22570 | Phtf1         | 18685  | 3+:103772180-103811411  |
| 22573 | Kif2c         | 73804  | 4-:116832742-116855189  |
| 22575 | St8sia6       | 241230 | 2-:13576566-13715147    |
| 22578 | Bmp5          | 12160  | 9+:75623899-75746389    |

|       |               |        |                         |
|-------|---------------|--------|-------------------------|
| 22579 | Eif4a2        | 13682  | 16+:23107828-23114019   |
| 22580 | MMT00081414   |        | 2+:15766872-15791436    |
| 22581 | 2310035C23Rik | 227446 | 1+:107560445-107651761  |
| 22583 | Vmn2r89       | 22301  | 14+:52030599-52080294   |
| 22584 | Gspt2         | 14853  | X+:91881657-91883890    |
| 22592 | MMT00055028   |        | 12+:100742958-100747794 |
| 22593 | Spink3        | 20730  | 18-:43887737-43896848   |
| 22598 | 4930402H24Rik | 228602 | 2-:130629128-130629599  |
| 22600 | 2410018C20Rik | 67873  | 8-:86775381-86781191    |
| 22604 | Zc3h6         | 78751  | 2+:128793144-128819866  |
| 22607 | Bex1          | 19716  | X-:132748511-132749977  |
| 22611 | Tmem5         | 216395 | 10-:121516443-121517069 |
| 22612 | 1500010J02Rik | 68964  | 11+:68840817-68849974   |
| 22618 | Ccl21c        | 65956  | 4+:41774242-41775336    |
| 22621 | Cklf          | 75458  | 8+:106774802-106787343  |
| 22622 | Prl6a1        | 19111  | 13+:27404496-27411120   |
| 22624 | Kcnj15        | 16516  | 16+:95517208-95518605   |
| 22627 | Adck5         | 268822 | 15+:76406735-76426238   |
| 22628 | EG626903      | 626903 | 5-:20621883-20635619    |
| 22629 | Asb17         | 66772  | 3+:153507229-153516575  |
| 22630 | MMT00034355   |        | 4+:24165577-24166314    |
| 22631 | MMT00054932   |        | 11+:101337214-101338381 |
| 22635 | Nrn1          | 68404  | 13-:36817495-36826349   |
| 22636 | Trim2         | 80890  | 3-:83964367-84024783    |
| 22640 | Bud13         | 215051 | 9+:46091104-46106864    |
| 22641 | Kif1c         | 16562  | 11+:70514046-70545471   |
| 22642 | Uts2          | 24111  | 4+:150371205-150375918  |
| 22643 | Ece1          | 230857 | 4+:137469486-137519654  |
| 22645 | Zar1          | 317755 | 5-:72968354-72972376    |
| 22647 | Pkib          | 18768  | 10+:57351786-57456887   |
| 22648 | Mpzl1         | 68481  | 1-:167522314-167564652  |
| 22650 | Ccdc129       | 232016 | 6+:55925581-55928732    |
| 22653 | Ric3          | 320360 | 7-:116181406-116226820  |
| 22655 | Sorcs3        | 66673  | 19+:48678332-48879987   |
| 22656 | Atp6ap1       | 54411  | X+:71542517-71549477    |
| 22660 | Kif4          | 16571  | X+:97821075-97922278    |
| 22662 | H2-T24        | 15042  | 17-:36143599-36157436   |
| 22668 | Rai14         | 75646  | 15-:10500395-10620182   |
| 22669 | Ahctf1        | 226747 | 1-:181675029-181684203  |
| 22670 | Clec4a1       | 269799 | 6+:122871991-122884638  |
| 22672 | Adam33        | 110751 | 2-:130876326-130882277  |
| 22673 | Prpf38b       | 66921  | 3-:108705236-108714643  |
| 22676 | 9030420J04Rik | 71544  | 9-:9180015-9239026      |
| 22677 | Prss2         | 22072  | 6+:41471786-41475078    |
| 22681 | Gm88          | 224813 | 17+:46390464-46394264   |
| 22684 | Slco1a5       | 108096 | 6-:142182750-142271470  |

|       |               |        |                         |
|-------|---------------|--------|-------------------------|
| 22688 | 4930432K21Rik | 74666  | 8+:86672148-86696488    |
| 22689 | 2610028A01Rik | 72400  | 14+:64479200-64538641   |
| 22691 | Ercc6l        | 236930 | X-:99338296-99339789    |
| 22693 | Trim68        | 101700 | 7-:109826100-109835764  |
| 22694 | EG629219      | 629219 | 7-:14807826-14840218    |
| 22695 | Tgoln2        | 22135  | 6-:72560950-72566742    |
| 22696 | Ypel4         | 241525 | 2+:84574165-84578798    |
| 22697 | Skil          | 20482  | 3+:30995754-31017908    |
| 22698 | Olfr218       | 258880 | 1+:175133488-175134428  |
| 22703 | Olfr599       | 258726 | 7+:110486569-110487515  |
| 22705 | Actr2         | 66713  | 11-:19962308-20012916   |
| 22709 | Proc          | 19123  | 18-:32282780-32295593   |
| 22710 | MMT00075201   |        | 12+:36499659-36501226   |
| 22712 | Phf11         | 219131 | 14-:59895750-59916356   |
| 22715 | Ap3m1         | 55946  | 14-:21855721-21871402   |
| 22716 | Agr3          | 403205 | 12+:36652207-36676323   |
| 22717 | EG620161      | 620161 | 6+:112926194-112926462  |
| 22718 | 1700093K21Rik | 67358  | 11-:23416248-23419101   |
| 22722 | Ttc14         | 67120  | 3+:33700135-33706871    |
| 22724 | Adamts13      | 279028 | 2+:26864045-26864967    |
| 22727 | Pdgfra        | 18595  | 5+:75548368-75594220    |
| 22730 | Glt8d1        | 76485  | 14+:31814891-31825171   |
| 22732 | Cyb5b         | 66427  | 8+:109674576-109708000  |
| 22733 | Alpk3         | 116904 | 7+:88202485-88250497    |
| 22734 | Ap3s2         | 11778  | 7-:87025043-87065481    |
| 22735 | MMT00007455   |        | 14-:109091411-109091860 |
| 22740 | Manbal        | 69161  | 2+:157204819-157222498  |
| 22743 | Igh-2         | 238447 | 12-:114496927-116384147 |
| 22744 | 9-Sep         | 53860  | 11+:117193033-117223622 |
| 22747 | Gpc3          | 14734  | X-:49625605-49967091    |
| 22750 | Mupcdh        | 72040  | 7-:148454983-148462673  |
| 22751 | Nosip         | 66394  | 7+:52317862-52332786    |
| 22752 | MMT00001763   |        | 4+:38610921-38611781    |
| 22753 | Sidt2         | 214597 | 9-:45745944-45763804    |
| 22758 | 2810003C17Rik | 108897 | 2+:31805822-31828961    |
| 22759 | Btbd10        | 68815  | 7-:120459131-120513055  |
| 22760 | Rlbp11l       | 74438  | 4+:9198142-9377045      |
| 22761 | Cep350        | 74081  | 1-:157787848-157820383  |
| 22762 | Slc6a4        | 15567  | 11+:76812098-76845843   |
| 22763 | Alcam         | 11658  | 16-:52249106-52310062   |
| 22764 | MMT00049130   |        | 12+:60393050-60393923   |
| 22767 | Nutf2         | 68051  | 8+:108384552-108403236  |
| 22770 | Slc27a2       | 26458  | 2+:126378890-126413671  |
| 22771 | Dhx37         | 208144 | 5-:125894230-125895773  |
| 22772 | Gm732         | 213450 | X-:105141079-105143760  |
| 22776 | Gsr           | 14782  | 8+:34764011-34807908    |

|       |               |        |                         |
|-------|---------------|--------|-------------------------|
| 22777 | Duox2         | 214593 | 2-:122106173-122123963  |
| 22779 | Pik3cg        | 30955  | 12-:32860500-32893335   |
| 22781 | Hibch         | 227095 | 1+:52901889-52977704    |
| 22782 | Frrs1         | 20321  | 3+:116564609-116606559  |
| 22785 | MMT00078758   |        |                         |
| 22786 | Mterfd3       | 74238  | 10-:84582176-84590769   |
| 22788 | MMT00013067   |        | 11-:92567035-92654529   |
| 22793 | Cbr2          | 12409  | 11-:120590822-120593309 |
| 22802 | Svs2          | 53878  | 2-:164062595-164063979  |
| 22804 | Omt2a         | 18379  | 9-:78159809-78160890    |
| 22806 | 6330406I15Rik | 70717  | 5+:150214382-150234277  |
| 22807 | Mboat2        | 67216  | 12+:25516479-25644558   |
| 22809 | Mrv1          | 17540  | 7-:118014872-118089558  |
| 22810 | MMT00038169   |        | X+:119214523-119216090  |
| 22814 | Cacna1s       | 12292  | 1+:137949360-138016105  |
| 22816 | Arl4c         | 320982 | 1-:90597661-90619274    |
| 22821 | Tmem135       | 72759  | 7-:96288714-96487270    |
| 22822 | MMT00013433   |        | 19+:13866454-13867106   |
| 22823 | Sh2d1a        | 20400  | X+:39855846-39875258    |
| 22825 | Olfr1316      | 258737 | 2-:111970029-111970972  |
| 22826 | Alox15        | 11687  | 11-:70158044-70165507   |
| 22827 | Clec4a2       | 26888  | 6+:123073333-123092947  |
| 22829 | Sval2         | 84543  | 6+:41810337-41814320    |
| 22830 | MMT00081088   |        | 10+:57106425-57107621   |
| 22833 | Acat2         | 110460 | 17-:13135760-13153593   |
| 22835 | Fbln1         | 14114  | 15+:85036440-85116084   |
| 22836 | Grpr          | 14829  | X-:159951835-159987571  |
| 22841 | Cib1          | 23991  | 7-:87372251-87377446    |
| 22852 | Nepn          | 66650  | 10+:52111413-52124410   |
| 22854 | Defb35        | 246084 | 8+:23048823-23051350    |
| 22856 | Pak2          | 224105 | 16-:31977031-32079410   |
| 22857 | Fahd2a        | 68126  | 2-:127261951-127270277  |
| 22858 | Fbxl17        | 50758  | 17-:63706093-63840237   |
| 22860 | Dtx2          | 74198  | 5+:136470746-136508734  |
| 22861 | E430002G05Rik | 210622 | 2+:102390172-102483195  |
| 22863 | Prkd2         | 101540 | 7+:17428328-17455812    |
| 22867 | Vps52         | 224705 | 17+:34102597-34103979   |
| 22868 | Krt15         | 16665  | 11-:99993332-99997172   |
| 22869 | Tceal8        | 66684  | X-:132704872-132706725  |
| 22871 | Pgrmc2        | 70804  | 3-:40870260-40886895    |
| 22873 | Slc38a2       | 67760  | 15-:96517829-96530140   |
| 22876 | Sash3         | 74131  | X+:45499705-45514740    |
| 22880 | Slc45a4       | 106068 | 15-:73410714-73436109   |
| 22885 | Pank1         | 75735  | 19-:34885384-34952407   |
| 22889 | Foxj3         | 230700 | 4+:119213134-119300547  |
| 22890 | D1Pas1        | 110957 | 1+:188791754-188793736  |

|       |               |        |                         |
|-------|---------------|--------|-------------------------|
| 22894 | MMT00016059   |        | 6-:28311913-28313176    |
| 22900 | Olf419        | 258710 | 1-:176180116-176181056  |
| 22901 | 7-Mar         | 57438  | 2+:60047992-60086441    |
| 22903 | Mospd2        | 76763  | X-:161374111-161418262  |
| 22907 | MMT00054594   |        | 6-:145264134-145265169  |
| 22909 | Nup133        | 234865 | 8-:126423197-126473130  |
| 22912 | Stap1         | 56792  | 5+:86500862-86532832    |
| 22914 | EG626280      | 626280 | 15+:76188886-76194156   |
| 22918 | MMT00002192   |        | 12+:58815050-58838891   |
| 22919 | Lig1          | 16881  | 7+:13862631-13896740    |
| 22921 | 2810038D20Rik | 67218  | 14+:45202804-45208076   |
| 22922 | 2310010M24Rik | 71897  | 2+:49643207-49804366    |
| 22923 | Zfml          | 18139  | 6+:83864360-83936855    |
| 22924 | Midn          | 59090  | 10+:79611034-79621112   |
| 22925 | Parp16        | 214424 | 9+:65062928-65087021    |
| 22926 | Ergic2        | 67456  | 6-:148128566-148160559  |
| 22927 | 1700001L05Rik | 69291  | 15-:83187963-83197643   |
| 22930 | Mro           | 71263  | 18+:74019046-74040987   |
| 22933 | Tssc4         | 56844  | 7+:150255272-150256992  |
| 22934 | 4932425I24Rik | 320214 | 16-:38297839-38341914   |
| 22936 | Rhobtb1       | 69288  | 10+:68675916-68752765   |
| 22939 | C1galt1       | 94192  | 6+:7795263-7821454      |
| 22943 | Tpd52l1       | 21987  | 10-:31052185-31165727   |
| 22944 | Tmem44        | 224090 | 16-:30513777-30550621   |
| 22945 | Cpb2          | 56373  | 14+:75642147-75683358   |
| 22946 | MMT00071077   |        | 10+:41023784-41077470   |
| 22947 | Zfp358        | 140482 | 8+:3493170-3497208      |
| 22948 | MMT00069572   |        | 14-:57455124-57455950   |
| 22952 | Dppa1         | 347708 | 11-:46421955-46442779   |
| 22953 | Mvp           | 78388  | 7-:134130381-134158106  |
| 22954 | Slc25a30      | 67554  | 14-:76161805-76186844   |
| 22955 | 4930430E16Rik | 73873  | 11+:22908372-22921138   |
| 22957 | 1300018I05Rik | 74157  | 17+:29797639-29839630   |
| 22959 | Zfp174        | 385674 | 16+:3847872-3854811     |
| 22960 | Olf419        | 259035 | 7+:114217343-114218297  |
| 22961 | MMT00055950   | 665565 | 15+:59070014-59070558   |
| 22962 | MMT00013609   |        | 4+:101523329-101548604  |
| 22963 | Ctso          | 229445 | 3+:81736513-81756214    |
| 22964 | C9            | 12279  | 15+:6395332-6448476     |
| 22966 | Epha4         | 13838  | 1-:77365846-77511663    |
| 22969 | Axin2         | 12006  | 11+:108781797-108810797 |
| 22970 | D17Ert663e    | 52042  | 17-:13012718-13014031   |
| 22972 | 9030617O03Rik | 217830 | 12+:102024351-102110558 |
| 22973 | MMT00067195   |        | 17+:17785784-17786290   |
| 22978 | MMT00043176   |        | 5+:106644617-106645918  |
| 22981 | Bcar3         | 29815  | 3+:122122744-122233098  |

|       |                  |        |                         |
|-------|------------------|--------|-------------------------|
| 22982 | Mug2             | 17837  | 6+:121956815-122035983  |
| 22984 | Tnnt2            | 21956  | 1+:137732981-137748837  |
| 22987 | Eif2s2           | 67204  | 2-:154698172-154718511  |
| 22988 | Hscb             | 100900 | 5-:111258092-111265448  |
| 22989 | Lmcd1            | 30937  | 6+:112223811-112280418  |
| 22990 | Rps2             | 16898  | 17+:24857057-24858853   |
| 22992 | A430107O13Rik    | 214642 | 6+:22038688-22187742    |
| 22994 | Cpne3            | 70568  | 4-:19446401-19497257    |
| 22995 | Drd2             | 13489  | 9+:49148731-49216282    |
| 22996 | MMT00076852      |        | 14-:45341673-45344626   |
| 22998 | Ass1             | 11898  | 2+:31325821-31376149    |
| 23000 | Faim2            | 72393  | 15-:99330579-99358025   |
| 23001 | Galm             | 319625 | 17+:80526793-80584441   |
| 23003 | EG209550         | 209550 | 12+:11462884-11469489   |
| 23005 | 4930405A21Rik    | 74846  | 2-:156540273-156542803  |
| 23006 | Try4             | 22074  | 6+:41252283-41255485    |
| 23007 | 2410015N17Rik    | 66422  | 7-:134400475-134404181  |
| 23008 | Ctsz             | 64138  | 2-:174252995-174264503  |
| 23010 | MMT00047055      |        | 7-:14547637-14551245    |
| 23011 | MMT00012889      |        | 13+:15906733-15907217   |
| 23012 | Spg20            | 229285 | 3+:54916061-54939876    |
| 23014 | MMT00077643      |        |                         |
| 23019 | ENSMUSG000000630 | 791318 | 18-:5574983-5583802     |
| 23022 | Kif3a            | 16568  | 11+:53380894-53414604   |
| 23025 | Foxi2            | 270004 | 7+:142602121-142603714  |
| 23026 | Apom             | 55938  | 17-:35265942-35268697   |
| 23029 | Zfp27            | 22689  | 7-:30629768-30728569    |
| 23032 | Mett10d          | 67493  | 11+:74584364-74632194   |
| 23034 | Slc25a29         | 214663 | 12-:110064086-110073959 |
| 23037 | Thbs3            | 21827  | 3+:89019128-89030738    |
| 23038 | Casp4            | 12363  | 9+:5308873-5336707      |
| 23044 | Ctr9             | 22083  | 7+:118172534-118199850  |
| 23049 | 4933403O08Rik    | 71030  | X+:109352657-109357462  |
| 23052 | EG634331         | 634331 | 1+:99059343-99190012    |
| 23053 | 1700012B09Rik    | 69325  | 9-:14562643-14575474    |
| 23055 | Lmo1             | 109594 | 7-:116282084-116314027  |
| 23056 | Ccdc135          | 330830 | 8+:97579794-97602039    |
| 23059 | Fbxl20           | 72194  | 11-:97943868-97945481   |
| 23060 | 8430422H06Rik    | 74529  | 18+:14390811-14437050   |
| 23061 | Pole2            | 18974  | 12-:70302763-70329160   |
| 23064 | Myh2             | 17882  | 11+:66984720-67011014   |
| 23066 | Gtf2a1           | 83602  | 12-:92798108-92828019   |
| 23070 | BC024659         | 108934 | 13+:41345546-41368403   |
| 23073 | 4833414E09Rik    | 71633  | 1-:170349770-170350960  |
| 23076 | Kcnc2            | 268345 | 10+:111708177-111709460 |
| 23077 | Daam2            | 76441  | 17-:49597765-49638260   |

|       |               |        |                         |
|-------|---------------|--------|-------------------------|
| 23079 | Spag17        | 74362  | 3+:99689353-99867396    |
| 23082 | Gria3         | 53623  | X+:38754687-39029736    |
| 23084 | Vsig4         | 278180 | X-:93442546-93488775    |
| 23086 | MMT00059956   |        |                         |
| 23087 | Nusap1        | 108907 | 2+:119444452-119475512  |
| 23088 | 1700009N14Rik | 75471  | 4+:39397828-39398478    |
| 23089 | Slc1a2        | 20511  | 2+:102546594-102618263  |
| 23092 | Ifih1         | 71586  | 2-:62435396-62484223    |
| 23094 | Sap30         | 60406  | 8-:59961523-59966654    |
| 23097 | Pip4k2c       | 117150 | 10-:126635144-126648613 |
| 23101 | Pnliprp1      | 18946  | 19+:58803376-58818659   |
| 23102 | Fbxo7         | 69754  | 10+:85484672-85511072   |
| 23104 | Gp2           | 67133  | 7-:126586057-126602786  |
| 23108 | Map4k3        | 225028 | 17-:80979851-81127176   |
| 23109 | A430088P11Rik | 106059 | 15-:80526972-80528033   |
| 23111 | Eml5          | 319670 | 12-:100101306-100139238 |
| 23112 | Gys1          | 14936  | 7+:52690358-52711978    |
| 23115 | Mad211        | 56150  | 6+:66485472-66489946    |
| 23116 | 2810032G03Rik | 72669  | 12+:5382675-5423111     |
| 23118 | Ttrap         | 56196  | 13+:24923553-24934015   |
| 23119 | Cps1          | 227231 | 1+:67169601-67277833    |
| 23130 | Hps4          | 192232 | 5+:112773971-112807434  |
| 23131 | Pla1a         | 85031  | 16-:38396204-38432968   |
| 23132 | Mcm6          | 17219  | 1-:130228167-130256233  |
| 23138 | Osbpl6        | 99031  | 2+:76386396-76434101    |
| 23141 | Ebf2          | 13592  | 14+:67853597-68048604   |
| 23149 | Nln           | 75805  | 13-:104813136-104899682 |
| 23150 | EG622657      | 622657 | 14+:34026276-34026984   |
| 23152 | Kif27         | 75050  | 13+:58374894-58397948   |
| 23156 | MMT00013465   | 433597 | 3+:59547517-59556206    |
| 23157 | MMT00001961   |        | 18+:6516319-6557797     |
| 23159 | Myh8          | 17885  | 11+:67090934-67122132   |
| 23161 | Gclc          | 14629  | 9+:77602352-77642269    |
| 23162 | Csda          | 56449  | 6-:131314875-131338449  |
| 23169 | Pla2g2e       | 26970  | 4+:138433856-138438727  |
| 23172 | Atp13a4       | 224079 | 16-:29396130-29544951   |
| 23173 | Cuzd1         | 16433  | 7-:138452068-138465806  |
| 23174 | Psme2         | 19188  | 14-:56206322-56209726   |
| 23175 | Acsm4         | 233801 | 7+:126838122-126854941  |
| 23179 | Olfir575      | 259118 | 7-:110103179-110104134  |
| 23180 | Sult1d1       | 53315  | 5-:87984278-87997909    |
| 23182 | Ace3          | 217246 | 11+:105856044-105865922 |
| 23183 | Nnmt          | 18113  | 9-:48399981-48413258    |
| 23185 | Ndufs1        | 227197 | 1-:63190171-63223283    |
| 23188 | MMT00013081   |        | 3+:112822792-112826285  |
| 23189 | Rbm28         | 68272  | 6-:29075020-29108200    |



|       |               |        |                         |
|-------|---------------|--------|-------------------------|
| 23191 | 3632451O06Rik | 67419  | 14-:50301234-50403003   |
| 23194 | Rab3c         | 67295  | 13-:110852024-111070226 |
| 23201 | S1pr1         | 13609  | 3-:115413356-115417963  |
| 23202 | Olf559        | 259116 | 7-:109872045-109873002  |
| 23207 | Rab7          | 19349  | 6-:87949116-87995214    |
| 23208 | Hck           | 15162  | 2+:152934322-152977162  |
| 23210 | Tprgl         | 67808  | 4-:153531596-153534775  |
| 23211 | Pscd3         | 19159  | 5+:144383421-144471109  |
| 23213 | Txndc3        | 73412  | 13-:19780805-19788919   |
| 23214 | 2610019A05Rik | 72149  | 11-:106024649-106054862 |
| 23215 | Mphosph6      | 68533  | 8-:120315544-120325829  |
| 23217 | Acyp2         | 75572  | 11-:30532202-30549408   |
| 23223 | MMT00076151   |        | 19-:3730467-3731012     |
| 23224 | C030014K22Rik | 226610 | 1+:168931696-169009599  |
| 23226 | Suox          | 211389 | 10-:128106948-128110938 |
| 23227 | Grin2a        | 14811  | 16-:9577802-9992626     |
| 23229 | Phf12         | 268448 | 11+:77796254-77844034   |
| 23232 | Crisp3        | 11572  | 17-:40358727-40379215   |
| 23233 | Npw           | 381073 | 17-:24794273-24795087   |
| 23240 | Gtpbp10       | 207704 | 5-:5537463-5559535      |
| 23242 | Gngt2         | 14710  | 11+:95703983-95707043   |
| 23245 | Nfib          | 18028  | 4-:81941984-82151195    |
| 23246 | Cited2        | 17684  | 10+:17443052-17444594   |
| 23247 | Ercc1         | 13870  | 7+:19930454-19941871    |
| 23248 | Tesk2         | 230661 | 4+:116393581-116476707  |
| 23250 | Plcl2         | 224860 | 17+:50745613-50827811   |
| 23252 | Snrpd1        | 20641  | 18+:10617864-10627968   |
| 23253 | D030011O10Rik | 320560 | 6-:148941534-149049831  |
| 23254 | Wdtdc1        | 230796 | 4-:132849494-132895173  |
| 23259 | Dnajc1        | 13418  | 2-:18135381-18136521    |
| 23261 | Clic6         | 209195 | 16+:92498379-92541482   |
| 23262 | C530043G21Rik | 215015 | 1-:158611184-158649130  |
| 23265 | Tmem67        | 329795 | 4-:11966263-12015084    |
| 23267 | Hsd17b11      | 114664 | 5-:104419413-104450797  |
| 23272 | Orc1l         | 18392  | 4+:108252080-108287434  |
| 23274 | 1700054O13Rik | 67334  | X+:9424072-9424626      |
| 23276 | Evi2b         | 216984 | 11-:79328524-79337196   |
| 23280 | Dscam         | 13508  | 16-:96814550-97391987   |
| 23281 | 1700126L10Rik | 73603  | 2-:164295801-164311797  |
| 23283 | Mrps12        | 24030  | 7-:29524660-29526799    |
| 23287 | Supt4h1       | 20922  | 11+:87551066-87557118   |
| 23288 | Cramp1l       | 57354  | 17-:25148246-25150969   |
| 23290 | MMT00061154   |        | X+:99333976-99334474    |
| 23291 | Rexo1         | 66932  | 10-:80005017-80009547   |
| 23295 | Snx11         | 74479  | 11-:96629190-96638834   |
| 23301 | Scamp1        | 107767 | 13-:94971265-95055382   |

|       |               |        |                         |
|-------|---------------|--------|-------------------------|
| 23303 | Olfr1302      | 258891 | 2+:111620469-111621415  |
| 23306 | Bag2          | 213539 | 1-:33802330-33814593    |
| 23307 | Myst2         | 217127 | 11-:95135573-95171492   |
| 23308 | Dock9         | 105445 | 14-:121941369-121980657 |
| 23313 | Htr1b         | 15551  | 9-:81524999-81526159    |
| 23318 | Cul2          | 71745  | 18+:3383028-3436372     |
| 23324 | Prdx6         | 11758  | 1-:163171140-163181296  |
| 23326 | Il7r          | 16197  | 15-:9435915-9459544     |
| 23327 | Brp44l        | 55951  | 17+:8476755-8490027     |
| 23328 | Rora          | 19883  | 9+:68501608-69226833    |
| 23331 | Csmd1         | 94109  | 8-:15895502-17535281    |
| 23332 | Sos2          | 20663  | 12-:70684752-70759065   |
| 23334 | Olfr692       | 258352 | 7+:112516841-112517829  |
| 23335 | MMT00030313   |        | 9-:3495833-3496959      |
| 23339 | Olfr871       | 258905 | 9+:20016794-20017729    |
| 23342 | Ndfip2        | 76273  | 14+:105657864-105708513 |
| 23344 | Nfkbiz        | 80859  | 16-:55811490-55838967   |
| 23345 | MMT00076071   |        |                         |
| 23348 | Calml4        | 75600  | 9+:62705893-62723722    |
| 23350 | BC048546      | 232400 | 6-:128489837-128531614  |
| 23351 | Zfp598        | 213753 | 17+:24806798-24818959   |
| 23352 | MMT00001681   |        | X+:14942325-14942614    |
| 23353 | Slmo2         | 66390  | 2-:174290600-174298399  |
| 23354 | Tshr          | 22095  | 12+:92639449-92777167   |
| 23355 | Nedd1         | 17997  | 10-:92147490-92185105   |
| 23356 | Gpr98         | 110789 | 13-:81644732-81723855   |
| 23360 | MMT00066283   |        | 5-:52783909-52830585    |
| 23361 | Bivm          | 246229 | 1+:44176854-44201592    |
| 23367 | Tm2d2         | 69742  | 8+:26127751-26133731    |
| 23368 | 6330503K22Rik | 101565 | 7+:125858887-125880534  |
| 23369 | Oaz2          | 18247  | 9+:65524399-65537263    |
| 23370 | Cpeb4         | 67579  | 11+:31820408-31832197   |
| 23371 | Cfb           | 14962  | 17-:34993326-34999162   |
| 23372 | Rbm5          | 83486  | 9-:107642825-107673314  |
| 23373 | Vps13d        | 230895 | 4-:144753078-144784961  |
| 23375 | MMT00055444   |        | 5-:100268536-100269009  |
| 23377 | Pdxk          | 216134 | 10-:77903349-77927724   |
| 23383 | Setd7         | 73251  | 3-:51320071-51322248    |
| 23388 | Olfr561       | 259096 | 7+:109923039-109923984  |
| 23391 | MMT00008521   |        | 8-:48712340-48713397    |
| 23394 | Psd4          | 215632 | 2+:24223102-24264686    |
| 23395 | MMT00061495   |        | 4+:144381739-144382372  |
| 23397 | Ccnjl         | 380694 | 11+:43342856-43399806   |
| 23398 | Adamts5       | 23794  | 16-:85896279-85900512   |
| 23400 | BC024997      | 215723 | 11+:68369687-68371746   |
| 23401 | H2-Q2         | 15013  | 17+:35479254-35496927   |

|       |                  |           |                         |
|-------|------------------|-----------|-------------------------|
| 23403 | Ndc80            | 67052     | 17-:71845444-71876197   |
| 23410 | C1qa             | 12259     | 4-:136451831-136454675  |
| 23412 | EG625690         | 625690    | 10-:84256896-84257449   |
| 23414 | Tnfaip8l2        | 69769     | 3-:94943442-94946282    |
| 23415 | Acp5             | 11433     | 9-:21931193-21935098    |
| 23416 | ENSMUSG000000713 | 628709    | 13-:65498322-66077477   |
| 23419 | Tipin            | 66131     | 9+:64129413-64152599    |
| 23425 | Tob1             | 22057     | 11+:94074953-94076040   |
| 23427 | MMT00054636      | 654456    | 8+:19300676-19300738    |
| 23430 | Aifm3            | 72168     | 16+:17489783-17507574   |
| 23437 | Efh2             | 27984     | 4-:141414303-141430824  |
| 23438 | C1galt1c1        | 59048     | X-:35983961-35988230    |
| 23440 | EG243642         | 243642    | 6+:127176793-127184635  |
| 23445 | Crlf1            | 12931     | 8+:73017056-73027980    |
| 23446 | Acsl6            | 216739    | 11+:54117703-54175026   |
| 23449 | Preli2           | 77619     | 18-:42092246-42110876   |
| 23450 | D12Ert647e       | 52668     | 12+:104672413-104678454 |
| 23453 | Dnajc3a          | 100037258 | 14+:119337211-119377404 |
| 23454 | Znhit1           | 70103     | 5-:137458062-137462879  |
| 23455 | Ptafr            | 19204     | 4+:132120002-132136239  |
| 23457 | Selenbp2         | 20342     | 3+:94497494-94508328    |
| 23458 | Clic4            | 29876     | 4-:134769886-134828675  |
| 23460 | Rragd            | 52187     | 4+:33070410-33109147    |
| 23462 | Bag5             | 70369     | 12-:112947703-112951505 |
| 23463 | Gimap1           | 16205     | 6+:48692180-48693793    |
| 23465 | Afp              | 11576     | 5+:90919765-90937882    |
| 23466 | Pou2f1           | 18986     | 1-:167805606-167932738  |
| 23467 | Amac1            | 56293     | 11-:69573410-69575346   |
| 23470 | Tmod1            | 21916     | 4+:46073837-46127676    |
| 23471 | Ddx46            | 212880    | 13+:55754271-55780492   |
| 23472 | Cts3             | 117066    | 13-:61589372-61669779   |
| 23474 | MMT00011721      |           | 2+:83819001-83822053    |
| 23475 | Nudt12           | 67993     | 17-:59140823-59152745   |
| 23476 | Ppp1r9a          | 243725    | 6+:4995935-5110715      |
| 23478 | Sacs             | 50720     | 14+:61821599-61833091   |
| 23482 | Syt4             | 20983     | 18-:31598839-31606860   |
| 23485 | Olf1r716         | 258597    | 7+:114290831-114291775  |
| 23487 | Polb             | 18970     | 8-:23738737-23763886    |
| 23489 | Tbc1d15          | 66687     | 10-:114635514-114688481 |
| 23490 | Fndc3b           | 72007     | 3-:27315076-27362768    |
| 23493 | Tgs1             | 116940    | 4+:3502172-3542151      |
| 23495 | Cryab            | 12955     | 9+:50560862-50564738    |
| 23496 | Zfp40            | 22700     | 17-:23311845-23315506   |
| 23498 | 2010204N08Rik    | 69983     | 3-:72692485-72704389    |
| 23499 | Edil3            | 13612     | 13+:89429023-89461489   |
| 23500 | BC055004         | 381680    | 5+:138671109-138693280  |

|       |               |        |                        |
|-------|---------------|--------|------------------------|
| 23508 | Pdgrd         | 71785  | 9+:6288469-6379261     |
| 23522 | Adcy10        | 271639 | 1+:167415311-167506900 |
| 23523 | MMT00039380   |        |                        |
| 23527 | MMT00021936   |        | 5-:30133239-30134698   |
| 23528 | O610038L08Rik | 74092  | 17-:29715751-29733251  |
| 23530 | Drd4          | 13491  | 7+:148477936-148480759 |
| 23531 | Foxb2         | 14240  | 19-:16946806-16948320  |
| 23533 | Ccnb1ip1      | 239083 | 14-:51408923-51413549  |
| 23541 | MMT00002245   |        | 2-:110049431-110050374 |
| 23543 | Rufy3         | 52822  | 5+:89012560-89070631   |
| 23544 | Atg4c         | 242557 | 4+:98884666-98925779   |
| 23546 | Zzef1         | 195018 | 11+:72680105-72683429  |
| 23547 | Tmed7         | 66676  | 18-:46745311-46757190  |
| 23548 | Crtac1        | 72832  | 19-:42358019-42506123  |
| 23549 | Es22          | 13897  | 8-:95725117-95753440   |
| 23550 | Ap2m1         | 11773  | 16+:20535576-20544125  |
| 23552 | Ras11b        | 68939  | 5+:74591259-74595495   |
| 23553 | Pcnp          | 76302  | 16-:56017305-56029779  |
| 23555 | BC026585      | 226527 | 1+:159388863-159419213 |
| 23557 | Ppp1r12c      | 232807 | 7-:4433115-4453624     |
| 23558 | MMT00030937   |        | 15+:18409242-18409510  |
| 23561 | Sox14         | 20669  | 9-:99775382-99776103   |
| 23563 | MMT00004841   |        | 11-:17873743-17874841  |
| 23567 | Tom111        | 71943  | 11-:90506634-90548908  |
| 23569 | Atp5s         | 68055  | 12+:70825948-70845645  |
| 23572 | 4631426J05Rik | 77590  | 7-:139428793-139508792 |
| 23576 | Fabp9         | 21884  | 3-:10193625-10197222   |
| 23578 | Cyp2j5        | 13109  | 4-:96295837-96330742   |
| 23579 | Gm98          | 225908 | 19-:10282759-10315241  |
| 23580 | BC059842      | 230676 | 4-:118064321-118070324 |
| 23584 | Adamts5       | 23794  | 16-:85862668-85900529  |
| 23588 | Anks1b        | 77531  | 10+:90411276-90434735  |
| 23590 | Ptgds         | 19215  | 2-:25322221-25325546   |
| 23591 | Dlg4          | 13385  | 11+:69832365-69858270  |
| 23595 | Gm550         | 225852 | 19+:6095867-6098245    |
| 23597 | Pcdha3        | 192163 | 18+:37105860-37347311  |
| 23599 | Ndrp3         | 29812  | 2-:156753082-156817761 |
| 23602 | Sec14l4       | 103655 | 11+:3931784-3948010    |
| 23604 | Ephb3         | 13845  | 16+:21204825-21223375  |
| 23605 | MMT00077586   |        | 18-:90491386-90492213  |
| 23606 | Cmtm8         | 70031  | 9-:114698462-114753270 |
| 23607 | MMT00040265   |        | 12+:71081867-71083890  |
| 23609 | Trim44        | 80985  | 2-:102144500-102241004 |
| 23610 | Prkaa2        | 108079 | 4-:104706216-104782403 |
| 23613 | Jak2          | 16452  | 19+:29326944-29386472  |
| 23614 | G630016D24Rik | 619301 | 14+:52632591-52640170  |

|       |               |           |                         |
|-------|---------------|-----------|-------------------------|
| 23615 | MMT00005149   |           | 6-:23105933-23106684    |
| 23617 | Nme1          | 18102     | 11-:93820339-93822103   |
| 23623 | 2010305C02Rik | 380712    | 11+:75281573-75284400   |
| 23625 | Pkd2          | 18764     | 5+:104888655-104932705  |
| 23626 | MMT00003764   |           | 14+:75117517-75118640   |
| 23631 | MMT00039126   |           | 8+:99688153-99688772    |
| 23636 | Bst2          | 69550     | 8-:74058160-74061335    |
| 23638 | Ddr1          | 12305     | 17-:35818512-35840932   |
| 23640 | Bdh1          | 71911     | 16+:31422384-31458980   |
| 23643 | Olf482        | 258728    | 7-:115238112-115239082  |
| 23645 | 1700041C02Rik | 73332     | 4-:119006184-119056366  |
| 23646 | Hsp90ab1      | 15516     | 17-:45704723-45710209   |
| 23648 | Pigy          | 66459     | 6-:57639344-57642071    |
| 23649 | BC049635      | 277773    | 4-:42880876-42884992    |
| 23651 | MMT00027295   |           | 18-:24212752-24262836   |
| 23653 | Zfp407        | 240476    | 18-:84378134-84381307   |
| 23659 | EG633250      | 633250    | 13+:62006047-62212827   |
| 23660 | Dpyd          | 99586     | 3+:118702087-119134638  |
| 23662 | Serp1nb2      | 18788     | 1+:109412049-109422175  |
| 23663 | Dab2ip        | 69601     | 2+:35477679-35586512    |
| 23664 | Btg1          | 12226     | 10+:96079538-96082262   |
| 23668 | Gse1          | 382034    | 8+:123012901-123105248  |
| 23679 | Ccl20         | 20297     | 1+:83113356-83115741    |
| 23680 | 5730419I09Rik | 74741     | 6-:142959447-143048638  |
| 23681 | Whrn          | 73750     | 4-:63075946-63156610    |
| 23682 | Trim8         | 93679     | 19+:46576788-46590839   |
| 23683 | Dnahc7c       | 100101919 | 1+:46706054-46864976    |
| 23685 | Tbxas1        | 21391     | 6+:38868973-39034559    |
| 23690 | Mug1          | 17836     | 6+:121788628-121839074  |
| 23691 | Sh3d19        | 27059     | 3+:85844766-85932398    |
| 23693 | A530016L24Rik | 319942    | 12+:113733198-113736602 |
| 23695 | 1700081L11Rik | 76719     | 11-:104229987-104287786 |
| 23697 | Rrp1b         | 72462     | 17+:32173045-32197674   |

**Table T4: Adipose Modules**

| Module | Locus Link | Gene Symbol   |
|--------|------------|---------------|
| 1      | 73205      | 3110043O21Rik |
| 1      | 14062      | F2r           |
| 1      | 29815      | Bcar3         |
| 1      | 53320      | Folh1         |
| 1      | 373864     | Col27a1       |
| 1      | 100121     | Tdrd7         |
| 1      | 105440     | Kctd9         |
| 1      | 20409      | Ostf1         |
| 1      | 226090     | Ermp1         |
| 1      | 108159     | Ubx6          |
| 1      | 75939      | 4930579G24Rik |
| 1      | 68815      | Btbd10        |
| 1      | 233280     | Nipa1         |
| 1      | 107227     | MacroD1       |
| 1      | 50797      | Copb2         |
| 1      | 14587      | Gfra3         |
| 1      | 18750      | Prkca         |
| 1      | 66070      | Cwc15         |
| 1      | 69568      | Vkorc11       |
| 1      | 232664     | Ccdc136       |
| 1      | 232943     | Klc3          |
| 1      | 353258     | Ltv1          |
| 1      | 11732      | Ank           |
| 1      | 102323     | Dcun1d2       |
| 1      | 225579     | Slc27a6       |
| 1      | 50490      | Nox4          |
| 1      | 57340      | Jph3          |
| 1      | 16193      | Il6           |
| 1      | 76365      | Tbx18         |
| 1      | 71778      | Klh5          |
| 1      | 108900     | 2700049P18Rik |
| 1      | 66251      | Arfgap3       |
| 1      | 14199      | Fhl1          |
| 1      | 53886      | Cdkl2         |
| 1      | 14238      | Foxf2         |
| 1      | 20292      | Ccl11         |
| 1      | 27404      | Abca8b        |
| 1      | 328381     | Sh2d4b        |
| 1      | 225659     | Cep76         |
| 1      | 67072      | Cdc37l1       |
| 1      | 24015      | Abce1         |
| 1      | 71927      | Itfg1         |
| 1      | 73373      | Phospho2      |
| 1      | 21787      | Tfg           |
| 1      | 67096      | Mmachc        |
| 1      | 226823     | Kctd3         |
| 1      | 13612      | Edil3         |
| 1      | 67776      | Loh11cr2a     |
| 1      | 544707     | EG544707      |

|   |           |               |
|---|-----------|---------------|
| 1 | 74238     | Mterfd3       |
| 1 | 74185     | Gbe1          |
| 1 | 56444     | Actr10        |
| 1 | 23924     | Katna1        |
| 1 | 214048    | Larp2         |
| 1 | 216558    | Ugp2          |
| 1 | 11484     | Aspa          |
| 1 | 17965     | Nbl1          |
| 1 | 225888    | Suv420h1      |
| 1 | 75572     | Acyp2         |
| 1 | 59029     | Psm14         |
| 1 | 67059     | Ola1          |
| 1 | 67795     | 6530404N21Rik |
| 1 | 268822    | Adck5         |
| 1 | 211347    | Pank3         |
| 1 | 235293    | Sc5d          |
| 1 | 54170     | Rragc         |
| 1 | 56298     | Arl6ip2       |
| 1 | 66971     | Cdk5rap1      |
| 1 | 237553    | Trhde         |
| 1 | 231532    | Arhgap24      |
| 1 | 320727    | Ipo8          |
| 1 | 69085     | Zcchc9        |
| 1 | 19704     | Upf1          |
| 1 | 668066    | RP23-67E6.3   |
| 1 | 329575    | RP23-275N21.2 |
| 1 | 100043387 | RP23-232H13.5 |
| 1 | 213811    | BC002059      |
| 1 | 218397    | Rasa1         |
| 1 | 235907    | Zfp71-rs1     |
| 1 | 14479     | Usp15         |
| 1 | 83962     | Btbd1         |
| 1 | 76958     | 2210418O10Rik |
| 1 | 14670     | Gna-rs1       |
| 1 | 16423     | Cd47          |
| 1 | 54342     | Gnpnat1       |
| 1 | 320717    | Pptc7         |
| 1 | 217980    | Larp5         |
| 1 | 68477     | Rmnd5a        |
| 1 | 226255    | Atrnl1        |
| 1 | 68310     | Zmym1         |
| 1 | 22680     | Zfp207        |
| 1 | 13680     | Ddx19a        |
| 1 | 28019     | Ing4          |
| 1 | 30795     | Fkbp3         |
| 1 | 109652    | Acy1          |
| 1 | 235036    | Ppan          |
| 1 | 100041835 | MMT00026054   |
| 1 | 100041835 | MMT00002146   |
| 1 | 20623     | Snrk          |
| 1 | 676923    | MMT00040704   |

|   |        |               |
|---|--------|---------------|
| 1 | 21848  | Trim24        |
| 1 | 16600  | Klf4          |
| 1 | 229699 | Slc16a4       |
| 1 | 237412 | EG237412      |
| 1 | 72899  | MacroD2       |
| 1 | 72103  | 2010301N04Rik |
| 1 | 71703  | Armcx3        |
| 1 | 58861  | Cysltr1       |
| 1 | 67229  | Prpf18        |
| 1 | 66706  | 4733401H18Rik |
| 1 | 13709  | Elf1          |
| 1 | 54369  | Nme6          |
| 1 | 21898  | Tlr4          |
| 1 | 11502  | Adam9         |
| 1 | 66205  | Cd302         |
| 1 | 216616 | Efemp1        |
| 1 | 140792 | Colec12       |
| 1 | 56878  | Rbms1         |
| 1 | 77864  | Ypel2         |
| 1 | 68845  | Pih1d1        |
| 1 | 225896 | D19ErtD721e   |
| 1 | 66587  | Fastk         |
| 1 | 73112  | 3110003A17Rik |
| 1 | 233067 | Lfn3          |
| 1 | 319565 | Syne2         |
| 1 | 207259 | Zbtb7c        |
| 1 | 57815  | Spata5        |
| 1 | 66141  | lfitm3        |
| 1 | 236366 | 5730507C01Rik |
| 1 | 101604 | E430018J23Rik |
| 1 | 12915  | Crebl1        |
| 1 | 108153 | Adamts7       |
| 1 | NaN    | MMT00008170   |
| 1 | 14309  | Fshr          |
| 1 | 98710  | Rabif         |
| 1 | 16562  | Kif1c         |
| 1 | 226646 | Ndufs2        |
| 1 | NaN    | MMT00053630   |
| 1 | 104418 | Dgkz          |
| 1 | 12567  | Cdk4          |
| 1 | 12567  | Cdk4          |
| 1 | 50798  | Gne           |
| 1 | NaN    | MMT00014519   |
| 1 | 14411  | Slc6a12       |
| 1 | 97387  | Strn4         |
| 1 | 380969 | C230021P08Rik |
| 1 | 110637 | Grik4         |
| 1 | 53761  | Bat2          |
| 1 | 67832  | Bxdc2         |
| 1 | 212647 | Aldh4a1       |
| 1 | 101869 | Unc45a        |



|   |           |               |
|---|-----------|---------------|
| 1 | 67873     | 2410018C20Rik |
| 1 | 72748     | Hdhd3         |
| 1 | 107999    | Gtpbp6        |
| 1 | 66421     | 2410004B18Rik |
| 1 | NaN       | MMT00004881   |
| 1 | 22194     | Ube2e1        |
| 1 | 22194     | Ube2e1        |
| 1 | NaN       | MMT00013262   |
| 1 | 27058     | Srp9          |
| 1 | NaN       | MMT00058199   |
| 1 | NaN       | MMT00078937   |
| 1 | NaN       | MMT00076721   |
| 1 | 106957    | Slc39a6       |
| 1 | NaN       | MMT00028111   |
| 1 | 19656     | Rbmxrt        |
| 1 | 19656     | Rbmxrt        |
| 1 | 56278     | Gkap1         |
| 1 | 109082    | Fbxw17        |
| 1 | 29809     | Rabgap1l      |
| 1 | 67489     | Ap4b1         |
| 1 | 233765    | Plekha7       |
| 1 | 50883     | Chek2         |
| 1 | 140484    | Pofut1        |
| 1 | 212989    | Best2         |
| 1 | 107747    | Aldh1l1       |
| 1 | 231134    | Dok7          |
| 1 | 20714     | Serpina3k     |
| 1 | 22346     | Vhlh          |
| 1 | NaN       | MMT00019109   |
| 1 | NaN       | MMT00080648   |
| 1 | NaN       | MMT00063687   |
| 1 | 57274     | Slc16a8       |
| 1 | 74116     | Pi16          |
| 1 | NaN       | MMT00026797   |
| 1 | 52713     | Ccdc59        |
| 1 | 17748     | Mt1           |
| 1 | 245269    | E130304F04Rik |
| 1 | 70369     | Bag5          |
| 1 | 56715     | Rabgef1       |
| 1 | 63913     | Niban         |
| 1 | 241915    | Phc3          |
| 1 | 30806     | Adamts8       |
| 1 | 724112    | BC106175      |
| 1 | 67416     | Armcx2        |
| 1 | 107515    | Lgr4          |
| 1 | 69178     | Snx5          |
| 1 | 67168     | P2ry5         |
| 1 | NaN       | MMT00061970   |
| 1 | 102084    | AI451557      |
| 1 | 19663     | Rbpms         |
| 1 | 100041868 | MMT00065456   |

|   |        |               |
|---|--------|---------------|
| 1 | 106821 | Al314976      |
| 1 | 14029  | Evx2          |
| 1 | 12325  | Camk2g        |
| 1 | 71514  | Sfpq          |
| 1 | 68010  | Bambi         |
| 1 | 15904  | Id4           |
| 1 | 12589  | Ift81         |
| 1 | 56364  | Zmym3         |
| 1 | 57814  | Kcne4         |
| 1 | 68979  | Nol11         |
| 1 | 69185  | Dtwd1         |
| 1 | 11920  | Atm           |
| 1 | 103784 | Wdr92         |
| 1 | 30931  | Tor1a         |
| 1 | NaN    | MMT00082622   |
| 1 | 69109  | 1810009O10Rik |
| 1 | NaN    | MMT00051866   |
| 1 | 66624  | Spcs2         |
| 1 | 56794  | Hacl1         |
| 1 | 20520  | Slc22a5       |
| 1 | 15357  | Hmgcr         |
| 1 | 78833  | Gins3         |
| 1 | 12144  | Blm           |
| 1 | 50493  | Txnrd1        |
| 1 | 27083  | Xlr4b         |
| 1 | 67213  | Cmtm6         |
| 1 | 74741  | 5730419I09Rik |
| 1 | 102910 | Armcx4        |
| 1 | 18087  | Nktr          |
| 1 | 219140 | Spata13       |
| 1 | 329540 | 8430427H17Rik |
| 1 | 66416  | Ndufa7        |
| 1 | NaN    | MMT00000385   |
| 1 | 66632  | Atpbd4        |
| 1 | 52592  | Brms1l        |
| 1 | 93885  | Pcdhb14       |
| 1 | 320742 | A230072C01Rik |
| 1 | NaN    | MMT00040265   |
| 1 | 320253 | 3-Mar         |
| 1 | 319613 | 5730410E15Rik |
| 1 | 329650 | Med12l        |
| 1 | 75796  | Cdyl2         |
| 1 | 22057  | Tob1          |
| 1 | 66860  | Tanc1         |
| 1 | 246293 | Klh8          |
| 1 | 12369  | Casp7         |
| 1 | 19108  | Prkx          |
| 1 | 15278  | Tfb2m         |
| 1 | 27377  | Yme1l1        |
| 1 | 14815  | Nr3c1         |
| 1 | 71910  | Ppapdc1       |

|   |        |               |
|---|--------|---------------|
| 1 | NaN    | MMT00002755   |
| 1 | NaN    | MMT00007396   |
| 1 | 12457  | Ccrn4l        |
| 1 | 74868  | Tmem65        |
| 1 | 11426  | Macf1         |
| 1 | 74044  | Ttf2          |
| 1 | NaN    | MMT00008417   |
| 1 | 21763  | Tex2          |
| 1 | 54375  | Azin1         |
| 1 | 16653  | Kras          |
| 1 | 67092  | Gatm          |
| 1 | 23983  | Pcbp1         |
| 1 | 264064 | Cdk8          |
| 1 | 76804  | Jmjd2c        |
| 1 | 18949  | Pnn           |
| 1 | NaN    | MMT00040762   |
| 1 | 55980  | Impa1         |
| 1 | 258268 | Olf1511       |
| 1 | 109791 | Clps          |
| 1 | 18049  | Ngf           |
| 1 | 26557  | Homer2        |
| 1 | 17847  | Usp34         |
| 1 | 12763  | Cmah          |
| 1 | 330863 | Trim67        |
| 1 | 18554  | Pcsk7         |
| 1 | 217684 | 4933426M11Rik |
| 1 | 22221  | Ubp1          |
| 1 | 54419  | Cldn6         |
| 1 | 224058 | Tmem207       |
| 1 | 74966  | 4930471G03Rik |
| 1 | 16177  | Il1r1         |
| 1 | 51797  | Ctps          |
| 1 | 76687  | Spcs3         |
| 1 | NaN    | MMT00033243   |
| 1 | 434439 | BC048562      |
| 1 | 58170  | Accn5         |
| 1 | 70767  | Prpf3         |
| 1 | 18004  | Nek1          |
| 1 | 218543 | Sfrs12        |
| 1 | 14629  | Gclc          |
| 1 | 228790 | Asxl1         |
| 1 | 59005  | Trappc2l      |
| 1 | 66077  | Aurkaip1      |
| 1 | 99586  | Dpyd          |
| 1 | 56196  | Ttrap         |
| 1 | 223435 | Trio          |
| 1 | 78618  | Centb2        |
| 1 | 97827  | Exdl2         |
| 1 | 67533  | Ppfbp1        |
| 1 | 17118  | Marcks        |
| 1 | 14758  | Gpm6b         |

|   |           |               |
|---|-----------|---------------|
| 1 | 72007     | Fndc3b        |
| 1 | 17076     | Ly75          |
| 1 | NaN       | MMT00045897   |
| 1 | 100047309 | MMT00074326   |
| 1 | 53378     | Sdcbp         |
| 1 | 19330     | Rab18         |
| 1 | 50753     | Fbxo8         |
| 1 | 226414    | Dars          |
| 1 | 19027     | Sypl          |
| 1 | 22770     | Zhx1          |
| 1 | NaN       | MMT00078831   |
| 1 | 229445    | Ctso          |
| 1 | 237082    | Nxt2          |
| 1 | 74838     | Narg1         |
| 1 | 235072    | 7-Sep         |
| 1 | 382030    | Tmem188       |
| 1 | 109108    | Slc30a9       |
| 1 | 214627    | Papd5         |
| 1 | 70238     | Rnf168        |
| 1 | 12807     | Hps3          |
| 1 | 19822     | Rnf4          |
| 1 | 231287    | Atp10d        |
| 1 | 30960     | Vapa          |
| 1 | 13178     | Dck           |
| 1 | 102442    | Dennd4a       |
| 1 | 233490    | Crebzf        |
| 1 | 67581     | Tbc1d23       |
| 1 | 234353    | Psd3          |
| 1 | 19877     | Rock1         |
| 1 | 14007     | Cugbp2        |
| 1 | 53599     | Cd164         |
| 1 | 75964     | D030074E01Rik |
| 1 | 70568     | Cpne3         |
| 1 | 104215    | Rhoq          |
| 1 | 93888     | Pcdhb17       |
| 1 | 72123     | 2010109K11Rik |
| 1 | 11639     | Ak3l1         |
| 1 | 19053     | Ppp2cb        |
| 1 | 258593    | Olfir700      |
| 1 | 269704    | Zfp664        |
| 1 | 50875     | Tmod3         |
| 1 | 628040    | EG628040      |
| 1 | 57437     | Golga7        |
| 1 | 118451    | Mrps2         |
| 1 | 52392     | D1Ert622e     |
| 1 | 17126     | Smad2         |
| 1 | 59079     | Erb2ip        |
| 1 | NaN       | MMT00006420   |
| 1 | 77781     | Epm2aip1      |
| 1 | 68187     | 4921533L14Rik |
| 1 | 11538     | Adnp          |

|   |        |               |
|---|--------|---------------|
| 1 | 16452  | Jak2          |
| 1 | 319901 | Dsel          |
| 1 | 17961  | Nat2          |
| 1 | 226026 | Smc5          |
| 1 | 12675  | Chuk          |
| 1 | 19821  | Rnf2          |
| 1 | 66687  | Tbc1d15       |
| 1 | 12421  | Rb1cc1        |
| 1 | 22764  | Zfx           |
| 1 | 76892  | Rnft1         |
| 1 | 52635  | D12Erttd551e  |
| 1 | 213109 | Phf3          |
| 1 | 56726  | Sh3bgrl       |
| 1 | 627049 | Zfp800        |
| 1 | 24109  | Ubl3          |
| 1 | 22632  | Yy1           |
| 1 | 17912  | Myo1b         |
| 1 | 56258  | Hnrnph2       |
| 1 | 229227 | 4932438A13Rik |
| 1 | 216705 | Clint1        |
| 1 | 12387  | Ctnnb1        |
| 1 | 98758  | Hnrnpf        |
| 1 | 210711 | 1110007A13Rik |
| 1 | 54607  | Socs6         |
| 1 | 98415  | Nucks1        |
| 1 | 52705  | Krr1          |
| 1 | 56297  | Arl6          |
| 1 | 627908 | MMT00030553   |
| 1 | 68151  | Gpr177        |
| 1 | 71835  | Lancl2        |
| 1 | 227835 | Gtdc1         |
| 1 | 225651 | Mppe1         |
| 1 | 93760  | Arid1a        |
| 1 | 109161 | Ube2q2        |
| 1 | 231050 | Galnt11       |
| 1 | 217615 | Ctage5        |
| 1 | 217732 | 2310044G17Rik |
| 1 | 74362  | Spag17        |
| 1 | NaN    | MMT00065780   |
| 1 | 330962 | MMT00003408   |
| 1 | 75710  | Rbm12         |
| 1 | 258589 | Olf703        |
| 1 | 77134  | Hnrnpa0       |
| 1 | 11846  | Arg1          |
| 1 | 226151 | 6030443O07Rik |
| 1 | 71492  | Bbs7          |
| 1 | 74018  | Als2          |
| 1 | 268288 | Samd3         |
| 1 | 71773  | Ugt2b1        |
| 1 | 108857 | Ankhd1        |
| 1 | 217893 | Pacs2         |

|   |        |               |
|---|--------|---------------|
| 1 | 22073  | Prss3         |
| 1 | NaN    | MMT00057004   |
| 1 | 630663 | MMT00057236   |
| 1 | 228777 | Nrsn2         |
| 1 | 52897  | D11Bwg0517e   |
| 1 | 74666  | 4930432K21Rik |
| 1 | 77531  | Anks1b        |
| 1 | 13706  | RP23-395H4.4  |
| 1 | 242819 | Rundc3b       |
| 1 | 378700 | RP23-244H7.9  |
| 1 | 629219 | EG629219      |
| 1 | 17318  | Mid1          |
| 1 | 217356 | Tmc8          |
| 1 | 210356 | E030049G20Rik |
| 1 | 78634  | 1700094C09Rik |
| 1 | 243853 | Fkrp          |
| 1 | NaN    | MMT00047341   |
| 1 | 237759 | Col23a1       |
| 1 | NaN    | MMT00073763   |
| 1 | 20501  | Slc16a1       |
| 1 | 11843  | Arf4          |
| 1 | 19353  | Rac1          |
| 1 | 68303  | 9130005N14Rik |
| 1 | 12778  | Cxcr7         |
| 1 | 19876  | Robo1         |
| 1 | 16948  | Lox           |
| 1 | 21982  | Tmem165       |
| 1 | 69608  | Sec24d        |
| 1 | 56193  | Plek          |
| 1 | 13032  | Ctsc          |
| 1 | 70472  | Atad2         |
| 1 | 13185  | Dscr3         |
| 1 | 14700  | Gng10         |
| 1 | 17973  | Nck1          |
| 1 | 56456  | Actl6a        |
| 1 | 20947  | MMT00047924   |
| 1 | 12123  | Hrk           |
| 1 | NaN    | MMT00059239   |
| 1 | NaN    | MMT00082889   |
| 1 | 16363  | Irf2          |
| 1 | 56030  | Tmem131       |
| 1 | 215814 | Ccdc28a       |
| 1 | 320184 | Lrrc58        |
| 1 | 68511  | 1110015M06Rik |
| 1 | 19286  | Pts           |
| 1 | 74552  | Npal3         |
| 1 | 226413 | Lct           |
| 1 | 116732 | Tsga13        |
| 1 | 19652  | Rbm3          |
| 1 | NaN    | MMT00076410   |
| 1 | 63872  | Zfp296        |

|   |        |               |
|---|--------|---------------|
| 1 | 80794  | Cblc          |
| 1 | 17175  | Masp2         |
| 1 | NaN    | MMT00076058   |
| 1 | 213989 | Tmem82        |
| 1 | 67726  | 1810073G14Rik |
| 1 | 68183  | Bcas2         |
| 1 | 75627  | Snpc1         |
| 1 | 16328  | Cep250        |
| 1 | 78767  | 2610021K21Rik |
| 1 | 216274 | Cep290        |
| 1 | NaN    | MMT00070118   |
| 1 | 20346  | Sema3a        |
| 1 | 69053  | 1810013L24Rik |
| 1 | 20482  | Skil          |
| 1 | 107753 | Lgals2        |
| 1 | 12904  | Crabp2        |
| 1 | 104910 | Al132487      |
| 1 | 14776  | Gpx2          |
| 1 | 75678  | Ippk          |
| 1 | 407788 | BC051142      |
| 1 | 19144  | Klk6          |
| 1 | 21685  | Tef           |
| 1 | 381073 | Npw           |
| 1 | 73476  | 1700069L16Rik |
| 1 | NaN    | MMT00081088   |
| 1 | 380787 | A230065H16Rik |
| 1 | 171277 | V1rh20        |
| 1 | NaN    | MMT00048291   |
| 1 | 170947 | Myoz3         |
| 1 | NaN    | MMT00033542   |
| 1 | 243547 | Grip2         |
| 1 | 66877  | Crnk1         |
| 1 | 224813 | Gm88          |
| 1 | 72242  | Psg21         |
| 1 | 226123 | BC023055      |
| 1 | 68891  | Cd177         |
| 1 | 332937 | Tcfap2e       |
| 1 | 19281  | Ptptr         |
| 1 | 29818  | Hspb7         |
| 1 | 74043  | Pex26         |
| 1 | NaN    | MMT00015104   |
| 1 | 93961  | B3galt5       |
| 1 | 209497 | Tmem164       |
| 1 | 30051  | Spdef         |
| 1 | 69864  | 1810065E05Rik |
| 1 | NaN    | MMT00010979   |
| 1 | 381373 | Sp9           |
| 1 | 66473  | Ctrb1         |
| 1 | 56554  | Raet1d        |
| 1 | 109660 | Ctrl          |
| 1 | 16413  | Itgb1bp1      |

|   |        |               |
|---|--------|---------------|
| 1 | 193034 | Trpv1         |
| 1 | 227526 | Armet1        |
| 1 | 71544  | 9030420J04Rik |
| 1 | 11434  | Acr           |
| 1 | 545474 | Scrt2         |
| 1 | 215493 | A3galt2       |
| 1 | 18752  | Prkcc         |
| 1 | 71130  | Sh2d6         |
| 1 | 233066 | AI428936      |
| 1 | 68709  | Cilp2         |
| 1 | 12794  | Cnih2         |
| 1 | 12416  | Cbx2          |
| 1 | 18260  | Ocln          |
| 1 | 432516 | Myo1a         |
| 1 | 20450  | St8sia2       |
| 1 | 14764  | Gpr44         |
| 1 | 15171  | Hcrt          |
| 1 | 228598 | Ebf4          |
| 1 | 74562  | Fer1l4        |
| 1 | NaN    | MMT00012844   |
| 1 | 11778  | Ap3s2         |
| 1 | 218210 | Nup153        |
| 1 | 237362 | Npffr1        |
| 1 | 55938  | Apom          |
| 1 | 225852 | Gm550         |
| 1 | 78369  | Icam4         |
| 1 | 68416  | Sycn          |
| 1 | 192188 | Stab2         |
| 1 | 22364  | Vpreb3        |
| 1 | 83813  | Tnk1          |
| 1 | 83396  | Glis2         |
| 1 | 12193  | Zfp36l2       |
| 1 | 272636 | D9Erttd280e   |
| 1 | 108899 | 2700081O15Rik |
| 1 | 234421 | Cib3          |
| 1 | 69169  | Faim3         |
| 1 | 209786 | Vmn2r-ps88    |
| 1 | 64451  | Dip2a         |
| 1 | 27386  | Npas3         |
| 1 | 434440 | Fbxw12        |
| 1 | 18545  | Pcp2          |
| 1 | 68311  | Lypd2         |
| 1 | 51811  | Clec4f        |
| 1 | 58214  | Cst10         |
| 1 | 258408 | Olfr463       |
| 1 | 19820  | Rnf12         |
| 1 | 75301  | 4930556N09Rik |
| 1 | 546036 | EG546036      |
| 1 | 223726 | Mpped1        |
| 1 | 56640  | Klk4          |
| 1 | 11806  | Apoa1         |



|   |        |               |
|---|--------|---------------|
| 1 | 239530 | Gpr20         |
| 1 | NaN    | MMT00033159   |
| 1 | NaN    | MMT00049098   |
| 1 | 12613  | Cel           |
| 1 | 14240  | Foxb2         |
| 1 | 240057 | Syngap1       |
| 1 | 17202  | Mc4r          |
| 1 | 211232 | Cpne9         |
| 1 | 102075 | Plekhg4       |
| 1 | 12504  | Cd4           |
| 1 | NaN    | MMT00005098   |
| 1 | 16728  | L1cam         |
| 1 | 258918 | Olf1346       |
| 1 | 72507  | Dzip1l        |
| 1 | 241612 | Slc5a12       |
| 1 | 671564 | Rnf212        |
| 1 | NaN    | MMT00011231   |
| 1 | NaN    | MMT00013041   |
| 1 | 208372 | Asb18         |
| 1 | NaN    | MMT00013481   |
| 1 | 627648 | EG627648      |
| 1 | 59083  | Fetub         |
| 1 | 78829  | Tsc22d4       |
| 1 | 280635 | Emilin3       |
| 1 | 171543 | Bmf           |
| 1 | 12300  | Cacng2        |
| 1 | 18479  | Pak1          |
| 1 | NaN    | MMT00015975   |
| 1 | NaN    | MMT00033987   |
| 1 | 56296  | Dmrtb1        |
| 1 | 208266 | Dot1l         |
| 1 | 20841  | Zfp143        |
| 1 | 27220  | Cartpt        |
| 1 | 233038 | 1190020J12Rik |
| 1 | 20410  | Sorbs3        |
| 1 | 74563  | Rasgef1c      |
| 1 | 30791  | Slc39a1       |
| 1 | 20401  | Sh3bp1        |
| 1 | 208104 | Mlxip         |
| 1 | 214239 | A430105I19Rik |
| 1 | 70024  | Mcm10         |
| 1 | 118449 | Synpo2        |
| 1 | 545279 | Ms4a15        |
| 1 | 19303  | Pxn           |
| 1 | 18429  | Oxt           |
| 1 | 76942  | Lypd5         |
| 1 | 381148 | Gm1614        |
| 1 | 231691 | Sds           |
| 1 | 12854  | Cort          |
| 1 | 13095  | Cyp2c29       |
| 1 | 66932  | Rexo1         |

|   |        |               |
|---|--------|---------------|
| 1 | 635169 | MMT00073704   |
| 1 | 26362  | Axl           |
| 1 | 21786  | Tff3          |
| 1 | 20977  | Syp           |
| 1 | 56632  | Sphk2         |
| 1 | 60507  | Qtrt1         |
| 1 | 73728  | Psd           |
| 1 | 58988  | Rps6kb2       |
| 1 | 21341  | Taf1c         |
| 1 | 68423  | Ankrd13d      |
| 1 | 211651 | Fancd2        |
| 1 | 104884 | Tdp1          |
| 1 | 18548  | Pcsk1         |
| 1 | 113854 | V1rb4         |
| 1 | 243842 | Gltscr1       |
| 1 | 57255  | Cldn13        |
| 1 | NaN    | MMT00042954   |
| 1 | 108068 | Grm2          |
| 1 | NaN    | MMT00048659   |
| 1 | 545481 | RP23-392P11.3 |
| 1 | 19876  | Robo1         |
| 1 | 94191  | Adarb2        |
| 1 | 18439  | P2rx7         |
| 1 | 29859  | Sult4a1       |
| 1 | NaN    | MMT00031206   |
| 1 | 230863 | Sh2d5         |
| 1 | 12962  | Crybb3        |
| 1 | 13041  | Ctsw          |
| 1 | 242939 | Cpz           |
| 1 | 219149 | Xkr6          |
| 1 | NaN    | MMT00017417   |
| 1 | NaN    | MMT00048670   |
| 1 | 68957  | Paqr6         |
| 1 | 320404 | Itpkb         |
| 1 | 98952  | C230093N12Rik |
| 1 | NaN    | MMT00078052   |
| 1 | 317755 | Zar1          |
| 1 | 24046  | Scn11a        |
| 1 | 67772  | Chd8          |
| 1 | 22072  | Prss2         |
| 1 | 20776  | Tmie          |
| 1 | 22073  | Prss3         |
| 1 | 73532  | 1700080E11Rik |
| 1 | 631304 | Cyp4f40       |
| 1 | NaN    | MMT00065821   |
| 1 | NaN    | MMT00027552   |
| 1 | NaN    | MMT00009628   |
| 1 | 207495 | Baiap2l2      |
| 1 | 230235 | 6430704M03Rik |
| 1 | 16596  | Klf1          |
| 1 | 258715 | Olf421        |

|   |        |                |
|---|--------|----------------|
| 1 | 330908 | Opcml          |
| 1 | 382083 | Snx22          |
| 1 | 246788 | Trpv3          |
| 1 | 78304  | Lsmd1          |
| 1 | 71781  | Slc16a14       |
| 1 | 57776  | Ttyh1          |
| 1 | 434437 | Amt            |
| 1 | 17341  | Bhlhb8         |
| 1 | 258701 | Olfr401        |
| 1 | 213262 | Fstl5          |
| 1 | 330428 | D630042F21Rik  |
| 1 | 258573 | Olfr1020       |
| 1 | NaN    | MMT00008620    |
| 1 | 74937  | 4930481B07Rik  |
| 1 | NaN    | MMT00006438    |
| 1 | 636752 | EG636752       |
| 1 | 72948  | Tppp           |
| 1 | 230809 | Pdik1l         |
| 1 | 108934 | BC024659       |
| 1 | 16973  | Lrp5           |
| 1 | 101359 | D330027H18Rik  |
| 1 | 333050 | Ksr2           |
| 1 | 217734 | Pomt2          |
| 1 | 11604  | Agrp           |
| 1 | 66768  | 4933428G09Rik  |
| 1 | 71159  | 4933416I08Rik  |
| 1 | 11898  | Ass1           |
| 1 | 11898  | Ass1           |
| 1 | 258752 | Olfr583        |
| 1 | 195018 | Zzef1          |
| 1 | 404195 | Cyp2c54        |
| 1 | 13385  | Dlg4           |
| 1 | 545817 | Cyp2w1         |
| 1 | 76574  | Mfsd2          |
| 1 | 16891  | Lipg           |
| 1 | NaN    | YGL234W_RC-551 |
| 1 | 235858 | Gm392          |
| 1 | 171253 | V1ri2          |
| 1 | 245688 | Rbbp7          |
| 1 | 14134  | Fcnb           |
| 1 | 75690  | 2210412E05Rik  |
| 1 | 14402  | Gabrb3         |
| 1 | 214058 | Megf11         |
| 1 | 56212  | Rhog           |
| 1 | 114230 | Aipl1          |
| 1 | 26992  | Brd7           |
| 1 | 268756 | Gulo           |
| 1 | 78928  | Pigt           |
| 1 | 21416  | Tcf7l2         |
| 1 | NaN    | MMT00015397    |
| 1 | 236598 | MMT00013190    |

|   |        |               |
|---|--------|---------------|
| 1 | 227545 | 5430407P10Rik |
| 1 | NaN    | MMT00055001   |
| 1 | 236598 | MMT00009389   |
| 1 | NaN    | MMT00079286   |
| 1 | 227195 | A430093A21Rik |
| 1 | 170798 | AY036118      |
| 1 | 12168  | Bmpr2         |
| 1 | 66314  | Tpd52l2       |
| 1 | 75985  | Rab30         |
| 1 | 71828  | Gtf2a1l       |
| 1 | 245424 | Gpr101        |
| 1 | 330836 | Slc7a6        |
| 1 | 382137 | D630004A14Rik |
| 1 | 59030  | Mkks          |
| 1 | 66975  | 2410002O22Rik |
| 1 | 71761  | Amdhd1        |
| 1 | 67736  | Ccdc130       |
| 1 | 107869 | Cth           |
| 1 | NaN    | MMT00057242   |
| 1 | 68184  | Denr          |
| 1 | 72759  | Tmem135       |
| 1 | 64085  | Clstn2        |
| 1 | 623205 | MMT00017441   |
| 1 | 99730  | Taf13         |
| 1 | 76561  | Snx7          |
| 1 | 19212  | Pter          |
| 1 | 67290  | 3110040N11Rik |
| 1 | 52076  | Tmem38b       |
| 1 | 67468  | Mmd           |
| 1 | 64213  | St7           |
| 1 | 77647  | Trat1         |
| 1 | 12450  | Ccng1         |
| 1 | 55946  | Ap3m1         |
| 1 | 66736  | Ttc35         |
| 1 | 13664  | Eif1a         |
| 1 | NaN    | MMT00024873   |
| 1 | 66143  | Eef1e1        |
| 1 | 69721  | Nkiras1       |
| 1 | 67834  | ldh3a         |
| 1 | 18760  | Prkd1         |
| 1 | 13809  | Enpep         |
| 1 | 11964  | Atp6v1a       |
| 1 | 11789  | Apc           |
| 1 | 18041  | Nfs1          |
| 1 | 74252  | Armc1         |
| 1 | NaN    | MMT00006294   |
| 1 | 68050  | 6330407G11Rik |
| 1 | 56305  | Pitpnb        |
| 1 | 64652  | Nisch         |
| 1 | 108664 | Atp6v1h       |
| 1 | 66397  | Sar1b         |

|   |           |               |
|---|-----------|---------------|
| 1 | 53382     | Txn1          |
| 1 | 19744     | Rheb          |
| 1 | 624446    | EG624446      |
| 1 | 19299     | Abcd3         |
| 1 | 319263    | Pcmt1         |
| 1 | NaN       | MMT00011132   |
| 1 | 71982     | Snx10         |
| 1 | 433862    | EG433862      |
| 1 | 71968     | Wdr73         |
| 1 | 67526     | Atg12         |
| 1 | 214663    | Slc25a29      |
| 1 | 22160     | Twist1        |
| 1 | 234356    | Csgalnact1    |
| 1 | 73910     | Arhgap18      |
| 1 | 237542    | Osbpl8        |
| 1 | 20452     | St8sia4       |
| 1 | 117167    | Steap4        |
| 1 | 72033     | Tsc22d2       |
| 1 | 16168     | Il15          |
| 1 | 94192     | C1galt1       |
| 1 | 100125272 | RP24-87L14.2  |
| 1 | NaN       | MMT00062592   |
| 1 | 22441     | Xlr           |
| 1 | 72993     | Appl1         |
| 1 | 72085     | Osgpl1        |
| 1 | 15982     | lfrd1         |
| 1 | 66626     | 5730403B10Rik |
| 1 | 210789    | Tbc1d4        |
| 1 | 74147     | Ehhadh        |
| 1 | 67993     | Nudt12        |
| 1 | 633285    | EG633285      |
| 1 | 67455     | Klh13         |
| 1 | 17022     | Lum           |
| 1 | 20128     | Trim30        |
| 1 | 209387    | AI451617      |
| 1 | 74558     | Gvin1         |
| 1 | 21824     | Thbd          |
| 1 | 69181     | Dyrk2         |
| 1 | 68564     | Nufip2        |
| 1 | 73173     | Pcdh18        |
| 1 | 15394     | Hoxa1         |
| 1 | 71458     | Bcor          |
| 1 | 18221     | Nudc          |
| 1 | 13666     | Eif2ak3       |
| 1 | 241230    | St8sia6       |
| 1 | 108151    | Sema3d        |
| 1 | 65960     | Twsg1         |
| 1 | 74213     | Rbm26         |
| 1 | 18783     | Pla2g4a       |
| 1 | 214791    | Sertad4       |
| 1 | 207304    | Hectd1        |

|   |        |                    |
|---|--------|--------------------|
| 1 | 76740  | Efr3a              |
| 1 | 218441 | Zfyve16            |
| 1 | 252876 | Zh2c2              |
| 1 | NaN    | MMT00058658        |
| 1 | 228421 | Kif18a             |
| 1 | 330256 | MMT00008885        |
| 1 | 16643  | Klrd1              |
| 1 | 71586  | Ifih1              |
| 1 | 20583  | Snai2              |
| 1 | 18788  | Serpib2            |
| 1 | 12173  | Bnc1               |
| 1 | 22418  | Wnt5a              |
| 1 | 66864  | Clec14a            |
| 1 | 432812 | BC052688           |
| 1 | 545370 | Hmcn1              |
| 1 | 70823  | Hmgb2l1            |
| 1 | 76117  | Arhgap15           |
| 1 | 66871  | Cpne8              |
| 1 | 19159  | Pscd3              |
| 1 | 11671  | Aldh3a2            |
| 1 | 271970 | Arsj               |
| 1 | NaN    | MMT00025372        |
| 1 | 207214 | Larp4              |
| 1 | 20382  | Sfrs2              |
| 1 | 100201 | Tmem64             |
| 1 | 626316 | OTTMUSG00000010173 |
| 1 | 238831 | Ppwd1              |
| 1 | 622175 | EG622175           |
| 1 | 246229 | Bivm               |
| 1 | 67606  | 1110018M03Rik      |
| 1 | 68833  | Pdcl3              |
| 1 | 66897  | Narg1l             |
| 1 | 212880 | Ddx46              |
| 1 | 234865 | Nup133             |
| 1 | 75698  | 3110001K24Rik      |
| 1 | 69934  | Rg9mtd3            |
| 1 | 66935  | 1700023B02Rik      |
| 1 | NaN    | MMT00033070        |
| 1 | 12368  | Casp6              |
| 1 | 12747  | Clk1               |
| 1 | 70237  | Bhlhb9             |
| 1 | 67367  | 1810007M14Rik      |
| 1 | 60599  | Trp53inp1          |
| 1 | 67245  | Peli1              |
| 1 | 69226  | Snx24              |
| 1 | 12628  | Cfh                |
| 1 | 214403 | EG214403           |
| 1 | 140742 | Sesn1              |
| 1 | 104015 | Synj1              |
| 1 | 11796  | Birc3              |
| 1 | 208177 | Phldb2             |

|   |        |               |
|---|--------|---------------|
| 1 | 338337 | Cog3          |
| 1 | 11819  | Nr2f2         |
| 1 | 55935  | Fnbp4         |
| 1 | 104263 | Jmjd1a        |
| 1 | 320712 | Abi3bp        |
| 1 | 20680  | Sox7          |
| 1 | 360216 | Zranb1        |
| 1 | 215748 | Cnksr3        |
| 1 | 270166 | Clpx          |
| 1 | 108853 | Mtrf1l        |
| 1 | 13006  | Smc3          |
| 1 | 69048  | Slc30a5       |
| 1 | NaN    | MMT00018157   |
| 1 | 219105 | Zmym5         |
| 1 | 53328  | Pgrmc1        |
| 1 | 98221  | Eif3m         |
| 1 | 105522 | Ankrd28       |
| 1 | 101565 | 6330503K22Rik |
| 1 | 116914 | Slc19a2       |
| 1 | NaN    | MMT00014691   |
| 1 | 74521  | 8430415E04Rik |
| 1 | NaN    | MMT00065196   |
| 1 | 230484 | Usp1          |
| 1 | NaN    | MMT00001293   |
| 1 | 16709  | Ktn1          |
| 1 | 67028  | 2610002M06Rik |
| 1 | 494468 | Armcx5        |
| 1 | 235050 | Zfp810        |
| 1 | 381062 | 2210404J11Rik |
| 1 | 67311  | Nanp          |
| 1 | 67311  | Nanp          |
| 1 | 27362  | Dnajib9       |
| 1 | 75430  | 3200002M19Rik |
| 1 | 214804 | Syde2         |
| 1 | 74670  | 4930432O21Rik |
| 1 | 22644  | Rnf103        |
| 1 | 230157 | Tmeff1        |
| 1 | 66724  | Map3k7ip3     |
| 1 | 59007  | Ngly1         |
| 1 | 73942  | 4930405M20Rik |
| 1 | 18139  | Zfml          |
| 1 | 66875  | 1200016B10Rik |
| 1 | 224598 | Zfp758        |
| 1 | 105559 | Mbnl2         |
| 1 | 56442  | Serinc1       |
| 1 | 269424 | Phf17         |
| 1 | 75424  | Zfp820        |
| 1 | 237411 | B230315N10Rik |
| 1 | 64602  | Ireb2         |
| 1 | 218503 | Fcho2         |
| 1 | 22327  | Vbp1          |

|   |        |               |
|---|--------|---------------|
| 1 | 101214 | Tra2a         |
| 1 | 66580  | Esf1          |
| 1 | 271457 | Rab5a         |
| 1 | 544971 | Bdp1          |
| 1 | 240283 | Dmxl1         |
| 1 | 214498 | Cdc73         |
| 1 | 110920 | Stch          |
| 1 | 77805  | Esco1         |
| 1 | 73288  | Ccdc132       |
| 1 | 67089  | Psmc6         |
| 1 | 67500  | Ccar1         |
| 1 | 70349  | Copb1         |
| 1 | 67300  | Cltc          |
| 1 | 70611  | Fbxo33        |
| 1 | 382038 | AK122209      |
| 1 | 80907  | Lactb         |
| 1 | 219228 | Pcdh17        |
| 1 | 66131  | Tipin         |
| 1 | 170791 | Rbm39         |
| 1 | NaN    | MMT00041792   |
| 1 | 22359  | Vldlr         |
| 1 | 63985  | Gmfb          |
| 1 | 84112  | Sucnr1        |
| 1 | 210293 | Dock10        |
| 1 | 64214  | Rgs18         |
| 1 | 70536  | Qpct          |
| 1 | 12364  | Casp12        |
| 1 | 212898 | Dse           |
| 1 | 66695  | Aspn          |
| 1 | NaN    | MMT00046622   |
| 1 | 378462 | Morn2         |
| 1 | 50500  | Ttpa          |
| 1 | 17184  | Matr3         |
| 1 | 226144 | Erlin1        |
| 1 | 68146  | Arl13b        |
| 1 | 20349  | Sema3e        |
| 1 | 54561  | Nap1l3        |
| 1 | 72902  | Spock3        |
| 1 | 19084  | Prkar1a       |
| 1 | 224794 | Enpp4         |
| 1 | 80859  | Nfkbiz        |
| 1 | 17158  | Man2a1        |
| 1 | 76421  | 1700028K03Rik |
| 1 | 56036  | Ccnl2         |
| 1 | 21847  | Klf10         |
| 1 | 70974  | Pgm2l1        |
| 1 | 170772 | Glcci1        |
| 1 | 216198 | Tcp1l12       |
| 1 | 545389 | Cep170        |
| 1 | 70099  | Smc4          |
| 1 | 18080  | Nin           |



|   |        |               |
|---|--------|---------------|
| 1 | 70834  | Spag9         |
| 1 | 629065 | EG629065      |
| 1 | 232286 | Tmf1          |
| 1 | 17311  | Kitl          |
| 1 | 329877 | Dennd4c       |
| 1 | 319448 | Fndc3a        |
| 1 | 11416  | Slc33a1       |
| 1 | NaN    | MMT00026286   |
| 1 | 320940 | Atp11c        |
| 1 | 329506 | Ctdspl2       |
| 1 | 58800  | Trpm7         |
| 1 | 50789  | Fbxl3         |
| 1 | 225028 | Map4k3        |
| 1 | 78521  | B230219D22Rik |
| 1 | 22612  | Yes1          |
| 1 | 69981  | Tmem30a       |
| 1 | 170719 | Oxr1          |
| 1 | 20663  | Sos2          |
| 1 | 109151 | Chd9          |
| 1 | 70155  | Ogfrl1        |
| 1 | 227446 | 2310035C23Rik |
| 1 | 321000 | 4933421E11Rik |
| 1 | 67760  | Slc38a2       |
| 1 | 74326  | Hnrnpr        |
| 1 | 231051 | Mll3          |
| 1 | NaN    | MMT00062595   |
| 1 | 11908  | Atf1          |
| 1 | 328108 | A430041B07Rik |
| 1 | 22343  | Lin7c         |
| 1 | 211255 | Kbtbd7        |
| 1 | 56195  | Ptbp2         |
| 1 | 271377 | Zbtb11        |
| 1 | 52184  | Odf2l         |
| 1 | 408062 | BC062115      |
| 1 | 72421  | Ttc30b        |
| 1 | 66625  | Sfrs18        |
| 1 | 108829 | Jmjd1c        |
| 1 | 19386  | Ranbp2        |
| 1 | 22764  | Zfx           |
| 1 | NaN    | MMT00038995   |
| 1 | 13204  | Dhx15         |
| 1 | 52323  | Klhl7         |
| 1 | 67010  | Rbm7          |
| 1 | 12033  | Bcap29        |
| 1 | 269198 | Nbeal1        |
| 1 | 22215  | Ube3a         |
| 1 | 57438  | 7-Mar         |
| 1 | NaN    | MMT00034426   |
| 1 | 319615 | 6330416L07Rik |
| 1 | 224585 | Zfp160        |
| 1 | 27215  | Azi2          |

|   |        |               |
|---|--------|---------------|
| 1 | 68145  | Etaa1         |
| 1 | 67019  | Actr6         |
| 1 | 93759  | Sirt1         |
| 1 | 235469 | Suhw4         |
| 1 | 231464 | Cnot6l        |
| 1 | 235380 | Dmxl2         |
| 1 | 109333 | Pkn2          |
| 1 | 74182  | Prei4         |
| 1 | 14453  | Gas2          |
| 1 | 68734  | Smek1         |
| 1 | 20687  | Sp3           |
| 1 | 22762  | Zfpm2         |
| 1 | 12452  | Ccng2         |
| 1 | 53330  | Vamp4         |
| 1 | 67043  | Syap1         |
| 1 | 72999  | Insig2        |
| 1 | 68861  | 1190002N15Rik |
| 1 | 641340 | Nrbf2         |
| 1 | 192657 | Eil2          |
| 1 | 14600  | Ghr           |
| 1 | 239122 | Setdb2        |
| 1 | NaN    | MMT00071421   |
| 1 | NaN    | MMT00050193   |
| 1 | 210853 | EG210853      |
| 1 | 74149  | 1300003B13Rik |
| 1 | 56758  | Mbnl1         |
| 1 | NaN    | MMT00014015   |
| 1 | 74114  | Crot          |
| 1 | 76900  | Ssbp4         |
| 1 | NaN    | MMT00029171   |
| 1 | 319638 | Nt5dc1        |
| 1 | 66870  | Serbp1        |
| 1 | 26611  | Rcn2          |
| 1 | 240396 | Mex3c         |
| 1 | 67864  | Yip4          |
| 1 | 210104 | BC043301      |
| 1 | 216965 | Taok1         |
| 1 | 21974  | Top2b         |
| 1 | NaN    | MMT00082345   |
| 1 | NaN    | MMT00054557   |
| 1 | 70078  | Nol7          |
| 1 | 75734  | 5230400G24Rik |
| 1 | 17156  | Man1a2        |
| 1 | 109905 | Rap1a         |
| 1 | 68944  | Tmco1         |
| 1 | 73130  | Tmed5         |
| 1 | 213056 | D1Erttd53e    |
| 1 | 20912  | Stxbp3a       |
| 1 | 98267  | Stk17b        |
| 1 | 15247  | Hiat1         |
| 1 | 26885  | Casp8ap2      |

|   |        |               |
|---|--------|---------------|
| 1 | 66552  | 2010106G01Rik |
| 1 | 668838 | EG668838      |
| 1 | 13690  | Eif4g2        |
| 1 | 545700 | Vmn2r-ps14    |
| 1 | 104348 | Zfp120        |
| 1 | 108645 | Mat2b         |
| 1 | NaN    | MMT00045089   |
| 1 | NaN    | MMT00046586   |
| 1 | 67456  | Ergic2        |
| 1 | 217869 | Eif5          |
| 1 | NaN    | MMT00052614   |
| 1 | 52575  | Rg9mtd1       |
| 1 | 110750 | Cse1l         |
| 1 | 20462  | Sfrs10        |
| 1 | 77591  | Ddx10         |
| 1 | NaN    | MMT00060167   |
| 1 | 66213  | Med7          |
| 1 | 56426  | Pdcd10        |
| 1 | NaN    | MMT00011278   |
| 1 | 71900  | Tmem106b      |
| 1 | 66631  | Hiatl1        |
| 1 | 72098  | Tmem68        |
| 1 | 68044  | Chac2         |
| 1 | 70047  | Trnt1         |
| 1 | 19302  | Pex2          |
| 1 | 20462  | Sfrs10        |
| 1 | NaN    | MMT00063585   |
| 1 | 68736  | 1110034B05Rik |
| 1 | 14228  | Fkbp4         |
| 1 | 68055  | Atp5s         |
| 1 | 20843  | Stag2         |
| 1 | 22782  | Slc30a1       |
| 1 | 210106 | Pols          |
| 1 | 226747 | Ahctf1        |
| 1 | 68646  | 1110020G09Rik |
| 1 | 72692  | Hnrpll        |
| 1 | 93871  | Brwd1         |
| 1 | NaN    | MMT00039793   |
| 1 | 107769 | Tm6sf1        |
| 1 | 50766  | Crim1         |
| 1 | 11856  | Arhgap6       |
| 1 | 72404  | Wdr44         |
| 1 | 213819 | Casd1         |
| 1 | 19645  | Rb1           |
| 1 | 56367  | Scoc          |
| 1 | 73124  | Golim4        |
| 1 | 70827  | Trak2         |
| 1 | 76137  | Ccdc90a       |
| 1 | 54635  | Pdgfc         |
| 1 | 15273  | Hivep2        |
| 1 | 15251  | Hif1a         |

|   |        |               |
|---|--------|---------------|
| 1 | 78923  | Chsy3         |
| 1 | 74197  | Gtf2e1        |
| 1 | 50850  | Spast         |
| 1 | 242521 | Klh9          |
| 1 | 19046  | Ppp1cb        |
| 1 | 67427  | Rps20         |
| 1 | 142980 | Tlr3          |
| 1 | 22235  | Ugdh          |
| 1 | 17286  | Meox2         |
| 1 | 211986 | Tmem18        |
| 1 | 72139  | 2610044O15Rik |
| 1 | 64451  | Dip2a         |
| 1 | 269033 | 4930503L19Rik |
| 1 | 76763  | Mospd2        |
| 1 | 66713  | Actr2         |
| 1 | 71721  | 1200015N20Rik |
| 1 | 227059 | Slc39a10      |
| 1 | 78248  | Armcx1        |
| 1 | 11977  | Atp7a         |
| 1 | 12617  | Cenpc1        |
| 1 | 70799  | Cep192        |
| 1 | 19650  | Rbl1          |
| 1 | 17918  | Myo5a         |
| 1 | 382252 | A830080D01Rik |
| 1 | 13405  | Dmd           |
| 1 | 320267 | Fubp3         |
| 1 | 17997  | Nedd1         |
| 1 | 67770  | 5830433M19Rik |
| 1 | 105203 | BC016423      |
| 1 | 59015  | Nup160        |
| 1 | 79264  | Krit1         |
| 1 | 78752  | Csgalnact2    |
| 1 | 338467 | Morc3         |
| 1 | 233812 | BC030336      |
| 1 | 17772  | Mtm1          |
| 1 | 235574 | Atp2c1        |
| 1 | 72425  | 2410042D21Rik |
| 1 | 11622  | Ahr           |
| 1 | 19091  | Prkg1         |
| 1 | NaN    | MMT00024195   |
| 1 | 16438  | Itpr1         |
| 1 | 14020  | Evi5          |
| 1 | 77113  | Klh2          |
| 1 | 72508  | Rps6kb1       |
| 1 | 21788  | Tfpi          |
| 1 | 22289  | Utx           |
| 1 | 16396  | Itch          |
| 1 | 237898 | Usp32         |
| 1 | 93836  | Rnf111        |
| 1 | 73754  | Thap1         |
| 1 | 19317  | Qk            |

|   |        |               |
|---|--------|---------------|
| 1 | 269016 | Sh3rf2        |
| 1 | 26894  | Cops7a        |
| 1 | NaN    | MMT00038159   |
| 1 | 70354  | 3110001I20Rik |
| 1 | 67771  | Arpc5         |
| 1 | 319601 | Zfp653        |
| 1 | 20823  | Ssb           |
| 1 | 77505  | Dnhd1         |
| 1 | 216618 | Ccdc104       |
| 1 | 56041  | Uso1          |
| 1 | 207704 | Gtpbp10       |
| 1 | 72568  | Lin9          |
| 1 | 70612  | 5730494N06Rik |
| 1 | NaN    | MMT00058516   |
| 1 | NaN    | MMT00056913   |
| 1 | NaN    | MMT00041235   |
| 1 | NaN    | MMT00048285   |
| 1 | 434339 | EG434339      |
| 1 | 21353  | Tank          |
| 1 | NaN    | MMT00002799   |
| 1 | 66588  | Cmpk1         |
| 1 | 72129  | Pex13         |
| 1 | 223601 | 0910001A06Rik |
| 1 | 12632  | Cfl2          |
| 1 | 19070  | Mobkl3        |
| 1 | 66979  | Pole4         |
| 1 | 71675  | 0610010F05Rik |
| 1 | 59032  | Ppp2r3c       |
| 1 | 15452  | Hprt1         |
| 1 | 66092  | Ghitm         |
| 1 | NaN    | MMT00051501   |
| 1 | 66725  | Lrrk2         |
| 1 | 14265  | Fmr1          |
| 1 | 55946  | Ap3m1         |
| 1 | 29864  | Rnf11         |
| 1 | 212285 | Centd1        |
| 1 | 12633  | Cflar         |
| 1 | 56705  | Ranbp9        |
| 1 | 23950  | Dnajb6        |
| 1 | 20280  | Scp2          |
| 1 | 624862 | EG624862      |
| 1 | 12176  | Bnip3         |
| 1 | NaN    | MMT00020969   |
| 1 | 66840  | Wdr45l        |
| 1 | 65972  | Ifi30         |
| 1 | 67241  | Smc6          |
| 1 | 216965 | Taok1         |
| 1 | 83493  | Sacm1l        |
| 1 | 12038  | Bche          |
| 1 | 140483 | Hnmt          |
| 1 | 67452  | Pnpla8        |

|   |        |               |
|---|--------|---------------|
| 1 | 215751 | BC013529      |
| 1 | NaN    | MMT00005424   |
| 1 | 66884  | Appbp2        |
| 1 | 229906 | Gtf2b         |
| 1 | 229681 | St7l          |
| 1 | 235461 | B230380D07Rik |
| 1 | 67204  | Eif2s2        |
| 1 | 69482  | Nup35         |
| 1 | 67005  | Polr3k        |
| 1 | 65114  | Vps35         |
| 1 | 59048  | C1galt1c1     |
| 1 | 12301  | Cacybp        |
| 1 | 57896  | Krcc1         |
| 1 | NaN    | MMT00077382   |
| 1 | 67035  | Dnajb4        |
| 1 | 14911  | Thumpd3       |
| 1 | 216395 | Tmem5         |
| 1 | 12912  | Creb1         |
| 1 | 12068  | Bet1          |
| 1 | 68117  | Apool         |
| 1 | 381101 | BC048355      |
| 1 | NaN    | MMT00040284   |
| 1 | 214505 | Gnptg         |
| 1 | 66822  | Fbxo25        |
| 1 | 67759  | 5033414D02Rik |
| 1 | 76044  | Ncapg2        |
| 1 | 74386  | Rmi1          |
| 1 | 75296  | Fgfr1op       |
| 1 | 67008  | 1600012F09Rik |
| 1 | 98732  | Rab3gap2      |
| 1 | 51886  | Fubp1         |
| 1 | 110876 | Scn2a1        |
| 1 | 224171 | C330027C09Rik |
| 1 | 211556 | BC002199      |
| 1 | 13645  | Egf           |
| 1 | 11938  | Atp2a2        |
| 1 | 107767 | Scamp1        |
| 1 | 26965  | Cul1          |
| 1 | 64291  | Osbpl1a       |
| 1 | 210544 | Wdr67         |
| 1 | 72400  | 2610028A01Rik |
| 1 | 71929  | Tmem123       |
| 1 | 75974  | Dock11        |
| 1 | 15446  | Hpgd          |
| 1 | 73389  | Hbp1          |
| 1 | 74533  | Gzf1          |
| 1 | 114774 | Pawr          |
| 1 | 14190  | Fgl2          |
| 1 | 218442 | Serinc5       |
| 1 | NaN    | MMT00010886   |
| 1 | 104776 | Aldh6a1       |

|   |        |               |
|---|--------|---------------|
| 1 | 106326 | Osbpl11       |
| 1 | 14066  | F3            |
| 1 | 109241 | Mbd5          |
| 1 | 18115  | Nnt           |
| 1 | 216805 | Flcn          |
| 1 | 20437  | Siah1a        |
| 1 | 229055 | Zbtb10        |
| 1 | 80898  | Erap1         |
| 1 | 67723  | 4932415G12Rik |
| 1 | 380921 | Dgkh          |
| 1 | 218203 | Mylip         |
| 1 | 59042  | Cope          |
| 1 | 67211  | Armc10        |
| 1 | NaN    | MMT00051649   |
| 1 | 26422  | Nbea          |
| 1 | 78903  | Wrnip1        |
| 1 | 72309  | Tmem158       |
| 1 | 73390  | 1700060H10Rik |
| 1 | 22021  | Tpst1         |
| 1 | 259279 | Tubgcp3       |
| 1 | 70598  | Filip1        |
| 1 | 78334  | Cdc2l6        |
| 1 | 225207 | Zfp521        |
| 1 | 28146  | D3Ucla1       |
| 1 | 13637  | Efna2         |
| 1 | 67437  | Ssr3          |
| 1 | 12952  | Cry1          |
| 1 | 72843  | Prdm4         |
| 1 | 12812  | Coil          |
| 1 | 17869  | Myc           |
| 1 | 76936  | Hnrnpm        |
| 1 | 76187  | Adhfe1        |
| 1 | 20503  | Slc16a7       |
| 1 | NaN    | MMT00044927   |
| 1 | 69535  | 2310004N24Rik |
| 1 | 14084  | Faf1          |
| 1 | 108079 | Prkaa2        |
| 1 | 19687  | Rfc1          |
| 1 | NaN    | MMT00041409   |
| 1 | 75770  | Brsk2         |
| 1 | 56210  | Rev1          |
| 1 | 11797  | Birc2         |
| 1 | 66866  | Nhlrc2        |
| 1 | 16588  | Kin           |
| 1 | 217664 | Mgat2         |
| 1 | 224938 | Pja2          |
| 1 | 20272  | Scn7a         |
| 1 | 225027 | Sfrs7         |
| 1 | NaN    | MMT00017521   |
| 1 | 170938 | Zfp617        |
| 1 | 114893 | Dcun1d1       |

|   |        |               |
|---|--------|---------------|
| 1 | 114893 | Dcun1d1       |
| 1 | 56351  | Ptges3        |
| 1 | 56351  | Ptges3        |
| 1 | 67877  | Nat5          |
| 1 | 12226  | Btg1          |
| 1 | 109019 | Obfc2a        |
| 1 | 18295  | Ogn           |
| 1 | 18242  | Oat           |
| 1 | NaN    | MMT00021961   |
| 1 | NaN    | MMT00007831   |
| 1 | NaN    | MMT00060741   |
| 1 | 56615  | Mgst1         |
| 1 | 116940 | Tgs1          |
| 1 | 105387 | Akr1c14       |
| 1 | 226695 | Ifi205        |
| 1 | 243967 | Gm484         |
| 1 | 270118 | Maml2         |
| 1 | 218693 | Paip1         |
| 1 | 15951  | Ifi204        |
| 1 | 74277  | Chic2         |
| 1 | 102632 | Acad11        |
| 1 | 19217  | Ptger2        |
| 1 | 53605  | Nap1l1        |
| 1 | 65099  | Irak1bp1      |
| 1 | 105171 | Arrdc3        |
| 1 | 20393  | Sgk1          |
| 1 | 13388  | Dll1          |
| 1 | 109113 | Uhrf2         |
| 1 | 67198  | 2810022L02Rik |
| 1 | 232288 | Frmd4b        |
| 1 | 83453  | Chrdl1        |
| 1 | 68743  | Anln          |
| 1 | NaN    | MMT00044046   |
| 1 | 18073  | Nid1          |
| 1 | 12380  | Cast          |
| 1 | 12468  | Cct7          |
| 1 | 13518  | Dst           |
| 1 | 170625 | Snx18         |
| 1 | 70747  | Tspan2        |
| 1 | 240725 | Sulf1         |
| 1 | 76453  | Prss23        |
| 1 | 11745  | Anxa3         |
| 1 | 624910 | Rgs21         |
| 1 | 71720  | Osbpl3        |
| 1 | 72672  | Zfp518        |
| 1 | 218914 | Wapal         |
| 1 | 77604  | C430048L16Rik |
| 1 | 71801  | Plekhf2       |
| 1 | 219135 | Mtmr6         |
| 1 | 50884  | Nckap1        |
| 1 | 78913  | Zfp294        |



|   |        |               |
|---|--------|---------------|
| 1 | 101148 | B630005N14Rik |
| 1 | 67958  | 2610101N10Rik |
| 1 | 241070 | Gpr1          |
| 1 | 21814  | Tgfbr3        |
| 1 | 67134  | Nol5a         |
| 1 | 20742  | Spnb2         |
| 1 | 116904 | Alpk3         |
| 1 | 208117 | Aph1b         |
| 1 | 18046  | Nfyc          |
| 1 | 18046  | Nfyc          |
| 1 | 13717  | Eln           |
| 1 | 56324  | Stam2         |
| 1 | 381580 | Ccdc27        |
| 1 | NaN    | MMT00029554   |
| 1 | 74094  | Tjap1         |
| 1 | 22040  | Trex1         |
| 1 | 667804 | MMT00076032   |
| 1 | 56748  | Nfu1          |
| 1 | 20133  | Rrm1          |
| 1 | 26360  | Angptl2       |
| 1 | 286942 | Kif19a        |
| 1 | 19172  | Psmb4         |
| 1 | 83766  | Actl6b        |
| 1 | 14601  | Ghrh          |
| 1 | 108927 | Lhfp          |
| 1 | 68533  | Mphosph6      |
| 1 | 54204  | 1-Sep         |
| 1 | NaN    | MMT00006341   |
| 1 | 226922 | Kcnq5         |
| 1 | 72590  | Ppme1         |
| 1 | 240899 | Lrrc52        |
| 1 | 76389  | Ankrd36       |
| 1 | 319996 | Casc4         |
| 1 | 50908  | C1s           |
| 1 | 235033 | Rdh8          |
| 1 | 20669  | Sox14         |
| 1 | 258979 | Olfr1255      |
| 1 | 259301 | Leap2         |
| 1 | 11548  | Adra1b        |
| 1 | 213211 | Rnf26         |
| 1 | 13838  | Epha4         |
| 1 | NaN    | MMT00027295   |
| 1 | 665270 | Plb1          |
| 1 | 18504  | Pax2          |
| 1 | 330830 | Ccdc135       |
| 1 | 20182  | Rxb           |
| 1 | 241769 | Kcnk15        |
| 1 | 66237  | Atp6v1g2      |
| 1 | 224705 | Vps52         |
| 1 | 11546  | Parp2         |
| 1 | 68977  | Haghl         |

|   |        |               |
|---|--------|---------------|
| 1 | 79043  | Spsb3         |
| 1 | 23989  | Med24         |
| 1 | 55927  | Hes6          |
| 1 | 12909  | Crcp          |
| 1 | 56844  | Tssc4         |
| 1 | 216551 | 1110067D22Rik |
| 1 | 73132  | Slc25a16      |
| 1 | 67045  | Riok2         |
| 1 | 70025  | Acot7         |
| 1 | 28113  | Tinf2         |
| 1 | 76073  | Pcgf5         |
| 1 | 223922 | Atf7          |
| 1 | 22700  | Zfp40         |
| 1 | 238317 | C130039O16Rik |
| 1 | NaN    | MMT00023461   |
| 1 | 75812  | Tasp1         |
| 1 | 22218  | Sumo1         |
| 1 | 22218  | Sumo1         |
| 1 | NaN    | MMT00048325   |
| 1 | 56220  | Zfp386        |
| 1 | 69207  | Sfrs11        |
| 1 | 381644 | Cep135        |
| 1 | 68730  | Dus1l         |
| 1 | 338366 | Mia3          |
| 1 | 18805  | Pld1          |
| 1 | 54598  | Calcr1        |
| 1 | 16210  | Impact        |
| 1 | 12552  | Cdh11         |
| 1 | 635702 | Naaladl2      |
| 1 | 12192  | Zfp361l       |
| 1 | 235682 | Zfp445        |
| 1 | 68818  | Zfand2b       |
| 1 | 22259  | Nr1h3         |
| 1 | 67138  | Herc5         |
| 1 | 80285  | Parp9         |
| 1 | 17472  | Gbp4          |
| 1 | 234311 | Ddx60         |
| 1 | 233056 | Zfp790        |
| 1 | NaN    | MMT00047910   |
| 1 | 320951 | Pisd          |
| 1 | 327956 | Vmo1          |
| 1 | 263803 | Pkn3          |
| 1 | 76686  | Clip3         |
| 1 | 75646  | Rai14         |
| 1 | 622459 | RP23-303F24.3 |
| 1 | 170765 | Ripply3       |
| 1 | 633752 | EG633752      |
| 1 | 56724  | Cript         |
| 1 | 321003 | Xpnpep3       |
| 1 | 19359  | Rad23b        |
| 1 | 56085  | Ubqln1        |

|   |        |               |
|---|--------|---------------|
| 1 | 52665  | Echdc1        |
| 1 | 55951  | Brp44l        |
| 1 | NaN    | MMT00081492   |
| 1 | 107734 | Mrpl30        |
| 1 | 54364  | Rpp30         |
| 1 | NaN    | MMT00002367   |
| 1 | NaN    | MMT00042824   |
| 1 | 23873  | Faim          |
| 1 | NaN    | MMT00037377   |
| 1 | 66637  | 5730449L18Rik |
| 1 | 66637  | 5730449L18Rik |
| 1 | NaN    | MMT00009124   |
| 1 | 66917  | Chordc1       |
| 1 | NaN    | MMT00052151   |
| 1 | NaN    | MMT00081393   |
| 1 | 24067  | Srp54a        |
| 1 | 20916  | Sucla2        |
| 1 | 225363 | Etf1          |
| 1 | 17876  | Myef2         |
| 1 | 12848  | Cops2         |
| 1 | 12785  | Cnbp          |
| 1 | 211253 | Mtrf1         |
| 1 | NaN    | MMT00050725   |
| 1 | 546071 | Mast3         |
| 1 | 245050 | C730027P07Rik |
| 1 | 12411  | Cbs           |
| 1 | 75563  | Dnali1        |
| 1 | 16426  | Itih3         |
| 1 | 23920  | Insrr         |
| 1 | 328779 | Hs3st6        |
| 1 | 18781  | Pla2g2c       |
| 1 | 108832 | 5430405G05Rik |
| 1 | 57749  | Piwil1        |
| 1 | 16326  | Inhbe         |
| 1 | 268291 | Rnf217        |
| 1 | 27214  | Dbf4          |
| 1 | 70385  | Ccdc99        |
| 1 | 67630  | Samd8         |
| 1 | 70645  | Oip5          |
| 1 | 216760 | Mfap3         |
| 1 | 71276  | Ccdc57        |
| 1 | 116972 | 2310047D13Rik |
| 1 | 229599 | Gm129         |
| 1 | 69216  | Ccdc23        |
| 1 | 14164  | Fgf1          |
| 1 | 52513  | Ddx56         |
| 1 | 106068 | Slc45a4       |
| 1 | 74315  | Rnf145        |
| 1 | 74012  | Rap2b         |
| 1 | 66591  | Mad2l1bp      |
| 1 | 71974  | Prmt3         |

|   |        |               |
|---|--------|---------------|
| 1 | 214642 | A430107O13Rik |
| 1 | 11504  | Adamts1       |
| 1 | 80292  | Zxdc          |
| 1 | 69028  | Mitd1         |
| 1 | 107528 | Magee1        |
| 1 | NaN    | MMT00072251   |
| 1 | 268591 | Serpina5      |
| 1 | 621976 | EG621976      |
| 1 | NaN    | MMT00052662   |
| 1 | 224170 | Dzip3         |
| 1 | 207209 | Gm317         |
| 1 | 209294 | Csta          |
| 1 | NaN    | MMT00014109   |
| 1 | 69239  | 2610034M16Rik |
| 1 | NaN    | MMT00004670   |
| 1 | 246727 | Oas3          |
| 2 | 22697  | Zscan21       |
| 2 | 73916  | lft57         |
| 2 | 14412  | Slc6a13       |
| 2 | 70103  | Znhit1        |
| 2 | NaN    | MMT00077995   |
| 2 | 58246  | Slc35b4       |
| 2 | 67898  | Pef1          |
| 2 | 66989  | Kctd20        |
| 2 | 66229  | Rpl711        |
| 2 | 76308  | Rab1b         |
| 2 | 71767  | Tysnd1        |
| 2 | 18247  | Oaz2          |
| 2 | 18247  | Oaz2          |
| 2 | NaN    | MMT00065790   |
| 2 | 74754  | Dhcr24        |
| 2 | 71207  | Nudt4         |
| 2 | 67830  | Rer1          |
| 2 | 20018  | Rpo1-3        |
| 2 | 19662  | Rbp4          |
| 2 | 640524 | Spnb5         |
| 2 | 77697  | Mmab          |
| 2 | 636544 | EG636544      |
| 2 | NaN    | MMT00058026   |
| 2 | NaN    | MMT00057790   |
| 2 | NaN    | MMT00007454   |
| 2 | NaN    | MMT00081411   |
| 2 | NaN    | MMT00050438   |
| 2 | NaN    | MMT00015325   |
| 2 | NaN    | MMT00043176   |
| 2 | NaN    | MMT00054594   |
| 2 | NaN    | MMT00038058   |
| 2 | NaN    | MMT00030262   |
| 2 | 78688  | Nol3          |
| 2 | 194231 | Cnksr1        |
| 2 | 11792  | Apex1         |

|   |           |               |
|---|-----------|---------------|
| 2 | NaN       | MMT00049287   |
| 2 | 104175    | Sbk1          |
| 2 | 11428     | Aco1          |
| 2 | NaN       | MMT00073452   |
| 2 | NaN       | MMT00059380   |
| 2 | 622117    | Triml2        |
| 2 | NaN       | MMT00057439   |
| 2 | NaN       | MMT00062394   |
| 2 | NaN       | MMT00018149   |
| 2 | NaN       | MMT00071096   |
| 2 | NaN       | MMT00062477   |
| 2 | NaN       | MMT00038325   |
| 2 | 636756    | EG636756      |
| 2 | NaN       | MMT00030239   |
| 2 | NaN       | MMT00067207   |
| 2 | NaN       | MMT00072546   |
| 2 | NaN       | MMT00002048   |
| 2 | NaN       | MMT00074600   |
| 2 | NaN       | MMT00079617   |
| 2 | NaN       | MMT00013125   |
| 2 | NaN       | MMT00075578   |
| 2 | NaN       | MMT00002004   |
| 2 | NaN       | MMT00004841   |
| 2 | NaN       | MMT00024286   |
| 2 | 629557    | EG629557      |
| 2 | NaN       | MMT00019672   |
| 2 | 668192    | EG668192      |
| 2 | NaN       | MMT00065577   |
| 2 | NaN       | MMT00002521   |
| 2 | NaN       | MMT00009375   |
| 2 | NaN       | MMT00075271   |
| 2 | NaN       | MMT00026015   |
| 2 | NaN       | MMT00001423   |
| 2 | NaN       | MMT00044275   |
| 2 | NaN       | MMT00053707   |
| 2 | NaN       | MMT00057721   |
| 2 | NaN       | MMT00010854   |
| 2 | NaN       | MMT00020962   |
| 2 | 378954    | 3000002C10Rik |
| 2 | NaN       | MMT00011246   |
| 2 | NaN       | MMT00019310   |
| 2 | NaN       | MMT00054062   |
| 2 | NaN       | MMT00057793   |
| 2 | 13806     | Eno1          |
| 2 | 13806     | Eno1          |
| 2 | 100047043 | MMT00034400   |
| 2 | NaN       | MMT00012632   |
| 2 | 100040887 | MMT00065461   |
| 2 | NaN       | MMT00027303   |
| 2 | NaN       | MMT00022502   |
| 2 | 622268    | EG622268      |

|   |        |               |
|---|--------|---------------|
| 2 | 94064  | Mrpl27        |
| 2 | 52469  | Ccdc56        |
| 2 | 66958  | Txndc14       |
| 2 | 14867  | Gstm6         |
| 2 | 23827  | Bpnt1         |
| 2 | 23827  | Bpnt1         |
| 2 | 107732 | Mrpl10        |
| 2 | 21428  | Mlx           |
| 2 | NaN    | MMT00020987   |
| 2 | 28030  | Gfm1          |
| 2 | 98766  | Ubac1         |
| 2 | 226849 | Ppp2r5a       |
| 2 | 11655  | Alas1         |
| 2 | NaN    | MMT00077003   |
| 2 | NaN    | MMT00029730   |
| 2 | 434198 | B130024G19Rik |
| 2 | 56506  | Cib2          |
| 2 | 22249  | Unc13b        |
| 2 | 68744  | Zfp740        |
| 2 | NaN    | MMT00037083   |
| 2 | 15194  | Htt           |
| 2 | 20187  | Ryk           |
| 2 | 102626 | Mapkapk3      |
| 2 | 114601 | Ehbp1l1       |
| 2 | 18938  | Ppp1r14b      |
| 2 | 18938  | Ppp1r14b      |
| 2 | 209683 | Ttc28         |
| 2 | 71452  | Ankrd40       |
| 2 | 56046  | Uqcc          |
| 2 | 17826  | Mtvr2         |
| 2 | 70784  | Rasl12        |
| 2 | 21665  | Tdg           |
| 2 | 100910 | 2010209O12Rik |
| 2 | 382014 | Tmem16h       |
| 2 | 66039  | D14Ert449e    |
| 2 | 66443  | Tnfaip8l1     |
| 2 | 17388  | Mmp15         |
| 2 | 52588  | Tspan14       |
| 2 | 66498  | Dda1          |
| 2 | 11773  | Ap2m1         |
| 2 | 16907  | Lmnb2         |
| 2 | 17216  | Mcm2          |
| 2 | 17768  | Mthfd2        |
| 2 | 67963  | Npc2          |
| 2 | 72549  | Reep4         |
| 2 | 13423  | Dnase2a       |
| 2 | 70231  | Gorasp2       |
| 2 | NaN    | MMT00023332   |
| 2 | 20321  | Frrs1         |
| 2 | 109225 | Ms4a7         |
| 2 | 57317  | Sfrs4         |

|   |        |               |
|---|--------|---------------|
| 2 | 11758  | Prdx6         |
| 2 | 100678 | Psph          |
| 2 | 69456  | Commd10       |
| 2 | 21386  | Tbx3          |
| 2 | 68144  | 5031426D15Rik |
| 2 | 209039 | Tenc1         |
| 2 | 16625  | Serpina3c     |
| 2 | 72747  | 2810439F02Rik |
| 2 | NaN    | MMT00051367   |
| 2 | 13806  | Eno1          |
| 2 | NaN    | MMT00012520   |
| 2 | NaN    | MMT00066041   |
| 2 | 407819 | BC031181      |
| 2 | NaN    | MMT00002245   |
| 2 | 19261  | Sirpa         |
| 2 | 52009  | Hn1l          |
| 2 | 111173 | Erc1          |
| 2 | 67486  | Polr3g        |
| 2 | 67956  | Setd8         |
| 2 | 101437 | Dhx32         |
| 2 | 228889 | Ddx27         |
| 2 | 30843  | Fbxl12        |
| 2 | 26447  | Poli          |
| 2 | 319801 | 9630033F20Rik |
| 2 | 20333  | Sec22b        |
| 2 | NaN    | MMT00033583   |
| 2 | 226777 | C130074G19Rik |
| 2 | NaN    | MMT00022996   |
| 2 | 21991  | Tpi1          |
| 2 | 26570  | Slc7a11       |
| 2 | NaN    | MMT00007996   |
| 2 | NaN    | MMT00041810   |
| 2 | NaN    | MMT00003764   |
| 2 | NaN    | MMT00058347   |
| 2 | NaN    | MMT00055891   |
| 2 | 22142  | Tuba1a        |
| 2 | 22147  | Tuba3b        |
| 2 | NaN    | MMT00079618   |
| 2 | NaN    | MMT00007982   |
| 2 | 22144  | Tuba3a        |
| 2 | 53860  | 9-Sep         |
| 2 | NaN    | MMT00050488   |
| 2 | 94219  | Cnm2          |
| 2 | 15216  | Hfe           |
| 2 | 75590  | Dusp9         |
| 2 | 76281  | Tax1bp3       |
| 2 | NaN    | MMT00060868   |
| 2 | 16905  | Lmna          |
| 2 | 16976  | Lrpap1        |
| 2 | NaN    | MMT00056938   |
| 2 | NaN    | MMT00046455   |

|   |        |                    |
|---|--------|--------------------|
| 2 | 233532 | Rsf1               |
| 2 | 58245  | Gpr180             |
| 2 | 16151  | lkbkg              |
| 2 | 26433  | Plod3              |
| 2 | 320299 | lqcb1              |
| 2 | 16419  | ltgb5              |
| 2 | 110006 | Gusb               |
| 2 | 56401  | Lepre1             |
| 2 | 12826  | Col4a1             |
| 2 | 14489  | Mtpn               |
| 2 | 71254  | Naif1              |
| 2 | 20224  | Sar1a              |
| 2 | 16061  | Igh-VJ558          |
| 2 | 70110  | Ifi35              |
| 2 | NaN    | MMT00078068        |
| 2 | 17984  | Ndn                |
| 2 | 68556  | Uckl1              |
| 2 | 235441 | Usp3               |
| 2 | 12467  | Cct6b              |
| 2 | 18606  | Enpp2              |
| 2 | 18823  | Plp1               |
| 2 | 22758  | Zscan12            |
| 2 | 12833  | Col6a1             |
| 2 | 57432  | Zc3h8              |
| 2 | NaN    | MMT00072901        |
| 2 | 16005  | Igfals             |
| 2 | 22248  | Unc119             |
| 2 | 666048 | OTTMUSG00000008561 |
| 2 | 217946 | Cdca7l             |
| 2 | 71966  | Nkiras2            |
| 2 | 211548 | Nomo1              |
| 2 | 67727  | Stx17              |
| 2 | 20646  | Snrpn              |
| 2 | 235435 | Lctl               |
| 2 | 22129  | Ttc3               |
| 2 | 18405  | Orm1               |
| 2 | 68033  | Cox19              |
| 2 | 22276  | Uros               |
| 2 | 63955  | Cables1            |
| 2 | NaN    | MMT00058311        |
| 2 | 19384  | Ran                |
| 2 | NaN    | MMT00014274        |
| 2 | NaN    | MMT00048420        |
| 2 | NaN    | MMT00046285        |
| 2 | NaN    | MMT00064324        |
| 2 | 52874  | D19Bwg1357e        |
| 2 | 72722  | 2810405J04Rik      |
| 2 | 68051  | Nutf2              |
| 2 | 68051  | Nutf2              |
| 2 | 320904 | D630012G11Rik      |
| 2 | 68981  | Snrpa1             |



|   |           |               |
|---|-----------|---------------|
| 2 | NaN       | MMT00008728   |
| 2 | NaN       | MMT00077405   |
| 2 | 11973     | Atp6v1e1      |
| 2 | 68032     | Tmem85        |
| 2 | 100040305 | MMT00074121   |
| 2 | 66073     | Txndc12       |
| 2 | NaN       | MMT00065558   |
| 2 | 432649    | EG432649      |
| 2 | 11603     | Agrn          |
| 2 | 67973     | Mphosph10     |
| 2 | 20717     | Serpina3m     |
| 2 | 19231     | Ptma          |
| 2 | 216134    | Pdxk          |
| 2 | 15381     | Hnrnpc        |
| 2 | 12159     | Bmp4          |
| 2 | 13829     | Epb4.9        |
| 2 | 16768     | Lag3          |
| 2 | 66112     | Mosc1         |
| 2 | 381694    | B3galtl       |
| 2 | 21906     | Otop1         |
| 2 | 73458     | 1700055N04Rik |
| 2 | 66223     | Mrpl35        |
| 2 | 20446     | St6galnac2    |
| 2 | 54380     | Smarcal1      |
| 2 | 235134    | Nfrkb         |
| 2 | 381903    | Alg8          |
| 2 | 12741     | Cldn5         |
| 2 | 319322    | Sf3b2         |
| 2 | 53424     | Tsnax         |
| 2 | 21366     | Slc6a6        |
| 2 | 22214     | Ube2h         |
| 2 | 56338     | Txnip         |
| 2 | 17112     | Tm4sf1        |
| 2 | 22433     | Xbp1          |
| 2 | 56048     | Lgals8        |
| 2 | 69068     | 1810011O10Rik |
| 2 | 81489     | Dnajb1        |
| 2 | 58185     | Rsad2         |
| 2 | 94094     | Trim34        |
| 2 | 209200    | Dtx3l         |
| 2 | 15242     | Hhex          |
| 2 | 54354     | Rassf5        |
| 2 | 78651     | Lsm6          |
| 2 | 71951     | Gpc2          |
| 2 | 72895     | Setd5         |
| 2 | 17183     | Matn4         |
| 2 | 68037     | 2900093K20Rik |
| 2 | 319719    | 4732471D19Rik |
| 2 | 53627     | Porcn         |
| 2 | 226407    | Rab3gap1      |
| 2 | 16553     | Kif13a        |

|   |        |               |
|---|--------|---------------|
| 2 | 494448 | Cbx6          |
| 2 | 67017  | 2010011120Rik |
| 2 | 224807 | Tmem63b       |
| 2 | 76665  | 1700123M08Rik |
| 2 | 242083 | Ppm1l         |
| 2 | 16348  | Invs          |
| 2 | 68591  | Mocos         |
| 2 | 54411  | Atp6ap1       |
| 2 | 56294  | Ptpn9         |
| 2 | 24070  | Mpdu1         |
| 2 | 68137  | Kdelr1        |
| 2 | 76952  | Nt5c2         |
| 2 | 20751  | Spr           |
| 2 | 81898  | Sf3b1         |
| 2 | 18038  | Nfkbil1       |
| 2 | 57751  | Rnf25         |
| 2 | 26406  | Map3k3        |
| 2 | 63856  | Taf8          |
| 2 | 11536  | Gpr182        |
| 2 | 227331 | Gigyf2        |
| 2 | 72205  | Eml2          |
| 2 | 11883  | Arsa          |
| 2 | 78670  | Plekhj1       |
| 2 | 107817 | Jmjd6         |
| 2 | 100210 | Gpn2          |
| 2 | 23991  | Cib1          |
| 2 | 108014 | Sfrs9         |
| 2 | 27054  | Sec23b        |
| 2 | 21355  | Tap2          |
| 2 | 14972  | H2-K1         |
| 2 | 14264  | Fmod          |
| 2 | 15006  | H2-Q1         |
| 2 | 15936  | Ier2          |
| 2 | NaN    | MMT00058471   |
| 2 | 27883  | D16H22S680E   |
| 2 | 52004  | Cdk2ap2       |
| 2 | 13663  | Ei24          |
| 2 | 30937  | Lmcd1         |
| 2 | 74626  | Tmem81        |
| 2 | 229615 | Pias3         |
| 2 | 244668 | Sipa1l2       |
| 2 | 16205  | Gimap1        |
| 2 | 101206 | Tada3l        |
| 2 | 20587  | Smarcb1       |
| 2 | 71810  | Ranbp3        |
| 2 | 209446 | Tcfe3         |
| 2 | 330192 | Vps37b        |
| 2 | 74479  | Snx11         |
| 2 | 26895  | Cops7b        |
| 2 | 59090  | Midn          |
| 2 | 109674 | Ampd2         |

|   |        |               |
|---|--------|---------------|
| 2 | 192232 | Hps4          |
| 2 | 98999  | Znfx1         |
| 2 | 20778  | Scarb1        |
| 2 | 217198 | Plekhh3       |
| 2 | 26397  | Map2k3        |
| 2 | 66711  | Sbds          |
| 2 | 15270  | H2afx         |
| 2 | 71667  | 0610007L01Rik |
| 2 | NaN    | MMT00020852   |
| 2 | 73873  | 4930430E16Rik |
| 2 | 228730 | Gm114         |
| 2 | 20509  | Slc19a1       |
| 2 | 211401 | Mtss1         |
| 2 | 19983  | Rpl5          |
| 2 | 627312 | MMT00039341   |
| 2 | 623519 | EG623519      |
| 2 | NaN    | MMT00052332   |
| 2 | NaN    | MMT00074658   |
| 2 | NaN    | MMT00067648   |
| 2 | NaN    | MMT00040104   |
| 2 | 11972  | Atp6v0d1      |
| 2 | 56358  | Copz2         |
| 2 | 27047  | Omd           |
| 2 | NaN    | MMT00063568   |
| 2 | NaN    | MMT00043055   |
| 2 | NaN    | MMT00033197   |
| 2 | 381820 | 2700089E24Rik |
| 2 | 71452  | Ankrd40       |
| 2 | 16404  | Itga7         |
| 2 | 11966  | Atp6v1b2      |
| 2 | 80748  | BC004004      |
| 2 | 51792  | Ppp2r1a       |
| 2 | 16010  | Igfbp4        |
| 2 | 13830  | Stom          |
| 2 | 14430  | Galt          |
| 2 | 17347  | Mknk2         |
| 2 | 22135  | Tgoln2        |
| 2 | 107272 | Psat1         |
| 2 | 245638 | Tbc1d8b       |
| 2 | 279067 | MMT00046983   |
| 2 | 383436 | EG383436      |
| 2 | NaN    | MMT00041940   |
| 2 | NaN    | MMT00066808   |
| 2 | 227885 | MMT00013510   |
| 2 | NaN    | MMT00079667   |
| 2 | NaN    | MMT00012419   |
| 2 | NaN    | MMT00077883   |
| 2 | NaN    | MMT00069569   |
| 2 | NaN    | MMT00016379   |
| 2 | 380730 | Gm884         |
| 2 | NaN    | MMT00003113   |

|   |        |               |
|---|--------|---------------|
| 2 | NaN    | MMT00042985   |
| 2 | NaN    | MMT00077845   |
| 2 | NaN    | MMT00070318   |
| 2 | 16898  | Rps2          |
| 2 | NaN    | MMT00069490   |
| 2 | NaN    | MMT00015290   |
| 2 | NaN    | MMT00049231   |
| 2 | NaN    | MMT00011946   |
| 2 | NaN    | MMT00018943   |
| 2 | NaN    | MMT00040516   |
| 2 | 14791  | Emg1          |
| 2 | 17975  | Ncl           |
| 2 | 28088  | D10Wsu52e     |
| 2 | 140887 | Lnx2          |
| 2 | 55989  | Nol5          |
| 2 | 20661  | Sort1         |
| 2 | 56209  | Gde1          |
| 2 | NaN    | MMT00034813   |
| 2 | 237860 | Ssh2          |
| 2 | 66510  | Rnf181        |
| 2 | 14547  | Gdap2         |
| 2 | 68879  | Prpf6         |
| 2 | 14043  | Ext2          |
| 2 | NaN    | MMT00077001   |
| 2 | 74106  | lqwd1         |
| 2 | 101113 | Snx21         |
| 2 | 66394  | Nosip         |
| 2 | 97159  | A430005L14Rik |
| 2 | 13481  | Dpm2          |
| 2 | 29810  | Bag3          |
| 2 | 215615 | Rnpep         |
| 2 | NaN    | MMT00007348   |
| 2 | 72726  | Tbcc          |
| 2 | 234734 | Aars          |
| 2 | 19727  | Rfxank        |
| 2 | 78330  | 1500032D16Rik |
| 2 | 97484  | Cog8          |
| 2 | NaN    | MMT00016059   |
| 2 | 22192  | Ube2m         |
| 2 | 58244  | Stx6          |
| 2 | 11544  | Adprh         |
| 2 | 59008  | Anapc5        |
| 2 | 57342  | Parva         |
| 2 | 50794  | Klf13         |
| 2 | NaN    | MMT00062390   |
| 2 | NaN    | MMT00044006   |
| 2 | NaN    | MMT00017193   |
| 2 | NaN    | MMT00053882   |
| 2 | 71795  | Pitpnc1       |
| 2 | 226527 | BC026585      |
| 2 | NaN    | MMT00014378   |

|   |        |               |
|---|--------|---------------|
| 2 | NaN    | MMT00033789   |
| 2 | 17896  | Myl4          |
| 2 | 13033  | Ctsd          |
| 2 | 14225  | Fkbp1a        |
| 2 | 171508 | Creld1        |
| 2 | 109154 | 2410014A08Rik |
| 2 | 19732  | Rgl2          |
| 2 | 69051  | Pycr2         |
| 2 | 217737 | Ahsa1         |
| 2 | 67160  | Eef1g         |
| 2 | 75751  | Ipo4          |
| 2 | 54219  | Cd320         |
| 2 | NaN    | MMT00034355   |
| 2 | 22153  | Tubb4         |
| 2 | NaN    | MMT00015534   |
| 2 | 22590  | Xpa           |
| 2 | 14976  | H2-Ke2        |
| 2 | 27681  | Snf8          |
| 2 | 13445  | Cdk2ap1       |
| 2 | NaN    | MMT00038941   |
| 2 | 75788  | Smurf1        |
| 2 | 192159 | Prpf8         |
| 2 | 16865  | Lgtn          |
| 2 | 317750 | Slc24a5       |
| 2 | 18541  | Pcnt          |
| 2 | NaN    | MMT00025562   |
| 2 | NaN    | MMT00018546   |
| 2 | 15013  | H2-Q2         |
| 2 | 14964  | H2-D1         |
| 2 | 107829 | Thoc5         |
| 2 | 140499 | Ube2j2        |
| 2 | 56488  | Nxt1          |
| 2 | 628893 | EG628893      |
| 2 | NaN    | MMT00067575   |
| 2 | 18632  | Pex11b        |
| 2 | 57436  | Gabarapl1     |
| 2 | 16412  | Itgb1         |
| 2 | 56722  | Litaf         |
| 2 | 18582  | Pde6d         |
| 2 | 14042  | Ext1          |
| 2 | 14824  | Grn           |
| 2 | 12227  | Btg2          |
| 2 | 14773  | Grk5          |
| 2 | 20317  | Serpinf1      |
| 2 | 50917  | Galns         |
| 2 | 56356  | Gltp          |
| 2 | NaN    | MMT00063701   |
| 2 | 67389  | C1qdc2        |
| 2 | NaN    | MMT00009278   |
| 2 | 14337  | Ftl2          |
| 2 | 11867  | Arpc1b        |

|   |           |               |
|---|-----------|---------------|
| 2 | 59069     | Tpm3          |
| 2 | 13433     | Dnmt1         |
| 2 | 66811     | Duoxa2        |
| 2 | 11981     | Atp9a         |
| 2 | 228869    | Ncoa5         |
| 2 | 67130     | Ndufa6        |
| 2 | 57912     | Cdc42se1      |
| 2 | 226971    | Plekhb2       |
| 2 | 225994    | BC016495      |
| 2 | 215418    | Axud1         |
| 2 | NaN       | MMT00041452   |
| 2 | 117592    | B3galt6       |
| 2 | 67619     | Nob1          |
| 2 | 78834     | Zfp623        |
| 2 | 107047    | Psmg2         |
| 2 | NaN       | MMT00045090   |
| 2 | 56055     | Gtpbp2        |
| 2 | 67513     | 2610002J02Rik |
| 2 | 15184     | Hdac5         |
| 2 | 105245    | Txndc5        |
| 2 | 233833    | Tnrc6a        |
| 2 | 80743     | Vps16         |
| 2 | 58202     | Cobra1        |
| 2 | 22278     | Usf1          |
| 2 | 70101     | Cyp4f16       |
| 2 | 109900    | Asl           |
| 2 | 192236    | Hps1          |
| 2 | 12616     | Cenpb         |
| 2 | 223775    | Pim3          |
| 2 | 21354     | Tap1          |
| 2 | 58239     | Dexi          |
| 2 | NaN       | MMT00070057   |
| 2 | 14359     | Fxr1          |
| 2 | 140499    | Ube2j2        |
| 2 | 18010     | Neu1          |
| 2 | 73711     | 1110012M11Rik |
| 2 | 12496     | Entpd2        |
| 2 | 72325     | 1300018117Rik |
| 2 | 19089     | Prkcsh        |
| 2 | 66911     | Nudt16l1      |
| 2 | 224824    | Pex6          |
| 2 | 72075     | Ogfr          |
| 2 | 14114     | Fbln1         |
| 2 | 71983     | Tmco6         |
| 2 | 18230     | Nxn           |
| 2 | 100040304 | MMT00028325   |
| 2 | 56717     | Frap1         |
| 2 | 234344    | Naf1          |
| 2 | 76719     | 1700081L11Rik |
| 2 | 23980     | Pebp1         |
| 2 | 23980     | Pebp1         |

|   |           |               |
|---|-----------|---------------|
| 2 | 27059     | Sh3d19        |
| 2 | 381990    | Zbtb2         |
| 2 | 75669     | Pik3r4        |
| 2 | 70439     | Taf15         |
| 2 | 80860     | Ghdc          |
| 2 | NaN       | MMT00069758   |
| 2 | 56459     | Sae1          |
| 2 | 107065    | Lrrtm2        |
| 2 | 68031     | Rnf146        |
| 2 | 117591    | Slc2a9        |
| 2 | 103968    | Plin          |
| 2 | 80888     | Hspb8         |
| 2 | 245651    | EG245651      |
| 2 | 21672     | Prdx2         |
| 2 | 69572     | Mfsd3         |
| 2 | 224823    | BC011248      |
| 2 | 12892     | Cpox          |
| 2 | 20848     | Stat3         |
| 2 | 23871     | Ets1          |
| 2 | 24010     | Ik            |
| 2 | 105827    | Amigo2        |
| 2 | 224703    | 2-Mar         |
| 2 | 18028     | Nfib          |
| 2 | 66170     | Chchd5        |
| 2 | NaN       | MMT00030953   |
| 2 | 67655     | Ctdp1         |
| 2 | 118445    | Klf16         |
| 2 | 214895    | Lman2l        |
| 2 | 97212     | Hadha         |
| 2 | 18969     | Pola2         |
| 2 | 108705    | Pttg1ip       |
| 2 | 93679     | Trim8         |
| 2 | 18799     | Plcd1         |
| 2 | 625253    | EG625253      |
| 2 | 12927     | Bcar1         |
| 2 | 22370     | Vtn           |
| 2 | 66246     | Osgep         |
| 2 | 17761     | Mtap7         |
| 2 | 67011     | Mettl6        |
| 2 | 11443     | Chrnbl        |
| 2 | 13836     | Epha2         |
| 2 | 12161     | Bmp6          |
| 2 | 66471     | Anp32e        |
| 2 | 100037258 | Dnajc3a       |
| 2 | 66286     | Sec11c        |
| 2 | 20773     | Sptlc2        |
| 2 | 67099     | 2310038H17Rik |
| 2 | 268465    | Eme1          |
| 2 | 15212     | Hexb          |
| 2 | 259003    | Olfrl72       |
| 2 | 380780    | Serpina11     |

|   |        |               |
|---|--------|---------------|
| 2 | 233020 | Hipk4         |
| 2 | 668940 | Myh7b         |
| 2 | 84682  | Cox4i2        |
| 2 | 27007  | Klrk1         |
| 2 | 17480  | Mpl           |
| 2 | 384997 | Pglyrp4       |
| 2 | 268515 | Bahcc1        |
| 2 | 217365 | Nploc4        |
| 2 | 11727  | Ang           |
| 2 | 75820  | Wdr64         |
| 2 | 83702  | Akr1c6        |
| 2 | 381204 | Naalad1       |
| 2 | 54710  | Hs3st3b1      |
| 2 | 236260 | MMT00062346   |
| 2 | 208098 | Panx3         |
| 2 | 13108  | Cyp2g1        |
| 2 | 13086  | Cyp2a4        |
| 2 | 15110  | Hand1         |
| 2 | 15496  | Hsd3b5        |
| 2 | 50708  | Hist1h1c      |
| 2 | 230866 | C230096C10Rik |
| 2 | 67683  | 2610029G23Rik |
| 2 | 260315 | Nav3          |
| 2 | NaN    | MMT00048401   |
| 2 | 70227  | Zfp619        |
| 2 | 74020  | Cpne4         |
| 2 | NaN    | MMT00001620   |
| 2 | 14782  | Gsr           |
| 2 | 633640 | EG633640      |
| 2 | 12660  | Chka          |
| 2 | 217344 | Rhbdf2        |
| 2 | 83431  | Ndel1         |
| 2 | 59028  | Rcl1          |
| 2 | 110809 | Sfrs1         |
| 2 | 237361 | EG237361      |
| 2 | 12914  | Crebbp        |
| 2 | NaN    | MMT00017112   |
| 2 | NaN    | MMT00078676   |
| 2 | NaN    | MMT00034706   |
| 2 | 66834  | Them2         |
| 2 | 15254  | Hint1         |
| 2 | 72729  | Cdc42se2      |
| 2 | 19737  | Rgs5          |
| 2 | 73251  | Setd7         |
| 2 | 67554  | Slc25a30      |
| 2 | 64436  | Inpp5e        |
| 2 | 445007 | Nup85         |
| 2 | NaN    | MMT00008599   |
| 2 | 69181  | Dyrk2         |
| 2 | 56332  | Amotl2        |
| 2 | 433759 | Hdac1         |



|   |        |                    |
|---|--------|--------------------|
| 2 | 219022 | Ttc5               |
| 2 | 20499  | Slc12a7            |
| 2 | 20439  | Siah2              |
| 2 | 12748  | Clk2               |
| 2 | 12304  | Pdia4              |
| 2 | 21807  | Tsc22d1            |
| 2 | 574418 | RP23-433P19.11     |
| 2 | 433424 | OTTMUSG00000012358 |
| 2 | 107449 | Unc5b              |
| 2 | 76527  | 2010004A03Rik      |
| 2 | 53872  | Caprin1            |
| 2 | 12350  | Car3               |
| 2 | 78309  | Parc               |
| 2 | 11991  | Hnrnpd             |
| 2 | 110119 | Mpi                |
| 2 | 70615  | Ankrd24            |
| 2 | 69923  | Agk                |
| 2 | 68514  | Efha1              |
| 2 | 216119 | A130042E20Rik      |
| 2 | 13498  | Atn1               |
| 2 | 246221 | Mpst               |
| 2 | 72454  | Ccdc71             |
| 2 | 381921 | Taok2              |
| 2 | 226548 | Aph1a              |
| 2 | 14674  | Gna13              |
| 2 | 78783  | Brpf1              |
| 2 | 16885  | Limk1              |
| 2 | 54645  | Gripap1            |
| 2 | 223774 | Alg12              |
| 2 | 230770 | Tmem39b            |
| 2 | 105450 | Mmrn2              |
| 2 | 286940 | Flnb               |
| 2 | 67876  | Coq10b             |
| 2 | 76108  | Rap2a              |
| 2 | 170728 | Rtn4ip1            |
| 2 | 18088  | Nkx2-2             |
| 2 | 217194 | Klh11              |
| 2 | 68352  | 0610012D14Rik      |
| 2 | 71839  | Osgin1             |
| 2 | 13117  | Cyp4a10            |
| 2 | NaN    | MMT00057138        |
| 2 | 73603  | 1700126L10Rik      |
| 2 | 227377 | Farp2              |
| 2 | 227743 | Mapkap1            |
| 2 | NaN    | MMT00081793        |
| 2 | 272428 | Acsm5              |
| 2 | 106059 | A430088P11Rik      |
| 2 | 54150  | Rdh7               |
| 2 | 210009 | Mtrr               |
| 2 | 238455 | 4732474O15Rik      |
| 2 | 73730  | Lce1l              |

|   |        |               |
|---|--------|---------------|
| 2 | NaN    | MMT00057554   |
| 2 | NaN    | MMT00013155   |
| 2 | 114128 | Laptm4b       |
| 2 | 277753 | Cyp4a12a      |
| 2 | NaN    | MMT00035685   |
| 2 | 68034  | 2900009107Rik |
| 2 | 12279  | C9            |
| 2 | 12007  | Azgp1         |
| 2 | 71754  | Cyp2d40       |
| 2 | 13088  | Cyp2b10       |
| 2 | 433809 | Rnf207        |
| 2 | 56070  | Tcerg1        |
| 2 | 208990 | Npb           |
| 2 | 207278 | Fchsd2        |
| 2 | 71978  | Ppp2r2a       |
| 2 | 57321  | Terf2ip       |
| 2 | NaN    | MMT00051549   |
| 2 | 210973 | Kbtbd2        |
| 2 | 11746  | Anxa4         |
| 2 | 74117  | Actr3         |
| 2 | NaN    | MMT00030928   |
| 2 | 242894 | Actr3b        |
| 2 | NaN    | MMT00054980   |
| 2 | NaN    | MMT00053760   |
| 2 | 56434  | Tspan3        |
| 2 | 23971  | Papss1        |
| 2 | 70572  | Ipo5          |
| 2 | 629364 | MMT00061218   |
| 2 | NaN    | MMT00017294   |
| 2 | NaN    | MMT00003599   |
| 2 | 68092  | Ncbp2         |
| 2 | 72183  | Snx6          |
| 2 | NaN    | MMT00041689   |
| 2 | 665503 | EG665503      |
| 2 | 114863 | Prosc         |
| 2 | 65098  | Zfand6        |
| 2 | 11867  | Arpc1b        |
| 2 | NaN    | MMT00024172   |
| 2 | NaN    | MMT00075773   |
| 2 | NaN    | MMT00082708   |
| 2 | 238836 | EG238836      |
| 2 | 232906 | Grif1         |
| 2 | 74365  | Lonrf3        |
| 2 | NaN    | MMT00078030   |
| 2 | 80912  | Pum1          |
| 2 | 59003  | Maea          |
| 2 | 77592  | 4931406H21Rik |
| 2 | 319266 | A130010J15Rik |
| 2 | 102334 | Ankrd10       |
| 2 | 226562 | Bat2d         |
| 2 | 67444  | Ilkap         |

|   |        |               |
|---|--------|---------------|
| 2 | 22631  | Ywhaz         |
| 2 | NaN    | MMT00062045   |
| 2 | 11840  | Arf1          |
| 2 | 330260 | Pon2          |
| 2 | 56334  | Tmed2         |
| 2 | NaN    | MMT00036534   |
| 2 | NaN    | MMT00001681   |
| 2 | NaN    | MMT00043239   |
| 2 | 21681  | Thoc4         |
| 2 | NaN    | MMT00077153   |
| 2 | 68922  | Dnaic1        |
| 2 | 26879  | B3galnt1      |
| 2 | NaN    | MMT00054728   |
| 2 | NaN    | MMT00077065   |
| 2 | 73469  | Rnf38         |
| 2 | 67255  | Zfp422        |
| 2 | 27057  | Ncoa4         |
| 2 | 232717 | BC048599      |
| 2 | 228960 | Stx16         |
| 2 | 66818  | 9130011J15Rik |
| 2 | 225115 | Svil          |
| 2 | 114874 | Ddhd1         |
| 2 | 66500  | Slc30a7       |
| 2 | 15926  | Idh1          |
| 2 | 20522  | Slc23a1       |
| 2 | 76302  | Pcnp          |
| 2 | 192285 | Phf21a        |
| 2 | 140482 | Zfp358        |
| 2 | 55950  | Bri3          |
| 2 | NaN    | MMT00052318   |
| 2 | NaN    | MMT00063804   |
| 2 | 11702  | Amd1          |
| 2 | 67488  | Calcoco1      |
| 2 | 18843  | Plunc         |
| 2 | 26889  | Cln8          |
| 2 | 16909  | Lmo2          |
| 2 | 18033  | Nfkb1         |
| 2 | 20723  | Serpinb9      |
| 2 | 60406  | Sap30         |
| 2 | 13197  | Gadd45a       |
| 2 | 223752 | Gramd4        |
| 2 | 28295  | D10Jhu81e     |
| 2 | 28295  | D10Jhu81e     |
| 2 | 12040  | Bckdhb        |
| 2 | 68980  | Wdr53         |
| 2 | NaN    | MMT00034311   |
| 2 | NaN    | MMT00054655   |
| 2 | NaN    | MMT00060113   |
| 2 | NaN    | MMT00014216   |
| 2 | NaN    | MMT00078034   |
| 2 | NaN    | MMT00043149   |

|   |        |                    |
|---|--------|--------------------|
| 2 | 11465  | Actg1              |
| 2 | 54401  | Ywhab              |
| 2 | 22388  | Wdr1               |
| 2 | 71853  | Pdia6              |
| 2 | 213827 | Arcn1              |
| 2 | 11669  | Aldh2              |
| 2 | 232798 | Leng8              |
| 2 | 226751 | Cdc42bpa           |
| 2 | 22095  | Tshr               |
| 2 | 71846  | Syce2              |
| 2 | 13629  | Eef2               |
| 2 | 668457 | EG668457           |
| 2 | 22121  | Rpl13a             |
| 2 | 620161 | EG620161           |
| 2 | 20090  | Rps29              |
| 2 | 258741 | Olf935             |
| 2 | 67023  | Use1               |
| 2 | 77605  | H2afv              |
| 2 | NaN    | MMT00039978        |
| 2 | 12389  | Cav1               |
| 2 | 57294  | Rps27              |
| 2 | 233893 | Zfp764             |
| 2 | 18176  | Nras               |
| 2 | 56013  | RP23-157O10.7      |
| 2 | 30805  | Slc22a4            |
| 2 | NaN    | MMT00052300        |
| 2 | 100087 | Kti12              |
| 2 | 53893  | Nudt5              |
| 2 | 110391 | Qdpr               |
| 2 | 433923 | EG433923           |
| 2 | NaN    | MMT00027514        |
| 2 | 623402 | EG623402           |
| 2 | 30056  | Timm9              |
| 2 | 231086 | Hadhb              |
| 2 | 667795 | EG667795           |
| 2 | 68904  | Abhd13             |
| 2 | 22044  | Trh                |
| 2 | 66290  | Atp6v1g1           |
| 2 | 321022 | Cdv3               |
| 2 | 12238  | Commd3             |
| 2 | 235459 | Gtf2a2             |
| 2 | 66684  | Tceal8             |
| 2 | 217066 | OTTMUSG00000001305 |
| 2 | NaN    | MMT00078790        |
| 2 | 19042  | Ppm1a              |
| 2 | 69663  | Ddx51              |
| 2 | NaN    | MMT00042876        |
| 2 | 19300  | Abcd4              |
| 2 | 69151  | Lzic               |
| 2 | NaN    | MMT00071427        |
| 2 | 268656 | Sptlc1             |

|   |        |               |
|---|--------|---------------|
| 2 | 213043 | MMT00000549   |
| 2 | 12729  | Clns1a        |
| 2 | 104662 | Tsr1          |
| 2 | 80509  | Med8          |
| 2 | 68275  | Rpa1          |
| 2 | 192136 | 5033411D12Rik |
| 2 | 58875  | Hibadh        |
| 2 | 109731 | Maob          |
| 2 | 20846  | Stat1         |
| 2 | NaN    | MMT00014375   |
| 2 | 217410 | Trib2         |
| 2 | 244198 | Olfml1        |
| 2 | 17250  | Abcc1         |
| 2 | 207181 | Rbms3         |
| 2 | 226049 | Dmrt2         |
| 2 | 66664  | Tmem41a       |
| 2 | NaN    | MMT00002063   |
| 2 | 75146  | Tmem180       |
| 2 | 212679 | Mars2         |
| 2 | NaN    | MMT00017766   |
| 2 | 442832 | 1600029O15Rik |
| 2 | NaN    | MMT00015606   |
| 2 | NaN    | MMT00076151   |
| 2 | NaN    | MMT00012906   |
| 2 | 625690 | EG625690      |
| 2 | 668699 | MMT00070312   |
| 2 | NaN    | MMT00043723   |
| 2 | NaN    | MMT00059232   |
| 2 | NaN    | MMT00069919   |
| 2 | NaN    | MMT00002494   |
| 2 | NaN    | MMT00079369   |
| 2 | 269941 | Chsy1         |
| 2 | 28018  | Ubfd1         |
| 2 | 11774  | Ap3b1         |
| 2 | 53625  | B3gnt2        |
| 2 | 63859  | Impg1         |
| 2 | 51875  | Tmem141       |
| 2 | 16651  | Sspn          |
| 2 | 72669  | 2810032G03Rik |
| 2 | 108960 | Irak2         |
| 2 | 66881  | Pcyox1        |
| 2 | 83814  | Nedd4l        |
| 2 | 229877 | Rap1gds1      |
| 2 | 70351  | Ppp4r1        |
| 2 | 20620  | Plk2          |
| 2 | 68036  | Zfp706        |
| 2 | 22031  | Traf3         |
| 2 | 327762 | Dna2          |
| 2 | 65964  | B230120H23Rik |
| 2 | 219072 | D14Erttd500e  |
| 2 | NaN    | MMT00042166   |

|   |        |                    |
|---|--------|--------------------|
| 2 | 69918  | 2610020C07Rik      |
| 2 | 320846 | A530058N18Rik      |
| 2 | 22687  | Zfp259             |
| 2 | 17721  | ND5                |
| 2 | 14718  | Got1               |
| 2 | 791337 | ENSMUSG00000053749 |
| 2 | 16582  | Kifc3              |
| 2 | 20519  | Slc22a3            |
| 2 | 73724  | Mcee               |
| 2 | 17387  | Mmp14              |
| 2 | 109934 | Abr                |
| 2 | 71994  | Cnn3               |
| 2 | 17955  | Nap1l4             |
| 2 | 66439  | 2010012O05Rik      |
| 2 | 70247  | Psmc1              |
| 2 | 66405  | Mcts2              |
| 2 | 56369  | Apip               |
| 2 | NaN    | MMT00014098        |
| 2 | 17993  | Ndufs4             |
| 2 | 64655  | Mrps22             |
| 2 | 664857 | 9330101J02Rik      |
| 2 | 66067  | Gtpbp8             |
| 2 | 66736  | Ttc35              |
| 2 | 26754  | Cops5              |
| 2 | 57439  | Tmem183a           |
| 2 | 67681  | Mrpl18             |
| 2 | 66272  | 1810020G14Rik      |
| 2 | 67713  | Dnajc19            |
| 2 | 66050  | 0610009B22Rik      |
| 2 | 76983  | Scfd1              |
| 2 | 75778  | Them4              |
| 2 | 58172  | Sertad2            |
| 2 | 22627  | Ywhae              |
| 2 | 67458  | Ergic1             |
| 2 | 18100  | Mrpl40             |
| 2 | 108143 | Taf9               |
| 2 | 218629 | Dhx29              |
| 2 | NaN    | MMT00023354        |
| 2 | 19651  | Rbl2               |
| 2 | 18189  | Nrxn1              |
| 2 | 66292  | Mrps21             |
| 2 | 66449  | MMT00011706        |
| 2 | 66449  | MMT00023224        |
| 2 | 70511  | 5730409G15Rik      |
| 2 | 59046  | Arpp19             |
| 2 | 59046  | Arpp19             |
| 2 | 23790  | Coro1c             |
| 2 | 15528  | Hspe1              |
| 2 | 628438 | EG628438           |
| 2 | 66359  | 2310005N03Rik      |
| 2 | 66477  | Usmg5              |

|   |        |               |
|---|--------|---------------|
| 2 | 69010  | Anapc13       |
| 2 | 12390  | Cav2          |
| 2 | 69574  | Cmb1          |
| 2 | 106840 | Unc119b       |
| 2 | 252974 | C330046G03Rik |
| 2 | 240411 | Loxhd1        |
| 2 | 74201  | Cep97         |
| 2 | 20513  | Slc1a6        |
| 2 | 12615  | Cenpa         |
| 2 | 12527  | Cd9           |
| 2 | 66098  | Chchd6        |
| 2 | 227682 | Trub2         |
| 2 | 29858  | Pmm1          |
| 2 | 235606 | Apeh          |
| 2 | 15288  | Hmbs          |
| 2 | 68971  | 1500001M20Rik |
| 2 | 66487  | Snhg8         |
| 2 | 108148 | Galnt2        |
| 2 | 219158 | 2610301G19Rik |
| 2 | 78581  | D530033C11Rik |
| 2 | NaN    | MMT00068616   |
| 2 | 664870 | MMT00080766   |
| 2 | 230161 | RP23-34B24.1  |
| 2 | 75497  | 1700008G05Rik |
| 2 | 68721  | 1110032A03Rik |
| 2 | 104384 | Rhox9         |
| 2 | 70314  | Rabep2        |
| 2 | 68631  | Cryl1         |
| 2 | 104303 | Arl1          |
| 2 | NaN    | MMT00073582   |
| 2 | 68877  | Maf1          |
| 2 | 67426  | Cabc1         |
| 2 | 225372 | Apbb3         |
| 2 | 69754  | Fbxo7         |
| 2 | 14132  | Fcgrt         |
| 2 | 16362  | Irf1          |
| 2 | 78267  | Klhdc8b       |
| 2 | 13641  | Efnb1         |
| 2 | 228775 | Trib3         |
| 2 | 258734 | Olfr502       |
| 2 | 320541 | A530082C11Rik |
| 2 | 383619 | Aim2          |
| 2 | 67980  | Gnpda2        |
| 2 | 58203  | Zbp1          |
| 2 | 19106  | Eif2ak2       |
| 2 | 71176  | Fbxo24        |
| 2 | NaN    | MMT00038457   |
| 2 | 21928  | Tnfaip2       |
| 2 | 99382  | Abtb2         |
| 2 | 20541  | Slc8a1        |
| 2 | 68917  | Hint2         |

|   |        |               |
|---|--------|---------------|
| 2 | 18753  | Prkcd         |
| 2 | 234593 | Ndrp4         |
| 2 | 76123  | Gpsm2         |
| 2 | 56277  | Tmem45a       |
| 2 | 18974  | Pole2         |
| 2 | 226250 | Afap1l2       |
| 2 | 21873  | Tjp2          |
| 2 | 103889 | Hoxb2         |
| 2 | 71111  | Gpr39         |
| 2 | 66401  | Nudt2         |
| 2 | 67184  | Ndufa13       |
| 2 | 57423  | Atp5j2        |
| 2 | 216767 | Mrpl22        |
| 2 | 13823  | Epb4.1l3      |
| 2 | 57295  | Icmt          |
| 2 | 70564  | 5730469M10Rik |
| 2 | 20909  | Stx4a         |
| 2 | 67186  | Rplp2         |
| 2 | 224860 | Plcl2         |
| 2 | 69961  | 2810432D09Rik |
| 2 | 55944  | Eif3d         |
| 2 | 103841 | Cuedc1        |
| 2 | 55983  | Pdzrn3        |
| 2 | 29876  | Clic4         |
| 2 | 12034  | Phb2          |
| 2 | 20928  | Abcc9         |
| 2 | 240219 | MMT00044805   |
| 2 | NaN    | MMT00077385   |
| 2 | 11736  | Ankfy1        |
| 2 | 67812  | Ubx2          |
| 2 | 68190  | 5330426P16Rik |
| 2 | 19224  | Ptgs1         |
| 2 | 23970  | Pacsin2       |
| 2 | 224829 | Trerf1        |
| 2 | 16173  | Il18          |
| 2 | 19363  | Rad51l1       |
| 2 | 13448  | Dok1          |
| 2 | 21664  | Phlda1        |
| 2 | 52065  | Mfhas1        |
| 2 | 228769 | Psmf1         |
| 2 | 54188  | Cpsf4         |
| 2 | 212503 | Paox          |
| 2 | 67388  | 1110008F13Rik |
| 2 | 15356  | Hmgcl         |
| 2 | 613258 | A730017L22Rik |
| 2 | 102247 | Agpat6        |
| 2 | 53619  | Blcap         |
| 2 | 67477  | 1300007F04Rik |
| 2 | 66350  | Pla2g12a      |
| 2 | 627022 | EG627022      |
| 2 | 22428  | Dctn6         |



|   |        |                    |
|---|--------|--------------------|
| 2 | NaN    | MMT00001956        |
| 2 | 381038 | Parl               |
| 2 | 433237 | ENSMUSG00000052976 |
| 2 | 11539  | Adora1             |
| 2 | 51795  | Srpx               |
| 2 | 329941 | Col8a2             |
| 2 | 20256  | Clec11a            |
| 2 | 240672 | Dusp5              |
| 2 | 23999  | Twf2               |
| 2 | 67860  | S100a16            |
| 2 | 140559 | Igsf8              |
| 2 | 68087  | Dcakd              |
| 2 | 64136  | Sdf2l1             |
| 2 | 12317  | Calr               |
| 2 | 16172  | Il17ra             |
| 2 | 105785 | Kdelr3             |
| 2 | 15507  | Hspb1              |
| 2 | 22240  | Dpysl3             |
| 2 | 15211  | Hexa               |
| 2 | 384009 | Glipr2             |
| 2 | 66111  | Tmed3              |
| 2 | 14998  | H2-DMa             |
| 2 | 17940  | Naip1              |
| 2 | 69638  | 2310040A07Rik      |
| 2 | 224109 | Lrrc33             |
| 2 | 14961  | H2-Ab1             |
| 2 | 12798  | Cnn2               |
| 2 | 13057  | Cyba               |
| 2 | 18807  | Pld3               |
| 2 | 56745  | C1qtnf1            |
| 2 | 14159  | Fes                |
| 2 | 14999  | H2-DMb1            |
| 2 | 18034  | Nfkb2              |
| 2 | 50793  | Orc3l              |
| 2 | 68197  | Ndufc2             |
| 2 | 19352  | Rabggtb            |
| 2 | 227737 | 9130404D14Rik      |
| 2 | 27984  | Efhd2              |
| 2 | 216161 | Sbno2              |
| 2 | 66151  | Prr13              |
| 2 | 76267  | Fads1              |
| 2 | 240916 | Vsig8              |
| 2 | 68636  | Fahd1              |
| 2 | 15109  | Hal                |
| 2 | 232201 | Arhgap25           |
| 2 | 217303 | Cd300a             |
| 2 | 216445 | Arhgap9            |
| 2 | 16414  | Itgb2              |
| 2 | 17916  | Myo1f              |
| 2 | 74776  | Ppa2               |
| 2 | 15900  | Irf8               |

|   |        |               |
|---|--------|---------------|
| 2 | 12837  | Col8a1        |
| 2 | 12818  | Col14a1       |
| 2 | 74761  | Mxra8         |
| 2 | 106572 | Rab31         |
| 2 | 20540  | Slc7a7        |
| 2 | 71607  | Snx20         |
| 2 | 17948  | Naip2         |
| 2 | 18173  | Slc11a1       |
| 2 | 71653  | 4930506M07Rik |
| 2 | 17110  | Lyz1          |
| 2 | 14645  | Glul          |
| 2 | 70097  | Sash1         |
| 2 | 68659  | 1110032E23Rik |
| 2 | 13058  | Cybb          |
| 2 | 26364  | Cd97          |
| 2 | 72416  | Lrprrc        |
| 2 | 69692  | Hddc2         |
| 2 | 11747  | Anxa5         |
| 2 | 109552 | Sri           |
| 2 | 53415  | Htati2        |
| 2 | 225020 | Fez2          |
| 2 | 26921  | Map4k4        |
| 2 | 71660  | Rarres2       |
| 2 | 102644 | Oaf           |
| 2 | 67971  | Tppp3         |
| 2 | 20740  | Spna2         |
| 2 | 56430  | Clip1         |
| 2 | 16970  | Lrmp          |
| 2 | 14528  | Gch1          |
| 2 | NaN    | MMT00074583   |
| 2 | 105787 | Prkaa1        |
| 2 | NaN    | MMT00058392   |
| 2 | 11722  | Amy1          |
| 2 | 12443  | Ccnd1         |
| 2 | 17977  | Ncoa1         |
| 2 | 26934  | Racgap1       |
| 2 | 236930 | Ercc6l        |
| 2 | 12575  | Cdkn1a        |
| 2 | 12305  | Ddr1          |
| 2 | 383548 | Serpinb3b     |
| 2 | 320840 | Negr1         |
| 2 | 18604  | Pdk2          |
| 2 | 12408  | Cbr1          |
| 2 | 66116  | Cml1          |
| 2 | 14979  | H2-Ke6        |
| 2 | NaN    | MMT00008758   |
| 2 | 71878  | 2310007D09Rik |
| 2 | 18005  | Nek2          |
| 2 | 16765  | Stmn1         |
| 2 | 16765  | Stmn1         |
| 2 | 18140  | Uhrf1         |

|   |        |               |
|---|--------|---------------|
| 2 | 66929  | Asf1b         |
| 2 | 17218  | Mcm5          |
| 2 | 18817  | Plk1          |
| 2 | 619653 | EG619653      |
| 2 | 105988 | Espl1         |
| 2 | 12704  | Cit           |
| 2 | 73847  | 5430432M24Rik |
| 2 | 16922  | Phyh          |
| 2 | 338365 | Slc41a2       |
| 2 | 100637 | N4bp2l1       |
| 2 | 56072  | Lgals12       |
| 2 | 224829 | Trerf1        |
| 2 | 77048  | Ccdc41        |
| 2 | 66355  | Gmpr          |
| 2 | 64294  | Itm2c         |
| 2 | 16881  | Lig1          |
| 2 | 50934  | Slc7a8        |
| 2 | 22403  | Wisp2         |
| 2 | 67863  | Slc25a11      |
| 2 | 29805  | Znhit2        |
| 2 | 14792  | Mboat5        |
| 2 | 74126  | Syvn1         |
| 2 | 13169  | Dbnl          |
| 2 | 27632  | Rdbp          |
| 2 | 56513  | Pard6a        |
| 2 | 666704 | Samd1         |
| 2 | 110253 | Triobp        |
| 2 | 231855 | C330006K01Rik |
| 2 | 14337  | Ftl2          |
| 2 | 52635  | D12Ert551e    |
| 2 | 29819  | Stau2         |
| 2 | 74764  | Klc4          |
| 2 | 66597  | Trim13        |
| 2 | 71701  | Pnpt1         |
| 2 | 668030 | MMT00015864   |
| 2 | 99929  | Tiparp        |
| 2 | 18845  | Plxna2        |
| 2 | 117150 | Pip4k2c       |
| 2 | 57278  | Bcam          |
| 2 | 268490 | Lsm12         |
| 2 | 18400  | Slc22a18      |
| 2 | 66124  | Josd2         |
| 2 | 20971  | Sdc4          |
| 2 | 78697  | Pus7          |
| 2 | 77125  | Il33          |
| 2 | 74198  | Dtx2          |
| 2 | 110816 | Pwp2          |
| 2 | 110816 | Pwp2          |
| 2 | 217995 | Heatr1        |
| 2 | 20324  | Sdpr          |
| 2 | 76813  | Armc6         |

|   |        |               |
|---|--------|---------------|
| 2 | 101612 | Grwd1         |
| 2 | 19228  | Pthr1         |
| 2 | NaN    | MMT00005802   |
| 2 | 20810  | Srm           |
| 2 | 98970  | Fibcd1        |
| 2 | 22083  | Ctr9          |
| 2 | 20867  | Stip1         |
| 2 | 72962  | Tymp          |
| 2 | 53817  | Bat1a         |
| 2 | NaN    | MMT00074939   |
| 2 | 59047  | Pnkp          |
| 2 | 76799  | 2510006D16Rik |
| 2 | NaN    | MMT00030605   |
| 2 | 70394  | Kptn          |
| 2 | 107173 | Gpr137        |
| 2 | 20818  | Srprb         |
| 2 | 71713  | Cdc40         |
| 2 | 72057  | Phf10         |
| 2 | 68558  | Ankra2        |
| 2 | 67230  | Zfp329        |
| 2 | 66970  | Ssbp2         |
| 2 | 268566 | Gphn          |
| 2 | 69807  | Trim32        |
| 2 | 69562  | Cdc2l5        |
| 2 | 76485  | Glt8d1        |
| 2 | 15353  | Hmg20b        |
| 2 | 77733  | Rnf170        |
| 2 | 99480  | Dnttip2       |
| 2 | 107569 | Nt5c3         |
| 2 | 12727  | Clcn4-2       |
| 2 | 66707  | Nkapl         |
| 2 | 216197 | Ckap4         |
| 2 | 74778  | 1110014J01Rik |
| 2 | 233863 | Gtf3c1        |
| 2 | 673094 | Cd99          |
| 2 | 360013 | Myo18a        |
| 2 | 73826  | Poldip3       |
| 2 | 52174  | D4Erttd196e   |
| 2 | 12626  | Cetn3         |
| 2 | 70422  | Ints2         |
| 2 | 67457  | Frmtd8        |
| 2 | 104252 | Cdc42ep2      |
| 2 | 74157  | 1300018I05Rik |
| 2 | 54126  | Arhgef7       |
| 2 | 12721  | Coro1a        |
| 2 | 24071  | Synj2bp       |
| 2 | 20901  | Strap         |
| 2 | 228140 | Tnks1bp1      |
| 2 | 71177  | 4933424B01Rik |
| 2 | NaN    | MMT00063181   |
| 2 | 69697  | 2310057J16Rik |

|   |        |                    |
|---|--------|--------------------|
| 2 | NaN    | MMT00048396        |
| 2 | 22130  | Ttf1               |
| 2 | 78890  | 2310079F23Rik      |
| 2 | 56215  | Acin1              |
| 2 | 240186 | Zfp438             |
| 2 | 237422 | Ric8b              |
| 2 | NaN    | MMT00055028        |
| 2 | 56771  | Med20              |
| 2 | 78255  | Ralgps2            |
| 2 | 72084  | Pigx               |
| 2 | NaN    | MMT00072579        |
| 2 | 69994  | Rsc1a1             |
| 2 | 13007  | Csrp1              |
| 2 | 71787  | Trspap1            |
| 2 | 21388  | Tbx5               |
| 2 | 71340  | Riok1              |
| 2 | 433865 | EG433865           |
| 2 | NaN    | MMT00021936        |
| 2 | 13043  | Ctnn               |
| 2 | 23917  | Impdh1             |
| 2 | 54721  | Tyk2               |
| 2 | 210148 | Slc30a6            |
| 2 | 211770 | Trib1              |
| 2 | 193838 | Eme2               |
| 2 | 320118 | Fbxl13             |
| 2 | 68170  | B230118H07Rik      |
| 2 | 80981  | Arl4d              |
| 2 | 67332  | Snrpd3             |
| 2 | NaN    | MMT00021505        |
| 2 | 67392  | 4833420G17Rik      |
| 2 | 194655 | Klf11              |
| 2 | 170756 | Slc24a6            |
| 2 | 11630  | Aim1               |
| 2 | 22324  | Vav1               |
| 2 | 20776  | Tmie               |
| 2 | 15018  | H2-Q7              |
| 2 | 69717  | ENSMUSG00000073403 |
| 2 | 57265  | Fzd2               |
| 2 | 66071  | Ethe1              |
| 2 | 71093  | Atoh8              |
| 2 | 170942 | Erdr1              |
| 2 | 73274  | Gpbp1              |
| 2 | 67738  | Ppid               |
| 2 | NaN    | MMT00008178        |
| 2 | 15519  | Hsp90aa1           |
| 2 | 18415  | Hspa4l             |
| 2 | NaN    | MMT00071061        |
| 2 | 620986 | EG620986           |
| 2 | 68240  | Rpa3               |
| 2 | 105148 | Iars               |
| 2 | 52633  | Nit2               |

|   |        |               |
|---|--------|---------------|
| 2 | 218335 | Ciptm1l       |
| 2 | 66645  | Pspc1         |
| 2 | 18968  | Pola1         |
| 2 | NaN    | MMT00022168   |
| 2 | 67048  | 2610030H06Rik |
| 2 | 72612  | 2700029M09Rik |
| 2 | 353208 | 2810021G02Rik |
| 2 | 66671  | Ccnh          |
| 2 | 67894  | 1810055E12Rik |
| 2 | 77574  | 3321401G04Rik |
| 2 | NaN    | MMT00067115   |
| 2 | NaN    | MMT00074659   |
| 2 | 68099  | 6720467C03Rik |
| 2 | 66857  | 1100001H23Rik |
| 2 | 16548  | Khk           |
| 2 | 12334  | Capn2         |
| 2 | 110962 | Mbd6          |
| 2 | 66993  | Smarcd3       |
| 2 | 77031  | Slc9a8        |
| 2 | 226154 | Lzts2         |
| 2 | 14870  | Gstp1         |
| 2 | 319899 | Dock6         |
| 2 | 14254  | Flt1          |
| 2 | 70435  | 2610204M08Rik |
| 2 | 268470 | Ube2z         |
| 2 | 239691 | AU021092      |
| 2 | 328280 | EG328280      |
| 2 | 14595  | B4galt1       |
| 2 | 12764  | Cmas          |
| 2 | 67151  | Psmc9         |
| 2 | NaN    | MMT00011281   |
| 2 | 24116  | Whsc2         |
| 2 | 17184  | Matr3         |
| 2 | 218811 | Sec24c        |
| 2 | 234730 | Fuk           |
| 2 | 16449  | Jag1          |
| 2 | 27041  | G3bp1         |
| 2 | 67169  | Nradd         |
| 2 | NaN    | MMT00081444   |
| 2 | 66385  | Ppp1r7        |
| 2 | 24055  | Sh3bp2        |
| 2 | 78560  | Gpr124        |
| 2 | 16906  | Lmnb1         |
| 2 | 12018  | Bak1          |
| 2 | 432763 | Prr7          |
| 2 | 65106  | Arl6ip5       |
| 2 | 69544  | Wdr5b         |
| 2 | 77809  | Lrrc42        |
| 2 | NaN    | MMT00068622   |
| 2 | 15469  | Prmt1         |
| 2 | 20595  | Smn1          |

|   |           |               |
|---|-----------|---------------|
| 2 | 20641     | Snrpd1        |
| 2 | 50927     | Nasp          |
| 2 | 107568    | Wwp1          |
| 2 | 23857     | Dmtf1         |
| 2 | 13667     | Eif2b4        |
| 2 | 78889     | Wsb1          |
| 2 | 26450     | Rbbp9         |
| 2 | 619677    | 4930529C04Rik |
| 2 | 233908    | Fus           |
| 2 | 76022     | 5830417110Rik |
| 2 | 67755     | Ddx47         |
| 2 | 74194     | Rnd3          |
| 2 | 66156     | Anapc11       |
| 2 | 67706     | Tmem179b      |
| 2 | 14823     | Grm8          |
| 2 | 170758    | Rac3          |
| 2 | 16923     | Sh2b3         |
| 2 | 19679     | Pitpnm2       |
| 2 | 18036     | Nfkbib        |
| 2 | 93892     | Pcdhb21       |
| 2 | 76510     | Trappc9       |
| 2 | 15258     | Hipk2         |
| 2 | 67157     | 2610301B20Rik |
| 2 | 107503    | Atf5          |
| 2 | 55992     | Trim3         |
| 2 | 66404     | 2410001C21Rik |
| 2 | 625253    | EG625253      |
| 2 | 69752     | Zfp511        |
| 2 | 216963    | Git1          |
| 2 | 102339    | Cog4          |
| 2 | 20024     | Sub1          |
| 2 | 56310     | Gps2          |
| 2 | 66680     | 3230401D17Rik |
| 2 | 66680     | 3230401D17Rik |
| 2 | 78038     | Mccc2         |
| 2 | 100226    | Stx12         |
| 2 | 378460    | Pram1         |
| 2 | 57344     | As3mt         |
| 2 | 211286    | Cln5          |
| 2 | 76663     | 1700123101Rik |
| 2 | 212862    | Chpt1         |
| 2 | 100044551 | MMT00001823   |
| 2 | 320661    | D5Ert579e     |
| 2 | 98932     | Myl9          |
| 2 | 75452     | Ascc2         |
| 2 | 15944     | Irgm          |
| 2 | 17957     | Napb          |
| 2 | 16409     | Ilgam         |
| 2 | 14696     | Gnb4          |
| 2 | 12751     | Tpp1          |
| 2 | 103967    | Dnm3          |

|   |        |               |
|---|--------|---------------|
| 2 | NaN    | MMT00052315   |
| 2 | 76539  | D19ErtD737e   |
| 2 | 68652  | Map3k7ip2     |
| 2 | 68146  | Arl13b        |
| 2 | 433375 | Creg1         |
| 2 | 227334 | Usp40         |
| 2 | 78523  | Mrpl9         |
| 2 | 30946  | Abt1          |
| 2 | 12877  | Cpeb1         |
| 2 | 69288  | Rhobtb1       |
| 2 | 23881  | G3bp2         |
| 2 | 229227 | 4932438A13Rik |
| 2 | 16542  | Kdr           |
| 2 | NaN    | MMT00077789   |
| 2 | 66307  | Isoc1         |
| 2 | NaN    | MMT00002151   |
| 2 | 71723  | Dhx34         |
| 2 | 15490  | Hsd17b7       |
| 2 | NaN    | MMT00038380   |
| 2 | NaN    | MMT00077590   |
| 2 | 56351  | Ptges3        |
| 2 | 13171  | Dbt           |
| 2 | 16573  | Kif5b         |
| 2 | 67075  | Magt1         |
| 2 | 56217  | Mpp5          |
| 2 | 18706  | Pik3ca        |
| 2 | NaN    | MMT00004929   |
| 2 | NaN    | MMT00004959   |
| 2 | 546271 | MMT00047275   |
| 2 | 105351 | AW209491      |
| 2 | 70428  | Polr3b        |
| 2 | 29875  | Iqgap1        |
| 2 | 13618  | Ednrb         |
| 2 | 211329 | Ncoa7         |
| 2 | 24136  | Zeb2          |
| 2 | 26416  | Mapk14        |
| 2 | 192185 | Nadk          |
| 2 | 93742  | Pard3         |
| 2 | 70796  | Zdhhc1        |
| 2 | 213988 | Tnrc6b        |
| 2 | 12847  | Copa          |
| 2 | 65246  | Xpo7          |
| 2 | NaN    | MMT00065667   |
| 2 | 18986  | Pou2f1        |
| 2 | 77578  | Bcl9          |
| 2 | 16179  | Irak1         |
| 2 | 107566 | Arl2bp        |
| 2 | NaN    | MMT00030937   |
| 2 | NaN    | MMT00054025   |
| 2 | NaN    | MMT00032606   |
| 2 | 666581 | RP23-162H3.1  |



|   |        |                    |
|---|--------|--------------------|
| 2 | NaN    | MMT00001646        |
| 2 | NaN    | MMT00017950        |
| 2 | NaN    | MMT00053547        |
| 2 | NaN    | MMT00069653        |
| 2 | NaN    | MMT00044489        |
| 2 | 76482  | 3110002H16Rik      |
| 2 | 54409  | Ramp2              |
| 2 | 66642  | Ctnnbl1            |
| 2 | 17128  | Smad4              |
| 2 | NaN    | MMT00082897        |
| 2 | 66407  | Mrps15             |
| 2 | NaN    | MMT00050551        |
| 2 | NaN    | MMT00001695        |
| 2 | 224044 | Cyp2ab1            |
| 2 | 53611  | Vti1a              |
| 2 | 233064 | Wdr62              |
| 2 | 216792 | A230051G13Rik      |
| 2 | 66905  | M6prbp1            |
| 2 | 109299 | C330006A16Rik      |
| 2 | 19165  | Psen2              |
| 2 | 74173  | 1700012B15Rik      |
| 2 | 67151  | Psmc9              |
| 2 | NaN    | MMT00022553        |
| 2 | 231931 | Gimap6             |
| 2 | 66066  | Gng11              |
| 2 | 107239 | AI790298           |
| 2 | 100669 | 9930105H17Rik      |
| 2 | 68157  | 6720475J19Rik      |
| 2 | 116701 | Fgfr1              |
| 2 | 382421 | EG382421           |
| 2 | NaN    | MMT00078167        |
| 2 | NaN    | MMT00044154        |
| 2 | NaN    | MMT00008110        |
| 2 | 66999  | Med28              |
| 2 | 85305  | Kars               |
| 2 | NaN    | MMT00036264        |
| 2 | 16898  | Rps2               |
| 2 | 625055 | EG625055           |
| 2 | 546164 | EG546164           |
| 2 | NaN    | MMT00065672        |
| 2 | NaN    | MMT00069688        |
| 2 | 243642 | EG243642           |
| 2 | NaN    | MMT00066059        |
| 2 | 677044 | ENSMUSG00000074250 |
| 2 | NaN    | MMT00000408        |
| 2 | NaN    | MMT00043750        |
| 2 | NaN    | MMT00005808        |
| 2 | NaN    | MMT00016905        |
| 2 | NaN    | MMT00060803        |
| 2 | NaN    | MMT00039476        |
| 2 | NaN    | MMT00082247        |

|   |           |                    |
|---|-----------|--------------------|
| 2 | NaN       | MMT00002524        |
| 2 | NaN       | MMT00045078        |
| 2 | 73830     | Eif3k              |
| 2 | NaN       | MMT00017268        |
| 2 | NaN       | MMT00000356        |
| 2 | 625752    | RP23-54E4.8        |
| 2 | NaN       | MMT00019254        |
| 2 | NaN       | MMT00004656        |
| 2 | NaN       | MMT00036668        |
| 2 | NaN       | MMT00061243        |
| 2 | NaN       | MMT00046046        |
| 2 | NaN       | MMT00026738        |
| 2 | NaN       | MMT00017270        |
| 2 | NaN       | MMT00017503        |
| 2 | NaN       | MMT00005190        |
| 2 | 55978     | Ift20              |
| 2 | 20022     | Polr2j             |
| 2 | 68565     | Mrps18a            |
| 2 | NaN       | MMT00043412        |
| 2 | NaN       | MMT00073158        |
| 2 | NaN       | MMT00025220        |
| 2 | 68017     | Ftsj2              |
| 2 | 54196     | Pabpn1             |
| 2 | NaN       | MMT00078932        |
| 2 | 66293     | 1810032O08Rik      |
| 2 | NaN       | MMT00075644        |
| 2 | NaN       | MMT00015578        |
| 2 | NaN       | MMT00015399        |
| 2 | NaN       | MMT00080853        |
| 2 | 675985    | MMT00081973        |
| 2 | NaN       | MMT00044478        |
| 3 | 11814     | Apoc3              |
| 3 | 71943     | Tom11              |
| 3 | 54384     | Mtmr7              |
| 3 | 194974    | Sunc1              |
| 3 | 626870    | OTTMUSG00000005148 |
| 3 | 20539     | Slc7a5             |
| 3 | 69719     | Cad                |
| 3 | 13924     | Ptprv              |
| 3 | 99031     | Osbpl6             |
| 3 | 76866     | Morn1              |
| 3 | 27276     | Plekhb1            |
| 3 | 54357     | Epb4.1l4b          |
| 3 | 11735     | Ank3               |
| 3 | 17153     | Mal                |
| 3 | 55987     | Cpxm2              |
| 3 | 56461     | Kcnip3             |
| 3 | 13384     | Mpp3               |
| 3 | 232232    | Hdac11             |
| 3 | 100039284 | MMT00029319        |
| 3 | 21401     | Tcea3              |

|   |        |               |
|---|--------|---------------|
| 3 | 18552  | Pcsk5         |
| 3 | 27260  | Plek2         |
| 3 | 226245 | 9930023K05Rik |
| 3 | 381149 | Nrg2          |
| 3 | 66809  | Krt20         |
| 3 | 13052  | Cxadr         |
| 3 | 12349  | Car2          |
| 3 | 11931  | Atp1b1        |
| 3 | 14933  | Gyk           |
| 3 | 68588  | Cthrc1        |
| 3 | 213539 | Bag2          |
| 3 | 54725  | Cadm1         |
| 3 | 12296  | Cacnb2        |
| 3 | 212980 | Slc45a3       |
| 3 | 70887  | Dmrtc1a       |
| 3 | 68283  | 9530077C05Rik |
| 3 | 71877  | Efhc1         |
| 3 | 57738  | Slc15a2       |
| 3 | 434778 | 6330534C20Rik |
| 3 | 66952  | 2310030G06Rik |
| 3 | 12638  | Cftr          |
| 3 | 12695  | Inadl         |
| 3 | 64058  | Perp          |
| 3 | 59058  | Bhlhb5        |
| 3 | 381126 | Gm944         |
| 3 | 77411  | Rbm35b        |
| 3 | 107586 | Ovol2         |
| 3 | 54326  | Elovl2        |
| 3 | 94224  | Srd5a2        |
| 3 | 78925  | Srd5a1        |
| 3 | 17777  | Mttp          |
| 3 | 208213 | Tmem132c      |
| 3 | 224997 | Dlgap1        |
| 3 | 20698  | Sphk1         |
| 3 | 14385  | Slc37a4       |
| 3 | 26944  | Tinag         |
| 3 | 68509  | 1110018H23Rik |
| 3 | 18082  | Nipsnap1      |
| 3 | 100072 | Camta1        |
| 3 | 268723 | A830039N20Rik |
| 3 | 226999 | Slc9a2        |
| 3 | 17349  | Mlf1          |
| 3 | 52187  | Rragd         |
| 3 | 73284  | Ddit4l        |
| 3 | 69121  | Chrdl2        |
| 3 | 21956  | Tnnt2         |
| 3 | 68854  | Asb11         |
| 3 | 69354  | Slc38a4       |
| 3 | 51801  | Ramp1         |
| 3 | 234671 | Ces2          |
| 3 | 71911  | Bdh1          |

|   |        |               |
|---|--------|---------------|
| 3 | 20377  | Sfrp1         |
| 3 | 75104  | Mmd2          |
| 3 | 26559  | Hunk          |
| 3 | 268527 | MMT00036029   |
| 3 | 380654 | 4930485B16Rik |
| 3 | 12684  | Cideb         |
| 3 | 14866  | Gstm5         |
| 3 | 14609  | Gja1          |
| 3 | 226419 | Dyrk3         |
| 3 | 11815  | Apod          |
| 3 | 15186  | Hdc           |
| 3 | 12162  | Bmp7          |
| 3 | 75600  | Calml4        |
| 3 | 18719  | Pip5k1b       |
| 3 | 19215  | Ptgds         |
| 3 | 230779 | Serinc2       |
| 3 | 230459 | Cyp2j13       |
| 3 | 16763  | Lad1          |
| 3 | 16525  | Kcnk1         |
| 3 | 106648 | Cyp4f15       |
| 3 | 53624  | Cldn7         |
| 3 | 56089  | Ramp3         |
| 3 | 224344 | Rbm11         |
| 3 | 332934 | Zmynd12       |
| 3 | 224912 | Crb3          |
| 3 | 110902 | Chrna2        |
| 3 | 68567  | Cgref1        |
| 3 | 22092  | Rsph1         |
| 3 | 30956  | Aass          |
| 3 | 66889  | Rnf128        |
| 3 | 66717  | Ccdc96        |
| 3 | 19126  | Prom1         |
| 3 | 244653 | Hydin         |
| 3 | 215723 | BC024997      |
| 3 | 224079 | Atp13a4       |
| 3 | 338417 | Scgb1c1       |
| 3 | 218630 | Ccno          |
| 3 | 103712 | 6330403K07Rik |
| 3 | 380653 | Gm872         |
| 3 | 73608  | Marveld3      |
| 3 | 16372  | Irx2          |
| 3 | 14425  | Galnt3        |
| 3 | 104362 | Meig1         |
| 3 | 67344  | Tctex1d1      |
| 3 | 56222  | Cited4        |
| 3 | 20732  | Spint1        |
| 3 | 57394  | Tmem27        |
| 3 | 75434  | 1700001C02Rik |
| 3 | 72185  | Dbnnd1        |
| 3 | 72236  | Tsnaxip1      |
| 3 | 27375  | Tjp3          |

|   |        |               |
|---|--------|---------------|
| 3 | 18741  | Pitx2         |
| 3 | 94180  | Acsbg1        |
| 3 | 217328 | Myo15b        |
| 3 | 12643  | Chad          |
| 3 | 102502 | Al427122      |
| 3 | 11847  | Arg2          |
| 3 | 67085  | 1700024G13Rik |
| 3 | 54562  | Lrrc6         |
| 3 | 54120  | Gipc2         |
| 3 | 208613 | E030011K20Rik |
| 3 | 71860  | Wdr16         |
| 3 | 244608 | Ccdc113       |
| 3 | 117229 | Stk33         |
| 3 | 19193  | Pipox         |
| 3 | 207920 | Rbm35a        |
| 3 | 72022  | Slc35f2       |
| 3 | 381738 | Gm1060        |
| 3 | 69329  | 1700003M02Rik |
| 3 | 22349  | Vil1          |
| 3 | 192120 | Bspry         |
| 3 | 68233  | 1700125D06Rik |
| 3 | 327954 | Dnahc2        |
| 3 | 207742 | Rnf43         |
| 3 | 69073  | 1810019J16Rik |
| 3 | 53419  | Corin         |
| 3 | 20517  | Slc22a1       |
| 3 | 71233  | 4933434I06Rik |
| 3 | 19123  | Proc          |
| 3 | 75533  | Nme5          |
| 3 | 74665  | Lrrc48        |
| 3 | 230822 | A330049M08Rik |
| 3 | 15451  | Hpn           |
| 3 | 192734 | Al646023      |
| 3 | 381260 | Gm973         |
| 3 | 14786  | Grb7          |
| 3 | 75472  | 1700009P17Rik |
| 3 | 11542  | Adora3        |
| 3 | 75429  | 3100002J23Rik |
| 3 | 237320 | Aldh8a1       |
| 3 | 24057  | Sh3yl1        |
| 3 | 74053  | Grip1         |
| 3 | 71062  | Tekt3         |
| 3 | 68344  | Tmem174       |
| 3 | 75426  | Igfbp1        |
| 3 | 76261  | 0610040J01Rik |
| 3 | 403205 | Agr3          |
| 3 | 71227  | Wdr69         |
| 3 | 74711  | TtlI9         |
| 3 | 12614  | Celsr1        |
| 3 | 66104  | Tceal6        |
| 3 | 207686 | A330021E22Rik |

|   |        |               |
|---|--------|---------------|
| 3 | 14725  | Lrp2          |
| 3 | 14121  | Fbp1          |
| 3 | 70882  | Armc3         |
| 3 | 73332  | 1700041C02Rik |
| 3 | 330721 | Nek5          |
| 3 | 19716  | Bex1          |
| 3 | 226356 | Gm101         |
| 3 | 77996  | D730039F16Rik |
| 3 | 13661  | Ehf           |
| 3 | 18705  | Pik3c2g       |
| 3 | 26458  | Slc27a2       |
| 3 | 75607  | Wnk2          |
| 3 | 353287 | MMT00032844   |
| 3 | 17075  | Tacstd1       |
| 3 | 17427  | Mns1          |
| 3 | 104601 | Mycbpap       |
| 3 | 14120  | Fbp2          |
| 3 | 13105  | Cyp2d9        |
| 3 | 218739 | A430083B19Rik |
| 3 | 102680 | Slc6a20a      |
| 3 | 20464  | Sim1          |
| 3 | 13370  | Dio1          |
| 3 | 18171  | Nr1i2         |
| 3 | 75568  | Capsl         |
| 3 | 107146 | Glyat         |
| 3 | 75495  | 1700010A17Rik |
| 3 | 330355 | Dnahc6        |
| 3 | 66930  | Fank1         |
| 3 | 170790 | Mlc1          |
| 3 | 320214 | 4932425I24Rik |
| 3 | 77522  | D630002J15Rik |
| 3 | 76509  | 1600029D21Rik |
| 3 | 21645  | Tcte1         |
| 3 | 75556  | 1700026D08Rik |
| 3 | 320159 | 4632412N22Rik |
| 3 | 12069  | Bex2          |
| 3 | 66825  | Rnf186        |
| 3 | 106347 | Ildr1         |
| 3 | 72088  | Ush1c         |
| 3 | 632778 | EG632778      |
| 3 | 71200  | Dydc2         |
| 3 | 225266 | Klhl14        |
| 3 | 71870  | Ccdc19        |
| 3 | 58210  | Sectm1b       |
| 3 | 75465  | Dynlrb2       |
| 3 | 78801  | Ak7           |
| 3 | 74934  | Armc4         |
| 3 | 50525  | Spag6         |
| 3 | 230163 | Aldob         |
| 3 | 70405  | Calml3        |
| 3 | 217138 | Atad4         |

|   |        |               |
|---|--------|---------------|
| 3 | 17393  | Mmp7          |
| 3 | 70337  | lyd           |
| 3 | 67082  | 1700011H14Rik |
| 3 | 59020  | Pdzk1         |
| 3 | 15223  | Foxj1         |
| 3 | 14598  | Ggt1          |
| 3 | 12556  | Cdh16         |
| 3 | 16433  | Cuzd1         |
| 3 | 75040  | 4930504H06Rik |
| 3 | 229302 | Tm4sf4        |
| 3 | 30962  | Slc7a9        |
| 3 | 69453  | 1700027L20Rik |
| 3 | 12587  | Mia1          |
| 3 | 72040  | Mupcdh        |
| 3 | 69325  | 1700012B09Rik |
| 3 | 69083  | Sult1c2       |
| 3 | 72058  | Igsf5         |
| 3 | 16006  | Igfbp1        |
| 3 | 13511  | Dsg2          |
| 3 | 212517 | Wdr52         |
| 3 | 11514  | Adcy8         |
| 3 | 210762 | Gm70          |
| 3 | 78088  | Ankrd56       |
| 3 | 330671 | B4galnt4      |
| 3 | 381693 | 4930434E21Rik |
| 3 | 16517  | Kcnj16        |
| 3 | 66758  | Zfp474        |
| 3 | 237806 | Dnahc9        |
| 3 | 75784  | 1700007G11Rik |
| 3 | 13487  | Slc26a3       |
| 3 | 67758  | Aadac         |
| 3 | 76589  | Unc5cl        |
| 3 | 16591  | Kl            |
| 3 | 93835  | Amn           |
| 3 | 102448 | Xylb          |
| 3 | 68396  | Cml4          |
| 3 | 242253 | Wdr63         |
| 3 | 75172  | 4930528G09Rik |
| 3 | 13884  | Es1           |
| 3 | 71313  | Fsip1         |
| 3 | 171531 | Mlph          |
| 3 | 67701  | Wfdc2         |
| 3 | 12550  | Cdh1          |
| 3 | 242646 | Tctex1d4      |
| 3 | 319530 | Zfp750        |
| 3 | 69787  | Anxa13        |
| 3 | 71827  | Lrrc34        |
| 3 | 78016  | 4930511H11Rik |
| 3 | 71345  | Tmem16j       |
| 3 | 22062  | Trp73         |
| 3 | 110351 | Rap1gap       |

|   |        |               |
|---|--------|---------------|
| 3 | 226243 | Habp2         |
| 3 | 22262  | Uox           |
| 3 | 50528  | Tmprss2       |
| 3 | 66451  | 2610528J11Rik |
| 3 | 70853  | 4921511C04Rik |
| 3 | 64406  | Sp5           |
| 3 | 76484  | Kndc1         |
| 3 | 17863  | Myb           |
| 3 | 109620 | Dsp           |
| 3 | 207778 | Dnahc7l       |
| 3 | 19733  | Rgn           |
| 3 | 72249  | 1700019G24Rik |
| 3 | 13491  | Drd4          |
| 3 | 231832 | Tmem184a      |
| 3 | 76974  | 1190003J15Rik |
| 3 | 66620  | 2610207O16Rik |
| 3 | 96935  | Susd4         |
| 3 | 81840  | Sorcs2        |
| 3 | 103655 | Sec14l4       |
| 3 | 17922  | Myo7b         |
| 3 | 67182  | Pdzk1ip1      |
| 3 | 19683  | Rdh16         |
| 3 | 26448  | Rage          |
| 3 | 14620  | Gjb3          |
| 3 | 57816  | Tesc          |
| 3 | 14275  | Folr1         |
| 3 | 19143  | St14          |
| 3 | 72315  | 2310015A05Rik |
| 3 | 433904 | Ociad2        |
| 3 | 20686  | Spa17         |
| 3 | 216867 | Slc16a11      |
| 3 | 20276  | Scnn1a        |
| 3 | 12739  | Cldn3         |
| 3 | 209012 | Ulk4          |
| 3 | 16977  | Lrrc23        |
| 3 | 170833 | Hook2         |
| 3 | 52589  | Ncald         |
| 3 | 16772  | Lama1         |
| 3 | 226352 | Epb4.1l5      |
| 3 | 73750  | Whrn          |
| 3 | 228846 | D630003M21Rik |
| 3 | 240753 | Plekha6       |
| 3 | 208943 | Myo5c         |
| 3 | 58233  | Dnaja4        |
| 3 | 52331  | Stbd1         |
| 3 | 212733 | Ccdc64b       |
| 3 | 58802  | Kcnmb4        |
| 3 | 72930  | Ppp2r2b       |
| 3 | 58187  | Cldn10        |
| 3 | 54139  | Irf6          |
| 3 | 26897  | Acot1         |



|   |        |               |
|---|--------|---------------|
| 3 | 209195 | Clic6         |
| 3 | 66748  | 4933404M02Rik |
| 3 | 18861  | Pms2          |
| 3 | 432720 | Akr1c19       |
| 3 | 73287  | 1700040L02Rik |
| 3 | 230959 | Ajap1         |
| 3 | 71687  | Tmem25        |
| 3 | 71661  | 0610005C13Rik |
| 3 | 13867  | Erbp3         |
| 3 | 16323  | Inhba         |
| 3 | 58226  | Cacna1h       |
| 3 | 594844 | Tceal3        |
| 3 | 269152 | Kif26b        |
| 3 | 107587 | Osr2          |
| 3 | 12070  | Ngfrap1       |
| 3 | 230972 | Arhgef16      |
| 3 | 232670 | Tspan33       |
| 3 | 74424  | Tmc5          |
| 3 | 12630  | Cfi           |
| 3 | 654824 | Ankrd37       |
| 3 | 242584 | Wdr78         |
| 3 | 69312  | 4930418G15Rik |
| 3 | 320752 | Dpy19l2       |
| 3 | 140919 | Slc17a6       |
| 3 | 26414  | Mapk10        |
| 3 | 212516 | BC060267      |
| 3 | 57355  | BC051019      |
| 3 | 71354  | Wdr31         |
| 3 | 209837 | Slc38a5       |
| 3 | 319832 | 6332401O19Rik |
| 3 | 70358  | Steap1        |
| 3 | 270192 | Rab6b         |
| 3 | 12560  | Cdh3          |
| 3 | 50759  | Fbxo16        |
| 3 | 53315  | Sult1d1       |
| 3 | 93732  | Acox2         |
| 3 | 331532 | Tceal5        |
| 3 | 56185  | Hao3          |
| 3 | 215772 | 9130014G24Rik |
| 3 | 213649 | Arhgef19      |
| 3 | 27281  | Hrasls        |
| 3 | 73332  | 1700041C02Rik |
| 3 | 72074  | Anks4b        |
| 3 | 64103  | Tnmd          |
| 3 | 14422  | B4galnt2      |
| 3 | 16869  | Lhx1          |
| 3 | 216019 | Hkdc1         |
| 3 | 114662 | Prss29        |
| 3 | 140709 | Emid2         |
| 3 | 20531  | Slc34a2       |
| 3 | 78286  | Nav2          |

|   |        |               |
|---|--------|---------------|
| 3 | 69894  | 2010107G23Rik |
| 3 | 73712  | Dmkn          |
| 3 | 72027  | Slc39a4       |
| 3 | 16668  | Krt18         |
| 3 | NaN    | MMT00053383   |
| 3 | 16691  | Krt8          |
| 3 | 80720  | Pbx4          |
| 3 | 434872 | Usp51         |
| 3 | 69297  | Lrrc46        |
| 3 | 11522  | Adh1          |
| 3 | 12454  | Ccnk          |
| 3 | 20733  | Spint2        |
| 3 | 15114  | Hap1          |
| 3 | 213208 | Il20rb        |
| 3 | 230872 | Crocc         |
| 3 | 53972  | Ngef          |
| 3 | 56460  | Pkp3          |
| 3 | 83674  | Cnm1          |
| 3 | 13800  | Enah          |
| 3 | 224022 | Slc7a4        |
| 3 | 110084 | Dnahc1        |
| 3 | 18600  | Padi2         |
| 3 | 98845  | Eps8l2        |
| 3 | 235611 | Plxnb1        |
| 3 | 207175 | Cetn4         |
| 3 | 545551 | BC021767      |
| 3 | 12817  | Col13a1       |
| 3 | 18546  | Pcp4          |
| 3 | 80883  | Ntng1         |
| 3 | 67815  | Sec14l2       |
| 3 | 18654  | Pgf           |
| 3 | 232714 | Mgam          |
| 3 | 211949 | Spsb4         |
| 3 | 69219  | Ddah1         |
| 3 | 21689  | Tekt1         |
| 3 | 74596  | Cds1          |
| 3 | 72778  | 2810451A06Rik |
| 3 | 195208 | Dcdc2a        |
| 3 | 74284  | 1700086L19Rik |
| 3 | 278240 | Spin2         |
| 3 | 71584  | Gdpd2         |
| 3 | 217887 | BC022687      |
| 3 | 16782  | Lamc2         |
| 3 | 75767  | Rab11fip1     |
| 3 | 69097  | Trim15        |
| 4 | 72121  | Dennd2d       |
| 4 | 17171  | Mas1          |
| 4 | NaN    | MMT00031273   |
| 4 | 277744 | Gm694         |
| 4 | 21419  | Tcfap2b       |
| 4 | 258737 | Olf1316       |

|   |        |               |
|---|--------|---------------|
| 4 | 347708 | Dppa1         |
| 4 | NaN    | MMT00081414   |
| 4 | 244653 | Hydin         |
| 4 | 76484  | Kndc1         |
| 4 | 77619  | Preli2        |
| 4 | 18012  | Neurod1       |
| 4 | NaN    | MMT00008227   |
| 4 | NaN    | MMT00039783   |
| 4 | 14171  | Fgf17         |
| 4 | 193740 | Hspa1a        |
| 4 | 12631  | Cf1           |
| 4 | NaN    | MMT00058578   |
| 4 | NaN    | MMT00003579   |
| 4 | 19273  | Ptpru         |
| 4 | 12372  | Casq1         |
| 4 | 29877  | Hdgfrp3       |
| 4 | 245631 | Mum111        |
| 4 | 16351  | Ipp           |
| 4 | 22715  | Zfp57         |
| 4 | 258985 | Olfr1256      |
| 4 | 224661 | Slc26a8       |
| 4 | NaN    | MMT00013609   |
| 4 | 23963  | Odz1          |
| 4 | 258805 | Olfr1426      |
| 4 | NaN    | MMT00046595   |
| 4 | 258540 | Olfr771       |
| 4 | 70846  | 4921506M07Rik |
| 4 | NaN    | MMT00055444   |
| 4 | 103978 | Gpc5          |
| 4 | 80976  | Syt13         |
| 4 | 212933 | Pm20d1        |
| 4 | 140488 | Igf2bp3       |
| 4 | NaN    | MMT00081874   |
| 4 | NaN    | MMT00015366   |
| 4 | 23985  | Slc26a4       |
| 4 | 78508  | 2900093L17Rik |
| 4 | NaN    | MMT00050594   |
| 4 | 11628  | Aicda         |
| 4 | 258816 | Olfr466       |
| 4 | NaN    | MMT00072975   |
| 4 | 381236 | Al747699      |
| 4 | 218066 | Olfr11        |
| 4 | 319800 | C730048C13Rik |
| 4 | 70789  | Kynu          |
| 4 | 76654  | Upp2          |
| 4 | 215446 | Entpd3        |
| 4 | 666279 | Dspp          |
| 4 | 241134 | 9430031J16Rik |
| 4 | 228564 | Frmd5         |
| 4 | NaN    | MMT00071794   |
| 4 | 619332 | 4933416C03Rik |

|   |        |               |
|---|--------|---------------|
| 4 | NaN    | MMT00054229   |
| 4 | NaN    | MMT00063855   |
| 4 | NaN    | MMT00023460   |
| 4 | 14183  | Fgfr2         |
| 4 | 56293  | Amac1         |
| 4 | 15043  | H2-T3         |
| 4 | NaN    | MMT00059956   |
| 4 | 76858  | Nlrp14        |
| 4 | 108989 | Tpr           |
| 4 | 19076  | Prim2         |
| 4 | 235040 | Atg4d         |
| 4 | 26893  | Cops6         |
| 4 | NaN    | MMT00056390   |
| 4 | 619326 | 9130409I23Rik |
| 4 | 100855 | Tbc1d14       |
| 4 | 15424  | Hoxc5         |
| 4 | NaN    | MMT00048506   |
| 4 | 74591  | Abca12        |
| 4 | NaN    | MMT00043469   |
| 4 | 12945  | Dmbt1         |
| 4 | 14179  | Fgf8          |
| 4 | NaN    | MMT00070692   |
| 4 | NaN    | MMT00047250   |
| 4 | 56278  | Gkap1         |
| 4 | 69993  | Chn2          |
| 4 | NaN    | MMT00003854   |
| 4 | 26413  | Mapk1         |
| 4 | 246079 | Defb9         |
| 4 | NaN    | MMT00007615   |
| 4 | NaN    | MMT00081758   |
| 4 | 78115  | 4930445E18Rik |
| 4 | 258731 | Olfr491       |
| 4 | 117066 | Cts3          |
| 4 | 243085 | Ugt2b35       |
| 4 | 73360  | Actrt1        |
| 4 | 258686 | Olfr1467      |
| 4 | 258498 | Olfr148       |
| 4 | 83703  | Dbr1          |
| 4 | 240539 | Gm336         |
| 4 | 380842 | Gm1574        |
| 4 | 627004 | MMT00000775   |
| 4 | 15112  | Hao1          |
| 4 | 638345 | Sbpl          |
| 4 | 329872 | Frem1         |
| 4 | 237353 | Sh3md4        |
| 4 | 117066 | Cts3          |
| 4 | 329324 | Syt14         |
| 4 | 12737  | Cldn1         |
| 4 | 235281 | Scn3b         |
| 4 | 320502 | Lmod3         |
| 4 | 109820 | Pgc           |

|   |        |                |
|---|--------|----------------|
| 4 | 21823  | Th             |
| 4 | 67622  | Mxra7          |
| 4 | 12295  | Cacnb1         |
| 4 | 14177  | Fgf6           |
| 4 | 17380  | Mme            |
| 4 | 67645  | 4930511111Rik  |
| 4 | 67931  | Serpini2       |
| 4 | 22296  | V1ra1          |
| 4 | 106369 | Ypel1          |
| 4 | 20621  | Snn            |
| 4 | NaN    | MMT00048540    |
| 4 | 16530  | Kcnk7          |
| 4 | 14563  | Gdf5           |
| 4 | 53606  | Isg15          |
| 4 | 677168 | MMT00057550    |
| 4 | 667370 | MMT00014813    |
| 4 | 50769  | Atp8a2         |
| 4 | 108803 | 4933402P03Rik  |
| 4 | 237877 | Atad5          |
| 4 | 72103  | 2010301N04Rik  |
| 4 | 67358  | 1700093K21Rik  |
| 4 | 217316 | Slc16a5        |
| 4 | 16447  | Ivl            |
| 4 | 54393  | Gabbr1         |
| 4 | NaN    | MMT00011639    |
| 4 | 70365  | Speer5-ps1     |
| 4 | NaN    | MMT00017420    |
| 4 | 381818 | EG381818       |
| 4 | NaN    | MMT00028069    |
| 4 | 74068  | Asz1           |
| 4 | NaN    | MMT00077133    |
| 4 | 21418  | Tcfap2a        |
| 4 | NaN    | MMT00076852    |
| 4 | 258776 | Olfr715        |
| 4 | 70571  | Tcerg1l        |
| 4 | 626058 | EG626058       |
| 4 | 73332  | 1700041C02Rik  |
| 4 | 20819  | Srst           |
| 4 | 105278 | Ccrk           |
| 4 | 76757  | Trdn           |
| 4 | 117149 | Tirap          |
| 4 | 69769  | Tnfaip8l2      |
| 4 | 213765 | RP23-336F11.32 |
| 4 | 11839  | Areg           |
| 4 | 68732  | Lrrc16a        |
| 4 | 192663 | Abcg4          |
| 4 | 73330  | 1700018P08Rik  |
| 4 | NaN    | MMT00079364    |
| 4 | 74362  | Spag17         |
| 4 | 215654 | Cdh12          |
| 4 | NaN    | MMT00030135    |

|   |           |               |
|---|-----------|---------------|
| 4 | 75532     | 1700015C15Rik |
| 4 | 434130    | MMT00042294   |
| 4 | NaN       | MMT00011949   |
| 4 | 18150     | Npm3          |
| 4 | 53902     | Rcan3         |
| 4 | NaN       | MMT00004371   |
| 4 | 14811     | Grin2a        |
| 4 | 71011     | 4933401B06Rik |
| 4 | 20339     | Sele          |
| 4 | NaN       | MMT00015505   |
| 4 | 258610    | Olfr307       |
| 4 | 11731     | Ang2          |
| 4 | 16192     | Il5ra         |
| 4 | 67653     | 4930544G11Rik |
| 4 | NaN       | MMT00000111   |
| 4 | 320923    | Mtap7d3       |
| 4 | 22634     | Plagl1        |
| 4 | 628850    | 6030426L16Rik |
| 4 | 94220     | Cnm4          |
| 4 | 17143     | Magea7        |
| 4 | NaN       | MMT00064177   |
| 4 | 67781     | Ilf2          |
| 4 | 100041004 | MMT00052718   |
| 4 | 231045    | 4931409K22Rik |
| 4 | NaN       | MMT00015015   |
| 4 | NaN       | MMT00026784   |
| 4 | 75547     | Akap13        |
| 4 | NaN       | MMT00030946   |
| 4 | 223642    | Zc3h3         |
| 4 | 19724     | Rfx1          |
| 4 | 328949    | Mcc           |
| 4 | 64934     | Pes1          |
| 4 | 18441     | P2ry1         |
| 4 | NaN       | MMT00021912   |
| 4 | 75645     | 1700011F14Rik |
| 4 | 241528    | Lrrc55        |
| 4 | 14459     | Gast          |
| 4 | 66323     | 1700001K19Rik |
| 4 | 11519     | Add2          |
| 4 | 57315     | Wdr46         |
| 4 | NaN       | MMT00079465   |
| 4 | 66343     | Tmem177       |
| 4 | NaN       | MMT00063357   |
| 4 | 56735     | Krt71         |
| 4 | 620205    | EG620205      |
| 4 | NaN       | MMT00049822   |
| 4 | 60367     | Il1rapl2      |
| 4 | 230753    | Thrap3        |
| 4 | 83428     | Ucn3          |
| 4 | 268686    | S100z         |
| 4 | 269338    | Vps39         |

|   |        |               |
|---|--------|---------------|
| 4 | 382217 | Gm1140        |
| 4 | 320982 | Arl4c         |
| 4 | 16181  | Il1rn         |
| 4 | 107476 | Acaca         |
| 4 | 331392 | EG331392      |
| 4 | 26356  | Ing1          |
| 4 | 12417  | Cbx3          |
| 4 | 28194  | Apon          |
| 4 | NaN    | MMT00072359   |
| 4 | 353047 | Plekhm1       |
| 4 | 320869 | 4732415M23Rik |
| 4 | 235497 | Leo1          |
| 4 | 76508  | 2210015D19Rik |
| 4 | NaN    | MMT00000014   |
| 4 | 67050  | Nkap          |
| 4 | 11448  | Chrne         |
| 4 | 16415  | Itgb2l        |
| 4 | 11720  | Mat1a         |
| 4 | 52250  | Reep1         |
| 4 | 22036  | Traip         |
| 4 | 74914  | Cylc2         |
| 4 | 170741 | Pilrb1        |
| 4 | NaN    | MMT00054498   |
| 4 | 71162  | 4933421I07Rik |
| 4 | 26877  | B3galt1       |
| 4 | NaN    | MMT00052951   |
| 4 | 73407  | 1700055M20Rik |
| 4 | 77998  | Grifin        |
| 4 | 75510  | 1700023D19Rik |
| 4 | 235582 | Glyctk        |
| 4 | 83965  | Enpp5         |
| 4 | 18559  | Pctp          |
| 4 | 269902 | Vmn2r57       |
| 4 | 16162  | Il12rb2       |
| 4 | 110956 | D17H6S56E-5   |
| 4 | 240832 | Tor1aip2      |
| 4 | NaN    | MMT00057992   |
| 4 | 16538  | Kcns1         |
| 4 | 18191  | Nrxn3         |
| 4 | 329977 | Fhad1         |
| 4 | 107831 | Bai1          |
| 4 | 72097  | 2010300C02Rik |
| 4 | 72016  | 1600002H07Rik |
| 4 | 56697  | Akap10        |
| 4 | 66700  | Vps24         |
| 4 | NaN    | MMT00009771   |
| 4 | 97423  | R74862        |
| 4 | 28042  | D5Wsu178e     |
| 4 | 15426  | Hoxc8         |
| 4 | 235041 | Kank2         |
| 4 | NaN    | MMT00046383   |

|   |           |               |
|---|-----------|---------------|
| 4 | 17842     | Mup3          |
| 4 | 20445     | St6galnac1    |
| 4 | NaN       | MMT00077009   |
| 4 | 76426     | 1700029J11Rik |
| 4 | NaN       | MMT00020895   |
| 4 | 320051    | Exph5         |
| 4 | 73358     | 1700054M17Rik |
| 4 | NaN       | MMT00010260   |
| 4 | 244329    | Mcp1          |
| 4 | 320181    | Fndc7         |
| 4 | 232925    | Igfl3         |
| 4 | 72258     | Kcnk10        |
| 4 | 320808    | Wdr22         |
| 4 | 22420     | Wnt6          |
| 4 | 231760    | Rimbp2        |
| 4 | 57257     | Vav3          |
| 4 | 74071     | lfltd1        |
| 4 | 81012     | V1rd7         |
| 4 | NaN       | MMT00072454   |
| 4 | 231201    | AF366264      |
| 4 | NaN       | MMT00004313   |
| 4 | 230895    | Vps13d        |
| 4 | NaN       | MMT00031355   |
| 4 | 244646    | Pkd1l3        |
| 4 | 21949     | Tnfsf8        |
| 4 | 107476    | Acaca         |
| 4 | 381535    | RP23-149D11.4 |
| 4 | NaN       | MMT00030044   |
| 4 | 74031     | 4632413I24Rik |
| 4 | 219094    | 9130227C08Rik |
| 4 | 53620     | Vamp5         |
| 4 | 100009609 | Vmn2r65       |
| 4 | 20666     | Sox11         |
| 4 | NaN       | MMT00007643   |
| 4 | 72333     | Palld         |
| 4 | 18040     | Nefm          |
| 4 | 14417     | Gad2          |
| 4 | 73795     | 4930405D01Rik |
| 4 | 270004    | Foxi2         |
| 4 | 56092     | Cts7          |
| 4 | 236904    | Klhl15        |
| 4 | 59310     | Mylc2pl       |
| 4 | NaN       | MMT00008587   |
| 4 | 72821     | Scn2b         |
| 4 | 59041     | Stk25         |
| 4 | 83602     | Gtf2a1        |
| 4 | 74092     | 0610038L08Rik |
| 4 | 434446    | Ccdc13        |
| 4 | NaN       | MMT00016293   |
| 4 | 14178     | Fgf7          |
| 4 | 22390     | Wee1          |



|   |        |               |
|---|--------|---------------|
| 4 | 17086  | Ncr1          |
| 4 | 100737 | Dcun1d4       |
| 4 | 100383 | Bsdc1         |
| 4 | 26430  | Parg          |
| 4 | 270110 | Irf2bp2       |
| 4 | 65973  | Asph          |
| 4 | 21453  | Tcof1         |
| 4 | 75500  | 1700010H22Rik |
| 4 | 243548 | Prickle2      |
| 4 | 215001 | Wfikkn1       |
| 4 | 71745  | Cul2          |
| 4 | 328845 | Acsbg2        |
| 4 | 214444 | Cdk5rap2      |
| 4 | 330177 | Taok3         |
| 4 | 20429  | Shox2         |
| 4 | 94176  | Dock2         |
| 5 | 21926  | Tnf           |
| 5 | 80891  | Fcrls         |
| 5 | 24088  | Tlr2          |
| 5 | 52855  | Lair1         |
| 5 | 14744  | Gpr65         |
| 5 | 12045  | Bcl2a1b       |
| 5 | 21897  | Tlr1          |
| 5 | 20302  | Ccl3          |
| 5 | 20303  | Ccl4          |
| 5 | 16408  | Itgal         |
| 5 | 16153  | Il10          |
| 5 | 17167  | Marco         |
| 5 | 50498  | Ebi3          |
| 5 | 12481  | Cd2           |
| 5 | 17474  | Clec4d        |
| 5 | 14058  | F10           |
| 5 | 20208  | Saa1          |
| 5 | 20210  | Saa3          |
| 5 | 12267  | C3ar1         |
| 5 | 381319 | Batf3         |
| 5 | 12517  | Cd72          |
| 5 | 11629  | Aif1          |
| 5 | 246256 | Fcgr4         |
| 5 | 108670 | Epsti1        |
| 5 | 236451 | EG236451      |
| 5 | 231655 | Oasl1         |
| 5 | 14129  | Fcgr1         |
| 5 | 64380  | Ms4a4c        |
| 5 | 15945  | Cxcl10        |
| 5 | 17079  | Cd180         |
| 5 | 217151 | Arl5c         |
| 5 | 12766  | Cxcr3         |
| 5 | 239827 | Pigz          |
| 5 | 215900 | A630077B13Rik |
| 5 | 242248 | Bank1         |

|   |        |               |
|---|--------|---------------|
| 5 | 12140  | Fabp7         |
| 5 | 21426  | Tcfec         |
| 5 | 217370 | BC017643      |
| 5 | 276891 | Timd4         |
| 5 | 211577 | Mrgprf        |
| 5 | 276905 | Armc7         |
| 5 | 17937  | Nab2          |
| 5 | 71946  | Endod1        |
| 5 | 67689  | Aldh3b1       |
| 5 | 13845  | Ephb3         |
| 5 | 212937 | Tifab         |
| 5 | 14347  | Fut7          |
| 5 | 13030  | Ctsb          |
| 5 | 210029 | Metrn1        |
| 5 | 74127  | Krt80         |
| 5 | 99151  | Cercam        |
| 5 | 27419  | Naglu         |
| 5 | 68337  | Crip2         |
| 5 | 17210  | Mcl1          |
| 5 | 14038  | Kal1          |
| 5 | 11857  | Arhgdib       |
| 5 | 27261  | Dok3          |
| 5 | 70785  | Dennd1c       |
| 5 | 104759 | Pld4          |
| 5 | 17095  | Lyl1          |
| 5 | 19253  | Ptpn18        |
| 5 | 106512 | Gpsm3         |
| 5 | 70719  | Hmha1         |
| 5 | 102657 | Cd276         |
| 5 | 19013  | Ppara         |
| 5 | 56454  | Aldh18a1      |
| 5 | 230766 | BC030183      |
| 5 | 12051  | Bcl3          |
| 5 | 14131  | Fcgr3         |
| 5 | 12982  | Csf2ra        |
| 5 | 230787 | BC013712      |
| 5 | 213002 | Ifitm6        |
| 5 | 17064  | Cd93          |
| 5 | 17758  | Mtap4         |
| 5 | 14710  | Gngt2         |
| 5 | 56198  | Heyl          |
| 5 | 71817  | Tmem50a       |
| 5 | 17449  | Mdh1          |
| 5 | 102595 | Plekho2       |
| 5 | 19025  | Ctsa          |
| 5 | 15361  | Hmga1         |
| 5 | 15361  | Hmga1         |
| 5 | 19698  | Relb          |
| 5 | 223701 | Mkl1          |
| 5 | 69612  | 2310037124Rik |
| 5 | NaN    | MMT00009927   |

|   |        |           |
|---|--------|-----------|
| 5 | 217082 | Hlf       |
| 5 | 19240  | Tmsb10    |
| 5 | 64138  | Ctsz      |
| 5 | 21391  | Tbxas1    |
| 5 | 12259  | C1qa      |
| 5 | 12978  | Csf1r     |
| 5 | 52055  | Rab11fip5 |
| 5 | 54445  | Unc93b1   |
| 5 | 14276  | Folr2     |
| 5 | 12260  | C1qb      |
| 5 | 12262  | C1qc      |
| 5 | 18636  | Cfp       |
| 5 | 56489  | Ikbke     |
| 5 | 16949  | Loxl1     |
| 5 | 216725 | Adamts2   |
| 5 | 21827  | Thbs3     |
| 5 | 107581 | Col16a1   |
| 5 | 21857  | Timp1     |
| 5 | 18542  | Pcolce    |
| 5 | 20204  | Prrx2     |
| 5 | 56532  | Ripk3     |
| 5 | 56742  | Psrc1     |
| 5 | 85031  | Pla1a     |
| 5 | 214425 | Cilp      |
| 5 | 76905  | Lrg1      |
| 5 | 18611  | Pea15a    |
| 5 | 13555  | E2f1      |
| 5 | 407790 | Ndufa4l2  |
| 5 | 378702 | Serf2     |
| 5 | 378702 | Serf2     |
| 5 | 11772  | Ap2a2     |
| 5 | 12831  | Col5a1    |
| 5 | 14457  | Gas7      |
| 5 | 14314  | Fstl1     |
| 5 | 14118  | Fbn1      |
| 5 | 68792  | Srpx2     |
| 5 | 18301  | Fxyd5     |
| 5 | 13449  | Dok2      |
| 5 | 13732  | Emp3      |
| 5 | 246707 | Emilin2   |
| 5 | 227659 | Slc2a6    |
| 5 | 72042  | Cotl1     |
| 5 | 73723  | Sh3bgrl3  |
| 5 | 234779 | Plcg2     |
| 5 | 16331  | Inpp5d    |
| 5 | 20963  | Syk       |
| 5 | 232536 | Mrps35    |
| 5 | 15483  | Hsd11b1   |
| 5 | 242341 | Atp6v0d2  |
| 5 | 14068  | F7        |
| 5 | 14960  | H2-Aa     |

|   |           |                    |
|---|-----------|--------------------|
| 5 | 231842    | Amz1               |
| 5 | 100038514 | OTTMUSG00000004551 |
| 5 | 12332     | Capg               |
| 5 | 217303    | Cd300a             |
| 5 | 98878     | Ehd4               |
| 5 | 22029     | Traf1              |
| 5 | 56857     | Slc37a2            |
| 5 | 14962     | Cfb                |
| 5 | 68318     | Aph1c              |
| 5 | 20379     | Sfrp4              |
| 5 | 171207    | Arhgap4            |
| 5 | 15162     | Hck                |
| 5 | 19354     | Rac2               |
| 5 | 15170     | Ptpn6              |
| 5 | 22376     | Was                |
| 5 | 212032    | Hk3                |
| 5 | 65221     | Slc15a3            |
| 5 | 17084     | Ly86               |
| 5 | 98365     | Slamf9             |
| 5 | 73149     | Clec4a3            |
| 5 | 13040     | Ctss               |
| 5 | 11810     | Apobec1            |
| 5 | 80719     | Igsf6              |
| 5 | 226421    | 5430435G22Rik      |
| 5 | 67865     | Rgs10              |
| 5 | 74131     | Sash3              |
| 5 | 27056     | Irf5               |
| 5 | 105855    | Nckap1l            |
| 5 | 108101    | Fermt3             |
| 5 | 17972     | Ncf4               |
| 5 | 233571    | P2ry6              |
| 5 | 14127     | Fcer1g             |
| 5 | 269799    | Clec4a1            |
| 5 | 22177     | Tyrobp             |
| 5 | 74748     | Slamf8             |
| 5 | NaN       | MMT00042387        |
| 5 | 66824     | Pycard             |
| 5 | 231805    | Pilra              |
| 5 | 211228    | Lrrc25             |
| 5 | 56744     | Pf4                |
| 5 | 17476     | Mpeg1              |
| 5 | 14017     | Evi2a              |
| 5 | 223433    | BC052328           |
| 5 | 216984    | Evi2b              |
| 5 | 19277     | Ptpro              |
| 5 | 16822     | Lcp2               |
| 5 | 67742     | Samsn1             |
| 5 | 14115     | Fbln2              |
| 5 | 12832     | Col5a2             |
| 5 | 19141     | Lgmn               |
| 5 | 54519     | Apbb1ip            |

|   |        |               |
|---|--------|---------------|
| 5 | 17025  | Alad          |
| 5 | 230815 | Man1c1        |
| 5 | 76088  | Dock8         |
| 5 | 56213  | Htra1         |
| 5 | 11690  | Alox5ap       |
| 5 | 107373 | 4632417K18Rik |
| 5 | 20305  | Ccl6          |
| 5 | 19017  | Ppargc1a      |
| 5 | 19038  | Ppic          |
| 5 | 12523  | Cd84          |
| 5 | 226422 | Rab7l1        |
| 5 | 66815  | Ccdc109b      |
| 5 | 217826 | Kcnk13        |
| 5 | 69573  | 2310016C08Rik |
| 5 | 20868  | Stk10         |
| 5 | 22411  | Wnt11         |
| 5 | 19222  | Ptgir         |
| 5 | 233186 | Siglec5       |
| 5 | 50778  | Rgs1          |
| 5 | 16197  | Il7r          |
| 5 | 18484  | Pam           |
| 5 | 76477  | Pcolce2       |
| 5 | 381924 | Itgad         |
| 5 | 16411  | Itgax         |
| 5 | 11501  | Adam8         |
| 5 | 17381  | Mmp12         |
| 5 | 171285 | Havcr2        |
| 5 | 24108  | Ubd           |
| 5 | 54483  | Mefv          |
| 5 | 19267  | Ptpre         |
| 5 | 667386 | MMT00066614   |
| 5 | 14049  | Eya2          |
| 5 | 54132  | Pdlim1        |
| 5 | 54132  | Pdlim1        |
| 5 | 72599  | Pdia5         |
| 5 | 229600 | BC028528      |
| 5 | 63986  | Gmfg          |
| 5 | 74145  | F13a1         |
| 5 | NaN    | MMT00082285   |
| 5 | 14137  | Fdft1         |
| 5 | 330064 | Slc5a6        |
| 5 | 14283  | Fosl1         |
| 5 | 20310  | Cxcl2         |
| 5 | 14825  | Cxcl1         |
| 5 | 625360 | MMT00062748   |
| 5 | NaN    | MMT00053742   |
| 5 | 17970  | Ncf2          |
| 5 | NaN    | MMT00001732   |
| 5 | 22751  | Zfp90         |
| 5 | 56045  | Samhd1        |
| 5 | 331004 | Slc9a9        |

|   |        |               |
|---|--------|---------------|
| 5 | 17312  | Mgl1          |
| 5 | 69146  | Gsdmd         |
| 5 | 66775  | Ptplad2       |
| 5 | 210530 | Leprel1       |
| 5 | 68119  | Cmtm3         |
| 5 | 12268  | C4b           |
| 5 | 20719  | Serpinb6a     |
| 5 | 56485  | Slc2a5        |
| 5 | 231440 | 9130213B05Rik |
| 5 | 140795 | P2ry14        |
| 5 | 224530 | Acat3         |
| 5 | 19073  | Srgn          |
| 5 | 19128  | Pros1         |
| 5 | 330723 | Htra4         |
| 5 | 55984  | Camkk1        |
| 5 | 233752 | Insc          |
| 5 | 320078 | Olfml2b       |
| 5 | 171286 | Slc12a8       |
| 5 | 98363  | Efhd1         |
| 5 | 70717  | 6330406115Rik |
| 5 | 68655  | Fndc1         |
| 5 | 242050 | Igsf10        |
| 5 | 58809  | Rnase4        |
| 5 | 67305  | Gpx7          |
| 5 | 14089  | Fap           |
| 5 | 72560  | Naalad2       |
| 5 | 14268  | Fn1           |
| 5 | 70757  | Ptplb         |
| 5 | NaN    | MMT00077446   |
| 5 | 67247  | Mosc2         |
| 5 | 83961  | Nrg4          |
| 5 | 69101  | Ydjc          |
| 5 | 11861  | Arl4a         |
| 5 | 231510 | Agpat9        |
| 5 | 213956 | AW544981      |
| 5 | 76408  | Abcc3         |
| 5 | 108682 | Gpt2          |
| 5 | 57914  | Crlf2         |
| 5 | 20743  | Spnb3         |
| 5 | 228859 | D930001122Rik |
| 5 | 70556  | Slc25a33      |
| 5 | 214855 | Arid5a        |
| 5 | 70445  | Cd248         |
| 5 | 26568  | Slc27a3       |
| 5 | 52377  | Rcn3          |
| 5 | 58859  | Efemp2        |
| 5 | 14245  | Lpin1         |
| 5 | 13036  | Ctsh          |
| 5 | 381680 | BC055004      |
| 5 | 30794  | Pdlim4        |
| 5 | 14456  | Gas6          |

|   |        |               |
|---|--------|---------------|
| 5 | 104681 | Slc16a6       |
| 5 | 12977  | Csf1          |
| 5 | 23801  | Aloxe3        |
| 5 | 237336 | Tbpl1         |
| 5 | 22340  | Vegfb         |
| 5 | 240641 | Kif20b        |
| 5 | 69716  | Trip13        |
| 5 | 30939  | Pttg1         |
| 5 | 66949  | Trim59        |
| 5 | 57441  | Gmnn          |
| 5 | 16571  | Kif4          |
| 5 | 218581 | Depdc1b       |
| 5 | 26886  | Cenph         |
| 5 | 101835 | AW146154      |
| 5 | 72107  | Dscc1         |
| 5 | NaN    | MMT00004673   |
| 5 | 73804  | Kif2c         |
| 5 | 77022  | 2700099C18Rik |
| 5 | 70466  | Ckap2l        |
| 5 | 56150  | Mad2l1        |
| 5 | 68026  | 2810417H13Rik |
| 5 | 68774  | Ms4a6d        |
| 5 | 20308  | Ccl9          |
| 5 | 18726  | Pira3         |
| 5 | 675749 | MMT00015654   |
| 5 | 19288  | Ptx3          |
| 5 | 13654  | Egr2          |
| 5 | 83433  | Trem2         |
| 5 | 237052 | Tceal1        |
| 5 | 67951  | Tubb6         |
| 5 | 22151  | Tubb2a        |
| 5 | 67103  | Ltb4dh        |
| 5 | 66357  | 2310008M10Rik |
| 5 | 12409  | Cbr2          |
| 5 | 108961 | E2f8          |
| 5 | 72155  | Cenpn         |
| 5 | 215387 | Ncaph         |
| 5 | 66197  | Cks2          |
| 5 | 107029 | Me2           |
| 5 | 106795 | Tcf19         |
| 5 | 12842  | Col1a1        |
| 5 | 319170 | Hist1h2an     |
| 5 | 20135  | Rrm2          |
| 5 | 20878  | Aurka         |
| 5 | 109212 | 6720460F02Rik |
| 5 | 52276  | Cdca8         |
| 5 | 21877  | Tk1           |
| 5 | 269582 | Clspn         |
| 5 | 12835  | Col6a3        |
| 5 | 29870  | Gtse1         |
| 5 | 208084 | Pif1          |

|   |           |               |
|---|-----------|---------------|
| 5 | 229841    | Cenpe         |
| 5 | 22137     | Ttk           |
| 5 | 54392     | Ncapg         |
| 5 | 20419     | Shcbp1        |
| 5 | 12316     | Aspm          |
| 5 | 16551     | Kif11         |
| 5 | 434175    | EG434175      |
| 5 | 12534     | Cdc2a         |
| 5 | 72415     | Sgol1         |
| 5 | 76464     | Casc5         |
| 5 | 67052     | Ndc80         |
| 5 | 66570     | Cenpm         |
| 5 | 208836    | Fanci         |
| 5 | 26909     | Exo1          |
| 5 | 17279     | Melk          |
| 5 | 67849     | Cdca5         |
| 5 | 11799     | Birc5         |
| 5 | 110033    | Kif22         |
| 5 | 209737    | Kif15         |
| 5 | 21335     | Tacc3         |
| 5 | 107995    | Cdc20         |
| 5 | 51944     | D2Erttd750e   |
| 5 | 14793     | Cdca3         |
| 5 | 12442     | Ccnb2         |
| 5 | 12428     | Ccna2         |
| 5 | 21973     | Top2a         |
| 5 | 66977     | Nuf2          |
| 5 | 108907    | Nusap1        |
| 5 | 234258    | Neil3         |
| 5 | 17345     | Mki67         |
| 5 | 66468     | 2810433K01Rik |
| 5 | 70218     | 3000004C01Rik |
| 5 | 68014     | Zwilch        |
| 5 | 19361     | Rad51         |
| 5 | 17219     | Mcm6          |
| 5 | 67177     | Cdt1          |
| 5 | 68039     | Nmb           |
| 5 | 13003     | Vcan          |
| 5 | 80889     | Mesdc1        |
| 5 | 21853     | Timeless      |
| 5 | 15160     | Serpind1      |
| 5 | 67652     | Spaca1        |
| 5 | 545913    | Zscan4d       |
| 5 | 100045495 | MMT00061492   |
| 5 | 12064     | Bdnf          |
| 5 | 72832     | Crtac1        |
| 5 | 242594    | 1700024P16Rik |
| 5 | 66934     | Dsn1          |
| 5 | 66873     | 1200009O22Rik |
| 5 | 320595    | Phf8          |
| 5 | 55963     | Slc1a4        |



|   |        |               |
|---|--------|---------------|
| 5 | 69627  | 2310031A18Rik |
| 5 | 14733  | Gpc1          |
| 5 | 67666  | Hapln3        |
| 5 | 16324  | Inhbb         |
| 5 | 13048  | Cux2          |
| 5 | 226153 | Peo1          |
| 5 | 226105 | Cyp2c70       |
| 5 | 68058  | Chd1l         |
| 5 | 79059  | Nme3          |
| 5 | 68777  | Tmem53        |
| 5 | 68350  | Mul1          |
| 5 | 75620  | 2810422J05Rik |
| 5 | 213603 | Slc44a3       |
| 5 | 170826 | Ppargc1b      |
| 5 | 232210 | 8430410A17Rik |
| 5 | 12652  | Chga          |
| 5 | 67384  | Bag4          |
| 5 | 20768  | Sephs2        |
| 5 | 66431  | 1810049H13Rik |
| 5 | 63828  | Fn3k          |
| 5 | 16803  | Lbp           |
| 5 | 67856  | Echdc3        |
| 5 | 69206  | 2010016I18Rik |
| 5 | 381411 | Gm1967        |
| 5 | 234564 | AU018778      |
| 5 | 171282 | Acot4         |
| 5 | 104158 | Ces3          |
| 5 | 68918  | 1190005I06Rik |
| 5 | 18984  | Por           |
| 5 | 69123  | 1810022C23Rik |
| 5 | 68126  | Fahd2a        |
| 5 | 12310  | Calca         |
| 5 | 64945  | Cldn12        |
| 5 | 74769  | Pik3cb        |
| 5 | 70503  | Ddo           |
| 5 | 18979  | Pon1          |
| 5 | 14261  | Fmo1          |
| 5 | 18639  | Pfkfb1        |
| 5 | 16169  | Il15ra        |
| 5 | 14546  | Gdap10        |
| 5 | 103844 | Al842396      |
| 5 | 329470 | Accs          |
| 5 | 66391  | 2310061J03Rik |
| 5 | 27053  | Asns          |
| 5 | 23986  | Peci          |
| 5 | 227696 | Phyhd1        |
| 5 | 68465  | Adipor2       |
| 5 | 76454  | Fbxo31        |
| 5 | 170441 | Slc2a10       |
| 5 | 13106  | Cyp2e1        |
| 5 | 20216  | Acsm3         |

|   |        |               |
|---|--------|---------------|
| 5 | 59010  | Sqrdl         |
| 5 | 14057  | Sfxn1         |
| 5 | 66945  | Sdha          |
| 5 | 229905 | Ccbl2         |
| 5 | 71986  | Ddx28         |
| 5 | 227095 | Hibch         |
| 5 | 71699  | Slc41a3       |
| 5 | 15200  | Hbegf         |
| 5 | 60527  | Fads3         |
| 5 | 270086 | Ogfod1        |
| 5 | 320405 | Cadps2        |
| 5 | 19349  | Rab7          |
| 5 | 81703  | Jdp2          |
| 5 | 66185  | 1110037F02Rik |
| 5 | 20716  | Serpina3n     |
| 5 | 13163  | Daxx          |
| 5 | 217843 | 9030205A07Rik |
| 5 | 71904  | Paqr7         |
| 5 | 245877 | Mtap7d1       |
| 5 | 67784  | Plxnd1        |
| 5 | 11975  | Atp6v0a1      |
| 5 | 15460  | Hr            |
| 5 | 68728  | Trp53inp2     |
| 5 | 104445 | Cdc42ep1      |
| 5 | 107022 | Gramd3        |
| 5 | 23893  | Grem2         |
| 5 | 50776  | Polg2         |
| 5 | 14778  | Gpx3          |
| 5 | 319468 | Ppm1h         |
| 5 | 13180  | Pcbd1         |
| 5 | 20822  | Trove2        |
| 5 | 18611  | Pea15a        |
| 5 | 114664 | Hsd17b11      |
| 5 | 26464  | Vnn3          |
| 5 | 66966  | Trit1         |
| 5 | 434234 | 2610020H08Rik |
| 5 | 13850  | Ephx2         |
| 5 | 545725 | Mterf         |
| 5 | 100163 | Pafah2        |
| 5 | 69742  | Tm2d2         |
| 5 | 12827  | Col4a2        |
| 5 | 13014  | Cstb          |
| 5 | 68038  | Chid1         |
| 5 | 78372  | 3300001G02Rik |
| 5 | 66787  | 4933433P14Rik |
| 5 | 72433  | Rab38         |
| 5 | 52430  | Echdc2        |
| 5 | 17035  | Lxn           |
| 5 | 76630  | Stambpl1      |
| 5 | 73246  | Rassf6        |
| 5 | 109901 | Ela1          |

|   |        |               |
|---|--------|---------------|
| 5 | 20348  | Sema3c        |
| 5 | 13039  | Ctsl          |
| 5 | 17294  | Mest          |
| 5 | 228550 | Itпка         |
| 5 | 109042 | Prkcdbp       |
| 5 | 59126  | Nek6          |
| 5 | 20306  | Ccl7          |
| 5 | 20296  | Ccl2          |
| 5 | 214779 | 9630041N07Rik |
| 5 | 338360 | B430212C06Rik |
| 5 | 223917 | Krt79         |
| 5 | 12406  | Serpinh1      |
| 5 | 98660  | Atp1a2        |
| 5 | 211480 | Kcnj14        |
| 5 | 20516  | Slc20a2       |
| 5 | 76238  | Grhpr         |
| 5 | 58176  | Rhbg          |
| 5 | 53857  | Tuba8         |
| 5 | 103172 | MMT00073283   |
| 5 | 230119 | Zbtb5         |
| 5 | 223453 | Dap           |
| 5 | 233445 | Vmn2r71       |
| 5 | 630825 | EG630825      |
| 5 | 98170  | Tmem132a      |
| 5 | NaN    | MMT00063223   |
| 5 | 73379  | Dcbld2        |
| 5 | 80287  | Apobec3       |
| 5 | 12834  | Col6a2        |
| 5 | 238328 | Vash1         |
| 5 | 231125 | Zfyve28       |
| 5 | 20167  | Rtn2          |
| 5 | 57440  | Ehd3          |
| 5 | 380711 | Garnl4        |
| 5 | 213696 | Duoxa1        |
| 5 | 11576  | Afp           |
| 5 | 19736  | Rgs4          |
| 5 | 20518  | Slc22a2       |
| 5 | 223337 | Ugt3a2        |
| 5 | 320405 | Cadps2        |
| 5 | 74257  | Tspan17       |
| 5 | 16846  | Lep           |
| 5 | 12505  | Cd44          |
| 5 | 71854  | Dpep3         |
| 5 | 116847 | Prep          |
| 5 | 226610 | C030014K22Rik |
| 5 | 77794  | Adamtsl2      |
| 5 | 67369  | Qpctl         |
| 5 | 232680 | Cpa2          |
| 5 | 16485  | Kcna1         |
| 5 | 70008  | Ace2          |
| 5 | 52639  | Wipi1         |

|   |        |               |
|---|--------|---------------|
| 5 | 19011  | Pp11r         |
| 5 | 22352  | Vim           |
| 5 | 75712  | Tmem14a       |
| 5 | 171241 | V1rg6         |
| 5 | 57266  | Cxcl14        |
| 5 | 326618 | Tpm4          |
| 5 | 20255  | Scg3          |
| 5 | 57262  | Retnla        |
| 5 | 170779 | Cd209d        |
| 5 | 20203  | S100b         |
| 5 | 16780  | Lamb3         |
| 5 | 171506 | H1foo         |
| 5 | 66240  | Kcne1l        |
| 5 | 76257  | Slc38a3       |
| 5 | 93960  | Nkd1          |
| 5 | 50918  | Myadm         |
| 5 | 12727  | Clcn4-2       |
| 5 | 13107  | Cyp2f2        |
| 5 | NaN    | MMT00068187   |
| 5 | 74205  | Acsl3         |
| 5 | 80708  | Pacsin3       |
| 5 | 67844  | Rab32         |
| 5 | 20321  | Frrs1         |
| 5 | 71997  | 1500002O20Rik |
| 5 | 70873  | 4921517L17Rik |
| 5 | 69379  | C8g           |
| 5 | NaN    | MMT00072312   |
| 5 | 381339 | Tmem182       |
| 5 | 18074  | Nid2          |
| 5 | 71683  | Gypc          |
| 5 | 50497  | Hspa14        |
| 5 | 66790  | Grtp1         |
| 5 | 68272  | Rbm28         |
| 5 | 231876 | Lmtk2         |
| 5 | 64385  | Cyp4f14       |
| 5 | 320292 | Rasgef1b      |
| 5 | 235135 | Tmem45b       |
| 5 | 13822  | Epb4.1l2      |
| 5 | 75564  | 1700027N10Rik |
| 5 | 24051  | Sgcb          |
| 5 | 24052  | Sgcd          |
| 5 | 192656 | Ripk2         |
| 5 | 218035 | Vps41         |
| 5 | 94089  | Trim7         |
| 5 | 68347  | 0610011F06Rik |
| 5 | 214952 | Rhot2         |
| 5 | 72168  | Aifm3         |
| 5 | 69479  | 1700029J07Rik |
| 5 | 12793  | Cnih          |
| 5 | 77032  | 2610029I01Rik |
| 5 | 12509  | Cd59a         |

|   |        |               |
|---|--------|---------------|
| 5 | 380753 | Atxn7l1       |
| 5 | 70772  | MMT00075624   |
| 5 | 217473 | Ankmy2        |
| 5 | 17257  | Mecp2         |
| 5 | 270035 | Letm2         |
| 5 | 223649 | Nrbp2         |
| 5 | NaN    | MMT00050414   |
| 5 | 102462 | Imp3          |
| 5 | 12585  | Cdr2          |
| 5 | 12306  | Anxa2         |
| 5 | 20702  | Serpina1c     |
| 5 | 20703  | Serpina1d     |
| 5 | 71103  | Glt6d1        |
| 5 | 13244  | Degs1         |
| 5 | 319189 | Hist2h2bb     |
| 5 | 12819  | Col15a1       |
| 5 | 110379 | Sec13         |
| 5 | 66663  | Uba5          |
| 5 | 104943 | 9030611O19Rik |
| 5 | 620934 | EG620934      |
| 5 | 244209 | Cyp2r1        |
| 5 | 208715 | Hmgcs1        |
| 5 | 14872  | Gstt2         |
| 5 | 78124  | 4930458L03Rik |
| 5 | 239796 | 1600021P15Rik |
| 5 | 407243 | Tmem189       |
| 5 | 84095  | Pi4k2a        |
| 5 | 234875 | Ttc13         |
| 5 | 209683 | Ttc28         |
| 5 | 71838  | Phf7          |
| 5 | 16795  | Large         |
| 5 | 110075 | Bmp3          |
| 5 | 14366  | Fzd4          |
| 5 | 23794  | Adamts5       |
| 5 | 18162  | Npr3          |
| 5 | 104718 | Ttc7b         |
| 5 | 75805  | Nln           |
| 5 | NaN    | MMT00035807   |
| 5 | 226856 | Lpgat1        |
| 5 | 77739  | Adamts1       |
| 5 | 212377 | F730047E07Rik |
| 5 | 69882  | 2010321M09Rik |
| 5 | 21339  | Taf1a         |
| 5 | 22719  | Zfp61         |
| 5 | 66867  | Hmg20a        |
| 5 | 72117  | Nat13         |
| 5 | 69876  | Thap3         |
| 5 | 66085  | Eif3f         |
| 5 | 52468  | Ctdsp2        |
| 5 | 12313  | Calm1         |
| 5 | 21652  | Phf1          |

|   |        |               |
|---|--------|---------------|
| 5 | 69870  | Polr3gl       |
| 5 | 67544  | 4932442K08Rik |
| 5 | 52685  | Cd300lg       |
| 5 | 16857  | Lgals6        |
| 5 | 269587 | Epb4.1        |
| 5 | 16952  | Anxa1         |
| 5 | 77827  | Krba1         |
| 5 | 14559  | Gdf1          |
| 5 | 67705  | 1810058I24Rik |
| 5 | 12479  | Cd1d1         |
| 5 | 671232 | MMT00070175   |
| 5 | 13008  | Csrp2         |
| 5 | 20502  | Slc16a2       |
| 5 | 93689  | Lmod1         |
| 5 | 57429  | Sult5a1       |
| 5 | 67068  | Dynlrb1       |
| 5 | 20195  | S100a11       |
| 5 | 20195  | S100a11       |
| 5 | 71770  | Ap2b1         |
| 5 | 319953 | Till1         |
| 5 | 68742  | 1110032O16Rik |
| 5 | 72056  | 1810055G02Rik |
| 5 | 104871 | Spata7        |
| 6 | 16701  | Krtap6-2      |
| 6 | 75731  | 5133401N09Rik |
| 6 | 66467  | Gtf2h5        |
| 6 | 227154 | Als2cr2       |
| 6 | 100494 | Zfand2a       |
| 6 | 242585 | Slc35d1       |
| 6 | 12677  | Vsx2          |
| 6 | 22171  | Tyms          |
| 6 | 67769  | Gpatch2       |
| 6 | 75758  | 9130401M01Rik |
| 6 | 66928  | 3110001D03Rik |
| 6 | 94066  | Mrpl36        |
| 6 | 20220  | Sap18         |
| 6 | 53380  | Psm10         |
| 6 | 17846  | Commd1        |
| 6 | 626952 | EG626952      |
| 6 | 66192  | Lage3         |
| 6 | 13589  | Mapre1        |
| 6 | 104721 | Ddx1          |
| 6 | 66844  | Ormdl2        |
| 6 | 107094 | Rrp12         |
| 6 | 64424  | Polr1e        |
| 6 | 68252  | A030007L17Rik |
| 6 | 23894  | Gtf2h2        |
| 6 | 66720  | Klh10         |
| 6 | 170752 | Bco2          |
| 6 | 12314  | Calm2         |
| 6 | 66988  | Lap3          |

|   |        |               |
|---|--------|---------------|
| 6 | 19428  | Rasl2-9       |
| 6 | 50887  | Nsbp1         |
| 6 | 216131 | Tmem1         |
| 6 | 28040  | D6Wsu163e     |
| 6 | 67239  | Bxdc1         |
| 6 | 18393  | Orc2l         |
| 6 | NaN    | MMT00041633   |
| 6 | 625796 | EG625796      |
| 6 | 66461  | Ptpmt1        |
| 6 | NaN    | MMT00030026   |
| 6 | 622657 | EG622657      |
| 6 | 54124  | Cks1b         |
| 6 | 65102  | Nif3l1        |
| 6 | 110960 | Tars          |
| 6 | 74011  | Slc25a27      |
| 6 | 20813  | Srp14         |
| 6 | 103765 | Tmem17        |
| 6 | 230810 | Slc30a2       |
| 6 | 30952  | Cngb3         |
| 6 | 13047  | Cux1          |
| 6 | 71564  | 9030607L17Rik |
| 6 | 12916  | Crem          |
| 6 | 12309  | S100g         |
| 6 | 52882  | Rgs7bp        |
| 6 | NaN    | MMT00008376   |
| 6 | 70377  | Derl3         |
| 6 | 113868 | Acaa1a        |
| 6 | NaN    | MMT00001400   |
| 6 | NaN    | MMT00014895   |
| 6 | 26940  | Ecsit         |
| 6 | 52552  | Parp8         |
| 6 | 72480  | Tspyl4        |
| 6 | 14579  | Gem           |
| 6 | 71970  | 2410018M08Rik |
| 6 | 16828  | Ldha          |
| 6 | NaN    | MMT00001941   |
| 6 | 11674  | Aldoa         |
| 6 | 407785 | Ndufs6        |
| 6 | 69804  | Tmem147       |
| 6 | 73738  | Uchl5ip       |
| 6 | 73738  | Uchl5ip       |
| 6 | NaN    | MMT00068885   |
| 6 | 81799  | C1qtnf3       |
| 6 | 56741  | Nope          |
| 6 | 71336  | Rbks          |
| 6 | 13001  | Csnk2b        |
| 6 | 67044  | Higd2a        |
| 6 | 73272  | 1700108F19Rik |
| 6 | 56421  | Pfcp          |
| 6 | 27397  | Mrpl17        |
| 6 | 19218  | Ptger3        |

|   |           |               |
|---|-----------|---------------|
| 6 | 111175    | Pecr          |
| 6 | 67014     | Mina          |
| 6 | 81910     | Rrbp1         |
| 6 | NaN       | MMT00011288   |
| 6 | 108124    | Napa          |
| 6 | 12181     | Bop1          |
| 6 | 114128    | Laptm4b       |
| 6 | 56282     | Mrpl12        |
| 6 | NaN       | MMT00018228   |
| 6 | 624219    | EG624219      |
| 6 | 70335     | Reep6         |
| 6 | 107376    | E330013P04Rik |
| 6 | 74192     | Arpc5l        |
| 6 | 66181     | Nola3         |
| 6 | 18105     | Nqo2          |
| 6 | 77862     | Thyn1         |
| 6 | 26425     | Nubp1         |
| 6 | 67851     | 1700021F05Rik |
| 6 | NaN       | MMT00035424   |
| 6 | NaN       | MMT00013924   |
| 6 | 30059     | Timm10        |
| 6 | 66273     | 1810020D17Rik |
| 6 | 66448     | Mrpl20        |
| 6 | 380712    | 2010305C02Rik |
| 6 | 100042265 | MMT00012636   |
| 6 | 56295     | Higd1a        |
| 6 | 67956     | Setd8         |
| 6 | 75772     | Pnpla5        |
| 6 | 72899     | MacroD2       |
| 6 | 110196    | Fdps          |
| 6 | NaN       | MMT00063985   |
| 6 | 56737     | Alg2          |
| 6 | 66422     | 2410015N17Rik |
| 6 | NaN       | MMT00021352   |
| 6 | 66538     | Rps19bp1      |
| 6 | 67212     | Mrpl55        |
| 6 | 226251    | Ablim1        |
| 6 | 12462     | Cct3          |
| 6 | NaN       | MMT00044543   |
| 6 | 19384     | Ran           |
| 6 | NaN       | MMT00073590   |
| 6 | 20656     | Sod2          |
| 6 | 64657     | Mrps10        |
| 6 | 68082     | Dusp19        |
| 6 | 319695    | Ankar         |
| 6 | 70984     | 4931406C07Rik |
| 6 | 15526     | Hspa9         |
| 6 | 26901     | Deb1          |
| 6 | NaN       | MMT00070823   |
| 6 | NaN       | MMT00054932   |
| 6 | 670717    | MMT00038112   |



|   |        |               |
|---|--------|---------------|
| 6 | NaN    | MMT00024508   |
| 6 | NaN    | MMT00079290   |
| 6 | 17434  | Mocs2         |
| 6 | 109245 | Lrrc39        |
| 6 | 69270  | Gins1         |
| 6 | NaN    | MMT00002928   |
| 6 | 106564 | Ppcs          |
| 6 | 13684  | Eif4e         |
| 6 | 67557  | Larp6         |
| 6 | 232493 | Gys2          |
| 6 | 231070 | Insig1        |
| 6 | 72900  | Ndufv2        |
| 6 | 212442 | Lactb2        |
| 6 | NaN    | MMT00070887   |
| 6 | 30058  | Timm8a1       |
| 6 | 30058  | Timm8a1       |
| 6 | 22088  | Tsg101        |
| 6 | 66271  | Tmem126a      |
| 6 | 108812 | Als2cr12      |
| 6 | 67899  | 2010110K16Rik |
| 6 | 70397  | Tmem70        |
| 6 | 12759  | Clu           |
| 6 | 20962  | Sycp3         |
| 6 | 29817  | Igfbp7        |
| 6 | 231207 | Cpeb2         |
| 6 | 20660  | Sor1          |
| 6 | 271639 | Adcy10        |
| 6 | 328258 | AU042651      |
| 6 | 66042  | Sostdc1       |
| 6 | 22333  | Vdac1         |
| 6 | 72330  | Kbtbd5        |
| 6 | 27226  | Pla2g7        |
| 6 | 71998  | Slc25a35      |
| 6 | 338359 | Supv3l1       |
| 6 | 110095 | Pygl          |
| 6 | 76614  | Immt          |
| 6 | 215951 | Lace1         |
| 6 | 107476 | Acaca         |
| 6 | 271144 | 9330128J19Rik |
| 6 | NaN    | MMT00010554   |
| 6 | NaN    | MMT00071316   |
| 6 | NaN    | MMT00041407   |
| 6 | 67895  | Ppa1          |
| 6 | 56451  | Suclg1        |
| 6 | 56078  | Car5b         |
| 6 | 14194  | Fh1           |
| 6 | 72039  | Mccc1         |
| 6 | 14859  | Gsta3         |
| 6 | 69487  | 2310003L22Rik |
| 6 | 66847  | Hint3         |
| 6 | 21682  | Tec           |

|   |        |               |
|---|--------|---------------|
| 6 | 270084 | Lpcat2        |
| 6 | 17060  | Blnk          |
| 6 | 58805  | Mlxipl        |
| 6 | 67900  | 1700020C11Rik |
| 6 | 20787  | Srebf1        |
| 6 | 66659  | Acp6          |
| 6 | 257633 | Acsf3         |
| 6 | 13202  | Ddt           |
| 6 | 67308  | Mrpl46        |
| 6 | 67914  | Coq9          |
| 6 | 11429  | Aco2          |
| 6 | NaN    | MMT00035904   |
| 6 | 170718 | Idh3b         |
| 6 | 20528  | Slc2a4        |
| 6 | 14860  | Gsta4         |
| 6 | 58200  | Ppp1r1a       |
| 6 | 320415 | Gchfr         |
| 6 | 20249  | Scd1          |
| 6 | 68393  | Mogat1        |
| 6 | 20850  | Stat5a        |
| 6 | 214742 | Rcor3         |
| 6 | 228602 | 4930402H24Rik |
| 6 | 433702 | AU014645      |
| 6 | 67078  | 1700012G19Rik |
| 6 | NaN    | MMT00063982   |
| 6 | 110391 | Qdpr          |
| 6 | 94062  | Mrpl3         |
| 6 | NaN    | MMT00037611   |
| 6 | 67003  | Uqcrc2        |
| 6 | 72170  | Chchd4        |
| 6 | 18631  | Pex11a        |
| 6 | 17713  | Grpel1        |
| 6 | 102093 | Phkb          |
| 6 | 70316  | Ndufab1       |
| 6 | 14226  | Fkbp1b        |
| 6 | 18120  | Mrpl49        |
| 6 | 66462  | 2810428115Rik |
| 6 | 380752 | Tssc1         |
| 6 | NaN    | MMT00013152   |
| 6 | 19247  | Ptpn11        |
| 6 | 66427  | Cyb5b         |
| 6 | 66427  | Cyb5b         |
| 6 | 230075 | Ndufb6        |
| 6 | 319554 | Idi1          |
| 6 | 66390  | Slmo2         |
| 6 | 76890  | Memo1         |
| 6 | 18858  | Pmp22         |
| 6 | 54722  | Dfna5h        |
| 6 | 215928 | BC021785      |
| 6 | 76633  | 1700112E06Rik |
| 6 | 231123 | BC023882      |

|   |        |               |
|---|--------|---------------|
| 6 | 73046  | Glr5          |
| 6 | 14874  | Gstz1         |
| 6 | 67460  | Decr1         |
| 6 | 12049  | Bcl2l10       |
| 6 | NaN    | MMT00015473   |
| 6 | NaN    | MMT00058786   |
| 6 | 60409  | Trappc4       |
| 6 | 74316  | Isca2         |
| 6 | NaN    | MMT00057426   |
| 6 | 621603 | Aldh3b2       |
| 6 | 12840  | Col9a2        |
| 6 | 272158 | Poln          |
| 6 | 107747 | Aldh111       |
| 6 | 77754  | Prune2        |
| 6 | 12497  | Entpd6        |
| 6 | 18648  | Pgam1         |
| 6 | 13190  | Dct           |
| 6 | 71934  | Car13         |
| 6 | 56199  | Abcb10        |
| 6 | 110821 | Pcca          |
| 6 | 66333  | Aqp11         |
| 6 | 170439 | Elovl6        |
| 6 | NaN    | MMT00074126   |
| 6 | 17436  | Me1           |
| 6 | 16407  | Itgae         |
| 6 | 235339 | Dlat          |
| 6 | 21835  | Thrsp         |
| 6 | 68263  | Pdhb          |
| 6 | 67528  | Nudt7         |
| 6 | 52706  | D10Ert761e    |
| 6 | NaN    | MMT00060232   |
| 6 | 70456  | Brp44         |
| 6 | 60525  | Acss2         |
| 6 | 55951  | Brp44l        |
| 6 | NaN    | MMT00011146   |
| 6 | NaN    | MMT00080137   |
| 6 | 105675 | Ppif          |
| 6 | 71743  | Coasy         |
| 6 | 14571  | Gpd2          |
| 6 | 109232 | Sccpdh        |
| 6 | 71116  | Stx18         |
| 6 | 67292  | Pigc          |
| 6 | 71832  | Csl           |
| 6 | 12974  | Cs            |
| 6 | 69113  | Alkbh3        |
| 6 | 12580  | Cdkn2c        |
| 6 | 78920  | Dlst          |
| 6 | 26379  | Esrra         |
| 6 | 380654 | 4930485B16Rik |
| 6 | 104112 | Acly          |
| 6 | 110460 | Acat2         |

|   |        |                    |
|---|--------|--------------------|
| 6 | 67512  | Agpat2             |
| 6 | 68385  | Tlcd1              |
| 6 | 12850  | Coq7               |
| 6 | 66375  | Dhrs7              |
| 6 | 64292  | Ptges              |
| 6 | 68603  | Pmvk               |
| 6 | 67892  | 1810063B05Rik      |
| 6 | 381338 | Lonrf2             |
| 6 | NaN    | MMT00042032        |
| 6 | 14555  | Gpd1               |
| 6 | 77037  | Mrap               |
| 6 | 20856  | Stc2               |
| 6 | 68499  | Mrpl53             |
| 6 | 66230  | Mrps28             |
| 6 | 11677  | Akr1b3             |
| 6 | 28080  | Atp5o              |
| 6 | NaN    | MMT00027093        |
| 6 | 18673  | Phb                |
| 6 | 69861  | 2010003K11Rik      |
| 6 | 13358  | Slc25a1            |
| 6 | 277973 | Slc9a5             |
| 6 | 14104  | Fasn               |
| 6 | 110208 | Pgd                |
| 6 | 27376  | Slc25a10           |
| 6 | 16178  | Il1r2              |
| 6 | 433719 | OTTMUSG00000001246 |
| 6 | NaN    | MMT00067065        |
| 6 | 21881  | Tkt                |
| 6 | 13143  | Dapk2              |
| 6 | 66234  | Sc4mol             |
| 6 | 104086 | Cyp27a1            |
| 6 | 20775  | Sqle               |
| 6 | 13121  | Cyp51              |
| 6 | 13371  | Dio2               |
| 6 | 57742  | Abhd1              |
| 6 | 68671  | Pcyt2              |
| 6 | 56279  | B230317C12Rik      |
| 6 | NaN    | MMT00011909        |
| 6 | 104816 | A530050D06Rik      |
| 6 | 110157 | Raf1               |
| 6 | 108156 | Mthfd1             |
| 6 | 211666 | Mgst2              |
| 6 | 29812  | Ndr3               |
| 6 | NaN    | MMT00036089        |
| 6 | 68927  | Ptcd2              |
| 6 | 12261  | C1qbp              |
| 6 | NaN    | MMT00001967        |
| 6 | 269105 | EG269105           |
| 6 | 66459  | Pigy               |
| 6 | 11949  | Atp5c1             |
| 6 | 11949  | Atp5c1             |

|   |        |               |
|---|--------|---------------|
| 6 | 18563  | Pcx           |
| 6 | 67680  | Sdhb          |
| 6 | 17995  | Ndufv1        |
| 6 | 270076 | Gcdh          |
| 6 | 78894  | Aacs          |
| 6 | 57264  | Retn          |
| 6 | 12894  | Cpt1a         |
| 6 | 70804  | Pgrmc2        |
| 6 | 71973  | Rbpms2        |
| 6 | 319942 | A530016L24Rik |
| 6 | 27280  | Phlda3        |
| 6 | 11781  | Ap4m1         |
| 6 | 230082 | Nol6          |
| 6 | 116939 | Pnpla3        |
| 6 | 11758  | Prdx6         |
| 6 | 11813  | Apoc2         |
| 6 | 67131  | Acbd4         |
| 6 | 71648  | Optn          |
| 6 | 16516  | Kcnj15        |
| 6 | 11921  | Atoh1         |
| 6 | NaN    | MMT00027196   |
| 6 | NaN    | MMT00000744   |
| 6 | 627427 | EG627427      |
| 6 | 66214  | 1190002H23Rik |
| 6 | 99543  | Olfml3        |
| 6 | 72701  | Zfp618        |
| 6 | 70370  | Fbln7         |
| 6 | 214359 | Tmem51        |
| 6 | 83675  | Bicc1         |
| 6 | 50524  | Sall2         |
| 6 | 194126 | Mtmr11        |
| 6 | 381217 | Gm967         |
| 6 | 319565 | Syne2         |
| 6 | 78892  | Crispld2      |
| 6 | 675135 | MMT00050019   |
| 6 | 17988  | Ndrp1         |
| 6 | 59009  | Sh3rf1        |
| 6 | 50785  | Hs6st1        |
| 6 | 494448 | Cbx6          |
| 6 | 74443  | 4933406E20Rik |
| 6 | 629378 | Dact3         |
| 6 | 19325  | Rab10         |
| 6 | 216856 | Nlgn2         |
| 6 | 235130 | Adamts15      |
| 6 | 17150  | Mfap2         |
| 6 | 69217  | Plekha4       |
| 6 | 16399  | Itga2b        |
| 6 | 17390  | Mmp2          |
| 6 | 246228 | Vwa1          |
| 6 | 23887  | Ggt5          |
| 6 | 22371  | Vwf           |

|   |        |               |
|---|--------|---------------|
| 6 | 227612 | A830007P12Rik |
| 6 | 234796 | BC025816      |
| 6 | 319433 | E130113E03Rik |
| 6 | 22628  | Ywhag         |
| 6 | 13822  | Epb4.1l2      |
| 6 | 232313 | Glt8d4        |
| 6 | 12499  | Entpd5        |
| 6 | 11692  | Gfer          |
| 6 | 13132  | Dab2          |
| 6 | 105837 | Mtbp          |
| 6 | 67729  | Mansc1        |
| 6 | 223272 | Itgb1         |
| 6 | 14767  | Nmur1         |
| 6 | 15257  | Hipk1         |
| 6 | 66734  | Map1lc3a      |
| 6 | 225884 | BC021614      |
| 6 | NaN    | MMT00042142   |
| 6 | 21356  | Tapbp         |
| 6 | NaN    | MMT00071569   |
| 6 | 58801  | Pmaip1        |
| 6 | 67702  | Rnf149        |
| 6 | 13685  | Eif4ebp1      |
| 6 | 108148 | Galnt2        |
| 6 | 14936  | Gys1          |
| 6 | NaN    | MMT00036391   |
| 6 | 12908  | Crat          |
| 6 | 97165  | Hmgb2         |
| 6 | 17217  | Mcm4          |
| 6 | 64899  | Lpin3         |
| 6 | 66994  | 1500031L02Rik |
| 6 | 75552  | Paqr9         |
| 6 | 22431  | Wt1           |
| 6 | 58243  | Nap1l5        |
| 6 | 269473 | Lrig2         |
| 6 | 73671  | Sult6b1       |
| 6 | 230103 | Npr2          |
| 6 | 17281  | Fyco1         |
| 6 | 67471  | Gpatch1       |
| 6 | 74302  | Mtmr3         |
| 6 | 20679  | Sox6          |
| 6 | 74616  | Scrn3         |
| 6 | 56314  | Zfp113        |
| 6 | 15259  | Hipk3         |
| 6 | 76809  | Bri3bp        |
| 6 | 56809  | Gmeb1         |
| 6 | 23794  | Adamts5       |
| 6 | 72308  | Brf1          |
| 6 | 69125  | Cnot8         |
| 6 | 59002  | Wdr8          |
| 6 | 16434  | Itpa          |
| 6 | 79554  | Gltpd1        |

|   |        |               |
|---|--------|---------------|
| 6 | 242642 | Hpd1          |
| 6 | 93692  | Glrx          |
| 6 | 171504 | MMT00073557   |
| 6 | 235047 | Zfp809        |
| 6 | 75785  | Klh124        |
| 6 | 56404  | Trip4         |
| 6 | 212555 | Pqlc2         |
| 6 | 50783  | Lsm4          |
| 6 | 15360  | Hmgcs2        |
| 6 | 242785 | Klh121        |
| 6 | 212153 | 2610015P09Rik |
| 6 | 79263  | Trim39        |
| 6 | 320225 | A230107C01Rik |
| 6 | 56177  | Olfm1         |
| 6 | 18113  | Nnmt          |
| 6 | 78787  | Usp54         |
| 6 | 13435  | Dnmt3a        |
| 6 | 625029 | Vmn2r83       |
| 6 | 226075 | Glis3         |
| 6 | 67378  | Bbs2          |
| 6 | NaN    | MMT00031263   |
| 6 | 54427  | Dnmt3l        |
| 6 | 18391  | Oprs1         |
| 6 | 22145  | Tuba4a        |
| 6 | 66469  | 2810405K02Rik |
| 6 | 107986 | Ddb2          |
| 6 | 21743  | Inmt          |
| 6 | 71664  | Mettl7b       |
| 6 | 67267  | 2900010M23Rik |
| 6 | 27361  | Sepx1         |
| 6 | 21991  | Tpi1          |
| 6 | 12282  | Hyou1         |
| 6 | 18595  | Pdgfra        |
| 6 | 192191 | Med9          |
| 6 | 67046  | Tbc1d7        |
| 6 | 233549 | Mogat2        |
| 6 | 67800  | Dgat2         |
| 6 | 76282  | Gpt           |
| 6 | 70153  | 2210016F16Rik |
| 6 | 71146  | 4933417O08Rik |
| 6 | 13360  | Dhcr7         |
| 6 | 382075 | Odf3l1        |
| 6 | 103733 | Tubg1         |
| 6 | 98238  | Lrrc59        |
| 6 | 67283  | Slc25a19      |
| 6 | 192166 | Sardh         |
| 6 | 12931  | Crlf1         |
| 6 | 226122 | Ubtd1         |
| 6 | 11769  | Ap1s1         |
| 6 | 66264  | Ccdc28b       |
| 6 | 27981  | D4Wsu53e      |

|   |        |               |
|---|--------|---------------|
| 6 | 73635  | 1700113I22Rik |
| 6 | 69071  | Tmem97        |
| 6 | 218271 | B4galt7       |
| 6 | 192292 | Nrbp1         |
| 6 | 104444 | Rexo2         |
| 6 | 619605 | Zcchc17       |
| 6 | 14431  | Gamt          |
| 6 | 22183  | Zrsr1         |
| 6 | 627110 | Tubb2a-ps2    |
| 6 | 320204 | 4833442J19Rik |
| 6 | 108735 | Sft2d2        |
| 6 | 433216 | EG433216      |
| 6 | 66508  | 2400001E08Rik |
| 6 | 69928  | Apitd1        |
| 6 | 18478  | Pah           |
| 6 | 69291  | 1700001L05Rik |
| 6 | 74359  | 4931414P19Rik |
| 6 | 68097  | Dynll2        |
| 6 | 52906  | Ahi1          |
| 6 | 14187  | Akr1b8        |
| 6 | 103742 | 1810046J19Rik |
| 6 | 66411  | Tbcb          |
| 6 | 17766  | Nudt1         |
| 6 | 19387  | Rangap1       |
| 6 | 53945  | Slc40a1       |
| 6 | 105445 | Dock9         |
| 6 | 13592  | Ebf2          |
| 6 | 23996  | Psmc4         |
| 6 | 73737  | 1110008P14Rik |
| 6 | 67994  | Mrps11        |
| 6 | 22154  | Tubb5         |
| 6 | NaN    | MMT00051732   |
| 6 | NaN    | MMT00038317   |
| 6 | 57785  | Rangrf        |
| 6 | NaN    | MMT00031928   |
| 6 | 21826  | Thbs2         |
| 6 | 52466  | Slc46a1       |
| 6 | 68043  | N6amt2        |
| 6 | 66320  | Tmem208       |
| 6 | 52530  | Nola2         |
| 6 | 668830 | EG668830      |
| 6 | 208624 | Alg3          |
| 6 | 68073  | A930016P21Rik |
| 6 | 103850 | Nt5m          |
| 6 | 76501  | Commd9        |
| 6 | NaN    | MMT00033856   |
| 6 | 171429 | Slc26a6       |
| 6 | 78754  | Galntl2       |
| 6 | 56418  | Ykt6          |
| 6 | 18102  | Nme1          |
| 6 | 216505 | Pik3ip1       |



|   |        |               |
|---|--------|---------------|
| 6 | 75471  | 1700009N14Rik |
| 6 | 74268  | Aven          |
| 6 | 67974  | Ccny          |
| 6 | 18025  | Nfe2l3        |
| 6 | 68118  | 9430023L20Rik |
| 6 | 20384  | Sfrs5         |
| 6 | 20384  | Sfrs5         |
| 6 | 237222 | Ofd1          |
| 6 | 67785  | Zmym4         |
| 6 | 30055  | Timm13        |
| 6 | 23897  | Hax1          |
| 6 | 23897  | Hax1          |
| 6 | 231872 | MMT00063115   |
| 6 | 19182  | Psmc3         |
| 6 | 236794 | Slc9a6        |
| 6 | 67843  | Slc35a4       |
| 6 | NaN    | MMT00066182   |
| 6 | 53333  | Tomm40        |
| 6 | 22225  | Usp5          |
| 6 | 69507  | 1700030G06Rik |
| 6 | 66096  | 0910001L09Rik |
| 6 | 14083  | Ptk2          |
| 6 | 13078  | Cyp1b1        |
| 6 | 22329  | Vcam1         |
| 6 | 56363  | Tmeff2        |
| 6 | 18779  | Pla2r1        |
| 6 | 11607  | Agtr1a        |
| 6 | 13482  | Dpp4          |
| 6 | 14660  | Gls           |
| 6 | 17536  | Meis2         |
| 6 | 74199  | Vit           |
| 6 | 73172  | 3110037116Rik |
| 6 | 76967  | 2700049A03Rik |
| 6 | 71779  | 8-Mar         |
| 6 | 229487 | Pet112l       |
| 6 | 74246  | Gale          |
| 6 | 234729 | Vac14         |
| 6 | 192156 | Mvd           |
| 6 | 16987  | Lss           |
| 6 | 108155 | Ogt           |
| 6 | 20356  | Sema5a        |
| 6 | 257635 | Sdsl          |
| 6 | 12447  | Ccne1         |
| 6 | 76380  | Ccdc46        |
| 6 | 171180 | Syt12         |
| 6 | 117606 | Boc           |
| 6 | 268977 | Ltbp1         |
| 6 | 14451  | Gas1          |
| 6 | 71145  | Scara5        |
| 6 | 385658 | Gm1752        |
| 6 | 108954 | Ppp1r15b      |

|   |        |               |
|---|--------|---------------|
| 6 | 627191 | Tmem90a       |
| 6 | 72655  | 2810026P18Rik |
| 6 | 18976  | Pomc          |
| 6 | 20474  | Six4          |
| 6 | 328099 | AU021838      |
| 6 | 320923 | Mtap7d3       |
| 6 | 75089  | Uhrf1bp1l     |
| 6 | 13682  | Eif4a2        |
| 6 | NaN    | MMT00032526   |
| 6 | 52348  | Vps37a        |
| 6 | 619331 | Zfp551        |
| 6 | 142688 | Asb13         |
| 6 | 17763  | Mtcp1         |
| 6 | 106581 | Itfg3         |
| 6 | 24135  | Zfp68         |
| 6 | 78689  | Mak10         |
| 6 | 320162 | Ccdc45        |
| 6 | 74570  | Zkscan1       |
| 6 | 73668  | Ttc21b        |
| 6 | 17344  | Pias2         |
| 6 | 117198 | Ivns1abp      |
| 6 | 236790 | Ddx26b        |
| 6 | 216190 | Appl2         |
| 6 | 56494  | Gosr2         |
| 6 | 217378 | Rbj           |
| 6 | 75692  | Nr2c2ap       |
| 6 | 106389 | Eaf2          |
| 6 | 26357  | Abcg2         |
| 6 | 69770  | 1600002K03Rik |
| 6 | 218820 | Zfp503        |
| 6 | 70891  | Spdya         |
| 6 | 192231 | Hexim1        |
| 6 | 320816 | Ankrd16       |
| 6 | 215512 | 5730593F17Rik |
| 6 | 217700 | Acot6         |
| 6 | 74200  | 2810403A07Rik |
| 6 | 238333 | Gm263         |
| 6 | 66531  | 2310061C15Rik |
| 6 | 16852  | Lgals1        |
| 6 | 53867  | Col5a3        |
| 6 | 22232  | Slc35a2       |
| 6 | 71724  | Aox3          |
| 6 | 403088 | MMT00010458   |
| 6 | 12876  | Cpe           |
| 6 | 12876  | Cpe           |
| 6 | 16431  | Itm2a         |
| 6 | 234214 | Sorbs2        |
| 6 | 50877  | Neu3          |
| 6 | 223669 | Zfp7          |
| 6 | 74051  | Steap2        |
| 6 | 68859  | 1190007F08Rik |

|   |           |               |
|---|-----------|---------------|
| 6 | 74646     | Spsb1         |
| 6 | 16424     | Itih1         |
| 6 | 629966    | EG629966      |
| 6 | 237221    | Gemin8        |
| 6 | 69454     | Clic3         |
| 6 | 217721    | Flvcr2        |
| 6 | 21961     | Tns1          |
| 6 | 14251     | Flot1         |
| 6 | 71268     | Lrrfip2       |
| 6 | 56248     | Ak3           |
| 6 | NaN       | MMT00024953   |
| 6 | NaN       | MMT00045847   |
| 6 | 19355     | Rad1          |
| 6 | NaN       | MMT00067195   |
| 6 | 208144    | Dhx37         |
| 6 | 100900    | Hscb          |
| 6 | 100034361 | Mfap1b        |
| 6 | 67155     | Smarca2       |
| 6 | 12263     | C2            |
| 6 | 24099     | Tnfsf13b      |
| 6 | 20257     | Stmn2         |
| 6 | 234683    | Elmo3         |
| 6 | 64817     | Svep1         |
| 6 | 214931    | Fbxl16        |
| 6 | 20315     | Cxcl12        |
| 6 | 13614     | Edn1          |
| 6 | 69069     | 1810011H11Rik |
| 6 | 237504    | Rassf9        |
| 6 | 16568     | Kif3a         |
| 6 | 232236    | C130022K22Rik |
| 6 | 52013     | D19Ert386e    |
| 6 | 67443     | Map1lc3b      |
| 6 | 319229    | Sctr          |
| 6 | 64075     | Smoc1         |
| 6 | 26938     | St6galnac5    |
| 6 | 20250     | Scd2          |
| 6 | 22361     | Vnn1          |
| 6 | 241274    | Pnpla7        |
| 6 | 68487     | Tmem140       |
| 6 | 66528     | 2210020M01Rik |
| 6 | 69034     | 4930579G22Rik |
| 6 | 224440    | Setd4         |
| 6 | 227937    | Pkp4          |
| 6 | 74164     | Nfx1          |
| 6 | 231670    | Fbxo21        |
| 6 | 81018     | Zfp313        |
| 6 | 69726     | Smyd3         |
| 6 | 212439    | AA986860      |
| 6 | 228765    | Sdcbp2        |
| 7 | 77864     | Ypel2         |
| 7 | 78586     | Srbd1         |

|   |        |               |
|---|--------|---------------|
| 7 | 67998  | 1300010M03Rik |
| 7 | 11637  | Ak2           |
| 7 | 12465  | Cct5          |
| 7 | 105835 | Sgsm3         |
| 7 | 73692  | 2410089E03Rik |
| 7 | NaN    | MMT00071219   |
| 7 | 18027  | Nfia          |
| 7 | 17342  | Mitf          |
| 7 | 232087 | Mat2a         |
| 7 | 11600  | Angpt1        |
| 7 | 18519  | Pcaf          |
| 7 | 230753 | Thrap3        |
| 7 | 74340  | Ahcyl2        |
| 7 | 66816  | Thap2         |
| 7 | 213550 | Dis3l         |
| 7 | 233328 | Lrrk1         |
| 7 | 235534 | Acpl2         |
| 7 | 17237  | Mgrn1         |
| 7 | 170707 | Usp48         |
| 7 | 72289  | Malat1        |
| 7 | 104859 | 4930573119Rik |
| 7 | 77300  | Raph1         |
| 7 | 19185  | Psm4          |
| 7 | NaN    | MMT00062659   |
| 7 | NaN    | MMT00035426   |
| 7 | 21745  | Tep1          |
| 7 | 12772  | Ccr2          |
| 7 | 224903 | Safb          |
| 7 | 230793 | Ahdc1         |
| 7 | 81896  | Ift122        |
| 7 | 208777 | Sned1         |
| 7 | 72275  | 2200002D01Rik |
| 7 | 72318  | Pscd4         |
| 7 | 79455  | Pdcl2         |
| 7 | 227120 | Plcl1         |
| 7 | 210808 | 9030625A04Rik |
| 7 | 68628  | Fbxw9         |
| 7 | 67956  | Setd8         |
| 7 | 67902  | Sumf2         |
| 7 | 18585  | Pde9a         |
| 7 | 19188  | Psme2         |
| 7 | 19188  | Psme2         |
| 7 | 415115 | Neur12        |
| 7 | 233865 | D430042O09Rik |
| 7 | 72278  | Ccpg1         |
| 7 | 72023  | Cyb561d1      |
| 7 | 16154  | Il10ra        |
| 7 | 54153  | Rasa4         |
| 7 | 17423  | Ndst2         |
| 7 | 65970  | Lima1         |
| 7 | 242248 | Bank1         |

|   |        |               |
|---|--------|---------------|
| 7 | NaN    | MMT00001961   |
| 7 | 226541 | Klhl20        |
| 7 | 234135 | Whsc1l1       |
| 7 | 320538 | D130059P03Rik |
| 7 | 72345  | 2810002O09Rik |
| 7 | 12821  | Col17a1       |
| 7 | 101835 | AW146154      |
| 7 | 209239 | Gan           |
| 7 | 16792  | Laptn5        |
| 7 | 73656  | Ms4a6c        |
| 7 | NaN    | MMT00065211   |
| 7 | 12581  | Cdkn2d        |
| 7 | 74237  | Tubgcp2       |
| 7 | 240084 | Cchcr1        |
| 7 | 71718  | Telo2         |
| 7 | 56876  | Nelf          |
| 7 | 217038 | Mrm1          |
| 7 | 234582 | Ccdc102a      |
| 7 | 69106  | Stoml1        |
| 7 | 69470  | Tmem127       |
| 7 | 13852  | Stx2          |
| 7 | 59031  | Chst12        |
| 7 | 69161  | Manbal        |
| 7 | 79196  | Osbpl5        |
| 7 | 330731 | EG330731      |
| 7 | 76681  | Trim12        |
| 7 | 74645  | 4930431B09Rik |
| 7 | 12576  | Cdkn1b        |
| 7 | 399558 | Flrt2         |
| 7 | 66236  | 1500011B03Rik |
| 7 | 320923 | Mtap7d3       |
| 7 | 76260  | Ttc8          |
| 7 | 109979 | Art3          |
| 7 | 234852 | Chmp1a        |
| 7 | 67579  | Cpeb4         |
| 7 | 18000  | 2-Sep         |
| 7 | 72776  | Sass6         |
| 7 | 70415  | 2610018G03Rik |
| 7 | 333789 | N4bp2         |
| 7 | 12293  | Cacna2d1      |
| 7 | 70604  | Dnajb14       |
| 7 | 319817 | Rc3h2         |
| 7 | 104836 | Cbl1          |
| 7 | 212943 | BC023892      |
| 7 | 104570 | Smek2         |
| 7 | 13205  | Ddx3x         |
| 7 | 218100 | Zfp322a       |
| 7 | 12283  | Cab39         |
| 7 | 71521  | Pds5a         |
| 7 | 11767  | Ap1m1         |
| 7 | 546387 | EG546387      |

|   |           |               |
|---|-----------|---------------|
| 7 | 21399     | Tcea1         |
| 7 | 105377    | Ankrd32       |
| 7 | NaN       | MMT00000525   |
| 7 | 68152     | 5830415L20Rik |
| 7 | 67263     | Zswim6        |
| 7 | 224105    | Pak2          |
| 7 | 109624    | Cald1         |
| 7 | NaN       | MMT00002304   |
| 7 | 52846     | D1Bwg0212e    |
| 7 | 26874     | Abcd2         |
| 7 | NaN       | MMT00039126   |
| 7 | 218734    | 3830406C13Rik |
| 7 | 269198    | Nbeal1        |
| 7 | NaN       | MMT00077178   |
| 7 | 382117    | D9Ert402e     |
| 7 | 19883     | Rora          |
| 7 | 18573     | Pde1a         |
| 7 | 72739     | Zkscan3       |
| 7 | 171212    | Galnt10       |
| 7 | 20512     | Slc1a3        |
| 7 | 231225    | Tapt1         |
| 7 | NaN       | MMT00077107   |
| 7 | 381314    | Iars2         |
| 7 | NaN       | MMT00000967   |
| 7 | 20965     | Syn2          |
| 7 | 208449    | Sgms1         |
| 7 | 72823     | Pard3b        |
| 7 | 330914    | MMT00072326   |
| 7 | 319565    | Syne2         |
| 7 | 17714     | Grpel2        |
| 7 | 12995     | Csnk2a1       |
| 7 | 12995     | Csnk2a1       |
| 7 | 18128     | Notch1        |
| 7 | NaN       | MMT00047239   |
| 7 | 30934     | Tor1b         |
| 7 | 66839     | 0610009O20Rik |
| 7 | 78825     | 5830417C01Rik |
| 7 | 229900    | Gbp6          |
| 7 | 80750     | N4bp1         |
| 7 | 100045149 | MMT00025143   |
| 7 | 18099     | Nlk           |
| 7 | 23888     | Gpc6          |
| 7 | 50758     | Fbxl17        |
| 7 | 231452    | Sdad1         |
| 7 | 20239     | Atxn2         |
| 7 | 18018     | Nfatc1        |
| 7 | 216613    | Ccdc85a       |
| 7 | 108797    | Mex3b         |
| 7 | 231912    | Katnal1       |
| 7 | 26408     | Map3k5        |
| 7 | 68339     | Ccdc88c       |

|   |        |               |
|---|--------|---------------|
| 7 | 60596  | Gucy1a3       |
| 7 | 54403  | Slc4a4        |
| 7 | 12577  | Cdkn1c        |
| 7 | 55990  | Fmo2          |
| 7 | 226041 | Pgm5          |
| 7 | 53623  | Gria3         |
| 7 | 226747 | Ahctf1        |
| 7 | NaN    | MMT00020644   |
| 7 | 12151  | Bmi1          |
| 7 | 74143  | Opa1          |
| 7 | 67532  | Mfap1a        |
| 7 | NaN    | MMT00036239   |
| 7 | 109115 | Supt3h        |
| 7 | NaN    | MMT00014022   |
| 7 | 12530  | Cdc25a        |
| 7 | 23955  | Nek4          |
| 7 | NaN    | MMT00080717   |
| 7 | NaN    | MMT00033071   |
| 7 | 214133 | Tet2          |
| 7 | NaN    | MMT00042003   |
| 7 | 30046  | Zfp292        |
| 7 | 12912  | Creb1         |
| 7 | 17999  | Nedd4         |
| 7 | 269198 | Nbeal1        |
| 7 | 56376  | Pdlim5        |
| 7 | 71544  | 9030420J04Rik |
| 7 | 71544  | 9030420J04Rik |
| 7 | 320712 | Abi3bp        |
| 7 | 328329 | Mast4         |
| 7 | 18145  | Npc1          |
| 7 | 545428 | 2610301F02Rik |
| 7 | 21871  | Atp6v0a2      |
| 7 | 66454  | Nmnat1        |
| 7 | NaN    | MMT00042479   |
| 7 | NaN    | MMT00030019   |
| 7 | 26444  | Psma7         |
| 7 | 223870 | Senp1         |
| 7 | 229227 | 4932438A13Rik |
| 7 | 12013  | Bach1         |
| 7 | 229663 | Csde1         |
| 7 | 12874  | Cpd           |
| 7 | 17246  | Mdm2          |
| 7 | 77590  | 4631426J05Rik |
| 7 | 13688  | Eif4ebp2      |
| 7 | 14630  | Gclm          |
| 7 | 218699 | Pxk           |
| 7 | 76014  | Zc3h18        |
| 7 | NaN    | MMT00075201   |
| 7 | NaN    | MMT00044175   |
| 7 | NaN    | MMT00047183   |
| 7 | NaN    | MMT00007970   |

|   |           |                    |
|---|-----------|--------------------|
| 7 | NaN       | MMT00012375        |
| 7 | 52822     | Rufy3              |
| 7 | 13669     | Eif3s10            |
| 7 | 70769     | Nolc1              |
| 7 | NaN       | MMT00019519        |
| 7 | NaN       | MMT00048203        |
| 7 | 319887    | E030030I06Rik      |
| 7 | NaN       | MMT00044766        |
| 7 | 628431    | Hmgb1-rs17         |
| 7 | 15289     | Hmgb1              |
| 7 | NaN       | MMT00046069        |
| 7 | 66257     | Nicn1              |
| 7 | 14874     | Gstz1              |
| 7 | 217830    | 9030617O03Rik      |
| 7 | NaN       | MMT00041615        |
| 7 | 327978    | Slfn5              |
| 7 | 19766     | Ripk1              |
| 7 | 244895    | C230081A13Rik      |
| 7 | 13998     | Fgd6               |
| 7 | 56637     | Gsk3b              |
| 7 | 20481     | Ski                |
| 7 | 20852     | Stat6              |
| 7 | NaN       | MMT00032015        |
| 7 | NaN       | MMT00013656        |
| 7 | 51786     | Cpsf2              |
| 7 | 50911     | Exosc9             |
| 7 | 56095     | Ftsj3              |
| 7 | NaN       | MMT00007878        |
| 7 | 99526     | Usp53              |
| 7 | 320165    | Tacc1              |
| 7 | 76719     | 1700081L11Rik      |
| 7 | 208647    | Creb3l2            |
| 7 | 229279    | Hnrnpa3            |
| 7 | NaN       | MMT00017539        |
| 7 | 13418     | Dnajc1             |
| 7 | 69237     | Gtpbp4             |
| 7 | 218544    | Sgtb               |
| 7 | 72972     | Gcap14             |
| 7 | NaN       | MMT00036444        |
| 7 | 432502    | EG432502           |
| 7 | NaN       | MMT00060205        |
| 7 | NaN       | MMT00034010        |
| 7 | 243272    | Sbno1              |
| 7 | 192195    | Ash1l              |
| 7 | 100038725 | ENSMUSG00000038594 |
| 7 | 21885     | Tle1               |
| 7 | 385454    | EG385454           |
| 7 | NaN       | MMT00050540        |
| 7 | 59057     | Zfp191             |
| 7 | 233575    | MMT00014327        |
| 7 | NaN       | MMT00047335        |



|   |        |               |
|---|--------|---------------|
| 7 | NaN    | MMT00046996   |
| 7 | 114713 | Rasa2         |
| 7 | 17300  | Foxc1         |
| 7 | NaN    | MMT00000944   |
| 7 | NaN    | MMT00011143   |
| 7 | NaN    | MMT00040956   |
| 7 | 11909  | Atf2          |
| 7 | 208846 | Daam1         |
| 7 | 101240 | Wdr91         |
| 7 | 93873  | Pcdhb2        |
| 7 | 78937  | 5830411G16Rik |
| 7 | 108655 | Foxp1         |
| 7 | 227525 | Dclre1c       |
| 7 | 434484 | Sp140         |
| 7 | 98682  | 2210010L05Rik |
| 7 | 240261 | Ccdc112       |
| 7 | 218194 | Phactr1       |
| 7 | 228355 | Madd          |
| 7 | 234797 | 6430548M08Rik |
| 7 | NaN    | MMT00047848   |
| 7 | 338355 | Fkbp15        |
| 7 | 233977 | Ppfia1        |
| 7 | 53416  | Stk39         |
| 7 | 22608  | Ybx1          |
| 7 | 22608  | Ybx1          |
| 7 | 107589 | Mylk          |
| 7 | NaN    | MMT00057557   |
| 7 | 17260  | Mef2c         |
| 7 | 56200  | Ddx21         |
| 7 | 67664  | Rnf125        |
| 7 | 67797  | 6530403A03Rik |
| 7 | 66935  | 1700023B02Rik |
| 7 | 214899 | Jarid1a       |
| 7 | 216613 | Ccdc85a       |
| 7 | 271564 | Vps13a        |
| 7 | 102182 | AI931714      |
| 7 | 381650 | Thap6         |
| 7 | 244672 | Cwf19l2       |
| 7 | NaN    | MMT00061267   |
| 7 | 74528  | 8430406I07Rik |
| 7 | 19155  | Npepps        |
| 7 | 215160 | Rhbdd2        |
| 7 | NaN    | MMT00048392   |
| 7 | 19988  | Rpl6          |
| 7 | NaN    | MMT00058413   |
| 7 | 67916  | Ppap2b        |
| 7 | 14313  | Fst           |
| 7 | 240168 | Rasgrp3       |
| 7 | NaN    | MMT00038301   |
| 7 | 74081  | Cep350        |
| 7 | 68177  | Ebpl          |

|   |        |               |
|---|--------|---------------|
| 7 | 94282  | Sfxn5         |
| 7 | 59001  | Pole3         |
| 8 | 258315 | Olfr767       |
| 8 | 77609  | C330001K17Rik |
| 8 | NaN    | MMT00013143   |
| 8 | 258096 | Olfr112       |
| 8 | 353282 | Sfmbt2        |
| 8 | NaN    | MMT00042049   |
| 8 | 272350 | EG272350      |
| 8 | 52024  | Ankrd22       |
| 8 | 73137  | Prrc1         |
| 8 | 258730 | Olfr483       |
| 8 | 270906 | Prr11         |
| 8 | 75064  | Cnbp2         |
| 8 | 110957 | D1Pas1        |
| 8 | 233001 | Nlrp9a        |
| 8 | 258935 | Olfr790       |
| 8 | NaN    | MMT00077586   |
| 8 | NaN    | MMT00005149   |
| 8 | 100012 | Oog3          |
| 8 | 74176  | Tgm5          |
| 8 | NaN    | MMT00013109   |
| 8 | 20707  | Serpib9c      |
| 8 | 76999  | 1700127D06Rik |
| 8 | 13640  | Efna5         |
| 8 | NaN    | MMT00065179   |
| 8 | 258710 | Olfr419       |
| 8 | 15551  | Htr1b         |
| 8 | 230796 | Wdtd1         |
| 8 | NaN    | MMT00028085   |
| 8 | 110789 | Gpr98         |
| 8 | NaN    | MMT00061717   |
| 8 | 22301  | Vmn2r89       |
| 8 | 211712 | Pcdh9         |
| 8 | 14613  | Gja5          |
| 8 | 654456 | MMT00054636   |
| 8 | NaN    | MMT00047055   |
| 8 | 382118 | Zfp167        |
| 8 | 12160  | Bmp5          |
| 8 | NaN    | MMT00064569   |
| 8 | 16502  | Kcnc1         |
| 8 | 78600  | Pde6h         |
| 8 | 18158  | Nppb          |
| 8 | NaN    | MMT00039382   |
| 8 | 627805 | Vmn2r108      |
| 8 | 258022 | Olfr1318      |
| 8 | 320664 | Cass4         |
| 8 | 16688  | Krt6b         |
| 8 | 546213 | Gm1420        |
| 8 | 258358 | Olfr557       |
| 8 | 71287  | Cpvl          |

|   |        |               |
|---|--------|---------------|
| 8 | 74998  | Rab11fip2     |
| 8 | 258585 | Olfr1086      |
| 8 | 72230  | Zfp558        |
| 8 | NaN    | MMT00019756   |
| 8 | 319974 | Auts2         |
| 8 | 15969  | Ifna6         |
| 8 | 109263 | Rlf           |
| 8 | NaN    | MMT00054100   |
| 8 | NaN    | MMT00046108   |
| 8 | 258247 | Olfr645       |
| 8 | NaN    | MMT00036516   |
| 8 | NaN    | MMT00013160   |
| 8 | 18185  | Nrl           |
| 8 | 279028 | Adamts13      |
| 8 | 209550 | EG209550      |
| 8 | 22074  | Try4          |
| 8 | NaN    | MMT00038169   |
| 8 | 668225 | EG668225      |
| 8 | 208884 | Zdhhc9        |
| 8 | 66761  | 4933417A18Rik |
| 8 | 73582  | 1700106N22Rik |
| 8 | 633250 | EG633250      |
| 8 | 20400  | Sh2d1a        |
| 8 | 258880 | Olfr218       |
| 8 | 278304 | Zfp385c       |
| 8 | 74529  | 8430422H06Rik |
| 8 | NaN    | MMT00009248   |
| 8 | 329693 | Fcrl5         |
| 8 | 20495  | Slc12a1       |
| 8 | 243725 | Ppp1r9a       |
| 8 | 634331 | EG634331      |
| 8 | 329679 | Fnip2         |
| 8 | 234959 | Med17         |
| 8 | 66780  | 4933436I01Rik |
| 8 | 110789 | Gpr98         |
| 8 | 50720  | Sacs          |
| 8 | 217246 | Ace3          |
| 8 | 240476 | Zfp407        |
| 8 | NaN    | MMT00066283   |
| 8 | 72472  | Slc16a10      |
| 8 | 271981 | A630047E20Rik |
| 8 | 66289  | 1810030J14Rik |
| 8 | NaN    | MMT00078220   |
| 8 | 17540  | Mrv1          |
| 8 | 218476 | Gm73          |
| 8 | 626904 | MMT00004644   |
| 8 | 170651 | Krtap16-1     |
| 8 | 258932 | Olfr791       |
| 8 | 258783 | Olfr920       |
| 8 | 258300 | Olfr1449      |
| 8 | 14126  | Ms4a2         |

|   |        |               |
|---|--------|---------------|
| 8 | 17384  | Mmp10         |
| 8 | 194597 | Tmprss11a     |
| 8 | 12640  | Cga           |
| 8 | NaN    | MMT00015154   |
| 8 | NaN    | MMT00070399   |
| 8 | 18193  | Nsd1          |
| 8 | 666348 | Apol7e        |
| 8 | 20983  | Syt4          |
| 8 | 17773  | Mtnr1a        |
| 8 | 258316 | Olfr727       |
| 8 | 194597 | Tmprss11a     |
| 8 | 116913 | Tpbpb         |
| 8 | 93886  | Pcdhb15       |
| 8 | 99663  | Cica6         |
| 8 | 436059 | EG436059      |
| 8 | NaN    | MMT00043095   |
| 8 | 192167 | Nlgn1         |
| 8 | 17450  | Morc1         |
| 8 | NaN    | MMT00008396   |
| 8 | 20730  | Spink3        |
| 8 | 258891 | Olfr1302      |
| 8 | 14829  | Grpr          |
| 8 | 406186 | Olfr142       |
| 8 | 239250 | Slitrk6       |
| 8 | 210198 | Gprc6a        |
| 8 | NaN    | MMT00012889   |
| 8 | 79202  | Tnfrsf22      |
| 8 | 18508  | Pax6          |
| 8 | NaN    | MMT00035581   |
| 8 | 78473  | Skap1         |
| 8 | 78251  | Zfp712        |
| 8 | NaN    | MMT00050850   |
| 8 | NaN    | MMT00000812   |
| 8 | 20278  | Scnn1g        |
| 8 | 242574 | C130073F10Rik |
| 8 | NaN    | MMT00060699   |
| 8 | 73784  | 4930430F21Rik |
| 8 | 93746  | Gprc5d        |
| 8 | 76846  | Rps9          |
| 8 | 384806 | MMT00074605   |
| 8 | 74915  | Atp6v1e2      |
| 8 | 110350 | Dync2h1       |
| 8 | 72082  | Cyp2c55       |
| 8 | 18511  | Pax9          |
| 8 | 140806 | Il25          |
| 8 | 242274 | Lrrc7         |
| 8 | 380709 | Spata22       |
| 8 | 242557 | Atg4c         |
| 8 | 320183 | Msrp3         |
| 8 | 78751  | Zc3h6         |
| 8 | 67295  | Rab3c         |

|   |        |               |
|---|--------|---------------|
| 8 | NaN    | MMT00013081   |
| 8 | 233332 | Adamts17      |
| 8 | 114871 | Psg28         |
| 8 | 73980  | MMT00024414   |
| 8 | 111507 | Igh           |
| 8 | 76399  | Ii31          |
| 8 | 277898 | 9830102E05Rik |
| 8 | 108950 | 1700049L16Rik |
| 8 | 18419  | Otog          |
| 8 | 320091 | Tmem16d       |
| 8 | 77669  | 9130221D24Rik |
| 8 | 68106  | Nt5c3l        |
| 8 | 246729 | Oas1h         |
| 8 | NaN    | MMT00006856   |
| 8 | 234353 | Psd3          |
| 8 | 22293  | Slc45a2       |
| 8 | 277773 | BC049635      |
| 8 | 270599 | Gm648         |
| 8 | 171211 | Edaradd       |
| 8 | 233801 | Acsm4         |
| 8 | 65100  | Zic5          |
| 8 | NaN    | MMT00018393   |
| 8 | 217232 | Cdc27         |
| 8 | 26465  | Zfp146        |
| 8 | 67728  | Dph2          |
| 8 | 16509  | Kcne1         |
| 8 | NaN    | MMT00022580   |
| 8 | 110855 | Pde6c         |
| 8 | 64335  | Svs3a         |
| 8 | 665227 | Vmn2r94       |
| 8 | 215029 | Prl3d3        |
| 8 | 320865 | Cdh18         |
| 8 | 16098  | MMT00030712   |
| 8 | 243377 | Svs1          |
| 8 | 56373  | Cpb2          |
| 8 | 84543  | Sval2         |
| 8 | 13828  | Epb4.2        |
| 8 | 69125  | Cnot8         |
| 8 | 382066 | Prdm10        |
| 8 | 67336  | 1700054K19Rik |
| 8 | 259118 | Olfr575       |
| 8 | 319670 | Emi5          |
| 8 | 71263  | Mro           |
| 8 | NaN    | MMT00026800   |
| 8 | NaN    | MMT00034233   |
| 8 | 258650 | Olfr444       |
| 8 | 19131  | Prh1          |
| 8 | NaN    | MMT00028216   |
| 8 | 258726 | Olfr599       |
| 8 | 16882  | Lig3          |
| 8 | 67741  | 4930579F01Rik |

|   |        |               |
|---|--------|---------------|
| 8 | 627607 | EG627607      |
| 8 | 207227 | Stxbp5l       |
| 8 | 75320  | Etnk1         |
| 8 | 640268 | EG640268      |
| 8 | 75079  | Zfp509        |
| 8 | 109254 | 9530008L14Rik |
| 8 | 68799  | Rgmb          |
| 8 | 75606  | 2010003K15Rik |
| 8 | 19674  | Rcvrn         |
| 8 | 258708 | Olfr1342      |
| 8 | NaN    | MMT00031646   |
| 8 | 213234 | Zbbx          |
| 8 | 67434  | 5730557B15Rik |
| 8 | NaN    | MMT00035925   |
| 8 | 654450 | MMT00010505   |
| 8 | 16576  | Kif7          |
| 8 | NaN    | MMT00046724   |
| 8 | 171230 | V1re7         |
| 8 | NaN    | MMT00041291   |
| 8 | 67120  | Ttc14         |
| 8 | 213450 | Gm732         |
| 8 | 268345 | Kcnc2         |
| 8 | 18453  | P4hb          |
| 8 | NaN    | MMT00078758   |
| 8 | NaN    | MMT00018457   |
| 8 | 17837  | Mug2          |
| 8 | 216395 | Tmem5         |
| 8 | 110350 | Dync2h1       |
| 8 | NaN    | MMT00008521   |
| 8 | 329795 | Tmem67        |
| 8 | 13109  | Cyp2j5        |
| 8 | NaN    | MMT00005811   |
| 8 | NaN    | MMT00042948   |
| 8 | NaN    | MMT00030613   |
| 8 | 433597 | MMT00013465   |
| 8 | 57354  | Cramp1l       |
| 8 | NaN    | MMT00061154   |
| 8 | 258905 | Olfr871       |
| 8 | 67909  | Galntl5       |
| 8 | 233115 | Dpy19l3       |
| 8 | 18700  | Piga          |
| 8 | 57251  | Olfr870       |
| 8 | 77918  | Krtap16-5     |
| 8 | 57258  | Xpo4          |
| 8 | 338354 | Zfp780b       |
| 8 | 12000  | Avpr2         |
| 8 | 171246 | V1rh3         |
| 8 | 258362 | Olfr1094      |
| 8 | NaN    | MMT00017494   |
| 8 | 70909  | 4921504E06Rik |
| 8 | 71106  | 4933413J09Rik |

|   |        |               |
|---|--------|---------------|
| 8 | 14608  | Gpr83         |
| 8 | 75829  | Prame         |
| 8 | NaN    | MMT00036513   |
| 8 | 15496  | Hsd3b5        |
| 8 | 20504  | Slc17a1       |
| 8 | 66719  | 4921522P10Rik |
| 8 | 78286  | Nav2          |
| 8 | NaN    | MMT00054267   |
| 8 | 54122  | Uevld         |
| 8 | 54601  | Foxo4         |
| 8 | 113864 | V1rc7         |
| 8 | 12393  | Runx2         |
| 8 | 208518 | Cep78         |
| 8 | 58869  | Pex5l         |
| 8 | 110751 | Adam33        |
| 8 | NaN    | MMT00030313   |
| 8 | 14237  | Foxd4         |
| 8 | 12812  | Coil          |
| 8 | 258548 | Olf805        |
| 8 | 54450  | Il1f5         |
| 8 | 269254 | Setx          |
| 8 | 66742  | Cypt6         |
| 8 | 67854  | Slco6b1       |
| 8 | 12565  | Cdh9          |
| 8 | 20706  | Serpinb9b     |
| 8 | 110304 | Gira3         |
| 8 | NaN    | MMT00007848   |
| 8 | NaN    | MMT00019998   |
| 8 | NaN    | MMT00010339   |
| 8 | NaN    | MMT00005283   |
| 8 | 385674 | Zfp174        |
| 8 | 258572 | Olf1032       |
| 8 | 258352 | Olf692        |
| 8 | 445007 | Nup85         |
| 8 | 259035 | Olf714        |
| 8 | 626280 | EG626280      |
| 8 | 94109  | Csmd1         |
| 8 | 15458  | Hpx           |
| 8 | NaN    | MMT00082318   |
| 8 | 225644 | Cplx4         |
| 8 | 258297 | Olf827        |
| 8 | 258304 | Olf498        |
| 8 | NaN    | MMT00009539   |
| 8 | 258810 | Olf665        |
| 8 | 66673  | Sorcs3        |
| 8 | NaN    | MMT00054056   |
| 8 | 331461 | Il1rap1       |
| 8 | NaN    | MMT00038532   |
| 8 | 22689  | Zfp27         |
| 8 | NaN    | MMT00048642   |
| 8 | 329421 | Myo3b         |

|   |        |               |
|---|--------|---------------|
| 8 | 19111  | Pr16a1        |
| 8 | 66786  | Olfr701       |
| 8 | 74365  | Lonrf3        |
| 8 | 18946  | Pnliprp1      |
| 8 | 20511  | Slc1a2        |
| 8 | 268491 | Gm1564        |
| 8 | 73415  | 1700049E17Rik |
| 8 | 73412  | Txndc3        |
| 8 | NaN    | MMT00013067   |
| 8 | 15042  | H2-T24        |
| 8 | 69694  | Tatdn1        |
| 8 | 627132 | Vmn2r93       |
| 8 | 320484 | A430107D22Rik |
| 8 | 78619  | Zfp449        |
| 8 | 108096 | Slco1a5       |
| 8 | 75050  | Kif27         |
| 8 | NaN    | MMT00039380   |
| 8 | 78631  | 1700085A12Rik |
| 8 | NaN    | MMT00060807   |
| 8 | NaN    | MMT00026261   |
| 8 | 271842 | Rpusd2        |
| 8 | 78771  | Mctp1         |
| 8 | 14729  | Gp5           |
| 8 | 241391 | Galnt5        |
| 8 | 111507 | Igh           |
| 8 | 258299 | Olfr1461      |
| 8 | NaN    | MMT00017308   |
| 8 | 74413  | Tc2n          |
| 8 | 74369  | Mei1          |
| 8 | NaN    | MMT00069233   |
| 8 | 76757  | Trdn          |
| 8 | 404545 | Tmem16g       |
| 8 | 213409 | Lemd1         |
| 8 | NaN    | MMT00039356   |
| 8 | 71156  | 1700108M19Rik |
| 8 | NaN    | MMT00029151   |
| 8 | 258216 | Olfr1034      |
| 8 | 170770 | Bbc3          |
| 8 | NaN    | MMT00020436   |
| 8 | 207596 | Thsd4         |
| 8 | NaN    | MMT00029634   |
| 8 | 545741 | EG545741      |
| 8 | 338320 | Mia2          |
| 8 | NaN    | MMT00023360   |
| 8 | 260347 | MMT00042388   |
| 8 | 67218  | 2810038D20Rik |
| 8 | 67504  | Rnf151        |
| 8 | 11449  | Chrng         |
| 8 | 432555 | EG432555      |
| 8 | 73809  | Satl1         |
| 8 | 98752  | Fcrla         |



|   |           |               |
|---|-----------|---------------|
| 8 | 67537     | Glpr112       |
| 8 | NaN       | MMT00039685   |
| 8 | 238944    | Nek10         |
| 8 | NaN       | MMT00035749   |
| 8 | 216049    | Zfp365        |
| 8 | 19069     | Nup88         |
| 8 | 71164     | Zdhhc11       |
| 8 | 259054    | Olfr589       |
| 8 | 237310    | Il22ra2       |
| 8 | 52042     | D17Ert663e    |
| 8 | 241452    | Dhrs9         |
| 8 | 114585    | D17H6S53E     |
| 8 | 385737    | Gm1758        |
| 8 | 77981     | B230110C06Rik |
| 8 | 239420    | Csmd3         |
| 8 | 385120    | Gm1502        |
| 9 | NaN       | MMT00019450   |
| 9 | 13085     | Cyp2a12       |
| 9 | 14942     | Gzme          |
| 9 | 27385     | Magel2        |
| 9 | 668212    | Efr3b         |
| 9 | 12425     | Cckar         |
| 9 | 57752     | Tacc2         |
| 9 | 72852     | 2900024O10Rik |
| 9 | 258803    | Olfr136       |
| 9 | 100043108 | Cyp2c69       |
| 9 | 18343     | Olfr44        |
| 9 | 14420     | Galc          |
| 9 | 434121    | EG434121      |
| 9 | 66712     | Spesp1        |
| 9 | 450219    | Gsdma3        |
| 9 | 230596    | Prpf38a       |
| 9 | 242126    | Slc22a15      |
| 9 | 12401     | Serpina6      |
| 9 | 78478     | 1700129I15Rik |
| 9 | 320679    | Samd12        |
| 9 | 15497     | Hsd3b6        |
| 9 | 258368    | Olfr1450      |
| 9 | 15165     | Hcn1          |
| 9 | NaN       | MMT00016640   |
| 9 | 211712    | Pcdh9         |
| 9 | 12686     | Elovl3        |
| 9 | 78354     | 2210407C18Rik |
| 9 | 320534    | Tmem104       |
| 9 | 50518     | a             |
| 9 | 268780    | Egflam        |
| 9 | 94176     | Dock2         |
| 9 | 67715     | 2010106E10Rik |
| 9 | 380822    | MMT00072212   |
| 9 | 258290    | Olfr1143      |
| 9 | 259015    | Olfr1038      |

|   |        |               |
|---|--------|---------------|
| 9 | 16061  | Igh-VJ558     |
| 9 | 320007 | Sidt1         |
| 9 | 114714 | Rad51c        |
| 9 | 627081 | Xlr5b         |
| 9 | 258934 | Olfr802       |
| 9 | 170639 | Olfr78        |
| 9 | 330660 | Btbd16        |
| 9 | 547097 | B020011L13Rik |
| 9 | 20459  | Ptk6          |
| 9 | 72789  | Veph1         |
| 9 | 109151 | Chd9          |
| 9 | 17230  | Tpsab1        |
| 9 | 77771  | Csrnp3        |
| 9 | 240479 | B230399E16Rik |
| 9 | 399603 | D330050I23Rik |
| 9 | 71623  | Krtap5-2      |
| 9 | 75216  | 4930534B04Rik |
| 9 | 232426 | 5530400C23Rik |
| 9 | NaN    | MMT00052724   |
| 9 | 13099  | Cyp2c40       |
| 9 | 241062 | Pgap1         |
| 9 | 108655 | Foxp1         |
| 9 | 15493  | Hsd3b2        |
| 9 | NaN    | MMT00038655   |
| 9 | 109331 | Rnf20         |
| 9 | 241547 | D230010M03Rik |
| 9 | NaN    | MMT00051225   |
| 9 | 330228 | 4933411G11Rik |
| 9 | 12322  | Camk2a        |
| 9 | 20445  | St6galnac1    |
| 9 | 16184  | Il2ra         |
| 9 | NaN    | MMT00037010   |
| 9 | 19226  | Pth           |
| 9 | 259019 | Olfr1045      |
| 9 | 258186 | Olfr75-ps1    |
| 9 | 381832 | Prpmp5        |
| 9 | 77531  | Anks1b        |
| 9 | 70900  | 4921517D22Rik |
| 9 | 66996  | Ceacam11      |
| 9 | 241638 | RP23-100C5.8  |
| 9 | 237625 | Pla2g3        |
| 9 | 237038 | Nox1          |
| 9 | 76816  | Sdccag8       |
| 9 | NaN    | MMT00012984   |
| 9 | 75956  | Srrm2         |
| 9 | NaN    | MMT00004378   |
| 9 | 217082 | Hlf           |
| 9 | 320495 | A130090K04Rik |
| 9 | 632654 | MMT00048312   |
| 9 | 224480 | Nox3          |
| 9 | 258808 | Olfr620       |

|   |        |               |
|---|--------|---------------|
| 9 | 57252  | Tas2r105      |
| 9 | 170716 | Cyp4f13       |
| 9 | 20271  | Scn5a         |
| 9 | NaN    | MMT00078580   |
| 9 | 103406 | 9130206N08Rik |
| 9 | NaN    | MMT00000773   |
| 9 | 108069 | Grm3          |
| 9 | 258883 | Olfr876       |
| 9 | 259000 | Olfr195       |
| 9 | NaN    | MMT00020896   |
| 9 | 112417 | Ugt2b37       |
| 9 | NaN    | MMT00013165   |
| 9 | NaN    | MMT00080431   |
| 9 | 232910 | Ap2s1         |
| 9 | NaN    | MMT00002308   |
| 9 | NaN    | MMT00067570   |
| 9 | 230558 | C8a           |
| 9 | NaN    | MMT00025388   |
| 9 | 16061  | Igh-VJ558     |
| 9 | 268980 | Strn          |
| 9 | 215890 | Rlbp112       |
| 9 | 21816  | Tgm1          |
| 9 | 20749  | Dbpht1        |
| 9 | NaN    | MMT00005305   |
| 9 | 72301  | 1810041L15Rik |
| 9 | NaN    | MMT00050244   |
| 9 | NaN    | MMT00002596   |
| 9 | 76217  | Jakmip2       |
| 9 | 225010 | Lycat         |
| 9 | 98870  | Al182371      |
| 9 | 75083  | Usp50         |
| 9 | 18387  | Oprk1         |
| 9 | 234736 | Rfwd3         |
| 9 | 56747  | Sez6l         |
| 9 | 20563  | Slit2         |
| 9 | 16687  | Krt6a         |
| 9 | 227627 | Lcn13         |
| 9 | 13525  | Adam26a       |
| 9 | 66763  | 4933425L06Rik |
| 9 | 77220  | C030003D03Rik |
| 9 | 73747  | 1110034G24Rik |
| 9 | NaN    | MMT00048531   |
| 9 | 233799 | Acsm2         |
| 9 | NaN    | MMT00063288   |
| 9 | NaN    | MMT00047578   |
| 9 | 69168  | Bola1         |
| 9 | 382090 | 4922501C03Rik |
| 9 | 212712 | Satb2         |
| 9 | 258587 | Olfr1100      |
| 9 | 109663 | Hoxc11        |
| 9 | 27028  | Ermap         |

|   |        |               |
|---|--------|---------------|
| 9 | 270163 | Myo9a         |
| 9 | 241308 | Ralgps1       |
| 9 | 20219  | Apcs          |
| 9 | 228094 | Cerkl         |
| 9 | 18440  | P2rx6         |
| 9 | 252904 | V1re9         |
| 9 | 74700  | 4930524O08Rik |
| 9 | 75030  | 4930503E24Rik |
| 9 | 258345 | Olfr1121      |
| 9 | 74978  | Lrriq1        |
| 9 | 16061  | Igh-VJ558     |
| 9 | 381350 | BC061194      |
| 9 | 23850  | Pappa2        |
| 9 | 103677 | Smg6          |
| 9 | 14738  | Gpr12         |
| 9 | 21375  | Tbr1          |
| 9 | 23928  | Lamc3         |
| 9 | 67719  | 2310057J18Rik |
| 9 | 68527  | 1110017I16Rik |
| 9 | NaN    | MMT00020922   |
| 9 | 77700  | 9130208D14Rik |
| 9 | 18352  | Olfr52        |
| 9 | 78257  | Lrrc9         |
| 9 | NaN    | MMT00077775   |
| 9 | 394252 | Serpinb3d     |
| 9 | 259017 | Olfr1019      |
| 9 | NaN    | MMT00045517   |
| 9 | 360214 | Defb39        |
| 9 | 11657  | Alb           |
| 9 | 12352  | Car5a         |
| 9 | 75484  | 1700007H22Rik |
| 9 | NaN    | MMT00063621   |
| 9 | 385493 | AU015836      |
| 9 | 21667  | Tdgf1         |
| 9 | 14125  | Fcer1a        |
| 9 | 83565  | Pramel3       |
| 9 | 67366  | 1810008K16Rik |
| 9 | NaN    | MMT00014316   |
| 9 | 240894 | Fmo9          |
| 9 | 73191  | Fezf1         |
| 9 | 13089  | Cyp2b13       |
| 9 | 14619  | Gjb2          |
| 9 | NaN    | MMT00037949   |
| 9 | 232358 | Vmn2r19       |
| 9 | 78443  | A930041C12Rik |
| 9 | 216225 | Slc5a8        |
| 9 | 235386 | C630028N24Rik |
| 9 | 13417  | Dnahc8        |
| 9 | 21639  | Tcrg-V5       |
| 9 | 77011  | 5730590G19Rik |
| 9 | 435927 | EG435927      |

|   |           |               |
|---|-----------|---------------|
| 9 | NaN       | MMT00020226   |
| 9 | 545291    | MMT00030912   |
| 9 | 239157    | Pnma2         |
| 9 | 381538    | Gm1027        |
| 9 | 23793     | Adam25        |
| 9 | 232836    | Galp          |
| 9 | 20599     | Smr3a         |
| 9 | 71421     | Amtn          |
| 9 | 268482    | Krt12         |
| 9 | 74441     | Slco6c1       |
| 9 | 20234     | Sbp           |
| 9 | 384422    | Igk-V8        |
| 9 | 258529    | Olf313        |
| 9 | NaN       | MMT00028550   |
| 9 | NaN       | MMT00059108   |
| 9 | 381229    | Ccdc147       |
| 9 | 66617     | 2610205E22Rik |
| 9 | 268755    | A930011O12Rik |
| 9 | 414071    | BC028471      |
| 9 | 245650    | Gucy2f        |
| 9 | 100041581 | Zkscan16      |
| 9 | 28250     | Slco1a4       |
| 9 | 15891     | Ibsp          |
| 9 | 258843    | Olf1087       |
| 9 | 69693     | Pof1b         |
| 9 | 237107    | Gnl3l         |
| 9 | NaN       | MMT00007654   |
| 9 | NaN       | MMT00046813   |
| 9 | 19256     | Ptpn20        |
| 9 | 627984    | Nlrp1c        |
| 9 | NaN       | MMT00042391   |
| 9 | 114660    | Etos1         |
| 9 | 640530    | EG640530      |
| 9 | 23927     | Krtap14       |
| 9 | 258287    | Olf125        |
| 9 | 229780    | Ccdc76        |
| 9 | NaN       | MMT00022090   |
| 9 | 13239     | Defcr5        |
| 9 | 20690     | Spam1         |
| 9 | 113851    | V1ra9         |
| 9 | 620631    | Ttc30a2       |
| 9 | 18183     | Nrg3          |
| 9 | 635702    | Naaladl2      |
| 9 | NaN       | MMT00026815   |
| 9 | 11922     | Neurod6       |
| 9 | 52028     | Bbs1          |
| 9 | 246691    | Prok1         |
| 9 | 224916    | Vmn2r120      |
| 9 | 70086     | Cysltr2       |
| 9 | 71508     | 8430426H19Rik |
| 9 | 319800    | C730048C13Rik |

|    |        |               |
|----|--------|---------------|
| 9  | 545391 | EG545391      |
| 9  | 77706  | Abcb5         |
| 9  | 380836 | Mrs2          |
| 9  | 51885  | Tubgcp4       |
| 9  | 226470 | Zbtb41        |
| 9  | 55993  | Msh4          |
| 9  | 52428  | Rhpn2         |
| 9  | 252838 | Tox           |
| 9  | 20397  | Sgpl1         |
| 10 | 74100  | MMT00001343   |
| 10 | 74183  | 2310042D19Rik |
| 10 | 216739 | Acsl6         |
| 10 | 12715  | Ckm           |
| 10 | 17901  | Myl1          |
| 10 | 74166  | Tmem38a       |
| 10 | 244923 | Klhl31        |
| 10 | 11474  | Actn3         |
| 10 | 13808  | Eno3          |
| 10 | 21955  | Tnnt1         |
| 10 | 11565  | Adssl1        |
| 10 | 12555  | Cdh15         |
| 10 | 68680  | 1110028A07Rik |
| 10 | 22138  | Ttn           |
| 10 | 21953  | Tnni2         |
| 10 | 53311  | Mybph         |
| 10 | 11937  | Atp2a1        |
| 10 | 268859 | MMT00006152   |
| 10 | 21925  | Tnnc2         |
| 10 | 56012  | Pgam2         |
| 10 | 140781 | Myh7          |
| 10 | 68802  | Mypn          |
| 10 | 11472  | Actn2         |
| 10 | 229665 | Ampd1         |
| 10 | 22138  | Ttn           |
| 10 | 76469  | Cmya5         |
| 10 | 233199 | Mybpc2        |
| 10 | 59011  | Myoz1         |
| 10 | 11811  | Apobec2       |
| 10 | 22003  | Tpm1          |
| 10 | 59006  | Myoz2         |
| 10 | 66106  | Smpx          |
| 10 | 17189  | Mb            |
| 10 | 22138  | Ttn           |
| 10 | 21957  | Tnnt3         |
| 10 | 17907  | Mylpf         |
| 10 | 68678  | Smtnl1        |
| 10 | 12292  | Cacna1s       |
| 10 | 12862  | Cox6a2        |
| 10 | 22138  | Ttn           |
| 10 | 17885  | Myh8          |
| 10 | 24131  | Ldb3          |

|    |        |               |
|----|--------|---------------|
| 10 | 15464  | Hrc           |
| 10 | 228003 | Kbtbd10       |
| 10 | 69585  | Hfe2          |
| 10 | 12391  | Cav3          |
| 10 | 76722  | Ckmt2         |
| 10 | 66211  | Rpl3l         |
| 10 | 17306  | Sypl2         |
| 10 | 74843  | Zmynd17       |
| 10 | 20190  | Ryr1          |
| 10 | 56534  | Hspb3         |
| 10 | 21384  | Tbx15         |
| 10 | 13009  | Csrp3         |
| 10 | 21924  | Tnnc1         |
| 10 | 17882  | Myh2          |
| 10 | 17996  | Neb           |
| 10 | 22138  | Ttn           |
| 10 | 59069  | Tpm3          |
| 10 | 329502 | Pla2g4e       |
| 10 | 17878  | Myf6          |
| 10 | 241431 | Xirp2         |
| 10 | 76294  | Asb5          |
| 10 | 378431 | Txlnb         |
| 10 | 50874  | Tmod4         |
| 10 | 17897  | Myl3          |
| 10 | 21828  | Thbs4         |
| 10 | 68515  | 1110012N22Rik |
| 10 | 69564  | Itgb1bp3      |
| 10 | 11459  | Acta1         |
| 10 | 223513 | Abra          |
| 10 | 11875  | Art5          |
| 10 | 56504  | Srpk3         |
| 10 | 12335  | Capn3         |
| 10 | 83679  | Pde4dip       |
| 10 | 17906  | Myl2          |
| 10 | 69700  | Col22a1       |
| 10 | 53318  | Pdlim3        |
| 11 | 75469  | Spata19       |
| 11 | 77963  | Hook1         |
| 11 | 76378  | Ropn1         |
| 11 | 70894  | 4921510J17Rik |
| 11 | 67342  | 1700058G18Rik |
| 11 | 66338  | Cdrt4         |
| 11 | 76653  | Cby3          |
| 11 | 13524  | Adam18        |
| 11 | 75483  | Cox8c         |
| 11 | 69314  | 1700011H22Rik |
| 11 | 18285  | Odf1          |
| 11 | 320604 | A730037C10Rik |
| 11 | 69317  | Hmgb4         |
| 11 | 434285 | BB014433      |
| 11 | 242408 | 4930412F15Rik |

|    |           |               |
|----|-----------|---------------|
| 11 | 67929     | Ccdc70        |
| 11 | 69357     | RP23-438H3.2  |
| 11 | 21884     | Fabp9         |
| 11 | 77945     | Rpgrip1       |
| 11 | 14028     | Evx1          |
| 11 | 17002     | Ltf           |
| 11 | 12231     | Btn1a1        |
| 11 | 109648    | Npy           |
| 11 | 228151    | 4833423E24Rik |
| 11 | 210321    | BC048679      |
| 11 | 269328    | Muc15         |
| 11 | 56315     | Rhcg          |
| 11 | 13608     | Edar          |
| 11 | 69134     | 2200001115Rik |
| 11 | 66255     | 1810005K13Rik |
| 11 | 547323    | MMT00078134   |
| 11 | 11500     | Adam7         |
| 11 | 77704     | Lcn9          |
| 11 | 78709     | Spink8        |
| 11 | 328971    | Spink10       |
| 11 | 11997     | Akr1b7        |
| 11 | 78128     | Spag11        |
| 11 | 77015     | Mpped2        |
| 11 | 67874     | Rprm          |
| 11 | 18991     | Pou3f1        |
| 11 | 381845    | 2310014L17Rik |
| 11 | 68243     | A930018P22Rik |
| 11 | 14800     | Gria2         |
| 11 | 13012     | Cst8          |
| 11 | 14858     | Gsta2         |
| 11 | 70163     | 2210415F13Rik |
| 11 | 77684     | 9230107M04Rik |
| 11 | 68171     | D730048I06Rik |
| 11 | 17057     | Klr1a         |
| 11 | 78242     | Spink12       |
| 11 | 12097     | Bglap2        |
| 11 | 231293    | C130090K23Rik |
| 11 | 14473     | Gc            |
| 11 | 100038927 | MMT00025642   |
| 11 | 16939     | Lor           |
| 11 | 246082    | Defb15        |
| 11 | 15874     | lapp          |
| 11 | 77701     | Lcn12         |
| 11 | 26366     | Ceacam10      |
| 11 | 246084    | Defb35        |
| 11 | 16665     | Krt15         |
| 11 | 240817    | 5830403L16Rik |
| 11 | 11572     | Crisp3        |
| 11 | 15930     | Indo          |
| 11 | 12095     | Bglap-rs1     |
| 11 | 12269     | C4bp          |



|    |           |                    |
|----|-----------|--------------------|
| 11 | 11571     | Crisp1             |
| 11 | 403172    | Defb21             |
| 11 | 629754    | OTTMUSG00000001088 |
| 11 | 78240     | Cst11              |
| 11 | 78076     | Lcn8               |
| 11 | 67935     | Ces7               |
| 11 | 66183     | 1110032A04Rik      |
| 11 | 22270     | Upk3a              |
| 11 | 72434     | Lypd3              |
| 11 | 15375     | Foxa1              |
| 11 | 20760     | Sprr2f             |
| 11 | 14623     | Gjb6               |
| 11 | 16622     | Klk1b5             |
| 11 | 104174    | Gldc               |
| 11 | 13214     | Defb1              |
| 11 | 20724     | Serpinb5           |
| 11 | 83984     | Tssk6              |
| 11 | 211147    | 11-Mar             |
| 11 | 68265     | lqcf3              |
| 11 | 70069     | H1fnt              |
| 11 | 219038    | Foxo3              |
| 11 | 69423     | 1700019M22Rik      |
| 11 | 73302     | 1700031M16Rik      |
| 11 | 19119     | Prm2               |
| 11 | 53814     | Oaz3               |
| 11 | 16833     | Ldhc               |
| 11 | 13074     | Cyp17a1            |
| 11 | 17235     | Smcp               |
| 11 | 75528     | 1700018L24Rik      |
| 11 | 100038417 | ENSMUSG00000073551 |
| 11 | 110326    | Tas1r1             |
| 11 | 66696     | Snx31              |
| 11 | 73722     | Lce1a2             |
| 11 | 69301     | 1700008P20Rik      |
| 12 | 214922    | Slc39a2            |
| 12 | 226539    | Dars2              |
| 12 | 107141    | Cyp2c50            |
| 12 | 13101     | Cyp2d10            |
| 12 | 258960    | Olf1r171           |
| 12 | NaN       | MMT00003591        |
| 12 | 100041375 | Cyp3a41b           |
| 12 | 70902     | Aytl1b             |
| 12 | 71760     | Agxt2l1            |
| 12 | 171195    | V1rc22             |
| 12 | 245880    | Wasf3              |
| 12 | 100019    | Mdn1               |
| 12 | 108114    | Slc22a7            |
| 12 | 380714    | Rph3al             |
| 12 | 629499    | 4922505G16Rik      |
| 12 | 97487     | Cmtm4              |
| 12 | 330401    | Tmcc1              |

|    |        |               |
|----|--------|---------------|
| 12 | 230857 | Ece1          |
| 12 | 74549  | 9130404D08Rik |
| 12 | 74055  | Plce1         |
| 12 | 27400  | Hsd17b6       |
| 12 | 19125  | Prodh         |
| 12 | 83997  | Slmap         |
| 12 | 18628  | Per3          |
| 12 | 72502  | Cwf19l1       |
| 12 | 100727 | Ugt2b34       |
| 12 | 18815  | Plg           |
| 12 | 279028 | Adamts13      |
| 12 | 320360 | Ric3          |
| 12 | 19116  | Prlr          |
| 12 | NaN    | MMT00074228   |
| 12 | 72297  | B3gnt3        |
| 12 | 18705  | Pik3c2g       |
| 12 | 58198  | Sall1         |
| 12 | 209091 | Ccnb3         |
| 12 | 368202 | Gm1019        |
| 12 | 56219  | Extl1         |
| 12 | 218973 | Wdhd1         |
| 12 | 12654  | Chi3l1        |
| 12 | 257871 | Olfr1372-ps1  |
| 12 | NaN    | MMT00011155   |
| 12 | NaN    | MMT00052319   |
| 12 | NaN    | MMT00031931   |
| 12 | NaN    | MMT00066154   |
| 12 | NaN    | MMT00007367   |
| 12 | 21906  | Otop1         |
| 12 | 27052  | Aoah          |
| 12 | 22773  | Zic3          |
| 12 | 24001  | Tiam2         |
| 12 | 78547  | E130304I02Rik |
| 12 | 76770  | 2010005H15Rik |
| 12 | 235952 | Gm189         |
| 12 | 14807  | Grik3         |
| 12 | 238205 | Lfn5          |
| 12 | NaN    | MMT00072061   |
| 12 | 16875  | Lhx8          |
| 12 | 64297  | Gprc5b        |
| 12 | 258692 | Olfr1442      |
| 12 | 74175  | Crct1         |
| 12 | 258954 | Olfr522       |
| 12 | 192174 | Rwdd4a        |
| 12 | NaN    | MMT00039919   |
| 12 | 258272 | Olfr1402      |
| 12 | NaN    | MMT00077643   |
| 12 | 18798  | Plcb4         |
| 12 | 68054  | Serpina12     |
| 12 | 320873 | Cdh10         |
| 12 | 242286 | 4833413O15Rik |

|    |           |                    |
|----|-----------|--------------------|
| 12 | 15485     | Hsd17b1            |
| 12 | 29862     | Ninj2              |
| 12 | 259010    | Olfr393            |
| 12 | 68507     | Ppfia4             |
| 12 | NaN       | MMT00007523        |
| 12 | 258645    | Olfr1403           |
| 12 | 100042314 | ENSMUSG00000074179 |
| 12 | NaN       | MMT00064181        |
| 12 | 26423     | Nr5a1              |
| 12 | 74143     | Opa1               |
| 12 | NaN       | MMT00006980        |
| 12 | 72503     | 2610507B11Rik      |
| 12 | 12142     | Prdm1              |
| 12 | 21948     | Cd70               |
| 12 | 23872     | Ets2               |
| 12 | 68837     | Foxk2              |
| 12 | NaN       | MMT00058440        |
| 12 | 208151    | Tmem132b           |
| 12 | 224024    | Scarf2             |
| 12 | 56191     | Tro                |
| 12 | 100040843 | Cyp4a32            |
| 12 | 234199    | Fgl1               |
| 12 | 207667    | Lbxcor1            |
| 12 | 242748    | Ptchd2             |
| 12 | 19752     | Rnase1             |
| 12 | NaN       | MMT00068134        |
| 12 | 67608     | Narf               |
| 12 | 109697    | Cpa1               |
| 12 | NaN       | MMT00077820        |
| 12 | 72007     | Fndc3b             |
| 12 | 16866     | Lhb                |
| 12 | NaN       | MMT00043344        |
| 12 | 71768     | Vwce               |
| 12 | 229613    | 6330549D23Rik      |
| 12 | NaN       | MMT00014972        |
| 12 | 72668     | 2810030E01Rik      |
| 12 | 636808    | Cntnap5a           |
| 12 | 218613    | Mier3              |
| 12 | 84506     | Hamp               |
| 12 | 110135    | Fgb                |
| 12 | 113847    | V1ra5              |
| 12 | 20863     | Stfa3              |
| 12 | 58218     | Trem3              |
| 12 | 100102    | Pcsk9              |
| 12 | 258811    | Olfr926            |
| 12 | 21679     | Tead4              |
| 12 | 245615    | Kir3dl2            |
| 12 | NaN       | MMT00078109        |
| 12 | 72607     | Usp13              |
| 12 | 20211     | Saa4               |
| 12 | 13096     | Cyp2c37            |

|    |        |               |
|----|--------|---------------|
| 12 | 258987 | Oifr1270      |
| 12 | 619301 | G630016D24Rik |
| 12 | 382035 | MMT00056309   |
| 12 | 319239 | Npsr1         |
| 12 | 14079  | Fabp2         |
| 12 | 67133  | Gp2           |
| 12 | 13406  | Dmp1          |
| 12 | 435889 | 1810049H19Rik |
| 12 | 52250  | Reep1         |
| 12 | NaN    | MMT00005917   |
| 13 | 108078 | Olr1          |
| 13 | 13733  | Emr1          |
| 13 | 14728  | Lilrb4        |
| 13 | 14255  | Flt3          |
| 13 | 212167 | A530088I07Rik |
| 13 | 74076  | 4933406C10Rik |
| 13 | 234407 | Glit25d1      |
| 13 | 232685 | AB041803      |
| 13 | 76709  | Arpc2         |
| 13 | 20932  | Surf4         |
| 13 | 21844  | Tiam1         |
| 13 | 75665  | Ccdc64        |
| 13 | 327900 | Ubt2          |
| 13 | 60322  | Chst7         |
| 13 | 17285  | Meox1         |
| 13 | 66650  | Nepn          |
| 13 | 63953  | Dusp10        |
| 13 | 14468  | Gbp1          |
| 13 | 12363  | Casp4         |
| 13 | 14991  | H2-M3         |
| 13 | 19139  | Prps1         |
| 13 | 71712  | 1200002N14Rik |
| 13 | 19227  | Pthlh         |
| 13 | 21789  | Tfpi2         |
| 13 | 74760  | Rab3il1       |
| 13 | 52614  | Emr4          |
| 13 | 664862 | Gpr137b-ps    |
| 13 | 73341  | Arhgef6       |
| 13 | 59036  | Dact1         |
| 13 | 105689 | Mycbp2        |
| 13 | 234094 | Arhgef10      |
| 13 | 77569  | Limch1        |
| 13 | 224273 | BC043118      |
| 13 | 18003  | Nedd9         |
| 13 | 209630 | Frmd4a        |
| 13 | 544963 | Iqgap2        |
| 13 | 18768  | Pkib          |
| 13 | 14130  | Fcgr2b        |
| 13 | 66190  | Phca          |
| 13 | 21930  | Tnfaip6       |
| 13 | 15117  | Has2          |

|    |        |               |
|----|--------|---------------|
| 13 | 72575  | C430049B03Rik |
| 13 | 18791  | Plat          |
| 13 | 21813  | Tgfbr2        |
| 13 | 108927 | Lhfp          |
| 13 | 20319  | Sfrp2         |
| 13 | 69538  | Antxr1        |
| 13 | 20363  | Sepp1         |
| 13 | 22224  | Usp10         |
| 13 | 71738  | Mamdc2        |
| 13 | 16773  | Lama2         |
| 13 | 50706  | Postn         |
| 13 | 16004  | Igf2r         |
| 13 | 83671  | Sytl2         |
| 13 | 11624  | Ahrr          |
| 13 | 56792  | Stap1         |
| 13 | 56644  | Clec7a        |
| 13 | 12522  | Cd83          |
| 13 | 19264  | Ptpcr         |
| 13 | 57781  | Cd200r1       |
| 13 | 12508  | Cd53          |
| 13 | 17087  | Ly96          |
| 13 | 12506  | Cd48          |
| 13 | 26888  | Clec4a2       |
| 13 | 12524  | Cd86          |
| 13 | 17533  | Mrc1          |
| 13 | 15939  | Ier5          |
| 13 | 77579  | Myh10         |
| 13 | 227157 | Mpp4          |
| 13 | 53603  | Tslp          |
| 13 | 76184  | Abca6         |
| 14 | 12362  | Casp1         |
| 14 | 216363 | Rab3ip        |
| 14 | 53376  | Usp2          |
| 14 | 56018  | Stard10       |
| 14 | 215929 | Al317395      |
| 14 | 218865 | Chdh          |
| 14 | 50905  | Il17rb        |
| 14 | 66433  | Chchd7        |
| 14 | 319582 | 6430573F11Rik |
| 14 | 66611  | Ribc1         |
| 14 | 211323 | Nrg1          |
| 14 | 69299  | Asb9          |
| 14 | 213575 | Dync2li1      |
| 14 | 232875 | Zscan18       |
| 14 | 170753 | Zfp704        |
| 14 | NaN    | MMT00078660   |
| 14 | 22038  | Plscr1        |
| 14 | 18828  | Plscr2        |
| 14 | 80890  | Trim2         |
| 14 | 74019  | Traf3ip1      |
| 14 | 18645  | Pfn2          |

|    |           |               |
|----|-----------|---------------|
| 14 | 234915    | AK129341      |
| 14 | 105439    | Slain1        |
| 14 | 67492     | Anubl1        |
| 14 | 328192    | MMT00012324   |
| 14 | 232146    | Tmem166       |
| 14 | 93761     | Smarca1       |
| 14 | 66569     | Gdpd1         |
| 14 | 69698     | 2310046K01Rik |
| 14 | 233733    | Galntl4       |
| 14 | 110197    | Dgkg          |
| 14 | 226654    | EG226654      |
| 14 | 20347     | Sema3b        |
| 14 | 17240     | Mdfi          |
| 14 | 14632     | Gli1          |
| 14 | 217335    | Fbf1          |
| 14 | 232970    | Phldb3        |
| 14 | 211389    | Suox          |
| 14 | 380694    | Ccnjl         |
| 14 | 24117     | Wif1          |
| 14 | 110385    | Pde4c         |
| 14 | 50781     | Dkk3          |
| 14 | 233335    | Dmn           |
| 14 | 665033    | EG665033      |
| 14 | 66601     | Tmigd1        |
| 14 | 71213     | Cage1         |
| 14 | 12228     | Btg3          |
| 14 | 12228     | Btg3          |
| 14 | 14853     | Gspt2         |
| 14 | 99681     | Tchh          |
| 14 | 237175    | Gpr64         |
| 14 | 71893     | Noxo1         |
| 14 | 14772     | Grk4          |
| 14 | 67298     | Gprasp1       |
| 14 | 213081    | Wdr19         |
| 14 | 19659     | Rbp1          |
| 14 | 19331     | Rab19         |
| 14 | 192651    | Zfp286        |
| 14 | 69772     | Bdh2          |
| 14 | 192167    | Nlgn1         |
| 14 | 20230     | Satb1         |
| 14 | 209268    | Igsf1         |
| 14 | 98396     | Slc41a1       |
| 14 | 16440     | Itpr3         |
| 14 | 100041639 | MMT00053163   |
| 14 | 14766     | Gpr56         |
| 14 | 216831    | AU040829      |
| 14 | 17357     | Marcks1       |
| 14 | NaN       | MMT00039914   |
| 14 | 217882    | AW555464      |
| 14 | 54324     | Arhgef5       |
| 14 | 209588    | Sectm1a       |

|    |        |               |
|----|--------|---------------|
| 14 | 99662  | Eps8l3        |
| 14 | 69364  | 1700012P22Rik |
| 14 | 192201 | Wfdc15b       |
| 14 | 71837  | 1700003E16Rik |
| 14 | 71840  | Tekt4         |
| 14 | 15417  | Hoxb9         |
| 14 | 74453  | Ccdc11        |
| 14 | 66353  | 2310007A19Rik |
| 14 | 13195  | Ddc           |
| 14 | 56739  | Rec8          |
| 14 | 171281 | Acot3         |
| 14 | 69836  | Pla2g12b      |
| 14 | 384198 | Gm1381        |
| 15 | 231507 | Plac8         |
| 15 | 74153  | Ube1l         |
| 15 | 17071  | Ly6f          |
| 15 | 110454 | Ly6a          |
| 15 | NaN    | MMT00008674   |
| 15 | 631323 | MMT00028135   |
| 15 | 56417  | Adar          |
| 15 | 327959 | Xaf1          |
| 15 | 17069  | Ly6e          |
| 15 | 16859  | Lgals9        |
| 15 | 23960  | Oas1g         |
| 15 | 69550  | Bst2          |
| 15 | 229003 | BC006779      |
| 15 | 16912  | Psmb9         |
| 15 | 16913  | Psmb8         |
| 15 | 217069 | Trim25        |
| 15 | 80861  | Dhx58         |
| 15 | NaN    | MMT00030347   |
| 15 | 547253 | Parp14        |
| 15 | 23962  | Oasl2         |
| 15 | 246728 | Oas2          |
| 15 | 16145  | Igtp          |
| 15 | 15953  | Ifi47         |
| 15 | 243771 | Parp12        |
| 15 | 54123  | Irf7          |
| 15 | 24110  | Usp18         |
| 15 | 17858  | Mx2           |
| 15 | 15957  | Ifit1         |
| 15 | 15959  | Ifit3         |
| 15 | 67775  | Rtp4          |
| 15 | 60440  | ligp1         |
| 15 | 21822  | Tgtp          |
| 15 | 54396  | ligp2         |
| 15 | 99899  | Ifi44         |
| 15 | 19039  | Lgals3bp      |
| 15 | 246730 | Oas1a         |
| 15 | NaN    | MMT00036681   |
| 15 | 15958  | Ifit2         |

|    |        |               |
|----|--------|---------------|
| 15 | 76074  | 5830443L24Rik |
| 15 | 629974 | Rnf213        |
| 15 | 219132 | D14Ertd668e   |
| 15 | 219131 | Phf11         |
| 15 | 55932  | Gbp3          |
| 15 | 14938  | Gzma          |
| 15 | 14963  | H2-BI         |
| 15 | 16068  | Il18bp        |
| 16 | 15233  | Hgd           |
| 16 | 66740  | 4931417E11Rik |
| 16 | NaN    | MMT00044569   |
| 16 | 319804 | Glit1d1       |
| 16 | 74468  | Hyal5         |
| 16 | 68355  | 2010204K13Rik |
| 16 | NaN    | MMT00077977   |
| 16 | NaN    | MMT00039710   |
| 16 | 330721 | Nek5          |
| 16 | 259030 | Olfr1125      |
| 16 | 20129  | Rptn          |
| 16 | 70897  | 4921509E07Rik |
| 16 | 75886  | Gstt4         |
| 16 | 69347  | 1700008P02Rik |
| 16 | 619288 | 4933417M04Rik |
| 16 | NaN    | MMT00034062   |
| 16 | 74458  | 4933425B07Rik |
| 16 | 258042 | Olfr487       |
| 16 | NaN    | MMT00045951   |
| 16 | 68307  | 4930558O21Rik |
| 16 | 258713 | Olfr430       |
| 16 | 258579 | Olfr1018      |
| 16 | 258571 | Olfr1033      |
| 16 | NaN    | MMT00029272   |
| 16 | 67944  | 1700025D03Rik |
| 16 | 629820 | EG629820      |
| 16 | 258546 | Olfr806       |
| 16 | 258541 | Olfr800       |
| 16 | NaN    | MMT00008723   |
| 16 | NaN    | MMT00046779   |
| 16 | 14985  | H2-M10.1      |
| 16 | 17139  | Magea3        |
| 16 | 77668  | 9130209A04Rik |
| 16 | 634346 | EG634346      |
| 16 | 66654  | Tex12         |
| 16 | NaN    | MMT00048365   |
| 16 | 74933  | 4930469G21Rik |
| 16 | 258282 | Olfr801       |
| 16 | 109821 | F11           |
| 16 | 623279 | Dok6          |
| 16 | 233060 | Zfp382        |
| 16 | 16061  | Igh-VJ558     |
| 16 | NaN    | MMT00007193   |



|    |           |               |
|----|-----------|---------------|
| 16 | 16867     | Lhcgr         |
| 16 | 12374     | Casr          |
| 16 | NaN       | MMT00004568   |
| 16 | 67892     | 1810063B05Rik |
| 16 | 74156     | Acot12        |
| 16 | 242851    | Gnat3         |
| 16 | 320772    | Mdga2         |
| 16 | 74249     | Lrrc2         |
| 16 | 11676     | Aldoc         |
| 16 | 15560     | Htr2c         |
| 16 | 73090     | 2900092C05Rik |
| 16 | 75647     | 1700025E21Rik |
| 16 | 12788     | Cnga1         |
| 16 | 105355    | Slc17a3       |
| 16 | 230099    | Car9          |
| 16 | 545798    | MMT00055433   |
| 16 | 71275     | 4933437F05Rik |
| 16 | 16061     | Igh-VJ558     |
| 16 | NaN       | MMT00070220   |
| 16 | 70866     | Slco6d1       |
| 16 | 57764     | Ntn4          |
| 16 | 16061     | Igh-VJ558     |
| 16 | 258789    | Olfr1271      |
| 16 | 668257    | Dgat2l6       |
| 16 | 627814    | Vmn2r109      |
| 16 | NaN       | MMT00040811   |
| 16 | 102022    | Ces6          |
| 16 | 243537    | Uroc1         |
| 16 | 258377    | Olfr654       |
| 16 | 70821     | 4921507P07Rik |
| 16 | NaN       | MMT00002620   |
| 16 | 100038941 | Vmn2r121      |
| 16 | NaN       | MMT00058344   |
| 16 | 226025    | Trpm3         |
| 16 | 70952     | 4921537P18Rik |
| 16 | 74672     | 4930449A18Rik |
| 16 | NaN       | MMT00008763   |
| 16 | 116852    | Akr1c20       |
| 16 | 258724    | Olfr784       |
| 16 | NaN       | MMT00022745   |
| 16 | 239857    | Cadm2         |
| 16 | NaN       | MMT00067361   |
| 16 | 209032    | Zc3hav1l      |
| 16 | 546983    | Vmn2r77       |
| 16 | 67648     | 4930542C12Rik |
| 16 | 209186    | C730036D15Rik |
| 16 | 216454    | BC089597      |
| 16 | 67937     | Tmem59l       |
| 16 | NaN       | MMT00047047   |
| 16 | 19885     | Rorc          |
| 16 | NaN       | MMT00059186   |

|    |        |               |
|----|--------|---------------|
| 16 | NaN    | MMT00008480   |
| 16 | 58991  | Ghrl          |
| 16 | NaN    | MMT00069497   |
| 16 | NaN    | MMT00014869   |
| 16 | 74469  | Taf7l         |
| 16 | NaN    | MMT00059569   |
| 16 | 259117 | Olfr560       |
| 17 | 72795  | Ttc19         |
| 17 | 14732  | Gpam          |
| 17 | 68876  | Xrcc6bp1      |
| 17 | 241113 | Prkag3        |
| 17 | 15442  | Hpse          |
| 17 | 99439  | Duox1         |
| 17 | 68149  | Otub2         |
| 17 | 330460 | BC022651      |
| 17 | 74080  | Nmnat3        |
| 17 | 69387  | Dnajib13      |
| 17 | 103161 | Apof          |
| 17 | 19171  | Psemb10       |
| 17 | 74481  | Batf2         |
| 17 | 71898  | Apol9b        |
| 17 | 20555  | Slfn1         |
| 17 | 16601  | Klf9          |
| 17 | 67030  | Fancl         |
| 17 | 79560  | Ublcp1        |
| 17 | 225791 | Zadh2         |
| 17 | 52440  | Tax1bp1       |
| 17 | 66302  | 2410005O16Rik |
| 17 | 16478  | Jund          |
| 17 | 11532  | Adh5          |
| 17 | 11532  | Adh5          |
| 17 | 102182 | AI931714      |
| 17 | 15502  | Dnaja1        |
| 17 | 71030  | 4933403O08Rik |
| 17 | 68493  | 1110007M04Rik |
| 17 | 19243  | Ptp4a1        |
| 17 | 140570 | Plxnb2        |
| 17 | 59040  | Rhot1         |
| 17 | 17850  | Mut           |
| 17 | 227197 | Ndufs1        |
| 17 | 667832 | MMT00021210   |
| 17 | 76947  | 2310030N02Rik |
| 17 | 23939  | Mapk7         |
| 17 | 14678  | Gnai2         |
| 17 | 17925  | Myo9b         |
| 17 | 50926  | Hnrpd1        |
| 17 | 16779  | Lamb2         |
| 17 | 232807 | Ppp1r12c      |
| 17 | 20130  | Rras          |
| 17 | 80876  | Ifitm2        |
| 17 | 16206  | Lrig1         |

|    |        |               |
|----|--------|---------------|
| 17 | 76219  | 6530401D17Rik |
| 17 | 60344  | Fign          |
| 17 | 12631  | Cfl1          |
| 17 | 76976  | 2900062L11Rik |
| 17 | 18576  | Pde3b         |
| 17 | 12015  | Bad           |
| 17 | 19646  | Rbbp4         |
| 17 | 71393  | Kctd6         |
| 17 | 19246  | Ptpn1         |
| 17 | 110842 | Etfa          |
| 17 | 59027  | Nampt         |
| 17 | 545260 | Arsi          |
| 17 | 70616  | Sf4           |
| 17 | 235323 | Usp28         |
| 17 | 56437  | Rrad          |
| 17 | 76478  | 2410004L22Rik |
| 17 | 219144 | Arl11         |
| 17 | 20556  | Slfn2         |
| 17 | 12265  | Ciita         |
| 17 | 320435 | 5830482F20Rik |
| 17 | 59014  | Rrs1          |
| 17 | 71991  | Ercc8         |
| 17 | 72184  | 2810406K13Rik |
| 17 | NaN    | MMT00030762   |
| 17 | 668450 | EG668450      |
| 17 | 235132 | Zbtb44        |
| 17 | 72554  | Utp14a        |
| 17 | 633387 | MMT00052835   |
| 17 | 60532  | Wtap          |
| 17 | 108943 | Rg9mtd2       |
| 17 | 54381  | MMT00040501   |
| 17 | 381695 | N4bp2l2       |
| 18 | 104110 | Adcy4         |
| 18 | 140721 | Caskin2       |
| 18 | 381379 | Med19         |
| 18 | 20448  | St6galnac4    |
| 18 | 13870  | Ercc1         |
| 18 | 94242  | Tinagl        |
| 18 | 104027 | Synpo         |
| 18 | 434215 | Lrrc32        |
| 18 | 22368  | Trpv2         |
| 18 | 242691 | Gpatch3       |
| 18 | 11512  | Adcy6         |
| 18 | 217127 | Myst2         |
| 18 | 105844 | Card10        |
| 18 | 22344  | Vezf1         |
| 18 | 76854  | Gper          |
| 18 | 50780  | Rgs3          |
| 18 | 228788 | BC020535      |
| 18 | 15248  | Hic1          |
| 18 | 84094  | Plvap         |

|    |        |               |
|----|--------|---------------|
| 18 | 75687  | 2310066E14Rik |
| 18 | 15284  | Hlx           |
| 18 | 192652 | Wdr81         |
| 18 | 57783  | Tnip1         |
| 18 | 107375 | Slc25a45      |
| 18 | 69553  | 2310033K02Rik |
| 18 | 74239  | lqce          |
| 18 | 214597 | Sidt2         |
| 18 | 106628 | Trip10        |
| 18 | 232879 | Zbtb45        |
| 18 | 209011 | Sirt7         |
| 18 | 59092  | Pcbp4         |
| 18 | 66513  | Map3k7ip1     |
| 18 | 66940  | Shisa5        |
| 18 | 15896  | Icam2         |
| 18 | 74772  | Atp13a2       |
| 18 | 78388  | Mvp           |
| 18 | 103724 | Tbc1d10a      |
| 18 | 51800  | Bok           |
| 18 | 230837 | Ddefl1        |
| 18 | 269633 | Wdr86         |
| 18 | 70192  | Cd209g        |
| 18 | 102545 | Cmtm7         |
| 18 | 16170  | Il16          |
| 18 | 12984  | Csf2rb2       |
| 18 | 12703  | Socs1         |
| 18 | 15976  | Ifnar2        |
| 18 | 26377  | Dapp1         |
| 18 | 17873  | Gadd45b       |
| 18 | 11307  | Abcg1         |
| 18 | 230908 | Tardbp        |
| 18 | 100198 | H6pd          |
| 18 | 208659 | BC029169      |
| 18 | 12091  | Glb1          |
| 18 | 14026  | Evl           |
| 18 | 17159  | Man2b1        |
| 18 | 23876  | Fbln5         |
| 18 | 219151 | Scara3        |
| 18 | 12258  | Serpig1       |
| 18 | 210622 | E430002G05Rik |
| 18 | 15277  | Hk2           |
| 18 | 21825  | Thbs1         |
| 18 | 268534 | Sntg2         |
| 18 | 11486  | Ada           |
| 18 | 73683  | Atg16l2       |
| 18 | 14133  | Fcna          |
| 18 | 231633 | Tmem119       |
| 18 | 16012  | Igfbp6        |
| 18 | 68794  | Flnc          |
| 18 | 16190  | Il4ra         |
| 18 | 66102  | Cxcl16        |

|    |        |               |
|----|--------|---------------|
| 18 | 70727  | Rasgef1a      |
| 18 | 19124  | Procr         |
| 18 | 56175  | Bace2         |
| 18 | 109264 | Me3           |
| 18 | 17228  | Cma1          |
| 18 | 17395  | Mmp9          |
| 18 | 69534  | Avpi1         |
| 18 | 16330  | Inpp5b        |
| 18 | 22158  | Tulp3         |
| 18 | 67604  | 1110007L15Rik |
| 18 | 13636  | Efna1         |
| 18 | 72322  | Xpo5          |
| 18 | 72635  | Lins2         |
| 18 | 18226  | Nup62         |
| 18 | 103213 | Traf3ip2      |
| 18 | 67393  | Cxxc5         |
| 18 | 217166 | Nr1d1         |
| 18 | 217827 | BC002230      |
| 18 | 229473 | D930015E06Rik |
| 18 | 20969  | Sdc1          |
| 18 | 68964  | 1500010J02Rik |
| 18 | 20811  | Srms          |
| 18 | 101540 | Prkd2         |
| 18 | 12351  | Car4          |
| 18 | NaN    | MMT00057509   |
| 18 | 19099  | Mapk8ip1      |
| 18 | 101543 | Wtip          |
| 18 | 16369  | Irs3          |
| 19 | NaN    | MMT00079689   |
| 19 | NaN    | MMT00069487   |
| 19 | NaN    | MMT00043009   |
| 19 | 15382  | Hnrnpa1       |
| 19 | 15382  | Hnrnpa1       |
| 19 | 67115  | Rpl14         |
| 19 | 68011  | Snrpg         |
| 19 | 73212  | 3110082117Rik |
| 19 | 69263  | Rfc3          |
| 19 | 69430  | 1700048O20Rik |
| 19 | 20821  | Trim21        |
| 19 | 16443  | Itsn1         |
| 19 | 208043 | Setd1b        |
| 19 | 12469  | Cct8          |
| 19 | NaN    | MMT00053207   |
| 19 | NaN    | MMT00082629   |
| 19 | NaN    | MMT00059984   |
| 19 | NaN    | MMT00050545   |
| 19 | 57890  | Il17re        |
| 19 | 11844  | Arf5          |
| 19 | 21422  | Tcfcp2        |
| 19 | 67041  | Oxct1         |
| 19 | NaN    | MMT00046581   |

|    |           |               |
|----|-----------|---------------|
| 19 | NaN       | MMT00034261   |
| 19 | NaN       | MMT00020332   |
| 19 | 67704     | 1810037117Rik |
| 19 | 30954     | Siva1         |
| 19 | NaN       | MMT00045890   |
| 19 | 30954     | Siva1         |
| 19 | 67711     | Nsmce1        |
| 19 | NaN       | MMT00048286   |
| 19 | NaN       | MMT00069486   |
| 19 | NaN       | MMT00011814   |
| 19 | NaN       | MMT00036520   |
| 19 | NaN       | MMT00042303   |
| 19 | NaN       | MMT00045906   |
| 19 | NaN       | MMT00048939   |
| 19 | NaN       | MMT00047531   |
| 19 | NaN       | MMT00007455   |
| 19 | 14388     | Gab1          |
| 19 | NaN       | MMT00040108   |
| 19 | NaN       | MMT00024951   |
| 19 | NaN       | MMT00059805   |
| 19 | NaN       | MMT00056634   |
| 19 | NaN       | MMT00004769   |
| 19 | NaN       | MMT00056589   |
| 19 | NaN       | MMT00071327   |
| 19 | NaN       | MMT00051740   |
| 19 | 229746    | EG229746      |
| 19 | NaN       | MMT00007741   |
| 19 | 20044     | Rps14         |
| 19 | NaN       | MMT00048362   |
| 19 | 100041686 | MMT00047654   |
| 20 | 28000     | Prpf19        |
| 20 | 72145     | Wdfy3         |
| 20 | 242608    | Podn          |
| 20 | 12521     | Cd82          |
| 20 | 77407     | Rab35         |
| 20 | 14312     | Brd2          |
| 20 | 22601     | Yap1          |
| 20 | 30050     | Fbxw2         |
| 20 | 68095     | Ociad1        |
| 20 | 16994     | Ltb           |
| 20 | 269003    | Sap130        |
| 20 | 77652     | MMT00072863   |
| 20 | 68585     | Rtn4          |
| 20 | 75608     | Chmp4b        |
| 20 | 74747     | Ddit4         |
| 20 | 214987    | 5830457O10Rik |
| 20 | 19383     | Raly          |
| 20 | 108654    | 4933403F05Rik |
| 20 | 72401     | Slc43a1       |
| 20 | 22032     | Traf4         |
| 20 | 68097     | Dynll2        |

|    |        |               |
|----|--------|---------------|
| 20 | 233979 | Tpcn2         |
| 20 | 319156 | Hist1h4d      |
| 20 | 14113  | Fbl           |
| 20 | 66395  | Ahnak         |
| 20 | 225467 | Pggt1b        |
| 20 | 67564  | Tmem35        |
| 20 | 238330 | 6430527G18Rik |
| 20 | 433864 | Gm1040        |
| 20 | 94178  | Mcoln1        |
| 20 | NaN    | MMT00015250   |
| 20 | 99311  | Commd7        |
| 20 | 68988  | Prpf31        |
| 20 | 66089  | Rmnd5b        |
| 20 | 15368  | Hmox1         |
| 20 | 66146  | Tmem57        |
| 20 | 67511  | Tmed9         |
| 20 | 114584 | Clic1         |
| 20 | 56440  | Snx1          |
| 20 | 20610  | Sumo3         |

**Table T5: Hypothalamus Modules**

| Module | Locus Link | Gene Symbol   |
|--------|------------|---------------|
| 1      | 66994      | 1500031L02Rik |
| 1      | 381148     | Gm1614        |
| 1      | 77622      | Apex2         |
| 1      | 22433      | Xbp1          |
| 1      | 13435      | Dnmt3a        |
| 1      | 67014      | Mina          |
| 1      | 233649     | Cnga4         |
| 1      | 66369      | Dus2l         |
| 1      | 208715     | Hmgcs1        |
| 1      | 216190     | Appl2         |
| 1      | 66477      | Usmg5         |
| 1      | 94226      | S1pr5         |
| 1      | 13497      | Drp2          |
| 1      | 16780      | Lamb3         |
| 1      | 26423      | Nr5a1         |
| 1      | 18508      | Pax6          |
| 1      | 20935      | Surf6         |
| 1      | 12684      | Cideb         |
| 1      | 27373      | Csnk1e        |
| 1      | 15976      | Ifnar2        |
| 1      | 100226     | Stx12         |
| 1      | 16428      | Itk           |
| 1      | 20311      | Cxcl5         |
| 1      | 64705      | Dpys          |
| 1      | 56046      | Uqcc          |
| 1      | 15122      | Hba-a1        |
| 1      | 18092      | Nkx2-6        |
| 1      | 208659     | BC029169      |
| 1      | 17937      | Nab2          |
| 1      | 16971      | Lrp1          |
| 1      | 83669      | Wdr6          |
| 1      | 72993      | Appl1         |
| 1      | 18377      | Omg           |
| 1      | 19092      | Prkg2         |
| 1      | 27281      | Hrasls        |
| 1      | 74108      | Parn          |
| 1      | 666704     | Samd1         |
| 1      | 58243      | Nap1l5        |
| 1      | 27981      | D4Wsu53e      |
| 1      | 628438     | EG628438      |
| 1      | 252864     | Dusp15        |
| 1      | 14860      | Gsta4         |
| 1      | 71268      | Lrrfip2       |
| 1      | 18546      | Pcp4          |
| 1      | 381678     | Zcwpw1        |
| 1      | 231872     | MMT00063115   |
| 1      | 17713      | Grpel1        |
| 1      | 59036      | Dact1         |
| 1      | 85305      | Kars          |



|   |           |                    |
|---|-----------|--------------------|
| 1 | 22608     | Ybx1               |
| 1 | 216198    | Tcp1112            |
| 1 | 320267    | Fubp3              |
| 1 | 407788    | BC051142           |
| 1 | 235339    | Dlat               |
| 1 | 68876     | Xrcc6bp1           |
| 1 | 210106    | Pols               |
| 1 | 80292     | Zxdc               |
| 1 | 13653     | Egr1               |
| 1 | NaN       | MMT00062394        |
| 1 | 66407     | Mrps15             |
| 1 | 226250    | Afap1l2            |
| 1 | 11432     | Acp2               |
| 1 | 68038     | Chid1              |
| 1 | 69071     | Tmem97             |
| 1 | 23983     | Pcbp1              |
| 1 | 76338     | Rab2b              |
| 1 | 68975     | Med27              |
| 1 | 22608     | Ybx1               |
| 1 | 18027     | Nfia               |
| 1 | 194612    | ENSMUSG00000046088 |
| 1 | 338417    | Scgb1c1            |
| 1 | 217779    | Lysmd1             |
| 1 | 140492    | Kcnn2              |
| 1 | 20813     | Srp14              |
| 1 | 18417     | Cldn11             |
| 1 | 72399     | Brap               |
| 1 | 235493    | BC031353           |
| 1 | NaN       | MMT00065821        |
| 1 | 70163     | 2210415F13Rik      |
| 1 | 19692     | Reg1               |
| 1 | 258857    | Olfr275            |
| 1 | 58235     | Pvrl1              |
| 1 | 78286     | Nav2               |
| 1 | 258822    | Olfr39             |
| 1 | 22073     | Prss3              |
| 1 | 69399     | 1700025G04Rik      |
| 1 | 239037    | Lrit1              |
| 1 | NaN       | MMT00041452        |
| 1 | NaN       | MMT00071843        |
| 1 | 16061     | Igh-VJ558          |
| 1 | 243262    | Oas1f              |
| 1 | 101604    | E430018J23Rik      |
| 1 | 226049    | Dmrt2              |
| 1 | 17189     | Mb                 |
| 1 | 54721     | Tyk2               |
| 1 | 100048814 | MMT00082139        |
| 1 | 68678     | Smtnl1             |
| 1 | 67772     | Chd8               |
| 1 | 18405     | Orm1               |
| 1 | 319716    | 6430520M22Rik      |

|   |        |               |
|---|--------|---------------|
| 1 | 16523  | Kcnj8         |
| 1 | 72607  | Usp13         |
| 1 | 17857  | Mx1           |
| 1 | 20541  | Slc8a1        |
| 1 | 52513  | Ddx56         |
| 1 | 330836 | Slc7a6        |
| 1 | 269378 | Ahcy          |
| 1 | 18430  | Oxtr          |
| 1 | 75731  | 5133401N09Rik |
| 1 | 217370 | BC017643      |
| 1 | 668940 | Myh7b         |
| 1 | 56089  | Ramp3         |
| 1 | 76574  | Mfsd2         |
| 1 | 28248  | Slco1a1       |
| 1 | 74754  | Dhcr24        |
| 1 | 224105 | Pak2          |
| 1 | 224481 | Tfb1m         |
| 1 | 15257  | Hipk1         |
| 1 | 93873  | Pcdhb2        |
| 1 | 68888  | 1190003M12Rik |
| 1 | 239691 | AU021092      |
| 1 | 227696 | Phyhd1        |
| 1 | 11863  | Arnt          |
| 1 | 20249  | Scd1          |
| 1 | 12447  | Ccne1         |
| 1 | 99031  | Osbpl6        |
| 1 | 76539  | D19Erttd737e  |
| 1 | 212937 | Tifab         |
| 1 | 74549  | 9130404D08Rik |
| 1 | 56496  | Tspan6        |
| 1 | NaN    | MMT00077385   |
| 1 | 77411  | Rbm35b        |
| 1 | 214642 | A430107O13Rik |
| 1 | 27762  | D17H6S56E-3   |
| 1 | 11472  | Actn2         |
| 1 | 50911  | Exosc9        |
| 1 | 22065  | Trpc3         |
| 1 | 56448  | Cyp2d22       |
| 1 | 20962  | Sycp3         |
| 1 | 84094  | Plvap         |
| 1 | 53857  | Tuba8         |
| 1 | 20305  | Ccl6          |
| 1 | 73732  | Muc16         |
| 1 | 67758  | Aadac         |
| 1 | 58206  | Zbtb32        |
| 1 | 233575 | MMT00014327   |
| 1 | 15985  | Cd79b         |
| 1 | 20017  | Rpo1-2        |
| 1 | 22092  | Rsph1         |
| 1 | 11781  | Ap4m1         |
| 1 | 52662  | D18Erttd653e  |

|   |        |               |
|---|--------|---------------|
| 1 | 217700 | Acot6         |
| 1 | 330355 | Dnahc6        |
| 1 | 71870  | Ccdc19        |
| 1 | 70853  | 4921511C04Rik |
| 1 | 66748  | 4933404M02Rik |
| 1 | 18861  | Pms2          |
| 1 | 50498  | Ebi3          |
| 1 | 68039  | Nmb           |
| 1 | 18817  | Plk1          |
| 1 | 17829  | Muc1          |
| 1 | 105844 | Card10        |
| 1 | 77505  | Dnhd1         |
| 1 | 66185  | 1110037F02Rik |
| 1 | 54188  | Cpsf4         |
| 1 | 110208 | Pgd           |
| 1 | 72199  | Mms19         |
| 1 | 57357  | Srd5a3        |
| 1 | 64385  | Cyp4f14       |
| 1 | 74166  | Tmem38a       |
| 1 | 230996 | 9430015G10Rik |
| 1 | 68396  | Cml4          |
| 1 | 56809  | Gmeb1         |
| 1 | 106068 | Slc45a4       |
| 1 | 73112  | 3110003A17Rik |
| 1 | 66959  | Dusp26        |
| 1 | 98267  | Stk17b        |
| 1 | 54598  | Calcr1        |
| 1 | 117167 | Steap4        |
| 1 | 108151 | Sema3d        |
| 1 | 214403 | EG214403      |
| 1 | NaN    | MMT00078660   |
| 1 | 22038  | Plscr1        |
| 1 | 212898 | Dse           |
| 1 | 20379  | Sfrp4         |
| 1 | 70717  | 6330406I15Rik |
| 1 | 16952  | Anxa1         |
| 1 | 54124  | Cks1b         |
| 1 | 14231  | Fkbp7         |
| 1 | 18828  | Plscr2        |
| 1 | 54381  | MMT00040501   |
| 1 | 68151  | Gpr177        |
| 1 | 17112  | Tm4sf1        |
| 1 | 71586  | Ifih1         |
| 1 | 55932  | Gbp3          |
| 1 | 15944  | Irgm          |
| 1 | 109857 | Cbr3          |
| 1 | 622657 | EG622657      |
| 1 | 18791  | Plat          |
| 1 | 29817  | Igfbp7        |
| 1 | 16600  | Klf4          |
| 1 | 68797  | Pdgfrl        |

|   |        |               |
|---|--------|---------------|
| 1 | 12010  | B2m           |
| 1 | 18155  | Pnoc          |
| 1 | 22329  | Vcam1         |
| 1 | 13733  | Emr1          |
| 1 | NaN    | MMT00062592   |
| 1 | 22441  | Xlr           |
| 1 | 14137  | Fdft1         |
| 1 | NaN    | MMT00082285   |
| 1 | 76137  | Ccdc90a       |
| 1 | 22044  | Trh           |
| 1 | 80859  | Nfkbiz        |
| 1 | NaN    | MMT00050551   |
| 1 | 110902 | Chrna2        |
| 1 | 217069 | Trim25        |
| 1 | 13489  | Drd2          |
| 1 | 407243 | Tmem189       |
| 1 | 19730  | Ralgds        |
| 1 | 74838  | Narg1         |
| 1 | 23980  | Pebp1         |
| 1 | 67023  | Use1          |
| 1 | 75104  | Mmd2          |
| 1 | 217827 | BC002230      |
| 1 | 231583 | Slc26a1       |
| 1 | 218543 | Sfrs12        |
| 1 | 239827 | Pigz          |
| 1 | 76408  | Abcc3         |
| 1 | 74490  | 5430432N15Rik |
| 1 | 72049  | Tnfrsf13c     |
| 1 | 213956 | AW544981      |
| 1 | 242785 | Klhl21        |
| 1 | 23939  | Mapk7         |
| 1 | 51798  | Ech1          |
| 1 | 14866  | Gstm5         |
| 1 | 233833 | Tnrc6a        |
| 1 | 170439 | Elovl6        |
| 1 | 69721  | Nkiras1       |
| 1 | 234796 | BC025816      |
| 1 | 93880  | Pcdhb9        |
| 1 | 56715  | Rabgef1       |
| 1 | 52592  | Brms1l        |
| 1 | 21407  | Tcf15         |
| 1 | 109161 | Ube2q2        |
| 1 | 27215  | Azi2          |
| 1 | 72508  | Rps6kb1       |
| 1 | 74453  | Ccdc11        |
| 1 | 67994  | Mrps11        |
| 1 | 53378  | Sdcbp         |
| 1 | 232807 | Ppp1r12c      |
| 1 | NaN    | MMT00048325   |
| 1 | 71997  | 1500002O20Rik |
| 1 | 50908  | C1s           |

|   |           |               |
|---|-----------|---------------|
| 1 | NaN       | MMT00050540   |
| 1 | NaN       | MMT00042003   |
| 1 | 67211     | Armc10        |
| 1 | 381695    | N4bp2l2       |
| 1 | 66552     | 2010106G01Rik |
| 1 | 11474     | Actn3         |
| 1 | 17294     | Mest          |
| 1 | 380969    | C230021P08Rik |
| 1 | 12009     | Azi1          |
| 1 | 66314     | Tpd52l2       |
| 1 | 30055     | Timm13        |
| 1 | 214901    | Chtf18        |
| 1 | NaN       | MMT00004670   |
| 1 | 71564     | 9030607L17Rik |
| 1 | 227659    | Slc2a6        |
| 1 | NaN       | MMT00014691   |
| 1 | 11772     | Ap2a2         |
| 1 | 21786     | Tff3          |
| 1 | 100041835 | MMT00026054   |
| 1 | 100041835 | MMT00002146   |
| 1 | 257635    | Sdsl          |
| 1 | 215210    | Tmem120a      |
| 1 | 83679     | Pde4dip       |
| 1 | 20540     | Slc7a7        |
| 1 | 381038    | Parl          |
| 1 | 11861     | Arl4a         |
| 1 | 234875    | Ttc13         |
| 1 | 72795     | Ttc19         |
| 1 | 52829     | D4Bwg0951e    |
| 1 | 317750    | Slc24a5       |
| 1 | 67457     | Frm8          |
| 1 | 20523     | Slc25a14      |
| 1 | 60525     | Acss2         |
| 1 | 233445    | Vmn2r71       |
| 1 | 52174     | D4Ert196e     |
| 1 | 433375    | Creg1         |
| 1 | 665565    | MMT00055950   |
| 1 | NaN       | MMT00077009   |
| 1 | 215418    | Axud1         |
| 1 | 109168    | 5730596K20Rik |
| 1 | 79059     | Nme3          |
| 1 | 19365     | Rad52         |
| 1 | 14432     | Gap43         |
| 1 | 11758     | Prdx6         |
| 1 | 66845     | Mrpl33        |
| 1 | NaN       | MMT00053207   |
| 1 | 56016     | Hebp2         |
| 1 | 66179     | 1110031l02Rik |
| 1 | 100434    | Slc44a1       |
| 1 | 76813     | Armc6         |
| 1 | 72325     | 1300018l17Rik |

|   |        |               |
|---|--------|---------------|
| 1 | NaN    | MMT00045078   |
| 1 | 20924  | Supt5h        |
| 1 | 28080  | Atp5o         |
| 1 | 73830  | Eif3k         |
| 1 | 23918  | Impdh2        |
| 1 | 215051 | Bud13         |
| 1 | 102448 | Xylb          |
| 1 | 19325  | Rab10         |
| 1 | 11544  | Adprh         |
| 1 | NaN    | MMT00035807   |
| 1 | 101142 | Itfg2         |
| 1 | 75471  | 1700009N14Rik |
| 1 | 71968  | Wdr73         |
| 1 | 232430 | Crebl2        |
| 1 | 11982  | Atp10a        |
| 1 | 110816 | Pwp2          |
| 1 | 110816 | Pwp2          |
| 1 | 14104  | Fasn          |
| 1 | NaN    | MMT00021936   |
| 1 | 246703 | Apoa1bp       |
| 1 | 14419  | Gal           |
| 1 | 214663 | Slc25a29      |
| 1 | 66170  | Chchd5        |
| 1 | 16061  | Igh-VJ558     |
| 1 | 22177  | Tyrobp        |
| 1 | 11972  | Atp6v0d1      |
| 1 | 12759  | Clu           |
| 1 | 13014  | Cstb          |
| 1 | 19012  | Ppap2a        |
| 1 | 67655  | Ctdp1         |
| 1 | 14085  | Fah           |
| 1 | 17925  | Myo9b         |
| 1 | 223649 | Nrbp2         |
| 1 | 15504  | Dnajb3        |
| 1 | 69131  | Crks          |
| 1 | 50874  | Tmod4         |
| 1 | 27261  | Dok3          |
| 1 | 63872  | Zfp296        |
| 1 | 228790 | Asxl1         |
| 1 | 399591 | 4930488E11Rik |
| 1 | 19354  | Rac2          |
| 1 | 108100 | Baiap2        |
| 1 | 213006 | Mfsd4         |
| 1 | 20186  | Nr1h4         |
| 1 | 12123  | Hrk           |
| 1 | 57264  | Retn          |
| 1 | 15473  | Hrsp12        |
| 1 | 20555  | Slfn1         |
| 1 | 66538  | Rps19bp1      |
| 1 | 12877  | Cpeb1         |
| 1 | 12292  | Cacna1s       |

|   |        |               |
|---|--------|---------------|
| 1 | 17826  | Mtvr2         |
| 1 | 192232 | Hps4          |
| 1 | 69719  | Cad           |
| 1 | 68183  | Bcas2         |
| 1 | 71893  | Noxo1         |
| 1 | 20778  | Scarb1        |
| 1 | 214048 | Larp2         |
| 1 | 72016  | 1600002H07Rik |
| 1 | 71720  | Osbpl3        |
| 1 | 320415 | Gchfr         |
| 1 | 140919 | Slc17a6       |
| 1 | 68477  | Rmnd5a        |
| 1 | 12283  | Cab39         |
| 1 | 20437  | Siah1a        |
| 1 | 19876  | Robo1         |
| 1 | 68877  | Maf1          |
| 1 | NaN    | MMT00041792   |
| 1 | 74277  | Chic2         |
| 1 | 67092  | Gatm          |
| 1 | 100121 | Tdrd7         |
| 1 | 15528  | Hspe1         |
| 1 | 271377 | Zbtb11        |
| 1 | 54561  | Nap1l3        |
| 1 | 209630 | Frmd4a        |
| 1 | 243743 | Plxna4        |
| 1 | 320365 | Fry           |
| 1 | 226747 | Ahctf1        |
| 1 | 114642 | Brdt          |
| 1 | 212555 | Pqhc2         |
| 1 | 20185  | Ncor1         |
| 1 | 17035  | Lxn           |
| 1 | 18654  | Pgf           |
| 1 | 415115 | Neurl2        |
| 1 | 66431  | 1810049H13Rik |
| 1 | 209012 | Ulk4          |
| 1 | 76866  | Morn1         |
| 1 | 18132  | Notch4        |
| 1 | 66853  | Pnpla2        |
| 1 | 333654 | Ppp1r13l      |
| 1 | 54409  | Ramp2         |
| 1 | 20130  | Rras          |
| 1 | 27361  | Sepx1         |
| 1 | 70877  | Micalcl       |
| 1 | 83701  | MMT00026414   |
| 1 | 270076 | Gcdh          |
| 1 | 245651 | EG245651      |
| 1 | 215951 | Lace1         |
| 1 | 627110 | Tubb2a-ps2    |
| 1 | 67186  | Rplp2         |
| 1 | NaN    | MMT00082629   |
| 1 | 69010  | Anapc13       |

|   |        |               |
|---|--------|---------------|
| 1 | 80914  | Uck2          |
| 1 | 208076 | Pknx2         |
| 1 | 627312 | MMT00039341   |
| 1 | 79196  | Osbp15        |
| 1 | 232210 | 8430410A17Rik |
| 1 | 237361 | EG237361      |
| 1 | 98766  | Ubc1          |
| 1 | 19079  | Prkab1        |
| 1 | 14609  | Gja1          |
| 1 | 29820  | Tnfrsf19      |
| 1 | 268656 | Sptlc1        |
| 1 | 66333  | Aqp11         |
| 1 | 26932  | Ppp2r5e       |
| 1 | 116748 | Lsm10         |
| 1 | 66229  | Rpl711        |
| 1 | 67711  | Nsmce1        |
| 1 | 103844 | Al842396      |
| 1 | 111175 | Pecr          |
| 1 | 64424  | Polr1e        |
| 1 | 192185 | Nadk          |
| 1 | 101543 | Wtip          |
| 1 | 243547 | Grip2         |
| 1 | 14979  | H2-Ke6        |
| 1 | 171429 | Slc26a6       |
| 1 | 233977 | Ppfia1        |
| 1 | 233107 | Kctd15        |
| 1 | 12450  | Ccng1         |
| 1 | 50776  | Polg2         |
| 1 | NaN    | MMT00072901   |
| 1 | 66928  | 3110001D03Rik |
| 1 | 269955 | Rccd1         |
| 1 | 66090  | Ypel3         |
| 1 | 12497  | Entpd6        |
| 1 | 105670 | Rcbtb2        |
| 1 | 72635  | Lins2         |
| 1 | 21665  | Tdg           |
| 1 | 64945  | Cldn12        |
| 1 | 18221  | Nudc          |
| 1 | 319475 | Zfp672        |
| 1 | 71667  | 0610007L01Rik |
| 1 | 56461  | Kcnp3         |
| 1 | 60527  | Fads3         |
| 1 | 216963 | Git1          |
| 1 | 107476 | Acaca         |
| 1 | NaN    | MMT00057509   |
| 1 | 227622 | BC029214      |
| 1 | 234407 | Glt25d1       |
| 1 | 238317 | C130039O16Rik |
| 1 | 11767  | Ap1m1         |
| 1 | 72033  | Tsc22d2       |
| 1 | 24109  | Ubl3          |



|   |        |               |
|---|--------|---------------|
| 1 | 104718 | Ttc7b         |
| 1 | 232333 | Slc6a1        |
| 1 | 19353  | Rac1          |
| 1 | 74315  | Rnf145        |
| 1 | 19084  | Prkar1a       |
| 1 | 67255  | Zfp422        |
| 1 | 76976  | 2900062L11Rik |
| 1 | 16924  | Lnx1          |
| 1 | NaN    | MMT00017312   |
| 1 | 633752 | EG633752      |
| 1 | 211556 | BC002199      |
| 1 | 59014  | Rrs1          |
| 1 | 108645 | Mat2b         |
| 1 | 19822  | Rnf4          |
| 1 | 619677 | 4930529C04Rik |
| 1 | 53424  | Tsnax         |
| 1 | 71989  | Rpusd4        |
| 1 | 22214  | Ube2h         |
| 1 | 20239  | Atxn2         |
| 1 | 12261  | C1qbp         |
| 1 | 21912  | Tspan7        |
| 1 | 71941  | Cars2         |
| 1 | 66089  | Rmnd5b        |
| 1 | 71393  | Kctd6         |
| 1 | 21787  | Tfg           |
| 1 | 13244  | Degs1         |
| 1 | 26444  | Psmc7         |
| 1 | NaN    | MMT00074658   |
| 1 | 623519 | EG623519      |
| 1 | NaN    | MMT00047531   |
| 1 | NaN    | MMT00045906   |
| 1 | NaN    | MMT00048939   |
| 1 | NaN    | MMT00007455   |
| 1 | NaN    | MMT00082897   |
| 1 | 68011  | Snrpg         |
| 1 | 69894  | 2010107G23Rik |
| 1 | 252966 | Cables2       |
| 1 | 259279 | Tubgcp3       |
| 1 | NaN    | MMT00034706   |
| 1 | NaN    | MMT00078676   |
| 1 | NaN    | MMT00017112   |
| 1 | 19988  | Rpl6          |
| 1 | NaN    | MMT00058413   |
| 1 | 442832 | 1600029O15Rik |
| 1 | NaN    | MMT00015606   |
| 1 | NaN    | MMT00050545   |
| 1 | NaN    | MMT00059984   |
| 1 | 100087 | Kti2          |
| 1 | 23980  | Pebp1         |
| 1 | 23980  | Pebp1         |
| 1 | 57752  | Tacc2         |

|   |        |               |
|---|--------|---------------|
| 1 | 54387  | Mcm3ap        |
| 1 | 109934 | Abr           |
| 1 | 72322  | Xpo5          |
| 1 | 67160  | Eef1g         |
| 1 | 67808  | Tprgl         |
| 1 | 231510 | Agpat9        |
| 1 | 15212  | Hexb          |
| 1 | 23881  | G3bp2         |
| 1 | 231050 | Galnt11       |
| 1 | 56041  | Uso1          |
| 1 | 319613 | 5730410E15Rik |
| 1 | 223648 | 2410075B13Rik |
| 1 | 74257  | Tspan17       |
| 1 | 20019  | Rpo1-4        |
| 1 | 19349  | Rab7          |
| 1 | 209815 | Tbc1d25       |
| 1 | 22340  | Vegfb         |
| 1 | 53627  | Porcn         |
| 1 | 227700 | Sh3glb2       |
| 1 | 107831 | Bai1          |
| 1 | 212986 | Scfd2         |
| 1 | 212919 | Kctd7         |
| 1 | 16423  | Cd47          |
| 1 | 50762  | Fbxo6         |
| 1 | 171207 | Arhgap4       |
| 1 | 104759 | Pld4          |
| 1 | 14751  | Gpi1          |
| 1 | 67876  | Coq10b        |
| 1 | 56310  | Gps2          |
| 1 | 545389 | Cep170        |
| 1 | 19155  | Npepps        |
| 1 | 20602  | Ncor2         |
| 1 | 67963  | Npc2          |
| 1 | 54196  | Pabpn1        |
| 1 | 11931  | Atp1b1        |
| 1 | 75452  | Ascc2         |
| 1 | 76954  | St5           |
| 1 | 72088  | Ush1c         |
| 1 | 12349  | Car2          |
| 1 | NaN    | MMT00071316   |
| 1 | 270162 | Elmod1        |
| 1 | 234779 | Plcg2         |
| 1 | 14792  | Mboat5        |
| 1 | 13449  | Dok2          |
| 1 | 66320  | Tmem208       |
| 1 | 27385  | Magel2        |
| 1 | 71911  | Bdh1          |
| 1 | 12348  | Car11         |
| 1 | 70785  | Dennd1c       |
| 1 | 19227  | Pthlh         |
| 1 | NaN    | MMT00038317   |

|   |        |               |
|---|--------|---------------|
| 1 | 57785  | Rangrf        |
| 1 | NaN    | MMT00031928   |
| 1 | 14385  | Slc37a4       |
| 1 | 71801  | Plekhf2       |
| 1 | 66422  | 2410015N17Rik |
| 1 | 67864  | Yipf4         |
| 1 | 66096  | 0910001L09Rik |
| 1 | 56705  | Ranbp9        |
| 1 | 56351  | Ptges3        |
| 1 | 18391  | Oprs1         |
| 1 | 27362  | Dnajb9        |
| 1 | 67468  | Mmd           |
| 1 | 12181  | Bop1          |
| 1 | 72123  | 2010109K11Rik |
| 1 | 11502  | Adam9         |
| 1 | 12894  | Cpt1a         |
| 1 | 16590  | Kit           |
| 1 | 227613 | Tubb2c        |
| 1 | 72185  | Dbnnd1        |
| 1 | 110351 | Rap1gap       |
| 1 | 232232 | Hdac11        |
| 1 | 53598  | Dctn3         |
| 1 | 76238  | Grhpr         |
| 1 | 63828  | Fn3k          |
| 1 | 17237  | Mgrn1         |
| 1 | 66469  | 2810405K02Rik |
| 1 | 230103 | Npr2          |
| 1 | 621603 | Aldh3b2       |
| 1 | 67666  | Hapln3        |
| 1 | 66949  | Trim59        |
| 1 | 75788  | Smurf1        |
| 1 | 66642  | Ctnnb1        |
| 1 | 67337  | Cstf1         |
| 1 | 68988  | Prpf31        |
| 1 | 69870  | Polr3gl       |
| 1 | 233274 | Siglech       |
| 1 | 71336  | Rbks          |
| 1 | 58246  | Slc35b4       |
| 1 | 72278  | Ccpg1         |
| 1 | 67122  | Nrarp         |
| 1 | 68738  | Acss1         |
| 1 | 16363  | Irf2          |
| 1 | 13663  | Ei24          |
| 1 | 20775  | Sqle          |
| 1 | 78903  | Wrnip1        |
| 1 | 73390  | 1700060H10Rik |
| 1 | 231876 | Lmtk2         |
| 1 | 109660 | Ctrl          |
| 1 | NaN    | MMT00001400   |
| 1 | 12227  | Btg2          |
| 1 | 67134  | Nol5a         |

|   |        |              |
|---|--------|--------------|
| 1 | 170718 | Idh3b        |
| 1 | 76088  | Dock8        |
| 1 | 14632  | Gli1         |
| 1 | 213539 | Bag2         |
| 1 | 77462  | Tmem116      |
| 1 | 76737  | Creld2       |
| 1 | 12879  | Cys1         |
| 1 | 22240  | Dpysl3       |
| 1 | 545339 | MMT00017557  |
| 1 | 70902  | Aytl1b       |
| 1 | 107885 | Mthfs        |
| 1 | 14068  | F7           |
| 1 | 15288  | Hmbs         |
| 1 | 319953 | Ttll1        |
| 1 | 232089 | Rbed1        |
| 1 | 320078 | Olfml2b      |
| 1 | 24030  | Mrps12       |
| 1 | 228714 | Csrp2bp      |
| 1 | NaN    | MMT00028462  |
| 1 | 69165  | Cd209b       |
| 1 | 140484 | Pofut1       |
| 1 | 20219  | Apcs         |
| 1 | 76252  | Atp6v0e2     |
| 1 | 67115  | Rpl14        |
| 1 | 171405 | AB056442     |
| 1 | 13821  | Epb4.1l1     |
| 1 | NaN    | MMT00077995  |
| 1 | 16638  | Klra7        |
| 1 | 230161 | RP23-34B24.1 |
| 1 | NaN    | MMT00014895  |
| 1 | 18952  | 4-Sep        |
| 1 | 13162  | Slc6a3       |
| 1 | 24117  | Wif1         |
| 1 | 104174 | Gldc         |
| 1 | 233065 | Alkbh6       |
| 1 | 19683  | Rdh16        |
| 1 | 17349  | Mlf1         |
| 1 | 22138  | Ttn          |
| 1 | 15377  | Foxa3        |
| 1 | 12613  | Cel          |
| 1 | 51811  | Clec4f       |
| 1 | 110095 | Pygl         |
| 1 | 74199  | Vit          |
| 1 | 52685  | Cd300lg      |
| 1 | 71276  | Ccdc57       |
| 1 | 170765 | Ripply3      |
| 1 | 268930 | Pkmyt1       |
| 1 | NaN    | MMT00025372  |
| 1 | 21877  | Tk1          |
| 1 | 16763  | Lad1         |
| 1 | 20716  | Serpina3n    |

|   |        |               |
|---|--------|---------------|
| 1 | 17984  | Ndn           |
| 1 | 12069  | Bex2          |
| 1 | 117592 | B3galt6       |
| 1 | 70082  | Lysmd2        |
| 1 | 56488  | Nxt1          |
| 1 | 16179  | lrak1         |
| 1 | 66664  | Tmem41a       |
| 1 | 14131  | Fcgr3         |
| 1 | 116891 | Derl2         |
| 1 | 14718  | Got1          |
| 1 | 69471  | 2310005L22Rik |
| 1 | 18102  | Nme1          |
| 1 | 228869 | Ncoa5         |
| 1 | 236732 | Rbm10         |
| 1 | 64384  | Sirt3         |
| 1 | 140499 | Ube2j2        |
| 1 | 66506  | Psmg3         |
| 1 | 383436 | EG383436      |
| 1 | 22144  | Tuba3a        |
| 1 | 22147  | Tuba3b        |
| 1 | NaN    | MMT00007982   |
| 1 | NaN    | MMT00079618   |
| 1 | 226407 | Rab3gap1      |
| 1 | 279067 | MMT00046983   |
| 1 | NaN    | MMT00073590   |
| 1 | 19384  | Ran           |
| 1 | 19317  | Qk            |
| 1 | 378460 | Pram1         |
| 1 | 21689  | Tekt1         |
| 1 | 75429  | 3100002J23Rik |
| 1 | 11514  | Adcy8         |
| 1 | 70556  | Slc25a33      |
| 1 | 232236 | C130022K22Rik |
| 1 | 109778 | Blvra         |
| 1 | 13198  | Ddit3         |
| 1 | 75710  | Rbm12         |
| 1 | 211255 | Kbtbd7        |
| 1 | 13388  | Dll1          |
| 1 | 17118  | Marcks        |
| 1 | NaN    | MMT00044046   |
| 1 | NaN    | MMT00002367   |
| 1 | 64451  | Dip2a         |
| 1 | 227580 | C1ql3         |
| 1 | 72480  | Tspyl4        |
| 1 | 70611  | Fbxo33        |
| 1 | 110391 | Qdpr          |
| 1 | 52706  | D10Erttd761e  |
| 1 | 56248  | Ak3           |
| 1 | 218442 | Serinc5       |
| 1 | 245884 | AI507611      |
| 1 | 67283  | Slc25a19      |

|   |        |               |
|---|--------|---------------|
| 1 | NaN    | MMT00040001   |
| 1 | NaN    | MMT00042532   |
| 1 | 66404  | 2410001C21Rik |
| 1 | 102339 | Cog4          |
| 1 | 66989  | Kctd20        |
| 1 | 14043  | Ext2          |
| 1 | 20556  | Slfn2         |
| 1 | 98878  | Ehd4          |
| 1 | 71207  | Nudt4         |
| 1 | 13433  | Dnmt1         |
| 1 | 17131  | Smad7         |
| 1 | 68041  | Mid1ip1       |
| 1 | 55963  | Slc1a4        |
| 1 | 213002 | Ifitm6        |
| 1 | 226413 | Lct           |
| 1 | 99151  | Cercam        |
| 1 | 240396 | Mex3c         |
| 1 | 67603  | Dusp6         |
| 1 | NaN    | MMT00042618   |
| 1 | 30960  | Vapa          |
| 1 | 29864  | Rnf11         |
| 1 | NaN    | MMT00082345   |
| 1 | 628040 | EG628040      |
| 1 | 57437  | Golga7        |
| 1 | 15904  | Id4           |
| 1 | 52392  | D1Ert622e     |
| 1 | 69568  | Vkorc1l1      |
| 1 | NaN    | MMT00046482   |
| 1 | 19231  | Ptma          |
| 1 | 18033  | Nfkb1         |
| 1 | 50789  | Fbxl3         |
| 1 | 69151  | Lzic          |
| 1 | 16526  | Kcnk2         |
| 1 | 68559  | Pdrg1         |
| 1 | 11732  | Ank           |
| 1 | 51792  | Ppp2r1a       |
| 1 | 270035 | Letm2         |
| 1 | 19645  | Rb1           |
| 1 | 12861  | Cox6a1        |
| 1 | 63985  | Gmfb          |
| 1 | 19126  | Prom1         |
| 1 | 60409  | Trappc4       |
| 1 | 353208 | 2810021G02Rik |
| 1 | 217473 | Ankmy2        |
| 1 | 223917 | Krt79         |
| 1 | 20717  | Serpina3m     |
| 1 | 70231  | Gorasp2       |
| 1 | 21823  | Th            |
| 1 | 223254 | Farp1         |
| 1 | 116972 | 2310047D13Rik |
| 1 | 403174 | A930005I04Rik |

|   |        |               |
|---|--------|---------------|
| 1 | 67704  | 1810037117Rik |
| 1 | 320118 | Fbxl13        |
| 1 | 110084 | Dnahc1        |
| 1 | NaN    | MMT00054932   |
| 1 | NaN    | MMT00070823   |
| 1 | 17763  | Mtcp1         |
| 1 | 84505  | Setdb1        |
| 1 | 12291  | Cacna1g       |
| 1 | 11426  | Macf1         |
| 1 | 67236  | 2810452K22Rik |
| 1 | 12461  | Cct2          |
| 1 | 53380  | Psmc10        |
| 1 | 77781  | Epm2aip1      |
| 1 | 54364  | Rpp30         |
| 1 | 66310  | Dpy30         |
| 1 | 66310  | Dpy30         |
| 1 | NaN    | MMT00046285   |
| 1 | 94064  | Mrpl27        |
| 1 | 622268 | EG622268      |
| 1 | NaN    | MMT00058311   |
| 1 | NaN    | MMT00051556   |
| 1 | NaN    | MMT00033125   |
| 1 | NaN    | MMT00076184   |
| 1 | NaN    | MMT00001194   |
| 1 | 12238  | Commd3        |
| 1 | 433546 | MMT00011283   |
| 1 | 20220  | Sap18         |
| 1 | 12850  | Coq7          |
| 1 | 26458  | Slc27a2       |
| 1 | NaN    | MMT00064324   |
| 1 | 56418  | Ykt6          |
| 1 | NaN    | MMT00048362   |
| 1 | 67416  | Armcx2        |
| 1 | 68981  | Snrpa1        |
| 1 | NaN    | MMT00011146   |
| 1 | 19384  | Ran           |
| 1 | 56434  | Tspan3        |
| 1 | 269704 | Zfp664        |
| 1 | NaN    | MMT00014274   |
| 1 | 57912  | Cdc42se1      |
| 1 | 223752 | Gramd4        |
| 1 | 71584  | Gdpd2         |
| 1 | 56506  | Cib2          |
| 1 | 56459  | Sae1          |
| 1 | NaN    | MMT00059396   |
| 1 | 73738  | Uchl5ip       |
| 1 | 73738  | Uchl5ip       |
| 1 | 68099  | 6720467C03Rik |
| 1 | NaN    | MMT00005424   |
| 1 | NaN    | MMT00077405   |
| 1 | NaN    | MMT00011281   |

|   |           |                    |
|---|-----------|--------------------|
| 1 | 28030     | Gfm1               |
| 1 | 670717    | MMT00038112        |
| 1 | NaN       | MMT00024508        |
| 1 | NaN       | MMT00079290        |
| 1 | 67877     | Nat5               |
| 1 | 20853     | Stau1              |
| 1 | 12632     | Cfl2               |
| 1 | 22762     | Zfpm2              |
| 1 | NaN       | MMT00060232        |
| 1 | 76178     | 6330578E17Rik      |
| 1 | 228942    | Cbln4              |
| 1 | 13195     | Ddc                |
| 1 | 626870    | OTTMUSG00000005148 |
| 1 | 19217     | Ptger2             |
| 1 | 68904     | Abhd13             |
| 1 | NaN       | MMT00063585        |
| 1 | 20462     | Sfrs10             |
| 1 | 70536     | Qpct               |
| 1 | 319448    | Fndc3a             |
| 1 | 77300     | Raph1              |
| 1 | 208624    | Alg3               |
| 1 | 56030     | Tmem131            |
| 1 | 100044551 | MMT00001823        |
| 1 | 21982     | Tmem165            |
| 1 | 102334    | Ankrd10            |
| 1 | 14700     | Gng10              |
| 1 | 19983     | Rpl5               |
| 1 | 81703     | Jdp2               |
| 1 | 18604     | Pdk2               |
| 1 | NaN       | MMT00046586        |
| 1 | 216705    | Clint1             |
| 1 | 100737    | Dcun1d4            |
| 1 | 66290     | Atp6v1g1           |
| 1 | NaN       | MMT00051501        |
| 1 | 27058     | Srp9               |
| 1 | NaN       | MMT00013262        |
| 1 | 22632     | Yy1                |
| 1 | 109905    | Rap1a              |
| 1 | 68044     | Chac2              |
| 1 | 15452     | Hprt1              |
| 1 | 18768     | Pkib               |
| 1 | 72902     | Spock3             |
| 1 | 71790     | Anxa9              |
| 1 | 12876     | Cpe                |
| 1 | 12876     | Cpe                |
| 1 | 70238     | Rnf168             |
| 1 | 13664     | Eif1a              |
| 1 | NaN       | MMT00039793        |
| 1 | 235459    | Gtf2a2             |
| 1 | 22782     | Slc30a1            |
| 1 | 69109     | 1810009O10Rik      |



|   |        |               |
|---|--------|---------------|
| 1 | 80907  | Lactb         |
| 1 | NaN    | MMT00015399   |
| 1 | NaN    | MMT00024951   |
| 1 | NaN    | MMT00056938   |
| 1 | NaN    | MMT00046455   |
| 1 | 75572  | Acyp2         |
| 1 | NaN    | MMT00068187   |
| 1 | 69961  | 2810432D09Rik |
| 1 | 69178  | Snx5          |
| 1 | 17060  | Blnk          |
| 1 | 13589  | Mapre1        |
| 1 | 80288  | Bcl9l         |
| 1 | NaN    | MMT00063223   |
| 1 | NaN    | MMT00078948   |
| 1 | 66282  | 1810029B16Rik |
| 1 | 54401  | Ywhab         |
| 1 | 58203  | Zbp1          |
| 1 | NaN    | MMT00078790   |
| 1 | 11758  | Prdx6         |
| 1 | 23790  | Coro1c        |
| 1 | 381379 | Med19         |
| 1 | 14066  | F3            |
| 1 | 17156  | Man1a2        |
| 1 | 72007  | Fndc3b        |
| 1 | 72421  | Ttc30b        |
| 1 | 66357  | 2310008M10Rik |
| 1 | 237052 | Tceal1        |
| 1 | 69608  | Sec24d        |
| 1 | 103768 | Tubg2         |
| 1 | 18115  | Nnt           |
| 1 | 57439  | Tmem183a      |
| 1 | 319695 | Ankar         |
| 1 | 320873 | Cdh10         |
| 1 | 12565  | Cdh9          |
| 1 | 105171 | Arrdc3        |
| 1 | 67378  | Bbs2          |
| 1 | 20333  | Sec22b        |
| 1 | 52466  | Slc46a1       |
| 1 | 210293 | Dock10        |
| 1 | 12617  | Cenpc1        |
| 1 | 20823  | Ssb           |
| 1 | 20620  | Plk2          |
| 1 | 74252  | Armc1         |
| 1 | 52076  | Tmem38b       |
| 1 | 22770  | Zhx1          |
| 1 | 76804  | Jmjd2c        |
| 1 | 338467 | Morc3         |
| 1 | 70799  | Cep192        |
| 1 | 18000  | 2-Sep         |
| 1 | 319263 | Pcmt1d1       |
| 1 | 219105 | Zmym5         |

|   |        |               |
|---|--------|---------------|
| 1 | 238447 | Igh-2         |
| 1 | 76510  | Trappc9       |
| 1 | 94229  | Slc4a10       |
| 1 | 73728  | Psd           |
| 1 | 20912  | Stxbp3a       |
| 1 | NaN    | MMT00038995   |
| 1 | 56442  | Serinc1       |
| 1 | 77032  | 2610029I01Rik |
| 1 | NaN    | MMT00041407   |
| 1 | 78913  | Zfp294        |
| 1 | 77591  | Ddx10         |
| 1 | 229227 | 4932438A13Rik |
| 1 | 117198 | Ivns1abp      |
| 1 | 77048  | Ccdc41        |
| 1 | 78248  | Armcx1        |
| 1 | 54375  | Azin1         |
| 1 | 99730  | Taf13         |
| 1 | 12794  | Cnih2         |
| 1 | 29805  | Znhit2        |
| 1 | 70472  | Atad2         |
| 1 | 170753 | Zfp704        |
| 1 | 223435 | Trio          |
| 1 | 26422  | Nbea          |
| 1 | 76483  | Lmf1          |
| 1 | 230157 | Tmeff1        |
| 1 | 22194  | Ube2e1        |
| 1 | 22194  | Ube2e1        |
| 1 | NaN    | MMT00004881   |
| 1 | NaN    | MMT00052614   |
| 1 | 217869 | Eif5          |
| 1 | NaN    | MMT00081393   |
| 1 | 67019  | Actr6         |
| 1 | 23950  | Dnajb6        |
| 1 | 13690  | Eif4g2        |
| 1 | 676923 | MMT00040704   |
| 1 | 70078  | Nol7          |
| 1 | 224585 | Zfp160        |
| 1 | 23971  | Papss1        |
| 1 | 106073 | D15Mgi27      |
| 1 | 140482 | Zfp358        |
| 1 | 19302  | Pex2          |
| 1 | 59032  | Ppp2r3c       |
| 1 | 67003  | Uqcrc2        |
| 1 | 19744  | Rheb          |
| 1 | 620986 | EG620986      |
| 1 | NaN    | MMT00011278   |
| 1 | 56426  | Pdcd10        |
| 1 | NaN    | MMT00027514   |
| 1 | 30795  | Fkbp3         |
| 1 | 70747  | Tspan2        |
| 1 | NaN    | MMT00063982   |

|   |        |               |
|---|--------|---------------|
| 1 | 14823  | Grm8          |
| 1 | 67958  | 2610101N10Rik |
| 1 | 235072 | 7-Sep         |
| 1 | NaN    | MMT00063687   |
| 1 | NaN    | MMT00080648   |
| 1 | 70834  | Spag9         |
| 1 | 71982  | Snx10         |
| 1 | 59079  | Erb2ip        |
| 1 | 70047  | Trnt1         |
| 1 | 210973 | Kbtbd2        |
| 1 | NaN    | MMT00007741   |
| 1 | NaN    | MMT00077590   |
| 1 | 67939  | 2010316F05Rik |
| 1 | NaN    | MMT00018157   |
| 1 | 68010  | Bambi         |
| 1 | 225896 | D19Ertd721e   |
| 1 | 226122 | Ubt1          |
| 1 | 66725  | Lrrk2         |
| 1 | 192657 | Eil2          |
| 1 | 56195  | Ptbp2         |
| 1 | 54607  | Socs6         |
| 1 | 69048  | Slc30a5       |
| 1 | 68352  | 0610012D14Rik |
| 1 | 18049  | Ngf           |
| 1 | 57896  | Krcc1         |
| 1 | 329877 | Dennd4c       |
| 1 | 13039  | Ctsl          |
| 1 | 16653  | Kras          |
| 1 | 224022 | Slc7a4        |
| 1 | 15982  | lfrd1         |
| 1 | 234915 | AK129341      |
| 1 | 18080  | Nin           |
| 1 | 226747 | Ahctf1        |
| 1 | 213819 | Casd1         |
| 1 | 72139  | 2610044O15Rik |
| 1 | NaN    | MMT00020969   |
| 1 | 624862 | EG624862      |
| 1 | 12176  | Bnip3         |
| 1 | 107769 | Tm6sf1        |
| 1 | 17954  | Nap1l2        |
| 1 | 19352  | Rabggtb       |
| 1 | 75812  | Tasp1         |
| 1 | 329650 | Med12l        |
| 1 | 14658  | Glr           |
| 1 | NaN    | MMT00003599   |
| 1 | 245688 | Rbbp7         |
| 1 | NaN    | MMT00060167   |
| 1 | 264064 | Cdk8          |
| 1 | 624446 | EG624446      |
| 1 | 17973  | Nck1          |
| 1 | 18949  | Pnn           |

|   |        |                    |
|---|--------|--------------------|
| 1 | 22612  | Yes1               |
| 1 | NaN    | MMT00038159        |
| 1 | 72999  | Insig2             |
| 1 | 320940 | Atp11c             |
| 1 | 20280  | Scp2               |
| 1 | 69028  | Mitd1              |
| 1 | 72183  | Snx6               |
| 1 | 16452  | Jak2               |
| 1 | 79264  | Krit1              |
| 1 | 12301  | Cacybp             |
| 1 | 21353  | Tank               |
| 1 | 109019 | Obfc2a             |
| 1 | 321000 | 4933421E11Rik      |
| 1 | 382252 | A830080D01Rik      |
| 1 | 237542 | Osbpl8             |
| 1 | 78521  | B230219D22Rik      |
| 1 | 72098  | Tmem68             |
| 1 | 17184  | Matr3              |
| 1 | 67089  | Psmc6              |
| 1 | 68845  | Pih1d1             |
| 1 | 74020  | Cpne4              |
| 1 | 242521 | Klh9               |
| 1 | 76073  | Pcgf5              |
| 1 | 110789 | Gpr98              |
| 1 | 226646 | Ndufs2             |
| 1 | 12007  | Azgp1              |
| 1 | 54608  | Abhd2              |
| 1 | 272428 | Acsm5              |
| 1 | 68338  | Golt1a             |
| 1 | 13108  | Cyp2g1             |
| 1 | 226143 | Cyp2c44            |
| 1 | 208098 | Panx3              |
| 1 | 72330  | Kbtbd5             |
| 1 | 26557  | Homer2             |
| 1 | 330460 | BC022651           |
| 1 | 71839  | Osgin1             |
| 1 | 109791 | Clps               |
| 1 | 71754  | Cyp2d40            |
| 1 | 13117  | Cyp4a10            |
| 1 | 12279  | C9                 |
| 1 | 69085  | Zcchc9             |
| 1 | 624219 | EG624219           |
| 1 | 80287  | Apobec3            |
| 1 | 13012  | Cst8               |
| 1 | 170728 | Rtn4ip1            |
| 1 | 68034  | 2900009I07Rik      |
| 1 | 78825  | 5830417C01Rik      |
| 1 | NaN    | MMT00057138        |
| 1 | 107589 | Mylk               |
| 1 | 433424 | OTTMUSG00000012358 |
| 1 | 84682  | Cox4i2             |

|   |        |               |
|---|--------|---------------|
| 1 | 71846  | Syce2         |
| 1 | 17995  | Ndufv1        |
| 1 | 17922  | Myo7b         |
| 1 | 118449 | Synpo2        |
| 1 | 54419  | Cldn6         |
| 1 | NaN    | MMT00081793   |
| 1 | 227743 | Mapkap1       |
| 1 | 102595 | Plekho2       |
| 1 | 258999 | Olfr178       |
| 1 | 545370 | Hmcn1         |
| 1 | 65956  | Ccl21c        |
| 1 | 258593 | Olfr700       |
| 1 | 19650  | Rbl1          |
| 1 | NaN    | MMT00014463   |
| 1 | 56358  | Copz2         |
| 1 | 13611  | S1pr4         |
| 1 | 109225 | Ms4a7         |
| 1 | 74043  | Pex26         |
| 1 | 57890  | Il17re        |
| 1 | NaN    | MMT00012844   |
| 1 | 108114 | Slc22a7       |
| 1 | 22224  | Usp10         |
| 1 | 629378 | Dact3         |
| 1 | 26940  | Ecsit         |
| 1 | 211548 | Nomo1         |
| 1 | 56876  | Nelf          |
| 1 | 435684 | Shf           |
| 1 | 66077  | Aurkaip1      |
| 1 | 67437  | Ssr3          |
| 1 | 668450 | EG668450      |
| 1 | 66397  | Sar1b         |
| 1 | NaN    | MMT00051866   |
| 1 | 57783  | Tnip1         |
| 1 | 235606 | Apeh          |
| 1 | 50753  | Fbxo8         |
| 1 | 192652 | Wdr81         |
| 1 | 67843  | Slc35a4       |
| 1 | NaN    | MMT00066182   |
| 1 | 544963 | Iqgap2        |
| 1 | 14062  | F2r           |
| 1 | 242050 | Igsf10        |
| 1 | 76501  | CommD9        |
| 1 | 78240  | Cst11         |
| 1 | 68617  | 1110012J17Rik |
| 1 | 230661 | Tesk2         |
| 1 | 231093 | Agbl5         |
| 1 | 18588  | Pde6g         |
| 1 | 73730  | Lce1l         |
| 1 | 70382  | Kctd2         |
| 1 | 76187  | Adhfe1        |
| 1 | 59007  | Ngly1         |

|   |        |               |
|---|--------|---------------|
| 1 | 100177 | Zmym6         |
| 1 | 23821  | Bace1         |
| 1 | 58245  | Gpr180        |
| 1 | 227522 | Rpp38         |
| 1 | 16669  | Krt19         |
| 1 | 66817  | Tmem170       |
| 1 | 12833  | Col6a1        |
| 1 | 74100  | MMT00001343   |
| 1 | 66531  | 2310061C15Rik |
| 1 | 68603  | Pmvk          |
| 1 | 233812 | BC030336      |
| 1 | 93885  | Pcdhb14       |
| 1 | 20439  | Siah2         |
| 1 | 69379  | C8g           |
| 1 | 71838  | Phf7          |
| 1 | 110006 | Gusb          |
| 1 | 230101 | Gba2          |
| 1 | 108705 | Pttg1ip       |
| 1 | NaN    | MMT00011231   |
| 1 | 233744 | Spon1         |
| 1 | 223665 | C030006K11Rik |
| 1 | 73652  | 2210408F21Rik |
| 1 | 76890  | Memo1         |
| 1 | NaN    | MMT00051740   |
| 1 | NaN    | MMT00071327   |
| 1 | NaN    | MMT00067648   |
| 1 | 66945  | Sdha          |
| 1 | 78523  | Mrpl9         |
| 1 | NaN    | MMT00042876   |
| 1 | 58202  | Cobra1        |
| 1 | 18541  | Pcnt          |
| 1 | 22217  | Usp12         |
| 1 | NaN    | MMT00007006   |
| 1 | NaN    | MMT00030019   |
| 1 | 76273  | Ndfip2        |
| 1 | 69536  | Hemk1         |
| 1 | NaN    | MMT00002799   |
| 1 | 66588  | Cmpk1         |
| 1 | 26611  | Rcn2          |
| 1 | 53328  | Pgrmc1        |
| 1 | 53382  | Txnl1         |
| 1 | 100678 | Psph          |
| 1 | 319322 | Sf3b2         |
| 1 | NaN    | MMT00068885   |
| 1 | 77569  | Limch1        |
| 1 | 70478  | Mipep         |
| 1 | 19182  | Psmc3         |
| 1 | 54380  | Smarcal1      |
| 1 | 20224  | Sar1a         |
| 1 | 52250  | Reep1         |
| 1 | 226971 | Plekhb2       |

|   |        |               |
|---|--------|---------------|
| 1 | 230075 | Ndufb6        |
| 1 | NaN    | MMT00020987   |
| 1 | 18719  | Pip5k1b       |
| 1 | 627022 | EG627022      |
| 1 | NaN    | MMT00056589   |
| 1 | NaN    | MMT00059805   |
| 1 | NaN    | MMT00004769   |
| 1 | NaN    | MMT00056634   |
| 1 | 667832 | MMT00021210   |
| 1 | 17846  | Commd1        |
| 1 | 75734  | 5230400G24Rik |
| 1 | 74776  | Ppa2          |
| 1 | 67443  | Map1lc3b      |
| 1 | 68240  | Rpa3          |
| 1 | NaN    | MMT00020332   |
| 1 | NaN    | MMT00034261   |
| 1 | NaN    | MMT00044478   |
| 1 | 20005  | Rpl9          |
| 1 | NaN    | MMT00046581   |
| 1 | NaN    | MMT00048392   |
| 1 | NaN    | MMT00012906   |
| 1 | 625690 | EG625690      |
| 1 | NaN    | MMT00059232   |
| 1 | NaN    | MMT00069919   |
| 1 | NaN    | MMT00002494   |
| 1 | NaN    | MMT00043723   |
| 1 | NaN    | MMT00017766   |
| 1 | 668699 | MMT00070312   |
| 1 | NaN    | MMT00079369   |
| 1 | 17449  | Mdh1          |
| 1 | NaN    | MMT00040108   |
| 1 | NaN    | MMT00048286   |
| 1 | NaN    | MMT00011814   |
| 1 | NaN    | MMT00036520   |
| 1 | NaN    | MMT00042303   |
| 1 | NaN    | MMT00069486   |
| 1 | 67157  | 2610301B20Rik |
| 1 | 229746 | EG229746      |
| 1 | 57344  | As3mt         |
| 1 | 22021  | Tpst1         |
| 1 | 20810  | Srm           |
| 1 | 73723  | Sh3bgrl3      |
| 1 | NaN    | MMT00001732   |
| 1 | 259086 | Olf609        |
| 1 | 225362 | Reep2         |
| 1 | 73737  | 1110008P14Rik |
| 1 | 20462  | Sfrs10        |
| 1 | 64602  | Ireb2         |
| 1 | NaN    | MMT00006294   |
| 1 | 68050  | 6330407G11Rik |
| 1 | 12552  | Cdh11         |

|   |        |               |
|---|--------|---------------|
| 1 | 269424 | Phf17         |
| 1 | NaN    | MMT00046996   |
| 1 | 76892  | Rnft1         |
| 1 | 59048  | C1galt1c1     |
| 1 | 66631  | Hiat1         |
| 1 | 68861  | 1190002N15Rik |
| 1 | 68187  | 4921533L14Rik |
| 1 | 93759  | Sirt1         |
| 1 | 66684  | Tceal8        |
| 1 | NaN    | MMT00045897   |
| 1 | 22235  | Ugdh          |
| 1 | 240283 | Dmx1          |
| 1 | 225028 | Map4k3        |
| 1 | 12675  | Chuk          |
| 1 | NaN    | MMT00029171   |
| 1 | 12626  | Cetn3         |
| 1 | 52184  | Odf2l         |
| 1 | 68146  | Arl13b        |
| 1 | 110842 | Etfa          |
| 1 | 12785  | Cnbp          |
| 1 | 74117  | Actr3         |
| 1 | 210933 | Bai3          |
| 1 | 66092  | Ghitm         |
| 1 | 66385  | Ppp1r7        |
| 1 | 83962  | Btbd1         |
| 1 | 98221  | Eif3m         |
| 1 | 229906 | Gtf2b         |
| 1 | 56307  | Metap2        |
| 1 | 66213  | Med7          |
| 1 | 321022 | Cdv3          |
| 1 | 53605  | Nap1l1        |
| 1 | 15247  | Hiat1         |
| 1 | 23989  | Med24         |
| 1 | 70572  | Ipo5          |
| 1 | 26922  | Mecr          |
| 1 | 78618  | Centb2        |
| 1 | 16979  | Lrrn1         |
| 1 | 98758  | Hnrnpf        |
| 1 | 71458  | Bcor          |
| 1 | NaN    | MMT00041243   |
| 1 | 57321  | Terf2ip       |
| 1 | NaN    | MMT00038380   |
| 1 | 65246  | Xpo7          |
| 1 | 67028  | 2610002M06Rik |
| 1 | 69981  | Tmem30a       |
| 1 | 14265  | Fmr1          |
| 1 | 217664 | Mgat2         |
| 1 | 70155  | Ogfr1         |
| 1 | 69535  | 2310004N24Rik |
| 1 | 29858  | Pmm1          |
| 1 | 217038 | Mrm1          |



|   |        |               |
|---|--------|---------------|
| 1 | 12265  | Ciita         |
| 1 | 22225  | Usp5          |
| 1 | 59042  | Cope          |
| 1 | 103733 | Tubg1         |
| 1 | 79043  | Spsb3         |
| 1 | 26425  | Nubp1         |
| 1 | NaN    | MMT00028111   |
| 1 | 19656  | Rbmxrt        |
| 1 | 19656  | Rbmxrt        |
| 1 | 227835 | Gtdc1         |
| 1 | NaN    | MMT00010554   |
| 1 | 69923  | Agk           |
| 1 | 227197 | Ndufs1        |
| 1 | 108664 | Atp6v1h       |
| 1 | 56278  | Gkap1         |
| 1 | 56278  | Gkap1         |
| 1 | 209446 | Tcfe3         |
| 1 | 22221  | Ubp1          |
| 1 | 66204  | Acyp1         |
| 1 | NaN    | MMT00081492   |
| 1 | 68777  | Tmem53        |
| 1 | 654824 | Ankrd37       |
| 1 | 99480  | Dnttip2       |
| 1 | 24067  | Srp54a        |
| 1 | 56771  | Med20         |
| 1 | 76687  | Spcs3         |
| 1 | 71767  | Tysnd1        |
| 1 | 71966  | Nkiras2       |
| 1 | 53317  | Plrg1         |
| 1 | 12469  | Cct8          |
| 1 | 67973  | Mphosph10     |
| 1 | 217980 | Larp5         |
| 1 | 214931 | Fbxl16        |
| 1 | 83486  | Rbm5          |
| 1 | 69804  | Tmem147       |
| 1 | 70823  | Hmgb211       |
| 1 | 56210  | Rev1          |
| 1 | 56200  | Ddx21         |
| 1 | 338337 | Cog3          |
| 1 | 74741  | 5730419I09Rik |
| 1 | NaN    | MMT00052332   |
| 1 | 210529 | G430022H21Rik |
| 1 | 50497  | Hspa14        |
| 1 | 14862  | Gstm1         |
| 1 | 74213  | Rbm26         |
| 1 | 59290  | Gpa33         |
| 1 | 50926  | Hnrpd1        |
| 1 | 213811 | BC002059      |
| 1 | NaN    | MMT00076058   |
| 1 | 66625  | Sfrs18        |
| 1 | 67759  | 5033414D02Rik |

|   |        |               |
|---|--------|---------------|
| 1 | 67832  | Bxdc2         |
| 1 | 67492  | Anubl1        |
| 1 | 494468 | Armcx5        |
| 1 | NaN    | MMT00026286   |
| 1 | 68184  | Denr          |
| 1 | 234865 | Nup133        |
| 1 | 68083  | Pak1ip1       |
| 1 | 21848  | Trim24        |
| 1 | 14017  | Evi2a         |
| 1 | 107652 | Uap1          |
| 1 | 13072  | Cyp11b2       |
| 1 | 18830  | Pltp          |
| 1 | 101565 | 6330503K22Rik |
| 1 | 12978  | Csf1r         |
| 1 | 216618 | Ccdc104       |
| 1 | 140483 | Hnmt          |
| 1 | 19139  | Prps1         |
| 1 | 14545  | Gdap1         |
| 1 | 94062  | Mrpl3         |
| 1 | 15525  | Hspa4         |
| 1 | 320720 | Fastkd1       |
| 1 | 19025  | Ctsa          |
| 1 | 66711  | Sbds          |
| 1 | NaN    | MMT00037611   |
| 1 | 83433  | Trem2         |
| 1 | 19682  | Rdh5          |
| 1 | 98845  | Eps8l2        |
| 1 | 225341 | Lims2         |
| 1 | 55978  | Ift20         |
| 1 | 11843  | Arf4          |
| 1 | 66706  | 4733401H18Rik |
| 1 | 76936  | Hnrnpm        |
| 1 | 12064  | Bdnf          |
| 1 | 18706  | Pik3ca        |
| 1 | 68722  | 1110029L17Rik |
| 1 | NaN    | MMT00023332   |
| 1 | 59010  | Sqrdl         |
| 1 | 27280  | Phlda3        |
| 1 | 26568  | Slc27a3       |
| 1 | 66349  | Atp5sl        |
| 1 | 229715 | Amigo1        |
| 1 | 71687  | Tmem25        |
| 1 | 13384  | Mpp3          |
| 1 | 66098  | Chchd6        |
| 1 | NaN    | MMT00038457   |
| 1 | 11692  | Gfer          |
| 1 | 234825 | Klhdc4        |
| 1 | 66268  | Pigyl         |
| 1 | 66449  | MMT00023224   |
| 1 | 66449  | MMT00011706   |
| 1 | 71994  | Cnn3          |

|   |        |               |
|---|--------|---------------|
| 1 | 58809  | Rnase4        |
| 1 | 13032  | Ctsc          |
| 1 | 68588  | Cthrc1        |
| 1 | 27226  | Pla2g7        |
| 1 | 22223  | Uchl1         |
| 1 | 93886  | Pcdhb15       |
| 1 | 11676  | Aldoc         |
| 1 | 66401  | Nudt2         |
| 1 | 71853  | Pdia6         |
| 1 | NaN    | MMT00008784   |
| 1 | NaN    | MMT00051613   |
| 1 | 641192 | MMT00077535   |
| 1 | 68742  | 1110032O16Rik |
| 1 | 20909  | Stx4a         |
| 1 | NaN    | MMT00078932   |
| 1 | NaN    | MMT00047810   |
| 1 | NaN    | MMT00046201   |
| 1 | 15356  | Hmgcl         |
| 1 | 80743  | Vps16         |
| 1 | 407785 | Ndufs6        |
| 1 | 108156 | Mthfd1        |
| 1 | 68642  | 2810441K11Rik |
| 1 | 56191  | Tro           |
| 1 | 27681  | Snf8          |
| 1 | 19300  | Abcd4         |
| 1 | 59046  | Arpp19        |
| 1 | 59046  | Arpp19        |
| 1 | 11655  | Alas1         |
| 1 | 26416  | Mapk14        |
| 1 | 72726  | Tbcc          |
| 1 | 67177  | Cdt1          |
| 1 | NaN    | MMT00076151   |
| 1 | 20018  | Rpo1-3        |
| 1 | 72832  | Crtac1        |
| 1 | 14756  | Gpld1         |
| 1 | 229487 | Pet112l       |
| 1 | 50769  | Atp8a2        |
| 1 | 69137  | 2200002K05Rik |
| 1 | 107829 | Thoc5         |
| 1 | 67046  | Tbc1d7        |
| 1 | 27267  | Cars          |
| 1 | 66293  | 1810032O08Rik |
| 1 | 53817  | Bat1a         |
| 1 | NaN    | MMT00035426   |
| 1 | 14057  | Sfxn1         |
| 1 | NaN    | MMT00058026   |
| 1 | 15211  | Hexa          |
| 1 | 66111  | Tmed3         |
| 1 | 67367  | 1810007M14Rik |
| 1 | 235469 | Suhw4         |
| 1 | 218503 | Fcho2         |

|   |        |               |
|---|--------|---------------|
| 1 | 17344  | Pias2         |
| 1 | 245050 | C730027P07Rik |
| 1 | 14800  | Gria2         |
| 1 | 97165  | Hmgb2         |
| 1 | 69507  | 1700030G06Rik |
| 1 | 74443  | 4933406E20Rik |
| 1 | 70349  | Copb1         |
| 1 | 69226  | Snx24         |
| 1 | 140742 | Sesn1         |
| 1 | 71837  | 1700003E16Rik |
| 1 | 269878 | Megf8         |
| 1 | 14670  | Gna-rs1       |
| 1 | 217335 | Fbf1          |
| 1 | 213109 | Phf3          |
| 1 | 11702  | Amd1          |
| 1 | NaN    | MMT00063804   |
| 1 | 66680  | 3230401D17Rik |
| 1 | 66680  | 3230401D17Rik |
| 1 | 231712 | Trafd1        |
| 1 | 76073  | Pcgf5         |
| 1 | NaN    | MMT00008417   |
| 1 | 53872  | Caprin1       |
| 1 | 56369  | Apip          |
| 1 | 66050  | 0610009B22Rik |
| 1 | 69482  | Nup35         |
| 1 | 52575  | Rg9mtd1       |
| 1 | 544971 | Bdp1          |
| 1 | 19165  | Psen2         |
| 1 | 545700 | Vmn2r-ps14    |
| 1 | 211253 | Mtrf1         |
| 1 | 23924  | Katna1        |
| 1 | 19386  | Ranbp2        |
| 1 | 73668  | Ttc21b        |
| 1 | 16588  | Kin           |
| 1 | 76123  | Gpsm2         |
| 1 | 76044  | Ncapg2        |
| 1 | 239122 | Setdb2        |
| 1 | 109151 | Chd9          |
| 1 | 13405  | Dmd           |
| 1 | 107227 | MacroD1       |
| 1 | 107767 | Scamp1        |
| 1 | 228730 | Gm114         |
| 1 | 56532  | Ripk3         |
| 1 | 68815  | Btbd10        |
| 1 | 68337  | Crip2         |
| 1 | 66940  | Shisa5        |
| 1 | 207214 | Larp4         |
| 1 | 93871  | Brwd1         |
| 1 | 74533  | Gzf1          |
| 1 | 192166 | Sardh         |
| 1 | 330192 | Vps37b        |

|   |        |               |
|---|--------|---------------|
| 1 | 381644 | Cep135        |
| 1 | 17918  | Myo5a         |
| 1 | 26433  | Plod3         |
| 1 | 72930  | Ppp2r2b       |
| 1 | 20747  | Spop          |
| 1 | 235293 | Sc5d          |
| 1 | 19361  | Rad51         |
| 1 | 15587  | Hyal2         |
| 1 | 67239  | Bxdc1         |
| 1 | 13667  | Eif2b4        |
| 1 | 17217  | Mcm4          |
| 1 | 80752  | BC004044      |
| 1 | 98970  | Fibcd1        |
| 1 | 385454 | EG385454      |
| 1 | 13197  | Gadd45a       |
| 1 | 225791 | Zadh2         |
| 1 | 319601 | Zfp653        |
| 1 | 107173 | Gpr137        |
| 1 | 229512 | Smg5          |
| 1 | 71723  | Dhx34         |
| 1 | 16399  | Itga2b        |
| 1 | 17912  | Myo1b         |
| 1 | 67533  | Ppfibp1       |
| 1 | 71929  | Tmem123       |
| 1 | 20501  | Slc16a1       |
| 1 | 192663 | Abcg4         |
| 1 | 232879 | Zbtb45        |
| 1 | 74562  | Fer1l4        |
| 1 | 69573  | 2310016C08Rik |
| 1 | 67379  | Dedd2         |
| 1 | 230868 | Igsf21        |
| 1 | 66156  | Anapc11       |
| 1 | 71146  | 4933417O08Rik |
| 1 | 69065  | Chac1         |
| 1 | 20262  | Stmn3         |
| 1 | 55992  | Trim3         |
| 1 | 74097  | Pop7          |
| 1 | 98238  | Lrrc59        |
| 1 | 67723  | 4932415G12Rik |
| 1 | 66411  | Tbcb          |
| 1 | 18100  | Mrpl40        |
| 1 | 67334  | 1700054O13Rik |
| 1 | 195733 | Grhl1         |
| 1 | 59092  | Pcbp4         |
| 1 | 12778  | Cxcr7         |
| 1 | 407790 | Ndufa4l2      |
| 1 | 74498  | Gorasp1       |
| 1 | 18040  | Nefm          |
| 1 | 54138  | Atxn10        |
| 1 | 67784  | Plxnd1        |
| 1 | 27377  | Yme1l1        |

|   |           |               |
|---|-----------|---------------|
| 1 | 66687     | Tbc1d15       |
| 1 | 50997     | Mpp2          |
| 1 | 13637     | Efna2         |
| 1 | 17975     | Ncl           |
| 1 | 72759     | Tmem135       |
| 1 | 59027     | Nampt         |
| 1 | NaN       | MMT00069487   |
| 1 | NaN       | MMT00079689   |
| 1 | NaN       | MMT00054557   |
| 1 | NaN       | MMT00078030   |
| 1 | 13121     | Cyp51         |
| 1 | 19046     | Ppp1cb        |
| 1 | NaN       | MMT00050725   |
| 1 | 12314     | Calm2         |
| 1 | NaN       | MMT00019522   |
| 1 | NaN       | MMT00009680   |
| 1 | NaN       | MMT00052151   |
| 1 | 226026    | Smc5          |
| 1 | 319901    | Dsel          |
| 1 | 75964     | D030074E01Rik |
| 1 | 52665     | Echdc1        |
| 1 | 14733     | Gpc1          |
| 1 | 216558    | Ugp2          |
| 1 | 53330     | Vamp4         |
| 1 | 83493     | Sacm1l        |
| 1 | 629364    | MMT00061218   |
| 1 | 226414    | Dars          |
| 1 | 17126     | Smad2         |
| 1 | 625796    | EG625796      |
| 1 | 67204     | Eif2s2        |
| 1 | 353310    | Zfp703        |
| 1 | 56297     | Arl6          |
| 1 | 667795    | EG667795      |
| 1 | 104721    | Ddx1          |
| 1 | 26965     | Cul1          |
| 1 | NaN       | MMT00017521   |
| 1 | NaN       | MMT00073158   |
| 1 | 66355     | Gmpr          |
| 1 | 59031     | Chst12        |
| 1 | 53607     | Snrpa         |
| 1 | NaN       | MMT00014970   |
| 1 | 12033     | Bcap29        |
| 1 | 13612     | Edil3         |
| 1 | NaN       | MMT00048420   |
| 1 | 14791     | Emg1          |
| 1 | 240025    | Dact2         |
| 1 | 269033    | 4930503L19Rik |
| 1 | 320184    | Lrrc58        |
| 1 | 100047309 | MMT00074326   |
| 1 | 19762     | Rit2          |
| 1 | 232906    | Grif1         |

|   |        |               |
|---|--------|---------------|
| 1 | NaN    | MMT00024172   |
| 1 | 109241 | Mbd5          |
| 1 | NaN    | MMT00001956   |
| 1 | NaN    | MMT00025562   |
| 1 | 269105 | EG269105      |
| 1 | NaN    | MMT00036391   |
| 1 | 67488  | Calcoco1      |
| 1 | 30056  | Timm9         |
| 1 | 55951  | Brp44l        |
| 1 | 68263  | Pdhb          |
| 1 | NaN    | MMT00080137   |
| 1 | NaN    | MMT00040104   |
| 1 | 241308 | Ralgps1       |
| 1 | NaN    | MMT00011132   |
| 1 | 18970  | Polb          |
| 1 | 56055  | Gtpbp2        |
| 1 | NaN    | MMT00046046   |
| 1 | NaN    | MMT00061243   |
| 1 | NaN    | MMT00004656   |
| 1 | NaN    | MMT00036668   |
| 1 | 56209  | Gde1          |
| 1 | 68879  | Prpf6         |
| 1 | 67513  | 2610002J02Rik |
| 1 | 66637  | 5730449L18Rik |
| 1 | 66637  | 5730449L18Rik |
| 1 | 675689 | MMT00041953   |
| 1 | 56724  | Cript         |
| 1 | 107047 | Psmg2         |
| 1 | NaN    | MMT00077382   |
| 1 | 675985 | MMT00081973   |
| 1 | NaN    | MMT00080853   |
| 1 | 56294  | Ptpn9         |
| 1 | 18950  | Pnp1          |
| 1 | NaN    | MMT00015578   |
| 1 | NaN    | MMT00075644   |
| 1 | 101437 | Dhx32         |
| 1 | 67619  | Nob1          |
| 1 | 21672  | Prdx2         |
| 1 | 16976  | Lrpap1        |
| 1 | 210148 | Slc30a6       |
| 1 | 53619  | Blcap         |
| 1 | 214895 | Lman2l        |
| 1 | 58521  | Eid1          |
| 1 | 19679  | Pitpnm2       |
| 1 | 434339 | EG434339      |
| 1 | 11416  | Slc33a1       |
| 1 | 104662 | Tsr1          |
| 1 | 24070  | Mpdu1         |
| 1 | 668838 | EG668838      |
| 1 | 23873  | Faim          |
| 1 | NaN    | MMT00074659   |

|   |        |               |
|---|--------|---------------|
| 1 | 67676  | Rpp21         |
| 1 | 76561  | Snx7          |
| 1 | 72129  | Pex13         |
| 1 | 433862 | EG433862      |
| 1 | 16169  | Il15ra        |
| 1 | 11532  | Adh5          |
| 1 | 78309  | Parc          |
| 1 | 64293  | Stk32b        |
| 1 | 319468 | Ppm1h         |
| 1 | 78372  | 3300001G02Rik |
| 1 | 232969 | Zfp428        |
| 1 | 94181  | Nans          |
| 1 | 56615  | Mgst1         |
| 1 | 14600  | Ghr           |
| 1 | 75974  | Dock11        |
| 1 | 70575  | Gfod2         |
| 1 | 20196  | S100a13       |
| 1 | 11484  | Aspa          |
| 1 | 216274 | Cep290        |
| 1 | 68117  | Apool         |
| 1 | 74552  | Npal3         |
| 1 | 11806  | Apoa1         |
| 1 | 78124  | 4930458L03Rik |
| 1 | 65972  | Ifi30         |
| 1 | 20971  | Sdc4          |
| 1 | 16516  | Kcnj15        |
| 1 | 17318  | Mid1          |
| 1 | 20293  | Ccl12         |
| 1 | 74481  | Batf2         |
| 1 | 11921  | Atoh1         |
| 1 | 18611  | Pea15a        |
| 1 | 55944  | Eif3d         |
| 1 | 15496  | Hsd3b5        |
| 1 | 12768  | Ccr1          |
| 1 | NaN    | MMT00049098   |
| 1 | 636752 | EG636752      |
| 1 | NaN    | MMT00006438   |
| 1 | 83702  | Akr1c6        |
| 1 | 242594 | 1700024P16Rik |
| 1 | 624866 | EG624866      |
| 1 | 80985  | Trim44        |
| 1 | 27007  | Klrk1         |
| 1 | 75820  | Wdr64         |
| 1 | 75497  | 1700008G05Rik |
| 1 | 11727  | Ang           |
| 1 | 277753 | Cyp4a12a      |
| 1 | 15109  | Hal           |
| 1 | 69123  | 1810022C23Rik |
| 1 | 74568  | Mlkl          |
| 1 | 11500  | Adam7         |
| 1 | 11846  | Arg1          |



|   |           |                    |
|---|-----------|--------------------|
| 1 | 329575    | RP23-275N21.2      |
| 1 | 227377    | Farp2              |
| 1 | 73603     | 1700126L10Rik      |
| 1 | 243822    | 4930401F20Rik      |
| 1 | 217365    | Nploc4             |
| 1 | 28250     | Slco1a4            |
| 1 | 330962    | MMT00003408        |
| 1 | 73132     | Slc25a16           |
| 1 | 15273     | Hivep2             |
| 1 | 29815     | Bcar3              |
| 1 | 244579    | Tox3               |
| 1 | 71721     | 1200015N20Rik      |
| 1 | 241201    | Cdh7               |
| 1 | 59029     | Psmc14             |
| 1 | 67005     | Polr3k             |
| 1 | 66979     | Pole4              |
| 1 | 93888     | Pcdhb17            |
| 1 | 74239     | Iqce               |
| 1 | 68646     | 1110020G09Rik      |
| 1 | 78752     | Csgalnact2         |
| 1 | 74670     | 4930432O21Rik      |
| 1 | NaN       | MMT00071421        |
| 1 | 20617     | Snca               |
| 1 | 214627    | Papd5              |
| 1 | 13178     | Dck                |
| 1 | 73130     | Tmed5              |
| 1 | 22289     | Utx                |
| 1 | 231051    | Mll3               |
| 1 | 69190     | Dym                |
| 1 | 219135    | Mttr6              |
| 1 | 12387     | Ctnnb1             |
| 1 | 107999    | Gtpbp6             |
| 1 | 69876     | Thap3              |
| 1 | 18036     | Nfkbib             |
| 1 | 68867     | Rnf122             |
| 1 | NaN       | MMT00044154        |
| 1 | NaN       | MMT00008110        |
| 1 | NaN       | MMT00078167        |
| 1 | 382421    | EG382421           |
| 1 | 100038514 | OTTMUSG00000004551 |
| 1 | 237553    | Trhde              |
| 1 | 140570    | Plxnb2             |
| 1 | 19039     | Lgals3bp           |
| 1 | 269799    | Clec4a1            |
| 1 | NaN       | MMT00058786        |
| 1 | 211389    | Suox               |
| 1 | 19294     | Pvrl2              |
| 1 | 80708     | Pacsin3            |
| 1 | 73893     | Tmem202            |
| 1 | 24057     | Sh3yl1             |
| 1 | 52004     | Cdk2ap2            |

|   |        |               |
|---|--------|---------------|
| 1 | 12764  | Cmas          |
| 1 | 230779 | Serinc2       |
| 1 | 225870 | Rin1          |
| 1 | 57816  | Tesc          |
| 1 | 17306  | Sypl2         |
| 1 | 228550 | ltpka         |
| 1 | 68487  | Tmem140       |
| 1 | 231147 | Sh3tc1        |
| 1 | 15896  | Icam2         |
| 1 | 231633 | Tmem119       |
| 1 | 227545 | 5430407P10Rik |
| 1 | 12259  | C1qa          |
| 1 | 15353  | Hmg20b        |
| 1 | 69159  | Rhebl1        |
| 1 | NaN    | MMT00049207   |
| 1 | 14976  | H2-Ke2        |
| 1 | 11966  | Atp6v1b2      |
| 1 | 66958  | Txndc14       |
| 1 | 12729  | Clns1a        |
| 1 | 102462 | Imp3          |
| 1 | 20464  | Sim1          |
| 1 | 70385  | Ccdc99        |
| 1 | 14587  | Gfra3         |
| 1 | 18606  | Enpp2         |
| 1 | 16939  | Lor           |
| 1 | 20349  | Sema3e        |
| 1 | 229699 | Slc16a4       |
| 1 | 66183  | 1110032A04Rik |
| 1 | 20112  | Rps6ka2       |
| 1 | NaN    | MMT00047910   |
| 1 | 67184  | Ndufa13       |
| 1 | 223701 | Mkl1          |
| 1 | 20024  | Sub1          |
| 1 | 277468 | Slc39a12      |
| 1 | 12848  | Cops2         |
| 1 | 13360  | Dhcr7         |
| 1 | 77604  | C430048L16Rik |
| 1 | 432812 | BC052688      |
| 1 | 103098 | Slc6a15       |
| 1 | 22446  | Xlr3c         |
| 1 | 75458  | Cklf          |
| 1 | 66736  | Ttc35         |
| 1 | 74386  | Rmi1          |
| 1 | 17219  | Mcm6          |
| 1 | 71860  | Wdr16         |
| 1 | 18709  | Pik3r2        |
| 1 | 21961  | Tns1          |
| 1 | 217140 | Scrn2         |
| 1 | 16331  | Inpp5d        |
| 1 | 104445 | Cdc42ep1      |
| 1 | 67393  | Cxxc5         |

|   |        |                    |
|---|--------|--------------------|
| 1 | 67860  | S100a16            |
| 1 | 19735  | Rgs2               |
| 1 | 102693 | Phldb1             |
| 1 | 12421  | Rb1cc1             |
| 1 | 67241  | Smc6               |
| 1 | 24015  | Abce1              |
| 1 | 67456  | Ergic2             |
| 1 | 14479  | Usp15              |
| 1 | 64213  | St7                |
| 1 | 67198  | 2810022L02Rik      |
| 1 | 106581 | Itfg3              |
| 1 | 68979  | Nol11              |
| 1 | 215378 | B830045N13Rik      |
| 1 | 66240  | Kcne1l             |
| 1 | 71904  | Paqr7              |
| 1 | 73847  | 5430432M24Rik      |
| 1 | 23894  | Gtf2h2             |
| 1 | 11546  | Parp2              |
| 1 | 59002  | Wdr8               |
| 1 | 214855 | Arid5a             |
| 1 | 66970  | Ssbp2              |
| 1 | 223864 | Rapgef3            |
| 1 | 22344  | Vezf1              |
| 1 | NaN    | MMT00057242        |
| 1 | 28040  | D6Wsu163e          |
| 1 | 66151  | Prr13              |
| 1 | 67063  | 2810432L12Rik      |
| 1 | 71743  | Coasy              |
| 1 | 52521  | Zfp622             |
| 1 | 67397  | Erp29              |
| 1 | 64652  | Nisch              |
| 1 | 227298 | BC038286           |
| 1 | 66085  | Eif3f              |
| 1 | 11769  | Ap1s1              |
| 1 | 667804 | MMT00076032        |
| 1 | 70024  | Mcm10              |
| 1 | 13088  | Cyp2b10            |
| 1 | 236790 | Ddx26b             |
| 1 | 17086  | Ncr1               |
| 1 | 235047 | Zfp809             |
| 1 | 16414  | Itgb2              |
| 1 | 18559  | Pctp               |
| 1 | 223433 | BC052328           |
| 1 | 217066 | OTTMUSG00000001305 |
| 1 | 56554  | Raet1d             |
| 1 | NaN    | MMT00050414        |
| 1 | 12908  | Crat               |
| 1 | 545279 | Ms4a15             |
| 1 | 58170  | Accn5              |
| 1 | NaN    | MMT00053630        |
| 1 | 66471  | Anp32e             |

|   |        |               |
|---|--------|---------------|
| 1 | 338523 | Jhdm1d        |
| 1 | 26885  | Casp8ap2      |
| 1 | 110960 | Tars          |
| 1 | 105203 | BC016423      |
| 1 | 103172 | MMT00073283   |
| 1 | 19018  | Scand1        |
| 1 | 319740 | Zfyve27       |
| 1 | 110198 | Akr7a5        |
| 1 | 18557  | Pctk3         |
| 1 | 20167  | Rtn2          |
| 1 | 22764  | Zfx           |
| 1 | 30951  | Cbx8          |
| 1 | 237412 | EG237412      |
| 1 | 11468  | Actg2         |
| 1 | 108161 | D0H6S2654E    |
| 1 | 116701 | Fgfr1         |
| 1 | 65221  | Slc15a3       |
| 1 | 13555  | E2f1          |
| 1 | 18984  | Por           |
| 1 | 104871 | Spata7        |
| 1 | 18004  | Nek1          |
| 1 | 71703  | Armcx3        |
| 1 | 237175 | Gpr64         |
| 1 | 73288  | Ccdc132       |
| 1 | 66724  | Map3k7ip3     |
| 1 | 20713  | Serpini1      |
| 1 | 12015  | Bad           |
| 1 | 216965 | Taok1         |
| 1 | 67131  | Acbd4         |
| 1 | 212326 | BC035537      |
| 1 | 110821 | Pcca          |
| 1 | 67168  | P2ry5         |
| 1 | 74318  | Hopx          |
| 1 | 619605 | Zcchc17       |
| 1 | 50875  | Tmod3         |
| 1 | 228543 | Rhov          |
| 1 | 13809  | Enpep         |
| 1 | 20743  | Spnb3         |
| 1 | 277973 | Slc9a5        |
| 1 | 12368  | Casp6         |
| 1 | 15361  | Hmga1         |
| 1 | 15361  | Hmga1         |
| 1 | 14086  | Fscn1         |
| 1 | 382014 | Tmem16h       |
| 1 | 16511  | Kcnh2         |
| 1 | 52055  | Rab11fip5     |
| 1 | 76454  | Fbxo31        |
| 1 | 632223 | MMT00011796   |
| 1 | 380711 | Garnl4        |
| 1 | 73046  | Glrx5         |
| 1 | 67851  | 1700021F05Rik |

|   |           |               |
|---|-----------|---------------|
| 1 | 100042265 | MMT00012636   |
| 1 | 56295     | Higd1a        |
| 1 | 67044     | Higd2a        |
| 1 | 12862     | Cox6a2        |
| 1 | 15165     | Hcn1          |
| 1 | 67392     | 4833420G17Rik |
| 1 | 271970    | Arsj          |
| 1 | 19256     | Ptpn20        |
| 1 | 68149     | Otub2         |
| 1 | 98415     | Nucks1        |
| 1 | 63955     | Cables1       |
| 1 | 219134    | Shisa2        |
| 1 | 20922     | Supt4h1       |
| 1 | 68927     | Ptcd2         |
| 1 | NaN       | MMT00006420   |
| 1 | 12192     | Zfp36l1       |
| 1 | 14712     | Gnpat         |
| 1 | 28019     | Ing4          |
| 1 | 77134     | Hnrnpa0       |
| 1 | 218203    | Mylip         |
| 1 | 80912     | Pum1          |
| 1 | 17766     | Nudt1         |
| 1 | 212439    | AA986860      |
| 1 | NaN       | MMT00001620   |
| 1 | 108075    | Ltbp4         |
| 1 | 107986    | Ddb2          |
| 1 | 68275     | Rpa1          |
| 1 | 100342    | 4732473B16Rik |
| 1 | 226744    | 9630058J23Rik |
| 1 | 26921     | Map4k4        |
| 1 | NaN       | MMT00077153   |
| 1 | NaN       | MMT00065667   |
| 1 | 244668    | Sipa1l2       |
| 1 | 68507     | Ppfia4        |
| 1 | 22142     | Tuba1a        |
| 1 | NaN       | MMT00060868   |
| 1 | 12499     | Entpd5        |
| 1 | NaN       | MMT00055891   |
| 1 | NaN       | MMT00008758   |
| 1 | 321018    | Serpina4-ps1  |
| 1 | 12443     | Ccnd1         |
| 1 | 27368     | Tbl2          |
| 1 | 18627     | Per2          |
| 1 | 11650     | Akp5          |
| 1 | 69274     | Ctdspl        |
| 1 | NaN       | MMT00021352   |
| 1 | 232223    | Txnrd3        |
| 1 | 234199    | Fgl1          |
| 1 | 76411     | 1700019E19Rik |
| 1 | NaN       | MMT00052300   |
| 1 | 71768     | Vwce          |

|   |        |               |
|---|--------|---------------|
| 1 | 16205  | Gimap1        |
| 1 | 56085  | Ubqln1        |
| 1 | NaN    | MMT00050193   |
| 1 | 20520  | Slc22a5       |
| 1 | 26424  | Nr5a2         |
| 1 | 12611  | Cebpg         |
| 1 | 15902  | Id2           |
| 1 | 14555  | Gpd1          |
| 1 | 66673  | Sorcs3        |
| 1 | 224703 | 2-Mar         |
| 1 | 67956  | Setd8         |
| 1 | 22138  | Ttn           |
| 1 | 228357 | Lrp4          |
| 1 | 223723 | Ttll12        |
| 1 | 71529  | 9030409G11Rik |
| 1 | NaN    | MMT00042479   |
| 1 | 381204 | Naalad1       |
| 1 | 435977 | EG435977      |
| 1 | NaN    | MMT00064565   |
| 1 | 54710  | Hs3st3b1      |
| 1 | 53901  | Rcan2         |
| 1 | 53311  | Mybph         |
| 1 | 20972  | Syngr1        |
| 1 | 107993 | Bfsp2         |
| 1 | NaN    | MMT00033856   |
| 1 | 12808  | Cobl          |
| 1 | 56221  | Ccl24         |
| 1 | 102632 | Acad11        |
| 1 | 67115  | Rpl14         |
| 1 | 11812  | Apoc1         |
| 1 | 76947  | 2310030N02Rik |
| 1 | 65099  | lrak1bp1      |
| 1 | 70821  | 4921507P07Rik |
| 1 | 66302  | 2410005O16Rik |
| 1 | 268470 | Ube2z         |
| 1 | 108767 | Pnrc1         |
| 1 | 12398  | Cbfa2t3       |
| 1 | 72341  | Tmem103       |
| 1 | 68556  | Uckl1         |
| 1 | 69871  | 2010007H12Rik |
| 1 | 18991  | Pou3f1        |
| 1 | 66999  | Med28         |
| 1 | 67528  | Nudt7         |
| 1 | 18167  | Npy2r         |
| 1 | 17216  | Mcm2          |
| 1 | 280645 | B3gat2        |
| 1 | 675135 | MMT00050019   |
| 1 | 11608  | Agtr1b        |
| 1 | 58988  | Rps6kb2       |
| 1 | NaN    | MMT00034311   |
| 1 | NaN    | MMT00013041   |

|   |        |               |
|---|--------|---------------|
| 1 | 66950  | Tmem206       |
| 1 | NaN    | MMT00037578   |
| 1 | 243659 | Styk1         |
| 1 | 378462 | Morn2         |
| 1 | 432745 | 4930447K03Rik |
| 1 | 19119  | Prm2          |
| 1 | 15446  | Hpgd          |
| 1 | 207175 | Cetn4         |
| 1 | 71881  | 2310001A20Rik |
| 1 | 12296  | Cacnb2        |
| 1 | 15930  | Indo          |
| 1 | 544998 | B930046C15Rik |
| 1 | 54326  | Elovl2        |
| 1 | 78321  | Ankrd23       |
| 1 | 56196  | Ttrap         |
| 1 | 101148 | B630005N14Rik |
| 1 | 14601  | Ghrh          |
| 1 | 14275  | Folr1         |
| 1 | 17957  | Napb          |
| 1 | 242748 | Ptchd2        |
| 1 | 380694 | Ccnjl         |
| 1 | 12827  | Col4a2        |
| 1 | 22158  | Tulp3         |
| 1 | 70240  | Ufsp1         |
| 1 | 21924  | Tnnc1         |
| 1 | 269016 | Sh3rf2        |
| 1 | 641340 | Nrbf2         |
| 1 | 72404  | Wdr44         |
| 1 | 67245  | Peli1         |
| 1 | 12452  | Ccng2         |
| 1 | 17311  | Kitl          |
| 1 | 16508  | Kcnd2         |
| 1 | 225651 | Mppe1         |
| 1 | 52323  | Klhl7         |
| 1 | 73173  | Pcdh18        |
| 1 | 76219  | 6530401D17Rik |
| 1 | 235682 | Zfp445        |
| 1 | 19070  | Mobkl3        |
| 1 | 66271  | Tmem126a      |
| 1 | 108900 | 2700049P18Rik |
| 1 | 68736  | 1110034B05Rik |
| 1 | 19283  | Ptprz1        |
| 1 | 170719 | Oxr1          |
| 1 | 72140  | Ccdc123       |
| 1 | 75871  | Zfp821        |
| 1 | 70435  | 2610204M08Rik |
| 1 | 214597 | Sidt2         |
| 1 | 64540  | Tspan4        |
| 1 | 378702 | Serf2         |
| 1 | 378702 | Serf2         |
| 1 | 17153  | Mal           |

|   |        |               |
|---|--------|---------------|
| 1 | 74563  | Rasgef1c      |
| 1 | 380787 | A230065H16Rik |
| 1 | 52690  | Setd3         |
| 1 | 93692  | Glrx          |
| 1 | 14660  | Gls           |
| 1 | 330149 | Hfm1          |
| 1 | 66061  | Tctex1d2      |
| 1 | 16210  | Impact        |
| 1 | 24083  | Gtlf3b        |
| 1 | 70591  | 5730455P16Rik |
| 1 | NaN    | MMT00033070   |
| 1 | 66935  | 1700023B02Rik |
| 1 | 71030  | 4933403O08Rik |
| 1 | 57432  | Zc3h8         |
| 1 | 217615 | Ctage5        |
| 1 | 14758  | Gpm6b         |
| 1 | 213056 | D1Ert53e      |
| 1 | 330731 | EG330731      |
| 1 | 227059 | Slc39a10      |
| 1 | 433702 | AU014645      |
| 1 | 56048  | Lgals8        |
| 1 | 229681 | St7l          |
| 1 | 226144 | Erlin1        |
| 1 | 56404  | Trip4         |
| 1 | 76784  | Mtif2         |
| 1 | 74096  | Hvcn1         |
| 1 | 13057  | Cyba          |
| 1 | 56222  | Cited4        |
| 1 | 80915  | Dusp12        |
| 1 | 22590  | Xpa           |
| 1 | NaN    | MMT00011155   |
| 1 | 67815  | Sec14l2       |
| 1 | 56282  | Mrp12         |
| 1 | 84036  | Kcnn1         |
| 1 | 19171  | Psmb10        |
| 1 | 68567  | Cgref1        |
| 1 | 69101  | Ydjc          |
| 1 | 66193  | 1110049F12Rik |
| 1 | 72899  | MacroD2       |
| 1 | 170938 | Zfp617        |
| 1 | 67053  | Rpp14         |
| 1 | 67095  | Trak1         |
| 1 | 84095  | Pi4k2a        |
| 1 | 20788  | Srebf2        |
| 1 | 105835 | Sgsm3         |
| 1 | 77794  | Adamtsl2      |
| 1 | 67830  | Rer1          |
| 1 | 26903  | Dysf          |
| 1 | 18087  | Nktr          |
| 1 | 231670 | Fbxo21        |
| 1 | 107094 | Rrp12         |



|   |        |               |
|---|--------|---------------|
| 1 | 108707 | 1810008A18Rik |
| 1 | 217119 | Xylt2         |
| 1 | 22027  | Hsp90b1       |
| 1 | 14251  | Flot1         |
| 1 | 55927  | Hes6          |
| 1 | 231842 | Amz1          |
| 1 | 81500  | Sil1          |
| 1 | 22670  | Trim26        |
| 1 | 171212 | Galnt10       |
| 1 | 80280  | Cdk5rap3      |
| 1 | 66513  | Map3k7ip1     |
| 1 | 242642 | Hpd1          |
| 1 | 14228  | Fkbp4         |
| 1 | 105837 | Mtbp          |
| 1 | 240186 | Zfp438        |
| 1 | 231123 | BC023882      |
| 1 | 75430  | 3200002M19Rik |
| 1 | 74772  | Atp13a2       |
| 1 | 20587  | Smarcb1       |
| 1 | 70616  | Sf4           |
| 1 | 80720  | Pbx4          |
| 1 | 231134 | Dok7          |
| 1 | 269585 | Zscan20       |
| 1 | 268759 | 9930012K11Rik |
| 1 | 140917 | Dclre1b       |
| 1 | 18387  | Oprk1         |
| 1 | 224860 | Plcl2         |
| 1 | 71522  | Ggt6          |
| 1 | NaN    | MMT00078937   |
| 1 | 108670 | Epsti1        |
| 1 | 257633 | Acsf3         |
| 1 | 382038 | AK122209      |
| 1 | 23996  | Psmc4         |
| 1 | 12824  | Col2a1        |
| 1 | 13001  | Csnk2b        |
| 1 | 73750  | Whrn          |
| 1 | 233489 | Picalm        |
| 1 | 24071  | Synj2bp       |
| 1 | 74019  | Traf3ip1      |
| 1 | 12313  | Calm1         |
| 1 | NaN    | MMT00011022   |
| 1 | 68628  | Fbxw9         |
| 1 | 66968  | 2310076L09Rik |
| 1 | 74451  | Pgs1          |
| 1 | 71713  | Cdc40         |
| 1 | 70530  | Lrfr2         |
| 1 | 380752 | Tssc1         |
| 1 | 13972  | Gnb1l         |
| 1 | 140559 | Igsf8         |
| 1 | 104886 | Rab15         |
| 1 | 67544  | 4932442K08Rik |

|   |        |               |
|---|--------|---------------|
| 1 | 71918  | 2310047A01Rik |
| 1 | 110637 | Grik4         |
| 1 | 74334  | Ranbp10       |
| 1 | 68744  | Zfp740        |
| 1 | 16907  | Lmnb2         |
| 1 | 13645  | Egf           |
| 1 | 64929  | Scel          |
| 1 | 319433 | E130113E03Rik |
| 1 | 211949 | Spsb4         |
| 1 | 68743  | Anln          |
| 1 | 75563  | Dnali1        |
| 1 | 240641 | Kif20b        |
| 1 | 108989 | Tpr           |
| 1 | 76131  | Depdc1a       |
| 1 | 66473  | Ctrb1         |
| 1 | 16391  | Irf9          |
| 1 | 20822  | Trove2        |
| 1 | 22601  | Yap1          |
| 1 | 56193  | Plek          |
| 1 | 106369 | Ypel1         |
| 1 | NaN    | MMT00057557   |
| 1 | 51795  | Srpx          |
| 1 | 70527  | Stampb        |
| 1 | 19240  | Tmsb10        |
| 1 | 68731  | 1110032A13Rik |
| 1 | 229055 | Zbtb10        |
| 1 | 93892  | Pcdhb21       |
| 1 | NaN    | MMT00001646   |
| 1 | NaN    | MMT00053547   |
| 1 | NaN    | MMT00069653   |
| 1 | 666581 | RP23-162H3.1  |
| 1 | 231532 | Arhgap24      |
| 1 | 68092  | Ncbp2         |
| 1 | 11735  | Ank3          |
| 1 | 20901  | Strap         |
| 1 | 217695 | Zfyve1        |
| 1 | NaN    | MMT00044927   |
| 1 | 66353  | 2310007A19Rik |
| 1 | 70772  | MMT00075624   |
| 1 | 231003 | Klhl17        |
| 1 | 14347  | Fut7          |
| 1 | 329910 | Acot11        |
| 1 | 241274 | Pnpla7        |
| 1 | 240753 | Plekha6       |
| 1 | 103712 | 6330403K07Rik |
| 1 | 66425  | Pcp411        |
| 1 | 76508  | 2210015D19Rik |
| 1 | 29812  | Ndr3          |
| 1 | 12354  | Car7          |
| 1 | 224440 | Setd4         |
| 1 | 56504  | Srpk3         |

|   |        |                    |
|---|--------|--------------------|
| 1 | 545539 | OTTMUSG00000021274 |
| 1 | 246277 | Csad               |
| 1 | 17993  | Ndufs4             |
| 1 | 68980  | Wdr53              |
| 1 | 75607  | Wnk2               |
| 1 | 11773  | Ap2m1              |
| 1 | 68251  | 5430437P03Rik      |
| 1 | 328381 | Sh2d4b             |
| 1 | 29806  | Limd1              |
| 1 | 52432  | Ppp2r2d            |
| 1 | 66943  | Pqlc1              |
| 1 | 320661 | D5Ert579e          |
| 1 | 72654  | Ccdc12             |
| 1 | 209011 | Sirt7              |
| 1 | 76457  | Ccdc134            |
| 1 | NaN    | MMT00039978        |
| 1 | 19267  | Ptpre              |
| 1 | 20382  | Sfrs2              |
| 1 | 18569  | Pdcd4              |
| 1 | 664862 | Gpr137b-ps         |
| 1 | 52857  | Gramd1a            |
| 1 | 68801  | Elovl5             |
| 1 | 97287  | Mtmr14             |
| 1 | 50493  | Txnrd1             |
| 1 | 74237  | Tubgcp2            |
| 1 | 80750  | N4bp1              |
| 1 | 235497 | Leo1               |
| 1 | 19243  | Ptp4a1             |
| 1 | 381629 | 0610007C21Rik      |
| 1 | 76740  | Efr3a              |
| 1 | 103967 | Dnm3               |
| 1 | 68671  | Pcyt2              |
| 1 | 103742 | 1810046J19Rik      |
| 1 | 54153  | Rasa4              |
| 1 | 18189  | Nrxn1              |
| 1 | 11677  | Akr1b3             |
| 1 | 67797  | 6530403A03Rik      |
| 1 | 207304 | Hectd1             |
| 1 | 104570 | Smek2              |
| 1 | 66671  | Ccnh               |
| 1 | 75712  | Tmem14a            |
| 1 | 66254  | Dimt1              |
| 1 | 72748  | Hdhd3              |
| 1 | 69156  | Comtd1             |
| 1 | 18823  | Plp1               |
| 1 | 80290  | Gpr146             |
| 1 | 17423  | Ndst2              |
| 1 | 627427 | EG627427           |
| 1 | NaN    | MMT00027196        |
| 1 | NaN    | MMT00000744        |
| 1 | 13358  | Slc25a1            |

|   |        |               |
|---|--------|---------------|
| 1 | 69539  | 2300002D11Rik |
| 1 | 213417 | Klhdc8a       |
| 1 | 51886  | Fubp1         |
| 1 | 94230  | Cpsf1         |
| 1 | 50783  | Lsm4          |
| 1 | 74764  | Klc4          |
| 1 | 103850 | Nt5m          |
| 1 | 18573  | Pde1a         |
| 1 | 12282  | Hyou1         |
| 1 | 67914  | Coq9          |
| 1 | 18030  | Nfil3         |
| 1 | 104318 | Csnk1d        |
| 1 | 213499 | Fbxo42        |
| 1 | 72308  | Brf1          |
| 1 | 237221 | Gemin8        |
| 1 | 69674  | Mif4gd        |
| 1 | 100072 | Camta1        |
| 1 | 101502 | Hsd3b7        |
| 1 | 114606 | Tle6          |
| 1 | 140709 | Emid2         |
| 1 | 64138  | Ctsz          |
| 1 | 246293 | Klhl8         |
| 1 | 14194  | Fh1           |
| 1 | 78834  | Zfp623        |
| 1 | 230125 | Mcart1        |
| 1 | 21807  | Tsc22d1       |
| 1 | 110460 | Acat2         |
| 1 | 228769 | Psmf1         |
| 1 | 56198  | Heyl          |
| 1 | 83383  | Tcfap4        |
| 1 | 13030  | Ctsb          |
| 1 | 227682 | Trub2         |
| 1 | 27273  | Pdk4          |
| 1 | 68971  | 1500001M20Rik |
| 1 | 22341  | Vegfc         |
| 1 | 269587 | Epb4.1        |
| 1 | 12159  | Bmp4          |
| 1 | 27276  | Plekhb1       |
| 1 | 72113  | Adck1         |
| 1 | 56421  | Pfkp          |
| 1 | 19188  | Psme2         |
| 1 | 20660  | Sorl1         |
| 1 | NaN    | MMT00007996   |
| 1 | 20840  | Stac          |
| 1 | NaN    | MMT00001941   |
| 1 | 11674  | Aldoa         |
| 1 | 13143  | Dapk2         |
| 1 | 16178  | Il1r2         |
| 1 | 79554  | Gltpd1        |
| 1 | 14226  | Fkbp1b        |
| 1 | 13823  | Epb4.1l3      |

|   |        |               |
|---|--------|---------------|
| 1 | 57317  | Sfrs4         |
| 1 | 26570  | Slc7a11       |
| 1 | 229707 | 6330569M22Rik |
| 1 | 16593  | Klc1          |
| 1 | 258692 | Olf1442       |
| 1 | 67826  | 1110031B06Rik |
| 1 | 103765 | Tmem17        |
| 1 | 73724  | Mcee          |
| 1 | 75939  | 4930579G24Rik |
| 1 | 12032  | Bcan          |
| 1 | 11816  | Apoe          |
| 1 | 225372 | Apbb3         |
| 1 | 76877  | Rab36         |
| 1 | NaN    | MMT00062477   |
| 1 | 232664 | Ccdc136       |
| 1 | 67898  | Pef1          |
| 1 | NaN    | MMT00032015   |
| 1 | 22215  | Ube3a         |
| 1 | 13800  | Enah          |
| 1 | 19159  | Pscd3         |
| 1 | 16329  | Inpp1         |
| 1 | 30058  | Timm8a1       |
| 1 | 30058  | Timm8a1       |
| 1 | 19141  | Lgmn          |
| 1 | 69726  | Smyd3         |
| 1 | 73608  | Marveld3      |
| 1 | 105278 | Ccrk          |
| 1 | 228355 | Madd          |
| 1 | 110157 | Raf1          |
| 1 | NaN    | MMT00027093   |
| 1 | 16828  | Ldha          |
| 1 | 106522 | AW548124      |
| 1 | 69742  | Tm2d2         |
| 1 | 77031  | Slc9a8        |
| 1 | 214952 | Rhot2         |
| 1 | 20257  | Stmn2         |
| 1 | 20356  | Sema5a        |
| 1 | 74316  | Isca2         |
| 1 | 380753 | Atxn7l1       |
| 1 | 104444 | Rexo2         |
| 1 | 235036 | Ppan          |
| 1 | 66398  | Comm5         |
| 1 | 19185  | Psm4          |
| 1 | 216131 | Tmem1         |
| 1 | 19414  | Rasa3         |
| 1 | 72155  | Cenpn         |
| 1 | 240023 | Pnlc1         |
| 1 | 227674 | Ddx31         |
| 1 | 72315  | 2310015A05Rik |
| 1 | 66236  | 1500011B03Rik |
| 1 | 13680  | Ddx19a        |

|   |        |               |
|---|--------|---------------|
| 1 | 17207  | Mcf2l         |
| 1 | NaN    | MMT00018228   |
| 1 | 11803  | Aplp1         |
| 1 | 101358 | Fbxl14        |
| 1 | 23801  | Aloxe3        |
| 1 | 21334  | Tac2          |
| 1 | 104836 | Cbl1          |
| 1 | 72149  | 2610019A05Rik |
| 1 | 20740  | Spna2         |
| 1 | 108954 | Ppp1r15b      |
| 1 | 218693 | Paip1         |
| 1 | 66826  | Taz           |
| 1 | 72960  | Top1mt        |
| 1 | 20255  | Scg3          |
| 1 | 69066  | 1810010H24Rik |
| 1 | 68865  | Arv1          |
| 1 | 109264 | Me3           |
| 1 | 23897  | Hax1          |
| 1 | 69635  | Dapk1         |
| 1 | 66911  | Nudt16l1      |
| 1 | 19655  | Rbmx          |
| 1 | 68631  | Cry1          |
| 1 | 19698  | Relb          |
| 1 | 78920  | Dlst          |
| 1 | 18519  | Pcaf          |
| 1 | NaN    | MMT00000525   |
| 1 | NaN    | MMT00047239   |
| 1 | 12226  | Btg1          |
| 1 | 66866  | Nhlrc2        |
| 1 | 26930  | MMT00033859   |
| 1 | 67863  | Slc25a11      |
| 1 | 234678 | D230025D16Rik |
| 1 | 55936  | Ctps2         |
| 1 | 17191  | Mbd2          |
| 1 | 217328 | Myo15b        |
| 1 | 52906  | Ahi1          |
| 1 | 71957  | Cpsf3l        |
| 1 | 26448  | Rage          |
| 1 | 75495  | 1700010A17Rik |
| 1 | 11983  | Atpif1        |
| 1 | 77862  | Thyn1         |
| 1 | 27390  | Mmel1         |
| 1 | 70122  | Milt3         |
| 1 | 71354  | Wdr31         |
| 1 | 18286  | Odf2          |
| 1 | 230163 | Aldob         |
| 1 | 381693 | 4930434E21Rik |
| 1 | NaN    | MMT00058471   |
| 1 | 213753 | Zfp598        |
| 1 | 67484  | Eepd1         |
| 1 | 625029 | Vmn2r83       |

|   |           |               |
|---|-----------|---------------|
| 1 | 228602    | 4930402H24Rik |
| 1 | NaN       | MMT00040762   |
| 1 | 223774    | Alg12         |
| 1 | 212516    | BC060267      |
| 1 | 20610     | Sumo3         |
| 1 | 17898     | Myl7          |
| 1 | 24136     | Zeb2          |
| 1 | 12070     | Ngfrap1       |
| 1 | 11603     | Agrn          |
| 1 | 68816     | Ppil1         |
| 1 | 70377     | Derl3         |
| 1 | 208990    | Npb           |
| 1 | 26901     | Deb1          |
| 1 | 228889    | Ddx27         |
| 1 | 56471     | Stmn4         |
| 1 | 21422     | Tcfcp2        |
| 1 | 93760     | Arid1a        |
| 1 | 15516     | Hsp90ab1      |
| 1 | 239528    | Eif2c2        |
| 1 | 100040305 | MMT00074121   |
| 1 | 100038888 | MMT00074572   |
| 1 | 56494     | Gosr2         |
| 1 | 66811     | Duoxa2        |
| 1 | 60345     | Nrip2         |
| 1 | 20044     | Rps14         |
| 1 | 66462     | 2810428115Rik |
| 1 | 68565     | Mrps18a       |
| 1 | 16525     | Kcnk1         |
| 1 | 269999    | Orai3         |
| 1 | 331004    | Slc9a9        |
| 1 | 68404     | Nrn1          |
| 1 | 13048     | Cux2          |
| 1 | 16832     | Ldhd          |
| 1 | 108897    | 2810003C17Rik |
| 1 | 192120    | Bspry         |
| 1 | 110596    | Rgref         |
| 1 | 269356    | Slc4a11       |
| 1 | 319565    | Syne2         |
| 1 | 442801    | Arhgef15      |
| 1 | 170833    | Hook2         |
| 1 | NaN       | MMT00053383   |
| 1 | 16691     | Krt8          |
| 1 | 114893    | Dcun1d1       |
| 1 | 75472     | 1700009P17Rik |
| 1 | 20732     | Spint1        |
| 1 | 20276     | Scnn1a        |
| 1 | 68198     | Ndufb2        |
| 1 | 217995    | Heatr1        |
| 1 | 69770     | 1600002K03Rik |
| 1 | 226153    | Peo1          |
| 1 | 22278     | Usf1          |

|   |        |               |
|---|--------|---------------|
| 1 | 72704  | 2810051F02Rik |
| 1 | 17202  | Mc4r          |
| 1 | 14402  | Gabrb3        |
| 1 | 12468  | Cct7          |
| 1 | 171508 | Creld1        |
| 1 | 16905  | Lmna          |
| 1 | 16881  | Lig1          |
| 1 | 229615 | Pias3         |
| 1 | 80880  | Kank3         |
| 1 | 380921 | Dgkh          |
| 1 | 12847  | Copa          |
| 1 | 26414  | Mapk10        |
| 1 | 13498  | Atn1          |
| 1 | 21916  | Tmod1         |
| 1 | 74013  | Rftn2         |
| 1 | 69470  | Tmem127       |
| 1 | 71974  | Prmt3         |
| 1 | NaN    | MMT00058347   |
| 1 | 70873  | 4921517L17Rik |
| 1 | 74246  | Gale          |
| 1 | 56812  | Dnajb10       |
| 1 | 15184  | Hdac5         |
| 1 | 12683  | Cidea         |
| 1 | 69663  | Ddx51         |
| 1 | 67727  | Stx17         |
| 1 | 14083  | Ptk2          |
| 1 | 19108  | Prkx          |
| 1 | 13169  | Dbnl          |
| 1 | 94180  | Acsbg1        |
| 1 | 66116  | Cml1          |
| 1 | 231125 | Zfyve28       |
| 1 | 245038 | Dclk3         |
| 1 | NaN    | MMT00023354   |
| 1 | 66867  | Hmg20a        |
| 1 | 20720  | Serpine2      |
| 1 | 103724 | Tbc1d10a      |
| 1 | 52666  | D10Ert610e    |
| 1 | 594844 | Tceal3        |
| 1 | 110119 | Mpi           |
| 1 | 66104  | Tceal6        |
| 1 | 53892  | Ppm1d         |
| 1 | 107022 | Gramd3        |
| 1 | 78255  | Ralgps2       |
| 1 | 20187  | Ryk           |
| 1 | 233733 | Galnt14       |
| 1 | 230959 | Ajap1         |
| 1 | 319352 | C530028O21Rik |
| 1 | 14768  | Lancl1        |
| 1 | 319189 | Hist2h2bb     |
| 1 | 58805  | Mlxip1        |
| 1 | 11814  | Apoc3         |



|   |           |               |
|---|-----------|---------------|
| 1 | 13010     | Cst3          |
| 1 | 108124    | Napa          |
| 1 | 229877    | Rap1gds1      |
| 1 | 100038850 | A130082M07Rik |
| 1 | 66815     | Ccdc109b      |
| 1 | 68252     | A030007L17Rik |
| 1 | 226849    | Ppp2r5a       |
| 1 | 20515     | Slc20a1       |
| 1 | 12040     | Bckdhb        |
| 1 | 27220     | Cartpt        |
| 1 | 109154    | 2410014A08Rik |
| 1 | 210029    | Metrn1        |
| 1 | 12977     | Csf1          |
| 1 | 215615    | Rnpep         |
| 1 | 71665     | Fuca1         |
| 1 | 71660     | Rarres2       |
| 1 | 102910    | Armcx4        |
| 1 | 69161     | Manbal        |
| 1 | 66870     | Serbp1        |
| 1 | 67770     | 5830433M19Rik |
| 1 | 18168     | Npy5r         |
| 1 | 106326    | Osbp11        |
| 1 | 20687     | Sp3           |
| 1 | 72003     | Synpr         |
| 1 | 232146    | Tmem166       |
| 1 | 170772    | Glcci1        |
| 1 | 66881     | Pcyox1        |
| 1 | 16328     | Cep250        |
| 1 | 19663     | Rbpms         |
| 1 | 22608     | Ybx1          |
| 1 | 210762    | Gm70          |
| 1 | 227095    | Hibch         |
| 1 | 103784    | Wdr92         |
| 1 | 107869    | Cth           |
| 1 | 50880     | Scly          |
| 1 | 12323     | Camk2b        |
| 1 | 13629     | Eef2          |
| 1 | 30805     | Slc22a4       |
| 1 | 20272     | Scn7a         |
| 1 | 67035     | Dnajb4        |
| 1 | 101214    | Tra2a         |
| 1 | 235461    | B230380D07Rik |
| 1 | 14933     | Gyk           |
| 1 | NaN       | MMT00054980   |
| 1 | 408062    | BC062115      |
| 1 | 13204     | Dhx15         |
| 1 | 105559    | Mbnl2         |
| 1 | 108829    | Jmjd1c        |
| 1 | 73341     | Arhgef6       |
| 1 | 225363    | Etf1          |
| 1 | 109333    | Pkn2          |

|   |        |               |
|---|--------|---------------|
| 1 | 252876 | Zh2c2         |
| 1 | 14172  | Fgf18         |
| 1 | 272322 | Arntl2        |
| 1 | NaN    | MMT00025220   |
| 1 | 12751  | Tpp1          |
| 1 | 70405  | Calml3        |
| 1 | 268709 | BC055107      |
| 1 | 72349  | Dusp3         |
| 1 | 15983  | lfrd2         |
| 1 | 11669  | Aldh2         |
| 1 | 70615  | Ankrd24       |
| 1 | 76108  | Rap2a         |
| 1 | 21652  | Phf1          |
| 1 | 16765  | Stmn1         |
| 1 | 16765  | Stmn1         |
| 1 | 57266  | Cxcl14        |
| 1 | 81898  | Sf3b1         |
| 1 | 233865 | D430042O09Rik |
| 1 | 107528 | Magee1        |
| 1 | 237979 | Sdk2          |
| 1 | 28295  | D10Jhu81e     |
| 1 | 28295  | D10Jhu81e     |
| 1 | 170758 | Rac3          |
| 1 | 18038  | Nfkbil1       |
| 1 | 246221 | Mpst          |
| 1 | 109299 | C330006A16Rik |
| 1 | 494448 | Cbx6          |
| 1 | 83409  | MMT00001648   |
| 1 | 18187  | Nrp2          |
| 1 | 226562 | Bat2d         |
| 1 | 268859 | MMT00006152   |
| 1 | 14571  | Gpd2          |
| 1 | 226654 | EG226654      |
| 1 | 231440 | 9130213B05Rik |
| 1 | 18631  | Pex11a        |
| 1 | 12295  | Cacnb1        |
| 1 | 106200 | Txndc11       |
| 1 | 71795  | Pitpnc1       |
| 1 | NaN    | MMT00015534   |
| 1 | 22153  | Tubb4         |
| 1 | NaN    | MMT00002524   |
| 1 | NaN    | MMT00034355   |
| 1 | 107734 | Mrpl30        |
| 1 | 110391 | Qdpr          |
| 1 | 11973  | Atp6v1e1      |
| 1 | 68576  | Hbxip         |
| 1 | 636544 | EG636544      |
| 1 | 72722  | 2810405J04Rik |
| 1 | NaN    | MMT00014216   |
| 1 | NaN    | MMT00060113   |
| 1 | 19286  | Pts           |

|   |        |                    |
|---|--------|--------------------|
| 1 | NaN    | MMT00077446        |
| 1 | 623205 | MMT00017441        |
| 1 | NaN    | MMT00021961        |
| 1 | 114893 | Dcun1d1            |
| 1 | NaN    | MMT00041633        |
| 1 | 14776  | Gpx2               |
| 1 | NaN    | MMT00009124        |
| 1 | 26879  | B3galnt1           |
| 1 | 11975  | Atp6v0a1           |
| 1 | 192734 | Al646023           |
| 1 | 68350  | Mul1               |
| 1 | 64085  | Clstn2             |
| 1 | NaN    | MMT00017294        |
| 1 | 238836 | EG238836           |
| 1 | NaN    | MMT00082708        |
| 1 | NaN    | MMT00075773        |
| 1 | 66143  | Eef1e1             |
| 1 | 11908  | Atf1               |
| 1 | 16594  | Klc2               |
| 1 | 16885  | Limk1              |
| 1 | 65098  | Zfand6             |
| 1 | 22333  | Vdac1              |
| 1 | 20513  | Slc1a6             |
| 1 | 66119  | Prickle4           |
| 1 | 67458  | Ergic1             |
| 1 | 71492  | Bbs7               |
| 1 | 211286 | Cln5               |
| 1 | 28088  | D10Wsu52e          |
| 1 | NaN    | MMT00050438        |
| 1 | 66659  | Acp6               |
| 1 | 11949  | Atp5c1             |
| 1 | NaN    | MMT00042824        |
| 1 | NaN    | MMT00015325        |
| 1 | 19053  | Ppp2cb             |
| 1 | NaN    | MMT00028347        |
| 1 | NaN    | MMT00037377        |
| 1 | 53893  | Nudt5              |
| 1 | 628709 | ENSMUSG00000071302 |
| 1 | 72085  | Osgpl1             |
| 1 | 56717  | Frap1              |
| 1 | 329015 | Atg2a              |
| 1 | 234797 | 6430548M08Rik      |
| 1 | 16981  | Lrrn3              |
| 1 | 14766  | Gpr56              |
| 1 | NaN    | MMT00069758        |
| 1 | 14629  | Gclc               |
| 1 | 19299  | Abcd3              |
| 1 | 13723  | Emb                |
| 1 | 276952 | Rasl10b            |
| 1 | 50785  | Hs6st1             |
| 1 | 16478  | Jund               |

|   |        |               |
|---|--------|---------------|
| 1 | 244058 | Rgma          |
| 1 | 81840  | Sorcs2        |
| 1 | 17772  | Mtm1          |
| 1 | 30956  | Aass          |
| 1 | 74326  | Hnrnpr        |
| 1 | 67010  | Rbm7          |
| 1 | 218734 | 3830406C13Rik |
| 1 | 76763  | Mospd2        |
| 1 | 67043  | Syap1         |
| 1 | 74521  | 8430415E04Rik |
| 1 | 235380 | Dmxl2         |
| 1 | 56258  | Hnrnph2       |
| 1 | 12747  | Clk1          |
| 1 | NaN    | MMT00076721   |
| 1 | 627908 | MMT00030553   |
| 1 | 22359  | Vldlr         |
| 1 | 67834  | Idh3a         |
| 1 | 52705  | Krr1          |
| 1 | 13641  | Efnb1         |
| 1 | 94352  | Loxl2         |
| 1 | 30806  | Adamts8       |
| 1 | 13797  | Emx2          |
| 1 | 276905 | Armc7         |
| 1 | 629966 | EG629966      |
| 1 | 72333  | Palld         |
| 1 | 16480  | Jup           |
| 1 | 171543 | Bmf           |
| 1 | 15442  | Hpse          |
| 1 | 13706  | RP23-395H4.4  |
| 1 | NaN    | MMT00011721   |
| 1 | 109979 | Art3          |
| 1 | 74147  | Ehhadh        |
| 1 | 208144 | Dhx37         |
| 1 | 28010  | D4Wsu114e     |
| 1 | 16562  | Kif1c         |
| 1 | 72927  | Hepacam       |
| 1 | 20293  | Ccl12         |
| 1 | 69219  | Ddah1         |
| 1 | 231287 | Atp10d        |
| 1 | 13709  | Elf1          |
| 1 | 19027  | Sypl          |
| 1 | 17961  | Nat2          |
| 1 | 20135  | Rrm2          |
| 1 | 142980 | Tlr3          |
| 1 | 12631  | Cfl1          |
| 1 | 11671  | Aldh3a2       |
| 1 | 11538  | Adnp          |
| 1 | 330260 | Pon2          |
| 1 | 623402 | EG623402      |
| 1 | 71978  | Ppp2r2a       |
| 1 | 214804 | Syde2         |

|   |           |               |
|---|-----------|---------------|
| 1 | 56213     | Htra1         |
| 1 | 271144    | 9330128J19Rik |
| 1 | NaN       | MMT00014109   |
| 1 | 238455    | 4732474O15Rik |
| 1 | 12412     | Cbx1          |
| 1 | 20393     | Sgk1          |
| 1 | 107503    | Atf5          |
| 1 | 72056     | 1810055G02Rik |
| 1 | 102323    | Dcun1d2       |
| 1 | 620292    | Cntnap5c      |
| 1 | 13824     | Epb4.1l4a     |
| 1 | 98732     | Rab3gap2      |
| 1 | 17357     | Marcksl1      |
| 1 | 71760     | Agxt2l1       |
| 1 | 20686     | Spa17         |
| 1 | 217431    | Nol10         |
| 1 | 67680     | Sdhb          |
| 1 | 226255    | Atrnl1        |
| 1 | 79566     | Sh3bp5l       |
| 1 | 66626     | 5730403B10Rik |
| 1 | NaN       | MMT00035904   |
| 1 | 226251    | Ablim1        |
| 1 | 14813     | Grin2c        |
| 1 | 230866    | C230096C10Rik |
| 1 | 217882    | AW555464      |
| 1 | 105522    | Ankrd28       |
| 1 | 72184     | 2810406K13Rik |
| 1 | 17305     | Mfng          |
| 1 | 19387     | Rangap1       |
| 1 | 234852    | Chmp1a        |
| 1 | 93834     | Peli2         |
| 1 | 213649    | Arhgef19      |
| 1 | 11302     | Aatk          |
| 1 | 224024    | Scarf2        |
| 1 | 56513     | Pard6a        |
| 1 | 12580     | Cdkn2c        |
| 1 | 381549    | Zfp69         |
| 1 | 56012     | Pgam2         |
| 1 | 11810     | Apobec1       |
| 1 | 399558    | Flrt2         |
| 1 | 100037283 | Rnaset2a      |
| 1 | 16161     | Il12rb1       |
| 1 | 21943     | Tnfsf11       |
| 1 | 225908    | Gm98          |
| 1 | 13867     | Erb3          |
| 1 | 19125     | Prodh         |
| 1 | 246278    | Cd207         |
| 1 | 66260     | Tmem54        |
| 1 | 20482     | Skil          |
| 1 | 72230     | Zfp558        |
| 1 | 68859     | 1190007F08Rik |

|   |        |               |
|---|--------|---------------|
| 1 | 20210  | Saa3          |
| 1 | 77522  | D630002J15Rik |
| 1 | 67077  | 1700019N12Rik |
| 1 | 14939  | Gzmb          |
| 1 | 56212  | Rhog          |
| 1 | 217946 | Cdca7l        |
| 1 | 242891 | Gm443         |
| 1 | 20728  | Spic          |
| 1 | 208144 | Dhx37         |
| 1 | NaN    | MMT00035510   |
| 1 | 11808  | Apoa4         |
| 1 | 13106  | Cyp2e1        |
| 1 | NaN    | MMT00030262   |
| 1 | 13202  | Ddt           |
| 1 | 67489  | Ap4b1         |
| 1 | 332934 | Zmynd12       |
| 1 | 18113  | Nnmt          |
| 1 | 22259  | Nr1h3         |
| 1 | 14595  | B4galt1       |
| 1 | 17240  | Mdfl          |
| 1 | 13448  | Dok1          |
| 1 | 12051  | Bcl3          |
| 1 | 333315 | Frem3         |
| 1 | 433759 | Hdac1         |
| 1 | 99543  | Olfml3        |
| 1 | 11867  | Arpc1b        |
| 1 | 83675  | Bicc1         |
| 1 | 80876  | lfitm2        |
| 1 | 67512  | Agpat2        |
| 1 | 234683 | Elmo3         |
| 1 | 17972  | Ncf4          |
| 1 | 230787 | BC013712      |
| 1 | 56264  | Cpxm1         |
| 1 | 277414 | Trp53i11      |
| 1 | 216867 | Slc16a11      |
| 1 | 117606 | Boc           |
| 1 | 17965  | Nbl1          |
| 1 | 16440  | Itpr3         |
| 1 | 20509  | Slc19a1       |
| 1 | 54324  | Arhgef5       |
| 1 | 67951  | Tubb6         |
| 1 | 16949  | Loxl1         |
| 1 | 209837 | Slc38a5       |
| 1 | 12516  | Cd7           |
| 1 | 68792  | Srpx2         |
| 1 | 380780 | Serpina11     |
| 1 | 53608  | Map3k6        |
| 1 | 207792 | BC034090      |
| 1 | 16411  | Itgax         |
| 1 | 14710  | Gngt2         |
| 1 | 240084 | Cchcr1        |

|   |           |               |
|---|-----------|---------------|
| 1 | 20847     | Stat2         |
| 1 | 22409     | Wnt10a        |
| 1 | 100689    | Spon2         |
| 1 | 22051     | Trip6         |
| 1 | 17150     | Mfap2         |
| 1 | 72168     | Aifm3         |
| 1 | 212032    | Hk3           |
| 1 | 330064    | Slc5a6        |
| 1 | 70314     | Rabep2        |
| 1 | 13036     | Ctsh          |
| 1 | 14794     | Spsb2         |
| 1 | 17095     | Lyl1          |
| 1 | 210622    | E430002G05Rik |
| 1 | 68591     | Mocos         |
| 1 | 68318     | Aph1c         |
| 1 | 16852     | Lgals1        |
| 1 | 232970    | Phldb3        |
| 1 | 100038347 | BC034069      |
| 1 | 67305     | Gpx7          |
| 1 | 230752    | 2610027C15Rik |
| 1 | 110253    | Triobp        |
| 1 | 98932     | Myl9          |
| 1 | 58859     | Efemp2        |
| 1 | 11857     | Arhgdib       |
| 1 | 16000     | Igf1          |
| 1 | 16923     | Sh2b3         |
| 1 | 66066     | Gng11         |
| 1 | 101540    | Prkd2         |
| 1 | 234582    | Ccdc102a      |
| 1 | 23887     | Ggt5          |
| 1 | 18034     | Nfkb2         |
| 1 | 70719     | Hmha1         |
| 1 | 51793     | Ddah2         |
| 1 | 14337     | Ftl2          |
| 1 | NaN       | MMT00066281   |
| 1 | 14325     | Ftl1          |
| 1 | 66905     | M6prbp1       |
| 1 | 27419     | Naglu         |
| 1 | 19253     | Ptpn18        |
| 1 | 106512    | Gpsm3         |
| 1 | 76257     | Slc38a3       |
| 1 | 54123     | Irf7          |
| 1 | 231655    | Oasl1         |
| 1 | 76854     | Gper          |
| 1 | 105450    | Mmrn2         |
| 1 | 20342     | Selenbp2      |
| 1 | 20342     | Selenbp2      |
| 1 | 140859    | Nek8          |
| 1 | 52430     | Echdc2        |
| 1 | 100163    | Pafah2        |
| 1 | 76263     | Gstk1         |

|   |        |               |
|---|--------|---------------|
| 1 | 14127  | Fcer1g        |
| 1 | 76893  | Lass2         |
| 1 | 56772  | Mllt11        |
| 1 | 73649  | Cybrd1        |
| 1 | 67900  | 1700020C11Rik |
| 1 | 70456  | Brp44         |
| 1 | 192161 | Pcdha9        |
| 1 | 12936  | Pcdha4        |
| 1 | 116731 | Pcdha1        |
| 1 | 192163 | Pcdha3        |
| 1 | 12937  | Pcdha6        |
| 1 | 12260  | C1qb          |
| 1 | 12931  | Crlf1         |
| 1 | 52250  | Reep1         |
| 1 | 105853 | Mal2          |
| 1 | 68031  | Rnf146        |
| 1 | 17064  | Cd93          |
| 1 | 71973  | Rbpms2        |
| 1 | 15936  | Ier2          |
| 1 | 74131  | Sash3         |
| 1 | 30794  | Pdlim4        |
| 1 | 545260 | Arsi          |
| 1 | 217344 | Rhbdf2        |
| 1 | 140887 | Lnx2          |
| 1 | 235441 | Usp3          |
| 1 | 30937  | Lmcd1         |
| 1 | 98365  | Slamf9        |
| 1 | 233064 | Wdr62         |
| 1 | 56489  | Ikbke         |
| 1 | 286940 | Flnb          |
| 1 | 13436  | Dnmt3b        |
| 1 | 216739 | Acsl6         |
| 1 | 78923  | Chsy3         |
| 1 | 50723  | Icosl         |
| 1 | 235041 | Kank2         |
| 1 | 55951  | Brp44l        |
| 1 | 625253 | EG625253      |
| 1 | 12298  | Cacnb4        |
| 1 | 59030  | Mkks          |
| 1 | 104110 | Adcy4         |
| 1 | 192188 | Stab2         |
| 1 | 20411  | Sorbs1        |
| 1 | NaN    | MMT00043009   |
| 1 | 18214  | Ddr2          |
| 1 | 106014 | AW049604      |
| 2 | 17341  | Bhlhb8        |
| 2 | 78928  | Pigt          |
| 2 | 21416  | Tcf7l2        |
| 2 | 66402  | Sln           |
| 2 | 75216  | 4930534B04Rik |
| 2 | 382083 | Snx22         |



|   |        |               |
|---|--------|---------------|
| 2 | 76166  | 6330545A04Rik |
| 2 | 80794  | Cblc          |
| 2 | 18816  | Serpinf2      |
| 2 | 68891  | Cd177         |
| 2 | NaN    | MMT00005305   |
| 2 | 269902 | Vmn2r57       |
| 2 | NaN    | r60_T1A12     |
| 2 | 218030 | Pou6f2        |
| 2 | 18440  | P2rx6         |
| 2 | 64297  | Gprc5b        |
| 2 | 50883  | Chek2         |
| 2 | NaN    | MMT00054100   |
| 2 | NaN    | MMT00068429   |
| 2 | 320398 | Lrig3         |
| 2 | 78829  | Tsc22d4       |
| 2 | 78076  | Lcn8          |
| 2 | 15425  | Hoxc6         |
| 2 | 20450  | St8sia2       |
| 2 | 12193  | Zfp36l2       |
| 2 | 78369  | Icam4         |
| 2 | 433809 | Rnf207        |
| 2 | 11434  | Acr           |
| 2 | 18046  | Nfyc          |
| 2 | 18046  | Nfyc          |
| 2 | 15497  | Hsd3b6        |
| 2 | 228094 | Cerkl         |
| 2 | 217734 | Pomt2         |
| 2 | 232910 | Ap2s1         |
| 2 | 72074  | Anks4b        |
| 2 | 72040  | Mupcdh        |
| 2 | 76377  | 2810410L24Rik |
| 2 | 99439  | Duox1         |
| 2 | 13095  | Cyp2c29       |
| 2 | 70069  | H1fnt         |
| 2 | 78767  | 2610021K21Rik |
| 2 | 227231 | Cps1          |
| 2 | 14240  | Foxb2         |
| 2 | NaN    | MMT00014037   |
| 2 | 286942 | Kif19a        |
| 2 | 113854 | V1rb4         |
| 2 | 71761  | Amdhd1        |
| 2 | 208104 | Mlxip         |
| 2 | 74966  | 4930471G03Rik |
| 2 | 242939 | Cpz           |
| 2 | 19876  | Robo1         |
| 2 | NaN    | MMT00035685   |
| 2 | 434484 | Sp140         |
| 2 | 74362  | Spag17        |
| 2 | 71159  | 4933416l08Rik |
| 2 | 108927 | Lhfp          |
| 2 | NaN    | MMT00039607   |

|   |        |               |
|---|--------|---------------|
| 2 | 76389  | Ankrd36       |
| 2 | 229474 | Fhdc1         |
| 2 | 240899 | Lrrc52        |
| 2 | 219149 | Xkr6          |
| 2 | 213989 | Tmem82        |
| 2 | 272636 | D9Ert280e     |
| 2 | NaN    | MMT00074939   |
| 2 | 330863 | Trim67        |
| 2 | 14936  | Gys1          |
| 2 | 108153 | Adamts7       |
| 2 | 258979 | Olfr1255      |
| 2 | 193034 | Trpv1         |
| 2 | 665270 | Plb1          |
| 2 | 104252 | Cdc42ep2      |
| 2 | 258811 | Olfr926       |
| 2 | NaN    | MMT00052724   |
| 2 | 545874 | Vmn2r25       |
| 2 | 15233  | Hgd           |
| 2 | 73284  | Ddit4l        |
| 2 | 319229 | Sctr          |
| 2 | 233020 | Hipk4         |
| 2 | 12156  | Bmp2          |
| 2 | 17380  | Mme           |
| 2 | 216445 | Arhgap9       |
| 2 | 258589 | Olfr703       |
| 2 | 54122  | Uevld         |
| 2 | 213234 | Zbbx          |
| 2 | 319554 | Idi1          |
| 2 | 16364  | Irf4          |
| 2 | NaN    | MMT00033197   |
| 2 | 16429  | Itln1         |
| 2 | NaN    | MMT00073452   |
| 2 | NaN    | MMT00072579   |
| 2 | NaN    | MMT00009278   |
| 2 | 105787 | Prkaa1        |
| 2 | NaN    | MMT00071569   |
| 2 | 209091 | Ccnb3         |
| 2 | 77595  | Nup210l       |
| 2 | 252837 | Ccrl1         |
| 2 | 20190  | Ryr1          |
| 2 | NaN    | MMT00039919   |
| 2 | 241547 | D230010M03Rik |
| 2 | 209225 | Zfp710        |
| 2 | 320632 | Ascc3l1       |
| 2 | 272347 | Zfp398        |
| 2 | 56790  | D3Ert2300e    |
| 2 | 68709  | Cilp2         |
| 2 | NaN    | MMT00014519   |
| 2 | 258552 | Olfr868       |
| 2 | 258701 | Olfr401       |
| 2 | 72507  | Dzip1l        |

|   |           |                |
|---|-----------|----------------|
| 2 | 432516    | Myo1a          |
| 2 | 18545     | Pcp2           |
| 2 | 18505     | Pax3           |
| 2 | 69785     | Ceacam13       |
| 2 | 207495    | Baiap2l2       |
| 2 | 546271    | MMT00047275    |
| 2 | 217214    | Nags           |
| 2 | NaN       | YGL234W_RC-551 |
| 2 | 22346     | Vhlh           |
| 2 | 108934    | BC024659       |
| 2 | 53761     | Bat2           |
| 2 | 100040304 | MMT00028325    |
| 2 | 18985     | Pou2af1        |
| 2 | 114662    | Prss29         |
| 2 | 100855    | Tbc1d14        |
| 2 | 79401     | Spz1           |
| 2 | NaN       | MMT00017417    |
| 2 | 242286    | 4833413O15Rik  |
| 2 | NaN       | MMT00008170    |
| 2 | NaN       | MMT00032221    |
| 2 | 107376    | E330013P04Rik  |
| 2 | 268465    | Eme1           |
| 2 | NaN       | MMT00039397    |
| 2 | 23917     | Impdh1         |
| 2 | 83997     | Slmap          |
| 2 | 74276     | Cldnd2         |
| 2 | 546036    | EG546036       |
| 2 | 213988    | Tnrc6b         |
| 2 | 73532     | 1700080E11Rik  |
| 2 | 58994     | Smpd3          |
| 2 | 235858    | Gm392          |
| 2 | 20669     | Sox14          |
| 2 | 241769    | Kcnk15         |
| 2 | 74092     | 0610038L08Rik  |
| 2 | 242653    | Cldn19         |
| 2 | 57255     | Cldn13         |
| 2 | 30051     | Spdef          |
| 2 | 14773     | Grk5           |
| 2 | 434439    | BC048562       |
| 2 | 216781    | Trim58         |
| 2 | 404195    | Cyp2c54        |
| 2 | 244349    | Myst3          |
| 2 | 18799     | Plcd1          |
| 2 | NaN       | MMT00045847    |
| 2 | 98710     | Rabif          |
| 2 | NaN       | MMT00000356    |
| 2 | 259081    | Olfr643        |
| 2 | 210356    | E030049G20Rik  |
| 2 | 67608     | Narf           |
| 2 | NaN       | MMT00016640    |
| 2 | 207209    | Gm317          |

|   |        |               |
|---|--------|---------------|
| 2 | 16508  | Kcnd2         |
| 2 | 23872  | Ets2          |
| 2 | 110809 | Sfrs1         |
| 2 | 237954 | Lrrc37a       |
| 2 | 235952 | Gm189         |
| 2 | 193385 | 6330500D04Rik |
| 2 | 320685 | Dctd          |
| 2 | 223726 | Mpped1        |
| 2 | 14764  | Gpr44         |
| 2 | 207393 | Elfn2         |
| 2 | 319565 | Syne2         |
| 2 | 628893 | EG628893      |
| 2 | 58214  | Cst10         |
| 2 | 227326 | Gpr55         |
| 2 | 72729  | Cdc42se2      |
| 2 | 20865  | C730007P19Rik |
| 2 | 223337 | Ugt3a2        |
| 2 | 12839  | Col9a1        |
| 2 | NaN    | MMT00015245   |
| 2 | 21354  | Tap1          |
| 2 | 14312  | Brd2          |
| 2 | 258960 | Olfr171       |
| 2 | NaN    | MMT00047280   |
| 2 | 30944  | Zfp354c       |
| 2 | NaN    | MMT00065977   |
| 2 | 258908 | Olfr853       |
| 2 | 16196  | Il7           |
| 2 | 94224  | Srd5a2        |
| 2 | 114230 | Aipl1         |
| 2 | NaN    | MMT00007396   |
| 2 | 408059 | BC049352      |
| 2 | NaN    | MMT00006341   |
| 2 | NaN    | MMT00033542   |
| 2 | 18861  | Pms2          |
| 2 | 241075 | Plekhm3       |
| 2 | 18191  | Nrxn3         |
| 2 | 67554  | Slc25a30      |
| 2 | 217305 | 4732429D16Rik |
| 2 | 54219  | Cd320         |
| 2 | 70103  | Znhit1        |
| 2 | 50917  | Galns         |
| 2 | 58235  | Pvrl1         |
| 2 | 22364  | Vpreb3        |
| 2 | 71093  | Atoh8         |
| 2 | 66257  | Nicn1         |
| 2 | NaN    | MMT00043344   |
| 2 | 94191  | Adarb2        |
| 2 | 671564 | Rnf212        |
| 2 | 54126  | Arhgef7       |
| 2 | 434437 | Amt           |
| 2 | 68243  | A930018P22Rik |

|   |        |               |
|---|--------|---------------|
| 2 | 245638 | Tbc1d8b       |
| 2 | 332175 | Zdhhc23       |
| 2 | 258952 | Olfir341      |
| 2 | 26377  | Dapp1         |
| 2 | 195018 | Zzef1         |
| 2 | 16162  | Ii12rb2       |
| 2 | 76610  | 1700063K16Rik |
| 2 | 56324  | Stam2         |
| 2 | 15586  | Hyal1         |
| 2 | 66816  | Thap2         |
| 2 | 328234 | Rnf182        |
| 2 | 19089  | Prkcsh        |
| 2 | 56643  | Slc15a1       |
| 2 | 14388  | Gab1          |
| 2 | 50786  | Hs6st2        |
| 2 | 207259 | Zbtb7c        |
| 2 | 109294 | Depdc2        |
| 2 | NaN    | MMT00015975   |
| 2 | NaN    | MMT00046108   |
| 2 | 72027  | Slc39a4       |
| 2 | 20465  | Sim2          |
| 2 | 56305  | Pitpnb        |
| 2 | 68265  | Iqcf3         |
| 2 | 68585  | Rtn4          |
| 2 | 231699 | Oas1e         |
| 2 | 75560  | Ep400         |
| 2 | 320549 | D5Ert577e     |
| 2 | 17057  | Klrb1a        |
| 2 | 75690  | 2210412E05Rik |
| 2 | 13370  | Dio1          |
| 2 | 75301  | 4930556N09Rik |
| 2 | NaN    | MMT00077700   |
| 2 | 14179  | Fgf8          |
| 2 | 21817  | Tgm2          |
| 2 | 434203 | Slc28a1       |
| 2 | 105785 | Kdelr3        |
| 2 | 22229  | Ucp3          |
| 2 | 380660 | Acss3         |
| 2 | 68680  | 1110028A07Rik |
| 2 | 16728  | L1cam         |
| 2 | 12583  | Cdo1          |
| 2 | NaN    | MMT00030026   |
| 2 | 108899 | 2700081O15Rik |
| 2 | 74335  | Xrcc3         |
| 2 | 18023  | Nfe2l1        |
| 2 | 13043  | Ctnn          |
| 2 | 19152  | Prtn3         |
| 2 | 258645 | Olfir1403     |
| 2 | 319670 | Eml5          |
| 2 | 106059 | A430088P11Rik |
| 2 | NaN    | MMT00005283   |

|   |        |                |
|---|--------|----------------|
| 2 | 105727 | Slc38a1        |
| 2 | NaN    | MMT00019402    |
| 2 | 72948  | Tppp           |
| 2 | 113847 | V1ra5          |
| 2 | 171241 | V1rg6          |
| 2 | NaN    | MMT00014972    |
| 2 | 619301 | G630016D24Rik  |
| 2 | NaN    | MMT00031309    |
| 2 | 19281  | Ptprt          |
| 2 | 109697 | Cpa1           |
| 2 | 238988 | Erc2           |
| 2 | 76669  | 1700128F08Rik  |
| 2 | 21388  | Tbx5           |
| 2 | 110058 | Syt17          |
| 2 | NaN    | MMT00005098    |
| 2 | 319845 | Bbs9           |
| 2 | 66797  | Cntnap2        |
| 2 | 67373  | 2210010C04Rik  |
| 2 | 69864  | 1810065E05Rik  |
| 2 | 71452  | Ankrd40        |
| 2 | NaN    | MMT00029554    |
| 2 | NaN    | YAL043C_RC-451 |
| 2 | 22040  | Trex1          |
| 2 | 50701  | Ela2           |
| 2 | 26556  | Homer1         |
| 2 | 11548  | Adra1b         |
| 2 | NaN    | MMT00033987    |
| 2 | 258743 | Olfr661        |
| 2 | 14824  | Grn            |
| 2 | 105827 | Amigo2         |
| 2 | NaN    | MMT00031206    |
| 2 | 258645 | Olfr1403       |
| 2 | 170574 | Sp7            |
| 2 | 72007  | Fndc3b         |
| 2 | 78304  | Lsmd1          |
| 2 | NaN    | MMT00009628    |
| 2 | NaN    | MMT00043953    |
| 2 | 17354  | Mllt10         |
| 2 | 231207 | Cpeb2          |
| 2 | 381373 | Sp9            |
| 2 | 215493 | A3galt2        |
| 2 | 333050 | Ksr2           |
| 2 | 52897  | D11Bwg0517e    |
| 2 | 233765 | Plekha7        |
| 2 | 12300  | Cacng2         |
| 2 | 545474 | Scrt2          |
| 2 | 12895  | Cpt1b          |
| 2 | 54420  | Cldn8          |
| 2 | 17167  | Marco          |
| 2 | 19303  | Pxn            |
| 2 | 14998  | H2-DMa         |

|   |        |               |
|---|--------|---------------|
| 2 | 11443  | Chrn1         |
| 2 | 83813  | Tnk1          |
| 2 | 12350  | Car3          |
| 2 | 214305 | Hhip1         |
| 2 | 13385  | Dlg4          |
| 2 | 330830 | Ccdc135       |
| 2 | 21959  | Tnp2          |
| 2 | 14309  | Fshr          |
| 2 | 71544  | 9030420J04Rik |
| 2 | 19820  | Rnf12         |
| 2 | 98952  | C230093N12Rik |
| 2 | 79455  | Pdcl2         |
| 2 | 83396  | Glis2         |
| 2 | 66237  | Atp6v1g2      |
| 2 | 12142  | Prdm1         |
| 2 | 11944  | Atp4a         |
| 2 | 16449  | Jag1          |
| 2 | 52428  | Rhpn2         |
| 2 | 71781  | Slc16a14      |
| 2 | NaN    | MMT00058440   |
| 2 | 258288 | Olf1484       |
| 2 | NaN    | MMT00048659   |
| 2 | 140499 | Ube2j2        |
| 2 | 673094 | Cd99          |
| 2 | 258954 | Olf522        |
| 2 | 252904 | V1re9         |
| 2 | 280635 | Emilin3       |
| 2 | 74094  | Tjap1         |
| 2 | 93961  | B3galt5       |
| 2 | NaN    | MMT00016293   |
| 2 | 26362  | Axl           |
| 2 | 171267 | V1rg11        |
| 2 | 50873  | Park2         |
| 2 | 67645  | 4930511111Rik |
| 2 | 16529  | Kcnk5         |
| 2 | 64453  | Zfp280b       |
| 2 | 12915  | Crebl1        |
| 2 | NaN    | MMT00027552   |
| 2 | 16596  | Klf1          |
| 2 | 12351  | Car4          |
| 2 | 116904 | Alpk3         |
| 2 | 258790 | Olf1263       |
| 2 | 209497 | Tmem164       |
| 2 | 18439  | P2rx7         |
| 2 | 15567  | Slc6a4        |
| 2 | 68957  | Paqr6         |
| 2 | 214239 | A430105119Rik |
| 2 | 320404 | Itpkb         |
| 2 | 67576  | 4930429B21Rik |
| 2 | NaN    | MMT00015104   |
| 2 | 258752 | Olf583        |

|   |        |               |
|---|--------|---------------|
| 2 | 13838  | Epha4         |
| 2 | NaN    | MMT00027295   |
| 2 | NaN    | MMT00078109   |
| 2 | 242594 | 1700024P16Rik |
| 2 | 245615 | Kir3dl2       |
| 2 | 14029  | Evx2          |
| 2 | NaN    | MMT00014480   |
| 2 | 259108 | Olfr550       |
| 2 | 29809  | Rabgap1l      |
| 2 | 258918 | Olfr1346      |
| 2 | 259003 | Olfr172       |
| 2 | 76788  | 2410127E18Rik |
| 2 | 631304 | Cyp4f40       |
| 2 | 53878  | Svs2          |
| 2 | 259091 | Olfr585       |
| 2 | 56734  | Tulp2         |
| 2 | 74221  | 1700011F03Rik |
| 2 | 22403  | Wisp2         |
| 2 | 545817 | Cyp2w1        |
| 2 | 22390  | Wee1          |
| 2 | 107141 | Cyp2c50       |
| 2 | 329858 | MMT00069147   |
| 3 | 103511 | BB146404      |
| 3 | 12818  | Col14a1       |
| 3 | 20296  | Ccl2          |
| 3 | 208777 | Sned1         |
| 3 | 11536  | Gpr182        |
| 3 | 18596  | Pdgfrb        |
| 3 | 15507  | Hspb1         |
| 3 | 15507  | Hspb1         |
| 3 | 21857  | Timp1         |
| 3 | 21788  | Tfpi          |
| 3 | 11745  | Anxa3         |
| 3 | 13078  | Cyp1b1        |
| 3 | 11668  | Aldh1a1       |
| 3 | 624910 | Rgs21         |
| 3 | 22361  | Vnn1          |
| 3 | 16591  | Kl            |
| 3 | 21859  | Timp3         |
| 3 | 11746  | Anxa4         |
| 3 | 17022  | Lum           |
| 3 | 16948  | Lox           |
| 3 | 216616 | Efemp1        |
| 3 | 216350 | Tspan8        |
| 3 | 208177 | Phldb2        |
| 3 | 11754  | Aoc3          |
| 3 | 12550  | Cdh1          |
| 3 | 22160  | Twist1        |
| 3 | 76453  | Prss23        |
| 3 | 69068  | 1810011O10Rik |
| 3 | 56744  | Pf4           |



|   |        |               |
|---|--------|---------------|
| 3 | 64074  | Smoc2         |
| 3 | 13482  | Dpp4          |
| 3 | 17533  | Mrc1          |
| 3 | 76933  | Ifi27         |
| 3 | 15903  | Id3           |
| 3 | 29876  | Clic4         |
| 3 | 13132  | Dab2          |
| 3 | 11815  | Apod          |
| 3 | 59012  | Moxd1         |
| 3 | 22370  | Vtn           |
| 3 | 19128  | Pros1         |
| 3 | 26357  | Abcg2         |
| 3 | 65970  | Lima1         |
| 3 | 21898  | Tlr4          |
| 3 | 13136  | Cd55          |
| 3 | 18783  | Pla2g4a       |
| 3 | 73656  | Ms4a6c        |
| 3 | 73671  | Sult6b1       |
| 3 | 209086 | Samd9l        |
| 3 | 57814  | Kcne4         |
| 3 | 21682  | Tec           |
| 3 | 20194  | S100a10       |
| 3 | 68303  | 9130005N14Rik |
| 3 | 19264  | Ptprc         |
| 3 | 22402  | Wisp1         |
| 3 | 330256 | MMT00008885   |
| 3 | 106628 | Trip10        |
| 3 | 107350 | AW112010      |
| 3 | 64075  | Smoc1         |
| 3 | 65256  | Asb2          |
| 3 | 15170  | Ptpn6         |
| 3 | 14960  | H2-Aa         |
| 3 | 12798  | Cnn2          |
| 3 | 12724  | Clcn2         |
| 3 | 57349  | Ppbp          |
| 3 | 207742 | Rnf43         |
| 3 | 16612  | Klk1          |
| 3 | 11937  | Atp2a1        |
| 3 | 14190  | Fgl2          |
| 3 | 20514  | Slc1a5        |
| 3 | 71345  | Tmem16j       |
| 3 | 19218  | Ptger3        |
| 3 | 12797  | Cnn1          |
| 3 | 328779 | Hs3st6        |
| 3 | 85031  | Pla1a         |
| 3 | 71566  | 9030425E11Rik |
| 3 | 69540  | Klk10         |
| 3 | 17873  | Gadd45b       |
| 3 | 18858  | Pmp22         |
| 3 | 12263  | C2            |
| 3 | 69291  | 1700001L05Rik |

|   |        |               |
|---|--------|---------------|
| 3 | 64292  | Ptges         |
| 3 | 12835  | Col6a3        |
| 3 | 16011  | Igfbp5        |
| 3 | 227753 | Gsn           |
| 3 | 16362  | Irf1          |
| 3 | 67103  | Ltb4dh        |
| 3 | 13179  | Dcn           |
| 3 | 320712 | Abi3bp        |
| 3 | 227612 | A830007P12Rik |
| 3 | 20347  | Sema3b        |
| 3 | 71724  | Aox3          |
| 3 | 102371 | AA407270      |
| 3 | 208836 | Fanci         |
| 3 | 19662  | Rbp4          |
| 3 | 20306  | Ccl7          |
| 3 | 14181  | Fgfbp1        |
| 3 | 27047  | Omd           |
| 3 | 56312  | Nupr1         |
| 3 | 12642  | Ch25h         |
| 3 | 11694  | Alx3          |
| 3 | 241327 | Olfml2a       |
| 3 | 11889  | Asgr1         |
| 3 | 14114  | Fbln1         |
| 3 | 71683  | Gypc          |
| 3 | 14219  | Ctgf          |
| 3 | 21824  | Thbd          |
| 3 | 96875  | Prg4          |
| 3 | 22268  | Upk1b         |
| 3 | 16425  | Itih2         |
| 3 | 20887  | Sult1a1       |
| 3 | 17300  | Foxc1         |
| 3 | 21814  | Tgfbr3        |
| 3 | 11535  | Adm           |
| 3 | 78896  | 1500015O10Rik |
| 3 | 242509 | Bnc2          |
| 3 | 104086 | Cyp27a1       |
| 3 | 78892  | Crispld2      |
| 3 | 74511  | Lrrc17        |
| 3 | 12817  | Col13a1       |
| 3 | 75750  | Slc10a6       |
| 3 | 103149 | Upb1          |
| 3 | 67082  | 1700011H14Rik |
| 3 | 12825  | Col3a1        |
| 3 | 14187  | Akr1b8        |
| 3 | 23876  | Fbln5         |
| 3 | 17312  | Mgl1          |
| 3 | 12560  | Cdh3          |
| 3 | 14130  | Fcgr2b        |
| 3 | 231162 | Cyt11         |
| 3 | 16008  | Igfbp2        |
| 3 | 434198 | B130024G19Rik |

|   |        |               |
|---|--------|---------------|
| 3 | 66898  | Baiap2l1      |
| 3 | 380712 | 2010305C02Rik |
| 3 | 109323 | C1qtnf7       |
| 3 | 67856  | Echdc3        |
| 3 | 21826  | Thbs2         |
| 3 | 19331  | Rab19         |
| 3 | 64058  | Perp          |
| 3 | 71914  | Antxr2        |
| 3 | 22411  | Wnt11         |
| 3 | 18214  | Ddr2          |
| 3 | 72565  | Uaca          |
| 3 | 13094  | Cyp2b9        |
| 3 | 71934  | Car13         |
| 3 | 77037  | Mrap          |
| 3 | 15160  | Serpind1      |
| 3 | 93689  | Lmod1         |
| 3 | 17313  | Mgp           |
| 3 | 76365  | Tbx18         |
| 3 | 103161 | Apof          |
| 3 | 20518  | Slc22a2       |
| 3 | 18399  | Slc22a6       |
| 3 | 14412  | Slc6a13       |
| 3 | 16012  | Igfbp6        |
| 3 | 22420  | Wnt6          |
| 3 | 12904  | Crabp2        |
| 3 | 20204  | Prrx2         |
| 3 | 16002  | Igf2          |
| 3 | 14234  | Foxc2         |
| 3 | 14268  | Fn1           |
| 3 | 14049  | Eya2          |
| 3 | 18400  | Slc22a18      |
| 3 | 67473  | Slc47a1       |
| 3 | 226999 | Slc9a2        |
| 3 | 21384  | Tbx15         |
| 3 | 223272 | Itgbl1        |
| 3 | 18295  | Ogn           |
| 3 | 102680 | Slc6a20a      |
| 3 | 67606  | 1110018M03Rik |
| 3 | 19038  | Ppic          |
| 3 | 12831  | Col5a1        |
| 3 | 104816 | A530050D06Rik |
| 3 | NaN    | MMT00019254   |
| 3 | 64817  | Svep1         |
| 3 | 67182  | Pdzk1ip1      |
| 3 | 76905  | Lrg1          |
| 3 | 53620  | Vamp5         |
| 3 | 21922  | Clec3b        |
| 3 | 68713  | Ifitm1        |
| 3 | 211577 | Mrgprf        |
| 3 | 12258  | Serping1      |
| 3 | 14411  | Slc6a12       |

|   |        |               |
|---|--------|---------------|
| 3 | 13732  | Emp3          |
| 3 | 244550 | Podnl1        |
| 3 | 20698  | Sphk1         |
| 3 | NaN    | MMT00077820   |
| 3 | 76747  | Dapl1         |
| 3 | 19215  | Ptgds         |
| 3 | 269633 | Wdr86         |
| 3 | 70355  | Gprc5c        |
| 3 | 23967  | Osr1          |
| 3 | 69553  | 2310033K02Rik |
| 3 | 243967 | Gm484         |
| 3 | 14264  | Fmod          |
| 3 | 70370  | Fbln7         |
| 3 | 23920  | Insrr         |
| 3 | 216725 | Adamts2       |
| 3 | 12843  | Col1a2        |
| 3 | 74127  | Krt80         |
| 3 | 68794  | Flnc          |
| 3 | 19659  | Rbp1          |
| 3 | 18542  | Pcolce        |
| 3 | 11601  | Angpt2        |
| 3 | 12870  | Cp            |
| 3 | 69774  | Ms4a6b        |
| 3 | 12364  | Casp12        |
| 3 | 330723 | Htra4         |
| 3 | 16773  | Lama2         |
| 3 | 209039 | Tenc1         |
| 3 | 16790  | Anpep         |
| 3 | 11568  | Aebp1         |
| 3 | 26968  | Islr          |
| 3 | 21401  | Tcea3         |
| 3 | 93671  | Cd163         |
| 3 | 68774  | Ms4a6d        |
| 3 | 20684  | Sp100         |
| 3 | 11761  | Aox1          |
| 3 | 246728 | Oas2          |
| 3 | 14744  | Gpr65         |
| 3 | 27356  | Insl6         |
| 3 | 15959  | Ifit3         |
| 3 | 629974 | Rnf213        |
| 3 | 15953  | Ifi47         |
| 3 | 72575  | C430049B03Rik |
| 3 | NaN    | MMT00072312   |
| 3 | 20324  | Sdpr          |
| 3 | 66824  | Pycard        |
| 3 | 12984  | Csf2rb2       |
| 3 | 63986  | Gmfg          |
| 3 | 74145  | F13a1         |
| 3 | 21822  | Tgtp          |
| 3 | 547253 | Parp14        |
| 3 | 66775  | Ptplad2       |

|   |        |               |
|---|--------|---------------|
| 3 | 56644  | Clec7a        |
| 3 | 19073  | Srgn          |
| 3 | 66857  | 1100001H23Rik |
| 3 | 15951  | Ifi204        |
| 3 | 15945  | Cxcl10        |
| 3 | 226421 | 5430435G22Rik |
| 3 | 226041 | Pgm5          |
| 3 | 16408  | Itgal         |
| 3 | 19220  | Ptgrf         |
| 3 | 268977 | Ltbp1         |
| 3 | 17355  | Aff1          |
| 3 | 18605  | Enpp1         |
| 3 | 69590  | 2310016C16Rik |
| 3 | 52377  | Rcn3          |
| 3 | 20499  | Slc12a7       |
| 3 | 219151 | Scara3        |
| 3 | 229488 | 9930021J17Rik |
| 3 | 12842  | Col1a1        |
| 3 | 232313 | Glt8d4        |
| 3 | 319480 | Itga11        |
| 3 | 12834  | Col6a2        |
| 3 | 68311  | Lypd2         |
| 3 | 74761  | Mxra8         |
| 3 | 21928  | Tnfaip2       |
| 3 | 20409  | Ostf1         |
| 3 | 67247  | Mosc2         |
| 3 | 246154 | Vasn          |
| 3 | 14238  | Foxf2         |
| 3 | 17886  | Myh9          |
| 3 | 69698  | 2310046K01Rik |
| 3 | 14560  | Gdf10         |
| 3 | 329941 | Col8a2        |
| 3 | 76281  | Tax1bp3       |
| 3 | 114774 | Pawr          |
| 3 | 225115 | Svil          |
| 3 | 67760  | Slc38a2       |
| 3 | 16431  | Itm2a         |
| 3 | 14469  | Gbp2          |
| 3 | 17476  | Mpeg1         |
| 4 | NaN    | MMT00037010   |
| 4 | 224661 | Slc26a8       |
| 4 | NaN    | MMT00030322   |
| 4 | 640530 | EG640530      |
| 4 | 26450  | Rbbp9         |
| 4 | 13124  | Cyp8b1        |
| 4 | 108655 | Foxp1         |
| 4 | NaN    | MMT00050325   |
| 4 | 22301  | Vmn2r89       |
| 4 | 69357  | RP23-438H3.2  |
| 4 | 66289  | 1810030J14Rik |
| 4 | 627984 | Nlrp1c        |

|   |        |               |
|---|--------|---------------|
| 4 | 111507 | Igh           |
| 4 | 629065 | EG629065      |
| 4 | 27395  | Mrpl15        |
| 4 | 268780 | Egflam        |
| 4 | 229665 | Ampd1         |
| 4 | 107221 | Gpr120        |
| 4 | 20271  | Scn5a         |
| 4 | NaN    | MMT00036566   |
| 4 | 75863  | Clec4g        |
| 4 | 71623  | Krtap5-2      |
| 4 | 109331 | Rnf20         |
| 4 | 238076 | Kcns3         |
| 4 | 17878  | Myf6          |
| 4 | 67555  | 4933434I20Rik |
| 4 | 77220  | C030003D03Rik |
| 4 | 16184  | Il2ra         |
| 4 | 19226  | Pth           |
| 4 | 12322  | Camk2a        |
| 4 | 621976 | EG621976      |
| 4 | 547097 | B020011L13Rik |
| 4 | 227627 | Lcn13         |
| 4 | 114714 | Rad51c        |
| 4 | 237038 | Nox1          |
| 4 | 72318  | Pscd4         |
| 4 | 13525  | Adam26a       |
| 4 | 21897  | Tlr1          |
| 4 | NaN    | MMT00050153   |
| 4 | 241638 | RP23-100C5.8  |
| 4 | 16846  | Lep           |
| 4 | 237911 | Brip1         |
| 4 | 12267  | C3ar1         |
| 4 | 77771  | Csrnp3        |
| 4 | 105349 | Akr1c18       |
| 4 | 18343  | Olfr44        |
| 4 | 234736 | Rfwd3         |
| 4 | NaN    | MMT00048531   |
| 4 | 66996  | Ceacam11      |
| 4 | 20445  | St6galnac1    |
| 4 | NaN    | MMT00080431   |
| 4 | NaN    | MMT00012984   |
| 4 | 22035  | Tnfsf10       |
| 4 | 68054  | Serpina12     |
| 4 | 76816  | Sdccag8       |
| 4 | NaN    | MMT00071383   |
| 4 | 57915  | Tbc1d1        |
| 4 | 232426 | 5530400C23Rik |
| 4 | NaN    | MMT00051225   |
| 4 | 259019 | Olfr1045      |
| 4 | 399603 | D330050I23Rik |
| 4 | 17230  | Tpsab1        |
| 4 | 75216  | 4930534B04Rik |

|   |           |               |
|---|-----------|---------------|
| 4 | 445007    | Nup85         |
| 4 | 77531     | Anks1b        |
| 4 | 268980    | Strn          |
| 4 | NaN       | MMT00029895   |
| 4 | 258186    | Olf75-ps1     |
| 4 | 11867     | Arpc1b        |
| 4 | 75459     | 1700007E06Rik |
| 4 | NaN       | MMT00070628   |
| 4 | 20459     | Ptk6          |
| 4 | 243725    | Ppp1r9a       |
| 4 | 259015    | Olf1038       |
| 4 | 382864    | Colq          |
| 4 | 258290    | Olf1143       |
| 4 | 66255     | 1810005K13Rik |
| 4 | 67477     | 1300007F04Rik |
| 4 | 236149    | BC014805      |
| 4 | 100040020 | MMT00018931   |
| 4 | 12873     | Cpa3          |
| 4 | 53973     | Cyp3a41a      |
| 4 | 14942     | Gzme          |
| 4 | 94094     | Trim34        |
| 4 | 629203    | EG629203      |
| 4 | 72151     | Rfc5          |
| 4 | 15493     | Hsd3b2        |
| 4 | 27364     | Srr           |
| 4 | 214058    | Megf11        |
| 4 | 22138     | Ttn           |
| 4 | 52614     | Emr4          |
| 4 | 57254     | Tas2r119      |
| 4 | NaN       | MMT00076063   |
| 4 | 107587    | Osr2          |
| 4 | 117586    | A1bg          |
| 4 | 330662    | Dock1         |
| 4 | 242248    | Bank1         |
| 4 | NaN       | MMT00046813   |
| 4 | NaN       | MMT00013165   |
| 4 | NaN       | MMT00007654   |
| 4 | 234564    | AU018778      |
| 4 | 12352     | Car5a         |
| 4 | NaN       | MMT00059108   |
| 4 | 71421     | Amtn          |
| 4 | NaN       | MMT00020896   |
| 4 | 259017    | Olf1019       |
| 4 | NaN       | MMT00077775   |
| 4 | 22227     | Ucp1          |
| 4 | 240894    | Fmo9          |
| 4 | NaN       | MMT00014316   |
| 4 | 21816     | Tgm1          |
| 4 | NaN       | MMT00002308   |
| 4 | 381538    | Gm1027        |
| 4 | 114660    | Etos1         |

|   |        |               |
|---|--------|---------------|
| 4 | 233799 | Acsm2         |
| 4 | NaN    | MMT00020226   |
| 4 | 13587  | Ear2          |
| 4 | 16182  | Il18r1        |
| 4 | 21345  | Tagln         |
| 4 | 21667  | Tdgf1         |
| 4 | 101835 | AW146154      |
| 4 | 235132 | Zbtb44        |
| 4 | NaN    | MMT00004378   |
| 4 | 72789  | Veph1         |
| 4 | 20234  | Sbp           |
| 4 | 74441  | Slco6c1       |
| 4 | NaN    | MMT00063621   |
| 4 | 20749  | Dbpht1        |
| 4 | 384422 | Igk-V8        |
| 4 | 258808 | Olfir620      |
| 4 | 12945  | Dmbt1         |
| 4 | NaN    | MMT00078580   |
| 4 | 102093 | Phkb          |
| 4 | NaN    | MMT00054498   |
| 4 | 109151 | Chd9          |
| 4 | 76386  | 1700010D01Rik |
| 4 | 71162  | 4933421I07Rik |
| 4 | 258934 | Olfir802      |
| 4 | 54354  | Rassf5        |
| 4 | NaN    | MMT00008599   |
| 4 | NaN    | MMT00054728   |
| 4 | 12401  | Serpina6      |
| 4 | 56636  | Fgf21         |
| 4 | 627081 | Xlr5b         |
| 4 | 16061  | Igh-VJ558     |
| 4 | 330228 | 4933411G11Rik |
| 4 | 13099  | Cyp2c40       |
| 4 | 70900  | 4921517D22Rik |
| 4 | 217082 | Hlf           |
| 4 | 213603 | Slc44a3       |
| 4 | 14028  | Evx1          |
| 4 | NaN    | MMT00038655   |
| 4 | 111507 | Igh           |
| 4 | 170639 | Olfir78       |
| 4 | 380822 | MMT00072212   |
| 4 | 67715  | 2010106E10Rik |
| 4 | NaN    | MMT00025388   |
| 4 | 170716 | Cyp4f13       |
| 4 | 385493 | AU015836      |
| 4 | 57252  | Tas2r105      |
| 4 | 259000 | Olfir195      |
| 4 | 224480 | Nox3          |
| 4 | 112417 | Ugt2b37       |
| 4 | 17395  | Mmp9          |
| 4 | 16061  | Igh-VJ558     |



|   |           |                    |
|---|-----------|--------------------|
| 4 | 12962     | Crybb3             |
| 4 | 22419     | Wnt5b              |
| 4 | 432649    | EG432649           |
| 4 | 69611     | Lce1d              |
| 4 | 80861     | Dhx58              |
| 4 | 625360    | MMT00062748        |
| 4 | 239618    | Pdzrn4             |
| 4 | 278180    | Vsig4              |
| 4 | NaN       | MMT00000773        |
| 4 | 100669    | 9930105H17Rik      |
| 4 | 20397     | Sgpl1              |
| 4 | 241062    | Pgap1              |
| 4 | 632654    | MMT00048312        |
| 4 | 50780     | Rgs3               |
| 4 | 20199     | S100a5             |
| 4 | 103406    | 9130206N08Rik      |
| 4 | 243171    | BC005561           |
| 4 | 258883    | Olfr876            |
| 4 | 94176     | Dock2              |
| 4 | NaN       | MMT00039783        |
| 4 | 21418     | Tcfap2a            |
| 4 | 78128     | Spag11             |
| 4 | 320495    | A130090K04Rik      |
| 4 | 58185     | Rsad2              |
| 4 | 14528     | Gch1               |
| 4 | 258843    | Olfr1087           |
| 4 | 229780    | Ccdc76             |
| 4 | 12353     | Car6               |
| 4 | 64697     | Keg1               |
| 4 | 77011     | 5730590G19Rik      |
| 4 | NaN       | MMT00078938        |
| 4 | NaN       | MMT00072808        |
| 4 | NaN       | MMT00067115        |
| 4 | 73747     | 1110034G24Rik      |
| 4 | 75552     | Paqr9              |
| 4 | 330660    | Btbd16             |
| 4 | 319158    | Hist1h4i           |
| 4 | 26877     | B3galt1            |
| 4 | 67932     | 1700129C05Rik      |
| 4 | NaN       | MMT00003854        |
| 4 | 381065    | EG381065           |
| 4 | 233490    | Crebzf             |
| 4 | NaN       | MMT00020852        |
| 4 | 69454     | Clic3              |
| 4 | 100040843 | Cyp4a32            |
| 4 | 259277    | Klk8               |
| 4 | 666048    | OTTMUSG00000008561 |
| 4 | 630663    | MMT00057236        |
| 4 | 73360     | Actrt1             |
| 4 | 83703     | Dbr1               |
| 4 | 70365     | Speer5-ps1         |

|   |        |               |
|---|--------|---------------|
| 4 | 665503 | EG665503      |
| 4 | 252838 | Tox           |
| 4 | NaN    | MMT00072251   |
| 4 | NaN    | MMT00062390   |
| 4 | 20504  | Slc17a1       |
| 4 | NaN    | MMT00012296   |
| 4 | 71361  | Aifm2         |
| 4 | NaN    | MMT00023461   |
| 4 | 73332  | 1700041C02Rik |
| 4 | 213450 | Gm732         |
| 4 | 73634  | 1700125H20Rik |
| 4 | 99663  | Clca6         |
| 4 | 21973  | Top2a         |
| 4 | NaN    | MMT00060741   |
| 4 | 20297  | Ccl20         |
| 4 | 67052  | Ndc80         |
| 4 | 22072  | Prss2         |
| 4 | 271639 | Adcy10        |
| 4 | 66338  | Cdrt4         |
| 4 | NaN    | MMT00067195   |
| 4 | 108907 | Nusap1        |
| 4 | NaN    | MMT00030613   |
| 4 | 330577 | 1700129I04Rik |
| 4 | 74413  | Tc2n          |
| 4 | 631323 | MMT00028135   |
| 4 | 241452 | Dhrs9         |
| 4 | 11449  | Chrng         |
| 4 | 258299 | Olfr1461      |
| 4 | NaN    | MMT00005811   |
| 4 | 21419  | Tcfap2b       |
| 4 | NaN    | MMT00082318   |
| 4 | 258216 | Olfr1034      |
| 4 | 241391 | Galnt5        |
| 4 | 15430  | Hoxd10        |
| 4 | NaN    | MMT00031273   |
| 4 | 26437  | Psg17         |
| 4 | 52635  | D12Ert551e    |
| 4 | 66786  | Olfr701       |
| 4 | 74365  | Lonrf3        |
| 4 | 433597 | MMT00013465   |
| 4 | NaN    | MMT00001961   |
| 4 | 54601  | Foxo4         |
| 4 | NaN    | MMT00061154   |
| 4 | 72462  | Rrp1b         |
| 4 | 258728 | Olfr482       |
| 4 | NaN    | MMT00054267   |
| 4 | 23794  | Adamts5       |
| 4 | 11571  | Crisp1        |
| 4 | 19111  | Pr16a1        |
| 4 | 258905 | Olfr871       |
| 4 | 12046  | Bcl2a1c       |

|   |        |               |
|---|--------|---------------|
| 4 | 78631  | 1700085A12Rik |
| 4 | 67218  | 2810038D20Rik |
| 4 | 56356  | Gltf          |
| 4 | NaN    | MMT00060807   |
| 4 | 67909  | Galnt15       |
| 4 | 12774  | Ccr5          |
| 4 | 17836  | Mug1          |
| 4 | 230676 | BC059842      |
| 4 | 13109  | Cyp2j5        |
| 4 | 75050  | Kif27         |
| 4 | 216984 | Evi2b         |
| 4 | 19204  | Ptafr         |
| 4 | 57354  | Cramp1l       |
| 4 | 75761  | Apol7a        |
| 4 | 12502  | Cd3g          |
| 4 | 12393  | Runx2         |
| 4 | 17474  | Clec4d        |
| 4 | 73719  | Lce1c         |
| 4 | 67690  | 1700016G05Rik |
| 4 | 240411 | Loxhd1        |
| 4 | 16071  | Igk-C         |
| 4 | 16429  | Itln1         |
| 4 | 258304 | Olfr498       |
| 4 | 18453  | P4hb          |
| 4 | 17837  | Mug2          |
| 4 | 238055 | Apob          |
| 4 | 64381  | Ms4a8a        |
| 4 | 216343 | Tph2          |
| 4 | 225644 | Cplx4         |
| 4 | 14867  | Gstm6         |
| 4 | 381680 | BC055004      |
| 4 | 11844  | Arf5          |
| 4 | 627805 | Vmn2r108      |
| 4 | 12160  | Bmp5          |
| 4 | 258316 | Olfr727       |
| 4 | 268491 | Gm1564        |
| 4 | 69694  | Tatdn1        |
| 4 | 20706  | Serpnb9b      |
| 4 | 54450  | Il1f5         |
| 4 | 320484 | A430107D22Rik |
| 4 | NaN    | MMT00010339   |
| 4 | 73415  | 1700049E17Rik |
| 4 | 14237  | Foxd4         |
| 4 | NaN    | MMT00026261   |
| 4 | 338354 | Zfp780b       |
| 4 | 98752  | Fcrla         |
| 4 | 64661  | Krtdap        |
| 4 | 258548 | Olfr805       |
| 4 | 229933 | Clca5         |
| 4 | NaN    | MMT00019998   |
| 4 | 110304 | Gira3         |

|   |        |               |
|---|--------|---------------|
| 4 | NaN    | MMT00054056   |
| 4 | 258540 | Olfr771       |
| 4 | 12623  | Ces1          |
| 4 | 56792  | Stap1         |
| 4 | 278180 | Vsig4         |
| 4 | 246084 | Defb35        |
| 4 | 626280 | EG626280      |
| 4 | 77772  | Dcst1         |
| 4 | 17896  | Myl4          |
| 4 | 52042  | D17Ertd663e   |
| 4 | 503558 | Taar9         |
| 4 | NaN    | MMT00049287   |
| 4 | 18946  | Pnlipr1       |
| 4 | 71544  | 9030420J04Rik |
| 4 | 229445 | Ctso          |
| 4 | NaN    | MMT00061495   |
| 4 | NaN    | MMT00039380   |
| 4 | NaN    | MMT00007848   |
| 4 | NaN    | MMT00048642   |
| 4 | 74176  | Tgm5          |
| 4 | 69983  | 2010204N08Rik |
| 4 | 67854  | Slco6b1       |
| 4 | 258572 | Olfr1032      |
| 4 | 385674 | Zfp174        |
| 4 | 67342  | 1700058G18Rik |
| 4 | 12812  | Coil          |
| 4 | 258352 | Olfr692       |
| 4 | NaN    | MMT00013067   |
| 4 | NaN    | MMT00013081   |
| 4 | 73412  | Txndc3        |
| 4 | NaN    | MMT00013609   |
| 4 | NaN    | MMT00059956   |
| 4 | NaN    | MMT00039126   |
| 4 | 12006  | Axin2         |
| 4 | 259035 | Olfr714       |
| 4 | 331461 | Il1rapl1      |
| 4 | 269254 | Setx          |
| 4 | NaN    | MMT00044599   |
| 4 | 67537  | Glipr1l2      |
| 4 | 76999  | 1700127D06Rik |
| 4 | 94109  | Csmd1         |
| 4 | 75064  | Cnbp2         |
| 4 | NaN    | MMT00013109   |
| 4 | 20511  | Slc1a2        |
| 4 | NaN    | MMT00030313   |
| 4 | 110751 | Adam33        |
| 4 | 259096 | Olfr561       |
| 4 | 21884  | Fabp9         |
| 4 | 71943  | Tom1l1        |
| 4 | 215015 | C530043G21Rik |
| 4 | NaN    | MMT00008521   |

|   |        |               |
|---|--------|---------------|
| 4 | 329421 | Myo3b         |
| 4 | 242705 | E2f2          |
| 4 | NaN    | MMT00042948   |
| 4 | 12363  | Casp4         |
| 4 | 66742  | Cypt6         |
| 4 | 270004 | Foxi2         |
| 4 | NaN    | MMT00065179   |
| 4 | NaN    | MMT00078758   |
| 4 | 268345 | Kcnc2         |
| 4 | 258297 | Olfir827      |
| 4 | NaN    | MMT00042049   |
| 4 | 258810 | Olfir665      |
| 4 | NaN    | MMT00009539   |
| 4 | 57258  | Xpo4          |
| 4 | 667683 | EG667683      |
| 4 | NaN    | MMT00028065   |
| 4 | 73873  | 4930430E16Rik |
| 4 | 77619  | Preli2        |
| 4 | NaN    | MMT00005149   |
| 4 | 15551  | Htr1b         |
| 4 | 22689  | Zfp27         |
| 4 | NaN    | MMT00041810   |
| 4 | 258710 | Olfir419      |
| 4 | NaN    | MMT00077586   |
| 4 | NaN    | MMT00040265   |
| 4 | 20730  | Spink3        |
| 4 | 22301  | Vmn2r89       |
| 4 | NaN    | MMT00061717   |
| 4 | 258935 | Olfir790      |
| 4 | 192786 | Rapgef6       |
| 4 | 18705  | Pik3c2g       |
| 4 | 110957 | D1Pas1        |
| 4 | NaN    | MMT00039382   |
| 4 | 69861  | 2010003K11Rik |
| 4 | 16571  | Kif4          |
| 4 | NaN    | MMT00038532   |
| 4 | 233001 | Nlrp9a        |
| 4 | 654456 | MMT00054636   |
| 4 | 242557 | Atg4c         |
| 4 | NaN    | MMT00047055   |
| 4 | 58909  | D430015B01Rik |
| 4 | NaN    | MMT00008396   |
| 4 | NaN    | MMT00028085   |
| 4 | 382118 | Zfp167        |
| 4 | 211712 | Pcdh9         |
| 4 | 18158  | Nppb          |
| 4 | 18511  | Pax9          |
| 4 | 110789 | Gpr98         |
| 4 | 68799  | Rgmb          |
| 4 | 14613  | Gja5          |
| 4 | 258891 | Olfir1302     |

|   |        |               |
|---|--------|---------------|
| 4 | 259118 | Olfr575       |
| 4 | 73784  | 4930430F21Rik |
| 4 | 219131 | Phf11         |
| 4 | NaN    | MMT00050850   |
| 4 | 74717  | Spata17       |
| 4 | NaN    | MMT00012889   |
| 4 | NaN    | MMT00060699   |
| 4 | 320183 | Msr3          |
| 4 | 72103  | 2010301N04Rik |
| 4 | 23960  | Oas1g         |
| 4 | 406186 | Olfr142       |
| 4 | 56619  | Clec4e        |
| 4 | 77981  | B230110C06Rik |
| 4 | 78619  | Zfp449        |
| 4 | 239250 | Slitrk6       |
| 4 | 22074  | Try4          |
| 4 | 171230 | V1re7         |
| 4 | 385737 | Gm1758        |
| 4 | NaN    | MMT00039685   |
| 4 | 15042  | H2-T24        |
| 4 | 434794 | Xlr4a         |
| 4 | 77422  | C330018D20Rik |
| 4 | 72082  | Cyp2c55       |
| 4 | NaN    | MMT00071794   |
| 4 | 380709 | Spata22       |
| 4 | 272350 | EG272350      |
| 4 | 30955  | Pik3cg        |
| 4 | 233332 | Adamts17      |
| 4 | 20707  | Serpinb9c     |
| 4 | 72431  | Ceacam18      |
| 4 | 67504  | Rnf151        |
| 4 | 216395 | Tmem5         |
| 4 | 13640  | Efna5         |
| 4 | 103889 | Hoxb2         |
| 4 | 232367 | Vmn2r27       |
| 4 | NaN    | MMT00048298   |
| 4 | 546837 | Cyp2j7        |
| 4 | 225923 | Gm97          |
| 4 | 68172  | Rpl39l        |
| 4 | 100012 | Oog3          |
| 4 | NaN    | MMT00019508   |
| 4 | NaN    | MMT00039948   |
| 4 | 75239  | 4930543E12Rik |
| 4 | NaN    | MMT00056913   |
| 4 | NaN    | MMT00041235   |
| 4 | 227525 | Dclre1c       |
| 4 | NaN    | MMT00016059   |
| 4 | NaN    | MMT00053882   |
| 4 | 116940 | Tgs1          |
| 4 | NaN    | MMT00049130   |
| 4 | 226527 | BC026585      |

|   |        |               |
|---|--------|---------------|
| 4 | 434204 | Whdc1         |
| 5 | 19883  | Rora          |
| 5 | 271697 | Pftk2         |
| 5 | 17906  | Myl2          |
| 5 | 620807 | CU075549.1    |
| 5 | 80976  | Syt13         |
| 5 | 240539 | Gm336         |
| 5 | 22634  | Plagl1        |
| 5 | 74362  | Spag17        |
| 5 | 329324 | Syt14         |
| 5 | NaN    | MMT00046383   |
| 5 | 20893  | Bhlhb2        |
| 5 | NaN    | MMT00059380   |
| 5 | 114863 | Prosc         |
| 5 | NaN    | MMT00012520   |
| 5 | 59090  | Midn          |
| 5 | 21881  | Tkt           |
| 5 | 14113  | Fbl           |
| 5 | 30050  | Fbxw2         |
| 5 | 232370 | Clstn3        |
| 5 | 68095  | Ociad1        |
| 5 | 70984  | 4931406C07Rik |
| 5 | NaN    | MMT00030762   |
| 5 | 238330 | 6430527G18Rik |
| 5 | 329831 | 4833436C18Rik |
| 5 | 104383 | Rcor2         |
| 5 | 233908 | Fus           |
| 5 | 67048  | 2610030H06Rik |
| 5 | 11981  | Atp9a         |
| 5 | 14417  | Gad2          |
| 5 | 18189  | Nrxn1         |
| 5 | 67417  | Ears2         |
| 5 | 53623  | Gria3         |
| 5 | 19416  | Rasd1         |
| 5 | 63856  | Taf8          |
| 5 | 19383  | Raly          |
| 5 | 78784  | Tnrc4         |
| 5 | 72205  | Eml2          |
| 5 | 70439  | Taf15         |
| 5 | 110196 | Fdps          |
| 5 | NaN    | MMT00063985   |
| 5 | 16580  | Kifc1         |
| 5 | 54393  | Gabbr1        |
| 5 | 16994  | Ltb           |
| 5 | 12521  | Cd82          |
| 5 | 74032  | 4632417N05Rik |
| 5 | 67027  | Mkfn2         |
| 5 | 494448 | Cbx6          |
| 5 | 93679  | Trim8         |
| 5 | 71254  | Naif1         |
| 5 | 66895  | 1300014I06Rik |

|   |           |                |
|---|-----------|----------------|
| 5 | NaN       | MMT00001695    |
| 5 | NaN       | MMT00011949    |
| 5 | 242608    | Podn           |
| 5 | 67895     | Ppa1           |
| 5 | NaN       | MMT00004885    |
| 5 | 67712     | Slc25a37       |
| 5 | 58239     | Dexi           |
| 5 | NaN       | MMT00004313    |
| 5 | 620205    | EG620205       |
| 5 | 59310     | Mylc2pl        |
| 5 | 60367     | Il1rapl2       |
| 5 | 108655    | Foxp1          |
| 5 | NaN       | MMT00017420    |
| 5 | 638345    | Sbpl           |
| 5 | NaN       | MMT00008587    |
| 5 | 230753    | Thrap3         |
| 5 | 73330     | 1700018P08Rik  |
| 5 | 117149    | Tirap          |
| 5 | 28194     | Apon           |
| 5 | 244646    | Pkd1l3         |
| 5 | 100009609 | Vmn2r65        |
| 5 | 53620     | Vamp5          |
| 5 | NaN       | MMT00072359    |
| 5 | NaN       | MMT00007643    |
| 5 | 219094    | 9130227C08Rik  |
| 5 | 20666     | Sox11          |
| 5 | 213765    | RP23-336F11.32 |
| 5 | 380842    | Gm1574         |
| 5 | NaN       | MMT00063357    |
| 5 | 269338    | Vps39          |
| 5 | 320923    | Mtap7d3        |
| 5 | NaN       | MMT00026784    |
| 5 | 67781     | Ilf2           |
| 5 | NaN       | MMT00064177    |
| 5 | 241528    | Lrrc55         |
| 5 | 231760    | Rimbp2         |
| 5 | 57257     | Vav3           |
| 5 | 11839     | Areg           |
| 5 | NaN       | MMT00049822    |
| 5 | 12417     | Cbx3           |
| 5 | 57315     | Wdr46          |
| 5 | 26356     | Ing1           |
| 5 | 320982    | Arl4c          |
| 5 | 75547     | Akap13         |
| 5 | 100041004 | MMT00052718    |
| 5 | 18441     | P2ry1          |
| 5 | 231045    | 4931409K22Rik  |
| 5 | 14459     | Gast           |
| 5 | NaN       | MMT00015015    |
| 5 | NaN       | MMT00030946    |
| 5 | NaN       | MMT00021912    |



|   |        |               |
|---|--------|---------------|
| 5 | 328949 | Mcc           |
| 5 | 223642 | Zc3h3         |
| 5 | 66323  | 1700001K19Rik |
| 5 | 76757  | Trdn          |
| 5 | 83428  | Ucn3          |
| 5 | 75645  | 1700011F14Rik |
| 5 | 382217 | Gm1140        |
| 5 | 19724  | Rfx1          |
| 5 | 12631  | Cfl1          |
| 5 | 67664  | Rnf125        |
| 5 | 21949  | Tnfsf8        |
| 5 | NaN    | MMT00031355   |
| 5 | 69769  | Tnfaip8l2     |
| 5 | 67622  | Mxra7         |
| 5 | 268686 | S100z         |
| 5 | 236904 | Klhl15        |
| 5 | 103841 | Cuedc1        |
| 5 | 432502 | EG432502      |
| 5 | NaN    | MMT00036444   |
| 5 | 54411  | Atp6ap1       |
| 5 | NaN    | MMT00067575   |
| 5 | 74053  | Grip1         |
| 5 | NaN    | MMT00075201   |
| 5 | NaN    | MMT00034010   |
| 5 | 71633  | 4833414E09Rik |
| 5 | 70769  | Nolc1         |
| 5 | 243272 | Sbno1         |
| 5 | NaN    | MMT00000944   |
| 5 | 76527  | 2010004A03Rik |
| 5 | 56376  | Pdlim5        |
| 5 | NaN    | MMT00047848   |
| 5 | 67998  | 1300010M03Rik |
| 5 | 226751 | Cdc42bpa      |
| 5 | 328329 | Mast4         |
| 5 | 18807  | Pld3          |
| 5 | 360013 | Myo18a        |
| 5 | 224044 | Cyp2ab1       |
| 5 | 14645  | Glul          |
| 5 | 20339  | Sele          |
| 5 | 381535 | RP23-149D11.4 |
| 5 | 18150  | Npm3          |
| 5 | 231201 | AF366264      |
| 5 | NaN    | MMT00011143   |
| 5 | NaN    | MMT00030044   |
| 5 | NaN    | MMT00030135   |
| 5 | 230895 | Vps13d        |
| 5 | 329872 | Frem1         |
| 5 | 16192  | Il5ra         |
| 5 | 11731  | Ang2          |
| 5 | 107476 | Acaca         |
| 5 | 107476 | Acaca         |

|   |        |               |
|---|--------|---------------|
| 5 | NaN    | MMT00079465   |
| 5 | 677168 | MMT00057550   |
| 5 | NaN    | MMT00000111   |
| 5 | 68732  | Lrrc16a       |
| 5 | 434130 | MMT00042294   |
| 5 | 56735  | Krt71         |
| 5 | 215654 | Cdh12         |
| 5 | 15395  | Hoxa10        |
| 5 | 67653  | 4930544G11Rik |
| 5 | 75532  | 1700015C15Rik |
| 5 | 16447  | Ivl           |
| 5 | 192663 | Abcg4         |
| 5 | 68964  | 1500010J02Rik |
| 5 | 243914 | Lgi4          |
| 5 | 244672 | Cwf19l2       |
| 5 | NaN    | MMT00013656   |
| 5 | 103978 | Gpc5          |
| 5 | NaN    | MMT00036239   |
| 5 | 60367  | Il1rapl2      |
| 5 | 216760 | Mfap3         |
| 5 | 72972  | Gcap14        |
| 5 | 214899 | Jarid1a       |
| 5 | 17260  | Mef2c         |
| 5 | 229279 | Hnrnpa3       |
| 5 | NaN    | MMT00017539   |
| 5 | 71521  | Pds5a         |
| 5 | 60596  | Gucy1a3       |
| 5 | 320405 | Cadps2        |
| 5 | 99526  | Usp53         |
| 5 | 74200  | 2810403A07Rik |
| 5 | NaN    | MMT00002304   |
| 5 | 56095  | Ftsj3         |
| 5 | 20845  | Star          |
| 5 | 20022  | Polr2j        |
| 5 | 12530  | Cdc25a        |
| 5 | 78889  | Wsb1          |
| 5 | 24055  | Sh3bp2        |
| 5 | 386649 | Nsf1c         |
| 5 | 13180  | Pcbd1         |
| 5 | 106572 | Rab31         |
| 5 | NaN    | MMT00042032   |
| 5 | 76485  | Gltd1         |
| 5 | 14874  | Gstz1         |
| 5 | 13418  | Dnajc1        |
| 5 | 319887 | E030030I06Rik |
| 5 | NaN    | MMT00046069   |
| 5 | 15289  | Hmgb1         |
| 5 | NaN    | MMT00019519   |
| 5 | NaN    | MMT00044766   |
| 5 | NaN    | MMT00007970   |
| 5 | NaN    | MMT00047183   |

|   |        |               |
|---|--------|---------------|
| 5 | NaN    | MMT00044175   |
| 5 | 23849  | Klf6          |
| 5 | 330177 | Taok3         |
| 5 | 17999  | Nedd4         |
| 5 | 227334 | Usp40         |
| 5 | 20317  | Serpinf1      |
| 5 | 72145  | Wdfy3         |
| 5 | 68087  | Dcakd         |
| 5 | 329977 | Fhad1         |
| 5 | 54003  | Nell2         |
| 5 | 16792  | Laptm5        |
| 5 | 68652  | Map3k7ip2     |
| 5 | 70422  | Ints2         |
| 5 | 13829  | Epb4.9        |
| 5 | 224530 | Acat3         |
| 5 | NaN    | MMT00038325   |
| 5 | 94282  | Sfxn5         |
| 5 | 16326  | Inhbe         |
| 5 | NaN    | MMT00009927   |
| 5 | 209239 | Gan           |
| 5 | 381260 | Gm973         |
| 5 | 208846 | Daam1         |
| 5 | 12575  | Cdkn1a        |
| 5 | 18128  | Notch1        |
| 5 | 19224  | Ptgs1         |
| 5 | 72289  | Malat1        |
| 5 | 19017  | Ppargc1a      |
| 5 | 434872 | Usp51         |
| 5 | 53902  | Rcan3         |
| 5 | 226548 | Aph1a         |
| 5 | 18986  | Pou2f1        |
| 5 | 11941  | Atp2b2        |
| 5 | 232536 | Mrps35        |
| 5 | 26408  | Map3k5        |
| 5 | 170826 | Ppargc1b      |
| 5 | 373864 | Col27a1       |
| 5 | 110197 | Dgkg          |
| 5 | 381149 | Nrg2          |
| 5 | 381062 | 2210404J11Rik |
| 5 | 20516  | Slc20a2       |
| 5 | NaN    | MMT00077001   |
| 5 | NaN    | MMT00071096   |
| 5 | NaN    | MMT00082622   |
| 5 | 237082 | Nxt2          |
| 5 | 60365  | Rbm8a         |
| 5 | NaN    | MMT00045090   |
| 5 | 107566 | Arl2bp        |
| 6 | NaN    | MMT00078052   |
| 6 | 17347  | Mknk2         |
| 6 | NaN    | MMT00068134   |
| 6 | 384198 | Gm1381        |

|   |        |               |
|---|--------|---------------|
| 6 | 57274  | Slc16a8       |
| 6 | 623734 | Vmn2r85       |
| 6 | 16601  | Klf9          |
| 6 | 66112  | Mosc1         |
| 6 | NaN    | MMT00039356   |
| 6 | NaN    | MMT00074323   |
| 6 | NaN    | MMT00040357   |
| 6 | 231134 | Dok7          |
| 6 | 227699 | Nup188        |
| 6 | 68833  | Pdcl3         |
| 6 | 13717  | Eln           |
| 6 | 208117 | Aph1b         |
| 6 | NaN    | MMT00079286   |
| 6 | 239530 | Gpr20         |
| 6 | 227526 | Armet1        |
| 6 | 381605 | Tbc1d2        |
| 6 | 21391  | Tbxas1        |
| 6 | 18504  | Pax2          |
| 6 | NaN    | MMT00054025   |
| 6 | 14626  | Gk2           |
| 6 | 258573 | Olf1020       |
| 6 | 241612 | Slc5a12       |
| 6 | NaN    | MMT00008620   |
| 6 | 231691 | Sds           |
| 6 | 209786 | Vmn2r-ps88    |
| 6 | 224058 | Tmem207       |
| 6 | 18479  | Pak1          |
| 6 | 14366  | Fzd4          |
| 6 | 83984  | Tssk6         |
| 6 | 98870  | Al182371      |
| 6 | 56640  | Klk4          |
| 6 | 434446 | Ccdc13        |
| 6 | 20947  | MMT00047924   |
| 6 | 241113 | Prkag3        |
| 6 | 66932  | Rexo1         |
| 6 | 330908 | Opcml         |
| 6 | NaN    | MMT00013481   |
| 6 | 258408 | Olf463        |
| 6 | 19651  | Rbl2          |
| 6 | 109082 | Fbxw17        |
| 6 | 69169  | Faim3         |
| 6 | 14134  | Fcnb          |
| 6 | 246747 | BC054059      |
| 6 | 13041  | Ctsw          |
| 6 | 635169 | MMT00073704   |
| 6 | NaN    | MMT00035976   |
| 6 | 20714  | Serpina3k     |
| 6 | 258715 | Olf421        |
| 6 | 21679  | Tead4         |
| 6 | 101359 | D330027H18Rik |
| 6 | 171253 | V1ri2         |

|   |           |               |
|---|-----------|---------------|
| 6 | 77998     | Grifin        |
| 6 | 56315     | Rhcg          |
| 6 | 106389    | Eaf2          |
| 6 | 11630     | Aim1          |
| 6 | 225884    | BC021614      |
| 6 | 14870     | Gstp1         |
| 6 | 16551     | Kif11         |
| 6 | NaN       | MMT00057004   |
| 6 | 26360     | Angptl2       |
| 6 | 236260    | MMT00062346   |
| 6 | 630825    | EG630825      |
| 6 | 12517     | Cd72          |
| 6 | 328099    | AU021838      |
| 6 | 21386     | Tbx3          |
| 6 | 100041449 | MMT00067427   |
| 6 | 69125     | Cnot8         |
| 6 | 12504     | Cd4           |
| 6 | 60599     | Trp53inp1     |
| 6 | 21974     | Top2b         |
| 6 | 74182     | Prei4         |
| 6 | 170798    | AY036118      |
| 6 | 108148    | Galnt2        |
| 6 | 67581     | Tbc1d23       |
| 6 | 75646     | Rai14         |
| 6 | 320204    | 4833442J19Rik |
| 6 | 234311    | Ddx60         |
| 6 | 225852    | Gm550         |
| 6 | 74646     | Spsb1         |
| 6 | 55938     | Apom          |
| 6 | 234214    | Sorbs2        |
| 6 | 66124     | Josd2         |
| 6 | 232358    | Vmn2r19       |
| 6 | 107272    | Psat1         |
| 6 | 246788    | Trpv3         |
| 6 | 57757     | Pglyrp2       |
| 6 | 668501    | zfp507        |
| 6 | 258268    | Olfr1511      |
| 6 | 228598    | Ebf4          |
| 6 | 216792    | A230051G13Rik |
| 6 | 54204     | 1-Sep         |
| 6 | 11864     | Arnt2         |
| 6 | 434440    | Fbxw12        |
| 6 | 14313     | Fst           |
| 6 | 16973     | Lrp5          |
| 6 | NaN       | MMT00048670   |
| 6 | 21953     | Tnni2         |
| 6 | 29818     | Hspb7         |
| 6 | 75770     | Brsk2         |
| 6 | NaN       | MMT00012375   |
| 6 | 245695    | A630018P17Rik |
| 6 | 236598    | MMT00009389   |

|   |        |                 |
|---|--------|-----------------|
| 6 | 330953 | Hcn4            |
| 6 | 13347  | Dffa            |
| 6 | 71816  | Rnf180          |
| 6 | NaN    | YBL111C_RC-1101 |
| 6 | 381820 | 2700089E24Rik   |
| 6 | 56296  | Dmrtb1          |
| 6 | 268878 | Atp13a5         |
| 6 | 319554 | Idi1            |
| 6 | 71898  | Apol9b          |
| 6 | 74031  | 4632413I24Rik   |
| 6 | 116732 | Tsga13          |
| 6 | 50887  | Nsbp1           |
| 6 | 68272  | Rbm28           |
| 6 | 74194  | Rnd3            |
| 6 | 58800  | Trpm7           |
| 6 | 52874  | D19Bwg1357e     |
| 6 | NaN    | MMT00055001     |
| 6 | 11797  | Birc2           |
| 6 | 18393  | Orc2l           |
| 6 | 228140 | Tnks1bp1        |
| 6 | 381580 | Ccdc27          |
| 6 | 73172  | 3110037I16Rik   |
| 6 | 18968  | Pola1           |
| 6 | 225467 | Pggt1b          |
| 6 | 270086 | Ogfod1          |
| 6 | 17480  | Mpl             |
| 6 | 15357  | Hmgcr           |
| 6 | 52635  | D12Ert551e      |
| 6 | 68837  | Foxk2           |
| 6 | 67099  | 2310038H17Rik   |
| 6 | 64659  | Mrps14          |
| 6 | 73916  | Ift57           |
| 6 | 225027 | Sfrs7           |
| 6 | 20452  | St8sia4         |
| 6 | 328108 | A430041B07Rik   |
| 6 | 110920 | Stch            |
| 6 | 57815  | Spata5          |
| 6 | 73205  | 3110043O21Rik   |
| 6 | 68514  | Efha1           |
| 6 | 66597  | Trim13          |
| 6 | 319170 | Hist1h2an       |
| 6 | 72900  | Ndufv2          |
| 6 | 278240 | Spin2           |
| 6 | 27375  | Tjp3            |
| 6 | 64451  | Dip2a           |
| 6 | 433865 | EG433865        |
| 6 | 192292 | Nrbp1           |
| 6 | 72568  | Lin9            |
| 6 | 66713  | Actr2           |
| 6 | 14102  | Fas             |
| 6 | 110637 | Grik4           |

|   |        |               |
|---|--------|---------------|
| 6 | 59015  | Nup160        |
| 6 | 104776 | Aldh6a1       |
| 6 | 58875  | Hibadh        |
| 6 | 56844  | Tssc4         |
| 6 | 74666  | 4930432K21Rik |
| 6 | 12661  | Chl1          |
| 6 | 65114  | Vps35         |
| 6 | 67452  | Pnpla8        |
| 6 | 110750 | Cse1l         |
| 6 | 225875 | Lrfr4         |
| 6 | 18139  | Zfml          |
| 6 | 12589  | Ift81         |
| 6 | 16396  | Itch          |
| 6 | 20133  | Rrm1          |
| 6 | 56794  | Hacl1         |
| 6 | 226043 | Cbwd1         |
| 6 | 107373 | 4632417K18Rik |
| 6 | 240725 | Sulf1         |
| 6 | 80898  | Erap1         |
| 6 | 72309  | Tmem158       |
| 6 | 17850  | Mut           |
| 6 | 67078  | 1700012G19Rik |
| 6 | 20473  | Six3          |
| 6 | 381217 | Gm967         |
| 6 | 69956  | Ptcd3         |
| 6 | 14911  | Thumpd3       |
| 6 | 12144  | Blm           |
| 6 | 19193  | Pipox         |
| 6 | 171168 | Asah3         |
| 6 | 12029  | Bcl6b         |
| 6 | 108832 | 5430405G05Rik |
| 6 | 110172 | Slc35b1       |
| 6 | NaN    | MMT00068622   |
| 6 | 218035 | Vps41         |
| 6 | 11722  | Amy1          |
| 6 | 59308  | Emcn          |
| 6 | 74934  | Armc4         |
| 6 | 66498  | Dda1          |
| 6 | 15284  | Hlx           |
| 6 | 66569  | Gdpd1         |
| 6 | 53972  | Ngef          |
| 6 | 79560  | Ublcp1        |
| 6 | 235611 | Plxnb1        |
| 6 | 16582  | Kifc3         |
| 7 | 232217 | 4933427D06Rik |
| 7 | 69550  | Bst2          |
| 7 | 16485  | Kcna1         |
| 7 | 21832  | Thpo          |
| 7 | 12737  | Cldn1         |
| 7 | NaN    | MMT00036534   |
| 7 | 72425  | 2410042D21Rik |

|   |        |               |
|---|--------|---------------|
| 7 | NaN    | MMT00062595   |
| 7 | 13006  | Smc3          |
| 7 | NaN    | MMT00001293   |
| 7 | 230484 | Usp1          |
| 7 | 56367  | Scoc          |
| 7 | 223601 | 0910001A06Rik |
| 7 | 67795  | 6530404N21Rik |
| 7 | 215751 | BC013529      |
| 7 | 66934  | Dsn1          |
| 7 | 19330  | Rab18         |
| 7 | 17761  | Mtap7         |
| 7 | 22631  | Ywhaz         |
| 7 | NaN    | MMT00059478   |
| 7 | NaN    | MMT00006564   |
| 7 | NaN    | MMT00040814   |
| 7 | 234353 | Psd3          |
| 7 | 16412  | Itgb1         |
| 7 | 73287  | 1700040L02Rik |
| 7 | 230700 | Foxj3         |
| 7 | 231086 | Hadhb         |
| 7 | 20519  | Slc22a3       |
| 7 | 76302  | Pcnp          |
| 7 | NaN    | MMT00053760   |
| 7 | 17721  | ND5           |
| 7 | 66701  | Spryd4        |
| 7 | 207278 | Fchsd2        |
| 7 | 107376 | E330013P04Rik |
| 7 | 229589 | Prune         |
| 7 | 210710 | Gab3          |
| 7 | 72097  | 2010300C02Rik |
| 7 | 58172  | Sertad2       |
| 7 | 381126 | Gm944         |
| 7 | 217843 | 9030205A07Rik |
| 7 | 102247 | Agpat6        |
| 7 | 23886  | Gdf15         |
| 7 | 27054  | Sec23b        |
| 7 | 66645  | Pspc1         |
| 7 | 71916  | Dus4l         |
| 7 | 233979 | Tpcn2         |
| 7 | 208449 | Sgms1         |
| 7 | 74106  | lqwd1         |
| 7 | 67011  | Mettl6        |
| 7 | 74482  | lfitm7        |
| 7 | 72701  | Zfp618        |
| 7 | 230753 | Thrap3        |
| 7 | 193043 | Zfp3          |
| 7 | 331532 | Tceal5        |
| 7 | 83602  | Gtf2a1        |
| 7 | 20977  | Syp           |
| 7 | 54673  | Sh3glb1       |
| 7 | 320772 | Mdga2         |



|   |           |                    |
|---|-----------|--------------------|
| 7 | 68144     | 5031426D15Rik      |
| 7 | 54140     | Avpr1a             |
| 7 | 71890     | Mad2l2             |
| 7 | 100040887 | MMT00065461        |
| 7 | 13445     | Cdk2ap1            |
| 7 | 622117    | Triml2             |
| 7 | 94245     | Dtnbp1             |
| 7 | NaN       | MMT00067207        |
| 7 | 12748     | Clk2               |
| 7 | 15108     | Hsd17b10           |
| 7 | 80509     | Med8               |
| 7 | 232685    | AB041803           |
| 7 | NaN       | MMT00017193        |
| 7 | NaN       | MMT00044006        |
| 7 | 209743    | AF529169           |
| 7 | 14431     | Gamt               |
| 7 | 56279     | B230317C12Rik      |
| 7 | 94219     | Cnnm2              |
| 7 | 53860     | 9-Sep              |
| 7 | 16869     | Lhx1               |
| 7 | 353047    | Plekhn1            |
| 7 | 14229     | Fkbp5              |
| 7 | 68097     | Dynll2             |
| 7 | 14630     | Gclm               |
| 7 | 15112     | Hao1               |
| 7 | NaN       | MMT00058578        |
| 7 | 11519     | Add2               |
| 7 | 64934     | Pes1               |
| 7 | 227195    | A430093A21Rik      |
| 7 | 14177     | Fgf6               |
| 7 | 627004    | MMT00000775        |
| 7 | NaN       | MMT00069688        |
| 7 | NaN       | MMT00065672        |
| 7 | NaN       | MMT00026738        |
| 7 | 546071    | Mast3              |
| 7 | 18189     | Nrxn1              |
| 7 | NaN       | MMT00078034        |
| 7 | NaN       | MMT00043750        |
| 7 | NaN       | MMT00016905        |
| 7 | 243642    | EG243642           |
| 7 | NaN       | MMT00000408        |
| 7 | NaN       | MMT00005808        |
| 7 | NaN       | MMT00060803        |
| 7 | NaN       | MMT00066059        |
| 7 | NaN       | MMT00039476        |
| 7 | 677044    | ENSMUSG00000074250 |
| 7 | NaN       | MMT00082247        |
| 7 | 20965     | Syn2               |
| 7 | 320165    | Tacc1              |
| 7 | 212632    | C79267             |
| 7 | 21453     | Tcof1              |

|   |        |             |
|---|--------|-------------|
| 7 | 67916  | Ppap2b      |
| 7 | 20481  | Ski         |
| 7 | 17143  | Magea7      |
| 7 | 230793 | Ahdc1       |
| 7 | NaN    | MMT00013155 |
| 7 | 114128 | Laptm4b     |
| 7 | NaN    | MMT00062045 |
| 7 | NaN    | MMT00007348 |
| 7 | NaN    | MMT00022996 |
| 7 | 21991  | Tpi1        |
| 7 | NaN    | MMT00033583 |
| 7 | 18645  | Pfn2        |
| 7 | 27059  | Sh3d19      |
| 7 | 17183  | Matn4       |
| 7 | 20312  | Cx3cl1      |
| 7 | 54160  | Copg2       |
| 7 | 98077  | C81431      |
| 7 | 107449 | Unc5b       |
| 7 | 226548 | Aph1a       |
| 7 | 16906  | Lmnb1       |
| 7 | 12018  | Bak1        |
| 7 | 20751  | Spr         |
| 7 | 68137  | Kdelr1      |
| 7 | 67169  | Nradd       |
| 7 | 21664  | Phlda1      |
| 7 | 60455  | Tmem8       |
| 7 | 57740  | Stk32c      |
| 7 | NaN    | MMT00008875 |
| 7 | 230770 | Tmem39b     |
| 7 | 67564  | Tmem35      |
| 7 | 26406  | Map3k3      |
| 7 | 77578  | Bcl9        |
| 7 | 72895  | Setd5       |
| 7 | 11928  | Atp1a1      |
| 7 | 52882  | Rgs7bp      |
| 7 | NaN    | MMT00077845 |
| 7 | NaN    | MMT00042985 |
| 7 | NaN    | MMT00003113 |
| 7 | NaN    | MMT00016379 |
| 7 | NaN    | MMT00069490 |
| 7 | NaN    | MMT00079667 |
| 7 | 16898  | Rps2        |
| 7 | NaN    | MMT00069569 |
| 7 | NaN    | MMT00077883 |
| 7 | NaN    | MMT00012419 |
| 7 | NaN    | MMT00015290 |
| 7 | NaN    | MMT00018943 |
| 7 | NaN    | MMT00011946 |
| 7 | NaN    | MMT00049231 |
| 7 | 380730 | Gm884       |
| 7 | NaN    | MMT00070318 |

|   |        |               |
|---|--------|---------------|
| 7 | 381921 | Taok2         |
| 7 | 72821  | Scn2b         |
| 7 | 72823  | Pard3b        |
| 7 | 18762  | Prkcz         |
| 7 | NaN    | MMT00017503   |
| 7 | NaN    | MMT00017270   |
| 7 | NaN    | MMT00005190   |
| 7 | 104263 | Jmjd1a        |
| 7 | NaN    | MMT00039914   |
| 7 | 433864 | Gm1040        |
| 7 | 433216 | EG433216      |
| 7 | 66508  | 2400001E08Rik |
| 7 | 17387  | Mmp14         |
| 7 | 233752 | Insc          |
| 7 | 320502 | Lmod3         |
| 7 | 75500  | 1700010H22Rik |
| 7 | 73692  | 2410089E03Rik |
| 7 | 76484  | Kndc1         |
| 7 | 68097  | Dynll2        |
| 7 | 20742  | Spnb2         |
| 7 | 217737 | Ahsa1         |
| 7 | 60507  | Qtrt1         |
| 7 | 56737  | Alg2          |
| 7 | 23955  | Nek4          |
| 7 | 11856  | Arhgap6       |
| 7 | 56036  | Ccnl2         |
| 7 | 214791 | Sertad4       |
| 7 | 216805 | Flcn          |
| 7 | 232798 | Leng8         |
| 7 | 215890 | Rlbp1l2       |
| 8 | 194231 | Cnksr1        |
| 8 | 26364  | Cd97          |
| 8 | 15162  | Hck           |
| 8 | NaN    | MMT00018252   |
| 8 | 11747  | Anxa5         |
| 8 | 74760  | Rab3il1       |
| 8 | 434234 | 2610020H08Rik |
| 8 | 66952  | 2310030G06Rik |
| 8 | 65115  | MMT00042763   |
| 8 | 14026  | Evl           |
| 8 | 68527  | 1110017116Rik |
| 8 | 16372  | Irx2          |
| 8 | 13685  | Eif4ebp1      |
| 8 | 71972  | Dnmbp         |
| 8 | 211147 | 11-Mar        |
| 8 | 216161 | Sbno2         |
| 8 | 103213 | Traf3ip2      |
| 8 | 68520  | Zfyve21       |
| 8 | 67849  | Cdca5         |
| 8 | 54357  | Epb4.1l4b     |
| 8 | 208943 | Myo5c         |

|   |        |               |
|---|--------|---------------|
| 8 | 23934  | Ly6h          |
| 8 | 214922 | Slc39a2       |
| 8 | 107747 | Aldh1l1       |
| 8 | 19273  | Ptpru         |
| 8 | 233186 | Siglec5       |
| 8 | 54722  | Dfna5h        |
| 8 | 75778  | Them4         |
| 8 | 77579  | Myh10         |
| 8 | 77605  | H2afv         |
| 8 | 13602  | Sparcl1       |
| 8 | 113868 | Acaa1a        |
| 8 | 13175  | Dclk1         |
| 8 | 66787  | 4933433P14Rik |
| 8 | NaN    | MMT00045357   |
| 8 | 30954  | Siva1         |
| 8 | 30954  | Siva1         |
| 8 | NaN    | MMT00045890   |
| 8 | 106795 | Tcf19         |
| 8 | 98388  | Chst10        |
| 8 | NaN    | MMT00050488   |
| 8 | 70351  | Ppp4r1        |
| 8 | 23897  | Hax1          |
| 8 | 16154  | Il10ra        |
| 8 | 20203  | S100b         |
| 8 | 320790 | Chd7          |
| 8 | 105352 | Dusp22        |
| 8 | 15468  | Prmt2         |
| 8 | 79263  | Trim39        |
| 8 | 60532  | Wtap          |
| 8 | 18190  | Nrxn2         |
| 8 | 217830 | 9030617O03Rik |
| 8 | 72392  | Tmem175       |
| 8 | 13688  | Eif4ebp2      |
| 8 | 56458  | Foxo1         |
| 8 | 226090 | Ermp1         |
| 8 | 19279  | Ptpr          |
| 8 | 19088  | Prkar2b       |
| 8 | 56092  | Cts7          |
| 8 | NaN    | MMT00077107   |
| 8 | 227120 | Plcl1         |
| 8 | NaN    | MMT00077178   |
| 8 | 229663 | Csde1         |
| 8 | 52530  | Nola2         |
| 8 | 12418  | Cbx4          |
| 8 | 66743  | 4931406I20Rik |
| 8 | 70604  | Dnajb14       |
| 8 | 238328 | Vash1         |
| 8 | 211612 | Ptchd1        |
| 8 | 107239 | AI790298      |
| 8 | 23945  | Mgll          |
| 8 | 192195 | Ash1l         |

|   |        |               |
|---|--------|---------------|
| 8 | 13205  | Ddx3x         |
| 8 | NaN    | MMT00057439   |
| 8 | 11991  | Hnrnpd        |
| 8 | 110542 | Amhr2         |
| 8 | 68033  | Cox19         |
| 8 | 98682  | 2210010L05Rik |
| 8 | 14546  | Gdap10        |
| 8 | 68177  | Ebpl          |
| 8 | 67151  | Psmc9         |
| 8 | 239435 | Aard          |
| 8 | 14778  | Gpx3          |
| 8 | 667386 | MMT00066614   |
| 8 | 19355  | Rad1          |
| 8 | 18845  | Plxna2        |
| 8 | 245269 | E130304F04Rik |
| 8 | 69718  | lpmk          |
| 8 | NaN    | MMT00024195   |
| 8 | 252868 | Odf4          |
| 8 | 332937 | Tcfap2e       |
| 8 | 68515  | 1110012N22Rik |
| 8 | 76653  | Cby3          |
| 8 | 12408  | Cbr1          |
| 8 | 12795  | PIK3          |
| 8 | 19252  | Dusp1         |
| 8 | 66108  | Ndufa9        |
| 8 | 16553  | Kif13a        |
| 8 | 11819  | Nr2f2         |
| 8 | 218820 | Zfp503        |
| 8 | 232196 | C87436        |
| 8 | 23986  | Peci          |
| 8 | 72236  | Tsnaxip1      |
| 8 | 52588  | Tspan14       |
| 8 | 17350  | Mlh1          |
| 8 | 18140  | Uhrf1         |
| 8 | 16206  | Lrig1         |
| 8 | 74711  | Ttli9         |
| 8 | 228836 | Dlgap4        |
| 8 | 18088  | Nkx2-2        |
| 8 | 69752  | Zfp511        |
| 8 | 209683 | Ttc28         |
| 8 | 52064  | Coq5          |
| 8 | NaN    | MMT00047335   |
| 8 | 67026  | Thap4         |
| 8 | 78697  | Pus7          |
| 8 | NaN    | MMT00036089   |
| 8 | 12826  | Col4a1        |
| 8 | NaN    | MMT00078322   |
| 8 | 19763  | Ring1         |
| 8 | 22248  | Unc119        |
| 8 | 76260  | Ttc8          |
| 8 | NaN    | MMT00043176   |

|   |        |                    |
|---|--------|--------------------|
| 8 | 626952 | EG626952           |
| 8 | 66192  | Lage3              |
| 8 | 66071  | Ethe1              |
| 8 | NaN    | MMT00066808        |
| 8 | 227885 | MMT00013510        |
| 8 | 21428  | Mlx                |
| 8 | 75533  | Nme5               |
| 8 | 68126  | Fahd2a             |
| 8 | 108857 | Ankhd1             |
| 8 | 433719 | OTTMUSG00000001246 |
| 8 | 19727  | Rfxank             |
| 8 | 106042 | Prickle1           |
| 8 | 14738  | Gpr12              |
| 8 | 13200  | Ddost              |
| 8 | 66985  | Rassf7             |
| 8 | 23991  | Cib1               |
| 8 | 17385  | Mmp11              |
| 8 | 14874  | Gstz1              |
| 8 | 67295  | Rab3c              |
| 8 | 268297 | Scml4              |
| 8 | 72350  | 2810002I04Rik      |
| 8 | 72125  | 2600011E07Rik      |
| 8 | 68734  | Smek1              |
| 8 | 27041  | G3bp1              |
| 8 | 28126  | D13Wsu177e         |
| 8 | 17748  | Mt1                |
| 8 | 12034  | Phb2               |
| 8 | 75751  | Ipo4               |
| 8 | 67426  | Cabc1              |
| 8 | 19228  | Pthr1              |
| 8 | 27632  | Rdbp               |
| 8 | 66394  | Nosip              |
| 8 | 14159  | Fes                |
| 8 | 67538  | Zswim3             |
| 8 | 74769  | Pik3cb             |
| 8 | 11501  | Adam8              |
| 8 | 73332  | 1700041C02Rik      |
| 8 | 56430  | Clip1              |
| 8 | 68564  | Nufip2             |
| 8 | 12995  | Csnk2a1            |
| 8 | 12995  | Csnk2a1            |
| 8 | 235567 | Dnajc13            |
| 8 | 319719 | 4732471D19Rik      |
| 8 | 213895 | Bms1               |
| 8 | NaN    | MMT00005802        |
| 8 | 69638  | 2310040A07Rik      |
| 8 | NaN    | MMT00058199        |
| 8 | 114301 | Palmd              |
| 8 | 68255  | Tmem86b            |
| 8 | 54725  | Cadm1              |
| 8 | 69456  | Commd10            |

|   |        |               |
|---|--------|---------------|
| 8 | 19363  | Rad51l1       |
| 8 | 69812  | 2010001M06Rik |
| 8 | 66570  | Cenpm         |
| 8 | 236733 | Usp11         |
| 8 | 77113  | Klhl2         |
| 8 | 217732 | 2310044G17Rik |
| 8 | 20322  | Sord          |
| 8 | 14701  | Gng12         |
| 8 | 241230 | St8sia6       |
| 8 | 67894  | 1810055E12Rik |
| 8 | 12091  | Glb1          |
| 8 | 17940  | Naip1         |
| 8 | 12927  | Bcar1         |
| 8 | 78689  | Mak10         |
| 8 | 213326 | Scyl2         |
| 8 | 223722 | Mcat          |
| 8 | 16190  | Il4ra         |
| 8 | 50918  | Myadm         |
| 8 | 117229 | Stk33         |
| 8 | 14547  | Gdap2         |
| 8 | 238205 | Lrfn5         |
| 8 | 231571 | Rpap2         |
| 8 | 192651 | Zfp286        |
| 8 | 17768  | Mthfd2        |
| 8 | 58230  | Rnf8          |
| 8 | 56440  | Snx1          |
| 8 | 13716  | Eil           |
| 8 | 67902  | Sumf2         |
| 8 | 67204  | Eif2s2        |
| 8 | 17758  | Mtap4         |
| 8 | 76484  | Kndc1         |
| 8 | 18105  | Nqo2          |
| 8 | 75687  | 2310066E14Rik |
| 8 | 76722  | Ckmt2         |
| 8 | 19062  | RP23-136K12.4 |
| 8 | 69479  | 1700029J07Rik |
| 8 | 212153 | 2610015P09Rik |
| 8 | 69051  | Pycr2         |
| 8 | 22143  | Tuba1b        |
| 8 | 76366  | Mtif3         |
| 8 | 66700  | Vps24         |
| 8 | 68721  | 1110032A03Rik |
| 8 | 67785  | Zmym4         |
| 8 | 231915 | Usp11         |
| 8 | 433256 | Acsl5         |
| 8 | 67041  | Oxct1         |
| 8 | 234729 | Vac14         |
| 8 | 72042  | Cotl1         |
| 8 | 107971 | Frs3          |
| 8 | 68875  | Tmcc2         |
| 8 | 56456  | Actl6a        |

|   |        |               |
|---|--------|---------------|
| 8 | 72103  | 2010301N04Rik |
| 8 | 66884  | Appbp2        |
| 8 | 76014  | Zc3h18        |
| 8 | 243853 | Fkrp          |
| 8 | 104910 | Al132487      |
| 9 | 66421  | 2410004B18Rik |
| 9 | 16434  | Itpa          |
| 9 | 11459  | Acta1         |
| 9 | 224671 | Btbd9         |
| 9 | 59028  | Rcl1          |
| 9 | 11540  | Adora2a       |
| 9 | 16969  | Zbtb7a        |
| 9 | 67579  | Cpeb4         |
| 9 | 15019  | H2-Q8         |
| 9 | 97484  | Cog8          |
| 9 | 17869  | Myc           |
| 9 | 67974  | Ccny          |
| 9 | 107271 | Yars          |
| 9 | 110379 | Sec13         |
| 9 | 77809  | Lrrc42        |
| 9 | 21807  | Tsc22d1       |
| 9 | 66610  | Abi3          |
| 9 | 22032  | Traf4         |
| 9 | 252974 | C330046G03Rik |
| 9 | 213452 | Ripk5         |
| 9 | NaN    | MMT00040516   |
| 9 | 68032  | Tmem85        |
| 9 | NaN    | MMT00001967   |
| 9 | 433923 | EG433923      |
| 9 | 74365  | Lonrf3        |
| 9 | 71514  | Sfpq          |
| 9 | 22393  | Wfs1          |
| 9 | NaN    | MMT00054655   |
| 9 | NaN    | MMT00022502   |
| 9 | NaN    | MMT00027303   |
| 9 | 192285 | Phf21a        |
| 9 | 207565 | Camkk2        |
| 9 | NaN    | MMT00043149   |
| 9 | 19042  | Ppm1a         |
| 9 | 56637  | Gsk3b         |
| 9 | NaN    | MMT00033296   |
| 9 | 16865  | Lgtn          |
| 9 | 20090  | Rps29         |
| 9 | 620161 | EG620161      |
| 9 | 109900 | Asl           |
| 9 | NaN    | MMT00029730   |
| 9 | 192159 | Prpf8         |
| 9 | NaN    | MMT00008728   |
| 9 | NaN    | MMT00011246   |
| 9 | NaN    | MMT00019310   |
| 9 | NaN    | MMT00057793   |



|   |        |               |
|---|--------|---------------|
| 9 | NaN    | MMT00030239   |
| 9 | NaN    | MMT00002521   |
| 9 | NaN    | MMT00053707   |
| 9 | 378954 | 3000002C10Rik |
| 9 | 629557 | EG629557      |
| 9 | NaN    | MMT00072546   |
| 9 | NaN    | MMT00024286   |
| 9 | NaN    | MMT00019672   |
| 9 | NaN    | MMT00065577   |
| 9 | NaN    | MMT00002048   |
| 9 | NaN    | MMT00074600   |
| 9 | NaN    | MMT00010854   |
| 9 | NaN    | MMT00079617   |
| 9 | NaN    | MMT00020962   |
| 9 | 668192 | EG668192      |
| 9 | NaN    | MMT00057721   |
| 9 | NaN    | MMT00004841   |
| 9 | NaN    | MMT00026015   |
| 9 | NaN    | MMT00009375   |
| 9 | NaN    | MMT00044275   |
| 9 | NaN    | MMT00075578   |
| 9 | NaN    | MMT00002004   |
| 9 | NaN    | MMT00013125   |
| 9 | NaN    | MMT00001423   |
| 9 | NaN    | MMT00075271   |
| 9 | NaN    | MMT00054062   |
| 9 | 636756 | EG636756      |
| 9 | 14225  | Fkbp1a        |
| 9 | NaN    | MMT00041940   |
| 9 | 245670 | Rragb         |
| 9 | 407819 | BC031181      |
| 9 | 11840  | Arf1          |
| 9 | 11949  | Atp5c1        |
| 9 | 71910  | Ppapdc1       |
| 9 | 14245  | Lpin1         |
| 9 | 11539  | Adora1        |
| 9 | NaN    | MMT00078831   |
| 9 | 52469  | Ccdc56        |
| 9 | NaN    | MMT00051732   |
| 9 | NaN    | MMT00007454   |
| 9 | 59041  | Stk25         |
| 9 | 57314  | Th1l          |
| 9 | 228812 | Pigu          |
| 9 | 72587  | Pan3          |
| 9 | 68440  | Dusp23        |
| 9 | 20284  | Scrg1         |
| 9 | 59003  | Maea          |
| 9 | 17750  | Mt2           |
| 9 | 70579  | Zc3h11a       |
| 9 | 217684 | 4933426M11Rik |
| 9 | 78303  | Hist3h2ba     |

|    |        |               |
|----|--------|---------------|
| 9  | 227634 | Camsap1       |
| 9  | 76952  | Nt5c2         |
| 9  | 57751  | Rnf25         |
| 9  | 227331 | Gigyf2        |
| 9  | 65106  | Arl6ip5       |
| 9  | 69195  | Tmem121       |
| 9  | 72454  | Ccdc71        |
| 9  | 15469  | Prmt1         |
| 9  | 235134 | Nfrkb         |
| 9  | 104079 | Nxph3         |
| 9  | 214987 | 5830457O10Rik |
| 9  | 19704  | Upf1          |
| 9  | 232400 | BC048546      |
| 9  | 22628  | Ywhag         |
| 9  | 53611  | Vti1a         |
| 9  | 432763 | Prr7          |
| 9  | 12804  | Cntfr         |
| 9  | 17977  | Ncoa1         |
| 9  | 330914 | MMT00072326   |
| 9  | 12293  | Cacna2d1      |
| 9  | 230082 | Nol6          |
| 9  | 66468  | 2810433K01Rik |
| 9  | 72415  | Sgol1         |
| 9  | 67604  | 1110007L15Rik |
| 9  | 14160  | Lgr5          |
| 9  | 233893 | Zfp764        |
| 9  | 71951  | Gpc2          |
| 9  | 14400  | Gabrb1        |
| 9  | 12805  | Cntn1         |
| 9  | 15258  | Hipk2         |
| 9  | 319817 | Rc3h2         |
| 9  | 14678  | Gnai2         |
| 9  | 228564 | Frmd5         |
| 9  | 241494 | Zfp385b       |
| 9  | 54635  | Pdgfc         |
| 9  | 68655  | Fndc1         |
| 9  | 15216  | Hfe           |
| 9  | 11532  | Adh5          |
| 9  | 242669 | Adc           |
| 9  | 70110  | Ifi35         |
| 9  | 664883 | Nova1         |
| 9  | NaN    | MMT00014048   |
| 9  | NaN    | MMT00024873   |
| 10 | NaN    | MMT00041291   |
| 10 | 97159  | A430005L14Rik |
| 10 | 70571  | Tcerg1l       |
| 10 | 242574 | C130073F10Rik |
| 10 | 84543  | Sval2         |
| 10 | 242248 | Bank1         |
| 10 | 26464  | Vnn3          |
| 10 | 63913  | Niban         |

|    |        |               |
|----|--------|---------------|
| 10 | 210853 | EG210853      |
| 10 | 17184  | Matr3         |
| 10 | 258537 | Olftr777      |
| 10 | 104156 | Etv5          |
| 10 | 26564  | Ror2          |
| 10 | 620807 | CU075549.1    |
| 10 | 630146 | Igsf2         |
| 10 | 20310  | Cxcl2         |
| 10 | 74081  | Cep350        |
| 10 | 69940  | Exoc1         |
| 10 | NaN    | MMT00054229   |
| 10 | NaN    | MMT00046724   |
| 10 | 67741  | 4930579F01Rik |
| 10 | 67292  | Pigc          |
| 10 | 19131  | Prh1          |
| 10 | 626058 | EG626058      |
| 10 | 223513 | Abra          |
| 10 | 18106  | Cd244         |
| 10 | 20445  | St6galnac1    |
| 10 | 320181 | Fndc7         |
| 10 | 234353 | Psd3          |
| 10 | 259099 | Olftr676      |
| 10 | 16153  | Il10          |
| 10 | NaN    | MMT00078220   |
| 10 | 271981 | A630047E20Rik |
| 10 | 270599 | Gm648         |
| 10 | 171211 | Edaradd       |
| 10 | 66500  | Slc30a7       |
| 10 | 329679 | Fnip2         |
| 10 | NaN    | MMT00006856   |
| 10 | 140887 | Lnx2          |
| 10 | 108950 | 1700049L16Rik |
| 10 | 240817 | 5830403L16Rik |
| 10 | NaN    | MMT00031646   |
| 10 | 13828  | Epb4.2        |
| 10 | NaN    | MMT00076423   |
| 10 | 229600 | BC028528      |
| 10 | 668225 | EG668225      |
| 10 | 54616  | Extl3         |
| 10 | 20958  | Sycp1-ps1     |
| 10 | 16576  | Kif7          |
| 10 | 207227 | Stxbp5l       |
| 10 | 78473  | Skap1         |
| 10 | 17384  | Mmp10         |
| 10 | NaN    | MMT00070399   |
| 10 | NaN    | MMT00023460   |
| 10 | 13557  | E2f3          |
| 10 | 75079  | Zfp509        |
| 10 | 278304 | Zfp385c       |
| 10 | 640268 | EG640268      |
| 10 | 14183  | Fgfr2         |

|    |        |               |
|----|--------|---------------|
| 10 | NaN    | MMT00034233   |
| 10 | 546387 | EG546387      |
| 10 | 79202  | Tnfrsf22      |
| 10 | NaN    | MMT00028216   |
| 10 | NaN    | MMT00019756   |
| 10 | NaN    | MMT00012505   |
| 10 | 217232 | Cdc27         |
| 10 | 258650 | Olf444        |
| 10 | 67728  | Dph2          |
| 10 | 77963  | Hook1         |
| 10 | NaN    | MMT00054511   |
| 10 | 16509  | Kcne1         |
| 10 | NaN    | MMT00004517   |
| 10 | 110855 | Pde6c         |
| 10 | 64898  | Lpin2         |
| 10 | NaN    | MMT00064569   |
| 10 | NaN    | MMT00024375   |
| 10 | 382066 | Prdm10        |
| 10 | 16882  | Lig3          |
| 10 | 234959 | Med17         |
| 10 | 319974 | Auts2         |
| 10 | 675749 | MMT00015654   |
| 10 | 633250 | EG633250      |
| 10 | 67993  | Nudt12        |
| 10 | 629219 | EG629219      |
| 10 | 11572  | Crisp3        |
| 10 | NaN    | MMT00076852   |
| 10 | 226610 | C030014K22Rik |
| 10 | 666348 | Apol7e        |
| 10 | 66780  | 4933436I01Rik |
| 10 | 20495  | Slc12a1       |
| 10 | NaN    | MMT00052315   |
| 10 | 65100  | Zic5          |
| 10 | 407786 | Taf9b         |
| 10 | 243725 | Ppp1r9a       |
| 10 | 68106  | Nt5c3l        |
| 10 | NaN    | MMT00018393   |
| 10 | 74438  | Rlbp1l1       |
| 10 | 14811  | Grin2a        |
| 10 | 258597 | Olf716        |
| 10 | 74529  | 8430422H06Rik |
| 10 | 110789 | Gpr98         |
| 10 | 217246 | Ace3          |
| 10 | 240476 | Zfp407        |
| 10 | 18788  | Serpib2       |
| 10 | 69125  | Cnot8         |
| 10 | 67336  | 1700054K19Rik |
| 10 | 230857 | Ece1          |
| 10 | 627607 | EG627607      |
| 10 | 319625 | Galm          |
| 10 | NaN    | MMT00066283   |

|    |        |               |
|----|--------|---------------|
| 10 | 258737 | Olf1316       |
| 10 | NaN    | MMT00071077   |
| 10 | 20400  | Sh2d1a        |
| 10 | 94192  | C1galt1       |
| 10 | 243377 | Svs1          |
| 10 | 56373  | Cpb2          |
| 10 | NaN    | MMT00022580   |
| 10 | 26465  | Zfp146        |
| 10 | NaN    | MMT00009248   |
| 10 | 78937  | 5830411G16Rik |
| 10 | 258880 | Olf218        |
| 10 | 329693 | Fcrl5         |
| 10 | NaN    | MMT00035581   |
| 10 | 13863  | Lcn5          |
| 10 | 58916  | Myot          |
| 10 | NaN    | MMT00026800   |
| 10 | NaN    | MMT00063855   |
| 10 | 99586  | Dpyd          |
| 10 | 60534  | Fancg         |
| 10 | NaN    | MMT00001681   |
| 10 | 22135  | Tgln2         |
| 10 | 17540  | Mrvi1         |
| 10 | 53315  | Sult1d1       |
| 10 | 277773 | BC049635      |
| 10 | NaN    | MMT00038169   |
| 10 | 634331 | EG634331      |
| 10 | 233801 | Acsn4         |
| 10 | 22095  | Tshr          |
| 10 | 50720  | Sacs          |
| 10 | 76378  | Ropn1         |
| 10 | NaN    | MMT00081414   |
| 10 | 93746  | Gprc5d        |
| 10 | 19123  | Proc          |
| 10 | NaN    | MMT00069572   |
| 10 | 258726 | Olf599        |
| 10 | 17684  | Cited2        |
| 10 | 347708 | Dppa1         |
| 10 | 20248  | Serpnb3a      |
| 10 | 73804  | Kif2c         |
| 10 | 11687  | Alox15        |
| 10 | NaN    | MMT00074228   |
| 10 | 20278  | Scnn1g        |
| 11 | 74840  | Armet         |
| 11 | 269582 | Clspn         |
| 11 | 11911  | Atf4          |
| 11 | 54120  | Gipc2         |
| 11 | 109042 | Prkcdbp       |
| 11 | 219038 | Foxo3         |
| 11 | 67298  | Gprasp1       |
| 11 | 66390  | Slmo2         |
| 11 | 212880 | Ddx46         |

|    |        |               |
|----|--------|---------------|
| 11 | 55946  | Ap3m1         |
| 11 | 13864  | Nr2f6         |
| 11 | 109731 | Maob          |
| 11 | 18218  | Dusp8         |
| 11 | 118445 | Klf16         |
| 11 | 70247  | Psmc1         |
| 11 | 268749 | Rnf31         |
| 11 | 19186  | Psme1         |
| 11 | 231464 | Cnot6l        |
| 11 | 170787 | Hdac10        |
| 11 | 18145  | Npc1          |
| 11 | 73469  | Rnf38         |
| 11 | NaN    | MMT00003764   |
| 11 | 19188  | Psme2         |
| 11 | 76701  | Ctrc          |
| 11 | 69207  | Sfrs11        |
| 11 | 209683 | Ttc28         |
| 11 | 56219  | Extl1         |
| 11 | 218271 | B4galt7       |
| 11 | 57247  | Zfp276        |
| 11 | 56401  | Lepre1        |
| 11 | 11565  | Adss1         |
| 11 | 226841 | Vash2         |
| 11 | 225207 | Zfp521        |
| 11 | 67155  | Smarca2       |
| 11 | 66929  | Asf1b         |
| 11 | 12892  | Cpox          |
| 11 | NaN    | MMT00014098   |
| 11 | 72750  | Als2cr13      |
| 11 | 19277  | Ptpro         |
| 11 | 66818  | 9130011J15Rik |
| 11 | 66448  | Mrpl20        |
| 11 | 53871  | Pkd2l2        |
| 11 | 270192 | Rab6b         |
| 11 | 18619  | Penk1         |
| 11 | 83431  | Ndel1         |
| 11 | 12325  | Camk2g        |
| 11 | 19364  | Rad51l3       |
| 11 | 271842 | Rpusd2        |
| 11 | 67444  | Ilkap         |
| 11 | 72147  | Zbtb46        |
| 11 | 13618  | Ednrb         |
| 11 | 66391  | 2310061J03Rik |
| 11 | 223870 | Senp1         |
| 11 | 77945  | Rpgrip1       |
| 11 | 231225 | Tapt1         |
| 11 | 12874  | Cpd           |
| 11 | 52187  | Rragd         |
| 11 | 333789 | N4bp2         |
| 11 | 50780  | Rgs3          |
| 11 | 30838  | Fbxw4         |

|    |        |               |
|----|--------|---------------|
| 11 | 230872 | Crocc         |
| 11 | 56364  | Zmym3         |
| 11 | 449521 | Zfp213        |
| 11 | 77407  | Rab35         |
| 11 | 67971  | Tppp3         |
| 11 | 77574  | 3321401G04Rik |
| 11 | 98170  | Tmem132a      |
| 11 | 78894  | Aacs          |
| 11 | 57340  | Jph3          |
| 11 | 74747  | Ddit4         |
| 11 | 232670 | Tspan33       |
| 11 | 11883  | Arsa          |
| 11 | 20286  | Zc3h7b        |
| 11 | 28000  | Prpf19        |
| 11 | 108121 | U2af1         |
| 11 | 67874  | Rprm          |
| 11 | 50849  | Rnf10         |
| 11 | 18193  | Nsd1          |
| 11 | NaN    | MMT00007878   |
| 11 | 105377 | Ankrd32       |
| 11 | 68465  | Adipor2       |
| 11 | 56454  | Aldh18a1      |
| 11 | 76630  | Stambpl1      |
| 11 | 70796  | Zdhhc1        |
| 11 | 20384  | Sfrs5         |
| 11 | 18632  | Pex11b        |
| 11 | 16004  | Igf2r         |
| 11 | 625055 | EG625055      |
| 11 | NaN    | MMT00036264   |
| 11 | 668830 | EG668830      |
| 11 | 16898  | Rps2          |
| 11 | 546164 | EG546164      |
| 11 | 331392 | EG331392      |
| 11 | 218194 | Phactr1       |
| 11 | NaN    | MMT00060205   |
| 11 | 56013  | RP23-157O10.7 |
| 11 | NaN    | MMT00080717   |
| 11 | 52639  | Wipi1         |
| 11 | NaN    | MMT00041615   |
| 11 | 66935  | 1700023B02Rik |
| 11 | 13508  | Dscam         |
| 11 | NaN    | MMT00040956   |
| 11 | 16573  | Kif5b         |
| 11 | 14884  | Gtf2h1        |
| 11 | 12912  | Creb1         |
| 11 | 67332  | Snrpd3        |
| 11 | 11637  | Ak2           |
| 11 | 12727  | Clcn4-2       |
| 11 | 80883  | Ntng1         |
| 11 | 233335 | Dmn           |
| 11 | 14337  | Ftl2          |

|    |        |               |
|----|--------|---------------|
| 11 | 20265  | Scn1a         |
| 11 | 225020 | Fez2          |
| 11 | 212943 | BC023892      |
| 11 | NaN    | MMT00002755   |
| 11 | 628431 | Hmgb1-rs17    |
| 11 | 11792  | Apex1         |
| 11 | 52504  | Cenpo         |
| 11 | 67855  | Asprv1        |
| 11 | 73712  | Dmkn          |
| 11 | 19716  | Bex1          |
| 11 | 664870 | MMT00080766   |
| 11 | 19172  | Psmb4         |
| 11 | 72084  | Pigx          |
| 11 | 67553  | Gstcd         |
| 11 | 107065 | Lrrtm2        |
| 11 | 67493  | Mett10d       |
| 11 | 218544 | Sgtb          |
| 11 | 224938 | Pja2          |
| 11 | 13609  | S1pr1         |
| 11 | 11465  | Actg1         |
| 11 | 72171  | Shq1          |
| 11 | 100637 | N4bp2l1       |
| 11 | 59038  | Pxmp4         |
| 12 | 12481  | Cd2           |
| 12 | 19265  | Ptprcap       |
| 12 | 81910  | Rrbp1         |
| 12 | 56745  | C1qtnf1       |
| 12 | 13008  | Csrp2         |
| 12 | 69487  | 2310003L22Rik |
| 12 | 22062  | Trp73         |
| 12 | 17536  | Meis2         |
| 12 | 15228  | Foxg1         |
| 12 | 14089  | Fap           |
| 12 | 20719  | Serpinb6a     |
| 12 | 108101 | Fermt3        |
| 12 | 246707 | Emilin2       |
| 12 | 17988  | Ndrp1         |
| 12 | 114584 | Clic1         |
| 12 | 15979  | Ifngr1        |
| 12 | 69574  | Cmb1          |
| 12 | 67460  | Decr1         |
| 12 | 110310 | Krt7          |
| 12 | 11522  | Adh1          |
| 12 | 228993 | 1700019H03Rik |
| 12 | 12837  | Col8a1        |
| 12 | 67009  | Ttc23         |
| 12 | 58188  | Vstm2b        |
| 12 | 140795 | P2ry14        |
| 12 | 73635  | 1700113l22Rik |
| 12 | 12766  | Cxcr3         |
| 12 | 24110  | Usp18         |



|    |        |               |
|----|--------|---------------|
| 12 | 14276  | Folr2         |
| 12 | 69217  | Plekha4       |
| 12 | 229003 | BC006779      |
| 12 | 21745  | Tep1          |
| 12 | 12162  | Bmp7          |
| 12 | 14132  | Fcgrt         |
| 12 | 56175  | Bace2         |
| 12 | 574428 | Zmynd15       |
| 12 | 22146  | Tuba1c        |
| 12 | 69700  | Col22a1       |
| 12 | 15248  | Hic1          |
| 12 | 16772  | Lama1         |
| 12 | 14863  | Gstm2         |
| 12 | 78558  | Htra3         |
| 12 | 20377  | Sfrp1         |
| 12 | 434215 | Lrrc32        |
| 12 | 12406  | Serpinh1      |
| 12 | 232984 | B3gnt8        |
| 12 | 208266 | Dot1l         |
| 12 | 71998  | Slc25a35      |
| 12 | 66395  | Ahnak         |
| 12 | 14118  | Fbn1          |
| 12 | 69146  | Gsdmd         |
| 12 | 17390  | Mmp2          |
| 12 | 106877 | Afap1l1       |
| 12 | 66797  | Cntnap2       |
| 12 | 102626 | Mapkapk3      |
| 12 | 74153  | Ube1l         |
| 12 | 23962  | Oasl2         |
| 12 | 56449  | Csda          |
| 12 | 104681 | Slc16a6       |
| 12 | 71670  | Acy3          |
| 12 | 20528  | Slc2a4        |
| 12 | 72000  | 1600016N20Rik |
| 12 | 12268  | C4b           |
| 12 | 12409  | Cbr2          |
| 12 | 12124  | Bik           |
| 12 | 56047  | Msln          |
| 12 | 210530 | Leprel1       |
| 12 | 69142  | Cd209f        |
| 12 | 54132  | Pdlim1        |
| 12 | 54132  | Pdlim1        |
| 12 | 11475  | Acta2         |
| 12 | 224833 | AI661453      |
| 12 | 232431 | Gprc5a        |
| 12 | 15957  | Ifit1         |
| 12 | 20304  | Ccl5          |
| 12 | 11433  | Acp5          |
| 12 | 212933 | Pm20d1        |
| 12 | 66528  | 2210020M01Rik |
| 12 | 243771 | Parp12        |

|    |           |               |
|----|-----------|---------------|
| 12 | 52668     | D12Ertd647e   |
| 12 | 56460     | Pkp3          |
| 12 | 170441    | Slc2a10       |
| 12 | 58200     | Ppp1r1a       |
| 12 | 67893     | Tmem86a       |
| 12 | 107995    | Cdc20         |
| 12 | 12262     | C1qc          |
| 12 | 70445     | Cd248         |
| 12 | 21380     | Tbx1          |
| 12 | 67706     | Tmem179b      |
| 12 | 233571    | P2ry6         |
| 13 | 545055    | Cma2          |
| 13 | 226243    | Habp2         |
| 13 | NaN       | MMT00077729   |
| 13 | 74202     | Fblim1        |
| 13 | 19222     | Ptgir         |
| 13 | 242126    | Slc22a15      |
| 13 | 71847     | Gmcl1l        |
| 13 | 18647     | Pftk1         |
| 13 | 195236    | Gm24          |
| 13 | 235386    | C630028N24Rik |
| 13 | 21925     | Tnnc2         |
| 13 | 12394     | Runx1         |
| 13 | 224170    | Dzip3         |
| 13 | NaN       | MMT00019450   |
| 13 | NaN       | MMT00033071   |
| 13 | 15464     | Hrc           |
| 13 | NaN       | MMT00052662   |
| 13 | 11720     | Mat1a         |
| 13 | 319800    | C730048C13Rik |
| 13 | 319615    | 6330416L07Rik |
| 13 | 74591     | Abca12        |
| 13 | 215929    | Al317395      |
| 13 | NaN       | MMT00020895   |
| 13 | 100041581 | Zkscan16      |
| 13 | 258287    | Olf125        |
| 13 | 15891     | Ibsp          |
| 13 | 11657     | Alb           |
| 13 | 67310     | Pri8a9        |
| 13 | 67366     | 1810008K16Rik |
| 13 | 23793     | Adam25        |
| 13 | 77706     | Abcb5         |
| 13 | 22715     | Zfp57         |
| 13 | 435927    | EG435927      |
| 13 | 394252    | Serpib3d      |
| 13 | 258985    | Olf1256       |
| 13 | 117066    | Cts3          |
| 13 | NaN       | MMT00037949   |
| 13 | 258334    | Olf1396       |
| 13 | 232836    | Galp          |
| 13 | 69168     | Bola1         |

|    |        |               |
|----|--------|---------------|
| 13 | 75484  | 1700007H22Rik |
| 13 | 243085 | Ugt2b35       |
| 13 | 258529 | Olfr313       |
| 13 | 216225 | Slc5a8        |
| 13 | 77700  | 9130208D14Rik |
| 13 | NaN    | MMT00063288   |
| 13 | 14125  | Fcer1a        |
| 13 | 434285 | BB014433      |
| 13 | 192136 | 5033411D12Rik |
| 13 | 360214 | Defb39        |
| 13 | 109663 | Hoxc11        |
| 13 | 21639  | Tcrg-V5       |
| 13 | 233079 | Ffar2         |
| 13 | 237107 | Gnl3l         |
| 13 | NaN    | MMT00067570   |
| 13 | 245650 | Gucy2f        |
| 13 | 23927  | Krtap14       |
| 13 | NaN    | MMT00065634   |
| 13 | 69693  | Pof1b         |
| 13 | 20702  | Serpina1c     |
| 13 | 75546  | 1700019P21Rik |
| 13 | NaN    | MMT00020922   |
| 13 | 78257  | Lrrc9         |
| 13 | 13089  | Cyp2b13       |
| 13 | NaN    | MMT00033681   |
| 13 | 83565  | Pramel3       |
| 13 | 635702 | Naaladl2      |
| 13 | 214575 | Tdrd5         |
| 13 | 381350 | BC061194      |
| 13 | 74978  | Lrriq1        |
| 13 | 67719  | 2310057J18Rik |
| 13 | 71597  | Isx           |
| 13 | 16061  | Igh-VJ558     |
| 13 | 212712 | Satb2         |
| 13 | 13417  | Dnahc8        |
| 13 | 545291 | MMT00030912   |
| 13 | NaN    | MMT00026815   |
| 13 | NaN    | MMT00052951   |
| 13 | 226470 | Zbtb41        |
| 13 | 20599  | Smr3a         |
| 13 | 22283  | Ush2a         |
| 13 | 72852  | 2900024O10Rik |
| 13 | 12722  | Clca1         |
| 13 | 270152 | Amica1        |
| 13 | 20216  | Acsm3         |
| 13 | 258803 | Olfr136       |
| 13 | 230596 | Prpf38a       |
| 13 | 320679 | Samd12        |
| 13 | 18162  | Npr3          |
| 13 | 450219 | Gsdma3        |
| 13 | 14164  | Fgf1          |

|    |        |               |
|----|--------|---------------|
| 13 | 381229 | Ccdc147       |
| 13 | NaN    | MMT00028550   |
| 13 | 16415  | Itgb2l        |
| 13 | 57752  | Tacc2         |
| 13 | 78478  | 1700129I15Rik |
| 13 | 20821  | Trim21        |
| 14 | 215029 | Prl3d3        |
| 14 | 665227 | Vmn2r94       |
| 14 | 73582  | 1700106N22Rik |
| 14 | 66761  | 4933417A18Rik |
| 14 | 258783 | Olfr920       |
| 14 | 258300 | Olfr1449      |
| 14 | 626904 | MMT00004644   |
| 14 | 654450 | MMT00010505   |
| 14 | 74485  | 4933430H15Rik |
| 14 | NaN    | MMT00038301   |
| 14 | NaN    | MMT00072628   |
| 14 | 170643 | Kirrel        |
| 14 | 14913  | Guca1a        |
| 14 | 14060  | F13b          |
| 14 | NaN    | MMT00044404   |
| 14 | 330721 | Nek5          |
| 14 | 67143  | Ikzf5         |
| 14 | 627814 | Vmn2r109      |
| 14 | 13120  | Cyp4b1        |
| 14 | 30962  | Slc7a9        |
| 14 | 58866  | Treh          |
| 14 | 14171  | Fgf17         |
| 14 | 18759  | Prkci         |
| 14 | 22313  | Vmn2r104      |
| 14 | 20190  | Ryr1          |
| 14 | 106757 | Tmem146       |
| 14 | 12506  | Cd48          |
| 14 | 15426  | Hoxc8         |
| 14 | 114871 | Psg28         |
| 14 | 22293  | Slc45a2       |
| 14 | 59020  | Pdzk1         |
| 14 | NaN    | MMT00012332   |
| 14 | 73358  | 1700054M17Rik |
| 14 | NaN    | MMT00078159   |
| 14 | NaN    | MMT00005649   |
| 14 | 320091 | Tmem16d       |
| 14 | 73980  | MMT00024414   |
| 14 | NaN    | MMT00013556   |
| 14 | 277898 | 9830102E05Rik |
| 14 | 622175 | EG622175      |
| 14 | 17139  | Magea3        |
| 14 | 75510  | 1700023D19Rik |
| 14 | 14985  | H2-M10.1      |
| 14 | NaN    | MMT00041012   |
| 14 | NaN    | MMT00046779   |

|    |        |               |
|----|--------|---------------|
| 14 | NaN    | MMT00008723   |
| 14 | 238690 | Zfp458        |
| 14 | 16061  | Igh-VJ558     |
| 14 | 233328 | Lrrk1         |
| 14 | 633285 | EG633285      |
| 14 | 243548 | Prickle2      |
| 14 | 104443 | Npffr2        |
| 14 | 171194 | V1rc21        |
| 14 | 258776 | Olfr715       |
| 14 | 258897 | Olfr1201      |
| 14 | 111507 | Igh           |
| 14 | NaN    | MMT00078587   |
| 14 | NaN    | MMT00040811   |
| 14 | 12968  | Cryge         |
| 14 | 21679  | Tead4         |
| 14 | 76399  | Il31          |
| 14 | 77669  | 9130221D24Rik |
| 14 | NaN    | MMT00035925   |
| 14 | 66747  | 4933400A11Rik |
| 14 | 171274 | V1rh16        |
| 14 | 668880 | Stard9        |
| 14 | 20441  | St3gal3       |
| 14 | 219132 | D14Ertd668e   |
| 14 | 14126  | Ms4a2         |
| 14 | 16995  | Ltb4r1        |
| 14 | 171254 | V1ri3         |
| 14 | NaN    | MMT00007852   |
| 14 | 68344  | Tmem174       |
| 14 | 210933 | Bai3          |
| 14 | 319476 | Lrtm1         |
| 14 | 435889 | 1810049H19Rik |
| 14 | 235040 | Atg4d         |
| 14 | 242819 | Rundc3b       |
| 14 | 232925 | Igfl3         |
| 14 | 243274 | Tmem132d      |
| 14 | 27405  | Abcg3         |
| 14 | 76654  | Upp2          |
| 14 | 246082 | Defb15        |
| 14 | 57764  | Ntn4          |
| 14 | 547263 | EG547263      |
| 14 | 258794 | Olfr878       |
| 14 | NaN    | MMT00039676   |
| 14 | 223773 | Zbed4         |
| 14 | 100559 | Ugt2b38       |
| 14 | 257871 | Olfr1372-ps1  |
| 14 | 627648 | EG627648      |
| 14 | 75469  | Spata19       |
| 14 | 195176 | Igh-VX24      |
| 14 | 67434  | 5730557B15Rik |
| 14 | NaN    | MMT00008174   |
| 14 | 237890 | Sifn14        |

|    |        |               |
|----|--------|---------------|
| 14 | 19674  | Rcvm          |
| 14 | 107746 | Rapgef1       |
| 14 | 246729 | Oas1h         |
| 14 | 24052  | Sgcd          |
| 14 | 110115 | Cyp11b1       |
| 14 | 12505  | Cd44          |
| 14 | 58229  | AB041550      |
| 14 | 17386  | Mmp13         |
| 14 | 68179  | 4930408G06Rik |
| 14 | 269328 | Muc15         |
| 14 | 13636  | Efna1         |
| 14 | 224705 | Vps52         |
| 14 | 69181  | Dyrk2         |
| 14 | 194597 | Tmprss11a     |
| 14 | 72345  | 2810002O09Rik |
| 14 | 20494  | Slc10a2       |
| 14 | NaN    | MMT00022553   |
| 14 | 258022 | Olf1318       |
| 14 | 76743  | D230044M03Rik |
| 14 | 16502  | Kcnc1         |
| 14 | 258247 | Olf1645       |
| 14 | 258585 | Olf1086       |
| 14 | 546213 | Gm1420        |
| 14 | 22764  | Zfx           |
| 14 | 192167 | Nlgn1         |
| 14 | 17250  | Abcc1         |
| 14 | 110350 | Dync2h1       |
| 14 | 258358 | Olf1557       |
| 14 | 215446 | Entpd3        |
| 14 | 16688  | Krt6b         |
| 14 | 279028 | Adamts13      |
| 14 | 58198  | Sall1         |
| 14 | 18193  | Nsd1          |
| 14 | 13117  | Cyp4a10       |
| 14 | 66797  | Cntnap2       |
| 14 | 229227 | 4932438A13Rik |
| 14 | 258315 | Olf1767       |
| 14 | 258730 | Olf1483       |
| 14 | 20289  | Scx           |
| 14 | 26366  | Ceacam10      |
| 14 | NaN    | MMT00015154   |
| 14 | 18503  | Pax1          |
| 14 | NaN    | MMT00058658   |
| 14 | 207181 | Rbms3         |
| 14 | 381650 | Thap6         |
| 14 | 385380 | Tex28         |
| 14 | NaN    | MMT00065923   |
| 14 | 229227 | 4932438A13Rik |
| 14 | 242151 | Kcna10        |
| 14 | 434377 | Zfp560        |
| 14 | 436059 | EG436059      |

|    |        |               |
|----|--------|---------------|
| 14 | 270906 | Prr11         |
| 14 | 74915  | Atp6v1e2      |
| 14 | 235582 | Glyctk        |
| 14 | 170741 | Pilrb1        |
| 14 | 76846  | Rps9          |
| 14 | 16098  | MMT00030712   |
| 14 | 218476 | Gm73          |
| 14 | 170651 | Krtap16-1     |
| 14 | 15969  | Ifna6         |
| 14 | 109254 | 9530008L14Rik |
| 14 | 207607 | Ccdc40        |
| 14 | 18185  | Nrl           |
| 14 | 13822  | Epb4.1l2      |
| 14 | 12671  | Chrm3         |
| 14 | 80782  | Klrb1b        |
| 14 | NaN    | MMT00016159   |
| 14 | 16622  | Klk1b5        |
| 14 | 72297  | B3gnt3        |
| 14 | NaN    | MMT00043095   |
| 14 | 328845 | Acsbg2        |
| 14 | 73476  | 1700069L16Rik |
| 14 | 83961  | Nrg4          |
| 14 | 230459 | Cyp2j13       |
| 14 | 57278  | Bcam          |
| 14 | 14695  | Gnb3          |
| 14 | NaN    | MMT00068006   |
| 14 | 210321 | BC048679      |
| 14 | NaN    | MMT00004867   |
| 14 | 57295  | Icmt          |
| 14 | NaN    | MMT00009602   |
| 14 | 74998  | Rab11fip2     |
| 14 | 320664 | Cass4         |
| 14 | 56697  | Akap10        |
| 14 | 636808 | Cntnap5a      |
| 14 | 229613 | 6330549D23Rik |
| 15 | NaN    | MMT00033243   |
| 15 | 211712 | Pcdh9         |
| 15 | 23928  | Lamc3         |
| 15 | NaN    | MMT00061667   |
| 15 | 16351  | Ipp           |
| 15 | 14663  | Glycam1       |
| 15 | 239857 | Cadm2         |
| 15 | 320158 | Zmat4         |
| 15 | 74700  | 4930524O08Rik |
| 15 | 93726  | Ear11         |
| 15 | 12372  | Casq1         |
| 15 | 23850  | Pappa2        |
| 15 | NaN    | MMT00045517   |
| 15 | 258731 | Olfr491       |
| 15 | 15424  | Hoxc5         |
| 15 | 258345 | Olfr1121      |

|    |           |                    |
|----|-----------|--------------------|
| 15 | 270049    | 4930431L04Rik      |
| 15 | 77596     | Gpr110             |
| 15 | 75030     | 4930503E24Rik      |
| 15 | 243655    | Klre1              |
| 15 | 51885     | Tubgcp4            |
| 15 | 258686    | Olfr1467           |
| 15 | 18352     | Olfr52             |
| 15 | 108803    | 4933402P03Rik      |
| 15 | NaN       | MMT00067361        |
| 15 | 209032    | Zc3hav1l           |
| 15 | NaN       | MMT00013951        |
| 15 | 246691    | Prok1              |
| 15 | 66443     | Tnfaip81           |
| 15 | 76130     | Las1l              |
| 15 | 15221     | Foxd3              |
| 15 | 670007    | MMT00003845        |
| 15 | 257985    | Olfr782            |
| 15 | 113851    | V1ra9              |
| 15 | 14815     | Nr3c1              |
| 15 | 210145    | Irgc1              |
| 15 | 69299     | Asb9               |
| 15 | 100038417 | ENSMUSG00000073551 |
| 15 | 20526     | Slc2a2             |
| 15 | 546983    | Vmn2r77            |
| 15 | 319800    | C730048C13Rik      |
| 15 | 240168    | Rasgrp3            |
| 15 | NaN       | MMT00000714        |
| 15 | 100043902 | Six3os1            |
| 15 | NaN       | MMT00068618        |
| 15 | 246079    | Defb9              |
| 15 | 226695    | Ifi205             |
| 15 | 18183     | Nrg3               |
| 15 | 57342     | Parva              |
| 15 | 214253    | Etnk2              |
| 15 | 74841     | Usp38              |
| 15 | 13112     | Cyp3a11            |
| 15 | NaN       | MMT00056385        |
| 15 | 381510    | Dpy19l4            |
| 15 | NaN       | MMT00035612        |
| 15 | 620631    | Ttc30a2            |
| 15 | 238205    | Lrfn5              |
| 15 | NaN       | MMT00007193        |
| 15 | NaN       | MMT00063871        |
| 15 | 74672     | 4930449A18Rik      |
| 15 | NaN       | MMT00005386        |
| 15 | NaN       | MMT00006445        |
| 15 | NaN       | MMT00008674        |
| 15 | 100041422 | MMT00070324        |
| 15 | 16160     | Ii12b              |
| 15 | 71508     | 8430426H19Rik      |
| 15 | 14538     | Gcnt2              |



|    |           |               |
|----|-----------|---------------|
| 15 | 103677    | Smg6          |
| 15 | NaN       | MMT00073552   |
| 15 | 224916    | Vmn2r120      |
| 15 | 16768     | Lag3          |
| 15 | NaN       | MMT00008763   |
| 15 | NaN       | MMT00059569   |
| 15 | 259117    | Olf560        |
| 15 | NaN       | MMT00035998   |
| 15 | 280662    | Afm           |
| 15 | 19885     | Rorc          |
| 15 | 433073    | EG433073      |
| 15 | 258042    | Olf487        |
| 15 | 209186    | C730036D15Rik |
| 15 | 639634    | Aadacl2       |
| 15 | 22324     | Vav1          |
| 15 | 234404    | Nxn1          |
| 15 | 619326    | 9130409I23Rik |
| 15 | 237353    | Sh3md4        |
| 15 | 321003    | Xpnpep3       |
| 15 | NaN       | MMT00058344   |
| 15 | NaN       | MMT00044569   |
| 15 | 56422     | Hbs1l         |
| 15 | NaN       | MMT00061970   |
| 15 | 73988     | 4930438A08Rik |
| 15 | NaN       | MMT00047047   |
| 15 | 625131    | Vmn2r87       |
| 15 | 70952     | 4921537P18Rik |
| 15 | 13239     | Defcr5        |
| 15 | 258378    | Olf593        |
| 15 | 20690     | Spam1         |
| 15 | 226025    | Trpm3         |
| 15 | 245631    | Mum1l1        |
| 15 | 258724    | Olf784        |
| 15 | NaN       | MMT00046622   |
| 15 | 116852    | Akr1c20       |
| 15 | 74419     | Tktl2         |
| 15 | 258498    | Olf148        |
| 15 | 17228     | Cma1          |
| 15 | 71011     | 4933401B06Rik |
| 15 | NaN       | MMT00046203   |
| 15 | NaN       | MMT00022090   |
| 15 | 270163    | Myo9a         |
| 15 | 30952     | Cngb3         |
| 15 | 100038941 | Vmn2r121      |
| 16 | 23831     | Car14         |
| 16 | 11796     | Birc3         |
| 16 | 16177     | Il1r1         |
| 16 | 224273    | BC043118      |
| 16 | 18974     | Pole2         |
| 16 | 19212     | Pter          |
| 16 | 72039     | Mccc1         |

|    |        |               |
|----|--------|---------------|
| 16 | 17472  | Gbp4          |
| 16 | 140792 | Colec12       |
| 16 | 12628  | Cfh           |
| 16 | 20708  | Serpinb6b     |
| 16 | 80285  | Parp9         |
| 16 | 72560  | Naalad2       |
| 16 | 217721 | Flvcr2        |
| 16 | 67375  | Qprt          |
| 16 | 12045  | Bcl2a1b       |
| 16 | 26388  | Ifi202b       |
| 16 | 18753  | Prkcd         |
| 16 | 15116  | Has1          |
| 16 | 22360  | Nrsn1         |
| 16 | 21412  | Tcf21         |
| 16 | 15277  | Hk2           |
| 16 | 22350  | Ezr           |
| 16 | 16913  | Psemb8        |
| 16 | 14373  | G0s2          |
| 16 | 215900 | A630077B13Rik |
| 16 | 18074  | Nid2          |
| 16 | 18073  | Nid1          |
| 16 | 16912  | Psemb9        |
| 16 | 104027 | Synpo         |
| 16 | 74155  | Errfi1        |
| 16 | 19124  | Procr         |
| 16 | 21813  | Tgfbr2        |
| 16 | 12832  | Col5a2        |
| 16 | 105387 | Akr1c14       |
| 16 | 230815 | Man1c1        |
| 16 | 67111  | Naaa          |
| 16 | 21847  | Klf10         |
| 16 | 53599  | Cd164         |
| 16 | 28146  | D3Ucla1       |
| 16 | 66864  | Clec14a       |
| 16 | 22418  | Wnt5a         |
| 16 | 109222 | Rarres1       |
| 16 | 257871 | Olf1372-ps1   |
| 16 | 12306  | Anxa2         |
| 16 | 66859  | Slc16a9       |
| 16 | 54139  | Irf6          |
| 16 | 65960  | Twsg1         |
| 16 | 56277  | Tmem45a       |
| 16 | 232345 | A2m           |
| 16 | 15229  | Foxd1         |
| 16 | 55983  | Pdzrn3        |
| 16 | 100201 | Tmem64        |
| 16 | 20750  | Spp1          |
| 16 | 170625 | Snx18         |
| 16 | 210711 | 1110007A13Rik |
| 16 | 94045  | P2rx5         |
| 16 | 217082 | Hlf           |

|    |        |                    |
|----|--------|--------------------|
| 16 | 29875  | Iqgap1             |
| 16 | 20583  | Snai2              |
| 16 | 98396  | Slc41a1            |
| 16 | 108927 | Lhfp               |
| 16 | 21923  | Tnc                |
| 16 | 226856 | Lpgat1             |
| 17 | 66926  | Trmt6              |
| 17 | 360216 | Zranb1             |
| 17 | 67062  | Mcart6             |
| 17 | 114643 | Oas1c              |
| 17 | 74126  | Syvn1              |
| 17 | 24010  | Ik                 |
| 17 | 70974  | Pgm2l1             |
| 17 | 18548  | Pcsk1              |
| 17 | 667373 | OTTMUSG00000016644 |
| 17 | 14020  | Evi5               |
| 17 | 75805  | Nln                |
| 17 | 26754  | Cops5              |
| 17 | 67684  | 3300001P08Rik      |
| 17 | 75296  | Fgfr1op            |
| 17 | 214779 | 9630041N07Rik      |
| 17 | 212547 | BC027231           |
| 17 | 67276  | Thex1              |
| 17 | 76633  | 1700112E06Rik      |
| 17 | 102182 | AI931714           |
| 17 | 18415  | Hspa4l             |
| 17 | 27404  | Abca8b             |
| 17 | 67707  | Mrpl24             |
| 17 | 17427  | Mns1               |
| 17 | 72102  | Dusp11             |
| 17 | 70767  | Prpf3              |
| 17 | 75568  | Capsl              |
| 17 | 71233  | 4933434I06Rik      |
| 17 | 70882  | Armc3              |
| 17 | 67153  | Rnaseh2b           |
| 17 | 14859  | Gsta3              |
| 17 | 66966  | Trit1              |
| 17 | 20615  | Snapin             |
| 17 | 66871  | Cpne8              |
| 17 | 17281  | Fyco1              |
| 17 | 353258 | Ltv1               |
| 17 | 72736  | Txndc1             |
| 17 | 26430  | Parg               |
| 17 | 192167 | Nlgn1              |
| 17 | 77125  | Il33               |
| 17 | 22129  | Ttc3               |
| 17 | 13003  | Vcan               |
| 17 | 76217  | Jakmip2            |
| 17 | 16568  | Kif3a              |
| 17 | 72554  | Utp14a             |
| 17 | 50927  | Nasp               |

|    |        |               |
|----|--------|---------------|
| 17 | 68310  | Zmym1         |
| 17 | 13185  | Dscr3         |
| 17 | 73274  | Gpbp1         |
| 17 | 102866 | Pls3          |
| 17 | 72416  | Lrprrc        |
| 17 | 22758  | Zscan12       |
| 17 | 12462  | Cct3          |
| 17 | 71452  | Ankrd40       |
| 17 | 71897  | 2310010M24Rik |
| 17 | 226154 | Lzts2         |
| 17 | 50797  | Copb2         |
| 17 | 209357 | Gtf2h3        |
| 17 | 26893  | Cops6         |
| 17 | 68636  | Fahd1         |
| 17 | 20916  | Sucla2        |
| 17 | 271457 | Rab5a         |
| 17 | 15519  | Hsp90aa1      |
| 17 | 192191 | Med9          |
| 17 | 53333  | Tomm40        |
| 17 | 18242  | Oat           |
| 17 | 68267  | Slc25a22      |
| 17 | 15270  | H2afx         |
| 17 | 232821 | Ccdc106       |
| 17 | 67455  | Klh13         |
| 17 | 16709  | Ktn1          |
| 17 | 71675  | 0610010F05Rik |
| 17 | 72899  | MacroD2       |
| 17 | 208967 | Thnsl1        |
| 17 | 54562  | Lrrc6         |
| 17 | 237411 | B230315N10Rik |
| 17 | 216551 | 1110067D22Rik |
| 17 | 74114  | Crot          |
| 17 | 70237  | Bhlhb9        |
| 17 | 227446 | 2310035C23Rik |
| 17 | 270166 | Clpx          |
| 17 | 66877  | Crnk1         |
| 17 | 17997  | Nedd1         |
| 17 | 67311  | Nanp          |
| 17 | 72612  | 2700029M09Rik |
| 17 | 67311  | Nanp          |
| 17 | 15382  | Hnrnpa1       |
| 17 | 12508  | Cd53          |
| 17 | 233067 | Lfn3          |
| 17 | 232943 | Klc3          |
| 17 | 227157 | Mpp4          |
| 17 | 14772  | Grk4          |
| 17 | 237222 | Ofd1          |
| 17 | 226791 | Lyplal1       |
| 17 | 75172  | 4930528G09Rik |
| 17 | 76421  | 1700028K03Rik |
| 17 | 22646  | Zfp105        |

|    |           |               |
|----|-----------|---------------|
| 17 | 210544    | Wdr67         |
| 17 | 17996     | Neb           |
| 17 | 268723    | A830039N20Rik |
| 17 | 22145     | Tuba4a        |
| 17 | 268534    | Sntg2         |
| 17 | 212167    | A530088I07Rik |
| 17 | 18639     | Pfkfb1        |
| 17 | 104303    | Arl1          |
| 17 | 71986     | Ddx28         |
| 17 | 69807     | Trim32        |
| 17 | 56199     | Abcb10        |
| 17 | 382137    | D630004A14Rik |
| 17 | 320299    | Iqcb1         |
| 17 | 545725    | Mterf         |
| 17 | 109113    | Uhrf2         |
| 17 | 12912     | Creb1         |
| 17 | 12168     | Bmpr2         |
| 17 | 70897     | 4921509E07Rik |
| 17 | 23919     | Insl5         |
| 17 | 71116     | Stx18         |
| 17 | 100383    | Bsdc1         |
| 17 | 100037258 | Dnajc3a       |
| 17 | 66975     | 2410002O22Rik |
| 17 | 230908    | Tardbp        |
| 17 | 20787     | Sreb1         |
| 18 | 195208    | Dcdc2a        |
| 18 | NaN       | MMT00022745   |
| 18 | 216454    | BC089597      |
| 18 | 11628     | Aicda         |
| 18 | 11789     | Apc           |
| 18 | 57781     | Cd200r1       |
| 18 | NaN       | MMT00077065   |
| 18 | NaN       | MMT00022290   |
| 18 | NaN       | MMT00014869   |
| 18 | 16061     | Igh-VJ558     |
| 18 | 258626    | Olfr1501      |
| 18 | 73795     | 4930405D01Rik |
| 18 | 78115     | 4930445E18Rik |
| 18 | 20739     | Spna1         |
| 18 | 14999     | H2-DMb1       |
| 18 | 259051    | Olfr658       |
| 18 | 102022    | Ces6          |
| 18 | 383619    | Aim2          |
| 18 | 14263     | Fmo5          |
| 18 | 93675     | Clec2i        |
| 18 | NaN       | MMT00069497   |
| 18 | 16061     | Igh-VJ558     |
| 18 | 11704     | Amelx         |
| 18 | NaN       | MMT00072976   |
| 18 | 20859     | Sult2a1       |
| 18 | NaN       | MMT00059186   |

|    |        |               |
|----|--------|---------------|
| 18 | NaN    | MMT00065558   |
| 18 | NaN    | MMT00041814   |
| 18 | 110075 | Bmp3          |
| 18 | 70866  | Slco6d1       |
| 18 | 105355 | Slc17a3       |
| 18 | 258377 | Olf654        |
| 18 | NaN    | MMT00070220   |
| 18 | 73090  | 2900092C05Rik |
| 18 | 15560  | Htr2c         |
| 18 | 72899  | MacroD2       |
| 18 | 623279 | Dok6          |
| 18 | 243537 | Uroc1         |
| 18 | NaN    | MMT00045951   |
| 18 | 67892  | 1810063B05Rik |
| 18 | 15396  | Hoxa11        |
| 18 | NaN    | MMT00004568   |
| 18 | 79410  | Klra23        |
| 18 | 104384 | Rhox9         |
| 18 | 233060 | Zfp382        |
| 18 | NaN    | MMT00050594   |
| 18 | 58186  | Rad18         |
| 18 | 58991  | Ghrl          |
| 18 | 74469  | Taf7l         |
| 18 | 171506 | H1foo         |
| 18 | 29810  | Bag3          |
| 18 | 93683  | Glce          |
| 18 | 16867  | Lhcgr         |
| 18 | NaN    | MMT00008480   |
| 18 | 55990  | Fmo2          |
| 18 | 76421  | 1700028K03Rik |
| 18 | 66654  | Tex12         |
| 18 | 68169  | A930038C07Rik |
| 18 | 320538 | D130059P03Rik |
| 18 | 227606 | Tbpl2         |
| 18 | 232406 | BC035044      |
| 18 | 545216 | EG545216      |
| 18 | 258789 | Olf1271       |
| 18 | NaN    | MMT00033789   |
| 18 | NaN    | MMT00057426   |
| 18 | 142687 | Asb14         |
| 18 | 72121  | Dennd2d       |
| 18 | 109821 | F11           |
| 18 | 26931  | Ppp2r5c       |
| 18 | 13884  | Es1           |
| 18 | 242851 | Gnat3         |
| 18 | 626215 | EG626215      |
| 18 | 668030 | MMT00015864   |
| 18 | 11504  | Adamts1       |
| 18 | 258713 | Olf430        |
| 18 | 258579 | Olf1018       |
| 18 | 258571 | Olf1033       |

|    |        |               |
|----|--------|---------------|
| 18 | 11542  | Adora3        |
| 18 | 70784  | Rasl12        |
| 18 | 72401  | Slc43a1       |
| 18 | 629820 | EG629820      |
| 18 | 258541 | Olfr800       |
| 18 | 230099 | Car9          |
| 18 | 234988 | Mbd3l2        |
| 18 | 619288 | 4933417M04Rik |
| 18 | 258546 | Olfr806       |
| 18 | 74249  | Lrrc2         |
| 18 | 12788  | Cnga1         |
| 18 | 75647  | 1700025E21Rik |
| 18 | 545798 | MMT00055433   |
| 18 | 11480  | Acvr2a        |
| 18 | 70550  | 5730416F02Rik |
| 18 | 628236 | MMT00031533   |
| 18 | NaN    | MMT00034062   |
| 18 | 77049  | 4921528I07Rik |
| 18 | 104348 | Zfp120        |
| 18 | 74933  | 4930469G21Rik |
| 18 | 69347  | 1700008P02Rik |
| 19 | 26874  | Abcd2         |
| 19 | 12616  | Cenpb         |
| 19 | 241431 | Xirp2         |
| 19 | 545921 | EG545921      |
| 19 | 13119  | Cyp4a14       |
| 19 | 258363 | Olfr1093      |
| 19 | 54392  | Ncapg         |
| 19 | 223286 | MMT00018827   |
| 19 | NaN    | MMT00047250   |
| 19 | 258581 | Olfr1030      |
| 19 | NaN    | MMT00061955   |
| 19 | 223922 | Atf7          |
| 19 | 12578  | Cdkn2a        |
| 19 | 67596  | 5830405N20Rik |
| 19 | NaN    | MMT00070759   |
| 19 | 22787  | Zp2           |
| 19 | 258814 | Olfr1156      |
| 19 | 229499 | Fcrl1         |
| 19 | 74691  | Tdrd9         |
| 19 | 109820 | Pgc           |
| 19 | 19157  | Pscd1         |
| 19 | 545047 | EG545047      |
| 19 | 20147  | Rs1           |
| 19 | 213043 | MMT00000549   |
| 19 | NaN    | MMT00082650   |
| 19 | 76390  | 1700012C15Rik |
| 19 | 12097  | Bglap2        |
| 19 | 72429  | 2010203O07Rik |
| 19 | 23871  | Ets1          |
| 19 | 258821 | Olfr273       |

|    |           |               |
|----|-----------|---------------|
| 19 | 320051    | Exph5         |
| 19 | NaN       | MMT00024086   |
| 19 | 16429     | Itln1         |
| 19 | 16172     | Il17ra        |
| 19 | 77200     | 5430403G16Rik |
| 19 | NaN       | MMT00025844   |
| 19 | 74267     | lqcf1         |
| 19 | 238011    | Enpp7         |
| 19 | NaN       | MMT00003591   |
| 19 | 13193     | Dcx           |
| 19 | 259007    | Olfr395       |
| 19 | 73495     | 1700072E05Rik |
| 19 | 69761     | 1600015110Rik |
| 19 | NaN       | MMT00043772   |
| 19 | 117589    | Asb7          |
| 19 | 329633    | MMT00063459   |
| 19 | 228592    | F830045P16Rik |
| 19 | 75555     | 1700020D05Rik |
| 19 | 329977    | Fhad1         |
| 19 | 669149    | Vmn2r88       |
| 19 | 83559     | Tex18         |
| 19 | 634201    | MMT00016962   |
| 19 | 114332    | Lyve1         |
| 19 | NaN       | MMT00072624   |
| 19 | NaN       | MMT00021250   |
| 19 | NaN       | MMT00070380   |
| 19 | 66203     | Lce1m         |
| 19 | 15434     | Hoxd3         |
| 19 | 545276    | Gal3st3       |
| 19 | 14377     | G6pc          |
| 19 | NaN       | MMT00071219   |
| 19 | NaN       | MMT00063568   |
| 19 | 16439     | Itpr2         |
| 19 | 110956    | D17H6S56E-5   |
| 19 | 100042638 | MMT00009475   |
| 19 | NaN       | MMT00072975   |
| 19 | 627537    | Vmn2r100      |
| 19 | 209590    | Il23r         |
| 19 | 545378    | Sh2d1b2       |
| 19 | NaN       | MMT00042249   |
| 19 | 259045    | Olfr669       |
| 19 | 258997    | Olfr202       |
| 19 | 381236    | AI747699      |
| 20 | NaN       | MMT00056884   |
| 20 | NaN       | MMT00001015   |
| 20 | NaN       | MMT00001011   |
| 20 | 75829     | Prame         |
| 20 | 53625     | B3gnt2        |
| 20 | 214133    | Tet2          |
| 20 | 258117    | Olfr1437      |
| 20 | NaN       | MMT00036513   |



|    |           |                    |
|----|-----------|--------------------|
| 20 | NaN       | MMT00076649        |
| 20 | NaN       | MMT00060789        |
| 20 | NaN       | MMT00055765        |
| 20 | NaN       | MMT00002063        |
| 20 | 76117     | Arhgap15           |
| 20 | 76640     | 1700113H08Rik      |
| 20 | NaN       | MMT00077109        |
| 20 | 77475     | C030037F17Rik      |
| 20 | 18379     | Omt2a              |
| 20 | 626903    | EG626903           |
| 20 | 629754    | OTTMUSG00000001088 |
| 20 | 69717     | ENSMUSG00000073403 |
| 20 | NaN       | MMT00001763        |
| 20 | 66772     | Asb17              |
| 20 | 72020     | Zfp654             |
| 20 | 170737    | Znrf1              |
| 20 | 94176     | Dock2              |
| 20 | 16163     | Il13               |
| 20 | NaN       | MMT00070787        |
| 20 | 71030     | 4933403O08Rik      |
| 20 | 71106     | 4933413J09Rik      |
| 20 | 15496     | Hsd3b5             |
| 20 | 113864    | V1rc7              |
| 20 | 17907     | Mylpf              |
| 20 | NaN       | MMT00004673        |
| 20 | 12556     | Cdh16              |
| 20 | 66719     | 4921522P10Rik      |
| 20 | 257908    | Olfr115            |
| 20 | 241633    | Atp8b4             |
| 20 | NaN       | MMT00059495        |
| 20 | NaN       | MMT00013307        |
| 20 | NaN       | MMT00074583        |
| 20 | 11419     | Accn2              |
| 20 | 76681     | Trim12             |
| 20 | 70917     | 4921509O07Rik      |
| 20 | 71889     | Epn3               |
| 20 | 258775    | Olfr196            |
| 20 | 100038941 | Vmn2r121           |
| 20 | 634650    | EG634650           |
| 20 | 546726    | Cyp26c1            |
| 20 | 22778     | Ikzf1              |
| 20 | 237987    | Otop2              |
| 20 | 29877     | Hdgfrp3            |
| 20 | 235300    | Tmem136            |
| 20 | 20818     | Srprb              |
| 20 | 13998     | Fgd6               |
| 20 | NaN       | MMT00003831        |
| 20 | 72672     | Zfp518             |
| 20 | 233115    | Dpy19l3            |
| 20 | 110135    | Fgb                |
| 20 | 70372     | 1700025l17Rik      |

|    |        |               |
|----|--------|---------------|
| 20 | 218914 | Wapal         |
| 20 | 57251  | Olfr870       |
| 20 | 378425 | Nlrp12        |
| 20 | 11605  | Gla           |
| 20 | NaN    | MMT00032843   |
| 20 | 14711  | Gnmt          |
| 20 | 215413 | A230074B11Rik |
| 20 | 171246 | V1rh3         |
| 20 | 258580 | Olfr1023      |
| 20 | 73809  | Satl1         |
| 20 | NaN    | MMT00012252   |
| 20 | 74413  | Tc2n          |
| 20 | NaN    | MMT00017494   |
| 20 | 208665 | Akr1d1        |
| 20 | 258527 | Olfr1368      |
| 20 | NaN    | MMT00073897   |
| 20 | 258362 | Olfr1094      |
| 20 | 14058  | F10           |
| 20 | NaN    | MMT00029634   |
| 20 | NaN    | MMT00041431   |
| 20 | 207596 | Thsd4         |
| 20 | 231452 | Sdad1         |
| 20 | 73332  | 1700041C02Rik |
| 20 | 19069  | Nup88         |
| 20 | NaN    | MMT00069233   |
| 20 | 19877  | Rock1         |
| 20 | 260347 | MMT00042388   |
| 20 | NaN    | MMT00018457   |
| 20 | 76757  | Trdn          |
| 20 | 111507 | Igh           |
| 20 | NaN    | MMT00052319   |
| 20 | 70466  | Ckap2l        |
| 20 | 70909  | 4921504E06Rik |
| 20 | 208518 | Cep78         |
| 20 | 12000  | Avpr2         |
| 20 | NaN    | MMT00048401   |
| 20 | 227394 | Slco4c1       |
| 20 | 545741 | EG545741      |
| 20 | 338320 | Mia2          |
| 20 | 71156  | 1700108M19Rik |
| 20 | 69423  | 1700019M22Rik |
| 20 | 73302  | 1700031M16Rik |
| 20 | 78286  | Nav2          |
| 20 | 77022  | 2700099C18Rik |
| 20 | 14674  | Gna13         |

**Table T6: Liver Modules**

| Module | Locus Link | Gene Symbol   |
|--------|------------|---------------|
| 1      | 268297     | Scml4         |
| 1      | 654456     | MMT00054636   |
| 1      | 244608     | Ccdc113       |
| 1      | 236598     | MMT00009389   |
| 1      |            | MMT00079286   |
| 1      | 77022      | 2700099C18Rik |
| 1      | 20186      | Nr1h4         |
| 1      | 69671      | Tmem52        |
| 1      | 12909      | Crcp          |
| 1      | 29809      | Rabgap1l      |
| 1      | 67009      | Ttc23         |
| 1      | 52690      | Setd3         |
| 1      | 66066      | Gng11         |
| 1      | 65256      | Asb2          |
| 1      | 67397      | Erp29         |
| 1      | 360216     | Zranb1        |
| 1      |            | MMT00071427   |
| 1      | 74769      | Pik3cb        |
| 1      | 78334      | Cdc2l6        |
| 1      |            | MMT00078790   |
| 1      | 59028      | Rcl1          |
| 1      | 54170      | Rragc         |
| 1      | 100210     | Gpn2          |
| 1      | 67078      | 1700012G19Rik |
| 1      | 56278      | Gkap1         |
| 1      | 56278      | Gkap1         |
| 1      | 17344      | Pias2         |
| 1      | 74246      | Gale          |
| 1      | 235441     | Usp3          |
| 1      | 193838     | Eme2          |
| 1      | 320162     | Ccdc45        |
| 1      | 13113      | Cyp3a13       |
| 1      | 68118      | 9430023L20Rik |
| 1      | 70974      | Pgm2l1        |
| 1      | 68477      | Rmnd5a        |
| 1      | 16601      | Klf9          |
| 1      | 59083      | Fetub         |
| 1      | 69590      | 2310016C16Rik |
| 1      | 66695      | Aspn          |
| 1      | 16449      | Jag1          |
| 1      | 68243      | A930018P22Rik |
| 1      | 77998      | Grifin        |
| 1      | 258552     | Olfr868       |
| 1      | 18799      | Plcd1         |
| 1      | 74031      | 4632413I24Rik |
| 1      | 225998     | Rorb          |
| 1      | 22232      | Slc35a2       |
| 1      | 66260      | Tmem54        |
| 1      | 19088      | Prkar2b       |

|   |        |               |
|---|--------|---------------|
| 1 | 11548  | Adra1b        |
| 1 | 12351  | Car4          |
| 1 |        | MMT00081303   |
| 1 | 67645  | 4930511111Rik |
| 1 | 18505  | Pax3          |
| 1 | 16529  | Kcnk5         |
| 1 | 18189  | Nrxn1         |
| 1 | 242653 | Cldn19        |
| 1 | 21959  | Tnp2          |
| 1 | 76610  | 1700063K16Rik |
| 1 | 64453  | Zfp280b       |
| 1 |        | MMT00043948   |
| 1 | 239611 | Muc19         |
| 1 | 234129 | Tpte          |
| 1 | 81905  | Cacng8        |
| 1 | 50873  | Park2         |
| 1 | 74094  | Tjap1         |
| 1 | 53878  | Svs2          |
| 1 | 26556  | Homer1        |
| 1 | 21388  | Tbx5          |
| 1 | 67186  | Rplp2         |
| 1 | 14312  | Brd2          |
| 1 |        | MMT00015397   |
| 1 | 236598 | MMT00013190   |
| 1 |        | MMT00077446   |
| 1 | 70757  | Ptplb         |
| 1 | 170942 | Erdr1         |
| 1 | 14388  | Gab1          |
| 1 | 214952 | Rhot2         |
| 1 | 11532  | Adh5          |
| 1 | 11532  | Adh5          |
| 1 | 68875  | Tmcc2         |
| 1 | 12908  | Crat          |
| 1 | 381605 | Tbc1d2        |
| 1 | 76813  | Armc6         |
| 1 | 67991  | Btbd14a       |
| 1 | 71718  | Telo2         |
| 1 | 66124  | Josd2         |
| 1 | 21817  | Tgm2          |
| 1 | 12915  | Crebl1        |
| 1 | 56632  | Sphk2         |
| 1 | 244349 | Myst3         |
| 1 | 16162  | Ii12rb2       |
| 1 | 207393 | Elfn2         |
| 1 | 58994  | Smpd3         |
| 1 | 259007 | Olfr395       |
| 1 | 70591  | 5730455P16Rik |
| 1 | 212647 | Aldh4a1       |
| 1 | 52174  | D4Ertd196e    |
| 1 | 71452  | Ankrd40       |
| 1 | 56748  | Nfu1          |

|   |           |               |
|---|-----------|---------------|
| 1 | 73826     | Poldip3       |
| 1 | 17996     | Neb           |
| 1 | 620161    | EG620161      |
| 1 | 20090     | Rps29         |
| 1 | 66390     | Slmo2         |
| 1 | 67832     | Bxdc2         |
| 1 | 71207     | Nudt4         |
| 1 | 22596     | Xrcc5         |
| 1 | 66061     | Tctex1d2      |
| 1 | 66401     | Nudt2         |
| 1 | 17174     | Masp1         |
| 1 | 75178     | 4930528F23Rik |
| 1 | 11796     | Birc3         |
| 1 | 66952     | 2310030G06Rik |
| 1 |           | MMT00000967   |
| 1 | 69270     | Gins1         |
| 1 | 106389    | Eaf2          |
| 1 | 76260     | Ttc8          |
| 1 | 381062    | 2210404J11Rik |
| 1 | 21987     | Tpd5211       |
| 1 | 67075     | Magt1         |
| 1 | 219135    | Mtmr6         |
| 1 | 20130     | Rras          |
| 1 | 14751     | Gpi1          |
| 1 | 54598     | Calcr1        |
| 1 | 107515    | Lgr4          |
| 1 |           | MMT00068187   |
| 1 |           | MMT00002367   |
| 1 | 16438     | Itpr1         |
| 1 | 77604     | C430048L16Rik |
| 1 | 68977     | Haghl         |
| 1 | 22700     | Zfp40         |
| 1 | 65086     | Lpar3         |
| 1 | 218914    | Wapal         |
| 1 | 72672     | Zfp518        |
| 1 | 227682    | Trub2         |
| 1 | 105450    | Mmrn2         |
| 1 | 19123     | Proc          |
| 1 | 72049     | Tnfrsf13c     |
| 1 | 66968     | 2310076L09Rik |
| 1 | 68556     | Uckl1         |
| 1 |           | MMT00043239   |
| 1 | 56092     | Cts7          |
| 1 | 100041868 | MMT00065456   |
| 1 | 13121     | Cyp51         |
| 1 | 319554    | Idi1          |
| 1 | 319554    | Idi1          |
| 1 | 114606    | Tle6          |
| 1 |           | MMT00033789   |
| 1 |           | MMT00033197   |
| 1 | 20714     | Serpina3k     |

|   |        |               |
|---|--------|---------------|
| 1 | 243743 | Plxna4        |
| 1 | 71853  | Pdia6         |
| 1 | 620934 | EG620934      |
| 1 | 59092  | Pcbp4         |
| 1 | 77056  | Tmco4         |
| 1 | 435684 | Shf           |
| 1 | 15587  | Hyal2         |
| 1 | 19736  | Rgs4          |
| 1 |        | MMT00071061   |
| 1 | 15381  | Hnrnpc        |
| 1 |        | MMT00008376   |
| 1 | 234214 | Sorbs2        |
| 1 | 66844  | Ormdl2        |
| 1 | 65102  | Nif3l1        |
| 1 | 12916  | Creml         |
| 1 | 57749  | Piwil1        |
| 1 | 110920 | Stch          |
| 1 | 20333  | Sec22b        |
| 1 | 105853 | Mal2          |
| 1 | 67738  | Ppid          |
| 1 |        | MMT00008178   |
| 1 |        | MMT00081393   |
| 1 | 64384  | Sirt3         |
| 1 |        | MMT00052318   |
| 1 | 55950  | Bri3          |
| 1 | 232232 | Hdac11        |
| 1 | 116701 | Fgfr1         |
| 1 | 67231  | Tbc1d20       |
| 1 | 68918  | 1190005106Rik |
| 1 | 26379  | Esrra         |
| 1 | 74498  | Gorasp1       |
| 1 | 109652 | Acy1          |
| 1 | 76257  | Slc38a3       |
| 1 | 20743  | Spnb3         |
| 1 | 66624  | Spcs2         |
| 1 |        | MMT00051866   |
| 1 | 66357  | 2310008M10Rik |
| 1 | 236794 | Slc9a6        |
| 1 | 23887  | Ggt5          |
| 1 | 210622 | E430002G05Rik |
| 1 | 239691 | AU021092      |
| 1 | 64292  | Ptges         |
| 1 | 258537 | Olfir777      |
| 1 | 258897 | Olfir1201     |
| 1 | 227485 | Cdh19         |
| 1 | 79410  | Klra23        |
| 1 | 16876  | Lhx9          |
| 1 | 170939 | AY026312      |
| 1 | 74100  | MMT00001343   |
| 1 | 13924  | Ptprv         |
| 1 | 229905 | Ccbl2         |

|   |           |               |
|---|-----------|---------------|
| 1 | 21391     | Tbxas1        |
| 1 | 66141     | Ifitm3        |
| 1 | 105351    | AW209491      |
| 1 | 21422     | Tcfcp2        |
| 1 | 18126     | Nos2          |
| 1 | 20740     | Spna2         |
| 1 | 236366    | 5730507C01Rik |
| 1 |           | MMT00055001   |
| 1 | 22343     | Lin7c         |
| 1 | 56324     | Stam2         |
| 1 | 108148    | Galnt2        |
| 1 | 22283     | Ush2a         |
| 1 |           | MMT00008513   |
| 1 | 12764     | Cmas          |
| 1 | 100034361 | Mfap1b        |
| 1 | 320299    | Iqcb1         |
| 1 | 14547     | Gdap2         |
| 1 | 70984     | 4931406C07Rik |
| 1 | 19018     | Scand1        |
| 1 | 72039     | Mccc1         |
| 1 | 11601     | Angpt2        |
| 1 | 71914     | Antxr2        |
| 1 | 67041     | Oxct1         |
| 1 |           | MMT00001400   |
| 1 | 101358    | Fbxl14        |
| 1 | 26876     | Adh4          |
| 1 | 69034     | 4930579G22Rik |
| 1 | 71703     | Armcx3        |
| 1 | 622117    | Triml2        |
| 1 |           | MMT00073452   |
| 1 | 16404     | Itga7         |
| 1 | 72121     | Dennd2d       |
| 1 | 218952    | Fermt2        |
| 1 | 16061     | Igh-VJ558     |
| 1 | 56018     | Stard10       |
| 1 | 12526     | Cd8b1         |
| 1 | 233038    | 1190020J12Rik |
| 1 | 16656     | Hivep3        |
| 1 |           | MMT00007741   |
| 1 | 74570     | Zkscan1       |
| 1 | 13864     | Nr2f6         |
| 1 | 67873     | 2410018C20Rik |
| 1 | 22027     | Hsp90b1       |
| 1 |           | MMT00036239   |
| 1 | 230908    | Tardbp        |
| 1 | 18415     | Hspa4l        |
| 1 | 15519     | Hsp90aa1      |
| 1 | 66663     | Uba5          |
| 1 | 102462    | Imp3          |
| 1 | 66471     | Anp32e        |
| 1 | 106957    | Slc39a6       |

|   |        |               |
|---|--------|---------------|
| 1 | 23827  | Bpnt1         |
| 1 | 23827  | Bpnt1         |
| 1 | 238330 | 6430527G18Rik |
| 1 | 27217  | Mixl1         |
| 1 | 27413  | Abcb11        |
| 1 | 17150  | Mfap2         |
| 1 | 67239  | Bxdc1         |
| 1 | 258979 | Olfr1255      |
| 1 | 56048  | Lgals8        |
| 1 | 26992  | Brd7          |
| 1 | 20016  | Rpo1-1        |
| 1 |        | MMT00068622   |
| 1 | 56354  | Dnajc7        |
| 1 | 71916  | Dus4l         |
| 1 | 629378 | Dact3         |
| 1 | 545725 | Mterf         |
| 1 | 216190 | Appl2         |
| 1 | 15891  | lbsp          |
| 1 | 100669 | 9930105H17Rik |
| 1 | 64436  | Inpp5e        |
| 1 | 320051 | Exph5         |
| 1 | 23919  | Insl5         |
| 1 | 246079 | Defb9         |
| 1 | 195236 | Gm24          |
| 1 |        | MMT00011022   |
| 1 | 381549 | Zfp69         |
| 1 | 14264  | Fmod          |
| 1 |        | MMT00082889   |
| 1 | 13611  | S1pr4         |
| 1 | 83453  | Chrdl1        |
| 1 | 18191  | Nrxn3         |
| 1 | 21954  | Tnni3         |
| 1 | 209268 | Igsf1         |
| 1 | 53886  | Cdkl2         |
| 1 | 21953  | Tnni2         |
| 1 | 227522 | Rpp38         |
| 1 | 14057  | Sfxn1         |
| 1 | 235132 | Zbtb44        |
| 1 | 66468  | 2810433K01Rik |
| 1 | 243842 | Gltscr1       |
| 1 |        | MMT00040284   |
| 1 | 171180 | Syt12         |
| 1 | 104252 | Cdc42ep2      |
| 1 | 76338  | Rab2b         |
| 1 | 258908 | Olfr853       |
| 1 | 75646  | Rai14         |
| 1 | 73728  | Psd           |
| 1 | 114230 | Aipl1         |
| 1 |        | MMT00048659   |
| 1 | 16866  | Lhb           |
| 1 | 286942 | Kif19a        |



|   |        |               |
|---|--------|---------------|
| 1 | 258743 | Olfr661       |
| 1 | 16425  | Itih2         |
| 1 | 15504  | Dnajb3        |
| 1 | 94244  | Fkbp6         |
| 1 | 244653 | Hydin         |
| 1 | 66740  | 4931417E11Rik |
| 1 | 16517  | Kcnj16        |
| 1 | 103677 | Smg6          |
| 1 | 214403 | EG214403      |
| 1 | 20840  | Stac          |
| 1 | 210044 | Adcy2         |
| 1 | 259080 | Olfr619       |
| 1 | 385737 | Gm1758        |
| 1 | 71888  | Krt33a        |
| 1 | 69952  | 2810011L19Rik |
| 1 |        | MMT00007831   |
| 1 | 223272 | Itgbl1        |
| 1 | 69716  | Trip13        |
| 1 | 214663 | Slc25a29      |
| 1 | 70385  | Ccdc99        |
| 1 | 192174 | Rwdd4a        |
| 1 | 67896  | Ccdc80        |
| 1 | 210544 | Wdr67         |
| 1 | 110532 | Adarb1        |
| 1 | 53380  | Psmc10        |
| 1 | 18628  | Per3          |
| 1 | 13099  | Cyp2c40       |
| 1 | 109232 | Sccpdh        |
| 1 | 17535  | Mre11a        |
| 1 |        | MMT00044478   |
| 1 | 109979 | Art3          |
| 1 | 16773  | Lama2         |
| 1 | 22217  | Usp12         |
| 1 | 217011 | Nle1          |
| 1 | 230157 | Tmeff1        |
| 1 | 72612  | 2700029M09Rik |
| 1 |        | MMT00011231   |
| 1 | 12504  | Cd4           |
| 1 | 103136 | Pwp1          |
| 1 | 110956 | D17H6S56E-5   |
| 1 | 108853 | Mtrf1l        |
| 1 | 69562  | Cdc2l5        |
| 1 |        | MMT00040265   |
| 1 |        | MMT00082585   |
| 1 |        | MMT00082318   |
| 1 | 67292  | Pigc          |
| 1 | 14645  | Glul          |
| 1 |        | MMT00028347   |
| 1 |        | MMT00005421   |
| 1 | 11468  | Actg2         |
| 1 | 229227 | 4932438A13Rik |

|   |        |               |
|---|--------|---------------|
| 1 | 622175 | EG622175      |
| 1 | 56358  | Copz2         |
| 1 | 65956  | Ccl21c        |
| 1 | 12778  | Cxcr7         |
| 1 | 224794 | Enpp4         |
| 1 | 20288  | Msr1          |
| 1 | 78248  | Armcx1        |
| 1 | 211550 | Tifa          |
| 1 | 17076  | Ly75          |
| 1 | 20452  | St8sia4       |
| 1 | 17112  | Tm4sf1        |
| 1 | 76044  | Ncapg2        |
| 1 | 22138  | Ttn           |
| 1 | 59308  | Emcn          |
| 1 | 71997  | 1500002O20Rik |
| 1 | 238328 | Vash1         |
| 1 | 11702  | Amd1          |
| 1 |        | MMT00063804   |
| 1 | 72795  | Ttc19         |
| 1 | 12265  | Ciita         |
| 1 | 13555  | E2f1          |
| 1 | 17965  | Nbl1          |
| 1 | 12833  | Col6a1        |
| 1 | 68034  | 2900009I07Rik |
| 1 | 170728 | Rtn4ip1       |
| 1 | 102595 | Plekho2       |
| 1 | 230770 | Tmem39b       |
| 1 | 640530 | EG640530      |
| 1 | 51875  | Tmem141       |
| 1 |        | MMT00065558   |
| 1 | 432649 | EG432649      |
| 1 |        | MMT00062271   |
| 1 |        | MMT00012520   |
| 1 | 76123  | Gpsm2         |
| 1 | 382137 | D630004A14Rik |
| 1 | 71276  | Ccdc57        |
| 1 | 54364  | Rpp30         |
| 1 | 72759  | Tmem135       |
| 1 | 15112  | Hao1          |
| 1 | 68904  | Abhd13        |
| 1 |        | MMT00048401   |
| 1 |        | MMT00053760   |
| 1 | 56334  | Tmed2         |
| 1 |        | MMT00036534   |
| 1 | 665503 | EG665503      |
| 1 |        | MMT00041689   |
| 1 | 114863 | Prosc         |
| 1 | 71835  | Lancl2        |
| 1 | 76302  | Pcnp          |
| 1 | 68137  | Kdelr1        |
| 1 | 20751  | Spr           |

|   |           |               |
|---|-----------|---------------|
| 1 | 74117     | Actr3         |
| 1 | 109108    | Slc30a9       |
| 1 | 52635     | D12Ert551e    |
| 1 |           | MMT00078831   |
| 1 | 55992     | Trim3         |
| 1 | 242894    | Actr3b        |
| 1 | 102442    | Dennd4a       |
| 1 | 14979     | H2-Ke6        |
| 1 | 106326    | Osbp11        |
| 1 | 104215    | Rhoq          |
| 1 | 65098     | Zfand6        |
| 1 | 231086    | Hadhb         |
| 1 | 79455     | Pdcl2         |
| 1 | 80915     | Dusp12        |
| 1 | 68039     | Nmb           |
| 1 | 106821    | Al314976      |
| 1 | 100226    | Stx12         |
| 1 | 14815     | Nr3c1         |
| 1 | 56422     | Hbs1l         |
| 1 |           | MMT00002755   |
| 1 | 118451    | Mrps2         |
| 1 | 76900     | Ssbp4         |
| 1 | 12982     | Csf2ra        |
| 1 | 50497     | Hspa14        |
| 1 |           | MMT00006294   |
| 1 | 68050     | 6330407G11Rik |
| 1 | 407790    | Ndufa4l2      |
| 1 | 78783     | Brpf1         |
| 1 | 56724     | Cript         |
| 1 | 73094     | Sgip1         |
| 1 | 67683     | 2610029G23Rik |
| 1 | 20716     | Serpina3n     |
| 1 | 15361     | Hmga1         |
| 1 | 15361     | Hmga1         |
| 1 | 67488     | Calcoco1      |
| 1 | 353258    | Ltv1          |
| 1 | 72722     | 2810405J04Rik |
| 1 | 68272     | Rbm28         |
| 1 | 104662    | Tsr1          |
| 1 | 74552     | Npal3         |
| 1 | 100041375 | Cyp3a41b      |
| 1 | 53973     | Cyp3a41a      |
| 1 | 58988     | Rps6kb2       |
| 1 | 192188    | Stab2         |
| 1 | 12029     | Bcl6b         |
| 1 | 68731     | 1110032A13Rik |
| 1 | 60599     | Trp53inp1     |
| 1 | 69757     | Leng1         |
| 1 | 13179     | Dcn           |
| 1 | 19128     | Pros1         |
| 1 | 30055     | Timm13        |

|   |        |                |
|---|--------|----------------|
| 1 | 27215  | Azi2           |
| 1 | 69048  | Slc30a5        |
| 1 | 629203 | EG629203       |
| 1 | 170791 | Rbm39          |
| 1 | 217869 | Eif5           |
| 1 |        | MMT00052614    |
| 1 | 67035  | Dnajib4        |
| 1 | 16564  | Kif21a         |
| 1 | 56298  | Arl6ip2        |
| 1 | 55946  | Ap3m1          |
| 1 | 55946  | Ap3m1          |
| 1 | 68083  | Pak1ip1        |
| 1 | 16411  | Itgax          |
| 1 | 17095  | Lyl1           |
| 1 |        | MMT00001732    |
| 1 | 74173  | 1700012B15Rik  |
| 1 | 20182  | Rxrb           |
| 1 | 53605  | Nap1l1         |
| 1 | 13684  | Eif4e          |
| 1 | 67204  | Eif2s2         |
| 1 | 66975  | 2410002O22Rik  |
| 1 | 59030  | Mkks           |
| 1 | 12238  | Commd3         |
| 1 | 17912  | Myo1b          |
| 1 | 74838  | Narg1          |
| 1 | 226043 | Cbwd1          |
| 1 | 16639  | Klra8          |
| 1 | 98732  | Rab3gap2       |
| 1 | 15273  | Hivep2         |
| 1 | 231464 | Cnot6l         |
| 1 | 94242  | Tinagl         |
| 1 | 14020  | Evi5           |
| 1 | 11977  | Atp7a          |
| 1 | 77048  | Ccdc41         |
| 1 | 73910  | Arhgap18       |
| 1 | 21399  | Tcea1          |
| 1 | 11797  | Birc2          |
| 1 | 319263 | Pcmt1          |
| 1 | 73274  | Gpbp1          |
| 1 | 73373  | Phospho2       |
| 1 | 67500  | Ccar1          |
| 1 | 20843  | Stag2          |
| 1 | 12421  | Rb1cc1         |
| 1 | 545700 | Vmn2r-ps14     |
| 1 |        | MMT00010886    |
| 1 |        | MMT00052300    |
| 1 | 69956  | Ptcd3          |
| 1 | 68153  | Gtf2e2         |
| 1 |        | MMT00065780    |
| 1 |        | YAL043C_RC-451 |
| 1 |        | MMT00037377    |

|   |        |             |
|---|--------|-------------|
| 1 | 433864 | Gm1040      |
| 1 | 71340  | Riok1       |
| 1 | 24135  | Zfp68       |
| 1 | 16709  | Ktn1        |
| 1 | 60532  | Wtap        |
| 1 | 50706  | Postn       |
| 1 | 13185  | Dscr3       |
| 1 |        | MMT00004670 |
| 1 | 76740  | Efr3a       |
| 1 | 224938 | Pja2        |
| 1 | 28040  | D6Wsu163e   |
| 1 | 67300  | Cltc        |
| 1 | 14302  | Frk         |
| 1 | 70349  | Copb1       |
| 1 | 218397 | Rasa1       |
| 1 | 52440  | Tax1bp1     |
| 1 | 235907 | Zfp71-rs1   |
| 1 |        | MMT00050725 |
| 1 | 80898  | Erap1       |
| 1 | 381695 | N4bp2l2     |
| 1 | 102866 | Pls3        |
| 1 | 227095 | Hibch       |
| 1 | 22215  | Ube3a       |
| 1 | 67456  | Ergic2      |
| 1 | 16573  | Kif5b       |
| 1 | 56217  | Mpp5        |
| 1 | 74252  | Armc1       |
| 1 | 19386  | Ranbp2      |
| 1 | 378702 | Serf2       |
| 1 | 378702 | Serf2       |
| 1 | 66724  | Map3k7ip3   |
| 1 | 77591  | Ddx10       |
| 1 | 14911  | Thumpd3     |
| 1 | 633387 | MMT00052835 |
| 1 | 70099  | Smc4        |
| 1 | 210104 | BC043301    |
| 1 |        | MMT00001293 |
| 1 | 230484 | Usp1        |
| 1 | 13006  | Smc3        |
| 1 | 216618 | Ccdc104     |
| 1 | 23924  | Katna1      |
| 1 | 231571 | Rpap2       |
| 1 | 26965  | Cul1        |
| 1 | 16452  | Jak2        |
| 1 | 212285 | Centd1      |
| 1 | 67241  | Smc6        |
| 1 | 22259  | Nr1h3       |
| 1 | 104570 | Smek2       |
| 1 | 635702 | Naaladl2    |
| 1 | 227700 | Sh3glb2     |
| 1 | 83379  | Klb         |

|   |        |               |
|---|--------|---------------|
| 1 | 67994  | Mrps11        |
| 1 | 21682  | Tec           |
| 1 | 231123 | BC023882      |
| 1 |        | MMT00039126   |
| 1 | 67526  | Atg12         |
| 1 | 19877  | Rock1         |
| 1 |        | MMT00005424   |
| 1 | 229055 | Zbtb10        |
| 1 | 12631  | Cfl1          |
| 1 |        | MMT00018157   |
| 1 | 109113 | Uhrf2         |
| 1 | 73737  | 1110008P14Rik |
| 1 | 18036  | Nfkbib        |
| 1 | 13435  | Dnmt3a        |
| 1 | 27419  | Naglu         |
| 1 | 19349  | Rab7          |
| 1 |        | MMT00026286   |
| 1 |        | MMT00017521   |
| 1 | 66935  | 1700023B02Rik |
| 1 |        | MMT00033070   |
| 1 | 66531  | 2310061C15Rik |
| 1 | 67676  | Rpp21         |
| 1 | 70834  | Spag9         |
| 1 | 230082 | Nol6          |
| 1 | 72568  | Lin9          |
| 1 | 75296  | Fgfr1op       |
| 1 | 68861  | 1190002N15Rik |
| 1 | 69178  | Snx5          |
| 1 | 22238  | Ugt2b5        |
| 1 | 83702  | Akr1c6        |
| 1 | 66631  | Hiat1         |
| 1 | 19733  | Rgn           |
| 1 | 67758  | Aadac         |
| 1 | 26357  | Abcg2         |
| 1 | 67030  | Fancl         |
| 1 | 52665  | Echdc1        |
| 1 | 17449  | Mdh1          |
| 1 | 66085  | Eif3f         |
| 1 | 108829 | Jmjd1c        |
| 1 | 104348 | Zfp120        |
| 1 | 17175  | Masp2         |
| 1 | 109333 | Pkn2          |
| 1 | 77805  | Esco1         |
| 1 | 22764  | Zfx           |
| 1 | 269198 | Nbeal1        |
| 1 | 73288  | Ccdc132       |
| 1 | 21974  | Top2b         |
| 1 | 66580  | Esf1          |
| 1 | 207704 | Gtpbp10       |
| 1 | 110750 | Cse1l         |
| 1 | 59032  | Ppp2r3c       |

|   |        |             |
|---|--------|-------------|
| 1 | 235469 | Suhw4       |
| 1 | 68145  | Etaa1       |
| 1 | 14060  | F13b        |
| 1 | 65114  | Vps35       |
| 1 | 71927  | Itfg1       |
| 1 | 59007  | Ngly1       |
| 1 | 114893 | Dcun1d1     |
| 1 | 114893 | Dcun1d1     |
| 1 | 225363 | Etf1        |
| 1 | 12848  | Cops2       |
| 1 | 67204  | Eif2s2      |
| 1 | 26885  | Casp8ap2    |
| 1 | 13690  | Eif4g2      |
| 1 | 13205  | Ddx3x       |
| 1 | 19139  | Prps1       |
| 1 | 20916  | Sucla2      |
| 1 | 83493  | Sacm1l      |
| 1 | 14600  | Ghr         |
| 1 | 66713  | Actr2       |
| 1 | 20912  | Stxbp3a     |
| 1 | 216965 | Taok1       |
| 1 | 59079  | Erbp2ip     |
| 1 | 67452  | Pnpla8      |
| 1 | 68117  | Apool       |
| 1 | 224585 | Zfp160      |
| 1 | 12785  | Cnbp        |
| 1 | 12747  | Clk1        |
| 1 | 13682  | Eif4a2      |
| 1 |        | MMT00032526 |
| 1 |        | MMT00024951 |
| 1 |        | MMT00063687 |
| 1 |        | MMT00080648 |
| 1 | 104721 | Ddx1        |
| 1 | 211253 | Mtrf1       |
| 1 | 102182 | AI931714    |
| 1 | 116852 | Akr1c20     |
| 1 | 18000  | 2-Sep       |
| 1 | 83962  | Btbd1       |
| 1 | 18139  | Zfml        |
| 1 | 100727 | Ugt2b34     |
| 1 | 14084  | Faf1        |
| 1 | 12469  | Cct8        |
| 1 | 24071  | Synj2bp     |
| 1 | 14479  | Usp15       |
| 1 | 14359  | Fxr1        |
| 1 | 99480  | Dnttip2     |
| 1 | 11722  | Amy1        |
| 1 | 50887  | Nsbp1       |
| 1 | 67003  | Uqcrc2      |
| 1 | 227197 | Ndufs1      |
| 1 | 12015  | Bad         |

|   |        |               |
|---|--------|---------------|
| 1 | 14071  | F9            |
| 1 | 12465  | Cct5          |
| 1 | 71177  | 4933424B01Rik |
| 1 | 71973  | Rbpms2        |
| 1 | 68209  | Rnaseh2c      |
| 1 | 67276  | Thex1         |
| 1 | 18968  | Pola1         |
| 1 | 54381  | MMT00040501   |
| 1 | 50797  | Copb2         |
| 1 | 12269  | C4bp          |
| 1 | 56373  | Cpb2          |
| 1 | 12313  | Calm1         |
| 1 | 67771  | Arpc5         |
| 1 | 71701  | Pnpt1         |
| 1 | 50765  | Trfr2         |
| 1 | 68170  | B230118H07Rik |
| 1 | 50793  | Orc3l         |
| 1 | 24015  | Abce1         |
| 1 | 24067  | Srp54a        |
| 1 | 76983  | Scfd1         |
| 1 | 329416 | Nostrin       |
| 1 | 23894  | Gtf2h2        |
| 1 | 72993  | Appl1         |
| 1 | 80285  | Parp9         |
| 1 | 317717 | Sec22a        |
| 1 | 235050 | Zfp810        |
| 1 | 67939  | 2010316F05Rik |
| 1 | 226122 | Ubt1          |
| 1 | 235606 | Apeh          |
| 1 | 66985  | Rassf7        |
| 1 |        | MMT00044427   |
| 1 |        | MMT00078932   |
| 1 |        | MMT00015578   |
| 1 |        | MMT00075644   |
| 1 |        | MMT00074659   |
| 1 | 105689 | Mycbp2        |
| 1 | 18176  | Nras          |
| 1 | 108943 | Rg9mtd2       |
| 1 | 16351  | Ipp           |
| 1 |        | MMT00070118   |
| 1 | 14791  | Emg1          |
| 1 | 53893  | Nudt5         |
| 1 |        | MMT00056938   |
| 1 | 28295  | D10Jhu81e     |
| 1 | 28295  | D10Jhu81e     |
| 1 | 622459 | RP23-303F24.3 |
| 1 | 103784 | Wdr92         |
| 1 | 99730  | Taf13         |
| 1 | 433862 | EG433862      |
| 1 |        | MMT00021961   |
| 1 | 140482 | Zfp358        |



|   |        |               |
|---|--------|---------------|
| 1 |        | MMT00057242   |
| 1 |        | MMT00003599   |
| 1 |        | MMT00017294   |
| 1 | 19679  | Pitpnm2       |
| 1 | 52685  | Cd300lg       |
| 1 | 75812  | Tasp1         |
| 1 | 53599  | Cd164         |
| 1 | 68187  | 4921533L14Rik |
| 1 | 75964  | D030074E01Rik |
| 1 | 18004  | Nek1          |
| 1 | 27377  | Yme1l1        |
| 1 | 70568  | Cpne3         |
| 1 | 19046  | Ppp1cb        |
| 1 | 68151  | Gpr177        |
| 1 | 70335  | Reep6         |
| 1 | 667795 | EG667795      |
| 1 | 226026 | Smc5          |
| 1 | 20823  | Ssb           |
| 1 | 12387  | Ctnnb1        |
| 1 | 235072 | 7-Sep         |
| 1 | 12807  | Hps3          |
| 1 | 11964  | Atp6v1a       |
| 1 |        | MMT00054980   |
| 1 | 50884  | Nckap1        |
| 1 | 52705  | Krr1          |
| 1 | 245688 | Rbbp7         |
| 1 | 622402 | Akr1c12       |
| 1 | 17156  | Man1a2        |
| 1 | 71675  | 0610010F05Rik |
| 1 | 17997  | Nedd1         |
| 1 | 629364 | MMT00061218   |
| 1 | 13809  | Enpep         |
| 1 |        | MMT00057554   |
| 1 |        | MMT00030928   |
| 1 | 55980  | Impa1         |
| 1 |        | MMT00054557   |
| 1 | 56258  | Hnrnp2        |
| 1 | 67581  | Tbc1d23       |
| 1 | 59015  | Nup160        |
| 1 | 27057  | Ncoa4         |
| 1 | 229445 | Ctso          |
| 1 | 114128 | Laptm4b       |
| 1 | 623205 | MMT00017441   |
| 1 | 19330  | Rab18         |
| 1 | 22764  | Zfx           |
| 1 | 50850  | Spast         |
| 1 | 66736  | Ttc35         |
| 1 | 53973  | Cyp3a41a      |
| 1 | 13112  | Cyp3a11       |
| 1 | 226548 | Aph1a         |
| 1 | 67045  | Riok2         |

|   |        |               |
|---|--------|---------------|
| 1 | 238831 | Ppwd1         |
| 1 | 76073  | Pcgf5         |
| 1 | 26877  | B3galt1       |
| 1 | 11433  | Acp5          |
| 1 | 68184  | Denr          |
| 1 | 56404  | Trip4         |
| 1 | 105377 | Ankrd32       |
| 1 | 79235  | Lrat          |
| 1 | 59057  | Zfp191        |
| 1 | 17876  | Myef2         |
| 1 | 225888 | Suv420h1      |
| 1 | 72736  | Txndc1        |
| 1 | 12282  | Hyou1         |
| 1 | 12874  | Cpd           |
| 1 | 69237  | Gtpbp4        |
| 1 |        | MMT00020644   |
| 1 | 18783  | Pla2g4a       |
| 1 | 212898 | Dse           |
| 1 | 98267  | Stk17b        |
| 1 | 75974  | Dock11        |
| 1 | 76117  | Arhgap15      |
| 1 | 67138  | Herc5         |
| 1 | 14469  | Gbp2          |
| 1 | 56193  | Plek          |
| 1 | 21426  | Tcfec         |
| 1 | 278180 | Vsig4         |
| 1 | 14130  | Fcgr2b        |
| 1 | 11745  | Anxa3         |
| 1 | 68818  | Zfand2b       |
| 1 |        | MMT00053630   |
| 1 | 66587  | Fastk         |
| 1 | 16952  | Anxa1         |
| 1 | 240899 | Lrrc52        |
| 1 | 14102  | Fas           |
| 1 | 107227 | MacroD1       |
| 1 | 74114  | Crot          |
| 1 | 192166 | Sardh         |
| 1 | 26941  | Slc9a3r1      |
| 1 | 13589  | Mapre1        |
| 1 | 16562  | Kif1c         |
| 1 | 15451  | Hpn           |
| 1 | 14794  | Spsb2         |
| 1 | 66905  | M6prbp1       |
| 1 | 15502  | Dnaja1        |
| 1 | 71030  | 4933403O08Rik |
| 1 |        | MMT00052151   |
| 1 | 26358  | Aldh1a7       |
| 1 | 226105 | Cyp2c70       |
| 1 |        | MMT00015473   |
| 1 |        | MMT00058786   |
| 1 | 66671  | Ccnh          |

|   |        |               |
|---|--------|---------------|
| 1 | 67212  | Mrpl55        |
| 1 | 12552  | Cdh11         |
| 1 | 11972  | Atp6v0d1      |
| 1 | 233863 | Gtf3c1        |
| 1 | 20713  | Serpini1      |
| 1 | 229512 | Smg5          |
| 1 | 15353  | Hmg20b        |
| 1 | 217198 | Plekhh3       |
| 1 | 79560  | Ublcp1        |
| 1 | 20901  | Strap         |
| 1 | 11769  | Ap1s1         |
| 1 |        | MMT00051740   |
| 1 |        | MMT00071327   |
| 1 |        | MMT00056634   |
| 1 |        | MMT00004769   |
| 1 |        | MMT00056589   |
| 1 |        | MMT00059805   |
| 1 | 110198 | Akr7a5        |
| 1 | 60595  | Actn4         |
| 1 | 12314  | Calm2         |
| 1 | 235682 | Zfp445        |
| 1 | 17434  | Mocs2         |
| 1 | 16478  | Jund          |
| 1 | 66307  | Isoc1         |
| 1 | 102093 | Phkb          |
| 1 | 68031  | Rnf146        |
| 1 |        | MMT00069487   |
| 1 |        | MMT00079689   |
| 1 | 22346  | Vhlh          |
| 1 |        | MMT00068814   |
| 1 | 18976  | Pomc          |
| 1 | 74092  | 0610038L08Rik |
| 1 | 13838  | Epha4         |
| 1 | 76377  | 2810410L24Rik |
| 1 | 22040  | Trex1         |
| 1 | 381580 | Ccdc27        |
| 1 |        | r60_T1A12     |
| 1 | 50786  | Hs6st2        |
| 1 | 330953 | Hcn4          |
| 1 | 195018 | Zzef1         |
| 1 | 213211 | Rnf26         |
| 1 | 74362  | Spag17        |
| 1 | 226090 | Ermp1         |
| 1 | 14866  | Gstm5         |
| 1 | 66282  | 1810029B16Rik |
| 1 | 320405 | Cadps2        |
| 1 | 54126  | Arhgef7       |
| 1 | 78689  | Mak10         |
| 1 | 74202  | Fblim1        |
| 1 |        | MMT00076721   |
| 1 | 625796 | EG625796      |

|   |        |               |
|---|--------|---------------|
| 1 | 30051  | Spdef         |
| 1 | 11604  | Agrp          |
| 1 |        | MMT00029554   |
| 1 | 280635 | Emilin3       |
| 1 | 18545  | Pcp2          |
| 1 | 193034 | Trpv1         |
| 1 | 18429  | Oxt           |
| 1 | 207259 | Zbtb7c        |
| 1 | 20822  | Trove2        |
| 1 | 18046  | Nfyc          |
| 1 | 18046  | Nfyc          |
| 1 | 667804 | MMT00076032   |
| 1 | 208117 | Aph1b         |
| 1 | 13717  | Eln           |
| 1 | 83813  | Tnk1          |
| 1 | 434440 | Fbxw12        |
| 1 | 545279 | Ms4a15        |
| 1 | 258268 | Olf1511       |
| 1 | 14314  | Fstl1         |
| 1 | 72309  | Tmem158       |
| 1 | 433809 | Rnf207        |
| 1 | 193385 | 6330500D04Rik |
| 1 |        | MMT00016293   |
| 1 |        | MMT00010979   |
| 1 | 75770  | Brsk2         |
| 1 | 71828  | Gtf2a1l       |
| 1 | 93961  | B3galt5       |
| 1 | 69864  | 1810065E05Rik |
| 1 |        | MMT00043953   |
| 1 |        | MMT00015104   |
| 1 | 224090 | Tmem44        |
| 1 | 108934 | BC024659      |
| 1 |        | MMT00027295   |
| 1 | 13385  | Dlg4          |
| 1 | 50701  | Ela2          |
| 1 | 75556  | 1700026D08Rik |
| 1 | 69918  | 2610020C07Rik |
| 1 |        | MMT00009628   |
| 1 | 68891  | Cd177         |
| 1 | 13041  | Ctsw          |
| 1 | 108927 | Lhfp          |
| 1 | 78829  | Tsc22d4       |
| 1 | 94281  | Sfxn4         |
| 1 | 245424 | Gpr101        |
| 1 | 215493 | A3galt2       |
| 1 |        | MMT00043055   |
| 1 | 12895  | Cpt1b         |
| 1 | 269902 | Vmn2r57       |
| 1 | 66897  | Narg1l        |
| 1 | 67902  | Sumf2         |
| 1 |        | MMT00080853   |

|   |        |               |
|---|--------|---------------|
| 1 | 675985 | MMT00081973   |
| 1 | 104263 | Jmjd1a        |
| 1 | 16970  | Lrmp          |
| 1 | 225852 | Gm550         |
| 1 | 20364  | Sepw1         |
| 1 | 71146  | 4933417O08Rik |
| 1 | 73916  | lft57         |
| 1 | 12144  | Blm           |
| 1 | 72103  | 2010301N04Rik |
| 1 | 18807  | Pld3          |
| 1 | 23999  | Twf2          |
| 1 | 319170 | Hist1h2an     |
| 1 | 19352  | Rabggtb       |
| 1 | 73389  | Hbp1          |
| 1 | 338523 | Jhdm1d        |
| 1 | 219105 | Zmym5         |
| 1 | 71713  | Cdc40         |
| 1 | 13482  | Dpp4          |
| 1 | 66875  | 1200016B10Rik |
| 1 | 59040  | Rhot1         |
| 1 | 213811 | BC002059      |
| 1 | 16905  | Lmna          |
| 1 | 66508  | 2400001E08Rik |
| 1 | 433216 | EG433216      |
| 1 | 50880  | Scly          |
| 1 | 70337  | lyd           |
| 1 | 66268  | Pigyl         |
| 1 | 74097  | Pop7          |
| 1 | 66538  | Rps19bp1      |
| 1 | 117198 | lvns1abp      |
| 1 | 74533  | Gzf1          |
| 1 | 56876  | Nelf          |
| 1 | 22218  | Sumo1         |
| 1 | 22218  | Sumo1         |
| 1 | 56844  | Tssc4         |
| 1 | 22262  | Uox           |
| 1 | 16396  | Itch          |
| 1 | 113868 | Acaa1a        |
| 1 | 234729 | Vac14         |
| 1 | 14559  | Gdf1          |
| 1 | 70789  | Kynu          |
| 1 | 320951 | Pisd          |
| 1 | 18970  | Polb          |
| 1 | 217893 | Pacs2         |
| 1 | 66190  | Phca          |
| 1 | 19212  | Pter          |
| 1 | 108654 | 4933403F05Rik |
| 1 | 65246  | Xpo7          |
| 1 | 230752 | 2610027C15Rik |
| 1 | 238447 | Igh-2         |
| 1 | 19299  | Abcd3         |

|   |        |               |
|---|--------|---------------|
| 1 | 622127 | Cyp3a57       |
| 1 | 18038  | Nfkbil1       |
| 1 | 56508  | Rapgef4       |
| 1 | 211347 | Pank3         |
| 1 | 26413  | Mapk1         |
| 1 | 67993  | Nudt12        |
| 1 | 64214  | Rgs18         |
| 1 | 77963  | Hook1         |
| 1 |        | MMT00058516   |
| 1 | 94192  | C1galt1       |
| 1 | 66625  | Sfrs18        |
| 1 | 66734  | Map1lc3a      |
| 1 | 70354  | 3110001120Rik |
| 1 | 319740 | Zfyve27       |
| 1 | 71954  | Suds3         |
| 1 | 67005  | Polr3k        |
| 1 | 59029  | Psm14         |
| 1 |        | MMT00046586   |
| 1 |        | MMT00045089   |
| 1 | 408062 | BC062115      |
| 1 | 74326  | Hnrnpr        |
| 1 |        | MMT00077382   |
| 1 | 624446 | EG624446      |
| 1 | 19302  | Pex2          |
| 1 | 668838 | EG668838      |
| 1 | 109905 | Rap1a         |
| 1 | 381921 | Taok2         |
| 1 | 215751 | BC013529      |
| 1 | 208624 | Alg3          |
| 1 | 11975  | Atp6v0a1      |
| 1 | 14231  | Fkbp7         |
| 1 | 66314  | Tpd52l2       |
| 1 | 72692  | Hnrpll        |
| 1 | 17973  | Nck1          |
| 1 | 12617  | Cenpc1        |
| 1 | 216395 | Tmem5         |
| 1 |        | MMT00065196   |
| 1 | 72139  | 2610044O15Rik |
| 1 |        | MMT00038159   |
| 1 | 216792 | A230051G13Rik |
| 1 |        | MMT00046285   |
| 1 |        | MMT00064324   |
| 1 |        | MMT00009680   |
| 1 |        | MMT00019522   |
| 1 | 19983  | Rpl5          |
| 1 |        | MMT00004885   |
| 1 | 58875  | Hibadh        |
| 1 |        | MMT00014375   |
| 1 | 103841 | Cuedc1        |
| 1 | 234353 | Psd3          |
| 1 | 15278  | Tfb2m         |

|   |           |               |
|---|-----------|---------------|
| 1 | 237082    | Nxt2          |
| 1 | 11973     | Atp6v1e1      |
| 1 |           | MMT00045897   |
| 1 | 56705     | Ranbp9        |
| 1 | 14933     | Gyk           |
| 1 | 382252    | A830080D01Rik |
| 1 | 68734     | Smek1         |
| 1 | 235574    | Atp2c1        |
| 1 | 105203    | BC016423      |
| 1 | 237898    | Usp32         |
| 1 | 19821     | Rnf2          |
| 1 | 208665    | Akr1d1        |
| 1 | 13405     | Dmd           |
| 1 | 382030    | Tmem188       |
| 1 | 226352    | Epb4.1I5      |
| 1 | 72098     | Tmem68        |
| 1 | 23950     | Dnajb6        |
| 1 | 67427     | Rps20         |
| 1 | 226414    | Dars          |
| 1 | 76561     | Snx7          |
| 1 | 17961     | Nat2          |
| 1 | 50753     | Fbxo8         |
| 1 | 223601    | 0910001A06Rik |
| 1 | 329506    | Ctdspl2       |
| 1 | 21788     | Tfpi          |
| 1 | 15251     | Hif1a         |
| 1 | 30795     | Fkbp3         |
| 1 | 22235     | Ugdh          |
| 1 | 56310     | Gps2          |
| 1 | 72425     | 2410042D21Rik |
| 1 |           | MMT00013041   |
| 1 | 243085    | Ugt2b35       |
| 1 | 19070     | Mobkl3        |
| 1 | 170719    | Oxr1          |
| 1 | 56726     | Sh3bgrl       |
| 1 | 328108    | A430041B07Rik |
| 1 | 100047309 | MMT00074326   |
| 1 | 53378     | Sdcbp         |
| 1 | 52575     | Rg9mtd1       |
| 1 | 13204     | Dhx15         |
| 1 | 12675     | Chuk          |
| 1 | 319638    | Nt5dc1        |
| 1 | 22612     | Yes1          |
| 1 | 67010     | Rbm7          |
| 1 | 225028    | Map4k3        |
| 1 | 99586     | Dpyd          |
| 1 | 66687     | Tbc1d15       |
| 1 | 22343     | Lin7c         |
| 1 | 211255    | Kbtbd7        |
| 1 | 15247     | Hiat1         |
| 1 | 72508     | Rps6kb1       |

|   |           |               |
|---|-----------|---------------|
| 1 | 271377    | Zbtb11        |
| 1 | 213819    | Casd1         |
| 1 |           | MMT00038995   |
| 1 | 12450     | Ccng1         |
| 1 | 19286     | Pts           |
| 1 | 192136    | 5033411D12Rik |
| 1 | 67834     | Idh3a         |
| 1 |           | MMT00042824   |
| 1 | 16790     | Anpep         |
| 1 | 74197     | Gtf2e1        |
| 1 | 13664     | Eif1a         |
| 1 | 53627     | Porcn         |
| 1 | 76510     | Trappc9       |
| 1 | 13845     | Ephb3         |
| 1 | 71929     | Tmem123       |
| 1 | 112417    | Ugt2b37       |
| 1 | 66552     | 2010106G01Rik |
| 1 | 12038     | Bche          |
| 1 |           | MMT00038380   |
| 1 | 98221     | Eif3m         |
| 1 |           | MMT00077590   |
| 1 | 232286    | Tmf1          |
| 1 | 229681    | St7l          |
| 1 | 16779     | Lamb2         |
| 1 | 223337    | Ugt3a2        |
| 1 | 72085     | Osgpl1        |
| 1 | 67059     | Ola1          |
| 1 | 20024     | Sub1          |
| 1 | 76687     | Spcs3         |
| 1 | 12739     | Cldn3         |
| 1 | 59010     | Sqrdl         |
| 1 | 107569    | Nt5c3         |
| 1 | 213056    | D1Ert53e      |
| 1 | 63985     | Gmfb          |
| 1 | 20216     | Acsn3         |
| 1 | 216558    | Ugp2          |
| 1 | 12626     | Cetn3         |
| 1 | 56442     | Serinc1       |
| 1 | 76971     | 2810007J24Rik |
| 1 | 72094     | Ugt2a3        |
| 1 | 28253     | Slco1b2       |
| 1 | 72900     | Ndufv2        |
| 1 | 56720     | Tdo2          |
| 1 | 100041449 | MMT00067427   |
| 1 | 56388     | Cyp3a25       |
| 1 | 70047     | Trnt1         |
| 1 | 66092     | Ghitm         |
| 1 | 56758     | Mbnl1         |
| 1 | 105387    | Akr1c14       |
| 1 | 93759     | Sirt1         |
| 1 | 18979     | Pon1          |



|   |           |                    |
|---|-----------|--------------------|
| 1 | 57438     | 7-Mar              |
| 1 | 107568    | Wwp1               |
| 1 | 71773     | Ugt2b1             |
| 1 | 232807    | Ppp1r12c           |
| 1 | 53328     | Pgrmc1             |
| 1 | 105522    | Ankrd28            |
| 1 | 20526     | Slc2a2             |
| 1 | 140483    | Hnmt               |
| 1 | 58800     | Trpm7              |
| 1 | 18478     | Pah                |
| 1 | 18576     | Pde3b              |
| 1 | 100038514 | OTTMUSG00000004551 |
| 1 | 69770     | 1600002K03Rik      |
| 1 | 211986    | Tmem18             |
| 1 | 71492     | Bbs7               |
| 1 | 494468    | Armcx5             |
| 1 | 67062     | Mcart6             |
| 1 | 78252     | 4432416J03Rik      |
| 1 | 70237     | Bhlhb9             |
| 1 | 226747    | Ahctf1             |
| 1 | 72151     | Rfc5               |
| 1 |           | MMT00009390        |
| 1 | 17386     | Mmp13              |
| 1 | 20379     | Sfrp4              |
| 1 | 67120     | Ttc14              |
| 1 | 269198    | Nbeal1             |
| 1 | 68423     | Ankrd13d           |
| 1 | 226144    | Erlin1             |
| 1 |           | MMT00046622        |
| 1 | 209380    | EG209380           |
| 1 | 23849     | Klf6               |
| 1 | 242248    | Bank1              |
| 1 |           | MMT00061970        |
| 1 | 14626     | Gk2                |
| 1 | 68979     | Nol11              |
| 1 | 11658     | Alcam              |
| 1 | 258746    | Olfr648            |
| 1 | 105440    | Kctd9              |
| 1 | 12416     | Cbx2               |
| 1 |           | MMT00048670        |
| 1 | 113847    | V1ra5              |
| 1 | 226413    | Lct                |
| 1 | 16728     | L1cam              |
| 1 | 12567     | Cdk4               |
| 1 | 12567     | Cdk4               |
| 1 | 74386     | Rmi1               |
| 1 | 235858    | Gm392              |
| 1 | 72776     | Sass6              |
| 1 | 13058     | Cybb               |
| 1 | 269473    | Lrig2              |
| 1 |           | MMT00047183        |

|   |        |               |
|---|--------|---------------|
| 1 |        | MMT00044175   |
| 1 |        | MMT00012375   |
| 1 |        | MMT00007970   |
| 1 |        | MMT00004959   |
| 1 | 668457 | EG668457      |
| 1 | 68146  | Arl13b        |
| 1 | 12283  | Cab39         |
| 1 | 68255  | Tmem86b       |
| 1 | 66292  | Mrps21        |
| 1 |        | MMT00018228   |
| 1 | 218734 | 3830406C13Rik |
| 1 | 102182 | Al931714      |
| 1 |        | MMT00038301   |
| 1 | 98870  | Al182371      |
| 1 | 66156  | Anapc11       |
| 1 | 21991  | Tpi1          |
| 1 | 74194  | Rnd3          |
| 1 | 72739  | Zkscan3       |
| 1 | 433702 | AU014645      |
| 1 | 52874  | D19Bwg1357e   |
| 1 |        | MMT00007878   |
| 1 |        | MMT00077178   |
| 1 | 66431  | 1810049H13Rik |
| 1 | 70422  | Ints2         |
| 1 | 226747 | Ahctf1        |
| 1 | 545428 | 2610301F02Rik |
| 1 | 13171  | Dbt           |
| 1 | 67230  | Zfp329        |
| 1 | 330731 | EG330731      |
| 1 | 67914  | Coq9          |
| 1 | 269198 | Nbeal1        |
| 1 | 50911  | Exosc9        |
| 1 | 67101  | 2310039H08Rik |
| 1 | 76784  | Mtif2         |
| 1 | 236790 | Ddx26b        |
| 1 | 12912  | Creb1         |
| 1 | 170938 | Zfp617        |
| 1 | 30046  | Zfp292        |
| 1 | 214899 | Jarid1a       |
| 1 |        | MMT00002151   |
| 1 |        | MMT00000525   |
| 1 | 99526  | Usp53         |
| 1 |        | MMT00061267   |
| 1 | 67532  | Mfap1a        |
| 1 | 320078 | Olfml2b       |
| 1 | 321022 | Cdv3          |
| 1 |        | MMT00077107   |
| 1 | 19883  | Rora          |
| 1 | 18706  | Pik3ca        |
| 1 | 214642 | A430107O13Rik |
| 1 | 18393  | Orc2l         |

|   |        |               |
|---|--------|---------------|
| 1 | 216965 | Taok1         |
| 1 | 11920  | Atm           |
| 1 |        | MMT00033296   |
| 1 | 225467 | Pggt1b        |
| 1 |        | MMT00033071   |
| 1 | 15525  | Hspa4         |
| 1 | 72554  | Utp14a        |
| 1 |        | MMT00045078   |
| 1 | 50927  | Nasp          |
| 1 | 22697  | Zscan21       |
| 1 | 56307  | Metap2        |
| 1 | 22758  | Zscan12       |
| 1 | 68310  | Zmym1         |
| 1 | 67298  | Gprasp1       |
| 1 | 56282  | Mrpl12        |
| 1 | 664857 | 9330101J02Rik |
| 1 | 218100 | Zfp322a       |
| 1 | 12589  | Ift81         |
| 1 | 218973 | Wdhd1         |
| 1 | 320415 | Gchfr         |
| 1 | 67168  | P2ry5         |
| 1 | 67785  | Zmym4         |
| 1 | 228730 | Gm114         |
| 1 | 237222 | Ofd1          |
| 1 | 218035 | Vps41         |
| 1 | 12380  | Cast          |
| 1 | 20133  | Rrm1          |
| 1 | 68533  | Mphosph6      |
| 1 | 16588  | Kin           |
| 1 | 67229  | Prpf18        |
| 1 | 380921 | Dgkh          |
| 1 | 76184  | Abca6         |
| 1 | 12962  | Crybb3        |
| 1 | 70369  | Bag5          |
| 1 | 214764 | 2700050L05Rik |
| 1 | 93871  | Brwd1         |
| 1 | 20397  | Sgpl1         |
| 1 | 76594  | Dnajc18       |
| 1 | 22646  | Zfp105        |
| 1 | 66223  | Mrpl35        |
| 1 | 208967 | Thnsl1        |
| 1 | 20723  | Serpib9       |
| 1 | 14728  | Lilrb4        |
| 1 | 78354  | 2210407C18Rik |
| 1 | 320435 | 5830482F20Rik |
| 1 | 218194 | Phactr1       |
| 1 | 15257  | Hipk1         |
| 1 | 56745  | C1qtnf1       |
| 1 | 20523  | Slc25a14      |
| 1 | 67726  | 1810073G14Rik |
| 1 | 69354  | Slc38a4       |

|   |        |               |
|---|--------|---------------|
| 1 | 226075 | Glis3         |
| 1 | 233489 | Picalm        |
| 1 | 50909  | C1r           |
| 1 | 75698  | 3110001K24Rik |
| 1 | 52592  | Brms1l        |
| 1 | 67973  | Mphosph10     |
| 1 | 57815  | Spata5        |
| 1 | 258281 | Olf780        |
| 1 | 27405  | Abcg3         |
| 1 | 217151 | Arl5c         |
| 1 | 66645  | Pspc1         |
| 1 | 226999 | Slc9a2        |
| 1 | 12391  | Cav3          |
| 1 | 11657  | Alb           |
| 1 | 70560  | Wars2         |
| 1 | 72930  | Ppp2r2b       |
| 1 | 72054  | Cyp4f18       |
| 1 | 53320  | Folh1         |
| 1 | 232201 | Arhgap25      |
| 1 | 73173  | Pcdh18        |
| 1 | 52906  | Ahi1          |
| 1 | 546983 | Vmn2r77       |
| 1 | 101142 | Itfg2         |
| 1 | 12677  | Vsx2          |
| 1 | 15160  | Serpind1      |
| 1 | 192292 | Nrbp1         |
| 1 | 72058  | Igsf5         |
| 1 | 280662 | Afm           |
| 1 | 433256 | Acsl5         |
| 1 |        | MMT00062394   |
| 1 |        | MMT00045847   |
| 1 | 66416  | Ndufa7        |
| 1 | 673094 | Cd99          |
| 1 | 233315 | Mtmr10        |
| 1 | 231915 | Usp1          |
| 1 | 52443  | Mrpl48        |
| 1 | 52443  | Mrpl48        |
| 1 | 70791  | Hars2         |
| 1 | 93970  | Klra18        |
| 1 | 242584 | Wdr78         |
| 1 | 72022  | Slc35f2       |
| 1 | 66422  | 2410015N17Rik |
| 1 | 242669 | Adc           |
| 1 | 53872  | Caprin1       |
| 1 | 16653  | Kras          |
| 1 | 213827 | Arcn1         |
| 1 | 229227 | 4932438A13Rik |
| 1 | 77781  | Epm2aip1      |
| 1 | 226747 | Ahctf1        |
| 1 | 53317  | Plrg1         |
| 1 | 56437  | Rrad          |

|   |        |              |
|---|--------|--------------|
| 1 | 12824  | Col2a1       |
| 1 | 64451  | Dip2a        |
| 1 | 14778  | Gpx3         |
| 1 | 56741  | Nope         |
| 1 | 20518  | Slc22a2      |
| 1 | 19109  | Prl          |
| 1 | 382864 | Colq         |
| 1 | 239618 | Pdzn4        |
| 1 | 228730 | Gm114        |
| 1 | 66240  | Kcne1l       |
| 1 | 18040  | Nefm         |
| 1 |        | MMT00059239  |
| 1 | 75805  | Nln          |
| 1 | 627191 | Tmem90a      |
| 1 | 14776  | Gpx2         |
| 1 |        | MMT00040000  |
| 1 | 215690 | Nav1         |
| 1 | 26382  | Fgd2         |
| 1 | 54607  | Socs6        |
| 1 | 213109 | Phf3         |
| 1 | 75430  | 320002M19Rik |
| 1 | 16852  | Lgals1       |
| 1 | 65972  | Ifi30        |
| 1 | 17480  | Mpl          |
| 1 | 241113 | Prkag3       |
| 1 | 116904 | Alpk3        |
| 1 | 545260 | Arsi         |
| 1 | 545474 | Scrt2        |
| 1 | 68957  | Paqr6        |
| 1 | 233765 | Plekha7      |
| 1 | 224705 | Vps52        |
| 1 | 22364  | Vpreb3       |
| 1 | 235130 | Adamts15     |
| 1 | 269016 | Sh3rf2       |
| 1 | 320404 | Itpkb        |
| 1 | 208104 | Mlxip        |
| 1 | 11434  | Acr          |
| 1 | 14029  | Evx2         |
| 1 | 108068 | Grm2         |
| 1 |        | MMT00031206  |
| 1 | 13821  | Epb4.1l1     |
| 1 | 27386  | Npas3        |
| 1 | 27372  | Prl3c1       |
| 1 | 432516 | Myo1a        |
| 1 | 54204  | 1-Sep        |
| 1 | 20450  | St8sia2      |
| 1 | 78369  | Icam4        |
| 1 | 29859  | Sult4a1      |
| 1 |        | MMT00033987  |
| 1 | 94191  | Adarb2       |
| 1 | 14309  | Fshr         |

|   |        |               |
|---|--------|---------------|
| 1 | 228598 | Ebf4          |
| 1 | 12300  | Cacng2        |
| 1 | 14240  | Foxb2         |
| 1 | 241769 | Kcnk15        |
| 1 | 22403  | Wisp2         |
| 1 | 219149 | Xkr6          |
| 1 | 233040 | Fbxo27        |
| 1 | 214239 | A430105I19Rik |
| 1 | 53761  | Bat2          |
| 1 | 76942  | Lypd5         |
| 1 | 272636 | D9Erttd280e   |
| 1 | 333050 | Ksr2          |
| 1 | 67576  | 4930429B21Rik |
| 1 | 19303  | Pxn           |
| 1 | 50875  | Tmod3         |
| 1 | 116732 | Tsga13        |
| 1 | 94045  | P2rx5         |
| 1 | 101869 | Unc45a        |
| 1 | 57274  | Slc16a8       |
| 1 | 16948  | Lox           |
| 1 | 19876  | Robo1         |
| 1 | 66932  | Rexo1         |
| 1 | 635169 | MMT00073704   |
| 1 | 545481 | RP23-392P11.3 |
| 1 | 381373 | Sp9           |
| 1 | 71544  | 9030420J04Rik |
| 1 | 12193  | Zfp36I2       |
| 1 | 18439  | P2rx7         |
| 1 | 12931  | Crlf1         |
| 1 | 14936  | Gys1          |
| 1 | 56296  | Dmrtb1        |
| 1 | 330830 | Ccdc135       |
| 1 | 319229 | Sctr          |
| 1 | 665270 | Plb1          |
| 1 |        | MMT00027552   |
| 1 | 70024  | Mcm10         |
| 1 | 110637 | Grik4         |
| 1 | 243846 | Ccdc9         |
| 1 |        | MMT00012844   |
| 1 | 60507  | Qtrt1         |
| 1 | 194655 | Klf11         |
| 1 | 12332  | Capg          |
| 1 | 14622  | Gjb5          |
| 1 | 66353  | 2310007A19Rik |
| 1 | 11569  | Aebp2         |
| 1 | 78767  | 2610021K21Rik |
| 1 | 56070  | Tcerg1        |
| 1 | 237759 | Col23a1       |
| 1 | 17341  | Bhlhb8        |
| 1 | 226123 | BC023055      |
| 1 | 330460 | BC022651      |

|   |        |               |
|---|--------|---------------|
| 1 | 84682  | Cox4i2        |
| 1 |        | MMT00046455   |
| 1 | 233532 | Rsf1          |
| 1 | 170765 | Ripply3       |
| 1 | 12151  | Bmi1          |
| 1 | 142980 | Tlr3          |
| 1 | 58193  | Extl2         |
| 1 | 215814 | Ccdc28a       |
| 1 | 319625 | Galm          |
| 1 | 75578  | Fggy          |
| 1 | 109731 | Maob          |
| 1 | 69934  | Rg9mtd3       |
| 1 | 77300  | Raph1         |
| 1 | 383295 | Ypel5         |
| 1 | 76804  | Jmjd2c        |
| 1 | 627908 | MMT00030553   |
| 1 |        | MMT00078030   |
| 1 | 330260 | Pon2          |
| 1 | 218543 | Sfrs12        |
| 1 | 72183  | Snx6          |
| 1 | 20698  | Sphk1         |
| 1 | 11921  | Atoh1         |
| 1 | 16516  | Kcnj15        |
| 1 | 629966 | EG629966      |
| 1 | 12854  | Cort          |
| 1 | 97387  | Strn4         |
| 1 | 407788 | BC051142      |
| 1 | 242939 | Cpz           |
| 1 | 237362 | Npffr1        |
| 1 | 26362  | Axl           |
| 1 | 209786 | Vmn2r-ps88    |
| 1 | 74563  | Rasgef1c      |
| 1 | 67334  | 1700054O13Rik |
| 1 | 13637  | Efna2         |
| 1 | 227526 | Armet1        |
| 1 | 216781 | Trim58        |
| 1 | 16973  | Lrp5          |
| 1 | 74198  | Dtx2          |
| 1 | 67367  | 1810007M14Rik |
| 1 | 20448  | St6galnac4    |
| 1 | 208144 | Dhx37         |
| 1 | 66700  | Vps24         |
| 1 | 208990 | Npb           |
| 1 | 319695 | Ankar         |
| 1 | 170625 | Snx18         |
| 1 | 54326  | Elovl2        |
| 1 | 16412  | Itgb1         |
| 1 | 57321  | Terf2ip       |
| 1 | 11504  | Adamts1       |
| 1 | 66359  | 2310005N03Rik |
| 1 | 17975  | Ncl           |

|   |        |               |
|---|--------|---------------|
| 1 |        | MMT00032606   |
| 1 |        | MMT00044489   |
| 1 |        | MMT00017950   |
| 1 | 666581 | RP23-162H3.1  |
| 1 |        | MMT00001646   |
| 1 |        | MMT00053547   |
| 1 |        | MMT00069653   |
| 1 |        | MMT00054025   |
| 1 | 71514  | Sfpq          |
| 1 | 66477  | Usmg5         |
| 1 | 74562  | Fer1f4        |
| 1 |        | MMT00014109   |
| 1 |        | MMT00031931   |
| 1 | 20863  | Stfa3         |
| 1 |        | MMT00063568   |
| 1 | 78240  | Cst1f1        |
| 1 | 218763 | Lrrc3b        |
| 1 | 12904  | Crabp2        |
| 1 | 620292 | Cntnap5c      |
| 1 | 19144  | Klk6          |
| 1 | 99662  | Eps8f3        |
| 1 | 52250  | Reep1         |
| 1 |        | MMT00069895   |
| 1 | 76686  | Clip3         |
| 1 | 18548  | Pcsk1         |
| 1 | 18191  | Nrxn3         |
| 1 | 258987 | Olf1270       |
| 1 | 69329  | 1700003M02Rik |
| 1 | 330908 | Opcml         |
| 1 | 219144 | Arl1f1        |
| 1 | 19172  | Psmb4         |
| 1 | 20856  | Stc2          |
| 1 | 258918 | Olf1346       |
| 1 |        | MMT00059380   |
| 1 | 320873 | Cdh10         |
| 1 | 218613 | Mier3         |
| 1 | 74443  | 4933406E20Rik |
| 1 | 20512  | Slc1a3        |
| 1 | 14767  | Nmur1         |
| 1 | 26944  | Tinag         |
| 1 |        | MMT00003591   |
| 1 | 328381 | Sh2d4b        |
| 1 | 12794  | Cnih2         |
| 1 |        | MMT00078109   |
| 1 |        | MMT00078052   |
| 1 | 258645 | Olf1403       |
| 1 | 113854 | V1rb4         |
| 1 | 78124  | 4930458L03Rik |
| 1 | 71854  | Dpep3         |
| 1 | 12805  | Cntn1         |
| 1 | 217356 | Tmc8          |



|   |        |               |
|---|--------|---------------|
| 1 | 17318  | Mid1          |
| 1 |        | MMT00057004   |
| 1 | 72899  | MacroD2       |
| 1 | 241612 | Slc5a12       |
| 1 | 216011 | Lrrc20        |
| 1 | 23790  | Coro1c        |
| 1 |        | MMT00033159   |
| 1 | 18479  | Pak1          |
| 1 | 54419  | Cldn6         |
| 1 | 239530 | Gpr20         |
| 1 | 233020 | Hipk4         |
| 1 | 228357 | Lrp4          |
| 1 | 243822 | 4930401F20Rik |
| 1 | 67888  | Tmem100       |
| 1 |        | MMT00073158   |
| 1 | 628893 | EG628893      |
| 1 | 258408 | Olf463        |
| 1 | 18741  | Pitx2         |
| 1 | 109648 | Npy           |
| 1 | 16638  | Klra7         |
| 1 | 233549 | Mogat2        |
| 1 | 386463 | Cdsn          |
| 1 | 16511  | Kcnh2         |
| 1 | 102075 | Plekhg4       |
| 1 | 69239  | 2610034M16Rik |
| 1 | 724112 | BC106175      |
| 1 | 58214  | Cst10         |
| 1 | 23794  | Adamts5       |
| 1 | 546036 | EG546036      |
| 1 | 99031  | Osbpl6        |
| 1 | 214593 | Duox2         |
| 1 | 68507  | Ppfia4        |
| 1 | 230868 | Igsf21        |
| 1 | 211651 | Fancd2        |
| 1 |        | MMT00008620   |
| 1 | 223726 | Mpped1        |
| 1 | 68709  | Cilp2         |
| 1 | 57255  | Cldn13        |
| 1 |        | MMT00042954   |
| 1 | 11778  | Ap3s2         |
| 1 | 208613 | E030011K20Rik |
| 1 | 263803 | Pkn3          |
| 1 | 66237  | Atp6v1g2      |
| 1 | 68311  | Lypd2         |
| 1 | 12763  | Cmah          |
| 1 | 11568  | Aebp1         |
| 1 | 232664 | Ccdc136       |
| 1 | 50883  | Chek2         |
| 1 | 69169  | Faim3         |
| 1 | 14587  | Gfra3         |
| 1 | 56640  | Klk4          |

|   |        |               |
|---|--------|---------------|
| 1 | 382035 | MMT00056309   |
| 1 | 226922 | Kcnq5         |
| 1 | 381073 | Npw           |
| 1 | 14764  | Gpr44         |
| 1 | 58187  | Cldn10        |
| 1 | 20817  | Srpk2         |
| 1 | 207175 | Cetn4         |
| 1 | 57294  | Rps27         |
| 1 | 66884  | Appbp2        |
| 1 | 214058 | Megf11        |
| 1 | 230863 | Sh2d5         |
| 1 | 16413  | Itgb1bp1      |
| 1 | 30791  | Slc39a1       |
| 1 | 232943 | Klc3          |
| 1 | 58238  | A830059I20Rik |
| 1 |        | MMT00005098   |
| 1 | 57890  | Il17re        |
| 1 | 20262  | Stmn3         |
| 1 | 70873  | 4921517L17Rik |
| 1 | 242748 | Ptchd2        |
| 1 |        | MMT00017417   |
| 1 |        | MMT00057992   |
| 1 | 382075 | Odf31         |
| 1 | 83396  | Glis2         |
| 1 | 329972 | Spata21       |
| 1 | 66077  | Aurkaip1      |
| 1 | 68837  | Foxk2         |
| 1 | 74549  | 9130404D08Rik |
| 1 | 381694 | B3galtl       |
| 1 |        | MMT00035685   |
| 1 | 12721  | Coro1a        |
| 1 | 29818  | Hspb7         |
| 1 | 19281  | Ptprt         |
| 1 | 20669  | Sox14         |
| 1 | 258752 | Olfr583       |
| 1 | 171267 | V1rg11        |
| 1 | 242286 | 4833413O15Rik |
| 1 | 19820  | Rnf12         |
| 1 |        | MMT00008170   |
| 1 | 259003 | Olfr172       |
| 1 | 98952  | C230093N12Rik |
| 1 | 15425  | Hoxc6         |
| 1 |        | MMT00077643   |
| 1 | 73300  | 1700031F05Rik |
| 1 | 29862  | Ninj2         |
| 1 | 212880 | Ddx46         |
| 1 | 232196 | C87436        |
| 1 | 66449  | MMT00023224   |
| 1 | 66449  | MMT00011706   |
| 1 | 17721  | ND5           |
| 1 | 104079 | Nxph3         |

|   |        |             |
|---|--------|-------------|
| 1 | 72074  | Anks4b      |
| 1 | 73246  | Rassf6      |
| 1 | 99439  | Duox1       |
| 1 | 72242  | Psg21       |
| 1 | 56461  | Kcnip3      |
| 1 |        | MMT00014895 |
| 1 | 69028  | Mitd1       |
| 1 | 18974  | Pole2       |
| 1 | 20773  | Sptlc2      |
| 1 | 381148 | Gm1614      |
| 1 | 17940  | Naip1       |
| 1 | 77505  | Dnhd1       |
| 1 | 213262 | Fstl5       |
| 1 | 66971  | Cdk5rap1    |
| 1 | 75627  | Snpc1       |
| 1 | 66877  | Crnk1       |
| 1 | 232288 | Frmf4b      |
| 1 | 237847 | Rtn4rl1     |
| 1 | 12168  | Bmpr2       |
| 1 | 223631 | BC025446    |
| 1 | 246221 | Mpst        |
| 1 | 68010  | Bambi       |
| 1 |        | MMT00008110 |
| 1 |        | MMT00078167 |
| 1 |        | MMT00044154 |
| 1 | 382421 | EG382421    |
| 1 | 12684  | Cideb       |
| 1 | 22770  | Zhx1        |
| 1 | 81898  | Sf3b1       |
| 1 | 26430  | Parg        |
| 1 | 227835 | Gtdc1       |
| 1 | 70572  | Ipo5        |
| 1 | 18100  | Mrpl40      |
| 1 | 71978  | Ppp2r2a     |
| 1 | 210973 | Kbtbd2      |
| 1 | 74143  | Opa1        |
| 1 | 67533  | Ppfibp1     |
| 1 | 231225 | Tapt1       |
| 1 |        | MMT00014691 |
| 1 | 59042  | Cope        |
| 1 | 54725  | Cadm1       |
| 1 | 26425  | Nubp1       |
| 1 | 20503  | Slc16a7     |
| 1 | 217615 | Ctage5      |
| 1 |        | MMT00042003 |
| 1 |        | MMT00041409 |
| 1 | 56210  | Rev1        |
| 1 | 66411  | Tbcb        |
| 1 | 11692  | Gfer        |
| 1 |        | MMT00081492 |
| 1 |        | MMT00046996 |

|   |        |               |
|---|--------|---------------|
| 1 | 22380  | Wbp4          |
| 1 | 71998  | Slc25a35      |
| 1 | 72400  | 2610028A01Rik |
| 1 | 207304 | Hectd1        |
| 1 | 58521  | Eid1          |
| 1 | 28250  | Slco1a4       |
| 1 | 19253  | Ptpn18        |
| 1 | 215632 | Psd4          |
| 1 | 16414  | Itgb2         |
| 1 | 14347  | Fut7          |
| 1 | 104759 | Pld4          |
| 1 | 234779 | Plcg2         |
| 1 | 17916  | Myo1f         |
| 1 | 12766  | Cxcr3         |
| 1 | 11867  | Arpc1b        |
| 1 | 20841  | Zfp143        |
| 1 | 20555  | Slfn1         |
| 1 | 20556  | Slfn2         |
| 1 | 11669  | Aldh2         |
| 1 | 212167 | A530088I07Rik |
| 1 | 50758  | Fbxl17        |
| 1 | 53814  | Oaz3          |
| 1 | 13618  | Ednrb         |
| 1 | 19737  | Rgs5          |
| 1 | 67023  | Use1          |
| 1 | 69010  | Anapc13       |
| 1 | 619331 | Zfp551        |
| 1 | 71133  | 4933422A05Rik |
| 1 | 12293  | Cacna2d1      |
| 1 | 68943  | Pink1         |
| 1 | 231997 | Fkbp14        |
| 1 | 319800 | C730048C13Rik |
| 1 | 229227 | 4932438A13Rik |
| 1 | 23881  | G3bp2         |
| 1 |        | MMT00067065   |
| 1 |        | MMT00074126   |
| 1 | 74205  | Acsl3         |
| 1 | 20517  | Slc22a1       |
| 1 | 18816  | Serpinf2      |
| 1 | 12861  | Cox6a1        |
| 1 | 76974  | 1190003J15Rik |
| 1 | 71743  | Coasy         |
| 1 | 110135 | Fgb           |
| 1 | 102644 | Oaf           |
| 1 | 76485  | Glt8d1        |
| 1 | 57349  | Ppbp          |
| 1 | 15944  | Irgm          |
| 1 | 17472  | Gbp4          |
| 1 | 634650 | EG634650      |
| 1 | 16069  | Igj           |
| 1 | 236082 | Dhrsx         |

|   |           |               |
|---|-----------|---------------|
| 1 | 14062     | F2r           |
| 1 | 77652     | MMT00072863   |
| 1 | 66725     | Lrrk2         |
| 1 | 21898     | Tlr4          |
| 1 | 58861     | Cysltr1       |
| 1 | 60440     | ligp1         |
| 1 | 15958     | lfit2         |
| 1 | 107373    | 4632417K18Rik |
| 1 | 20719     | Serpnb6a      |
| 1 | 14744     | Gpr65         |
| 1 | 278180    | Vsig4         |
| 1 | 12523     | Cd84          |
| 1 | 257635    | Sdsl          |
| 1 | 20419     | Shcbp1        |
| 1 | 240641    | Kif20b        |
| 1 | 56644     | Clec7a        |
| 1 | 15951     | lfi204        |
| 1 | 12508     | Cd53          |
| 1 | 140557    | Smc1b         |
| 1 | 19264     | Ptprc         |
| 1 | 16551     | Kif11         |
| 1 | 18805     | Pld1          |
| 1 | 100041835 | MMT00002146   |
| 1 | 100041835 | MMT00026054   |
| 1 |           | MMT00071569   |
| 1 | 18049     | Ngf           |
| 1 | 14609     | Gja1          |
| 1 | 21356     | Tapbp         |
| 1 | 66917     | Chordc1       |
| 1 | 67072     | Cdc37l1       |
| 1 | 78688     | Nol3          |
| 1 | 338337    | Cog3          |
| 1 | 54139     | Irf6          |
| 1 | 27404     | Abca8b        |
| 1 | 64540     | Tspan4        |
| 1 | 100201    | Tmem64        |
| 1 | 12447     | Ccne1         |
| 1 | 21685     | Tef           |
| 1 | 103765    | Tmem17        |
| 1 | 54140     | Avpr1a        |
| 1 | 20501     | Slc16a1       |
| 2 |           | MMT00070057   |
| 2 |           | MMT00071544   |
| 2 | 269378    | Ahcy          |
| 2 | 19042     | Ppm1a         |
| 2 | 19039     | Lgals3bp      |
| 2 | 67486     | Polr3g        |
| 2 | 67630     | Samd8         |
| 2 | 67956     | Setd8         |
| 2 | 108124    | Napa          |
| 2 | 68440     | Dusp23        |

|   |        |               |
|---|--------|---------------|
| 2 | 67283  | Slc25a19      |
| 2 | 67958  | 2610101N10Rik |
| 2 | 54342  | Gnprn1        |
| 2 | 17311  | Kitl          |
| 2 | 218441 | Zfyve16       |
| 2 | 68730  | Dus1l         |
| 2 | 208177 | Phldb2        |
| 2 | 66864  | Clec14a       |
| 2 | 72421  | Ttc30b        |
| 2 | 19353  | Rac1          |
| 2 | 11819  | Nr2f2         |
| 2 | 104015 | Synj1         |
| 2 | 84506  | Hamp          |
| 2 | 26365  | Ceacam1       |
| 2 | 75472  | 1700009P17Rik |
| 2 | 70615  | Ankrd24       |
| 2 | 240025 | Dact2         |
| 2 | 71968  | Wdr73         |
| 2 | 11484  | Aspa          |
| 2 | 214804 | Syde2         |
| 2 |        | MMT00020969   |
| 2 | 624862 | EG624862      |
| 2 | 12176  | Bnip3         |
| 2 | 64291  | Osbpl1a       |
| 2 | 668830 | EG668830      |
| 2 | 75735  | Pank1         |
| 2 | 52392  | D1Ert622e     |
| 2 |        | MMT00054728   |
| 2 |        | MMT00077065   |
| 2 | 73205  | 3110043O21Rik |
| 2 | 71982  | Snx10         |
| 2 | 338467 | Morc3         |
| 2 | 66895  | 1300014I06Rik |
| 2 | 320184 | Lrrc58        |
| 2 | 101565 | 6330503K22Rik |
| 2 | 74521  | 8430415E04Rik |
| 2 | 12611  | Cebpg         |
| 2 | 67311  | Nanp          |
| 2 | 67311  | Nanp          |
| 2 | 80287  | Apobec3       |
| 2 |        | MMT00024873   |
| 2 | 68867  | Rnf122        |
| 2 | 56717  | Frap1         |
| 2 | 320808 | Wdr22         |
| 2 | 13030  | Ctsb          |
| 2 | 54409  | Ramp2         |
| 2 | 64138  | Ctsz          |
| 2 | 232089 | Rbed1         |
| 2 | 73723  | Sh3bgrl3      |
| 2 | 80876  | Ifitm2        |
| 2 | 70785  | Dennd1c       |

|   |        |             |
|---|--------|-------------|
| 2 | 74481  | Batf2       |
| 2 | 13448  | Dok1        |
| 2 | 99543  | Olfml3      |
| 2 | 11603  | Agrn        |
| 2 | 27261  | Dok3        |
| 2 | 17064  | Cd93        |
| 2 | 668501 | zfp507      |
| 2 | 170758 | Rac3        |
| 2 | 20409  | Ostf1       |
| 2 | 60411  | Cenpk       |
| 2 | 105352 | Dusp22      |
| 2 | 53614  | Reck        |
| 2 | 69870  | Polr3gl     |
| 2 | 69190  | Dym         |
| 2 | 67712  | Slc25a37    |
| 2 | 20732  | Spint1      |
| 2 | 107449 | Unc5b       |
| 2 | 71687  | Tmem25      |
| 2 | 14159  | Fes         |
| 2 | 21401  | Tcea3       |
| 2 | 20276  | Scnn1a      |
| 2 | 28146  | D3Ucla1     |
| 2 | 53382  | Txn1        |
| 2 | 217664 | Mgat2       |
| 2 | 52076  | Tmem38b     |
| 2 | 17022  | Lum         |
| 2 | 20363  | Sepp1       |
| 2 | 98932  | Myl9        |
| 2 | 12831  | Col5a1      |
| 2 | 18611  | Pea15a      |
| 2 |        | MMT00033243 |
| 2 | 233801 | Acsm4       |
| 2 | 235380 | Dmxl2       |
| 2 | 20663  | Sos2        |
| 2 | 16885  | Limk1       |
| 2 | 66500  | Slc30a7     |
| 2 | 15926  | Idh1        |
| 2 | 107734 | Mrpl30      |
| 2 | 11538  | Adnp        |
| 2 | 546387 | EG546387    |
| 2 | 52466  | Slc46a1     |
| 2 | 225027 | Sfrs7       |
| 2 | 216705 | Clint1      |
| 2 | 56297  | Arl6        |
| 2 | 54561  | Nap1l3      |
| 2 | 66979  | Pole4       |
| 2 | 73754  | Thap1       |
| 2 | 19645  | Rb1         |
| 2 | 21789  | Tfpi2       |
| 2 | 20462  | Sfrs10      |
| 2 |        | MMT00063585 |

|   |        |               |
|---|--------|---------------|
| 2 | 20462  | Sfrs10        |
| 2 | 227446 | 2310035C23Rik |
| 2 | 20280  | Scp2          |
| 2 | 70078  | Nol7          |
| 2 | 17772  | Mtm1          |
| 2 | 21353  | Tank          |
| 2 | 627049 | Zfp800        |
| 2 |        | MMT00029171   |
| 2 | 11622  | Ahr           |
| 2 | 72129  | Pex13         |
| 2 | 70536  | Qpct          |
| 2 | 78923  | Chsy3         |
| 2 | 56444  | Actr10        |
| 2 | 76892  | Rnft1         |
| 2 | 72404  | Wdr44         |
| 2 | 66870  | Serbp1        |
| 2 | 109019 | Obfc2a        |
| 2 | 619326 | 9130409I23Rik |
| 2 | 12033  | Bcap29        |
| 2 | 73124  | Golim4        |
| 2 | 56367  | Scoc          |
| 2 |        | MMT00056913   |
| 2 | 242521 | Klh9          |
| 2 | 233490 | Crebzf        |
| 2 | 434339 | EG434339      |
| 2 | 16328  | Cep250        |
| 2 | 214642 | A430107O13Rik |
| 2 | 68576  | Hbxip         |
| 2 | 66143  | Eef1e1        |
| 2 | 12452  | Ccng2         |
| 2 | 235041 | Kank2         |
| 2 | 214987 | 5830457O10Rik |
| 2 | 26406  | Map3k3        |
| 2 | 67458  | Ergic1        |
| 2 | 623402 | EG623402      |
| 2 | 71881  | 2310001A20Rik |
| 2 | 18041  | Nfs1          |
| 2 | 103768 | Tubg2         |
| 2 | 93888  | Pcdhb17       |
| 2 | 22289  | Utx           |
| 2 | 13498  | Atn1          |
| 2 | 109225 | Ms4a7         |
| 2 | 59036  | Dact1         |
| 2 | 71738  | Mamdc2        |
| 2 | 231051 | Mll3          |
| 2 | 170772 | Glcci1        |
| 2 | 60406  | Sap30         |
| 2 | 231583 | Slc26a1       |
| 2 | 17886  | Myh9          |
| 2 | 15483  | Hsd11b1       |
| 2 | 230793 | Ahdc1         |



|   |        |               |
|---|--------|---------------|
| 2 | 80288  | Bcl9l         |
| 2 |        | MMT00080137   |
| 2 | 50702  | Cfhr1         |
| 2 | 68044  | Chac2         |
| 2 | 67245  | Peli1         |
| 2 | 50789  | Fbxl3         |
| 2 | 75734  | 5230400G24Rik |
| 2 | 269033 | 4930503L19Rik |
| 2 | 240396 | Mex3c         |
| 2 | 11908  | Atf1          |
| 2 | 65960  | Twsg1         |
| 2 |        | MMT00062595   |
| 2 | 21453  | Tcof1         |
| 2 | 232798 | Leng8         |
| 2 | 72040  | Mupcdh        |
| 2 | 73130  | Tmed5         |
| 2 | 19744  | Rheb          |
| 2 | 78752  | Csgalnact2    |
| 2 | 52323  | Klhl7         |
| 2 | 56426  | Pdcd10        |
| 2 |        | MMT00011278   |
| 2 | 67455  | Klhl13        |
| 2 | 620986 | EG620986      |
| 2 | 67008  | 1600012F09Rik |
| 2 | 330914 | MMT00072326   |
| 2 | 14453  | Gas2          |
| 2 | 228836 | Dlgap4        |
| 2 | 74185  | Gbe1          |
| 2 | 68263  | Pdhb          |
| 2 | 66397  | Sar1b         |
| 2 | 574428 | Zmynd15       |
| 2 | 70719  | Hmha1         |
| 2 | 17758  | Mtap4         |
| 2 | 53315  | Sult1d1       |
| 2 | 192657 | Eil2          |
| 2 | 66302  | 2410005O16Rik |
| 2 | 71900  | Tmem106b      |
| 2 | 67019  | Actr6         |
| 2 | 108645 | Mat2b         |
| 2 | 237411 | B230315N10Rik |
| 2 | 12628  | Cfh           |
| 2 | 57896  | Krcc1         |
| 2 | 240283 | Dmxl1         |
| 2 | 79264  | Krit1         |
| 2 | 320940 | Atp11c        |
| 2 | 76763  | Mospd2        |
| 2 | 67043  | Syap1         |
| 2 | 271457 | Rab5a         |
| 2 | 59048  | C1galt1c1     |
| 2 | 67089  | Psmc6         |
| 2 | 214403 | EG214403      |

|   |        |               |
|---|--------|---------------|
| 2 | 110842 | Etfa          |
| 2 | 321000 | 4933421E11Rik |
| 2 | 67864  | Yipf4         |
| 2 | 52184  | Odf2l         |
| 2 |        | MMT00034426   |
| 2 | 329877 | Dennd4c       |
| 2 | 629065 | EG629065      |
| 2 | 12301  | Cacybp        |
| 2 | 329015 | Atg2a         |
| 2 | 106581 | Itfg3         |
| 2 | 70772  | MMT00075624   |
| 2 | 268749 | Rnf31         |
| 2 | 74239  | Iqce          |
| 2 | 64652  | Nisch         |
| 2 | 71723  | Dhx34         |
| 2 | 224833 | Al661453      |
| 2 | 252876 | Zh2c2         |
| 2 | 233651 | Dchs1         |
| 2 | 59031  | Chst12        |
| 2 | 83701  | MMT00026414   |
| 2 | 225908 | Gm98          |
| 2 | 16594  | Klc2          |
| 2 | 223701 | Mkl1          |
| 2 | 245877 | Mtap7d1       |
| 2 | 13852  | Stx2          |
| 2 | 216963 | Git1          |
| 2 | 16971  | Lrp1          |
| 2 | 19704  | Upf1          |
| 2 | 140721 | Caskin2       |
| 2 |        | MMT00004881   |
| 2 | 22194  | Ube2e1        |
| 2 | 22194  | Ube2e1        |
| 2 | 214048 | Larp2         |
| 2 | 67157  | 2610301B20Rik |
| 2 | 104110 | Adcy4         |
| 2 | 68055  | Atp5s         |
| 2 |        | MMT00014015   |
| 2 | 94062  | Mrpl3         |
| 2 | 232086 | Tmem150       |
| 2 | 68097  | Dynll2        |
| 2 | 544971 | Bdp1          |
| 2 | 101148 | B630005N14Rik |
| 2 | 19091  | Prkg1         |
| 2 | 15446  | Hpgd          |
| 2 | 50500  | Ttpa          |
| 2 | 73398  | 1700054F22Rik |
| 2 | 18828  | Plscr2        |
| 2 | 64602  | Ireb2         |
| 2 | 74670  | 4930432O21Rik |
| 2 | 319832 | 6332401O19Rik |
| 2 | 14786  | Grb7          |

|   |        |               |
|---|--------|---------------|
| 2 | 11767  | Ap1m1         |
| 2 | 12632  | Cf12          |
| 2 |        | MMT00039793   |
| 2 | 78913  | Zfp294        |
| 2 | 56195  | Ptbp2         |
| 2 | 20687  | Sp3           |
| 2 |        | MMT00025372   |
| 2 | 116914 | Slc19a2       |
| 2 | 14758  | Gpm6b         |
| 2 | 26940  | Ecsit         |
| 2 | 14058  | F10           |
| 2 | 19025  | Ctsa          |
| 2 | 107869 | Cth           |
| 2 | 19876  | Robo1         |
| 2 | 18242  | Oat           |
| 2 | 228812 | Pigu          |
| 2 | 76187  | Adhfe1        |
| 2 | 67492  | Anubl1        |
| 2 |        | MMT00076410   |
| 2 | 19652  | Rbm3          |
| 2 | 63872  | Zfp296        |
| 2 |        | MMT00048325   |
| 2 | 69274  | Ctdspl        |
| 2 | 243547 | Grip2         |
| 2 | 12560  | Cdh3          |
| 2 | 54196  | Pabpn1        |
| 2 | 71566  | 9030425E11Rik |
| 2 | 22158  | Tulp3         |
| 2 | 50780  | Rgs3          |
| 2 | 14086  | Fscn1         |
| 2 | 70314  | Rabep2        |
| 2 | 75871  | Zfp821        |
| 2 | 234582 | Ccdc102a      |
| 2 | 16440  | Itpr3         |
| 2 | 12842  | Col1a1        |
| 2 | 229503 | BC023814      |
| 2 |        | MMT00043772   |
| 2 | 21827  | Thbs3         |
| 2 | 22371  | Vwf           |
| 2 | 360013 | Myo18a        |
| 2 | 103655 | Sec14l4       |
| 2 | 244058 | Rgma          |
| 2 | 670717 | MMT00038112   |
| 2 | 78267  | Klhdc8b       |
| 2 | 106042 | Prickle1      |
| 2 | 228769 | Psmf1         |
| 2 | 229615 | Pias3         |
| 2 | 217827 | BC002230      |
| 2 | 72469  | Plcd3         |
| 2 | 100169 | Phactr4       |
| 2 | 19300  | Abcd4         |

|   |        |               |
|---|--------|---------------|
| 2 | 93679  | Trim8         |
| 2 | 269587 | Epb4.1        |
| 2 | 72199  | Mms19         |
| 2 | 240753 | Plekha6       |
| 2 | 66867  | Hmg20a        |
| 2 | 11512  | Adcy6         |
| 2 | 110962 | Mbd6          |
| 2 | 209683 | Ttc28         |
| 2 | 80907  | Lactb         |
| 2 |        | MMT00054932   |
| 2 |        | MMT00070823   |
| 2 |        | MMT00024508   |
| 2 |        | MMT00079290   |
| 2 | 28019  | Ing4          |
| 2 | 12398  | Cbfa2t3       |
| 2 | 23821  | Bace1         |
| 2 | 68197  | Ndufc2        |
| 2 | 667832 | MMT00021210   |
| 2 | 216856 | Nlgn2         |
| 2 | 54324  | Arhgef5       |
| 2 | 12009  | Azi1          |
| 2 | 13163  | Daxx          |
| 2 | 72000  | 1600016N20Rik |
| 2 | 208659 | BC029169      |
| 2 | 68350  | Mul1          |
| 2 | 208043 | Setd1b        |
| 2 | 83383  | Tcfap4        |
| 2 | 217779 | Lysmd1        |
| 2 | 66513  | Map3k7ip1     |
| 2 | 16969  | Zbtb7a        |
| 2 | 217335 | Fbf1          |
| 2 | 20112  | Rps6ka2       |
| 2 | 14670  | Gna-rs1       |
| 2 | 17000  | Ltbr          |
| 2 | 67437  | Ssr3          |
| 2 | 19229  | Ptk2b         |
| 2 | 70435  | 2610204M08Rik |
| 2 | 20602  | Ncor2         |
| 2 | 71664  | Mettl7b       |
| 2 | 22339  | Vegfa         |
| 2 |        | MMT00002010   |
| 2 | 56177  | Olfm1         |
| 2 | 226548 | Aph1a         |
| 2 | 110253 | Triobp        |
| 2 |        | MMT00066182   |
| 2 | 67843  | Slc35a4       |
| 2 | 102448 | Xylb          |
| 2 | 442801 | Arhgef15      |
| 2 | 231855 | C330006K01Rik |
| 2 | 69553  | 2310033K02Rik |
| 2 | 233865 | D430042O09Rik |

|   |        |               |
|---|--------|---------------|
| 2 | 21652  | Phf1          |
| 2 | 20853  | Stau1         |
| 2 | 224671 | Btbd9         |
| 2 | 20924  | Supt5h        |
| 2 | 226154 | Lzts2         |
| 2 | 26433  | Plod3         |
| 2 | 209446 | Tcfe3         |
| 2 | 106628 | Trip10        |
| 2 | 211548 | Nomo1         |
| 2 | 22225  | Usp5          |
| 2 | 214597 | Sidt2         |
| 2 | 75687  | 2310066E14Rik |
| 2 | 140570 | Plxnb2        |
| 2 | 20502  | Slc16a2       |
| 2 | 17925  | Myo9b         |
| 2 | 231147 | Sh3tc1        |
| 2 | 77827  | Krba1         |
| 2 | 17423  | Ndst2         |
| 2 | 69601  | Dab2ip        |
| 2 | 228788 | BC020535      |
| 2 | 494448 | Cbx6          |
| 2 | 381217 | Gm967         |
| 2 | 15284  | Hlx           |
| 2 | 102693 | Phldb1        |
| 2 | 223864 | Rapgef3       |
| 2 | 216161 | Sbno2         |
| 2 | 192652 | Wdr81         |
| 2 | 13716  | Eil           |
| 2 | 353310 | Zfp703        |
| 2 | 105844 | Card10        |
| 2 | 79566  | Sh3bp5l       |
| 2 | 52857  | Gramd1a       |
| 2 | 434215 | Lrrc32        |
| 2 | 232970 | Phldb3        |
| 2 | 14766  | Gpr56         |
| 2 | 240084 | Cchcr1        |
| 2 | 66233  | Dmap1         |
| 2 | 22594  | Xrcc1         |
| 2 | 68964  | 1500010J02Rik |
| 2 | 53817  | Bat1a         |
| 2 | 13641  | Efnb1         |
| 2 | 107607 | Nod1          |
| 2 | 18596  | Pdgfrb        |
| 2 | 207565 | Camkk2        |
| 2 | 21832  | Thpo          |
| 2 | 67760  | Slc38a2       |
| 2 | 277414 | Trp53i11      |
| 2 | 373864 | Col27a1       |
| 2 | 72026  | Trmu          |
| 2 | 16423  | Cd47          |
| 2 | 75452  | Ascc2         |

|   |        |               |
|---|--------|---------------|
| 2 | 108151 | Sema3d        |
| 2 | 74149  | 1300003B13Rik |
| 2 |        | MMT00050193   |
| 2 | 210853 | EG210853      |
| 2 |        | MMT00071421   |
| 2 | 208647 | Creb3l2       |
| 2 | 76022  | 5830417110Rik |
| 2 | 224598 | Zfp758        |
| 2 | 58805  | Mlxipl        |
| 2 | 66205  | Cd302         |
| 2 | 11502  | Adam9         |
| 2 | 75424  | Zfp820        |
| 2 | 319615 | 6330416L07Rik |
| 2 | 13039  | Ctsl          |
| 2 | 13709  | Elf1          |
| 2 | 105827 | Amigo2        |
| 2 | 14412  | Slc6a13       |
| 2 | 72033  | Tsc22d2       |
| 2 | 227937 | Pkp4          |
| 2 | 217882 | AW555464      |
| 2 | 70382  | Kctd2         |
| 2 | 214742 | Rcor3         |
| 2 | 57314  | Th1l          |
| 2 | 67465  | Sf3a1         |
| 2 | 20017  | Rpo1-2        |
| 2 | 16330  | Inpp5b        |
| 2 | 228714 | Csrp2bp       |
| 2 | 67337  | Cstf1         |
| 2 | 98396  | Slc41a1       |
| 2 | 68910  | Zfp467        |
| 2 | 320951 | Pisd          |
| 2 | 382034 | Gse1          |
| 2 | 66653  | Brf2          |
| 2 | 71893  | Noxo1         |
| 2 | 104027 | Synpo         |
| 2 | 80708  | Pacsin3       |
| 2 | 170441 | Slc2a10       |
| 2 | 17829  | Muc1          |
| 2 | 21809  | Tgfb3         |
| 2 | 234825 | Klhdc4        |
| 2 | 94230  | Cpsf1         |
| 2 | 19730  | Ralgds        |
| 2 | 70611  | Fbxo33        |
| 2 | 269878 | Megf8         |
| 2 | 67784  | Plxnd1        |
| 2 | 72140  | Ccdc123       |
| 2 | 12827  | Col4a2        |
| 2 | 71941  | Cars2         |
| 2 | 101206 | Tada3l        |
| 2 | 15248  | Hic1          |
| 2 | 98170  | Tmem132a      |

|   |           |               |
|---|-----------|---------------|
| 2 | 23939     | Mapk7         |
| 2 | 276905    | Armc7         |
| 2 | 67393     | Cxxc5         |
| 2 | 18034     | Nfkb2         |
| 2 | 234796    | BC025816      |
| 2 | 57783     | Tnip1         |
| 2 | 329575    | RP23-275N21.2 |
| 2 | 668066    | RP23-67E6.3   |
| 2 | 100043387 | RP23-232H13.5 |
| 2 | 380780    | Serpina11     |
| 2 | 52065     | Mfhas1        |
| 2 | 71254     | Naif1         |
| 2 | 433865    | EG433865      |
| 2 | 269424    | Phf17         |
| 2 | 26568     | Slc27a3       |
| 2 | 11772     | Ap2a2         |
| 2 | 23989     | Med24         |
| 2 |           | MMT00014970   |
| 2 | 53607     | Snrpa         |
| 2 | 218271    | B4galt7       |
| 2 | 56513     | Pard6a        |
| 2 | 666704    | Samd1         |
| 2 | 239122    | Setdb2        |
| 2 | 232969    | Zfp428        |
| 2 | 56812     | Dnajb10       |
| 2 | 70616     | Sf4           |
| 2 | 66464     | Taf12         |
| 2 | 80752     | BC004044      |
| 2 | 103733    | Tubg1         |
| 2 | 23918     | Impdh2        |
| 2 | 26939     | Polr3e        |
| 2 | 233977    | Ppfia1        |
| 2 | 106200    | Txndc11       |
| 2 | 218811    | Sec24c        |
| 2 | 76457     | Ccdc134       |
| 2 | 236732    | Rbm10         |
| 2 | 24116     | Whsc2         |
| 2 | 72284     | Oraov1        |
| 2 | 22401     | Zmat3         |
| 2 | 74479     | Snx11         |
| 2 | 381379    | Med19         |
| 2 | 231872    | MMT00063115   |
| 2 | 70231     | Gorasp2       |
| 2 | 209815    | Tbc1d25       |
| 2 | 229644    | Trim45        |
| 2 | 76547     | Tmem101       |
| 2 | 20668     | Sox13         |
| 2 | 78286     | Nav2          |
| 2 | 98956     | Nat10         |
| 2 | 51789     | Tnk2          |
| 2 | 73158     | Larp1         |

|   |        |                    |
|---|--------|--------------------|
| 2 | 109674 | Ampd2              |
| 2 | 20587  | Smarcb1            |
| 2 | 105835 | Sgsm3              |
| 2 | 69961  | 2810432D09Rik      |
| 2 | 228869 | Ncoa5              |
| 2 | 73847  | 5430432M24Rik      |
| 2 | 16582  | Kifc3              |
| 2 | 171508 | Creld1             |
| 2 | 108014 | Sfrs9              |
| 2 | 54387  | Mcm3ap             |
| 2 | 213753 | Zfp598             |
| 2 | 231876 | Lmtk2              |
| 2 | 14566  | Gdf9               |
| 2 | 67877  | Nat5               |
| 2 | 17159  | Man2b1             |
| 2 | 225659 | Cep76              |
| 2 | 22763  | Zfr                |
| 2 |        | MMT00072312        |
| 2 | 68559  | Pdrg1              |
| 2 | 223650 | Eppk1              |
| 2 | 67473  | Slc47a1            |
| 2 | 13077  | Cyp1a2             |
| 2 | 66461  | Ptpmt1             |
| 2 |        | MMT00004455        |
| 2 |        | MMT00075201        |
| 2 | 13688  | Eif4ebp2           |
| 2 |        | MMT00040814        |
| 2 |        | MMT00059478        |
| 2 |        | MMT00006564        |
| 2 | 18128  | Notch1             |
| 2 | 20852  | Stat6              |
| 2 | 231801 | Hrbl               |
| 2 | 76014  | Zc3h18             |
| 2 | 234797 | 6430548M08Rik      |
| 2 | 224903 | Safb               |
| 2 | 105278 | Ccrk               |
| 2 | 19185  | Psm4               |
| 2 | 668450 | EG668450           |
| 2 | 17110  | Lyz1               |
| 2 | 15108  | Hsd17b10           |
| 2 | 14595  | B4galt1            |
| 2 | 66131  | Tipin              |
| 2 | 19084  | Prkar1a            |
| 2 | 67028  | 2610002M06Rik      |
| 2 | 73112  | 3110003A17Rik      |
| 2 | 230766 | BC030183           |
| 2 | 71745  | Cul2               |
| 2 | 224481 | Tfb1m              |
| 2 | 66310  | Dpy30              |
| 2 | 66310  | Dpy30              |
| 2 | 433424 | OTTMUSG00000012358 |



|   |           |               |
|---|-----------|---------------|
| 2 | 19193     | Pipox         |
| 2 | 71795     | Pitpnc1       |
| 2 | 329977    | Fhad1         |
| 2 | 57437     | Golga7        |
| 2 | 628040    | EG628040      |
| 2 | 56434     | Tspan3        |
| 2 | 66811     | Duoxa2        |
| 2 | 73708     | Dppa3         |
| 2 | 18189     | Nrxn1         |
| 2 | 244646    | Pkd113        |
| 2 |           | MMT00004313   |
| 2 | 53620     | Vamp5         |
| 2 | 21949     | Tnfsf8        |
| 2 | 219094    | 9130227C08Rik |
| 2 | 329872    | Frem1         |
| 2 | 380842    | Gm1574        |
| 2 | 381535    | RP23-149D11.4 |
| 2 | 57257     | Vav3          |
| 2 | 14563     | Gdf5          |
| 2 |           | MMT00031355   |
| 2 |           | MMT00072359   |
| 2 | 100009609 | Vmn2r65       |
| 2 |           | MMT00007643   |
| 2 | 14177     | Fgf6          |
| 2 | 12295     | Cacnb1        |
| 2 | 20666     | Sox11         |
| 2 | 627004    | MMT00000775   |
| 2 | 227195    | A430093A21Rik |
| 2 |           | MMT00022502   |
| 2 |           | MMT00027303   |
| 2 | 21823     | Th            |
| 2 | 17143     | Magea7        |
| 2 | 94352     | Loxl2         |
| 2 | 69568     | Vkorc11       |
| 2 | 75500     | 1700010H22Rik |
| 2 |           | MMT00033125   |
| 2 |           | MMT00076184   |
| 2 |           | MMT00051556   |
| 2 | 226562    | Bat2d         |
| 2 |           | MMT00001194   |
| 2 | 231760    | Rimbp2        |
| 2 | 230895    | Vps13d        |
| 2 | 231201    | AF366264      |
| 2 |           | MMT00030044   |
| 2 | 107476    | Acaca         |
| 2 | 78896     | 1500015O10Rik |
| 2 | 67653     | 4930544G11Rik |
| 2 | 11731     | Ang2          |
| 2 | 320923    | Mtap7d3       |
| 2 | 233893    | Zfp764        |
| 2 | 434198    | B130024G19Rik |

|   |        |               |
|---|--------|---------------|
| 2 |        | MMT00082345   |
| 2 | 24109  | Ubl3          |
| 2 | 12192  | Zfp36l1       |
| 2 |        | MMT00006420   |
| 2 | 102339 | Cog4          |
| 2 | 104859 | 4930573l19Rik |
| 2 | 16431  | Itm2a         |
| 2 | 214498 | Cdc73         |
| 2 | 66213  | Med7          |
| 2 |        | MMT00051501   |
| 2 |        | MMT00024195   |
| 2 | 20481  | Ski           |
| 2 | 15258  | Hipk2         |
| 2 | 192285 | Phf21a        |
| 2 | 14700  | Gng10         |
| 2 | 53330  | Vamp4         |
| 2 |        | MMT00041633   |
| 2 | 15452  | Hprt1         |
| 2 |        | MMT00011132   |
| 2 | 76108  | Rap2a         |
| 2 | 13178  | Dck           |
| 2 | 26611  | Rcn2          |
| 2 | 218503 | Fcho2         |
| 2 |        | MMT00002799   |
| 2 | 66588  | Cmpk1         |
| 2 | 78521  | B230219D22Rik |
| 2 | 55951  | Brp44l        |
| 2 | 67770  | 5830433M19Rik |
| 2 | 320267 | Fubp3         |
| 2 | 77113  | Klhl2         |
| 2 | 29864  | Rnf11         |
| 2 | 319448 | Fndc3a        |
| 2 | 69981  | Tmem30a       |
| 2 | 68944  | Tmco1         |
| 2 | 11416  | Slc33a1       |
| 2 | 22327  | Vbp1          |
| 2 | 77592  | 4931406H21Rik |
| 2 | 104776 | Aldh6a1       |
| 2 | 70155  | Ogfrl1        |
| 2 | 68646  | 1110020G09Rik |
| 2 | 233812 | BC030336      |
| 2 | 14265  | Fmr1          |
| 2 | 545370 | Hmcn1         |
| 2 | 56615  | Mgst1         |
| 2 | 18221  | Nudc          |
| 2 | 68240  | Rpa3          |
| 2 | 67795  | 6530404N21Rik |
| 2 | 67702  | Rnf149        |
| 2 | 641340 | Nrbf2         |
| 2 | 73942  | 4930405M20Rik |
| 2 | 235459 | Gtf2a2        |

|   |           |               |
|---|-----------|---------------|
| 2 | 66290     | Atp6v1g1      |
| 2 | 69185     | Dtwd1         |
| 2 | 433923    | EG433923      |
| 2 | 19053     | Ppp2cb        |
| 2 |           | MMT00040762   |
| 2 |           | MMT00001620   |
| 2 | 76453     | Prss23        |
| 2 | 66701     | Spryd4        |
| 2 | 664870    | MMT00080766   |
| 2 | 21982     | Tmem165       |
| 2 | 66684     | Tceal8        |
| 2 | 66467     | Gtf2h5        |
| 2 | 244209    | Cyp2r1        |
| 2 | 53611     | Vti1a         |
| 2 | 76267     | Fads1         |
| 2 | 22240     | Dpysl3        |
| 2 | 18552     | Pcsk5         |
| 2 | 70397     | Tmem70        |
| 2 | 66050     | 0610009B22Rik |
| 2 | 100125272 | RP24-87L14.2  |
| 2 | 57752     | Tacc2         |
| 2 | 30843     | Fbxl12        |
| 2 | 218194    | Phactr1       |
| 2 | 27373     | Csnk1e        |
| 2 | 277973    | Slc9a5        |
| 2 | 20193     | S100a1        |
| 2 | 107589    | Mylk          |
| 2 | 338355    | Fkbp15        |
| 2 |           | MMT00047848   |
| 2 |           | MMT00011146   |
| 2 | 55951     | Brp44l        |
| 2 | 18193     | Nsd1          |
| 2 | 17977     | Ncoa1         |
| 2 | 208777    | Sned1         |
| 2 | 72823     | Pard3b        |
| 2 | 18187     | Nrp2          |
| 2 | 14254     | Flt1          |
| 2 | 328280    | EG328280      |
| 2 | 22719     | Zfp61         |
| 2 | 30934     | Tor1b         |
| 2 | 213988    | Tnrc6b        |
| 2 | 320790    | Chd7          |
| 2 | 230075    | Ndufb6        |
| 2 |           | MMT00013262   |
| 2 | 27058     | Srp9          |
| 2 | 66271     | Tmem126a      |
| 2 | 19155     | Npepps        |
| 2 | 269003    | Sap130        |
| 2 | 20813     | Srp14         |
| 2 | 209239    | Gan           |
| 2 | 212632    | C79267        |

|   |        |               |
|---|--------|---------------|
| 2 | 328329 | Mast4         |
| 2 | 228355 | Madd          |
| 2 | 56637  | Gsk3b         |
| 2 | 72349  | Dusp3         |
| 2 | 72895  | Setd5         |
| 2 | 242608 | Podn          |
| 2 | 104444 | Rexo2         |
| 2 | 75471  | 1700009N14Rik |
| 2 | 19384  | Ran           |
| 2 |        | MMT00073590   |
| 2 | 19384  | Ran           |
| 2 |        | MMT00014274   |
| 2 | 20220  | Sap18         |
| 2 | 245945 | Rbm47         |
| 2 |        | MMT00034261   |
| 2 |        | MMT00020332   |
| 2 |        | MMT00040001   |
| 2 |        | MMT00042532   |
| 2 | 210530 | Leprel1       |
| 2 | 494448 | Cbx6          |
| 2 | 70550  | 5730416F02Rik |
| 2 | 26447  | Poli          |
| 2 | 105559 | Mbnl2         |
| 2 | 207214 | Larp4         |
| 2 | 217012 | Unc45b        |
| 2 | 69752  | Zfp511        |
| 2 | 72308  | Brf1          |
| 2 | 74268  | Aven          |
| 2 | 66847  | Hint3         |
| 2 | 15586  | Hyal1         |
| 2 | 76947  | 2310030N02Rik |
| 3 | 105988 | Esp1          |
| 3 | 66929  | Asf1b         |
| 3 | 234258 | Neil3         |
| 3 | 240444 | Kcng2         |
| 3 | 72415  | Sgol1         |
| 3 |        | MMT00052951   |
| 3 | 212933 | Pm20d1        |
| 3 | 18845  | Plxna2        |
| 3 | 382207 | Phf16         |
| 3 | 70804  | Pgrmc2        |
| 3 | 66320  | Tmem208       |
| 3 | 75767  | Rab11fip1     |
| 3 | 329260 | Dennd1b       |
| 3 | 110385 | Pde4c         |
| 3 | 67892  | 1810063B05Rik |
| 3 | 271144 | 9330128J19Rik |
| 3 | 56739  | Rec8          |
| 3 | 67092  | Gatm          |
| 3 | 20846  | Stat1         |
| 3 | 52552  | Parp8         |

|   |        |                    |
|---|--------|--------------------|
| 3 | 209200 | Dtx3l              |
| 3 | 70799  | Cep192             |
| 3 | 217328 | Myo15b             |
| 3 | 73379  | Dcbld2             |
| 3 | 67557  | Larp6              |
| 3 | 68144  | 5031426D15Rik      |
| 3 | 666048 | OTTMUSG00000008561 |
| 3 | 59290  | Gpa33              |
| 3 | 52897  | D11Bwg0517e        |
| 3 | 208098 | Panx3              |
| 3 | 630663 | MMT00057236        |
| 3 | 18227  | Nr4a2              |
| 3 | 68092  | Ncbp2              |
| 3 | 18949  | Pnn                |
| 3 | 76130  | Las1l              |
| 3 | 16538  | Kcns1              |
| 3 | 22631  | Ywhaz              |
| 3 | 14164  | Fgf1               |
| 3 | 21428  | Mlx                |
| 3 | 14113  | Fbl                |
| 3 | 59005  | Trappc2l           |
| 3 | 57814  | Kcne4              |
| 3 | 26970  | Pla2g2e            |
| 3 |        | MMT00020852        |
| 3 | 26360  | Angptl2            |
| 3 | 69399  | 1700025G04Rik      |
| 3 | 378700 | RP23-244H7.9       |
| 3 | 109082 | Fbxw17             |
| 3 | 56471  | Stmn4              |
| 3 | 258593 | Olfir700           |
| 3 | 380714 | Rph3al             |
| 3 | 22044  | Trh                |
| 3 | 258701 | Olfir401           |
| 3 | 57776  | Ttyh1              |
| 3 |        | MMT00009771        |
| 3 | 668940 | Myh7b              |
| 3 | 319601 | Zfp653             |
| 3 | 68895  | Rasl11a            |
| 3 | 225870 | Rin1               |
| 3 | 11746  | Anxa4              |
| 3 | 106369 | Ypel1              |
| 3 | 20336  | Exoc4              |
| 3 | 228960 | Stx16              |
| 3 | 17761  | Mtap7              |
| 3 | 110809 | Sfrs1              |
| 3 |        | MMT00051549        |
| 3 | 230700 | Foxj3              |
| 3 | 20195  | S100a11            |
| 3 | 327762 | Dna2               |
| 3 | 69151  | Lzic               |
| 3 | 73699  | Ppp2r1b            |

|   |        |               |
|---|--------|---------------|
| 3 | 16909  | Lmo2          |
| 3 | 59069  | Tpm3          |
| 3 | 100177 | Zmym6         |
| 3 | 109620 | Dsp           |
| 3 | 217843 | 9030205A07Rik |
| 3 |        | MMT00038941   |
| 3 |        | MMT00014378   |
| 3 | 378462 | Morn2         |
| 3 | 225651 | Mppe1         |
| 3 | 320365 | Fry           |
| 3 | 65964  | B230120H23Rik |
| 3 | 64085  | Clstn2        |
| 3 | 268515 | Bahcc1        |
| 3 | 75690  | 2210412E05Rik |
| 3 | 66632  | Atpbd4        |
| 3 | 225207 | Zfp521        |
| 3 | 240725 | Sulf1         |
| 3 | 242819 | Rundc3b       |
| 3 | 330863 | Trim67        |
| 3 | 71159  | 4933416I08Rik |
| 3 | 231134 | Dok7          |
| 3 | 52504  | Cenpo         |
| 3 | 226971 | Plekfb2       |
| 3 | 18541  | Pcnt          |
| 3 | 56459  | Sae1          |
| 3 | 67130  | Ndufa6        |
| 3 | 225115 | Svil          |
| 3 | 20620  | Plk2          |
| 3 | 237320 | Aldh8a1       |
| 3 | 67184  | Ndufa13       |
| 3 |        | MMT00074939   |
| 3 |        | MMT00018326   |
| 3 | 76421  | 1700028K03Rik |
| 3 |        | MMT00030953   |
| 3 | 28030  | Gfm1          |
| 3 | 213043 | MMT00000549   |
| 3 | 71832  | Csl           |
| 3 |        | MMT00032580   |
| 3 | 74482  | Ifitm7        |
| 3 | 12142  | Prdm1         |
| 3 | 226849 | Ppp2r5a       |
| 3 | 17920  | Myo6          |
| 3 | 226856 | Lpgat1        |
| 3 | 214627 | Papd5         |
| 3 | 11789  | Apc           |
| 3 | 100737 | Dcun1d4       |
| 3 | 66407  | Mrps15        |
| 3 | 72117  | Nat13         |
| 3 | 319266 | A130010J15Rik |
| 3 | 18408  | Slc25a15      |
| 3 |        | MMT00001681   |

|   |        |               |
|---|--------|---------------|
| 3 | 14782  | Gsr           |
| 3 | 216350 | Tspan8        |
| 3 | 74868  | Tmem65        |
| 3 | 69479  | 1700029J07Rik |
| 3 | 27368  | Tbl2          |
| 3 | 70598  | Filip1        |
| 3 | 24099  | Tnfsf13b      |
| 3 | 21826  | Thbs2         |
| 3 | 101359 | D330027H18Rik |
| 3 | 20378  | Frzb          |
| 3 | 18752  | Prkcc         |
| 3 |        | MMT00043344   |
| 3 | 75820  | Wdr64         |
| 3 | 380694 | Ccnjl         |
| 3 | 78651  | Lsm6          |
| 3 | 319520 | Dusp4         |
| 3 | 16568  | Kif3a         |
| 3 | 78787  | Usp54         |
| 3 | 57423  | Atp5j2        |
| 3 | 170707 | Usp48         |
| 3 | 58230  | Rnf8          |
| 3 | 20185  | Ncor1         |
| 3 | 81703  | Jdp2          |
| 3 |        | MMT00044077   |
| 3 | 56191  | Tro           |
| 3 | 67877  | Nat5          |
| 3 |        | MMT00057248   |
| 3 | 74841  | Usp38         |
| 3 | 320538 | D130059P03Rik |
| 3 | 11803  | Aplp1         |
| 3 | 11500  | Adam7         |
| 3 | 67736  | Ccdc130       |
| 3 | 12837  | Col8a1        |
| 3 | 101359 | D330027H18Rik |
| 3 | 74276  | Cldnd2        |
| 3 | 74055  | Plce1         |
| 3 | 14998  | H2-DMa        |
| 3 | 27220  | Cartpt        |
| 3 | 53624  | Cldn7         |
| 3 | 78304  | Lsmd1         |
| 3 | 50997  | Mpp2          |
| 3 |        | MMT00039919   |
| 3 | 271221 | 5031414D18Rik |
| 3 | 246691 | Prok1         |
| 3 | 635702 | Naaladl2      |
| 3 | 58186  | Rad18         |
| 3 | 51885  | Tubgcp4       |
| 3 | 224170 | Dzip3         |
| 3 | 209032 | Zc3hav1l      |
| 3 |        | MMT00031309   |
| 3 | 64661  | Krtdap        |

|   |        |               |
|---|--------|---------------|
| 3 | 19247  | Ptpn11        |
| 3 | 74081  | Cep350        |
| 3 | 226541 | Klhl20        |
| 3 | 69749  | 2410004N09Rik |
| 3 |        | MMT00006445   |
| 3 | 70561  | Txndc16       |
| 3 | 258954 | Olfr522       |
| 3 | 27364  | Srr           |
| 3 | 259010 | Olfr393       |
| 3 | 23872  | Ets2          |
| 3 | 207209 | Gm317         |
| 3 | 83997  | Slmap         |
| 3 | 20965  | Syn2          |
| 3 | 75563  | Dnali1        |
| 3 | 22248  | Unc119        |
| 3 | 14199  | Fhl1          |
| 3 | 16891  | Lipg          |
| 3 | 66569  | Gdpd1         |
| 3 | 11814  | Apoc3         |
| 3 | 50501  | Prok2         |
| 3 | 15426  | Hoxc8         |
| 3 | 74665  | Lrrc48        |
| 3 | 231134 | Dok7          |
| 3 | 269328 | Muc15         |
| 3 | 18781  | Pla2g2c       |
| 3 | 170947 | Myoz3         |
| 3 | 636808 | Cntnap5a      |
| 3 | 210321 | BC048679      |
| 3 | 18719  | Pip5k1b       |
| 3 | 13497  | Drp2          |
| 3 | 103266 | Al597468      |
| 3 | 216760 | Mfap3         |
| 3 | 212989 | Best2         |
| 3 | 66448  | Mrpl20        |
| 3 |        | MMT00047335   |
| 3 | 22121  | Rpl13a        |
| 3 | 15254  | Hint1         |
| 3 | 12892  | Cpox          |
| 3 | 66676  | Tmed7         |
| 3 | 234736 | Rfwd3         |
| 3 | 76719  | 1700081L11Rik |
| 3 | 59001  | Pole3         |
| 3 |        | MMT00014098   |
| 3 | 68917  | Hint2         |
| 3 | 320827 | C530008M17Rik |
| 3 | 66185  | 1110037F02Rik |
| 3 | 30060  | Mfi2          |
| 3 | 210356 | E030049G20Rik |
| 3 | 74309  | Osbp2         |
| 3 | 71878  | 2310007D09Rik |
| 3 | 23920  | Insrr         |



|   |        |               |
|---|--------|---------------|
| 3 | 16634  | Klra3         |
| 3 | 226151 | 6030443O07Rik |
| 3 | 210789 | Tbc1d4        |
| 3 | 72750  | Als2cr13      |
| 3 | 17289  | Mertk         |
| 3 | 170753 | Zfp704        |
| 3 | 268595 | D430019H16Rik |
| 3 | 380787 | A230065H16Rik |
| 3 | 107272 | Psat1         |
| 3 |        | MMT00033542   |
| 3 | 381853 | Gipr          |
| 3 | 258570 | Olfr1043      |
| 3 | 67344  | Tctex1d1      |
| 3 | 14633  | Gli2          |
| 3 | 228151 | 4833423E24Rik |
| 3 | 244923 | Klhl31        |
| 3 | 16664  | Krt14         |
| 3 |        | MMT00006980   |
| 3 | 629499 | 4922505G16Rik |
| 3 | 238076 | Kcns3         |
| 3 | 103511 | BB146404      |
| 3 | 68859  | 1190007F08Rik |
| 3 | 76770  | 2010005H15Rik |
| 3 | 230235 | 6430704M03Rik |
| 3 | 26434  | Prnd          |
| 3 | 54562  | Lrrc6         |
| 3 | 78547  | E130304I02Rik |
| 3 |        | MMT00052319   |
| 3 |        | MMT00011155   |
| 3 |        | MMT00005439   |
| 3 | 320840 | Negr1         |
| 3 | 14400  | Gabrb1        |
| 3 | 54216  | Pcdh7         |
| 3 | 235952 | Gm189         |
| 3 | 70902  | Aytl1b        |
| 3 | 636752 | EG636752      |
| 3 | 104383 | Rcor2         |
| 3 | 258573 | Olfr1020      |
| 3 | 171253 | V1ri2         |
| 3 | 671564 | Rnf212        |
| 3 | 75434  | 1700001C02Rik |
| 3 |        | MMT00006438   |
| 3 | 21341  | Taf1c         |
| 3 | 51795  | Srpx          |
| 3 | 207667 | Lbxcor1       |
| 3 | 12291  | Cacna1g       |
| 3 | 73732  | Muc16         |
| 3 | 22349  | Vil1          |
| 3 | 72668  | 2810030E01Rik |
| 3 | 57264  | Retn          |
| 3 |        | MMT00064181   |

|   |        |               |
|---|--------|---------------|
| 3 | 258715 | Olfr421       |
| 3 | 171241 | V1rg6         |
| 3 | 268288 | Samd3         |
| 3 | 140484 | Pofut1        |
| 3 | 75301  | 4930556N09Rik |
| 3 | 69364  | 1700012P22Rik |
| 3 | 76389  | Ankrd36       |
| 3 | 208151 | Tmem132b      |
| 3 | 71840  | Tekt4         |
| 3 | 68509  | 1110018H23Rik |
| 3 | 70218  | 3000004C01Rik |
| 3 | 382083 | Snx22         |
| 3 |        | MMT00006341   |
| 3 | 209091 | Ccnb3         |
| 3 | 20776  | Tmie          |
| 3 | 338360 | B430212C06Rik |
| 3 | 72948  | Tppp          |
| 3 | 13661  | Ehf           |
| 3 |        | MMT00014972   |
| 3 | 17309  | Mgat3         |
| 3 | 66226  | Trappc2       |
| 3 | 13822  | Epb4.1l2      |
| 3 | 320508 | Cachd1        |
| 3 | 64817  | Svep1         |
| 3 | 104886 | Rab15         |
| 3 | 18772  | Pkp1          |
| 3 | 627427 | EG627427      |
| 3 | 14226  | Fkbp1b        |
| 3 | 72236  | Tsnaxip1      |
| 3 | 260315 | Nav3          |
| 3 |        | MMT00076649   |
| 3 | 66772  | Asb17         |
| 3 | 213234 | Zbbx          |
| 3 | 68515  | 1110012N22Rik |
| 3 | 56212  | Rhog          |
| 3 | 21679  | Tead4         |
| 3 | 107753 | Lgals2        |
| 3 | 19687  | Rfc1          |
| 3 | 252868 | Odf4          |
| 3 | 70807  | Arrdc2        |
| 3 | 233552 | Gdpd5         |
| 3 | 71847  | Gmcl1l        |
| 3 | 98660  | Atp1a2        |
| 3 | 108897 | 2810003C17Rik |
| 3 | 243967 | Gm484         |
| 3 | 20513  | Slc1a6        |
| 3 | 53311  | Mybph         |
| 3 | 383548 | Serpib3b      |
| 3 | 76747  | Dapl1         |
| 3 | 666173 | Vps13b        |
| 3 | 56089  | Ramp3         |

|   |        |               |
|---|--------|---------------|
| 3 | 209294 | Csta          |
| 3 | 24131  | Ldb3          |
| 3 | 17349  | Mlf1          |
| 3 | 11474  | Actn3         |
| 3 | 12715  | Ckm           |
| 3 | 16665  | Krt15         |
| 3 | 66957  | Serpinb11     |
| 3 |        | MMT00072061   |
| 3 | 193043 | Zfp3          |
| 3 | 213208 | Il20rb        |
| 3 | 57751  | Rnf25         |
| 3 | 14170  | Fgf15         |
| 3 | 30946  | Abt1          |
| 3 | 78834  | Zfp623        |
| 3 | 14081  | Acsl1         |
| 3 | 19222  | Ptgir         |
| 3 |        | MMT00007367   |
| 3 | 70153  | 2210016F16Rik |
| 3 | 14425  | Galnt3        |
| 3 | 68743  | Anln          |
| 3 | 72133  | Trub1         |
| 3 |        | MMT00044046   |
| 3 | 12364  | Casp12        |
| 3 | 17202  | Mc4r          |
| 3 | 72184  | 2810406K13Rik |
| 3 |        | MMT00016159   |
| 3 | 213002 | Ifitm6        |
| 3 | 27007  | Klrk1         |
| 3 |        | MMT00000714   |
| 3 |        | MMT00022451   |
| 3 | 257871 | Olf1372-ps1   |
| 3 | 108832 | 5430405G05Rik |
| 3 | 675135 | MMT00050019   |
| 3 | 14674  | Gna13         |
| 3 | 22773  | Zic3          |
| 3 | 97487  | Cmtm4         |
| 3 | 67646  | 4930522H14Rik |
| 3 | 233805 | Dcun1d3       |
| 3 | 384214 | Abhd7         |
| 3 | 21828  | Thbs4         |
| 3 | 627648 | EG627648      |
| 3 | 18843  | Plunc         |
| 3 | 74966  | 4930471G03Rik |
| 3 | 224058 | Tmem207       |
| 3 |        | MMT00013481   |
| 3 | 12654  | Chi3l1        |
| 3 | 73341  | Arhgef6       |
| 3 | 208372 | Asb18         |
| 3 | 16875  | Lhx8          |
| 3 | 15417  | Hoxb9         |
| 3 | 66254  | Dimt1         |

|   |           |               |
|---|-----------|---------------|
| 3 | 14601     | Ghrh          |
| 3 | 71785     | Pdghd         |
| 3 | 218210    | Nup153        |
| 3 |           | MMT00052662   |
| 3 | 223917    | Krt79         |
| 3 | 319997    | A630001G21Rik |
| 3 | 52428     | Rhpn2         |
| 3 | 14807     | Grik3         |
| 3 | 21906     | Otop1         |
| 3 | 257632    | Nod2          |
| 3 | 67085     | 1700024G13Rik |
| 3 | 252864    | Dusp15        |
| 3 | 24001     | Tiam2         |
| 3 | 100041422 | MMT00070324   |
| 3 |           | MMT00013951   |
| 3 | 245615    | Kir3dl2       |
| 3 | 64293     | Stk32b        |
| 3 |           | MMT00077820   |
| 3 | 21948     | Cd70          |
| 3 | 209012    | Ulk4          |
| 3 | 13592     | Ebf2          |
| 3 | 14402     | Gabrb3        |
| 3 | 67077     | 1700019N12Rik |
| 3 | 21334     | Tac2          |
| 3 | 11600     | Angpt1        |
| 3 |           | MMT00030347   |
| 3 | 14462     | Gata3         |
| 3 | 17002     | Ltf           |
| 3 | 380653    | Gm872         |
| 3 | 258960    | Olf171        |
| 3 | 258811    | Olf926        |
| 3 | 66720     | Klhl10        |
| 3 | 66958     | Txndc14       |
| 3 | 21906     | Otop1         |
| 3 | 109151    | Chd9          |
| 3 | 99929     | Tiparp        |
| 3 |           | MMT00054498   |
| 3 |           | MMT00071077   |
| 3 | 72249     | 1700019G24Rik |
| 3 | 78303     | Hist3h2ba     |
| 3 | 18705     | Pik3c2g       |
| 3 | 67050     | Nkap          |
| 3 | 83703     | Dbr1          |
| 3 | 242100    | Pglyrp3       |
| 4 | 66197     | Cks2          |
| 4 | 67704     | 1810037117Rik |
| 4 | 75572     | Acyp2         |
| 4 | 66421     | 2410004B18Rik |
| 4 |           | MMT00001695   |
| 4 |           | MMT00050414   |
| 4 | 319189    | Hist2h2bb     |

|   |           |               |
|---|-----------|---------------|
| 4 | 67840     | Mrp63         |
| 4 | 75669     | Pik3r4        |
| 4 | 20339     | Sele          |
| 4 | 73635     | 1700113I22Rik |
| 4 | 108655    | Foxp1         |
| 4 | 21339     | Taf1a         |
| 4 | 434234    | 2610020H08Rik |
| 4 | 70428     | Polr3b        |
| 4 |           | MMT00040108   |
| 4 | 72341     | Tmem103       |
| 4 | 67755     | Ddx47         |
| 4 | 233335    | Dmn           |
| 4 | 215193    | AA408296      |
| 4 | 216363    | Rab3ip        |
| 4 | 71648     | Optn          |
| 4 | 330177    | Taok3         |
| 4 | 235134    | Nfrkb         |
| 4 | 27362     | Dnajb9        |
| 4 | 76426     | 1700029J11Rik |
| 4 | 70767     | Prpf3         |
| 4 | 69456     | Commd10       |
| 4 | 212377    | F730047E07Rik |
| 4 | 13198     | Ddit3         |
| 4 | 67391     | Fundc2        |
| 4 |           | MMT00010554   |
| 4 |           | MMT00071316   |
| 4 | 67538     | Zswim3        |
| 4 | 66680     | 3230401D17Rik |
| 4 | 66680     | 3230401D17Rik |
| 4 | 66586     | Crls1         |
| 4 | 13680     | Ddx19a        |
| 4 | 14579     | Gem           |
| 4 | 235567    | Dnajc13       |
| 4 | 12468     | Cct7          |
| 4 | 13244     | Degs1         |
| 4 | 70456     | Brp44         |
| 4 | 52706     | D10ErtD761e   |
| 4 | 67725     | Nudt13        |
| 4 | 76936     | Hnrnpm        |
| 4 | 66385     | Ppp1r7        |
| 4 | 407785    | Ndufs6        |
| 4 | 71989     | Rpusd4        |
| 4 | 76967     | 2700049A03Rik |
| 4 | 53871     | Pkd2l2        |
| 4 | 17281     | Fyco1         |
| 4 | 22341     | Vegfc         |
| 4 | 17685     | Msh2          |
| 4 | 242050    | Igsf10        |
| 4 | 100041686 | MMT00047654   |
| 4 | 229227    | 4932438A13Rik |
| 4 | 56376     | Pdlim5        |

|   |        |               |
|---|--------|---------------|
| 4 | 66454  | Nmnat1        |
| 4 | 51786  | Cpsf2         |
| 4 | 245638 | Tbc1d8b       |
| 4 | 320165 | Tacc1         |
| 4 | 78586  | Srbd1         |
| 4 | 208846 | Daam1         |
| 4 | 227525 | Dclre1c       |
| 4 | 17380  | Mme           |
| 4 | 240539 | Gm336         |
| 4 | 67495  | 2010200O16Rik |
| 4 | 17246  | Mdm2          |
| 4 | 14711  | Gnmt          |
| 4 | 70612  | 5730494N06Rik |
| 4 | 67096  | Mmachc        |
| 4 | 98685  | 1190005F20Rik |
| 4 | 56715  | Rabgef1       |
| 4 | 237422 | Ric8b         |
| 4 | 72778  | 2810451A06Rik |
| 4 | 71660  | Rarres2       |
| 4 | 12870  | Cp            |
| 4 | 60596  | Gucy1a3       |
| 4 | 211232 | Cpne9         |
| 4 | 74157  | 1300018I05Rik |
| 4 | 67457  | Frmd8         |
| 4 | 56878  | Rbms1         |
| 4 |        | MMT00041243   |
| 4 | 26570  | Slc7a11       |
| 4 | 68190  | 5330426P16Rik |
| 4 | 108155 | Ogt           |
| 4 | 69821  | Mterfd2       |
| 4 | 210529 | G430022H21Rik |
| 4 | 83486  | Rbm5          |
| 4 | 381678 | Zcwpw1        |
| 4 | 232236 | C130022K22Rik |
| 4 | 52013  | D19ErtD386e   |
| 4 | 67011  | Mettl6        |
| 4 | 22129  | Ttc3          |
| 4 | 72416  | Lrpprc        |
| 4 |        | MMT00077003   |
| 4 | 67267  | 2900010M23Rik |
| 4 | 67808  | Tprgl         |
| 4 | 68499  | Mrpl53        |
| 4 | 245651 | EG245651      |
| 4 | 20256  | Clec11a       |
| 4 | 66230  | Mrps28        |
| 4 | 232714 | Mgam          |
| 4 | 15526  | Hspa9         |
| 4 | 69787  | Anxa13        |
| 4 | 13669  | Eif3s10       |
| 4 | 243272 | Sbno1         |
| 4 | 229663 | Csde1         |

|   |        |               |
|---|--------|---------------|
| 4 | 244672 | Cwf19l2       |
| 4 | 18028  | Nfib          |
| 4 |        | MMT00063982   |
| 4 | 14884  | Gtf2h1        |
| 4 | 71521  | Pds5a         |
| 4 |        | MMT00013656   |
| 4 | 319817 | Rc3h2         |
| 4 | 17260  | Mef2c         |
| 4 | 12010  | B2m           |
| 4 | 320720 | Fastkd1       |
| 4 | 60344  | Fign          |
| 4 | 208449 | Sgms1         |
| 4 | 103742 | 1810046J19Rik |
| 4 |        | MMT00007006   |
| 4 | 224273 | BC043118      |
| 4 | 12995  | Csnk2a1       |
| 4 | 12995  | Csnk2a1       |
| 4 | 17957  | Napb          |
| 4 | 20224  | Sar1a         |
| 4 | 54160  | Copg2         |
| 4 |        | MMT00030762   |
| 4 |        | MMT00012906   |
| 4 | 625690 | EG625690      |
| 4 |        | MMT00017766   |
| 4 |        | MMT00076151   |
| 4 | 442832 | 1600029O15Rik |
| 4 |        | MMT00015606   |
| 4 | 668699 | MMT00070312   |
| 4 |        | MMT00079369   |
| 4 |        | MMT00069919   |
| 4 |        | MMT00059232   |
| 4 |        | MMT00043723   |
| 4 |        | MMT00002494   |
| 4 | 56046  | Uqcc          |
| 4 | 72536  | Tagap         |
| 4 | 17846  | Commd1        |
| 4 | 20747  | Spop          |
| 4 | 14696  | Gnb4          |
| 4 |        | MMT00014022   |
| 4 | 74316  | Isca2         |
| 4 | 18673  | Phb           |
| 4 | 433546 | MMT00011283   |
| 4 | 20005  | Rpl9          |
| 4 |        | MMT00041615   |
| 4 |        | MMT00040956   |
| 4 | 19364  | Rad51l3       |
| 4 | 214444 | Cdk5rap2      |
| 4 | 72145  | Wdfy3         |
| 4 | 227334 | Usp40         |
| 4 | 18519  | Pcaf          |
| 4 | 52822  | Rufy3         |

|   |        |               |
|---|--------|---------------|
| 4 |        | MMT00017539   |
| 4 | 229279 | Hnrnpa3       |
| 4 | 338320 | Mia2          |
| 4 | 19766  | Ripk1         |
| 4 |        | MMT00046069   |
| 4 |        | MMT00019519   |
| 4 | 15289  | Hmgb1         |
| 4 | 319887 | E030030I06Rik |
| 4 | 628431 | Hmgb1-rs17    |
| 4 |        | MMT00048203   |
| 4 |        | MMT00044766   |
| 4 | 20742  | Spnb2         |
| 4 | 333789 | N4bp2         |
| 4 | 78523  | Mrpl9         |
| 4 | 214133 | Tet2          |
| 4 | 24136  | Zeb2          |
| 4 | 16210  | Impact        |
| 4 | 17087  | Ly96          |
| 4 | 20044  | Rps14         |
| 4 | 329908 | Usp24         |
| 4 | 224860 | Plcl2         |
| 4 | 76681  | Trim12        |
| 4 | 26874  | Abcd2         |
| 4 |        | MMT00050540   |
| 4 | 385454 | EG385454      |
| 4 |        | MMT00004929   |
| 4 | 14823  | Grm8          |
| 4 | 14660  | Gls           |
| 4 | 212999 | Tnpo2         |
| 4 | 17191  | Mbd2          |
| 4 | 380969 | C230021P08Rik |
| 4 | 108797 | Mex3b         |
| 4 | 68198  | Ndufb2        |
| 4 | 70316  | Ndufab1       |
| 4 |        | MMT00047239   |
| 4 | 381126 | Gm944         |
| 4 | 21787  | Tfg           |
| 4 | 17714  | Grpel2        |
| 4 | 50926  | Hnrpdl        |
| 4 | 55990  | Fmo2          |
| 4 | 66270  | 1810015C04Rik |
| 4 | 18605  | Enpp1         |
| 4 | 215929 | AI317395      |
| 4 |        | MMT00007996   |
| 4 |        | MMT00048286   |
| 4 |        | MMT00046581   |
| 4 | 71787  | Trspap1       |
| 4 | 13036  | Ctsh          |
| 4 | 320712 | Abi3bp        |
| 4 | 72805  | 2810455K09Rik |
| 4 | 18616  | Peg3          |



|   |        |                    |
|---|--------|--------------------|
| 4 | 226751 | Cdc42bpa           |
| 4 | 74776  | Ppa2               |
| 4 | 20493  | Slc10a1            |
| 4 | 71633  | 4833414E09Rik      |
| 4 | 26930  | MMT00033859        |
| 4 | 74025  | Nphp3              |
| 4 | 257871 | Olf1372-ps1        |
| 4 |        | MMT00000944        |
| 4 | 213895 | Bms1               |
| 4 | 76719  | 1700081L11Rik      |
| 4 | 230753 | Thrap3             |
| 4 | 70579  | Zc3h11a            |
| 4 | 54673  | Sh3glb1            |
| 4 | 319565 | Syne2              |
| 4 | 19062  | RP23-136K12.4      |
| 4 | 212153 | 2610015P09Rik      |
| 4 | 320816 | Ankrd16            |
| 4 | 83675  | Bicc1              |
| 4 | 67727  | Stx17              |
| 4 | 72587  | Pan3               |
| 4 | 626870 | OTTMUSG0000005148  |
| 4 | 234135 | Whsc1l1            |
| 4 | 76572  | Rbmxl2             |
| 4 | 217995 | Heatr1             |
| 4 | 67693  | 2310003F16Rik      |
| 4 | 54357  | Epb4.1l4b          |
| 4 | 226641 | Atf6               |
| 4 | 625752 | RP23-54E4.8        |
| 4 | 69487  | 2310003L22Rik      |
| 4 | 13180  | Pcbd1              |
| 4 | 50781  | Dkk3               |
| 4 | 21885  | Tle1               |
| 4 | 319804 | Glt1d1             |
| 4 | 13998  | Fgd6               |
| 4 |        | MMT00057557        |
| 4 | 16898  | Rps2               |
| 4 | 546164 | EG546164           |
| 4 |        | MMT00036264        |
| 4 |        | MMT00016905        |
| 4 | 677044 | ENSMUSG00000074250 |
| 4 |        | MMT00043750        |
| 4 |        | MMT00000408        |
| 4 |        | MMT00005808        |
| 4 |        | MMT00039476        |
| 4 | 243642 | EG243642           |
| 4 |        | MMT00060803        |
| 4 |        | MMT00066059        |
| 4 | 625055 | EG625055           |
| 4 |        | MMT00082247        |
| 4 |        | MMT00069688        |
| 4 |        | MMT00065672        |

|   |           |               |
|---|-----------|---------------|
| 4 | 109254    | 9530008L14Rik |
| 4 | 320405    | Cadps2        |
| 4 |           | MMT00000356   |
| 4 |           | MMT00017268   |
| 4 | 12530     | Cdc25a        |
| 4 | 16542     | Kdr           |
| 4 | 71544     | 9030420J04Rik |
| 4 | 71544     | 9030420J04Rik |
| 4 | 14630     | Gclm          |
| 4 | 70604     | Dnajb14       |
| 4 |           | MMT00042479   |
| 4 | 26424     | Nr5a2         |
| 4 |           | MMT00030019   |
| 4 | 66935     | 1700023B02Rik |
| 4 |           | MMT00061243   |
| 4 |           | MMT00046046   |
| 4 |           | MMT00036668   |
| 4 | 675689    | MMT00041953   |
| 4 | 271564    | Vps13a        |
| 4 | 67444     | Ilkap         |
| 4 |           | MMT00033583   |
| 4 | 317750    | Slc24a5       |
| 4 | 140499    | Ube2j2        |
| 4 |           | MMT00058026   |
| 4 | 56095     | Ftsj3         |
| 4 | 17955     | Nap1l4        |
| 4 | 70769     | Nolc1         |
| 4 | 94089     | Trim7         |
| 4 | 66070     | Cwc15         |
| 4 | 239435    | Aard          |
| 4 | 227331    | Gigyf2        |
| 4 | 83602     | Gtf2a1        |
| 4 | 22130     | Ttf1          |
| 4 | 12727     | Clcn4-2       |
| 4 | 72289     | Malat1        |
| 4 | 192195    | Ash1l         |
| 4 | 72972     | Gcap14        |
| 4 | 13418     | Dnajc1        |
| 4 | 100040305 | MMT00074121   |
| 4 | 80744     | BC003993      |
| 4 | 14874     | Gstz1         |
| 4 |           | MMT00047284   |
| 4 |           | MMT00031504   |
| 4 |           | MMT00014056   |
| 4 |           | MMT00082577   |
| 4 |           | MMT00006479   |
| 4 | 232685    | AB041803      |
| 4 | 12793     | Cnih          |
| 4 | 94190     | Ophn1         |
| 4 | 66204     | Acyp1         |
| 4 |           | MMT00058413   |

|   |        |                    |
|---|--------|--------------------|
| 4 | 19988  | Rpl6               |
| 4 | 73830  | Eif3k              |
| 4 | 226646 | Ndufs2             |
| 4 | 11736  | Ankfy1             |
| 4 | 327978 | Sfn5               |
| 4 | 69700  | Col22a1            |
| 4 | 67607  | 2810426N06Rik      |
| 4 | 243171 | BC005561           |
| 5 |        | MMT00033856        |
| 5 | 70355  | Gprc5c             |
| 5 | 68037  | 2900093K20Rik      |
| 5 | 242691 | Gpatch3            |
| 5 | 104445 | Cdc42ep1           |
| 5 | 223665 | C030006K11Rik      |
| 5 | 78920  | Dlst               |
| 5 | 333654 | Ppp1r13l           |
| 5 | 56190  | Rbm38              |
| 5 | 22224  | Usp10              |
| 5 | 229715 | Amigo1             |
| 5 | 20324  | Sdpr               |
| 5 | 235036 | Ppan               |
| 5 | 667373 | OTTMUSG00000016644 |
| 5 | 20595  | Smn1               |
| 5 | 81500  | Sil1               |
| 5 |        | MMT00058658        |
| 5 | 102632 | Acad11             |
| 5 | 544963 | Iqgap2             |
| 5 | 103850 | Nt5m               |
| 5 | 212706 | C330016O10Rik      |
| 5 | 330192 | Vps37b             |
| 5 |        | MMT00007507        |
| 5 | 234730 | Fuk                |
| 5 | 71767  | Tysnd1             |
| 5 | 75785  | Klhl24             |
| 5 | 18938  | Ppp1r14b           |
| 5 | 18938  | Ppp1r14b           |
| 5 | 76501  | Commd9             |
| 5 | 74504  | 2410018C17Rik      |
| 5 | 20810  | Srm                |
| 5 | 98970  | Fibcd1             |
| 5 | 216131 | Tmem1              |
| 5 | 237781 | Smcr7              |
| 5 | 223722 | Mcat               |
| 5 | 101612 | Grwd1              |
| 5 | 29805  | Znhit2             |
| 5 | 110816 | Pwp2               |
| 5 | 110816 | Pwp2               |
| 5 | 257633 | Acsf3              |
| 5 | 14431  | Gamt               |
| 5 | 27632  | Rdbp               |
| 5 | 231633 | Tmem119            |

|   |        |               |
|---|--------|---------------|
| 5 | 75751  | Ipo4          |
| 5 | 68671  | Pcyt2         |
| 5 | 209011 | Sirt7         |
| 5 | 18247  | Oaz2          |
| 5 | 18247  | Oaz2          |
| 5 | 19246  | Ptpn1         |
| 5 | 404195 | Cyp2c54       |
| 5 | 107141 | Cyp2c50       |
| 5 | 30956  | Aass          |
| 5 | 12346  | Car1          |
| 5 |        | MMT00041407   |
| 5 | 18600  | Padi2         |
| 5 | 58859  | Efemp2        |
| 5 | 11781  | Ap4m1         |
| 5 | 19294  | Pvrl2         |
| 5 | 56222  | Cited4        |
| 5 | 223648 | 2410075B13Rik |
| 5 | 22724  | Zbtb7b        |
| 5 | 74330  | Dnajc14       |
| 5 | 69106  | Stoml1        |
| 5 | 18542  | Pcolce        |
| 5 | 72042  | Cotl1         |
| 5 | 51793  | Ddah2         |
| 5 | 16949  | Loxl1         |
| 5 | 24083  | Gtlf3b        |
| 5 | 216725 | Adamts2       |
| 5 | 74772  | Atp13a2       |
| 5 | 22344  | Vezf1         |
| 5 | 16399  | Itga2b        |
| 5 | 18132  | Notch4        |
| 5 | 26754  | Cops5         |
| 5 | 17993  | Ndufs4        |
| 5 | 69876  | Thap3         |
| 5 | 106073 | D15Mgi27      |
| 5 | 17850  | Mut           |
| 5 | 217119 | Xylt2         |
| 5 | 18709  | Pik3r2        |
| 5 |        | MMT00052332   |
| 5 | 76958  | 2210418O10Rik |
| 5 | 76483  | Lmf1          |
| 5 | 66889  | Rnf128        |
| 5 | 77578  | Bcl9          |
| 5 | 72023  | Cyb561d1      |
| 5 | 93960  | Nkd1          |
| 5 | 234683 | Elmo3         |
| 5 | 22340  | Vegfb         |
| 5 | 28113  | Tinf2         |
| 5 | 12927  | Bcar1         |
| 5 | 71275  | 4933437F05Rik |
| 5 | 12354  | Car7          |
| 5 | 224805 | Aars2         |

|   |        |               |
|---|--------|---------------|
| 5 | 77411  | Rbm35b        |
| 5 | 71670  | Acy3          |
| 5 | 20516  | Slc20a2       |
| 5 | 217980 | Larp5         |
| 5 | 16419  | Itgb5         |
| 5 | 16190  | Il4ra         |
| 5 | 101113 | Snx21         |
| 5 | 84094  | Plvap         |
| 5 | 229746 | EG229746      |
| 5 | 29806  | Limd1         |
| 5 | 57743  | Sec61a2       |
| 5 | 67684  | 3300001P08Rik |
| 5 |        | MMT00045357   |
| 5 | 18294  | Ogg1          |
| 5 | 268448 | Phf12         |
| 5 | 76308  | Rab1b         |
| 5 | 227298 | BC038286      |
| 5 | 53333  | Tomm40        |
| 5 | 13109  | Cyp2j5        |
| 5 | 107581 | Col16a1       |
| 5 | 216613 | Ccdc85a       |
| 5 | 670496 | MMT00043554   |
| 5 | 192191 | Med9          |
| 5 | 71966  | Nkiras2       |
| 5 | 224912 | Crb3          |
| 5 | 99571  | Fgg           |
| 5 | 18504  | Pax2          |
| 5 | 17195  | Mbl2          |
| 5 | 213989 | Tmem82        |
| 5 | 27376  | Slc25a10      |
| 5 | 12479  | Cd1d1         |
| 5 | 80794  | Cblc          |
| 5 | 140792 | Colec12       |
| 5 | 107999 | Gtpbp6        |
| 5 | 64058  | Perp          |
| 5 | 57757  | Pglyrp2       |
| 5 | 12817  | Col13a1       |
| 5 | 212528 | Trmt1         |
| 5 | 217140 | Scrn2         |
| 5 | 26922  | Mecr          |
| 5 | 53945  | Slc40a1       |
| 5 | 71586  | Ifih1         |
| 5 | 22644  | Rnf103        |
| 5 | 68736  | 1110034B05Rik |
| 5 | 140742 | Sesn1         |
| 5 | 20583  | Snai2         |
| 5 | 77200  | 5430403G16Rik |
| 5 | 30951  | Cbx8          |
| 5 | 103172 | MMT00073283   |
| 5 | 67044  | Higd2a        |
| 5 | 13001  | Csnk2b        |

|   |        |               |
|---|--------|---------------|
| 5 | 68267  | Slc25a22      |
| 5 | 67063  | 2810432L12Rik |
| 5 | 66736  | Ttc35         |
| 5 | 67894  | 1810055E12Rik |
| 5 | 14132  | Fcgrt         |
| 5 | 13629  | Eef2          |
| 5 | 320118 | Fbxl13        |
| 5 | 449521 | Zfp213        |
| 5 | 238205 | Lfn5          |
| 5 | 237890 | Slfn14        |
| 5 | 70103  | Znhit1        |
| 5 | 171212 | Galnt10       |
| 5 | 211389 | Suox          |
| 5 | 66928  | 3110001D03Rik |
| 5 | 73836  | Slc35b2       |
| 5 | 218544 | Sgtb          |
| 5 | 67860  | S100a16       |
| 5 | 13358  | Slc25a1       |
| 5 |        | MMT00032015   |
| 5 | 68036  | Zfp706        |
| 5 | 18582  | Pde6d         |
| 5 | 106840 | Unc119b       |
| 5 | 329941 | Col8a2        |
| 5 | 84095  | Pi4k2a        |
| 5 | 73046  | Glrx5         |
| 5 | 668139 | EG668139      |
| 5 | 30838  | Fbxw4         |
| 5 | 212943 | BC023892      |
| 5 | 237911 | Brip1         |
| 5 | 20739  | Spna1         |
| 5 | 18573  | Pde1a         |
| 5 | 68251  | 5430437P03Rik |
| 5 |        | MMT00071219   |
| 5 | 20617  | Snca          |
| 5 | 66462  | 2810428I15Rik |
| 5 | 12462  | Cct3          |
| 5 |        | MMT00044543   |
| 5 | 70247  | Psmc1         |
| 5 | 24010  | Ik            |
| 5 | 14411  | Slc6a12       |
| 5 | 12724  | Cln2          |
| 5 | 118445 | Klf16         |
| 5 | 11889  | Asgr1         |
| 5 | 22333  | Vdac1         |
| 5 |        | MMT00042032   |
| 5 | 13202  | Ddt           |
| 5 | 73711  | 1110012M11Rik |
| 5 | 107065 | Lrrtm2        |
| 5 | 66506  | Psmg3         |
| 5 | 107146 | Glyat         |
| 5 | 55989  | Nol5          |

|   |           |               |
|---|-----------|---------------|
| 5 | 74764     | Klc4          |
| 5 | 27052     | Aoah          |
| 5 | 66405     | Mcts2         |
| 5 | 100037258 | Dnajc3a       |
| 5 | 12261     | C1qbp         |
| 5 | 66096     | 0910001L09Rik |
| 5 |           | MMT00057439   |
| 5 |           | MMT00067207   |
| 5 |           | MMT00057721   |
| 5 |           | MMT00002521   |
| 5 |           | MMT00010854   |
| 5 |           | MMT00079617   |
| 5 | 378954    | 3000002C10Rik |
| 5 |           | MMT00020962   |
| 5 | 668192    | EG668192      |
| 5 |           | MMT00053707   |
| 5 |           | MMT00072546   |
| 5 |           | MMT00002048   |
| 5 |           | MMT00030239   |
| 5 |           | MMT00074600   |
| 5 |           | MMT00019672   |
| 5 |           | MMT00024286   |
| 5 | 629557    | EG629557      |
| 5 |           | MMT00075271   |
| 5 |           | MMT00013125   |
| 5 |           | MMT00075578   |
| 5 |           | MMT00001423   |
| 5 |           | MMT00002004   |
| 5 |           | MMT00026015   |
| 5 |           | MMT00004841   |
| 5 |           | MMT00009375   |
| 5 |           | MMT00044275   |
| 5 |           | MMT00065577   |
| 5 |           | MMT00054062   |
| 5 |           | MMT00011246   |
| 5 |           | MMT00038325   |
| 5 |           | MMT00057793   |
| 5 |           | MMT00019310   |
| 5 | 636756    | EG636756      |
| 5 | 83965     | Enpp5         |
| 5 | 24030     | Mrps12        |
| 5 | 67900     | 1700020C11Rik |
| 5 | 107350    | AW112010      |
| 5 | 209086    | Samd9l        |
| 5 | 74558     | Gvin1         |
| 5 | 26388     | lfi202b       |
| 5 | 12140     | Fabp7         |
| 5 | 68347     | 0610011F06Rik |
| 5 | 19188     | Psme2         |
| 5 | 19188     | Psme2         |
| 5 | 12334     | Capn2         |

|   |        |               |
|---|--------|---------------|
| 5 | 19106  | Eif2ak2       |
| 5 | 64685  | Nmi           |
| 5 | 68514  | Efha1         |
| 5 | 77125  | Il33          |
| 5 |        | MMT00043009   |
| 5 | 15382  | Hnrnpa1       |
| 5 | 15382  | Hnrnpa1       |
| 6 | 102084 | Al451557      |
| 6 | 16362  | Irf1          |
| 6 | 57816  | Tesc          |
| 6 | 171286 | Slc12a8       |
| 6 | 20621  | Snn           |
| 6 | 55984  | Camkk1        |
| 6 | 12703  | Socs1         |
| 6 | 71607  | Snx20         |
| 6 | 15900  | Irf8          |
| 6 | 11501  | Adam8         |
| 6 | 171504 | MMT00073557   |
| 6 | 15114  | Hap1          |
| 6 | 50934  | Slc7a8        |
| 6 | 224109 | Lrrc33        |
| 6 | 98999  | Znfx1         |
| 6 | 106572 | Rab31         |
| 6 | 18753  | Prkcd         |
| 6 | 16170  | Il16          |
| 6 | 15939  | Ier5          |
| 6 | 227612 | A830007P12Rik |
| 6 | 52055  | Rab11fip5     |
| 6 | 101540 | Prkd2         |
| 6 | 26903  | Dysf          |
| 6 | 21853  | Timeless      |
| 6 | 21745  | Tep1          |
| 6 | 16881  | Lig1          |
| 6 | 52276  | Cdca8         |
| 6 | 67416  | Armcx2        |
| 6 | 19159  | Pscd3         |
| 6 | 20847  | Stat2         |
| 6 | 60594  | Capn12        |
| 6 | 26909  | Exo1          |
| 6 | 68026  | 2810417H13Rik |
| 6 | 26886  | Cenph         |
| 6 | 22137  | Ttk           |
| 6 | 56742  | Psrc1         |
| 6 | 434175 | EG434175      |
| 6 | 12428  | Ccna2         |
| 6 | 209737 | Kif15         |
| 6 | 12442  | Ccnb2         |
| 6 | 21973  | Top2a         |
| 6 | 229841 | Cenpe         |
| 6 | 269582 | Clspn         |
| 6 | 18140  | Uhrf1         |



|   |        |                    |
|---|--------|--------------------|
| 6 | 11799  | Birc5              |
| 6 | 21335  | Tacc3              |
| 6 | 18817  | Plk1               |
| 6 | 69928  | Apitd1             |
| 6 | 67849  | Cdca5              |
| 6 | 26934  | Racgap1            |
| 6 | 51944  | D2ErtD750e         |
| 6 | 109212 | 6720460F02Rik      |
| 6 | 107995 | Cdc20              |
| 6 | 110033 | Kif22              |
| 6 | 14793  | Cdca3              |
| 6 | 268930 | Pkmyt1             |
| 6 | 15979  | Ifngr1             |
| 6 | 69717  | ENSMUSG00000073403 |
| 6 | 71946  | Endod1             |
| 6 | 80885  | Gpr109a            |
| 6 | 20303  | Ccl4               |
| 6 | 14960  | H2-Aa              |
| 6 | 20202  | S100a9             |
| 6 | 20201  | S100a8             |
| 6 | 67111  | Naaa               |
| 6 | 12070  | Ngfrap1            |
| 6 | 67689  | Aldh3b1            |
| 6 | 546546 | Serpina3h          |
| 6 | 19124  | Procr              |
| 6 | 22352  | Vim                |
| 6 | 15277  | Hk2                |
| 6 | 69189  | 1810033B17Rik      |
| 6 | 74748  | Slamf8             |
| 6 | 20296  | Ccl2               |
| 6 | 18722  | Pira1              |
| 6 | 18768  | Pkib               |
| 6 | 76477  | Pcolce2            |
| 6 | 24051  | Sgcb               |
| 6 | 14991  | H2-M3              |
| 6 | 66859  | Slc16a9            |
| 6 | 15945  | Cxcl10             |
| 6 | 19073  | Srgn               |
| 6 | 17084  | Ly86               |
| 6 | 19224  | Ptgs1              |
| 6 | 14710  | Gngt2              |
| 6 | 19241  | Tmsb4x             |
| 6 | 12517  | Cd72               |
| 6 | 17069  | Ly6e               |
| 6 | 319468 | Ppm1h              |
| 6 | 74153  | Ube1l              |
| 6 | 66940  | Shisa5             |
| 6 | 16154  | Il10ra             |
| 6 | 12984  | Csf2rb2            |
| 6 | 50498  | Ebi3               |
| 6 | 20540  | Slc7a7             |

|   |        |               |
|---|--------|---------------|
| 6 | 17972  | Ncf4          |
| 6 | 74131  | Sash3         |
| 6 | 381319 | Batf3         |
| 6 | 108101 | Fermt3        |
| 6 | 12978  | Csf1r         |
| 6 | 20963  | Syk           |
| 6 | 19354  | Rac2          |
| 6 | 14026  | Evl           |
| 6 | 65221  | Slc15a3       |
| 6 | 230787 | BC013712      |
| 6 | 56532  | Ripk3         |
| 6 | 14127  | Fcer1g        |
| 6 | 11857  | Arhgdib       |
| 6 | 212032 | Hk3           |
| 6 | 12483  | Cd22          |
| 6 | 56454  | Aldh18a1      |
| 6 | 12481  | Cd2           |
| 6 | 16185  | Il2rb         |
| 6 | 20304  | Ccl5          |
| 6 | 331004 | Slc9a9        |
| 6 | 11690  | Alox5ap       |
| 6 | 11307  | Abcg1         |
| 6 | 17312  | Mgl1          |
| 6 | 74012  | Rap2b         |
| 6 | 107029 | Me2           |
| 6 | 246707 | Emilin2       |
| 6 | 18301  | Fxyd5         |
| 6 | 66775  | Ptplad2       |
| 6 | 378460 | Pram1         |
| 6 | 246728 | Oas2          |
| 6 | 58203  | Zbp1          |
| 6 | 216984 | Evi2b         |
| 6 | 211228 | Lrrc25        |
| 6 | 78749  | 4631422O05Rik |
| 6 | 67052  | Ndc80         |
| 6 | 17279  | Melk          |
| 6 | 14938  | Gzma          |
| 6 | 207269 | BC023105      |
| 6 | 624083 | MMT00060916   |
| 6 | 71934  | Car13         |
| 6 | 98365  | Slamf9        |
| 6 | 269799 | Clec4a1       |
| 6 | 17167  | Marco         |
| 6 | 217303 | Cd300a        |
| 6 | 217303 | Cd300a        |
| 6 | 18726  | Pira3         |
| 6 | 675749 | MMT00015654   |
| 6 | 231805 | Pilra         |
| 6 | 226421 | 5430435G22Rik |
| 6 | 11629  | Aif1          |
| 6 | 105855 | Nckap1l       |

|   |           |               |
|---|-----------|---------------|
| 6 | 74596     | Cds1          |
| 6 | 54519     | Apbb1ip       |
| 6 | 16408     | Itgal         |
| 6 | 15162     | Hck           |
| 6 | 67865     | Rgs10         |
| 6 | 14276     | Folr2         |
| 6 | 24088     | Tlr2          |
| 6 | 11801     | Cd5l          |
| 6 | 14695     | Gnb3          |
| 6 | 16068     | Il18bp        |
| 6 | 16913     | Psmb8         |
| 6 | 23962     | Oasl2         |
| 6 | 14129     | Fcgr1         |
| 6 | 76933     | Ifi27         |
| 6 | 54123     | Irf7          |
| 6 | 246256    | Fcgr4         |
| 6 | 231507    | Plac8         |
| 6 | 71712     | 1200002N14Rik |
| 6 | 68774     | Ms4a6d        |
| 6 | 14293     | Fpr1          |
| 6 | 58801     | Pmaip1        |
| 6 | 55985     | Cxcl13        |
| 6 | 12045     | Bcl2a1b       |
| 6 | 210293    | Dock10        |
| 6 | 74191     | P2ry13        |
| 6 | 13040     | Ctss          |
| 6 | 69774     | Ms4a6b        |
| 6 | 13733     | Emr1          |
| 6 | 270084    | Lpcat2        |
| 6 | 14468     | Gbp1          |
| 6 | 98878     | Ehd4          |
| 6 | 64380     | Ms4a4c        |
| 6 | 21822     | Tgtp          |
| 6 | 56045     | Samhd1        |
| 6 | 20684     | Sp100         |
| 6 | 20728     | Spic          |
| 6 | 66824     | Pycard        |
| 6 | 54396     | ligp2         |
| 6 | 52668     | D12Ertd647e   |
| 6 | 246730    | Oas1a         |
| 6 | 100093633 | Ly6c2         |
| 6 | 110454    | Ly6a          |
| 6 | 17858     | Mx2           |
| 6 | 16145     | Igtp          |
| 6 |           | MMT00008674   |
| 6 | 23960     | Oas1g         |
| 6 | 327959    | Xaf1          |
| 6 | 24110     | Usp18         |
| 6 | 631323    | MMT00028135   |
| 6 | 67775     | Rtp4          |
| 6 | 99899     | Ifi44         |

|   |        |               |
|---|--------|---------------|
| 6 | 209630 | Frmd4a        |
| 6 | 11624  | Ahrr          |
| 6 | 56760  | Clec1b        |
| 6 | 20305  | Ccl6          |
| 6 | 64381  | Ms4a8a        |
| 6 | 16792  | Laptm5        |
| 6 | 13823  | Epb4.1l3      |
| 6 | 63913  | Niban         |
| 6 | 217826 | Kcnk13        |
| 6 | 22376  | Was           |
| 6 | 26364  | Cd97          |
| 6 | 20868  | Stk10         |
| 6 | 16822  | Lcp2          |
| 6 | 19171  | Psemb10       |
| 6 | 243771 | Parp12        |
| 6 |        | MMT00036681   |
| 6 | 71898  | Apol9b        |
| 6 | 16391  | Irf9          |
| 6 | 640524 | Spnb5         |
| 6 | 16912  | Psemb9        |
| 6 | 17071  | Ly6f          |
| 6 | 231655 | Oasl1         |
| 6 | 215900 | A630077B13Rik |
| 6 | 29875  | Iqgap1        |
| 6 | 68713  | Ifitm1        |
| 6 | 20446  | St6galnac2    |
| 6 | 68119  | Cmtm3         |
| 6 | 14131  | Fcgr3         |
| 6 | 233571 | P2ry6         |
| 6 |        | MMT00053742   |
| 6 | 17970  | Ncf2          |
| 6 | 12516  | Cd7           |
| 6 | 231931 | Gimap6        |
| 7 | 223255 | Stk24         |
| 7 | 60322  | Chst7         |
| 7 | 23801  | Aloxe3        |
| 7 | 75275  | 4930563P21Rik |
| 7 | 76238  | Grhpr         |
| 7 |        | MMT00074658   |
| 7 |        | MMT00067648   |
| 7 | 16907  | Lmnb2         |
| 7 | 66498  | Dda1          |
| 7 | 224650 | Anks1         |
| 7 | 15270  | H2afx         |
| 7 | 69663  | Ddx51         |
| 7 | 71810  | Ranbp3        |
| 7 | 18554  | Pcsk7         |
| 7 | 103889 | Hoxb2         |
| 7 | 76799  | 2510006D16Rik |
| 7 | 67160  | Eef1g         |
| 7 | 68033  | Cox19         |

|   |        |               |
|---|--------|---------------|
| 7 | 97287  | Mtmr14        |
| 7 | 18762  | Prkcz         |
| 7 | 17388  | Mmp15         |
| 7 | 15356  | Hmgcl         |
| 7 | 217214 | Nags          |
| 7 | 235040 | Atg4d         |
| 7 | 18010  | Neu1          |
| 7 | 338417 | Scgb1c1       |
| 7 | 67655  | Ctdp1         |
| 7 | 15184  | Hdac5         |
| 7 | 19228  | Pthr1         |
| 7 | 192236 | Hps1          |
| 7 | 100910 | 2010209O12Rik |
| 7 | 11764  | Ap1b1         |
| 7 | 54485  | Dll4          |
| 7 | 19732  | Rgl2          |
| 7 | 11302  | Aatk          |
| 7 |        | MMT00053207   |
| 7 | 107971 | Frs3          |
| 7 | 64655  | Mrps22        |
| 7 | 19983  | Rpl5          |
| 7 | 18563  | Pcx           |
| 7 | 224824 | Pex6          |
| 7 | 217127 | Myst2         |
| 7 | 252966 | Cables2       |
| 7 | 18400  | Slc22a18      |
| 7 | 17826  | Mtvr2         |
| 7 |        | MMT00059984   |
| 7 |        | MMT00082629   |
| 7 |        | MMT00050545   |
| 7 | 16005  | Igfals        |
| 7 | 11773  | Ap2m1         |
| 7 | 66151  | Prr13         |
| 7 | 111173 | Erc1          |
| 7 | 20778  | Scarb1        |
| 7 | 72325  | 1300018117Rik |
| 7 | 70101  | Cyp4f16       |
| 7 | 12759  | Clu           |
| 7 | 217344 | Rhbdf2        |
| 7 | 14824  | Grn           |
| 7 | 74761  | Mxra8         |
| 7 | 16010  | Igfbp4        |
| 7 | 80860  | Ghdc          |
| 7 | 20733  | Spint2        |
| 7 |        | MMT00047531   |
| 7 |        | MMT00048939   |
| 7 |        | MMT00045906   |
| 7 |        | MMT00007455   |
| 7 | 237361 | EG237361      |
| 7 | 235582 | Glyctk        |
| 7 | 382014 | Tmem16h       |

|   |        |               |
|---|--------|---------------|
| 7 | 20499  | Slc12a7       |
| 7 | 75788  | Smurf1        |
| 7 | 434204 | Whdc1         |
| 7 | 16976  | Lrpap1        |
| 7 | 110542 | Amhr2         |
| 7 | 104318 | Csnk1d        |
| 7 | 104816 | A530050D06Rik |
| 7 | 54343  | Atf7ip        |
| 7 | 68497  | 1110018G07Rik |
| 7 | 18969  | Pola2         |
| 7 | 14976  | H2-Ke2        |
| 7 | 69754  | Fbxo7         |
| 7 | 80893  | Tmprss5       |
| 7 | 26921  | Map4k4        |
| 7 | 12704  | Cit           |
| 7 | 71130  | Sh2d6         |
| 7 | 72607  | Usp13         |
| 7 | 69572  | Mfsd3         |
| 7 | 13830  | Stom          |
| 7 | 78670  | Plekhj1       |
| 7 |        | MMT00039978   |
| 7 | 69882  | 2010321M09Rik |
| 7 | 108705 | Pttg1ip       |
| 7 | 53424  | Tsnax         |
| 7 |        | MMT00042876   |
| 7 | 67681  | Mrpl18        |
| 7 | 14225  | Fkbp1a        |
| 7 | 22370  | Vtn           |
| 7 | 13433  | Dnmt1         |
| 7 | 171193 | V1rc20        |
| 7 | 21844  | Tiam1         |
| 7 | 12955  | Cryab         |
| 7 | 50917  | Galns         |
| 7 | 242126 | Slc22a15      |
| 7 | 11571  | Crisp1        |
| 7 | 52430  | Echdc2        |
| 7 | 230917 | Tmem201       |
| 7 | 100198 | H6pd          |
| 7 | 66090  | Ypel3         |
| 7 | 19414  | Rasa3         |
| 7 | 72194  | Fbxl20        |
| 7 | 69217  | Plekha4       |
| 7 | 234776 | Atmin         |
| 7 | 74334  | Ranbp10       |
| 7 | 20239  | Atxn2         |
| 7 | 192232 | Hps4          |
| 7 | 380753 | Atxn711       |
| 7 | 76408  | Abcc3         |
| 7 | 77862  | Thyn1         |
| 7 | 66286  | Sec11c        |
| 7 | 212442 | Lactb2        |

|   |        |               |
|---|--------|---------------|
| 7 | 22256  | Ung           |
| 7 | 207742 | Rnf43         |
| 7 | 71911  | Bdh1          |
| 7 | 13857  | Epor          |
| 7 | 229473 | D930015E06Rik |
| 7 | 67177  | Cdt1          |
| 7 | 19882  | Mst1r         |
| 7 | 58207  | Slc43a3       |
| 7 | 14756  | Gpld1         |
| 7 |        | MMT00066154   |
| 7 | 18018  | Nfatc1        |
| 7 | 224823 | BC011248      |
| 7 | 224105 | Pak2          |
| 7 | 77590  | 4631426J05Rik |
| 7 | 18027  | Nfia          |
| 7 | 21366  | Slc6a6        |
| 7 | 12156  | Bmp2          |
| 7 | 18703  | Pigr          |
| 7 | 58172  | Sertad2       |
| 7 | 68703  | Rere          |
| 7 | 12877  | Cpeb1         |
| 7 | 74200  | 2810403A07Rik |
| 7 | 19013  | Ppara         |
| 7 | 67916  | Ppap2b        |
| 7 | 320661 | D5Erttd579e   |
| 7 | 12352  | Car5a         |
| 7 | 20708  | Serpinb6b     |
| 7 | 64945  | Cldn12        |
| 7 | 56430  | Clip1         |
| 7 | 57440  | Ehd3          |
| 7 | 319565 | Syne2         |
| 7 |        | MMT00058471   |
| 7 | 66826  | Taz           |
| 7 | 20321  | Frrs1         |
| 7 | 75665  | Ccdc64        |
| 7 | 259279 | Tubgcp3       |
| 7 | 229487 | Pet112l       |
| 7 | 54380  | Smarcal1      |
| 7 |        | MMT00073582   |
| 7 | 104303 | Arl1          |
| 7 | 56364  | Zmym3         |
| 7 | 26895  | Cops7b        |
| 7 | 58202  | Cobra1        |
| 7 | 67713  | Dnajc19       |
| 7 | 209683 | Ttc28         |
| 7 | 230872 | Crocc         |
| 7 | 16205  | Gimap1        |
| 7 | 15194  | Htt           |
| 7 | 277939 | C2cd3         |
| 7 | 67027  | Mkxn2         |
| 7 |        | MMT00082897   |

|   |        |                    |
|---|--------|--------------------|
| 7 | 628709 | ENSMUSG00000071302 |
| 7 | 80743  | Vps16              |
| 7 |        | MMT00017112        |
| 7 |        | MMT00034706        |
| 7 |        | MMT00078676        |
| 7 | 233833 | Tnrc6a             |
| 7 | 74626  | Tmem81             |
| 7 | 319322 | Sf3b2              |
| 7 | 192159 | Prpf8              |
| 7 |        | MMT00048291        |
| 7 | 68114  | Mum1               |
| 7 | 625253 | EG625253           |
| 7 | 71567  | Mcm9               |
| 7 | 22214  | Ube2h              |
| 7 | 211978 | Zfyve26            |
| 7 | 20321  | Frrs1              |
| 7 | 21916  | Tmod1              |
| 7 | 67899  | 2010110K16Rik      |
| 7 | 67534  | Ttll4              |
| 7 | 13421  | Dnase1l3           |
| 7 | 66839  | 0610009O20Rik      |
| 7 | 214895 | Lman2l             |
| 7 | 67417  | Ears2              |
| 7 | 170749 | Mtmr4              |
| 7 | 12879  | Cys1               |
| 7 | 226153 | Peo1               |
| 7 | 68722  | 1110029L17Rik      |
| 7 | 26416  | Mapk14             |
| 7 | 213550 | Dis3l              |
| 7 | 53614  | Reck               |
| 7 | 56150  | Mad2l1             |
| 7 | 170787 | Hdac10             |
| 7 | 66860  | Tanc1              |
| 7 | 20187  | Ryk                |
| 7 |        | MMT00065790        |
| 7 | 232223 | Txnrd3             |
| 7 | 628438 | EG628438           |
| 7 | 15528  | Hspe1              |
| 7 | 21665  | Tdg                |
| 7 | 93760  | Arid1a             |
| 7 | 12325  | Camk2g             |
| 7 | 55935  | Fnbp4              |
| 7 | 108960 | Irak2              |
| 7 | 22388  | Wdr1               |
| 7 | 22278  | Usf1               |
| 7 | 56722  | Litaf              |
| 7 | 239796 | 1600021P15Rik      |
| 7 | 27681  | Snf8               |
| 7 | 70351  | Ppp4r1             |
| 7 | 57912  | Cdc42se1           |
| 7 | 229877 | Rap1gds1           |



|   |        |               |
|---|--------|---------------|
| 7 | 226777 | C130074G19Rik |
| 7 | 59008  | Anapc5        |
| 7 | 170716 | Cyp4f13       |
| 7 |        | MMT00016059   |
| 7 | 15116  | Has1          |
| 7 | 12748  | Clk2          |
| 7 | 232717 | BC048599      |
| 7 | 192678 | Rassf3        |
| 7 | 68275  | Rpa1          |
| 7 | 20393  | Sgk1          |
| 7 | 109161 | Ube2q2        |
| 7 | 619677 | 4930529C04Rik |
| 7 | 59041  | Stk25         |
| 7 | 11426  | Macf1         |
| 7 | 12914  | Crebbp        |
| 7 | 102334 | Ankrd10       |
| 7 | 68133  | Gcsh          |
| 7 | 73469  | Rnf38         |
| 7 | 21814  | Tgfbr3        |
| 7 | 71393  | Kctd6         |
| 7 | 23876  | Fbln5         |
| 7 | 269941 | Chsy1         |
| 7 | 71983  | Tmco6         |
| 7 | 20317  | Serpinf1      |
| 7 |        | MMT00009278   |
| 7 | 14337  | Ftl2          |
| 7 | 19089  | Prkcsh        |
| 7 |        | MMT00077001   |
| 7 | 11844  | Arf5          |
| 7 | 21672  | Prdx2         |
| 7 | 23831  | Car14         |
| 7 | 22192  | Ube2m         |
| 7 | 13445  | Cdk2ap1       |
| 7 | 57342  | Parva         |
| 7 | 226527 | BC026585      |
| 7 | 14430  | Galt          |
| 7 | 68877  | Maf1          |
| 7 | 69612  | 2310037124Rik |
| 7 | 216767 | Mrpl22        |
| 7 |        | MMT00023354   |
| 7 |        | MMT00025562   |
| 7 | 22221  | Ubp1          |
| 7 | 240219 | MMT00044805   |
| 7 | 77040  | Atg16l1       |
| 7 | 234875 | Ttc13         |
| 7 | 230810 | Slc30a2       |
| 7 | 16842  | Lef1          |
| 7 | 19012  | Ppap2a        |
| 7 | 17355  | Aff1          |
| 7 | 14734  | Gpc3          |
| 7 | 19885  | Rorc          |

|   |        |               |
|---|--------|---------------|
| 7 | 53598  | Dctn3         |
| 7 | 270110 | lrf2bp2       |
| 7 | 70178  | 2210412D01Rik |
| 7 | 56274  | Stk3          |
| 7 | 170718 | ldh3b         |
| 7 | 69574  | Cmb1          |
| 8 | 66273  | 1810020D17Rik |
| 8 | 30059  | Timm10        |
| 8 | 66433  | Chchd7        |
| 8 | 12226  | Btg1          |
| 8 | 235459 | Gtf2a2        |
| 8 | 216134 | Pdxk          |
| 8 | 66333  | Aqp11         |
| 8 | 71435  | Arhgap21      |
| 8 | 16323  | Inhba         |
| 8 | 74018  | Als2          |
| 8 | 12550  | Cdh1          |
| 8 | 16161  | Il12rb1       |
| 8 | 67608  | Narf          |
| 8 |        | MMT00022168   |
| 8 | 140917 | Dclre1b       |
| 8 | 12581  | Cdkn2d        |
| 8 | 218630 | Ccno          |
| 8 | 228140 | Tnks1bp1      |
| 8 | 71918  | 2310047A01Rik |
| 8 | 74043  | Pex26         |
| 8 | 12091  | Glb1          |
| 8 | 75620  | 2810422J05Rik |
| 8 | 57247  | Zfp276        |
| 8 | 50785  | Hs6st1        |
| 8 | 104175 | Sbk1          |
| 8 | 215210 | Tmem120a      |
| 8 | 407243 | Tmem189       |
| 8 | 269614 | Pank4         |
| 8 | 211770 | Trib1         |
| 8 | 17347  | Mknk2         |
| 8 | 108099 | Prkag2        |
| 8 | 14366  | Fzd4          |
| 8 | 26397  | Map2k3        |
| 8 | 50794  | Klf13         |
| 8 | 227696 | Phyhd1        |
| 8 | 353190 | Edc3          |
| 8 | 226251 | Ablim1        |
| 8 | 66597  | Trim13        |
| 8 | 16373  | Irx3          |
| 8 | 15937  | Ier3          |
| 8 | 216505 | Pik3ip1       |
| 8 | 22436  | Xdh           |
| 8 | 66349  | Atp5sl        |
| 8 | 223649 | Nrbp2         |
| 8 | 209039 | Tenc1         |

|   |        |               |
|---|--------|---------------|
| 8 | 12348  | Car11         |
| 8 | 57317  | Sfrs4         |
| 8 | 170833 | Hook2         |
| 8 | 67095  | Trak1         |
| 8 | 140859 | Nek8          |
| 8 | 52468  | Ctdsp2        |
| 8 | 18557  | Pctk3         |
| 8 | 83679  | Pde4dip       |
| 8 | 225341 | Lims2         |
| 8 | 22680  | Zfp207        |
| 8 | 69482  | Nup35         |
| 8 | 18171  | Nr1i2         |
| 8 | 328192 | MMT00012324   |
| 8 | 56458  | Foxo1         |
| 8 | 241494 | Zfp385b       |
| 8 | 80509  | Med8          |
| 8 | 14872  | Gstt2         |
| 8 | 215928 | BC021785      |
| 8 | 11883  | Arsa          |
| 8 | 28042  | D5Wsu178e     |
| 8 |        | MMT00021505   |
| 8 | 21664  | Phlda1        |
| 8 | 76608  | Hectd3        |
| 8 | 24055  | Sh3bp2        |
| 8 | 117591 | Slc2a9        |
| 8 | 105675 | Ppif          |
| 8 | 142688 | Asb13         |
| 8 | 22390  | Wee1          |
| 8 | 11429  | Aco2          |
| 8 |        | MMT00035904   |
| 8 | 79196  | Osbpl5        |
| 8 | 72999  | Insig2        |
| 8 | 270166 | Clpx          |
| 8 |        | MMT00060167   |
| 8 | 216551 | 1110067D22Rik |
| 8 | 56794  | Hacl1         |
| 8 | 237052 | Tceal1        |
| 8 | 54635  | Pdgfc         |
| 8 | 69226  | Snx24         |
| 8 |        | MMT00060741   |
| 8 | 76282  | Gpt           |
| 8 | 665700 | Hmcn2         |
| 8 | 546071 | Mast3         |
| 8 | 68082  | Dusp19        |
| 8 | 215418 | Axud1         |
| 8 | 244668 | Sipa1l2       |
| 8 | 225049 | Ttc7          |
| 8 | 17237  | Mgrn1         |
| 8 | 71699  | Slc41a3       |
| 8 | 12894  | Cpt1a         |
| 8 | 72399  | Brap          |

|   |        |               |
|---|--------|---------------|
| 8 | 66853  | Pnpla2        |
| 8 | 72056  | 1810055G02Rik |
| 8 | 242785 | Klhl21        |
| 8 | 76454  | Fbxo31        |
| 8 | 50798  | Gne           |
| 8 | 53608  | Map3k6        |
| 8 | 20454  | St3gal5       |
| 8 | 66898  | Baiap2l1      |
| 8 | 13195  | Ddc           |
| 8 | 68252  | A030007L17Rik |
| 8 | 217473 | Ankmy2        |
| 8 | 229599 | Gm129         |
| 8 | 53376  | Usp2          |
| 8 | 13170  | Dbp           |
| 8 | 226781 | Slc30a10      |
| 8 | 18984  | Por           |
| 8 | 110960 | Tars          |
| 8 | 20893  | Bhlhb2        |
| 8 | 56485  | Slc2a5        |
| 8 | 21859  | Timp3         |
| 8 | 12737  | Cldn1         |
| 8 | 11865  | Arntl         |
| 8 | 225994 | BC016495      |
| 8 | 20515  | Slc20a1       |
| 8 | 16407  | Itgae         |
| 8 | 12401  | Serpina6      |
| 8 | 21877  | Tk1           |
| 8 | 619653 | EG619653      |
| 8 | 53972  | Ngef          |
| 8 | 20322  | Sord          |
| 8 | 20610  | Sumo3         |
| 8 | 67477  | 1300007F04Rik |
| 8 | 67800  | Dgat2         |
| 8 | 27984  | Efhd2         |
| 8 | 211401 | Mtss1         |
| 8 | 12355  | Nr1i3         |
| 8 | 215160 | Rhbdd2        |
| 8 | 68876  | Xrcc6bp1      |
| 8 | 330064 | Slc5a6        |
| 8 | 83431  | Ndel1         |
| 8 | 11639  | Ak3l1         |
| 8 | 98766  | Ubac1         |
| 8 | 20509  | Slc19a1       |
| 8 | 231691 | Sds           |
| 8 | 50776  | Polg2         |
| 8 | 20410  | Sorbs3        |
| 8 | 17294  | Mest          |
| 8 | 99311  | Commd7        |
| 8 |        | MMT00028111   |
| 8 | 19656  | Rbmxrt        |
| 8 | 19656  | Rbmxrt        |

|   |        |               |
|---|--------|---------------|
| 8 | 14792  | Mboat5        |
| 8 | 67379  | Dedd2         |
| 8 | 64424  | Polr1e        |
| 8 | 17210  | Mcl1          |
| 8 | 14828  | Hspa5         |
| 8 | 74840  | Armet         |
| 8 | 12068  | Bet1          |
| 8 | 63828  | Fn3k          |
| 8 | 17691  | Snf1lk        |
| 8 | 102247 | Agpat6        |
| 8 | 214424 | Parp16        |
| 8 | 19041  | Ppl           |
| 8 | 18627  | Per2          |
| 8 | 384198 | Gm1381        |
| 8 | 11428  | Aco1          |
| 8 | 109900 | Asl           |
| 8 | 14263  | Fmo5          |
| 8 | 110959 | Nudt19        |
| 8 | 26932  | Ppp2r5e       |
| 8 |        | MMT00039914   |
| 8 | 17357  | Marcks1       |
| 8 | 109978 | Art4          |
| 8 | 16658  | Mafb          |
| 8 | 52633  | Nit2          |
| 8 | 12795  | Plk3          |
| 8 | 20387  | Sftpa1        |
| 8 | 18631  | Pex11a        |
| 8 | 14311  | Cidec         |
| 8 | 74315  | Rnf145        |
| 8 | 72170  | Chchd4        |
| 8 |        | MMT00068885   |
| 8 | 72480  | Tspyl4        |
| 8 | 259301 | Leap2         |
| 8 | 66427  | Cyb5b         |
| 8 | 66427  | Cyb5b         |
| 8 | 170756 | Slc24a6       |
| 8 | 66293  | 1810032O08Rik |
| 8 | 81845  | Bat4          |
| 8 | 66067  | Gtpbp8        |
| 8 | 71972  | Dnmbp         |
| 8 | 224826 | Ubr2          |
| 8 | 18145  | Npc1          |
| 8 | 170826 | Ppargc1b      |
| 8 | 16169  | Il15ra        |
| 8 | 52690  | Setd3         |
| 8 |        | MMT00019109   |
| 8 | 230661 | Tesk2         |
| 8 | 67544  | 4932442K08Rik |
| 8 | 20194  | S100a10       |
| 8 | 26408  | Map3k5        |
| 8 | 69288  | Rhobtb1       |

|   |        |             |
|---|--------|-------------|
| 8 | 225372 | Apbb3       |
| 8 | 67155  | Smarca2     |
| 8 | 12013  | Bach1       |
| 8 | 14546  | Gdap10      |
| 8 | 23972  | Papss2      |
| 8 | 18534  | Pck1        |
| 8 | 19017  | Ppargc1a    |
| 8 | 11988  | Slc7a2      |
| 8 | 407831 | Tmem204     |
| 8 | 70503  | Ddo         |
| 8 | 224020 | Pi4ka       |
| 8 | 72278  | Ccp1        |
| 8 | 26458  | Slc27a2     |
| 8 | 23986  | Peci        |
| 8 | 68043  | N6amt2      |
| 8 | 338366 | Mia3        |
| 8 | 20520  | Slc22a5     |
| 8 | 21848  | Trim24      |
| 8 | 21807  | Tsc22d1     |
| 8 |        | MMT00040357 |
| 8 | 76650  | Srxn1       |
| 8 | 192156 | Mvd         |
| 8 | 212919 | Kctd7       |
| 8 | 18022  | Nfe2        |
| 8 | 70031  | Cmtm8       |
| 8 |        | MMT00058347 |
| 8 | 59126  | Nek6        |
| 8 | 107375 | Slc25a45    |
| 8 |        | MMT00055891 |
| 8 |        | MMT00007982 |
| 8 | 22142  | Tuba1a      |
| 8 |        | MMT00079618 |
| 8 | 22147  | Tuba3b      |
| 8 | 22144  | Tuba3a      |
| 8 | 72748  | Hdhd3       |
| 8 | 22146  | Tuba1c      |
| 8 | 22143  | Tuba1b      |
| 8 | 22145  | Tuba4a      |
| 8 | 19734  | Rgs16       |
| 8 | 233752 | Insc        |
| 8 | 17750  | Mt2         |
| 8 | 27054  | Sec23b      |
| 8 | 212547 | BC027231    |
| 8 |        | MMT00072901 |
| 8 | 52829  | D4Bwg0951e  |
| 8 | 57875  | Angptl4     |
| 8 | 67151  | Psmc9       |
| 8 | 67151  | Psmc9       |
| 8 | 104910 | AI132487    |
| 8 | 231070 | Insig1      |
| 8 | 18035  | Nfkb1a      |

|   |        |               |
|---|--------|---------------|
| 8 | 632778 | EG632778      |
| 8 | 54610  | Tbc1d8        |
| 8 | 18626  | Per1          |
| 8 | 76487  | Ppp1r3g       |
| 8 | 259116 | Olfir559      |
| 8 | 71817  | Tmem50a       |
| 8 | 20371  | Foxp3         |
| 9 | 56200  | Ddx21         |
| 9 | 68617  | 1110012J17Rik |
| 9 | 435977 | EG435977      |
| 9 | 240186 | Zfp438        |
| 9 | 11459  | Acta1         |
| 9 |        | MMT00003579   |
| 9 | 17906  | Myl2          |
| 9 |        | MMT00004371   |
| 9 | 13132  | Dab2          |
| 9 |        | MMT00058578   |
| 9 | 73795  | 4930405D01Rik |
| 9 | 105653 | Phyhip        |
| 9 | 13797  | Emx2          |
| 9 | 286940 | Flnb          |
| 9 | 242083 | Ppm1l         |
| 9 | 78115  | 4930445E18Rik |
| 9 | 22715  | Zfp57         |
| 9 | 94176  | Dock2         |
| 9 | 21418  | Tcfap2a       |
| 9 | 258610 | Olfir307      |
| 9 | 70846  | 4921506M07Rik |
| 9 |        | MMT00065634   |
| 9 | 15424  | Hoxc5         |
| 9 |        | MMT00070692   |
| 9 | 258985 | Olfir1256     |
| 9 | 233328 | Lrrk1         |
| 9 | 434446 | Ccdc13        |
| 9 | 16192  | Il5ra         |
| 9 | 117149 | Tirap         |
| 9 | 17300  | Foxc1         |
| 9 | 230753 | Thrap3        |
| 9 | 638345 | Sbpl          |
| 9 |        | MMT00081874   |
| 9 | 53902  | Rcan3         |
| 9 | 16530  | Kcnk7         |
| 9 | 18150  | Npm3          |
| 9 |        | MMT00048506   |
| 9 | 80976  | Syt13         |
| 9 | 192663 | Abcg4         |
| 9 | 68732  | Lrrc16a       |
| 9 | 56735  | Krt71         |
| 9 |        | MMT00079364   |
| 9 | 434130 | MMT00042294   |
| 9 | 215654 | Cdh12         |

|   |           |                |
|---|-----------|----------------|
| 9 | 74362     | Spag17         |
| 9 | 60367     | Il1rapl2       |
| 9 | 75532     | 1700015C15Rik  |
| 9 | 226695    | Ifi205         |
| 9 | 103978    | Gpc5           |
| 9 | 386750    | Slitrk3        |
| 9 | 213765    | RP23-336F11.32 |
| 9 | 107476    | Acaca          |
| 9 | 83428     | Ucn3           |
| 9 | 269338    | Vps39          |
| 9 | 64934     | Pes1           |
| 9 | 382217    | Gm1140         |
| 9 | 73330     | 1700018P08Rik  |
| 9 |           | MMT00049822    |
| 9 |           | MMT00063357    |
| 9 | 66343     | Tmem177        |
| 9 | 268686    | S100z          |
| 9 |           | MMT00011949    |
| 9 |           | MMT00030946    |
| 9 | 75645     | 1700011F14Rik  |
| 9 | 320982    | Arl4c          |
| 9 | 241528    | Lrrc55         |
| 9 | 76757     | Trdn           |
| 9 | 12417     | Cbx3           |
| 9 | 16181     | Il1rn          |
| 9 |           | MMT00079465    |
| 9 | 69769     | Tnfaip8l2      |
| 9 |           | MMT00021912    |
| 9 |           | MMT00030135    |
| 9 |           | MMT00064177    |
| 9 | 235497    | Leo1           |
| 9 | 67622     | Mxra7          |
| 9 | 67781     | Ilf2           |
| 9 | 231045    | 4931409K22Rik  |
| 9 |           | MMT00015015    |
| 9 | 11519     | Add2           |
| 9 | 26356     | Ing1           |
| 9 | 14459     | Gast           |
| 9 | 100041004 | MMT00052718    |
| 9 | 18441     | P2ry1          |
| 9 | 75547     | Akap13         |
| 9 | 223642    | Zc3h3          |
| 9 | 57315     | Wdr46          |
| 9 | 331392    | EG331392       |
| 9 | 66323     | 1700001K19Rik  |
| 9 | 328949    | Mcc            |
| 9 |           | MMT00026784    |
| 9 | 19724     | Rfx1           |
| 9 | 12631     | Cfl1           |
| 9 | 11839     | Areg           |
| 9 | 16447     | Ivl            |



|    |        |               |
|----|--------|---------------|
| 9  |        | MMT00000111   |
| 9  | 381818 | EG381818      |
| 9  |        | MMT00028069   |
| 9  |        | MMT00017420   |
| 9  | 19273  | Ptpru         |
| 9  | 381236 | AI747699      |
| 9  | 74591  | Abca12        |
| 9  | 258816 | Olfr466       |
| 9  |        | MMT00015366   |
| 9  |        | MMT00015505   |
| 9  | 22634  | Plagl1        |
| 9  | 74068  | Asz1          |
| 9  | 71011  | 4933401B06Rik |
| 9  | 258805 | Olfr1426      |
| 9  | 23963  | Odz1          |
| 9  |        | MMT00063855   |
| 9  | 54393  | Gabbr1        |
| 9  | 243548 | Prickle2      |
| 9  |        | MMT00071794   |
| 9  | 215446 | Entpd3        |
| 9  | 105203 | BC016423      |
| 9  | 12961  | Crybb2        |
| 9  |        | MMT00008227   |
| 9  | 241134 | 9430031J16Rik |
| 9  |        | MMT00047250   |
| 9  | 11419  | Accn2         |
| 9  |        | MMT00050594   |
| 9  | 17171  | Mas1          |
| 9  | 72333  | Palld         |
| 9  | 233806 | Tmem159       |
| 9  | 78508  | 2900093L17Rik |
| 9  | 140488 | Igf2bp3       |
| 9  |        | MMT00055444   |
| 9  | 67358  | 1700093K21Rik |
| 9  | 319991 | Kif6          |
| 9  | 29877  | Hdgfrp3       |
| 9  | 193740 | Hspa1a        |
| 9  |        | MMT00048540   |
| 9  |        | MMT00013609   |
| 9  |        | MMT00059956   |
| 10 | 13666  | Eif2ak3       |
| 10 | 60409  | Trappc4       |
| 10 | 66637  | 5730449L18Rik |
| 10 | 66637  | 5730449L18Rik |
| 10 | 320253 | 3-Mar         |
| 10 | 51886  | Fubp1         |
| 10 | 75678  | Ippk          |
| 10 | 69608  | Sec24d        |
| 10 | 625253 | EG625253      |
| 10 | 22021  | Tpst1         |
| 10 | 30056  | Timm9         |

|    |           |               |
|----|-----------|---------------|
| 10 | 434484    | Sp140         |
| 10 | 80292     | Zxdc          |
| 10 | 269704    | Zfp664        |
| 10 | 210711    | 1110007A13Rik |
| 10 | 94220     | Cnm4          |
| 10 | 26879     | B3galnt1      |
| 10 | 70238     | Rnf168        |
| 10 | 100044551 | MMT00001823   |
| 10 | 382117    | D9Ert402e     |
| 10 | 12369     | Casp7         |
| 10 | 107047    | Psmg2         |
| 10 | 67290     | 3110040N11Rik |
| 10 | 67068     | Dynlrb1       |
| 10 | 18088     | Nkx2-2        |
| 10 | 218203    | Mylip         |
| 10 | 16669     | Krt19         |
| 10 |           | MMT00066041   |
| 10 |           | MMT00002245   |
| 10 |           | MMT00051367   |
| 10 | 64213     | St7           |
| 10 | 80912     | Pum1          |
| 10 | 53625     | B3gnt2        |
| 10 | 407819    | BC031181      |
| 10 |           | MMT00041235   |
| 10 |           | MMT00048285   |
| 10 | 114128    | Laptm4b       |
| 10 |           | MMT00013155   |
| 10 | 69109     | 1810009O10Rik |
| 10 | 67099     | 2310038H17Rik |
| 10 | 66818     | 9130011J15Rik |
| 10 | 17126     | Smad2         |
| 10 | 18632     | Pex11b        |
| 10 | 97159     | A430005L14Rik |
| 10 | 633640    | EG633640      |
| 10 | 252974    | C330046G03Rik |
| 10 | 77531     | Anks1b        |
| 10 |           | MMT00040516   |
| 10 |           | MMT00018546   |
| 10 | 11840     | Arf1          |
| 10 | 21681     | Thoc4         |
| 10 |           | MMT00062045   |
| 10 |           | MMT00007348   |
| 10 | 445007    | Nup85         |
| 10 | 64451     | Dip2a         |
| 10 | 56196     | Ttrap         |
| 10 | 59058     | Bhlhb5        |
| 10 | 76137     | Ccdc90a       |
| 10 | 14172     | Fgf18         |
| 10 | 114774    | Pawr          |
| 10 | 22632     | Yy1           |
| 10 | 98415     | Nucks1        |

|    |        |             |
|----|--------|-------------|
| 10 | 78618  | Centb2      |
| 10 | 67255  | Zfp422      |
| 10 | 30960  | Vapa        |
| 10 | 97827  | Exdl2       |
| 10 | 14007  | Cugbp2      |
| 10 | 218442 | Serinc5     |
| 10 | 98758  | Hnrnpf      |
| 10 | 58200  | Ppp1r1a     |
| 10 | 19027  | Sypl        |
| 10 | 232906 | Grif1       |
| 10 |        | MMT00024172 |
| 10 |        | MMT00075773 |
| 10 |        | MMT00082708 |
| 10 | 238836 | EG238836    |
| 10 | 74365  | Lonrf3      |
| 10 | 50766  | Crim1       |
| 10 | 19317  | Qk          |
| 10 | 228777 | Nrsn2       |
| 10 | 63859  | Impg1       |
| 10 | 72821  | Scn2b       |
| 10 | 59310  | Myic2pl     |
| 10 | 236904 | Klhl15      |
| 10 |        | MMT00008587 |
| 10 | 18115  | Nnt         |
| 10 | 93836  | Rnf111      |
| 10 | 54401  | Ywhab       |
| 10 | 264064 | Cdk8        |
| 10 | 109151 | Chd9        |
| 10 | 19822  | Rnf4        |
| 10 | 20437  | Siah1a      |
| 10 | 219022 | Ttc5        |
| 10 | 12615  | Cenpa       |
| 10 | 56488  | Nxt1        |
| 10 | 114874 | Ddhd1       |
| 10 | 72729  | Cdc42se2    |
| 10 | 12729  | Clns1a      |
| 10 | 381269 | Mreg        |
| 10 | 232821 | Ccdc106     |
| 10 | 75710  | Rbm12       |
| 10 | 14619  | Gjb2        |
| 10 | 70227  | Zfp619      |
| 10 | 22420  | Wnt6        |
| 10 | 58239  | Dexi        |
| 10 | 67956  | Setd8       |
| 10 | 22057  | Tob1        |
| 10 | 13806  | Eno1        |
| 10 | 56277  | Tmem45a     |
| 10 |        | MMT00047341 |
| 10 | 223435 | Trio        |
| 10 | 214384 | Myocd       |
| 10 | 97998  | Depdc6      |

|    |        |               |
|----|--------|---------------|
| 10 | 78634  | 1700094C09Rik |
| 10 |        | MMT00027196   |
| 10 | 15395  | Hoxa10        |
| 10 | 235281 | Scn3b         |
| 10 | 50874  | Tmod4         |
| 10 | 270035 | Letm2         |
| 10 | 109222 | Rarres1       |
| 10 | 29815  | Bcar3         |
| 10 | 107769 | Tm6sf1        |
| 10 | 17118  | Marcks        |
| 10 | 19650  | Rbl1          |
| 10 | 22038  | Plscr1        |
| 10 |        | MMT00078660   |
| 10 | 16643  | Klrd1         |
| 10 | 14190  | Fgl2          |
| 10 | 235461 | B230380D07Rik |
| 10 |        | MMT00078587   |
| 10 | 66654  | Tex12         |
| 10 | 320742 | A230072C01Rik |
| 10 | 224171 | C330027C09Rik |
| 10 | 109820 | Pgc           |
| 10 | 56351  | Ptges3        |
| 10 | 56351  | Ptges3        |
| 10 | 19646  | Rbbp4         |
| 10 | 78309  | Parc          |
| 10 | 14268  | Fn1           |
| 10 |        | MMT00077405   |
| 10 | 109624 | Cald1         |
| 10 | 28194  | Apon          |
| 10 | 60455  | Tmem8         |
| 10 | 19416  | Rasd1         |
| 10 | 71951  | Gpc2          |
| 10 | 24070  | Mpdu1         |
| 10 | 69550  | Bst2          |
| 10 | 18190  | Nrxn2         |
| 10 | 11637  | Ak2           |
| 10 | 103161 | Apof          |
| 10 | 77031  | Slc9a8        |
| 10 | 50849  | Rnf10         |
| 10 | 12018  | Bak1          |
| 10 | 11540  | Adora2a       |
| 10 | 77407  | Rab35         |
| 10 | 63856  | Taf8          |
| 10 | 11536  | Gpr182        |
| 10 | 65106  | Arl6ip5       |
| 10 | 16906  | Lmnb1         |
| 10 | 74569  | Ttc17         |
| 10 |        | MMT00048420   |
| 10 | 68097  | Dynll2        |
| 10 |        | MMT00015399   |
| 10 | 67998  | 1300010M03Rik |

|    |        |               |
|----|--------|---------------|
| 10 | 68032  | Tmem85        |
| 10 | 12577  | Cdkn1c        |
| 10 | 74754  | Dhcr24        |
| 10 | 16994  | Ltb           |
| 10 | 17240  | Mdfi          |
| 10 | 102545 | Cmtm7         |
| 10 | 66119  | Prickle4      |
| 10 | 229589 | Prune         |
| 10 | 72931  | 2900010J23Rik |
| 10 | 243537 | Uroc1         |
| 10 |        | MMT00048362   |
| 10 | 56378  | Arpc3         |
| 10 |        | MMT00059396   |
| 10 | 70209  | Tmem143       |
| 10 | 69161  | Manbal        |
| 10 | 14555  | Gpd1          |
| 10 | 57436  | Gabarapl1     |
| 10 | 70439  | Taf15         |
| 10 | 107528 | Magee1        |
| 10 | 20384  | Sfrs5         |
| 10 | 20384  | Sfrs5         |
| 10 | 16911  | Lmo4          |
| 10 | 106522 | AW548124      |
| 10 | 68095  | Ociad1        |
| 10 | 14827  | Pdia3         |
| 10 | 75608  | Chmp4b        |
| 10 | 226118 | AI606181      |
| 10 | 20935  | Surf6         |
| 10 | 94178  | Mcoln1        |
| 10 | 15368  | Hmox1         |
| 10 | 381903 | Alg8          |
| 10 | 224807 | Tmem63b       |
| 10 | 21881  | Tkt           |
| 10 | 21355  | Tap2          |
| 10 | 76709  | Arpc2         |
| 10 | 57740  | Stk32c        |
| 10 | 83409  | MMT00001648   |
| 10 |        | MMT00008875   |
| 10 | 74747  | Ddit4         |
| 10 | 12359  | Cat           |
| 10 | 232370 | Clstn3        |
| 10 | 74145  | F13a1         |
| 10 | 15439  | Hp            |
| 10 | 110196 | Fdps          |
| 10 |        | MMT00063985   |
| 10 |        | MMT00013152   |
| 10 |        | MMT00067195   |
| 10 | 109299 | C330006A16Rik |
| 10 | 233979 | Tpcn2         |
| 10 | 52666  | D10Erttd610e  |
| 10 | 110119 | Mpi           |

|    |        |               |
|----|--------|---------------|
| 10 | 107376 | E330013P04Rik |
| 10 | 22032  | Traf4         |
| 10 | 19359  | Rad23b        |
| 10 | 27059  | Sh3d19        |
| 10 | 20286  | Zc3h7b        |
| 10 | 114584 | Clic1         |
| 10 | 22601  | Yap1          |
| 10 | 11867  | Arpc1b        |
| 10 | 69742  | Tm2d2         |
| 10 | 11898  | Ass1          |
| 10 | 11898  | Ass1          |
| 11 | 80748  | BC004004      |
| 11 | 77766  | Elp4          |
| 11 | 71890  | Mad2l2        |
| 11 | 69836  | Pla2g12b      |
| 11 | 18585  | Pde9a         |
| 11 | 50762  | Fbxo6         |
| 11 | 75973  | 5033413D22Rik |
| 11 | 101502 | Hsd3b7        |
| 11 | 71761  | Amdhd1        |
| 11 | 231532 | Arhgap24      |
| 11 | 68801  | Elovl5        |
| 11 | 11833  | Aqp8          |
| 11 | 11931  | Atp1b1        |
| 11 | 15486  | Hsd17b2       |
| 11 | 224440 | Setd4         |
| 11 | 17773  | Mtnr1a        |
| 11 | 12686  | Elovl3        |
| 11 | 16956  | Lpl           |
| 11 | 217316 | Slc16a5       |
| 11 | 56294  | Ptpn9         |
| 11 | 20623  | Snrk          |
| 11 |        | MMT00038457   |
| 11 | 71994  | Cnn3          |
| 11 | 74027  | 3930402G23Rik |
| 11 | 17988  | Ndrp1         |
| 11 | 69627  | 2310031A18Rik |
| 11 | 83961  | Nrg4          |
| 11 | 229488 | 9930021J17Rik |
| 11 | 21835  | Thrsp         |
| 11 | 225896 | D19Ert721e    |
| 11 | 108954 | Ppp1r15b      |
| 11 | 12575  | Cdkn1a        |
| 11 | 68652  | Map3k7ip2     |
| 11 | 83814  | Nedd4l        |
| 11 | 21743  | Inmt          |
| 11 | 320360 | Ric3          |
| 11 | 56209  | Gde1          |
| 11 | 224530 | Acat3         |
| 11 | 67664  | Rnf125        |
| 11 | 218215 | Rnf144b       |

|    |        |               |
|----|--------|---------------|
| 11 | 27273  | Pdk4          |
| 11 | 108767 | Pnrc1         |
| 11 | 77864  | Ypel2         |
| 11 | 18030  | Nfil3         |
| 11 | 99382  | Abtb2         |
| 11 | 212980 | Slc45a3       |
| 11 | 13086  | Cyp2a4        |
| 11 | 56809  | Gmeb1         |
| 11 | 12608  | Cebpb         |
| 11 | 70935  | Speer4f       |
| 11 | 320717 | Pptc7         |
| 11 | 14385  | Slc37a4       |
| 11 | 100637 | N4bp2l1       |
| 11 | 64209  | Herpud1       |
| 11 | 14245  | Lpin1         |
| 11 | 66626  | 5730403B10Rik |
| 11 | 108857 | Ankhd1        |
| 11 | 100561 | Slc15a4       |
| 11 | 13609  | S1pr1         |
| 11 | 26889  | Cln8          |
| 11 | 75750  | Slc10a6       |
| 11 | 170768 | Pfkfb3        |
| 11 | 140887 | Lnx2          |
| 11 | 233067 | Lrfn3         |
| 11 | 13436  | Dnmt3b        |
| 11 | 20811  | Srms          |
| 11 | 12660  | Chka          |
| 11 | 52670  | Cpsf4l        |
| 11 | 232493 | Gys2          |
| 11 |        | MMT00015534   |
| 11 | 627110 | Tubb2a-ps2    |
| 11 |        | MMT00060868   |
| 11 | 22151  | Tubb2a        |
| 11 | 22153  | Tubb4         |
| 11 |        | MMT00034355   |
| 11 | 227613 | Tubb2c        |
| 11 | 76654  | Upp2          |
| 11 | 27375  | Tjp3          |
| 11 | 59002  | Wdr8          |
| 11 | 100689 | Spon2         |
| 11 | 68337  | Crip2         |
| 11 | 20442  | St3gal1       |
| 11 | 666644 | EG666644      |
| 11 | 104681 | Slc16a6       |
| 11 | 21928  | Tnfaip2       |
| 11 | 20531  | Slc34a2       |
| 11 | 213417 | Klhdc8a       |
| 11 | 21873  | Tjp2          |
| 11 | 103213 | Traf3ip2      |
| 11 | 55963  | Slc1a4        |
| 11 | 75552  | Paqr9         |

|    |        |               |
|----|--------|---------------|
| 11 | 223752 | Gramd4        |
| 11 | 76954  | St5           |
| 11 | 70877  | Micalcl       |
| 11 | 27267  | Cars          |
| 11 |        | MMT00057509   |
| 11 | 278279 | Tmtc2         |
| 11 | 14229  | Fkbp5         |
| 11 |        | MMT00030937   |
| 11 | 207278 | Fchsd2        |
| 11 | 64898  | Lpin2         |
| 11 | 252838 | Tox           |
| 11 | 68591  | Mocos         |
| 11 | 18391  | Oprs1         |
| 11 | 67876  | Coq10b        |
| 11 |        | MMT00082650   |
| 11 | 19243  | Ptp4a1        |
| 11 | 66866  | Nhlrc2        |
| 11 | 27409  | Abcg5         |
| 11 | 67426  | Cabc1         |
| 11 | 74152  | 1300002K09Rik |
| 11 | 19165  | Psen2         |
| 11 | 57432  | Zc3h8         |
| 11 |        | MMT00049098   |
| 11 | 16363  | Irf2          |
| 11 | 227622 | BC029214      |
| 11 | 73652  | 2210408F21Rik |
| 11 | 192656 | Ripk2         |
| 11 | 71970  | 2410018M08Rik |
| 11 | 72655  | 2810026P18Rik |
| 11 | 67511  | Tmed9         |
| 11 | 66400  | Alkbh7        |
| 11 | 50877  | Neu3          |
| 11 | 69053  | 1810013L24Rik |
| 11 | 69159  | Rhebl1        |
| 11 | 72401  | Slc43a1       |
| 11 | 71361  | Aifm2         |
| 11 | 20909  | Stx4a         |
| 11 | 27219  | Sgk2          |
| 11 | 11941  | Atp2b2        |
| 11 | 108161 | D0H6S2654E    |
| 11 | 77864  | Ypel2         |
| 11 | 140887 | Lnx2          |
| 11 | 30931  | Tor1a         |
| 11 | 23893  | Grem2         |
| 11 | 16840  | Lect1         |
| 11 | 66970  | Ssbp2         |
| 11 | 57441  | Gmnn          |
| 12 | 13487  | Slc26a3       |
| 12 | 111507 | Igh           |
| 12 | 75784  | 1700007G11Rik |
| 12 | 13175  | Dclk1         |



|    |        |               |
|----|--------|---------------|
| 12 | 240261 | Ccdc112       |
| 12 | 16580  | Kifc1         |
| 12 | 414071 | BC028471      |
| 12 | 56790  | D3Ert300e     |
| 12 | 20445  | St6galnac1    |
| 12 | 108699 | Chn1          |
| 12 | 80861  | Dhx58         |
| 12 |        | MMT00067570   |
| 12 | 72852  | 2900024O10Rik |
| 12 | 19256  | Ptpn20        |
| 12 | 239157 | Pnma2         |
| 12 | 16415  | Itgb2l        |
| 12 | 19099  | Mapk8ip1      |
| 12 | 78128  | Spag11        |
| 12 | 319158 | Hist1h4i      |
| 12 | 216225 | Slc5a8        |
| 12 | 14028  | Evx1          |
| 12 |        | MMT00050153   |
| 12 | 330228 | 4933411G11Rik |
| 12 | 224480 | Nox3          |
| 12 | 57252  | Tas2r105      |
| 12 | 268780 | Egflam        |
| 12 | 108069 | Grm3          |
| 12 |        | MMT00013165   |
| 12 | 50518  | a             |
| 12 | 320495 | A130090K04Rik |
| 12 | 632654 | MMT00048312   |
| 12 | 627081 | Xlr5b         |
| 12 | 109331 | Rnf20         |
| 12 | 20271  | Scn5a         |
| 12 |        | MMT00080431   |
| 12 | 12322  | Camk2a        |
| 12 |        | MMT00051225   |
| 12 | 16184  | Il2ra         |
| 12 | 217082 | Hlf           |
| 12 | 20234  | Sbp           |
| 12 | 384422 | Igk-V8        |
| 12 | 258883 | Olf876        |
| 12 | 328971 | Spink10       |
| 12 | 268482 | Krt12         |
| 12 | 74441  | Slco6c1       |
| 12 |        | MMT00038655   |
| 12 | 215890 | Rlbp1l2       |
| 12 |        | MMT00078580   |
| 12 | 107587 | Osr2          |
| 12 |        | MMT00063621   |
| 12 | 259000 | Olf195        |
| 12 | 20749  | Dbpht1        |
| 12 |        | MMT00059108   |
| 12 |        | MMT00028550   |
| 12 | 21667  | Tdgf1         |

|    |        |               |
|----|--------|---------------|
| 12 | 16061  | Igh-VJ558     |
| 12 | 258808 | Olfr620       |
| 12 | 258934 | Olfr802       |
| 12 | 258290 | Olfr1143      |
| 12 |        | MMT00004378   |
| 12 | 385493 | AU015836      |
| 12 |        | MMT00037949   |
| 12 | 78257  | Lrrc9         |
| 12 | 66712  | Spesp1        |
| 12 | 23793  | Adam25        |
| 12 | 57752  | Tacc2         |
| 12 | 381538 | Gm1027        |
| 12 | 71421  | Amtn          |
| 12 |        | MMT00020896   |
| 12 |        | MMT00014316   |
| 12 | 20199  | S100a5        |
| 12 | 320679 | Samd12        |
| 12 | 381229 | Ccdc147       |
| 12 | 78478  | 1700129I15Rik |
| 12 | 64929  | Scel          |
| 12 | 73191  | Fezf1         |
| 12 | 259017 | Olfr1019      |
| 12 |        | MMT00020226   |
| 12 | 320752 | Dpy19l2       |
| 12 | 258803 | Olfr136       |
| 12 | 77706  | Abcb5         |
| 12 |        | MMT00046813   |
| 12 |        | MMT00007654   |
| 12 | 77011  | 5730590G19Rik |
| 12 | 229780 | Ccdc76        |
| 12 | 14266  | Aff2          |
| 12 | 71345  | Tmem16j       |
| 12 | 226470 | Zbtb41        |
| 12 | 240894 | Fmo9          |
| 12 | 394252 | Serpib3d      |
| 12 | 83565  | Pramel3       |
| 12 | 232836 | Galp          |
| 12 | 435927 | EG435927      |
| 12 | 258529 | Olfr313       |
| 12 | 18708  | Pik3r1        |
| 12 |        | MMT00078938   |
| 12 | 76386  | 1700010D01Rik |
| 12 | 67932  | 1700129C05Rik |
| 12 | 330660 | Btbd16        |
| 12 | 114660 | Etos1         |
| 12 | 71162  | 4933421I07Rik |
| 12 | 72318  | Pscd4         |
| 12 | 207792 | BC034090      |
| 12 | 212733 | Ccdc64b       |
| 12 | 668212 | Efr3b         |
| 12 |        | MMT00000773   |

|    |        |                    |
|----|--------|--------------------|
| 12 |        | MMT00030322        |
| 12 | 237625 | Pla2g3             |
| 12 | 77531  | Anks1b             |
| 12 |        | MMT00029895        |
| 12 | 268980 | Strn               |
| 12 | 399603 | D330050I23Rik      |
| 12 | 237038 | Nox1               |
| 12 | 103406 | 9130206N08Rik      |
| 12 | 67715  | 2010106E10Rik      |
| 12 |        | MMT00025388        |
| 12 | 75216  | 4930534B04Rik      |
| 12 |        | MMT00037010        |
| 12 | 13525  | Adam26a            |
| 12 | 76816  | Sdccag8            |
| 12 | 241638 | RP23-100C5.8       |
| 12 | 258186 | Olfr75-ps1         |
| 12 | 330890 | Piwil4             |
| 12 | 259019 | Olfr1045           |
| 12 | 547097 | B020011L13Rik      |
| 12 | 259015 | Olfr1038           |
| 12 | 77220  | C030003D03Rik      |
| 12 | 208084 | Pif1               |
| 12 | 50780  | Rgs3               |
| 12 | 170639 | Olfr78             |
| 12 | 70900  | 4921517D22Rik      |
| 12 | 320007 | Sidt1              |
| 12 | 380822 | MMT00072212        |
| 12 | 24115  | Best1              |
| 12 |        | MMT00008594        |
| 13 | 75064  | Cnbp2              |
| 13 | 268345 | Kcnc2              |
| 13 | 73873  | 4930430E16Rik      |
| 13 | 110957 | D1Pas1             |
| 13 | 15551  | Htr1b              |
| 13 | 258710 | Olfr419            |
| 13 |        | MMT00077586        |
| 13 |        | MMT00013081        |
| 13 | 213450 | Gm732              |
| 13 |        | MMT00005149        |
| 13 |        | MMT00047055        |
| 13 | 258891 | Olfr1302           |
| 13 | 66673  | Sorcs3             |
| 13 | 12427  | Ccna1              |
| 13 | 20707  | Serpib9c           |
| 13 | 791318 | ENSMUSG00000063087 |
| 13 | 224344 | Rbm11              |
| 13 | 67537  | Glpr1l2            |
| 13 | 258810 | Olfr665            |
| 13 |        | MMT00009539        |
| 13 | 66786  | Olfr701            |
| 13 | 17896  | Myl4               |

|    |           |               |
|----|-----------|---------------|
| 13 | 258297    | Olfr827       |
| 13 | 12006     | Axin2         |
| 13 | 20511     | Slc1a2        |
| 13 | 258304    | Olfr498       |
| 13 | 66742     | Cypt6         |
| 13 | 100101919 | Dnahc7c       |
| 13 | 21884     | Fabp9         |
| 13 | 75050     | Kif27         |
| 13 |           | MMT00053882   |
| 13 | 215723    | BC024997      |
| 13 |           | MMT00039382   |
| 13 | 93885     | Pcdhb14       |
| 13 | 53623     | Gria3         |
| 13 |           | MMT00054267   |
| 13 | 111507    | Igh           |
| 13 | 76757     | Trdn          |
| 13 | 16163     | Il13          |
| 13 | 14608     | Gpr83         |
| 13 | 67909     | Galntl5       |
| 13 |           | MMT00030613   |
| 13 | 241452    | Dhrs9         |
| 13 |           | MMT00031273   |
| 13 | 93873     | Pcdhb2        |
| 13 | 67218     | 2810038D20Rik |
| 13 | 243659    | Styk1         |
| 13 | 258905    | Olfr871       |
| 13 | 54122     | Uevld         |
| 13 | 56356     | Gltp          |
| 13 |           | MMT00017308   |
| 13 | 54601     | Foxo4         |
| 13 | 74413     | Tc2n          |
| 13 | 242557    | Atg4c         |
| 13 | 73412     | Txndc3        |
| 13 |           | MMT00042948   |
| 13 | 15042     | H2-T24        |
| 13 | 77981     | B230110C06Rik |
| 13 | 259096    | Olfr561       |
| 13 |           | MMT00038532   |
| 13 |           | MMT00061495   |
| 13 | 329421    | Myo3b         |
| 13 | 67295     | Rab3c         |
| 13 | 22689     | Zfp27         |
| 13 | 385674    | Zfp174        |
| 13 |           | MMT00049287   |
| 13 |           | MMT00042049   |
| 13 | 78751     | Zc3h6         |
| 13 | 445007    | Nup85         |
| 13 | 74176     | Tgm5          |
| 13 |           | MMT00013109   |
| 13 | 258935    | Olfr790       |
| 13 | 72431     | Ceacam18      |

|    |        |               |
|----|--------|---------------|
| 13 |        | MMT00013067   |
| 13 | 259035 | Olfr714       |
| 13 | 52042  | D17Ert663e    |
| 13 | 110751 | Adam33        |
| 13 | 94109  | Csmd1         |
| 13 | 626280 | EG626280      |
| 13 |        | MMT00039380   |
| 13 | 258352 | Olfr692       |
| 13 | 71200  | Dydc2         |
| 13 | 69694  | Tatdn1        |
| 13 | 208213 | Tmem132c      |
| 13 | 72003  | Synpr         |
| 13 | 69826  | Ms4a10        |
| 13 | 58869  | Pex5l         |
| 13 | 271842 | Rpusd2        |
| 13 |        | MMT00026261   |
| 13 | 259026 | Olfr378       |
| 13 | 258316 | Olfr727       |
| 13 |        | MMT00023360   |
| 13 | 73893  | Tmem202       |
| 13 | 67854  | Slco6b1       |
| 13 | 320484 | A430107D22Rik |
| 13 | 114585 | D17H6S53E     |
| 13 |        | MMT00007848   |
| 13 | 338354 | Zfp780b       |
| 13 | 20706  | Serpinb9b     |
| 13 | 12565  | Cdh9          |
| 13 | 268491 | Gm1564        |
| 13 | 229933 | Clca5         |
| 13 | 98752  | Fcrla         |
| 13 | 224661 | Slc26a8       |
| 13 |        | MMT00011639   |
| 13 | 331461 | Il1rap1       |
| 13 |        | MMT00019998   |
| 13 |        | MMT00054056   |
| 13 | 225644 | Cplx4         |
| 13 | 19111  | Prl6a1        |
| 13 | 16526  | Kcnk2         |
| 13 | 11449  | Chrng         |
| 13 | 258548 | Olfr805       |
| 13 | 67504  | Rnf151        |
| 13 |        | MMT00010339   |
| 13 | 258216 | Olfr1034      |
| 13 | 74369  | Mei1          |
| 13 | 78771  | Mctp1         |
| 13 | 241391 | Galnt5        |
| 13 | 71164  | Zdhhc11       |
| 13 |        | MMT00063670   |
| 13 | 21419  | Tcfap2b       |
| 13 | 14729  | Gp5           |
| 13 | 258572 | Olfr1032      |

|    |        |               |
|----|--------|---------------|
| 13 | 258299 | Olfr1461      |
| 13 | 503558 | Taar9         |
| 13 | 108096 | Slco1a5       |
| 13 | 433597 | MMT00013465   |
| 13 | 78631  | 1700085A12Rik |
| 13 | 72993  | Appl1         |
| 13 |        | MMT00005811   |
| 13 | 69983  | 2010204N08Rik |
| 13 | 215378 | B830045N13Rik |
| 13 | 52635  | D12Ert551e    |
| 14 | 20788  | Srebf2        |
| 14 | 73724  | Mcee          |
| 14 | 58809  | Rnase4        |
| 14 | 68879  | Prpf6         |
| 14 | 13143  | Dapk2         |
| 14 | 78321  | Ankrd23       |
| 14 | 57080  | Gtf2ird1      |
| 14 | 72549  | Reep4         |
| 14 | 20850  | Stat5a        |
| 14 | 70575  | Gfod2         |
| 14 | 545551 | BC021767      |
| 14 | 229003 | BC006779      |
| 14 | 108100 | Baiap2        |
| 14 | 17387  | Mmp14         |
| 14 | 15903  | Id3           |
| 14 | 74190  | 1200009I06Rik |
| 14 | 14194  | Fh1           |
| 14 | 212326 | BC035537      |
| 14 | 68177  | Ebpl          |
| 14 | 16859  | Lgals9        |
| 14 | 12826  | Col4a1        |
| 14 | 11544  | Adprh         |
| 14 | 104174 | Gldc          |
| 14 | 69635  | Dapk1         |
| 14 | 14043  | Ext2          |
| 14 | 26943  | Serinc3       |
| 14 | 67046  | Tbc1d7        |
| 14 | 53860  | 9-Sep         |
| 14 | 240913 | Adamts4       |
| 14 | 27762  | D17H6S56E-3   |
| 14 | 213649 | Arhgef19      |
| 14 | 22083  | Ctr9          |
| 14 | 328779 | Hs3st6        |
| 14 | 68927  | Ptcd2         |
| 14 | 67996  | Sfrs6         |
| 14 | 269999 | Orai3         |
| 14 | 213499 | Fbxo42        |
| 14 | 66089  | Rmnd5b        |
| 14 | 74451  | Pgs1          |
| 14 | 229707 | 6330569M22Rik |
| 14 | 68017  | Ftsj2         |

|    |        |               |
|----|--------|---------------|
| 14 | 97484  | Cog8          |
| 14 | 58246  | Slc35b4       |
| 14 | 215615 | Rnpep         |
| 14 | 66989  | Kctd20        |
| 14 | 228846 | D630003M21Rik |
| 14 | 66355  | Gmpr          |
| 14 | 52588  | Tspan14       |
| 14 | 56401  | Lepre1        |
| 14 | 71452  | Ankrd40       |
| 14 | 234734 | Aars          |
| 14 | 72726  | Tbcc          |
| 14 | 18332  | Olfr33        |
| 14 | 13169  | Dbnl          |
| 14 | 66911  | Nudt16l1      |
| 14 | 94066  | Mrpl36        |
| 14 | 12812  | Coil          |
| 14 | 67801  | Plip          |
| 14 | 69674  | Mif4gd        |
| 14 | 59038  | Pxmp4         |
| 14 | 72962  | Tymp          |
| 14 | 18671  | Abcb1a        |
| 14 |        | MMT00036089   |
| 14 | 16763  | Lad1          |
| 14 | 79554  | Gltpd1        |
| 14 | 76252  | Atp6v0e2      |
| 14 | 23854  | Def8          |
| 14 | 668030 | MMT00015864   |
| 14 | 22608  | Ybx1          |
| 14 | 56440  | Snx1          |
| 14 | 106068 | Slc45a4       |
| 14 | 27056  | Irf5          |
| 14 | 68453  | Gpihbp1       |
| 14 | 12406  | Serpinh1      |
| 14 | 15468  | Prmt2         |
| 14 |        | MMT00031263   |
| 14 | 233733 | Galnt14       |
| 14 | 13496  | Arid3a        |
| 14 | 56050  | Cyp39a1       |
| 14 | 72275  | 2200002D01Rik |
| 14 | 13096  | Cyp2c37       |
| 14 | 12411  | Cbs           |
| 14 | 268822 | Adck5         |
| 14 | 432720 | Akr1c19       |
| 14 | 18639  | Pfkfb1        |
| 14 | 622434 | 4631416L12Rik |
| 14 | 67512  | Agpat2        |
| 14 | 77037  | Mrap          |
| 14 | 380752 | Tssc1         |
| 14 | 232879 | Zbtb45        |
| 14 | 67951  | Tubb6         |
| 14 | 18606  | Enpp2         |

|    |        |               |
|----|--------|---------------|
| 14 | 59047  | Pnkp          |
| 14 | 59027  | Nampt         |
| 14 | 58235  | Pvrl1         |
| 14 | 74182  | Prei4         |
| 14 | 79043  | Spsb3         |
| 14 | 76073  | Pcgf5         |
| 14 | 676923 | MMT00040704   |
| 14 | 12051  | Bcl3          |
| 14 | 60527  | Fads3         |
| 14 | 327956 | Vmo1          |
| 14 | 68149  | Otub2         |
| 14 | 22154  | Tubb5         |
| 14 | 94181  | Nans          |
| 14 | 67247  | Mosc2         |
| 14 | 16668  | Krt18         |
| 14 | 268291 | Rnf217        |
| 14 | 13667  | Eif2b4        |
| 14 | 223774 | Alg12         |
| 14 | 56338  | Txnip         |
| 14 | 72654  | Ccdc12        |
| 14 | 98845  | Eps8l2        |
| 14 | 54375  | Azin1         |
| 14 |        | MMT00044927   |
| 14 | 107503 | Atf5          |
| 14 |        | MMT00037611   |
| 14 | 16177  | Il1r1         |
| 14 | 15982  | lfrd1         |
| 14 | 66236  | 1500011B03Rik |
| 14 | 76306  | 1110021L09Rik |
| 14 | 52331  | Stbd1         |
| 14 | 16007  | Cyr61         |
| 14 | 11911  | Atf4          |
| 14 | 78903  | Wrnip1        |
| 14 | 51800  | Bok           |
| 14 | 76508  | 2210015D19Rik |
| 14 | 22362  | Vpreb1        |
| 14 | 227545 | 5430407P10Rik |
| 14 | 75692  | Nr2c2ap       |
| 14 | 74616  | Scrn3         |
| 14 | 68558  | Ankra2        |
| 14 | 268534 | Sntg2         |
| 14 | 230696 | AU022252      |
| 15 |        | MMT00069758   |
| 15 | 12977  | Csf1          |
| 15 | 18611  | Pea15a        |
| 15 | 320869 | 4732415M23Rik |
| 15 | 215001 | Wfikkn1       |
| 15 |        | MMT00065667   |
| 15 | 23970  | Pacsin2       |
| 15 | 18569  | Pdcd4         |
| 15 | 110391 | Qdpr          |



|    |        |               |
|----|--------|---------------|
| 15 | 68346  | Sirt5         |
| 15 |        | MMT00017270   |
| 15 |        | MMT00005190   |
| 15 |        | MMT00017503   |
| 15 | 12122  | Bid           |
| 15 | 15110  | Hand1         |
| 15 | 246703 | Apoa1bp       |
| 15 |        | MMT00004656   |
| 15 |        | MMT00048392   |
| 15 | 22320  | Vamp8         |
| 15 | 269105 | EG269105      |
| 15 |        | MMT00036391   |
| 15 | 107173 | Gpr137        |
| 15 | 320904 | D630012G11Rik |
| 15 | 68051  | Nutf2         |
| 15 | 68051  | Nutf2         |
| 15 | 67956  | Setd8         |
| 15 | 20022  | Polr2j        |
| 15 |        | MMT00036444   |
| 15 | 432502 | EG432502      |
| 15 |        | MMT00034010   |
| 15 |        | MMT00060205   |
| 15 |        | MMT00077845   |
| 15 |        | MMT00070318   |
| 15 | 16898  | Rps2          |
| 15 |        | MMT00003113   |
| 15 |        | MMT00042985   |
| 15 | 380730 | Gm884         |
| 15 |        | MMT00069569   |
| 15 |        | MMT00016379   |
| 15 |        | MMT00077883   |
| 15 |        | MMT00012419   |
| 15 |        | MMT00079667   |
| 15 |        | MMT00018943   |
| 15 |        | MMT00011946   |
| 15 |        | MMT00049231   |
| 15 |        | MMT00015290   |
| 15 |        | MMT00069490   |
| 15 |        | MMT00026738   |
| 15 | 244895 | C230081A13Rik |
| 15 | 223870 | Senp1         |
| 15 | 67680  | Sdhd          |
| 15 | 11949  | Atp5c1        |
| 15 | 11949  | Atp5c1        |
| 15 | 13033  | Ctsd          |
| 15 |        | MMT00029730   |
| 15 |        | MMT00014600   |
| 15 | 54219  | Cd320         |
| 15 | 15019  | H2-Q8         |
| 15 | 14964  | H2-D1         |
| 15 | 15013  | H2-Q2         |

|    |        |               |
|----|--------|---------------|
| 15 |        | MMT00077153   |
| 15 | 68981  | Snrpa1        |
| 15 |        | MMT00001967   |
| 15 | 13101  | Cyp2d10       |
| 15 |        | MMT00022996   |
| 15 | 21991  | Tpi1          |
| 15 | 59003  | Maea          |
| 15 |        | MMT00072579   |
| 16 | 234199 | Fgl1          |
| 16 | 20219  | Apcs          |
| 16 | 13136  | Cd55          |
| 16 | 26888  | Clec4a2       |
| 16 | 12506  | Cd48          |
| 16 | 117167 | Steap4        |
| 16 | 209387 | Al451617      |
| 16 | 234311 | Ddx60         |
| 16 | 13032  | Ctsc          |
| 16 | 97165  | Hmgb2         |
| 16 | 18080  | Nin           |
| 16 | 56421  | Pfkp          |
| 16 | 67759  | 5033414D02Rik |
| 16 | 15953  | Ifi47         |
| 16 | 100702 | Mpa2l         |
| 16 | 94094  | Trim34        |
| 16 | 223433 | BC052328      |
| 16 | 60533  | Cd274         |
| 16 | 18173  | Slc11a1       |
| 16 | 330256 | MMT00008885   |
| 16 | 219132 | D14Ert668e    |
| 16 | 20128  | Trim30        |
| 16 | 52614  | Emr4          |
| 16 | 52855  | Lair1         |
| 16 | 76074  | 5830443L24Rik |
| 16 | 15951  | Ifi204        |
| 16 | 19735  | Rgs2          |
| 16 | 55932  | Gbp3          |
| 16 | 12524  | Cd86          |
| 16 | 73656  | Ms4a6c        |
| 16 | 12363  | Casp4         |
| 16 | 19331  | Rab19         |
| 16 | 276891 | Timd4         |
| 16 | 20541  | Slc8a1        |
| 16 | 19277  | Ptpro         |
| 16 | 219131 | Phf11         |
| 16 | 58185  | Rsad2         |
| 16 | 629974 | Rnf213        |
| 16 | 15957  | Ifit1         |
| 16 | 667370 | MMT00014813   |
| 16 | 15959  | Ifit3         |
| 16 | 547253 | Parp14        |
| 16 | 229900 | Gbp6          |

|    |        |               |
|----|--------|---------------|
| 16 | 20343  | Sell          |
| 16 | 17476  | Mpeg1         |
| 16 | 236451 | EG236451      |
| 16 | 17329  | Cxcl9         |
| 16 | 67742  | Samsn1        |
| 16 | 12362  | Casp1         |
| 16 | 80719  | Igsf6         |
| 16 | 22751  | Zfp90         |
| 16 | 231130 | Tnip2         |
| 16 | 75600  | Calml4        |
| 16 | 208836 | Fanci         |
| 16 | 66977  | Nuf2          |
| 16 | 19361  | Rad51         |
| 16 | 17219  | Mcm6          |
| 16 | 17217  | Mcm4          |
| 16 | 20878  | Aurka         |
| 16 | 18074  | Nid2          |
| 16 | 70472  | Atad2         |
| 16 | 66949  | Trim59        |
| 16 | 236930 | Ercc6l        |
| 16 | 12316  | Aspm          |
| 16 | 27214  | Dbf4          |
| 16 | 19699  | Reln          |
| 16 | 629974 | Rnf213        |
| 16 | 22035  | Tnfsf10       |
| 16 | 114643 | Oas1c         |
| 16 | 74568  | Mkl           |
| 16 | 56417  | Adar          |
| 16 | 67198  | 2810022L02Rik |
| 16 | 70110  | Ifi35         |
| 16 | 677168 | MMT00057550   |
| 16 | 53606  | Isg15         |
| 17 | 194597 | Tmprss11a     |
| 17 | 72103  | 2010301N04Rik |
| 17 | 69125  | Cnot8         |
| 17 | 329693 | Fcrl5         |
| 17 | 67336  | 1700054K19Rik |
| 17 |        | MMT00009248   |
| 17 | 234959 | Med17         |
| 17 |        | MMT00064569   |
| 17 | 16485  | Kcna1         |
| 17 |        | MMT00022580   |
| 17 | 382066 | Prdm10        |
| 17 | 26465  | Zfp146        |
| 17 |        | MMT00026800   |
| 17 | 258737 | Olfrl316      |
| 17 | 70571  | Tcerg1l       |
| 17 | 74071  | Ifitd1        |
| 17 | 78937  | 5830411G16Rik |
| 17 | 72097  | 2010300C02Rik |
| 17 | 626058 | EG626058      |

|    |        |               |
|----|--------|---------------|
| 17 | 93746  | Gprc5d        |
| 17 |        | MMT00081414   |
| 17 | 380709 | Spata22       |
| 17 | 436059 | EG436059      |
| 17 | 384806 | MMT00074605   |
| 17 | 209448 | Hoxc10        |
| 17 | 52024  | Ankrd22       |
| 17 | 353282 | Sfmbt2        |
| 17 | 231125 | Zfyve28       |
| 17 |        | MMT00013143   |
| 17 |        | MMT00054511   |
| 17 | 75079  | Zfp509        |
| 17 | 16509  | Kcne1         |
| 17 | 630146 | Igsf2         |
| 17 | 20958  | Sycp1-ps1     |
| 17 | 78473  | Skap1         |
| 17 | 76846  | Rps9          |
| 17 | 74053  | Grip1         |
| 17 | 192167 | Nlgn1         |
| 17 | 74915  | Atp6v1e2      |
| 17 | 16098  | MMT00030712   |
| 17 | 242274 | Lrrc7         |
| 17 | 329093 | Cpa6          |
| 17 |        | MMT00019756   |
| 17 | 217232 | Cdc27         |
| 17 | 73582  | 1700106N22Rik |
| 17 | 272350 | EG272350      |
| 17 | 72902  | Spock3        |
| 17 | 71062  | Tekt3         |
| 17 | 77422  | C330018D20Rik |
| 17 | 258358 | Olfir557      |
| 17 |        | MMT00015154   |
| 17 | 68588  | Cthrc1        |
| 17 | 20289  | Scx           |
| 17 | 270906 | Prr11         |
| 17 | 320664 | Cass4         |
| 17 | 258022 | Olfir1318     |
| 17 | 258585 | Olfir1086     |
| 17 | 258730 | Olfir483      |
| 17 | 74998  | Rab11fip2     |
| 17 | 99663  | Clca6         |
| 17 | 14613  | Gja5          |
| 17 | 233332 | Adamts17      |
| 17 |        | MMT00048642   |
| 17 | 210198 | Gprc6a        |
| 17 | 18158  | Nppb          |
| 17 | 74717  | Spata17       |
| 17 |        | MMT00028085   |
| 17 | 116913 | Tpbpb         |
| 17 | 56619  | Clec4e        |
| 17 | 76999  | 1700127D06Rik |

|    |        |               |
|----|--------|---------------|
| 17 |        | MMT00008396   |
| 17 | 19259  | Ptpn5         |
| 17 | 20983  | Syt4          |
| 17 | 259118 | Olfir575      |
| 17 | 242574 | C130073F10Rik |
| 17 | 627132 | Vmn2r93       |
| 17 | 73784  | 4930430F21Rik |
| 17 | 78251  | Zfp712        |
| 17 | 84543  | Sval2         |
| 17 |        | MMT00050850   |
| 17 | 320183 | Msr3          |
| 17 |        | MMT00060699   |
| 17 | 13863  | Lcn5          |
| 17 |        | MMT00041291   |
| 17 |        | MMT00000812   |
| 17 | 140806 | Ii25          |
| 17 | 22301  | Vmn2r89       |
| 17 |        | MMT00061717   |
| 17 | 76219  | 6530401D17Rik |
| 17 | 110789 | Gpr98         |
| 17 | 14829  | Grpr          |
| 17 | 546213 | Gm1420        |
| 17 | 67728  | Dph2          |
| 17 | 18508  | Pax6          |
| 17 | 76854  | Gper          |
| 17 | 18193  | Nsd1          |
| 17 | 16688  | Krt6b         |
| 17 | 20819  | Srst          |
| 17 | 406186 | Olfir142      |
| 17 | 20278  | Scnn1g        |
| 17 | 16882  | Lig3          |
| 17 | 18511  | Pax9          |
| 17 | 19131  | Prh1          |
| 17 | 243377 | Svs1          |
| 17 | 68799  | Rgmb          |
| 17 |        | MMT00077977   |
| 17 | 17450  | Morc1         |
| 17 | 271813 | Agbl2         |
| 17 | 619332 | 4933416C03Rik |
| 17 | 211378 | 6720489N17Rik |
| 17 | 110304 | Gira3         |
| 17 |        | MMT00075591   |
| 17 | 77918  | Krtap16-5     |
| 17 | 258284 | Olfir114      |
| 17 |        | MMT00049952   |
| 17 | 242408 | 4930412F15Rik |
| 17 | 319215 | 4932413F04Rik |
| 18 | 53318  | Pdlim3        |
| 18 | 241431 | Xirp2         |
| 18 | 11875  | Art5          |
| 18 | 74166  | Tmem38a       |

|    |        |               |
|----|--------|---------------|
| 18 | 21380  | Tbx1          |
| 18 | 68794  | Finc          |
| 18 | 329502 | Pla2g4e       |
| 18 | 59069  | Tpm3          |
| 18 | 268859 | MMT00006152   |
| 18 | 109264 | Me3           |
| 18 | 68802  | Mypn          |
| 18 | 12292  | Cacna1s       |
| 18 | 12869  | Cox8b         |
| 18 | 56012  | Pgam2         |
| 18 | 17882  | Myh2          |
| 18 | 228003 | Kbtbd10       |
| 18 | 68678  | Smtnl1        |
| 18 | 76722  | Ckmt2         |
| 18 | 15464  | Hrc           |
| 18 | 11937  | Atp2a1        |
| 18 | 59011  | Myoz1         |
| 18 | 17907  | Mylpf         |
| 18 | 21925  | Tnnc2         |
| 18 | 22003  | Tpm1          |
| 18 | 21957  | Tnnt3         |
| 18 | 229665 | Ampd1         |
| 18 | 378431 | Txlnb         |
| 18 | 233199 | Mybpc2        |
| 18 | 381339 | Tmem182       |
| 18 | 69564  | Itgb1bp3      |
| 18 | 140781 | Myh7          |
| 18 | 59006  | Myoz2         |
| 18 | 22138  | Ttn           |
| 18 | 17901  | Myl1          |
| 18 | 17189  | Mb            |
| 18 | 76469  | Cmya5         |
| 18 | 58916  | Myot          |
| 18 | 22138  | Ttn           |
| 18 | 21384  | Tbx15         |
| 18 | 23828  | Bves          |
| 18 | 11472  | Actn2         |
| 18 | 66106  | Smpx          |
| 18 | 17897  | Myl3          |
| 18 | 11811  | Apobec2       |
| 18 | 66211  | Rpl3l         |
| 18 | 12862  | Cox6a2        |
| 18 | 20190  | Ryr1          |
| 18 | 17929  | Myom1         |
| 18 | 56534  | Hspb3         |
| 18 | 17306  | Sypl2         |
| 18 | 20474  | Six4          |
| 18 | 76294  | Asb5          |
| 19 | 69812  | 2010001M06Rik |
| 19 | 171207 | Arhgap4       |
| 19 | 19731  | Rgl1          |

|    |        |               |
|----|--------|---------------|
| 19 | 15170  | Ptpn6         |
| 19 | 114601 | Ehbp1l1       |
| 19 | 19698  | Relb          |
| 19 | 74257  | Tspan17       |
| 19 | 21912  | Tspan7        |
| 19 | 109934 | Abr           |
| 19 | 17313  | Mgp           |
| 19 | 16598  | Klf2          |
| 19 | 14251  | Flot1         |
| 19 | 78388  | Mvp           |
| 19 | 50723  | Icosl         |
| 19 | 17305  | Mfng          |
| 19 | 140559 | Igsf8         |
| 19 | 14456  | Gas6          |
| 19 | 52377  | Rcn3          |
| 19 | 26901  | Deb1          |
| 19 | 16772  | Lama1         |
| 19 | 214901 | Chtf18        |
| 19 |        | MMT00075074   |
| 19 | 101543 | Wtip          |
| 19 | 57914  | Crlf2         |
| 19 | 74155  | Errfi1        |
| 19 | 14204  | Il4i1         |
| 19 |        | MMT00007396   |
| 19 | 231712 | Trafd1        |
| 19 | 14038  | Kal1          |
| 19 | 51811  | Clec4f        |
| 19 | 22177  | Tyrobp        |
| 19 | 12260  | C1qb          |
| 19 | 19141  | Lgmn          |
| 19 | 54445  | Unc93b1       |
| 19 | 14961  | H2-Ab1        |
| 19 | 15458  | Hpx           |
| 19 | 64294  | Itm2c         |
| 19 | 109857 | Cbr3          |
| 19 | 70274  | Ly6g6e        |
| 19 | 212937 | Tifab         |
| 19 | 19265  | Ptprcap       |
| 19 | 227659 | Slc2a6        |
| 19 | 22368  | Trpv2         |
| 19 | 106512 | Gpsm3         |
| 19 | 16331  | Inpp5d        |
| 19 | 19240  | Tmsb10        |
| 19 | 18636  | Cfp           |
| 19 | 12262  | C1qc          |
| 19 | 13449  | Dok2          |
| 19 | 12259  | C1qa          |
| 19 | 54153  | Rasa4         |
| 19 | 69507  | 1700030G06Rik |
| 19 | 13732  | Emp3          |
| 19 | 15896  | Icam2         |

|    |        |               |
|----|--------|---------------|
| 19 | 214855 | Arid5a        |
| 19 | 74096  | Hvcn1         |
| 19 | 19186  | Psme1         |
| 19 | 67893  | Tmem86a       |
| 19 | 14017  | Evi2a         |
| 19 | 56744  | Pf4           |
| 19 | 13057  | Cyba          |
| 19 | 11668  | Aldh1a1       |
| 19 | 14874  | Gstz1         |
| 19 | 29817  | Igfbp7        |
| 19 | 74760  | Rab3il1       |
| 19 | 51801  | Ramp1         |
| 19 | 218975 | Mapk1ip1l     |
| 19 | 67971  | Tppp3         |
| 19 | 75778  | Them4         |
| 19 | 76809  | Bri3bp        |
| 19 | 22051  | Trip6         |
| 19 | 232430 | Crebl2        |
| 19 | 79059  | Nme3          |
| 19 | 71760  | Agxt2l1       |
| 20 | 67366  | 1810008K16Rik |
| 20 | 14598  | Ggt1          |
| 20 | 19152  | Prtn3         |
| 20 | 21785  | Tff2          |
| 20 | 66473  | Ctrb1         |
| 20 | 13706  | RP23-395H4.4  |
| 20 | 22073  | Prss3         |
| 20 | 19752  | Rnase1        |
| 20 | 12613  | Cel           |
| 20 | 18947  | Pnliprp2      |
| 20 | 435889 | 1810049H19Rik |
| 20 | 109660 | Ctrl          |
| 20 | 19692  | Reg1          |
| 20 | 76701  | Ctrc          |
| 20 | 67868  | Ela3          |
| 20 | 22074  | Try4          |
| 20 | 18946  | Pnliprp1      |
| 20 | 114228 | Prss1         |
| 20 | 22072  | Prss2         |
| 20 | 22073  | Prss3         |
| 20 | 19693  | Reg2          |
| 20 | 67373  | 2210010C04Rik |
| 20 | 16433  | Cuzd1         |
| 20 | 109697 | Cpa1          |
| 20 | 18489  | Reg3b         |
| 20 | 67931  | Serpini2      |
| 20 | 20730  | Spink3        |
| 20 | 232680 | Cpa2          |
| 20 | 12425  | Cckar         |
| 20 | 16612  | Klk1          |
| 20 | 76703  | Cpb1          |



|    |        |         |
|----|--------|---------|
| 20 | 16622  | Klk1b5  |
| 20 | 67133  | Gp2     |
| 20 | 109901 | Ela1    |
| 20 | 109791 | Clps    |
| 20 | 56312  | Nupr1   |
| 20 | 209837 | Slc38a5 |
| 20 | 19694  | Reg3a   |
| 20 | 12945  | Dmbt1   |

**Table T7: AH TTC Network**

| Adipose_Probe_ID | Hypothalamus_Probe_ID | Adipose_Gene_Symbol | Hypothalamus_Gene_Symbol | Correlation Sign |
|------------------|-----------------------|---------------------|--------------------------|------------------|
| 10               | 1122                  | NaN                 | Pax3                     | 1                |
| 10               | 4199                  | NaN                 | B3galt5                  | 1                |
| 10               | 5505                  | NaN                 | Thap2                    | 1                |
| 10               | 7916                  | NaN                 | MMT00016293              | 1                |
| 10               | 7974                  | NaN                 | Arhgef7                  | 1                |
| 10               | 8256                  | NaN                 | Tjap1                    | 1                |
| 10               | 8644                  | NaN                 | V1rg11                   | 1                |
| 10               | 9946                  | NaN                 | Stam2                    | 1                |
| 10               | 9954                  | NaN                 | MMT00047280              | 1                |
| 10               | 10520                 | NaN                 | Xkr6                     | 1                |
| 10               | 10687                 | NaN                 | Itpkb                    | 1                |
| 10               | 10723                 | NaN                 | 4930556N09Rik            | 1                |
| 10               | 11256                 | NaN                 | H2-DMa                   | 1                |
| 10               | 11966                 | NaN                 | Zfp280b                  | 1                |
| 10               | 12248                 | NaN                 | Tnp2                     | 1                |
| 10               | 12272                 | NaN                 | Fshr                     | 1                |
| 10               | 12772                 | NaN                 | Axl                      | 1                |
| 10               | 14313                 | NaN                 | Tnk1                     | 1                |
| 10               | 15743                 | NaN                 | Hoxc6                    | 1                |
| 10               | 16390                 | NaN                 | Plb1                     | 1                |
| 10               | 17613                 | NaN                 | P2rx7                    | 1                |
| 10               | 17750                 | NaN                 | Hs6st2                   | 1                |
| 10               | 18124                 | NaN                 | Ptprt                    | 1                |
| 10               | 18620                 | NaN                 | Slmap                    | 1                |
| 10               | 19219                 | NaN                 | MMT00015104              | 1                |
| 10               | 21866                 | NaN                 | Hhip1                    | 1                |
| 10               | 22434                 | NaN                 | Olf1255                  | 1                |
| 10               | 22802                 | NaN                 | Svs2                     | 1                |
| 10               | 23546                 | NaN                 | Zzef1                    | 1                |
| 10               | 23591                 | NaN                 | Dlg4                     | 1                |
| 10               | 23651                 | NaN                 | MMT00027295              | 1                |
| 143              | 143                   | Gvin1               | Gvin1                    | 1                |
| 146              | 15870                 | Rlbp1l2             | Aqp5                     | 1                |
| 187              | 2118                  | Wdr62               | Kptn                     | 1                |
| 187              | 2599                  | Wdr62               | Lsm14a                   | 1                |
| 187              | 6513                  | Wdr62               | Qpctl                    | 1                |
| 187              | 7761                  | Wdr62               | Nudt19                   | 1                |
| 187              | 7803                  | Wdr62               | Ttyh1                    | 1                |
| 187              | 8394                  | Wdr62               | Dpy19l3                  | 1                |
| 187              | 17632                 | Wdr62               | Lypd3                    | -1               |
| 187              | 19306                 | Wdr62               | Al428936                 | 1                |
| 187              | 19462                 | Wdr62               | 4933439C20Rik            | -1               |
| 187              | 20606                 | Wdr62               | MMT00042166              | -1               |
| 199              | 1515                  | Gabrb3              | Med20                    | 1                |
| 199              | 2424                  | Gabrb3              | Unc5cl                   | -1               |
| 199              | 7088                  | Gabrb3              | Slc37a1                  | -1               |
| 199              | 7965                  | Gabrb3              | Enpp5                    | -1               |
| 213              | 12761                 | Rgs16               | Tsc22d3                  | -1               |
| 213              | 16494                 | Rgs16               | 2310007D09Rik            | -1               |
| 223              | 1325                  | Trp53inp2           | Pigu                     | -1               |
| 223              | 2351                  | Trp53inp2           | 1110008F13Rik            | 1                |
| 223              | 5603                  | Trp53inp2           | BC020535                 | 1                |
| 223              | 6059                  | Trp53inp2           | Dsn1                     | 1                |
| 223              | 6250                  | Trp53inp2           | Csnk2a1                  | -1               |
| 223              | 11166                 | Trp53inp2           | Uqcc                     | 1                |
| 223              | 12866                 | Trp53inp2           | 4921517L17Rik            | -1               |
| 223              | 14399                 | Trp53inp2           | Csnk2a1                  | -1               |

|     |       |             |               |    |
|-----|-------|-------------|---------------|----|
| 223 | 14649 | Trp53inp2   | 5430405G05Rik | -1 |
| 223 | 14734 | Trp53inp2   | Nrsn2         | 1  |
| 223 | 20837 | Trp53inp2   | Dlgap4        | -1 |
| 223 | 23005 | Trp53inp2   | 4930405A21Rik | 1  |
| 230 | 1466  | MMT00000744 | Ubap2l        | -1 |
| 230 | 2752  | MMT00000744 | Fcgr1         | -1 |
| 230 | 3314  | MMT00000744 | Wars2         | -1 |
| 230 | 5508  | MMT00000744 | Lrig2         | 1  |
| 230 | 6708  | MMT00000744 | Serpini2      | 1  |
| 230 | 9519  | MMT00000744 | Fstl5         | 1  |
| 230 | 10521 | MMT00000744 | Ttf2          | -1 |
| 230 | 12367 | MMT00000744 | MMT00072365   | 1  |
| 230 | 12716 | MMT00000744 | 5830417110Rik | 1  |
| 230 | 15299 | MMT00000744 | Mrps21        | 1  |
| 230 | 15901 | MMT00000744 | Tpm3          | 1  |
| 230 | 16416 | MMT00000744 | Comm2         | -1 |
| 230 | 21650 | MMT00000744 | Ap4b1         | -1 |
| 230 | 22570 | MMT00000744 | Phf1          | -1 |
| 245 | 1297  | Sqrdl       | Phox2a        | -1 |
| 246 | 246   | MMT00053742 | MMT00053742   | 1  |
| 246 | 1625  | MMT00053742 | AW146154      | -1 |
| 246 | 9402  | MMT00053742 | 1200016B10Rik | -1 |
| 246 | 9611  | MMT00053742 | Ncf2          | 1  |
| 246 | 15569 | MMT00053742 | BC003331      | 1  |
| 246 | 17463 | MMT00053742 | Rgl1          | 1  |
| 247 | 21425 | Clns1a      | Rab6          | -1 |
| 250 | 5385  | Tubb2a-ps2  | Tubb2b        | 1  |
| 250 | 15476 | Tubb2a-ps2  | Fem1b         | -1 |
| 268 | 268   | Sys1        | Sys1          | 1  |
| 274 | 5345  | Trit1       | MMT00023326   | 1  |
| 286 | 283   | MMT00070509 | Gmcl1l        | -1 |
| 286 | 286   | MMT00070509 | MMT00070509   | 1  |
| 286 | 403   | MMT00070509 | Leprotl1      | -1 |
| 286 | 1097  | MMT00070509 | Dctn6         | 1  |
| 286 | 1604  | MMT00070509 | Ssbp4         | 1  |
| 286 | 1755  | MMT00070509 | Ocel1         | 1  |
| 286 | 2294  | MMT00070509 | AU040829      | -1 |
| 286 | 3052  | MMT00070509 | 9130404D08Rik | -1 |
| 286 | 3609  | MMT00070509 | Plvap         | 1  |
| 286 | 5433  | MMT00070509 | 2410004L22Rik | -1 |
| 286 | 5925  | MMT00070509 | Tmem59l       | -1 |
| 286 | 9304  | MMT00070509 | AI449175      | 1  |
| 286 | 9569  | MMT00070509 | Dda1          | -1 |
| 286 | 9729  | MMT00070509 | Got1l1        | -1 |
| 286 | 10373 | MMT00070509 | Tmem141       | 1  |
| 286 | 10758 | MMT00070509 | Gdf1          | -1 |
| 286 | 12966 | MMT00070509 | Slc39a1       | 1  |
| 286 | 13732 | MMT00070509 | Tpm4          | -1 |
| 286 | 15296 | MMT00070509 | Mier3         | 1  |
| 286 | 15455 | MMT00070509 | Lsm4          | -1 |
| 286 | 16617 | MMT00070509 | Sh2d4a        | -1 |
| 286 | 16702 | MMT00070509 | 2810422J05Rik | -1 |
| 286 | 16849 | MMT00070509 | Trmt1         | -1 |
| 286 | 16858 | MMT00070509 | Tmem38a       | -1 |
| 286 | 17703 | MMT00070509 | Large         | -1 |
| 286 | 19286 | MMT00070509 | 1110012M11Rik | -1 |
| 286 | 21433 | MMT00070509 | Ubx6          | 1  |
| 286 | 21840 | MMT00070509 | Tmie          | 1  |
| 286 | 22408 | MMT00070509 | Calr3         | 1  |

|     |       |               |               |    |
|-----|-------|---------------|---------------|----|
| 286 | 23445 | MMT00070509   | Crlf1         | 1  |
| 286 | 23636 | MMT00070509   | Bst2          | -1 |
| 290 | 290   | B230118H07Rik | B230118H07Rik | 1  |
| 290 | 1510  | B230118H07Rik | A530058N18Rik | 1  |
| 295 | 1297  | Pdlim1        | Phox2a        | 1  |
| 327 | 812   | H2-Ea         | En2           | 1  |
| 327 | 2801  | H2-Ea         | H2-BI         | 1  |
| 327 | 2938  | H2-Ea         | H2-T23        | 1  |
| 327 | 3859  | H2-Ea         | Fpr2          | 1  |
| 327 | 4555  | H2-Ea         | Cchcr1        | 1  |
| 327 | 7088  | H2-Ea         | Slc37a1       | 1  |
| 327 | 7603  | H2-Ea         | Sod2          | 1  |
| 327 | 8750  | H2-Ea         | 1700010114Rik | 1  |
| 327 | 8767  | H2-Ea         | Rgl2          | 1  |
| 327 | 10374 | H2-Ea         | Trim15        | 1  |
| 327 | 10667 | H2-Ea         | H2-Eb1        | 1  |
| 327 | 10931 | H2-Ea         | Pkn3          | -1 |
| 327 | 12168 | H2-Ea         | H2-Ke6        | 1  |
| 327 | 12694 | H2-Ea         | Riok2         | -1 |
| 327 | 12943 | H2-Ea         | Slc25a27      | 1  |
| 327 | 13117 | H2-Ea         | Tmprss5       | 1  |
| 327 | 13493 | H2-Ea         | Ring1         | 1  |
| 327 | 14322 | H2-Ea         | Bat1a         | -1 |
| 327 | 14488 | H2-Ea         | Tshb          | -1 |
| 327 | 15580 | H2-Ea         | MMT00077001   | 1  |
| 327 | 16067 | H2-Ea         | Pcaf          | -1 |
| 327 | 16692 | H2-Ea         | Bat4          | 1  |
| 327 | 17322 | H2-Ea         | Zfp758        | -1 |
| 327 | 17412 | H2-Ea         | Aif1          | -1 |
| 327 | 17646 | H2-Ea         | C4b           | 1  |
| 327 | 18577 | H2-Ea         | Btbd9         | -1 |
| 327 | 20238 | H2-Ea         | H2-T9         | 1  |
| 327 | 20511 | H2-Ea         | Decr2         | 1  |
| 327 | 21295 | H2-Ea         | Snf1lk        | -1 |
| 327 | 21415 | H2-Ea         | Has1          | 1  |
| 344 | 16618 | MMT00036566   | Hps3          | -1 |
| 372 | 372   | Txndc1        | Txndc1        | 1  |
| 375 | 16077 | MMT00077729   | Mocs2         | -1 |
| 387 | 5271  | Rgs10         | Npy           | -1 |
| 387 | 6133  | Rgs10         | Agrp          | -1 |
| 387 | 11345 | Rgs10         | Slc40a1       | 1  |
| 402 | 2794  | Timp3         | Map3k6        | 1  |
| 402 | 12761 | Timp3         | Tsc22d3       | 1  |
| 403 | 283   | Leprotl1      | Gmcl1l        | 1  |
| 403 | 403   | Leprotl1      | Leprotl1      | 1  |
| 403 | 1097  | Leprotl1      | Dctn6         | -1 |
| 403 | 1604  | Leprotl1      | Ssbp4         | -1 |
| 403 | 1755  | Leprotl1      | Ocel1         | -1 |
| 403 | 2749  | Leprotl1      | Naf1          | 1  |
| 403 | 3052  | Leprotl1      | 9130404D08Rik | 1  |
| 403 | 3609  | Leprotl1      | Plvap         | -1 |
| 403 | 5433  | Leprotl1      | 2410004L22Rik | 1  |
| 403 | 5925  | Leprotl1      | Tmem59l       | 1  |
| 403 | 9304  | Leprotl1      | AI449175      | -1 |
| 403 | 9569  | Leprotl1      | Dda1          | 1  |
| 403 | 9729  | Leprotl1      | Got1l1        | 1  |
| 403 | 10373 | Leprotl1      | Tmem141       | -1 |
| 403 | 10758 | Leprotl1      | Gdf1          | 1  |
| 403 | 11109 | Leprotl1      | AI931714      | 1  |

|     |       |               |               |    |
|-----|-------|---------------|---------------|----|
| 403 | 13732 | Leprotl1      | Tpm4          | 1  |
| 403 | 16371 | Leprotl1      | Ppp2cb        | 1  |
| 403 | 16617 | Leprotl1      | Sh2d4a        | 1  |
| 403 | 16849 | Leprotl1      | Trmt1         | 1  |
| 403 | 16858 | Leprotl1      | Tmem38a       | 1  |
| 403 | 17553 | Leprotl1      | Eif4ebp1      | -1 |
| 403 | 17703 | Leprotl1      | Large         | 1  |
| 403 | 21433 | Leprotl1      | Ubx6          | -1 |
| 403 | 21840 | Leprotl1      | Tmie          | -1 |
| 403 | 22408 | Leprotl1      | Calr3         | -1 |
| 403 | 23445 | Leprotl1      | Crif1         | -1 |
| 409 | 1416  | Lxn           | 6720460F02Rik | 1  |
| 409 | 6133  | Lxn           | Agp           | -1 |
| 409 | 15255 | Lxn           | Ccl8          | 1  |
| 413 | 15870 | Acy1          | Aqp5          | 1  |
| 419 | 7670  | Foxk2         | Ccdc57        | 1  |
| 419 | 13615 | Foxk2         | Arl16         | 1  |
| 419 | 16613 | Foxk2         | 1110031102Rik | -1 |
| 419 | 17193 | Foxk2         | Npb           | -1 |
| 419 | 21414 | Foxk2         | BC017643      | -1 |
| 419 | 22250 | Foxk2         | Wdr45l        | 1  |
| 445 | 1297  | 2610029101Rik | Phox2a        | 1  |
| 451 | 2752  | Milt11        | Fcgr1         | -1 |
| 451 | 3314  | Milt11        | Wars2         | -1 |
| 451 | 6708  | Milt11        | Serpini2      | 1  |
| 451 | 9408  | Milt11        | Hmgcs2        | 1  |
| 451 | 9519  | Milt11        | Fstl5         | 1  |
| 451 | 12367 | Milt11        | MMT00072365   | 1  |
| 451 | 16416 | Milt11        | Commd2        | -1 |
| 468 | 468   | 2610020C07Rik | 2610020C07Rik | 1  |
| 468 | 9010  | 2610020C07Rik | 8430419L09Rik | -1 |
| 468 | 9622  | 2610020C07Rik | Rasgef1a      | -1 |
| 468 | 15719 | 2610020C07Rik | BC060267      | -1 |
| 468 | 19964 | 2610020C07Rik | Ndufa9        | 1  |
| 468 | 19999 | 2610020C07Rik | Ift122        | -1 |
| 468 | 20423 | 2610020C07Rik | 8-Mar         | 1  |
| 468 | 22395 | 2610020C07Rik | Kcna1         | -1 |
| 479 | 479   | Best1         | Best1         | 1  |
| 514 | 11630 | Abca6         | Mug-ps1       | -1 |
| 514 | 15870 | Abca6         | Aqp5          | -1 |
| 514 | 22982 | Abca6         | Mug2          | -1 |
| 525 | 6234  | Lyl1          | P4ha2         | -1 |
| 525 | 7751  | Lyl1          | Sgk2          | 1  |
| 525 | 10606 | Lyl1          | Apbb1ip       | 1  |
| 525 | 14860 | Lyl1          | MMT00051231   | 1  |
| 525 | 23094 | Lyl1          | Sap30         | -1 |
| 544 | 2794  | Il16          | Map3k6        | -1 |
| 544 | 5345  | Il16          | MMT00023326   | -1 |
| 544 | 6038  | Il16          | Acot1         | 1  |
| 544 | 16494 | Il16          | 2310007D09Rik | -1 |
| 548 | 18785 | Gpr109a       | Angptl4       | 1  |
| 563 | 22996 | D4Bwg0951e    | MMT00076852   | -1 |
| 577 | 16823 | Rrp12         | Inhbb         | 1  |
| 577 | 18373 | Rrp12         | Dnajb1        | 1  |
| 609 | 15870 | MMT00060868   | Aqp5          | 1  |
| 623 | 2945  | Lmf1          | MMT00005190   | -1 |
| 623 | 8341  | Lmf1          | MMT00017270   | -1 |
| 623 | 11291 | Lmf1          | 1110018H23Rik | 1  |
| 623 | 20511 | Lmf1          | Decr2         | 1  |

|     |       |             |               |    |
|-----|-------|-------------|---------------|----|
| 623 | 21246 | Lmf1        | Telo2         | 1  |
| 630 | 630   | C1s         | C1s           | 1  |
| 630 | 9622  | C1s         | Rasgef1a      | 1  |
| 630 | 19964 | C1s         | Ndufa9        | -1 |
| 630 | 22075 | C1s         | C1s           | 1  |
| 630 | 22395 | C1s         | Kcna1         | 1  |
| 640 | 640   | MMT00065211 | MMT00065211   | 1  |
| 640 | 5284  | MMT00065211 | Npffr1        | 1  |
| 640 | 14570 | MMT00065211 | Erdr1         | 1  |
| 640 | 23014 | MMT00065211 | MMT00077643   | 1  |
| 661 | 661   | Siglec1     | Siglec1       | 1  |
| 661 | 4337  | Siglec1     | Myst3         | -1 |
| 661 | 4407  | Siglec1     | 4930429B21Rik | -1 |
| 661 | 7875  | Siglec1     | Crat          | -1 |
| 661 | 7974  | Siglec1     | Arhgef7       | -1 |
| 661 | 14498 | Siglec1     | Layn          | 1  |
| 661 | 14754 | Siglec1     | Atoh8         | -1 |
| 661 | 15881 | Siglec1     | Hcn4          | -1 |
| 661 | 16197 | Siglec1     | MMT00065977   | -1 |
| 661 | 16318 | Siglec1     | Ms4a15        | -1 |
| 663 | 10    | Muc19       | NaN           | 1  |
| 663 | 115   | Muc19       | NaN           | 1  |
| 663 | 316   | Muc19       | 4930471G03Rik | 1  |
| 663 | 391   | Muc19       | 4933416I08Rik | 1  |
| 663 | 486   | Muc19       | Josd2         | 1  |
| 663 | 558   | Muc19       | Crebl1        | 1  |
| 663 | 663   | Muc19       | Muc19         | 1  |
| 663 | 1059  | Muc19       | P2rx6         | 1  |
| 663 | 1518  | Muc19       | Amigo2        | 1  |
| 663 | 1696  | Muc19       | V1re9         | 1  |
| 663 | 1771  | Muc19       | Park2         | 1  |
| 663 | 1907  | Muc19       | D230010M03Rik | 1  |
| 663 | 1920  | Muc19       | Oas1e         | 1  |
| 663 | 2067  | Muc19       | Myo1a         | 1  |
| 663 | 2226  | Muc19       | Amt           | 1  |
| 663 | 2819  | Muc19       | Kcnk5         | 1  |
| 663 | 3144  | Muc19       | Ube2j2        | 1  |
| 663 | 3166  | Muc19       | Vmn2r57       | 1  |
| 663 | 3208  | Muc19       | 4930511I11Rik | 1  |
| 663 | 3383  | Muc19       | Cd99          | 1  |
| 663 | 3511  | Muc19       | Rnf182        | 1  |
| 663 | 3841  | Muc19       | MMT00014519   | 1  |
| 663 | 3948  | Muc19       | V1rb4         | 1  |
| 663 | 4079  | Muc19       | Emilin3       | 1  |
| 663 | 4088  | Muc19       | Pdcl2         | 1  |
| 663 | 4199  | Muc19       | B3galt5       | 1  |
| 663 | 4246  | Muc19       | Fbxw12        | 1  |
| 663 | 4311  | Muc19       | MMT00033987   | 1  |
| 663 | 4337  | Muc19       | Myst3         | 1  |
| 663 | 4870  | Muc19       | Olfir550      | 1  |
| 663 | 5265  | Muc19       | A3galt2       | 1  |
| 663 | 5505  | Muc19       | Thap2         | 1  |
| 663 | 5694  | Muc19       | Sp7           | 1  |
| 663 | 5908  | Muc19       | MMT00027552   | 1  |
| 663 | 6403  | Muc19       | MMT00039607   | 1  |
| 663 | 6429  | Muc19       | Sim2          | 1  |
| 663 | 6719  | Muc19       | Cacng8        | 1  |
| 663 | 6880  | Muc19       | Dmrtb1        | 1  |
| 663 | 7041  | Muc19       | Sp140         | 1  |

|     |       |       |               |   |
|-----|-------|-------|---------------|---|
| 663 | 7436  | Muc19 | 1700063K16Rik | 1 |
| 663 | 7577  | Muc19 | Cldn8         | 1 |
| 663 | 7916  | Muc19 | MMT00016293   | 1 |
| 663 | 7974  | Muc19 | Arhgef7       | 1 |
| 663 | 8157  | Muc19 | MMT00005305   | 1 |
| 663 | 8256  | Muc19 | Tjap1         | 1 |
| 663 | 8644  | Muc19 | V1rg11        | 1 |
| 663 | 8703  | Muc19 | Gstp1         | 1 |
| 663 | 9233  | Muc19 | Acss3         | 1 |
| 663 | 9463  | Muc19 | Zdhhc23       | 1 |
| 663 | 9743  | Muc19 | Gm189         | 1 |
| 663 | 9946  | Muc19 | Stam2         | 1 |
| 663 | 10055 | Muc19 | Tpte          | 1 |
| 663 | 10195 | Muc19 | Klf1          | 1 |
| 663 | 10260 | Muc19 | Zfp36l2       | 1 |
| 663 | 10281 | Muc19 | Slc15a1       | 1 |
| 663 | 10377 | Muc19 | A430105l19Rik | 1 |
| 663 | 10452 | Muc19 | Grn           | 1 |
| 663 | 10520 | Muc19 | Xkr6          | 1 |
| 663 | 10657 | Muc19 | Rnf12         | 1 |
| 663 | 10687 | Muc19 | ltpkb         | 1 |
| 663 | 10723 | Muc19 | 4930556N09Rik | 1 |
| 663 | 10806 | Muc19 | Rnf212        | 1 |
| 663 | 10886 | Muc19 | Fndc3b        | 1 |
| 663 | 11016 | Muc19 | Pcp2          | 1 |
| 663 | 11256 | Muc19 | H2-DMa        | 1 |
| 663 | 11350 | Muc19 | 9030420J04Rik | 1 |
| 663 | 11507 | Muc19 | Adarb2        | 1 |
| 663 | 11665 | Muc19 | Hyal1         | 1 |
| 663 | 11805 | Muc19 | Bat2          | 1 |
| 663 | 11837 | Muc19 | Paqr6         | 1 |
| 663 | 11966 | Muc19 | Zfp280b       | 1 |
| 663 | 12062 | Muc19 | Dzip1l        | 1 |
| 663 | 12188 | Muc19 | Chek2         | 1 |
| 663 | 12248 | Muc19 | Tnp2          | 1 |
| 663 | 12272 | Muc19 | Fshr          | 1 |
| 663 | 12372 | Muc19 | MMT00039397   | 1 |
| 663 | 12430 | Muc19 | Fst           | 1 |
| 663 | 12568 | Muc19 | Lrrc37a       | 1 |
| 663 | 12604 | Muc19 | Acr           | 1 |
| 663 | 12651 | Muc19 | Tsc22d4       | 1 |
| 663 | 12753 | Muc19 | MMT00043344   | 1 |
| 663 | 12772 | Muc19 | Axl           | 1 |
| 663 | 12826 | Muc19 | Zfp354c       | 1 |
| 663 | 13487 | Muc19 | A230051G13Rik | 1 |
| 663 | 13676 | Muc19 | MMT00010979   | 1 |
| 663 | 13742 | Muc19 | 1700024P16Rik | 1 |
| 663 | 13767 | Muc19 | Kcnk15        | 1 |
| 663 | 13800 | Muc19 | Lrp5          | 1 |
| 663 | 14149 | Muc19 | BC048562      | 1 |
| 663 | 14313 | Muc19 | Tnk1          | 1 |
| 663 | 14565 | Muc19 | Rnf207        | 1 |
| 663 | 14754 | Muc19 | Atoh8         | 1 |
| 663 | 15424 | Muc19 | Atp6v1g2      | 1 |
| 663 | 15697 | Muc19 | Tbc1d8b       | 1 |
| 663 | 15743 | Muc19 | Hoxc6         | 1 |
| 663 | 15747 | Muc19 | Sfrs1         | 1 |
| 663 | 15813 | Muc19 | Vpreb3        | 1 |
| 663 | 15885 | Muc19 | Adamts7       | 1 |

|     |       |        |               |    |
|-----|-------|--------|---------------|----|
| 663 | 16104 | Muc19  | Ugt3a2        | 1  |
| 663 | 16390 | Muc19  | Plb1          | 1  |
| 663 | 16664 | Muc19  | Car4          | 1  |
| 663 | 16672 | Muc19  | Tmem82        | 1  |
| 663 | 16794 | Muc19  | Chrn1         | 1  |
| 663 | 17171 | Muc19  | MMT00045847   | 1  |
| 663 | 17337 | Muc19  | 1810065E05Rik | 1  |
| 663 | 17422 | Muc19  | Dctd          | 1  |
| 663 | 17613 | Muc19  | P2rx7         | 1  |
| 663 | 17750 | Muc19  | Hs6st2        | 1  |
| 663 | 17890 | Muc19  | 2610021K21Rik | 1  |
| 663 | 18214 | Muc19  | Ankrd40       | 1  |
| 663 | 18409 | Muc19  | Nicn1         | 1  |
| 663 | 18620 | Muc19  | Slmap         | 1  |
| 663 | 18790 | Muc19  | Car3          | 1  |
| 663 | 18980 | Muc19  | Il7           | 1  |
| 663 | 19219 | Muc19  | MMT00015104   | 1  |
| 663 | 19265 | Muc19  | EG546036      | 1  |
| 663 | 19351 | Muc19  | Prkcs         | 1  |
| 663 | 19436 | Muc19  | Dapp1         | 1  |
| 663 | 19483 | Muc19  | Depdc2        | 1  |
| 663 | 19645 | Muc19  | Il12rb2       | 1  |
| 663 | 19672 | Muc19  | Cldn19        | 1  |
| 663 | 20089 | Muc19  | MMT00015975   | 1  |
| 663 | 20255 | Muc19  | Elfn2         | 1  |
| 663 | 20406 | Muc19  | Cacng2        | 1  |
| 663 | 20532 | Muc19  | Rnf26         | 1  |
| 663 | 20566 | Muc19  | Tnni2         | 1  |
| 663 | 20908 | Muc19  | Olf583        | 1  |
| 663 | 20944 | Muc19  | Tmem164       | 1  |
| 663 | 21511 | Muc19  | MMT00054100   | 1  |
| 663 | 21595 | Muc19  | Trpv1         | 1  |
| 663 | 21866 | Muc19  | Hhip1         | 1  |
| 663 | 21923 | Muc19  | Olf585        | 1  |
| 663 | 22125 | Muc19  | Gab1          | 1  |
| 663 | 22150 | Muc19  | Fhdc1         | 1  |
| 663 | 22271 | Muc19  | Cyp2c29       | 1  |
| 663 | 22434 | Muc19  | Olf1255       | 1  |
| 663 | 22555 | Muc19  | Ela2          | 1  |
| 663 | 22762 | Muc19  | Slc6a4        | 1  |
| 663 | 22802 | Muc19  | Svs2          | 1  |
| 663 | 22966 | Muc19  | Epha4         | 1  |
| 663 | 23119 | Muc19  | Cps1          | 1  |
| 663 | 23454 | Muc19  | Znfx1         | 1  |
| 663 | 23528 | Muc19  | 0610038L08Rik | 1  |
| 663 | 23531 | Muc19  | Foxb2         | 1  |
| 663 | 23546 | Muc19  | Zzef1         | 1  |
| 663 | 23561 | Muc19  | Sox14         | 1  |
| 663 | 23591 | Muc19  | Dlg4          | 1  |
| 663 | 23651 | Muc19  | MMT00027295   | 1  |
| 676 | 676   | Ms4a4d | Ms4a4d        | 1  |
| 676 | 1936  | Ms4a4d | Cbwd1         | 1  |
| 676 | 2830  | Ms4a4d | 4632417K18Rik | 1  |
| 676 | 11369 | Ms4a4d | Stx3          | 1  |
| 676 | 11812 | Ms4a4d | Mrpl16        | 1  |
| 676 | 12312 | Ms4a4d | Ms4a6d        | -1 |
| 676 | 17447 | Ms4a4d | Ctsf          | 1  |
| 676 | 17600 | Ms4a4d | Kcnq5         | -1 |
| 678 | 11705 | Ncaph  | Polr3f        | -1 |



|     |       |               |               |    |
|-----|-------|---------------|---------------|----|
| 678 | 14740 | Ncaph         | Mfap1b        | -1 |
| 692 | 692   | Pelo          | Pelo          | 1  |
| 700 | 1755  | 4930529C04Rik | Ocel1         | -1 |
| 700 | 5925  | 4930529C04Rik | Tmem59l       | 1  |
| 715 | 2883  | Padi3         | MMT00048540   | 1  |
| 715 | 6191  | Padi3         | Ddost         | 1  |
| 715 | 8610  | Padi3         | Padi4         | 1  |
| 715 | 14397 | Padi3         | Padi2         | 1  |
| 715 | 15700 | Padi3         | Crocc         | -1 |
| 715 | 19924 | Padi3         | Ubiad1        | -1 |
| 716 | 10189 | Dbpht1        | Cage1         | -1 |
| 716 | 15698 | Dbpht1        | Them2         | -1 |
| 716 | 17528 | Dbpht1        | Gmn           | -1 |
| 716 | 23118 | Dbpht1        | Ttrap         | -1 |
| 725 | 1660  | BC005561      | Zfp33b        | -1 |
| 737 | 737   | MMT00023716   | MMT00023716   | 1  |
| 737 | 2483  | MMT00023716   | Gmeb1         | -1 |
| 737 | 4523  | MMT00023716   | Ptpru         | -1 |
| 737 | 5064  | MMT00023716   | Tekt2         | -1 |
| 737 | 6191  | MMT00023716   | Ddost         | -1 |
| 737 | 8525  | MMT00023716   | 2510006D16Rik | 1  |
| 737 | 8677  | MMT00023716   | Zbtb8os       | -1 |
| 737 | 10134 | MMT00023716   | Hivep3        | -1 |
| 737 | 10407 | MMT00023716   | Gpatch3       | 1  |
| 737 | 11870 | MMT00023716   | Apitd1        | 1  |
| 737 | 18580 | MMT00023716   | Phactr4       | 1  |
| 737 | 19647 | MMT00023716   | Cort          | 1  |
| 737 | 20147 | MMT00023716   | Ybx1          | -1 |
| 755 | 2794  | Ppp1r13l      | Map3k6        | 1  |
| 769 | 1755  | 5430437P03Rik | Ocel1         | -1 |
| 769 | 9569  | 5430437P03Rik | Dda1          | 1  |
| 769 | 15296 | 5430437P03Rik | Mier3         | -1 |
| 791 | 12761 | Il18r1        | Tsc22d3       | -1 |
| 791 | 12834 | Il18r1        | Fabp7         | 1  |
| 791 | 21142 | Il18r1        | Gm129         | -1 |
| 830 | 2294  | Socs1         | AU040829      | -1 |
| 830 | 2708  | Socs1         | Sgk1          | -1 |
| 830 | 2794  | Socs1         | Map3k6        | -1 |
| 830 | 2880  | Socs1         | Cd93          | 1  |
| 830 | 4084  | Socs1         | Asah3l        | -1 |
| 830 | 5345  | Socs1         | MMT00023326   | -1 |
| 830 | 6038  | Socs1         | Acot1         | 1  |
| 830 | 8980  | Socs1         | Plekhf1       | -1 |
| 830 | 12157 | Socs1         | Gal3st4       | 1  |
| 830 | 12649 | Socs1         | Itgad         | -1 |
| 830 | 12761 | Socs1         | Tsc22d3       | -1 |
| 830 | 12989 | Socs1         | 1190002H23Rik | -1 |
| 830 | 16494 | Socs1         | 2310007D09Rik | -1 |
| 830 | 18179 | Socs1         | Dbp           | -1 |
| 830 | 18553 | Socs1         | Tekt4         | -1 |
| 830 | 21380 | Socs1         | Ier5          | 1  |
| 830 | 21643 | Socs1         | Agtr1a        | -1 |
| 830 | 22989 | Socs1         | Lmcd1         | 1  |
| 860 | 12398 | Psemb10       | Ifi44         | 1  |
| 866 | 6532  | Zfp369        | Auh           | 1  |
| 866 | 18492 | Zfp369        | Dhfr          | 1  |
| 866 | 20847 | Zfp369        | Pdik1l        | -1 |
| 870 | 870   | Rint1         | Rint1         | 1  |
| 874 | 7159  | Aldh1a7       | 1700031F05Rik | -1 |

|      |       |               |               |    |
|------|-------|---------------|---------------|----|
| 874  | 17447 | Aldh1a7       | Ctsf          | 1  |
| 874  | 21015 | Aldh1a7       | MMT00014048   | 1  |
| 894  | 8816  | Ddit4         | Nfkbia        | 1  |
| 894  | 9745  | Ddit4         | Gadd45g       | 1  |
| 929  | 2708  | Dusp4         | Sgk1          | -1 |
| 929  | 4084  | Dusp4         | Asah3l        | -1 |
| 929  | 12761 | Dusp4         | Tsc22d3       | -1 |
| 929  | 12989 | Dusp4         | 1190002H23Rik | -1 |
| 929  | 19004 | Dusp4         | Pdk4          | -1 |
| 942  | 2708  | Kcna5         | Sgk1          | 1  |
| 942  | 6564  | Kcna5         | Cebpd         | 1  |
| 942  | 8816  | Kcna5         | Nfkbia        | 1  |
| 942  | 8980  | Kcna5         | Plekhf1       | 1  |
| 942  | 12989 | Kcna5         | 1190002H23Rik | 1  |
| 982  | 1297  | Ccl7          | Phox2a        | 1  |
| 1014 | 1014  | Rtcd1         | Rtcd1         | 1  |
| 1014 | 3314  | Rtcd1         | Wars2         | 1  |
| 1014 | 12824 | Rtcd1         | Dbt           | -1 |
| 1014 | 14559 | Rtcd1         | Frrs1         | 1  |
| 1014 | 20810 | Rtcd1         | Mttp          | -1 |
| 1041 | 1041  | 3110049J23Rik | 3110049J23Rik | 1  |
| 1041 | 11162 | 3110049J23Rik | Hkdc1         | -1 |
| 1041 | 20705 | 3110049J23Rik | Supv3l1       | 1  |
| 1041 | 22333 | 3110049J23Rik | Hnrnp3        | -1 |
| 1085 | 5271  | Col5a2        | Npy           | -1 |
| 1085 | 6133  | Col5a2        | Agrp          | -1 |
| 1097 | 403   | Dctn6         | Leprotl1      | -1 |
| 1101 | 1101  | Sec11a        | Sec11a        | 1  |
| 1135 | 1135  | Akap12        | Akap12        | -1 |
| 1135 | 2571  | Akap12        | Rmnd1         | 1  |
| 1135 | 3545  | Akap12        | Mtrf1l        | -1 |
| 1135 | 3744  | Akap12        | Rmnd1         | 1  |
| 1135 | 6363  | Akap12        | 9130014G24Rik | -1 |
| 1135 | 8786  | Akap12        | Rmnd1         | 1  |
| 1135 | 19115 | Akap12        | Rab32         | 1  |
| 1136 | 15870 | Kdelr3        | Aqp5          | 1  |
| 1162 | 1162  | Cpsf4         | Cpsf4         | 1  |
| 1162 | 7116  | Cpsf4         | Katnal1       | -1 |
| 1162 | 7378  | Cpsf4         | 1700001J03Rik | -1 |
| 1162 | 7821  | Cpsf4         | MMT00042003   | -1 |
| 1162 | 15297 | Cpsf4         | MMT00048291   | 1  |
| 1162 | 17616 | Cpsf4         | Flt1          | -1 |
| 1162 | 21125 | Cpsf4         | Mtif3         | 1  |
| 1177 | 1177  | EG545391      | EG545391      | 1  |
| 1183 | 2793  | MMT00009390   | MMT00005644   | -1 |
| 1183 | 5989  | MMT00009390   | 2310042D19Rik | -1 |
| 1183 | 17693 | MMT00009390   | MMT00044427   | -1 |
| 1232 | 1232  | Abhd1         | Abhd1         | 1  |
| 1248 | 1248  | Usp24         | Usp24         | 1  |
| 1248 | 13663 | Usp24         | Sgip1         | -1 |
| 1248 | 17302 | Usp24         | Dhcr24        | -1 |
| 1253 | 15353 | Scel          | Ednrb         | 1  |
| 1255 | 5271  | Grhpr         | Npy           | 1  |
| 1255 | 6133  | Grhpr         | Agrp          | 1  |
| 1257 | 7159  | Slc25a45      | 1700031F05Rik | 1  |
| 1257 | 8443  | Slc25a45      | Pola2         | 1  |
| 1270 | 1270  | 1700029I01Rik | 1700029I01Rik | 1  |
| 1270 | 3475  | 1700029I01Rik | 2610305D13Rik | 1  |
| 1270 | 11870 | 1700029I01Rik | Apitd1        | 1  |

|      |       |               |               |    |
|------|-------|---------------|---------------|----|
| 1270 | 15664 | 1700029I01Rik | Masp2         | 1  |
| 1270 | 18338 | 1700029I01Rik | Akr1e1        | -1 |
| 1270 | 18548 | 1700029I01Rik | 1700012P22Rik | -1 |
| 1270 | 19924 | 1700029I01Rik | Ubiad1        | 1  |
| 1279 | 1279  | Ctps2         | Ctps2         | 1  |
| 1280 | 5342  | Mesdc2        | Eps8l3        | 1  |
| 1324 | 19744 | Rfc5          | Acy3          | -1 |
| 1336 | 1336  | MMT00069537   | MMT00069537   | 1  |
| 1336 | 1629  | MMT00069537   | Gcsh          | -1 |
| 1336 | 2243  | MMT00069537   | Gcsh          | 1  |
| 1336 | 3865  | MMT00069537   | Acta1         | 1  |
| 1336 | 7910  | MMT00069537   | AK122209      | 1  |
| 1336 | 10308 | MMT00069537   | Fuk           | -1 |
| 1336 | 11057 | MMT00069537   | MMT00032844   | 1  |
| 1336 | 12440 | MMT00069537   | Sult5a1       | -1 |
| 1336 | 14391 | MMT00069537   | MMT00017335   | -1 |
| 1336 | 15953 | MMT00069537   | Acsf3         | -1 |
| 1336 | 16849 | MMT00069537   | Trmt1         | -1 |
| 1336 | 18700 | MMT00069537   | Trappc2l      | 1  |
| 1336 | 20690 | MMT00069537   | Zfp276        | -1 |
| 1336 | 22351 | MMT00069537   | Fanca         | -1 |
| 1371 | 1371  | 1200009I06Rik | 1200009I06Rik | 1  |
| 1371 | 3812  | 1200009I06Rik | Zfyve26       | -1 |
| 1371 | 6357  | 1200009I06Rik | Ankrd9        | -1 |
| 1371 | 7388  | 1200009I06Rik | Amn           | -1 |
| 1371 | 8155  | 1200009I06Rik | Mark3         | 1  |
| 1371 | 9832  | 1200009I06Rik | Brf1          | -1 |
| 1371 | 10526 | 1200009I06Rik | MMT00036239   | -1 |
| 1371 | 12517 | 1200009I06Rik | 4930573l19Rik | 1  |
| 1371 | 15984 | 1200009I06Rik | MMT00075074   | 1  |
| 1371 | 16580 | 1200009I06Rik | Tnfaip2       | 1  |
| 1371 | 18140 | 1200009I06Rik | Atg2b         | 1  |
| 1371 | 21149 | 1200009I06Rik | A230065H16Rik | -1 |
| 1371 | 23462 | 1200009I06Rik | Bag5          | 1  |
| 1371 | 23693 | 1200009I06Rik | A530016L24Rik | 1  |
| 1374 | 794   | Mdn1          | Mrps14        | -1 |
| 1374 | 5456  | Mdn1          | Rabgap1l      | -1 |
| 1374 | 6498  | Mdn1          | MMT00016809   | -1 |
| 1374 | 11167 | Mdn1          | Dars2         | -1 |
| 1401 | 2599  | Klk8          | Lsm14a        | -1 |
| 1401 | 9454  | Klk8          | 2810426N06Rik | -1 |
| 1401 | 18365 | Klk8          | Bcl2l12       | 1  |
| 1401 | 20490 | Klk8          | Tmem143       | 1  |
| 1424 | 4375  | Dapk1         | Cysltr2       | 1  |
| 1424 | 12834 | Dapk1         | Fabp7         | 1  |
| 1424 | 16494 | Dapk1         | 2310007D09Rik | -1 |
| 1424 | 18179 | Dapk1         | Dbp           | -1 |
| 1424 | 21142 | Dapk1         | Gm129         | -1 |
| 1429 | 21969 | Strn4         | Tk1           | 1  |
| 1435 | 7888  | Ptges3        | Pigz          | -1 |
| 1436 | 391   | Nfu1          | 4933416I08Rik | 1  |
| 1436 | 4199  | Nfu1          | B3galt5       | 1  |
| 1436 | 4246  | Nfu1          | Fbxw12        | 1  |
| 1436 | 5908  | Nfu1          | MMT00027552   | 1  |
| 1436 | 7436  | Nfu1          | 1700063K16Rik | 1  |
| 1436 | 7916  | Nfu1          | MMT00016293   | 1  |
| 1436 | 8256  | Nfu1          | Tjap1         | 1  |
| 1436 | 8620  | Nfu1          | MMT00048670   | 1  |
| 1436 | 8644  | Nfu1          | V1rg11        | 1  |

|      |       |             |               |    |
|------|-------|-------------|---------------|----|
| 1436 | 9946  | Nfu1        | Stam2         | 1  |
| 1436 | 9954  | Nfu1        | MMT00047280   | 1  |
| 1436 | 10260 | Nfu1        | Zfp36l2       | 1  |
| 1436 | 10377 | Nfu1        | A430105l19Rik | 1  |
| 1436 | 10687 | Nfu1        | ltpkb         | 1  |
| 1436 | 10723 | Nfu1        | 4930556N09Rik | 1  |
| 1436 | 10974 | Nfu1        | Vmn2r25       | 1  |
| 1436 | 11256 | Nfu1        | H2-DMa        | 1  |
| 1436 | 11303 | Nfu1        | Slc5a12       | 1  |
| 1436 | 11425 | Nfu1        | Evx2          | 1  |
| 1436 | 11507 | Nfu1        | Adarb2        | 1  |
| 1436 | 12248 | Nfu1        | Tnp2          | 1  |
| 1436 | 12272 | Nfu1        | Fshr          | 1  |
| 1436 | 12430 | Nfu1        | Fst           | 1  |
| 1436 | 12651 | Nfu1        | Tsc22d4       | 1  |
| 1436 | 12772 | Nfu1        | Axl           | 1  |
| 1436 | 12826 | Nfu1        | Zfp354c       | 1  |
| 1436 | 13487 | Nfu1        | A230051G13Rik | 1  |
| 1436 | 13860 | Nfu1        | Cpt1b         | 1  |
| 1436 | 14313 | Nfu1        | Tnk1          | 1  |
| 1436 | 14565 | Nfu1        | Rnf207        | 1  |
| 1436 | 14754 | Nfu1        | Atoh8         | 1  |
| 1436 | 15697 | Nfu1        | Tbc1d8b       | 1  |
| 1436 | 15743 | Nfu1        | Hoxc6         | 1  |
| 1436 | 15885 | Nfu1        | Adamts7       | 1  |
| 1436 | 17613 | Nfu1        | P2rx7         | 1  |
| 1436 | 18620 | Nfu1        | Slmap         | 1  |
| 1436 | 18790 | Nfu1        | Car3          | 1  |
| 1436 | 19219 | Nfu1        | MMT00015104   | 1  |
| 1436 | 19436 | Nfu1        | Dapp1         | 1  |
| 1436 | 19645 | Nfu1        | Il12rb2       | 1  |
| 1436 | 20506 | Nfu1        | 1700011F03Rik | 1  |
| 1436 | 20908 | Nfu1        | Olf1r583      | 1  |
| 1436 | 20944 | Nfu1        | Tmem164       | 1  |
| 1436 | 21511 | Nfu1        | MMT00054100   | 1  |
| 1436 | 21866 | Nfu1        | Hhip1         | 1  |
| 1436 | 22150 | Nfu1        | Fhdc1         | 1  |
| 1436 | 22434 | Nfu1        | Olf1r1255     | 1  |
| 1436 | 22750 | Nfu1        | Mupcdh        | 1  |
| 1436 | 22966 | Nfu1        | Epha4         | 1  |
| 1436 | 23528 | Nfu1        | 0610038L08Rik | 1  |
| 1436 | 23546 | Nfu1        | Zzef1         | 1  |
| 1436 | 23591 | Nfu1        | Dlg4          | 1  |
| 1436 | 23651 | Nfu1        | MMT00027295   | 1  |
| 1438 | 1466  | Dclre1b     | Ubap2l        | -1 |
| 1438 | 2708  | Dclre1b     | Sgk1          | 1  |
| 1438 | 2752  | Dclre1b     | Fcgr1         | -1 |
| 1438 | 3314  | Dclre1b     | Wars2         | -1 |
| 1438 | 5508  | Dclre1b     | Lrig2         | 1  |
| 1438 | 6564  | Dclre1b     | Cebpd         | 1  |
| 1438 | 8816  | Dclre1b     | Nfkb1a        | 1  |
| 1438 | 8980  | Dclre1b     | Plekhf1       | 1  |
| 1438 | 9519  | Dclre1b     | Fstl5         | 1  |
| 1438 | 12367 | Dclre1b     | MMT00072365   | 1  |
| 1438 | 14486 | Dclre1b     | Sox7          | -1 |
| 1438 | 16416 | Dclre1b     | Commd2        | -1 |
| 1441 | 21917 | MMT00001620 | Taf9b         | 1  |
| 1444 | 630   | C1r         | C1s           | 1  |
| 1444 | 9622  | C1r         | Rasgef1a      | 1  |

|      |       |               |               |    |
|------|-------|---------------|---------------|----|
| 1444 | 11701 | C1r           | Oas1c         | -1 |
| 1444 | 14307 | C1r           | Kcnj8         | -1 |
| 1444 | 19964 | C1r           | Ndufa9        | -1 |
| 1444 | 22075 | C1r           | C1s           | 1  |
| 1444 | 22395 | C1r           | Kcna1         | 1  |
| 1466 | 1014  | Ubap2l        | Rtcd1         | 1  |
| 1466 | 1438  | Ubap2l        | Dclre1b       | -1 |
| 1466 | 1466  | Ubap2l        | Ubap2l        | 1  |
| 1466 | 2752  | Ubap2l        | Fcgr1         | 1  |
| 1466 | 3314  | Ubap2l        | Wars2         | 1  |
| 1466 | 5508  | Ubap2l        | Lrig2         | -1 |
| 1466 | 6206  | Ubap2l        | MMT00063701   | 1  |
| 1466 | 6283  | Ubap2l        | Ptpn22        | -1 |
| 1466 | 6708  | Ubap2l        | Serpini2      | -1 |
| 1466 | 9408  | Ubap2l        | Hmgcs2        | -1 |
| 1466 | 9519  | Ubap2l        | Fstl5         | -1 |
| 1466 | 10521 | Ubap2l        | Ttf2          | 1  |
| 1466 | 12367 | Ubap2l        | MMT00072365   | -1 |
| 1466 | 12716 | Ubap2l        | 5830417l10Rik | -1 |
| 1466 | 15299 | Ubap2l        | Mrps21        | -1 |
| 1466 | 15901 | Ubap2l        | Tpm3          | -1 |
| 1466 | 16416 | Ubap2l        | Comm2         | 1  |
| 1466 | 16753 | Ubap2l        | Hfe2          | -1 |
| 1466 | 17837 | Ubap2l        | Polr3gl       | -1 |
| 1466 | 21650 | Ubap2l        | Ap4b1         | 1  |
| 1466 | 22570 | Ubap2l        | Phtf1         | 1  |
| 1466 | 23037 | Ubap2l        | Thbs3         | 1  |
| 1476 | 1297  | 2610020H08Rik | Phox2a        | -1 |
| 1502 | 1502  | Preli2        | Preli2        | 1  |
| 1502 | 19725 | Preli2        | Dcp2          | 1  |
| 1515 | 1515  | Med20         | Med20         | 1  |
| 1515 | 2424  | Med20         | Unc5cl        | -1 |
| 1515 | 7088  | Med20         | Slc37a1       | -1 |
| 1547 | 5737  | Eid1          | Nkx2-2        | 1  |
| 1549 | 6133  | Gmfg          | Agrp          | -1 |
| 1554 | 2012  | Rph3al        | Cetn4         | -1 |
| 1554 | 2752  | Rph3al        | Fcgr1         | 1  |
| 1554 | 3159  | Rph3al        | Pld1          | 1  |
| 1554 | 3206  | Rph3al        | Gpr160        | 1  |
| 1554 | 4666  | Rph3al        | Exosc9        | -1 |
| 1554 | 5762  | Rph3al        | Trpc3         | -1 |
| 1554 | 9360  | Rph3al        | Taf1c         | -1 |
| 1554 | 9519  | Rph3al        | Fstl5         | -1 |
| 1554 | 12367 | Rph3al        | MMT00072365   | -1 |
| 1554 | 16416 | Rph3al        | Comm2         | 1  |
| 1554 | 16618 | Rph3al        | Hps3          | -1 |
| 1554 | 19700 | Rph3al        | E030011K20Rik | 1  |
| 1561 | 15870 | Aurka         | Aqp5          | 1  |
| 1566 | 2118  | Kctd15        | Kptn          | 1  |
| 1566 | 2599  | Kctd15        | Lsm14a        | 1  |
| 1566 | 4729  | Kctd15        | Slc7a10       | -1 |
| 1566 | 6513  | Kctd15        | Qpctl         | 1  |
| 1566 | 7761  | Kctd15        | Nudt19        | 1  |
| 1566 | 7803  | Kctd15        | Ttyh1         | 1  |
| 1566 | 8394  | Kctd15        | Dpy19l3       | 1  |
| 1566 | 9122  | Kctd15        | Sepw1         | 1  |
| 1566 | 9454  | Kctd15        | 2810426N06Rik | 1  |
| 1566 | 11800 | Kctd15        | Clip3         | -1 |
| 1566 | 14842 | Kctd15        | Gipr          | 1  |

|      |       |               |               |    |
|------|-------|---------------|---------------|----|
| 1566 | 17632 | Kctd15        | Lypd3         | -1 |
| 1566 | 19142 | Kctd15        | Gpatch1       | 1  |
| 1566 | 19306 | Kctd15        | AI428936      | 1  |
| 1566 | 19462 | Kctd15        | 4933439C20Rik | -1 |
| 1566 | 20490 | Kctd15        | Tmem143       | -1 |
| 1566 | 20606 | Kctd15        | MMT00042166   | -1 |
| 1568 | 16255 | Frmd4b        | Reg3b         | 1  |
| 1603 | 1603  | Lrwd1         | Lrwd1         | 1  |
| 1603 | 16330 | Lrwd1         | 2310043J07Rik | -1 |
| 1604 | 5433  | Ssbp4         | 2410004L22Rik | -1 |
| 1613 | 16692 | Trim26        | Bat4          | -1 |
| 1613 | 17412 | Trim26        | Aif1          | 1  |
| 1618 | 14740 | Mfap1a        | Mfap1b        | -1 |
| 1619 | 5342  | Fbxw17        | Eps8l3        | 1  |
| 1619 | 15870 | Fbxw17        | Aqp5          | 1  |
| 1619 | 17981 | Fbxw17        | MMT00036029   | 1  |
| 1619 | 22982 | Fbxw17        | Mug2          | 1  |
| 1629 | 1336  | Gcsh          | MMT00069537   | -1 |
| 1629 | 1629  | Gcsh          | Gcsh          | 1  |
| 1629 | 2243  | Gcsh          | Gcsh          | -1 |
| 1629 | 7910  | Gcsh          | AK122209      | -1 |
| 1629 | 14391 | Gcsh          | MMT00017335   | 1  |
| 1629 | 15953 | Gcsh          | Acsf3         | 1  |
| 1629 | 18700 | Gcsh          | Trappc2l      | -1 |
| 1629 | 20690 | Gcsh          | Zfp276        | 1  |
| 1629 | 22351 | Gcsh          | Fanca         | 1  |
| 1635 | 8399  | 8430427H17Rik | Herpud1       | -1 |
| 1635 | 12761 | 8430427H17Rik | Tsc22d3       | -1 |
| 1646 | 9514  | Slc15a4       | Vps37a        | 1  |
| 1646 | 14134 | Slc15a4       | Phf10         | 1  |
| 1646 | 18418 | Slc15a4       | Hspa1b        | 1  |
| 1654 | 13810 | Dhx58         | 1110036O03Rik | -1 |
| 1660 | 665   | Zfp33b        | Slc26a1       | 1  |
| 1660 | 1447  | Zfp33b        | Naaa          | 1  |
| 1660 | 1660  | Zfp33b        | Zfp33b        | 1  |
| 1660 | 6330  | Zfp33b        | Dgkq          | -1 |
| 1660 | 8807  | Zfp33b        | Ankrd56       | 1  |
| 1660 | 19990 | Zfp33b        | 4921515J06Rik | 1  |
| 1661 | 1297  | Duoxa1        | Phox2a        | 1  |
| 1672 | 963   | Mlh1          | Lrrfip2       | 1  |
| 1672 | 1672  | Mlh1          | Mlh1          | 1  |
| 1678 | 11166 | Tcf15         | Uqcc          | 1  |
| 1678 | 13355 | Tcf15         | Foxs1         | 1  |
| 1678 | 23005 | Tcf15         | 4930405A21Rik | 1  |
| 1690 | 1690  | Nlrp5         | Nlrp5         | 1  |
| 1690 | 2118  | Nlrp5         | Kptn          | -1 |
| 1690 | 2599  | Nlrp5         | Lsm14a        | -1 |
| 1690 | 7761  | Nlrp5         | Nudt19        | -1 |
| 1690 | 8394  | Nlrp5         | Dpy19l3       | -1 |
| 1690 | 9122  | Nlrp5         | Sepw1         | -1 |
| 1690 | 15670 | Nlrp5         | Pnmal1        | 1  |
| 1690 | 17632 | Nlrp5         | Lypd3         | 1  |
| 1690 | 19306 | Nlrp5         | AI428936      | -1 |
| 1690 | 19462 | Nlrp5         | 4933439C20Rik | 1  |
| 1690 | 20606 | Nlrp5         | MMT00042166   | 1  |
| 1697 | 9569  | Sf4           | Dda1          | 1  |
| 1702 | 14188 | Galc          | Ttc8          | 1  |
| 1709 | 2294  | Mt2           | AU040829      | 1  |
| 1709 | 2794  | Mt2           | Map3k6        | 1  |

|      |       |          |               |    |
|------|-------|----------|---------------|----|
| 1709 | 5345  | Mt2      | MMT00023326   | 1  |
| 1709 | 8980  | Mt2      | Plekhf1       | 1  |
| 1709 | 12649 | Mt2      | Itgad         | 1  |
| 1709 | 14050 | Mt2      | Il12rb1       | 1  |
| 1709 | 16494 | Mt2      | 2310007D09Rik | 1  |
| 1709 | 21142 | Mt2      | Gm129         | 1  |
| 1709 | 21313 | Mt2      | Rhou          | 1  |
| 1734 | 1734  | Arrdc2   | Arrdc2        | 1  |
| 1751 | 5345  | Xdh      | MMT00023326   | 1  |
| 1755 | 283   | Ocel1    | Gmcl1l        | -1 |
| 1755 | 286   | Ocel1    | MMT00070509   | 1  |
| 1755 | 403   | Ocel1    | Lepro1l       | -1 |
| 1755 | 1097  | Ocel1    | Dctn6         | 1  |
| 1755 | 1604  | Ocel1    | Ssbp4         | 1  |
| 1755 | 1755  | Ocel1    | Ocel1         | 1  |
| 1755 | 2243  | Ocel1    | Gcsh          | 1  |
| 1755 | 2294  | Ocel1    | AU040829      | -1 |
| 1755 | 2749  | Ocel1    | Naf1          | -1 |
| 1755 | 3052  | Ocel1    | 9130404D08Rik | -1 |
| 1755 | 3609  | Ocel1    | Plvap         | 1  |
| 1755 | 5433  | Ocel1    | 2410004L22Rik | -1 |
| 1755 | 5925  | Ocel1    | Tmem59l       | -1 |
| 1755 | 6035  | Ocel1    | Nkd1          | -1 |
| 1755 | 6760  | Ocel1    | 2810428l15Rik | 1  |
| 1755 | 8951  | Ocel1    | Cd97          | -1 |
| 1755 | 9304  | Ocel1    | Al449175      | 1  |
| 1755 | 9569  | Ocel1    | Dda1          | -1 |
| 1755 | 9729  | Ocel1    | Got1l1        | -1 |
| 1755 | 10373 | Ocel1    | Tmem141       | 1  |
| 1755 | 10497 | Ocel1    | Man2b1        | -1 |
| 1755 | 10758 | Ocel1    | Gdf1          | -1 |
| 1755 | 11109 | Ocel1    | Al931714      | -1 |
| 1755 | 12966 | Ocel1    | Slc39a1       | 1  |
| 1755 | 13732 | Ocel1    | Tpm4          | -1 |
| 1755 | 14951 | Ocel1    | Dpep3         | -1 |
| 1755 | 15094 | Ocel1    | Pbx4          | -1 |
| 1755 | 15296 | Ocel1    | Mier3         | 1  |
| 1755 | 15455 | Ocel1    | Lsm4          | -1 |
| 1755 | 16617 | Ocel1    | Sh2d4a        | -1 |
| 1755 | 16702 | Ocel1    | 2810422J05Rik | -1 |
| 1755 | 16849 | Ocel1    | Trmt1         | -1 |
| 1755 | 16858 | Ocel1    | Tmem38a       | -1 |
| 1755 | 17703 | Ocel1    | Large         | -1 |
| 1755 | 18886 | Ocel1    | Slc18a1       | -1 |
| 1755 | 19286 | Ocel1    | 1110012M11Rik | -1 |
| 1755 | 21433 | Ocel1    | Ubx6          | 1  |
| 1755 | 21681 | Ocel1    | 9130011J15Rik | -1 |
| 1755 | 21840 | Ocel1    | Tmie          | 1  |
| 1755 | 22408 | Ocel1    | Calr3         | 1  |
| 1755 | 23445 | Ocel1    | Crlf1         | 1  |
| 1755 | 23636 | Ocel1    | Bst2          | -1 |
| 1759 | 2708  | Rgs3     | Sgk1          | -1 |
| 1759 | 8980  | Rgs3     | Plekhf1       | -1 |
| 1764 | 1297  | Tifab    | Phox2a        | 1  |
| 1766 | 1297  | Srp2     | Phox2a        | 1  |
| 1766 | 6133  | Srp2     | Agrp          | -1 |
| 1767 | 1767  | BC016495 | BC016495      | 1  |
| 1771 | 391   | Park2    | 4933416l08Rik | 1  |
| 1771 | 2067  | Park2    | Myo1a         | 1  |

|      |       |       |               |   |
|------|-------|-------|---------------|---|
| 1771 | 3144  | Park2 | Ube2j2        | 1 |
| 1771 | 3383  | Park2 | Cd99          | 1 |
| 1771 | 4079  | Park2 | Emilin3       | 1 |
| 1771 | 4199  | Park2 | B3galt5       | 1 |
| 1771 | 4337  | Park2 | Myst3         | 1 |
| 1771 | 5908  | Park2 | MMT00027552   | 1 |
| 1771 | 7916  | Park2 | MMT00016293   | 1 |
| 1771 | 7974  | Park2 | Arhgef7       | 1 |
| 1771 | 8256  | Park2 | Tjap1         | 1 |
| 1771 | 8644  | Park2 | V1rg11        | 1 |
| 1771 | 9946  | Park2 | Stam2         | 1 |
| 1771 | 10260 | Park2 | Zfp36l2       | 1 |
| 1771 | 10377 | Park2 | A430105l19Rik | 1 |
| 1771 | 10520 | Park2 | Xkr6          | 1 |
| 1771 | 10687 | Park2 | ltpkb         | 1 |
| 1771 | 11016 | Park2 | Pcp2          | 1 |
| 1771 | 11256 | Park2 | H2-DMa        | 1 |
| 1771 | 11350 | Park2 | 9030420J04Rik | 1 |
| 1771 | 11507 | Park2 | Adarb2        | 1 |
| 1771 | 11837 | Park2 | Paqr6         | 1 |
| 1771 | 11966 | Park2 | Zfp280b       | 1 |
| 1771 | 12248 | Park2 | Tnp2          | 1 |
| 1771 | 12272 | Park2 | Fshr          | 1 |
| 1771 | 12372 | Park2 | MMT00039397   | 1 |
| 1771 | 12568 | Park2 | Lrrc37a       | 1 |
| 1771 | 12772 | Park2 | Axl           | 1 |
| 1771 | 12826 | Park2 | Zfp354c       | 1 |
| 1771 | 13890 | Park2 | Olf1263       | 1 |
| 1771 | 14313 | Park2 | Tnk1          | 1 |
| 1771 | 14565 | Park2 | Rnf207        | 1 |
| 1771 | 14754 | Park2 | Atoh8         | 1 |
| 1771 | 15626 | Park2 | MMT00035685   | 1 |
| 1771 | 15743 | Park2 | Hoxc6         | 1 |
| 1771 | 15885 | Park2 | Adamts7       | 1 |
| 1771 | 16390 | Park2 | Plb1          | 1 |
| 1771 | 16664 | Park2 | Car4          | 1 |
| 1771 | 16672 | Park2 | Tmem82        | 1 |
| 1771 | 17171 | Park2 | MMT00045847   | 1 |
| 1771 | 17613 | Park2 | P2rx7         | 1 |
| 1771 | 17750 | Park2 | Hs6st2        | 1 |
| 1771 | 18620 | Park2 | Slmap         | 1 |
| 1771 | 18790 | Park2 | Car3          | 1 |
| 1771 | 19219 | Park2 | MMT00015104   | 1 |
| 1771 | 19265 | Park2 | EG546036      | 1 |
| 1771 | 19351 | Park2 | Prkcsh        | 1 |
| 1771 | 19436 | Park2 | Dapp1         | 1 |
| 1771 | 19645 | Park2 | Il12rb2       | 1 |
| 1771 | 20506 | Park2 | 1700011F03Rik | 1 |
| 1771 | 20908 | Park2 | Olf1583       | 1 |
| 1771 | 20944 | Park2 | Tmem164       | 1 |
| 1771 | 21511 | Park2 | MMT00054100   | 1 |
| 1771 | 21595 | Park2 | Trpv1         | 1 |
| 1771 | 21866 | Park2 | Hhip1         | 1 |
| 1771 | 21923 | Park2 | Olf1585       | 1 |
| 1771 | 22150 | Park2 | Fhdc1         | 1 |
| 1771 | 22434 | Park2 | Olf1255       | 1 |
| 1771 | 22750 | Park2 | Mupcdh        | 1 |
| 1771 | 22762 | Park2 | Slc6a4        | 1 |
| 1771 | 22802 | Park2 | Svs2          | 1 |



|      |       |          |               |    |
|------|-------|----------|---------------|----|
| 1771 | 22966 | Park2    | Epha4         | 1  |
| 1771 | 23119 | Park2    | Cps1          | 1  |
| 1771 | 23531 | Park2    | Foxb2         | 1  |
| 1771 | 23546 | Park2    | Zzef1         | 1  |
| 1771 | 23591 | Park2    | Dlg4          | 1  |
| 1771 | 23651 | Park2    | MMT00027295   | 1  |
| 1790 | 2294  | Hic1     | AU040829      | -1 |
| 1790 | 2708  | Hic1     | Sgk1          | -1 |
| 1790 | 4084  | Hic1     | Asah3l        | -1 |
| 1790 | 6564  | Hic1     | Cebpd         | -1 |
| 1790 | 8816  | Hic1     | Nfkbia        | -1 |
| 1790 | 9821  | Hic1     | Pmaip1        | -1 |
| 1790 | 12989 | Hic1     | 1190002H23Rik | -1 |
| 1795 | 12826 | Rabgap1l | Zfp354c       | 1  |
| 1795 | 13496 | Rabgap1l | H1fnt         | 1  |
| 1802 | 15870 | Ipo4     | Aqp5          | 1  |
| 1805 | 15870 | Tmem204  | Aqp5          | -1 |
| 1867 | 1466  | Bcas2    | Ubap2l        | 1  |
| 1867 | 1867  | Bcas2    | Bcas2         | 1  |
| 1867 | 2752  | Bcas2    | Fcgr1         | 1  |
| 1867 | 3314  | Bcas2    | Wars2         | 1  |
| 1867 | 5021  | Bcas2    | Gdap2         | -1 |
| 1867 | 5508  | Bcas2    | Lrig2         | -1 |
| 1867 | 6283  | Bcas2    | Ptpn22        | -1 |
| 1867 | 9408  | Bcas2    | Hmgcs2        | -1 |
| 1867 | 9519  | Bcas2    | Fstl5         | -1 |
| 1867 | 10521 | Bcas2    | Ttf2          | 1  |
| 1867 | 12367 | Bcas2    | MMT00072365   | -1 |
| 1867 | 12716 | Bcas2    | 5830417l10Rik | -1 |
| 1867 | 15901 | Bcas2    | Tpm3          | -1 |
| 1867 | 16283 | Bcas2    | EG627427      | -1 |
| 1867 | 16416 | Bcas2    | Comm2         | 1  |
| 1867 | 17837 | Bcas2    | Polr3gl       | -1 |
| 1867 | 20810 | Bcas2    | Mttp          | -1 |
| 1867 | 21650 | Bcas2    | Ap4b1         | 1  |
| 1867 | 22570 | Bcas2    | Phtf1         | 1  |
| 1889 | 5345  | Dcun1d3  | MMT00023326   | 1  |
| 1889 | 12761 | Dcun1d3  | Tsc22d3       | 1  |
| 1894 | 8992  | Lrp4     | Trfr2         | -1 |
| 1920 | 10    | Oas1e    | NaN           | 1  |
| 1920 | 1771  | Oas1e    | Park2         | 1  |
| 1920 | 4199  | Oas1e    | B3galt5       | 1  |
| 1920 | 5505  | Oas1e    | Thap2         | 1  |
| 1920 | 7916  | Oas1e    | MMT00016293   | 1  |
| 1920 | 11016 | Oas1e    | Pcp2          | 1  |
| 1920 | 11966 | Oas1e    | Zfp280b       | 1  |
| 1920 | 12248 | Oas1e    | Tnp2          | 1  |
| 1920 | 12272 | Oas1e    | Fshr          | 1  |
| 1920 | 12753 | Oas1e    | MMT00043344   | 1  |
| 1920 | 12772 | Oas1e    | Axl           | 1  |
| 1920 | 14754 | Oas1e    | Atoh8         | 1  |
| 1920 | 17750 | Oas1e    | Hs6st2        | 1  |
| 1920 | 18620 | Oas1e    | Slmap         | 1  |
| 1920 | 19219 | Oas1e    | MMT00015104   | 1  |
| 1920 | 19436 | Oas1e    | Dapp1         | 1  |
| 1920 | 22733 | Oas1e    | Alpk3         | 1  |
| 1920 | 22802 | Oas1e    | Svs2          | 1  |
| 1920 | 23546 | Oas1e    | Zzef1         | 1  |
| 1920 | 23651 | Oas1e    | MMT00027295   | 1  |

|      |       |             |               |    |
|------|-------|-------------|---------------|----|
| 1936 | 1936  | Cbwd1       | Cbwd1         | 1  |
| 1936 | 4643  | Cbwd1       | Mbl2          | -1 |
| 1936 | 4678  | Cbwd1       | Kank1         | 1  |
| 1936 | 11369 | Cbwd1       | Stx3          | 1  |
| 1936 | 11812 | Cbwd1       | Mrpl16        | 1  |
| 1936 | 16669 | Cbwd1       | Tjp2          | -1 |
| 1956 | 1510  | Usp50       | A530058N18Rik | 1  |
| 1957 | 12761 | Mansc1      | Tsc22d3       | -1 |
| 1957 | 16494 | Mansc1      | 2310007D09Rik | -1 |
| 1960 | 897   | Ubr2        | Mut           | 1  |
| 1960 | 1960  | Ubr2        | Ubr2          | 1  |
| 1960 | 2424  | Ubr2        | Unc5cl        | -1 |
| 1960 | 7054  | Ubr2        | Trerf1        | 1  |
| 1960 | 7088  | Ubr2        | Slc37a1       | -1 |
| 1960 | 10729 | Ubr2        | Fgd2          | -1 |
| 1960 | 18772 | Ubr2        | BC048355      | -1 |
| 1960 | 20100 | Ubr2        | Guca1b        | 1  |
| 1968 | 737   | Nudc        | MMT00023716   | 1  |
| 1972 | 2938  | Ly6g6e      | H2-T23        | 1  |
| 1972 | 20238 | Ly6g6e      | H2-T9         | 1  |
| 1985 | 9413  | Pepd        | 1190020J12Rik | 1  |
| 1985 | 17389 | Pepd        | Pop4          | 1  |
| 1991 | 1991  | Ttc17       | Ttc17         | -1 |
| 1991 | 2472  | Ttc17       | MMT00014056   | -1 |
| 1991 | 9547  | Ttc17       | MMT00006479   | -1 |
| 1991 | 16881 | Ttc17       | MMT00031504   | -1 |
| 1991 | 17295 | Ttc17       | MMT00082577   | -1 |
| 1991 | 22320 | Ttc17       | MMT00047284   | -1 |
| 1991 | 23474 | Ttc17       | MMT00011721   | -1 |
| 2012 | 2012  | Cetn4       | Cetn4         | 1  |
| 2012 | 2752  | Cetn4       | Fcgr1         | -1 |
| 2012 | 3159  | Cetn4       | Pld1          | -1 |
| 2012 | 4666  | Cetn4       | Exosc9        | 1  |
| 2012 | 5762  | Cetn4       | Trpc3         | 1  |
| 2012 | 9519  | Cetn4       | Fstl5         | 1  |
| 2012 | 12367 | Cetn4       | MMT00072365   | 1  |
| 2012 | 16416 | Cetn4       | Comm2         | -1 |
| 2012 | 16618 | Cetn4       | Hps3          | 1  |
| 2012 | 19700 | Cetn4       | E030011K20Rik | -1 |
| 2021 | 2021  | Atf7ip      | Atf7ip        | 1  |
| 2021 | 14557 | Atf7ip      | Pyroxd1       | 1  |
| 2021 | 22907 | Atf7ip      | MMT00054594   | -1 |
| 2021 | 22978 | Atf7ip      | MMT00043176   | -1 |
| 2023 | 2023  | MMT00072215 | MMT00072215   | 1  |
| 2023 | 5681  | MMT00072215 | Mbd1          | 1  |
| 2023 | 12109 | MMT00072215 | Smad4         | -1 |
| 2023 | 22930 | MMT00072215 | Mro           | -1 |
| 2023 | 22961 | MMT00072215 | MMT00055950   | 1  |
| 2044 | 9449  | Hsd17b7     | Sft2d2        | 1  |
| 2044 | 16163 | Hsd17b7     | Tmco1         | -1 |
| 2074 | 1297  | Sfxn1       | Phox2a        | -1 |
| 2079 | 2079  | Mthfs       | Mthfs         | 1  |
| 2079 | 15853 | Mthfs       | D430036J16Rik | -1 |
| 2084 | 2752  | Pftk1       | Fcgr1         | 1  |
| 2084 | 3159  | Pftk1       | Pld1          | 1  |
| 2084 | 4666  | Pftk1       | Exosc9        | -1 |
| 2084 | 12367 | Pftk1       | MMT00072365   | -1 |
| 2084 | 16416 | Pftk1       | Comm2         | 1  |
| 2084 | 16618 | Pftk1       | Hps3          | -1 |

|      |       |               |               |    |
|------|-------|---------------|---------------|----|
| 2084 | 19700 | Pftk1         | E030011K20Rik | 1  |
| 2088 | 5342  | Ppan          | Eps8l3        | 1  |
| 2088 | 15870 | Ppan          | Aqp5          | 1  |
| 2090 | 17363 | Rpo1-2        | Aebp2         | 1  |
| 2090 | 18333 | Rpo1-2        | Rassf8        | 1  |
| 2110 | 2794  | Gtf2ird1      | Map3k6        | -1 |
| 2110 | 5345  | Gtf2ird1      | MMT00023326   | -1 |
| 2110 | 12761 | Gtf2ird1      | Tsc22d3       | -1 |
| 2113 | 21313 | Rasd1         | Rhou          | -1 |
| 2121 | 2121  | Brms1l        | Brms1l        | 1  |
| 2128 | 15698 | 4930447K03Rik | Them2         | -1 |
| 2128 | 17528 | 4930447K03Rik | Gmnn          | -1 |
| 2157 | 18462 | 0610007C21Rik | Gm1060        | -1 |
| 2166 | 15870 | Amd1          | Aqp5          | 1  |
| 2185 | 737   | Pef1          | MMT00023716   | -1 |
| 2199 | 5345  | Aff1          | MMT00023326   | 1  |
| 2199 | 18553 | Aff1          | Tekt4         | 1  |
| 2200 | 2224  | BC006779      | Oasl2         | 1  |
| 2200 | 3683  | BC006779      | Oas2          | 1  |
| 2200 | 6824  | BC006779      | Irf7          | 1  |
| 2200 | 12398 | BC006779      | Ifi44         | 1  |
| 2200 | 13309 | BC006779      | Tgtp          | 1  |
| 2200 | 15572 | BC006779      | Dtx3l         | 1  |
| 2200 | 21549 | BC006779      | Rtp4          | 1  |
| 2200 | 23450 | BC006779      | D12Ert647e    | 1  |
| 2223 | 719   | Slc28a2       | Usp2          | -1 |
| 2223 | 21142 | Slc28a2       | Gm129         | -1 |
| 2224 | 143   | Oasl2         | Gvin1         | 1  |
| 2224 | 2224  | Oasl2         | Oasl2         | 1  |
| 2224 | 3683  | Oasl2         | Oas2          | 1  |
| 2224 | 4426  | Oasl2         | ligp2         | 1  |
| 2224 | 5853  | Oasl2         | Trim30        | 1  |
| 2224 | 6824  | Oasl2         | Irf7          | 1  |
| 2224 | 7069  | Oasl2         | Ube1l         | 1  |
| 2224 | 7105  | Oasl2         | Plac8         | 1  |
| 2224 | 9616  | Oasl2         | AI451557      | 1  |
| 2224 | 9847  | Oasl2         | Ifi27         | 1  |
| 2224 | 12398 | Oasl2         | Ifi44         | 1  |
| 2224 | 13309 | Oasl2         | Tgtp          | 1  |
| 2224 | 14258 | Oasl2         | Ifi47         | 1  |
| 2224 | 19189 | Oasl2         | Sp100         | 1  |
| 2224 | 21549 | Oasl2         | Rtp4          | 1  |
| 2224 | 23450 | Oasl2         | D12Ert647e    | 1  |
| 2232 | 8443  | Strn          | Pola2         | 1  |
| 2232 | 11369 | Strn          | Stx3          | -1 |
| 2232 | 17447 | Strn          | Ctsf          | -1 |
| 2259 | 11717 | Ddx3x         | Wdhd1         | 1  |
| 2273 | 8902  | Haghl         | Aldh3b1       | 1  |
| 2294 | 2294  | AU040829      | AU040829      | 1  |
| 2301 | 1297  | Pcyox1        | Phox2a        | 1  |
| 2308 | 2308  | A930005I04Rik | A930005I04Rik | 1  |
| 2308 | 6456  | A930005I04Rik | Tyms          | 1  |
| 2308 | 12385 | A930005I04Rik | Mrpl33        | -1 |
| 2308 | 18462 | A930005I04Rik | Gm1060        | -1 |
| 2319 | 15255 | E2f1          | Ccl8          | 1  |
| 2362 | 2362  | Mkks          | Mkks          | 1  |
| 2370 | 2708  | 8430408G22Rik | Sgk1          | 1  |
| 2370 | 6564  | 8430408G22Rik | Cebpd         | 1  |
| 2370 | 8816  | 8430408G22Rik | Nfkbia        | 1  |

|      |       |               |               |    |
|------|-------|---------------|---------------|----|
| 2370 | 9745  | 8430408G22Rik | Gadd45g       | 1  |
| 2370 | 12761 | 8430408G22Rik | Tsc22d3       | 1  |
| 2370 | 16494 | 8430408G22Rik | 2310007D09Rik | 1  |
| 2370 | 21313 | 8430408G22Rik | Rhou          | 1  |
| 2372 | 737   | Stx12         | MMT00023716   | 1  |
| 2372 | 2372  | Stx12         | Stx12         | 1  |
| 2372 | 2902  | Stx12         | D4Erd196e     | 1  |
| 2372 | 5064  | Stx12         | Tekt2         | -1 |
| 2372 | 6191  | Stx12         | Ddost         | -1 |
| 2372 | 8610  | Stx12         | Padi4         | -1 |
| 2372 | 12140 | Stx12         | Mrps15        | -1 |
| 2372 | 14397 | Stx12         | Padi2         | -1 |
| 2372 | 18207 | Stx12         | Dnali1        | -1 |
| 2372 | 19647 | Stx12         | Cort          | 1  |
| 2372 | 19924 | Stx12         | Ubiad1        | 1  |
| 2421 | 1297  | Itgb5         | Phox2a        | 1  |
| 2436 | 8610  | Fblim1        | Padi4         | 1  |
| 2440 | 2440  | 1500003O22Rik | 1500003O22Rik | 1  |
| 2442 | 23191 | Rab2b         | 3632451O06Rik | -1 |
| 2456 | 2456  | Mrpl10        | Mrpl10        | 1  |
| 2456 | 12302 | Mrpl10        | Cbx1          | 1  |
| 2457 | 1466  | 1110032E23Rik | Ubp2l         | 1  |
| 2457 | 2752  | 1110032E23Rik | Fcgr1         | 1  |
| 2457 | 3314  | 1110032E23Rik | Wars2         | 1  |
| 2457 | 5687  | 1110032E23Rik | Klf11         | -1 |
| 2457 | 10521 | 1110032E23Rik | Ttf2          | 1  |
| 2457 | 12367 | 1110032E23Rik | MMT00072365   | -1 |
| 2457 | 12716 | 1110032E23Rik | 5830417110Rik | -1 |
| 2457 | 16416 | 1110032E23Rik | Commd2        | 1  |
| 2472 | 290   | MMT00014056   | B230118H07Rik | -1 |
| 2472 | 1510  | MMT00014056   | A530058N18Rik | -1 |
| 2472 | 1806  | MMT00014056   | Nola3         | 1  |
| 2472 | 1991  | MMT00014056   | Ttc17         | 1  |
| 2472 | 2472  | MMT00014056   | MMT00014056   | 1  |
| 2472 | 9547  | MMT00014056   | MMT00006479   | 1  |
| 2472 | 14757 | MMT00014056   | Hdx           | 1  |
| 2472 | 16881 | MMT00014056   | MMT00031504   | 1  |
| 2472 | 17295 | MMT00014056   | MMT00082577   | 1  |
| 2472 | 18368 | MMT00014056   | Mpped2        | -1 |
| 2472 | 18835 | MMT00014056   | Dtwd1         | 1  |
| 2472 | 19763 | MMT00014056   | Acp2          | 1  |
| 2472 | 19803 | MMT00014056   | BC003993      | 1  |
| 2472 | 22320 | MMT00014056   | MMT00047284   | 1  |
| 2472 | 23474 | MMT00014056   | MMT00011721   | 1  |
| 2483 | 737   | Gmeb1         | MMT00023716   | -1 |
| 2485 | 3812  | Adck1         | Zfyve26       | -1 |
| 2485 | 8155  | Adck1         | Mark3         | 1  |
| 2485 | 8724  | Adck1         | Tgfb3         | 1  |
| 2485 | 21442 | Adck1         | Rad51l1       | -1 |
| 2523 | 17661 | Pgs1          | Birc5         | 1  |
| 2527 | 2527  | 1600012F09Rik | 1600012F09Rik | 1  |
| 2541 | 15255 | Ppa2          | Ccl8          | -1 |
| 2550 | 6824  | MMT00036681   | Irf7          | 1  |
| 2550 | 12398 | MMT00036681   | Ifi44         | 1  |
| 2562 | 19622 | Nhedc2        | Bdh2          | 1  |
| 2571 | 1041  | Rmnd1         | 3110049J23Rik | 1  |
| 2571 | 1135  | Rmnd1         | Akap12        | -1 |
| 2571 | 2571  | Rmnd1         | Rmnd1         | 1  |
| 2571 | 3545  | Rmnd1         | Mtrf1l        | -1 |

|      |       |             |               |    |
|------|-------|-------------|---------------|----|
| 2571 | 3744  | Rmnd1       | Rmnd1         | 1  |
| 2571 | 6363  | Rmnd1       | 9130014G24Rik | -1 |
| 2571 | 8786  | Rmnd1       | Rmnd1         | 1  |
| 2571 | 11162 | Rmnd1       | Hkdc1         | -1 |
| 2571 | 19115 | Rmnd1       | Rab32         | 1  |
| 2571 | 20134 | Rmnd1       | Ppp1r14c      | -1 |
| 2571 | 20705 | Rmnd1       | Supv3l1       | 1  |
| 2571 | 22333 | Rmnd1       | Hnrnph3       | -1 |
| 2571 | 22598 | Rmnd1       | 4930402H24Rik | -1 |
| 2578 | 5345  | Csf2rb2     | MMT00023326   | -1 |
| 2578 | 12761 | Csf2rb2     | Tsc22d3       | -1 |
| 2598 | 1297  | Naglu       | Phox2a        | 1  |
| 2599 | 1040  | Lsm14a      | Dnhd1         | -1 |
| 2599 | 1101  | Lsm14a      | Sec11a        | 1  |
| 2599 | 2118  | Lsm14a      | Kptn          | 1  |
| 2599 | 2599  | Lsm14a      | Lsm14a        | 1  |
| 2599 | 4729  | Lsm14a      | Slc7a10       | -1 |
| 2599 | 6513  | Lsm14a      | Qpctl         | 1  |
| 2599 | 7761  | Lsm14a      | Nudt19        | 1  |
| 2599 | 7803  | Lsm14a      | Ttyh1         | 1  |
| 2599 | 8394  | Lsm14a      | Dpy19l3       | 1  |
| 2599 | 9122  | Lsm14a      | Sepw1         | 1  |
| 2599 | 9376  | Lsm14a      | Zscan18       | 1  |
| 2599 | 9413  | Lsm14a      | 1190020J12Rik | -1 |
| 2599 | 9454  | Lsm14a      | 2810426N06Rik | 1  |
| 2599 | 11800 | Lsm14a      | Clip3         | -1 |
| 2599 | 11982 | Lsm14a      | MMT00035514   | -1 |
| 2599 | 12623 | Lsm14a      | Ccdc123       | 1  |
| 2599 | 13418 | Lsm14a      | Lgi4          | -1 |
| 2599 | 14842 | Lsm14a      | Gipr          | 1  |
| 2599 | 15670 | Lsm14a      | Pnmal1        | -1 |
| 2599 | 15722 | Lsm14a      | Ccdc9         | -1 |
| 2599 | 17314 | Lsm14a      | Napa          | -1 |
| 2599 | 17632 | Lsm14a      | Lypd3         | -1 |
| 2599 | 18365 | Lsm14a      | Bcl2l12       | -1 |
| 2599 | 19142 | Lsm14a      | Gpatch1       | 1  |
| 2599 | 19306 | Lsm14a      | Al428936      | 1  |
| 2599 | 19462 | Lsm14a      | 4933439C20Rik | -1 |
| 2599 | 20490 | Lsm14a      | Tmem143       | -1 |
| 2599 | 20606 | Lsm14a      | MMT00042166   | -1 |
| 2625 | 5345  | MMT00077446 | MMT00023326   | 1  |
| 2625 | 12761 | MMT00077446 | Tsc22d3       | 1  |
| 2630 | 13192 | Il17re      | Impg1         | 1  |
| 2630 | 18070 | Il17re      | Ogg1          | 1  |
| 2632 | 1466  | Aph1a       | Ubap2l        | -1 |
| 2632 | 2752  | Aph1a       | Fcgr1         | -1 |
| 2632 | 3314  | Aph1a       | Wars2         | -1 |
| 2632 | 9519  | Aph1a       | Fstl5         | 1  |
| 2632 | 12367 | Aph1a       | MMT00072365   | 1  |
| 2632 | 12716 | Aph1a       | 5830417l10Rik | 1  |
| 2632 | 15299 | Aph1a       | Mrps21        | 1  |
| 2632 | 15901 | Aph1a       | Tpm3          | 1  |
| 2632 | 16416 | Aph1a       | Commd2        | -1 |
| 2694 | 12367 | Siah2       | MMT00072365   | 1  |
| 2694 | 16416 | Siah2       | Commd2        | -1 |
| 2705 | 9077  | Hrbl        | Cnpy4         | 1  |
| 2705 | 13780 | Hrbl        | Pilra         | -1 |
| 2705 | 14631 | Hrbl        | Stag3         | 1  |
| 2708 | 8816  | Sgk1        | Nfkbia        | 1  |

|      |       |               |                    |    |
|------|-------|---------------|--------------------|----|
| 2719 | 2719  | St6galnac2    | St6galnac2         | 1  |
| 2741 | 15827 | 3230401D17Rik | Rrm1               | -1 |
| 2743 | 1918  | Tcf3          | Usp39              | 1  |
| 2743 | 2743  | Tcf3          | Tcf3               | 1  |
| 2743 | 2815  | Tcf3          | Eif2ak3            | 1  |
| 2743 | 3703  | Tcf3          | Ggcx               | 1  |
| 2743 | 4038  | Tcf3          | 1200009O22Rik      | -1 |
| 2743 | 5296  | Tcf3          | Rnf181             | 1  |
| 2743 | 7273  | Tcf3          | Rnf103             | 1  |
| 2743 | 8016  | Tcf3          | Mrpl35             | -1 |
| 2743 | 8055  | Tcf3          | Ptcd3              | 1  |
| 2743 | 8889  | Tcf3          | Dnahc6             | -1 |
| 2743 | 9355  | Tcf3          | Reep1              | 1  |
| 2743 | 11338 | Tcf3          | Vamp8              | 1  |
| 2743 | 14584 | Tcf3          | Vps24              | -1 |
| 2743 | 15384 | Tcf3          | Mat2a              | 1  |
| 2743 | 15625 | Tcf3          | Capg               | 1  |
| 2743 | 16255 | Tcf3          | Reg3b              | -1 |
| 2743 | 17562 | Tcf3          | Rbed1              | 1  |
| 2743 | 18948 | Tcf3          | Olf1270            | -1 |
| 2743 | 20507 | Tcf3          | Sh2d6              | 1  |
| 2749 | 403   | Naf1          | Leprotl1           | 1  |
| 2749 | 1755  | Naf1          | Ocel1              | -1 |
| 2749 | 2294  | Naf1          | AU040829           | 1  |
| 2749 | 5925  | Naf1          | Tmem59l            | 1  |
| 2749 | 9569  | Naf1          | Dda1               | 1  |
| 2749 | 10497 | Naf1          | Man2b1             | 1  |
| 2749 | 13732 | Naf1          | Tpm4               | 1  |
| 2749 | 16617 | Naf1          | Sh2d4a             | 1  |
| 2749 | 16849 | Naf1          | Trmt1              | 1  |
| 2749 | 20721 | Naf1          | 4432412L15Rik      | 1  |
| 2752 | 1466  | Fcgr1         | Ubap2l             | 1  |
| 2752 | 2752  | Fcgr1         | Fcgr1              | 1  |
| 2752 | 3314  | Fcgr1         | Wars2              | 1  |
| 2752 | 9519  | Fcgr1         | Fstl5              | -1 |
| 2752 | 12367 | Fcgr1         | MMT00072365        | -1 |
| 2752 | 12398 | Fcgr1         | Ifi44              | 1  |
| 2752 | 15299 | Fcgr1         | Mrps21             | -1 |
| 2752 | 16416 | Fcgr1         | Comm2              | 1  |
| 2753 | 15853 | Myo6          | D430036J16Rik      | 1  |
| 2755 | 7083  | EG382421      | MMT00044154        | 1  |
| 2755 | 7116  | EG382421      | Katnal1            | 1  |
| 2755 | 7821  | EG382421      | MMT00042003        | 1  |
| 2755 | 17535 | EG382421      | MMT00008110        | 1  |
| 2770 | 15870 | Fbl           | Aqp5               | 1  |
| 2793 | 2793  | MMT00005644   | MMT00005644        | 1  |
| 2793 | 5989  | MMT00005644   | 2310042D19Rik      | 1  |
| 2793 | 12718 | MMT00005644   | Dhrsx              | 1  |
| 2793 | 17693 | MMT00005644   | MMT00044427        | 1  |
| 2793 | 19924 | MMT00005644   | Ubiad1             | -1 |
| 2793 | 22122 | MMT00005644   | MMT00042954        | 1  |
| 2794 | 1751  | Map3k6        | Xdh                | 1  |
| 2794 | 2294  | Map3k6        | AU040829           | 1  |
| 2794 | 2708  | Map3k6        | Sgk1               | 1  |
| 2794 | 2794  | Map3k6        | Map3k6             | 1  |
| 2794 | 4084  | Map3k6        | Asah3l             | 1  |
| 2794 | 4454  | Map3k6        | BC055107           | 1  |
| 2794 | 5345  | Map3k6        | MMT00023326        | 1  |
| 2794 | 5715  | Map3k6        | ENSMUSG00000052976 | 1  |

|      |       |         |               |    |
|------|-------|---------|---------------|----|
| 2794 | 5974  | Map3k6  | Arntl         | -1 |
| 2794 | 6038  | Map3k6  | Acot1         | -1 |
| 2794 | 6564  | Map3k6  | Cebpd         | 1  |
| 2794 | 7285  | Map3k6  | Tbc1d4        | 1  |
| 2794 | 8171  | Map3k6  | Spink8        | 1  |
| 2794 | 8399  | Map3k6  | Herpud1       | 1  |
| 2794 | 8816  | Map3k6  | Nfkbia        | 1  |
| 2794 | 8980  | Map3k6  | Plekhf1       | 1  |
| 2794 | 11305 | Map3k6  | Galntl2       | 1  |
| 2794 | 11345 | Map3k6  | Slc40a1       | -1 |
| 2794 | 12208 | Map3k6  | Pnpla7        | 1  |
| 2794 | 12649 | Map3k6  | Itgad         | 1  |
| 2794 | 12761 | Map3k6  | Tsc22d3       | 1  |
| 2794 | 12834 | Map3k6  | Fabp7         | -1 |
| 2794 | 12989 | Map3k6  | 1190002H23Rik | 1  |
| 2794 | 14233 | Map3k6  | Fgfr1         | -1 |
| 2794 | 16494 | Map3k6  | 2310007D09Rik | 1  |
| 2794 | 17143 | Map3k6  | 2010002N04Rik | 1  |
| 2794 | 18553 | Map3k6  | Tekt4         | 1  |
| 2794 | 19004 | Map3k6  | Pdk4          | 1  |
| 2794 | 19621 | Map3k6  | Cldn5         | -1 |
| 2794 | 21313 | Map3k6  | Rhou          | 1  |
| 2794 | 21380 | Map3k6  | Ier5          | -1 |
| 2794 | 21574 | Map3k6  | Acot11        | 1  |
| 2794 | 21643 | Map3k6  | Agtr1a        | 1  |
| 2794 | 22989 | Map3k6  | Lmcd1         | -1 |
| 2801 | 6824  | H2-BI   | Irf7          | 1  |
| 2815 | 2743  | Eif2ak3 | Tcf3          | -1 |
| 2815 | 16255 | Eif2ak3 | Reg3b         | 1  |
| 2819 | 10    | Kcnk5   | NaN           | 1  |
| 2819 | 115   | Kcnk5   | NaN           | 1  |
| 2819 | 236   | Kcnk5   | Bbs9          | 1  |
| 2819 | 316   | Kcnk5   | 4930471G03Rik | 1  |
| 2819 | 391   | Kcnk5   | 4933416I08Rik | 1  |
| 2819 | 558   | Kcnk5   | Crebl1        | 1  |
| 2819 | 663   | Kcnk5   | Muc19         | 1  |
| 2819 | 1059  | Kcnk5   | P2rx6         | 1  |
| 2819 | 1122  | Kcnk5   | Pax3          | 1  |
| 2819 | 1354  | Kcnk5   | Lsmd1         | 1  |
| 2819 | 1436  | Kcnk5   | Nfu1          | 1  |
| 2819 | 1518  | Kcnk5   | Amigo2        | 1  |
| 2819 | 1696  | Kcnk5   | V1re9         | 1  |
| 2819 | 1771  | Kcnk5   | Park2         | 1  |
| 2819 | 1795  | Kcnk5   | Rabgap1l      | 1  |
| 2819 | 1920  | Kcnk5   | Oas1e         | 1  |
| 2819 | 2067  | Kcnk5   | Myo1a         | 1  |
| 2819 | 2226  | Kcnk5   | Amt           | 1  |
| 2819 | 2283  | Kcnk5   | MMT00029554   | 1  |
| 2819 | 2819  | Kcnk5   | Kcnk5         | 1  |
| 2819 | 3144  | Kcnk5   | Ube2j2        | 1  |
| 2819 | 3166  | Kcnk5   | Vmn2r57       | 1  |
| 2819 | 3208  | Kcnk5   | 4930511111Rik | 1  |
| 2819 | 3383  | Kcnk5   | Cd99          | 1  |
| 2819 | 3511  | Kcnk5   | Rnf182        | 1  |
| 2819 | 3948  | Kcnk5   | V1rb4         | 1  |
| 2819 | 4079  | Kcnk5   | Emilin3       | 1  |
| 2819 | 4088  | Kcnk5   | Pdcl2         | 1  |
| 2819 | 4199  | Kcnk5   | B3galt5       | 1  |
| 2819 | 4246  | Kcnk5   | Fbxw12        | 1  |

|      |       |       |               |   |
|------|-------|-------|---------------|---|
| 2819 | 4311  | Kcnk5 | MMT00033987   | 1 |
| 2819 | 4337  | Kcnk5 | Myst3         | 1 |
| 2819 | 4407  | Kcnk5 | 4930429B21Rik | 1 |
| 2819 | 4870  | Kcnk5 | Olf1550       | 1 |
| 2819 | 5380  | Kcnk5 | Olf1403       | 1 |
| 2819 | 5505  | Kcnk5 | Thap2         | 1 |
| 2819 | 5694  | Kcnk5 | Sp7           | 1 |
| 2819 | 5908  | Kcnk5 | MMT00027552   | 1 |
| 2819 | 6403  | Kcnk5 | MMT00039607   | 1 |
| 2819 | 6422  | Kcnk5 | Grk5          | 1 |
| 2819 | 6429  | Kcnk5 | Sim2          | 1 |
| 2819 | 6719  | Kcnk5 | Cacng8        | 1 |
| 2819 | 7094  | Kcnk5 | Cyp2c54       | 1 |
| 2819 | 7132  | Kcnk5 | Sp9           | 1 |
| 2819 | 7279  | Kcnk5 | Cldn13        | 1 |
| 2819 | 7436  | Kcnk5 | 1700063K16Rik | 1 |
| 2819 | 7916  | Kcnk5 | MMT00016293   | 1 |
| 2819 | 7974  | Kcnk5 | Arhgef7       | 1 |
| 2819 | 8256  | Kcnk5 | Tjap1         | 1 |
| 2819 | 8620  | Kcnk5 | MMT00048670   | 1 |
| 2819 | 8644  | Kcnk5 | V1rg11        | 1 |
| 2819 | 8709  | Kcnk5 | Trim58        | 1 |
| 2819 | 9436  | Kcnk5 | Cntnap2       | 1 |
| 2819 | 9946  | Kcnk5 | Stam2         | 1 |
| 2819 | 10055 | Kcnk5 | Tpte          | 1 |
| 2819 | 10195 | Kcnk5 | Klf1          | 1 |
| 2819 | 10240 | Kcnk5 | Cyp2w1        | 1 |
| 2819 | 10260 | Kcnk5 | Zfp36l2       | 1 |
| 2819 | 10377 | Kcnk5 | A430105l19Rik | 1 |
| 2819 | 10452 | Kcnk5 | Grn           | 1 |
| 2819 | 10520 | Kcnk5 | Xkr6          | 1 |
| 2819 | 10657 | Kcnk5 | Rnf12         | 1 |
| 2819 | 10687 | Kcnk5 | Itpkb         | 1 |
| 2819 | 10886 | Kcnk5 | Fndc3b        | 1 |
| 2819 | 11016 | Kcnk5 | Pcp2          | 1 |
| 2819 | 11256 | Kcnk5 | H2-DMa        | 1 |
| 2819 | 11350 | Kcnk5 | 9030420J04Rik | 1 |
| 2819 | 11507 | Kcnk5 | Adarb2        | 1 |
| 2819 | 11805 | Kcnk5 | Bat2          | 1 |
| 2819 | 11837 | Kcnk5 | Paqr6         | 1 |
| 2819 | 11966 | Kcnk5 | Zfp280b       | 1 |
| 2819 | 12062 | Kcnk5 | Dzip1l        | 1 |
| 2819 | 12188 | Kcnk5 | Chek2         | 1 |
| 2819 | 12248 | Kcnk5 | Tnp2          | 1 |
| 2819 | 12272 | Kcnk5 | Fshr          | 1 |
| 2819 | 12372 | Kcnk5 | MMT00039397   | 1 |
| 2819 | 12422 | Kcnk5 | Eme1          | 1 |
| 2819 | 12568 | Kcnk5 | Lrrc37a       | 1 |
| 2819 | 12604 | Kcnk5 | Acr           | 1 |
| 2819 | 12696 | Kcnk5 | RP23-392P11.3 | 1 |
| 2819 | 12753 | Kcnk5 | MMT00043344   | 1 |
| 2819 | 12772 | Kcnk5 | Axl           | 1 |
| 2819 | 12826 | Kcnk5 | Zfp354c       | 1 |
| 2819 | 13311 | Kcnk5 | Prl3c1        | 1 |
| 2819 | 13487 | Kcnk5 | A230051G13Rik | 1 |
| 2819 | 13676 | Kcnk5 | MMT00010979   | 1 |
| 2819 | 13742 | Kcnk5 | 1700024P16Rik | 1 |
| 2819 | 13767 | Kcnk5 | Kcnk15        | 1 |
| 2819 | 13890 | Kcnk5 | Olf1263       | 1 |



|      |       |       |               |   |
|------|-------|-------|---------------|---|
| 2819 | 14149 | Kcnk5 | BC048562      | 1 |
| 2819 | 14313 | Kcnk5 | Tnk1          | 1 |
| 2819 | 14519 | Kcnk5 | Trex1         | 1 |
| 2819 | 14565 | Kcnk5 | Rnf207        | 1 |
| 2819 | 14754 | Kcnk5 | Atoh8         | 1 |
| 2819 | 15424 | Kcnk5 | Atp6v1g2      | 1 |
| 2819 | 15626 | Kcnk5 | MMT00035685   | 1 |
| 2819 | 15697 | Kcnk5 | Tbc1d8b       | 1 |
| 2819 | 15743 | Kcnk5 | Hoxc6         | 1 |
| 2819 | 15813 | Kcnk5 | Vpreb3        | 1 |
| 2819 | 15885 | Kcnk5 | Adamts7       | 1 |
| 2819 | 16390 | Kcnk5 | Plb1          | 1 |
| 2819 | 16664 | Kcnk5 | Car4          | 1 |
| 2819 | 16672 | Kcnk5 | Tmem82        | 1 |
| 2819 | 16718 | Kcnk5 | Zbtb7c        | 1 |
| 2819 | 17044 | Kcnk5 | Gpr55         | 1 |
| 2819 | 17068 | Kcnk5 | Olfir661      | 1 |
| 2819 | 17122 | Kcnk5 | MMT00068814   | 1 |
| 2819 | 17171 | Kcnk5 | MMT00045847   | 1 |
| 2819 | 17337 | Kcnk5 | 1810065E05Rik | 1 |
| 2819 | 17417 | Kcnk5 | Pxn           | 1 |
| 2819 | 17613 | Kcnk5 | P2rx7         | 1 |
| 2819 | 17750 | Kcnk5 | Hs6st2        | 1 |
| 2819 | 17960 | Kcnk5 | Yod1          | 1 |
| 2819 | 18162 | Kcnk5 | BC049352      | 1 |
| 2819 | 18214 | Kcnk5 | Ankrd40       | 1 |
| 2819 | 18409 | Kcnk5 | Nicn1         | 1 |
| 2819 | 18525 | Kcnk5 | Mpped1        | 1 |
| 2819 | 18620 | Kcnk5 | Slmap         | 1 |
| 2819 | 18790 | Kcnk5 | Car3          | 1 |
| 2819 | 18892 | Kcnk5 | Cyp4f40       | 1 |
| 2819 | 19219 | Kcnk5 | MMT00015104   | 1 |
| 2819 | 19265 | Kcnk5 | EG546036      | 1 |
| 2819 | 19267 | Kcnk5 | Olfir341      | 1 |
| 2819 | 19351 | Kcnk5 | PrkcsH        | 1 |
| 2819 | 19436 | Kcnk5 | Dapp1         | 1 |
| 2819 | 19483 | Kcnk5 | Depdc2        | 1 |
| 2819 | 19645 | Kcnk5 | Il12rb2       | 1 |
| 2819 | 19658 | Kcnk5 | Cldnd2        | 1 |
| 2819 | 19672 | Kcnk5 | Cldn19        | 1 |
| 2819 | 19722 | Kcnk5 | Pvr1          | 1 |
| 2819 | 19941 | Kcnk5 | 1700080E11Rik | 1 |
| 2819 | 20158 | Kcnk5 | Slc38a1       | 1 |
| 2819 | 20255 | Kcnk5 | Elfn2         | 1 |
| 2819 | 20319 | Kcnk5 | Syne2         | 1 |
| 2819 | 20406 | Kcnk5 | Cacng2        | 1 |
| 2819 | 20419 | Kcnk5 | Adra1b        | 1 |
| 2819 | 20506 | Kcnk5 | 1700011F03Rik | 1 |
| 2819 | 20532 | Kcnk5 | Rnf26         | 1 |
| 2819 | 20735 | Kcnk5 | Tnrc6b        | 1 |
| 2819 | 20908 | Kcnk5 | Olfir583      | 1 |
| 2819 | 20944 | Kcnk5 | Tmem164       | 1 |
| 2819 | 21511 | Kcnk5 | MMT00054100   | 1 |
| 2819 | 21595 | Kcnk5 | Trpv1         | 1 |
| 2819 | 21717 | Kcnk5 | EG628893      | 1 |
| 2819 | 21723 | Kcnk5 | Homer1        | 1 |
| 2819 | 21866 | Kcnk5 | Hhip1         | 1 |
| 2819 | 21923 | Kcnk5 | Olfir585      | 1 |
| 2819 | 22125 | Kcnk5 | Gab1          | 1 |

|      |       |               |               |    |
|------|-------|---------------|---------------|----|
| 2819 | 22150 | Kcnk5         | Fhdc1         | 1  |
| 2819 | 22271 | Kcnk5         | Cyp2c29       | 1  |
| 2819 | 22434 | Kcnk5         | Olf1255       | 1  |
| 2819 | 22555 | Kcnk5         | Ela2          | 1  |
| 2819 | 22733 | Kcnk5         | Alpk3         | 1  |
| 2819 | 22750 | Kcnk5         | Mupcdh        | 1  |
| 2819 | 22762 | Kcnk5         | Slc6a4        | 1  |
| 2819 | 22802 | Kcnk5         | Svs2          | 1  |
| 2819 | 22966 | Kcnk5         | Epha4         | 1  |
| 2819 | 23070 | Kcnk5         | BC024659      | 1  |
| 2819 | 23109 | Kcnk5         | A430088P11Rik | 1  |
| 2819 | 23528 | Kcnk5         | 0610038L08Rik | 1  |
| 2819 | 23546 | Kcnk5         | Zzef1         | 1  |
| 2819 | 23561 | Kcnk5         | Sox14         | 1  |
| 2819 | 23591 | Kcnk5         | Dlg4          | 1  |
| 2819 | 23651 | Kcnk5         | MMT00027295   | 1  |
| 2829 | 2599  | Lrnf3         | Lsm14a        | -1 |
| 2829 | 7761  | Lrnf3         | Nudt19        | -1 |
| 2829 | 8394  | Lrnf3         | Dpy19l3       | -1 |
| 2829 | 9122  | Lrnf3         | Sepw1         | -1 |
| 2829 | 11800 | Lrnf3         | Clip3         | 1  |
| 2829 | 17632 | Lrnf3         | Lypd3         | 1  |
| 2829 | 19462 | Lrnf3         | 4933439C20Rik | 1  |
| 2829 | 20606 | Lrnf3         | MMT00042166   | 1  |
| 2830 | 6038  | 4632417K18Rik | Acot1         | 1  |
| 2832 | 2832  | 2810021J22Rik | 2810021J22Rik | 1  |
| 2832 | 13181 | 2810021J22Rik | Lcp2          | 1  |
| 2841 | 15870 | Kcne4         | Aqp5          | 1  |
| 2848 | 5795  | Serpine2      | MMT00057992   | -1 |
| 2848 | 9827  | Serpine2      | Pam           | 1  |
| 2848 | 19289 | Serpine2      | Pofut1        | -1 |
| 2850 | 2880  | Slc16a6       | Cd93          | 1  |
| 2850 | 6038  | Slc16a6       | Acot1         | 1  |
| 2858 | 12834 | Arhgap20      | Fabp7         | 1  |
| 2869 | 13424 | Copa          | MMT00039710   | -1 |
| 2877 | 13615 | Pcyt2         | Arl16         | -1 |
| 2877 | 13810 | Pcyt2         | 1110036O03Rik | 1  |
| 2877 | 16613 | Pcyt2         | 1110031I02Rik | 1  |
| 2877 | 17193 | Pcyt2         | Npb           | 1  |
| 2877 | 21414 | Pcyt2         | BC017643      | 1  |
| 2879 | 5342  | Ptprv         | Eps8l3        | 1  |
| 2879 | 15870 | Ptprv         | Aqp5          | 1  |
| 2879 | 22982 | Ptprv         | Mug2          | 1  |
| 2881 | 2880  | Hlf           | Cd93          | -1 |
| 2881 | 12834 | Hlf           | Fabp7         | -1 |
| 2881 | 14222 | Hlf           | MMT00076410   | 1  |
| 2881 | 15713 | Hlf           | Rbm3          | 1  |
| 2881 | 21643 | Hlf           | Agtr1a        | 1  |
| 2885 | 1041  | Hebp2         | 3110049J23Rik | -1 |
| 2885 | 2571  | Hebp2         | Rmnd1         | -1 |
| 2885 | 3744  | Hebp2         | Rmnd1         | -1 |
| 2885 | 6363  | Hebp2         | 9130014G24Rik | 1  |
| 2885 | 8786  | Hebp2         | Rmnd1         | -1 |
| 2885 | 19115 | Hebp2         | Rab32         | -1 |
| 2901 | 6330  | Tmem132d      | Dgkq          | 1  |
| 2912 | 2599  | Wtip          | Lsm14a        | -1 |
| 2912 | 7761  | Wtip          | Nudt19        | -1 |
| 2912 | 8394  | Wtip          | Dpy19l3       | -1 |
| 2912 | 9122  | Wtip          | Sepw1         | -1 |

|      |       |             |               |    |
|------|-------|-------------|---------------|----|
| 2912 | 17632 | Wtip        | Lypd3         | 1  |
| 2912 | 19142 | Wtip        | Gpatch1       | -1 |
| 2912 | 19306 | Wtip        | AI428936      | -1 |
| 2912 | 20606 | Wtip        | MMT00042166   | 1  |
| 2915 | 23005 | Nfs1        | 4930405A21Rik | -1 |
| 2918 | 14517 | Mtmr10      | Clcn4-2       | -1 |
| 2928 | 6133  | Igf1        | Agp           | -1 |
| 2938 | 812   | H2-T23      | En2           | 1  |
| 2938 | 2801  | H2-T23      | H2-BI         | 1  |
| 2938 | 2938  | H2-T23      | H2-T23        | 1  |
| 2938 | 4555  | H2-T23      | Cchcr1        | 1  |
| 2938 | 7088  | H2-T23      | Slc37a1       | 1  |
| 2938 | 7603  | H2-T23      | Sod2          | 1  |
| 2938 | 8750  | H2-T23      | 1700010I14Rik | 1  |
| 2938 | 8767  | H2-T23      | Rgl2          | 1  |
| 2938 | 10374 | H2-T23      | Trim15        | 1  |
| 2938 | 10667 | H2-T23      | H2-Eb1        | 1  |
| 2938 | 10931 | H2-T23      | Pkn3          | -1 |
| 2938 | 11475 | H2-T23      | H2-D1         | -1 |
| 2938 | 12168 | H2-T23      | H2-Ke6        | 1  |
| 2938 | 12694 | H2-T23      | Riok2         | -1 |
| 2938 | 12943 | H2-T23      | Slc25a27      | 1  |
| 2938 | 13117 | H2-T23      | Tmprss5       | 1  |
| 2938 | 13493 | H2-T23      | Ring1         | 1  |
| 2938 | 14322 | H2-T23      | Bat1a         | -1 |
| 2938 | 15580 | H2-T23      | MMT00077001   | 1  |
| 2938 | 16067 | H2-T23      | Pcaf          | -1 |
| 2938 | 16692 | H2-T23      | Bat4          | 1  |
| 2938 | 17322 | H2-T23      | Zfp758        | -1 |
| 2938 | 17412 | H2-T23      | Aif1          | -1 |
| 2938 | 17646 | H2-T23      | C4b           | 1  |
| 2938 | 17707 | H2-T23      | Rshl2b        | 1  |
| 2938 | 18577 | H2-T23      | Btbd9         | -1 |
| 2938 | 20100 | H2-T23      | Guca1b        | -1 |
| 2938 | 20238 | H2-T23      | H2-T9         | 1  |
| 2938 | 21295 | H2-T23      | Snf1lk        | -1 |
| 2938 | 21415 | H2-T23      | Has1          | 1  |
| 2938 | 22104 | H2-T23      | Rnf123        | 1  |
| 2938 | 23250 | H2-T23      | Plcl2         | 1  |
| 2938 | 23371 | H2-T23      | Cfb           | -1 |
| 2945 | 1960  | MMT00005190 | Ubr2          | 1  |
| 2945 | 2644  | MMT00005190 | Srrm2         | -1 |
| 2945 | 2945  | MMT00005190 | MMT00005190   | 1  |
| 2945 | 6437  | MMT00005190 | Gnptg         | -1 |
| 2945 | 7286  | MMT00005190 | Noxo1         | -1 |
| 2945 | 8341  | MMT00005190 | MMT00017270   | 1  |
| 2945 | 10729 | MMT00005190 | Fgd2          | -1 |
| 2945 | 11291 | MMT00005190 | 1110018H23Rik | -1 |
| 2945 | 13075 | MMT00005190 | Mrps2         | 1  |
| 2945 | 14132 | MMT00005190 | Glo1          | -1 |
| 2945 | 19011 | MMT00005190 | Rpl3l         | -1 |
| 2945 | 19064 | MMT00005190 | MMT00004867   | -1 |
| 2945 | 20100 | MMT00005190 | Guca1b        | 1  |
| 2945 | 21246 | MMT00005190 | Telo2         | -1 |
| 2950 | 7100  | Micall1     | Tomm22        | 1  |
| 2969 | 1297  | Ptpro       | Phox2a        | 1  |
| 2973 | 2708  | 4-Sep       | Sgk1          | -1 |
| 2973 | 4084  | 4-Sep       | Asah3l        | -1 |
| 2973 | 5345  | 4-Sep       | MMT00023326   | -1 |

|      |       |               |               |    |
|------|-------|---------------|---------------|----|
| 2973 | 12761 | 4-Sep         | Tsc22d3       | -1 |
| 2973 | 12989 | 4-Sep         | 1190002H23Rik | -1 |
| 2973 | 13355 | 4-Sep         | Foxs1         | 1  |
| 2973 | 17143 | 4-Sep         | 2010002N04Rik | -1 |
| 2973 | 18553 | 4-Sep         | Tekt4         | -1 |
| 2980 | 2980  | Slc37a2       | Slc37a2       | 1  |
| 2980 | 16501 | Slc37a2       | Loh11cr2a     | -1 |
| 2984 | 15870 | MMT00029895   | Aqp5          | 1  |
| 2993 | 2993  | Gm1752        | Gm1752        | 1  |
| 2993 | 6503  | Gm1752        | Cep97         | -1 |
| 3006 | 2880  | Alas2         | Cd93          | 1  |
| 3006 | 3006  | Alas2         | Alas2         | 1  |
| 3006 | 18298 | Alas2         | Slc25a37      | 1  |
| 3006 | 21335 | Alas2         | Trp53rk       | 1  |
| 3006 | 21387 | Alas2         | Cnot7         | 1  |
| 3008 | 15870 | Nxt1          | Aqp5          | 1  |
| 3009 | 1297  | Serpina1c     | Phox2a        | 1  |
| 3017 | 19876 | Fas           | 6030443O07Rik | -1 |
| 3021 | 3021  | Gdf9          | Gdf9          | 1  |
| 3021 | 19032 | Gdf9          | Tymp          | 1  |
| 3028 | 15870 | Uhrf1         | Aqp5          | 1  |
| 3029 | 737   | Ybx1          | MMT00023716   | 1  |
| 3029 | 3029  | Ybx1          | Ybx1          | 1  |
| 3029 | 5064  | Ybx1          | Tekt2         | -1 |
| 3029 | 8654  | Ybx1          | Fbxl13        | 1  |
| 3029 | 8677  | Ybx1          | Zbtb8os       | -1 |
| 3029 | 9276  | Ybx1          | MMT00008480   | -1 |
| 3029 | 10134 | Ybx1          | Hivep3        | -1 |
| 3029 | 12140 | Ybx1          | Mrps15        | -1 |
| 3029 | 18207 | Ybx1          | Dnali1        | -1 |
| 3029 | 20147 | Ybx1          | Ybx1          | -1 |
| 3040 | 2708  | Bcl3          | Sgk1          | -1 |
| 3040 | 5345  | Bcl3          | MMT00023326   | -1 |
| 3040 | 6038  | Bcl3          | Acot1         | 1  |
| 3040 | 6133  | Bcl3          | Agrp          | -1 |
| 3040 | 12761 | Bcl3          | Tsc22d3       | -1 |
| 3040 | 16494 | Bcl3          | 2310007D09Rik | -1 |
| 3040 | 21643 | Bcl3          | Agtr1a        | -1 |
| 3052 | 403   | 9130404D08Rik | Leprotl1      | 1  |
| 3052 | 1604  | 9130404D08Rik | Ssbp4         | -1 |
| 3052 | 1755  | 9130404D08Rik | Ocel1         | -1 |
| 3052 | 2294  | 9130404D08Rik | AU040829      | 1  |
| 3052 | 3052  | 9130404D08Rik | 9130404D08Rik | 1  |
| 3052 | 3609  | 9130404D08Rik | Plvap         | -1 |
| 3052 | 5433  | 9130404D08Rik | 2410004L22Rik | 1  |
| 3052 | 5925  | 9130404D08Rik | Tmem59l       | 1  |
| 3052 | 8951  | 9130404D08Rik | Cd97          | 1  |
| 3052 | 9304  | 9130404D08Rik | Al449175      | -1 |
| 3052 | 9569  | 9130404D08Rik | Dda1          | 1  |
| 3052 | 9729  | 9130404D08Rik | Got1l1        | 1  |
| 3052 | 10373 | 9130404D08Rik | Tmem141       | -1 |
| 3052 | 10497 | 9130404D08Rik | Man2b1        | 1  |
| 3052 | 10758 | 9130404D08Rik | Gdf1          | 1  |
| 3052 | 12966 | 9130404D08Rik | Slc39a1       | -1 |
| 3052 | 13732 | 9130404D08Rik | Tpm4          | 1  |
| 3052 | 15094 | 9130404D08Rik | Pbx4          | 1  |
| 3052 | 15296 | 9130404D08Rik | Mier3         | -1 |
| 3052 | 16617 | 9130404D08Rik | Sh2d4a        | 1  |
| 3052 | 16849 | 9130404D08Rik | Trmt1         | 1  |

|      |       |               |               |    |
|------|-------|---------------|---------------|----|
| 3052 | 16858 | 9130404D08Rik | Tmem38a       | 1  |
| 3052 | 17703 | 9130404D08Rik | Large         | 1  |
| 3052 | 21840 | 9130404D08Rik | Tmie          | -1 |
| 3066 | 18514 | MMT00035562   | 4930412F15Rik | -1 |
| 3086 | 13810 | Tubg2         | 1110036O03Rik | 1  |
| 3096 | 15870 | Ugt1a6a       | Aqp5          | -1 |
| 3103 | 8769  | MMT00062748   | Cenpk         | 1  |
| 3103 | 16046 | MMT00062748   | Ppwd1         | -1 |
| 3103 | 16077 | MMT00062748   | Mocs2         | -1 |
| 3111 | 2708  | Ddefl1        | Sgk1          | -1 |
| 3111 | 2880  | Ddefl1        | Cd93          | 1  |
| 3111 | 4084  | Ddefl1        | Asah3l        | -1 |
| 3111 | 12761 | Ddefl1        | Tsc22d3       | -1 |
| 3111 | 12989 | Ddefl1        | 1190002H23Rik | -1 |
| 3111 | 16494 | Ddefl1        | 2310007D09Rik | -1 |
| 3141 | 3141  | Tmf1          | Tmf1          | 1  |
| 3141 | 16255 | Tmf1          | Reg3b         | 1  |
| 3150 | 5271  | Syne2         | Npy           | 1  |
| 3154 | 15870 | Mcm5          | Aqp5          | 1  |
| 3159 | 3159  | Pld1          | Pld1          | 1  |
| 3159 | 16618 | Pld1          | Hps3          | -1 |
| 3159 | 19700 | Pld1          | E030011K20Rik | 1  |
| 3191 | 246   | Lamc2         | MMT00053742   | -1 |
| 3191 | 1625  | Lamc2         | AW146154      | 1  |
| 3191 | 15569 | Lamc2         | BC003331      | -1 |
| 3191 | 17463 | Lamc2         | Rgl1          | -1 |
| 3204 | 16618 | Gm24          | Hps3          | -1 |
| 3214 | 5258  | Dnmt3b        | Mcts2         | -1 |
| 3214 | 5603  | Dnmt3b        | BC020535      | 1  |
| 3214 | 6188  | Dnmt3b        | Myh7b         | -1 |
| 3214 | 6250  | Dnmt3b        | Csnk2a1       | -1 |
| 3214 | 11166 | Dnmt3b        | Uqcc          | 1  |
| 3214 | 11705 | Dnmt3b        | Polr3f        | -1 |
| 3214 | 13355 | Dnmt3b        | Foxs1         | 1  |
| 3214 | 14399 | Dnmt3b        | Csnk2a1       | -1 |
| 3214 | 14734 | Dnmt3b        | Nrsn2         | 1  |
| 3214 | 20505 | Dnmt3b        | Ttll9         | 1  |
| 3214 | 23005 | Dnmt3b        | 4930405A21Rik | 1  |
| 3226 | 2558  | Tnfrsf17      | Tmem132b      | -1 |
| 3226 | 6234  | Tnfrsf17      | P4ha2         | -1 |
| 3226 | 6769  | Tnfrsf17      | Banp          | -1 |
| 3226 | 11345 | Tnfrsf17      | Slc40a1       | 1  |
| 3226 | 15870 | Tnfrsf17      | Aqp5          | -1 |
| 3226 | 18373 | Tnfrsf17      | Dnajb1        | -1 |
| 3253 | 15870 | Tbc1d20       | Aqp5          | -1 |
| 3257 | 14734 | Map1lc3a      | Nrsn2         | 1  |
| 3257 | 15760 | Map1lc3a      | Trib3         | -1 |
| 3257 | 20837 | Map1lc3a      | Dlgap4        | -1 |
| 3257 | 23005 | Map1lc3a      | 4930405A21Rik | 1  |
| 3261 | 6330  | Rpap2         | Dgkq          | 1  |
| 3261 | 16168 | Rpap2         | Crf2          | 1  |
| 3261 | 20729 | Rpap2         | Ttc28         | 1  |
| 3261 | 22988 | Rpap2         | Hscb          | -1 |
| 3307 | 2743  | Cd8b1         | Tcf3          | -1 |
| 3309 | 8416  | Grpel2        | Cdc20         | -1 |
| 3314 | 1014  | Wars2         | Rtcd1         | 1  |
| 3314 | 1438  | Wars2         | Dclre1b       | -1 |
| 3314 | 1466  | Wars2         | Ubap2l        | 1  |
| 3314 | 2632  | Wars2         | Aph1a         | -1 |

|      |       |               |               |    |
|------|-------|---------------|---------------|----|
| 3314 | 2752  | Wars2         | Fcgr1         | 1  |
| 3314 | 3314  | Wars2         | Wars2         | 1  |
| 3314 | 3874  | Wars2         | Slitrk3       | -1 |
| 3314 | 5021  | Wars2         | Gdap2         | -1 |
| 3314 | 5508  | Wars2         | Lrig2         | -1 |
| 3314 | 6283  | Wars2         | Ptpn22        | -1 |
| 3314 | 6470  | Wars2         | Arnt          | -1 |
| 3314 | 6708  | Wars2         | Serpini2      | -1 |
| 3314 | 7810  | Wars2         | Trim45        | -1 |
| 3314 | 9408  | Wars2         | Hmgcs2        | -1 |
| 3314 | 9519  | Wars2         | Fstl5         | -1 |
| 3314 | 10521 | Wars2         | Ttf2          | 1  |
| 3314 | 12367 | Wars2         | MMT00072365   | -1 |
| 3314 | 12716 | Wars2         | 5830417110Rik | -1 |
| 3314 | 13512 | Wars2         | Tmem144       | -1 |
| 3314 | 15299 | Wars2         | Mrps21        | -1 |
| 3314 | 15550 | Wars2         | 2010200O16Rik | -1 |
| 3314 | 15901 | Wars2         | Tpm3          | -1 |
| 3314 | 16283 | Wars2         | EG627427      | -1 |
| 3314 | 16416 | Wars2         | Commd2        | 1  |
| 3314 | 16618 | Wars2         | Hps3          | -1 |
| 3314 | 17669 | Wars2         | 2310007A19Rik | 1  |
| 3314 | 17837 | Wars2         | Polr3gl       | -1 |
| 3314 | 19700 | Wars2         | E030011K20Rik | 1  |
| 3314 | 20810 | Wars2         | Mttp          | -1 |
| 3314 | 20890 | Wars2         | Psmb4         | -1 |
| 3314 | 21650 | Wars2         | Ap4b1         | 1  |
| 3314 | 22570 | Wars2         | Phf1          | 1  |
| 3314 | 23037 | Wars2         | Thbs3         | 1  |
| 3325 | 13136 | Plekhj1       | Itgb1bp3      | 1  |
| 3325 | 17135 | Plekhj1       | Mum1          | -1 |
| 3342 | 21917 | Ik            | Taf9b         | -1 |
| 3401 | 3401  | BB146404      | BB146404      | 1  |
| 3411 | 3411  | Rabl2a        | Rabl2a        | 1  |
| 3411 | 3654  | Rabl2a        | St13          | -1 |
| 3411 | 7100  | Rabl2a        | Tomm22        | 1  |
| 3432 | 2012  | EG330963      | Cetn4         | -1 |
| 3432 | 2752  | EG330963      | Fcgr1         | 1  |
| 3432 | 3159  | EG330963      | Pld1          | 1  |
| 3432 | 3206  | EG330963      | Gpr160        | 1  |
| 3432 | 3314  | EG330963      | Wars2         | 1  |
| 3432 | 4666  | EG330963      | Exosc9        | -1 |
| 3432 | 5762  | EG330963      | Trpc3         | -1 |
| 3432 | 9360  | EG330963      | Taf1c         | -1 |
| 3432 | 9519  | EG330963      | Fstl5         | -1 |
| 3432 | 12367 | EG330963      | MMT00072365   | -1 |
| 3432 | 16416 | EG330963      | Commd2        | 1  |
| 3432 | 16618 | EG330963      | Hps3          | -1 |
| 3432 | 19700 | EG330963      | E030011K20Rik | 1  |
| 3464 | 3464  | 1700048O20Rik | 1700048O20Rik | 1  |
| 3468 | 15870 | MMT00009124   | Aqp5          | 1  |
| 3475 | 1270  | 2610305D13Rik | 1700029I01Rik | 1  |
| 3475 | 3475  | 2610305D13Rik | 2610305D13Rik | 1  |
| 3475 | 6191  | 2610305D13Rik | Ddost         | -1 |
| 3475 | 11870 | 2610305D13Rik | Apitd1        | 1  |
| 3475 | 12140 | 2610305D13Rik | Mrps15        | -1 |
| 3475 | 14397 | 2610305D13Rik | Padi2         | -1 |
| 3475 | 15664 | 2610305D13Rik | Masp2         | 1  |
| 3475 | 18338 | 2610305D13Rik | Akr1e1        | -1 |

|      |       |               |               |    |
|------|-------|---------------|---------------|----|
| 3475 | 18548 | 2610305D13Rik | 1700012P22Rik | -1 |
| 3475 | 19647 | 2610305D13Rik | Cort          | 1  |
| 3475 | 19924 | 2610305D13Rik | Ubiad1        | 1  |
| 3480 | 2456  | Pnpo          | Mrpl10        | -1 |
| 3480 | 3480  | Pnpo          | Pnpo          | 1  |
| 3480 | 10498 | Pnpo          | Ube2z         | 1  |
| 3480 | 12302 | Pnpo          | Cbx1          | -1 |
| 3480 | 13810 | Pnpo          | 1110036O03Rik | 1  |
| 3480 | 19092 | Pnpo          | MMT00045362   | 1  |
| 3480 | 23295 | Pnpo          | Snx11         | -1 |
| 3493 | 3493  | Wbp4          | Wbp4          | 1  |
| 3531 | 3531  | Tslp          | Tslp          | 1  |
| 3531 | 9745  | Tslp          | Gadd45g       | -1 |
| 3532 | 3159  | S100a5        | Pld1          | 1  |
| 3532 | 3206  | S100a5        | Gpr160        | 1  |
| 3532 | 4666  | S100a5        | Exosc9        | -1 |
| 3532 | 9360  | S100a5        | Taf1c         | -1 |
| 3532 | 9519  | S100a5        | Fstl5         | -1 |
| 3532 | 12367 | S100a5        | MMT00072365   | -1 |
| 3532 | 16416 | S100a5        | Commd2        | 1  |
| 3532 | 16618 | S100a5        | Hps3          | -1 |
| 3532 | 19700 | S100a5        | E030011K20Rik | 1  |
| 3559 | 18140 | 4933433P14Rik | Atg2b         | 1  |
| 3587 | 1006  | MMT00041940   | 2600011E07Rik | 1  |
| 3587 | 1214  | MMT00041940   | Trip13        | -1 |
| 3587 | 1281  | MMT00041940   | Alkbh3        | -1 |
| 3587 | 1351  | MMT00041940   | Whsc111       | 1  |
| 3587 | 2558  | MMT00041940   | Tmem132b      | 1  |
| 3587 | 4235  | MMT00041940   | Pfkfb3        | 1  |
| 3587 | 5247  | MMT00041940   | Irak2         | 1  |
| 3587 | 5385  | MMT00041940   | Tubb2b        | 1  |
| 3587 | 6769  | MMT00041940   | Banp          | 1  |
| 3587 | 11043 | MMT00041940   | Hsph1         | 1  |
| 3587 | 13571 | MMT00041940   | Samd8         | 1  |
| 3587 | 15476 | MMT00041940   | Fem1b         | -1 |
| 3587 | 15731 | MMT00041940   | Mfhas1        | 1  |
| 3587 | 18373 | MMT00041940   | Dnjb1         | 1  |
| 3587 | 18418 | MMT00041940   | Hspa1b        | 1  |
| 3587 | 18903 | MMT00041940   | Crem          | 1  |
| 3587 | 20559 | MMT00041940   | Nat13         | 1  |
| 3587 | 23419 | MMT00041940   | Tipin         | -1 |
| 3610 | 14342 | Rnf38         | 4930412F15Rik | 1  |
| 3622 | 9161  | Trim21        | Mrpl17        | 1  |
| 3622 | 19734 | Trim21        | Dchs1         | 1  |
| 3622 | 22693 | Trim21        | Trim68        | 1  |
| 3624 | 3624  | Pygb          | Pygb          | 1  |
| 3624 | 18555 | Pygb          | Sdcbp2        | -1 |
| 3624 | 19971 | Pygb          | B930046C15Rik | 1  |
| 3631 | 6038  | Vps37b        | Acot1         | 1  |
| 3649 | 4566  | Zfp395        | MMT00078134   | -1 |
| 3649 | 4918  | Zfp395        | Scara5        | -1 |
| 3649 | 16179 | Zfp395        | Gulo          | 1  |
| 3654 | 3411  | St13          | Rab12a        | -1 |
| 3654 | 3654  | St13          | St13          | 1  |
| 3654 | 6733  | St13          | Mfng          | 1  |
| 3654 | 6804  | St13          | Cyp2d22       | -1 |
| 3654 | 6974  | St13          | Tmem65        | -1 |
| 3654 | 7021  | St13          | Slc16a8       | 1  |
| 3654 | 7100  | St13          | Tomm22        | -1 |

|      |       |               |               |    |
|------|-------|---------------|---------------|----|
| 3654 | 9540  | St13          | Csnk1e        | -1 |
| 3654 | 10482 | St13          | Mcat          | -1 |
| 3654 | 11549 | St13          | Depdc6        | 1  |
| 3654 | 14145 | St13          | Sgsm3         | -1 |
| 3654 | 16153 | St13          | Syng1         | 1  |
| 3654 | 16467 | St13          | Card10        | -1 |
| 3654 | 16522 | St13          | Ccdc85a       | -1 |
| 3654 | 17831 | St13          | Ndufa6        | 1  |
| 3654 | 19955 | St13          | Cbx2          | 1  |
| 3654 | 21526 | St13          | Mkl1          | 1  |
| 3659 | 143   | EG236451      | Gvin1         | 1  |
| 3659 | 3683  | EG236451      | Oas2          | 1  |
| 3659 | 5853  | EG236451      | Trim30        | 1  |
| 3659 | 6824  | EG236451      | Irf7          | 1  |
| 3659 | 7105  | EG236451      | Plac8         | 1  |
| 3659 | 9616  | EG236451      | Al451557      | 1  |
| 3659 | 12398 | EG236451      | Ifi44         | 1  |
| 3659 | 13309 | EG236451      | Tgtp          | 1  |
| 3659 | 16949 | EG236451      | Iigp1         | 1  |
| 3676 | 9322  | Ucp2          | Relt          | -1 |
| 3676 | 21425 | Ucp2          | Rab6          | -1 |
| 3683 | 2224  | Oas2          | Oasl2         | 1  |
| 3683 | 3683  | Oas2          | Oas2          | 1  |
| 3683 | 6824  | Oas2          | Irf7          | 1  |
| 3683 | 9616  | Oas2          | Al451557      | 1  |
| 3683 | 12398 | Oas2          | Ifi44         | 1  |
| 3683 | 13309 | Oas2          | Tgtp          | 1  |
| 3683 | 21549 | Oas2          | Rtp4          | 1  |
| 3683 | 23450 | Oas2          | D12Ert647e    | 1  |
| 3685 | 2599  | Apoc1         | Lsm14a        | 1  |
| 3685 | 7761  | Apoc1         | Nudt19        | 1  |
| 3687 | 4084  | Bcl9          | Asah3l        | -1 |
| 3689 | 5345  | Adh1          | MMT00023326   | 1  |
| 3698 | 3698  | 1600014C10Rik | 1600014C10Rik | 1  |
| 3699 | 12834 | Dscr3         | Fabp7         | 1  |
| 3701 | 3701  | Zfp68         | Zfp68         | 1  |
| 3703 | 1918  | Ggcx          | Usp39         | 1  |
| 3703 | 2743  | Ggcx          | Tcf3          | 1  |
| 3703 | 2815  | Ggcx          | Eif2ak3       | 1  |
| 3703 | 3703  | Ggcx          | Ggcx          | 1  |
| 3703 | 4038  | Ggcx          | 1200009O22Rik | -1 |
| 3703 | 5296  | Ggcx          | Rnf181        | 1  |
| 3703 | 7273  | Ggcx          | Rnf103        | 1  |
| 3703 | 8016  | Ggcx          | Mrpl35        | -1 |
| 3703 | 8055  | Ggcx          | Ptcd3         | 1  |
| 3703 | 8889  | Ggcx          | Dnahc6        | -1 |
| 3703 | 9355  | Ggcx          | Reep1         | 1  |
| 3703 | 11338 | Ggcx          | Vamp8         | 1  |
| 3703 | 14584 | Ggcx          | Vps24         | -1 |
| 3703 | 15384 | Ggcx          | Mat2a         | 1  |
| 3703 | 15625 | Ggcx          | Capg          | 1  |
| 3703 | 16255 | Ggcx          | Reg3b         | -1 |
| 3703 | 18948 | Ggcx          | Olf1270       | -1 |
| 3706 | 1281  | 2410002O22Rik | Alkbh3        | -1 |
| 3706 | 18373 | 2410002O22Rik | Dnajb1        | 1  |
| 3706 | 18418 | 2410002O22Rik | Hspa1b        | 1  |
| 3713 | 10054 | Acot6         | Fsip1         | 1  |
| 3721 | 15870 | Me2           | Aqp5          | 1  |
| 3727 | 3727  | Erdr1         | Erdr1         | 1  |



|      |       |             |               |    |
|------|-------|-------------|---------------|----|
| 3728 | 3728  | Sfxn4       | Sfxn4         | 1  |
| 3728 | 6320  | Sfxn4       | 1810055E12Rik | 1  |
| 3744 | 1041  | Rmnd1       | 3110049J23Rik | 1  |
| 3744 | 1135  | Rmnd1       | Akap12        | -1 |
| 3744 | 2571  | Rmnd1       | Rmnd1         | 1  |
| 3744 | 3545  | Rmnd1       | Mtrf1l        | -1 |
| 3744 | 3744  | Rmnd1       | Rmnd1         | 1  |
| 3744 | 6363  | Rmnd1       | 9130014G24Rik | -1 |
| 3744 | 8786  | Rmnd1       | Rmnd1         | 1  |
| 3744 | 11162 | Rmnd1       | Hkdc1         | -1 |
| 3744 | 19115 | Rmnd1       | Rab32         | 1  |
| 3744 | 20134 | Rmnd1       | Ppp1r14c      | -1 |
| 3744 | 22598 | Rmnd1       | 4930402H24Rik | -1 |
| 3753 | 230   | Setdb1      | MMT00000744   | 1  |
| 3753 | 1014  | Setdb1      | Rtcd1         | -1 |
| 3753 | 1466  | Setdb1      | Ubap2l        | -1 |
| 3753 | 1867  | Setdb1      | Bcas2         | -1 |
| 3753 | 2632  | Setdb1      | Aph1a         | 1  |
| 3753 | 2752  | Setdb1      | Fcgr1         | -1 |
| 3753 | 3159  | Setdb1      | Pld1          | -1 |
| 3753 | 3206  | Setdb1      | Gpr160        | -1 |
| 3753 | 3314  | Setdb1      | Wars2         | -1 |
| 3753 | 6470  | Setdb1      | Arnt          | 1  |
| 3753 | 6708  | Setdb1      | Serpini2      | 1  |
| 3753 | 8679  | Setdb1      | Tiparp        | -1 |
| 3753 | 9408  | Setdb1      | Hmgcs2        | 1  |
| 3753 | 9519  | Setdb1      | Fstl5         | 1  |
| 3753 | 10521 | Setdb1      | Ttf2          | -1 |
| 3753 | 11121 | Setdb1      | Mtmr11        | 1  |
| 3753 | 12367 | Setdb1      | MMT00072365   | 1  |
| 3753 | 12716 | Setdb1      | 5830417I10Rik | 1  |
| 3753 | 12863 | Setdb1      | Fgg           | 1  |
| 3753 | 13527 | Setdb1      | Ctss          | 1  |
| 3753 | 15299 | Setdb1      | Mrps21        | 1  |
| 3753 | 15550 | Setdb1      | 2010200O16Rik | 1  |
| 3753 | 15901 | Setdb1      | Tpm3          | 1  |
| 3753 | 16170 | Setdb1      | S100a11       | -1 |
| 3753 | 16283 | Setdb1      | EG627427      | 1  |
| 3753 | 16416 | Setdb1      | Comm2         | -1 |
| 3753 | 17837 | Setdb1      | Polr3gl       | 1  |
| 3753 | 18376 | Setdb1      | Pex11b        | 1  |
| 3753 | 19700 | Setdb1      | E030011K20Rik | -1 |
| 3753 | 20661 | Setdb1      | Tuft1         | 1  |
| 3753 | 20810 | Setdb1      | Mttp          | 1  |
| 3753 | 20890 | Setdb1      | Psm4          | 1  |
| 3753 | 21650 | Setdb1      | Ap4b1         | -1 |
| 3753 | 21780 | Setdb1      | Ankrd35       | 1  |
| 3753 | 22570 | Setdb1      | Phf1          | -1 |
| 3753 | 23037 | Setdb1      | Thbs3         | -1 |
| 3796 | 15870 | D19Bwg1357e | Aqp5          | 1  |
| 3799 | 1297  | Serpinh1    | Phox2a        | 1  |
| 3811 | 15870 | MMT00052318 | Aqp5          | -1 |
| 3812 | 3812  | Zfyve26     | Zfyve26       | 1  |
| 3812 | 6828  | Zfyve26     | Pigh          | -1 |
| 3825 | 2708  | Uaca        | Sgk1          | -1 |
| 3847 | 23636 | Tdrd7       | Bst2          | 1  |
| 3849 | 1427  | MMT00047578 | Ahrr          | -1 |
| 3849 | 18373 | MMT00047578 | Dnajb1        | 1  |
| 3850 | 15353 | Dach1       | Ednrb         | 1  |

|      |       |               |               |    |
|------|-------|---------------|---------------|----|
| 3885 | 5252  | Apol7c        | Mfsd3         | -1 |
| 3885 | 15485 | Apol7c        | Zfp251        | 1  |
| 3885 | 22627 | Apol7c        | Adck5         | 1  |
| 3888 | 15870 | Ran           | Aqp5          | 1  |
| 3905 | 812   | H2-Q1         | En2           | -1 |
| 3905 | 2801  | H2-Q1         | H2-BI         | -1 |
| 3905 | 2938  | H2-Q1         | H2-T23        | -1 |
| 3905 | 6406  | H2-Q1         | Sh3rf2        | 1  |
| 3905 | 7088  | H2-Q1         | Slc37a1       | -1 |
| 3905 | 7603  | H2-Q1         | Sod2          | -1 |
| 3905 | 8750  | H2-Q1         | 1700010114Rik | -1 |
| 3905 | 8767  | H2-Q1         | Rgl2          | -1 |
| 3905 | 10374 | H2-Q1         | Trim15        | -1 |
| 3905 | 10667 | H2-Q1         | H2-Eb1        | -1 |
| 3905 | 10931 | H2-Q1         | Pkn3          | 1  |
| 3905 | 11475 | H2-Q1         | H2-D1         | 1  |
| 3905 | 12168 | H2-Q1         | H2-Ke6        | -1 |
| 3905 | 12694 | H2-Q1         | Riok2         | 1  |
| 3905 | 12943 | H2-Q1         | Slc25a27      | -1 |
| 3905 | 13493 | H2-Q1         | Ring1         | -1 |
| 3905 | 15580 | H2-Q1         | MMT00077001   | -1 |
| 3905 | 16692 | H2-Q1         | Bat4          | -1 |
| 3905 | 17412 | H2-Q1         | Aif1          | 1  |
| 3905 | 20238 | H2-Q1         | H2-T9         | -1 |
| 3921 | 737   | 2300002D11Rik | MMT00023716   | 1  |
| 3921 | 2902  | 2300002D11Rik | D4Ert196e     | 1  |
| 3921 | 5064  | 2300002D11Rik | Tekt2         | -1 |
| 3921 | 6191  | 2300002D11Rik | Ddost         | -1 |
| 3921 | 8610  | 2300002D11Rik | Padi4         | -1 |
| 3921 | 8677  | 2300002D11Rik | Zbtb8os       | -1 |
| 3921 | 10407 | 2300002D11Rik | Gpatch3       | 1  |
| 3921 | 12140 | 2300002D11Rik | Mrps15        | -1 |
| 3921 | 16287 | 2300002D11Rik | Extl1         | 1  |
| 3921 | 19924 | 2300002D11Rik | Ubiad1        | 1  |
| 3938 | 13656 | Abt1          | Ly86          | -1 |
| 3938 | 15698 | Abt1          | Them2         | -1 |
| 3938 | 17528 | Abt1          | Gmn           | -1 |
| 3973 | 2215  | Dmtf1         | Zfp71-rs1     | 1  |
| 3973 | 5032  | Dmtf1         | Gm872         | 1  |
| 3973 | 8467  | Dmtf1         | Scfd1         | 1  |
| 3973 | 9424  | Dmtf1         | Cltc          | 1  |
| 3973 | 10785 | Dmtf1         | Ctdspl2       | 1  |
| 4010 | 6330  | Alkbh2        | Dgkq          | 1  |
| 4010 | 8807  | Alkbh2        | Ankrd56       | -1 |
| 4010 | 10978 | Alkbh2        | MMT00078322   | 1  |
| 4010 | 16066 | Alkbh2        | Coq2          | 1  |
| 4010 | 17716 | Alkbh2        | Rnf10         | -1 |
| 4032 | 2938  | MMT00008594   | H2-T23        | 1  |
| 4032 | 7088  | MMT00008594   | Slc37a1       | 1  |
| 4032 | 10667 | MMT00008594   | H2-Eb1        | 1  |
| 4032 | 10931 | MMT00008594   | Pkn3          | -1 |
| 4032 | 12694 | MMT00008594   | Riok2         | -1 |
| 4032 | 16692 | MMT00008594   | Bat4          | 1  |
| 4032 | 20238 | MMT00008594   | H2-T9         | 1  |
| 4032 | 21415 | MMT00008594   | Has1          | 1  |
| 4038 | 4038  | 1200009O22Rik | 1200009O22Rik | 1  |
| 4048 | 4443  | BC002230      | Zfp790        | -1 |
| 4048 | 15476 | BC002230      | Fem1b         | 1  |
| 4048 | 18726 | BC002230      | D630004A14Rik | -1 |

|      |       |               |               |    |
|------|-------|---------------|---------------|----|
| 4048 | 19389 | BC002230      | Iqcb1         | -1 |
| 4070 | 4070  | Chst10        | Chst10        | 1  |
| 4072 | 15870 | Adcy2         | Aqp5          | 1  |
| 4072 | 17981 | Adcy2         | MMT00036029   | 1  |
| 4079 | 15743 | Emilin3       | Hoxc6         | 1  |
| 4084 | 2708  | Asah3l        | Sgk1          | 1  |
| 4084 | 2794  | Asah3l        | Map3k6        | 1  |
| 4084 | 4084  | Asah3l        | Asah3l        | 1  |
| 4084 | 5345  | Asah3l        | MMT00023326   | 1  |
| 4084 | 8171  | Asah3l        | Spink8        | 1  |
| 4084 | 11345 | Asah3l        | Slc40a1       | -1 |
| 4084 | 12761 | Asah3l        | Tsc22d3       | 1  |
| 4084 | 12989 | Asah3l        | 1190002H23Rik | 1  |
| 4084 | 14233 | Asah3l        | Fgfr1         | -1 |
| 4084 | 16494 | Asah3l        | 2310007D09Rik | 1  |
| 4084 | 18553 | Asah3l        | Tekt4         | 1  |
| 4084 | 19004 | Asah3l        | Pdk4          | 1  |
| 4084 | 21313 | Asah3l        | Rhou          | 1  |
| 4084 | 21380 | Asah3l        | Ier5          | -1 |
| 4084 | 21643 | Asah3l        | Agtr1a        | 1  |
| 4114 | 4426  | Parp12        | ligp2         | 1  |
| 4114 | 6824  | Parp12        | Irf7          | 1  |
| 4114 | 9847  | Parp12        | Ifi27         | 1  |
| 4114 | 12398 | Parp12        | Ifi44         | 1  |
| 4114 | 13309 | Parp12        | Tgtp          | 1  |
| 4114 | 19189 | Parp12        | Sp100         | 1  |
| 4114 | 21549 | Parp12        | Rtp4          | 1  |
| 4114 | 23450 | Parp12        | D12Ert647e    | 1  |
| 4116 | 9449  | Ifi205        | Sft2d2        | -1 |
| 4116 | 11406 | Ifi205        | Ifi203        | 1  |
| 4116 | 11445 | Ifi205        | Atp1a2        | -1 |
| 4124 | 2881  | 1110037F02Rik | Hlf           | 1  |
| 4124 | 6376  | 1110037F02Rik | Nle1          | 1  |
| 4152 | 6038  | Lrrc33        | Acot1         | 1  |
| 4158 | 4932  | 4933400N17Rik | Cd70          | 1  |
| 4181 | 19971 | Gzf1          | B930046C15Rik | 1  |
| 4186 | 12761 | Car7          | Tsc22d3       | -1 |
| 4188 | 2794  | Sult1a1       | Map3k6        | 1  |
| 4188 | 5345  | Sult1a1       | MMT00023326   | 1  |
| 4188 | 12761 | Sult1a1       | Tsc22d3       | 1  |
| 4188 | 12834 | Sult1a1       | Fabp7         | -1 |
| 4188 | 16494 | Sult1a1       | 2310007D09Rik | 1  |
| 4188 | 21380 | Sult1a1       | Ier5          | -1 |
| 4188 | 21643 | Sult1a1       | Agtr1a        | 1  |
| 4189 | 13355 | Epb4.1l1      | Foxs1         | -1 |
| 4189 | 23005 | Epb4.1l1      | 4930405A21Rik | -1 |
| 4195 | 678   | Csrp2bp       | Ncaph         | -1 |
| 4195 | 1510  | Csrp2bp       | A530058N18Rik | 1  |
| 4195 | 4195  | Csrp2bp       | Csrp2bp       | 1  |
| 4195 | 4897  | Csrp2bp       | Ciao1         | 1  |
| 4195 | 5603  | Csrp2bp       | BC020535      | -1 |
| 4195 | 5737  | Csrp2bp       | Nkx2-2        | 1  |
| 4195 | 6188  | Csrp2bp       | Myh7b         | 1  |
| 4195 | 9361  | Csrp2bp       | Hand1         | 1  |
| 4195 | 9762  | Csrp2bp       | Snx5          | -1 |
| 4195 | 11705 | Csrp2bp       | Polr3f        | 1  |
| 4195 | 14403 | Csrp2bp       | S100g         | -1 |
| 4195 | 14740 | Csrp2bp       | Mfap1b        | 1  |
| 4195 | 17043 | Csrp2bp       | Tmem127       | -1 |

|      |       |         |               |    |
|------|-------|---------|---------------|----|
| 4195 | 18835 | Csrp2bp | Dtwd1         | -1 |
| 4199 | 10    | B3galt5 | NaN           | 1  |
| 4199 | 316   | B3galt5 | 4930471G03Rik | 1  |
| 4199 | 391   | B3galt5 | 4933416I08Rik | 1  |
| 4199 | 558   | B3galt5 | Crebl1        | 1  |
| 4199 | 1059  | B3galt5 | P2rx6         | 1  |
| 4199 | 1122  | B3galt5 | Pax3          | 1  |
| 4199 | 1696  | B3galt5 | V1re9         | 1  |
| 4199 | 1771  | B3galt5 | Park2         | 1  |
| 4199 | 1795  | B3galt5 | Rabgap1l      | 1  |
| 4199 | 1920  | B3galt5 | Oas1e         | 1  |
| 4199 | 2067  | B3galt5 | Myo1a         | 1  |
| 4199 | 2819  | B3galt5 | Kcnk5         | 1  |
| 4199 | 3208  | B3galt5 | 4930511I11Rik | 1  |
| 4199 | 3362  | B3galt5 | Fgf8          | 1  |
| 4199 | 3383  | B3galt5 | Cd99          | 1  |
| 4199 | 3511  | B3galt5 | Rnf182        | 1  |
| 4199 | 4079  | B3galt5 | Emilin3       | 1  |
| 4199 | 4199  | B3galt5 | B3galt5       | 1  |
| 4199 | 4246  | B3galt5 | Fbxw12        | 1  |
| 4199 | 4430  | B3galt5 | Ankrd36       | 1  |
| 4199 | 5505  | B3galt5 | Thap2         | 1  |
| 4199 | 5908  | B3galt5 | MMT00027552   | 1  |
| 4199 | 6403  | B3galt5 | MMT00039607   | 1  |
| 4199 | 7279  | B3galt5 | Cldn13        | 1  |
| 4199 | 7436  | B3galt5 | 1700063K16Rik | 1  |
| 4199 | 7916  | B3galt5 | MMT00016293   | 1  |
| 4199 | 7974  | B3galt5 | Arhgef7       | 1  |
| 4199 | 8157  | B3galt5 | MMT00005305   | 1  |
| 4199 | 8256  | B3galt5 | Tjap1         | 1  |
| 4199 | 8644  | B3galt5 | V1rg11        | 1  |
| 4199 | 9463  | B3galt5 | Zdhhc23       | 1  |
| 4199 | 9743  | B3galt5 | Gm189         | 1  |
| 4199 | 9946  | B3galt5 | Stam2         | 1  |
| 4199 | 10260 | B3galt5 | Zfp36l2       | 1  |
| 4199 | 10377 | B3galt5 | A430105I19Rik | 1  |
| 4199 | 10657 | B3galt5 | Rnf12         | 1  |
| 4199 | 10687 | B3galt5 | ltpkb         | 1  |
| 4199 | 11016 | B3galt5 | Pcp2          | 1  |
| 4199 | 11256 | B3galt5 | H2-DMa        | 1  |
| 4199 | 11303 | B3galt5 | Slc5a12       | 1  |
| 4199 | 11350 | B3galt5 | 9030420J04Rik | 1  |
| 4199 | 11425 | B3galt5 | Evx2          | 1  |
| 4199 | 11507 | B3galt5 | Adarb2        | 1  |
| 4199 | 11966 | B3galt5 | Zfp280b       | 1  |
| 4199 | 12248 | B3galt5 | Tnp2          | 1  |
| 4199 | 12272 | B3galt5 | Fshr          | 1  |
| 4199 | 12372 | B3galt5 | MMT00039397   | 1  |
| 4199 | 12430 | B3galt5 | Fst           | 1  |
| 4199 | 12568 | B3galt5 | Lrrc37a       | 1  |
| 4199 | 12753 | B3galt5 | MMT00043344   | 1  |
| 4199 | 12772 | B3galt5 | Axl           | 1  |
| 4199 | 12826 | B3galt5 | Zfp354c       | 1  |
| 4199 | 13487 | B3galt5 | A230051G13Rik | 1  |
| 4199 | 13742 | B3galt5 | 1700024P16Rik | 1  |
| 4199 | 14313 | B3galt5 | Tnk1          | 1  |
| 4199 | 14565 | B3galt5 | Rnf207        | 1  |
| 4199 | 14754 | B3galt5 | Atoh8         | 1  |
| 4199 | 15697 | B3galt5 | Tbc1d8b       | 1  |

|      |       |               |               |    |
|------|-------|---------------|---------------|----|
| 4199 | 15743 | B3galt5       | Hoxc6         | 1  |
| 4199 | 15885 | B3galt5       | Adamts7       | 1  |
| 4199 | 16664 | B3galt5       | Car4          | 1  |
| 4199 | 16672 | B3galt5       | Tmem82        | 1  |
| 4199 | 16718 | B3galt5       | Zbtb7c        | 1  |
| 4199 | 17417 | B3galt5       | Pxn           | 1  |
| 4199 | 17613 | B3galt5       | P2rx7         | 1  |
| 4199 | 17750 | B3galt5       | Hs6st2        | 1  |
| 4199 | 18620 | B3galt5       | Slmap         | 1  |
| 4199 | 19219 | B3galt5       | MMT00015104   | 1  |
| 4199 | 19265 | B3galt5       | EG546036      | 1  |
| 4199 | 19351 | B3galt5       | PrkcsH        | 1  |
| 4199 | 19436 | B3galt5       | Dapp1         | 1  |
| 4199 | 19483 | B3galt5       | Depdc2        | 1  |
| 4199 | 19645 | B3galt5       | Il12rb2       | 1  |
| 4199 | 20908 | B3galt5       | OlfR583       | 1  |
| 4199 | 20944 | B3galt5       | Tmem164       | 1  |
| 4199 | 21511 | B3galt5       | MMT00054100   | 1  |
| 4199 | 21866 | B3galt5       | Hhip1         | 1  |
| 4199 | 21923 | B3galt5       | OlfR585       | 1  |
| 4199 | 22125 | B3galt5       | Gab1          | 1  |
| 4199 | 22150 | B3galt5       | Fhdc1         | 1  |
| 4199 | 22271 | B3galt5       | Cyp2c29       | 1  |
| 4199 | 22434 | B3galt5       | OlfR1255      | 1  |
| 4199 | 22762 | B3galt5       | Slc6a4        | 1  |
| 4199 | 22802 | B3galt5       | Svs2          | 1  |
| 4199 | 22966 | B3galt5       | Epha4         | 1  |
| 4199 | 23546 | B3galt5       | Zzef1         | 1  |
| 4199 | 23591 | B3galt5       | Dlg4          | 1  |
| 4199 | 23651 | B3galt5       | MMT00027295   | 1  |
| 4298 | 5342  | St3gal1       | Eps8l3        | 1  |
| 4298 | 15870 | St3gal1       | Aqp5          | 1  |
| 4305 | 4305  | Tmem51        | Tmem51        | 1  |
| 4308 | 4106  | Nphp3         | MMT00041409   | 1  |
| 4308 | 4443  | Nphp3         | Zfp790        | -1 |
| 4308 | 9402  | Nphp3         | 1200016B10Rik | -1 |
| 4308 | 15476 | Nphp3         | Fem1b         | 1  |
| 4308 | 18726 | Nphp3         | D630004A14Rik | -1 |
| 4308 | 19389 | Nphp3         | Iqcb1         | -1 |
| 4336 | 5737  | Rbbp9         | Nkx2-2        | -1 |
| 4344 | 19032 | 1810073G14Rik | Tymp          | 1  |
| 4369 | 1297  | Acot4         | Phox2a        | -1 |
| 4384 | 1297  | Gamt          | Phox2a        | 1  |
| 4387 | 1515  | Frs3          | Med20         | 1  |
| 4387 | 2424  | Frs3          | Unc5cl        | -1 |
| 4387 | 7088  | Frs3          | Slc37a1       | -1 |
| 4387 | 16692 | Frs3          | Bat4          | -1 |
| 4400 | 15870 | 9030425E11Rik | Aqp5          | -1 |
| 4404 | 5252  | Commd5        | Mfsd3         | 1  |
| 4404 | 15485 | Commd5        | Zfp251        | -1 |
| 4404 | 22627 | Commd5        | Adck5         | -1 |
| 4411 | 897   | 2310039H08Rik | Mut           | 1  |
| 4411 | 1960  | 2310039H08Rik | Ubr2          | 1  |
| 4411 | 18772 | 2310039H08Rik | BC048355      | -1 |
| 4411 | 20100 | 2310039H08Rik | Guca1b        | 1  |
| 4413 | 6824  | MMT00030347   | Irf7          | 1  |
| 4413 | 12398 | MMT00030347   | Ifi44         | 1  |
| 4414 | 7388  | 5033406O09Rik | Amn           | -1 |
| 4414 | 8155  | 5033406O09Rik | Mark3         | 1  |

|      |       |               |               |    |
|------|-------|---------------|---------------|----|
| 4414 | 15277 | 5033406O09Rik | 2810002N01Rik | 1  |
| 4418 | 9906  | H2-Aa         | Ninj2         | 1  |
| 4426 | 143   | ligp2         | Gvin1         | 1  |
| 4426 | 2224  | ligp2         | Oasl2         | 1  |
| 4426 | 3683  | ligp2         | Oas2          | 1  |
| 4426 | 6824  | ligp2         | Irf7          | 1  |
| 4426 | 7105  | ligp2         | Plac8         | 1  |
| 4426 | 12398 | ligp2         | Irf44         | 1  |
| 4426 | 13309 | ligp2         | Tgtp          | 1  |
| 4426 | 16949 | ligp2         | ligp1         | 1  |
| 4426 | 19189 | ligp2         | Sp100         | 1  |
| 4426 | 21549 | ligp2         | Rtp4          | 1  |
| 4433 | 15870 | Snrpa1        | Aqp5          | 1  |
| 4454 | 2294  | BC055107      | AU040829      | 1  |
| 4454 | 2708  | BC055107      | Sgk1          | 1  |
| 4454 | 2794  | BC055107      | Map3k6        | 1  |
| 4454 | 4084  | BC055107      | Asah3l        | 1  |
| 4454 | 4152  | BC055107      | Lrrc33        | 1  |
| 4454 | 4454  | BC055107      | BC055107      | 1  |
| 4454 | 5345  | BC055107      | MMT00023326   | 1  |
| 4454 | 7990  | BC055107      | Nostrin       | 1  |
| 4454 | 8816  | BC055107      | Nfkbia        | 1  |
| 4454 | 8980  | BC055107      | Plekhf1       | 1  |
| 4454 | 11305 | BC055107      | Galntl2       | 1  |
| 4454 | 12761 | BC055107      | Tsc22d3       | 1  |
| 4454 | 12989 | BC055107      | 1190002H23Rik | 1  |
| 4454 | 16494 | BC055107      | 2310007D09Rik | 1  |
| 4454 | 17143 | BC055107      | 2010002N04Rik | 1  |
| 4454 | 18553 | BC055107      | Tekt4         | 1  |
| 4454 | 19004 | BC055107      | Pdk4          | 1  |
| 4454 | 21313 | BC055107      | Rhou          | 1  |
| 4454 | 21380 | BC055107      | Ier5          | -1 |
| 4466 | 22693 | MMT00014327   | Trim68        | -1 |
| 4474 | 6330  | EG627022      | Dgkq          | 1  |
| 4474 | 8807  | EG627022      | Ankrd56       | -1 |
| 4474 | 16066 | EG627022      | Coq2          | 1  |
| 4484 | 1767  | MMT00014015   | BC016495      | 1  |
| 4493 | 6564  | Ptgir         | Cebpd         | -1 |
| 4493 | 8399  | Ptgir         | Herpud1       | -1 |
| 4493 | 8816  | Ptgir         | Nfkbia        | -1 |
| 4493 | 12732 | Ptgir         | Hsd17b1       | -1 |
| 4493 | 14626 | Ptgir         | Zbtb2         | -1 |
| 4493 | 15476 | Ptgir         | Fem1b         | 1  |
| 4493 | 15826 | Ptgir         | Arl4d         | -1 |
| 4493 | 17143 | Ptgir         | 2010002N04Rik | -1 |
| 4493 | 18726 | Ptgir         | D630004A14Rik | -1 |
| 4493 | 19389 | Ptgir         | Iqcb1         | -1 |
| 4493 | 21903 | Ptgir         | Nr1d1         | 1  |
| 4493 | 23094 | Ptgir         | Sap30         | -1 |
| 4508 | 143   | Ifit1         | Gvin1         | 1  |
| 4508 | 2224  | Ifit1         | Oasl2         | 1  |
| 4508 | 3683  | Ifit1         | Oas2          | 1  |
| 4508 | 4426  | Ifit1         | ligp2         | 1  |
| 4508 | 5853  | Ifit1         | Trim30        | 1  |
| 4508 | 6824  | Ifit1         | Irf7          | 1  |
| 4508 | 9847  | Ifit1         | Irf27         | 1  |
| 4508 | 12398 | Ifit1         | Irf44         | 1  |
| 4508 | 13309 | Ifit1         | Tgtp          | 1  |
| 4508 | 16949 | Ifit1         | ligp1         | 1  |

|      |       |               |               |    |
|------|-------|---------------|---------------|----|
| 4508 | 19189 | Ifit1         | Sp100         | 1  |
| 4508 | 21549 | Ifit1         | Rtp4          | 1  |
| 4508 | 23450 | Ifit1         | D12Ert647e    | 1  |
| 4516 | 12398 | Rsad2         | Ifi44         | 1  |
| 4526 | 2938  | Satb1         | H2-T23        | 1  |
| 4526 | 7088  | Satb1         | Slc37a1       | 1  |
| 4526 | 10931 | Satb1         | Pkn3          | -1 |
| 4526 | 20238 | Satb1         | H2-T9         | 1  |
| 4526 | 21295 | Satb1         | Snf1lk        | -1 |
| 4532 | 3363  | BC034090      | MMT00033159   | -1 |
| 4532 | 4532  | BC034090      | BC034090      | 1  |
| 4532 | 15702 | BC034090      | MMT00047561   | 1  |
| 4549 | 10606 | 9930012K11Rik | Apbb1ip       | 1  |
| 4549 | 11382 | 9930012K11Rik | Cdca3         | 1  |
| 4549 | 12761 | 9930012K11Rik | Tsc22d3       | -1 |
| 4551 | 1297  | Cyp2e1        | Phox2a        | -1 |
| 4612 | 8787  | Hspa5         | Sdf2l1        | 1  |
| 4612 | 18418 | Hspa5         | Hspa1b        | 1  |
| 4617 | 16066 | Agpat9        | Coq2          | -1 |
| 4626 | 1890  | 2310046K01Rik | Nanp          | -1 |
| 4626 | 4626  | 2310046K01Rik | 2310046K01Rik | 1  |
| 4626 | 6202  | 2310046K01Rik | Hrk           | -1 |
| 4626 | 9361  | 2310046K01Rik | Hand1         | 1  |
| 4626 | 13581 | 2310046K01Rik | Srxn1         | 1  |
| 4626 | 18555 | 2310046K01Rik | Sdcbp2        | -1 |
| 4626 | 19826 | 2310046K01Rik | Nanp          | -1 |
| 4628 | 14734 | MMT00040865   | Nrsn2         | -1 |
| 4628 | 18555 | MMT00040865   | Sdcbp2        | 1  |
| 4638 | 1603  | Alkbh4        | Lrwd1         | -1 |
| 4638 | 13424 | Alkbh4        | MMT00039710   | 1  |
| 4650 | 1297  | RP23-438H3.2  | Phox2a        | 1  |
| 4655 | 283   | 1810029B16Rik | Gmcl1l        | 1  |
| 4655 | 403   | 1810029B16Rik | Leprotl1      | 1  |
| 4655 | 1604  | 1810029B16Rik | Ssbp4         | -1 |
| 4655 | 1755  | 1810029B16Rik | Ocel1         | -1 |
| 4655 | 3609  | 1810029B16Rik | Plvap         | -1 |
| 4655 | 5433  | 1810029B16Rik | 2410004L22Rik | 1  |
| 4655 | 5925  | 1810029B16Rik | Tmem59l       | 1  |
| 4655 | 9304  | 1810029B16Rik | Al449175      | -1 |
| 4655 | 9569  | 1810029B16Rik | Dda1          | 1  |
| 4655 | 13732 | 1810029B16Rik | Tpm4          | 1  |
| 4655 | 16617 | 1810029B16Rik | Sh2d4a        | 1  |
| 4655 | 17703 | 1810029B16Rik | Large         | 1  |
| 4655 | 21433 | 1810029B16Rik | Ubx6          | -1 |
| 4655 | 21840 | 1810029B16Rik | Tmie          | -1 |
| 4657 | 4576  | C230096C10Rik | Chchd7        | -1 |
| 4669 | 20265 | H2-M10.5      | Rsph1         | 1  |
| 4694 | 143   | MMT00046622   | Gvin1         | 1  |
| 4695 | 812   | D330027H18Rik | En2           | -1 |
| 4695 | 1515  | D330027H18Rik | Med20         | 1  |
| 4695 | 1960  | D330027H18Rik | Ubr2          | 1  |
| 4695 | 2424  | D330027H18Rik | Unc5cl        | -1 |
| 4695 | 2801  | D330027H18Rik | H2-BI         | -1 |
| 4695 | 2938  | D330027H18Rik | H2-T23        | -1 |
| 4695 | 4555  | D330027H18Rik | Cchcr1        | -1 |
| 4695 | 4584  | D330027H18Rik | MMT00022168   | -1 |
| 4695 | 5232  | D330027H18Rik | Arhgef16      | -1 |
| 4695 | 6406  | D330027H18Rik | Sh3rf2        | 1  |
| 4695 | 7088  | D330027H18Rik | Slc37a1       | -1 |

|      |       |               |               |    |
|------|-------|---------------|---------------|----|
| 4695 | 7603  | D330027H18Rik | Sod2          | -1 |
| 4695 | 8750  | D330027H18Rik | 1700010114Rik | -1 |
| 4695 | 8767  | D330027H18Rik | Rgl2          | -1 |
| 4695 | 10374 | D330027H18Rik | Trim15        | -1 |
| 4695 | 10667 | D330027H18Rik | H2-Eb1        | -1 |
| 4695 | 10931 | D330027H18Rik | Pkn3          | 1  |
| 4695 | 11475 | D330027H18Rik | H2-D1         | 1  |
| 4695 | 12168 | D330027H18Rik | H2-Ke6        | -1 |
| 4695 | 12694 | D330027H18Rik | Riok2         | 1  |
| 4695 | 12943 | D330027H18Rik | Slc25a27      | -1 |
| 4695 | 13117 | D330027H18Rik | Tmprss5       | -1 |
| 4695 | 13493 | D330027H18Rik | Ring1         | -1 |
| 4695 | 15153 | D330027H18Rik | Foxm1         | 1  |
| 4695 | 15580 | D330027H18Rik | MMT00077001   | -1 |
| 4695 | 16692 | D330027H18Rik | Bat4          | -1 |
| 4695 | 17322 | D330027H18Rik | Zfp758        | 1  |
| 4695 | 17412 | D330027H18Rik | Aif1          | 1  |
| 4695 | 17707 | D330027H18Rik | Rshl2b        | -1 |
| 4695 | 18577 | D330027H18Rik | Btbd9         | 1  |
| 4695 | 20100 | D330027H18Rik | Guca1b        | 1  |
| 4695 | 20238 | D330027H18Rik | H2-T9         | -1 |
| 4695 | 21295 | D330027H18Rik | Snf1lk        | 1  |
| 4695 | 21415 | D330027H18Rik | Has1          | -1 |
| 4708 | 4084  | Traf3ip2      | Asah3l        | -1 |
| 4708 | 12761 | Traf3ip2      | Tsc22d3       | -1 |
| 4723 | 6330  | Art3          | Dgkq          | 1  |
| 4723 | 8807  | Art3          | Ankrd56       | -1 |
| 4729 | 2599  | Slc7a10       | Lsm14a        | -1 |
| 4729 | 4729  | Slc7a10       | Slc7a10       | 1  |
| 4729 | 7761  | Slc7a10       | Nudt19        | -1 |
| 4729 | 8394  | Slc7a10       | Dpy19l3       | -1 |
| 4729 | 12623 | Slc7a10       | Ccdc123       | -1 |
| 4729 | 17632 | Slc7a10       | Lypd3         | 1  |
| 4729 | 19142 | Slc7a10       | Gpatch1       | -1 |
| 4729 | 19306 | Slc7a10       | AI428936      | -1 |
| 4729 | 19462 | Slc7a10       | 4933439C20Rik | 1  |
| 4729 | 20606 | Slc7a10       | MMT00042166   | 1  |
| 4776 | 15870 | Dclk1         | Aqp5          | 1  |
| 4778 | 4778  | Cyct          | Cyct          | 1  |
| 4802 | 17981 | 5430433G21Rik | MMT00036029   | 1  |
| 4805 | 15713 | Hspb1         | Rbm3          | -1 |
| 4832 | 4899  | Nxn12         | Nr4a2         | 1  |
| 4832 | 5342  | Nxn12         | Eps8l3        | 1  |
| 4832 | 15870 | Nxn12         | Aqp5          | 1  |
| 4832 | 17981 | Nxn12         | MMT00036029   | 1  |
| 4832 | 22982 | Nxn12         | Mug2          | 1  |
| 4849 | 5342  | Zxdc          | Eps8l3        | 1  |
| 4849 | 15870 | Zxdc          | Aqp5          | 1  |
| 4864 | 15870 | S100a16       | Aqp5          | 1  |
| 4868 | 5345  | Mertk         | MMT00023326   | 1  |
| 4868 | 12761 | Mertk         | Tsc22d3       | 1  |
| 4868 | 12989 | Mertk         | 1190002H23Rik | 1  |
| 4868 | 14233 | Mertk         | Fgfr1l        | -1 |
| 4868 | 18553 | Mertk         | Tekt4         | 1  |
| 4868 | 21380 | Mertk         | Ier5          | -1 |
| 4896 | 4896  | 4930405M20Rik | 4930405M20Rik | 1  |
| 4901 | 1297  | MMT00073557   | Phox2a        | 1  |
| 4901 | 4901  | MMT00073557   | MMT00073557   | 1  |
| 4901 | 5639  | MMT00073557   | Gdpd3         | -1 |



|      |       |               |               |    |
|------|-------|---------------|---------------|----|
| 4901 | 12730 | MMT00073557   | 9130019O22Rik | -1 |
| 4901 | 18442 | MMT00073557   | Zfp764        | -1 |
| 4906 | 2708  | A830059I20Rik | Sgk1          | -1 |
| 4918 | 15870 | Scara5        | Aqp5          | -1 |
| 4918 | 17981 | Scara5        | MMT00036029   | -1 |
| 4938 | 4139  | Mccc2         | Sh2d5         | 1  |
| 4938 | 4938  | Mccc2         | Mccc2         | 1  |
| 4959 | 15870 | Optn          | Aqp5          | -1 |
| 5003 | 8677  | 2410081M15Rik | Zbtb8os       | -1 |
| 5014 | 1960  | MMT00017503   | Ubr2          | 1  |
| 5014 | 2644  | MMT00017503   | Srrm2         | -1 |
| 5014 | 2945  | MMT00017503   | MMT00005190   | 1  |
| 5014 | 5014  | MMT00017503   | MMT00017503   | 1  |
| 5014 | 6437  | MMT00017503   | Gnptg         | -1 |
| 5014 | 7286  | MMT00017503   | Noxo1         | -1 |
| 5014 | 8341  | MMT00017503   | MMT00017270   | 1  |
| 5014 | 10729 | MMT00017503   | Fgd2          | -1 |
| 5014 | 11291 | MMT00017503   | 1110018H23Rik | -1 |
| 5014 | 13075 | MMT00017503   | Mrps2         | 1  |
| 5014 | 14132 | MMT00017503   | Glo1          | -1 |
| 5014 | 19011 | MMT00017503   | Rpl3l         | -1 |
| 5014 | 19064 | MMT00017503   | MMT00004867   | -1 |
| 5014 | 20100 | MMT00017503   | Guca1b        | 1  |
| 5014 | 21246 | MMT00017503   | Telo2         | -1 |
| 5021 | 1466  | Gdap2         | Ubap2l        | -1 |
| 5021 | 2752  | Gdap2         | Fcgr1         | -1 |
| 5021 | 3314  | Gdap2         | Wars2         | -1 |
| 5021 | 6283  | Gdap2         | Ptpn22        | 1  |
| 5021 | 6708  | Gdap2         | Serpini2      | 1  |
| 5021 | 9519  | Gdap2         | Fstl5         | 1  |
| 5021 | 10521 | Gdap2         | Ttf2          | -1 |
| 5021 | 12367 | Gdap2         | MMT00072365   | 1  |
| 5021 | 12716 | Gdap2         | 5830417I10Rik | 1  |
| 5021 | 15299 | Gdap2         | Mrps21        | 1  |
| 5021 | 21650 | Gdap2         | Ap4b1         | -1 |
| 5021 | 22570 | Gdap2         | Phtf1         | -1 |
| 5027 | 2708  | Pde4b         | Sgk1          | -1 |
| 5027 | 12989 | Pde4b         | 1190002H23Rik | -1 |
| 5044 | 6824  | Ifi35         | Irf7          | 1  |
| 5044 | 12398 | Ifi35         | Ifi44         | 1  |
| 5044 | 13309 | Ifi35         | Tgtp          | 1  |
| 5044 | 21549 | Ifi35         | Rtp4          | 1  |
| 5068 | 2294  | Afap1l2       | AU040829      | -1 |
| 5068 | 2794  | Afap1l2       | Map3k6        | -1 |
| 5068 | 4084  | Afap1l2       | Asah3l        | -1 |
| 5068 | 5345  | Afap1l2       | MMT00023326   | -1 |
| 5068 | 6038  | Afap1l2       | Acot1         | 1  |
| 5068 | 8980  | Afap1l2       | Plekhf1       | -1 |
| 5068 | 12761 | Afap1l2       | Tsc22d3       | -1 |
| 5068 | 16494 | Afap1l2       | 2310007D09Rik | -1 |
| 5068 | 21313 | Afap1l2       | Rhou          | -1 |
| 5068 | 21643 | Afap1l2       | Agtr1a        | -1 |
| 5098 | 153   | 1700029J11Rik | 2010011I20Rik | -1 |
| 5113 | 2294  | Nxn1          | AU040829      | 1  |
| 5113 | 5345  | Nxn1          | MMT00023326   | 1  |
| 5113 | 12761 | Nxn1          | Tsc22d3       | 1  |
| 5113 | 13732 | Nxn1          | Tpm4          | 1  |
| 5123 | 5123  | Zfp191        | Zfp191        | 1  |
| 5135 | 5135  | Pisd          | Pisd          | 1  |

|      |       |                    |                |    |
|------|-------|--------------------|----------------|----|
| 5153 | 4666  | MMT00072251        | Exosc9         | -1 |
| 5156 | 5342  | Srm                | Eps8l3         | 1  |
| 5156 | 15870 | Srm                | Aqp5           | 1  |
| 5158 | 21444 | Rtn4               | Pnpt1          | -1 |
| 5208 | 5342  | Plod2              | Eps8l3         | 1  |
| 5208 | 15870 | Plod2              | Aqp5           | 1  |
| 5208 | 17981 | Plod2              | MMT00036029    | 1  |
| 5208 | 22982 | Plod2              | Mug2           | 1  |
| 5218 | 7088  | ENSMUSG00000046088 | Slc37a1        | -1 |
| 5218 | 17322 | ENSMUSG00000046088 | Zfp758         | 1  |
| 5227 | 15870 | 2310008M10Rik      | Aqp5           | 1  |
| 5227 | 20237 | 2310008M10Rik      | RP23-433P19.11 | -1 |
| 5230 | 19462 | MMT00077995        | 4933439C20Rik  | 1  |
| 5233 | 1297  | Pcbd1              | Phox2a         | 1  |
| 5250 | 143   | Ifit2              | Gvin1          | 1  |
| 5250 | 6824  | Ifit2              | Irf7           | 1  |
| 5250 | 9847  | Ifit2              | Ifi27          | 1  |
| 5250 | 12398 | Ifit2              | Ifi44          | 1  |
| 5250 | 12969 | Ifit2              | Xaf1           | 1  |
| 5250 | 19189 | Ifit2              | Sp100          | 1  |
| 5250 | 23450 | Ifit2              | D12Ert647e     | 1  |
| 5252 | 15485 | Mfsd3              | Zfp251         | -1 |
| 5258 | 5258  | Mcts2              | Mcts2          | 1  |
| 5258 | 5603  | Mcts2              | BC020535       | -1 |
| 5258 | 6188  | Mcts2              | Myh7b          | 1  |
| 5272 | 15870 | Grk4               | Aqp5           | -1 |
| 5284 | 5284  | Npffr1             | Npffr1         | 1  |
| 5284 | 23014 | Npffr1             | MMT00077643    | 1  |
| 5295 | 1297  | F2r                | Phox2a         | 1  |
| 5332 | 6234  | Pdlim4             | P4ha2          | -1 |
| 5336 | 6133  | Timeless           | Agrp           | -1 |
| 5336 | 15870 | Timeless           | Aqp5           | 1  |
| 5339 | 5339  | 4930488E11Rik      | 4930488E11Rik  | 1  |
| 5339 | 13590 | 4930488E11Rik      | Mcart6         | 1  |
| 5352 | 1040  | Pdcd2l             | Dnhd1          | -1 |
| 5352 | 2118  | Pdcd2l             | Kptn           | 1  |
| 5352 | 2599  | Pdcd2l             | Lsm14a         | 1  |
| 5352 | 3040  | Pdcd2l             | Bcl3           | -1 |
| 5352 | 4729  | Pdcd2l             | Slc7a10        | -1 |
| 5352 | 6513  | Pdcd2l             | Qpctl          | 1  |
| 5352 | 7761  | Pdcd2l             | Nudt19         | 1  |
| 5352 | 7803  | Pdcd2l             | Ttyh1          | 1  |
| 5352 | 8394  | Pdcd2l             | Dpy19l3        | 1  |
| 5352 | 9122  | Pdcd2l             | Sepw1          | 1  |
| 5352 | 9413  | Pdcd2l             | 1190020J12Rik  | -1 |
| 5352 | 9454  | Pdcd2l             | 2810426N06Rik  | 1  |
| 5352 | 11800 | Pdcd2l             | Clip3          | -1 |
| 5352 | 14842 | Pdcd2l             | Gipr           | 1  |
| 5352 | 15670 | Pdcd2l             | Pnmal1         | -1 |
| 5352 | 15722 | Pdcd2l             | Ccdc9          | -1 |
| 5352 | 17314 | Pdcd2l             | Napa           | -1 |
| 5352 | 17632 | Pdcd2l             | Lypd3          | -1 |
| 5352 | 19142 | Pdcd2l             | Gpatch1        | 1  |
| 5352 | 19306 | Pdcd2l             | AI428936       | 1  |
| 5352 | 19462 | Pdcd2l             | 4933439C20Rik  | -1 |
| 5352 | 20490 | Pdcd2l             | Tmem143        | -1 |
| 5352 | 20606 | Pdcd2l             | MMT00042166    | -1 |
| 5357 | 9449  | MMT00021917        | Sft2d2         | 1  |
| 5357 | 11406 | MMT00021917        | Ifi203         | -1 |

|      |       |               |               |    |
|------|-------|---------------|---------------|----|
| 5357 | 11445 | MMT00021917   | Atp1a2        | 1  |
| 5357 | 11571 | MMT00021917   | Bpnt1         | -1 |
| 5357 | 13149 | MMT00021917   | Ifi203        | -1 |
| 5357 | 16163 | MMT00021917   | Tmco1         | -1 |
| 5357 | 19332 | MMT00021917   | Bpnt1         | -1 |
| 5362 | 1230  | Nans          | MMT00057236   | 1  |
| 5364 | 6133  | Kif22         | Agrp          | -1 |
| 5425 | 5345  | Ung           | MMT00023326   | 1  |
| 5433 | 1755  | 2410004L22Rik | Ocel1         | -1 |
| 5456 | 403   | Rabgap1l      | Leprotl1      | 1  |
| 5465 | 5465  | Slamf8        | Slamf8        | 1  |
| 5482 | 812   | Cdsn          | En2           | 1  |
| 5482 | 1515  | Cdsn          | Med20         | -1 |
| 5482 | 1960  | Cdsn          | Ubr2          | -1 |
| 5482 | 2424  | Cdsn          | Unc5cl        | 1  |
| 5482 | 2801  | Cdsn          | H2-BI         | 1  |
| 5482 | 2938  | Cdsn          | H2-T23        | 1  |
| 5482 | 4555  | Cdsn          | Cchcr1        | 1  |
| 5482 | 4584  | Cdsn          | MMT00022168   | 1  |
| 5482 | 5232  | Cdsn          | Arhgef16      | 1  |
| 5482 | 6070  | Cdsn          | D630003M21Rik | 1  |
| 5482 | 6406  | Cdsn          | Sh3rf2        | -1 |
| 5482 | 7088  | Cdsn          | Slc37a1       | 1  |
| 5482 | 7603  | Cdsn          | Sod2          | 1  |
| 5482 | 7965  | Cdsn          | Enpp5         | 1  |
| 5482 | 8750  | Cdsn          | 1700010114Rik | 1  |
| 5482 | 8767  | Cdsn          | Rgl2          | 1  |
| 5482 | 10374 | Cdsn          | Trim15        | 1  |
| 5482 | 10667 | Cdsn          | H2-Eb1        | 1  |
| 5482 | 10931 | Cdsn          | Pkn3          | -1 |
| 5482 | 11475 | Cdsn          | H2-D1         | -1 |
| 5482 | 12168 | Cdsn          | H2-Ke6        | 1  |
| 5482 | 12694 | Cdsn          | Riok2         | -1 |
| 5482 | 12943 | Cdsn          | Slc25a27      | 1  |
| 5482 | 13493 | Cdsn          | Ring1         | 1  |
| 5482 | 13682 | Cdsn          | BC051142      | 1  |
| 5482 | 14322 | Cdsn          | Bat1a         | -1 |
| 5482 | 15153 | Cdsn          | Foxm1         | -1 |
| 5482 | 15580 | Cdsn          | MMT00077001   | 1  |
| 5482 | 16067 | Cdsn          | Pcaf          | -1 |
| 5482 | 16692 | Cdsn          | Bat4          | 1  |
| 5482 | 17322 | Cdsn          | Zfp758        | -1 |
| 5482 | 17412 | Cdsn          | Aif1          | -1 |
| 5482 | 17646 | Cdsn          | C4b           | 1  |
| 5482 | 17707 | Cdsn          | Rshl2b        | 1  |
| 5482 | 18577 | Cdsn          | Btbd9         | -1 |
| 5482 | 20100 | Cdsn          | Guca1b        | -1 |
| 5482 | 20238 | Cdsn          | H2-T9         | 1  |
| 5482 | 20511 | Cdsn          | Decr2         | 1  |
| 5482 | 21295 | Cdsn          | Snf1lk        | -1 |
| 5482 | 21415 | Cdsn          | Has1          | 1  |
| 5482 | 23371 | Cdsn          | Cfb           | -1 |
| 5488 | 5488  | C920009B18Rik | C920009B18Rik | 1  |
| 5488 | 6372  | C920009B18Rik | 1110021L09Rik | -1 |
| 5488 | 12070 | C920009B18Rik | Adat2         | -1 |
| 5508 | 1466  | Lrig2         | Ubap2l        | -1 |
| 5508 | 2752  | Lrig2         | Fcgr1         | -1 |
| 5508 | 3314  | Lrig2         | Wars2         | -1 |
| 5508 | 6283  | Lrig2         | Ptpn22        | 1  |

|      |       |               |               |    |
|------|-------|---------------|---------------|----|
| 5508 | 6708  | Lrig2         | Serpini2      | 1  |
| 5508 | 9519  | Lrig2         | Fstl5         | 1  |
| 5508 | 10521 | Lrig2         | Ttf2          | -1 |
| 5508 | 12367 | Lrig2         | MMT00072365   | 1  |
| 5508 | 12716 | Lrig2         | 5830417110Rik | 1  |
| 5508 | 21650 | Lrig2         | Ap4b1         | -1 |
| 5508 | 22570 | Lrig2         | Phtf1         | -1 |
| 5511 | 649   | BC055004      | Pop7          | 1  |
| 5511 | 2705  | BC055004      | Hrbl          | -1 |
| 5511 | 3701  | BC055004      | Zfp68         | -1 |
| 5511 | 6330  | BC055004      | Dgkq          | -1 |
| 5511 | 7945  | BC055004      | Gpc2          | -1 |
| 5511 | 8992  | BC055004      | Trfr2         | 1  |
| 5511 | 9077  | BC055004      | Cnpy4         | -1 |
| 5511 | 10995 | BC055004      | Ap4m1         | 1  |
| 5511 | 12157 | BC055004      | Gal3st4       | -1 |
| 5511 | 12907 | BC055004      | Zkscan1       | 1  |
| 5511 | 13780 | BC055004      | Pilra         | 1  |
| 5511 | 14631 | BC055004      | Stag3         | -1 |
| 5511 | 15587 | BC055004      | Actl6b        | -1 |
| 5511 | 16451 | BC055004      | 2010007H12Rik | 1  |
| 5511 | 18195 | BC055004      | Mafk          | -1 |
| 5511 | 19502 | BC055004      | Fbxo24        | 1  |
| 5522 | 5522  | Pink1         | Pink1         | 1  |
| 5522 | 6191  | Pink1         | Ddost         | -1 |
| 5522 | 10366 | Pink1         | 4931403E03Rik | 1  |
| 5522 | 16083 | Pink1         | Pla2g2c       | 1  |
| 5539 | 2351  | Eif2s2        | 1110008F13Rik | -1 |
| 5539 | 20837 | Eif2s2        | Dlgap4        | 1  |
| 5539 | 23005 | Eif2s2        | 4930405A21Rik | -1 |
| 5587 | 15870 | Rmnd5b        | Aqp5          | 1  |
| 5597 | 7975  | Till4         | Lancl1        | 1  |
| 5597 | 11621 | Till4         | Mixl1         | 1  |
| 5603 | 5603  | BC020535      | BC020535      | 1  |
| 5603 | 13355 | BC020535      | Foxs1         | 1  |
| 5603 | 23005 | BC020535      | 4930405A21Rik | 1  |
| 5611 | 5611  | Rapgef3       | Rapgef3       | 1  |
| 5632 | 3312  | Reck          | 6430704M03Rik | 1  |
| 5632 | 10327 | Reck          | Hint2         | 1  |
| 5632 | 14342 | Reck          | 4930412F15Rik | 1  |
| 5632 | 18514 | Reck          | 4930412F15Rik | -1 |
| 5639 | 5639  | Gdpd3         | Gdpd3         | 1  |
| 5644 | 5322  | Spsb2         | Slpi          | 1  |
| 5644 | 7751  | Spsb2         | Sgk2          | 1  |
| 5644 | 14860 | Spsb2         | MMT00051231   | 1  |
| 5677 | 14557 | Cmas          | Pyroxd1       | -1 |
| 5681 | 2023  | Mbd1          | MMT00072215   | 1  |
| 5681 | 5681  | Mbd1          | Mbd1          | 1  |
| 5681 | 12109 | Mbd1          | Smad4         | -1 |
| 5681 | 12984 | Mbd1          | Cyb5          | 1  |
| 5681 | 22930 | Mbd1          | Mro           | -1 |
| 5681 | 22961 | Mbd1          | MMT00055950   | 1  |
| 5686 | 12761 | Cys1          | Tsc22d3       | 1  |
| 5686 | 12834 | Cys1          | Fabp7         | -1 |
| 5692 | 5692  | 2010005H15Rik | 2010005H15Rik | 1  |
| 5692 | 17179 | 2010005H15Rik | Stfa3         | 1  |
| 5692 | 17373 | 2010005H15Rik | EG433016      | 1  |
| 5694 | 10    | Sp7           | NaN           | 1  |
| 5694 | 115   | Sp7           | NaN           | 1  |

|      |      |     |               |   |
|------|------|-----|---------------|---|
| 5694 | 141  | Sp7 | Jag1          | 1 |
| 5694 | 225  | Sp7 | MMT00073704   | 1 |
| 5694 | 236  | Sp7 | Bbs9          | 1 |
| 5694 | 316  | Sp7 | 4930471G03Rik | 1 |
| 5694 | 391  | Sp7 | 4933416I08Rik | 1 |
| 5694 | 484  | Sp7 | Atp4a         | 1 |
| 5694 | 558  | Sp7 | Crebl1        | 1 |
| 5694 | 663  | Sp7 | Muc19         | 1 |
| 5694 | 1021 | Sp7 | Rhpn2         | 1 |
| 5694 | 1059 | Sp7 | P2rx6         | 1 |
| 5694 | 1122 | Sp7 | Pax3          | 1 |
| 5694 | 1137 | Sp7 | Mlxip         | 1 |
| 5694 | 1436 | Sp7 | Nfu1          | 1 |
| 5694 | 1570 | Sp7 | Olf522        | 1 |
| 5694 | 1619 | Sp7 | Fbxw17        | 1 |
| 5694 | 1696 | Sp7 | V1re9         | 1 |
| 5694 | 1771 | Sp7 | Park2         | 1 |
| 5694 | 1795 | Sp7 | Rabgap1l      | 1 |
| 5694 | 1829 | Sp7 | MMT00030026   | 1 |
| 5694 | 1876 | Sp7 | Amdhd1        | 1 |
| 5694 | 1907 | Sp7 | D230010M03Rik | 1 |
| 5694 | 1920 | Sp7 | Oas1e         | 1 |
| 5694 | 2067 | Sp7 | Myo1a         | 1 |
| 5694 | 2226 | Sp7 | Amt           | 1 |
| 5694 | 2283 | Sp7 | MMT00029554   | 1 |
| 5694 | 2819 | Sp7 | Kcnk5         | 1 |
| 5694 | 3080 | Sp7 | MMT00014480   | 1 |
| 5694 | 3127 | Sp7 | Plcd1         | 1 |
| 5694 | 3144 | Sp7 | Ube2j2        | 1 |
| 5694 | 3166 | Sp7 | Vmn2r57       | 1 |
| 5694 | 3208 | Sp7 | 4930511I11Rik | 1 |
| 5694 | 3383 | Sp7 | Cd99          | 1 |
| 5694 | 3511 | Sp7 | Rnf182        | 1 |
| 5694 | 3841 | Sp7 | MMT00014519   | 1 |
| 5694 | 3948 | Sp7 | V1rb4         | 1 |
| 5694 | 3986 | Sp7 | Ep400         | 1 |
| 5694 | 4079 | Sp7 | Emilin3       | 1 |
| 5694 | 4088 | Sp7 | Pdcl2         | 1 |
| 5694 | 4166 | Sp7 | Cblc          | 1 |
| 5694 | 4199 | Sp7 | B3galt5       | 1 |
| 5694 | 4246 | Sp7 | Fbxw12        | 1 |
| 5694 | 4337 | Sp7 | Myst3         | 1 |
| 5694 | 4407 | Sp7 | 4930429B21Rik | 1 |
| 5694 | 4425 | Sp7 | Olf1346       | 1 |
| 5694 | 4430 | Sp7 | Ankrd36       | 1 |
| 5694 | 4870 | Sp7 | Olf550        | 1 |
| 5694 | 5494 | Sp7 | Gpr101        | 1 |
| 5694 | 5505 | Sp7 | Thap2         | 1 |
| 5694 | 5694 | Sp7 | Sp7           | 1 |
| 5694 | 5783 | Sp7 | 4833413O15Rik | 1 |
| 5694 | 5908 | Sp7 | MMT00027552   | 1 |
| 5694 | 6367 | Sp7 | Lhfp          | 1 |
| 5694 | 6403 | Sp7 | MMT00039607   | 1 |
| 5694 | 6422 | Sp7 | Grk5          | 1 |
| 5694 | 6719 | Sp7 | Cacng8        | 1 |
| 5694 | 6880 | Sp7 | Dmrtb1        | 1 |
| 5694 | 7041 | Sp7 | Sp140         | 1 |
| 5694 | 7094 | Sp7 | Cyp2c54       | 1 |
| 5694 | 7279 | Sp7 | Cldn13        | 1 |

|      |       |     |               |   |
|------|-------|-----|---------------|---|
| 5694 | 7436  | Sp7 | 1700063K16Rik | 1 |
| 5694 | 7721  | Sp7 | MMT00000356   | 1 |
| 5694 | 7916  | Sp7 | MMT00016293   | 1 |
| 5694 | 7974  | Sp7 | Arhgef7       | 1 |
| 5694 | 8157  | Sp7 | MMT00005305   | 1 |
| 5694 | 8256  | Sp7 | Tjap1         | 1 |
| 5694 | 8620  | Sp7 | MMT00048670   | 1 |
| 5694 | 8644  | Sp7 | V1rg11        | 1 |
| 5694 | 8709  | Sp7 | Trim58        | 1 |
| 5694 | 8905  | Sp7 | Trim67        | 1 |
| 5694 | 8952  | Sp7 | Marco         | 1 |
| 5694 | 9340  | Sp7 | Cdc42ep2      | 1 |
| 5694 | 9436  | Sp7 | Ctnnap2       | 1 |
| 5694 | 9463  | Sp7 | Zdhhc23       | 1 |
| 5694 | 9743  | Sp7 | Gm189         | 1 |
| 5694 | 9946  | Sp7 | Stam2         | 1 |
| 5694 | 9954  | Sp7 | MMT00047280   | 1 |
| 5694 | 10195 | Sp7 | Klf1          | 1 |
| 5694 | 10260 | Sp7 | Zfp36l2       | 1 |
| 5694 | 10377 | Sp7 | A430105I19Rik | 1 |
| 5694 | 10452 | Sp7 | Grn           | 1 |
| 5694 | 10520 | Sp7 | Xkr6          | 1 |
| 5694 | 10576 | Sp7 | Xrcc3         | 1 |
| 5694 | 10657 | Sp7 | Rnf12         | 1 |
| 5694 | 10687 | Sp7 | ltpkb         | 1 |
| 5694 | 10806 | Sp7 | Rnf212        | 1 |
| 5694 | 10886 | Sp7 | Fndc3b        | 1 |
| 5694 | 11001 | Sp7 | Pou6f2        | 1 |
| 5694 | 11016 | Sp7 | Pcp2          | 1 |
| 5694 | 11256 | Sp7 | H2-DMa        | 1 |
| 5694 | 11303 | Sp7 | Slc5a12       | 1 |
| 5694 | 11350 | Sp7 | 9030420J04Rik | 1 |
| 5694 | 11425 | Sp7 | Evx2          | 1 |
| 5694 | 11507 | Sp7 | Adarb2        | 1 |
| 5694 | 11677 | Sp7 | 5730507C01Rik | 1 |
| 5694 | 11805 | Sp7 | Bat2          | 1 |
| 5694 | 11809 | Sp7 | 4930534B04Rik | 1 |
| 5694 | 11837 | Sp7 | Paqr6         | 1 |
| 5694 | 11966 | Sp7 | Zfp280b       | 1 |
| 5694 | 12046 | Sp7 | Impdh1        | 1 |
| 5694 | 12248 | Sp7 | Tnp2          | 1 |
| 5694 | 12272 | Sp7 | Fshr          | 1 |
| 5694 | 12372 | Sp7 | MMT00039397   | 1 |
| 5694 | 12430 | Sp7 | Fst           | 1 |
| 5694 | 12457 | Sp7 | MMT00072579   | 1 |
| 5694 | 12568 | Sp7 | Lrrc37a       | 1 |
| 5694 | 12651 | Sp7 | Tsc22d4       | 1 |
| 5694 | 12696 | Sp7 | RP23-392P11.3 | 1 |
| 5694 | 12753 | Sp7 | MMT00043344   | 1 |
| 5694 | 12772 | Sp7 | Axl           | 1 |
| 5694 | 12826 | Sp7 | Zfp354c       | 1 |
| 5694 | 13102 | Sp7 | Prkaa1        | 1 |
| 5694 | 13311 | Sp7 | Prl3c1        | 1 |
| 5694 | 13487 | Sp7 | A230051G13Rik | 1 |
| 5694 | 13676 | Sp7 | MMT00010979   | 1 |
| 5694 | 13742 | Sp7 | 1700024P16Rik | 1 |
| 5694 | 13890 | Sp7 | Olfr1263      | 1 |
| 5694 | 14149 | Sp7 | BC048562      | 1 |
| 5694 | 14313 | Sp7 | Tnk1          | 1 |

|      |       |     |               |   |
|------|-------|-----|---------------|---|
| 5694 | 14519 | Sp7 | Trex1         | 1 |
| 5694 | 14565 | Sp7 | Rnf207        | 1 |
| 5694 | 14754 | Sp7 | Atoh8         | 1 |
| 5694 | 15424 | Sp7 | Atp6v1g2      | 1 |
| 5694 | 15446 | Sp7 | Cd320         | 1 |
| 5694 | 15626 | Sp7 | MMT00035685   | 1 |
| 5694 | 15697 | Sp7 | Tbc1d8b       | 1 |
| 5694 | 15743 | Sp7 | Hoxc6         | 1 |
| 5694 | 15747 | Sp7 | Sfrs1         | 1 |
| 5694 | 15885 | Sp7 | Adamts7       | 1 |
| 5694 | 16104 | Sp7 | Ugt3a2        | 1 |
| 5694 | 16197 | Sp7 | MMT00065977   | 1 |
| 5694 | 16390 | Sp7 | Plb1          | 1 |
| 5694 | 16491 | Sp7 | 6330500D04Rik | 1 |
| 5694 | 16664 | Sp7 | Car4          | 1 |
| 5694 | 16672 | Sp7 | Tmem82        | 1 |
| 5694 | 16718 | Sp7 | Zbtb7c        | 1 |
| 5694 | 16794 | Sp7 | Chrn1         | 1 |
| 5694 | 17122 | Sp7 | MMT00068814   | 1 |
| 5694 | 17171 | Sp7 | MMT00045847   | 1 |
| 5694 | 17337 | Sp7 | 1810065E05Rik | 1 |
| 5694 | 17417 | Sp7 | Pxn           | 1 |
| 5694 | 17422 | Sp7 | Dctd          | 1 |
| 5694 | 17613 | Sp7 | P2rx7         | 1 |
| 5694 | 17750 | Sp7 | Hs6st2        | 1 |
| 5694 | 17960 | Sp7 | Yod1          | 1 |
| 5694 | 18162 | Sp7 | BC049352      | 1 |
| 5694 | 18214 | Sp7 | Ankrd40       | 1 |
| 5694 | 18409 | Sp7 | Nicn1         | 1 |
| 5694 | 18525 | Sp7 | Mpped1        | 1 |
| 5694 | 18620 | Sp7 | Slmap         | 1 |
| 5694 | 18651 | Sp7 | Tulp2         | 1 |
| 5694 | 18699 | Sp7 | 2700089E24Rik | 1 |
| 5694 | 18790 | Sp7 | Car3          | 1 |
| 5694 | 18980 | Sp7 | Ii7           | 1 |
| 5694 | 19219 | Sp7 | MMT00015104   | 1 |
| 5694 | 19265 | Sp7 | EG546036      | 1 |
| 5694 | 19267 | Sp7 | Olf341        | 1 |
| 5694 | 19351 | Sp7 | Prkcsb        | 1 |
| 5694 | 19436 | Sp7 | Dapp1         | 1 |
| 5694 | 19483 | Sp7 | Depdc2        | 1 |
| 5694 | 19645 | Sp7 | Ii12rb2       | 1 |
| 5694 | 19672 | Sp7 | Cldn19        | 1 |
| 5694 | 19941 | Sp7 | 1700080E11Rik | 1 |
| 5694 | 20089 | Sp7 | MMT00015975   | 1 |
| 5694 | 20158 | Sp7 | Slc38a1       | 1 |
| 5694 | 20255 | Sp7 | Elfn2         | 1 |
| 5694 | 20319 | Sp7 | Syne2         | 1 |
| 5694 | 20419 | Sp7 | Adra1b        | 1 |
| 5694 | 20506 | Sp7 | 1700011F03Rik | 1 |
| 5694 | 20566 | Sp7 | Tnni2         | 1 |
| 5694 | 20588 | Sp7 | Brd2          | 1 |
| 5694 | 20735 | Sp7 | Tnrc6b        | 1 |
| 5694 | 20908 | Sp7 | Olf3583       | 1 |
| 5694 | 20925 | Sp7 | 2810410L24Rik | 1 |
| 5694 | 20944 | Sp7 | Tmem164       | 1 |
| 5694 | 21209 | Sp7 | Ebf4          | 1 |
| 5694 | 21511 | Sp7 | MMT00054100   | 1 |
| 5694 | 21595 | Sp7 | Trpv1         | 1 |

|      |       |          |               |    |
|------|-------|----------|---------------|----|
| 5694 | 21717 | Sp7      | EG628893      | 1  |
| 5694 | 21866 | Sp7      | Hhip1         | 1  |
| 5694 | 21923 | Sp7      | Olf585        | 1  |
| 5694 | 21931 | Sp7      | Nrxn3         | 1  |
| 5694 | 22125 | Sp7      | Gab1          | 1  |
| 5694 | 22150 | Sp7      | Fhdc1         | 1  |
| 5694 | 22271 | Sp7      | Cyp2c29       | 1  |
| 5694 | 22434 | Sp7      | Olf1255       | 1  |
| 5694 | 22555 | Sp7      | Ela2          | 1  |
| 5694 | 22559 | Sp7      | MMT00031309   | 1  |
| 5694 | 22733 | Sp7      | Alpk3         | 1  |
| 5694 | 22750 | Sp7      | Mupcdh        | 1  |
| 5694 | 22762 | Sp7      | Slc6a4        | 1  |
| 5694 | 22802 | Sp7      | Svs2          | 1  |
| 5694 | 22966 | Sp7      | Epha4         | 1  |
| 5694 | 23056 | Sp7      | Ccdc135       | 1  |
| 5694 | 23119 | Sp7      | Cps1          | 1  |
| 5694 | 23454 | Sp7      | Znhit1        | 1  |
| 5694 | 23528 | Sp7      | 0610038L08Rik | 1  |
| 5694 | 23531 | Sp7      | Foxb2         | 1  |
| 5694 | 23546 | Sp7      | Zzef1         | 1  |
| 5694 | 23561 | Sp7      | Sox14         | 1  |
| 5694 | 23591 | Sp7      | Dlg4          | 1  |
| 5694 | 23614 | Sp7      | G630016D24Rik | 1  |
| 5694 | 23651 | Sp7      | MMT00027295   | 1  |
| 5734 | 15870 | EG619653 | Aqp5          | 1  |
| 5752 | 3159  | Dffa     | Pld1          | -1 |
| 5752 | 3206  | Dffa     | Gpr160        | -1 |
| 5752 | 4666  | Dffa     | Exosc9        | 1  |
| 5752 | 12367 | Dffa     | MMT00072365   | 1  |
| 5752 | 16416 | Dffa     | Commd2        | -1 |
| 5752 | 16618 | Dffa     | Hps3          | 1  |
| 5752 | 19700 | Dffa     | E030011K20Rik | -1 |
| 5758 | 8980  | Tpst1    | Plekhf1       | -1 |
| 5758 | 12761 | Tpst1    | Tsc22d3       | -1 |
| 5758 | 16494 | Tpst1    | 2310007D09Rik | -1 |
| 5762 | 2012  | Trpc3    | Cetn4         | 1  |
| 5762 | 3159  | Trpc3    | Pld1          | -1 |
| 5762 | 3206  | Trpc3    | Gpr160        | -1 |
| 5762 | 4666  | Trpc3    | Exosc9        | 1  |
| 5762 | 5762  | Trpc3    | Trpc3         | 1  |
| 5762 | 12367 | Trpc3    | MMT00072365   | 1  |
| 5762 | 15870 | Trpc3    | Aqp5          | 1  |
| 5762 | 16416 | Trpc3    | Commd2        | -1 |
| 5762 | 16618 | Trpc3    | Hps3          | 1  |
| 5762 | 19700 | Trpc3    | E030011K20Rik | -1 |
| 5776 | 15870 | Rpa1     | Aqp5          | 1  |
| 5786 | 1960  | Lta      | Ubr2          | 1  |
| 5786 | 2424  | Lta      | Unc5cl        | -1 |
| 5786 | 2801  | Lta      | H2-BI         | -1 |
| 5786 | 2938  | Lta      | H2-T23        | -1 |
| 5786 | 4555  | Lta      | Cchcr1        | -1 |
| 5786 | 7088  | Lta      | Slc37a1       | -1 |
| 5786 | 8750  | Lta      | 1700010I14Rik | -1 |
| 5786 | 8767  | Lta      | Rgl2          | -1 |
| 5786 | 10374 | Lta      | Trim15        | -1 |
| 5786 | 10667 | Lta      | H2-Eb1        | -1 |
| 5786 | 10931 | Lta      | Pkn3          | 1  |
| 5786 | 12168 | Lta      | H2-Ke6        | -1 |



|      |       |               |               |    |
|------|-------|---------------|---------------|----|
| 5786 | 12943 | Lta           | Slc25a27      | -1 |
| 5786 | 13493 | Lta           | Ring1         | -1 |
| 5786 | 15580 | Lta           | MMT00077001   | -1 |
| 5786 | 16692 | Lta           | Bat4          | -1 |
| 5786 | 17322 | Lta           | Zfp758        | 1  |
| 5786 | 17412 | Lta           | Aif1          | 1  |
| 5786 | 17707 | Lta           | Rshl2b        | -1 |
| 5786 | 20100 | Lta           | Guca1b        | 1  |
| 5786 | 20238 | Lta           | H2-T9         | -1 |
| 5786 | 21295 | Lta           | Snf1lk        | 1  |
| 5786 | 21415 | Lta           | Has1          | -1 |
| 5786 | 22104 | Lta           | Rnf123        | -1 |
| 5786 | 23371 | Lta           | Cfb           | 1  |
| 5806 | 6133  | Prrx2         | Agrp          | -1 |
| 5833 | 8902  | Kcnk7         | Aldh3b1       | -1 |
| 5833 | 19744 | Kcnk7         | Acy3          | 1  |
| 5840 | 5840  | Tbc1d9b       | Tbc1d9b       | 1  |
| 5845 | 12398 | Il18bp        | Ifi44         | 1  |
| 5853 | 143   | Trim30        | Gvin1         | 1  |
| 5853 | 5853  | Trim30        | Trim30        | 1  |
| 5853 | 8547  | Trim30        | Gbp4          | 1  |
| 5853 | 12398 | Trim30        | Ifi44         | 1  |
| 5853 | 13309 | Trim30        | Tgtp          | 1  |
| 5858 | 11166 | Itch          | Uqcc          | 1  |
| 5858 | 20055 | Itch          | Ghrh          | -1 |
| 5875 | 6234  | Cd86          | P4ha2         | -1 |
| 5884 | 1014  | Gstm2         | Rtcd1         | -1 |
| 5884 | 1466  | Gstm2         | Ubap2l        | -1 |
| 5884 | 2752  | Gstm2         | Fcgr1         | -1 |
| 5884 | 3314  | Gstm2         | Wars2         | -1 |
| 5884 | 5021  | Gstm2         | Gdap2         | 1  |
| 5884 | 5508  | Gstm2         | Lrig2         | 1  |
| 5884 | 6283  | Gstm2         | Ptpn22        | 1  |
| 5884 | 6708  | Gstm2         | Serpini2      | 1  |
| 5884 | 9408  | Gstm2         | Hmgcs2        | 1  |
| 5884 | 9519  | Gstm2         | Fstl5         | 1  |
| 5884 | 10521 | Gstm2         | Ttf2          | -1 |
| 5884 | 12367 | Gstm2         | MMT00072365   | 1  |
| 5884 | 12716 | Gstm2         | 5830417110Rik | 1  |
| 5884 | 15299 | Gstm2         | Mrps21        | 1  |
| 5884 | 15550 | Gstm2         | 2010200O16Rik | 1  |
| 5884 | 15901 | Gstm2         | Tpm3          | 1  |
| 5884 | 16416 | Gstm2         | Commd2        | -1 |
| 5884 | 17837 | Gstm2         | Polr3gl       | 1  |
| 5884 | 20810 | Gstm2         | Mttp          | 1  |
| 5884 | 21650 | Gstm2         | Ap4b1         | -1 |
| 5884 | 22570 | Gstm2         | Phf1          | -1 |
| 5889 | 2708  | Errfi1        | Sgk1          | 1  |
| 5889 | 4443  | Errfi1        | Zfp790        | 1  |
| 5889 | 6564  | Errfi1        | Cebpd         | 1  |
| 5889 | 8816  | Errfi1        | Nfkbia        | 1  |
| 5889 | 9745  | Errfi1        | Gadd45g       | 1  |
| 5889 | 14486 | Errfi1        | Sox7          | -1 |
| 5889 | 14860 | Errfi1        | MMT00051231   | -1 |
| 5889 | 15826 | Errfi1        | Arl4d         | 1  |
| 5900 | 2533  | Igsf21        | Arhgef19      | 1  |
| 5900 | 14397 | Igsf21        | Padi2         | -1 |
| 5919 | 2880  | B930041F14Rik | Cd93          | 1  |
| 5919 | 21387 | B930041F14Rik | Cnot7         | 1  |

|      |       |               |               |    |
|------|-------|---------------|---------------|----|
| 5923 | 14443 | Vav1          | C3            | -1 |
| 5934 | 2253  | S100a10       | Lysmd1        | 1  |
| 5934 | 2752  | S100a10       | Fcgr1         | -1 |
| 5934 | 3314  | S100a10       | Wars2         | -1 |
| 5934 | 17669 | S100a10       | 2310007A19Rik | -1 |
| 5934 | 22570 | S100a10       | Phf1          | -1 |
| 5934 | 23037 | S100a10       | Thbs3         | -1 |
| 5949 | 12398 | Zbp1          | Ifi44         | 1  |
| 5965 | 1041  | Pbld          | 3110049J23Rik | -1 |
| 5965 | 2571  | Pbld          | Rmnd1         | -1 |
| 5965 | 3195  | Pbld          | Mypn          | 1  |
| 5965 | 8786  | Pbld          | Rmnd1         | -1 |
| 5965 | 11162 | Pbld          | Hkdc1         | 1  |
| 5965 | 15971 | Pbld          | Aifm2         | 1  |
| 5965 | 19115 | Pbld          | Rab32         | -1 |
| 5965 | 19392 | Pbld          | Slc25a16      | -1 |
| 5965 | 20136 | Pbld          | Col13a1       | 1  |
| 5965 | 20705 | Pbld          | Supv3l1       | -1 |
| 5965 | 22333 | Pbld          | Hnrnp3        | 1  |
| 5968 | 19064 | MMT00012419   | MMT00004867   | -1 |
| 5974 | 2049  | Arntl         | Gsta3         | -1 |
| 5974 | 2294  | Arntl         | AU040829      | -1 |
| 5974 | 2794  | Arntl         | Map3k6        | -1 |
| 5974 | 2880  | Arntl         | Cd93          | 1  |
| 5974 | 5345  | Arntl         | MMT00023326   | -1 |
| 5974 | 5974  | Arntl         | Arntl         | 1  |
| 5974 | 6038  | Arntl         | Acot1         | 1  |
| 5974 | 8495  | Arntl         | Lox           | 1  |
| 5974 | 8980  | Arntl         | Plekhf1       | -1 |
| 5974 | 12157 | Arntl         | Gal3st4       | 1  |
| 5974 | 12649 | Arntl         | Itgad         | -1 |
| 5974 | 12761 | Arntl         | Tsc22d3       | -1 |
| 5974 | 12834 | Arntl         | Fabp7         | 1  |
| 5974 | 16494 | Arntl         | 2310007D09Rik | -1 |
| 5974 | 18036 | Arntl         | Tmem100       | 1  |
| 5974 | 18179 | Arntl         | Dbp           | -1 |
| 5974 | 18553 | Arntl         | Tekt4         | -1 |
| 5974 | 19621 | Arntl         | Cldn5         | 1  |
| 5974 | 20571 | Arntl         | Tmem45a       | 1  |
| 5974 | 21142 | Arntl         | Gm129         | -1 |
| 5974 | 21380 | Arntl         | Ier5          | 1  |
| 5974 | 21643 | Arntl         | Agtr1a        | -1 |
| 5974 | 21935 | Arntl         | Prok2         | 1  |
| 5974 | 22989 | Arntl         | Lmcd1         | 1  |
| 5989 | 2793  | 2310042D19Rik | MMT00005644   | 1  |
| 5989 | 5989  | 2310042D19Rik | 2310042D19Rik | 1  |
| 5989 | 12718 | 2310042D19Rik | Dhrsx         | 1  |
| 5989 | 17693 | 2310042D19Rik | MMT00044427   | 1  |
| 5989 | 19924 | 2310042D19Rik | Ubiad1        | -1 |
| 6011 | 15870 | Fbxl13        | Aqp5          | -1 |
| 6011 | 17981 | Fbxl13        | MMT00036029   | -1 |
| 6012 | 1297  | Chid1         | Phox2a        | 1  |
| 6016 | 1510  | A530057A03Rik | A530058N18Rik | -1 |
| 6016 | 6016  | A530057A03Rik | A530057A03Rik | 1  |
| 6019 | 2708  | Gdap10        | Sgk1          | 1  |
| 6019 | 4864  | Gdap10        | S100a16       | -1 |
| 6019 | 5345  | Gdap10        | MMT00023326   | 1  |
| 6019 | 6133  | Gdap10        | Agpr          | 1  |
| 6019 | 8816  | Gdap10        | Nfkbia        | 1  |

|      |       |             |               |    |
|------|-------|-------------|---------------|----|
| 6019 | 12761 | Gdap10      | Tsc22d3       | 1  |
| 6019 | 12834 | Gdap10      | Fabp7         | -1 |
| 6019 | 18553 | Gdap10      | Tekt4         | 1  |
| 6021 | 265   | MMT00008784 | Taf9          | 1  |
| 6021 | 684   | MMT00008784 | 1700102P08Rik | 1  |
| 6021 | 1006  | MMT00008784 | 2600011E07Rik | 1  |
| 6021 | 1214  | MMT00008784 | Trip13        | -1 |
| 6021 | 1281  | MMT00008784 | Alkbh3        | -1 |
| 6021 | 1351  | MMT00008784 | Whsc111       | 1  |
| 6021 | 2273  | MMT00008784 | Haghl         | -1 |
| 6021 | 2558  | MMT00008784 | Tmem132b      | 1  |
| 6021 | 4235  | MMT00008784 | Pfkfb3        | 1  |
| 6021 | 4612  | MMT00008784 | Hspa5         | 1  |
| 6021 | 5247  | MMT00008784 | Irak2         | 1  |
| 6021 | 5385  | MMT00008784 | Tubb2b        | 1  |
| 6021 | 5634  | MMT00008784 | Creb1         | 1  |
| 6021 | 6769  | MMT00008784 | Banp          | 1  |
| 6021 | 6828  | MMT00008784 | Pigh          | 1  |
| 6021 | 8399  | MMT00008784 | Herpud1       | 1  |
| 6021 | 8469  | MMT00008784 | Sfrs6         | 1  |
| 6021 | 8939  | MMT00008784 | MMT00024195   | 1  |
| 6021 | 9258  | MMT00008784 | P4ha1         | 1  |
| 6021 | 9513  | MMT00008784 | Tardbp        | 1  |
| 6021 | 9514  | MMT00008784 | Vps37a        | 1  |
| 6021 | 9899  | MMT00008784 | D13Wsu177e    | 1  |
| 6021 | 11043 | MMT00008784 | Hsph1         | 1  |
| 6021 | 11486 | MMT00008784 | Tacc3         | -1 |
| 6021 | 11756 | MMT00008784 | 2810011L19Rik | 1  |
| 6021 | 11867 | MMT00008784 | Rcor3         | 1  |
| 6021 | 12732 | MMT00008784 | Hsd17b1       | 1  |
| 6021 | 13571 | MMT00008784 | Samd8         | 1  |
| 6021 | 14134 | MMT00008784 | Phf10         | 1  |
| 6021 | 15015 | MMT00008784 | G3bp1         | 1  |
| 6021 | 15177 | MMT00008784 | Bmpr2         | 1  |
| 6021 | 15476 | MMT00008784 | Fem1b         | -1 |
| 6021 | 15731 | MMT00008784 | Mfhas1        | 1  |
| 6021 | 16098 | MMT00008784 | Rps20         | -1 |
| 6021 | 18373 | MMT00008784 | Dnajb1        | 1  |
| 6021 | 18418 | MMT00008784 | Hspa1b        | 1  |
| 6021 | 18726 | MMT00008784 | D630004A14Rik | 1  |
| 6021 | 18846 | MMT00008784 | lkbkg         | 1  |
| 6021 | 18903 | MMT00008784 | Crem          | 1  |
| 6021 | 20457 | MMT00008784 | Gtf2a2        | -1 |
| 6021 | 20535 | MMT00008784 | Rbm4          | 1  |
| 6021 | 20559 | MMT00008784 | Nat13         | 1  |
| 6021 | 21431 | MMT00008784 | Xbp1          | 1  |
| 6021 | 21903 | MMT00008784 | Nr1d1         | -1 |
| 6021 | 21981 | MMT00008784 | Ormdl2        | 1  |
| 6021 | 22141 | MMT00008784 | Rorb          | 1  |
| 6021 | 22673 | MMT00008784 | Prpf38b       | 1  |
| 6021 | 23318 | MMT00008784 | Cul2          | -1 |
| 6021 | 23419 | MMT00008784 | Tipin         | -1 |
| 6035 | 1297  | Nkd1        | Phox2a        | 1  |
| 6035 | 1755  | Nkd1        | Ocel1         | -1 |
| 6035 | 5433  | Nkd1        | 2410004L22Rik | 1  |
| 6035 | 5925  | Nkd1        | Tmem59l       | 1  |
| 6035 | 6035  | Nkd1        | Nkd1          | 1  |
| 6035 | 9729  | Nkd1        | Got1l1        | 1  |
| 6035 | 13732 | Nkd1        | Tpm4          | 1  |

|      |       |       |               |    |
|------|-------|-------|---------------|----|
| 6035 | 16849 | Nkd1  | Trmt1         | 1  |
| 6035 | 20721 | Nkd1  | 4432412L15Rik | 1  |
| 6036 | 2938  | Pram1 | H2-T23        | 1  |
| 6036 | 7088  | Pram1 | Slc37a1       | 1  |
| 6036 | 10667 | Pram1 | H2-Eb1        | 1  |
| 6036 | 16692 | Pram1 | Bat4          | 1  |
| 6036 | 17322 | Pram1 | Zfp758        | -1 |
| 6036 | 20238 | Pram1 | H2-T9         | 1  |
| 6041 | 15870 | Penk1 | Aqp5          | -1 |
| 6059 | 1325  | Dsn1  | Pigu          | -1 |
| 6059 | 2351  | Dsn1  | 1110008F13Rik | 1  |
| 6059 | 2915  | Dsn1  | Nfs1          | -1 |
| 6059 | 3214  | Dsn1  | Dnmt3b        | -1 |
| 6059 | 5603  | Dsn1  | BC020535      | 1  |
| 6059 | 5737  | Dsn1  | Nkx2-2        | -1 |
| 6059 | 6059  | Dsn1  | Dsn1          | 1  |
| 6059 | 6188  | Dsn1  | Myh7b         | -1 |
| 6059 | 6250  | Dsn1  | Csnk2a1       | -1 |
| 6059 | 11166 | Dsn1  | Uqcc          | 1  |
| 6059 | 11705 | Dsn1  | Polr3f        | -1 |
| 6059 | 12866 | Dsn1  | 4921517L17Rik | -1 |
| 6059 | 13355 | Dsn1  | Foxs1         | 1  |
| 6059 | 14399 | Dsn1  | Csnk2a1       | -1 |
| 6059 | 14649 | Dsn1  | 5430405G05Rik | -1 |
| 6059 | 14734 | Dsn1  | Nrsn2         | 1  |
| 6059 | 15760 | Dsn1  | Trib3         | -1 |
| 6059 | 20505 | Dsn1  | Ttll9         | 1  |
| 6059 | 20837 | Dsn1  | Dlgap4        | -1 |
| 6059 | 23005 | Dsn1  | 4930405A21Rik | 1  |
| 6060 | 3325  | Tle6  | Plekhj1       | -1 |
| 6060 | 6060  | Tle6  | Tle6          | 1  |
| 6060 | 12336 | Tle6  | Timm13        | -1 |
| 6060 | 13136 | Tle6  | Itgb1bp3      | -1 |
| 6060 | 17135 | Tle6  | Mum1          | 1  |
| 6091 | 1297  | Rbbp4 | Phox2a        | -1 |
| 6116 | 478   | Pcgf5 | Sfrs9         | -1 |
| 6116 | 1447  | Pcgf5 | Naaa          | 1  |
| 6116 | 5425  | Pcgf5 | Ung           | -1 |
| 6116 | 6330  | Pcgf5 | Dgkq          | -1 |
| 6116 | 8794  | Pcgf5 | 1500011B03Rik | -1 |
| 6116 | 8807  | Pcgf5 | Ankrd56       | 1  |
| 6116 | 10978 | Pcgf5 | MMT00078322   | -1 |
| 6116 | 12656 | Pcgf5 | Coq5          | -1 |
| 6116 | 15466 | Pcgf5 | Gm136         | 1  |
| 6116 | 16066 | Pcgf5 | Coq2          | -1 |
| 6116 | 17716 | Pcgf5 | Rnf10         | 1  |
| 6116 | 22988 | Pcgf5 | Hscb          | 1  |
| 6147 | 5692  | Dirc2 | 2010005H15Rik | 1  |
| 6147 | 11355 | Dirc2 | Csta          | 1  |
| 6147 | 17179 | Dirc2 | Stfa3         | 1  |
| 6147 | 17373 | Dirc2 | EG433016      | 1  |
| 6158 | 6158  | Msh2  | Msh2          | 1  |
| 6191 | 737   | Ddost | MMT00023716   | -1 |
| 6191 | 1270  | Ddost | 1700029I01Rik | -1 |
| 6191 | 2011  | Ddost | Slc2a5        | 1  |
| 6191 | 2902  | Ddost | D4ErtD196e    | -1 |
| 6191 | 3475  | Ddost | 2610305D13Rik | -1 |
| 6191 | 4305  | Ddost | Tmem51        | -1 |
| 6191 | 4523  | Ddost | Ptpru         | 1  |

|      |       |             |               |    |
|------|-------|-------------|---------------|----|
| 6191 | 5522  | Ddost       | Pink1         | -1 |
| 6191 | 6191  | Ddost       | Ddost         | 1  |
| 6191 | 8610  | Ddost       | Padi4         | 1  |
| 6191 | 8677  | Ddost       | Zbtb8os       | 1  |
| 6191 | 10366 | Ddost       | 4931403E03Rik | -1 |
| 6191 | 10407 | Ddost       | Gpatch3       | -1 |
| 6191 | 11870 | Ddost       | Apitd1        | -1 |
| 6191 | 12140 | Ddost       | Mrps15        | 1  |
| 6191 | 14397 | Ddost       | Padi2         | 1  |
| 6191 | 15700 | Ddost       | Crocc         | -1 |
| 6191 | 18338 | Ddost       | Akr1e1        | 1  |
| 6191 | 19647 | Ddost       | Cort          | -1 |
| 6191 | 19924 | Ddost       | Ubiad1        | -1 |
| 6206 | 1014  | MMT00063701 | Rtcd1         | 1  |
| 6206 | 1466  | MMT00063701 | Ubap2l        | 1  |
| 6206 | 2752  | MMT00063701 | Fcgr1         | 1  |
| 6206 | 3314  | MMT00063701 | Wars2         | 1  |
| 6206 | 6283  | MMT00063701 | Ptpn22        | -1 |
| 6206 | 6708  | MMT00063701 | Serpini2      | -1 |
| 6206 | 9519  | MMT00063701 | Fstl5         | -1 |
| 6206 | 10521 | MMT00063701 | Ttf2          | 1  |
| 6206 | 12367 | MMT00063701 | MMT00072365   | -1 |
| 6206 | 12716 | MMT00063701 | 5830417110Rik | -1 |
| 6206 | 15299 | MMT00063701 | Mrps21        | -1 |
| 6206 | 15901 | MMT00063701 | Tpm3          | -1 |
| 6206 | 16416 | MMT00063701 | Commd2        | 1  |
| 6206 | 21650 | MMT00063701 | Ap4b1         | 1  |
| 6206 | 22570 | MMT00063701 | Phf1          | 1  |
| 6213 | 1297  | Ccl2        | Phox2a        | 1  |
| 6218 | 14222 | Hnrnpc      | MMT00076410   | -1 |
| 6218 | 15713 | Hnrnpc      | Rbm3          | -1 |
| 6218 | 21333 | Hnrnpc      | Cirbp         | -1 |
| 6218 | 22600 | Hnrnpc      | 2410018C20Rik | -1 |
| 6234 | 5332  | P4ha2       | Pdlim4        | -1 |
| 6234 | 6234  | P4ha2       | P4ha2         | 1  |
| 6234 | 19032 | P4ha2       | Tymp          | 1  |
| 6250 | 1325  | Csnk2a1     | Pigu          | 1  |
| 6250 | 2351  | Csnk2a1     | 1110008F13Rik | -1 |
| 6250 | 3257  | Csnk2a1     | Map1lc3a      | -1 |
| 6250 | 5603  | Csnk2a1     | BC020535      | -1 |
| 6250 | 6059  | Csnk2a1     | Dsn1          | -1 |
| 6250 | 6188  | Csnk2a1     | Myh7b         | 1  |
| 6250 | 6250  | Csnk2a1     | Csnk2a1       | 1  |
| 6250 | 11166 | Csnk2a1     | Uqcc          | -1 |
| 6250 | 11705 | Csnk2a1     | Polr3f        | 1  |
| 6250 | 12866 | Csnk2a1     | 4921517L17Rik | 1  |
| 6250 | 13355 | Csnk2a1     | Foxs1         | -1 |
| 6250 | 14399 | Csnk2a1     | Csnk2a1       | 1  |
| 6250 | 14649 | Csnk2a1     | 5430405G05Rik | 1  |
| 6250 | 14734 | Csnk2a1     | Nrsn2         | -1 |
| 6250 | 15760 | Csnk2a1     | Trib3         | 1  |
| 6250 | 18555 | Csnk2a1     | Sdcbp2        | 1  |
| 6250 | 20505 | Csnk2a1     | Ttll9         | -1 |
| 6250 | 20837 | Csnk2a1     | Dlgap4        | 1  |
| 6250 | 23005 | Csnk2a1     | 4930405A21Rik | -1 |
| 6270 | 1495  | Cysltr1     | Zfp445        | 1  |
| 6270 | 4325  | Cysltr1     | Slc16a4       | 1  |
| 6270 | 4332  | Cysltr1     | Sf3b1         | 1  |
| 6270 | 5271  | Cysltr1     | Npy           | -1 |

|      |       |               |               |    |
|------|-------|---------------|---------------|----|
| 6270 | 6179  | Cysltr1       | Cxcl5         | 1  |
| 6270 | 11906 | Cysltr1       | Nfe2l3        | 1  |
| 6270 | 13390 | Cysltr1       | Ddx31         | -1 |
| 6270 | 23397 | Cysltr1       | Ccnjl         | -1 |
| 6283 | 1014  | Ptpn22        | Rtcd1         | 1  |
| 6283 | 1466  | Ptpn22        | Ubap2l        | 1  |
| 6283 | 2752  | Ptpn22        | Fcgr1         | 1  |
| 6283 | 3206  | Ptpn22        | Gpr160        | 1  |
| 6283 | 3314  | Ptpn22        | Wars2         | 1  |
| 6283 | 3874  | Ptpn22        | Slitrk3       | -1 |
| 6283 | 5021  | Ptpn22        | Gdap2         | -1 |
| 6283 | 5508  | Ptpn22        | Lrig2         | -1 |
| 6283 | 9408  | Ptpn22        | Hmgcs2        | -1 |
| 6283 | 9519  | Ptpn22        | Fstl5         | -1 |
| 6283 | 10521 | Ptpn22        | Ttf2          | 1  |
| 6283 | 12716 | Ptpn22        | 5830417110Rik | -1 |
| 6283 | 15901 | Ptpn22        | Tpm3          | -1 |
| 6283 | 16416 | Ptpn22        | Commd2        | 1  |
| 6283 | 17837 | Ptpn22        | Polr3gl       | -1 |
| 6283 | 20810 | Ptpn22        | Mttp          | -1 |
| 6283 | 21650 | Ptpn22        | Ap4b1         | 1  |
| 6283 | 22570 | Ptpn22        | Phtf1         | 1  |
| 6322 | 5342  | Pknox2        | Eps8l3        | 1  |
| 6322 | 15870 | Pknox2        | Aqp5          | 1  |
| 6330 | 665   | Dgkq          | Slc26a1       | -1 |
| 6330 | 1447  | Dgkq          | Naaa          | -1 |
| 6330 | 1660  | Dgkq          | Zfp33b        | -1 |
| 6330 | 6330  | Dgkq          | Dgkq          | 1  |
| 6330 | 8807  | Dgkq          | Ankrd56       | -1 |
| 6330 | 10978 | Dgkq          | MMT00078322   | 1  |
| 6330 | 12656 | Dgkq          | Coq5          | 1  |
| 6330 | 16066 | Dgkq          | Coq2          | 1  |
| 6330 | 16168 | Dgkq          | Crlf2         | 1  |
| 6330 | 19151 | Dgkq          | Dmp1          | -1 |
| 6333 | 6333  | lqcg          | lqcg          | 1  |
| 6353 | 12761 | Spata13       | Tsc22d3       | -1 |
| 6360 | 812   | D17H6S56E-3   | En2           | -1 |
| 6360 | 2424  | D17H6S56E-3   | Unc5cl        | -1 |
| 6360 | 2938  | D17H6S56E-3   | H2-T23        | -1 |
| 6360 | 7088  | D17H6S56E-3   | Slc37a1       | -1 |
| 6360 | 8750  | D17H6S56E-3   | 1700010l14Rik | -1 |
| 6360 | 8767  | D17H6S56E-3   | Rgl2          | -1 |
| 6360 | 10667 | D17H6S56E-3   | H2-Eb1        | -1 |
| 6360 | 10931 | D17H6S56E-3   | Pkn3          | 1  |
| 6360 | 16692 | D17H6S56E-3   | Bat4          | -1 |
| 6360 | 17412 | D17H6S56E-3   | Aif1          | 1  |
| 6360 | 20238 | D17H6S56E-3   | H2-T9         | -1 |
| 6360 | 21295 | D17H6S56E-3   | Snf1lk        | 1  |
| 6360 | 21415 | D17H6S56E-3   | Has1          | -1 |
| 6363 | 1135  | 9130014G24Rik | Akap12        | 1  |
| 6363 | 2571  | 9130014G24Rik | Rmnd1         | -1 |
| 6363 | 3744  | 9130014G24Rik | Rmnd1         | -1 |
| 6363 | 6363  | 9130014G24Rik | 9130014G24Rik | 1  |
| 6363 | 8786  | 9130014G24Rik | Rmnd1         | -1 |
| 6363 | 19115 | 9130014G24Rik | Rab32         | -1 |
| 6372 | 6372  | 1110021L09Rik | 1110021L09Rik | 1  |
| 6376 | 6376  | Nle1          | Nle1          | 1  |
| 6376 | 10539 | Nle1          | Unc45b        | -1 |
| 6376 | 15127 | Nle1          | Cct6b         | 1  |

|      |       |             |               |    |
|------|-------|-------------|---------------|----|
| 6386 | 5345  | Por         | MMT00023326   | 1  |
| 6394 | 11870 | Fbxo6       | Apitd1        | -1 |
| 6394 | 15664 | Fbxo6       | Masp2         | -1 |
| 6394 | 18338 | Fbxo6       | Akr1e1        | 1  |
| 6394 | 18548 | Fbxo6       | 1700012P22Rik | 1  |
| 6396 | 2118  | Zfp105      | Kptn          | -1 |
| 6396 | 2599  | Zfp105      | Lsm14a        | -1 |
| 6396 | 6513  | Zfp105      | Qpctl         | -1 |
| 6396 | 7761  | Zfp105      | Nudt19        | -1 |
| 6396 | 7803  | Zfp105      | Ttyh1         | -1 |
| 6396 | 8394  | Zfp105      | Dpy19l3       | -1 |
| 6396 | 9122  | Zfp105      | Sepw1         | -1 |
| 6396 | 9413  | Zfp105      | 1190020J12Rik | 1  |
| 6396 | 9454  | Zfp105      | 2810426N06Rik | -1 |
| 6396 | 11800 | Zfp105      | Clip3         | 1  |
| 6396 | 13418 | Zfp105      | Lgi4          | 1  |
| 6396 | 14842 | Zfp105      | Gipr          | -1 |
| 6396 | 15670 | Zfp105      | Pnmal1        | 1  |
| 6396 | 17632 | Zfp105      | Lypd3         | 1  |
| 6396 | 18165 | Zfp105      | 5830482F20Rik | -1 |
| 6396 | 19306 | Zfp105      | AI428936      | -1 |
| 6396 | 19462 | Zfp105      | 4933439C20Rik | 1  |
| 6396 | 20606 | Zfp105      | MMT00042166   | 1  |
| 6397 | 4576  | Slc2a9      | Chchd7        | 1  |
| 6413 | 11620 | Fbxo4       | Zfr           | -1 |
| 6417 | 5345  | Rasgef1c    | MMT00023326   | 1  |
| 6417 | 12761 | Rasgef1c    | Tsc22d3       | 1  |
| 6428 | 3159  | MMT00035510 | Pld1          | -1 |
| 6428 | 16618 | MMT00035510 | Hps3          | 1  |
| 6428 | 19700 | MMT00035510 | E030011K20Rik | -1 |
| 6456 | 15870 | Tyms        | Aqp5          | 1  |
| 6470 | 2752  | Arnt        | Fcgr1         | -1 |
| 6470 | 3314  | Arnt        | Wars2         | -1 |
| 6470 | 12716 | Arnt        | 5830417I10Rik | 1  |
| 6470 | 23037 | Arnt        | Thbs3         | -1 |
| 6475 | 268   | Sdc4        | Sys1          | 1  |
| 6498 | 585   | MMT00016809 | Tas2r119      | 1  |
| 6498 | 794   | MMT00016809 | Mrps14        | 1  |
| 6498 | 5456  | MMT00016809 | Rabgap1l      | 1  |
| 6498 | 6498  | MMT00016809 | MMT00016809   | 1  |
| 6498 | 9449  | MMT00016809 | Sft2d2        | 1  |
| 6498 | 11167 | MMT00016809 | Dars2         | 1  |
| 6498 | 22984 | MMT00016809 | Tnnt2         | -1 |
| 6506 | 1041  | Scyl2       | 3110049J23Rik | 1  |
| 6506 | 11162 | Scyl2       | Hkdc1         | -1 |
| 6506 | 20705 | Scyl2       | Supv3l1       | 1  |
| 6506 | 23588 | Scyl2       | Anks1b        | 1  |
| 6513 | 1040  | Qpctl       | Dnhd1         | -1 |
| 6513 | 2118  | Qpctl       | Kptn          | 1  |
| 6513 | 2599  | Qpctl       | Lsm14a        | 1  |
| 6513 | 6513  | Qpctl       | Qpctl         | 1  |
| 6513 | 7761  | Qpctl       | Nudt19        | 1  |
| 6513 | 7803  | Qpctl       | Ttyh1         | 1  |
| 6513 | 8394  | Qpctl       | Dpy19l3       | 1  |
| 6513 | 9122  | Qpctl       | Sepw1         | 1  |
| 6513 | 11800 | Qpctl       | Clip3         | -1 |
| 6513 | 15670 | Qpctl       | Pnmal1        | -1 |
| 6513 | 17632 | Qpctl       | Lypd3         | -1 |
| 6513 | 19306 | Qpctl       | AI428936      | 1  |

|      |       |          |               |    |
|------|-------|----------|---------------|----|
| 6513 | 19462 | Qpctl    | 4933439C20Rik | -1 |
| 6513 | 20606 | Qpctl    | MMT00042166   | -1 |
| 6513 | 21223 | Qpctl    | Pira1         | -1 |
| 6525 | 15870 | Uchl5ip  | Aqp5          | 1  |
| 6528 | 5603  | Dusp15   | BC020535      | 1  |
| 6532 | 6532  | Auh      | Auh           | 1  |
| 6555 | 2938  | Aadacl2  | H2-T23        | -1 |
| 6555 | 7088  | Aadacl2  | Slc37a1       | -1 |
| 6555 | 8767  | Aadacl2  | Rgl2          | -1 |
| 6555 | 10667 | Aadacl2  | H2-Eb1        | -1 |
| 6555 | 16692 | Aadacl2  | Bat4          | -1 |
| 6555 | 17412 | Aadacl2  | Aif1          | 1  |
| 6555 | 20238 | Aadacl2  | H2-T9         | -1 |
| 6564 | 2294  | Cebpd    | AU040829      | 1  |
| 6564 | 2708  | Cebpd    | Sgk1          | 1  |
| 6564 | 4443  | Cebpd    | Zfp790        | 1  |
| 6564 | 4454  | Cebpd    | BC055107      | 1  |
| 6564 | 6564  | Cebpd    | Cebpd         | 1  |
| 6564 | 8171  | Cebpd    | Spink8        | 1  |
| 6564 | 8816  | Cebpd    | Nfkbia        | 1  |
| 6564 | 8980  | Cebpd    | Plekhf1       | 1  |
| 6564 | 9745  | Cebpd    | Gadd45g       | 1  |
| 6564 | 9821  | Cebpd    | Pmaip1        | 1  |
| 6564 | 12761 | Cebpd    | Tsc22d3       | 1  |
| 6564 | 14486 | Cebpd    | Sox7          | -1 |
| 6564 | 15826 | Cebpd    | Arl4d         | 1  |
| 6564 | 18553 | Cebpd    | Tekt4         | 1  |
| 6564 | 21313 | Cebpd    | Rhou          | 1  |
| 6564 | 21380 | Cebpd    | Ier5          | -1 |
| 6576 | 2224  | Slfn2    | Oasl2         | 1  |
| 6576 | 5853  | Slfn2    | Trim30        | 1  |
| 6576 | 6824  | Slfn2    | Irf7          | 1  |
| 6576 | 9616  | Slfn2    | AI451557      | 1  |
| 6576 | 12398 | Slfn2    | Ifi44         | 1  |
| 6576 | 13309 | Slfn2    | Tgtp          | 1  |
| 6576 | 21549 | Slfn2    | Rtp4          | 1  |
| 6587 | 3970  | Irf9     | 4931414P19Rik | -1 |
| 6587 | 4566  | Irf9     | MMT00078134   | 1  |
| 6648 | 11705 | Cenpl    | Polr3f        | 1  |
| 6648 | 14740 | Cenpl    | Mfap1b        | 1  |
| 6648 | 18835 | Cenpl    | Dtwd1         | -1 |
| 6670 | 15870 | Nat10    | Aqp5          | 1  |
| 6697 | 2752  | Serpini1 | Fcgr1         | 1  |
| 6697 | 3159  | Serpini1 | Pld1          | 1  |
| 6697 | 3314  | Serpini1 | Wars2         | 1  |
| 6697 | 3874  | Serpini1 | Slitrk3       | -1 |
| 6697 | 9519  | Serpini1 | Fstl5         | -1 |
| 6697 | 10521 | Serpini1 | Ttf2          | 1  |
| 6697 | 12367 | Serpini1 | MMT00072365   | -1 |
| 6697 | 12716 | Serpini1 | 5830417I10Rik | -1 |
| 6697 | 16416 | Serpini1 | Commd2        | 1  |
| 6697 | 19700 | Serpini1 | E030011K20Rik | 1  |
| 6719 | 115   | Cacng8   | NaN           | 1  |
| 6719 | 2067  | Cacng8   | Myo1a         | 1  |
| 6719 | 7916  | Cacng8   | MMT00016293   | 1  |
| 6719 | 8256  | Cacng8   | Tjap1         | 1  |
| 6719 | 8644  | Cacng8   | V1rg11        | 1  |
| 6719 | 10806 | Cacng8   | Rnf212        | 1  |
| 6719 | 12188 | Cacng8   | Chek2         | 1  |



|      |       |         |               |    |
|------|-------|---------|---------------|----|
| 6719 | 12248 | Cacng8  | Tnp2          | 1  |
| 6719 | 12272 | Cacng8  | Fshr          | 1  |
| 6719 | 12568 | Cacng8  | Lrrc37a       | 1  |
| 6719 | 18620 | Cacng8  | Slmap         | 1  |
| 6719 | 19219 | Cacng8  | MMT00015104   | 1  |
| 6719 | 19265 | Cacng8  | EG546036      | 1  |
| 6719 | 19436 | Cacng8  | Dapp1         | 1  |
| 6719 | 20089 | Cacng8  | MMT00015975   | 1  |
| 6719 | 21866 | Cacng8  | Hhipl1        | 1  |
| 6719 | 23546 | Cacng8  | Zzef1         | 1  |
| 6719 | 23561 | Cacng8  | Sox14         | 1  |
| 6719 | 23591 | Cacng8  | Dlg4          | 1  |
| 6719 | 23651 | Cacng8  | MMT00027295   | 1  |
| 6733 | 15870 | Mfng    | Aqp5          | -1 |
| 6765 | 1375  | Ldhb    | Strap         | 1  |
| 6765 | 2021  | Ldhb    | Atf7ip        | -1 |
| 6765 | 6765  | Ldhb    | Ldhb          | 1  |
| 6765 | 11130 | Ldhb    | Slco1c1       | -1 |
| 6765 | 14307 | Ldhb    | Kcnj8         | -1 |
| 6765 | 14557 | Ldhb    | Pyroxd1       | -1 |
| 6765 | 19964 | Ldhb    | Ndufa9        | -1 |
| 6765 | 21126 | Ldhb    | Dera          | -1 |
| 6765 | 21937 | Ldhb    | MMT00015325   | 1  |
| 6765 | 22907 | Ldhb    | MMT00054594   | 1  |
| 6765 | 22978 | Ldhb    | MMT00043176   | 1  |
| 6768 | 1627  | Plekhf2 | 2310030N02Rik | -1 |
| 6769 | 1006  | Banp    | 2600011E07Rik | 1  |
| 6769 | 1351  | Banp    | Whsc11        | 1  |
| 6769 | 2558  | Banp    | Tmem132b      | 1  |
| 6769 | 3293  | Banp    | Nup153        | 1  |
| 6769 | 3790  | Banp    | Mtss1         | 1  |
| 6769 | 5364  | Banp    | Kif22         | -1 |
| 6769 | 6769  | Banp    | Banp          | 1  |
| 6769 | 7149  | Banp    | 9530077C05Rik | 1  |
| 6769 | 7263  | Banp    | Narg1l        | 1  |
| 6769 | 7894  | Banp    | MMT00029319   | -1 |
| 6769 | 8988  | Banp    | 1110007A13Rik | 1  |
| 6769 | 9899  | Banp    | D13Wsu177e    | 1  |
| 6769 | 11063 | Banp    | Phf8          | 1  |
| 6769 | 11756 | Banp    | 2810011L19Rik | 1  |
| 6769 | 11906 | Banp    | Nfe2l3        | -1 |
| 6769 | 13390 | Banp    | Ddx31         | 1  |
| 6769 | 13571 | Banp    | Samd8         | 1  |
| 6769 | 14095 | Banp    | Nav1          | 1  |
| 6769 | 14517 | Banp    | Cln4-2        | -1 |
| 6769 | 14529 | Banp    | Rax           | 1  |
| 6769 | 14626 | Banp    | Zbtb2         | 1  |
| 6769 | 15177 | Banp    | Bmpr2         | 1  |
| 6769 | 15476 | Banp    | Fem1b         | -1 |
| 6769 | 15731 | Banp    | Mfhas1        | 1  |
| 6769 | 15780 | Banp    | Pde4d         | 1  |
| 6769 | 16030 | Banp    | Prpf3         | 1  |
| 6769 | 16224 | Banp    | Cdc2l5        | 1  |
| 6769 | 17158 | Banp    | Zfp113        | 1  |
| 6769 | 17207 | Banp    | 2700050L05Rik | 1  |
| 6769 | 17884 | Banp    | Lnx2          | 1  |
| 6769 | 18065 | Banp    | Peo1          | 1  |
| 6769 | 18373 | Banp    | Dnajb1        | 1  |
| 6769 | 18726 | Banp    | D630004A14Rik | 1  |

|      |       |             |               |    |
|------|-------|-------------|---------------|----|
| 6769 | 18846 | Banp        | lkbkg         | 1  |
| 6769 | 19651 | Banp        | Thex1         | 1  |
| 6769 | 19936 | Banp        | Egf           | -1 |
| 6769 | 20470 | Banp        | Scml4         | 1  |
| 6769 | 20946 | Banp        | Nufip2        | 1  |
| 6769 | 20980 | Banp        | Taf12         | 1  |
| 6769 | 21483 | Banp        | Ippk          | 1  |
| 6769 | 22141 | Banp        | Rorb          | 1  |
| 6769 | 23397 | Banp        | Ccnjl         | 1  |
| 6769 | 23419 | Banp        | Tipin         | -1 |
| 6804 | 3654  | Cyp2d22     | St13          | -1 |
| 6804 | 6804  | Cyp2d22     | Cyp2d22       | 1  |
| 6804 | 7100  | Cyp2d22     | Tomm22        | 1  |
| 6804 | 9540  | Cyp2d22     | Csnk1e        | 1  |
| 6804 | 16467 | Cyp2d22     | Card10        | 1  |
| 6804 | 19955 | Cyp2d22     | Cbx2          | -1 |
| 6806 | 6824  | Agrn        | Irf7          | 1  |
| 6815 | 2752  | Sort1       | Fcgr1         | 1  |
| 6820 | 13355 | MMT00046996 | Foxs1         | -1 |
| 6824 | 2224  | Irf7        | Oasl2         | 1  |
| 6824 | 3683  | Irf7        | Oas2          | 1  |
| 6824 | 5853  | Irf7        | Trim30        | 1  |
| 6824 | 6824  | Irf7        | Irf7          | 1  |
| 6824 | 7069  | Irf7        | Ube11         | 1  |
| 6824 | 8800  | Irf7        | Rnf213        | 1  |
| 6824 | 9616  | Irf7        | AI451557      | 1  |
| 6824 | 9847  | Irf7        | Irf27         | 1  |
| 6824 | 12398 | Irf7        | Irf44         | 1  |
| 6824 | 13309 | Irf7        | Tgtp          | 1  |
| 6824 | 15074 | Irf7        | Usp18         | 1  |
| 6824 | 18186 | Irf7        | Parp14        | 1  |
| 6824 | 19189 | Irf7        | Sp100         | 1  |
| 6824 | 21549 | Irf7        | Rtp4          | 1  |
| 6824 | 23450 | Irf7        | D12Ert647e    | 1  |
| 6828 | 3812  | Pigh        | Zfyve26       | -1 |
| 6828 | 6828  | Pigh        | Pigh          | 1  |
| 6842 | 15853 | Amotl2      | D430036J16Rik | -1 |
| 6845 | 11382 | Cyb561d1    | Cdca3         | 1  |
| 6846 | 13615 | Olfr1402    | Arl16         | -1 |
| 6846 | 17193 | Olfr1402    | Npb           | 1  |
| 6888 | 665   | Cxcl9       | Slc26a1       | 1  |
| 6888 | 1447  | Cxcl9       | Naaa          | 1  |
| 6888 | 1660  | Cxcl9       | Zfp33b        | 1  |
| 6888 | 6330  | Cxcl9       | Dgkq          | -1 |
| 6888 | 6487  | Cxcl9       | Slc4a4        | 1  |
| 6888 | 8807  | Cxcl9       | Ankrd56       | 1  |
| 6888 | 10978 | Cxcl9       | MMT00078322   | -1 |
| 6888 | 16066 | Cxcl9       | Coq2          | -1 |
| 6907 | 14740 | Usp50       | Mfap1b        | 1  |
| 6907 | 18835 | Usp50       | Dtwd1         | -1 |
| 6910 | 12398 | Ly6c2       | Irf44         | 1  |
| 6910 | 13309 | Ly6c2       | Tgtp          | 1  |
| 6916 | 3706  | Wdr5b       | 2410002O22Rik | -1 |
| 6916 | 19389 | Wdr5b       | Iqcb1         | -1 |
| 6922 | 9122  | Tmem86b     | Sepw1         | -1 |
| 6922 | 11982 | Tmem86b     | MMT00035514   | 1  |
| 6922 | 19462 | Tmem86b     | 4933439C20Rik | 1  |
| 6922 | 23557 | Tmem86b     | Ppp1r12c      | 1  |
| 6931 | 6931  | Hrsp12      | Hrsp12        | 1  |

|      |       |               |               |    |
|------|-------|---------------|---------------|----|
| 6931 | 11549 | Hrsp12        | Depdc6        | 1  |
| 6931 | 12091 | Hrsp12        | 1810015C04Rik | 1  |
| 6931 | 12655 | Hrsp12        | Tmem180       | -1 |
| 6931 | 13648 | Hrsp12        | Dap           | 1  |
| 6931 | 18939 | Hrsp12        | Matn2         | 1  |
| 6931 | 20871 | Hrsp12        | Pop1          | -1 |
| 6932 | 5342  | Ckap4         | Eps8l3        | 1  |
| 6932 | 15870 | Ckap4         | Aqp5          | 1  |
| 6934 | 16618 | Panx3         | Hps3          | 1  |
| 6934 | 19700 | Panx3         | E030011K20Rik | -1 |
| 6974 | 6974  | Tmem65        | Tmem65        | 1  |
| 6974 | 7100  | Tmem65        | Tomm22        | 1  |
| 6994 | 5345  | Glul          | MMT00023326   | 1  |
| 6994 | 6038  | Glul          | Acot1         | -1 |
| 6994 | 12761 | Glul          | Tsc22d3       | 1  |
| 6994 | 12834 | Glul          | Fabp7         | -1 |
| 6994 | 21380 | Glul          | Ier5          | -1 |
| 7011 | 15255 | 1810022C23Rik | Ccl8          | -1 |
| 7057 | 1297  | Stk10         | Phox2a        | 1  |
| 7069 | 2224  | Ube1l         | Oasl2         | 1  |
| 7069 | 3683  | Ube1l         | Oas2          | 1  |
| 7069 | 6824  | Ube1l         | Irf7          | 1  |
| 7069 | 7069  | Ube1l         | Ube1l         | 1  |
| 7069 | 9616  | Ube1l         | Al451557      | 1  |
| 7069 | 12398 | Ube1l         | Ifi44         | 1  |
| 7069 | 13309 | Ube1l         | Tgtp          | 1  |
| 7069 | 18186 | Ube1l         | Parp14        | 1  |
| 7069 | 19189 | Ube1l         | Sp100         | 1  |
| 7069 | 21549 | Ube1l         | Rtp4          | 1  |
| 7069 | 23450 | Ube1l         | D12Ert647e    | 1  |
| 7083 | 1162  | MMT00044154   | Cpsf4         | -1 |
| 7083 | 2755  | MMT00044154   | EG382421      | 1  |
| 7083 | 7083  | MMT00044154   | MMT00044154   | 1  |
| 7083 | 7116  | MMT00044154   | Katnal1       | 1  |
| 7083 | 7378  | MMT00044154   | 1700001J03Rik | 1  |
| 7083 | 7821  | MMT00044154   | MMT00042003   | 1  |
| 7083 | 12377 | MMT00044154   | MMT00050540   | 1  |
| 7083 | 15480 | MMT00044154   | MMT00078167   | 1  |
| 7083 | 17535 | MMT00044154   | MMT00008110   | 1  |
| 7084 | 7084  | Spz1          | Spz1          | 1  |
| 7088 | 812   | Slc37a1       | En2           | 1  |
| 7088 | 1515  | Slc37a1       | Med20         | -1 |
| 7088 | 2424  | Slc37a1       | Unc5cl        | 1  |
| 7088 | 2801  | Slc37a1       | H2-BI         | 1  |
| 7088 | 2938  | Slc37a1       | H2-T23        | 1  |
| 7088 | 3859  | Slc37a1       | Fpr2          | 1  |
| 7088 | 4555  | Slc37a1       | Cchcr1        | 1  |
| 7088 | 6406  | Slc37a1       | Sh3rf2        | -1 |
| 7088 | 7088  | Slc37a1       | Slc37a1       | 1  |
| 7088 | 7603  | Slc37a1       | Sod2          | 1  |
| 7088 | 7965  | Slc37a1       | Enpp5         | 1  |
| 7088 | 8750  | Slc37a1       | 1700010I14Rik | 1  |
| 7088 | 8767  | Slc37a1       | Rgl2          | 1  |
| 7088 | 9805  | Slc37a1       | Tagap         | 1  |
| 7088 | 10374 | Slc37a1       | Trim15        | 1  |
| 7088 | 10667 | Slc37a1       | H2-Eb1        | 1  |
| 7088 | 10729 | Slc37a1       | Fgd2          | 1  |
| 7088 | 10931 | Slc37a1       | Pkn3          | -1 |
| 7088 | 11475 | Slc37a1       | H2-D1         | -1 |

|      |       |         |               |    |
|------|-------|---------|---------------|----|
| 7088 | 12168 | Slc37a1 | H2-Ke6        | 1  |
| 7088 | 12694 | Slc37a1 | Riok2         | -1 |
| 7088 | 12943 | Slc37a1 | Slc25a27      | 1  |
| 7088 | 13117 | Slc37a1 | Tmprss5       | 1  |
| 7088 | 13493 | Slc37a1 | Ring1         | 1  |
| 7088 | 15580 | Slc37a1 | MMT00077001   | 1  |
| 7088 | 16067 | Slc37a1 | Pcaf          | -1 |
| 7088 | 16692 | Slc37a1 | Bat4          | 1  |
| 7088 | 17322 | Slc37a1 | Zfp758        | -1 |
| 7088 | 17412 | Slc37a1 | Aif1          | -1 |
| 7088 | 17707 | Slc37a1 | Rshl2b        | 1  |
| 7088 | 17760 | Slc37a1 | Ccr6          | -1 |
| 7088 | 18577 | Slc37a1 | Btbd9         | -1 |
| 7088 | 20238 | Slc37a1 | H2-T9         | 1  |
| 7088 | 20511 | Slc37a1 | Decr2         | 1  |
| 7088 | 21295 | Slc37a1 | Snf1lk        | -1 |
| 7088 | 21415 | Slc37a1 | Has1          | 1  |
| 7088 | 21952 | Slc37a1 | Tfb1m         | -1 |
| 7088 | 22104 | Slc37a1 | Rnf123        | 1  |
| 7088 | 23250 | Slc37a1 | Plcl2         | 1  |
| 7088 | 23371 | Slc37a1 | Cfb           | -1 |
| 7094 | 10    | Cyp2c54 | NaN           | 1  |
| 7094 | 141   | Cyp2c54 | Jag1          | 1  |
| 7094 | 225   | Cyp2c54 | MMT00073704   | 1  |
| 7094 | 236   | Cyp2c54 | Bbs9          | 1  |
| 7094 | 316   | Cyp2c54 | 4930471G03Rik | 1  |
| 7094 | 317   | Cyp2c54 | Ceacam13      | 1  |
| 7094 | 391   | Cyp2c54 | 4933416I08Rik | 1  |
| 7094 | 484   | Cyp2c54 | Atp4a         | 1  |
| 7094 | 486   | Cyp2c54 | Josd2         | 1  |
| 7094 | 552   | Cyp2c54 | MMT00013481   | 1  |
| 7094 | 558   | Cyp2c54 | Crebl1        | 1  |
| 7094 | 584   | Cyp2c54 | Tmem207       | 1  |
| 7094 | 658   | Cyp2c54 | Vmn2r-ps88    | 1  |
| 7094 | 661   | Cyp2c54 | Siglec1       | -1 |
| 7094 | 985   | Cyp2c54 | Hsd3b6        | 1  |
| 7094 | 1021  | Cyp2c54 | Rhpn2         | 1  |
| 7094 | 1059  | Cyp2c54 | P2rx6         | 1  |
| 7094 | 1122  | Cyp2c54 | Pax3          | 1  |
| 7094 | 1137  | Cyp2c54 | Mlxip         | 1  |
| 7094 | 1148  | Cyp2c54 | Pak1          | 1  |
| 7094 | 1170  | Cyp2c54 | Faim3         | 1  |
| 7094 | 1354  | Cyp2c54 | Lsmd1         | 1  |
| 7094 | 1570  | Cyp2c54 | Olf522        | 1  |
| 7094 | 1619  | Cyp2c54 | Fbxw17        | 1  |
| 7094 | 1679  | Cyp2c54 | MMT00009278   | 1  |
| 7094 | 1696  | Cyp2c54 | V1re9         | 1  |
| 7094 | 1771  | Cyp2c54 | Park2         | 1  |
| 7094 | 1795  | Cyp2c54 | Rabgap1l      | 1  |
| 7094 | 1829  | Cyp2c54 | MMT00030026   | 1  |
| 7094 | 1876  | Cyp2c54 | Amdhd1        | 1  |
| 7094 | 1907  | Cyp2c54 | D230010M03Rik | 1  |
| 7094 | 1920  | Cyp2c54 | Oas1e         | 1  |
| 7094 | 2067  | Cyp2c54 | Myo1a         | 1  |
| 7094 | 2226  | Cyp2c54 | Amt           | 1  |
| 7094 | 2658  | Cyp2c54 | Fzd2          | 1  |
| 7094 | 2819  | Cyp2c54 | Kcnk5         | 1  |
| 7094 | 3080  | Cyp2c54 | MMT00014480   | 1  |
| 7094 | 3127  | Cyp2c54 | Plcd1         | 1  |

|      |      |         |               |   |
|------|------|---------|---------------|---|
| 7094 | 3144 | Cyp2c54 | Ube2j2        | 1 |
| 7094 | 3166 | Cyp2c54 | Vmn2r57       | 1 |
| 7094 | 3208 | Cyp2c54 | 4930511111Rik | 1 |
| 7094 | 3220 | Cyp2c54 | Ap2s1         | 1 |
| 7094 | 3254 | Cyp2c54 | Grifin        | 1 |
| 7094 | 3362 | Cyp2c54 | Fgf8          | 1 |
| 7094 | 3383 | Cyp2c54 | Cd99          | 1 |
| 7094 | 3402 | Cyp2c54 | A930018P22Rik | 1 |
| 7094 | 3511 | Cyp2c54 | Rnf182        | 1 |
| 7094 | 3841 | Cyp2c54 | MMT00014519   | 1 |
| 7094 | 3948 | Cyp2c54 | V1rb4         | 1 |
| 7094 | 3986 | Cyp2c54 | Ep400         | 1 |
| 7094 | 4079 | Cyp2c54 | Emilin3       | 1 |
| 7094 | 4088 | Cyp2c54 | Pdcl2         | 1 |
| 7094 | 4166 | Cyp2c54 | Cblc          | 1 |
| 7094 | 4199 | Cyp2c54 | B3galt5       | 1 |
| 7094 | 4246 | Cyp2c54 | Fbxw12        | 1 |
| 7094 | 4337 | Cyp2c54 | Myst3         | 1 |
| 7094 | 4407 | Cyp2c54 | 4930429B21Rik | 1 |
| 7094 | 4425 | Cyp2c54 | Olf1346       | 1 |
| 7094 | 4430 | Cyp2c54 | Ankrd36       | 1 |
| 7094 | 4870 | Cyp2c54 | Olf1550       | 1 |
| 7094 | 5083 | Cyp2c54 | Gprc5b        | 1 |
| 7094 | 5126 | Cyp2c54 | Fcnb          | 1 |
| 7094 | 5377 | Cyp2c54 | MMT00077700   | 1 |
| 7094 | 5380 | Cyp2c54 | Olf1403       | 1 |
| 7094 | 5505 | Cyp2c54 | Thap2         | 1 |
| 7094 | 5694 | Cyp2c54 | Sp7           | 1 |
| 7094 | 5748 | Cyp2c54 | Brsk2         | 1 |
| 7094 | 5908 | Cyp2c54 | MMT00027552   | 1 |
| 7094 | 5929 | Cyp2c54 | Cpz           | 1 |
| 7094 | 6367 | Cyp2c54 | Lhfp          | 1 |
| 7094 | 6390 | Cyp2c54 | MMT00073452   | 1 |
| 7094 | 6403 | Cyp2c54 | MMT00039607   | 1 |
| 7094 | 6422 | Cyp2c54 | Grk5          | 1 |
| 7094 | 6429 | Cyp2c54 | Sim2          | 1 |
| 7094 | 6754 | Cyp2c54 | Trpv3         | 1 |
| 7094 | 6756 | Cyp2c54 | Sds           | 1 |
| 7094 | 6880 | Cyp2c54 | Dmrtb1        | 1 |
| 7094 | 7041 | Cyp2c54 | Sp140         | 1 |
| 7094 | 7084 | Cyp2c54 | Spz1          | 1 |
| 7094 | 7085 | Cyp2c54 | St8sia2       | 1 |
| 7094 | 7094 | Cyp2c54 | Cyp2c54       | 1 |
| 7094 | 7279 | Cyp2c54 | Cldn13        | 1 |
| 7094 | 7340 | Cyp2c54 | Ascc3l1       | 1 |
| 7094 | 7436 | Cyp2c54 | 1700063K16Rik | 1 |
| 7094 | 7721 | Cyp2c54 | MMT00000356   | 1 |
| 7094 | 7916 | Cyp2c54 | MMT00016293   | 1 |
| 7094 | 7974 | Cyp2c54 | Arhgef7       | 1 |
| 7094 | 8157 | Cyp2c54 | MMT00005305   | 1 |
| 7094 | 8170 | Cyp2c54 | Snx22         | 1 |
| 7094 | 8256 | Cyp2c54 | Tjap1         | 1 |
| 7094 | 8620 | Cyp2c54 | MMT00048670   | 1 |
| 7094 | 8644 | Cyp2c54 | V1rg11        | 1 |
| 7094 | 8709 | Cyp2c54 | Trim58        | 1 |
| 7094 | 8784 | Cyp2c54 | Hgd           | 1 |
| 7094 | 8905 | Cyp2c54 | Trim67        | 1 |
| 7094 | 8952 | Cyp2c54 | Marco         | 1 |
| 7094 | 9340 | Cyp2c54 | Cdc42ep2      | 1 |

|      |       |         |               |   |
|------|-------|---------|---------------|---|
| 7094 | 9421  | Cyp2c54 | Serpinf2      | 1 |
| 7094 | 9436  | Cyp2c54 | Cntnap2       | 1 |
| 7094 | 9463  | Cyp2c54 | Zdhhc23       | 1 |
| 7094 | 9485  | Cyp2c54 | 2700081O15Rik | 1 |
| 7094 | 9743  | Cyp2c54 | Gm189         | 1 |
| 7094 | 9946  | Cyp2c54 | Stam2         | 1 |
| 7094 | 9954  | Cyp2c54 | MMT00047280   | 1 |
| 7094 | 9990  | Cyp2c54 | MMT00081303   | 1 |
| 7094 | 10195 | Cyp2c54 | Klf1          | 1 |
| 7094 | 10240 | Cyp2c54 | Cyp2w1        | 1 |
| 7094 | 10260 | Cyp2c54 | Zfp36l2       | 1 |
| 7094 | 10281 | Cyp2c54 | Slc15a1       | 1 |
| 7094 | 10377 | Cyp2c54 | A430105l19Rik | 1 |
| 7094 | 10452 | Cyp2c54 | Grn           | 1 |
| 7094 | 10520 | Cyp2c54 | Xkr6          | 1 |
| 7094 | 10576 | Cyp2c54 | Xrcc3         | 1 |
| 7094 | 10657 | Cyp2c54 | Rnf12         | 1 |
| 7094 | 10687 | Cyp2c54 | ltpkb         | 1 |
| 7094 | 10838 | Cyp2c54 | Spdef         | 1 |
| 7094 | 10886 | Cyp2c54 | Fndc3b        | 1 |
| 7094 | 11001 | Cyp2c54 | Pou6f2        | 1 |
| 7094 | 11016 | Cyp2c54 | Pcp2          | 1 |
| 7094 | 11017 | Cyp2c54 | Olf926        | 1 |
| 7094 | 11256 | Cyp2c54 | H2-DMa        | 1 |
| 7094 | 11303 | Cyp2c54 | Slc5a12       | 1 |
| 7094 | 11350 | Cyp2c54 | 9030420J04Rik | 1 |
| 7094 | 11424 | Cyp2c54 | lqcf3         | 1 |
| 7094 | 11425 | Cyp2c54 | Evx2          | 1 |
| 7094 | 11507 | Cyp2c54 | Adarb2        | 1 |
| 7094 | 11665 | Cyp2c54 | Hyal1         | 1 |
| 7094 | 11677 | Cyp2c54 | 5730507C01Rik | 1 |
| 7094 | 11689 | Cyp2c54 | MMT00078109   | 1 |
| 7094 | 11805 | Cyp2c54 | Bat2          | 1 |
| 7094 | 11809 | Cyp2c54 | 4930534B04Rik | 1 |
| 7094 | 11837 | Cyp2c54 | Paqr6         | 1 |
| 7094 | 11881 | Cyp2c54 | Mpl           | 1 |
| 7094 | 11966 | Cyp2c54 | Zfp280b       | 1 |
| 7094 | 12046 | Cyp2c54 | Impdh1        | 1 |
| 7094 | 12198 | Cyp2c54 | Atp13a5       | 1 |
| 7094 | 12248 | Cyp2c54 | Tnp2          | 1 |
| 7094 | 12272 | Cyp2c54 | Fshr          | 1 |
| 7094 | 12371 | Cyp2c54 | 1700128F08Rik | 1 |
| 7094 | 12372 | Cyp2c54 | MMT00039397   | 1 |
| 7094 | 12430 | Cyp2c54 | Fst           | 1 |
| 7094 | 12457 | Cyp2c54 | MMT00072579   | 1 |
| 7094 | 12464 | Cyp2c54 | MMT00047924   | 1 |
| 7094 | 12471 | Cyp2c54 | Olf1020       | 1 |
| 7094 | 12497 | Cyp2c54 | Kir3dl2       | 1 |
| 7094 | 12568 | Cyp2c54 | Lrrc37a       | 1 |
| 7094 | 12633 | Cyp2c54 | Klk4          | 1 |
| 7094 | 12651 | Cyp2c54 | Tsc22d4       | 1 |
| 7094 | 12696 | Cyp2c54 | RP23-392P11.3 | 1 |
| 7094 | 12753 | Cyp2c54 | MMT00043344   | 1 |
| 7094 | 12772 | Cyp2c54 | Axl           | 1 |
| 7094 | 12826 | Cyp2c54 | Zfp354c       | 1 |
| 7094 | 12919 | Cyp2c54 | Nup210l       | 1 |
| 7094 | 13102 | Cyp2c54 | Prkaa1        | 1 |
| 7094 | 13141 | Cyp2c54 | MMT00071569   | 1 |
| 7094 | 13184 | Cyp2c54 | MMT00017268   | 1 |

|      |       |         |               |   |
|------|-------|---------|---------------|---|
| 7094 | 13201 | Cyp2c54 | Rbl2          | 1 |
| 7094 | 13311 | Cyp2c54 | Prl3c1        | 1 |
| 7094 | 13487 | Cyp2c54 | A230051G13Rik | 1 |
| 7094 | 13496 | Cyp2c54 | H1fnt         | 1 |
| 7094 | 13570 | Cyp2c54 | Olf171        | 1 |
| 7094 | 13742 | Cyp2c54 | 1700024P16Rik | 1 |
| 7094 | 13800 | Cyp2c54 | Lrp5          | 1 |
| 7094 | 13860 | Cyp2c54 | Cpt1b         | 1 |
| 7094 | 13890 | Cyp2c54 | Olf1263       | 1 |
| 7094 | 14035 | Cyp2c54 | Lrrc52        | 1 |
| 7094 | 14313 | Cyp2c54 | Tnk1          | 1 |
| 7094 | 14364 | Cyp2c54 | Robo1         | 1 |
| 7094 | 14519 | Cyp2c54 | Trex1         | 1 |
| 7094 | 14565 | Cyp2c54 | Rnf207        | 1 |
| 7094 | 14754 | Cyp2c54 | Atoh8         | 1 |
| 7094 | 15424 | Cyp2c54 | Atp6v1g2      | 1 |
| 7094 | 15626 | Cyp2c54 | MMT00035685   | 1 |
| 7094 | 15697 | Cyp2c54 | Tbc1d8b       | 1 |
| 7094 | 15743 | Cyp2c54 | Hoxc6         | 1 |
| 7094 | 15747 | Cyp2c54 | Sfrs1         | 1 |
| 7094 | 15885 | Cyp2c54 | Adamts7       | 1 |
| 7094 | 16104 | Cyp2c54 | Ugt3a2        | 1 |
| 7094 | 16197 | Cyp2c54 | MMT00065977   | 1 |
| 7094 | 16390 | Cyp2c54 | Plb1          | 1 |
| 7094 | 16553 | Cyp2c54 | Cilp2         | 1 |
| 7094 | 16664 | Cyp2c54 | Car4          | 1 |
| 7094 | 16672 | Cyp2c54 | Tmem82        | 1 |
| 7094 | 16718 | Cyp2c54 | Zbtb7c        | 1 |
| 7094 | 16794 | Cyp2c54 | Chrn1         | 1 |
| 7094 | 16957 | Cyp2c54 | MMT00046108   | 1 |
| 7094 | 17044 | Cyp2c54 | Gpr55         | 1 |
| 7094 | 17122 | Cyp2c54 | MMT00068814   | 1 |
| 7094 | 17171 | Cyp2c54 | MMT00045847   | 1 |
| 7094 | 17337 | Cyp2c54 | 1810065E05Rik | 1 |
| 7094 | 17417 | Cyp2c54 | Pxn           | 1 |
| 7094 | 17422 | Cyp2c54 | Dctd          | 1 |
| 7094 | 17578 | Cyp2c54 | Kif19a        | 1 |
| 7094 | 17613 | Cyp2c54 | P2rx7         | 1 |
| 7094 | 17750 | Cyp2c54 | Hs6st2        | 1 |
| 7094 | 17890 | Cyp2c54 | 2610021K21Rik | 1 |
| 7094 | 17960 | Cyp2c54 | Yod1          | 1 |
| 7094 | 18124 | Cyp2c54 | Ptptr         | 1 |
| 7094 | 18162 | Cyp2c54 | BC049352      | 1 |
| 7094 | 18325 | Cyp2c54 | Cst10         | 1 |
| 7094 | 18409 | Cyp2c54 | Nicn1         | 1 |
| 7094 | 18525 | Cyp2c54 | Mpped1        | 1 |
| 7094 | 18620 | Cyp2c54 | Slmap         | 1 |
| 7094 | 18651 | Cyp2c54 | Tulp2         | 1 |
| 7094 | 18699 | Cyp2c54 | 2700089E24Rik | 1 |
| 7094 | 18790 | Cyp2c54 | Car3          | 1 |
| 7094 | 18892 | Cyp2c54 | Cyp4f40       | 1 |
| 7094 | 19219 | Cyp2c54 | MMT00015104   | 1 |
| 7094 | 19267 | Cyp2c54 | Olf1341       | 1 |
| 7094 | 19333 | Cyp2c54 | Ccdc13        | 1 |
| 7094 | 19351 | Cyp2c54 | Prkcsb        | 1 |
| 7094 | 19432 | Cyp2c54 | MMT00068429   | 1 |
| 7094 | 19436 | Cyp2c54 | Dapp1         | 1 |
| 7094 | 19483 | Cyp2c54 | Depdc2        | 1 |
| 7094 | 19645 | Cyp2c54 | Il12rb2       | 1 |

|      |       |         |               |    |
|------|-------|---------|---------------|----|
| 7094 | 19672 | Cyp2c54 | Cldn19        | 1  |
| 7094 | 19806 | Cyp2c54 | 4732429D16Rik | 1  |
| 7094 | 20089 | Cyp2c54 | MMT00015975   | 1  |
| 7094 | 20158 | Cyp2c54 | Slc38a1       | 1  |
| 7094 | 20255 | Cyp2c54 | Elfn2         | 1  |
| 7094 | 20319 | Cyp2c54 | Syne2         | 1  |
| 7094 | 20419 | Cyp2c54 | Adra1b        | 1  |
| 7094 | 20506 | Cyp2c54 | 1700011F03Rik | 1  |
| 7094 | 20566 | Cyp2c54 | Tnni2         | 1  |
| 7094 | 20588 | Cyp2c54 | Brd2          | 1  |
| 7094 | 20735 | Cyp2c54 | Tnrc6b        | 1  |
| 7094 | 20736 | Cyp2c54 | Itgb1bp1      | 1  |
| 7094 | 20908 | Cyp2c54 | Olf583        | 1  |
| 7094 | 20925 | Cyp2c54 | 2810410L24Rik | 1  |
| 7094 | 20944 | Cyp2c54 | Tmem164       | 1  |
| 7094 | 21209 | Cyp2c54 | Ebf4          | 1  |
| 7094 | 21511 | Cyp2c54 | MMT00054100   | 1  |
| 7094 | 21595 | Cyp2c54 | Trpv1         | 1  |
| 7094 | 21723 | Cyp2c54 | Homer1        | 1  |
| 7094 | 21866 | Cyp2c54 | Hhip1         | 1  |
| 7094 | 21923 | Cyp2c54 | Olf585        | 1  |
| 7094 | 21931 | Cyp2c54 | Nrxn3         | 1  |
| 7094 | 22073 | Cyp2c54 | Lrig3         | 1  |
| 7094 | 22125 | Cyp2c54 | Gab1          | 1  |
| 7094 | 22150 | Cyp2c54 | Fhdc1         | 1  |
| 7094 | 22271 | Cyp2c54 | Cyp2c29       | 1  |
| 7094 | 22434 | Cyp2c54 | Olf1255       | 1  |
| 7094 | 22555 | Cyp2c54 | Ela2          | 1  |
| 7094 | 22559 | Cyp2c54 | MMT00031309   | 1  |
| 7094 | 22733 | Cyp2c54 | Alpk3         | 1  |
| 7094 | 22750 | Cyp2c54 | Mupcdh        | 1  |
| 7094 | 22762 | Cyp2c54 | Slc6a4        | 1  |
| 7094 | 22802 | Cyp2c54 | Svs2          | 1  |
| 7094 | 22966 | Cyp2c54 | Epha4         | 1  |
| 7094 | 23056 | Cyp2c54 | Ccdc135       | 1  |
| 7094 | 23070 | Cyp2c54 | BC024659      | 1  |
| 7094 | 23079 | Cyp2c54 | Spag17        | 1  |
| 7094 | 23112 | Cyp2c54 | Gys1          | 1  |
| 7094 | 23119 | Cyp2c54 | Cps1          | 1  |
| 7094 | 23454 | Cyp2c54 | Znhit1        | 1  |
| 7094 | 23528 | Cyp2c54 | 0610038L08Rik | 1  |
| 7094 | 23531 | Cyp2c54 | Foxb2         | 1  |
| 7094 | 23546 | Cyp2c54 | Zzef1         | 1  |
| 7094 | 23591 | Cyp2c54 | Dlg4          | 1  |
| 7094 | 23614 | Cyp2c54 | G630016D24Rik | 1  |
| 7094 | 23651 | Cyp2c54 | MMT00027295   | 1  |
| 7100 | 3654  | Tomm22  | St13          | -1 |
| 7100 | 7021  | Tomm22  | Slc16a8       | -1 |
| 7100 | 7100  | Tomm22  | Tomm22        | 1  |
| 7100 | 9540  | Tomm22  | Csnk1e        | 1  |
| 7100 | 10482 | Tomm22  | Mcat          | 1  |
| 7100 | 16153 | Tomm22  | Syng1         | -1 |
| 7100 | 16467 | Tomm22  | Card10        | 1  |
| 7100 | 19955 | Tomm22  | Cbx2          | -1 |
| 7100 | 21526 | Tomm22  | Mkl1          | -1 |
| 7100 | 22475 | Tomm22  | Sh3bp1        | 1  |
| 7101 | 2142  | Gimap6  | Phldb1        | 1  |
| 7105 | 12398 | Plac8   | Ifi44         | 1  |
| 7116 | 1162  | Katnal1 | Cpsf4         | -1 |



|      |       |               |               |    |
|------|-------|---------------|---------------|----|
| 7116 | 7083  | Katnal1       | MMT00044154   | 1  |
| 7116 | 7116  | Katnal1       | Katnal1       | 1  |
| 7116 | 7378  | Katnal1       | 170001J03Rik  | 1  |
| 7116 | 7821  | Katnal1       | MMT00042003   | 1  |
| 7116 | 12377 | Katnal1       | MMT00050540   | 1  |
| 7116 | 15480 | Katnal1       | MMT00078167   | 1  |
| 7116 | 17535 | Katnal1       | MMT00008110   | 1  |
| 7116 | 17616 | Katnal1       | Flt1          | 1  |
| 7120 | 4443  | Dusp1         | Zfp790        | 1  |
| 7120 | 9745  | Dusp1         | Gadd45g       | 1  |
| 7124 | 21425 | Dnajb13       | Rab6          | 1  |
| 7135 | 17707 | Ezr           | Rshl2b        | 1  |
| 7135 | 22104 | Ezr           | Rnf123        | 1  |
| 7136 | 6564  | Id3           | Cebpd         | -1 |
| 7136 | 8816  | Id3           | Nfkbia        | -1 |
| 7136 | 9745  | Id3           | Gadd45g       | -1 |
| 7136 | 15826 | Id3           | Arl4d         | -1 |
| 7159 | 874   | 1700031F05Rik | Aldh1a7       | -1 |
| 7159 | 1257  | 1700031F05Rik | Slc25a45      | 1  |
| 7159 | 1936  | 1700031F05Rik | Cbwd1         | -1 |
| 7159 | 5833  | 1700031F05Rik | Kcnk7         | 1  |
| 7159 | 7159  | 1700031F05Rik | 1700031F05Rik | 1  |
| 7159 | 8443  | 1700031F05Rik | Pola2         | 1  |
| 7159 | 8902  | 1700031F05Rik | Aldh3b1       | -1 |
| 7159 | 15334 | 1700031F05Rik | Rnaseh2c      | -1 |
| 7159 | 17447 | 1700031F05Rik | Ctsf          | -1 |
| 7159 | 19744 | 1700031F05Rik | Acy3          | 1  |
| 7159 | 21015 | 1700031F05Rik | MMT00014048   | -1 |
| 7163 | 5345  | Ptplb         | MMT00023326   | 1  |
| 7163 | 12761 | Ptplb         | Tsc22d3       | 1  |
| 7173 | 1466  | Trim59        | Ubap2l        | 1  |
| 7173 | 2752  | Trim59        | Fcgr1         | 1  |
| 7173 | 5508  | Trim59        | Lrig2         | -1 |
| 7173 | 9519  | Trim59        | Fstl5         | -1 |
| 7173 | 10521 | Trim59        | Ttf2          | 1  |
| 7173 | 12367 | Trim59        | MMT00072365   | -1 |
| 7173 | 12716 | Trim59        | 5830417110Rik | -1 |
| 7173 | 16416 | Trim59        | Commd2        | 1  |
| 7209 | 15826 | Gpa33         | Arl4d         | -1 |
| 7224 | 1297  | Pafah2        | Phox2a        | 1  |
| 7225 | 1297  | Tiam1         | Phox2a        | 1  |
| 7232 | 1602  | MMT00078948   | Mina          | -1 |
| 7240 | 16618 | C730007P19Rik | Hps3          | -1 |
| 7240 | 19700 | C730007P19Rik | E030011K20Rik | 1  |
| 7258 | 1447  | Bmp2k         | Naaa          | 1  |
| 7258 | 6330  | Bmp2k         | Dgkq          | -1 |
| 7258 | 8807  | Bmp2k         | Ankrd56       | 1  |
| 7258 | 16066 | Bmp2k         | Coq2          | -1 |
| 7261 | 1297  | Ttc7b         | Phox2a        | 1  |
| 7273 | 15384 | Rnf103        | Mat2a         | 1  |
| 7282 | 15255 | Ppic          | Ccl8          | 1  |
| 7284 | 143   | MMT00008674   | Gvin1         | 1  |
| 7284 | 3683  | MMT00008674   | Oas2          | 1  |
| 7284 | 5853  | MMT00008674   | Trim30        | 1  |
| 7284 | 6824  | MMT00008674   | Irf7          | 1  |
| 7284 | 12398 | MMT00008674   | Ifi44         | 1  |
| 7284 | 13309 | MMT00008674   | Tgtp          | 1  |
| 7311 | 403   | Lsm6          | Leprotl1      | 1  |
| 7311 | 1755  | Lsm6          | Ocel1         | -1 |

|      |       |               |               |    |
|------|-------|---------------|---------------|----|
| 7311 | 5433  | Lsm6          | 2410004L22Rik | 1  |
| 7311 | 5925  | Lsm6          | Tmem59l       | 1  |
| 7311 | 13732 | Lsm6          | Tpm4          | 1  |
| 7311 | 21840 | Lsm6          | Tmie          | -1 |
| 7321 | 2938  | Rdbp          | H2-T23        | -1 |
| 7321 | 7088  | Rdbp          | Slc37a1       | -1 |
| 7321 | 8767  | Rdbp          | Rgl2          | -1 |
| 7321 | 10667 | Rdbp          | H2-Eb1        | -1 |
| 7321 | 13493 | Rdbp          | Ring1         | -1 |
| 7321 | 16692 | Rdbp          | Bat4          | -1 |
| 7321 | 17412 | Rdbp          | Aif1          | 1  |
| 7321 | 20238 | Rdbp          | H2-T9         | -1 |
| 7321 | 21295 | Rdbp          | Snf1lk        | 1  |
| 7342 | 2752  | Anp32e        | Fcgr1         | -1 |
| 7343 | 19462 | Mcm10         | 4933439C20Rik | 1  |
| 7368 | 15255 | Adam8         | Ccl8          | 1  |
| 7370 | 2456  | Spop          | Mrpl10        | -1 |
| 7370 | 4046  | Spop          | Phb           | -1 |
| 7370 | 6376  | Spop          | Nle1          | -1 |
| 7370 | 10498 | Spop          | Ube2z         | 1  |
| 7370 | 12302 | Spop          | Cbx1          | -1 |
| 7370 | 13810 | Spop          | 1110036O03Rik | 1  |
| 7370 | 23295 | Spop          | Snx11         | -1 |
| 7370 | 23307 | Spop          | Myst2         | -1 |
| 7372 | 15321 | Fastk         | Pus7          | -1 |
| 7377 | 10978 | Suds3         | MMT00078322   | 1  |
| 7378 | 7116  | 1700001J03Rik | Katnal1       | 1  |
| 7378 | 7378  | 1700001J03Rik | 1700001J03Rik | 1  |
| 7378 | 17616 | 1700001J03Rik | Flt1          | 1  |
| 7391 | 5284  | Bhlhb8        | Npffr1        | 1  |
| 7391 | 23014 | Bhlhb8        | MMT00077643   | 1  |
| 7396 | 2294  | Lao1          | AU040829      | 1  |
| 7396 | 2708  | Lao1          | Sgk1          | 1  |
| 7396 | 2794  | Lao1          | Map3k6        | 1  |
| 7396 | 5345  | Lao1          | MMT00023326   | 1  |
| 7396 | 8171  | Lao1          | Spink8        | 1  |
| 7396 | 8980  | Lao1          | Plekhf1       | 1  |
| 7396 | 11305 | Lao1          | Galntl2       | 1  |
| 7396 | 11345 | Lao1          | Slc40a1       | -1 |
| 7396 | 12649 | Lao1          | Itgad         | 1  |
| 7396 | 12761 | Lao1          | Tsc22d3       | 1  |
| 7396 | 12834 | Lao1          | Fabp7         | -1 |
| 7396 | 12989 | Lao1          | 1190002H23Rik | 1  |
| 7396 | 14233 | Lao1          | Fgfr1         | -1 |
| 7396 | 16494 | Lao1          | 2310007D09Rik | 1  |
| 7396 | 17143 | Lao1          | 2010002N04Rik | 1  |
| 7396 | 18553 | Lao1          | Tekt4         | 1  |
| 7396 | 19621 | Lao1          | Cldn5         | -1 |
| 7396 | 21142 | Lao1          | Gm129         | 1  |
| 7396 | 21313 | Lao1          | Rhou          | 1  |
| 7396 | 21380 | Lao1          | Ier5          | -1 |
| 7396 | 21992 | Lao1          | Lap3          | -1 |
| 7396 | 22989 | Lao1          | Lmcd1         | -1 |
| 7436 | 10    | 1700063K16Rik | NaN           | 1  |
| 7436 | 115   | 1700063K16Rik | NaN           | 1  |
| 7436 | 141   | 1700063K16Rik | Jag1          | 1  |
| 7436 | 219   | 1700063K16Rik | MMT00058440   | 1  |
| 7436 | 225   | 1700063K16Rik | MMT00073704   | 1  |
| 7436 | 236   | 1700063K16Rik | Bbs9          | 1  |

|      |      |               |               |   |
|------|------|---------------|---------------|---|
| 7436 | 316  | 1700063K16Rik | 4930471G03Rik | 1 |
| 7436 | 317  | 1700063K16Rik | Ceacam13      | 1 |
| 7436 | 346  | 1700063K16Rik | Olf1484       | 1 |
| 7436 | 391  | 1700063K16Rik | 4933416I08Rik | 1 |
| 7436 | 484  | 1700063K16Rik | Atp4a         | 1 |
| 7436 | 486  | 1700063K16Rik | Josd2         | 1 |
| 7436 | 552  | 1700063K16Rik | MMT00013481   | 1 |
| 7436 | 558  | 1700063K16Rik | Crebl1        | 1 |
| 7436 | 584  | 1700063K16Rik | Tmem207       | 1 |
| 7436 | 663  | 1700063K16Rik | Muc19         | 1 |
| 7436 | 985  | 1700063K16Rik | Hsd3b6        | 1 |
| 7436 | 1021 | 1700063K16Rik | Rhpn2         | 1 |
| 7436 | 1058 | 1700063K16Rik | Olf1868       | 1 |
| 7436 | 1059 | 1700063K16Rik | P2rx6         | 1 |
| 7436 | 1122 | 1700063K16Rik | Pax3          | 1 |
| 7436 | 1137 | 1700063K16Rik | Mlxip         | 1 |
| 7436 | 1170 | 1700063K16Rik | Faim3         | 1 |
| 7436 | 1354 | 1700063K16Rik | Lsmd1         | 1 |
| 7436 | 1436 | 1700063K16Rik | Nfu1          | 1 |
| 7436 | 1518 | 1700063K16Rik | Amigo2        | 1 |
| 7436 | 1570 | 1700063K16Rik | Olf1522       | 1 |
| 7436 | 1619 | 1700063K16Rik | Fbxw17        | 1 |
| 7436 | 1679 | 1700063K16Rik | MMT00009278   | 1 |
| 7436 | 1696 | 1700063K16Rik | V1re9         | 1 |
| 7436 | 1771 | 1700063K16Rik | Park2         | 1 |
| 7436 | 1795 | 1700063K16Rik | Rabgap1l      | 1 |
| 7436 | 1829 | 1700063K16Rik | MMT00030026   | 1 |
| 7436 | 1876 | 1700063K16Rik | Amdhd1        | 1 |
| 7436 | 1881 | 1700063K16Rik | Slc16a14      | 1 |
| 7436 | 1907 | 1700063K16Rik | D230010M03Rik | 1 |
| 7436 | 1920 | 1700063K16Rik | Oas1e         | 1 |
| 7436 | 2067 | 1700063K16Rik | Myo1a         | 1 |
| 7436 | 2226 | 1700063K16Rik | Amt           | 1 |
| 7436 | 2283 | 1700063K16Rik | MMT00029554   | 1 |
| 7436 | 2326 | 1700063K16Rik | zfp507        | 1 |
| 7436 | 2658 | 1700063K16Rik | Fzd2          | 1 |
| 7436 | 2802 | 1700063K16Rik | Lin7c         | 1 |
| 7436 | 2819 | 1700063K16Rik | Kcnk5         | 1 |
| 7436 | 2870 | 1700063K16Rik | D5Erd577e     | 1 |
| 7436 | 3080 | 1700063K16Rik | MMT00014480   | 1 |
| 7436 | 3127 | 1700063K16Rik | Plcd1         | 1 |
| 7436 | 3144 | 1700063K16Rik | Ube2j2        | 1 |
| 7436 | 3166 | 1700063K16Rik | Vmn2r57       | 1 |
| 7436 | 3208 | 1700063K16Rik | 4930511111Rik | 1 |
| 7436 | 3254 | 1700063K16Rik | Grifin        | 1 |
| 7436 | 3349 | 1700063K16Rik | MMT00043953   | 1 |
| 7436 | 3362 | 1700063K16Rik | Fgf8          | 1 |
| 7436 | 3383 | 1700063K16Rik | Cd99          | 1 |
| 7436 | 3402 | 1700063K16Rik | A930018P22Rik | 1 |
| 7436 | 3511 | 1700063K16Rik | Rnf182        | 1 |
| 7436 | 3841 | 1700063K16Rik | MMT00014519   | 1 |
| 7436 | 3886 | 1700063K16Rik | MMT00047275   | 1 |
| 7436 | 3948 | 1700063K16Rik | V1rb4         | 1 |
| 7436 | 3986 | 1700063K16Rik | Ep400         | 1 |
| 7436 | 4079 | 1700063K16Rik | Emilin3       | 1 |
| 7436 | 4088 | 1700063K16Rik | Pdcl2         | 1 |
| 7436 | 4166 | 1700063K16Rik | Cblc          | 1 |
| 7436 | 4199 | 1700063K16Rik | B3galt5       | 1 |
| 7436 | 4246 | 1700063K16Rik | Fbxw12        | 1 |

|      |      |               |               |   |
|------|------|---------------|---------------|---|
| 7436 | 4311 | 1700063K16Rik | MMT00033987   | 1 |
| 7436 | 4337 | 1700063K16Rik | Myst3         | 1 |
| 7436 | 4407 | 1700063K16Rik | 4930429B21Rik | 1 |
| 7436 | 4425 | 1700063K16Rik | Olf1346       | 1 |
| 7436 | 4430 | 1700063K16Rik | Ankrd36       | 1 |
| 7436 | 4717 | 1700063K16Rik | Cd177         | 1 |
| 7436 | 4870 | 1700063K16Rik | Olf1550       | 1 |
| 7436 | 5126 | 1700063K16Rik | Fcnb          | 1 |
| 7436 | 5265 | 1700063K16Rik | A3galt2       | 1 |
| 7436 | 5377 | 1700063K16Rik | MMT00077700   | 1 |
| 7436 | 5380 | 1700063K16Rik | Olf1403       | 1 |
| 7436 | 5494 | 1700063K16Rik | Gpr101        | 1 |
| 7436 | 5505 | 1700063K16Rik | Thap2         | 1 |
| 7436 | 5527 | 1700063K16Rik | Zfp398        | 1 |
| 7436 | 5577 | 1700063K16Rik | MMT00009628   | 1 |
| 7436 | 5694 | 1700063K16Rik | Sp7           | 1 |
| 7436 | 5748 | 1700063K16Rik | Brsk2         | 1 |
| 7436 | 5783 | 1700063K16Rik | 4833413O15Rik | 1 |
| 7436 | 5908 | 1700063K16Rik | MMT00027552   | 1 |
| 7436 | 5929 | 1700063K16Rik | Cpz           | 1 |
| 7436 | 6367 | 1700063K16Rik | Lhfp          | 1 |
| 7436 | 6403 | 1700063K16Rik | MMT00039607   | 1 |
| 7436 | 6422 | 1700063K16Rik | Grk5          | 1 |
| 7436 | 6429 | 1700063K16Rik | Sim2          | 1 |
| 7436 | 6719 | 1700063K16Rik | Cacng8        | 1 |
| 7436 | 6754 | 1700063K16Rik | Trpv3         | 1 |
| 7436 | 6880 | 1700063K16Rik | Dmrtb1        | 1 |
| 7436 | 6992 | 1700063K16Rik | Olf172        | 1 |
| 7436 | 7041 | 1700063K16Rik | Sp140         | 1 |
| 7436 | 7085 | 1700063K16Rik | St8sia2       | 1 |
| 7436 | 7094 | 1700063K16Rik | Cyp2c54       | 1 |
| 7436 | 7132 | 1700063K16Rik | Sp9           | 1 |
| 7436 | 7279 | 1700063K16Rik | Cldn13        | 1 |
| 7436 | 7340 | 1700063K16Rik | Ascc3l1       | 1 |
| 7436 | 7436 | 1700063K16Rik | 1700063K16Rik | 1 |
| 7436 | 7577 | 1700063K16Rik | Cldn8         | 1 |
| 7436 | 7698 | 1700063K16Rik | Klrb1a        | 1 |
| 7436 | 7721 | 1700063K16Rik | MMT00000356   | 1 |
| 7436 | 7879 | 1700063K16Rik | Ifitm3        | 1 |
| 7436 | 7916 | 1700063K16Rik | MMT00016293   | 1 |
| 7436 | 7959 | 1700063K16Rik | Tbx5          | 1 |
| 7436 | 7974 | 1700063K16Rik | Arhgef7       | 1 |
| 7436 | 8157 | 1700063K16Rik | MMT00005305   | 1 |
| 7436 | 8170 | 1700063K16Rik | Snx22         | 1 |
| 7436 | 8189 | 1700063K16Rik | Cflar         | 1 |
| 7436 | 8256 | 1700063K16Rik | Tjap1         | 1 |
| 7436 | 8620 | 1700063K16Rik | MMT00048670   | 1 |
| 7436 | 8644 | 1700063K16Rik | V1rg11        | 1 |
| 7436 | 8709 | 1700063K16Rik | Trim58        | 1 |
| 7436 | 8905 | 1700063K16Rik | Trim67        | 1 |
| 7436 | 8952 | 1700063K16Rik | Marco         | 1 |
| 7436 | 9128 | 1700063K16Rik | Nxph1         | 1 |
| 7436 | 9421 | 1700063K16Rik | Serpinf2      | 1 |
| 7436 | 9436 | 1700063K16Rik | Cntnap2       | 1 |
| 7436 | 9446 | 1700063K16Rik | MMT00017417   | 1 |
| 7436 | 9463 | 1700063K16Rik | Zdhc23        | 1 |
| 7436 | 9468 | 1700063K16Rik | Gtf2a1l       | 1 |
| 7436 | 9485 | 1700063K16Rik | 2700081O15Rik | 1 |
| 7436 | 9743 | 1700063K16Rik | Gm189         | 1 |

|      |       |               |               |   |
|------|-------|---------------|---------------|---|
| 7436 | 9923  | 1700063K16Rik | Tssk6         | 1 |
| 7436 | 9946  | 1700063K16Rik | Stam2         | 1 |
| 7436 | 9954  | 1700063K16Rik | MMT00047280   | 1 |
| 7436 | 9990  | 1700063K16Rik | MMT00081303   | 1 |
| 7436 | 10055 | 1700063K16Rik | Tpte          | 1 |
| 7436 | 10195 | 1700063K16Rik | Klf1          | 1 |
| 7436 | 10234 | 1700063K16Rik | C230093N12Rik | 1 |
| 7436 | 10240 | 1700063K16Rik | Cyp2w1        | 1 |
| 7436 | 10260 | 1700063K16Rik | Zfp36l2       | 1 |
| 7436 | 10281 | 1700063K16Rik | Slc15a1       | 1 |
| 7436 | 10377 | 1700063K16Rik | A430105I19Rik | 1 |
| 7436 | 10452 | 1700063K16Rik | Grn           | 1 |
| 7436 | 10520 | 1700063K16Rik | Xkr6          | 1 |
| 7436 | 10576 | 1700063K16Rik | Xrcc3         | 1 |
| 7436 | 10657 | 1700063K16Rik | Rnf12         | 1 |
| 7436 | 10687 | 1700063K16Rik | Itpkb         | 1 |
| 7436 | 10689 | 1700063K16Rik | Pitpnb        | 1 |
| 7436 | 10723 | 1700063K16Rik | 4930556N09Rik | 1 |
| 7436 | 10806 | 1700063K16Rik | Rnf212        | 1 |
| 7436 | 10835 | 1700063K16Rik | Kcnd2         | 1 |
| 7436 | 10838 | 1700063K16Rik | Spdef         | 1 |
| 7436 | 10886 | 1700063K16Rik | Fndc3b        | 1 |
| 7436 | 11001 | 1700063K16Rik | Pou6f2        | 1 |
| 7436 | 11016 | 1700063K16Rik | Pcp2          | 1 |
| 7436 | 11017 | 1700063K16Rik | Olf926        | 1 |
| 7436 | 11256 | 1700063K16Rik | H2-DMa        | 1 |
| 7436 | 11303 | 1700063K16Rik | Slc5a12       | 1 |
| 7436 | 11350 | 1700063K16Rik | 9030420J04Rik | 1 |
| 7436 | 11424 | 1700063K16Rik | lqcf3         | 1 |
| 7436 | 11425 | 1700063K16Rik | Evx2          | 1 |
| 7436 | 11507 | 1700063K16Rik | Adarb2        | 1 |
| 7436 | 11665 | 1700063K16Rik | Hyal1         | 1 |
| 7436 | 11677 | 1700063K16Rik | 5730507C01Rik | 1 |
| 7436 | 11689 | 1700063K16Rik | MMT00078109   | 1 |
| 7436 | 11805 | 1700063K16Rik | Bat2          | 1 |
| 7436 | 11809 | 1700063K16Rik | 4930534B04Rik | 1 |
| 7436 | 11837 | 1700063K16Rik | Paqr6         | 1 |
| 7436 | 11966 | 1700063K16Rik | Zfp280b       | 1 |
| 7436 | 12046 | 1700063K16Rik | Impdh1        | 1 |
| 7436 | 12062 | 1700063K16Rik | Dzip1l        | 1 |
| 7436 | 12188 | 1700063K16Rik | Chek2         | 1 |
| 7436 | 12248 | 1700063K16Rik | Tnp2          | 1 |
| 7436 | 12272 | 1700063K16Rik | Fshr          | 1 |
| 7436 | 12372 | 1700063K16Rik | MMT00039397   | 1 |
| 7436 | 12422 | 1700063K16Rik | Eme1          | 1 |
| 7436 | 12430 | 1700063K16Rik | Fst           | 1 |
| 7436 | 12457 | 1700063K16Rik | MMT00072579   | 1 |
| 7436 | 12497 | 1700063K16Rik | Kir3dl2       | 1 |
| 7436 | 12568 | 1700063K16Rik | Lrrc37a       | 1 |
| 7436 | 12604 | 1700063K16Rik | Acr           | 1 |
| 7436 | 12651 | 1700063K16Rik | Tsc22d4       | 1 |
| 7436 | 12696 | 1700063K16Rik | RP23-392P11.3 | 1 |
| 7436 | 12753 | 1700063K16Rik | MMT00043344   | 1 |
| 7436 | 12772 | 1700063K16Rik | Axl           | 1 |
| 7436 | 12826 | 1700063K16Rik | Zfp354c       | 1 |
| 7436 | 13102 | 1700063K16Rik | Prkaa1        | 1 |
| 7436 | 13141 | 1700063K16Rik | MMT00071569   | 1 |
| 7436 | 13201 | 1700063K16Rik | Rbl2          | 1 |
| 7436 | 13311 | 1700063K16Rik | Prl3c1        | 1 |

|      |       |               |               |   |
|------|-------|---------------|---------------|---|
| 7436 | 13487 | 1700063K16Rik | A230051G13Rik | 1 |
| 7436 | 13496 | 1700063K16Rik | H1fnt         | 1 |
| 7436 | 13570 | 1700063K16Rik | Olf1r171      | 1 |
| 7436 | 13676 | 1700063K16Rik | MMT00010979   | 1 |
| 7436 | 13742 | 1700063K16Rik | 1700024P16Rik | 1 |
| 7436 | 13767 | 1700063K16Rik | Kcnk15        | 1 |
| 7436 | 13800 | 1700063K16Rik | Lrp5          | 1 |
| 7436 | 13860 | 1700063K16Rik | Cpt1b         | 1 |
| 7436 | 13890 | 1700063K16Rik | Olf1r1263     | 1 |
| 7436 | 14035 | 1700063K16Rik | Lrrc52        | 1 |
| 7436 | 14149 | 1700063K16Rik | BC048562      | 1 |
| 7436 | 14313 | 1700063K16Rik | Tnk1          | 1 |
| 7436 | 14510 | 1700063K16Rik | Olf1r643      | 1 |
| 7436 | 14519 | 1700063K16Rik | Trex1         | 1 |
| 7436 | 14565 | 1700063K16Rik | Rnf207        | 1 |
| 7436 | 14754 | 1700063K16Rik | Atoh8         | 1 |
| 7436 | 15200 | 1700063K16Rik | Gk2           | 1 |
| 7436 | 15424 | 1700063K16Rik | Atp6v1g2      | 1 |
| 7436 | 15446 | 1700063K16Rik | Cd320         | 1 |
| 7436 | 15626 | 1700063K16Rik | MMT00035685   | 1 |
| 7436 | 15697 | 1700063K16Rik | Tbc1d8b       | 1 |
| 7436 | 15743 | 1700063K16Rik | Hoxc6         | 1 |
| 7436 | 15747 | 1700063K16Rik | Sfrs1         | 1 |
| 7436 | 15847 | 1700063K16Rik | Gm392         | 1 |
| 7436 | 15885 | 1700063K16Rik | Adamts7       | 1 |
| 7436 | 16104 | 1700063K16Rik | Ugt3a2        | 1 |
| 7436 | 16157 | 1700063K16Rik | D9Erd280e     | 1 |
| 7436 | 16197 | 1700063K16Rik | MMT00065977   | 1 |
| 7436 | 16226 | 1700063K16Rik | MMT00033542   | 1 |
| 7436 | 16323 | 1700063K16Rik | Smpd3         | 1 |
| 7436 | 16390 | 1700063K16Rik | Pib1          | 1 |
| 7436 | 16491 | 1700063K16Rik | 6330500D04Rik | 1 |
| 7436 | 16553 | 1700063K16Rik | Cilp2         | 1 |
| 7436 | 16664 | 1700063K16Rik | Car4          | 1 |
| 7436 | 16672 | 1700063K16Rik | Tmem82        | 1 |
| 7436 | 16718 | 1700063K16Rik | Zbtb7c        | 1 |
| 7436 | 16794 | 1700063K16Rik | Chrn1         | 1 |
| 7436 | 16957 | 1700063K16Rik | MMT00046108   | 1 |
| 7436 | 17044 | 1700063K16Rik | Gpr55         | 1 |
| 7436 | 17068 | 1700063K16Rik | Olf1r661      | 1 |
| 7436 | 17122 | 1700063K16Rik | MMT00068814   | 1 |
| 7436 | 17123 | 1700063K16Rik | Olf1r1511     | 1 |
| 7436 | 17149 | 1700063K16Rik | Pms2          | 1 |
| 7436 | 17171 | 1700063K16Rik | MMT00045847   | 1 |
| 7436 | 17263 | 1700063K16Rik | Ccnb3         | 1 |
| 7436 | 17337 | 1700063K16Rik | 1810065E05Rik | 1 |
| 7436 | 17413 | 1700063K16Rik | MMT00043948   | 1 |
| 7436 | 17417 | 1700063K16Rik | Pxn           | 1 |
| 7436 | 17422 | 1700063K16Rik | Dctd          | 1 |
| 7436 | 17578 | 1700063K16Rik | Kif19a        | 1 |
| 7436 | 17613 | 1700063K16Rik | P2rx7         | 1 |
| 7436 | 17750 | 1700063K16Rik | Hs6st2        | 1 |
| 7436 | 17890 | 1700063K16Rik | 2610021K21Rik | 1 |
| 7436 | 17960 | 1700063K16Rik | Yod1          | 1 |
| 7436 | 18124 | 1700063K16Rik | Ptprt         | 1 |
| 7436 | 18162 | 1700063K16Rik | BC049352      | 1 |
| 7436 | 18214 | 1700063K16Rik | Ankrd40       | 1 |
| 7436 | 18325 | 1700063K16Rik | Cst10         | 1 |
| 7436 | 18409 | 1700063K16Rik | Nicn1         | 1 |

|      |       |               |               |   |
|------|-------|---------------|---------------|---|
| 7436 | 18525 | 1700063K16Rik | Mpped1        | 1 |
| 7436 | 18620 | 1700063K16Rik | Slmap         | 1 |
| 7436 | 18651 | 1700063K16Rik | Tulp2         | 1 |
| 7436 | 18699 | 1700063K16Rik | 2700089E24Rik | 1 |
| 7436 | 18773 | 1700063K16Rik | MMT00014972   | 1 |
| 7436 | 18790 | 1700063K16Rik | Car3          | 1 |
| 7436 | 18892 | 1700063K16Rik | Cyp4f40       | 1 |
| 7436 | 18980 | 1700063K16Rik | Il7           | 1 |
| 7436 | 19219 | 1700063K16Rik | MMT00015104   | 1 |
| 7436 | 19265 | 1700063K16Rik | EG546036      | 1 |
| 7436 | 19267 | 1700063K16Rik | Olf341        | 1 |
| 7436 | 19351 | 1700063K16Rik | PrkcsH        | 1 |
| 7436 | 19420 | 1700063K16Rik | Lcn8          | 1 |
| 7436 | 19432 | 1700063K16Rik | MMT00068429   | 1 |
| 7436 | 19436 | 1700063K16Rik | Dapp1         | 1 |
| 7436 | 19483 | 1700063K16Rik | Depdc2        | 1 |
| 7436 | 19645 | 1700063K16Rik | Il12rb2       | 1 |
| 7436 | 19658 | 1700063K16Rik | Cldnd2        | 1 |
| 7436 | 19672 | 1700063K16Rik | Cldn19        | 1 |
| 7436 | 19709 | 1700063K16Rik | 1-Sep         | 1 |
| 7436 | 19722 | 1700063K16Rik | Pvrl1         | 1 |
| 7436 | 19806 | 1700063K16Rik | 4732429D16Rik | 1 |
| 7436 | 19941 | 1700063K16Rik | 1700080E11Rik | 1 |
| 7436 | 20089 | 1700063K16Rik | MMT00015975   | 1 |
| 7436 | 20158 | 1700063K16Rik | Slc38a1       | 1 |
| 7436 | 20255 | 1700063K16Rik | Elfn2         | 1 |
| 7436 | 20319 | 1700063K16Rik | Syne2         | 1 |
| 7436 | 20406 | 1700063K16Rik | Cacng2        | 1 |
| 7436 | 20419 | 1700063K16Rik | Adra1b        | 1 |
| 7436 | 20506 | 1700063K16Rik | 1700011F03Rik | 1 |
| 7436 | 20532 | 1700063K16Rik | Rnf26         | 1 |
| 7436 | 20566 | 1700063K16Rik | Tnni2         | 1 |
| 7436 | 20588 | 1700063K16Rik | Brd2          | 1 |
| 7436 | 20735 | 1700063K16Rik | Tnrc6b        | 1 |
| 7436 | 20908 | 1700063K16Rik | Olf3583       | 1 |
| 7436 | 20925 | 1700063K16Rik | 2810410L24Rik | 1 |
| 7436 | 20944 | 1700063K16Rik | Tmem164       | 1 |
| 7436 | 21209 | 1700063K16Rik | Ebf4          | 1 |
| 7436 | 21291 | 1700063K16Rik | Slc39a4       | 1 |
| 7436 | 21511 | 1700063K16Rik | MMT00054100   | 1 |
| 7436 | 21563 | 1700063K16Rik | Arhgap9       | 1 |
| 7436 | 21595 | 1700063K16Rik | Trpv1         | 1 |
| 7436 | 21717 | 1700063K16Rik | EG628893      | 1 |
| 7436 | 21723 | 1700063K16Rik | Homer1        | 1 |
| 7436 | 21866 | 1700063K16Rik | Hhip1         | 1 |
| 7436 | 21923 | 1700063K16Rik | Olf3585       | 1 |
| 7436 | 21931 | 1700063K16Rik | Nrxn3         | 1 |
| 7436 | 22073 | 1700063K16Rik | Lrig3         | 1 |
| 7436 | 22125 | 1700063K16Rik | Gab1          | 1 |
| 7436 | 22150 | 1700063K16Rik | Fhdc1         | 1 |
| 7436 | 22271 | 1700063K16Rik | Cyp2c29       | 1 |
| 7436 | 22434 | 1700063K16Rik | Olf31255      | 1 |
| 7436 | 22541 | 1700063K16Rik | 4632413I24Rik | 1 |
| 7436 | 22555 | 1700063K16Rik | Ela2          | 1 |
| 7436 | 22559 | 1700063K16Rik | MMT00031309   | 1 |
| 7436 | 22733 | 1700063K16Rik | Alpk3         | 1 |
| 7436 | 22750 | 1700063K16Rik | Mupcdh        | 1 |
| 7436 | 22762 | 1700063K16Rik | Slc6a4        | 1 |
| 7436 | 22802 | 1700063K16Rik | Svs2          | 1 |

|      |       |               |               |    |
|------|-------|---------------|---------------|----|
| 7436 | 22966 | 1700063K16Rik | Epha4         | 1  |
| 7436 | 23056 | 1700063K16Rik | Ccdc135       | 1  |
| 7436 | 23070 | 1700063K16Rik | BC024659      | 1  |
| 7436 | 23079 | 1700063K16Rik | Spag17        | 1  |
| 7436 | 23109 | 1700063K16Rik | A430088P11Rik | 1  |
| 7436 | 23112 | 1700063K16Rik | Gys1          | 1  |
| 7436 | 23119 | 1700063K16Rik | Cps1          | 1  |
| 7436 | 23454 | 1700063K16Rik | Znhit1        | 1  |
| 7436 | 23528 | 1700063K16Rik | 0610038L08Rik | 1  |
| 7436 | 23531 | 1700063K16Rik | Foxb2         | 1  |
| 7436 | 23546 | 1700063K16Rik | Zzef1         | 1  |
| 7436 | 23561 | 1700063K16Rik | Sox14         | 1  |
| 7436 | 23591 | 1700063K16Rik | Dlg4          | 1  |
| 7436 | 23651 | 1700063K16Rik | MMT00027295   | 1  |
| 7436 | 23685 | 1700063K16Rik | Tbxas1        | 1  |
| 7452 | 11130 | Abcc9         | Slco1c1       | -1 |
| 7452 | 14557 | Abcc9         | Pyroxd1       | -1 |
| 7479 | 2794  | Mcf2l         | Map3k6        | 1  |
| 7479 | 4084  | Mcf2l         | Asah3l        | 1  |
| 7479 | 5345  | Mcf2l         | MMT00023326   | 1  |
| 7479 | 8980  | Mcf2l         | Plekhf1       | 1  |
| 7479 | 11305 | Mcf2l         | Galntl2       | 1  |
| 7479 | 11345 | Mcf2l         | Slc40a1       | -1 |
| 7479 | 12761 | Mcf2l         | Tsc22d3       | 1  |
| 7479 | 12989 | Mcf2l         | 1190002H23Rik | 1  |
| 7479 | 16494 | Mcf2l         | 2310007D09Rik | 1  |
| 7479 | 17143 | Mcf2l         | 2010002N04Rik | 1  |
| 7479 | 21313 | Mcf2l         | Rhou          | 1  |
| 7479 | 21380 | Mcf2l         | Ier5          | -1 |
| 7492 | 4084  | Adfp          | Asah3l        | 1  |
| 7495 | 2012  | Ugt2b5        | Cetn4         | -1 |
| 7495 | 2752  | Ugt2b5        | Fcgr1         | 1  |
| 7495 | 3159  | Ugt2b5        | Pld1          | 1  |
| 7495 | 3206  | Ugt2b5        | Gpr160        | 1  |
| 7495 | 3314  | Ugt2b5        | Wars2         | 1  |
| 7495 | 4666  | Ugt2b5        | Exosc9        | -1 |
| 7495 | 5762  | Ugt2b5        | Trpc3         | -1 |
| 7495 | 9360  | Ugt2b5        | Taf1c         | -1 |
| 7495 | 9519  | Ugt2b5        | Fstl5         | -1 |
| 7495 | 12367 | Ugt2b5        | MMT00072365   | -1 |
| 7495 | 16416 | Ugt2b5        | Commd2        | 1  |
| 7495 | 16618 | Ugt2b5        | Hps3          | -1 |
| 7495 | 19700 | Ugt2b5        | E030011K20Rik | 1  |
| 7495 | 22570 | Ugt2b5        | Phf1          | 1  |
| 7496 | 15870 | Arsi          | Aqp5          | 1  |
| 7503 | 403   | Rab11fip1     | Leprotl1      | -1 |
| 7503 | 5925  | Rab11fip1     | Tmem59l       | -1 |
| 7503 | 9729  | Rab11fip1     | Got1l1        | -1 |
| 7519 | 1014  | Gstm1         | Rtcd1         | 1  |
| 7519 | 1466  | Gstm1         | Udap2l        | 1  |
| 7519 | 2752  | Gstm1         | Fcgr1         | 1  |
| 7519 | 3314  | Gstm1         | Wars2         | 1  |
| 7519 | 5508  | Gstm1         | Lrig2         | -1 |
| 7519 | 6283  | Gstm1         | Ptpn22        | -1 |
| 7519 | 9519  | Gstm1         | Fstl5         | -1 |
| 7519 | 10521 | Gstm1         | Ttf2          | 1  |
| 7519 | 12716 | Gstm1         | 5830417I10Rik | -1 |
| 7519 | 15550 | Gstm1         | 2010200O16Rik | -1 |
| 7519 | 18673 | Gstm1         | Muc1          | 1  |



|      |       |             |               |    |
|------|-------|-------------|---------------|----|
| 7519 | 21650 | Gstm1       | Ap4b1         | 1  |
| 7519 | 22570 | Gstm1       | Phtf1         | 1  |
| 7519 | 23037 | Gstm1       | Thbs3         | 1  |
| 7524 | 2794  | Aldh4a1     | Map3k6        | 1  |
| 7524 | 6564  | Aldh4a1     | Cebpd         | 1  |
| 7524 | 8816  | Aldh4a1     | Nfkbia        | 1  |
| 7524 | 8980  | Aldh4a1     | Plekhf1       | 1  |
| 7524 | 9745  | Aldh4a1     | Gadd45g       | 1  |
| 7524 | 12761 | Aldh4a1     | Tsc22d3       | 1  |
| 7524 | 21313 | Aldh4a1     | Rhou          | 1  |
| 7580 | 812   | Slc22a20    | En2           | 1  |
| 7580 | 2424  | Slc22a20    | Unc5cl        | 1  |
| 7580 | 2801  | Slc22a20    | H2-BI         | 1  |
| 7580 | 2938  | Slc22a20    | H2-T23        | 1  |
| 7580 | 4555  | Slc22a20    | Cchcr1        | 1  |
| 7580 | 6070  | Slc22a20    | D630003M21Rik | 1  |
| 7580 | 7088  | Slc22a20    | Slc37a1       | 1  |
| 7580 | 7603  | Slc22a20    | Sod2          | 1  |
| 7580 | 8750  | Slc22a20    | 1700010I14Rik | 1  |
| 7580 | 8767  | Slc22a20    | Rgl2          | 1  |
| 7580 | 10374 | Slc22a20    | Trim15        | 1  |
| 7580 | 10667 | Slc22a20    | H2-Eb1        | 1  |
| 7580 | 10931 | Slc22a20    | Pkn3          | -1 |
| 7580 | 11475 | Slc22a20    | H2-D1         | -1 |
| 7580 | 12168 | Slc22a20    | H2-Ke6        | 1  |
| 7580 | 12694 | Slc22a20    | Riok2         | -1 |
| 7580 | 12943 | Slc22a20    | Slc25a27      | 1  |
| 7580 | 13493 | Slc22a20    | Ring1         | 1  |
| 7580 | 15580 | Slc22a20    | MMT00077001   | 1  |
| 7580 | 16067 | Slc22a20    | Pcaf          | -1 |
| 7580 | 16692 | Slc22a20    | Bat4          | 1  |
| 7580 | 17322 | Slc22a20    | Zfp758        | -1 |
| 7580 | 17412 | Slc22a20    | Aif1          | -1 |
| 7580 | 20238 | Slc22a20    | H2-T9         | 1  |
| 7580 | 21295 | Slc22a20    | Snf1lk        | -1 |
| 7580 | 21415 | Slc22a20    | Has1          | 1  |
| 7590 | 1297  | Ankrd40     | Phox2a        | 1  |
| 7610 | 2351  | Scand1      | 1110008F13Rik | -1 |
| 7610 | 5603  | Scand1      | BC020535      | -1 |
| 7610 | 6059  | Scand1      | Dsn1          | -1 |
| 7610 | 11166 | Scand1      | Uqcc          | -1 |
| 7610 | 13355 | Scand1      | Foxs1         | -1 |
| 7610 | 14649 | Scand1      | 5430405G05Rik | 1  |
| 7610 | 14734 | Scand1      | Nrsn2         | -1 |
| 7610 | 20505 | Scand1      | Ttll9         | -1 |
| 7610 | 20837 | Scand1      | Dlgap4        | 1  |
| 7610 | 23005 | Scand1      | 4930405A21Rik | -1 |
| 7619 | 1006  | Pik3ip1     | 2600011E07Rik | -1 |
| 7619 | 4235  | Pik3ip1     | Pfkfb3        | -1 |
| 7619 | 5385  | Pik3ip1     | Tubb2b        | -1 |
| 7619 | 15476 | Pik3ip1     | Fem1b         | 1  |
| 7619 | 15870 | Pik3ip1     | Aqp5          | -1 |
| 7619 | 16823 | Pik3ip1     | Inhbb         | -1 |
| 7619 | 18373 | Pik3ip1     | Dnajb1        | -1 |
| 7637 | 2801  | MMT00056309 | H2-BI         | 1  |
| 7637 | 2938  | MMT00056309 | H2-T23        | 1  |
| 7637 | 4555  | MMT00056309 | Cchcr1        | 1  |
| 7637 | 7088  | MMT00056309 | Slc37a1       | 1  |
| 7637 | 7603  | MMT00056309 | Sod2          | 1  |

|      |       |               |               |    |
|------|-------|---------------|---------------|----|
| 7637 | 8750  | MMT00056309   | 170001014Rik  | 1  |
| 7637 | 8767  | MMT00056309   | Rgl2          | 1  |
| 7637 | 10374 | MMT00056309   | Trim15        | 1  |
| 7637 | 10667 | MMT00056309   | H2-Eb1        | 1  |
| 7637 | 10931 | MMT00056309   | Pkn3          | -1 |
| 7637 | 11475 | MMT00056309   | H2-D1         | -1 |
| 7637 | 12168 | MMT00056309   | H2-Ke6        | 1  |
| 7637 | 12694 | MMT00056309   | Riok2         | -1 |
| 7637 | 12943 | MMT00056309   | Slc25a27      | 1  |
| 7637 | 13493 | MMT00056309   | Ring1         | 1  |
| 7637 | 14322 | MMT00056309   | Bat1a         | -1 |
| 7637 | 15580 | MMT00056309   | MMT00077001   | 1  |
| 7637 | 16067 | MMT00056309   | Pcaf          | -1 |
| 7637 | 16692 | MMT00056309   | Bat4          | 1  |
| 7637 | 17322 | MMT00056309   | Zfp758        | -1 |
| 7637 | 17412 | MMT00056309   | Aif1          | -1 |
| 7637 | 20238 | MMT00056309   | H2-T9         | 1  |
| 7637 | 21295 | MMT00056309   | Snf1lk        | -1 |
| 7637 | 21415 | MMT00056309   | Has1          | 1  |
| 7654 | 2472  | Ptpmt1        | MMT00014056   | -1 |
| 7654 | 9547  | Ptpmt1        | MMT00006479   | -1 |
| 7654 | 16881 | Ptpmt1        | MMT00031504   | -1 |
| 7654 | 17295 | Ptpmt1        | MMT00082577   | -1 |
| 7654 | 22320 | Ptpmt1        | MMT00047284   | -1 |
| 7680 | 20559 | EG667232      | Nat13         | -1 |
| 7693 | 15870 | B3galt6       | Aqp5          | 1  |
| 7725 | 15827 | 3230401D17Rik | Rrm1          | -1 |
| 7735 | 1606  | Traip         | Srp14         | 1  |
| 7735 | 3585  | Traip         | Hint1         | 1  |
| 7735 | 4214  | Traip         | MMT00014098   | 1  |
| 7735 | 10026 | Traip         | Ndufc2        | 1  |
| 7735 | 11975 | Traip         | Usmg5         | 1  |
| 7761 | 2118  | Nudt19        | Kptn          | 1  |
| 7761 | 2599  | Nudt19        | Lsm14a        | 1  |
| 7761 | 4729  | Nudt19        | Slc7a10       | -1 |
| 7761 | 6513  | Nudt19        | Qpctl         | 1  |
| 7761 | 7761  | Nudt19        | Nudt19        | 1  |
| 7761 | 7803  | Nudt19        | Ttyh1         | 1  |
| 7761 | 8394  | Nudt19        | Dpy19l3       | 1  |
| 7761 | 9122  | Nudt19        | Sepw1         | 1  |
| 7761 | 9413  | Nudt19        | 1190020J12Rik | -1 |
| 7761 | 9454  | Nudt19        | 2810426N06Rik | 1  |
| 7761 | 11800 | Nudt19        | Clip3         | -1 |
| 7761 | 11982 | Nudt19        | MMT00035514   | -1 |
| 7761 | 12623 | Nudt19        | Ccdc123       | 1  |
| 7761 | 14842 | Nudt19        | Gipr          | 1  |
| 7761 | 15670 | Nudt19        | Pnmal1        | -1 |
| 7761 | 17314 | Nudt19        | Napa          | -1 |
| 7761 | 17632 | Nudt19        | Lypd3         | -1 |
| 7761 | 19142 | Nudt19        | Gpatch1       | 1  |
| 7761 | 19306 | Nudt19        | Al428936      | 1  |
| 7761 | 19462 | Nudt19        | 4933439C20Rik | -1 |
| 7761 | 20490 | Nudt19        | Tmem143       | -1 |
| 7761 | 20606 | Nudt19        | MMT00042166   | -1 |
| 7813 | 2294  | Stac          | AU040829      | -1 |
| 7813 | 12761 | Stac          | Tsc22d3       | -1 |
| 7813 | 16494 | Stac          | 2310007D09Rik | -1 |
| 7861 | 13218 | Klhdc4        | C330043M08Rik | -1 |
| 7873 | 6133  | Steap4        | Agrp          | -1 |

|      |       |             |               |    |
|------|-------|-------------|---------------|----|
| 7877 | 21142 | Obfc2a      | Gm129         | -1 |
| 7892 | 11756 | Ccr2        | 2810011L19Rik | -1 |
| 7909 | 7135  | Oas3        | Ezr           | 1  |
| 7909 | 7909  | Oas3        | Oas3          | 1  |
| 7909 | 8750  | Oas3        | 1700010I14Rik | 1  |
| 7909 | 11435 | Oas3        | Rnaset2a      | 1  |
| 7909 | 17707 | Oas3        | Rshl2b        | 1  |
| 7909 | 21075 | Oas3        | Gtf2h5        | -1 |
| 7909 | 22104 | Oas3        | Rnf123        | 1  |
| 7934 | 17135 | MMT00002010 | Mum1          | -1 |
| 7936 | 11406 | MMT00061970 | Ifi203        | 1  |
| 7945 | 7945  | Gpc2        | Gpc2          | 1  |
| 7945 | 9077  | Gpc2        | Cnpy4         | 1  |
| 7945 | 13780 | Gpc2        | Pilra         | -1 |
| 7945 | 14631 | Gpc2        | Stag3         | 1  |
| 7945 | 19502 | Gpc2        | Fbxo24        | -1 |
| 7973 | 6824  | Lgals9      | Irf7          | 1  |
| 7973 | 12398 | Lgals9      | Ifi44         | 1  |
| 7973 | 13309 | Lgals9      | Tgtp          | 1  |
| 7975 | 7975  | Lancl1      | Lancl1        | 1  |
| 7975 | 11621 | Lancl1      | Mixl1         | 1  |
| 7975 | 19578 | Lancl1      | Aox1          | -1 |
| 7991 | 2424  | Gpr115      | Unc5cl        | -1 |
| 7991 | 7088  | Gpr115      | Slc37a1       | -1 |
| 7991 | 7603  | Gpr115      | Sod2          | -1 |
| 7991 | 7991  | Gpr115      | Gpr115        | 1  |
| 7991 | 8750  | Gpr115      | 1700010I14Rik | -1 |
| 7991 | 12168 | Gpr115      | H2-Ke6        | -1 |
| 7991 | 16692 | Gpr115      | Bat4          | -1 |
| 7991 | 17707 | Gpr115      | Rshl2b        | -1 |
| 7991 | 21295 | Gpr115      | Snf1lk        | 1  |
| 7991 | 21415 | Gpr115      | Has1          | -1 |
| 8016 | 2743  | Mrpl35      | Tcf3          | -1 |
| 8016 | 8016  | Mrpl35      | Mrpl35        | 1  |
| 8016 | 15384 | Mrpl35      | Mat2a         | -1 |
| 8016 | 18948 | Mrpl35      | Olf1270       | 1  |
| 8022 | 7083  | MMT00004959 | MMT00044154   | 1  |
| 8022 | 7116  | MMT00004959 | Katnal1       | 1  |
| 8022 | 7821  | MMT00004959 | MMT00042003   | 1  |
| 8022 | 17535 | MMT00004959 | MMT00008110   | 1  |
| 8037 | 1006  | MMT00052151 | 2600011E07Rik | 1  |
| 8037 | 8939  | MMT00052151 | MMT00024195   | 1  |
| 8037 | 15476 | MMT00052151 | Fem1b         | -1 |
| 8037 | 18373 | MMT00052151 | Dnajb1        | 1  |
| 8037 | 18418 | MMT00052151 | Hspa1b        | 1  |
| 8055 | 1918  | Ptcd3       | Usp39         | 1  |
| 8055 | 2743  | Ptcd3       | Tcf3          | 1  |
| 8055 | 2815  | Ptcd3       | Eif2ak3       | 1  |
| 8055 | 3703  | Ptcd3       | Ggcx          | 1  |
| 8055 | 5296  | Ptcd3       | Rnf181        | 1  |
| 8055 | 7273  | Ptcd3       | Rnf103        | 1  |
| 8055 | 8016  | Ptcd3       | Mrpl35        | -1 |
| 8055 | 8055  | Ptcd3       | Ptcd3         | 1  |
| 8055 | 8889  | Ptcd3       | Dnahc6        | -1 |
| 8055 | 11338 | Ptcd3       | Vamp8         | 1  |
| 8055 | 15384 | Ptcd3       | Mat2a         | 1  |
| 8055 | 16255 | Ptcd3       | Reg3b         | -1 |
| 8055 | 18948 | Ptcd3       | Olf1270       | -1 |
| 8073 | 2079  | Irak1bp1    | Mthfs         | 1  |

|      |       |             |               |    |
|------|-------|-------------|---------------|----|
| 8073 | 2753  | Irak1bp1    | Myo6          | -1 |
| 8073 | 10077 | Irak1bp1    | Cep63         | 1  |
| 8073 | 15853 | Irak1bp1    | D430036J16Rik | -1 |
| 8079 | 15162 | Pts         | Il18          | -1 |
| 8088 | 1297  | Negr1       | Phox2a        | -1 |
| 8114 | 403   | Kcnn1       | Leprotl1      | -1 |
| 8114 | 1604  | Kcnn1       | Ssbp4         | 1  |
| 8114 | 1755  | Kcnn1       | Ocel1         | 1  |
| 8114 | 3052  | Kcnn1       | 9130404D08Rik | -1 |
| 8114 | 3609  | Kcnn1       | Plvap         | 1  |
| 8114 | 5433  | Kcnn1       | 2410004L22Rik | -1 |
| 8114 | 5925  | Kcnn1       | Tmem59l       | -1 |
| 8114 | 9304  | Kcnn1       | Al449175      | 1  |
| 8114 | 13732 | Kcnn1       | Tpm4          | -1 |
| 8114 | 16617 | Kcnn1       | Sh2d4a        | -1 |
| 8114 | 16849 | Kcnn1       | Trmt1         | -1 |
| 8114 | 17703 | Kcnn1       | Large         | -1 |
| 8114 | 21840 | Kcnn1       | Tmie          | 1  |
| 8155 | 1371  | Mark3       | 1200009I06Rik | 1  |
| 8155 | 3812  | Mark3       | Zfyve26       | -1 |
| 8155 | 6357  | Mark3       | Ankrd9        | -1 |
| 8155 | 7388  | Mark3       | Amn           | -1 |
| 8155 | 8155  | Mark3       | Mark3         | 1  |
| 8155 | 9832  | Mark3       | Brf1          | -1 |
| 8155 | 10526 | Mark3       | MMT00036239   | -1 |
| 8155 | 12517 | Mark3       | 4930573I19Rik | 1  |
| 8155 | 15984 | Mark3       | MMT00075074   | 1  |
| 8155 | 18140 | Mark3       | Atg2b         | 1  |
| 8155 | 21149 | Mark3       | A230065H16Rik | -1 |
| 8155 | 23462 | Mark3       | Bag5          | 1  |
| 8193 | 1297  | Pi4k2a      | Phox2a        | 1  |
| 8194 | 9622  | MMT00077789 | Rasgef1a      | -1 |
| 8194 | 16255 | MMT00077789 | Reg3b         | 1  |
| 8194 | 19964 | MMT00077789 | Ndufa9        | 1  |
| 8194 | 22395 | MMT00077789 | Kcna1         | -1 |
| 8210 | 6542  | Hspa12a     | Epor          | 1  |
| 8210 | 12571 | Hspa12a     | Cdkn2d        | 1  |
| 8210 | 17098 | Hspa12a     | Qtrt1         | -1 |
| 8210 | 23415 | Hspa12a     | Acp5          | 1  |
| 8231 | 19037 | Tcfcp2      | Slc11a2       | 1  |
| 8256 | 10260 | Tjap1       | Zfp36l2       | 1  |
| 8256 | 14313 | Tjap1       | Tnk1          | 1  |
| 8256 | 18620 | Tjap1       | Slmap         | 1  |
| 8256 | 21866 | Tjap1       | Hhip1         | 1  |
| 8256 | 22093 | Tjap1       | Zbbx          | 1  |
| 8256 | 22150 | Tjap1       | Fhdc1         | 1  |
| 8256 | 22271 | Tjap1       | Cyp2c29       | 1  |
| 8256 | 22434 | Tjap1       | Olf1255       | 1  |
| 8256 | 23651 | Tjap1       | MMT00027295   | 1  |
| 8268 | 4084  | Kctd7       | Asah3l        | -1 |
| 8270 | 15870 | Clspn       | Aqp5          | 1  |
| 8274 | 14266 | Zc3h11a     | Sox13         | 1  |
| 8284 | 1901  | EG209380    | Tpp1          | -1 |
| 8284 | 9161  | EG209380    | Mrpl17        | 1  |
| 8284 | 19734 | EG209380    | Dchs1         | 1  |
| 8284 | 22693 | EG209380    | Trim68        | 1  |
| 8300 | 5342  | MMT00043905 | Eps8l3        | 1  |
| 8300 | 15352 | MMT00043905 | Socs2         | 1  |
| 8300 | 15870 | MMT00043905 | Aqp5          | 1  |

|      |       |               |               |    |
|------|-------|---------------|---------------|----|
| 8300 | 17981 | MMT00043905   | MMT00036029   | 1  |
| 8337 | 290   | Lgr4          | B230118H07Rik | 1  |
| 8337 | 1510  | Lgr4          | A530058N18Rik | 1  |
| 8341 | 1960  | MMT00017270   | Ubr2          | 1  |
| 8341 | 2644  | MMT00017270   | Srrm2         | -1 |
| 8341 | 2945  | MMT00017270   | MMT00005190   | 1  |
| 8341 | 5014  | MMT00017270   | MMT00017503   | 1  |
| 8341 | 6437  | MMT00017270   | Gnptg         | -1 |
| 8341 | 7286  | MMT00017270   | Noxo1         | -1 |
| 8341 | 8341  | MMT00017270   | MMT00017270   | 1  |
| 8341 | 10729 | MMT00017270   | Fgd2          | -1 |
| 8341 | 11291 | MMT00017270   | 1110018H23Rik | -1 |
| 8341 | 13075 | MMT00017270   | Mrps2         | 1  |
| 8341 | 14132 | MMT00017270   | Glo1          | -1 |
| 8341 | 17760 | MMT00017270   | Ccr6          | 1  |
| 8341 | 19011 | MMT00017270   | Rpl3l         | -1 |
| 8341 | 19064 | MMT00017270   | MMT00004867   | -1 |
| 8341 | 20100 | MMT00017270   | Guca1b        | 1  |
| 8341 | 21246 | MMT00017270   | Telo2         | -1 |
| 8368 | 6376  | Rad51l3       | Nle1          | 1  |
| 8368 | 10539 | Rad51l3       | Unc45b        | -1 |
| 8372 | 4810  | Uap1          | Vsig8         | -1 |
| 8372 | 7449  | Uap1          | Creg1         | 1  |
| 8372 | 7963  | Uap1          | Rxrg          | -1 |
| 8372 | 9449  | Uap1          | Sft2d2        | -1 |
| 8372 | 11406 | Uap1          | Ifi203        | 1  |
| 8372 | 11445 | Uap1          | Atp1a2        | -1 |
| 8372 | 11571 | Uap1          | Bpnt1         | 1  |
| 8372 | 11741 | Uap1          | Slc30a10      | -1 |
| 8372 | 16163 | Uap1          | Tmco1         | 1  |
| 8372 | 19332 | Uap1          | Bpnt1         | 1  |
| 8372 | 19835 | Uap1          | Iars2         | 1  |
| 8372 | 23466 | Uap1          | Pou2f1        | -1 |
| 8394 | 2599  | Dpy19l3       | Lsm14a        | 1  |
| 8394 | 7761  | Dpy19l3       | Nudt19        | 1  |
| 8394 | 8394  | Dpy19l3       | Dpy19l3       | 1  |
| 8394 | 9122  | Dpy19l3       | Sepw1         | 1  |
| 8394 | 15670 | Dpy19l3       | Pnmal1        | -1 |
| 8394 | 17632 | Dpy19l3       | Lypd3         | -1 |
| 8394 | 19142 | Dpy19l3       | Gpatch1       | 1  |
| 8394 | 19462 | Dpy19l3       | 4933439C20Rik | -1 |
| 8430 | 3079  | Pttg1ip       | Gstt3         | 1  |
| 8430 | 19493 | Pttg1ip       | Icosl         | 1  |
| 8430 | 22786 | Pttg1ip       | Mterfd3       | 1  |
| 8438 | 9322  | Mrpl48        | Relt          | 1  |
| 8438 | 21425 | Mrpl48        | Rab6          | 1  |
| 8439 | 2880  | Slc25a33      | Cd93          | -1 |
| 8439 | 12834 | Slc25a33      | Fabp7         | -1 |
| 8441 | 16618 | Tmem54        | Hps3          | 1  |
| 8443 | 8443  | Pola2         | Pola2         | 1  |
| 8446 | 15870 | Cybrd1        | Aqp5          | 1  |
| 8446 | 18987 | Cybrd1        | Treh          | 1  |
| 8448 | 14281 | Sucla2        | 5031414D18Rik | -1 |
| 8449 | 8399  | Vash2         | Herpud1       | -1 |
| 8477 | 15870 | MMT00002146   | Aqp5          | 1  |
| 8477 | 22982 | MMT00002146   | Mug2          | 1  |
| 8499 | 678   | C430048L16Rik | Ncaph         | 1  |
| 8499 | 1510  | C430048L16Rik | A530058N18Rik | -1 |
| 8499 | 4897  | C430048L16Rik | Ciao1         | -1 |

|      |       |               |               |    |
|------|-------|---------------|---------------|----|
| 8499 | 5737  | C430048L16Rik | Nkx2-2        | -1 |
| 8499 | 14403 | C430048L16Rik | S100g         | 1  |
| 8499 | 14740 | C430048L16Rik | Mfap1b        | -1 |
| 8499 | 18835 | C430048L16Rik | Dtwd1         | 1  |
| 8510 | 13813 | Tbl2          | Ktelc1        | -1 |
| 8510 | 14043 | Tbl2          | 4930455C21Rik | 1  |
| 8530 | 3006  | Snca          | Alas2         | 1  |
| 8530 | 18298 | Snca          | Slc25a37      | 1  |
| 8541 | 15870 | Tubb5         | Aqp5          | 1  |
| 8547 | 8547  | Gbp4          | Gbp4          | 1  |
| 8547 | 13309 | Gbp4          | Tgtp          | 1  |
| 8547 | 19189 | Gbp4          | Sp100         | 1  |
| 8555 | 8547  | H2-M3         | Gbp4          | 1  |
| 8563 | 7761  | Leng1         | Nudt19        | 1  |
| 8563 | 7803  | Leng1         | Ttyh1         | 1  |
| 8563 | 9122  | Leng1         | Sepw1         | 1  |
| 8563 | 11982 | Leng1         | MMT00035514   | -1 |
| 8563 | 17632 | Leng1         | Lypd3         | -1 |
| 8563 | 19462 | Leng1         | 4933439C20Rik | -1 |
| 8568 | 3159  | Tnik          | Pld1          | 1  |
| 8568 | 16618 | Tnik          | Hps3          | -1 |
| 8568 | 19700 | Tnik          | E030011K20Rik | 1  |
| 8606 | 13813 | Cntnap5c      | Ktelc1        | -1 |
| 8606 | 14043 | Cntnap5c      | 4930455C21Rik | 1  |
| 8610 | 2372  | Padi4         | Stx12         | -1 |
| 8610 | 2883  | Padi4         | MMT00048540   | 1  |
| 8610 | 6191  | Padi4         | Ddost         | 1  |
| 8610 | 8610  | Padi4         | Padi4         | 1  |
| 8610 | 19633 | Padi4         | Gm694         | 1  |
| 8637 | 13813 | Tnpo2         | Ktelc1        | -1 |
| 8637 | 14043 | Tnpo2         | 4930455C21Rik | 1  |
| 8638 | 15870 | Fkbp14        | Aqp5          | 1  |
| 8649 | 7088  | MMT00072863   | Slc37a1       | -1 |
| 8649 | 7603  | MMT00072863   | Sod2          | -1 |
| 8649 | 8750  | MMT00072863   | 1700010I14Rik | -1 |
| 8649 | 9805  | MMT00072863   | Tagap         | -1 |
| 8649 | 10729 | MMT00072863   | Fgd2          | -1 |
| 8649 | 16692 | MMT00072863   | Bat4          | -1 |
| 8649 | 17707 | MMT00072863   | Rshl2b        | -1 |
| 8649 | 18577 | MMT00072863   | Btbd9         | 1  |
| 8649 | 20238 | MMT00072863   | H2-T9         | -1 |
| 8649 | 21295 | MMT00072863   | Snf1lk        | 1  |
| 8649 | 21415 | MMT00072863   | Has1          | -1 |
| 8649 | 21952 | MMT00072863   | Tfb1m         | 1  |
| 8653 | 3654  | AW124722      | St13          | 1  |
| 8653 | 7021  | AW124722      | Slc16a8       | 1  |
| 8653 | 7100  | AW124722      | Tomm22        | -1 |
| 8653 | 8653  | AW124722      | AW124722      | 1  |
| 8653 | 21526 | AW124722      | Mkl1          | 1  |
| 8654 | 8677  | Fbxl13        | Zbtb8os       | -1 |
| 8659 | 143   | Psmb8         | Gvin1         | 1  |
| 8659 | 6824  | Psmb8         | Irf7          | 1  |
| 8659 | 12398 | Psmb8         | Ifi44         | 1  |
| 8659 | 13309 | Psmb8         | Tgtp          | 1  |
| 8659 | 16949 | Psmb8         | ligp1         | 1  |
| 8670 | 265   | MMT00051613   | Taf9          | 1  |
| 8670 | 684   | MMT00051613   | 1700102P08Rik | 1  |
| 8670 | 863   | MMT00051613   | Dnajc14       | -1 |
| 8670 | 1006  | MMT00051613   | 2600011E07Rik | 1  |

|      |       |             |               |    |
|------|-------|-------------|---------------|----|
| 8670 | 1214  | MMT00051613 | Trip13        | -1 |
| 8670 | 1281  | MMT00051613 | Alkbh3        | -1 |
| 8670 | 1351  | MMT00051613 | Whsc111       | 1  |
| 8670 | 1594  | MMT00051613 | Mrpl24        | 1  |
| 8670 | 2273  | MMT00051613 | Haghl         | -1 |
| 8670 | 2558  | MMT00051613 | Tmem132b      | 1  |
| 8670 | 3706  | MMT00051613 | 2410002O22Rik | 1  |
| 8670 | 4235  | MMT00051613 | Pfkfb3        | 1  |
| 8670 | 5385  | MMT00051613 | Tubb2b        | 1  |
| 8670 | 5634  | MMT00051613 | Creb1         | 1  |
| 8670 | 6769  | MMT00051613 | Banp          | 1  |
| 8670 | 6828  | MMT00051613 | Pigh          | 1  |
| 8670 | 8399  | MMT00051613 | Herpud1       | 1  |
| 8670 | 8469  | MMT00051613 | Sfrs6         | 1  |
| 8670 | 8787  | MMT00051613 | Sdf2l1        | 1  |
| 8670 | 8939  | MMT00051613 | MMT00024195   | 1  |
| 8670 | 9258  | MMT00051613 | P4ha1         | 1  |
| 8670 | 9513  | MMT00051613 | Tardbp        | 1  |
| 8670 | 9514  | MMT00051613 | Vps37a        | 1  |
| 8670 | 9899  | MMT00051613 | D13Wsu177e    | 1  |
| 8670 | 11043 | MMT00051613 | Hsph1         | 1  |
| 8670 | 11486 | MMT00051613 | Tacc3         | -1 |
| 8670 | 11756 | MMT00051613 | 2810011L19Rik | 1  |
| 8670 | 11867 | MMT00051613 | Rcor3         | 1  |
| 8670 | 12732 | MMT00051613 | Hsd17b1       | 1  |
| 8670 | 12937 | MMT00051613 | Uhrf2         | 1  |
| 8670 | 13741 | MMT00051613 | Hspa4l        | 1  |
| 8670 | 14134 | MMT00051613 | Phf10         | 1  |
| 8670 | 15015 | MMT00051613 | G3bp1         | 1  |
| 8670 | 15177 | MMT00051613 | Bmpr2         | 1  |
| 8670 | 15476 | MMT00051613 | Fem1b         | -1 |
| 8670 | 15731 | MMT00051613 | Mfhas1        | 1  |
| 8670 | 16098 | MMT00051613 | Rps20         | -1 |
| 8670 | 18373 | MMT00051613 | Dnajb1        | 1  |
| 8670 | 18418 | MMT00051613 | Hspa1b        | 1  |
| 8670 | 18726 | MMT00051613 | D630004A14Rik | 1  |
| 8670 | 18903 | MMT00051613 | Crem          | 1  |
| 8670 | 20457 | MMT00051613 | Gtf2a2        | -1 |
| 8670 | 20535 | MMT00051613 | Rbm4          | 1  |
| 8670 | 20559 | MMT00051613 | Nat13         | 1  |
| 8670 | 21431 | MMT00051613 | Xbp1          | 1  |
| 8670 | 21903 | MMT00051613 | Nr1d1         | -1 |
| 8670 | 21981 | MMT00051613 | Ormdl2        | 1  |
| 8670 | 22141 | MMT00051613 | Rorb          | 1  |
| 8670 | 22272 | MMT00051613 | Vpreb1        | 1  |
| 8670 | 22673 | MMT00051613 | Prpf38b       | 1  |
| 8670 | 23318 | MMT00051613 | Cul2          | -1 |
| 8670 | 23419 | MMT00051613 | Tipin         | -1 |
| 8677 | 737   | Zbtb8os     | MMT00023716   | -1 |
| 8677 | 5003  | Zbtb8os     | 2410081M15Rik | -1 |
| 8677 | 5064  | Zbtb8os     | Tekt2         | 1  |
| 8677 | 8525  | Zbtb8os     | 2510006D16Rik | -1 |
| 8677 | 8677  | Zbtb8os     | Zbtb8os       | 1  |
| 8679 | 9408  | Tiparp      | Hmgcs2        | -1 |
| 8679 | 16416 | Tiparp      | Commd2        | 1  |
| 8684 | 2558  | Il15        | Tmem132b      | -1 |
| 8684 | 6769  | Il15        | Banp          | -1 |
| 8703 | 10    | Gstp1       | NaN           | 1  |
| 8703 | 115   | Gstp1       | NaN           | 1  |

|      |      |       |               |    |
|------|------|-------|---------------|----|
| 8703 | 141  | Gstp1 | Jag1          | 1  |
| 8703 | 219  | Gstp1 | MMT00058440   | 1  |
| 8703 | 225  | Gstp1 | MMT00073704   | 1  |
| 8703 | 316  | Gstp1 | 4930471G03Rik | 1  |
| 8703 | 346  | Gstp1 | Olf1484       | 1  |
| 8703 | 391  | Gstp1 | 4933416I08Rik | 1  |
| 8703 | 484  | Gstp1 | Atp4a         | 1  |
| 8703 | 558  | Gstp1 | Crebl1        | 1  |
| 8703 | 584  | Gstp1 | Tmem207       | 1  |
| 8703 | 663  | Gstp1 | Muc19         | 1  |
| 8703 | 1021 | Gstp1 | Rhpn2         | 1  |
| 8703 | 1058 | Gstp1 | Olf1868       | 1  |
| 8703 | 1059 | Gstp1 | P2rx6         | 1  |
| 8703 | 1122 | Gstp1 | Pax3          | 1  |
| 8703 | 1127 | Gstp1 | Pomt2         | 1  |
| 8703 | 1136 | Gstp1 | Kdelr3        | 1  |
| 8703 | 1239 | Gstp1 | Cerkl         | 1  |
| 8703 | 1256 | Gstp1 | Baiap2l2      | 1  |
| 8703 | 1354 | Gstp1 | Lsmd1         | 1  |
| 8703 | 1457 | Gstp1 | Efr3b         | 1  |
| 8703 | 1518 | Gstp1 | Amigo2        | 1  |
| 8703 | 1570 | Gstp1 | Olf1522       | 1  |
| 8703 | 1619 | Gstp1 | Fbxw17        | 1  |
| 8703 | 1679 | Gstp1 | MMT00009278   | 1  |
| 8703 | 1696 | Gstp1 | V1re9         | 1  |
| 8703 | 1771 | Gstp1 | Park2         | 1  |
| 8703 | 1795 | Gstp1 | Rabgap1l      | 1  |
| 8703 | 1829 | Gstp1 | MMT00030026   | 1  |
| 8703 | 1876 | Gstp1 | Amdhd1        | 1  |
| 8703 | 1881 | Gstp1 | Slc16a14      | 1  |
| 8703 | 1907 | Gstp1 | D230010M03Rik | 1  |
| 8703 | 1920 | Gstp1 | Oas1e         | 1  |
| 8703 | 1936 | Gstp1 | Cbwd1         | -1 |
| 8703 | 2067 | Gstp1 | Myo1a         | 1  |
| 8703 | 2226 | Gstp1 | Amt           | 1  |
| 8703 | 2283 | Gstp1 | MMT00029554   | 1  |
| 8703 | 2326 | Gstp1 | zfp507        | 1  |
| 8703 | 2737 | Gstp1 | Milt10        | 1  |
| 8703 | 2802 | Gstp1 | Lin7c         | 1  |
| 8703 | 2819 | Gstp1 | Kcnk5         | 1  |
| 8703 | 3080 | Gstp1 | MMT00014480   | 1  |
| 8703 | 3127 | Gstp1 | Plcd1         | 1  |
| 8703 | 3144 | Gstp1 | Ube2j2        | 1  |
| 8703 | 3145 | Gstp1 | Idi1          | 1  |
| 8703 | 3166 | Gstp1 | Vmn2r57       | 1  |
| 8703 | 3208 | Gstp1 | 4930511111Rik | 1  |
| 8703 | 3284 | Gstp1 | Plekha7       | 1  |
| 8703 | 3362 | Gstp1 | Fgf8          | 1  |
| 8703 | 3383 | Gstp1 | Cd99          | 1  |
| 8703 | 3511 | Gstp1 | Rnf182        | 1  |
| 8703 | 3640 | Gstp1 | D11Bwg0517e   | 1  |
| 8703 | 3948 | Gstp1 | V1rb4         | 1  |
| 8703 | 3986 | Gstp1 | Ep400         | 1  |
| 8703 | 4012 | Gstp1 | Ctsw          | 1  |
| 8703 | 4079 | Gstp1 | Emilin3       | 1  |
| 8703 | 4088 | Gstp1 | Pdcl2         | 1  |
| 8703 | 4199 | Gstp1 | B3galt5       | 1  |
| 8703 | 4246 | Gstp1 | Fbxw12        | 1  |
| 8703 | 4311 | Gstp1 | MMT00033987   | 1  |



|      |      |       |               |    |
|------|------|-------|---------------|----|
| 8703 | 4337 | Gstp1 | Myst3         | 1  |
| 8703 | 4407 | Gstp1 | 4930429B21Rik | 1  |
| 8703 | 4425 | Gstp1 | Olfr1346      | 1  |
| 8703 | 4430 | Gstp1 | Ankrd36       | 1  |
| 8703 | 4578 | Gstp1 | Pglyrp2       | 1  |
| 8703 | 4683 | Gstp1 | E330013P04Rik | 1  |
| 8703 | 4870 | Gstp1 | Olfr550       | 1  |
| 8703 | 5126 | Gstp1 | Fcnb          | 1  |
| 8703 | 5265 | Gstp1 | A3galt2       | 1  |
| 8703 | 5377 | Gstp1 | MMT00077700   | 1  |
| 8703 | 5380 | Gstp1 | Olfr1403      | 1  |
| 8703 | 5455 | Gstp1 | Kcnab3        | 1  |
| 8703 | 5505 | Gstp1 | Thap2         | 1  |
| 8703 | 5694 | Gstp1 | Sp7           | 1  |
| 8703 | 5748 | Gstp1 | Brsk2         | 1  |
| 8703 | 5783 | Gstp1 | 4833413O15Rik | 1  |
| 8703 | 5908 | Gstp1 | MMT00027552   | 1  |
| 8703 | 5929 | Gstp1 | Cpz           | 1  |
| 8703 | 5946 | Gstp1 | MMT00048659   | 1  |
| 8703 | 6193 | Gstp1 | Lactb2        | 1  |
| 8703 | 6367 | Gstp1 | Lhfp          | 1  |
| 8703 | 6403 | Gstp1 | MMT00039607   | 1  |
| 8703 | 6422 | Gstp1 | Grk5          | 1  |
| 8703 | 6429 | Gstp1 | Sim2          | 1  |
| 8703 | 6520 | Gstp1 | Arnt2         | 1  |
| 8703 | 6687 | Gstp1 | Ogfod1        | 1  |
| 8703 | 6719 | Gstp1 | Cacng8        | 1  |
| 8703 | 6754 | Gstp1 | Trpv3         | 1  |
| 8703 | 6880 | Gstp1 | Dmrtb1        | 1  |
| 8703 | 6992 | Gstp1 | Olfr172       | 1  |
| 8703 | 7041 | Gstp1 | Sp140         | 1  |
| 8703 | 7078 | Gstp1 | Olfr463       | 1  |
| 8703 | 7132 | Gstp1 | Sp9           | 1  |
| 8703 | 7279 | Gstp1 | Cldn13        | 1  |
| 8703 | 7436 | Gstp1 | 1700063K16Rik | 1  |
| 8703 | 7577 | Gstp1 | Cldn8         | 1  |
| 8703 | 7618 | Gstp1 | Glis2         | 1  |
| 8703 | 7860 | Gstp1 | Bmp6          | 1  |
| 8703 | 7916 | Gstp1 | MMT00016293   | 1  |
| 8703 | 7974 | Gstp1 | Arhgef7       | 1  |
| 8703 | 8109 | Gstp1 | 6330545A04Rik | 1  |
| 8703 | 8157 | Gstp1 | MMT00005305   | 1  |
| 8703 | 8170 | Gstp1 | Snx22         | 1  |
| 8703 | 8256 | Gstp1 | Tjap1         | 1  |
| 8703 | 8488 | Gstp1 | Opcml         | 1  |
| 8703 | 8617 | Gstp1 | 2210412E05Rik | 1  |
| 8703 | 8620 | Gstp1 | MMT00048670   | 1  |
| 8703 | 8644 | Gstp1 | V1rg11        | 1  |
| 8703 | 8703 | Gstp1 | Gstp1         | 1  |
| 8703 | 8709 | Gstp1 | Trim58        | 1  |
| 8703 | 8721 | Gstp1 | Tbc1d10c      | -1 |
| 8703 | 8905 | Gstp1 | Trim67        | 1  |
| 8703 | 9233 | Gstp1 | Acss3         | 1  |
| 8703 | 9240 | Gstp1 | Olfr401       | 1  |
| 8703 | 9421 | Gstp1 | Serpinf2      | 1  |
| 8703 | 9436 | Gstp1 | Cntnap2       | 1  |
| 8703 | 9463 | Gstp1 | Zdhhc23       | 1  |
| 8703 | 9743 | Gstp1 | Gm189         | 1  |
| 8703 | 9946 | Gstp1 | Stam2         | 1  |

|      |       |       |               |   |
|------|-------|-------|---------------|---|
| 8703 | 10055 | Gstp1 | Tpte          | 1 |
| 8703 | 10078 | Gstp1 | Tbc1d14       | 1 |
| 8703 | 10195 | Gstp1 | Klf1          | 1 |
| 8703 | 10240 | Gstp1 | Cyp2w1        | 1 |
| 8703 | 10281 | Gstp1 | Slc15a1       | 1 |
| 8703 | 10377 | Gstp1 | A430105I19Rik | 1 |
| 8703 | 10452 | Gstp1 | Grn           | 1 |
| 8703 | 10520 | Gstp1 | Xkr6          | 1 |
| 8703 | 10657 | Gstp1 | Rnf12         | 1 |
| 8703 | 10687 | Gstp1 | ltpkb         | 1 |
| 8703 | 10723 | Gstp1 | 4930556N09Rik | 1 |
| 8703 | 10806 | Gstp1 | Rnf212        | 1 |
| 8703 | 10886 | Gstp1 | Fndc3b        | 1 |
| 8703 | 11001 | Gstp1 | Pou6f2        | 1 |
| 8703 | 11016 | Gstp1 | Pcp2          | 1 |
| 8703 | 11050 | Gstp1 | 2210010C04Rik | 1 |
| 8703 | 11256 | Gstp1 | H2-DMa        | 1 |
| 8703 | 11350 | Gstp1 | 9030420J04Rik | 1 |
| 8703 | 11425 | Gstp1 | Evx2          | 1 |
| 8703 | 11507 | Gstp1 | Adarb2        | 1 |
| 8703 | 11665 | Gstp1 | Hyal1         | 1 |
| 8703 | 11689 | Gstp1 | MMT00078109   | 1 |
| 8703 | 11805 | Gstp1 | Bat2          | 1 |
| 8703 | 11809 | Gstp1 | 4930534B04Rik | 1 |
| 8703 | 11837 | Gstp1 | Paqr6         | 1 |
| 8703 | 11966 | Gstp1 | Zfp280b       | 1 |
| 8703 | 12062 | Gstp1 | Dzip1l        | 1 |
| 8703 | 12188 | Gstp1 | Chek2         | 1 |
| 8703 | 12248 | Gstp1 | Tnp2          | 1 |
| 8703 | 12272 | Gstp1 | Fshr          | 1 |
| 8703 | 12372 | Gstp1 | MMT00039397   | 1 |
| 8703 | 12422 | Gstp1 | Eme1          | 1 |
| 8703 | 12430 | Gstp1 | Fst           | 1 |
| 8703 | 12451 | Gstp1 | Srd5a2        | 1 |
| 8703 | 12568 | Gstp1 | Lrrc37a       | 1 |
| 8703 | 12604 | Gstp1 | Acr           | 1 |
| 8703 | 12651 | Gstp1 | Tsc22d4       | 1 |
| 8703 | 12753 | Gstp1 | MMT00043344   | 1 |
| 8703 | 12772 | Gstp1 | Axl           | 1 |
| 8703 | 13102 | Gstp1 | Prkaa1        | 1 |
| 8703 | 13201 | Gstp1 | Rbl2          | 1 |
| 8703 | 13487 | Gstp1 | A230051G13Rik | 1 |
| 8703 | 13676 | Gstp1 | MMT00010979   | 1 |
| 8703 | 13742 | Gstp1 | 1700024P16Rik | 1 |
| 8703 | 13767 | Gstp1 | Kcnk15        | 1 |
| 8703 | 13800 | Gstp1 | Lrp5          | 1 |
| 8703 | 13890 | Gstp1 | Olf1263       | 1 |
| 8703 | 14035 | Gstp1 | Lrrc52        | 1 |
| 8703 | 14075 | Gstp1 | E030049G20Rik | 1 |
| 8703 | 14149 | Gstp1 | BC048562      | 1 |
| 8703 | 14313 | Gstp1 | Tnk1          | 1 |
| 8703 | 14510 | Gstp1 | Olf1643       | 1 |
| 8703 | 14519 | Gstp1 | Trex1         | 1 |
| 8703 | 14565 | Gstp1 | Rnf207        | 1 |
| 8703 | 14754 | Gstp1 | Atoh8         | 1 |
| 8703 | 15424 | Gstp1 | Atp6v1g2      | 1 |
| 8703 | 15626 | Gstp1 | MMT00035685   | 1 |
| 8703 | 15697 | Gstp1 | Tbc1d8b       | 1 |
| 8703 | 15747 | Gstp1 | Sfrs1         | 1 |

|      |       |               |               |    |
|------|-------|---------------|---------------|----|
| 8703 | 15813 | Gstp1         | Vpreb3        | 1  |
| 8703 | 15885 | Gstp1         | Adamts7       | 1  |
| 8703 | 16018 | Gstp1         | MMT00074939   | 1  |
| 8703 | 16390 | Gstp1         | Plb1          | 1  |
| 8703 | 16664 | Gstp1         | Car4          | 1  |
| 8703 | 16672 | Gstp1         | Tmem82        | 1  |
| 8703 | 16957 | Gstp1         | MMT00046108   | 1  |
| 8703 | 17068 | Gstp1         | Olfr661       | 1  |
| 8703 | 17171 | Gstp1         | MMT00045847   | 1  |
| 8703 | 17337 | Gstp1         | 1810065E05Rik | 1  |
| 8703 | 17447 | Gstp1         | Ctsf          | -1 |
| 8703 | 17612 | Gstp1         | Vhlh          | 1  |
| 8703 | 17613 | Gstp1         | P2rx7         | 1  |
| 8703 | 17750 | Gstp1         | Hs6st2        | 1  |
| 8703 | 18214 | Gstp1         | Ankrd40       | 1  |
| 8703 | 18409 | Gstp1         | Nicn1         | 1  |
| 8703 | 18620 | Gstp1         | Slmap         | 1  |
| 8703 | 18699 | Gstp1         | 2700089E24Rik | 1  |
| 8703 | 18790 | Gstp1         | Car3          | 1  |
| 8703 | 19219 | Gstp1         | MMT00015104   | 1  |
| 8703 | 19265 | Gstp1         | EG546036      | 1  |
| 8703 | 19267 | Gstp1         | Olfr341       | 1  |
| 8703 | 19351 | Gstp1         | Prkcsh        | 1  |
| 8703 | 19436 | Gstp1         | Dapp1         | 1  |
| 8703 | 19483 | Gstp1         | Depdc2        | 1  |
| 8703 | 19645 | Gstp1         | Il12rb2       | 1  |
| 8703 | 19672 | Gstp1         | Cldn19        | 1  |
| 8703 | 20406 | Gstp1         | Cacng2        | 1  |
| 8703 | 20419 | Gstp1         | Adra1b        | 1  |
| 8703 | 20532 | Gstp1         | Rnf26         | 1  |
| 8703 | 20735 | Gstp1         | Tnrc6b        | 1  |
| 8703 | 20908 | Gstp1         | Olfr583       | 1  |
| 8703 | 20944 | Gstp1         | Tmem164       | 1  |
| 8703 | 21511 | Gstp1         | MMT00054100   | 1  |
| 8703 | 21595 | Gstp1         | Trpv1         | 1  |
| 8703 | 21723 | Gstp1         | Homer1        | 1  |
| 8703 | 21866 | Gstp1         | Hhip1         | 1  |
| 8703 | 21923 | Gstp1         | Olfr585       | 1  |
| 8703 | 22125 | Gstp1         | Gab1          | 1  |
| 8703 | 22434 | Gstp1         | Olfr1255      | 1  |
| 8703 | 22555 | Gstp1         | Ela2          | 1  |
| 8703 | 22762 | Gstp1         | Slc6a4        | 1  |
| 8703 | 22802 | Gstp1         | Svs2          | 1  |
| 8703 | 22966 | Gstp1         | Epha4         | 1  |
| 8703 | 23079 | Gstp1         | Spag17        | 1  |
| 8703 | 23112 | Gstp1         | Gys1          | 1  |
| 8703 | 23119 | Gstp1         | Cps1          | 1  |
| 8703 | 23454 | Gstp1         | Znhit1        | 1  |
| 8703 | 23528 | Gstp1         | 0610038L08Rik | 1  |
| 8703 | 23546 | Gstp1         | Zzef1         | 1  |
| 8703 | 23561 | Gstp1         | Sox14         | 1  |
| 8703 | 23591 | Gstp1         | Dlg4          | 1  |
| 8703 | 23651 | Gstp1         | MMT00027295   | 1  |
| 8711 | 13355 | 5430432M24Rik | Foxs1         | 1  |
| 8711 | 23005 | 5430432M24Rik | 4930405A21Rik | 1  |
| 8721 | 1518  | Tbc1d10c      | Amigo2        | -1 |
| 8721 | 2830  | Tbc1d10c      | 4632417K18Rik | 1  |
| 8721 | 4311  | Tbc1d10c      | MMT00033987   | -1 |
| 8721 | 6719  | Tbc1d10c      | Cacng8        | -1 |

|      |       |               |               |    |
|------|-------|---------------|---------------|----|
| 8721 | 8703  | Tbc1d10c      | Gstp1         | -1 |
| 8721 | 8721  | Tbc1d10c      | Tbc1d10c      | 1  |
| 8721 | 8902  | Tbc1d10c      | Aldh3b1       | 1  |
| 8721 | 11369 | Tbc1d10c      | Stx3          | 1  |
| 8721 | 11812 | Tbc1d10c      | Mrpl16        | 1  |
| 8721 | 13767 | Tbc1d10c      | Kcnk15        | -1 |
| 8721 | 17447 | Tbc1d10c      | Ctsf          | 1  |
| 8721 | 19744 | Tbc1d10c      | Acy3          | -1 |
| 8721 | 19857 | Tbc1d10c      | Rab1b         | 1  |
| 8727 | 6038  | Slc27a3       | Acot1         | 1  |
| 8743 | 989   | Pkp4          | Phyhd1        | 1  |
| 8743 | 5345  | Pkp4          | MMT00023326   | 1  |
| 8743 | 6133  | Pkp4          | Agrp          | 1  |
| 8743 | 12208 | Pkp4          | Pnpla7        | 1  |
| 8745 | 15870 | Mcm2          | Aqp5          | 1  |
| 8750 | 812   | 1700010I14Rik | En2           | 1  |
| 8750 | 2801  | 1700010I14Rik | H2-BI         | 1  |
| 8750 | 2938  | 1700010I14Rik | H2-T23        | 1  |
| 8750 | 3859  | 1700010I14Rik | Fpr2          | 1  |
| 8750 | 7088  | 1700010I14Rik | Slc37a1       | 1  |
| 8750 | 7339  | 1700010I14Rik | Tdp1          | -1 |
| 8750 | 7603  | 1700010I14Rik | Sod2          | 1  |
| 8750 | 7909  | 1700010I14Rik | Oas3          | 1  |
| 8750 | 8750  | 1700010I14Rik | 1700010I14Rik | 1  |
| 8750 | 8767  | 1700010I14Rik | Rgl2          | 1  |
| 8750 | 10374 | 1700010I14Rik | Trim15        | 1  |
| 8750 | 10667 | 1700010I14Rik | H2-Eb1        | 1  |
| 8750 | 10729 | 1700010I14Rik | Fgd2          | 1  |
| 8750 | 10931 | 1700010I14Rik | Pkn3          | -1 |
| 8750 | 11435 | 1700010I14Rik | Rnaset2a      | 1  |
| 8750 | 11475 | 1700010I14Rik | H2-D1         | -1 |
| 8750 | 12694 | 1700010I14Rik | Riok2         | -1 |
| 8750 | 12943 | 1700010I14Rik | Slc25a27      | 1  |
| 8750 | 13493 | 1700010I14Rik | Ring1         | 1  |
| 8750 | 15580 | 1700010I14Rik | MMT00077001   | 1  |
| 8750 | 16692 | 1700010I14Rik | Bat4          | 1  |
| 8750 | 17322 | 1700010I14Rik | Zfp758        | -1 |
| 8750 | 17412 | 1700010I14Rik | Aif1          | -1 |
| 8750 | 17707 | 1700010I14Rik | Rshl2b        | 1  |
| 8750 | 18577 | 1700010I14Rik | Btbd9         | -1 |
| 8750 | 20238 | 1700010I14Rik | H2-T9         | 1  |
| 8750 | 20511 | 1700010I14Rik | Decr2         | 1  |
| 8750 | 21295 | 1700010I14Rik | Snf1lk        | -1 |
| 8750 | 21415 | 1700010I14Rik | Has1          | 1  |
| 8750 | 22104 | 1700010I14Rik | Rnf123        | 1  |
| 8750 | 23371 | 1700010I14Rik | Cfb           | -1 |
| 8769 | 16046 | Cenpk         | Ppwd1         | -1 |
| 8783 | 4139  | Zfyve16       | Sh2d5         | 1  |
| 8783 | 4896  | Zfyve16       | 4930405M20Rik | -1 |
| 8783 | 4938  | Zfyve16       | Mccc2         | 1  |
| 8783 | 8783  | Zfyve16       | Zfyve16       | 1  |
| 8783 | 18492 | Zfyve16       | Dhfr          | -1 |
| 8786 | 1041  | Rmnd1         | 3110049J23Rik | 1  |
| 8786 | 1135  | Rmnd1         | Akap12        | -1 |
| 8786 | 2571  | Rmnd1         | Rmnd1         | 1  |
| 8786 | 3545  | Rmnd1         | Mtrf1l        | -1 |
| 8786 | 3744  | Rmnd1         | Rmnd1         | 1  |
| 8786 | 6363  | Rmnd1         | 9130014G24Rik | -1 |
| 8786 | 8786  | Rmnd1         | Rmnd1         | 1  |

|      |       |               |               |    |
|------|-------|---------------|---------------|----|
| 8786 | 11162 | Rmnd1         | Hkdc1         | -1 |
| 8786 | 19115 | Rmnd1         | Rab32         | 1  |
| 8786 | 20134 | Rmnd1         | Ppp1r14c      | -1 |
| 8786 | 22333 | Rmnd1         | Hnrnp3        | -1 |
| 8786 | 22598 | Rmnd1         | 4930402H24Rik | -1 |
| 8790 | 2243  | Galnt2        | Gcsh          | 1  |
| 8790 | 3865  | Galnt2        | Acta1         | 1  |
| 8790 | 6065  | Galnt2        | Pfce1         | 1  |
| 8790 | 7910  | Galnt2        | AK122209      | 1  |
| 8790 | 12440 | Galnt2        | Sult5a1       | -1 |
| 8790 | 14391 | Galnt2        | MMT00017335   | -1 |
| 8790 | 15953 | Galnt2        | Acsf3         | -1 |
| 8790 | 18700 | Galnt2        | Trappc2l      | 1  |
| 8790 | 20690 | Galnt2        | Zfp276        | -1 |
| 8790 | 22201 | Galnt2        | Pard3         | -1 |
| 8790 | 22351 | Galnt2        | Fanca         | -1 |
| 8794 | 10978 | 1500011B03Rik | MMT00078322   | 1  |
| 8797 | 2294  | Snrk          | AU040829      | 1  |
| 8797 | 2708  | Snrk          | Sgk1          | 1  |
| 8797 | 4084  | Snrk          | Asah3l        | 1  |
| 8797 | 5345  | Snrk          | MMT00023326   | 1  |
| 8797 | 8980  | Snrk          | Plekhf1       | 1  |
| 8797 | 12761 | Snrk          | Tsc22d3       | 1  |
| 8797 | 12989 | Snrk          | 1190002H23Rik | 1  |
| 8797 | 15870 | Snrk          | Aqp5          | -1 |
| 8797 | 21643 | Snrk          | Agtr1a        | 1  |
| 8800 | 143   | Rnf213        | Gvin1         | 1  |
| 8800 | 2224  | Rnf213        | Oasl2         | 1  |
| 8800 | 3683  | Rnf213        | Oas2          | 1  |
| 8800 | 4426  | Rnf213        | ligp2         | 1  |
| 8800 | 5853  | Rnf213        | Trim30        | 1  |
| 8800 | 6824  | Rnf213        | Irf7          | 1  |
| 8800 | 8547  | Rnf213        | Gbp4          | 1  |
| 8800 | 9847  | Rnf213        | Ifi27         | 1  |
| 8800 | 12398 | Rnf213        | Ifi44         | 1  |
| 8800 | 13309 | Rnf213        | Tgtp          | 1  |
| 8800 | 19189 | Rnf213        | Sp100         | 1  |
| 8800 | 21549 | Rnf213        | Rtp4          | 1  |
| 8800 | 23450 | Rnf213        | D12Ert647e    | 1  |
| 8816 | 2708  | Nfkb1a        | Sgk1          | 1  |
| 8816 | 5345  | Nfkb1a        | MMT00023326   | 1  |
| 8816 | 6564  | Nfkb1a        | Cebpd         | 1  |
| 8816 | 8816  | Nfkb1a        | Nfkb1a        | 1  |
| 8816 | 9745  | Nfkb1a        | Gadd45g       | 1  |
| 8816 | 12761 | Nfkb1a        | Tsc22d3       | 1  |
| 8816 | 12989 | Nfkb1a        | 1190002H23Rik | 1  |
| 8816 | 21380 | Nfkb1a        | Ier5          | -1 |
| 8822 | 15826 | Galnt14       | Arl4d         | -1 |
| 8822 | 21189 | Galnt14       | Arl5c         | -1 |
| 8840 | 8840  | Tmem18        | Tmem18        | 1  |
| 8860 | 2752  | Prkab2        | Fcgr1         | -1 |
| 8864 | 2012  | MMT00046672   | Cetn4         | -1 |
| 8864 | 3159  | MMT00046672   | Pld1          | 1  |
| 8864 | 4666  | MMT00046672   | Exosc9        | -1 |
| 8864 | 5762  | MMT00046672   | Trpc3         | -1 |
| 8864 | 9360  | MMT00046672   | Taf1c         | -1 |
| 8864 | 9519  | MMT00046672   | Fstl5         | -1 |
| 8864 | 12367 | MMT00046672   | MMT00072365   | -1 |
| 8864 | 16416 | MMT00046672   | Commd2        | 1  |

|      |       |               |               |    |
|------|-------|---------------|---------------|----|
| 8864 | 16618 | MMT00046672   | Hps3          | -1 |
| 8864 | 19700 | MMT00046672   | E030011K20Rik | 1  |
| 8887 | 2243  | Dpep1         | Gcsh          | -1 |
| 8887 | 7910  | Dpep1         | AK122209      | -1 |
| 8887 | 14391 | Dpep1         | MMT00017335   | 1  |
| 8887 | 15953 | Dpep1         | Acsf3         | 1  |
| 8887 | 18700 | Dpep1         | Trappc2l      | -1 |
| 8887 | 20690 | Dpep1         | Zfp276        | 1  |
| 8887 | 22201 | Dpep1         | Pard3         | 1  |
| 8887 | 22351 | Dpep1         | Fanca         | 1  |
| 8891 | 14517 | MMT00071061   | Clcn4-2       | -1 |
| 8902 | 8902  | Aldh3b1       | Aldh3b1       | 1  |
| 8902 | 11812 | Aldh3b1       | Mrpl16        | 1  |
| 8902 | 17447 | Aldh3b1       | Ctsf          | 1  |
| 8902 | 19744 | Aldh3b1       | Acy3          | -1 |
| 8906 | 7083  | MMT00004929   | MMT00044154   | 1  |
| 8906 | 7116  | MMT00004929   | Katnal1       | 1  |
| 8906 | 7378  | MMT00004929   | 1700001J03Rik | 1  |
| 8906 | 7821  | MMT00004929   | MMT00042003   | 1  |
| 8906 | 17535 | MMT00004929   | MMT00008110   | 1  |
| 8915 | 15870 | Nob1          | Aqp5          | 1  |
| 8925 | 8155  | MMT00026932   | Mark3         | -1 |
| 8925 | 21149 | MMT00026932   | A230065H16Rik | 1  |
| 8980 | 2708  | Plekhf1       | Sgk1          | 1  |
| 8980 | 5345  | Plekhf1       | MMT00023326   | 1  |
| 8980 | 8816  | Plekhf1       | Nfkbia        | 1  |
| 8980 | 8980  | Plekhf1       | Plekhf1       | 1  |
| 8980 | 12989 | Plekhf1       | 1190002H23Rik | 1  |
| 8980 | 16494 | Plekhf1       | 2310007D09Rik | 1  |
| 8980 | 21313 | Plekhf1       | Rhou          | 1  |
| 9005 | 9005  | Mapk1ip1l     | Mapk1ip1l     | 1  |
| 9010 | 9010  | 8430419L09Rik | 8430419L09Rik | 1  |
| 9026 | 3159  | Cep135        | Pld1          | 1  |
| 9026 | 3206  | Cep135        | Gpr160        | 1  |
| 9026 | 12367 | Cep135        | MMT00072365   | -1 |
| 9026 | 16416 | Cep135        | Commd2        | 1  |
| 9026 | 16618 | Cep135        | Hps3          | -1 |
| 9026 | 19700 | Cep135        | E030011K20Rik | 1  |
| 9028 | 1101  | Unc45a        | Sec11a        | -1 |
| 9066 | 18709 | 2210020M01Rik | Srp68         | -1 |
| 9077 | 2705  | Cnpy4         | Hrbl          | 1  |
| 9077 | 6330  | Cnpy4         | Dgkq          | 1  |
| 9077 | 7945  | Cnpy4         | Gpc2          | 1  |
| 9077 | 8992  | Cnpy4         | Trfr2         | -1 |
| 9077 | 9077  | Cnpy4         | Cnpy4         | 1  |
| 9077 | 10995 | Cnpy4         | Ap4m1         | -1 |
| 9077 | 12157 | Cnpy4         | Gal3st4       | 1  |
| 9077 | 12907 | Cnpy4         | Zkscan1       | -1 |
| 9077 | 13780 | Cnpy4         | Pilra         | -1 |
| 9077 | 14631 | Cnpy4         | Stag3         | 1  |
| 9077 | 15587 | Cnpy4         | Actl6b        | 1  |
| 9077 | 16451 | Cnpy4         | 2010007H12Rik | -1 |
| 9077 | 19502 | Cnpy4         | Fbxo24        | -1 |
| 9082 | 1297  | Nrarp         | Phox2a        | 1  |
| 9122 | 2118  | Sepw1         | Kptn          | 1  |
| 9122 | 2599  | Sepw1         | Lsm14a        | 1  |
| 9122 | 6513  | Sepw1         | Qpctl         | 1  |
| 9122 | 7761  | Sepw1         | Nudt19        | 1  |
| 9122 | 7803  | Sepw1         | Ttyh1         | 1  |

|      |       |               |               |    |
|------|-------|---------------|---------------|----|
| 9122 | 8394  | Sepw1         | Dpy19I3       | 1  |
| 9122 | 9122  | Sepw1         | Sepw1         | 1  |
| 9122 | 15670 | Sepw1         | Pnmal1        | -1 |
| 9122 | 17632 | Sepw1         | Lypd3         | -1 |
| 9122 | 19462 | Sepw1         | 4933439C20Rik | -1 |
| 9122 | 20606 | Sepw1         | MMT00042166   | -1 |
| 9122 | 21223 | Sepw1         | Pira1         | -1 |
| 9137 | 15870 | Hunk          | Aqp5          | 1  |
| 9141 | 9361  | MMT00028469   | Hand1         | 1  |
| 9141 | 13581 | MMT00028469   | Srxn1         | 1  |
| 9158 | 8902  | Pde9a         | Aldh3b1       | 1  |
| 9161 | 9161  | Mrpl17        | Mrpl17        | 1  |
| 9161 | 19734 | Mrpl17        | Dchs1         | 1  |
| 9161 | 22693 | Mrpl17        | Trim68        | 1  |
| 9191 | 9230  | Lbxcor1       | 1700027N10Rik | 1  |
| 9191 | 13946 | Lbxcor1       | Slc35b2       | -1 |
| 9191 | 14027 | Lbxcor1       | Rpo1-1        | 1  |
| 9191 | 18772 | Lbxcor1       | BC048355      | -1 |
| 9191 | 19519 | Lbxcor1       | BC011248      | -1 |
| 9192 | 2023  | MMT00042303   | MMT00072215   | -1 |
| 9192 | 22961 | MMT00042303   | MMT00055950   | -1 |
| 9195 | 9195  | Sub1          | Sub1          | 1  |
| 9219 | 13946 | Mad2l1bp      | Slc35b2       | 1  |
| 9230 | 9191  | 1700027N10Rik | Lbxcor1       | 1  |
| 9230 | 9230  | 1700027N10Rik | 1700027N10Rik | 1  |
| 9230 | 13946 | 1700027N10Rik | Slc35b2       | -1 |
| 9230 | 14027 | 1700027N10Rik | Rpo1-1        | 1  |
| 9230 | 15318 | 1700027N10Rik | Aars2         | -1 |
| 9230 | 18772 | 1700027N10Rik | BC048355      | -1 |
| 9230 | 19519 | 1700027N10Rik | BC011248      | -1 |
| 9235 | 15870 | Tnfrsf12a     | Aqp5          | 1  |
| 9252 | 1297  | Slc22a2       | Phox2a        | 1  |
| 9258 | 14222 | P4ha1         | MMT00076410   | -1 |
| 9258 | 15713 | P4ha1         | Rbm3          | -1 |
| 9258 | 21333 | P4ha1         | Cirbp         | -1 |
| 9260 | 2794  | Cmtm6         | Map3k6        | -1 |
| 9260 | 5345  | Cmtm6         | MMT00023326   | -1 |
| 9260 | 12761 | Cmtm6         | Tsc22d3       | -1 |
| 9260 | 12834 | Cmtm6         | Fabp7         | 1  |
| 9260 | 16494 | Cmtm6         | 2310007D09Rik | -1 |
| 9260 | 19621 | Cmtm6         | Cldn5         | 1  |
| 9260 | 21313 | Cmtm6         | Rhou          | -1 |
| 9276 | 10134 | MMT00008480   | Hivep3        | 1  |
| 9281 | 19217 | Rnf122        | Cyr61         | -1 |
| 9301 | 2883  | MMT00050551   | MMT00048540   | -1 |
| 9304 | 283   | AI449175      | Gmcl1l        | -1 |
| 9304 | 403   | AI449175      | Leprotl1      | -1 |
| 9304 | 1097  | AI449175      | Dctn6         | 1  |
| 9304 | 1604  | AI449175      | Ssbp4         | 1  |
| 9304 | 1755  | AI449175      | Ocel1         | 1  |
| 9304 | 2294  | AI449175      | AU040829      | -1 |
| 9304 | 2749  | AI449175      | Naf1          | -1 |
| 9304 | 3052  | AI449175      | 9130404D08Rik | -1 |
| 9304 | 3609  | AI449175      | Plvap         | 1  |
| 9304 | 5433  | AI449175      | 2410004L22Rik | -1 |
| 9304 | 5925  | AI449175      | Tmem59l       | -1 |
| 9304 | 9304  | AI449175      | AI449175      | 1  |
| 9304 | 9569  | AI449175      | Dda1          | -1 |
| 9304 | 9729  | AI449175      | Got1l1        | -1 |

|      |       |               |               |    |
|------|-------|---------------|---------------|----|
| 9304 | 10373 | Al449175      | Tmem141       | 1  |
| 9304 | 10497 | Al449175      | Man2b1        | -1 |
| 9304 | 10758 | Al449175      | Gdf1          | -1 |
| 9304 | 11109 | Al449175      | Al931714      | -1 |
| 9304 | 12966 | Al449175      | Slc39a1       | 1  |
| 9304 | 13732 | Al449175      | Tpm4          | -1 |
| 9304 | 14951 | Al449175      | Dpep3         | -1 |
| 9304 | 15094 | Al449175      | Pbx4          | -1 |
| 9304 | 15296 | Al449175      | Mier3         | 1  |
| 9304 | 15455 | Al449175      | Lsm4          | -1 |
| 9304 | 16617 | Al449175      | Sh2d4a        | -1 |
| 9304 | 16702 | Al449175      | 2810422J05Rik | -1 |
| 9304 | 16849 | Al449175      | Trmt1         | -1 |
| 9304 | 16858 | Al449175      | Tmem38a       | -1 |
| 9304 | 17648 | Al449175      | Scrg1         | -1 |
| 9304 | 17703 | Al449175      | Large         | -1 |
| 9304 | 18886 | Al449175      | Slc18a1       | -1 |
| 9304 | 21433 | Al449175      | Ubx6          | 1  |
| 9304 | 21840 | Al449175      | Tmie          | 1  |
| 9304 | 22408 | Al449175      | Calr3         | 1  |
| 9304 | 23445 | Al449175      | Crlf1         | 1  |
| 9306 | 15870 | Spon1         | Aqp5          | 1  |
| 9310 | 5603  | Pdrg1         | BC020535      | 1  |
| 9310 | 13355 | Pdrg1         | Foxs1         | 1  |
| 9310 | 23005 | Pdrg1         | 4930405A21Rik | 1  |
| 9320 | 6824  | Rnf31         | Irf7          | 1  |
| 9320 | 12398 | Rnf31         | Irf44         | 1  |
| 9322 | 2599  | Relt          | Lsm14a        | -1 |
| 9322 | 7761  | Relt          | Nudt19        | -1 |
| 9322 | 8394  | Relt          | Dpy19l3       | -1 |
| 9322 | 9122  | Relt          | Sepw1         | -1 |
| 9322 | 17632 | Relt          | Lypd3         | 1  |
| 9322 | 19462 | Relt          | 4933439C20Rik | 1  |
| 9322 | 20606 | Relt          | MMT00042166   | 1  |
| 9352 | 9352  | Hnrpl         | Hnrpl         | 1  |
| 9352 | 13475 | Hnrpl         | Morn2         | -1 |
| 9361 | 4626  | Hand1         | 2310046K01Rik | 1  |
| 9361 | 9361  | Hand1         | Hand1         | 1  |
| 9361 | 13581 | Hand1         | Srxn1         | 1  |
| 9392 | 2012  | 4922505G16Rik | Cetn4         | -1 |
| 9392 | 4666  | 4922505G16Rik | Exosc9        | -1 |
| 9392 | 12367 | 4922505G16Rik | MMT00072365   | -1 |
| 9392 | 16618 | 4922505G16Rik | Hps3          | -1 |
| 9408 | 1014  | Hmgcs2        | Rtcd1         | -1 |
| 9408 | 2752  | Hmgcs2        | Fcgr1         | -1 |
| 9408 | 9408  | Hmgcs2        | Hmgcs2        | 1  |
| 9417 | 2464  | Cd163         | A130022J15Rik | 1  |
| 9417 | 3141  | Cd163         | Tmf1          | 1  |
| 9417 | 4850  | Cd163         | Fancd2        | 1  |
| 9417 | 8141  | Cd163         | Scnn1a        | -1 |
| 9417 | 8194  | Cd163         | MMT00077789   | 1  |
| 9417 | 9010  | Cd163         | 8430419L09Rik | -1 |
| 9417 | 9417  | Cd163         | Cd163         | 1  |
| 9417 | 9622  | Cd163         | Rasgef1a      | -1 |
| 9417 | 14557 | Cd163         | Pyroxd1       | 1  |
| 9417 | 15719 | Cd163         | BC060267      | -1 |
| 9417 | 16255 | Cd163         | Reg3b         | 1  |
| 9417 | 17743 | Cd163         | Phb2          | 1  |
| 9417 | 19964 | Cd163         | Ndufa9        | 1  |



|      |       |               |               |    |
|------|-------|---------------|---------------|----|
| 9417 | 19999 | Cd163         | Ift122        | -1 |
| 9417 | 22395 | Cd163         | Kcna1         | -1 |
| 9440 | 21969 | Zfp653        | Tk1           | 1  |
| 9454 | 2449  | 2810426N06Rik | Mybpc2        | 1  |
| 9454 | 2599  | 2810426N06Rik | Lsm14a        | 1  |
| 9454 | 4729  | 2810426N06Rik | Slc7a10       | -1 |
| 9454 | 6513  | 2810426N06Rik | Qpctl         | 1  |
| 9454 | 6839  | 2810426N06Rik | Mrpl46        | 1  |
| 9454 | 7761  | 2810426N06Rik | Nudt19        | 1  |
| 9454 | 7803  | 2810426N06Rik | Ttyh1         | 1  |
| 9454 | 8394  | 2810426N06Rik | Dpy19l3       | 1  |
| 9454 | 9122  | 2810426N06Rik | Sepw1         | 1  |
| 9454 | 9454  | 2810426N06Rik | 2810426N06Rik | 1  |
| 9454 | 9655  | 2810426N06Rik | Sult2b1       | -1 |
| 9454 | 11800 | 2810426N06Rik | Clip3         | -1 |
| 9454 | 12623 | 2810426N06Rik | Ccdc123       | 1  |
| 9454 | 14842 | 2810426N06Rik | Gipr          | 1  |
| 9454 | 15670 | 2810426N06Rik | Pnmal1        | -1 |
| 9454 | 17632 | 2810426N06Rik | Lypd3         | -1 |
| 9454 | 18365 | 2810426N06Rik | Bcl2l12       | -1 |
| 9454 | 19142 | 2810426N06Rik | Gpatch1       | 1  |
| 9454 | 19306 | 2810426N06Rik | Al428936      | 1  |
| 9454 | 19462 | 2810426N06Rik | 4933439C20Rik | -1 |
| 9454 | 20490 | 2810426N06Rik | Tmem143       | -1 |
| 9454 | 20606 | 2810426N06Rik | MMT00042166   | -1 |
| 9460 | 4666  | Fer1l4        | Exosc9        | -1 |
| 9460 | 5762  | Fer1l4        | Trpc3         | -1 |
| 9513 | 14134 | Tardbp        | Phf10         | 1  |
| 9513 | 15476 | Tardbp        | Fem1b         | -1 |
| 9513 | 18373 | Tardbp        | Dnajb1        | 1  |
| 9513 | 18418 | Tardbp        | Hspa1b        | 1  |
| 9513 | 21903 | Tardbp        | Nr1d1         | -1 |
| 9513 | 22141 | Tardbp        | Rorb          | 1  |
| 9531 | 4233  | MMT00043554   | Brpf1         | 1  |
| 9531 | 13192 | MMT00043554   | Impg1         | 1  |
| 9531 | 17930 | MMT00043554   | Cidec         | 1  |
| 9531 | 18070 | MMT00043554   | Ogg1          | 1  |
| 9541 | 8610  | Npal3         | Padi4         | 1  |
| 9547 | 290   | MMT00006479   | B230118H07Rik | -1 |
| 9547 | 1510  | MMT00006479   | A530058N18Rik | -1 |
| 9547 | 1991  | MMT00006479   | Ttc17         | 1  |
| 9547 | 2472  | MMT00006479   | MMT00014056   | 1  |
| 9547 | 9547  | MMT00006479   | MMT00006479   | 1  |
| 9547 | 14757 | MMT00006479   | Hdx           | 1  |
| 9547 | 16881 | MMT00006479   | MMT00031504   | 1  |
| 9547 | 17295 | MMT00006479   | MMT00082577   | 1  |
| 9547 | 18368 | MMT00006479   | Mpped2        | -1 |
| 9547 | 18835 | MMT00006479   | Dtwd1         | 1  |
| 9547 | 19763 | MMT00006479   | Acp2          | 1  |
| 9547 | 19803 | MMT00006479   | BC003993      | 1  |
| 9547 | 21017 | MMT00006479   | Gstz1         | 1  |
| 9547 | 22320 | MMT00006479   | MMT00047284   | 1  |
| 9547 | 23474 | MMT00006479   | MMT00011721   | 1  |
| 9558 | 737   | Akr7a5        | MMT00023716   | 1  |
| 9558 | 2533  | Akr7a5        | Arhgef19      | 1  |
| 9558 | 11870 | Akr7a5        | Apitd1        | 1  |
| 9558 | 14397 | Akr7a5        | Padi2         | -1 |
| 9558 | 15700 | Akr7a5        | Crocc         | 1  |
| 9558 | 19647 | Akr7a5        | Cort          | 1  |

|      |       |                    |               |    |
|------|-------|--------------------|---------------|----|
| 9611 | 246   | Ncf2               | MMT00053742   | 1  |
| 9611 | 1625  | Ncf2               | AW146154      | -1 |
| 9611 | 9402  | Ncf2               | 1200016B10Rik | -1 |
| 9611 | 9611  | Ncf2               | Ncf2          | 1  |
| 9611 | 15569 | Ncf2               | BC003331      | 1  |
| 9611 | 17463 | Ncf2               | Rgl1          | 1  |
| 9616 | 13309 | Al451557           | Tgtp          | 1  |
| 9620 | 15870 | Sdpr               | Aqp5          | -1 |
| 9634 | 8610  | Atp13a2            | Padi4         | 1  |
| 9651 | 4084  | Cxxc5              | Asah3l        | -1 |
| 9651 | 12761 | Cxxc5              | Tsc22d3       | -1 |
| 9655 | 5345  | Sult2b1            | MMT00023326   | 1  |
| 9655 | 12761 | Sult2b1            | Tsc22d3       | 1  |
| 9655 | 16494 | Sult2b1            | 2310007D09Rik | 1  |
| 9674 | 1297  | Pea15a             | Phox2a        | -1 |
| 9683 | 22982 | Prdm8              | Mug2          | -1 |
| 9686 | 1416  | Nek4               | 6720460F02Rik | -1 |
| 9689 | 22012 | 4432416J03Rik      | ltgae         | 1  |
| 9701 | 9413  | Prkcz              | 1190020J12Rik | -1 |
| 9713 | 15870 | Ykt6               | Aqp5          | 1  |
| 9715 | 15255 | OTTMUSG00000004551 | Ccl8          | -1 |
| 9715 | 16378 | OTTMUSG00000004551 | Ccl8          | -1 |
| 9717 | 6824  | Psemb9             | Irf7          | 1  |
| 9717 | 12398 | Psemb9             | Ifi44         | 1  |
| 9717 | 13309 | Psemb9             | Tgtp          | 1  |
| 9718 | 1014  | Fmo5               | Rtcd1         | -1 |
| 9718 | 1466  | Fmo5               | Ubap2l        | -1 |
| 9718 | 2752  | Fmo5               | Fcgr1         | -1 |
| 9718 | 3314  | Fmo5               | Wars2         | -1 |
| 9718 | 9408  | Fmo5               | Hmgcs2        | 1  |
| 9718 | 9519  | Fmo5               | Fstl5         | 1  |
| 9718 | 10521 | Fmo5               | Ttf2          | -1 |
| 9718 | 12367 | Fmo5               | MMT00072365   | 1  |
| 9718 | 16283 | Fmo5               | EG627427      | 1  |
| 9718 | 16416 | Fmo5               | Comm2         | -1 |
| 9718 | 17837 | Fmo5               | Polr3gl       | 1  |
| 9718 | 20661 | Fmo5               | Tuft1         | 1  |
| 9729 | 403   | Got111             | Leptol1       | 1  |
| 9729 | 1097  | Got111             | Dctn6         | -1 |
| 9729 | 1604  | Got111             | Ssbp4         | -1 |
| 9729 | 1755  | Got111             | Ocel1         | -1 |
| 9729 | 2294  | Got111             | AU040829      | 1  |
| 9729 | 3052  | Got111             | 9130404D08Rik | 1  |
| 9729 | 5433  | Got111             | 2410004L22Rik | 1  |
| 9729 | 5925  | Got111             | Tmem59l       | 1  |
| 9729 | 9304  | Got111             | Al449175      | -1 |
| 9729 | 9569  | Got111             | Dda1          | 1  |
| 9729 | 9729  | Got111             | Got111        | 1  |
| 9729 | 10373 | Got111             | Tmem141       | -1 |
| 9729 | 10758 | Got111             | Gdf1          | 1  |
| 9729 | 13732 | Got111             | Tpm4          | 1  |
| 9729 | 15296 | Got111             | Mier3         | -1 |
| 9729 | 16617 | Got111             | Sh2d4a        | 1  |
| 9729 | 16849 | Got111             | Trmt1         | 1  |
| 9729 | 17553 | Got111             | Eif4ebp1      | -1 |
| 9729 | 17703 | Got111             | Large         | 1  |
| 9729 | 21433 | Got111             | Ubx6          | -1 |
| 9729 | 21840 | Got111             | Tmie          | -1 |
| 9734 | 13776 | Wwp1               | D12Ert551e    | 1  |

|      |       |               |               |    |
|------|-------|---------------|---------------|----|
| 9755 | 1162  | MMT00066614   | Cpsf4         | 1  |
| 9755 | 7116  | MMT00066614   | Katnal1       | -1 |
| 9757 | 3159  | Olfr502       | Pld1          | 1  |
| 9757 | 16618 | Olfr502       | Hps3          | -1 |
| 9762 | 153   | Snx5          | 2010011I20Rik | 1  |
| 9762 | 678   | Snx5          | Ncaph         | 1  |
| 9762 | 1510  | Snx5          | A530058N18Rik | -1 |
| 9762 | 4195  | Snx5          | Csrp2bp       | -1 |
| 9762 | 4897  | Snx5          | Ciao1         | -1 |
| 9762 | 5603  | Snx5          | BC020535      | 1  |
| 9762 | 5737  | Snx5          | Nkx2-2        | -1 |
| 9762 | 6188  | Snx5          | Myh7b         | -1 |
| 9762 | 9762  | Snx5          | Snx5          | 1  |
| 9762 | 11705 | Snx5          | Polr3f        | -1 |
| 9762 | 12243 | Snx5          | Edar          | -1 |
| 9762 | 12388 | Snx5          | 8430406I07Rik | -1 |
| 9762 | 14403 | Snx5          | S100g         | 1  |
| 9762 | 14740 | Snx5          | Mfap1b        | -1 |
| 9762 | 16715 | Snx5          | 2610034M16Rik | -1 |
| 9762 | 17043 | Snx5          | Tmem127       | 1  |
| 9762 | 17814 | Snx5          | Napb          | 1  |
| 9762 | 18835 | Snx5          | Dtwd1         | 1  |
| 9762 | 19110 | Snx5          | Gm114         | 1  |
| 9805 | 11435 | Tagap         | Rnaset2a      | -1 |
| 9805 | 15870 | Tagap         | Aqp5          | 1  |
| 9820 | 16949 | BC023105      | ligp1         | 1  |
| 9827 | 9827  | Pam           | Pam           | 1  |
| 9829 | 10606 | Stoml1        | Apbb1ip       | 1  |
| 9830 | 18462 | Rbks          | Gm1060        | -1 |
| 9832 | 6357  | Brf1          | Ankrd9        | 1  |
| 9832 | 7388  | Brf1          | Amn           | 1  |
| 9832 | 8155  | Brf1          | Mark3         | -1 |
| 9832 | 10526 | Brf1          | MMT00036239   | 1  |
| 9832 | 12517 | Brf1          | 4930573I19Rik | -1 |
| 9832 | 15984 | Brf1          | MMT00075074   | -1 |
| 9832 | 21149 | Brf1          | A230065H16Rik | 1  |
| 9832 | 23462 | Brf1          | Bag5          | -1 |
| 9859 | 10729 | Cx3cl1        | Fgd2          | -1 |
| 9861 | 5342  | Serpnb6b      | Eps8l3        | 1  |
| 9861 | 9684  | Serpnb6b      | Phf21b        | 1  |
| 9861 | 15870 | Serpnb6b      | Aqp5          | 1  |
| 9861 | 17981 | Serpnb6b      | MMT00036029   | 1  |
| 9875 | 2456  | Cdk5rap3      | Mrpl10        | -1 |
| 9875 | 3480  | Cdk5rap3      | Pnpo          | 1  |
| 9875 | 9875  | Cdk5rap3      | Cdk5rap3      | 1  |
| 9875 | 10498 | Cdk5rap3      | Ube2z         | 1  |
| 9875 | 12302 | Cdk5rap3      | Cbx1          | -1 |
| 9875 | 19092 | Cdk5rap3      | MMT00045362   | 1  |
| 9875 | 23295 | Cdk5rap3      | Snx11         | -1 |
| 9885 | 13813 | 4930401F20Rik | Ktelc1        | -1 |
| 9885 | 14043 | 4930401F20Rik | 4930455C21Rik | 1  |
| 9899 | 15476 | D13Wsu177e    | Fem1b         | -1 |
| 9899 | 15870 | D13Wsu177e    | Aqp5          | 1  |
| 9909 | 19064 | MMT00077883   | MMT00004867   | -1 |
| 9912 | 1423  | Ttc27         | Spdya         | -1 |
| 9912 | 9912  | Ttc27         | Ttc27         | 1  |
| 9912 | 11467 | Ttc27         | Ypel5         | -1 |
| 9912 | 16861 | Ttc27         | Nlrc4         | 1  |
| 9926 | 21142 | Snx18         | Gm129         | -1 |

|       |       |             |               |    |
|-------|-------|-------------|---------------|----|
| 9931  | 1604  | Glt25d1     | Ssbp4         | -1 |
| 9931  | 1755  | Glt25d1     | Ocel1         | -1 |
| 9931  | 5433  | Glt25d1     | 2410004L22Rik | 1  |
| 9931  | 5925  | Glt25d1     | Tmem59l       | 1  |
| 9931  | 9304  | Glt25d1     | Al449175      | -1 |
| 9931  | 9569  | Glt25d1     | Dda1          | 1  |
| 9931  | 9729  | Glt25d1     | Got111        | 1  |
| 9931  | 10758 | Glt25d1     | Gdf1          | 1  |
| 9931  | 13732 | Glt25d1     | Tpm4          | 1  |
| 9931  | 15296 | Glt25d1     | Mier3         | -1 |
| 9931  | 17703 | Glt25d1     | Large         | 1  |
| 9935  | 2670  | Prnd        | Igsf1         | 1  |
| 9938  | 21165 | MMT00012610 | Hmbs          | -1 |
| 9951  | 2801  | Rpp21       | H2-BI         | -1 |
| 9951  | 2938  | Rpp21       | H2-T23        | -1 |
| 9951  | 4555  | Rpp21       | Cchcr1        | -1 |
| 9951  | 4958  | Rpp21       | Ndufa7        | 1  |
| 9951  | 6406  | Rpp21       | Sh3rf2        | 1  |
| 9951  | 7088  | Rpp21       | Slc37a1       | -1 |
| 9951  | 7603  | Rpp21       | Sod2          | -1 |
| 9951  | 8750  | Rpp21       | 1700010114Rik | -1 |
| 9951  | 8767  | Rpp21       | Rgl2          | -1 |
| 9951  | 10374 | Rpp21       | Trim15        | -1 |
| 9951  | 10667 | Rpp21       | H2-Eb1        | -1 |
| 9951  | 10931 | Rpp21       | Pkn3          | 1  |
| 9951  | 12168 | Rpp21       | H2-Ke6        | -1 |
| 9951  | 12694 | Rpp21       | Riok2         | 1  |
| 9951  | 12943 | Rpp21       | Slc25a27      | -1 |
| 9951  | 13493 | Rpp21       | Ring1         | -1 |
| 9951  | 14631 | Rpp21       | Stag3         | -1 |
| 9951  | 15580 | Rpp21       | MMT00077001   | -1 |
| 9951  | 16692 | Rpp21       | Bat4          | -1 |
| 9951  | 17322 | Rpp21       | Zfp758        | 1  |
| 9951  | 17412 | Rpp21       | Aif1          | 1  |
| 9951  | 17646 | Rpp21       | C4b           | -1 |
| 9951  | 18577 | Rpp21       | Btbd9         | 1  |
| 9951  | 20238 | Rpp21       | H2-T9         | -1 |
| 9951  | 21295 | Rpp21       | Snf1lk        | 1  |
| 9951  | 21415 | Rpp21       | Has1          | -1 |
| 9990  | 316   | MMT00081303 | 4930471G03Rik | 1  |
| 9990  | 14313 | MMT00081303 | Tnk1          | 1  |
| 9990  | 14510 | MMT00081303 | Olfr643       | 1  |
| 9996  | 2708  | Rassf9      | Sgk1          | -1 |
| 9996  | 6564  | Rassf9      | Cebpd         | -1 |
| 9996  | 8816  | Rassf9      | Nfkbia        | -1 |
| 9996  | 8980  | Rassf9      | Plekhf1       | -1 |
| 9996  | 12761 | Rassf9      | Tsc22d3       | -1 |
| 9996  | 12989 | Rassf9      | 1190002H23Rik | -1 |
| 9996  | 22989 | Rassf9      | Lmcd1         | 1  |
| 10002 | 1297  | Krt79       | Phox2a        | 1  |
| 10055 | 10    | Tpte        | NaN           | 1  |
| 10055 | 115   | Tpte        | NaN           | 1  |
| 10055 | 316   | Tpte        | 4930471G03Rik | 1  |
| 10055 | 391   | Tpte        | 4933416I08Rik | 1  |
| 10055 | 486   | Tpte        | Josd2         | 1  |
| 10055 | 558   | Tpte        | Crebl1        | 1  |
| 10055 | 663   | Tpte        | Muc19         | 1  |
| 10055 | 1059  | Tpte        | P2rx6         | 1  |
| 10055 | 1518  | Tpte        | Amigo2        | 1  |

|       |       |      |               |   |
|-------|-------|------|---------------|---|
| 10055 | 1619  | Tpte | Fbxw17        | 1 |
| 10055 | 1696  | Tpte | V1re9         | 1 |
| 10055 | 1771  | Tpte | Park2         | 1 |
| 10055 | 1795  | Tpte | Rabgap1l      | 1 |
| 10055 | 1829  | Tpte | MMT00030026   | 1 |
| 10055 | 1920  | Tpte | Oas1e         | 1 |
| 10055 | 2067  | Tpte | Myo1a         | 1 |
| 10055 | 2226  | Tpte | Amt           | 1 |
| 10055 | 2819  | Tpte | Kcnk5         | 1 |
| 10055 | 3144  | Tpte | Ube2j2        | 1 |
| 10055 | 3166  | Tpte | Vmn2r57       | 1 |
| 10055 | 3208  | Tpte | 4930511111Rik | 1 |
| 10055 | 3254  | Tpte | Grifin        | 1 |
| 10055 | 3383  | Tpte | Cd99          | 1 |
| 10055 | 3511  | Tpte | Rnf182        | 1 |
| 10055 | 3841  | Tpte | MMT00014519   | 1 |
| 10055 | 3948  | Tpte | V1rb4         | 1 |
| 10055 | 3986  | Tpte | Ep400         | 1 |
| 10055 | 4079  | Tpte | Emilin3       | 1 |
| 10055 | 4088  | Tpte | Pdcl2         | 1 |
| 10055 | 4199  | Tpte | B3galt5       | 1 |
| 10055 | 4246  | Tpte | Fbxw12        | 1 |
| 10055 | 4311  | Tpte | MMT00033987   | 1 |
| 10055 | 4337  | Tpte | Myst3         | 1 |
| 10055 | 4407  | Tpte | 4930429B21Rik | 1 |
| 10055 | 4430  | Tpte | Ankrd36       | 1 |
| 10055 | 4683  | Tpte | E330013P04Rik | 1 |
| 10055 | 4870  | Tpte | Olf550        | 1 |
| 10055 | 5265  | Tpte | A3galt2       | 1 |
| 10055 | 5505  | Tpte | Thap2         | 1 |
| 10055 | 5694  | Tpte | Sp7           | 1 |
| 10055 | 5908  | Tpte | MMT00027552   | 1 |
| 10055 | 6367  | Tpte | Lhfp          | 1 |
| 10055 | 6403  | Tpte | MMT00039607   | 1 |
| 10055 | 6422  | Tpte | Grk5          | 1 |
| 10055 | 6429  | Tpte | Sim2          | 1 |
| 10055 | 6719  | Tpte | Cacng8        | 1 |
| 10055 | 6880  | Tpte | Dmrtb1        | 1 |
| 10055 | 7041  | Tpte | Sp140         | 1 |
| 10055 | 7132  | Tpte | Sp9           | 1 |
| 10055 | 7279  | Tpte | Cldn13        | 1 |
| 10055 | 7436  | Tpte | 1700063K16Rik | 1 |
| 10055 | 7577  | Tpte | Cldn8         | 1 |
| 10055 | 7916  | Tpte | MMT00016293   | 1 |
| 10055 | 7974  | Tpte | Arhgef7       | 1 |
| 10055 | 8157  | Tpte | MMT00005305   | 1 |
| 10055 | 8256  | Tpte | Tjap1         | 1 |
| 10055 | 8644  | Tpte | V1rg11        | 1 |
| 10055 | 8703  | Tpte | Gstp1         | 1 |
| 10055 | 9436  | Tpte | Cntnap2       | 1 |
| 10055 | 9463  | Tpte | Zdhhc23       | 1 |
| 10055 | 9743  | Tpte | Gm189         | 1 |
| 10055 | 9946  | Tpte | Stam2         | 1 |
| 10055 | 9954  | Tpte | MMT00047280   | 1 |
| 10055 | 10055 | Tpte | Tpte          | 1 |
| 10055 | 10195 | Tpte | Klf1          | 1 |
| 10055 | 10240 | Tpte | Cyp2w1        | 1 |
| 10055 | 10260 | Tpte | Zfp36l2       | 1 |
| 10055 | 10281 | Tpte | Slc15a1       | 1 |

|       |       |      |               |   |
|-------|-------|------|---------------|---|
| 10055 | 10377 | Tpte | A430105I19Rik | 1 |
| 10055 | 10452 | Tpte | Grn           | 1 |
| 10055 | 10520 | Tpte | Xkr6          | 1 |
| 10055 | 10657 | Tpte | Rnf12         | 1 |
| 10055 | 10687 | Tpte | Itpkb         | 1 |
| 10055 | 10723 | Tpte | 4930556N09Rik | 1 |
| 10055 | 10806 | Tpte | Rnf212        | 1 |
| 10055 | 10886 | Tpte | Fndc3b        | 1 |
| 10055 | 11016 | Tpte | Pcp2          | 1 |
| 10055 | 11256 | Tpte | H2-DMa        | 1 |
| 10055 | 11350 | Tpte | 9030420J04Rik | 1 |
| 10055 | 11507 | Tpte | Adarb2        | 1 |
| 10055 | 11665 | Tpte | Hyal1         | 1 |
| 10055 | 11805 | Tpte | Bat2          | 1 |
| 10055 | 11837 | Tpte | Paqr6         | 1 |
| 10055 | 11966 | Tpte | Zfp280b       | 1 |
| 10055 | 12062 | Tpte | Dzip1l        | 1 |
| 10055 | 12188 | Tpte | Chek2         | 1 |
| 10055 | 12248 | Tpte | Tnp2          | 1 |
| 10055 | 12272 | Tpte | Fshr          | 1 |
| 10055 | 12372 | Tpte | MMT00039397   | 1 |
| 10055 | 12430 | Tpte | Fst           | 1 |
| 10055 | 12568 | Tpte | Lrrc37a       | 1 |
| 10055 | 12604 | Tpte | Acr           | 1 |
| 10055 | 12651 | Tpte | Tsc22d4       | 1 |
| 10055 | 12696 | Tpte | RP23-392P11.3 | 1 |
| 10055 | 12753 | Tpte | MMT00043344   | 1 |
| 10055 | 12772 | Tpte | Axl           | 1 |
| 10055 | 12826 | Tpte | Zfp354c       | 1 |
| 10055 | 13487 | Tpte | A230051G13Rik | 1 |
| 10055 | 13676 | Tpte | MMT00010979   | 1 |
| 10055 | 13742 | Tpte | 1700024P16Rik | 1 |
| 10055 | 13767 | Tpte | Kcnk15        | 1 |
| 10055 | 13800 | Tpte | Lrp5          | 1 |
| 10055 | 13860 | Tpte | Cpt1b         | 1 |
| 10055 | 13890 | Tpte | Olf1263       | 1 |
| 10055 | 14149 | Tpte | BC048562      | 1 |
| 10055 | 14313 | Tpte | Tnk1          | 1 |
| 10055 | 14519 | Tpte | Trex1         | 1 |
| 10055 | 14565 | Tpte | Rnf207        | 1 |
| 10055 | 14754 | Tpte | Atoh8         | 1 |
| 10055 | 15424 | Tpte | Atp6v1g2      | 1 |
| 10055 | 15697 | Tpte | Tbc1d8b       | 1 |
| 10055 | 15743 | Tpte | Hoxc6         | 1 |
| 10055 | 15747 | Tpte | Sfrs1         | 1 |
| 10055 | 15813 | Tpte | Vpreb3        | 1 |
| 10055 | 15885 | Tpte | Adamts7       | 1 |
| 10055 | 16104 | Tpte | Ugt3a2        | 1 |
| 10055 | 16197 | Tpte | MMT00065977   | 1 |
| 10055 | 16390 | Tpte | Plb1          | 1 |
| 10055 | 16664 | Tpte | Car4          | 1 |
| 10055 | 16672 | Tpte | Tmem82        | 1 |
| 10055 | 16718 | Tpte | Zbtb7c        | 1 |
| 10055 | 16794 | Tpte | Chrn1         | 1 |
| 10055 | 16957 | Tpte | MMT00046108   | 1 |
| 10055 | 17171 | Tpte | MMT00045847   | 1 |
| 10055 | 17337 | Tpte | 1810065E05Rik | 1 |
| 10055 | 17417 | Tpte | Pxn           | 1 |
| 10055 | 17422 | Tpte | Dctd          | 1 |

|       |       |               |               |    |
|-------|-------|---------------|---------------|----|
| 10055 | 17613 | Tpte          | P2rx7         | 1  |
| 10055 | 17750 | Tpte          | Hs6st2        | 1  |
| 10055 | 18214 | Tpte          | Ankrd40       | 1  |
| 10055 | 18409 | Tpte          | Nicn1         | 1  |
| 10055 | 18620 | Tpte          | Slmap         | 1  |
| 10055 | 18790 | Tpte          | Car3          | 1  |
| 10055 | 18980 | Tpte          | Il7           | 1  |
| 10055 | 19219 | Tpte          | MMT00015104   | 1  |
| 10055 | 19265 | Tpte          | EG546036      | 1  |
| 10055 | 19351 | Tpte          | PrkcsH        | 1  |
| 10055 | 19436 | Tpte          | Dapp1         | 1  |
| 10055 | 19483 | Tpte          | Depdc2        | 1  |
| 10055 | 19645 | Tpte          | Il12rb2       | 1  |
| 10055 | 19672 | Tpte          | Cldn19        | 1  |
| 10055 | 20089 | Tpte          | MMT00015975   | 1  |
| 10055 | 20255 | Tpte          | Elfn2         | 1  |
| 10055 | 20319 | Tpte          | Syne2         | 1  |
| 10055 | 20406 | Tpte          | Cacng2        | 1  |
| 10055 | 20419 | Tpte          | Adra1b        | 1  |
| 10055 | 20532 | Tpte          | Rnf26         | 1  |
| 10055 | 20566 | Tpte          | Tnni2         | 1  |
| 10055 | 20908 | Tpte          | OlfR583       | 1  |
| 10055 | 20944 | Tpte          | Tmem164       | 1  |
| 10055 | 21511 | Tpte          | MMT00054100   | 1  |
| 10055 | 21595 | Tpte          | Trpv1         | 1  |
| 10055 | 21866 | Tpte          | Hhip1         | 1  |
| 10055 | 21923 | Tpte          | OlfR585       | 1  |
| 10055 | 22125 | Tpte          | Gab1          | 1  |
| 10055 | 22150 | Tpte          | Fhdc1         | 1  |
| 10055 | 22271 | Tpte          | Cyp2c29       | 1  |
| 10055 | 22434 | Tpte          | OlfR1255      | 1  |
| 10055 | 22555 | Tpte          | Ela2          | 1  |
| 10055 | 22762 | Tpte          | Slc6a4        | 1  |
| 10055 | 22802 | Tpte          | Svs2          | 1  |
| 10055 | 22966 | Tpte          | Epha4         | 1  |
| 10055 | 23119 | Tpte          | Cps1          | 1  |
| 10055 | 23454 | Tpte          | Znhit1        | 1  |
| 10055 | 23528 | Tpte          | 0610038L08Rik | 1  |
| 10055 | 23531 | Tpte          | Foxb2         | 1  |
| 10055 | 23546 | Tpte          | Zzef1         | 1  |
| 10055 | 23561 | Tpte          | Sox14         | 1  |
| 10055 | 23591 | Tpte          | Dlg4          | 1  |
| 10055 | 23651 | Tpte          | MMT00027295   | 1  |
| 10065 | 10711 | 9030625A04Rik | 1700108F19Rik | -1 |
| 10077 | 10077 | Cep63         | Cep63         | 1  |
| 10087 | 1297  | Bmp3          | Phox2a        | 1  |
| 10109 | 143   | Gbp3          | Gvin1         | 1  |
| 10109 | 4426  | Gbp3          | ligp2         | 1  |
| 10109 | 6824  | Gbp3          | Irf7          | 1  |
| 10109 | 8547  | Gbp3          | Gbp4          | 1  |
| 10109 | 12398 | Gbp3          | Ifi44         | 1  |
| 10109 | 13309 | Gbp3          | Tgtp          | 1  |
| 10109 | 16949 | Gbp3          | ligp1         | 1  |
| 10109 | 19189 | Gbp3          | Sp100         | 1  |
| 10109 | 21549 | Gbp3          | Rtp4          | 1  |
| 10109 | 23450 | Gbp3          | D12ErtD647e   | 1  |
| 10130 | 17729 | MMT00043239   | Prim2         | -1 |
| 10147 | 1297  | Itgax         | Phox2a        | 1  |
| 10147 | 15255 | Itgax         | Ccl8          | 1  |

|       |       |               |               |    |
|-------|-------|---------------|---------------|----|
| 10147 | 16378 | Itgax         | Ccl8          | 1  |
| 10210 | 2708  | Sgms1         | Sgk1          | 1  |
| 10210 | 12761 | Sgms1         | Tsc22d3       | 1  |
| 10210 | 14233 | Sgms1         | Fgfr1         | -1 |
| 10215 | 5345  | Nampt         | MMT00023326   | 1  |
| 10247 | 3159  | V1rc20        | Pld1          | 1  |
| 10247 | 12367 | V1rc20        | MMT00072365   | -1 |
| 10247 | 16416 | V1rc20        | Commd2        | 1  |
| 10247 | 16618 | V1rc20        | Hps3          | -1 |
| 10247 | 19700 | V1rc20        | E030011K20Rik | 1  |
| 10273 | 2294  | Gpt2          | AU040829      | 1  |
| 10273 | 12761 | Gpt2          | Tsc22d3       | 1  |
| 10298 | 3159  | Olf1015       | Pld1          | 1  |
| 10298 | 16618 | Olf1015       | Hps3          | -1 |
| 10298 | 19700 | Olf1015       | E030011K20Rik | 1  |
| 10360 | 8443  | Nrxn2         | Pola2         | 1  |
| 10376 | 812   | C920025E04Rik | En2           | -1 |
| 10376 | 1960  | C920025E04Rik | Ubr2          | 1  |
| 10376 | 2424  | C920025E04Rik | Unc5cl        | -1 |
| 10376 | 2801  | C920025E04Rik | H2-BI         | -1 |
| 10376 | 2938  | C920025E04Rik | H2-T23        | -1 |
| 10376 | 4555  | C920025E04Rik | Cchcr1        | -1 |
| 10376 | 4584  | C920025E04Rik | MMT00022168   | -1 |
| 10376 | 6406  | C920025E04Rik | Sh3rf2        | 1  |
| 10376 | 7088  | C920025E04Rik | Slc37a1       | -1 |
| 10376 | 7603  | C920025E04Rik | Sod2          | -1 |
| 10376 | 7965  | C920025E04Rik | Enpp5         | -1 |
| 10376 | 8750  | C920025E04Rik | 1700010114Rik | -1 |
| 10376 | 8767  | C920025E04Rik | Rgl2          | -1 |
| 10376 | 10374 | C920025E04Rik | Trim15        | -1 |
| 10376 | 10667 | C920025E04Rik | H2-Eb1        | -1 |
| 10376 | 10931 | C920025E04Rik | Pkn3          | 1  |
| 10376 | 11475 | C920025E04Rik | H2-D1         | 1  |
| 10376 | 12168 | C920025E04Rik | H2-Ke6        | -1 |
| 10376 | 12694 | C920025E04Rik | Riok2         | 1  |
| 10376 | 12943 | C920025E04Rik | Slc25a27      | -1 |
| 10376 | 13117 | C920025E04Rik | Tmprss5       | -1 |
| 10376 | 13493 | C920025E04Rik | Ring1         | -1 |
| 10376 | 14322 | C920025E04Rik | Bat1a         | 1  |
| 10376 | 15580 | C920025E04Rik | MMT00077001   | -1 |
| 10376 | 16067 | C920025E04Rik | Pcaf          | 1  |
| 10376 | 16692 | C920025E04Rik | Bat4          | -1 |
| 10376 | 17322 | C920025E04Rik | Zfp758        | 1  |
| 10376 | 17412 | C920025E04Rik | Aif1          | 1  |
| 10376 | 17646 | C920025E04Rik | C4b           | -1 |
| 10376 | 17707 | C920025E04Rik | Rsh12b        | -1 |
| 10376 | 18577 | C920025E04Rik | Btbd9         | 1  |
| 10376 | 20100 | C920025E04Rik | Guca1b        | 1  |
| 10376 | 20238 | C920025E04Rik | H2-T9         | -1 |
| 10376 | 21295 | C920025E04Rik | Snf1lk        | 1  |
| 10376 | 21415 | C920025E04Rik | Has1          | -1 |
| 10376 | 23371 | C920025E04Rik | Cfb           | 1  |
| 10387 | 6542  | 4933427D06Rik | Epor          | 1  |
| 10387 | 12571 | 4933427D06Rik | Cdkn2d        | 1  |
| 10387 | 17098 | 4933427D06Rik | Qtrt1         | -1 |
| 10387 | 23415 | 4933427D06Rik | Acp5          | 1  |
| 10393 | 3970  | Slc7a8        | 4931414P19Rik | 1  |
| 10393 | 4566  | Slc7a8        | MMT00078134   | -1 |
| 10393 | 8472  | Slc7a8        | Txndc16       | 1  |



|       |       |             |               |    |
|-------|-------|-------------|---------------|----|
| 10393 | 16179 | Slc7a8      | Gulo          | 1  |
| 10406 | 14443 | Trip10      | C3            | 1  |
| 10407 | 2902  | Gpatch3     | D4ErtD196e    | 1  |
| 10407 | 10407 | Gpatch3     | Gpatch3       | 1  |
| 10407 | 16287 | Gpatch3     | Extl1         | 1  |
| 10408 | 2708  | Per1        | Sgk1          | 1  |
| 10408 | 2794  | Per1        | Map3k6        | 1  |
| 10408 | 5345  | Per1        | MMT00023326   | 1  |
| 10408 | 6564  | Per1        | Cebpd         | 1  |
| 10408 | 8816  | Per1        | Nfkbia        | 1  |
| 10408 | 8980  | Per1        | Plekhf1       | 1  |
| 10408 | 9745  | Per1        | Gadd45g       | 1  |
| 10408 | 11345 | Per1        | Slc40a1       | -1 |
| 10408 | 12761 | Per1        | Tsc22d3       | 1  |
| 10408 | 12834 | Per1        | Fabp7         | -1 |
| 10408 | 12989 | Per1        | 1190002H23Rik | 1  |
| 10408 | 14486 | Per1        | Sox7          | -1 |
| 10408 | 16494 | Per1        | 2310007D09Rik | 1  |
| 10408 | 18553 | Per1        | Tekt4         | 1  |
| 10408 | 21142 | Per1        | Gm129         | 1  |
| 10408 | 21313 | Per1        | Rhou          | 1  |
| 10408 | 21380 | Per1        | Ier5          | -1 |
| 10408 | 23371 | Per1        | Cfb           | 1  |
| 10426 | 3683  | Ly6f        | Oas2          | 1  |
| 10426 | 12398 | Ly6f        | Ifi44         | 1  |
| 10443 | 8394  | Pvrl2       | Dpy19l3       | 1  |
| 10443 | 17632 | Pvrl2       | Lypd3         | -1 |
| 10467 | 10606 | MMT00074572 | Apbb1ip       | 1  |
| 10482 | 3411  | Mcat        | Rabl2a        | 1  |
| 10482 | 3654  | Mcat        | St13          | -1 |
| 10482 | 6804  | Mcat        | Cyp2d22       | 1  |
| 10482 | 7100  | Mcat        | Tomm22        | 1  |
| 10482 | 9540  | Mcat        | Csnk1e        | 1  |
| 10482 | 10482 | Mcat        | Mcat          | 1  |
| 10482 | 16467 | Mcat        | Card10        | 1  |
| 10482 | 16522 | Mcat        | Ccdc85a       | 1  |
| 10482 | 17831 | Mcat        | Ndufa6        | -1 |
| 10482 | 19955 | Mcat        | Cbx2          | -1 |
| 10482 | 21526 | Mcat        | Mkl1          | -1 |
| 10483 | 10483 | Crot        | Crot          | 1  |
| 10484 | 15870 | Dnajb11     | Aqp5          | 1  |
| 10503 | 3314  | MMT00043055 | Wars2         | -1 |
| 10504 | 5342  | Ripk3       | Eps8l3        | 1  |
| 10504 | 15870 | Ripk3       | Aqp5          | 1  |
| 10521 | 1014  | Ttf2        | Rtcd1         | 1  |
| 10521 | 1466  | Ttf2        | Ubap2l        | 1  |
| 10521 | 2752  | Ttf2        | Fcgr1         | 1  |
| 10521 | 3314  | Ttf2        | Wars2         | 1  |
| 10521 | 5021  | Ttf2        | Gdap2         | -1 |
| 10521 | 5508  | Ttf2        | Lrig2         | -1 |
| 10521 | 6206  | Ttf2        | MMT00063701   | 1  |
| 10521 | 6283  | Ttf2        | Ptpn22        | -1 |
| 10521 | 9408  | Ttf2        | Hmgcs2        | -1 |
| 10521 | 9519  | Ttf2        | Fstl5         | -1 |
| 10521 | 10521 | Ttf2        | Ttf2          | 1  |
| 10521 | 12367 | Ttf2        | MMT00072365   | -1 |
| 10521 | 12716 | Ttf2        | 5830417110Rik | -1 |
| 10521 | 15299 | Ttf2        | Mrps21        | -1 |
| 10521 | 15901 | Ttf2        | Tpm3          | -1 |

|       |       |             |               |    |
|-------|-------|-------------|---------------|----|
| 10521 | 16416 | Ttf2        | Commd2        | 1  |
| 10521 | 17837 | Ttf2        | Polr3gl       | -1 |
| 10521 | 21650 | Ttf2        | Ap4b1         | 1  |
| 10521 | 22570 | Ttf2        | Phtf1         | 1  |
| 10526 | 1371  | MMT00036239 | 1200009I06Rik | -1 |
| 10526 | 6357  | MMT00036239 | Ankrd9        | 1  |
| 10526 | 7388  | MMT00036239 | Amn           | 1  |
| 10526 | 8155  | MMT00036239 | Mark3         | -1 |
| 10526 | 10526 | MMT00036239 | MMT00036239   | 1  |
| 10526 | 12517 | MMT00036239 | 4930573I19Rik | -1 |
| 10526 | 13027 | MMT00036239 | Ppp2r5c       | 1  |
| 10526 | 13389 | MMT00036239 | Six6os1       | 1  |
| 10526 | 15984 | MMT00036239 | MMT00075074   | -1 |
| 10526 | 16580 | MMT00036239 | Tnfaip2       | -1 |
| 10526 | 21149 | MMT00036239 | A230065H16Rik | 1  |
| 10526 | 23462 | MMT00036239 | Bag5          | -1 |
| 10539 | 6376  | Unc45b      | Nle1          | -1 |
| 10539 | 10539 | Unc45b      | Unc45b        | 1  |
| 10553 | 4810  | Dusp23      | Vsig8         | -1 |
| 10553 | 5465  | Dusp23      | Slamf8        | -1 |
| 10553 | 17463 | Dusp23      | Rgl1          | 1  |
| 10635 | 10635 | Itfg2       | Itfg2         | 1  |
| 10643 | 10098 | Gc          | 2610507B11Rik | 1  |
| 10663 | 2880  | Sytl2       | Cd93          | 1  |
| 10663 | 5345  | Sytl2       | MMT00023326   | -1 |
| 10663 | 11345 | Sytl2       | Slc40a1       | 1  |
| 10663 | 12761 | Sytl2       | Tsc22d3       | -1 |
| 10663 | 12834 | Sytl2       | Fabp7         | 1  |
| 10663 | 16494 | Sytl2       | 2310007D09Rik | -1 |
| 10663 | 22989 | Sytl2       | Lmcd1         | 1  |
| 10667 | 812   | H2-Eb1      | En2           | 1  |
| 10667 | 1515  | H2-Eb1      | Med20         | -1 |
| 10667 | 2424  | H2-Eb1      | Unc5cl        | 1  |
| 10667 | 2801  | H2-Eb1      | H2-BI         | 1  |
| 10667 | 2938  | H2-Eb1      | H2-T23        | 1  |
| 10667 | 3859  | H2-Eb1      | Fpr2          | 1  |
| 10667 | 4555  | H2-Eb1      | Cchcr1        | 1  |
| 10667 | 4584  | H2-Eb1      | MMT00022168   | 1  |
| 10667 | 5232  | H2-Eb1      | Arhgef16      | 1  |
| 10667 | 6070  | H2-Eb1      | D630003M21Rik | 1  |
| 10667 | 6406  | H2-Eb1      | Sh3rf2        | -1 |
| 10667 | 7088  | H2-Eb1      | Slc37a1       | 1  |
| 10667 | 7603  | H2-Eb1      | Sod2          | 1  |
| 10667 | 7965  | H2-Eb1      | Enpp5         | 1  |
| 10667 | 8750  | H2-Eb1      | 1700010I14Rik | 1  |
| 10667 | 8767  | H2-Eb1      | Rgl2          | 1  |
| 10667 | 10374 | H2-Eb1      | Trim15        | 1  |
| 10667 | 10667 | H2-Eb1      | H2-Eb1        | 1  |
| 10667 | 10931 | H2-Eb1      | Pkn3          | -1 |
| 10667 | 11475 | H2-Eb1      | H2-D1         | -1 |
| 10667 | 12168 | H2-Eb1      | H2-Ke6        | 1  |
| 10667 | 12694 | H2-Eb1      | Riok2         | -1 |
| 10667 | 12943 | H2-Eb1      | Slc25a27      | 1  |
| 10667 | 13117 | H2-Eb1      | Tmprss5       | 1  |
| 10667 | 13493 | H2-Eb1      | Ring1         | 1  |
| 10667 | 14322 | H2-Eb1      | Bat1a         | -1 |
| 10667 | 15153 | H2-Eb1      | Foxm1         | -1 |
| 10667 | 15580 | H2-Eb1      | MMT00077001   | 1  |
| 10667 | 16067 | H2-Eb1      | Pcaf          | -1 |

|       |       |               |               |    |
|-------|-------|---------------|---------------|----|
| 10667 | 16692 | H2-Eb1        | Bat4          | 1  |
| 10667 | 17322 | H2-Eb1        | Zfp758        | -1 |
| 10667 | 17412 | H2-Eb1        | Aif1          | -1 |
| 10667 | 17646 | H2-Eb1        | C4b           | 1  |
| 10667 | 17707 | H2-Eb1        | Rshl2b        | 1  |
| 10667 | 18577 | H2-Eb1        | Btbd9         | -1 |
| 10667 | 20100 | H2-Eb1        | Guca1b        | -1 |
| 10667 | 20238 | H2-Eb1        | H2-T9         | 1  |
| 10667 | 20511 | H2-Eb1        | Decr2         | 1  |
| 10667 | 21295 | H2-Eb1        | Snf1lk        | -1 |
| 10667 | 21415 | H2-Eb1        | Has1          | 1  |
| 10667 | 22104 | H2-Eb1        | Rnf123        | 1  |
| 10667 | 23371 | H2-Eb1        | Cfb           | -1 |
| 10668 | 2243  | Kars          | Gcsh          | 1  |
| 10668 | 10308 | Kars          | Fuk           | -1 |
| 10668 | 10497 | Kars          | Man2b1        | -1 |
| 10668 | 10668 | Kars          | Kars          | 1  |
| 10668 | 11057 | Kars          | MMT00032844   | 1  |
| 10668 | 14391 | Kars          | MMT00017335   | -1 |
| 10668 | 16849 | Kars          | Trmt1         | -1 |
| 10672 | 2794  | BC031353      | Map3k6        | 1  |
| 10672 | 4084  | BC031353      | Asah3l        | 1  |
| 10672 | 5345  | BC031353      | MMT00023326   | 1  |
| 10672 | 6038  | BC031353      | Acot1         | -1 |
| 10672 | 12761 | BC031353      | Tsc22d3       | 1  |
| 10672 | 14233 | BC031353      | Fgfr1         | -1 |
| 10672 | 16494 | BC031353      | 2310007D09Rik | 1  |
| 10672 | 17143 | BC031353      | 2010002N04Rik | 1  |
| 10672 | 19004 | BC031353      | Pdk4          | 1  |
| 10672 | 21380 | BC031353      | Ier5          | -1 |
| 10675 | 10675 | Mobkl2a       | Mobkl2a       | 1  |
| 10686 | 6038  | MMT00001732   | Acot1         | -1 |
| 10686 | 12761 | MMT00001732   | Tsc22d3       | 1  |
| 10686 | 21380 | MMT00001732   | Ier5          | -1 |
| 10711 | 11423 | 1700108F19Rik | 6720463M24Rik | -1 |
| 10729 | 7088  | Fgd2          | Slc37a1       | 1  |
| 10729 | 10729 | Fgd2          | Fgd2          | 1  |
| 10729 | 14132 | Fgd2          | Glo1          | 1  |
| 10729 | 14190 | Fgd2          | Ppil1         | -1 |
| 10758 | 283   | Gdf1          | Gmcl1l        | -1 |
| 10758 | 403   | Gdf1          | Leprotl1      | -1 |
| 10758 | 1097  | Gdf1          | Dctn6         | 1  |
| 10758 | 1604  | Gdf1          | Ssbp4         | 1  |
| 10758 | 1755  | Gdf1          | Ocel1         | 1  |
| 10758 | 2294  | Gdf1          | AU040829      | -1 |
| 10758 | 3052  | Gdf1          | 9130404D08Rik | -1 |
| 10758 | 3609  | Gdf1          | Plvap         | 1  |
| 10758 | 5433  | Gdf1          | 2410004L22Rik | -1 |
| 10758 | 5925  | Gdf1          | Tmem59l       | -1 |
| 10758 | 9304  | Gdf1          | AI449175      | 1  |
| 10758 | 9569  | Gdf1          | Dda1          | -1 |
| 10758 | 9729  | Gdf1          | Got111        | -1 |
| 10758 | 10758 | Gdf1          | Gdf1          | -1 |
| 10758 | 13732 | Gdf1          | Tpm4          | -1 |
| 10758 | 15296 | Gdf1          | Mier3         | 1  |
| 10758 | 16617 | Gdf1          | Sh2d4a        | -1 |
| 10758 | 16702 | Gdf1          | 2810422J05Rik | -1 |
| 10758 | 16858 | Gdf1          | Tmem38a       | -1 |
| 10758 | 17703 | Gdf1          | Large         | -1 |

|       |       |               |               |    |
|-------|-------|---------------|---------------|----|
| 10758 | 21433 | Gdf1          | Ubx6          | 1  |
| 10758 | 21840 | Gdf1          | Tmie          | 1  |
| 10758 | 22408 | Gdf1          | Calr3         | 1  |
| 10758 | 23445 | Gdf1          | Crlf1         | 1  |
| 10774 | 1297  | Ehd3          | Phox2a        | 1  |
| 10782 | 8465  | 4933403O08Rik | BC023814      | 1  |
| 10782 | 8939  | 4933403O08Rik | MMT00024195   | 1  |
| 10782 | 15476 | 4933403O08Rik | Fem1b         | -1 |
| 10782 | 18373 | 4933403O08Rik | Dnajb1        | 1  |
| 10782 | 18418 | 4933403O08Rik | Hspa1b        | 1  |
| 10788 | 18140 | D430019H16Rik | Atg2b         | 1  |
| 10808 | 6133  | Rab711        | Agrp          | -1 |
| 10821 | 21639 | Pkd2l2        | Hspa9         | 1  |
| 10827 | 3314  | MMT00063568   | Wars2         | -1 |
| 10876 | 10876 | Steap1        | Steap1        | 1  |
| 10876 | 13045 | Steap1        | A330021E22Rik | 1  |
| 10881 | 15870 | Uchl5ip       | Aqp5          | 1  |
| 10885 | 15870 | Bri3          | Aqp5          | -1 |
| 10931 | 10931 | Pkn3          | Pkn3          | 1  |
| 10931 | 16692 | Pkn3          | Bat4          | -1 |
| 10978 | 478   | MMT00078322   | Sfrs9         | 1  |
| 10978 | 1447  | MMT00078322   | Naaa          | -1 |
| 10978 | 1660  | MMT00078322   | Zfp33b        | -1 |
| 10978 | 5425  | MMT00078322   | Ung           | 1  |
| 10978 | 6330  | MMT00078322   | Dgkq          | 1  |
| 10978 | 8807  | MMT00078322   | Ankrd56       | -1 |
| 10978 | 10978 | MMT00078322   | MMT00078322   | 1  |
| 10978 | 12656 | MMT00078322   | Coq5          | 1  |
| 10978 | 12797 | MMT00078322   | Brdt          | -1 |
| 10978 | 15466 | MMT00078322   | Gm136         | -1 |
| 10978 | 16066 | MMT00078322   | Coq2          | 1  |
| 10978 | 17716 | MMT00078322   | Rnf10         | -1 |
| 10995 | 8992  | Ap4m1         | Trfr2         | 1  |
| 10995 | 9077  | Ap4m1         | Cnpy4         | -1 |
| 10995 | 10995 | Ap4m1         | Ap4m1         | 1  |
| 10995 | 13780 | Ap4m1         | Pilra         | 1  |
| 10995 | 14631 | Ap4m1         | Stag3         | -1 |
| 10995 | 19502 | Ap4m1         | Fbxo24        | 1  |
| 11016 | 9946  | Pcp2          | Stam2         | 1  |
| 11016 | 15743 | Pcp2          | Hoxc6         | 1  |
| 11016 | 23546 | Pcp2          | Zzef1         | 1  |
| 11043 | 265   | Hsph1         | Taf9          | 1  |
| 11043 | 286   | Hsph1         | MMT00070509   | 1  |
| 11043 | 684   | Hsph1         | 1700102P08Rik | 1  |
| 11043 | 863   | Hsph1         | Dnajc14       | -1 |
| 11043 | 1006  | Hsph1         | 2600011E07Rik | 1  |
| 11043 | 1027  | Hsph1         | Accs          | -1 |
| 11043 | 1039  | Hsph1         | Zfp207        | 1  |
| 11043 | 1214  | Hsph1         | Trip13        | -1 |
| 11043 | 1281  | Hsph1         | Alkbh3        | -1 |
| 11043 | 1351  | Hsph1         | Whsc111       | 1  |
| 11043 | 1455  | Hsph1         | Smek1         | 1  |
| 11043 | 2362  | Hsph1         | Mkks          | 1  |
| 11043 | 2558  | Hsph1         | Tmem132b      | 1  |
| 11043 | 3293  | Hsph1         | Nup153        | 1  |
| 11043 | 3620  | Hsph1         | Bet1          | 1  |
| 11043 | 3666  | Hsph1         | Tas1r1        | -1 |
| 11043 | 3706  | Hsph1         | 2410002O22Rik | 1  |
| 11043 | 4192  | Hsph1         | Zranb1        | -1 |

|       |       |       |               |    |
|-------|-------|-------|---------------|----|
| 11043 | 4235  | Hsph1 | Pfkfb3        | 1  |
| 11043 | 4443  | Hsph1 | Zfp790        | 1  |
| 11043 | 4612  | Hsph1 | Hspa5         | 1  |
| 11043 | 4805  | Hsph1 | Hspb1         | 1  |
| 11043 | 5247  | Hsph1 | Irak2         | 1  |
| 11043 | 5364  | Hsph1 | Kif22         | -1 |
| 11043 | 5385  | Hsph1 | Tubb2b        | 1  |
| 11043 | 5634  | Hsph1 | Creb1         | 1  |
| 11043 | 6234  | Hsph1 | P4ha2         | 1  |
| 11043 | 6588  | Hsph1 | Rbmx          | -1 |
| 11043 | 6769  | Hsph1 | Banp          | 1  |
| 11043 | 6828  | Hsph1 | Pigh          | 1  |
| 11043 | 7263  | Hsph1 | Narg1l        | 1  |
| 11043 | 7368  | Hsph1 | Adam8         | 1  |
| 11043 | 7751  | Hsph1 | Sgk2          | -1 |
| 11043 | 7922  | Hsph1 | Casp7         | -1 |
| 11043 | 8399  | Hsph1 | Herpud1       | 1  |
| 11043 | 8469  | Hsph1 | Sfrs6         | 1  |
| 11043 | 8662  | Hsph1 | Brca2         | -1 |
| 11043 | 8787  | Hsph1 | Sdf2l1        | 1  |
| 11043 | 8939  | Hsph1 | MMT00024195   | 1  |
| 11043 | 8988  | Hsph1 | 1110007A13Rik | 1  |
| 11043 | 9067  | Hsph1 | Tra2a         | 1  |
| 11043 | 9258  | Hsph1 | P4ha1         | 1  |
| 11043 | 9513  | Hsph1 | Tardbp        | 1  |
| 11043 | 9514  | Hsph1 | Vps37a        | 1  |
| 11043 | 9672  | Hsph1 | Tmem101       | 1  |
| 11043 | 9899  | Hsph1 | D13Wsu177e    | 1  |
| 11043 | 11043 | Hsph1 | Hsph1         | 1  |
| 11043 | 11063 | Hsph1 | Phf8          | 1  |
| 11043 | 11486 | Hsph1 | Tacc3         | -1 |
| 11043 | 11756 | Hsph1 | 2810011L19Rik | 1  |
| 11043 | 11867 | Hsph1 | Rcor3         | 1  |
| 11043 | 12219 | Hsph1 | Cyb5b         | 1  |
| 11043 | 12513 | Hsph1 | Whsc2         | 1  |
| 11043 | 12667 | Hsph1 | Slc39a2       | 1  |
| 11043 | 12732 | Hsph1 | Hsd17b1       | 1  |
| 11043 | 12937 | Hsph1 | Uhrf2         | 1  |
| 11043 | 13741 | Hsph1 | Hspa4l        | 1  |
| 11043 | 14014 | Hsph1 | MMT00008376   | 1  |
| 11043 | 14134 | Hsph1 | Phf10         | 1  |
| 11043 | 14222 | Hsph1 | MMT00076410   | -1 |
| 11043 | 14517 | Hsph1 | Cln4-2        | -1 |
| 11043 | 14577 | Hsph1 | Cdc37l1       | 1  |
| 11043 | 15015 | Hsph1 | G3bp1         | 1  |
| 11043 | 15177 | Hsph1 | Bmpr2         | 1  |
| 11043 | 15476 | Hsph1 | Fem1b         | -1 |
| 11043 | 15594 | Hsph1 | Gm1967        | -1 |
| 11043 | 15713 | Hsph1 | Rbm3          | -1 |
| 11043 | 15731 | Hsph1 | Mfhas1        | 1  |
| 11043 | 16098 | Hsph1 | Rps20         | -1 |
| 11043 | 16748 | Hsph1 | Zfp810        | -1 |
| 11043 | 17112 | Hsph1 | Dok7          | 1  |
| 11043 | 17449 | Hsph1 | Zfp296        | 1  |
| 11043 | 18373 | Hsph1 | Dnajb1        | 1  |
| 11043 | 18418 | Hsph1 | Hspa1b        | 1  |
| 11043 | 18619 | Hsph1 | 2810406K13Rik | -1 |
| 11043 | 18726 | Hsph1 | D630004A14Rik | 1  |
| 11043 | 18846 | Hsph1 | lkbkg         | 1  |

|       |       |             |                |    |
|-------|-------|-------------|----------------|----|
| 11043 | 18889 | Hsph1       | Shq1           | 1  |
| 11043 | 18903 | Hsph1       | Crem           | 1  |
| 11043 | 19389 | Hsph1       | lqcb1          | 1  |
| 11043 | 19391 | Hsph1       | Apex2          | 1  |
| 11043 | 20237 | Hsph1       | RP23-433P19.11 | -1 |
| 11043 | 20535 | Hsph1       | Rbm4           | 1  |
| 11043 | 20559 | Hsph1       | Nat13          | 1  |
| 11043 | 20912 | Hsph1       | Chordc1        | 1  |
| 11043 | 21389 | Hsph1       | Odf2           | -1 |
| 11043 | 21431 | Hsph1       | Xbp1           | 1  |
| 11043 | 21903 | Hsph1       | Nr1d1          | -1 |
| 11043 | 21981 | Hsph1       | Ormdl2         | 1  |
| 11043 | 22012 | Hsph1       | Itgae          | -1 |
| 11043 | 22141 | Hsph1       | Rorb           | 1  |
| 11043 | 22272 | Hsph1       | Vpreb1         | 1  |
| 11043 | 22673 | Hsph1       | Prpf38b        | 1  |
| 11043 | 22732 | Hsph1       | Cyb5b          | 1  |
| 11043 | 23116 | Hsph1       | 2810032G03Rik  | 1  |
| 11043 | 23318 | Hsph1       | Cul2           | -1 |
| 11043 | 23419 | Hsph1       | Tipin          | -1 |
| 11128 | 11057 | Aars        | MMT00032844    | -1 |
| 11147 | 4038  | Gng12       | 1200009O22Rik  | 1  |
| 11147 | 11147 | Gng12       | Gng12          | 1  |
| 11166 | 6059  | Uqcc        | Dsn1           | 1  |
| 11166 | 11166 | Uqcc        | Uqcc           | 1  |
| 11166 | 13355 | Uqcc        | Foxs1          | 1  |
| 11166 | 14734 | Uqcc        | Nrsn2          | 1  |
| 11166 | 23005 | Uqcc        | 4930405A21Rik  | 1  |
| 11167 | 6498  | Dars2       | MMT00016809    | 1  |
| 11167 | 11167 | Dars2       | Dars2          | 1  |
| 11195 | 13813 | Fmn1        | Ktelc1         | -1 |
| 11198 | 8547  | Gbp1        | Gbp4           | 1  |
| 11199 | 7670  | Sirt7       | Ccdc57         | 1  |
| 11199 | 11199 | Sirt7       | Sirt7          | 1  |
| 11199 | 13615 | Sirt7       | Arl16          | 1  |
| 11199 | 22021 | Sirt7       | Csnk1d         | 1  |
| 11204 | 143   | Al451617    | Gvin1          | 1  |
| 11204 | 5853  | Al451617    | Trim30         | 1  |
| 11204 | 11204 | Al451617    | Al451617       | 1  |
| 11204 | 23636 | Al451617    | Bst2           | 1  |
| 11214 | 684   | MMT00049207 | 1700102P08Rik  | 1  |
| 11214 | 1006  | MMT00049207 | 2600011E07Rik  | 1  |
| 11214 | 1214  | MMT00049207 | Trip13         | -1 |
| 11214 | 1281  | MMT00049207 | Alkbh3         | -1 |
| 11214 | 1351  | MMT00049207 | Whsc111        | 1  |
| 11214 | 2558  | MMT00049207 | Tmem132b       | 1  |
| 11214 | 5247  | MMT00049207 | Irak2          | 1  |
| 11214 | 5385  | MMT00049207 | Tubb2b         | 1  |
| 11214 | 6769  | MMT00049207 | Banp           | 1  |
| 11214 | 7751  | MMT00049207 | Sgk2           | -1 |
| 11214 | 7922  | MMT00049207 | Casp7          | -1 |
| 11214 | 8122  | MMT00049207 | Hexim1         | 1  |
| 11214 | 8399  | MMT00049207 | Herpud1        | 1  |
| 11214 | 8662  | MMT00049207 | Brca2          | -1 |
| 11214 | 9513  | MMT00049207 | Tardbp         | 1  |
| 11214 | 9514  | MMT00049207 | Vps37a         | 1  |
| 11214 | 11867 | MMT00049207 | Rcor3          | 1  |
| 11214 | 12732 | MMT00049207 | Hsd17b1        | 1  |
| 11214 | 14517 | MMT00049207 | Clcn4-2        | -1 |

|       |       |               |                |    |
|-------|-------|---------------|----------------|----|
| 11214 | 15476 | MMT00049207   | Fem1b          | -1 |
| 11214 | 15731 | MMT00049207   | Mfhas1         | 1  |
| 11214 | 18373 | MMT00049207   | Dnajb1         | 1  |
| 11214 | 18418 | MMT00049207   | Hspa1b         | 1  |
| 11214 | 18903 | MMT00049207   | Crem           | 1  |
| 11214 | 20237 | MMT00049207   | RP23-433P19.11 | -1 |
| 11214 | 20457 | MMT00049207   | Gtf2a2         | -1 |
| 11214 | 20559 | MMT00049207   | Nat13          | 1  |
| 11214 | 23419 | MMT00049207   | Tipin          | -1 |
| 11233 | 12834 | Tef           | Fabp7          | -1 |
| 11259 | 21142 | Ccdc69        | Gm129          | -1 |
| 11265 | 12398 | Irgm          | Ifi44          | 1  |
| 11265 | 19189 | Irgm          | Sp100          | 1  |
| 11275 | 15870 | Fanci         | Aqp5           | 1  |
| 11292 | 403   | Nr2f6         | Leprotl1       | 1  |
| 11292 | 1604  | Nr2f6         | Ssbp4          | -1 |
| 11292 | 1755  | Nr2f6         | Ocel1          | -1 |
| 11292 | 3052  | Nr2f6         | 9130404D08Rik  | 1  |
| 11292 | 3609  | Nr2f6         | Plvap          | -1 |
| 11292 | 5433  | Nr2f6         | 2410004L22Rik  | 1  |
| 11292 | 5925  | Nr2f6         | Tmem59l        | 1  |
| 11292 | 9304  | Nr2f6         | AI449175       | -1 |
| 11292 | 9569  | Nr2f6         | Dda1           | 1  |
| 11292 | 9729  | Nr2f6         | Got1l1         | 1  |
| 11292 | 10758 | Nr2f6         | Gdf1           | 1  |
| 11292 | 13732 | Nr2f6         | Tpm4           | 1  |
| 11292 | 14951 | Nr2f6         | Dpep3          | 1  |
| 11292 | 15296 | Nr2f6         | Mier3          | -1 |
| 11292 | 16617 | Nr2f6         | Sh2d4a         | 1  |
| 11292 | 16702 | Nr2f6         | 2810422J05Rik  | 1  |
| 11292 | 16849 | Nr2f6         | Trmt1          | 1  |
| 11292 | 16858 | Nr2f6         | Tmem38a        | 1  |
| 11292 | 17703 | Nr2f6         | Large          | 1  |
| 11292 | 21840 | Nr2f6         | Tmie           | -1 |
| 11292 | 22408 | Nr2f6         | Calr3          | -1 |
| 11292 | 23445 | Nr2f6         | Crif1          | -1 |
| 11308 | 15870 | Cdbl          | Aqp5           | -1 |
| 11339 | 15870 | Eef1g         | Aqp5           | 1  |
| 11340 | 1416  | Syn2          | 6720460F02Rik  | -1 |
| 11340 | 6133  | Syn2          | Agrp           | 1  |
| 11340 | 12761 | Syn2          | Tsc22d3        | 1  |
| 11340 | 14233 | Syn2          | Fgfr1          | -1 |
| 11369 | 676   | Stx3          | Ms4a4d         | 1  |
| 11369 | 1257  | Stx3          | Slc25a45       | -1 |
| 11369 | 1936  | Stx3          | Cbwd1          | 1  |
| 11369 | 2830  | Stx3          | 4632417K18Rik  | 1  |
| 11369 | 8721  | Stx3          | Tbc1d10c       | 1  |
| 11369 | 8902  | Stx3          | Aldh3b1        | 1  |
| 11369 | 11369 | Stx3          | Stx3           | 1  |
| 11369 | 11812 | Stx3          | Mrpl16         | 1  |
| 11369 | 12312 | Stx3          | Ms4a6d         | -1 |
| 11369 | 17447 | Stx3          | Ctsf           | 1  |
| 11369 | 17600 | Stx3          | Kcnq5          | -1 |
| 11369 | 18868 | Stx3          | Mpeg1          | -1 |
| 11369 | 19857 | Stx3          | Rab1b          | 1  |
| 11393 | 12761 | A830007P12Rik | Tsc22d3        | -1 |
| 11395 | 21969 | Tcea1         | Tk1            | -1 |
| 11406 | 7449  | Ifi203        | Creg1          | 1  |
| 11406 | 9449  | Ifi203        | Sft2d2         | -1 |

|       |       |               |               |    |
|-------|-------|---------------|---------------|----|
| 11406 | 11406 | Ifi203        | Ifi203        | 1  |
| 11406 | 11445 | Ifi203        | Atp1a2        | -1 |
| 11406 | 11571 | Ifi203        | Bpnt1         | 1  |
| 11406 | 12712 | Ifi203        | MMT00059415   | -1 |
| 11406 | 13149 | Ifi203        | Ifi203        | 1  |
| 11406 | 16163 | Ifi203        | Tmco1         | 1  |
| 11406 | 19332 | Ifi203        | Bpnt1         | 1  |
| 11406 | 19731 | Ifi203        | Olf2r275      | -1 |
| 11406 | 21967 | Ifi203        | Tyk2          | -1 |
| 11409 | 2794  | Phf16         | Map3k6        | 1  |
| 11409 | 5345  | Phf16         | MMT00023326   | 1  |
| 11409 | 11305 | Phf16         | Galnt12       | 1  |
| 11409 | 12761 | Phf16         | Tsc22d3       | 1  |
| 11409 | 16494 | Phf16         | 2310007D09Rik | 1  |
| 11409 | 21313 | Phf16         | Rhou          | 1  |
| 11419 | 23397 | Atrnl1        | Ccnj1         | -1 |
| 11423 | 4566  | 6720463M24Rik | MMT00078134   | 1  |
| 11423 | 11423 | 6720463M24Rik | 6720463M24Rik | 1  |
| 11423 | 14281 | 6720463M24Rik | 5031414D18Rik | 1  |
| 11423 | 15353 | 6720463M24Rik | Ednrb         | -1 |
| 11435 | 7135  | Rnaset2a      | Ezr           | 1  |
| 11435 | 7339  | Rnaset2a      | Tdp1          | -1 |
| 11435 | 7909  | Rnaset2a      | Oas3          | 1  |
| 11435 | 8750  | Rnaset2a      | 1700010I14Rik | 1  |
| 11435 | 11435 | Rnaset2a      | Rnaset2a      | 1  |
| 11435 | 17707 | Rnaset2a      | Rsh12b        | 1  |
| 11435 | 22104 | Rnaset2a      | Rnf123        | 1  |
| 11445 | 1297  | Atp1a2        | Phox2a        | 1  |
| 11446 | 1297  | Dock8         | Phox2a        | 1  |
| 11462 | 15870 | Gpam          | Aqp5          | 1  |
| 11465 | 2599  | Eif3k         | Lsm14a        | 1  |
| 11465 | 7761  | Eif3k         | Nudt19        | 1  |
| 11465 | 8394  | Eif3k         | Dpy19l3       | 1  |
| 11465 | 9122  | Eif3k         | Sepw1         | 1  |
| 11465 | 15670 | Eif3k         | Pnmal1        | -1 |
| 11465 | 17389 | Eif3k         | Pop4          | -1 |
| 11465 | 17632 | Eif3k         | Lypd3         | -1 |
| 11465 | 19462 | Eif3k         | 4933439C20Rik | -1 |
| 11467 | 1423  | Ypel5         | Spdya         | 1  |
| 11467 | 9912  | Ypel5         | Ttc27         | -1 |
| 11467 | 11467 | Ypel5         | Ypel5         | 1  |
| 11467 | 16067 | Ypel5         | Pcaf          | 1  |
| 11500 | 2938  | 3300001P08Rik | H2-T23        | -1 |
| 11500 | 7088  | 3300001P08Rik | Slc37a1       | -1 |
| 11500 | 8750  | 3300001P08Rik | 1700010I14Rik | -1 |
| 11500 | 8767  | 3300001P08Rik | Rgl2          | -1 |
| 11500 | 10374 | 3300001P08Rik | Trim15        | -1 |
| 11500 | 10667 | 3300001P08Rik | H2-Eb1        | -1 |
| 11500 | 12943 | 3300001P08Rik | Slc25a27      | -1 |
| 11500 | 13493 | 3300001P08Rik | Ring1         | -1 |
| 11500 | 15580 | 3300001P08Rik | MMT00077001   | -1 |
| 11500 | 16692 | 3300001P08Rik | Bat4          | -1 |
| 11500 | 17412 | 3300001P08Rik | Aif1          | 1  |
| 11500 | 20238 | 3300001P08Rik | H2-T9         | -1 |
| 11503 | 15870 | Rangap1       | Aqp5          | 1  |
| 11516 | 6286  | Sfxn5         | Rfc1          | -1 |
| 11519 | 1297  | Slc2a10       | Phox2a        | 1  |
| 11521 | 8939  | Dnaja1        | MMT00024195   | 1  |
| 11560 | 10308 | MMT00001695   | Fuk           | 1  |



|       |       |               |               |    |
|-------|-------|---------------|---------------|----|
| 11560 | 11057 | MMT00001695   | MMT00032844   | -1 |
| 11560 | 22809 | MMT00001695   | Mrvi1         | -1 |
| 11560 | 22810 | MMT00001695   | MMT00038169   | -1 |
| 11571 | 11571 | Bpnt1         | Bpnt1         | 1  |
| 11571 | 11741 | Bpnt1         | Slc30a10      | -1 |
| 11571 | 19332 | Bpnt1         | Bpnt1         | 1  |
| 11571 | 19835 | Bpnt1         | Iars2         | 1  |
| 11590 | 13117 | Cbx4          | Tmprss5       | 1  |
| 11590 | 15476 | Cbx4          | Fem1b         | 1  |
| 11593 | 11406 | Usf1          | Ifi203        | 1  |
| 11593 | 13149 | Usf1          | Ifi203        | 1  |
| 11620 | 9195  | Zfr           | Sub1          | 1  |
| 11620 | 11620 | Zfr           | Zfr           | 1  |
| 11620 | 12091 | Zfr           | 1810015C04Rik | -1 |
| 11621 | 5597  | Mixl1         | Ttll4         | 1  |
| 11621 | 7975  | Mixl1         | Lancl1        | 1  |
| 11621 | 11621 | Mixl1         | Mixl1         | 1  |
| 11648 | 1515  | Lrfrn2        | Med20         | -1 |
| 11648 | 2424  | Lrfrn2        | Unc5cl        | 1  |
| 11648 | 18871 | Lrfrn2        | AI314976      | 1  |
| 11649 | 3938  | Hfe           | Abt1          | -1 |
| 11649 | 10189 | Hfe           | Cage1         | -1 |
| 11649 | 11649 | Hfe           | Hfe           | 1  |
| 11649 | 15698 | Hfe           | Them2         | -1 |
| 11649 | 17528 | Hfe           | Gmnn          | -1 |
| 11649 | 23118 | Hfe           | Ttrap         | -1 |
| 11668 | 22996 | D6Wsu163e     | MMT00076852   | -1 |
| 11701 | 6769  | Oas1c         | Banp          | -1 |
| 11701 | 8399  | Oas1c         | Herpud1       | -1 |
| 11701 | 10606 | Oas1c         | Apbb1ip       | 1  |
| 11701 | 12398 | Oas1c         | Ifi44         | 1  |
| 11701 | 12732 | Oas1c         | Hsd17b1       | -1 |
| 11701 | 18373 | Oas1c         | Dnajb1        | -1 |
| 11717 | 15870 | Wdhd1         | Aqp5          | 1  |
| 11718 | 5345  | Nmb           | MMT00023326   | 1  |
| 11724 | 1297  | Tuba3a        | Phox2a        | 1  |
| 11740 | 2294  | Cpm           | AU040829      | 1  |
| 11740 | 5345  | Cpm           | MMT00023326   | 1  |
| 11740 | 12834 | Cpm           | Fabp7         | -1 |
| 11776 | 1755  | Ifi30         | Ocel1         | 1  |
| 11776 | 5433  | Ifi30         | 2410004L22Rik | -1 |
| 11776 | 5925  | Ifi30         | Tmem59l       | -1 |
| 11776 | 9906  | Ifi30         | Ninj2         | 1  |
| 11777 | 21524 | MMT00008513   | Ncoa4         | -1 |
| 11780 | 22337 | Taok1         | Nlk           | 1  |
| 11789 | 11789 | Ccdc90a       | Ccdc90a       | 1  |
| 11789 | 15022 | Ccdc90a       | Tmem14c       | 1  |
| 11795 | 4057  | Gps2          | Slc2a4        | 1  |
| 11795 | 6376  | Gps2          | Nle1          | -1 |
| 11798 | 3159  | A530082C11Rik | Pld1          | 1  |
| 11798 | 4666  | A530082C11Rik | Exosc9        | -1 |
| 11798 | 12367 | A530082C11Rik | MMT00072365   | -1 |
| 11798 | 16416 | A530082C11Rik | Commd2        | 1  |
| 11798 | 16618 | A530082C11Rik | Hps3          | -1 |
| 11798 | 19700 | A530082C11Rik | E030011K20Rik | 1  |
| 11812 | 676   | Mrpl16        | Ms4a4d        | 1  |
| 11812 | 1257  | Mrpl16        | Slc25a45      | -1 |
| 11812 | 2830  | Mrpl16        | 4632417K18Rik | 1  |
| 11812 | 11369 | Mrpl16        | Stx3          | 1  |

|       |       |             |               |    |
|-------|-------|-------------|---------------|----|
| 11812 | 11812 | Mrpl16      | Mrpl16        | 1  |
| 11812 | 12312 | Mrpl16      | Ms4a6d        | -1 |
| 11812 | 17447 | Mrpl16      | Ctsf          | 1  |
| 11812 | 17600 | Mrpl16      | Kcnq5         | -1 |
| 11812 | 18868 | Mrpl16      | Mpeg1         | -1 |
| 11812 | 19857 | Mrpl16      | Rab1b         | 1  |
| 11816 | 7057  | Ccdc99      | Stk10         | -1 |
| 11816 | 11816 | Ccdc99      | Ccdc99        | 1  |
| 11816 | 13181 | Ccdc99      | Lcp2          | -1 |
| 11859 | 6456  | Poln        | Tyms          | 1  |
| 11859 | 12385 | Poln        | Mrpl33        | -1 |
| 11859 | 18462 | Poln        | Gm1060        | -1 |
| 11864 | 11864 | Dis3l       | Dis3l         | 1  |
| 11870 | 11870 | Apitd1      | Apitd1        | 1  |
| 11870 | 19647 | Apitd1      | Cort          | 1  |
| 11872 | 1918  | Vamp5       | Usp39         | 1  |
| 11872 | 2743  | Vamp5       | Tcf3          | 1  |
| 11872 | 3703  | Vamp5       | Ggcx          | 1  |
| 11872 | 7273  | Vamp5       | Rnf103        | 1  |
| 11872 | 8016  | Vamp5       | Mrpl35        | -1 |
| 11872 | 15384 | Vamp5       | Mat2a         | 1  |
| 11872 | 16255 | Vamp5       | Reg3b         | -1 |
| 11872 | 18948 | Vamp5       | Olf1270       | -1 |
| 11888 | 1040  | Myadm       | Dnhd1         | 1  |
| 11888 | 1690  | Myadm       | Nlrp5         | 1  |
| 11888 | 2118  | Myadm       | Kptn          | -1 |
| 11888 | 2599  | Myadm       | Lsm14a        | -1 |
| 11888 | 6513  | Myadm       | Qpct1         | -1 |
| 11888 | 7761  | Myadm       | Nudt19        | -1 |
| 11888 | 7803  | Myadm       | Ttyh1         | -1 |
| 11888 | 8394  | Myadm       | Dpy19l3       | -1 |
| 11888 | 8563  | Myadm       | Leng1         | -1 |
| 11888 | 9122  | Myadm       | Sepw1         | -1 |
| 11888 | 9376  | Myadm       | Zscan18       | -1 |
| 11888 | 9413  | Myadm       | 1190020J12Rik | 1  |
| 11888 | 9454  | Myadm       | 2810426N06Rik | -1 |
| 11888 | 11321 | Myadm       | 2310014L17Rik | 1  |
| 11888 | 11888 | Myadm       | Myadm         | 1  |
| 11888 | 11982 | Myadm       | MMT00035514   | 1  |
| 11888 | 14842 | Myadm       | Gipr          | -1 |
| 11888 | 15670 | Myadm       | Pnmal1        | 1  |
| 11888 | 17314 | Myadm       | Napa          | 1  |
| 11888 | 17632 | Myadm       | Lypd3         | 1  |
| 11888 | 19142 | Myadm       | Gpatch1       | -1 |
| 11888 | 19306 | Myadm       | AI428936      | -1 |
| 11888 | 19462 | Myadm       | 4933439C20Rik | 1  |
| 11888 | 20606 | Myadm       | MMT00042166   | 1  |
| 11888 | 21223 | Myadm       | Pira1         | 1  |
| 11917 | 1297  | Fahd1       | Phox2a        | -1 |
| 11946 | 3314  | MMT00030953 | Wars2         | -1 |
| 11953 | 20810 | Gtf2b       | Mttp          | -1 |
| 11966 | 10    | Zfp280b     | NaN           | 1  |
| 11966 | 83    | Zfp280b     | NaN           | 1  |
| 11966 | 98    | Zfp280b     | NaN           | 1  |
| 11966 | 115   | Zfp280b     | NaN           | 1  |
| 11966 | 141   | Zfp280b     | Jag1          | 1  |
| 11966 | 219   | Zfp280b     | MMT00058440   | 1  |
| 11966 | 225   | Zfp280b     | MMT00073704   | 1  |
| 11966 | 236   | Zfp280b     | Bbs9          | 1  |

|       |      |         |               |   |
|-------|------|---------|---------------|---|
| 11966 | 316  | Zfp280b | 4930471G03Rik | 1 |
| 11966 | 317  | Zfp280b | Ceacam13      | 1 |
| 11966 | 346  | Zfp280b | Olf1484       | 1 |
| 11966 | 352  | Zfp280b | 4732415M23Rik | 1 |
| 11966 | 391  | Zfp280b | 4933416I08Rik | 1 |
| 11966 | 484  | Zfp280b | Atp4a         | 1 |
| 11966 | 486  | Zfp280b | Josd2         | 1 |
| 11966 | 552  | Zfp280b | MMT00013481   | 1 |
| 11966 | 558  | Zfp280b | Crebl1        | 1 |
| 11966 | 584  | Zfp280b | Tmem207       | 1 |
| 11966 | 658  | Zfp280b | Vmn2r-ps88    | 1 |
| 11966 | 663  | Zfp280b | Muc19         | 1 |
| 11966 | 985  | Zfp280b | Hsd3b6        | 1 |
| 11966 | 1021 | Zfp280b | Rhpn2         | 1 |
| 11966 | 1058 | Zfp280b | Olf1868       | 1 |
| 11966 | 1059 | Zfp280b | P2rx6         | 1 |
| 11966 | 1122 | Zfp280b | Pax3          | 1 |
| 11966 | 1136 | Zfp280b | Kdelr3        | 1 |
| 11966 | 1137 | Zfp280b | Mlxip         | 1 |
| 11966 | 1170 | Zfp280b | Faim3         | 1 |
| 11966 | 1239 | Zfp280b | Cerkl         | 1 |
| 11966 | 1256 | Zfp280b | Baiap2l2      | 1 |
| 11966 | 1354 | Zfp280b | Lsmd1         | 1 |
| 11966 | 1436 | Zfp280b | Nfu1          | 1 |
| 11966 | 1518 | Zfp280b | Amigo2        | 1 |
| 11966 | 1570 | Zfp280b | Olf1522       | 1 |
| 11966 | 1593 | Zfp280b | D3Erd300e     | 1 |
| 11966 | 1619 | Zfp280b | Fbxw17        | 1 |
| 11966 | 1679 | Zfp280b | MMT00009278   | 1 |
| 11966 | 1696 | Zfp280b | V1re9         | 1 |
| 11966 | 1771 | Zfp280b | Park2         | 1 |
| 11966 | 1795 | Zfp280b | Rabgap1l      | 1 |
| 11966 | 1829 | Zfp280b | MMT00030026   | 1 |
| 11966 | 1876 | Zfp280b | Amdhd1        | 1 |
| 11966 | 1881 | Zfp280b | Slc16a14      | 1 |
| 11966 | 1907 | Zfp280b | D230010M03Rik | 1 |
| 11966 | 1920 | Zfp280b | Oas1e         | 1 |
| 11966 | 2067 | Zfp280b | Myo1a         | 1 |
| 11966 | 2177 | Zfp280b | Htatip2       | 1 |
| 11966 | 2226 | Zfp280b | Amt           | 1 |
| 11966 | 2283 | Zfp280b | MMT00029554   | 1 |
| 11966 | 2326 | Zfp280b | zfp507        | 1 |
| 11966 | 2648 | Zfp280b | MMT00005098   | 1 |
| 11966 | 2658 | Zfp280b | Fzd2          | 1 |
| 11966 | 2675 | Zfp280b | Nfyc          | 1 |
| 11966 | 2737 | Zfp280b | Mllt10        | 1 |
| 11966 | 2767 | Zfp280b | MMT00031206   | 1 |
| 11966 | 2778 | Zfp280b | Coro1a        | 1 |
| 11966 | 2802 | Zfp280b | Lin7c         | 1 |
| 11966 | 2819 | Zfp280b | Kcnk5         | 1 |
| 11966 | 2851 | Zfp280b | Inpp5e        | 1 |
| 11966 | 2870 | Zfp280b | D5Erd577e     | 1 |
| 11966 | 2879 | Zfp280b | Ptpv          | 1 |
| 11966 | 2935 | Zfp280b | Slc28a1       | 1 |
| 11966 | 3067 | Zfp280b | Ucp3          | 1 |
| 11966 | 3080 | Zfp280b | MMT00014480   | 1 |
| 11966 | 3127 | Zfp280b | Plcd1         | 1 |
| 11966 | 3144 | Zfp280b | Ube2j2        | 1 |
| 11966 | 3166 | Zfp280b | Vmn2r57       | 1 |

|       |      |         |               |   |
|-------|------|---------|---------------|---|
| 11966 | 3208 | Zfp280b | 4930511111Rik | 1 |
| 11966 | 3254 | Zfp280b | Grifin        | 1 |
| 11966 | 3284 | Zfp280b | Plekha7       | 1 |
| 11966 | 3349 | Zfp280b | MMT00043953   | 1 |
| 11966 | 3362 | Zfp280b | Fgf8          | 1 |
| 11966 | 3379 | Zfp280b | Cdo1          | 1 |
| 11966 | 3383 | Zfp280b | Cd99          | 1 |
| 11966 | 3402 | Zfp280b | A930018P22Rik | 1 |
| 11966 | 3459 | Zfp280b | Nags          | 1 |
| 11966 | 3511 | Zfp280b | Rnf182        | 1 |
| 11966 | 3841 | Zfp280b | MMT00014519   | 1 |
| 11966 | 3886 | Zfp280b | MMT00047275   | 1 |
| 11966 | 3948 | Zfp280b | V1rb4         | 1 |
| 11966 | 3986 | Zfp280b | Ep400         | 1 |
| 11966 | 4079 | Zfp280b | Emilin3       | 1 |
| 11966 | 4088 | Zfp280b | Pdcl2         | 1 |
| 11966 | 4166 | Zfp280b | Cblc          | 1 |
| 11966 | 4173 | Zfp280b | MMT00008170   | 1 |
| 11966 | 4199 | Zfp280b | B3galt5       | 1 |
| 11966 | 4246 | Zfp280b | Fbxw12        | 1 |
| 11966 | 4311 | Zfp280b | MMT00033987   | 1 |
| 11966 | 4337 | Zfp280b | Myst3         | 1 |
| 11966 | 4407 | Zfp280b | 4930429B21Rik | 1 |
| 11966 | 4425 | Zfp280b | Olf1346       | 1 |
| 11966 | 4430 | Zfp280b | Ankrd36       | 1 |
| 11966 | 4444 | Zfp280b | Ksr2          | 1 |
| 11966 | 4468 | Zfp280b | MMT00052724   | 1 |
| 11966 | 4683 | Zfp280b | E330013P04Rik | 1 |
| 11966 | 4717 | Zfp280b | Cd177         | 1 |
| 11966 | 4870 | Zfp280b | Olf1550       | 1 |
| 11966 | 5126 | Zfp280b | Fcnb          | 1 |
| 11966 | 5265 | Zfp280b | A3galt2       | 1 |
| 11966 | 5377 | Zfp280b | MMT00077700   | 1 |
| 11966 | 5380 | Zfp280b | Olf1403       | 1 |
| 11966 | 5455 | Zfp280b | Kcnab3        | 1 |
| 11966 | 5494 | Zfp280b | Gpr101        | 1 |
| 11966 | 5505 | Zfp280b | Thap2         | 1 |
| 11966 | 5527 | Zfp280b | Zfp398        | 1 |
| 11966 | 5577 | Zfp280b | MMT00009628   | 1 |
| 11966 | 5694 | Zfp280b | Sp7           | 1 |
| 11966 | 5748 | Zfp280b | Brsk2         | 1 |
| 11966 | 5783 | Zfp280b | 4833413O15Rik | 1 |
| 11966 | 5908 | Zfp280b | MMT00027552   | 1 |
| 11966 | 5929 | Zfp280b | Cpz           | 1 |
| 11966 | 5946 | Zfp280b | MMT00048659   | 1 |
| 11966 | 6049 | Zfp280b | Cpeb2         | 1 |
| 11966 | 6185 | Zfp280b | Icam4         | 1 |
| 11966 | 6367 | Zfp280b | Lhfp          | 1 |
| 11966 | 6382 | Zfp280b | Col23a1       | 1 |
| 11966 | 6403 | Zfp280b | MMT00039607   | 1 |
| 11966 | 6422 | Zfp280b | Grk5          | 1 |
| 11966 | 6429 | Zfp280b | Sim2          | 1 |
| 11966 | 6520 | Zfp280b | Arnt2         | 1 |
| 11966 | 6719 | Zfp280b | Cacng8        | 1 |
| 11966 | 6754 | Zfp280b | Trpv3         | 1 |
| 11966 | 6756 | Zfp280b | Sds           | 1 |
| 11966 | 6784 | Zfp280b | AI182371      | 1 |
| 11966 | 6880 | Zfp280b | Dmrtb1        | 1 |
| 11966 | 6992 | Zfp280b | Olf172        | 1 |

|       |       |         |               |   |
|-------|-------|---------|---------------|---|
| 11966 | 7041  | Zfp280b | Sp140         | 1 |
| 11966 | 7078  | Zfp280b | Olf463        | 1 |
| 11966 | 7085  | Zfp280b | St8sia2       | 1 |
| 11966 | 7094  | Zfp280b | Cyp2c54       | 1 |
| 11966 | 7132  | Zfp280b | Sp9           | 1 |
| 11966 | 7279  | Zfp280b | Cldn13        | 1 |
| 11966 | 7340  | Zfp280b | Ascc3l1       | 1 |
| 11966 | 7436  | Zfp280b | 1700063K16Rik | 1 |
| 11966 | 7439  | Zfp280b | Syt17         | 1 |
| 11966 | 7577  | Zfp280b | Cldn8         | 1 |
| 11966 | 7618  | Zfp280b | Glis2         | 1 |
| 11966 | 7698  | Zfp280b | Klrb1a        | 1 |
| 11966 | 7721  | Zfp280b | MMT00000356   | 1 |
| 11966 | 7879  | Zfp280b | Ifitm3        | 1 |
| 11966 | 7916  | Zfp280b | MMT00016293   | 1 |
| 11966 | 7959  | Zfp280b | Tbx5          | 1 |
| 11966 | 7974  | Zfp280b | Arhgef7       | 1 |
| 11966 | 8157  | Zfp280b | MMT00005305   | 1 |
| 11966 | 8170  | Zfp280b | Snx22         | 1 |
| 11966 | 8189  | Zfp280b | Cflar         | 1 |
| 11966 | 8256  | Zfp280b | Tjap1         | 1 |
| 11966 | 8617  | Zfp280b | 2210412E05Rik | 1 |
| 11966 | 8620  | Zfp280b | MMT00048670   | 1 |
| 11966 | 8644  | Zfp280b | V1rg11        | 1 |
| 11966 | 8709  | Zfp280b | Trim58        | 1 |
| 11966 | 8730  | Zfp280b | MMT00008620   | 1 |
| 11966 | 8905  | Zfp280b | Trim67        | 1 |
| 11966 | 8952  | Zfp280b | Marco         | 1 |
| 11966 | 9128  | Zfp280b | Nxph1         | 1 |
| 11966 | 9240  | Zfp280b | Olf401        | 1 |
| 11966 | 9340  | Zfp280b | Cdc42ep2      | 1 |
| 11966 | 9421  | Zfp280b | Serpinf2      | 1 |
| 11966 | 9436  | Zfp280b | Cntnap2       | 1 |
| 11966 | 9446  | Zfp280b | MMT00017417   | 1 |
| 11966 | 9463  | Zfp280b | Zdhhc23       | 1 |
| 11966 | 9468  | Zfp280b | Gtf2a1l       | 1 |
| 11966 | 9485  | Zfp280b | 2700081O15Rik | 1 |
| 11966 | 9743  | Zfp280b | Gm189         | 1 |
| 11966 | 9868  | Zfp280b | Sult4a1       | 1 |
| 11966 | 9923  | Zfp280b | Tssk6         | 1 |
| 11966 | 9946  | Zfp280b | Stam2         | 1 |
| 11966 | 9954  | Zfp280b | MMT00047280   | 1 |
| 11966 | 9990  | Zfp280b | MMT00081303   | 1 |
| 11966 | 10055 | Zfp280b | Tpte          | 1 |
| 11966 | 10195 | Zfp280b | Klf1          | 1 |
| 11966 | 10234 | Zfp280b | C230093N12Rik | 1 |
| 11966 | 10240 | Zfp280b | Cyp2w1        | 1 |
| 11966 | 10260 | Zfp280b | Zfp36l2       | 1 |
| 11966 | 10281 | Zfp280b | Slc15a1       | 1 |
| 11966 | 10377 | Zfp280b | A430105I19Rik | 1 |
| 11966 | 10452 | Zfp280b | Grn           | 1 |
| 11966 | 10457 | Zfp280b | Olf853        | 1 |
| 11966 | 10520 | Zfp280b | Xkr6          | 1 |
| 11966 | 10576 | Zfp280b | Xrcc3         | 1 |
| 11966 | 10657 | Zfp280b | Rnf12         | 1 |
| 11966 | 10687 | Zfp280b | Itpkb         | 1 |
| 11966 | 10689 | Zfp280b | Pitpnb        | 1 |
| 11966 | 10700 | Zfp280b | Grwd1         | 1 |
| 11966 | 10723 | Zfp280b | 4930556N09Rik | 1 |

|       |       |         |               |   |
|-------|-------|---------|---------------|---|
| 11966 | 10806 | Zfp280b | Rnf212        | 1 |
| 11966 | 10835 | Zfp280b | Kcnd2         | 1 |
| 11966 | 10838 | Zfp280b | Spdef         | 1 |
| 11966 | 10880 | Zfp280b | Klra8         | 1 |
| 11966 | 10886 | Zfp280b | Fndc3b        | 1 |
| 11966 | 11001 | Zfp280b | Pou6f2        | 1 |
| 11966 | 11016 | Zfp280b | Pcp2          | 1 |
| 11966 | 11017 | Zfp280b | Olfir926      | 1 |
| 11966 | 11050 | Zfp280b | 2210010C04Rik | 1 |
| 11966 | 11256 | Zfp280b | H2-DMa        | 1 |
| 11966 | 11303 | Zfp280b | Slc5a12       | 1 |
| 11966 | 11350 | Zfp280b | 9030420J04Rik | 1 |
| 11966 | 11424 | Zfp280b | lqcf3         | 1 |
| 11966 | 11425 | Zfp280b | Evx2          | 1 |
| 11966 | 11507 | Zfp280b | Adarb2        | 1 |
| 11966 | 11645 | Zfp280b | Prtn3         | 1 |
| 11966 | 11665 | Zfp280b | Hyal1         | 1 |
| 11966 | 11677 | Zfp280b | 5730507C01Rik | 1 |
| 11966 | 11689 | Zfp280b | MMT00078109   | 1 |
| 11966 | 11805 | Zfp280b | Bat2          | 1 |
| 11966 | 11809 | Zfp280b | 4930534B04Rik | 1 |
| 11966 | 11837 | Zfp280b | Paqr6         | 1 |
| 11966 | 11966 | Zfp280b | Zfp280b       | 1 |
| 11966 | 12046 | Zfp280b | Impdh1        | 1 |
| 11966 | 12062 | Zfp280b | Dzip1l        | 1 |
| 11966 | 12188 | Zfp280b | Chek2         | 1 |
| 11966 | 12198 | Zfp280b | Atp13a5       | 1 |
| 11966 | 12248 | Zfp280b | Tnp2          | 1 |
| 11966 | 12272 | Zfp280b | Fshr          | 1 |
| 11966 | 12371 | Zfp280b | 1700128F08Rik | 1 |
| 11966 | 12372 | Zfp280b | MMT00039397   | 1 |
| 11966 | 12422 | Zfp280b | Eme1          | 1 |
| 11966 | 12430 | Zfp280b | Fst           | 1 |
| 11966 | 12451 | Zfp280b | Srd5a2        | 1 |
| 11966 | 12457 | Zfp280b | MMT00072579   | 1 |
| 11966 | 12464 | Zfp280b | MMT00047924   | 1 |
| 11966 | 12471 | Zfp280b | Olfir1020     | 1 |
| 11966 | 12497 | Zfp280b | Kir3dl2       | 1 |
| 11966 | 12568 | Zfp280b | Lrrc37a       | 1 |
| 11966 | 12604 | Zfp280b | Acr           | 1 |
| 11966 | 12633 | Zfp280b | Klk4          | 1 |
| 11966 | 12651 | Zfp280b | Tsc22d4       | 1 |
| 11966 | 12696 | Zfp280b | RP23-392P11.3 | 1 |
| 11966 | 12753 | Zfp280b | MMT00043344   | 1 |
| 11966 | 12772 | Zfp280b | Axl           | 1 |
| 11966 | 12826 | Zfp280b | Zfp354c       | 1 |
| 11966 | 12919 | Zfp280b | Nup210l       | 1 |
| 11966 | 13102 | Zfp280b | Prkaa1        | 1 |
| 11966 | 13141 | Zfp280b | MMT00071569   | 1 |
| 11966 | 13184 | Zfp280b | MMT00017268   | 1 |
| 11966 | 13201 | Zfp280b | Rbl2          | 1 |
| 11966 | 13311 | Zfp280b | Prl3c1        | 1 |
| 11966 | 13487 | Zfp280b | A230051G13Rik | 1 |
| 11966 | 13496 | Zfp280b | H1fnt         | 1 |
| 11966 | 13570 | Zfp280b | Olfir171      | 1 |
| 11966 | 13676 | Zfp280b | MMT00010979   | 1 |
| 11966 | 13712 | Zfp280b | Lypd5         | 1 |
| 11966 | 13742 | Zfp280b | 1700024P16Rik | 1 |
| 11966 | 13767 | Zfp280b | Kcnk15        | 1 |

|       |       |         |               |   |
|-------|-------|---------|---------------|---|
| 11966 | 13800 | Zfp280b | Lrp5          | 1 |
| 11966 | 13860 | Zfp280b | Cpt1b         | 1 |
| 11966 | 13890 | Zfp280b | Olf1263       | 1 |
| 11966 | 14035 | Zfp280b | Lrrc52        | 1 |
| 11966 | 14149 | Zfp280b | BC048562      | 1 |
| 11966 | 14293 | Zfp280b | Col9a1        | 1 |
| 11966 | 14313 | Zfp280b | Tnk1          | 1 |
| 11966 | 14364 | Zfp280b | Robo1         | 1 |
| 11966 | 14495 | Zfp280b | A630018P17Rik | 1 |
| 11966 | 14510 | Zfp280b | Olf1643       | 1 |
| 11966 | 14519 | Zfp280b | Trex1         | 1 |
| 11966 | 14565 | Zfp280b | Rnf207        | 1 |
| 11966 | 14643 | Zfp280b | Ets2          | 1 |
| 11966 | 14754 | Zfp280b | Atoh8         | 1 |
| 11966 | 14993 | Zfp280b | MMT00015245   | 1 |
| 11966 | 15200 | Zfp280b | Gk2           | 1 |
| 11966 | 15424 | Zfp280b | Atp6v1g2      | 1 |
| 11966 | 15446 | Zfp280b | Cd320         | 1 |
| 11966 | 15601 | Zfp280b | Plekhm3       | 1 |
| 11966 | 15626 | Zfp280b | MMT00035685   | 1 |
| 11966 | 15697 | Zfp280b | Tbc1d8b       | 1 |
| 11966 | 15743 | Zfp280b | Hoxc6         | 1 |
| 11966 | 15747 | Zfp280b | Sfrs1         | 1 |
| 11966 | 15813 | Zfp280b | Vpreb3        | 1 |
| 11966 | 15847 | Zfp280b | Gm392         | 1 |
| 11966 | 15885 | Zfp280b | Adamts7       | 1 |
| 11966 | 16018 | Zfp280b | MMT00074939   | 1 |
| 11966 | 16104 | Zfp280b | Ugt3a2        | 1 |
| 11966 | 16157 | Zfp280b | D9Ert280e     | 1 |
| 11966 | 16197 | Zfp280b | MMT00065977   | 1 |
| 11966 | 16226 | Zfp280b | MMT00033542   | 1 |
| 11966 | 16323 | Zfp280b | Smpd3         | 1 |
| 11966 | 16390 | Zfp280b | Pib1          | 1 |
| 11966 | 16491 | Zfp280b | 6330500D04Rik | 1 |
| 11966 | 16553 | Zfp280b | Cilp2         | 1 |
| 11966 | 16664 | Zfp280b | Car4          | 1 |
| 11966 | 16672 | Zfp280b | Tmem82        | 1 |
| 11966 | 16718 | Zfp280b | Zbtb7c        | 1 |
| 11966 | 16794 | Zfp280b | Chrn1         | 1 |
| 11966 | 16957 | Zfp280b | MMT00046108   | 1 |
| 11966 | 17044 | Zfp280b | Gpr55         | 1 |
| 11966 | 17068 | Zfp280b | Olf1661       | 1 |
| 11966 | 17122 | Zfp280b | MMT00068814   | 1 |
| 11966 | 17123 | Zfp280b | Olf1511       | 1 |
| 11966 | 17149 | Zfp280b | Pms2          | 1 |
| 11966 | 17171 | Zfp280b | MMT00045847   | 1 |
| 11966 | 17337 | Zfp280b | 1810065E05Rik | 1 |
| 11966 | 17413 | Zfp280b | MMT00043948   | 1 |
| 11966 | 17417 | Zfp280b | Pxn           | 1 |
| 11966 | 17422 | Zfp280b | Dctd          | 1 |
| 11966 | 17524 | Zfp280b | MMT00006341   | 1 |
| 11966 | 17547 | Zfp280b | C730007P19Rik | 1 |
| 11966 | 17578 | Zfp280b | Kif19a        | 1 |
| 11966 | 17612 | Zfp280b | Vhlh          | 1 |
| 11966 | 17613 | Zfp280b | P2rx7         | 1 |
| 11966 | 17750 | Zfp280b | Hs6st2        | 1 |
| 11966 | 17783 | Zfp280b | D630012G11Rik | 1 |
| 11966 | 17890 | Zfp280b | 2610021K21Rik | 1 |
| 11966 | 17960 | Zfp280b | Yod1          | 1 |

|       |       |         |               |   |
|-------|-------|---------|---------------|---|
| 11966 | 18124 | Zfp280b | Ptprt         | 1 |
| 11966 | 18162 | Zfp280b | BC049352      | 1 |
| 11966 | 18171 | Zfp280b | MMT00007396   | 1 |
| 11966 | 18214 | Zfp280b | Ankrd40       | 1 |
| 11966 | 18240 | Zfp280b | Scrt2         | 1 |
| 11966 | 18325 | Zfp280b | Cst10         | 1 |
| 11966 | 18351 | Zfp280b | Nfyc          | 1 |
| 11966 | 18409 | Zfp280b | Nicn1         | 1 |
| 11966 | 18451 | Zfp280b | Csgalnact1    | 1 |
| 11966 | 18525 | Zfp280b | Mpped1        | 1 |
| 11966 | 18562 | Zfp280b | Nup188        | 1 |
| 11966 | 18620 | Zfp280b | Slmap         | 1 |
| 11966 | 18651 | Zfp280b | Tulp2         | 1 |
| 11966 | 18684 | Zfp280b | Cctn          | 1 |
| 11966 | 18699 | Zfp280b | 2700089E24Rik | 1 |
| 11966 | 18773 | Zfp280b | MMT00014972   | 1 |
| 11966 | 18790 | Zfp280b | Car3          | 1 |
| 11966 | 18847 | Zfp280b | Armet1        | 1 |
| 11966 | 18892 | Zfp280b | Cyp4f40       | 1 |
| 11966 | 18980 | Zfp280b | Ii7           | 1 |
| 11966 | 19219 | Zfp280b | MMT00015104   | 1 |
| 11966 | 19265 | Zfp280b | EG546036      | 1 |
| 11966 | 19267 | Zfp280b | Olf341        | 1 |
| 11966 | 19333 | Zfp280b | Ccdc13        | 1 |
| 11966 | 19334 | Zfp280b | Gpr44         | 1 |
| 11966 | 19351 | Zfp280b | Prkcs         | 1 |
| 11966 | 19420 | Zfp280b | Lcn8          | 1 |
| 11966 | 19432 | Zfp280b | MMT00068429   | 1 |
| 11966 | 19436 | Zfp280b | Dapp1         | 1 |
| 11966 | 19483 | Zfp280b | Depdc2        | 1 |
| 11966 | 19542 | Zfp280b | Hspb7         | 1 |
| 11966 | 19645 | Zfp280b | Ii12rb2       | 1 |
| 11966 | 19658 | Zfp280b | Cldnd2        | 1 |
| 11966 | 19672 | Zfp280b | Cldn19        | 1 |
| 11966 | 19699 | Zfp280b | Rnf180        | 1 |
| 11966 | 19709 | Zfp280b | 1-Sep         | 1 |
| 11966 | 19722 | Zfp280b | Pvrl1         | 1 |
| 11966 | 19806 | Zfp280b | 4732429D16Rik | 1 |
| 11966 | 19941 | Zfp280b | 1700080E11Rik | 1 |
| 11966 | 20089 | Zfp280b | MMT00015975   | 1 |
| 11966 | 20158 | Zfp280b | Slc38a1       | 1 |
| 11966 | 20255 | Zfp280b | Elfn2         | 1 |
| 11966 | 20319 | Zfp280b | Syne2         | 1 |
| 11966 | 20406 | Zfp280b | Cacng2        | 1 |
| 11966 | 20419 | Zfp280b | Adra1b        | 1 |
| 11966 | 20506 | Zfp280b | 1700011F03Rik | 1 |
| 11966 | 20532 | Zfp280b | Rnf26         | 1 |
| 11966 | 20566 | Zfp280b | Tnni2         | 1 |
| 11966 | 20588 | Zfp280b | Brd2          | 1 |
| 11966 | 20735 | Zfp280b | Tnrc6b        | 1 |
| 11966 | 20802 | Zfp280b | Cdc42se2      | 1 |
| 11966 | 20858 | Zfp280b | Duox1         | 1 |
| 11966 | 20908 | Zfp280b | Olf583        | 1 |
| 11966 | 20925 | Zfp280b | 2810410L24Rik | 1 |
| 11966 | 20944 | Zfp280b | Tmem164       | 1 |
| 11966 | 20971 | Zfp280b | Tsga13        | 1 |
| 11966 | 21070 | Zfp280b | Cnot8         | 1 |
| 11966 | 21209 | Zfp280b | Ebf4          | 1 |
| 11966 | 21261 | Zfp280b | Pax2          | 1 |



|       |       |               |               |    |
|-------|-------|---------------|---------------|----|
| 11966 | 21270 | Zfp280b       | V1rg6         | 1  |
| 11966 | 21291 | Zfp280b       | Slc39a4       | 1  |
| 11966 | 21511 | Zfp280b       | MMT00054100   | 1  |
| 11966 | 21563 | Zfp280b       | Arhgap9       | 1  |
| 11966 | 21595 | Zfp280b       | Trpv1         | 1  |
| 11966 | 21602 | Zfp280b       | V1ra5         | 1  |
| 11966 | 21717 | Zfp280b       | EG628893      | 1  |
| 11966 | 21723 | Zfp280b       | Homer1        | 1  |
| 11966 | 21866 | Zfp280b       | Hhipl1        | 1  |
| 11966 | 21923 | Zfp280b       | Olfir585      | 1  |
| 11966 | 21931 | Zfp280b       | Nrxn3         | 1  |
| 11966 | 21996 | Zfp280b       | Mme           | 1  |
| 11966 | 22015 | Zfp280b       | 2410127E18Rik | 1  |
| 11966 | 22073 | Zfp280b       | Lrig3         | 1  |
| 11966 | 22125 | Zfp280b       | Gab1          | 1  |
| 11966 | 22148 | Zfp280b       | MMT00035976   | 1  |
| 11966 | 22150 | Zfp280b       | Fhdc1         | 1  |
| 11966 | 22271 | Zfp280b       | Cyp2c29       | 1  |
| 11966 | 22366 | Zfp280b       | MMT00005283   | 1  |
| 11966 | 22434 | Zfp280b       | Olfir1255     | 1  |
| 11966 | 22445 | Zfp280b       | Prkag3        | 1  |
| 11966 | 22541 | Zfp280b       | 4632413I24Rik | 1  |
| 11966 | 22555 | Zfp280b       | Ela2          | 1  |
| 11966 | 22559 | Zfp280b       | MMT00031309   | 1  |
| 11966 | 22733 | Zfp280b       | Alpk3         | 1  |
| 11966 | 22750 | Zfp280b       | Mupcdh        | 1  |
| 11966 | 22762 | Zfp280b       | Slc6a4        | 1  |
| 11966 | 22802 | Zfp280b       | Svs2          | 1  |
| 11966 | 22954 | Zfp280b       | Slc25a30      | 1  |
| 11966 | 22966 | Zfp280b       | Epha4         | 1  |
| 11966 | 23056 | Zfp280b       | Ccdc135       | 1  |
| 11966 | 23070 | Zfp280b       | BC024659      | 1  |
| 11966 | 23079 | Zfp280b       | Spag17        | 1  |
| 11966 | 23109 | Zfp280b       | A430088P11Rik | 1  |
| 11966 | 23111 | Zfp280b       | Eml5          | 1  |
| 11966 | 23112 | Zfp280b       | Gys1          | 1  |
| 11966 | 23119 | Zfp280b       | Cps1          | 1  |
| 11966 | 23291 | Zfp280b       | Rexo1         | 1  |
| 11966 | 23454 | Zfp280b       | Znhit1        | 1  |
| 11966 | 23528 | Zfp280b       | 0610038L08Rik | 1  |
| 11966 | 23531 | Zfp280b       | Foxb2         | 1  |
| 11966 | 23546 | Zfp280b       | Zzef1         | 1  |
| 11966 | 23561 | Zfp280b       | Sox14         | 1  |
| 11966 | 23591 | Zfp280b       | Dlg4          | 1  |
| 11966 | 23614 | Zfp280b       | G630016D24Rik | 1  |
| 11966 | 23651 | Zfp280b       | MMT00027295   | 1  |
| 11966 | 23685 | Zfp280b       | Tbxas1        | 1  |
| 12004 | 2599  | Lgals6        | Lsm14a        | 1  |
| 12004 | 7761  | Lgals6        | Nudt19        | 1  |
| 12004 | 8394  | Lgals6        | Dpy19I3       | 1  |
| 12004 | 12004 | Lgals6        | Lgals6        | 1  |
| 12004 | 16931 | Lgals6        | Actn4         | -1 |
| 12012 | 9449  | Cd247         | Sft2d2        | -1 |
| 12029 | 1416  | Tcf19         | 6720460F02Rik | 1  |
| 12029 | 6133  | Tcf19         | Agrp          | -1 |
| 12032 | 15870 | Cdca7         | Aqp5          | 1  |
| 12055 | 3079  | 1810008A18Rik | Gstt3         | 1  |
| 12055 | 6932  | 1810008A18Rik | Ckap4         | 1  |
| 12055 | 10455 | 1810008A18Rik | MMT00015250   | 1  |

|       |       |               |               |    |
|-------|-------|---------------|---------------|----|
| 12055 | 13362 | 1810008A18Rik | Ddt           | 1  |
| 12055 | 15897 | 1810008A18Rik | D10Jhu81e     | -1 |
| 12055 | 19493 | 1810008A18Rik | Icosl         | 1  |
| 12055 | 22786 | 1810008A18Rik | Mterfd3       | 1  |
| 12070 | 2511  | Adat2         | Ltv1          | -1 |
| 12070 | 12070 | Adat2         | Adat2         | 1  |
| 12097 | 3475  | 9430015G10Rik | 2610305D13Rik | 1  |
| 12097 | 11870 | 9430015G10Rik | Apitd1        | 1  |
| 12097 | 12097 | 9430015G10Rik | 9430015G10Rik | 1  |
| 12097 | 18338 | 9430015G10Rik | Akr1e1        | -1 |
| 12097 | 19924 | 9430015G10Rik | Ubiad1        | 1  |
| 12104 | 15870 | MMT00063115   | Aqp5          | 1  |
| 12109 | 2023  | Smad4         | MMT00072215   | -1 |
| 12109 | 12109 | Smad4         | Smad4         | 1  |
| 12109 | 12984 | Smad4         | Cyb5          | -1 |
| 12109 | 22930 | Smad4         | Mro           | 1  |
| 12115 | 6133  | Hist1h2an     | Agrp          | -1 |
| 12120 | 15870 | Rad51         | Aqp5          | 1  |
| 12126 | 6824  | Znfx1         | Irf7          | 1  |
| 12126 | 19189 | Znfx1         | Sp100         | 1  |
| 12126 | 21549 | Znfx1         | Rtp4          | 1  |
| 12139 | 3159  | Cmtm4         | Pld1          | 1  |
| 12139 | 4666  | Cmtm4         | Exosc9        | -1 |
| 12139 | 5762  | Cmtm4         | Trpc3         | -1 |
| 12139 | 12367 | Cmtm4         | MMT00072365   | -1 |
| 12139 | 16618 | Cmtm4         | Hps3          | -1 |
| 12139 | 19700 | Cmtm4         | E030011K20Rik | 1  |
| 12140 | 5064  | Mrps15        | Tekt2         | 1  |
| 12140 | 8677  | Mrps15        | Zbtb8os       | 1  |
| 12140 | 12140 | Mrps15        | Mrps15        | 1  |
| 12168 | 1297  | H2-Ke6        | Phox2a        | -1 |
| 12172 | 22996 | Adam9         | MMT00076852   | -1 |
| 12173 | 3363  | Acbd6         | MMT00033159   | -1 |
| 12173 | 4532  | Acbd6         | BC034090      | 1  |
| 12173 | 8176  | Acbd6         | Stx6          | -1 |
| 12173 | 12173 | Acbd6         | Acbd6         | 1  |
| 12173 | 15702 | Acbd6         | MMT00047561   | 1  |
| 12174 | 737   | 2610027C15Rik | MMT00023716   | 1  |
| 12174 | 4138  | 2610027C15Rik | Cited4        | 1  |
| 12174 | 5064  | 2610027C15Rik | Tekt2         | -1 |
| 12174 | 6191  | 2610027C15Rik | Ddost         | -1 |
| 12174 | 8677  | 2610027C15Rik | Zbtb8os       | -1 |
| 12174 | 10134 | 2610027C15Rik | Hivep3        | -1 |
| 12174 | 10407 | 2610027C15Rik | Gpatch3       | 1  |
| 12208 | 16694 | Pnpla7        | Sepp1         | 1  |
| 12219 | 12208 | Cyb5b         | Pnpla7        | -1 |
| 12230 | 15870 | MMT00005802   | Aqp5          | 1  |
| 12238 | 1297  | Traf3         | Phox2a        | 1  |
| 12239 | 3401  | A630077B13Rik | BB146404      | -1 |
| 12245 | 15698 | Zfp322a       | Them2         | -1 |
| 12245 | 17528 | Zfp322a       | Gmnn          | -1 |
| 12248 | 1771  | Tnp2          | Park2         | 1  |
| 12248 | 1907  | Tnp2          | D230010M03Rik | 1  |
| 12248 | 2067  | Tnp2          | Myo1a         | 1  |
| 12248 | 2226  | Tnp2          | Amt           | 1  |
| 12248 | 2819  | Tnp2          | Kcnk5         | 1  |
| 12248 | 3144  | Tnp2          | Ube2j2        | 1  |
| 12248 | 3166  | Tnp2          | Vmn2r57       | 1  |
| 12248 | 3208  | Tnp2          | 4930511111Rik | 1  |

|       |       |        |               |    |
|-------|-------|--------|---------------|----|
| 12248 | 3511  | Tnp2   | Rnf182        | 1  |
| 12248 | 4079  | Tnp2   | Emilin3       | 1  |
| 12248 | 4199  | Tnp2   | B3galt5       | 1  |
| 12248 | 5783  | Tnp2   | 4833413O15Rik | 1  |
| 12248 | 5908  | Tnp2   | MMT00027552   | 1  |
| 12248 | 7041  | Tnp2   | Sp140         | 1  |
| 12248 | 7436  | Tnp2   | 1700063K16Rik | 1  |
| 12248 | 7916  | Tnp2   | MMT00016293   | 1  |
| 12248 | 7974  | Tnp2   | Arhgef7       | 1  |
| 12248 | 8256  | Tnp2   | Tjap1         | 1  |
| 12248 | 8644  | Tnp2   | V1rg11        | 1  |
| 12248 | 8952  | Tnp2   | Marco         | 1  |
| 12248 | 9946  | Tnp2   | Stam2         | 1  |
| 12248 | 10377 | Tnp2   | A430105I19Rik | 1  |
| 12248 | 10520 | Tnp2   | Xkr6          | 1  |
| 12248 | 10687 | Tnp2   | Itpkb         | 1  |
| 12248 | 11016 | Tnp2   | Pcp2          | 1  |
| 12248 | 11837 | Tnp2   | Paqr6         | 1  |
| 12248 | 11966 | Tnp2   | Zfp280b       | 1  |
| 12248 | 12248 | Tnp2   | Tnp2          | 1  |
| 12248 | 12272 | Tnp2   | Fshr          | 1  |
| 12248 | 12772 | Tnp2   | Axl           | 1  |
| 12248 | 14313 | Tnp2   | Tnk1          | 1  |
| 12248 | 14754 | Tnp2   | Atoh8         | 1  |
| 12248 | 17750 | Tnp2   | Hs6st2        | 1  |
| 12248 | 19219 | Tnp2   | MMT00015104   | 1  |
| 12248 | 19645 | Tnp2   | Il12rb2       | 1  |
| 12248 | 20319 | Tnp2   | Syne2         | 1  |
| 12248 | 20908 | Tnp2   | Olfir583      | 1  |
| 12248 | 20944 | Tnp2   | Tmem164       | 1  |
| 12248 | 22762 | Tnp2   | Slc6a4        | 1  |
| 12248 | 23546 | Tnp2   | Zzef1         | 1  |
| 12248 | 23591 | Tnp2   | Dlg4          | 1  |
| 12248 | 23651 | Tnp2   | MMT00027295   | 1  |
| 12280 | 15353 | Cln5   | Ednrb         | -1 |
| 12302 | 2456  | Cbx1   | Mrpl10        | 1  |
| 12302 | 3480  | Cbx1   | Pnpo          | -1 |
| 12302 | 5661  | Cbx1   | Lrrc46        | -1 |
| 12302 | 9875  | Cbx1   | Cdk5rap3      | -1 |
| 12302 | 10498 | Cbx1   | Ube2z         | -1 |
| 12302 | 12302 | Cbx1   | Cbx1          | 1  |
| 12302 | 13810 | Cbx1   | 1110036O03Rik | -1 |
| 12302 | 14384 | Cbx1   | Dnajc7        | -1 |
| 12302 | 18448 | Cbx1   | Klhl11        | 1  |
| 12302 | 19092 | Cbx1   | MMT00045362   | -1 |
| 12302 | 19196 | Cbx1   | Nfe2l1        | -1 |
| 12302 | 23295 | Cbx1   | Snx11         | 1  |
| 12312 | 8721  | Ms4a6d | Tbc1d10c      | -1 |
| 12312 | 11369 | Ms4a6d | Stx3          | -1 |
| 12312 | 11812 | Ms4a6d | Mrpl16        | -1 |
| 12312 | 17447 | Ms4a6d | Ctsf          | -1 |
| 12312 | 19857 | Ms4a6d | Rab1b         | -1 |
| 12316 | 3159  | Mpa2l  | Pld1          | 1  |
| 12316 | 3206  | Mpa2l  | Gpr160        | 1  |
| 12316 | 4666  | Mpa2l  | Exosc9        | -1 |
| 12316 | 12367 | Mpa2l  | MMT00072365   | -1 |
| 12316 | 16416 | Mpa2l  | Comm2         | 1  |
| 12316 | 16618 | Mpa2l  | Hps3          | -1 |
| 12316 | 19700 | Mpa2l  | E030011K20Rik | 1  |

|       |       |             |               |    |
|-------|-------|-------------|---------------|----|
| 12336 | 17135 | Timm13      | Mum1          | -1 |
| 12341 | 12341 | EG330731    | EG330731      | 1  |
| 12355 | 2938  | AI507611    | H2-T23        | -1 |
| 12355 | 7088  | AI507611    | Slc37a1       | -1 |
| 12355 | 8750  | AI507611    | 1700010I14Rik | -1 |
| 12355 | 8767  | AI507611    | Rgl2          | -1 |
| 12355 | 10374 | AI507611    | Trim15        | -1 |
| 12355 | 10667 | AI507611    | H2-Eb1        | -1 |
| 12355 | 10931 | AI507611    | Pkn3          | 1  |
| 12355 | 12168 | AI507611    | H2-Ke6        | -1 |
| 12355 | 12694 | AI507611    | Riok2         | 1  |
| 12355 | 12943 | AI507611    | Slc25a27      | -1 |
| 12355 | 13493 | AI507611    | Ring1         | -1 |
| 12355 | 15580 | AI507611    | MMT00077001   | -1 |
| 12355 | 16067 | AI507611    | Pcaf          | 1  |
| 12355 | 16692 | AI507611    | Bat4          | -1 |
| 12355 | 17322 | AI507611    | Zfp758        | 1  |
| 12355 | 17412 | AI507611    | Aif1          | 1  |
| 12355 | 18577 | AI507611    | Btbd9         | 1  |
| 12355 | 20238 | AI507611    | H2-T9         | -1 |
| 12355 | 21295 | AI507611    | Snf1lk        | 1  |
| 12367 | 1466  | MMT00072365 | Ubp2l         | -1 |
| 12367 | 2012  | MMT00072365 | Cetn4         | 1  |
| 12367 | 2752  | MMT00072365 | Fcgr1         | -1 |
| 12367 | 3159  | MMT00072365 | Pld1          | -1 |
| 12367 | 3206  | MMT00072365 | Gpr160        | -1 |
| 12367 | 3314  | MMT00072365 | Wars2         | -1 |
| 12367 | 3874  | MMT00072365 | Slitrk3       | 1  |
| 12367 | 4666  | MMT00072365 | Exosc9        | 1  |
| 12367 | 5687  | MMT00072365 | Klf11         | 1  |
| 12367 | 5762  | MMT00072365 | Trpc3         | 1  |
| 12367 | 6708  | MMT00072365 | Serpini2      | 1  |
| 12367 | 7173  | MMT00072365 | Trim59        | -1 |
| 12367 | 8679  | MMT00072365 | Tiparp        | -1 |
| 12367 | 9360  | MMT00072365 | Taf1c         | 1  |
| 12367 | 9408  | MMT00072365 | Hmgcs2        | 1  |
| 12367 | 9519  | MMT00072365 | Fstl5         | 1  |
| 12367 | 10521 | MMT00072365 | Ttf2          | -1 |
| 12367 | 12367 | MMT00072365 | MMT00072365   | 1  |
| 12367 | 12716 | MMT00072365 | 5830417I10Rik | 1  |
| 12367 | 12784 | MMT00072365 | Nudt6         | -1 |
| 12367 | 15901 | MMT00072365 | Tpm3          | 1  |
| 12367 | 16170 | MMT00072365 | S100a11       | -1 |
| 12367 | 16416 | MMT00072365 | Commd2        | -1 |
| 12367 | 16618 | MMT00072365 | Hps3          | 1  |
| 12367 | 19700 | MMT00072365 | E030011K20Rik | -1 |
| 12367 | 21650 | MMT00072365 | Ap4b1         | -1 |
| 12367 | 21780 | MMT00072365 | Ankrd35       | 1  |
| 12367 | 22570 | MMT00072365 | Phf1          | -1 |
| 12367 | 23037 | MMT00072365 | Thbs3         | -1 |
| 12377 | 7083  | MMT00050540 | MMT00044154   | 1  |
| 12377 | 7821  | MMT00050540 | MMT00042003   | 1  |
| 12377 | 17535 | MMT00050540 | MMT00008110   | 1  |
| 12380 | 10130 | Rftn2       | MMT00043239   | -1 |
| 12380 | 11621 | Rftn2       | Mixl1         | 1  |
| 12380 | 19578 | Rftn2       | Aox1          | -1 |
| 12385 | 2157  | Mrpl33      | 0610007C21Rik | -1 |
| 12385 | 6456  | Mrpl33      | Tyms          | -1 |
| 12385 | 11859 | Mrpl33      | Poln          | -1 |

|       |       |               |               |    |
|-------|-------|---------------|---------------|----|
| 12385 | 12385 | Mrpl33        | Mrpl33        | 1  |
| 12385 | 18462 | Mrpl33        | Gm1060        | 1  |
| 12388 | 678   | 8430406I07Rik | Ncaph         | -1 |
| 12388 | 1510  | 8430406I07Rik | A530058N18Rik | 1  |
| 12388 | 4897  | 8430406I07Rik | Ciao1         | 1  |
| 12388 | 5603  | 8430406I07Rik | BC020535      | -1 |
| 12388 | 5737  | 8430406I07Rik | Nkx2-2        | 1  |
| 12388 | 6805  | 8430406I07Rik | Rrbp1         | -1 |
| 12388 | 11705 | 8430406I07Rik | Polr3f        | 1  |
| 12388 | 12388 | 8430406I07Rik | 8430406I07Rik | 1  |
| 12388 | 13355 | 8430406I07Rik | Foxs1         | -1 |
| 12388 | 14740 | 8430406I07Rik | Mfap1b        | 1  |
| 12398 | 3683  | Ifi44         | Oas2          | 1  |
| 12398 | 6824  | Ifi44         | Irf7          | 1  |
| 12398 | 7105  | Ifi44         | Plac8         | 1  |
| 12398 | 9847  | Ifi44         | Ifi27         | 1  |
| 12398 | 12398 | Ifi44         | Ifi44         | 1  |
| 12398 | 13309 | Ifi44         | Tgtp          | 1  |
| 12398 | 19189 | Ifi44         | Sp100         | 1  |
| 12398 | 21549 | Ifi44         | Rtp4          | 1  |
| 12398 | 23450 | Ifi44         | D12Ert647e    | 1  |
| 12401 | 22343 | MMT00011281   | Blm           | -1 |
| 12402 | 153   | Th1l          | 2010011I20Rik | -1 |
| 12402 | 23008 | Th1l          | Ctsz          | 1  |
| 12412 | 8231  | BC004728      | Tcfcp2        | -1 |
| 12412 | 12412 | BC004728      | BC004728      | 1  |
| 12412 | 19037 | BC004728      | Slc11a2       | 1  |
| 12412 | 21060 | BC004728      | Ela1          | 1  |
| 12412 | 21542 | BC004728      | Larp4         | 1  |
| 12420 | 12208 | Klhl21        | Pnpla7        | 1  |
| 12440 | 15953 | Sult5a1       | Acsf3         | 1  |
| 12440 | 18700 | Sult5a1       | Trappc2l      | -1 |
| 12440 | 22351 | Sult5a1       | Fanca         | 1  |
| 12480 | 6376  | Cdc42bpg      | Nle1          | 1  |
| 12480 | 13810 | Cdc42bpg      | 1110036O03Rik | -1 |
| 12480 | 18448 | Cdc42bpg      | Klhl11        | 1  |
| 12480 | 21189 | Cdc42bpg      | Arl5c         | -1 |
| 12546 | 7670  | Cd7           | Ccdc57        | -1 |
| 12546 | 9790  | Cd7           | Tspan10       | 1  |
| 12546 | 11199 | Cd7           | Sirt7         | -1 |
| 12546 | 13615 | Cd7           | Arl16         | -1 |
| 12546 | 16210 | Cd7           | Metrl1        | -1 |
| 12546 | 16613 | Cd7           | 1110031I02Rik | 1  |
| 12546 | 17193 | Cd7           | Npb           | 1  |
| 12546 | 17897 | Cd7           | Gm1019        | 1  |
| 12546 | 21414 | Cd7           | BC017643      | 1  |
| 12546 | 22250 | Cd7           | Wdr45l        | -1 |
| 12565 | 1297  | Grem2         | Phox2a        | -1 |
| 12572 | 8399  | Zfp90         | Herpud1       | -1 |
| 12599 | 12599 | Golt1b        | Golt1b        | 1  |
| 12625 | 22786 | Al597468      | Mterfd3       | -1 |
| 12626 | 11382 | Fut7          | Cdca3         | 1  |
| 12656 | 6330  | Coq5          | Dgkq          | 1  |
| 12656 | 8807  | Coq5          | Ankrd56       | -1 |
| 12656 | 10978 | Coq5          | MMT00078322   | 1  |
| 12656 | 12656 | Coq5          | Coq5          | 1  |
| 12656 | 15466 | Coq5          | Gm136         | -1 |
| 12656 | 16066 | Coq5          | Coq2          | 1  |
| 12656 | 17716 | Coq5          | Rnf10         | -1 |

|       |       |               |               |    |
|-------|-------|---------------|---------------|----|
| 12661 | 2012  | 4932438A13Rik | Cetn4         | 1  |
| 12694 | 2938  | Riok2         | H2-T23        | -1 |
| 12694 | 7088  | Riok2         | Slc37a1       | -1 |
| 12694 | 7603  | Riok2         | Sod2          | -1 |
| 12694 | 8750  | Riok2         | 1700010I14Rik | -1 |
| 12694 | 8767  | Riok2         | Rgl2          | -1 |
| 12694 | 12694 | Riok2         | Riok2         | 1  |
| 12694 | 12943 | Riok2         | Slc25a27      | -1 |
| 12694 | 16692 | Riok2         | Bat4          | -1 |
| 12694 | 17322 | Riok2         | Zfp758        | 1  |
| 12694 | 20238 | Riok2         | H2-T9         | -1 |
| 12694 | 21295 | Riok2         | Snf1lk        | 1  |
| 12694 | 21415 | Riok2         | Has1          | -1 |
| 12703 | 10675 | Pcsk1         | Mobkl2a       | 1  |
| 12716 | 1014  | 5830417I10Rik | Rtcd1         | -1 |
| 12716 | 1466  | 5830417I10Rik | Ubap2l        | -1 |
| 12716 | 2752  | 5830417I10Rik | Fcgr1         | -1 |
| 12716 | 3314  | 5830417I10Rik | Wars2         | -1 |
| 12716 | 7334  | 5830417I10Rik | Lor           | 1  |
| 12716 | 9519  | 5830417I10Rik | Fstl5         | 1  |
| 12716 | 10521 | 5830417I10Rik | Ttf2          | -1 |
| 12716 | 12367 | 5830417I10Rik | MMT00072365   | 1  |
| 12716 | 12716 | 5830417I10Rik | 5830417I10Rik | 1  |
| 12716 | 15901 | 5830417I10Rik | Tpm3          | 1  |
| 12716 | 16416 | 5830417I10Rik | Commd2        | -1 |
| 12716 | 21650 | 5830417I10Rik | Ap4b1         | -1 |
| 12716 | 22570 | 5830417I10Rik | Phtf1         | -1 |
| 12718 | 2793  | Dhrsx         | MMT00005644   | -1 |
| 12718 | 5989  | Dhrsx         | 2310042D19Rik | -1 |
| 12718 | 12718 | Dhrsx         | Dhrsx         | -1 |
| 12718 | 17693 | Dhrsx         | MMT00044427   | -1 |
| 12718 | 18033 | Dhrsx         | Klhl17        | 1  |
| 12718 | 22122 | Dhrsx         | MMT00042954   | -1 |
| 12730 | 2278  | 9130019O22Rik | Gtf3c1        | 1  |
| 12730 | 4901  | 9130019O22Rik | MMT00073557   | -1 |
| 12730 | 5639  | 9130019O22Rik | Gdpd3         | 1  |
| 12730 | 6856  | 9130019O22Rik | Tnrc6a        | 1  |
| 12730 | 12730 | 9130019O22Rik | 9130019O22Rik | 1  |
| 12730 | 18442 | 9130019O22Rik | Zfp764        | 1  |
| 12751 | 2980  | Sorl1         | Slc37a2       | -1 |
| 12751 | 16501 | Sorl1         | Loh11cr2a     | 1  |
| 12761 | 1751  | Tsc22d3       | Xdh           | 1  |
| 12761 | 2294  | Tsc22d3       | AU040829      | 1  |
| 12761 | 2708  | Tsc22d3       | Sgk1          | 1  |
| 12761 | 2794  | Tsc22d3       | Map3k6        | 1  |
| 12761 | 5345  | Tsc22d3       | MMT00023326   | 1  |
| 12761 | 6564  | Tsc22d3       | Cebpd         | 1  |
| 12761 | 8816  | Tsc22d3       | Nfkbia        | 1  |
| 12761 | 8980  | Tsc22d3       | Plekhf1       | 1  |
| 12761 | 9745  | Tsc22d3       | Gadd45g       | 1  |
| 12761 | 9821  | Tsc22d3       | Pmaip1        | 1  |
| 12761 | 10273 | Tsc22d3       | Gpt2          | 1  |
| 12761 | 11345 | Tsc22d3       | Slc40a1       | -1 |
| 12761 | 12761 | Tsc22d3       | Tsc22d3       | 1  |
| 12761 | 12834 | Tsc22d3       | Fabp7         | -1 |
| 12761 | 12989 | Tsc22d3       | 1190002H23Rik | 1  |
| 12761 | 14486 | Tsc22d3       | Sox7          | -1 |
| 12761 | 16494 | Tsc22d3       | 2310007D09Rik | 1  |
| 12761 | 18427 | Tsc22d3       | Serpinb1a     | -1 |

|       |       |               |               |    |
|-------|-------|---------------|---------------|----|
| 12761 | 18553 | Tsc22d3       | Tekt4         | 1  |
| 12761 | 19004 | Tsc22d3       | Pdk4          | 1  |
| 12761 | 21259 | Tsc22d3       | 5430416O09Rik | -1 |
| 12761 | 21313 | Tsc22d3       | Rhou          | 1  |
| 12761 | 21380 | Tsc22d3       | Ier5          | -1 |
| 12761 | 21574 | Tsc22d3       | Acot11        | 1  |
| 12761 | 21643 | Tsc22d3       | Agtr1a        | 1  |
| 12761 | 22989 | Tsc22d3       | Lmcd1         | -1 |
| 12770 | 15870 | Nola2         | Aqp5          | 1  |
| 12775 | 2449  | Vstm2b        | Mybpc2        | -1 |
| 12775 | 2599  | Vstm2b        | Lsm14a        | -1 |
| 12775 | 4729  | Vstm2b        | Slc7a10       | 1  |
| 12775 | 7761  | Vstm2b        | Nudt19        | -1 |
| 12775 | 7803  | Vstm2b        | Ttyh1         | -1 |
| 12775 | 8394  | Vstm2b        | Dpy19I3       | -1 |
| 12775 | 9122  | Vstm2b        | Sepw1         | -1 |
| 12775 | 9413  | Vstm2b        | 1190020J12Rik | 1  |
| 12775 | 9454  | Vstm2b        | 2810426N06Rik | -1 |
| 12775 | 9655  | Vstm2b        | Sult2b1       | 1  |
| 12775 | 11800 | Vstm2b        | Clip3         | 1  |
| 12775 | 11982 | Vstm2b        | MMT00035514   | 1  |
| 12775 | 14842 | Vstm2b        | Gipr          | -1 |
| 12775 | 17632 | Vstm2b        | Lypd3         | 1  |
| 12775 | 18365 | Vstm2b        | Bcl2l12       | 1  |
| 12775 | 19142 | Vstm2b        | Gpatch1       | -1 |
| 12775 | 19306 | Vstm2b        | AI428936      | -1 |
| 12775 | 19462 | Vstm2b        | 4933439C20Rik | 1  |
| 12775 | 20490 | Vstm2b        | Tmem143       | 1  |
| 12775 | 20606 | Vstm2b        | MMT00042166   | 1  |
| 12778 | 15870 | 1700024P16Rik | Aqp5          | 1  |
| 12778 | 17981 | 1700024P16Rik | MMT00036029   | 1  |
| 12778 | 22982 | 1700024P16Rik | Mug2          | 1  |
| 12784 | 2012  | Nudt6         | Cetn4         | -1 |
| 12784 | 2752  | Nudt6         | Fcgr1         | 1  |
| 12784 | 3159  | Nudt6         | Pld1          | 1  |
| 12784 | 3206  | Nudt6         | Gpr160        | 1  |
| 12784 | 3314  | Nudt6         | Wars2         | 1  |
| 12784 | 4666  | Nudt6         | Exosc9        | -1 |
| 12784 | 5762  | Nudt6         | Trpc3         | -1 |
| 12784 | 9519  | Nudt6         | Fstl5         | -1 |
| 12784 | 12367 | Nudt6         | MMT00072365   | -1 |
| 12784 | 12784 | Nudt6         | Nudt6         | 1  |
| 12784 | 12853 | Nudt6         | Phc3          | -1 |
| 12784 | 16416 | Nudt6         | Comm2         | 1  |
| 12784 | 16618 | Nudt6         | Hps3          | -1 |
| 12784 | 19700 | Nudt6         | E030011K20Rik | 1  |
| 12794 | 18338 | MMT00082139   | Akr1e1        | -1 |
| 12797 | 12797 | Brdt          | Brdt          | 1  |
| 12799 | 5342  | Spon2         | Eps8l3        | 1  |
| 12799 | 6038  | Spon2         | Acot1         | 1  |
| 12799 | 15870 | Spon2         | Aqp5          | 1  |
| 12799 | 21643 | Spon2         | Agtr1a        | -1 |
| 12833 | 5342  | Drp2          | Eps8l3        | 1  |
| 12833 | 15870 | Drp2          | Aqp5          | 1  |
| 12833 | 17981 | Drp2          | MMT00036029   | 1  |
| 12833 | 22982 | Drp2          | Mug2          | 1  |
| 12834 | 12834 | Fabp7         | Fabp7         | 1  |
| 12854 | 1604  | Ndufa13       | Ssbp4         | 1  |
| 12854 | 1755  | Ndufa13       | Ocel1         | 1  |

|       |       |               |               |    |
|-------|-------|---------------|---------------|----|
| 12854 | 5433  | Ndufa13       | 2410004L22Rik | -1 |
| 12854 | 5925  | Ndufa13       | Tmem59l       | -1 |
| 12854 | 9729  | Ndufa13       | Got1l1        | -1 |
| 12854 | 13732 | Ndufa13       | Tpm4          | -1 |
| 12854 | 16617 | Ndufa13       | Sh2d4a        | -1 |
| 12854 | 17703 | Ndufa13       | Large         | -1 |
| 12854 | 21840 | Ndufa13       | Tmie          | 1  |
| 12856 | 4850  | Clstn3        | Fancd2        | 1  |
| 12856 | 8141  | Clstn3        | Scnn1a        | -1 |
| 12856 | 9010  | Clstn3        | 8430419L09Rik | -1 |
| 12856 | 9417  | Clstn3        | Cd163         | 1  |
| 12856 | 9622  | Clstn3        | Rasgef1a      | -1 |
| 12856 | 15719 | Clstn3        | BC060267      | -1 |
| 12856 | 17363 | Clstn3        | Aebp2         | 1  |
| 12856 | 17743 | Clstn3        | Phb2          | 1  |
| 12856 | 19964 | Clstn3        | Ndufa9        | 1  |
| 12856 | 19999 | Clstn3        | lft122        | -1 |
| 12856 | 22395 | Clstn3        | Kcna1         | -1 |
| 12862 | 15870 | Trem2         | Aqp5          | 1  |
| 12863 | 1466  | Fgg           | Ubp2l         | -1 |
| 12863 | 2752  | Fgg           | Fcgr1         | -1 |
| 12863 | 5687  | Fgg           | Klf11         | 1  |
| 12863 | 6708  | Fgg           | Serpini2      | 1  |
| 12863 | 9519  | Fgg           | Fstl5         | 1  |
| 12863 | 12367 | Fgg           | MMT00072365   | 1  |
| 12863 | 15901 | Fgg           | Tpm3          | 1  |
| 12863 | 16416 | Fgg           | Comm2         | -1 |
| 12866 | 1325  | 4921517L17Rik | Pigu          | 1  |
| 12866 | 6059  | 4921517L17Rik | Dsn1          | -1 |
| 12866 | 11166 | 4921517L17Rik | Uqcc          | -1 |
| 12866 | 12866 | 4921517L17Rik | 4921517L17Rik | 1  |
| 12866 | 14734 | 4921517L17Rik | Nrsn2         | -1 |
| 12866 | 20055 | 4921517L17Rik | Ghrh          | 1  |
| 12866 | 20837 | 4921517L17Rik | Dlgap4        | 1  |
| 12866 | 23005 | 4921517L17Rik | 4930405A21Rik | -1 |
| 12885 | 1660  | Ccl24         | Zfp33b        | -1 |
| 12885 | 6330  | Ccl24         | Dgkq          | 1  |
| 12885 | 7378  | Ccl24         | 1700001J03Rik | 1  |
| 12885 | 8182  | Ccl24         | Tbx1          | 1  |
| 12885 | 17616 | Ccl24         | Flt1          | 1  |
| 12892 | 2472  | 1700019L03Rik | MMT00014056   | 1  |
| 12892 | 9547  | 1700019L03Rik | MMT00006479   | 1  |
| 12892 | 16881 | 1700019L03Rik | MMT00031504   | 1  |
| 12892 | 17295 | 1700019L03Rik | MMT00082577   | 1  |
| 12892 | 19803 | 1700019L03Rik | BC003993      | 1  |
| 12892 | 22320 | 1700019L03Rik | MMT00047284   | 1  |
| 12892 | 23474 | 1700019L03Rik | MMT00011721   | 1  |
| 12904 | 2880  | MMT00040704   | Cd93          | -1 |
| 12904 | 6038  | MMT00040704   | Acot1         | -1 |
| 12904 | 18036 | MMT00040704   | Tmem100       | -1 |
| 12904 | 18179 | MMT00040704   | Dbp           | 1  |
| 12905 | 18036 | Nfil3         | Tmem100       | 1  |
| 12936 | 1297  | Pdim1         | Phox2a        | 1  |
| 12943 | 12943 | Slc25a27      | Slc25a27      | 1  |
| 12943 | 17322 | Slc25a27      | Zfp758        | -1 |
| 12948 | 2743  | MMT00009927   | Tcf3          | -1 |
| 12948 | 3703  | MMT00009927   | Gcx           | -1 |
| 12948 | 15384 | MMT00009927   | Mat2a         | -1 |
| 12948 | 18948 | MMT00009927   | Olf1270       | 1  |



|       |       |               |               |    |
|-------|-------|---------------|---------------|----|
| 12948 | 20507 | MMT00009927   | Sh2d6         | -1 |
| 12969 | 2224  | Xaf1          | Oasl2         | 1  |
| 12969 | 3683  | Xaf1          | Oas2          | 1  |
| 12969 | 4426  | Xaf1          | ligp2         | 1  |
| 12969 | 6824  | Xaf1          | lrf7          | 1  |
| 12969 | 12398 | Xaf1          | lfi44         | 1  |
| 12969 | 13309 | Xaf1          | Tgtp          | 1  |
| 12969 | 14258 | Xaf1          | lfi47         | 1  |
| 12969 | 21549 | Xaf1          | Rtp4          | 1  |
| 12969 | 23450 | Xaf1          | D12Ert647e    | 1  |
| 12974 | 12834 | Slc1a6        | Fabp7         | -1 |
| 12981 | 1297  | Nek6          | Phox2a        | 1  |
| 12984 | 5681  | Cyb5          | Mbd1          | 1  |
| 12984 | 12109 | Cyb5          | Smad4         | -1 |
| 12984 | 12984 | Cyb5          | Cyb5          | 1  |
| 12984 | 18592 | Cyb5          | Txnl4a        | 1  |
| 12984 | 20942 | Cyb5          | MMT00006980   | -1 |
| 12984 | 22930 | Cyb5          | Mro           | -1 |
| 12999 | 5342  | Igf1bp6       | Eps8l3        | 1  |
| 13004 | 18090 | Arhgef10      | D10Bwg1379e   | -1 |
| 13009 | 11759 | MMT00017557   | 3110079O15Rik | -1 |
| 13009 | 13268 | MMT00017557   | 1600015I10Rik | -1 |
| 13018 | 18373 | AW544981      | Dnajb1        | -1 |
| 13018 | 21903 | AW544981      | Nr1d1         | 1  |
| 13023 | 15870 | Adamts1       | Aqp5          | 1  |
| 13027 | 1371  | Ppp2r5c       | 1200009I06Rik | -1 |
| 13027 | 3812  | Ppp2r5c       | Zfyve26       | 1  |
| 13027 | 6357  | Ppp2r5c       | Ankrd9        | 1  |
| 13027 | 7388  | Ppp2r5c       | Amn           | 1  |
| 13027 | 8155  | Ppp2r5c       | Mark3         | -1 |
| 13027 | 10526 | Ppp2r5c       | MMT00036239   | 1  |
| 13027 | 12517 | Ppp2r5c       | 4930573I19Rik | -1 |
| 13027 | 15984 | Ppp2r5c       | MMT00075074   | -1 |
| 13027 | 21149 | Ppp2r5c       | A230065H16Rik | 1  |
| 13027 | 23462 | Ppp2r5c       | Bag5          | -1 |
| 13037 | 1297  | Serpnb3b      | Phox2a        | -1 |
| 13044 | 8443  | 5730596K20Rik | Pola2         | 1  |
| 13045 | 13045 | A330021E22Rik | A330021E22Rik | 1  |
| 13072 | 8155  | BC022687      | Mark3         | 1  |
| 13072 | 21149 | BC022687      | A230065H16Rik | -1 |
| 13113 | 1101  | Man2a2        | Sec11a        | -1 |
| 13129 | 5342  | Bmp8a         | Eps8l3        | 1  |
| 13129 | 11630 | Bmp8a         | Mug-ps1       | 1  |
| 13129 | 15870 | Bmp8a         | Aqp5          | 1  |
| 13129 | 17981 | Bmp8a         | MMT00036029   | 1  |
| 13129 | 22982 | Bmp8a         | Mug2          | 1  |
| 13139 | 13139 | Mid1          | Mid1          | 1  |
| 13142 | 11382 | Wdr81         | Cdca3         | 1  |
| 13149 | 9449  | lfi203        | Sft2d2        | -1 |
| 13149 | 11406 | lfi203        | lfi203        | 1  |
| 13149 | 11445 | lfi203        | Atp1a2        | -1 |
| 13149 | 11571 | lfi203        | Bpnt1         | 1  |
| 13149 | 13149 | lfi203        | lfi203        | 1  |
| 13149 | 19332 | lfi203        | Bpnt1         | 1  |
| 13156 | 6824  | lfit3         | lrf7          | 1  |
| 13156 | 12398 | lfit3         | lfi44         | 1  |
| 13156 | 13156 | lfit3         | lfit3         | 1  |
| 13164 | 4899  | Il4ra         | Nr4a2         | 1  |
| 13164 | 5342  | Il4ra         | Eps8l3        | 1  |

|       |       |               |               |    |
|-------|-------|---------------|---------------|----|
| 13164 | 15870 | Il4ra         | Aqp5          | 1  |
| 13164 | 16823 | Il4ra         | Inhbb         | 1  |
| 13164 | 17981 | Il4ra         | MMT00036029   | 1  |
| 13164 | 22982 | Il4ra         | Mug2          | 1  |
| 13181 | 5345  | Lcp2          | MMT00023326   | -1 |
| 13195 | 13181 | Mtif2         | Lcp2          | 1  |
| 13195 | 13195 | Mtif2         | Mtif2         | 1  |
| 13195 | 21444 | Mtif2         | Pnpt1         | 1  |
| 13211 | 5342  | Sbno2         | Eps8l3        | 1  |
| 13211 | 15870 | Sbno2         | Aqp5          | 1  |
| 13218 | 13218 | C330043M08Rik | C330043M08Rik | 1  |
| 13221 | 13221 | Srd5a3        | Srd5a3        | 1  |
| 13224 | 2012  | Cp            | Cetn4         | -1 |
| 13224 | 3159  | Cp            | Pld1          | 1  |
| 13224 | 3206  | Cp            | Gpr160        | 1  |
| 13224 | 4666  | Cp            | Exosc9        | -1 |
| 13224 | 5762  | Cp            | Trpc3         | -1 |
| 13224 | 9360  | Cp            | Taf1c         | -1 |
| 13224 | 9519  | Cp            | Fstl5         | -1 |
| 13224 | 12367 | Cp            | MMT00072365   | -1 |
| 13224 | 15508 | Cp            | 4632415L05Rik | 1  |
| 13224 | 16416 | Cp            | Commd2        | 1  |
| 13224 | 16618 | Cp            | Hps3          | -1 |
| 13224 | 19700 | Cp            | E030011K20Rik | 1  |
| 13238 | 12834 | Nr1h3         | Fabp7         | -1 |
| 13246 | 13946 | Klc4          | Slc35b2       | 1  |
| 13246 | 18772 | Klc4          | BC048355      | 1  |
| 13277 | 12571 | 9530015I07Rik | Cdkn2d        | -1 |
| 13285 | 9829  | Cd276         | Stoml1        | 1  |
| 13285 | 13285 | Cd276         | Cd276         | 1  |
| 13289 | 2294  | Dusp10        | AU040829      | -1 |
| 13289 | 2794  | Dusp10        | Map3k6        | -1 |
| 13289 | 5345  | Dusp10        | MMT00023326   | -1 |
| 13289 | 6038  | Dusp10        | Acot1         | 1  |
| 13289 | 8980  | Dusp10        | Plekhf1       | -1 |
| 13289 | 12761 | Dusp10        | Tsc22d3       | -1 |
| 13289 | 16494 | Dusp10        | 2310007D09Rik | -1 |
| 13304 | 17135 | Gadd45b       | Mum1          | -1 |
| 13306 | 2294  | Cables2       | AU040829      | -1 |
| 13309 | 143   | Tgtp          | Gvin1         | 1  |
| 13309 | 6824  | Tgtp          | Irf7          | 1  |
| 13309 | 12398 | Tgtp          | Ifi44         | 1  |
| 13309 | 13309 | Tgtp          | Tgtp          | 1  |
| 13311 | 4199  | Prl3c1        | B3galt5       | 1  |
| 13311 | 7436  | Prl3c1        | 1700063K16Rik | 1  |
| 13311 | 8709  | Prl3c1        | Trim58        | 1  |
| 13311 | 9946  | Prl3c1        | Stam2         | 1  |
| 13311 | 12248 | Prl3c1        | Tnp2          | 1  |
| 13329 | 8750  | Osbp2         | 1700010I14Rik | -1 |
| 13347 | 2752  | Abi3          | Fcgr1         | -1 |
| 13347 | 3159  | Abi3          | Pld1          | -1 |
| 13347 | 3206  | Abi3          | Gpr160        | -1 |
| 13347 | 4666  | Abi3          | Exosc9        | 1  |
| 13347 | 9360  | Abi3          | Taf1c         | 1  |
| 13347 | 12367 | Abi3          | MMT00072365   | 1  |
| 13347 | 16416 | Abi3          | Commd2        | -1 |
| 13347 | 16618 | Abi3          | Hps3          | 1  |
| 13347 | 19700 | Abi3          | E030011K20Rik | -1 |
| 13355 | 1325  | Foxs1         | Pigu          | -1 |

|       |       |               |               |    |
|-------|-------|---------------|---------------|----|
| 13355 | 3214  | Foxs1         | Dnmt3b        | -1 |
| 13355 | 5258  | Foxs1         | Mcts2         | -1 |
| 13355 | 5539  | Foxs1         | Eif2s2        | -1 |
| 13355 | 5603  | Foxs1         | BC020535      | 1  |
| 13355 | 5737  | Foxs1         | Nkx2-2        | -1 |
| 13355 | 6059  | Foxs1         | Dsn1          | 1  |
| 13355 | 6188  | Foxs1         | Myh7b         | -1 |
| 13355 | 6250  | Foxs1         | Csnk2a1       | -1 |
| 13355 | 11166 | Foxs1         | Uqcc          | 1  |
| 13355 | 11705 | Foxs1         | Polr3f        | -1 |
| 13355 | 12866 | Foxs1         | 4921517L17Rik | -1 |
| 13355 | 13355 | Foxs1         | Foxs1         | 1  |
| 13355 | 14399 | Foxs1         | Csnk2a1       | -1 |
| 13355 | 14649 | Foxs1         | 5430405G05Rik | -1 |
| 13355 | 14734 | Foxs1         | Nrsn2         | 1  |
| 13355 | 20505 | Foxs1         | Ttl9          | 1  |
| 13355 | 20837 | Foxs1         | Dlgap4        | -1 |
| 13355 | 23005 | Foxs1         | 4930405A21Rik | 1  |
| 13356 | 8721  | Aldh3b2       | Tbc1d10c      | -1 |
| 13356 | 8902  | Aldh3b2       | Aldh3b1       | -1 |
| 13356 | 17447 | Aldh3b2       | Ctsf          | -1 |
| 13356 | 19744 | Aldh3b2       | Acy3          | 1  |
| 13357 | 8648  | Rpp14         | Flnb          | 1  |
| 13357 | 13357 | Rpp14         | Rpp14         | 1  |
| 13371 | 5345  | Peli2         | MMT00023326   | 1  |
| 13390 | 1006  | Ddx31         | 2600011E07Rik | 1  |
| 13390 | 4443  | Ddx31         | Zfp790        | 1  |
| 13390 | 11043 | Ddx31         | Hsph1         | 1  |
| 13390 | 15476 | Ddx31         | Fem1b         | -1 |
| 13390 | 15870 | Ddx31         | Aqp5          | 1  |
| 13390 | 18373 | Ddx31         | Dnajb1        | 1  |
| 13417 | 246   | 1700025G04Rik | MMT00053742   | 1  |
| 13417 | 1625  | 1700025G04Rik | AW146154      | -1 |
| 13417 | 8933  | 1700025G04Rik | Arpc5         | 1  |
| 13417 | 9402  | 1700025G04Rik | 1200016B10Rik | -1 |
| 13417 | 11233 | 1700025G04Rik | Tef           | 1  |
| 13417 | 13417 | 1700025G04Rik | 1700025G04Rik | 1  |
| 13417 | 15569 | 1700025G04Rik | BC003331      | 1  |
| 13417 | 17463 | 1700025G04Rik | Rgl1          | 1  |
| 13449 | 18373 | Tmem103       | Dnajb1        | -1 |
| 13455 | 6133  | Cenpe         | Agrp          | -1 |
| 13475 | 5594  | Morn2         | Erbp3         | 1  |
| 13475 | 9352  | Morn2         | Hnrpll        | -1 |
| 13475 | 10057 | Morn2         | Sult6b1       | -1 |
| 13475 | 13475 | Morn2         | Morn2         | 1  |
| 13489 | 2794  | D230025D16Rik | Map3k6        | 1  |
| 13489 | 5345  | D230025D16Rik | MMT00023326   | 1  |
| 13489 | 12761 | D230025D16Rik | Tsc22d3       | 1  |
| 13489 | 16494 | D230025D16Rik | 2310007D09Rik | 1  |
| 13493 | 2938  | Ring1         | H2-T23        | -1 |
| 13493 | 7088  | Ring1         | Slc37a1       | -1 |
| 13493 | 8750  | Ring1         | 1700010I14Rik | -1 |
| 13493 | 8767  | Ring1         | Rgl2          | -1 |
| 13493 | 10374 | Ring1         | Trim15        | -1 |
| 13493 | 10667 | Ring1         | H2-Eb1        | -1 |
| 13493 | 10931 | Ring1         | Pkn3          | 1  |
| 13493 | 13493 | Ring1         | Ring1         | -1 |
| 13493 | 15580 | Ring1         | MMT00077001   | -1 |
| 13493 | 16692 | Ring1         | Bat4          | -1 |

|       |       |               |               |    |
|-------|-------|---------------|---------------|----|
| 13493 | 17412 | Ring1         | Aif1          | 1  |
| 13493 | 18577 | Ring1         | Btbd9         | 1  |
| 13493 | 20238 | Ring1         | H2-T9         | -1 |
| 13493 | 21295 | Ring1         | Snf1lk        | 1  |
| 13499 | 14860 | St7l          | MMT00051231   | -1 |
| 13504 | 7803  | Lair1         | Ttyh1         | 1  |
| 13504 | 19462 | Lair1         | 4933439C20Rik | -1 |
| 13507 | 1886  | Spats1        | Tcte1         | -1 |
| 13507 | 9191  | Spats1        | Lbxcor1       | -1 |
| 13507 | 9230  | Spats1        | 1700027N10Rik | -1 |
| 13507 | 13946 | Spats1        | Slc35b2       | 1  |
| 13507 | 14027 | Spats1        | Rpo1-1        | -1 |
| 13507 | 15318 | Spats1        | Aars2         | 1  |
| 13507 | 18772 | Spats1        | BC048355      | 1  |
| 13507 | 19519 | Spats1        | BC011248      | 1  |
| 13511 | 3159  | Aytl1b        | Plid1         | 1  |
| 13511 | 12367 | Aytl1b        | MMT00072365   | -1 |
| 13511 | 16618 | Aytl1b        | Hps3          | -1 |
| 13511 | 19700 | Aytl1b        | E030011K20Rik | 1  |
| 13513 | 6824  | Trim25        | Irf7          | 1  |
| 13513 | 12398 | Trim25        | Ifi44         | 1  |
| 13513 | 13309 | Trim25        | Tgtp          | 1  |
| 13513 | 13513 | Trim25        | Trim25        | 1  |
| 13514 | 6824  | Apol9b        | Irf7          | 1  |
| 13514 | 12398 | Apol9b        | Ifi44         | 1  |
| 13516 | 5342  | Fibcd1        | Eps8l3        | 1  |
| 13516 | 15870 | Fibcd1        | Aqp5          | 1  |
| 13521 | 18418 | Ears2         | Hspa1b        | 1  |
| 13528 | 12004 | Capn12        | Lgals6        | -1 |
| 13528 | 16931 | Capn12        | Actn4         | 1  |
| 13551 | 14626 | Zfp623        | Zbtb2         | 1  |
| 13551 | 17884 | Zfp623        | Lnx2          | 1  |
| 13554 | 1510  | Aqr           | A530058N18Rik | -1 |
| 13554 | 13554 | Aqr           | Aqr           | 1  |
| 13554 | 14734 | Aqr           | Nrsn2         | 1  |
| 13554 | 14740 | Aqr           | Mfap1b        | -1 |
| 13554 | 18368 | Aqr           | Mpped2        | -1 |
| 13569 | 13569 | 1190003M12Rik | 1190003M12Rik | 1  |
| 13581 | 4626  | Srxn1         | 2310046K01Rik | 1  |
| 13581 | 9361  | Srxn1         | Hand1         | 1  |
| 13581 | 13581 | Srxn1         | Srxn1         | 1  |
| 13581 | 18555 | Srxn1         | Sdcbp2        | -1 |
| 13588 | 6133  | MMT00042387   | Agrp          | -1 |
| 13615 | 9790  | Arl16         | Tspan10       | -1 |
| 13615 | 13615 | Arl16         | Arl16         | 1  |
| 13615 | 13923 | Arl16         | Nploc4        | -1 |
| 13615 | 16613 | Arl16         | 1110031102Rik | -1 |
| 13615 | 17193 | Arl16         | Npb           | -1 |
| 13615 | 21414 | Arl16         | BC017643      | -1 |
| 13617 | 4566  | Acin1         | MMT00078134   | -1 |
| 13617 | 7802  | Acin1         | Adcy4         | 1  |
| 13648 | 1297  | Dap           | Phox2a        | 1  |
| 13648 | 13648 | Dap           | Dap           | 1  |
| 13654 | 13309 | Stat1         | Tgtp          | 1  |
| 13677 | 21693 | Tinagl        | BC029169      | 1  |
| 13682 | 2938  | BC051142      | H2-T23        | 1  |
| 13682 | 7088  | BC051142      | Slc37a1       | 1  |
| 13682 | 8767  | BC051142      | Rgl2          | 1  |
| 13682 | 10667 | BC051142      | H2-Eb1        | 1  |

|       |       |               |               |    |
|-------|-------|---------------|---------------|----|
| 13682 | 12694 | BC051142      | Riok2         | -1 |
| 13682 | 16692 | BC051142      | Bat4          | 1  |
| 13682 | 17322 | BC051142      | Zfp758        | -1 |
| 13682 | 20238 | BC051142      | H2-T9         | 1  |
| 13688 | 1041  | Ppa1          | 3110049J23Rik | -1 |
| 13688 | 22333 | Ppa1          | Hnrnp3        | 1  |
| 13732 | 283   | Tpm4          | Gmcl1l        | 1  |
| 13732 | 403   | Tpm4          | Leprotl1      | 1  |
| 13732 | 1604  | Tpm4          | Ssbp4         | -1 |
| 13732 | 1755  | Tpm4          | Ocel1         | -1 |
| 13732 | 2294  | Tpm4          | AU040829      | 1  |
| 13732 | 2749  | Tpm4          | Naf1          | 1  |
| 13732 | 3052  | Tpm4          | 9130404D08Rik | 1  |
| 13732 | 3609  | Tpm4          | Plvap         | -1 |
| 13732 | 5433  | Tpm4          | 2410004L22Rik | 1  |
| 13732 | 5925  | Tpm4          | Tmem59l       | 1  |
| 13732 | 9304  | Tpm4          | AI449175      | -1 |
| 13732 | 9569  | Tpm4          | Dda1          | 1  |
| 13732 | 9729  | Tpm4          | Got1l1        | 1  |
| 13732 | 10758 | Tpm4          | Gdf1          | 1  |
| 13732 | 12966 | Tpm4          | Slc39a1       | -1 |
| 13732 | 13732 | Tpm4          | Tpm4          | 1  |
| 13732 | 14951 | Tpm4          | Dpep3         | 1  |
| 13732 | 15296 | Tpm4          | Mier3         | -1 |
| 13732 | 16617 | Tpm4          | Sh2d4a        | 1  |
| 13732 | 16702 | Tpm4          | 2810422J05Rik | 1  |
| 13732 | 16849 | Tpm4          | Trmt1         | 1  |
| 13732 | 16858 | Tpm4          | Tmem38a       | 1  |
| 13732 | 17703 | Tpm4          | Large         | 1  |
| 13732 | 21433 | Tpm4          | Ubx6          | -1 |
| 13732 | 21681 | Tpm4          | 9130011J15Rik | 1  |
| 13732 | 21840 | Tpm4          | Tmie          | -1 |
| 13732 | 22408 | Tpm4          | Calr3         | -1 |
| 13732 | 23445 | Tpm4          | Crlf1         | -1 |
| 13741 | 3620  | Hspa4l        | Bet1          | 1  |
| 13768 | 20100 | Mrps10        | Guca1b        | -1 |
| 13780 | 8992  | Pilra         | Trfr2         | -1 |
| 13780 | 9077  | Pilra         | Cnpy4         | 1  |
| 13780 | 12157 | Pilra         | Gal3st4       | 1  |
| 13780 | 12907 | Pilra         | Zkscan1       | -1 |
| 13780 | 13780 | Pilra         | Pilra         | -1 |
| 13780 | 19502 | Pilra         | Fbxo24        | -1 |
| 13789 | 10667 | H2-Q8         | H2-Eb1        | 1  |
| 13801 | 15276 | Adh4          | Eif4e         | 1  |
| 13801 | 20810 | Adh4          | Mttp          | 1  |
| 13810 | 2456  | 1110036O03Rik | Mrpl10        | -1 |
| 13810 | 4272  | 1110036O03Rik | Hsd17b6       | 1  |
| 13810 | 12302 | 1110036O03Rik | Cbx1          | -1 |
| 13810 | 13810 | 1110036O03Rik | 1110036O03Rik | 1  |
| 13810 | 14384 | 1110036O03Rik | Dnajc7        | 1  |
| 13810 | 18448 | 1110036O03Rik | Klhl11        | -1 |
| 13810 | 22868 | 1110036O03Rik | Krt15         | -1 |
| 13813 | 13813 | Ktelc1        | Ktelc1        | 1  |
| 13813 | 14043 | Ktelc1        | 4930455C21Rik | -1 |
| 13813 | 19433 | Ktelc1        | Mex3b         | 1  |
| 13823 | 13813 | Olf1043       | Ktelc1        | -1 |
| 13823 | 14043 | Olf1043       | 4930455C21Rik | 1  |
| 13826 | 16949 | Melk          | ligp1         | 1  |
| 13839 | 12208 | Gypc          | Pnpla7        | -1 |

|       |       |               |               |    |
|-------|-------|---------------|---------------|----|
| 13842 | 6037  | Aurkaip1      | Ccnl2         | -1 |
| 13870 | 5342  | 4921521F21Rik | Eps8l3        | 1  |
| 13870 | 15870 | 4921521F21Rik | Aqp5          | 1  |
| 13884 | 18373 | Aven          | Dnajb1        | 1  |
| 13885 | 2558  | Clec7a        | Tmem132b      | -1 |
| 13885 | 8399  | Clec7a        | Herpud1       | -1 |
| 13885 | 15870 | Clec7a        | Aqp5          | -1 |
| 13885 | 17981 | Clec7a        | MMT00036029   | -1 |
| 13885 | 22982 | Clec7a        | Mug2          | -1 |
| 13890 | 3511  | Olfr1263      | Rnf182        | 1  |
| 13890 | 12372 | Olfr1263      | MMT00039397   | 1  |
| 13919 | 5342  | Synpo         | Eps8l3        | 1  |
| 13919 | 15870 | Synpo         | Aqp5          | 1  |
| 13919 | 17981 | Synpo         | MMT00036029   | 1  |
| 13929 | 3164  | Lamb3         | Hsd11b1       | 1  |
| 13929 | 6484  | Lamb3         | A130010J15Rik | -1 |
| 13929 | 11571 | Lamb3         | Bpnt1         | 1  |
| 13929 | 11741 | Lamb3         | Slc30a10      | -1 |
| 13929 | 19332 | Lamb3         | Bpnt1         | 1  |
| 13946 | 1886  | Slc35b2       | Tcte1         | -1 |
| 13946 | 9230  | Slc35b2       | 1700027N10Rik | -1 |
| 13946 | 13946 | Slc35b2       | Slc35b2       | 1  |
| 13946 | 14027 | Slc35b2       | Rpo1-1        | -1 |
| 13946 | 15318 | Slc35b2       | Aars2         | 1  |
| 13946 | 18772 | Slc35b2       | BC048355      | 1  |
| 13946 | 19519 | Slc35b2       | BC011248      | 1  |
| 13947 | 1297  | Crip2         | Phox2a        | 1  |
| 13947 | 15255 | Crip2         | Ccl8          | 1  |
| 13988 | 2485  | Cntnap2       | Adck1         | 1  |
| 13988 | 8724  | Cntnap2       | Tgfb3         | 1  |
| 13988 | 13389 | Cntnap2       | Six6os1       | -1 |
| 13988 | 22297 | Cntnap2       | Zfyve1        | -1 |
| 14014 | 14222 | MMT00008376   | MMT00076410   | -1 |
| 14014 | 15713 | MMT00008376   | Rbm3          | -1 |
| 14014 | 18418 | MMT00008376   | Hspa1b        | 1  |
| 14014 | 18785 | MMT00008376   | Angptl4       | 1  |
| 14014 | 21333 | MMT00008376   | Cirbp         | -1 |
| 14014 | 22600 | MMT00008376   | 2410018C20Rik | -1 |
| 14027 | 9191  | Rpo1-1        | Lbxcor1       | 1  |
| 14027 | 9230  | Rpo1-1        | 1700027N10Rik | 1  |
| 14027 | 13946 | Rpo1-1        | Slc35b2       | -1 |
| 14027 | 14027 | Rpo1-1        | Rpo1-1        | 1  |
| 14027 | 15318 | Rpo1-1        | Aars2         | -1 |
| 14027 | 18772 | Rpo1-1        | BC048355      | -1 |
| 14027 | 19519 | Rpo1-1        | BC011248      | -1 |
| 14043 | 13813 | 4930455C21Rik | Ktelc1        | -1 |
| 14043 | 14043 | 4930455C21Rik | 4930455C21Rik | 1  |
| 14045 | 14045 | Rps4y2        | Rps4y2        | 1  |
| 14048 | 1281  | Ccny          | Alkbh3        | -1 |
| 14048 | 8399  | Ccny          | Herpud1       | 1  |
| 14059 | 403   | Cyp4f18       | Leprotl1      | 1  |
| 14059 | 1604  | Cyp4f18       | Ssbp4         | -1 |
| 14059 | 1755  | Cyp4f18       | Ocel1         | -1 |
| 14059 | 3052  | Cyp4f18       | 9130404D08Rik | 1  |
| 14059 | 3609  | Cyp4f18       | Plvap         | -1 |
| 14059 | 5433  | Cyp4f18       | 2410004L22Rik | 1  |
| 14059 | 5925  | Cyp4f18       | Tmem59l       | 1  |
| 14059 | 9304  | Cyp4f18       | AI449175      | -1 |
| 14059 | 9569  | Cyp4f18       | Dda1          | 1  |

|       |       |               |               |    |
|-------|-------|---------------|---------------|----|
| 14059 | 9729  | Cyp4f18       | Got11         | 1  |
| 14059 | 10758 | Cyp4f18       | Gdf1          | 1  |
| 14059 | 13732 | Cyp4f18       | Tpm4          | 1  |
| 14059 | 15296 | Cyp4f18       | Mier3         | -1 |
| 14059 | 16617 | Cyp4f18       | Sh2d4a        | 1  |
| 14059 | 16702 | Cyp4f18       | 2810422J05Rik | 1  |
| 14059 | 16858 | Cyp4f18       | Tmem38a       | 1  |
| 14059 | 17703 | Cyp4f18       | Large         | 1  |
| 14059 | 21840 | Cyp4f18       | Tmie          | -1 |
| 14059 | 22408 | Cyp4f18       | Calr3         | -1 |
| 14059 | 23445 | Cyp4f18       | Crif1         | -1 |
| 14062 | 7116  | Pan3          | Katnal1       | 1  |
| 14062 | 7378  | Pan3          | 1700001J03Rik | 1  |
| 14084 | 14084 | D530033C11Rik | D530033C11Rik | 1  |
| 14085 | 1447  | Cdkl2         | Naaa          | -1 |
| 14085 | 6330  | Cdkl2         | Dgkq          | 1  |
| 14085 | 8807  | Cdkl2         | Ankrd56       | -1 |
| 14085 | 10978 | Cdkl2         | MMT00078322   | 1  |
| 14085 | 16066 | Cdkl2         | Coq2          | 1  |
| 14100 | 5345  | Ccnk          | MMT00023326   | 1  |
| 14102 | 6234  | Evi2a         | P4ha2         | -1 |
| 14102 | 6769  | Evi2a         | Banp          | -1 |
| 14102 | 8399  | Evi2a         | Herpud1       | -1 |
| 14102 | 11345 | Evi2a         | Slc40a1       | 1  |
| 14102 | 11756 | Evi2a         | 2810011L19Rik | -1 |
| 14102 | 23094 | Evi2a         | Sap30         | -1 |
| 14129 | 20729 | 5430403G16Rik | Ttc28         | 1  |
| 14132 | 2424  | Glo1          | Unc5cl        | 1  |
| 14132 | 7088  | Glo1          | Slc37a1       | 1  |
| 14132 | 10729 | Glo1          | Fgd2          | 1  |
| 14132 | 11435 | Glo1          | Rnaset2a      | 1  |
| 14132 | 14132 | Glo1          | Glo1          | 1  |
| 14132 | 14190 | Glo1          | Ppil1         | -1 |
| 14132 | 17707 | Glo1          | Rshl2b        | 1  |
| 14132 | 18577 | Glo1          | Btbd9         | -1 |
| 14132 | 18871 | Glo1          | Al314976      | 1  |
| 14132 | 20100 | Glo1          | Guca1b        | -1 |
| 14132 | 22104 | Glo1          | Rnf123        | 1  |
| 14142 | 2708  | MMT00021961   | Sgk1          | 1  |
| 14142 | 8171  | MMT00021961   | Spink8        | 1  |
| 14142 | 12989 | MMT00021961   | 1190002H23Rik | 1  |
| 14167 | 15870 | Exo1          | Aqp5          | 1  |
| 14169 | 1041  | 1700052N19Rik | 3110049J23Rik | -1 |
| 14169 | 1135  | 1700052N19Rik | Akap12        | 1  |
| 14169 | 2571  | 1700052N19Rik | Rmnd1         | -1 |
| 14169 | 3545  | 1700052N19Rik | Mtrf1l        | 1  |
| 14169 | 3744  | 1700052N19Rik | Rmnd1         | -1 |
| 14169 | 6363  | 1700052N19Rik | 9130014G24Rik | 1  |
| 14169 | 8786  | 1700052N19Rik | Rmnd1         | -1 |
| 14169 | 19115 | 1700052N19Rik | Rab32         | -1 |
| 14169 | 20134 | 1700052N19Rik | Ppp1r14c      | 1  |
| 14169 | 20705 | 1700052N19Rik | Supv3l1       | -1 |
| 14169 | 22598 | 1700052N19Rik | 4930402H24Rik | 1  |
| 14180 | 6870  | Xlr3c         | Xlr4b         | 1  |
| 14180 | 14180 | Xlr3c         | Xlr3c         | 1  |
| 14188 | 14188 | Ttc8          | Ttc8          | 1  |
| 14190 | 7088  | Ppil1         | Slc37a1       | -1 |
| 14190 | 10729 | Ppil1         | Fgd2          | -1 |
| 14190 | 14132 | Ppil1         | Glo1          | -1 |

|       |       |               |               |    |
|-------|-------|---------------|---------------|----|
| 14190 | 14190 | Ppil1         | Ppil1         | 1  |
| 14208 | 12004 | Ech1          | Lgals6        | -1 |
| 14208 | 16931 | Ech1          | Actn4         | 1  |
| 14222 | 23495 | MMT00076410   | Cryab         | -1 |
| 14258 | 143   | Ifi47         | Gvin1         | 1  |
| 14258 | 5853  | Ifi47         | Trim30        | 1  |
| 14258 | 6824  | Ifi47         | Irf7          | 1  |
| 14258 | 8547  | Ifi47         | Gbp4          | 1  |
| 14258 | 12398 | Ifi47         | Ifi44         | 1  |
| 14258 | 13309 | Ifi47         | Tgtp          | 1  |
| 14258 | 16949 | Ifi47         | ligp1         | 1  |
| 14258 | 19189 | Ifi47         | Sp100         | 1  |
| 14263 | 2708  | Arrdc3        | Sgk1          | 1  |
| 14263 | 12761 | Arrdc3        | Tsc22d3       | 1  |
| 14263 | 14233 | Arrdc3        | Fgfr1         | -1 |
| 14263 | 14486 | Arrdc3        | Sox7          | -1 |
| 14263 | 14860 | Arrdc3        | MMT00051231   | -1 |
| 14263 | 19004 | Arrdc3        | Pdk4          | 1  |
| 14266 | 14266 | Sox13         | Sox13         | 1  |
| 14281 | 11756 | 5031414D18Rik | 2810011L19Rik | -1 |
| 14296 | 2456  | Slc35b1       | Mrpl10        | -1 |
| 14296 | 10498 | Slc35b1       | Ube2z         | 1  |
| 14296 | 23295 | Slc35b1       | Snx11         | -1 |
| 14304 | 9322  | Mrpl48        | Relt          | 1  |
| 14304 | 21425 | Mrpl48        | Rab6          | 1  |
| 14307 | 575   | Kcnj8         | Edn1          | 1  |
| 14307 | 1006  | Kcnj8         | 2600011E07Rik | -1 |
| 14307 | 1214  | Kcnj8         | Trip13        | 1  |
| 14307 | 1281  | Kcnj8         | Alkbh3        | 1  |
| 14307 | 2558  | Kcnj8         | Tmem132b      | -1 |
| 14307 | 3922  | Kcnj8         | Clec11a       | 1  |
| 14307 | 4048  | Kcnj8         | BC002230      | 1  |
| 14307 | 4084  | Kcnj8         | Asah3l        | -1 |
| 14307 | 4731  | Kcnj8         | Zmynd12       | 1  |
| 14307 | 5364  | Kcnj8         | Kif22         | 1  |
| 14307 | 6769  | Kcnj8         | Banp          | -1 |
| 14307 | 7751  | Kcnj8         | Sgk2          | 1  |
| 14307 | 8399  | Kcnj8         | Herpud1       | -1 |
| 14307 | 8939  | Kcnj8         | MMT00024195   | -1 |
| 14307 | 10397 | Kcnj8         | Gtf2e2        | -1 |
| 14307 | 10606 | Kcnj8         | Apbb1ip       | 1  |
| 14307 | 13285 | Kcnj8         | Cd276         | 1  |
| 14307 | 14577 | Kcnj8         | Cdc3711       | -1 |
| 14307 | 14626 | Kcnj8         | Zbtb2         | -1 |
| 14307 | 14860 | Kcnj8         | MMT00051231   | 1  |
| 14307 | 15177 | Kcnj8         | Bmpr2         | -1 |
| 14307 | 15476 | Kcnj8         | Fem1b         | 1  |
| 14307 | 15731 | Kcnj8         | Mfhas1        | -1 |
| 14307 | 16748 | Kcnj8         | Zfp810        | 1  |
| 14307 | 18373 | Kcnj8         | Dnajb1        | -1 |
| 14307 | 18418 | Kcnj8         | Hspa1b        | -1 |
| 14307 | 18619 | Kcnj8         | 2810406K13Rik | 1  |
| 14307 | 18726 | Kcnj8         | D630004A14Rik | -1 |
| 14307 | 18903 | Kcnj8         | Crem          | -1 |
| 14307 | 19389 | Kcnj8         | Iqcb1         | -1 |
| 14307 | 20457 | Kcnj8         | Gtf2a2        | 1  |
| 14307 | 20912 | Kcnj8         | Chordc1       | -1 |
| 14307 | 21431 | Kcnj8         | Xbp1          | -1 |
| 14307 | 21483 | Kcnj8         | Ippk          | -1 |



|       |       |             |               |    |
|-------|-------|-------------|---------------|----|
| 14307 | 21981 | Kcnj8       | Ormdl2        | -1 |
| 14307 | 22141 | Kcnj8       | Rorb          | -1 |
| 14307 | 22732 | Kcnj8       | Cyb5b         | -1 |
| 14307 | 23419 | Kcnj8       | Tipin         | 1  |
| 14333 | 1297  | Zcchc17     | Phox2a        | 1  |
| 14334 | 2599  | Fxyd3       | Lsm14a        | -1 |
| 14334 | 7761  | Fxyd3       | Nudt19        | -1 |
| 14334 | 8394  | Fxyd3       | Dpy19l3       | -1 |
| 14334 | 9122  | Fxyd3       | Sepw1         | -1 |
| 14334 | 9454  | Fxyd3       | 2810426N06Rik | -1 |
| 14334 | 17632 | Fxyd3       | Lypd3         | 1  |
| 14334 | 19142 | Fxyd3       | Gpatch1       | -1 |
| 14334 | 19306 | Fxyd3       | Al428936      | -1 |
| 14334 | 19462 | Fxyd3       | 4933439C20Rik | 1  |
| 14334 | 20606 | Fxyd3       | MMT00042166   | 1  |
| 14343 | 8331  | Hnrnpa0     | BC052688      | 1  |
| 14343 | 11403 | Hnrnpa0     | 2210016F16Rik | -1 |
| 14343 | 20847 | Hnrnpa0     | Pdik1l        | 1  |
| 14363 | 5342  | Cxcl16      | Eps8l3        | 1  |
| 14363 | 15870 | Cxcl16      | Aqp5          | 1  |
| 14369 | 3159  | MMT00057201 | Pld1          | 1  |
| 14369 | 16618 | MMT00057201 | Hps3          | -1 |
| 14369 | 19700 | MMT00057201 | E030011K20Rik | 1  |
| 14375 | 2938  | D17H6S56E-5 | H2-T23        | 1  |
| 14375 | 4555  | D17H6S56E-5 | Cchcr1        | 1  |
| 14375 | 7088  | D17H6S56E-5 | Slc37a1       | 1  |
| 14375 | 7603  | D17H6S56E-5 | Sod2          | 1  |
| 14375 | 8767  | D17H6S56E-5 | Rgl2          | 1  |
| 14375 | 10667 | D17H6S56E-5 | H2-Eb1        | 1  |
| 14375 | 10931 | D17H6S56E-5 | Pkn3          | -1 |
| 14375 | 12168 | D17H6S56E-5 | H2-Ke6        | 1  |
| 14375 | 12694 | D17H6S56E-5 | Riok2         | -1 |
| 14375 | 16692 | D17H6S56E-5 | Bat4          | 1  |
| 14375 | 17322 | D17H6S56E-5 | Zfp758        | -1 |
| 14375 | 20238 | D17H6S56E-5 | H2-T9         | 1  |
| 14379 | 5342  | Car12       | Eps8l3        | 1  |
| 14379 | 9002  | Car12       | Col24a1       | 1  |
| 14379 | 11630 | Car12       | Mug-ps1       | 1  |
| 14379 | 13464 | Car12       | Mc4r          | 1  |
| 14379 | 15870 | Car12       | Aqp5          | 1  |
| 14379 | 17981 | Car12       | MMT00036029   | 1  |
| 14379 | 22982 | Car12       | Mug2          | 1  |
| 14384 | 2456  | Dnajc7      | Mrpl10        | -1 |
| 14384 | 2470  | Dnajc7      | Grb7          | 1  |
| 14384 | 3480  | Dnajc7      | Pnpo          | 1  |
| 14384 | 4272  | Dnajc7      | Hsd17b6       | 1  |
| 14384 | 6376  | Dnajc7      | Nle1          | -1 |
| 14384 | 10498 | Dnajc7      | Ube2z         | 1  |
| 14384 | 12302 | Dnajc7      | Cbx1          | -1 |
| 14384 | 13810 | Dnajc7      | 1110036O03Rik | 1  |
| 14384 | 14384 | Dnajc7      | Dnajc7        | 1  |
| 14384 | 15826 | Dnajc7      | Arl4d         | 1  |
| 14384 | 18448 | Dnajc7      | Klh11         | -1 |
| 14384 | 21189 | Dnajc7      | Arl5c         | 1  |
| 14384 | 22868 | Dnajc7      | Krt15         | -1 |
| 14391 | 1336  | MMT00017335 | MMT00069537   | -1 |
| 14391 | 1629  | MMT00017335 | Gcsh          | 1  |
| 14391 | 2243  | MMT00017335 | Gcsh          | -1 |
| 14391 | 3865  | MMT00017335 | Acta1         | -1 |

|       |       |               |               |    |
|-------|-------|---------------|---------------|----|
| 14391 | 5433  | MMT00017335   | 2410004L22Rik | 1  |
| 14391 | 6065  | MMT00017335   | Plce1         | -1 |
| 14391 | 7910  | MMT00017335   | AK122209      | -1 |
| 14391 | 10308 | MMT00017335   | Fuk           | 1  |
| 14391 | 11057 | MMT00017335   | MMT00032844   | -1 |
| 14391 | 12440 | MMT00017335   | Sult5a1       | 1  |
| 14391 | 14391 | MMT00017335   | MMT00017335   | 1  |
| 14391 | 15953 | MMT00017335   | Acsf3         | 1  |
| 14391 | 16849 | MMT00017335   | Trmt1         | 1  |
| 14391 | 18700 | MMT00017335   | Trappc2l      | -1 |
| 14391 | 20690 | MMT00017335   | Zfp276        | 1  |
| 14391 | 22201 | MMT00017335   | Pard3         | 1  |
| 14391 | 22351 | MMT00017335   | Fanca         | 1  |
| 14398 | 7084  | Snn           | Spz1          | -1 |
| 14399 | 1325  | Csnk2a1       | Pigu          | 1  |
| 14399 | 2351  | Csnk2a1       | 1110008F13Rik | -1 |
| 14399 | 3257  | Csnk2a1       | Map1lc3a      | -1 |
| 14399 | 5603  | Csnk2a1       | BC020535      | -1 |
| 14399 | 6059  | Csnk2a1       | Dsn1          | -1 |
| 14399 | 6188  | Csnk2a1       | Myh7b         | 1  |
| 14399 | 6250  | Csnk2a1       | Csnk2a1       | 1  |
| 14399 | 11166 | Csnk2a1       | Uqcc          | -1 |
| 14399 | 11705 | Csnk2a1       | Polr3f        | 1  |
| 14399 | 12866 | Csnk2a1       | 4921517L17Rik | 1  |
| 14399 | 13355 | Csnk2a1       | Foxs1         | -1 |
| 14399 | 14399 | Csnk2a1       | Csnk2a1       | 1  |
| 14399 | 14649 | Csnk2a1       | 5430405G05Rik | 1  |
| 14399 | 14734 | Csnk2a1       | Nrsn2         | -1 |
| 14399 | 15760 | Csnk2a1       | Trib3         | 1  |
| 14399 | 18555 | Csnk2a1       | Sdcbp2        | 1  |
| 14399 | 20505 | Csnk2a1       | TtlI9         | -1 |
| 14399 | 20837 | Csnk2a1       | Dlgap4        | 1  |
| 14399 | 23005 | Csnk2a1       | 4930405A21Rik | -1 |
| 14455 | 283   | 2700029M09Rik | Gmcl1l        | 1  |
| 14455 | 403   | 2700029M09Rik | Leprotl1      | 1  |
| 14455 | 1755  | 2700029M09Rik | Ocel1         | -1 |
| 14455 | 5925  | 2700029M09Rik | Tmem59l       | 1  |
| 14466 | 737   | MMT00057557   | MMT00023716   | -1 |
| 14466 | 3029  | MMT00057557   | Ybx1          | -1 |
| 14466 | 9276  | MMT00057557   | MMT00008480   | 1  |
| 14475 | 7088  | Abcg1         | Slc37a1       | 1  |
| 14498 | 661   | Layn          | Siglec1       | 1  |
| 14498 | 7875  | Layn          | Crat          | -1 |
| 14498 | 14498 | Layn          | Layn          | 1  |
| 14511 | 1755  | Sostdc1       | Ocel1         | -1 |
| 14519 | 10260 | Trex1         | Zfp36l2       | 1  |
| 14519 | 11507 | Trex1         | Adarb2        | 1  |
| 14526 | 2472  | Pacsin3       | MMT00014056   | 1  |
| 14526 | 8987  | Pacsin3       | F2            | 1  |
| 14526 | 9547  | Pacsin3       | MMT00006479   | 1  |
| 14526 | 16881 | Pacsin3       | MMT00031504   | 1  |
| 14526 | 17295 | Pacsin3       | MMT00082577   | 1  |
| 14526 | 19763 | Pacsin3       | Acp2          | 1  |
| 14526 | 22320 | Pacsin3       | MMT00047284   | 1  |
| 14557 | 1375  | Pyroxd1       | Strap         | -1 |
| 14557 | 2021  | Pyroxd1       | Atf7ip        | 1  |
| 14557 | 11130 | Pyroxd1       | Slco1c1       | 1  |
| 14557 | 14307 | Pyroxd1       | Kcnj8         | 1  |
| 14557 | 14557 | Pyroxd1       | Pyroxd1       | 1  |

|       |       |               |               |    |
|-------|-------|---------------|---------------|----|
| 14557 | 19964 | Pyroxd1       | Ndufa9        | 1  |
| 14557 | 21937 | Pyroxd1       | MMT00015325   | -1 |
| 14557 | 22907 | Pyroxd1       | MMT00054594   | -1 |
| 14557 | 22978 | Pyroxd1       | MMT00043176   | -1 |
| 14559 | 1014  | Frrs1         | Rtcd1         | 1  |
| 14559 | 2752  | Frrs1         | Fcgr1         | 1  |
| 14559 | 12824 | Frrs1         | Dbt           | -1 |
| 14559 | 14559 | Frrs1         | Frrs1         | 1  |
| 14570 | 640   | Erdr1         | MMT00065211   | 1  |
| 14570 | 5284  | Erdr1         | Npffr1        | 1  |
| 14570 | 7391  | Erdr1         | Bhlhb8        | 1  |
| 14570 | 14570 | Erdr1         | Erdr1         | 1  |
| 14570 | 23014 | Erdr1         | MMT00077643   | 1  |
| 14577 | 14577 | Cdc37l1       | Cdc37l1       | 1  |
| 14603 | 2224  | Ly6e          | Oasl2         | 1  |
| 14603 | 6824  | Ly6e          | Irf7          | 1  |
| 14603 | 9616  | Ly6e          | AI451557      | 1  |
| 14603 | 12398 | Ly6e          | Ifi44         | 1  |
| 14603 | 13309 | Ly6e          | Tgtp          | 1  |
| 14603 | 14258 | Ly6e          | Ifi47         | 1  |
| 14603 | 16949 | Ly6e          | ligp1         | 1  |
| 14603 | 21549 | Ly6e          | Rtp4          | 1  |
| 14611 | 1755  | Ddx60         | Ocel1         | 1  |
| 14611 | 5925  | Ddx60         | Tmem59l       | -1 |
| 14611 | 9304  | Ddx60         | AI449175      | 1  |
| 14611 | 9569  | Ddx60         | Dda1          | -1 |
| 14611 | 10758 | Ddx60         | Gdf1          | -1 |
| 14611 | 13732 | Ddx60         | Tpm4          | -1 |
| 14611 | 13862 | Ddx60         | Myh15         | 1  |
| 14611 | 16849 | Ddx60         | Trmt1         | -1 |
| 14631 | 7945  | Stag3         | Gpc2          | 1  |
| 14631 | 14631 | Stag3         | Stag3         | 1  |
| 14647 | 5737  | Cst3          | Nkx2-2        | 1  |
| 14647 | 9361  | Cst3          | Hand1         | 1  |
| 14647 | 11705 | Cst3          | Polr3f        | 1  |
| 14647 | 14403 | Cst3          | S100g         | -1 |
| 14650 | 22930 | 2810433K01Rik | Mro           | 1  |
| 14667 | 5801  | Fggy          | MMT00042142   | 1  |
| 14667 | 14667 | Fggy          | Fggy          | 1  |
| 14667 | 17046 | Fggy          | Fggy          | 1  |
| 14677 | 1194  | S100b         | Per3          | 1  |
| 14677 | 3079  | S100b         | Gstt3         | -1 |
| 14677 | 10455 | S100b         | MMT00015250   | -1 |
| 14677 | 15897 | S100b         | D10Jhu81e     | 1  |
| 14677 | 18905 | S100b         | Prmt2         | -1 |
| 14677 | 19493 | S100b         | Icosl         | -1 |
| 14677 | 20979 | S100b         | D10Jhu81e     | 1  |
| 14677 | 22786 | S100b         | Mterfd3       | -1 |
| 14691 | 14691 | Nckap1        | Nckap1        | 1  |
| 14714 | 5256  | Ccdc102a      | Tnfrsf13c     | 1  |
| 14714 | 11382 | Ccdc102a      | Cdca3         | 1  |
| 14733 | 14733 | Fhit          | Fhit          | 1  |
| 14733 | 18526 | Fhit          | Dydc2         | -1 |
| 14740 | 678   | Mfap1b        | Ncaph         | -1 |
| 14740 | 1510  | Mfap1b        | A530058N18Rik | 1  |
| 14740 | 4897  | Mfap1b        | Ciao1         | 1  |
| 14740 | 5737  | Mfap1b        | Nkx2-2        | 1  |
| 14740 | 11705 | Mfap1b        | Polr3f        | 1  |
| 14740 | 14403 | Mfap1b        | S100g         | -1 |

|       |       |               |               |    |
|-------|-------|---------------|---------------|----|
| 14740 | 14740 | Mfap1b        | Mfap1b        | 1  |
| 14740 | 18368 | Mfap1b        | Mpped2        | 1  |
| 14740 | 18835 | Mfap1b        | Dtwd1         | -1 |
| 14757 | 290   | Hdx           | B230118H07Rik | -1 |
| 14757 | 1510  | Hdx           | A530058N18Rik | -1 |
| 14757 | 1991  | Hdx           | Ttc17         | 1  |
| 14757 | 2472  | Hdx           | MMT00014056   | 1  |
| 14757 | 9547  | Hdx           | MMT00006479   | 1  |
| 14757 | 14757 | Hdx           | Hdx           | 1  |
| 14757 | 16881 | Hdx           | MMT00031504   | 1  |
| 14757 | 17295 | Hdx           | MMT00082577   | 1  |
| 14757 | 18368 | Hdx           | Mpped2        | -1 |
| 14757 | 19763 | Hdx           | Acp2          | 1  |
| 14757 | 19803 | Hdx           | BC003993      | 1  |
| 14757 | 19843 | Hdx           | Rbm45         | 1  |
| 14757 | 22320 | Hdx           | MMT00047284   | 1  |
| 14757 | 23474 | Hdx           | MMT00011721   | 1  |
| 14816 | 23005 | Pcdhb9        | 4930405A21Rik | 1  |
| 14818 | 15870 | Il17ra        | Aqp5          | 1  |
| 14842 | 2118  | Gipr          | Kptn          | 1  |
| 14842 | 2599  | Gipr          | Lsm14a        | 1  |
| 14842 | 6513  | Gipr          | Qpctl         | 1  |
| 14842 | 7761  | Gipr          | Nudt19        | 1  |
| 14842 | 7803  | Gipr          | Ttyh1         | 1  |
| 14842 | 8394  | Gipr          | Dpy19l3       | 1  |
| 14842 | 9122  | Gipr          | Sepw1         | 1  |
| 14842 | 14842 | Gipr          | Gipr          | 1  |
| 14842 | 15670 | Gipr          | Pnmal1        | -1 |
| 14842 | 17632 | Gipr          | Lypd3         | -1 |
| 14842 | 19306 | Gipr          | Al428936      | 1  |
| 14842 | 19462 | Gipr          | 4933439C20Rik | -1 |
| 14866 | 18709 | Kctd2         | Srp68         | -1 |
| 14866 | 19322 | Kctd2         | Myo15b        | 1  |
| 14866 | 21528 | Kctd2         | Nup85         | 1  |
| 14877 | 5271  | Ptx3          | Npy           | -1 |
| 14877 | 5410  | Ptx3          | Cyp4f15       | -1 |
| 14877 | 6133  | Ptx3          | Agrp          | -1 |
| 14880 | 12398 | Ms4a4c        | Ifi44         | 1  |
| 14894 | 2794  | G0s2          | Map3k6        | -1 |
| 14894 | 4084  | G0s2          | Asah3l        | -1 |
| 14894 | 12761 | G0s2          | Tsc22d3       | -1 |
| 14913 | 9912  | Yipf4         | Ttc27         | 1  |
| 14952 | 14952 | Tex2          | Tex2          | 1  |
| 14954 | 12761 | Rab19         | Tsc22d3       | -1 |
| 14965 | 16692 | Csnk2b        | Bat4          | 1  |
| 14989 | 14989 | Map3k5        | Map3k5        | 1  |
| 14989 | 19115 | Map3k5        | Rab32         | -1 |
| 15016 | 872   | MMT00074608   | MMT00004441   | 1  |
| 15016 | 9790  | MMT00074608   | Tspan10       | 1  |
| 15016 | 13615 | MMT00074608   | Arl16         | -1 |
| 15016 | 16613 | MMT00074608   | 1110031I02Rik | 1  |
| 15016 | 16782 | MMT00074608   | 1110012N22Rik | -1 |
| 15016 | 17193 | MMT00074608   | Npb           | 1  |
| 15016 | 21414 | MMT00074608   | BC017643      | 1  |
| 15022 | 11789 | Tmem14c       | Ccdc90a       | 1  |
| 15022 | 15022 | Tmem14c       | Tmem14c       | 1  |
| 15027 | 403   | Brd7          | Leprotl1      | 1  |
| 15039 | 15870 | Zmynd15       | Aqp5          | 1  |
| 15056 | 7088  | D930020B18Rik | Slc37a1       | 1  |

|       |       |               |               |    |
|-------|-------|---------------|---------------|----|
| 15056 | 8750  | D930020B18Rik | 1700010I14Rik | 1  |
| 15062 | 6564  | P2ry5         | Cebpd         | -1 |
| 15066 | 3159  | Tmcc1         | Pld1          | 1  |
| 15069 | 15870 | MMT00014274   | Aqp5          | 1  |
| 15072 | 290   | CommD9        | B230118H07Rik | -1 |
| 15074 | 143   | Usp18         | Gvin1         | 1  |
| 15074 | 2224  | Usp18         | Oasl2         | 1  |
| 15074 | 3683  | Usp18         | Oas2          | 1  |
| 15074 | 4114  | Usp18         | Parp12        | 1  |
| 15074 | 4426  | Usp18         | ligp2         | 1  |
| 15074 | 5853  | Usp18         | Trim30        | 1  |
| 15074 | 6824  | Usp18         | Irf7          | 1  |
| 15074 | 7069  | Usp18         | Ube1l         | 1  |
| 15074 | 7105  | Usp18         | Plac8         | 1  |
| 15074 | 8800  | Usp18         | Rnf213        | 1  |
| 15074 | 9616  | Usp18         | AI451557      | 1  |
| 15074 | 9847  | Usp18         | Irf27         | 1  |
| 15074 | 12398 | Usp18         | Irf44         | 1  |
| 15074 | 13309 | Usp18         | Tgtp          | 1  |
| 15074 | 14258 | Usp18         | Irf47         | 1  |
| 15074 | 15074 | Usp18         | Usp18         | 1  |
| 15074 | 16949 | Usp18         | ligp1         | 1  |
| 15074 | 18186 | Usp18         | Parp14        | 1  |
| 15074 | 19189 | Usp18         | Sp100         | 1  |
| 15074 | 21549 | Usp18         | Rtp4          | 1  |
| 15074 | 23450 | Usp18         | D12ErtD647e   | 1  |
| 15088 | 7388  | 2810452K22Rik | Amn           | -1 |
| 15088 | 8155  | 2810452K22Rik | Mark3         | 1  |
| 15088 | 12517 | 2810452K22Rik | 4930573I19Rik | 1  |
| 15088 | 23462 | 2810452K22Rik | Bag5          | 1  |
| 15121 | 11445 | Itln1         | Atp1a2        | -1 |
| 15125 | 5342  | Oxtr          | Eps8l3        | 1  |
| 15125 | 11630 | Oxtr          | Mug-ps1       | 1  |
| 15125 | 15870 | Oxtr          | Aqp5          | 1  |
| 15160 | 1874  | VeZF1         | Slc19a2       | -1 |
| 15160 | 2708  | VeZF1         | Sgk1          | -1 |
| 15160 | 10606 | VeZF1         | Apbb1ip       | 1  |
| 15160 | 19004 | VeZF1         | Pdk4          | -1 |
| 15170 | 1297  | Tspan17       | Phox2a        | 1  |
| 15174 | 14355 | 3110001D03Rik | Tle1          | 1  |
| 15181 | 12694 | Enpp4         | Riok2         | 1  |
| 15181 | 16692 | Enpp4         | Bat4          | -1 |
| 15181 | 17322 | Enpp4         | Zfp758        | 1  |
| 15241 | 16618 | EG636752      | Hps3          | 1  |
| 15258 | 13513 | Coil          | Trim25        | 1  |
| 15258 | 15258 | Coil          | Coil          | 1  |
| 15264 | 2644  | Flywch2       | Srrm2         | -1 |
| 15276 | 15276 | Eif4e         | Eif4e         | 1  |
| 15276 | 20810 | Eif4e         | MtTp          | 1  |
| 15277 | 7388  | 2810002N01Rik | Amn           | -1 |
| 15277 | 15277 | 2810002N01Rik | 2810002N01Rik | 1  |
| 15277 | 23462 | 2810002N01Rik | Bag5          | 1  |
| 15301 | 575   | Dyrk2         | Edn1          | 1  |
| 15306 | 9912  | Dpy30         | Ttc27         | 1  |
| 15306 | 16861 | Dpy30         | Nlrc4         | 1  |
| 15316 | 5345  | MMT00077385   | MMT00023326   | 1  |
| 15318 | 9191  | Aars2         | Lbxcor1       | -1 |
| 15318 | 9230  | Aars2         | 1700027N10Rik | -1 |
| 15318 | 10824 | Aars2         | Vegfa         | 1  |

|       |       |          |               |    |
|-------|-------|----------|---------------|----|
| 15318 | 13946 | Aars2    | Slc35b2       | 1  |
| 15318 | 14027 | Aars2    | Rpo1-1        | -1 |
| 15318 | 15318 | Aars2    | Aars2         | 1  |
| 15318 | 18772 | Aars2    | BC048355      | 1  |
| 15318 | 19519 | Aars2    | BC011248      | 1  |
| 15324 | 19020 | Tep1     | V1rh20        | -1 |
| 15334 | 7159  | Rnaseh2c | 1700031F05Rik | -1 |
| 15334 | 8902  | Rnaseh2c | Aldh3b1       | 1  |
| 15334 | 11369 | Rnaseh2c | Stx3          | 1  |
| 15334 | 15334 | Rnaseh2c | Rnaseh2c      | 1  |
| 15334 | 17447 | Rnaseh2c | Ctsf          | 1  |
| 15334 | 19744 | Rnaseh2c | Acy3          | -1 |
| 15352 | 15352 | Socs2    | Socs2         | 1  |
| 15352 | 15870 | Socs2    | Aqp5          | 1  |
| 15353 | 15353 | Ednrb    | Ednrb         | 1  |
| 15367 | 5345  | Vegfc    | MMT00023326   | -1 |
| 15367 | 12761 | Vegfc    | Tsc22d3       | -1 |
| 15367 | 16494 | Vegfc    | 2310007D09Rik | -1 |
| 15384 | 1918  | Mat2a    | Usp39         | 1  |
| 15384 | 2743  | Mat2a    | Tcf3          | 1  |
| 15384 | 3703  | Mat2a    | Ggcx          | 1  |
| 15384 | 5296  | Mat2a    | Rnf181        | 1  |
| 15384 | 8016  | Mat2a    | Mrpl35        | -1 |
| 15384 | 8055  | Mat2a    | Ptcd3         | 1  |
| 15384 | 13355 | Mat2a    | Foxs1         | -1 |
| 15384 | 15384 | Mat2a    | Mat2a         | 1  |
| 15384 | 16255 | Mat2a    | Reg3b         | -1 |
| 15384 | 18948 | Mat2a    | Olf1270       | -1 |
| 15393 | 9258  | Sec22a   | P4ha1         | -1 |
| 15414 | 2794  | Arhgap18 | Map3k6        | -1 |
| 15414 | 5345  | Arhgap18 | MMT00023326   | -1 |
| 15414 | 12761 | Arhgap18 | Tsc22d3       | -1 |
| 15414 | 16494 | Arhgap18 | 2310007D09Rik | -1 |
| 15414 | 17143 | Arhgap18 | 2010002N04Rik | -1 |
| 15414 | 21313 | Arhgap18 | Rhou          | -1 |
| 15446 | 15870 | Cd320    | Aqp5          | 1  |
| 15455 | 403   | Lsm4     | Leprot1       | 1  |
| 15455 | 1097  | Lsm4     | Dctn6         | -1 |
| 15455 | 1604  | Lsm4     | Ssbp4         | -1 |
| 15455 | 1755  | Lsm4     | Ocel1         | -1 |
| 15455 | 3052  | Lsm4     | 9130404D08Rik | 1  |
| 15455 | 3609  | Lsm4     | Plvap         | -1 |
| 15455 | 5433  | Lsm4     | 2410004L22Rik | 1  |
| 15455 | 5925  | Lsm4     | Tmem59l       | 1  |
| 15455 | 9304  | Lsm4     | Al449175      | -1 |
| 15455 | 9569  | Lsm4     | Dda1          | 1  |
| 15455 | 9729  | Lsm4     | Got111        | 1  |
| 15455 | 10373 | Lsm4     | Tmem141       | -1 |
| 15455 | 10758 | Lsm4     | Gdf1          | 1  |
| 15455 | 13732 | Lsm4     | Tpm4          | 1  |
| 15455 | 14951 | Lsm4     | Dpep3         | 1  |
| 15455 | 15296 | Lsm4     | Mier3         | -1 |
| 15455 | 16617 | Lsm4     | Sh2d4a        | 1  |
| 15455 | 16702 | Lsm4     | 2810422J05Rik | 1  |
| 15455 | 16849 | Lsm4     | Trmt1         | 1  |
| 15455 | 16858 | Lsm4     | Tmem38a       | 1  |
| 15455 | 17703 | Lsm4     | Large         | 1  |
| 15455 | 21433 | Lsm4     | Ubx6          | -1 |
| 15455 | 21840 | Lsm4     | Tmie          | -1 |

|       |       |               |               |    |
|-------|-------|---------------|---------------|----|
| 15455 | 22408 | Lsm4          | Calr3         | -1 |
| 15455 | 23445 | Lsm4          | Crif1         | -1 |
| 15456 | 1466  | Chi3l3        | Ubap2l        | 1  |
| 15456 | 2752  | Chi3l3        | Fcgr1         | 1  |
| 15456 | 3314  | Chi3l3        | Wars2         | 1  |
| 15466 | 10978 | Gm136         | MMT00078322   | -1 |
| 15476 | 12732 | Fem1b         | Hsd17b1       | -1 |
| 15476 | 15476 | Fem1b         | Fem1b         | 1  |
| 15480 | 1162  | MMT00078167   | Cpsf4         | -1 |
| 15480 | 7083  | MMT00078167   | MMT00044154   | 1  |
| 15480 | 7116  | MMT00078167   | Katnal1       | 1  |
| 15480 | 7821  | MMT00078167   | MMT00042003   | 1  |
| 15480 | 12377 | MMT00078167   | MMT00050540   | 1  |
| 15480 | 15480 | MMT00078167   | MMT00078167   | 1  |
| 15480 | 17535 | MMT00078167   | MMT00008110   | 1  |
| 15499 | 17981 | Dact1         | MMT00036029   | -1 |
| 15504 | 2224  | Mx2           | Oasl2         | 1  |
| 15504 | 3683  | Mx2           | Oas2          | 1  |
| 15504 | 4114  | Mx2           | Parp12        | 1  |
| 15504 | 4426  | Mx2           | ligp2         | 1  |
| 15504 | 5853  | Mx2           | Trim30        | 1  |
| 15504 | 6824  | Mx2           | Irf7          | 1  |
| 15504 | 7069  | Mx2           | Ube1l         | 1  |
| 15504 | 8800  | Mx2           | Rnf213        | 1  |
| 15504 | 9616  | Mx2           | Al451557      | 1  |
| 15504 | 9847  | Mx2           | Ifi27         | 1  |
| 15504 | 12398 | Mx2           | Ifi44         | 1  |
| 15504 | 13309 | Mx2           | Tgtp          | 1  |
| 15504 | 14258 | Mx2           | Ifi47         | 1  |
| 15504 | 15074 | Mx2           | Usp18         | 1  |
| 15504 | 18186 | Mx2           | Parp14        | 1  |
| 15504 | 19189 | Mx2           | Sp100         | 1  |
| 15504 | 19738 | Mx2           | Lgals3bp      | 1  |
| 15504 | 21549 | Mx2           | Rtp4          | 1  |
| 15504 | 23450 | Mx2           | D12Ert647e    | 1  |
| 15508 | 2012  | 4632415L05Rik | Cetn4         | -1 |
| 15508 | 3159  | 4632415L05Rik | Pld1          | 1  |
| 15508 | 3206  | 4632415L05Rik | Gpr160        | 1  |
| 15508 | 3314  | 4632415L05Rik | Wars2         | 1  |
| 15508 | 4666  | 4632415L05Rik | Exosc9        | -1 |
| 15508 | 5762  | 4632415L05Rik | Trpc3         | -1 |
| 15508 | 9360  | 4632415L05Rik | Taf1c         | -1 |
| 15508 | 9519  | 4632415L05Rik | Fstl5         | -1 |
| 15508 | 10521 | 4632415L05Rik | Ttf2          | 1  |
| 15508 | 12367 | 4632415L05Rik | MMT00072365   | -1 |
| 15508 | 12853 | 4632415L05Rik | Phc3          | -1 |
| 15508 | 15508 | 4632415L05Rik | 4632415L05Rik | 1  |
| 15508 | 16416 | 4632415L05Rik | Commd2        | 1  |
| 15508 | 16618 | 4632415L05Rik | Hps3          | -1 |
| 15508 | 19700 | 4632415L05Rik | E030011K20Rik | 1  |
| 15521 | 1755  | Mast3         | Ocel1         | -1 |
| 15521 | 13732 | Mast3         | Tpm4          | 1  |
| 15522 | 12761 | 1810011O10Rik | Tsc22d3       | 1  |
| 15531 | 1515  | Prickle4      | Med20         | 1  |
| 15531 | 1960  | Prickle4      | Ubr2          | 1  |
| 15531 | 2424  | Prickle4      | Unc5cl        | -1 |
| 15531 | 2938  | Prickle4      | H2-T23        | -1 |
| 15531 | 7088  | Prickle4      | Slc37a1       | -1 |
| 15531 | 7965  | Prickle4      | Enpp5         | -1 |

|       |       |               |               |    |
|-------|-------|---------------|---------------|----|
| 15531 | 10667 | Prickle4      | H2-Eb1        | -1 |
| 15531 | 10729 | Prickle4      | Fgd2          | -1 |
| 15531 | 12943 | Prickle4      | Slc25a27      | -1 |
| 15531 | 16692 | Prickle4      | Bat4          | -1 |
| 15531 | 17322 | Prickle4      | Zfp758        | 1  |
| 15531 | 18871 | Prickle4      | Al314976      | -1 |
| 15531 | 20100 | Prickle4      | Guca1b        | 1  |
| 15531 | 20238 | Prickle4      | H2-T9         | -1 |
| 15531 | 21295 | Prickle4      | Snf1lk        | 1  |
| 15531 | 21415 | Prickle4      | Has1          | -1 |
| 15536 | 1297  | Garnl4        | Phox2a        | 1  |
| 15538 | 18373 | B130024G19Rik | Dnajb1        | -1 |
| 15557 | 19524 | MMT00080723   | Rhag          | -1 |
| 15558 | 15870 | Pnp1          | Aqp5          | 1  |
| 15565 | 4626  | 2310001A20Rik | 2310046K01Rik | -1 |
| 15566 | 5345  | Snn           | MMT00023326   | -1 |
| 15566 | 12761 | Snn           | Tsc22d3       | -1 |
| 15566 | 16494 | Snn           | 2310007D09Rik | -1 |
| 15569 | 246   | BC003331      | MMT00053742   | 1  |
| 15569 | 1625  | BC003331      | AW146154      | -1 |
| 15569 | 1712  | BC003331      | Rnf2          | 1  |
| 15569 | 8933  | BC003331      | Arpc5         | 1  |
| 15569 | 9402  | BC003331      | 1200016B10Rik | -1 |
| 15569 | 9611  | BC003331      | Ncf2          | 1  |
| 15569 | 11233 | BC003331      | Tef           | 1  |
| 15569 | 13417 | BC003331      | 1700025G04Rik | 1  |
| 15569 | 15569 | BC003331      | BC003331      | 1  |
| 15569 | 15614 | BC003331      | Tpr           | 1  |
| 15569 | 17463 | BC003331      | Rgl1          | 1  |
| 15569 | 20004 | BC003331      | 1190005F20Rik | 1  |
| 15573 | 2752  | Aipl1         | Fcgr1         | 1  |
| 15573 | 12367 | Aipl1         | MMT00072365   | -1 |
| 15573 | 16416 | Aipl1         | Comm2         | 1  |
| 15573 | 16618 | Aipl1         | Hps3          | -1 |
| 15573 | 19700 | Aipl1         | E030011K20Rik | 1  |
| 15575 | 15870 | Bckdhd        | Aqp5          | -1 |
| 15594 | 1297  | Gm1967        | Phox2a        | -1 |
| 15625 | 2743  | Capg          | Tcf3          | 1  |
| 15625 | 8016  | Capg          | Mrpl35        | -1 |
| 15625 | 15384 | Capg          | Mat2a         | 1  |
| 15625 | 18948 | Capg          | Olf1270       | -1 |
| 15631 | 1241  | Lpin1         | Meox1         | -1 |
| 15631 | 2708  | Lpin1         | Sgk1          | 1  |
| 15631 | 2794  | Lpin1         | Map3k6        | 1  |
| 15631 | 2880  | Lpin1         | Cd93          | -1 |
| 15631 | 4084  | Lpin1         | Asah3l        | 1  |
| 15631 | 5345  | Lpin1         | MMT00023326   | 1  |
| 15631 | 6038  | Lpin1         | Acot1         | -1 |
| 15631 | 6133  | Lpin1         | Agpr          | 1  |
| 15631 | 8980  | Lpin1         | Plekhf1       | 1  |
| 15631 | 11345 | Lpin1         | Slc40a1       | -1 |
| 15631 | 12761 | Lpin1         | Tsc22d3       | 1  |
| 15631 | 12834 | Lpin1         | Fabp7         | -1 |
| 15631 | 16494 | Lpin1         | 2310007D09Rik | 1  |
| 15631 | 18553 | Lpin1         | Tekt4         | 1  |
| 15631 | 21643 | Lpin1         | Agtr1a        | 1  |
| 15631 | 22989 | Lpin1         | Lmcd1         | -1 |
| 15664 | 15664 | Masp2         | Masp2         | 1  |
| 15674 | 17528 | Riok1         | Gmn           | 1  |



|       |       |             |               |    |
|-------|-------|-------------|---------------|----|
| 15675 | 265   | MMT00077535 | Taf9          | 1  |
| 15675 | 286   | MMT00077535 | MMT00070509   | 1  |
| 15675 | 684   | MMT00077535 | 1700102P08Rik | 1  |
| 15675 | 863   | MMT00077535 | Dnajc14       | -1 |
| 15675 | 1006  | MMT00077535 | 2600011E07Rik | 1  |
| 15675 | 1214  | MMT00077535 | Trip13        | -1 |
| 15675 | 1281  | MMT00077535 | Alkbh3        | -1 |
| 15675 | 1351  | MMT00077535 | Whsc111       | 1  |
| 15675 | 1594  | MMT00077535 | Mrpl24        | 1  |
| 15675 | 2558  | MMT00077535 | Tmem132b      | 1  |
| 15675 | 3706  | MMT00077535 | 2410002O22Rik | 1  |
| 15675 | 4308  | MMT00077535 | Nphp3         | -1 |
| 15675 | 5385  | MMT00077535 | Tubb2b        | 1  |
| 15675 | 5634  | MMT00077535 | Creb1         | 1  |
| 15675 | 6769  | MMT00077535 | Banp          | 1  |
| 15675 | 6828  | MMT00077535 | Pigh          | 1  |
| 15675 | 7751  | MMT00077535 | Sgk2          | -1 |
| 15675 | 8399  | MMT00077535 | Herpud1       | 1  |
| 15675 | 8469  | MMT00077535 | Sfrs6         | 1  |
| 15675 | 8787  | MMT00077535 | Sdf2l1        | 1  |
| 15675 | 8939  | MMT00077535 | MMT00024195   | 1  |
| 15675 | 9067  | MMT00077535 | Tra2a         | 1  |
| 15675 | 9513  | MMT00077535 | Tardbp        | 1  |
| 15675 | 9514  | MMT00077535 | Vps37a        | 1  |
| 15675 | 10054 | MMT00077535 | Fsip1         | -1 |
| 15675 | 11486 | MMT00077535 | Tacc3         | -1 |
| 15675 | 11867 | MMT00077535 | Rcor3         | 1  |
| 15675 | 12732 | MMT00077535 | Hsd17b1       | 1  |
| 15675 | 12937 | MMT00077535 | Uhrf2         | 1  |
| 15675 | 13285 | MMT00077535 | Cd276         | -1 |
| 15675 | 14134 | MMT00077535 | Phf10         | 1  |
| 15675 | 15177 | MMT00077535 | Bmpr2         | 1  |
| 15675 | 15476 | MMT00077535 | Fem1b         | -1 |
| 15675 | 15731 | MMT00077535 | Mfhas1        | 1  |
| 15675 | 16098 | MMT00077535 | Rps20         | -1 |
| 15675 | 18373 | MMT00077535 | Dnajb1        | 1  |
| 15675 | 18418 | MMT00077535 | Hspa1b        | 1  |
| 15675 | 19389 | MMT00077535 | lqcb1         | 1  |
| 15675 | 20535 | MMT00077535 | Rbm4          | 1  |
| 15675 | 20559 | MMT00077535 | Nat13         | 1  |
| 15675 | 20912 | MMT00077535 | Chordc1       | 1  |
| 15675 | 21431 | MMT00077535 | Xbp1          | 1  |
| 15675 | 21903 | MMT00077535 | Nr1d1         | -1 |
| 15675 | 21981 | MMT00077535 | Ormdl2        | 1  |
| 15675 | 23318 | MMT00077535 | Cul2          | -1 |
| 15676 | 7159  | Fads1       | 1700031F05Rik | -1 |
| 15676 | 17447 | Fads1       | Ctsf          | 1  |
| 15698 | 3938  | Them2       | Abt1          | 1  |
| 15698 | 15698 | Them2       | Them2         | 1  |
| 15698 | 17528 | Them2       | Gmnn          | 1  |
| 15698 | 23118 | Them2       | Ttrap         | 1  |
| 15708 | 1918  | Retsat      | Usp39         | -1 |
| 15708 | 2743  | Retsat      | Tcf3          | -1 |
| 15708 | 2815  | Retsat      | Eif2ak3       | -1 |
| 15708 | 3703  | Retsat      | Ggcx          | -1 |
| 15708 | 5296  | Retsat      | Rnf181        | -1 |
| 15708 | 7273  | Retsat      | Rnf103        | -1 |
| 15708 | 8016  | Retsat      | Mrpl35        | 1  |
| 15708 | 8055  | Retsat      | Ptcd3         | -1 |

|       |       |               |               |    |
|-------|-------|---------------|---------------|----|
| 15708 | 8889  | Retsat        | Dnahc6        | 1  |
| 15708 | 11338 | Retsat        | Vamp8         | -1 |
| 15708 | 15384 | Retsat        | Mat2a         | -1 |
| 15708 | 16255 | Retsat        | Reg3b         | 1  |
| 15708 | 17562 | Retsat        | Rbed1         | -1 |
| 15708 | 18948 | Retsat        | Olf1270       | 1  |
| 15708 | 20507 | Retsat        | Sh2d6         | -1 |
| 15713 | 23495 | Rbm3          | Cryab         | -1 |
| 15720 | 5345  | Trp53i11      | MMT00023326   | -1 |
| 15720 | 12761 | Trp53i11      | Tsc22d3       | -1 |
| 15720 | 13355 | Trp53i11      | Foxs1         | 1  |
| 15720 | 22989 | Trp53i11      | Lmcd1         | 1  |
| 15722 | 2599  | Ccdc9         | Lsm14a        | 1  |
| 15722 | 9122  | Ccdc9         | Sepw1         | 1  |
| 15723 | 5342  | Csf1          | Eps8l3        | 1  |
| 15723 | 15870 | Csf1          | Aqp5          | 1  |
| 15742 | 1297  | 2900062L11Rik | Phox2a        | -1 |
| 15773 | 13813 | MMT00069895   | Ktelc1        | -1 |
| 15773 | 14043 | MMT00069895   | 4930455C21Rik | 1  |
| 15792 | 1755  | Use1          | Ocel1         | -1 |
| 15815 | 12091 | MMT00080242   | 1810015C04Rik | -1 |
| 15815 | 20871 | MMT00080242   | Pop1          | 1  |
| 15842 | 2752  | Med12l        | Fcgr1         | 1  |
| 15842 | 3874  | Med12l        | Slitrk3       | -1 |
| 15842 | 9519  | Med12l        | Fstl5         | -1 |
| 15842 | 12367 | Med12l        | MMT00072365   | -1 |
| 15844 | 9449  | Klhdc9        | Sft2d2        | 1  |
| 15844 | 11406 | Klhdc9        | Ifi203        | -1 |
| 15844 | 13149 | Klhdc9        | Ifi203        | -1 |
| 15864 | 7135  | Rps6ka2       | Ezr           | -1 |
| 15864 | 7909  | Rps6ka2       | Oas3          | -1 |
| 15864 | 11435 | Rps6ka2       | Rnaset2a      | -1 |
| 15864 | 17707 | Rps6ka2       | Rshl2b        | -1 |
| 15864 | 22104 | Rps6ka2       | Rnf123        | -1 |
| 15870 | 9684  | Aqp5          | Phf21b        | 1  |
| 15870 | 15870 | Aqp5          | Aqp5          | 1  |
| 15896 | 2558  | Pdgfrb        | Tmem132b      | -1 |
| 15896 | 4084  | Pdgfrb        | Asah3l        | -1 |
| 15896 | 8399  | Pdgfrb        | Herpud1       | -1 |
| 15896 | 12761 | Pdgfrb        | Tsc22d3       | -1 |
| 15897 | 3079  | D10Jhu81e     | Gstt3         | -1 |
| 15897 | 15897 | D10Jhu81e     | D10Jhu81e     | 1  |
| 15897 | 20979 | D10Jhu81e     | D10Jhu81e     | 1  |
| 15897 | 22786 | D10Jhu81e     | Mterfd3       | -1 |
| 15915 | 3159  | Spata21       | Pld1          | -1 |
| 15915 | 16618 | Spata21       | Hps3          | 1  |
| 15915 | 19700 | Spata21       | E030011K20Rik | -1 |
| 15918 | 5342  | Fkbp11        | Eps8l3        | 1  |
| 15918 | 15870 | Fkbp11        | Aqp5          | 1  |
| 15920 | 7332  | A630001G21Rik | 1700027L20Rik | 1  |
| 15920 | 11759 | A630001G21Rik | 3110079O15Rik | 1  |
| 15920 | 13268 | A630001G21Rik | 1600015I10Rik | 1  |
| 15935 | 6804  | Pnpla3        | Cyp2d22       | 1  |
| 15935 | 10482 | Pnpla3        | Mcat          | 1  |
| 15935 | 19955 | Pnpla3        | Cbx2          | -1 |
| 15937 | 2880  | Adamts4       | Cd93          | 1  |
| 15937 | 14222 | Adamts4       | MMT00076410   | -1 |
| 15937 | 15713 | Adamts4       | Rbm3          | -1 |
| 15937 | 18179 | Adamts4       | Dbp           | -1 |

|       |       |               |               |    |
|-------|-------|---------------|---------------|----|
| 15937 | 18785 | Adamts4       | Angptl4       | 1  |
| 15937 | 21333 | Adamts4       | Cirbp         | -1 |
| 15937 | 21643 | Adamts4       | Agtr1a        | -1 |
| 15937 | 22600 | Adamts4       | 2410018C20Rik | -1 |
| 15937 | 22604 | Adamts4       | Zc3h6         | -1 |
| 15937 | 22989 | Adamts4       | Lmcd1         | 1  |
| 15953 | 7910  | Acsf3         | AK122209      | -1 |
| 15953 | 15953 | Acsf3         | Acsf3         | 1  |
| 15953 | 20690 | Acsf3         | Zfp276        | 1  |
| 15953 | 22351 | Acsf3         | Fanca         | 1  |
| 15971 | 1041  | Aifm2         | 3110049J23Rik | -1 |
| 15971 | 2571  | Aifm2         | Rmnd1         | -1 |
| 15971 | 3195  | Aifm2         | Mypn          | 1  |
| 15971 | 8786  | Aifm2         | Rmnd1         | -1 |
| 15971 | 11162 | Aifm2         | Hkdc1         | 1  |
| 15971 | 15971 | Aifm2         | Aifm2         | 1  |
| 15971 | 19115 | Aifm2         | Rab32         | -1 |
| 15971 | 19392 | Aifm2         | Slc25a16      | -1 |
| 15971 | 20136 | Aifm2         | Col13a1       | 1  |
| 15971 | 20705 | Aifm2         | Supv3l1       | -1 |
| 15971 | 22333 | Aifm2         | Hnrnp3        | 1  |
| 15979 | 11403 | Rmi1          | 2210016F16Rik | -1 |
| 16000 | 17046 | Nol10         | Fgyy          | 1  |
| 16006 | 1297  | Anxa2         | Phox2a        | 1  |
| 16024 | 6133  | P2ry6         | Agrp          | -1 |
| 16037 | 14222 | MMT00011022   | MMT00076410   | 1  |
| 16037 | 15713 | MMT00011022   | Rbm3          | 1  |
| 16046 | 16046 | Ppwd1         | Ppwd1         | 1  |
| 16046 | 16077 | Ppwd1         | Mocs2         | 1  |
| 16047 | 1297  | Irf8          | Phox2a        | 1  |
| 16048 | 18555 | Nsfl1c        | Sdcbp2        | 1  |
| 16060 | 1375  | Gys2          | Strap         | 1  |
| 16060 | 2021  | Gys2          | Atf7ip        | -1 |
| 16060 | 6765  | Gys2          | Ldhd          | 1  |
| 16060 | 11130 | Gys2          | Slco1c1       | -1 |
| 16060 | 14307 | Gys2          | Kcnj8         | -1 |
| 16060 | 14557 | Gys2          | Pyroxd1       | -1 |
| 16060 | 19964 | Gys2          | Ndufa9        | -1 |
| 16060 | 21937 | Gys2          | MMT00015325   | 1  |
| 16060 | 22907 | Gys2          | MMT00054594   | 1  |
| 16060 | 22978 | Gys2          | MMT00043176   | 1  |
| 16066 | 665   | Coq2          | Slc26a1       | -1 |
| 16066 | 1447  | Coq2          | Naaa          | -1 |
| 16066 | 6330  | Coq2          | Dgkq          | 1  |
| 16066 | 8807  | Coq2          | Ankrd56       | -1 |
| 16066 | 16066 | Coq2          | Coq2          | 1  |
| 16080 | 1297  | Prkcdbp       | Phox2a        | 1  |
| 16093 | 2294  | 4732473B16Rik | AU040829      | 1  |
| 16093 | 2708  | 4732473B16Rik | Sgk1          | 1  |
| 16093 | 2794  | 4732473B16Rik | Map3k6        | 1  |
| 16093 | 4084  | 4732473B16Rik | Asah3l        | 1  |
| 16093 | 5345  | 4732473B16Rik | MMT00023326   | 1  |
| 16093 | 6564  | 4732473B16Rik | Cebpd         | 1  |
| 16093 | 8816  | 4732473B16Rik | Nfkb1a        | 1  |
| 16093 | 8980  | 4732473B16Rik | Plekhf1       | 1  |
| 16093 | 12761 | 4732473B16Rik | Tsc22d3       | 1  |
| 16093 | 12989 | 4732473B16Rik | 1190002H23Rik | 1  |
| 16093 | 16494 | 4732473B16Rik | 2310007D09Rik | 1  |
| 16093 | 17143 | 4732473B16Rik | 2010002N04Rik | 1  |

|       |       |               |               |    |
|-------|-------|---------------|---------------|----|
| 16093 | 19004 | 4732473B16Rik | Pdk4          | 1  |
| 16093 | 19573 | 4732473B16Rik | Serpine1      | 1  |
| 16093 | 21313 | 4732473B16Rik | Rhou          | 1  |
| 16100 | 16618 | Tnni3         | Hps3          | -1 |
| 16104 | 1297  | Ugt3a2        | Phox2a        | 1  |
| 16107 | 3624  | Entpd6        | Pygb          | 1  |
| 16107 | 18555 | Entpd6        | Sdcbp2        | -1 |
| 16131 | 1297  | Ptpre         | Phox2a        | 1  |
| 16131 | 5345  | Ptpre         | MMT00023326   | -1 |
| 16131 | 12761 | Ptpre         | Tsc22d3       | -1 |
| 16139 | 4014  | Vkorc1l1      | Dock1         | 1  |
| 16146 | 2752  | Gucy1a3       | Fcgr1         | 1  |
| 16146 | 3314  | Gucy1a3       | Wars2         | 1  |
| 16146 | 6708  | Gucy1a3       | Serpini2      | -1 |
| 16146 | 9408  | Gucy1a3       | Hmgcs2        | -1 |
| 16146 | 9519  | Gucy1a3       | Fstl5         | -1 |
| 16146 | 10521 | Gucy1a3       | Ttf2          | 1  |
| 16146 | 12367 | Gucy1a3       | MMT00072365   | -1 |
| 16146 | 12716 | Gucy1a3       | 5830417l10Rik | -1 |
| 16146 | 16416 | Gucy1a3       | Commd2        | 1  |
| 16168 | 16168 | Crlf2         | Crlf2         | 1  |
| 16168 | 20729 | Crlf2         | Ttc28         | 1  |
| 16176 | 2743  | St3gal5       | Tcf3          | -1 |
| 16176 | 2815  | St3gal5       | Eif2ak3       | -1 |
| 16176 | 3703  | St3gal5       | Ggcx          | -1 |
| 16176 | 5296  | St3gal5       | Rnf181        | -1 |
| 16176 | 15384 | St3gal5       | Mat2a         | -1 |
| 16176 | 16255 | St3gal5       | Reg3b         | 1  |
| 16176 | 18948 | St3gal5       | Olf1270       | 1  |
| 16179 | 12761 | Gulo          | Tsc22d3       | -1 |
| 16182 | 143   | Oasl1         | Gvin1         | 1  |
| 16182 | 2224  | Oasl1         | Oasl2         | 1  |
| 16182 | 3683  | Oasl1         | Oas2          | 1  |
| 16182 | 4426  | Oasl1         | ligp2         | 1  |
| 16182 | 5853  | Oasl1         | Trim30        | 1  |
| 16182 | 6824  | Oasl1         | Irf7          | 1  |
| 16182 | 7069  | Oasl1         | Ube1l         | 1  |
| 16182 | 7105  | Oasl1         | Plac8         | 1  |
| 16182 | 9616  | Oasl1         | AI451557      | 1  |
| 16182 | 9847  | Oasl1         | Ifi27         | 1  |
| 16182 | 12398 | Oasl1         | Ifi44         | 1  |
| 16182 | 12969 | Oasl1         | Xaf1          | 1  |
| 16182 | 13309 | Oasl1         | Tgtp          | 1  |
| 16182 | 14258 | Oasl1         | Ifi47         | 1  |
| 16182 | 16949 | Oasl1         | ligp1         | 1  |
| 16182 | 21549 | Oasl1         | Rtp4          | 1  |
| 16182 | 23450 | Oasl1         | D12Ert647e    | 1  |
| 16191 | 4414  | Klc1          | 5033406O09Rik | -1 |
| 16191 | 6357  | Klc1          | Ankrd9        | 1  |
| 16191 | 7388  | Klc1          | Amn           | 1  |
| 16191 | 8155  | Klc1          | Mark3         | -1 |
| 16191 | 15277 | Klc1          | 2810002N01Rik | -1 |
| 16191 | 23462 | Klc1          | Bag5          | -1 |
| 16199 | 12398 | Samhd1        | Ifi44         | 1  |
| 16210 | 6133  | Metrl1        | Agrp          | -1 |
| 16224 | 17528 | Cdc2l5        | Gmnn          | 1  |
| 16233 | 15870 | 1600027J07Rik | Aqp5          | 1  |
| 16238 | 12398 | Nmi           | Ifi44         | 1  |
| 16242 | 16242 | MMT00053207   | MMT00053207   | 1  |

|       |       |               |               |    |
|-------|-------|---------------|---------------|----|
| 16248 | 1297  | Cdr2          | Phox2a        | 1  |
| 16257 | 22962 | Osbpl8        | MMT00013609   | -1 |
| 16283 | 1466  | EG627427      | Ubap2l        | -1 |
| 16283 | 2752  | EG627427      | Fcgr1         | -1 |
| 16283 | 3314  | EG627427      | Wars2         | -1 |
| 16283 | 5508  | EG627427      | Lrig2         | 1  |
| 16283 | 6708  | EG627427      | Serpini2      | 1  |
| 16283 | 9519  | EG627427      | Fstl5         | 1  |
| 16283 | 10521 | EG627427      | Ttf2          | -1 |
| 16283 | 12367 | EG627427      | MMT00072365   | 1  |
| 16283 | 12716 | EG627427      | 5830417110Rik | 1  |
| 16283 | 15299 | EG627427      | Mrps21        | 1  |
| 16283 | 15901 | EG627427      | Tpm3          | 1  |
| 16283 | 16416 | EG627427      | Comm2         | -1 |
| 16283 | 21650 | EG627427      | Ap4b1         | -1 |
| 16283 | 22570 | EG627427      | Phtf1         | -1 |
| 16284 | 2294  | Rasl11a       | AU040829      | -1 |
| 16284 | 5345  | Rasl11a       | MMT00023326   | -1 |
| 16284 | 12761 | Rasl11a       | Tsc22d3       | -1 |
| 16289 | 2832  | Myocd         | 2810021J22Rik | -1 |
| 16289 | 4057  | Myocd         | Slc2a4        | 1  |
| 16289 | 6376  | Myocd         | Nle1          | -1 |
| 16289 | 19032 | Myocd         | Tymp          | 1  |
| 16294 | 2708  | Chst7         | Sgk1          | -1 |
| 16294 | 5345  | Chst7         | MMT00023326   | -1 |
| 16294 | 6038  | Chst7         | Acot1         | 1  |
| 16294 | 6133  | Chst7         | Agp           | -1 |
| 16294 | 12649 | Chst7         | Itgad         | -1 |
| 16294 | 12761 | Chst7         | Tsc22d3       | -1 |
| 16295 | 16295 | Nlrp14        | Nlrp14        | 1  |
| 16299 | 684   | Creld2        | 1700102P08Rik | 1  |
| 16299 | 1006  | Creld2        | 2600011E07Rik | 1  |
| 16299 | 2558  | Creld2        | Tmem132b      | 1  |
| 16299 | 4612  | Creld2        | Hspa5         | 1  |
| 16299 | 8787  | Creld2        | Sdf2l1        | 1  |
| 16299 | 9258  | Creld2        | P4ha1         | 1  |
| 16299 | 9514  | Creld2        | Vps37a        | 1  |
| 16299 | 11043 | Creld2        | Hsph1         | 1  |
| 16299 | 15870 | Creld2        | Aqp5          | 1  |
| 16299 | 18036 | Creld2        | Tmem100       | 1  |
| 16299 | 18418 | Creld2        | Hspa1b        | 1  |
| 16299 | 20559 | Creld2        | Nat13         | 1  |
| 16330 | 1603  | 2310043J07Rik | Lrwd1         | -1 |
| 16333 | 2752  | Wdr64         | Fcgr1         | -1 |
| 16333 | 3159  | Wdr64         | Pld1          | -1 |
| 16333 | 4666  | Wdr64         | Exosc9        | 1  |
| 16333 | 12367 | Wdr64         | MMT00072365   | 1  |
| 16333 | 16618 | Wdr64         | Hps3          | 1  |
| 16333 | 19700 | Wdr64         | E030011K20Rik | -1 |
| 16340 | 2456  | Scrn2         | Mrpl10        | -1 |
| 16356 | 3325  | 9030607L17Rik | Plekhj1       | -1 |
| 16356 | 6060  | 9030607L17Rik | Tle6          | 1  |
| 16356 | 13136 | 9030607L17Rik | Itgb1bp3      | -1 |
| 16356 | 17135 | 9030607L17Rik | Mum1          | 1  |
| 16356 | 19493 | 9030607L17Rik | Icosl         | 1  |
| 16380 | 18785 | Vasn          | Angptl4       | -1 |
| 16416 | 1466  | Comm2         | Ubap2l        | 1  |
| 16416 | 2752  | Comm2         | Fcgr1         | 1  |
| 16416 | 3159  | Comm2         | Pld1          | 1  |

|       |       |               |               |    |
|-------|-------|---------------|---------------|----|
| 16416 | 3206  | Commd2        | Gpr160        | 1  |
| 16416 | 3314  | Commd2        | Wars2         | 1  |
| 16416 | 3874  | Commd2        | Slitrk3       | -1 |
| 16416 | 4666  | Commd2        | Exosc9        | -1 |
| 16416 | 6708  | Commd2        | Serpini2      | -1 |
| 16416 | 7173  | Commd2        | Trim59        | 1  |
| 16416 | 8679  | Commd2        | Tiparp        | 1  |
| 16416 | 9408  | Commd2        | Hmgcs2        | -1 |
| 16416 | 9519  | Commd2        | Fstl5         | -1 |
| 16416 | 10521 | Commd2        | Ttf2          | 1  |
| 16416 | 12367 | Commd2        | MMT00072365   | -1 |
| 16416 | 12716 | Commd2        | 5830417110Rik | -1 |
| 16416 | 15299 | Commd2        | Mrps21        | -1 |
| 16416 | 15901 | Commd2        | Tpm3          | -1 |
| 16416 | 16283 | Commd2        | EG627427      | -1 |
| 16416 | 16416 | Commd2        | Commd2        | 1  |
| 16416 | 16618 | Commd2        | Hps3          | -1 |
| 16416 | 17837 | Commd2        | Polr3gl       | -1 |
| 16416 | 19700 | Commd2        | E030011K20Rik | 1  |
| 16416 | 21650 | Commd2        | Ap4b1         | 1  |
| 16416 | 21780 | Commd2        | Ankrd35       | -1 |
| 16416 | 22570 | Commd2        | Phtf1         | 1  |
| 16440 | 5247  | Gprc5a        | Irak2         | 1  |
| 16440 | 18418 | Gprc5a        | Hspa1b        | 1  |
| 16443 | 16443 | Ccdc59        | Ccdc59        | 1  |
| 16451 | 2705  | 2010007H12Rik | Hrbl          | -1 |
| 16451 | 7945  | 2010007H12Rik | Gpc2          | -1 |
| 16451 | 8992  | 2010007H12Rik | Trfr2         | 1  |
| 16451 | 9077  | 2010007H12Rik | Cnpy4         | -1 |
| 16451 | 10995 | 2010007H12Rik | Ap4m1         | 1  |
| 16451 | 12907 | 2010007H12Rik | Zkscan1       | 1  |
| 16451 | 13780 | 2010007H12Rik | Pilra         | 1  |
| 16451 | 14631 | 2010007H12Rik | Stag3         | -1 |
| 16451 | 15587 | 2010007H12Rik | Actl6b        | -1 |
| 16451 | 19502 | 2010007H12Rik | Fbxo24        | 1  |
| 16474 | 15476 | Bhlhb2        | Fem1b         | 1  |
| 16474 | 15731 | Bhlhb2        | Mfhas1        | -1 |
| 16474 | 18179 | Bhlhb2        | Dbp           | 1  |
| 16485 | 23115 | Cuedc1        | Mad2l1        | 1  |
| 16491 | 16491 | 6330500D04Rik | 6330500D04Rik | 1  |
| 16492 | 18785 | Hk2           | Angptl4       | -1 |
| 16494 | 11166 | 2310007D09Rik | Uqcc          | 1  |
| 16494 | 14734 | 2310007D09Rik | Nrsn2         | 1  |
| 16494 | 23005 | 2310007D09Rik | 4930405A21Rik | 1  |
| 16514 | 10667 | Vps52         | H2-Eb1        | 1  |
| 16521 | 2224  | Adar          | Oasl2         | 1  |
| 16521 | 4426  | Adar          | ligp2         | 1  |
| 16521 | 5853  | Adar          | Trim30        | 1  |
| 16521 | 6824  | Adar          | Irf7          | 1  |
| 16521 | 8800  | Adar          | Rnf213        | 1  |
| 16521 | 12398 | Adar          | Ifi44         | 1  |
| 16521 | 13309 | Adar          | Tgtp          | 1  |
| 16521 | 14258 | Adar          | Ifi47         | 1  |
| 16521 | 18186 | Adar          | Parp14        | 1  |
| 16521 | 19189 | Adar          | Sp100         | 1  |
| 16521 | 21549 | Adar          | Rtp4          | 1  |
| 16521 | 23450 | Adar          | D12Ert647e    | 1  |
| 16522 | 6098  | Ccdc85a       | Ncf4          | -1 |
| 16525 | 15255 | Lbp           | Ccl8          | 1  |

|       |       |               |               |    |
|-------|-------|---------------|---------------|----|
| 16525 | 16378 | Lbp           | Ccl8          | 1  |
| 16528 | 7449  | Ddr2          | Creg1         | -1 |
| 16528 | 9449  | Ddr2          | Sft2d2        | 1  |
| 16528 | 11571 | Ddr2          | Bpnt1         | -1 |
| 16549 | 8750  | Wtap          | 1700010I14Rik | 1  |
| 16557 | 403   | Rbpms         | Leprot1       | -1 |
| 16557 | 1097  | Rbpms         | Dctn6         | 1  |
| 16557 | 10373 | Rbpms         | Tmem141       | 1  |
| 16557 | 21433 | Rbpms         | Ubx6          | 1  |
| 16572 | 4426  | D14Ertd668e   | ligp2         | 1  |
| 16572 | 5853  | D14Ertd668e   | Trim30        | 1  |
| 16572 | 6824  | D14Ertd668e   | Irf7          | 1  |
| 16572 | 9847  | D14Ertd668e   | Ifi27         | 1  |
| 16572 | 12398 | D14Ertd668e   | Ifi44         | 1  |
| 16572 | 13309 | D14Ertd668e   | Tgtp          | 1  |
| 16572 | 19189 | D14Ertd668e   | Sp100         | 1  |
| 16572 | 21549 | D14Ertd668e   | Rtp4          | 1  |
| 16572 | 23450 | D14Ertd668e   | D12Ertd647e   | 1  |
| 16580 | 6357  | Tnfaip2       | Ankrd9        | 1  |
| 16580 | 7388  | Tnfaip2       | Amn           | 1  |
| 16580 | 8155  | Tnfaip2       | Mark3         | -1 |
| 16580 | 15984 | Tnfaip2       | MMT00075074   | -1 |
| 16580 | 21149 | Tnfaip2       | A230065H16Rik | 1  |
| 16580 | 23462 | Tnfaip2       | Bag5          | -1 |
| 16592 | 18555 | Psmf1         | Sdcbp2        | 1  |
| 16613 | 13615 | 1110031I02Rik | Arl16         | -1 |
| 16613 | 13810 | 1110031I02Rik | 1110036O03Rik | 1  |
| 16613 | 16210 | 1110031I02Rik | Metnl         | -1 |
| 16613 | 16613 | 1110031I02Rik | 1110031I02Rik | 1  |
| 16613 | 17193 | 1110031I02Rik | Npb           | 1  |
| 16613 | 21414 | 1110031I02Rik | BC017643      | 1  |
| 16613 | 22250 | 1110031I02Rik | Wdr45l        | -1 |
| 16614 | 4106  | Zscan21       | MMT00041409   | 1  |
| 16617 | 283   | Sh2d4a        | Gmcl1         | 1  |
| 16617 | 403   | Sh2d4a        | Leprot1       | 1  |
| 16617 | 1097  | Sh2d4a        | Dctn6         | -1 |
| 16617 | 1604  | Sh2d4a        | Ssbp4         | -1 |
| 16617 | 1755  | Sh2d4a        | Ocel1         | -1 |
| 16617 | 2243  | Sh2d4a        | Gcsh          | -1 |
| 16617 | 2294  | Sh2d4a        | AU040829      | 1  |
| 16617 | 2749  | Sh2d4a        | Naf1          | 1  |
| 16617 | 3052  | Sh2d4a        | 9130404D08Rik | 1  |
| 16617 | 3609  | Sh2d4a        | Plvap         | -1 |
| 16617 | 4655  | Sh2d4a        | 1810029B16Rik | 1  |
| 16617 | 5433  | Sh2d4a        | 2410004L22Rik | 1  |
| 16617 | 5925  | Sh2d4a        | Tmem59l       | 1  |
| 16617 | 6035  | Sh2d4a        | Nkd1          | 1  |
| 16617 | 8951  | Sh2d4a        | Cd97          | 1  |
| 16617 | 9304  | Sh2d4a        | Al449175      | -1 |
| 16617 | 9569  | Sh2d4a        | Dda1          | 1  |
| 16617 | 9729  | Sh2d4a        | Got1l1        | 1  |
| 16617 | 10373 | Sh2d4a        | Tmem141       | -1 |
| 16617 | 10497 | Sh2d4a        | Man2b1        | 1  |
| 16617 | 10758 | Sh2d4a        | Gdf1          | 1  |
| 16617 | 11109 | Sh2d4a        | Al931714      | 1  |
| 16617 | 12966 | Sh2d4a        | Slc39a1       | -1 |
| 16617 | 13732 | Sh2d4a        | Tpm4          | 1  |
| 16617 | 14391 | Sh2d4a        | MMT00017335   | 1  |
| 16617 | 14951 | Sh2d4a        | Dpep3         | 1  |

|       |       |               |               |    |
|-------|-------|---------------|---------------|----|
| 16617 | 15094 | Sh2d4a        | Pbx4          | 1  |
| 16617 | 15296 | Sh2d4a        | Mier3         | -1 |
| 16617 | 16617 | Sh2d4a        | Sh2d4a        | 1  |
| 16617 | 16702 | Sh2d4a        | 2810422J05Rik | 1  |
| 16617 | 16849 | Sh2d4a        | Trmt1         | 1  |
| 16617 | 16858 | Sh2d4a        | Tmem38a       | 1  |
| 16617 | 17553 | Sh2d4a        | Eif4ebp1      | -1 |
| 16617 | 17703 | Sh2d4a        | Large         | 1  |
| 16617 | 19286 | Sh2d4a        | 1110012M11Rik | 1  |
| 16617 | 20721 | Sh2d4a        | 4432412L15Rik | 1  |
| 16617 | 21433 | Sh2d4a        | Ubx6          | -1 |
| 16617 | 21840 | Sh2d4a        | Tmie          | -1 |
| 16617 | 22408 | Sh2d4a        | Calr3         | -1 |
| 16617 | 23445 | Sh2d4a        | Crlf1         | -1 |
| 16617 | 23636 | Sh2d4a        | Bst2          | 1  |
| 16618 | 2012  | Hps3          | Cetn4         | 1  |
| 16618 | 4666  | Hps3          | Exosc9        | 1  |
| 16618 | 5762  | Hps3          | Trpc3         | 1  |
| 16618 | 16618 | Hps3          | Hps3          | 1  |
| 16618 | 19700 | Hps3          | E030011K20Rik | -1 |
| 16624 | 16624 | Psma8         | Psma8         | 1  |
| 16624 | 18371 | Psma8         | Sap130        | -1 |
| 16629 | 4084  | Sall2         | Asah3l        | -1 |
| 16679 | 1466  | Ctsk          | Ubap2l        | -1 |
| 16679 | 2632  | Ctsk          | Aph1a         | 1  |
| 16679 | 2752  | Ctsk          | Fcgr1         | -1 |
| 16679 | 3314  | Ctsk          | Wars2         | -1 |
| 16679 | 6708  | Ctsk          | Serpini2      | 1  |
| 16679 | 9408  | Ctsk          | Hmgcs2        | 1  |
| 16679 | 9519  | Ctsk          | Fstl5         | 1  |
| 16679 | 10521 | Ctsk          | Ttf2          | -1 |
| 16679 | 12367 | Ctsk          | MMT00072365   | 1  |
| 16679 | 15299 | Ctsk          | Mrps21        | 1  |
| 16679 | 16416 | Ctsk          | Comm2         | -1 |
| 16679 | 22570 | Ctsk          | Phtf1         | -1 |
| 16679 | 23037 | Ctsk          | Thbs3         | -1 |
| 16692 | 16692 | Bat4          | Bat4          | 1  |
| 16702 | 1604  | 2810422J05Rik | Ssbp4         | -1 |
| 16702 | 1755  | 2810422J05Rik | Ocel1         | -1 |
| 16702 | 5433  | 2810422J05Rik | 2410004L22Rik | 1  |
| 16702 | 5925  | 2810422J05Rik | Tmem59l       | 1  |
| 16702 | 9304  | 2810422J05Rik | AI449175      | -1 |
| 16702 | 13732 | 2810422J05Rik | Tpm4          | 1  |
| 16702 | 17703 | 2810422J05Rik | Large         | 1  |
| 16702 | 21840 | 2810422J05Rik | Tmie          | -1 |
| 16719 | 5345  | Slc43a3       | MMT00023326   | 1  |
| 16719 | 12761 | Slc43a3       | Tsc22d3       | 1  |
| 16719 | 19182 | Slc43a3       | Igsf2         | 1  |
| 16721 | 11549 | Stk3          | Depdc6        | 1  |
| 16802 | 2243  | Def8          | Gcsh          | -1 |
| 16802 | 6065  | Def8          | Plce1         | -1 |
| 16802 | 7910  | Def8          | AK122209      | -1 |
| 16802 | 12440 | Def8          | Sult5a1       | 1  |
| 16802 | 14391 | Def8          | MMT00017335   | 1  |
| 16802 | 15953 | Def8          | Acsf3         | 1  |
| 16802 | 18700 | Def8          | Trappc2l      | -1 |
| 16802 | 20690 | Def8          | Zfp276        | 1  |
| 16802 | 22201 | Def8          | Pard3         | 1  |
| 16802 | 22351 | Def8          | Fanca         | 1  |



|       |       |             |               |    |
|-------|-------|-------------|---------------|----|
| 16809 | 16809 | Rxrb        | Rxrb          | 1  |
| 16809 | 21519 | Rxrb        | 1700012B15Rik | 1  |
| 16814 | 16814 | AU042651    | AU042651      | 1  |
| 16819 | 5342  | Lyve1       | Eps8l3        | 1  |
| 16819 | 15870 | Lyve1       | Aqp5          | 1  |
| 16832 | 13813 | Trim63      | Ktelc1        | -1 |
| 16832 | 14043 | Trim63      | 4930455C21Rik | 1  |
| 16849 | 403   | Trmt1       | Leprotl1      | 1  |
| 16849 | 1097  | Trmt1       | Dctn6         | -1 |
| 16849 | 1336  | Trmt1       | MMT00069537   | -1 |
| 16849 | 1604  | Trmt1       | Ssbp4         | -1 |
| 16849 | 1755  | Trmt1       | Ocel1         | -1 |
| 16849 | 2243  | Trmt1       | Gcsh          | -1 |
| 16849 | 3052  | Trmt1       | 9130404D08Rik | 1  |
| 16849 | 3609  | Trmt1       | Plvap         | -1 |
| 16849 | 5433  | Trmt1       | 2410004L22Rik | 1  |
| 16849 | 5925  | Trmt1       | Tmem59l       | 1  |
| 16849 | 6035  | Trmt1       | Nkd1          | 1  |
| 16849 | 8951  | Trmt1       | Cd97          | 1  |
| 16849 | 9304  | Trmt1       | Al449175      | -1 |
| 16849 | 9569  | Trmt1       | Dda1          | 1  |
| 16849 | 9729  | Trmt1       | Got1l1        | 1  |
| 16849 | 10308 | Trmt1       | Fuk           | 1  |
| 16849 | 10497 | Trmt1       | Man2b1        | 1  |
| 16849 | 10758 | Trmt1       | Gdf1          | 1  |
| 16849 | 11057 | Trmt1       | MMT00032844   | -1 |
| 16849 | 11109 | Trmt1       | Al931714      | 1  |
| 16849 | 12966 | Trmt1       | Slc39a1       | -1 |
| 16849 | 13732 | Trmt1       | Tpm4          | 1  |
| 16849 | 14391 | Trmt1       | MMT00017335   | 1  |
| 16849 | 15094 | Trmt1       | Pbx4          | 1  |
| 16849 | 15296 | Trmt1       | Mier3         | -1 |
| 16849 | 16617 | Trmt1       | Sh2d4a        | 1  |
| 16849 | 16849 | Trmt1       | Trmt1         | 1  |
| 16849 | 16858 | Trmt1       | Tmem38a       | 1  |
| 16849 | 17703 | Trmt1       | Large         | 1  |
| 16849 | 20721 | Trmt1       | 4432412L15Rik | 1  |
| 16849 | 21840 | Trmt1       | Tmie          | -1 |
| 16849 | 23445 | Trmt1       | Crlf1         | -1 |
| 16852 | 6038  | Vash1       | Acot1         | 1  |
| 16852 | 8724  | Vash1       | Tgfb3         | 1  |
| 16852 | 13389 | Vash1       | Six6os1       | -1 |
| 16858 | 1755  | Tmem38a     | Ocel1         | -1 |
| 16858 | 5925  | Tmem38a     | Tmem59l       | 1  |
| 16858 | 16858 | Tmem38a     | Tmem38a       | 1  |
| 16861 | 9912  | Nlrc4       | Ttc27         | 1  |
| 16861 | 11467 | Nlrc4       | Ypel5         | -1 |
| 16861 | 16861 | Nlrc4       | Nlrc4         | 1  |
| 16881 | 290   | MMT00031504 | B230118H07Rik | -1 |
| 16881 | 1510  | MMT00031504 | A530058N18Rik | -1 |
| 16881 | 1806  | MMT00031504 | Nola3         | 1  |
| 16881 | 1991  | MMT00031504 | Ttc17         | 1  |
| 16881 | 2472  | MMT00031504 | MMT00014056   | 1  |
| 16881 | 9547  | MMT00031504 | MMT00006479   | 1  |
| 16881 | 14757 | MMT00031504 | Hdx           | 1  |
| 16881 | 16881 | MMT00031504 | MMT00031504   | 1  |
| 16881 | 17295 | MMT00031504 | MMT00082577   | 1  |
| 16881 | 18368 | MMT00031504 | Mpped2        | -1 |
| 16881 | 18835 | MMT00031504 | Dtwd1         | 1  |

|       |       |               |               |    |
|-------|-------|---------------|---------------|----|
| 16881 | 19763 | MMT00031504   | Acp2          | 1  |
| 16881 | 19803 | MMT00031504   | BC003993      | 1  |
| 16881 | 21017 | MMT00031504   | Gstz1         | 1  |
| 16881 | 22320 | MMT00031504   | MMT00047284   | 1  |
| 16881 | 23474 | MMT00031504   | MMT00011721   | 1  |
| 16886 | 9912  | Dpy30         | Ttc27         | 1  |
| 16886 | 16861 | Dpy30         | Nlrc4         | 1  |
| 16890 | 10667 | H2-Eb2        | H2-Eb1        | 1  |
| 16913 | 2118  | Pira3         | Kptn          | -1 |
| 16913 | 2599  | Pira3         | Lsm14a        | -1 |
| 16913 | 7761  | Pira3         | Nudt19        | -1 |
| 16913 | 7803  | Pira3         | Ttyh1         | -1 |
| 16913 | 8394  | Pira3         | Dpy19l3       | -1 |
| 16913 | 9122  | Pira3         | Sepw1         | -1 |
| 16913 | 11982 | Pira3         | MMT00035514   | 1  |
| 16913 | 14842 | Pira3         | Gipr          | -1 |
| 16913 | 17632 | Pira3         | Lypd3         | 1  |
| 16913 | 19306 | Pira3         | AI428936      | -1 |
| 16913 | 19462 | Pira3         | 4933439C20Rik | 1  |
| 16913 | 21223 | Pira3         | Pira1         | 1  |
| 16919 | 1297  | Pea15a        | Phox2a        | 1  |
| 16919 | 15255 | Pea15a        | Ccl8          | 1  |
| 16919 | 16378 | Pea15a        | Ccl8          | 1  |
| 16949 | 6824  | ligp1         | Irf7          | 1  |
| 16949 | 7105  | ligp1         | Plac8         | 1  |
| 16949 | 12398 | ligp1         | Ifi44         | 1  |
| 16949 | 13309 | ligp1         | Tgtp          | 1  |
| 16965 | 1297  | Gstt2         | Phox2a        | -1 |
| 16972 | 8332  | Nenf          | Tmem206       | -1 |
| 16972 | 11741 | Nenf          | Slc30a10      | -1 |
| 16972 | 14864 | Nenf          | Cdk4          | -1 |
| 16972 | 21916 | Nenf          | Cdk4          | -1 |
| 16973 | 1466  | MMT00027196   | Ubap2l        | -1 |
| 16973 | 2752  | MMT00027196   | Fcgr1         | -1 |
| 16973 | 3314  | MMT00027196   | Wars2         | -1 |
| 16973 | 10521 | MMT00027196   | Ttf2          | -1 |
| 16973 | 12716 | MMT00027196   | 5830417110Rik | 1  |
| 16973 | 21650 | MMT00027196   | Ap4b1         | -1 |
| 16973 | 22570 | MMT00027196   | Phtf1         | -1 |
| 16983 | 7360  | Pigx          | Mfi2          | -1 |
| 16994 | 1297  | Trove2        | Phox2a        | -1 |
| 17043 | 14740 | Tmem127       | Mfap1b        | -1 |
| 17046 | 5801  | Fggy          | MMT00042142   | 1  |
| 17046 | 14667 | Fggy          | Fggy          | 1  |
| 17046 | 17046 | Fggy          | Fggy          | 1  |
| 17053 | 678   | MMT00068622   | Ncaph         | 1  |
| 17053 | 1510  | MMT00068622   | A530058N18Rik | -1 |
| 17053 | 11705 | MMT00068622   | Polr3f        | -1 |
| 17053 | 14403 | MMT00068622   | S100g         | 1  |
| 17053 | 14740 | MMT00068622   | Mfap1b        | -1 |
| 17053 | 18835 | MMT00068622   | Dtwd1         | 1  |
| 17071 | 143   | Samd9l        | Gvin1         | 1  |
| 17071 | 12398 | Samd9l        | Ifi44         | 1  |
| 17073 | 13615 | 1810049H13Rik | Arl16         | -1 |
| 17081 | 14733 | 3830406C13Rik | Fhit          | 1  |
| 17081 | 17081 | 3830406C13Rik | 3830406C13Rik | 1  |
| 17081 | 21075 | 3830406C13Rik | Gtf2h5        | 1  |
| 17090 | 1466  | Lass2         | Ubap2l        | -1 |
| 17090 | 2752  | Lass2         | Fcgr1         | -1 |

|       |       |               |               |    |
|-------|-------|---------------|---------------|----|
| 17090 | 3314  | Lass2         | Wars2         | -1 |
| 17090 | 5508  | Lass2         | Lrig2         | 1  |
| 17090 | 9408  | Lass2         | Hmgcs2        | 1  |
| 17090 | 9519  | Lass2         | Fstl5         | 1  |
| 17090 | 10521 | Lass2         | Ttf2          | -1 |
| 17090 | 12367 | Lass2         | MMT00072365   | 1  |
| 17090 | 12716 | Lass2         | 5830417110Rik | 1  |
| 17090 | 15901 | Lass2         | Tpm3          | 1  |
| 17090 | 16416 | Lass2         | Comm2         | -1 |
| 17090 | 17669 | Lass2         | 2310007A19Rik | -1 |
| 17090 | 20810 | Lass2         | Mttp          | 1  |
| 17090 | 22570 | Lass2         | Phf1          | -1 |
| 17093 | 19964 | Opa1          | Ndufa9        | 1  |
| 17109 | 16494 | C430049B03Rik | 2310007D09Rik | -1 |
| 17135 | 13136 | Mum1          | Itgb1bp3      | -1 |
| 17135 | 16356 | Mum1          | 9030607L17Rik | 1  |
| 17135 | 17135 | Mum1          | Mum1          | 1  |
| 17147 | 3654  | Till12        | St13          | -1 |
| 17147 | 6804  | Till12        | Cyp2d22       | 1  |
| 17147 | 7100  | Till12        | Tomm22        | 1  |
| 17147 | 9540  | Till12        | Csnk1e        | 1  |
| 17147 | 10482 | Till12        | Mcat          | 1  |
| 17147 | 16467 | Till12        | Card10        | 1  |
| 17147 | 16522 | Till12        | Ccdc85a       | 1  |
| 17147 | 19955 | Till12        | Cbx2          | -1 |
| 17158 | 8992  | Zfp113        | Trfr2         | 1  |
| 17158 | 9077  | Zfp113        | Cnpy4         | -1 |
| 17158 | 10995 | Zfp113        | Ap4m1         | 1  |
| 17158 | 13780 | Zfp113        | Pilra         | 1  |
| 17158 | 14631 | Zfp113        | Stag3         | -1 |
| 17158 | 19502 | Zfp113        | Fbxo24        | 1  |
| 17159 | 20729 | Gtpbp6        | Ttc28         | 1  |
| 17160 | 18373 | Ccdc127       | Dnajb1        | 1  |
| 17178 | 2294  | Ifnar2        | AU040829      | -1 |
| 17178 | 8980  | Ifnar2        | Plekhf1       | -1 |
| 17182 | 21969 | C230021P08Rik | Tk1           | 1  |
| 17197 | 143   | Igtp          | Gvin1         | 1  |
| 17197 | 4426  | Igtp          | Igtp2         | 1  |
| 17197 | 6824  | Igtp          | Irf7          | 1  |
| 17197 | 12398 | Igtp          | Ifi44         | 1  |
| 17197 | 13309 | Igtp          | Tgtp          | 1  |
| 17197 | 16949 | Igtp          | Igtp1         | 1  |
| 17197 | 19189 | Igtp          | Sp100         | 1  |
| 17197 | 21549 | Igtp          | Rtp4          | 1  |
| 17221 | 1510  | Zfp264        | A530058N18Rik | -1 |
| 17221 | 4897  | Zfp264        | Ciao1         | -1 |
| 17221 | 5603  | Zfp264        | BC020535      | 1  |
| 17221 | 5737  | Zfp264        | Nkx2-2        | -1 |
| 17221 | 11705 | Zfp264        | Polr3f        | -1 |
| 17221 | 13355 | Zfp264        | Foxs1         | 1  |
| 17221 | 14403 | Zfp264        | S100g         | 1  |
| 17221 | 14740 | Zfp264        | Mfap1b        | -1 |
| 17221 | 18835 | Zfp264        | Dtd1          | 1  |
| 17233 | 8816  | Nmur1         | Nfkb1a        | 1  |
| 17243 | 2708  | Bcl6b         | Sgk1          | -1 |
| 17243 | 5345  | Bcl6b         | MMT00023326   | -1 |
| 17243 | 12761 | Bcl6b         | Tsc22d3       | -1 |
| 17243 | 20983 | Bcl6b         | Hlx           | 1  |
| 17243 | 21380 | Bcl6b         | Ier5          | 1  |

|       |       |               |               |    |
|-------|-------|---------------|---------------|----|
| 17243 | 22758 | Bcl6b         | 2810003C17Rik | 1  |
| 17269 | 2794  | Spsb1         | Map3k6        | 1  |
| 17285 | 2485  | 1700019E19Rik | Adck1         | 1  |
| 17285 | 3812  | 1700019E19Rik | Zfyve26       | -1 |
| 17285 | 6038  | 1700019E19Rik | Acot1         | 1  |
| 17285 | 7388  | 1700019E19Rik | Amn           | -1 |
| 17285 | 8155  | 1700019E19Rik | Mark3         | 1  |
| 17285 | 8724  | 1700019E19Rik | Tgfb3         | 1  |
| 17285 | 12517 | 1700019E19Rik | 4930573l19Rik | 1  |
| 17285 | 13389 | 1700019E19Rik | Six6os1       | -1 |
| 17285 | 19214 | 1700019E19Rik | Snpc1         | -1 |
| 17285 | 22297 | 1700019E19Rik | Zfyve1        | -1 |
| 17295 | 290   | MMT00082577   | B230118H07Rik | -1 |
| 17295 | 1510  | MMT00082577   | A530058N18Rik | -1 |
| 17295 | 1991  | MMT00082577   | Ttc17         | 1  |
| 17295 | 2472  | MMT00082577   | MMT00014056   | 1  |
| 17295 | 9547  | MMT00082577   | MMT00006479   | 1  |
| 17295 | 14757 | MMT00082577   | Hdx           | 1  |
| 17295 | 16881 | MMT00082577   | MMT00031504   | 1  |
| 17295 | 17295 | MMT00082577   | MMT00082577   | 1  |
| 17295 | 18368 | MMT00082577   | Mpped2        | -1 |
| 17295 | 19763 | MMT00082577   | Acp2          | 1  |
| 17295 | 19803 | MMT00082577   | BC003993      | 1  |
| 17295 | 21017 | MMT00082577   | Gstz1         | 1  |
| 17295 | 22320 | MMT00082577   | MMT00047284   | 1  |
| 17295 | 23474 | MMT00082577   | MMT00011721   | 1  |
| 17297 | 15870 | Comtd1        | Aqp5          | 1  |
| 17314 | 2118  | Napa          | Kptn          | -1 |
| 17314 | 2599  | Napa          | Lsm14a        | -1 |
| 17314 | 6513  | Napa          | Qpctl         | -1 |
| 17314 | 7761  | Napa          | Nudt19        | -1 |
| 17314 | 7803  | Napa          | Ttyh1         | -1 |
| 17314 | 8394  | Napa          | Dpy19l3       | -1 |
| 17314 | 9122  | Napa          | Sepw1         | -1 |
| 17314 | 11321 | Napa          | 2310014L17Rik | 1  |
| 17314 | 14842 | Napa          | Gipr          | -1 |
| 17314 | 15670 | Napa          | Pnmal1        | 1  |
| 17314 | 17314 | Napa          | Napa          | 1  |
| 17314 | 17632 | Napa          | Lypd3         | 1  |
| 17314 | 19306 | Napa          | Al428936      | -1 |
| 17314 | 19462 | Napa          | 4933439C20Rik | 1  |
| 17314 | 20606 | Napa          | MMT00042166   | 1  |
| 17317 | 2743  | Jmjd1a        | Tcf3          | -1 |
| 17321 | 14281 | Hepacam       | 5031414D18Rik | -1 |
| 17321 | 17321 | Hepacam       | Hepacam       | 1  |
| 17322 | 7088  | Zfp758        | Slc37a1       | -1 |
| 17322 | 7603  | Zfp758        | Sod2          | -1 |
| 17322 | 12694 | Zfp758        | Riok2         | 1  |
| 17322 | 16692 | Zfp758        | Bat4          | -1 |
| 17322 | 17322 | Zfp758        | Zfp758        | 1  |
| 17323 | 15870 | Tubb6         | Aqp5          | 1  |
| 17339 | 15870 | Acaa1b        | Aqp5          | -1 |
| 17348 | 8883  | Pf4           | Mtap4         | 1  |
| 17363 | 9010  | Aebp2         | 8430419L09Rik | -1 |
| 17363 | 17363 | Aebp2         | Aebp2         | 1  |
| 17363 | 18333 | Aebp2         | Rassf8        | 1  |
| 17363 | 19964 | Aebp2         | Ndufa9        | 1  |
| 17363 | 22395 | Aebp2         | Kcna1         | -1 |
| 17371 | 2752  | Emx2          | Fcgr1         | -1 |

|       |       |               |               |    |
|-------|-------|---------------|---------------|----|
| 17371 | 3159  | Emx2          | Pld1          | -1 |
| 17371 | 3206  | Emx2          | Gpr160        | -1 |
| 17371 | 4666  | Emx2          | Exosc9        | 1  |
| 17371 | 9360  | Emx2          | Taf1c         | 1  |
| 17371 | 9519  | Emx2          | Fstl5         | 1  |
| 17371 | 12367 | Emx2          | MMT00072365   | 1  |
| 17371 | 16416 | Emx2          | Commd2        | -1 |
| 17371 | 16618 | Emx2          | Hps3          | 1  |
| 17371 | 19700 | Emx2          | E030011K20Rik | -1 |
| 17389 | 3698  | Pop4          | 1600014C10Rik | -1 |
| 17389 | 9413  | Pop4          | 1190020J12Rik | 1  |
| 17389 | 17389 | Pop4          | Pop4          | 1  |
| 17389 | 18165 | Pop4          | 5830482F20Rik | -1 |
| 17391 | 630   | C530028O21Rik | C1s           | -1 |
| 17391 | 1957  | C530028O21Rik | Mansc1        | 1  |
| 17391 | 2021  | C530028O21Rik | Atf7ip        | 1  |
| 17391 | 2464  | C530028O21Rik | A130022J15Rik | 1  |
| 17391 | 2743  | C530028O21Rik | Tcf3          | -1 |
| 17391 | 2815  | C530028O21Rik | Eif2ak3       | -1 |
| 17391 | 3078  | C530028O21Rik | 9630033F20Rik | 1  |
| 17391 | 3141  | C530028O21Rik | Tmf1          | 1  |
| 17391 | 4850  | C530028O21Rik | Fancd2        | 1  |
| 17391 | 8141  | C530028O21Rik | Scnn1a        | -1 |
| 17391 | 9010  | C530028O21Rik | 8430419L09Rik | -1 |
| 17391 | 9417  | C530028O21Rik | Cd163         | 1  |
| 17391 | 9622  | C530028O21Rik | Rasgef1a      | -1 |
| 17391 | 14557 | C530028O21Rik | Pyroxd1       | 1  |
| 17391 | 15719 | C530028O21Rik | BC060267      | -1 |
| 17391 | 16255 | C530028O21Rik | Reg3b         | 1  |
| 17391 | 17363 | C530028O21Rik | Aebp2         | 1  |
| 17391 | 17743 | C530028O21Rik | Phb2          | 1  |
| 17391 | 18333 | C530028O21Rik | Rassf8        | 1  |
| 17391 | 18948 | C530028O21Rik | Olf1270       | 1  |
| 17391 | 19964 | C530028O21Rik | Ndufa9        | 1  |
| 17391 | 19999 | C530028O21Rik | Ift122        | -1 |
| 17391 | 22395 | C530028O21Rik | Kcna1         | -1 |
| 17391 | 22978 | C530028O21Rik | MMT00043176   | -1 |
| 17403 | 1755  | N4bp1         | Ocel1         | -1 |
| 17403 | 5433  | N4bp1         | 2410004L22Rik | 1  |
| 17403 | 10497 | N4bp1         | Man2b1        | 1  |
| 17403 | 16849 | N4bp1         | Trmt1         | 1  |
| 17408 | 9449  | lqwd1         | Sft2d2        | 1  |
| 17413 | 10    | MMT00043948   | NaN           | 1  |
| 17413 | 115   | MMT00043948   | NaN           | 1  |
| 17413 | 141   | MMT00043948   | Jag1          | 1  |
| 17413 | 219   | MMT00043948   | MMT00058440   | 1  |
| 17413 | 225   | MMT00043948   | MMT00073704   | 1  |
| 17413 | 236   | MMT00043948   | Bbs9          | 1  |
| 17413 | 316   | MMT00043948   | 4930471G03Rik | 1  |
| 17413 | 391   | MMT00043948   | 4933416I08Rik | 1  |
| 17413 | 484   | MMT00043948   | Atp4a         | 1  |
| 17413 | 486   | MMT00043948   | Josd2         | 1  |
| 17413 | 558   | MMT00043948   | Crebl1        | 1  |
| 17413 | 584   | MMT00043948   | Tmem207       | 1  |
| 17413 | 658   | MMT00043948   | Vmn2r-ps88    | 1  |
| 17413 | 663   | MMT00043948   | Muc19         | 1  |
| 17413 | 1021  | MMT00043948   | Rhpn2         | 1  |
| 17413 | 1058  | MMT00043948   | Olf1868       | 1  |
| 17413 | 1059  | MMT00043948   | P2rx6         | 1  |

|       |      |             |               |   |
|-------|------|-------------|---------------|---|
| 17413 | 1122 | MMT00043948 | Pax3          | 1 |
| 17413 | 1137 | MMT00043948 | Mlxip         | 1 |
| 17413 | 1148 | MMT00043948 | Pak1          | 1 |
| 17413 | 1170 | MMT00043948 | Faim3         | 1 |
| 17413 | 1354 | MMT00043948 | Lsmd1         | 1 |
| 17413 | 1436 | MMT00043948 | Nfu1          | 1 |
| 17413 | 1570 | MMT00043948 | Olf522        | 1 |
| 17413 | 1619 | MMT00043948 | Fbxw17        | 1 |
| 17413 | 1679 | MMT00043948 | MMT00009278   | 1 |
| 17413 | 1696 | MMT00043948 | V1re9         | 1 |
| 17413 | 1771 | MMT00043948 | Park2         | 1 |
| 17413 | 1795 | MMT00043948 | Rabgap1l      | 1 |
| 17413 | 1829 | MMT00043948 | MMT00030026   | 1 |
| 17413 | 1876 | MMT00043948 | Amdhd1        | 1 |
| 17413 | 1907 | MMT00043948 | D230010M03Rik | 1 |
| 17413 | 1920 | MMT00043948 | Oas1e         | 1 |
| 17413 | 2067 | MMT00043948 | Myo1a         | 1 |
| 17413 | 2226 | MMT00043948 | Amt           | 1 |
| 17413 | 2283 | MMT00043948 | MMT00029554   | 1 |
| 17413 | 2767 | MMT00043948 | MMT00031206   | 1 |
| 17413 | 2819 | MMT00043948 | Kcnk5         | 1 |
| 17413 | 2870 | MMT00043948 | D5Erd577e     | 1 |
| 17413 | 3080 | MMT00043948 | MMT00014480   | 1 |
| 17413 | 3127 | MMT00043948 | Plcd1         | 1 |
| 17413 | 3144 | MMT00043948 | Ube2j2        | 1 |
| 17413 | 3166 | MMT00043948 | Vmn2r57       | 1 |
| 17413 | 3208 | MMT00043948 | 4930511111Rik | 1 |
| 17413 | 3254 | MMT00043948 | Grifin        | 1 |
| 17413 | 3362 | MMT00043948 | Fgf8          | 1 |
| 17413 | 3383 | MMT00043948 | Cd99          | 1 |
| 17413 | 3402 | MMT00043948 | A930018P22Rik | 1 |
| 17413 | 3511 | MMT00043948 | Rnf182        | 1 |
| 17413 | 3841 | MMT00043948 | MMT00014519   | 1 |
| 17413 | 3867 | MMT00043948 | Sln           | 1 |
| 17413 | 3886 | MMT00043948 | MMT00047275   | 1 |
| 17413 | 3948 | MMT00043948 | V1rb4         | 1 |
| 17413 | 3986 | MMT00043948 | Ep400         | 1 |
| 17413 | 4079 | MMT00043948 | Emilin3       | 1 |
| 17413 | 4088 | MMT00043948 | Pdcl2         | 1 |
| 17413 | 4166 | MMT00043948 | Cblc          | 1 |
| 17413 | 4199 | MMT00043948 | B3galt5       | 1 |
| 17413 | 4246 | MMT00043948 | Fbxw12        | 1 |
| 17413 | 4311 | MMT00043948 | MMT00033987   | 1 |
| 17413 | 4337 | MMT00043948 | Myst3         | 1 |
| 17413 | 4407 | MMT00043948 | 4930429B21Rik | 1 |
| 17413 | 4425 | MMT00043948 | Olf1346       | 1 |
| 17413 | 4430 | MMT00043948 | Ankrd36       | 1 |
| 17413 | 4683 | MMT00043948 | E330013P04Rik | 1 |
| 17413 | 4717 | MMT00043948 | Cd177         | 1 |
| 17413 | 4870 | MMT00043948 | Olf550        | 1 |
| 17413 | 5126 | MMT00043948 | Fcnb          | 1 |
| 17413 | 5377 | MMT00043948 | MMT00077700   | 1 |
| 17413 | 5380 | MMT00043948 | Olf1403       | 1 |
| 17413 | 5494 | MMT00043948 | Gpr101        | 1 |
| 17413 | 5505 | MMT00043948 | Thap2         | 1 |
| 17413 | 5694 | MMT00043948 | Sp7           | 1 |
| 17413 | 5748 | MMT00043948 | Brsk2         | 1 |
| 17413 | 5783 | MMT00043948 | 4833413O15Rik | 1 |
| 17413 | 5908 | MMT00043948 | MMT00027552   | 1 |

|       |       |             |               |   |
|-------|-------|-------------|---------------|---|
| 17413 | 5929  | MMT00043948 | Cpz           | 1 |
| 17413 | 6367  | MMT00043948 | Lhfp          | 1 |
| 17413 | 6403  | MMT00043948 | MMT00039607   | 1 |
| 17413 | 6422  | MMT00043948 | Grk5          | 1 |
| 17413 | 6429  | MMT00043948 | Sim2          | 1 |
| 17413 | 6520  | MMT00043948 | Arnt2         | 1 |
| 17413 | 6719  | MMT00043948 | Cacng8        | 1 |
| 17413 | 6754  | MMT00043948 | Trpv3         | 1 |
| 17413 | 6756  | MMT00043948 | Sds           | 1 |
| 17413 | 6880  | MMT00043948 | Dmrtb1        | 1 |
| 17413 | 7041  | MMT00043948 | Sp140         | 1 |
| 17413 | 7078  | MMT00043948 | Olf463        | 1 |
| 17413 | 7085  | MMT00043948 | St8sia2       | 1 |
| 17413 | 7094  | MMT00043948 | Cyp2c54       | 1 |
| 17413 | 7132  | MMT00043948 | Sp9           | 1 |
| 17413 | 7279  | MMT00043948 | Cldn13        | 1 |
| 17413 | 7436  | MMT00043948 | 1700063K16Rik | 1 |
| 17413 | 7698  | MMT00043948 | Klr1a         | 1 |
| 17413 | 7721  | MMT00043948 | MMT00000356   | 1 |
| 17413 | 7879  | MMT00043948 | Ifitm3        | 1 |
| 17413 | 7916  | MMT00043948 | MMT00016293   | 1 |
| 17413 | 7974  | MMT00043948 | Arhgef7       | 1 |
| 17413 | 8157  | MMT00043948 | MMT00005305   | 1 |
| 17413 | 8170  | MMT00043948 | Snx22         | 1 |
| 17413 | 8256  | MMT00043948 | Tjap1         | 1 |
| 17413 | 8620  | MMT00043948 | MMT00048670   | 1 |
| 17413 | 8644  | MMT00043948 | V1rg11        | 1 |
| 17413 | 8709  | MMT00043948 | Trim58        | 1 |
| 17413 | 8784  | MMT00043948 | Hgd           | 1 |
| 17413 | 8905  | MMT00043948 | Trim67        | 1 |
| 17413 | 8952  | MMT00043948 | Marco         | 1 |
| 17413 | 9240  | MMT00043948 | Olf401        | 1 |
| 17413 | 9340  | MMT00043948 | Cdc42ep2      | 1 |
| 17413 | 9421  | MMT00043948 | Serpinf2      | 1 |
| 17413 | 9436  | MMT00043948 | Cntnap2       | 1 |
| 17413 | 9446  | MMT00043948 | MMT00017417   | 1 |
| 17413 | 9463  | MMT00043948 | Zdhc23        | 1 |
| 17413 | 9468  | MMT00043948 | Gtf2a1l       | 1 |
| 17413 | 9485  | MMT00043948 | 2700081O15Rik | 1 |
| 17413 | 9743  | MMT00043948 | Gm189         | 1 |
| 17413 | 9946  | MMT00043948 | Stam2         | 1 |
| 17413 | 9954  | MMT00043948 | MMT00047280   | 1 |
| 17413 | 9990  | MMT00043948 | MMT00081303   | 1 |
| 17413 | 10055 | MMT00043948 | Tpte          | 1 |
| 17413 | 10078 | MMT00043948 | Tbc1d14       | 1 |
| 17413 | 10195 | MMT00043948 | Klf1          | 1 |
| 17413 | 10234 | MMT00043948 | C230093N12Rik | 1 |
| 17413 | 10240 | MMT00043948 | Cyp2w1        | 1 |
| 17413 | 10260 | MMT00043948 | Zfp36l2       | 1 |
| 17413 | 10281 | MMT00043948 | Slc15a1       | 1 |
| 17413 | 10377 | MMT00043948 | A430105I19Rik | 1 |
| 17413 | 10452 | MMT00043948 | Grn           | 1 |
| 17413 | 10520 | MMT00043948 | Xkr6          | 1 |
| 17413 | 10576 | MMT00043948 | Xrcc3         | 1 |
| 17413 | 10657 | MMT00043948 | Rnf12         | 1 |
| 17413 | 10687 | MMT00043948 | Itpkb         | 1 |
| 17413 | 10689 | MMT00043948 | Pitpnb        | 1 |
| 17413 | 10723 | MMT00043948 | 4930556N09Rik | 1 |
| 17413 | 10806 | MMT00043948 | Rnf212        | 1 |

|       |       |             |               |   |
|-------|-------|-------------|---------------|---|
| 17413 | 10835 | MMT00043948 | Kcnd2         | 1 |
| 17413 | 10838 | MMT00043948 | Spdef         | 1 |
| 17413 | 10886 | MMT00043948 | Fndc3b        | 1 |
| 17413 | 10974 | MMT00043948 | Vmn2r25       | 1 |
| 17413 | 11001 | MMT00043948 | Pou6f2        | 1 |
| 17413 | 11016 | MMT00043948 | Pcp2          | 1 |
| 17413 | 11017 | MMT00043948 | Olf926        | 1 |
| 17413 | 11256 | MMT00043948 | H2-DMa        | 1 |
| 17413 | 11303 | MMT00043948 | Slc5a12       | 1 |
| 17413 | 11350 | MMT00043948 | 9030420J04Rik | 1 |
| 17413 | 11424 | MMT00043948 | Iqcf3         | 1 |
| 17413 | 11425 | MMT00043948 | Evx2          | 1 |
| 17413 | 11507 | MMT00043948 | Adarb2        | 1 |
| 17413 | 11665 | MMT00043948 | Hyal1         | 1 |
| 17413 | 11677 | MMT00043948 | 5730507C01Rik | 1 |
| 17413 | 11689 | MMT00043948 | MMT00078109   | 1 |
| 17413 | 11805 | MMT00043948 | Bat2          | 1 |
| 17413 | 11809 | MMT00043948 | 4930534B04Rik | 1 |
| 17413 | 11837 | MMT00043948 | Paqr6         | 1 |
| 17413 | 11966 | MMT00043948 | Zfp280b       | 1 |
| 17413 | 12046 | MMT00043948 | Impdh1        | 1 |
| 17413 | 12062 | MMT00043948 | Dzip1l        | 1 |
| 17413 | 12188 | MMT00043948 | Chek2         | 1 |
| 17413 | 12198 | MMT00043948 | Atp13a5       | 1 |
| 17413 | 12248 | MMT00043948 | Tnp2          | 1 |
| 17413 | 12272 | MMT00043948 | Fshr          | 1 |
| 17413 | 12371 | MMT00043948 | 1700128F08Rik | 1 |
| 17413 | 12372 | MMT00043948 | MMT00039397   | 1 |
| 17413 | 12422 | MMT00043948 | Eme1          | 1 |
| 17413 | 12430 | MMT00043948 | Fst           | 1 |
| 17413 | 12457 | MMT00043948 | MMT00072579   | 1 |
| 17413 | 12464 | MMT00043948 | MMT00047924   | 1 |
| 17413 | 12471 | MMT00043948 | Olf926        | 1 |
| 17413 | 12568 | MMT00043948 | Lrrc37a       | 1 |
| 17413 | 12604 | MMT00043948 | Acr           | 1 |
| 17413 | 12633 | MMT00043948 | Klk4          | 1 |
| 17413 | 12651 | MMT00043948 | Tsc22d4       | 1 |
| 17413 | 12696 | MMT00043948 | RP23-392P11.3 | 1 |
| 17413 | 12753 | MMT00043948 | MMT00043344   | 1 |
| 17413 | 12772 | MMT00043948 | Axl           | 1 |
| 17413 | 12826 | MMT00043948 | Zfp354c       | 1 |
| 17413 | 13102 | MMT00043948 | Prkaa1        | 1 |
| 17413 | 13141 | MMT00043948 | MMT00071569   | 1 |
| 17413 | 13201 | MMT00043948 | Rbl2          | 1 |
| 17413 | 13311 | MMT00043948 | Prl3c1        | 1 |
| 17413 | 13428 | MMT00043948 | Gpr20         | 1 |
| 17413 | 13487 | MMT00043948 | A230051G13Rik | 1 |
| 17413 | 13496 | MMT00043948 | H1fnt         | 1 |
| 17413 | 13570 | MMT00043948 | Olf926        | 1 |
| 17413 | 13676 | MMT00043948 | MMT00010979   | 1 |
| 17413 | 13742 | MMT00043948 | 1700024P16Rik | 1 |
| 17413 | 13767 | MMT00043948 | Kcnk15        | 1 |
| 17413 | 13800 | MMT00043948 | Lrp5          | 1 |
| 17413 | 13860 | MMT00043948 | Cpt1b         | 1 |
| 17413 | 13890 | MMT00043948 | Olf926        | 1 |
| 17413 | 14035 | MMT00043948 | Lrrc52        | 1 |
| 17413 | 14149 | MMT00043948 | BC048562      | 1 |
| 17413 | 14303 | MMT00043948 | V1ri2         | 1 |
| 17413 | 14313 | MMT00043948 | Tnk1          | 1 |



|       |       |             |               |   |
|-------|-------|-------------|---------------|---|
| 17413 | 14364 | MMT00043948 | Robo1         | 1 |
| 17413 | 14495 | MMT00043948 | A630018P17Rik | 1 |
| 17413 | 14510 | MMT00043948 | Olf643        | 1 |
| 17413 | 14519 | MMT00043948 | Trex1         | 1 |
| 17413 | 14565 | MMT00043948 | Rnf207        | 1 |
| 17413 | 14754 | MMT00043948 | Atoh8         | 1 |
| 17413 | 15200 | MMT00043948 | Gk2           | 1 |
| 17413 | 15424 | MMT00043948 | Atp6v1g2      | 1 |
| 17413 | 15446 | MMT00043948 | Cd320         | 1 |
| 17413 | 15626 | MMT00043948 | MMT00035685   | 1 |
| 17413 | 15697 | MMT00043948 | Tbc1d8b       | 1 |
| 17413 | 15743 | MMT00043948 | Hoxc6         | 1 |
| 17413 | 15747 | MMT00043948 | Sfrs1         | 1 |
| 17413 | 15847 | MMT00043948 | Gm392         | 1 |
| 17413 | 15885 | MMT00043948 | Adamts7       | 1 |
| 17413 | 16001 | MMT00043948 | D330027H18Rik | 1 |
| 17413 | 16018 | MMT00043948 | MMT00074939   | 1 |
| 17413 | 16104 | MMT00043948 | Ugt3a2        | 1 |
| 17413 | 16157 | MMT00043948 | D9Erd280e     | 1 |
| 17413 | 16197 | MMT00043948 | MMT00065977   | 1 |
| 17413 | 16226 | MMT00043948 | MMT00033542   | 1 |
| 17413 | 16323 | MMT00043948 | Smpd3         | 1 |
| 17413 | 16390 | MMT00043948 | Plb1          | 1 |
| 17413 | 16491 | MMT00043948 | 6330500D04Rik | 1 |
| 17413 | 16553 | MMT00043948 | Cilp2         | 1 |
| 17413 | 16664 | MMT00043948 | Car4          | 1 |
| 17413 | 16672 | MMT00043948 | Tmem82        | 1 |
| 17413 | 16718 | MMT00043948 | Zbtb7c        | 1 |
| 17413 | 16794 | MMT00043948 | Chrn1         | 1 |
| 17413 | 16957 | MMT00043948 | MMT00046108   | 1 |
| 17413 | 17044 | MMT00043948 | Gpr55         | 1 |
| 17413 | 17068 | MMT00043948 | Olf661        | 1 |
| 17413 | 17122 | MMT00043948 | MMT00068814   | 1 |
| 17413 | 17123 | MMT00043948 | Olf1511       | 1 |
| 17413 | 17149 | MMT00043948 | Pms2          | 1 |
| 17413 | 17171 | MMT00043948 | MMT00045847   | 1 |
| 17413 | 17337 | MMT00043948 | 1810065E05Rik | 1 |
| 17413 | 17413 | MMT00043948 | MMT00043948   | 1 |
| 17413 | 17417 | MMT00043948 | Pxn           | 1 |
| 17413 | 17422 | MMT00043948 | Dctd          | 1 |
| 17413 | 17578 | MMT00043948 | Kif19a        | 1 |
| 17413 | 17613 | MMT00043948 | P2rx7         | 1 |
| 17413 | 17750 | MMT00043948 | Hs6st2        | 1 |
| 17413 | 17890 | MMT00043948 | 2610021K21Rik | 1 |
| 17413 | 17960 | MMT00043948 | Yod1          | 1 |
| 17413 | 18124 | MMT00043948 | Ptptr         | 1 |
| 17413 | 18162 | MMT00043948 | BC049352      | 1 |
| 17413 | 18214 | MMT00043948 | Ankrd40       | 1 |
| 17413 | 18325 | MMT00043948 | Cst10         | 1 |
| 17413 | 18409 | MMT00043948 | Nicn1         | 1 |
| 17413 | 18451 | MMT00043948 | Csgalnact1    | 1 |
| 17413 | 18525 | MMT00043948 | Mpped1        | 1 |
| 17413 | 18620 | MMT00043948 | Slmap         | 1 |
| 17413 | 18651 | MMT00043948 | Tulp2         | 1 |
| 17413 | 18699 | MMT00043948 | 2700089E24Rik | 1 |
| 17413 | 18790 | MMT00043948 | Car3          | 1 |
| 17413 | 18847 | MMT00043948 | Armet1        | 1 |
| 17413 | 18892 | MMT00043948 | Cyp4f40       | 1 |
| 17413 | 18980 | MMT00043948 | Ii7           | 1 |

|       |       |             |               |   |
|-------|-------|-------------|---------------|---|
| 17413 | 19219 | MMT00043948 | MMT00015104   | 1 |
| 17413 | 19265 | MMT00043948 | EG546036      | 1 |
| 17413 | 19267 | MMT00043948 | Olf341        | 1 |
| 17413 | 19333 | MMT00043948 | Ccdc13        | 1 |
| 17413 | 19334 | MMT00043948 | Gpr44         | 1 |
| 17413 | 19351 | MMT00043948 | Prkcsb        | 1 |
| 17413 | 19420 | MMT00043948 | Lcn8          | 1 |
| 17413 | 19432 | MMT00043948 | MMT00068429   | 1 |
| 17413 | 19436 | MMT00043948 | Dapp1         | 1 |
| 17413 | 19483 | MMT00043948 | Depdc2        | 1 |
| 17413 | 19542 | MMT00043948 | Hspb7         | 1 |
| 17413 | 19645 | MMT00043948 | Il12rb2       | 1 |
| 17413 | 19658 | MMT00043948 | Cldnd2        | 1 |
| 17413 | 19672 | MMT00043948 | Cldn19        | 1 |
| 17413 | 19709 | MMT00043948 | 1-Sep         | 1 |
| 17413 | 19941 | MMT00043948 | 1700080E11Rik | 1 |
| 17413 | 20089 | MMT00043948 | MMT00015975   | 1 |
| 17413 | 20158 | MMT00043948 | Slc38a1       | 1 |
| 17413 | 20255 | MMT00043948 | Elfn2         | 1 |
| 17413 | 20319 | MMT00043948 | Syne2         | 1 |
| 17413 | 20406 | MMT00043948 | Cacng2        | 1 |
| 17413 | 20419 | MMT00043948 | Adra1b        | 1 |
| 17413 | 20506 | MMT00043948 | 1700011F03Rik | 1 |
| 17413 | 20532 | MMT00043948 | Rnf26         | 1 |
| 17413 | 20566 | MMT00043948 | Tnni2         | 1 |
| 17413 | 20588 | MMT00043948 | Brd2          | 1 |
| 17413 | 20735 | MMT00043948 | Tnrc6b        | 1 |
| 17413 | 20858 | MMT00043948 | Duox1         | 1 |
| 17413 | 20908 | MMT00043948 | Olf353        | 1 |
| 17413 | 20925 | MMT00043948 | 2810410L24Rik | 1 |
| 17413 | 20944 | MMT00043948 | Tmem164       | 1 |
| 17413 | 21070 | MMT00043948 | Cnot8         | 1 |
| 17413 | 21209 | MMT00043948 | Ebf4          | 1 |
| 17413 | 21291 | MMT00043948 | Slc39a4       | 1 |
| 17413 | 21511 | MMT00043948 | MMT00054100   | 1 |
| 17413 | 21563 | MMT00043948 | Arhgap9       | 1 |
| 17413 | 21595 | MMT00043948 | Trpv1         | 1 |
| 17413 | 21717 | MMT00043948 | EG628893      | 1 |
| 17413 | 21723 | MMT00043948 | Homer1        | 1 |
| 17413 | 21866 | MMT00043948 | Hhip1         | 1 |
| 17413 | 21923 | MMT00043948 | Olf355        | 1 |
| 17413 | 21931 | MMT00043948 | Nrxn3         | 1 |
| 17413 | 21996 | MMT00043948 | Mme           | 1 |
| 17413 | 22015 | MMT00043948 | 2410127E18Rik | 1 |
| 17413 | 22073 | MMT00043948 | Lrig3         | 1 |
| 17413 | 22125 | MMT00043948 | Gab1          | 1 |
| 17413 | 22150 | MMT00043948 | Fhdc1         | 1 |
| 17413 | 22271 | MMT00043948 | Cyp2c29       | 1 |
| 17413 | 22434 | MMT00043948 | Olf1255       | 1 |
| 17413 | 22445 | MMT00043948 | Prkag3        | 1 |
| 17413 | 22541 | MMT00043948 | 4632413I24Rik | 1 |
| 17413 | 22555 | MMT00043948 | Ela2          | 1 |
| 17413 | 22559 | MMT00043948 | MMT00031309   | 1 |
| 17413 | 22733 | MMT00043948 | Alpk3         | 1 |
| 17413 | 22750 | MMT00043948 | Mupcdh        | 1 |
| 17413 | 22762 | MMT00043948 | Slc6a4        | 1 |
| 17413 | 22802 | MMT00043948 | Svs2          | 1 |
| 17413 | 22966 | MMT00043948 | Epha4         | 1 |
| 17413 | 23056 | MMT00043948 | Ccdc135       | 1 |

|       |       |             |               |    |
|-------|-------|-------------|---------------|----|
| 17413 | 23070 | MMT00043948 | BC024659      | 1  |
| 17413 | 23079 | MMT00043948 | Spag17        | 1  |
| 17413 | 23109 | MMT00043948 | A430088P11Rik | 1  |
| 17413 | 23112 | MMT00043948 | Gys1          | 1  |
| 17413 | 23119 | MMT00043948 | Cps1          | 1  |
| 17413 | 23454 | MMT00043948 | Znhit1        | 1  |
| 17413 | 23528 | MMT00043948 | 0610038L08Rik | 1  |
| 17413 | 23531 | MMT00043948 | Foxb2         | 1  |
| 17413 | 23546 | MMT00043948 | Zzef1         | 1  |
| 17413 | 23561 | MMT00043948 | Sox14         | 1  |
| 17413 | 23591 | MMT00043948 | Dlg4          | 1  |
| 17413 | 23614 | MMT00043948 | G630016D24Rik | 1  |
| 17413 | 23651 | MMT00043948 | MMT00027295   | 1  |
| 17413 | 23685 | MMT00043948 | Tbxas1        | 1  |
| 17420 | 6873  | Vps13b      | BC023055      | 1  |
| 17420 | 6931  | Vps13b      | Hrsp12        | -1 |
| 17420 | 7100  | Vps13b      | Tomm22        | 1  |
| 17420 | 11549 | Vps13b      | Depdc6        | -1 |
| 17420 | 12091 | Vps13b      | 1810015C04Rik | -1 |
| 17420 | 12655 | Vps13b      | Tmem180       | 1  |
| 17420 | 13648 | Vps13b      | Dap           | -1 |
| 17420 | 16153 | Vps13b      | Syng1         | -1 |
| 17420 | 18939 | Vps13b      | Matn2         | -1 |
| 17420 | 20871 | Vps13b      | Pop1          | 1  |
| 17422 | 15870 | Dctd        | Aqp5          | 1  |
| 17447 | 2830  | Ctsf        | 4632417K18Rik | 1  |
| 17447 | 8703  | Ctsf        | Gstp1         | -1 |
| 17447 | 8721  | Ctsf        | Tbc1d10c      | 1  |
| 17447 | 8902  | Ctsf        | Aldh3b1       | 1  |
| 17447 | 11369 | Ctsf        | Stx3          | 1  |
| 17447 | 11812 | Ctsf        | Mrpl16        | 1  |
| 17447 | 17447 | Ctsf        | Ctsf          | 1  |
| 17447 | 19744 | Ctsf        | Acy3          | -1 |
| 17447 | 19857 | Ctsf        | Rab1b         | 1  |
| 17449 | 14222 | Zfp296      | MMT00076410   | -1 |
| 17449 | 15713 | Zfp296      | Rbm3          | -1 |
| 17449 | 17112 | Zfp296      | Dok7          | 1  |
| 17449 | 21431 | Zfp296      | Xbp1          | 1  |
| 17461 | 22079 | Ripk5       | Tmem81        | 1  |
| 17461 | 22226 | Ripk5       | Pm20d1        | -1 |
| 17463 | 246   | Rgl1        | MMT00053742   | 1  |
| 17463 | 1625  | Rgl1        | AW146154      | -1 |
| 17463 | 8933  | Rgl1        | Arpc5         | 1  |
| 17463 | 9402  | Rgl1        | 1200016B10Rik | -1 |
| 17463 | 9611  | Rgl1        | Ncf2          | 1  |
| 17463 | 15569 | Rgl1        | BC003331      | 1  |
| 17463 | 17463 | Rgl1        | Rgl1          | 1  |
| 17472 | 5271  | Cd53        | Npy           | -1 |
| 17514 | 6202  | Thbd        | Hrk           | -1 |
| 17514 | 18555 | Thbd        | Sdcbp2        | -1 |
| 17514 | 19971 | Thbd        | B930046C15Rik | 1  |
| 17525 | 2294  | Ctgf        | AU040829      | 1  |
| 17525 | 2708  | Ctgf        | Sgk1          | 1  |
| 17525 | 2794  | Ctgf        | Map3k6        | 1  |
| 17525 | 6564  | Ctgf        | Cebpd         | 1  |
| 17525 | 8816  | Ctgf        | Nfkbia        | 1  |
| 17525 | 8980  | Ctgf        | Plekhf1       | 1  |
| 17525 | 9745  | Ctgf        | Gadd45g       | 1  |
| 17525 | 12761 | Ctgf        | Tsc22d3       | 1  |

|       |       |             |               |    |
|-------|-------|-------------|---------------|----|
| 17525 | 12989 | Ctgf        | 1190002H23Rik | 1  |
| 17525 | 14486 | Ctgf        | Sox7          | -1 |
| 17525 | 16494 | Ctgf        | 2310007D09Rik | 1  |
| 17525 | 21313 | Ctgf        | Rhou          | 1  |
| 17528 | 2128  | Gmnn        | 4930447K03Rik | -1 |
| 17528 | 3938  | Gmnn        | Abt1          | 1  |
| 17528 | 10189 | Gmnn        | Cage1         | 1  |
| 17528 | 11649 | Gmnn        | Hfe           | -1 |
| 17528 | 13656 | Gmnn        | Ly86          | 1  |
| 17528 | 14822 | Gmnn        | Nrsn1         | 1  |
| 17528 | 15698 | Gmnn        | Them2         | 1  |
| 17528 | 16491 | Gmnn        | 6330500D04Rik | 1  |
| 17528 | 17528 | Gmnn        | Gmnn          | 1  |
| 17528 | 23118 | Gmnn        | Ttrap         | 1  |
| 17529 | 19955 | Tnfrsf13c   | Cbx2          | -1 |
| 17535 | 1162  | MMT00008110 | Cpsf4         | -1 |
| 17535 | 2755  | MMT00008110 | EG382421      | 1  |
| 17535 | 7083  | MMT00008110 | MMT00044154   | 1  |
| 17535 | 7116  | MMT00008110 | Katnal1       | 1  |
| 17535 | 7821  | MMT00008110 | MMT00042003   | 1  |
| 17535 | 12377 | MMT00008110 | MMT00050540   | 1  |
| 17535 | 15480 | MMT00008110 | MMT00078167   | 1  |
| 17535 | 17535 | MMT00008110 | MMT00008110   | 1  |
| 17535 | 19565 | MMT00008110 | EG385454      | 1  |
| 17535 | 21125 | MMT00008110 | Mtif3         | -1 |
| 17542 | 5345  | MMT00044805 | MMT00023326   | 1  |
| 17542 | 6133  | MMT00044805 | Agrp          | 1  |
| 17542 | 12761 | MMT00044805 | Tsc22d3       | 1  |
| 17562 | 2743  | Rbed1       | Tcf3          | 1  |
| 17562 | 2815  | Rbed1       | Eif2ak3       | 1  |
| 17562 | 3703  | Rbed1       | Ggcx          | 1  |
| 17562 | 5296  | Rbed1       | Rnf181        | 1  |
| 17562 | 8016  | Rbed1       | Mrpl35        | -1 |
| 17562 | 15384 | Rbed1       | Mat2a         | 1  |
| 17562 | 18948 | Rbed1       | Olf1270       | -1 |
| 17574 | 17574 | Prdm16      | Prdm16        | 1  |
| 17579 | 1466  | MMT00078068 | Ubap2l        | -1 |
| 17579 | 3314  | MMT00078068 | Wars2         | -1 |
| 17579 | 9519  | MMT00078068 | Fstl5         | 1  |
| 17579 | 10521 | MMT00078068 | Ttf2          | -1 |
| 17579 | 12367 | MMT00078068 | MMT00072365   | 1  |
| 17579 | 16416 | MMT00078068 | Comm2         | -1 |
| 17581 | 17581 | Pisd        | Pisd          | 1  |
| 17583 | 2708  | Per2        | Sgk1          | 1  |
| 17583 | 2794  | Per2        | Map3k6        | 1  |
| 17583 | 2880  | Per2        | Cd93          | -1 |
| 17583 | 4084  | Per2        | Asah3l        | 1  |
| 17583 | 5345  | Per2        | MMT00023326   | 1  |
| 17583 | 8980  | Per2        | Plekhf1       | 1  |
| 17583 | 10273 | Per2        | Gpt2          | 1  |
| 17583 | 11345 | Per2        | Slc40a1       | -1 |
| 17583 | 12761 | Per2        | Tsc22d3       | 1  |
| 17583 | 12834 | Per2        | Fabp7         | -1 |
| 17583 | 12989 | Per2        | 1190002H23Rik | 1  |
| 17583 | 14233 | Per2        | Fgfr1         | -1 |
| 17583 | 16494 | Per2        | 2310007D09Rik | 1  |
| 17583 | 18553 | Per2        | Tekt4         | 1  |
| 17583 | 19621 | Per2        | Cldn5         | -1 |
| 17583 | 21259 | Per2        | 5430416O09Rik | -1 |

|       |       |         |               |    |
|-------|-------|---------|---------------|----|
| 17583 | 21313 | Per2    | Rhou          | 1  |
| 17583 | 21380 | Per2    | Ier5          | -1 |
| 17583 | 21643 | Per2    | Agtr1a        | 1  |
| 17583 | 22989 | Per2    | Lmcd1         | -1 |
| 17585 | 187   | Gramd1a | Wdr62         | 1  |
| 17585 | 2118  | Gramd1a | Kptn          | 1  |
| 17585 | 2599  | Gramd1a | Lsm14a        | 1  |
| 17585 | 4729  | Gramd1a | Slc7a10       | -1 |
| 17585 | 6513  | Gramd1a | Qpct1         | 1  |
| 17585 | 7761  | Gramd1a | Nudt19        | 1  |
| 17585 | 8394  | Gramd1a | Dpy19l3       | 1  |
| 17585 | 9122  | Gramd1a | Sepw1         | 1  |
| 17585 | 9454  | Gramd1a | 2810426N06Rik | 1  |
| 17585 | 11800 | Gramd1a | Clip3         | -1 |
| 17585 | 14842 | Gramd1a | Gipr          | 1  |
| 17585 | 15670 | Gramd1a | Pnmal1        | -1 |
| 17585 | 17632 | Gramd1a | Lypd3         | -1 |
| 17585 | 19142 | Gramd1a | Gpatch1       | 1  |
| 17585 | 19306 | Gramd1a | Al428936      | 1  |
| 17585 | 19462 | Gramd1a | 4933439C20Rik | -1 |
| 17585 | 20606 | Gramd1a | MMT00042166   | -1 |
| 17619 | 2118  | Zfp551  | Kptn          | 1  |
| 17619 | 2599  | Zfp551  | Lsm14a        | 1  |
| 17619 | 6922  | Zfp551  | Tmem86b       | -1 |
| 17619 | 7761  | Zfp551  | Nudt19        | 1  |
| 17619 | 7803  | Zfp551  | Ttyh1         | 1  |
| 17619 | 8394  | Zfp551  | Dpy19l3       | 1  |
| 17619 | 9122  | Zfp551  | Sepw1         | 1  |
| 17619 | 9376  | Zfp551  | Zscan18       | 1  |
| 17619 | 14842 | Zfp551  | Gipr          | 1  |
| 17619 | 19462 | Zfp551  | 4933439C20Rik | -1 |
| 17622 | 2708  | Foxo1   | Sgk1          | 1  |
| 17622 | 5345  | Foxo1   | MMT00023326   | 1  |
| 17622 | 12761 | Foxo1   | Tsc22d3       | 1  |
| 17622 | 12989 | Foxo1   | 1190002H23Rik | 1  |
| 17622 | 15826 | Foxo1   | Arl4d         | 1  |
| 17631 | 22982 | Pla2r1  | Mug2          | -1 |
| 17673 | 15870 | Nola1   | Aqp5          | 1  |
| 17692 | 18757 | Smc6    | Vsnl1         | 1  |
| 17692 | 23003 | Smc6    | EG209550      | 1  |
| 17703 | 1297  | Large   | Phox2a        | 1  |
| 17703 | 1755  | Large   | Ocel1         | -1 |
| 17703 | 5433  | Large   | 2410004L22Rik | 1  |
| 17703 | 5925  | Large   | Tmem59l       | 1  |
| 17707 | 5669  | Rshl2b  | Fndc1         | -1 |
| 17707 | 7088  | Rshl2b  | Slc37a1       | 1  |
| 17707 | 7603  | Rshl2b  | Sod2          | 1  |
| 17707 | 7909  | Rshl2b  | Oas3          | 1  |
| 17707 | 8750  | Rshl2b  | 1700010l14Rik | 1  |
| 17707 | 9805  | Rshl2b  | Tagap         | 1  |
| 17707 | 10729 | Rshl2b  | Fgd2          | 1  |
| 17707 | 11435 | Rshl2b  | Rnaset2a      | 1  |
| 17707 | 17707 | Rshl2b  | Rshl2b        | 1  |
| 17707 | 17760 | Rshl2b  | Ccr6          | -1 |
| 17707 | 21295 | Rshl2b  | Snf1lk        | -1 |
| 17707 | 21415 | Rshl2b  | Has1          | 1  |
| 17707 | 21952 | Rshl2b  | Tfb1m         | -1 |
| 17707 | 22104 | Rshl2b  | Rnf123        | 1  |
| 17716 | 478   | Rnf10   | Sfrs9         | -1 |

|       |       |        |               |    |
|-------|-------|--------|---------------|----|
| 17716 | 5425  | Rnf10  | Ung           | -1 |
| 17716 | 6330  | Rnf10  | Dgkq          | -1 |
| 17716 | 8807  | Rnf10  | Ankrd56       | 1  |
| 17716 | 10978 | Rnf10  | MMT00078322   | -1 |
| 17716 | 11257 | Rnf10  | Trem3         | -1 |
| 17716 | 12656 | Rnf10  | Coq5          | -1 |
| 17716 | 15466 | Rnf10  | Gm136         | 1  |
| 17716 | 16066 | Rnf10  | Coq2          | -1 |
| 17716 | 17716 | Rnf10  | Rnf10         | 1  |
| 17720 | 13813 | Rap2b  | Ktelc1        | -1 |
| 17729 | 10130 | Prim2  | MMT00043239   | 1  |
| 17729 | 17729 | Prim2  | Prim2         | 1  |
| 17729 | 20077 | Prim2  | Ccdc115       | 1  |
| 17743 | 630   | Phb2   | C1s           | -1 |
| 17743 | 9622  | Phb2   | Rasgef1a      | -1 |
| 17743 | 14307 | Phb2   | Kcnj8         | 1  |
| 17743 | 19964 | Phb2   | Ndufa9        | 1  |
| 17743 | 22395 | Phb2   | Kcna1         | -1 |
| 17750 | 10    | Hs6st2 | NaN           | 1  |
| 17750 | 115   | Hs6st2 | NaN           | 1  |
| 17750 | 141   | Hs6st2 | Jag1          | 1  |
| 17750 | 316   | Hs6st2 | 4930471G03Rik | 1  |
| 17750 | 391   | Hs6st2 | 4933416I08Rik | 1  |
| 17750 | 558   | Hs6st2 | Crebl1        | 1  |
| 17750 | 985   | Hs6st2 | Hsd3b6        | 1  |
| 17750 | 1021  | Hs6st2 | Rhpn2         | 1  |
| 17750 | 1059  | Hs6st2 | P2rx6         | 1  |
| 17750 | 1122  | Hs6st2 | Pax3          | 1  |
| 17750 | 1354  | Hs6st2 | Lsmd1         | 1  |
| 17750 | 1619  | Hs6st2 | Fbxw17        | 1  |
| 17750 | 1679  | Hs6st2 | MMT00009278   | 1  |
| 17750 | 1696  | Hs6st2 | V1re9         | 1  |
| 17750 | 1771  | Hs6st2 | Park2         | 1  |
| 17750 | 1795  | Hs6st2 | Rabgap1l      | 1  |
| 17750 | 1829  | Hs6st2 | MMT00030026   | 1  |
| 17750 | 1876  | Hs6st2 | Amdhd1        | 1  |
| 17750 | 1920  | Hs6st2 | Oas1e         | 1  |
| 17750 | 2067  | Hs6st2 | Myo1a         | 1  |
| 17750 | 2226  | Hs6st2 | Amt           | 1  |
| 17750 | 2819  | Hs6st2 | Kcnk5         | 1  |
| 17750 | 3127  | Hs6st2 | Plcd1         | 1  |
| 17750 | 3144  | Hs6st2 | Ube2j2        | 1  |
| 17750 | 3166  | Hs6st2 | Vmn2r57       | 1  |
| 17750 | 3208  | Hs6st2 | 4930511111Rik | 1  |
| 17750 | 3254  | Hs6st2 | Grifin        | 1  |
| 17750 | 3383  | Hs6st2 | Cd99          | 1  |
| 17750 | 3511  | Hs6st2 | Rnf182        | 1  |
| 17750 | 3841  | Hs6st2 | MMT00014519   | 1  |
| 17750 | 3948  | Hs6st2 | V1rb4         | 1  |
| 17750 | 3986  | Hs6st2 | Ep400         | 1  |
| 17750 | 4079  | Hs6st2 | Emilin3       | 1  |
| 17750 | 4088  | Hs6st2 | Pdcl2         | 1  |
| 17750 | 4166  | Hs6st2 | Cblc          | 1  |
| 17750 | 4199  | Hs6st2 | B3galt5       | 1  |
| 17750 | 4246  | Hs6st2 | Fbxw12        | 1  |
| 17750 | 4337  | Hs6st2 | Myst3         | 1  |
| 17750 | 4407  | Hs6st2 | 4930429B21Rik | 1  |
| 17750 | 4430  | Hs6st2 | Ankrd36       | 1  |
| 17750 | 4870  | Hs6st2 | Olfir550      | 1  |

|       |       |        |               |   |
|-------|-------|--------|---------------|---|
| 17750 | 5126  | Hs6st2 | Fcnb          | 1 |
| 17750 | 5505  | Hs6st2 | Thap2         | 1 |
| 17750 | 5694  | Hs6st2 | Sp7           | 1 |
| 17750 | 5748  | Hs6st2 | Brsk2         | 1 |
| 17750 | 5908  | Hs6st2 | MMT00027552   | 1 |
| 17750 | 5929  | Hs6st2 | Cpz           | 1 |
| 17750 | 6367  | Hs6st2 | Lhfp          | 1 |
| 17750 | 6403  | Hs6st2 | MMT00039607   | 1 |
| 17750 | 6422  | Hs6st2 | Grk5          | 1 |
| 17750 | 6429  | Hs6st2 | Sim2          | 1 |
| 17750 | 6754  | Hs6st2 | Trpv3         | 1 |
| 17750 | 6880  | Hs6st2 | Dmrtb1        | 1 |
| 17750 | 7041  | Hs6st2 | Sp140         | 1 |
| 17750 | 7085  | Hs6st2 | St8sia2       | 1 |
| 17750 | 7094  | Hs6st2 | Cyp2c54       | 1 |
| 17750 | 7279  | Hs6st2 | Cldn13        | 1 |
| 17750 | 7436  | Hs6st2 | 1700063K16Rik | 1 |
| 17750 | 7916  | Hs6st2 | MMT00016293   | 1 |
| 17750 | 7974  | Hs6st2 | Arhgef7       | 1 |
| 17750 | 8157  | Hs6st2 | MMT00005305   | 1 |
| 17750 | 8256  | Hs6st2 | Tjap1         | 1 |
| 17750 | 8620  | Hs6st2 | MMT00048670   | 1 |
| 17750 | 8644  | Hs6st2 | V1rg11        | 1 |
| 17750 | 8709  | Hs6st2 | Trim58        | 1 |
| 17750 | 8905  | Hs6st2 | Trim67        | 1 |
| 17750 | 8952  | Hs6st2 | Marco         | 1 |
| 17750 | 9436  | Hs6st2 | Cntnap2       | 1 |
| 17750 | 9463  | Hs6st2 | Zdhc23        | 1 |
| 17750 | 9946  | Hs6st2 | Stam2         | 1 |
| 17750 | 9954  | Hs6st2 | MMT00047280   | 1 |
| 17750 | 10195 | Hs6st2 | Klf1          | 1 |
| 17750 | 10240 | Hs6st2 | Cyp2w1        | 1 |
| 17750 | 10260 | Hs6st2 | Zfp36l2       | 1 |
| 17750 | 10281 | Hs6st2 | Slc15a1       | 1 |
| 17750 | 10377 | Hs6st2 | A430105l19Rik | 1 |
| 17750 | 10452 | Hs6st2 | Grn           | 1 |
| 17750 | 10520 | Hs6st2 | Xkr6          | 1 |
| 17750 | 10657 | Hs6st2 | Rnf12         | 1 |
| 17750 | 10687 | Hs6st2 | Itpkb         | 1 |
| 17750 | 10689 | Hs6st2 | Pitpnb        | 1 |
| 17750 | 10886 | Hs6st2 | Fndc3b        | 1 |
| 17750 | 11016 | Hs6st2 | Pcp2          | 1 |
| 17750 | 11256 | Hs6st2 | H2-DMa        | 1 |
| 17750 | 11303 | Hs6st2 | Slc5a12       | 1 |
| 17750 | 11350 | Hs6st2 | 9030420J04Rik | 1 |
| 17750 | 11425 | Hs6st2 | Evx2          | 1 |
| 17750 | 11507 | Hs6st2 | Adarb2        | 1 |
| 17750 | 11665 | Hs6st2 | Hyal1         | 1 |
| 17750 | 11689 | Hs6st2 | MMT00078109   | 1 |
| 17750 | 11805 | Hs6st2 | Bat2          | 1 |
| 17750 | 11809 | Hs6st2 | 4930534B04Rik | 1 |
| 17750 | 11837 | Hs6st2 | Paqr6         | 1 |
| 17750 | 11881 | Hs6st2 | Mpl           | 1 |
| 17750 | 11966 | Hs6st2 | Zfp280b       | 1 |
| 17750 | 12062 | Hs6st2 | Dzip1l        | 1 |
| 17750 | 12248 | Hs6st2 | Tnp2          | 1 |
| 17750 | 12272 | Hs6st2 | Fshr          | 1 |
| 17750 | 12372 | Hs6st2 | MMT00039397   | 1 |
| 17750 | 12430 | Hs6st2 | Fst           | 1 |

|       |       |        |               |   |
|-------|-------|--------|---------------|---|
| 17750 | 12497 | Hs6st2 | Kir3dl2       | 1 |
| 17750 | 12568 | Hs6st2 | Lrrc37a       | 1 |
| 17750 | 12633 | Hs6st2 | Klk4          | 1 |
| 17750 | 12651 | Hs6st2 | Tsc22d4       | 1 |
| 17750 | 12696 | Hs6st2 | RP23-392P11.3 | 1 |
| 17750 | 12753 | Hs6st2 | MMT00043344   | 1 |
| 17750 | 12772 | Hs6st2 | Axl           | 1 |
| 17750 | 12826 | Hs6st2 | Zfp354c       | 1 |
| 17750 | 13102 | Hs6st2 | Prkaa1        | 1 |
| 17750 | 13201 | Hs6st2 | Rbl2          | 1 |
| 17750 | 13487 | Hs6st2 | A230051G13Rik | 1 |
| 17750 | 13742 | Hs6st2 | 1700024P16Rik | 1 |
| 17750 | 13800 | Hs6st2 | Lrp5          | 1 |
| 17750 | 13860 | Hs6st2 | Cpt1b         | 1 |
| 17750 | 13890 | Hs6st2 | Olf1263       | 1 |
| 17750 | 14149 | Hs6st2 | BC048562      | 1 |
| 17750 | 14313 | Hs6st2 | Tnk1          | 1 |
| 17750 | 14565 | Hs6st2 | Rnf207        | 1 |
| 17750 | 14754 | Hs6st2 | Atoh8         | 1 |
| 17750 | 15424 | Hs6st2 | Atp6v1g2      | 1 |
| 17750 | 15626 | Hs6st2 | MMT00035685   | 1 |
| 17750 | 15697 | Hs6st2 | Tbc1d8b       | 1 |
| 17750 | 15743 | Hs6st2 | Hoxc6         | 1 |
| 17750 | 15747 | Hs6st2 | Sfrs1         | 1 |
| 17750 | 15885 | Hs6st2 | Adamts7       | 1 |
| 17750 | 16197 | Hs6st2 | MMT00065977   | 1 |
| 17750 | 16390 | Hs6st2 | Plb1          | 1 |
| 17750 | 16553 | Hs6st2 | Cilp2         | 1 |
| 17750 | 16664 | Hs6st2 | Car4          | 1 |
| 17750 | 16672 | Hs6st2 | Tmem82        | 1 |
| 17750 | 16718 | Hs6st2 | Zbtb7c        | 1 |
| 17750 | 16794 | Hs6st2 | Chrn1         | 1 |
| 17750 | 16957 | Hs6st2 | MMT00046108   | 1 |
| 17750 | 17171 | Hs6st2 | MMT00045847   | 1 |
| 17750 | 17337 | Hs6st2 | 1810065E05Rik | 1 |
| 17750 | 17417 | Hs6st2 | Pxn           | 1 |
| 17750 | 17422 | Hs6st2 | Dctd          | 1 |
| 17750 | 17578 | Hs6st2 | Kif19a        | 1 |
| 17750 | 17613 | Hs6st2 | P2rx7         | 1 |
| 17750 | 17750 | Hs6st2 | Hs6st2        | 1 |
| 17750 | 17890 | Hs6st2 | 2610021K21Rik | 1 |
| 17750 | 17960 | Hs6st2 | Yod1          | 1 |
| 17750 | 18162 | Hs6st2 | BC049352      | 1 |
| 17750 | 18409 | Hs6st2 | Nicn1         | 1 |
| 17750 | 18525 | Hs6st2 | Mpped1        | 1 |
| 17750 | 18620 | Hs6st2 | Slmap         | 1 |
| 17750 | 18651 | Hs6st2 | Tulp2         | 1 |
| 17750 | 18790 | Hs6st2 | Car3          | 1 |
| 17750 | 18847 | Hs6st2 | Armet1        | 1 |
| 17750 | 18980 | Hs6st2 | Ii7           | 1 |
| 17750 | 19219 | Hs6st2 | MMT00015104   | 1 |
| 17750 | 19265 | Hs6st2 | EG546036      | 1 |
| 17750 | 19267 | Hs6st2 | Olf1341       | 1 |
| 17750 | 19333 | Hs6st2 | Ccdc13        | 1 |
| 17750 | 19351 | Hs6st2 | Prkcs         | 1 |
| 17750 | 19420 | Hs6st2 | Lcn8          | 1 |
| 17750 | 19432 | Hs6st2 | MMT00068429   | 1 |
| 17750 | 19436 | Hs6st2 | Dapp1         | 1 |
| 17750 | 19483 | Hs6st2 | Depdc2        | 1 |



|       |       |               |               |    |
|-------|-------|---------------|---------------|----|
| 17750 | 19645 | Hs6st2        | Il12rb2       | 1  |
| 17750 | 19672 | Hs6st2        | Cldn19        | 1  |
| 17750 | 20089 | Hs6st2        | MMT00015975   | 1  |
| 17750 | 20158 | Hs6st2        | Slc38a1       | 1  |
| 17750 | 20255 | Hs6st2        | Elfn2         | 1  |
| 17750 | 20319 | Hs6st2        | Syne2         | 1  |
| 17750 | 20419 | Hs6st2        | Adra1b        | 1  |
| 17750 | 20506 | Hs6st2        | 1700011F03Rik | 1  |
| 17750 | 20566 | Hs6st2        | Tnni2         | 1  |
| 17750 | 20588 | Hs6st2        | Brd2          | 1  |
| 17750 | 20908 | Hs6st2        | Olf583        | 1  |
| 17750 | 20944 | Hs6st2        | Tmem164       | 1  |
| 17750 | 21209 | Hs6st2        | Ebf4          | 1  |
| 17750 | 21511 | Hs6st2        | MMT00054100   | 1  |
| 17750 | 21595 | Hs6st2        | Trpv1         | 1  |
| 17750 | 21717 | Hs6st2        | EG628893      | 1  |
| 17750 | 21723 | Hs6st2        | Homer1        | 1  |
| 17750 | 21866 | Hs6st2        | Hhip1         | 1  |
| 17750 | 21923 | Hs6st2        | Olf585        | 1  |
| 17750 | 21931 | Hs6st2        | Nrxn3         | 1  |
| 17750 | 22073 | Hs6st2        | Lrig3         | 1  |
| 17750 | 22125 | Hs6st2        | Gab1          | 1  |
| 17750 | 22150 | Hs6st2        | Fhdc1         | 1  |
| 17750 | 22271 | Hs6st2        | Cyp2c29       | 1  |
| 17750 | 22434 | Hs6st2        | Olf1255       | 1  |
| 17750 | 22445 | Hs6st2        | Prkag3        | 1  |
| 17750 | 22555 | Hs6st2        | Ela2          | 1  |
| 17750 | 22559 | Hs6st2        | MMT00031309   | 1  |
| 17750 | 22733 | Hs6st2        | Alpk3         | 1  |
| 17750 | 22750 | Hs6st2        | Mupcdh        | 1  |
| 17750 | 22762 | Hs6st2        | Slc6a4        | 1  |
| 17750 | 22802 | Hs6st2        | Svs2          | 1  |
| 17750 | 22966 | Hs6st2        | Epha4         | 1  |
| 17750 | 23070 | Hs6st2        | BC024659      | 1  |
| 17750 | 23119 | Hs6st2        | Cps1          | 1  |
| 17750 | 23454 | Hs6st2        | Znhit1        | 1  |
| 17750 | 23528 | Hs6st2        | 0610038L08Rik | 1  |
| 17750 | 23531 | Hs6st2        | Foxb2         | 1  |
| 17750 | 23546 | Hs6st2        | Zzef1         | 1  |
| 17750 | 23591 | Hs6st2        | Dlg4          | 1  |
| 17750 | 23651 | Hs6st2        | MMT00027295   | 1  |
| 17752 | 4454  | Chac1         | BC055107      | 1  |
| 17752 | 5345  | Chac1         | MMT00023326   | 1  |
| 17752 | 8171  | Chac1         | Spink8        | 1  |
| 17752 | 12761 | Chac1         | Tsc22d3       | 1  |
| 17752 | 12834 | Chac1         | Fabp7         | -1 |
| 17805 | 17805 | Slc39a12      | Slc39a12      | -1 |
| 17805 | 18702 | Slc39a12      | Mrc1          | -1 |
| 17820 | 22722 | Cpd           | Ttc14         | 1  |
| 17826 | 1297  | 3300001G02Rik | Phox2a        | 1  |
| 17827 | 12834 | Klhl13        | Fabp7         | 1  |
| 17837 | 2752  | Polr3gl       | Fcgr1         | -1 |
| 17854 | 3812  | Rdh11         | Zfyve26       | 1  |
| 17862 | 5345  | Fbxo21        | MMT00023326   | 1  |
| 17876 | 15870 | Tubb4         | Aqp5          | 1  |
| 17884 | 15870 | Lnx2          | Aqp5          | 1  |
| 17897 | 9790  | Gm1019        | Tspan10       | 1  |
| 17897 | 13615 | Gm1019        | Arl16         | -1 |
| 17897 | 17193 | Gm1019        | Npb           | 1  |

|       |       |               |               |    |
|-------|-------|---------------|---------------|----|
| 17897 | 21414 | Gm1019        | BC017643      | 1  |
| 17909 | 5342  | Mesdc1        | Eps8l3        | 1  |
| 17909 | 15870 | Mesdc1        | Aqp5          | 1  |
| 17991 | 2470  | Fbxl20        | Grb7          | -1 |
| 17991 | 21189 | Fbxl20        | Arl5c         | -1 |
| 18022 | 16823 | Adamts17      | Inhbb         | 1  |
| 18046 | 3159  | Ublcp1        | Pld1          | 1  |
| 18046 | 16618 | Ublcp1        | Hps3          | -1 |
| 18053 | 9413  | Psmc4         | 1190020J12Rik | -1 |
| 18053 | 18053 | Psmc4         | Psmc4         | 1  |
| 18053 | 23283 | Psmc4         | Mrps12        | 1  |
| 18070 | 18070 | Ogg1          | Ogg1          | 1  |
| 18083 | 2794  | Gadd45a       | Map3k6        | -1 |
| 18083 | 12761 | Gadd45a       | Tsc22d3       | -1 |
| 18088 | 2599  | Alkbh6        | Lsm14a        | 1  |
| 18088 | 7761  | Alkbh6        | Nudt19        | 1  |
| 18088 | 8394  | Alkbh6        | Dpy19l3       | 1  |
| 18088 | 17632 | Alkbh6        | Lypd3         | -1 |
| 18088 | 19142 | Alkbh6        | Gpatch1       | 1  |
| 18088 | 19306 | Alkbh6        | Al428936      | 1  |
| 18140 | 10788 | Atg2b         | D430019H16Rik | 1  |
| 18140 | 18140 | Atg2b         | Atg2b         | 1  |
| 18143 | 18143 | Dnajc1        | Dnajc1        | -1 |
| 18143 | 23259 | Dnajc1        | Dnajc1        | 1  |
| 18164 | 15870 | Gdf10         | Aqp5          | -1 |
| 18165 | 2599  | 5830482F20Rik | Lsm14a        | 1  |
| 18165 | 7761  | 5830482F20Rik | Nudt19        | 1  |
| 18165 | 8394  | 5830482F20Rik | Dpy19l3       | 1  |
| 18165 | 9263  | 5830482F20Rik | Fbxo27        | -1 |
| 18165 | 9413  | 5830482F20Rik | 1190020J12Rik | -1 |
| 18165 | 9454  | 5830482F20Rik | 2810426N06Rik | 1  |
| 18165 | 17632 | 5830482F20Rik | Lypd3         | -1 |
| 18165 | 18053 | 5830482F20Rik | Psmc4         | 1  |
| 18165 | 18165 | 5830482F20Rik | 5830482F20Rik | 1  |
| 18165 | 23283 | 5830482F20Rik | Mrps12        | 1  |
| 18172 | 5639  | Nupr1         | Gdpd3         | 1  |
| 18174 | 2224  | Stat2         | Oasl2         | 1  |
| 18174 | 3683  | Stat2         | Oas2          | 1  |
| 18174 | 5853  | Stat2         | Trim30        | 1  |
| 18174 | 6824  | Stat2         | Irf7          | 1  |
| 18174 | 7069  | Stat2         | Ube1l         | 1  |
| 18174 | 7105  | Stat2         | Plac8         | 1  |
| 18174 | 9616  | Stat2         | Al451557      | 1  |
| 18174 | 9847  | Stat2         | Ifi27         | 1  |
| 18174 | 12398 | Stat2         | Ifi44         | 1  |
| 18174 | 13309 | Stat2         | Tgtp          | 1  |
| 18174 | 15074 | Stat2         | Usp18         | 1  |
| 18174 | 19189 | Stat2         | Sp100         | 1  |
| 18174 | 21549 | Stat2         | Rtp4          | 1  |
| 18174 | 23450 | Stat2         | D12Ert647e    | 1  |
| 18176 | 21425 | Aqp11         | Rab6          | -1 |
| 18177 | 15870 | Cyp7b1        | Aqp5          | 1  |
| 18179 | 5345  | Dbp           | MMT00023326   | 1  |
| 18179 | 5974  | Dbp           | Arntl         | -1 |
| 18179 | 12834 | Dbp           | Fabp7         | -1 |
| 18179 | 16951 | Dbp           | R74862        | 1  |
| 18179 | 18179 | Dbp           | Dbp           | 1  |
| 18179 | 21142 | Dbp           | Gm129         | 1  |
| 18179 | 21935 | Dbp           | Prok2         | -1 |

|       |       |               |               |    |
|-------|-------|---------------|---------------|----|
| 18184 | 3797  | Klr1b1b       | Nrip2         | -1 |
| 18184 | 10635 | Klr1b1b       | Itfg2         | -1 |
| 18186 | 2224  | Parp14        | Oasl2         | 1  |
| 18186 | 3683  | Parp14        | Oas2          | 1  |
| 18186 | 5853  | Parp14        | Trim30        | 1  |
| 18186 | 6824  | Parp14        | Irf7          | 1  |
| 18186 | 7069  | Parp14        | Ube1l         | 1  |
| 18186 | 9616  | Parp14        | Al451557      | 1  |
| 18186 | 12398 | Parp14        | Ifi44         | 1  |
| 18186 | 13309 | Parp14        | Tgtp          | 1  |
| 18186 | 19189 | Parp14        | Sp100         | 1  |
| 18186 | 21549 | Parp14        | Rtp4          | 1  |
| 18186 | 23450 | Parp14        | D12Erd647e    | 1  |
| 18195 | 18195 | Mafk          | Mafk          | 1  |
| 18235 | 12398 | Epsti1        | Ifi44         | 1  |
| 18271 | 21439 | MMT00007507   | Il25          | 1  |
| 18314 | 21142 | 4631416L12Rik | Gm129         | -1 |
| 18324 | 14222 | 4930546H06Rik | MMT00076410   | 1  |
| 18324 | 15713 | 4930546H06Rik | Rbm3          | 1  |
| 18333 | 18333 | Rassf8        | Rassf8        | 1  |
| 18338 | 1270  | Akr1e1        | 1700029I01Rik | -1 |
| 18338 | 3475  | Akr1e1        | 2610305D13Rik | -1 |
| 18338 | 6191  | Akr1e1        | Ddost         | 1  |
| 18338 | 11870 | Akr1e1        | Apitd1        | -1 |
| 18338 | 15664 | Akr1e1        | Masp2         | -1 |
| 18338 | 18338 | Akr1e1        | Akr1e1        | 1  |
| 18338 | 18548 | Akr1e1        | 1700012P22Rik | 1  |
| 18338 | 19647 | Akr1e1        | Cort          | -1 |
| 18338 | 19924 | Akr1e1        | Ubiad1        | -1 |
| 18365 | 18365 | Bcl2l12       | Bcl2l12       | 1  |
| 18371 | 18371 | Sap130        | Sap130        | 1  |
| 18373 | 7263  | Dnajb1        | Narg1l        | 1  |
| 18373 | 18373 | Dnajb1        | Dnajb1        | 1  |
| 18373 | 20535 | Dnajb1        | Rbm4          | 1  |
| 18388 | 8980  | Lnx1          | Plekhf1       | 1  |
| 18496 | 16494 | Mbd4          | 2310007D09Rik | -1 |
| 18514 | 10327 | 4930412F15Rik | Hint2         | -1 |
| 18514 | 14342 | 4930412F15Rik | 4930412F15Rik | -1 |
| 18514 | 18514 | 4930412F15Rik | 4930412F15Rik | 1  |
| 18520 | 3654  | MMT00005421   | St13          | 1  |
| 18520 | 6804  | MMT00005421   | Cyp2d22       | -1 |
| 18520 | 7100  | MMT00005421   | Tomm22        | -1 |
| 18520 | 9540  | MMT00005421   | Csnk1e        | -1 |
| 18520 | 14145 | MMT00005421   | Sgsm3         | -1 |
| 18520 | 16467 | MMT00005421   | Card10        | -1 |
| 18537 | 6372  | Moxd1         | 1110021L09Rik | 1  |
| 18561 | 9980  | Ngly1         | MMT00008758   | -1 |
| 18561 | 18561 | Ngly1         | Ngly1         | 1  |
| 18574 | 9230  | Parc          | 1700027N10Rik | 1  |
| 18574 | 13946 | Parc          | Slc35b2       | -1 |
| 18574 | 14027 | Parc          | Rpo1-1        | 1  |
| 18574 | 18772 | Parc          | BC048355      | -1 |
| 18574 | 19519 | Parc          | BC011248      | -1 |
| 18577 | 2938  | Btbd9         | H2-T23        | -1 |
| 18577 | 7088  | Btbd9         | Slc37a1       | -1 |
| 18577 | 16692 | Btbd9         | Bat4          | -1 |
| 18577 | 17412 | Btbd9         | Aif1          | 1  |
| 18577 | 20238 | Btbd9         | H2-T9         | -1 |
| 18592 | 5681  | Txn14a        | Mbd1          | 1  |

|       |       |               |               |    |
|-------|-------|---------------|---------------|----|
| 18592 | 12109 | Txn14a        | Smad4         | -1 |
| 18592 | 12984 | Txn14a        | Cyb5          | 1  |
| 18592 | 17323 | Txn14a        | Tubb6         | -1 |
| 18592 | 18592 | Txn14a        | Txn14a        | 1  |
| 18592 | 19689 | Txn14a        | 1110032A13Rik | -1 |
| 18592 | 20942 | Txn14a        | MMT00006980   | -1 |
| 18592 | 21244 | Txn14a        | Nfatc1        | 1  |
| 18592 | 22930 | Txn14a        | Mro           | -1 |
| 18597 | 13813 | Ganc          | Ktelc1        | -1 |
| 18597 | 14043 | Ganc          | 4930455C21Rik | 1  |
| 18618 | 18618 | Tex14         | Tex14         | 1  |
| 18632 | 15476 | Asxl1         | Fem1b         | 1  |
| 18632 | 15680 | Asxl1         | 2810030E01Rik | -1 |
| 18662 | 11571 | Batf3         | Bpnt1         | 1  |
| 18662 | 11741 | Batf3         | Slc30a10      | -1 |
| 18662 | 19332 | Batf3         | Bpnt1         | 1  |
| 18672 | 18672 | Oraov1        | Oraov1        | 1  |
| 18673 | 1466  | Muc1          | Ubap2l        | 1  |
| 18673 | 2752  | Muc1          | Fcgr1         | 1  |
| 18673 | 3314  | Muc1          | Wars2         | 1  |
| 18673 | 5508  | Muc1          | Lrig2         | -1 |
| 18673 | 6206  | Muc1          | MMT00063701   | 1  |
| 18673 | 6708  | Muc1          | Serpini2      | -1 |
| 18673 | 8679  | Muc1          | Tiparp        | 1  |
| 18673 | 9519  | Muc1          | Fstl5         | -1 |
| 18673 | 10521 | Muc1          | Ttf2          | 1  |
| 18673 | 12367 | Muc1          | MMT00072365   | -1 |
| 18673 | 12716 | Muc1          | 5830417110Rik | -1 |
| 18673 | 15901 | Muc1          | Tpm3          | -1 |
| 18673 | 16416 | Muc1          | Commd2        | 1  |
| 18673 | 21650 | Muc1          | Ap4b1         | 1  |
| 18673 | 22570 | Muc1          | Phtf1         | 1  |
| 18680 | 2752  | EG633285      | Fcgr1         | -1 |
| 18680 | 9519  | EG633285      | Fstl5         | 1  |
| 18680 | 12367 | EG633285      | MMT00072365   | 1  |
| 18680 | 13512 | EG633285      | Tmem144       | 1  |
| 18680 | 16416 | EG633285      | Commd2        | -1 |
| 18700 | 2243  | Trappc2l      | Gcsh          | 1  |
| 18700 | 14391 | Trappc2l      | MMT00017335   | -1 |
| 18700 | 18700 | Trappc2l      | Trappc2l      | 1  |
| 18700 | 22351 | Trappc2l      | Fanca         | -1 |
| 18702 | 17805 | Mrc1          | Slc39a12      | 1  |
| 18702 | 18702 | Mrc1          | Mrc1          | 1  |
| 18709 | 18709 | Srp68         | Srp68         | 1  |
| 18709 | 19322 | Srp68         | Myo15b        | -1 |
| 18709 | 21528 | Srp68         | Nup85         | -1 |
| 18713 | 12761 | 3110037116Rik | Tsc22d3       | -1 |
| 18714 | 5795  | Farsb         | MMT00057992   | 1  |
| 18714 | 11621 | Farsb         | Mixl1         | 1  |
| 18714 | 16137 | Farsb         | Xrcc5         | -1 |
| 18714 | 18714 | Farsb         | Farsb         | 1  |
| 18743 | 15476 | Ruvbl1        | Fem1b         | -1 |
| 18750 | 8416  | Thap6         | Cdc20         | -1 |
| 18752 | 3159  | Fgf7          | Pld1          | 1  |
| 18752 | 16416 | Fgf7          | Commd2        | 1  |
| 18752 | 16618 | Fgf7          | Hps3          | -1 |
| 18754 | 1014  | Rbm8a         | Rtcd1         | 1  |
| 18754 | 1438  | Rbm8a         | Dclre1b       | -1 |
| 18754 | 1466  | Rbm8a         | Ubap2l        | 1  |

|       |       |          |               |    |
|-------|-------|----------|---------------|----|
| 18754 | 2752  | Rbm8a    | Fcgr1         | 1  |
| 18754 | 3159  | Rbm8a    | Pld1          | 1  |
| 18754 | 3314  | Rbm8a    | Wars2         | 1  |
| 18754 | 3874  | Rbm8a    | Slitrk3       | -1 |
| 18754 | 3957  | Rbm8a    | Dennd1b       | 1  |
| 18754 | 4666  | Rbm8a    | Exosc9        | -1 |
| 18754 | 6206  | Rbm8a    | MMT00063701   | 1  |
| 18754 | 6283  | Rbm8a    | Ptpn22        | -1 |
| 18754 | 6708  | Rbm8a    | Serpini2      | -1 |
| 18754 | 8464  | Rbm8a    | Snapin        | -1 |
| 18754 | 8523  | Rbm8a    | Ddit4l        | 1  |
| 18754 | 9408  | Rbm8a    | Hmgcs2        | -1 |
| 18754 | 9519  | Rbm8a    | Fstl5         | -1 |
| 18754 | 10521 | Rbm8a    | Ttf2          | 1  |
| 18754 | 12367 | Rbm8a    | MMT00072365   | -1 |
| 18754 | 12716 | Rbm8a    | 5830417110Rik | -1 |
| 18754 | 15299 | Rbm8a    | Mrps21        | -1 |
| 18754 | 15550 | Rbm8a    | 2010200O16Rik | -1 |
| 18754 | 15901 | Rbm8a    | Tpm3          | -1 |
| 18754 | 16416 | Rbm8a    | Commd2        | 1  |
| 18754 | 16618 | Rbm8a    | Hps3          | -1 |
| 18754 | 16753 | Rbm8a    | Hfe2          | -1 |
| 18754 | 17669 | Rbm8a    | 2310007A19Rik | 1  |
| 18754 | 17837 | Rbm8a    | Polr3gl       | -1 |
| 18754 | 18376 | Rbm8a    | Pex11b        | -1 |
| 18754 | 19700 | Rbm8a    | E030011K20Rik | 1  |
| 18754 | 20385 | Rbm8a    | Chd1l         | -1 |
| 18754 | 20661 | Rbm8a    | Tuft1         | -1 |
| 18754 | 20810 | Rbm8a    | Mttp          | -1 |
| 18754 | 22570 | Rbm8a    | Phf1          | 1  |
| 18762 | 12398 | Herc5    | Ifi44         | 1  |
| 18762 | 13309 | Herc5    | Tgtp          | 1  |
| 18762 | 19189 | Herc5    | Sp100         | 1  |
| 18762 | 21549 | Herc5    | Rtp4          | 1  |
| 18762 | 23450 | Herc5    | D12Ert647e    | 1  |
| 18798 | 15384 | Ndufa4l2 | Mat2a         | -1 |
| 18798 | 20507 | Ndufa4l2 | Sh2d6         | -1 |
| 18835 | 678   | Dtwd1    | Ncaph         | 1  |
| 18835 | 1510  | Dtwd1    | A530058N18Rik | -1 |
| 18835 | 4897  | Dtwd1    | Ciao1         | -1 |
| 18835 | 5737  | Dtwd1    | Nkx2-2        | -1 |
| 18835 | 9762  | Dtwd1    | Snx5          | 1  |
| 18835 | 11705 | Dtwd1    | Polr3f        | -1 |
| 18835 | 14403 | Dtwd1    | S100g         | 1  |
| 18835 | 14740 | Dtwd1    | Mfap1b        | -1 |
| 18835 | 18835 | Dtwd1    | Dtwd1         | 1  |
| 18871 | 18871 | AI314976 | AI314976      | 1  |
| 18878 | 1014  | Pde4dip  | Rtcd1         | -1 |
| 18878 | 1466  | Pde4dip  | Ubp2l         | -1 |
| 18878 | 2752  | Pde4dip  | Fcgr1         | -1 |
| 18878 | 3314  | Pde4dip  | Wars2         | -1 |
| 18878 | 6708  | Pde4dip  | Serpini2      | 1  |
| 18878 | 9408  | Pde4dip  | Hmgcs2        | 1  |
| 18878 | 9519  | Pde4dip  | Fstl5         | 1  |
| 18878 | 10521 | Pde4dip  | Ttf2          | -1 |
| 18878 | 12367 | Pde4dip  | MMT00072365   | 1  |
| 18878 | 12716 | Pde4dip  | 5830417110Rik | 1  |
| 18878 | 15550 | Pde4dip  | 2010200O16Rik | 1  |
| 18878 | 15901 | Pde4dip  | Tpm3          | 1  |

|       |       |             |               |    |
|-------|-------|-------------|---------------|----|
| 18878 | 16416 | Pde4dip     | Commd2        | -1 |
| 18878 | 17837 | Pde4dip     | Polr3gl       | 1  |
| 18878 | 19700 | Pde4dip     | E030011K20Rik | -1 |
| 18878 | 20810 | Pde4dip     | Mttp          | 1  |
| 18878 | 21650 | Pde4dip     | Ap4b1         | -1 |
| 18878 | 22570 | Pde4dip     | Phtf1         | -1 |
| 18886 | 403   | Slc18a1     | Leprotl1      | 1  |
| 18886 | 10373 | Slc18a1     | Tmem141       | -1 |
| 18903 | 1006  | Crem        | 2600011E07Rik | 1  |
| 18906 | 2938  | Zfand3      | H2-T23        | 1  |
| 18906 | 7088  | Zfand3      | Slc37a1       | 1  |
| 18906 | 7603  | Zfand3      | Sod2          | 1  |
| 18906 | 8750  | Zfand3      | 1700010114Rik | 1  |
| 18906 | 8767  | Zfand3      | Rgl2          | 1  |
| 18906 | 10667 | Zfand3      | H2-Eb1        | 1  |
| 18906 | 10931 | Zfand3      | Pkn3          | -1 |
| 18906 | 12694 | Zfand3      | Riok2         | -1 |
| 18906 | 12943 | Zfand3      | Slc25a27      | 1  |
| 18906 | 16692 | Zfand3      | Bat4          | 1  |
| 18906 | 17322 | Zfand3      | Zfp758        | -1 |
| 18906 | 18577 | Zfand3      | Btbd9         | -1 |
| 18906 | 20238 | Zfand3      | H2-T9         | 1  |
| 18906 | 21295 | Zfand3      | Snf1lk        | -1 |
| 18906 | 21415 | Zfand3      | Has1          | 1  |
| 18928 | 1297  | Ttc28       | Phox2a        | 1  |
| 18939 | 6931  | Matn2       | Hrsp12        | -1 |
| 18939 | 11549 | Matn2       | Depdc6        | -1 |
| 18939 | 12091 | Matn2       | 1810015C04Rik | -1 |
| 18939 | 12655 | Matn2       | Tmem180       | 1  |
| 18939 | 13648 | Matn2       | Dap           | -1 |
| 18939 | 18939 | Matn2       | Matn2         | -1 |
| 18939 | 20871 | Matn2       | Pop1          | 1  |
| 18947 | 22226 | Ctse        | Pm20d1        | 1  |
| 18948 | 1918  | Olfr1270    | Usp39         | -1 |
| 18948 | 2743  | Olfr1270    | Tcf3          | -1 |
| 18948 | 3703  | Olfr1270    | Ggcx          | -1 |
| 18948 | 5296  | Olfr1270    | Rnf181        | -1 |
| 18948 | 8016  | Olfr1270    | Mrpl35        | 1  |
| 18948 | 8055  | Olfr1270    | Ptcd3         | -1 |
| 18948 | 8889  | Olfr1270    | Dnahc6        | 1  |
| 18948 | 15384 | Olfr1270    | Mat2a         | -1 |
| 18948 | 18948 | Olfr1270    | Olfr1270      | 1  |
| 18971 | 3159  | Dok7        | Pld1          | 1  |
| 18971 | 16618 | Dok7        | Hps3          | -1 |
| 18974 | 21969 | Cse1l       | Tk1           | -1 |
| 19004 | 18785 | Pdk4        | Angptl4       | 1  |
| 19034 | 1297  | Bag4        | Phox2a        | -1 |
| 19037 | 8231  | Slc11a2     | Tcfcp2        | -1 |
| 19037 | 12412 | Slc11a2     | BC004728      | 1  |
| 19037 | 19037 | Slc11a2     | Slc11a2       | 1  |
| 19037 | 21060 | Slc11a2     | Ela1          | 1  |
| 19037 | 21542 | Slc11a2     | Larp4         | 1  |
| 19051 | 10497 | Podnl1      | Man2b1        | 1  |
| 19051 | 16849 | Podnl1      | Trmt1         | 1  |
| 19056 | 15485 | Zfp7        | Zfp251        | -1 |
| 19064 | 2644  | MMT00004867 | Srrm2         | 1  |
| 19064 | 2945  | MMT00004867 | MMT00005190   | -1 |
| 19064 | 5014  | MMT00004867 | MMT00017503   | -1 |
| 19064 | 5968  | MMT00004867 | MMT00012419   | -1 |

|       |       |             |               |    |
|-------|-------|-------------|---------------|----|
| 19064 | 7286  | MMT00004867 | Noxo1         | 1  |
| 19064 | 8341  | MMT00004867 | MMT00017270   | -1 |
| 19064 | 9909  | MMT00004867 | MMT00077883   | -1 |
| 19064 | 11291 | MMT00004867 | 1110018H23Rik | 1  |
| 19064 | 16695 | MMT00004867 | Hs3st6        | 1  |
| 19064 | 19011 | MMT00004867 | Rpl3l         | 1  |
| 19064 | 21246 | MMT00004867 | Telo2         | 1  |
| 19075 | 15870 | Lmnb2       | Aqp5          | 1  |
| 19077 | 21142 | Has2        | Gm129         | -1 |
| 19078 | 9161  | EG668139    | Mrpl17        | -1 |
| 19078 | 19734 | EG668139    | Dchs1         | -1 |
| 19078 | 22693 | EG668139    | Trim68        | -1 |
| 19092 | 2456  | MMT00045362 | Mrpl10        | 1  |
| 19092 | 10498 | MMT00045362 | Ube2z         | -1 |
| 19092 | 12302 | MMT00045362 | Cbx1          | 1  |
| 19092 | 23295 | MMT00045362 | Snx11         | 1  |
| 19095 | 16618 | MMT00006438 | Hps3          | 1  |
| 19095 | 19700 | MMT00006438 | E030011K20Rik | -1 |
| 19108 | 1006  | Armet       | 2600011E07Rik | 1  |
| 19108 | 15713 | Armet       | Rbm3          | -1 |
| 19108 | 16098 | Armet       | Rps20         | -1 |
| 19108 | 18418 | Armet       | Hspa1b        | 1  |
| 19115 | 1041  | Rab32       | 3110049J23Rik | 1  |
| 19115 | 1135  | Rab32       | Akap12        | -1 |
| 19115 | 2571  | Rab32       | Rmnd1         | 1  |
| 19115 | 3545  | Rab32       | Mtrf1l        | -1 |
| 19115 | 3744  | Rab32       | Rmnd1         | 1  |
| 19115 | 6363  | Rab32       | 9130014G24Rik | -1 |
| 19115 | 8786  | Rab32       | Rmnd1         | 1  |
| 19115 | 11162 | Rab32       | Hkdc1         | -1 |
| 19115 | 12070 | Rab32       | Adat2         | 1  |
| 19115 | 14989 | Rab32       | Map3k5        | -1 |
| 19115 | 19115 | Rab32       | Rab32         | 1  |
| 19115 | 20705 | Rab32       | Supv3l1       | 1  |
| 19115 | 21258 | Rab32       | 2010003K15Rik | -1 |
| 19115 | 22333 | Rab32       | Hnrnp3        | -1 |
| 19115 | 22598 | Rab32       | 4930402H24Rik | -1 |
| 19134 | 13810 | Fn3k        | 1110036O03Rik | 1  |
| 19134 | 14384 | Fn3k        | Dnajc7        | 1  |
| 19134 | 21414 | Fn3k        | BC017643      | 1  |
| 19142 | 2599  | Gpatch1     | Lsm14a        | 1  |
| 19142 | 7761  | Gpatch1     | Nudt19        | 1  |
| 19142 | 8394  | Gpatch1     | Dpy19l3       | 1  |
| 19160 | 12773 | MMT00042532 | Klhl1         | 1  |
| 19163 | 1297  | Cadps2      | Phox2a        | -1 |
| 19169 | 2449  | Atp10a      | Mybpc2        | -1 |
| 19169 | 2599  | Atp10a      | Lsm14a        | -1 |
| 19169 | 7761  | Atp10a      | Nudt19        | -1 |
| 19169 | 8394  | Atp10a      | Dpy19l3       | -1 |
| 19169 | 9122  | Atp10a      | Sepw1         | -1 |
| 19169 | 9454  | Atp10a      | 2810426N06Rik | -1 |
| 19187 | 2012  | Chrm3       | Cetn4         | -1 |
| 19187 | 2752  | Chrm3       | Fcgr1         | 1  |
| 19187 | 3159  | Chrm3       | Pld1          | 1  |
| 19187 | 3206  | Chrm3       | Gpr160        | 1  |
| 19187 | 4666  | Chrm3       | Exosc9        | -1 |
| 19187 | 9519  | Chrm3       | Fstl5         | -1 |
| 19187 | 12367 | Chrm3       | MMT00072365   | -1 |
| 19187 | 16416 | Chrm3       | Commd2        | 1  |

|       |       |               |               |    |
|-------|-------|---------------|---------------|----|
| 19187 | 16618 | Chrm3         | Hps3          | -1 |
| 19187 | 19700 | Chrm3         | E030011K20Rik | 1  |
| 19189 | 6824  | Sp100         | Irf7          | 1  |
| 19189 | 7069  | Sp100         | Ube1l         | 1  |
| 19189 | 7105  | Sp100         | Plac8         | 1  |
| 19189 | 10606 | Sp100         | Apbb1ip       | 1  |
| 19189 | 12398 | Sp100         | Irf44         | 1  |
| 19191 | 8807  | Ccng2         | Ankrd56       | -1 |
| 19192 | 15698 | Hist1h1c      | Them2         | -1 |
| 19192 | 17528 | Hist1h1c      | Gmnn          | -1 |
| 19202 | 7360  | 1500031L02Rik | Mfi2          | -1 |
| 19214 | 17957 | Snpc1         | 1700086L19Rik | -1 |
| 19214 | 19214 | Snpc1         | Snpc1         | 1  |
| 19219 | 391   | MMT00015104   | 4933416I08Rik | 1  |
| 19219 | 4199  | MMT00015104   | B3galt5       | 1  |
| 19219 | 7916  | MMT00015104   | MMT00016293   | 1  |
| 19219 | 8256  | MMT00015104   | Tjap1         | 1  |
| 19219 | 8644  | MMT00015104   | V1rg11        | 1  |
| 19219 | 9946  | MMT00015104   | Stam2         | 1  |
| 19219 | 11256 | MMT00015104   | H2-DMa        | 1  |
| 19219 | 12248 | MMT00015104   | Tnp2          | 1  |
| 19219 | 12772 | MMT00015104   | Axl           | 1  |
| 19219 | 13742 | MMT00015104   | 1700024P16Rik | 1  |
| 19219 | 14313 | MMT00015104   | Tnk1          | 1  |
| 19219 | 16718 | MMT00015104   | Zbtb7c        | 1  |
| 19219 | 17750 | MMT00015104   | Hs6st2        | 1  |
| 19219 | 18620 | MMT00015104   | Slmap         | 1  |
| 19219 | 20908 | MMT00015104   | Olf583        | 1  |
| 19219 | 21511 | MMT00015104   | MMT00054100   | 1  |
| 19219 | 21866 | MMT00015104   | Hhipl1        | 1  |
| 19219 | 22271 | MMT00015104   | Cyp2c29       | 1  |
| 19219 | 22762 | MMT00015104   | Slc6a4        | 1  |
| 19219 | 22802 | MMT00015104   | Svs2          | 1  |
| 19219 | 23546 | MMT00015104   | Zzef1         | 1  |
| 19219 | 23591 | MMT00015104   | Dlg4          | 1  |
| 19219 | 23651 | MMT00015104   | MMT00027295   | 1  |
| 19223 | 16077 | Ercc8         | Mocs2         | 1  |
| 19223 | 19223 | Ercc8         | Ercc8         | 1  |
| 19234 | 12761 | Nrg4          | Tsc22d3       | 1  |
| 19244 | 5342  | Impdh2        | Eps8l3        | 1  |
| 19247 | 1297  | Prelp         | Phox2a        | 1  |
| 19326 | 16083 | Usp48         | Pla2g2c       | 1  |
| 19332 | 11571 | Bpnt1         | Bpnt1         | 1  |
| 19332 | 11741 | Bpnt1         | Slc30a10      | -1 |
| 19332 | 19332 | Bpnt1         | Bpnt1         | 1  |
| 19332 | 19835 | Bpnt1         | Iars2         | 1  |
| 19362 | 15476 | Gper          | Fem1b         | 1  |
| 19373 | 15870 | MMT00018326   | Aqp5          | 1  |
| 19391 | 19391 | Apex2         | Apex2         | 1  |
| 19392 | 1041  | Slc25a16      | 3110049J23Rik | 1  |
| 19392 | 2571  | Slc25a16      | Rmnd1         | 1  |
| 19392 | 3195  | Slc25a16      | Mypn          | -1 |
| 19392 | 8786  | Slc25a16      | Rmnd1         | 1  |
| 19392 | 11162 | Slc25a16      | Hkdc1         | -1 |
| 19392 | 15971 | Slc25a16      | Aifm2         | -1 |
| 19392 | 19392 | Slc25a16      | Slc25a16      | 1  |
| 19392 | 20705 | Slc25a16      | Supv3l1       | 1  |
| 19392 | 22333 | Slc25a16      | Hnrnp3        | -1 |
| 19402 | 2243  | Ddx19a        | Gcsh          | -1 |



|       |       |               |               |    |
|-------|-------|---------------|---------------|----|
| 19402 | 10308 | Ddx19a        | Fuk           | 1  |
| 19402 | 14391 | Ddx19a        | MMT00017335   | 1  |
| 19421 | 19421 | Mbd2          | Mbd2          | 1  |
| 19421 | 20958 | Mbd2          | 4933403F05Rik | 1  |
| 19422 | 18373 | Fkbp1b        | Dnajb1        | -1 |
| 19433 | 19433 | Mex3b         | Mex3b         | 1  |
| 19440 | 2632  | Anxa9         | Aph1a         | 1  |
| 19440 | 2752  | Anxa9         | Fcgr1         | -1 |
| 19440 | 3314  | Anxa9         | Wars2         | -1 |
| 19440 | 9408  | Anxa9         | Hmgcs2        | 1  |
| 19440 | 15299 | Anxa9         | Mrps21        | 1  |
| 19443 | 10978 | Prkab1        | MMT00078322   | -1 |
| 19447 | 12097 | MMT00004670   | 9430015G10Rik | -1 |
| 19447 | 19742 | MMT00004670   | Cdc21         | 1  |
| 19451 | 4084  | Armc7         | Asah3l        | -1 |
| 19451 | 12761 | Armc7         | Tsc22d3       | -1 |
| 19462 | 1040  | 4933439C20Rik | Dnhd1         | 1  |
| 19462 | 1690  | 4933439C20Rik | Nlrp5         | 1  |
| 19462 | 2118  | 4933439C20Rik | Kptn          | -1 |
| 19462 | 2599  | 4933439C20Rik | Lsm14a        | -1 |
| 19462 | 4729  | 4933439C20Rik | Slc7a10       | 1  |
| 19462 | 6513  | 4933439C20Rik | Qpctl         | -1 |
| 19462 | 6922  | 4933439C20Rik | Tmem86b       | 1  |
| 19462 | 7761  | 4933439C20Rik | Nudt19        | -1 |
| 19462 | 7803  | 4933439C20Rik | Ttyh1         | -1 |
| 19462 | 8394  | 4933439C20Rik | Dpy19l3       | -1 |
| 19462 | 8563  | 4933439C20Rik | Leng1         | -1 |
| 19462 | 9122  | 4933439C20Rik | Sepw1         | -1 |
| 19462 | 9376  | 4933439C20Rik | Zscan18       | -1 |
| 19462 | 9413  | 4933439C20Rik | 1190020J12Rik | 1  |
| 19462 | 9454  | 4933439C20Rik | 2810426N06Rik | -1 |
| 19462 | 11321 | 4933439C20Rik | 2310014L17Rik | 1  |
| 19462 | 11800 | 4933439C20Rik | Clip3         | 1  |
| 19462 | 11888 | 4933439C20Rik | Myadm         | 1  |
| 19462 | 11982 | 4933439C20Rik | MMT00035514   | 1  |
| 19462 | 12623 | 4933439C20Rik | Ccdc123       | -1 |
| 19462 | 13395 | 4933439C20Rik | Ube2m         | 1  |
| 19462 | 13418 | 4933439C20Rik | Lgi4          | 1  |
| 19462 | 14842 | 4933439C20Rik | Gipr          | -1 |
| 19462 | 15670 | 4933439C20Rik | Pnmal1        | 1  |
| 19462 | 17314 | 4933439C20Rik | Napa          | 1  |
| 19462 | 17632 | 4933439C20Rik | Lypd3         | 1  |
| 19462 | 18088 | 4933439C20Rik | Alkbh6        | -1 |
| 19462 | 18165 | 4933439C20Rik | 5830482F20Rik | -1 |
| 19462 | 19142 | 4933439C20Rik | Gpatch1       | -1 |
| 19462 | 19306 | 4933439C20Rik | AI428936      | -1 |
| 19462 | 19462 | 4933439C20Rik | 4933439C20Rik | 1  |
| 19462 | 20606 | 4933439C20Rik | MMT00042166   | 1  |
| 19462 | 21223 | 4933439C20Rik | Pira1         | 1  |
| 19483 | 1907  | Depdc2        | D230010M03Rik | 1  |
| 19483 | 7436  | Depdc2        | 1700063K16Rik | 1  |
| 19483 | 8157  | Depdc2        | MMT00005305   | 1  |
| 19483 | 9946  | Depdc2        | Stam2         | 1  |
| 19483 | 12651 | Depdc2        | Tsc22d4       | 1  |
| 19502 | 2705  | Fbxo24        | Hrbl          | -1 |
| 19502 | 3701  | Fbxo24        | Zfp68         | -1 |
| 19502 | 7945  | Fbxo24        | Gpc2          | -1 |
| 19502 | 8992  | Fbxo24        | Trfr2         | 1  |
| 19502 | 9077  | Fbxo24        | Cnpy4         | -1 |

|       |       |             |               |    |
|-------|-------|-------------|---------------|----|
| 19502 | 10995 | Fbxo24      | Ap4m1         | 1  |
| 19502 | 12157 | Fbxo24      | Gal3st4       | -1 |
| 19502 | 12907 | Fbxo24      | Zkscan1       | 1  |
| 19502 | 13780 | Fbxo24      | Pilra         | 1  |
| 19502 | 14631 | Fbxo24      | Stag3         | -1 |
| 19502 | 15587 | Fbxo24      | Actl6b        | -1 |
| 19502 | 16451 | Fbxo24      | 2010007H12Rik | 1  |
| 19502 | 17158 | Fbxo24      | Zfp113        | -1 |
| 19502 | 19502 | Fbxo24      | Fbxo24        | 1  |
| 19511 | 12602 | Pcdhb21     | Filip1        | 1  |
| 19516 | 11940 | Ppfia4      | Chi3l1        | 1  |
| 19519 | 9230  | BC011248    | 1700027N10Rik | -1 |
| 19519 | 13946 | BC011248    | Slc35b2       | 1  |
| 19519 | 15318 | BC011248    | Aars2         | 1  |
| 19519 | 18772 | BC011248    | BC048355      | 1  |
| 19522 | 280   | Tcf21       | Snai2         | 1  |
| 19522 | 5342  | Tcf21       | Eps8l3        | 1  |
| 19522 | 15870 | Tcf21       | Aqp5          | 1  |
| 19522 | 17981 | Tcf21       | MMT00036029   | 1  |
| 19547 | 15870 | MMT00022553 | Aqp5          | 1  |
| 19547 | 22982 | MMT00022553 | Mug2          | 1  |
| 19556 | 6564  | Efna1       | Cebpd         | -1 |
| 19556 | 8816  | Efna1       | Nfkbia        | -1 |
| 19560 | 11705 | Trmt6       | Polr3f        | 1  |
| 19560 | 14740 | Trmt6       | Mfap1b        | 1  |
| 19565 | 7083  | EG385454    | MMT00044154   | 1  |
| 19565 | 7821  | EG385454    | MMT00042003   | 1  |
| 19565 | 17535 | EG385454    | MMT00008110   | 1  |
| 19573 | 5974  | Serpine1    | Arntl         | -1 |
| 19573 | 12761 | Serpine1    | Tsc22d3       | 1  |
| 19578 | 11621 | Aox1        | Mixl1         | -1 |
| 19578 | 19578 | Aox1        | Aox1          | 1  |
| 19606 | 15870 | Egr2        | Aqp5          | 1  |
| 19621 | 18179 | Cldn5       | Dbp           | -1 |
| 19623 | 15870 | Myl7        | Aqp5          | 1  |
| 19623 | 17981 | Myl7        | MMT00036029   | 1  |
| 19633 | 8610  | Gm694       | Padi4         | 1  |
| 19670 | 4084  | Fbxl14      | Asah3l        | -1 |
| 19670 | 12761 | Fbxl14      | Tsc22d3       | -1 |
| 19672 | 10    | Cldn19      | NaN           | 1  |
| 19672 | 141   | Cldn19      | Jag1          | 1  |
| 19672 | 225   | Cldn19      | MMT00073704   | 1  |
| 19672 | 316   | Cldn19      | 4930471G03Rik | 1  |
| 19672 | 391   | Cldn19      | 4933416I08Rik | 1  |
| 19672 | 486   | Cldn19      | Josd2         | 1  |
| 19672 | 558   | Cldn19      | Crebl1        | 1  |
| 19672 | 584   | Cldn19      | Tmem207       | 1  |
| 19672 | 661   | Cldn19      | Siglec1       | -1 |
| 19672 | 1059  | Cldn19      | P2rx6         | 1  |
| 19672 | 1170  | Cldn19      | Faim3         | 1  |
| 19672 | 1619  | Cldn19      | Fbxw17        | 1  |
| 19672 | 1696  | Cldn19      | V1re9         | 1  |
| 19672 | 1771  | Cldn19      | Park2         | 1  |
| 19672 | 1795  | Cldn19      | Rabgap1l      | 1  |
| 19672 | 1829  | Cldn19      | MMT00030026   | 1  |
| 19672 | 1876  | Cldn19      | Amdhd1        | 1  |
| 19672 | 1920  | Cldn19      | Oas1e         | 1  |
| 19672 | 2067  | Cldn19      | Myo1a         | 1  |
| 19672 | 2226  | Cldn19      | Amt           | 1  |

|       |       |        |               |   |
|-------|-------|--------|---------------|---|
| 19672 | 2283  | Cldn19 | MMT00029554   | 1 |
| 19672 | 2819  | Cldn19 | Kcnk5         | 1 |
| 19672 | 3144  | Cldn19 | Ube2j2        | 1 |
| 19672 | 3166  | Cldn19 | Vmn2r57       | 1 |
| 19672 | 3208  | Cldn19 | 4930511111Rik | 1 |
| 19672 | 3254  | Cldn19 | Grifin        | 1 |
| 19672 | 3383  | Cldn19 | Cd99          | 1 |
| 19672 | 3511  | Cldn19 | Rnf182        | 1 |
| 19672 | 3841  | Cldn19 | MMT00014519   | 1 |
| 19672 | 3948  | Cldn19 | V1rb4         | 1 |
| 19672 | 3986  | Cldn19 | Ep400         | 1 |
| 19672 | 4079  | Cldn19 | Emilin3       | 1 |
| 19672 | 4088  | Cldn19 | Pdcl2         | 1 |
| 19672 | 4166  | Cldn19 | Cblc          | 1 |
| 19672 | 4199  | Cldn19 | B3galt5       | 1 |
| 19672 | 4246  | Cldn19 | Fbxw12        | 1 |
| 19672 | 4337  | Cldn19 | Myst3         | 1 |
| 19672 | 4407  | Cldn19 | 4930429B21Rik | 1 |
| 19672 | 4430  | Cldn19 | Ankrd36       | 1 |
| 19672 | 5126  | Cldn19 | Fcnb          | 1 |
| 19672 | 5505  | Cldn19 | Thap2         | 1 |
| 19672 | 5694  | Cldn19 | Sp7           | 1 |
| 19672 | 5748  | Cldn19 | Brsk2         | 1 |
| 19672 | 5908  | Cldn19 | MMT00027552   | 1 |
| 19672 | 5929  | Cldn19 | Cpz           | 1 |
| 19672 | 6367  | Cldn19 | Lhfp          | 1 |
| 19672 | 6403  | Cldn19 | MMT00039607   | 1 |
| 19672 | 6422  | Cldn19 | Grk5          | 1 |
| 19672 | 6429  | Cldn19 | Sim2          | 1 |
| 19672 | 6754  | Cldn19 | Trpv3         | 1 |
| 19672 | 6756  | Cldn19 | Sds           | 1 |
| 19672 | 6880  | Cldn19 | Dmrtb1        | 1 |
| 19672 | 7041  | Cldn19 | Sp140         | 1 |
| 19672 | 7085  | Cldn19 | St8sia2       | 1 |
| 19672 | 7094  | Cldn19 | Cyp2c54       | 1 |
| 19672 | 7132  | Cldn19 | Sp9           | 1 |
| 19672 | 7279  | Cldn19 | Cldn13        | 1 |
| 19672 | 7436  | Cldn19 | 1700063K16Rik | 1 |
| 19672 | 7916  | Cldn19 | MMT00016293   | 1 |
| 19672 | 7974  | Cldn19 | Arhgef7       | 1 |
| 19672 | 8157  | Cldn19 | MMT00005305   | 1 |
| 19672 | 8256  | Cldn19 | Tjap1         | 1 |
| 19672 | 8620  | Cldn19 | MMT00048670   | 1 |
| 19672 | 8644  | Cldn19 | V1rg11        | 1 |
| 19672 | 8709  | Cldn19 | Trim58        | 1 |
| 19672 | 8905  | Cldn19 | Trim67        | 1 |
| 19672 | 8952  | Cldn19 | Marco         | 1 |
| 19672 | 9340  | Cldn19 | Cdc42ep2      | 1 |
| 19672 | 9436  | Cldn19 | Cntnap2       | 1 |
| 19672 | 9463  | Cldn19 | Zdhhc23       | 1 |
| 19672 | 9743  | Cldn19 | Gm189         | 1 |
| 19672 | 9946  | Cldn19 | Stam2         | 1 |
| 19672 | 9954  | Cldn19 | MMT00047280   | 1 |
| 19672 | 10195 | Cldn19 | Klf1          | 1 |
| 19672 | 10240 | Cldn19 | Cyp2w1        | 1 |
| 19672 | 10260 | Cldn19 | Zfp36l2       | 1 |
| 19672 | 10377 | Cldn19 | A430105l19Rik | 1 |
| 19672 | 10452 | Cldn19 | Grn           | 1 |
| 19672 | 10520 | Cldn19 | Xkr6          | 1 |

|       |       |        |               |   |
|-------|-------|--------|---------------|---|
| 19672 | 10576 | Cldn19 | Xrcc3         | 1 |
| 19672 | 10657 | Cldn19 | Rnf12         | 1 |
| 19672 | 10687 | Cldn19 | Itpkb         | 1 |
| 19672 | 10723 | Cldn19 | 4930556N09Rik | 1 |
| 19672 | 10886 | Cldn19 | Fndc3b        | 1 |
| 19672 | 11016 | Cldn19 | Pcp2          | 1 |
| 19672 | 11256 | Cldn19 | H2-DMa        | 1 |
| 19672 | 11303 | Cldn19 | Slc5a12       | 1 |
| 19672 | 11350 | Cldn19 | 9030420J04Rik | 1 |
| 19672 | 11424 | Cldn19 | lqcf3         | 1 |
| 19672 | 11507 | Cldn19 | Adarb2        | 1 |
| 19672 | 11665 | Cldn19 | Hyal1         | 1 |
| 19672 | 11689 | Cldn19 | MMT00078109   | 1 |
| 19672 | 11805 | Cldn19 | Bat2          | 1 |
| 19672 | 11809 | Cldn19 | 4930534B04Rik | 1 |
| 19672 | 11837 | Cldn19 | Paqr6         | 1 |
| 19672 | 11966 | Cldn19 | Zfp280b       | 1 |
| 19672 | 12062 | Cldn19 | Dzip1l        | 1 |
| 19672 | 12188 | Cldn19 | Chek2         | 1 |
| 19672 | 12248 | Cldn19 | Tnp2          | 1 |
| 19672 | 12272 | Cldn19 | Fshr          | 1 |
| 19672 | 12372 | Cldn19 | MMT00039397   | 1 |
| 19672 | 12430 | Cldn19 | Fst           | 1 |
| 19672 | 12568 | Cldn19 | Lrrc37a       | 1 |
| 19672 | 12604 | Cldn19 | Acr           | 1 |
| 19672 | 12633 | Cldn19 | Klk4          | 1 |
| 19672 | 12651 | Cldn19 | Tsc22d4       | 1 |
| 19672 | 12696 | Cldn19 | RP23-392P11.3 | 1 |
| 19672 | 12753 | Cldn19 | MMT00043344   | 1 |
| 19672 | 12772 | Cldn19 | Axl           | 1 |
| 19672 | 12826 | Cldn19 | Zfp354c       | 1 |
| 19672 | 12919 | Cldn19 | Nup210l       | 1 |
| 19672 | 13102 | Cldn19 | Prkaa1        | 1 |
| 19672 | 13141 | Cldn19 | MMT00071569   | 1 |
| 19672 | 13487 | Cldn19 | A230051G13Rik | 1 |
| 19672 | 13496 | Cldn19 | H1fnt         | 1 |
| 19672 | 13712 | Cldn19 | Lypd5         | 1 |
| 19672 | 13742 | Cldn19 | 1700024P16Rik | 1 |
| 19672 | 13800 | Cldn19 | Lrp5          | 1 |
| 19672 | 13890 | Cldn19 | Olf1263       | 1 |
| 19672 | 14035 | Cldn19 | Lrrc52        | 1 |
| 19672 | 14149 | Cldn19 | BC048562      | 1 |
| 19672 | 14313 | Cldn19 | Tnk1          | 1 |
| 19672 | 14510 | Cldn19 | Olf1643       | 1 |
| 19672 | 14519 | Cldn19 | Trex1         | 1 |
| 19672 | 14565 | Cldn19 | Rnf207        | 1 |
| 19672 | 14754 | Cldn19 | Atoh8         | 1 |
| 19672 | 15424 | Cldn19 | Atp6v1g2      | 1 |
| 19672 | 15446 | Cldn19 | Cd320         | 1 |
| 19672 | 15626 | Cldn19 | MMT00035685   | 1 |
| 19672 | 15697 | Cldn19 | Tbc1d8b       | 1 |
| 19672 | 15743 | Cldn19 | Hoxc6         | 1 |
| 19672 | 15747 | Cldn19 | Sfrs1         | 1 |
| 19672 | 15885 | Cldn19 | Adamts7       | 1 |
| 19672 | 16197 | Cldn19 | MMT00065977   | 1 |
| 19672 | 16226 | Cldn19 | MMT00033542   | 1 |
| 19672 | 16390 | Cldn19 | Plb1          | 1 |
| 19672 | 16664 | Cldn19 | Car4          | 1 |
| 19672 | 16672 | Cldn19 | Tmem82        | 1 |

|       |       |        |               |   |
|-------|-------|--------|---------------|---|
| 19672 | 16718 | Cldn19 | Zbtb7c        | 1 |
| 19672 | 16794 | Cldn19 | Chrb1         | 1 |
| 19672 | 16957 | Cldn19 | MMT00046108   | 1 |
| 19672 | 17122 | Cldn19 | MMT00068814   | 1 |
| 19672 | 17171 | Cldn19 | MMT00045847   | 1 |
| 19672 | 17337 | Cldn19 | 1810065E05Rik | 1 |
| 19672 | 17417 | Cldn19 | Pxn           | 1 |
| 19672 | 17422 | Cldn19 | Dctd          | 1 |
| 19672 | 17578 | Cldn19 | Kif19a        | 1 |
| 19672 | 17613 | Cldn19 | P2rx7         | 1 |
| 19672 | 17750 | Cldn19 | Hs6st2        | 1 |
| 19672 | 17960 | Cldn19 | Yod1          | 1 |
| 19672 | 18162 | Cldn19 | BC049352      | 1 |
| 19672 | 18409 | Cldn19 | Nicn1         | 1 |
| 19672 | 18620 | Cldn19 | Slmap         | 1 |
| 19672 | 18651 | Cldn19 | Tulp2         | 1 |
| 19672 | 18790 | Cldn19 | Car3          | 1 |
| 19672 | 18847 | Cldn19 | Armet1        | 1 |
| 19672 | 18980 | Cldn19 | Ii7           | 1 |
| 19672 | 19219 | Cldn19 | MMT00015104   | 1 |
| 19672 | 19265 | Cldn19 | EG546036      | 1 |
| 19672 | 19267 | Cldn19 | Olf341        | 1 |
| 19672 | 19351 | Cldn19 | Prksh         | 1 |
| 19672 | 19420 | Cldn19 | Lcn8          | 1 |
| 19672 | 19436 | Cldn19 | Dapp1         | 1 |
| 19672 | 19483 | Cldn19 | Depdc2        | 1 |
| 19672 | 19645 | Cldn19 | Ii12rb2       | 1 |
| 19672 | 19672 | Cldn19 | Cldn19        | 1 |
| 19672 | 20089 | Cldn19 | MMT00015975   | 1 |
| 19672 | 20158 | Cldn19 | Slc38a1       | 1 |
| 19672 | 20255 | Cldn19 | Elfn2         | 1 |
| 19672 | 20319 | Cldn19 | Syne2         | 1 |
| 19672 | 20419 | Cldn19 | Adra1b        | 1 |
| 19672 | 20506 | Cldn19 | 1700011F03Rik | 1 |
| 19672 | 20566 | Cldn19 | Tnni2         | 1 |
| 19672 | 20908 | Cldn19 | Olf583        | 1 |
| 19672 | 20944 | Cldn19 | Tmem164       | 1 |
| 19672 | 21070 | Cldn19 | Cnot8         | 1 |
| 19672 | 21209 | Cldn19 | Ebf4          | 1 |
| 19672 | 21511 | Cldn19 | MMT00054100   | 1 |
| 19672 | 21595 | Cldn19 | Trpv1         | 1 |
| 19672 | 21717 | Cldn19 | EG628893      | 1 |
| 19672 | 21866 | Cldn19 | Hhip1         | 1 |
| 19672 | 21923 | Cldn19 | Olf585        | 1 |
| 19672 | 21931 | Cldn19 | Nrxn3         | 1 |
| 19672 | 22073 | Cldn19 | Lrig3         | 1 |
| 19672 | 22125 | Cldn19 | Gab1          | 1 |
| 19672 | 22150 | Cldn19 | Fhdc1         | 1 |
| 19672 | 22271 | Cldn19 | Cyp2c29       | 1 |
| 19672 | 22434 | Cldn19 | Olf1255       | 1 |
| 19672 | 22541 | Cldn19 | 4632413I24Rik | 1 |
| 19672 | 22555 | Cldn19 | Ela2          | 1 |
| 19672 | 22559 | Cldn19 | MMT00031309   | 1 |
| 19672 | 22733 | Cldn19 | Alpk3         | 1 |
| 19672 | 22750 | Cldn19 | Mupcdh        | 1 |
| 19672 | 22762 | Cldn19 | Slc6a4        | 1 |
| 19672 | 22802 | Cldn19 | Svs2          | 1 |
| 19672 | 22966 | Cldn19 | Epha4         | 1 |
| 19672 | 23070 | Cldn19 | BC024659      | 1 |

|       |       |          |               |    |
|-------|-------|----------|---------------|----|
| 19672 | 23109 | Cldn19   | A430088P11Rik | 1  |
| 19672 | 23119 | Cldn19   | Cps1          | 1  |
| 19672 | 23454 | Cldn19   | Znhit1        | 1  |
| 19672 | 23528 | Cldn19   | 0610038L08Rik | 1  |
| 19672 | 23531 | Cldn19   | Foxb2         | 1  |
| 19672 | 23546 | Cldn19   | Zzef1         | 1  |
| 19672 | 23561 | Cldn19   | Sox14         | 1  |
| 19672 | 23591 | Cldn19   | Dlg4          | 1  |
| 19672 | 23651 | Cldn19   | MMT00027295   | 1  |
| 19708 | 3683  | Ly6a     | Oas2          | 1  |
| 19708 | 4426  | Ly6a     | ligp2         | 1  |
| 19708 | 6824  | Ly6a     | Irf7          | 1  |
| 19708 | 12398 | Ly6a     | Ifi44         | 1  |
| 19708 | 13309 | Ly6a     | Tgtp          | 1  |
| 19708 | 14258 | Ly6a     | Ifi47         | 1  |
| 19708 | 16949 | Ly6a     | ligp1         | 1  |
| 19708 | 18186 | Ly6a     | Parp14        | 1  |
| 19713 | 17528 | BC048599 | Gmn           | 1  |
| 19717 | 9946  | Ccdc27   | Stam2         | 1  |
| 19717 | 11256 | Ccdc27   | H2-DMa        | 1  |
| 19717 | 12772 | Ccdc27   | Axl           | 1  |
| 19717 | 15743 | Ccdc27   | Hoxc6         | 1  |
| 19717 | 21866 | Ccdc27   | Hhip1         | 1  |
| 19717 | 23546 | Ccdc27   | Zzef1         | 1  |
| 19717 | 23591 | Ccdc27   | Dlg4          | 1  |
| 19717 | 23651 | Ccdc27   | MMT00027295   | 1  |
| 19719 | 1660  | EG634650 | Zfp33b        | -1 |
| 19719 | 6330  | EG634650 | Dgkq          | 1  |
| 19725 | 18371 | Dcp2     | Sap130        | -1 |
| 19725 | 19725 | Dcp2     | Dcp2          | 1  |
| 19725 | 20900 | Dcp2     | Epb4.1l4a     | 1  |
| 19725 | 23482 | Dcp2     | Syt4          | -1 |
| 19734 | 1371  | Dchs1    | 1200009I06Rik | 1  |
| 19734 | 9161  | Dchs1    | Mrpl17        | 1  |
| 19734 | 19734 | Dchs1    | Dchs1         | 1  |
| 19738 | 2224  | Lgals3bp | Oasl2         | 1  |
| 19738 | 3683  | Lgals3bp | Oas2          | 1  |
| 19738 | 6824  | Lgals3bp | Irf7          | 1  |
| 19738 | 7105  | Lgals3bp | Plac8         | 1  |
| 19738 | 12398 | Lgals3bp | Ifi44         | 1  |
| 19738 | 13309 | Lgals3bp | Tgtp          | 1  |
| 19738 | 21549 | Lgals3bp | Rtp4          | 1  |
| 19738 | 23450 | Lgals3bp | D12Ert647e    | 1  |
| 19757 | 2794  | Fkbp5    | Map3k6        | 1  |
| 19757 | 5345  | Fkbp5    | MMT00023326   | 1  |
| 19757 | 11345 | Fkbp5    | Slc40a1       | -1 |
| 19757 | 12761 | Fkbp5    | Tsc22d3       | 1  |
| 19757 | 12834 | Fkbp5    | Fabp7         | -1 |
| 19757 | 12989 | Fkbp5    | 1190002H23Rik | 1  |
| 19757 | 16494 | Fkbp5    | 2310007D09Rik | 1  |
| 19757 | 18553 | Fkbp5    | Tekt4         | 1  |
| 19757 | 19182 | Fkbp5    | Igsf2         | 1  |
| 19757 | 21380 | Fkbp5    | Ier5          | -1 |
| 19757 | 21574 | Fkbp5    | Acot11        | 1  |
| 19763 | 290   | Acp2     | B230118H07Rik | -1 |
| 19763 | 1510  | Acp2     | A530058N18Rik | -1 |
| 19763 | 1991  | Acp2     | Ttc17         | 1  |
| 19763 | 2472  | Acp2     | MMT00014056   | 1  |
| 19763 | 9547  | Acp2     | MMT00006479   | 1  |

|       |       |             |               |    |
|-------|-------|-------------|---------------|----|
| 19763 | 14757 | Acp2        | Hdx           | 1  |
| 19763 | 16881 | Acp2        | MMT00031504   | 1  |
| 19763 | 17295 | Acp2        | MMT00082577   | 1  |
| 19763 | 18368 | Acp2        | Mpped2        | -1 |
| 19763 | 19763 | Acp2        | Acp2          | 1  |
| 19763 | 19803 | Acp2        | BC003993      | 1  |
| 19763 | 21017 | Acp2        | Gstz1         | 1  |
| 19763 | 22320 | Acp2        | MMT00047284   | 1  |
| 19763 | 23474 | Acp2        | MMT00011721   | 1  |
| 19803 | 1510  | BC003993    | A530058N18Rik | -1 |
| 19803 | 1991  | BC003993    | Ttc17         | 1  |
| 19803 | 2472  | BC003993    | MMT00014056   | 1  |
| 19803 | 9547  | BC003993    | MMT00006479   | 1  |
| 19803 | 14757 | BC003993    | Hdx           | 1  |
| 19803 | 16881 | BC003993    | MMT00031504   | 1  |
| 19803 | 17295 | BC003993    | MMT00082577   | 1  |
| 19803 | 18368 | BC003993    | Mpped2        | -1 |
| 19803 | 19763 | BC003993    | Acp2          | 1  |
| 19803 | 19803 | BC003993    | BC003993      | 1  |
| 19803 | 22320 | BC003993    | MMT00047284   | 1  |
| 19803 | 23474 | BC003993    | MMT00011721   | 1  |
| 19812 | 12761 | Armcx2      | Tsc22d3       | -1 |
| 19835 | 1177  | lars2       | EG545391      | -1 |
| 19835 | 6484  | lars2       | A130010J15Rik | -1 |
| 19835 | 7449  | lars2       | Creg1         | 1  |
| 19835 | 8857  | lars2       | Rab3gap2      | -1 |
| 19835 | 9449  | lars2       | Sft2d2        | -1 |
| 19835 | 11445 | lars2       | Atp1a2        | -1 |
| 19835 | 11571 | lars2       | Bpnt1         | 1  |
| 19835 | 11741 | lars2       | Slc30a10      | -1 |
| 19835 | 19332 | lars2       | Bpnt1         | 1  |
| 19835 | 19835 | lars2       | lars2         | 1  |
| 19843 | 4778  | Rbm45       | Cyct          | -1 |
| 19843 | 19843 | Rbm45       | Rbm45         | 1  |
| 19854 | 1297  | Kcnj14      | Phox2a        | 1  |
| 19924 | 715   | Ubiad1      | Padi3         | -1 |
| 19924 | 1270  | Ubiad1      | 1700029I01Rik | 1  |
| 19924 | 2011  | Ubiad1      | Slc2a5        | -1 |
| 19924 | 2793  | Ubiad1      | MMT00005644   | -1 |
| 19924 | 3475  | Ubiad1      | 2610305D13Rik | 1  |
| 19924 | 4305  | Ubiad1      | Tmem51        | 1  |
| 19924 | 5064  | Ubiad1      | Tekt2         | -1 |
| 19924 | 6191  | Ubiad1      | Ddost         | -1 |
| 19924 | 8610  | Ubiad1      | Padi4         | -1 |
| 19924 | 11870 | Ubiad1      | Apitd1        | 1  |
| 19924 | 12097 | Ubiad1      | 9430015G10Rik | 1  |
| 19924 | 12140 | Ubiad1      | Mrps15        | -1 |
| 19924 | 14397 | Ubiad1      | Padi2         | -1 |
| 19924 | 18207 | Ubiad1      | Dnali1        | -1 |
| 19924 | 18338 | Ubiad1      | Akr1e1        | -1 |
| 19924 | 18548 | Ubiad1      | 1700012P22Rik | -1 |
| 19924 | 19647 | Ubiad1      | Cort          | 1  |
| 19924 | 19924 | Ubiad1      | Ubiad1        | 1  |
| 19925 | 3411  | Arsa        | Rabl2a        | 1  |
| 19929 | 19064 | MMT00079667 | MMT00004867   | -1 |
| 19933 | 3654  | Pi16        | St13          | 1  |
| 19933 | 7100  | Pi16        | Tommm22       | -1 |
| 19933 | 16153 | Pi16        | Syngn1        | 1  |
| 19964 | 2021  | Ndufa9      | Atf7ip        | 1  |

|       |       |                    |               |    |
|-------|-------|--------------------|---------------|----|
| 19964 | 4850  | Ndufa9             | Fancd2        | 1  |
| 19964 | 8141  | Ndufa9             | Scnn1a        | -1 |
| 19964 | 9010  | Ndufa9             | 8430419L09Rik | -1 |
| 19964 | 9417  | Ndufa9             | Cd163         | 1  |
| 19964 | 9622  | Ndufa9             | Rasgef1a      | -1 |
| 19964 | 11130 | Ndufa9             | Slco1c1       | 1  |
| 19964 | 14557 | Ndufa9             | Pyroxd1       | 1  |
| 19964 | 15719 | Ndufa9             | BC060267      | -1 |
| 19964 | 17363 | Ndufa9             | Aebp2         | 1  |
| 19964 | 17743 | Ndufa9             | Phb2          | 1  |
| 19964 | 19964 | Ndufa9             | Ndufa9        | 1  |
| 19964 | 19999 | Ndufa9             | Ift122        | -1 |
| 19964 | 20423 | Ndufa9             | 8-Mar         | 1  |
| 19964 | 22395 | Ndufa9             | Kcna1         | -1 |
| 19971 | 18555 | B930046C15Rik      | Sdcbp2        | -1 |
| 19971 | 19971 | B930046C15Rik      | B930046C15Rik | 1  |
| 19982 | 2294  | ENSMUSG00000071036 | AU040829      | 1  |
| 19982 | 3359  | ENSMUSG00000071036 | Pp11r         | 1  |
| 19982 | 5345  | ENSMUSG00000071036 | MMT00023326   | 1  |
| 19982 | 12649 | ENSMUSG00000071036 | Ilgad         | 1  |
| 19982 | 18036 | ENSMUSG00000071036 | Tmem100       | -1 |
| 19995 | 6932  | Pwp1               | Ckap4         | 1  |
| 19995 | 11882 | Pwp1               | Prdm4         | -1 |
| 19995 | 22786 | Pwp1               | Mterfd3       | 1  |
| 19995 | 23102 | Pwp1               | Fbxo7         | 1  |
| 19999 | 9417  | Ift122             | Cd163         | -1 |
| 19999 | 9622  | Ift122             | Rasgef1a      | 1  |
| 19999 | 19964 | Ift122             | Ndufa9        | -1 |
| 19999 | 22395 | Ift122             | Kcna1         | 1  |
| 20004 | 6769  | 1190005F20Rik      | Banp          | 1  |
| 20004 | 14626 | 1190005F20Rik      | Zbtb2         | 1  |
| 20004 | 18373 | 1190005F20Rik      | Dnajb1        | 1  |
| 20024 | 18785 | Lrrc32             | Angptl4       | 1  |
| 20068 | 8155  | 2610204M08Rik      | Mark3         | 1  |
| 20077 | 10130 | Ccdc115            | MMT00043239   | 1  |
| 20077 | 14597 | Ccdc115            | Col19a1       | -1 |
| 20077 | 15266 | Ccdc115            | Cnm4          | 1  |
| 20077 | 17729 | Ccdc115            | Prim2         | 1  |
| 20077 | 20077 | Ccdc115            | Ccdc115       | 1  |
| 20083 | 17412 | ENSMUSG00000073403 | Aif1          | 1  |
| 20100 | 897   | Guca1b             | Mut           | 1  |
| 20100 | 1960  | Guca1b             | Ubr2          | 1  |
| 20100 | 2424  | Guca1b             | Unc5cl        | -1 |
| 20100 | 7054  | Guca1b             | Trerf1        | 1  |
| 20100 | 7088  | Guca1b             | Slc37a1       | -1 |
| 20100 | 8904  | Guca1b             | Trerf1        | -1 |
| 20100 | 9191  | Guca1b             | Lbxcor1       | 1  |
| 20100 | 9230  | Guca1b             | 1700027N10Rik | 1  |
| 20100 | 10729 | Guca1b             | Fgd2          | -1 |
| 20100 | 16692 | Guca1b             | Bat4          | -1 |
| 20100 | 18772 | Guca1b             | BC048355      | -1 |
| 20100 | 18871 | Guca1b             | AI314976      | -1 |
| 20100 | 20100 | Guca1b             | Guca1b        | 1  |
| 20100 | 20966 | Guca1b             | MMT00014378   | -1 |
| 20100 | 21062 | Guca1b             | Rpl7l1        | -1 |
| 20118 | 665   | Tmem175            | Slc26a1       | -1 |
| 20118 | 1447  | Tmem175            | Naaa          | -1 |
| 20118 | 1660  | Tmem175            | Zfp33b        | -1 |
| 20118 | 6330  | Tmem175            | Dgkq          | 1  |



|       |       |          |               |    |
|-------|-------|----------|---------------|----|
| 20118 | 8807  | Tmem175  | Ankrd56       | -1 |
| 20118 | 10978 | Tmem175  | MMT00078322   | 1  |
| 20118 | 16066 | Tmem175  | Coq2          | 1  |
| 20118 | 19151 | Tmem175  | Dmp1          | -1 |
| 20119 | 3654  | Polr3h   | St13          | -1 |
| 20119 | 7100  | Polr3h   | Tomm22        | 1  |
| 20119 | 9540  | Polr3h   | Csnk1e        | 1  |
| 20119 | 10482 | Polr3h   | Mcat          | 1  |
| 20119 | 16467 | Polr3h   | Card10        | 1  |
| 20127 | 2021  | lpo8     | Atf7ip        | -1 |
| 20127 | 9622  | lpo8     | Rasgef1a      | 1  |
| 20127 | 14307 | lpo8     | Kcnj8         | -1 |
| 20127 | 14557 | lpo8     | Pyroxd1       | -1 |
| 20127 | 17363 | lpo8     | Aebp2         | -1 |
| 20127 | 18333 | lpo8     | Rassf8        | -1 |
| 20127 | 19964 | lpo8     | Ndufa9        | -1 |
| 20127 | 22395 | lpo8     | Kcna1         | 1  |
| 20127 | 22978 | lpo8     | MMT00043176   | 1  |
| 20147 | 4138  | Ybx1     | Cited4        | -1 |
| 20147 | 9276  | Ybx1     | MMT00008480   | 1  |
| 20147 | 10134 | Ybx1     | Hivep3        | 1  |
| 20147 | 20147 | Ybx1     | Ybx1          | 1  |
| 20174 | 2743  | Ctnna2   | Tcf3          | -1 |
| 20174 | 2815  | Ctnna2   | Eif2ak3       | -1 |
| 20174 | 3703  | Ctnna2   | Ggcx          | -1 |
| 20174 | 4038  | Ctnna2   | 1200009O22Rik | 1  |
| 20174 | 5296  | Ctnna2   | Rnf181        | -1 |
| 20174 | 8016  | Ctnna2   | Mrpl35        | 1  |
| 20174 | 13569 | Ctnna2   | 1190003M12Rik | 1  |
| 20174 | 15384 | Ctnna2   | Mat2a         | -1 |
| 20174 | 16255 | Ctnna2   | Reg3b         | 1  |
| 20174 | 18948 | Ctnna2   | Olf1270       | 1  |
| 20174 | 22395 | Ctnna2   | Kcna1         | -1 |
| 20175 | 2708  | Hoxb2    | Sgk1          | -1 |
| 20175 | 6564  | Hoxb2    | Cebpd         | -1 |
| 20175 | 8816  | Hoxb2    | Nfkbia        | -1 |
| 20216 | 6133  | BC028528 | Agrp          | -1 |
| 20238 | 812   | H2-T9    | En2           | 1  |
| 20238 | 2801  | H2-T9    | H2-BI         | 1  |
| 20238 | 2938  | H2-T9    | H2-T23        | 1  |
| 20238 | 4555  | H2-T9    | Cchr1         | 1  |
| 20238 | 7088  | H2-T9    | Slc37a1       | 1  |
| 20238 | 7603  | H2-T9    | Sod2          | 1  |
| 20238 | 8750  | H2-T9    | 1700010I14Rik | 1  |
| 20238 | 8767  | H2-T9    | Rgl2          | 1  |
| 20238 | 10374 | H2-T9    | Trim15        | 1  |
| 20238 | 10667 | H2-T9    | H2-Eb1        | 1  |
| 20238 | 10931 | H2-T9    | Pkn3          | -1 |
| 20238 | 11475 | H2-T9    | H2-D1         | -1 |
| 20238 | 12168 | H2-T9    | H2-Ke6        | 1  |
| 20238 | 12694 | H2-T9    | Riok2         | -1 |
| 20238 | 12943 | H2-T9    | Slc25a27      | 1  |
| 20238 | 13493 | H2-T9    | Ring1         | 1  |
| 20238 | 14322 | H2-T9    | Bat1a         | -1 |
| 20238 | 15580 | H2-T9    | MMT00077001   | 1  |
| 20238 | 16692 | H2-T9    | Bat4          | 1  |
| 20238 | 17322 | H2-T9    | Zfp758        | -1 |
| 20238 | 17412 | H2-T9    | Aif1          | -1 |
| 20238 | 17646 | H2-T9    | C4b           | 1  |

|       |       |               |               |    |
|-------|-------|---------------|---------------|----|
| 20238 | 18577 | H2-T9         | Btbd9         | -1 |
| 20238 | 20100 | H2-T9         | Guca1b        | -1 |
| 20238 | 20238 | H2-T9         | H2-T9         | 1  |
| 20238 | 20511 | H2-T9         | Decr2         | 1  |
| 20238 | 21295 | H2-T9         | Snf1lk        | -1 |
| 20238 | 21415 | H2-T9         | Has1          | 1  |
| 20238 | 23250 | H2-T9         | Plcl2         | 1  |
| 20281 | 15255 | Naip1         | Ccl8          | 1  |
| 20281 | 16378 | Naip1         | Ccl8          | 1  |
| 20292 | 3812  | 1810048J11Rik | Zfyve26       | -1 |
| 20292 | 6038  | 1810048J11Rik | Acot1         | 1  |
| 20292 | 8724  | 1810048J11Rik | Tgfb3         | 1  |
| 20292 | 12437 | 1810048J11Rik | Six6          | 1  |
| 20292 | 13389 | 1810048J11Rik | Six6os1       | -1 |
| 20292 | 14621 | 1810048J11Rik | Six4          | -1 |
| 20292 | 14862 | 1810048J11Rik | Dhrs7         | -1 |
| 20292 | 20292 | 1810048J11Rik | 1810048J11Rik | 1  |
| 20292 | 21369 | 1810048J11Rik | Cd4           | 1  |
| 20292 | 21442 | 1810048J11Rik | Rad51l1       | -1 |
| 20292 | 22256 | 1810048J11Rik | Arg2          | -1 |
| 20300 | 21425 | Plekhb1       | Rab6          | 1  |
| 20333 | 403   | Calca         | Leprotl1      | 1  |
| 20337 | 20337 | St6galnac4    | St6galnac4    | 1  |
| 20346 | 2938  | Gna-rs1       | H2-T23        | 1  |
| 20346 | 17322 | Gna-rs1       | Zfp758        | -1 |
| 20346 | 20238 | Gna-rs1       | H2-T9         | 1  |
| 20361 | 5345  | Mtmr14        | MMT00023326   | 1  |
| 20361 | 6133  | Mtmr14        | Agrp          | 1  |
| 20361 | 12761 | Mtmr14        | Tsc22d3       | 1  |
| 20372 | 15870 | Heatr1        | Aqp5          | 1  |
| 20385 | 2752  | Chd1l         | Fcgr1         | -1 |
| 20413 | 6234  | Wdr86         | P4ha2         | -1 |
| 20413 | 7751  | Wdr86         | Sgk2          | 1  |
| 20413 | 8399  | Wdr86         | Herpud1       | -1 |
| 20413 | 11345 | Wdr86         | Slc40a1       | 1  |
| 20413 | 12761 | Wdr86         | Tsc22d3       | -1 |
| 20413 | 18373 | Wdr86         | Dnajb1        | -1 |
| 20413 | 21431 | Wdr86         | Xbp1          | -1 |
| 20419 | 3362  | Adra1b        | Fgf8          | 1  |
| 20419 | 5377  | Adra1b        | MMT00077700   | 1  |
| 20431 | 6038  | Slc7a7        | Acot1         | 1  |
| 20484 | 1336  | Ces1          | MMT00069537   | 1  |
| 20484 | 1755  | Ces1          | Ocel1         | 1  |
| 20484 | 2243  | Ces1          | Gcsh          | 1  |
| 20484 | 3052  | Ces1          | 9130404D08Rik | -1 |
| 20484 | 5925  | Ces1          | Tmem59l       | -1 |
| 20484 | 9304  | Ces1          | AI449175      | 1  |
| 20484 | 10497 | Ces1          | Man2b1        | -1 |
| 20484 | 13732 | Ces1          | Tpm4          | -1 |
| 20484 | 16849 | Ces1          | Trmt1         | -1 |
| 20485 | 18179 | 6430520M22Rik | Dbp           | 1  |
| 20490 | 2449  | Tmem143       | Mybpc2        | -1 |
| 20490 | 2599  | Tmem143       | Lsm14a        | -1 |
| 20490 | 7761  | Tmem143       | Nudt19        | -1 |
| 20490 | 9655  | Tmem143       | Sult2b1       | 1  |
| 20490 | 18365 | Tmem143       | Bcl2l12       | 1  |
| 20490 | 20490 | Tmem143       | Tmem143       | 1  |
| 20490 | 21853 | Tmem143       | 5430432N15Rik | 1  |
| 20511 | 897   | Decr2         | Mut           | -1 |

|       |       |               |               |    |
|-------|-------|---------------|---------------|----|
| 20511 | 1960  | Decr2         | Ubr2          | -1 |
| 20511 | 3859  | Decr2         | Fpr2          | 1  |
| 20511 | 7088  | Decr2         | Slc37a1       | 1  |
| 20511 | 9805  | Decr2         | Tagap         | 1  |
| 20511 | 17760 | Decr2         | Ccr6          | -1 |
| 20511 | 20100 | Decr2         | Guca1b        | -1 |
| 20511 | 20243 | Decr2         | Wfikkn1       | -1 |
| 20511 | 20511 | Decr2         | Decr2         | 1  |
| 20511 | 21295 | Decr2         | Snf1lk        | -1 |
| 20511 | 22104 | Decr2         | Rnf123        | 1  |
| 20515 | 2472  | Dimt1         | MMT00014056   | 1  |
| 20515 | 9547  | Dimt1         | MMT00006479   | 1  |
| 20515 | 14757 | Dimt1         | Hdx           | 1  |
| 20515 | 16881 | Dimt1         | MMT00031504   | 1  |
| 20515 | 17295 | Dimt1         | MMT00082577   | 1  |
| 20515 | 19763 | Dimt1         | Acp2          | 1  |
| 20515 | 19803 | Dimt1         | BC003993      | 1  |
| 20515 | 22320 | Dimt1         | MMT00047284   | 1  |
| 20515 | 23474 | Dimt1         | MMT00011721   | 1  |
| 20532 | 15743 | Rnf26         | Hoxc6         | 1  |
| 20535 | 15476 | Rbm4          | Fem1b         | -1 |
| 20535 | 15731 | Rbm4          | Mfhas1        | 1  |
| 20535 | 15870 | Rbm4          | Aqp5          | 1  |
| 20571 | 15870 | Tmem45a       | Aqp5          | 1  |
| 20606 | 2599  | MMT00042166   | Lsm14a        | -1 |
| 20606 | 7761  | MMT00042166   | Nudt19        | -1 |
| 20606 | 7803  | MMT00042166   | Ttyh1         | -1 |
| 20606 | 8394  | MMT00042166   | Dpy19l3       | -1 |
| 20606 | 9122  | MMT00042166   | Sepw1         | -1 |
| 20606 | 11321 | MMT00042166   | 2310014L17Rik | 1  |
| 20606 | 11800 | MMT00042166   | Clip3         | 1  |
| 20606 | 15670 | MMT00042166   | Pnmal1        | 1  |
| 20606 | 17632 | MMT00042166   | Lypd3         | 1  |
| 20606 | 19462 | MMT00042166   | 4933439C20Rik | 1  |
| 20606 | 20606 | MMT00042166   | MMT00042166   | 1  |
| 20628 | 12571 | Hoxd10        | Cdkn2d        | 1  |
| 20648 | 1297  | B430212C06Rik | Phox2a        | 1  |
| 20661 | 2632  | Tuft1         | Aph1a         | 1  |
| 20661 | 2752  | Tuft1         | Fcgr1         | -1 |
| 20661 | 3314  | Tuft1         | Wars2         | -1 |
| 20661 | 9408  | Tuft1         | Hmgcs2        | 1  |
| 20661 | 9519  | Tuft1         | Fstl5         | 1  |
| 20661 | 12367 | Tuft1         | MMT00072365   | 1  |
| 20661 | 16416 | Tuft1         | Commd2        | -1 |
| 20661 | 17669 | Tuft1         | 2310007A19Rik | -1 |
| 20661 | 20661 | Tuft1         | Tuft1         | 1  |
| 20666 | 11571 | Mosc1         | Bpnt1         | 1  |
| 20666 | 11741 | Mosc1         | Slc30a10      | -1 |
| 20666 | 19332 | Mosc1         | Bpnt1         | 1  |
| 20690 | 2243  | Zfp276        | Gcsh          | -1 |
| 20690 | 7910  | Zfp276        | AK122209      | -1 |
| 20690 | 12440 | Zfp276        | Sult5a1       | 1  |
| 20690 | 14391 | Zfp276        | MMT00017335   | 1  |
| 20690 | 15953 | Zfp276        | Acsf3         | 1  |
| 20690 | 18700 | Zfp276        | Trappc2l      | -1 |
| 20690 | 20690 | Zfp276        | Zfp276        | 1  |
| 20690 | 22201 | Zfp276        | Pard3         | 1  |
| 20690 | 22351 | Zfp276        | Fanca         | 1  |
| 20703 | 13464 | Itga11        | Mc4r          | -1 |

|       |       |               |               |    |
|-------|-------|---------------|---------------|----|
| 20703 | 15870 | Itga11        | Aqp5          | -1 |
| 20703 | 22982 | Itga11        | Mug2          | -1 |
| 20721 | 6035  | 4432412L15Rik | Nkd1          | 1  |
| 20727 | 2708  | Mmp11         | Sgk1          | -1 |
| 20730 | 4084  | Dusp26        | Asah3l        | -1 |
| 20757 | 1918  | Suclg1        | Usp39         | 1  |
| 20757 | 2743  | Suclg1        | Tcf3          | 1  |
| 20757 | 2815  | Suclg1        | Eif2ak3       | 1  |
| 20757 | 15384 | Suclg1        | Mat2a         | 1  |
| 20757 | 18948 | Suclg1        | Olf1270       | -1 |
| 20801 | 2599  | Mrps11        | Lsm14a        | -1 |
| 20801 | 4729  | Mrps11        | Slc7a10       | 1  |
| 20801 | 6839  | Mrps11        | Mrpl46        | -1 |
| 20801 | 7761  | Mrps11        | Nudt19        | -1 |
| 20801 | 19142 | Mrps11        | Gpatch1       | -1 |
| 20801 | 20490 | Mrps11        | Tmem143       | 1  |
| 20810 | 9408  | Mttp          | Hmgcs2        | 1  |
| 20810 | 20810 | Mttp          | Mttp          | 1  |
| 20837 | 5603  | Dlgap4        | BC020535      | -1 |
| 20837 | 6059  | Dlgap4        | Dsn1          | -1 |
| 20837 | 11166 | Dlgap4        | Uqcc          | -1 |
| 20837 | 14734 | Dlgap4        | Nrsn2         | -1 |
| 20837 | 20837 | Dlgap4        | Dlgap4        | 1  |
| 20837 | 23005 | Dlgap4        | 4930405A21Rik | -1 |
| 20852 | 20852 | Extl2         | Extl2         | 1  |
| 20861 | 1466  | Dcst1         | Ubap2l        | -1 |
| 20861 | 2752  | Dcst1         | Fcgr1         | -1 |
| 20861 | 3314  | Dcst1         | Wars2         | -1 |
| 20861 | 6206  | Dcst1         | MMT00063701   | -1 |
| 20861 | 6708  | Dcst1         | Serpini2      | 1  |
| 20861 | 9519  | Dcst1         | Fstl5         | 1  |
| 20861 | 10521 | Dcst1         | Ttf2          | -1 |
| 20861 | 12367 | Dcst1         | MMT00072365   | 1  |
| 20861 | 12716 | Dcst1         | 5830417l10Rik | 1  |
| 20861 | 15901 | Dcst1         | Tpm3          | 1  |
| 20861 | 16416 | Dcst1         | Commd2        | -1 |
| 20861 | 21650 | Dcst1         | Ap4b1         | -1 |
| 20861 | 22570 | Dcst1         | Phf1          | -1 |
| 20861 | 23037 | Dcst1         | Thbs3         | -1 |
| 20871 | 6931  | Pop1          | Hrsp12        | -1 |
| 20871 | 11549 | Pop1          | Depdc6        | -1 |
| 20871 | 12091 | Pop1          | 1810015C04Rik | -1 |
| 20871 | 12655 | Pop1          | Tmem180       | 1  |
| 20871 | 13648 | Pop1          | Dap           | -1 |
| 20871 | 18939 | Pop1          | Matn2         | -1 |
| 20871 | 20871 | Pop1          | Pop1          | 1  |
| 20871 | 22734 | Pop1          | Ap3s2         | 1  |
| 20903 | 2743  | Rpia          | Tcf3          | -1 |
| 20903 | 2815  | Rpia          | Eif2ak3       | -1 |
| 20903 | 15384 | Rpia          | Mat2a         | -1 |
| 20908 | 2819  | Olf1583       | Kcnk5         | 1  |
| 20908 | 3208  | Olf1583       | 4930511111Rik | 1  |
| 20908 | 3383  | Olf1583       | Cd99          | 1  |
| 20908 | 4079  | Olf1583       | Emilin3       | 1  |
| 20908 | 4199  | Olf1583       | B3galt5       | 1  |
| 20908 | 4246  | Olf1583       | Fbxw12        | 1  |
| 20908 | 5908  | Olf1583       | MMT00027552   | 1  |
| 20908 | 7436  | Olf1583       | 1700063K16Rik | 1  |
| 20908 | 7916  | Olf1583       | MMT00016293   | 1  |

|       |       |         |                |    |
|-------|-------|---------|----------------|----|
| 20908 | 7974  | Olfr583 | Arhgef7        | 1  |
| 20908 | 8157  | Olfr583 | MMT00005305    | 1  |
| 20908 | 8256  | Olfr583 | Tjap1          | 1  |
| 20908 | 8644  | Olfr583 | V1rg11         | 1  |
| 20908 | 9946  | Olfr583 | Stam2          | 1  |
| 20908 | 10377 | Olfr583 | A430105I19Rik  | 1  |
| 20908 | 10520 | Olfr583 | Xkr6           | 1  |
| 20908 | 10687 | Olfr583 | ltpkb          | 1  |
| 20908 | 11256 | Olfr583 | H2-DMa         | 1  |
| 20908 | 11966 | Olfr583 | Zfp280b        | 1  |
| 20908 | 12248 | Olfr583 | Tnp2           | 1  |
| 20908 | 12272 | Olfr583 | Fshr           | 1  |
| 20908 | 12372 | Olfr583 | MMT00039397    | 1  |
| 20908 | 12568 | Olfr583 | Lrrc37a        | 1  |
| 20908 | 12772 | Olfr583 | Axl            | 1  |
| 20908 | 13487 | Olfr583 | A230051G13Rik  | 1  |
| 20908 | 13570 | Olfr583 | Olfr171        | 1  |
| 20908 | 13742 | Olfr583 | 1700024P16Rik  | 1  |
| 20908 | 14313 | Olfr583 | Tnk1           | 1  |
| 20908 | 14754 | Olfr583 | Atoh8          | 1  |
| 20908 | 15743 | Olfr583 | Hoxc6          | 1  |
| 20908 | 15885 | Olfr583 | Adamts7        | 1  |
| 20908 | 16672 | Olfr583 | Tmem82         | 1  |
| 20908 | 17422 | Olfr583 | Dctd           | 1  |
| 20908 | 17613 | Olfr583 | P2rx7          | 1  |
| 20908 | 17750 | Olfr583 | Hs6st2         | 1  |
| 20908 | 19219 | Olfr583 | MMT00015104    | 1  |
| 20908 | 19436 | Olfr583 | Dapp1          | 1  |
| 20908 | 19645 | Olfr583 | Il12rb2        | 1  |
| 20908 | 20908 | Olfr583 | Olfr583        | 1  |
| 20908 | 22125 | Olfr583 | Gab1           | 1  |
| 20908 | 22434 | Olfr583 | Olfr1255       | 1  |
| 20908 | 22802 | Olfr583 | Svs2           | 1  |
| 20908 | 23546 | Olfr583 | Zzef1          | 1  |
| 20908 | 23591 | Olfr583 | Dlg4           | 1  |
| 20908 | 23651 | Olfr583 | MMT00027295    | 1  |
| 20912 | 1006  | Chordc1 | 2600011E07Rik  | 1  |
| 20912 | 1281  | Chordc1 | Alkbh3         | -1 |
| 20912 | 2558  | Chordc1 | Tmem132b       | 1  |
| 20912 | 4443  | Chordc1 | Zfp790         | 1  |
| 20912 | 6769  | Chordc1 | Banp           | 1  |
| 20912 | 7751  | Chordc1 | Sgk2           | -1 |
| 20912 | 8939  | Chordc1 | MMT00024195    | 1  |
| 20912 | 11063 | Chordc1 | Phf8           | 1  |
| 20912 | 11867 | Chordc1 | Rcor3          | 1  |
| 20912 | 12732 | Chordc1 | Hsd17b1        | 1  |
| 20912 | 14860 | Chordc1 | MMT00051231    | -1 |
| 20912 | 15476 | Chordc1 | Fem1b          | -1 |
| 20912 | 15731 | Chordc1 | Mfhas1         | 1  |
| 20912 | 18373 | Chordc1 | Dnajb1         | 1  |
| 20912 | 18418 | Chordc1 | Hspa1b         | 1  |
| 20912 | 18846 | Chordc1 | lkbkg          | 1  |
| 20912 | 20237 | Chordc1 | RP23-433P19.11 | -1 |
| 20912 | 22141 | Chordc1 | Rorb           | 1  |
| 20912 | 23419 | Chordc1 | Tipin          | -1 |
| 20918 | 2456  | Nxph3   | Mrpl10         | 1  |
| 20918 | 4046  | Nxph3   | Phb            | 1  |
| 20918 | 5661  | Nxph3   | Lrrc46         | -1 |
| 20918 | 10498 | Nxph3   | Ube2z          | -1 |

|       |       |               |               |    |
|-------|-------|---------------|---------------|----|
| 20918 | 12302 | Nxph3         | Cbx1          | 1  |
| 20918 | 19196 | Nxph3         | Nfe211        | -1 |
| 20918 | 23295 | Nxph3         | Snx11         | 1  |
| 20958 | 19421 | 4933403F05Rik | Mbd2          | 1  |
| 20958 | 20958 | 4933403F05Rik | 4933403F05Rik | 1  |
| 20979 | 3079  | D10Jhu81e     | Gstt3         | -1 |
| 20979 | 15897 | D10Jhu81e     | D10Jhu81e     | 1  |
| 20979 | 20979 | D10Jhu81e     | D10Jhu81e     | 1  |
| 20979 | 22786 | D10Jhu81e     | Mterfd3       | -1 |
| 20980 | 1006  | Taf12         | 2600011E07Rik | 1  |
| 20980 | 1351  | Taf12         | Whsc111       | 1  |
| 20980 | 2558  | Taf12         | Tmem132b      | 1  |
| 20980 | 15476 | Taf12         | Fem1b         | -1 |
| 20980 | 16098 | Taf12         | Rps20         | -1 |
| 20980 | 18373 | Taf12         | Dnajb1        | 1  |
| 20980 | 22012 | Taf12         | ltgae         | -1 |
| 20997 | 4426  | MMT00028135   | ligp2         | 1  |
| 20997 | 12398 | MMT00028135   | lfi44         | 1  |
| 20997 | 13309 | MMT00028135   | Tgtp          | 1  |
| 20997 | 16949 | MMT00028135   | ligp1         | 1  |
| 21013 | 1297  | Vnn3          | Phox2a        | -1 |
| 21015 | 7159  | MMT00014048   | 1700031F05Rik | -1 |
| 21015 | 21015 | MMT00014048   | MMT00014048   | 1  |
| 21017 | 2472  | Gstz1         | MMT00014056   | 1  |
| 21017 | 9547  | Gstz1         | MMT00006479   | 1  |
| 21017 | 14757 | Gstz1         | Hdx           | 1  |
| 21017 | 16881 | Gstz1         | MMT00031504   | 1  |
| 21017 | 22320 | Gstz1         | MMT00047284   | 1  |
| 21019 | 12761 | Picalm        | Tsc22d3       | 1  |
| 21053 | 153   | Ypel1         | 2010011I20Rik | -1 |
| 21060 | 12412 | Ela1          | BC004728      | 1  |
| 21060 | 19037 | Ela1          | Slc11a2       | 1  |
| 21060 | 21060 | Ela1          | Ela1          | 1  |
| 21070 | 15870 | Cnot8         | Aqp5          | 1  |
| 21075 | 8750  | Gtf2h5        | 1700010I14Rik | -1 |
| 21075 | 11435 | Gtf2h5        | Rnaset2a      | -1 |
| 21075 | 17707 | Gtf2h5        | Rshl2b        | -1 |
| 21075 | 22104 | Gtf2h5        | Rnf123        | -1 |
| 21095 | 16295 | 9130401M01Rik | Nlrp14        | 1  |
| 21099 | 6542  | Rapgef6       | Epor          | 1  |
| 21099 | 12571 | Rapgef6       | Cdkn2d        | 1  |
| 21099 | 23415 | Rapgef6       | Acp5          | 1  |
| 21101 | 15162 | 1110032A03Rik | Il18          | 1  |
| 21102 | 9260  | Cmtm7         | Cmtm6         | 1  |
| 21102 | 21102 | Cmtm7         | Cmtm7         | 1  |
| 21125 | 1162  | Mtif3         | Cpsf4         | 1  |
| 21125 | 7116  | Mtif3         | Katnal1       | -1 |
| 21125 | 7378  | Mtif3         | 1700001J03Rik | -1 |
| 21125 | 17616 | Mtif3         | Flt1          | -1 |
| 21126 | 1375  | Dera          | Strap         | -1 |
| 21126 | 2021  | Dera          | Atf7ip        | 1  |
| 21126 | 11130 | Dera          | Slco1c1       | 1  |
| 21126 | 14557 | Dera          | Pyroxd1       | 1  |
| 21126 | 22907 | Dera          | MMT00054594   | -1 |
| 21126 | 22978 | Dera          | MMT00043176   | -1 |
| 21127 | 7100  | Triobp        | Tomm22        | 1  |
| 21127 | 9540  | Triobp        | Csnk1e        | 1  |
| 21142 | 2794  | Gm129         | Map3k6        | 1  |
| 21142 | 4678  | Gm129         | Kank1         | -1 |

|       |       |         |               |    |
|-------|-------|---------|---------------|----|
| 21142 | 5345  | Gm129   | MMT00023326   | 1  |
| 21142 | 5974  | Gm129   | Arntl         | -1 |
| 21142 | 6038  | Gm129   | Acot1         | -1 |
| 21142 | 12649 | Gm129   | Itgad         | 1  |
| 21142 | 12761 | Gm129   | Tsc22d3       | 1  |
| 21142 | 12834 | Gm129   | Fabp7         | -1 |
| 21142 | 16494 | Gm129   | 2310007D09Rik | 1  |
| 21142 | 18179 | Gm129   | Dbp           | 1  |
| 21142 | 21142 | Gm129   | Gm129         | 1  |
| 21142 | 21935 | Gm129   | Prok2         | -1 |
| 21207 | 15870 | Pi15    | Aqp5          | 1  |
| 21209 | 2599  | Ebf4    | Lsm14a        | -1 |
| 21212 | 5974  | Klb     | Arntl         | 1  |
| 21223 | 2118  | Pira1   | Kptn          | -1 |
| 21223 | 2599  | Pira1   | Lsm14a        | -1 |
| 21223 | 6513  | Pira1   | Qpctl         | -1 |
| 21223 | 7761  | Pira1   | Nudt19        | -1 |
| 21223 | 7803  | Pira1   | Ttyh1         | -1 |
| 21223 | 8394  | Pira1   | Dpy19l3       | -1 |
| 21223 | 9122  | Pira1   | Sepw1         | -1 |
| 21223 | 9413  | Pira1   | 1190020J12Rik | 1  |
| 21223 | 11888 | Pira1   | Myadm         | 1  |
| 21223 | 11982 | Pira1   | MMT00035514   | 1  |
| 21223 | 14842 | Pira1   | Gipr          | -1 |
| 21223 | 15670 | Pira1   | Pnmal1        | 1  |
| 21223 | 17632 | Pira1   | Lypd3         | 1  |
| 21223 | 19142 | Pira1   | Gpatch1       | -1 |
| 21223 | 19306 | Pira1   | Al428936      | -1 |
| 21223 | 19462 | Pira1   | 4933439C20Rik | 1  |
| 21223 | 21223 | Pira1   | Pira1         | 1  |
| 21232 | 9980  | Nkiras1 | MMT00008758   | -1 |
| 21295 | 7088  | Snf1lk  | Slc37a1       | -1 |
| 21295 | 8750  | Snf1lk  | 1700010l14Rik | -1 |
| 21295 | 16692 | Snf1lk  | Bat4          | -1 |
| 21295 | 17322 | Snf1lk  | Zfp758        | 1  |
| 21295 | 21295 | Snf1lk  | Snf1lk        | 1  |
| 21307 | 1918  | Krcc1   | Usp39         | 1  |
| 21307 | 2743  | Krcc1   | Tcf3          | 1  |
| 21307 | 3703  | Krcc1   | Ggcx          | 1  |
| 21307 | 5296  | Krcc1   | Rnf181        | 1  |
| 21307 | 8016  | Krcc1   | Mrpl35        | -1 |
| 21307 | 8055  | Krcc1   | Ptcd3         | 1  |
| 21307 | 15384 | Krcc1   | Mat2a         | 1  |
| 21307 | 18948 | Krcc1   | Olf1270       | -1 |
| 21313 | 18700 | Rhou    | Trappc2l      | -1 |
| 21329 | 21329 | Azi2    | Azi2          | 1  |
| 21331 | 2708  | Slc10a6 | Sgk1          | 1  |
| 21331 | 2794  | Slc10a6 | Map3k6        | 1  |
| 21331 | 5345  | Slc10a6 | MMT00023326   | 1  |
| 21331 | 6564  | Slc10a6 | Cebpd         | 1  |
| 21331 | 8816  | Slc10a6 | Nfkbia        | 1  |
| 21331 | 8980  | Slc10a6 | Plekhf1       | 1  |
| 21331 | 12761 | Slc10a6 | Tsc22d3       | 1  |
| 21331 | 12989 | Slc10a6 | 1190002H23Rik | 1  |
| 21331 | 14486 | Slc10a6 | Sox7          | -1 |
| 21331 | 15826 | Slc10a6 | Arl4d         | 1  |
| 21331 | 16494 | Slc10a6 | 2310007D09Rik | 1  |
| 21331 | 19004 | Slc10a6 | Pdk4          | 1  |
| 21331 | 21313 | Slc10a6 | Rhou          | 1  |

|       |       |               |               |    |
|-------|-------|---------------|---------------|----|
| 21331 | 21380 | Slc10a6       | Ier5          | -1 |
| 21351 | 6824  | Shisa5        | Irf7          | 1  |
| 21351 | 7069  | Shisa5        | Ube1l         | 1  |
| 21354 | 15870 | Xpa           | Aqp5          | -1 |
| 21364 | 1297  | Ppm1h         | Phox2a        | 1  |
| 21378 | 15255 | Havcr2        | Ccl8          | 1  |
| 21380 | 21142 | Ier5          | Gm129         | -1 |
| 21391 | 15870 | Lgi2          | Aqp5          | 1  |
| 21415 | 15476 | Has1          | Fem1b         | -1 |
| 21425 | 9322  | Rab6          | Relt          | 1  |
| 21425 | 20300 | Rab6          | Plekha1       | -1 |
| 21425 | 21425 | Rab6          | Rab6          | 1  |
| 21433 | 403   | Ubx6          | Leprtl1       | -1 |
| 21438 | 2599  | Plekha4       | Lsm14a        | -1 |
| 21438 | 7761  | Plekha4       | Nudt19        | -1 |
| 21438 | 8394  | Plekha4       | Dpy19l3       | -1 |
| 21438 | 18365 | Plekha4       | Bcl2l12       | 1  |
| 21438 | 21853 | Plekha4       | 5430432N15Rik | 1  |
| 21442 | 3812  | Rad51l1       | Zfyve26       | 1  |
| 21444 | 13195 | Pnpt1         | Mtif2         | 1  |
| 21444 | 21371 | Pnpt1         | Spnb2         | -1 |
| 21444 | 21444 | Pnpt1         | Pnpt1         | 1  |
| 21448 | 1297  | Paqr7         | Phox2a        | 1  |
| 21454 | 18526 | MMT00068006   | Dydc2         | -1 |
| 21512 | 5342  | Gas6          | Eps8l3        | 1  |
| 21512 | 15870 | Gas6          | Aqp5          | 1  |
| 21519 | 16809 | 1700012B15Rik | Rxrb          | 1  |
| 21519 | 21519 | 1700012B15Rik | 1700012B15Rik | 1  |
| 21538 | 21969 | Rg9mtd1       | Tk1           | -1 |
| 21541 | 403   | Brf2          | Leprtl1       | -1 |
| 21541 | 1755  | Brf2          | Ocel1         | 1  |
| 21541 | 5433  | Brf2          | 2410004L22Rik | -1 |
| 21541 | 9729  | Brf2          | Got1l1        | -1 |
| 21549 | 143   | Rtp4          | Gvin1         | 1  |
| 21549 | 2224  | Rtp4          | Oasl2         | 1  |
| 21549 | 3683  | Rtp4          | Oas2          | 1  |
| 21549 | 4426  | Rtp4          | ligp2         | 1  |
| 21549 | 5853  | Rtp4          | Trim30        | 1  |
| 21549 | 6824  | Rtp4          | Irf7          | 1  |
| 21549 | 7069  | Rtp4          | Ube1l         | 1  |
| 21549 | 7105  | Rtp4          | Plac8         | 1  |
| 21549 | 8800  | Rtp4          | Rnf213        | 1  |
| 21549 | 9847  | Rtp4          | Ifi27         | 1  |
| 21549 | 12398 | Rtp4          | Ifi44         | 1  |
| 21549 | 13309 | Rtp4          | Tgtp          | 1  |
| 21549 | 14258 | Rtp4          | Ifi47         | 1  |
| 21549 | 16949 | Rtp4          | ligp1         | 1  |
| 21549 | 19189 | Rtp4          | Sp100         | 1  |
| 21549 | 21549 | Rtp4          | Rtp4          | 1  |
| 21549 | 23450 | Rtp4          | D12Ertd647e   | 1  |
| 21579 | 21579 | Lsm12         | Lsm12         | 1  |
| 21585 | 16692 | Hipk1         | Bat4          | -1 |
| 21607 | 874   | Aldh1a1       | Aldh1a7       | 1  |
| 21607 | 7159  | Aldh1a1       | 1700031F05Rik | -1 |
| 21607 | 11369 | Aldh1a1       | Stx3          | 1  |
| 21607 | 11812 | Aldh1a1       | Mrpl16        | 1  |
| 21607 | 15334 | Aldh1a1       | Rnaseh2c      | 1  |
| 21607 | 17447 | Aldh1a1       | Ctsf          | 1  |
| 21607 | 21015 | Aldh1a1       | MMT00014048   | 1  |



|       |       |               |               |    |
|-------|-------|---------------|---------------|----|
| 21639 | 21639 | Hspa9         | Hspa9         | 1  |
| 21643 | 2558  | Agtr1a        | Tmem132b      | -1 |
| 21643 | 15476 | Agtr1a        | Fem1b         | 1  |
| 21655 | 13810 | Rab40b        | 1110036O03Rik | -1 |
| 21655 | 16613 | Rab40b        | 1110031I02Rik | -1 |
| 21655 | 17193 | Rab40b        | Npb           | -1 |
| 21655 | 21414 | Rab40b        | BC017643      | -1 |
| 21655 | 22250 | Rab40b        | Wdr45l        | 1  |
| 21665 | 5737  | Nat5          | Nkx2-2        | -1 |
| 21665 | 6805  | Nat5          | Rrbp1         | 1  |
| 21665 | 11705 | Nat5          | Polr3f        | -1 |
| 21665 | 14740 | Nat5          | Mfap1b        | -1 |
| 21712 | 21712 | Ttc5          | Ttc5          | 1  |
| 21712 | 23533 | Ttc5          | Ccnb1ip1      | -1 |
| 21729 | 14740 | Hdc           | Mfap1b        | 1  |
| 21729 | 18835 | Hdc           | Dtwd1         | -1 |
| 21733 | 8939  | Rhebl1        | MMT00024195   | -1 |
| 21733 | 12219 | Rhebl1        | Cyb5b         | -1 |
| 21733 | 15476 | Rhebl1        | Fem1b         | 1  |
| 21733 | 21903 | Rhebl1        | Nr1d1         | 1  |
| 21747 | 15870 | H2afx         | Aqp5          | 1  |
| 21761 | 21761 | D14Ert449e    | D14Ert449e    | 1  |
| 21780 | 1014  | Ankrd35       | Rtcd1         | -1 |
| 21780 | 1466  | Ankrd35       | Ubap2l        | -1 |
| 21780 | 2632  | Ankrd35       | Aph1a         | 1  |
| 21780 | 2752  | Ankrd35       | Fcgr1         | -1 |
| 21780 | 3314  | Ankrd35       | Wars2         | -1 |
| 21780 | 3874  | Ankrd35       | Slitrk3       | 1  |
| 21780 | 6283  | Ankrd35       | Ptpn22        | 1  |
| 21780 | 6708  | Ankrd35       | Serpini2      | 1  |
| 21780 | 9408  | Ankrd35       | Hmgcs2        | 1  |
| 21780 | 9519  | Ankrd35       | Fstl5         | 1  |
| 21780 | 10521 | Ankrd35       | Ttf2          | -1 |
| 21780 | 12367 | Ankrd35       | MMT00072365   | 1  |
| 21780 | 12716 | Ankrd35       | 5830417110Rik | 1  |
| 21780 | 12886 | Ankrd35       | Acp6          | -1 |
| 21780 | 15299 | Ankrd35       | Mrps21        | 1  |
| 21780 | 15550 | Ankrd35       | 2010200O16Rik | 1  |
| 21780 | 15901 | Ankrd35       | Tpm3          | 1  |
| 21780 | 16283 | Ankrd35       | EG627427      | 1  |
| 21780 | 16416 | Ankrd35       | Commd2        | -1 |
| 21780 | 16753 | Ankrd35       | Hfe2          | 1  |
| 21780 | 17837 | Ankrd35       | Polr3gl       | 1  |
| 21780 | 18376 | Ankrd35       | Pex11b        | 1  |
| 21780 | 20661 | Ankrd35       | Tuft1         | 1  |
| 21780 | 20810 | Ankrd35       | Mttp          | 1  |
| 21780 | 21650 | Ankrd35       | Ap4b1         | -1 |
| 21780 | 21780 | Ankrd35       | Ankrd35       | 1  |
| 21780 | 22570 | Ankrd35       | Phf1          | -1 |
| 21790 | 11621 | Smarcal1      | Mixl1         | 1  |
| 21805 | 10134 | Plk3          | Hivep3        | 1  |
| 21805 | 18207 | Plk3          | Dnali1        | 1  |
| 21824 | 1660  | 5830443L24Rik | Zfp33b        | -1 |
| 21824 | 6330  | 5830443L24Rik | Dgkq          | 1  |
| 21824 | 8547  | 5830443L24Rik | Gbp4          | 1  |
| 21824 | 12398 | 5830443L24Rik | Ifi44         | 1  |
| 21824 | 13309 | 5830443L24Rik | Tgtp          | 1  |
| 21824 | 16949 | 5830443L24Rik | ligp1         | 1  |
| 21824 | 21824 | 5830443L24Rik | 5830443L24Rik | 1  |

|       |       |               |               |    |
|-------|-------|---------------|---------------|----|
| 21849 | 6038  | Icam2         | Acot1         | 1  |
| 21853 | 2449  | 5430432N15Rik | Mybpc2        | -1 |
| 21853 | 2599  | 5430432N15Rik | Lsm14a        | -1 |
| 21853 | 7761  | 5430432N15Rik | Nudt19        | -1 |
| 21853 | 8394  | 5430432N15Rik | Dpy19l3       | -1 |
| 21853 | 9454  | 5430432N15Rik | 2810426N06Rik | -1 |
| 21853 | 9655  | 5430432N15Rik | Sult2b1       | 1  |
| 21853 | 18365 | 5430432N15Rik | Bcl2l12       | 1  |
| 21853 | 19306 | 5430432N15Rik | Al428936      | -1 |
| 21853 | 20490 | 5430432N15Rik | Tmem143       | 1  |
| 21853 | 21853 | 5430432N15Rik | 5430432N15Rik | 1  |
| 21863 | 1297  | Dok2          | Phox2a        | 1  |
| 21863 | 6038  | Dok2          | Acot1         | 1  |
| 21863 | 15255 | Dok2          | Ccl8          | 1  |
| 21872 | 1297  | Stambpl1      | Phox2a        | 1  |
| 21872 | 6133  | Stambpl1      | Agrp          | -1 |
| 21903 | 6564  | Nr1d1         | Cebpd         | -1 |
| 21903 | 15476 | Nr1d1         | Fem1b         | 1  |
| 21903 | 21903 | Nr1d1         | Nr1d1         | 1  |
| 21907 | 14734 | Dynlrb1       | Nrsn2         | 1  |
| 21952 | 2424  | Tfb1m         | Unc5cl        | -1 |
| 21952 | 2938  | Tfb1m         | H2-T23        | -1 |
| 21952 | 7088  | Tfb1m         | Slc37a1       | -1 |
| 21952 | 7603  | Tfb1m         | Sod2          | -1 |
| 21952 | 7909  | Tfb1m         | Oas3          | -1 |
| 21952 | 8750  | Tfb1m         | 1700010l14Rik | -1 |
| 21952 | 9805  | Tfb1m         | Tagap         | -1 |
| 21952 | 10667 | Tfb1m         | H2-Eb1        | -1 |
| 21952 | 11435 | Tfb1m         | Rnaset2a      | -1 |
| 21952 | 16692 | Tfb1m         | Bat4          | -1 |
| 21952 | 17322 | Tfb1m         | Zfp758        | 1  |
| 21952 | 17707 | Tfb1m         | Rshl2b        | -1 |
| 21952 | 17760 | Tfb1m         | Ccr6          | 1  |
| 21952 | 20238 | Tfb1m         | H2-T9         | -1 |
| 21952 | 20511 | Tfb1m         | Decr2         | -1 |
| 21952 | 21295 | Tfb1m         | Snf1lk        | 1  |
| 21952 | 21415 | Tfb1m         | Has1          | -1 |
| 21952 | 21952 | Tfb1m         | Tfb1m         | 1  |
| 21952 | 22104 | Tfb1m         | Rnf123        | -1 |
| 21969 | 15870 | Tk1           | Aqp5          | 1  |
| 21986 | 153   | Cstf1         | 2010011l20Rik | 1  |
| 21988 | 2118  | MMT00015654   | Kptn          | -1 |
| 21988 | 2599  | MMT00015654   | Lsm14a        | -1 |
| 21988 | 7761  | MMT00015654   | Nudt19        | -1 |
| 21988 | 7803  | MMT00015654   | Ttyh1         | -1 |
| 21988 | 8394  | MMT00015654   | Dpy19l3       | -1 |
| 21988 | 9122  | MMT00015654   | Sepw1         | -1 |
| 21988 | 11982 | MMT00015654   | MMT00035514   | 1  |
| 21988 | 14842 | MMT00015654   | Gipr          | -1 |
| 21988 | 17632 | MMT00015654   | Lypd3         | 1  |
| 21988 | 19306 | MMT00015654   | Al428936      | -1 |
| 21988 | 19462 | MMT00015654   | 4933439C20Rik | 1  |
| 21988 | 21223 | MMT00015654   | Pira1         | 1  |
| 22010 | 4192  | Ccdc41        | Zranb1        | -1 |
| 22010 | 15476 | Ccdc41        | Fem1b         | -1 |
| 22010 | 18373 | Ccdc41        | Dnajb1        | 1  |
| 22021 | 13615 | Csnk1d        | Arl16         | 1  |
| 22037 | 143   | Oas1g         | Gvin1         | 1  |
| 22037 | 2224  | Oas1g         | Oasl2         | 1  |

|       |       |             |               |    |
|-------|-------|-------------|---------------|----|
| 22037 | 3683  | Oas1g       | Oas2          | 1  |
| 22037 | 4114  | Oas1g       | Parp12        | 1  |
| 22037 | 4426  | Oas1g       | ligp2         | 1  |
| 22037 | 5853  | Oas1g       | Trim30        | 1  |
| 22037 | 6038  | Oas1g       | Acot1         | 1  |
| 22037 | 6824  | Oas1g       | Irf7          | 1  |
| 22037 | 9616  | Oas1g       | AI451557      | 1  |
| 22037 | 9847  | Oas1g       | Irf27         | 1  |
| 22037 | 12398 | Oas1g       | Irf44         | 1  |
| 22037 | 13309 | Oas1g       | Tgtp          | 1  |
| 22037 | 14258 | Oas1g       | Irf47         | 1  |
| 22037 | 15572 | Oas1g       | Dtx3l         | 1  |
| 22037 | 16949 | Oas1g       | ligp1         | 1  |
| 22037 | 18186 | Oas1g       | Parp14        | 1  |
| 22037 | 21549 | Oas1g       | Rtp4          | 1  |
| 22037 | 23450 | Oas1g       | D12Ert647e    | 1  |
| 22075 | 630   | C1s         | C1s           | 1  |
| 22075 | 9622  | C1s         | Rasgef1a      | 1  |
| 22075 | 19964 | C1s         | Ndufa9        | -1 |
| 22075 | 22075 | C1s         | C1s           | 1  |
| 22075 | 22395 | C1s         | Kcna1         | 1  |
| 22077 | 5989  | MMT00057550 | 2310042D19Rik | 1  |
| 22095 | 11130 | Mgst1       | Slco1c1       | 1  |
| 22095 | 14557 | Mgst1       | Pyroxd1       | 1  |
| 22104 | 5669  | Rnf123      | Fndc1         | -1 |
| 22104 | 7088  | Rnf123      | Slc37a1       | 1  |
| 22104 | 7339  | Rnf123      | Tdp1          | -1 |
| 22104 | 7603  | Rnf123      | Sod2          | 1  |
| 22104 | 7909  | Rnf123      | Oas3          | 1  |
| 22104 | 8750  | Rnf123      | 1700010I14Rik | 1  |
| 22104 | 9805  | Rnf123      | Tagap         | 1  |
| 22104 | 10729 | Rnf123      | Fgd2          | 1  |
| 22104 | 11435 | Rnf123      | Rnaset2a      | 1  |
| 22104 | 17707 | Rnf123      | Rshl2b        | 1  |
| 22104 | 17760 | Rnf123      | Ccr6          | -1 |
| 22104 | 21295 | Rnf123      | Snf1lk        | -1 |
| 22104 | 21415 | Rnf123      | Has1          | 1  |
| 22104 | 21952 | Rnf123      | Tfb1m         | -1 |
| 22104 | 22104 | Rnf123      | Rnf123        | 1  |
| 22139 | 1214  | Stip1       | Trip13        | -1 |
| 22139 | 2037  | Stip1       | Ankrd16       | -1 |
| 22139 | 4106  | Stip1       | MMT00041409   | -1 |
| 22139 | 11043 | Stip1       | Hsph1         | 1  |
| 22139 | 18373 | Stip1       | Dnajb1        | 1  |
| 22139 | 18418 | Stip1       | Hspa1b        | 1  |
| 22146 | 1041  | Aifm2       | 3110049J23Rik | -1 |
| 22146 | 2571  | Aifm2       | Rmnd1         | -1 |
| 22146 | 3195  | Aifm2       | Mypn          | 1  |
| 22146 | 8786  | Aifm2       | Rmnd1         | -1 |
| 22146 | 11162 | Aifm2       | Hkdc1         | 1  |
| 22146 | 19115 | Aifm2       | Rab32         | -1 |
| 22146 | 19392 | Aifm2       | Slc25a16      | -1 |
| 22146 | 20136 | Aifm2       | Col13a1       | 1  |
| 22146 | 20705 | Aifm2       | Supv3l1       | -1 |
| 22146 | 22333 | Aifm2       | Hnrnp3        | 1  |
| 22151 | 1297  | Plxnd1      | Phox2a        | 1  |
| 22161 | 1297  | Tmem132a    | Phox2a        | 1  |
| 22184 | 1510  | MMT00033856 | A530058N18Rik | 1  |
| 22188 | 15870 | Top2a       | Aqp5          | 1  |

|       |       |                    |               |    |
|-------|-------|--------------------|---------------|----|
| 22202 | 1466  | OTTMUSG00000021274 | Ubp2l         | -1 |
| 22202 | 2752  | OTTMUSG00000021274 | Fcgr1         | -1 |
| 22202 | 3314  | OTTMUSG00000021274 | Wars2         | -1 |
| 22202 | 6708  | OTTMUSG00000021274 | Serpini2      | 1  |
| 22202 | 9519  | OTTMUSG00000021274 | Fstl5         | 1  |
| 22202 | 10521 | OTTMUSG00000021274 | Ttf2          | -1 |
| 22202 | 12367 | OTTMUSG00000021274 | MMT00072365   | 1  |
| 22202 | 12716 | OTTMUSG00000021274 | 5830417110Rik | 1  |
| 22202 | 15901 | OTTMUSG00000021274 | Tpm3          | 1  |
| 22202 | 16416 | OTTMUSG00000021274 | Commd2        | -1 |
| 22202 | 21650 | OTTMUSG00000021274 | Ap4b1         | -1 |
| 22202 | 22570 | OTTMUSG00000021274 | Phf1          | -1 |
| 22202 | 23037 | OTTMUSG00000021274 | Thbs3         | -1 |
| 22213 | 2294  | Adora1             | AU040829      | 1  |
| 22213 | 2794  | Adora1             | Map3k6        | 1  |
| 22213 | 5345  | Adora1             | MMT00023326   | 1  |
| 22213 | 12761 | Adora1             | Tsc22d3       | 1  |
| 22213 | 12834 | Adora1             | Fabp7         | -1 |
| 22226 | 22226 | Pm20d1             | Pm20d1        | 1  |
| 22229 | 15870 | Dnmt1              | Aqp5          | 1  |
| 22232 | 14952 | Krt19              | Tex2          | 1  |
| 22272 | 14222 | Vpreb1             | MMT00076410   | -1 |
| 22272 | 15713 | Vpreb1             | Rbm3          | -1 |
| 22290 | 5385  | Tubb2a             | Tubb2b        | 1  |
| 22297 | 13207 | Zfyve1             | Sptlc2        | -1 |
| 22297 | 22297 | Zfyve1             | Zfyve1        | 1  |
| 22298 | 8807  | Zfp259             | Ankrd56       | -1 |
| 22298 | 16066 | Zfp259             | Coq2          | 1  |
| 22320 | 290   | MMT00047284        | B230118H07Rik | -1 |
| 22320 | 1510  | MMT00047284        | A530058N18Rik | -1 |
| 22320 | 1991  | MMT00047284        | Ttc17         | 1  |
| 22320 | 2472  | MMT00047284        | MMT00014056   | 1  |
| 22320 | 9547  | MMT00047284        | MMT00006479   | 1  |
| 22320 | 14757 | MMT00047284        | Hdx           | 1  |
| 22320 | 16881 | MMT00047284        | MMT00031504   | 1  |
| 22320 | 17295 | MMT00047284        | MMT00082577   | 1  |
| 22320 | 18368 | MMT00047284        | Mpped2        | -1 |
| 22320 | 19763 | MMT00047284        | Acp2          | 1  |
| 22320 | 19803 | MMT00047284        | BC003993      | 1  |
| 22320 | 21017 | MMT00047284        | Gstz1         | 1  |
| 22320 | 22320 | MMT00047284        | MMT00047284   | 1  |
| 22320 | 23474 | MMT00047284        | MMT00011721   | 1  |
| 22333 | 1041  | Hnrph3             | 3110049J23Rik | -1 |
| 22333 | 11162 | Hnrph3             | Hkdc1         | 1  |
| 22333 | 20705 | Hnrph3             | Supv3l1       | -1 |
| 22333 | 22333 | Hnrph3             | Hnrph3        | 1  |
| 22337 | 8005  | Nik                | Omg           | -1 |
| 22337 | 22337 | Nik                | Nik           | 1  |
| 22351 | 2243  | Fanca              | Gcsh          | -1 |
| 22351 | 3865  | Fanca              | Acta1         | -1 |
| 22351 | 6065  | Fanca              | Plce1         | -1 |
| 22351 | 7910  | Fanca              | AK122209      | -1 |
| 22351 | 12440 | Fanca              | Sult5a1       | 1  |
| 22351 | 14391 | Fanca              | MMT00017335   | 1  |
| 22351 | 15953 | Fanca              | Acsf3         | 1  |
| 22351 | 18700 | Fanca              | Trappc2l      | -1 |
| 22351 | 20690 | Fanca              | Zfp276        | 1  |
| 22351 | 22201 | Fanca              | Pard3         | 1  |
| 22351 | 22351 | Fanca              | Fanca         | 1  |

|       |       |             |               |    |
|-------|-------|-------------|---------------|----|
| 22361 | 1297  | Sephs2      | Phox2a        | -1 |
| 22395 | 9010  | Kcna1       | 8430419L09Rik | 1  |
| 22395 | 9622  | Kcna1       | Rasgef1a      | 1  |
| 22395 | 19964 | Kcna1       | Ndufa9        | -1 |
| 22395 | 22395 | Kcna1       | Kcna1         | 1  |
| 22408 | 403   | Calr3       | Leprotl1      | -1 |
| 22408 | 1604  | Calr3       | Ssbp4         | 1  |
| 22408 | 1755  | Calr3       | Ocel1         | 1  |
| 22408 | 2294  | Calr3       | AU040829      | -1 |
| 22408 | 3052  | Calr3       | 9130404D08Rik | -1 |
| 22408 | 5433  | Calr3       | 2410004L22Rik | -1 |
| 22408 | 5925  | Calr3       | Tmem59l       | -1 |
| 22408 | 9304  | Calr3       | AI449175      | 1  |
| 22408 | 9569  | Calr3       | Dda1          | -1 |
| 22408 | 9729  | Calr3       | Got1l1        | -1 |
| 22408 | 10758 | Calr3       | Gdf1          | -1 |
| 22408 | 13732 | Calr3       | Tpm4          | -1 |
| 22408 | 15296 | Calr3       | Mier3         | 1  |
| 22408 | 16617 | Calr3       | Sh2d4a        | -1 |
| 22408 | 16702 | Calr3       | 2810422J05Rik | -1 |
| 22408 | 16858 | Calr3       | Tmem38a       | -1 |
| 22408 | 17703 | Calr3       | Large         | -1 |
| 22408 | 19286 | Calr3       | 1110012M11Rik | -1 |
| 22408 | 21840 | Calr3       | Tmie          | 1  |
| 22411 | 3312  | Reck        | 6430704M03Rik | 1  |
| 22411 | 10327 | Reck        | Hint2         | 1  |
| 22411 | 14342 | Reck        | 4930412F15Rik | 1  |
| 22411 | 18514 | Reck        | 4930412F15Rik | -1 |
| 22411 | 23470 | Reck        | Tmod1         | -1 |
| 22412 | 5342  | Ptpn5       | Eps8l3        | 1  |
| 22412 | 9002  | Ptpn5       | Col24a1       | 1  |
| 22412 | 11630 | Ptpn5       | Mug-ps1       | 1  |
| 22412 | 13464 | Ptpn5       | Mc4r          | 1  |
| 22412 | 15870 | Ptpn5       | Aqp5          | 1  |
| 22412 | 17981 | Ptpn5       | MMT00036029   | 1  |
| 22412 | 18987 | Ptpn5       | Treh          | 1  |
| 22412 | 22982 | Ptpn5       | Mug2          | 1  |
| 22462 | 15870 | MMT00026054 | Aqp5          | 1  |
| 22476 | 5974  | Tspan4      | Arntl         | -1 |
| 22476 | 12834 | Tspan4      | Fabp7         | -1 |
| 22479 | 21431 | Ascc2       | Xbp1          | 1  |
| 22486 | 1297  | Sh3bgrl3    | Phox2a        | 1  |
| 22487 | 22487 | Trub1       | Trub1         | 1  |
| 22496 | 2224  | Slfn1       | Oasl2         | 1  |
| 22496 | 3683  | Slfn1       | Oas2          | 1  |
| 22496 | 4426  | Slfn1       | ligp2         | 1  |
| 22496 | 5853  | Slfn1       | Trim30        | 1  |
| 22496 | 6824  | Slfn1       | Irf7          | 1  |
| 22496 | 8800  | Slfn1       | Rnf213        | 1  |
| 22496 | 9616  | Slfn1       | AI451557      | 1  |
| 22496 | 9847  | Slfn1       | Ifi27         | 1  |
| 22496 | 12398 | Slfn1       | Ifi44         | 1  |
| 22496 | 13309 | Slfn1       | Tgtp          | 1  |
| 22496 | 14258 | Slfn1       | Ifi47         | 1  |
| 22496 | 15074 | Slfn1       | Usp18         | 1  |
| 22496 | 16949 | Slfn1       | ligp1         | 1  |
| 22496 | 21549 | Slfn1       | Rtp4          | 1  |
| 22521 | 9514  | Hsp90b1     | Vps37a        | 1  |
| 22521 | 11043 | Hsp90b1     | Hsph1         | 1  |

|       |       |               |               |    |
|-------|-------|---------------|---------------|----|
| 22521 | 18418 | Hsp90b1       | Hspa1b        | 1  |
| 22555 | 7916  | Ela2          | MMT00016293   | 1  |
| 22555 | 7974  | Ela2          | Arhgef7       | 1  |
| 22555 | 8644  | Ela2          | V1rg11        | 1  |
| 22555 | 10520 | Ela2          | Xkr6          | 1  |
| 22555 | 11256 | Ela2          | H2-DMa        | 1  |
| 22555 | 12248 | Ela2          | Tnp2          | 1  |
| 22555 | 15743 | Ela2          | Hoxc6         | 1  |
| 22555 | 15885 | Ela2          | Adamts7       | 1  |
| 22555 | 22434 | Ela2          | Olf1255       | 1  |
| 22555 | 23119 | Ela2          | Cps1          | 1  |
| 22555 | 23454 | Ela2          | Znhit1        | 1  |
| 22555 | 23546 | Ela2          | Zzef1         | 1  |
| 22555 | 23591 | Ela2          | Dlg4          | 1  |
| 22555 | 23651 | Ela2          | MMT00027295   | 1  |
| 22557 | 9790  | P4hb          | Tspan10       | -1 |
| 22557 | 13615 | P4hb          | Arl16         | 1  |
| 22560 | 2794  | Gpr56         | Map3k6        | 1  |
| 22560 | 5345  | Gpr56         | MMT00023326   | 1  |
| 22570 | 1466  | Phf1          | Ubp2l         | 1  |
| 22570 | 2752  | Phf1          | Fcgr1         | 1  |
| 22570 | 3314  | Phf1          | Wars2         | 1  |
| 22570 | 6283  | Phf1          | Ptpn22        | -1 |
| 22570 | 9519  | Phf1          | Fstl5         | -1 |
| 22570 | 10521 | Phf1          | Ttf2          | 1  |
| 22570 | 12716 | Phf1          | 5830417110Rik | -1 |
| 22570 | 16416 | Phf1          | Comm2         | 1  |
| 22570 | 21650 | Phf1          | Ap4b1         | 1  |
| 22570 | 22570 | Phf1          | Phf1          | 1  |
| 22573 | 3159  | Kif2c         | Pld1          | 1  |
| 22573 | 12367 | Kif2c         | MMT00072365   | -1 |
| 22573 | 16618 | Kif2c         | Hps3          | -1 |
| 22598 | 18373 | 4930402H24Rik | Dnajb1        | 1  |
| 22628 | 7372  | EG626903      | Fastk         | -1 |
| 22630 | 15870 | MMT00034355   | Aqp5          | 1  |
| 22642 | 5342  | Uts2          | Eps8l3        | 1  |
| 22642 | 9002  | Uts2          | Col24a1       | 1  |
| 22642 | 9684  | Uts2          | Phf21b        | 1  |
| 22642 | 15870 | Uts2          | Aqp5          | 1  |
| 22642 | 17981 | Uts2          | MMT00036029   | 1  |
| 22642 | 22982 | Uts2          | Mug2          | 1  |
| 22648 | 9449  | Mpzl1         | Sft2d2        | 1  |
| 22688 | 2294  | 4930432K21Rik | AU040829      | 1  |
| 22689 | 15870 | 2610028A01Rik | Aqp5          | 1  |
| 22693 | 9161  | Trim68        | Mrpl17        | 1  |
| 22693 | 22693 | Trim68        | Trim68        | 1  |
| 22696 | 15870 | Ypel4         | Aqp5          | -1 |
| 22712 | 143   | Phf11         | Gvin1         | 1  |
| 22712 | 3683  | Phf11         | Oas2          | 1  |
| 22712 | 4426  | Phf11         | ligp2         | 1  |
| 22712 | 5853  | Phf11         | Trim30        | 1  |
| 22712 | 6824  | Phf11         | Irf7          | 1  |
| 22712 | 9847  | Phf11         | Ifi27         | 1  |
| 22712 | 12398 | Phf11         | Ifi44         | 1  |
| 22712 | 13309 | Phf11         | Tgtp          | 1  |
| 22712 | 19189 | Phf11         | Sp100         | 1  |
| 22712 | 21549 | Phf11         | Rtp4          | 1  |
| 22712 | 23450 | Phf11         | D12Ert647e    | 1  |
| 22727 | 22012 | Pdgfra        | Ilgae         | 1  |

|       |       |               |               |    |
|-------|-------|---------------|---------------|----|
| 22732 | 12208 | Cyb5b         | Pnpla7        | -1 |
| 22740 | 5603  | Manbal        | BC020535      | 1  |
| 22740 | 11705 | Manbal        | Polr3f        | -1 |
| 22740 | 13355 | Manbal        | Foxs1         | 1  |
| 22740 | 14734 | Manbal        | Nrsn2         | 1  |
| 22740 | 23005 | Manbal        | 4930405A21Rik | 1  |
| 22744 | 1297  | 9-Sep         | Phox2a        | 1  |
| 22762 | 22337 | Slc6a4        | Nlk           | 1  |
| 22776 | 403   | Gsr           | Leprot1       | -1 |
| 22776 | 1097  | Gsr           | Dctn6         | 1  |
| 22776 | 1604  | Gsr           | Ssbp4         | 1  |
| 22776 | 1755  | Gsr           | Ocel1         | 1  |
| 22776 | 5433  | Gsr           | 2410004L22Rik | -1 |
| 22776 | 5925  | Gsr           | Tmem59l       | -1 |
| 22776 | 9304  | Gsr           | Al449175      | 1  |
| 22776 | 9729  | Gsr           | Got1l1        | -1 |
| 22776 | 10373 | Gsr           | Tmem141       | 1  |
| 22776 | 17703 | Gsr           | Large         | -1 |
| 22776 | 21433 | Gsr           | Ubx6          | 1  |
| 22777 | 13813 | Duox2         | Ktelc1        | -1 |
| 22777 | 14043 | Duox2         | 4930455C21Rik | 1  |
| 22779 | 8840  | Pik3cg        | Tmem18        | 1  |
| 22782 | 1014  | Frrs1         | Rtcd1         | 1  |
| 22786 | 22786 | Mterfd3       | Mterfd3       | 1  |
| 22822 | 2801  | MMT00013433   | H2-BI         | 1  |
| 22822 | 2938  | MMT00013433   | H2-T23        | 1  |
| 22822 | 4555  | MMT00013433   | Cchcr1        | 1  |
| 22822 | 7088  | MMT00013433   | Slc37a1       | 1  |
| 22822 | 7603  | MMT00013433   | Sod2          | 1  |
| 22822 | 8750  | MMT00013433   | 1700010l14Rik | 1  |
| 22822 | 8767  | MMT00013433   | Rgl2          | 1  |
| 22822 | 10374 | MMT00013433   | Trim15        | 1  |
| 22822 | 10667 | MMT00013433   | H2-Eb1        | 1  |
| 22822 | 10931 | MMT00013433   | Pkn3          | -1 |
| 22822 | 12168 | MMT00013433   | H2-Ke6        | 1  |
| 22822 | 12694 | MMT00013433   | Riok2         | -1 |
| 22822 | 12943 | MMT00013433   | Slc25a27      | 1  |
| 22822 | 14322 | MMT00013433   | Bat1a         | -1 |
| 22822 | 15580 | MMT00013433   | MMT00077001   | 1  |
| 22822 | 16692 | MMT00013433   | Bat4          | 1  |
| 22822 | 17322 | MMT00013433   | Zfp758        | -1 |
| 22822 | 17412 | MMT00013433   | Aif1          | -1 |
| 22822 | 18577 | MMT00013433   | Btbd9         | -1 |
| 22822 | 20238 | MMT00013433   | H2-T9         | 1  |
| 22822 | 21295 | MMT00013433   | Snf1lk        | -1 |
| 22822 | 21415 | MMT00013433   | Has1          | 1  |
| 22861 | 15870 | E430002G05Rik | Aqp5          | -1 |
| 22861 | 17981 | E430002G05Rik | MMT00036029   | -1 |
| 22867 | 7603  | Vps52         | Sod2          | 1  |
| 22867 | 10667 | Vps52         | H2-Eb1        | 1  |
| 22867 | 12168 | Vps52         | H2-Ke6        | 1  |
| 22867 | 12694 | Vps52         | Riok2         | -1 |
| 22867 | 16692 | Vps52         | Bat4          | 1  |
| 22894 | 13218 | MMT00016059   | C330043M08Rik | -1 |
| 22909 | 1336  | Nup133        | MMT00069537   | 1  |
| 22909 | 2243  | Nup133        | Gcsh          | 1  |
| 22909 | 7910  | Nup133        | AK122209      | 1  |
| 22909 | 12440 | Nup133        | Sult5a1       | -1 |
| 22909 | 15953 | Nup133        | Acsf3         | -1 |

|       |       |               |               |    |
|-------|-------|---------------|---------------|----|
| 22909 | 18700 | Nup133        | Trappc2l      | 1  |
| 22909 | 22351 | Nup133        | Fanca         | -1 |
| 22919 | 15870 | Lig1          | Aqp5          | 1  |
| 22944 | 22944 | Tmem44        | Tmem44        | 1  |
| 22961 | 2023  | MMT00055950   | MMT00072215   | 1  |
| 22961 | 5681  | MMT00055950   | Mbd1          | 1  |
| 22961 | 12109 | MMT00055950   | Smad4         | -1 |
| 22961 | 12984 | MMT00055950   | Cyb5          | 1  |
| 22961 | 22930 | MMT00055950   | Mro           | -1 |
| 22961 | 22961 | MMT00055950   | MMT00055950   | 1  |
| 22966 | 391   | Epha4         | 4933416I08Rik | 1  |
| 22966 | 3511  | Epha4         | Rnf182        | 1  |
| 22966 | 4199  | Epha4         | B3galt5       | 1  |
| 22966 | 4246  | Epha4         | Fbxw12        | 1  |
| 22966 | 7916  | Epha4         | MMT00016293   | 1  |
| 22966 | 8644  | Epha4         | V1rg11        | 1  |
| 22966 | 8952  | Epha4         | Marco         | 1  |
| 22966 | 9946  | Epha4         | Stam2         | 1  |
| 22966 | 10260 | Epha4         | Zfp36l2       | 1  |
| 22966 | 10377 | Epha4         | A430105I19Rik | 1  |
| 22966 | 10687 | Epha4         | Itpkb         | 1  |
| 22966 | 11016 | Epha4         | Pcp2          | 1  |
| 22966 | 11256 | Epha4         | H2-DMa        | 1  |
| 22966 | 11507 | Epha4         | Adarb2        | 1  |
| 22966 | 12248 | Epha4         | Tnp2          | 1  |
| 22966 | 12272 | Epha4         | Fshr          | 1  |
| 22966 | 12568 | Epha4         | Lrrc37a       | 1  |
| 22966 | 12651 | Epha4         | Tsc22d4       | 1  |
| 22966 | 14313 | Epha4         | Tnk1          | 1  |
| 22966 | 22271 | Epha4         | Cyp2c29       | 1  |
| 22966 | 23546 | Epha4         | Zzef1         | 1  |
| 22966 | 23591 | Epha4         | Dlg4          | 1  |
| 22966 | 23651 | Epha4         | MMT00027295   | 1  |
| 22988 | 22988 | Hscb          | Hscb          | 1  |
| 22989 | 16494 | Lmcd1         | 2310007D09Rik | -1 |
| 22992 | 15870 | A430107O13Rik | Aqp5          | 1  |
| 23000 | 2938  | Faim2         | H2-T23        | -1 |
| 23000 | 7088  | Faim2         | Slc37a1       | -1 |
| 23000 | 8767  | Faim2         | Rgl2          | -1 |
| 23000 | 10667 | Faim2         | H2-Eb1        | -1 |
| 23000 | 10931 | Faim2         | Pkn3          | 1  |
| 23000 | 15580 | Faim2         | MMT00077001   | -1 |
| 23000 | 16692 | Faim2         | Bat4          | -1 |
| 23000 | 17412 | Faim2         | Aif1          | 1  |
| 23005 | 223   | 4930405A21Rik | Trp53inp2     | 1  |
| 23005 | 1325  | 4930405A21Rik | Pigu          | -1 |
| 23005 | 2351  | 4930405A21Rik | 1110008F13Rik | 1  |
| 23005 | 2915  | 4930405A21Rik | Nfs1          | -1 |
| 23005 | 5603  | 4930405A21Rik | BC020535      | 1  |
| 23005 | 5858  | 4930405A21Rik | Itch          | 1  |
| 23005 | 6059  | 4930405A21Rik | Dsn1          | 1  |
| 23005 | 6188  | 4930405A21Rik | Myh7b         | -1 |
| 23005 | 6250  | 4930405A21Rik | Csnk2a1       | -1 |
| 23005 | 11166 | 4930405A21Rik | Uqcc          | 1  |
| 23005 | 12866 | 4930405A21Rik | 4921517L17Rik | -1 |
| 23005 | 13355 | 4930405A21Rik | Foxs1         | 1  |
| 23005 | 14399 | 4930405A21Rik | Csnk2a1       | -1 |
| 23005 | 14649 | 4930405A21Rik | 5430405G05Rik | -1 |
| 23005 | 14734 | 4930405A21Rik | Nrsn2         | 1  |



|       |       |               |               |    |
|-------|-------|---------------|---------------|----|
| 23005 | 15760 | 4930405A21Rik | Trib3         | -1 |
| 23005 | 17523 | 4930405A21Rik | Gdf5          | 1  |
| 23005 | 20505 | 4930405A21Rik | Tll9          | 1  |
| 23005 | 20837 | 4930405A21Rik | Dlgap4        | -1 |
| 23005 | 23005 | 4930405A21Rik | 4930405A21Rik | 1  |
| 23008 | 153   | Ctsz          | 2010011I20Rik | -1 |
| 23012 | 2012  | Spg20         | Cetn4         | 1  |
| 23012 | 2632  | Spg20         | Aph1a         | 1  |
| 23012 | 2752  | Spg20         | Fcgr1         | -1 |
| 23012 | 2904  | Spg20         | Gzme          | 1  |
| 23012 | 3159  | Spg20         | Pld1          | -1 |
| 23012 | 3314  | Spg20         | Wars2         | -1 |
| 23012 | 3874  | Spg20         | Slitrk3       | 1  |
| 23012 | 4666  | Spg20         | Exosc9        | 1  |
| 23012 | 5762  | Spg20         | Trpc3         | 1  |
| 23012 | 6708  | Spg20         | Serpini2      | 1  |
| 23012 | 8679  | Spg20         | Tiparp        | -1 |
| 23012 | 9519  | Spg20         | Fstl5         | 1  |
| 23012 | 12367 | Spg20         | MMT00072365   | 1  |
| 23012 | 12716 | Spg20         | 5830417I10Rik | 1  |
| 23012 | 16170 | Spg20         | S100a11       | -1 |
| 23012 | 16416 | Spg20         | Commd2        | -1 |
| 23012 | 16618 | Spg20         | Hps3          | 1  |
| 23012 | 19700 | Spg20         | E030011K20Rik | -1 |
| 23012 | 21780 | Spg20         | Ankrd35       | 1  |
| 23012 | 22120 | Spg20         | Ccna1         | -1 |
| 23012 | 22570 | Spg20         | Phtf1         | -1 |
| 23012 | 23037 | Spg20         | Thbs3         | -1 |
| 23014 | 640   | MMT00077643   | MMT00065211   | 1  |
| 23014 | 5284  | MMT00077643   | Npffr1        | 1  |
| 23014 | 14570 | MMT00077643   | Erdr1         | 1  |
| 23014 | 23014 | MMT00077643   | MMT00077643   | 1  |
| 23032 | 5634  | Mett10d       | Creb1         | 1  |
| 23034 | 15870 | Slc25a29      | Aqp5          | 1  |
| 23044 | 5342  | Ctr9          | Eps8l3        | 1  |
| 23044 | 15870 | Ctr9          | Aqp5          | 1  |
| 23061 | 15870 | Pole2         | Aqp5          | 1  |
| 23118 | 10189 | Ttrap         | Cage1         | 1  |
| 23118 | 15698 | Ttrap         | Them2         | 1  |
| 23118 | 17528 | Ttrap         | Gmnn          | 1  |
| 23118 | 23118 | Ttrap         | Ttrap         | 1  |
| 23132 | 15870 | Mcm6          | Aqp5          | 1  |
| 23162 | 8525  | Csda          | 2510006D16Rik | -1 |
| 23169 | 10366 | Pla2g2e       | 4931403E03Rik | 1  |
| 23169 | 16083 | Pla2g2e       | Pla2g2c       | 1  |
| 23189 | 18785 | Rbm28         | Angptl4       | -1 |
| 23191 | 4566  | 3632451O06Rik | MMT00078134   | 1  |
| 23191 | 23191 | 3632451O06Rik | 3632451O06Rik | 1  |
| 23247 | 2794  | Ercc1         | Map3k6        | 1  |
| 23247 | 4454  | Ercc1         | BC055107      | 1  |
| 23247 | 12761 | Ercc1         | Tsc22d3       | 1  |
| 23250 | 19217 | Plcl2         | Cyr61         | -1 |
| 23259 | 12494 | Dnajc1        | Thns1         | -1 |
| 23259 | 18143 | Dnajc1        | Dnajc1        | -1 |
| 23259 | 23259 | Dnajc1        | Dnajc1        | 1  |
| 23262 | 1625  | C530043G21Rik | AW146154      | 1  |
| 23267 | 1297  | Hsd17b11      | Phox2a        | -1 |
| 23283 | 2599  | Mrps12        | Lsm14a        | 1  |
| 23283 | 7761  | Mrps12        | Nudt19        | 1  |

|       |       |             |               |    |
|-------|-------|-------------|---------------|----|
| 23283 | 8394  | Mrps12      | Dpy19l3       | 1  |
| 23283 | 9263  | Mrps12      | Fbxo27        | -1 |
| 23283 | 9413  | Mrps12      | 1190020J12Rik | -1 |
| 23283 | 9454  | Mrps12      | 2810426N06Rik | 1  |
| 23283 | 16031 | Mrps12      | Stab2         | 1  |
| 23283 | 17389 | Mrps12      | Pop4          | -1 |
| 23283 | 17632 | Mrps12      | Lypd3         | -1 |
| 23283 | 18053 | Mrps12      | Psmc4         | 1  |
| 23283 | 18165 | Mrps12      | 5830482F20Rik | 1  |
| 23283 | 19142 | Mrps12      | Gpatch1       | 1  |
| 23283 | 23283 | Mrps12      | Mrps12        | 1  |
| 23301 | 4139  | Scamp1      | Sh2d5         | -1 |
| 23301 | 8783  | Scamp1      | Zfyve16       | -1 |
| 23301 | 18492 | Scamp1      | Dhfr          | 1  |
| 23342 | 8448  | Ndfip2      | Sucla2        | 1  |
| 23342 | 15353 | Ndfip2      | Ednrb         | 1  |
| 23351 | 12834 | Zfp598      | Fabp7         | -1 |
| 23353 | 153   | Slmo2       | 2010011I20Rik | 1  |
| 23353 | 23008 | Slmo2       | Ctsz          | -1 |
| 23462 | 7388  | Bag5        | Amn           | -1 |
| 23462 | 8155  | Bag5        | Mark3         | 1  |
| 23462 | 10526 | Bag5        | MMT00036239   | -1 |
| 23463 | 6038  | Gimap1      | Acot1         | 1  |
| 23466 | 9449  | Pou2f1      | Sft2d2        | 1  |
| 23474 | 290   | MMT00011721 | B230118H07Rik | -1 |
| 23474 | 1510  | MMT00011721 | A530058N18Rik | -1 |
| 23474 | 1806  | MMT00011721 | Nola3         | 1  |
| 23474 | 1991  | MMT00011721 | Ttc17         | 1  |
| 23474 | 2472  | MMT00011721 | MMT00014056   | 1  |
| 23474 | 9547  | MMT00011721 | MMT00006479   | 1  |
| 23474 | 14757 | MMT00011721 | Hdx           | 1  |
| 23474 | 16881 | MMT00011721 | MMT00031504   | 1  |
| 23474 | 17295 | MMT00011721 | MMT00082577   | 1  |
| 23474 | 18368 | MMT00011721 | Mpped2        | -1 |
| 23474 | 18835 | MMT00011721 | Dtwd1         | 1  |
| 23474 | 19763 | MMT00011721 | Acp2          | 1  |
| 23474 | 19803 | MMT00011721 | BC003993      | 1  |
| 23474 | 21017 | MMT00011721 | Gstz1         | 1  |
| 23474 | 22320 | MMT00011721 | MMT00047284   | 1  |
| 23474 | 23474 | MMT00011721 | MMT00011721   | 1  |
| 23493 | 12341 | Tgs1        | EG330731      | 1  |
| 23495 | 14009 | Cryab       | 2310030G06Rik | -1 |
| 23495 | 15162 | Cryab       | Il18          | 1  |
| 23495 | 21101 | Cryab       | 1110032A03Rik | 1  |
| 23500 | 2705  | BC055004    | Hrbl          | 1  |
| 23500 | 8992  | BC055004    | Trfr2         | -1 |
| 23500 | 9077  | BC055004    | Cnpy4         | 1  |
| 23500 | 10995 | BC055004    | Ap4m1         | -1 |
| 23500 | 12157 | BC055004    | Gal3st4       | 1  |
| 23500 | 12907 | BC055004    | Zkscan1       | -1 |
| 23500 | 13780 | BC055004    | Pilra         | -1 |
| 23500 | 19502 | BC055004    | Fbxo24        | -1 |
| 23508 | 23508 | Pdgfd       | Pdgfd         | 1  |
| 23546 | 4199  | Zzef1       | B3galt5       | 1  |
| 23546 | 7436  | Zzef1       | 1700063K16Rik | 1  |
| 23546 | 7916  | Zzef1       | MMT00016293   | 1  |
| 23546 | 9946  | Zzef1       | Stam2         | 1  |
| 23546 | 12248 | Zzef1       | Tnp2          | 1  |
| 23546 | 12568 | Zzef1       | Lrrc37a       | 1  |

|       |       |       |               |    |
|-------|-------|-------|---------------|----|
| 23546 | 12772 | Zzef1 | Axl           | 1  |
| 23546 | 15743 | Zzef1 | Hoxc6         | 1  |
| 23546 | 19219 | Zzef1 | MMT00015104   | 1  |
| 23546 | 23546 | Zzef1 | Zzef1         | 1  |
| 23546 | 23591 | Zzef1 | Dlg4          | 1  |
| 23547 | 19955 | Tmed7 | Cbx2          | 1  |
| 23550 | 15870 | Ap2m1 | Aqp5          | 1  |
| 23591 | 391   | Dlg4  | 4933416I08Rik | 1  |
| 23591 | 661   | Dlg4  | Siglec1       | -1 |
| 23591 | 1771  | Dlg4  | Park2         | 1  |
| 23591 | 2067  | Dlg4  | Myo1a         | 1  |
| 23591 | 2819  | Dlg4  | Kcnk5         | 1  |
| 23591 | 3208  | Dlg4  | 4930511I11Rik | 1  |
| 23591 | 3383  | Dlg4  | Cd99          | 1  |
| 23591 | 3511  | Dlg4  | Rnf182        | 1  |
| 23591 | 4079  | Dlg4  | Emilin3       | 1  |
| 23591 | 4088  | Dlg4  | Pdcl2         | 1  |
| 23591 | 4199  | Dlg4  | B3galt5       | 1  |
| 23591 | 5908  | Dlg4  | MMT00027552   | 1  |
| 23591 | 7436  | Dlg4  | 1700063K16Rik | 1  |
| 23591 | 7916  | Dlg4  | MMT00016293   | 1  |
| 23591 | 7974  | Dlg4  | Arhgef7       | 1  |
| 23591 | 8157  | Dlg4  | MMT00005305   | 1  |
| 23591 | 8256  | Dlg4  | Tjap1         | 1  |
| 23591 | 8644  | Dlg4  | V1rg11        | 1  |
| 23591 | 8952  | Dlg4  | Marco         | 1  |
| 23591 | 9946  | Dlg4  | Stam2         | 1  |
| 23591 | 10260 | Dlg4  | Zfp36I2       | 1  |
| 23591 | 10377 | Dlg4  | A430105I19Rik | 1  |
| 23591 | 10520 | Dlg4  | Xkr6          | 1  |
| 23591 | 10687 | Dlg4  | Itpkb         | 1  |
| 23591 | 11016 | Dlg4  | Pcp2          | 1  |
| 23591 | 11256 | Dlg4  | H2-DMa        | 1  |
| 23591 | 11507 | Dlg4  | Adarb2        | 1  |
| 23591 | 11837 | Dlg4  | Paqr6         | 1  |
| 23591 | 11966 | Dlg4  | Zfp280b       | 1  |
| 23591 | 12248 | Dlg4  | Tnp2          | 1  |
| 23591 | 12272 | Dlg4  | Fshr          | 1  |
| 23591 | 12372 | Dlg4  | MMT00039397   | 1  |
| 23591 | 12753 | Dlg4  | MMT00043344   | 1  |
| 23591 | 12772 | Dlg4  | Axl           | 1  |
| 23591 | 13742 | Dlg4  | 1700024P16Rik | 1  |
| 23591 | 14313 | Dlg4  | Tnk1          | 1  |
| 23591 | 14754 | Dlg4  | Atoh8         | 1  |
| 23591 | 15743 | Dlg4  | Hoxc6         | 1  |
| 23591 | 16718 | Dlg4  | Zbtb7c        | 1  |
| 23591 | 17613 | Dlg4  | P2rx7         | 1  |
| 23591 | 17750 | Dlg4  | Hs6st2        | 1  |
| 23591 | 19219 | Dlg4  | MMT00015104   | 1  |
| 23591 | 19436 | Dlg4  | Dapp1         | 1  |
| 23591 | 19645 | Dlg4  | Ii12rb2       | 1  |
| 23591 | 20908 | Dlg4  | Olfir583      | 1  |
| 23591 | 21866 | Dlg4  | Hhip1         | 1  |
| 23591 | 22125 | Dlg4  | Gab1          | 1  |
| 23591 | 22271 | Dlg4  | Cyp2c29       | 1  |
| 23591 | 22434 | Dlg4  | Olfir1255     | 1  |
| 23591 | 23546 | Dlg4  | Zzef1         | 1  |
| 23591 | 23591 | Dlg4  | Dlg4          | 1  |
| 23591 | 23651 | Dlg4  | MMT00027295   | 1  |

|       |       |               |               |    |
|-------|-------|---------------|---------------|----|
| 23599 | 403   | Ndr3          | Leprot1       | 1  |
| 23599 | 1097  | Ndr3          | Dctn6         | -1 |
| 23599 | 1755  | Ndr3          | Ocel1         | -1 |
| 23599 | 9729  | Ndr3          | Got11         | 1  |
| 23599 | 10373 | Ndr3          | Tmem141       | -1 |
| 23599 | 21433 | Ndr3          | Ubx6          | -1 |
| 23599 | 21840 | Ndr3          | Tmie          | -1 |
| 23604 | 14860 | Ephb3         | MMT00051231   | 1  |
| 23617 | 15870 | Nme1          | Aqp5          | 1  |
| 23625 | 665   | Pkd2          | Slc26a1       | -1 |
| 23625 | 1447  | Pkd2          | Naaa          | -1 |
| 23625 | 1660  | Pkd2          | Zfp33b        | -1 |
| 23625 | 6330  | Pkd2          | Dgkq          | 1  |
| 23625 | 8807  | Pkd2          | Ankrd56       | -1 |
| 23625 | 19990 | Pkd2          | 4921515J06Rik | -1 |
| 23625 | 22298 | Pkd2          | Zfp259        | 1  |
| 23625 | 23625 | Pkd2          | Pkd2          | 1  |
| 23636 | 6824  | Bst2          | Irf7          | 1  |
| 23636 | 12398 | Bst2          | Ifi44         | 1  |
| 23646 | 9514  | Hsp90ab1      | Vps37a        | 1  |
| 23693 | 8155  | A530016L24Rik | Mark3         | 1  |
| 23693 | 21149 | A530016L24Rik | A230065H16Rik | -1 |



**Table T8: HL TTC Network**

| Hypothalamus_Probe_ID | Liver_Probe_ID | Hypothalamus_Gene_Symbol | Liver_Gene_Symbol | Correlation Sign |
|-----------------------|----------------|--------------------------|-------------------|------------------|
| 10                    | 3208           | NAN                      | 493051111Rik      | 1                |
| 10                    | 7436           | NAN                      | 1700063K16Rik     | 1                |
| 10                    | 11966          | NAN                      | Zfp280b           | 1                |
| 10                    | 12861          | NAN                      | Rhcg              | 1                |
| 10                    | 19436          | NAN                      | Dapp1             | 1                |
| 10                    | 22125          | NAN                      | Gab1              | 1                |
| 115                   | 19436          | NAN                      | Dapp1             | 1                |
| 141                   | 11966          | Jag1                     | Zfp280b           | 1                |
| 141                   | 19436          | Jag1                     | Dapp1             | 1                |
| 143                   | 143            | Gvin1                    | Gvin1             | 1                |
| 143                   | 4426           | Gvin1                    | ligp2             | 1                |
| 143                   | 9847           | Gvin1                    | lfi27             | 1                |
| 143                   | 11265          | Gvin1                    | lrgm              | 1                |
| 143                   | 12398          | Gvin1                    | lfi44             | 1                |
| 143                   | 12600          | Gvin1                    | lfi204            | 1                |
| 143                   | 13309          | Gvin1                    | Tgtp              | 1                |
| 143                   | 14258          | Gvin1                    | lfi47             | 1                |
| 143                   | 15074          | Gvin1                    | Usp18             | 1                |
| 143                   | 17197          | Gvin1                    | Igtp              | 1                |
| 143                   | 20997          | Gvin1                    | MMT00028135       | 1                |
| 143                   | 21549          | Gvin1                    | Rtp4              | 1                |
| 143                   | 22037          | Gvin1                    | Oas1g             | 1                |
| 143                   | 23208          | Gvin1                    | Hck               | 1                |
| 153                   | 153            | 2010011I20Rik            | 2010011I20Rik     | 1                |
| 153                   | 5098           | 2010011I20Rik            | 1700029J11Rik     | -1               |
| 153                   | 6117           | 2010011I20Rik            | Atp9a             | 1                |
| 153                   | 6231           | 2010011I20Rik            | 9030622O22Rik     | 1                |
| 153                   | 12402          | 2010011I20Rik            | Th1l              | -1               |
| 153                   | 14647          | 2010011I20Rik            | Cst3              | -1               |
| 153                   | 16863          | 2010011I20Rik            | 2410001C21Rik     | -1               |
| 153                   | 22740          | 2010011I20Rik            | Manbal            | 1                |
| 153                   | 23008          | 2010011I20Rik            | Ctsz              | -1               |
| 153                   | 23353          | 2010011I20Rik            | Slmo2             | 1                |
| 219                   | 19436          | MMT00058440              | Dapp1             | 1                |
| 225                   | 19436          | MMT00073704              | Dapp1             | 1                |
| 246                   | 246            | MMT00053742              | MMT00053742       | 1                |
| 246                   | 9611           | MMT00053742              | Ncf2              | 1                |
| 246                   | 15569          | MMT00053742              | BC003331          | 1                |
| 246                   | 17463          | MMT00053742              | Rgl1              | 1                |
| 246                   | 17850          | MMT00053742              | Prg4              | -1               |
| 265                   | 740            | Taf9                     | Txnrd3            | -1               |
| 265                   | 1281           | Taf9                     | Alkbh3            | -1               |
| 265                   | 2433           | Taf9                     | Armc10            | -1               |
| 265                   | 3587           | Taf9                     | MMT00041940       | 1                |
| 265                   | 6021           | Taf9                     | MMT00008784       | 1                |
| 265                   | 8670           | Taf9                     | MMT00051613       | 1                |
| 265                   | 9258           | Taf9                     | P4ha1             | 1                |
| 265                   | 11043          | Taf9                     | Hsph1             | 1                |
| 265                   | 11214          | Taf9                     | MMT00049207       | 1                |
| 265                   | 11312          | Taf9                     | 2210016H18Rik     | -1               |
| 265                   | 11379          | Taf9                     | Dnttip1           | -1               |
| 265                   | 15476          | Taf9                     | Fem1b             | -1               |
| 265                   | 15675          | Taf9                     | MMT00077535       | 1                |
| 265                   | 17595          | Taf9                     | MMT00048325       | 1                |
| 265                   | 18099          | Taf9                     | Nfx1              | -1               |
| 265                   | 18373          | Taf9                     | Dnajb1            | 1                |
| 265                   | 21389          | Taf9                     | Odf2              | -1               |
| 265                   | 21775          | Taf9                     | MMT00051649       | -1               |
| 268                   | 268            | Sys1                     | Sys1              | 1                |
| 268                   | 4540           | Sys1                     | Prl8a2            | -1               |
| 268                   | 6475           | Sys1                     | Sdc4              | 1                |
| 268                   | 13067          | Sys1                     | MMT00074323       | 1                |
| 283                   | 1755           | Gmcl1l                   | Ocel1             | -1               |
| 283                   | 9304           | Gmcl1l                   | A1449175          | -1               |
| 283                   | 16617          | Gmcl1l                   | Sh2d4a            | 1                |
| 283                   | 18886          | Gmcl1l                   | Slc18a1           | 1                |
| 286                   | 286            | MMT00070509              | MMT00070509       | 1                |

|     |       |               |               |    |
|-----|-------|---------------|---------------|----|
| 286 | 499   | MMT00070509   | 2310057J16Rik | 1  |
| 286 | 1849  | MMT00070509   | MMT00063181   | 1  |
| 286 | 3587  | MMT00070509   | MMT00041940   | 1  |
| 286 | 3799  | MMT00070509   | Serpinh1      | 1  |
| 286 | 3913  | MMT00070509   | Mrpl15        | 1  |
| 286 | 4805  | MMT00070509   | Hspb1         | 1  |
| 286 | 4950  | MMT00070509   | Dnajb10       | 1  |
| 286 | 6021  | MMT00070509   | MMT00008784   | 1  |
| 286 | 7731  | MMT00070509   | 1500001M20Rik | -1 |
| 286 | 8319  | MMT00070509   | MMT00062477   | 1  |
| 286 | 8618  | MMT00070509   | EG433865      | -1 |
| 286 | 8670  | MMT00070509   | MMT00051613   | 1  |
| 286 | 9224  | MMT00070509   | MMT00013510   | 1  |
| 286 | 9258  | MMT00070509   | P4ha1         | 1  |
| 286 | 9899  | MMT00070509   | D13Wsu177e    | 1  |
| 286 | 11043 | MMT00070509   | Hsph1         | 1  |
| 286 | 11208 | MMT00070509   | Hspb1         | 1  |
| 286 | 11214 | MMT00070509   | MMT00049207   | 1  |
| 286 | 11818 | MMT00070509   | MMT00048396   | 1  |
| 286 | 13521 | MMT00070509   | Ears2         | 1  |
| 286 | 15476 | MMT00070509   | Fem1b         | -1 |
| 286 | 15675 | MMT00070509   | MMT00077535   | 1  |
| 286 | 17595 | MMT00070509   | MMT00048325   | 1  |
| 286 | 18373 | MMT00070509   | Dnajb1        | 1  |
| 286 | 20912 | MMT00070509   | Chordc1       | 1  |
| 286 | 22139 | MMT00070509   | Stip1         | 1  |
| 286 | 23646 | MMT00070509   | Hsp90ab1      | 1  |
| 290 | 8337  | B230118H07Rik | Lgr4          | 1  |
| 290 | 19763 | B230118H07Rik | Acp2          | -1 |
| 290 | 22184 | B230118H07Rik | MMT00033856   | 1  |
| 290 | 23609 | B230118H07Rik | Trim44        | -1 |
| 299 | 20902 | MMT00061667   | Itln1         | -1 |
| 316 | 19436 | 4930471G03Rik | Dapp1         | 1  |
| 317 | 11966 | Ceacam13      | Zfp280b       | 1  |
| 317 | 19436 | Ceacam13      | Dapp1         | 1  |
| 346 | 19436 | Olf1484       | Dapp1         | 1  |
| 352 | 19436 | 4732415M23Rik | Dapp1         | 1  |
| 364 | 18019 | 0610040B09Rik | MMT00049952   | 1  |
| 364 | 21199 | 0610040B09Rik | Pcdh9         | 1  |
| 365 | 16654 | 1700019N12Rik | Oas1f         | -1 |
| 365 | 16658 | 1700019N12Rik | MMT00011796   | -1 |
| 372 | 372   | Txndc1        | Txndc1        | 1  |
| 391 | 3208  | 4933416I08Rik | 4930511I11Rik | 1  |
| 391 | 5694  | 4933416I08Rik | Sp7           | 1  |
| 391 | 7436  | 4933416I08Rik | 1700063K16Rik | 1  |
| 391 | 11966 | 4933416I08Rik | Zfp280b       | 1  |
| 391 | 12861 | 4933416I08Rik | Rhcg          | 1  |
| 391 | 19436 | 4933416I08Rik | Dapp1         | 1  |
| 391 | 19672 | 4933416I08Rik | Cldn19        | 1  |
| 391 | 22125 | 4933416I08Rik | Gab1          | 1  |
| 403 | 286   | Leprotl1      | MMT00070509   | -1 |
| 403 | 403   | Leprotl1      | Leprotl1      | 1  |
| 403 | 1097  | Leprotl1      | Dctn6         | -1 |
| 403 | 1755  | Leprotl1      | Ocel1         | -1 |
| 403 | 2749  | Leprotl1      | Naf1          | 1  |
| 403 | 5433  | Leprotl1      | 2410004L22Rik | 1  |
| 403 | 9304  | Leprotl1      | Al449175      | -1 |
| 403 | 10195 | Leprotl1      | Klf1          | -1 |
| 403 | 13004 | Leprotl1      | Arhgef10      | -1 |
| 403 | 13732 | Leprotl1      | Tpm4          | 1  |
| 403 | 13774 | Leprotl1      | Gdf15         | 1  |
| 403 | 15455 | Leprotl1      | Lsm4          | 1  |
| 403 | 16371 | Leprotl1      | Ppp2cb        | 1  |
| 403 | 16557 | Leprotl1      | Rbpms         | -1 |
| 403 | 16617 | Leprotl1      | Sh2d4a        | 1  |
| 403 | 16849 | Leprotl1      | Trmt1         | 1  |
| 403 | 17553 | Leprotl1      | Eif4ebp1      | -1 |
| 403 | 18886 | Leprotl1      | Slc18a1       | 1  |
| 403 | 20484 | Leprotl1      | Ces1          | 1  |

|     |       |               |               |    |
|-----|-------|---------------|---------------|----|
| 403 | 22776 | Leprotl1      | Gsr           | -1 |
| 425 | 16658 | MMT00064181   | MMT00011796   | -1 |
| 478 | 10978 | Sfrs9         | MMT00078322   | 1  |
| 484 | 19436 | Atp4a         | Dapp1         | 1  |
| 486 | 19436 | Josd2         | Dapp1         | 1  |
| 546 | 16654 | Gltsr1        | Oas1f         | -1 |
| 550 | 16654 | Hars2         | Oas1f         | -1 |
| 550 | 16658 | Hars2         | MMT00011796   | -1 |
| 558 | 3208  | Crebl1        | 4930511111Rik | 1  |
| 558 | 7436  | Crebl1        | 1700063K16Rik | 1  |
| 558 | 11966 | Crebl1        | Zfp280b       | 1  |
| 558 | 12861 | Crebl1        | Rhcg          | 1  |
| 558 | 19436 | Crebl1        | Dapp1         | 1  |
| 558 | 22125 | Crebl1        | Gab1          | 1  |
| 584 | 19436 | Tmem207       | Dapp1         | 1  |
| 607 | 2079  | Me1           | Mthfs         | -1 |
| 630 | 630   | C1s           | C1s           | 1  |
| 630 | 1444  | C1s           | C1r           | 1  |
| 630 | 6625  | C1s           | C1s           | 1  |
| 630 | 17391 | C1s           | C530028O21Rik | -1 |
| 630 | 19964 | C1s           | Ndufa9        | -1 |
| 630 | 22075 | C1s           | C1s           | 1  |
| 658 | 19436 | Vmn2r-ps88    | Dapp1         | 1  |
| 661 | 661   | Siglec1       | Siglec1       | 1  |
| 661 | 14498 | Siglec1       | Layn          | 1  |
| 663 | 19436 | Muc19         | Dapp1         | 1  |
| 665 | 6330  | Slc26a1       | Dgkq          | -1 |
| 665 | 8807  | Slc26a1       | Ankrd56       | 1  |
| 665 | 23625 | Slc26a1       | Pkd2          | -1 |
| 676 | 676   | Ms4a4d        | Ms4a4d        | 1  |
| 676 | 11812 | Ms4a4d        | Mrpl16        | 1  |
| 678 | 1956  | Ncaph         | Usp50         | 1  |
| 678 | 4833  | Ncaph         | Synpo2        | -1 |
| 678 | 6016  | Ncaph         | A530057A03Rik | 1  |
| 678 | 6231  | Ncaph         | 9030622O22Rik | 1  |
| 678 | 6797  | Ncaph         | Blvra         | 1  |
| 678 | 7991  | Ncaph         | Gpr115        | -1 |
| 678 | 14740 | Ncaph         | Mfap1b        | -1 |
| 678 | 17043 | Ncaph         | Tmem127       | 1  |
| 678 | 21729 | Ncaph         | Hdc           | -1 |
| 678 | 22857 | Ncaph         | Fahd2a        | 1  |
| 680 | 16404 | Loxl4         | Trappc2       | -1 |
| 680 | 16658 | Loxl4         | MMT00011796   | -1 |
| 684 | 1849  | 1700102P08Rik | MMT00063181   | 1  |
| 684 | 2329  | 1700102P08Rik | Wdr6          | -1 |
| 684 | 2570  | 1700102P08Rik | Tmod4         | 1  |
| 684 | 3587  | 1700102P08Rik | MMT00041940   | 1  |
| 684 | 3913  | 1700102P08Rik | Mrpl15        | 1  |
| 684 | 4805  | 1700102P08Rik | Hspb1         | 1  |
| 684 | 4950  | 1700102P08Rik | Dnajb10       | 1  |
| 684 | 6021  | 1700102P08Rik | MMT00008784   | 1  |
| 684 | 7731  | 1700102P08Rik | 1500001M20Rik | -1 |
| 684 | 8319  | 1700102P08Rik | MMT00062477   | 1  |
| 684 | 8618  | 1700102P08Rik | EG433865      | -1 |
| 684 | 8670  | 1700102P08Rik | MMT00051613   | 1  |
| 684 | 8891  | 1700102P08Rik | MMT00071061   | 1  |
| 684 | 9067  | 1700102P08Rik | Tra2a         | 1  |
| 684 | 9224  | 1700102P08Rik | MMT00013510   | 1  |
| 684 | 9258  | 1700102P08Rik | P4ha1         | 1  |
| 684 | 9680  | 1700102P08Rik | Ahsa1         | 1  |
| 684 | 11043 | 1700102P08Rik | Hsph1         | 1  |
| 684 | 11208 | 1700102P08Rik | Hspb1         | 1  |
| 684 | 11214 | 1700102P08Rik | MMT00049207   | 1  |
| 684 | 13521 | 1700102P08Rik | Ears2         | 1  |
| 684 | 13741 | 1700102P08Rik | Hspa4l        | 1  |
| 684 | 14014 | 1700102P08Rik | MMT00008376   | 1  |
| 684 | 14298 | 1700102P08Rik | Atp2a2        | 1  |
| 684 | 15476 | 1700102P08Rik | Fem1b         | -1 |
| 684 | 15675 | 1700102P08Rik | MMT00077535   | 1  |



|     |       |               |               |    |
|-----|-------|---------------|---------------|----|
| 684 | 16754 | 1700102P08Rik | Hsp90aa1      | 1  |
| 684 | 17449 | 1700102P08Rik | Zfp296        | 1  |
| 684 | 17595 | 1700102P08Rik | MMT00048325   | 1  |
| 684 | 18373 | 1700102P08Rik | Dnajb1        | 1  |
| 684 | 20332 | 1700102P08Rik | Stau2         | -1 |
| 684 | 20912 | 1700102P08Rik | Chordc1       | 1  |
| 684 | 21389 | 1700102P08Rik | Odf2          | -1 |
| 684 | 22139 | 1700102P08Rik | Stip1         | 1  |
| 684 | 22751 | 1700102P08Rik | Nosip         | -1 |
| 684 | 23646 | 1700102P08Rik | Hsp90ab1      | 1  |
| 692 | 692   | Pelo          | Pelo          | 1  |
| 719 | 250   | Usp2          | Tubb2a-ps2    | -1 |
| 719 | 609   | Usp2          | MMT00060868   | -1 |
| 719 | 1363  | Usp2          | BC021767      | -1 |
| 719 | 3214  | Usp2          | Dnmt3b        | -1 |
| 719 | 3246  | Usp2          | Prei4         | 1  |
| 719 | 3804  | Usp2          | MMT00015534   | -1 |
| 719 | 4201  | Usp2          | Tubb2c        | -1 |
| 719 | 5330  | Usp2          | Cbfa2t3       | -1 |
| 719 | 5374  | Usp2          | Chka          | -1 |
| 719 | 5974  | Usp2          | Arntl         | -1 |
| 719 | 6670  | Usp2          | Nat10         | -1 |
| 719 | 9495  | Usp2          | Srms          | -1 |
| 719 | 9910  | Usp2          | EG666644      | 1  |
| 719 | 11735 | Usp2          | Thoc5         | -1 |
| 719 | 12489 | Usp2          | Wdr8          | -1 |
| 719 | 12904 | Usp2          | MMT00040704   | 1  |
| 719 | 13864 | Usp2          | Larp1         | -1 |
| 719 | 15631 | Usp2          | Lpin1         | 1  |
| 719 | 16580 | Usp2          | Tnfaip2       | -1 |
| 719 | 16669 | Usp2          | Tjp2          | -1 |
| 719 | 16690 | Usp2          | Tjp3          | -1 |
| 719 | 17876 | Usp2          | Tubb4         | -1 |
| 719 | 17884 | Usp2          | Lnx2          | -1 |
| 719 | 18250 | Usp2          | Mmp14         | -1 |
| 719 | 19466 | Usp2          | Pptc7         | 1  |
| 719 | 19671 | Usp2          | Upp2          | 1  |
| 719 | 22290 | Usp2          | Tubb2a        | -1 |
| 719 | 22630 | Usp2          | MMT00034355   | -1 |
| 719 | 22863 | Usp2          | Prkd2         | -1 |
| 737 | 737   | MMT00023716   | MMT00023716   | 1  |
| 737 | 6857  | MMT00023716   | Serinc2       | -1 |
| 737 | 8654  | MMT00023716   | Fbxl13        | 1  |
| 737 | 14676 | MMT00023716   | Mecr          | 1  |
| 737 | 20147 | MMT00023716   | Ybx1          | -1 |
| 801 | 15911 | Olf295        | Glra4         | -1 |
| 801 | 16654 | Olf295        | Oas1f         | -1 |
| 801 | 16658 | Olf295        | MMT00011796   | -1 |
| 803 | 18731 | Lhb           | Fgf17         | -1 |
| 804 | 16654 | 2210407C18Rik | Oas1f         | -1 |
| 804 | 16658 | 2210407C18Rik | MMT00011796   | -1 |
| 812 | 327   | En2           | H2-Ea         | 1  |
| 812 | 2325  | En2           | H2-K1         | 1  |
| 812 | 2938  | En2           | H2-T23        | 1  |
| 812 | 3599  | En2           | MMT00035426   | -1 |
| 812 | 3857  | En2           | 1700001C19Rik | -1 |
| 812 | 5410  | En2           | Cyp4f15       | -1 |
| 812 | 10667 | En2           | H2-Eb1        | 1  |
| 812 | 13493 | En2           | Ring1         | -1 |
| 812 | 20238 | En2           | H2-T9         | 1  |
| 812 | 21478 | En2           | Loxhd1        | -1 |
| 812 | 22822 | En2           | MMT00013433   | 1  |
| 824 | 15826 | Esco1         | Arl4d         | 1  |
| 857 | 3587  | Sfrs12        | MMT00041940   | 1  |
| 857 | 6021  | Sfrs12        | MMT00008784   | 1  |
| 857 | 8670  | Sfrs12        | MMT00051613   | 1  |
| 857 | 11043 | Sfrs12        | Hsph1         | 1  |
| 857 | 11214 | Sfrs12        | MMT00049207   | 1  |
| 857 | 15675 | Sfrs12        | MMT00077535   | 1  |

|      |       |               |               |    |
|------|-------|---------------|---------------|----|
| 863  | 499   | Dnajc14       | 2310057J16Rik | -1 |
| 863  | 902   | Dnajc14       | Slc30a1       | 1  |
| 863  | 1849  | Dnajc14       | MMT00063181   | -1 |
| 863  | 3587  | Dnajc14       | MMT00041940   | -1 |
| 863  | 3849  | Dnajc14       | MMT00047578   | -1 |
| 863  | 5352  | Dnajc14       | Pdcd2l        | 1  |
| 863  | 6021  | Dnajc14       | MMT00008784   | -1 |
| 863  | 6126  | Dnajc14       | MMT00067575   | -1 |
| 863  | 8319  | Dnajc14       | MMT00062477   | -1 |
| 863  | 8670  | Dnajc14       | MMT00051613   | -1 |
| 863  | 9224  | Dnajc14       | MMT00013510   | -1 |
| 863  | 9258  | Dnajc14       | P4ha1         | -1 |
| 863  | 9279  | Dnajc14       | MMT00066808   | -1 |
| 863  | 9899  | Dnajc14       | D13Wsu177e    | -1 |
| 863  | 10267 | Dnajc14       | Setdb2        | 1  |
| 863  | 11043 | Dnajc14       | Hsph1         | -1 |
| 863  | 11214 | Dnajc14       | MMT00049207   | -1 |
| 863  | 14298 | Dnajc14       | Atp2a2        | -1 |
| 863  | 15476 | Dnajc14       | Fem1b         | 1  |
| 863  | 15675 | Dnajc14       | MMT00077535   | -1 |
| 863  | 16754 | Dnajc14       | Hsp90aa1      | -1 |
| 863  | 17449 | Dnajc14       | Zfp296        | -1 |
| 863  | 18373 | Dnajc14       | Dnajb1        | -1 |
| 863  | 20912 | Dnajc14       | Chordc1       | -1 |
| 863  | 21389 | Dnajc14       | Odf2          | 1  |
| 863  | 22139 | Dnajc14       | Stip1         | -1 |
| 863  | 23646 | Dnajc14       | Hsp90ab1      | -1 |
| 870  | 870   | Rint1         | Rint1         | 1  |
| 897  | 3857  | Mut           | 1700001C19Rik | 1  |
| 897  | 20100 | Mut           | Guca1b        | 1  |
| 904  | 9224  | MMT00003579   | MMT00013510   | 1  |
| 942  | 3686  | Kcna5         | Psmc9         | 1  |
| 981  | 16654 | 1110015M06Rik | Oas1f         | -1 |
| 981  | 16658 | 1110015M06Rik | MMT00011796   | -1 |
| 984  | 4805  | Derl3         | Hspb1         | 1  |
| 984  | 11208 | Derl3         | Hspb1         | 1  |
| 985  | 19436 | Hsd3b6        | Dapp1         | 1  |
| 1006 | 740   | 2600011E07Rik | Txnrd3        | -1 |
| 1006 | 902   | 2600011E07Rik | Slc30a1       | -1 |
| 1006 | 1156  | 2600011E07Rik | Rbj           | -1 |
| 1006 | 2433  | 2600011E07Rik | Armc10        | -1 |
| 1006 | 2823  | 2600011E07Rik | Sipa1l2       | -1 |
| 1006 | 3462  | 2600011E07Rik | Nmnat3        | -1 |
| 1006 | 3587  | 2600011E07Rik | MMT00041940   | 1  |
| 1006 | 4048  | 2600011E07Rik | BC002230      | -1 |
| 1006 | 4192  | 2600011E07Rik | Zranb1        | -1 |
| 1006 | 4404  | 2600011E07Rik | Commd5        | -1 |
| 1006 | 4966  | 2600011E07Rik | Zscan20       | 1  |
| 1006 | 5352  | 2600011E07Rik | Pdcd2l        | -1 |
| 1006 | 5544  | 2600011E07Rik | Camsap1       | 1  |
| 1006 | 6021  | 2600011E07Rik | MMT00008784   | 1  |
| 1006 | 6126  | 2600011E07Rik | MMT00067575   | 1  |
| 1006 | 6286  | 2600011E07Rik | Rfc1          | -1 |
| 1006 | 6485  | 2600011E07Rik | Map3k7ip1     | -1 |
| 1006 | 6769  | 2600011E07Rik | Banp          | 1  |
| 1006 | 7140  | 2600011E07Rik | Mtbp          | -1 |
| 1006 | 7619  | 2600011E07Rik | Pik3ip1       | -1 |
| 1006 | 8122  | 2600011E07Rik | Hexim1        | 1  |
| 1006 | 8319  | 2600011E07Rik | MMT00062477   | 1  |
| 1006 | 8499  | 2600011E07Rik | C430048L16Rik | 1  |
| 1006 | 8662  | 2600011E07Rik | Brca2         | -1 |
| 1006 | 8670  | 2600011E07Rik | MMT00051613   | 1  |
| 1006 | 8684  | 2600011E07Rik | Il15          | -1 |
| 1006 | 9067  | 2600011E07Rik | Tra2a         | 1  |
| 1006 | 9258  | 2600011E07Rik | P4ha1         | 1  |
| 1006 | 9899  | 2600011E07Rik | D13Wsu177e    | 1  |
| 1006 | 10435 | 2600011E07Rik | Nab2          | -1 |
| 1006 | 10769 | 2600011E07Rik | Hnrnpd        | -1 |
| 1006 | 11043 | 2600011E07Rik | Hsph1         | 1  |

|      |       |              |               |    |
|------|-------|--------------|---------------|----|
| 1006 | 11095 | 260001E07Rik | Bag3          | 1  |
| 1006 | 11201 | 260001E07Rik | Sunc1         | -1 |
| 1006 | 11214 | 260001E07Rik | MMT00049207   | 1  |
| 1006 | 13189 | 260001E07Rik | Dnajb4        | 1  |
| 1006 | 13563 | 260001E07Rik | 9930023K05Rik | -1 |
| 1006 | 14298 | 260001E07Rik | Atp2a2        | 1  |
| 1006 | 15476 | 260001E07Rik | Fem1b         | -1 |
| 1006 | 15635 | 260001E07Rik | Crks          | 1  |
| 1006 | 15675 | 260001E07Rik | MMT00077535   | 1  |
| 1006 | 16251 | 260001E07Rik | G6pc          | 1  |
| 1006 | 18083 | 260001E07Rik | Gadd45a       | -1 |
| 1006 | 18099 | 260001E07Rik | Nfx1          | -1 |
| 1006 | 18215 | 260001E07Rik | Gpr146        | -1 |
| 1006 | 18373 | 260001E07Rik | Dnajb1        | 1  |
| 1006 | 18418 | 260001E07Rik | Hspa1b        | 1  |
| 1006 | 18903 | 260001E07Rik | Crem          | 1  |
| 1006 | 19052 | 260001E07Rik | Mktn2         | -1 |
| 1006 | 20332 | 260001E07Rik | Stau2         | -1 |
| 1006 | 20912 | 260001E07Rik | Chordc1       | 1  |
| 1006 | 20965 | 260001E07Rik | Usp28         | -1 |
| 1006 | 21333 | 260001E07Rik | Cirbp         | -1 |
| 1006 | 21389 | 260001E07Rik | Odf2          | -1 |
| 1006 | 21775 | 260001E07Rik | MMT00051649   | -1 |
| 1006 | 22303 | 260001E07Rik | Cdt1          | -1 |
| 1006 | 23458 | 260001E07Rik | Clic4         | 1  |
| 1014 | 1014  | Rtcd1        | Rtcd1         | 1  |
| 1014 | 1867  | Rtcd1        | Bcas2         | 1  |
| 1014 | 3753  | Rtcd1        | Setdb1        | -1 |
| 1014 | 7519  | Rtcd1        | Gstm1         | 1  |
| 1014 | 10521 | Rtcd1        | Ttf2          | 1  |
| 1014 | 11611 | Rtcd1        | S100a13       | -1 |
| 1014 | 13202 | Rtcd1        | Sass6         | -1 |
| 1014 | 14559 | Rtcd1        | Frrs1         | 1  |
| 1014 | 20385 | Rtcd1        | Chd1l         | 1  |
| 1021 | 19436 | Rhpn2        | Dapp1         | 1  |
| 1027 | 3587  | Accs         | MMT00041940   | -1 |
| 1027 | 6021  | Accs         | MMT00008784   | -1 |
| 1027 | 8670  | Accs         | MMT00051613   | -1 |
| 1027 | 9258  | Accs         | P4ha1         | -1 |
| 1027 | 11043 | Accs         | Hsph1         | -1 |
| 1027 | 11214 | Accs         | MMT00049207   | -1 |
| 1027 | 15476 | Accs         | Fem1b         | 1  |
| 1027 | 15675 | Accs         | MMT00077535   | -1 |
| 1027 | 15746 | Accs         | Calr          | -1 |
| 1027 | 21389 | Accs         | Odf2          | 1  |
| 1027 | 22139 | Accs         | Stip1         | -1 |
| 1036 | 11043 | Dusp19       | Hsph1         | 1  |
| 1036 | 11214 | Dusp19       | MMT00049207   | 1  |
| 1039 | 3587  | Zfp207       | MMT00041940   | 1  |
| 1039 | 6021  | Zfp207       | MMT00008784   | 1  |
| 1039 | 6126  | Zfp207       | MMT00067575   | 1  |
| 1039 | 8319  | Zfp207       | MMT00062477   | 1  |
| 1039 | 8670  | Zfp207       | MMT00051613   | 1  |
| 1039 | 9258  | Zfp207       | P4ha1         | 1  |
| 1039 | 11043 | Zfp207       | Hsph1         | 1  |
| 1039 | 11214 | Zfp207       | MMT00049207   | 1  |
| 1039 | 15476 | Zfp207       | Fem1b         | -1 |
| 1039 | 15675 | Zfp207       | MMT00077535   | 1  |
| 1039 | 18373 | Zfp207       | Dnajb1        | 1  |
| 1039 | 20912 | Zfp207       | Chordc1       | 1  |
| 1040 | 2599  | Dnhd1        | Lsm14a        | -1 |
| 1040 | 4697  | Dnhd1        | Cyp2a12       | 1  |
| 1040 | 6513  | Dnhd1        | Qpctl         | -1 |
| 1040 | 10545 | Dnhd1        | Tmem147       | -1 |
| 1040 | 11321 | Dnhd1        | 2310014L17Rik | 1  |
| 1040 | 11465 | Dnhd1        | Eif3k         | -1 |
| 1040 | 11888 | Dnhd1        | Myadm         | 1  |
| 1040 | 16639 | Dnhd1        | MMT00078937   | 1  |
| 1040 | 18088 | Dnhd1        | Alkbh6        | -1 |

|      |       |               |               |    |
|------|-------|---------------|---------------|----|
| 1040 | 19462 | Dnhd1         | 4933439C20Rik | 1  |
| 1040 | 20606 | Dnhd1         | MMT00042166   | 1  |
| 1040 | 23247 | Dnhd1         | Ercc1         | 1  |
| 1041 | 1041  | 3110049J23Rik | 3110049J23Rik | -1 |
| 1041 | 2571  | 3110049J23Rik | Rmnd1         | 1  |
| 1041 | 2662  | 3110049J23Rik | Sgpl1         | 1  |
| 1041 | 3744  | 3110049J23Rik | Rmnd1         | 1  |
| 1041 | 5965  | 3110049J23Rik | Pbld          | -1 |
| 1041 | 8786  | 3110049J23Rik | Rmnd1         | 1  |
| 1041 | 13348 | 3110049J23Rik | Ank3          | -1 |
| 1041 | 13688 | 3110049J23Rik | Ppa1          | -1 |
| 1041 | 15971 | 3110049J23Rik | Aifm2         | -1 |
| 1041 | 18300 | 3110049J23Rik | Arg1          | -1 |
| 1041 | 18893 | 3110049J23Rik | Lace1         | 1  |
| 1041 | 19115 | 3110049J23Rik | Rab32         | 1  |
| 1041 | 19392 | 3110049J23Rik | Slc25a16      | 1  |
| 1041 | 21105 | 3110049J23Rik | Pex26         | -1 |
| 1041 | 21258 | 3110049J23Rik | 2010003K15Rik | 1  |
| 1041 | 22146 | 3110049J23Rik | Aifm2         | -1 |
| 1058 | 19436 | Olf868        | Dapp1         | 1  |
| 1059 | 19436 | P2rx6         | Dapp1         | 1  |
| 1079 | 12930 | Hr            | Pthr1         | -1 |
| 1086 | 3587  | 2610205E22Rik | MMT00041940   | -1 |
| 1086 | 6021  | 2610205E22Rik | MMT00008784   | -1 |
| 1086 | 8670  | 2610205E22Rik | MMT00051613   | -1 |
| 1086 | 11043 | 2610205E22Rik | Hsph1         | -1 |
| 1086 | 11214 | 2610205E22Rik | MMT00049207   | -1 |
| 1086 | 15675 | 2610205E22Rik | MMT00077535   | -1 |
| 1086 | 20332 | 2610205E22Rik | Stau2         | 1  |
| 1086 | 22139 | 2610205E22Rik | Stip1         | -1 |
| 1097 | 403   | Dctn6         | Leprot1       | -1 |
| 1097 | 1097  | Dctn6         | Dctn6         | 1  |
| 1097 | 1755  | Dctn6         | Ocel1         | 1  |
| 1097 | 9304  | Dctn6         | Al449175      | 1  |
| 1097 | 13004 | Dctn6         | Arhgef10      | 1  |
| 1097 | 13732 | Dctn6         | Tpm4          | -1 |
| 1097 | 15455 | Dctn6         | Lsm4          | -1 |
| 1097 | 16617 | Dctn6         | Sh2d4a        | -1 |
| 1097 | 18886 | Dctn6         | Slc18a1       | -1 |
| 1097 | 22776 | Dctn6         | Gsr           | 1  |
| 1101 | 1101  | Sec11a        | Sec11a        | 1  |
| 1101 | 22841 | Sec11a        | Cib1          | -1 |
| 1122 | 12861 | Pax3          | Rhcg          | 1  |
| 1122 | 19436 | Pax3          | Dapp1         | 1  |
| 1134 | 19436 | Vmn2r19       | Dapp1         | 1  |
| 1135 | 2571  | Akap12        | Rmnd1         | -1 |
| 1135 | 3744  | Akap12        | Rmnd1         | -1 |
| 1135 | 8786  | Akap12        | Rmnd1         | -1 |
| 1135 | 19115 | Akap12        | Rab32         | -1 |
| 1136 | 19436 | Kdelr3        | Dapp1         | 1  |
| 1137 | 19436 | Mlxip         | Dapp1         | 1  |
| 1162 | 1162  | Cpsf4         | Cpsf4         | 1  |
| 1162 | 2115  | Cpsf4         | Gpr12         | 1  |
| 1162 | 3598  | Cpsf4         | Rpo1-3        | -1 |
| 1162 | 8906  | Cpsf4         | MMT00004929   | -1 |
| 1170 | 19436 | Faim3         | Dapp1         | 1  |
| 1177 | 1177  | EG545391      | EG545391      | 1  |
| 1214 | 740   | Trip13        | Txnr3         | 1  |
| 1214 | 1281  | Trip13        | Alkbh3        | 1  |
| 1214 | 1383  | Trip13        | Bhlhb9        | 1  |
| 1214 | 1697  | Trip13        | Sf4           | -1 |
| 1214 | 2043  | Trip13        | Arl2bp        | 1  |
| 1214 | 2329  | Trip13        | Wdr6          | 1  |
| 1214 | 2433  | Trip13        | Armc10        | 1  |
| 1214 | 3587  | Trip13        | MMT00041940   | -1 |
| 1214 | 3799  | Trip13        | Serpinh1      | -1 |
| 1214 | 3970  | Trip13        | 4931414P19Rik | -1 |
| 1214 | 4355  | Trip13        | Pard6a        | -1 |
| 1214 | 4780  | Trip13        | Sfrs5         | 1  |

|      |       |               |               |    |
|------|-------|---------------|---------------|----|
| 1214 | 4950  | Trip13        | Dnajb10       | -1 |
| 1214 | 4966  | Trip13        | Zscan20       | -1 |
| 1214 | 5013  | Trip13        | Fancl         | 1  |
| 1214 | 5727  | Trip13        | Camk2g        | 1  |
| 1214 | 6021  | Trip13        | MMT00008784   | -1 |
| 1214 | 7109  | Trip13        | Bxdc2         | 1  |
| 1214 | 7389  | Trip13        | Sfrs5         | 1  |
| 1214 | 7731  | Trip13        | 1500001M20Rik | 1  |
| 1214 | 8319  | Trip13        | MMT00062477   | -1 |
| 1214 | 8554  | Trip13        | Letm2         | -1 |
| 1214 | 8670  | Trip13        | MMT00051613   | -1 |
| 1214 | 8727  | Trip13        | Slc27a3       | -1 |
| 1214 | 9258  | Trip13        | P4ha1         | -1 |
| 1214 | 10267 | Trip13        | Setdb2        | 1  |
| 1214 | 10357 | Trip13        | Tm4sf1        | 1  |
| 1214 | 11043 | Trip13        | Hsph1         | -1 |
| 1214 | 11214 | Trip13        | MMT00049207   | -1 |
| 1214 | 11697 | Trip13        | Rasl2-9       | 1  |
| 1214 | 11857 | Trip13        | Arv1          | 1  |
| 1214 | 13052 | Trip13        | Tnfrsf19      | 1  |
| 1214 | 15476 | Trip13        | Fem1b         | 1  |
| 1214 | 15675 | Trip13        | MMT00077535   | -1 |
| 1214 | 16037 | Trip13        | MMT00011022   | 1  |
| 1214 | 16630 | Trip13        | Armxc5        | 1  |
| 1214 | 16750 | Trip13        | Casp6         | 1  |
| 1214 | 17449 | Trip13        | Zfp296        | -1 |
| 1214 | 18373 | Trip13        | Dnajb1        | -1 |
| 1214 | 19540 | Trip13        | Zfp428        | -1 |
| 1214 | 20332 | Trip13        | Stau2         | 1  |
| 1214 | 20855 | Trip13        | Phldb2        | 1  |
| 1214 | 20912 | Trip13        | Chordc1       | -1 |
| 1214 | 21775 | Trip13        | MMT00051649   | 1  |
| 1214 | 22139 | Trip13        | Stip1         | -1 |
| 1214 | 22751 | Trip13        | Nosip         | 1  |
| 1214 | 23646 | Trip13        | Hsp90ab1      | -1 |
| 1232 | 1232  | Abhd1         | Abhd1         | 1  |
| 1232 | 11859 | Abhd1         | Poln          | 1  |
| 1239 | 19436 | Cerkl         | Dapp1         | 1  |
| 1241 | 1241  | Meox1         | Meox1         | 1  |
| 1241 | 6756  | Meox1         | Sds           | -1 |
| 1241 | 8428  | Meox1         | Sorbs3        | -1 |
| 1241 | 9275  | Meox1         | Aass          | -1 |
| 1241 | 16580 | Meox1         | Tnfaip2       | 1  |
| 1241 | 17622 | Meox1         | Foxo1         | -1 |
| 1256 | 19436 | Baiap2l2      | Dapp1         | 1  |
| 1257 | 17447 | Slc25a45      | Ctsf          | -1 |
| 1270 | 1270  | 1700029I01Rik | 1700029I01Rik | 1  |
| 1270 | 3475  | 1700029I01Rik | 2610305D13Rik | 1  |
| 1270 | 6191  | 1700029I01Rik | Ddost         | -1 |
| 1270 | 18338 | 1700029I01Rik | Akr1e1        | -1 |
| 1270 | 19924 | 1700029I01Rik | Ubiad1        | 1  |
| 1279 | 1279  | Ctps2         | Ctps2         | 1  |
| 1281 | 3587  | Alkbh3        | MMT00041940   | -1 |
| 1281 | 3849  | Alkbh3        | MMT00047578   | -1 |
| 1281 | 4966  | Alkbh3        | Zscan20       | -1 |
| 1281 | 5352  | Alkbh3        | Pdcd2l        | 1  |
| 1281 | 6021  | Alkbh3        | MMT00008784   | -1 |
| 1281 | 8319  | Alkbh3        | MMT00062477   | -1 |
| 1281 | 8670  | Alkbh3        | MMT00051613   | -1 |
| 1281 | 9258  | Alkbh3        | P4ha1         | -1 |
| 1281 | 9899  | Alkbh3        | D13Wsu177e    | -1 |
| 1281 | 10267 | Alkbh3        | Setdb2        | 1  |
| 1281 | 11043 | Alkbh3        | Hsph1         | -1 |
| 1281 | 11214 | Alkbh3        | MMT00049207   | -1 |
| 1281 | 15476 | Alkbh3        | Fem1b         | 1  |
| 1281 | 15675 | Alkbh3        | MMT00077535   | -1 |
| 1281 | 17449 | Alkbh3        | Zfp296        | -1 |
| 1281 | 18083 | Alkbh3        | Gadd45a       | 1  |
| 1281 | 18373 | Alkbh3        | Dnajb1        | -1 |

|      |       |               |               |    |
|------|-------|---------------|---------------|----|
| 1281 | 18418 | Alkbh3        | Hspa1b        | -1 |
| 1281 | 19540 | Alkbh3        | Zfp428        | -1 |
| 1281 | 20332 | Alkbh3        | Stau2         | 1  |
| 1281 | 20855 | Alkbh3        | Phldb2        | 1  |
| 1281 | 20946 | Alkbh3        | Nufip2        | 1  |
| 1281 | 21389 | Alkbh3        | Odf2          | 1  |
| 1281 | 22139 | Alkbh3        | Stip1         | -1 |
| 1281 | 23646 | Alkbh3        | Hsp90ab1      | -1 |
| 1294 | 19436 | MMT00016640   | Dapp1         | 1  |
| 1296 | 6769  | 5330401P04Rik | Banp          | -1 |
| 1296 | 18373 | 5330401P04Rik | Dnajb1        | -1 |
| 1296 | 18418 | 5330401P04Rik | Hspa1b        | -1 |
| 1325 | 17887 | Pigu          | Cryl1         | -1 |
| 1336 | 1336  | MMT00069537   | MMT00069537   | 1  |
| 1336 | 2243  | MMT00069537   | Gcsh          | 1  |
| 1336 | 14391 | MMT00069537   | MMT00017335   | -1 |
| 1336 | 16849 | MMT00069537   | Trmt1         | -1 |
| 1351 | 740   | Whsc111       | Txnrd3        | -1 |
| 1351 | 3587  | Whsc111       | MMT00041940   | 1  |
| 1351 | 3808  | Whsc111       | 2010209O12Rik | -1 |
| 1351 | 4048  | Whsc111       | BC002230      | -1 |
| 1351 | 4192  | Whsc111       | Zranb1        | -1 |
| 1351 | 4391  | Whsc111       | Zfp467        | -1 |
| 1351 | 6021  | Whsc111       | MMT00008784   | 1  |
| 1351 | 6126  | Whsc111       | MMT00067575   | 1  |
| 1351 | 6218  | Whsc111       | Hnrnpc        | 1  |
| 1351 | 6286  | Whsc111       | Rfc1          | -1 |
| 1351 | 6592  | Whsc111       | Lgals2        | 1  |
| 1351 | 7619  | Whsc111       | Pik3ip1       | -1 |
| 1351 | 8319  | Whsc111       | MMT00062477   | 1  |
| 1351 | 8662  | Whsc111       | Brca2         | -1 |
| 1351 | 8670  | Whsc111       | MMT00051613   | 1  |
| 1351 | 9258  | Whsc111       | P4ha1         | 1  |
| 1351 | 11043 | Whsc111       | Hsph1         | 1  |
| 1351 | 11214 | Whsc111       | MMT00049207   | 1  |
| 1351 | 14014 | Whsc111       | MMT00008376   | 1  |
| 1351 | 15476 | Whsc111       | Fem1b         | -1 |
| 1351 | 15675 | Whsc111       | MMT00077535   | 1  |
| 1351 | 16251 | Whsc111       | G6pc          | 1  |
| 1351 | 17160 | Whsc111       | Ccdc127       | 1  |
| 1351 | 17591 | Whsc111       | D930015E06Rik | -1 |
| 1351 | 18083 | Whsc111       | Gadd45a       | -1 |
| 1351 | 18099 | Whsc111       | Nfx1          | -1 |
| 1351 | 18336 | Whsc111       | Lrpap1        | -1 |
| 1351 | 18373 | Whsc111       | Dnajb1        | 1  |
| 1351 | 18418 | Whsc111       | Hspa1b        | 1  |
| 1351 | 18696 | Whsc111       | MMT00042876   | -1 |
| 1351 | 19052 | Whsc111       | Mkrn2         | -1 |
| 1351 | 20332 | Whsc111       | Stau2         | -1 |
| 1351 | 20822 | Whsc111       | Smurf1        | -1 |
| 1351 | 20965 | Whsc111       | Usp28         | -1 |
| 1351 | 21333 | Whsc111       | Cirbp         | -1 |
| 1351 | 21389 | Whsc111       | Odf2          | -1 |
| 1351 | 22303 | Whsc111       | Cdt1          | -1 |
| 1354 | 11966 | Lsmd1         | Zfp280b       | 1  |
| 1354 | 19436 | Lsmd1         | Dapp1         | 1  |
| 1371 | 1371  | 1200009I06Rik | 1200009I06Rik | 1  |
| 1371 | 7388  | 1200009I06Rik | Amn           | 1  |
| 1371 | 8155  | 1200009I06Rik | Mark3         | 1  |
| 1371 | 15984 | 1200009I06Rik | MMT00075074   | 1  |
| 1374 | 8157  | Mdn1          | MMT00005305   | -1 |
| 1374 | 13117 | Mdn1          | Tmprss5       | -1 |
| 1375 | 6765  | Strap         | Ldhb          | 1  |
| 1375 | 14557 | Strap         | Pyroxd1       | -1 |
| 1375 | 21126 | Strap         | Dera          | -1 |
| 1423 | 11108 | Spdya         | Ltbp1         | 1  |
| 1423 | 12451 | Spdya         | Srd5a2        | -1 |
| 1436 | 3208  | Nfu1          | 4930511111Rik | 1  |
| 1436 | 11966 | Nfu1          | Zfp280b       | 1  |

|      |       |               |                    |    |
|------|-------|---------------|--------------------|----|
| 1436 | 12861 | Nfu1          | Rhcg               | 1  |
| 1436 | 19436 | Nfu1          | Dapp1              | 1  |
| 1447 | 1660  | Naaa          | Zfp33b             | 1  |
| 1447 | 5100  | Naaa          | Pebp1              | 1  |
| 1447 | 6330  | Naaa          | Dgkq               | -1 |
| 1447 | 8547  | Naaa          | Gbp4               | -1 |
| 1447 | 8807  | Naaa          | Ankrd56            | 1  |
| 1447 | 14085 | Naaa          | Cdkl2              | -1 |
| 1447 | 15908 | Naaa          | Pebp1              | 1  |
| 1447 | 17807 | Naaa          | Pebp1              | 1  |
| 1447 | 19719 | Naaa          | EG634650           | -1 |
| 1447 | 20269 | Naaa          | Hsd17b13           | 1  |
| 1447 | 23625 | Naaa          | Pkd2               | -1 |
| 1455 | 18099 | Smek1         | Nfx1               | -1 |
| 1455 | 18373 | Smek1         | Dnajb1             | 1  |
| 1455 | 21333 | Smek1         | Cirbp              | -1 |
| 1455 | 21389 | Smek1         | Odf2               | -1 |
| 1466 | 524   | Ubap2l        | Hsd3b2             | 1  |
| 1466 | 1466  | Ubap2l        | Ubap2l             | 1  |
| 1466 | 1867  | Ubap2l        | Bcas2              | 1  |
| 1466 | 1963  | Ubap2l        | MMT00039783        | 1  |
| 1466 | 2752  | Ubap2l        | Fcgr1              | 1  |
| 1466 | 3753  | Ubap2l        | Setdb1             | -1 |
| 1466 | 5938  | Ubap2l        | Pfn2               | 1  |
| 1466 | 6206  | Ubap2l        | MMT00063701        | 1  |
| 1466 | 7519  | Ubap2l        | Gstm1              | 1  |
| 1466 | 7810  | Ubap2l        | Trim45             | 1  |
| 1466 | 8738  | Ubap2l        | Reg4               | -1 |
| 1466 | 10521 | Ubap2l        | Ttf2               | 1  |
| 1466 | 10681 | Ubap2l        | Dgkz               | -1 |
| 1466 | 11121 | Ubap2l        | Mttr11             | -1 |
| 1466 | 11611 | Ubap2l        | S100a13            | -1 |
| 1466 | 12367 | Ubap2l        | MMT00072365        | -1 |
| 1466 | 15901 | Ubap2l        | Tpm3               | -1 |
| 1466 | 16416 | Ubap2l        | Comm2              | 1  |
| 1466 | 16753 | Ubap2l        | Hfe2               | -1 |
| 1466 | 18138 | Ubap2l        | MMT00000385        | 1  |
| 1466 | 18754 | Ubap2l        | Rbm8a              | 1  |
| 1466 | 18911 | Ubap2l        | Selenbp2           | 1  |
| 1466 | 20385 | Ubap2l        | Chd1l              | 1  |
| 1466 | 20661 | Ubap2l        | Tuft1              | 1  |
| 1466 | 21814 | Ubap2l        | Accn5              | 1  |
| 1466 | 22202 | Ubap2l        | OTTMUSG00000021274 | -1 |
| 1466 | 22570 | Ubap2l        | Phtf1              | 1  |
| 1466 | 23457 | Ubap2l        | Selenbp2           | 1  |
| 1510 | 1956  | A530058N18Rik | Usp50              | -1 |
| 1510 | 4833  | A530058N18Rik | Synpo2             | 1  |
| 1510 | 5761  | A530058N18Rik | Ralgps2            | 1  |
| 1510 | 6016  | A530058N18Rik | A530057A03Rik      | -1 |
| 1510 | 6231  | A530058N18Rik | 9030622O22Rik      | -1 |
| 1510 | 7527  | A530058N18Rik | Rnase10            | 1  |
| 1510 | 7991  | A530058N18Rik | Gpr115             | 1  |
| 1510 | 8337  | A530058N18Rik | Lgr4               | 1  |
| 1510 | 11348 | A530058N18Rik | Med20              | 1  |
| 1510 | 13554 | A530058N18Rik | Aqr                | -1 |
| 1510 | 14740 | A530058N18Rik | Mfap1b             | 1  |
| 1510 | 16052 | A530058N18Rik | Tsg101             | 1  |
| 1510 | 17043 | A530058N18Rik | Tmem127            | -1 |
| 1510 | 19763 | A530058N18Rik | Acp2               | -1 |
| 1510 | 21729 | A530058N18Rik | Hdc                | 1  |
| 1510 | 22184 | A530058N18Rik | MMT00033856        | 1  |
| 1510 | 22592 | A530058N18Rik | MMT00055028        | 1  |
| 1510 | 22857 | A530058N18Rik | Fahd2a             | -1 |
| 1510 | 23609 | A530058N18Rik | Trim44             | -1 |
| 1515 | 1515  | Med20         | Med20              | 1  |
| 1515 | 7088  | Med20         | Slc37a1            | -1 |
| 1515 | 10667 | Med20         | H2-Eb1             | -1 |
| 1515 | 15531 | Med20         | Prickle4           | 1  |
| 1518 | 19436 | Amigo2        | Dapp1              | 1  |

|      |       |               |               |    |
|------|-------|---------------|---------------|----|
| 1522 | 18053 | Nfkbib        | Psmc4         | -1 |
| 1570 | 19436 | Olf522        | Dapp1         | 1  |
| 1593 | 19436 | D3Erd300e     | Dapp1         | 1  |
| 1594 | 3587  | Mrpl24        | MMT00041940   | 1  |
| 1594 | 6021  | Mrpl24        | MMT00008784   | 1  |
| 1594 | 8670  | Mrpl24        | MMT00051613   | 1  |
| 1594 | 9258  | Mrpl24        | P4ha1         | 1  |
| 1594 | 11043 | Mrpl24        | Hsph1         | 1  |
| 1594 | 11214 | Mrpl24        | MMT00049207   | 1  |
| 1594 | 15476 | Mrpl24        | Fem1b         | -1 |
| 1594 | 15675 | Mrpl24        | MMT00077535   | 1  |
| 1594 | 18373 | Mrpl24        | Dnajb1        | 1  |
| 1603 | 1603  | Lrwd1         | Lrwd1         | 1  |
| 1603 | 4638  | Lrwd1         | Alkbh4        | -1 |
| 1604 | 286   | Ssbp4         | MMT00070509   | 1  |
| 1604 | 403   | Ssbp4         | Leprotl1      | -1 |
| 1604 | 1755  | Ssbp4         | Ocel1         | 1  |
| 1604 | 2749  | Ssbp4         | Naf1          | -1 |
| 1604 | 3055  | Ssbp4         | Pde4c         | 1  |
| 1604 | 5433  | Ssbp4         | 2410004L22Rik | -1 |
| 1604 | 6760  | Ssbp4         | 2810428I15Rik | 1  |
| 1604 | 8114  | Ssbp4         | Kcnn1         | 1  |
| 1604 | 9304  | Ssbp4         | AI449175      | 1  |
| 1604 | 9931  | Ssbp4         | Glt25d1       | -1 |
| 1604 | 10195 | Ssbp4         | Klf1          | 1  |
| 1604 | 13732 | Ssbp4         | Tpm4          | -1 |
| 1604 | 13774 | Ssbp4         | Gdf15         | -1 |
| 1604 | 14455 | Ssbp4         | 2700029M09Rik | -1 |
| 1604 | 15094 | Ssbp4         | Pbx4          | -1 |
| 1604 | 15455 | Ssbp4         | Lsm4          | -1 |
| 1604 | 16617 | Ssbp4         | Sh2d4a        | -1 |
| 1604 | 16849 | Ssbp4         | Trmt1         | -1 |
| 1604 | 16858 | Ssbp4         | Tmem38a       | -1 |
| 1604 | 18886 | Ssbp4         | Slc18a1       | -1 |
| 1604 | 20484 | Ssbp4         | Ces1          | -1 |
| 1619 | 11966 | Fbxw17        | Zfp280b       | 1  |
| 1619 | 19436 | Fbxw17        | Dapp1         | 1  |
| 1625 | 246   | AW146154      | MMT00053742   | -1 |
| 1625 | 9611  | AW146154      | Ncf2          | -1 |
| 1625 | 15569 | AW146154      | BC003331      | -1 |
| 1625 | 17463 | AW146154      | Rgl1          | -1 |
| 1625 | 17850 | AW146154      | Prg4          | 1  |
| 1625 | 23262 | AW146154      | C530043G21Rik | 1  |
| 1627 | 6768  | 2310030N02Rik | Plekhf2       | -1 |
| 1629 | 1336  | Gcsh          | MMT00069537   | -1 |
| 1629 | 2243  | Gcsh          | Gcsh          | -1 |
| 1629 | 14391 | Gcsh          | MMT00017335   | 1  |
| 1629 | 21394 | Gcsh          | Cdh15         | 1  |
| 1646 | 18373 | Slc15a4       | Dnajb1        | 1  |
| 1660 | 1660  | Zfp33b        | Zfp33b        | 1  |
| 1660 | 5728  | Zfp33b        | MMT00044077   | 1  |
| 1660 | 6330  | Zfp33b        | Dgkq          | -1 |
| 1660 | 8547  | Zfp33b        | Gbp4          | -1 |
| 1660 | 8807  | Zfp33b        | Ankrd56       | 1  |
| 1660 | 9057  | Zfp33b        | Spp1          | 1  |
| 1660 | 14085 | Zfp33b        | Cdkl2         | -1 |
| 1660 | 19719 | Zfp33b        | EG634650      | -1 |
| 1660 | 20118 | Zfp33b        | Tmem175       | -1 |
| 1660 | 20269 | Zfp33b        | Hsd17b13      | 1  |
| 1672 | 1672  | Mlh1          | Mlh1          | 1  |
| 1679 | 11966 | MMT00009278   | Zfp280b       | 1  |
| 1679 | 19436 | MMT00009278   | Dapp1         | 1  |
| 1690 | 19462 | Nlrp5         | 4933439C20Rik | 1  |
| 1696 | 5694  | V1re9         | Sp7           | 1  |
| 1696 | 7436  | V1re9         | 1700063K16Rik | 1  |
| 1696 | 11966 | V1re9         | Zfp280b       | 1  |
| 1696 | 12861 | V1re9         | Rhcg          | 1  |
| 1696 | 19436 | V1re9         | Dapp1         | 1  |
| 1696 | 22125 | V1re9         | Gab1          | 1  |



|      |       |              |               |    |
|------|-------|--------------|---------------|----|
| 1709 | 1709  | Mt2          | Mt2           | 1  |
| 1734 | 1734  | Arrdc2       | Arrdc2        | 1  |
| 1740 | 16658 | RP23-244H7.9 | MMT00011796   | -1 |
| 1751 | 2794  | Xdh          | Map3k6        | 1  |
| 1755 | 286   | Ocel1        | MMT00070509   | 1  |
| 1755 | 403   | Ocel1        | Leprotl1      | -1 |
| 1755 | 769   | Ocel1        | 5430437P03Rik | -1 |
| 1755 | 1755  | Ocel1        | Ocel1         | 1  |
| 1755 | 2082  | Ocel1        | AU018778      | 1  |
| 1755 | 2703  | Ocel1        | MMT00073763   | 1  |
| 1755 | 2749  | Ocel1        | Naf1          | -1 |
| 1755 | 3052  | Ocel1        | 9130404D08Rik | -1 |
| 1755 | 3055  | Ocel1        | Pde4c         | 1  |
| 1755 | 5433  | Ocel1        | 2410004L22Rik | -1 |
| 1755 | 6760  | Ocel1        | 2810428115Rik | 1  |
| 1755 | 8114  | Ocel1        | Kcnn1         | 1  |
| 1755 | 9304  | Ocel1        | Al449175      | 1  |
| 1755 | 9931  | Ocel1        | Glt25d1       | -1 |
| 1755 | 10195 | Ocel1        | Klf1          | 1  |
| 1755 | 13004 | Ocel1        | Arhgef10      | 1  |
| 1755 | 13732 | Ocel1        | Tpm4          | -1 |
| 1755 | 13774 | Ocel1        | Gdf15         | -1 |
| 1755 | 14455 | Ocel1        | 2700029M09Rik | -1 |
| 1755 | 15094 | Ocel1        | Pbx4          | -1 |
| 1755 | 15455 | Ocel1        | Lsm4          | -1 |
| 1755 | 16617 | Ocel1        | Sh2d4a        | -1 |
| 1755 | 16849 | Ocel1        | Trmt1         | -1 |
| 1755 | 16858 | Ocel1        | Tmem38a       | -1 |
| 1755 | 17703 | Ocel1        | Large         | -1 |
| 1755 | 18886 | Ocel1        | Slc18a1       | -1 |
| 1755 | 20484 | Ocel1        | Ces1          | -1 |
| 1767 | 4484  | BC016495     | MMT00014015   | 1  |
| 1770 | 19436 | BC054059     | Dapp1         | 1  |
| 1771 | 3208  | Park2        | 4930511111Rik | 1  |
| 1771 | 5694  | Park2        | Sp7           | 1  |
| 1771 | 7436  | Park2        | 1700063K16Rik | 1  |
| 1771 | 11966 | Park2        | Zfp280b       | 1  |
| 1771 | 12861 | Park2        | Rhcg          | 1  |
| 1771 | 19436 | Park2        | Dapp1         | 1  |
| 1771 | 19672 | Park2        | Cldn19        | 1  |
| 1771 | 22125 | Park2        | Gab1          | 1  |
| 1795 | 3208  | Rabgap1l     | 4930511111Rik | 1  |
| 1795 | 5694  | Rabgap1l     | Sp7           | 1  |
| 1795 | 7436  | Rabgap1l     | 1700063K16Rik | 1  |
| 1795 | 11966 | Rabgap1l     | Zfp280b       | 1  |
| 1795 | 12861 | Rabgap1l     | Rhcg          | 1  |
| 1795 | 19436 | Rabgap1l     | Dapp1         | 1  |
| 1795 | 19672 | Rabgap1l     | Cldn19        | 1  |
| 1795 | 22125 | Rabgap1l     | Gab1          | 1  |
| 1804 | 19436 | Tgm2         | Dapp1         | 1  |
| 1806 | 4833  | Nola3        | Synpo2        | -1 |
| 1829 | 11966 | MMT00030026  | Zfp280b       | 1  |
| 1829 | 19436 | MMT00030026  | Dapp1         | 1  |
| 1867 | 11611 | Bcas2        | S100a13       | -1 |
| 1876 | 11966 | Amdhd1       | Zfp280b       | 1  |
| 1876 | 19436 | Amdhd1       | Dapp1         | 1  |
| 1918 | 2743  | Usp39        | Tcf3          | 1  |
| 1918 | 3703  | Usp39        | Ggcx          | 1  |
| 1918 | 11338 | Usp39        | Vamp8         | 1  |
| 1918 | 11872 | Usp39        | Vamp5         | 1  |
| 1918 | 15384 | Usp39        | Mat2a         | 1  |
| 1918 | 15708 | Usp39        | Retsat        | 1  |
| 1918 | 16670 | Usp39        | Csmd2         | -1 |
| 1918 | 22695 | Usp39        | Tgoln2        | 1  |
| 1920 | 3208  | Oas1e        | 4930511111Rik | 1  |
| 1920 | 5694  | Oas1e        | Sp7           | 1  |
| 1920 | 7436  | Oas1e        | 1700063K16Rik | 1  |
| 1920 | 11966 | Oas1e        | Zfp280b       | 1  |
| 1920 | 12861 | Oas1e        | Rhcg          | 1  |

|      |       |               |               |    |
|------|-------|---------------|---------------|----|
| 1920 | 19436 | Oas1e         | Dapp1         | 1  |
| 1920 | 19672 | Oas1e         | Cldn19        | 1  |
| 1920 | 22125 | Oas1e         | Gab1          | 1  |
| 1936 | 1936  | Cbwd1         | Cbwd1         | 1  |
| 1936 | 9326  | Cbwd1         | Pgm5          | -1 |
| 1947 | 1755  | Myo9b         | Ocel1         | -1 |
| 1957 | 9010  | Mansc1        | 8430419L09Rik | -1 |
| 1960 | 1960  | Ubr2          | Ubr2          | 1  |
| 1960 | 3857  | Ubr2          | 1700001C19Rik | 1  |
| 1960 | 4411  | Ubr2          | 2310039H08Rik | 1  |
| 1960 | 7088  | Ubr2          | Slc37a1       | -1 |
| 1960 | 13493 | Ubr2          | Ring1         | 1  |
| 1960 | 15531 | Ubr2          | Prickle4      | 1  |
| 1960 | 20100 | Ubr2          | Guca1b        | 1  |
| 1960 | 20511 | Ubr2          | Decr2         | -1 |
| 1960 | 20966 | Ubr2          | MMT00014378   | -1 |
| 1960 | 23250 | Ubr2          | Plcl2         | -1 |
| 1984 | 20902 | Ubqln3        | Itln1         | -1 |
| 2011 | 4305  | Slc2a5        | Tmem51        | 1  |
| 2011 | 19924 | Slc2a5        | Ubiad1        | -1 |
| 2012 | 12367 | Cetn4         | MMT00072365   | 1  |
| 2012 | 15508 | Cetn4         | 4632415L05Rik | -1 |
| 2012 | 16416 | Cetn4         | Commd2        | -1 |
| 2021 | 2021  | Atf7ip        | Atf7ip        | 1  |
| 2021 | 2932  | Atf7ip        | Slco1a1       | -1 |
| 2021 | 6765  | Atf7ip        | Ldhb          | -1 |
| 2021 | 13488 | Atf7ip        | Art4          | -1 |
| 2021 | 14557 | Atf7ip        | Pyroxd1       | 1  |
| 2021 | 17391 | Atf7ip        | C530028O21Rik | 1  |
| 2021 | 20127 | Atf7ip        | Ipo8          | -1 |
| 2021 | 21126 | Atf7ip        | Dera          | 1  |
| 2021 | 22095 | Atf7ip        | Mgst1         | 1  |
| 2023 | 2023  | MMT00072215   | MMT00072215   | 1  |
| 2023 | 3167  | MMT00072215   | Dym           | -1 |
| 2023 | 9192  | MMT00072215   | MMT00042303   | -1 |
| 2023 | 12109 | MMT00072215   | Smad4         | -1 |
| 2023 | 22961 | MMT00072215   | MMT00055950   | 1  |
| 2067 | 11966 | Myo1a         | Zfp280b       | 1  |
| 2067 | 19436 | Myo1a         | Dapp1         | 1  |
| 2079 | 2079  | Mthfs         | Mthfs         | 1  |
| 2079 | 8073  | Mthfs         | Irak1bp1      | -1 |
| 2118 | 2599  | Kptn          | Lsm14a        | 1  |
| 2118 | 4697  | Kptn          | Cyp2a12       | -1 |
| 2118 | 6513  | Kptn          | Qpctl         | 1  |
| 2118 | 11321 | Kptn          | 2310014L17Rik | -1 |
| 2118 | 11888 | Kptn          | Myadm         | -1 |
| 2118 | 17314 | Kptn          | Napa          | -1 |
| 2118 | 19462 | Kptn          | 4933439C20Rik | -1 |
| 2118 | 23247 | Kptn          | Ercc1         | -1 |
| 2128 | 10189 | 4930447K03Rik | Cage1         | 1  |
| 2128 | 15698 | 4930447K03Rik | Them2         | -1 |
| 2157 | 11859 | 0610007C21Rik | Poln          | -1 |
| 2157 | 12385 | 0610007C21Rik | Mrpl33        | -1 |
| 2190 | 3587  | Heyl          | MMT00041940   | -1 |
| 2190 | 6021  | Heyl          | MMT00008784   | -1 |
| 2190 | 8670  | Heyl          | MMT00051613   | -1 |
| 2190 | 9899  | Heyl          | D13Wsu177e    | -1 |
| 2190 | 11043 | Heyl          | Hsph1         | -1 |
| 2190 | 11214 | Heyl          | MMT00049207   | -1 |
| 2190 | 15675 | Heyl          | MMT00077535   | -1 |
| 2190 | 18373 | Heyl          | Dnajb1        | -1 |
| 2190 | 20535 | Heyl          | Rbm4          | -1 |
| 2210 | 3291  | Chn1          | Ptk2          | -1 |
| 2210 | 9831  | Chn1          | Nedd4l        | -1 |
| 2224 | 2224  | Oasl2         | Oasl2         | 1  |
| 2224 | 3523  | Oasl2         | Trim34        | 1  |
| 2224 | 5002  | Oasl2         | Ifi202b       | 1  |
| 2224 | 7316  | Oasl2         | Ifi204        | 1  |
| 2224 | 11009 | Oasl2         | MMT00008885   | 1  |

|      |       |             |               |    |
|------|-------|-------------|---------------|----|
| 2224 | 11204 | Oasl2       | Al451617      | 1  |
| 2224 | 12398 | Oasl2       | lfi44         | 1  |
| 2224 | 12600 | Oasl2       | lfi204        | 1  |
| 2224 | 15074 | Oasl2       | Usp18         | 1  |
| 2224 | 16572 | Oasl2       | D14Ert668e    | 1  |
| 2224 | 21549 | Oasl2       | Rtp4          | 1  |
| 2226 | 11966 | Amt         | Zfp280b       | 1  |
| 2226 | 19436 | Amt         | Dapp1         | 1  |
| 2243 | 1052  | Gcsh        | Cog4          | 1  |
| 2243 | 1336  | Gcsh        | MMT00069537   | 1  |
| 2243 | 2243  | Gcsh        | Gcsh          | 1  |
| 2243 | 3055  | Gcsh        | Pde4c         | 1  |
| 2243 | 7910  | Gcsh        | AK122209      | 1  |
| 2243 | 9304  | Gcsh        | Al449175      | 1  |
| 2243 | 9770  | Gcsh        | Bcmo1         | -1 |
| 2243 | 10195 | Gcsh        | Klf1          | 1  |
| 2243 | 10668 | Gcsh        | Kars          | 1  |
| 2243 | 11787 | Gcsh        | Rsf1          | 1  |
| 2243 | 14391 | Gcsh        | MMT00017335   | -1 |
| 2243 | 15455 | Gcsh        | Lsm4          | -1 |
| 2243 | 15953 | Gcsh        | Acsf3         | -1 |
| 2243 | 16849 | Gcsh        | Trmt1         | -1 |
| 2243 | 18697 | Gcsh        | Afg3l1        | 1  |
| 2243 | 18886 | Gcsh        | Slc18a1       | -1 |
| 2243 | 20484 | Gcsh        | Ces1          | -1 |
| 2243 | 21394 | Gcsh        | Cdh15         | -1 |
| 2243 | 21632 | Gcsh        | MMT00046455   | 1  |
| 2243 | 22351 | Gcsh        | Fanca         | -1 |
| 2243 | 22909 | Gcsh        | Nup133        | 1  |
| 2273 | 3587  | Haghl       | MMT00041940   | -1 |
| 2273 | 7731  | Haghl       | 1500001M20Rik | 1  |
| 2273 | 8670  | Haghl       | MMT00051613   | -1 |
| 2273 | 9680  | Haghl       | Ahsa1         | -1 |
| 2273 | 11043 | Haghl       | Hsph1         | -1 |
| 2273 | 14014 | Haghl       | MMT00008376   | -1 |
| 2273 | 15675 | Haghl       | MMT00077535   | -1 |
| 2273 | 16299 | Haghl       | Creld2        | -1 |
| 2273 | 22139 | Haghl       | Stip1         | -1 |
| 2283 | 11966 | MMT00029554 | Zfp280b       | 1  |
| 2283 | 19436 | MMT00029554 | Dapp1         | 1  |
| 2283 | 22125 | MMT00029554 | Gab1          | 1  |
| 2294 | 250   | AU040829    | Tubb2a-ps2    | -1 |
| 2294 | 269   | AU040829    | Tuba1b        | -1 |
| 2294 | 337   | AU040829    | Rasgef1b      | 1  |
| 2294 | 563   | AU040829    | D4Bwg0951e    | 1  |
| 2294 | 609   | AU040829    | MMT00060868   | -1 |
| 2294 | 1755  | AU040829    | Ocel1         | -1 |
| 2294 | 1941  | AU040829    | MMT00079618   | -1 |
| 2294 | 2294  | AU040829    | AU040829      | 1  |
| 2294 | 2322  | AU040829    | Tuba4a        | -1 |
| 2294 | 2483  | AU040829    | Gmeb1         | 1  |
| 2294 | 2794  | AU040829    | Map3k6        | 1  |
| 2294 | 3804  | AU040829    | MMT00015534   | -1 |
| 2294 | 4201  | AU040829    | Tubb2c        | -1 |
| 2294 | 4392  | AU040829    | 1810055G02Rik | 1  |
| 2294 | 4708  | AU040829    | Traf3ip2      | -1 |
| 2294 | 5068  | AU040829    | Afap1l2       | -1 |
| 2294 | 5187  | AU040829    | Speer4f       | 1  |
| 2294 | 6490  | AU040829    | Il1r1         | 1  |
| 2294 | 6564  | AU040829    | Cebpd         | 1  |
| 2294 | 8399  | AU040829    | Herpud1       | 1  |
| 2294 | 9304  | AU040829    | Al449175      | -1 |
| 2294 | 9910  | AU040829    | EG666644      | 1  |
| 2294 | 9931  | AU040829    | Glit25d1      | 1  |
| 2294 | 11129 | AU040829    | Ankhd1        | 1  |
| 2294 | 11724 | AU040829    | Tuba3a        | -1 |
| 2294 | 12420 | AU040829    | Klhl21        | 1  |
| 2294 | 12460 | AU040829    | Pnpla2        | 1  |
| 2294 | 12479 | AU040829    | lfrd1         | 1  |

|      |       |               |               |    |
|------|-------|---------------|---------------|----|
| 2294 | 13289 | AU040829      | Dusp10        | -1 |
| 2294 | 15455 | AU040829      | Lsm4          | 1  |
| 2294 | 15522 | AU040829      | 1810011O10Rik | 1  |
| 2294 | 15631 | AU040829      | Lpin1         | 1  |
| 2294 | 15882 | AU040829      | AA986860      | 1  |
| 2294 | 16176 | AU040829      | St3gal5       | 1  |
| 2294 | 16580 | AU040829      | Tnfaip2       | -1 |
| 2294 | 16617 | AU040829      | Sh2d4a        | 1  |
| 2294 | 16669 | AU040829      | Tjp2          | -1 |
| 2294 | 16858 | AU040829      | Tmem38a       | 1  |
| 2294 | 17352 | AU040829      | Cebp          | 1  |
| 2294 | 17444 | AU040829      | Tuba1a        | -1 |
| 2294 | 17525 | AU040829      | Ctgf          | 1  |
| 2294 | 17622 | AU040829      | Foxo1         | 1  |
| 2294 | 17876 | AU040829      | Tubb4         | -1 |
| 2294 | 18027 | AU040829      | 5730403B10Rik | 1  |
| 2294 | 18886 | AU040829      | Slc18a1       | 1  |
| 2294 | 19025 | AU040829      | Slc37a4       | 1  |
| 2294 | 19146 | AU040829      | N4bp2l1       | 1  |
| 2294 | 19466 | AU040829      | Pptc7         | 1  |
| 2294 | 19556 | AU040829      | Efna1         | -1 |
| 2294 | 21331 | AU040829      | Slc10a6       | 1  |
| 2294 | 22290 | AU040829      | Tubb2a        | -1 |
| 2294 | 22443 | AU040829      | Tuba1c        | -1 |
| 2294 | 22630 | AU040829      | MMT00034355   | -1 |
| 2294 | 22873 | AU040829      | Slc38a2       | 1  |
| 2326 | 19436 | zfp507        | Dapp1         | 1  |
| 2351 | 2915  | 1110008F13Rik | Nfs1          | -1 |
| 2351 | 7610  | 1110008F13Rik | Scand1        | -1 |
| 2351 | 23005 | 1110008F13Rik | 4930405A21Rik | 1  |
| 2362 | 3587  | Mkks          | MMT00041940   | 1  |
| 2362 | 6021  | Mkks          | MMT00008784   | 1  |
| 2362 | 6126  | Mkks          | MMT00067575   | 1  |
| 2362 | 8319  | Mkks          | MMT00062477   | 1  |
| 2362 | 8670  | Mkks          | MMT00051613   | 1  |
| 2362 | 11043 | Mkks          | Hsph1         | 1  |
| 2362 | 11214 | Mkks          | MMT00049207   | 1  |
| 2362 | 15675 | Mkks          | MMT00077535   | 1  |
| 2362 | 18373 | Mkks          | Dnajb1        | 1  |
| 2362 | 20535 | Mkks          | Rbm4          | 1  |
| 2370 | 22216 | 8430408G22Rik | Sp5           | -1 |
| 2372 | 2372  | Stx12         | Stx12         | 1  |
| 2372 | 16287 | Stx12         | Extl1         | 1  |
| 2424 | 510   | Unc5cl        | Neu1          | -1 |
| 2424 | 1515  | Unc5cl        | Med20         | -1 |
| 2424 | 3857  | Unc5cl        | 1700001C19Rik | -1 |
| 2424 | 7088  | Unc5cl        | Slc37a1       | 1  |
| 2424 | 15531 | Unc5cl        | Prickle4      | -1 |
| 2424 | 20100 | Unc5cl        | Guca1b        | -1 |
| 2449 | 126   | Mybpc2        | 0610012D14Rik | -1 |
| 2449 | 19762 | Mybpc2        | Pih1d1        | -1 |
| 2449 | 19854 | Mybpc2        | Kcnj14        | 1  |
| 2449 | 20490 | Mybpc2        | Tmem143       | -1 |
| 2456 | 2456  | Mrpl10        | Mrpl10        | 1  |
| 2456 | 3480  | Mrpl10        | Pnpo          | -1 |
| 2456 | 5661  | Mrpl10        | Lrrc46        | -1 |
| 2456 | 12302 | Mrpl10        | Cbx1          | 1  |
| 2456 | 13810 | Mrpl10        | 1110036O03Rik | -1 |
| 2456 | 13983 | Mrpl10        | Copz2         | 1  |
| 2456 | 14384 | Mrpl10        | Dnajc7        | -1 |
| 2456 | 19092 | Mrpl10        | MMT00045362   | 1  |
| 2472 | 2472  | MMT00014056   | MMT00014056   | 1  |
| 2472 | 7192  | MMT00014056   | Ttc21b        | 1  |
| 2472 | 7654  | MMT00014056   | Ptpmt1        | -1 |
| 2472 | 9547  | MMT00014056   | MMT00006479   | 1  |
| 2472 | 14757 | MMT00014056   | Hdx           | 1  |
| 2472 | 15365 | MMT00014056   | Ext2          | 1  |
| 2472 | 16881 | MMT00014056   | MMT00031504   | 1  |
| 2472 | 17295 | MMT00014056   | MMT00082577   | 1  |

|      |       |             |               |    |
|------|-------|-------------|---------------|----|
| 2472 | 19763 | MMT00014056 | Acp2          | 1  |
| 2472 | 19803 | MMT00014056 | BC003993      | 1  |
| 2472 | 22320 | MMT00014056 | MMT00047284   | 1  |
| 2472 | 23474 | MMT00014056 | MMT00011721   | 1  |
| 2485 | 13988 | Adck1       | Cntnap2       | 1  |
| 2511 | 12070 | Ltv1        | Adat2         | -1 |
| 2533 | 2533  | Arhgef19    | Arhgef19      | 1  |
| 2533 | 4657  | Arhgef19    | C230096C10Rik | -1 |
| 2533 | 7307  | Arhgef19    | Agmat         | -1 |
| 2558 | 740   | Tmem132b    | Txnrd3        | -1 |
| 2558 | 902   | Tmem132b    | Slc30a1       | -1 |
| 2558 | 1156  | Tmem132b    | Rbj           | -1 |
| 2558 | 2329  | Tmem132b    | Wdr6          | -1 |
| 2558 | 3462  | Tmem132b    | Nmnat3        | -1 |
| 2558 | 3587  | Tmem132b    | MMT00041940   | 1  |
| 2558 | 3808  | Tmem132b    | 2010209O12Rik | -1 |
| 2558 | 3913  | Tmem132b    | Mrpl15        | 1  |
| 2558 | 5544  | Tmem132b    | Camsap1       | 1  |
| 2558 | 6021  | Tmem132b    | MMT00008784   | 1  |
| 2558 | 6126  | Tmem132b    | MMT00067575   | 1  |
| 2558 | 6218  | Tmem132b    | Hnrnpc        | 1  |
| 2558 | 6769  | Tmem132b    | Banp          | 1  |
| 2558 | 7140  | Tmem132b    | Mtbp          | -1 |
| 2558 | 7731  | Tmem132b    | 1500001M20Rik | -1 |
| 2558 | 7963  | Tmem132b    | Rxrg          | -1 |
| 2558 | 8037  | Tmem132b    | MMT00052151   | 1  |
| 2558 | 8319  | Tmem132b    | MMT00062477   | 1  |
| 2558 | 8464  | Tmem132b    | Snapi         | -1 |
| 2558 | 8670  | Tmem132b    | MMT00051613   | 1  |
| 2558 | 8891  | Tmem132b    | MMT00071061   | 1  |
| 2558 | 9067  | Tmem132b    | Tra2a         | 1  |
| 2558 | 9258  | Tmem132b    | P4ha1         | 1  |
| 2558 | 9899  | Tmem132b    | D13Wsu177e    | 1  |
| 2558 | 10769 | Tmem132b    | Hnrnpd        | -1 |
| 2558 | 11043 | Tmem132b    | Hsph1         | 1  |
| 2558 | 11095 | Tmem132b    | Bag3          | 1  |
| 2558 | 11214 | Tmem132b    | MMT00049207   | 1  |
| 2558 | 14014 | Tmem132b    | MMT00008376   | 1  |
| 2558 | 14135 | Tmem132b    | Eepd1         | -1 |
| 2558 | 14298 | Tmem132b    | Atp2a2        | 1  |
| 2558 | 15476 | Tmem132b    | Fem1b         | -1 |
| 2558 | 15675 | Tmem132b    | MMT00077535   | 1  |
| 2558 | 16251 | Tmem132b    | G6pc          | 1  |
| 2558 | 16754 | Tmem132b    | Hsp90aa1      | 1  |
| 2558 | 18099 | Tmem132b    | Nfx1          | -1 |
| 2558 | 18215 | Tmem132b    | Gpr146        | -1 |
| 2558 | 18373 | Tmem132b    | Dnajb1        | 1  |
| 2558 | 18418 | Tmem132b    | Hspa1b        | 1  |
| 2558 | 20332 | Tmem132b    | Stau2         | -1 |
| 2558 | 20535 | Tmem132b    | Rbm4          | 1  |
| 2558 | 20912 | Tmem132b    | Chordc1       | 1  |
| 2558 | 21322 | Tmem132b    | Usp1          | 1  |
| 2558 | 21333 | Tmem132b    | Cirbp         | -1 |
| 2558 | 21389 | Tmem132b    | Odf2          | -1 |
| 2558 | 22139 | Tmem132b    | Stip1         | 1  |
| 2558 | 22303 | Tmem132b    | Cdt1          | -1 |
| 2571 | 1041  | Rmnd1       | 3110049J23Rik | -1 |
| 2571 | 1135  | Rmnd1       | Akap12        | 1  |
| 2571 | 2571  | Rmnd1       | Rmnd1         | 1  |
| 2571 | 3744  | Rmnd1       | Rmnd1         | 1  |
| 2571 | 5965  | Rmnd1       | Pbld          | -1 |
| 2571 | 7620  | Rmnd1       | Foxo3         | -1 |
| 2571 | 8786  | Rmnd1       | Rmnd1         | 1  |
| 2571 | 14169 | Rmnd1       | 1700052N19Rik | -1 |
| 2571 | 18300 | Rmnd1       | Arg1          | -1 |
| 2571 | 19115 | Rmnd1       | Rab32         | 1  |
| 2571 | 19392 | Rmnd1       | Slc25a16      | 1  |
| 2571 | 22146 | Rmnd1       | Aifm2         | -1 |
| 2599 | 126   | Lsm14a      | 0610012D14Rik | -1 |

|      |       |         |               |    |
|------|-------|---------|---------------|----|
| 2599 | 187   | Lsm14a  | Wdr62         | -1 |
| 2599 | 1985  | Lsm14a  | Pepd          | -1 |
| 2599 | 2388  | Lsm14a  | Dot1l         | 1  |
| 2599 | 2599  | Lsm14a  | Lsm14a        | 1  |
| 2599 | 2912  | Lsm14a  | Wtip          | -1 |
| 2599 | 4697  | Lsm14a  | Cyp2a12       | -1 |
| 2599 | 5352  | Lsm14a  | Pdcd2l        | 1  |
| 2599 | 6513  | Lsm14a  | Qpctl         | 1  |
| 2599 | 7761  | Lsm14a  | Nudt19        | 1  |
| 2599 | 8521  | Lsm14a  | Ceacam1       | -1 |
| 2599 | 9122  | Lsm14a  | Sepw1         | 1  |
| 2599 | 9359  | Lsm14a  | Dhx34         | -1 |
| 2599 | 10545 | Lsm14a  | Tmem147       | 1  |
| 2599 | 11321 | Lsm14a  | 2310014L17Rik | -1 |
| 2599 | 11465 | Lsm14a  | Eif3k         | 1  |
| 2599 | 11888 | Lsm14a  | Myadm         | -1 |
| 2599 | 12004 | Lsm14a  | Lgals6        | 1  |
| 2599 | 12423 | Lsm14a  | Cyp2g1        | -1 |
| 2599 | 16639 | Lsm14a  | MMT00078937   | -1 |
| 2599 | 17314 | Lsm14a  | Napa          | -1 |
| 2599 | 18053 | Lsm14a  | Psmc4         | 1  |
| 2599 | 18088 | Lsm14a  | Alkbh6        | 1  |
| 2599 | 19462 | Lsm14a  | 4933439C20Rik | -1 |
| 2599 | 19762 | Lsm14a  | Pih1d1        | -1 |
| 2599 | 19854 | Lsm14a  | Kcnj14        | 1  |
| 2599 | 20606 | Lsm14a  | MMT00042166   | -1 |
| 2599 | 21438 | Lsm14a  | Plekha4       | -1 |
| 2599 | 23247 | Lsm14a  | Ercc1         | -1 |
| 2599 | 23595 | Lsm14a  | Gm550         | 1  |
| 2601 | 21517 | Dnajc18 | Sil1          | -1 |
| 2632 | 524   | Aph1a   | Hsd3b2        | -1 |
| 2632 | 3753  | Aph1a   | Setdb1        | 1  |
| 2632 | 11121 | Aph1a   | Mttr11        | 1  |
| 2644 | 15264 | Srrm2   | Flywch2       | -1 |
| 2675 | 19436 | Nfyc    | Dapp1         | 1  |
| 2705 | 9077  | Hrbl    | Cnpy4         | 1  |
| 2705 | 13780 | Hrbl    | Pilra         | 1  |
| 2705 | 16451 | Hrbl    | 2010007H12Rik | -1 |
| 2705 | 17089 | Hrbl    | Pilrb1        | 1  |
| 2708 | 337   | Sgk1    | Rasgef1b      | 1  |
| 2708 | 563   | Sgk1    | D4Bwg0951e    | 1  |
| 2708 | 1877  | Sgk1    | Amica1        | 1  |
| 2708 | 2294  | Sgk1    | AU040829      | 1  |
| 2708 | 2483  | Sgk1    | Gmeb1         | 1  |
| 2708 | 2794  | Sgk1    | Map3k6        | 1  |
| 2708 | 3170  | Sgk1    | Mcart1        | 1  |
| 2708 | 3196  | Sgk1    | Tat           | 1  |
| 2708 | 3452  | Sgk1    | Ccrn4l        | 1  |
| 2708 | 4084  | Sgk1    | Asah3l        | 1  |
| 2708 | 4235  | Sgk1    | Pkfb3         | 1  |
| 2708 | 5187  | Sgk1    | Speer4f       | 1  |
| 2708 | 5856  | Sgk1    | Mfsd2         | 1  |
| 2708 | 5889  | Sgk1    | Errfi1        | 1  |
| 2708 | 6028  | Sgk1    | Alas1         | 1  |
| 2708 | 6490  | Sgk1    | Il1r1         | 1  |
| 2708 | 6564  | Sgk1    | Cebpd         | 1  |
| 2708 | 6589  | Sgk1    | Mafb          | 1  |
| 2708 | 6756  | Sgk1    | Sds           | 1  |
| 2708 | 7112  | Sgk1    | Apbb3         | 1  |
| 2708 | 7136  | Sgk1    | Id3           | -1 |
| 2708 | 8399  | Sgk1    | Herpud1       | 1  |
| 2708 | 8816  | Sgk1    | Nfkbia        | 1  |
| 2708 | 9213  | Sgk1    | Osgin1        | -1 |
| 2708 | 10408 | Sgk1    | Per1          | 1  |
| 2708 | 11093 | Sgk1    | Zdhhc1        | 1  |
| 2708 | 11574 | Sgk1    | Gne           | 1  |
| 2708 | 11599 | Sgk1    | Coq10b        | 1  |
| 2708 | 11808 | Sgk1    | Pck1          | 1  |
| 2708 | 12479 | Sgk1    | lfrd1         | 1  |

|      |       |       |               |    |
|------|-------|-------|---------------|----|
| 2708 | 12761 | Sgk1  | Tsc22d3       | 1  |
| 2708 | 13289 | Sgk1  | Dusp10        | -1 |
| 2708 | 13339 | Sgk1  | D630042F21Rik | 1  |
| 2708 | 13471 | Sgk1  | Cln8          | 1  |
| 2708 | 15021 | Sgk1  | Ppargc1a      | 1  |
| 2708 | 15522 | Sgk1  | 1810011O10Rik | 1  |
| 2708 | 15631 | Sgk1  | Lpin1         | 1  |
| 2708 | 15882 | Sgk1  | AA986860      | 1  |
| 2708 | 16176 | Sgk1  | St3gal5       | 1  |
| 2708 | 16580 | Sgk1  | Tnfaip2       | -1 |
| 2708 | 17352 | Sgk1  | Cebpb         | 1  |
| 2708 | 17525 | Sgk1  | Ctgf          | 1  |
| 2708 | 17622 | Sgk1  | Foxo1         | 1  |
| 2708 | 17752 | Sgk1  | Chac1         | 1  |
| 2708 | 18027 | Sgk1  | 5730403B10Rik | 1  |
| 2708 | 18314 | Sgk1  | 4631416L12Rik | 1  |
| 2708 | 18785 | Sgk1  | Angptl4       | 1  |
| 2708 | 19025 | Sgk1  | Slc37a4       | 1  |
| 2708 | 19124 | Sgk1  | Pim3          | 1  |
| 2708 | 19466 | Sgk1  | Pptc7         | 1  |
| 2708 | 19556 | Sgk1  | Efna1         | -1 |
| 2708 | 19757 | Sgk1  | Fkbp5         | 1  |
| 2708 | 19970 | Sgk1  | Mrpl36        | -1 |
| 2708 | 20690 | Sgk1  | Zfp276        | 1  |
| 2708 | 21331 | Sgk1  | Slc10a6       | 1  |
| 2708 | 21934 | Sgk1  | Id2           | -1 |
| 2708 | 22873 | Sgk1  | Slc38a2       | 1  |
| 2708 | 23202 | Sgk1  | Olfir559      | 1  |
| 2743 | 1140  | Tcf3  | Rmnd5a        | -1 |
| 2743 | 2743  | Tcf3  | Tcf3          | 1  |
| 2743 | 3703  | Tcf3  | Ggcx          | 1  |
| 2743 | 4086  | Tcf3  | Adamts8       | 1  |
| 2743 | 4093  | Tcf3  | Akp5          | 1  |
| 2743 | 7273  | Tcf3  | Rnf103        | -1 |
| 2743 | 11338 | Tcf3  | Vamp8         | 1  |
| 2743 | 11872 | Tcf3  | Vamp5         | 1  |
| 2743 | 15384 | Tcf3  | Mat2a         | 1  |
| 2743 | 15625 | Tcf3  | Capg          | 1  |
| 2743 | 15708 | Tcf3  | Retsat        | 1  |
| 2743 | 16670 | Tcf3  | Csmd2         | -1 |
| 2743 | 17317 | Tcf3  | Jmjd1a        | -1 |
| 2743 | 17562 | Tcf3  | Rbed1         | 1  |
| 2743 | 22695 | Tcf3  | Tgoln2        | 1  |
| 2749 | 1755  | Naf1  | Ocel1         | -1 |
| 2749 | 13732 | Naf1  | Tpm4          | 1  |
| 2749 | 15455 | Naf1  | Lsm4          | 1  |
| 2749 | 16617 | Naf1  | Sh2d4a        | 1  |
| 2749 | 18886 | Naf1  | Slc18a1       | 1  |
| 2752 | 524   | Fcgr1 | Hsd3b2        | 1  |
| 2752 | 1466  | Fcgr1 | Ubap2l        | 1  |
| 2752 | 1867  | Fcgr1 | Bcas2         | 1  |
| 2752 | 1963  | Fcgr1 | MMT00039783   | 1  |
| 2752 | 2752  | Fcgr1 | Fcgr1         | 1  |
| 2752 | 3753  | Fcgr1 | Setdb1        | -1 |
| 2752 | 3823  | Fcgr1 | Slc22a15      | -1 |
| 2752 | 5938  | Fcgr1 | Pfn2          | 1  |
| 2752 | 6206  | Fcgr1 | MMT00063701   | 1  |
| 2752 | 7519  | Fcgr1 | Gstm1         | 1  |
| 2752 | 7810  | Fcgr1 | Trim45        | 1  |
| 2752 | 8738  | Fcgr1 | Reg4          | -1 |
| 2752 | 9408  | Fcgr1 | Hmgcs2        | -1 |
| 2752 | 10521 | Fcgr1 | Ttf2          | 1  |
| 2752 | 10681 | Fcgr1 | Dgkz          | -1 |
| 2752 | 11121 | Fcgr1 | Mttr11        | -1 |
| 2752 | 11611 | Fcgr1 | S100a13       | -1 |
| 2752 | 12250 | Fcgr1 | P2ry14        | 1  |
| 2752 | 12367 | Fcgr1 | MMT00072365   | -1 |
| 2752 | 13134 | Fcgr1 | Lipg          | -1 |
| 2752 | 15901 | Fcgr1 | Tpm3          | -1 |

|      |       |             |                    |    |
|------|-------|-------------|--------------------|----|
| 2752 | 16416 | Fcgr1       | Commd2             | 1  |
| 2752 | 16679 | Fcgr1       | Ctsk               | -1 |
| 2752 | 16753 | Fcgr1       | Hfe2               | -1 |
| 2752 | 18754 | Fcgr1       | Rbm8a              | 1  |
| 2752 | 18911 | Fcgr1       | Selenbp2           | 1  |
| 2752 | 20385 | Fcgr1       | Chd1l              | 1  |
| 2752 | 20661 | Fcgr1       | Tuft1              | 1  |
| 2752 | 20917 | Fcgr1       | Gstm6              | -1 |
| 2752 | 21650 | Fcgr1       | Ap4b1              | 1  |
| 2752 | 21814 | Fcgr1       | Accn5              | 1  |
| 2752 | 22202 | Fcgr1       | OTTMUSG00000021274 | -1 |
| 2752 | 22570 | Fcgr1       | Phf1               | 1  |
| 2752 | 23457 | Fcgr1       | Selenbp2           | 1  |
| 2753 | 2079  | Myo6        | Mthfs              | -1 |
| 2753 | 2753  | Myo6        | Myo6               | 1  |
| 2753 | 3642  | Myo6        | Spsb4              | -1 |
| 2753 | 8073  | Myo6        | lrak1bp1           | 1  |
| 2753 | 10236 | Myo6        | EG665033           | 1  |
| 2783 | 16422 | Pdzrn4      | Kctd5              | 1  |
| 2789 | 6021  | Sirt5       | MMT00008784        | -1 |
| 2789 | 8670  | Sirt5       | MMT00051613        | -1 |
| 2789 | 11043 | Sirt5       | Hsph1              | -1 |
| 2789 | 11214 | Sirt5       | MMT00049207        | -1 |
| 2789 | 15675 | Sirt5       | MMT00077535        | -1 |
| 2793 | 1183  | MMT00005644 | MMT00009390        | -1 |
| 2793 | 2793  | MMT00005644 | MMT00005644        | 1  |
| 2793 | 5989  | MMT00005644 | 2310042D19Rik      | 1  |
| 2793 | 12718 | MMT00005644 | Dhrsx              | -1 |
| 2793 | 18033 | MMT00005644 | Klhl17             | -1 |
| 2793 | 19026 | MMT00005644 | lsg15              | 1  |
| 2793 | 22077 | MMT00005644 | MMT00057550        | 1  |
| 2793 | 22122 | MMT00005644 | MMT00042954        | -1 |
| 2794 | 250   | Map3k6      | Tubb2a-ps2         | -1 |
| 2794 | 269   | Map3k6      | Tuba1b             | -1 |
| 2794 | 337   | Map3k6      | Rasgef1b           | 1  |
| 2794 | 563   | Map3k6      | D4Bwg0951e         | 1  |
| 2794 | 609   | Map3k6      | MMT00060868        | -1 |
| 2794 | 1646  | Map3k6      | Slc15a4            | 1  |
| 2794 | 1709  | Map3k6      | Mt2                | 1  |
| 2794 | 1941  | Map3k6      | MMT00079618        | -1 |
| 2794 | 2322  | Map3k6      | Tuba4a             | -1 |
| 2794 | 2794  | Map3k6      | Map3k6             | 1  |
| 2794 | 3214  | Map3k6      | Dnmt3b             | -1 |
| 2794 | 3559  | Map3k6      | 4933433P14Rik      | 1  |
| 2794 | 3686  | Map3k6      | Psmc9              | 1  |
| 2794 | 3804  | Map3k6      | MMT00015534        | -1 |
| 2794 | 4201  | Map3k6      | Tubb2c             | -1 |
| 2794 | 4235  | Map3k6      | Pfkfb3             | 1  |
| 2794 | 4286  | Map3k6      | Ptp4a1             | 1  |
| 2794 | 4392  | Map3k6      | 1810055G02Rik      | 1  |
| 2794 | 4708  | Map3k6      | Traf3ip2           | -1 |
| 2794 | 5187  | Map3k6      | Speer4f            | 1  |
| 2794 | 5791  | Map3k6      | Baiap2l1           | 1  |
| 2794 | 6048  | Map3k6      | Psmc9              | 1  |
| 2794 | 6118  | Map3k6      | Slc1a4             | -1 |
| 2794 | 6386  | Map3k6      | Por                | 1  |
| 2794 | 6490  | Map3k6      | Il1r1              | 1  |
| 2794 | 6564  | Map3k6      | Cebpd              | 1  |
| 2794 | 6675  | Map3k6      | Sfrs4              | 1  |
| 2794 | 6990  | Map3k6      | Nr1i2              | 1  |
| 2794 | 7066  | Map3k6      | Agtr1b             | 1  |
| 2794 | 7151  | Map3k6      | MMT00007982        | -1 |
| 2794 | 8399  | Map3k6      | Herpud1            | 1  |
| 2794 | 9763  | Map3k6      | Tuba3b             | -1 |
| 2794 | 10408 | Map3k6      | Per1               | 1  |
| 2794 | 10712 | Map3k6      | Fchs2              | 1  |
| 2794 | 11093 | Map3k6      | Zdhhc1             | 1  |
| 2794 | 11129 | Map3k6      | Ankhd1             | 1  |
| 2794 | 11574 | Map3k6      | Gne                | 1  |



|      |       |         |               |    |
|------|-------|---------|---------------|----|
| 2794 | 11724 | Map3k6  | Tuba3a        | -1 |
| 2794 | 11807 | Map3k6  | Fbxo31        | 1  |
| 2794 | 11808 | Map3k6  | Pck1          | 1  |
| 2794 | 12420 | Map3k6  | Klhl21        | 1  |
| 2794 | 12436 | Map3k6  | Serinc3       | 1  |
| 2794 | 12460 | Map3k6  | Pnpla2        | 1  |
| 2794 | 12489 | Map3k6  | Wdr8          | -1 |
| 2794 | 13339 | Map3k6  | D630042F21Rik | 1  |
| 2794 | 14335 | Map3k6  | Olfir33       | 1  |
| 2794 | 14462 | Map3k6  | Zfp385b       | 1  |
| 2794 | 15021 | Map3k6  | Ppargc1a      | 1  |
| 2794 | 15631 | Map3k6  | Lpin1         | 1  |
| 2794 | 15882 | Map3k6  | AA986860      | 1  |
| 2794 | 16176 | Map3k6  | St3gal5       | 1  |
| 2794 | 16580 | Map3k6  | Tnfaip2       | -1 |
| 2794 | 16647 | Map3k6  | D16H22S680E   | 1  |
| 2794 | 16669 | Map3k6  | Tjp2          | -1 |
| 2794 | 16690 | Map3k6  | Tjp3          | -1 |
| 2794 | 17352 | Map3k6  | Cebpb         | 1  |
| 2794 | 17444 | Map3k6  | Tuba1a        | -1 |
| 2794 | 17525 | Map3k6  | Ctgf          | 1  |
| 2794 | 17622 | Map3k6  | Foxo1         | 1  |
| 2794 | 17656 | Map3k6  | Hdhd3         | -1 |
| 2794 | 17876 | Map3k6  | Tubb4         | -1 |
| 2794 | 18027 | Map3k6  | 5730403B10Rik | 1  |
| 2794 | 18314 | Map3k6  | 4631416L12Rik | 1  |
| 2794 | 18785 | Map3k6  | Angptl4       | 1  |
| 2794 | 19025 | Map3k6  | Slc37a4       | 1  |
| 2794 | 19146 | Map3k6  | N4bp211       | 1  |
| 2794 | 19466 | Map3k6  | Pptc7         | 1  |
| 2794 | 19556 | Map3k6  | Efna1         | -1 |
| 2794 | 19671 | Map3k6  | Upp2          | 1  |
| 2794 | 19723 | Map3k6  | Pfkfb1        | 1  |
| 2794 | 19757 | Map3k6  | Fkbp5         | 1  |
| 2794 | 21331 | Map3k6  | Slc10a6       | 1  |
| 2794 | 22290 | Map3k6  | Tubb2a        | -1 |
| 2794 | 22443 | Map3k6  | Tuba1c        | -1 |
| 2794 | 22630 | Map3k6  | MMT00034355   | -1 |
| 2794 | 23201 | Map3k6  | S1pr1         | -1 |
| 2794 | 23202 | Map3k6  | Olfir559      | 1  |
| 2800 | 1281  | Dusp11  | Alkbh3        | -1 |
| 2800 | 3587  | Dusp11  | MMT00041940   | 1  |
| 2800 | 4950  | Dusp11  | Dnajb10       | 1  |
| 2800 | 6021  | Dusp11  | MMT00008784   | 1  |
| 2800 | 8670  | Dusp11  | MMT00051613   | 1  |
| 2800 | 9258  | Dusp11  | P4ha1         | 1  |
| 2800 | 11043 | Dusp11  | Hsph1         | 1  |
| 2800 | 11214 | Dusp11  | MMT00049207   | 1  |
| 2800 | 12498 | Dusp11  | Abcg8         | -1 |
| 2800 | 15476 | Dusp11  | Fem1b         | -1 |
| 2800 | 15675 | Dusp11  | MMT00077535   | 1  |
| 2800 | 17595 | Dusp11  | MMT00048325   | 1  |
| 2800 | 18373 | Dusp11  | Dnajb1        | 1  |
| 2800 | 19176 | Dusp11  | 2210404J11Rik | -1 |
| 2800 | 20194 | Dusp11  | Pnlcd1        | -1 |
| 2801 | 327   | H2-BI   | H2-Ea         | 1  |
| 2801 | 2325  | H2-BI   | H2-K1         | 1  |
| 2801 | 2938  | H2-BI   | H2-T23        | 1  |
| 2801 | 3857  | H2-BI   | 1700001C19Rik | -1 |
| 2801 | 6360  | H2-BI   | D17H6S56E-3   | -1 |
| 2801 | 9158  | H2-BI   | Pde9a         | -1 |
| 2801 | 10376 | H2-BI   | C920025E04Rik | -1 |
| 2801 | 10667 | H2-BI   | H2-Eb1        | 1  |
| 2801 | 13493 | H2-BI   | Ring1         | -1 |
| 2801 | 18906 | H2-BI   | Zfand3        | 1  |
| 2801 | 20238 | H2-BI   | H2-T9         | 1  |
| 2801 | 20346 | H2-BI   | Gna-rs1       | 1  |
| 2801 | 22822 | H2-BI   | MMT00013433   | 1  |
| 2815 | 2743  | Eif2ak3 | Tcf3          | 1  |

|      |       |               |               |    |
|------|-------|---------------|---------------|----|
| 2815 | 3703  | Eif2ak3       | Ggcx          | 1  |
| 2815 | 11338 | Eif2ak3       | Vamp8         | 1  |
| 2815 | 11872 | Eif2ak3       | Vamp5         | 1  |
| 2815 | 15384 | Eif2ak3       | Mat2a         | 1  |
| 2815 | 15708 | Eif2ak3       | Retsat        | 1  |
| 2815 | 16670 | Eif2ak3       | Csmd2         | -1 |
| 2819 | 3208  | Kcnk5         | 4930511111Rik | 1  |
| 2819 | 7436  | Kcnk5         | 1700063K16Rik | 1  |
| 2819 | 11966 | Kcnk5         | Zfp280b       | 1  |
| 2819 | 12861 | Kcnk5         | Rhcg          | 1  |
| 2819 | 19436 | Kcnk5         | Dapp1         | 1  |
| 2830 | 676   | 4632417K18Rik | Ms4a4d        | 1  |
| 2830 | 11812 | 4632417K18Rik | Mrpl16        | 1  |
| 2830 | 17447 | 4632417K18Rik | Ctsf          | 1  |
| 2832 | 1745  | 2810021J22Rik | Gas7          | -1 |
| 2870 | 12861 | D5Erd577e     | Rhcg          | 1  |
| 2880 | 250   | Cd93          | Tubb2a-ps2    | 1  |
| 2880 | 407   | Cd93          | Serpina6      | -1 |
| 2880 | 609   | Cd93          | MMT00060868   | 1  |
| 2880 | 719   | Cd93          | Usp2          | -1 |
| 2880 | 2110  | Cd93          | Gtf2ird1      | 1  |
| 2880 | 2399  | Cd93          | MMT00060167   | 1  |
| 2880 | 2829  | Cd93          | Lrln3         | 1  |
| 2880 | 2850  | Cd93          | Slc16a6       | 1  |
| 2880 | 3214  | Cd93          | Dnmt3b        | 1  |
| 2880 | 3410  | Cd93          | Paqr9         | 1  |
| 2880 | 5183  | Cd93          | St5           | 1  |
| 2880 | 5374  | Cd93          | Chka          | 1  |
| 2880 | 5804  | Cd93          | Thrsp         | -1 |
| 2880 | 5849  | Cd93          | 2310031A18Rik | 1  |
| 2880 | 6386  | Cd93          | Por           | -1 |
| 2880 | 6756  | Cd93          | Sds           | -1 |
| 2880 | 8328  | Cd93          | Klhdc8a       | 1  |
| 2880 | 8428  | Cd93          | Sorbs3        | -1 |
| 2880 | 10207 | Cd93          | MMT00012324   | 1  |
| 2880 | 10775 | Cd93          | Slc16a1       | 1  |
| 2880 | 11599 | Cd93          | Coq10b        | -1 |
| 2880 | 11741 | Cd93          | Slc30a10      | 1  |
| 2880 | 12799 | Cd93          | Spon2         | 1  |
| 2880 | 14462 | Cd93          | Zfp385b       | -1 |
| 2880 | 15631 | Cd93          | Lpin1         | -1 |
| 2880 | 16580 | Cd93          | Tnfaip2       | 1  |
| 2880 | 16851 | Cd93          | Slc34a2       | 1  |
| 2880 | 17247 | Cd93          | A030007L17Rik | 1  |
| 2880 | 17622 | Cd93          | Foxo1         | -1 |
| 2880 | 17876 | Cd93          | Tubb4         | 1  |
| 2880 | 18027 | Cd93          | 5730403B10Rik | -1 |
| 2880 | 18179 | Cd93          | Dbp           | -1 |
| 2880 | 19025 | Cd93          | Slc37a4       | -1 |
| 2880 | 19466 | Cd93          | Pptc7         | -1 |
| 2880 | 19671 | Cd93          | Upp2          | -1 |
| 2880 | 19790 | Cd93          | Polg2         | -1 |
| 2880 | 21142 | Cd93          | Gm129         | -1 |
| 2880 | 21918 | Cd93          | Snx24         | 1  |
| 2880 | 22290 | Cd93          | Tubb2a        | 1  |
| 2880 | 22630 | Cd93          | MMT00034355   | 1  |
| 2883 | 2902  | MMT00048540   | D4Erd196e     | -1 |
| 2883 | 3616  | MMT00048540   | Dnajc16       | 1  |
| 2883 | 8610  | MMT00048540   | Padi4         | 1  |
| 2902 | 2902  | D4Erd196e     | D4Erd196e     | 1  |
| 2902 | 10407 | D4Erd196e     | Gpatch3       | 1  |
| 2902 | 16287 | D4Erd196e     | Extl1         | 1  |
| 2915 | 7610  | Nfs1          | Scand1        | 1  |
| 2938 | 327   | H2-T23        | H2-Ea         | 1  |
| 2938 | 763   | H2-T23        | 4933406E20Rik | 1  |
| 2938 | 2325  | H2-T23        | H2-K1         | 1  |
| 2938 | 2801  | H2-T23        | H2-BI         | 1  |
| 2938 | 2938  | H2-T23        | H2-T23        | 1  |
| 2938 | 3599  | H2-T23        | MMT00035426   | -1 |

|      |       |               |               |    |
|------|-------|---------------|---------------|----|
| 2938 | 3704  | H2-T23        | H2-Q7         | 1  |
| 2938 | 3857  | H2-T23        | 1700001C19Rik | -1 |
| 2938 | 4004  | H2-T23        | Thbs2         | -1 |
| 2938 | 5410  | H2-T23        | Cyp4f15       | -1 |
| 2938 | 6360  | H2-T23        | D17H6S56E-3   | -1 |
| 2938 | 7088  | H2-T23        | Slc37a1       | 1  |
| 2938 | 8750  | H2-T23        | 1700010I14Rik | 1  |
| 2938 | 8767  | H2-T23        | Rgl2          | 1  |
| 2938 | 9158  | H2-T23        | Pde9a         | -1 |
| 2938 | 10376 | H2-T23        | C920025E04Rik | -1 |
| 2938 | 10394 | H2-T23        | MMT00028435   | 1  |
| 2938 | 10667 | H2-T23        | H2-Eb1        | 1  |
| 2938 | 12335 | H2-T23        | Plcb4         | 1  |
| 2938 | 12355 | H2-T23        | Al507611      | 1  |
| 2938 | 12694 | H2-T23        | Riok2         | -1 |
| 2938 | 13493 | H2-T23        | Ring1         | -1 |
| 2938 | 13789 | H2-T23        | H2-Q8         | 1  |
| 2938 | 16692 | H2-T23        | Bat4          | 1  |
| 2938 | 17691 | H2-T23        | Kank3         | 1  |
| 2938 | 18577 | H2-T23        | Bitbd9        | -1 |
| 2938 | 18906 | H2-T23        | Zfand3        | 1  |
| 2938 | 20238 | H2-T23        | H2-T9         | 1  |
| 2938 | 20346 | H2-T23        | Gna-rs1       | 1  |
| 2938 | 20421 | H2-T23        | Cdkn2c        | 1  |
| 2938 | 22822 | H2-T23        | MMT00013433   | 1  |
| 2938 | 23250 | H2-T23        | Plcl2         | 1  |
| 2938 | 23401 | H2-T23        | H2-Q2         | 1  |
| 2945 | 2945  | MMT00005190   | MMT00005190   | 1  |
| 2945 | 5014  | MMT00005190   | MMT00017503   | 1  |
| 2945 | 8341  | MMT00005190   | MMT00017270   | 1  |
| 2945 | 14924 | MMT00005190   | Hn1l          | -1 |
| 2965 | 14215 | Fgf15         | Rab5a         | 1  |
| 2980 | 2980  | Slc37a2       | Slc37a2       | 1  |
| 2980 | 20468 | Slc37a2       | Spa17         | 1  |
| 3016 | 4805  | Bsdc1         | Hspb1         | -1 |
| 3016 | 6021  | Bsdc1         | MMT00008784   | -1 |
| 3016 | 7211  | Bsdc1         | 2410014A08Rik | -1 |
| 3016 | 7416  | Bsdc1         | 6430548M08Rik | -1 |
| 3016 | 8021  | Bsdc1         | 1600002K03Rik | -1 |
| 3016 | 8314  | Bsdc1         | Armc6         | -1 |
| 3016 | 8486  | Bsdc1         | Plod3         | -1 |
| 3016 | 8670  | Bsdc1         | MMT00051613   | -1 |
| 3016 | 9570  | Bsdc1         | Creld1        | -1 |
| 3016 | 10824 | Bsdc1         | Vegfa         | -1 |
| 3016 | 11043 | Bsdc1         | Hsph1         | -1 |
| 3016 | 11208 | Bsdc1         | Hspb1         | -1 |
| 3016 | 11214 | Bsdc1         | MMT00049207   | -1 |
| 3016 | 13521 | Bsdc1         | Ears2         | -1 |
| 3016 | 14222 | Bsdc1         | MMT00076410   | 1  |
| 3016 | 14249 | Bsdc1         | Lzts2         | -1 |
| 3016 | 15476 | Bsdc1         | Fem1b         | 1  |
| 3016 | 15675 | Bsdc1         | MMT00077535   | -1 |
| 3016 | 15713 | Bsdc1         | Rbm3          | 1  |
| 3016 | 16585 | Bsdc1         | Syvn1         | -1 |
| 3016 | 17595 | Bsdc1         | MMT00048325   | -1 |
| 3016 | 18065 | Bsdc1         | Peo1          | -1 |
| 3016 | 19317 | Bsdc1         | EG626952      | 1  |
| 3016 | 20194 | Bsdc1         | Pnlcd1        | 1  |
| 3016 | 22139 | Bsdc1         | Stip1         | -1 |
| 3016 | 22710 | Bsdc1         | MMT00075201   | -1 |
| 3017 | 21331 | Fas           | Slc10a6       | 1  |
| 3021 | 3021  | Gdf9          | Gdf9          | 1  |
| 3029 | 20147 | Ybx1          | Ybx1          | -1 |
| 3029 | 20548 | Ybx1          | 1700041C02Rik | 1  |
| 3041 | 3587  | 2410004A20Rik | MMT00041940   | 1  |
| 3041 | 6021  | 2410004A20Rik | MMT00008784   | 1  |
| 3041 | 8670  | 2410004A20Rik | MMT00051613   | 1  |
| 3041 | 11214 | 2410004A20Rik | MMT00049207   | 1  |
| 3041 | 15476 | 2410004A20Rik | Fem1b         | -1 |

|      |       |               |                    |    |
|------|-------|---------------|--------------------|----|
| 3041 | 15675 | 2410004A20Rik | MMT00077535        | 1  |
| 3041 | 16251 | 2410004A20Rik | G6pc               | 1  |
| 3041 | 20535 | 2410004A20Rik | Rbm4               | 1  |
| 3043 | 20902 | Otop1         | Itln1              | -1 |
| 3052 | 1755  | 9130404D08Rik | Ocel1              | -1 |
| 3052 | 2671  | 9130404D08Rik | Sh3rf1             | 1  |
| 3052 | 2703  | 9130404D08Rik | MMT00073763        | -1 |
| 3052 | 2749  | 9130404D08Rik | Naf1               | 1  |
| 3052 | 3055  | 9130404D08Rik | Pde4c              | -1 |
| 3052 | 9304  | 9130404D08Rik | Al449175           | -1 |
| 3052 | 9931  | 9130404D08Rik | Glt25d1            | 1  |
| 3052 | 10195 | 9130404D08Rik | Klf1               | -1 |
| 3052 | 13732 | 9130404D08Rik | Tpm4               | 1  |
| 3052 | 15455 | 9130404D08Rik | Lsm4               | 1  |
| 3052 | 16617 | 9130404D08Rik | Sh2d4a             | 1  |
| 3052 | 16849 | 9130404D08Rik | Trmt1              | 1  |
| 3052 | 18886 | 9130404D08Rik | Slc18a1            | 1  |
| 3052 | 20484 | 9130404D08Rik | Ces1               | 1  |
| 3067 | 11966 | Ucp3          | Zfp280b            | 1  |
| 3067 | 19436 | Ucp3          | Dapp1              | 1  |
| 3078 | 19964 | 9630033F20Rik | Ndufa9             | 1  |
| 3079 | 12055 | Gstt3         | 1810008A18Rik      | 1  |
| 3079 | 22222 | Gstt3         | Gstt1              | 1  |
| 3080 | 19436 | MMT00014480   | Dapp1              | 1  |
| 3127 | 3208  | Plcd1         | 4930511111Rik      | 1  |
| 3127 | 5694  | Plcd1         | Sp7                | 1  |
| 3127 | 11966 | Plcd1         | Zfp280b            | 1  |
| 3127 | 19436 | Plcd1         | Dapp1              | 1  |
| 3144 | 11966 | Ube2j2        | Zfp280b            | 1  |
| 3144 | 12861 | Ube2j2        | Rhcg               | 1  |
| 3144 | 19436 | Ube2j2        | Dapp1              | 1  |
| 3156 | 22740 | Usp13         | Manbal             | -1 |
| 3159 | 3159  | Pld1          | Pld1               | 1  |
| 3159 | 3206  | Pld1          | Gpr160             | 1  |
| 3159 | 5822  | Pld1          | Car2               | 1  |
| 3159 | 5938  | Pld1          | Pfn2               | 1  |
| 3159 | 8568  | Pld1          | Tnik               | 1  |
| 3159 | 12367 | Pld1          | MMT00072365        | -1 |
| 3159 | 12784 | Pld1          | Nudt6              | 1  |
| 3159 | 13423 | Pld1          | ENSMUSG00000053749 | 1  |
| 3159 | 15508 | Pld1          | 4632415L05Rik      | 1  |
| 3159 | 16416 | Pld1          | Commd2             | 1  |
| 3159 | 18790 | Pld1          | Car3               | 1  |
| 3159 | 21323 | Pld1          | MMT00074228        | 1  |
| 3163 | 19436 | MMT00039919   | Dapp1              | 1  |
| 3164 | 16361 | Hsd11b1       | Olfir703           | -1 |
| 3166 | 11966 | Vmn2r57       | Zfp280b            | 1  |
| 3166 | 19436 | Vmn2r57       | Dapp1              | 1  |
| 3166 | 22125 | Vmn2r57       | Gab1               | 1  |
| 3195 | 1041  | Mypn          | 3110049J23Rik      | 1  |
| 3195 | 5965  | Mypn          | Pbld               | 1  |
| 3195 | 13688 | Mypn          | Ppa1               | 1  |
| 3195 | 15971 | Mypn          | Aifm2              | 1  |
| 3195 | 22146 | Mypn          | Aifm2              | 1  |
| 3206 | 5938  | Gpr160        | Pfn2               | 1  |
| 3206 | 12367 | Gpr160        | MMT00072365        | -1 |
| 3206 | 16416 | Gpr160        | Commd2             | 1  |
| 3208 | 3208  | 4930511111Rik | 4930511111Rik      | 1  |
| 3208 | 7436  | 4930511111Rik | 1700063K16Rik      | 1  |
| 3208 | 11966 | 4930511111Rik | Zfp280b            | 1  |
| 3208 | 12861 | 4930511111Rik | Rhcg               | 1  |
| 3208 | 19436 | 4930511111Rik | Dapp1              | 1  |
| 3208 | 22125 | 4930511111Rik | Gab1               | 1  |
| 3286 | 3286  | Alox5ap       | Alox5ap            | 1  |
| 3293 | 3587  | Nup153        | MMT00041940        | 1  |
| 3293 | 6021  | Nup153        | MMT00008784        | 1  |
| 3293 | 6769  | Nup153        | Banp               | 1  |
| 3293 | 8319  | Nup153        | MMT00062477        | 1  |
| 3293 | 8670  | Nup153        | MMT00051613        | 1  |

|      |       |               |                    |    |
|------|-------|---------------|--------------------|----|
| 3293 | 11214 | Nup153        | MMT00049207        | 1  |
| 3293 | 15675 | Nup153        | MMT00077535        | 1  |
| 3293 | 18215 | Nup153        | Gpr146             | -1 |
| 3293 | 18373 | Nup153        | Dnajb1             | 1  |
| 3293 | 18418 | Nup153        | Hspa1b             | 1  |
| 3314 | 524   | Wars2         | Hsd3b2             | 1  |
| 3314 | 1466  | Wars2         | Ubap2l             | 1  |
| 3314 | 1867  | Wars2         | Bcas2              | 1  |
| 3314 | 1963  | Wars2         | MMT00039783        | 1  |
| 3314 | 2521  | Wars2         | Olfml3             | 1  |
| 3314 | 2752  | Wars2         | Fcgr1              | 1  |
| 3314 | 3753  | Wars2         | Setdb1             | -1 |
| 3314 | 5938  | Wars2         | Pfn2               | 1  |
| 3314 | 6206  | Wars2         | MMT00063701        | 1  |
| 3314 | 7519  | Wars2         | Gstm1              | 1  |
| 3314 | 7810  | Wars2         | Trim45             | 1  |
| 3314 | 8738  | Wars2         | Reg4               | -1 |
| 3314 | 10521 | Wars2         | Ttf2               | 1  |
| 3314 | 10681 | Wars2         | Dgkz               | -1 |
| 3314 | 11121 | Wars2         | Mttr11             | -1 |
| 3314 | 11611 | Wars2         | S100a13            | -1 |
| 3314 | 12367 | Wars2         | MMT00072365        | -1 |
| 3314 | 13134 | Wars2         | Lipg               | -1 |
| 3314 | 16416 | Wars2         | Commd2             | 1  |
| 3314 | 16679 | Wars2         | Ctsk               | -1 |
| 3314 | 16753 | Wars2         | Hfe2               | -1 |
| 3314 | 18754 | Wars2         | Rbm8a              | 1  |
| 3314 | 18911 | Wars2         | Selenbp2           | 1  |
| 3314 | 20385 | Wars2         | Chd1l              | 1  |
| 3314 | 20661 | Wars2         | Tuft1              | 1  |
| 3314 | 20917 | Wars2         | Gstm6              | -1 |
| 3314 | 21650 | Wars2         | Ap4b1              | 1  |
| 3314 | 21814 | Wars2         | Accn5              | 1  |
| 3314 | 22202 | Wars2         | OTTMUSG00000021274 | -1 |
| 3314 | 22570 | Wars2         | Phf1               | 1  |
| 3314 | 23457 | Wars2         | Selenbp2           | 1  |
| 3322 | 6021  | Ofd1          | MMT00008784        | -1 |
| 3322 | 8670  | Ofd1          | MMT00051613        | -1 |
| 3322 | 15675 | Ofd1          | MMT00077535        | -1 |
| 3322 | 22139 | Ofd1          | Stip1              | -1 |
| 3325 | 17135 | Plekhj1       | Mum1               | -1 |
| 3349 | 19436 | MMT00043953   | Dapp1              | 1  |
| 3354 | 13648 | Ropn1l        | Dap                | -1 |
| 3362 | 12861 | Fgf8          | Rhcg               | 1  |
| 3362 | 19436 | Fgf8          | Dapp1              | 1  |
| 3365 | 5974  | Tiam2         | Arntl              | 1  |
| 3379 | 19436 | Cdo1          | Dapp1              | 1  |
| 3383 | 19436 | Cd99          | Dapp1              | 1  |
| 3401 | 18300 | BB146404      | Arg1               | 1  |
| 3402 | 11966 | A930018P22Rik | Zfp280b            | 1  |
| 3402 | 19436 | A930018P22Rik | Dapp1              | 1  |
| 3411 | 3411  | Rabl2a        | Rabl2a             | 1  |
| 3411 | 3654  | Rabl2a        | St13               | -1 |
| 3411 | 6804  | Rabl2a        | Cyp2d22            | 1  |
| 3411 | 11503 | Rabl2a        | Rangap1            | 1  |
| 3411 | 12468 | Rabl2a        | Cyp2d13            | 1  |
| 3411 | 19216 | Rabl2a        | Bik                | 1  |
| 3462 | 11379 | Nmnat3        | Dnttip1            | 1  |
| 3462 | 15675 | Nmnat3        | MMT00077535        | -1 |
| 3475 | 3475  | 2610305D13Rik | 2610305D13Rik      | 1  |
| 3475 | 3616  | 2610305D13Rik | Dnajc16            | -1 |
| 3475 | 6191  | 2610305D13Rik | Ddost              | -1 |
| 3475 | 6830  | 2610305D13Rik | Rsc1a1             | -1 |
| 3475 | 18338 | 2610305D13Rik | Akr1e1             | -1 |
| 3475 | 19924 | 2610305D13Rik | Ubiad1             | 1  |
| 3480 | 2456  | Pnp0          | Mrpl10             | -1 |
| 3480 | 12302 | Pnp0          | Cbx1               | -1 |
| 3491 | 11094 | Btn1a1        | Slc17a3            | -1 |
| 3491 | 20759 | Btn1a1        | Slc17a1            | -1 |

|      |       |         |               |    |
|------|-------|---------|---------------|----|
| 3493 | 18706 | Wbp4    | Lect1         | 1  |
| 3511 | 11966 | Rnf182  | Zfp280b       | 1  |
| 3511 | 12861 | Rnf182  | Rhcg          | 1  |
| 3511 | 19436 | Rnf182  | Dapp1         | 1  |
| 3526 | 22841 | Rccd1   | Cib1          | 1  |
| 3542 | 2115  | Atp5j2  | Gpr12         | -1 |
| 3542 | 17676 | Atp5j2  | Amz1          | 1  |
| 3545 | 2571  | Mtrf1l  | Rmnd1         | -1 |
| 3545 | 3744  | Mtrf1l  | Rmnd1         | -1 |
| 3545 | 8786  | Mtrf1l  | Rmnd1         | -1 |
| 3545 | 19115 | Mtrf1l  | Rab32         | -1 |
| 3554 | 11087 | Npas3   | Wnt11         | 1  |
| 3609 | 1755  | Plvap   | Ocel1         | 1  |
| 3609 | 5433  | Plvap   | 2410004L22Rik | -1 |
| 3609 | 9304  | Plvap   | AI449175      | 1  |
| 3609 | 10195 | Plvap   | Klf1          | 1  |
| 3609 | 13732 | Plvap   | Tpm4          | -1 |
| 3609 | 15455 | Plvap   | Lsm4          | -1 |
| 3609 | 16617 | Plvap   | Sh2d4a        | -1 |
| 3609 | 16849 | Plvap   | Trmt1         | -1 |
| 3609 | 18886 | Plvap   | Slc18a1       | -1 |
| 3609 | 20484 | Plvap   | Ces1          | -1 |
| 3620 | 15476 | Bet1    | Fem1b         | -1 |
| 3654 | 3411  | St13    | Rabl2a        | -1 |
| 3654 | 3654  | St13    | St13          | 1  |
| 3654 | 3799  | St13    | Serpinh1      | 1  |
| 3654 | 5910  | St13    | 1110014J01Rik | -1 |
| 3654 | 6804  | St13    | Cyp2d22       | -1 |
| 3654 | 8653  | St13    | AW124722      | 1  |
| 3654 | 9822  | St13    | Celsr1        | -1 |
| 3654 | 10482 | St13    | Mcat          | -1 |
| 3654 | 11503 | St13    | Rangap1       | -1 |
| 3654 | 12468 | St13    | Cyp2d13       | -1 |
| 3654 | 12965 | St13    | Pmm1          | 1  |
| 3654 | 14185 | St13    | Poldip3       | 1  |
| 3654 | 19216 | St13    | Bik           | -1 |
| 3666 | 3587  | Tas1r1  | MMT00041940   | -1 |
| 3666 | 6021  | Tas1r1  | MMT00008784   | -1 |
| 3666 | 8670  | Tas1r1  | MMT00051613   | -1 |
| 3666 | 11214 | Tas1r1  | MMT00049207   | -1 |
| 3666 | 15476 | Tas1r1  | Fem1b         | 1  |
| 3666 | 15675 | Tas1r1  | MMT00077535   | -1 |
| 3666 | 18373 | Tas1r1  | Dnajb1        | -1 |
| 3666 | 18418 | Tas1r1  | Hspa1b        | -1 |
| 3675 | 15911 | Pglyrp4 | Glra4         | -1 |
| 3675 | 16654 | Pglyrp4 | Oas1f         | -1 |
| 3675 | 16658 | Pglyrp4 | MMT00011796   | -1 |
| 3675 | 17702 | Pglyrp4 | Ccdc40        | -1 |
| 3683 | 2200  | Oas2    | BC006779      | 1  |
| 3683 | 2224  | Oas2    | Oas2          | 1  |
| 3683 | 3659  | Oas2    | EG236451      | 1  |
| 3683 | 3683  | Oas2    | Oas2          | 1  |
| 3683 | 4508  | Oas2    | lfit1         | 1  |
| 3683 | 5216  | Oas2    | Spnb5         | 1  |
| 3683 | 5250  | Oas2    | lfit2         | 1  |
| 3683 | 5853  | Oas2    | Trim30        | 1  |
| 3683 | 6595  | Oas2    | Oas1a         | 1  |
| 3683 | 6824  | Oas2    | Irf7          | 1  |
| 3683 | 7316  | Oas2    | Ifi204        | 1  |
| 3683 | 8800  | Oas2    | Rnf213        | 1  |
| 3683 | 9847  | Oas2    | Ifi27         | 1  |
| 3683 | 10109 | Oas2    | Gbp3          | 1  |
| 3683 | 11009 | Oas2    | MMT00008885   | 1  |
| 3683 | 11204 | Oas2    | AI451617      | 1  |
| 3683 | 11265 | Oas2    | Irgm          | 1  |
| 3683 | 12312 | Oas2    | Ms4a6d        | 1  |
| 3683 | 12398 | Oas2    | Ifi44         | 1  |
| 3683 | 12600 | Oas2    | Ifi204        | 1  |
| 3683 | 12969 | Oas2    | Xaf1          | 1  |

|      |       |               |               |    |
|------|-------|---------------|---------------|----|
| 3683 | 13156 | Oas2          | lfit3         | 1  |
| 3683 | 13309 | Oas2          | Tgtp          | 1  |
| 3683 | 13522 | Oas2          | Slfn5         | 1  |
| 3683 | 13654 | Oas2          | Stat1         | 1  |
| 3683 | 14506 | Oas2          | Slc15a3       | 1  |
| 3683 | 14880 | Oas2          | Ms4a4c        | 1  |
| 3683 | 15074 | Oas2          | Usp18         | 1  |
| 3683 | 16572 | Oas2          | D14Ert668e    | 1  |
| 3683 | 18174 | Oas2          | Stat2         | 1  |
| 3683 | 18186 | Oas2          | Parp14        | 1  |
| 3683 | 19738 | Oas2          | Lgals3bp      | 1  |
| 3683 | 20997 | Oas2          | MMT00028135   | 1  |
| 3683 | 21549 | Oas2          | Rtp4          | 1  |
| 3683 | 21824 | Oas2          | 5830443L24Rik | 1  |
| 3683 | 22037 | Oas2          | Oas1g         | 1  |
| 3683 | 23450 | Oas2          | D12Ert647e    | 1  |
| 3698 | 3698  | 1600014C10Rik | 1600014C10Rik | 1  |
| 3698 | 17389 | 1600014C10Rik | Pop4          | -1 |
| 3703 | 2743  | Ggcx          | Tcf3          | 1  |
| 3703 | 3703  | Ggcx          | Ggcx          | 1  |
| 3703 | 4093  | Ggcx          | Akp5          | 1  |
| 3703 | 11338 | Ggcx          | Vamp8         | 1  |
| 3703 | 11872 | Ggcx          | Vamp5         | 1  |
| 3703 | 15384 | Ggcx          | Mat2a         | 1  |
| 3703 | 15708 | Ggcx          | Retsat        | 1  |
| 3703 | 22695 | Ggcx          | Tgoln2        | 1  |
| 3706 | 1281  | 2410002O22Rik | Alkbh3        | -1 |
| 3706 | 3587  | 2410002O22Rik | MMT00041940   | 1  |
| 3706 | 3849  | 2410002O22Rik | MMT00047578   | 1  |
| 3706 | 6021  | 2410002O22Rik | MMT00008784   | 1  |
| 3706 | 8670  | 2410002O22Rik | MMT00051613   | 1  |
| 3706 | 9067  | 2410002O22Rik | Tra2a         | 1  |
| 3706 | 9258  | 2410002O22Rik | P4ha1         | 1  |
| 3706 | 11043 | 2410002O22Rik | Hsph1         | 1  |
| 3706 | 11214 | 2410002O22Rik | MMT00049207   | 1  |
| 3706 | 15476 | 2410002O22Rik | Fem1b         | -1 |
| 3706 | 15675 | 2410002O22Rik | MMT00077535   | 1  |
| 3706 | 18099 | 2410002O22Rik | Nfx1          | -1 |
| 3706 | 18373 | 2410002O22Rik | Dnajb1        | 1  |
| 3706 | 18418 | 2410002O22Rik | Hspa1b        | 1  |
| 3706 | 20194 | 2410002O22Rik | Pnidc1        | -1 |
| 3706 | 20912 | 2410002O22Rik | Chordc1       | 1  |
| 3706 | 21389 | 2410002O22Rik | Odf2          | -1 |
| 3744 | 1135  | Rmnd1         | Akap12        | 1  |
| 3744 | 2571  | Rmnd1         | Rmnd1         | 1  |
| 3744 | 3744  | Rmnd1         | Rmnd1         | 1  |
| 3744 | 8786  | Rmnd1         | Rmnd1         | 1  |
| 3744 | 14169 | Rmnd1         | 1700052N19Rik | -1 |
| 3744 | 18300 | Rmnd1         | Arg1          | -1 |
| 3744 | 19115 | Rmnd1         | Rab32         | 1  |
| 3808 | 9067  | 2010209O12Rik | Tra2a         | -1 |
| 3808 | 9258  | 2010209O12Rik | P4ha1         | -1 |
| 3808 | 11043 | 2010209O12Rik | Hsph1         | -1 |
| 3812 | 2485  | Zfyve26       | Adck1         | -1 |
| 3812 | 6755  | Zfyve26       | Wdr22         | -1 |
| 3812 | 9022  | Zfyve26       | Plek2         | 1  |
| 3812 | 13988 | Zfyve26       | Cntnap2       | -1 |
| 3812 | 20187 | Zfyve26       | Gphn          | 1  |
| 3812 | 22918 | Zfyve26       | MMT00002192   | 1  |
| 3859 | 8750  | Fpr2          | 1700010I14Rik | 1  |
| 3865 | 1336  | Acta1         | MMT00069537   | 1  |
| 3865 | 2243  | Acta1         | Gcsh          | 1  |
| 3865 | 14391 | Acta1         | MMT00017335   | -1 |
| 3865 | 15953 | Acta1         | Acsf3         | -1 |
| 3865 | 21394 | Acta1         | Cdh15         | -1 |
| 3874 | 524   | Slitrk3       | Hsd3b2        | -1 |
| 3874 | 3753  | Slitrk3       | Setdb1        | 1  |
| 3874 | 5938  | Slitrk3       | Pfn2          | -1 |
| 3874 | 6206  | Slitrk3       | MMT00063701   | -1 |

|      |       |               |               |    |
|------|-------|---------------|---------------|----|
| 3874 | 10521 | Slitrk3       | Ttf2          | -1 |
| 3874 | 12250 | Slitrk3       | P2ry14        | -1 |
| 3874 | 12367 | Slitrk3       | MMT00072365   | 1  |
| 3874 | 16416 | Slitrk3       | Comm2         | -1 |
| 3874 | 20661 | Slitrk3       | Tuft1         | -1 |
| 3886 | 19436 | MMT00047275   | Dapp1         | 1  |
| 3889 | 16191 | Wasf3         | Klc1          | -1 |
| 3938 | 10189 | Abt1          | Cage1         | -1 |
| 3938 | 11094 | Abt1          | Slc17a3       | 1  |
| 3938 | 11649 | Abt1          | Hfe           | -1 |
| 3938 | 15698 | Abt1          | Them2         | 1  |
| 3938 | 20759 | Abt1          | Slc17a1       | 1  |
| 3938 | 23118 | Abt1          | Ttrap         | 1  |
| 3948 | 11966 | V1rb4         | Zfp280b       | 1  |
| 3948 | 12861 | V1rb4         | Rhcg          | 1  |
| 3948 | 19436 | V1rb4         | Dapp1         | 1  |
| 3956 | 19436 | Psat1         | Dapp1         | 1  |
| 3970 | 4837  | 4931414P19Rik | Ear2          | 1  |
| 3970 | 13617 | 4931414P19Rik | Acin1         | 1  |
| 3986 | 3208  | Ep400         | 4930511111Rik | 1  |
| 3986 | 5694  | Ep400         | Sp7           | 1  |
| 3986 | 7436  | Ep400         | 1700063K16Rik | 1  |
| 3986 | 9468  | Ep400         | Gtf2a1l       | 1  |
| 3986 | 11966 | Ep400         | Zfp280b       | 1  |
| 3986 | 12861 | Ep400         | Rhcg          | 1  |
| 3986 | 17413 | Ep400         | MMT00043948   | 1  |
| 3986 | 19436 | Ep400         | Dapp1         | 1  |
| 3986 | 19672 | Ep400         | Cldn19        | 1  |
| 3986 | 22125 | Ep400         | Gab1          | 1  |
| 3991 | 22099 | Hoxb9         | Cnot8         | 1  |
| 4038 | 3703  | 1200009O22Rik | Ggcx          | -1 |
| 4038 | 4038  | 1200009O22Rik | 1200009O22Rik | 1  |
| 4038 | 4093  | 1200009O22Rik | Akp5          | -1 |
| 4038 | 18658 | 1200009O22Rik | Gstk1         | -1 |
| 4048 | 3587  | BC002230      | MMT00041940   | -1 |
| 4048 | 6021  | BC002230      | MMT00008784   | -1 |
| 4048 | 6769  | BC002230      | Banp          | -1 |
| 4048 | 8670  | BC002230      | MMT00051613   | -1 |
| 4048 | 11214 | BC002230      | MMT00049207   | -1 |
| 4048 | 15476 | BC002230      | Fem1b         | 1  |
| 4048 | 15675 | BC002230      | MMT00077535   | -1 |
| 4048 | 17224 | BC002230      | 5430407P10Rik | -1 |
| 4048 | 18373 | BC002230      | Dnajb1        | -1 |
| 4048 | 18418 | BC002230      | Hspa1b        | -1 |
| 4079 | 3208  | Emilin3       | 4930511111Rik | 1  |
| 4079 | 5694  | Emilin3       | Sp7           | 1  |
| 4079 | 7436  | Emilin3       | 1700063K16Rik | 1  |
| 4079 | 11966 | Emilin3       | Zfp280b       | 1  |
| 4079 | 12861 | Emilin3       | Rhcg          | 1  |
| 4079 | 19436 | Emilin3       | Dapp1         | 1  |
| 4079 | 19672 | Emilin3       | Cldn19        | 1  |
| 4079 | 22125 | Emilin3       | Gab1          | 1  |
| 4084 | 563   | Asah3l        | D4Bwg0951e    | 1  |
| 4084 | 662   | Asah3l        | Mid1ip1       | -1 |
| 4084 | 1447  | Asah3l        | Naaa          | -1 |
| 4084 | 2294  | Asah3l        | AU040829      | 1  |
| 4084 | 2322  | Asah3l        | Tuba4a        | -1 |
| 4084 | 2794  | Asah3l        | Map3k6        | 1  |
| 4084 | 3040  | Asah3l        | Bcl3          | -1 |
| 4084 | 3559  | Asah3l        | 4933433P14Rik | 1  |
| 4084 | 4084  | Asah3l        | Asah3l        | 1  |
| 4084 | 4235  | Asah3l        | Pkfb3         | 1  |
| 4084 | 4391  | Asah3l        | Zfp467        | -1 |
| 4084 | 4678  | Asah3l        | Kank1         | -1 |
| 4084 | 4708  | Asah3l        | Traf3ip2      | -1 |
| 4084 | 6118  | Asah3l        | Slc1a4        | -1 |
| 4084 | 6393  | Asah3l        | 3110043O21Rik | 1  |
| 4084 | 6490  | Asah3l        | Il1r1         | 1  |
| 4084 | 6564  | Asah3l        | Cebpd         | 1  |



|      |       |             |               |    |
|------|-------|-------------|---------------|----|
| 4084 | 6976  | Asah3l      | Rbm35b        | -1 |
| 4084 | 7140  | Asah3l      | Mtbp          | -1 |
| 4084 | 8399  | Asah3l      | Herpud1       | 1  |
| 4084 | 8639  | Asah3l      | Map1lc3b      | 1  |
| 4084 | 10384 | Asah3l      | Chic2         | 1  |
| 4084 | 10712 | Asah3l      | Fchsd2        | 1  |
| 4084 | 11093 | Asah3l      | Zdhhc1        | 1  |
| 4084 | 11808 | Asah3l      | Pck1          | 1  |
| 4084 | 12761 | Asah3l      | Tsc22d3       | 1  |
| 4084 | 13018 | Asah3l      | AW544981      | -1 |
| 4084 | 13289 | Asah3l      | Dusp10        | -1 |
| 4084 | 13339 | Asah3l      | D630042F21Rik | 1  |
| 4084 | 13471 | Asah3l      | Cln8          | 1  |
| 4084 | 14135 | Asah3l      | Eepd1         | -1 |
| 4084 | 15522 | Asah3l      | 1810011O10Rik | 1  |
| 4084 | 15631 | Asah3l      | Lpin1         | 1  |
| 4084 | 16176 | Asah3l      | St3gal5       | 1  |
| 4084 | 16580 | Asah3l      | Tnfaip2       | -1 |
| 4084 | 17525 | Asah3l      | Ctgf          | 1  |
| 4084 | 17660 | Asah3l      | Nlrp12        | 1  |
| 4084 | 18027 | Asah3l      | 5730403B10Rik | 1  |
| 4084 | 18314 | Asah3l      | 4631416L12Rik | 1  |
| 4084 | 18785 | Asah3l      | Angptl4       | 1  |
| 4084 | 19757 | Asah3l      | Fkbp5         | 1  |
| 4084 | 21331 | Asah3l      | Slc10a6       | 1  |
| 4084 | 22873 | Asah3l      | Slc38a2       | 1  |
| 4084 | 23201 | Asah3l      | S1pr1         | -1 |
| 4088 | 3208  | Pdcl2       | 4930511111Rik | 1  |
| 4088 | 7436  | Pdcl2       | 1700063K16Rik | 1  |
| 4088 | 11966 | Pdcl2       | Zfp280b       | 1  |
| 4088 | 12861 | Pdcl2       | Rhcg          | 1  |
| 4088 | 19436 | Pdcl2       | Dapp1         | 1  |
| 4088 | 19672 | Pdcl2       | Cldn19        | 1  |
| 4093 | 18018 | Akp5        | Galnt11       | 1  |
| 4105 | 18420 | Speer5-ps1  | Igh           | 1  |
| 4106 | 10769 | MMT00041409 | Hnrnpd        | 1  |
| 4107 | 13296 | MMT00068618 | Aim1          | 1  |
| 4139 | 4938  | Sh2d5       | Mccc2         | 1  |
| 4139 | 8967  | Sh2d5       | Acot12        | -1 |
| 4139 | 16214 | Sh2d5       | Ocln          | -1 |
| 4139 | 18492 | Sh2d5       | Dhfr          | -1 |
| 4152 | 6490  | Lrrc33      | Il1r1         | 1  |
| 4166 | 11966 | Cbcl        | Zfp280b       | 1  |
| 4166 | 12861 | Cbcl        | Rhcg          | 1  |
| 4166 | 19436 | Cbcl        | Dapp1         | 1  |
| 4173 | 19436 | MMT00008170 | Dapp1         | 1  |
| 4191 | 4191  | Fbln2       | Fbln2         | 1  |
| 4192 | 3587  | Zranb1      | MMT00041940   | -1 |
| 4192 | 4966  | Zranb1      | Zscan20       | -1 |
| 4192 | 6021  | Zranb1      | MMT00008784   | -1 |
| 4192 | 8670  | Zranb1      | MMT00051613   | -1 |
| 4192 | 9258  | Zranb1      | P4ha1         | -1 |
| 4192 | 10769 | Zranb1      | Hnrnpd        | 1  |
| 4192 | 11043 | Zranb1      | Hsph1         | -1 |
| 4192 | 11214 | Zranb1      | MMT00049207   | -1 |
| 4192 | 15675 | Zranb1      | MMT00077535   | -1 |
| 4192 | 18373 | Zranb1      | Dnajb1        | -1 |
| 4192 | 18418 | Zranb1      | Hspa1b        | -1 |
| 4195 | 6231  | Csrp2bp     | 9030622O22Rik | -1 |
| 4199 | 3208  | B3galt5     | 4930511111Rik | 1  |
| 4199 | 7436  | B3galt5     | 1700063K16Rik | 1  |
| 4199 | 11966 | B3galt5     | Zfp280b       | 1  |
| 4199 | 12861 | B3galt5     | Rhcg          | 1  |
| 4199 | 19436 | B3galt5     | Dapp1         | 1  |
| 4235 | 7619  | Pfkfb3      | Pik3ip1       | -1 |
| 4246 | 11966 | Fbxw12      | Zfp280b       | 1  |
| 4246 | 19436 | Fbxw12      | Dapp1         | 1  |
| 4272 | 13810 | Hsd17b6     | 1110036O03Rik | 1  |
| 4272 | 14384 | Hsd17b6     | Dnajc7        | 1  |

|      |       |               |               |    |
|------|-------|---------------|---------------|----|
| 4305 | 2533  | Tmem51        | Arhgef19      | 1  |
| 4305 | 3616  | Tmem51        | Dnajc16       | -1 |
| 4305 | 6830  | Tmem51        | Rsc1a1        | -1 |
| 4305 | 7307  | Tmem51        | Agmat         | -1 |
| 4308 | 6021  | Nphp3         | MMT00008784   | -1 |
| 4308 | 6769  | Nphp3         | Banp          | -1 |
| 4308 | 8670  | Nphp3         | MMT00051613   | -1 |
| 4308 | 11214 | Nphp3         | MMT00049207   | -1 |
| 4308 | 15476 | Nphp3         | Fem1b         | 1  |
| 4308 | 15675 | Nphp3         | MMT00077535   | -1 |
| 4308 | 18083 | Nphp3         | Gadd45a       | 1  |
| 4308 | 18373 | Nphp3         | Dnajb1        | -1 |
| 4308 | 18418 | Nphp3         | Hspa1b        | -1 |
| 4308 | 20535 | Nphp3         | Rbm4          | -1 |
| 4311 | 663   | MMT00033987   | Muc19         | 1  |
| 4311 | 10055 | MMT00033987   | Tpte          | 1  |
| 4311 | 11966 | MMT00033987   | Zfp280b       | 1  |
| 4311 | 12861 | MMT00033987   | Rhcg          | 1  |
| 4311 | 19436 | MMT00033987   | Dapp1         | 1  |
| 4337 | 3208  | Myst3         | 4930511111Rik | 1  |
| 4337 | 11966 | Myst3         | Zfp280b       | 1  |
| 4337 | 12861 | Myst3         | Rhcg          | 1  |
| 4337 | 19436 | Myst3         | Dapp1         | 1  |
| 4346 | 3587  | Ccdc46        | MMT00041940   | 1  |
| 4346 | 6021  | Ccdc46        | MMT00008784   | 1  |
| 4346 | 6126  | Ccdc46        | MMT00067575   | 1  |
| 4346 | 8319  | Ccdc46        | MMT00062477   | 1  |
| 4346 | 8670  | Ccdc46        | MMT00051613   | 1  |
| 4346 | 9258  | Ccdc46        | P4ha1         | 1  |
| 4346 | 9680  | Ccdc46        | Ahsa1         | 1  |
| 4346 | 9899  | Ccdc46        | D13Wsu177e    | 1  |
| 4346 | 11043 | Ccdc46        | Hsph1         | 1  |
| 4346 | 11214 | Ccdc46        | MMT00049207   | 1  |
| 4346 | 14135 | Ccdc46        | Eepd1         | -1 |
| 4346 | 14298 | Ccdc46        | Atp2a2        | 1  |
| 4346 | 15675 | Ccdc46        | MMT00077535   | 1  |
| 4346 | 18373 | Ccdc46        | Dnajb1        | 1  |
| 4346 | 18418 | Ccdc46        | Hspa1b        | 1  |
| 4346 | 20535 | Ccdc46        | Rbm4          | 1  |
| 4346 | 20912 | Ccdc46        | Chordc1       | 1  |
| 4363 | 16251 | 2810002104Rik | G6pc          | 1  |
| 4363 | 18083 | 2810002104Rik | Gadd45a       | -1 |
| 4363 | 18373 | 2810002104Rik | Dnajb1        | 1  |
| 4363 | 18903 | 2810002104Rik | Crem          | 1  |
| 4365 | 21547 | Tapbp         | Il10          | -1 |
| 4407 | 3208  | 4930429B21Rik | 4930511111Rik | 1  |
| 4407 | 5694  | 4930429B21Rik | Sp7           | 1  |
| 4407 | 7436  | 4930429B21Rik | 1700063K16Rik | 1  |
| 4407 | 11966 | 4930429B21Rik | Zfp280b       | 1  |
| 4407 | 12861 | 4930429B21Rik | Rhcg          | 1  |
| 4407 | 19436 | 4930429B21Rik | Dapp1         | 1  |
| 4407 | 19672 | 4930429B21Rik | Cldn19        | 1  |
| 4407 | 22125 | 4930429B21Rik | Gab1          | 1  |
| 4414 | 16191 | 5033406O09Rik | Klc1          | -1 |
| 4425 | 19436 | Olf1346       | Dapp1         | 1  |
| 4426 | 2224  | ligp2         | Oasl2         | 1  |
| 4426 | 3683  | ligp2         | Oas2          | 1  |
| 4426 | 12398 | ligp2         | Ifi44         | 1  |
| 4426 | 15074 | ligp2         | Usp18         | 1  |
| 4426 | 18174 | ligp2         | Stat2         | 1  |
| 4426 | 20997 | ligp2         | MMT00028135   | 1  |
| 4426 | 21549 | ligp2         | Rtp4          | 1  |
| 4428 | 16035 | Pri8a8        | Chd8          | 1  |
| 4430 | 11966 | Ankrd36       | Zfp280b       | 1  |
| 4430 | 19436 | Ankrd36       | Dapp1         | 1  |
| 4443 | 575   | Zfp790        | Edn1          | -1 |
| 4443 | 3587  | Zfp790        | MMT00041940   | 1  |
| 4443 | 6021  | Zfp790        | MMT00008784   | 1  |
| 4443 | 8670  | Zfp790        | MMT00051613   | 1  |

|      |       |             |               |    |
|------|-------|-------------|---------------|----|
| 4443 | 10267 | Zfp790      | Setdb2        | -1 |
| 4443 | 11214 | Zfp790      | MMT00049207   | 1  |
| 4443 | 11697 | Zfp790      | Rasl2-9       | -1 |
| 4443 | 14785 | Zfp790      | F3            | -1 |
| 4443 | 14859 | Zfp790      | Hspa1a        | 1  |
| 4443 | 15476 | Zfp790      | Fem1b         | -1 |
| 4443 | 15675 | Zfp790      | MMT00077535   | 1  |
| 4443 | 15826 | Zfp790      | Arl4d         | 1  |
| 4443 | 16251 | Zfp790      | G6pc          | 1  |
| 4443 | 16517 | Zfp790      | D4Wsu53e      | 1  |
| 4443 | 17224 | Zfp790      | 5430407P10Rik | 1  |
| 4443 | 18083 | Zfp790      | Gadd45a       | -1 |
| 4443 | 18373 | Zfp790      | Dnajb1        | 1  |
| 4443 | 18418 | Zfp790      | Hspa1b        | 1  |
| 4443 | 19528 | Zfp790      | Zfp503        | -1 |
| 4443 | 21229 | Zfp790      | Acss1         | -1 |
| 4443 | 21389 | Zfp790      | Odf2          | -1 |
| 4443 | 22272 | Zfp790      | Vpreb1        | 1  |
| 4443 | 23527 | Zfp790      | MMT00021936   | 1  |
| 4444 | 19436 | Ksr2        | Dapp1         | 1  |
| 4454 | 4286  | BC055107    | Ptp4a1        | 1  |
| 4454 | 11129 | BC055107    | Ankhd1        | 1  |
| 4454 | 16176 | BC055107    | St3gal5       | 1  |
| 4454 | 16647 | BC055107    | D16H22S680E   | 1  |
| 4454 | 19466 | BC055107    | Pptc7         | 1  |
| 4480 | 16035 | Bahcc1      | Chd8          | 1  |
| 4480 | 17144 | Bahcc1      | B3gat2        | 1  |
| 4480 | 19186 | Bahcc1      | Pla2g4c       | 1  |
| 4480 | 19564 | Bahcc1      | Bcam          | 1  |
| 4480 | 21859 | Bahcc1      | Fancg         | 1  |
| 4523 | 737   | Ptpu        | MMT00023716   | -1 |
| 4523 | 6857  | Ptpu        | Serinc2       | 1  |
| 4532 | 12173 | BC034090    | Acdb6         | 1  |
| 4555 | 327   | Cchr1       | H2-Ea         | 1  |
| 4555 | 2325  | Cchr1       | H2-K1         | 1  |
| 4555 | 2938  | Cchr1       | H2-T23        | 1  |
| 4555 | 3857  | Cchr1       | 1700001C19Rik | -1 |
| 4555 | 10667 | Cchr1       | H2-Eb1        | 1  |
| 4555 | 13493 | Cchr1       | Ring1         | -1 |
| 4555 | 20238 | Cchr1       | H2-T9         | 1  |
| 4555 | 22822 | Cchr1       | MMT00013433   | 1  |
| 4566 | 4203  | MMT00078134 | Fermt2        | -1 |
| 4566 | 4837  | MMT00078134 | Ear2          | -1 |
| 4566 | 6587  | MMT00078134 | Irf9          | 1  |
| 4566 | 10711 | MMT00078134 | 1700108F19Rik | -1 |
| 4566 | 12280 | MMT00078134 | Cln5          | 1  |
| 4566 | 13617 | MMT00078134 | Acin1         | -1 |
| 4612 | 499   | Hspa5       | 2310057J16Rik | 1  |
| 4612 | 1280  | Hspa5       | Mesdc2        | 1  |
| 4612 | 1663  | Hspa5       | Fkbp4         | 1  |
| 4612 | 1849  | Hspa5       | MMT00063181   | 1  |
| 4612 | 2329  | Hspa5       | Wdr6          | -1 |
| 4612 | 3587  | Hspa5       | MMT00041940   | 1  |
| 4612 | 3799  | Hspa5       | Serpinh1      | 1  |
| 4612 | 3913  | Hspa5       | Mrpl15        | 1  |
| 4612 | 4612  | Hspa5       | Hspa5         | 1  |
| 4612 | 4950  | Hspa5       | Dnajb10       | 1  |
| 4612 | 6021  | Hspa5       | MMT00008784   | 1  |
| 4612 | 6126  | Hspa5       | MMT00067575   | 1  |
| 4612 | 6218  | Hspa5       | Hnrnpc        | 1  |
| 4612 | 6234  | Hspa5       | P4ha2         | 1  |
| 4612 | 7731  | Hspa5       | 1500001M20Rik | -1 |
| 4612 | 7798  | Hspa5       | MMT00077178   | 1  |
| 4612 | 8319  | Hspa5       | MMT00062477   | 1  |
| 4612 | 8670  | Hspa5       | MMT00051613   | 1  |
| 4612 | 8891  | Hspa5       | MMT00071061   | 1  |
| 4612 | 9067  | Hspa5       | Tra2a         | 1  |
| 4612 | 9224  | Hspa5       | MMT00013510   | 1  |
| 4612 | 9258  | Hspa5       | P4ha1         | 1  |

|      |       |               |                    |    |
|------|-------|---------------|--------------------|----|
| 4612 | 9279  | Hspa5         | MMT00066808        | 1  |
| 4612 | 9285  | Hspa5         | Mtcp1              | 1  |
| 4612 | 9513  | Hspa5         | Tardbp             | 1  |
| 4612 | 9680  | Hspa5         | Ahsa1              | 1  |
| 4612 | 11043 | Hspa5         | Hsph1              | 1  |
| 4612 | 11214 | Hspa5         | MMT00049207        | 1  |
| 4612 | 11818 | Hspa5         | MMT00048396        | 1  |
| 4612 | 12498 | Hspa5         | Abcg8              | -1 |
| 4612 | 13521 | Hspa5         | Ears2              | 1  |
| 4612 | 13741 | Hspa5         | Hspa4l             | 1  |
| 4612 | 14014 | Hspa5         | MMT00008376        | 1  |
| 4612 | 14227 | Hspa5         | Lrrc39             | -1 |
| 4612 | 15675 | Hspa5         | MMT00077535        | 1  |
| 4612 | 16299 | Hspa5         | Creld2             | 1  |
| 4612 | 16327 | Hspa5         | Ubfd1              | 1  |
| 4612 | 16754 | Hspa5         | Hsp90aa1           | 1  |
| 4612 | 17595 | Hspa5         | MMT00048325        | 1  |
| 4612 | 18099 | Hspa5         | Nfx1               | -1 |
| 4612 | 19453 | Hspa5         | Cdk2ap2            | 1  |
| 4612 | 20194 | Hspa5         | Pnlcd1             | -1 |
| 4612 | 20332 | Hspa5         | Stau2              | -1 |
| 4612 | 22139 | Hspa5         | Stip1              | 1  |
| 4612 | 23646 | Hspa5         | Hsp90ab1           | 1  |
| 4626 | 4626  | 2310046K01Rik | 2310046K01Rik      | 1  |
| 4626 | 13581 | 2310046K01Rik | Srxn1              | 1  |
| 4628 | 6157  | MMT00040865   | MMT00041452        | 1  |
| 4665 | 6021  | Dynll1        | MMT00008784        | 1  |
| 4665 | 15675 | Dynll1        | MMT00077535        | 1  |
| 4666 | 5822  | Exosc9        | Car2               | -1 |
| 4666 | 5938  | Exosc9        | Pfn2               | -1 |
| 4666 | 8568  | Exosc9        | Tnik               | -1 |
| 4666 | 12367 | Exosc9        | MMT00072365        | 1  |
| 4666 | 12784 | Exosc9        | Nudt6              | -1 |
| 4666 | 13423 | Exosc9        | ENSMUSG00000053749 | -1 |
| 4666 | 15508 | Exosc9        | 4632415L05Rik      | -1 |
| 4666 | 16416 | Exosc9        | Commd2             | -1 |
| 4674 | 12981 | Cxcl12        | Nek6               | 1  |
| 4674 | 18027 | Cxcl12        | 5730403B10Rik      | -1 |
| 4674 | 19025 | Cxcl12        | Slc37a4            | -1 |
| 4717 | 19436 | Cd177         | Dapp1              | 1  |
| 4719 | 20092 | Col2a1        | Matr3              | 1  |
| 4729 | 1985  | Slc7a10       | Pepd               | 1  |
| 4729 | 2599  | Slc7a10       | Lsm14a             | -1 |
| 4729 | 4697  | Slc7a10       | Cyp2a12            | 1  |
| 4729 | 6513  | Slc7a10       | Qpctl              | -1 |
| 4729 | 7761  | Slc7a10       | Nudt19             | -1 |
| 4729 | 16639 | Slc7a10       | MMT00078937        | 1  |
| 4731 | 3587  | Zmynd12       | MMT00041940        | -1 |
| 4731 | 6021  | Zmynd12       | MMT00008784        | -1 |
| 4731 | 8319  | Zmynd12       | MMT00062477        | -1 |
| 4731 | 8670  | Zmynd12       | MMT00051613        | -1 |
| 4731 | 11043 | Zmynd12       | Hsph1              | -1 |
| 4731 | 11214 | Zmynd12       | MMT00049207        | -1 |
| 4731 | 15675 | Zmynd12       | MMT00077535        | -1 |
| 4731 | 18373 | Zmynd12       | Dnajb1             | -1 |
| 4731 | 20535 | Zmynd12       | Rbm4               | -1 |
| 4731 | 22139 | Zmynd12       | Stip1              | -1 |
| 4737 | 16089 | Olfra449      | 4732474O15Rik      | 1  |
| 4737 | 16654 | Olfra449      | Oas1f              | 1  |
| 4737 | 19201 | Olfra449      | 2210018M11Rik      | 1  |
| 4737 | 19554 | Olfra449      | 6330549D23Rik      | 1  |
| 4778 | 19843 | Cyct          | Rbm45              | -1 |
| 4787 | 7731  | Parn          | 1500001M20Rik      | 1  |
| 4787 | 9258  | Parn          | P4ha1              | -1 |
| 4787 | 11043 | Parn          | Hsph1              | -1 |
| 4787 | 22751 | Parn          | Nosip              | 1  |
| 4805 | 266   | Hspb1         | Nr2f2              | -1 |
| 4805 | 423   | Hspb1         | Klh5               | -1 |
| 4805 | 499   | Hspb1         | 2310057J16Rik      | 1  |

|      |       |               |               |    |
|------|-------|---------------|---------------|----|
| 4805 | 768   | Hspb1         | Samd1         | 1  |
| 4805 | 1039  | Hspb1         | Zfp207        | -1 |
| 4805 | 1383  | Hspb1         | Bhlhb9        | -1 |
| 4805 | 1663  | Hspb1         | Fkbp4         | 1  |
| 4805 | 1849  | Hspb1         | MMT00063181   | 1  |
| 4805 | 1968  | Hspb1         | Nudc          | 1  |
| 4805 | 3054  | Hspb1         | Hnrnpa1       | -1 |
| 4805 | 3059  | Hspb1         | Tctex1d2      | -1 |
| 4805 | 3587  | Hspb1         | MMT00041940   | 1  |
| 4805 | 3799  | Hspb1         | Serpinh1      | 1  |
| 4805 | 3869  | Hspb1         | Zadh2         | -1 |
| 4805 | 3929  | Hspb1         | Sfrs11        | -1 |
| 4805 | 4805  | Hspb1         | Hspb1         | 1  |
| 4805 | 4950  | Hspb1         | Dnajb10       | 1  |
| 4805 | 5013  | Hspb1         | Fanci1        | -1 |
| 4805 | 5086  | Hspb1         | Ccnh          | -1 |
| 4805 | 6021  | Hspb1         | MMT00008784   | 1  |
| 4805 | 6234  | Hspb1         | P4ha2         | 1  |
| 4805 | 6729  | Hspb1         | Hnrnpa1       | -1 |
| 4805 | 7731  | Hspb1         | 1500001M20Rik | -1 |
| 4805 | 7787  | Hspb1         | MMT00043009   | -1 |
| 4805 | 8021  | Hspb1         | 1600002K03Rik | 1  |
| 4805 | 8486  | Hspb1         | Plod3         | 1  |
| 4805 | 8618  | Hspb1         | EG433865      | -1 |
| 4805 | 8670  | Hspb1         | MMT00051613   | 1  |
| 4805 | 9224  | Hspb1         | MMT00013510   | 1  |
| 4805 | 9258  | Hspb1         | P4ha1         | 1  |
| 4805 | 9570  | Hspb1         | Creld1        | 1  |
| 4805 | 10102 | Hspb1         | Lman2l        | 1  |
| 4805 | 10824 | Hspb1         | Vegfa         | 1  |
| 4805 | 11043 | Hspb1         | Hsph1         | 1  |
| 4805 | 11208 | Hspb1         | Hspb1         | 1  |
| 4805 | 11214 | Hspb1         | MMT00049207   | 1  |
| 4805 | 11818 | Hspb1         | MMT00048396   | 1  |
| 4805 | 11857 | Hspb1         | Arv1          | -1 |
| 4805 | 12040 | Hspb1         | Commd10       | -1 |
| 4805 | 13257 | Hspb1         | Nadk          | 1  |
| 4805 | 13521 | Hspb1         | Ears2         | 1  |
| 4805 | 13884 | Hspb1         | Aven          | 1  |
| 4805 | 14114 | Hspb1         | Ccdc23        | -1 |
| 4805 | 14249 | Hspb1         | Lzts2         | 1  |
| 4805 | 15162 | Hspb1         | Ii18          | -1 |
| 4805 | 15675 | Hspb1         | MMT00077535   | 1  |
| 4805 | 16750 | Hspb1         | Casp6         | -1 |
| 4805 | 17137 | Hspb1         | Nudt4         | 1  |
| 4805 | 17595 | Hspb1         | MMT00048325   | 1  |
| 4805 | 17712 | Hspb1         | Nup62         | 1  |
| 4805 | 18065 | Hspb1         | Peo1          | 1  |
| 4805 | 19176 | Hspb1         | 2210404J11Rik | -1 |
| 4805 | 19540 | Hspb1         | Zfp428        | 1  |
| 4805 | 20332 | Hspb1         | Stau2         | -1 |
| 4805 | 20855 | Hspb1         | Phldb2        | -1 |
| 4805 | 21307 | Hspb1         | Krcc1         | -1 |
| 4805 | 22139 | Hspb1         | Stip1         | 1  |
| 4805 | 22710 | Hspb1         | MMT00075201   | 1  |
| 4805 | 23569 | Hspb1         | Atp5s         | -1 |
| 4805 | 23646 | Hspb1         | Hsp90ab1      | 1  |
| 4810 | 10553 | Vsig8         | Dusp23        | -1 |
| 4849 | 10279 | Zxdc          | Rnf186        | -1 |
| 4849 | 16251 | Zxdc          | G6pc          | 1  |
| 4849 | 18083 | Zxdc          | Gadd45a       | -1 |
| 4850 | 9010  | Fancd2        | 8430419L09Rik | -1 |
| 4864 | 16753 | S100a16       | Hfe2          | 1  |
| 4870 | 19436 | Olf550        | Dapp1         | 1  |
| 4896 | 4896  | 4930405M20Rik | 4930405M20Rik | 1  |
| 4897 | 1956  | Ciao1         | Usp50         | -1 |
| 4897 | 4833  | Ciao1         | Synpo2        | 1  |
| 4897 | 6016  | Ciao1         | A530057A03Rik | -1 |
| 4897 | 6231  | Ciao1         | 9030622O22Rik | -1 |

|      |       |               |               |    |
|------|-------|---------------|---------------|----|
| 4897 | 7991  | Ciao1         | Gpr115        | 1  |
| 4897 | 14740 | Ciao1         | Mfap1b        | 1  |
| 4897 | 17043 | Ciao1         | Tmem127       | -1 |
| 4897 | 21729 | Ciao1         | Hdc           | 1  |
| 4897 | 22857 | Ciao1         | Fahd2a        | -1 |
| 4901 | 4188  | MMT00073557   | Sult1a1       | -1 |
| 4901 | 9655  | MMT00073557   | Sult2b1       | -1 |
| 4901 | 12730 | MMT00073557   | 9130019O22Rik | -1 |
| 4901 | 16598 | MMT00073557   | E430018J23Rik | 1  |
| 4901 | 22361 | MMT00073557   | Sephs2        | -1 |
| 4904 | 9067  | Tinf2         | Tra2a         | -1 |
| 4904 | 9258  | Tinf2         | P4ha1         | -1 |
| 4904 | 20332 | Tinf2         | Stau2         | 1  |
| 4906 | 18373 | A830059I20Rik | Dnajb1        | 1  |
| 4938 | 4938  | Mccc2         | Mccc2         | 1  |
| 4966 | 16251 | Zscan20       | G6pc          | 1  |
| 4973 | 15002 | Grik4         | Ncapg         | 1  |
| 5003 | 8654  | 2410081M15Rik | Fbxl13        | 1  |
| 5010 | 7731  | Gnpda2        | 1500001M20Rik | 1  |
| 5010 | 13052 | Gnpda2        | Tnfrsf19      | 1  |
| 5010 | 14222 | Gnpda2        | MMT00076410   | 1  |
| 5010 | 15713 | Gnpda2        | Rbm3          | 1  |
| 5010 | 17595 | Gnpda2        | MMT00048325   | -1 |
| 5010 | 23646 | Gnpda2        | Hsp90ab1      | -1 |
| 5011 | 3799  | A930016P21Rik | Serpinh1      | 1  |
| 5011 | 7731  | A930016P21Rik | 1500001M20Rik | -1 |
| 5011 | 23646 | A930016P21Rik | Hsp90ab1      | 1  |
| 5014 | 2945  | MMT00017503   | MMT00005190   | 1  |
| 5014 | 5014  | MMT00017503   | MMT00017503   | 1  |
| 5014 | 8341  | MMT00017503   | MMT00017270   | 1  |
| 5014 | 14924 | MMT00017503   | Hn1l          | -1 |
| 5021 | 524   | Gdap2         | Hsd3b2        | -1 |
| 5021 | 1466  | Gdap2         | Ubp2l         | -1 |
| 5021 | 1963  | Gdap2         | MMT00039783   | -1 |
| 5021 | 2521  | Gdap2         | Olfml3        | -1 |
| 5021 | 3753  | Gdap2         | Setdb1        | 1  |
| 5021 | 5114  | Gdap2         | Fbxo33        | 1  |
| 5021 | 6206  | Gdap2         | MMT00063701   | -1 |
| 5021 | 7519  | Gdap2         | Gstm1         | -1 |
| 5021 | 10521 | Gdap2         | Ttf2          | -1 |
| 5021 | 11585 | Gdap2         | Bdp1          | 1  |
| 5021 | 11611 | Gdap2         | S100a13       | 1  |
| 5023 | 8499  | Spast         | C430048L16Rik | 1  |
| 5023 | 18903 | Spast         | Crem          | 1  |
| 5064 | 19924 | Tekt2         | Ubiad1        | -1 |
| 5083 | 11966 | Gprc5b        | Zfp280b       | 1  |
| 5083 | 12861 | Gprc5b        | Rhcg          | 1  |
| 5083 | 19436 | Gprc5b        | Dapp1         | 1  |
| 5104 | 16035 | 1700094C09Rik | Chd8          | 1  |
| 5123 | 5123  | Zfp191        | Zfp191        | 1  |
| 5126 | 7436  | Fcnb          | 1700063K16Rik | 1  |
| 5126 | 11966 | Fcnb          | Zfp280b       | 1  |
| 5126 | 12861 | Fcnb          | Rhcg          | 1  |
| 5126 | 19436 | Fcnb          | Dapp1         | 1  |
| 5126 | 19672 | Fcnb          | Cldn19        | 1  |
| 5145 | 2980  | Scn3b         | Slc37a2       | 1  |
| 5145 | 20468 | Scn3b         | Spa17         | 1  |
| 5158 | 19436 | Rtn4          | Dapp1         | 1  |
| 5175 | 19436 | MMT00032221   | Dapp1         | 1  |
| 5180 | 18873 | E130304I02Rik | AB041550      | -1 |
| 5181 | 21547 | 4930481B07Rik | Il10          | -1 |
| 5232 | 6021  | Arhgef16      | MMT00008784   | -1 |
| 5232 | 8670  | Arhgef16      | MMT00051613   | -1 |
| 5232 | 10667 | Arhgef16      | H2-Eb1        | 1  |
| 5232 | 11214 | Arhgef16      | MMT00049207   | -1 |
| 5232 | 15675 | Arhgef16      | MMT00077535   | -1 |
| 5244 | 16265 | MMT00022648   | Prkci         | 1  |
| 5247 | 3587  | Irak2         | MMT00041940   | 1  |
| 5247 | 6021  | Irak2         | MMT00008784   | 1  |

|      |       |             |               |    |
|------|-------|-------------|---------------|----|
| 5247 | 8670  | Irak2       | MMT00051613   | 1  |
| 5249 | 23265 | Olf615      | Tmem67        | -1 |
| 5258 | 5258  | Mcts2       | Mcts2         | 1  |
| 5265 | 19436 | A3galt2     | Dapp1         | 1  |
| 5274 | 11214 | MMT00065196 | MMT00049207   | -1 |
| 5284 | 14570 | Npfr1       | Erd1          | 1  |
| 5296 | 2743  | Rnf181      | Tcf3          | 1  |
| 5296 | 3703  | Rnf181      | Gcx           | 1  |
| 5296 | 11338 | Rnf181      | Vamp8         | 1  |
| 5296 | 11872 | Rnf181      | Vamp5         | 1  |
| 5296 | 15384 | Rnf181      | Mat2a         | 1  |
| 5296 | 15625 | Rnf181      | Capg          | 1  |
| 5296 | 15708 | Rnf181      | Retsat        | 1  |
| 5296 | 16670 | Rnf181      | Csmd2         | -1 |
| 5345 | 250   | MMT00023326 | Tubb2a-ps2    | -1 |
| 5345 | 437   | MMT00023326 | Ndr1          | -1 |
| 5345 | 530   | MMT00023326 | Mest          | -1 |
| 5345 | 563   | MMT00023326 | D4Bwg0951e    | 1  |
| 5345 | 609   | MMT00023326 | MMT00060868   | -1 |
| 5345 | 719   | MMT00023326 | Usp2          | 1  |
| 5345 | 864   | MMT00023326 | MMT00031865   | 1  |
| 5345 | 1310  | MMT00023326 | Cabc1         | -1 |
| 5345 | 1438  | MMT00023326 | Dclre1b       | 1  |
| 5345 | 1646  | MMT00023326 | Slc15a4       | 1  |
| 5345 | 1709  | MMT00023326 | Mt2           | 1  |
| 5345 | 1851  | MMT00023326 | Tmem41a       | 1  |
| 5345 | 1877  | MMT00023326 | Amica1        | 1  |
| 5345 | 1911  | MMT00023326 | 1300007F04Rik | 1  |
| 5345 | 1960  | MMT00023326 | Ubr2          | 1  |
| 5345 | 2126  | MMT00023326 | Dgat2         | 1  |
| 5345 | 2190  | MMT00023326 | Heyl          | -1 |
| 5345 | 2256  | MMT00023326 | Serpina9      | -1 |
| 5345 | 2322  | MMT00023326 | Tuba4a        | -1 |
| 5345 | 2529  | MMT00023326 | Hmcn2         | 1  |
| 5345 | 2636  | MMT00023326 | Tars          | -1 |
| 5345 | 2766  | MMT00023326 | Elp4          | -1 |
| 5345 | 2794  | MMT00023326 | Map3k6        | 1  |
| 5345 | 3170  | MMT00023326 | Mcart1        | 1  |
| 5345 | 3214  | MMT00023326 | Dnmt3b        | -1 |
| 5345 | 3410  | MMT00023326 | Paqr9         | -1 |
| 5345 | 3502  | MMT00023326 | Gde1          | 1  |
| 5345 | 3559  | MMT00023326 | 4933433P14Rik | 1  |
| 5345 | 3686  | MMT00023326 | Psm9          | 1  |
| 5345 | 3790  | MMT00023326 | Mtss1         | 1  |
| 5345 | 3804  | MMT00023326 | MMT00015534   | -1 |
| 5345 | 4084  | MMT00023326 | Asah3l        | 1  |
| 5345 | 4286  | MMT00023326 | Ptp4a1        | 1  |
| 5345 | 4333  | MMT00023326 | Sumo3         | -1 |
| 5345 | 4392  | MMT00023326 | 1810055G02Rik | 1  |
| 5345 | 4534  | MMT00023326 | Ndel1         | 1  |
| 5345 | 4708  | MMT00023326 | Traf3ip2      | -1 |
| 5345 | 4715  | MMT00023326 | Tmem120a      | 1  |
| 5345 | 5068  | MMT00023326 | Afap1l2       | -1 |
| 5345 | 5183  | MMT00023326 | St5           | -1 |
| 5345 | 5187  | MMT00023326 | Speer4f       | 1  |
| 5345 | 5259  | MMT00023326 | Mat1a         | 1  |
| 5345 | 5345  | MMT00023326 | MMT00023326   | 1  |
| 5345 | 5569  | MMT00023326 | Pdgfc         | -1 |
| 5345 | 5574  | MMT00023326 | Hsd3b7        | -1 |
| 5345 | 5734  | MMT00023326 | EG619653      | 1  |
| 5345 | 5791  | MMT00023326 | Baiap2l1      | 1  |
| 5345 | 5814  | MMT00023326 | Nrbp2         | 1  |
| 5345 | 5849  | MMT00023326 | 2310031A18Rik | -1 |
| 5345 | 5856  | MMT00023326 | Mfsd2         | 1  |
| 5345 | 5858  | MMT00023326 | Itch          | 1  |
| 5345 | 5974  | MMT00023326 | Arntl         | -1 |
| 5345 | 5994  | MMT00023326 | Olf609        | 1  |
| 5345 | 6048  | MMT00023326 | Psm9          | 1  |
| 5345 | 6118  | MMT00023326 | Slc1a4        | -1 |

|      |       |             |               |    |
|------|-------|-------------|---------------|----|
| 5345 | 6211  | MMT00023326 | Arhgap24      | -1 |
| 5345 | 6338  | MMT00023326 | Setd3         | 1  |
| 5345 | 6370  | MMT00023326 | Aqp8          | -1 |
| 5345 | 6386  | MMT00023326 | Por           | 1  |
| 5345 | 6490  | MMT00023326 | Il1r1         | 1  |
| 5345 | 6675  | MMT00023326 | Sfrs4         | 1  |
| 5345 | 6756  | MMT00023326 | Sds           | 1  |
| 5345 | 6990  | MMT00023326 | Nr1i2         | 1  |
| 5345 | 7066  | MMT00023326 | Agtr1b        | 1  |
| 5345 | 7112  | MMT00023326 | Apbb3         | 1  |
| 5345 | 7839  | MMT00023326 | Asl           | 1  |
| 5345 | 7862  | MMT00023326 | Cpsf4l        | 1  |
| 5345 | 8399  | MMT00023326 | Herpud1       | 1  |
| 5345 | 8408  | MMT00023326 | Nr1i3         | 1  |
| 5345 | 8428  | MMT00023326 | Sorbs3        | 1  |
| 5345 | 8639  | MMT00023326 | Map1lc3b      | 1  |
| 5345 | 8641  | MMT00023326 | Slc7a2        | 1  |
| 5345 | 8658  | MMT00023326 | Fmo2          | 1  |
| 5345 | 9309  | MMT00023326 | MMT00035904   | 1  |
| 5345 | 9495  | MMT00023326 | Srms          | -1 |
| 5345 | 9587  | MMT00023326 | Bri3bp        | -1 |
| 5345 | 9910  | MMT00023326 | EG666644      | 1  |
| 5345 | 10088 | MMT00023326 | Ddc           | -1 |
| 5345 | 10166 | MMT00023326 | Rhbdd2        | 1  |
| 5345 | 10207 | MMT00023326 | MMT00012324   | -1 |
| 5345 | 10408 | MMT00023326 | Per1          | 1  |
| 5345 | 10486 | MMT00023326 | 1300002K09Rik | -1 |
| 5345 | 10712 | MMT00023326 | Fchsd2        | 1  |
| 5345 | 11093 | MMT00023326 | Zdhhc1        | 1  |
| 5345 | 11129 | MMT00023326 | Ankhd1        | 1  |
| 5345 | 11574 | MMT00023326 | Gne           | 1  |
| 5345 | 11599 | MMT00023326 | Coq10b        | 1  |
| 5345 | 11614 | MMT00023326 | Sult1e1       | 1  |
| 5345 | 11741 | MMT00023326 | Slc30a10      | -1 |
| 5345 | 11807 | MMT00023326 | Fbxo31        | 1  |
| 5345 | 11808 | MMT00023326 | Pck1          | 1  |
| 5345 | 11823 | MMT00023326 | Mmp7          | 1  |
| 5345 | 12040 | MMT00023326 | Commd10       | -1 |
| 5345 | 12190 | MMT00023326 | Krt18         | -1 |
| 5345 | 12193 | MMT00023326 | Aco2          | 1  |
| 5345 | 12204 | MMT00023326 | Ankmy2        | 1  |
| 5345 | 12219 | MMT00023326 | Cyb5b         | -1 |
| 5345 | 12232 | MMT00023326 | MMT00060943   | 1  |
| 5345 | 12420 | MMT00023326 | Klhl21        | 1  |
| 5345 | 12436 | MMT00023326 | Serinc3       | 1  |
| 5345 | 12460 | MMT00023326 | Pnpla2        | 1  |
| 5345 | 12489 | MMT00023326 | Wdr8          | -1 |
| 5345 | 12761 | MMT00023326 | Tsc22d3       | 1  |
| 5345 | 12799 | MMT00023326 | Spon2         | -1 |
| 5345 | 12807 | MMT00023326 | Faim          | -1 |
| 5345 | 13140 | MMT00023326 | MMT00005814   | 1  |
| 5345 | 13339 | MMT00023326 | D630042F21Rik | 1  |
| 5345 | 13471 | MMT00023326 | Cln8          | 1  |
| 5345 | 13684 | MMT00023326 | Abcd4         | 1  |
| 5345 | 13962 | MMT00023326 | Chd7          | 1  |
| 5345 | 14041 | MMT00023326 | Cldn1         | -1 |
| 5345 | 14462 | MMT00023326 | Zfp385b       | 1  |
| 5345 | 14582 | MMT00023326 | Mt1           | 1  |
| 5345 | 14620 | MMT00023326 | Tbc1d8        | 1  |
| 5345 | 14726 | MMT00023326 | Slc19a1       | 1  |
| 5345 | 14989 | MMT00023326 | Map3k5        | 1  |
| 5345 | 15008 | MMT00023326 | Chrdl2        | 1  |
| 5345 | 15021 | MMT00023326 | Ppargc1a      | 1  |
| 5345 | 15046 | MMT00023326 | Arl6ip2       | 1  |
| 5345 | 15049 | MMT00023326 | Rnf125        | -1 |
| 5345 | 15292 | MMT00023326 | 2010107G23Rik | -1 |
| 5345 | 15320 | MMT00023326 | MMT00017479   | 1  |
| 5345 | 15521 | MMT00023326 | Mast3         | 1  |
| 5345 | 15567 | MMT00023326 | 1600002H07Rik | 1  |



|      |       |             |               |    |
|------|-------|-------------|---------------|----|
| 5345 | 15624 | MMT00023326 | Crcp          | 1  |
| 5345 | 15631 | MMT00023326 | Lpin1         | 1  |
| 5345 | 15709 | MMT00023326 | Tceal1        | 1  |
| 5345 | 15758 | MMT00023326 | Stx4a         | -1 |
| 5345 | 15882 | MMT00023326 | AA986860      | 1  |
| 5345 | 16176 | MMT00023326 | St3gal5       | 1  |
| 5345 | 16580 | MMT00023326 | Tnfaip2       | -1 |
| 5345 | 16647 | MMT00023326 | D16H22S680E   | 1  |
| 5345 | 16669 | MMT00023326 | Tjp2          | -1 |
| 5345 | 16690 | MMT00023326 | Tjp3          | -1 |
| 5345 | 16946 | MMT00023326 | lvns1abp      | 1  |
| 5345 | 17078 | MMT00023326 | Syde2         | 1  |
| 5345 | 17338 | MMT00023326 | Mocos         | -1 |
| 5345 | 17352 | MMT00023326 | Cebpb         | 1  |
| 5345 | 17418 | MMT00023326 | D1Ertid622e   | 1  |
| 5345 | 17617 | MMT00023326 | Atp5sl        | 1  |
| 5345 | 17622 | MMT00023326 | Foxo1         | 1  |
| 5345 | 17876 | MMT00023326 | Tubb4         | -1 |
| 5345 | 17928 | MMT00023326 | Pex11a        | 1  |
| 5345 | 18027 | MMT00023326 | 5730403B10Rik | 1  |
| 5345 | 18286 | MMT00023326 | Slc41a3       | 1  |
| 5345 | 18314 | MMT00023326 | 4631416L12Rik | 1  |
| 5345 | 18586 | MMT00023326 | Tns1          | 1  |
| 5345 | 18606 | MMT00023326 | A230074B11Rik | 1  |
| 5345 | 18802 | MMT00023326 | Nit2          | -1 |
| 5345 | 18827 | MMT00023326 | Oprs1         | -1 |
| 5345 | 19025 | MMT00023326 | Slc37a4       | 1  |
| 5345 | 19146 | MMT00023326 | N4bp2l1       | 1  |
| 5345 | 19217 | MMT00023326 | Cyr61         | -1 |
| 5345 | 19234 | MMT00023326 | Nrg4          | 1  |
| 5345 | 19277 | MMT00023326 | MMT00044927   | 1  |
| 5345 | 19466 | MMT00023326 | Pptc7         | 1  |
| 5345 | 19532 | MMT00023326 | Med8          | -1 |
| 5345 | 19556 | MMT00023326 | Efna1         | -1 |
| 5345 | 19671 | MMT00023326 | Upp2          | 1  |
| 5345 | 19723 | MMT00023326 | Pfkfb1        | 1  |
| 5345 | 19757 | MMT00023326 | Fkbp5         | 1  |
| 5345 | 20370 | MMT00023326 | Sccpdh        | -1 |
| 5345 | 20854 | MMT00023326 | Comm7         | -1 |
| 5345 | 20880 | MMT00023326 | Raf1          | -1 |
| 5345 | 20907 | MMT00023326 | Lims2         | 1  |
| 5345 | 21142 | MMT00023326 | Gm129         | 1  |
| 5345 | 21163 | MMT00023326 | Slc16a5       | 1  |
| 5345 | 21251 | MMT00023326 | Cpt1a         | 1  |
| 5345 | 21331 | MMT00023326 | Slc10a6       | 1  |
| 5345 | 21408 | MMT00023326 | Svil          | -1 |
| 5345 | 21901 | MMT00023326 | BC035537      | -1 |
| 5345 | 21918 | MMT00023326 | Snx24         | -1 |
| 5345 | 21969 | MMT00023326 | Tk1           | 1  |
| 5345 | 22031 | MMT00023326 | Vcam1         | 1  |
| 5345 | 22218 | MMT00023326 | Rfc3          | -1 |
| 5345 | 22290 | MMT00023326 | Tubb2a        | -1 |
| 5345 | 22324 | MMT00023326 | MMT00060741   | -1 |
| 5345 | 22630 | MMT00023326 | MMT00034355   | -1 |
| 5345 | 22732 | MMT00023326 | Cyb5b         | -1 |
| 5345 | 22936 | MMT00023326 | Rhobtb1       | 1  |
| 5345 | 23161 | MMT00023326 | Gclc          | -1 |
| 5345 | 23183 | MMT00023326 | Nnmt          | 1  |
| 5345 | 23201 | MMT00023326 | S1pr1         | -1 |
| 5345 | 23202 | MMT00023326 | Olf559        | 1  |
| 5345 | 23437 | MMT00023326 | Efhd2         | 1  |
| 5345 | 23558 | MMT00023326 | MMT00030937   | 1  |
| 5360 | 5360  | Cep76       | Cep76         | 1  |
| 5360 | 18373 | Cep76       | Dnajb1        | 1  |
| 5364 | 3587  | Kif22       | MMT00041940   | -1 |
| 5364 | 6021  | Kif22       | MMT00008784   | -1 |
| 5364 | 8670  | Kif22       | MMT00051613   | -1 |
| 5364 | 11214 | Kif22       | MMT00049207   | -1 |
| 5364 | 15675 | Kif22       | MMT00077535   | -1 |

|      |       |               |               |    |
|------|-------|---------------|---------------|----|
| 5364 | 18083 | Kif22         | Gadd45a       | 1  |
| 5364 | 18418 | Kif22         | Hspa1b        | -1 |
| 5377 | 19436 | MMT00077700   | Dapp1         | 1  |
| 5380 | 11966 | Olfr1403      | Zfp280b       | 1  |
| 5380 | 19436 | Olfr1403      | Dapp1         | 1  |
| 5385 | 3587  | Tubb2b        | MMT00041940   | 1  |
| 5385 | 4950  | Tubb2b        | Dnajb10       | 1  |
| 5385 | 6021  | Tubb2b        | MMT00008784   | 1  |
| 5385 | 8319  | Tubb2b        | MMT00062477   | 1  |
| 5385 | 8670  | Tubb2b        | MMT00051613   | 1  |
| 5385 | 11043 | Tubb2b        | Hsph1         | 1  |
| 5385 | 11214 | Tubb2b        | MMT00049207   | 1  |
| 5385 | 15675 | Tubb2b        | MMT00077535   | 1  |
| 5385 | 18418 | Tubb2b        | Hspa1b        | 1  |
| 5385 | 20332 | Tubb2b        | Stau2         | -1 |
| 5385 | 20965 | Tubb2b        | Usp28         | -1 |
| 5385 | 21389 | Tubb2b        | Odf2          | -1 |
| 5385 | 22139 | Tubb2b        | Stip1         | 1  |
| 5410 | 4286  | Cyp4f15       | Ptp4a1        | 1  |
| 5410 | 5849  | Cyp4f15       | 2310031A18Rik | -1 |
| 5410 | 6030  | Cyp4f15       | As3mt         | 1  |
| 5410 | 12799 | Cyp4f15       | Spon2         | -1 |
| 5410 | 22218 | Cyp4f15       | Rfc3          | -1 |
| 5410 | 22290 | Cyp4f15       | Tubb2a        | -1 |
| 5410 | 22630 | Cyp4f15       | MMT00034355   | -1 |
| 5410 | 23183 | Cyp4f15       | Nnmt          | 1  |
| 5422 | 6021  | 4933422A05Rik | MMT00008784   | 1  |
| 5422 | 8670  | 4933422A05Rik | MMT00051613   | 1  |
| 5422 | 9258  | 4933422A05Rik | P4ha1         | 1  |
| 5422 | 15675 | 4933422A05Rik | MMT00077535   | 1  |
| 5422 | 18373 | 4933422A05Rik | Dnajb1        | 1  |
| 5425 | 5100  | Ung           | Pebp1         | -1 |
| 5425 | 10978 | Ung           | MMT00078322   | 1  |
| 5425 | 15908 | Ung           | Pebp1         | -1 |
| 5433 | 286   | 2410004L22Rik | MMT00070509   | -1 |
| 5433 | 403   | 2410004L22Rik | Leprotl1      | 1  |
| 5433 | 769   | 2410004L22Rik | 5430437P03Rik | 1  |
| 5433 | 1755  | 2410004L22Rik | Ocel1         | -1 |
| 5433 | 2749  | 2410004L22Rik | Naf1          | 1  |
| 5433 | 3052  | 2410004L22Rik | 9130404D08Rik | 1  |
| 5433 | 3055  | 2410004L22Rik | Pde4c         | -1 |
| 5433 | 5433  | 2410004L22Rik | 2410004L22Rik | 1  |
| 5433 | 9304  | 2410004L22Rik | Al449175      | -1 |
| 5433 | 9931  | 2410004L22Rik | Glit25d1      | 1  |
| 5433 | 10195 | 2410004L22Rik | Klf1          | -1 |
| 5433 | 13004 | 2410004L22Rik | Arhgef10      | -1 |
| 5433 | 13732 | 2410004L22Rik | Tpm4          | 1  |
| 5433 | 15094 | 2410004L22Rik | Pbx4          | 1  |
| 5433 | 15455 | 2410004L22Rik | Lsm4          | 1  |
| 5433 | 16617 | 2410004L22Rik | Sh2d4a        | 1  |
| 5433 | 16849 | 2410004L22Rik | Trmt1         | 1  |
| 5433 | 16858 | 2410004L22Rik | Tmem38a       | 1  |
| 5433 | 18886 | 2410004L22Rik | Slc18a1       | 1  |
| 5433 | 20484 | 2410004L22Rik | Ces1          | 1  |
| 5436 | 17144 | Pr17a1        | B3gat2        | 1  |
| 5456 | 1374  | Rabgap1l      | Mdn1          | -1 |
| 5456 | 6498  | Rabgap1l      | MMT00016809   | 1  |
| 5456 | 6648  | Rabgap1l      | Cenpl         | 1  |
| 5494 | 3208  | Gpr101        | 4930511111Rik | 1  |
| 5494 | 11966 | Gpr101        | Zfp280b       | 1  |
| 5494 | 19436 | Gpr101        | Dapp1         | 1  |
| 5505 | 3208  | Thap2         | 4930511111Rik | 1  |
| 5505 | 7436  | Thap2         | 1700063K16Rik | 1  |
| 5505 | 11966 | Thap2         | Zfp280b       | 1  |
| 5505 | 12861 | Thap2         | Rhcg          | 1  |
| 5505 | 19436 | Thap2         | Dapp1         | 1  |
| 5508 | 1466  | Lrig2         | Ubap2l        | -1 |
| 5508 | 6206  | Lrig2         | MMT00063701   | -1 |
| 5508 | 10521 | Lrig2         | Ttf2          | -1 |

|      |       |             |               |    |
|------|-------|-------------|---------------|----|
| 5508 | 11611 | Lrig2       | S100a13       | 1  |
| 5508 | 22570 | Lrig2       | Phtf1         | -1 |
| 5527 | 19436 | Zfp398      | Dapp1         | 1  |
| 5572 | 6021  | Opalin      | MMT00008784   | -1 |
| 5572 | 7963  | Opalin      | Rxrg          | 1  |
| 5572 | 8670  | Opalin      | MMT00051613   | -1 |
| 5572 | 15675 | Opalin      | MMT00077535   | -1 |
| 5572 | 20535 | Opalin      | Rbm4          | -1 |
| 5577 | 19436 | MMT00009628 | Dapp1         | 1  |
| 5597 | 7975  | Tll4        | Lancl1        | 1  |
| 5597 | 23119 | Tll4        | Cps1          | 1  |
| 5603 | 2915  | BC020535    | Nfs1          | -1 |
| 5603 | 6059  | BC020535    | Dsn1          | 1  |
| 5603 | 6231  | BC020535    | 9030622O22Rik | 1  |
| 5603 | 6820  | BC020535    | MMT00046996   | -1 |
| 5603 | 13355 | BC020535    | Foxs1         | 1  |
| 5603 | 14647 | BC020535    | Cst3          | -1 |
| 5603 | 22740 | BC020535    | Manbal        | 1  |
| 5603 | 23005 | BC020535    | 4930405A21Rik | 1  |
| 5610 | 15461 | Syngap1     | Galnt2        | 1  |
| 5634 | 1156  | Creb1       | Rbj           | -1 |
| 5634 | 1281  | Creb1       | Alkbh3        | -1 |
| 5634 | 3587  | Creb1       | MMT00041940   | 1  |
| 5634 | 3913  | Creb1       | Mrpl15        | 1  |
| 5634 | 6021  | Creb1       | MMT00008784   | 1  |
| 5634 | 7798  | Creb1       | MMT00077178   | 1  |
| 5634 | 8319  | Creb1       | MMT00062477   | 1  |
| 5634 | 8670  | Creb1       | MMT00051613   | 1  |
| 5634 | 9258  | Creb1       | P4ha1         | 1  |
| 5634 | 10526 | Creb1       | MMT00036239   | 1  |
| 5634 | 11043 | Creb1       | Hsph1         | 1  |
| 5634 | 11214 | Creb1       | MMT00049207   | 1  |
| 5634 | 15476 | Creb1       | Fem1b         | -1 |
| 5634 | 15675 | Creb1       | MMT00077535   | 1  |
| 5634 | 16299 | Creb1       | Crel2         | 1  |
| 5634 | 16754 | Creb1       | Hsp90aa1      | 1  |
| 5634 | 18099 | Creb1       | Nfx1          | -1 |
| 5634 | 18373 | Creb1       | Dnajb1        | 1  |
| 5634 | 20332 | Creb1       | Stau2         | -1 |
| 5634 | 20828 | Creb1       | MMT00007878   | 1  |
| 5634 | 20912 | Creb1       | Chordc1       | 1  |
| 5634 | 21389 | Creb1       | Odf2          | -1 |
| 5634 | 22139 | Creb1       | Stip1         | 1  |
| 5634 | 22216 | Creb1       | Sp5           | -1 |
| 5639 | 5639  | Gdpd3       | Gdpd3         | 1  |
| 5639 | 12730 | Gdpd3       | 9130019O22Rik | 1  |
| 5639 | 13206 | Gdpd3       | Qprt          | -1 |
| 5661 | 2456  | Lrrc46      | Mrpl10        | -1 |
| 5661 | 12302 | Lrrc46      | Cbx1          | -1 |
| 5681 | 2023  | Mbd1        | MMT00072215   | 1  |
| 5681 | 5681  | Mbd1        | Mbd1          | 1  |
| 5681 | 8269  | Mbd1        | Ccdc11        | 1  |
| 5681 | 12109 | Mbd1        | Smad4         | -1 |
| 5681 | 22961 | Mbd1        | MMT00055950   | 1  |
| 5686 | 6021  | Cys1        | MMT00008784   | 1  |
| 5686 | 8670  | Cys1        | MMT00051613   | 1  |
| 5686 | 15675 | Cys1        | MMT00077535   | 1  |
| 5687 | 12367 | Klf11       | MMT00072365   | 1  |
| 5687 | 13512 | Klf11       | Tmem144       | 1  |
| 5687 | 16416 | Klf11       | Commd2        | -1 |
| 5694 | 3208  | Sp7         | 4930511111Rik | 1  |
| 5694 | 7436  | Sp7         | 1700063K16Rik | 1  |
| 5694 | 11966 | Sp7         | Zfp280b       | 1  |
| 5694 | 12861 | Sp7         | Rhcg          | 1  |
| 5694 | 19436 | Sp7         | Dapp1         | 1  |
| 5694 | 22125 | Sp7         | Gab1          | 1  |
| 5735 | 14859 | Nkapl       | Hspa1a        | -1 |
| 5735 | 18373 | Nkapl       | Dnajb1        | -1 |
| 5737 | 1956  | Nkx2-2      | Usp50         | -1 |

|      |       |             |               |    |
|------|-------|-------------|---------------|----|
| 5737 | 4833  | Nkx2-2      | Synpo2        | 1  |
| 5737 | 6231  | Nkx2-2      | 9030622O22Rik | -1 |
| 5737 | 7991  | Nkx2-2      | Gpr115        | 1  |
| 5737 | 9762  | Nkx2-2      | Snx5          | -1 |
| 5737 | 12388 | Nkx2-2      | 8430406I07Rik | 1  |
| 5737 | 14647 | Nkx2-2      | Cst3          | 1  |
| 5737 | 17043 | Nkx2-2      | Tmem127       | -1 |
| 5737 | 21665 | Nkx2-2      | Nat5          | -1 |
| 5737 | 21729 | Nkx2-2      | Hdc           | 1  |
| 5748 | 11966 | Brsk2       | Zfp280b       | 1  |
| 5748 | 12861 | Brsk2       | Rhcg          | 1  |
| 5748 | 19436 | Brsk2       | Dapp1         | 1  |
| 5762 | 12367 | Trpc3       | MMT00072365   | 1  |
| 5786 | 20194 | Lta         | Pnlcd1        | 1  |
| 5792 | 22139 | Tpd52l2     | Stip1         | 1  |
| 5795 | 7043  | MMT00057992 | Cyp11b2       | 1  |
| 5795 | 9827  | MMT00057992 | Pam           | -1 |
| 5795 | 18714 | MMT00057992 | Farsb         | 1  |
| 5840 | 5840  | Tbc1d9b     | Tbc1d9b       | 1  |
| 5841 | 3587  | Atg12       | MMT00041940   | 1  |
| 5841 | 3849  | Atg12       | MMT00047578   | 1  |
| 5841 | 6021  | Atg12       | MMT00008784   | 1  |
| 5841 | 8670  | Atg12       | MMT00051613   | 1  |
| 5841 | 9067  | Atg12       | Tra2a         | 1  |
| 5841 | 11214 | Atg12       | MMT00049207   | 1  |
| 5841 | 15675 | Atg12       | MMT00077535   | 1  |
| 5841 | 18099 | Atg12       | Nfx1          | -1 |
| 5841 | 21389 | Atg12       | Odf2          | -1 |
| 5853 | 12398 | Trim30      | Ifi44         | 1  |
| 5853 | 15074 | Trim30      | Usp18         | 1  |
| 5853 | 21549 | Trim30      | Rtp4          | 1  |
| 5908 | 3208  | MMT00027552 | 4930511I11Rik | 1  |
| 5908 | 5694  | MMT00027552 | Sp7           | 1  |
| 5908 | 7436  | MMT00027552 | 1700063K16Rik | 1  |
| 5908 | 11966 | MMT00027552 | Zfp280b       | 1  |
| 5908 | 12861 | MMT00027552 | Rhcg          | 1  |
| 5908 | 19436 | MMT00027552 | Dapp1         | 1  |
| 5908 | 22125 | MMT00027552 | Gab1          | 1  |
| 5925 | 286   | Tmem59l     | MMT00070509   | -1 |
| 5925 | 403   | Tmem59l     | Leprotl1      | 1  |
| 5925 | 769   | Tmem59l     | 5430437P03Rik | 1  |
| 5925 | 1755  | Tmem59l     | Ocel1         | -1 |
| 5925 | 2671  | Tmem59l     | Sh3rf1        | 1  |
| 5925 | 2703  | Tmem59l     | MMT00073763   | -1 |
| 5925 | 2749  | Tmem59l     | Naf1          | 1  |
| 5925 | 3052  | Tmem59l     | 9130404D08Rik | 1  |
| 5925 | 3055  | Tmem59l     | Pde4c         | -1 |
| 5925 | 5433  | Tmem59l     | 2410004L22Rik | 1  |
| 5925 | 6760  | Tmem59l     | 2810428I15Rik | -1 |
| 5925 | 8114  | Tmem59l     | Kcnn1         | -1 |
| 5925 | 9304  | Tmem59l     | Al449175      | -1 |
| 5925 | 9931  | Tmem59l     | Glit25d1      | 1  |
| 5925 | 10195 | Tmem59l     | Klf1          | -1 |
| 5925 | 13004 | Tmem59l     | Arhgef10      | -1 |
| 5925 | 13732 | Tmem59l     | Tpm4          | 1  |
| 5925 | 14455 | Tmem59l     | 2700029M09Rik | 1  |
| 5925 | 14845 | Tmem59l     | Tmem188       | -1 |
| 5925 | 15094 | Tmem59l     | Pbx4          | 1  |
| 5925 | 15455 | Tmem59l     | Lsm4          | 1  |
| 5925 | 16617 | Tmem59l     | Sh2d4a        | 1  |
| 5925 | 16849 | Tmem59l     | Trmt1         | 1  |
| 5925 | 16858 | Tmem59l     | Tmem38a       | 1  |
| 5925 | 17703 | Tmem59l     | Large         | 1  |
| 5925 | 18886 | Tmem59l     | Slc18a1       | 1  |
| 5925 | 20484 | Tmem59l     | Ces1          | 1  |
| 5925 | 22776 | Tmem59l     | Gsr           | -1 |
| 5929 | 3208  | Cpz         | 4930511I11Rik | 1  |
| 5929 | 7436  | Cpz         | 1700063K16Rik | 1  |
| 5929 | 11966 | Cpz         | Zfp280b       | 1  |

|      |       |               |               |    |
|------|-------|---------------|---------------|----|
| 5929 | 12861 | Cpz           | Rhcg          | 1  |
| 5929 | 19436 | Cpz           | Dapp1         | 1  |
| 5929 | 19672 | Cpz           | Cldn19        | 1  |
| 5929 | 22125 | Cpz           | Gab1          | 1  |
| 5974 | 719   | Arntl         | Usp2          | -1 |
| 5974 | 2399  | Arntl         | MMT00060167   | 1  |
| 5974 | 2636  | Arntl         | Tars          | 1  |
| 5974 | 5974  | Arntl         | Arntl         | 1  |
| 5974 | 7414  | Arntl         | Clpx          | 1  |
| 5974 | 9495  | Arntl         | Srms          | 1  |
| 5974 | 10088 | Arntl         | Ddc           | 1  |
| 5974 | 11741 | Arntl         | Slc30a10      | 1  |
| 5974 | 15709 | Arntl         | Tceal1        | -1 |
| 5974 | 16176 | Arntl         | St3gal5       | -1 |
| 5974 | 18498 | Arntl         | Slc5a6        | -1 |
| 5989 | 1183  | 2310042D19Rik | MMT00009390   | -1 |
| 5989 | 2793  | 2310042D19Rik | MMT00005644   | 1  |
| 5989 | 5989  | 2310042D19Rik | 2310042D19Rik | 1  |
| 5989 | 12718 | 2310042D19Rik | Dhrsx         | -1 |
| 5989 | 18033 | 2310042D19Rik | Klhl17        | -1 |
| 5989 | 19026 | 2310042D19Rik | lsg15         | 1  |
| 5989 | 22077 | 2310042D19Rik | MMT000057550  | 1  |
| 5989 | 22122 | 2310042D19Rik | MMT00042954   | -1 |
| 6012 | 1849  | Chid1         | MMT000063181  | -1 |
| 6012 | 22139 | Chid1         | Stip1         | -1 |
| 6035 | 2703  | Nkd1          | MMT000073763  | -1 |
| 6035 | 10195 | Nkd1          | Klf1          | -1 |
| 6035 | 10273 | Nkd1          | Gpt2          | -1 |
| 6035 | 18886 | Nkd1          | Slc18a1       | 1  |
| 6037 | 1705  | Ccnl2         | Gltpd1        | 1  |
| 6037 | 6325  | Ccnl2         | Cpsf3l        | 1  |
| 6038 | 250   | Acot1         | Tubb2a-ps2    | 1  |
| 6038 | 402   | Acot1         | Timp3         | -1 |
| 6038 | 609   | Acot1         | MMT000060868  | 1  |
| 6038 | 719   | Acot1         | Usp2          | -1 |
| 6038 | 1767  | Acot1         | BC016495      | -1 |
| 6038 | 2110  | Acot1         | Gtf2ird1      | 1  |
| 6038 | 2322  | Acot1         | Tuba4a        | 1  |
| 6038 | 2399  | Acot1         | MMT00060167   | 1  |
| 6038 | 2485  | Acot1         | Adck1         | 1  |
| 6038 | 2794  | Acot1         | Map3k6        | -1 |
| 6038 | 2829  | Acot1         | Lrfr3         | 1  |
| 6038 | 2850  | Acot1         | Slc16a6       | 1  |
| 6038 | 3214  | Acot1         | Dnmt3b        | 1  |
| 6038 | 3410  | Acot1         | Paqr9         | 1  |
| 6038 | 3804  | Acot1         | MMT00015534   | 1  |
| 6038 | 4201  | Acot1         | Tubb2c        | 1  |
| 6038 | 4286  | Acot1         | Ptp4a1        | -1 |
| 6038 | 5068  | Acot1         | Afap1l2       | 1  |
| 6038 | 5374  | Acot1         | Chka          | 1  |
| 6038 | 5574  | Acot1         | Hsd3b7        | 1  |
| 6038 | 5849  | Acot1         | 2310031A18Rik | 1  |
| 6038 | 5974  | Acot1         | Arntl         | 1  |
| 6038 | 6386  | Acot1         | Por           | -1 |
| 6038 | 6756  | Acot1         | Sds           | -1 |
| 6038 | 7839  | Acot1         | Asl           | -1 |
| 6038 | 7862  | Acot1         | Cpsf4l        | -1 |
| 6038 | 8399  | Acot1         | Herpud1       | -1 |
| 6038 | 8428  | Acot1         | Sorbs3        | -1 |
| 6038 | 9495  | Acot1         | Srms          | 1  |
| 6038 | 9910  | Acot1         | EG666644      | -1 |
| 6038 | 10775 | Acot1         | Slc16a1       | 1  |
| 6038 | 11129 | Acot1         | Ankhd1        | -1 |
| 6038 | 11599 | Acot1         | Coq10b        | -1 |
| 6038 | 11741 | Acot1         | Slc30a10      | 1  |
| 6038 | 12489 | Acot1         | Wdr8          | 1  |
| 6038 | 12799 | Acot1         | Spon2         | 1  |
| 6038 | 14462 | Acot1         | Zfp385b       | -1 |
| 6038 | 15021 | Acot1         | Ppargc1a      | -1 |

|      |       |               |               |    |
|------|-------|---------------|---------------|----|
| 6038 | 15609 | Acot1         | Mreg          | 1  |
| 6038 | 15631 | Acot1         | Lpin1         | -1 |
| 6038 | 16060 | Acot1         | Gys2          | -1 |
| 6038 | 16515 | Acot1         | Gramd4        | 1  |
| 6038 | 16580 | Acot1         | Tnfaip2       | 1  |
| 6038 | 17622 | Acot1         | Foxo1         | -1 |
| 6038 | 17876 | Acot1         | Tubb4         | 1  |
| 6038 | 18179 | Acot1         | Dbp           | -1 |
| 6038 | 19025 | Acot1         | Slc37a4       | -1 |
| 6038 | 19466 | Acot1         | Pptc7         | -1 |
| 6038 | 19671 | Acot1         | Upp2          | -1 |
| 6038 | 19790 | Acot1         | Polg2         | -1 |
| 6038 | 20292 | Acot1         | 1810048J11Rik | 1  |
| 6038 | 20854 | Acot1         | Commd7        | 1  |
| 6038 | 21142 | Acot1         | Gm129         | -1 |
| 6038 | 22290 | Acot1         | Tubb2a        | 1  |
| 6038 | 22630 | Acot1         | MMT00034355   | 1  |
| 6049 | 19436 | Cpeb2         | Dapp1         | 1  |
| 6059 | 6059  | Dsn1          | Dsn1          | 1  |
| 6059 | 7610  | Dsn1          | Scand1        | -1 |
| 6059 | 14647 | Dsn1          | Cst3          | -1 |
| 6059 | 23005 | Dsn1          | 4930405A21Rik | 1  |
| 6065 | 11404 | Plce1         | Gnpat         | 1  |
| 6065 | 15953 | Plce1         | Acsf3         | -1 |
| 6065 | 21394 | Plce1         | Cdh15         | -1 |
| 6070 | 10667 | D630003M21Rik | H2-Eb1        | 1  |
| 6070 | 13493 | D630003M21Rik | Ring1         | -1 |
| 6077 | 9067  | Pik3cb        | Tra2a         | 1  |
| 6105 | 20902 | Cryaa         | Itln1         | -1 |
| 6133 | 2256  | Agrp          | Serpina9      | -1 |
| 6133 | 2850  | Agrp          | Slc16a6       | -1 |
| 6133 | 6109  | Agrp          | Hsd17b2       | -1 |
| 6133 | 8428  | Agrp          | Sorbs3        | 1  |
| 6133 | 11807 | Agrp          | Fbxo31        | 1  |
| 6143 | 3913  | Pacsin2       | Mrpl15        | 1  |
| 6158 | 6158  | Msh2          | Msh2          | 1  |
| 6185 | 19436 | Icam4         | Dapp1         | 1  |
| 6188 | 6231  | Myh7b         | 9030622O22Rik | -1 |
| 6188 | 22740 | Myh7b         | Manbal        | -1 |
| 6191 | 2902  | Ddost         | D4Erd196e     | -1 |
| 6191 | 3475  | Ddost         | 2610305D13Rik | -1 |
| 6191 | 3616  | Ddost         | Dnajc16       | 1  |
| 6191 | 4885  | Ddost         | Fhad1         | -1 |
| 6191 | 6191  | Ddost         | Ddost         | 1  |
| 6191 | 6830  | Ddost         | Rsc1a1        | 1  |
| 6191 | 16287 | Ddost         | Extl1         | -1 |
| 6191 | 18338 | Ddost         | Akr1e1        | 1  |
| 6191 | 19924 | Ddost         | Ubiad1        | -1 |
| 6191 | 20045 | Ddost         | D4Wsu114e     | -1 |
| 6202 | 4626  | Hrk           | 2310046K01Rik | -1 |
| 6202 | 6157  | Hrk           | MMT00041452   | 1  |
| 6202 | 13581 | Hrk           | Srxn1         | -1 |
| 6206 | 11611 | MMT00063701   | S100a13       | -1 |
| 6206 | 16753 | MMT00063701   | Hfe2          | -1 |
| 6218 | 3913  | Hnrnpc        | Mrpl15        | 1  |
| 6218 | 4950  | Hnrnpc        | Dnajb10       | 1  |
| 6218 | 7444  | Hnrnpc        | Hspe1         | 1  |
| 6218 | 7731  | Hnrnpc        | 1500001M20Rik | -1 |
| 6218 | 8670  | Hnrnpc        | MMT00051613   | 1  |
| 6218 | 9067  | Hnrnpc        | Tra2a         | 1  |
| 6218 | 9258  | Hnrnpc        | P4ha1         | 1  |
| 6218 | 11043 | Hnrnpc        | Hsph1         | 1  |
| 6218 | 13521 | Hnrnpc        | Ears2         | 1  |
| 6218 | 14014 | Hnrnpc        | MMT00008376   | 1  |
| 6218 | 15675 | Hnrnpc        | MMT00077535   | 1  |
| 6218 | 17595 | Hnrnpc        | MMT00048325   | 1  |
| 6218 | 22751 | Hnrnpc        | Nosip         | -1 |
| 6218 | 23646 | Hnrnpc        | Hsp90ab1      | 1  |
| 6231 | 17926 | 9030622O22Rik | Nptx1         | 1  |

|      |       |               |               |    |
|------|-------|---------------|---------------|----|
| 6234 | 2433  | P4ha2         | Armc10        | -1 |
| 6234 | 3170  | P4ha2         | Mcart1        | 1  |
| 6234 | 3587  | P4ha2         | MMT00041940   | 1  |
| 6234 | 3913  | P4ha2         | Mrpl15        | 1  |
| 6234 | 5332  | P4ha2         | Pdlim4        | -1 |
| 6234 | 6021  | P4ha2         | MMT00008784   | 1  |
| 6234 | 6234  | P4ha2         | P4ha2         | 1  |
| 6234 | 7963  | P4ha2         | Rxrg          | -1 |
| 6234 | 8670  | P4ha2         | MMT00051613   | 1  |
| 6234 | 9258  | P4ha2         | P4ha1         | 1  |
| 6234 | 11043 | P4ha2         | Hsph1         | 1  |
| 6234 | 11214 | P4ha2         | MMT00049207   | 1  |
| 6234 | 12040 | P4ha2         | Comm10        | -1 |
| 6234 | 12761 | P4ha2         | Tsc22d3       | 1  |
| 6234 | 14135 | P4ha2         | Eepd1         | -1 |
| 6234 | 15675 | P4ha2         | MMT00077535   | 1  |
| 6234 | 18373 | P4ha2         | Dnajb1        | 1  |
| 6234 | 20912 | P4ha2         | Chordc1       | 1  |
| 6234 | 21775 | P4ha2         | MMT00051649   | -1 |
| 6234 | 22139 | P4ha2         | Stip1         | 1  |
| 6234 | 22751 | P4ha2         | Nosip         | -1 |
| 6250 | 6059  | Csnk2a1       | Dsn1          | -1 |
| 6250 | 6820  | Csnk2a1       | MMT00046996   | 1  |
| 6250 | 14647 | Csnk2a1       | Cst3          | 1  |
| 6277 | 19436 | Prdm1         | Dapp1         | 1  |
| 6283 | 524   | Ptpn22        | Hsd3b2        | -1 |
| 6283 | 1466  | Ptpn22        | Ubap2l        | -1 |
| 6283 | 1867  | Ptpn22        | Bcas2         | -1 |
| 6283 | 3753  | Ptpn22        | Setdb1        | 1  |
| 6283 | 10521 | Ptpn22        | Ttf2          | -1 |
| 6283 | 10681 | Ptpn22        | Dgkz          | 1  |
| 6283 | 11611 | Ptpn22        | S100a13       | 1  |
| 6283 | 22570 | Ptpn22        | Phf1          | -1 |
| 6330 | 665   | Dgkq          | Slc26a1       | -1 |
| 6330 | 1660  | Dgkq          | Zfp33b        | -1 |
| 6330 | 4617  | Dgkq          | Agpat9        | -1 |
| 6330 | 5100  | Dgkq          | Pebp1         | -1 |
| 6330 | 6330  | Dgkq          | Dgkq          | 1  |
| 6330 | 8547  | Dgkq          | Gbp4          | 1  |
| 6330 | 8807  | Dgkq          | Ankrd56       | -1 |
| 6330 | 10978 | Dgkq          | MMT00078322   | 1  |
| 6330 | 12656 | Dgkq          | Coq5          | 1  |
| 6330 | 14085 | Dgkq          | Cdkl2         | 1  |
| 6330 | 15908 | Dgkq          | Pebp1         | -1 |
| 6330 | 17807 | Dgkq          | Pebp1         | -1 |
| 6330 | 19719 | Dgkq          | EG634650      | 1  |
| 6330 | 20118 | Dgkq          | Tmem175       | 1  |
| 6330 | 20269 | Dgkq          | Hsd17b13      | -1 |
| 6330 | 23625 | Dgkq          | Pkd2          | 1  |
| 6333 | 6333  | lqcg          | lqcg          | 1  |
| 6357 | 7388  | Ankrd9        | Amn           | -1 |
| 6357 | 8155  | Ankrd9        | Mark3         | -1 |
| 6357 | 12238 | Ankrd9        | Traf3         | 1  |
| 6357 | 16191 | Ankrd9        | Klc1          | 1  |
| 6363 | 1041  | 9130014G24Rik | 3110049J23Rik | 1  |
| 6363 | 2571  | 9130014G24Rik | Rmnd1         | -1 |
| 6363 | 3744  | 9130014G24Rik | Rmnd1         | -1 |
| 6363 | 5965  | 9130014G24Rik | Pbld          | 1  |
| 6363 | 8786  | 9130014G24Rik | Rmnd1         | -1 |
| 6363 | 18300 | 9130014G24Rik | Arg1          | 1  |
| 6363 | 19115 | 9130014G24Rik | Rab32         | -1 |
| 6367 | 3208  | Lhfp          | 4930511111Rik | 1  |
| 6367 | 7436  | Lhfp          | 1700063K16Rik | 1  |
| 6367 | 11966 | Lhfp          | Zfp280b       | 1  |
| 6367 | 12861 | Lhfp          | Rhcg          | 1  |
| 6367 | 19436 | Lhfp          | Dapp1         | 1  |
| 6367 | 22125 | Lhfp          | Gab1          | 1  |
| 6372 | 5488  | 1110021L09Rik | C920009B18Rik | -1 |
| 6372 | 6372  | 1110021L09Rik | 1110021L09Rik | 1  |

|      |       |               |               |    |
|------|-------|---------------|---------------|----|
| 6376 | 1368  | Nle1          | Pctp          | 1  |
| 6376 | 1745  | Nle1          | Gas7          | -1 |
| 6376 | 6376  | Nle1          | Nle1          | 1  |
| 6376 | 10539 | Nle1          | Unc45b        | -1 |
| 6376 | 15127 | Nle1          | Cct6b         | -1 |
| 6403 | 3208  | MMT00039607   | 4930511111Rik | 1  |
| 6403 | 5694  | MMT00039607   | Sp7           | 1  |
| 6403 | 7436  | MMT00039607   | 1700063K16Rik | 1  |
| 6403 | 11966 | MMT00039607   | Zfp280b       | 1  |
| 6403 | 12861 | MMT00039607   | Rhcg          | 1  |
| 6403 | 14407 | MMT00039607   | Six3          | 1  |
| 6403 | 19436 | MMT00039607   | Dapp1         | 1  |
| 6403 | 19672 | MMT00039607   | Cldn19        | 1  |
| 6403 | 22125 | MMT00039607   | Gab1          | 1  |
| 6406 | 2938  | Sh3rf2        | H2-T23        | -1 |
| 6406 | 10667 | Sh3rf2        | H2-Eb1        | -1 |
| 6406 | 22822 | Sh3rf2        | MMT00013433   | -1 |
| 6422 | 3208  | Grk5          | 4930511111Rik | 1  |
| 6422 | 7436  | Grk5          | 1700063K16Rik | 1  |
| 6422 | 11966 | Grk5          | Zfp280b       | 1  |
| 6422 | 12861 | Grk5          | Rhcg          | 1  |
| 6422 | 14407 | Grk5          | Six3          | 1  |
| 6422 | 19436 | Grk5          | Dapp1         | 1  |
| 6422 | 19672 | Grk5          | Cldn19        | 1  |
| 6422 | 22125 | Grk5          | Gab1          | 1  |
| 6426 | 18947 | Mfsd4         | Ctse          | 1  |
| 6426 | 22226 | Mfsd4         | Pm20d1        | 1  |
| 6429 | 19436 | Sim2          | Dapp1         | 1  |
| 6437 | 2945  | Gnptg         | MMT00005190   | -1 |
| 6437 | 5014  | Gnptg         | MMT00017503   | -1 |
| 6437 | 8341  | Gnptg         | MMT00017270   | -1 |
| 6445 | 1820  | Milt3         | Mat2b         | -1 |
| 6445 | 3587  | Milt3         | MMT00041940   | 1  |
| 6445 | 3910  | Milt3         | Trpm7         | -1 |
| 6445 | 6021  | Milt3         | MMT00008784   | 1  |
| 6445 | 8670  | Milt3         | MMT00051613   | 1  |
| 6445 | 11043 | Milt3         | Hsph1         | 1  |
| 6445 | 11214 | Milt3         | MMT00049207   | 1  |
| 6445 | 15675 | Milt3         | MMT00077535   | 1  |
| 6445 | 18373 | Milt3         | Dnajb1        | 1  |
| 6445 | 20535 | Milt3         | Rbm4          | 1  |
| 6445 | 20855 | Milt3         | Phldb2        | -1 |
| 6445 | 22139 | Milt3         | Stip1         | 1  |
| 6456 | 11859 | Tyms          | Poln          | -1 |
| 6456 | 12385 | Tyms          | Mrpl33        | -1 |
| 6470 | 1466  | Arnt          | Ubap2l        | -1 |
| 6470 | 6206  | Arnt          | MMT00063701   | -1 |
| 6484 | 16361 | A130010J15Rik | Olfir703      | 1  |
| 6498 | 1374  | MMT00016809   | Mdn1          | -1 |
| 6498 | 6498  | MMT00016809   | MMT00016809   | 1  |
| 6498 | 6648  | MMT00016809   | Cenpl         | 1  |
| 6498 | 9449  | MMT00016809   | Sft2d2        | 1  |
| 6498 | 11167 | MMT00016809   | Dars2         | 1  |
| 6498 | 15844 | MMT00016809   | Klhdc9        | 1  |
| 6498 | 18276 | MMT00016809   | Apoa2         | 1  |
| 6510 | 23250 | Plcl2         | Plcl2         | 1  |
| 6513 | 2388  | Qpctl         | Dot1l         | 1  |
| 6513 | 2599  | Qpctl         | Lsm14a        | 1  |
| 6513 | 2912  | Qpctl         | Wtip          | -1 |
| 6513 | 4697  | Qpctl         | Cyp2a12       | -1 |
| 6513 | 6513  | Qpctl         | Qpctl         | 1  |
| 6513 | 11321 | Qpctl         | 2310014L17Rik | -1 |
| 6513 | 11888 | Qpctl         | Myadm         | -1 |
| 6513 | 16639 | Qpctl         | MMT00078937   | -1 |
| 6513 | 17314 | Qpctl         | Napa          | -1 |
| 6513 | 19462 | Qpctl         | 4933439C20Rik | -1 |
| 6513 | 20606 | Qpctl         | MMT00042166   | -1 |
| 6513 | 23247 | Qpctl         | Ercc1         | -1 |
| 6520 | 11966 | Arnt2         | Zfp280b       | 1  |



|      |       |               |               |    |
|------|-------|---------------|---------------|----|
| 6520 | 19436 | Arnt2         | Dapp1         | 1  |
| 6532 | 4386  | Auh           | Sptlc1        | 1  |
| 6532 | 6532  | Auh           | Auh           | 1  |
| 6542 | 8210  | Epor          | Hspa12a       | 1  |
| 6542 | 10387 | Epor          | 4933427D06Rik | 1  |
| 6542 | 10466 | Epor          | S1pr5         | 1  |
| 6542 | 11598 | Epor          | MMT00031533   | 1  |
| 6542 | 14550 | Epor          | Acot7         | 1  |
| 6542 | 20628 | Epor          | Hoxd10        | 1  |
| 6542 | 21099 | Epor          | Rapgef6       | 1  |
| 6564 | 337   | Cebpd         | Rasgef1b      | 1  |
| 6564 | 563   | Cebpd         | D4Bwg0951e    | 1  |
| 6564 | 2294  | Cebpd         | AU040829      | 1  |
| 6564 | 2483  | Cebpd         | Gmeb1         | 1  |
| 6564 | 3170  | Cebpd         | Mcart1        | 1  |
| 6564 | 3196  | Cebpd         | Tat           | 1  |
| 6564 | 3452  | Cebpd         | Ccrn4l        | 1  |
| 6564 | 4205  | Cebpd         | Rgs1          | 1  |
| 6564 | 4235  | Cebpd         | Pfkfb3        | 1  |
| 6564 | 4849  | Cebpd         | Zxdc          | 1  |
| 6564 | 5187  | Cebpd         | Speer4f       | 1  |
| 6564 | 5889  | Cebpd         | Errfi1        | 1  |
| 6564 | 6564  | Cebpd         | Cebpd         | 1  |
| 6564 | 7136  | Cebpd         | ld3           | -1 |
| 6564 | 8632  | Cebpd         | Igfbp1        | 1  |
| 6564 | 8816  | Cebpd         | Nfkbia        | 1  |
| 6564 | 9213  | Cebpd         | Osgin1        | -1 |
| 6564 | 10279 | Cebpd         | Rnf186        | -1 |
| 6564 | 10408 | Cebpd         | Per1          | 1  |
| 6564 | 11808 | Cebpd         | Pck1          | 1  |
| 6564 | 12761 | Cebpd         | Tsc22d3       | 1  |
| 6564 | 14263 | Cebpd         | Arrdc3        | -1 |
| 6564 | 15522 | Cebpd         | 1810011O10Rik | 1  |
| 6564 | 15631 | Cebpd         | Lpin1         | 1  |
| 6564 | 15826 | Cebpd         | Arl4d         | 1  |
| 6564 | 15882 | Cebpd         | AA986860      | 1  |
| 6564 | 16517 | Cebpd         | D4Wsu53e      | 1  |
| 6564 | 16580 | Cebpd         | Tnfaip2       | -1 |
| 6564 | 17352 | Cebpd         | Cebpb         | 1  |
| 6564 | 17525 | Cebpd         | Ctgf          | 1  |
| 6564 | 17752 | Cebpd         | Chac1         | 1  |
| 6564 | 18083 | Cebpd         | Gadd45a       | -1 |
| 6564 | 18785 | Cebpd         | Angptl4       | 1  |
| 6564 | 19124 | Cebpd         | Pim3          | 1  |
| 6564 | 19528 | Cebpd         | Zfp503        | -1 |
| 6564 | 19556 | Cebpd         | Efna1         | -1 |
| 6564 | 21331 | Cebpd         | Slc10a6       | 1  |
| 6564 | 21805 | Cebpd         | Plk3          | 1  |
| 6564 | 21934 | Cebpd         | ld2           | -1 |
| 6564 | 22873 | Cebpd         | Slc38a2       | 1  |
| 6564 | 23202 | Cebpd         | Olfr559       | 1  |
| 6564 | 23552 | Cebpd         | Rasl11b       | -1 |
| 6571 | 264   | 3000004C01Rik | Dcakd         | 1  |
| 6588 | 1453  | Rbmx          | Gfod2         | -1 |
| 6588 | 3587  | Rbmx          | MMT00041940   | -1 |
| 6588 | 6021  | Rbmx          | MMT00008784   | -1 |
| 6588 | 8670  | Rbmx          | MMT00051613   | -1 |
| 6588 | 11043 | Rbmx          | Hsph1         | -1 |
| 6588 | 11214 | Rbmx          | MMT00049207   | -1 |
| 6588 | 15675 | Rbmx          | MMT00077535   | -1 |
| 6588 | 17449 | Rbmx          | Zfp296        | -1 |
| 6588 | 22139 | Rbmx          | Stip1         | -1 |
| 6632 | 19436 | Dio1          | Dapp1         | 1  |
| 6648 | 4833  | Cenpl         | Synpo2        | 1  |
| 6665 | 17941 | AY026312      | Ror2          | 1  |
| 6673 | 11214 | Nasp          | MMT00049207   | 1  |
| 6680 | 16757 | Olfr393       | Tmem146       | 1  |
| 6680 | 17926 | Olfr393       | Nptx1         | 1  |
| 6680 | 18731 | Olfr393       | Fgf17         | 1  |

|      |       |               |                    |    |
|------|-------|---------------|--------------------|----|
| 6708 | 524   | Serpini2      | Hsd3b2             | -1 |
| 6708 | 1466  | Serpini2      | Ubap2l             | -1 |
| 6708 | 1867  | Serpini2      | Bcas2              | -1 |
| 6708 | 1963  | Serpini2      | MMT00039783        | -1 |
| 6708 | 3753  | Serpini2      | Setdb1             | 1  |
| 6708 | 5938  | Serpini2      | Pfn2               | -1 |
| 6708 | 6206  | Serpini2      | MMT00063701        | -1 |
| 6708 | 10521 | Serpini2      | Tif2               | -1 |
| 6708 | 10681 | Serpini2      | Dgkz               | 1  |
| 6708 | 11121 | Serpini2      | Mtmr11             | 1  |
| 6708 | 11611 | Serpini2      | S100a13            | 1  |
| 6708 | 12367 | Serpini2      | MMT00072365        | 1  |
| 6708 | 16416 | Serpini2      | Comm2              | -1 |
| 6708 | 18754 | Serpini2      | Rbm8a              | -1 |
| 6708 | 18911 | Serpini2      | Selenbp2           | -1 |
| 6708 | 20661 | Serpini2      | Tuft1              | -1 |
| 6708 | 21814 | Serpini2      | Accn5              | -1 |
| 6708 | 22202 | Serpini2      | OTTMUSG00000021274 | 1  |
| 6708 | 22570 | Serpini2      | Phf1               | -1 |
| 6708 | 23457 | Serpini2      | Selenbp2           | -1 |
| 6719 | 19436 | Cacng8        | Dapp1              | 1  |
| 6733 | 19216 | Mfng          | Bik                | -1 |
| 6754 | 7436  | Trpv3         | 1700063K16Rik      | 1  |
| 6754 | 11966 | Trpv3         | Zfp280b            | 1  |
| 6754 | 12861 | Trpv3         | Rhcg               | 1  |
| 6754 | 19436 | Trpv3         | Dapp1              | 1  |
| 6754 | 22125 | Trpv3         | Gab1               | 1  |
| 6760 | 1755  | 2810428115Rik | Ocel1              | 1  |
| 6761 | 20039 | MMT00030685   | Trpc4              | 1  |
| 6765 | 6765  | Ldhd          | Ldhd               | 1  |
| 6766 | 6766  | Sspn          | Sspn               | 1  |
| 6766 | 9010  | Sspn          | 8430419L09Rik      | -1 |
| 6769 | 902   | Banp          | Slc30a1            | -1 |
| 6769 | 1156  | Banp          | Rbj                | -1 |
| 6769 | 1293  | Banp          | Safb               | 1  |
| 6769 | 3170  | Banp          | Mcart1             | 1  |
| 6769 | 3196  | Banp          | Tat                | 1  |
| 6769 | 3462  | Banp          | Nmnat3             | -1 |
| 6769 | 3587  | Banp          | MMT00041940        | 1  |
| 6769 | 4404  | Banp          | Comm5              | -1 |
| 6769 | 4780  | Banp          | Sfrs5              | -1 |
| 6769 | 4966  | Banp          | Zscan20            | 1  |
| 6769 | 5727  | Banp          | Camk2g             | -1 |
| 6769 | 6021  | Banp          | MMT00008784        | 1  |
| 6769 | 6126  | Banp          | MMT00067575        | 1  |
| 6769 | 6485  | Banp          | Map3k7ip1          | -1 |
| 6769 | 6769  | Banp          | Banp               | 1  |
| 6769 | 6976  | Banp          | Rbm35b             | -1 |
| 6769 | 7140  | Banp          | Mtbp               | -1 |
| 6769 | 7389  | Banp          | Sfrs5              | -1 |
| 6769 | 7963  | Banp          | Rxrg               | -1 |
| 6769 | 8122  | Banp          | Hexim1             | 1  |
| 6769 | 8319  | Banp          | MMT00062477        | 1  |
| 6769 | 8554  | Banp          | Letm2              | 1  |
| 6769 | 8662  | Banp          | Brca2              | -1 |
| 6769 | 8670  | Banp          | MMT00051613        | 1  |
| 6769 | 9067  | Banp          | Tra2a              | 1  |
| 6769 | 9258  | Banp          | P4ha1              | 1  |
| 6769 | 9899  | Banp          | D13Wsu177e         | 1  |
| 6769 | 10435 | Banp          | Nab2               | -1 |
| 6769 | 10769 | Banp          | Hnrnpd             | -1 |
| 6769 | 11043 | Banp          | Hsph1              | 1  |
| 6769 | 11214 | Banp          | MMT00049207        | 1  |
| 6769 | 11379 | Banp          | Dnttip1            | -1 |
| 6769 | 12761 | Banp          | Tsc22d3            | 1  |
| 6769 | 13087 | Banp          | Cxadr              | -1 |
| 6769 | 14135 | Banp          | Eepd1              | -1 |
| 6769 | 14859 | Banp          | Hspa1a             | 1  |
| 6769 | 15476 | Banp          | Fem1b              | -1 |

|      |       |          |               |    |
|------|-------|----------|---------------|----|
| 6769 | 15566 | Banp     | Snn           | -1 |
| 6769 | 15675 | Banp     | MMT00077535   | 1  |
| 6769 | 16251 | Banp     | G6pc          | 1  |
| 6769 | 18083 | Banp     | Gadd45a       | -1 |
| 6769 | 18099 | Banp     | Nfx1          | -1 |
| 6769 | 18215 | Banp     | Gpr146        | -1 |
| 6769 | 18373 | Banp     | Dnajb1        | 1  |
| 6769 | 18418 | Banp     | Hspa1b        | 1  |
| 6769 | 20535 | Banp     | Rbm4          | 1  |
| 6769 | 20912 | Banp     | Chordc1       | 1  |
| 6769 | 21389 | Banp     | Odf2          | -1 |
| 6769 | 22216 | Banp     | Sp5           | -1 |
| 6769 | 22303 | Banp     | Cdt1          | -1 |
| 6769 | 23253 | Banp     | D030011O10Rik | 1  |
| 6784 | 19436 | Al182371 | Dapp1         | 1  |
| 6804 | 2805  | Cyp2d22  | Rhog          | 1  |
| 6804 | 3654  | Cyp2d22  | St13          | -1 |
| 6804 | 6804  | Cyp2d22  | Cyp2d22       | 1  |
| 6804 | 8653  | Cyp2d22  | AW124722      | -1 |
| 6804 | 10558 | Cyp2d22  | Cyp2d40       | -1 |
| 6804 | 11503 | Cyp2d22  | Rangap1       | 1  |
| 6804 | 11968 | Cyp2d22  | Cenpm         | 1  |
| 6804 | 12468 | Cyp2d22  | Cyp2d13       | 1  |
| 6804 | 14185 | Cyp2d22  | Poldip3       | -1 |
| 6804 | 19216 | Cyp2d22  | Bik           | 1  |
| 6805 | 4833  | Rrbp1    | Synpo2        | -1 |
| 6805 | 6231  | Rrbp1    | 9030622O22Rik | 1  |
| 6805 | 21665 | Rrbp1    | Nat5          | 1  |
| 6824 | 143   | Irf7     | Gvin1         | 1  |
| 6824 | 1533  | Irf7     | BC013712      | 1  |
| 6824 | 2224  | Irf7     | Oasl2         | 1  |
| 6824 | 2550  | Irf7     | MMT00036681   | 1  |
| 6824 | 3659  | Irf7     | EG236451      | 1  |
| 6824 | 3683  | Irf7     | Oas2          | 1  |
| 6824 | 4114  | Irf7     | Parp12        | 1  |
| 6824 | 4426  | Irf7     | Iigp2         | 1  |
| 6824 | 4508  | Irf7     | Ifit1         | 1  |
| 6824 | 5002  | Irf7     | Ifi202b       | 1  |
| 6824 | 5216  | Irf7     | Spnb5         | 1  |
| 6824 | 5250  | Irf7     | Ifit2         | 1  |
| 6824 | 5853  | Irf7     | Trim30        | 1  |
| 6824 | 6595  | Irf7     | Oas1a         | 1  |
| 6824 | 6824  | Irf7     | Irf7          | 1  |
| 6824 | 7069  | Irf7     | Ube1l         | 1  |
| 6824 | 7105  | Irf7     | Plac8         | 1  |
| 6824 | 7316  | Irf7     | Ifi204        | 1  |
| 6824 | 8800  | Irf7     | Rnf213        | 1  |
| 6824 | 9847  | Irf7     | Ifi27         | 1  |
| 6824 | 10109 | Irf7     | Gbp3          | 1  |
| 6824 | 11009 | Irf7     | MMT00008885   | 1  |
| 6824 | 11204 | Irf7     | Al451617      | 1  |
| 6824 | 11265 | Irf7     | Irgm          | 1  |
| 6824 | 11701 | Irf7     | Oas1c         | 1  |
| 6824 | 12312 | Irf7     | Ms4a6d        | 1  |
| 6824 | 12398 | Irf7     | Ifi44         | 1  |
| 6824 | 12600 | Irf7     | Ifi204        | 1  |
| 6824 | 12969 | Irf7     | Xaf1          | 1  |
| 6824 | 13156 | Irf7     | Ifit3         | 1  |
| 6824 | 13309 | Irf7     | Tgtp          | 1  |
| 6824 | 13514 | Irf7     | Apol9b        | 1  |
| 6824 | 13527 | Irf7     | Ctss          | 1  |
| 6824 | 14880 | Irf7     | Ms4a4c        | 1  |
| 6824 | 15074 | Irf7     | Usp18         | 1  |
| 6824 | 16182 | Irf7     | Oasl1         | 1  |
| 6824 | 16572 | Irf7     | D14Ert668e    | 1  |
| 6824 | 17197 | Irf7     | Igtp          | 1  |
| 6824 | 18186 | Irf7     | Parp14        | 1  |
| 6824 | 19189 | Irf7     | Sp100         | 1  |
| 6824 | 19738 | Irf7     | Lgals3bp      | 1  |

|      |       |             |               |    |
|------|-------|-------------|---------------|----|
| 6824 | 20321 | Irf7        | Ms4a6b        | 1  |
| 6824 | 20791 | Irf7        | MMT00014813   | 1  |
| 6824 | 20997 | Irf7        | MMT00028135   | 1  |
| 6824 | 21351 | Irf7        | Shisa5        | 1  |
| 6824 | 21549 | Irf7        | Rtp4          | 1  |
| 6824 | 21824 | Irf7        | 5830443L24Rik | 1  |
| 6824 | 22037 | Irf7        | Oas1g         | 1  |
| 6824 | 23450 | Irf7        | D12Ert647e    | 1  |
| 6828 | 2433  | Pigh        | Armc10        | -1 |
| 6828 | 3812  | Pigh        | Zfyve26       | -1 |
| 6828 | 6021  | Pigh        | MMT00008784   | 1  |
| 6828 | 6755  | Pigh        | Wdr22         | 1  |
| 6828 | 8670  | Pigh        | MMT00051613   | 1  |
| 6828 | 15476 | Pigh        | Fem1b         | -1 |
| 6828 | 15675 | Pigh        | MMT00077535   | 1  |
| 6828 | 21389 | Pigh        | Odf2          | -1 |
| 6828 | 21775 | Pigh        | MMT00051649   | -1 |
| 6839 | 20801 | Mrpl46      | Mrps11        | -1 |
| 6931 | 20871 | Hrsp12      | Pop1          | -1 |
| 6932 | 3496  | Ckap4       | Slc41a2       | -1 |
| 6932 | 12055 | Ckap4       | 1810008A18Rik | 1  |
| 6972 | 2329  | Trspap1     | Wdr6          | 1  |
| 6972 | 3587  | Trspap1     | MMT00041940   | -1 |
| 6972 | 6021  | Trspap1     | MMT00008784   | -1 |
| 6972 | 7731  | Trspap1     | 1500001M20Rik | 1  |
| 6972 | 8670  | Trspap1     | MMT00051613   | -1 |
| 6972 | 9258  | Trspap1     | P4ha1         | -1 |
| 6972 | 11043 | Trspap1     | Hsph1         | -1 |
| 6972 | 11214 | Trspap1     | MMT00049207   | -1 |
| 6972 | 15675 | Trspap1     | MMT00077535   | -1 |
| 6972 | 20912 | Trspap1     | Chordc1       | -1 |
| 6974 | 3654  | Tmem65      | St13          | -1 |
| 6974 | 6974  | Tmem65      | Tmem65        | 1  |
| 6974 | 16295 | Tmem65      | Nlrp14        | -1 |
| 6974 | 19216 | Tmem65      | Bik           | 1  |
| 6992 | 19436 | Olf172      | Dapp1         | 1  |
| 7021 | 3654  | Slc16a8     | St13          | 1  |
| 7021 | 6804  | Slc16a8     | Cyp2d22       | -1 |
| 7021 | 7100  | Slc16a8     | Tomm22        | -1 |
| 7021 | 8653  | Slc16a8     | AW124722      | 1  |
| 7021 | 11503 | Slc16a8     | Rangap1       | -1 |
| 7021 | 12468 | Slc16a8     | Cyp2d13       | -1 |
| 7021 | 19216 | Slc16a8     | Bik           | -1 |
| 7029 | 18027 | MMT00072012 | 5730403B10Rik | 1  |
| 7041 | 7436  | Sp140       | 1700063K16Rik | 1  |
| 7041 | 11966 | Sp140       | Zfp280b       | 1  |
| 7041 | 12861 | Sp140       | Rhcg          | 1  |
| 7041 | 19436 | Sp140       | Dapp1         | 1  |
| 7054 | 20100 | Tref1       | Guca1b        | 1  |
| 7054 | 20966 | Tref1       | MMT00014378   | -1 |
| 7069 | 2224  | Ube1l       | Oasl2         | 1  |
| 7069 | 6824  | Ube1l       | Irf7          | 1  |
| 7069 | 12398 | Ube1l       | lfi44         | 1  |
| 7069 | 13156 | Ube1l       | lfit3         | 1  |
| 7069 | 19189 | Ube1l       | Sp100         | 1  |
| 7069 | 21351 | Ube1l       | Shisa5        | 1  |
| 7069 | 21549 | Ube1l       | Rtp4          | 1  |
| 7083 | 2115  | MMT00044154 | Gpr12         | -1 |
| 7083 | 8022  | MMT00044154 | MMT00004959   | 1  |
| 7083 | 8906  | MMT00044154 | MMT00004929   | 1  |
| 7084 | 7084  | Spz1        | Spz1          | 1  |
| 7084 | 14407 | Spz1        | Six3          | 1  |
| 7084 | 19436 | Spz1        | Dapp1         | 1  |
| 7085 | 19436 | St8sia2     | Dapp1         | 1  |
| 7088 | 327   | Slc37a1     | H2-Ea         | 1  |
| 7088 | 510   | Slc37a1     | Neu1          | -1 |
| 7088 | 1340  | Slc37a1     | Tap2          | 1  |
| 7088 | 2325  | Slc37a1     | H2-K1         | 1  |
| 7088 | 2522  | Slc37a1     | Olf1442       | -1 |

|      |       |         |               |    |
|------|-------|---------|---------------|----|
| 7088 | 2801  | Slc37a1 | H2-BI         | 1  |
| 7088 | 2938  | Slc37a1 | H2-T23        | 1  |
| 7088 | 3599  | Slc37a1 | MMT00035426   | -1 |
| 7088 | 3704  | Slc37a1 | H2-Q7         | 1  |
| 7088 | 3857  | Slc37a1 | 1700001C19Rik | -1 |
| 7088 | 4001  | Slc37a1 | Apoa4         | -1 |
| 7088 | 4004  | Slc37a1 | Thbs2         | -1 |
| 7088 | 4958  | Slc37a1 | Ndufa7        | -1 |
| 7088 | 5410  | Slc37a1 | Cyp4f15       | -1 |
| 7088 | 5648  | Slc37a1 | Zfp213        | -1 |
| 7088 | 6510  | Slc37a1 | Plcl2         | 1  |
| 7088 | 7088  | Slc37a1 | Slc37a1       | 1  |
| 7088 | 8649  | Slc37a1 | MMT00072863   | -1 |
| 7088 | 8750  | Slc37a1 | 1700010I14Rik | 1  |
| 7088 | 8767  | Slc37a1 | Rgl2          | 1  |
| 7088 | 9158  | Slc37a1 | Pde9a         | -1 |
| 7088 | 9717  | Slc37a1 | Psemb9        | 1  |
| 7088 | 10376 | Slc37a1 | C920025E04Rik | -1 |
| 7088 | 10394 | Slc37a1 | MMT00028435   | 1  |
| 7088 | 10667 | Slc37a1 | H2-Eb1        | 1  |
| 7088 | 12335 | Slc37a1 | Plcb4         | 1  |
| 7088 | 12355 | Slc37a1 | Al507611      | 1  |
| 7088 | 12694 | Slc37a1 | Riok2         | -1 |
| 7088 | 13438 | Slc37a1 | Btg3          | 1  |
| 7088 | 13493 | Slc37a1 | Ring1         | -1 |
| 7088 | 13667 | Slc37a1 | Cbs           | -1 |
| 7088 | 13789 | Slc37a1 | H2-Q8         | 1  |
| 7088 | 14132 | Slc37a1 | Glo1          | 1  |
| 7088 | 14209 | Slc37a1 | Btg3          | 1  |
| 7088 | 15181 | Slc37a1 | Enpp4         | -1 |
| 7088 | 15322 | Slc37a1 | Rasl12        | -1 |
| 7088 | 15531 | Slc37a1 | Prickle4      | -1 |
| 7088 | 15540 | Slc37a1 | C2            | 1  |
| 7088 | 15645 | Slc37a1 | Mrpl18        | 1  |
| 7088 | 16153 | Slc37a1 | Syngn1        | 1  |
| 7088 | 17691 | Slc37a1 | Kank3         | 1  |
| 7088 | 17707 | Slc37a1 | Rshl2b        | 1  |
| 7088 | 18003 | Slc37a1 | Tff3          | -1 |
| 7088 | 18251 | Slc37a1 | Susd4         | 1  |
| 7088 | 18577 | Slc37a1 | Bitbd9        | -1 |
| 7088 | 18906 | Slc37a1 | Zfand3        | 1  |
| 7088 | 20100 | Slc37a1 | Guca1b        | -1 |
| 7088 | 20238 | Slc37a1 | H2-T9         | 1  |
| 7088 | 20346 | Slc37a1 | Gna-rs1       | 1  |
| 7088 | 20511 | Slc37a1 | Decr2         | 1  |
| 7088 | 21295 | Slc37a1 | Snf1lk        | -1 |
| 7088 | 22822 | Slc37a1 | MMT00013433   | 1  |
| 7088 | 23250 | Slc37a1 | Plcl2         | 1  |
| 7094 | 3208  | Cyp2c54 | 4930511I11Rik | 1  |
| 7094 | 7436  | Cyp2c54 | 1700063K16Rik | 1  |
| 7094 | 11966 | Cyp2c54 | Zfp280b       | 1  |
| 7094 | 12861 | Cyp2c54 | Rhcg          | 1  |
| 7094 | 14407 | Cyp2c54 | Six3          | 1  |
| 7094 | 19436 | Cyp2c54 | Dapp1         | 1  |
| 7094 | 22125 | Cyp2c54 | Gab1          | 1  |
| 7100 | 3411  | Tomm22  | Rabl2a        | 1  |
| 7100 | 3654  | Tomm22  | St13          | -1 |
| 7100 | 6804  | Tomm22  | Cyp2d22       | 1  |
| 7100 | 7100  | Tomm22  | Tomm22        | 1  |
| 7100 | 8653  | Tomm22  | AW124722      | -1 |
| 7100 | 9822  | Tomm22  | Celsr1        | 1  |
| 7100 | 11503 | Tomm22  | Rangap1       | 1  |
| 7100 | 12468 | Tomm22  | Cyp2d13       | 1  |
| 7100 | 19216 | Tomm22  | Bik           | 1  |
| 7105 | 1533  | Plac8   | BC013712      | 1  |
| 7105 | 2200  | Plac8   | BC006779      | 1  |
| 7105 | 2224  | Plac8   | Oasl2         | 1  |
| 7105 | 3426  | Plac8   | Hap1          | 1  |
| 7105 | 3594  | Plac8   | Rasa4         | 1  |

|      |       |               |               |    |
|------|-------|---------------|---------------|----|
| 7105 | 3683  | Plac8         | Oas2          | 1  |
| 7105 | 4426  | Plac8         | ligp2         | 1  |
| 7105 | 6098  | Plac8         | Ncf4          | 1  |
| 7105 | 6824  | Plac8         | Irf7          | 1  |
| 7105 | 7069  | Plac8         | Ube1l         | 1  |
| 7105 | 7105  | Plac8         | Plac8         | 1  |
| 7105 | 7284  | Plac8         | MMT00008674   | 1  |
| 7105 | 7336  | Plac8         | Cd5l          | 1  |
| 7105 | 8659  | Plac8         | Psmb8         | 1  |
| 7105 | 8800  | Plac8         | Rnf213        | 1  |
| 7105 | 9847  | Plac8         | Ifi27         | 1  |
| 7105 | 10109 | Plac8         | Gbp3          | 1  |
| 7105 | 12126 | Plac8         | Znfx1         | 1  |
| 7105 | 12398 | Plac8         | Ifi44         | 1  |
| 7105 | 12600 | Plac8         | Ifi204        | 1  |
| 7105 | 12969 | Plac8         | Xaf1          | 1  |
| 7105 | 13181 | Plac8         | Lcp2          | 1  |
| 7105 | 13309 | Plac8         | Tgtp          | 1  |
| 7105 | 14506 | Plac8         | Slc15a3       | 1  |
| 7105 | 14880 | Plac8         | Ms4a4c        | 1  |
| 7105 | 15074 | Plac8         | Usp18         | 1  |
| 7105 | 16102 | Plac8         | Cd72          | 1  |
| 7105 | 16182 | Plac8         | Oasl1         | 1  |
| 7105 | 17412 | Plac8         | Aif1          | 1  |
| 7105 | 19738 | Plac8         | Lgals3bp      | 1  |
| 7105 | 20431 | Plac8         | Slc7a7        | 1  |
| 7105 | 20997 | Plac8         | MMT00028135   | 1  |
| 7105 | 21351 | Plac8         | Shisa5        | 1  |
| 7105 | 21549 | Plac8         | Rtp4          | 1  |
| 7105 | 22037 | Plac8         | Oas1g         | 1  |
| 7105 | 23208 | Plac8         | Hck           | 1  |
| 7105 | 23450 | Plac8         | D12Ert647e    | 1  |
| 7116 | 1162  | Katnal1       | Cpsf4         | -1 |
| 7116 | 2115  | Katnal1       | Gpr12         | -1 |
| 7116 | 2755  | Katnal1       | EG382421      | 1  |
| 7116 | 3598  | Katnal1       | Rpo1-3        | 1  |
| 7116 | 7083  | Katnal1       | MMT00044154   | 1  |
| 7116 | 7116  | Katnal1       | Katnal1       | 1  |
| 7116 | 8022  | Katnal1       | MMT00004959   | 1  |
| 7116 | 8906  | Katnal1       | MMT00004929   | 1  |
| 7116 | 12377 | Katnal1       | MMT000050540  | 1  |
| 7116 | 15480 | Katnal1       | MMT00078167   | 1  |
| 7116 | 17535 | Katnal1       | MMT00008110   | 1  |
| 7116 | 19565 | Katnal1       | EG385454      | 1  |
| 7116 | 21125 | Katnal1       | Mtif3         | -1 |
| 7132 | 11966 | Sp9           | Zfp280b       | 1  |
| 7132 | 12861 | Sp9           | Rhcg          | 1  |
| 7132 | 19436 | Sp9           | Dapp1         | 1  |
| 7135 | 7909  | Ezr           | Oas3          | 1  |
| 7135 | 11435 | Ezr           | Rnaset2a      | 1  |
| 7135 | 21754 | Ezr           | Synj2         | -1 |
| 7149 | 3196  | 9530077C05Rik | Tat           | 1  |
| 7149 | 3587  | 9530077C05Rik | MMT00041940   | 1  |
| 7149 | 3849  | 9530077C05Rik | MMT00047578   | 1  |
| 7149 | 6021  | 9530077C05Rik | MMT00008784   | 1  |
| 7149 | 8670  | 9530077C05Rik | MMT00051613   | 1  |
| 7149 | 9258  | 9530077C05Rik | P4ha1         | 1  |
| 7149 | 11043 | 9530077C05Rik | Hsph1         | 1  |
| 7149 | 11214 | 9530077C05Rik | MMT00049207   | 1  |
| 7149 | 12761 | 9530077C05Rik | Tsc22d3       | 1  |
| 7149 | 15476 | 9530077C05Rik | Fem1b         | -1 |
| 7149 | 15675 | 9530077C05Rik | MMT00077535   | 1  |
| 7149 | 17569 | 9530077C05Rik | 1810058I24Rik | -1 |
| 7149 | 18373 | 9530077C05Rik | Dnajb1        | 1  |
| 7149 | 22216 | 9530077C05Rik | Sp5           | -1 |
| 7159 | 7159  | 1700031F05Rik | 1700031F05Rik | 1  |
| 7173 | 5938  | Trim59        | Pfn2          | 1  |
| 7173 | 6206  | Trim59        | MMT00063701   | 1  |
| 7173 | 7572  | Trim59        | Ppm1l         | -1 |

|      |       |               |               |    |
|------|-------|---------------|---------------|----|
| 7173 | 10521 | Trim59        | Ttf2          | 1  |
| 7173 | 11611 | Trim59        | S100a13       | -1 |
| 7173 | 12367 | Trim59        | MMT00072365   | -1 |
| 7173 | 16416 | Trim59        | Comm2         | 1  |
| 7234 | 17702 | MMT00005439   | Ccdc40        | -1 |
| 7263 | 3587  | Narg1l        | MMT00041940   | 1  |
| 7263 | 6021  | Narg1l        | MMT00008784   | 1  |
| 7263 | 8670  | Narg1l        | MMT00051613   | 1  |
| 7263 | 9067  | Narg1l        | Tra2a         | 1  |
| 7263 | 11214 | Narg1l        | MMT00049207   | 1  |
| 7263 | 15476 | Narg1l        | Fem1b         | -1 |
| 7263 | 15675 | Narg1l        | MMT00077535   | 1  |
| 7263 | 16251 | Narg1l        | G6pc          | 1  |
| 7263 | 16517 | Narg1l        | D4Wsu53e      | 1  |
| 7263 | 17591 | Narg1l        | D930015E06Rik | -1 |
| 7263 | 18083 | Narg1l        | Gadd45a       | -1 |
| 7263 | 18373 | Narg1l        | Dnajb1        | 1  |
| 7263 | 18418 | Narg1l        | Hspa1b        | 1  |
| 7273 | 2743  | Rnf103        | Tcf3          | 1  |
| 7273 | 3703  | Rnf103        | Ggcx          | 1  |
| 7273 | 11338 | Rnf103        | Vamp8         | 1  |
| 7273 | 15384 | Rnf103        | Mat2a         | 1  |
| 7273 | 15708 | Rnf103        | Retsat        | 1  |
| 7279 | 11966 | Cldn13        | Zfp280b       | 1  |
| 7279 | 19436 | Cldn13        | Dapp1         | 1  |
| 7289 | 12861 | L1cam         | Rhcg          | 1  |
| 7289 | 19436 | L1cam         | Dapp1         | 1  |
| 7303 | 6021  | Tmem182       | MMT00008784   | -1 |
| 7303 | 8670  | Tmem182       | MMT00051613   | -1 |
| 7303 | 15675 | Tmem182       | MMT00077535   | -1 |
| 7339 | 7909  | Tdp1          | Oas3          | -1 |
| 7339 | 8750  | Tdp1          | 1700010I14Rik | -1 |
| 7339 | 11435 | Tdp1          | Rnaset2a      | -1 |
| 7339 | 17760 | Tdp1          | Ccr6          | 1  |
| 7339 | 21754 | Tdp1          | Synj2         | 1  |
| 7360 | 16983 | Mfi2          | Pigx          | -1 |
| 7368 | 3587  | Adam8         | MMT00041940   | 1  |
| 7368 | 3913  | Adam8         | Mrpl15        | 1  |
| 7368 | 6021  | Adam8         | MMT00008784   | 1  |
| 7368 | 7444  | Adam8         | Hspe1         | 1  |
| 7368 | 7731  | Adam8         | 1500001M20Rik | -1 |
| 7368 | 8670  | Adam8         | MMT00051613   | 1  |
| 7368 | 8891  | Adam8         | MMT00071061   | 1  |
| 7368 | 9067  | Adam8         | Tra2a         | 1  |
| 7368 | 9258  | Adam8         | P4ha1         | 1  |
| 7368 | 11043 | Adam8         | Hsph1         | 1  |
| 7368 | 11214 | Adam8         | MMT00049207   | 1  |
| 7368 | 12498 | Adam8         | Abcg8         | -1 |
| 7368 | 13741 | Adam8         | Hspa4l        | 1  |
| 7368 | 15476 | Adam8         | Fem1b         | -1 |
| 7368 | 15675 | Adam8         | MMT00077535   | 1  |
| 7368 | 18099 | Adam8         | Nfx1          | -1 |
| 7368 | 21553 | Adam8         | EG628438      | 1  |
| 7368 | 22751 | Adam8         | Nosip         | -1 |
| 7372 | 15321 | Fastk         | Pus7          | -1 |
| 7372 | 20413 | Fastk         | Wdr86         | -1 |
| 7378 | 1162  | 1700001J03Rik | Cpsf4         | -1 |
| 7378 | 2115  | 1700001J03Rik | Gpr12         | -1 |
| 7378 | 3587  | 1700001J03Rik | MMT00041940   | -1 |
| 7378 | 6021  | 1700001J03Rik | MMT00008784   | -1 |
| 7378 | 8022  | 1700001J03Rik | MMT00004959   | 1  |
| 7378 | 8670  | 1700001J03Rik | MMT00051613   | -1 |
| 7378 | 8906  | 1700001J03Rik | MMT00004929   | 1  |
| 7378 | 11043 | 1700001J03Rik | Hsph1         | -1 |
| 7378 | 11214 | 1700001J03Rik | MMT00049207   | -1 |
| 7378 | 15480 | 1700001J03Rik | MMT00078167   | 1  |
| 7378 | 15675 | 1700001J03Rik | MMT00077535   | -1 |
| 7378 | 17535 | 1700001J03Rik | MMT00008110   | 1  |
| 7378 | 18373 | 1700001J03Rik | Dnajb1        | -1 |

|      |       |               |               |    |
|------|-------|---------------|---------------|----|
| 7378 | 18418 | 1700001J03Rik | Hspa1b        | -1 |
| 7386 | 14027 | Pex6          | Rpo1-1        | 1  |
| 7388 | 1371  | Amn           | 1200009I06Rik | -1 |
| 7388 | 4414  | Amn           | 5033406O09Rik | -1 |
| 7388 | 5829  | Amn           | 2810455K09Rik | 1  |
| 7388 | 7388  | Amn           | Amn           | -1 |
| 7388 | 8155  | Amn           | Mark3         | -1 |
| 7388 | 12238 | Amn           | Traf3         | 1  |
| 7388 | 13027 | Amn           | Ppp2r5c       | 1  |
| 7388 | 15984 | Amn           | MMT00075074   | -1 |
| 7388 | 16191 | Amn           | Klc1          | 1  |
| 7407 | 9067  | Slc9a3r1      | Tra2a         | -1 |
| 7436 | 3208  | 1700063K16Rik | 4930511I11Rik | 1  |
| 7436 | 11966 | 1700063K16Rik | Zfp280b       | 1  |
| 7436 | 12861 | 1700063K16Rik | Rhcg          | 1  |
| 7436 | 19436 | 1700063K16Rik | Dapp1         | 1  |
| 7436 | 22125 | 1700063K16Rik | Gab1          | 1  |
| 7449 | 9449  | Creg1         | Sft2d2        | -1 |
| 7449 | 19520 | Creg1         | Uck2          | -1 |
| 7480 | 8971  | 4930506M07Rik | Slc18a2       | 1  |
| 7551 | 18934 | Grik3         | MMT00015154   | -1 |
| 7551 | 21896 | Grik3         | Lce1c         | -1 |
| 7577 | 19436 | Cldn8         | Dapp1         | 1  |
| 7603 | 327   | Sod2          | H2-Ea         | 1  |
| 7603 | 2325  | Sod2          | H2-K1         | 1  |
| 7603 | 2938  | Sod2          | H2-T23        | 1  |
| 7603 | 3599  | Sod2          | MMT00035426   | -1 |
| 7603 | 4004  | Sod2          | Thbs2         | -1 |
| 7603 | 5410  | Sod2          | Cyp4f15       | -1 |
| 7603 | 7088  | Sod2          | Slc37a1       | 1  |
| 7603 | 8750  | Sod2          | 1700010I14Rik | 1  |
| 7603 | 9158  | Sod2          | Pde9a         | -1 |
| 7603 | 10376 | Sod2          | C920025E04Rik | -1 |
| 7603 | 10667 | Sod2          | H2-Eb1        | 1  |
| 7603 | 13493 | Sod2          | Ring1         | -1 |
| 7603 | 18906 | Sod2          | Zfand3        | 1  |
| 7603 | 20238 | Sod2          | H2-T9         | 1  |
| 7603 | 20346 | Sod2          | Gna-rs1       | 1  |
| 7603 | 22822 | Sod2          | MMT00013433   | 1  |
| 7670 | 6846  | Ccdc57        | Olfir1402     | -1 |
| 7670 | 8791  | Ccdc57        | Sectm1a       | -1 |
| 7670 | 15016 | Ccdc57        | MMT00074608   | -1 |
| 7670 | 17792 | Ccdc57        | Vmn2r79       | -1 |
| 7670 | 17897 | Ccdc57        | Gm1019        | -1 |
| 7698 | 12861 | Klrb1a        | Rhcg          | 1  |
| 7698 | 19436 | Klrb1a        | Dapp1         | 1  |
| 7721 | 12861 | MMT00000356   | Rhcg          | 1  |
| 7751 | 499   | Sgk2          | 2310057J16Rik | -1 |
| 7751 | 1697  | Sgk2          | Sf4           | -1 |
| 7751 | 2041  | Sgk2          | Cct7          | -1 |
| 7751 | 2490  | Sgk2          | MMT00070880   | 1  |
| 7751 | 3587  | Sgk2          | MMT00041940   | -1 |
| 7751 | 3849  | Sgk2          | MMT00047578   | -1 |
| 7751 | 3908  | Sgk2          | Fundc2        | 1  |
| 7751 | 4355  | Sgk2          | Pard6a        | -1 |
| 7751 | 4950  | Sgk2          | Dnajb10       | -1 |
| 7751 | 4966  | Sgk2          | Zscan20       | -1 |
| 7751 | 5013  | Sgk2          | Fancl         | 1  |
| 7751 | 5944  | Sgk2          | Sp3           | 1  |
| 7751 | 6021  | Sgk2          | MMT00008784   | -1 |
| 7751 | 6126  | Sgk2          | MMT00067575   | -1 |
| 7751 | 6769  | Sgk2          | Banp          | -1 |
| 7751 | 7963  | Sgk2          | Rxrg          | 1  |
| 7751 | 8319  | Sgk2          | MMT00062477   | -1 |
| 7751 | 8486  | Sgk2          | Plod3         | -1 |
| 7751 | 8618  | Sgk2          | EG433865      | 1  |
| 7751 | 8670  | Sgk2          | MMT00051613   | -1 |
| 7751 | 9258  | Sgk2          | P4ha1         | -1 |
| 7751 | 10769 | Sgk2          | Hnrnpd        | 1  |



|      |       |             |               |    |
|------|-------|-------------|---------------|----|
| 7751 | 11043 | Sgk2        | Hsph1         | -1 |
| 7751 | 11214 | Sgk2        | MMT00049207   | -1 |
| 7751 | 12761 | Sgk2        | Tsc22d3       | -1 |
| 7751 | 14135 | Sgk2        | Eepd1         | 1  |
| 7751 | 15476 | Sgk2        | Fem1b         | 1  |
| 7751 | 15675 | Sgk2        | MMT00077535   | -1 |
| 7751 | 17449 | Sgk2        | Zfp296        | -1 |
| 7751 | 17595 | Sgk2        | MMT00048325   | -1 |
| 7751 | 18203 | Sgk2        | Ablim3        | -1 |
| 7751 | 18373 | Sgk2        | Dnajb1        | -1 |
| 7751 | 18418 | Sgk2        | Hspa1b        | -1 |
| 7751 | 19540 | Sgk2        | Zfp428        | -1 |
| 7751 | 20304 | Sgk2        | Ccrk          | -1 |
| 7751 | 20535 | Sgk2        | Rbm4          | -1 |
| 7751 | 20855 | Sgk2        | Phldb2        | 1  |
| 7751 | 20912 | Sgk2        | Chordc1       | -1 |
| 7751 | 21775 | Sgk2        | MMT00051649   | 1  |
| 7751 | 22139 | Sgk2        | Stip1         | -1 |
| 7761 | 126   | Nudt19      | 0610012D14Rik | -1 |
| 7761 | 1985  | Nudt19      | Pepd          | -1 |
| 7761 | 2388  | Nudt19      | Dot1l         | 1  |
| 7761 | 2599  | Nudt19      | Lsm14a        | 1  |
| 7761 | 2912  | Nudt19      | Wtip          | -1 |
| 7761 | 4697  | Nudt19      | Cyp2a12       | -1 |
| 7761 | 5352  | Nudt19      | Pdcd2l        | 1  |
| 7761 | 6371  | Nudt19      | Dedd2         | 1  |
| 7761 | 6513  | Nudt19      | Qpctl         | 1  |
| 7761 | 7761  | Nudt19      | Nudt19        | 1  |
| 7761 | 9122  | Nudt19      | Sepw1         | 1  |
| 7761 | 9454  | Nudt19      | 2810426N06Rik | 1  |
| 7761 | 10545 | Nudt19      | Tmem147       | 1  |
| 7761 | 11321 | Nudt19      | 2310014L17Rik | -1 |
| 7761 | 11465 | Nudt19      | Eif3k         | 1  |
| 7761 | 11888 | Nudt19      | Myadm         | -1 |
| 7761 | 12004 | Nudt19      | Lgals6        | 1  |
| 7761 | 12423 | Nudt19      | Cyp2g1        | -1 |
| 7761 | 16639 | Nudt19      | MMT00078937   | -1 |
| 7761 | 17314 | Nudt19      | Napa          | -1 |
| 7761 | 18088 | Nudt19      | Alkbh6        | 1  |
| 7761 | 19142 | Nudt19      | Gpatch1       | 1  |
| 7761 | 19462 | Nudt19      | 4933439C20Rik | -1 |
| 7761 | 19762 | Nudt19      | Pih1d1        | -1 |
| 7761 | 19854 | Nudt19      | Kcnj14        | 1  |
| 7761 | 20606 | Nudt19      | MMT00042166   | -1 |
| 7761 | 21438 | Nudt19      | Plekha4       | -1 |
| 7761 | 23247 | Nudt19      | Ercc1         | -1 |
| 7761 | 23595 | Nudt19      | Gm550         | 1  |
| 7803 | 2388  | Ttyh1       | Dot1l         | 1  |
| 7803 | 2599  | Ttyh1       | Lsm14a        | 1  |
| 7803 | 4697  | Ttyh1       | Cyp2a12       | -1 |
| 7803 | 6513  | Ttyh1       | Qpctl         | 1  |
| 7803 | 9122  | Ttyh1       | Sepw1         | 1  |
| 7803 | 10545 | Ttyh1       | Tmem147       | 1  |
| 7803 | 11321 | Ttyh1       | 2310014L17Rik | -1 |
| 7803 | 11888 | Ttyh1       | Myadm         | -1 |
| 7803 | 16639 | Ttyh1       | MMT00078937   | -1 |
| 7803 | 17314 | Ttyh1       | Napa          | -1 |
| 7803 | 19462 | Ttyh1       | 4933439C20Rik | -1 |
| 7803 | 20606 | Ttyh1       | MMT00042166   | -1 |
| 7803 | 23247 | Ttyh1       | Ercc1         | -1 |
| 7821 | 2115  | MMT00042003 | Gpr12         | -1 |
| 7821 | 8022  | MMT00042003 | MMT00004959   | 1  |
| 7821 | 8906  | MMT00042003 | MMT00004929   | 1  |
| 7821 | 17535 | MMT00042003 | MMT00008110   | 1  |
| 7875 | 661   | Crat        | Siglec1       | -1 |
| 7875 | 14498 | Crat        | Layn          | -1 |
| 7876 | 17316 | EG625534    | Nkx2-1        | 1  |
| 7879 | 11966 | Ifitm3      | Zfp280b       | 1  |
| 7879 | 19436 | Ifitm3      | Dapp1         | 1  |

|      |       |             |               |    |
|------|-------|-------------|---------------|----|
| 7888 | 3587  | Pigz        | MMT00041940   | -1 |
| 7888 | 6021  | Pigz        | MMT00008784   | -1 |
| 7888 | 8319  | Pigz        | MMT00062477   | -1 |
| 7888 | 8670  | Pigz        | MMT00051613   | -1 |
| 7888 | 11043 | Pigz        | Hsph1         | -1 |
| 7888 | 11214 | Pigz        | MMT00049207   | -1 |
| 7888 | 15675 | Pigz        | MMT00077535   | -1 |
| 7888 | 17595 | Pigz        | MMT00048325   | -1 |
| 7888 | 18373 | Pigz        | Dnajb1        | -1 |
| 7888 | 18418 | Pigz        | Hspa1b        | -1 |
| 7888 | 20535 | Pigz        | Rbm4          | -1 |
| 7888 | 20855 | Pigz        | Phldb2        | 1  |
| 7888 | 22139 | Pigz        | Stip1         | -1 |
| 7896 | 6912  | Polr3e      | Crym          | 1  |
| 7908 | 19551 | MMT00082889 | Rab11fip2     | -1 |
| 7909 | 7135  | Oas3        | Ezr           | 1  |
| 7909 | 7909  | Oas3        | Oas3          | 1  |
| 7909 | 8750  | Oas3        | 1700010I14Rik | 1  |
| 7909 | 11435 | Oas3        | Rnaset2a      | 1  |
| 7909 | 21754 | Oas3        | Syrj2         | -1 |
| 7910 | 1336  | AK122209    | MMT00069537   | 1  |
| 7910 | 2243  | AK122209    | Gcsh          | 1  |
| 7910 | 11404 | AK122209    | Gnpat         | 1  |
| 7910 | 14391 | AK122209    | MMT00017335   | -1 |
| 7910 | 15953 | AK122209    | Acsf3         | -1 |
| 7910 | 21394 | AK122209    | Cdh15         | -1 |
| 7910 | 22909 | AK122209    | Nup133        | 1  |
| 7916 | 3208  | MMT00016293 | 4930511I11Rik | 1  |
| 7916 | 5694  | MMT00016293 | Sp7           | 1  |
| 7916 | 7436  | MMT00016293 | 1700063K16Rik | 1  |
| 7916 | 11966 | MMT00016293 | Zfp280b       | 1  |
| 7916 | 12861 | MMT00016293 | Rhcg          | 1  |
| 7916 | 19436 | MMT00016293 | Dapp1         | 1  |
| 7916 | 19672 | MMT00016293 | Cldn19        | 1  |
| 7916 | 22125 | MMT00016293 | Gab1          | 1  |
| 7922 | 3587  | Casp7       | MMT00041940   | -1 |
| 7922 | 4966  | Casp7       | Zscan20       | -1 |
| 7922 | 5544  | Casp7       | Camsap1       | -1 |
| 7922 | 6021  | Casp7       | MMT00008784   | -1 |
| 7922 | 6769  | Casp7       | Banp          | -1 |
| 7922 | 8670  | Casp7       | MMT00051613   | -1 |
| 7922 | 9258  | Casp7       | P4ha1         | -1 |
| 7922 | 9899  | Casp7       | D13Wsu177e    | -1 |
| 7922 | 11043 | Casp7       | Hsph1         | -1 |
| 7922 | 11214 | Casp7       | MMT00049207   | -1 |
| 7922 | 15675 | Casp7       | MMT00077535   | -1 |
| 7922 | 18373 | Casp7       | Dnajb1        | -1 |
| 7922 | 18418 | Casp7       | Hspa1b        | -1 |
| 7922 | 20332 | Casp7       | Stau2         | 1  |
| 7945 | 9077  | Gpc2        | Cnpy4         | 1  |
| 7945 | 13780 | Gpc2        | Pilra         | 1  |
| 7945 | 14631 | Gpc2        | Stag3         | 1  |
| 7945 | 16451 | Gpc2        | 2010007H12Rik | -1 |
| 7945 | 17089 | Gpc2        | Pilrb1        | 1  |
| 7945 | 19502 | Gpc2        | Fbxo24        | -1 |
| 7963 | 9449  | Rxrg        | Sft2d2        | 1  |
| 7963 | 19520 | Rxrg        | Uck2          | 1  |
| 7965 | 7088  | Enpp5       | Slc37a1       | 1  |
| 7965 | 15531 | Enpp5       | Prickle4      | -1 |
| 7965 | 22822 | Enpp5       | MMT00013433   | 1  |
| 7974 | 3208  | Arhgef7     | 4930511I11Rik | 1  |
| 7974 | 5694  | Arhgef7     | Sp7           | 1  |
| 7974 | 7436  | Arhgef7     | 1700063K16Rik | 1  |
| 7974 | 11966 | Arhgef7     | Zfp280b       | 1  |
| 7974 | 12861 | Arhgef7     | Rhcg          | 1  |
| 7974 | 19436 | Arhgef7     | Dapp1         | 1  |
| 7974 | 19672 | Arhgef7     | Cldn19        | 1  |
| 7974 | 22125 | Arhgef7     | Gab1          | 1  |
| 7975 | 7975  | Lancl1      | Lancl1        | 1  |

|      |       |               |               |    |
|------|-------|---------------|---------------|----|
| 7975 | 23119 | Lancl1        | Cps1          | 1  |
| 7990 | 18314 | Nostrin       | 4631416L12Rik | 1  |
| 8005 | 3279  | Omg           | Slc46a1       | -1 |
| 8016 | 2743  | Mrpl35        | Tcf3          | -1 |
| 8016 | 3703  | Mrpl35        | Ggcx          | -1 |
| 8016 | 11338 | Mrpl35        | Vamp8         | -1 |
| 8016 | 11872 | Mrpl35        | Vamp5         | -1 |
| 8016 | 12182 | Mrpl35        | Immt          | -1 |
| 8016 | 15384 | Mrpl35        | Mat2a         | -1 |
| 8016 | 15708 | Mrpl35        | Retsat        | -1 |
| 8055 | 2743  | Ptcd3         | Tcf3          | 1  |
| 8055 | 3703  | Ptcd3         | Ggcx          | 1  |
| 8055 | 11338 | Ptcd3         | Vamp8         | 1  |
| 8055 | 11872 | Ptcd3         | Vamp5         | 1  |
| 8055 | 15384 | Ptcd3         | Mat2a         | 1  |
| 8055 | 15708 | Ptcd3         | Retsat        | 1  |
| 8081 | 6021  | Rhot1         | MMT00008784   | 1  |
| 8081 | 8670  | Rhot1         | MMT00051613   | 1  |
| 8081 | 11214 | Rhot1         | MMT00049207   | 1  |
| 8081 | 15675 | Rhot1         | MMT00077535   | 1  |
| 8109 | 19436 | 6330545A04Rik | Dapp1         | 1  |
| 8110 | 23530 | Abhd7         | Drd4          | -1 |
| 8122 | 2011  | Hexim1        | Slc2a5        | -1 |
| 8122 | 18418 | Hexim1        | Hspa1b        | 1  |
| 8141 | 9417  | Scnn1a        | Cd163         | -1 |
| 8141 | 17391 | Scnn1a        | C530028O21Rik | -1 |
| 8141 | 17743 | Scnn1a        | Phb2          | -1 |
| 8141 | 19964 | Scnn1a        | Ndufa9        | -1 |
| 8155 | 1371  | Mark3         | 1200009I06Rik | 1  |
| 8155 | 5829  | Mark3         | 2810455K09Rik | -1 |
| 8155 | 7099  | Mark3         | Kcnk10        | 1  |
| 8155 | 7388  | Mark3         | Amn           | 1  |
| 8155 | 8155  | Mark3         | Mark3         | 1  |
| 8155 | 8925  | Mark3         | MMT00026932   | -1 |
| 8155 | 9678  | Mark3         | AW555464      | 1  |
| 8155 | 9832  | Mark3         | Brf1          | -1 |
| 8155 | 10526 | Mark3         | MMT00036239   | -1 |
| 8155 | 12238 | Mark3         | Traf3         | -1 |
| 8155 | 13027 | Mark3         | Ppp2r5c       | -1 |
| 8155 | 13988 | Mark3         | Cntnap2       | 1  |
| 8155 | 15984 | Mark3         | MMT00075074   | 1  |
| 8155 | 16191 | Mark3         | Klc1          | -1 |
| 8155 | 23693 | Mark3         | A530016L24Rik | 1  |
| 8157 | 11966 | MMT00005305   | Zfp280b       | 1  |
| 8157 | 19436 | MMT00005305   | Dapp1         | 1  |
| 8170 | 19436 | Snx22         | Dapp1         | 1  |
| 8171 | 2794  | Spink8        | Map3k6        | 1  |
| 8171 | 6211  | Spink8        | Arhgap24      | -1 |
| 8171 | 11129 | Spink8        | Ankhd1        | 1  |
| 8171 | 16176 | Spink8        | St3gal5       | 1  |
| 8174 | 4805  | 5330426P16Rik | Hspb1         | 1  |
| 8174 | 7731  | 5330426P16Rik | 1500001M20Rik | -1 |
| 8174 | 11208 | 5330426P16Rik | Hspb1         | 1  |
| 8189 | 3208  | Cflar         | 4930511I11Rik | 1  |
| 8189 | 11966 | Cflar         | Zfp280b       | 1  |
| 8189 | 19436 | Cflar         | Dapp1         | 1  |
| 8234 | 3196  | Tbpl1         | Tat           | 1  |
| 8234 | 15476 | Tbpl1         | Fem1b         | -1 |
| 8256 | 3208  | Tjap1         | 4930511I11Rik | 1  |
| 8256 | 7436  | Tjap1         | 1700063K16Rik | 1  |
| 8256 | 11966 | Tjap1         | Zfp280b       | 1  |
| 8256 | 12861 | Tjap1         | Rhcg          | 1  |
| 8256 | 19436 | Tjap1         | Dapp1         | 1  |
| 8256 | 22125 | Tjap1         | Gab1          | 1  |
| 8297 | 23530 | Dhx37         | Drd4          | -1 |
| 8300 | 23530 | MMT00043905   | Drd4          | -1 |
| 8341 | 2945  | MMT00017270   | MMT00005190   | 1  |
| 8341 | 5014  | MMT00017270   | MMT00017503   | 1  |
| 8341 | 8341  | MMT00017270   | MMT00017270   | 1  |

|      |       |             |               |    |
|------|-------|-------------|---------------|----|
| 8341 | 14924 | MMT00017270 | Hn1l          | -1 |
| 8394 | 1985  | Dpy19I3     | Pepd          | -1 |
| 8394 | 2388  | Dpy19I3     | Dot1l         | 1  |
| 8394 | 2599  | Dpy19I3     | Lsm14a        | 1  |
| 8394 | 2912  | Dpy19I3     | Wtip          | -1 |
| 8394 | 4697  | Dpy19I3     | Cyp2a12       | -1 |
| 8394 | 5352  | Dpy19I3     | Pdcd2l        | 1  |
| 8394 | 6513  | Dpy19I3     | Qpctl         | 1  |
| 8394 | 7761  | Dpy19I3     | Nudt19        | 1  |
| 8394 | 9122  | Dpy19I3     | Sepw1         | 1  |
| 8394 | 10545 | Dpy19I3     | Tmem147       | 1  |
| 8394 | 11321 | Dpy19I3     | 2310014L17Rik | -1 |
| 8394 | 11888 | Dpy19I3     | Myadm         | -1 |
| 8394 | 12423 | Dpy19I3     | Cyp2g1        | -1 |
| 8394 | 16639 | Dpy19I3     | MMT00078937   | -1 |
| 8394 | 17314 | Dpy19I3     | Napa          | -1 |
| 8394 | 19462 | Dpy19I3     | 4933439C20Rik | -1 |
| 8394 | 19762 | Dpy19I3     | Pih1d1        | -1 |
| 8394 | 19854 | Dpy19I3     | Kcnj14        | 1  |
| 8394 | 20606 | Dpy19I3     | MMT00042166   | -1 |
| 8394 | 23247 | Dpy19I3     | Ercc1         | -1 |
| 8394 | 23595 | Dpy19I3     | Gm550         | 1  |
| 8399 | 1156  | Herpud1     | Rbj           | -1 |
| 8399 | 1957  | Herpud1     | Mansc1        | -1 |
| 8399 | 3097  | Herpud1     | Ppp1r3g       | 1  |
| 8399 | 3170  | Herpud1     | Mcart1        | 1  |
| 8399 | 3196  | Herpud1     | Tat           | 1  |
| 8399 | 3462  | Herpud1     | Nmnat3        | -1 |
| 8399 | 3587  | Herpud1     | MMT00041940   | 1  |
| 8399 | 5727  | Herpud1     | Camk2g        | -1 |
| 8399 | 6021  | Herpud1     | MMT00008784   | 1  |
| 8399 | 6769  | Herpud1     | Banp          | 1  |
| 8399 | 7140  | Herpud1     | Mtbp          | -1 |
| 8399 | 7963  | Herpud1     | Rxrg          | -1 |
| 8399 | 8319  | Herpud1     | MMT00062477   | 1  |
| 8399 | 8670  | Herpud1     | MMT00051613   | 1  |
| 8399 | 9258  | Herpud1     | P4ha1         | 1  |
| 8399 | 10769 | Herpud1     | Hnrnpd        | -1 |
| 8399 | 11214 | Herpud1     | MMT00049207   | 1  |
| 8399 | 12761 | Herpud1     | Tsc22d3       | 1  |
| 8399 | 13087 | Herpud1     | Cxadr         | -1 |
| 8399 | 13471 | Herpud1     | Cln8          | 1  |
| 8399 | 15631 | Herpud1     | Lpin1         | 1  |
| 8399 | 15675 | Herpud1     | MMT00077535   | 1  |
| 8399 | 18373 | Herpud1     | Dnajb1        | 1  |
| 8399 | 18418 | Herpud1     | Hspa1b        | 1  |
| 8399 | 20912 | Herpud1     | Chordc1       | 1  |
| 8443 | 8443  | Pola2       | Pola2         | 1  |
| 8443 | 13044 | Pola2       | 5730596K20Rik | 1  |
| 8443 | 14564 | Pola2       | Mrpl49        | -1 |
| 8449 | 11214 | Vash2       | MMT00049207   | -1 |
| 8465 | 12761 | BC023814    | Tsc22d3       | 1  |
| 8465 | 14263 | BC023814    | Arrdc3        | -1 |
| 8465 | 15476 | BC023814    | Fem1b         | -1 |
| 8465 | 20535 | BC023814    | Rbm4          | 1  |
| 8469 | 499   | Sfrs6       | 2310057J16Rik | 1  |
| 8469 | 1849  | Sfrs6       | MMT00063181   | 1  |
| 8469 | 3587  | Sfrs6       | MMT00041940   | 1  |
| 8469 | 3799  | Sfrs6       | Serpinh1      | 1  |
| 8469 | 3913  | Sfrs6       | Mrpl15        | 1  |
| 8469 | 4950  | Sfrs6       | Dnajb10       | 1  |
| 8469 | 6021  | Sfrs6       | MMT00008784   | 1  |
| 8469 | 6126  | Sfrs6       | MMT00067575   | 1  |
| 8469 | 7731  | Sfrs6       | 1500001M20Rik | -1 |
| 8469 | 8319  | Sfrs6       | MMT00062477   | 1  |
| 8469 | 8670  | Sfrs6       | MMT00051613   | 1  |
| 8469 | 8891  | Sfrs6       | MMT00071061   | 1  |
| 8469 | 9224  | Sfrs6       | MMT00013510   | 1  |
| 8469 | 9258  | Sfrs6       | P4ha1         | 1  |

|      |       |               |               |    |
|------|-------|---------------|---------------|----|
| 8469 | 9279  | Sfrs6         | MMT00066808   | 1  |
| 8469 | 9680  | Sfrs6         | Ahsa1         | 1  |
| 8469 | 9899  | Sfrs6         | D13Wsu177e    | 1  |
| 8469 | 11043 | Sfrs6         | Hsph1         | 1  |
| 8469 | 11214 | Sfrs6         | MMT00049207   | 1  |
| 8469 | 13052 | Sfrs6         | Tnfrsf19      | -1 |
| 8469 | 13521 | Sfrs6         | Ears2         | 1  |
| 8469 | 14014 | Sfrs6         | MMT00008376   | 1  |
| 8469 | 14298 | Sfrs6         | Atp2a2        | 1  |
| 8469 | 15675 | Sfrs6         | MMT00077535   | 1  |
| 8469 | 16299 | Sfrs6         | Creld2        | 1  |
| 8469 | 16754 | Sfrs6         | Hsp90aa1      | 1  |
| 8469 | 17595 | Sfrs6         | MMT00048325   | 1  |
| 8469 | 18099 | Sfrs6         | Nfx1          | -1 |
| 8469 | 20912 | Sfrs6         | Chordc1       | 1  |
| 8469 | 20965 | Sfrs6         | Usp28         | -1 |
| 8469 | 21389 | Sfrs6         | Odf2          | -1 |
| 8469 | 22139 | Sfrs6         | Stip1         | 1  |
| 8469 | 22751 | Sfrs6         | Nosip         | -1 |
| 8469 | 23646 | Sfrs6         | Hsp90ab1      | 1  |
| 8472 | 1648  | Txndc16       | Gnpnat1       | 1  |
| 8472 | 4203  | Txndc16       | Fermt2        | 1  |
| 8472 | 4837  | Txndc16       | Ear2          | 1  |
| 8488 | 19436 | Opcml         | Dapp1         | 1  |
| 8525 | 737   | 2510006D16Rik | MMT00023716   | 1  |
| 8545 | 17702 | Spink12       | Ccdc40        | -1 |
| 8545 | 18731 | Spink12       | Fgf17         | -1 |
| 8574 | 22139 | Top1mt        | Stip1         | -1 |
| 8610 | 3616  | Padi4         | Dnajc16       | 1  |
| 8610 | 6191  | Padi4         | Ddost         | 1  |
| 8610 | 7307  | Padi4         | Agmat         | 1  |
| 8610 | 8610  | Padi4         | Padi4         | 1  |
| 8610 | 9634  | Padi4         | Atp13a2       | 1  |
| 8610 | 16287 | Padi4         | Extl1         | -1 |
| 8617 | 19436 | 2210412E05Rik | Dapp1         | 1  |
| 8620 | 19436 | MMT00048670   | Dapp1         | 1  |
| 8644 | 3208  | V1rg11        | 4930511111Rik | 1  |
| 8644 | 5694  | V1rg11        | Sp7           | 1  |
| 8644 | 7436  | V1rg11        | 1700063K16Rik | 1  |
| 8644 | 11966 | V1rg11        | Zfp280b       | 1  |
| 8644 | 12861 | V1rg11        | Rhcg          | 1  |
| 8644 | 19436 | V1rg11        | Dapp1         | 1  |
| 8644 | 19672 | V1rg11        | Cldn19        | 1  |
| 8644 | 22125 | V1rg11        | Gab1          | 1  |
| 8648 | 8648  | Flnb          | Flnb          | 1  |
| 8653 | 8653  | AW124722      | AW124722      | 1  |
| 8662 | 3587  | Brca2         | MMT00041940   | -1 |
| 8662 | 6021  | Brca2         | MMT00008784   | -1 |
| 8662 | 8670  | Brca2         | MMT00051613   | -1 |
| 8662 | 11214 | Brca2         | MMT00049207   | -1 |
| 8662 | 15675 | Brca2         | MMT00077535   | -1 |
| 8662 | 18373 | Brca2         | Dnajb1        | -1 |
| 8662 | 18418 | Brca2         | Hspa1b        | -1 |
| 8662 | 21775 | Brca2         | MMT00051649   | 1  |
| 8667 | 4701  | Plxna3        | MMT00062346   | -1 |
| 8677 | 737   | Zbtb8os       | MMT00023716   | -1 |
| 8677 | 6857  | Zbtb8os       | Serinc2       | 1  |
| 8677 | 8654  | Zbtb8os       | Fbxl13        | -1 |
| 8677 | 8677  | Zbtb8os       | Zbtb8os       | 1  |
| 8679 | 5938  | Tiparp        | Pfn2          | 1  |
| 8679 | 12367 | Tiparp        | MMT00072365   | -1 |
| 8679 | 16416 | Tiparp        | Commd2        | 1  |
| 8703 | 17447 | Gstp1         | Ctsf          | -1 |
| 8709 | 3208  | Trim58        | 4930511111Rik | 1  |
| 8709 | 7436  | Trim58        | 1700063K16Rik | 1  |
| 8709 | 11966 | Trim58        | Zfp280b       | 1  |
| 8709 | 12861 | Trim58        | Rhcg          | 1  |
| 8709 | 19436 | Trim58        | Dapp1         | 1  |
| 8721 | 8721  | Tbc1d10c      | Tbc1d10c      | 1  |

|      |       |               |               |    |
|------|-------|---------------|---------------|----|
| 8721 | 17447 | Tbc1d10c      | Ctsf          | 1  |
| 8724 | 6755  | Tgfb3         | Wdr22         | 1  |
| 8724 | 13988 | Tgfb3         | Cntnap2       | 1  |
| 8750 | 327   | 1700010114Rik | H2-Ea         | 1  |
| 8750 | 2325  | 1700010114Rik | H2-K1         | 1  |
| 8750 | 2938  | 1700010114Rik | H2-T23        | 1  |
| 8750 | 4004  | 1700010114Rik | Thbs2         | -1 |
| 8750 | 5410  | 1700010114Rik | Cyp4f15       | -1 |
| 8750 | 5648  | 1700010114Rik | Zfp213        | -1 |
| 8750 | 7088  | 1700010114Rik | Slc37a1       | 1  |
| 8750 | 7909  | 1700010114Rik | Oas3          | 1  |
| 8750 | 8649  | 1700010114Rik | MMT00072863   | -1 |
| 8750 | 8750  | 1700010114Rik | 1700010114Rik | 1  |
| 8750 | 8767  | 1700010114Rik | Rgl2          | 1  |
| 8750 | 9158  | 1700010114Rik | Pde9a         | -1 |
| 8750 | 10376 | 1700010114Rik | C920025E04Rik | -1 |
| 8750 | 10667 | 1700010114Rik | H2-Eb1        | 1  |
| 8750 | 11435 | 1700010114Rik | Rnaset2a      | 1  |
| 8750 | 12335 | 1700010114Rik | Plcb4         | 1  |
| 8750 | 12694 | 1700010114Rik | Riok2         | -1 |
| 8750 | 13493 | 1700010114Rik | Ring1         | -1 |
| 8750 | 14132 | 1700010114Rik | Glo1          | 1  |
| 8750 | 17707 | 1700010114Rik | Rshl2b        | 1  |
| 8750 | 18906 | 1700010114Rik | Zfand3        | 1  |
| 8750 | 20238 | 1700010114Rik | H2-T9         | 1  |
| 8750 | 20346 | 1700010114Rik | Gna-rs1       | 1  |
| 8750 | 21754 | 1700010114Rik | Synj2         | -1 |
| 8750 | 22822 | 1700010114Rik | MMT00013433   | 1  |
| 8750 | 23250 | 1700010114Rik | Plcl2         | 1  |
| 8767 | 327   | Rgl2          | H2-Ea         | 1  |
| 8767 | 763   | Rgl2          | 4933406E20Rik | 1  |
| 8767 | 2325  | Rgl2          | H2-K1         | 1  |
| 8767 | 2938  | Rgl2          | H2-T23        | 1  |
| 8767 | 3265  | Rgl2          | Dntt          | -1 |
| 8767 | 3599  | Rgl2          | MMT00035426   | -1 |
| 8767 | 3704  | Rgl2          | H2-Q7         | 1  |
| 8767 | 4004  | Rgl2          | Thbs2         | -1 |
| 8767 | 5410  | Rgl2          | Cyp4f15       | -1 |
| 8767 | 6360  | Rgl2          | D17H6S56E-3   | -1 |
| 8767 | 7088  | Rgl2          | Slc37a1       | 1  |
| 8767 | 8750  | Rgl2          | 1700010114Rik | 1  |
| 8767 | 8767  | Rgl2          | Rgl2          | 1  |
| 8767 | 9158  | Rgl2          | Pde9a         | -1 |
| 8767 | 10376 | Rgl2          | C920025E04Rik | -1 |
| 8767 | 10667 | Rgl2          | H2-Eb1        | 1  |
| 8767 | 12168 | Rgl2          | H2-Ke6        | 1  |
| 8767 | 12355 | Rgl2          | AI507611      | 1  |
| 8767 | 12694 | Rgl2          | Riok2         | -1 |
| 8767 | 13493 | Rgl2          | Ring1         | -1 |
| 8767 | 16153 | Rgl2          | Syng1         | 1  |
| 8767 | 18906 | Rgl2          | Zfand3        | 1  |
| 8767 | 20238 | Rgl2          | H2-T9         | 1  |
| 8767 | 20346 | Rgl2          | Gna-rs1       | 1  |
| 8767 | 22822 | Rgl2          | MMT00013433   | 1  |
| 8767 | 23250 | Rgl2          | Plcl2         | 1  |
| 8783 | 8783  | Zfyve16       | Zfyve16       | 1  |
| 8783 | 18492 | Zfyve16       | Dhfr          | -1 |
| 8783 | 23301 | Zfyve16       | Scamp1        | -1 |
| 8786 | 1041  | Rmnd1         | 3110049J23Rik | -1 |
| 8786 | 1135  | Rmnd1         | Akap12        | 1  |
| 8786 | 2571  | Rmnd1         | Rmnd1         | 1  |
| 8786 | 3744  | Rmnd1         | Rmnd1         | 1  |
| 8786 | 5965  | Rmnd1         | Pbld          | -1 |
| 8786 | 7620  | Rmnd1         | Foxo3         | -1 |
| 8786 | 8786  | Rmnd1         | Rmnd1         | 1  |
| 8786 | 14169 | Rmnd1         | 1700052N19Rik | -1 |
| 8786 | 15971 | Rmnd1         | Aifm2         | -1 |
| 8786 | 18300 | Rmnd1         | Arg1          | -1 |
| 8786 | 19115 | Rmnd1         | Rab32         | 1  |

|      |       |               |               |    |
|------|-------|---------------|---------------|----|
| 8786 | 19392 | Rmnd1         | Slc25a16      | 1  |
| 8786 | 22146 | Rmnd1         | Aifm2         | -1 |
| 8787 | 499   | Sdf2l1        | 2310057J16Rik | 1  |
| 8787 | 1281  | Sdf2l1        | Alkbh3        | -1 |
| 8787 | 1663  | Sdf2l1        | Fkbp4         | 1  |
| 8787 | 1849  | Sdf2l1        | MMT00063181   | 1  |
| 8787 | 2329  | Sdf2l1        | Wdr6          | -1 |
| 8787 | 2813  | Sdf2l1        | Mrpl55        | 1  |
| 8787 | 3587  | Sdf2l1        | MMT00041940   | 1  |
| 8787 | 3799  | Sdf2l1        | Serpinh1      | 1  |
| 8787 | 3913  | Sdf2l1        | Mrpl15        | 1  |
| 8787 | 4805  | Sdf2l1        | Hspb1         | 1  |
| 8787 | 4950  | Sdf2l1        | Dnajb10       | 1  |
| 8787 | 6021  | Sdf2l1        | MMT00008784   | 1  |
| 8787 | 6234  | Sdf2l1        | P4ha2         | 1  |
| 8787 | 7444  | Sdf2l1        | Hspe1         | 1  |
| 8787 | 7731  | Sdf2l1        | 1500001M20Rik | -1 |
| 8787 | 8021  | Sdf2l1        | 1600002K03Rik | 1  |
| 8787 | 8670  | Sdf2l1        | MMT00051613   | 1  |
| 8787 | 9258  | Sdf2l1        | P4ha1         | 1  |
| 8787 | 11043 | Sdf2l1        | Hsph1         | 1  |
| 8787 | 11208 | Sdf2l1        | Hspb1         | 1  |
| 8787 | 11214 | Sdf2l1        | MMT00049207   | 1  |
| 8787 | 11379 | Sdf2l1        | Dnntp1        | -1 |
| 8787 | 11818 | Sdf2l1        | MMT00048396   | 1  |
| 8787 | 13521 | Sdf2l1        | Ears2         | 1  |
| 8787 | 14014 | Sdf2l1        | MMT00008376   | 1  |
| 8787 | 15476 | Sdf2l1        | Fem1b         | -1 |
| 8787 | 15675 | Sdf2l1        | MMT00077535   | 1  |
| 8787 | 16299 | Sdf2l1        | Crel2         | 1  |
| 8787 | 16754 | Sdf2l1        | Hsp90aa1      | 1  |
| 8787 | 17595 | Sdf2l1        | MMT00048325   | 1  |
| 8787 | 19176 | Sdf2l1        | 2210404J11Rik | -1 |
| 8787 | 21553 | Sdf2l1        | EG628438      | 1  |
| 8787 | 22139 | Sdf2l1        | Stip1         | 1  |
| 8787 | 23646 | Sdf2l1        | Hsp90ab1      | 1  |
| 8794 | 5100  | 1500011B03Rik | Pebp1         | -1 |
| 8794 | 12656 | 1500011B03Rik | Coq5          | 1  |
| 8794 | 15908 | 1500011B03Rik | Pebp1         | -1 |
| 8794 | 17807 | 1500011B03Rik | Pebp1         | -1 |
| 8800 | 12398 | Rnf213        | lfi44         | 1  |
| 8800 | 12600 | Rnf213        | lfi204        | 1  |
| 8807 | 1660  | Ankrd56       | Zfp33b        | 1  |
| 8807 | 4617  | Ankrd56       | Agpat9        | 1  |
| 8807 | 5100  | Ankrd56       | Pebp1         | 1  |
| 8807 | 6330  | Ankrd56       | Dgkq          | -1 |
| 8807 | 8547  | Ankrd56       | Gbp4          | -1 |
| 8807 | 8807  | Ankrd56       | Ankrd56       | 1  |
| 8807 | 10550 | Ankrd56       | Rchy1         | 1  |
| 8807 | 10978 | Ankrd56       | MMT00078322   | -1 |
| 8807 | 12656 | Ankrd56       | Coq5          | -1 |
| 8807 | 14085 | Ankrd56       | Cdkl2         | -1 |
| 8807 | 15908 | Ankrd56       | Pebp1         | 1  |
| 8807 | 17807 | Ankrd56       | Pebp1         | 1  |
| 8807 | 19719 | Ankrd56       | EG634650      | -1 |
| 8807 | 20118 | Ankrd56       | Tmem175       | -1 |
| 8807 | 20269 | Ankrd56       | Hsd17b13      | 1  |
| 8807 | 22298 | Ankrd56       | Zfp259        | -1 |
| 8807 | 23625 | Ankrd56       | Pkd2          | -1 |
| 8816 | 337   | Nfkbia        | Rasgef1b      | 1  |
| 8816 | 1877  | Nfkbia        | Amica1        | 1  |
| 8816 | 2294  | Nfkbia        | AU040829      | 1  |
| 8816 | 2483  | Nfkbia        | Gmeb1         | 1  |
| 8816 | 3196  | Nfkbia        | Tat           | 1  |
| 8816 | 3452  | Nfkbia        | Ccrn4l        | 1  |
| 8816 | 4205  | Nfkbia        | Rgs1          | 1  |
| 8816 | 4235  | Nfkbia        | Pfkfb3        | 1  |
| 8816 | 5187  | Nfkbia        | Speer4f       | 1  |
| 8816 | 5889  | Nfkbia        | Errfi1        | 1  |

|      |       |               |               |    |
|------|-------|---------------|---------------|----|
| 8816 | 6564  | Nfkbia        | Cebpd         | 1  |
| 8816 | 7136  | Nfkbia        | Id3           | -1 |
| 8816 | 7315  | Nfkbia        | EG624219      | -1 |
| 8816 | 8632  | Nfkbia        | Igfbp1        | 1  |
| 8816 | 8816  | Nfkbia        | Nfkbia        | 1  |
| 8816 | 9213  | Nfkbia        | Osgin1        | -1 |
| 8816 | 10279 | Nfkbia        | Rnf186        | -1 |
| 8816 | 12479 | Nfkbia        | Ifrd1         | 1  |
| 8816 | 12761 | Nfkbia        | Tsc22d3       | 1  |
| 8816 | 14473 | Nfkbia        | 6330534C20Rik | 1  |
| 8816 | 14894 | Nfkbia        | G0s2          | -1 |
| 8816 | 15522 | Nfkbia        | 1810011O10Rik | 1  |
| 8816 | 15631 | Nfkbia        | Lpin1         | 1  |
| 8816 | 15826 | Nfkbia        | Arl4d         | 1  |
| 8816 | 15882 | Nfkbia        | AA986860      | 1  |
| 8816 | 16517 | Nfkbia        | D4Wsu53e      | 1  |
| 8816 | 16580 | Nfkbia        | Tnfaip2       | -1 |
| 8816 | 17352 | Nfkbia        | Cebpb         | 1  |
| 8816 | 17525 | Nfkbia        | Ctgf          | 1  |
| 8816 | 18083 | Nfkbia        | Gadd45a       | -1 |
| 8816 | 18785 | Nfkbia        | Angptl4       | 1  |
| 8816 | 19124 | Nfkbia        | Pim3          | 1  |
| 8816 | 19466 | Nfkbia        | Pptc7         | 1  |
| 8816 | 19528 | Nfkbia        | Zfp503        | -1 |
| 8816 | 19556 | Nfkbia        | Efn1          | -1 |
| 8816 | 20690 | Nfkbia        | Zfp276        | 1  |
| 8816 | 21331 | Nfkbia        | Slc10a6       | 1  |
| 8816 | 21934 | Nfkbia        | Id2           | -1 |
| 8816 | 22873 | Nfkbia        | Slc38a2       | 1  |
| 8816 | 23552 | Nfkbia        | Rasl11b       | -1 |
| 8828 | 15461 | Slc30a2       | Galnt2        | 1  |
| 8828 | 16654 | Slc30a2       | Oas1f         | 1  |
| 8828 | 17702 | Slc30a2       | Ccdc40        | 1  |
| 8828 | 17926 | Slc30a2       | Nptx1         | 1  |
| 8840 | 8840  | Tmem18        | Tmem18        | 1  |
| 8840 | 19766 | Tmem18        | Slc26a4       | -1 |
| 8881 | 13766 | Olf462        | Slc7a9        | 1  |
| 8889 | 2743  | Dnahc6        | Tcf3          | -1 |
| 8889 | 3703  | Dnahc6        | Gcx           | -1 |
| 8889 | 11338 | Dnahc6        | Vamp8         | -1 |
| 8889 | 11872 | Dnahc6        | Vamp5         | -1 |
| 8889 | 15384 | Dnahc6        | Mat2a         | -1 |
| 8889 | 15708 | Dnahc6        | Retsat        | -1 |
| 8891 | 3587  | MMT00071061   | MMT00041940   | 1  |
| 8891 | 6021  | MMT00071061   | MMT00008784   | 1  |
| 8891 | 8670  | MMT00071061   | MMT00051613   | 1  |
| 8891 | 9067  | MMT00071061   | Tra2a         | 1  |
| 8891 | 9258  | MMT00071061   | P4ha1         | 1  |
| 8891 | 11043 | MMT00071061   | Hsph1         | 1  |
| 8891 | 11214 | MMT00071061   | MMT00049207   | 1  |
| 8891 | 15675 | MMT00071061   | MMT00077535   | 1  |
| 8891 | 20912 | MMT00071061   | Chordc1       | 1  |
| 8902 | 8902  | Aldh3b1       | Aldh3b1       | 1  |
| 8902 | 10629 | Aldh3b1       | BC021614      | -1 |
| 8902 | 19298 | Aldh3b1       | Unc93b1       | 1  |
| 8904 | 20100 | Trerf1        | Guca1b        | -1 |
| 8904 | 20966 | Trerf1        | MMT00014378   | 1  |
| 8905 | 7436  | Trim67        | 1700063K16Rik | 1  |
| 8905 | 11966 | Trim67        | Zfp280b       | 1  |
| 8905 | 19436 | Trim67        | Dapp1         | 1  |
| 8905 | 22125 | Trim67        | Gab1          | 1  |
| 8910 | 17579 | Ube4a         | MMT00078068   | -1 |
| 8932 | 8967  | C430004E15Rik | Acot12        | 1  |
| 8933 | 9611  | Arpc5         | Ncf2          | 1  |
| 8933 | 17463 | Arpc5         | Rgl1          | 1  |
| 8939 | 902   | MMT00024195   | Slc30a1       | -1 |
| 8939 | 3196  | MMT00024195   | Tat           | 1  |
| 8939 | 3587  | MMT00024195   | MMT00041940   | 1  |
| 8939 | 6021  | MMT00024195   | MMT00008784   | 1  |



|      |       |             |               |    |
|------|-------|-------------|---------------|----|
| 8939 | 6769  | MMT00024195 | Banp          | 1  |
| 8939 | 8670  | MMT00024195 | MMT00051613   | 1  |
| 8939 | 8684  | MMT00024195 | Il15          | -1 |
| 8939 | 10435 | MMT00024195 | Nab2          | -1 |
| 8939 | 11214 | MMT00024195 | MMT00049207   | 1  |
| 8939 | 15476 | MMT00024195 | Fem1b         | -1 |
| 8939 | 15675 | MMT00024195 | MMT00077535   | 1  |
| 8939 | 16251 | MMT00024195 | G6pc          | 1  |
| 8939 | 17224 | MMT00024195 | 5430407P10Rik | 1  |
| 8939 | 18083 | MMT00024195 | Gadd45a       | -1 |
| 8939 | 18373 | MMT00024195 | Dnajb1        | 1  |
| 8939 | 18418 | MMT00024195 | Hspa1b        | 1  |
| 8939 | 18713 | MMT00024195 | 3110037116Rik | -1 |
| 8939 | 20535 | MMT00024195 | Rbm4          | 1  |
| 8939 | 21389 | MMT00024195 | Odf2          | -1 |
| 8939 | 21872 | MMT00024195 | Stambpl1      | -1 |
| 8939 | 23215 | MMT00024195 | Mphosph6      | -1 |
| 8951 | 2703  | Cd97        | MMT00073763   | -1 |
| 8951 | 10195 | Cd97        | Klf1          | -1 |
| 8951 | 10273 | Cd97        | Gpt2          | -1 |
| 8951 | 16617 | Cd97        | Sh2d4a        | 1  |
| 8951 | 16849 | Cd97        | Trmt1         | 1  |
| 8951 | 17403 | Cd97        | N4bp1         | 1  |
| 8951 | 18886 | Cd97        | Slc18a1       | 1  |
| 8967 | 8967  | Acot12      | Acot12        | 1  |
| 8980 | 250   | Plekhf1     | Tubb2a-ps2    | -1 |
| 8980 | 337   | Plekhf1     | Rasgef1b      | 1  |
| 8980 | 563   | Plekhf1     | D4Bwg0951e    | 1  |
| 8980 | 609   | Plekhf1     | MMT00060868   | -1 |
| 8980 | 1646  | Plekhf1     | Slc15a4       | 1  |
| 8980 | 1877  | Plekhf1     | Amica1        | 1  |
| 8980 | 1941  | Plekhf1     | MMT00079618   | -1 |
| 8980 | 2294  | Plekhf1     | AU040829      | 1  |
| 8980 | 2322  | Plekhf1     | Tuba4a        | -1 |
| 8980 | 2794  | Plekhf1     | Map3k6        | 1  |
| 8980 | 3040  | Plekhf1     | Bcl3          | -1 |
| 8980 | 3170  | Plekhf1     | Mcart1        | 1  |
| 8980 | 3452  | Plekhf1     | Ccrn4l        | 1  |
| 8980 | 3804  | Plekhf1     | MMT00015534   | -1 |
| 8980 | 4235  | Plekhf1     | Pfkfb3        | 1  |
| 8980 | 4678  | Plekhf1     | Kank1         | -1 |
| 8980 | 5187  | Plekhf1     | Speer4f       | 1  |
| 8980 | 5889  | Plekhf1     | Errfi1        | 1  |
| 8980 | 6028  | Plekhf1     | Alas1         | 1  |
| 8980 | 6386  | Plekhf1     | Por           | 1  |
| 8980 | 6490  | Plekhf1     | Il1r1         | 1  |
| 8980 | 6564  | Plekhf1     | Cebpd         | 1  |
| 8980 | 6589  | Plekhf1     | Mafb          | 1  |
| 8980 | 6756  | Plekhf1     | Sds           | 1  |
| 8980 | 6990  | Plekhf1     | Nr1j2         | 1  |
| 8980 | 7112  | Plekhf1     | Apbb3         | 1  |
| 8980 | 7136  | Plekhf1     | Id3           | -1 |
| 8980 | 8399  | Plekhf1     | Herpud1       | 1  |
| 8980 | 10408 | Plekhf1     | Per1          | 1  |
| 8980 | 11129 | Plekhf1     | Ankhd1        | 1  |
| 8980 | 11574 | Plekhf1     | Gne           | 1  |
| 8980 | 11599 | Plekhf1     | Coq10b        | 1  |
| 8980 | 11808 | Plekhf1     | Pck1          | 1  |
| 8980 | 12420 | Plekhf1     | Klhl21        | 1  |
| 8980 | 12479 | Plekhf1     | Ifrd1         | 1  |
| 8980 | 12761 | Plekhf1     | Tsc22d3       | 1  |
| 8980 | 13289 | Plekhf1     | Dusp10        | -1 |
| 8980 | 14041 | Plekhf1     | Cldn1         | -1 |
| 8980 | 14462 | Plekhf1     | Zfp385b       | 1  |
| 8980 | 15021 | Plekhf1     | Ppargc1a      | 1  |
| 8980 | 15522 | Plekhf1     | 1810011O10Rik | 1  |
| 8980 | 15631 | Plekhf1     | Lpin1         | 1  |
| 8980 | 15882 | Plekhf1     | AA986860      | 1  |
| 8980 | 16176 | Plekhf1     | St3gal5       | 1  |

|      |       |               |               |    |
|------|-------|---------------|---------------|----|
| 8980 | 16580 | Plekhf1       | Tnfaip2       | -1 |
| 8980 | 16690 | Plekhf1       | Tjp3          | -1 |
| 8980 | 17352 | Plekhf1       | Cebpb         | 1  |
| 8980 | 17525 | Plekhf1       | Ctgf          | 1  |
| 8980 | 17622 | Plekhf1       | Foxo1         | 1  |
| 8980 | 17876 | Plekhf1       | Tubb4         | -1 |
| 8980 | 18027 | Plekhf1       | 5730403B10Rik | 1  |
| 8980 | 18314 | Plekhf1       | 4631416L12Rik | 1  |
| 8980 | 18785 | Plekhf1       | Angptl4       | 1  |
| 8980 | 19025 | Plekhf1       | Slc37a4       | 1  |
| 8980 | 19146 | Plekhf1       | N4bp2l1       | 1  |
| 8980 | 19466 | Plekhf1       | Pptc7         | 1  |
| 8980 | 19556 | Plekhf1       | Efna1         | -1 |
| 8980 | 19671 | Plekhf1       | Upp2          | 1  |
| 8980 | 19757 | Plekhf1       | Fkbp5         | 1  |
| 8980 | 20803 | Plekhf1       | Tmem50a       | 1  |
| 8980 | 21331 | Plekhf1       | Slc10a6       | 1  |
| 8980 | 21934 | Plekhf1       | Id2           | -1 |
| 8980 | 22290 | Plekhf1       | Tubb2a        | -1 |
| 8980 | 22630 | Plekhf1       | MMT00034355   | -1 |
| 8980 | 22873 | Plekhf1       | Slc38a2       | 1  |
| 8980 | 23202 | Plekhf1       | Olfrr559      | 1  |
| 8988 | 3587  | 1110007A13Rik | MMT00041940   | 1  |
| 8988 | 6021  | 1110007A13Rik | MMT00008784   | 1  |
| 8988 | 8670  | 1110007A13Rik | MMT00051613   | 1  |
| 8988 | 11214 | 1110007A13Rik | MMT00049207   | 1  |
| 8988 | 15675 | 1110007A13Rik | MMT00077535   | 1  |
| 8988 | 18373 | 1110007A13Rik | Dnajb1        | 1  |
| 8988 | 18418 | 1110007A13Rik | Hspa1b        | 1  |
| 8988 | 20535 | 1110007A13Rik | Rbm4          | 1  |
| 8992 | 4469  | Trfr2         | Cyp3a13       | 1  |
| 8992 | 5511  | Trfr2         | BC055004      | 1  |
| 8992 | 9077  | Trfr2         | Cnpy4         | -1 |
| 8992 | 12885 | Trfr2         | Ccl24         | -1 |
| 8992 | 13780 | Trfr2         | Pilra         | -1 |
| 8992 | 15219 | Trfr2         | 0910001L09Rik | -1 |
| 8992 | 16451 | Trfr2         | 2010007H12Rik | 1  |
| 8992 | 17089 | Trfr2         | Pilrb1        | -1 |
| 8992 | 17158 | Trfr2         | Zfp113        | 1  |
| 8992 | 19502 | Trfr2         | Fbxo24        | 1  |
| 9005 | 9005  | Mapk1ip1l     | Mapk1ip1l     | 1  |
| 9010 | 9010  | 8430419L09Rik | 8430419L09Rik | 1  |
| 9010 | 9417  | 8430419L09Rik | Cd163         | -1 |
| 9010 | 16440 | 8430419L09Rik | Gprc5a        | 1  |
| 9010 | 17391 | 8430419L09Rik | C530028O21Rik | -1 |
| 9010 | 17743 | 8430419L09Rik | Phb2          | -1 |
| 9010 | 19964 | 8430419L09Rik | Ndufa9        | -1 |
| 9022 | 9022  | Plek2         | Plek2         | 1  |
| 9022 | 20187 | Plek2         | Gphn          | 1  |
| 9057 | 4675  | Spp1          | Sparcl1       | 1  |
| 9057 | 9057  | Spp1          | Spp1          | 1  |
| 9057 | 20269 | Spp1          | Hsd17b13      | 1  |
| 9067 | 3587  | Tra2a         | MMT00041940   | 1  |
| 9067 | 6021  | Tra2a         | MMT00008784   | 1  |
| 9067 | 8670  | Tra2a         | MMT00051613   | 1  |
| 9067 | 9224  | Tra2a         | MMT00013510   | 1  |
| 9067 | 9258  | Tra2a         | P4ha1         | 1  |
| 9067 | 11043 | Tra2a         | Hsph1         | 1  |
| 9067 | 11214 | Tra2a         | MMT00049207   | 1  |
| 9067 | 15675 | Tra2a         | MMT00077535   | 1  |
| 9067 | 22139 | Tra2a         | Stip1         | 1  |
| 9074 | 15775 | MMT00003693   | Nat11         | 1  |
| 9075 | 15953 | MMT00018252   | Acsf3         | 1  |
| 9077 | 5511  | Cnpy4         | BC055004      | -1 |
| 9077 | 9077  | Cnpy4         | Cnpy4         | 1  |
| 9077 | 13780 | Cnpy4         | Pilra         | 1  |
| 9077 | 15219 | Cnpy4         | 0910001L09Rik | 1  |
| 9077 | 16451 | Cnpy4         | 2010007H12Rik | -1 |
| 9077 | 17089 | Cnpy4         | Pilrb1        | 1  |

|      |       |               |               |    |
|------|-------|---------------|---------------|----|
| 9077 | 17158 | Cnpy4         | Zfp113        | -1 |
| 9077 | 18881 | Cnpy4         | Cops6         | -1 |
| 9077 | 19502 | Cnpy4         | Fbxo24        | -1 |
| 9122 | 2388  | Sepw1         | Dot1l         | 1  |
| 9122 | 2599  | Sepw1         | Lsm14a        | 1  |
| 9122 | 4697  | Sepw1         | Cyp2a12       | -1 |
| 9122 | 6371  | Sepw1         | Dedd2         | 1  |
| 9122 | 6513  | Sepw1         | Qpctl         | 1  |
| 9122 | 6519  | Sepw1         | Phldb3        | 1  |
| 9122 | 9122  | Sepw1         | Sepw1         | 1  |
| 9122 | 11321 | Sepw1         | 2310014L17Rik | -1 |
| 9122 | 11465 | Sepw1         | Eif3k         | 1  |
| 9122 | 11888 | Sepw1         | Myadm         | -1 |
| 9122 | 16639 | Sepw1         | MMT00078937   | -1 |
| 9122 | 17314 | Sepw1         | Napa          | -1 |
| 9122 | 19462 | Sepw1         | 4933439C20Rik | -1 |
| 9122 | 20606 | Sepw1         | MMT00042166   | -1 |
| 9122 | 23247 | Sepw1         | Ercc1         | -1 |
| 9161 | 6921  | Mrpl17        | Olfml1        | -1 |
| 9161 | 9161  | Mrpl17        | Mrpl17        | 1  |
| 9161 | 22693 | Mrpl17        | Trim68        | 1  |
| 9161 | 22841 | Mrpl17        | Cib1          | 1  |
| 9191 | 9230  | Lbxcor1       | 1700027N10Rik | -1 |
| 9191 | 18574 | Lbxcor1       | Parc          | 1  |
| 9191 | 18772 | Lbxcor1       | BC048355      | -1 |
| 9191 | 20100 | Lbxcor1       | Guca1b        | 1  |
| 9230 | 9230  | 1700027N10Rik | 1700027N10Rik | -1 |
| 9230 | 14027 | 1700027N10Rik | Rpo1-1        | 1  |
| 9230 | 15318 | 1700027N10Rik | Aars2         | -1 |
| 9230 | 18574 | 1700027N10Rik | Parc          | 1  |
| 9230 | 18772 | 1700027N10Rik | BC048355      | -1 |
| 9240 | 19436 | Olf401        | Dapp1         | 1  |
| 9258 | 499   | P4ha1         | 2310057J16Rik | 1  |
| 9258 | 523   | P4ha1         | 1700040L02Rik | -1 |
| 9258 | 740   | P4ha1         | Txnrd3        | -1 |
| 9258 | 1281  | P4ha1         | Alkbh3        | -1 |
| 9258 | 1435  | P4ha1         | Ptges3        | 1  |
| 9258 | 1849  | P4ha1         | MMT00063181   | 1  |
| 9258 | 2329  | P4ha1         | Wdr6          | -1 |
| 9258 | 3587  | P4ha1         | MMT00041940   | 1  |
| 9258 | 3799  | P4ha1         | Serpinh1      | 1  |
| 9258 | 3849  | P4ha1         | MMT00047578   | 1  |
| 9258 | 3913  | P4ha1         | Mrpl15        | 1  |
| 9258 | 3970  | P4ha1         | 4931414P19Rik | 1  |
| 9258 | 4612  | P4ha1         | Hspa5         | 1  |
| 9258 | 4805  | P4ha1         | Hspb1         | 1  |
| 9258 | 4950  | P4ha1         | Dnajb10       | 1  |
| 9258 | 6021  | P4ha1         | MMT00008784   | 1  |
| 9258 | 6218  | P4ha1         | Hnrnpc        | 1  |
| 9258 | 6525  | P4ha1         | Uchl5ip       | -1 |
| 9258 | 7444  | P4ha1         | Hspe1         | 1  |
| 9258 | 7731  | P4ha1         | 1500001M20Rik | -1 |
| 9258 | 7798  | P4ha1         | MMT00077178   | 1  |
| 9258 | 8670  | P4ha1         | MMT00051613   | 1  |
| 9258 | 8891  | P4ha1         | MMT00071061   | 1  |
| 9258 | 9067  | P4ha1         | Tra2a         | 1  |
| 9258 | 9224  | P4ha1         | MMT00013510   | 1  |
| 9258 | 9258  | P4ha1         | P4ha1         | 1  |
| 9258 | 9279  | P4ha1         | MMT00066808   | 1  |
| 9258 | 9513  | P4ha1         | Tardbp        | 1  |
| 9258 | 9680  | P4ha1         | Ahsa1         | 1  |
| 9258 | 10177 | P4ha1         | Osgep         | -1 |
| 9258 | 10881 | P4ha1         | Uchl5ip       | -1 |
| 9258 | 11043 | P4ha1         | Hsph1         | 1  |
| 9258 | 11208 | P4ha1         | Hspb1         | 1  |
| 9258 | 11214 | P4ha1         | MMT00049207   | 1  |
| 9258 | 11818 | P4ha1         | MMT00048396   | 1  |
| 9258 | 12419 | P4ha1         | MMT00081393   | 1  |
| 9258 | 12498 | P4ha1         | Abcg8         | -1 |

|      |       |             |               |    |
|------|-------|-------------|---------------|----|
| 9258 | 12968 | P4ha1       | Fbxw9         | -1 |
| 9258 | 13052 | P4ha1       | Tnfrsf19      | -1 |
| 9258 | 13521 | P4ha1       | Ears2         | 1  |
| 9258 | 13741 | P4ha1       | Hspa4l        | 1  |
| 9258 | 14014 | P4ha1       | MMT00008376   | 1  |
| 9258 | 14222 | P4ha1       | MMT00076410   | -1 |
| 9258 | 14298 | P4ha1       | Atp2a2        | 1  |
| 9258 | 15476 | P4ha1       | Fem1b         | -1 |
| 9258 | 15675 | P4ha1       | MMT00077535   | 1  |
| 9258 | 15713 | P4ha1       | Rbm3          | -1 |
| 9258 | 16299 | P4ha1       | Creld2        | 1  |
| 9258 | 16585 | P4ha1       | Syvn1         | 1  |
| 9258 | 16754 | P4ha1       | Hsp90aa1      | 1  |
| 9258 | 17595 | P4ha1       | MMT00048325   | 1  |
| 9258 | 18099 | P4ha1       | Nfx1          | -1 |
| 9258 | 18118 | P4ha1       | Cacybp        | 1  |
| 9258 | 18336 | P4ha1       | Lrpap1        | -1 |
| 9258 | 18865 | P4ha1       | Ptges3        | 1  |
| 9258 | 20194 | P4ha1       | Pnlcd1        | -1 |
| 9258 | 20332 | P4ha1       | Stau2         | -1 |
| 9258 | 20828 | P4ha1       | MMT00007878   | 1  |
| 9258 | 20912 | P4ha1       | Chordc1       | 1  |
| 9258 | 20965 | P4ha1       | Usp28         | -1 |
| 9258 | 21352 | P4ha1       | Dtnbp1        | -1 |
| 9258 | 21389 | P4ha1       | Odf2          | -1 |
| 9258 | 21553 | P4ha1       | EG628438      | 1  |
| 9258 | 22139 | P4ha1       | Stip1         | 1  |
| 9258 | 22521 | P4ha1       | Hsp90b1       | 1  |
| 9258 | 22751 | P4ha1       | Nosip         | -1 |
| 9258 | 23646 | P4ha1       | Hsp90ab1      | 1  |
| 9263 | 23283 | Fbxo27      | Mrps12        | -1 |
| 9276 | 12492 | MMT00008480 | Ybx1          | 1  |
| 9276 | 20147 | MMT00008480 | Ybx1          | 1  |
| 9276 | 20548 | MMT00008480 | 1700041C02Rik | -1 |
| 9301 | 9301  | MMT00050551 | MMT00050551   | 1  |
| 9304 | 286   | Al449175    | MMT00070509   | 1  |
| 9304 | 403   | Al449175    | Leprotl1      | -1 |
| 9304 | 1755  | Al449175    | Ocel1         | 1  |
| 9304 | 2703  | Al449175    | MMT00073763   | 1  |
| 9304 | 2749  | Al449175    | Naf1          | -1 |
| 9304 | 3052  | Al449175    | 9130404D08Rik | -1 |
| 9304 | 3055  | Al449175    | Pde4c         | 1  |
| 9304 | 5433  | Al449175    | 2410004L22Rik | -1 |
| 9304 | 8114  | Al449175    | Kcnn1         | 1  |
| 9304 | 9304  | Al449175    | Al449175      | 1  |
| 9304 | 9931  | Al449175    | Glt25d1       | -1 |
| 9304 | 10195 | Al449175    | Klf1          | 1  |
| 9304 | 13004 | Al449175    | Arhgef10      | 1  |
| 9304 | 13732 | Al449175    | Tpm4          | -1 |
| 9304 | 14455 | Al449175    | 2700029M09Rik | -1 |
| 9304 | 15094 | Al449175    | Pbx4          | -1 |
| 9304 | 15455 | Al449175    | Lsm4          | -1 |
| 9304 | 16617 | Al449175    | Sh2d4a        | -1 |
| 9304 | 16849 | Al449175    | Trmt1         | -1 |
| 9304 | 18886 | Al449175    | Slc18a1       | -1 |
| 9304 | 20484 | Al449175    | Ces1          | -1 |
| 9322 | 20300 | Relt        | Plekhhb1      | 1  |
| 9322 | 21425 | Relt        | Rab6          | 1  |
| 9355 | 3703  | Reep1       | Ggcx          | 1  |
| 9360 | 15508 | Taf1c       | 4632415L05Rik | -1 |
| 9361 | 4626  | Hand1       | 2310046K01Rik | 1  |
| 9361 | 6231  | Hand1       | 9030622O22Rik | -1 |
| 9361 | 9361  | Hand1       | Hand1         | 1  |
| 9361 | 13581 | Hand1       | Srxn1         | 1  |
| 9361 | 17514 | Hand1       | Thbd          | 1  |
| 9361 | 19560 | Hand1       | Trmt6         | 1  |
| 9363 | 19436 | Wisp2       | Dapp1         | 1  |
| 9374 | 4938  | Thbs4       | Mccc2         | 1  |
| 9376 | 2599  | Zscan18     | Lsm14a        | 1  |

|      |       |               |                    |    |
|------|-------|---------------|--------------------|----|
| 9402 | 3196  | 1200016B10Rik | Tat                | 1  |
| 9402 | 10279 | 1200016B10Rik | Rnf186             | -1 |
| 9402 | 11214 | 1200016B10Rik | MMT00049207        | 1  |
| 9402 | 12761 | 1200016B10Rik | Tsc22d3            | 1  |
| 9402 | 15569 | 1200016B10Rik | BC003331           | -1 |
| 9402 | 15826 | 1200016B10Rik | Arl4d              | 1  |
| 9402 | 17850 | 1200016B10Rik | Prg4               | 1  |
| 9402 | 18083 | 1200016B10Rik | Gadd45a            | -1 |
| 9408 | 524   | Hmgcs2        | Hsd3b2             | -1 |
| 9408 | 1466  | Hmgcs2        | Ubap2l             | -1 |
| 9408 | 1867  | Hmgcs2        | Bcas2              | -1 |
| 9408 | 2752  | Hmgcs2        | Fcgr1              | -1 |
| 9408 | 3753  | Hmgcs2        | Setdb1             | 1  |
| 9408 | 5938  | Hmgcs2        | Pfn2               | -1 |
| 9408 | 6206  | Hmgcs2        | MMT00063701        | -1 |
| 9408 | 7519  | Hmgcs2        | Gstm1              | -1 |
| 9408 | 9408  | Hmgcs2        | Hmgcs2             | 1  |
| 9408 | 10521 | Hmgcs2        | Ttf2               | -1 |
| 9408 | 10681 | Hmgcs2        | Dgkz               | 1  |
| 9408 | 11121 | Hmgcs2        | Mttr11             | 1  |
| 9408 | 11611 | Hmgcs2        | S100a13            | 1  |
| 9408 | 12367 | Hmgcs2        | MMT00072365        | 1  |
| 9408 | 13134 | Hmgcs2        | Lipg               | 1  |
| 9408 | 16416 | Hmgcs2        | Commd2             | -1 |
| 9408 | 16753 | Hmgcs2        | Hfe2               | 1  |
| 9408 | 18754 | Hmgcs2        | Rbm8a              | -1 |
| 9408 | 18911 | Hmgcs2        | Selenbp2           | -1 |
| 9408 | 20385 | Hmgcs2        | Chd1l              | -1 |
| 9408 | 20661 | Hmgcs2        | Tuft1              | -1 |
| 9408 | 22202 | Hmgcs2        | OTTMUSG00000021274 | 1  |
| 9408 | 22570 | Hmgcs2        | Phtf1              | -1 |
| 9408 | 22640 | Hmgcs2        | Bud13              | -1 |
| 9408 | 23457 | Hmgcs2        | Selenbp2           | -1 |
| 9413 | 1985  | 1190020J12Rik | Pepd               | 1  |
| 9413 | 2599  | 1190020J12Rik | Lsm14a             | -1 |
| 9413 | 4697  | 1190020J12Rik | Cyp2a12            | 1  |
| 9413 | 14208 | 1190020J12Rik | Ech1               | -1 |
| 9413 | 16639 | 1190020J12Rik | MMT00078937        | 1  |
| 9413 | 18053 | 1190020J12Rik | Psmc4              | -1 |
| 9413 | 18165 | 1190020J12Rik | 5830482F20Rik      | -1 |
| 9413 | 23283 | 1190020J12Rik | Mrps12             | -1 |
| 9417 | 9417  | Cd163         | Cd163              | 1  |
| 9417 | 17391 | Cd163         | C530028O21Rik      | 1  |
| 9417 | 19964 | Cd163         | Ndufa9             | 1  |
| 9419 | 8670  | Acox2         | MMT00051613        | -1 |
| 9419 | 11043 | Acox2         | Hsph1              | -1 |
| 9419 | 11214 | Acox2         | MMT00049207        | -1 |
| 9421 | 11966 | Serpinf2      | Zfp280b            | 1  |
| 9421 | 12861 | Serpinf2      | Rhcg               | 1  |
| 9421 | 19436 | Serpinf2      | Dapp1              | 1  |
| 9436 | 3208  | Cntnap2       | 4930511111Rik      | 1  |
| 9436 | 7436  | Cntnap2       | 1700063K16Rik      | 1  |
| 9436 | 11966 | Cntnap2       | Zfp280b            | 1  |
| 9436 | 12861 | Cntnap2       | Rhcg               | 1  |
| 9436 | 19436 | Cntnap2       | Dapp1              | 1  |
| 9436 | 19672 | Cntnap2       | Cldn19             | 1  |
| 9436 | 22125 | Cntnap2       | Gab1               | 1  |
| 9449 | 1177  | Sft2d2        | EG545391           | 1  |
| 9449 | 7449  | Sft2d2        | Creg1              | -1 |
| 9449 | 8372  | Sft2d2        | Uap1               | -1 |
| 9449 | 9449  | Sft2d2        | Sft2d2             | 1  |
| 9449 | 11406 | Sft2d2        | Ifi203             | -1 |
| 9449 | 13149 | Sft2d2        | Ifi203             | -1 |
| 9449 | 15844 | Sft2d2        | Klhdc9             | 1  |
| 9449 | 16361 | Sft2d2        | Olfir703           | 1  |
| 9449 | 19520 | Sft2d2        | Uck2               | 1  |
| 9449 | 23466 | Sft2d2        | Pou2f1             | 1  |
| 9454 | 1985  | 2810426N06Rik | Pepd               | -1 |
| 9454 | 2388  | 2810426N06Rik | Dot1l              | 1  |

|      |       |               |               |    |
|------|-------|---------------|---------------|----|
| 9454 | 2599  | 2810426N06Rik | Lsm14a        | 1  |
| 9454 | 4697  | 2810426N06Rik | Cyp2a12       | -1 |
| 9454 | 6513  | 2810426N06Rik | Qpctl         | 1  |
| 9454 | 9454  | 2810426N06Rik | 2810426N06Rik | 1  |
| 9454 | 16639 | 2810426N06Rik | MMT00078937   | -1 |
| 9454 | 19462 | 2810426N06Rik | 4933439C20Rik | -1 |
| 9454 | 19762 | 2810426N06Rik | Pih1d1        | -1 |
| 9454 | 19854 | 2810426N06Rik | Kcnj14        | 1  |
| 9454 | 23595 | 2810426N06Rik | Gm550         | 1  |
| 9463 | 3208  | Zdhhc23       | 4930511111Rik | 1  |
| 9463 | 5694  | Zdhhc23       | Sp7           | 1  |
| 9463 | 7436  | Zdhhc23       | 1700063K16Rik | 1  |
| 9463 | 11966 | Zdhhc23       | Zfp280b       | 1  |
| 9463 | 12248 | Zdhhc23       | Tnp2          | 1  |
| 9463 | 12861 | Zdhhc23       | Rhcg          | 1  |
| 9463 | 19436 | Zdhhc23       | Dapp1         | 1  |
| 9463 | 19672 | Zdhhc23       | Cldn19        | 1  |
| 9463 | 22125 | Zdhhc23       | Gab1          | 1  |
| 9468 | 3208  | Gtf2a1l       | 4930511111Rik | 1  |
| 9468 | 11966 | Gtf2a1l       | Zfp280b       | 1  |
| 9468 | 12861 | Gtf2a1l       | Rhcg          | 1  |
| 9468 | 19436 | Gtf2a1l       | Dapp1         | 1  |
| 9513 | 499   | Tardbp        | 2310057J16Rik | 1  |
| 9513 | 740   | Tardbp        | Txnrd3        | -1 |
| 9513 | 1281  | Tardbp        | Alkbh3        | -1 |
| 9513 | 3587  | Tardbp        | MMT00041940   | 1  |
| 9513 | 3799  | Tardbp        | Serpinh1      | 1  |
| 9513 | 3849  | Tardbp        | MMT00047578   | 1  |
| 9513 | 3913  | Tardbp        | Mrpl15        | 1  |
| 9513 | 4805  | Tardbp        | Hspb1         | 1  |
| 9513 | 4950  | Tardbp        | Dnajb10       | 1  |
| 9513 | 6021  | Tardbp        | MMT00008784   | 1  |
| 9513 | 7731  | Tardbp        | 1500001M20Rik | -1 |
| 9513 | 7798  | Tardbp        | MMT00077178   | 1  |
| 9513 | 8670  | Tardbp        | MMT00051613   | 1  |
| 9513 | 8891  | Tardbp        | MMT00071061   | 1  |
| 9513 | 9067  | Tardbp        | Tra2a         | 1  |
| 9513 | 9224  | Tardbp        | MMT00013510   | 1  |
| 9513 | 9258  | Tardbp        | P4ha1         | 1  |
| 9513 | 9513  | Tardbp        | Tardbp        | 1  |
| 9513 | 9680  | Tardbp        | Ahsa1         | 1  |
| 9513 | 9899  | Tardbp        | D13Wsu177e    | 1  |
| 9513 | 10177 | Tardbp        | Osgep         | -1 |
| 9513 | 10526 | Tardbp        | MMT00036239   | 1  |
| 9513 | 11043 | Tardbp        | Hsph1         | 1  |
| 9513 | 11208 | Tardbp        | Hspb1         | 1  |
| 9513 | 11214 | Tardbp        | MMT00049207   | 1  |
| 9513 | 12498 | Tardbp        | Abcg8         | -1 |
| 9513 | 13521 | Tardbp        | Ears2         | 1  |
| 9513 | 13741 | Tardbp        | Hspa4l        | 1  |
| 9513 | 14014 | Tardbp        | MMT00008376   | 1  |
| 9513 | 14298 | Tardbp        | Atp2a2        | 1  |
| 9513 | 15476 | Tardbp        | Fem1b         | -1 |
| 9513 | 15675 | Tardbp        | MMT00077535   | 1  |
| 9513 | 16299 | Tardbp        | Creld2        | 1  |
| 9513 | 16754 | Tardbp        | Hsp90aa1      | 1  |
| 9513 | 17595 | Tardbp        | MMT00048325   | 1  |
| 9513 | 18099 | Tardbp        | Nfx1          | -1 |
| 9513 | 19540 | Tardbp        | Zfp428        | 1  |
| 9513 | 20194 | Tardbp        | Pnlcd1        | -1 |
| 9513 | 20332 | Tardbp        | Stau2         | -1 |
| 9513 | 20828 | Tardbp        | MMT00007878   | 1  |
| 9513 | 20912 | Tardbp        | Chordc1       | 1  |
| 9513 | 21352 | Tardbp        | Dtnbp1        | -1 |
| 9513 | 21389 | Tardbp        | Odf2          | -1 |
| 9513 | 22139 | Tardbp        | Stip1         | 1  |
| 9513 | 22710 | Tardbp        | MMT00075201   | 1  |
| 9513 | 22751 | Tardbp        | Nosip         | -1 |
| 9513 | 23646 | Tardbp        | Hsp90ab1      | 1  |

|      |       |        |               |    |
|------|-------|--------|---------------|----|
| 9514 | 202   | Vps37a | Naif1         | 1  |
| 9514 | 499   | Vps37a | 2310057J16Rik | 1  |
| 9514 | 523   | Vps37a | 1700040L02Rik | -1 |
| 9514 | 768   | Vps37a | Samd1         | 1  |
| 9514 | 1411  | Vps37a | Tada3l        | 1  |
| 9514 | 1453  | Vps37a | Gfod2         | 1  |
| 9514 | 1663  | Vps37a | Fkbp4         | 1  |
| 9514 | 1697  | Vps37a | Sf4           | 1  |
| 9514 | 1820  | Vps37a | Mat2b         | -1 |
| 9514 | 1849  | Vps37a | MMT00063181   | 1  |
| 9514 | 2041  | Vps37a | Cct7          | 1  |
| 9514 | 3376  | Vps37a | Trip4         | -1 |
| 9514 | 3587  | Vps37a | MMT00041940   | 1  |
| 9514 | 3799  | Vps37a | Serpinh1      | 1  |
| 9514 | 3849  | Vps37a | MMT00047578   | 1  |
| 9514 | 3913  | Vps37a | Mrpl15        | 1  |
| 9514 | 3998  | Vps37a | 4930528F23Rik | -1 |
| 9514 | 4261  | Vps37a | MMT00014970   | 1  |
| 9514 | 4355  | Vps37a | Pard6a        | 1  |
| 9514 | 4784  | Vps37a | Slc2a2        | -1 |
| 9514 | 4805  | Vps37a | Hspb1         | 1  |
| 9514 | 4950  | Vps37a | Dnajb10       | 1  |
| 9514 | 4966  | Vps37a | Zscan20       | 1  |
| 9514 | 5013  | Vps37a | Fanci1        | -1 |
| 9514 | 6021  | Vps37a | MMT00008784   | 1  |
| 9514 | 6126  | Vps37a | MMT00067575   | 1  |
| 9514 | 6171  | Vps37a | Abtb2         | 1  |
| 9514 | 7731  | Vps37a | 1500001M20Rik | -1 |
| 9514 | 7865  | Vps37a | MMT00062659   | -1 |
| 9514 | 8319  | Vps37a | MMT00062477   | 1  |
| 9514 | 8486  | Vps37a | Plod3         | 1  |
| 9514 | 8618  | Vps37a | EG433865      | -1 |
| 9514 | 8670  | Vps37a | MMT00051613   | 1  |
| 9514 | 9224  | Vps37a | MMT00013510   | 1  |
| 9514 | 9258  | Vps37a | P4ha1         | 1  |
| 9514 | 9279  | Vps37a | MMT00066808   | 1  |
| 9514 | 9680  | Vps37a | Ahsa1         | 1  |
| 9514 | 9899  | Vps37a | D13Wsu177e    | 1  |
| 9514 | 10102 | Vps37a | Lman2l        | 1  |
| 9514 | 10177 | Vps37a | Osgep         | -1 |
| 9514 | 10267 | Vps37a | Setdb2        | -1 |
| 9514 | 11043 | Vps37a | Hsph1         | 1  |
| 9514 | 11201 | Vps37a | Sunc1         | -1 |
| 9514 | 11208 | Vps37a | Hspb1         | 1  |
| 9514 | 11214 | Vps37a | MMT00049207   | 1  |
| 9514 | 11665 | Vps37a | Hyal1         | 1  |
| 9514 | 11818 | Vps37a | MMT00048396   | 1  |
| 9514 | 13052 | Vps37a | Tnfrsf19      | -1 |
| 9514 | 13521 | Vps37a | Ears2         | 1  |
| 9514 | 14139 | Vps37a | 2410005O16Rik | -1 |
| 9514 | 14222 | Vps37a | MMT00076410   | -1 |
| 9514 | 14249 | Vps37a | Lzts2         | 1  |
| 9514 | 14298 | Vps37a | Atp2a2        | 1  |
| 9514 | 15476 | Vps37a | Fem1b         | -1 |
| 9514 | 15675 | Vps37a | MMT00077535   | 1  |
| 9514 | 15713 | Vps37a | Rbm3          | -1 |
| 9514 | 16043 | Vps37a | Sult1c2       | -1 |
| 9514 | 16299 | Vps37a | Creld2        | 1  |
| 9514 | 16585 | Vps37a | Syvn1         | 1  |
| 9514 | 17449 | Vps37a | Zfp296        | 1  |
| 9514 | 17595 | Vps37a | MMT00048325   | 1  |
| 9514 | 17712 | Vps37a | Nup62         | 1  |
| 9514 | 18099 | Vps37a | Nfx1          | -1 |
| 9514 | 18666 | Vps37a | Hint3         | -1 |
| 9514 | 19540 | Vps37a | Zfp428        | 1  |
| 9514 | 19607 | Vps37a | Birc3         | -1 |
| 9514 | 20332 | Vps37a | Stau2         | -1 |
| 9514 | 20912 | Vps37a | Chordc1       | 1  |
| 9514 | 20965 | Vps37a | Usp28         | -1 |

|      |       |             |                    |    |
|------|-------|-------------|--------------------|----|
| 9514 | 21389 | Vps37a      | Odf2               | -1 |
| 9514 | 21556 | Vps37a      | 4930579F01Rik      | -1 |
| 9514 | 21588 | Vps37a      | Snrpa              | 1  |
| 9514 | 22139 | Vps37a      | Stip1              | 1  |
| 9514 | 22751 | Vps37a      | Nosip              | -1 |
| 9514 | 23646 | Vps37a      | Hsp90ab1           | 1  |
| 9519 | 524   | Fstl5       | Hsd3b2             | -1 |
| 9519 | 673   | Fstl5       | Tchh               | 1  |
| 9519 | 1466  | Fstl5       | Ubap2l             | -1 |
| 9519 | 1867  | Fstl5       | Bcas2              | -1 |
| 9519 | 1963  | Fstl5       | MMT00039783        | -1 |
| 9519 | 2752  | Fstl5       | Fcgr1              | -1 |
| 9519 | 3753  | Fstl5       | Setdb1             | 1  |
| 9519 | 5938  | Fstl5       | Pfn2               | -1 |
| 9519 | 6206  | Fstl5       | MMT00063701        | -1 |
| 9519 | 7519  | Fstl5       | Gstm1              | -1 |
| 9519 | 8738  | Fstl5       | Reg4               | 1  |
| 9519 | 10521 | Fstl5       | Ttf2               | -1 |
| 9519 | 10681 | Fstl5       | Dgkz               | 1  |
| 9519 | 11121 | Fstl5       | Mtmr11             | 1  |
| 9519 | 11611 | Fstl5       | S100a13            | 1  |
| 9519 | 12250 | Fstl5       | P2ry14             | -1 |
| 9519 | 12367 | Fstl5       | MMT00072365        | 1  |
| 9519 | 13134 | Fstl5       | Lipg               | 1  |
| 9519 | 13302 | Fstl5       | Bche               | 1  |
| 9519 | 16416 | Fstl5       | Comm2              | -1 |
| 9519 | 16679 | Fstl5       | Ctsk               | 1  |
| 9519 | 16753 | Fstl5       | Hfe2               | 1  |
| 9519 | 18138 | Fstl5       | MMT00000385        | -1 |
| 9519 | 18754 | Fstl5       | Rbm8a              | -1 |
| 9519 | 18911 | Fstl5       | Selenbp2           | -1 |
| 9519 | 20385 | Fstl5       | Chd1l              | -1 |
| 9519 | 20661 | Fstl5       | Tuft1              | -1 |
| 9519 | 20917 | Fstl5       | Gstm6              | 1  |
| 9519 | 21650 | Fstl5       | Ap4b1              | -1 |
| 9519 | 21814 | Fstl5       | Accn5              | -1 |
| 9519 | 22202 | Fstl5       | OTTMUSG00000021274 | 1  |
| 9519 | 22570 | Fstl5       | Phtf1              | -1 |
| 9519 | 23457 | Fstl5       | Selenbp2           | -1 |
| 9540 | 3654  | Csnk1e      | St13               | -1 |
| 9540 | 6804  | Csnk1e      | Cyp2d22            | 1  |
| 9540 | 8653  | Csnk1e      | AW124722           | -1 |
| 9540 | 11503 | Csnk1e      | Rangap1            | 1  |
| 9540 | 12468 | Csnk1e      | Cyp2d13            | 1  |
| 9540 | 19216 | Csnk1e      | Bik                | 1  |
| 9547 | 2472  | MMT00006479 | MMT00014056        | 1  |
| 9547 | 7192  | MMT00006479 | Ttc21b             | 1  |
| 9547 | 7654  | MMT00006479 | Ptpmt1             | -1 |
| 9547 | 9547  | MMT00006479 | MMT00006479        | 1  |
| 9547 | 14757 | MMT00006479 | Hdx                | 1  |
| 9547 | 15365 | MMT00006479 | Ext2               | 1  |
| 9547 | 16881 | MMT00006479 | MMT00031504        | 1  |
| 9547 | 17295 | MMT00006479 | MMT00082577        | 1  |
| 9547 | 19763 | MMT00006479 | Acp2               | 1  |
| 9547 | 19803 | MMT00006479 | BC003993           | 1  |
| 9547 | 22320 | MMT00006479 | MMT00047284        | 1  |
| 9547 | 23474 | MMT00006479 | MMT00011721        | 1  |
| 9547 | 23609 | MMT00006479 | Trim44             | 1  |
| 9552 | 18373 | Dnmt3a      | Dnajb1             | 1  |
| 9552 | 18418 | Dnmt3a      | Hspa1b             | 1  |
| 9569 | 286   | Dda1        | MMT00070509        | -1 |
| 9569 | 1755  | Dda1        | Ocel1              | -1 |
| 9569 | 2703  | Dda1        | MMT00073763        | -1 |
| 9569 | 2749  | Dda1        | Naf1               | 1  |
| 9569 | 3055  | Dda1        | Pde4c              | -1 |
| 9569 | 5433  | Dda1        | 2410004L22Rik      | 1  |
| 9569 | 9304  | Dda1        | AI449175           | -1 |
| 9569 | 9931  | Dda1        | Glt25d1            | 1  |
| 9569 | 10195 | Dda1        | Klf1               | -1 |



|      |       |             |               |    |
|------|-------|-------------|---------------|----|
| 9569 | 13732 | Dda1        | Tpm4          | 1  |
| 9569 | 14455 | Dda1        | 2700029M09Rik | 1  |
| 9569 | 15094 | Dda1        | Pbx4          | 1  |
| 9569 | 15455 | Dda1        | Lsm4          | 1  |
| 9569 | 16617 | Dda1        | Sh2d4a        | 1  |
| 9569 | 16849 | Dda1        | Trmt1         | 1  |
| 9569 | 18886 | Dda1        | Slc18a1       | 1  |
| 9569 | 20484 | Dda1        | Ces1          | 1  |
| 9611 | 9611  | Ncf2        | Ncf2          | 1  |
| 9611 | 17463 | Ncf2        | Rgl1          | 1  |
| 9611 | 17850 | Ncf2        | Prg4          | -1 |
| 9616 | 7069  | Al451557    | Ube1l         | 1  |
| 9616 | 8659  | Al451557    | Psmb8         | 1  |
| 9616 | 8800  | Al451557    | Rnf213        | 1  |
| 9616 | 21351 | Al451557    | Shisa5        | 1  |
| 9616 | 21549 | Al451557    | Rtp4          | 1  |
| 9616 | 21824 | Al451557    | 5830443L24Rik | 1  |
| 9622 | 630   | Rasgef1a    | C1s           | 1  |
| 9622 | 3078  | Rasgef1a    | 9630033F20Rik | -1 |
| 9622 | 9417  | Rasgef1a    | Cd163         | -1 |
| 9622 | 17391 | Rasgef1a    | C530028O21Rik | -1 |
| 9622 | 17743 | Rasgef1a    | Phb2          | -1 |
| 9622 | 19964 | Rasgef1a    | Ndufa9        | -1 |
| 9622 | 22075 | Rasgef1a    | C1s           | 1  |
| 9655 | 19762 | Sult2b1     | Pih1d1        | 1  |
| 9655 | 19854 | Sult2b1     | Kcnj14        | -1 |
| 9672 | 6021  | Tmem101     | MMT00008784   | 1  |
| 9672 | 7444  | Tmem101     | Hspe1         | 1  |
| 9672 | 8670  | Tmem101     | MMT00051613   | 1  |
| 9672 | 9067  | Tmem101     | Tra2a         | 1  |
| 9672 | 9258  | Tmem101     | P4ha1         | 1  |
| 9672 | 11043 | Tmem101     | Hsph1         | 1  |
| 9672 | 15675 | Tmem101     | MMT00077535   | 1  |
| 9698 | 12674 | MMT00081969 | Lyzl6         | -1 |
| 9729 | 286   | Got1l1      | MMT00070509   | -1 |
| 9729 | 403   | Got1l1      | Leprotl1      | 1  |
| 9729 | 1755  | Got1l1      | Ocel1         | -1 |
| 9729 | 2749  | Got1l1      | Naf1          | 1  |
| 9729 | 5433  | Got1l1      | 2410004L22Rik | 1  |
| 9729 | 9304  | Got1l1      | Al449175      | -1 |
| 9729 | 9931  | Got1l1      | Glt25d1       | 1  |
| 9729 | 13004 | Got1l1      | Arhgef10      | -1 |
| 9729 | 13732 | Got1l1      | Tpm4          | 1  |
| 9729 | 15455 | Got1l1      | Lsm4          | 1  |
| 9729 | 16617 | Got1l1      | Sh2d4a        | 1  |
| 9729 | 16849 | Got1l1      | Trmt1         | 1  |
| 9729 | 17553 | Got1l1      | Eif4ebp1      | -1 |
| 9729 | 18886 | Got1l1      | Slc18a1       | 1  |
| 9729 | 20484 | Got1l1      | Ces1          | 1  |
| 9745 | 337   | Gadd45g     | Rasgef1b      | 1  |
| 9745 | 3196  | Gadd45g     | Tat           | 1  |
| 9745 | 3452  | Gadd45g     | Ccrn4l        | 1  |
| 9745 | 3652  | Gadd45g     | Adm           | 1  |
| 9745 | 4205  | Gadd45g     | Rgs1          | 1  |
| 9745 | 4404  | Gadd45g     | Commd5        | -1 |
| 9745 | 5889  | Gadd45g     | Errfi1        | 1  |
| 9745 | 6564  | Gadd45g     | Cebpd         | 1  |
| 9745 | 7120  | Gadd45g     | Dusp1         | 1  |
| 9745 | 7136  | Gadd45g     | Id3           | -1 |
| 9745 | 7315  | Gadd45g     | EG624219      | -1 |
| 9745 | 8632  | Gadd45g     | Igfbp1        | 1  |
| 9745 | 8816  | Gadd45g     | Nfkbia        | 1  |
| 9745 | 9745  | Gadd45g     | Gadd45g       | 1  |
| 9745 | 10842 | Gadd45g     | Slc25a25      | 1  |
| 9745 | 12761 | Gadd45g     | Tsc22d3       | 1  |
| 9745 | 14263 | Gadd45g     | Arddc3        | -1 |
| 9745 | 14894 | Gadd45g     | G0s2          | -1 |
| 9745 | 15522 | Gadd45g     | 1810011O10Rik | 1  |
| 9745 | 15826 | Gadd45g     | Arl4d         | 1  |

|      |       |             |               |    |
|------|-------|-------------|---------------|----|
| 9745 | 16517 | Gadd45g     | D4Wsu53e      | 1  |
| 9745 | 17525 | Gadd45g     | Ctgf          | 1  |
| 9745 | 18083 | Gadd45g     | Gadd45a       | -1 |
| 9745 | 19528 | Gadd45g     | Zfp503        | -1 |
| 9745 | 21805 | Gadd45g     | Plk3          | 1  |
| 9745 | 21934 | Gadd45g     | Id2           | -1 |
| 9745 | 22216 | Gadd45g     | Sp5           | -1 |
| 9745 | 23552 | Gadd45g     | Rasl11b       | -1 |
| 9762 | 6231  | Snx5        | 9030622O22Rik | 1  |
| 9790 | 3061  | Tspan10     | Scarf2        | 1  |
| 9790 | 3119  | Tspan10     | Mapk10        | 1  |
| 9790 | 6017  | Tspan10     | MMT00018015   | -1 |
| 9790 | 6846  | Tspan10     | Olfr1402      | 1  |
| 9790 | 8791  | Tspan10     | Sectm1a       | 1  |
| 9790 | 13615 | Tspan10     | Arl16         | -1 |
| 9790 | 15016 | Tspan10     | MMT00074608   | 1  |
| 9790 | 16613 | Tspan10     | 1110031102Rik | 1  |
| 9790 | 17333 | Tspan10     | Slc25a10      | -1 |
| 9790 | 17680 | Tspan10     | 1700069L16Rik | 1  |
| 9790 | 17792 | Tspan10     | Vmn2r79       | 1  |
| 9790 | 17897 | Tspan10     | Gm1019        | 1  |
| 9790 | 22557 | Tspan10     | P4hb          | -1 |
| 9805 | 7088  | Tagap       | Slc37a1       | 1  |
| 9805 | 11803 | Tagap       | 1500032D16Rik | -1 |
| 9805 | 13493 | Tagap       | Ring1         | -1 |
| 9805 | 17707 | Tagap       | Rshl2b        | 1  |
| 9821 | 17525 | Pmaip1      | Ctgf          | 1  |
| 9821 | 19466 | Pmaip1      | Pptc7         | 1  |
| 9821 | 21331 | Pmaip1      | Slc10a6       | 1  |
| 9827 | 9707  | Pam         | Golt1a        | -1 |
| 9827 | 9827  | Pam         | Pam           | 1  |
| 9827 | 12053 | Pam         | 2310005L22Rik | -1 |
| 9827 | 23361 | Pam         | Bivm          | 1  |
| 9830 | 11859 | Rbks        | Poln          | -1 |
| 9847 | 2224  | Ifi27       | Oasl2         | 1  |
| 9847 | 3683  | Ifi27       | Oas2          | 1  |
| 9847 | 6824  | Ifi27       | Irf7          | 1  |
| 9847 | 12398 | Ifi27       | Ifi44         | 1  |
| 9847 | 15074 | Ifi27       | Usp18         | 1  |
| 9847 | 21351 | Ifi27       | Shisa5        | 1  |
| 9899 | 3196  | D13Wsu177e  | Tat           | 1  |
| 9899 | 3587  | D13Wsu177e  | MMT00041940   | 1  |
| 9899 | 6021  | D13Wsu177e  | MMT00008784   | 1  |
| 9899 | 7963  | D13Wsu177e  | Rxrg          | -1 |
| 9899 | 8670  | D13Wsu177e  | MMT00051613   | 1  |
| 9899 | 9258  | D13Wsu177e  | P4ha1         | 1  |
| 9899 | 11043 | D13Wsu177e  | Hsph1         | 1  |
| 9899 | 11214 | D13Wsu177e  | MMT00049207   | 1  |
| 9899 | 15675 | D13Wsu177e  | MMT00077535   | 1  |
| 9899 | 16251 | D13Wsu177e  | G6pc          | 1  |
| 9899 | 18083 | D13Wsu177e  | Gadd45a       | -1 |
| 9899 | 18373 | D13Wsu177e  | Dnajb1        | 1  |
| 9899 | 18418 | D13Wsu177e  | Hspa1b        | 1  |
| 9899 | 22303 | D13Wsu177e  | Cdt1          | -1 |
| 9900 | 22914 | MMT00062271 | EG626280      | -1 |
| 9912 | 9912  | Ttc27       | Ttc27         | 1  |
| 9912 | 11108 | Ttc27       | Ltbp1         | -1 |
| 9912 | 12451 | Ttc27       | Srd5a2        | 1  |
| 9912 | 14913 | Ttc27       | Yipf4         | 1  |
| 9912 | 15306 | Ttc27       | Dpy30         | 1  |
| 9912 | 16886 | Ttc27       | Dpy30         | 1  |
| 9912 | 21710 | Ttc27       | Slc30a6       | 1  |
| 9946 | 11966 | Stam2       | Zfp280b       | 1  |
| 9946 | 12861 | Stam2       | Rhcg          | 1  |
| 9946 | 19436 | Stam2       | Dapp1         | 1  |
| 9954 | 11966 | MMT00047280 | Zfp280b       | 1  |
| 9954 | 19436 | MMT00047280 | Dapp1         | 1  |
| 9973 | 3587  | Tmem5       | MMT00041940   | -1 |
| 9973 | 6021  | Tmem5       | MMT00008784   | -1 |

|       |       |               |               |    |
|-------|-------|---------------|---------------|----|
| 9973  | 6769  | Tmem5         | Banp          | -1 |
| 9973  | 8670  | Tmem5         | MMT00051613   | -1 |
| 9973  | 11214 | Tmem5         | MMT00049207   | -1 |
| 9973  | 15675 | Tmem5         | MMT00077535   | -1 |
| 9973  | 18373 | Tmem5         | Dnajb1        | -1 |
| 9973  | 18418 | Tmem5         | Hspa1b        | -1 |
| 9990  | 19436 | MMT00081303   | Dapp1         | 1  |
| 9999  | 1858  | Zswim3        | 2810432L12Rik | -1 |
| 9999  | 4404  | Zswim3        | Commd5        | -1 |
| 9999  | 8499  | Zswim3        | C430048L16Rik | 1  |
| 9999  | 9067  | Zswim3        | Tra2a         | 1  |
| 9999  | 10435 | Zswim3        | Nab2          | -1 |
| 9999  | 11610 | Zswim3        | Hey1          | -1 |
| 9999  | 15476 | Zswim3        | Fem1b         | -1 |
| 9999  | 16251 | Zswim3        | G6pc          | 1  |
| 9999  | 16517 | Zswim3        | D4Wsu53e      | 1  |
| 9999  | 18083 | Zswim3        | Gadd45a       | -1 |
| 9999  | 18099 | Zswim3        | Nfx1          | -1 |
| 9999  | 18373 | Zswim3        | Dnajb1        | 1  |
| 9999  | 18903 | Zswim3        | Crem          | 1  |
| 9999  | 22216 | Zswim3        | Sp5           | -1 |
| 9999  | 22303 | Zswim3        | Cdt1          | -1 |
| 10027 | 3587  | Mcm9          | MMT00041940   | -1 |
| 10027 | 6021  | Mcm9          | MMT00008784   | -1 |
| 10027 | 6769  | Mcm9          | Banp          | -1 |
| 10027 | 8670  | Mcm9          | MMT00051613   | -1 |
| 10027 | 11043 | Mcm9          | Hsph1         | -1 |
| 10027 | 11214 | Mcm9          | MMT00049207   | -1 |
| 10027 | 15476 | Mcm9          | Fem1b         | 1  |
| 10027 | 15675 | Mcm9          | MMT00077535   | -1 |
| 10027 | 18373 | Mcm9          | Dnajb1        | -1 |
| 10027 | 18418 | Mcm9          | Hspa1b        | -1 |
| 10054 | 11043 | Fsip1         | Hsph1         | -1 |
| 10055 | 19436 | Tpte          | Dapp1         | 1  |
| 10077 | 3780  | Cep63         | Ryk           | -1 |
| 10077 | 10077 | Cep63         | Cep63         | 1  |
| 10077 | 10236 | Cep63         | EG665033      | -1 |
| 10130 | 8664  | MMT00043239   | MMT00014895   | -1 |
| 10130 | 17729 | MMT00043239   | Prim2         | 1  |
| 10130 | 20077 | MMT00043239   | Ccdc115       | 1  |
| 10134 | 12140 | Hivep3        | Mrps15        | 1  |
| 10134 | 12492 | Hivep3        | Ybx1          | 1  |
| 10134 | 20147 | Hivep3        | Ybx1          | 1  |
| 10134 | 20548 | Hivep3        | 1700041C02Rik | -1 |
| 10189 | 10189 | Cage1         | Cage1         | -1 |
| 10189 | 11094 | Cage1         | Slc17a3       | 1  |
| 10189 | 15698 | Cage1         | Them2         | 1  |
| 10189 | 17528 | Cage1         | Gmn           | 1  |
| 10189 | 20759 | Cage1         | Slc17a1       | 1  |
| 10189 | 23118 | Cage1         | Ttrap         | 1  |
| 10195 | 11966 | Klf1          | Zfp280b       | 1  |
| 10195 | 19436 | Klf1          | Dapp1         | 1  |
| 10203 | 5410  | Cyp4f16       | Cyp4f15       | -1 |
| 10234 | 3208  | C230093N12Rik | 4930511111Rik | 1  |
| 10234 | 7436  | C230093N12Rik | 1700063K16Rik | 1  |
| 10234 | 11966 | C230093N12Rik | Zfp280b       | 1  |
| 10234 | 12861 | C230093N12Rik | Rhcg          | 1  |
| 10234 | 19436 | C230093N12Rik | Dapp1         | 1  |
| 10236 | 2079  | EG665033      | Mthfs         | -1 |
| 10236 | 10236 | EG665033      | EG665033      | 1  |
| 10240 | 3208  | Cyp2w1        | 4930511111Rik | 1  |
| 10240 | 7436  | Cyp2w1        | 1700063K16Rik | 1  |
| 10240 | 11966 | Cyp2w1        | Zfp280b       | 1  |
| 10240 | 19436 | Cyp2w1        | Dapp1         | 1  |
| 10273 | 10273 | Gpt2          | Gpt2          | 1  |
| 10281 | 3208  | Slc15a1       | 4930511111Rik | 1  |
| 10281 | 5694  | Slc15a1       | Sp7           | 1  |
| 10281 | 11966 | Slc15a1       | Zfp280b       | 1  |
| 10281 | 12861 | Slc15a1       | Rhcg          | 1  |

|       |       |               |               |    |
|-------|-------|---------------|---------------|----|
| 10281 | 19436 | Slc15a1       | Dapp1         | 1  |
| 10308 | 1336  | Fuk           | MMT00069537   | -1 |
| 10308 | 2243  | Fuk           | Gcsh          | -1 |
| 10308 | 9304  | Fuk           | AI449175      | -1 |
| 10308 | 14511 | Fuk           | Sostdc1       | 1  |
| 10327 | 3139  | Hint2         | Gba2          | 1  |
| 10327 | 3610  | Hint2         | Rnf38         | 1  |
| 10327 | 3847  | Hint2         | Tdrd7         | -1 |
| 10327 | 8907  | Hint2         | Npr2          | 1  |
| 10366 | 6830  | 4931403E03Rik | Rsc1a1        | -1 |
| 10373 | 286   | Tmem141       | MMT00070509   | 1  |
| 10373 | 403   | Tmem141       | Leprotl1      | -1 |
| 10373 | 1097  | Tmem141       | Dctn6         | 1  |
| 10373 | 1755  | Tmem141       | Ocel1         | 1  |
| 10373 | 9304  | Tmem141       | AI449175      | 1  |
| 10373 | 13004 | Tmem141       | Arhgef10      | 1  |
| 10373 | 13732 | Tmem141       | Tpm4          | -1 |
| 10373 | 15455 | Tmem141       | Lsm4          | -1 |
| 10373 | 16617 | Tmem141       | Sh2d4a        | -1 |
| 10373 | 18886 | Tmem141       | Slc18a1       | -1 |
| 10373 | 20484 | Tmem141       | Ces1          | -1 |
| 10373 | 22776 | Tmem141       | Gsr           | 1  |
| 10374 | 327   | Trim15        | H2-Ea         | 1  |
| 10374 | 2325  | Trim15        | H2-K1         | 1  |
| 10374 | 2938  | Trim15        | H2-T23        | 1  |
| 10374 | 6360  | Trim15        | D17H6S56E-3   | -1 |
| 10374 | 8750  | Trim15        | 1700010I14Rik | 1  |
| 10374 | 9158  | Trim15        | Pde9a         | -1 |
| 10374 | 10376 | Trim15        | C920025E04Rik | -1 |
| 10374 | 10667 | Trim15        | H2-Eb1        | 1  |
| 10374 | 12355 | Trim15        | AI507611      | 1  |
| 10374 | 13493 | Trim15        | Ring1         | -1 |
| 10374 | 13789 | Trim15        | H2-Q8         | 1  |
| 10374 | 20238 | Trim15        | H2-T9         | 1  |
| 10374 | 20346 | Trim15        | Gna-rs1       | 1  |
| 10374 | 22822 | Trim15        | MMT00013433   | 1  |
| 10377 | 11966 | A430105I19Rik | Zfp280b       | 1  |
| 10377 | 19436 | A430105I19Rik | Dapp1         | 1  |
| 10397 | 3587  | Gtf2e2        | MMT00041940   | 1  |
| 10397 | 3849  | Gtf2e2        | MMT00047578   | 1  |
| 10397 | 6021  | Gtf2e2        | MMT00008784   | 1  |
| 10397 | 8670  | Gtf2e2        | MMT00051613   | 1  |
| 10397 | 11214 | Gtf2e2        | MMT00049207   | 1  |
| 10397 | 15476 | Gtf2e2        | Fem1b         | -1 |
| 10397 | 15675 | Gtf2e2        | MMT00077535   | 1  |
| 10397 | 18373 | Gtf2e2        | Dnajb1        | 1  |
| 10407 | 16287 | Gpatch3       | Extl1         | 1  |
| 10452 | 3208  | Grn           | 4930511I11Rik | 1  |
| 10452 | 7436  | Grn           | 1700063K16Rik | 1  |
| 10452 | 11966 | Grn           | Zfp280b       | 1  |
| 10452 | 12861 | Grn           | Rhcg          | 1  |
| 10452 | 19436 | Grn           | Dapp1         | 1  |
| 10452 | 22125 | Grn           | Gab1          | 1  |
| 10455 | 12055 | MMT00015250   | 1810008A18Rik | 1  |
| 10482 | 3411  | Mcat          | Rabl2a        | 1  |
| 10482 | 3654  | Mcat          | St13          | -1 |
| 10482 | 5910  | Mcat          | 1110014J01Rik | 1  |
| 10482 | 6804  | Mcat          | Cyp2d22       | 1  |
| 10482 | 10482 | Mcat          | Mcat          | 1  |
| 10482 | 11503 | Mcat          | Rangap1       | 1  |
| 10482 | 12468 | Mcat          | Cyp2d13       | 1  |
| 10482 | 17147 | Mcat          | Tll12         | 1  |
| 10482 | 19216 | Mcat          | Bik           | 1  |
| 10491 | 2079  | Acpl2         | Mthfs         | -1 |
| 10491 | 3642  | Acpl2         | Spsb4         | -1 |
| 10491 | 8073  | Acpl2         | Irak1bp1      | 1  |
| 10497 | 1755  | Man2b1        | Ocel1         | -1 |
| 10497 | 2703  | Man2b1        | MMT00073763   | -1 |
| 10497 | 3055  | Man2b1        | Pde4c         | -1 |

|       |       |             |                    |    |
|-------|-------|-------------|--------------------|----|
| 10497 | 5433  | Man2b1      | 2410004L22Rik      | 1  |
| 10497 | 9304  | Man2b1      | Al449175           | -1 |
| 10497 | 10195 | Man2b1      | Klf1               | -1 |
| 10497 | 10273 | Man2b1      | Gpt2               | -1 |
| 10497 | 15455 | Man2b1      | Lsm4               | 1  |
| 10497 | 16617 | Man2b1      | Sh2d4a             | 1  |
| 10497 | 16849 | Man2b1      | Trmt1              | 1  |
| 10497 | 17403 | Man2b1      | N4bp1              | 1  |
| 10497 | 18886 | Man2b1      | Slc18a1            | 1  |
| 10497 | 20484 | Man2b1      | Ces1               | 1  |
| 10498 | 2456  | Ube2z       | Mrpl10             | -1 |
| 10498 | 12302 | Ube2z       | Cbx1               | -1 |
| 10498 | 19092 | Ube2z       | MMT00045362        | -1 |
| 10520 | 7436  | Xkr6        | 1700063K16Rik      | 1  |
| 10520 | 11966 | Xkr6        | Zfp280b            | 1  |
| 10520 | 19436 | Xkr6        | Dapp1              | 1  |
| 10521 | 524   | Ttf2        | Hsd3b2             | 1  |
| 10521 | 1466  | Ttf2        | Ubap2l             | 1  |
| 10521 | 1867  | Ttf2        | Bcas2              | 1  |
| 10521 | 3753  | Ttf2        | Setdb1             | -1 |
| 10521 | 6206  | Ttf2        | MMT00063701        | 1  |
| 10521 | 7810  | Ttf2        | Trim45             | 1  |
| 10521 | 10521 | Ttf2        | Ttf2               | 1  |
| 10521 | 11611 | Ttf2        | S100a13            | -1 |
| 10521 | 16416 | Ttf2        | Commd2             | 1  |
| 10521 | 22202 | Ttf2        | OTTMUSG00000021274 | -1 |
| 10521 | 22570 | Ttf2        | Phtf1              | 1  |
| 10526 | 7388  | MMT00036239 | Amn                | -1 |
| 10526 | 8155  | MMT00036239 | Mark3              | -1 |
| 10526 | 10526 | MMT00036239 | MMT00036239        | 1  |
| 10526 | 12238 | MMT00036239 | Traf3              | 1  |
| 10526 | 13027 | MMT00036239 | Ppp2r5c            | 1  |
| 10526 | 15984 | MMT00036239 | MMT00075074        | -1 |
| 10539 | 6376  | Unc45b      | Nle1               | -1 |
| 10576 | 11966 | Xrcc3       | Zfp280b            | 1  |
| 10576 | 19436 | Xrcc3       | Dapp1              | 1  |
| 10606 | 6021  | Apbb1ip     | MMT00008784        | -1 |
| 10606 | 6769  | Apbb1ip     | Banp               | -1 |
| 10606 | 8670  | Apbb1ip     | MMT00051613        | -1 |
| 10606 | 11214 | Apbb1ip     | MMT00049207        | -1 |
| 10606 | 15476 | Apbb1ip     | Fem1b              | 1  |
| 10606 | 15675 | Apbb1ip     | MMT00077535        | -1 |
| 10606 | 18373 | Apbb1ip     | Dnajb1             | -1 |
| 10641 | 6021  | Hpdl        | MMT00008784        | -1 |
| 10641 | 8670  | Hpdl        | MMT00051613        | -1 |
| 10641 | 11214 | Hpdl        | MMT00049207        | -1 |
| 10641 | 15675 | Hpdl        | MMT00077535        | -1 |
| 10657 | 3208  | Rnf12       | 4930511111Rik      | 1  |
| 10657 | 5694  | Rnf12       | Sp7                | 1  |
| 10657 | 7436  | Rnf12       | 1700063K16Rik      | 1  |
| 10657 | 11966 | Rnf12       | Zfp280b            | 1  |
| 10657 | 12861 | Rnf12       | Rhcg               | 1  |
| 10657 | 19436 | Rnf12       | Dapp1              | 1  |
| 10657 | 19672 | Rnf12       | Cldn19             | 1  |
| 10657 | 22125 | Rnf12       | Gab1               | 1  |
| 10667 | 327   | H2-Eb1      | H2-Ea              | 1  |
| 10667 | 510   | H2-Eb1      | Neu1               | -1 |
| 10667 | 763   | H2-Eb1      | 4933406E20Rik      | 1  |
| 10667 | 1340  | H2-Eb1      | Tap2               | 1  |
| 10667 | 2325  | H2-Eb1      | H2-K1              | 1  |
| 10667 | 2801  | H2-Eb1      | H2-BI              | 1  |
| 10667 | 2938  | H2-Eb1      | H2-T23             | 1  |
| 10667 | 3599  | H2-Eb1      | MMT00035426        | -1 |
| 10667 | 3704  | H2-Eb1      | H2-Q7              | 1  |
| 10667 | 3857  | H2-Eb1      | 1700001C19Rik      | -1 |
| 10667 | 4958  | H2-Eb1      | Ndufa7             | -1 |
| 10667 | 5410  | H2-Eb1      | Cyp4f15            | -1 |
| 10667 | 6360  | H2-Eb1      | D17H6S56E-3        | -1 |
| 10667 | 7088  | H2-Eb1      | Slc37a1            | 1  |

|       |       |               |               |    |
|-------|-------|---------------|---------------|----|
| 10667 | 8750  | H2-Eb1        | 1700010I14Rik | 1  |
| 10667 | 8767  | H2-Eb1        | Rgl2          | 1  |
| 10667 | 9158  | H2-Eb1        | Pde9a         | -1 |
| 10667 | 10376 | H2-Eb1        | C920025E04Rik | -1 |
| 10667 | 10667 | H2-Eb1        | H2-Eb1        | 1  |
| 10667 | 12355 | H2-Eb1        | AI507611      | 1  |
| 10667 | 13493 | H2-Eb1        | Ring1         | -1 |
| 10667 | 13789 | H2-Eb1        | H2-Q8         | 1  |
| 10667 | 15531 | H2-Eb1        | Prickle4      | -1 |
| 10667 | 18906 | H2-Eb1        | Zfand3        | 1  |
| 10667 | 20100 | H2-Eb1        | Guca1b        | -1 |
| 10667 | 20238 | H2-Eb1        | H2-T9         | 1  |
| 10667 | 20346 | H2-Eb1        | Gna-rs1       | 1  |
| 10667 | 21478 | H2-Eb1        | Loxhd1        | -1 |
| 10667 | 22822 | H2-Eb1        | MMT00013433   | 1  |
| 10667 | 23250 | H2-Eb1        | Plcl2         | 1  |
| 10672 | 6021  | BC031353      | MMT00008784   | -1 |
| 10672 | 8670  | BC031353      | MMT00051613   | -1 |
| 10672 | 9067  | BC031353      | Tra2a         | -1 |
| 10672 | 11214 | BC031353      | MMT00049207   | -1 |
| 10672 | 11379 | BC031353      | Dnttip1       | 1  |
| 10672 | 15476 | BC031353      | Fem1b         | 1  |
| 10672 | 15675 | BC031353      | MMT00077535   | -1 |
| 10672 | 18099 | BC031353      | Nfx1          | 1  |
| 10672 | 18373 | BC031353      | Dnajb1        | -1 |
| 10672 | 21389 | BC031353      | Odf2          | 1  |
| 10675 | 10675 | Mobkl2a       | Mobkl2a       | 1  |
| 10687 | 3208  | Itpkb         | 4930511111Rik | 1  |
| 10687 | 7436  | Itpkb         | 1700063K16Rik | 1  |
| 10687 | 11966 | Itpkb         | Zfp280b       | 1  |
| 10687 | 12861 | Itpkb         | Rhcg          | 1  |
| 10687 | 19436 | Itpkb         | Dapp1         | 1  |
| 10687 | 22125 | Itpkb         | Gab1          | 1  |
| 10729 | 2945  | Fgd2          | MMT00005190   | -1 |
| 10729 | 3430  | Fgd2          | Rhof          | 1  |
| 10729 | 5014  | Fgd2          | MMT00017503   | -1 |
| 10729 | 6510  | Fgd2          | Plcl2         | 1  |
| 10729 | 7088  | Fgd2          | Slc37a1       | 1  |
| 10729 | 8341  | Fgd2          | MMT00017270   | -1 |
| 10729 | 12335 | Fgd2          | Plcb4         | 1  |
| 10729 | 14132 | Fgd2          | Glo1          | 1  |
| 10729 | 17707 | Fgd2          | Rshl2b        | 1  |
| 10729 | 23250 | Fgd2          | Plcl2         | 1  |
| 10758 | 286   | Gdf1          | MMT00070509   | -1 |
| 10758 | 403   | Gdf1          | Leprotl1      | 1  |
| 10758 | 1755  | Gdf1          | Ocel1         | -1 |
| 10758 | 3055  | Gdf1          | Pde4c         | -1 |
| 10758 | 5433  | Gdf1          | 2410004L22Rik | 1  |
| 10758 | 6760  | Gdf1          | 2810428I15Rik | -1 |
| 10758 | 9304  | Gdf1          | AI449175      | -1 |
| 10758 | 9931  | Gdf1          | Glt25d1       | 1  |
| 10758 | 13732 | Gdf1          | Tpm4          | 1  |
| 10758 | 15455 | Gdf1          | Lsm4          | 1  |
| 10758 | 16617 | Gdf1          | Sh2d4a        | 1  |
| 10758 | 16858 | Gdf1          | Tmem38a       | 1  |
| 10758 | 18886 | Gdf1          | Slc18a1       | 1  |
| 10758 | 20484 | Gdf1          | Ces1          | 1  |
| 10769 | 1849  | Hnrmpd        | MMT00063181   | -1 |
| 10769 | 11043 | Hnrmpd        | Hsph1         | -1 |
| 10769 | 11214 | Hnrmpd        | MMT00049207   | -1 |
| 10769 | 22139 | Hnrmpd        | Stip1         | -1 |
| 10769 | 23646 | Hnrmpd        | Hsp90ab1      | -1 |
| 10788 | 397   | D430019H16Rik | Ak7           | -1 |
| 10788 | 18140 | D430019H16Rik | Atg2b         | 1  |
| 10824 | 499   | Vegfa         | 2310057J16Rik | 1  |
| 10824 | 1849  | Vegfa         | MMT00063181   | 1  |
| 10824 | 3799  | Vegfa         | Serpinh1      | 1  |
| 10824 | 9224  | Vegfa         | MMT00013510   | 1  |
| 10824 | 9230  | Vegfa         | 1700027N10Rik | 1  |

|       |       |             |               |    |
|-------|-------|-------------|---------------|----|
| 10824 | 9279  | Vegfa       | MMT00066808   | 1  |
| 10824 | 11818 | Vegfa       | MMT00048396   | 1  |
| 10824 | 17595 | Vegfa       | MMT00048325   | 1  |
| 10824 | 23646 | Vegfa       | Hsp90ab1      | 1  |
| 10835 | 11966 | Kcnd2       | Zfp280b       | 1  |
| 10836 | 9773  | MMT00002878 | MMT00068134   | -1 |
| 10838 | 3208  | Spdef       | 4930511111Rik | 1  |
| 10838 | 5694  | Spdef       | Sp7           | 1  |
| 10838 | 7436  | Spdef       | 1700063K16Rik | 1  |
| 10838 | 11966 | Spdef       | Zfp280b       | 1  |
| 10838 | 12861 | Spdef       | Rhcg          | 1  |
| 10838 | 19436 | Spdef       | Dapp1         | 1  |
| 10838 | 19672 | Spdef       | Cldn19        | 1  |
| 10838 | 22125 | Spdef       | Gab1          | 1  |
| 10876 | 10876 | Steap1      | Steap1        | 1  |
| 10876 | 13045 | Steap1      | A330021E22Rik | 1  |
| 10883 | 18418 | Pols        | Hspa1b        | 1  |
| 10886 | 3208  | Fndc3b      | 4930511111Rik | 1  |
| 10886 | 11966 | Fndc3b      | Zfp280b       | 1  |
| 10886 | 19436 | Fndc3b      | Dapp1         | 1  |
| 10886 | 22125 | Fndc3b      | Gab1          | 1  |
| 10908 | 12861 | Hipk4       | Rhcg          | 1  |
| 10931 | 327   | Pkn3        | H2-Ea         | -1 |
| 10931 | 2325  | Pkn3        | H2-K1         | -1 |
| 10931 | 2938  | Pkn3        | H2-T23        | -1 |
| 10931 | 3599  | Pkn3        | MMT00035426   | 1  |
| 10931 | 3857  | Pkn3        | 1700001C19Rik | 1  |
| 10931 | 4004  | Pkn3        | Thbs2         | 1  |
| 10931 | 4958  | Pkn3        | Ndufa7        | 1  |
| 10931 | 5410  | Pkn3        | Cyp4f15       | 1  |
| 10931 | 5648  | Pkn3        | Zfp213        | 1  |
| 10931 | 6360  | Pkn3        | D17H6S56E-3   | 1  |
| 10931 | 7088  | Pkn3        | Slc37a1       | -1 |
| 10931 | 8750  | Pkn3        | 1700010I14Rik | -1 |
| 10931 | 8767  | Pkn3        | Rgl2          | -1 |
| 10931 | 9158  | Pkn3        | Pde9a         | 1  |
| 10931 | 10376 | Pkn3        | C920025E04Rik | 1  |
| 10931 | 10667 | Pkn3        | H2-Eb1        | -1 |
| 10931 | 13493 | Pkn3        | Ring1         | 1  |
| 10931 | 18906 | Pkn3        | Zfand3        | -1 |
| 10931 | 20238 | Pkn3        | H2-T9         | -1 |
| 10931 | 20346 | Pkn3        | Gna-rs1       | -1 |
| 10931 | 22822 | Pkn3        | MMT00013433   | -1 |
| 10957 | 14969 | Pgc         | EG245506      | 1  |
| 10957 | 15775 | Pgc         | Nat11         | 1  |
| 10974 | 12861 | Vmn2r25     | Rhcg          | 1  |
| 10978 | 4617  | MMT00078322 | Agpat9        | -1 |
| 10978 | 5100  | MMT00078322 | Pebp1         | -1 |
| 10978 | 6116  | MMT00078322 | Pcgf5         | -1 |
| 10978 | 6330  | MMT00078322 | Dgkq          | 1  |
| 10978 | 8807  | MMT00078322 | Ankrd56       | -1 |
| 10978 | 10978 | MMT00078322 | MMT00078322   | 1  |
| 10978 | 12656 | MMT00078322 | Coq5          | 1  |
| 10978 | 15908 | MMT00078322 | Pebp1         | -1 |
| 10978 | 17716 | MMT00078322 | Rnf10         | -1 |
| 10978 | 17807 | MMT00078322 | Pebp1         | -1 |
| 10995 | 9077  | Ap4m1       | Cnpy4         | -1 |
| 10995 | 16451 | Ap4m1       | 2010007H12Rik | 1  |
| 10995 | 17089 | Ap4m1       | Pilrb1        | -1 |
| 10995 | 19502 | Ap4m1       | Fbxo24        | 1  |
| 11001 | 11966 | Pou6f2      | Zfp280b       | 1  |
| 11001 | 19436 | Pou6f2      | Dapp1         | 1  |
| 11016 | 3208  | Pcp2        | 4930511111Rik | 1  |
| 11016 | 7436  | Pcp2        | 1700063K16Rik | 1  |
| 11016 | 11966 | Pcp2        | Zfp280b       | 1  |
| 11016 | 12861 | Pcp2        | Rhcg          | 1  |
| 11016 | 19436 | Pcp2        | Dapp1         | 1  |
| 11016 | 19672 | Pcp2        | Cldn19        | 1  |
| 11016 | 22125 | Pcp2        | Gab1          | 1  |

|       |       |               |               |    |
|-------|-------|---------------|---------------|----|
| 11043 | 499   | Hsph1         | 2310057J16Rik | 1  |
| 11043 | 523   | Hsph1         | 1700040L02Rik | -1 |
| 11043 | 3587  | Hsph1         | MMT00041940   | 1  |
| 11043 | 3799  | Hsph1         | Serpinh1      | 1  |
| 11043 | 3849  | Hsph1         | MMT00047578   | 1  |
| 11043 | 3913  | Hsph1         | Mrpl15        | 1  |
| 11043 | 4612  | Hsph1         | Hspa5         | 1  |
| 11043 | 4950  | Hsph1         | Dnajb10       | 1  |
| 11043 | 6021  | Hsph1         | MMT00008784   | 1  |
| 11043 | 7731  | Hsph1         | 1500001M20Rik | -1 |
| 11043 | 8319  | Hsph1         | MMT00062477   | 1  |
| 11043 | 8670  | Hsph1         | MMT00051613   | 1  |
| 11043 | 9067  | Hsph1         | Tra2a         | 1  |
| 11043 | 9224  | Hsph1         | MMT00013510   | 1  |
| 11043 | 9258  | Hsph1         | P4ha1         | 1  |
| 11043 | 9680  | Hsph1         | Ahsa1         | 1  |
| 11043 | 9899  | Hsph1         | D13Wsu177e    | 1  |
| 11043 | 11043 | Hsph1         | Hsph1         | 1  |
| 11043 | 11214 | Hsph1         | MMT00049207   | 1  |
| 11043 | 13521 | Hsph1         | Ears2         | 1  |
| 11043 | 14014 | Hsph1         | MMT00008376   | 1  |
| 11043 | 14298 | Hsph1         | Atp2a2        | 1  |
| 11043 | 15476 | Hsph1         | Fem1b         | -1 |
| 11043 | 15675 | Hsph1         | MMT00077535   | 1  |
| 11043 | 16299 | Hsph1         | Creld2        | 1  |
| 11043 | 16585 | Hsph1         | Syvn1         | 1  |
| 11043 | 16754 | Hsph1         | Hsp90aa1      | 1  |
| 11043 | 18099 | Hsph1         | Nfx1          | -1 |
| 11043 | 18373 | Hsph1         | Dnajb1        | 1  |
| 11043 | 20332 | Hsph1         | Stau2         | -1 |
| 11043 | 20912 | Hsph1         | Chordc1       | 1  |
| 11043 | 21389 | Hsph1         | Odf2          | -1 |
| 11043 | 22139 | Hsph1         | Stip1         | 1  |
| 11043 | 23646 | Hsph1         | Hsp90ab1      | 1  |
| 11050 | 11966 | 2210010C04Rik | Zfp280b       | 1  |
| 11050 | 19436 | 2210010C04Rik | Dapp1         | 1  |
| 11057 | 1052  | MMT00032844   | Cog4          | 1  |
| 11057 | 1336  | MMT00032844   | MMT00069537   | 1  |
| 11057 | 1676  | MMT00032844   | Tmem170       | -1 |
| 11057 | 2243  | MMT00032844   | Gcsh          | 1  |
| 11057 | 10668 | MMT00032844   | Kars          | 1  |
| 11057 | 11128 | MMT00032844   | Aars          | -1 |
| 11057 | 11560 | MMT00032844   | MMT00001695   | -1 |
| 11057 | 14391 | MMT00032844   | MMT00017335   | -1 |
| 11063 | 3587  | Phf8          | MMT00041940   | 1  |
| 11063 | 6021  | Phf8          | MMT00008784   | 1  |
| 11063 | 6769  | Phf8          | Banp          | 1  |
| 11063 | 7140  | Phf8          | Mtbp          | -1 |
| 11063 | 8499  | Phf8          | C430048L16Rik | 1  |
| 11063 | 8670  | Phf8          | MMT00051613   | 1  |
| 11063 | 10435 | Phf8          | Nab2          | -1 |
| 11063 | 10769 | Phf8          | Hnrnpd        | -1 |
| 11063 | 15675 | Phf8          | MMT00077535   | 1  |
| 11063 | 16251 | Phf8          | G6pc          | 1  |
| 11063 | 18215 | Phf8          | Gpr146        | -1 |
| 11063 | 18373 | Phf8          | Dnajb1        | 1  |
| 11063 | 18418 | Phf8          | Hspa1b        | 1  |
| 11063 | 20912 | Phf8          | Chordc1       | 1  |
| 11063 | 22303 | Phf8          | Cdt1          | -1 |
| 11063 | 23668 | Phf8          | Gse1          | -1 |
| 11084 | 2079  | AF529169      | Mthfs         | 1  |
| 11109 | 1755  | AI931714      | Ocel1         | -1 |
| 11109 | 9304  | AI931714      | AI449175      | -1 |
| 11109 | 13732 | AI931714      | Tpm4          | 1  |
| 11109 | 16617 | AI931714      | Sh2d4a        | 1  |
| 11109 | 18886 | AI931714      | Slc18a1       | 1  |
| 11109 | 20484 | AI931714      | Ces1          | 1  |
| 11121 | 1466  | Mtmr11        | Ubap2l        | -1 |
| 11121 | 3753  | Mtmr11        | Setdb1        | 1  |



|       |       |               |                    |    |
|-------|-------|---------------|--------------------|----|
| 11121 | 22202 | Mtrm11        | OTTMUSG00000021274 | 1  |
| 11130 | 2932  | Slco1c1       | Slco1a1            | -1 |
| 11130 | 6765  | Slco1c1       | Ldhb               | -1 |
| 11130 | 7452  | Slco1c1       | Abcc9              | -1 |
| 11130 | 14557 | Slco1c1       | Pyroxd1            | 1  |
| 11130 | 21126 | Slco1c1       | Dera               | 1  |
| 11162 | 1041  | Hkdc1         | 3110049J23Rik      | 1  |
| 11162 | 5965  | Hkdc1         | Pbld               | 1  |
| 11162 | 13348 | Hkdc1         | Ank3               | 1  |
| 11162 | 13688 | Hkdc1         | Ppa1               | 1  |
| 11162 | 15971 | Hkdc1         | Aifm2              | 1  |
| 11162 | 18893 | Hkdc1         | Lace1              | -1 |
| 11162 | 19115 | Hkdc1         | Rab32              | -1 |
| 11162 | 19392 | Hkdc1         | Slc25a16           | -1 |
| 11162 | 21105 | Hkdc1         | Pex26              | 1  |
| 11162 | 22146 | Hkdc1         | Aifm2              | 1  |
| 11164 | 1745  | Odf4          | Gas7               | -1 |
| 11166 | 2915  | Uqcc          | Nfs1               | -1 |
| 11166 | 6059  | Uqcc          | Dsn1               | 1  |
| 11166 | 6820  | Uqcc          | MMT00046996        | -1 |
| 11166 | 7610  | Uqcc          | Scand1             | -1 |
| 11166 | 14647 | Uqcc          | Cst3               | -1 |
| 11166 | 22740 | Uqcc          | Manbal             | 1  |
| 11166 | 23005 | Uqcc          | 4930405A21Rik      | 1  |
| 11166 | 23599 | Uqcc          | Ndr3               | 1  |
| 11167 | 1374  | Dars2         | Mdn1               | -1 |
| 11167 | 6498  | Dars2         | MMT00016809        | 1  |
| 11167 | 6648  | Dars2         | Cenpl              | 1  |
| 11199 | 15016 | Sirt7         | MMT00074608        | -1 |
| 11199 | 17897 | Sirt7         | Gm1019             | -1 |
| 11208 | 1039  | Hspb1         | Zfp207             | -1 |
| 11208 | 3587  | Hspb1         | MMT00041940        | 1  |
| 11208 | 3799  | Hspb1         | Serpinh1           | 1  |
| 11208 | 4805  | Hspb1         | Hspb1              | 1  |
| 11208 | 4950  | Hspb1         | Dnajb10            | 1  |
| 11208 | 6021  | Hspb1         | MMT00008784        | 1  |
| 11208 | 7731  | Hspb1         | 1500001M20Rik      | -1 |
| 11208 | 8670  | Hspb1         | MMT00051613        | 1  |
| 11208 | 11043 | Hspb1         | Hsph1              | 1  |
| 11208 | 11208 | Hspb1         | Hspb1              | 1  |
| 11208 | 11214 | Hspb1         | MMT00049207        | 1  |
| 11208 | 13521 | Hspb1         | Ears2              | 1  |
| 11208 | 15675 | Hspb1         | MMT00077535        | 1  |
| 11208 | 16750 | Hspb1         | Casp6              | -1 |
| 11208 | 17595 | Hspb1         | MMT00048325        | 1  |
| 11208 | 19540 | Hspb1         | Zfp428             | 1  |
| 11208 | 22139 | Hspb1         | Stip1              | 1  |
| 11240 | 4048  | Ppm1d         | BC002230           | -1 |
| 11240 | 15476 | Ppm1d         | Fem1b              | -1 |
| 11240 | 16251 | Ppm1d         | G6pc               | 1  |
| 11240 | 16517 | Ppm1d         | D4Wsu53e           | 1  |
| 11240 | 18083 | Ppm1d         | Gadd45a            | -1 |
| 11240 | 18373 | Ppm1d         | Dnajb1             | 1  |
| 11240 | 18713 | Ppm1d         | 3110037I16Rik      | -1 |
| 11240 | 22216 | Ppm1d         | Sp5                | -1 |
| 11256 | 11966 | H2-DMa        | Zfp280b            | 1  |
| 11256 | 19436 | H2-DMa        | Dapp1              | 1  |
| 11264 | 19502 | Zcwpw1        | Fbxo24             | -1 |
| 11291 | 2945  | 1110018H23Rik | MMT00005190        | -1 |
| 11291 | 5014  | 1110018H23Rik | MMT00017503        | -1 |
| 11291 | 5968  | 1110018H23Rik | MMT00012419        | -1 |
| 11291 | 8341  | 1110018H23Rik | MMT00017270        | -1 |
| 11291 | 9909  | 1110018H23Rik | MMT00077883        | -1 |
| 11291 | 14924 | 1110018H23Rik | Hn1l               | 1  |
| 11291 | 19064 | 1110018H23Rik | MMT00004867        | 1  |
| 11305 | 2794  | Galntl2       | Map3k6             | 1  |
| 11305 | 3559  | Galntl2       | 4933433P14Rik      | 1  |
| 11305 | 4392  | Galntl2       | 1810055G02Rik      | 1  |
| 11305 | 6490  | Galntl2       | Il1r1              | 1  |

|       |       |               |               |    |
|-------|-------|---------------|---------------|----|
| 11305 | 8399  | Galnt12       | Herpud1       | 1  |
| 11305 | 15631 | Galnt12       | Lpin1         | 1  |
| 11305 | 16176 | Galnt12       | St3gal5       | 1  |
| 11305 | 18802 | Galnt12       | Nit2          | -1 |
| 11305 | 19757 | Galnt12       | Fkbp5         | 1  |
| 11305 | 21331 | Galnt12       | Slc10a6       | 1  |
| 11305 | 23558 | Galnt12       | MMT00030937   | 1  |
| 11306 | 10189 | 1700016G14Rik | Cage1         | -1 |
| 11306 | 11094 | 1700016G14Rik | Slc17a3       | 1  |
| 11306 | 15698 | 1700016G14Rik | Them2         | 1  |
| 11306 | 20759 | 1700016G14Rik | Slc17a1       | 1  |
| 11315 | 9258  | Dok3          | P4ha1         | 1  |
| 11321 | 19462 | 2310014L17Rik | 4933439C20Rik | 1  |
| 11338 | 2743  | Vamp8         | Tcf3          | 1  |
| 11338 | 3703  | Vamp8         | Ggcx          | 1  |
| 11338 | 11872 | Vamp8         | Vamp5         | 1  |
| 11338 | 15384 | Vamp8         | Mat2a         | 1  |
| 11338 | 15708 | Vamp8         | Retsat        | 1  |
| 11345 | 1310  | Slc40a1       | Cabc1         | 1  |
| 11345 | 2110  | Slc40a1       | Gtf2ird1      | 1  |
| 11345 | 3170  | Slc40a1       | Mcart1        | -1 |
| 11345 | 3196  | Slc40a1       | Tat           | -1 |
| 11345 | 3452  | Slc40a1       | Ccrn4l        | -1 |
| 11345 | 3502  | Slc40a1       | Gde1          | -1 |
| 11345 | 4286  | Slc40a1       | Ptp4a1        | -1 |
| 11345 | 4708  | Slc40a1       | Traf3ip2      | 1  |
| 11345 | 5259  | Slc40a1       | Mat1a         | -1 |
| 11345 | 5574  | Slc40a1       | Hsd3b7        | 1  |
| 11345 | 6028  | Slc40a1       | Alas1         | -1 |
| 11345 | 6386  | Slc40a1       | Por           | -1 |
| 11345 | 6756  | Slc40a1       | Sds           | -1 |
| 11345 | 7136  | Slc40a1       | Id3           | 1  |
| 11345 | 7954  | Slc40a1       | Ccdc12        | 1  |
| 11345 | 8399  | Slc40a1       | Herpud1       | -1 |
| 11345 | 8641  | Slc40a1       | Slc7a2        | -1 |
| 11345 | 11129 | Slc40a1       | Ankhd1        | -1 |
| 11345 | 11599 | Slc40a1       | Coq10b        | -1 |
| 11345 | 11808 | Slc40a1       | Pck1          | -1 |
| 11345 | 12151 | Slc40a1       | MMT00082650   | -1 |
| 11345 | 12761 | Slc40a1       | Tsc22d3       | -1 |
| 11345 | 12930 | Slc40a1       | Pthr1         | 1  |
| 11345 | 12982 | Slc40a1       | Cars          | 1  |
| 11345 | 13989 | Slc40a1       | Foxp3         | -1 |
| 11345 | 14041 | Slc40a1       | Cldn1         | 1  |
| 11345 | 14472 | Slc40a1       | Ahcy          | -1 |
| 11345 | 15320 | Slc40a1       | MMT00017479   | -1 |
| 11345 | 15631 | Slc40a1       | Lpin1         | -1 |
| 11345 | 15758 | Slc40a1       | Stx4a         | 1  |
| 11345 | 15882 | Slc40a1       | AA986860      | -1 |
| 11345 | 16176 | Slc40a1       | St3gal5       | -1 |
| 11345 | 16580 | Slc40a1       | Tnfaip2       | 1  |
| 11345 | 16647 | Slc40a1       | D16H22S680E   | -1 |
| 11345 | 17622 | Slc40a1       | Foxo1         | -1 |
| 11345 | 18027 | Slc40a1       | 5730403B10Rik | -1 |
| 11345 | 18314 | Slc40a1       | 4631416L12Rik | -1 |
| 11345 | 19025 | Slc40a1       | Slc37a4       | -1 |
| 11345 | 19146 | Slc40a1       | N4bp2l1       | -1 |
| 11345 | 19466 | Slc40a1       | Pptc7         | -1 |
| 11345 | 19723 | Slc40a1       | Pfkfb1        | -1 |
| 11345 | 20854 | Slc40a1       | Commd7        | 1  |
| 11345 | 21934 | Slc40a1       | Id2           | 1  |
| 11345 | 23183 | Slc40a1       | Nnmt          | -1 |
| 11345 | 23201 | Slc40a1       | S1pr1         | 1  |
| 11345 | 23202 | Slc40a1       | Olfir559      | -1 |
| 11350 | 3208  | 9030420J04Rik | 4930511111Rik | 1  |
| 11350 | 7436  | 9030420J04Rik | 1700063K16Rik | 1  |
| 11350 | 11966 | 9030420J04Rik | Zfp280b       | 1  |
| 11350 | 12861 | 9030420J04Rik | Rhcg          | 1  |
| 11350 | 19436 | 9030420J04Rik | Dapp1         | 1  |

|       |       |               |               |    |
|-------|-------|---------------|---------------|----|
| 11350 | 19672 | 9030420J04Rik | Cldn19        | 1  |
| 11350 | 22125 | 9030420J04Rik | Gab1          | 1  |
| 11369 | 676   | Stx3          | Ms4a4d        | 1  |
| 11369 | 8902  | Stx3          | Aldh3b1       | 1  |
| 11369 | 11369 | Stx3          | Stx3          | 1  |
| 11369 | 11812 | Stx3          | Mrpl16        | 1  |
| 11369 | 17447 | Stx3          | Ctsf          | 1  |
| 11388 | 9798  | Tdrd9         | MMT00072061   | -1 |
| 11388 | 17926 | Tdrd9         | Nptx1         | 1  |
| 11406 | 11406 | Ifi203        | Ifi203        | 1  |
| 11406 | 13149 | Ifi203        | Ifi203        | 1  |
| 11406 | 15844 | Ifi203        | Klhdc9        | -1 |
| 11423 | 11423 | 6720463M24Rik | 6720463M24Rik | 1  |
| 11423 | 12280 | 6720463M24Rik | Cln5          | 1  |
| 11424 | 3208  | lqcf3         | 4930511111Rik | 1  |
| 11424 | 11966 | lqcf3         | Zfp280b       | 1  |
| 11424 | 12861 | lqcf3         | Rhcg          | 1  |
| 11424 | 19436 | lqcf3         | Dapp1         | 1  |
| 11425 | 19436 | Evx2          | Dapp1         | 1  |
| 11435 | 7135  | Rnaset2a      | Ezr           | 1  |
| 11435 | 7191  | Rnaset2a      | Fgfr1op       | -1 |
| 11435 | 7909  | Rnaset2a      | Oas3          | 1  |
| 11435 | 8750  | Rnaset2a      | 1700010114Rik | 1  |
| 11435 | 11435 | Rnaset2a      | Rnaset2a      | 1  |
| 11435 | 15864 | Rnaset2a      | Rps6ka2       | 1  |
| 11435 | 17760 | Rnaset2a      | Ccr6          | -1 |
| 11435 | 21075 | Rnaset2a      | Gtf2h5        | -1 |
| 11435 | 21754 | Rnaset2a      | Synj2         | -1 |
| 11445 | 9449  | Atp1a2        | Sft2d2        | 1  |
| 11445 | 19520 | Atp1a2        | Uck2          | 1  |
| 11467 | 9912  | Ypel5         | Ttc27         | -1 |
| 11475 | 2938  | H2-D1         | H2-T23        | -1 |
| 11475 | 10667 | H2-D1         | H2-Eb1        | -1 |
| 11475 | 22822 | H2-D1         | MMT00013433   | -1 |
| 11486 | 3587  | Tacc3         | MMT00041940   | -1 |
| 11486 | 6021  | Tacc3         | MMT00008784   | -1 |
| 11486 | 7731  | Tacc3         | 1500001M20Rik | 1  |
| 11486 | 8670  | Tacc3         | MMT00051613   | -1 |
| 11486 | 9258  | Tacc3         | P4ha1         | -1 |
| 11486 | 11043 | Tacc3         | Hsph1         | -1 |
| 11486 | 11214 | Tacc3         | MMT00049207   | -1 |
| 11486 | 15675 | Tacc3         | MMT00077535   | -1 |
| 11486 | 18083 | Tacc3         | Gadd45a       | 1  |
| 11486 | 18373 | Tacc3         | Dnajb1        | -1 |
| 11507 | 3208  | Adarb2        | 4930511111Rik | 1  |
| 11507 | 7436  | Adarb2        | 1700063K16Rik | 1  |
| 11507 | 11966 | Adarb2        | Zfp280b       | 1  |
| 11507 | 12861 | Adarb2        | Rhcg          | 1  |
| 11507 | 19436 | Adarb2        | Dapp1         | 1  |
| 11545 | 6021  | Ppcs          | MMT00008784   | -1 |
| 11545 | 8670  | Ppcs          | MMT00051613   | -1 |
| 11545 | 15675 | Ppcs          | MMT00077535   | -1 |
| 11545 | 18373 | Ppcs          | Dnajb1        | -1 |
| 11549 | 3654  | Depdc6        | Stt13         | 1  |
| 11549 | 6931  | Depdc6        | Hrsp12        | 1  |
| 11549 | 11992 | Depdc6        | Mrpl19        | 1  |
| 11549 | 13648 | Depdc6        | Dap           | 1  |
| 11549 | 20871 | Depdc6        | Pop1          | -1 |
| 11571 | 9449  | Bpnt1         | Sft2d2        | -1 |
| 11571 | 11406 | Bpnt1         | Ifi203        | 1  |
| 11571 | 11571 | Bpnt1         | Bpnt1         | 1  |
| 11571 | 16361 | Bpnt1         | Olfir703      | -1 |
| 11571 | 16972 | Bpnt1         | Nenf          | 1  |
| 11571 | 19332 | Bpnt1         | Bpnt1         | 1  |
| 11571 | 19835 | Bpnt1         | Iars2         | 1  |
| 11571 | 23466 | Bpnt1         | Pou2f1        | -1 |
| 11593 | 15844 | Usf1          | Klhdc9        | -1 |
| 11620 | 9195  | Zfr           | Sub1          | 1  |
| 11620 | 11620 | Zfr           | Zfr           | 1  |

|       |       |               |               |    |
|-------|-------|---------------|---------------|----|
| 11621 | 7975  | Mixl1         | Lancl1        | 1  |
| 11621 | 12380 | Mixl1         | Rftn2         | 1  |
| 11621 | 19578 | Mixl1         | Aox1          | -1 |
| 11621 | 22333 | Mixl1         | Hnrmph3       | 1  |
| 11621 | 23119 | Mixl1         | Cps1          | 1  |
| 11649 | 11094 | Hfe           | Slc17a3       | -1 |
| 11649 | 15698 | Hfe           | Them2         | -1 |
| 11649 | 17528 | Hfe           | Gmn           | -1 |
| 11649 | 20759 | Hfe           | Slc17a1       | -1 |
| 11649 | 23118 | Hfe           | Ttrap         | -1 |
| 11665 | 3208  | Hyal1         | 4930511111Rik | 1  |
| 11665 | 5694  | Hyal1         | Sp7           | 1  |
| 11665 | 7436  | Hyal1         | 1700063K16Rik | 1  |
| 11665 | 8157  | Hyal1         | MMT00005305   | 1  |
| 11665 | 11966 | Hyal1         | Zfp280b       | 1  |
| 11665 | 12861 | Hyal1         | Rhcg          | 1  |
| 11665 | 19436 | Hyal1         | Dapp1         | 1  |
| 11665 | 19672 | Hyal1         | Cldn19        | 1  |
| 11665 | 22125 | Hyal1         | Gab1          | 1  |
| 11689 | 11966 | MMT00078109   | Zfp280b       | 1  |
| 11689 | 19436 | MMT00078109   | Dapp1         | 1  |
| 11705 | 1956  | Polr3f        | Usp50         | -1 |
| 11705 | 4336  | Polr3f        | Rbbp9         | -1 |
| 11705 | 4833  | Polr3f        | Synpo2        | 1  |
| 11705 | 6059  | Polr3f        | Dsn1          | -1 |
| 11705 | 6231  | Polr3f        | 9030622O22Rik | -1 |
| 11705 | 7991  | Polr3f        | Gpr115        | 1  |
| 11705 | 9762  | Polr3f        | Snx5          | -1 |
| 11705 | 11705 | Polr3f        | Polr3f        | 1  |
| 11705 | 12388 | Polr3f        | 8430406I07Rik | 1  |
| 11705 | 14647 | Polr3f        | Cst3          | 1  |
| 11705 | 14740 | Polr3f        | Mfap1b        | 1  |
| 11705 | 17043 | Polr3f        | Tmem127       | -1 |
| 11705 | 17221 | Polr3f        | Zfp264        | -1 |
| 11705 | 21665 | Polr3f        | Nat5          | -1 |
| 11705 | 21729 | Polr3f        | Hdc           | 1  |
| 11705 | 22740 | Polr3f        | Manbal        | -1 |
| 11705 | 22857 | Polr3f        | Fahd2a        | -1 |
| 11741 | 8372  | Slc30a10      | Uap1          | -1 |
| 11741 | 9449  | Slc30a10      | Sft2d2        | 1  |
| 11741 | 11406 | Slc30a10      | Ifi203        | -1 |
| 11741 | 11571 | Slc30a10      | Bpnt1         | -1 |
| 11741 | 16361 | Slc30a10      | Olfir703      | 1  |
| 11741 | 19332 | Slc30a10      | Bpnt1         | -1 |
| 11741 | 19520 | Slc30a10      | Uck2          | 1  |
| 11756 | 3196  | 2810011L19Rik | Tat           | 1  |
| 11756 | 6769  | 2810011L19Rik | Banp          | 1  |
| 11756 | 8499  | 2810011L19Rik | C430048L16Rik | 1  |
| 11756 | 10435 | 2810011L19Rik | Nab2          | -1 |
| 11756 | 17525 | 2810011L19Rik | Ctgf          | 1  |
| 11756 | 18083 | 2810011L19Rik | Gadd45a       | -1 |
| 11756 | 18373 | 2810011L19Rik | Dnajb1        | 1  |
| 11756 | 22216 | 2810011L19Rik | Sp5           | -1 |
| 11756 | 22303 | 2810011L19Rik | Cdt1          | -1 |
| 11800 | 2599  | Clip3         | Lsm14a        | -1 |
| 11800 | 4697  | Clip3         | Cyp2a12       | 1  |
| 11800 | 6513  | Clip3         | Qpctl         | -1 |
| 11800 | 10545 | Clip3         | Tmem147       | -1 |
| 11800 | 12423 | Clip3         | Cyp2g1        | 1  |
| 11800 | 19462 | Clip3         | 4933439C20Rik | 1  |
| 11800 | 19762 | Clip3         | Pih1d1        | 1  |
| 11800 | 20606 | Clip3         | MMT00042166   | 1  |
| 11800 | 23247 | Clip3         | Ercc1         | 1  |
| 11805 | 3208  | Bat2          | 4930511111Rik | 1  |
| 11805 | 5694  | Bat2          | Sp7           | 1  |
| 11805 | 11966 | Bat2          | Zfp280b       | 1  |
| 11805 | 12861 | Bat2          | Rhcg          | 1  |
| 11805 | 19436 | Bat2          | Dapp1         | 1  |
| 11809 | 3208  | 4930534B04Rik | 4930511111Rik | 1  |

|       |       |               |               |    |
|-------|-------|---------------|---------------|----|
| 11809 | 7436  | 4930534B04Rik | 1700063K16Rik | 1  |
| 11809 | 11966 | 4930534B04Rik | Zfp280b       | 1  |
| 11809 | 12861 | 4930534B04Rik | Rhcg          | 1  |
| 11809 | 19436 | 4930534B04Rik | Dapp1         | 1  |
| 11809 | 19672 | 4930534B04Rik | Cldn19        | 1  |
| 11812 | 676   | Mrpl16        | Ms4a4d        | 1  |
| 11812 | 11369 | Mrpl16        | Stx3          | 1  |
| 11812 | 11812 | Mrpl16        | Mrpl16        | 1  |
| 11812 | 17447 | Mrpl16        | Ctsf          | 1  |
| 11816 | 11816 | Ccdc99        | Ccdc99        | 1  |
| 11837 | 3208  | Paqr6         | 4930511111Rik | 1  |
| 11837 | 7436  | Paqr6         | 1700063K16Rik | 1  |
| 11837 | 11966 | Paqr6         | Zfp280b       | 1  |
| 11837 | 12861 | Paqr6         | Rhcg          | 1  |
| 11837 | 19436 | Paqr6         | Dapp1         | 1  |
| 11859 | 11859 | Poln          | Poln          | -1 |
| 11859 | 12385 | Poln          | Mrpl33        | -1 |
| 11864 | 11864 | Dis3l         | Dis3l         | 1  |
| 11867 | 3462  | Rcor3         | Nmnat3        | -1 |
| 11867 | 3587  | Rcor3         | MMT00041940   | 1  |
| 11867 | 6021  | Rcor3         | MMT00008784   | 1  |
| 11867 | 6126  | Rcor3         | MMT00067575   | 1  |
| 11867 | 8319  | Rcor3         | MMT00062477   | 1  |
| 11867 | 8670  | Rcor3         | MMT00051613   | 1  |
| 11867 | 9258  | Rcor3         | P4ha1         | 1  |
| 11867 | 10769 | Rcor3         | Hnrnpd        | -1 |
| 11867 | 11043 | Rcor3         | Hsph1         | 1  |
| 11867 | 11214 | Rcor3         | MMT00049207   | 1  |
| 11867 | 14298 | Rcor3         | Atp2a2        | 1  |
| 11867 | 15675 | Rcor3         | MMT00077535   | 1  |
| 11867 | 18099 | Rcor3         | Nfx1          | -1 |
| 11867 | 18215 | Rcor3         | Gpr146        | -1 |
| 11867 | 18373 | Rcor3         | Dnajb1        | 1  |
| 11867 | 18418 | Rcor3         | Hspa1b        | 1  |
| 11867 | 20535 | Rcor3         | Rbm4          | 1  |
| 11867 | 20912 | Rcor3         | Chordc1       | 1  |
| 11867 | 20965 | Rcor3         | Usp28         | -1 |
| 11867 | 21333 | Rcor3         | Cirbp         | -1 |
| 11867 | 21389 | Rcor3         | Odf2          | -1 |
| 11870 | 2533  | Apitd1        | Arhgef19      | 1  |
| 11870 | 3475  | Apitd1        | 2610305D13Rik | 1  |
| 11870 | 6191  | Apitd1        | Ddost         | -1 |
| 11870 | 6830  | Apitd1        | Rsc1a1        | -1 |
| 11870 | 18338 | Apitd1        | Akr1e1        | -1 |
| 11870 | 19924 | Apitd1        | Ubiad1        | 1  |
| 11888 | 19462 | Myadm         | 4933439C20Rik | 1  |
| 11903 | 10526 | 4933437F05Rik | MMT00036239   | 1  |
| 11966 | 3208  | Zfp280b       | 4930511111Rik | 1  |
| 11966 | 5694  | Zfp280b       | Sp7           | 1  |
| 11966 | 7436  | Zfp280b       | 1700063K16Rik | 1  |
| 11966 | 11966 | Zfp280b       | Zfp280b       | 1  |
| 11966 | 12861 | Zfp280b       | Rhcg          | 1  |
| 11966 | 14407 | Zfp280b       | Six3          | 1  |
| 11966 | 19436 | Zfp280b       | Dapp1         | 1  |
| 11966 | 19672 | Zfp280b       | Cldn19        | 1  |
| 11966 | 22125 | Zfp280b       | Gab1          | 1  |
| 11982 | 6513  | MMT00035514   | Qpctl         | -1 |
| 11982 | 11321 | MMT00035514   | 2310014L17Rik | 1  |
| 11982 | 11888 | MMT00035514   | Myadm         | 1  |
| 11982 | 19462 | MMT00035514   | 4933439C20Rik | 1  |
| 11982 | 23247 | MMT00035514   | Ercc1         | 1  |
| 12004 | 12004 | Lgals6        | Lgals6        | 1  |
| 12046 | 11966 | Impdh1        | Zfp280b       | 1  |
| 12046 | 19436 | Impdh1        | Dapp1         | 1  |
| 12062 | 11966 | Dzip1l        | Zfp280b       | 1  |
| 12062 | 12861 | Dzip1l        | Rhcg          | 1  |
| 12062 | 19436 | Dzip1l        | Dapp1         | 1  |
| 12070 | 2827  | Adat2         | Raet1d        | -1 |
| 12070 | 12070 | Adat2         | Adat2         | 1  |

|       |       |               |               |    |
|-------|-------|---------------|---------------|----|
| 12070 | 18300 | Adat2         | Arg1          | -1 |
| 12070 | 19115 | Adat2         | Rab32         | 1  |
| 12091 | 11620 | 1810015C04Rik | Zfr           | -1 |
| 12091 | 11992 | 1810015C04Rik | Mrpl19        | 1  |
| 12091 | 20871 | 1810015C04Rik | Pop1          | -1 |
| 12097 | 12097 | 9430015G10Rik | 9430015G10Rik | 1  |
| 12109 | 2023  | Smad4         | MMT00072215   | -1 |
| 12109 | 5681  | Smad4         | Mbd1          | -1 |
| 12109 | 12109 | Smad4         | Smad4         | 1  |
| 12117 | 3587  | 1700024G13Rik | MMT00041940   | -1 |
| 12117 | 6021  | 1700024G13Rik | MMT00008784   | -1 |
| 12117 | 8670  | 1700024G13Rik | MMT00051613   | -1 |
| 12117 | 11214 | 1700024G13Rik | MMT00049207   | -1 |
| 12117 | 15675 | 1700024G13Rik | MMT00077535   | -1 |
| 12140 | 12140 | Mrps15        | Mrps15        | 1  |
| 12157 | 250   | Gal3st4       | Tubb2a-ps2    | 1  |
| 12157 | 609   | Gal3st4       | MMT00060868   | 1  |
| 12157 | 719   | Gal3st4       | Usp2          | -1 |
| 12157 | 1310  | Gal3st4       | Cabc1         | 1  |
| 12157 | 1363  | Gal3st4       | BC021767      | 1  |
| 12157 | 1767  | Gal3st4       | BC016495      | -1 |
| 12157 | 1941  | Gal3st4       | MMT00079618   | 1  |
| 12157 | 3214  | Gal3st4       | Dnmt3b        | 1  |
| 12157 | 3804  | Gal3st4       | MMT00015534   | 1  |
| 12157 | 3868  | Gal3st4       | Ebpl          | 1  |
| 12157 | 4469  | Gal3st4       | Cyp3a13       | -1 |
| 12157 | 5183  | Gal3st4       | St5           | 1  |
| 12157 | 5974  | Gal3st4       | Arntl         | 1  |
| 12157 | 6386  | Gal3st4       | Por           | -1 |
| 12157 | 10176 | Gal3st4       | Snrpg         | 1  |
| 12157 | 10486 | Gal3st4       | 1300002K09Rik | 1  |
| 12157 | 10642 | Gal3st4       | Ngef          | -1 |
| 12157 | 11129 | Gal3st4       | Ankhd1        | -1 |
| 12157 | 11741 | Gal3st4       | Slc30a10      | 1  |
| 12157 | 12489 | Gal3st4       | Wdr8          | 1  |
| 12157 | 13780 | Gal3st4       | Pilra         | 1  |
| 12157 | 15709 | Gal3st4       | Tceal1        | -1 |
| 12157 | 16060 | Gal3st4       | Gys2          | -1 |
| 12157 | 16690 | Gal3st4       | Tjp3          | 1  |
| 12157 | 17444 | Gal3st4       | Tuba1a        | 1  |
| 12157 | 17876 | Gal3st4       | Tubb4         | 1  |
| 12157 | 18147 | Gal3st4       | Nhlrc2        | -1 |
| 12157 | 19234 | Gal3st4       | Nrg4          | -1 |
| 12157 | 21409 | Gal3st4       | Gldc          | 1  |
| 12157 | 22290 | Gal3st4       | Tubb2a        | 1  |
| 12157 | 22630 | Gal3st4       | MMT00034355   | 1  |
| 12168 | 327   | H2-Ke6        | H2-Ea         | 1  |
| 12168 | 510   | H2-Ke6        | Neu1          | -1 |
| 12168 | 2325  | H2-Ke6        | H2-K1         | 1  |
| 12168 | 2938  | H2-Ke6        | H2-T23        | 1  |
| 12168 | 3599  | H2-Ke6        | MMT00035426   | -1 |
| 12168 | 3857  | H2-Ke6        | 1700001C19Rik | -1 |
| 12168 | 10376 | H2-Ke6        | C920025E04Rik | -1 |
| 12168 | 10667 | H2-Ke6        | H2-Eb1        | 1  |
| 12168 | 13493 | H2-Ke6        | Ring1         | -1 |
| 12168 | 15531 | H2-Ke6        | Prickle4      | -1 |
| 12168 | 20238 | H2-Ke6        | H2-T9         | 1  |
| 12168 | 22822 | H2-Ke6        | MMT00013433   | 1  |
| 12208 | 1615  | Pnpla7        | Timm10        | 1  |
| 12208 | 1851  | Pnpla7        | Tmem41a       | 1  |
| 12208 | 6118  | Pnpla7        | Slc1a4        | -1 |
| 12208 | 11129 | Pnpla7        | Ankhd1        | 1  |
| 12208 | 11807 | Pnpla7        | Fbxo31        | 1  |
| 12208 | 22732 | Pnpla7        | Cyb5b         | -1 |
| 12219 | 6021  | Cyb5b         | MMT00008784   | 1  |
| 12219 | 15675 | Cyb5b         | MMT00077535   | 1  |
| 12219 | 18373 | Cyb5b         | Dnajb1        | 1  |
| 12219 | 18418 | Cyb5b         | Hspa1b        | 1  |
| 12219 | 20965 | Cyb5b         | Usp28         | -1 |

|       |       |               |                    |    |
|-------|-------|---------------|--------------------|----|
| 12248 | 3208  | Tnp2          | 4930511111Rik      | 1  |
| 12248 | 5694  | Tnp2          | Sp7                | 1  |
| 12248 | 7436  | Tnp2          | 1700063K16Rik      | 1  |
| 12248 | 11966 | Tnp2          | Zfp280b            | 1  |
| 12248 | 12861 | Tnp2          | Rhcg               | 1  |
| 12248 | 14407 | Tnp2          | Six3               | 1  |
| 12248 | 19436 | Tnp2          | Dapp1              | 1  |
| 12248 | 19672 | Tnp2          | Cldn19             | 1  |
| 12248 | 22125 | Tnp2          | Gab1               | 1  |
| 12272 | 3208  | Fshr          | 4930511111Rik      | 1  |
| 12272 | 5694  | Fshr          | Sp7                | 1  |
| 12272 | 7436  | Fshr          | 1700063K16Rik      | 1  |
| 12272 | 11966 | Fshr          | Zfp280b            | 1  |
| 12272 | 12248 | Fshr          | Tnp2               | 1  |
| 12272 | 12861 | Fshr          | Rhcg               | 1  |
| 12272 | 19436 | Fshr          | Dapp1              | 1  |
| 12272 | 19672 | Fshr          | Cldn19             | 1  |
| 12272 | 22125 | Fshr          | Gab1               | 1  |
| 12302 | 2456  | Cbx1          | Mrpl10             | 1  |
| 12302 | 3480  | Cbx1          | Pnpo               | -1 |
| 12302 | 5661  | Cbx1          | Lrrc46             | -1 |
| 12302 | 12302 | Cbx1          | Cbx1               | 1  |
| 12302 | 13983 | Cbx1          | Copz2              | 1  |
| 12302 | 14384 | Cbx1          | Dnajc7             | -1 |
| 12302 | 19092 | Cbx1          | MMT00045362        | 1  |
| 12302 | 23295 | Cbx1          | Snx11              | 1  |
| 12312 | 11812 | Ms4a6d        | Mrpl16             | -1 |
| 12347 | 19436 | MMT00014037   | Dapp1              | 1  |
| 12367 | 524   | MMT00072365   | Hsd3b2             | -1 |
| 12367 | 1466  | MMT00072365   | Ubap2l             | -1 |
| 12367 | 1867  | MMT00072365   | Bcas2              | -1 |
| 12367 | 2752  | MMT00072365   | Fcgr1              | -1 |
| 12367 | 3159  | MMT00072365   | Pld1               | -1 |
| 12367 | 3206  | MMT00072365   | Gpr160             | -1 |
| 12367 | 3753  | MMT00072365   | Setdb1             | 1  |
| 12367 | 5822  | MMT00072365   | Car2               | -1 |
| 12367 | 5938  | MMT00072365   | Pfn2               | -1 |
| 12367 | 6206  | MMT00072365   | MMT00063701        | -1 |
| 12367 | 8568  | MMT00072365   | Tnik               | -1 |
| 12367 | 10521 | MMT00072365   | Ttf2               | -1 |
| 12367 | 10681 | MMT00072365   | Dgkz               | 1  |
| 12367 | 11121 | MMT00072365   | Mttr11             | 1  |
| 12367 | 11611 | MMT00072365   | S100a13            | 1  |
| 12367 | 12250 | MMT00072365   | P2ry14             | -1 |
| 12367 | 12367 | MMT00072365   | MMT00072365        | 1  |
| 12367 | 13134 | MMT00072365   | Lipg               | 1  |
| 12367 | 15508 | MMT00072365   | 4632415L05Rik      | -1 |
| 12367 | 16416 | MMT00072365   | Commd2             | -1 |
| 12367 | 18754 | MMT00072365   | Rbm8a              | -1 |
| 12367 | 18911 | MMT00072365   | Selenbp2           | -1 |
| 12367 | 20661 | MMT00072365   | Tuft1              | -1 |
| 12367 | 21814 | MMT00072365   | Accn5              | -1 |
| 12367 | 22202 | MMT00072365   | OTTMUSG00000021274 | 1  |
| 12367 | 22570 | MMT00072365   | Phtf1              | -1 |
| 12367 | 23457 | MMT00072365   | Selenbp2           | -1 |
| 12372 | 3208  | MMT00039397   | 4930511111Rik      | 1  |
| 12372 | 11966 | MMT00039397   | Zfp280b            | 1  |
| 12372 | 12861 | MMT00039397   | Rhcg               | 1  |
| 12372 | 19436 | MMT00039397   | Dapp1              | 1  |
| 12385 | 11859 | Mrpl33        | Poln               | 1  |
| 12385 | 12385 | Mrpl33        | Mrpl33             | 1  |
| 12388 | 4833  | 8430406I07Rik | Synpo2             | 1  |
| 12388 | 6231  | 8430406I07Rik | 9030622O22Rik      | -1 |
| 12388 | 11043 | 8430406I07Rik | Hsph1              | 1  |
| 12388 | 12388 | 8430406I07Rik | 8430406I07Rik      | 1  |
| 12388 | 21729 | 8430406I07Rik | Hdc                | 1  |
| 12398 | 143   | Ifi44         | Gvin1              | 1  |
| 12398 | 1180  | Ifi44         | Clec4a3            | 1  |
| 12398 | 1533  | Ifi44         | BC013712           | 1  |

|       |       |          |               |    |
|-------|-------|----------|---------------|----|
| 12398 | 2200  | lfi44    | BC006779      | 1  |
| 12398 | 2224  | lfi44    | Oasl2         | 1  |
| 12398 | 3659  | lfi44    | EG236451      | 1  |
| 12398 | 3683  | lfi44    | Oas2          | 1  |
| 12398 | 4114  | lfi44    | Parp12        | 1  |
| 12398 | 4426  | lfi44    | ligp2         | 1  |
| 12398 | 4508  | lfi44    | lfit1         | 1  |
| 12398 | 5002  | lfi44    | lfi202b       | 1  |
| 12398 | 5216  | lfi44    | Spnb5         | 1  |
| 12398 | 5250  | lfi44    | lfit2         | 1  |
| 12398 | 5853  | lfi44    | Trim30        | 1  |
| 12398 | 6587  | lfi44    | Irf9          | 1  |
| 12398 | 6595  | lfi44    | Oas1a         | 1  |
| 12398 | 6824  | lfi44    | Irf7          | 1  |
| 12398 | 7069  | lfi44    | Ube1l         | 1  |
| 12398 | 7105  | lfi44    | Plac8         | 1  |
| 12398 | 7284  | lfi44    | MMT00008674   | 1  |
| 12398 | 7316  | lfi44    | lfi204        | 1  |
| 12398 | 8659  | lfi44    | Psmb8         | 1  |
| 12398 | 8800  | lfi44    | Rnf213        | 1  |
| 12398 | 9401  | lfi44    | Fcgr4         | 1  |
| 12398 | 9847  | lfi44    | lfi27         | 1  |
| 12398 | 10109 | lfi44    | Gbp3          | 1  |
| 12398 | 11204 | lfi44    | AI451617      | 1  |
| 12398 | 11265 | lfi44    | Irgm          | 1  |
| 12398 | 11701 | lfi44    | Oas1c         | 1  |
| 12398 | 12312 | lfi44    | Ms4a6d        | 1  |
| 12398 | 12398 | lfi44    | lfi44         | 1  |
| 12398 | 12600 | lfi44    | lfi204        | 1  |
| 12398 | 12969 | lfi44    | Xaf1          | 1  |
| 12398 | 13156 | lfi44    | lfit3         | 1  |
| 12398 | 13309 | lfi44    | Tgtp          | 1  |
| 12398 | 13522 | lfi44    | Slfn5         | 1  |
| 12398 | 13527 | lfi44    | Ctss          | 1  |
| 12398 | 13654 | lfi44    | Stat1         | 1  |
| 12398 | 14258 | lfi44    | lfi47         | 1  |
| 12398 | 14506 | lfi44    | Slc15a3       | 1  |
| 12398 | 14611 | lfi44    | Ddx60         | 1  |
| 12398 | 14880 | lfi44    | Ms4a4c        | 1  |
| 12398 | 15074 | lfi44    | Usp18         | 1  |
| 12398 | 15504 | lfi44    | Mx2           | 1  |
| 12398 | 16182 | lfi44    | Oasl1         | 1  |
| 12398 | 16199 | lfi44    | Samhd1        | 1  |
| 12398 | 16521 | lfi44    | Adar          | 1  |
| 12398 | 16572 | lfi44    | D14Ert668e    | 1  |
| 12398 | 16988 | lfi44    | Clec4f        | 1  |
| 12398 | 17197 | lfi44    | Igtp          | 1  |
| 12398 | 18174 | lfi44    | Stat2         | 1  |
| 12398 | 18186 | lfi44    | Parp14        | 1  |
| 12398 | 19738 | lfi44    | Lgals3bp      | 1  |
| 12398 | 20321 | lfi44    | Ms4a6b        | 1  |
| 12398 | 20791 | lfi44    | MMT00014813   | 1  |
| 12398 | 20997 | lfi44    | MMT00028135   | 1  |
| 12398 | 21351 | lfi44    | Shisa5        | 1  |
| 12398 | 21549 | lfi44    | Rtp4          | 1  |
| 12398 | 21824 | lfi44    | 5830443L24Rik | 1  |
| 12398 | 22037 | lfi44    | Oas1g         | 1  |
| 12398 | 23208 | lfi44    | Hck           | 1  |
| 12398 | 23450 | lfi44    | D12Ert647e    | 1  |
| 12405 | 5410  | Cyp4f14  | Cyp4f15       | -1 |
| 12412 | 12412 | BC004728 | BC004728      | 1  |
| 12412 | 21060 | BC004728 | Ela1          | 1  |
| 12422 | 3208  | Eme1     | 4930511I11Rik | 1  |
| 12422 | 11966 | Eme1     | Zfp280b       | 1  |
| 12422 | 12861 | Eme1     | Rhcg          | 1  |
| 12422 | 19436 | Eme1     | Dapp1         | 1  |
| 12430 | 3208  | Fst      | 4930511I11Rik | 1  |
| 12430 | 5694  | Fst      | Sp7           | 1  |
| 12430 | 7436  | Fst      | 1700063K16Rik | 1  |



|       |       |               |               |    |
|-------|-------|---------------|---------------|----|
| 12430 | 11966 | Fst           | Zfp280b       | 1  |
| 12430 | 12861 | Fst           | Rhcg          | 1  |
| 12430 | 19436 | Fst           | Dapp1         | 1  |
| 12430 | 22125 | Fst           | Gab1          | 1  |
| 12440 | 1336  | Sult5a1       | MMT00069537   | -1 |
| 12440 | 2243  | Sult5a1       | Gcsh          | -1 |
| 12440 | 14391 | Sult5a1       | MMT00017335   | 1  |
| 12440 | 15953 | Sult5a1       | Acsf3         | 1  |
| 12440 | 22909 | Sult5a1       | Nup133        | -1 |
| 12457 | 3208  | MMT00072579   | 4930511111Rik | 1  |
| 12457 | 11966 | MMT00072579   | Zfp280b       | 1  |
| 12471 | 19436 | Olfr1020      | Dapp1         | 1  |
| 12513 | 6769  | Whsc2         | Banp          | 1  |
| 12513 | 18373 | Whsc2         | Dnajb1        | 1  |
| 12513 | 18418 | Whsc2         | Hspa1b        | 1  |
| 12515 | 3587  | N4bp2         | MMT00041940   | 1  |
| 12515 | 9899  | N4bp2         | D13Wsu177e    | 1  |
| 12515 | 11214 | N4bp2         | MMT00049207   | 1  |
| 12517 | 1371  | 4930573119Rik | 1200009106Rik | 1  |
| 12517 | 5829  | 4930573119Rik | 2810455K09Rik | -1 |
| 12517 | 7388  | 4930573119Rik | Amn           | 1  |
| 12517 | 8155  | 4930573119Rik | Mark3         | 1  |
| 12517 | 8925  | 4930573119Rik | MMT00026932   | -1 |
| 12517 | 12238 | 4930573119Rik | Traf3         | -1 |
| 12517 | 13027 | 4930573119Rik | Ppp2r5c       | -1 |
| 12517 | 15984 | 4930573119Rik | MMT00075074   | 1  |
| 12517 | 23693 | 4930573119Rik | A530016L24Rik | 1  |
| 12571 | 8210  | Cdkn2d        | Hspa12a       | 1  |
| 12571 | 10115 | Cdkn2d        | Ptk2          | 1  |
| 12571 | 10387 | Cdkn2d        | 4933427D06Rik | 1  |
| 12571 | 10466 | Cdkn2d        | S1pr5         | 1  |
| 12571 | 11598 | Cdkn2d        | MMT00031533   | 1  |
| 12571 | 14550 | Cdkn2d        | Acot7         | 1  |
| 12571 | 15135 | Cdkn2d        | Col5a3        | -1 |
| 12571 | 20628 | Cdkn2d        | Hoxd10        | 1  |
| 12571 | 21099 | Cdkn2d        | Rapgef6       | 1  |
| 12571 | 21218 | Cdkn2d        | Col9a2        | 1  |
| 12571 | 23034 | Cdkn2d        | Slc25a29      | 1  |
| 12599 | 7911  | Golt1b        | Pik3c2g       | -1 |
| 12599 | 12599 | Golt1b        | Golt1b        | 1  |
| 12602 | 2043  | Filip1        | Arl2bp        | 1  |
| 12602 | 2329  | Filip1        | Wdr6          | 1  |
| 12602 | 13257 | Filip1        | Nadk          | -1 |
| 12604 | 11966 | Acr           | Zfp280b       | 1  |
| 12604 | 12861 | Acr           | Rhcg          | 1  |
| 12604 | 19436 | Acr           | Dapp1         | 1  |
| 12648 | 5727  | Nt5dc1        | Camk2g        | 1  |
| 12649 | 1709  | Itgad         | Mt2           | 1  |
| 12649 | 1877  | Itgad         | Amica1        | 1  |
| 12649 | 2794  | Itgad         | Map3k6        | 1  |
| 12649 | 6030  | Itgad         | As3mt         | 1  |
| 12649 | 6490  | Itgad         | Il1r1         | 1  |
| 12649 | 7095  | Itgad         | Timm8a1       | 1  |
| 12649 | 7862  | Itgad         | Cpsf4l        | 1  |
| 12649 | 9910  | Itgad         | EG666644      | 1  |
| 12649 | 10088 | Itgad         | Ddc           | -1 |
| 12649 | 11129 | Itgad         | Ankhd1        | 1  |
| 12649 | 11574 | Itgad         | Gne           | 1  |
| 12649 | 11807 | Itgad         | Fbxo31        | 1  |
| 12649 | 15631 | Itgad         | Lpin1         | 1  |
| 12649 | 18905 | Itgad         | Prmt2         | -1 |
| 12649 | 19466 | Itgad         | Pptc7         | 1  |
| 12649 | 21331 | Itgad         | Slc10a6       | 1  |
| 12651 | 19436 | Tsc22d4       | Dapp1         | 1  |
| 12655 | 6931  | Tmem180       | Hrsp12        | -1 |
| 12655 | 20871 | Tmem180       | Pop1          | 1  |
| 12656 | 5100  | Coq5          | Pebp1         | -1 |
| 12656 | 10978 | Coq5          | MMT00078322   | 1  |
| 12656 | 12656 | Coq5          | Coq5          | 1  |

|       |       |               |                    |    |
|-------|-------|---------------|--------------------|----|
| 12656 | 15908 | Coq5          | Pebp1              | -1 |
| 12656 | 17807 | Coq5          | Pebp1              | -1 |
| 12667 | 6021  | Slc39a2       | MMT00008784        | 1  |
| 12667 | 8670  | Slc39a2       | MMT00051613        | 1  |
| 12667 | 9258  | Slc39a2       | P4ha1              | 1  |
| 12667 | 11043 | Slc39a2       | Hsph1              | 1  |
| 12667 | 15675 | Slc39a2       | MMT00077535        | 1  |
| 12667 | 18373 | Slc39a2       | Dnajb1             | 1  |
| 12676 | 20187 | Nrxn3         | Gphn               | -1 |
| 12681 | 7444  | Eif2c2        | Hspe1              | 1  |
| 12681 | 10878 | Eif2c2        | Tsnax              | -1 |
| 12681 | 13741 | Eif2c2        | Hspa4l             | 1  |
| 12681 | 18336 | Eif2c2        | Lrpap1             | -1 |
| 12681 | 18696 | Eif2c2        | MMT00042876        | -1 |
| 12681 | 21553 | Eif2c2        | EG628438           | 1  |
| 12694 | 327   | Riok2         | H2-Ea              | -1 |
| 12694 | 2325  | Riok2         | H2-K1              | -1 |
| 12694 | 2801  | Riok2         | H2-BI              | -1 |
| 12694 | 2938  | Riok2         | H2-T23             | -1 |
| 12694 | 3704  | Riok2         | H2-Q7              | -1 |
| 12694 | 4004  | Riok2         | Thbs2              | 1  |
| 12694 | 5410  | Riok2         | Cyp4f15            | 1  |
| 12694 | 6360  | Riok2         | D17H6S56E-3        | 1  |
| 12694 | 8750  | Riok2         | 1700010114Rik      | -1 |
| 12694 | 8767  | Riok2         | Rgl2               | -1 |
| 12694 | 9158  | Riok2         | Pde9a              | 1  |
| 12694 | 10667 | Riok2         | H2-Eb1             | -1 |
| 12694 | 12694 | Riok2         | Riok2              | 1  |
| 12694 | 13493 | Riok2         | Ring1              | 1  |
| 12694 | 18577 | Riok2         | Btbd9              | 1  |
| 12694 | 18906 | Riok2         | Zfand3             | -1 |
| 12694 | 20238 | Riok2         | H2-T9              | -1 |
| 12694 | 20346 | Riok2         | Gna-rs1            | -1 |
| 12694 | 22822 | Riok2         | MMT00013433        | -1 |
| 12696 | 19436 | RP23-392P11.3 | Dapp1              | 1  |
| 12716 | 524   | 5830417110Rik | Hsd3b2             | -1 |
| 12716 | 1466  | 5830417110Rik | Ubap2l             | -1 |
| 12716 | 1867  | 5830417110Rik | Bcas2              | -1 |
| 12716 | 1963  | 5830417110Rik | MMT00039783        | -1 |
| 12716 | 3753  | 5830417110Rik | Setdb1             | 1  |
| 12716 | 5021  | 5830417110Rik | Gdap2              | 1  |
| 12716 | 5938  | 5830417110Rik | Pfn2               | -1 |
| 12716 | 6206  | 5830417110Rik | MMT00063701        | -1 |
| 12716 | 7519  | 5830417110Rik | Gstm1              | -1 |
| 12716 | 8738  | 5830417110Rik | Reg4               | 1  |
| 12716 | 10521 | 5830417110Rik | Ttf2               | -1 |
| 12716 | 10681 | 5830417110Rik | Dgkz               | 1  |
| 12716 | 11121 | 5830417110Rik | Mttr11             | 1  |
| 12716 | 11611 | 5830417110Rik | S100a13            | 1  |
| 12716 | 12367 | 5830417110Rik | MMT00072365        | 1  |
| 12716 | 15901 | 5830417110Rik | Tpm3               | 1  |
| 12716 | 16416 | 5830417110Rik | Commd2             | -1 |
| 12716 | 16679 | 5830417110Rik | Ctsk               | 1  |
| 12716 | 18754 | 5830417110Rik | Rbm8a              | -1 |
| 12716 | 18911 | 5830417110Rik | Selenbp2           | -1 |
| 12716 | 20661 | 5830417110Rik | Tuft1              | -1 |
| 12716 | 22202 | 5830417110Rik | OTTMUSG00000021274 | 1  |
| 12716 | 22570 | 5830417110Rik | Phtf1              | -1 |
| 12716 | 23457 | 5830417110Rik | Selenbp2           | -1 |
| 12718 | 2793  | Dhrsx         | MMT00005644        | 1  |
| 12718 | 5989  | Dhrsx         | 2310042D19Rik      | 1  |
| 12730 | 9655  | 9130019O22Rik | Sult2b1            | 1  |
| 12730 | 12730 | 9130019O22Rik | 9130019O22Rik      | 1  |
| 12730 | 16598 | 9130019O22Rik | E430018J23Rik      | -1 |
| 12730 | 22361 | 9130019O22Rik | Sephs2             | 1  |
| 12732 | 3587  | Hsd17b1       | MMT00041940        | 1  |
| 12732 | 6021  | Hsd17b1       | MMT00008784        | 1  |
| 12732 | 6769  | Hsd17b1       | Banp               | 1  |
| 12732 | 7731  | Hsd17b1       | 1500001M20Rik      | -1 |

|       |       |             |               |    |
|-------|-------|-------------|---------------|----|
| 12732 | 8319  | Hsd17b1     | MMT00062477   | 1  |
| 12732 | 8670  | Hsd17b1     | MMT00051613   | 1  |
| 12732 | 9258  | Hsd17b1     | P4ha1         | 1  |
| 12732 | 11043 | Hsd17b1     | Hsph1         | 1  |
| 12732 | 11201 | Hsd17b1     | Sunc1         | -1 |
| 12732 | 11214 | Hsd17b1     | MMT00049207   | 1  |
| 12732 | 14298 | Hsd17b1     | Atp2a2        | 1  |
| 12732 | 15476 | Hsd17b1     | Fem1b         | -1 |
| 12732 | 15675 | Hsd17b1     | MMT00077535   | 1  |
| 12732 | 16251 | Hsd17b1     | G6pc          | 1  |
| 12732 | 17449 | Hsd17b1     | Zfp296        | 1  |
| 12732 | 18083 | Hsd17b1     | Gadd45a       | -1 |
| 12732 | 18373 | Hsd17b1     | Dnajb1        | 1  |
| 12732 | 18418 | Hsd17b1     | Hspa1b        | 1  |
| 12732 | 20535 | Hsd17b1     | Rbm4          | 1  |
| 12732 | 20912 | Hsd17b1     | Chordc1       | 1  |
| 12732 | 21389 | Hsd17b1     | Odf2          | -1 |
| 12732 | 22139 | Hsd17b1     | Stip1         | 1  |
| 12739 | 3913  | Insl5       | Mrpl15        | 1  |
| 12739 | 4805  | Insl5       | Hspb1         | 1  |
| 12739 | 11208 | Insl5       | Hspb1         | 1  |
| 12739 | 17595 | Insl5       | MMT00048325   | 1  |
| 12753 | 11966 | MMT00043344 | Zfp280b       | 1  |
| 12753 | 19436 | MMT00043344 | Dapp1         | 1  |
| 12761 | 213   | Tsc22d3     | Rgs16         | 1  |
| 12761 | 250   | Tsc22d3     | Tubb2a-ps2    | -1 |
| 12761 | 266   | Tsc22d3     | Nr2f2         | -1 |
| 12761 | 269   | Tsc22d3     | Tuba1b        | -1 |
| 12761 | 337   | Tsc22d3     | Rasgef1b      | 1  |
| 12761 | 402   | Tsc22d3     | Timp3         | 1  |
| 12761 | 437   | Tsc22d3     | Ndrp1         | -1 |
| 12761 | 530   | Tsc22d3     | Mest          | -1 |
| 12761 | 547   | Tsc22d3     | Mknk2         | 1  |
| 12761 | 563   | Tsc22d3     | D4Bwg0951e    | 1  |
| 12761 | 609   | Tsc22d3     | MMT00060868   | -1 |
| 12761 | 689   | Tsc22d3     | 2010004A03Rik | 1  |
| 12761 | 719   | Tsc22d3     | Usp2          | 1  |
| 12761 | 864   | Tsc22d3     | MMT00031865   | 1  |
| 12761 | 1039  | Tsc22d3     | Zfp207        | -1 |
| 12761 | 1310  | Tsc22d3     | Cabc1         | -1 |
| 12761 | 1646  | Tsc22d3     | Slc15a4       | 1  |
| 12761 | 1709  | Tsc22d3     | Mt2           | 1  |
| 12761 | 1767  | Tsc22d3     | BC016495      | 1  |
| 12761 | 1805  | Tsc22d3     | Tmem204       | 1  |
| 12761 | 1827  | Tsc22d3     | Gnb1l         | -1 |
| 12761 | 1853  | Tsc22d3     | Stat5a        | -1 |
| 12761 | 1877  | Tsc22d3     | Amica1        | 1  |
| 12761 | 1941  | Tsc22d3     | MMT00079618   | -1 |
| 12761 | 2043  | Tsc22d3     | Arl2bp        | -1 |
| 12761 | 2110  | Tsc22d3     | Gtf2ird1      | -1 |
| 12761 | 2294  | Tsc22d3     | AU040829      | 1  |
| 12761 | 2322  | Tsc22d3     | Tuba4a        | -1 |
| 12761 | 2329  | Tsc22d3     | Wdr6          | -1 |
| 12761 | 2399  | Tsc22d3     | MMT00060167   | -1 |
| 12761 | 2483  | Tsc22d3     | Gmeb1         | 1  |
| 12761 | 2529  | Tsc22d3     | Hmcn2         | 1  |
| 12761 | 2636  | Tsc22d3     | Tars          | -1 |
| 12761 | 2794  | Tsc22d3     | Map3k6        | 1  |
| 12761 | 2829  | Tsc22d3     | Lrfr3         | -1 |
| 12761 | 3040  | Tsc22d3     | Bcl3          | -1 |
| 12761 | 3097  | Tsc22d3     | Ppp1r3g       | 1  |
| 12761 | 3170  | Tsc22d3     | Mcart1        | 1  |
| 12761 | 3196  | Tsc22d3     | Tat           | 1  |
| 12761 | 3214  | Tsc22d3     | Dnmt3b        | -1 |
| 12761 | 3410  | Tsc22d3     | Paqr9         | -1 |
| 12761 | 3502  | Tsc22d3     | Gde1          | 1  |
| 12761 | 3559  | Tsc22d3     | 4933433P14Rik | 1  |
| 12761 | 3686  | Tsc22d3     | Psmc9         | 1  |
| 12761 | 3789  | Tsc22d3     | 4833442J19Rik | 1  |

|       |       |         |               |    |
|-------|-------|---------|---------------|----|
| 12761 | 3790  | Tsc22d3 | Mtss1         | 1  |
| 12761 | 3804  | Tsc22d3 | MMT00015534   | -1 |
| 12761 | 4084  | Tsc22d3 | Asah3l        | 1  |
| 12761 | 4201  | Tsc22d3 | Tubb2c        | -1 |
| 12761 | 4235  | Tsc22d3 | Pfkfb3        | 1  |
| 12761 | 4286  | Tsc22d3 | Ptp4a1        | 1  |
| 12761 | 4392  | Tsc22d3 | 1810055G02Rik | 1  |
| 12761 | 4534  | Tsc22d3 | Ndel1         | 1  |
| 12761 | 4678  | Tsc22d3 | Kank1         | -1 |
| 12761 | 4708  | Tsc22d3 | Traf3ip2      | -1 |
| 12761 | 5183  | Tsc22d3 | St5           | -1 |
| 12761 | 5187  | Tsc22d3 | Speer4f       | 1  |
| 12761 | 5345  | Tsc22d3 | MMT00023326   | 1  |
| 12761 | 5355  | Tsc22d3 | Gpsm2         | -1 |
| 12761 | 5569  | Tsc22d3 | Pdgfc         | -1 |
| 12761 | 5574  | Tsc22d3 | Hsd3b7        | -1 |
| 12761 | 5587  | Tsc22d3 | Rmnd5b        | -1 |
| 12761 | 5791  | Tsc22d3 | Baiap2l1      | 1  |
| 12761 | 5849  | Tsc22d3 | 2310031A18Rik | -1 |
| 12761 | 5856  | Tsc22d3 | Mfsd2         | 1  |
| 12761 | 5974  | Tsc22d3 | Arntl         | -1 |
| 12761 | 6028  | Tsc22d3 | Alas1         | 1  |
| 12761 | 6048  | Tsc22d3 | Psmc9         | 1  |
| 12761 | 6118  | Tsc22d3 | Slc1a4        | -1 |
| 12761 | 6211  | Tsc22d3 | Arhgap24      | -1 |
| 12761 | 6343  | Tsc22d3 | Slc20a1       | 1  |
| 12761 | 6386  | Tsc22d3 | Por           | 1  |
| 12761 | 6490  | Tsc22d3 | Il1r1         | 1  |
| 12761 | 6564  | Tsc22d3 | Cebpd         | 1  |
| 12761 | 6675  | Tsc22d3 | Sfrs4         | 1  |
| 12761 | 6756  | Tsc22d3 | Sds           | 1  |
| 12761 | 6771  | Tsc22d3 | Insc          | -1 |
| 12761 | 6788  | Tsc22d3 | Psen2         | -1 |
| 12761 | 6928  | Tsc22d3 | Klhl8         | -1 |
| 12761 | 6990  | Tsc22d3 | Nr1i2         | 1  |
| 12761 | 7066  | Tsc22d3 | Agtr1b        | 1  |
| 12761 | 7112  | Tsc22d3 | Apbb3         | 1  |
| 12761 | 7136  | Tsc22d3 | Id3           | -1 |
| 12761 | 7751  | Tsc22d3 | Sgk2          | -1 |
| 12761 | 7839  | Tsc22d3 | Asl           | 1  |
| 12761 | 7862  | Tsc22d3 | Cpsf4l        | 1  |
| 12761 | 7944  | Tsc22d3 | Al132487      | 1  |
| 12761 | 7954  | Tsc22d3 | Ccdc12        | -1 |
| 12761 | 7963  | Tsc22d3 | Rxrg          | -1 |
| 12761 | 8200  | Tsc22d3 | Dfna5h        | -1 |
| 12761 | 8328  | Tsc22d3 | Klhdc8a       | -1 |
| 12761 | 8399  | Tsc22d3 | Herpud1       | 1  |
| 12761 | 8639  | Tsc22d3 | Map1lc3b      | 1  |
| 12761 | 8641  | Tsc22d3 | Slc7a2        | 1  |
| 12761 | 9309  | Tsc22d3 | MMT00035904   | 1  |
| 12761 | 9495  | Tsc22d3 | Srms          | -1 |
| 12761 | 9763  | Tsc22d3 | Tuba3b        | -1 |
| 12761 | 9910  | Tsc22d3 | EG666644      | 1  |
| 12761 | 10088 | Tsc22d3 | Ddc           | -1 |
| 12761 | 10207 | Tsc22d3 | MMT00012324   | -1 |
| 12761 | 10384 | Tsc22d3 | Chic2         | 1  |
| 12761 | 10408 | Tsc22d3 | Per1          | 1  |
| 12761 | 10486 | Tsc22d3 | 1300002K09Rik | -1 |
| 12761 | 10712 | Tsc22d3 | Fchsd2        | 1  |
| 12761 | 10775 | Tsc22d3 | Slc16a1       | -1 |
| 12761 | 10803 | Tsc22d3 | Wnt5a         | -1 |
| 12761 | 11093 | Tsc22d3 | Zdhhc1        | 1  |
| 12761 | 11129 | Tsc22d3 | Ankhd1        | 1  |
| 12761 | 11193 | Tsc22d3 | Tsc22d1       | -1 |
| 12761 | 11574 | Tsc22d3 | Gne           | 1  |
| 12761 | 11599 | Tsc22d3 | Coq10b        | 1  |
| 12761 | 11724 | Tsc22d3 | Tuba3a        | -1 |
| 12761 | 11741 | Tsc22d3 | Slc30a10      | -1 |
| 12761 | 11807 | Tsc22d3 | Fbxo31        | 1  |

|       |       |         |               |    |
|-------|-------|---------|---------------|----|
| 12761 | 11808 | Tsc22d3 | Pck1          | 1  |
| 12761 | 12193 | Tsc22d3 | Aco2          | 1  |
| 12761 | 12204 | Tsc22d3 | Ankmy2        | 1  |
| 12761 | 12420 | Tsc22d3 | Klhl21        | 1  |
| 12761 | 12436 | Tsc22d3 | Serinc3       | 1  |
| 12761 | 12460 | Tsc22d3 | Pnpla2        | 1  |
| 12761 | 12489 | Tsc22d3 | Wdr8          | -1 |
| 12761 | 12761 | Tsc22d3 | Tsc22d3       | 1  |
| 12761 | 12807 | Tsc22d3 | Faim          | -1 |
| 12761 | 12839 | Tsc22d3 | Fh1           | 1  |
| 12761 | 12908 | Tsc22d3 | Jdp2          | 1  |
| 12761 | 12981 | Tsc22d3 | Nek6          | -1 |
| 12761 | 13087 | Tsc22d3 | Cxadr         | -1 |
| 12761 | 13289 | Tsc22d3 | Dusp10        | -1 |
| 12761 | 13339 | Tsc22d3 | D630042F21Rik | 1  |
| 12761 | 13471 | Tsc22d3 | Cln8          | 1  |
| 12761 | 13989 | Tsc22d3 | Foxp3         | 1  |
| 12761 | 14041 | Tsc22d3 | Cldn1         | -1 |
| 12761 | 14138 | Tsc22d3 | Anks4b        | -1 |
| 12761 | 14462 | Tsc22d3 | Zfp385b       | 1  |
| 12761 | 14620 | Tsc22d3 | Tbc1d8        | 1  |
| 12761 | 14989 | Tsc22d3 | Map3k5        | 1  |
| 12761 | 15008 | Tsc22d3 | Chrdl2        | 1  |
| 12761 | 15021 | Tsc22d3 | Ppargc1a      | 1  |
| 12761 | 15258 | Tsc22d3 | Coil          | -1 |
| 12761 | 15425 | Tsc22d3 | Adprh         | -1 |
| 12761 | 15481 | Tsc22d3 | 1110067D22Rik | -1 |
| 12761 | 15521 | Tsc22d3 | Mast3         | 1  |
| 12761 | 15522 | Tsc22d3 | 1810011O10Rik | 1  |
| 12761 | 15609 | Tsc22d3 | Mreg          | -1 |
| 12761 | 15624 | Tsc22d3 | Crcp          | 1  |
| 12761 | 15631 | Tsc22d3 | Lpin1         | 1  |
| 12761 | 15709 | Tsc22d3 | Tceal1        | 1  |
| 12761 | 15862 | Tsc22d3 | Mrap          | -1 |
| 12761 | 15882 | Tsc22d3 | AA986860      | 1  |
| 12761 | 16060 | Tsc22d3 | Gys2          | 1  |
| 12761 | 16176 | Tsc22d3 | St3gal5       | 1  |
| 12761 | 16515 | Tsc22d3 | Gramd4        | -1 |
| 12761 | 16580 | Tsc22d3 | Tnfaip2       | -1 |
| 12761 | 16647 | Tsc22d3 | D16H22S680E   | 1  |
| 12761 | 16669 | Tsc22d3 | Tjp2          | -1 |
| 12761 | 16690 | Tsc22d3 | Tjp3          | -1 |
| 12761 | 16851 | Tsc22d3 | Slc34a2       | -1 |
| 12761 | 16946 | Tsc22d3 | lvns1abp      | 1  |
| 12761 | 17078 | Tsc22d3 | Syde2         | 1  |
| 12761 | 17338 | Tsc22d3 | Mocos         | -1 |
| 12761 | 17342 | Tsc22d3 | Dhx32         | -1 |
| 12761 | 17352 | Tsc22d3 | Cebpb         | 1  |
| 12761 | 17444 | Tsc22d3 | Tuba1a        | -1 |
| 12761 | 17525 | Tsc22d3 | Ctgf          | 1  |
| 12761 | 17530 | Tsc22d3 | MMT00041792   | -1 |
| 12761 | 17622 | Tsc22d3 | Foxo1         | 1  |
| 12761 | 17656 | Tsc22d3 | Hdhd3         | -1 |
| 12761 | 17876 | Tsc22d3 | Tubb4         | -1 |
| 12761 | 17928 | Tsc22d3 | Pex11a        | 1  |
| 12761 | 18027 | Tsc22d3 | 5730403B10Rik | 1  |
| 12761 | 18179 | Tsc22d3 | Dbp           | 1  |
| 12761 | 18275 | Tsc22d3 | D730039F16Rik | -1 |
| 12761 | 18314 | Tsc22d3 | 4631416L12Rik | 1  |
| 12761 | 18785 | Tsc22d3 | Angptl4       | 1  |
| 12761 | 18802 | Tsc22d3 | Nit2          | -1 |
| 12761 | 18827 | Tsc22d3 | Oprs1         | -1 |
| 12761 | 19025 | Tsc22d3 | Slc37a4       | 1  |
| 12761 | 19146 | Tsc22d3 | N4bp2l1       | 1  |
| 12761 | 19217 | Tsc22d3 | Cyr61         | -1 |
| 12761 | 19234 | Tsc22d3 | Nrg4          | 1  |
| 12761 | 19277 | Tsc22d3 | MMT00044927   | 1  |
| 12761 | 19466 | Tsc22d3 | Pptc7         | 1  |
| 12761 | 19532 | Tsc22d3 | Med8          | -1 |

|       |       |         |               |    |
|-------|-------|---------|---------------|----|
| 12761 | 19556 | Tsc22d3 | Efna1         | -1 |
| 12761 | 19671 | Tsc22d3 | Upp2          | 1  |
| 12761 | 19723 | Tsc22d3 | Pfkfb1        | 1  |
| 12761 | 19757 | Tsc22d3 | Fkbp5         | 1  |
| 12761 | 20085 | Tsc22d3 | Lpin2         | 1  |
| 12761 | 20689 | Tsc22d3 | Cnksr3        | -1 |
| 12761 | 20690 | Tsc22d3 | Zfp276        | 1  |
| 12761 | 20803 | Tsc22d3 | Tmem50a       | 1  |
| 12761 | 20854 | Tsc22d3 | Commd7        | -1 |
| 12761 | 20880 | Tsc22d3 | Raf1          | -1 |
| 12761 | 20907 | Tsc22d3 | Lims2         | 1  |
| 12761 | 21142 | Tsc22d3 | Gm129         | 1  |
| 12761 | 21167 | Tsc22d3 | Irf5          | -1 |
| 12761 | 21251 | Tsc22d3 | Cpt1a         | 1  |
| 12761 | 21331 | Tsc22d3 | Slc10a6       | 1  |
| 12761 | 21408 | Tsc22d3 | Svil          | -1 |
| 12761 | 21805 | Tsc22d3 | Plk3          | 1  |
| 12761 | 21811 | Tsc22d3 | Ak3l1         | 1  |
| 12761 | 21901 | Tsc22d3 | BC035537      | -1 |
| 12761 | 21918 | Tsc22d3 | Snx24         | -1 |
| 12761 | 21934 | Tsc22d3 | Id2           | -1 |
| 12761 | 22031 | Tsc22d3 | Vcam1         | 1  |
| 12761 | 22076 | Tsc22d3 | Pgm2l1        | 1  |
| 12761 | 22218 | Tsc22d3 | Rfc3          | -1 |
| 12761 | 22290 | Tsc22d3 | Tubb2a        | -1 |
| 12761 | 22388 | Tsc22d3 | 2410018M08Rik | 1  |
| 12761 | 22443 | Tsc22d3 | Tuba1c        | -1 |
| 12761 | 22470 | Tsc22d3 | Ppargc1b      | 1  |
| 12761 | 22630 | Tsc22d3 | MMT00034355   | -1 |
| 12761 | 22636 | Tsc22d3 | Trim2         | -1 |
| 12761 | 22681 | Tsc22d3 | Gm88          | 1  |
| 12761 | 22936 | Tsc22d3 | Rhobtb1       | 1  |
| 12761 | 23161 | Tsc22d3 | Gclc          | -1 |
| 12761 | 23201 | Tsc22d3 | S1pr1         | -1 |
| 12761 | 23202 | Tsc22d3 | Olfir559      | 1  |
| 12761 | 23437 | Tsc22d3 | Efhd2         | 1  |
| 12761 | 23558 | Tsc22d3 | MMT00030937   | 1  |
| 12761 | 23680 | Tsc22d3 | 5730419I09Rik | -1 |
| 12769 | 9224  | Tmem177 | MMT00013510   | 1  |
| 12769 | 11043 | Tmem177 | Hsph1         | 1  |
| 12769 | 11214 | Tmem177 | MMT00049207   | 1  |
| 12769 | 18487 | Tmem177 | Serpina5      | -1 |
| 12769 | 20332 | Tmem177 | Stau2         | -1 |
| 12772 | 3208  | Axl     | 4930511I11Rik | 1  |
| 12772 | 7436  | Axl     | 1700063K16Rik | 1  |
| 12772 | 11966 | Axl     | Zfp280b       | 1  |
| 12772 | 12861 | Axl     | Rhcg          | 1  |
| 12772 | 19436 | Axl     | Dapp1         | 1  |
| 12772 | 19672 | Axl     | Cldn19        | 1  |
| 12772 | 22125 | Axl     | Gab1          | 1  |
| 12824 | 1014  | Dbt     | Rtcd1         | -1 |
| 12826 | 11966 | Zfp354c | Zfp280b       | 1  |
| 12826 | 19436 | Zfp354c | Dapp1         | 1  |
| 12834 | 250   | Fabp7   | Tubb2a-ps2    | 1  |
| 12834 | 402   | Fabp7   | Timp3         | -1 |
| 12834 | 407   | Fabp7   | Serpina6      | -1 |
| 12834 | 433   | Fabp7   | Pla2g12b      | 1  |
| 12834 | 437   | Fabp7   | Ndrp1         | 1  |
| 12834 | 530   | Fabp7   | Mest          | 1  |
| 12834 | 547   | Fabp7   | Mknk2         | -1 |
| 12834 | 609   | Fabp7   | MMT00060868   | 1  |
| 12834 | 719   | Fabp7   | Usp2          | -1 |
| 12834 | 992   | Fabp7   | 8430410A17Rik | 1  |
| 12834 | 1310  | Fabp7   | Cabc1         | 1  |
| 12834 | 1326  | Fabp7   | Tox           | -1 |
| 12834 | 1362  | Fabp7   | Avpr1a        | 1  |
| 12834 | 1363  | Fabp7   | BC021767      | 1  |
| 12834 | 1371  | Fabp7   | 1200009I06Rik | 1  |
| 12834 | 1646  | Fabp7   | Slc15a4       | -1 |

|       |      |       |               |    |
|-------|------|-------|---------------|----|
| 12834 | 1736 | Fabp7 | Elov13        | 1  |
| 12834 | 1767 | Fabp7 | BC016495      | -1 |
| 12834 | 1853 | Fabp7 | Stat5a        | 1  |
| 12834 | 1876 | Fabp7 | Amdhd1        | 1  |
| 12834 | 2027 | Fabp7 | Wnt5b         | -1 |
| 12834 | 2110 | Fabp7 | Gtf2ird1      | 1  |
| 12834 | 2126 | Fabp7 | Dgat2         | -1 |
| 12834 | 2384 | Fabp7 | Micalcl       | 1  |
| 12834 | 2399 | Fabp7 | MMT00060167   | 1  |
| 12834 | 2636 | Fabp7 | Tars          | 1  |
| 12834 | 2766 | Fabp7 | Elp4          | 1  |
| 12834 | 2829 | Fabp7 | Lrfr3         | 1  |
| 12834 | 2850 | Fabp7 | Slc16a6       | 1  |
| 12834 | 3214 | Fabp7 | Dnmt3b        | 1  |
| 12834 | 3235 | Fabp7 | BC029214      | 1  |
| 12834 | 3410 | Fabp7 | Paqr9         | 1  |
| 12834 | 3502 | Fabp7 | Gde1          | -1 |
| 12834 | 3746 | Fabp7 | Osbpl5        | -1 |
| 12834 | 3789 | Fabp7 | 4833442J19Rik | -1 |
| 12834 | 3804 | Fabp7 | MMT00015534   | 1  |
| 12834 | 4286 | Fabp7 | Ptp4a1        | -1 |
| 12834 | 4333 | Fabp7 | Sumo3         | 1  |
| 12834 | 4379 | Fabp7 | Glrx          | -1 |
| 12834 | 4534 | Fabp7 | Ndel1         | -1 |
| 12834 | 4708 | Fabp7 | Traf3ip2      | 1  |
| 12834 | 5068 | Fabp7 | Afap112       | 1  |
| 12834 | 5183 | Fabp7 | St5           | 1  |
| 12834 | 5374 | Fabp7 | Chka          | 1  |
| 12834 | 5492 | Fabp7 | MMT00039914   | -1 |
| 12834 | 5569 | Fabp7 | Pdgfc         | 1  |
| 12834 | 5574 | Fabp7 | Hsd3b7        | 1  |
| 12834 | 5629 | Fabp7 | Als2          | 1  |
| 12834 | 5734 | Fabp7 | EG619653      | -1 |
| 12834 | 5802 | Fabp7 | Mad2l2        | 1  |
| 12834 | 5804 | Fabp7 | Thrsp         | -1 |
| 12834 | 5849 | Fabp7 | 2310031A18Rik | 1  |
| 12834 | 5856 | Fabp7 | Mfsd2         | -1 |
| 12834 | 5892 | Fabp7 | MMT00038457   | -1 |
| 12834 | 5934 | Fabp7 | S100a10       | 1  |
| 12834 | 5974 | Fabp7 | Arntl         | 1  |
| 12834 | 6019 | Fabp7 | Gdap10        | -1 |
| 12834 | 6028 | Fabp7 | Alas1         | -1 |
| 12834 | 6109 | Fabp7 | Hsd17b2       | 1  |
| 12834 | 6118 | Fabp7 | Slc1a4        | 1  |
| 12834 | 6211 | Fabp7 | Arhgap24      | 1  |
| 12834 | 6343 | Fabp7 | Slc20a1       | -1 |
| 12834 | 6370 | Fabp7 | Aqp8          | 1  |
| 12834 | 6386 | Fabp7 | Por           | -1 |
| 12834 | 6394 | Fabp7 | Fbxo6         | 1  |
| 12834 | 6657 | Fabp7 | Irf6          | 1  |
| 12834 | 6788 | Fabp7 | Psen2         | 1  |
| 12834 | 6990 | Fabp7 | Nr1i2         | -1 |
| 12834 | 7199 | Fabp7 | Wee1          | -1 |
| 12834 | 7414 | Fabp7 | Clpx          | 1  |
| 12834 | 7751 | Fabp7 | Sgk2          | 1  |
| 12834 | 7770 | Fabp7 | Galt          | 1  |
| 12834 | 7839 | Fabp7 | Asl           | -1 |
| 12834 | 7954 | Fabp7 | Ccdc12        | 1  |
| 12834 | 7973 | Fabp7 | Lgals9        | 1  |
| 12834 | 8328 | Fabp7 | Klhdc8a       | 1  |
| 12834 | 8658 | Fabp7 | Fmo2          | -1 |
| 12834 | 9260 | Fabp7 | Cmtm6         | 1  |
| 12834 | 9309 | Fabp7 | MMT00035904   | -1 |
| 12834 | 9438 | Fabp7 | Pctk3         | -1 |
| 12834 | 9481 | Fabp7 | Ppl           | -1 |
| 12834 | 9495 | Fabp7 | Srms          | 1  |
| 12834 | 9587 | Fabp7 | Bri3bp        | 1  |
| 12834 | 9831 | Fabp7 | Nedd4l        | 1  |
| 12834 | 9910 | Fabp7 | EG666644      | -1 |

|       |       |       |               |    |
|-------|-------|-------|---------------|----|
| 12834 | 10088 | Fabp7 | Ddc           | 1  |
| 12834 | 10215 | Fabp7 | Nampt         | -1 |
| 12834 | 10486 | Fabp7 | 1300002K09Rik | 1  |
| 12834 | 10546 | Fabp7 | Prpf6         | 1  |
| 12834 | 10642 | Fabp7 | Ngef          | -1 |
| 12834 | 10712 | Fabp7 | Fchsd2        | -1 |
| 12834 | 10775 | Fabp7 | Slc16a1       | 1  |
| 12834 | 11075 | Fabp7 | Xrcc6bp1      | -1 |
| 12834 | 11129 | Fabp7 | Ankhd1        | -1 |
| 12834 | 11312 | Fabp7 | 2210016H18Rik | 1  |
| 12834 | 11576 | Fabp7 | Gm1381        | -1 |
| 12834 | 11599 | Fabp7 | Coq10b        | -1 |
| 12834 | 11741 | Fabp7 | Slc30a10      | 1  |
| 12834 | 11807 | Fabp7 | Fbxo31        | -1 |
| 12834 | 11857 | Fabp7 | Arv1          | 1  |
| 12834 | 12114 | Fabp7 | Homer2        | -1 |
| 12834 | 12151 | Fabp7 | MMT00082650   | -1 |
| 12834 | 12165 | Fabp7 | Ppp2r1b       | 1  |
| 12834 | 12193 | Fabp7 | Aco2          | -1 |
| 12834 | 12204 | Fabp7 | Ankmy2        | -1 |
| 12834 | 12433 | Fabp7 | 5033413D22Rik | 1  |
| 12834 | 12489 | Fabp7 | Wdr8          | 1  |
| 12834 | 12687 | Fabp7 | Zc3h8         | -1 |
| 12834 | 12754 | Fabp7 | E130304F04Rik | 1  |
| 12834 | 12799 | Fabp7 | Spon2         | 1  |
| 12834 | 12807 | Fabp7 | Faim          | 1  |
| 12834 | 12904 | Fabp7 | MMT00040704   | -1 |
| 12834 | 12941 | Fabp7 | Elov15        | 1  |
| 12834 | 12982 | Fabp7 | Cars          | 1  |
| 12834 | 13000 | Fabp7 | 9130404D14Rik | 1  |
| 12834 | 13078 | Fabp7 | Eps8l2        | 1  |
| 12834 | 13210 | Fabp7 | Nudt1         | 1  |
| 12834 | 13947 | Fabp7 | Crip2         | 1  |
| 12834 | 14041 | Fabp7 | Cldn1         | 1  |
| 12834 | 14279 | Fabp7 | 3930402G23Rik | 1  |
| 12834 | 14442 | Fabp7 | Ethe1         | 1  |
| 12834 | 14462 | Fabp7 | Zfp385b       | -1 |
| 12834 | 15049 | Fabp7 | Rnf125        | 1  |
| 12834 | 15284 | Fabp7 | EG632778      | -1 |
| 12834 | 15481 | Fabp7 | 1110067D22Rik | 1  |
| 12834 | 15609 | Fabp7 | Mreg          | 1  |
| 12834 | 15631 | Fabp7 | Lpin1         | -1 |
| 12834 | 15665 | Fabp7 | Bicap         | 1  |
| 12834 | 15709 | Fabp7 | Tceal1        | -1 |
| 12834 | 15758 | Fabp7 | Stx4a         | 1  |
| 12834 | 15824 | Fabp7 | D19Erttd721e  | 1  |
| 12834 | 16060 | Fabp7 | Gys2          | -1 |
| 12834 | 16176 | Fabp7 | St3gal5       | -1 |
| 12834 | 16515 | Fabp7 | Gramd4        | 1  |
| 12834 | 16580 | Fabp7 | Tnfaip2       | 1  |
| 12834 | 16647 | Fabp7 | D16H22S680E   | -1 |
| 12834 | 16669 | Fabp7 | Tjp2          | 1  |
| 12834 | 16690 | Fabp7 | Tjp3          | 1  |
| 12834 | 17247 | Fabp7 | A030007L17Rik | 1  |
| 12834 | 17338 | Fabp7 | Mocos         | 1  |
| 12834 | 17342 | Fabp7 | Dhx32         | 1  |
| 12834 | 17583 | Fabp7 | Per2          | -1 |
| 12834 | 17876 | Fabp7 | Tubb4         | 1  |
| 12834 | 17884 | Fabp7 | Lnx2          | 1  |
| 12834 | 17999 | Fabp7 | A730017L22Rik | 1  |
| 12834 | 18147 | Fabp7 | Nhlrc2        | -1 |
| 12834 | 18179 | Fabp7 | Dbp           | -1 |
| 12834 | 18438 | Fabp7 | Map3k7ip2     | 1  |
| 12834 | 18455 | Fabp7 | Mtnr1a        | 1  |
| 12834 | 18498 | Fabp7 | Slc5a6        | -1 |
| 12834 | 18607 | Fabp7 | Acat3         | 1  |
| 12834 | 18756 | Fabp7 | Tspan14       | 1  |
| 12834 | 18827 | Fabp7 | Oprs1         | 1  |
| 12834 | 18990 | Fabp7 | Hal           | 1  |



|       |       |               |               |    |
|-------|-------|---------------|---------------|----|
| 12834 | 19025 | Fabp7         | Slc37a4       | -1 |
| 12834 | 19032 | Fabp7         | Tymp          | 1  |
| 12834 | 19146 | Fabp7         | N4bp2l1       | -1 |
| 12834 | 19217 | Fabp7         | Cyr61         | 1  |
| 12834 | 19234 | Fabp7         | Nrg4          | -1 |
| 12834 | 19277 | Fabp7         | MMT00044927   | -1 |
| 12834 | 19305 | Fabp7         | Azin1         | -1 |
| 12834 | 19465 | Fabp7         | Hacl1         | 1  |
| 12834 | 19532 | Fabp7         | Med8          | 1  |
| 12834 | 19671 | Fabp7         | Upp2          | -1 |
| 12834 | 19701 | Fabp7         | 9930021J17Rik | 1  |
| 12834 | 19723 | Fabp7         | Pfkfb1        | -1 |
| 12834 | 19790 | Fabp7         | Polg2         | -1 |
| 12834 | 20266 | Fabp7         | Insig2        | 1  |
| 12834 | 20345 | Fabp7         | Al842396      | 1  |
| 12834 | 20370 | Fabp7         | Sccpdh        | 1  |
| 12834 | 20745 | Fabp7         | Sord          | -1 |
| 12834 | 20854 | Fabp7         | Commd7        | 1  |
| 12834 | 20999 | Fabp7         | 1110049F12Rik | 1  |
| 12834 | 21142 | Fabp7         | Gm129         | -1 |
| 12834 | 21163 | Fabp7         | Slc16a5       | -1 |
| 12834 | 21188 | Fabp7         | Pnkp          | 1  |
| 12834 | 21295 | Fabp7         | Snf1lk        | -1 |
| 12834 | 21409 | Fabp7         | Gldc          | 1  |
| 12834 | 21805 | Fabp7         | Plk3          | -1 |
| 12834 | 21811 | Fabp7         | Ak3l1         | -1 |
| 12834 | 21903 | Fabp7         | Nr1d1         | 1  |
| 12834 | 21918 | Fabp7         | Snx24         | 1  |
| 12834 | 21969 | Fabp7         | Tk1           | -1 |
| 12834 | 22076 | Fabp7         | Pgm2l1        | -1 |
| 12834 | 22290 | Fabp7         | Tubb2a        | 1  |
| 12834 | 22324 | Fabp7         | MMT00060741   | 1  |
| 12834 | 22476 | Fabp7         | Tspan4        | -1 |
| 12834 | 22627 | Fabp7         | Adck5         | 1  |
| 12834 | 22630 | Fabp7         | MMT00034355   | 1  |
| 12834 | 22936 | Fabp7         | Rhobtb1       | -1 |
| 12834 | 23161 | Fabp7         | Gclc          | 1  |
| 12834 | 23183 | Fabp7         | Nnmt          | -1 |
| 12834 | 23437 | Fabp7         | Efh2          | -1 |
| 12838 | 3743  | Tec           | Corin         | -1 |
| 12866 | 2915  | 4921517L17Rik | Nfs1          | 1  |
| 12866 | 6820  | 4921517L17Rik | MMT00046996   | 1  |
| 12866 | 23005 | 4921517L17Rik | 4930405A21Rik | -1 |
| 12872 | 11043 | Rg9mtd3       | Hsph1         | -1 |
| 12872 | 18373 | Rg9mtd3       | Dnajb1        | -1 |
| 12872 | 20332 | Rg9mtd3       | Stau2         | 1  |
| 12907 | 9077  | Zkscan1       | Cnpy4         | -1 |
| 12907 | 13780 | Zkscan1       | Pilra         | -1 |
| 12907 | 15219 | Zkscan1       | 0910001L09Rik | -1 |
| 12907 | 16451 | Zkscan1       | 2010007H12Rik | 1  |
| 12907 | 17089 | Zkscan1       | Pilrb1        | -1 |
| 12907 | 17158 | Zkscan1       | Zfp113        | 1  |
| 12937 | 3587  | Uhrf2         | MMT00041940   | 1  |
| 12937 | 3913  | Uhrf2         | Mrpl15        | 1  |
| 12937 | 6021  | Uhrf2         | MMT00008784   | 1  |
| 12937 | 7963  | Uhrf2         | Rxrg          | -1 |
| 12937 | 8319  | Uhrf2         | MMT00062477   | 1  |
| 12937 | 8670  | Uhrf2         | MMT00051613   | 1  |
| 12937 | 9258  | Uhrf2         | P4ha1         | 1  |
| 12937 | 11043 | Uhrf2         | Hsph1         | 1  |
| 12937 | 11214 | Uhrf2         | MMT00049207   | 1  |
| 12937 | 15675 | Uhrf2         | MMT00077535   | 1  |
| 12937 | 18373 | Uhrf2         | Dnajb1        | 1  |
| 12937 | 18418 | Uhrf2         | Hspa1b        | 1  |
| 12937 | 20912 | Uhrf2         | Chordc1       | 1  |
| 12943 | 327   | Slc25a27      | H2-Ea         | 1  |
| 12943 | 2938  | Slc25a27      | H2-T23        | 1  |
| 12943 | 9158  | Slc25a27      | Pde9a         | -1 |
| 12943 | 10376 | Slc25a27      | C920025E04Rik | -1 |

|       |       |               |               |    |
|-------|-------|---------------|---------------|----|
| 12943 | 10667 | Slc25a27      | H2-Eb1        | 1  |
| 12943 | 13493 | Slc25a27      | Ring1         | -1 |
| 12943 | 20238 | Slc25a27      | H2-T9         | 1  |
| 12943 | 22822 | Slc25a27      | MMT00013433   | 1  |
| 12958 | 15036 | Itpr2         | 2410004B18Rik | 1  |
| 12960 | 523   | Arrdc4        | 1700040L02Rik | 1  |
| 12960 | 1849  | Arrdc4        | MMT00063181   | -1 |
| 12960 | 9224  | Arrdc4        | MMT00013510   | -1 |
| 12960 | 11043 | Arrdc4        | Hsph1         | -1 |
| 12960 | 12498 | Arrdc4        | Abcg8         | 1  |
| 12960 | 14222 | Arrdc4        | MMT00076410   | 1  |
| 12960 | 15713 | Arrdc4        | Rbm3          | 1  |
| 12960 | 22139 | Arrdc4        | Stip1         | -1 |
| 12960 | 23646 | Arrdc4        | Hsp90ab1      | -1 |
| 12966 | 286   | Slc39a1       | MMT00070509   | 1  |
| 12966 | 1755  | Slc39a1       | Ocel1         | 1  |
| 12966 | 9304  | Slc39a1       | Al449175      | 1  |
| 12966 | 15455 | Slc39a1       | Lsm4          | -1 |
| 12966 | 16617 | Slc39a1       | Sh2d4a        | -1 |
| 12966 | 18886 | Slc39a1       | Slc18a1       | -1 |
| 12984 | 2674  | Cyb5          | 1810005K13Rik | -1 |
| 12984 | 4415  | Cyb5          | B230399E16Rik | 1  |
| 12984 | 8871  | Cyb5          | Gm443         | 1  |
| 12984 | 12984 | Cyb5          | Cyb5          | 1  |
| 12984 | 18592 | Cyb5          | Txn14a        | 1  |
| 12984 | 21162 | Cyb5          | MMT00008728   | -1 |
| 12989 | 337   | 1190002H23Rik | Rasgef1b      | 1  |
| 12989 | 563   | 1190002H23Rik | D4Bwg0951e    | 1  |
| 12989 | 2294  | 1190002H23Rik | AU040829      | 1  |
| 12989 | 2483  | 1190002H23Rik | Gmeb1         | 1  |
| 12989 | 2794  | 1190002H23Rik | Map3k6        | 1  |
| 12989 | 4235  | 1190002H23Rik | Pfkfb3        | 1  |
| 12989 | 5187  | 1190002H23Rik | Speer4f       | 1  |
| 12989 | 6564  | 1190002H23Rik | Cebpd         | 1  |
| 12989 | 8399  | 1190002H23Rik | Herpud1       | 1  |
| 12989 | 11574 | 1190002H23Rik | Gne           | 1  |
| 12989 | 11808 | 1190002H23Rik | Pck1          | 1  |
| 12989 | 12908 | 1190002H23Rik | Jdp2          | 1  |
| 12989 | 13471 | 1190002H23Rik | Cln8          | 1  |
| 12989 | 13489 | 1190002H23Rik | D230025D16Rik | 1  |
| 12989 | 15021 | 1190002H23Rik | Ppargc1a      | 1  |
| 12989 | 15522 | 1190002H23Rik | 1810011O10Rik | 1  |
| 12989 | 15631 | 1190002H23Rik | Lpin1         | 1  |
| 12989 | 15882 | 1190002H23Rik | AA986860      | 1  |
| 12989 | 16176 | 1190002H23Rik | St3gal5       | 1  |
| 12989 | 16580 | 1190002H23Rik | Tnfaip2       | -1 |
| 12989 | 17352 | 1190002H23Rik | Cebpb         | 1  |
| 12989 | 17525 | 1190002H23Rik | Ctgf          | 1  |
| 12989 | 17622 | 1190002H23Rik | Foxo1         | 1  |
| 12989 | 18027 | 1190002H23Rik | 5730403B10Rik | 1  |
| 12989 | 18785 | 1190002H23Rik | Angptl4       | 1  |
| 12989 | 19146 | 1190002H23Rik | N4bp2l1       | 1  |
| 12989 | 20690 | 1190002H23Rik | Zfp276        | 1  |
| 12989 | 21331 | 1190002H23Rik | Slc10a6       | 1  |
| 12989 | 21934 | 1190002H23Rik | ld2           | -1 |
| 12989 | 23202 | 1190002H23Rik | Olf1559       | 1  |
| 13015 | 6021  | D14Ert500e    | MMT00008784   | -1 |
| 13015 | 8670  | D14Ert500e    | MMT00051613   | -1 |
| 13015 | 11214 | D14Ert500e    | MMT00049207   | -1 |
| 13015 | 15675 | D14Ert500e    | MMT00077535   | -1 |
| 13045 | 13045 | A330021E22Rik | A330021E22Rik | 1  |
| 13086 | 18418 | Ccdc79        | Hspa1b        | -1 |
| 13102 | 19436 | Prkaa1        | Dapp1         | 1  |
| 13103 | 11214 | Erlin1        | MMT00049207   | 1  |
| 13115 | 16251 | B230120H23Rik | G6pc          | -1 |
| 13117 | 2325  | Tmprss5       | H2-K1         | 1  |
| 13117 | 2938  | Tmprss5       | H2-T23        | 1  |
| 13117 | 3599  | Tmprss5       | MMT00035426   | -1 |
| 13117 | 20238 | Tmprss5       | H2-T9         | 1  |

|       |       |               |               |    |
|-------|-------|---------------|---------------|----|
| 13117 | 22822 | Tmprss5       | MMT00013433   | 1  |
| 13136 | 17135 | Itgb1bp3      | Mum1          | -1 |
| 13137 | 1648  | 2610301G19Rik | Gnpnat1       | 1  |
| 13141 | 7436  | MMT00071569   | 1700063K16Rik | 1  |
| 13141 | 11966 | MMT00071569   | Zfp280b       | 1  |
| 13141 | 12861 | MMT00071569   | Rhcg          | 1  |
| 13141 | 19436 | MMT00071569   | Dapp1         | 1  |
| 13149 | 11406 | Ifi203        | Ifi203        | 1  |
| 13149 | 13149 | Ifi203        | Ifi203        | 1  |
| 13149 | 15844 | Ifi203        | Klhdc9        | -1 |
| 13201 | 19436 | Rbl2          | Dapp1         | 1  |
| 13207 | 15618 | Sptlc2        | Sel1l         | -1 |
| 13214 | 8670  | Slc12a8       | MMT00051613   | -1 |
| 13214 | 15675 | Slc12a8       | MMT00077535   | -1 |
| 13218 | 3329  | C330043M08Rik | Car5a         | 1  |
| 13218 | 7861  | C330043M08Rik | Klhdc4        | -1 |
| 13218 | 12915 | C330043M08Rik | Slc7a5        | 1  |
| 13218 | 13218 | C330043M08Rik | C330043M08Rik | 1  |
| 13218 | 22894 | C330043M08Rik | MMT00016059   | -1 |
| 13285 | 6021  | Cd276         | MMT00008784   | -1 |
| 13285 | 8670  | Cd276         | MMT00051613   | -1 |
| 13285 | 9258  | Cd276         | P4ha1         | -1 |
| 13285 | 11214 | Cd276         | MMT00049207   | -1 |
| 13285 | 13285 | Cd276         | Cd276         | 1  |
| 13285 | 15675 | Cd276         | MMT00077535   | -1 |
| 13285 | 18373 | Cd276         | Dnajb1        | -1 |
| 13309 | 143   | Tgtp          | Gvin1         | 1  |
| 13309 | 1533  | Tgtp          | BC013712      | 1  |
| 13309 | 2058  | Tgtp          | Hk3           | 1  |
| 13309 | 2200  | Tgtp          | BC006779      | 1  |
| 13309 | 2224  | Tgtp          | Oasl2         | 1  |
| 13309 | 3683  | Tgtp          | Oas2          | 1  |
| 13309 | 4426  | Tgtp          | ligp2         | 1  |
| 13309 | 4508  | Tgtp          | Ifit1         | 1  |
| 13309 | 6072  | Tgtp          | C1qc          | 1  |
| 13309 | 6098  | Tgtp          | Ncf4          | 1  |
| 13309 | 6595  | Tgtp          | Oas1a         | 1  |
| 13309 | 6824  | Tgtp          | Irf7          | 1  |
| 13309 | 7069  | Tgtp          | Ube1l         | 1  |
| 13309 | 7105  | Tgtp          | Plac8         | 1  |
| 13309 | 7316  | Tgtp          | Ifi204        | 1  |
| 13309 | 7336  | Tgtp          | Cd5l          | 1  |
| 13309 | 8800  | Tgtp          | Rnf213        | 1  |
| 13309 | 9401  | Tgtp          | Fcgr4         | 1  |
| 13309 | 9847  | Tgtp          | Ifi27         | 1  |
| 13309 | 10109 | Tgtp          | Gbp3          | 1  |
| 13309 | 10504 | Tgtp          | Ripk3         | 1  |
| 13309 | 11009 | Tgtp          | MMT00008885   | 1  |
| 13309 | 11204 | Tgtp          | Al451617      | 1  |
| 13309 | 11265 | Tgtp          | Irgm          | 1  |
| 13309 | 12126 | Tgtp          | Znfx1         | 1  |
| 13309 | 12312 | Tgtp          | Ms4a6d        | 1  |
| 13309 | 12398 | Tgtp          | Ifi44         | 1  |
| 13309 | 12600 | Tgtp          | Ifi204        | 1  |
| 13309 | 12969 | Tgtp          | Xaf1          | 1  |
| 13309 | 13181 | Tgtp          | Lcp2          | 1  |
| 13309 | 13309 | Tgtp          | Tgtp          | 1  |
| 13309 | 13522 | Tgtp          | Sifn5         | 1  |
| 13309 | 13527 | Tgtp          | Ctss          | 1  |
| 13309 | 14258 | Tgtp          | Ifi47         | 1  |
| 13309 | 14506 | Tgtp          | Slc15a3       | 1  |
| 13309 | 14883 | Tgtp          | Itgal         | 1  |
| 13309 | 15074 | Tgtp          | Usp18         | 1  |
| 13309 | 16521 | Tgtp          | Adar          | 1  |
| 13309 | 16988 | Tgtp          | Clec4f        | 1  |
| 13309 | 17197 | Tgtp          | Igtp          | 1  |
| 13309 | 18174 | Tgtp          | Stat2         | 1  |
| 13309 | 18186 | Tgtp          | Parp14        | 1  |
| 13309 | 19189 | Tgtp          | Sp100         | 1  |

|       |       |               |               |    |
|-------|-------|---------------|---------------|----|
| 13309 | 19738 | Tgtp          | Lgals3bp      | 1  |
| 13309 | 20321 | Tgtp          | Ms4a6b        | 1  |
| 13309 | 20431 | Tgtp          | Slc7a7        | 1  |
| 13309 | 20997 | Tgtp          | MMT00028135   | 1  |
| 13309 | 21351 | Tgtp          | Shisa5        | 1  |
| 13309 | 21549 | Tgtp          | Rtp4          | 1  |
| 13309 | 21824 | Tgtp          | 5830443L24Rik | 1  |
| 13309 | 22037 | Tgtp          | Oas1g         | 1  |
| 13309 | 23208 | Tgtp          | Hck           | 1  |
| 13309 | 23450 | Tgtp          | D12Ert647e    | 1  |
| 13311 | 19436 | Pr13c1        | Dapp1         | 1  |
| 13327 | 14969 | Vmn2r95       | EG245506      | -1 |
| 13355 | 2915  | Foxs1         | Nfs1          | -1 |
| 13355 | 3214  | Foxs1         | Dnmt3b        | 1  |
| 13355 | 6059  | Foxs1         | Dsn1          | 1  |
| 13355 | 6231  | Foxs1         | 9030622O22Rik | 1  |
| 13355 | 6820  | Foxs1         | MMT00046996   | -1 |
| 13355 | 7610  | Foxs1         | Scand1        | -1 |
| 13355 | 13355 | Foxs1         | Foxs1         | 1  |
| 13355 | 22740 | Foxs1         | Manbal        | 1  |
| 13355 | 23005 | Foxs1         | 4930405A21Rik | 1  |
| 13357 | 13357 | Rpp14         | Rpp14         | 1  |
| 13389 | 3512  | Six6os1       | 6530401N04Rik | 1  |
| 13389 | 6755  | Six6os1       | Wdr22         | -1 |
| 13389 | 9022  | Six6os1       | Plek2         | 1  |
| 13389 | 13988 | Six6os1       | Cntnap2       | -1 |
| 13389 | 20187 | Six6os1       | Gphn          | 1  |
| 13389 | 20292 | Six6os1       | 1810048J11Rik | -1 |
| 13389 | 20393 | Six6os1       | 1110018G07Rik | 1  |
| 13390 | 9258  | Ddx31         | P4ha1         | 1  |
| 13390 | 15675 | Ddx31         | MMT00077535   | 1  |
| 13390 | 18373 | Ddx31         | Dnajb1        | 1  |
| 13417 | 15569 | 1700025G04Rik | BC003331      | 1  |
| 13475 | 13475 | Morn2         | Morn2         | 1  |
| 13487 | 3208  | A230051G13Rik | 4930511111Rik | 1  |
| 13487 | 7436  | A230051G13Rik | 1700063K16Rik | 1  |
| 13487 | 11966 | A230051G13Rik | Zfp280b       | 1  |
| 13487 | 12861 | A230051G13Rik | Rhcg          | 1  |
| 13487 | 19436 | A230051G13Rik | Dapp1         | 1  |
| 13493 | 327   | Ring1         | H2-Ea         | 1  |
| 13493 | 2325  | Ring1         | H2-K1         | 1  |
| 13493 | 2938  | Ring1         | H2-T23        | 1  |
| 13493 | 7088  | Ring1         | Slc37a1       | 1  |
| 13493 | 10667 | Ring1         | H2-Eb1        | 1  |
| 13493 | 13493 | Ring1         | Ring1         | -1 |
| 13493 | 20238 | Ring1         | H2-T9         | 1  |
| 13493 | 22822 | Ring1         | MMT00013433   | 1  |
| 13496 | 19436 | H1fnt         | Dapp1         | 1  |
| 13527 | 3753  | Ctss          | Setdb1        | 1  |
| 13554 | 13554 | Aqr           | Aqr           | 1  |
| 13563 | 20913 | 9930023K05Rik | Osgepl1       | 1  |
| 13571 | 18418 | Samd8         | Hspa1b        | 1  |
| 13581 | 4626  | Srxn1         | 2310046K01Rik | 1  |
| 13581 | 13581 | Srxn1         | Srxn1         | 1  |
| 13590 | 5339  | Mcart6        | 4930488E11Rik | 1  |
| 13615 | 3061  | Arl16         | Scarf2        | -1 |
| 13615 | 3119  | Arl16         | Mapk10        | -1 |
| 13615 | 5613  | Arl16         | Mrpl12        | 1  |
| 13615 | 6017  | Arl16         | MMT00018015   | 1  |
| 13615 | 6426  | Arl16         | Mfsd4         | -1 |
| 13615 | 6846  | Arl16         | Olfr1402      | -1 |
| 13615 | 8791  | Arl16         | Sectm1a       | -1 |
| 13615 | 10214 | Arl16         | Sectm1b       | -1 |
| 13615 | 12546 | Arl16         | Cd7           | -1 |
| 13615 | 13615 | Arl16         | Arl16         | 1  |
| 13615 | 15016 | Arl16         | MMT00074608   | -1 |
| 13615 | 16613 | Arl16         | 1110031I02Rik | -1 |
| 13615 | 17333 | Arl16         | Slc25a10      | 1  |
| 13615 | 17680 | Arl16         | 1700069L16Rik | -1 |

|       |       |               |               |    |
|-------|-------|---------------|---------------|----|
| 13615 | 17792 | Arl16         | Vmn2r79       | -1 |
| 13615 | 17897 | Arl16         | Gm1019        | -1 |
| 13615 | 22557 | Arl16         | P4hb          | 1  |
| 13648 | 6931  | Dap           | Hrsp12        | 1  |
| 13648 | 13648 | Dap           | Dap           | 1  |
| 13648 | 17082 | Dap           | MMT00013155   | 1  |
| 13648 | 20209 | Dap           | 5730557B15Rik | 1  |
| 13648 | 20871 | Dap           | Pop1          | -1 |
| 13648 | 22362 | Dap           | Laptm4b       | 1  |
| 13656 | 1957  | Ly86          | Mansc1        | 1  |
| 13656 | 10189 | Ly86          | Cage1         | -1 |
| 13676 | 19436 | MMT00010979   | Dapp1         | 1  |
| 13732 | 286   | Tpm4          | MMT00070509   | -1 |
| 13732 | 403   | Tpm4          | Leprot1       | 1  |
| 13732 | 769   | Tpm4          | 5430437P03Rik | 1  |
| 13732 | 1755  | Tpm4          | Ocel1         | -1 |
| 13732 | 2749  | Tpm4          | Naf1          | 1  |
| 13732 | 3055  | Tpm4          | Pde4c         | -1 |
| 13732 | 5433  | Tpm4          | 2410004L22Rik | 1  |
| 13732 | 6760  | Tpm4          | 2810428I15Rik | -1 |
| 13732 | 9304  | Tpm4          | Al449175      | -1 |
| 13732 | 9931  | Tpm4          | Glt25d1       | 1  |
| 13732 | 10195 | Tpm4          | Klf1          | -1 |
| 13732 | 13732 | Tpm4          | Tpm4          | 1  |
| 13732 | 13774 | Tpm4          | Gdf15         | 1  |
| 13732 | 15094 | Tpm4          | Pbx4          | 1  |
| 13732 | 15455 | Tpm4          | Lsm4          | 1  |
| 13732 | 16617 | Tpm4          | Sh2d4a        | 1  |
| 13732 | 16849 | Tpm4          | Trmt1         | 1  |
| 13732 | 16858 | Tpm4          | Tmem38a       | 1  |
| 13732 | 18886 | Tpm4          | Slc18a1       | 1  |
| 13732 | 20484 | Tpm4          | Ces1          | 1  |
| 13741 | 3587  | Hspa4l        | MMT00041940   | 1  |
| 13741 | 3913  | Hspa4l        | Mrpl15        | 1  |
| 13741 | 4805  | Hspa4l        | Hspb1         | 1  |
| 13741 | 4950  | Hspa4l        | Dnajb10       | 1  |
| 13741 | 6021  | Hspa4l        | MMT00008784   | 1  |
| 13741 | 7731  | Hspa4l        | 1500001M20Rik | -1 |
| 13741 | 7798  | Hspa4l        | MMT00077178   | 1  |
| 13741 | 8670  | Hspa4l        | MMT00051613   | 1  |
| 13741 | 9067  | Hspa4l        | Tra2a         | 1  |
| 13741 | 9258  | Hspa4l        | P4ha1         | 1  |
| 13741 | 11043 | Hspa4l        | Hsph1         | 1  |
| 13741 | 11208 | Hspa4l        | Hspb1         | 1  |
| 13741 | 11214 | Hspa4l        | MMT00049207   | 1  |
| 13741 | 11379 | Hspa4l        | Dnttip1       | -1 |
| 13741 | 12498 | Hspa4l        | Abcg8         | -1 |
| 13741 | 13521 | Hspa4l        | Ears2         | 1  |
| 13741 | 13741 | Hspa4l        | Hspa4l        | 1  |
| 13741 | 15476 | Hspa4l        | Fem1b         | -1 |
| 13741 | 15675 | Hspa4l        | MMT00077535   | 1  |
| 13741 | 16750 | Hspa4l        | Casp6         | -1 |
| 13741 | 16754 | Hspa4l        | Hsp90aa1      | 1  |
| 13741 | 18099 | Hspa4l        | Nfx1          | -1 |
| 13741 | 20194 | Hspa4l        | Pnlcd1        | -1 |
| 13741 | 20912 | Hspa4l        | Chordc1       | 1  |
| 13741 | 21352 | Hspa4l        | Dtnbp1        | -1 |
| 13741 | 21389 | Hspa4l        | Odf2          | -1 |
| 13741 | 22139 | Hspa4l        | Stip1         | 1  |
| 13741 | 22216 | Hspa4l        | Sp5           | -1 |
| 13741 | 22751 | Hspa4l        | Nosip         | -1 |
| 13741 | 23646 | Hspa4l        | Hsp90ab1      | 1  |
| 13742 | 3208  | 1700024P16Rik | 4930511I11Rik | 1  |
| 13742 | 5694  | 1700024P16Rik | Sp7           | 1  |
| 13742 | 7436  | 1700024P16Rik | 1700063K16Rik | 1  |
| 13742 | 11966 | 1700024P16Rik | Zfp280b       | 1  |
| 13742 | 12861 | 1700024P16Rik | Rhcg          | 1  |
| 13742 | 19436 | 1700024P16Rik | Dapp1         | 1  |
| 13747 | 614   | Entpd2        | C8g           | 1  |

|       |       |               |               |    |
|-------|-------|---------------|---------------|----|
| 13747 | 19678 | Entpd2        | Scn11a        | 1  |
| 13767 | 663   | Kcnk15        | Muc19         | 1  |
| 13767 | 3208  | Kcnk15        | 4930511111Rik | 1  |
| 13767 | 7436  | Kcnk15        | 1700063K16Rik | 1  |
| 13767 | 11966 | Kcnk15        | Zfp280b       | 1  |
| 13767 | 12861 | Kcnk15        | Rhcg          | 1  |
| 13767 | 19436 | Kcnk15        | Dapp1         | 1  |
| 13780 | 9077  | Pilra         | Cnpy4         | -1 |
| 13780 | 10995 | Pilra         | Ap4m1         | 1  |
| 13780 | 13780 | Pilra         | Pilra         | -1 |
| 13780 | 15219 | Pilra         | 0910001L09Rik | -1 |
| 13780 | 16451 | Pilra         | 2010007H12Rik | 1  |
| 13780 | 17089 | Pilra         | Pilrb1        | -1 |
| 13780 | 17158 | Pilra         | Zfp113        | 1  |
| 13780 | 18881 | Pilra         | Cops6         | 1  |
| 13780 | 19502 | Pilra         | Fbxo24        | 1  |
| 13800 | 19436 | Lrp5          | Dapp1         | 1  |
| 13810 | 1241  | 1110036O03Rik | Meox1         | 1  |
| 13810 | 1654  | 1110036O03Rik | Dhx58         | -1 |
| 13810 | 1853  | 1110036O03Rik | Stat5a        | -1 |
| 13810 | 2456  | 1110036O03Rik | Mrpl10        | -1 |
| 13810 | 6376  | 1110036O03Rik | Nle1          | -1 |
| 13810 | 12736 | 1110036O03Rik | Stat3         | -1 |
| 13810 | 13810 | 1110036O03Rik | 1110036O03Rik | 1  |
| 13810 | 14384 | 1110036O03Rik | Dnajc7        | 1  |
| 13813 | 13813 | Ktelc1        | Ktelc1        | 1  |
| 13813 | 14043 | Ktelc1        | 4930455C21Rik | -1 |
| 13860 | 11966 | Cpt1b         | Zfp280b       | 1  |
| 13860 | 19436 | Cpt1b         | Dapp1         | 1  |
| 13862 | 9304  | Myh15         | Al449175      | 1  |
| 13862 | 18886 | Myh15         | Slc18a1       | -1 |
| 13883 | 6021  | EG627788      | MMT00008784   | 1  |
| 13883 | 15675 | EG627788      | MMT00077535   | 1  |
| 13890 | 3208  | Olf1263       | 4930511111Rik | 1  |
| 13890 | 7436  | Olf1263       | 1700063K16Rik | 1  |
| 13890 | 11966 | Olf1263       | Zfp280b       | 1  |
| 13890 | 19436 | Olf1263       | Dapp1         | 1  |
| 13946 | 9230  | Slc35b2       | 1700027N10Rik | 1  |
| 13946 | 14027 | Slc35b2       | Rpo1-1        | -1 |
| 13946 | 15318 | Slc35b2       | Aars2         | 1  |
| 13946 | 18772 | Slc35b2       | BC048355      | 1  |
| 13979 | 3743  | Ociad2        | Corin         | -1 |
| 14014 | 499   | MMT00008376   | 2310057J16Rik | 1  |
| 14014 | 1453  | MMT00008376   | Gfod2         | 1  |
| 14014 | 1849  | MMT00008376   | MMT00063181   | 1  |
| 14014 | 3587  | MMT00008376   | MMT00041940   | 1  |
| 14014 | 3799  | MMT00008376   | Serpinh1      | 1  |
| 14014 | 3913  | MMT00008376   | Mrpl15        | 1  |
| 14014 | 4950  | MMT00008376   | Dnajb10       | 1  |
| 14014 | 6021  | MMT00008376   | MMT00008784   | 1  |
| 14014 | 7731  | MMT00008376   | 1500001M20Rik | -1 |
| 14014 | 8670  | MMT00008376   | MMT00051613   | 1  |
| 14014 | 9224  | MMT00008376   | MMT00013510   | 1  |
| 14014 | 9279  | MMT00008376   | MMT00066808   | 1  |
| 14014 | 9680  | MMT00008376   | Ahsa1         | 1  |
| 14014 | 11043 | MMT00008376   | Hsph1         | 1  |
| 14014 | 11214 | MMT00008376   | MMT00049207   | 1  |
| 14014 | 11818 | MMT00008376   | MMT00048396   | 1  |
| 14014 | 12960 | MMT00008376   | Arrdc4        | -1 |
| 14014 | 13052 | MMT00008376   | Tnfrsf19      | -1 |
| 14014 | 13521 | MMT00008376   | Ears2         | 1  |
| 14014 | 15476 | MMT00008376   | Fem1b         | -1 |
| 14014 | 15675 | MMT00008376   | MMT00077535   | 1  |
| 14014 | 17595 | MMT00008376   | MMT00048325   | 1  |
| 14014 | 21389 | MMT00008376   | Odf2          | -1 |
| 14014 | 22139 | MMT00008376   | Stip1         | 1  |
| 14014 | 23471 | MMT00008376   | Ddx46         | -1 |
| 14014 | 23646 | MMT00008376   | Hsp90ab1      | 1  |
| 14027 | 9230  | Rpo1-1        | 1700027N10Rik | -1 |

|       |       |               |               |    |
|-------|-------|---------------|---------------|----|
| 14027 | 14027 | Rpo1-1        | Rpo1-1        | 1  |
| 14027 | 15318 | Rpo1-1        | Aars2         | -1 |
| 14027 | 18574 | Rpo1-1        | Parc          | 1  |
| 14027 | 18772 | Rpo1-1        | BC048355      | -1 |
| 14027 | 20100 | Rpo1-1        | Guca1b        | 1  |
| 14035 | 3208  | Lrrc52        | 4930511111Rik | 1  |
| 14035 | 11966 | Lrrc52        | Zfp280b       | 1  |
| 14035 | 12861 | Lrrc52        | Rhcg          | 1  |
| 14035 | 19436 | Lrrc52        | Dapp1         | 1  |
| 14043 | 8637  | 4930455C21Rik | Tnp02         | 1  |
| 14043 | 13813 | 4930455C21Rik | Ktelc1        | -1 |
| 14043 | 14043 | 4930455C21Rik | 4930455C21Rik | 1  |
| 14045 | 14045 | Rps4y2        | Rps4y2        | 1  |
| 14050 | 11937 | Il12rb1       | Snx10         | 1  |
| 14075 | 5694  | E030049G20Rik | Sp7           | 1  |
| 14075 | 7436  | E030049G20Rik | 1700063K16Rik | 1  |
| 14075 | 11966 | E030049G20Rik | Zfp280b       | 1  |
| 14084 | 16295 | D530033C11Rik | Nlrp14        | -1 |
| 14084 | 21095 | D530033C11Rik | 9130401M01Rik | -1 |
| 14085 | 8807  | Cdkl2         | Ankrd56       | -1 |
| 14095 | 3587  | Nav1          | MMT00041940   | 1  |
| 14095 | 8319  | Nav1          | MMT00062477   | 1  |
| 14095 | 8670  | Nav1          | MMT00051613   | 1  |
| 14095 | 9258  | Nav1          | P4ha1         | 1  |
| 14095 | 11214 | Nav1          | MMT00049207   | 1  |
| 14095 | 18418 | Nav1          | Hspa1b        | 1  |
| 14108 | 3496  | Polr3b        | Slc41a2       | 1  |
| 14108 | 12055 | Polr3b        | 1810008A18Rik | -1 |
| 14132 | 2945  | Glo1          | MMT00005190   | -1 |
| 14132 | 5014  | Glo1          | MMT00017503   | -1 |
| 14132 | 8341  | Glo1          | MMT00017270   | -1 |
| 14132 | 14132 | Glo1          | Glo1          | 1  |
| 14134 | 740   | Phf10         | Txnrd3        | -1 |
| 14134 | 902   | Phf10         | Slc30a1       | -1 |
| 14134 | 1849  | Phf10         | MMT00063181   | 1  |
| 14134 | 3587  | Phf10         | MMT00041940   | 1  |
| 14134 | 3799  | Phf10         | Serpinh1      | 1  |
| 14134 | 3849  | Phf10         | MMT00047578   | 1  |
| 14134 | 4192  | Phf10         | Zranb1        | -1 |
| 14134 | 4612  | Phf10         | Hspa5         | 1  |
| 14134 | 4780  | Phf10         | Sfrs5         | -1 |
| 14134 | 4950  | Phf10         | Dnajb10       | 1  |
| 14134 | 4966  | Phf10         | Zscan20       | 1  |
| 14134 | 6021  | Phf10         | MMT00008784   | 1  |
| 14134 | 6126  | Phf10         | MMT00067575   | 1  |
| 14134 | 7389  | Phf10         | Sfrs5         | -1 |
| 14134 | 7731  | Phf10         | 1500001M20Rik | -1 |
| 14134 | 7865  | Phf10         | MMT00062659   | -1 |
| 14134 | 8319  | Phf10         | MMT00062477   | 1  |
| 14134 | 8670  | Phf10         | MMT00051613   | 1  |
| 14134 | 8891  | Phf10         | MMT00071061   | 1  |
| 14134 | 9067  | Phf10         | Tra2a         | 1  |
| 14134 | 9258  | Phf10         | P4ha1         | 1  |
| 14134 | 9899  | Phf10         | D13Wsu177e    | 1  |
| 14134 | 11043 | Phf10         | Hsph1         | 1  |
| 14134 | 11201 | Phf10         | Sunc1         | -1 |
| 14134 | 11214 | Phf10         | MMT00049207   | 1  |
| 14134 | 11379 | Phf10         | Dnttip1       | -1 |
| 14134 | 11818 | Phf10         | MMT00048396   | 1  |
| 14134 | 13052 | Phf10         | Tnfrsf19      | -1 |
| 14134 | 14135 | Phf10         | Eepd1         | -1 |
| 14134 | 14298 | Phf10         | Atp2a2        | 1  |
| 14134 | 14681 | Phf10         | Alg12         | 1  |
| 14134 | 15476 | Phf10         | Fem1b         | -1 |
| 14134 | 15675 | Phf10         | MMT00077535   | 1  |
| 14134 | 17595 | Phf10         | MMT00048325   | 1  |
| 14134 | 18099 | Phf10         | Nfx1          | -1 |
| 14134 | 18215 | Phf10         | Gpr146        | -1 |
| 14134 | 18373 | Phf10         | Dnajb1        | 1  |

|       |       |               |               |    |
|-------|-------|---------------|---------------|----|
| 14134 | 18418 | Phf10         | Hspa1b        | 1  |
| 14134 | 20194 | Phf10         | Pnlcd1        | -1 |
| 14134 | 20332 | Phf10         | Stau2         | -1 |
| 14134 | 20535 | Phf10         | Rbm4          | 1  |
| 14134 | 20912 | Phf10         | Chordc1       | 1  |
| 14134 | 20965 | Phf10         | Usp28         | -1 |
| 14134 | 21389 | Phf10         | Odf2          | -1 |
| 14134 | 21775 | Phf10         | MMT00051649   | -1 |
| 14134 | 22139 | Phf10         | Stip1         | 1  |
| 14134 | 22751 | Phf10         | Nosip         | -1 |
| 14134 | 23646 | Phf10         | Hsp90ab1      | 1  |
| 14135 | 250   | Eepd1         | Tubb2a-ps2    | 1  |
| 14135 | 609   | Eepd1         | MMT00060868   | 1  |
| 14135 | 1767  | Eepd1         | BC016495      | -1 |
| 14135 | 3804  | Eepd1         | MMT00015534   | 1  |
| 14135 | 4286  | Eepd1         | Ptp4a1        | -1 |
| 14135 | 17876 | Eepd1         | Tubb4         | 1  |
| 14135 | 22290 | Eepd1         | Tubb2a        | 1  |
| 14135 | 22630 | Eepd1         | MMT00034355   | 1  |
| 14139 | 6021  | 2410005O16Rik | MMT00008784   | -1 |
| 14139 | 8670  | 2410005O16Rik | MMT00051613   | -1 |
| 14139 | 11214 | 2410005O16Rik | MMT00049207   | -1 |
| 14139 | 15675 | 2410005O16Rik | MMT00077535   | -1 |
| 14139 | 18373 | 2410005O16Rik | Dnajb1        | -1 |
| 14145 | 3654  | Sgsm3         | St13          | -1 |
| 14149 | 663   | BC048562      | Muc19         | 1  |
| 14149 | 3208  | BC048562      | 4930511I11Rik | 1  |
| 14149 | 5694  | BC048562      | Sp7           | 1  |
| 14149 | 7436  | BC048562      | 1700063K16Rik | 1  |
| 14149 | 10055 | BC048562      | Tpte          | 1  |
| 14149 | 11966 | BC048562      | Zfp280b       | 1  |
| 14149 | 12861 | BC048562      | Rhcg          | 1  |
| 14149 | 19436 | BC048562      | Dapp1         | 1  |
| 14149 | 19672 | BC048562      | Cldn19        | 1  |
| 14149 | 22125 | BC048562      | Gab1          | 1  |
| 14180 | 14180 | Xlr3c         | Xlr3c         | 1  |
| 14188 | 1702  | Ttc8          | Galc          | 1  |
| 14188 | 7099  | Ttc8          | Kcnk10        | 1  |
| 14188 | 14188 | Ttc8          | Ttc8          | 1  |
| 14190 | 7088  | Ppil1         | Slc37a1       | -1 |
| 14190 | 12335 | Ppil1         | Plcb4         | -1 |
| 14190 | 14132 | Ppil1         | Glo1          | -1 |
| 14202 | 3587  | Fnbp4         | MMT00041940   | -1 |
| 14202 | 6021  | Fnbp4         | MMT00008784   | -1 |
| 14202 | 8670  | Fnbp4         | MMT00051613   | -1 |
| 14202 | 11214 | Fnbp4         | MMT00049207   | -1 |
| 14202 | 15675 | Fnbp4         | MMT00077535   | -1 |
| 14202 | 18373 | Fnbp4         | Dnajb1        | -1 |
| 14204 | 12861 | Gm317         | Rhcg          | 1  |
| 14222 | 499   | MMT00076410   | 2310057J16Rik | -1 |
| 14222 | 523   | MMT00076410   | 1700040L02Rik | 1  |
| 14222 | 1411  | MMT00076410   | Tada3l        | -1 |
| 14222 | 1453  | MMT00076410   | Gfod2         | -1 |
| 14222 | 1697  | MMT00076410   | Sf4           | -1 |
| 14222 | 1849  | MMT00076410   | MMT00063181   | -1 |
| 14222 | 2315  | MMT00076410   | Abcb1a        | 1  |
| 14222 | 3376  | MMT00076410   | Trip4         | 1  |
| 14222 | 3587  | MMT00076410   | MMT00041940   | -1 |
| 14222 | 3799  | MMT00076410   | Serpinh1      | -1 |
| 14222 | 3913  | MMT00076410   | Mrpl15        | -1 |
| 14222 | 4192  | MMT00076410   | Zranb1        | 1  |
| 14222 | 4298  | MMT00076410   | St3gal1       | -1 |
| 14222 | 4355  | MMT00076410   | Pard6a        | -1 |
| 14222 | 4950  | MMT00076410   | Dnajb10       | -1 |
| 14222 | 4966  | MMT00076410   | Zscan20       | -1 |
| 14222 | 5374  | MMT00076410   | Chka          | -1 |
| 14222 | 6021  | MMT00076410   | MMT00008784   | -1 |
| 14222 | 6268  | MMT00076410   | Slc45a3       | -1 |
| 14222 | 7165  | MMT00076410   | Nt5m          | -1 |



|       |       |               |               |    |
|-------|-------|---------------|---------------|----|
| 14222 | 7731  | MMT00076410   | 1500001M20Rik | 1  |
| 14222 | 8670  | MMT00076410   | MMT00051613   | -1 |
| 14222 | 9067  | MMT00076410   | Tra2a         | -1 |
| 14222 | 9224  | MMT00076410   | MMT00013510   | -1 |
| 14222 | 9258  | MMT00076410   | P4ha1         | -1 |
| 14222 | 9279  | MMT00076410   | MMT00066808   | -1 |
| 14222 | 9672  | MMT00076410   | Tmem101       | -1 |
| 14222 | 9831  | MMT00076410   | Nedd4l        | -1 |
| 14222 | 9899  | MMT00076410   | D13Wsu177e    | -1 |
| 14222 | 10267 | MMT00076410   | Setdb2        | 1  |
| 14222 | 11043 | MMT00076410   | Hsph1         | -1 |
| 14222 | 11201 | MMT00076410   | Sunc1         | 1  |
| 14222 | 11214 | MMT00076410   | MMT00049207   | -1 |
| 14222 | 11412 | MMT00076410   | Abcg5         | 1  |
| 14222 | 11818 | MMT00076410   | MMT00048396   | -1 |
| 14222 | 12498 | MMT00076410   | Abcg8         | 1  |
| 14222 | 12513 | MMT00076410   | Whsc2         | -1 |
| 14222 | 12905 | MMT00076410   | Nfil3         | -1 |
| 14222 | 13052 | MMT00076410   | Tnfrsf19      | 1  |
| 14222 | 14222 | MMT00076410   | MMT00076410   | 1  |
| 14222 | 14298 | MMT00076410   | Atp2a2        | -1 |
| 14222 | 14333 | MMT00076410   | Zcchc17       | -1 |
| 14222 | 15014 | MMT00076410   | Mrp63         | -1 |
| 14222 | 15476 | MMT00076410   | Fem1b         | 1  |
| 14222 | 15675 | MMT00076410   | MMT00077535   | -1 |
| 14222 | 15713 | MMT00076410   | Rbm3          | 1  |
| 14222 | 16043 | MMT00076410   | Sult1c2       | 1  |
| 14222 | 17449 | MMT00076410   | Zfp296        | -1 |
| 14222 | 17712 | MMT00076410   | Nup62         | -1 |
| 14222 | 18099 | MMT00076410   | Nfx1          | 1  |
| 14222 | 18373 | MMT00076410   | Dnajb1        | -1 |
| 14222 | 18418 | MMT00076410   | Hspa1b        | -1 |
| 14222 | 20965 | MMT00076410   | Usp28         | 1  |
| 14222 | 20980 | MMT00076410   | Taf12         | -1 |
| 14222 | 21389 | MMT00076410   | Odf2          | 1  |
| 14222 | 21556 | MMT00076410   | 4930579F01Rik | 1  |
| 14222 | 22139 | MMT00076410   | Stip1         | -1 |
| 14222 | 22272 | MMT00076410   | Vprep1        | -1 |
| 14222 | 23646 | MMT00076410   | Hsp90ab1      | -1 |
| 14233 | 2794  | Fgfrl1        | Map3k6        | -1 |
| 14233 | 6386  | Fgfrl1        | Por           | -1 |
| 14233 | 8428  | Fgfrl1        | Sorbs3        | -1 |
| 14233 | 11129 | Fgfrl1        | Ankhd1        | -1 |
| 14233 | 11807 | Fgfrl1        | Fbxo31        | -1 |
| 14233 | 15631 | Fgfrl1        | Lpin1         | -1 |
| 14233 | 15709 | Fgfrl1        | Tceal1        | -1 |
| 14233 | 16176 | Fgfrl1        | St3gal5       | -1 |
| 14233 | 18027 | Fgfrl1        | 5730403B10Rik | -1 |
| 14242 | 11966 | Prss29        | Zfp280b       | 1  |
| 14242 | 19436 | Prss29        | Dapp1         | 1  |
| 14258 | 12398 | Ifi47         | Ifi44         | 1  |
| 14258 | 12600 | Ifi47         | Ifi204        | 1  |
| 14258 | 21549 | Ifi47         | Rtp4          | 1  |
| 14266 | 12173 | Sox13         | Acbd6         | -1 |
| 14266 | 14266 | Sox13         | Sox13         | 1  |
| 14266 | 17461 | Sox13         | Ripk5         | 1  |
| 14281 | 10711 | 5031414D18Rik | 1700108F19Rik | -1 |
| 14281 | 13588 | 5031414D18Rik | MMT00042387   | -1 |
| 14281 | 17321 | 5031414D18Rik | Hepacam       | -1 |
| 14307 | 2932  | Kcnj8         | Slco1a1       | -1 |
| 14307 | 6765  | Kcnj8         | Ldhd          | -1 |
| 14307 | 14557 | Kcnj8         | Pyroxd1       | 1  |
| 14307 | 17391 | Kcnj8         | C530028O21Rik | 1  |
| 14313 | 11966 | Tnk1          | Zfp280b       | 1  |
| 14313 | 19436 | Tnk1          | Dapp1         | 1  |
| 14316 | 3208  | MMT00012375   | 4930511111Rik | 1  |
| 14316 | 11966 | MMT00012375   | Zfp280b       | 1  |
| 14316 | 12861 | MMT00012375   | Rhcg          | 1  |
| 14316 | 19436 | MMT00012375   | Dapp1         | 1  |

|       |       |               |               |    |
|-------|-------|---------------|---------------|----|
| 14322 | 2938  | Bat1a         | H2-T23        | -1 |
| 14322 | 13493 | Bat1a         | Ring1         | 1  |
| 14322 | 22822 | Bat1a         | MMT00013433   | -1 |
| 14342 | 3139  | 4930412F15Rik | Gba2          | 1  |
| 14342 | 3610  | 4930412F15Rik | Rnf38         | 1  |
| 14342 | 3847  | 4930412F15Rik | Tdrd7         | -1 |
| 14342 | 8907  | 4930412F15Rik | Npr2          | 1  |
| 14384 | 13810 | Dnajc7        | 1110036O03Rik | 1  |
| 14384 | 14384 | Dnajc7        | Dnajc7        | 1  |
| 14391 | 1052  | MMT00017335   | Cog4          | -1 |
| 14391 | 1336  | MMT00017335   | MMT00069537   | -1 |
| 14391 | 2243  | MMT00017335   | Gcsh          | -1 |
| 14391 | 7910  | MMT00017335   | AK122209      | -1 |
| 14391 | 9304  | MMT00017335   | AI449175      | -1 |
| 14391 | 10668 | MMT00017335   | Kars          | -1 |
| 14391 | 11560 | MMT00017335   | MMT00001695   | 1  |
| 14391 | 14391 | MMT00017335   | MMT00017335   | 1  |
| 14391 | 15953 | MMT00017335   | Acsf3         | 1  |
| 14391 | 16849 | MMT00017335   | Trmt1         | 1  |
| 14391 | 18697 | MMT00017335   | Afg3l1        | -1 |
| 14391 | 20484 | MMT00017335   | Ces1          | 1  |
| 14391 | 21394 | MMT00017335   | Cdh15         | 1  |
| 14391 | 22909 | MMT00017335   | Nup133        | -1 |
| 14397 | 2533  | Padi2         | Arhgef19      | -1 |
| 14397 | 2889  | Padi2         | Pqlc2         | -1 |
| 14397 | 3616  | Padi2         | Dnajc16       | 1  |
| 14397 | 4657  | Padi2         | C230096C10Rik | 1  |
| 14397 | 7524  | Padi2         | Aldh4a1       | -1 |
| 14397 | 19924 | Padi2         | Ubiad1        | -1 |
| 14399 | 6059  | Csnk2a1       | Dsn1          | -1 |
| 14399 | 6820  | Csnk2a1       | MMT00046996   | 1  |
| 14403 | 1956  | S100g         | Usp50         | 1  |
| 14403 | 4833  | S100g         | Synpo2        | -1 |
| 14403 | 6016  | S100g         | A530057A03Rik | 1  |
| 14403 | 6231  | S100g         | 9030622O22Rik | 1  |
| 14403 | 7991  | S100g         | Gpr115        | -1 |
| 14403 | 17043 | S100g         | Tmem127       | 1  |
| 14403 | 21729 | S100g         | Hdc           | -1 |
| 14403 | 22857 | S100g         | Fahd2a        | 1  |
| 14418 | 17343 | Vcan          | Timm8a1       | 1  |
| 14457 | 3587  | 4921507P07Rik | MMT00041940   | -1 |
| 14457 | 6021  | 4921507P07Rik | MMT00008784   | -1 |
| 14457 | 8670  | 4921507P07Rik | MMT00051613   | -1 |
| 14457 | 9067  | 4921507P07Rik | Tra2a         | -1 |
| 14457 | 15675 | 4921507P07Rik | MMT00077535   | -1 |
| 14486 | 337   | Sox7          | Rasgef1b      | -1 |
| 14486 | 3196  | Sox7          | Tat           | -1 |
| 14486 | 3452  | Sox7          | Ccrn4l        | -1 |
| 14486 | 5889  | Sox7          | Errfi1        | -1 |
| 14486 | 6564  | Sox7          | Cebpd         | -1 |
| 14486 | 12761 | Sox7          | Tsc22d3       | -1 |
| 14486 | 17525 | Sox7          | Ctgf          | -1 |
| 14486 | 21934 | Sox7          | Id2           | 1  |
| 14498 | 661   | Layn          | Siglec1       | 1  |
| 14498 | 14498 | Layn          | Layn          | 1  |
| 14510 | 7436  | Olfir643      | 1700063K16Rik | 1  |
| 14510 | 11966 | Olfir643      | Zfp280b       | 1  |
| 14510 | 12861 | Olfir643      | Rhcg          | 1  |
| 14510 | 19436 | Olfir643      | Dapp1         | 1  |
| 14517 | 3587  | Clcn4-2       | MMT00041940   | -1 |
| 14517 | 6021  | Clcn4-2       | MMT00008784   | -1 |
| 14517 | 6769  | Clcn4-2       | Banp          | -1 |
| 14517 | 8670  | Clcn4-2       | MMT00051613   | -1 |
| 14517 | 11214 | Clcn4-2       | MMT00049207   | -1 |
| 14517 | 15675 | Clcn4-2       | MMT00077535   | -1 |
| 14517 | 17224 | Clcn4-2       | 5430407P10Rik | -1 |
| 14517 | 18083 | Clcn4-2       | Gadd45a       | 1  |
| 14517 | 18373 | Clcn4-2       | Dnajb1        | -1 |
| 14517 | 18418 | Clcn4-2       | Hspa1b        | -1 |

|       |       |               |               |    |
|-------|-------|---------------|---------------|----|
| 14517 | 20535 | Clcn4-2       | Rbm4          | -1 |
| 14519 | 3208  | Trex1         | 493051111Rik  | 1  |
| 14519 | 7436  | Trex1         | 1700063K16Rik | 1  |
| 14519 | 11966 | Trex1         | Zfp280b       | 1  |
| 14519 | 12861 | Trex1         | Rhcg          | 1  |
| 14519 | 19436 | Trex1         | Dapp1         | 1  |
| 14557 | 2932  | Pyroxd1       | Sico1a1       | -1 |
| 14557 | 5902  | Pyroxd1       | 4930563P21Rik | 1  |
| 14557 | 6765  | Pyroxd1       | Ldhd          | -1 |
| 14557 | 7452  | Pyroxd1       | Abcc9         | -1 |
| 14557 | 7911  | Pyroxd1       | Pik3c2g       | 1  |
| 14557 | 13488 | Pyroxd1       | Art4          | -1 |
| 14557 | 14307 | Pyroxd1       | Kcnj8         | -1 |
| 14557 | 14557 | Pyroxd1       | Pyroxd1       | 1  |
| 14557 | 17391 | Pyroxd1       | C530028O21Rik | 1  |
| 14557 | 19964 | Pyroxd1       | Ndufa9        | 1  |
| 14557 | 20127 | Pyroxd1       | lpo8          | -1 |
| 14557 | 21126 | Pyroxd1       | Dera          | 1  |
| 14557 | 22095 | Pyroxd1       | Mgst1         | 1  |
| 14558 | 1745  | Arhgef15      | Gas7          | -1 |
| 14559 | 1014  | Frrs1         | Rtcd1         | 1  |
| 14559 | 1867  | Frrs1         | Bcas2         | 1  |
| 14565 | 11966 | Rnf207        | Zfp280b       | 1  |
| 14565 | 12861 | Rnf207        | Rhcg          | 1  |
| 14565 | 19436 | Rnf207        | Dapp1         | 1  |
| 14570 | 14570 | Erdr1         | Erdr1         | 1  |
| 14577 | 3317  | Cdc3711       | Ak3           | 1  |
| 14577 | 3587  | Cdc3711       | MMT00041940   | 1  |
| 14577 | 3849  | Cdc3711       | MMT00047578   | 1  |
| 14577 | 6021  | Cdc3711       | MMT00008784   | 1  |
| 14577 | 8670  | Cdc3711       | MMT00051613   | 1  |
| 14577 | 9258  | Cdc3711       | P4ha1         | 1  |
| 14577 | 11043 | Cdc3711       | Hsph1         | 1  |
| 14577 | 11214 | Cdc3711       | MMT00049207   | 1  |
| 14577 | 12761 | Cdc3711       | Tsc22d3       | 1  |
| 14577 | 14577 | Cdc3711       | Cdc3711       | 1  |
| 14577 | 15476 | Cdc3711       | Fem1b         | -1 |
| 14577 | 15675 | Cdc3711       | MMT00077535   | 1  |
| 14577 | 18373 | Cdc3711       | Dnajb1        | 1  |
| 14577 | 22139 | Cdc3711       | Stip1         | 1  |
| 14584 | 2743  | Vps24         | Tcf3          | -1 |
| 14597 | 17729 | Col19a1       | Prim2         | -1 |
| 14621 | 20292 | Six4          | 1810048J11Rik | -1 |
| 14626 | 4849  | Zbtb2         | Zxdc          | 1  |
| 14626 | 6769  | Zbtb2         | Banp          | 1  |
| 14626 | 8499  | Zbtb2         | C430048L16Rik | 1  |
| 14626 | 11585 | Zbtb2         | Bdp1          | 1  |
| 14626 | 12761 | Zbtb2         | Tsc22d3       | 1  |
| 14626 | 15476 | Zbtb2         | Fem1b         | -1 |
| 14626 | 16251 | Zbtb2         | G6pc          | 1  |
| 14626 | 18083 | Zbtb2         | Gadd45a       | -1 |
| 14626 | 18373 | Zbtb2         | Dnajb1        | 1  |
| 14626 | 18418 | Zbtb2         | Hspa1b        | 1  |
| 14626 | 18713 | Zbtb2         | 3110037I16Rik | -1 |
| 14626 | 22216 | Zbtb2         | Sp5           | -1 |
| 14626 | 23458 | Zbtb2         | Clic4         | 1  |
| 14631 | 9077  | Stag3         | Cnpy4         | 1  |
| 14631 | 13780 | Stag3         | Pilra         | 1  |
| 14631 | 14631 | Stag3         | Stag3         | 1  |
| 14631 | 16451 | Stag3         | 2010007H12Rik | -1 |
| 14631 | 17089 | Stag3         | Pilrb1        | 1  |
| 14631 | 17158 | Stag3         | Zfp113        | -1 |
| 14631 | 18881 | Stag3         | Cops6         | -1 |
| 14631 | 19502 | Stag3         | Fbxo24        | -1 |
| 14643 | 3208  | Ets2          | 493051111Rik  | 1  |
| 14643 | 11966 | Ets2          | Zfp280b       | 1  |
| 14647 | 14647 | Cst3          | Cst3          | 1  |
| 14649 | 2915  | 5430405G05Rik | Nfs1          | 1  |
| 14649 | 6059  | 5430405G05Rik | Dsn1          | -1 |

|       |       |               |               |    |
|-------|-------|---------------|---------------|----|
| 14649 | 6157  | 5430405G05Rik | MMT00041452   | 1  |
| 14649 | 6250  | 5430405G05Rik | Csnk2a1       | 1  |
| 14649 | 6820  | 5430405G05Rik | MMT00046996   | 1  |
| 14649 | 7610  | 5430405G05Rik | Scand1        | 1  |
| 14649 | 14399 | 5430405G05Rik | Csnk2a1       | 1  |
| 14649 | 14647 | 5430405G05Rik | Cst3          | 1  |
| 14649 | 15565 | 5430405G05Rik | 2310001A20Rik | 1  |
| 14649 | 22740 | 5430405G05Rik | Manbal        | -1 |
| 14649 | 23005 | 5430405G05Rik | 4930405A21Rik | -1 |
| 14733 | 13357 | Fhit          | Rpp14         | -1 |
| 14733 | 14733 | Fhit          | Fhit          | 1  |
| 14734 | 2915  | Nrsn2         | Nfs1          | -1 |
| 14734 | 5450  | Nrsn2         | Nrbp1         | -1 |
| 14734 | 6059  | Nrsn2         | Dsn1          | 1  |
| 14734 | 6250  | Nrsn2         | Csnk2a1       | -1 |
| 14734 | 6820  | Nrsn2         | MMT00046996   | -1 |
| 14734 | 7610  | Nrsn2         | Scand1        | -1 |
| 14734 | 14399 | Nrsn2         | Csnk2a1       | -1 |
| 14734 | 14647 | Nrsn2         | Cst3          | -1 |
| 14734 | 15565 | Nrsn2         | 2310001A20Rik | -1 |
| 14734 | 22740 | Nrsn2         | Manbal        | 1  |
| 14734 | 23005 | Nrsn2         | 4930405A21Rik | 1  |
| 14734 | 23599 | Nrsn2         | Ndr3          | 1  |
| 14740 | 1956  | Mfap1b        | Usp50         | -1 |
| 14740 | 4833  | Mfap1b        | Synpo2        | 1  |
| 14740 | 6016  | Mfap1b        | A530057A03Rik | -1 |
| 14740 | 6231  | Mfap1b        | 9030622O22Rik | -1 |
| 14740 | 7991  | Mfap1b        | Gpr115        | 1  |
| 14740 | 14740 | Mfap1b        | Mfap1b        | 1  |
| 14740 | 17043 | Mfap1b        | Tmem127       | -1 |
| 14740 | 18835 | Mfap1b        | Dtw1          | -1 |
| 14740 | 19560 | Mfap1b        | Trmt6         | 1  |
| 14740 | 21729 | Mfap1b        | Hdc           | 1  |
| 14740 | 22857 | Mfap1b        | Fahd2a        | -1 |
| 14740 | 23609 | Mfap1b        | Trim44        | -1 |
| 14754 | 3208  | Atoh8         | 493051111Rik  | 1  |
| 14754 | 5694  | Atoh8         | Sp7           | 1  |
| 14754 | 7436  | Atoh8         | 1700063K16Rik | 1  |
| 14754 | 11966 | Atoh8         | Zfp280b       | 1  |
| 14754 | 12861 | Atoh8         | Rhcg          | 1  |
| 14754 | 19436 | Atoh8         | Dapp1         | 1  |
| 14754 | 19672 | Atoh8         | Cldn19        | 1  |
| 14754 | 22125 | Atoh8         | Gab1          | 1  |
| 14757 | 19763 | Hdx           | Acp2          | 1  |
| 14785 | 2294  | F3            | AU040829      | 1  |
| 14822 | 11094 | Nrsn1         | Slc17a3       | 1  |
| 14822 | 15698 | Nrsn1         | Them2         | 1  |
| 14822 | 17528 | Nrsn1         | Gmn           | 1  |
| 14822 | 20759 | Nrsn1         | Slc17a1       | 1  |
| 14822 | 23118 | Nrsn1         | Ttrap         | 1  |
| 14830 | 19436 | Olf421        | Dapp1         | 1  |
| 14842 | 2599  | Gipr          | Lsm14a        | 1  |
| 14842 | 4697  | Gipr          | Cyp2a12       | -1 |
| 14842 | 6513  | Gipr          | Qpctl         | 1  |
| 14842 | 11321 | Gipr          | 2310014L17Rik | -1 |
| 14842 | 16639 | Gipr          | MMT00078937   | -1 |
| 14842 | 19462 | Gipr          | 4933439C20Rik | -1 |
| 14842 | 23247 | Gipr          | Ercc1         | -1 |
| 14860 | 3196  | MMT00051231   | Tat           | -1 |
| 14860 | 3587  | MMT00051231   | MMT00041940   | -1 |
| 14860 | 4391  | MMT00051231   | Zfp467        | 1  |
| 14860 | 6021  | MMT00051231   | MMT00008784   | -1 |
| 14860 | 8670  | MMT00051231   | MMT00051613   | -1 |
| 14860 | 12761 | MMT00051231   | Tsc22d3       | -1 |
| 14860 | 15675 | MMT00051231   | MMT00077535   | -1 |
| 14860 | 15826 | MMT00051231   | Arl4d         | -1 |
| 14860 | 16251 | MMT00051231   | G6pc          | -1 |
| 14860 | 17525 | MMT00051231   | Ctgf          | -1 |
| 14860 | 18083 | MMT00051231   | Gadd45a       | 1  |

|       |       |               |               |    |
|-------|-------|---------------|---------------|----|
| 14860 | 18373 | MMT00051231   | Dnajb1        | -1 |
| 14860 | 18418 | MMT00051231   | Hspa1b        | -1 |
| 14860 | 19528 | MMT00051231   | Zfp503        | 1  |
| 14860 | 20535 | MMT00051231   | Rbm4          | -1 |
| 14862 | 20292 | Dhrs7         | 1810048J11Rik | -1 |
| 14951 | 1755  | Dpep3         | Ocel1         | -1 |
| 14951 | 9304  | Dpep3         | AI449175      | -1 |
| 14951 | 18886 | Dpep3         | Slc18a1       | 1  |
| 14952 | 14952 | Tex2          | Tex2          | 1  |
| 14993 | 3208  | MMT00015245   | 4930511111Rik | 1  |
| 15004 | 18305 | MMT00067307   | Etv5          | -1 |
| 15015 | 740   | G3bp1         | Txnrd3        | -1 |
| 15015 | 3587  | G3bp1         | MMT00041940   | 1  |
| 15015 | 6021  | G3bp1         | MMT00008784   | 1  |
| 15015 | 8670  | G3bp1         | MMT00051613   | 1  |
| 15015 | 9067  | G3bp1         | Tra2a         | 1  |
| 15015 | 9258  | G3bp1         | P4ha1         | 1  |
| 15015 | 11043 | G3bp1         | Hsph1         | 1  |
| 15015 | 11214 | G3bp1         | MMT00049207   | 1  |
| 15015 | 15675 | G3bp1         | MMT00077535   | 1  |
| 15015 | 18099 | G3bp1         | Nfx1          | -1 |
| 15015 | 20194 | G3bp1         | Pnlcd1        | -1 |
| 15015 | 20332 | G3bp1         | Stau2         | -1 |
| 15022 | 11789 | Tmem14c       | Ccdc90a       | 1  |
| 15022 | 15022 | Tmem14c       | Tmem14c       | 1  |
| 15024 | 523   | 2310061J03Rik | 1700040L02Rik | 1  |
| 15024 | 23646 | 2310061J03Rik | Hsp90ab1      | -1 |
| 15074 | 2224  | Usp18         | Oasl2         | 1  |
| 15074 | 12398 | Usp18         | Ifi44         | 1  |
| 15074 | 12600 | Usp18         | Ifi204        | 1  |
| 15074 | 15074 | Usp18         | Usp18         | 1  |
| 15074 | 21549 | Usp18         | Rtp4          | 1  |
| 15094 | 286   | Pbx4          | MMT00070509   | -1 |
| 15094 | 1755  | Pbx4          | Ocel1         | -1 |
| 15094 | 9304  | Pbx4          | AI449175      | -1 |
| 15094 | 9931  | Pbx4          | Git25d1       | 1  |
| 15094 | 13732 | Pbx4          | Tpm4          | 1  |
| 15094 | 15455 | Pbx4          | Lsm4          | 1  |
| 15094 | 16617 | Pbx4          | Sh2d4a        | 1  |
| 15094 | 18886 | Pbx4          | Slc18a1       | 1  |
| 15119 | 14969 | EG545921      | EG245506      | 1  |
| 15127 | 6376  | Cct6b         | Nle1          | 1  |
| 15127 | 10539 | Cct6b         | Unc45b        | -1 |
| 15137 | 12861 | Olfrl403      | Rhcg          | 1  |
| 15152 | 3587  | F730047E07Rik | MMT00041940   | -1 |
| 15152 | 6021  | F730047E07Rik | MMT00008784   | -1 |
| 15152 | 8670  | F730047E07Rik | MMT00051613   | -1 |
| 15152 | 11043 | F730047E07Rik | Hsph1         | -1 |
| 15152 | 11214 | F730047E07Rik | MMT00049207   | -1 |
| 15152 | 15675 | F730047E07Rik | MMT00077535   | -1 |
| 15162 | 8079  | Il18          | Pts           | -1 |
| 15162 | 12751 | Il18          | Sorl1         | 1  |
| 15162 | 13382 | Il18          | Bco2          | 1  |
| 15177 | 3587  | Bmpr2         | MMT00041940   | 1  |
| 15177 | 6021  | Bmpr2         | MMT00008784   | 1  |
| 15177 | 8319  | Bmpr2         | MMT00062477   | 1  |
| 15177 | 8670  | Bmpr2         | MMT00051613   | 1  |
| 15177 | 9067  | Bmpr2         | Tra2a         | 1  |
| 15177 | 9258  | Bmpr2         | P4ha1         | 1  |
| 15177 | 9899  | Bmpr2         | D13Wsu177e    | 1  |
| 15177 | 11043 | Bmpr2         | Hsph1         | 1  |
| 15177 | 11214 | Bmpr2         | MMT00049207   | 1  |
| 15177 | 14298 | Bmpr2         | Atp2a2        | 1  |
| 15177 | 15476 | Bmpr2         | Fem1b         | -1 |
| 15177 | 15675 | Bmpr2         | MMT00077535   | 1  |
| 15177 | 18373 | Bmpr2         | Dnajb1        | 1  |
| 15177 | 18418 | Bmpr2         | Hspa1b        | 1  |
| 15177 | 20332 | Bmpr2         | Stau2         | -1 |
| 15177 | 21389 | Bmpr2         | Odf2          | -1 |

|       |       |               |                    |    |
|-------|-------|---------------|--------------------|----|
| 15200 | 11966 | Gk2           | Zfp280b            | 1  |
| 15200 | 12861 | Gk2           | Rhcg               | 1  |
| 15200 | 19436 | Gk2           | Dapp1              | 1  |
| 15252 | 11966 | MMT00019402   | Zfp280b            | 1  |
| 15258 | 15258 | Coil          | Coil               | 1  |
| 15266 | 8664  | Cnm4          | MMT00014895        | -1 |
| 15266 | 17729 | Cnm4          | Prim2              | 1  |
| 15266 | 18606 | Cnm4          | A230074B11Rik      | -1 |
| 15266 | 20077 | Cnm4          | Ccdc115            | 1  |
| 15266 | 22333 | Cnm4          | Hnrnp3             | -1 |
| 15266 | 23361 | Cnm4          | Bivm               | 1  |
| 15276 | 11257 | Eif4e         | Trem3              | -1 |
| 15276 | 22640 | Eif4e         | Bud13              | -1 |
| 15277 | 4414  | 2810002N01Rik | 5033406O09Rik      | 1  |
| 15277 | 16191 | 2810002N01Rik | Klc1               | -1 |
| 15296 | 286   | Mier3         | MMT00070509        | 1  |
| 15296 | 1755  | Mier3         | Ocel1              | 1  |
| 15296 | 5433  | Mier3         | 2410004L22Rik      | -1 |
| 15296 | 9304  | Mier3         | Al449175           | 1  |
| 15296 | 9931  | Mier3         | Glt25d1            | -1 |
| 15296 | 13732 | Mier3         | Tpm4               | -1 |
| 15296 | 15455 | Mier3         | Lsm4               | -1 |
| 15296 | 16617 | Mier3         | Sh2d4a             | -1 |
| 15296 | 16858 | Mier3         | Tmem38a            | -1 |
| 15296 | 17703 | Mier3         | Large              | -1 |
| 15296 | 18886 | Mier3         | Slc18a1            | -1 |
| 15296 | 20484 | Mier3         | Ces1               | -1 |
| 15297 | 1162  | MMT00048291   | Cpsf4              | 1  |
| 15297 | 2115  | MMT00048291   | Gpr12              | 1  |
| 15299 | 524   | Mrps21        | Hsd3b2             | -1 |
| 15299 | 1867  | Mrps21        | Bcas2              | -1 |
| 15299 | 3753  | Mrps21        | Setdb1             | 1  |
| 15299 | 10521 | Mrps21        | Ttf2               | -1 |
| 15299 | 10681 | Mrps21        | Dgkz               | 1  |
| 15299 | 11121 | Mrps21        | Mttr11             | 1  |
| 15299 | 11611 | Mrps21        | S100a13            | 1  |
| 15299 | 16753 | Mrps21        | Hfe2               | 1  |
| 15299 | 18754 | Mrps21        | Rbm8a              | -1 |
| 15299 | 20661 | Mrps21        | Tuft1              | -1 |
| 15299 | 22202 | Mrps21        | OTTMUSG00000021274 | 1  |
| 15299 | 22570 | Mrps21        | Phf1               | -1 |
| 15318 | 9230  | Aars2         | 1700027N10Rik      | 1  |
| 15318 | 14027 | Aars2         | Rpo1-1             | -1 |
| 15318 | 15318 | Aars2         | Aars2              | 1  |
| 15318 | 18772 | Aars2         | BC048355           | 1  |
| 15321 | 20413 | Pus7          | Wdr86              | 1  |
| 15352 | 1851  | Socs2         | Tmem41a            | -1 |
| 15352 | 4512  | Socs2         | Esrra              | -1 |
| 15352 | 19141 | Socs2         | Gorasp1            | -1 |
| 15353 | 12280 | Ednrb         | Cin5               | -1 |
| 15353 | 13550 | Ednrb         | Mbnl2              | -1 |
| 15378 | 6755  | Exdl2         | Wdr22              | -1 |
| 15384 | 2743  | Mat2a         | Tcf3               | 1  |
| 15384 | 3703  | Mat2a         | Ggcx               | 1  |
| 15384 | 4093  | Mat2a         | Akp5               | 1  |
| 15384 | 11338 | Mat2a         | Vamp8              | 1  |
| 15384 | 11872 | Mat2a         | Vamp5              | 1  |
| 15384 | 15384 | Mat2a         | Mat2a              | 1  |
| 15384 | 15708 | Mat2a         | Retsat             | 1  |
| 15384 | 16670 | Mat2a         | Csmd2              | -1 |
| 15384 | 17317 | Mat2a         | Jmjd1a             | -1 |
| 15386 | 9756  | Tex12         | 1500015O10Rik      | 1  |
| 15414 | 3587  | Arhgap18      | MMT00041940        | 1  |
| 15414 | 6021  | Arhgap18      | MMT00008784        | 1  |
| 15414 | 8670  | Arhgap18      | MMT00051613        | 1  |
| 15414 | 11043 | Arhgap18      | Hsph1              | 1  |
| 15414 | 11214 | Arhgap18      | MMT00049207        | 1  |
| 15414 | 15675 | Arhgap18      | MMT00077535        | 1  |
| 15414 | 22139 | Arhgap18      | Stip1              | 1  |

|       |       |          |               |    |
|-------|-------|----------|---------------|----|
| 15424 | 11966 | Atp6v1g2 | Zfp280b       | 1  |
| 15424 | 19436 | Atp6v1g2 | Dapp1         | 1  |
| 15446 | 3208  | Cd320    | 4930511111Rik | 1  |
| 15446 | 11966 | Cd320    | Zfp280b       | 1  |
| 15446 | 19436 | Cd320    | Dapp1         | 1  |
| 15455 | 1755  | Lsm4     | Ocel1         | -1 |
| 15455 | 15455 | Lsm4     | Lsm4          | 1  |
| 15466 | 5100  | Gm136    | Pebp1         | 1  |
| 15466 | 10978 | Gm136    | MMT00078322   | -1 |
| 15466 | 12656 | Gm136    | Coq5          | -1 |
| 15466 | 15908 | Gm136    | Pebp1         | 1  |
| 15466 | 17807 | Gm136    | Pebp1         | 1  |
| 15476 | 740   | Fem1b    | Txnrd3        | 1  |
| 15476 | 902   | Fem1b    | Slc30a1       | 1  |
| 15476 | 1156  | Fem1b    | Rbj           | 1  |
| 15476 | 1311  | Fem1b    | Mpp4          | -1 |
| 15476 | 1820  | Fem1b    | Mat2b         | 1  |
| 15476 | 2043  | Fem1b    | Arl2bp        | 1  |
| 15476 | 2433  | Fem1b    | Armc10        | 1  |
| 15476 | 2718  | Fem1b    | Scrn3         | 1  |
| 15476 | 3196  | Fem1b    | Tat           | -1 |
| 15476 | 3462  | Fem1b    | Nmnat3        | 1  |
| 15476 | 3587  | Fem1b    | MMT00041940   | -1 |
| 15476 | 3849  | Fem1b    | MMT00047578   | -1 |
| 15476 | 3908  | Fem1b    | Fundc2        | 1  |
| 15476 | 4192  | Fem1b    | Zranb1        | 1  |
| 15476 | 4612  | Fem1b    | Hspa5         | -1 |
| 15476 | 4780  | Fem1b    | Sfrs5         | 1  |
| 15476 | 4966  | Fem1b    | Zscan20       | -1 |
| 15476 | 5352  | Fem1b    | Pdcd2l        | 1  |
| 15476 | 6021  | Fem1b    | MMT00008784   | -1 |
| 15476 | 6126  | Fem1b    | MMT00067575   | -1 |
| 15476 | 6171  | Fem1b    | Abtb2         | -1 |
| 15476 | 6286  | Fem1b    | Rfc1          | 1  |
| 15476 | 6769  | Fem1b    | Banp          | -1 |
| 15476 | 7140  | Fem1b    | Mtbp          | 1  |
| 15476 | 7389  | Fem1b    | Sfrs5         | 1  |
| 15476 | 7731  | Fem1b    | 150001M20Rik  | 1  |
| 15476 | 8184  | Fem1b    | Rbm26         | 1  |
| 15476 | 8262  | Fem1b    | Syp           | -1 |
| 15476 | 8319  | Fem1b    | MMT00062477   | -1 |
| 15476 | 8464  | Fem1b    | Snapi         | 1  |
| 15476 | 8554  | Fem1b    | Letm2         | -1 |
| 15476 | 8662  | Fem1b    | Brca2         | 1  |
| 15476 | 8670  | Fem1b    | MMT00051613   | -1 |
| 15476 | 8684  | Fem1b    | Il15          | 1  |
| 15476 | 8727  | Fem1b    | Slc27a3       | -1 |
| 15476 | 9067  | Fem1b    | Tra2a         | -1 |
| 15476 | 9258  | Fem1b    | P4ha1         | -1 |
| 15476 | 9680  | Fem1b    | Ahsa1         | -1 |
| 15476 | 9899  | Fem1b    | D13Wsu177e    | -1 |
| 15476 | 10267 | Fem1b    | Setdb2        | 1  |
| 15476 | 10435 | Fem1b    | Nab2          | 1  |
| 15476 | 10769 | Fem1b    | Hnrnpd        | 1  |
| 15476 | 11043 | Fem1b    | Hsph1         | -1 |
| 15476 | 11095 | Fem1b    | Bag3          | -1 |
| 15476 | 11201 | Fem1b    | Sunc1         | 1  |
| 15476 | 11214 | Fem1b    | MMT00049207   | -1 |
| 15476 | 11697 | Fem1b    | Rasl2-9       | 1  |
| 15476 | 12329 | Fem1b    | Sox6          | 1  |
| 15476 | 12761 | Fem1b    | Tsc22d3       | -1 |
| 15476 | 12960 | Fem1b    | Arrdc4        | 1  |
| 15476 | 13052 | Fem1b    | Tnfrsf19      | 1  |
| 15476 | 13087 | Fem1b    | Cxadr         | 1  |
| 15476 | 13521 | Fem1b    | Ears2         | -1 |
| 15476 | 13563 | Fem1b    | 9930023K05Rik | 1  |
| 15476 | 14135 | Fem1b    | Eepd1         | 1  |
| 15476 | 14298 | Fem1b    | Atp2a2        | -1 |
| 15476 | 14785 | Fem1b    | F3            | 1  |

|       |       |               |               |    |
|-------|-------|---------------|---------------|----|
| 15476 | 14859 | Fem1b         | Hspa1a        | -1 |
| 15476 | 15177 | Fem1b         | Bmpr2         | -1 |
| 15476 | 15476 | Fem1b         | Fem1b         | 1  |
| 15476 | 15675 | Fem1b         | MMT00077535   | -1 |
| 15476 | 15740 | Fem1b         | 1810010H24Rik | 1  |
| 15476 | 16030 | Fem1b         | Prpf3         | -1 |
| 15476 | 16251 | Fem1b         | G6pc          | -1 |
| 15476 | 16517 | Fem1b         | D4Wsu53e      | -1 |
| 15476 | 16585 | Fem1b         | Syvn1         | -1 |
| 15476 | 16754 | Fem1b         | Hsp90aa1      | -1 |
| 15476 | 17160 | Fem1b         | Ccdc127       | -1 |
| 15476 | 17224 | Fem1b         | 5430407P10Rik | -1 |
| 15476 | 17449 | Fem1b         | Zfp296        | -1 |
| 15476 | 18083 | Fem1b         | Gadd45a       | 1  |
| 15476 | 18099 | Fem1b         | Nfx1          | 1  |
| 15476 | 18135 | Fem1b         | Tmed3         | -1 |
| 15476 | 18215 | Fem1b         | Gpr146        | 1  |
| 15476 | 18373 | Fem1b         | Dnajb1        | -1 |
| 15476 | 18418 | Fem1b         | Hspa1b        | -1 |
| 15476 | 18903 | Fem1b         | Crem          | -1 |
| 15476 | 19176 | Fem1b         | 2210404J11Rik | 1  |
| 15476 | 19528 | Fem1b         | Zfp503        | 1  |
| 15476 | 19620 | Fem1b         | Zfand2a       | -1 |
| 15476 | 20332 | Fem1b         | Stau2         | 1  |
| 15476 | 20535 | Fem1b         | Rbm4          | -1 |
| 15476 | 20855 | Fem1b         | Phldb2        | 1  |
| 15476 | 20912 | Fem1b         | Chordc1       | -1 |
| 15476 | 20965 | Fem1b         | Usp28         | 1  |
| 15476 | 20980 | Fem1b         | Taf12         | -1 |
| 15476 | 21322 | Fem1b         | Uspl1         | -1 |
| 15476 | 21389 | Fem1b         | Odf2          | 1  |
| 15476 | 21715 | Fem1b         | Siah1a        | 1  |
| 15476 | 22139 | Fem1b         | Stip1         | -1 |
| 15476 | 22216 | Fem1b         | Sp5           | 1  |
| 15476 | 22272 | Fem1b         | Vpreb1        | -1 |
| 15476 | 22303 | Fem1b         | Cdt1          | 1  |
| 15476 | 23458 | Fem1b         | Clic4         | -1 |
| 15476 | 23527 | Fem1b         | MMT00021936   | -1 |
| 15476 | 23646 | Fem1b         | Hsp90ab1      | -1 |
| 15485 | 5252  | Zfp251        | Mfsd3         | -1 |
| 15485 | 21291 | Zfp251        | Slc39a4       | -1 |
| 15539 | 3208  | MMT00028325   | 4930511I11Rik | 1  |
| 15539 | 7436  | MMT00028325   | 1700063K16Rik | 1  |
| 15539 | 8256  | MMT00028325   | Tjap1         | 1  |
| 15539 | 11966 | MMT00028325   | Zfp280b       | 1  |
| 15539 | 12861 | MMT00028325   | Rhcg          | 1  |
| 15539 | 19436 | MMT00028325   | Dapp1         | 1  |
| 15550 | 1867  | 2010200O16Rik | Bcas2         | -1 |
| 15550 | 3753  | 2010200O16Rik | Setdb1        | 1  |
| 15550 | 7519  | 2010200O16Rik | Gstm1         | -1 |
| 15550 | 10681 | 2010200O16Rik | Dgkz          | 1  |
| 15550 | 20385 | 2010200O16Rik | Chd1l         | -1 |
| 15550 | 20661 | 2010200O16Rik | Tuft1         | -1 |
| 15550 | 22570 | 2010200O16Rik | Phtf1         | -1 |
| 15569 | 246   | BC003331      | MMT00053742   | 1  |
| 15569 | 9611  | BC003331      | Ncf2          | 1  |
| 15569 | 15569 | BC003331      | BC003331      | 1  |
| 15569 | 17463 | BC003331      | Rgl1          | 1  |
| 15569 | 17850 | BC003331      | Prg4          | -1 |
| 15573 | 11966 | Aipl1         | Zfp280b       | 1  |
| 15573 | 19436 | Aipl1         | Dapp1         | 1  |
| 15573 | 19672 | Aipl1         | Cldn19        | 1  |
| 15580 | 327   | MMT00077001   | H2-Ea         | 1  |
| 15580 | 2325  | MMT00077001   | H2-K1         | 1  |
| 15580 | 2938  | MMT00077001   | H2-T23        | 1  |
| 15580 | 3857  | MMT00077001   | 1700001C19Rik | -1 |
| 15580 | 5410  | MMT00077001   | Cyp4f15       | -1 |
| 15580 | 7088  | MMT00077001   | Slc37a1       | 1  |
| 15580 | 8767  | MMT00077001   | Rgl2          | 1  |



|       |       |             |               |    |
|-------|-------|-------------|---------------|----|
| 15580 | 9158  | MMT00077001 | Pde9a         | -1 |
| 15580 | 10376 | MMT00077001 | C920025E04Rik | -1 |
| 15580 | 10394 | MMT00077001 | MMT00028435   | 1  |
| 15580 | 10667 | MMT00077001 | H2-Eb1        | 1  |
| 15580 | 12355 | MMT00077001 | AI507611      | 1  |
| 15580 | 13493 | MMT00077001 | Ring1         | -1 |
| 15580 | 13789 | MMT00077001 | H2-Q8         | 1  |
| 15580 | 20238 | MMT00077001 | H2-T9         | 1  |
| 15580 | 22822 | MMT00077001 | MMT00013433   | 1  |
| 15587 | 9077  | Actl6b      | Cnpy4         | 1  |
| 15587 | 13780 | Actl6b      | Pilra         | 1  |
| 15587 | 16451 | Actl6b      | 2010007H12Rik | -1 |
| 15587 | 19502 | Actl6b      | Fbxo24        | -1 |
| 15594 | 18373 | Gm1967      | Dnajb1        | -1 |
| 15626 | 11966 | MMT00035685 | Zfp280b       | 1  |
| 15626 | 12861 | MMT00035685 | Rhcg          | 1  |
| 15626 | 19436 | MMT00035685 | Dapp1         | 1  |
| 15635 | 9067  | Crkrs       | Tra2a         | 1  |
| 15635 | 9258  | Crkrs       | P4ha1         | 1  |
| 15635 | 15675 | Crkrs       | MMT00077535   | 1  |
| 15635 | 18099 | Crkrs       | Nfx1          | -1 |
| 15635 | 18215 | Crkrs       | Gpr146        | -1 |
| 15635 | 18373 | Crkrs       | Dnajb1        | 1  |
| 15635 | 20912 | Crkrs       | Chordc1       | 1  |
| 15664 | 6394  | Masp2       | Fbxo6         | -1 |
| 15664 | 18338 | Masp2       | Akr1e1        | -1 |
| 15670 | 2388  | Pnmal1      | Dot1l         | -1 |
| 15670 | 2599  | Pnmal1      | Lsm14a        | -1 |
| 15670 | 4697  | Pnmal1      | Cyp2a12       | 1  |
| 15670 | 6513  | Pnmal1      | Qpctl         | -1 |
| 15670 | 10545 | Pnmal1      | Tmem147       | -1 |
| 15670 | 11321 | Pnmal1      | 2310014L17Rik | 1  |
| 15670 | 11888 | Pnmal1      | Myadm         | 1  |
| 15670 | 17314 | Pnmal1      | Napa          | 1  |
| 15670 | 19462 | Pnmal1      | 4933439C20Rik | 1  |
| 15670 | 20606 | Pnmal1      | MMT00042166   | 1  |
| 15670 | 23247 | Pnmal1      | Ercc1         | 1  |
| 15697 | 3208  | Tbc1d8b     | 4930511I11Rik | 1  |
| 15697 | 5694  | Tbc1d8b     | Sp7           | 1  |
| 15697 | 7436  | Tbc1d8b     | 1700063K16Rik | 1  |
| 15697 | 9468  | Tbc1d8b     | Gtf2a1l       | 1  |
| 15697 | 11966 | Tbc1d8b     | Zfp280b       | 1  |
| 15697 | 12248 | Tbc1d8b     | Tnp2          | 1  |
| 15697 | 12861 | Tbc1d8b     | Rhcg          | 1  |
| 15697 | 17413 | Tbc1d8b     | MMT00043948   | 1  |
| 15697 | 19436 | Tbc1d8b     | Dapp1         | 1  |
| 15697 | 19672 | Tbc1d8b     | Cldn19        | 1  |
| 15697 | 22125 | Tbc1d8b     | Gab1          | 1  |
| 15698 | 3938  | Them2       | Abt1          | -1 |
| 15698 | 10189 | Them2       | Cage1         | -1 |
| 15698 | 11094 | Them2       | Slc17a3       | 1  |
| 15698 | 11649 | Them2       | Hfe           | -1 |
| 15698 | 15698 | Them2       | Them2         | 1  |
| 15698 | 17528 | Them2       | Gmnn          | 1  |
| 15698 | 19192 | Them2       | Hist1h1c      | -1 |
| 15698 | 20759 | Them2       | Slc17a1       | 1  |
| 15698 | 23118 | Them2       | Trap          | 1  |
| 15700 | 2533  | Crocc       | Arhgef19      | 1  |
| 15700 | 3616  | Crocc       | Dnajc16       | -1 |
| 15700 | 4657  | Crocc       | C230096C10Rik | -1 |
| 15700 | 7307  | Crocc       | Agmat         | -1 |
| 15713 | 499   | Rbm3        | 2310057J16Rik | -1 |
| 15713 | 523   | Rbm3        | 1700040L02Rik | 1  |
| 15713 | 1411  | Rbm3        | Tada3l        | -1 |
| 15713 | 1453  | Rbm3        | Gfod2         | -1 |
| 15713 | 1697  | Rbm3        | Sf4           | -1 |
| 15713 | 1849  | Rbm3        | MMT00063181   | -1 |
| 15713 | 2315  | Rbm3        | Abcb1a        | 1  |
| 15713 | 2721  | Rbm3        | Inmt          | 1  |

|       |       |          |               |    |
|-------|-------|----------|---------------|----|
| 15713 | 2850  | Rbm3     | Slc16a6       | -1 |
| 15713 | 3376  | Rbm3     | Trip4         | 1  |
| 15713 | 3587  | Rbm3     | MMT00041940   | -1 |
| 15713 | 3799  | Rbm3     | Serpinh1      | -1 |
| 15713 | 3913  | Rbm3     | Mrpl15        | -1 |
| 15713 | 4192  | Rbm3     | Zranb1        | 1  |
| 15713 | 4298  | Rbm3     | St3gal1       | -1 |
| 15713 | 4355  | Rbm3     | Pard6a        | -1 |
| 15713 | 4950  | Rbm3     | Dnajb10       | -1 |
| 15713 | 4966  | Rbm3     | Zscan20       | -1 |
| 15713 | 5374  | Rbm3     | Chka          | -1 |
| 15713 | 6021  | Rbm3     | MMT00008784   | -1 |
| 15713 | 6268  | Rbm3     | Slc45a3       | -1 |
| 15713 | 7165  | Rbm3     | Nt5m          | -1 |
| 15713 | 7731  | Rbm3     | 1500001M20Rik | 1  |
| 15713 | 8670  | Rbm3     | MMT00051613   | -1 |
| 15713 | 9067  | Rbm3     | Tra2a         | -1 |
| 15713 | 9224  | Rbm3     | MMT00013510   | -1 |
| 15713 | 9258  | Rbm3     | P4ha1         | -1 |
| 15713 | 9279  | Rbm3     | MMT00066808   | -1 |
| 15713 | 9672  | Rbm3     | Tmem101       | -1 |
| 15713 | 9831  | Rbm3     | Nedd4l        | -1 |
| 15713 | 9899  | Rbm3     | D13Wsu177e    | -1 |
| 15713 | 10215 | Rbm3     | Nampt         | 1  |
| 15713 | 11043 | Rbm3     | Hsph1         | -1 |
| 15713 | 11201 | Rbm3     | Sunc1         | 1  |
| 15713 | 11214 | Rbm3     | MMT00049207   | -1 |
| 15713 | 11412 | Rbm3     | Abcg5         | 1  |
| 15713 | 11818 | Rbm3     | MMT00048396   | -1 |
| 15713 | 12498 | Rbm3     | Abcg8         | 1  |
| 15713 | 12513 | Rbm3     | Whsc2         | -1 |
| 15713 | 12905 | Rbm3     | Nfil3         | -1 |
| 15713 | 13052 | Rbm3     | Tnfrsf19      | 1  |
| 15713 | 14222 | Rbm3     | MMT00076410   | 1  |
| 15713 | 14298 | Rbm3     | Atp2a2        | -1 |
| 15713 | 14333 | Rbm3     | Zcchc17       | -1 |
| 15713 | 15014 | Rbm3     | Mrp63         | -1 |
| 15713 | 15476 | Rbm3     | Fem1b         | 1  |
| 15713 | 15675 | Rbm3     | MMT00077535   | -1 |
| 15713 | 15713 | Rbm3     | Rbm3          | 1  |
| 15713 | 16043 | Rbm3     | Sult1c2       | 1  |
| 15713 | 17449 | Rbm3     | Zfp296        | -1 |
| 15713 | 17712 | Rbm3     | Nup62         | -1 |
| 15713 | 18099 | Rbm3     | Nfx1          | 1  |
| 15713 | 18373 | Rbm3     | Dnajb1        | -1 |
| 15713 | 18418 | Rbm3     | Hspa1b        | -1 |
| 15713 | 20965 | Rbm3     | Usp28         | 1  |
| 15713 | 20980 | Rbm3     | Taf12         | -1 |
| 15713 | 21389 | Rbm3     | Odf2          | 1  |
| 15713 | 21556 | Rbm3     | 4930579F01Rik | 1  |
| 15713 | 22139 | Rbm3     | Stip1         | -1 |
| 15713 | 22272 | Rbm3     | Vpreb1        | -1 |
| 15713 | 23646 | Rbm3     | Hsp90ab1      | -1 |
| 15719 | 17391 | BC060267 | C530028O21Rik | -1 |
| 15719 | 19964 | BC060267 | Ndufa9        | -1 |
| 15722 | 2599  | Ccdc9    | Lsm14a        | -1 |
| 15722 | 6513  | Ccdc9    | Qpctl         | -1 |
| 15731 | 482   | Mfhas1   | Rnf43         | -1 |
| 15731 | 902   | Mfhas1   | Slc30a1       | -1 |
| 15731 | 1156  | Mfhas1   | Rbj           | -1 |
| 15731 | 3196  | Mfhas1   | Tat           | 1  |
| 15731 | 3587  | Mfhas1   | MMT00041940   | 1  |
| 15731 | 4966  | Mfhas1   | Zscan20       | 1  |
| 15731 | 6021  | Mfhas1   | MMT00008784   | 1  |
| 15731 | 6268  | Mfhas1   | Slc45a3       | 1  |
| 15731 | 6485  | Mfhas1   | Map3k7ip1     | -1 |
| 15731 | 6769  | Mfhas1   | Banp          | 1  |
| 15731 | 8262  | Mfhas1   | Syp           | 1  |
| 15731 | 8319  | Mfhas1   | MMT00062477   | 1  |

|       |       |        |               |    |
|-------|-------|--------|---------------|----|
| 15731 | 8670  | Mfhas1 | MMT00051613   | 1  |
| 15731 | 8684  | Mfhas1 | Il15          | -1 |
| 15731 | 9067  | Mfhas1 | Tra2a         | 1  |
| 15731 | 9258  | Mfhas1 | P4ha1         | 1  |
| 15731 | 9629  | Mfhas1 | Spnb3         | -1 |
| 15731 | 9899  | Mfhas1 | D13Wsu177e    | 1  |
| 15731 | 10279 | Mfhas1 | Rnf186        | -1 |
| 15731 | 10435 | Mfhas1 | Nab2          | -1 |
| 15731 | 11043 | Mfhas1 | Hsph1         | 1  |
| 15731 | 11095 | Mfhas1 | Bag3          | 1  |
| 15731 | 11214 | Mfhas1 | MMT00049207   | 1  |
| 15731 | 12487 | Mfhas1 | Tbc1d10a      | -1 |
| 15731 | 12571 | Mfhas1 | Cdkn2d        | -1 |
| 15731 | 12761 | Mfhas1 | Tsc22d3       | 1  |
| 15731 | 13094 | Mfhas1 | Cnn3          | -1 |
| 15731 | 14135 | Mfhas1 | Eepd1         | -1 |
| 15731 | 14298 | Mfhas1 | Atp2a2        | 1  |
| 15731 | 14785 | Mfhas1 | F3            | -1 |
| 15731 | 14859 | Mfhas1 | Hspa1a        | 1  |
| 15731 | 15476 | Mfhas1 | Fem1b         | -1 |
| 15731 | 15566 | Mfhas1 | Snn           | -1 |
| 15731 | 15675 | Mfhas1 | MMT00077535   | 1  |
| 15731 | 16251 | Mfhas1 | G6pc          | 1  |
| 15731 | 16517 | Mfhas1 | D4Wsu53e      | 1  |
| 15731 | 17224 | Mfhas1 | 5430407P10Rik | 1  |
| 15731 | 17591 | Mfhas1 | D930015E06Rik | -1 |
| 15731 | 18083 | Mfhas1 | Gadd45a       | -1 |
| 15731 | 18099 | Mfhas1 | Nfx1          | -1 |
| 15731 | 18215 | Mfhas1 | Gpr146        | -1 |
| 15731 | 18373 | Mfhas1 | Dnajb1        | 1  |
| 15731 | 18418 | Mfhas1 | Hspa1b        | 1  |
| 15731 | 18903 | Mfhas1 | Crem          | 1  |
| 15731 | 19052 | Mfhas1 | Mknr2         | -1 |
| 15731 | 20035 | Mfhas1 | Zbtb46        | -1 |
| 15731 | 20912 | Mfhas1 | Chordc1       | 1  |
| 15731 | 20965 | Mfhas1 | Usp28         | -1 |
| 15731 | 21389 | Mfhas1 | Odf2          | -1 |
| 15731 | 22216 | Mfhas1 | Sp5           | -1 |
| 15731 | 22303 | Mfhas1 | Cdt1          | -1 |
| 15731 | 23458 | Mfhas1 | Clic4         | 1  |
| 15731 | 23527 | Mfhas1 | MMT00021936   | 1  |
| 15731 | 23668 | Mfhas1 | Gse1          | -1 |
| 15743 | 19436 | Hoxc6  | Dapp1         | 1  |
| 15746 | 7731  | Calr   | 1500001M20Rik | -1 |
| 15747 | 3208  | Sfrs1  | 4930511I11Rik | 1  |
| 15747 | 5694  | Sfrs1  | Sp7           | 1  |
| 15747 | 7436  | Sfrs1  | 1700063K16Rik | 1  |
| 15747 | 9468  | Sfrs1  | Gtf2a1l       | 1  |
| 15747 | 11966 | Sfrs1  | Zfp280b       | 1  |
| 15747 | 12248 | Sfrs1  | Tnp2          | 1  |
| 15747 | 12861 | Sfrs1  | Rhcg          | 1  |
| 15747 | 19436 | Sfrs1  | Dapp1         | 1  |
| 15747 | 19672 | Sfrs1  | Cldn19        | 1  |
| 15747 | 22125 | Sfrs1  | Gab1          | 1  |
| 15760 | 14647 | Trib3  | Cst3          | 1  |
| 15760 | 23005 | Trib3  | 4930405A21Rik | -1 |
| 15766 | 3208  | Bmp2   | 4930511I11Rik | 1  |
| 15766 | 7436  | Bmp2   | 1700063K16Rik | 1  |
| 15766 | 11966 | Bmp2   | Zfp280b       | 1  |
| 15766 | 19436 | Bmp2   | Dapp1         | 1  |
| 15766 | 22125 | Bmp2   | Gab1          | 1  |
| 15787 | 15476 | Wdr92  | Fem1b         | -1 |
| 15826 | 337   | Arl4d  | Rasgef1b      | 1  |
| 15826 | 2294  | Arl4d  | AU040829      | 1  |
| 15826 | 5187  | Arl4d  | Speer4f       | 1  |
| 15826 | 5889  | Arl4d  | Errfi1        | 1  |
| 15826 | 6564  | Arl4d  | Cebpd         | 1  |
| 15826 | 7136  | Arl4d  | Id3           | -1 |
| 15826 | 12761 | Arl4d  | Tsc22d3       | 1  |

|       |       |               |                    |    |
|-------|-------|---------------|--------------------|----|
| 15826 | 15522 | Arl4d         | 1810011O10Rik      | 1  |
| 15826 | 15826 | Arl4d         | Arl4d              | 1  |
| 15826 | 17352 | Arl4d         | Cebpb              | 1  |
| 15826 | 17525 | Arl4d         | Ctgf               | 1  |
| 15826 | 17752 | Arl4d         | Chac1              | 1  |
| 15826 | 22873 | Arl4d         | Slc38a2            | 1  |
| 15826 | 23552 | Arl4d         | Rasl11b            | -1 |
| 15832 | 15775 | Crybb2        | Nat11              | 1  |
| 15832 | 15911 | Crybb2        | Gira4              | 1  |
| 15832 | 16654 | Crybb2        | Oas1f              | 1  |
| 15832 | 16658 | Crybb2        | MMT00011796        | 1  |
| 15832 | 17702 | Crybb2        | Ccdc40             | 1  |
| 15847 | 3208  | Gm392         | 4930511I11Rik      | 1  |
| 15847 | 7436  | Gm392         | 1700063K16Rik      | 1  |
| 15847 | 11966 | Gm392         | Zfp280b            | 1  |
| 15847 | 19436 | Gm392         | Dapp1              | 1  |
| 15847 | 22125 | Gm392         | Gab1               | 1  |
| 15853 | 2079  | D430036J16Rik | Mthfs              | -1 |
| 15853 | 2753  | D430036J16Rik | Myo6               | 1  |
| 15853 | 3642  | D430036J16Rik | Spsb4              | -1 |
| 15853 | 3780  | D430036J16Rik | Ryk                | 1  |
| 15853 | 5263  | D430036J16Rik | Anapc13            | -1 |
| 15853 | 8073  | D430036J16Rik | Irak1bp1           | 1  |
| 15853 | 10236 | D430036J16Rik | EG665033           | 1  |
| 15881 | 661   | Hcn4          | Siglec1            | -1 |
| 15881 | 14498 | Hcn4          | Layn               | -1 |
| 15885 | 3208  | Adamts7       | 4930511I11Rik      | 1  |
| 15885 | 7436  | Adamts7       | 1700063K16Rik      | 1  |
| 15885 | 11966 | Adamts7       | Zfp280b            | 1  |
| 15885 | 12861 | Adamts7       | Rhcg               | 1  |
| 15885 | 19436 | Adamts7       | Dapp1              | 1  |
| 15885 | 22125 | Adamts7       | Gab1               | 1  |
| 15896 | 2110  | Pdgfrb        | Gtf2ird1           | 1  |
| 15897 | 12055 | D10Jhu81e     | 1810008A18Rik      | -1 |
| 15901 | 524   | Tpm3          | Hsd3b2             | -1 |
| 15901 | 673   | Tpm3          | Tchh               | 1  |
| 15901 | 1466  | Tpm3          | Ubap2l             | -1 |
| 15901 | 1867  | Tpm3          | Bcas2              | -1 |
| 15901 | 3753  | Tpm3          | Setdb1             | 1  |
| 15901 | 6206  | Tpm3          | MMT00063701        | -1 |
| 15901 | 7519  | Tpm3          | Gstm1              | -1 |
| 15901 | 8738  | Tpm3          | Reg4               | 1  |
| 15901 | 10521 | Tpm3          | Ttf2               | -1 |
| 15901 | 10681 | Tpm3          | Dgkz               | 1  |
| 15901 | 11121 | Tpm3          | Mttr11             | 1  |
| 15901 | 11611 | Tpm3          | S100a13            | 1  |
| 15901 | 12367 | Tpm3          | MMT00072365        | 1  |
| 15901 | 16753 | Tpm3          | Hfe2               | 1  |
| 15901 | 18754 | Tpm3          | Rbm8a              | -1 |
| 15901 | 18911 | Tpm3          | Selenbp2           | -1 |
| 15901 | 20661 | Tpm3          | Tuft1              | -1 |
| 15901 | 22202 | Tpm3          | OTTMUSG00000021274 | 1  |
| 15901 | 22570 | Tpm3          | Phf1               | -1 |
| 15901 | 23457 | Tpm3          | Selenbp2           | -1 |
| 15924 | 1453  | Rbm38         | Gfod2              | -1 |
| 15924 | 2471  | Rbm38         | Ccdc134            | -1 |
| 15924 | 10382 | Rbm38         | Mttr4              | -1 |
| 15952 | 22194 | Bai3          | Olfir39            | -1 |
| 15953 | 1336  | Acsf3         | MMT00069537        | -1 |
| 15953 | 2243  | Acsf3         | Gcsh               | -1 |
| 15953 | 11404 | Acsf3         | Gnpat              | -1 |
| 15953 | 14391 | Acsf3         | MMT00017335        | 1  |
| 15953 | 15953 | Acsf3         | Acsf3              | 1  |
| 15953 | 18697 | Acsf3         | Afg3l1             | -1 |
| 15953 | 21394 | Acsf3         | Cdh15              | 1  |
| 15953 | 22909 | Acsf3         | Nup133             | -1 |
| 15971 | 1041  | Aifm2         | 3110049J23Rik      | 1  |
| 15971 | 5965  | Aifm2         | Pbld               | 1  |
| 15971 | 15971 | Aifm2         | Aifm2              | 1  |

|       |       |             |               |    |
|-------|-------|-------------|---------------|----|
| 15984 | 1371  | MMT00075074 | 1200009I06Rik | 1  |
| 15984 | 7388  | MMT00075074 | Amn           | 1  |
| 15984 | 8155  | MMT00075074 | Mark3         | 1  |
| 15984 | 12238 | MMT00075074 | Traf3         | -1 |
| 15984 | 13027 | MMT00075074 | Ppp2r5c       | -1 |
| 15984 | 15984 | MMT00075074 | MMT00075074   | 1  |
| 16018 | 3208  | MMT00074939 | 4930511I11Rik | 1  |
| 16018 | 12861 | MMT00074939 | Rhcg          | 1  |
| 16018 | 19436 | MMT00074939 | Dapp1         | 1  |
| 16030 | 3587  | Prpf3       | MMT00041940   | 1  |
| 16030 | 6021  | Prpf3       | MMT00008784   | 1  |
| 16030 | 8670  | Prpf3       | MMT00051613   | 1  |
| 16030 | 11214 | Prpf3       | MMT00049207   | 1  |
| 16030 | 15476 | Prpf3       | Fem1b         | -1 |
| 16030 | 15675 | Prpf3       | MMT00077535   | 1  |
| 16030 | 18373 | Prpf3       | Dnajb1        | 1  |
| 16046 | 16046 | Ppwd1       | Ppwd1         | 1  |
| 16066 | 4474  | Coq2        | EG627022      | 1  |
| 16066 | 4617  | Coq2        | Agpat9        | -1 |
| 16066 | 5100  | Coq2        | Pebp1         | -1 |
| 16066 | 6330  | Coq2        | Dgkq          | 1  |
| 16066 | 7258  | Coq2        | Bmp2k         | -1 |
| 16066 | 8807  | Coq2        | Ankrd56       | -1 |
| 16066 | 10978 | Coq2        | MMT00078322   | 1  |
| 16066 | 12656 | Coq2        | Coq5          | 1  |
| 16066 | 14085 | Coq2        | Cdkl2         | 1  |
| 16066 | 15271 | Coq2        | Dbf4          | -1 |
| 16066 | 15908 | Coq2        | Pebp1         | -1 |
| 16066 | 16066 | Coq2        | Coq2          | 1  |
| 16066 | 17807 | Coq2        | Pebp1         | -1 |
| 16066 | 20118 | Coq2        | Tmem175       | 1  |
| 16067 | 2938  | Pcaf        | H2-T23        | -1 |
| 16067 | 3857  | Pcaf        | 1700001C19Rik | 1  |
| 16067 | 13493 | Pcaf        | Ring1         | 1  |
| 16067 | 22822 | Pcaf        | MMT00013433   | -1 |
| 16067 | 23250 | Pcaf        | Plcl2         | -1 |
| 16074 | 22395 | Prkcc       | Kcna1         | -1 |
| 16077 | 16077 | Mocs2       | Mocs2         | 1  |
| 16078 | 20394 | Defb15      | EG668225      | -1 |
| 16098 | 202   | Rps20       | Naif1         | -1 |
| 16098 | 1697  | Rps20       | Sf4           | -1 |
| 16098 | 1849  | Rps20       | MMT00063181   | -1 |
| 16098 | 3587  | Rps20       | MMT00041940   | -1 |
| 16098 | 3799  | Rps20       | Serpinh1      | -1 |
| 16098 | 4950  | Rps20       | Dnajb10       | -1 |
| 16098 | 4966  | Rps20       | Zscan20       | -1 |
| 16098 | 5352  | Rps20       | Pdcd2l        | 1  |
| 16098 | 6021  | Rps20       | MMT00008784   | -1 |
| 16098 | 7731  | Rps20       | 1500001M20Rik | 1  |
| 16098 | 8319  | Rps20       | MMT00062477   | -1 |
| 16098 | 8486  | Rps20       | Plod3         | -1 |
| 16098 | 8670  | Rps20       | MMT00051613   | -1 |
| 16098 | 9067  | Rps20       | Tra2a         | -1 |
| 16098 | 9258  | Rps20       | P4ha1         | -1 |
| 16098 | 9899  | Rps20       | D13Wsu177e    | -1 |
| 16098 | 10267 | Rps20       | Setdb2        | 1  |
| 16098 | 11043 | Rps20       | Hsph1         | -1 |
| 16098 | 11201 | Rps20       | Sunc1         | 1  |
| 16098 | 11214 | Rps20       | MMT00049207   | -1 |
| 16098 | 11818 | Rps20       | MMT00048396   | -1 |
| 16098 | 13052 | Rps20       | Tnfrsf19      | 1  |
| 16098 | 14139 | Rps20       | 2410005O16Rik | 1  |
| 16098 | 14222 | Rps20       | MMT00076410   | 1  |
| 16098 | 15476 | Rps20       | Fem1b         | 1  |
| 16098 | 15675 | Rps20       | MMT00077535   | -1 |
| 16098 | 15713 | Rps20       | Rbm3          | 1  |
| 16098 | 17449 | Rps20       | Zfp296        | -1 |
| 16098 | 17595 | Rps20       | MMT00048325   | -1 |
| 16098 | 17712 | Rps20       | Nup62         | -1 |

|       |       |               |               |    |
|-------|-------|---------------|---------------|----|
| 16098 | 18373 | Rps20         | Dnajb1        | -1 |
| 16098 | 18418 | Rps20         | Hspa1b        | -1 |
| 16098 | 19540 | Rps20         | Zfp428        | -1 |
| 16098 | 20332 | Rps20         | Stau2         | 1  |
| 16098 | 20912 | Rps20         | Chordc1       | -1 |
| 16098 | 22139 | Rps20         | Stip1         | -1 |
| 16098 | 23646 | Rps20         | Hsp90ab1      | -1 |
| 16128 | 15775 | Agbl1         | Nat11         | -1 |
| 16128 | 16660 | Agbl1         | Gpc6          | -1 |
| 16128 | 17702 | Agbl1         | Ccdc40        | -1 |
| 16137 | 6079  | Xrcc5         | Tmem169       | -1 |
| 16137 | 18714 | Xrcc5         | Farsb         | -1 |
| 16153 | 3654  | Syng1         | St13          | 1  |
| 16157 | 19436 | D9Ert280e     | Dapp1         | 1  |
| 16159 | 16465 | Igh-VJ558     | Ccdc130       | -1 |
| 16163 | 9449  | Tmco1         | Sft2d2        | -1 |
| 16168 | 6330  | Crlf2         | Dgkq          | 1  |
| 16168 | 16168 | Crlf2         | Crlf2         | 1  |
| 16170 | 3753  | S100a11       | Setdb1        | -1 |
| 16179 | 4918  | Gulo          | Scara5        | 1  |
| 16179 | 17087 | Gulo          | Gulo          | -1 |
| 16179 | 20720 | Gulo          | Ptk2b         | -1 |
| 16186 | 6021  | Cfp           | MMT00008784   | 1  |
| 16186 | 8670  | Cfp           | MMT00051613   | 1  |
| 16186 | 11043 | Cfp           | Hsph1         | 1  |
| 16186 | 11214 | Cfp           | MMT00049207   | 1  |
| 16186 | 15476 | Cfp           | Fem1b         | -1 |
| 16186 | 15675 | Cfp           | MMT00077535   | 1  |
| 16197 | 11966 | MMT00065977   | Zfp280b       | 1  |
| 16197 | 19436 | MMT00065977   | Dapp1         | 1  |
| 16197 | 22555 | MMT00065977   | Ela2          | 1  |
| 16255 | 2743  | Reg3b         | Tcf3          | -1 |
| 16255 | 3703  | Reg3b         | Ggcx          | -1 |
| 16255 | 4093  | Reg3b         | Akp5          | -1 |
| 16255 | 8194  | Reg3b         | MMT00077789   | 1  |
| 16255 | 11338 | Reg3b         | Vamp8         | -1 |
| 16255 | 11872 | Reg3b         | Vamp5         | -1 |
| 16255 | 15384 | Reg3b         | Mat2a         | -1 |
| 16255 | 15708 | Reg3b         | Retsat        | -1 |
| 16255 | 17391 | Reg3b         | C530028O21Rik | 1  |
| 16255 | 18658 | Reg3b         | Gstk1         | -1 |
| 16283 | 524   | EG627427      | Hsd3b2        | -1 |
| 16283 | 3753  | EG627427      | Setdb1        | 1  |
| 16283 | 10681 | EG627427      | Dgkz          | 1  |
| 16283 | 11121 | EG627427      | Mtmt11        | 1  |
| 16283 | 11611 | EG627427      | S100a13       | 1  |
| 16283 | 18754 | EG627427      | Rbm8a         | -1 |
| 16283 | 18911 | EG627427      | Selenbp2      | -1 |
| 16283 | 20661 | EG627427      | Tuft1         | -1 |
| 16283 | 23457 | EG627427      | Selenbp2      | -1 |
| 16295 | 6804  | Nlrp14        | Cyp2d22       | -1 |
| 16295 | 12468 | Nlrp14        | Cyp2d13       | -1 |
| 16295 | 16295 | Nlrp14        | Nlrp14        | 1  |
| 16295 | 21095 | Nlrp14        | 9130401M01Rik | 1  |
| 16299 | 3587  | Creld2        | MMT00041940   | 1  |
| 16299 | 6021  | Creld2        | MMT00008784   | 1  |
| 16299 | 8670  | Creld2        | MMT00051613   | 1  |
| 16299 | 11043 | Creld2        | Hsph1         | 1  |
| 16299 | 11214 | Creld2        | MMT00049207   | 1  |
| 16299 | 15675 | Creld2        | MMT00077535   | 1  |
| 16323 | 3208  | Smpd3         | 4930511111Rik | 1  |
| 16323 | 11966 | Smpd3         | Zfp280b       | 1  |
| 16327 | 6797  | Ubfd1         | Blvra         | -1 |
| 16330 | 1603  | 2310043J07Rik | Lrwd1         | -1 |
| 16390 | 3208  | Plb1          | 4930511111Rik | 1  |
| 16390 | 5694  | Plb1          | Sp7           | 1  |
| 16390 | 7436  | Plb1          | 1700063K16Rik | 1  |
| 16390 | 11966 | Plb1          | Zfp280b       | 1  |
| 16390 | 12248 | Plb1          | Tnp2          | 1  |

|       |       |               |                    |    |
|-------|-------|---------------|--------------------|----|
| 16390 | 12861 | Plb1          | Rhcg               | 1  |
| 16390 | 14407 | Plb1          | Six3               | 1  |
| 16390 | 19436 | Plb1          | Dapp1              | 1  |
| 16390 | 19672 | Plb1          | Cldn19             | 1  |
| 16390 | 22125 | Plb1          | Gab1               | 1  |
| 16392 | 3704  | EG627648      | H2-Q7              | 1  |
| 16392 | 8649  | EG627648      | MMT00072863        | -1 |
| 16406 | 15476 | Mettl6        | Fem1b              | -1 |
| 16406 | 22216 | Mettl6        | Sp5                | -1 |
| 16416 | 524   | Commd2        | Hsd3b2             | 1  |
| 16416 | 1466  | Commd2        | Ubp2l              | 1  |
| 16416 | 1867  | Commd2        | Bcas2              | 1  |
| 16416 | 2752  | Commd2        | Fcgr1              | 1  |
| 16416 | 3206  | Commd2        | Gpr160             | 1  |
| 16416 | 3753  | Commd2        | Setdb1             | -1 |
| 16416 | 5822  | Commd2        | Car2               | 1  |
| 16416 | 5938  | Commd2        | Pfn2               | 1  |
| 16416 | 6206  | Commd2        | MMT00063701        | 1  |
| 16416 | 7519  | Commd2        | Gstm1              | 1  |
| 16416 | 8738  | Commd2        | Reg4               | -1 |
| 16416 | 10521 | Commd2        | Ttf2               | 1  |
| 16416 | 10681 | Commd2        | Dgkz               | -1 |
| 16416 | 11121 | Commd2        | Mttr11             | -1 |
| 16416 | 11611 | Commd2        | S100a13            | -1 |
| 16416 | 12250 | Commd2        | P2ry14             | 1  |
| 16416 | 12367 | Commd2        | MMT00072365        | -1 |
| 16416 | 13423 | Commd2        | ENSMUSG00000053749 | 1  |
| 16416 | 15508 | Commd2        | 4632415L05Rik      | 1  |
| 16416 | 16416 | Commd2        | Commd2             | 1  |
| 16416 | 16753 | Commd2        | Hfe2               | -1 |
| 16416 | 18754 | Commd2        | Rbm8a              | 1  |
| 16416 | 18911 | Commd2        | Selenbp2           | 1  |
| 16416 | 20385 | Commd2        | Chd1l              | 1  |
| 16416 | 20661 | Commd2        | Tuft1              | 1  |
| 16416 | 21814 | Commd2        | Accn5              | 1  |
| 16416 | 22202 | Commd2        | OTTMUSG00000021274 | -1 |
| 16416 | 22570 | Commd2        | Phf1               | 1  |
| 16416 | 23457 | Commd2        | Selenbp2           | 1  |
| 16436 | 15281 | Gpr39         | V1rc22             | -1 |
| 16453 | 22263 | Olfr1372-ps1  | Gzmd               | -1 |
| 16467 | 3654  | Card10        | St13               | -1 |
| 16467 | 6183  | Card10        | Atxn10             | -1 |
| 16467 | 6804  | Card10        | Cyp2d22            | 1  |
| 16467 | 7100  | Card10        | Tommm22            | 1  |
| 16467 | 8653  | Card10        | AW124722           | -1 |
| 16467 | 11503 | Card10        | Rangap1            | 1  |
| 16467 | 12468 | Card10        | Cyp2d13            | 1  |
| 16467 | 19216 | Card10        | Bik                | 1  |
| 16491 | 10189 | 6330500D04Rik | Cage1              | -1 |
| 16491 | 11094 | 6330500D04Rik | Slc17a3            | 1  |
| 16491 | 15698 | 6330500D04Rik | Them2              | 1  |
| 16491 | 19436 | 6330500D04Rik | Dapp1              | 1  |
| 16491 | 20759 | 6330500D04Rik | Slc17a1            | 1  |
| 16494 | 250   | 2310007D09Rik | Tubb2a-ps2         | -1 |
| 16494 | 563   | 2310007D09Rik | D4Bwg0951e         | 1  |
| 16494 | 609   | 2310007D09Rik | MMT00060868        | -1 |
| 16494 | 719   | 2310007D09Rik | Usp2               | 1  |
| 16494 | 793   | 2310007D09Rik | Morc3              | 1  |
| 16494 | 1363  | 2310007D09Rik | BC021767           | -1 |
| 16494 | 1646  | 2310007D09Rik | Slc15a4            | 1  |
| 16494 | 1709  | 2310007D09Rik | Mt2                | 1  |
| 16494 | 1877  | 2310007D09Rik | Amica1             | 1  |
| 16494 | 2110  | 2310007D09Rik | Gtf2ird1           | -1 |
| 16494 | 2322  | 2310007D09Rik | Tuba4a             | -1 |
| 16494 | 2615  | 2310007D09Rik | EG624862           | 1  |
| 16494 | 2794  | 2310007D09Rik | Map3k6             | 1  |
| 16494 | 3040  | 2310007D09Rik | Bcl3               | -1 |
| 16494 | 3170  | 2310007D09Rik | Mcart1             | 1  |
| 16494 | 3214  | 2310007D09Rik | Dnmt3b             | -1 |

|       |       |               |               |    |
|-------|-------|---------------|---------------|----|
| 16494 | 3235  | 2310007D09Rik | BC029214      | -1 |
| 16494 | 3246  | 2310007D09Rik | Prei4         | 1  |
| 16494 | 3556  | 2310007D09Rik | Al661453      | -1 |
| 16494 | 3559  | 2310007D09Rik | 4933433P14Rik | 1  |
| 16494 | 3804  | 2310007D09Rik | MMT00015534   | -1 |
| 16494 | 4084  | 2310007D09Rik | Asah3l        | 1  |
| 16494 | 4201  | 2310007D09Rik | Tubb2c        | -1 |
| 16494 | 4235  | 2310007D09Rik | Pfkfb3        | 1  |
| 16494 | 4286  | 2310007D09Rik | Ptp4a1        | 1  |
| 16494 | 4380  | 2310007D09Rik | Smarcb1       | -1 |
| 16494 | 4392  | 2310007D09Rik | 1810055G02Rik | 1  |
| 16494 | 4678  | 2310007D09Rik | Kank1         | -1 |
| 16494 | 4708  | 2310007D09Rik | Traf3ip2      | -1 |
| 16494 | 5187  | 2310007D09Rik | Speer4f       | 1  |
| 16494 | 5831  | 2310007D09Rik | Sh2b3         | -1 |
| 16494 | 6386  | 2310007D09Rik | Por           | 1  |
| 16494 | 6490  | 2310007D09Rik | Il1r1         | 1  |
| 16494 | 6564  | 2310007D09Rik | Cebpd         | 1  |
| 16494 | 7061  | 2310007D09Rik | Spsb3         | -1 |
| 16494 | 7397  | 2310007D09Rik | MMT00020969   | 1  |
| 16494 | 8399  | 2310007D09Rik | Herpud1       | 1  |
| 16494 | 8507  | 2310007D09Rik | 1700054F22Rik | 1  |
| 16494 | 8843  | 2310007D09Rik | Eil2          | 1  |
| 16494 | 9275  | 2310007D09Rik | Aass          | 1  |
| 16494 | 9495  | 2310007D09Rik | Srms          | -1 |
| 16494 | 9910  | 2310007D09Rik | EG666644      | 1  |
| 16494 | 10088 | 2310007D09Rik | Ddc           | -1 |
| 16494 | 10215 | 2310007D09Rik | Nampt         | 1  |
| 16494 | 10541 | 2310007D09Rik | Ap2a2         | -1 |
| 16494 | 10712 | 2310007D09Rik | Fchsd2        | 1  |
| 16494 | 11129 | 2310007D09Rik | Ankhd1        | 1  |
| 16494 | 11599 | 2310007D09Rik | Coq10b        | 1  |
| 16494 | 11614 | 2310007D09Rik | Sult1e1       | 1  |
| 16494 | 11741 | 2310007D09Rik | Slc30a10      | -1 |
| 16494 | 11807 | 2310007D09Rik | Fbxo31        | 1  |
| 16494 | 11808 | 2310007D09Rik | Pck1          | 1  |
| 16494 | 11823 | 2310007D09Rik | Mmp7          | 1  |
| 16494 | 11926 | 2310007D09Rik | Ampd2         | -1 |
| 16494 | 11937 | 2310007D09Rik | Snx10         | 1  |
| 16494 | 11949 | 2310007D09Rik | Cldn3         | -1 |
| 16494 | 12190 | 2310007D09Rik | Krt18         | -1 |
| 16494 | 12420 | 2310007D09Rik | Klhl21        | 1  |
| 16494 | 12436 | 2310007D09Rik | Serinc3       | 1  |
| 16494 | 12479 | 2310007D09Rik | lfrd1         | 1  |
| 16494 | 12489 | 2310007D09Rik | Wdr8          | -1 |
| 16494 | 12761 | 2310007D09Rik | Tsc22d3       | 1  |
| 16494 | 12799 | 2310007D09Rik | Spon2         | -1 |
| 16494 | 12904 | 2310007D09Rik | MMT00040704   | 1  |
| 16494 | 12982 | 2310007D09Rik | Cars          | -1 |
| 16494 | 13078 | 2310007D09Rik | Eps8l2        | -1 |
| 16494 | 13471 | 2310007D09Rik | Cln8          | 1  |
| 16494 | 13705 | 2310007D09Rik | Osbpl1a       | 1  |
| 16494 | 14041 | 2310007D09Rik | Cldn1         | -1 |
| 16494 | 15021 | 2310007D09Rik | Ppargc1a      | 1  |
| 16494 | 15522 | 2310007D09Rik | 1810011O10Rik | 1  |
| 16494 | 15631 | 2310007D09Rik | Lpin1         | 1  |
| 16494 | 16176 | 2310007D09Rik | St3gal5       | 1  |
| 16494 | 16580 | 2310007D09Rik | Tnfaip2       | -1 |
| 16494 | 16647 | 2310007D09Rik | D16H22S680E   | 1  |
| 16494 | 16669 | 2310007D09Rik | Tjp2          | -1 |
| 16494 | 16690 | 2310007D09Rik | Tjp3          | -1 |
| 16494 | 16946 | 2310007D09Rik | lvns1abp      | 1  |
| 16494 | 17078 | 2310007D09Rik | Syde2         | 1  |
| 16494 | 17352 | 2310007D09Rik | Cebpb         | 1  |
| 16494 | 17418 | 2310007D09Rik | D1Ertld622e   | 1  |
| 16494 | 17525 | 2310007D09Rik | Ctgf          | 1  |
| 16494 | 17622 | 2310007D09Rik | Foxo1         | 1  |
| 16494 | 17876 | 2310007D09Rik | Tubb4         | -1 |
| 16494 | 17994 | 2310007D09Rik | Zh2c2         | 1  |



|       |       |               |                    |    |
|-------|-------|---------------|--------------------|----|
| 16494 | 18027 | 2310007D09Rik | 5730403B10Rik      | 1  |
| 16494 | 18314 | 2310007D09Rik | 4631416L12Rik      | 1  |
| 16494 | 18785 | 2310007D09Rik | Angptl4            | 1  |
| 16494 | 18827 | 2310007D09Rik | Oprs1              | -1 |
| 16494 | 19025 | 2310007D09Rik | Slc37a4            | 1  |
| 16494 | 19146 | 2310007D09Rik | N4bp211            | 1  |
| 16494 | 19234 | 2310007D09Rik | Nrg4               | 1  |
| 16494 | 19277 | 2310007D09Rik | MMT00044927        | 1  |
| 16494 | 19323 | 2310007D09Rik | Bnip3              | 1  |
| 16494 | 19466 | 2310007D09Rik | Pptc7              | 1  |
| 16494 | 19556 | 2310007D09Rik | Efna1              | -1 |
| 16494 | 19671 | 2310007D09Rik | Upp2               | 1  |
| 16494 | 19723 | 2310007D09Rik | Pfkfb1             | 1  |
| 16494 | 19757 | 2310007D09Rik | Fkbp5              | 1  |
| 16494 | 20085 | 2310007D09Rik | Lpin2              | 1  |
| 16494 | 20570 | 2310007D09Rik | Ap3m1              | 1  |
| 16494 | 20854 | 2310007D09Rik | Comm7              | -1 |
| 16494 | 20880 | 2310007D09Rik | Raf1               | -1 |
| 16494 | 21167 | 2310007D09Rik | Irf5               | -1 |
| 16494 | 21331 | 2310007D09Rik | Slc10a6            | 1  |
| 16494 | 21901 | 2310007D09Rik | BC035537           | -1 |
| 16494 | 22031 | 2310007D09Rik | Vcam1              | 1  |
| 16494 | 22290 | 2310007D09Rik | Tubb2a             | -1 |
| 16494 | 22630 | 2310007D09Rik | MMT00034355        | -1 |
| 16494 | 22863 | 2310007D09Rik | Prkd2              | -1 |
| 16494 | 22873 | 2310007D09Rik | Slc38a2            | 1  |
| 16494 | 23180 | 2310007D09Rik | Sult1d1            | 1  |
| 16494 | 23183 | 2310007D09Rik | Nnmt               | 1  |
| 16494 | 23558 | 2310007D09Rik | MMT00030937        | 1  |
| 16501 | 2980  | Loh11cr2a     | Slc37a2            | -1 |
| 16501 | 16501 | Loh11cr2a     | Loh11cr2a          | 1  |
| 16501 | 20468 | Loh11cr2a     | Spa17              | -1 |
| 16522 | 3654  | Ccdc85a       | St13               | -1 |
| 16522 | 19216 | Ccdc85a       | Bik                | 1  |
| 16525 | 15775 | Lbp           | Nat11              | -1 |
| 16553 | 11966 | Cilp2         | Zfp280b            | 1  |
| 16553 | 12861 | Cilp2         | Rhcg               | 1  |
| 16553 | 19436 | Cilp2         | Dapp1              | 1  |
| 16613 | 13615 | 1110031102Rik | Arl16              | -1 |
| 16613 | 16613 | 1110031102Rik | 1110031102Rik      | 1  |
| 16616 | 8670  | Paox          | MMT00051613        | -1 |
| 16616 | 11214 | Paox          | MMT00049207        | -1 |
| 16616 | 15675 | Paox          | MMT00077535        | -1 |
| 16616 | 17595 | Paox          | MMT00048325        | -1 |
| 16617 | 286   | Sh2d4a        | MMT00070509        | -1 |
| 16617 | 1755  | Sh2d4a        | Ocel1              | -1 |
| 16617 | 2703  | Sh2d4a        | MMT00073763        | -1 |
| 16617 | 3052  | Sh2d4a        | 9130404D08Rik      | 1  |
| 16617 | 3055  | Sh2d4a        | Pde4c              | -1 |
| 16617 | 5433  | Sh2d4a        | 2410004L22Rik      | 1  |
| 16617 | 9304  | Sh2d4a        | Al449175           | -1 |
| 16617 | 9931  | Sh2d4a        | Glit25d1           | 1  |
| 16617 | 10195 | Sh2d4a        | Klf1               | -1 |
| 16617 | 13732 | Sh2d4a        | Tpm4               | 1  |
| 16617 | 15094 | Sh2d4a        | Pbx4               | 1  |
| 16617 | 15455 | Sh2d4a        | Lsm4               | 1  |
| 16617 | 16617 | Sh2d4a        | Sh2d4a             | 1  |
| 16617 | 16849 | Sh2d4a        | Trmt1              | 1  |
| 16617 | 18886 | Sh2d4a        | Slc18a1            | 1  |
| 16617 | 20484 | Sh2d4a        | Ces1               | 1  |
| 16618 | 3159  | Hps3          | Pld1               | -1 |
| 16618 | 3206  | Hps3          | Gpr160             | -1 |
| 16618 | 5822  | Hps3          | Car2               | -1 |
| 16618 | 5938  | Hps3          | Pfn2               | -1 |
| 16618 | 8568  | Hps3          | Tnik               | -1 |
| 16618 | 12367 | Hps3          | MMT00072365        | 1  |
| 16618 | 12784 | Hps3          | Nudt6              | -1 |
| 16618 | 13423 | Hps3          | ENSMUSG00000053749 | -1 |
| 16618 | 15508 | Hps3          | 4632415L05Rik      | -1 |

|       |       |               |               |    |
|-------|-------|---------------|---------------|----|
| 16618 | 16416 | Hps3          | Commd2        | -1 |
| 16618 | 18790 | Hps3          | Car3          | -1 |
| 16618 | 21323 | Hps3          | MMT00074228   | -1 |
| 16637 | 7436  | Vmn2r85       | 1700063K16Rik | 1  |
| 16664 | 11966 | Car4          | Zfp280b       | 1  |
| 16664 | 12861 | Car4          | Rhcg          | 1  |
| 16664 | 19436 | Car4          | Dapp1         | 1  |
| 16672 | 3208  | Tmem82        | 4930511111Rik | 1  |
| 16672 | 7436  | Tmem82        | 1700063K16Rik | 1  |
| 16672 | 11966 | Tmem82        | Zfp280b       | 1  |
| 16672 | 12861 | Tmem82        | Rhcg          | 1  |
| 16672 | 19436 | Tmem82        | Dapp1         | 1  |
| 16675 | 3587  | Flrt2         | MMT00041940   | 1  |
| 16675 | 18083 | Flrt2         | Gadd45a       | -1 |
| 16675 | 18418 | Flrt2         | Hspa1b        | 1  |
| 16675 | 20535 | Flrt2         | Rbm4          | 1  |
| 16692 | 327   | Bat4          | H2-Ea         | 1  |
| 16692 | 510   | Bat4          | Neu1          | -1 |
| 16692 | 763   | Bat4          | 4933406E20Rik | 1  |
| 16692 | 1340  | Bat4          | Tap2          | 1  |
| 16692 | 2325  | Bat4          | H2-K1         | 1  |
| 16692 | 2801  | Bat4          | H2-BI         | 1  |
| 16692 | 2938  | Bat4          | H2-T23        | 1  |
| 16692 | 3599  | Bat4          | MMT00035426   | -1 |
| 16692 | 3704  | Bat4          | H2-Q7         | 1  |
| 16692 | 3857  | Bat4          | 1700001C19Rik | -1 |
| 16692 | 4004  | Bat4          | Thbs2         | -1 |
| 16692 | 5410  | Bat4          | Cyp4f15       | -1 |
| 16692 | 5648  | Bat4          | Zfp213        | -1 |
| 16692 | 6360  | Bat4          | D17H6S56E-3   | -1 |
| 16692 | 7088  | Bat4          | Slc37a1       | 1  |
| 16692 | 8750  | Bat4          | 1700010I14Rik | 1  |
| 16692 | 8767  | Bat4          | Rgl2          | 1  |
| 16692 | 9158  | Bat4          | Pde9a         | -1 |
| 16692 | 10376 | Bat4          | C920025E04Rik | -1 |
| 16692 | 10394 | Bat4          | MMT00028435   | 1  |
| 16692 | 10667 | Bat4          | H2-Eb1        | 1  |
| 16692 | 11459 | Bat4          | Mas1          | -1 |
| 16692 | 12335 | Bat4          | Plcb4         | 1  |
| 16692 | 12355 | Bat4          | Al507611      | 1  |
| 16692 | 12694 | Bat4          | Riok2         | -1 |
| 16692 | 13493 | Bat4          | Ring1         | -1 |
| 16692 | 13789 | Bat4          | H2-Q8         | 1  |
| 16692 | 14322 | Bat4          | Bat1a         | -1 |
| 16692 | 15181 | Bat4          | Enpp4         | -1 |
| 16692 | 15531 | Bat4          | Prickle4      | -1 |
| 16692 | 17691 | Bat4          | Kank3         | 1  |
| 16692 | 18577 | Bat4          | Btbd9         | -1 |
| 16692 | 18906 | Bat4          | Zfand3        | 1  |
| 16692 | 20100 | Bat4          | Guca1b        | -1 |
| 16692 | 20238 | Bat4          | H2-T9         | 1  |
| 16692 | 20346 | Bat4          | Gna-rs1       | 1  |
| 16692 | 21478 | Bat4          | Loxhd1        | -1 |
| 16692 | 22822 | Bat4          | MMT00013433   | 1  |
| 16692 | 23250 | Bat4          | Plcl2         | 1  |
| 16692 | 23401 | Bat4          | H2-Q2         | 1  |
| 16702 | 286   | 2810422J05Rik | MMT00070509   | -1 |
| 16702 | 1755  | 2810422J05Rik | Ocel1         | -1 |
| 16702 | 5433  | 2810422J05Rik | 2410004L22Rik | 1  |
| 16702 | 9931  | 2810422J05Rik | Glt25d1       | 1  |
| 16702 | 13732 | 2810422J05Rik | Tpm4          | 1  |
| 16702 | 15455 | 2810422J05Rik | Lsm4          | 1  |
| 16715 | 6231  | 2610034M16Rik | 9030622O22Rik | -1 |
| 16715 | 14647 | 2610034M16Rik | Cst3          | 1  |
| 16715 | 21729 | 2610034M16Rik | Hdc           | 1  |
| 16718 | 19436 | Zbtb7c        | Dapp1         | 1  |
| 16748 | 6021  | Zfp810        | MMT00008784   | -1 |
| 16748 | 6769  | Zfp810        | Banp          | -1 |
| 16748 | 8670  | Zfp810        | MMT00051613   | -1 |

|       |       |             |               |    |
|-------|-------|-------------|---------------|----|
| 16748 | 15675 | Zfp810      | MMT00077535   | -1 |
| 16748 | 18373 | Zfp810      | Dnajb1        | -1 |
| 16748 | 18418 | Zfp810      | Hspa1b        | -1 |
| 16794 | 7436  | Chrb1       | 1700063K16Rik | 1  |
| 16794 | 9468  | Chrb1       | Gtf2a1l       | 1  |
| 16794 | 11966 | Chrb1       | Zfp280b       | 1  |
| 16794 | 19436 | Chrb1       | Dapp1         | 1  |
| 16794 | 19672 | Chrb1       | Cldn19        | 1  |
| 16814 | 16814 | AU042651    | AU042651      | 1  |
| 16849 | 286   | Trmt1       | MMT00070509   | -1 |
| 16849 | 1336  | Trmt1       | MMT00069537   | -1 |
| 16849 | 1755  | Trmt1       | Ocel1         | -1 |
| 16849 | 2243  | Trmt1       | Gcsh          | -1 |
| 16849 | 2671  | Trmt1       | Sh3rf1        | 1  |
| 16849 | 2703  | Trmt1       | MMT00073763   | -1 |
| 16849 | 2749  | Trmt1       | Naf1          | 1  |
| 16849 | 3052  | Trmt1       | 9130404D08Rik | 1  |
| 16849 | 3055  | Trmt1       | Pde4c         | -1 |
| 16849 | 5433  | Trmt1       | 2410004L22Rik | 1  |
| 16849 | 6760  | Trmt1       | 2810428I15Rik | -1 |
| 16849 | 9304  | Trmt1       | AI449175      | -1 |
| 16849 | 9931  | Trmt1       | Glt25d1       | 1  |
| 16849 | 10195 | Trmt1       | Klf1          | -1 |
| 16849 | 10273 | Trmt1       | Gpt2          | -1 |
| 16849 | 13732 | Trmt1       | Tpm4          | 1  |
| 16849 | 14391 | Trmt1       | MMT00017335   | 1  |
| 16849 | 14845 | Trmt1       | Tmem188       | -1 |
| 16849 | 15094 | Trmt1       | Pbx4          | 1  |
| 16849 | 15455 | Trmt1       | Lsm4          | 1  |
| 16849 | 16617 | Trmt1       | Sh2d4a        | 1  |
| 16849 | 16849 | Trmt1       | Trmt1         | 1  |
| 16849 | 17403 | Trmt1       | N4bp1         | 1  |
| 16849 | 17703 | Trmt1       | Large         | 1  |
| 16849 | 18886 | Trmt1       | Slc18a1       | 1  |
| 16849 | 20484 | Trmt1       | Ces1          | 1  |
| 16849 | 22776 | Trmt1       | Gsr           | -1 |
| 16855 | 11043 | Itk         | Hsph1         | -1 |
| 16858 | 286   | Tmem38a     | MMT00070509   | -1 |
| 16858 | 1755  | Tmem38a     | Ocel1         | -1 |
| 16858 | 2749  | Tmem38a     | Naf1          | 1  |
| 16858 | 3055  | Tmem38a     | Pde4c         | -1 |
| 16858 | 5433  | Tmem38a     | 2410004L22Rik | 1  |
| 16858 | 6760  | Tmem38a     | 2810428I15Rik | -1 |
| 16858 | 9304  | Tmem38a     | AI449175      | -1 |
| 16858 | 9931  | Tmem38a     | Glt25d1       | 1  |
| 16858 | 13732 | Tmem38a     | Tpm4          | 1  |
| 16858 | 15455 | Tmem38a     | Lsm4          | 1  |
| 16858 | 16617 | Tmem38a     | Sh2d4a        | 1  |
| 16858 | 16858 | Tmem38a     | Tmem38a       | 1  |
| 16858 | 18886 | Tmem38a     | Slc18a1       | 1  |
| 16858 | 20484 | Tmem38a     | Ces1          | 1  |
| 16861 | 12451 | Nlrc4       | Srd5a2        | 1  |
| 16861 | 16886 | Nlrc4       | Dpy30         | 1  |
| 16881 | 2472  | MMT00031504 | MMT00014056   | 1  |
| 16881 | 7654  | MMT00031504 | Ptpmt1        | -1 |
| 16881 | 9547  | MMT00031504 | MMT00006479   | 1  |
| 16881 | 14757 | MMT00031504 | Hdx           | 1  |
| 16881 | 15365 | MMT00031504 | Ext2          | 1  |
| 16881 | 16881 | MMT00031504 | MMT00031504   | 1  |
| 16881 | 17295 | MMT00031504 | MMT00082577   | 1  |
| 16881 | 19763 | MMT00031504 | Acp2          | 1  |
| 16881 | 19803 | MMT00031504 | BC003993      | 1  |
| 16881 | 22320 | MMT00031504 | MMT00047284   | 1  |
| 16881 | 23474 | MMT00031504 | MMT00011721   | 1  |
| 16931 | 187   | Actn4       | Wdr62         | 1  |
| 16949 | 143   | ligp1       | Gvin1         | 1  |
| 16949 | 2224  | ligp1       | Oasl2         | 1  |
| 16949 | 4426  | ligp1       | ligp2         | 1  |
| 16949 | 4508  | ligp1       | lfit1         | 1  |

|       |       |               |               |    |
|-------|-------|---------------|---------------|----|
| 16949 | 6824  | ligp1         | Irf7          | 1  |
| 16949 | 8800  | ligp1         | Rnf213        | 1  |
| 16949 | 9820  | ligp1         | BC023105      | 1  |
| 16949 | 12398 | ligp1         | Irf44         | 1  |
| 16949 | 12600 | ligp1         | Irf204        | 1  |
| 16949 | 13309 | ligp1         | Tgtp          | 1  |
| 16949 | 14258 | ligp1         | Irf47         | 1  |
| 16949 | 15074 | ligp1         | Usp18         | 1  |
| 16949 | 18174 | ligp1         | Stat2         | 1  |
| 16949 | 20997 | ligp1         | MMT00028135   | 1  |
| 16949 | 21549 | ligp1         | Rtp4          | 1  |
| 16949 | 21824 | ligp1         | 5830443L24Rik | 1  |
| 16951 | 20332 | R74862        | Stau2         | 1  |
| 16957 | 3208  | MMT00046108   | 4930511111Rik | 1  |
| 16957 | 7436  | MMT00046108   | 1700063K16Rik | 1  |
| 16957 | 11966 | MMT00046108   | Zfp280b       | 1  |
| 16957 | 12861 | MMT00046108   | Rhcg          | 1  |
| 16957 | 13117 | MMT00046108   | Tmprss5       | 1  |
| 16957 | 19436 | MMT00046108   | Dapp1         | 1  |
| 16957 | 22125 | MMT00046108   | Gab1          | 1  |
| 16976 | 18373 | Zhx3          | Dnajb1        | 1  |
| 17010 | 3208  | Galns         | 4930511111Rik | 1  |
| 17010 | 19436 | Galns         | Dapp1         | 1  |
| 17016 | 9258  | Dnajc11       | P4ha1         | 1  |
| 17044 | 7436  | Gpr55         | 1700063K16Rik | 1  |
| 17044 | 11966 | Gpr55         | Zfp280b       | 1  |
| 17044 | 19436 | Gpr55         | Dapp1         | 1  |
| 17046 | 16760 | Fggy          | 1600029D21Rik | 1  |
| 17067 | 20721 | 1700057G04Rik | 4432412L15Rik | -1 |
| 17068 | 3208  | Olfr661       | 4930511111Rik | 1  |
| 17068 | 11966 | Olfr661       | Zfp280b       | 1  |
| 17068 | 12861 | Olfr661       | Rhcg          | 1  |
| 17068 | 19436 | Olfr661       | Dapp1         | 1  |
| 17098 | 8210  | Qtrt1         | Hspa12a       | -1 |
| 17098 | 10387 | Qtrt1         | 4933427D06Rik | -1 |
| 17098 | 11598 | Qtrt1         | MMT00031533   | -1 |
| 17098 | 20628 | Qtrt1         | Hoxd10        | -1 |
| 17098 | 21099 | Qtrt1         | Rapgef6       | -1 |
| 17122 | 11966 | MMT00068814   | Zfp280b       | 1  |
| 17122 | 19436 | MMT00068814   | Dapp1         | 1  |
| 17123 | 19436 | Olfr1511      | Dapp1         | 1  |
| 17135 | 3325  | Mum1          | Plekhh1       | -1 |
| 17135 | 6060  | Mum1          | Tle6          | 1  |
| 17135 | 12336 | Mum1          | Timm13        | -1 |
| 17135 | 15247 | Mum1          | Cstb          | 1  |
| 17135 | 17135 | Mum1          | Mum1          | 1  |
| 17135 | 21964 | Mum1          | Vwce          | 1  |
| 17143 | 337   | 2010002N04Rik | Rasgef1b      | 1  |
| 17143 | 563   | 2010002N04Rik | D4Bwg0951e    | 1  |
| 17143 | 2794  | 2010002N04Rik | Map3k6        | 1  |
| 17143 | 3097  | 2010002N04Rik | Ppp1r3g       | 1  |
| 17143 | 3170  | 2010002N04Rik | Mcart1        | 1  |
| 17143 | 3246  | 2010002N04Rik | Prei4         | 1  |
| 17143 | 4235  | 2010002N04Rik | Pfkfb3        | 1  |
| 17143 | 6564  | 2010002N04Rik | Cebpd         | 1  |
| 17143 | 7066  | 2010002N04Rik | Agtr1b        | 1  |
| 17143 | 8399  | 2010002N04Rik | Herpud1       | 1  |
| 17143 | 10408 | 2010002N04Rik | Per1          | 1  |
| 17143 | 11093 | 2010002N04Rik | Zdhhc1        | 1  |
| 17143 | 11129 | 2010002N04Rik | Ankhd1        | 1  |
| 17143 | 11599 | 2010002N04Rik | Coq10b        | 1  |
| 17143 | 11808 | 2010002N04Rik | Pck1          | 1  |
| 17143 | 12420 | 2010002N04Rik | Klhl21        | 1  |
| 17143 | 12479 | 2010002N04Rik | Ifrd1         | 1  |
| 17143 | 15021 | 2010002N04Rik | Ppargc1a      | 1  |
| 17143 | 15631 | 2010002N04Rik | Lpin1         | 1  |
| 17143 | 16176 | 2010002N04Rik | St3gal5       | 1  |
| 17143 | 16580 | 2010002N04Rik | Tnfaip2       | -1 |
| 17143 | 17525 | 2010002N04Rik | Ctgf          | 1  |

|       |       |               |               |    |
|-------|-------|---------------|---------------|----|
| 17143 | 17622 | 2010002N04Rik | Foxo1         | 1  |
| 17143 | 18027 | 2010002N04Rik | 5730403B10Rik | 1  |
| 17143 | 18314 | 2010002N04Rik | 4631416L12Rik | 1  |
| 17143 | 18785 | 2010002N04Rik | Angptl4       | 1  |
| 17143 | 19025 | 2010002N04Rik | Slc37a4       | 1  |
| 17143 | 19124 | 2010002N04Rik | Pim3          | 1  |
| 17143 | 19146 | 2010002N04Rik | N4bp2l1       | 1  |
| 17143 | 19466 | 2010002N04Rik | Pptc7         | 1  |
| 17143 | 19757 | 2010002N04Rik | Fkbp5         | 1  |
| 17143 | 21331 | 2010002N04Rik | Slc10a6       | 1  |
| 17143 | 22873 | 2010002N04Rik | Slc38a2       | 1  |
| 17143 | 23201 | 2010002N04Rik | S1pr1         | -1 |
| 17143 | 23202 | 2010002N04Rik | Olfir559      | 1  |
| 17149 | 19436 | Pms2          | Dapp1         | 1  |
| 17160 | 9067  | Ccdc127       | Tra2a         | 1  |
| 17160 | 9258  | Ccdc127       | P4ha1         | 1  |
| 17160 | 15476 | Ccdc127       | Fem1b         | -1 |
| 17163 | 16098 | Fmo1          | Rps20         | -1 |
| 17171 | 11966 | MMT00045847   | Zfp280b       | 1  |
| 17171 | 19436 | MMT00045847   | Dapp1         | 1  |
| 17174 | 523   | Dmrtc1a       | 1700040L02Rik | 1  |
| 17193 | 3061  | Npb           | Scarf2        | 1  |
| 17193 | 3119  | Npb           | Mapk10        | 1  |
| 17193 | 3339  | Npb           | Dip2a         | 1  |
| 17193 | 6017  | Npb           | MMT00018015   | -1 |
| 17193 | 6846  | Npb           | Olfir1402     | 1  |
| 17193 | 8791  | Npb           | Sectm1a       | 1  |
| 17193 | 10214 | Npb           | Sectm1b       | 1  |
| 17193 | 12546 | Npb           | Cd7           | 1  |
| 17193 | 13615 | Npb           | Arl16         | -1 |
| 17193 | 15016 | Npb           | MMT00074608   | 1  |
| 17193 | 16613 | Npb           | 1110031I02Rik | 1  |
| 17193 | 17680 | Npb           | 1700069L16Rik | 1  |
| 17193 | 17792 | Npb           | Vmn2r79       | 1  |
| 17193 | 17897 | Npb           | Gm1019        | 1  |
| 17193 | 22557 | Npb           | P4hb          | -1 |
| 17196 | 21352 | Fkrp          | Dtnbp1        | 1  |
| 17207 | 3587  | 2700050L05Rik | MMT00041940   | 1  |
| 17207 | 6021  | 2700050L05Rik | MMT00008784   | 1  |
| 17207 | 8670  | 2700050L05Rik | MMT00051613   | 1  |
| 17207 | 11214 | 2700050L05Rik | MMT00049207   | 1  |
| 17207 | 15476 | 2700050L05Rik | Fem1b         | -1 |
| 17207 | 15675 | 2700050L05Rik | MMT00077535   | 1  |
| 17207 | 18373 | 2700050L05Rik | Dnajb1        | 1  |
| 17295 | 2472  | MMT00082577   | MMT00014056   | 1  |
| 17295 | 7654  | MMT00082577   | Ptpmt1        | -1 |
| 17295 | 9547  | MMT00082577   | MMT00006479   | 1  |
| 17295 | 14757 | MMT00082577   | Hdx           | 1  |
| 17295 | 15365 | MMT00082577   | Ext2          | 1  |
| 17295 | 16881 | MMT00082577   | MMT00031504   | 1  |
| 17295 | 17295 | MMT00082577   | MMT00082577   | 1  |
| 17295 | 19763 | MMT00082577   | Acp2          | 1  |
| 17295 | 19803 | MMT00082577   | BC003993      | 1  |
| 17295 | 22320 | MMT00082577   | MMT00047284   | 1  |
| 17295 | 23474 | MMT00082577   | MMT00011721   | 1  |
| 17314 | 4697  | Napa          | Cyp2a12       | 1  |
| 17314 | 6513  | Napa          | Qpctl         | -1 |
| 17314 | 11321 | Napa          | 2310014L17Rik | 1  |
| 17314 | 16639 | Napa          | MMT00078937   | 1  |
| 17314 | 19462 | Napa          | 4933439C20Rik | 1  |
| 17314 | 20606 | Napa          | MMT00042166   | 1  |
| 17314 | 23247 | Napa          | Ercc1         | 1  |
| 17321 | 17321 | Hepacam       | Hepacam       | 1  |
| 17322 | 327   | Zfp758        | H2-Ea         | -1 |
| 17322 | 2325  | Zfp758        | H2-K1         | -1 |
| 17322 | 2938  | Zfp758        | H2-T23        | -1 |
| 17322 | 3857  | Zfp758        | 1700001C19Rik | 1  |
| 17322 | 4004  | Zfp758        | Thbs2         | 1  |
| 17322 | 5410  | Zfp758        | Cyp4f15       | 1  |

|       |       |               |               |    |
|-------|-------|---------------|---------------|----|
| 17322 | 5648  | Zfp758        | Zfp213        | 1  |
| 17322 | 6510  | Zfp758        | Plcl2         | -1 |
| 17322 | 7088  | Zfp758        | Slc37a1       | -1 |
| 17322 | 8750  | Zfp758        | 1700010114Rik | -1 |
| 17322 | 8767  | Zfp758        | Rgl2          | -1 |
| 17322 | 9158  | Zfp758        | Pde9a         | 1  |
| 17322 | 10376 | Zfp758        | C920025E04Rik | 1  |
| 17322 | 10667 | Zfp758        | H2-Eb1        | -1 |
| 17322 | 12335 | Zfp758        | Plcb4         | -1 |
| 17322 | 13493 | Zfp758        | Ring1         | 1  |
| 17322 | 18906 | Zfp758        | Zfand3        | -1 |
| 17322 | 20238 | Zfp758        | H2-T9         | -1 |
| 17322 | 20346 | Zfp758        | Gna-rs1       | -1 |
| 17322 | 22822 | Zfp758        | MMT00013433   | -1 |
| 17322 | 23250 | Zfp758        | Plcl2         | -1 |
| 17337 | 3208  | 1810065E05Rik | 4930511111Rik | 1  |
| 17337 | 11966 | 1810065E05Rik | Zfp280b       | 1  |
| 17337 | 12861 | 1810065E05Rik | Rhcg          | 1  |
| 17337 | 19436 | 1810065E05Rik | Dapp1         | 1  |
| 17363 | 9010  | Aebp2         | 8430419L09Rik | -1 |
| 17363 | 17391 | Aebp2         | C530028O21Rik | 1  |
| 17363 | 19964 | Aebp2         | Ndufa9        | 1  |
| 17389 | 1985  | Pop4          | Pepd          | 1  |
| 17389 | 3698  | Pop4          | 1600014C10Rik | -1 |
| 17389 | 17389 | Pop4          | Pop4          | 1  |
| 17389 | 18053 | Pop4          | Psmc4         | -1 |
| 17389 | 23283 | Pop4          | Mrps12        | -1 |
| 17396 | 13893 | Myoz3         | Slc6a2        | -1 |
| 17396 | 14077 | Myoz3         | Trpv5         | -1 |
| 17396 | 14256 | Myoz3         | MMT00024953   | -1 |
| 17396 | 14395 | Myoz3         | MMT00007523   | -1 |
| 17396 | 14706 | Myoz3         | MMT00014463   | -1 |
| 17396 | 16426 | Myoz3         | MMT00023627   | 1  |
| 17412 | 327   | Aif1          | H2-Ea         | -1 |
| 17412 | 2325  | Aif1          | H2-K1         | -1 |
| 17412 | 2938  | Aif1          | H2-T23        | -1 |
| 17412 | 4004  | Aif1          | Thbs2         | 1  |
| 17412 | 9158  | Aif1          | Pde9a         | 1  |
| 17412 | 10667 | Aif1          | H2-Eb1        | -1 |
| 17412 | 13493 | Aif1          | Ring1         | 1  |
| 17412 | 22822 | Aif1          | MMT00013433   | -1 |
| 17413 | 11966 | MMT00043948   | Zfp280b       | 1  |
| 17413 | 19436 | MMT00043948   | Dapp1         | 1  |
| 17417 | 19436 | Pxn           | Dapp1         | 1  |
| 17447 | 676   | Ctsf          | Ms4a4d        | 1  |
| 17447 | 8721  | Ctsf          | Tbc1d10c      | 1  |
| 17447 | 8902  | Ctsf          | Aldh3b1       | 1  |
| 17447 | 11812 | Ctsf          | Mrpl16        | 1  |
| 17447 | 17447 | Ctsf          | Ctsf          | 1  |
| 17449 | 7731  | Zfp296        | 1500001M20Rik | -1 |
| 17449 | 9067  | Zfp296        | Tra2a         | 1  |
| 17449 | 9258  | Zfp296        | P4ha1         | 1  |
| 17449 | 11043 | Zfp296        | Hsph1         | 1  |
| 17449 | 22751 | Zfp296        | Nosip         | -1 |
| 17463 | 246   | Rgl1          | MMT00053742   | 1  |
| 17463 | 9611  | Rgl1          | Ncf2          | 1  |
| 17463 | 15569 | Rgl1          | BC003331      | 1  |
| 17463 | 17463 | Rgl1          | Rgl1          | 1  |
| 17463 | 17850 | Rgl1          | Prg4          | -1 |
| 17463 | 23262 | Rgl1          | C530043G21Rik | -1 |
| 17515 | 16660 | Itln1         | Gpc6          | -1 |
| 17515 | 17702 | Itln1         | Ccdc40        | -1 |
| 17515 | 22302 | Itln1         | MMT00041810   | 1  |
| 17528 | 1580  | Gmnn          | Mrs2          | -1 |
| 17528 | 3938  | Gmnn          | Abt1          | -1 |
| 17528 | 6605  | Gmnn          | Gpld1         | -1 |
| 17528 | 10189 | Gmnn          | Cage1         | -1 |
| 17528 | 11094 | Gmnn          | Slc17a3       | 1  |
| 17528 | 11649 | Gmnn          | Hfe           | -1 |

|       |       |               |               |    |
|-------|-------|---------------|---------------|----|
| 17528 | 14770 | Gmnn          | Cops7a        | 1  |
| 17528 | 15698 | Gmnn          | Them2         | 1  |
| 17528 | 17528 | Gmnn          | Gmnn          | 1  |
| 17528 | 19192 | Gmnn          | Hist1h1c      | -1 |
| 17528 | 19713 | Gmnn          | BC048599      | 1  |
| 17528 | 20759 | Gmnn          | Slc17a1       | 1  |
| 17528 | 23118 | Gmnn          | Ttrap         | 1  |
| 17535 | 2115  | MMT00008110   | Gpr12         | -1 |
| 17535 | 8022  | MMT00008110   | MMT00004959   | 1  |
| 17535 | 8906  | MMT00008110   | MMT00004929   | 1  |
| 17553 | 13004 | Eif4ebp1      | Arhgef10      | 1  |
| 17553 | 17553 | Eif4ebp1      | Eif4ebp1      | 1  |
| 17562 | 3703  | Rbed1         | Ggcx          | 1  |
| 17562 | 15708 | Rbed1         | Retsat        | 1  |
| 17574 | 17574 | Prdm16        | Prdm16        | 1  |
| 17583 | 15631 | Per2          | Lpin1         | 1  |
| 17600 | 676   | Kcnq5         | Ms4a4d        | -1 |
| 17600 | 11812 | Kcnq5         | Mrpl16        | -1 |
| 17612 | 663   | Vhlh          | Muc19         | 1  |
| 17612 | 11966 | Vhlh          | Zfp280b       | 1  |
| 17612 | 19436 | Vhlh          | Dapp1         | 1  |
| 17613 | 3208  | P2rx7         | 4930511111Rik | 1  |
| 17613 | 7436  | P2rx7         | 1700063K16Rik | 1  |
| 17613 | 11966 | P2rx7         | Zfp280b       | 1  |
| 17613 | 12861 | P2rx7         | Rhcg          | 1  |
| 17613 | 19436 | P2rx7         | Dapp1         | 1  |
| 17613 | 19672 | P2rx7         | Cldn19        | 1  |
| 17613 | 22125 | P2rx7         | Gab1          | 1  |
| 17616 | 1162  | Flt1          | Cpsf4         | -1 |
| 17616 | 2115  | Flt1          | Gpr12         | -1 |
| 17616 | 17676 | Flt1          | Amz1          | 1  |
| 17616 | 21125 | Flt1          | Mtif3         | -1 |
| 17632 | 1985  | Lypd3         | Pepd          | 1  |
| 17632 | 2388  | Lypd3         | Dot1l         | -1 |
| 17632 | 2599  | Lypd3         | Lsm14a        | -1 |
| 17632 | 4697  | Lypd3         | Cyp2a12       | 1  |
| 17632 | 6371  | Lypd3         | Dedd2         | -1 |
| 17632 | 6513  | Lypd3         | Qpctl         | -1 |
| 17632 | 6519  | Lypd3         | Phldb3        | -1 |
| 17632 | 9122  | Lypd3         | Sepw1         | -1 |
| 17632 | 10545 | Lypd3         | Tmem147       | -1 |
| 17632 | 11321 | Lypd3         | 2310014L17Rik | 1  |
| 17632 | 11888 | Lypd3         | Myadm         | 1  |
| 17632 | 12423 | Lypd3         | Cyp2g1        | 1  |
| 17632 | 16639 | Lypd3         | MMT00078937   | 1  |
| 17632 | 17314 | Lypd3         | Napa          | 1  |
| 17632 | 18053 | Lypd3         | Psmc4         | -1 |
| 17632 | 18088 | Lypd3         | Alkbh6        | -1 |
| 17632 | 19462 | Lypd3         | 4933439C20Rik | 1  |
| 17632 | 20606 | Lypd3         | MMT00042166   | 1  |
| 17632 | 23247 | Lypd3         | Ercc1         | 1  |
| 17632 | 23283 | Lypd3         | Mrps12        | -1 |
| 17632 | 23595 | Lypd3         | Gm550         | -1 |
| 17646 | 2938  | C4b           | H2-T23        | 1  |
| 17646 | 13493 | C4b           | Ring1         | -1 |
| 17646 | 20238 | C4b           | H2-T9         | 1  |
| 17646 | 22822 | C4b           | MMT00013433   | 1  |
| 17669 | 3753  | 2310007A19Rik | Setdb1        | -1 |
| 17689 | 13643 | 4933405O20Rik | Dlec1         | -1 |
| 17693 | 2793  | MMT00044427   | MMT00005644   | 1  |
| 17693 | 5989  | MMT00044427   | 2310042D19Rik | 1  |
| 17693 | 12718 | MMT00044427   | Dhrsx         | -1 |
| 17693 | 19026 | MMT00044427   | Isg15         | 1  |
| 17693 | 22077 | MMT00044427   | MMT00057550   | 1  |
| 17703 | 286   | Large         | MMT00070509   | -1 |
| 17703 | 403   | Large         | Leprotl1      | 1  |
| 17703 | 1755  | Large         | Ocel1         | -1 |
| 17703 | 2749  | Large         | Naf1          | 1  |
| 17703 | 3055  | Large         | Pde4c         | -1 |

|       |       |             |               |    |
|-------|-------|-------------|---------------|----|
| 17703 | 5433  | Large       | 2410004L22Rik | 1  |
| 17703 | 6760  | Large       | 2810428I15Rik | -1 |
| 17703 | 8114  | Large       | Kcnn1         | -1 |
| 17703 | 9304  | Large       | AI449175      | -1 |
| 17703 | 9931  | Large       | Git25d1       | 1  |
| 17703 | 13732 | Large       | Tpm4          | 1  |
| 17703 | 13774 | Large       | Gdf15         | 1  |
| 17703 | 14455 | Large       | 2700029M09Rik | 1  |
| 17703 | 15094 | Large       | Pbx4          | 1  |
| 17703 | 15455 | Large       | Lsm4          | 1  |
| 17703 | 16617 | Large       | Sh2d4a        | 1  |
| 17703 | 16858 | Large       | Tmem38a       | 1  |
| 17703 | 18886 | Large       | Slc18a1       | 1  |
| 17703 | 20484 | Large       | Ces1          | 1  |
| 17707 | 2325  | Rshl2b      | H2-K1         | 1  |
| 17707 | 2938  | Rshl2b      | H2-T23        | 1  |
| 17707 | 7088  | Rshl2b      | Slc37a1       | 1  |
| 17707 | 7135  | Rshl2b      | Ezr           | 1  |
| 17707 | 7909  | Rshl2b      | Oas3          | 1  |
| 17707 | 8750  | Rshl2b      | 1700010I14Rik | 1  |
| 17707 | 10667 | Rshl2b      | H2-Eb1        | 1  |
| 17707 | 11435 | Rshl2b      | Rnaset2a      | 1  |
| 17707 | 14132 | Rshl2b      | Glo1          | 1  |
| 17707 | 15540 | Rshl2b      | C2            | 1  |
| 17707 | 15864 | Rshl2b      | Rps6ka2       | 1  |
| 17707 | 17707 | Rshl2b      | Rshl2b        | 1  |
| 17707 | 17760 | Rshl2b      | Ccr6          | -1 |
| 17707 | 21075 | Rshl2b      | Gtf2h5        | -1 |
| 17707 | 21754 | Rshl2b      | Synj2         | -1 |
| 17707 | 21952 | Rshl2b      | Tfb1m         | -1 |
| 17707 | 22104 | Rshl2b      | Rnf123        | 1  |
| 17707 | 22822 | Rshl2b      | MMT00013433   | 1  |
| 17716 | 5100  | Rnf10       | Pebp1         | 1  |
| 17716 | 10978 | Rnf10       | MMT00078322   | -1 |
| 17716 | 12656 | Rnf10       | Coq5          | -1 |
| 17716 | 15908 | Rnf10       | Pebp1         | 1  |
| 17716 | 17716 | Rnf10       | Rnf10         | 1  |
| 17716 | 17807 | Rnf10       | Pebp1         | 1  |
| 17729 | 8664  | Prim2       | MMT00014895   | -1 |
| 17729 | 17729 | Prim2       | Prim2         | 1  |
| 17729 | 18606 | Prim2       | A230074B11Rik | -1 |
| 17729 | 20077 | Prim2       | Ccdc115       | 1  |
| 17729 | 23306 | Prim2       | Bag2          | 1  |
| 17743 | 17391 | Phb2        | C530028O21Rik | 1  |
| 17743 | 17743 | Phb2        | Phb2          | 1  |
| 17743 | 19964 | Phb2        | Ndufa9        | 1  |
| 17748 | 17991 | Olfcr878    | Fbxl20        | -1 |
| 17750 | 3208  | Hs6st2      | 4930511I11Rik | 1  |
| 17750 | 5694  | Hs6st2      | Sp7           | 1  |
| 17750 | 7436  | Hs6st2      | 1700063K16Rik | 1  |
| 17750 | 11966 | Hs6st2      | Zfp280b       | 1  |
| 17750 | 12861 | Hs6st2      | Rhcg          | 1  |
| 17750 | 14407 | Hs6st2      | Six3          | 1  |
| 17750 | 19436 | Hs6st2      | Dapp1         | 1  |
| 17750 | 19672 | Hs6st2      | Cldn19        | 1  |
| 17750 | 22125 | Hs6st2      | Gab1          | 1  |
| 17760 | 7088  | Ccr6        | Slc37a1       | -1 |
| 17760 | 17707 | Ccr6        | Rshl2b        | -1 |
| 17760 | 20511 | Ccr6        | Decr2         | -1 |
| 17810 | 3208  | MMT00054025 | 4930511I11Rik | 1  |
| 17810 | 7436  | MMT00054025 | 1700063K16Rik | 1  |
| 17810 | 11966 | MMT00054025 | Zfp280b       | 1  |
| 17810 | 12861 | MMT00054025 | Rhcg          | 1  |
| 17810 | 19436 | MMT00054025 | Dapp1         | 1  |
| 17814 | 6231  | Napb        | 9030622O22Rik | 1  |
| 17814 | 14647 | Napb        | Cst3          | -1 |
| 17831 | 3654  | Ndufa6      | St13          | 1  |
| 17831 | 6804  | Ndufa6      | Cyp2d22       | -1 |
| 17831 | 12468 | Ndufa6      | Cyp2d13       | -1 |



|       |       |               |               |    |
|-------|-------|---------------|---------------|----|
| 17831 | 19216 | Ndufa6        | Bik           | -1 |
| 17837 | 524   | Polr3gl       | Hsd3b2        | -1 |
| 17837 | 1466  | Polr3gl       | Ubap2l        | -1 |
| 17837 | 3753  | Polr3gl       | Setdb1        | 1  |
| 17837 | 6206  | Polr3gl       | MMT00063701   | -1 |
| 17837 | 10521 | Polr3gl       | Ttf2          | -1 |
| 17837 | 11121 | Polr3gl       | Mtrn11        | 1  |
| 17837 | 11611 | Polr3gl       | S100a13       | 1  |
| 17837 | 18754 | Polr3gl       | Rbm8a         | -1 |
| 17837 | 20661 | Polr3gl       | Tuft1         | -1 |
| 17875 | 22764 | Cntnap5a      | MMT00049130   | 1  |
| 17887 | 3799  | Cryl1         | Serpinh1      | -1 |
| 17887 | 11043 | Cryl1         | Hsph1         | -1 |
| 17887 | 22139 | Cryl1         | Stip1         | -1 |
| 17897 | 8791  | Gm1019        | Sectm1a       | 1  |
| 17897 | 17792 | Gm1019        | Vmn2r79       | 1  |
| 17957 | 19214 | 1700086L19Rik | Snapc1        | -1 |
| 17960 | 3208  | Yod1          | 4930511111Rik | 1  |
| 17960 | 7436  | Yod1          | 1700063K16Rik | 1  |
| 17960 | 11966 | Yod1          | Zfp280b       | 1  |
| 17960 | 13117 | Yod1          | Tmprss5       | 1  |
| 17960 | 19436 | Yod1          | Dapp1         | 1  |
| 17981 | 8439  | MMT00036029   | Slc25a33      | 1  |
| 18001 | 14709 | Nrl           | Rab36         | -1 |
| 18036 | 4192  | Tmem100       | Zranb1        | -1 |
| 18036 | 7619  | Tmem100       | Pik3ip1       | -1 |
| 18036 | 7731  | Tmem100       | 1500001M20Rik | -1 |
| 18036 | 7862  | Tmem100       | Cpsf4l        | -1 |
| 18036 | 8787  | Tmem100       | Sdf21         | 1  |
| 18036 | 10215 | Tmem100       | Nampt         | -1 |
| 18036 | 11412 | Tmem100       | Abcg5         | -1 |
| 18036 | 16690 | Tmem100       | Tjp3          | 1  |
| 18036 | 17876 | Tmem100       | Tubb4         | 1  |
| 18036 | 19671 | Tmem100       | Upp2          | -1 |
| 18053 | 1985  | Psmc4         | Pepd          | -1 |
| 18053 | 18053 | Psmc4         | Psmc4         | 1  |
| 18112 | 21454 | Ikzf5         | MMT00068006   | 1  |
| 18124 | 3208  | Ptptr         | 4930511111Rik | 1  |
| 18124 | 11966 | Ptptr         | Zfp280b       | 1  |
| 18140 | 397   | Atg2b         | Ak7           | -1 |
| 18140 | 8155  | Atg2b         | Mark3         | 1  |
| 18140 | 18140 | Atg2b         | Atg2b         | 1  |
| 18165 | 1985  | 5830482F20Rik | Pepd          | -1 |
| 18165 | 18053 | 5830482F20Rik | Psmc4         | 1  |
| 18165 | 23283 | 5830482F20Rik | Mrps12        | 1  |
| 18179 | 250   | Dbp           | Tubb2a-ps2    | -1 |
| 18179 | 407   | Dbp           | Serpina6      | 1  |
| 18179 | 415   | Dbp           | Ypel2         | -1 |
| 18179 | 437   | Dbp           | Ndrp1         | -1 |
| 18179 | 523   | Dbp           | 1700040L02Rik | 1  |
| 18179 | 609   | Dbp           | MMT00060868   | -1 |
| 18179 | 719   | Dbp           | Usp2          | 1  |
| 18179 | 1453  | Dbp           | Gfod2         | -1 |
| 18179 | 1767  | Dbp           | BC016495      | 1  |
| 18179 | 2011  | Dbp           | Slc2a5        | 1  |
| 18179 | 2384  | Dbp           | Micalcl       | -1 |
| 18179 | 2399  | Dbp           | MMT00060167   | -1 |
| 18179 | 2829  | Dbp           | Lrfr3         | -1 |
| 18179 | 3214  | Dbp           | Dnmt3b        | -1 |
| 18179 | 3804  | Dbp           | MMT00015534   | -1 |
| 18179 | 3989  | Dbp           | Wrnip1        | -1 |
| 18179 | 4201  | Dbp           | Tubb2c        | -1 |
| 18179 | 4298  | Dbp           | St3gal1       | -1 |
| 18179 | 4463  | Dbp           | Ncoa5         | -1 |
| 18179 | 4612  | Dbp           | Hspa5         | -1 |
| 18179 | 5068  | Dbp           | Afap1l2       | -1 |
| 18179 | 5120  | Dbp           | Alkbh7        | -1 |
| 18179 | 5183  | Dbp           | St5           | -1 |
| 18179 | 5247  | Dbp           | Irak2         | -1 |

|       |       |             |               |    |
|-------|-------|-------------|---------------|----|
| 18179 | 5374  | Dbp         | Chka          | -1 |
| 18179 | 5804  | Dbp         | Thrsp         | 1  |
| 18179 | 5849  | Dbp         | 2310031A18Rik | -1 |
| 18179 | 5974  | Dbp         | Arntl         | -1 |
| 18179 | 6171  | Dbp         | Abtb2         | -1 |
| 18179 | 6268  | Dbp         | Slc45a3       | -1 |
| 18179 | 6343  | Dbp         | Slc20a1       | 1  |
| 18179 | 7862  | Dbp         | Cpsf4l        | 1  |
| 18179 | 8684  | Dbp         | Il15          | 1  |
| 18179 | 8787  | Dbp         | Sdf2l1        | -1 |
| 18179 | 9067  | Dbp         | Tra2a         | -1 |
| 18179 | 9495  | Dbp         | Srms          | -1 |
| 18179 | 9585  | Dbp         | Neu3          | -1 |
| 18179 | 9831  | Dbp         | Nedd4l        | -1 |
| 18179 | 9899  | Dbp         | D13Wsu177e    | -1 |
| 18179 | 10088 | Dbp         | Ddc           | -1 |
| 18179 | 10215 | Dbp         | Nampt         | 1  |
| 18179 | 10444 | Dbp         | 1810020D17Rik | 1  |
| 18179 | 10642 | Dbp         | Ngef          | 1  |
| 18179 | 11043 | Dbp         | Hsph1         | -1 |
| 18179 | 11201 | Dbp         | Sunc1         | 1  |
| 18179 | 11741 | Dbp         | Slc30a10      | -1 |
| 18179 | 12513 | Dbp         | Whsc2         | -1 |
| 18179 | 12904 | Dbp         | MMT00040704   | 1  |
| 18179 | 12905 | Dbp         | Nfil3         | -1 |
| 18179 | 13864 | Dbp         | Larp1         | -1 |
| 18179 | 13947 | Dbp         | Crip2         | -1 |
| 18179 | 14279 | Dbp         | 3930402G23Rik | -1 |
| 18179 | 14298 | Dbp         | Atp2a2        | -1 |
| 18179 | 15665 | Dbp         | Bicap         | -1 |
| 18179 | 16060 | Dbp         | Gys2          | 1  |
| 18179 | 16299 | Dbp         | Creld2        | -1 |
| 18179 | 16327 | Dbp         | Ubfd1         | -1 |
| 18179 | 16585 | Dbp         | Syvn1         | -1 |
| 18179 | 16690 | Dbp         | Tjp3          | -1 |
| 18179 | 16712 | Dbp         | Pnrc1         | -1 |
| 18179 | 17528 | Dbp         | Gmnn          | 1  |
| 18179 | 17876 | Dbp         | Tubb4         | -1 |
| 18179 | 17884 | Dbp         | Ln timer      | -1 |
| 18179 | 17952 | Dbp         | Ripk2         | 1  |
| 18179 | 18179 | Dbp         | Dbp           | 1  |
| 18179 | 18552 | Dbp         | Nr2c2ap       | -1 |
| 18179 | 18756 | Dbp         | Tspan14       | -1 |
| 18179 | 19134 | Dbp         | Fn3k          | 1  |
| 18179 | 19453 | Dbp         | Cdk2ap2       | -1 |
| 18179 | 19671 | Dbp         | Upp2          | 1  |
| 18179 | 20332 | Dbp         | Stau2         | 1  |
| 18179 | 20746 | Dbp         | 2210015D19Rik | 1  |
| 18179 | 21142 | Dbp         | Gm129         | 1  |
| 18179 | 21389 | Dbp         | Odf2          | 1  |
| 18179 | 21531 | Dbp         | Ttc23         | 1  |
| 18179 | 22290 | Dbp         | Tubb2a        | -1 |
| 18179 | 22474 | Dbp         | Ubqln1        | -1 |
| 18179 | 22630 | Dbp         | MMT00034355   | -1 |
| 18179 | 22933 | Dbp         | Tssc4         | -1 |
| 18179 | 23458 | Dbp         | Clic4         | -1 |
| 18183 | 16096 | MMT00016159 | Csmd3         | -1 |
| 18185 | 9224  | Ndufb2      | MMT00013510   | 1  |
| 18186 | 3683  | Parp14      | Oas2          | 1  |
| 18186 | 12398 | Parp14      | Ifi44         | 1  |
| 18186 | 12600 | Parp14      | Ifi204        | 1  |
| 18195 | 18195 | Mafk        | Mafk          | 1  |
| 18207 | 12140 | Dnali1      | Mrps15        | 1  |
| 18214 | 19436 | Ankrd40     | Dapp1         | 1  |
| 18298 | 1258  | Slc25a37    | Hba-a1        | 1  |
| 18325 | 3208  | Cst10       | 4930511111Rik | 1  |
| 18325 | 11966 | Cst10       | Zfp280b       | 1  |
| 18325 | 19436 | Cst10       | Dapp1         | 1  |
| 18333 | 9010  | Rassf8      | 8430419L09Rik | -1 |

|       |       |         |               |    |
|-------|-------|---------|---------------|----|
| 18333 | 18333 | Rassf8  | Rassf8        | 1  |
| 18333 | 19964 | Rassf8  | Ndufa9        | 1  |
| 18333 | 20127 | Rassf8  | Ipo8          | -1 |
| 18338 | 3475  | Akr1e1  | 2610305D13Rik | -1 |
| 18338 | 4305  | Akr1e1  | Tmem51        | 1  |
| 18338 | 6191  | Akr1e1  | Ddost         | 1  |
| 18338 | 6830  | Akr1e1  | Rsc1a1        | 1  |
| 18338 | 12097 | Akr1e1  | 9430015G10Rik | -1 |
| 18338 | 18338 | Akr1e1  | Akr1e1        | 1  |
| 18338 | 19924 | Akr1e1  | Ubiad1        | -1 |
| 18365 | 486   | Bcl2l12 | Josd2         | -1 |
| 18365 | 18365 | Bcl2l12 | Bcl2l12       | 1  |
| 18365 | 19762 | Bcl2l12 | Pih1d1        | 1  |
| 18365 | 19854 | Bcl2l12 | Kcnj14        | -1 |
| 18365 | 20490 | Bcl2l12 | Tmem143       | 1  |
| 18368 | 4833  | Mpped2  | Synpo2        | 1  |
| 18368 | 13554 | Mpped2  | Aqr           | -1 |
| 18368 | 17043 | Mpped2  | Tmem127       | -1 |
| 18368 | 19763 | Mpped2  | Acp2          | -1 |
| 18368 | 21729 | Mpped2  | Hdc           | 1  |
| 18368 | 23474 | Mpped2  | MMT00011721   | -1 |
| 18368 | 23609 | Mpped2  | Trim44        | -1 |
| 18371 | 13839 | Sap130  | Gypc          | -1 |
| 18371 | 19725 | Sap130  | Dcp2          | -1 |
| 18373 | 740   | Dnajb1  | Txnrd3        | -1 |
| 18373 | 902   | Dnajb1  | Slc30a1       | -1 |
| 18373 | 1156  | Dnajb1  | Rbj           | -1 |
| 18373 | 1697  | Dnajb1  | Sf4           | 1  |
| 18373 | 2433  | Dnajb1  | Armc10        | -1 |
| 18373 | 3170  | Dnajb1  | Mcart1        | 1  |
| 18373 | 3196  | Dnajb1  | Tat           | 1  |
| 18373 | 3462  | Dnajb1  | Nmnat3        | -1 |
| 18373 | 3587  | Dnajb1  | MMT00041940   | 1  |
| 18373 | 3849  | Dnajb1  | MMT00047578   | 1  |
| 18373 | 3908  | Dnajb1  | Fundc2        | -1 |
| 18373 | 3913  | Dnajb1  | Mrpl15        | 1  |
| 18373 | 4391  | Dnajb1  | Zfp467        | -1 |
| 18373 | 4966  | Dnajb1  | Zscan20       | 1  |
| 18373 | 5544  | Dnajb1  | Camsap1       | 1  |
| 18373 | 5727  | Dnajb1  | Camk2g        | -1 |
| 18373 | 5766  | Dnajb1  | 5033414D02Rik | -1 |
| 18373 | 6021  | Dnajb1  | MMT00008784   | 1  |
| 18373 | 6126  | Dnajb1  | MMT00067575   | 1  |
| 18373 | 6286  | Dnajb1  | Rfc1          | -1 |
| 18373 | 6485  | Dnajb1  | Map3k7ip1     | -1 |
| 18373 | 6592  | Dnajb1  | Lgals2        | 1  |
| 18373 | 6769  | Dnajb1  | Banp          | 1  |
| 18373 | 6976  | Dnajb1  | Rbm35b        | -1 |
| 18373 | 7140  | Dnajb1  | Mtbp          | -1 |
| 18373 | 7963  | Dnajb1  | Rxrg          | -1 |
| 18373 | 8122  | Dnajb1  | Hexim1        | 1  |
| 18373 | 8181  | Dnajb1  | Thap1         | 1  |
| 18373 | 8319  | Dnajb1  | MMT00062477   | 1  |
| 18373 | 8464  | Dnajb1  | Snapin        | -1 |
| 18373 | 8499  | Dnajb1  | C430048L16Rik | 1  |
| 18373 | 8662  | Dnajb1  | Brca2         | -1 |
| 18373 | 8670  | Dnajb1  | MMT00051613   | 1  |
| 18373 | 8684  | Dnajb1  | Il15          | -1 |
| 18373 | 9067  | Dnajb1  | Tra2a         | 1  |
| 18373 | 9258  | Dnajb1  | P4ha1         | 1  |
| 18373 | 9899  | Dnajb1  | D13Wsu177e    | 1  |
| 18373 | 10435 | Dnajb1  | Nab2          | -1 |
| 18373 | 10769 | Dnajb1  | Hnrnpd        | -1 |
| 18373 | 11043 | Dnajb1  | Hsph1         | 1  |
| 18373 | 11095 | Dnajb1  | Bag3          | 1  |
| 18373 | 11214 | Dnajb1  | MMT00049207   | 1  |
| 18373 | 11379 | Dnajb1  | Dnttip1       | -1 |
| 18373 | 12761 | Dnajb1  | Tsc22d3       | 1  |
| 18373 | 13087 | Dnajb1  | Cxadr         | -1 |

|       |       |        |               |    |
|-------|-------|--------|---------------|----|
| 18373 | 13189 | Dnajb1 | Dnajb4        | 1  |
| 18373 | 13563 | Dnajb1 | 9930023K05Rik | -1 |
| 18373 | 14135 | Dnajb1 | Eepd1         | -1 |
| 18373 | 14298 | Dnajb1 | Atp2a2        | 1  |
| 18373 | 14785 | Dnajb1 | F3            | -1 |
| 18373 | 14859 | Dnajb1 | Hspa1a        | 1  |
| 18373 | 15177 | Dnajb1 | Bmpr2         | 1  |
| 18373 | 15476 | Dnajb1 | Fem1b         | -1 |
| 18373 | 15484 | Dnajb1 | Lrrc42        | -1 |
| 18373 | 15566 | Dnajb1 | Snn           | -1 |
| 18373 | 15675 | Dnajb1 | MMT00077535   | 1  |
| 18373 | 16251 | Dnajb1 | G6pc          | 1  |
| 18373 | 17160 | Dnajb1 | Ccdc127       | 1  |
| 18373 | 17224 | Dnajb1 | 5430407P10Rik | 1  |
| 18373 | 18083 | Dnajb1 | Gadd45a       | -1 |
| 18373 | 18099 | Dnajb1 | Nfx1          | -1 |
| 18373 | 18215 | Dnajb1 | Gpr146        | -1 |
| 18373 | 18373 | Dnajb1 | Dnajb1        | 1  |
| 18373 | 18418 | Dnajb1 | Hspa1b        | 1  |
| 18373 | 18903 | Dnajb1 | Crem          | 1  |
| 18373 | 20122 | Dnajb1 | Tmem86a       | -1 |
| 18373 | 20332 | Dnajb1 | Stau2         | -1 |
| 18373 | 20454 | Dnajb1 | MMT00018457   | 1  |
| 18373 | 20535 | Dnajb1 | Rbm4          | 1  |
| 18373 | 20912 | Dnajb1 | Chordc1       | 1  |
| 18373 | 20965 | Dnajb1 | Usp28         | -1 |
| 18373 | 21389 | Dnajb1 | Odf2          | -1 |
| 18373 | 21775 | Dnajb1 | MMT00051649   | -1 |
| 18373 | 22139 | Dnajb1 | Stip1         | 1  |
| 18373 | 22216 | Dnajb1 | Sp5           | -1 |
| 18373 | 22303 | Dnajb1 | Cdt1          | -1 |
| 18373 | 23668 | Dnajb1 | Gse1          | -1 |
| 18376 | 524   | Pex11b | Hsd3b2        | -1 |
| 18376 | 1466  | Pex11b | Ubap2l        | -1 |
| 18376 | 2752  | Pex11b | Fcgr1         | -1 |
| 18376 | 3753  | Pex11b | Setdb1        | 1  |
| 18376 | 6206  | Pex11b | MMT00063701   | -1 |
| 18376 | 7810  | Pex11b | Trim45        | -1 |
| 18376 | 10521 | Pex11b | Ttf2          | -1 |
| 18376 | 10681 | Pex11b | Dgkz          | 1  |
| 18376 | 11611 | Pex11b | S100a13       | 1  |
| 18376 | 12367 | Pex11b | MMT00072365   | 1  |
| 18376 | 18754 | Pex11b | Rbm8a         | -1 |
| 18376 | 18911 | Pex11b | Selenbp2      | -1 |
| 18376 | 20661 | Pex11b | Tuft1         | -1 |
| 18409 | 3208  | Nicn1  | 4930511111Rik | 1  |
| 18409 | 7436  | Nicn1  | 1700063K16Rik | 1  |
| 18409 | 11966 | Nicn1  | Zfp280b       | 1  |
| 18409 | 12861 | Nicn1  | Rhcg          | 1  |
| 18409 | 19436 | Nicn1  | Dapp1         | 1  |
| 18409 | 22125 | Nicn1  | Gab1          | 1  |
| 18418 | 423   | Hspa1b | Klh5          | -1 |
| 18418 | 499   | Hspa1b | 2310057J16Rik | 1  |
| 18418 | 768   | Hspa1b | Samd1         | 1  |
| 18418 | 1453  | Hspa1b | Gfod2         | 1  |
| 18418 | 1663  | Hspa1b | Fkbp4         | 1  |
| 18418 | 1697  | Hspa1b | Sf4           | 1  |
| 18418 | 1849  | Hspa1b | MMT00063181   | 1  |
| 18418 | 2041  | Hspa1b | Cct7          | 1  |
| 18418 | 2329  | Hspa1b | Wdr6          | -1 |
| 18418 | 2570  | Hspa1b | Tmod4         | 1  |
| 18418 | 3462  | Hspa1b | Nmnat3        | -1 |
| 18418 | 3587  | Hspa1b | MMT00041940   | 1  |
| 18418 | 3799  | Hspa1b | Serpinh1      | 1  |
| 18418 | 3849  | Hspa1b | MMT00047578   | 1  |
| 18418 | 3913  | Hspa1b | Mrpl15        | 1  |
| 18418 | 4261  | Hspa1b | MMT00014970   | 1  |
| 18418 | 4338  | Hspa1b | EG328280      | 1  |
| 18418 | 4355  | Hspa1b | Pard6a        | 1  |

|       |       |          |               |    |
|-------|-------|----------|---------------|----|
| 18418 | 4950  | Hspa1b   | Dnajb10       | 1  |
| 18418 | 4966  | Hspa1b   | Zscan20       | 1  |
| 18418 | 5352  | Hspa1b   | Pdcd2l        | -1 |
| 18418 | 5544  | Hspa1b   | Camsap1       | 1  |
| 18418 | 6021  | Hspa1b   | MMT00008784   | 1  |
| 18418 | 6126  | Hspa1b   | MMT00067575   | 1  |
| 18418 | 6234  | Hspa1b   | P4ha2         | 1  |
| 18418 | 6769  | Hspa1b   | Banp          | 1  |
| 18418 | 7731  | Hspa1b   | 1500001M20Rik | -1 |
| 18418 | 7798  | Hspa1b   | MMT00077178   | 1  |
| 18418 | 8319  | Hspa1b   | MMT00062477   | 1  |
| 18418 | 8486  | Hspa1b   | Plod3         | 1  |
| 18418 | 8554  | Hspa1b   | Letm2         | 1  |
| 18418 | 8618  | Hspa1b   | EG433865      | -1 |
| 18418 | 8670  | Hspa1b   | MMT00051613   | 1  |
| 18418 | 8727  | Hspa1b   | Slc27a3       | 1  |
| 18418 | 9067  | Hspa1b   | Tra2a         | 1  |
| 18418 | 9224  | Hspa1b   | MMT00013510   | 1  |
| 18418 | 9258  | Hspa1b   | P4ha1         | 1  |
| 18418 | 9279  | Hspa1b   | MMT00066808   | 1  |
| 18418 | 9570  | Hspa1b   | Crelb1        | 1  |
| 18418 | 9680  | Hspa1b   | Ahsa1         | 1  |
| 18418 | 9899  | Hspa1b   | D13Wsu177e    | 1  |
| 18418 | 10102 | Hspa1b   | Lman2l        | 1  |
| 18418 | 10116 | Hspa1b   | Mettl7b       | 1  |
| 18418 | 10267 | Hspa1b   | Setdb2        | -1 |
| 18418 | 10769 | Hspa1b   | Hnrnpd        | -1 |
| 18418 | 10824 | Hspa1b   | Vegfa         | 1  |
| 18418 | 11043 | Hspa1b   | Hsph1         | 1  |
| 18418 | 11095 | Hspa1b   | Bag3          | 1  |
| 18418 | 11208 | Hspa1b   | Hspb1         | 1  |
| 18418 | 11214 | Hspa1b   | MMT00049207   | 1  |
| 18418 | 11379 | Hspa1b   | Dnrtip1       | -1 |
| 18418 | 11392 | Hspa1b   | AU021838      | -1 |
| 18418 | 11697 | Hspa1b   | Rasl2-9       | -1 |
| 18418 | 11818 | Hspa1b   | MMT00048396   | 1  |
| 18418 | 12388 | Hspa1b   | 8430406I07Rik | 1  |
| 18418 | 13521 | Hspa1b   | Ears2         | 1  |
| 18418 | 13741 | Hspa1b   | Hspa4l        | 1  |
| 18418 | 14014 | Hspa1b   | MMT00008376   | 1  |
| 18418 | 14135 | Hspa1b   | Eepd1         | -1 |
| 18418 | 14298 | Hspa1b   | Atp2a2        | 1  |
| 18418 | 15476 | Hspa1b   | Fem1b         | -1 |
| 18418 | 15484 | Hspa1b   | Lrrc42        | -1 |
| 18418 | 15675 | Hspa1b   | MMT00077535   | 1  |
| 18418 | 16299 | Hspa1b   | Crelb2        | 1  |
| 18418 | 16585 | Hspa1b   | Syvn1         | 1  |
| 18418 | 16750 | Hspa1b   | Casp6         | -1 |
| 18418 | 16754 | Hspa1b   | Hsp90aa1      | 1  |
| 18418 | 17449 | Hspa1b   | Zfp296        | 1  |
| 18418 | 17595 | Hspa1b   | MMT00048325   | 1  |
| 18418 | 18065 | Hspa1b   | Peo1          | 1  |
| 18418 | 18373 | Hspa1b   | Dnajb1        | 1  |
| 18418 | 18418 | Hspa1b   | Hspa1b        | 1  |
| 18418 | 19540 | Hspa1b   | Zfp428        | 1  |
| 18418 | 20293 | Hspa1b   | MMT00017521   | -1 |
| 18418 | 20332 | Hspa1b   | Stau2         | -1 |
| 18418 | 20535 | Hspa1b   | Rbm4          | 1  |
| 18418 | 20855 | Hspa1b   | Phldb2        | -1 |
| 18418 | 20912 | Hspa1b   | Chordc1       | 1  |
| 18418 | 21389 | Hspa1b   | Odf2          | -1 |
| 18418 | 21643 | Hspa1b   | Agtr1a        | -1 |
| 18418 | 21775 | Hspa1b   | MMT00051649   | -1 |
| 18418 | 21995 | Hspa1b   | Nktr          | 1  |
| 18418 | 22139 | Hspa1b   | Stip1         | 1  |
| 18418 | 22751 | Hspa1b   | Nosip         | -1 |
| 18418 | 23646 | Hspa1b   | Hsp90ab1      | 1  |
| 18427 | 15631 | Serpib1a | Lpin1         | -1 |
| 18442 | 12730 | Zfp764   | 9130019O22Rik | 1  |

|       |       |               |               |    |
|-------|-------|---------------|---------------|----|
| 18448 | 13810 | Klh11         | 1110036O03Rik | -1 |
| 18448 | 14384 | Klh11         | Dnaja7        | -1 |
| 18462 | 2157  | Gm1060        | 0610007C21Rik | -1 |
| 18462 | 2308  | Gm1060        | A930005I04Rik | -1 |
| 18462 | 9830  | Gm1060        | Rbks          | -1 |
| 18462 | 11859 | Gm1060        | Poln          | 1  |
| 18462 | 12385 | Gm1060        | Mrpl33        | 1  |
| 18462 | 18462 | Gm1060        | Gm1060        | 1  |
| 18485 | 1849  | Wdr31         | MMT00063181   | -1 |
| 18485 | 3587  | Wdr31         | MMT00041940   | -1 |
| 18485 | 3799  | Wdr31         | Serpinh1      | -1 |
| 18485 | 6021  | Wdr31         | MMT00008784   | -1 |
| 18485 | 8670  | Wdr31         | MMT00051613   | -1 |
| 18485 | 11043 | Wdr31         | Hsph1         | -1 |
| 18485 | 15675 | Wdr31         | MMT00077535   | -1 |
| 18485 | 15746 | Wdr31         | Calr          | -1 |
| 18485 | 17449 | Wdr31         | Zfp296        | -1 |
| 18485 | 22139 | Wdr31         | Stip1         | -1 |
| 18485 | 23646 | Wdr31         | Hsp90ab1      | -1 |
| 18492 | 23301 | Dhfr          | Scamp1        | 1  |
| 18514 | 3139  | 4930412F15Rik | Gba2          | -1 |
| 18514 | 3847  | 4930412F15Rik | Tdrd7         | 1  |
| 18514 | 8907  | 4930412F15Rik | Npr2          | -1 |
| 18514 | 10327 | 4930412F15Rik | Hint2         | -1 |
| 18526 | 7586  | Dydc2         | 5730469M10Rik | 1  |
| 18526 | 19777 | Dydc2         | Lrit1         | 1  |
| 18534 | 6231  | Ovol2         | 9030622O22Rik | 1  |
| 18548 | 3475  | 1700012P22Rik | 2610305D13Rik | -1 |
| 18548 | 18338 | 1700012P22Rik | Akr1e1        | 1  |
| 18553 | 433   | Tekt4         | Pla2g12b      | -1 |
| 18553 | 719   | Tekt4         | Usp2          | 1  |
| 18553 | 1310  | Tekt4         | Cabc1         | -1 |
| 18553 | 2399  | Tekt4         | MMT00060167   | -1 |
| 18553 | 2483  | Tekt4         | Gmeb1         | 1  |
| 18553 | 2529  | Tekt4         | Hmcn2         | 1  |
| 18553 | 2794  | Tekt4         | Map3k6        | 1  |
| 18553 | 2829  | Tekt4         | Lrfr3         | -1 |
| 18553 | 3214  | Tekt4         | Dnmt3b        | -1 |
| 18553 | 4392  | Tekt4         | 1810055G02Rik | 1  |
| 18553 | 5345  | Tekt4         | MMT00023326   | 1  |
| 18553 | 5374  | Tekt4         | Chka          | -1 |
| 18553 | 5569  | Tekt4         | Pdgfc         | -1 |
| 18553 | 5574  | Tekt4         | Hsd3b7        | -1 |
| 18553 | 5791  | Tekt4         | Baiap211      | 1  |
| 18553 | 5849  | Tekt4         | 2310031A18Rik | -1 |
| 18553 | 5856  | Tekt4         | Mfsd2         | 1  |
| 18553 | 5974  | Tekt4         | Arntl         | -1 |
| 18553 | 6343  | Tekt4         | Slc20a1       | 1  |
| 18553 | 6386  | Tekt4         | Por           | 1  |
| 18553 | 6657  | Tekt4         | Irf6          | -1 |
| 18553 | 6756  | Tekt4         | Sds           | 1  |
| 18553 | 6990  | Tekt4         | Nr1i2         | 1  |
| 18553 | 7414  | Tekt4         | Clpx          | -1 |
| 18553 | 8399  | Tekt4         | Herpud1       | 1  |
| 18553 | 9158  | Tekt4         | Pde9a         | -1 |
| 18553 | 9309  | Tekt4         | MMT00035904   | 1  |
| 18553 | 9495  | Tekt4         | Srms          | -1 |
| 18553 | 10088 | Tekt4         | Ddc           | -1 |
| 18553 | 10775 | Tekt4         | Slc16a1       | -1 |
| 18553 | 11129 | Tekt4         | Ankhd1        | 1  |
| 18553 | 11599 | Tekt4         | Coq10b        | 1  |
| 18553 | 11741 | Tekt4         | Slc30a10      | -1 |
| 18553 | 11807 | Tekt4         | Fbxo31        | 1  |
| 18553 | 12193 | Tekt4         | Aco2          | 1  |
| 18553 | 12460 | Tekt4         | Pnpla2        | 1  |
| 18553 | 12489 | Tekt4         | Wdr8          | -1 |
| 18553 | 14041 | Tekt4         | Cldn1         | -1 |
| 18553 | 15481 | Tekt4         | 1110067D22Rik | -1 |
| 18553 | 15609 | Tekt4         | Mreg          | -1 |

|       |       |               |               |    |
|-------|-------|---------------|---------------|----|
| 18553 | 15631 | Tekt4         | Lpin1         | 1  |
| 18553 | 15709 | Tekt4         | Tceal1        | 1  |
| 18553 | 15882 | Tekt4         | AA986860      | 1  |
| 18553 | 16176 | Tekt4         | St3gal5       | 1  |
| 18553 | 16580 | Tekt4         | Tnfaip2       | -1 |
| 18553 | 17622 | Tekt4         | Foxo1         | 1  |
| 18553 | 18586 | Tekt4         | Tns1          | 1  |
| 18553 | 19025 | Tekt4         | Slc37a4       | 1  |
| 18553 | 19146 | Tekt4         | N4bp211       | 1  |
| 18553 | 19234 | Tekt4         | Nrg4          | 1  |
| 18553 | 19466 | Tekt4         | Pptc7         | 1  |
| 18553 | 20854 | Tekt4         | Commd7        | -1 |
| 18553 | 21142 | Tekt4         | Gm129         | 1  |
| 18553 | 21331 | Tekt4         | Slc10a6       | 1  |
| 18553 | 22324 | Tekt4         | MMT00060741   | -1 |
| 18553 | 23437 | Tekt4         | Efhd2         | 1  |
| 18555 | 6157  | Sdcbp2        | MMT00041452   | 1  |
| 18555 | 12916 | Sdcbp2        | Fkbp1a        | -1 |
| 18555 | 13581 | Sdcbp2        | Srxn1         | -1 |
| 18555 | 14647 | Sdcbp2        | Cst3          | 1  |
| 18555 | 15565 | Sdcbp2        | 2310001A20Rik | 1  |
| 18555 | 23005 | Sdcbp2        | 4930405A21Rik | -1 |
| 18572 | 11214 | Stx18         | MMT00049207   | 1  |
| 18572 | 15476 | Stx18         | Fem1b         | -1 |
| 18577 | 327   | Btd9          | H2-Ea         | -1 |
| 18577 | 2938  | Btd9          | H2-T23        | -1 |
| 18577 | 3430  | Btd9          | Rhof          | -1 |
| 18577 | 7088  | Btd9          | Slc37a1       | -1 |
| 18577 | 8750  | Btd9          | 1700010I14Rik | -1 |
| 18577 | 9158  | Btd9          | Pde9a         | 1  |
| 18577 | 10667 | Btd9          | H2-Eb1        | -1 |
| 18577 | 12335 | Btd9          | Plcb4         | -1 |
| 18577 | 13493 | Btd9          | Ring1         | 1  |
| 18577 | 14132 | Btd9          | Glo1          | -1 |
| 18577 | 18577 | Btd9          | Bitbd9        | 1  |
| 18577 | 18906 | Btd9          | Zfand3        | -1 |
| 18577 | 20238 | Btd9          | H2-T9         | -1 |
| 18577 | 22822 | Btd9          | MMT00013433   | -1 |
| 18577 | 23250 | Btd9          | Plcl2         | -1 |
| 18592 | 2674  | Txnl4a        | 1810005K13Rik | -1 |
| 18592 | 12984 | Txnl4a        | Cyb5          | 1  |
| 18592 | 18592 | Txnl4a        | Txnl4a        | 1  |
| 18592 | 19689 | Txnl4a        | 1110032A13Rik | -1 |
| 18592 | 21162 | Txnl4a        | MMT00008728   | -1 |
| 18602 | 18602 | Wisp1         | Wisp1         | 1  |
| 18619 | 3587  | 2810406K13Rik | MMT00041940   | -1 |
| 18619 | 3849  | 2810406K13Rik | MMT00047578   | -1 |
| 18619 | 4966  | 2810406K13Rik | Zscan20       | -1 |
| 18619 | 6021  | 2810406K13Rik | MMT00008784   | -1 |
| 18619 | 8670  | 2810406K13Rik | MMT00051613   | -1 |
| 18619 | 9258  | 2810406K13Rik | P4ha1         | -1 |
| 18619 | 9899  | 2810406K13Rik | D13Wsu177e    | -1 |
| 18619 | 10492 | 2810406K13Rik | 1810046K07Rik | 1  |
| 18619 | 11043 | 2810406K13Rik | Hsph1         | -1 |
| 18619 | 11201 | 2810406K13Rik | Sunc1         | 1  |
| 18619 | 11214 | 2810406K13Rik | MMT00049207   | -1 |
| 18619 | 14298 | 2810406K13Rik | Atp2a2        | -1 |
| 18619 | 15476 | 2810406K13Rik | Fem1b         | 1  |
| 18619 | 15675 | 2810406K13Rik | MMT00077535   | -1 |
| 18619 | 16043 | 2810406K13Rik | Sult1c2       | 1  |
| 18619 | 18373 | 2810406K13Rik | Dnajb1        | -1 |
| 18619 | 20535 | 2810406K13Rik | Rbm4          | -1 |
| 18619 | 20912 | 2810406K13Rik | Chordc1       | -1 |
| 18620 | 11966 | Slmap         | Zfp280b       | 1  |
| 18620 | 12861 | Slmap         | Rhcg          | 1  |
| 18620 | 19436 | Slmap         | Dapp1         | 1  |
| 18635 | 9067  | Hps1          | Tra2a         | -1 |
| 18651 | 11966 | Tulp2         | Zfp280b       | 1  |
| 18651 | 19436 | Tulp2         | Dapp1         | 1  |

|       |       |               |               |    |
|-------|-------|---------------|---------------|----|
| 18699 | 19436 | 2700089E24Rik | Dapp1         | 1  |
| 18700 | 1336  | Trappc2l      | MMT00069537   | 1  |
| 18700 | 2243  | Trappc2l      | Gcsh          | 1  |
| 18700 | 7910  | Trappc2l      | AK122209      | 1  |
| 18700 | 11212 | Trappc2l      | 1300018I17Rik | 1  |
| 18700 | 11404 | Trappc2l      | Gnpat         | 1  |
| 18700 | 14391 | Trappc2l      | MMT00017335   | -1 |
| 18700 | 15953 | Trappc2l      | Acsf3         | -1 |
| 18700 | 16802 | Trappc2l      | Def8          | 1  |
| 18700 | 18697 | Trappc2l      | Afg3l1        | 1  |
| 18700 | 21394 | Trappc2l      | Cdh15         | -1 |
| 18700 | 22909 | Trappc2l      | Nup133        | 1  |
| 18702 | 17805 | Mrc1          | Slc39a12      | -1 |
| 18702 | 18702 | Mrc1          | Mrc1          | 1  |
| 18709 | 14753 | Srp68         | Slc25a19      | -1 |
| 18709 | 14866 | Srp68         | Kctd2         | -1 |
| 18709 | 16337 | Srp68         | Grin2c        | -1 |
| 18709 | 18709 | Srp68         | Srp68         | 1  |
| 18714 | 18714 | Farsb         | Farsb         | 1  |
| 18726 | 3196  | D630004A14Rik | Tat           | 1  |
| 18726 | 3587  | D630004A14Rik | MMT00041940   | 1  |
| 18726 | 6021  | D630004A14Rik | MMT00008784   | 1  |
| 18726 | 6769  | D630004A14Rik | Banp          | 1  |
| 18726 | 7674  | D630004A14Rik | Spata7        | -1 |
| 18726 | 8319  | D630004A14Rik | MMT00062477   | 1  |
| 18726 | 8670  | D630004A14Rik | MMT00051613   | 1  |
| 18726 | 9258  | D630004A14Rik | P4ha1         | 1  |
| 18726 | 9899  | D630004A14Rik | D13Wsu177e    | 1  |
| 18726 | 11043 | D630004A14Rik | Hsph1         | 1  |
| 18726 | 11095 | D630004A14Rik | Bag3          | 1  |
| 18726 | 11161 | D630004A14Rik | Gpatch2       | 1  |
| 18726 | 11214 | D630004A14Rik | MMT00049207   | 1  |
| 18726 | 12761 | D630004A14Rik | Tsc22d3       | 1  |
| 18726 | 15476 | D630004A14Rik | Fem1b         | -1 |
| 18726 | 15675 | D630004A14Rik | MMT00077535   | 1  |
| 18726 | 15826 | D630004A14Rik | Arl4d         | 1  |
| 18726 | 16251 | D630004A14Rik | G6pc          | 1  |
| 18726 | 17160 | D630004A14Rik | Ccdc127       | 1  |
| 18726 | 17224 | D630004A14Rik | 5430407P10Rik | 1  |
| 18726 | 17591 | D630004A14Rik | D930015E06Rik | -1 |
| 18726 | 18083 | D630004A14Rik | Gadd45a       | -1 |
| 18726 | 18373 | D630004A14Rik | Dnajb1        | 1  |
| 18726 | 18418 | D630004A14Rik | Hspa1b        | 1  |
| 18726 | 20535 | D630004A14Rik | Rbm4          | 1  |
| 18726 | 20912 | D630004A14Rik | Chordc1       | 1  |
| 18726 | 20965 | D630004A14Rik | Usp28         | -1 |
| 18726 | 21389 | D630004A14Rik | Odf2          | -1 |
| 18726 | 22216 | D630004A14Rik | Sp5           | -1 |
| 18738 | 1466  | Hadha         | Ubap2l        | 1  |
| 18772 | 9230  | BC048355      | 1700027N10Rik | 1  |
| 18772 | 14027 | BC048355      | Rpo1-1        | -1 |
| 18772 | 15318 | BC048355      | Aars2         | 1  |
| 18772 | 18574 | BC048355      | Parc          | -1 |
| 18772 | 18772 | BC048355      | BC048355      | 1  |
| 18772 | 20100 | BC048355      | Guca1b        | -1 |
| 18775 | 2703  | Best2         | MMT00073763   | -1 |
| 18785 | 5804  | Angptl4       | Thrsp         | -1 |
| 18785 | 12315 | Angptl4       | Srebf1        | -1 |
| 18790 | 3208  | Car3          | 4930511I11Rik | 1  |
| 18790 | 7436  | Car3          | 1700063K16Rik | 1  |
| 18790 | 11966 | Car3          | Zfp280b       | 1  |
| 18790 | 12861 | Car3          | Rhcg          | 1  |
| 18790 | 19436 | Car3          | Dapp1         | 1  |
| 18790 | 22125 | Car3          | Gab1          | 1  |
| 18835 | 1956  | Dtwd1         | Usp50         | 1  |
| 18835 | 4833  | Dtwd1         | Synpo2        | -1 |
| 18835 | 6016  | Dtwd1         | A530057A03Rik | 1  |
| 18835 | 6231  | Dtwd1         | 9030622O22Rik | 1  |
| 18835 | 7991  | Dtwd1         | Gpr115        | -1 |



|       |       |          |               |    |
|-------|-------|----------|---------------|----|
| 18835 | 14740 | Dtwd1    | Mfap1b        | -1 |
| 18835 | 17043 | Dtwd1    | Tmem127       | 1  |
| 18835 | 21729 | Dtwd1    | Hdc           | -1 |
| 18835 | 22857 | Dtwd1    | Fahd2a        | 1  |
| 18846 | 3587  | lkbkg    | MMT00041940   | 1  |
| 18846 | 3849  | lkbkg    | MMT00047578   | 1  |
| 18846 | 6021  | lkbkg    | MMT00008784   | 1  |
| 18846 | 6126  | lkbkg    | MMT00067575   | 1  |
| 18846 | 6286  | lkbkg    | Rfc1          | -1 |
| 18846 | 8319  | lkbkg    | MMT00062477   | 1  |
| 18846 | 8662  | lkbkg    | Brca2         | -1 |
| 18846 | 8670  | lkbkg    | MMT00051613   | 1  |
| 18846 | 9899  | lkbkg    | D13Wsu177e    | 1  |
| 18846 | 10769 | lkbkg    | Hnrnpd        | -1 |
| 18846 | 11043 | lkbkg    | Hsph1         | 1  |
| 18846 | 11214 | lkbkg    | MMT00049207   | 1  |
| 18846 | 15675 | lkbkg    | MMT00077535   | 1  |
| 18846 | 16037 | lkbkg    | MMT00011022   | -1 |
| 18846 | 17160 | lkbkg    | Ccdc127       | 1  |
| 18846 | 18373 | lkbkg    | Dnajb1        | 1  |
| 18846 | 18418 | lkbkg    | Hspa1b        | 1  |
| 18846 | 20965 | lkbkg    | Usp28         | -1 |
| 18846 | 21389 | lkbkg    | Odf2          | -1 |
| 18847 | 19436 | Armet1   | Dapp1         | 1  |
| 18868 | 11812 | Mpeg1    | Mrpl16        | -1 |
| 18871 | 7088  | Al314976 | Slc37a1       | 1  |
| 18871 | 15531 | Al314976 | Prickle4      | -1 |
| 18871 | 20100 | Al314976 | Guca1b        | -1 |
| 18874 | 19057 | Olfr777  | Cntnap2       | -1 |
| 18886 | 1755  | Slc18a1  | Ocel1         | -1 |
| 18889 | 3587  | Shq1     | MMT00041940   | 1  |
| 18889 | 6021  | Shq1     | MMT00008784   | 1  |
| 18889 | 6769  | Shq1     | Banp          | 1  |
| 18889 | 8670  | Shq1     | MMT00051613   | 1  |
| 18889 | 11043 | Shq1     | Hsph1         | 1  |
| 18889 | 11214 | Shq1     | MMT00049207   | 1  |
| 18889 | 15476 | Shq1     | Fem1b         | -1 |
| 18889 | 15675 | Shq1     | MMT00077535   | 1  |
| 18889 | 18373 | Shq1     | Dnajb1        | 1  |
| 18889 | 21389 | Shq1     | Odf2          | -1 |
| 18903 | 3587  | Crem     | MMT00041940   | 1  |
| 18903 | 3849  | Crem     | MMT00047578   | 1  |
| 18903 | 6021  | Crem     | MMT00008784   | 1  |
| 18903 | 6126  | Crem     | MMT00067575   | 1  |
| 18903 | 8319  | Crem     | MMT00062477   | 1  |
| 18903 | 8670  | Crem     | MMT00051613   | 1  |
| 18903 | 9258  | Crem     | P4ha1         | 1  |
| 18903 | 9899  | Crem     | D13Wsu177e    | 1  |
| 18903 | 11043 | Crem     | Hsph1         | 1  |
| 18903 | 11214 | Crem     | MMT00049207   | 1  |
| 18903 | 14298 | Crem     | Atp2a2        | 1  |
| 18903 | 15675 | Crem     | MMT00077535   | 1  |
| 18903 | 18373 | Crem     | Dnajb1        | 1  |
| 18903 | 18418 | Crem     | Hspa1b        | 1  |
| 18903 | 20535 | Crem     | Rbm4          | 1  |
| 18903 | 20912 | Crem     | Chordc1       | 1  |
| 18903 | 22272 | Crem     | Vpreb1        | 1  |
| 18939 | 6931  | Matn2    | Hrsp12        | 1  |
| 18939 | 11992 | Matn2    | Mrpl19        | 1  |
| 18939 | 13648 | Matn2    | Dap           | 1  |
| 18939 | 17082 | Matn2    | MMT00013155   | 1  |
| 18939 | 20209 | Matn2    | 5730557B15Rik | 1  |
| 18939 | 20871 | Matn2    | Pop1          | -1 |
| 18939 | 22362 | Matn2    | Laptm4b       | 1  |
| 18948 | 2743  | Olfr1270 | Tcf3          | -1 |
| 18948 | 3703  | Olfr1270 | Ggcx          | -1 |
| 18948 | 7273  | Olfr1270 | Rnf103        | 1  |
| 18948 | 11338 | Olfr1270 | Vamp8         | -1 |
| 18948 | 11872 | Olfr1270 | Vamp5         | -1 |

|       |       |          |               |    |
|-------|-------|----------|---------------|----|
| 18948 | 15384 | Olfr1270 | Mat2a         | -1 |
| 18948 | 15625 | Olfr1270 | Capg          | -1 |
| 18948 | 15708 | Olfr1270 | Retsat        | -1 |
| 18948 | 16670 | Olfr1270 | Csmd2         | 1  |
| 18948 | 17317 | Olfr1270 | Jmjd1a        | 1  |
| 18948 | 17562 | Olfr1270 | Rbed1         | -1 |
| 18948 | 22695 | Olfr1270 | Tgoln2        | -1 |
| 18980 | 3208  | Il7      | 4930511111Rik | 1  |
| 18980 | 7436  | Il7      | 1700063K16Rik | 1  |
| 18980 | 11966 | Il7      | Zfp280b       | 1  |
| 18980 | 19436 | Il7      | Dapp1         | 1  |
| 18980 | 19672 | Il7      | Cldn19        | 1  |
| 18980 | 21723 | Il7      | Homer1        | 1  |
| 18980 | 22125 | Il7      | Gab1          | 1  |
| 19004 | 563   | Pdk4     | D4Bwg0951e    | 1  |
| 19004 | 1877  | Pdk4     | Amica1        | 1  |
| 19004 | 2294  | Pdk4     | AU040829      | 1  |
| 19004 | 3170  | Pdk4     | Mcart1        | 1  |
| 19004 | 3196  | Pdk4     | Tat           | 1  |
| 19004 | 4084  | Pdk4     | Asah3l        | 1  |
| 19004 | 12761 | Pdk4     | Tsc22d3       | 1  |
| 19004 | 13471 | Pdk4     | Cln8          | 1  |
| 19004 | 15631 | Pdk4     | Lpin1         | 1  |
| 19004 | 15882 | Pdk4     | AA986860      | 1  |
| 19004 | 17525 | Pdk4     | Ctgf          | 1  |
| 19004 | 18027 | Pdk4     | 5730403B10Rik | 1  |
| 19004 | 18785 | Pdk4     | Angptl4       | 1  |
| 19004 | 21331 | Pdk4     | Slc10a6       | 1  |
| 19011 | 8341  | Rpl3l    | MMT00017270   | -1 |
| 19022 | 3587  | Ccnb2    | MMT00041940   | 1  |
| 19022 | 6021  | Ccnb2    | MMT00008784   | 1  |
| 19022 | 8670  | Ccnb2    | MMT00051613   | 1  |
| 19022 | 11214 | Ccnb2    | MMT00049207   | 1  |
| 19022 | 15476 | Ccnb2    | Fem1b         | -1 |
| 19022 | 15675 | Ccnb2    | MMT00077535   | 1  |
| 19037 | 12412 | Slc11a2  | BC004728      | 1  |
| 19037 | 19037 | Slc11a2  | Slc11a2       | 1  |
| 19037 | 21060 | Slc11a2  | Ela1          | 1  |
| 19108 | 2329  | Armet    | Wdr6          | -1 |
| 19108 | 3587  | Armet    | MMT00041940   | 1  |
| 19108 | 6021  | Armet    | MMT00008784   | 1  |
| 19108 | 8670  | Armet    | MMT00051613   | 1  |
| 19108 | 9067  | Armet    | Tra2a         | 1  |
| 19108 | 9258  | Armet    | P4ha1         | 1  |
| 19108 | 11043 | Armet    | Hsph1         | 1  |
| 19108 | 11214 | Armet    | MMT00049207   | 1  |
| 19108 | 15476 | Armet    | Fem1b         | -1 |
| 19108 | 15675 | Armet    | MMT00077535   | 1  |
| 19108 | 20912 | Armet    | Chordc1       | 1  |
| 19108 | 21352 | Armet    | Dtnbp1        | -1 |
| 19108 | 22751 | Armet    | Nosip         | -1 |
| 19115 | 1041  | Rab32    | 3110049J23Rik | -1 |
| 19115 | 1135  | Rab32    | Akap12        | 1  |
| 19115 | 2571  | Rab32    | Rmnd1         | 1  |
| 19115 | 3744  | Rab32    | Rmnd1         | 1  |
| 19115 | 5965  | Rab32    | Pbld          | -1 |
| 19115 | 8786  | Rab32    | Rmnd1         | 1  |
| 19115 | 12070 | Rab32    | Adat2         | 1  |
| 19115 | 13688 | Rab32    | Ppa1          | -1 |
| 19115 | 14169 | Rab32    | 1700052N19Rik | -1 |
| 19115 | 14989 | Rab32    | Map3k5        | -1 |
| 19115 | 15971 | Rab32    | Aifm2         | -1 |
| 19115 | 18300 | Rab32    | Arg1          | -1 |
| 19115 | 19115 | Rab32    | Rab32         | 1  |
| 19115 | 21258 | Rab32    | 2010003K15Rik | 1  |
| 19115 | 22146 | Rab32    | Aifm2         | -1 |
| 19142 | 1985  | Gpatch1  | Pepd          | -1 |
| 19142 | 2388  | Gpatch1  | Dot1l         | 1  |
| 19142 | 2599  | Gpatch1  | Lsm14a        | 1  |

|       |       |               |               |    |
|-------|-------|---------------|---------------|----|
| 19142 | 4697  | Gpatch1       | Cyp2a12       | -1 |
| 19142 | 5352  | Gpatch1       | Pdcd2l        | 1  |
| 19142 | 6513  | Gpatch1       | Qpctl         | 1  |
| 19142 | 7761  | Gpatch1       | Nudt19        | 1  |
| 19142 | 11321 | Gpatch1       | 2310014L17Rik | -1 |
| 19142 | 16639 | Gpatch1       | MMT00078937   | -1 |
| 19142 | 18053 | Gpatch1       | Psmc4         | 1  |
| 19142 | 19462 | Gpatch1       | 4933439C20Rik | -1 |
| 19151 | 6330  | Dmp1          | Dgkq          | -1 |
| 19151 | 23625 | Dmp1          | Pkd2          | -1 |
| 19182 | 21331 | Igsf2         | Slc10a6       | 1  |
| 19189 | 2224  | Sp100         | Oasl2         | 1  |
| 19189 | 2550  | Sp100         | MMT00036681   | 1  |
| 19189 | 5216  | Sp100         | Spnb5         | 1  |
| 19189 | 6824  | Sp100         | Irf7          | 1  |
| 19189 | 9847  | Sp100         | Irf27         | 1  |
| 19189 | 12398 | Sp100         | Irf44         | 1  |
| 19189 | 13514 | Sp100         | Apol9b        | 1  |
| 19189 | 15074 | Sp100         | Usp18         | 1  |
| 19189 | 19738 | Sp100         | Lgals3bp      | 1  |
| 19189 | 21549 | Sp100         | Rtp4          | 1  |
| 19189 | 23450 | Sp100         | D12Ert647e    | 1  |
| 19192 | 11094 | Hist1h1c      | Slc17a3       | -1 |
| 19192 | 19192 | Hist1h1c      | Hist1h1c      | 1  |
| 19196 | 12302 | Nfe2l1        | Cbx1          | -1 |
| 19214 | 19214 | Snapc1        | Snapc1        | 1  |
| 19219 | 3208  | MMT00015104   | 4930511111Rik | 1  |
| 19219 | 7436  | MMT00015104   | 1700063K16Rik | 1  |
| 19219 | 11966 | MMT00015104   | Zfp280b       | 1  |
| 19219 | 12861 | MMT00015104   | Rhcg          | 1  |
| 19219 | 19436 | MMT00015104   | Dapp1         | 1  |
| 19219 | 22125 | MMT00015104   | Gab1          | 1  |
| 19227 | 3587  | MMT00058471   | MMT00041940   | -1 |
| 19227 | 8670  | MMT00058471   | MMT00051613   | -1 |
| 19227 | 11043 | MMT00058471   | Hsph1         | -1 |
| 19227 | 22139 | MMT00058471   | Stip1         | -1 |
| 19267 | 3208  | Olf341        | 4930511111Rik | 1  |
| 19267 | 5694  | Olf341        | Sp7           | 1  |
| 19267 | 7436  | Olf341        | 1700063K16Rik | 1  |
| 19267 | 11966 | Olf341        | Zfp280b       | 1  |
| 19267 | 12861 | Olf341        | Rhcg          | 1  |
| 19267 | 13117 | Olf341        | Tmprss5       | 1  |
| 19267 | 19436 | Olf341        | Dapp1         | 1  |
| 19267 | 19672 | Olf341        | Cldn19        | 1  |
| 19267 | 22125 | Olf341        | Gab1          | 1  |
| 19286 | 15455 | 1110012M11Rik | Lsm4          | 1  |
| 19306 | 1985  | Al428936      | Pepd          | -1 |
| 19306 | 2388  | Al428936      | Dot1l         | 1  |
| 19306 | 2599  | Al428936      | Lsm14a        | 1  |
| 19306 | 4697  | Al428936      | Cyp2a12       | -1 |
| 19306 | 6513  | Al428936      | Qpctl         | 1  |
| 19306 | 11888 | Al428936      | Myadm         | -1 |
| 19306 | 16639 | Al428936      | MMT00078937   | -1 |
| 19306 | 19462 | Al428936      | 4933439C20Rik | -1 |
| 19306 | 19762 | Al428936      | Pih1d1        | -1 |
| 19306 | 23595 | Al428936      | Gm550         | 1  |
| 19322 | 18709 | Myo15b        | Srp68         | -1 |
| 19332 | 9449  | Bpnt1         | Sft2d2        | -1 |
| 19332 | 11406 | Bpnt1         | Irf203        | 1  |
| 19332 | 11571 | Bpnt1         | Bpnt1         | 1  |
| 19332 | 16361 | Bpnt1         | Olf341        | -1 |
| 19332 | 16972 | Bpnt1         | Nenf          | 1  |
| 19332 | 19332 | Bpnt1         | Bpnt1         | 1  |
| 19332 | 19835 | Bpnt1         | Irf2          | 1  |
| 19332 | 23466 | Bpnt1         | Pou2f1        | -1 |
| 19339 | 337   | Gem           | Rasgef1b      | 1  |
| 19339 | 5889  | Gem           | Errfi1        | 1  |
| 19339 | 17525 | Gem           | Ctgf          | 1  |
| 19339 | 18083 | Gem           | Gadd45a       | -1 |

|       |       |               |               |    |
|-------|-------|---------------|---------------|----|
| 19345 | 6931  | Ssh2          | Hrsp12        | -1 |
| 19351 | 3208  | Prkcsh        | 4930511111Rik | 1  |
| 19351 | 7436  | Prkcsh        | 1700063K16Rik | 1  |
| 19351 | 11966 | Prkcsh        | Zfp280b       | 1  |
| 19351 | 12861 | Prkcsh        | Rhcg          | 1  |
| 19351 | 19436 | Prkcsh        | Dapp1         | 1  |
| 19351 | 22125 | Prkcsh        | Gab1          | 1  |
| 19389 | 3196  | lqcb1         | Tat           | 1  |
| 19389 | 3587  | lqcb1         | MMT00041940   | 1  |
| 19389 | 3849  | lqcb1         | MMT00047578   | 1  |
| 19389 | 6021  | lqcb1         | MMT00008784   | 1  |
| 19389 | 8670  | lqcb1         | MMT00051613   | 1  |
| 19389 | 11214 | lqcb1         | MMT00049207   | 1  |
| 19389 | 12761 | lqcb1         | Tsc22d3       | 1  |
| 19389 | 15476 | lqcb1         | Fem1b         | -1 |
| 19389 | 15675 | lqcb1         | MMT00077535   | 1  |
| 19389 | 15826 | lqcb1         | Arl4d         | 1  |
| 19389 | 16251 | lqcb1         | G6pc          | 1  |
| 19389 | 16517 | lqcb1         | D4Wsu53e      | 1  |
| 19389 | 17525 | lqcb1         | Ctgf          | 1  |
| 19389 | 18083 | lqcb1         | Gadd45a       | -1 |
| 19389 | 18373 | lqcb1         | Dnajb1        | 1  |
| 19389 | 18418 | lqcb1         | Hspa1b        | 1  |
| 19389 | 22216 | lqcb1         | Sp5           | -1 |
| 19391 | 3587  | Apex2         | MMT00041940   | 1  |
| 19391 | 6021  | Apex2         | MMT00008784   | 1  |
| 19391 | 8670  | Apex2         | MMT00051613   | 1  |
| 19391 | 9258  | Apex2         | P4ha1         | 1  |
| 19391 | 15675 | Apex2         | MMT00077535   | 1  |
| 19391 | 18373 | Apex2         | Dnajb1        | 1  |
| 19392 | 1041  | Slc25a16      | 3110049J23Rik | -1 |
| 19392 | 13688 | Slc25a16      | Ppa1          | -1 |
| 19392 | 19392 | Slc25a16      | Slc25a16      | 1  |
| 19420 | 5694  | Lcn8          | Sp7           | 1  |
| 19420 | 7436  | Lcn8          | 1700063K16Rik | 1  |
| 19420 | 11966 | Lcn8          | Zfp280b       | 1  |
| 19420 | 12861 | Lcn8          | Rhcg          | 1  |
| 19420 | 19436 | Lcn8          | Dapp1         | 1  |
| 19421 | 19421 | Mbd2          | Mbd2          | 1  |
| 19433 | 13813 | Mex3b         | Ktelc1        | 1  |
| 19436 | 3208  | Dapp1         | 4930511111Rik | 1  |
| 19436 | 7436  | Dapp1         | 1700063K16Rik | 1  |
| 19436 | 11966 | Dapp1         | Zfp280b       | 1  |
| 19436 | 12861 | Dapp1         | Rhcg          | 1  |
| 19436 | 19436 | Dapp1         | Dapp1         | 1  |
| 19436 | 22125 | Dapp1         | Gab1          | 1  |
| 19462 | 2388  | 4933439C20Rik | Dot1l         | -1 |
| 19462 | 2599  | 4933439C20Rik | Lsm14a        | -1 |
| 19462 | 4697  | 4933439C20Rik | Cyp2a12       | 1  |
| 19462 | 5352  | 4933439C20Rik | Pdcd2l        | -1 |
| 19462 | 6371  | 4933439C20Rik | Dedd2         | -1 |
| 19462 | 6396  | 4933439C20Rik | Zfp105        | 1  |
| 19462 | 6513  | 4933439C20Rik | Qpctl         | -1 |
| 19462 | 6519  | 4933439C20Rik | Phldb3        | -1 |
| 19462 | 9122  | 4933439C20Rik | Sepw1         | -1 |
| 19462 | 9322  | 4933439C20Rik | Relt          | 1  |
| 19462 | 10545 | 4933439C20Rik | Tmem147       | -1 |
| 19462 | 11321 | 4933439C20Rik | 2310014L17Rik | 1  |
| 19462 | 11465 | 4933439C20Rik | Eif3k         | -1 |
| 19462 | 11888 | 4933439C20Rik | Myadm         | 1  |
| 19462 | 12423 | 4933439C20Rik | Cyp2g1        | 1  |
| 19462 | 16639 | 4933439C20Rik | MMT00078937   | 1  |
| 19462 | 17314 | 4933439C20Rik | Napa          | 1  |
| 19462 | 18088 | 4933439C20Rik | Alkbh6        | -1 |
| 19462 | 19462 | 4933439C20Rik | 4933439C20Rik | 1  |
| 19462 | 20606 | 4933439C20Rik | MMT00042166   | 1  |
| 19462 | 23247 | 4933439C20Rik | Ercc1         | 1  |
| 19462 | 23595 | 4933439C20Rik | Gm550         | -1 |
| 19483 | 3208  | Depdc2        | 4930511111Rik | 1  |

|       |       |          |               |    |
|-------|-------|----------|---------------|----|
| 19483 | 7436  | Depdc2   | 1700063K16Rik | 1  |
| 19483 | 11966 | Depdc2   | Zfp280b       | 1  |
| 19483 | 12861 | Depdc2   | Rhcg          | 1  |
| 19483 | 19436 | Depdc2   | Dapp1         | 1  |
| 19483 | 22125 | Depdc2   | Gab1          | 1  |
| 19493 | 12055 | Icosl    | 1810008A18Rik | 1  |
| 19502 | 9077  | Fbxo24   | Cnpy4         | -1 |
| 19502 | 10995 | Fbxo24   | Ap4m1         | 1  |
| 19502 | 13780 | Fbxo24   | Pilra         | -1 |
| 19502 | 15219 | Fbxo24   | 0910001L09Rik | -1 |
| 19502 | 16451 | Fbxo24   | 2010007H12Rik | 1  |
| 19502 | 17089 | Fbxo24   | Pilrb1        | -1 |
| 19502 | 17158 | Fbxo24   | Zfp113        | 1  |
| 19502 | 19502 | Fbxo24   | Fbxo24        | 1  |
| 19519 | 9230  | BC011248 | 1700027N10Rik | 1  |
| 19519 | 14027 | BC011248 | Rpo1-1        | -1 |
| 19519 | 15318 | BC011248 | Aars2         | 1  |
| 19519 | 18574 | BC011248 | Parc          | -1 |
| 19519 | 18772 | BC011248 | BC048355      | 1  |
| 19533 | 3587  | Gpr62    | MMT00041940   | -1 |
| 19533 | 6021  | Gpr62    | MMT00008784   | -1 |
| 19533 | 8670  | Gpr62    | MMT00051613   | -1 |
| 19533 | 11043 | Gpr62    | Hsph1         | -1 |
| 19533 | 11214 | Gpr62    | MMT00049207   | -1 |
| 19533 | 15675 | Gpr62    | MMT00077535   | -1 |
| 19543 | 14720 | B3gnt3   | Lcn9          | -1 |
| 19559 | 18432 | Icmt     | 4933430H15Rik | -1 |
| 19573 | 17525 | Serpine1 | Ctgf          | 1  |
| 19578 | 12744 | Aox1     | 1110034B05Rik | -1 |
| 19578 | 19578 | Aox1     | Aox1          | 1  |
| 19606 | 18083 | Egr2     | Gadd45a       | -1 |
| 19621 | 250   | Cldn5    | Tubb2a-ps2    | 1  |
| 19621 | 609   | Cldn5    | MMT00060868   | 1  |
| 19621 | 719   | Cldn5    | Usp2          | -1 |
| 19621 | 1310  | Cldn5    | Cabc1         | 1  |
| 19621 | 1767  | Cldn5    | BC016495      | -1 |
| 19621 | 2399  | Cldn5    | MMT00060167   | 1  |
| 19621 | 3214  | Cldn5    | Dnmt3b        | 1  |
| 19621 | 3246  | Cldn5    | Prei4         | -1 |
| 19621 | 3804  | Cldn5    | MMT00015534   | 1  |
| 19621 | 4708  | Cldn5    | Traf3ip2      | 1  |
| 19621 | 5183  | Cldn5    | St5           | 1  |
| 19621 | 5374  | Cldn5    | Chka          | 1  |
| 19621 | 5974  | Cldn5    | Arntl         | 1  |
| 19621 | 6386  | Cldn5    | Por           | -1 |
| 19621 | 7136  | Cldn5    | Id3           | 1  |
| 19621 | 9495  | Cldn5    | Srms          | 1  |
| 19621 | 10215 | Cldn5    | Nampt         | -1 |
| 19621 | 10486 | Cldn5    | 1300002K09Rik | 1  |
| 19621 | 11599 | Cldn5    | Coq10b        | -1 |
| 19621 | 11741 | Cldn5    | Slc30a10      | 1  |
| 19621 | 12489 | Cldn5    | Wdr8          | 1  |
| 19621 | 14041 | Cldn5    | Cldn1         | 1  |
| 19621 | 15631 | Cldn5    | Lpin1         | -1 |
| 19621 | 16060 | Cldn5    | Gys2          | -1 |
| 19621 | 16176 | Cldn5    | St3gal5       | -1 |
| 19621 | 16580 | Cldn5    | Tnfaip2       | 1  |
| 19621 | 16669 | Cldn5    | Tjp2          | 1  |
| 19621 | 16690 | Cldn5    | Tjp3          | 1  |
| 19621 | 17876 | Cldn5    | Tubb4         | 1  |
| 19621 | 18314 | Cldn5    | 4631416L12Rik | -1 |
| 19621 | 18827 | Cldn5    | Oprs1         | 1  |
| 19621 | 19466 | Cldn5    | Pptc7         | -1 |
| 19621 | 19671 | Cldn5    | Upp2          | -1 |
| 19621 | 21409 | Cldn5    | Gldc          | 1  |
| 19621 | 22290 | Cldn5    | Tubb2a        | 1  |
| 19621 | 22630 | Cldn5    | MMT00034355   | 1  |
| 19633 | 8610  | Gm694    | Padi4         | 1  |
| 19645 | 3208  | Il12rb2  | 4930511I11Rik | 1  |

|       |       |               |                    |    |
|-------|-------|---------------|--------------------|----|
| 19645 | 7436  | Il12rb2       | 1700063K16Rik      | 1  |
| 19645 | 11966 | Il12rb2       | Zfp280b            | 1  |
| 19645 | 12861 | Il12rb2       | Rhcg               | 1  |
| 19645 | 19436 | Il12rb2       | Dapp1              | 1  |
| 19645 | 22125 | Il12rb2       | Gab1               | 1  |
| 19647 | 6191  | Cort          | Ddost              | -1 |
| 19647 | 19924 | Cort          | Ubiad1             | 1  |
| 19651 | 3587  | Thex1         | MMT00041940        | 1  |
| 19651 | 6021  | Thex1         | MMT00008784        | 1  |
| 19651 | 8670  | Thex1         | MMT00051613        | 1  |
| 19651 | 11043 | Thex1         | Hsph1              | 1  |
| 19651 | 11214 | Thex1         | MMT00049207        | 1  |
| 19651 | 15476 | Thex1         | Fem1b              | -1 |
| 19651 | 15675 | Thex1         | MMT00077535        | 1  |
| 19651 | 18373 | Thex1         | Dnajb1             | 1  |
| 19651 | 20912 | Thex1         | Chordc1            | 1  |
| 19651 | 21389 | Thex1         | Odf2               | -1 |
| 19658 | 3208  | Cldnd2        | 4930511I11Rik      | 1  |
| 19672 | 3208  | Cldn19        | 4930511I11Rik      | 1  |
| 19672 | 5694  | Cldn19        | Sp7                | 1  |
| 19672 | 7436  | Cldn19        | 1700063K16Rik      | 1  |
| 19672 | 11966 | Cldn19        | Zfp280b            | 1  |
| 19672 | 12861 | Cldn19        | Rhcg               | 1  |
| 19672 | 19436 | Cldn19        | Dapp1              | 1  |
| 19672 | 19672 | Cldn19        | Cldn19             | 1  |
| 19672 | 22125 | Cldn19        | Gab1               | 1  |
| 19689 | 2674  | 1110032A13Rik | 1810005K13Rik      | 1  |
| 19689 | 18592 | 1110032A13Rik | Txn14a             | -1 |
| 19700 | 3159  | E030011K20Rik | Pld1               | 1  |
| 19700 | 5822  | E030011K20Rik | Car2               | 1  |
| 19700 | 5938  | E030011K20Rik | Pfn2               | 1  |
| 19700 | 8568  | E030011K20Rik | Tnik               | 1  |
| 19700 | 11611 | E030011K20Rik | S100a13            | -1 |
| 19700 | 12367 | E030011K20Rik | MMT00072365        | -1 |
| 19700 | 12784 | E030011K20Rik | Nudt6              | 1  |
| 19700 | 13423 | E030011K20Rik | ENSMUSG00000053749 | 1  |
| 19700 | 15508 | E030011K20Rik | 4632415L05Rik      | 1  |
| 19700 | 16416 | E030011K20Rik | Commd2             | 1  |
| 19700 | 18790 | E030011K20Rik | Car3               | 1  |
| 19700 | 21323 | E030011K20Rik | MMT00074228        | 1  |
| 19709 | 19436 | 1-Sep         | Dapp1              | 1  |
| 19717 | 2115  | Ccdc27        | Gpr12              | -1 |
| 19720 | 1355  | Cyp26c1       | MMT00047341        | -1 |
| 19722 | 11966 | Pvrl1         | Zfp280b            | 1  |
| 19725 | 19725 | Dcp2          | Dcp2               | 1  |
| 19734 | 9161  | Dchs1         | Mrpl17             | 1  |
| 19744 | 8902  | Acy3          | Aldh3b1            | -1 |
| 19744 | 10629 | Acy3          | BC021614           | 1  |
| 19744 | 17447 | Acy3          | Ctsf               | -1 |
| 19763 | 4833  | Acp2          | Synpo2             | -1 |
| 19763 | 9547  | Acp2          | MMT00006479        | 1  |
| 19763 | 17295 | Acp2          | MMT00082577        | 1  |
| 19763 | 19763 | Acp2          | Acp2               | 1  |
| 19763 | 23474 | Acp2          | MMT00011721        | 1  |
| 19803 | 2472  | BC003993      | MMT00014056        | 1  |
| 19803 | 7654  | BC003993      | Ptpmt1             | -1 |
| 19803 | 9547  | BC003993      | MMT00006479        | 1  |
| 19803 | 14757 | BC003993      | Hdx                | 1  |
| 19803 | 16881 | BC003993      | MMT00031504        | 1  |
| 19803 | 17295 | BC003993      | MMT00082577        | 1  |
| 19803 | 19763 | BC003993      | Acp2               | 1  |
| 19803 | 19803 | BC003993      | BC003993           | 1  |
| 19803 | 22320 | BC003993      | MMT00047284        | 1  |
| 19803 | 23474 | BC003993      | MMT00011721        | 1  |
| 19808 | 2243  | Fetub         | Gcsh               | -1 |
| 19826 | 6157  | Nanp          | MMT00041452        | 1  |
| 19826 | 13581 | Nanp          | Srxn1              | -1 |
| 19835 | 11571 | lars2         | Bpnt1              | 1  |
| 19835 | 16361 | lars2         | Olfir703           | -1 |

|       |       |               |               |    |
|-------|-------|---------------|---------------|----|
| 19835 | 19332 | lars2         | Bpnt1         | 1  |
| 19843 | 19843 | Rbm45         | Rbm45         | 1  |
| 19857 | 11812 | Rab1b         | Mrpl16        | 1  |
| 19857 | 17447 | Rab1b         | Ctsf          | 1  |
| 19885 | 2079  | Al427122      | Mthfs         | -1 |
| 19924 | 2533  | Ubiad1        | Arhgef19      | 1  |
| 19924 | 3475  | Ubiad1        | 2610305D13Rik | 1  |
| 19924 | 3616  | Ubiad1        | Dnajc16       | -1 |
| 19924 | 4305  | Ubiad1        | Tmem51        | -1 |
| 19924 | 4885  | Ubiad1        | Fhad1         | 1  |
| 19924 | 6191  | Ubiad1        | Ddost         | -1 |
| 19924 | 6830  | Ubiad1        | Rsc1a1        | -1 |
| 19924 | 12097 | Ubiad1        | 9430015G10Rik | 1  |
| 19924 | 16287 | Ubiad1        | Extl1         | 1  |
| 19924 | 18338 | Ubiad1        | Akr1e1        | -1 |
| 19924 | 19924 | Ubiad1        | Ubiad1        | 1  |
| 19924 | 20045 | Ubiad1        | D4Wsu114e     | 1  |
| 19936 | 18373 | Egf           | Dnajb1        | -1 |
| 19946 | 22184 | Elf5          | MMT00033856   | 1  |
| 19949 | 22139 | Tubgcp2       | Stip1         | -1 |
| 19955 | 2805  | Cbx2          | Rhog          | -1 |
| 19955 | 3411  | Cbx2          | Rabl2a        | -1 |
| 19955 | 3654  | Cbx2          | St13          | 1  |
| 19955 | 5910  | Cbx2          | 1110014J01Rik | -1 |
| 19955 | 6804  | Cbx2          | Cyp2d22       | -1 |
| 19955 | 7100  | Cbx2          | Tom22         | -1 |
| 19955 | 8653  | Cbx2          | AW124722      | 1  |
| 19955 | 10482 | Cbx2          | Mcat          | -1 |
| 19955 | 10558 | Cbx2          | Cyp2d40       | 1  |
| 19955 | 11503 | Cbx2          | Rangap1       | -1 |
| 19955 | 11968 | Cbx2          | Cenpm         | -1 |
| 19955 | 12185 | Cbx2          | Cyp2d10       | -1 |
| 19955 | 12468 | Cbx2          | Cyp2d13       | -1 |
| 19955 | 14185 | Cbx2          | Poldip3       | 1  |
| 19955 | 17147 | Cbx2          | Till12        | -1 |
| 19955 | 19216 | Cbx2          | Bik           | -1 |
| 19964 | 630   | Ndufa9        | C1s           | -1 |
| 19964 | 1444  | Ndufa9        | C1r           | -1 |
| 19964 | 3078  | Ndufa9        | 9630033F20Rik | 1  |
| 19964 | 8194  | Ndufa9        | MMT00077789   | 1  |
| 19964 | 9417  | Ndufa9        | Cd163         | 1  |
| 19964 | 14557 | Ndufa9        | Pyroxd1       | 1  |
| 19964 | 17391 | Ndufa9        | C530028O21Rik | 1  |
| 19964 | 17743 | Ndufa9        | Phb2          | 1  |
| 19964 | 19964 | Ndufa9        | Ndufa9        | 1  |
| 19964 | 19999 | Ndufa9        | lft122        | -1 |
| 19964 | 20127 | Ndufa9        | lpo8          | -1 |
| 19964 | 22075 | Ndufa9        | C1s           | -1 |
| 19971 | 6157  | B930046C15Rik | MMT00041452   | -1 |
| 19971 | 13581 | B930046C15Rik | Srxn1         | 1  |
| 19986 | 18432 | MMT00026797   | 4933430H15Rik | -1 |
| 19999 | 9417  | lft122        | Cd163         | -1 |
| 19999 | 17391 | lft122        | C530028O21Rik | -1 |
| 19999 | 19964 | lft122        | Ndufa9        | -1 |
| 19999 | 19999 | lft122        | lft122        | 1  |
| 20004 | 6769  | 1190005F20Rik | Banp          | 1  |
| 20004 | 15476 | 1190005F20Rik | Fem1b         | -1 |
| 20004 | 15569 | 1190005F20Rik | BC003331      | 1  |
| 20004 | 18373 | 1190005F20Rik | Dnajb1        | 1  |
| 20004 | 22216 | 1190005F20Rik | Sp5           | -1 |
| 20037 | 14077 | Extl3         | Trpv5         | -1 |
| 20037 | 23224 | Extl3         | C030014K22Rik | -1 |
| 20068 | 7388  | 2610204M08Rik | Amn           | 1  |
| 20068 | 23693 | 2610204M08Rik | A530016L24Rik | 1  |
| 20077 | 17729 | Ccdc115       | Prim2         | 1  |
| 20077 | 20077 | Ccdc115       | Ccdc115       | 1  |
| 20088 | 12961 | Rapgef1       | MMT00054077   | -1 |
| 20089 | 3208  | MMT00015975   | 4930511111Rik | 1  |
| 20089 | 19436 | MMT00015975   | Dapp1         | 1  |

|       |       |                |               |    |
|-------|-------|----------------|---------------|----|
| 20100 | 1960  | Guca1b         | Ubr2          | 1  |
| 20100 | 2325  | Guca1b         | H2-K1         | -1 |
| 20100 | 2938  | Guca1b         | H2-T23        | -1 |
| 20100 | 3857  | Guca1b         | 1700001C19Rik | 1  |
| 20100 | 4411  | Guca1b         | 2310039H08Rik | 1  |
| 20100 | 8341  | Guca1b         | MMT00017270   | 1  |
| 20100 | 10667 | Guca1b         | H2-Eb1        | -1 |
| 20100 | 12355 | Guca1b         | A1507611      | -1 |
| 20100 | 13493 | Guca1b         | Ring1         | 1  |
| 20100 | 13789 | Guca1b         | H2-Q8         | -1 |
| 20100 | 14132 | Guca1b         | Glo1          | -1 |
| 20100 | 15531 | Guca1b         | Prickle4      | 1  |
| 20100 | 20100 | Guca1b         | Guca1b        | 1  |
| 20100 | 20238 | Guca1b         | H2-T9         | -1 |
| 20100 | 20966 | Guca1b         | MMT00014378   | -1 |
| 20100 | 22822 | Guca1b         | MMT00013433   | -1 |
| 20100 | 23250 | Guca1b         | Plcl2         | -1 |
| 20136 | 1041  | Col13a1        | 3110049J23Rik | 1  |
| 20136 | 5965  | Col13a1        | Pbld          | 1  |
| 20147 | 12492 | Ybx1           | Ybx1          | 1  |
| 20147 | 20147 | Ybx1           | Ybx1          | 1  |
| 20147 | 20548 | Ybx1           | 1700041C02Rik | -1 |
| 20219 | 14709 | MMT00076423    | Rab36         | -1 |
| 20237 | 3587  | RP23-433P19.11 | MMT00041940   | -1 |
| 20237 | 4833  | RP23-433P19.11 | Synpo2        | -1 |
| 20237 | 5881  | RP23-433P19.11 | Fzd4          | 1  |
| 20237 | 6016  | RP23-433P19.11 | A530057A03Rik | 1  |
| 20237 | 6021  | RP23-433P19.11 | MMT00008784   | -1 |
| 20237 | 6769  | RP23-433P19.11 | Banp          | -1 |
| 20237 | 7991  | RP23-433P19.11 | Gpr115        | -1 |
| 20237 | 8319  | RP23-433P19.11 | MMT00062477   | -1 |
| 20237 | 8670  | RP23-433P19.11 | MMT00051613   | -1 |
| 20237 | 8684  | RP23-433P19.11 | Il15          | 1  |
| 20237 | 9258  | RP23-433P19.11 | P4ha1         | -1 |
| 20237 | 10769 | RP23-433P19.11 | Hnrmpd        | 1  |
| 20237 | 11043 | RP23-433P19.11 | Hsph1         | -1 |
| 20237 | 11214 | RP23-433P19.11 | MMT00049207   | -1 |
| 20237 | 15675 | RP23-433P19.11 | MMT00077535   | -1 |
| 20237 | 17043 | RP23-433P19.11 | Tmem127       | 1  |
| 20237 | 18373 | RP23-433P19.11 | Dnajb1        | -1 |
| 20237 | 18418 | RP23-433P19.11 | Hspa1b        | -1 |
| 20237 | 21389 | RP23-433P19.11 | Odf2          | 1  |
| 20237 | 21729 | RP23-433P19.11 | Hdc           | -1 |
| 20237 | 22857 | RP23-433P19.11 | Fahd2a        | 1  |
| 20238 | 327   | H2-T9          | H2-Ea         | 1  |
| 20238 | 763   | H2-T9          | 4933406E20Rik | 1  |
| 20238 | 2325  | H2-T9          | H2-K1         | 1  |
| 20238 | 2801  | H2-T9          | H2-BI         | 1  |
| 20238 | 2938  | H2-T9          | H2-T23        | 1  |
| 20238 | 3599  | H2-T9          | MMT00035426   | -1 |
| 20238 | 3704  | H2-T9          | H2-Q7         | 1  |
| 20238 | 3857  | H2-T9          | 1700001C19Rik | -1 |
| 20238 | 4004  | H2-T9          | Thbs2         | -1 |
| 20238 | 4526  | H2-T9          | Satb1         | -1 |
| 20238 | 4958  | H2-T9          | Ndufa7        | -1 |
| 20238 | 5410  | H2-T9          | Cyp4f15       | -1 |
| 20238 | 5648  | H2-T9          | Zfp213        | -1 |
| 20238 | 6360  | H2-T9          | D17H6S56E-3   | -1 |
| 20238 | 7088  | H2-T9          | Slc37a1       | 1  |
| 20238 | 8750  | H2-T9          | 1700010I14Rik | 1  |
| 20238 | 8767  | H2-T9          | Rgl2          | 1  |
| 20238 | 9158  | H2-T9          | Pde9a         | -1 |
| 20238 | 10376 | H2-T9          | C920025E04Rik | -1 |
| 20238 | 10667 | H2-T9          | H2-Eb1        | 1  |
| 20238 | 12335 | H2-T9          | Plcb4         | 1  |
| 20238 | 12355 | H2-T9          | A1507611      | 1  |
| 20238 | 12694 | H2-T9          | Riok2         | -1 |
| 20238 | 13493 | H2-T9          | Ring1         | -1 |
| 20238 | 13789 | H2-T9          | H2-Q8         | 1  |



|       |       |               |               |    |
|-------|-------|---------------|---------------|----|
| 20238 | 15540 | H2-T9         | C2            | 1  |
| 20238 | 18577 | H2-T9         | Bitbd9        | -1 |
| 20238 | 18906 | H2-T9         | Zfand3        | 1  |
| 20238 | 20238 | H2-T9         | H2-T9         | 1  |
| 20238 | 20346 | H2-T9         | Gna-rs1       | 1  |
| 20238 | 20421 | H2-T9         | Cdkn2c        | 1  |
| 20238 | 22822 | H2-T9         | MMT00013433   | 1  |
| 20238 | 23250 | H2-T9         | Plcl2         | 1  |
| 20238 | 23401 | H2-T9         | H2-Q2         | 1  |
| 20255 | 11966 | Elf2          | Zfp280b       | 1  |
| 20255 | 19436 | Elf2          | Dapp1         | 1  |
| 20300 | 21425 | Plekha1       | Rab6          | -1 |
| 20319 | 3208  | Syne2         | 4930511111Rik | 1  |
| 20319 | 7436  | Syne2         | 1700063K16Rik | 1  |
| 20319 | 11966 | Syne2         | Zfp280b       | 1  |
| 20319 | 12861 | Syne2         | Rhcg          | 1  |
| 20319 | 19436 | Syne2         | Dapp1         | 1  |
| 20319 | 19672 | Syne2         | Cldn19        | 1  |
| 20319 | 22125 | Syne2         | Gab1          | 1  |
| 20324 | 11966 | Tppp          | Zfp280b       | 1  |
| 20385 | 2752  | Chd1l         | Fcgr1         | -1 |
| 20385 | 3753  | Chd1l         | Setdb1        | 1  |
| 20385 | 18754 | Chd1l         | Rbm8a         | -1 |
| 20406 | 19436 | Cacng2        | Dapp1         | 1  |
| 20419 | 3208  | Adra1b        | 4930511111Rik | 1  |
| 20419 | 11966 | Adra1b        | Zfp280b       | 1  |
| 20419 | 19436 | Adra1b        | Dapp1         | 1  |
| 20419 | 22125 | Adra1b        | Gab1          | 1  |
| 20457 | 3587  | Gtf2a2        | MMT00041940   | -1 |
| 20457 | 6021  | Gtf2a2        | MMT00008784   | -1 |
| 20457 | 8670  | Gtf2a2        | MMT00051613   | -1 |
| 20457 | 10769 | Gtf2a2        | Hnrnpd        | 1  |
| 20457 | 11043 | Gtf2a2        | Hsph1         | -1 |
| 20457 | 11214 | Gtf2a2        | MMT00049207   | -1 |
| 20457 | 15675 | Gtf2a2        | MMT00077535   | -1 |
| 20457 | 18418 | Gtf2a2        | Hspa1b        | -1 |
| 20457 | 20332 | Gtf2a2        | Stau2         | 1  |
| 20470 | 18373 | Scml4         | Dnajb1        | 1  |
| 20470 | 18418 | Scml4         | Hspa1b        | 1  |
| 20490 | 126   | Tmem143       | 0610012D14Rik | 1  |
| 20490 | 2599  | Tmem143       | Lsm14a        | -1 |
| 20490 | 6513  | Tmem143       | Qpctl         | -1 |
| 20490 | 19762 | Tmem143       | Pih1d1        | 1  |
| 20490 | 19854 | Tmem143       | Kcnj14        | -1 |
| 20490 | 20490 | Tmem143       | Tmem143       | 1  |
| 20490 | 21438 | Tmem143       | Plekha4       | 1  |
| 20505 | 2915  | Till9         | Nfs1          | -1 |
| 20505 | 7610  | Till9         | Scand1        | -1 |
| 20505 | 23005 | Till9         | 4930405A21Rik | 1  |
| 20506 | 3208  | 1700011F03Rik | 4930511111Rik | 1  |
| 20506 | 7436  | 1700011F03Rik | 1700063K16Rik | 1  |
| 20506 | 11966 | 1700011F03Rik | Zfp280b       | 1  |
| 20506 | 12861 | 1700011F03Rik | Rhcg          | 1  |
| 20506 | 19436 | 1700011F03Rik | Dapp1         | 1  |
| 20506 | 19672 | 1700011F03Rik | Cldn19        | 1  |
| 20506 | 22125 | 1700011F03Rik | Gab1          | 1  |
| 20511 | 5645  | Decr2         | Tmem8         | 1  |
| 20511 | 7088  | Decr2         | Slc37a1       | 1  |
| 20511 | 20511 | Decr2         | Decr2         | 1  |
| 20520 | 4805  | EG546143      | Hspb1         | 1  |
| 20532 | 19436 | Rnf26         | Dapp1         | 1  |
| 20535 | 902   | Rbm4          | Slc30a1       | -1 |
| 20535 | 3587  | Rbm4          | MMT00041940   | 1  |
| 20535 | 4780  | Rbm4          | Sfrs5         | -1 |
| 20535 | 6021  | Rbm4          | MMT00008784   | 1  |
| 20535 | 6769  | Rbm4          | Banp          | 1  |
| 20535 | 8319  | Rbm4          | MMT00062477   | 1  |
| 20535 | 8670  | Rbm4          | MMT00051613   | 1  |
| 20535 | 9067  | Rbm4          | Tra2a         | 1  |

|       |       |             |               |    |
|-------|-------|-------------|---------------|----|
| 20535 | 9258  | Rbm4        | P4ha1         | 1  |
| 20535 | 11043 | Rbm4        | Hsph1         | 1  |
| 20535 | 11214 | Rbm4        | MMT00049207   | 1  |
| 20535 | 12761 | Rbm4        | Tsc22d3       | 1  |
| 20535 | 14859 | Rbm4        | Hspa1a        | 1  |
| 20535 | 15476 | Rbm4        | Fem1b         | -1 |
| 20535 | 15675 | Rbm4        | MMT00077535   | 1  |
| 20535 | 18373 | Rbm4        | Dnajb1        | 1  |
| 20535 | 18418 | Rbm4        | Hspa1b        | 1  |
| 20535 | 20912 | Rbm4        | Chordc1       | 1  |
| 20535 | 21389 | Rbm4        | Odf2          | -1 |
| 20535 | 22303 | Rbm4        | Cdt1          | -1 |
| 20559 | 499   | Nat13       | 2310057J16Rik | 1  |
| 20559 | 740   | Nat13       | Txnrd3        | -1 |
| 20559 | 1849  | Nat13       | MMT00063181   | 1  |
| 20559 | 3587  | Nat13       | MMT00041940   | 1  |
| 20559 | 6021  | Nat13       | MMT00008784   | 1  |
| 20559 | 6126  | Nat13       | MMT00067575   | 1  |
| 20559 | 7731  | Nat13       | 1500001M20Rik | -1 |
| 20559 | 8319  | Nat13       | MMT00062477   | 1  |
| 20559 | 8670  | Nat13       | MMT00051613   | 1  |
| 20559 | 8891  | Nat13       | MMT00071061   | 1  |
| 20559 | 9067  | Nat13       | Tra2a         | 1  |
| 20559 | 9224  | Nat13       | MMT00013510   | 1  |
| 20559 | 9258  | Nat13       | P4ha1         | 1  |
| 20559 | 9279  | Nat13       | MMT00066808   | 1  |
| 20559 | 9680  | Nat13       | Ahsa1         | 1  |
| 20559 | 11043 | Nat13       | Hsph1         | 1  |
| 20559 | 11214 | Nat13       | MMT00049207   | 1  |
| 20559 | 11818 | Nat13       | MMT00048396   | 1  |
| 20559 | 13741 | Nat13       | Hspa4l        | 1  |
| 20559 | 15476 | Nat13       | Fem1b         | -1 |
| 20559 | 15675 | Nat13       | MMT00077535   | 1  |
| 20559 | 16754 | Nat13       | Hsp90aa1      | 1  |
| 20559 | 17595 | Nat13       | MMT00048325   | 1  |
| 20559 | 18099 | Nat13       | Nfx1          | -1 |
| 20559 | 21389 | Nat13       | Odf2          | -1 |
| 20559 | 22139 | Nat13       | Stip1         | 1  |
| 20559 | 23646 | Nat13       | Hsp90ab1      | 1  |
| 20563 | 11214 | Mns1        | MMT00049207   | 1  |
| 20566 | 3208  | Tnni2       | 4930511111Rik | 1  |
| 20566 | 7436  | Tnni2       | 1700063K16Rik | 1  |
| 20566 | 11966 | Tnni2       | Zfp280b       | 1  |
| 20566 | 19436 | Tnni2       | Dapp1         | 1  |
| 20571 | 5183  | Tmem45a     | St5           | 1  |
| 20571 | 5374  | Tmem45a     | Chka          | 1  |
| 20571 | 5974  | Tmem45a     | Arntl         | 1  |
| 20571 | 14279 | Tmem45a     | 3930402G23Rik | 1  |
| 20571 | 15824 | Tmem45a     | D19Erd721e    | 1  |
| 20571 | 19305 | Tmem45a     | Azin1         | -1 |
| 20571 | 19671 | Tmem45a     | Upp2          | -1 |
| 20588 | 19436 | Brd2        | Dapp1         | 1  |
| 20606 | 2388  | MMT00042166 | Dot1l         | -1 |
| 20606 | 2599  | MMT00042166 | Lsm14a        | -1 |
| 20606 | 4697  | MMT00042166 | Cyp2a12       | 1  |
| 20606 | 6513  | MMT00042166 | Qpctl         | -1 |
| 20606 | 11321 | MMT00042166 | 2310014L17Rik | 1  |
| 20606 | 11888 | MMT00042166 | Myadm         | 1  |
| 20606 | 16639 | MMT00042166 | MMT00078937   | 1  |
| 20606 | 19462 | MMT00042166 | 4933439C20Rik | 1  |
| 20606 | 20606 | MMT00042166 | MMT00042166   | 1  |
| 20606 | 23247 | MMT00042166 | Ercc1         | 1  |
| 20661 | 524   | Tuft1       | Hsd3b2        | -1 |
| 20661 | 3753  | Tuft1       | Setdb1        | 1  |
| 20661 | 10681 | Tuft1       | Dgkz          | 1  |
| 20661 | 11121 | Tuft1       | Mttr11        | 1  |
| 20661 | 12367 | Tuft1       | MMT00072365   | 1  |
| 20661 | 18754 | Tuft1       | Rbm8a         | -1 |
| 20661 | 18911 | Tuft1       | Selenbp2      | -1 |

|       |       |               |               |    |
|-------|-------|---------------|---------------|----|
| 20661 | 20661 | Tuft1         | Tuft1         | -1 |
| 20661 | 23457 | Tuft1         | Selenbp2      | -1 |
| 20690 | 1336  | Zfp276        | MMT00069537   | -1 |
| 20690 | 2243  | Zfp276        | Gcsh          | -1 |
| 20690 | 11404 | Zfp276        | Gnpat         | -1 |
| 20690 | 14391 | Zfp276        | MMT00017335   | 1  |
| 20690 | 15953 | Zfp276        | Acsf3         | 1  |
| 20690 | 22909 | Zfp276        | Nup133        | -1 |
| 20705 | 1041  | Supv31l       | 3110049J23Rik | -1 |
| 20705 | 5965  | Supv31l       | Pbld          | -1 |
| 20705 | 13688 | Supv31l       | Ppa1          | -1 |
| 20705 | 15971 | Supv31l       | Aifm2         | -1 |
| 20705 | 18300 | Supv31l       | Arg1          | -1 |
| 20705 | 18893 | Supv31l       | Lace1         | 1  |
| 20705 | 19115 | Supv31l       | Rab32         | 1  |
| 20705 | 19392 | Supv31l       | Slc25a16      | 1  |
| 20705 | 21105 | Supv31l       | Pex26         | -1 |
| 20705 | 21258 | Supv31l       | 2010003K15Rik | 1  |
| 20705 | 22146 | Supv31l       | Aifm2         | -1 |
| 20721 | 1755  | 4432412L15Rik | Ocel1         | -1 |
| 20721 | 2703  | 4432412L15Rik | MMT00073763   | -1 |
| 20721 | 5433  | 4432412L15Rik | 2410004L22Rik | 1  |
| 20721 | 9304  | 4432412L15Rik | Al449175      | -1 |
| 20721 | 10195 | 4432412L15Rik | Klf1          | -1 |
| 20721 | 16617 | 4432412L15Rik | Sh2d4a        | 1  |
| 20721 | 16849 | 4432412L15Rik | Trmt1         | 1  |
| 20721 | 18886 | 4432412L15Rik | Slc18a1       | 1  |
| 20721 | 20484 | 4432412L15Rik | Ces1          | 1  |
| 20729 | 17159 | Ttc28         | Gtpbbp6       | 1  |
| 20729 | 22988 | Ttc28         | Hscb          | 1  |
| 20735 | 19436 | Tnrc6b        | Dapp1         | 1  |
| 20802 | 3208  | Cdc42se2      | 4930511111Rik | 1  |
| 20802 | 11966 | Cdc42se2      | Zfp280b       | 1  |
| 20810 | 524   | Mttp          | Hsd3b2        | -1 |
| 20810 | 1466  | Mttp          | Ubap2l        | -1 |
| 20810 | 1867  | Mttp          | Bcas2         | -1 |
| 20810 | 1963  | Mttp          | MMT00039783   | -1 |
| 20810 | 3753  | Mttp          | Setdb1        | 1  |
| 20810 | 3859  | Mttp          | Fpr2          | 1  |
| 20810 | 6206  | Mttp          | MMT00063701   | -1 |
| 20810 | 7519  | Mttp          | Gstm1         | -1 |
| 20810 | 10521 | Mttp          | Ttf2          | -1 |
| 20810 | 11257 | Mttp          | Trem3         | -1 |
| 20810 | 11611 | Mttp          | S100a13       | 1  |
| 20810 | 15276 | Mttp          | Eif4e         | 1  |
| 20810 | 18754 | Mttp          | Rbm8a         | -1 |
| 20810 | 20810 | Mttp          | Mttp          | 1  |
| 20810 | 22640 | Mttp          | Bud13         | -1 |
| 20837 | 2915  | Dlgap4        | Nfs1          | 1  |
| 20837 | 6250  | Dlgap4        | Csnk2a1       | 1  |
| 20837 | 7610  | Dlgap4        | Scand1        | 1  |
| 20837 | 14399 | Dlgap4        | Csnk2a1       | 1  |
| 20837 | 14647 | Dlgap4        | Cst3          | 1  |
| 20837 | 23005 | Dlgap4        | 4930405A21Rik | -1 |
| 20837 | 23599 | Dlgap4        | Ndr3          | -1 |
| 20847 | 14343 | Pdik1l        | Hnrnpa0       | 1  |
| 20847 | 15979 | Pdik1l        | Rmi1          | 1  |
| 20847 | 16225 | Pdik1l        | Mak10         | 1  |
| 20847 | 19771 | Pdik1l        | Fbp1          | -1 |
| 20858 | 19436 | Duox1         | Dapp1         | 1  |
| 20871 | 6931  | Pop1          | Hrsp12        | -1 |
| 20871 | 13648 | Pop1          | Dap           | -1 |
| 20871 | 20871 | Pop1          | Pop1          | 1  |
| 20890 | 524   | Psmb4         | Hsd3b2        | -1 |
| 20890 | 673   | Psmb4         | Tchh          | 1  |
| 20890 | 1466  | Psmb4         | Ubap2l        | -1 |
| 20890 | 2752  | Psmb4         | Fcgr1         | -1 |
| 20890 | 3753  | Psmb4         | Setdb1        | 1  |
| 20890 | 10521 | Psmb4         | Ttf2          | -1 |

|       |       |               |               |    |
|-------|-------|---------------|---------------|----|
| 20890 | 10681 | Psemb4        | Dgkz          | 1  |
| 20890 | 11121 | Psemb4        | Mtmr11        | 1  |
| 20890 | 11611 | Psemb4        | S100a13       | 1  |
| 20890 | 11758 | Psemb4        | S100a1        | 1  |
| 20890 | 12367 | Psemb4        | MMT00072365   | 1  |
| 20890 | 16679 | Psemb4        | Ctsk          | 1  |
| 20890 | 18754 | Psemb4        | Rbm8a         | -1 |
| 20890 | 18911 | Psemb4        | Selenbp2      | -1 |
| 20890 | 20661 | Psemb4        | Tuft1         | -1 |
| 20890 | 23457 | Psemb4        | Selenbp2      | -1 |
| 20908 | 3208  | Olf583        | 4930511111Rik | 1  |
| 20908 | 7436  | Olf583        | 1700063K16Rik | 1  |
| 20908 | 11966 | Olf583        | Zfp280b       | 1  |
| 20908 | 12861 | Olf583        | Rhcg          | 1  |
| 20908 | 19436 | Olf583        | Dapp1         | 1  |
| 20908 | 22125 | Olf583        | Gab1          | 1  |
| 20912 | 499   | Chordc1       | 2310057J16Rik | 1  |
| 20912 | 1281  | Chordc1       | Alkbh3        | -1 |
| 20912 | 3587  | Chordc1       | MMT00041940   | 1  |
| 20912 | 3799  | Chordc1       | Serpinh1      | 1  |
| 20912 | 3849  | Chordc1       | MMT00047578   | 1  |
| 20912 | 4805  | Chordc1       | Hspb1         | 1  |
| 20912 | 4950  | Chordc1       | Dnajb10       | 1  |
| 20912 | 6021  | Chordc1       | MMT00008784   | 1  |
| 20912 | 7731  | Chordc1       | 1500001M20Rik | -1 |
| 20912 | 8319  | Chordc1       | MMT00062477   | 1  |
| 20912 | 8670  | Chordc1       | MMT00051613   | 1  |
| 20912 | 9224  | Chordc1       | MMT00013510   | 1  |
| 20912 | 9258  | Chordc1       | P4ha1         | 1  |
| 20912 | 9899  | Chordc1       | D13Wsu177e    | 1  |
| 20912 | 11043 | Chordc1       | Hsph1         | 1  |
| 20912 | 11208 | Chordc1       | Hspb1         | 1  |
| 20912 | 11214 | Chordc1       | MMT00049207   | 1  |
| 20912 | 13521 | Chordc1       | Ears2         | 1  |
| 20912 | 15476 | Chordc1       | Fem1b         | -1 |
| 20912 | 15675 | Chordc1       | MMT00077535   | 1  |
| 20912 | 17595 | Chordc1       | MMT00048325   | 1  |
| 20912 | 18373 | Chordc1       | Dnajb1        | 1  |
| 20912 | 20332 | Chordc1       | Stau2         | -1 |
| 20912 | 20535 | Chordc1       | Rbm4          | 1  |
| 20912 | 20855 | Chordc1       | Phldb2        | -1 |
| 20912 | 20912 | Chordc1       | Chordc1       | 1  |
| 20912 | 22139 | Chordc1       | Stip1         | 1  |
| 20912 | 23646 | Chordc1       | Hsp90ab1      | 1  |
| 20925 | 19436 | 2810410L24Rik | Dapp1         | 1  |
| 20942 | 18592 | MMT00006980   | Txn14a        | -1 |
| 20942 | 21162 | MMT00006980   | MMT00008728   | 1  |
| 20944 | 3208  | Tmem164       | 4930511111Rik | 1  |
| 20944 | 7436  | Tmem164       | 1700063K16Rik | 1  |
| 20944 | 11966 | Tmem164       | Zfp280b       | 1  |
| 20944 | 12861 | Tmem164       | Rhcg          | 1  |
| 20944 | 19436 | Tmem164       | Dapp1         | 1  |
| 20958 | 17225 | 4933403F05Rik | Impa2         | -1 |
| 20958 | 19421 | 4933403F05Rik | Mbd2          | 1  |
| 20958 | 20958 | 4933403F05Rik | 4933403F05Rik | 1  |
| 20961 | 12722 | Lig3          | EG624866      | -1 |
| 20963 | 10209 | Ifna6         | Plin          | 1  |
| 20979 | 12055 | D10Jhu81e     | 1810008A18Rik | -1 |
| 20980 | 6021  | Taf12         | MMT00008784   | 1  |
| 20980 | 6769  | Taf12         | Banp          | 1  |
| 20980 | 8670  | Taf12         | MMT00051613   | 1  |
| 20980 | 11214 | Taf12         | MMT00049207   | 1  |
| 20980 | 15476 | Taf12         | Fem1b         | -1 |
| 20980 | 15675 | Taf12         | MMT00077535   | 1  |
| 20980 | 18373 | Taf12         | Dnajb1        | 1  |
| 20980 | 18418 | Taf12         | Hspa1b        | 1  |
| 21060 | 12412 | Ela1          | BC004728      | 1  |
| 21070 | 7436  | Cnot8         | 1700063K16Rik | 1  |
| 21070 | 11966 | Cnot8         | Zfp280b       | 1  |

|       |       |       |               |    |
|-------|-------|-------|---------------|----|
| 21070 | 19436 | Cnot8 | Dapp1         | 1  |
| 21102 | 21102 | Cmtm7 | Cmtm7         | 1  |
| 21126 | 6765  | Dera  | Ldhb          | -1 |
| 21126 | 14557 | Dera  | Pyroxd1       | 1  |
| 21135 | 3587  | Gm711 | MMT00041940   | -1 |
| 21135 | 6021  | Gm711 | MMT00008784   | -1 |
| 21135 | 8670  | Gm711 | MMT00051613   | -1 |
| 21135 | 10492 | Gm711 | 1810046K07Rik | 1  |
| 21135 | 11043 | Gm711 | Hsph1         | -1 |
| 21135 | 11214 | Gm711 | MMT00049207   | -1 |
| 21135 | 15675 | Gm711 | MMT00077535   | -1 |
| 21135 | 20332 | Gm711 | Stau2         | 1  |
| 21142 | 213   | Gm129 | Rgs16         | 1  |
| 21142 | 250   | Gm129 | Tubb2a-ps2    | -1 |
| 21142 | 269   | Gm129 | Tuba1b        | -1 |
| 21142 | 402   | Gm129 | Timp3         | 1  |
| 21142 | 609   | Gm129 | MMT00060868   | -1 |
| 21142 | 719   | Gm129 | Usp2          | 1  |
| 21142 | 1453  | Gm129 | Gfod2         | -1 |
| 21142 | 1941  | Gm129 | MMT00079618   | -1 |
| 21142 | 2322  | Gm129 | Tuba4a        | -1 |
| 21142 | 2829  | Gm129 | Lrfr3         | -1 |
| 21142 | 2850  | Gm129 | Slc16a6       | -1 |
| 21142 | 3214  | Gm129 | Dnmt3b        | -1 |
| 21142 | 3804  | Gm129 | MMT00015534   | -1 |
| 21142 | 4192  | Gm129 | Zranb1        | 1  |
| 21142 | 4201  | Gm129 | Tubb2c        | -1 |
| 21142 | 4298  | Gm129 | St3gal1       | -1 |
| 21142 | 4392  | Gm129 | 1810055G02Rik | 1  |
| 21142 | 4612  | Gm129 | Hspa5         | -1 |
| 21142 | 4950  | Gm129 | Dnajb10       | -1 |
| 21142 | 5247  | Gm129 | Irak2         | -1 |
| 21142 | 5374  | Gm129 | Chka          | -1 |
| 21142 | 5849  | Gm129 | 2310031A18Rik | -1 |
| 21142 | 5974  | Gm129 | Arntl         | -1 |
| 21142 | 6073  | Gm129 | Mthfd2        | -1 |
| 21142 | 6171  | Gm129 | Abtb2         | -1 |
| 21142 | 7061  | Gm129 | Spsb3         | -1 |
| 21142 | 7211  | Gm129 | 2410014A08Rik | -1 |
| 21142 | 7862  | Gm129 | Cpsf4l        | 1  |
| 21142 | 8399  | Gm129 | Herpud1       | 1  |
| 21142 | 8870  | Gm129 | Arid3a        | -1 |
| 21142 | 9379  | Gm129 | Ypel2         | -1 |
| 21142 | 9495  | Gm129 | Srms          | -1 |
| 21142 | 10215 | Gm129 | Nampt         | 1  |
| 21142 | 10267 | Gm129 | Setdb2        | 1  |
| 21142 | 10382 | Gm129 | Mtmr4         | -1 |
| 21142 | 11043 | Gm129 | Hsph1         | -1 |
| 21142 | 11201 | Gm129 | Sunc1         | 1  |
| 21142 | 11412 | Gm129 | Abcg5         | 1  |
| 21142 | 11599 | Gm129 | Coq10b        | 1  |
| 21142 | 12420 | Gm129 | Klhl21        | 1  |
| 21142 | 12489 | Gm129 | Wdr8          | -1 |
| 21142 | 12498 | Gm129 | Abcg8         | 1  |
| 21142 | 12995 | Gm129 | Tmed9         | -1 |
| 21142 | 13025 | Gm129 | Irf2          | 1  |
| 21142 | 13521 | Gm129 | Ears2         | -1 |
| 21142 | 13568 | Gm129 | Cad           | -1 |
| 21142 | 13705 | Gm129 | Osbpl1a       | 1  |
| 21142 | 14249 | Gm129 | Lzts2         | -1 |
| 21142 | 14298 | Gm129 | Atp2a2        | -1 |
| 21142 | 14681 | Gm129 | Alg12         | -1 |
| 21142 | 15631 | Gm129 | Lpin1         | 1  |
| 21142 | 16043 | Gm129 | Sult1c2       | 1  |
| 21142 | 16060 | Gm129 | Gys2          | 1  |
| 21142 | 16299 | Gm129 | Creld2        | -1 |
| 21142 | 16327 | Gm129 | Ubfd1         | -1 |
| 21142 | 16580 | Gm129 | Tnfaip2       | -1 |
| 21142 | 16585 | Gm129 | Syvn1         | -1 |

|       |       |               |               |    |
|-------|-------|---------------|---------------|----|
| 21142 | 16690 | Gm129         | Tjp3          | -1 |
| 21142 | 17323 | Gm129         | Tubb6         | -1 |
| 21142 | 17876 | Gm129         | Tubb4         | -1 |
| 21142 | 17884 | Gm129         | Lnx2          | -1 |
| 21142 | 18135 | Gm129         | Tmed3         | -1 |
| 21142 | 18314 | Gm129         | 4631416L12Rik | 1  |
| 21142 | 18552 | Gm129         | Nr2c2ap       | -1 |
| 21142 | 19108 | Gm129         | Armet         | -1 |
| 21142 | 19146 | Gm129         | N4bp2l1       | 1  |
| 21142 | 19453 | Gm129         | Cdk2ap2       | -1 |
| 21142 | 19671 | Gm129         | Upp2          | 1  |
| 21142 | 21531 | Gm129         | Ttc23         | 1  |
| 21142 | 22139 | Gm129         | Stip1         | -1 |
| 21142 | 22290 | Gm129         | Tubb2a        | -1 |
| 21142 | 22443 | Gm129         | Tuba1c        | -1 |
| 21142 | 22474 | Gm129         | Ubqln1        | -1 |
| 21142 | 22630 | Gm129         | MMT00034355   | -1 |
| 21142 | 22933 | Gm129         | Tssc4         | -1 |
| 21149 | 7388  | A230065H16Rik | Amn           | -1 |
| 21149 | 8155  | A230065H16Rik | Mark3         | -1 |
| 21149 | 8925  | A230065H16Rik | MMT00026932   | 1  |
| 21149 | 12238 | A230065H16Rik | Traf3         | 1  |
| 21149 | 13027 | A230065H16Rik | Ppp2r5c       | 1  |
| 21149 | 15984 | A230065H16Rik | MMT00075074   | -1 |
| 21149 | 23693 | A230065H16Rik | A530016L24Rik | -1 |
| 21151 | 3587  | Nkap          | MMT00041940   | 1  |
| 21151 | 6021  | Nkap          | MMT00008784   | 1  |
| 21151 | 8670  | Nkap          | MMT00051613   | 1  |
| 21151 | 11214 | Nkap          | MMT00049207   | 1  |
| 21151 | 15675 | Nkap          | MMT00077535   | 1  |
| 21151 | 18373 | Nkap          | Dnajb1        | 1  |
| 21209 | 19436 | Ebf4          | Dapp1         | 1  |
| 21223 | 11321 | Pira1         | 2310014L17Rik | 1  |
| 21223 | 11888 | Pira1         | Myadm         | 1  |
| 21223 | 19462 | Pira1         | 4933439C20Rik | 1  |
| 21258 | 1041  | 2010003K15Rik | 3110049J23Rik | 1  |
| 21258 | 2571  | 2010003K15Rik | Rmnd1         | -1 |
| 21258 | 2827  | 2010003K15Rik | Raet1d        | 1  |
| 21258 | 3744  | 2010003K15Rik | Rmnd1         | -1 |
| 21258 | 8786  | 2010003K15Rik | Rmnd1         | -1 |
| 21258 | 13688 | 2010003K15Rik | Ppa1          | 1  |
| 21258 | 14989 | 2010003K15Rik | Map3k5        | 1  |
| 21258 | 18300 | 2010003K15Rik | Arg1          | 1  |
| 21258 | 19115 | 2010003K15Rik | Rab32         | -1 |
| 21258 | 21258 | 2010003K15Rik | 2010003K15Rik | -1 |
| 21259 | 17583 | 5430416O09Rik | Per2          | -1 |
| 21259 | 19723 | 5430416O09Rik | Pfkfb1        | -1 |
| 21261 | 19436 | Pax2          | Dapp1         | 1  |
| 21291 | 11966 | Slc39a4       | Zfp280b       | 1  |
| 21291 | 19436 | Slc39a4       | Dapp1         | 1  |
| 21295 | 327   | Snf1lk        | H2-Ea         | -1 |
| 21295 | 763   | Snf1lk        | 4933406E20Rik | -1 |
| 21295 | 2325  | Snf1lk        | H2-K1         | -1 |
| 21295 | 2938  | Snf1lk        | H2-T23        | -1 |
| 21295 | 3704  | Snf1lk        | H2-Q7         | -1 |
| 21295 | 5410  | Snf1lk        | Cyp4f15       | 1  |
| 21295 | 7088  | Snf1lk        | Slc37a1       | -1 |
| 21295 | 8649  | Snf1lk        | MMT00072863   | 1  |
| 21295 | 8750  | Snf1lk        | 1700010I14Rik | -1 |
| 21295 | 8767  | Snf1lk        | Rgl2          | -1 |
| 21295 | 9158  | Snf1lk        | Pde9a         | 1  |
| 21295 | 10376 | Snf1lk        | C920025E04Rik | 1  |
| 21295 | 10667 | Snf1lk        | H2-Eb1        | -1 |
| 21295 | 12355 | Snf1lk        | A1507611      | -1 |
| 21295 | 12694 | Snf1lk        | Riok2         | 1  |
| 21295 | 13493 | Snf1lk        | Ring1         | 1  |
| 21295 | 17707 | Snf1lk        | Rshl2b        | -1 |
| 21295 | 18906 | Snf1lk        | Zfand3        | -1 |
| 21295 | 20238 | Snf1lk        | H2-T9         | -1 |

|       |       |         |               |    |
|-------|-------|---------|---------------|----|
| 21295 | 20346 | Snf1lk  | Gna-rs1       | -1 |
| 21295 | 20511 | Snf1lk  | Decr2         | -1 |
| 21295 | 22822 | Snf1lk  | MMT00013433   | -1 |
| 21295 | 23250 | Snf1lk  | Plcl2         | -1 |
| 21313 | 337   | Rhou    | Rasgef1b      | 1  |
| 21313 | 563   | Rhou    | D4Bwg0951e    | 1  |
| 21313 | 1877  | Rhou    | Amica1        | 1  |
| 21313 | 2483  | Rhou    | Gmeb1         | 1  |
| 21313 | 2794  | Rhou    | Map3k6        | 1  |
| 21313 | 3170  | Rhou    | Mcart1        | 1  |
| 21313 | 3196  | Rhou    | Tat           | 1  |
| 21313 | 3452  | Rhou    | Ccrn4l        | 1  |
| 21313 | 4235  | Rhou    | Pkfb3         | 1  |
| 21313 | 4286  | Rhou    | Ptp4a1        | 1  |
| 21313 | 4678  | Rhou    | Kank1         | -1 |
| 21313 | 5187  | Rhou    | Speer4f       | 1  |
| 21313 | 5889  | Rhou    | Errfi1        | 1  |
| 21313 | 6490  | Rhou    | Il1r1         | 1  |
| 21313 | 6564  | Rhou    | Cebpd         | 1  |
| 21313 | 6756  | Rhou    | Sds           | 1  |
| 21313 | 8399  | Rhou    | Herpud1       | 1  |
| 21313 | 11129 | Rhou    | Ankhd1        | 1  |
| 21313 | 12436 | Rhou    | Serinc3       | 1  |
| 21313 | 12479 | Rhou    | lfrd1         | 1  |
| 21313 | 12761 | Rhou    | Tsc22d3       | 1  |
| 21313 | 12908 | Rhou    | Jdp2          | 1  |
| 21313 | 15522 | Rhou    | 1810011O10Rik | 1  |
| 21313 | 15631 | Rhou    | Lpin1         | 1  |
| 21313 | 15882 | Rhou    | AA986860      | 1  |
| 21313 | 16176 | Rhou    | St3gal5       | 1  |
| 21313 | 16580 | Rhou    | Tnfaip2       | -1 |
| 21313 | 17223 | Rhou    | 4933426M11Rik | 1  |
| 21313 | 17352 | Rhou    | Cebpb         | 1  |
| 21313 | 17525 | Rhou    | Ctgf          | 1  |
| 21313 | 17622 | Rhou    | Foxo1         | 1  |
| 21313 | 17994 | Rhou    | Zh2c2         | 1  |
| 21313 | 18027 | Rhou    | 5730403B10Rik | 1  |
| 21313 | 18314 | Rhou    | 4631416L12Rik | 1  |
| 21313 | 19146 | Rhou    | N4bp2l1       | 1  |
| 21313 | 19466 | Rhou    | Pptc7         | 1  |
| 21313 | 19556 | Rhou    | Efna1         | -1 |
| 21313 | 19621 | Rhou    | Cldn5         | -1 |
| 21313 | 19757 | Rhou    | Fkbp5         | 1  |
| 21313 | 21331 | Rhou    | Slc10a6       | 1  |
| 21313 | 21934 | Rhou    | ld2           | -1 |
| 21313 | 22873 | Rhou    | Slc38a2       | 1  |
| 21331 | 4084  | Slc10a6 | Asah3l        | 1  |
| 21331 | 15882 | Slc10a6 | AA986860      | 1  |
| 21331 | 16176 | Slc10a6 | St3gal5       | 1  |
| 21331 | 21331 | Slc10a6 | Slc10a6       | 1  |
| 21333 | 202   | Cirbp   | Naif1         | -1 |
| 21333 | 499   | Cirbp   | 2310057J16Rik | -1 |
| 21333 | 523   | Cirbp   | 1700040L02Rik | 1  |
| 21333 | 1453  | Cirbp   | Gfod2         | -1 |
| 21333 | 1849  | Cirbp   | MMT00063181   | -1 |
| 21333 | 3799  | Cirbp   | Serpinh1      | -1 |
| 21333 | 3913  | Cirbp   | Mrpl15        | -1 |
| 21333 | 4805  | Cirbp   | Hspb1         | -1 |
| 21333 | 4950  | Cirbp   | Dnajb10       | -1 |
| 21333 | 5107  | Cirbp   | Gprc5c        | -1 |
| 21333 | 6021  | Cirbp   | MMT00008784   | -1 |
| 21333 | 6525  | Cirbp   | Uchl5ip       | 1  |
| 21333 | 7211  | Cirbp   | 2410014A08Rik | -1 |
| 21333 | 7731  | Cirbp   | 1500001M20Rik | 1  |
| 21333 | 8670  | Cirbp   | MMT00051613   | -1 |
| 21333 | 9224  | Cirbp   | MMT00013510   | -1 |
| 21333 | 9258  | Cirbp   | P4ha1         | -1 |
| 21333 | 9279  | Cirbp   | MMT00066808   | -1 |
| 21333 | 9680  | Cirbp   | Ahsa1         | -1 |

|       |       |          |               |    |
|-------|-------|----------|---------------|----|
| 21333 | 9899  | Cirbp    | D13Wsu177e    | -1 |
| 21333 | 10102 | Cirbp    | Lman2l        | -1 |
| 21333 | 10177 | Cirbp    | Osgep         | 1  |
| 21333 | 10881 | Cirbp    | Uchl5ip       | 1  |
| 21333 | 11043 | Cirbp    | Hsph1         | -1 |
| 21333 | 11208 | Cirbp    | Hspb1         | -1 |
| 21333 | 11214 | Cirbp    | MMT00049207   | -1 |
| 21333 | 11412 | Cirbp    | Abcg5         | 1  |
| 21333 | 11818 | Cirbp    | MMT00048396   | -1 |
| 21333 | 12498 | Cirbp    | Abcg8         | 1  |
| 21333 | 13052 | Cirbp    | Tnfrsf19      | 1  |
| 21333 | 13521 | Cirbp    | Ears2         | -1 |
| 21333 | 14222 | Cirbp    | MMT00076410   | 1  |
| 21333 | 14333 | Cirbp    | Zcchc17       | -1 |
| 21333 | 15675 | Cirbp    | MMT00077535   | -1 |
| 21333 | 15713 | Cirbp    | Rbm3          | 1  |
| 21333 | 16043 | Cirbp    | Sult1c2       | 1  |
| 21333 | 16299 | Cirbp    | Crel2         | -1 |
| 21333 | 16585 | Cirbp    | Syvn1         | -1 |
| 21333 | 17449 | Cirbp    | Zfp296        | -1 |
| 21333 | 17595 | Cirbp    | MMT00048325   | -1 |
| 21333 | 17887 | Cirbp    | Cryl1         | 1  |
| 21333 | 18099 | Cirbp    | Nfx1          | 1  |
| 21333 | 20332 | Cirbp    | Stau2         | 1  |
| 21333 | 20746 | Cirbp    | 2210015D19Rik | 1  |
| 21333 | 21389 | Cirbp    | Odf2          | 1  |
| 21333 | 22139 | Cirbp    | Stip1         | -1 |
| 21333 | 23646 | Cirbp    | Hsp90ab1      | -1 |
| 21380 | 337   | Ier5     | Rasgef1b      | -1 |
| 21380 | 2794  | Ier5     | Map3k6        | -1 |
| 21380 | 4392  | Ier5     | 1810055G02Rik | -1 |
| 21380 | 5187  | Ier5     | Speer4f       | -1 |
| 21380 | 6564  | Ier5     | Cebpd         | -1 |
| 21380 | 8399  | Ier5     | Herpud1       | -1 |
| 21380 | 15631 | Ier5     | Lpin1         | -1 |
| 21380 | 15882 | Ier5     | AA986860      | -1 |
| 21380 | 16176 | Ier5     | St3gal5       | -1 |
| 21380 | 16580 | Ier5     | Tnfaip2       | 1  |
| 21380 | 17352 | Ier5     | Cebpb         | -1 |
| 21380 | 18027 | Ier5     | 5730403B10Rik | -1 |
| 21380 | 19556 | Ier5     | Efna1         | 1  |
| 21380 | 21331 | Ier5     | Slc10a6       | -1 |
| 21389 | 1849  | Odf2     | MMT00063181   | -1 |
| 21389 | 3587  | Odf2     | MMT00041940   | -1 |
| 21389 | 6021  | Odf2     | MMT00008784   | -1 |
| 21389 | 8670  | Odf2     | MMT00051613   | -1 |
| 21389 | 8684  | Odf2     | Il15          | 1  |
| 21389 | 9258  | Odf2     | P4ha1         | -1 |
| 21389 | 10769 | Odf2     | Hnrnpd        | 1  |
| 21389 | 11043 | Odf2     | Hsph1         | -1 |
| 21389 | 11214 | Odf2     | MMT00049207   | -1 |
| 21389 | 15675 | Odf2     | MMT00077535   | -1 |
| 21389 | 17449 | Odf2     | Zfp296        | -1 |
| 21389 | 20535 | Odf2     | Rbm4          | -1 |
| 21389 | 21389 | Odf2     | Odf2          | 1  |
| 21389 | 22139 | Odf2     | Stip1         | -1 |
| 21414 | 3061  | BC017643 | Scarf2        | 1  |
| 21414 | 3119  | BC017643 | Mapk10        | 1  |
| 21414 | 6017  | BC017643 | MMT00018015   | -1 |
| 21414 | 6846  | BC017643 | Olf1402       | 1  |
| 21414 | 8791  | BC017643 | Sectm1a       | 1  |
| 21414 | 10214 | BC017643 | Sectm1b       | 1  |
| 21414 | 11199 | BC017643 | Sirt7         | -1 |
| 21414 | 13615 | BC017643 | Arl16         | -1 |
| 21414 | 15016 | BC017643 | MMT00074608   | 1  |
| 21414 | 16613 | BC017643 | 1110031102Rik | 1  |
| 21414 | 17680 | BC017643 | 1700069L16Rik | 1  |
| 21414 | 17792 | BC017643 | Vmn2r79       | 1  |
| 21414 | 17897 | BC017643 | Gm1019        | 1  |



|       |       |             |               |    |
|-------|-------|-------------|---------------|----|
| 21414 | 21655 | BC017643    | Rab40b        | -1 |
| 21414 | 22557 | BC017643    | P4hb          | -1 |
| 21415 | 327   | Has1        | H2-Ea         | 1  |
| 21415 | 2325  | Has1        | H2-K1         | 1  |
| 21415 | 2938  | Has1        | H2-T23        | 1  |
| 21415 | 3704  | Has1        | H2-Q7         | 1  |
| 21415 | 3857  | Has1        | 1700001C19Rik | -1 |
| 21415 | 5410  | Has1        | Cyp4f15       | -1 |
| 21415 | 5648  | Has1        | Zfp213        | -1 |
| 21415 | 7088  | Has1        | Slc37a1       | 1  |
| 21415 | 8750  | Has1        | 1700010I14Rik | 1  |
| 21415 | 9158  | Has1        | Pde9a         | -1 |
| 21415 | 10376 | Has1        | C920025E04Rik | -1 |
| 21415 | 10667 | Has1        | H2-Eb1        | 1  |
| 21415 | 12694 | Has1        | Riok2         | -1 |
| 21415 | 13493 | Has1        | Ring1         | -1 |
| 21415 | 15531 | Has1        | Prickle4      | -1 |
| 21415 | 18577 | Has1        | Btbd9         | -1 |
| 21415 | 20238 | Has1        | H2-T9         | 1  |
| 21415 | 22822 | Has1        | MMT00013433   | 1  |
| 21421 | 15476 | Usp34       | Fem1b         | -1 |
| 21425 | 20300 | Rab6        | Plekhb1       | 1  |
| 21425 | 21425 | Rab6        | Rab6          | 1  |
| 21431 | 740   | Xbp1        | Txnrd3        | -1 |
| 21431 | 2329  | Xbp1        | Wdr6          | -1 |
| 21431 | 3462  | Xbp1        | Nmnat3        | -1 |
| 21431 | 3587  | Xbp1        | MMT00041940   | 1  |
| 21431 | 3808  | Xbp1        | 2010209O12Rik | -1 |
| 21431 | 3913  | Xbp1        | Mrpl15        | 1  |
| 21431 | 4966  | Xbp1        | Zscan20       | 1  |
| 21431 | 6021  | Xbp1        | MMT00008784   | 1  |
| 21431 | 7731  | Xbp1        | 1500001M20Rik | -1 |
| 21431 | 8319  | Xbp1        | MMT00062477   | 1  |
| 21431 | 8464  | Xbp1        | Snapin        | -1 |
| 21431 | 8670  | Xbp1        | MMT00051613   | 1  |
| 21431 | 9067  | Xbp1        | Tra2a         | 1  |
| 21431 | 9258  | Xbp1        | P4ha1         | 1  |
| 21431 | 9514  | Xbp1        | Vps37a        | 1  |
| 21431 | 11043 | Xbp1        | Hsph1         | 1  |
| 21431 | 11214 | Xbp1        | MMT00049207   | 1  |
| 21431 | 15476 | Xbp1        | Fem1b         | -1 |
| 21431 | 15675 | Xbp1        | MMT00077535   | 1  |
| 21431 | 18336 | Xbp1        | Lrpap1        | -1 |
| 21431 | 18373 | Xbp1        | Dnajb1        | 1  |
| 21431 | 18418 | Xbp1        | Hspa1b        | 1  |
| 21431 | 20332 | Xbp1        | Stau2         | -1 |
| 21431 | 20912 | Xbp1        | Chordc1       | 1  |
| 21431 | 22751 | Xbp1        | Nosip         | -1 |
| 21433 | 403   | Ubx6        | Leprotl1      | -1 |
| 21433 | 1755  | Ubx6        | Ocel1         | 1  |
| 21433 | 10195 | Ubx6        | Klf1          | 1  |
| 21433 | 13732 | Ubx6        | Tpm4          | -1 |
| 21433 | 16617 | Ubx6        | Sh2d4a        | -1 |
| 21433 | 18886 | Ubx6        | Slc18a1       | -1 |
| 21433 | 22776 | Ubx6        | Gsr           | 1  |
| 21442 | 9022  | Rad51l1     | Plek2         | 1  |
| 21444 | 13195 | Pnpt1       | Mtif2         | 1  |
| 21483 | 6769  | Ippk        | Banp          | 1  |
| 21483 | 16251 | Ippk        | G6pc          | 1  |
| 21483 | 17525 | Ippk        | Ctgf          | 1  |
| 21483 | 18083 | Ippk        | Gadd45a       | -1 |
| 21483 | 18713 | Ippk        | 3110037I16Rik | -1 |
| 21511 | 3208  | MMT00054100 | 4930511I11Rik | 1  |
| 21511 | 7436  | MMT00054100 | 1700063K16Rik | 1  |
| 21511 | 11966 | MMT00054100 | Zfp280b       | 1  |
| 21511 | 12861 | MMT00054100 | Rhcg          | 1  |
| 21511 | 19436 | MMT00054100 | Dapp1         | 1  |
| 21511 | 22125 | MMT00054100 | Gab1          | 1  |
| 21526 | 3654  | Mkl1        | St13          | 1  |

|       |       |         |               |    |
|-------|-------|---------|---------------|----|
| 21526 | 6804  | Mkl1    | Cyp2d22       | -1 |
| 21526 | 10482 | Mkl1    | Mcat          | -1 |
| 21526 | 11503 | Mkl1    | Rangap1       | -1 |
| 21526 | 12468 | Mkl1    | Cyp2d13       | -1 |
| 21526 | 19216 | Mkl1    | Bik           | -1 |
| 21542 | 12412 | Larp4   | BC004728      | 1  |
| 21549 | 2224  | Rtp4    | Oasl2         | 1  |
| 21549 | 2550  | Rtp4    | MMT00036681   | 1  |
| 21549 | 3523  | Rtp4    | Trim34        | 1  |
| 21549 | 4508  | Rtp4    | lfit1         | 1  |
| 21549 | 5002  | Rtp4    | lfi202b       | 1  |
| 21549 | 5216  | Rtp4    | Spnb5         | 1  |
| 21549 | 6824  | Rtp4    | lrf7          | 1  |
| 21549 | 7316  | Rtp4    | lfi204        | 1  |
| 21549 | 8800  | Rtp4    | Rnf213        | 1  |
| 21549 | 9847  | Rtp4    | lfi27         | 1  |
| 21549 | 11009 | Rtp4    | MMT00008885   | 1  |
| 21549 | 11204 | Rtp4    | AI451617      | 1  |
| 21549 | 12398 | Rtp4    | lfi44         | 1  |
| 21549 | 12600 | Rtp4    | lfi204        | 1  |
| 21549 | 12969 | Rtp4    | Xaf1          | 1  |
| 21549 | 13156 | Rtp4    | lfit3         | 1  |
| 21549 | 13514 | Rtp4    | Apol9b        | 1  |
| 21549 | 15074 | Rtp4    | Usp18         | 1  |
| 21549 | 16182 | Rtp4    | Oasl1         | 1  |
| 21549 | 16572 | Rtp4    | D14Ert668e    | 1  |
| 21549 | 20997 | Rtp4    | MMT00028135   | 1  |
| 21549 | 21549 | Rtp4    | Rtp4          | 1  |
| 21549 | 22037 | Rtp4    | Oas1g         | 1  |
| 21549 | 23450 | Rtp4    | D12Ert647e    | 1  |
| 21563 | 12861 | Arhgap9 | Rhcg          | 1  |
| 21563 | 19436 | Arhgap9 | Dapp1         | 1  |
| 21568 | 6769  | Cdc73   | Banp          | 1  |
| 21568 | 18418 | Cdc73   | Hspa1b        | 1  |
| 21574 | 6118  | Acot11  | Slc1a4        | -1 |
| 21574 | 11129 | Acot11  | Ankhd1        | 1  |
| 21574 | 11807 | Acot11  | Fbxo31        | 1  |
| 21574 | 12489 | Acot11  | Wdr8          | -1 |
| 21574 | 16176 | Acot11  | St3gal5       | 1  |
| 21574 | 19025 | Acot11  | Slc37a4       | 1  |
| 21595 | 663   | Trpv1   | Muc19         | 1  |
| 21595 | 3208  | Trpv1   | 4930511111Rik | 1  |
| 21595 | 7436  | Trpv1   | 1700063K16Rik | 1  |
| 21595 | 11966 | Trpv1   | Zfp280b       | 1  |
| 21595 | 12861 | Trpv1   | Rhcg          | 1  |
| 21595 | 19436 | Trpv1   | Dapp1         | 1  |
| 21595 | 22125 | Trpv1   | Gab1          | 1  |
| 21620 | 719   | Tmem166 | Usp2          | 1  |
| 21620 | 4235  | Tmem166 | Pfkfb3        | 1  |
| 21620 | 6756  | Tmem166 | Sds           | 1  |
| 21620 | 15521 | Tmem166 | Mast3         | 1  |
| 21620 | 15607 | Tmem166 | Klf13         | 1  |
| 21620 | 15631 | Tmem166 | Lpin1         | 1  |
| 21620 | 21142 | Tmem166 | Gm129         | 1  |
| 21620 | 21331 | Tmem166 | Slc10a6       | 1  |
| 21643 | 4708  | Agtr1a  | Traf3ip2      | -1 |
| 21643 | 15631 | Agtr1a  | Lpin1         | 1  |
| 21643 | 16580 | Agtr1a  | Tnfaip2       | -1 |
| 21643 | 18027 | Agtr1a  | 5730403B10Rik | 1  |
| 21643 | 19466 | Agtr1a  | Pptc7         | 1  |
| 21643 | 19671 | Agtr1a  | Upp2          | 1  |
| 21643 | 21331 | Agtr1a  | Slc10a6       | 1  |
| 21650 | 524   | Ap4b1   | Hsd3b2        | 1  |
| 21650 | 1466  | Ap4b1   | Ubp2l         | 1  |
| 21650 | 1867  | Ap4b1   | Bcas2         | 1  |
| 21650 | 1963  | Ap4b1   | MMT00039783   | 1  |
| 21650 | 3753  | Ap4b1   | Setdb1        | -1 |
| 21650 | 6206  | Ap4b1   | MMT00063701   | 1  |
| 21650 | 7519  | Ap4b1   | Gstm1         | 1  |

|       |       |               |                    |    |
|-------|-------|---------------|--------------------|----|
| 21650 | 8738  | Ap4b1         | Reg4               | -1 |
| 21650 | 10521 | Ap4b1         | Ttf2               | 1  |
| 21650 | 10681 | Ap4b1         | Dgkz               | -1 |
| 21650 | 11121 | Ap4b1         | Mtmr11             | -1 |
| 21650 | 11611 | Ap4b1         | S100a13            | -1 |
| 21650 | 16753 | Ap4b1         | Hfe2               | -1 |
| 21650 | 20385 | Ap4b1         | Chd1l              | 1  |
| 21650 | 20917 | Ap4b1         | Gstm6              | -1 |
| 21650 | 22202 | Ap4b1         | OTTMUSG00000021274 | -1 |
| 21650 | 22570 | Ap4b1         | Phf1               | 1  |
| 21660 | 19436 | Il1rn         | Dapp1              | 1  |
| 21681 | 286   | 9130011J15Rik | MMT00070509        | -1 |
| 21681 | 1755  | 9130011J15Rik | Ocel1              | -1 |
| 21681 | 15455 | 9130011J15Rik | Lsm4               | 1  |
| 21717 | 7436  | EG628893      | 1700063K16Rik      | 1  |
| 21717 | 11966 | EG628893      | Zfp280b            | 1  |
| 21717 | 12861 | EG628893      | Rhcg               | 1  |
| 21717 | 19436 | EG628893      | Dapp1              | 1  |
| 21723 | 3208  | Homer1        | 4930511I11Rik      | 1  |
| 21723 | 5694  | Homer1        | Sp7                | 1  |
| 21723 | 7436  | Homer1        | 1700063K16Rik      | 1  |
| 21723 | 9468  | Homer1        | Gtf2a1l            | 1  |
| 21723 | 11966 | Homer1        | Zfp280b            | 1  |
| 21723 | 12861 | Homer1        | Rhcg               | 1  |
| 21723 | 19436 | Homer1        | Dapp1              | 1  |
| 21723 | 19672 | Homer1        | Cldn19             | 1  |
| 21723 | 22125 | Homer1        | Gab1               | 1  |
| 21761 | 21761 | D14Ert449e    | D14Ert449e         | 1  |
| 21769 | 661   | Loxl2         | Siglec1            | -1 |
| 21780 | 1466  | Ankrd35       | Ubap2l             | -1 |
| 21780 | 3753  | Ankrd35       | Setdb1             | 1  |
| 21780 | 6206  | Ankrd35       | MMT00063701        | -1 |
| 21780 | 7810  | Ankrd35       | Trim45             | -1 |
| 21780 | 11611 | Ankrd35       | S100a13            | 1  |
| 21780 | 12367 | Ankrd35       | MMT00072365        | 1  |
| 21780 | 18754 | Ankrd35       | Rbm8a              | -1 |
| 21780 | 20661 | Ankrd35       | Tuft1              | -1 |
| 21840 | 286   | Tmie          | MMT00070509        | 1  |
| 21840 | 403   | Tmie          | Leprotl1           | -1 |
| 21840 | 1755  | Tmie          | Ocel1              | 1  |
| 21840 | 2703  | Tmie          | MMT00073763        | 1  |
| 21840 | 2749  | Tmie          | Naf1               | -1 |
| 21840 | 3055  | Tmie          | Pde4c              | 1  |
| 21840 | 5433  | Tmie          | 2410004L22Rik      | -1 |
| 21840 | 9304  | Tmie          | Al449175           | 1  |
| 21840 | 10195 | Tmie          | Klf1               | 1  |
| 21840 | 10273 | Tmie          | Gpt2               | 1  |
| 21840 | 13004 | Tmie          | Arhgef10           | 1  |
| 21840 | 13732 | Tmie          | Tpm4               | -1 |
| 21840 | 15094 | Tmie          | Pbx4               | -1 |
| 21840 | 15455 | Tmie          | Lsm4               | -1 |
| 21840 | 16617 | Tmie          | Sh2d4a             | -1 |
| 21840 | 16849 | Tmie          | Trmt1              | -1 |
| 21840 | 18886 | Tmie          | Slc18a1            | -1 |
| 21840 | 20484 | Tmie          | Ces1               | -1 |
| 21853 | 486   | 5430432N15Rik | Josd2              | -1 |
| 21853 | 19854 | 5430432N15Rik | Kcnj14             | -1 |
| 21866 | 3208  | Hhpl1         | 4930511I11Rik      | 1  |
| 21866 | 7436  | Hhpl1         | 1700063K16Rik      | 1  |
| 21866 | 11966 | Hhpl1         | Zfp280b            | 1  |
| 21866 | 12861 | Hhpl1         | Rhcg               | 1  |
| 21866 | 19436 | Hhpl1         | Dapp1              | 1  |
| 21866 | 22125 | Hhpl1         | Gab1               | 1  |
| 21903 | 902   | Nr1d1         | Slc30a1            | 1  |
| 21903 | 2433  | Nr1d1         | Armc10             | 1  |
| 21903 | 3170  | Nr1d1         | Mcart1             | -1 |
| 21903 | 3196  | Nr1d1         | Tat                | -1 |
| 21903 | 3587  | Nr1d1         | MMT00041940        | -1 |
| 21903 | 3849  | Nr1d1         | MMT00047578        | -1 |

|       |       |             |               |    |
|-------|-------|-------------|---------------|----|
| 21903 | 4966  | Nr1d1       | Zscan20       | -1 |
| 21903 | 6021  | Nr1d1       | MMT00008784   | -1 |
| 21903 | 6126  | Nr1d1       | MMT00067575   | -1 |
| 21903 | 7963  | Nr1d1       | Rxrg          | 1  |
| 21903 | 8184  | Nr1d1       | Rbm26         | 1  |
| 21903 | 8319  | Nr1d1       | MMT00062477   | -1 |
| 21903 | 8632  | Nr1d1       | Igfbp1        | -1 |
| 21903 | 8670  | Nr1d1       | MMT00051613   | -1 |
| 21903 | 9067  | Nr1d1       | Tra2a         | -1 |
| 21903 | 9258  | Nr1d1       | P4ha1         | -1 |
| 21903 | 9899  | Nr1d1       | D13Wsu177e    | -1 |
| 21903 | 11043 | Nr1d1       | Hsph1         | -1 |
| 21903 | 11214 | Nr1d1       | MMT00049207   | -1 |
| 21903 | 12754 | Nr1d1       | E130304F04Rik | 1  |
| 21903 | 12761 | Nr1d1       | Tsc22d3       | -1 |
| 21903 | 13521 | Nr1d1       | Ears2         | -1 |
| 21903 | 14135 | Nr1d1       | Eepd1         | 1  |
| 21903 | 14263 | Nr1d1       | Arrdc3        | 1  |
| 21903 | 14785 | Nr1d1       | F3            | 1  |
| 21903 | 15476 | Nr1d1       | Fem1b         | 1  |
| 21903 | 15675 | Nr1d1       | MMT00077535   | -1 |
| 21903 | 16251 | Nr1d1       | G6pc          | -1 |
| 21903 | 16517 | Nr1d1       | D4Wsu53e      | -1 |
| 21903 | 16750 | Nr1d1       | Casp6         | 1  |
| 21903 | 18083 | Nr1d1       | Gadd45a       | 1  |
| 21903 | 18373 | Nr1d1       | Dnajb1        | -1 |
| 21903 | 18418 | Nr1d1       | Hspa1b        | -1 |
| 21903 | 20296 | Nr1d1       | C030027H14Rik | -1 |
| 21903 | 20535 | Nr1d1       | Rbm4          | -1 |
| 21903 | 20912 | Nr1d1       | Chordc1       | -1 |
| 21903 | 21389 | Nr1d1       | Odf2          | 1  |
| 21903 | 21643 | Nr1d1       | Agtr1a        | 1  |
| 21903 | 21903 | Nr1d1       | Nr1d1         | 1  |
| 21903 | 22139 | Nr1d1       | Stip1         | -1 |
| 21903 | 22216 | Nr1d1       | Sp5           | 1  |
| 21903 | 23527 | Nr1d1       | MMT00021936   | -1 |
| 21909 | 11043 | Neur12      | Hsph1         | -1 |
| 21923 | 3208  | Olf585      | 4930511111Rik | 1  |
| 21923 | 7436  | Olf585      | 1700063K16Rik | 1  |
| 21923 | 11966 | Olf585      | Zfp280b       | 1  |
| 21923 | 19436 | Olf585      | Dapp1         | 1  |
| 21931 | 3208  | Nrxn3       | 4930511111Rik | 1  |
| 21931 | 7436  | Nrxn3       | 1700063K16Rik | 1  |
| 21931 | 11966 | Nrxn3       | Zfp280b       | 1  |
| 21935 | 19234 | Prok2       | Nrg4          | -1 |
| 21937 | 6765  | MMT00015325 | Ldhd          | 1  |
| 21937 | 14557 | MMT00015325 | Pyroxd1       | -1 |
| 21952 | 7088  | Tfb1m       | Slc37a1       | -1 |
| 21952 | 17707 | Tfb1m       | Rshl2b        | -1 |
| 21952 | 22822 | Tfb1m       | MMT00013433   | -1 |
| 21952 | 23250 | Tfb1m       | Plcl2         | -1 |
| 21955 | 3587  | Atxn711     | MMT00041940   | -1 |
| 21955 | 6021  | Atxn711     | MMT00008784   | -1 |
| 21955 | 8670  | Atxn711     | MMT00051613   | -1 |
| 21955 | 11043 | Atxn711     | Hsph1         | -1 |
| 21955 | 11214 | Atxn711     | MMT00049207   | -1 |
| 21955 | 15476 | Atxn711     | Fem1b         | 1  |
| 21955 | 15675 | Atxn711     | MMT00077535   | -1 |
| 21955 | 22139 | Atxn711     | Stip1         | -1 |
| 21981 | 499   | Ormdl2      | 2310057J16Rik | 1  |
| 21981 | 1849  | Ormdl2      | MMT00063181   | 1  |
| 21981 | 3587  | Ormdl2      | MMT00041940   | 1  |
| 21981 | 3799  | Ormdl2      | Serpinh1      | 1  |
| 21981 | 3849  | Ormdl2      | MMT00047578   | 1  |
| 21981 | 4950  | Ormdl2      | Dnajb10       | 1  |
| 21981 | 6021  | Ormdl2      | MMT00008784   | 1  |
| 21981 | 8319  | Ormdl2      | MMT00062477   | 1  |
| 21981 | 8670  | Ormdl2      | MMT00051613   | 1  |
| 21981 | 9258  | Ormdl2      | P4ha1         | 1  |

|       |       |        |               |    |
|-------|-------|--------|---------------|----|
| 21981 | 9899  | Ormdl2 | D13Wsu177e    | 1  |
| 21981 | 11043 | Ormdl2 | Hsph1         | 1  |
| 21981 | 11214 | Ormdl2 | MMT00049207   | 1  |
| 21981 | 15476 | Ormdl2 | Fem1b         | -1 |
| 21981 | 15675 | Ormdl2 | MMT00077535   | 1  |
| 21981 | 17712 | Ormdl2 | Nup62         | 1  |
| 21981 | 18373 | Ormdl2 | Dnajb1        | 1  |
| 21981 | 18418 | Ormdl2 | Hspa1b        | 1  |
| 21981 | 20332 | Ormdl2 | Stau2         | -1 |
| 21981 | 20535 | Ormdl2 | Rbm4          | 1  |
| 21981 | 20912 | Ormdl2 | Chordc1       | 1  |
| 21981 | 21389 | Ormdl2 | Odf2          | -1 |
| 21981 | 22139 | Ormdl2 | Stip1         | 1  |
| 21981 | 23646 | Ormdl2 | Hsp90ab1      | 1  |
| 21992 | 250   | Lap3   | Tubb2a-ps2    | 1  |
| 21992 | 269   | Lap3   | Tuba1b        | 1  |
| 21992 | 609   | Lap3   | MMT00060868   | 1  |
| 21992 | 719   | Lap3   | Usp2          | -1 |
| 21992 | 1941  | Lap3   | MMT00079618   | 1  |
| 21992 | 2322  | Lap3   | Tuba4a        | 1  |
| 21992 | 2399  | Lap3   | MMT00060167   | 1  |
| 21992 | 2829  | Lap3   | Lrfr3         | 1  |
| 21992 | 3214  | Lap3   | Dnmt3b        | 1  |
| 21992 | 3246  | Lap3   | Prei4         | -1 |
| 21992 | 3804  | Lap3   | MMT00015534   | 1  |
| 21992 | 4201  | Lap3   | Tubb2c        | 1  |
| 21992 | 4392  | Lap3   | 1810055G02Rik | -1 |
| 21992 | 5183  | Lap3   | St5           | 1  |
| 21992 | 5374  | Lap3   | Chka          | 1  |
| 21992 | 5974  | Lap3   | Arntl         | 1  |
| 21992 | 6343  | Lap3   | Slc20a1       | -1 |
| 21992 | 6386  | Lap3   | Por           | -1 |
| 21992 | 7151  | Lap3   | MMT00007982   | 1  |
| 21992 | 7862  | Lap3   | Cpsf4l        | -1 |
| 21992 | 9495  | Lap3   | Srms          | 1  |
| 21992 | 9763  | Lap3   | Tuba3b        | 1  |
| 21992 | 10215 | Lap3   | Nampt         | -1 |
| 21992 | 10486 | Lap3   | 1300002K09Rik | 1  |
| 21992 | 10642 | Lap3   | Ngef          | -1 |
| 21992 | 10863 | Lap3   | Tssc1         | 1  |
| 21992 | 11412 | Lap3   | Abcg5         | -1 |
| 21992 | 11724 | Lap3   | Tuba3a        | 1  |
| 21992 | 11741 | Lap3   | Slc30a10      | 1  |
| 21992 | 12460 | Lap3   | Pnpla2        | -1 |
| 21992 | 12489 | Lap3   | Wdr8          | 1  |
| 21992 | 16060 | Lap3   | Gys2          | -1 |
| 21992 | 16176 | Lap3   | St3gal5       | -1 |
| 21992 | 16669 | Lap3   | Tjp2          | 1  |
| 21992 | 16690 | Lap3   | Tjp3          | 1  |
| 21992 | 17444 | Lap3   | Tuba1a        | 1  |
| 21992 | 17876 | Lap3   | Tubb4         | 1  |
| 21992 | 17884 | Lap3   | Lnx2          | 1  |
| 21992 | 18179 | Lap3   | Dbp           | -1 |
| 21992 | 18552 | Lap3   | Nr2c2ap       | 1  |
| 21992 | 19025 | Lap3   | Slc37a4       | -1 |
| 21992 | 19146 | Lap3   | N4bp2l1       | -1 |
| 21992 | 19671 | Lap3   | Upp2          | -1 |
| 21992 | 21142 | Lap3   | Gm129         | -1 |
| 21992 | 21531 | Lap3   | Ttc23         | -1 |
| 21992 | 22290 | Lap3   | Tubb2a        | 1  |
| 21992 | 22388 | Lap3   | 2410018M08Rik | -1 |
| 21992 | 22470 | Lap3   | Ppargc1b      | -1 |
| 21992 | 22474 | Lap3   | Ubqln1        | 1  |
| 21992 | 22630 | Lap3   | MMT00034355   | 1  |
| 21996 | 3208  | Mme    | 4930511111Rik | 1  |
| 21996 | 7436  | Mme    | 1700063K16Rik | 1  |
| 21996 | 11966 | Mme    | Zfp280b       | 1  |
| 21996 | 12861 | Mme    | Rhcg          | 1  |
| 21996 | 19436 | Mme    | Dapp1         | 1  |

|       |       |               |               |    |
|-------|-------|---------------|---------------|----|
| 21996 | 22125 | Mme           | Gab1          | 1  |
| 22012 | 3170  | Itgae         | Mcart1        | -1 |
| 22012 | 3196  | Itgae         | Tat           | -1 |
| 22012 | 3587  | Itgae         | MMT00041940   | -1 |
| 22012 | 6021  | Itgae         | MMT00008784   | -1 |
| 22012 | 6769  | Itgae         | Banp          | -1 |
| 22012 | 7140  | Itgae         | Mtbp          | 1  |
| 22012 | 8319  | Itgae         | MMT00062477   | -1 |
| 22012 | 8670  | Itgae         | MMT00051613   | -1 |
| 22012 | 10769 | Itgae         | Hnrnpd        | 1  |
| 22012 | 11214 | Itgae         | MMT00049207   | -1 |
| 22012 | 12761 | Itgae         | Tsc22d3       | -1 |
| 22012 | 15675 | Itgae         | MMT00077535   | -1 |
| 22012 | 18373 | Itgae         | Dnajb1        | -1 |
| 22012 | 18418 | Itgae         | Hspa1b        | -1 |
| 22015 | 3208  | 2410127E18Rik | 4930511111Rik | 1  |
| 22015 | 7436  | 2410127E18Rik | 1700063K16Rik | 1  |
| 22015 | 11966 | 2410127E18Rik | Zfp280b       | 1  |
| 22015 | 12861 | 2410127E18Rik | Rhcg          | 1  |
| 22015 | 19436 | 2410127E18Rik | Dapp1         | 1  |
| 22015 | 22125 | 2410127E18Rik | Gab1          | 1  |
| 22021 | 3061  | Csnk1d        | Scarf2        | -1 |
| 22021 | 17897 | Csnk1d        | Gm1019        | -1 |
| 22035 | 19685 | Olf142        | MMT00009602   | -1 |
| 22035 | 20663 | Olf142        | Depdc1a       | -1 |
| 22035 | 23254 | Olf142        | Wdtdc1        | -1 |
| 22073 | 7436  | Lrig3         | 1700063K16Rik | 1  |
| 22073 | 9468  | Lrig3         | Gtf2a1l       | 1  |
| 22073 | 11966 | Lrig3         | Zfp280b       | 1  |
| 22073 | 19436 | Lrig3         | Dapp1         | 1  |
| 22075 | 630   | C1s           | C1s           | 1  |
| 22075 | 1444  | C1s           | C1r           | 1  |
| 22075 | 22075 | C1s           | C1s           | 1  |
| 22079 | 12232 | Tmem81        | MMT00060943   | 1  |
| 22079 | 13140 | Tmem81        | MMT00005814   | 1  |
| 22079 | 18947 | Tmem81        | Ctse          | -1 |
| 22092 | 19406 | Plekhg4       | Ikzf1         | -1 |
| 22104 | 7088  | Rnf123        | Slc37a1       | 1  |
| 22104 | 7135  | Rnf123        | Ezr           | 1  |
| 22104 | 7909  | Rnf123        | Oas3          | 1  |
| 22104 | 8750  | Rnf123        | 1700010114Rik | 1  |
| 22104 | 10667 | Rnf123        | H2-Eb1        | 1  |
| 22104 | 11435 | Rnf123        | Rnaset2a      | 1  |
| 22104 | 17707 | Rnf123        | Rshl2b        | 1  |
| 22104 | 17760 | Rnf123        | Ccr6          | -1 |
| 22104 | 21075 | Rnf123        | Gtf2h5        | -1 |
| 22104 | 21754 | Rnf123        | Synj2         | -1 |
| 22104 | 22104 | Rnf123        | Rnf123        | 1  |
| 22125 | 3208  | Gab1          | 4930511111Rik | 1  |
| 22125 | 5694  | Gab1          | Sp7           | 1  |
| 22125 | 7436  | Gab1          | 1700063K16Rik | 1  |
| 22125 | 11966 | Gab1          | Zfp280b       | 1  |
| 22125 | 12861 | Gab1          | Rhcg          | 1  |
| 22125 | 19436 | Gab1          | Dapp1         | 1  |
| 22125 | 22125 | Gab1          | Gab1          | 1  |
| 22141 | 3196  | Rorb          | Tat           | 1  |
| 22141 | 3587  | Rorb          | MMT00041940   | 1  |
| 22141 | 3849  | Rorb          | MMT00047578   | 1  |
| 22141 | 4192  | Rorb          | Zranb1        | -1 |
| 22141 | 4849  | Rorb          | Zxdc          | 1  |
| 22141 | 6021  | Rorb          | MMT00008784   | 1  |
| 22141 | 6126  | Rorb          | MMT00067575   | 1  |
| 22141 | 6171  | Rorb          | Abtb2         | 1  |
| 22141 | 6268  | Rorb          | Slc45a3       | 1  |
| 22141 | 6769  | Rorb          | Banp          | 1  |
| 22141 | 8319  | Rorb          | MMT00062477   | 1  |
| 22141 | 8464  | Rorb          | Snapi         | -1 |
| 22141 | 8662  | Rorb          | Brca2         | -1 |
| 22141 | 8670  | Rorb          | MMT00051613   | 1  |

|       |       |                    |               |    |
|-------|-------|--------------------|---------------|----|
| 22141 | 8684  | Rorb               | Il15          | -1 |
| 22141 | 8742  | Rorb               | Tmem39a       | 1  |
| 22141 | 9067  | Rorb               | Tra2a         | 1  |
| 22141 | 9616  | Rorb               | Al451557      | -1 |
| 22141 | 9899  | Rorb               | D13Wsu177e    | 1  |
| 22141 | 10435 | Rorb               | Nab2          | -1 |
| 22141 | 10769 | Rorb               | Hnrnpd        | -1 |
| 22141 | 11043 | Rorb               | Hsph1         | 1  |
| 22141 | 11095 | Rorb               | Bag3          | 1  |
| 22141 | 11161 | Rorb               | Gpatch2       | 1  |
| 22141 | 11214 | Rorb               | MMT00049207   | 1  |
| 22141 | 12761 | Rorb               | Tsc22d3       | 1  |
| 22141 | 13156 | Rorb               | lfit3         | -1 |
| 22141 | 14135 | Rorb               | Eepd1         | -1 |
| 22141 | 14785 | Rorb               | F3            | -1 |
| 22141 | 15476 | Rorb               | Fem1b         | -1 |
| 22141 | 15675 | Rorb               | MMT00077535   | 1  |
| 22141 | 16251 | Rorb               | G6pc          | 1  |
| 22141 | 17224 | Rorb               | 5430407P10Rik | 1  |
| 22141 | 17760 | Rorb               | Ccr6          | -1 |
| 22141 | 18083 | Rorb               | Gadd45a       | -1 |
| 22141 | 18373 | Rorb               | Dnajb1        | 1  |
| 22141 | 18418 | Rorb               | Hspa1b        | 1  |
| 22141 | 20332 | Rorb               | Stau2         | -1 |
| 22141 | 20535 | Rorb               | Rbm4          | 1  |
| 22141 | 20946 | Rorb               | Nufip2        | -1 |
| 22141 | 20965 | Rorb               | Usp28         | -1 |
| 22141 | 21389 | Rorb               | Odf2          | -1 |
| 22141 | 21872 | Rorb               | Stambpl1      | -1 |
| 22141 | 22216 | Rorb               | Sp5           | -1 |
| 22141 | 22303 | Rorb               | Cdt1          | -1 |
| 22141 | 23458 | Rorb               | Clic4         | 1  |
| 22150 | 11966 | Fhdc1              | Zfp280b       | 1  |
| 22150 | 19436 | Fhdc1              | Dapp1         | 1  |
| 22201 | 7910  | Pard3              | AK122209      | -1 |
| 22201 | 13218 | Pard3              | C330043M08Rik | -1 |
| 22201 | 14391 | Pard3              | MMT00017335   | 1  |
| 22201 | 15953 | Pard3              | Acsf3         | 1  |
| 22201 | 21394 | Pard3              | Cdh15         | 1  |
| 22201 | 22351 | Pard3              | Fanca         | 1  |
| 22202 | 1466  | OTTMUSG00000021274 | Ubap2l        | -1 |
| 22219 | 14969 | Cyp11b1            | EG245506      | -1 |
| 22219 | 16660 | Cyp11b1            | Gpc6          | -1 |
| 22219 | 17702 | Cyp11b1            | Ccdc40        | -1 |
| 22226 | 18947 | Pm20d1             | Ctse          | 1  |
| 22226 | 22226 | Pm20d1             | Pm20d1        | 1  |
| 22239 | 23301 | Ap3b1              | Scamp1        | 1  |
| 22247 | 8210  | Pigyl              | Hspa12a       | -1 |
| 22247 | 10387 | Pigyl              | 4933427D06Rik | -1 |
| 22247 | 21099 | Pigyl              | Rapgef6       | -1 |
| 22250 | 8791  | Wdr45l             | Sectm1a       | -1 |
| 22250 | 15016 | Wdr45l             | MMT00074608   | -1 |
| 22250 | 16613 | Wdr45l             | 1110031102Rik | -1 |
| 22250 | 17792 | Wdr45l             | Vmn2r79       | -1 |
| 22250 | 17897 | Wdr45l             | Gm1019        | -1 |
| 22256 | 9022  | Arg2               | Plek2         | 1  |
| 22256 | 20187 | Arg2               | Gphn          | 1  |
| 22271 | 11966 | Cyp2c29            | Zfp280b       | 1  |
| 22271 | 19436 | Cyp2c29            | Dapp1         | 1  |
| 22272 | 3587  | Vpreb1             | MMT00041940   | 1  |
| 22272 | 6021  | Vpreb1             | MMT00008784   | 1  |
| 22272 | 8670  | Vpreb1             | MMT00051613   | 1  |
| 22272 | 9258  | Vpreb1             | P4ha1         | 1  |
| 22272 | 11043 | Vpreb1             | Hsph1         | 1  |
| 22272 | 11214 | Vpreb1             | MMT00049207   | 1  |
| 22272 | 15675 | Vpreb1             | MMT00077535   | 1  |
| 22272 | 18373 | Vpreb1             | Dnajb1        | 1  |
| 22297 | 15618 | Zfyve1             | Sel1l         | 1  |
| 22297 | 22297 | Zfyve1             | Zfyve1        | 1  |

|       |       |               |               |    |
|-------|-------|---------------|---------------|----|
| 22310 | 11043 | Asb5          | Hsph1         | -1 |
| 22310 | 12498 | Asb5          | Abcg8         | 1  |
| 22314 | 8548  | E2f2          | Tor1aip2      | 1  |
| 22320 | 2472  | MMT00047284   | MMT00014056   | 1  |
| 22320 | 7654  | MMT00047284   | Ptpmt1        | -1 |
| 22320 | 9547  | MMT00047284   | MMT00006479   | 1  |
| 22320 | 14757 | MMT00047284   | Hdx           | 1  |
| 22320 | 15365 | MMT00047284   | Ext2          | 1  |
| 22320 | 16881 | MMT00047284   | MMT00031504   | 1  |
| 22320 | 17295 | MMT00047284   | MMT00082577   | 1  |
| 22320 | 19763 | MMT00047284   | Acp2          | 1  |
| 22320 | 19803 | MMT00047284   | BC003993      | 1  |
| 22320 | 22320 | MMT00047284   | MMT00047284   | 1  |
| 22320 | 23474 | MMT00047284   | MMT00011721   | 1  |
| 22333 | 1041  | Hnrmp3        | 3110049J23Rik | 1  |
| 22333 | 5965  | Hnrmp3        | Pbld          | 1  |
| 22333 | 13348 | Hnrmp3        | Ank3          | 1  |
| 22333 | 13688 | Hnrmp3        | Ppa1          | 1  |
| 22333 | 15971 | Hnrmp3        | Aifm2         | 1  |
| 22333 | 18300 | Hnrmp3        | Arg1          | 1  |
| 22333 | 19115 | Hnrmp3        | Rab32         | -1 |
| 22333 | 19392 | Hnrmp3        | Slc25a16      | -1 |
| 22333 | 21105 | Hnrmp3        | Pex26         | 1  |
| 22333 | 21258 | Hnrmp3        | 2010003K15Rik | -1 |
| 22333 | 22146 | Hnrmp3        | Aifm2         | 1  |
| 22337 | 3279  | Nik           | Slc46a1       | 1  |
| 22337 | 22337 | Nik           | Nik           | 1  |
| 22351 | 1336  | Fanca         | MMT00069537   | -1 |
| 22351 | 2243  | Fanca         | Gcsh          | -1 |
| 22351 | 7910  | Fanca         | AK122209      | -1 |
| 22351 | 11404 | Fanca         | Gnpat         | -1 |
| 22351 | 13495 | Fanca         | Abcb10        | 1  |
| 22351 | 14391 | Fanca         | MMT00017335   | 1  |
| 22351 | 15953 | Fanca         | Acsf3         | 1  |
| 22351 | 16802 | Fanca         | Def8          | -1 |
| 22351 | 18697 | Fanca         | Afg3l1        | -1 |
| 22351 | 21394 | Fanca         | Cdh15         | 1  |
| 22351 | 22351 | Fanca         | Fanca         | 1  |
| 22351 | 22909 | Fanca         | Nup133        | -1 |
| 22361 | 6021  | Sephs2        | MMT00008784   | -1 |
| 22361 | 8670  | Sephs2        | MMT00051613   | -1 |
| 22361 | 11214 | Sephs2        | MMT00049207   | -1 |
| 22366 | 7436  | MMT00005283   | 1700063K16Rik | 1  |
| 22366 | 11966 | MMT00005283   | Zfp280b       | 1  |
| 22366 | 19436 | MMT00005283   | Dapp1         | 1  |
| 22366 | 22125 | MMT00005283   | Gab1          | 1  |
| 22395 | 3078  | Kcna1         | 9630033F20Rik | -1 |
| 22395 | 9417  | Kcna1         | Cd163         | -1 |
| 22395 | 17391 | Kcna1         | C530028O21Rik | -1 |
| 22395 | 17743 | Kcna1         | Phb2          | -1 |
| 22395 | 19964 | Kcna1         | Ndufa9        | -1 |
| 22395 | 20127 | Kcna1         | Ipo8          | 1  |
| 22408 | 1755  | Calr3         | Ocel1         | 1  |
| 22408 | 13732 | Calr3         | Tpm4          | -1 |
| 22408 | 15455 | Calr3         | Lsm4          | -1 |
| 22434 | 11966 | Olf1255       | Zfp280b       | 1  |
| 22434 | 19436 | Olf1255       | Dapp1         | 1  |
| 22445 | 3208  | Prkag3        | 4930511111Rik | 1  |
| 22445 | 7436  | Prkag3        | 1700063K16Rik | 1  |
| 22445 | 11966 | Prkag3        | Zfp280b       | 1  |
| 22445 | 19436 | Prkag3        | Dapp1         | 1  |
| 22445 | 22125 | Prkag3        | Gab1          | 1  |
| 22446 | 20333 | Ccr5          | Calca         | 1  |
| 22499 | 18099 | 9030409G11Rik | Nfx1          | -1 |
| 22499 | 20045 | 9030409G11Rik | D4Wsu114e     | -1 |
| 22555 | 3208  | Ela2          | 4930511111Rik | 1  |
| 22555 | 11966 | Ela2          | Zfp280b       | 1  |
| 22555 | 19436 | Ela2          | Dapp1         | 1  |
| 22570 | 524   | Phtf1         | Hsd3b2        | 1  |



|       |       |               |                    |    |
|-------|-------|---------------|--------------------|----|
| 22570 | 1466  | Phtf1         | Ubap2l             | 1  |
| 22570 | 1867  | Phtf1         | Bcas2              | 1  |
| 22570 | 1963  | Phtf1         | MMT00039783        | 1  |
| 22570 | 3753  | Phtf1         | Setdb1             | -1 |
| 22570 | 6206  | Phtf1         | MMT00063701        | 1  |
| 22570 | 7519  | Phtf1         | Gstm1              | 1  |
| 22570 | 7810  | Phtf1         | Trim45             | 1  |
| 22570 | 10521 | Phtf1         | Ttf2               | 1  |
| 22570 | 10681 | Phtf1         | Dgkz               | -1 |
| 22570 | 11121 | Phtf1         | Mtmr11             | -1 |
| 22570 | 11611 | Phtf1         | S100a13            | -1 |
| 22570 | 12367 | Phtf1         | MMT00072365        | -1 |
| 22570 | 16416 | Phtf1         | Commd2             | 1  |
| 22570 | 16753 | Phtf1         | Hfe2               | -1 |
| 22570 | 18754 | Phtf1         | Rbm8a              | 1  |
| 22570 | 20385 | Phtf1         | Chd1l              | 1  |
| 22570 | 20661 | Phtf1         | Tuft1              | 1  |
| 22570 | 20917 | Phtf1         | Gstm6              | -1 |
| 22570 | 21650 | Phtf1         | Ap4b1              | 1  |
| 22570 | 22202 | Phtf1         | OTTMUSG00000021274 | -1 |
| 22570 | 22570 | Phtf1         | Phtf1              | 1  |
| 22598 | 2571  | 4930402H24Rik | Rmnd1              | -1 |
| 22598 | 3744  | 4930402H24Rik | Rmnd1              | -1 |
| 22598 | 8786  | 4930402H24Rik | Rmnd1              | -1 |
| 22598 | 19115 | 4930402H24Rik | Rab32              | -1 |
| 22600 | 740   | 2410018C20Rik | Txnrd3             | 1  |
| 22600 | 1453  | 2410018C20Rik | Gfod2              | -1 |
| 22600 | 1849  | 2410018C20Rik | MMT00063181        | -1 |
| 22600 | 3587  | 2410018C20Rik | MMT00041940        | -1 |
| 22600 | 3799  | 2410018C20Rik | Serpinh1           | -1 |
| 22600 | 4950  | 2410018C20Rik | Dnajb10            | -1 |
| 22600 | 7731  | 2410018C20Rik | 1500001M20Rik      | 1  |
| 22600 | 8670  | 2410018C20Rik | MMT00051613        | -1 |
| 22600 | 8787  | 2410018C20Rik | Sdf2l1             | -1 |
| 22600 | 9067  | 2410018C20Rik | Tra2a              | -1 |
| 22600 | 9224  | 2410018C20Rik | MMT00013510        | -1 |
| 22600 | 9258  | 2410018C20Rik | P4ha1              | -1 |
| 22600 | 9680  | 2410018C20Rik | Ahsa1              | -1 |
| 22600 | 11043 | 2410018C20Rik | Hsph1              | -1 |
| 22600 | 12388 | 2410018C20Rik | 8430406I07Rik      | -1 |
| 22600 | 13052 | 2410018C20Rik | Tnfrsf19           | 1  |
| 22600 | 13521 | 2410018C20Rik | Ears2              | -1 |
| 22600 | 14014 | 2410018C20Rik | MMT00008376        | -1 |
| 22600 | 14298 | 2410018C20Rik | Atp2a2             | -1 |
| 22600 | 15675 | 2410018C20Rik | MMT00077535        | -1 |
| 22600 | 16043 | 2410018C20Rik | Sult1c2            | 1  |
| 22600 | 16299 | 2410018C20Rik | Crel2              | -1 |
| 22600 | 16327 | 2410018C20Rik | Ubfd1              | -1 |
| 22600 | 16585 | 2410018C20Rik | Syvn1              | -1 |
| 22600 | 17595 | 2410018C20Rik | MMT00048325        | -1 |
| 22600 | 20246 | 2410018C20Rik | Pdia5              | -1 |
| 22600 | 20332 | 2410018C20Rik | Stau2              | 1  |
| 22600 | 22139 | 2410018C20Rik | Stip1              | -1 |
| 22600 | 23646 | 2410018C20Rik | Hsp90ab1           | -1 |
| 22612 | 1745  | 1500010J02Rik | Gas7               | -1 |
| 22645 | 3743  | Zar1          | Corin              | -1 |
| 22673 | 3587  | Prpf38b       | MMT00041940        | 1  |
| 22673 | 6021  | Prpf38b       | MMT00008784        | 1  |
| 22673 | 6769  | Prpf38b       | Banp               | 1  |
| 22673 | 8670  | Prpf38b       | MMT00051613        | 1  |
| 22673 | 9258  | Prpf38b       | P4ha1              | 1  |
| 22673 | 10769 | Prpf38b       | Hnrnpd             | -1 |
| 22673 | 11214 | Prpf38b       | MMT00049207        | 1  |
| 22673 | 15675 | Prpf38b       | MMT00077535        | 1  |
| 22673 | 18215 | Prpf38b       | Gpr146             | -1 |
| 22673 | 18373 | Prpf38b       | Dnajb1             | 1  |
| 22693 | 3622  | Trim68        | Trim21             | 1  |
| 22693 | 9161  | Trim68        | Mrpl17             | 1  |
| 22693 | 22693 | Trim68        | Trim68             | 1  |

|       |       |             |               |    |
|-------|-------|-------------|---------------|----|
| 22732 | 18373 | Cyb5b       | Dnajb1        | 1  |
| 22732 | 18418 | Cyb5b       | Hspa1b        | 1  |
| 22733 | 3208  | Alpk3       | 4930511111Rik | 1  |
| 22733 | 7436  | Alpk3       | 1700063K16Rik | 1  |
| 22733 | 9468  | Alpk3       | Gtf2a1l       | 1  |
| 22733 | 11966 | Alpk3       | Zfp280b       | 1  |
| 22733 | 12861 | Alpk3       | Rhcg          | 1  |
| 22733 | 19436 | Alpk3       | Dapp1         | 1  |
| 22733 | 22125 | Alpk3       | Gab1          | 1  |
| 22750 | 3208  | Mupcdh      | 4930511111Rik | 1  |
| 22750 | 7436  | Mupcdh      | 1700063K16Rik | 1  |
| 22750 | 11966 | Mupcdh      | Zfp280b       | 1  |
| 22750 | 19436 | Mupcdh      | Dapp1         | 1  |
| 22750 | 22125 | Mupcdh      | Gab1          | 1  |
| 22751 | 7731  | Nosip       | 1500001M20Rik | 1  |
| 22751 | 8891  | Nosip       | MMT00071061   | -1 |
| 22751 | 9067  | Nosip       | Tra2a         | -1 |
| 22751 | 9258  | Nosip       | P4ha1         | -1 |
| 22751 | 11043 | Nosip       | Hsph1         | -1 |
| 22762 | 3208  | Slc6a4      | 4930511111Rik | 1  |
| 22762 | 7436  | Slc6a4      | 1700063K16Rik | 1  |
| 22762 | 11966 | Slc6a4      | Zfp280b       | 1  |
| 22762 | 12861 | Slc6a4      | Rhcg          | 1  |
| 22762 | 19436 | Slc6a4      | Dapp1         | 1  |
| 22786 | 3496  | Mterfd3     | Slc41a2       | -1 |
| 22786 | 12055 | Mterfd3     | 1810008A18Rik | 1  |
| 22786 | 19995 | Mterfd3     | Pwp1          | 1  |
| 22786 | 22222 | Mterfd3     | Gstt1         | 1  |
| 22786 | 22786 | Mterfd3     | Mterfd3       | 1  |
| 22802 | 663   | Svs2        | Muc19         | 1  |
| 22802 | 3208  | Svs2        | 4930511111Rik | 1  |
| 22802 | 5694  | Svs2        | Sp7           | 1  |
| 22802 | 7436  | Svs2        | 1700063K16Rik | 1  |
| 22802 | 9468  | Svs2        | Gtf2a1l       | 1  |
| 22802 | 11966 | Svs2        | Zfp280b       | 1  |
| 22802 | 12651 | Svs2        | Tsc22d4       | 1  |
| 22802 | 12861 | Svs2        | Rhcg          | 1  |
| 22802 | 19436 | Svs2        | Dapp1         | 1  |
| 22907 | 2932  | MMT00054594 | Slco1a1       | 1  |
| 22907 | 6765  | MMT00054594 | Ldhd          | 1  |
| 22907 | 14557 | MMT00054594 | Pyroxd1       | -1 |
| 22930 | 2023  | Mro         | MMT00072215   | -1 |
| 22930 | 2674  | Mro         | 1810005K13Rik | 1  |
| 22930 | 3167  | Mro         | Dym           | 1  |
| 22930 | 3721  | Mro         | Me2           | -1 |
| 22930 | 5360  | Mro         | Cep76         | -1 |
| 22930 | 5681  | Mro         | Mbd1          | -1 |
| 22930 | 8269  | Mro         | Ccdc11        | -1 |
| 22930 | 9192  | Mro         | MMT00042303   | 1  |
| 22930 | 12109 | Mro         | Smad4         | 1  |
| 22930 | 18592 | Mro         | Txn14a        | -1 |
| 22930 | 22961 | Mro         | MMT00055950   | -1 |
| 22954 | 19436 | Slc25a30    | Dapp1         | 1  |
| 22961 | 2023  | MMT00055950 | MMT00072215   | 1  |
| 22961 | 22961 | MMT00055950 | MMT00055950   | 1  |
| 22966 | 3208  | Epha4       | 4930511111Rik | 1  |
| 22966 | 5694  | Epha4       | Sp7           | 1  |
| 22966 | 7436  | Epha4       | 1700063K16Rik | 1  |
| 22966 | 11966 | Epha4       | Zfp280b       | 1  |
| 22966 | 12861 | Epha4       | Rhcg          | 1  |
| 22966 | 19436 | Epha4       | Dapp1         | 1  |
| 22966 | 19672 | Epha4       | Cldn19        | 1  |
| 22966 | 22125 | Epha4       | Gab1          | 1  |
| 22978 | 2932  | MMT00043176 | Slco1a1       | 1  |
| 22978 | 6765  | MMT00043176 | Ldhd          | 1  |
| 22978 | 13488 | MMT00043176 | Art4          | 1  |
| 22978 | 14557 | MMT00043176 | Pyroxd1       | -1 |
| 22978 | 20127 | MMT00043176 | lpo8          | 1  |
| 22978 | 21126 | MMT00043176 | Dera          | -1 |

|       |       |               |               |    |
|-------|-------|---------------|---------------|----|
| 22984 | 6498  | Tnnt2         | MMT00016809   | -1 |
| 22984 | 9707  | Tnnt2         | Golt1a        | 1  |
| 22988 | 5100  | Hscb          | Pebp1         | 1  |
| 22988 | 10978 | Hscb          | MMT00078322   | -1 |
| 22988 | 12656 | Hscb          | Coq5          | -1 |
| 22988 | 15908 | Hscb          | Pebp1         | 1  |
| 22988 | 19443 | Hscb          | Prkab1        | 1  |
| 22989 | 250   | Lmcd1         | Tubb2a-ps2    | 1  |
| 22989 | 563   | Lmcd1         | D4Bwg0951e    | -1 |
| 22989 | 609   | Lmcd1         | MMT00060868   | 1  |
| 22989 | 1363  | Lmcd1         | BC021767      | 1  |
| 22989 | 2110  | Lmcd1         | Gtf2ird1      | 1  |
| 22989 | 2794  | Lmcd1         | Map3k6        | -1 |
| 22989 | 2829  | Lmcd1         | Lrfr3         | 1  |
| 22989 | 3214  | Lmcd1         | Dnmt3b        | 1  |
| 22989 | 3246  | Lmcd1         | Prei4         | -1 |
| 22989 | 3804  | Lmcd1         | MMT00015534   | 1  |
| 22989 | 4235  | Lmcd1         | Pfkfb3        | -1 |
| 22989 | 4708  | Lmcd1         | Traf3ip2      | 1  |
| 22989 | 6386  | Lmcd1         | Por           | -1 |
| 22989 | 6756  | Lmcd1         | Sds           | -1 |
| 22989 | 8328  | Lmcd1         | Klhdc8a       | 1  |
| 22989 | 8399  | Lmcd1         | Herpud1       | -1 |
| 22989 | 8711  | Lmcd1         | 5430432M24Rik | 1  |
| 22989 | 9495  | Lmcd1         | Srms          | 1  |
| 22989 | 10775 | Lmcd1         | Slc16a1       | 1  |
| 22989 | 11093 | Lmcd1         | Zdhhc1        | -1 |
| 22989 | 11129 | Lmcd1         | Ankhd1        | -1 |
| 22989 | 11599 | Lmcd1         | Coq10b        | -1 |
| 22989 | 11741 | Lmcd1         | Slc30a10      | 1  |
| 22989 | 11808 | Lmcd1         | Pck1          | -1 |
| 22989 | 12489 | Lmcd1         | Wdr8          | 1  |
| 22989 | 12799 | Lmcd1         | Spon2         | 1  |
| 22989 | 13289 | Lmcd1         | Dusp10        | 1  |
| 22989 | 15021 | Lmcd1         | Ppargc1a      | -1 |
| 22989 | 15052 | Lmcd1         | Kifc3         | 1  |
| 22989 | 15631 | Lmcd1         | Lpin1         | -1 |
| 22989 | 16176 | Lmcd1         | St3gal5       | -1 |
| 22989 | 16515 | Lmcd1         | Gramd4        | 1  |
| 22989 | 16580 | Lmcd1         | Tnfaip2       | 1  |
| 22989 | 16669 | Lmcd1         | Tjp2          | 1  |
| 22989 | 16690 | Lmcd1         | Tjp3          | 1  |
| 22989 | 17525 | Lmcd1         | Ctgf          | -1 |
| 22989 | 17622 | Lmcd1         | Foxo1         | -1 |
| 22989 | 17876 | Lmcd1         | Tubb4         | 1  |
| 22989 | 18027 | Lmcd1         | 5730403B10Rik | -1 |
| 22989 | 18250 | Lmcd1         | Mmp14         | 1  |
| 22989 | 18314 | Lmcd1         | 4631416L12Rik | -1 |
| 22989 | 18785 | Lmcd1         | Angptl4       | -1 |
| 22989 | 19466 | Lmcd1         | Pptc7         | -1 |
| 22989 | 19671 | Lmcd1         | Upp2          | -1 |
| 22989 | 19970 | Lmcd1         | Mrpl36        | 1  |
| 22989 | 21142 | Lmcd1         | Gm129         | -1 |
| 22989 | 21331 | Lmcd1         | Slc10a6       | -1 |
| 22989 | 21918 | Lmcd1         | Snx24         | 1  |
| 22989 | 22290 | Lmcd1         | Tubb2a        | 1  |
| 22989 | 22630 | Lmcd1         | MMT00034355   | 1  |
| 22989 | 23201 | Lmcd1         | S1pr1         | 1  |
| 23005 | 2915  | 4930405A21Rik | Nfs1          | -1 |
| 23005 | 5450  | 4930405A21Rik | Nrbp1         | -1 |
| 23005 | 6059  | 4930405A21Rik | Dsn1          | 1  |
| 23005 | 6250  | 4930405A21Rik | Csnk2a1       | -1 |
| 23005 | 6820  | 4930405A21Rik | MMT00046996   | -1 |
| 23005 | 7355  | 4930405A21Rik | Procr         | -1 |
| 23005 | 7610  | 4930405A21Rik | Scand1        | -1 |
| 23005 | 10028 | 4930405A21Rik | Chchd6        | -1 |
| 23005 | 14399 | 4930405A21Rik | Csnk2a1       | -1 |
| 23005 | 14647 | 4930405A21Rik | Cst3          | -1 |
| 23005 | 14816 | 4930405A21Rik | Pcdhb9        | 1  |

|       |       |                    |                    |    |
|-------|-------|--------------------|--------------------|----|
| 23005 | 20221 | 4930405A21Rik      | lft57              | -1 |
| 23005 | 22740 | 4930405A21Rik      | Manbal             | 1  |
| 23005 | 23005 | 4930405A21Rik      | 4930405A21Rik      | 1  |
| 23005 | 23599 | 4930405A21Rik      | Ndrp3              | 1  |
| 23014 | 14570 | MMT00077643        | Erdr1              | 1  |
| 23019 | 11379 | ENSMUSG00000063087 | Dnttp1             | -1 |
| 23037 | 524   | Thbs3              | Hsd3b2             | 1  |
| 23037 | 1466  | Thbs3              | Ubap2l             | 1  |
| 23037 | 3753  | Thbs3              | Setdb1             | -1 |
| 23037 | 6206  | Thbs3              | MMT00063701        | 1  |
| 23037 | 10521 | Thbs3              | Ttf2               | 1  |
| 23037 | 11611 | Thbs3              | S100a13            | -1 |
| 23037 | 20385 | Thbs3              | Chd1l              | 1  |
| 23037 | 22202 | Thbs3              | OTTMUSG00000021274 | -1 |
| 23056 | 11966 | Ccdc135            | Zfp280b            | 1  |
| 23056 | 12861 | Ccdc135            | Rhcg               | 1  |
| 23056 | 19436 | Ccdc135            | Dapp1              | 1  |
| 23070 | 11966 | BC024659           | Zfp280b            | 1  |
| 23070 | 19436 | BC024659           | Dapp1              | 1  |
| 23079 | 19436 | Spag17             | Dapp1              | 1  |
| 23094 | 337   | Sap30              | Rasgef1b           | 1  |
| 23094 | 3170  | Sap30              | Mcart1             | 1  |
| 23094 | 3196  | Sap30              | Tat                | 1  |
| 23094 | 3452  | Sap30              | Ccrn4l             | 1  |
| 23094 | 12761 | Sap30              | Tsc22d3            | 1  |
| 23094 | 15631 | Sap30              | Lpin1              | 1  |
| 23094 | 15882 | Sap30              | AA986860           | 1  |
| 23094 | 16580 | Sap30              | Tnfaip2            | -1 |
| 23094 | 17525 | Sap30              | Ctgf               | 1  |
| 23094 | 19466 | Sap30              | Ptpc7              | 1  |
| 23094 | 20296 | Sap30              | C030027H14Rik      | 1  |
| 23094 | 21934 | Sap30              | Id2                | -1 |
| 23094 | 22216 | Sap30              | Sp5                | -1 |
| 23094 | 22873 | Sap30              | Slc38a2            | 1  |
| 23109 | 3208  | A430088P11Rik      | 4930511111Rik      | 1  |
| 23109 | 7436  | A430088P11Rik      | 1700063K16Rik      | 1  |
| 23109 | 11966 | A430088P11Rik      | Zfp280b            | 1  |
| 23109 | 12861 | A430088P11Rik      | Rhcg               | 1  |
| 23109 | 19436 | A430088P11Rik      | Dapp1              | 1  |
| 23112 | 19436 | Gys1               | Dapp1              | 1  |
| 23116 | 3587  | 2810032G03Rik      | MMT00041940        | 1  |
| 23116 | 6021  | 2810032G03Rik      | MMT00008784        | 1  |
| 23116 | 8670  | 2810032G03Rik      | MMT00051613        | 1  |
| 23116 | 11043 | 2810032G03Rik      | Hsph1              | 1  |
| 23116 | 15675 | 2810032G03Rik      | MMT00077535        | 1  |
| 23116 | 18373 | 2810032G03Rik      | Dnajb1             | 1  |
| 23116 | 21389 | 2810032G03Rik      | Odf2               | -1 |
| 23118 | 10189 | Ttrap              | Cage1              | -1 |
| 23118 | 11094 | Ttrap              | Slc17a3            | 1  |
| 23118 | 11649 | Ttrap              | Hfe                | -1 |
| 23118 | 15698 | Ttrap              | Them2              | 1  |
| 23118 | 17528 | Ttrap              | Gmnn               | 1  |
| 23118 | 19192 | Ttrap              | Hist1h1c           | -1 |
| 23118 | 20759 | Ttrap              | Slc17a1            | 1  |
| 23118 | 23118 | Ttrap              | Ttrap              | 1  |
| 23119 | 3208  | Cps1               | 4930511111Rik      | 1  |
| 23119 | 7436  | Cps1               | 1700063K16Rik      | 1  |
| 23119 | 11966 | Cps1               | Zfp280b            | 1  |
| 23119 | 12861 | Cps1               | Rhcg               | 1  |
| 23119 | 19436 | Cps1               | Dapp1              | 1  |
| 23250 | 2938  | Plcl2              | H2-T23             | 1  |
| 23250 | 23250 | Plcl2              | Plcl2              | 1  |
| 23259 | 23259 | Dnajc1             | Dnajc1             | 1  |
| 23283 | 23283 | Mrps12             | Mrps12             | 1  |
| 23295 | 3480  | Snx11              | Pnpo               | -1 |
| 23295 | 5661  | Snx11              | Lrrc46             | -1 |
| 23295 | 12302 | Snx11              | Cbx1               | 1  |
| 23295 | 16340 | Snx11              | Scrn2              | -1 |
| 23295 | 19092 | Snx11              | MMT00045362        | 1  |

|       |       |       |               |    |
|-------|-------|-------|---------------|----|
| 23318 | 3587  | Cul2  | MMT00041940   | -1 |
| 23318 | 6021  | Cul2  | MMT00008784   | -1 |
| 23318 | 6126  | Cul2  | MMT00067575   | -1 |
| 23318 | 7731  | Cul2  | 1500001M20Rik | 1  |
| 23318 | 8319  | Cul2  | MMT00062477   | -1 |
| 23318 | 8670  | Cul2  | MMT00051613   | -1 |
| 23318 | 9067  | Cul2  | Tra2a         | -1 |
| 23318 | 9258  | Cul2  | P4ha1         | -1 |
| 23318 | 11043 | Cul2  | Hsph1         | -1 |
| 23318 | 11214 | Cul2  | MMT00049207   | -1 |
| 23318 | 13052 | Cul2  | Tnfrsf19      | 1  |
| 23318 | 15476 | Cul2  | Fem1b         | 1  |
| 23318 | 15675 | Cul2  | MMT00077535   | -1 |
| 23318 | 18373 | Cul2  | Dnajb1        | -1 |
| 23318 | 18418 | Cul2  | Hspa1b        | -1 |
| 23318 | 20332 | Cul2  | Stau2         | 1  |
| 23318 | 20535 | Cul2  | Rbm4          | -1 |
| 23318 | 20912 | Cul2  | Chordc1       | -1 |
| 23318 | 22139 | Cul2  | Stip1         | -1 |
| 23371 | 2938  | Cfb   | H2-T23        | -1 |
| 23371 | 10667 | Cfb   | H2-Eb1        | -1 |
| 23377 | 250   | Pdxk  | Tubb2a-ps2    | -1 |
| 23377 | 499   | Pdxk  | 2310057J16Rik | -1 |
| 23377 | 523   | Pdxk  | 1700040L02Rik | 1  |
| 23377 | 609   | Pdxk  | MMT00060868   | -1 |
| 23377 | 1311  | Pdxk  | Mpp4          | -1 |
| 23377 | 1363  | Pdxk  | BC021767      | -1 |
| 23377 | 1453  | Pdxk  | Gfod2         | -1 |
| 23377 | 1849  | Pdxk  | MMT00063181   | -1 |
| 23377 | 3799  | Pdxk  | Serpinh1      | -1 |
| 23377 | 3804  | Pdxk  | MMT00015534   | -1 |
| 23377 | 4201  | Pdxk  | Tubb2c        | -1 |
| 23377 | 4950  | Pdxk  | Dnajb10       | -1 |
| 23377 | 5849  | Pdxk  | 2310031A18Rik | -1 |
| 23377 | 7731  | Pdxk  | 1500001M20Rik | 1  |
| 23377 | 7862  | Pdxk  | Cpsf4l        | 1  |
| 23377 | 8787  | Pdxk  | Sdf2l1        | -1 |
| 23377 | 9224  | Pdxk  | MMT00013510   | -1 |
| 23377 | 9279  | Pdxk  | MMT00066808   | -1 |
| 23377 | 10215 | Pdxk  | Nampt         | 1  |
| 23377 | 10484 | Pdxk  | Dnajb11       | -1 |
| 23377 | 11043 | Pdxk  | Hsph1         | -1 |
| 23377 | 11412 | Pdxk  | Abcg5         | 1  |
| 23377 | 11818 | Pdxk  | MMT00048396   | -1 |
| 23377 | 12498 | Pdxk  | Abcg8         | 1  |
| 23377 | 14014 | Pdxk  | MMT00008376   | -1 |
| 23377 | 14222 | Pdxk  | MMT00076410   | 1  |
| 23377 | 14298 | Pdxk  | Atp2a2        | -1 |
| 23377 | 14726 | Pdxk  | Slc19a1       | 1  |
| 23377 | 15713 | Pdxk  | Rbm3          | 1  |
| 23377 | 16299 | Pdxk  | Creld2        | -1 |
| 23377 | 17449 | Pdxk  | Zfp296        | -1 |
| 23377 | 17595 | Pdxk  | MMT00048325   | -1 |
| 23377 | 17876 | Pdxk  | Tubb4         | -1 |
| 23377 | 19540 | Pdxk  | Zfp428        | -1 |
| 23377 | 19671 | Pdxk  | Upp2          | 1  |
| 23377 | 19726 | Pdxk  | Erp29         | -1 |
| 23377 | 21389 | Pdxk  | Odf2          | 1  |
| 23377 | 22139 | Pdxk  | Stip1         | -1 |
| 23377 | 22290 | Pdxk  | Tubb2a        | -1 |
| 23377 | 22630 | Pdxk  | MMT00034355   | -1 |
| 23377 | 23646 | Pdxk  | Hsp90ab1      | -1 |
| 23415 | 8210  | Acp5  | Hspa12a       | 1  |
| 23415 | 10387 | Acp5  | 4933427D06Rik | 1  |
| 23415 | 10466 | Acp5  | S1pr5         | 1  |
| 23415 | 20628 | Acp5  | Hoxd10        | 1  |
| 23419 | 3587  | Tipin | MMT00041940   | -1 |
| 23419 | 6021  | Tipin | MMT00008784   | -1 |
| 23419 | 6769  | Tipin | Banp          | -1 |

|       |       |             |               |    |
|-------|-------|-------------|---------------|----|
| 23419 | 7140  | Tipin       | Mtbp          | 1  |
| 23419 | 8319  | Tipin       | MMT00062477   | -1 |
| 23419 | 8670  | Tipin       | MMT00051613   | -1 |
| 23419 | 9067  | Tipin       | Tra2a         | -1 |
| 23419 | 9258  | Tipin       | P4ha1         | -1 |
| 23419 | 11043 | Tipin       | Hsph1         | -1 |
| 23419 | 11214 | Tipin       | MMT00049207   | -1 |
| 23419 | 11379 | Tipin       | Dnttip1       | 1  |
| 23419 | 12761 | Tipin       | Tsc22d3       | -1 |
| 23419 | 14859 | Tipin       | Hspa1a        | -1 |
| 23419 | 15476 | Tipin       | Fem1b         | 1  |
| 23419 | 15675 | Tipin       | MMT00077535   | -1 |
| 23419 | 18099 | Tipin       | Nfx1          | 1  |
| 23419 | 18215 | Tipin       | Gpr146        | 1  |
| 23419 | 18373 | Tipin       | Dnajb1        | -1 |
| 23419 | 18418 | Tipin       | Hspa1b        | -1 |
| 23419 | 20912 | Tipin       | Chordc1       | -1 |
| 23419 | 21389 | Tipin       | Odf2          | 1  |
| 23445 | 286   | Crif1       | MMT00070509   | 1  |
| 23445 | 1755  | Crif1       | Ocel1         | 1  |
| 23445 | 5433  | Crif1       | 2410004L22Rik | -1 |
| 23445 | 9304  | Crif1       | Al449175      | 1  |
| 23445 | 13732 | Crif1       | Tpm4          | -1 |
| 23445 | 15455 | Crif1       | Lsm4          | -1 |
| 23445 | 16617 | Crif1       | Sh2d4a        | -1 |
| 23445 | 18886 | Crif1       | Slc18a1       | -1 |
| 23445 | 20484 | Crif1       | Ces1          | -1 |
| 23450 | 2224  | D12Ert647e  | Oasl2         | 1  |
| 23450 | 6595  | D12Ert647e  | Oas1a         | 1  |
| 23450 | 6824  | D12Ert647e  | Irf7          | 1  |
| 23450 | 11009 | D12Ert647e  | MMT00008885   | 1  |
| 23450 | 12398 | D12Ert647e  | Ifi44         | 1  |
| 23450 | 12600 | D12Ert647e  | Ifi204        | 1  |
| 23450 | 15074 | D12Ert647e  | Usp18         | 1  |
| 23450 | 21549 | D12Ert647e  | Rtp4          | 1  |
| 23450 | 22037 | D12Ert647e  | Oas1g         | 1  |
| 23450 | 23450 | D12Ert647e  | D12Ert647e    | 1  |
| 23453 | 3587  | Dnajc3a     | MMT00041940   | 1  |
| 23453 | 4805  | Dnajc3a     | Hspb1         | 1  |
| 23453 | 6021  | Dnajc3a     | MMT00008784   | 1  |
| 23453 | 8670  | Dnajc3a     | MMT00051613   | 1  |
| 23453 | 9899  | Dnajc3a     | D13Wsu177e    | 1  |
| 23453 | 11043 | Dnajc3a     | Hsph1         | 1  |
| 23453 | 11214 | Dnajc3a     | MMT00049207   | 1  |
| 23453 | 15675 | Dnajc3a     | MMT00077535   | 1  |
| 23454 | 11966 | Znhit1      | Zfp280b       | 1  |
| 23454 | 12861 | Znhit1      | Rhcg          | 1  |
| 23454 | 19436 | Znhit1      | Dapp1         | 1  |
| 23462 | 1371  | Bag5        | 1200009I06Rik | 1  |
| 23462 | 4414  | Bag5        | 5033406O09Rik | 1  |
| 23462 | 5829  | Bag5        | 2810455K09Rik | -1 |
| 23462 | 7388  | Bag5        | Amn           | 1  |
| 23462 | 8155  | Bag5        | Mark3         | 1  |
| 23462 | 12238 | Bag5        | Traf3         | -1 |
| 23462 | 13027 | Bag5        | Ppp2r5c       | -1 |
| 23462 | 15984 | Bag5        | MMT00075074   | 1  |
| 23462 | 16191 | Bag5        | Klc1          | -1 |
| 23474 | 2472  | MMT00011721 | MMT00014056   | 1  |
| 23474 | 7654  | MMT00011721 | Ptpmt1        | -1 |
| 23474 | 9547  | MMT00011721 | MMT00006479   | 1  |
| 23474 | 14757 | MMT00011721 | Hdx           | 1  |
| 23474 | 15365 | MMT00011721 | Ext2          | 1  |
| 23474 | 16881 | MMT00011721 | MMT00031504   | 1  |
| 23474 | 17295 | MMT00011721 | MMT00082577   | 1  |
| 23474 | 19763 | MMT00011721 | Acp2          | 1  |
| 23474 | 19803 | MMT00011721 | BC003993      | 1  |
| 23474 | 22320 | MMT00011721 | MMT00047284   | 1  |
| 23474 | 23474 | MMT00011721 | MMT00011721   | 1  |
| 23482 | 16624 | Syt4        | Psma8         | -1 |

|       |       |               |               |    |
|-------|-------|---------------|---------------|----|
| 23482 | 19725 | Syt4          | Dcp2          | -1 |
| 23495 | 3799  | Cryab         | Serpinh1      | 1  |
| 23495 | 7731  | Cryab         | 1500001M20Rik | -1 |
| 23495 | 23646 | Cryab         | Hsp90ab1      | 1  |
| 23528 | 3208  | 0610038L08Rik | 4930511111Rik | 1  |
| 23528 | 7436  | 0610038L08Rik | 1700063K16Rik | 1  |
| 23528 | 11966 | 0610038L08Rik | Zfp280b       | 1  |
| 23528 | 12861 | 0610038L08Rik | Rhcg          | 1  |
| 23528 | 19436 | 0610038L08Rik | Dapp1         | 1  |
| 23528 | 19672 | 0610038L08Rik | Cldn19        | 1  |
| 23528 | 22125 | 0610038L08Rik | Gab1          | 1  |
| 23546 | 3208  | Zzef1         | 4930511111Rik | 1  |
| 23546 | 5694  | Zzef1         | Sp7           | 1  |
| 23546 | 7436  | Zzef1         | 1700063K16Rik | 1  |
| 23546 | 11966 | Zzef1         | Zfp280b       | 1  |
| 23546 | 12861 | Zzef1         | Rhcg          | 1  |
| 23546 | 19436 | Zzef1         | Dapp1         | 1  |
| 23546 | 19672 | Zzef1         | Cldn19        | 1  |
| 23546 | 22125 | Zzef1         | Gab1          | 1  |
| 23561 | 11966 | Sox14         | Zfp280b       | 1  |
| 23591 | 3208  | Dlg4          | 4930511111Rik | 1  |
| 23591 | 5694  | Dlg4          | Sp7           | 1  |
| 23591 | 7436  | Dlg4          | 1700063K16Rik | 1  |
| 23591 | 11966 | Dlg4          | Zfp280b       | 1  |
| 23591 | 12861 | Dlg4          | Rhcg          | 1  |
| 23591 | 19436 | Dlg4          | Dapp1         | 1  |
| 23591 | 22125 | Dlg4          | Gab1          | 1  |
| 23625 | 6330  | Pkd2          | Dgkq          | 1  |
| 23625 | 8807  | Pkd2          | Ankrd56       | -1 |
| 23636 | 5433  | Bst2          | 2410004L22Rik | 1  |
| 23636 | 15455 | Bst2          | Lsm4          | 1  |
| 23651 | 3208  | MMT00027295   | 4930511111Rik | 1  |
| 23651 | 7436  | MMT00027295   | 1700063K16Rik | 1  |
| 23651 | 11966 | MMT00027295   | Zfp280b       | 1  |
| 23651 | 12861 | MMT00027295   | Rhcg          | 1  |
| 23651 | 19436 | MMT00027295   | Dapp1         | 1  |
| 23651 | 19672 | MMT00027295   | Cldn19        | 1  |
| 23651 | 22125 | MMT00027295   | Gab1          | 1  |
| 23693 | 8155  | A530016L24Rik | Mark3         | 1  |

**Table T9: AL TTC Network**

| Adipose_Probe_ID | Liver_Probe_ID | Adipose_Gene_Symbol | Liver_Gene_Symbol | Correlation Sign |
|------------------|----------------|---------------------|-------------------|------------------|
| 127              | 5364           | Clic1               | Kif22             | 1                |
| 127              | 11382          | Clic1               | Cdca3             | 1                |
| 127              | 14472          | Clic1               | Ahcy              | -1               |
| 127              | 21947          | Clic1               | Cdca8             | 1                |
| 141              | 4833           | Jag1                | Synpo2            | -1               |
| 141              | 17043          | Jag1                | Tmem127           | 1                |
| 141              | 21729          | Jag1                | Hdc               | -1               |
| 143              | 143            | Gvin1               | Gvin1             | 1                |
| 143              | 1533           | Gvin1               | BC013712          | 1                |
| 143              | 2058           | Gvin1               | Hk3               | 1                |
| 143              | 2200           | Gvin1               | BC006779          | 1                |
| 143              | 2224           | Gvin1               | Oasl2             | 1                |
| 143              | 2550           | Gvin1               | MMT00036681       | 1                |
| 143              | 3426           | Gvin1               | Hap1              | 1                |
| 143              | 3594           | Gvin1               | Rasa4             | 1                |
| 143              | 3683           | Gvin1               | Oas2              | 1                |
| 143              | 4114           | Gvin1               | Parp12            | 1                |
| 143              | 4409           | Gvin1               | 5430435G22Rik     | 1                |
| 143              | 4426           | Gvin1               | Iigp2             | 1                |
| 143              | 4508           | Gvin1               | Ifit1             | 1                |
| 143              | 4901           | Gvin1               | MMT00073557       | 1                |
| 143              | 5044           | Gvin1               | Ifi35             | 1                |
| 143              | 5845           | Gvin1               | I118bp            | 1                |
| 143              | 5949           | Gvin1               | Zbp1              | 1                |
| 143              | 6036           | Gvin1               | Pram1             | 1                |
| 143              | 6072           | Gvin1               | C1qc              | 1                |
| 143              | 6098           | Gvin1               | Ncf4              | 1                |
| 143              | 6587           | Gvin1               | Irf9              | 1                |
| 143              | 6824           | Gvin1               | Irf7              | 1                |
| 143              | 6910           | Gvin1               | Ly6c2             | 1                |
| 143              | 7069           | Gvin1               | Ube1l             | 1                |
| 143              | 7105           | Gvin1               | Plac8             | 1                |
| 143              | 7238           | Gvin1               | Pycard            | 1                |
| 143              | 7284           | Gvin1               | MMT00008674       | 1                |
| 143              | 7336           | Gvin1               | Cd5l              | 1                |
| 143              | 8533           | Gvin1               | Ptprcap           | 1                |
| 143              | 8564           | Gvin1               | Pld4              | 1                |
| 143              | 8659           | Gvin1               | Psmb8             | 1                |
| 143              | 8800           | Gvin1               | Rnf213            | 1                |
| 143              | 9320           | Gvin1               | Rnf31             | 1                |
| 143              | 9401           | Gvin1               | Fcgr4             | 1                |
| 143              | 9820           | Gvin1               | BC023105          | 1                |
| 143              | 9847           | Gvin1               | Ifi27             | 1                |
| 143              | 10109          | Gvin1               | Gbp3              | 1                |
| 143              | 10504          | Gvin1               | Ripk3             | 1                |
| 143              | 10606          | Gvin1               | Apbb1ip           | 1                |
| 143              | 11204          | Gvin1               | AI451617          | 1                |
| 143              | 12126          | Gvin1               | Znfx1             | 1                |
| 143              | 12398          | Gvin1               | Ifi44             | 1                |



|     |       |        |               |    |
|-----|-------|--------|---------------|----|
| 143 | 12600 | Gvin1  | Ifi204        | 1  |
| 143 | 12969 | Gvin1  | Xaf1          | 1  |
| 143 | 13156 | Gvin1  | Ifit3         | 1  |
| 143 | 13309 | Gvin1  | Tgtp          | 1  |
| 143 | 13514 | Gvin1  | Apol9b        | 1  |
| 143 | 14192 | Gvin1  | Trpv2         | 1  |
| 143 | 14237 | Gvin1  | Rac2          | 1  |
| 143 | 14506 | Gvin1  | Slc15a3       | 1  |
| 143 | 14603 | Gvin1  | Ly6e          | 1  |
| 143 | 14880 | Gvin1  | Ms4a4c        | 1  |
| 143 | 14883 | Gvin1  | Itgal         | 1  |
| 143 | 15074 | Gvin1  | Usp18         | 1  |
| 143 | 15280 | Gvin1  | Cxcl10        | 1  |
| 143 | 15504 | Gvin1  | Mx2           | 1  |
| 143 | 15749 | Gvin1  | Cd22          | 1  |
| 143 | 15825 | Gvin1  | Fermt3        | 1  |
| 143 | 16102 | Gvin1  | Cd72          | 1  |
| 143 | 16182 | Gvin1  | Oasl1         | 1  |
| 143 | 16186 | Gvin1  | Cfp           | 1  |
| 143 | 16199 | Gvin1  | Samhd1        | 1  |
| 143 | 16521 | Gvin1  | Adar          | 1  |
| 143 | 16874 | Gvin1  | Fcer1g        | 1  |
| 143 | 17197 | Gvin1  | Igtp          | 1  |
| 143 | 17412 | Gvin1  | Aif1          | 1  |
| 143 | 18174 | Gvin1  | Stat2         | 1  |
| 143 | 19189 | Gvin1  | Sp100         | 1  |
| 143 | 19708 | Gvin1  | Ly6a          | 1  |
| 143 | 19738 | Gvin1  | Lgals3bp      | 1  |
| 143 | 20997 | Gvin1  | MMT00028135   | 1  |
| 143 | 21351 | Gvin1  | Shisa5        | 1  |
| 143 | 21440 | Gvin1  | Tmsb10        | 1  |
| 143 | 21549 | Gvin1  | Rtp4          | 1  |
| 143 | 21824 | Gvin1  | 5830443L24Rik | 1  |
| 143 | 22037 | Gvin1  | Oas1g         | 1  |
| 143 | 23208 | Gvin1  | Hck           | 1  |
| 143 | 23242 | Gvin1  | Gngt2         | 1  |
| 143 | 23450 | Gvin1  | D12Ertd647e   | 1  |
| 177 | 607   | Appl2  | Me1           | -1 |
| 177 | 5884  | Appl2  | Gstm2         | -1 |
| 177 | 6193  | Appl2  | Lactb2        | -1 |
| 177 | 8444  | Appl2  | Rdh16         | -1 |
| 177 | 8815  | Appl2  | Mx1           | -1 |
| 177 | 11375 | Appl2  | Derl2         | -1 |
| 177 | 18201 | Appl2  | MMT00060232   | -1 |
| 177 | 21214 | Appl2  | Scd1          | -1 |
| 183 | 20058 | Bmp4   | Dnaic1        | -1 |
| 183 | 20385 | Bmp4   | Chd1l         | 1  |
| 183 | 21214 | Bmp4   | Scd1          | 1  |
| 184 | 6193  | Sorbs1 | Lactb2        | -1 |
| 184 | 6771  | Sorbs1 | Insc          | -1 |
| 184 | 8896  | Sorbs1 | Fasn          | -1 |

|     |       |               |               |    |
|-----|-------|---------------|---------------|----|
| 184 | 12315 | Sorbs1        | Srebf1        | -1 |
| 184 | 14151 | Sorbs1        | Slc44a1       | -1 |
| 184 | 14442 | Sorbs1        | Ethe1         | -1 |
| 184 | 20798 | Sorbs1        | Ccp1          | 1  |
| 184 | 21202 | Sorbs1        | Acly          | -1 |
| 184 | 21251 | Sorbs1        | Cpt1a         | 1  |
| 184 | 22770 | Sorbs1        | Slc27a2       | 1  |
| 185 | 2636  | Ap2b1         | Tars          | 1  |
| 187 | 2599  | Wdr62         | Lsm14a        | 1  |
| 204 | 11095 | EG432649      | Bag3          | 1  |
| 205 | 4635  | Cnksr1        | MMT00023332   | 1  |
| 205 | 18201 | Cnksr1        | MMT00060232   | 1  |
| 205 | 21214 | Cnksr1        | Scd1          | 1  |
| 213 | 15631 | Rgs16         | Lpin1         | -1 |
| 214 | 13293 | Lrp1          | Gsta2         | -1 |
| 214 | 18113 | Lrp1          | MMT00034400   | -1 |
| 214 | 18487 | Lrp1          | Serpina5      | 1  |
| 214 | 22978 | Lrp1          | MMT00043176   | 1  |
| 223 | 3449  | Trp53inp2     | Hes6          | 1  |
| 223 | 5804  | Trp53inp2     | Thrsp         | 1  |
| 223 | 7610  | Trp53inp2     | Scand1        | -1 |
| 223 | 8815  | Trp53inp2     | Mx1           | 1  |
| 223 | 8896  | Trp53inp2     | Fasn          | 1  |
| 223 | 10132 | Trp53inp2     | Ces2          | 1  |
| 223 | 11462 | Trp53inp2     | Gpam          | 1  |
| 223 | 12910 | Trp53inp2     | 1110028A07Rik | 1  |
| 223 | 14647 | Trp53inp2     | Cst3          | -1 |
| 223 | 14816 | Trp53inp2     | Pcdhb9        | 1  |
| 223 | 15059 | Trp53inp2     | Mogat1        | 1  |
| 223 | 20058 | Trp53inp2     | Dnaic1        | -1 |
| 223 | 20221 | Trp53inp2     | Ift57         | -1 |
| 223 | 21202 | Trp53inp2     | Acly          | 1  |
| 223 | 22046 | Trp53inp2     | Cml4          | 1  |
| 223 | 23005 | Trp53inp2     | 4930405A21Rik | 1  |
| 227 | 8815  | B4galt1       | Mx1           | -1 |
| 230 | 524   | MMT00000744   | Hsd3b2        | -1 |
| 230 | 1867  | MMT00000744   | Bcas2         | -1 |
| 230 | 3753  | MMT00000744   | Setdb1        | 1  |
| 230 | 5884  | MMT00000744   | Gstm2         | 1  |
| 230 | 6206  | MMT00000744   | MMT00063701   | -1 |
| 230 | 7810  | MMT00000744   | Trim45        | -1 |
| 230 | 8738  | MMT00000744   | Reg4          | 1  |
| 230 | 10521 | MMT00000744   | Ttf2          | -1 |
| 230 | 11611 | MMT00000744   | S100a13       | 1  |
| 230 | 18754 | MMT00000744   | Rbm8a         | -1 |
| 230 | 20058 | MMT00000744   | Dnaic1        | -1 |
| 230 | 20661 | MMT00000744   | Tuft1         | -1 |
| 230 | 20917 | MMT00000744   | Gstm6         | 1  |
| 230 | 22570 | MMT00000744   | Phf1          | -1 |
| 242 | 6193  | 4732471D19Rik | Lactb2        | -1 |
| 245 | 6370  | Sqrdl         | Aqp8          | -1 |

|     |       |             |               |    |
|-----|-------|-------------|---------------|----|
| 245 | 8815  | Sqrdl       | Mx1           | -1 |
| 245 | 12910 | Sqrdl       | 1110028A07Rik | -1 |
| 245 | 12941 | Sqrdl       | Elov15        | -1 |
| 245 | 14017 | Sqrdl       | Ces5          | -1 |
| 245 | 15059 | Sqrdl       | Mogat1        | -1 |
| 245 | 21214 | Sqrdl       | Scd1          | -1 |
| 245 | 22138 | Sqrdl       | Ang           | 1  |
| 246 | 15569 | MMT00053742 | BC003331      | 1  |
| 250 | 392   | Tubb2a-ps2  | Sec22b        | 1  |
| 250 | 609   | Tubb2a-ps2  | MMT00060868   | 1  |
| 250 | 1036  | Tubb2a-ps2  | Dusp19        | 1  |
| 250 | 1156  | Tubb2a-ps2  | Rbj           | -1 |
| 250 | 1569  | Tubb2a-ps2  | Tmco4         | -1 |
| 250 | 1760  | Tubb2a-ps2  | Nek8          | -1 |
| 250 | 1806  | Tubb2a-ps2  | Nola3         | 1  |
| 250 | 2051  | Tubb2a-ps2  | Ddx27         | -1 |
| 250 | 2339  | Tubb2a-ps2  | 5730449L18Rik | 1  |
| 250 | 2636  | Tubb2a-ps2  | Tars          | 1  |
| 250 | 2766  | Tubb2a-ps2  | Elp4          | 1  |
| 250 | 3393  | Tubb2a-ps2  | Snhg8         | -1 |
| 250 | 3468  | Tubb2a-ps2  | MMT00009124   | 1  |
| 250 | 3504  | Tubb2a-ps2  | Anpep         | -1 |
| 250 | 3564  | Tubb2a-ps2  | Spcs2         | 1  |
| 250 | 3587  | Tubb2a-ps2  | MMT00041940   | 1  |
| 250 | 3620  | Tubb2a-ps2  | Bet1          | 1  |
| 250 | 4192  | Tubb2a-ps2  | Zranb1        | -1 |
| 250 | 4674  | Tubb2a-ps2  | Cxcl12        | -1 |
| 250 | 4966  | Tubb2a-ps2  | Zscan20       | 1  |
| 250 | 5068  | Tubb2a-ps2  | Afap112       | 1  |
| 250 | 5227  | Tubb2a-ps2  | 2310008M10Rik | 1  |
| 250 | 5934  | Tubb2a-ps2  | S100a10       | 1  |
| 250 | 6012  | Tubb2a-ps2  | Chid1         | 1  |
| 250 | 6370  | Tubb2a-ps2  | Aqp8          | 1  |
| 250 | 6386  | Tubb2a-ps2  | Por           | -1 |
| 250 | 6464  | Tubb2a-ps2  | Pcbp4         | -1 |
| 250 | 6650  | Tubb2a-ps2  | MMT00050325   | 1  |
| 250 | 7414  | Tubb2a-ps2  | Cipx          | 1  |
| 250 | 7619  | Tubb2a-ps2  | Pik3ip1       | -1 |
| 250 | 7678  | Tubb2a-ps2  | Ltbr          | -1 |
| 250 | 7862  | Tubb2a-ps2  | Cpsf4l        | -1 |
| 250 | 8319  | Tubb2a-ps2  | MMT00062477   | 1  |
| 250 | 8597  | Tubb2a-ps2  | Papss1        | 1  |
| 250 | 8815  | Tubb2a-ps2  | Mx1           | 1  |
| 250 | 8891  | Tubb2a-ps2  | MMT00071061   | 1  |
| 250 | 9067  | Tubb2a-ps2  | Tra2a         | 1  |
| 250 | 9629  | Tubb2a-ps2  | Spnb3         | -1 |
| 250 | 11095 | Tubb2a-ps2  | Bag3          | 1  |
| 250 | 11741 | Tubb2a-ps2  | Slc30a10      | 1  |
| 250 | 11807 | Tubb2a-ps2  | Fbxo31        | -1 |
| 250 | 12204 | Tubb2a-ps2  | Ankmy2        | -1 |
| 250 | 12276 | Tubb2a-ps2  | Hmga1         | -1 |

|     |       |            |               |    |
|-----|-------|------------|---------------|----|
| 250 | 12419 | Tubb2a-ps2 | MMT00081393   | 1  |
| 250 | 12941 | Tubb2a-ps2 | Elov15        | 1  |
| 250 | 13200 | Tubb2a-ps2 | 5730449L18Rik | 1  |
| 250 | 14380 | Tubb2a-ps2 | MMT00051866   | 1  |
| 250 | 14442 | Tubb2a-ps2 | Ethe1         | 1  |
| 250 | 15481 | Tubb2a-ps2 | 1110067D22Rik | 1  |
| 250 | 16251 | Tubb2a-ps2 | G6pc          | 1  |
| 250 | 17001 | Tubb2a-ps2 | Hmga1         | -1 |
| 250 | 18099 | Tubb2a-ps2 | Nfx1          | -1 |
| 250 | 18135 | Tubb2a-ps2 | Tmed3         | 1  |
| 250 | 18179 | Tubb2a-ps2 | Dbp           | -1 |
| 250 | 18201 | Tubb2a-ps2 | MMT00060232   | 1  |
| 250 | 18215 | Tubb2a-ps2 | Gpr146        | -1 |
| 250 | 18286 | Tubb2a-ps2 | Slc41a3       | -1 |
| 250 | 18418 | Tubb2a-ps2 | Hspa1b        | 1  |
| 250 | 18572 | Tubb2a-ps2 | Stx18         | 1  |
| 250 | 18827 | Tubb2a-ps2 | Oprs1         | 1  |
| 250 | 18846 | Tubb2a-ps2 | lkbkg         | 1  |
| 250 | 18903 | Tubb2a-ps2 | Crem          | 1  |
| 250 | 19108 | Tubb2a-ps2 | Armet         | 1  |
| 250 | 20045 | Tubb2a-ps2 | D4Wsu114e     | -1 |
| 250 | 20068 | Tubb2a-ps2 | 2610204M08Rik | -1 |
| 250 | 20457 | Tubb2a-ps2 | Gtf2a2        | -1 |
| 250 | 20965 | Tubb2a-ps2 | Usp28         | -1 |
| 250 | 21192 | Tubb2a-ps2 | 2310047A01Rik | -1 |
| 250 | 21214 | Tubb2a-ps2 | Scd1          | 1  |
| 250 | 21251 | Tubb2a-ps2 | Cpt1a         | -1 |
| 250 | 21389 | Tubb2a-ps2 | Odf2          | -1 |
| 250 | 21591 | Tubb2a-ps2 | Hectd3        | -1 |
| 250 | 21793 | Tubb2a-ps2 | Pla2g12a      | -1 |
| 250 | 22138 | Tubb2a-ps2 | Ang           | -1 |
| 250 | 22303 | Tubb2a-ps2 | Cdt1          | -1 |
| 250 | 23437 | Tubb2a-ps2 | Efhd2         | -1 |
| 250 | 23617 | Tubb2a-ps2 | Nme1          | 1  |
| 255 | 250   | Twf2       | Tubb2a-ps2    | 1  |
| 255 | 269   | Twf2       | Tuba1b        | 1  |
| 255 | 609   | Twf2       | MMT00060868   | 1  |
| 255 | 1941  | Twf2       | MMT00079618   | 1  |
| 255 | 3804  | Twf2       | MMT00015534   | 1  |
| 255 | 4201  | Twf2       | Tubb2c        | 1  |
| 255 | 6386  | Twf2       | Por           | -1 |
| 255 | 7862  | Twf2       | Cpsf4l        | -1 |
| 255 | 9763  | Twf2       | Tuba3b        | 1  |
| 255 | 10911 | Twf2       | Mcl1          | -1 |
| 255 | 11724 | Twf2       | Tuba3a        | 1  |
| 255 | 11741 | Twf2       | Slc30a10      | 1  |
| 255 | 15709 | Twf2       | Tceal1        | -1 |
| 255 | 16060 | Twf2       | Gys2          | -1 |
| 255 | 17323 | Twf2       | Tubb6         | 1  |
| 255 | 17444 | Twf2       | Tuba1a        | 1  |
| 255 | 17876 | Twf2       | Tubb4         | 1  |

|     |       |        |               |    |
|-----|-------|--------|---------------|----|
| 255 | 22138 | Twf2   | Ang           | -1 |
| 255 | 22290 | Twf2   | Tubb2a        | 1  |
| 255 | 22630 | Twf2   | MMT00034355   | 1  |
| 263 | 21214 | Akr1b3 | Scd1          | 1  |
| 265 | 3377  | Taf9   | Cs            | 1  |
| 268 | 268   | Sys1   | Sys1          | 1  |
| 268 | 4540  | Sys1   | Prf8a2        | -1 |
| 268 | 6475  | Sys1   | Sdc4          | 1  |
| 268 | 13067 | Sys1   | MMT00074323   | 1  |
| 268 | 21909 | Sys1   | Neurl2        | 1  |
| 274 | 269   | Trit1  | Tuba1b        | -1 |
| 274 | 662   | Trit1  | Mid1ip1       | -1 |
| 274 | 2322  | Trit1  | Tuba4a        | -1 |
| 274 | 3754  | Trit1  | Dock6         | -1 |
| 274 | 6044  | Trit1  | Sucnr1        | -1 |
| 274 | 6211  | Trit1  | Arhgap24      | -1 |
| 274 | 6370  | Trit1  | Aqp8          | -1 |
| 274 | 8639  | Trit1  | Map1lc3b      | 1  |
| 274 | 8896  | Trit1  | Fasn          | -1 |
| 274 | 10384 | Trit1  | Chic2         | 1  |
| 274 | 10486 | Trit1  | 1300002K09Rik | -1 |
| 274 | 10961 | Trit1  | Pgd           | -1 |
| 274 | 11129 | Trit1  | Ankhd1        | 1  |
| 274 | 11462 | Trit1  | Gpam          | -1 |
| 274 | 11724 | Trit1  | Tuba3a        | -1 |
| 274 | 11807 | Trit1  | Fbxo31        | 1  |
| 274 | 12315 | Trit1  | Srebf1        | -1 |
| 274 | 12460 | Trit1  | Pnpla2        | 1  |
| 274 | 13018 | Trit1  | AW544981      | -1 |
| 274 | 14138 | Trit1  | Anks4b        | -1 |
| 274 | 14442 | Trit1  | Ethe1         | -1 |
| 274 | 16647 | Trit1  | D16H22S680E   | 1  |
| 274 | 17338 | Trit1  | Mocos         | -1 |
| 274 | 17660 | Trit1  | Nlrp12        | 1  |
| 274 | 18286 | Trit1  | Slc41a3       | 1  |
| 274 | 18785 | Trit1  | Angptl4       | 1  |
| 274 | 18827 | Trit1  | Oprs1         | -1 |
| 274 | 21202 | Trit1  | Acly          | -1 |
| 274 | 21251 | Trit1  | Cpt1a         | 1  |
| 274 | 21408 | Trit1  | Svil          | -1 |
| 274 | 21901 | Trit1  | BC035537      | -1 |
| 274 | 22138 | Trit1  | Ang           | 1  |
| 274 | 22443 | Trit1  | Tuba1c        | -1 |
| 274 | 22744 | Trit1  | 9-Sep         | -1 |
| 274 | 22830 | Trit1  | MMT00081088   | 1  |
| 280 | 5364  | Snai2  | Kif22         | 1  |
| 280 | 8328  | Snai2  | Klhdc8a       | 1  |
| 280 | 12839 | Snai2  | Fh1           | -1 |
| 280 | 12982 | Snai2  | Cars          | 1  |
| 280 | 14472 | Snai2  | Ahcy          | -1 |
| 284 | 8444  | Osr2   | Rdh16         | -1 |

|     |       |             |               |    |
|-----|-------|-------------|---------------|----|
| 284 | 20058 | Osr2        | Dnaic1        | 1  |
| 286 | 286   | MMT00070509 | MMT00070509   | 1  |
| 286 | 403   | MMT00070509 | Leprotl1      | -1 |
| 286 | 1755  | MMT00070509 | Ocel1         | 1  |
| 286 | 2703  | MMT00070509 | MMT00073763   | 1  |
| 286 | 2749  | MMT00070509 | Naf1          | -1 |
| 286 | 3052  | MMT00070509 | 9130404D08Rik | -1 |
| 286 | 3055  | MMT00070509 | Pde4c         | 1  |
| 286 | 5433  | MMT00070509 | 2410004L22Rik | -1 |
| 286 | 6760  | MMT00070509 | 2810428115Rik | 1  |
| 286 | 8114  | MMT00070509 | Kcnn1         | 1  |
| 286 | 9304  | MMT00070509 | Al449175      | 1  |
| 286 | 9931  | MMT00070509 | GlT25d1       | -1 |
| 286 | 13004 | MMT00070509 | Arhgef10      | 1  |
| 286 | 13732 | MMT00070509 | Tpm4          | -1 |
| 286 | 14455 | MMT00070509 | 2700029M09Rik | -1 |
| 286 | 15094 | MMT00070509 | Pbx4          | -1 |
| 286 | 15455 | MMT00070509 | Lsm4          | -1 |
| 286 | 16617 | MMT00070509 | Sh2d4a        | -1 |
| 286 | 16858 | MMT00070509 | Tmem38a       | -1 |
| 286 | 18886 | MMT00070509 | Slc18a1       | -1 |
| 286 | 20484 | MMT00070509 | Ces1          | -1 |
| 286 | 23636 | MMT00070509 | Bst2          | -1 |
| 288 | 2963  | Col6a2      | Tmem64        | 1  |
| 288 | 12941 | Col6a2      | Elov15        | 1  |
| 301 | 1594  | AU014645    | Mrpl24        | 1  |
| 301 | 8662  | AU014645    | Brca2         | -1 |
| 301 | 10027 | AU014645    | Mcm9          | -1 |
| 301 | 18099 | AU014645    | Nfx1          | -1 |
| 301 | 20148 | AU014645    | Pttg1         | -1 |
| 301 | 22303 | AU014645    | Cdt1          | -1 |
| 327 | 327   | H2-Ea       | H2-Ea         | 1  |
| 327 | 763   | H2-Ea       | 4933406E20Rik | 1  |
| 327 | 1340  | H2-Ea       | Tap2          | 1  |
| 327 | 2325  | H2-Ea       | H2-K1         | 1  |
| 327 | 2801  | H2-Ea       | H2-BI         | 1  |
| 327 | 2938  | H2-Ea       | H2-T23        | 1  |
| 327 | 3599  | H2-Ea       | MMT00035426   | -1 |
| 327 | 3704  | H2-Ea       | H2-Q7         | 1  |
| 327 | 3857  | H2-Ea       | 1700001C19Rik | -1 |
| 327 | 4004  | H2-Ea       | Thbs2         | -1 |
| 327 | 4958  | H2-Ea       | Ndufa7        | -1 |
| 327 | 5410  | H2-Ea       | Cyp4f15       | -1 |
| 327 | 6360  | H2-Ea       | D17H6S56E-3   | -1 |
| 327 | 7088  | H2-Ea       | Slc37a1       | 1  |
| 327 | 8750  | H2-Ea       | 1700010I14Rik | 1  |
| 327 | 8767  | H2-Ea       | Rgl2          | 1  |
| 327 | 9158  | H2-Ea       | Pde9a         | -1 |
| 327 | 9717  | H2-Ea       | Psmb9         | 1  |
| 327 | 10376 | H2-Ea       | C920025E04Rik | -1 |
| 327 | 10394 | H2-Ea       | MMT00028435   | 1  |

|     |       |             |                    |    |
|-----|-------|-------------|--------------------|----|
| 327 | 10667 | H2-Ea       | H2-Eb1             | 1  |
| 327 | 12335 | H2-Ea       | Plcb4              | 1  |
| 327 | 12355 | H2-Ea       | Al507611           | 1  |
| 327 | 12694 | H2-Ea       | Riok2              | -1 |
| 327 | 13493 | H2-Ea       | Ring1              | -1 |
| 327 | 13789 | H2-Ea       | H2-Q8              | 1  |
| 327 | 17691 | H2-Ea       | Kank3              | 1  |
| 327 | 18251 | H2-Ea       | Susd4              | 1  |
| 327 | 18577 | H2-Ea       | Btbd9              | -1 |
| 327 | 18906 | H2-Ea       | Zfand3             | 1  |
| 327 | 20238 | H2-Ea       | H2-T9              | 1  |
| 327 | 20346 | H2-Ea       | Gna-rs1            | 1  |
| 327 | 20511 | H2-Ea       | Decr2              | 1  |
| 327 | 21295 | H2-Ea       | Snf1lk             | -1 |
| 327 | 21478 | H2-Ea       | Loxhd1             | -1 |
| 327 | 22822 | H2-Ea       | MMT00013433        | 1  |
| 327 | 23250 | H2-Ea       | Plcl2              | 1  |
| 327 | 23401 | H2-Ea       | H2-Q2              | 1  |
| 329 | 8444  | Lmod1       | Rdh16              | -1 |
| 329 | 8815  | Lmod1       | Mx1                | -1 |
| 339 | 8444  | Hmgcs1      | Rdh16              | 1  |
| 339 | 8815  | Hmgcs1      | Mx1                | 1  |
| 339 | 12910 | Hmgcs1      | 1110028A07Rik      | 1  |
| 339 | 18201 | Hmgcs1      | MMT00060232        | 1  |
| 339 | 21214 | Hmgcs1      | Scd1               | 1  |
| 342 | 269   | Nrbf2       | Tuba1b             | 1  |
| 342 | 1941  | Nrbf2       | MMT00079618        | 1  |
| 342 | 2322  | Nrbf2       | Tuba4a             | 1  |
| 342 | 7151  | Nrbf2       | MMT00007982        | 1  |
| 342 | 9763  | Nrbf2       | Tuba3b             | 1  |
| 342 | 11724 | Nrbf2       | Tuba3a             | 1  |
| 342 | 22443 | Nrbf2       | Tuba1c             | 1  |
| 354 | 607   | MMT00007996 | Me1                | 1  |
| 354 | 8815  | MMT00007996 | Mx1                | 1  |
| 354 | 12910 | MMT00007996 | 1110028A07Rik      | 1  |
| 354 | 18201 | MMT00007996 | MMT00060232        | 1  |
| 354 | 21214 | MMT00007996 | Scd1               | 1  |
| 354 | 22138 | MMT00007996 | Ang                | -1 |
| 354 | 23026 | MMT00007996 | Apom               | -1 |
| 359 | 20678 | Ciita       | Cyp39a1            | -1 |
| 361 | 8815  | Figf        | Mx1                | -1 |
| 361 | 17996 | Figf        | Igfbp2             | 1  |
| 361 | 18201 | Figf        | MMT00060232        | -1 |
| 361 | 21214 | Figf        | Scd1               | -1 |
| 361 | 23026 | Figf        | Apom               | 1  |
| 371 | 607   | MMT00058786 | Me1                | 1  |
| 371 | 874   | MMT00058786 | Aldh1a7            | 1  |
| 371 | 3377  | MMT00058786 | Cs                 | 1  |
| 371 | 7602  | MMT00058786 | Pcca               | 1  |
| 371 | 8815  | MMT00058786 | Mx1                | 1  |
| 371 | 10554 | MMT00058786 | ENSMUSG00000074179 | 1  |

|     |       |             |               |    |
|-----|-------|-------------|---------------|----|
| 371 | 13293 | MMT00058786 | Gsta2         | 1  |
| 371 | 18201 | MMT00058786 | MMT00060232   | 1  |
| 371 | 21214 | MMT00058786 | Scd1          | 1  |
| 372 | 372   | Txndc1      | Txndc1        | 1  |
| 379 | 2348  | Nmnat1      | Irak1         | -1 |
| 387 | 1572  | Rgs10       | Saa3          | 1  |
| 387 | 1646  | Rgs10       | Slc15a4       | -1 |
| 387 | 2235  | Rgs10       | Ndufv1        | -1 |
| 387 | 2850  | Rgs10       | Slc16a6       | 1  |
| 387 | 3228  | Rgs10       | Saa1          | 1  |
| 387 | 3265  | Rgs10       | Dntt          | 1  |
| 387 | 3410  | Rgs10       | Paqr9         | 1  |
| 387 | 4286  | Rgs10       | Ptp4a1        | -1 |
| 387 | 4531  | Rgs10       | EG434175      | 1  |
| 387 | 4534  | Rgs10       | Ndel1         | -1 |
| 387 | 4993  | Rgs10       | Tsc22d1       | 1  |
| 387 | 5259  | Rgs10       | Mat1a         | -1 |
| 387 | 5364  | Rgs10       | Kif22         | 1  |
| 387 | 5574  | Rgs10       | Hsd3b7        | 1  |
| 387 | 5934  | Rgs10       | S100a10       | 1  |
| 387 | 5983  | Rgs10       | Pcolce2       | 1  |
| 387 | 6109  | Rgs10       | Hsd17b2       | 1  |
| 387 | 6386  | Rgs10       | Por           | -1 |
| 387 | 8328  | Rgs10       | Klhdc8a       | 1  |
| 387 | 8416  | Rgs10       | Cdc20         | 1  |
| 387 | 8428  | Rgs10       | Sorbs3        | -1 |
| 387 | 8773  | Rgs10       | MMT00027093   | 1  |
| 387 | 10808 | Rgs10       | Rab7l1        | 1  |
| 387 | 11382 | Rgs10       | Cdca3         | 1  |
| 387 | 13210 | Rgs10       | Nudt1         | 1  |
| 387 | 13431 | Rgs10       | MMT00038058   | 1  |
| 387 | 13455 | Rgs10       | Cenpe         | 1  |
| 387 | 14472 | Rgs10       | Ahcy          | -1 |
| 387 | 15205 | Rgs10       | MMT00030262   | 1  |
| 387 | 15320 | Rgs10       | MMT00017479   | -1 |
| 387 | 15931 | Rgs10       | Ces3          | -1 |
| 387 | 17629 | Rgs10       | Saa2          | 1  |
| 387 | 17823 | Rgs10       | D2Ertd750e    | 1  |
| 387 | 18299 | Rgs10       | MMT00035424   | 1  |
| 387 | 20171 | Rgs10       | 1700008G05Rik | 1  |
| 387 | 21692 | Rgs10       | MMT00013924   | 1  |
| 392 | 5934  | Sec22b      | S100a10       | 1  |
| 392 | 17996 | Sec22b      | Igfbp2        | -1 |
| 392 | 18201 | Sec22b      | MMT00060232   | 1  |
| 392 | 20079 | Sec22b      | MMT00019254   | -1 |
| 392 | 21214 | Sec22b      | Scd1          | 1  |
| 394 | 5684  | Ccdc85a     | Ranbp10       | -1 |
| 402 | 250   | Timp3       | Tubb2a-ps2    | -1 |
| 402 | 609   | Timp3       | MMT00060868   | -1 |
| 402 | 719   | Timp3       | Usp2          | 1  |
| 402 | 2636  | Timp3       | Tars          | -1 |



|     |       |          |               |    |
|-----|-------|----------|---------------|----|
| 402 | 2794  | Timp3    | Map3k6        | 1  |
| 402 | 3804  | Timp3    | MMT00015534   | -1 |
| 402 | 5974  | Timp3    | Arntl         | -1 |
| 402 | 6343  | Timp3    | Slc20a1       | 1  |
| 402 | 6386  | Timp3    | Por           | 1  |
| 402 | 6771  | Timp3    | Insc          | -1 |
| 402 | 7862  | Timp3    | Cpsf4l        | 1  |
| 402 | 8641  | Timp3    | Slc7a2        | 1  |
| 402 | 10612 | Timp3    | Slc24a6       | 1  |
| 402 | 10642 | Timp3    | Ngef          | 1  |
| 402 | 10712 | Timp3    | Fchsd2        | 1  |
| 402 | 10911 | Timp3    | Mcl1          | 1  |
| 402 | 11574 | Timp3    | Gne           | 1  |
| 402 | 11741 | Timp3    | Slc30a10      | -1 |
| 402 | 11807 | Timp3    | Fbxo31        | 1  |
| 402 | 12420 | Timp3    | Klhl21        | 1  |
| 402 | 12460 | Timp3    | Pnpla2        | 1  |
| 402 | 12799 | Timp3    | Spon2         | -1 |
| 402 | 16060 | Timp3    | Gys2          | 1  |
| 402 | 17876 | Timp3    | Tubb4         | -1 |
| 402 | 17878 | Timp3    | Brap          | 1  |
| 402 | 17952 | Timp3    | Ripk2         | 1  |
| 402 | 18179 | Timp3    | Dbp           | 1  |
| 402 | 18498 | Timp3    | Slc5a6        | 1  |
| 402 | 19025 | Timp3    | Slc37a4       | 1  |
| 402 | 21733 | Timp3    | Rhebl1        | 1  |
| 402 | 21811 | Timp3    | Ak3l1         | 1  |
| 402 | 22076 | Timp3    | Pgm2l1        | 1  |
| 402 | 22290 | Timp3    | Tubb2a        | -1 |
| 402 | 22470 | Timp3    | Ppargc1b      | 1  |
| 402 | 22630 | Timp3    | MMT00034355   | -1 |
| 403 | 286   | Leprotl1 | MMT00070509   | -1 |
| 403 | 403   | Leprotl1 | Leprotl1      | 1  |
| 403 | 1097  | Leprotl1 | Dctn6         | -1 |
| 403 | 1755  | Leprotl1 | Ocel1         | -1 |
| 403 | 2749  | Leprotl1 | Naf1          | 1  |
| 403 | 3055  | Leprotl1 | Pde4c         | -1 |
| 403 | 5433  | Leprotl1 | 2410004L22Rik | 1  |
| 403 | 8114  | Leprotl1 | Kcnn1         | -1 |
| 403 | 9304  | Leprotl1 | AI449175      | -1 |
| 403 | 10195 | Leprotl1 | Klf1          | -1 |
| 403 | 13004 | Leprotl1 | Arhgef10      | -1 |
| 403 | 13732 | Leprotl1 | Tpm4          | 1  |
| 403 | 13774 | Leprotl1 | Gdf15         | 1  |
| 403 | 14455 | Leprotl1 | 2700029M09Rik | 1  |
| 403 | 15455 | Leprotl1 | Lsm4          | 1  |
| 403 | 16557 | Leprotl1 | Rbpms         | -1 |
| 403 | 16617 | Leprotl1 | Sh2d4a        | 1  |
| 403 | 17553 | Leprotl1 | Eif4ebp1      | -1 |
| 403 | 18886 | Leprotl1 | Slc18a1       | 1  |
| 403 | 20484 | Leprotl1 | Ces1          | 1  |

|     |       |               |                    |    |
|-----|-------|---------------|--------------------|----|
| 403 | 22776 | Leprot1       | Gsr                | -1 |
| 405 | 2200  | Emr4          | BC006779           | 1  |
| 405 | 2850  | Emr4          | Slc16a6            | 1  |
| 405 | 3040  | Emr4          | Bcl3               | 1  |
| 405 | 5364  | Emr4          | Kif22              | 1  |
| 405 | 8328  | Emr4          | Klhdc8a            | 1  |
| 405 | 8416  | Emr4          | Cdc20              | 1  |
| 405 | 11382 | Emr4          | Cdca3              | 1  |
| 405 | 17323 | Emr4          | Tubb6              | 1  |
| 405 | 18300 | Emr4          | Arg1               | -1 |
| 405 | 18455 | Emr4          | Mtnr1a             | 1  |
| 409 | 3836  | Lxn           | 2200001115Rik      | 1  |
| 409 | 6030  | Lxn           | As3mt              | -1 |
| 409 | 6370  | Lxn           | Aqp8               | 1  |
| 409 | 12910 | Lxn           | 1110028A07Rik      | 1  |
| 409 | 14472 | Lxn           | Ahcy               | -1 |
| 409 | 15320 | Lxn           | MMT00017479        | -1 |
| 409 | 16647 | Lxn           | D16H22S680E        | -1 |
| 409 | 20079 | Lxn           | MMT00019254        | -1 |
| 409 | 22138 | Lxn           | Ang                | -1 |
| 409 | 23026 | Lxn           | Apom               | -1 |
| 419 | 3061  | Foxk2         | Scarf2             | -1 |
| 419 | 3119  | Foxk2         | Mapk10             | -1 |
| 419 | 6846  | Foxk2         | Olf1402            | -1 |
| 419 | 8791  | Foxk2         | Sectm1a            | -1 |
| 419 | 13615 | Foxk2         | Arl16              | 1  |
| 419 | 15016 | Foxk2         | MMT00074608        | -1 |
| 419 | 16613 | Foxk2         | 1110031102Rik      | -1 |
| 419 | 17792 | Foxk2         | Vmn2r79            | -1 |
| 419 | 17897 | Foxk2         | Gm1019             | -1 |
| 434 | 10554 | Psm1          | ENSMUSG00000074179 | 1  |
| 434 | 13431 | Psm1          | MMT00038058        | -1 |
| 434 | 15205 | Psm1          | MMT00030262        | -1 |
| 443 | 1941  | Xpo5          | MMT00079618        | 1  |
| 443 | 3804  | Xpo5          | MMT00015534        | 1  |
| 443 | 4201  | Xpo5          | Tubb2c             | 1  |
| 443 | 11724 | Xpo5          | Tuba3a             | 1  |
| 443 | 17323 | Xpo5          | Tubb6              | 1  |
| 443 | 19671 | Xpo5          | Upp2               | -1 |
| 445 | 153   | 2610029I01Rik | 2010011I20Rik      | 1  |
| 445 | 607   | 2610029I01Rik | Me1                | 1  |
| 445 | 874   | 2610029I01Rik | Aldh1a7            | 1  |
| 445 | 1851  | 2610029I01Rik | Tmem41a            | -1 |
| 445 | 2636  | 2610029I01Rik | Tars               | 1  |
| 445 | 3038  | 2610029I01Rik | Serpina12          | 1  |
| 445 | 3265  | 2610029I01Rik | Dntt               | 1  |
| 445 | 4431  | 2610029I01Rik | Tmem17             | 1  |
| 445 | 6370  | 2610029I01Rik | Aqp8               | 1  |
| 445 | 11259 | 2610029I01Rik | Ccdc69             | 1  |
| 445 | 11857 | 2610029I01Rik | Arv1               | 1  |
| 445 | 12941 | 2610029I01Rik | Elov5              | 1  |

|     |       |               |                    |    |
|-----|-------|---------------|--------------------|----|
| 445 | 14017 | 2610029I01Rik | Ces5               | 1  |
| 445 | 17617 | 2610029I01Rik | Atp5sl             | -1 |
| 445 | 18201 | 2610029I01Rik | MMT00060232        | 1  |
| 445 | 18827 | 2610029I01Rik | Oprs1              | 1  |
| 445 | 20079 | 2610029I01Rik | MMT00019254        | -1 |
| 445 | 22138 | 2610029I01Rik | Ang                | -1 |
| 445 | 23026 | 2610029I01Rik | Apom               | -1 |
| 451 | 524   | Mllt11        | Hsd3b2             | -1 |
| 451 | 1963  | Mllt11        | MMT00039783        | -1 |
| 451 | 3753  | Mllt11        | Setdb1             | 1  |
| 451 | 4967  | Mllt11        | Plekhm1            | 1  |
| 451 | 11121 | Mllt11        | Mtmr11             | 1  |
| 451 | 11611 | Mllt11        | S100a13            | 1  |
| 451 | 12367 | Mllt11        | MMT00072365        | 1  |
| 451 | 18911 | Mllt11        | Selenbp2           | -1 |
| 451 | 20385 | Mllt11        | Chd1l              | -1 |
| 451 | 22202 | Mllt11        | OTTMUSG00000021274 | 1  |
| 451 | 23457 | Mllt11        | Selenbp2           | -1 |
| 468 | 9417  | 2610020C07Rik | Cd163              | 1  |
| 468 | 17391 | 2610020C07Rik | C530028O21Rik      | 1  |
| 468 | 19964 | 2610020C07Rik | Ndufa9             | 1  |
| 468 | 19999 | 2610020C07Rik | Ift122             | -1 |
| 491 | 8815  | MMT00030239   | Mx1                | 1  |
| 491 | 21214 | MMT00030239   | Scd1               | 1  |
| 511 | 21251 | Itpa          | Cpt1a              | -1 |
| 525 | 563   | Lyl1          | D4Bwg0951e         | -1 |
| 525 | 3196  | Lyl1          | Tat                | -1 |
| 525 | 4708  | Lyl1          | Traf3ip2           | 1  |
| 525 | 5364  | Lyl1          | Kif22              | 1  |
| 525 | 5766  | Lyl1          | 5033414D02Rik      | 1  |
| 525 | 7066  | Lyl1          | Agtr1b             | -1 |
| 525 | 7963  | Lyl1          | Rxrg               | 1  |
| 525 | 8328  | Lyl1          | Klhdc8a            | 1  |
| 525 | 11093 | Lyl1          | Zdhhc1             | -1 |
| 525 | 11382 | Lyl1          | Cdca3              | 1  |
| 525 | 12761 | Lyl1          | Tsc22d3            | -1 |
| 525 | 15631 | Lyl1          | Lpin1              | -1 |
| 525 | 16580 | Lyl1          | Tnfaip2            | 1  |
| 525 | 17525 | Lyl1          | Ctgf               | -1 |
| 525 | 18027 | Lyl1          | 5730403B10Rik      | -1 |
| 525 | 18785 | Lyl1          | Angptl4            | -1 |
| 530 | 20967 | Mest          | Fabp2              | 1  |
| 533 | 7151  | MMT00040762   | MMT00007982        | 1  |
| 533 | 8054  | MMT00040762   | Smarca2            | -1 |
| 533 | 21733 | MMT00040762   | Rhebl1             | -1 |
| 538 | 5934  | Mpp2          | S100a10            | -1 |
| 538 | 6193  | Mpp2          | Lactb2             | -1 |
| 538 | 21251 | Mpp2          | Cpt1a              | 1  |
| 544 | 250   | Il16          | Tubb2a-ps2         | 1  |
| 544 | 269   | Il16          | Tuba1b             | 1  |
| 544 | 563   | Il16          | D4Bwg0951e         | -1 |

|     |       |         |               |    |
|-----|-------|---------|---------------|----|
| 544 | 609   | Il16    | MMT00060868   | 1  |
| 544 | 1941  | Il16    | MMT00079618   | 1  |
| 544 | 2483  | Il16    | Gmeb1         | -1 |
| 544 | 2794  | Il16    | Map3k6        | -1 |
| 544 | 2850  | Il16    | Slc16a6       | 1  |
| 544 | 3214  | Il16    | Dnmt3b        | 1  |
| 544 | 3686  | Il16    | Psmc9         | -1 |
| 544 | 3804  | Il16    | MMT00015534   | 1  |
| 544 | 4201  | Il16    | Tubb2c        | 1  |
| 544 | 4286  | Il16    | Ptp4a1        | -1 |
| 544 | 4708  | Il16    | Traf3ip2      | 1  |
| 544 | 6048  | Il16    | Psmc9         | -1 |
| 544 | 6338  | Il16    | Setd3         | -1 |
| 544 | 6386  | Il16    | Por           | -1 |
| 544 | 6490  | Il16    | Il1r1         | -1 |
| 544 | 8399  | Il16    | Herpud1       | -1 |
| 544 | 8639  | Il16    | Map1lc3b      | -1 |
| 544 | 8641  | Il16    | Slc7a2        | -1 |
| 544 | 9763  | Il16    | Tuba3b        | 1  |
| 544 | 11129 | Il16    | Ankhd1        | -1 |
| 544 | 11599 | Il16    | Coq10b        | -1 |
| 544 | 11741 | Il16    | Slc30a10      | 1  |
| 544 | 11807 | Il16    | Fbxo31        | -1 |
| 544 | 12420 | Il16    | Klhl21        | -1 |
| 544 | 12479 | Il16    | Ifrd1         | -1 |
| 544 | 13471 | Il16    | Cln8          | -1 |
| 544 | 13889 | Il16    | Agpat2        | 1  |
| 544 | 15320 | Il16    | MMT00017479   | -1 |
| 544 | 15631 | Il16    | Lpin1         | -1 |
| 544 | 15862 | Il16    | Mrap          | 1  |
| 544 | 16060 | Il16    | Gys2          | -1 |
| 544 | 16176 | Il16    | St3gal5       | -1 |
| 544 | 16580 | Il16    | Tnfaip2       | 1  |
| 544 | 16669 | Il16    | Tjp2          | 1  |
| 544 | 16690 | Il16    | Tjp3          | 1  |
| 544 | 17083 | Il16    | Atp1b1        | -1 |
| 544 | 17323 | Il16    | Tubb6         | 1  |
| 544 | 17444 | Il16    | Tuba1a        | 1  |
| 544 | 17622 | Il16    | Foxo1         | -1 |
| 544 | 17876 | Il16    | Tubb4         | 1  |
| 544 | 18027 | Il16    | 5730403B10Rik | -1 |
| 544 | 19466 | Il16    | Pptc7         | -1 |
| 544 | 19532 | Il16    | Med8          | 1  |
| 544 | 22290 | Il16    | Tubb2a        | 1  |
| 544 | 22630 | Il16    | MMT00034355   | 1  |
| 544 | 22936 | Il16    | Rhobtb1       | -1 |
| 544 | 23248 | Il16    | Tesk2         | -1 |
| 544 | 23558 | Il16    | MMT00030937   | -1 |
| 548 | 662   | Gpr109a | Mid1ip1       | -1 |
| 548 | 3565  | Gpr109a | MMT00045908   | -1 |
| 548 | 3754  | Gpr109a | Dock6         | -1 |

|     |       |               |                    |    |
|-----|-------|---------------|--------------------|----|
| 548 | 5804  | Gpr109a       | Thrsp              | -1 |
| 548 | 6044  | Gpr109a       | Sucnr1             | -1 |
| 548 | 7659  | Gpr109a       | Rab30              | 1  |
| 548 | 8439  | Gpr109a       | Slc25a33           | 1  |
| 548 | 8896  | Gpr109a       | Fasn               | -1 |
| 548 | 9408  | Gpr109a       | Hmgcs2             | 1  |
| 548 | 11462 | Gpr109a       | Gpam               | -1 |
| 548 | 12315 | Gpr109a       | Srebf1             | -1 |
| 548 | 12499 | Gpr109a       | Avpi1              | -1 |
| 548 | 13423 | Gpr109a       | ENSMUSG00000053749 | -1 |
| 548 | 14151 | Gpr109a       | Slc44a1            | -1 |
| 548 | 17660 | Gpr109a       | Nlrp12             | 1  |
| 548 | 17800 | Gpr109a       | Lrtm1              | -1 |
| 548 | 20385 | Gpr109a       | Chd1l              | -1 |
| 548 | 20567 | Gpr109a       | Ggt6               | -1 |
| 548 | 21202 | Gpr109a       | Acly               | -1 |
| 548 | 22954 | Gpr109a       | Slc25a30           | 1  |
| 575 | 16525 | Edn1          | Lbp                | 1  |
| 577 | 214   | Rrp12         | Lrp1               | -1 |
| 577 | 1569  | Rrp12         | Tmco4              | -1 |
| 577 | 2051  | Rrp12         | Ddx27              | -1 |
| 577 | 6193  | Rrp12         | Lactb2             | 1  |
| 577 | 6464  | Rrp12         | Pcbp4              | -1 |
| 577 | 6650  | Rrp12         | MMT00050325        | 1  |
| 577 | 10612 | Rrp12         | Slc24a6            | -1 |
| 577 | 18099 | Rrp12         | Nfx1               | -1 |
| 577 | 18215 | Rrp12         | Gpr146             | -1 |
| 577 | 22303 | Rrp12         | Cdt1               | -1 |
| 589 | 14017 | Epb4.1l4b     | Ces5               | -1 |
| 602 | 12910 | 9630041N07Rik | 1110028A07Rik      | -1 |
| 602 | 14017 | 9630041N07Rik | Ces5               | -1 |
| 605 | 719   | Unc119b       | Usp2               | -1 |
| 605 | 1767  | Unc119b       | BC016495           | -1 |
| 605 | 2829  | Unc119b       | Lrfr3              | 1  |
| 605 | 3214  | Unc119b       | Dnmt3b             | 1  |
| 605 | 5974  | Unc119b       | Arntl              | 1  |
| 605 | 7061  | Unc119b       | Spsb3              | 1  |
| 605 | 8328  | Unc119b       | Klhdc8a            | 1  |
| 605 | 16060 | Unc119b       | Gys2               | -1 |
| 605 | 16690 | Unc119b       | Tjp3               | 1  |
| 605 | 19671 | Unc119b       | Upp2               | -1 |
| 605 | 21531 | Unc119b       | Ttc23              | -1 |
| 607 | 607   | Me1           | Me1                | 1  |
| 607 | 1129  | Me1           | Gsta4              | 1  |
| 607 | 3446  | Me1           | Eno1               | 1  |
| 607 | 6329  | Me1           | Cyp2b10            | 1  |
| 607 | 7602  | Me1           | Pcca               | 1  |
| 607 | 8444  | Me1           | Rdh16              | 1  |
| 607 | 8773  | Me1           | MMT00027093        | -1 |
| 607 | 10554 | Me1           | ENSMUSG00000074179 | 1  |
| 607 | 12556 | Me1           | Ass1               | 1  |

|     |       |             |               |    |
|-----|-------|-------------|---------------|----|
| 607 | 13271 | Me1         | Idh2          | 1  |
| 607 | 13293 | Me1         | Gsta2         | 1  |
| 607 | 15205 | Me1         | MMT00030262   | -1 |
| 607 | 18113 | Me1         | MMT00034400   | 1  |
| 607 | 18201 | Me1         | MMT00060232   | 1  |
| 607 | 19066 | Me1         | MMT00012632   | 1  |
| 607 | 20804 | Me1         | Eno1          | 1  |
| 607 | 21214 | Me1         | Scd1          | 1  |
| 607 | 21727 | Me1         | Khk           | 1  |
| 607 | 22998 | Me1         | Ass1          | 1  |
| 609 | 250   | MMT00060868 | Tubb2a-ps2    | 1  |
| 609 | 609   | MMT00060868 | MMT00060868   | 1  |
| 609 | 2636  | MMT00060868 | Tars          | 1  |
| 609 | 3393  | MMT00060868 | Snhg8         | -1 |
| 609 | 4966  | MMT00060868 | Zscan20       | 1  |
| 609 | 6370  | MMT00060868 | Aqp8          | 1  |
| 609 | 7619  | MMT00060868 | Pik3ip1       | -1 |
| 609 | 7862  | MMT00060868 | Cpsf4l        | -1 |
| 609 | 8815  | MMT00060868 | Mx1           | 1  |
| 609 | 11095 | MMT00060868 | Bag3          | 1  |
| 609 | 11741 | MMT00060868 | Slc30a10      | 1  |
| 609 | 12941 | MMT00060868 | Elovl5        | 1  |
| 609 | 18201 | MMT00060868 | MMT00060232   | 1  |
| 609 | 18215 | MMT00060868 | Gpr146        | -1 |
| 609 | 18286 | MMT00060868 | Slc41a3       | -1 |
| 609 | 18827 | MMT00060868 | Oprs1         | 1  |
| 609 | 18846 | MMT00060868 | Ikbkg         | 1  |
| 609 | 21214 | MMT00060868 | Scd1          | 1  |
| 609 | 21251 | MMT00060868 | Cpt1a         | -1 |
| 609 | 22138 | MMT00060868 | Ang           | -1 |
| 609 | 22290 | MMT00060868 | Tubb2a        | 1  |
| 612 | 760   | Ccr1        | Akr1c19       | -1 |
| 612 | 19382 | Ccr1        | Slc2a6        | 1  |
| 614 | 6193  | C8g         | Lactb2        | -1 |
| 614 | 14147 | C8g         | Acss2         | -1 |
| 614 | 21202 | C8g         | Acly          | -1 |
| 614 | 23623 | C8g         | 2010305C02Rik | -1 |
| 617 | 8815  | MMT00077405 | Mx1           | 1  |
| 617 | 18201 | MMT00077405 | MMT00060232   | 1  |
| 617 | 21214 | MMT00077405 | Scd1          | 1  |
| 623 | 19064 | Lmf1        | MMT00004867   | 1  |
| 626 | 21214 | D19Ert386e  | Scd1          | -1 |
| 630 | 630   | C1s         | C1s           | 1  |
| 630 | 1444  | C1s         | C1r           | 1  |
| 630 | 6625  | C1s         | C1s           | 1  |
| 630 | 9417  | C1s         | Cd163         | -1 |
| 630 | 17391 | C1s         | C530028O21Rik | -1 |
| 630 | 19964 | C1s         | Ndufa9        | -1 |
| 630 | 22075 | C1s         | C1s           | 1  |
| 633 | 5934  | Ap1b1       | S100a10       | 1  |
| 633 | 6386  | Ap1b1       | Por           | -1 |

|     |       |               |               |    |
|-----|-------|---------------|---------------|----|
| 633 | 11741 | Ap1b1         | Slc30a10      | 1  |
| 633 | 18827 | Ap1b1         | Oprs1         | 1  |
| 661 | 661   | Siglec1       | Siglec1       | 1  |
| 661 | 14498 | Siglec1       | Layn          | 1  |
| 662 | 184   | Mid1ip1       | Sorbs1        | -1 |
| 662 | 865   | Mid1ip1       | Npc1          | -1 |
| 662 | 1709  | Mid1ip1       | Mt2           | -1 |
| 662 | 1941  | Mid1ip1       | MMT00079618   | 1  |
| 662 | 2013  | Mid1ip1       | Il15ra        | -1 |
| 662 | 2051  | Mid1ip1       | Ddx27         | -1 |
| 662 | 2322  | Mid1ip1       | Tuba4a        | 1  |
| 662 | 6377  | Mid1ip1       | D18Ertd653e   | -1 |
| 662 | 6599  | Mid1ip1       | 1700020C11Rik | 1  |
| 662 | 6771  | Mid1ip1       | Insc          | 1  |
| 662 | 7151  | Mid1ip1       | MMT00007982   | 1  |
| 662 | 7659  | Mid1ip1       | Rab30         | -1 |
| 662 | 7795  | Mid1ip1       | MMT00071427   | -1 |
| 662 | 9763  | Mid1ip1       | Tuba3b        | 1  |
| 662 | 10612 | Mid1ip1       | Slc24a6       | -1 |
| 662 | 10759 | Mid1ip1       | Rbms1         | -1 |
| 662 | 11724 | Mid1ip1       | Tuba3a        | 1  |
| 662 | 16343 | Mid1ip1       | Dgkh          | -1 |
| 662 | 17444 | Mid1ip1       | Tuba1a        | 1  |
| 662 | 17660 | Mid1ip1       | Nlrp12        | -1 |
| 662 | 19089 | Mid1ip1       | Peci          | -1 |
| 662 | 21251 | Mid1ip1       | Cpt1a         | -1 |
| 662 | 22443 | Mid1ip1       | Tuba1c        | 1  |
| 676 | 676   | Ms4a4d        | Ms4a4d        | 1  |
| 676 | 11369 | Ms4a4d        | Stx3          | 1  |
| 676 | 11812 | Ms4a4d        | Mrpl16        | 1  |
| 676 | 17447 | Ms4a4d        | Ctsf          | 1  |
| 677 | 662   | Ace2          | Mid1ip1       | -1 |
| 677 | 1709  | Ace2          | Mt2           | 1  |
| 677 | 6193  | Ace2          | Lactb2        | -1 |
| 677 | 18286 | Ace2          | Slc41a3       | 1  |
| 677 | 21251 | Ace2          | Cpt1a         | 1  |
| 679 | 15205 | Lrp3          | MMT00030262   | -1 |
| 692 | 692   | Pelo          | Pelo          | 1  |
| 700 | 9304  | 4930529C04Rik | A1449175      | -1 |
| 701 | 607   | Polr3g        | Me1           | 1  |
| 701 | 8444  | Polr3g        | Rdh16         | 1  |
| 701 | 8815  | Polr3g        | Mx1           | 1  |
| 701 | 12910 | Polr3g        | 1110028A07Rik | 1  |
| 701 | 18201 | Polr3g        | MMT00060232   | 1  |
| 701 | 20058 | Polr3g        | Dnaic1        | -1 |
| 701 | 21214 | Polr3g        | Scd1          | 1  |
| 701 | 21727 | Polr3g        | Khk           | 1  |
| 701 | 23549 | Polr3g        | Es22          | 1  |
| 703 | 7315  | Spryd4        | EG624219      | 1  |
| 703 | 8632  | Spryd4        | Igfbp1        | -1 |
| 703 | 16517 | Spryd4        | D4Wsu53e      | -1 |

|     |       |               |             |    |
|-----|-------|---------------|-------------|----|
| 703 | 21160 | Spryd4        | Irs2        | -1 |
| 708 | 9408  | Ophn1         | Hmgcs2      | 1  |
| 708 | 14147 | Ophn1         | Acss2       | -1 |
| 708 | 14151 | Ophn1         | Slc44a1     | -1 |
| 708 | 18738 | Ophn1         | Hadha       | 1  |
| 708 | 21202 | Ophn1         | Acly        | -1 |
| 709 | 662   | Pparg         | Mid1ip1     | 1  |
| 709 | 5594  | Pparg         | Erbp3       | -1 |
| 709 | 7659  | Pparg         | Rab30       | -1 |
| 709 | 8439  | Pparg         | Slc25a33    | -1 |
| 709 | 12315 | Pparg         | Srebf1      | 1  |
| 709 | 15049 | Pparg         | Rnf125      | -1 |
| 709 | 15990 | Pparg         | Dnmbp       | -1 |
| 709 | 16557 | Pparg         | Rbpms       | -1 |
| 709 | 16823 | Pparg         | Inhbb       | -1 |
| 709 | 17660 | Pparg         | Nlrp12      | -1 |
| 709 | 17852 | Pparg         | Cpeb2       | -1 |
| 709 | 18148 | Pparg         | Cables1     | -1 |
| 709 | 18785 | Pparg         | Angptl4     | -1 |
| 709 | 20488 | Pparg         | Bok         | -1 |
| 709 | 21288 | Pparg         | Tcp11l2     | -1 |
| 709 | 22321 | Pparg         | Apol7a      | 1  |
| 709 | 23130 | Pparg         | Hps4        | -1 |
| 715 | 3616  | Padi3         | Dnajc16     | 1  |
| 715 | 6191  | Padi3         | Ddost       | 1  |
| 715 | 7307  | Padi3         | Agmat       | 1  |
| 715 | 8610  | Padi3         | Padi4       | 1  |
| 715 | 16287 | Padi3         | Extl1       | -1 |
| 715 | 19924 | Padi3         | Ubiad1      | -1 |
| 716 | 10189 | Dbpht1        | Cage1       | 1  |
| 716 | 11094 | Dbpht1        | Slc17a3     | -1 |
| 716 | 20759 | Dbpht1        | Slc17a1     | -1 |
| 719 | 2399  | Usp2          | MMT00060167 | -1 |
| 719 | 22936 | Usp2          | Rhobtb1     | 1  |
| 727 | 5764  | Ywhae         | Ltb4dh      | 1  |
| 727 | 11946 | Ywhae         | MMT00030953 | 1  |
| 737 | 737   | MMT00023716   | MMT00023716 | 1  |
| 737 | 6857  | MMT00023716   | Serinc2     | -1 |
| 737 | 8654  | MMT00023716   | Fbxl13      | 1  |
| 737 | 14676 | MMT00023716   | Mecr        | 1  |
| 738 | 8444  | Rbp4          | Rdh16       | 1  |
| 740 | 5364  | Txnrd3        | Kif22       | -1 |
| 755 | 4687  | Ppp1r13l      | Gtpbp8      | -1 |
| 755 | 7944  | Ppp1r13l      | A1132487    | 1  |
| 755 | 18785 | Ppp1r13l      | Angptl4     | 1  |
| 763 | 8444  | 4933406E20Rik | Rdh16       | -1 |
| 790 | 3393  | MMT00026414   | Snhg8       | -1 |
| 791 | 793   | Il18r1        | Morc3       | -1 |
| 791 | 4286  | Il18r1        | Ptp4a1      | -1 |
| 791 | 4534  | Il18r1        | Ndel1       | -1 |
| 791 | 5574  | Il18r1        | Hsd3b7      | 1  |



|     |       |               |             |    |
|-----|-------|---------------|-------------|----|
| 791 | 5934  | Il18r1        | S100a10     | 1  |
| 791 | 6028  | Il18r1        | Alas1       | -1 |
| 791 | 6386  | Il18r1        | Por         | -1 |
| 791 | 6788  | Il18r1        | Psen2       | 1  |
| 791 | 10215 | Il18r1        | Nampt       | -1 |
| 791 | 11599 | Il18r1        | Coq10b      | -1 |
| 791 | 16176 | Il18r1        | St3gal5     | -1 |
| 791 | 16690 | Il18r1        | Tjp3        | 1  |
| 791 | 18827 | Il18r1        | Oprs1       | 1  |
| 791 | 19277 | Il18r1        | MMT00044927 | -1 |
| 791 | 19757 | Il18r1        | Fkbp5       | -1 |
| 791 | 23437 | Il18r1        | Efhd2       | -1 |
| 806 | 1572  | Ly96          | Saa3        | 1  |
| 806 | 3228  | Ly96          | Saa1        | 1  |
| 806 | 5364  | Ly96          | Kif22       | 1  |
| 806 | 17629 | Ly96          | Saa2        | 1  |
| 814 | 3502  | Gpr64         | Gde1        | 1  |
| 814 | 6030  | Gpr64         | As3mt       | 1  |
| 814 | 6370  | Gpr64         | Aqp8        | -1 |
| 814 | 12941 | Gpr64         | Elov15      | -1 |
| 814 | 14017 | Gpr64         | Ces5        | -1 |
| 814 | 18827 | Gpr64         | Oprs1       | -1 |
| 814 | 20079 | Gpr64         | MMT00019254 | 1  |
| 814 | 21214 | Gpr64         | Scd1        | -1 |
| 814 | 22138 | Gpr64         | Ang         | 1  |
| 817 | 269   | C130039O16Rik | Tuba1b      | 1  |
| 817 | 274   | C130039O16Rik | Trit1       | -1 |
| 817 | 354   | C130039O16Rik | MMT00007996 | 1  |
| 817 | 662   | C130039O16Rik | Mid1ip1     | 1  |
| 817 | 1257  | C130039O16Rik | Slc25a45    | 1  |
| 817 | 7151  | C130039O16Rik | MMT00007982 | 1  |
| 817 | 9763  | C130039O16Rik | Tuba3b      | 1  |
| 817 | 11724 | C130039O16Rik | Tuba3a      | 1  |
| 817 | 16292 | C130039O16Rik | Prpf18      | -1 |
| 817 | 17656 | C130039O16Rik | Hdhd3       | 1  |
| 817 | 17660 | C130039O16Rik | Nlrp12      | -1 |
| 817 | 22443 | C130039O16Rik | Tuba1c      | 1  |
| 820 | 20967 | 3200002M19Rik | Fabp2       | 1  |
| 830 | 147   | Socs1         | Uox         | -1 |
| 830 | 213   | Socs1         | Rgs16       | -1 |
| 830 | 250   | Socs1         | Tubb2a-ps2  | 1  |
| 830 | 269   | Socs1         | Tuba1b      | 1  |
| 830 | 402   | Socs1         | Timp3       | -1 |
| 830 | 407   | Socs1         | Serpina6    | -1 |
| 830 | 413   | Socs1         | Acy1        | -1 |
| 830 | 437   | Socs1         | Ndrp1       | 1  |
| 830 | 563   | Socs1         | D4Bwg0951e  | -1 |
| 830 | 609   | Socs1         | MMT00060868 | 1  |
| 830 | 719   | Socs1         | Usp2        | -1 |
| 830 | 760   | Socs1         | Akr1c19     | -1 |
| 830 | 771   | Socs1         | Zbtb45      | 1  |

|     |      |       |               |    |
|-----|------|-------|---------------|----|
| 830 | 830  | Socs1 | Socs1         | 1  |
| 830 | 1362 | Socs1 | Avpr1a        | 1  |
| 830 | 1363 | Socs1 | BC021767      | 1  |
| 830 | 1646 | Socs1 | Slc15a4       | -1 |
| 830 | 1709 | Socs1 | Mt2           | -1 |
| 830 | 1711 | Socs1 | Grhl1         | 1  |
| 830 | 1767 | Socs1 | BC016495      | -1 |
| 830 | 1853 | Socs1 | Stat5a        | 1  |
| 830 | 1941 | Socs1 | MMT00079618   | 1  |
| 830 | 2110 | Socs1 | Gtf2ird1      | 1  |
| 830 | 2200 | Socs1 | BC006779      | 1  |
| 830 | 2256 | Socs1 | Serpina9      | 1  |
| 830 | 2262 | Socs1 | Papss2        | -1 |
| 830 | 2294 | Socs1 | AU040829      | -1 |
| 830 | 2322 | Socs1 | Tuba4a        | 1  |
| 830 | 2384 | Socs1 | Micalcl       | 1  |
| 830 | 2399 | Socs1 | MMT00060167   | 1  |
| 830 | 2483 | Socs1 | Gmeb1         | -1 |
| 830 | 2485 | Socs1 | Adck1         | 1  |
| 830 | 2529 | Socs1 | Hmcn2         | -1 |
| 830 | 2615 | Socs1 | EG624862      | -1 |
| 830 | 2636 | Socs1 | Tars          | 1  |
| 830 | 2794 | Socs1 | Map3k6        | -1 |
| 830 | 2829 | Socs1 | Lrfn3         | 1  |
| 830 | 2850 | Socs1 | Slc16a6       | 1  |
| 830 | 3040 | Socs1 | Bcl3          | 1  |
| 830 | 3214 | Socs1 | Dnmt3b        | 1  |
| 830 | 3246 | Socs1 | Prei4         | -1 |
| 830 | 3410 | Socs1 | Paqr9         | 1  |
| 830 | 3746 | Socs1 | Osbpl5        | -1 |
| 830 | 3804 | Socs1 | MMT00015534   | 1  |
| 830 | 4090 | Socs1 | Orai3         | 1  |
| 830 | 4201 | Socs1 | Tubb2c        | 1  |
| 830 | 4286 | Socs1 | Ptp4a1        | -1 |
| 830 | 4426 | Socs1 | Ilgp2         | 1  |
| 830 | 4469 | Socs1 | Cyp3a13       | -1 |
| 830 | 4534 | Socs1 | Ndel1         | -1 |
| 830 | 4708 | Socs1 | Traf3ip2      | 1  |
| 830 | 5068 | Socs1 | Afap112       | 1  |
| 830 | 5183 | Socs1 | St5           | 1  |
| 830 | 5187 | Socs1 | Speer4f       | -1 |
| 830 | 5364 | Socs1 | Kif22         | 1  |
| 830 | 5374 | Socs1 | Chka          | 1  |
| 830 | 5569 | Socs1 | Pdgfc         | 1  |
| 830 | 5574 | Socs1 | Hsd3b7        | 1  |
| 830 | 5587 | Socs1 | Rmnd5b        | 1  |
| 830 | 5734 | Socs1 | EG619653      | -1 |
| 830 | 5802 | Socs1 | Mad2l2        | 1  |
| 830 | 5804 | Socs1 | Thrsp         | -1 |
| 830 | 5849 | Socs1 | 2310031A18Rik | 1  |
| 830 | 5878 | Socs1 | Iqgap2        | -1 |

|     |       |       |               |    |
|-----|-------|-------|---------------|----|
| 830 | 5892  | Socs1 | MMT00038457   | -1 |
| 830 | 5974  | Socs1 | Arntl         | 1  |
| 830 | 6073  | Socs1 | Mthfd2        | 1  |
| 830 | 6118  | Socs1 | Slc1a4        | 1  |
| 830 | 6177  | Socs1 | Thpo          | 1  |
| 830 | 6329  | Socs1 | Cyp2b10       | -1 |
| 830 | 6338  | Socs1 | Setd3         | -1 |
| 830 | 6380  | Socs1 | 6330569M22Rik | 1  |
| 830 | 6386  | Socs1 | Por           | -1 |
| 830 | 6394  | Socs1 | Fbxo6         | 1  |
| 830 | 6756  | Socs1 | Sds           | -1 |
| 830 | 6771  | Socs1 | Insc          | 1  |
| 830 | 6823  | Socs1 | Yars          | 1  |
| 830 | 6916  | Socs1 | Wdr5b         | 1  |
| 830 | 6990  | Socs1 | Nr1i2         | -1 |
| 830 | 7061  | Socs1 | Spsb3         | 1  |
| 830 | 7136  | Socs1 | Id3           | 1  |
| 830 | 7151  | Socs1 | MMT00007982   | 1  |
| 830 | 7397  | Socs1 | MMT00020969   | -1 |
| 830 | 7414  | Socs1 | Clpx          | 1  |
| 830 | 7839  | Socs1 | Asl           | -1 |
| 830 | 7862  | Socs1 | Cpsf4l        | -1 |
| 830 | 7954  | Socs1 | Ccdc12        | 1  |
| 830 | 8328  | Socs1 | Klhdc8a       | 1  |
| 830 | 8399  | Socs1 | Herpud1       | -1 |
| 830 | 8416  | Socs1 | Cdc20         | 1  |
| 830 | 8428  | Socs1 | Sorbs3        | -1 |
| 830 | 8469  | Socs1 | Sfrs6         | 1  |
| 830 | 8641  | Socs1 | Slc7a2        | -1 |
| 830 | 9275  | Socs1 | Aass          | -1 |
| 830 | 9309  | Socs1 | MMT00035904   | -1 |
| 830 | 9495  | Socs1 | Srms          | 1  |
| 830 | 9686  | Socs1 | Nek4          | 1  |
| 830 | 9718  | Socs1 | Fmo5          | -1 |
| 830 | 9763  | Socs1 | Tuba3b        | 1  |
| 830 | 9910  | Socs1 | EG666644      | -1 |
| 830 | 10207 | Socs1 | MMT00012324   | 1  |
| 830 | 10215 | Socs1 | Nampt         | -1 |
| 830 | 10393 | Socs1 | Slc7a8        | 1  |
| 830 | 10408 | Socs1 | Per1          | -1 |
| 830 | 10486 | Socs1 | 1300002K09Rik | 1  |
| 830 | 10642 | Socs1 | Ngef          | -1 |
| 830 | 10712 | Socs1 | Fchsd2        | -1 |
| 830 | 10775 | Socs1 | Slc16a1       | 1  |
| 830 | 10802 | Socs1 | Kcnn2         | -1 |
| 830 | 11024 | Socs1 | MMT00049098   | 1  |
| 830 | 11129 | Socs1 | Ankhd1        | -1 |
| 830 | 11356 | Socs1 | Med27         | 1  |
| 830 | 11444 | Socs1 | Rnpep         | 1  |
| 830 | 11574 | Socs1 | Gne           | -1 |
| 830 | 11599 | Socs1 | Coq10b        | -1 |

|     |       |       |               |    |
|-----|-------|-------|---------------|----|
| 830 | 11724 | Socs1 | Tuba3a        | 1  |
| 830 | 11741 | Socs1 | Slc30a10      | 1  |
| 830 | 11807 | Socs1 | Fbxo31        | -1 |
| 830 | 11808 | Socs1 | Pck1          | -1 |
| 830 | 11949 | Socs1 | Cldn3         | 1  |
| 830 | 12151 | Socs1 | MMT00082650   | -1 |
| 830 | 12193 | Socs1 | Aco2          | -1 |
| 830 | 12204 | Socs1 | Ankmy2        | -1 |
| 830 | 12417 | Socs1 | Mtap7d1       | 1  |
| 830 | 12420 | Socs1 | Klhl21        | -1 |
| 830 | 12460 | Socs1 | Pnpla2        | -1 |
| 830 | 12489 | Socs1 | Wdr8          | 1  |
| 830 | 12513 | Socs1 | Whsc2         | 1  |
| 830 | 12799 | Socs1 | Spon2         | 1  |
| 830 | 12904 | Socs1 | MMT00040704   | -1 |
| 830 | 12905 | Socs1 | Nfil3         | 1  |
| 830 | 12925 | Socs1 | Farp1         | 1  |
| 830 | 12982 | Socs1 | Cars          | 1  |
| 830 | 12995 | Socs1 | Tmed9         | 1  |
| 830 | 13216 | Socs1 | Ccdc106       | -1 |
| 830 | 13289 | Socs1 | Dusp10        | 1  |
| 830 | 13376 | Socs1 | Alg2          | 1  |
| 830 | 13471 | Socs1 | Cln8          | -1 |
| 830 | 13705 | Socs1 | Osbpl1a       | -1 |
| 830 | 13947 | Socs1 | Crip2         | 1  |
| 830 | 14041 | Socs1 | Cldn1         | 1  |
| 830 | 14258 | Socs1 | Ifi47         | 1  |
| 830 | 14462 | Socs1 | Zfp385b       | -1 |
| 830 | 14472 | Socs1 | Ahcy          | -1 |
| 830 | 14506 | Socs1 | Slc15a3       | 1  |
| 830 | 14726 | Socs1 | Slc19a1       | -1 |
| 830 | 14806 | Socs1 | Ccdc45        | -1 |
| 830 | 15008 | Socs1 | Chrdl2        | -1 |
| 830 | 15015 | Socs1 | G3bp1         | 1  |
| 830 | 15021 | Socs1 | Ppargc1a      | -1 |
| 830 | 15052 | Socs1 | Kifc3         | 1  |
| 830 | 15280 | Socs1 | Cxcl10        | 1  |
| 830 | 15320 | Socs1 | MMT00017479   | -1 |
| 830 | 15425 | Socs1 | Adprh         | 1  |
| 830 | 15447 | Socs1 | Eif4a3        | 1  |
| 830 | 15481 | Socs1 | 1110067D22Rik | 1  |
| 830 | 15624 | Socs1 | Crp           | -1 |
| 830 | 15631 | Socs1 | Lpin1         | -1 |
| 830 | 15696 | Socs1 | Pycr2         | 1  |
| 830 | 15709 | Socs1 | Tceal1        | -1 |
| 830 | 15882 | Socs1 | AA986860      | -1 |
| 830 | 16060 | Socs1 | Gys2          | -1 |
| 830 | 16176 | Socs1 | St3gal5       | -1 |
| 830 | 16182 | Socs1 | Oasl1         | 1  |
| 830 | 16521 | Socs1 | Adar          | 1  |
| 830 | 16580 | Socs1 | Tnfaip2       | 1  |

|     |       |       |               |    |
|-----|-------|-------|---------------|----|
| 830 | 16647 | Socs1 | D16H22S680E   | -1 |
| 830 | 16669 | Socs1 | Tjp2          | 1  |
| 830 | 16676 | Socs1 | Aspa          | -1 |
| 830 | 16690 | Socs1 | Tjp3          | 1  |
| 830 | 16712 | Socs1 | Pnrc1         | 1  |
| 830 | 16851 | Socs1 | Slc34a2       | 1  |
| 830 | 17022 | Socs1 | MMT00055891   | 1  |
| 830 | 17078 | Socs1 | Syde2         | -1 |
| 830 | 17083 | Socs1 | Atp1b1        | -1 |
| 830 | 17247 | Socs1 | A030007L17Rik | 1  |
| 830 | 17323 | Socs1 | Tubb6         | 1  |
| 830 | 17338 | Socs1 | Mocos         | 1  |
| 830 | 17352 | Socs1 | Cebpb         | -1 |
| 830 | 17444 | Socs1 | Tuba1a        | 1  |
| 830 | 17525 | Socs1 | Ctgf          | -1 |
| 830 | 17530 | Socs1 | MMT00041792   | 1  |
| 830 | 17577 | Socs1 | Med28         | 1  |
| 830 | 17583 | Socs1 | Per2          | -1 |
| 830 | 17622 | Socs1 | Foxo1         | -1 |
| 830 | 17656 | Socs1 | Hdhd3         | 1  |
| 830 | 17876 | Socs1 | Tubb4         | 1  |
| 830 | 17884 | Socs1 | Lnx2          | 1  |
| 830 | 17952 | Socs1 | Ripk2         | -1 |
| 830 | 18027 | Socs1 | 5730403B10Rik | -1 |
| 830 | 18147 | Socs1 | Nhlrc2        | -1 |
| 830 | 18174 | Socs1 | Stat2         | 1  |
| 830 | 18176 | Socs1 | Aqp11         | -1 |
| 830 | 18179 | Socs1 | Dbp           | -1 |
| 830 | 18250 | Socs1 | Mmp14         | 1  |
| 830 | 18438 | Socs1 | Map3k7ip2     | 1  |
| 830 | 18498 | Socs1 | Slc5a6        | -1 |
| 830 | 18785 | Socs1 | Angptl4       | -1 |
| 830 | 18804 | Socs1 | Plip          | 1  |
| 830 | 18827 | Socs1 | Oprs1         | 1  |
| 830 | 19025 | Socs1 | Slc37a4       | -1 |
| 830 | 19146 | Socs1 | N4bp2l1       | -1 |
| 830 | 19148 | Socs1 | Rnf144b       | 1  |
| 830 | 19234 | Socs1 | Nrg4          | -1 |
| 830 | 19277 | Socs1 | MMT00044927   | -1 |
| 830 | 19305 | Socs1 | Azin1         | -1 |
| 830 | 19323 | Socs1 | Bnip3         | -1 |
| 830 | 19375 | Socs1 | Inhba         | 1  |
| 830 | 19466 | Socs1 | Pptc7         | -1 |
| 830 | 19532 | Socs1 | Med8          | 1  |
| 830 | 19556 | Socs1 | Efna1         | 1  |
| 830 | 19671 | Socs1 | Upp2          | -1 |
| 830 | 19701 | Socs1 | 9930021J17Rik | 1  |
| 830 | 19723 | Socs1 | Pfkfb1        | -1 |
| 830 | 19790 | Socs1 | Polg2         | -1 |
| 830 | 19970 | Socs1 | Mrpl36        | 1  |
| 830 | 20085 | Socs1 | Lpin2         | -1 |

|     |       |        |               |    |
|-----|-------|--------|---------------|----|
| 830 | 20171 | Socs1  | 1700008G05Rik | 1  |
| 830 | 20217 | Socs1  | Rab3ip        | -1 |
| 830 | 20431 | Socs1  | Slc7a7        | 1  |
| 830 | 20803 | Socs1  | Tmem50a       | -1 |
| 830 | 20830 | Socs1  | MMT00057509   | 1  |
| 830 | 20854 | Socs1  | Commd7        | 1  |
| 830 | 21142 | Socs1  | Gm129         | -1 |
| 830 | 21167 | Socs1  | Irf5          | 1  |
| 830 | 21331 | Socs1  | Slc10a6       | -1 |
| 830 | 21380 | Socs1  | Ier5          | 1  |
| 830 | 21733 | Socs1  | Rhebl1        | -1 |
| 830 | 21811 | Socs1  | Ak3l1         | -1 |
| 830 | 21918 | Socs1  | Snx24         | 1  |
| 830 | 21969 | Socs1  | Tk1           | -1 |
| 830 | 22076 | Socs1  | Pgm2l1        | -1 |
| 830 | 22116 | Socs1  | Fbxo42        | 1  |
| 830 | 22290 | Socs1  | Tubb2a        | 1  |
| 830 | 22443 | Socs1  | Tuba1c        | 1  |
| 830 | 22470 | Socs1  | Ppargc1b      | -1 |
| 830 | 22630 | Socs1  | MMT00034355   | 1  |
| 830 | 22681 | Socs1  | Gm88          | -1 |
| 830 | 22863 | Socs1  | Prkd2         | 1  |
| 830 | 22873 | Socs1  | Slc38a2       | -1 |
| 830 | 22933 | Socs1  | Tssc4         | 1  |
| 830 | 22936 | Socs1  | Rhobtb1       | -1 |
| 830 | 23180 | Socs1  | Sult1d1       | -1 |
| 830 | 23183 | Socs1  | Nnmt          | -1 |
| 830 | 23201 | Socs1  | S1pr1         | 1  |
| 830 | 23202 | Socs1  | Olf559        | -1 |
| 830 | 23248 | Socs1  | Tesk2         | -1 |
| 830 | 23558 | Socs1  | MMT00030937   | -1 |
| 860 | 143   | Psmb10 | Gvin1         | 1  |
| 860 | 1533  | Psmb10 | BC013712      | 1  |
| 860 | 2200  | Psmb10 | BC006779      | 1  |
| 860 | 2224  | Psmb10 | Oasl2         | 1  |
| 860 | 2752  | Psmb10 | Fcgr1         | 1  |
| 860 | 2830  | Psmb10 | 4632417K18Rik | 1  |
| 860 | 2969  | Psmb10 | Ptpro         | 1  |
| 860 | 3659  | Psmb10 | EG236451      | 1  |
| 860 | 3683  | Psmb10 | Oas2          | 1  |
| 860 | 4114  | Psmb10 | Parp12        | 1  |
| 860 | 4409  | Psmb10 | 5430435G22Rik | 1  |
| 860 | 4426  | Psmb10 | Iigp2         | 1  |
| 860 | 4508  | Psmb10 | Ifit1         | 1  |
| 860 | 5044  | Psmb10 | Iifi35        | 1  |
| 860 | 5250  | Psmb10 | Iifi2         | 1  |
| 860 | 5465  | Psmb10 | Slamf8        | 1  |
| 860 | 5766  | Psmb10 | 5033414D02Rik | 1  |
| 860 | 5845  | Psmb10 | Ii18bp        | 1  |
| 860 | 5853  | Psmb10 | Trim30        | 1  |
| 860 | 5949  | Psmb10 | Zbp1          | 1  |

|     |       |        |             |   |
|-----|-------|--------|-------------|---|
| 860 | 5975  | Psmb10 | Car13       | 1 |
| 860 | 6098  | Psmb10 | Ncf4        | 1 |
| 860 | 6213  | Psmb10 | Ccl2        | 1 |
| 860 | 6383  | Psmb10 | Gbp2        | 1 |
| 860 | 6734  | Psmb10 | Ehd4        | 1 |
| 860 | 6779  | Psmb10 | Gbp6        | 1 |
| 860 | 6824  | Psmb10 | Irf7        | 1 |
| 860 | 6888  | Psmb10 | Cxcl9       | 1 |
| 860 | 7057  | Psmb10 | Stk10       | 1 |
| 860 | 7069  | Psmb10 | Ube1l       | 1 |
| 860 | 7105  | Psmb10 | Plac8       | 1 |
| 860 | 7238  | Psmb10 | Pycard      | 1 |
| 860 | 7284  | Psmb10 | MMT00008674 | 1 |
| 860 | 7316  | Psmb10 | Ifi204      | 1 |
| 860 | 7336  | Psmb10 | Cd5l        | 1 |
| 860 | 8270  | Psmb10 | Clspn       | 1 |
| 860 | 8555  | Psmb10 | H2-M3       | 1 |
| 860 | 8659  | Psmb10 | Psmb8       | 1 |
| 860 | 8800  | Psmb10 | Rnf213      | 1 |
| 860 | 8922  | Psmb10 | Ii10ra      | 1 |
| 860 | 8951  | Psmb10 | Cd97        | 1 |
| 860 | 9100  | Psmb10 | Ms4a6c      | 1 |
| 860 | 9401  | Psmb10 | Fcgr4       | 1 |
| 860 | 9847  | Psmb10 | Ifi27       | 1 |
| 860 | 10109 | Psmb10 | Gbp3        | 1 |
| 860 | 10393 | Psmb10 | Slc7a8      | 1 |
| 860 | 10504 | Psmb10 | Ripk3       | 1 |
| 860 | 10606 | Psmb10 | Apbb1ip     | 1 |
| 860 | 10926 | Psmb10 | P2ry13      | 1 |
| 860 | 11009 | Psmb10 | MMT00008885 | 1 |
| 860 | 11204 | Psmb10 | Al451617    | 1 |
| 860 | 11265 | Psmb10 | Irgm        | 1 |
| 860 | 11275 | Psmb10 | Fanci       | 1 |
| 860 | 11701 | Psmb10 | Oas1c       | 1 |
| 860 | 12398 | Psmb10 | Ifi44       | 1 |
| 860 | 12600 | Psmb10 | Ifi204      | 1 |
| 860 | 12969 | Psmb10 | Xaf1        | 1 |
| 860 | 13156 | Psmb10 | Ifit3       | 1 |
| 860 | 13172 | Psmb10 | Epb4.113    | 1 |
| 860 | 13309 | Psmb10 | Tgtp        | 1 |
| 860 | 13455 | Psmb10 | Cenpe       | 1 |
| 860 | 13504 | Psmb10 | Lair1       | 1 |
| 860 | 13527 | Psmb10 | Ctss        | 1 |
| 860 | 13585 | Psmb10 | Nckap1l     | 1 |
| 860 | 13654 | Psmb10 | Stat1       | 1 |
| 860 | 14237 | Psmb10 | Rac2        | 1 |
| 860 | 14258 | Psmb10 | Ifi47       | 1 |
| 860 | 14260 | Psmb10 | Mlkl        | 1 |
| 860 | 14506 | Psmb10 | Slc15a3     | 1 |
| 860 | 14603 | Psmb10 | Ly6e        | 1 |
| 860 | 14880 | Psmb10 | Ms4a4c      | 1 |

|     |       |             |                    |    |
|-----|-------|-------------|--------------------|----|
| 860 | 14883 | Psemb10     | Itgal              | 1  |
| 860 | 14954 | Psemb10     | Rab19              | 1  |
| 860 | 15159 | Psemb10     | Timd4              | 1  |
| 860 | 15387 | Psemb10     | Mgl1               | 1  |
| 860 | 15449 | Psemb10     | Mitd1              | 1  |
| 860 | 15825 | Psemb10     | Fermt3             | 1  |
| 860 | 16147 | Psemb10     | Tlr2               | 1  |
| 860 | 16182 | Psemb10     | Oasl1              | 1  |
| 860 | 16199 | Psemb10     | Samhd1             | 1  |
| 860 | 16521 | Psemb10     | Adar               | 1  |
| 860 | 16572 | Psemb10     | D14Ertd668e        | 1  |
| 860 | 16874 | Psemb10     | Fcer1g             | 1  |
| 860 | 17197 | Psemb10     | Igtp               | 1  |
| 860 | 17312 | Psemb10     | Sirpa              | 1  |
| 860 | 17412 | Psemb10     | Aif1               | 1  |
| 860 | 17904 | Psemb10     | Cds1               | 1  |
| 860 | 18186 | Psemb10     | Parp14             | 1  |
| 860 | 18211 | Psemb10     | Folr2              | 1  |
| 860 | 18289 | Psemb10     | Tap1               | 1  |
| 860 | 19063 | Psemb10     | Evl                | 1  |
| 860 | 19189 | Psemb10     | Sp100              | 1  |
| 860 | 19262 | Psemb10     | Cd274              | 1  |
| 860 | 19794 | Psemb10     | Rgs2               | 1  |
| 860 | 20150 | Psemb10     | Ptprc              | 1  |
| 860 | 20321 | Psemb10     | Ms4a6b             | 1  |
| 860 | 20433 | Psemb10     | Cdca5              | 1  |
| 860 | 20997 | Psemb10     | MMT00028135        | 1  |
| 860 | 21351 | Psemb10     | Shisa5             | 1  |
| 860 | 21364 | Psemb10     | Ppm1h              | 1  |
| 860 | 21549 | Psemb10     | Rtp4               | 1  |
| 860 | 21794 | Psemb10     | Pfkip              | 1  |
| 860 | 21824 | Psemb10     | 5830443L24Rik      | 1  |
| 860 | 22037 | Psemb10     | Oas1g              | 1  |
| 860 | 23208 | Psemb10     | Hck                | 1  |
| 866 | 866   | Zfp369      | Zfp369             | 1  |
| 866 | 10189 | Zfp369      | Cage1              | 1  |
| 866 | 14343 | Zfp369      | Hnrnpa0            | -1 |
| 870 | 870   | Rint1       | Rint1              | 1  |
| 873 | 3449  | Slc22a3     | Hes6               | 1  |
| 873 | 5804  | Slc22a3     | Thrsp              | 1  |
| 873 | 6816  | Slc22a3     | Slc46a3            | 1  |
| 873 | 11576 | Slc22a3     | Gm1381             | 1  |
| 873 | 18069 | Slc22a3     | Gpt                | 1  |
| 874 | 7159  | Aldh1a7     | 1700031F05Rik      | -1 |
| 874 | 11446 | Aldh1a7     | Dock8              | -1 |
| 877 | 10554 | MMT00015473 | ENSMUSG00000074179 | 1  |
| 877 | 13293 | MMT00015473 | Gsta2              | 1  |
| 877 | 18201 | MMT00015473 | MMT00060232        | 1  |
| 877 | 21214 | MMT00015473 | Scd1               | 1  |
| 894 | 6589  | Ddit4       | Mafb               | 1  |
| 894 | 21934 | Ddit4       | Id2                | -1 |



|     |       |         |               |    |
|-----|-------|---------|---------------|----|
| 905 | 12915 | Fyco1   | Slc7a5        | 1  |
| 905 | 21214 | Fyco1   | Scd1          | -1 |
| 929 | 3170  | Dusp4   | Mcart1        | -1 |
| 929 | 4084  | Dusp4   | Asah3l        | -1 |
| 929 | 4404  | Dusp4   | Commd5        | 1  |
| 929 | 11093 | Dusp4   | Zdhhc1        | -1 |
| 929 | 11808 | Dusp4   | Pck1          | -1 |
| 929 | 12761 | Dusp4   | Tsc22d3       | -1 |
| 929 | 13339 | Dusp4   | D630042F21Rik | -1 |
| 929 | 13489 | Dusp4   | D230025D16Rik | -1 |
| 929 | 15631 | Dusp4   | Lpin1         | -1 |
| 929 | 15990 | Dusp4   | Dnmbp         | -1 |
| 929 | 16517 | Dusp4   | D4Wsu53e      | -1 |
| 929 | 17525 | Dusp4   | Ctgf          | -1 |
| 929 | 17622 | Dusp4   | Foxo1         | -1 |
| 929 | 18785 | Dusp4   | Angptl4       | -1 |
| 929 | 23202 | Dusp4   | Olf1559       | -1 |
| 929 | 23253 | Dusp4   | D030011O10Rik | -1 |
| 939 | 1613  | Daxx    | Trim26        | 1  |
| 939 | 14017 | Daxx    | Ces5          | 1  |
| 942 | 337   | Kcna5   | Rasgef1b      | 1  |
| 942 | 2294  | Kcna5   | AU040829      | 1  |
| 942 | 2730  | Kcna5   | Bcor          | -1 |
| 942 | 3170  | Kcna5   | Mcart1        | 1  |
| 942 | 3196  | Kcna5   | Tat           | 1  |
| 942 | 3452  | Kcna5   | Ccrn4l        | 1  |
| 942 | 3565  | Kcna5   | MMT00045908   | 1  |
| 942 | 5889  | Kcna5   | Errfi1        | 1  |
| 942 | 9213  | Kcna5   | Osgin1        | -1 |
| 942 | 10279 | Kcna5   | Rnf186        | -1 |
| 942 | 12556 | Kcna5   | Ass1          | 1  |
| 942 | 12761 | Kcna5   | Tsc22d3       | 1  |
| 942 | 13289 | Kcna5   | Dusp10        | -1 |
| 942 | 14785 | Kcna5   | F3            | -1 |
| 942 | 15522 | Kcna5   | 1810011O10Rik | 1  |
| 942 | 15631 | Kcna5   | Lpin1         | 1  |
| 942 | 15882 | Kcna5   | AA986860      | 1  |
| 942 | 16580 | Kcna5   | Tnfaip2       | -1 |
| 942 | 17525 | Kcna5   | Ctgf          | 1  |
| 942 | 18083 | Kcna5   | Gadd45a       | -1 |
| 942 | 21934 | Kcna5   | Id2           | -1 |
| 942 | 22216 | Kcna5   | Sp5           | -1 |
| 942 | 22998 | Kcna5   | Ass1          | 1  |
| 949 | 8684  | Plekha6 | Il15          | 1  |
| 958 | 4308  | Ppp2r5e | Nphp3         | 1  |
| 958 | 4391  | Ppp2r5e | Zfp467        | 1  |
| 958 | 16251 | Ppp2r5e | G6pc          | -1 |
| 958 | 21687 | Ppp2r5e | Zbtb7b        | 1  |
| 963 | 20058 | Lrrfip2 | Dnaic1        | -1 |
| 963 | 20385 | Lrrfip2 | Chd1l         | 1  |
| 972 | 1572  | Sri     | Saa3          | 1  |

|      |       |               |               |    |
|------|-------|---------------|---------------|----|
| 972  | 3228  | Sri           | Saa1          | 1  |
| 972  | 3265  | Sri           | Dntt          | 1  |
| 972  | 5364  | Sri           | Kif22         | 1  |
| 972  | 5934  | Sri           | S100a10       | 1  |
| 972  | 17629 | Sri           | Saa2          | 1  |
| 972  | 20967 | Sri           | Fabp2         | 1  |
| 982  | 6370  | Ccl7          | Aqp8          | 1  |
| 982  | 8815  | Ccl7          | Mx1           | 1  |
| 982  | 12910 | Ccl7          | 1110028A07Rik | 1  |
| 982  | 12941 | Ccl7          | Elov15        | 1  |
| 982  | 14017 | Ccl7          | Ces5          | 1  |
| 982  | 15059 | Ccl7          | Mogat1        | 1  |
| 982  | 18042 | Ccl7          | Aph1c         | -1 |
| 982  | 18201 | Ccl7          | MMT00060232   | 1  |
| 982  | 22138 | Ccl7          | Ang           | -1 |
| 982  | 23026 | Ccl7          | Apom          | -1 |
| 989  | 21408 | Phyhd1        | Svil          | -1 |
| 1014 | 1014  | Rtcd1         | Rtcd1         | 1  |
| 1014 | 1963  | Rtcd1         | MMT00039783   | 1  |
| 1014 | 7519  | Rtcd1         | Gstm1         | 1  |
| 1014 | 10681 | Rtcd1         | Dgkz          | -1 |
| 1014 | 14559 | Rtcd1         | Frrs1         | 1  |
| 1014 | 20385 | Rtcd1         | Chd1l         | 1  |
| 1017 | 21214 | Dync2li1      | Scd1          | -1 |
| 1027 | 185   | Accs          | Ap2b1         | -1 |
| 1027 | 1806  | Accs          | Nola3         | -1 |
| 1027 | 3332  | Accs          | Lrrc59        | -1 |
| 1027 | 4351  | Accs          | Plxnb1        | 1  |
| 1027 | 4635  | Accs          | MMT00023332   | -1 |
| 1027 | 6193  | Accs          | Lactb2        | -1 |
| 1027 | 8597  | Accs          | Papss1        | -1 |
| 1027 | 9164  | Accs          | Uba5          | -1 |
| 1027 | 11807 | Accs          | Fbxo31        | 1  |
| 1027 | 12143 | Accs          | Thyn1         | -1 |
| 1027 | 18286 | Accs          | Slc41a3       | 1  |
| 1027 | 18419 | Accs          | Srprb         | -1 |
| 1027 | 21214 | Accs          | Scd1          | -1 |
| 1027 | 21251 | Accs          | Cpt1a         | 1  |
| 1027 | 23617 | Accs          | Nme1          | -1 |
| 1041 | 1041  | 3110049J23Rik | 3110049J23Rik | -1 |
| 1041 | 2051  | 3110049J23Rik | Ddx27         | 1  |
| 1041 | 5965  | 3110049J23Rik | Pbld          | -1 |
| 1041 | 13688 | 3110049J23Rik | Ppa1          | -1 |
| 1041 | 15971 | 3110049J23Rik | Aifm2         | -1 |
| 1041 | 18893 | 3110049J23Rik | Lace1         | 1  |
| 1041 | 19392 | 3110049J23Rik | Slc25a16      | 1  |
| 1055 | 11129 | Gm525         | Ankhd1        | -1 |
| 1061 | 7602  | Krt20         | Pcca          | -1 |
| 1074 | 3756  | Acsm3         | Chrne         | -1 |
| 1074 | 6044  | Acsm3         | Sucnr1        | -1 |
| 1074 | 6370  | Acsm3         | Aqp8          | -1 |

|      |       |             |               |    |
|------|-------|-------------|---------------|----|
| 1074 | 12941 | Acsm3       | Elov15        | -1 |
| 1074 | 14017 | Acsm3       | Ces5          | -1 |
| 1074 | 14147 | Acsm3       | Acss2         | -1 |
| 1074 | 14151 | Acsm3       | Slc44a1       | -1 |
| 1074 | 18201 | Acsm3       | MMT00060232   | -1 |
| 1074 | 20079 | Acsm3       | MMT00019254   | 1  |
| 1074 | 21214 | Acsm3       | Scd1          | -1 |
| 1074 | 21575 | Acsm3       | Cyp2c55       | -1 |
| 1074 | 21966 | Acsm3       | Pcp4l1        | 1  |
| 1074 | 22046 | Acsm3       | Cml4          | -1 |
| 1074 | 22138 | Acsm3       | Ang           | 1  |
| 1074 | 22727 | Acsm3       | Pdgfra        | 1  |
| 1079 | 1711  | Hr          | Grl1          | -1 |
| 1079 | 3495  | Hr          | EG633752      | 1  |
| 1079 | 3989  | Hr          | Wrnip1        | -1 |
| 1079 | 4349  | Hr          | Mrpl27        | 1  |
| 1079 | 5804  | Hr          | Thrsp         | 1  |
| 1079 | 6816  | Hr          | Slc46a3       | 1  |
| 1079 | 10132 | Hr          | Ces2          | 1  |
| 1079 | 11576 | Hr          | Gm1381        | 1  |
| 1079 | 13251 | Hr          | EG622268      | 1  |
| 1079 | 17090 | Hr          | Lass2         | 1  |
| 1079 | 18515 | Hr          | Ddx28         | -1 |
| 1079 | 20058 | Hr          | Dnaic1        | -1 |
| 1079 | 21583 | Hr          | Gstz1         | 1  |
| 1084 | 5364  | Pros1       | Kif22         | 1  |
| 1085 | 3836  | Col5a2      | 2200001115Rik | 1  |
| 1085 | 5364  | Col5a2      | Kif22         | 1  |
| 1091 | 5766  | Acsl5       | 5033414D02Rik | 1  |
| 1091 | 19794 | Acsl5       | Rgs2          | 1  |
| 1091 | 23208 | Acsl5       | Hck           | 1  |
| 1101 | 1101  | Sec11a      | Sec11a        | 1  |
| 1101 | 22841 | Sec11a      | Cib1          | -1 |
| 1105 | 14151 | Crls1       | Slc44a1       | -1 |
| 1105 | 21202 | Crls1       | Acly          | -1 |
| 1108 | 21214 | MMT00067207 | Scd1          | 1  |
| 1114 | 14151 | Cdca7l      | Slc44a1       | 1  |
| 1114 | 21214 | Cdca7l      | Scd1          | 1  |
| 1120 | 760   | Rbpms2      | Akr1c19       | 1  |
| 1120 | 1129  | Rbpms2      | Gsta4         | 1  |
| 1120 | 2127  | Rbpms2      | Ldha          | -1 |
| 1120 | 2262  | Rbpms2      | Papss2        | 1  |
| 1120 | 2721  | Rbpms2      | Inmt          | 1  |
| 1120 | 3565  | Rbpms2      | MMT00045908   | 1  |
| 1120 | 5804  | Rbpms2      | Thrsp         | 1  |
| 1120 | 6263  | Rbpms2      | Slc7a4        | 1  |
| 1120 | 6329  | Rbpms2      | Cyp2b10       | 1  |
| 1120 | 6420  | Rbpms2      | Mipep         | 1  |
| 1120 | 6746  | Rbpms2      | E2f8          | -1 |
| 1120 | 8773  | Rbpms2      | MMT00027093   | -1 |
| 1120 | 9700  | Rbpms2      | Prodh         | 1  |

|      |       |             |                    |    |
|------|-------|-------------|--------------------|----|
| 1120 | 9718  | Rbpms2      | Fmo5               | 1  |
| 1120 | 9842  | Rbpms2      | Qdpr               | 1  |
| 1120 | 10554 | Rbpms2      | ENSMUSG00000074179 | 1  |
| 1120 | 12556 | Rbpms2      | Ass1               | 1  |
| 1120 | 13293 | Rbpms2      | Gsta2              | 1  |
| 1120 | 13431 | Rbpms2      | MMT00038058        | -1 |
| 1120 | 14055 | Rbpms2      | MMT00050438        | -1 |
| 1120 | 14100 | Rbpms2      | Ccnk               | 1  |
| 1120 | 15205 | Rbpms2      | MMT00030262        | -1 |
| 1120 | 17563 | Rbpms2      | Aldh111            | 1  |
| 1120 | 17638 | Rbpms2      | Adssl1             | 1  |
| 1120 | 18069 | Rbpms2      | Gpt                | 1  |
| 1120 | 19790 | Rbpms2      | Polg2              | 1  |
| 1120 | 20019 | Rbpms2      | Qdpr               | 1  |
| 1120 | 20058 | Rbpms2      | Dnaic1             | -1 |
| 1120 | 20385 | Rbpms2      | Chd1l              | 1  |
| 1120 | 20567 | Rbpms2      | Ggt6               | 1  |
| 1120 | 21727 | Rbpms2      | Khk                | 1  |
| 1120 | 22907 | Rbpms2      | MMT00054594        | -1 |
| 1120 | 22978 | Rbpms2      | MMT00043176        | -1 |
| 1129 | 5364  | Gsta4       | Kif22              | -1 |
| 1129 | 6085  | Gsta4       | MMT00007454        | -1 |
| 1129 | 13431 | Gsta4       | MMT00038058        | -1 |
| 1129 | 15205 | Gsta4       | MMT00030262        | -1 |
| 1135 | 1135  | Akap12      | Akap12             | 1  |
| 1135 | 2571  | Akap12      | Rmnd1              | 1  |
| 1135 | 3744  | Akap12      | Rmnd1              | 1  |
| 1135 | 8786  | Akap12      | Rmnd1              | 1  |
| 1135 | 18300 | Akap12      | Arg1               | -1 |
| 1135 | 19115 | Akap12      | Rab32              | 1  |
| 1162 | 1162  | Cpsf4       | Cpsf4              | 1  |
| 1162 | 2115  | Cpsf4       | Gpr12              | 1  |
| 1162 | 7483  | Cpsf4       | Cyp3a25            | 1  |
| 1162 | 8906  | Cpsf4       | MMT00004929        | -1 |
| 1162 | 15480 | Cpsf4       | MMT00078167        | -1 |
| 1162 | 17535 | Cpsf4       | MMT00008110        | -1 |
| 1177 | 19520 | EG545391    | Uck2               | 1  |
| 1180 | 5364  | Clec4a3     | Kif22              | 1  |
| 1180 | 14472 | Clec4a3     | Ahcy               | -1 |
| 1183 | 2793  | MMT00009390 | MMT00005644        | -1 |
| 1183 | 5989  | MMT00009390 | 2310042D19Rik      | -1 |
| 1201 | 8444  | Ptger3      | Rdh16              | 1  |
| 1201 | 20385 | Ptger3      | Chd1l              | 1  |
| 1203 | 8444  | Enah        | Rdh16              | -1 |
| 1203 | 20058 | Enah        | Dnaic1             | 1  |
| 1214 | 1416  | Trip13      | 6720460F02Rik      | 1  |
| 1214 | 5364  | Trip13      | Kif22              | 1  |
| 1214 | 8416  | Trip13      | Cdc20              | 1  |
| 1214 | 11382 | Trip13      | Cdca3              | 1  |
| 1214 | 17823 | Trip13      | D2Ertd750e         | 1  |
| 1214 | 21947 | Trip13      | Cdca8              | 1  |

|      |       |               |                    |    |
|------|-------|---------------|--------------------|----|
| 1232 | 1232  | Abhd1         | Abhd1              | 1  |
| 1241 | 20087 | Meox1         | Cd44               | -1 |
| 1248 | 1248  | Usp24         | Usp24              | 1  |
| 1250 | 10554 | Nol6          | ENSMUSG00000074179 | 1  |
| 1250 | 13293 | Nol6          | Gsta2              | 1  |
| 1250 | 20019 | Nol6          | Qdpr               | 1  |
| 1253 | 12280 | Scel          | Cln5               | -1 |
| 1253 | 23342 | Scel          | Ndfip2             | 1  |
| 1254 | 5364  | Lum           | Kif22              | 1  |
| 1254 | 16202 | Lum           | Ccnd1              | 1  |
| 1255 | 252   | Grhpr         | C730027P07Rik      | -1 |
| 1255 | 2636  | Grhpr         | Tars               | -1 |
| 1255 | 3836  | Grhpr         | 2200001115Rik      | -1 |
| 1255 | 4674  | Grhpr         | Cxcl12             | 1  |
| 1255 | 5425  | Grhpr         | Ung                | 1  |
| 1255 | 5934  | Grhpr         | S100a10            | -1 |
| 1255 | 6109  | Grhpr         | Hsd17b2            | -1 |
| 1255 | 6193  | Grhpr         | Lactb2             | -1 |
| 1255 | 6370  | Grhpr         | Aqp8               | -1 |
| 1255 | 6386  | Grhpr         | Por                | 1  |
| 1255 | 7973  | Grhpr         | Lgals9             | -1 |
| 1255 | 10961 | Grhpr         | Pgd                | -1 |
| 1255 | 11086 | Grhpr         | Pnpla5             | -1 |
| 1255 | 11807 | Grhpr         | Fbxo31             | 1  |
| 1255 | 12208 | Grhpr         | Pnpla7             | -1 |
| 1255 | 12941 | Grhpr         | Elov15             | -1 |
| 1255 | 14017 | Grhpr         | Ces5               | -1 |
| 1255 | 14147 | Grhpr         | Acss2              | -1 |
| 1255 | 14323 | Grhpr         | Scarb1             | 1  |
| 1255 | 14442 | Grhpr         | Ethe1              | -1 |
| 1255 | 17338 | Grhpr         | Mocos              | -1 |
| 1255 | 17996 | Grhpr         | Igfbp2             | 1  |
| 1255 | 18201 | Grhpr         | MMT00060232        | -1 |
| 1255 | 18827 | Grhpr         | Oprs1              | -1 |
| 1255 | 20079 | Grhpr         | MMT00019254        | 1  |
| 1255 | 20678 | Grhpr         | Cyp39a1            | 1  |
| 1255 | 21202 | Grhpr         | Acly               | -1 |
| 1255 | 21214 | Grhpr         | Scd1               | -1 |
| 1255 | 21966 | Grhpr         | Pcp4l1             | 1  |
| 1255 | 22138 | Grhpr         | Ang                | 1  |
| 1255 | 22727 | Grhpr         | Pdgfra             | 1  |
| 1257 | 7159  | Slc25a45      | 1700031F05Rik      | 1  |
| 1263 | 2875  | Folh1         | Wfdc2              | 1  |
| 1270 | 3475  | 1700029I01Rik | 2610305D13Rik      | 1  |
| 1270 | 18338 | 1700029I01Rik | Akr1e1             | -1 |
| 1270 | 19924 | 1700029I01Rik | Ubiad1             | 1  |
| 1270 | 20045 | 1700029I01Rik | D4Wsu114e          | 1  |
| 1271 | 20967 | 2810403A07Rik | Fabp2              | -1 |
| 1272 | 7602  | 1110008P14Rik | Pcca               | 1  |
| 1276 | 3265  | Col4a1        | Dntt               | 1  |
| 1276 | 3836  | Col4a1        | 2200001115Rik      | 1  |

|      |       |               |               |    |
|------|-------|---------------|---------------|----|
| 1276 | 5934  | Col4a1        | S100a10       | 1  |
| 1276 | 12565 | Col4a1        | Grem2         | -1 |
| 1276 | 12624 | Col4a1        | Clptm1l       | 1  |
| 1276 | 12941 | Col4a1        | Elov5         | 1  |
| 1276 | 18042 | Col4a1        | Aph1c         | -1 |
| 1276 | 18069 | Col4a1        | Gpt           | -1 |
| 1276 | 18827 | Col4a1        | Oprs1         | 1  |
| 1276 | 22138 | Col4a1        | Ang           | -1 |
| 1279 | 1279  | Ctps2         | Ctps2         | 1  |
| 1280 | 719   | Mesdc2        | Usp2          | -1 |
| 1280 | 17530 | Mesdc2        | MMT00041792   | 1  |
| 1281 | 21727 | Alkbh3        | Khk           | 1  |
| 1284 | 12908 | Serpina3h     | Jdp2          | 1  |
| 1287 | 11462 | Acss3         | Gpam          | -1 |
| 1290 | 17996 | Zscan12       | Igfbp2        | 1  |
| 1290 | 20079 | Zscan12       | MMT00019254   | 1  |
| 1290 | 22138 | Zscan12       | Ang           | 1  |
| 1296 | 7140  | 5330401P04Rik | Mtbp          | 1  |
| 1307 | 761   | Tmem116       | Amigo1        | 1  |
| 1307 | 1167  | Tmem116       | Atg2a         | 1  |
| 1307 | 1851  | Tmem116       | Tmem41a       | 1  |
| 1307 | 2051  | Tmem116       | Ddx27         | 1  |
| 1307 | 5425  | Tmem116       | Ung           | 1  |
| 1307 | 5922  | Tmem116       | Hyal2         | 1  |
| 1307 | 6193  | Tmem116       | Lactb2        | -1 |
| 1307 | 11807 | Tmem116       | Fbxo31        | 1  |
| 1307 | 12460 | Tmem116       | Pnpla2        | 1  |
| 1307 | 12637 | Tmem116       | Itpka         | 1  |
| 1307 | 17878 | Tmem116       | Brap          | 1  |
| 1307 | 18286 | Tmem116       | Slc41a3       | 1  |
| 1307 | 18515 | Tmem116       | Ddx28         | 1  |
| 1307 | 21079 | Tmem116       | Tfpi2         | -1 |
| 1307 | 21202 | Tmem116       | Acly          | -1 |
| 1307 | 21251 | Tmem116       | Cpt1a         | 1  |
| 1311 | 5364  | Mpp4          | Kif22         | 1  |
| 1323 | 14147 | Orc2l         | Acss2         | 1  |
| 1323 | 22217 | Orc2l         | Flvcr2        | -1 |
| 1329 | 12910 | 5730494N06Rik | 1110028A07Rik | 1  |
| 1336 | 1052  | MMT00069537   | Cog4          | 1  |
| 1336 | 1336  | MMT00069537   | MMT00069537   | 1  |
| 1336 | 2243  | MMT00069537   | Gcsh          | 1  |
| 1336 | 7910  | MMT00069537   | AK122209      | 1  |
| 1336 | 9770  | MMT00069537   | Bcmo1         | -1 |
| 1336 | 10668 | MMT00069537   | Kars          | 1  |
| 1336 | 11404 | MMT00069537   | Gnpat         | 1  |
| 1336 | 14391 | MMT00069537   | MMT00017335   | -1 |
| 1336 | 16849 | MMT00069537   | Trmt1         | -1 |
| 1336 | 18697 | MMT00069537   | Afg3l1        | 1  |
| 1336 | 21394 | MMT00069537   | Cdh15         | -1 |
| 1336 | 22909 | MMT00069537   | Nup133        | 1  |
| 1344 | 8641  | Marcks        | Slc7a2        | -1 |

|      |       |               |               |    |
|------|-------|---------------|---------------|----|
| 1344 | 11129 | Marcks        | Ankhd1        | -1 |
| 1344 | 11808 | Marcks        | Pck1          | -1 |
| 1344 | 15862 | Marcks        | Mrap          | 1  |
| 1344 | 16060 | Marcks        | Gys2          | -1 |
| 1344 | 16647 | Marcks        | D16H22S680E   | -1 |
| 1344 | 18827 | Marcks        | Oprs1         | 1  |
| 1344 | 23201 | Marcks        | S1pr1         | 1  |
| 1353 | 5364  | Plcg2         | Kif22         | 1  |
| 1361 | 2256  | 2010001M06Rik | Serpina9      | 1  |
| 1363 | 8815  | BC021767      | Mx1           | -1 |
| 1371 | 1371  | 1200009I06Rik | 1200009I06Rik | 1  |
| 1371 | 2454  | 1200009I06Rik | MMT00045890   | 1  |
| 1371 | 2485  | 1200009I06Rik | Adck1         | 1  |
| 1371 | 4414  | 1200009I06Rik | 5033406O09Rik | 1  |
| 1371 | 5829  | 1200009I06Rik | 2810455K09Rik | -1 |
| 1371 | 7099  | 1200009I06Rik | Kcnk10        | 1  |
| 1371 | 7388  | 1200009I06Rik | Amn           | 1  |
| 1371 | 8155  | 1200009I06Rik | Mark3         | 1  |
| 1371 | 8357  | 1200009I06Rik | Siva1         | 1  |
| 1371 | 8925  | 1200009I06Rik | MMT00026932   | -1 |
| 1371 | 9678  | 1200009I06Rik | AW555464      | 1  |
| 1371 | 10526 | 1200009I06Rik | MMT00036239   | -1 |
| 1371 | 12084 | 1200009I06Rik | Siva1         | 1  |
| 1371 | 12238 | 1200009I06Rik | Traf3         | -1 |
| 1371 | 13027 | 1200009I06Rik | Ppp2r5c       | -1 |
| 1371 | 13988 | 1200009I06Rik | Cntnap2       | 1  |
| 1371 | 15984 | 1200009I06Rik | MMT00075074   | 1  |
| 1371 | 16191 | 1200009I06Rik | Klc1          | -1 |
| 1371 | 23693 | 1200009I06Rik | A530016L24Rik | 1  |
| 1374 | 6498  | Mdn1          | MMT00016809   | -1 |
| 1374 | 6648  | Mdn1          | Cenpl         | -1 |
| 1380 | 1129  | Sycp3         | Gsta4         | 1  |
| 1380 | 20058 | Sycp3         | Dnaic1        | -1 |
| 1383 | 4674  | Bhlhb9        | Cxcl12        | 1  |
| 1396 | 11075 | Rassf7        | Xrcc6bp1      | 1  |
| 1397 | 7151  | 2900009I07Rik | MMT00007982   | -1 |
| 1401 | 19762 | Klk8          | Pih1d1        | 1  |
| 1401 | 19854 | Klk8          | Kcnj14        | -1 |
| 1401 | 20490 | Klk8          | Tmem143       | 1  |
| 1401 | 21438 | Klk8          | Plekha4       | 1  |
| 1406 | 17090 | Clic3         | Lass2         | 1  |
| 1416 | 1416  | 6720460F02Rik | 6720460F02Rik | 1  |
| 1416 | 3836  | 6720460F02Rik | 2200001I15Rik | 1  |
| 1416 | 5364  | 6720460F02Rik | Kif22         | 1  |
| 1416 | 8416  | 6720460F02Rik | Cdc20         | 1  |
| 1416 | 11382 | 6720460F02Rik | Cdca3         | 1  |
| 1416 | 17823 | 6720460F02Rik | D2Ert750e     | 1  |
| 1416 | 18299 | 6720460F02Rik | MMT00035424   | 1  |
| 1416 | 20433 | 6720460F02Rik | Cdca5         | 1  |
| 1416 | 21692 | 6720460F02Rik | MMT00013924   | 1  |
| 1416 | 21947 | 6720460F02Rik | Cdca8         | 1  |

|      |       |               |               |    |
|------|-------|---------------|---------------|----|
| 1416 | 22138 | 6720460F02Rik | Ang           | -1 |
| 1424 | 250   | Dapk1         | Tubb2a-ps2    | 1  |
| 1424 | 402   | Dapk1         | Timp3         | -1 |
| 1424 | 407   | Dapk1         | Serpina6      | -1 |
| 1424 | 415   | Dapk1         | Ypel2         | 1  |
| 1424 | 433   | Dapk1         | Pla2g12b      | 1  |
| 1424 | 437   | Dapk1         | Ndrp1         | 1  |
| 1424 | 609   | Dapk1         | MMT00060868   | 1  |
| 1424 | 719   | Dapk1         | Usp2          | -1 |
| 1424 | 865   | Dapk1         | Npc1          | -1 |
| 1424 | 1310  | Dapk1         | Cabc1         | 1  |
| 1424 | 1362  | Dapk1         | Avpr1a        | 1  |
| 1424 | 1424  | Dapk1         | Dapk1         | 1  |
| 1424 | 1453  | Dapk1         | Gfod2         | 1  |
| 1424 | 1585  | Dapk1         | Mif4gd        | 1  |
| 1424 | 1767  | Dapk1         | BC016495      | -1 |
| 1424 | 2011  | Dapk1         | Slc2a5        | -1 |
| 1424 | 2013  | Dapk1         | Il15ra        | -1 |
| 1424 | 2384  | Dapk1         | Micalcl       | 1  |
| 1424 | 2399  | Dapk1         | MMT00060167   | 1  |
| 1424 | 2636  | Dapk1         | Tars          | 1  |
| 1424 | 2829  | Dapk1         | Lrfr3         | 1  |
| 1424 | 2850  | Dapk1         | Slc16a6       | 1  |
| 1424 | 3214  | Dapk1         | Dnmt3b        | 1  |
| 1424 | 3235  | Dapk1         | BC029214      | 1  |
| 1424 | 3357  | Dapk1         | Rev1          | -1 |
| 1424 | 3410  | Dapk1         | Paqr9         | 1  |
| 1424 | 3746  | Dapk1         | Osbpl5        | -1 |
| 1424 | 3790  | Dapk1         | Mtss1         | -1 |
| 1424 | 3804  | Dapk1         | MMT00015534   | 1  |
| 1424 | 4192  | Dapk1         | Zranb1        | -1 |
| 1424 | 4201  | Dapk1         | Tubb2c        | 1  |
| 1424 | 4286  | Dapk1         | Ptp4a1        | -1 |
| 1424 | 4298  | Dapk1         | St3gal1       | 1  |
| 1424 | 4392  | Dapk1         | 1810055G02Rik | -1 |
| 1424 | 4534  | Dapk1         | Ndel1         | -1 |
| 1424 | 4959  | Dapk1         | Optn          | -1 |
| 1424 | 5120  | Dapk1         | Alkbh7        | 1  |
| 1424 | 5183  | Dapk1         | St5           | 1  |
| 1424 | 5372  | Dapk1         | Tor1a         | -1 |
| 1424 | 5374  | Dapk1         | Chka          | 1  |
| 1424 | 5375  | Dapk1         | Sec23b        | 1  |
| 1424 | 5487  | Dapk1         | Palmd         | -1 |
| 1424 | 5569  | Dapk1         | Pdgfc         | 1  |
| 1424 | 5574  | Dapk1         | Hsd3b7        | 1  |
| 1424 | 5802  | Dapk1         | Mad2l2        | 1  |
| 1424 | 5804  | Dapk1         | Thrsp         | -1 |
| 1424 | 5849  | Dapk1         | 2310031A18Rik | 1  |
| 1424 | 5934  | Dapk1         | S100a10       | 1  |
| 1424 | 5974  | Dapk1         | Arntl         | 1  |
| 1424 | 6019  | Dapk1         | Gdap10        | -1 |



|      |       |       |               |    |
|------|-------|-------|---------------|----|
| 1424 | 6171  | Dapk1 | Abtb2         | 1  |
| 1424 | 6268  | Dapk1 | Slc45a3       | 1  |
| 1424 | 6343  | Dapk1 | Slc20a1       | -1 |
| 1424 | 6386  | Dapk1 | Por           | -1 |
| 1424 | 6714  | Dapk1 | Lima1         | -1 |
| 1424 | 6771  | Dapk1 | Insc          | 1  |
| 1424 | 6788  | Dapk1 | Psen2         | 1  |
| 1424 | 7061  | Dapk1 | Spsb3         | 1  |
| 1424 | 7414  | Dapk1 | Clpx          | 1  |
| 1424 | 7862  | Dapk1 | Cpsf4l        | -1 |
| 1424 | 8054  | Dapk1 | Smarca2       | -1 |
| 1424 | 8328  | Dapk1 | Klhdc8a       | 1  |
| 1424 | 8399  | Dapk1 | Herpud1       | -1 |
| 1424 | 8595  | Dapk1 | MMT00019109   | 1  |
| 1424 | 8683  | Dapk1 | 3110002H16Rik | -1 |
| 1424 | 8684  | Dapk1 | Ii15          | -1 |
| 1424 | 9158  | Dapk1 | Pde9a         | 1  |
| 1424 | 9379  | Dapk1 | Ypel2         | 1  |
| 1424 | 9495  | Dapk1 | Srms          | 1  |
| 1424 | 9585  | Dapk1 | Neu3          | 1  |
| 1424 | 9831  | Dapk1 | Nedd4l        | 1  |
| 1424 | 9907  | Dapk1 | 4932442K08Rik | -1 |
| 1424 | 9910  | Dapk1 | EG666644      | -1 |
| 1424 | 10088 | Dapk1 | Ddc           | 1  |
| 1424 | 10215 | Dapk1 | Nampt         | -1 |
| 1424 | 10444 | Dapk1 | 1810020D17Rik | -1 |
| 1424 | 10486 | Dapk1 | 1300002K09Rik | 1  |
| 1424 | 10642 | Dapk1 | Ngf           | -1 |
| 1424 | 10712 | Dapk1 | Fchsd2        | -1 |
| 1424 | 10775 | Dapk1 | Slc16a1       | 1  |
| 1424 | 11024 | Dapk1 | MMT00049098   | 1  |
| 1424 | 11075 | Dapk1 | Xrcc6bp1      | -1 |
| 1424 | 11233 | Dapk1 | Tef           | -1 |
| 1424 | 11447 | Dapk1 | Nr1h4         | -1 |
| 1424 | 11557 | Dapk1 | Blk           | -1 |
| 1424 | 11599 | Dapk1 | Coq10b        | -1 |
| 1424 | 11741 | Dapk1 | Slc30a10      | 1  |
| 1424 | 12151 | Dapk1 | MMT00082650   | -1 |
| 1424 | 12204 | Dapk1 | Ankmy2        | -1 |
| 1424 | 12420 | Dapk1 | Klhl21        | -1 |
| 1424 | 12489 | Dapk1 | Wdr8          | 1  |
| 1424 | 12513 | Dapk1 | Whsc2         | 1  |
| 1424 | 12687 | Dapk1 | Zc3h8         | -1 |
| 1424 | 12904 | Dapk1 | MMT00040704   | -1 |
| 1424 | 12905 | Dapk1 | Nfil3         | 1  |
| 1424 | 13052 | Dapk1 | Tnfrsf19      | -1 |
| 1424 | 13078 | Dapk1 | Eps8l2        | 1  |
| 1424 | 13094 | Dapk1 | Cnn3          | -1 |
| 1424 | 13630 | Dapk1 | Cdkn1a        | 1  |
| 1424 | 13731 | Dapk1 | 2210408F21Rik | -1 |
| 1424 | 13864 | Dapk1 | Larp1         | 1  |

|      |       |       |               |    |
|------|-------|-------|---------------|----|
| 1424 | 13889 | Dapk1 | Agpat2        | 1  |
| 1424 | 13947 | Dapk1 | Crip2         | 1  |
| 1424 | 14041 | Dapk1 | Cldn1         | 1  |
| 1424 | 14279 | Dapk1 | 3930402G23Rik | 1  |
| 1424 | 14298 | Dapk1 | Atp2a2        | 1  |
| 1424 | 14462 | Dapk1 | Zfp385b       | -1 |
| 1424 | 15224 | Dapk1 | Cyp2a4        | -1 |
| 1424 | 15481 | Dapk1 | 1110067D22Rik | 1  |
| 1424 | 15665 | Dapk1 | Blcap         | 1  |
| 1424 | 15709 | Dapk1 | Tceal1        | -1 |
| 1424 | 15824 | Dapk1 | D19Ertd721e   | 1  |
| 1424 | 16060 | Dapk1 | Gys2          | -1 |
| 1424 | 16167 | Dapk1 | Stbd1         | -1 |
| 1424 | 16474 | Dapk1 | Bhlhb2        | -1 |
| 1424 | 16515 | Dapk1 | Gramd4        | 1  |
| 1424 | 16580 | Dapk1 | Tnfaip2       | 1  |
| 1424 | 16669 | Dapk1 | Tjp2          | 1  |
| 1424 | 16690 | Dapk1 | Tjp3          | 1  |
| 1424 | 16712 | Dapk1 | Pnrc1         | 1  |
| 1424 | 16851 | Dapk1 | Slc34a2       | 1  |
| 1424 | 16904 | Dapk1 | Sphk2         | 1  |
| 1424 | 17130 | Dapk1 | Baiap2        | 1  |
| 1424 | 17224 | Dapk1 | 5430407P10Rik | 1  |
| 1424 | 17247 | Dapk1 | A030007L17Rik | 1  |
| 1424 | 17338 | Dapk1 | Mocos         | 1  |
| 1424 | 17583 | Dapk1 | Per2          | -1 |
| 1424 | 17876 | Dapk1 | Tubb4         | 1  |
| 1424 | 17884 | Dapk1 | Lnx2          | 1  |
| 1424 | 17952 | Dapk1 | Ripk2         | -1 |
| 1424 | 18147 | Dapk1 | Nhlrc2        | -1 |
| 1424 | 18179 | Dapk1 | Dbp           | -1 |
| 1424 | 18215 | Dapk1 | Gpr146        | -1 |
| 1424 | 18296 | Dapk1 | Pcgf5         | -1 |
| 1424 | 18438 | Dapk1 | Map3k7ip2     | 1  |
| 1424 | 18498 | Dapk1 | Slc5a6        | -1 |
| 1424 | 18552 | Dapk1 | Nr2c2ap       | 1  |
| 1424 | 18607 | Dapk1 | Acat3         | 1  |
| 1424 | 18756 | Dapk1 | Tspan14       | 1  |
| 1424 | 18827 | Dapk1 | Oprs1         | 1  |
| 1424 | 19004 | Dapk1 | Pdk4          | 1  |
| 1424 | 19032 | Dapk1 | Tymp          | 1  |
| 1424 | 19146 | Dapk1 | N4bp2l1       | -1 |
| 1424 | 19234 | Dapk1 | Nrg4          | -1 |
| 1424 | 19305 | Dapk1 | Azin1         | -1 |
| 1424 | 19532 | Dapk1 | Med8          | 1  |
| 1424 | 19671 | Dapk1 | Upp2          | -1 |
| 1424 | 19701 | Dapk1 | 9930021J17Rik | 1  |
| 1424 | 19790 | Dapk1 | Polg2         | -1 |
| 1424 | 20266 | Dapk1 | Insig2        | 1  |
| 1424 | 20803 | Dapk1 | Tmem50a       | -1 |
| 1424 | 20965 | Dapk1 | Usp28         | -1 |

|      |       |               |                    |    |
|------|-------|---------------|--------------------|----|
| 1424 | 21142 | Dapk1         | Gm129              | -1 |
| 1424 | 21251 | Dapk1         | Cpt1a              | -1 |
| 1424 | 21306 | Dapk1         | Pvrl1              | 1  |
| 1424 | 21409 | Dapk1         | Gldc               | 1  |
| 1424 | 21531 | Dapk1         | Ttc23              | -1 |
| 1424 | 21811 | Dapk1         | Ak3l1              | -1 |
| 1424 | 22012 | Dapk1         | Itgae              | 1  |
| 1424 | 22290 | Dapk1         | Tubb2a             | 1  |
| 1424 | 22388 | Dapk1         | 2410018M08Rik      | -1 |
| 1424 | 22630 | Dapk1         | MMT00034355        | 1  |
| 1424 | 23437 | Dapk1         | Efhd2              | -1 |
| 1424 | 23458 | Dapk1         | Clic4              | 1  |
| 1427 | 3535  | Ahrr          | S100a9             | 1  |
| 1427 | 5364  | Ahrr          | Kif22              | 1  |
| 1433 | 10554 | Deb1          | ENSMUSG00000074179 | 1  |
| 1433 | 13293 | Deb1          | Gsta2              | 1  |
| 1438 | 337   | Dclre1b       | Rasgef1b           | 1  |
| 1438 | 10521 | Dclre1b       | Ttf2               | -1 |
| 1438 | 12761 | Dclre1b       | Tsc22d3            | 1  |
| 1438 | 15522 | Dclre1b       | 1810011O10Rik      | 1  |
| 1438 | 17525 | Dclre1b       | Ctgf               | 1  |
| 1438 | 19556 | Dclre1b       | Efna1              | -1 |
| 1438 | 21934 | Dclre1b       | Id2                | -1 |
| 1444 | 630   | C1r           | C1s                | 1  |
| 1444 | 1444  | C1r           | C1r                | 1  |
| 1444 | 6625  | C1r           | C1s                | 1  |
| 1444 | 9417  | C1r           | Cd163              | -1 |
| 1444 | 17391 | C1r           | C530028O21Rik      | -1 |
| 1444 | 19964 | C1r           | Ndufa9             | -1 |
| 1444 | 22075 | C1r           | C1s                | 1  |
| 1448 | 21947 | Zwilch        | Cdca8              | 1  |
| 1451 | 14017 | 2010300C02Rik | Ces5               | -1 |
| 1451 | 18201 | 2010300C02Rik | MMT00060232        | -1 |
| 1453 | 10546 | Gfod2         | Prpf6              | 1  |
| 1453 | 12513 | Gfod2         | Whsc2              | 1  |
| 1453 | 19148 | Gfod2         | Rnf144b            | 1  |
| 1453 | 21888 | Gfod2         | Kti12              | 1  |
| 1458 | 6193  | Cpsf2         | Lactb2             | 1  |
| 1462 | 14151 | Rpusd4        | Slc44a1            | -1 |
| 1464 | 12910 | Taf13         | 1110028A07Rik      | 1  |
| 1466 | 524   | Ubap2l        | Hsd3b2             | 1  |
| 1466 | 1466  | Ubap2l        | Ubap2l             | 1  |
| 1466 | 1867  | Ubap2l        | Bcas2              | 1  |
| 1466 | 1963  | Ubap2l        | MMT00039783        | 1  |
| 1466 | 2752  | Ubap2l        | Fcgr1              | 1  |
| 1466 | 3753  | Ubap2l        | Setdb1             | -1 |
| 1466 | 5938  | Ubap2l        | Pfn2               | 1  |
| 1466 | 6206  | Ubap2l        | MMT00063701        | 1  |
| 1466 | 7519  | Ubap2l        | Gstm1              | 1  |
| 1466 | 7810  | Ubap2l        | Trim45             | 1  |
| 1466 | 8738  | Ubap2l        | Reg4               | -1 |

|      |       |               |                    |    |
|------|-------|---------------|--------------------|----|
| 1466 | 10521 | Ubap2l        | Ttf2               | 1  |
| 1466 | 10681 | Ubap2l        | Dgkz               | -1 |
| 1466 | 11121 | Ubap2l        | Mtmr11             | -1 |
| 1466 | 11611 | Ubap2l        | S100a13            | -1 |
| 1466 | 12367 | Ubap2l        | MMT00072365        | -1 |
| 1466 | 13134 | Ubap2l        | Lipg               | -1 |
| 1466 | 15901 | Ubap2l        | Tpm3               | -1 |
| 1466 | 16416 | Ubap2l        | Commd2             | 1  |
| 1466 | 16753 | Ubap2l        | Hfe2               | -1 |
| 1466 | 18754 | Ubap2l        | Rbm8a              | 1  |
| 1466 | 18911 | Ubap2l        | Selenbp2           | 1  |
| 1466 | 20385 | Ubap2l        | Chd1l              | 1  |
| 1466 | 20661 | Ubap2l        | Tuft1              | 1  |
| 1466 | 21814 | Ubap2l        | Accn5              | 1  |
| 1466 | 22202 | Ubap2l        | OTTMUSG00000021274 | -1 |
| 1466 | 22570 | Ubap2l        | Phtf1              | 1  |
| 1466 | 23457 | Ubap2l        | Selenbp2           | 1  |
| 1470 | 11984 | Kcns3         | N6amt2             | -1 |
| 1471 | 13293 | Igfbp7        | Gsta2              | -1 |
| 1476 | 269   | 2610020H08Rik | Tuba1b             | -1 |
| 1476 | 607   | 2610020H08Rik | Me1                | -1 |
| 1476 | 662   | 2610020H08Rik | Mid1ip1            | -1 |
| 1476 | 1941  | 2610020H08Rik | MMT00079618        | -1 |
| 1476 | 2051  | 2610020H08Rik | Ddx27              | 1  |
| 1476 | 2322  | 2610020H08Rik | Tuba4a             | -1 |
| 1476 | 6044  | 2610020H08Rik | Sucnr1             | -1 |
| 1476 | 6193  | 2610020H08Rik | Lactb2             | -1 |
| 1476 | 6370  | 2610020H08Rik | Aqp8               | -1 |
| 1476 | 8896  | 2610020H08Rik | Fasn               | -1 |
| 1476 | 9763  | 2610020H08Rik | Tuba3b             | -1 |
| 1476 | 10772 | 2610020H08Rik | Aacs               | -1 |
| 1476 | 10961 | 2610020H08Rik | Pgd                | -1 |
| 1476 | 11129 | 2610020H08Rik | Ankhd1             | 1  |
| 1476 | 11462 | 2610020H08Rik | Gpam               | -1 |
| 1476 | 11724 | 2610020H08Rik | Tuba3a             | -1 |
| 1476 | 11807 | 2610020H08Rik | Fbxo31             | 1  |
| 1476 | 12143 | 2610020H08Rik | Thyn1              | -1 |
| 1476 | 12219 | 2610020H08Rik | Cyb5b              | -1 |
| 1476 | 12315 | 2610020H08Rik | Srebf1             | -1 |
| 1476 | 12460 | 2610020H08Rik | Pnpla2             | 1  |
| 1476 | 12910 | 2610020H08Rik | 1110028A07Rik      | -1 |
| 1476 | 13018 | 2610020H08Rik | AW544981           | -1 |
| 1476 | 13304 | 2610020H08Rik | Gadd45b            | 1  |
| 1476 | 13471 | 2610020H08Rik | Cln8               | 1  |
| 1476 | 14138 | 2610020H08Rik | Anks4b             | -1 |
| 1476 | 14147 | 2610020H08Rik | Acss2              | -1 |
| 1476 | 14151 | 2610020H08Rik | Slc44a1            | -1 |
| 1476 | 15892 | 2610020H08Rik | Slc22a5            | 1  |
| 1476 | 17090 | 2610020H08Rik | Lass2              | -1 |
| 1476 | 17444 | 2610020H08Rik | Tuba1a             | -1 |
| 1476 | 17660 | 2610020H08Rik | Nlrp12             | 1  |

|      |       |               |               |    |
|------|-------|---------------|---------------|----|
| 1476 | 17800 | 2610020H08Rik | Lrtm1         | -1 |
| 1476 | 18785 | 2610020H08Rik | Angptl4       | 1  |
| 1476 | 20246 | 2610020H08Rik | Pdia5         | 1  |
| 1476 | 20798 | 2610020H08Rik | Ccpq1         | 1  |
| 1476 | 21202 | 2610020H08Rik | Acly          | -1 |
| 1476 | 21214 | 2610020H08Rik | Scd1          | -1 |
| 1476 | 21251 | 2610020H08Rik | Cpt1a         | 1  |
| 1476 | 21408 | 2610020H08Rik | Svil          | -1 |
| 1476 | 22137 | 2610020H08Rik | Nudt7         | -1 |
| 1476 | 22138 | 2610020H08Rik | Ang           | 1  |
| 1476 | 22443 | 2610020H08Rik | Tuba1c        | -1 |
| 1476 | 22732 | 2610020H08Rik | Cyb5b         | -1 |
| 1480 | 482   | Plekhh3       | Rnf43         | 1  |
| 1480 | 563   | Plekhh3       | D4Bwg0951e    | -1 |
| 1480 | 662   | Plekhh3       | Mid1ip1       | 1  |
| 1480 | 8439  | Plekhh3       | Slc25a33      | -1 |
| 1480 | 8632  | Plekhh3       | Igfbp1        | -1 |
| 1480 | 12315 | Plekhh3       | Srebf1        | 1  |
| 1480 | 13489 | Plekhh3       | D230025D16Rik | -1 |
| 1480 | 15990 | Plekhh3       | Dnmbp         | -1 |
| 1480 | 18785 | Plekhh3       | Angptl4       | -1 |
| 1480 | 21160 | Plekhh3       | Irs2          | -1 |
| 1485 | 8328  | Plek          | Klhdc8a       | 1  |
| 1485 | 12981 | Plek          | Nek6          | 1  |
| 1485 | 23253 | Plek          | D030011O10Rik | -1 |
| 1500 | 5364  | Leprel1       | Kif22         | 1  |
| 1500 | 14472 | Leprel1       | Ahcy          | -1 |
| 1504 | 10629 | Xpo7          | BC021614      | 1  |
| 1505 | 8815  | Dusp9         | Mx1           | 1  |
| 1505 | 18201 | Dusp9         | MMT00060232   | 1  |
| 1513 | 7238  | Gzmb          | Pycard        | 1  |
| 1515 | 4960  | Med20         | MMT00067115   | 1  |
| 1515 | 15531 | Med20         | Prickle4      | 1  |
| 1531 | 5364  | Uqcrc2        | Kif22         | -1 |
| 1531 | 11382 | Uqcrc2        | Cdca3         | -1 |
| 1531 | 14656 | Uqcrc2        | Grip2         | 1  |
| 1531 | 20194 | Uqcrc2        | Pnlcd1        | -1 |
| 1531 | 23180 | Uqcrc2        | Sult1d1       | 1  |
| 1533 | 5364  | BC013712      | Kif22         | 1  |
| 1536 | 1620  | Hopx          | Htra1         | 1  |
| 1536 | 4188  | Hopx          | Sult1a1       | -1 |
| 1536 | 12219 | Hopx          | Cyb5b         | 1  |
| 1536 | 22732 | Hopx          | Cyb5b         | 1  |
| 1549 | 5364  | Gmfg          | Kif22         | 1  |
| 1550 | 12315 | Chst12        | Srebf1        | 1  |
| 1554 | 3159  | Rph3al        | Pld1          | 1  |
| 1554 | 5762  | Rph3al        | Trpc3         | -1 |
| 1554 | 5822  | Rph3al        | Car2          | 1  |
| 1554 | 5938  | Rph3al        | Pfn2          | 1  |
| 1554 | 8568  | Rph3al        | Tnik          | 1  |
| 1554 | 12367 | Rph3al        | MMT00072365   | -1 |

|      |       |             |                    |    |
|------|-------|-------------|--------------------|----|
| 1554 | 12784 | Rph3al      | Nudt6              | 1  |
| 1554 | 13423 | Rph3al      | ENSMUSG00000053749 | 1  |
| 1554 | 15508 | Rph3al      | 4632415L05Rik      | 1  |
| 1554 | 16416 | Rph3al      | Commd2             | 1  |
| 1554 | 18790 | Rph3al      | Car3               | 1  |
| 1554 | 21323 | Rph3al      | MMT00074228        | 1  |
| 1561 | 18299 | Aurka       | MMT00035424        | 1  |
| 1561 | 21692 | Aurka       | MMT00013924        | 1  |
| 1561 | 21947 | Aurka       | Cdca8              | 1  |
| 1562 | 12565 | Btg2        | Grem2              | -1 |
| 1566 | 2599  | Kctd15      | Lsm14a             | 1  |
| 1566 | 2912  | Kctd15      | Wtip               | -1 |
| 1566 | 4697  | Kctd15      | Cyp2a12            | -1 |
| 1566 | 5352  | Kctd15      | Pdcd2l             | 1  |
| 1566 | 6513  | Kctd15      | Qpctl              | 1  |
| 1566 | 7761  | Kctd15      | Nudt19             | 1  |
| 1566 | 10545 | Kctd15      | Tmem147            | 1  |
| 1566 | 11321 | Kctd15      | 2310014L17Rik      | -1 |
| 1566 | 16639 | Kctd15      | MMT00078937        | -1 |
| 1566 | 19854 | Kctd15      | Kcnj14             | 1  |
| 1568 | 17391 | Frmd4b      | C530028O21Rik      | 1  |
| 1582 | 437   | Srr         | Ndrp1              | -1 |
| 1582 | 2399  | Srr         | MMT00060167        | -1 |
| 1582 | 5804  | Srr         | Thrsp              | 1  |
| 1582 | 5849  | Srr         | 2310031A18Rik      | -1 |
| 1582 | 14279 | Srr         | 3930402G23Rik      | -1 |
| 1582 | 17583 | Srr         | Per2               | 1  |
| 1582 | 17609 | Srr         | Ptpn9              | -1 |
| 1585 | 269   | Mif4gd      | Tuba1b             | 1  |
| 1585 | 1941  | Mif4gd      | MMT00079618        | 1  |
| 1585 | 2322  | Mif4gd      | Tuba4a             | 1  |
| 1585 | 6771  | Mif4gd      | Insc               | 1  |
| 1585 | 7151  | Mif4gd      | MMT00007982        | 1  |
| 1585 | 7659  | Mif4gd      | Rab30              | -1 |
| 1585 | 9763  | Mif4gd      | Tuba3b             | 1  |
| 1585 | 11724 | Mif4gd      | Tuba3a             | 1  |
| 1585 | 17444 | Mif4gd      | Tuba1a             | 1  |
| 1587 | 10769 | MMT00044543 | Hnrnpd             | -1 |
| 1587 | 12112 | MMT00044543 | Tmem53             | -1 |
| 1587 | 18418 | MMT00044543 | Hspa1b             | 1  |
| 1587 | 22303 | MMT00044543 | Cdt1               | -1 |
| 1602 | 1602  | Mina        | Mina               | 1  |
| 1602 | 21214 | Mina        | Scd1               | 1  |
| 1603 | 1603  | Lrwd1       | Lrwd1              | 1  |
| 1603 | 4638  | Lrwd1       | Alkbh4             | -1 |
| 1607 | 607   | Memo1       | Me1                | 1  |
| 1607 | 8815  | Memo1       | Mx1                | 1  |
| 1607 | 14147 | Memo1       | Acss2              | 1  |
| 1607 | 18201 | Memo1       | MMT00060232        | 1  |
| 1607 | 21202 | Memo1       | Acly               | 1  |
| 1607 | 21214 | Memo1       | Scd1               | 1  |

|      |       |               |                    |    |
|------|-------|---------------|--------------------|----|
| 1607 | 21727 | Memo1         | Khk                | 1  |
| 1615 | 6193  | Timm10        | Lactb2             | 1  |
| 1615 | 7320  | Timm10        | MMT00051732        | 1  |
| 1615 | 7753  | Timm10        | Gfm1               | 1  |
| 1615 | 10554 | Timm10        | ENSMUSG00000074179 | 1  |
| 1615 | 13293 | Timm10        | Gsta2              | 1  |
| 1615 | 14147 | Timm10        | Acss2              | 1  |
| 1615 | 18549 | Timm10        | Robo1              | 1  |
| 1615 | 20019 | Timm10        | Qdpr               | 1  |
| 1615 | 21214 | Timm10        | Scd1               | 1  |
| 1615 | 21251 | Timm10        | Cpt1a              | -1 |
| 1615 | 21727 | Timm10        | Khk                | 1  |
| 1615 | 23640 | Timm10        | Bdh1               | -1 |
| 1620 | 3265  | Htra1         | Dntt               | 1  |
| 1620 | 3836  | Htra1         | 2200001I15Rik      | 1  |
| 1620 | 5364  | Htra1         | Kif22              | 1  |
| 1620 | 7839  | Htra1         | Asl                | -1 |
| 1620 | 17247 | Htra1         | A030007L17Rik      | 1  |
| 1620 | 17746 | Htra1         | Prlr               | 1  |
| 1620 | 18590 | Htra1         | Fgb                | 1  |
| 1620 | 20967 | Htra1         | Fabp2              | 1  |
| 1629 | 1336  | Gcsh          | MMT00069537        | -1 |
| 1629 | 2243  | Gcsh          | Gcsh               | -1 |
| 1629 | 10195 | Gcsh          | Klf1               | -1 |
| 1629 | 14391 | Gcsh          | MMT00017335        | 1  |
| 1629 | 20484 | Gcsh          | Ces1               | 1  |
| 1629 | 21394 | Gcsh          | Cdh15              | 1  |
| 1635 | 563   | 8430427H17Rik | D4Bwg0951e         | -1 |
| 1635 | 1827  | 8430427H17Rik | Gnb1l              | 1  |
| 1635 | 2322  | 8430427H17Rik | Tuba4a             | 1  |
| 1635 | 3097  | 8430427H17Rik | Ppp1r3g            | -1 |
| 1635 | 3246  | 8430427H17Rik | Prei4              | -1 |
| 1635 | 4352  | 8430427H17Rik | Rtn4r1l            | 1  |
| 1635 | 6976  | 8430427H17Rik | Rbm35b             | 1  |
| 1635 | 8641  | 8430427H17Rik | Slc7a2             | -1 |
| 1635 | 11093 | 8430427H17Rik | Zdhhc1             | -1 |
| 1635 | 11808 | 8430427H17Rik | Pck1               | -1 |
| 1635 | 12981 | 8430427H17Rik | Nek6               | 1  |
| 1635 | 13489 | 8430427H17Rik | D230025D16Rik      | -1 |
| 1635 | 13989 | 8430427H17Rik | Foxp3              | -1 |
| 1635 | 15021 | 8430427H17Rik | Ppargc1a           | -1 |
| 1635 | 15631 | 8430427H17Rik | Lpin1              | -1 |
| 1635 | 15862 | 8430427H17Rik | Mrap               | 1  |
| 1635 | 15990 | 8430427H17Rik | Dnmbp              | -1 |
| 1635 | 17323 | 8430427H17Rik | Tubb6              | 1  |
| 1635 | 17525 | 8430427H17Rik | Ctgf               | -1 |
| 1635 | 17656 | 8430427H17Rik | Hdhd3              | 1  |
| 1635 | 18314 | 8430427H17Rik | 4631416L12Rik      | -1 |
| 1635 | 18785 | 8430427H17Rik | Angptl4            | -1 |
| 1635 | 20803 | 8430427H17Rik | Tmem50a            | -1 |
| 1635 | 23201 | 8430427H17Rik | S1pr1              | 1  |

|      |       |               |               |    |
|------|-------|---------------|---------------|----|
| 1635 | 23202 | 8430427H17Rik | Oifr559       | -1 |
| 1635 | 23253 | 8430427H17Rik | D030011O10Rik | -1 |
| 1646 | 9258  | Slc15a4       | P4ha1         | 1  |
| 1649 | 407   | Pcolce        | Serpina6      | -1 |
| 1649 | 604   | Pcolce        | Ppp1r15b      | -1 |
| 1649 | 2639  | Pcolce        | Abhd2         | 1  |
| 1649 | 2850  | Pcolce        | Slc16a6       | 1  |
| 1649 | 3410  | Pcolce        | Paqr9         | 1  |
| 1649 | 3836  | Pcolce        | 2200001115Rik | 1  |
| 1649 | 5364  | Pcolce        | Kif22         | 1  |
| 1649 | 7761  | Pcolce        | Nudt19        | -1 |
| 1649 | 9700  | Pcolce        | Prodh         | -1 |
| 1649 | 10775 | Pcolce        | Slc16a1       | 1  |
| 1649 | 11233 | Pcolce        | Tef           | -1 |
| 1649 | 14472 | Pcolce        | Ahcy          | -1 |
| 1649 | 15320 | Pcolce        | MMT00017479   | -1 |
| 1649 | 16250 | Pcolce        | MMT00069147   | 1  |
| 1649 | 17247 | Pcolce        | A030007L17Rik | 1  |
| 1649 | 18069 | Pcolce        | Gpt           | -1 |
| 1649 | 18299 | Pcolce        | MMT00035424   | 1  |
| 1649 | 19772 | Pcolce        | Gnmt          | -1 |
| 1649 | 20171 | Pcolce        | 1700008G05Rik | 1  |
| 1649 | 21692 | Pcolce        | MMT00013924   | 1  |
| 1650 | 8815  | Ctdsp2        | Mx1           | -1 |
| 1650 | 18201 | Ctdsp2        | MMT00060232   | -1 |
| 1650 | 21214 | Ctdsp2        | Scd1          | -1 |
| 1653 | 3265  | Anxa5         | Dntt          | 1  |
| 1653 | 5364  | Anxa5         | Kif22         | 1  |
| 1653 | 6030  | Anxa5         | As3mt         | -1 |
| 1653 | 11129 | Anxa5         | Ankhd1        | -1 |
| 1653 | 12910 | Anxa5         | 1110028A07Rik | 1  |
| 1653 | 12941 | Anxa5         | Elovl5        | 1  |
| 1653 | 20967 | Anxa5         | Fabp2         | 1  |
| 1653 | 22138 | Anxa5         | Ang           | -1 |
| 1653 | 23026 | Anxa5         | Apom          | -1 |
| 1654 | 2224  | Dhx58         | Oasl2         | 1  |
| 1654 | 2550  | Dhx58         | MMT00036681   | 1  |
| 1654 | 3426  | Dhx58         | Hap1          | 1  |
| 1654 | 3523  | Dhx58         | Trim34        | 1  |
| 1654 | 4114  | Dhx58         | Parp12        | 1  |
| 1654 | 4508  | Dhx58         | Ifit1         | 1  |
| 1654 | 4516  | Dhx58         | Rsad2         | 1  |
| 1654 | 5044  | Dhx58         | Ifi35         | 1  |
| 1654 | 5853  | Dhx58         | Trim30        | 1  |
| 1654 | 6824  | Dhx58         | Irf7          | 1  |
| 1654 | 7284  | Dhx58         | MMT00008674   | 1  |
| 1654 | 8800  | Dhx58         | Rnf213        | 1  |
| 1654 | 9847  | Dhx58         | Ifi27         | 1  |
| 1654 | 10109 | Dhx58         | Gbp3          | 1  |
| 1654 | 11204 | Dhx58         | AI451617      | 1  |
| 1654 | 11265 | Dhx58         | Irgm          | 1  |



|      |       |        |               |    |
|------|-------|--------|---------------|----|
| 1654 | 12398 | Dhx58  | Ifi44         | 1  |
| 1654 | 12969 | Dhx58  | Xaf1          | 1  |
| 1654 | 13156 | Dhx58  | Ifit3         | 1  |
| 1654 | 13514 | Dhx58  | Apol9b        | 1  |
| 1654 | 13654 | Dhx58  | Stat1         | 1  |
| 1654 | 13810 | Dhx58  | 1110036O03Rik | -1 |
| 1654 | 14611 | Dhx58  | Ddx60         | 1  |
| 1654 | 14880 | Dhx58  | Ms4a4c        | 1  |
| 1654 | 15074 | Dhx58  | Usp18         | 1  |
| 1654 | 15504 | Dhx58  | Mx2           | 1  |
| 1654 | 16182 | Dhx58  | Oas1          | 1  |
| 1654 | 16572 | Dhx58  | D14Ertd668e   | 1  |
| 1654 | 17197 | Dhx58  | Igtp          | 1  |
| 1654 | 20997 | Dhx58  | MMT00028135   | 1  |
| 1654 | 21351 | Dhx58  | Shisa5        | 1  |
| 1654 | 21549 | Dhx58  | Rtp4          | 1  |
| 1654 | 22037 | Dhx58  | Oas1g         | 1  |
| 1660 | 1660  | Zfp33b | Zfp33b        | 1  |
| 1660 | 6330  | Zfp33b | Dgkq          | -1 |
| 1660 | 8547  | Zfp33b | Gbp4          | -1 |
| 1660 | 8807  | Zfp33b | Ankrd56       | 1  |
| 1660 | 9057  | Zfp33b | Spp1          | 1  |
| 1660 | 19719 | Zfp33b | EG634650      | -1 |
| 1660 | 20269 | Zfp33b | Hsd17b13      | 1  |
| 1661 | 4578  | Duoxa1 | Pglyrp2       | -1 |
| 1661 | 6044  | Duoxa1 | Sucnr1        | 1  |
| 1661 | 8815  | Duoxa1 | Mx1           | 1  |
| 1661 | 12910 | Duoxa1 | 1110028A07Rik | 1  |
| 1661 | 14017 | Duoxa1 | Ces5          | 1  |
| 1661 | 15059 | Duoxa1 | Mogat1        | 1  |
| 1661 | 20058 | Duoxa1 | Dnaic1        | -1 |
| 1661 | 20194 | Duoxa1 | Pnlnc1        | 1  |
| 1672 | 1672  | Mlh1   | Mlh1          | 1  |
| 1678 | 14647 | Tcf15  | Cst3          | -1 |
| 1678 | 23005 | Tcf15  | 4930405A21Rik | 1  |
| 1690 | 11321 | Nlrp5  | 2310014L17Rik | 1  |
| 1700 | 12910 | Ccdc64 | 1110028A07Rik | 1  |
| 1705 | 6771  | Gltpd1 | Insc          | 1  |
| 1705 | 8896  | Gltpd1 | Fasn          | 1  |
| 1705 | 10961 | Gltpd1 | Pgd           | 1  |
| 1705 | 14151 | Gltpd1 | Slc44a1       | 1  |
| 1705 | 15892 | Gltpd1 | Slc22a5       | -1 |
| 1705 | 21251 | Gltpd1 | Cpt1a         | -1 |
| 1705 | 21727 | Gltpd1 | Khk           | 1  |
| 1709 | 223   | Mt2    | Trp53inp2     | 1  |
| 1709 | 4392  | Mt2    | 1810055G02Rik | 1  |
| 1709 | 6490  | Mt2    | Il1r1         | 1  |
| 1709 | 15522 | Mt2    | 1810011O10Rik | 1  |
| 1711 | 662   | Grhl1  | Mid1ip1       | -1 |
| 1711 | 2400  | Grhl1  | Gck           | -1 |
| 1711 | 2726  | Grhl1  | Chd9          | -1 |

|      |       |        |               |    |
|------|-------|--------|---------------|----|
| 1711 | 2741  | Grhl1  | 3230401D17Rik | 1  |
| 1711 | 5296  | Grhl1  | Rnf181        | -1 |
| 1711 | 5594  | Grhl1  | Erbp3         | 1  |
| 1711 | 5804  | Grhl1  | Thrsp         | -1 |
| 1711 | 6461  | Grhl1  | Mttr3         | 1  |
| 1711 | 7659  | Grhl1  | Rab30         | 1  |
| 1711 | 7725  | Grhl1  | 3230401D17Rik | 1  |
| 1711 | 7944  | Grhl1  | Al132487      | 1  |
| 1711 | 8439  | Grhl1  | Slc25a33      | 1  |
| 1711 | 8896  | Grhl1  | Fasn          | -1 |
| 1711 | 9999  | Grhl1  | Zswim3        | 1  |
| 1711 | 10772 | Grhl1  | Aacs          | -1 |
| 1711 | 12315 | Grhl1  | Srebfl        | -1 |
| 1711 | 12499 | Grhl1  | Avpl1         | -1 |
| 1711 | 13304 | Grhl1  | Gadd45b       | 1  |
| 1711 | 13489 | Grhl1  | D230025D16Rik | 1  |
| 1711 | 14138 | Grhl1  | Anks4b        | -1 |
| 1711 | 15990 | Grhl1  | Dnmbp         | 1  |
| 1711 | 17660 | Grhl1  | Nlrp12        | 1  |
| 1711 | 17800 | Grhl1  | Lrtm1         | -1 |
| 1711 | 17852 | Grhl1  | Cpeb2         | 1  |
| 1711 | 18148 | Grhl1  | Cables1       | 1  |
| 1711 | 18785 | Grhl1  | Angptl4       | 1  |
| 1711 | 21160 | Grhl1  | Irs2          | 1  |
| 1711 | 21288 | Grhl1  | Tcp11l2       | 1  |
| 1711 | 22321 | Grhl1  | Apol7a        | -1 |
| 1711 | 22373 | Grhl1  | Txnip         | 1  |
| 1711 | 22443 | Grhl1  | Tuba1c        | -1 |
| 1711 | 23130 | Grhl1  | Hps4          | 1  |
| 1739 | 5364  | Lrrc17 | Kif22         | 1  |
| 1739 | 11382 | Lrrc17 | Cdca3         | 1  |
| 1745 | 252   | Gas7   | C730027P07Rik | 1  |
| 1745 | 433   | Gas7   | Pla2g12b      | 1  |
| 1745 | 2636  | Gas7   | Tars          | 1  |
| 1745 | 2850  | Gas7   | Slc16a6       | 1  |
| 1745 | 5364  | Gas7   | Kif22         | 1  |
| 1745 | 5934  | Gas7   | S100a10       | 1  |
| 1745 | 6386  | Gas7   | Por           | -1 |
| 1745 | 8428  | Gas7   | Sorbs3        | -1 |
| 1745 | 11741 | Gas7   | Slc30a10      | 1  |
| 1745 | 22290 | Gas7   | Tubb2a        | 1  |
| 1748 | 8444  | Rbp1   | Rdh16         | -1 |
| 1751 | 9587  | Xdh    | Bri3bp        | -1 |
| 1751 | 15624 | Xdh    | Crcp          | 1  |
| 1751 | 15631 | Xdh    | Lpin1         | 1  |
| 1755 | 286   | Ocel1  | MMT00070509   | 1  |
| 1755 | 403   | Ocel1  | Leprotl1      | -1 |
| 1755 | 769   | Ocel1  | 5430437P03Rik | -1 |
| 1755 | 1336  | Ocel1  | MMT00069537   | 1  |
| 1755 | 1755  | Ocel1  | Ocel1         | 1  |
| 1755 | 2243  | Ocel1  | Gcsh          | 1  |

|      |       |               |               |    |
|------|-------|---------------|---------------|----|
| 1755 | 2671  | Ocel1         | Sh3rf1        | -1 |
| 1755 | 2703  | Ocel1         | MMT00073763   | 1  |
| 1755 | 2749  | Ocel1         | Naf1          | -1 |
| 1755 | 3052  | Ocel1         | 9130404D08Rik | -1 |
| 1755 | 3055  | Ocel1         | Pde4c         | 1  |
| 1755 | 5433  | Ocel1         | 2410004L22Rik | -1 |
| 1755 | 6760  | Ocel1         | 2810428115Rik | 1  |
| 1755 | 8114  | Ocel1         | Kcnn1         | 1  |
| 1755 | 9304  | Ocel1         | Al449175      | 1  |
| 1755 | 9931  | Ocel1         | Gl25d1        | -1 |
| 1755 | 10195 | Ocel1         | Klf1          | 1  |
| 1755 | 13004 | Ocel1         | Arhgef10      | 1  |
| 1755 | 13732 | Ocel1         | Tpm4          | -1 |
| 1755 | 13774 | Ocel1         | Gdf15         | -1 |
| 1755 | 14845 | Ocel1         | Tmem188       | 1  |
| 1755 | 15094 | Ocel1         | Pbx4          | -1 |
| 1755 | 15455 | Ocel1         | Lsm4          | -1 |
| 1755 | 16617 | Ocel1         | Sh2d4a        | -1 |
| 1755 | 16849 | Ocel1         | Trmt1         | -1 |
| 1755 | 16858 | Ocel1         | Tmem38a       | -1 |
| 1755 | 17703 | Ocel1         | Large         | -1 |
| 1755 | 18886 | Ocel1         | Slc18a1       | -1 |
| 1755 | 20484 | Ocel1         | Ces1          | -1 |
| 1755 | 22776 | Ocel1         | Gsr           | 1  |
| 1758 | 5108  | Cadps2        | 2200002D01Rik | -1 |
| 1758 | 15059 | Cadps2        | Mogat1        | -1 |
| 1758 | 15135 | Cadps2        | Col5a3        | -1 |
| 1759 | 563   | Rgs3          | D4Bwg0951e    | -1 |
| 1759 | 7140  | Rgs3          | Mtbp          | 1  |
| 1759 | 11093 | Rgs3          | Zdhhc1        | -1 |
| 1759 | 11610 | Rgs3          | Hey1          | 1  |
| 1759 | 11808 | Rgs3          | Pck1          | -1 |
| 1759 | 17525 | Rgs3          | Ctgf          | -1 |
| 1759 | 18083 | Rgs3          | Gadd45a       | 1  |
| 1759 | 18785 | Rgs3          | Angptl4       | -1 |
| 1759 | 22216 | Rgs3          | Sp5           | 1  |
| 1761 | 20019 | 2010110K16Rik | Qdpr          | 1  |
| 1764 | 5364  | Tifab         | Kif22         | 1  |
| 1764 | 11129 | Tifab         | Ankhd1        | -1 |
| 1764 | 11382 | Tifab         | Cdca3         | 1  |
| 1764 | 12941 | Tifab         | Elov15        | 1  |
| 1764 | 17338 | Tifab         | Mocos         | 1  |
| 1764 | 18827 | Tifab         | Oprs1         | 1  |
| 1766 | 2850  | Srpx2         | Slc16a6       | 1  |
| 1766 | 3038  | Srpx2         | Serpina12     | 1  |
| 1766 | 3265  | Srpx2         | Dntt          | 1  |
| 1766 | 3410  | Srpx2         | Paqr9         | 1  |
| 1766 | 3502  | Srpx2         | Gde1          | -1 |
| 1766 | 3836  | Srpx2         | 2200001115Rik | 1  |
| 1766 | 4578  | Srpx2         | Pglyrp2       | -1 |
| 1766 | 5364  | Srpx2         | Kif22         | 1  |

|      |       |          |               |    |
|------|-------|----------|---------------|----|
| 1766 | 5691  | Srpx2    | Csrp3         | 1  |
| 1766 | 6030  | Srpx2    | As3mt         | -1 |
| 1766 | 7761  | Srpx2    | Nudt19        | -1 |
| 1766 | 7839  | Srpx2    | Asl           | -1 |
| 1766 | 12807 | Srpx2    | Faim          | 1  |
| 1766 | 12879 | Srpx2    | Ermp1         | 1  |
| 1766 | 12941 | Srpx2    | Elovl5        | 1  |
| 1766 | 14472 | Srpx2    | Ahcy          | -1 |
| 1766 | 15320 | Srpx2    | MMT00017479   | -1 |
| 1766 | 17247 | Srpx2    | A030007L17Rik | 1  |
| 1766 | 18590 | Srpx2    | Fgb           | 1  |
| 1766 | 19375 | Srpx2    | Inhba         | 1  |
| 1766 | 19740 | Srpx2    | Gpr98         | 1  |
| 1766 | 19917 | Srpx2    | Nek2          | 1  |
| 1766 | 20967 | Srpx2    | Fabp2         | 1  |
| 1766 | 22912 | Srpx2    | Stap1         | 1  |
| 1766 | 23026 | Srpx2    | Apom          | -1 |
| 1770 | 20079 | BC054059 | MMT00019254   | 1  |
| 1783 | 8815  | Arcn1    | Mx1           | 1  |
| 1790 | 337   | Hic1     | Rasgef1b      | -1 |
| 1790 | 563   | Hic1     | D4Bwg0951e    | -1 |
| 1790 | 1790  | Hic1     | Hic1          | 1  |
| 1790 | 2294  | Hic1     | AU040829      | -1 |
| 1790 | 3196  | Hic1     | Tat           | -1 |
| 1790 | 4235  | Hic1     | Pfkfb3        | -1 |
| 1790 | 5187  | Hic1     | Speer4f       | -1 |
| 1790 | 6564  | Hic1     | Cebpd         | -1 |
| 1790 | 7136  | Hic1     | Id3           | 1  |
| 1790 | 8399  | Hic1     | Herpud1       | -1 |
| 1790 | 12479 | Hic1     | lfrd1         | -1 |
| 1790 | 12761 | Hic1     | Tsc22d3       | -1 |
| 1790 | 13471 | Hic1     | Cln8          | -1 |
| 1790 | 15021 | Hic1     | Ppargc1a      | -1 |
| 1790 | 15522 | Hic1     | 1810011O10Rik | -1 |
| 1790 | 15631 | Hic1     | Lpin1         | -1 |
| 1790 | 15882 | Hic1     | AA986860      | -1 |
| 1790 | 16580 | Hic1     | Tnfaip2       | 1  |
| 1790 | 17525 | Hic1     | Ctgf          | -1 |
| 1790 | 17622 | Hic1     | Foxo1         | -1 |
| 1790 | 18785 | Hic1     | Angptl4       | -1 |
| 1790 | 20803 | Hic1     | Tmem50a       | -1 |
| 1790 | 21331 | Hic1     | Slc10a6       | -1 |
| 1790 | 21934 | Hic1     | Id2           | 1  |
| 1790 | 22873 | Hic1     | Slc38a2       | -1 |
| 1790 | 23202 | Hic1     | Olf559        | -1 |
| 1797 | 143   | Batf2    | Gvin1         | 1  |
| 1797 | 1447  | Batf2    | Naaa          | 1  |
| 1797 | 1533  | Batf2    | BC013712      | 1  |
| 1797 | 1932  | Batf2    | Racgap1       | 1  |
| 1797 | 2058  | Batf2    | Hk3           | 1  |
| 1797 | 2200  | Batf2    | BC006779      | 1  |

|      |      |       |               |   |
|------|------|-------|---------------|---|
| 1797 | 2224 | Batf2 | Oasl2         | 1 |
| 1797 | 2752 | Batf2 | Fcgr1         | 1 |
| 1797 | 2830 | Batf2 | 4632417K18Rik | 1 |
| 1797 | 3572 | Batf2 | Ebi3          | 1 |
| 1797 | 3594 | Batf2 | Rasa4         | 1 |
| 1797 | 3659 | Batf2 | EG236451      | 1 |
| 1797 | 3683 | Batf2 | Oas2          | 1 |
| 1797 | 3721 | Batf2 | Me2           | 1 |
| 1797 | 4114 | Batf2 | Parp12        | 1 |
| 1797 | 4409 | Batf2 | 5430435G22Rik | 1 |
| 1797 | 4426 | Batf2 | Ilgp2         | 1 |
| 1797 | 4508 | Batf2 | Ifit1         | 1 |
| 1797 | 5044 | Batf2 | Ifi35         | 1 |
| 1797 | 5250 | Batf2 | Ifit2         | 1 |
| 1797 | 5364 | Batf2 | Kif22         | 1 |
| 1797 | 5465 | Batf2 | Slamf8        | 1 |
| 1797 | 5556 | Batf2 | Ccl4          | 1 |
| 1797 | 5766 | Batf2 | 5033414D02Rik | 1 |
| 1797 | 5845 | Batf2 | Il18bp        | 1 |
| 1797 | 5853 | Batf2 | Trim30        | 1 |
| 1797 | 5949 | Batf2 | Zbp1          | 1 |
| 1797 | 5975 | Batf2 | Car13         | 1 |
| 1797 | 6072 | Batf2 | C1qc          | 1 |
| 1797 | 6098 | Batf2 | Ncf4          | 1 |
| 1797 | 6154 | Batf2 | 1700030G06Rik | 1 |
| 1797 | 6383 | Batf2 | Gbp2          | 1 |
| 1797 | 6595 | Batf2 | Oas1a         | 1 |
| 1797 | 6734 | Batf2 | Ehd4          | 1 |
| 1797 | 6824 | Batf2 | Irf7          | 1 |
| 1797 | 6888 | Batf2 | Cxcl9         | 1 |
| 1797 | 6910 | Batf2 | Ly6c2         | 1 |
| 1797 | 7057 | Batf2 | Stk10         | 1 |
| 1797 | 7069 | Batf2 | Ube1l         | 1 |
| 1797 | 7105 | Batf2 | Plac8         | 1 |
| 1797 | 7238 | Batf2 | Pycard        | 1 |
| 1797 | 7284 | Batf2 | MMT00008674   | 1 |
| 1797 | 7316 | Batf2 | Ifi204        | 1 |
| 1797 | 7336 | Batf2 | Cd5l          | 1 |
| 1797 | 8270 | Batf2 | Clspn         | 1 |
| 1797 | 8392 | Batf2 | Asf1b         | 1 |
| 1797 | 8555 | Batf2 | H2-M3         | 1 |
| 1797 | 8659 | Batf2 | Psmb8         | 1 |
| 1797 | 8800 | Batf2 | Rnf213        | 1 |
| 1797 | 8922 | Batf2 | Il10ra        | 1 |
| 1797 | 8951 | Batf2 | Cd97          | 1 |
| 1797 | 9100 | Batf2 | Ms4a6c        | 1 |
| 1797 | 9401 | Batf2 | Fcgr4         | 1 |
| 1797 | 9717 | Batf2 | Psmb9         | 1 |
| 1797 | 9820 | Batf2 | BC023105      | 1 |
| 1797 | 9847 | Batf2 | Ifi27         | 1 |
| 1797 | 9920 | Batf2 | Syk           | 1 |

|      |       |       |               |   |
|------|-------|-------|---------------|---|
| 1797 | 10109 | Batf2 | Gbp3          | 1 |
| 1797 | 10393 | Batf2 | Slc7a8        | 1 |
| 1797 | 10504 | Batf2 | Ripk3         | 1 |
| 1797 | 10606 | Batf2 | Apbb1ip       | 1 |
| 1797 | 10796 | Batf2 | Spic          | 1 |
| 1797 | 10926 | Batf2 | P2ry13        | 1 |
| 1797 | 11198 | Batf2 | Gbp1          | 1 |
| 1797 | 11265 | Batf2 | Irgm          | 1 |
| 1797 | 11275 | Batf2 | Fanci         | 1 |
| 1797 | 11486 | Batf2 | Tacc3         | 1 |
| 1797 | 11701 | Batf2 | Oas1c         | 1 |
| 1797 | 11870 | Batf2 | Apitd1        | 1 |
| 1797 | 12126 | Batf2 | Znfx1         | 1 |
| 1797 | 12398 | Batf2 | Ifi44         | 1 |
| 1797 | 12495 | Batf2 | Casp1         | 1 |
| 1797 | 12600 | Batf2 | Ifi204        | 1 |
| 1797 | 12969 | Batf2 | Xaf1          | 1 |
| 1797 | 13156 | Batf2 | Ifit3         | 1 |
| 1797 | 13172 | Batf2 | Epb4.1i3      | 1 |
| 1797 | 13181 | Batf2 | Lcp2          | 1 |
| 1797 | 13309 | Batf2 | Tgtp          | 1 |
| 1797 | 13455 | Batf2 | Cenpe         | 1 |
| 1797 | 13504 | Batf2 | Lair1         | 1 |
| 1797 | 13527 | Batf2 | Ctss          | 1 |
| 1797 | 13585 | Batf2 | Nckap1l       | 1 |
| 1797 | 13654 | Batf2 | Stat1         | 1 |
| 1797 | 13656 | Batf2 | Ly86          | 1 |
| 1797 | 13780 | Batf2 | Pilra         | 1 |
| 1797 | 13826 | Batf2 | Melk          | 1 |
| 1797 | 14029 | Batf2 | 2810022L02Rik | 1 |
| 1797 | 14192 | Batf2 | Trpv2         | 1 |
| 1797 | 14237 | Batf2 | Rac2          | 1 |
| 1797 | 14258 | Batf2 | Ifi47         | 1 |
| 1797 | 14260 | Batf2 | Mkl1          | 1 |
| 1797 | 14453 | Batf2 | Inpp5d        | 1 |
| 1797 | 14475 | Batf2 | Abcg1         | 1 |
| 1797 | 14506 | Batf2 | Slc15a3       | 1 |
| 1797 | 14603 | Batf2 | Ly6e          | 1 |
| 1797 | 14880 | Batf2 | Ms4a4c        | 1 |
| 1797 | 14883 | Batf2 | Itgal         | 1 |
| 1797 | 15159 | Batf2 | Timd4         | 1 |
| 1797 | 15280 | Batf2 | Cxcl10        | 1 |
| 1797 | 15387 | Batf2 | Mgl1          | 1 |
| 1797 | 15449 | Batf2 | Mitd1         | 1 |
| 1797 | 15504 | Batf2 | Mx2           | 1 |
| 1797 | 15749 | Batf2 | Cd22          | 1 |
| 1797 | 15825 | Batf2 | Fermt3        | 1 |
| 1797 | 16047 | Batf2 | Irf8          | 1 |
| 1797 | 16102 | Batf2 | Cd72          | 1 |
| 1797 | 16147 | Batf2 | Tlr2          | 1 |
| 1797 | 16182 | Batf2 | Oasl1         | 1 |

|      |       |       |               |    |
|------|-------|-------|---------------|----|
| 1797 | 16186 | Batf2 | Cfp           | 1  |
| 1797 | 16199 | Batf2 | Samhd1        | 1  |
| 1797 | 16521 | Batf2 | Adar          | 1  |
| 1797 | 16572 | Batf2 | D14Ert668e    | 1  |
| 1797 | 16827 | Batf2 | Arhgdib       | 1  |
| 1797 | 16854 | Batf2 | Kif15         | 1  |
| 1797 | 16874 | Batf2 | Fcer1g        | 1  |
| 1797 | 16988 | Batf2 | Clec4f        | 1  |
| 1797 | 17083 | Batf2 | Atp1b1        | -1 |
| 1797 | 17197 | Batf2 | Igtp          | 1  |
| 1797 | 17216 | Batf2 | Nuf2          | 1  |
| 1797 | 17312 | Batf2 | Sirpa         | 1  |
| 1797 | 17412 | Batf2 | Aif1          | 1  |
| 1797 | 17720 | Batf2 | Rap2b         | 1  |
| 1797 | 17904 | Batf2 | Cds1          | 1  |
| 1797 | 18174 | Batf2 | Stat2         | 1  |
| 1797 | 18186 | Batf2 | Parp14        | 1  |
| 1797 | 18211 | Batf2 | Folr2         | 1  |
| 1797 | 18289 | Batf2 | Tap1          | 1  |
| 1797 | 18594 | Batf2 | 1200002N14Rik | 1  |
| 1797 | 18662 | Batf2 | Batf3         | 1  |
| 1797 | 19063 | Batf2 | Evl           | 1  |
| 1797 | 19189 | Batf2 | Sp100         | 1  |
| 1797 | 19252 | Batf2 | Tmsb4x        | 1  |
| 1797 | 19262 | Batf2 | Cd274         | 1  |
| 1797 | 19708 | Batf2 | Ly6a          | 1  |
| 1797 | 19738 | Batf2 | Lgals3bp      | 1  |
| 1797 | 19794 | Batf2 | Rgs2          | 1  |
| 1797 | 20150 | Batf2 | Ptprc         | 1  |
| 1797 | 20321 | Batf2 | Ms4a6b        | 1  |
| 1797 | 20431 | Batf2 | Slc7a7        | 1  |
| 1797 | 20433 | Batf2 | Cdca5         | 1  |
| 1797 | 20474 | Batf2 | Gnb3          | 1  |
| 1797 | 20997 | Batf2 | MMT00028135   | 1  |
| 1797 | 21351 | Batf2 | Shisa5        | 1  |
| 1797 | 21440 | Batf2 | Tmsb10        | 1  |
| 1797 | 21549 | Batf2 | Rtp4          | 1  |
| 1797 | 21824 | Batf2 | 5830443L24Rik | 1  |
| 1797 | 21837 | Batf2 | BC052328      | 1  |
| 1797 | 22037 | Batf2 | Oas1g         | 1  |
| 1797 | 22188 | Batf2 | Top2a         | 1  |
| 1797 | 22327 | Batf2 | Tyrobp        | 1  |
| 1797 | 22647 | Batf2 | Pkib          | 1  |
| 1797 | 22876 | Batf2 | Sash3         | 1  |
| 1797 | 23208 | Batf2 | Hck           | 1  |
| 1797 | 23242 | Batf2 | Gngt2         | 1  |
| 1800 | 3196  | Retn  | Tat           | 1  |
| 1800 | 5364  | Retn  | Kif22         | -1 |
| 1800 | 13431 | Retn  | MMT00038058   | -1 |
| 1800 | 14472 | Retn  | Ahcy          | 1  |
| 1800 | 15205 | Retn  | MMT00030262   | -1 |

|      |       |               |                    |    |
|------|-------|---------------|--------------------|----|
| 1828 | 10554 | Elmo3         | ENSMUSG00000074179 | 1  |
| 1828 | 13293 | Elmo3         | Gsta2              | 1  |
| 1828 | 13431 | Elmo3         | MMT00038058        | -1 |
| 1828 | 15205 | Elmo3         | MMT00030262        | -1 |
| 1828 | 17563 | Elmo3         | Aldh111            | 1  |
| 1828 | 22406 | Elmo3         | Vnn1               | -1 |
| 1855 | 568   | Prss12        | A330049M08Rik      | 1  |
| 1855 | 7954  | Prss12        | Ccdc12             | 1  |
| 1858 | 20079 | 2810432L12Rik | MMT00019254        | 1  |
| 1862 | 6329  | Vdac1         | Cyp2b10            | 1  |
| 1862 | 6420  | Vdac1         | Mipep              | 1  |
| 1862 | 8773  | Vdac1         | MMT00027093        | -1 |
| 1862 | 13431 | Vdac1         | MMT00038058        | -1 |
| 1862 | 14055 | Vdac1         | MMT00050438        | -1 |
| 1862 | 15205 | Vdac1         | MMT00030262        | -1 |
| 1862 | 22907 | Vdac1         | MMT00054594        | -1 |
| 1862 | 22978 | Vdac1         | MMT00043176        | -1 |
| 1862 | 23201 | Vdac1         | S1pr1              | -1 |
| 1866 | 13431 | 2010012O05Rik | MMT00038058        | -1 |
| 1866 | 15205 | 2010012O05Rik | MMT00030262        | -1 |
| 1866 | 18250 | 2010012O05Rik | Mmp14              | -1 |
| 1867 | 524   | Bcas2         | Hsd3b2             | 1  |
| 1867 | 1867  | Bcas2         | Bcas2              | 1  |
| 1867 | 3753  | Bcas2         | Setdb1             | -1 |
| 1867 | 5021  | Bcas2         | Gdap2              | -1 |
| 1867 | 6206  | Bcas2         | MMT00063701        | 1  |
| 1867 | 8738  | Bcas2         | Reg4               | -1 |
| 1867 | 10521 | Bcas2         | Ttf2               | 1  |
| 1867 | 11611 | Bcas2         | S100a13            | -1 |
| 1867 | 18754 | Bcas2         | Rbm8a              | 1  |
| 1867 | 22202 | Bcas2         | OTTMUSG00000021274 | -1 |
| 1867 | 22570 | Bcas2         | Phtf1              | 1  |
| 1887 | 269   | Mapkapk3      | Tuba1b             | 1  |
| 1887 | 607   | Mapkapk3      | Me1                | 1  |
| 1887 | 1941  | Mapkapk3      | MMT00079618        | 1  |
| 1887 | 6502  | Mapkapk3      | Col15a1            | 1  |
| 1887 | 6771  | Mapkapk3      | Insc               | 1  |
| 1887 | 7151  | Mapkapk3      | MMT00007982        | 1  |
| 1887 | 8896  | Mapkapk3      | Fasn               | 1  |
| 1887 | 9763  | Mapkapk3      | Tuba3b             | 1  |
| 1887 | 10612 | Mapkapk3      | Slc24a6            | -1 |
| 1887 | 10961 | Mapkapk3      | Pgd                | 1  |
| 1887 | 11375 | Mapkapk3      | Derl2              | 1  |
| 1887 | 11462 | Mapkapk3      | Gpam               | 1  |
| 1887 | 11724 | Mapkapk3      | Tuba3a             | 1  |
| 1887 | 13889 | Mapkapk3      | Agpat2             | 1  |
| 1887 | 15862 | Mapkapk3      | Mrap               | 1  |
| 1887 | 17444 | Mapkapk3      | Tuba1a             | 1  |
| 1887 | 17660 | Mapkapk3      | Nlrp12             | -1 |
| 1887 | 21202 | Mapkapk3      | Acly               | 1  |
| 1887 | 21251 | Mapkapk3      | Cpt1a              | -1 |



|      |       |          |               |    |
|------|-------|----------|---------------|----|
| 1887 | 22443 | Mapkapk3 | Tuba1c        | 1  |
| 1888 | 15028 | Olf1396  | MMT00009785   | 1  |
| 1889 | 4235  | Dcun1d3  | Pfkfb3        | 1  |
| 1890 | 433   | Nanp     | Pla2g12b      | -1 |
| 1890 | 604   | Nanp     | Ppp1r15b      | 1  |
| 1890 | 719   | Nanp     | Usp2          | 1  |
| 1890 | 2399  | Nanp     | MMT00060167   | -1 |
| 1890 | 2636  | Nanp     | Tars          | -1 |
| 1890 | 2766  | Nanp     | Elp4          | -1 |
| 1890 | 6386  | Nanp     | Por           | 1  |
| 1890 | 6657  | Nanp     | Irf6          | -1 |
| 1890 | 7414  | Nanp     | Clpx          | -1 |
| 1890 | 10088 | Nanp     | Ddc           | -1 |
| 1890 | 10775 | Nanp     | Slc16a1       | -1 |
| 1890 | 11741 | Nanp     | Slc30a10      | -1 |
| 1890 | 15481 | Nanp     | 1110067D22Rik | -1 |
| 1890 | 15709 | Nanp     | Tceal1        | 1  |
| 1890 | 15824 | Nanp     | D19Ert721e    | -1 |
| 1890 | 18179 | Nanp     | Dbp           | 1  |
| 1890 | 18846 | Nanp     | Ikbkg         | -1 |
| 1890 | 21142 | Nanp     | Gm129         | 1  |
| 1894 | 17089 | Lrp4     | Pilrb1        | 1  |
| 1928 | 21214 | Triml2   | Scd1          | 1  |
| 1930 | 250   | Ccdc109b | Tubb2a-ps2    | 1  |
| 1930 | 433   | Ccdc109b | Pla2g12b      | 1  |
| 1930 | 609   | Ccdc109b | MMT00060868   | 1  |
| 1930 | 1572  | Ccdc109b | Saa3          | 1  |
| 1930 | 3228  | Ccdc109b | Saa1          | 1  |
| 1930 | 3265  | Ccdc109b | Dntt          | 1  |
| 1930 | 3410  | Ccdc109b | Paqr9         | 1  |
| 1930 | 3804  | Ccdc109b | MMT00015534   | 1  |
| 1930 | 4686  | Ccdc109b | BC021785      | 1  |
| 1930 | 5364  | Ccdc109b | Kif22         | 1  |
| 1930 | 5802  | Ccdc109b | Mad2l2        | 1  |
| 1930 | 5934  | Ccdc109b | S100a10       | 1  |
| 1930 | 6370  | Ccdc109b | Aqp8          | 1  |
| 1930 | 6386  | Ccdc109b | Por           | -1 |
| 1930 | 10486 | Ccdc109b | 1300002K09Rik | 1  |
| 1930 | 11129 | Ccdc109b | Ankhd1        | -1 |
| 1930 | 11741 | Ccdc109b | Slc30a10      | 1  |
| 1930 | 12433 | Ccdc109b | 5033413D22Rik | 1  |
| 1930 | 12910 | Ccdc109b | 1110028A07Rik | 1  |
| 1930 | 12941 | Ccdc109b | Elovl5        | 1  |
| 1930 | 13210 | Ccdc109b | Nudt1         | 1  |
| 1930 | 15709 | Ccdc109b | Tceal1        | -1 |
| 1930 | 15862 | Ccdc109b | Mrap          | 1  |
| 1930 | 15931 | Ccdc109b | Ces3          | -1 |
| 1930 | 17323 | Ccdc109b | Tubb6         | 1  |
| 1930 | 17617 | Ccdc109b | Atp5sl        | -1 |
| 1930 | 17876 | Ccdc109b | Tubb4         | 1  |
| 1930 | 18827 | Ccdc109b | Oprs1         | 1  |

|      |       |             |               |    |
|------|-------|-------------|---------------|----|
| 1930 | 19532 | Ccdc109b    | Med8          | 1  |
| 1930 | 22290 | Ccdc109b    | Tubb2a        | 1  |
| 1930 | 22630 | Ccdc109b    | MMT00034355   | 1  |
| 1930 | 22869 | Ccdc109b    | Tceal8        | 1  |
| 1932 | 1416  | Racgap1     | 6720460F02Rik | 1  |
| 1932 | 3836  | Racgap1     | 2200001115Rik | 1  |
| 1932 | 5364  | Racgap1     | Kif22         | 1  |
| 1932 | 8416  | Racgap1     | Cdc20         | 1  |
| 1932 | 11422 | Racgap1     | Pltp          | 1  |
| 1932 | 18299 | Racgap1     | MMT00035424   | 1  |
| 1932 | 20433 | Racgap1     | Cdca5         | 1  |
| 1932 | 21692 | Racgap1     | MMT00013924   | 1  |
| 1932 | 21947 | Racgap1     | Cdca8         | 1  |
| 1932 | 22138 | Racgap1     | Ang           | -1 |
| 1936 | 1936  | Cbwd1       | Cbwd1         | 1  |
| 1936 | 7159  | Cbwd1       | 1700031F05Rik | -1 |
| 1936 | 9326  | Cbwd1       | Pgm5          | -1 |
| 1936 | 11446 | Cbwd1       | Dock8         | -1 |
| 1940 | 5974  | MMT00002367 | Arntl         | 1  |
| 1940 | 12565 | MMT00002367 | Grem2         | -1 |
| 1941 | 607   | MMT00079618 | Me1           | 1  |
| 1941 | 874   | MMT00079618 | Aldh1a7       | 1  |
| 1941 | 3696  | MMT00079618 | Elovl6        | 1  |
| 1941 | 4351  | MMT00079618 | Plxnb1        | -1 |
| 1941 | 6044  | MMT00079618 | Sucnr1        | 1  |
| 1941 | 6193  | MMT00079618 | Lactb2        | 1  |
| 1941 | 6370  | MMT00079618 | Aqp8          | 1  |
| 1941 | 8444  | MMT00079618 | Rdh16         | 1  |
| 1941 | 8815  | MMT00079618 | Mx1           | 1  |
| 1941 | 9713  | MMT00079618 | Ykt6          | 1  |
| 1941 | 11375 | MMT00079618 | Derl2         | 1  |
| 1941 | 11462 | MMT00079618 | Gpam          | 1  |
| 1941 | 12219 | MMT00079618 | Cyb5b         | 1  |
| 1941 | 12910 | MMT00079618 | 1110028A07Rik | 1  |
| 1941 | 14017 | MMT00079618 | Ces5          | 1  |
| 1941 | 14147 | MMT00079618 | Acss2         | 1  |
| 1941 | 16222 | MMT00079618 | Adipor2       | 1  |
| 1941 | 18201 | MMT00079618 | MMT00060232   | 1  |
| 1941 | 18286 | MMT00079618 | Slc41a3       | -1 |
| 1941 | 20079 | MMT00079618 | MMT00019254   | -1 |
| 1941 | 21202 | MMT00079618 | Acly          | 1  |
| 1941 | 21214 | MMT00079618 | Scd1          | 1  |
| 1941 | 21251 | MMT00079618 | Cpt1a         | -1 |
| 1941 | 21575 | MMT00079618 | Cyp2c55       | 1  |
| 1941 | 22138 | MMT00079618 | Ang           | -1 |
| 1941 | 22732 | MMT00079618 | Cyb5b         | 1  |
| 1941 | 22821 | MMT00079618 | Tmem135       | 1  |
| 1941 | 23008 | MMT00079618 | Ctsz          | -1 |
| 1941 | 23026 | MMT00079618 | Apom          | -1 |
| 1941 | 23549 | MMT00079618 | Es22          | 1  |
| 1960 | 1960  | Ubr2        | Ubr2          | 1  |

|      |       |             |               |    |
|------|-------|-------------|---------------|----|
| 1960 | 3857  | Ubr2        | 170001C19Rik  | 1  |
| 1960 | 4411  | Ubr2        | 2310039H08Rik | 1  |
| 1960 | 6044  | Ubr2        | Sucnr1        | -1 |
| 1960 | 7088  | Ubr2        | Slc37a1       | -1 |
| 1960 | 10667 | Ubr2        | H2-Eb1        | -1 |
| 1960 | 15531 | Ubr2        | Prickle4      | 1  |
| 1960 | 20100 | Ubr2        | Guca1b        | 1  |
| 1960 | 20966 | Ubr2        | MMT00014378   | -1 |
| 1968 | 6857  | Nudc        | Serinc2       | -1 |
| 1972 | 2938  | Ly6g6e      | H2-T23        | 1  |
| 1972 | 8444  | Ly6g6e      | Rdh16         | -1 |
| 1978 | 20967 | Ublcp1      | Fabp2         | -1 |
| 1982 | 8815  | EG668192    | Mx1           | 1  |
| 1982 | 21214 | EG668192    | Scd1          | 1  |
| 1985 | 1985  | Pepd        | Pepd          | 1  |
| 1985 | 3698  | Pepd        | 1600014C10Rik | -1 |
| 1985 | 17389 | Pepd        | Pop4          | 1  |
| 1985 | 18053 | Pepd        | Psmc4         | -1 |
| 1991 | 12315 | Ttc17       | Srebf1        | -1 |
| 2002 | 12910 | Hapln3      | 1110028A07Rik | 1  |
| 2012 | 5938  | Cetn4       | Pfn2          | -1 |
| 2012 | 11611 | Cetn4       | S100a13       | 1  |
| 2012 | 12367 | Cetn4       | MMT00072365   | 1  |
| 2012 | 12784 | Cetn4       | Nudt6         | -1 |
| 2012 | 16416 | Cetn4       | Commd2        | -1 |
| 2012 | 20385 | Cetn4       | Chd1l         | -1 |
| 2013 | 437   | Il15ra      | Ndrp1         | -1 |
| 2013 | 2126  | Il15ra      | Dgat2         | 1  |
| 2013 | 2636  | Il15ra      | Tars          | -1 |
| 2013 | 2850  | Il15ra      | Slc16a6       | -1 |
| 2013 | 6213  | Il15ra      | Ccl2          | -1 |
| 2013 | 6370  | Il15ra      | Aqp8          | -1 |
| 2013 | 9127  | Il15ra      | Mtfmt         | -1 |
| 2013 | 13513 | Il15ra      | Trim25        | -1 |
| 2013 | 15049 | Il15ra      | Rnf125        | -1 |
| 2013 | 18179 | Il15ra      | Dbp           | 1  |
| 2013 | 21142 | Il15ra      | Gm129         | 1  |
| 2019 | 14116 | Sf3a1       | Sp1           | 1  |
| 2021 | 2021  | Atf7ip      | Atf7ip        | 1  |
| 2021 | 14557 | Atf7ip      | Pyroxd1       | 1  |
| 2021 | 21126 | Atf7ip      | Dera          | 1  |
| 2023 | 2023  | MMT00072215 | MMT00072215   | 1  |
| 2023 | 3167  | MMT00072215 | Dym           | -1 |
| 2023 | 9192  | MMT00072215 | MMT00042303   | -1 |
| 2023 | 22961 | MMT00072215 | MMT00055950   | 1  |
| 2028 | 7602  | Isca2       | Pcca          | 1  |
| 2028 | 8444  | Isca2       | Rdh16         | 1  |
| 2028 | 9427  | Isca2       | Nqo2          | 1  |
| 2028 | 11065 | Isca2       | Mccc1         | 1  |
| 2028 | 20019 | Isca2       | Qdpr          | 1  |
| 2028 | 20058 | Isca2       | Dnaic1        | -1 |

|      |       |          |                    |    |
|------|-------|----------|--------------------|----|
| 2028 | 21727 | Isca2    | Khk                | 1  |
| 2044 | 9449  | Hsd17b7  | Sft2d2             | 1  |
| 2044 | 19520 | Hsd17b7  | Uck2               | 1  |
| 2049 | 5364  | Gsta3    | Kif22              | -1 |
| 2049 | 19342 | Gsta3    | Cth                | 1  |
| 2049 | 21512 | Gsta3    | Gas6               | -1 |
| 2051 | 607   | Ddx27    | Me1                | -1 |
| 2051 | 874   | Ddx27    | Aldh1a7            | -1 |
| 2051 | 6044  | Ddx27    | Sucnr1             | -1 |
| 2051 | 6502  | Ddx27    | Col15a1            | -1 |
| 2051 | 8815  | Ddx27    | Mx1                | -1 |
| 2051 | 12910 | Ddx27    | 1110028A07Rik      | -1 |
| 2051 | 14147 | Ddx27    | Acss2              | -1 |
| 2051 | 18201 | Ddx27    | MMT00060232        | -1 |
| 2051 | 20058 | Ddx27    | Dnaic1             | 1  |
| 2051 | 21202 | Ddx27    | Acly               | -1 |
| 2051 | 21214 | Ddx27    | Scd1               | -1 |
| 2051 | 23549 | Ddx27    | Es22               | -1 |
| 2054 | 5364  | Acaa1a   | Kif22              | -1 |
| 2054 | 6329  | Acaa1a   | Cyp2b10            | 1  |
| 2054 | 14472 | Acaa1a   | Ahcy               | 1  |
| 2058 | 15320 | Hk3      | MMT00017479        | -1 |
| 2062 | 21214 | EG668830 | Scd1               | 1  |
| 2074 | 3265  | Sfxn1    | Dntt               | -1 |
| 2074 | 3836  | Sfxn1    | 2200001115Rik      | -1 |
| 2074 | 5364  | Sfxn1    | Kif22              | -1 |
| 2074 | 6030  | Sfxn1    | As3mt              | 1  |
| 2074 | 6370  | Sfxn1    | Aqp8               | -1 |
| 2074 | 11129 | Sfxn1    | Ankhd1             | 1  |
| 2074 | 12208 | Sfxn1    | Pnpla7             | -1 |
| 2074 | 12910 | Sfxn1    | 1110028A07Rik      | -1 |
| 2074 | 12941 | Sfxn1    | Elovl5             | -1 |
| 2074 | 14017 | Sfxn1    | Ces5               | -1 |
| 2074 | 18827 | Sfxn1    | Oprs1              | -1 |
| 2074 | 20678 | Sfxn1    | Cyp39a1            | 1  |
| 2074 | 20967 | Sfxn1    | Fabp2              | -1 |
| 2074 | 22138 | Sfxn1    | Ang                | 1  |
| 2074 | 22727 | Sfxn1    | Pdgfra             | 1  |
| 2079 | 2079  | Mthfs    | Mthfs              | 1  |
| 2081 | 6329  | Dlat     | Cyp2b10            | 1  |
| 2081 | 11382 | Dlat     | Cdca3              | -1 |
| 2081 | 14472 | Dlat     | Ahcy               | 1  |
| 2082 | 3265  | AU018778 | Dntt               | -1 |
| 2082 | 3836  | AU018778 | 2200001115Rik      | -1 |
| 2082 | 12941 | AU018778 | Elovl5             | -1 |
| 2082 | 17996 | AU018778 | Igfbp2             | 1  |
| 2082 | 20079 | AU018778 | MMT00019254        | 1  |
| 2082 | 22138 | AU018778 | Ang                | 1  |
| 2082 | 22912 | AU018778 | Stap1              | -1 |
| 2084 | 12367 | Pftk1    | MMT00072365        | -1 |
| 2084 | 13423 | Pftk1    | ENSMUSG00000053749 | 1  |

|      |       |          |               |    |
|------|-------|----------|---------------|----|
| 2084 | 15508 | Pftk1    | 4632415L05Rik | 1  |
| 2084 | 16416 | Pftk1    | Commd2        | 1  |
| 2084 | 18790 | Pftk1    | Car3          | 1  |
| 2110 | 250   | Gtf2ird1 | Tubb2a-ps2    | 1  |
| 2110 | 269   | Gtf2ird1 | Tuba1b        | 1  |
| 2110 | 609   | Gtf2ird1 | MMT00060868   | 1  |
| 2110 | 1310  | Gtf2ird1 | Cabc1         | 1  |
| 2110 | 1941  | Gtf2ird1 | MMT00079618   | 1  |
| 2110 | 2322  | Gtf2ird1 | Tuba4a        | 1  |
| 2110 | 2794  | Gtf2ird1 | Map3k6        | -1 |
| 2110 | 2862  | Gtf2ird1 | MMT00068885   | 1  |
| 2110 | 5791  | Gtf2ird1 | Baiap211      | -1 |
| 2110 | 6118  | Gtf2ird1 | Slc1a4        | 1  |
| 2110 | 6211  | Gtf2ird1 | Arhgap24      | 1  |
| 2110 | 6343  | Gtf2ird1 | Slc20a1       | -1 |
| 2110 | 6386  | Gtf2ird1 | Por           | -1 |
| 2110 | 6771  | Gtf2ird1 | Insc          | 1  |
| 2110 | 7151  | Gtf2ird1 | MMT00007982   | 1  |
| 2110 | 7944  | Gtf2ird1 | A1132487      | -1 |
| 2110 | 9763  | Gtf2ird1 | Tuba3b        | 1  |
| 2110 | 9907  | Gtf2ird1 | 4932442K08Rik | -1 |
| 2110 | 10486 | Gtf2ird1 | 1300002K09Rik | 1  |
| 2110 | 10712 | Gtf2ird1 | Fchsd2        | -1 |
| 2110 | 10745 | Gtf2ird1 | Gale          | 1  |
| 2110 | 11093 | Gtf2ird1 | Zdhhc1        | -1 |
| 2110 | 11129 | Gtf2ird1 | Ankhd1        | -1 |
| 2110 | 11574 | Gtf2ird1 | Gne           | -1 |
| 2110 | 11724 | Gtf2ird1 | Tuba3a        | 1  |
| 2110 | 11741 | Gtf2ird1 | Slc30a10      | 1  |
| 2110 | 11807 | Gtf2ird1 | Fbxo31        | -1 |
| 2110 | 11808 | Gtf2ird1 | Pck1          | -1 |
| 2110 | 12420 | Gtf2ird1 | Klh21         | -1 |
| 2110 | 12460 | Gtf2ird1 | Pnpla2        | -1 |
| 2110 | 12489 | Gtf2ird1 | Wdr8          | 1  |
| 2110 | 12981 | Gtf2ird1 | Nek6          | 1  |
| 2110 | 13889 | Gtf2ird1 | Agpat2        | 1  |
| 2110 | 13990 | Gtf2ird1 | MMT00040357   | 1  |
| 2110 | 14626 | Gtf2ird1 | Zbtb2         | -1 |
| 2110 | 14989 | Gtf2ird1 | Map3k5        | -1 |
| 2110 | 15862 | Gtf2ird1 | Mrap          | 1  |
| 2110 | 15892 | Gtf2ird1 | Slc22a5       | -1 |
| 2110 | 16060 | Gtf2ird1 | Gys2          | -1 |
| 2110 | 16176 | Gtf2ird1 | St3gal5       | -1 |
| 2110 | 16510 | Gtf2ird1 | Tspyl4        | 1  |
| 2110 | 16647 | Gtf2ird1 | D16H22S680E   | -1 |
| 2110 | 16690 | Gtf2ird1 | Tjp3          | 1  |
| 2110 | 17338 | Gtf2ird1 | Mocos         | 1  |
| 2110 | 17342 | Gtf2ird1 | Dhx32         | 1  |
| 2110 | 17444 | Gtf2ird1 | Tuba1a        | 1  |
| 2110 | 17656 | Gtf2ird1 | Hdhd3         | 1  |
| 2110 | 17660 | Gtf2ird1 | Nlrp12        | -1 |

|      |       |          |                    |    |
|------|-------|----------|--------------------|----|
| 2110 | 17818 | Gtf2ird1 | Chchd4             | -1 |
| 2110 | 17876 | Gtf2ird1 | Tubb4              | 1  |
| 2110 | 18027 | Gtf2ird1 | 5730403B10Rik      | -1 |
| 2110 | 18688 | Gtf2ird1 | Leap2              | 1  |
| 2110 | 18802 | Gtf2ird1 | Nit2               | 1  |
| 2110 | 18827 | Gtf2ird1 | Oprs1              | 1  |
| 2110 | 19025 | Gtf2ird1 | Slc37a4            | -1 |
| 2110 | 19532 | Gtf2ird1 | Med8               | 1  |
| 2110 | 21251 | Gtf2ird1 | Cpt1a              | -1 |
| 2110 | 21664 | Gtf2ird1 | Insig1             | 1  |
| 2110 | 22290 | Gtf2ird1 | Tubb2a             | 1  |
| 2110 | 22443 | Gtf2ird1 | Tuba1c             | 1  |
| 2110 | 22630 | Gtf2ird1 | MMT00034355        | 1  |
| 2110 | 22744 | Gtf2ird1 | 9-Sep              | 1  |
| 2110 | 23201 | Gtf2ird1 | S1pr1              | 1  |
| 2110 | 23202 | Gtf2ird1 | Olf559             | -1 |
| 2113 | 482   | Rasd1    | Rnf43              | 1  |
| 2113 | 5889  | Rasd1    | Errfi1             | -1 |
| 2113 | 6976  | Rasd1    | Rbm35b             | 1  |
| 2113 | 17525 | Rasd1    | Ctgf               | -1 |
| 2113 | 18083 | Rasd1    | Gadd45a            | 1  |
| 2113 | 19556 | Rasd1    | Efna1              | 1  |
| 2113 | 22216 | Rasd1    | Sp5                | 1  |
| 2113 | 23552 | Rasd1    | Rasl11b            | 1  |
| 2121 | 3512  | Brms1l   | 6530401N04Rik      | 1  |
| 2121 | 22918 | Brms1l   | MMT00002192        | 1  |
| 2126 | 607   | Dgat2    | Me1                | 1  |
| 2126 | 874   | Dgat2    | Aldh1a7            | 1  |
| 2126 | 1129  | Dgat2    | Gsta4              | 1  |
| 2126 | 2051  | Dgat2    | Ddx27              | -1 |
| 2126 | 2721  | Dgat2    | Inmt               | 1  |
| 2126 | 3356  | Dgat2    | Adhfe1             | 1  |
| 2126 | 3562  | Dgat2    | MMT00011909        | 1  |
| 2126 | 3696  | Dgat2    | Elovl6             | 1  |
| 2126 | 4056  | Dgat2    | Tnfaip8l1          | -1 |
| 2126 | 4351  | Dgat2    | Plxnb1             | -1 |
| 2126 | 5804  | Dgat2    | Thrsp              | 1  |
| 2126 | 6044  | Dgat2    | Sucnr1             | 1  |
| 2126 | 6193  | Dgat2    | Lactb2             | 1  |
| 2126 | 6573  | Dgat2    | Pecr               | 1  |
| 2126 | 7602  | Dgat2    | Pcca               | 1  |
| 2126 | 8444  | Dgat2    | Rdh16              | 1  |
| 2126 | 8815  | Dgat2    | Mx1                | 1  |
| 2126 | 8896  | Dgat2    | Fasn               | 1  |
| 2126 | 9408  | Dgat2    | Hmgcs2             | -1 |
| 2126 | 9427  | Dgat2    | Nqo2               | 1  |
| 2126 | 9842  | Dgat2    | Qdpr               | 1  |
| 2126 | 10554 | Dgat2    | ENSMUSG00000074179 | 1  |
| 2126 | 10961 | Dgat2    | Pgd                | 1  |
| 2126 | 11462 | Dgat2    | Gpam               | 1  |
| 2126 | 12219 | Dgat2    | Cyb5b              | 1  |

|      |       |             |               |    |
|------|-------|-------------|---------------|----|
| 2126 | 12556 | Dgat2       | Ass1          | 1  |
| 2126 | 13293 | Dgat2       | Gsta2         | 1  |
| 2126 | 14147 | Dgat2       | Acss2         | 1  |
| 2126 | 14151 | Dgat2       | Slc44a1       | 1  |
| 2126 | 15205 | Dgat2       | MMT00030262   | -1 |
| 2126 | 16525 | Dgat2       | Lbp           | -1 |
| 2126 | 17225 | Dgat2       | Impa2         | -1 |
| 2126 | 17563 | Dgat2       | Aldh1l1       | 1  |
| 2126 | 17660 | Dgat2       | Nlrp12        | -1 |
| 2126 | 18201 | Dgat2       | MMT00060232   | 1  |
| 2126 | 18515 | Dgat2       | Ddx28         | -1 |
| 2126 | 18549 | Dgat2       | Robo1         | 1  |
| 2126 | 20019 | Dgat2       | Qdpr          | 1  |
| 2126 | 20058 | Dgat2       | Dnaic1        | -1 |
| 2126 | 20385 | Dgat2       | Chd1l         | 1  |
| 2126 | 21202 | Dgat2       | Acly          | 1  |
| 2126 | 21214 | Dgat2       | Scd1          | 1  |
| 2126 | 21251 | Dgat2       | Cpt1a         | -1 |
| 2126 | 21575 | Dgat2       | Cyp2c55       | 1  |
| 2126 | 21727 | Dgat2       | Khk           | 1  |
| 2126 | 21793 | Dgat2       | Pla2g12a      | -1 |
| 2126 | 22732 | Dgat2       | Cyb5b         | 1  |
| 2126 | 22770 | Dgat2       | Slc27a2       | -1 |
| 2126 | 22821 | Dgat2       | Tmem135       | 1  |
| 2126 | 22998 | Dgat2       | Ass1          | 1  |
| 2126 | 23623 | Dgat2       | 2010305C02Rik | 1  |
| 2142 | 719   | Phldb1      | Usp2          | 1  |
| 2142 | 2636  | Phldb1      | Tars          | -1 |
| 2142 | 3235  | Phldb1      | BC029214      | -1 |
| 2142 | 5734  | Phldb1      | EG619653      | 1  |
| 2142 | 5892  | Phldb1      | MMT00038457   | 1  |
| 2142 | 5974  | Phldb1      | Arntl         | -1 |
| 2142 | 7862  | Phldb1      | Cpsf4l        | 1  |
| 2142 | 9481  | Phldb1      | Ppl           | 1  |
| 2142 | 10642 | Phldb1      | Ngef          | 1  |
| 2142 | 13630 | Phldb1      | Cdkn1a        | -1 |
| 2142 | 14279 | Phldb1      | 3930402G23Rik | -1 |
| 2142 | 17583 | Phldb1      | Per2          | 1  |
| 2142 | 18179 | Phldb1      | Dbp           | 1  |
| 2142 | 18846 | Phldb1      | Ikkbg         | -1 |
| 2142 | 20745 | Phldb1      | Sord          | 1  |
| 2142 | 21969 | Phldb1      | Tk1           | 1  |
| 2145 | 8815  | MMT00075271 | Mx1           | 1  |
| 2145 | 21214 | MMT00075271 | Scd1          | 1  |
| 2146 | 11129 | MMT00044046 | Ankhd1        | -1 |
| 2146 | 16647 | MMT00044046 | D16H22S680E   | -1 |
| 2146 | 18827 | MMT00044046 | Oprs1         | 1  |
| 2150 | 760   | Rragc       | Akr1c19       | 1  |
| 2150 | 1711  | Rragc       | Grl1          | -1 |
| 2150 | 2320  | Rragc       | Spc24         | 1  |
| 2150 | 2721  | Rragc       | Inmt          | 1  |

|      |       |               |               |    |
|------|-------|---------------|---------------|----|
| 2150 | 4056  | Rragc         | Tnfaip8l1     | -1 |
| 2150 | 5729  | Rragc         | 2310016C08Rik | -1 |
| 2150 | 5804  | Rragc         | Thrsp         | 1  |
| 2150 | 5849  | Rragc         | 2310031A18Rik | -1 |
| 2150 | 6746  | Rragc         | E2f8          | -1 |
| 2150 | 6816  | Rragc         | Slc46a3       | 1  |
| 2150 | 7492  | Rragc         | Adfp          | -1 |
| 2150 | 8328  | Rragc         | Klhdc8a       | -1 |
| 2150 | 9408  | Rragc         | Hmgcs2        | -1 |
| 2150 | 11462 | Rragc         | Gpam          | 1  |
| 2150 | 13293 | Rragc         | Gsta2         | 1  |
| 2150 | 14279 | Rragc         | 3930402G23Rik | -1 |
| 2150 | 15824 | Rragc         | D19Ertd721e   | -1 |
| 2150 | 16525 | Rragc         | Lbp           | -1 |
| 2150 | 17660 | Rragc         | Nlrp12        | -1 |
| 2150 | 20171 | Rragc         | 1700008G05Rik | -1 |
| 2150 | 20385 | Rragc         | Chd1l         | 1  |
| 2150 | 20488 | Rragc         | Bok           | -1 |
| 2150 | 20567 | Rragc         | Ggt6          | 1  |
| 2150 | 21202 | Rragc         | Acly          | 1  |
| 2150 | 21727 | Rragc         | Khk           | 1  |
| 2150 | 22653 | Rragc         | Ric3          | -1 |
| 2157 | 11859 | 0610007C21Rik | Poln          | -1 |
| 2157 | 12385 | 0610007C21Rik | Mrpl33        | -1 |
| 2166 | 269   | Amd1          | Tuba1b        | 1  |
| 2166 | 827   | Amd1          | Flcn          | -1 |
| 2166 | 1941  | Amd1          | MMT00079618   | 1  |
| 2166 | 5594  | Amd1          | Erb3          | -1 |
| 2166 | 7151  | Amd1          | MMT00007982   | 1  |
| 2166 | 9763  | Amd1          | Tuba3b        | 1  |
| 2166 | 10612 | Amd1          | Slc24a6       | -1 |
| 2166 | 11724 | Amd1          | Tuba3a        | 1  |
| 2166 | 17444 | Amd1          | Tuba1a        | 1  |
| 2166 | 17656 | Amd1          | Hdhd3         | 1  |
| 2166 | 21733 | Amd1          | Rhebl1        | -1 |
| 2166 | 22443 | Amd1          | Tuba1c        | 1  |
| 2167 | 1416  | Pif1          | 6720460F02Rik | 1  |
| 2167 | 1561  | Pif1          | Aurka         | 1  |
| 2167 | 5364  | Pif1          | Kif22         | 1  |
| 2167 | 8416  | Pif1          | Cdc20         | 1  |
| 2167 | 11382 | Pif1          | Cdca3         | 1  |
| 2167 | 17823 | Pif1          | D2Ertd750e    | 1  |
| 2167 | 19022 | Pif1          | Ccnb2         | 1  |
| 2167 | 19318 | Pif1          | Plk1          | 1  |
| 2167 | 20433 | Pif1          | Cdca5         | 1  |
| 2167 | 21947 | Pif1          | Cdca8         | 1  |
| 2178 | 3836  | Slc8a1        | 2200001115Rik | 1  |
| 2178 | 5364  | Slc8a1        | Kif22         | 1  |
| 2178 | 12925 | Slc8a1        | Farp1         | 1  |
| 2178 | 12981 | Slc8a1        | Nek6          | 1  |
| 2199 | 719   | Aff1          | Usp2          | 1  |



|      |       |          |               |    |
|------|-------|----------|---------------|----|
| 2199 | 3214  | Aff1     | Dnmt3b        | -1 |
| 2199 | 3235  | Aff1     | BC029214      | -1 |
| 2199 | 3790  | Aff1     | Mtss1         | 1  |
| 2199 | 5183  | Aff1     | St5           | -1 |
| 2199 | 5374  | Aff1     | Chka          | -1 |
| 2199 | 5804  | Aff1     | Thrsp         | 1  |
| 2199 | 5849  | Aff1     | 2310031A18Rik | -1 |
| 2199 | 5974  | Aff1     | Arntl         | -1 |
| 2199 | 6343  | Aff1     | Slc20a1       | 1  |
| 2199 | 6386  | Aff1     | Por           | 1  |
| 2199 | 8399  | Aff1     | Herpud1       | 1  |
| 2199 | 9495  | Aff1     | Srms          | -1 |
| 2199 | 10215 | Aff1     | Nampt         | 1  |
| 2199 | 11599 | Aff1     | Coq10b        | 1  |
| 2199 | 14041 | Aff1     | Cldn1         | -1 |
| 2199 | 14050 | Aff1     | Il12rb1       | 1  |
| 2199 | 15049 | Aff1     | Rnf125        | -1 |
| 2199 | 15631 | Aff1     | Lpin1         | 1  |
| 2199 | 16580 | Aff1     | Tnfaip2       | -1 |
| 2199 | 16690 | Aff1     | Tjp3          | -1 |
| 2199 | 18179 | Aff1     | Dbp           | 1  |
| 2199 | 19146 | Aff1     | N4bp2l1       | 1  |
| 2199 | 19671 | Aff1     | Upp2          | 1  |
| 2199 | 21142 | Aff1     | Gm129         | 1  |
| 2199 | 23437 | Aff1     | Efhd2         | 1  |
| 2200 | 1533  | BC006779 | BC013712      | 1  |
| 2200 | 2200  | BC006779 | BC006779      | 1  |
| 2200 | 2224  | BC006779 | Oasl2         | 1  |
| 2200 | 2550  | BC006779 | MMT00036681   | 1  |
| 2200 | 3523  | BC006779 | Trim34        | 1  |
| 2200 | 3659  | BC006779 | EG236451      | 1  |
| 2200 | 3683  | BC006779 | Oas2          | 1  |
| 2200 | 4114  | BC006779 | Parp12        | 1  |
| 2200 | 4508  | BC006779 | Ifit1         | 1  |
| 2200 | 6072  | BC006779 | C1qc          | 1  |
| 2200 | 6587  | BC006779 | Irf9          | 1  |
| 2200 | 6824  | BC006779 | Irf7          | 1  |
| 2200 | 7105  | BC006779 | Plac8         | 1  |
| 2200 | 7284  | BC006779 | MMT00008674   | 1  |
| 2200 | 8800  | BC006779 | Rnf213        | 1  |
| 2200 | 9401  | BC006779 | Fcgr4         | 1  |
| 2200 | 9847  | BC006779 | Ifi27         | 1  |
| 2200 | 11009 | BC006779 | MMT00008885   | 1  |
| 2200 | 11204 | BC006779 | AI451617      | 1  |
| 2200 | 12398 | BC006779 | Ifi44         | 1  |
| 2200 | 12600 | BC006779 | Ifi204        | 1  |
| 2200 | 12969 | BC006779 | Xaf1          | 1  |
| 2200 | 13514 | BC006779 | Apol9b        | 1  |
| 2200 | 13654 | BC006779 | Stat1         | 1  |
| 2200 | 14506 | BC006779 | Slc15a3       | 1  |
| 2200 | 14603 | BC006779 | Ly6e          | 1  |

|      |       |          |                    |    |
|------|-------|----------|--------------------|----|
| 2200 | 14880 | BC006779 | Ms4a4c             | 1  |
| 2200 | 15074 | BC006779 | Usp18              | 1  |
| 2200 | 15504 | BC006779 | Mx2                | 1  |
| 2200 | 16182 | BC006779 | Oasl1              | 1  |
| 2200 | 16186 | BC006779 | Cfp                | 1  |
| 2200 | 16521 | BC006779 | Adar               | 1  |
| 2200 | 16572 | BC006779 | D14Ert668e         | 1  |
| 2200 | 16988 | BC006779 | Clec4f             | 1  |
| 2200 | 18174 | BC006779 | Stat2              | 1  |
| 2200 | 18186 | BC006779 | Parp14             | 1  |
| 2200 | 19738 | BC006779 | Lgals3bp           | 1  |
| 2200 | 21351 | BC006779 | Shisa5             | 1  |
| 2200 | 21549 | BC006779 | Rtp4               | 1  |
| 2200 | 22037 | BC006779 | Oas1g              | 1  |
| 2200 | 23208 | BC006779 | Hck                | 1  |
| 2200 | 23410 | BC006779 | C1qa               | 1  |
| 2200 | 23450 | BC006779 | D12Ert647e         | 1  |
| 2214 | 10554 | Larp6    | ENSMUSG00000074179 | -1 |
| 2214 | 13293 | Larp6    | Gsta2              | -1 |
| 2218 | 5804  | D15Mgi27 | Thrsp              | 1  |
| 2222 | 8444  | Tagln    | Rdh16              | -1 |
| 2223 | 719   | Slc28a2  | Usp2               | -1 |
| 2223 | 2850  | Slc28a2  | Slc16a6            | 1  |
| 2223 | 5804  | Slc28a2  | Thrsp              | -1 |
| 2223 | 5849  | Slc28a2  | 2310031A18Rik      | 1  |
| 2223 | 5974  | Slc28a2  | Arntl              | 1  |
| 2223 | 6756  | Slc28a2  | Sds                | -1 |
| 2223 | 8541  | Slc28a2  | Tubb5              | 1  |
| 2223 | 16580 | Slc28a2  | Tnfaip2            | 1  |
| 2223 | 19671 | Slc28a2  | Upp2               | -1 |
| 2223 | 21142 | Slc28a2  | Gm129              | -1 |
| 2223 | 22630 | Slc28a2  | MMT00034355        | 1  |
| 2223 | 23437 | Slc28a2  | Efhd2              | -1 |
| 2224 | 143   | Oasl2    | Gvin1              | 1  |
| 2224 | 405   | Oasl2    | Emr4               | 1  |
| 2224 | 701   | Oasl2    | Polr3g             | -1 |
| 2224 | 830   | Oasl2    | Socs1              | 1  |
| 2224 | 917   | Oasl2    | Kal1               | 1  |
| 2224 | 1180  | Oasl2    | Clec4a3            | 1  |
| 2224 | 1533  | Oasl2    | BC013712           | 1  |
| 2224 | 1840  | Oasl2    | Fpr1               | 1  |
| 2224 | 1908  | Oasl2    | Rnf213             | 1  |
| 2224 | 2058  | Oasl2    | Hk3                | 1  |
| 2224 | 2200  | Oasl2    | BC006779           | 1  |
| 2224 | 2224  | Oasl2    | Oasl2              | 1  |
| 2224 | 2550  | Oasl2    | MMT00036681        | 1  |
| 2224 | 2578  | Oasl2    | Csf2rb2            | 1  |
| 2224 | 2752  | Oasl2    | Fcgr1              | 1  |
| 2224 | 2830  | Oasl2    | 4632417K18Rik      | 1  |
| 2224 | 3028  | Oasl2    | Uhrf1              | 1  |
| 2224 | 3036  | Oasl2    | Slamf9             | 1  |

|      |      |       |               |    |
|------|------|-------|---------------|----|
| 2224 | 3286 | Oasl2 | Alox5ap       | 1  |
| 2224 | 3426 | Oasl2 | Hap1          | 1  |
| 2224 | 3523 | Oasl2 | Trim34        | 1  |
| 2224 | 3572 | Oasl2 | Ebi3          | 1  |
| 2224 | 3594 | Oasl2 | Rasa4         | 1  |
| 2224 | 3659 | Oasl2 | EG236451      | 1  |
| 2224 | 3683 | Oasl2 | Oas2          | 1  |
| 2224 | 4114 | Oasl2 | Parp12        | 1  |
| 2224 | 4409 | Oasl2 | 5430435G22Rik | 1  |
| 2224 | 4426 | Oasl2 | ligp2         | 1  |
| 2224 | 4508 | Oasl2 | Ifit1         | 1  |
| 2224 | 4516 | Oasl2 | Rsad2         | 1  |
| 2224 | 4901 | Oasl2 | MMT00073557   | 1  |
| 2224 | 5002 | Oasl2 | Ifi202b       | 1  |
| 2224 | 5044 | Oasl2 | Ifi35         | 1  |
| 2224 | 5216 | Oasl2 | Spnb5         | 1  |
| 2224 | 5250 | Oasl2 | Ifit2         | 1  |
| 2224 | 5554 | Oasl2 | Emr1          | 1  |
| 2224 | 5556 | Oasl2 | Ccl4          | 1  |
| 2224 | 5765 | Oasl2 | Ifitm2        | 1  |
| 2224 | 5766 | Oasl2 | 5033414D02Rik | 1  |
| 2224 | 5845 | Oasl2 | l118bp        | 1  |
| 2224 | 5853 | Oasl2 | Trim30        | 1  |
| 2224 | 5875 | Oasl2 | Cd86          | 1  |
| 2224 | 5949 | Oasl2 | Zbp1          | 1  |
| 2224 | 5975 | Oasl2 | Car13         | 1  |
| 2224 | 6036 | Oasl2 | Pram1         | 1  |
| 2224 | 6072 | Oasl2 | C1qc          | 1  |
| 2224 | 6098 | Oasl2 | Ncf4          | 1  |
| 2224 | 6213 | Oasl2 | Ccl2          | 1  |
| 2224 | 6587 | Oasl2 | Irf9          | 1  |
| 2224 | 6595 | Oasl2 | Oas1a         | 1  |
| 2224 | 6734 | Oasl2 | Ehd4          | 1  |
| 2224 | 6779 | Oasl2 | Gbp6          | 1  |
| 2224 | 6806 | Oasl2 | Agrn          | 1  |
| 2224 | 6824 | Oasl2 | Irf7          | 1  |
| 2224 | 6866 | Oasl2 | Gls           | -1 |
| 2224 | 6888 | Oasl2 | Cxcl9         | 1  |
| 2224 | 6910 | Oasl2 | Ly6c2         | 1  |
| 2224 | 7057 | Oasl2 | Stk10         | 1  |
| 2224 | 7069 | Oasl2 | Ube1l         | 1  |
| 2224 | 7105 | Oasl2 | Plac8         | 1  |
| 2224 | 7238 | Oasl2 | Pycard        | 1  |
| 2224 | 7284 | Oasl2 | MMT00008674   | 1  |
| 2224 | 7316 | Oasl2 | Ifi204        | 1  |
| 2224 | 7336 | Oasl2 | Cd5l          | 1  |
| 2224 | 8270 | Oasl2 | Cispn         | 1  |
| 2224 | 8555 | Oasl2 | H2-M3         | 1  |
| 2224 | 8564 | Oasl2 | Pld4          | 1  |
| 2224 | 8659 | Oasl2 | Psmb8         | 1  |
| 2224 | 8800 | Oasl2 | Rnf213        | 1  |

|      |       |       |               |   |
|------|-------|-------|---------------|---|
| 2224 | 8922  | Oasl2 | Ii10ra        | 1 |
| 2224 | 8951  | Oasl2 | Cd97          | 1 |
| 2224 | 8952  | Oasl2 | Marco         | 1 |
| 2224 | 9100  | Oasl2 | Ms4a6c        | 1 |
| 2224 | 9320  | Oasl2 | Rnf31         | 1 |
| 2224 | 9401  | Oasl2 | Fcgr4         | 1 |
| 2224 | 9616  | Oasl2 | Al451557      | 1 |
| 2224 | 9717  | Oasl2 | Psmb9         | 1 |
| 2224 | 9820  | Oasl2 | BC023105      | 1 |
| 2224 | 9821  | Oasl2 | Pmaip1        | 1 |
| 2224 | 9847  | Oasl2 | Ifi27         | 1 |
| 2224 | 9920  | Oasl2 | Syk           | 1 |
| 2224 | 9928  | Oasl2 | Lgmn          | 1 |
| 2224 | 10109 | Oasl2 | Gbp3          | 1 |
| 2224 | 10393 | Oasl2 | Slc7a8        | 1 |
| 2224 | 10504 | Oasl2 | Ripk3         | 1 |
| 2224 | 10606 | Oasl2 | Apbb1ip       | 1 |
| 2224 | 10796 | Oasl2 | Spic          | 1 |
| 2224 | 10926 | Oasl2 | P2ry13        | 1 |
| 2224 | 11009 | Oasl2 | MMT00008885   | 1 |
| 2224 | 11204 | Oasl2 | Al451617      | 1 |
| 2224 | 11265 | Oasl2 | Irgm          | 1 |
| 2224 | 11701 | Oasl2 | Oas1c         | 1 |
| 2224 | 12126 | Oasl2 | Znfx1         | 1 |
| 2224 | 12312 | Oasl2 | Ms4a6d        | 1 |
| 2224 | 12398 | Oasl2 | Ifi44         | 1 |
| 2224 | 12493 | Oasl2 | Ankfy1        | 1 |
| 2224 | 12495 | Oasl2 | Casp1         | 1 |
| 2224 | 12600 | Oasl2 | Ifi204        | 1 |
| 2224 | 12969 | Oasl2 | Xaf1          | 1 |
| 2224 | 13156 | Oasl2 | Ifit3         | 1 |
| 2224 | 13172 | Oasl2 | Epb4.1i3      | 1 |
| 2224 | 13181 | Oasl2 | Lcp2          | 1 |
| 2224 | 13309 | Oasl2 | Tgtp          | 1 |
| 2224 | 13372 | Oasl2 | Slc11a1       | 1 |
| 2224 | 13504 | Oasl2 | Lair1         | 1 |
| 2224 | 13514 | Oasl2 | Apol9b        | 1 |
| 2224 | 13522 | Oasl2 | Sfn5          | 1 |
| 2224 | 13527 | Oasl2 | Ctss          | 1 |
| 2224 | 13528 | Oasl2 | Capn12        | 1 |
| 2224 | 13585 | Oasl2 | Nckap1l       | 1 |
| 2224 | 13654 | Oasl2 | Stat1         | 1 |
| 2224 | 13656 | Oasl2 | Ly86          | 1 |
| 2224 | 13749 | Oasl2 | Parp9         | 1 |
| 2224 | 13780 | Oasl2 | Pilra         | 1 |
| 2224 | 13826 | Oasl2 | Melk          | 1 |
| 2224 | 14029 | Oasl2 | 2810022L02Rik | 1 |
| 2224 | 14117 | Oasl2 | C1qb          | 1 |
| 2224 | 14237 | Oasl2 | Rac2          | 1 |
| 2224 | 14258 | Oasl2 | Ifi47         | 1 |
| 2224 | 14260 | Oasl2 | Mikl          | 1 |

|      |       |       |             |   |
|------|-------|-------|-------------|---|
| 2224 | 14453 | Oasl2 | Inpp5d      | 1 |
| 2224 | 14506 | Oasl2 | Slc15a3     | 1 |
| 2224 | 14603 | Oasl2 | Ly6e        | 1 |
| 2224 | 14611 | Oasl2 | Ddx60       | 1 |
| 2224 | 14880 | Oasl2 | Ms4a4c      | 1 |
| 2224 | 14883 | Oasl2 | Itgal       | 1 |
| 2224 | 14954 | Oasl2 | Rab19       | 1 |
| 2224 | 15074 | Oasl2 | Usp18       | 1 |
| 2224 | 15159 | Oasl2 | Timd4       | 1 |
| 2224 | 15280 | Oasl2 | Cxcl10      | 1 |
| 2224 | 15348 | Oasl2 | Eif2ak2     | 1 |
| 2224 | 15449 | Oasl2 | Mitd1       | 1 |
| 2224 | 15504 | Oasl2 | Mx2         | 1 |
| 2224 | 15572 | Oasl2 | Dtx3l       | 1 |
| 2224 | 15749 | Oasl2 | Cd22        | 1 |
| 2224 | 15825 | Oasl2 | Fermt3      | 1 |
| 2224 | 16102 | Oasl2 | Cd72        | 1 |
| 2224 | 16129 | Oasl2 | Trafd1      | 1 |
| 2224 | 16147 | Oasl2 | Tlr2        | 1 |
| 2224 | 16182 | Oasl2 | Oasl1       | 1 |
| 2224 | 16186 | Oasl2 | Cfp         | 1 |
| 2224 | 16199 | Oasl2 | Samhd1      | 1 |
| 2224 | 16238 | Oasl2 | Nmi         | 1 |
| 2224 | 16521 | Oasl2 | Adar        | 1 |
| 2224 | 16572 | Oasl2 | D14Ertd668e | 1 |
| 2224 | 16874 | Oasl2 | Fcer1g      | 1 |
| 2224 | 16913 | Oasl2 | Pira3       | 1 |
| 2224 | 16949 | Oasl2 | Iigp1       | 1 |
| 2224 | 16988 | Oasl2 | Clec4f      | 1 |
| 2224 | 17071 | Oasl2 | Samd9l      | 1 |
| 2224 | 17197 | Oasl2 | Igtp        | 1 |
| 2224 | 17412 | Oasl2 | Aif1        | 1 |
| 2224 | 17472 | Oasl2 | Cd53        | 1 |
| 2224 | 17577 | Oasl2 | Med28       | 1 |
| 2224 | 17904 | Oasl2 | Cds1        | 1 |
| 2224 | 18174 | Oasl2 | Stat2       | 1 |
| 2224 | 18186 | Oasl2 | Parp14      | 1 |
| 2224 | 18211 | Oasl2 | Folr2       | 1 |
| 2224 | 18289 | Oasl2 | Tap1        | 1 |
| 2224 | 18686 | Oasl2 | Zfp143      | 1 |
| 2224 | 18868 | Oasl2 | Mpeg1       | 1 |
| 2224 | 19026 | Oasl2 | Isg15       | 1 |
| 2224 | 19063 | Oasl2 | Evl         | 1 |
| 2224 | 19189 | Oasl2 | Sp100       | 1 |
| 2224 | 19252 | Oasl2 | Tmsb4x      | 1 |
| 2224 | 19262 | Oasl2 | Cd274       | 1 |
| 2224 | 19382 | Oasl2 | Slc2a6      | 1 |
| 2224 | 19708 | Oasl2 | Ly6a        | 1 |
| 2224 | 19738 | Oasl2 | Lgals3bp    | 1 |
| 2224 | 19794 | Oasl2 | Rgs2        | 1 |
| 2224 | 20150 | Oasl2 | Ptprc       | 1 |

|      |       |        |               |    |
|------|-------|--------|---------------|----|
| 2224 | 20321 | Oasl2  | Ms4a6b        | 1  |
| 2224 | 20431 | Oasl2  | Slc7a7        | 1  |
| 2224 | 20432 | Oasl2  | Smc1b         | 1  |
| 2224 | 20474 | Oasl2  | Gnb3          | 1  |
| 2224 | 20791 | Oasl2  | MMT00014813   | 1  |
| 2224 | 20997 | Oasl2  | MMT00028135   | 1  |
| 2224 | 21351 | Oasl2  | Shisa5        | 1  |
| 2224 | 21440 | Oasl2  | Tmsb10        | 1  |
| 2224 | 21549 | Oasl2  | Rtp4          | 1  |
| 2224 | 21824 | Oasl2  | 5830443L24Rik | 1  |
| 2224 | 21988 | Oasl2  | MMT00015654   | 1  |
| 2224 | 22037 | Oasl2  | Oas1g         | 1  |
| 2224 | 22077 | Oasl2  | MMT00057550   | 1  |
| 2224 | 22327 | Oasl2  | Tyrobp        | 1  |
| 2224 | 22496 | Oasl2  | Sfn1          | 1  |
| 2224 | 22647 | Oasl2  | Pkib          | 1  |
| 2224 | 22670 | Oasl2  | Clec4a1       | 1  |
| 2224 | 22712 | Oasl2  | Phf11         | 1  |
| 2224 | 23038 | Oasl2  | Casp4         | 1  |
| 2224 | 23092 | Oasl2  | Ifih1         | 1  |
| 2224 | 23208 | Oasl2  | Hck           | 1  |
| 2224 | 23242 | Oasl2  | Gngt2         | 1  |
| 2224 | 23276 | Oasl2  | Evi2b         | 1  |
| 2224 | 23410 | Oasl2  | C1qa          | 1  |
| 2224 | 23450 | Oasl2  | D12Erttd647e  | 1  |
| 2227 | 5364  | Cenpa  | Kif22         | 1  |
| 2241 | 8444  | Trim7  | Rdh16         | -1 |
| 2245 | 7519  | Sh2d4b | Gstm1         | -1 |
| 2245 | 21575 | Sh2d4b | Cyp2c55       | -1 |
| 2262 | 407   | Papss2 | Serpina6      | 1  |
| 2262 | 413   | Papss2 | Acy1          | 1  |
| 2262 | 719   | Papss2 | Usp2          | 1  |
| 2262 | 1065  | Papss2 | Hmgcr         | 1  |
| 2262 | 1711  | Papss2 | Grhl1         | -1 |
| 2262 | 2110  | Papss2 | Gtf2ird1      | -1 |
| 2262 | 2399  | Papss2 | MMT00060167   | -1 |
| 2262 | 2529  | Papss2 | Hmcn2         | 1  |
| 2262 | 2631  | Papss2 | Aldh111       | 1  |
| 2262 | 3079  | Papss2 | Gstt3         | 1  |
| 2262 | 3565  | Papss2 | MMT00045908   | 1  |
| 2262 | 3746  | Papss2 | Osbpl5        | 1  |
| 2262 | 4056  | Papss2 | Tnfaip8l1     | -1 |
| 2262 | 5068  | Papss2 | Afap112       | -1 |
| 2262 | 5804  | Papss2 | Thrsp         | 1  |
| 2262 | 5849  | Papss2 | 2310031A18Rik | -1 |
| 2262 | 6657  | Papss2 | Irf6          | -1 |
| 2262 | 6816  | Papss2 | Slc46a3       | 1  |
| 2262 | 7414  | Papss2 | Clpx          | -1 |
| 2262 | 7492  | Papss2 | Adfp          | -1 |
| 2262 | 8328  | Papss2 | Klhdc8a       | -1 |
| 2262 | 8404  | Papss2 | Fa2h          | -1 |

|      |       |               |               |    |
|------|-------|---------------|---------------|----|
| 2262 | 9481  | Papss2        | Ppl           | 1  |
| 2262 | 9700  | Papss2        | Prodh         | 1  |
| 2262 | 9718  | Papss2        | Fmo5          | 1  |
| 2262 | 10775 | Papss2        | Slc16a1       | -1 |
| 2262 | 11576 | Papss2        | Gm1381        | 1  |
| 2262 | 12114 | Papss2        | Homer2        | 1  |
| 2262 | 13078 | Papss2        | Eps8l2        | -1 |
| 2262 | 14041 | Papss2        | Cldn1         | -1 |
| 2262 | 14279 | Papss2        | 3930402G23Rik | -1 |
| 2262 | 15049 | Papss2        | Rnf125        | -1 |
| 2262 | 15824 | Papss2        | D19Ertd721e   | -1 |
| 2262 | 16580 | Papss2        | Tnfaip2       | -1 |
| 2262 | 17583 | Papss2        | Per2          | 1  |
| 2262 | 18069 | Papss2        | Gpt           | 1  |
| 2262 | 18438 | Papss2        | Map3k7ip2     | -1 |
| 2262 | 18515 | Papss2        | Ddx28         | -1 |
| 2262 | 19790 | Papss2        | Polg2         | 1  |
| 2262 | 20058 | Papss2        | Dnaic1        | -1 |
| 2262 | 20171 | Papss2        | 1700008G05Rik | -1 |
| 2262 | 20385 | Papss2        | Chd1l         | 1  |
| 2262 | 20488 | Papss2        | Bok           | -1 |
| 2262 | 21142 | Papss2        | Gm129         | 1  |
| 2262 | 21918 | Papss2        | Snx24         | -1 |
| 2262 | 21934 | Papss2        | Id2           | -1 |
| 2262 | 22324 | Papss2        | MMT00060741   | -1 |
| 2262 | 22653 | Papss2        | Ric3          | -1 |
| 2266 | 5804  | Angptl2       | Thrsp         | 1  |
| 2266 | 20488 | Angptl2       | Bok           | -1 |
| 2270 | 12910 | Pter          | 1110028A07Rik | 1  |
| 2282 | 7315  | Cbx8          | EG624219      | 1  |
| 2282 | 8632  | Cbx8          | Igfbp1        | -1 |
| 2294 | 22936 | AU040829      | Rhobtb1       | 1  |
| 2301 | 12910 | Pcyox1        | 1110028A07Rik | 1  |
| 2308 | 2308  | A930005I04Rik | A930005I04Rik | 1  |
| 2308 | 9830  | A930005I04Rik | Rbks          | 1  |
| 2308 | 11859 | A930005I04Rik | Poln          | -1 |
| 2308 | 12385 | A930005I04Rik | Mrpl33        | -1 |
| 2322 | 214   | Tuba4a        | Lrp1          | -1 |
| 2322 | 607   | Tuba4a        | Me1           | 1  |
| 2322 | 874   | Tuba4a        | Aldh1a7       | 1  |
| 2322 | 2051  | Tuba4a        | Ddx27         | -1 |
| 2322 | 3345  | Tuba4a        | EG620934      | 1  |
| 2322 | 3377  | Tuba4a        | Cs            | 1  |
| 2322 | 3504  | Tuba4a        | Anpep         | -1 |
| 2322 | 3696  | Tuba4a        | Elovl6        | 1  |
| 2322 | 4351  | Tuba4a        | Plxnb1        | -1 |
| 2322 | 4517  | Tuba4a        | Itih3         | -1 |
| 2322 | 5884  | Tuba4a        | Gstm2         | 1  |
| 2322 | 6044  | Tuba4a        | Sucnr1        | 1  |
| 2322 | 6193  | Tuba4a        | Lactb2        | 1  |
| 2322 | 6812  | Tuba4a        | MMT00040104   | 1  |

|      |       |         |                    |    |
|------|-------|---------|--------------------|----|
| 2322 | 7753  | Tuba4a  | Gfm1               | 1  |
| 2322 | 7957  | Tuba4a  | MMT00074126        | 1  |
| 2322 | 8444  | Tuba4a  | Rdh16              | 1  |
| 2322 | 8815  | Tuba4a  | Mx1                | 1  |
| 2322 | 9713  | Tuba4a  | Ykt6               | 1  |
| 2322 | 10132 | Tuba4a  | Ces2               | 1  |
| 2322 | 10554 | Tuba4a  | ENSMUSG00000074179 | 1  |
| 2322 | 11014 | Tuba4a  | Hibadh             | 1  |
| 2322 | 11054 | Tuba4a  | Rnase4             | -1 |
| 2322 | 11104 | Tuba4a  | MMT00014375        | 1  |
| 2322 | 11946 | Tuba4a  | MMT00030953        | 1  |
| 2322 | 12219 | Tuba4a  | Cyb5b              | 1  |
| 2322 | 12276 | Tuba4a  | Hmga1              | -1 |
| 2322 | 13293 | Tuba4a  | Gsta2              | 1  |
| 2322 | 14017 | Tuba4a  | Ces5               | 1  |
| 2322 | 14147 | Tuba4a  | Acss2              | 1  |
| 2322 | 14323 | Tuba4a  | Scarb1             | -1 |
| 2322 | 15849 | Tuba4a  | Pacs2              | -1 |
| 2322 | 16251 | Tuba4a  | G6pc               | 1  |
| 2322 | 17001 | Tuba4a  | Hmga1              | -1 |
| 2322 | 17828 | Tuba4a  | Serpina3n          | -1 |
| 2322 | 18201 | Tuba4a  | MMT00060232        | 1  |
| 2322 | 18683 | Tuba4a  | Ctsa               | -1 |
| 2322 | 18846 | Tuba4a  | Ikbkg              | 1  |
| 2322 | 20019 | Tuba4a  | Qdpr               | 1  |
| 2322 | 20328 | Tuba4a  | Csl                | 1  |
| 2322 | 21202 | Tuba4a  | Acly               | 1  |
| 2322 | 21214 | Tuba4a  | Scd1               | 1  |
| 2322 | 21251 | Tuba4a  | Cpt1a              | -1 |
| 2322 | 21508 | Tuba4a  | Echdc1             | 1  |
| 2322 | 21575 | Tuba4a  | Cyp2c55            | 1  |
| 2322 | 21727 | Tuba4a  | Khk                | 1  |
| 2322 | 22138 | Tuba4a  | Ang                | -1 |
| 2322 | 22732 | Tuba4a  | Cyb5b              | 1  |
| 2322 | 22821 | Tuba4a  | Tmem135            | 1  |
| 2322 | 23026 | Tuba4a  | Apom               | -1 |
| 2330 | 14017 | Ccdc28b | Ces5               | 1  |
| 2330 | 21575 | Ccdc28b | Cyp2c55            | 1  |
| 2330 | 22138 | Ccdc28b | Ang                | -1 |
| 2330 | 22821 | Ccdc28b | Tmem135            | 1  |
| 2336 | 873   | Lpar3   | Slc22a3            | 1  |
| 2336 | 1453  | Lpar3   | Gfod2              | -1 |
| 2336 | 2721  | Lpar3   | Inmt               | 1  |
| 2336 | 5804  | Lpar3   | Thrsp              | 1  |
| 2336 | 6816  | Lpar3   | Slc46a3            | 1  |
| 2336 | 10132 | Lpar3   | Ces2               | 1  |
| 2336 | 10367 | Lpar3   | Coq7               | 1  |
| 2336 | 13947 | Lpar3   | Crip2              | -1 |
| 2336 | 14279 | Lpar3   | 3930402G23Rik      | -1 |
| 2336 | 18250 | Lpar3   | Mmp14              | -1 |
| 2336 | 22046 | Lpar3   | Cml4               | 1  |



|      |       |               |                    |    |
|------|-------|---------------|--------------------|----|
| 2344 | 294   | Ogt           | Ehhadh             | -1 |
| 2344 | 7602  | Ogt           | Pcca               | -1 |
| 2344 | 8815  | Ogt           | Mx1                | -1 |
| 2344 | 10554 | Ogt           | ENSMUSG00000074179 | -1 |
| 2344 | 11375 | Ogt           | Derl2              | -1 |
| 2344 | 12955 | Ogt           | Atp5o              | -1 |
| 2344 | 13293 | Ogt           | Gsta2              | -1 |
| 2344 | 14151 | Ogt           | Slc44a1            | -1 |
| 2344 | 18201 | Ogt           | MMT00060232        | -1 |
| 2344 | 21214 | Ogt           | Scd1               | -1 |
| 2344 | 21575 | Ogt           | Cyp2c55            | -1 |
| 2344 | 21727 | Ogt           | Khk                | -1 |
| 2350 | 3462  | Ruvbl1        | Nmnat3             | -1 |
| 2350 | 8632  | Ruvbl1        | Igfbp1             | 1  |
| 2350 | 12910 | Ruvbl1        | 1110028A07Rik      | -1 |
| 2350 | 13304 | Ruvbl1        | Gadd45b            | 1  |
| 2350 | 20567 | Ruvbl1        | Ggt6               | -1 |
| 2356 | 3377  | Dnajc13       | Cs                 | 1  |
| 2362 | 3196  | Mkks          | Tat                | 1  |
| 2362 | 3587  | Mkks          | MMT00041940        | 1  |
| 2362 | 11095 | Mkks          | Bag3               | 1  |
| 2362 | 12761 | Mkks          | Tsc22d3            | 1  |
| 2362 | 17160 | Mkks          | Ccdc127            | 1  |
| 2362 | 18099 | Mkks          | Nfx1               | -1 |
| 2362 | 18373 | Mkks          | Dnajb1             | 1  |
| 2362 | 21955 | Mkks          | Atxn711            | -1 |
| 2365 | 18201 | BC031181      | MMT00060232        | 1  |
| 2370 | 337   | 8430408G22Rik | Rasgef1b           | 1  |
| 2370 | 2256  | 8430408G22Rik | Serpina9           | -1 |
| 2370 | 2294  | 8430408G22Rik | AU040829           | 1  |
| 2370 | 2483  | 8430408G22Rik | Gmeb1              | 1  |
| 2370 | 3652  | 8430408G22Rik | Adm                | 1  |
| 2370 | 4205  | 8430408G22Rik | Rgs1               | 1  |
| 2370 | 4286  | 8430408G22Rik | Ptp4a1             | 1  |
| 2370 | 5856  | 8430408G22Rik | Mfsd2              | 1  |
| 2370 | 5889  | 8430408G22Rik | Errfi1             | 1  |
| 2370 | 6564  | 8430408G22Rik | Cebpd              | 1  |
| 2370 | 8816  | 8430408G22Rik | Nfkbia             | 1  |
| 2370 | 9213  | 8430408G22Rik | Osgin1             | -1 |
| 2370 | 10408 | 8430408G22Rik | Per1               | 1  |
| 2370 | 12761 | 8430408G22Rik | Tsc22d3            | 1  |
| 2370 | 13491 | 8430408G22Rik | Plk2               | -1 |
| 2370 | 15522 | 8430408G22Rik | 1810011O10Rik      | 1  |
| 2370 | 15631 | 8430408G22Rik | Lpin1              | 1  |
| 2370 | 15882 | 8430408G22Rik | AA986860           | 1  |
| 2370 | 16580 | 8430408G22Rik | Tnfaip2            | -1 |
| 2370 | 16712 | 8430408G22Rik | Pnrc1              | -1 |
| 2370 | 17352 | 8430408G22Rik | Cebpb              | 1  |
| 2370 | 17525 | 8430408G22Rik | Ctgf               | 1  |
| 2370 | 19025 | 8430408G22Rik | Slc37a4            | 1  |
| 2370 | 19556 | 8430408G22Rik | Efna1              | -1 |

|      |       |               |               |    |
|------|-------|---------------|---------------|----|
| 2370 | 21331 | 8430408G22Rik | Slc10a6       | 1  |
| 2370 | 21934 | 8430408G22Rik | Id2           | -1 |
| 2370 | 23552 | 8430408G22Rik | Rasl11b       | -1 |
| 2372 | 2372  | Stx12         | Stx12         | 1  |
| 2372 | 3475  | Stx12         | 2610305D13Rik | 1  |
| 2372 | 3616  | Stx12         | Dnajc16       | -1 |
| 2372 | 6191  | Stx12         | Ddost         | -1 |
| 2372 | 6830  | Stx12         | Rsc1a1        | -1 |
| 2372 | 6857  | Stx12         | Serinc2       | -1 |
| 2372 | 8610  | Stx12         | Padi4         | -1 |
| 2372 | 16287 | Stx12         | Extl1         | 1  |
| 2377 | 607   | Mmd           | Me1           | 1  |
| 2377 | 8444  | Mmd           | Rdh16         | 1  |
| 2377 | 8815  | Mmd           | Mx1           | 1  |
| 2377 | 18201 | Mmd           | MMT00060232   | 1  |
| 2377 | 20058 | Mmd           | Dnaic1        | -1 |
| 2387 | 1561  | Dscc1         | Aurka         | 1  |
| 2387 | 20433 | Dscc1         | Cdca5         | 1  |
| 2403 | 8815  | Cfl1          | Mx1           | 1  |
| 2403 | 21214 | Cfl1          | Scd1          | 1  |
| 2403 | 23026 | Cfl1          | Apom          | -1 |
| 2420 | 2636  | 2010016I18Rik | Tars          | -1 |
| 2420 | 3038  | 2010016I18Rik | Serpina12     | -1 |
| 2420 | 3265  | 2010016I18Rik | Dntt          | -1 |
| 2420 | 5934  | 2010016I18Rik | S100a10       | -1 |
| 2420 | 6030  | 2010016I18Rik | As3mt         | 1  |
| 2420 | 6370  | 2010016I18Rik | Aqp8          | -1 |
| 2420 | 6386  | 2010016I18Rik | Por           | 1  |
| 2420 | 8815  | 2010016I18Rik | Mx1           | -1 |
| 2420 | 11741 | 2010016I18Rik | Slc30a10      | -1 |
| 2420 | 12799 | 2010016I18Rik | Spon2         | -1 |
| 2420 | 12941 | 2010016I18Rik | Elov15        | -1 |
| 2420 | 14017 | 2010016I18Rik | Ces5          | -1 |
| 2420 | 15709 | 2010016I18Rik | Tceal1        | 1  |
| 2420 | 17247 | 2010016I18Rik | A030007L17Rik | -1 |
| 2420 | 17338 | 2010016I18Rik | Mocos         | -1 |
| 2420 | 18827 | 2010016I18Rik | Oprs1         | -1 |
| 2420 | 20079 | 2010016I18Rik | MMT00019254   | 1  |
| 2420 | 21214 | 2010016I18Rik | Scd1          | -1 |
| 2420 | 22138 | 2010016I18Rik | Ang           | 1  |
| 2421 | 8444  | Itgb5         | Rdh16         | 1  |
| 2421 | 12910 | Itgb5         | 1110028A07Rik | 1  |
| 2421 | 20058 | Itgb5         | Dnaic1        | -1 |
| 2439 | 17090 | Pitpnm2       | Lass2         | 1  |
| 2440 | 2440  | 1500003O22Rik | 1500003O22Rik | 1  |
| 2456 | 3480  | Mrpl10        | Pnpo          | -1 |
| 2456 | 12302 | Mrpl10        | Cbx1          | 1  |
| 2457 | 6206  | 1110032E23Rik | MMT00063701   | 1  |
| 2457 | 10521 | 1110032E23Rik | Ttf2          | 1  |
| 2457 | 11129 | 1110032E23Rik | Ankhd1        | -1 |
| 2457 | 11611 | 1110032E23Rik | S100a13       | -1 |

|      |       |               |                    |    |
|------|-------|---------------|--------------------|----|
| 2457 | 16416 | 1110032E23Rik | Commd2             | 1  |
| 2461 | 3502  | Appbp2        | Gde1               | 1  |
| 2461 | 5766  | Appbp2        | 5033414D02Rik      | -1 |
| 2469 | 9718  | Coasy         | Fmo5               | 1  |
| 2469 | 10554 | Coasy         | ENSMUSG00000074179 | 1  |
| 2469 | 13293 | Coasy         | Gsta2              | 1  |
| 2469 | 13431 | Coasy         | MMT00038058        | -1 |
| 2469 | 14472 | Coasy         | Ahcy               | 1  |
| 2469 | 15205 | Coasy         | MMT00030262        | -1 |
| 2469 | 18549 | Coasy         | Robo1              | 1  |
| 2469 | 23640 | Coasy         | Bdh1               | -1 |
| 2472 | 2472  | MMT00014056   | MMT00014056        | 1  |
| 2472 | 9547  | MMT00014056   | MMT00006479        | 1  |
| 2472 | 14757 | MMT00014056   | Hdx                | 1  |
| 2472 | 16881 | MMT00014056   | MMT00031504        | 1  |
| 2472 | 17295 | MMT00014056   | MMT00082577        | 1  |
| 2472 | 19763 | MMT00014056   | Acp2               | 1  |
| 2472 | 19803 | MMT00014056   | BC003993           | 1  |
| 2472 | 22320 | MMT00014056   | MMT00047284        | 1  |
| 2472 | 23474 | MMT00014056   | MMT00011721        | 1  |
| 2479 | 3196  | Cenpo         | Tat                | -1 |
| 2479 | 4404  | Cenpo         | Commd5             | 1  |
| 2479 | 16517 | Cenpo         | D4Wsu53e           | -1 |
| 2479 | 16720 | Cenpo         | Mtmr7              | -1 |
| 2479 | 22216 | Cenpo         | Sp5                | 1  |
| 2485 | 2485  | Adck1         | Adck1              | 1  |
| 2485 | 13988 | Adck1         | Cntnap2            | 1  |
| 2485 | 20393 | Adck1         | 1110018G07Rik      | -1 |
| 2486 | 16647 | Ephb1         | D16H22S680E        | -1 |
| 2489 | 607   | Npr3          | Me1                | 1  |
| 2489 | 3562  | Npr3          | MMT00011909        | 1  |
| 2489 | 12910 | Npr3          | 1110028A07Rik      | 1  |
| 2489 | 17996 | Npr3          | Igfbp2             | -1 |
| 2489 | 18201 | Npr3          | MMT00060232        | 1  |
| 2489 | 20058 | Npr3          | Dnaic1             | -1 |
| 2489 | 20079 | Npr3          | MMT00019254        | -1 |
| 2501 | 4686  | Isx           | BC021785           | 1  |
| 2507 | 7492  | Oaf           | Adfp               | 1  |
| 2511 | 607   | Ltv1          | Me1                | 1  |
| 2511 | 8444  | Ltv1          | Rdh16              | 1  |
| 2511 | 8815  | Ltv1          | Mx1                | 1  |
| 2511 | 10554 | Ltv1          | ENSMUSG00000074179 | 1  |
| 2511 | 13293 | Ltv1          | Gsta2              | 1  |
| 2511 | 18201 | Ltv1          | MMT00060232        | 1  |
| 2511 | 20058 | Ltv1          | Dnaic1             | -1 |
| 2511 | 21214 | Ltv1          | Scd1               | 1  |
| 2550 | 143   | MMT00036681   | Gvin1              | 1  |
| 2550 | 1533  | MMT00036681   | BC013712           | 1  |
| 2550 | 1908  | MMT00036681   | Rnf213             | 1  |
| 2550 | 2058  | MMT00036681   | Hk3                | 1  |
| 2550 | 2200  | MMT00036681   | BC006779           | 1  |

|      |       |             |               |   |
|------|-------|-------------|---------------|---|
| 2550 | 2224  | MMT00036681 | Oasl2         | 1 |
| 2550 | 2550  | MMT00036681 | MMT00036681   | 1 |
| 2550 | 2752  | MMT00036681 | Fcgr1         | 1 |
| 2550 | 2830  | MMT00036681 | 4632417K18Rik | 1 |
| 2550 | 3028  | MMT00036681 | Uhrf1         | 1 |
| 2550 | 3426  | MMT00036681 | Hap1          | 1 |
| 2550 | 3523  | MMT00036681 | Trim34        | 1 |
| 2550 | 3594  | MMT00036681 | Rasa4         | 1 |
| 2550 | 3659  | MMT00036681 | EG236451      | 1 |
| 2550 | 3683  | MMT00036681 | Oas2          | 1 |
| 2550 | 4114  | MMT00036681 | Parp12        | 1 |
| 2550 | 4409  | MMT00036681 | 5430435G22Rik | 1 |
| 2550 | 4426  | MMT00036681 | Iigp2         | 1 |
| 2550 | 4508  | MMT00036681 | Ifit1         | 1 |
| 2550 | 4516  | MMT00036681 | Rsad2         | 1 |
| 2550 | 5002  | MMT00036681 | Ifi202b       | 1 |
| 2550 | 5044  | MMT00036681 | Ifi35         | 1 |
| 2550 | 5216  | MMT00036681 | Spnb5         | 1 |
| 2550 | 5250  | MMT00036681 | Ifit2         | 1 |
| 2550 | 5766  | MMT00036681 | 5033414D02Rik | 1 |
| 2550 | 5845  | MMT00036681 | I118bp        | 1 |
| 2550 | 5853  | MMT00036681 | Trim30        | 1 |
| 2550 | 5875  | MMT00036681 | Cd86          | 1 |
| 2550 | 5949  | MMT00036681 | Zbp1          | 1 |
| 2550 | 6036  | MMT00036681 | Pram1         | 1 |
| 2550 | 6072  | MMT00036681 | C1qc          | 1 |
| 2550 | 6098  | MMT00036681 | Ncf4          | 1 |
| 2550 | 6587  | MMT00036681 | Irf9          | 1 |
| 2550 | 6595  | MMT00036681 | Oas1a         | 1 |
| 2550 | 6734  | MMT00036681 | Ehd4          | 1 |
| 2550 | 6779  | MMT00036681 | Gbp6          | 1 |
| 2550 | 6806  | MMT00036681 | Agrn          | 1 |
| 2550 | 6824  | MMT00036681 | Irf7          | 1 |
| 2550 | 6910  | MMT00036681 | Ly6c2         | 1 |
| 2550 | 7069  | MMT00036681 | Ube1l         | 1 |
| 2550 | 7105  | MMT00036681 | Plac8         | 1 |
| 2550 | 7238  | MMT00036681 | Pycard        | 1 |
| 2550 | 7284  | MMT00036681 | MMT00008674   | 1 |
| 2550 | 7316  | MMT00036681 | Ifi204        | 1 |
| 2550 | 7336  | MMT00036681 | Cd5l          | 1 |
| 2550 | 8270  | MMT00036681 | Clspn         | 1 |
| 2550 | 8555  | MMT00036681 | H2-M3         | 1 |
| 2550 | 8659  | MMT00036681 | Psmb8         | 1 |
| 2550 | 8800  | MMT00036681 | Rnf213        | 1 |
| 2550 | 9100  | MMT00036681 | Ms4a6c        | 1 |
| 2550 | 9401  | MMT00036681 | Fcgr4         | 1 |
| 2550 | 9820  | MMT00036681 | BC023105      | 1 |
| 2550 | 9847  | MMT00036681 | Ifi27         | 1 |
| 2550 | 10109 | MMT00036681 | Gbp3          | 1 |
| 2550 | 10504 | MMT00036681 | Ripk3         | 1 |
| 2550 | 10606 | MMT00036681 | Apbb1ip       | 1 |

|      |       |             |             |   |
|------|-------|-------------|-------------|---|
| 2550 | 10926 | MMT00036681 | P2ry13      | 1 |
| 2550 | 11009 | MMT00036681 | MMT00008885 | 1 |
| 2550 | 11204 | MMT00036681 | Al451617    | 1 |
| 2550 | 11265 | MMT00036681 | Irgm        | 1 |
| 2550 | 11701 | MMT00036681 | Oas1c       | 1 |
| 2550 | 12126 | MMT00036681 | Znfx1       | 1 |
| 2550 | 12312 | MMT00036681 | Ms4a6d      | 1 |
| 2550 | 12316 | MMT00036681 | Mpa2l       | 1 |
| 2550 | 12398 | MMT00036681 | Ifi44       | 1 |
| 2550 | 12493 | MMT00036681 | Ankfy1      | 1 |
| 2550 | 12600 | MMT00036681 | Ifi204      | 1 |
| 2550 | 12969 | MMT00036681 | Xaf1        | 1 |
| 2550 | 13156 | MMT00036681 | Ifit3       | 1 |
| 2550 | 13181 | MMT00036681 | Lcp2        | 1 |
| 2550 | 13309 | MMT00036681 | Tgtp        | 1 |
| 2550 | 13514 | MMT00036681 | Apol9b      | 1 |
| 2550 | 13522 | MMT00036681 | Sln5        | 1 |
| 2550 | 13527 | MMT00036681 | Ctss        | 1 |
| 2550 | 13528 | MMT00036681 | Capn12      | 1 |
| 2550 | 13585 | MMT00036681 | Nckap1l     | 1 |
| 2550 | 13654 | MMT00036681 | Stat1       | 1 |
| 2550 | 13656 | MMT00036681 | Ly86        | 1 |
| 2550 | 13749 | MMT00036681 | Parp9       | 1 |
| 2550 | 13780 | MMT00036681 | Pilra       | 1 |
| 2550 | 14258 | MMT00036681 | Ifi47       | 1 |
| 2550 | 14506 | MMT00036681 | Slc15a3     | 1 |
| 2550 | 14603 | MMT00036681 | Ly6e        | 1 |
| 2550 | 14611 | MMT00036681 | Ddx60       | 1 |
| 2550 | 14880 | MMT00036681 | Ms4a4c      | 1 |
| 2550 | 14883 | MMT00036681 | Itgal       | 1 |
| 2550 | 15074 | MMT00036681 | Usp18       | 1 |
| 2550 | 15280 | MMT00036681 | Cxcl10      | 1 |
| 2550 | 15348 | MMT00036681 | Eif2ak2     | 1 |
| 2550 | 15449 | MMT00036681 | Mitd1       | 1 |
| 2550 | 15504 | MMT00036681 | Mx2         | 1 |
| 2550 | 15572 | MMT00036681 | Dtx3l       | 1 |
| 2550 | 16102 | MMT00036681 | Cd72        | 1 |
| 2550 | 16182 | MMT00036681 | Oasl1       | 1 |
| 2550 | 16186 | MMT00036681 | Cfp         | 1 |
| 2550 | 16199 | MMT00036681 | Samhd1      | 1 |
| 2550 | 16521 | MMT00036681 | Adar        | 1 |
| 2550 | 16572 | MMT00036681 | D14Ert668e  | 1 |
| 2550 | 16874 | MMT00036681 | Fcer1g      | 1 |
| 2550 | 16949 | MMT00036681 | Iigp1       | 1 |
| 2550 | 16988 | MMT00036681 | Clec4f      | 1 |
| 2550 | 17071 | MMT00036681 | Samd9l      | 1 |
| 2550 | 17197 | MMT00036681 | Igtp        | 1 |
| 2550 | 17412 | MMT00036681 | Aif1        | 1 |
| 2550 | 17904 | MMT00036681 | Cds1        | 1 |
| 2550 | 18174 | MMT00036681 | Stat2       | 1 |
| 2550 | 18186 | MMT00036681 | Parp14      | 1 |

|      |       |             |               |    |
|------|-------|-------------|---------------|----|
| 2550 | 19026 | MMT00036681 | Isg15         | 1  |
| 2550 | 19189 | MMT00036681 | Sp100         | 1  |
| 2550 | 19262 | MMT00036681 | Cd274         | 1  |
| 2550 | 19708 | MMT00036681 | Ly6a          | 1  |
| 2550 | 19738 | MMT00036681 | Lgals3bp      | 1  |
| 2550 | 19794 | MMT00036681 | Rgs2          | 1  |
| 2550 | 20321 | MMT00036681 | Ms4a6b        | 1  |
| 2550 | 20431 | MMT00036681 | Slc7a7        | 1  |
| 2550 | 20791 | MMT00036681 | MMT00014813   | 1  |
| 2550 | 20997 | MMT00036681 | MMT00028135   | 1  |
| 2550 | 21351 | MMT00036681 | Shisa5        | 1  |
| 2550 | 21549 | MMT00036681 | Rtp4          | 1  |
| 2550 | 21824 | MMT00036681 | 5830443L24Rik | 1  |
| 2550 | 22037 | MMT00036681 | Oas1g         | 1  |
| 2550 | 22077 | MMT00036681 | MMT00057550   | 1  |
| 2550 | 22712 | MMT00036681 | Phf11         | 1  |
| 2550 | 23208 | MMT00036681 | Hck           | 1  |
| 2550 | 23242 | MMT00036681 | Gngt2         | 1  |
| 2550 | 23450 | MMT00036681 | D12Erttd647e  | 1  |
| 2562 | 19622 | Nhedc2      | Bdh2          | 1  |
| 2571 | 1041  | Rmnd1       | 3110049J23Rik | -1 |
| 2571 | 1135  | Rmnd1       | Akap12        | 1  |
| 2571 | 2571  | Rmnd1       | Rmnd1         | 1  |
| 2571 | 3744  | Rmnd1       | Rmnd1         | 1  |
| 2571 | 5965  | Rmnd1       | Pbld          | -1 |
| 2571 | 7620  | Rmnd1       | Foxo3         | -1 |
| 2571 | 8786  | Rmnd1       | Rmnd1         | 1  |
| 2571 | 14169 | Rmnd1       | 1700052N19Rik | -1 |
| 2571 | 18300 | Rmnd1       | Arg1          | -1 |
| 2571 | 19115 | Rmnd1       | Rab32         | 1  |
| 2571 | 19392 | Rmnd1       | Slc25a16      | 1  |
| 2571 | 22146 | Rmnd1       | Aifm2         | -1 |
| 2578 | 250   | Csf2rb2     | Tubb2a-ps2    | 1  |
| 2578 | 269   | Csf2rb2     | Tuba1b        | 1  |
| 2578 | 433   | Csf2rb2     | Pla2g12b      | 1  |
| 2578 | 604   | Csf2rb2     | Ppp1r15b      | -1 |
| 2578 | 609   | Csf2rb2     | MMT00060868   | 1  |
| 2578 | 719   | Csf2rb2     | Usp2          | -1 |
| 2578 | 771   | Csf2rb2     | Zbtb45        | 1  |
| 2578 | 1646  | Csf2rb2     | Slc15a4       | -1 |
| 2578 | 1767  | Csf2rb2     | BC016495      | -1 |
| 2578 | 2794  | Csf2rb2     | Map3k6        | -1 |
| 2578 | 3214  | Csf2rb2     | Dnmt3b        | 1  |
| 2578 | 3410  | Csf2rb2     | Paqr9         | 1  |
| 2578 | 3790  | Csf2rb2     | Mtss1         | -1 |
| 2578 | 3804  | Csf2rb2     | MMT00015534   | 1  |
| 2578 | 3868  | Csf2rb2     | Ebpl          | 1  |
| 2578 | 4286  | Csf2rb2     | Ptp4a1        | -1 |
| 2578 | 4534  | Csf2rb2     | Ndel1         | -1 |
| 2578 | 4576  | Csf2rb2     | Chchd7        | -1 |
| 2578 | 4708  | Csf2rb2     | Traf3ip2      | 1  |

|      |       |         |               |    |
|------|-------|---------|---------------|----|
| 2578 | 5364  | Csf2rb2 | Kif22         | 1  |
| 2578 | 5382  | Csf2rb2 | Fbn1          | 1  |
| 2578 | 5574  | Csf2rb2 | Hsd3b7        | 1  |
| 2578 | 5791  | Csf2rb2 | Baiap211      | -1 |
| 2578 | 5802  | Csf2rb2 | Mad212        | 1  |
| 2578 | 5892  | Csf2rb2 | MMT00038457   | -1 |
| 2578 | 5974  | Csf2rb2 | Arntl         | 1  |
| 2578 | 6109  | Csf2rb2 | Hsd17b2       | 1  |
| 2578 | 6338  | Csf2rb2 | Setd3         | -1 |
| 2578 | 6386  | Csf2rb2 | Por           | -1 |
| 2578 | 6394  | Csf2rb2 | Fbxo6         | 1  |
| 2578 | 6756  | Csf2rb2 | Sds           | -1 |
| 2578 | 6771  | Csf2rb2 | Insc          | 1  |
| 2578 | 6990  | Csf2rb2 | Nr1i2         | -1 |
| 2578 | 7839  | Csf2rb2 | Asl           | -1 |
| 2578 | 8328  | Csf2rb2 | Klhdc8a       | 1  |
| 2578 | 8428  | Csf2rb2 | Sorbs3        | -1 |
| 2578 | 8641  | Csf2rb2 | Slc7a2        | -1 |
| 2578 | 9275  | Csf2rb2 | Aass          | -1 |
| 2578 | 9309  | Csf2rb2 | MMT00035904   | -1 |
| 2578 | 9438  | Csf2rb2 | Pctk3         | -1 |
| 2578 | 9907  | Csf2rb2 | 4932442K08Rik | -1 |
| 2578 | 10486 | Csf2rb2 | 1300002K09Rik | 1  |
| 2578 | 10775 | Csf2rb2 | Slc16a1       | 1  |
| 2578 | 11129 | Csf2rb2 | Ankhd1        | -1 |
| 2578 | 11149 | Csf2rb2 | MMT00050488   | 1  |
| 2578 | 11599 | Csf2rb2 | Coq10b        | -1 |
| 2578 | 11614 | Csf2rb2 | Sult1e1       | -1 |
| 2578 | 11741 | Csf2rb2 | Slc30a10      | 1  |
| 2578 | 11807 | Csf2rb2 | Fbxo31        | -1 |
| 2578 | 12420 | Csf2rb2 | Klhl21        | -1 |
| 2578 | 12433 | Csf2rb2 | 5033413D22Rik | 1  |
| 2578 | 12799 | Csf2rb2 | Spon2         | 1  |
| 2578 | 12925 | Csf2rb2 | Farp1         | 1  |
| 2578 | 12981 | Csf2rb2 | Nek6          | 1  |
| 2578 | 12982 | Csf2rb2 | Cars          | 1  |
| 2578 | 13000 | Csf2rb2 | 9130404D14Rik | 1  |
| 2578 | 14237 | Csf2rb2 | Rac2          | 1  |
| 2578 | 14258 | Csf2rb2 | Ifi47         | 1  |
| 2578 | 14462 | Csf2rb2 | Zfp385b       | -1 |
| 2578 | 14472 | Csf2rb2 | Ahcy          | -1 |
| 2578 | 14989 | Csf2rb2 | Map3k5        | -1 |
| 2578 | 15021 | Csf2rb2 | Ppargc1a      | -1 |
| 2578 | 15320 | Csf2rb2 | MMT00017479   | -1 |
| 2578 | 15425 | Csf2rb2 | Adprh         | 1  |
| 2578 | 15631 | Csf2rb2 | Lpin1         | -1 |
| 2578 | 15709 | Csf2rb2 | Tceal1        | -1 |
| 2578 | 16060 | Csf2rb2 | Gys2          | -1 |
| 2578 | 16176 | Csf2rb2 | St3gal5       | -1 |
| 2578 | 16580 | Csf2rb2 | Tnfaip2       | 1  |
| 2578 | 16647 | Csf2rb2 | D16H22S680E   | -1 |

|      |       |         |               |    |
|------|-------|---------|---------------|----|
| 2578 | 16669 | Csf2rb2 | Tjp2          | 1  |
| 2578 | 16690 | Csf2rb2 | Tjp3          | 1  |
| 2578 | 17083 | Csf2rb2 | Atp1b1        | -1 |
| 2578 | 17247 | Csf2rb2 | A030007L17Rik | 1  |
| 2578 | 17338 | Csf2rb2 | Mocos         | 1  |
| 2578 | 17444 | Csf2rb2 | Tuba1a        | 1  |
| 2578 | 17617 | Csf2rb2 | Atp5sl        | -1 |
| 2578 | 17622 | Csf2rb2 | Foxo1         | -1 |
| 2578 | 17818 | Csf2rb2 | Chchd4        | -1 |
| 2578 | 17876 | Csf2rb2 | Tubb4         | 1  |
| 2578 | 17878 | Csf2rb2 | Brap          | -1 |
| 2578 | 18027 | Csf2rb2 | 5730403B10Rik | -1 |
| 2578 | 18147 | Csf2rb2 | Nhlrc2        | -1 |
| 2578 | 18179 | Csf2rb2 | Dbp           | -1 |
| 2578 | 18827 | Csf2rb2 | Oprs1         | 1  |
| 2578 | 19025 | Csf2rb2 | Slc37a4       | -1 |
| 2578 | 19234 | Csf2rb2 | Nrg4          | -1 |
| 2578 | 19466 | Csf2rb2 | Pptc7         | -1 |
| 2578 | 19532 | Csf2rb2 | Med8          | 1  |
| 2578 | 19790 | Csf2rb2 | Polg2         | -1 |
| 2578 | 20217 | Csf2rb2 | Rab3ip        | -1 |
| 2578 | 20745 | Csf2rb2 | Sord          | -1 |
| 2578 | 21142 | Csf2rb2 | Gm129         | -1 |
| 2578 | 21794 | Csf2rb2 | Pfkp          | 1  |
| 2578 | 21811 | Csf2rb2 | Ak3l1         | -1 |
| 2578 | 21918 | Csf2rb2 | Snx24         | 1  |
| 2578 | 22290 | Csf2rb2 | Tubb2a        | 1  |
| 2578 | 22630 | Csf2rb2 | MMT00034355   | 1  |
| 2578 | 22936 | Csf2rb2 | Rhobtb1       | -1 |
| 2578 | 23202 | Csf2rb2 | Olf559        | -1 |
| 2578 | 23248 | Csf2rb2 | Tesk2         | -1 |
| 2578 | 23558 | Csf2rb2 | MMT00030937   | -1 |
| 2583 | 8632  | Runx1   | Igfbp1        | -1 |
| 2595 | 20058 | Acbd4   | Dnaic1        | -1 |
| 2598 | 5364  | Naglu   | Kif22         | 1  |
| 2598 | 14017 | Naglu   | Ces5          | 1  |
| 2599 | 1985  | Lsm14a  | Pepd          | -1 |
| 2599 | 2388  | Lsm14a  | Dot1l         | 1  |
| 2599 | 2599  | Lsm14a  | Lsm14a        | 1  |
| 2599 | 2912  | Lsm14a  | Wtip          | -1 |
| 2599 | 4697  | Lsm14a  | Cyp2a12       | -1 |
| 2599 | 5352  | Lsm14a  | Pdcd2l        | 1  |
| 2599 | 6371  | Lsm14a  | Dedd2         | 1  |
| 2599 | 6513  | Lsm14a  | Qpctl         | 1  |
| 2599 | 6519  | Lsm14a  | Phldb3        | 1  |
| 2599 | 7761  | Lsm14a  | Nudt19        | 1  |
| 2599 | 9122  | Lsm14a  | Sepw1         | 1  |
| 2599 | 10545 | Lsm14a  | Tmem147       | 1  |
| 2599 | 11321 | Lsm14a  | 2310014L17Rik | -1 |
| 2599 | 11465 | Lsm14a  | Eif3k         | 1  |
| 2599 | 11888 | Lsm14a  | Myadm         | -1 |



|      |       |             |               |    |
|------|-------|-------------|---------------|----|
| 2599 | 12004 | Lsm14a      | Lgals6        | 1  |
| 2599 | 12423 | Lsm14a      | Cyp2g1        | -1 |
| 2599 | 16639 | Lsm14a      | MMT00078937   | -1 |
| 2599 | 17314 | Lsm14a      | Napa          | -1 |
| 2599 | 18088 | Lsm14a      | Alkbh6        | 1  |
| 2599 | 19462 | Lsm14a      | 4933439C20Rik | -1 |
| 2599 | 19762 | Lsm14a      | Pih1d1        | -1 |
| 2599 | 19854 | Lsm14a      | Kcnj14        | 1  |
| 2599 | 20606 | Lsm14a      | MMT00042166   | -1 |
| 2599 | 21438 | Lsm14a      | Plekha4       | -1 |
| 2599 | 23247 | Lsm14a      | Ercc1         | -1 |
| 2599 | 23595 | Lsm14a      | Gm550         | 1  |
| 2601 | 21517 | Dnajc18     | Sil1          | -1 |
| 2608 | 609   | Clcn2       | MMT00060868   | -1 |
| 2608 | 719   | Clcn2       | Usp2          | 1  |
| 2608 | 2126  | Clcn2       | Dgat2         | 1  |
| 2608 | 2399  | Clcn2       | MMT00060167   | -1 |
| 2608 | 2636  | Clcn2       | Tars          | -1 |
| 2608 | 2766  | Clcn2       | Elp4          | -1 |
| 2608 | 5934  | Clcn2       | S100a10       | -1 |
| 2608 | 5974  | Clcn2       | Arntl         | -1 |
| 2608 | 6213  | Clcn2       | Ccl2          | -1 |
| 2608 | 6370  | Clcn2       | Aqp8          | -1 |
| 2608 | 6386  | Clcn2       | Por           | 1  |
| 2608 | 7414  | Clcn2       | Clpx          | -1 |
| 2608 | 7619  | Clcn2       | Pik3ip1       | 1  |
| 2608 | 10642 | Clcn2       | Ngef          | 1  |
| 2608 | 11741 | Clcn2       | Slc30a10      | -1 |
| 2608 | 11807 | Clcn2       | Fbxo31        | 1  |
| 2608 | 12204 | Clcn2       | Ankmy2        | 1  |
| 2608 | 13094 | Clcn2       | Cnn3          | 1  |
| 2608 | 15481 | Clcn2       | 1110067D22Rik | -1 |
| 2608 | 15709 | Clcn2       | Tceal1        | 1  |
| 2608 | 17247 | Clcn2       | A030007L17Rik | -1 |
| 2608 | 18179 | Clcn2       | Dbp           | 1  |
| 2608 | 18498 | Clcn2       | Slc5a6        | 1  |
| 2608 | 18827 | Clcn2       | Oprs1         | -1 |
| 2608 | 20266 | Clcn2       | Insig2        | -1 |
| 2608 | 21142 | Clcn2       | Gm129         | 1  |
| 2608 | 21192 | Clcn2       | 2310047A01Rik | 1  |
| 2608 | 22290 | Clcn2       | Tubb2a        | -1 |
| 2608 | 23437 | Clcn2       | Efh2          | 1  |
| 2619 | 21251 | Zfp622      | Cpt1a         | 1  |
| 2625 | 771   | MMT00077446 | Zbtb45        | -1 |
| 2625 | 2329  | MMT00077446 | Wdr6          | -1 |
| 2625 | 3410  | MMT00077446 | Paqr9         | -1 |
| 2625 | 3502  | MMT00077446 | Gde1          | 1  |
| 2625 | 4286  | MMT00077446 | Ptp4a1        | 1  |
| 2625 | 4708  | MMT00077446 | Traf3ip2      | -1 |
| 2625 | 5364  | MMT00077446 | Kif22         | -1 |
| 2625 | 5382  | MMT00077446 | Fbn1          | -1 |

|      |       |             |                    |    |
|------|-------|-------------|--------------------|----|
| 2625 | 6370  | MMT00077446 | Aqp8               | -1 |
| 2625 | 6394  | MMT00077446 | Fbxo6              | -1 |
| 2625 | 7066  | MMT00077446 | Agtr1b             | 1  |
| 2625 | 7954  | MMT00077446 | Ccdc12             | -1 |
| 2625 | 8965  | MMT00077446 | Ahcy               | 1  |
| 2625 | 9127  | MMT00077446 | Mtfmt              | -1 |
| 2625 | 9275  | MMT00077446 | Aass               | 1  |
| 2625 | 9507  | MMT00077446 | Trip6              | -1 |
| 2625 | 9587  | MMT00077446 | Bri3bp             | -1 |
| 2625 | 11129 | MMT00077446 | Ankhd1             | 1  |
| 2625 | 11614 | MMT00077446 | Sult1e1            | 1  |
| 2625 | 11741 | MMT00077446 | Slc30a10           | -1 |
| 2625 | 12799 | MMT00077446 | Spon2              | -1 |
| 2625 | 12839 | MMT00077446 | Fh1                | 1  |
| 2625 | 12941 | MMT00077446 | Elov5              | -1 |
| 2625 | 12982 | MMT00077446 | Cars               | -1 |
| 2625 | 14472 | MMT00077446 | Ahcy               | 1  |
| 2625 | 15021 | MMT00077446 | Ppargc1a           | 1  |
| 2625 | 15320 | MMT00077446 | MMT00017479        | 1  |
| 2625 | 15631 | MMT00077446 | Lpin1              | 1  |
| 2625 | 16647 | MMT00077446 | D16H22S680E        | 1  |
| 2625 | 18027 | MMT00077446 | 5730403B10Rik      | 1  |
| 2625 | 18827 | MMT00077446 | Oprs1              | -1 |
| 2625 | 19025 | MMT00077446 | Slc37a4            | 1  |
| 2625 | 19277 | MMT00077446 | MMT00044927        | 1  |
| 2625 | 19723 | MMT00077446 | Pfkfb1             | 1  |
| 2625 | 21675 | MMT00077446 | Mosc2              | 1  |
| 2625 | 22218 | MMT00077446 | Rfc3               | -1 |
| 2625 | 22681 | MMT00077446 | Gm88               | 1  |
| 2625 | 23180 | MMT00077446 | Sult1d1            | 1  |
| 2625 | 23183 | MMT00077446 | Nnmt               | 1  |
| 2625 | 23202 | MMT00077446 | Olf559             | 1  |
| 2627 | 3683  | Ccl12       | Oas2               | 1  |
| 2627 | 4508  | Ccl12       | Ifit1              | 1  |
| 2627 | 5949  | Ccl12       | Zbp1               | 1  |
| 2627 | 8800  | Ccl12       | Rnf213             | 1  |
| 2627 | 12126 | Ccl12       | Znfx1              | 1  |
| 2627 | 18174 | Ccl12       | Stat2              | 1  |
| 2627 | 18186 | Ccl12       | Parp14             | 1  |
| 2627 | 20997 | Ccl12       | MMT00028135        | 1  |
| 2627 | 22037 | Ccl12       | Oas1g              | 1  |
| 2631 | 5804  | Aldh111     | Thrsp              | 1  |
| 2631 | 8444  | Aldh111     | Rdh16              | 1  |
| 2631 | 10554 | Aldh111     | ENSMUSG00000074179 | 1  |
| 2631 | 12556 | Aldh111     | Ass1               | 1  |
| 2631 | 13293 | Aldh111     | Gsta2              | 1  |
| 2631 | 20058 | Aldh111     | Dnaic1             | -1 |
| 2631 | 20385 | Aldh111     | Chd1l              | 1  |
| 2631 | 22998 | Aldh111     | Ass1               | 1  |
| 2632 | 524   | Aph1a       | Hsd3b2             | -1 |
| 2632 | 1867  | Aph1a       | Bcas2              | -1 |

|      |       |          |                    |    |
|------|-------|----------|--------------------|----|
| 2632 | 1963  | Aph1a    | MMT00039783        | -1 |
| 2632 | 3753  | Aph1a    | Setdb1             | 1  |
| 2632 | 5938  | Aph1a    | Pfn2               | -1 |
| 2632 | 10521 | Aph1a    | Ttf2               | -1 |
| 2632 | 11611 | Aph1a    | S100a13            | 1  |
| 2632 | 12367 | Aph1a    | MMT00072365        | 1  |
| 2632 | 16679 | Aph1a    | Ctsk               | 1  |
| 2632 | 18754 | Aph1a    | Rbm8a              | -1 |
| 2632 | 18911 | Aph1a    | Selenbp2           | -1 |
| 2632 | 20661 | Aph1a    | Tuft1              | -1 |
| 2632 | 23457 | Aph1a    | Selenbp2           | -1 |
| 2635 | 607   | Tmem126a | Me1                | 1  |
| 2635 | 18201 | Tmem126a | MMT00060232        | 1  |
| 2635 | 20019 | Tmem126a | Qdpr               | 1  |
| 2635 | 21214 | Tmem126a | Scd1               | 1  |
| 2668 | 17391 | C3ar1    | C530028O21Rik      | 1  |
| 2669 | 8632  | Ier2     | Igfbp1             | -1 |
| 2694 | 12367 | Siah2    | MMT00072365        | 1  |
| 2699 | 1036  | Hax1     | Dusp19             | 1  |
| 2699 | 4351  | Hax1     | Plxnb1             | -1 |
| 2699 | 12112 | Hax1     | Tmem53             | -1 |
| 2708 | 337   | Sgk1     | Rasgef1b           | 1  |
| 2708 | 6564  | Sgk1     | Cebpd              | 1  |
| 2708 | 8816  | Sgk1     | Nfkbia             | 1  |
| 2708 | 11807 | Sgk1     | Fbxo31             | 1  |
| 2708 | 18785 | Sgk1     | Angptl4            | 1  |
| 2718 | 6213  | Scrn3    | Ccl2               | -1 |
| 2718 | 14870 | Scrn3    | Capn2              | -1 |
| 2721 | 2636  | Inmt     | Tars               | -1 |
| 2721 | 6370  | Inmt     | Aqp8               | -1 |
| 2721 | 8444  | Inmt     | Rdh16              | -1 |
| 2721 | 8815  | Inmt     | Mx1                | -1 |
| 2721 | 12938 | Inmt     | Fhod3              | 1  |
| 2721 | 12941 | Inmt     | Elovl5             | -1 |
| 2721 | 14017 | Inmt     | Ces5               | -1 |
| 2721 | 18201 | Inmt     | MMT00060232        | -1 |
| 2721 | 18827 | Inmt     | Oprs1              | -1 |
| 2721 | 21214 | Inmt     | Scd1               | -1 |
| 2721 | 22138 | Inmt     | Ang                | 1  |
| 2727 | 147   | Stc2     | Uox                | 1  |
| 2727 | 760   | Stc2     | Akr1c19            | 1  |
| 2727 | 3356  | Stc2     | Adhfe1             | 1  |
| 2727 | 5449  | Stc2     | Got1               | 1  |
| 2727 | 5804  | Stc2     | Thrsp              | 1  |
| 2727 | 5884  | Stc2     | Gstm2              | 1  |
| 2727 | 6756  | Stc2     | Sds                | 1  |
| 2727 | 7492  | Stc2     | Adfp               | -1 |
| 2727 | 7602  | Stc2     | Pcca               | 1  |
| 2727 | 9213  | Stc2     | Osgin1             | -1 |
| 2727 | 9718  | Stc2     | Fmo5               | 1  |
| 2727 | 10554 | Stc2     | ENSMUSG00000074179 | 1  |

|      |       |      |               |    |
|------|-------|------|---------------|----|
| 2727 | 11946 | Stc2 | MMT00030953   | 1  |
| 2727 | 12556 | Stc2 | Ass1          | 1  |
| 2727 | 13293 | Stc2 | Gsta2         | 1  |
| 2727 | 13431 | Stc2 | MMT00038058   | -1 |
| 2727 | 14147 | Stc2 | Acss2         | 1  |
| 2727 | 15205 | Stc2 | MMT00030262   | -1 |
| 2727 | 17225 | Stc2 | Impa2         | -1 |
| 2727 | 18515 | Stc2 | Ddx28         | -1 |
| 2727 | 18549 | Stc2 | Robo1         | 1  |
| 2727 | 19723 | Stc2 | Pfkfb1        | 1  |
| 2727 | 20019 | Stc2 | Qdpr          | 1  |
| 2727 | 21727 | Stc2 | Khk           | 1  |
| 2727 | 23640 | Stc2 | Bdh1          | -1 |
| 2730 | 482   | Bcor | Rnf43         | 1  |
| 2730 | 563   | Bcor | D4Bwg0951e    | -1 |
| 2730 | 662   | Bcor | Mid1ip1       | 1  |
| 2730 | 3040  | Bcor | Bcl3          | 1  |
| 2730 | 4391  | Bcor | Zfp467        | 1  |
| 2730 | 6308  | Bcor | 2410075B13Rik | 1  |
| 2730 | 6393  | Bcor | 3110043O21Rik | -1 |
| 2730 | 6976  | Bcor | Rbm35b        | 1  |
| 2730 | 8234  | Bcor | Tbpl1         | -1 |
| 2730 | 12112 | Bcor | Tmem53        | 1  |
| 2730 | 12315 | Bcor | Srebf1        | 1  |
| 2730 | 13489 | Bcor | D230025D16Rik | -1 |
| 2730 | 14099 | Bcor | Nfe2          | 1  |
| 2730 | 14135 | Bcor | Eepd1         | 1  |
| 2730 | 15604 | Bcor | Arl4a         | -1 |
| 2730 | 16449 | Bcor | BC004044      | 1  |
| 2730 | 18785 | Bcor | Angptl4       | -1 |
| 2730 | 22443 | Bcor | Tuba1c        | 1  |
| 2743 | 1140  | Tcf3 | Rmnd5a        | -1 |
| 2743 | 2743  | Tcf3 | Tcf3          | 1  |
| 2743 | 3703  | Tcf3 | Ggcx          | 1  |
| 2743 | 4086  | Tcf3 | Adamts8       | 1  |
| 2743 | 4093  | Tcf3 | Akp5          | 1  |
| 2743 | 7273  | Tcf3 | Rnf103        | -1 |
| 2743 | 11338 | Tcf3 | Vamp8         | 1  |
| 2743 | 11872 | Tcf3 | Vamp5         | 1  |
| 2743 | 15384 | Tcf3 | Mat2a         | 1  |
| 2743 | 15625 | Tcf3 | Capg          | 1  |
| 2743 | 15708 | Tcf3 | Retsat        | 1  |
| 2743 | 16670 | Tcf3 | Csmd2         | -1 |
| 2743 | 17317 | Tcf3 | Jmjd1a        | -1 |
| 2743 | 17562 | Tcf3 | Rbed1         | 1  |
| 2743 | 18658 | Tcf3 | Gstk1         | 1  |
| 2743 | 22695 | Tcf3 | Tgoln2        | 1  |
| 2749 | 1755  | Naf1 | Ocel1         | -1 |
| 2749 | 9304  | Naf1 | AI449175      | -1 |
| 2749 | 13732 | Naf1 | Tpm4          | 1  |
| 2749 | 15094 | Naf1 | Pbx4          | 1  |

|      |       |       |               |    |
|------|-------|-------|---------------|----|
| 2749 | 15455 | Naf1  | Lsm4          | 1  |
| 2749 | 16617 | Naf1  | Sh2d4a        | 1  |
| 2749 | 16849 | Naf1  | Trmt1         | 1  |
| 2749 | 17403 | Naf1  | N4bp1         | 1  |
| 2749 | 18886 | Naf1  | Slc18a1       | 1  |
| 2749 | 20484 | Naf1  | Ces1          | 1  |
| 2752 | 1416  | Fcgr1 | 6720460F02Rik | 1  |
| 2752 | 1533  | Fcgr1 | BC013712      | 1  |
| 2752 | 1867  | Fcgr1 | Bcas2         | 1  |
| 2752 | 1932  | Fcgr1 | Racgap1       | 1  |
| 2752 | 2058  | Fcgr1 | Hk3           | 1  |
| 2752 | 2200  | Fcgr1 | BC006779      | 1  |
| 2752 | 2224  | Fcgr1 | Oasl2         | 1  |
| 2752 | 2752  | Fcgr1 | Fcgr1         | 1  |
| 2752 | 3028  | Fcgr1 | Uhrf1         | 1  |
| 2752 | 3683  | Fcgr1 | Oas2          | 1  |
| 2752 | 3721  | Fcgr1 | Me2           | 1  |
| 2752 | 3753  | Fcgr1 | Setdb1        | -1 |
| 2752 | 4409  | Fcgr1 | 5430435G22Rik | 1  |
| 2752 | 4426  | Fcgr1 | Iigp2         | 1  |
| 2752 | 4508  | Fcgr1 | Ifit1         | 1  |
| 2752 | 4516  | Fcgr1 | Rsad2         | 1  |
| 2752 | 5044  | Fcgr1 | Ifi35         | 1  |
| 2752 | 5250  | Fcgr1 | Ifit2         | 1  |
| 2752 | 5364  | Fcgr1 | Kif22         | 1  |
| 2752 | 5554  | Fcgr1 | Emr1          | 1  |
| 2752 | 5556  | Fcgr1 | Ccl4          | 1  |
| 2752 | 5766  | Fcgr1 | 5033414D02Rik | 1  |
| 2752 | 5845  | Fcgr1 | Ii18bp        | 1  |
| 2752 | 5853  | Fcgr1 | Trim30        | 1  |
| 2752 | 5875  | Fcgr1 | Cd86          | 1  |
| 2752 | 5938  | Fcgr1 | Pfn2          | 1  |
| 2752 | 5949  | Fcgr1 | Zbp1          | 1  |
| 2752 | 6072  | Fcgr1 | C1qc          | 1  |
| 2752 | 6098  | Fcgr1 | Ncf4          | 1  |
| 2752 | 6206  | Fcgr1 | MMT00063701   | 1  |
| 2752 | 6213  | Fcgr1 | Ccl2          | 1  |
| 2752 | 6595  | Fcgr1 | Oas1a         | 1  |
| 2752 | 6734  | Fcgr1 | Ehd4          | 1  |
| 2752 | 6824  | Fcgr1 | Irf7          | 1  |
| 2752 | 7069  | Fcgr1 | Ube1l         | 1  |
| 2752 | 7105  | Fcgr1 | Plac8         | 1  |
| 2752 | 7173  | Fcgr1 | Trim59        | 1  |
| 2752 | 7238  | Fcgr1 | Pycard        | 1  |
| 2752 | 7284  | Fcgr1 | MMT00008674   | 1  |
| 2752 | 7316  | Fcgr1 | Ifi204        | 1  |
| 2752 | 7336  | Fcgr1 | Cd5l          | 1  |
| 2752 | 8270  | Fcgr1 | Cispn         | 1  |
| 2752 | 8392  | Fcgr1 | Asf1b         | 1  |
| 2752 | 8555  | Fcgr1 | H2-M3         | 1  |
| 2752 | 8800  | Fcgr1 | Rnf213        | 1  |

|      |       |       |               |    |
|------|-------|-------|---------------|----|
| 2752 | 9100  | Fcgr1 | Ms4a6c        | 1  |
| 2752 | 9401  | Fcgr1 | Fcgr4         | 1  |
| 2752 | 9847  | Fcgr1 | Ifi27         | 1  |
| 2752 | 9928  | Fcgr1 | Lgmn          | 1  |
| 2752 | 10109 | Fcgr1 | Gbp3          | 1  |
| 2752 | 10504 | Fcgr1 | Ripk3         | 1  |
| 2752 | 10521 | Fcgr1 | Ttf2          | 1  |
| 2752 | 10606 | Fcgr1 | Apbb1ip       | 1  |
| 2752 | 10926 | Fcgr1 | P2ry13        | 1  |
| 2752 | 11265 | Fcgr1 | Irgm          | 1  |
| 2752 | 11275 | Fcgr1 | Fanci         | 1  |
| 2752 | 11437 | Fcgr1 | Gatm          | 1  |
| 2752 | 11611 | Fcgr1 | S100a13       | -1 |
| 2752 | 11701 | Fcgr1 | Oas1c         | 1  |
| 2752 | 11870 | Fcgr1 | Apitd1        | 1  |
| 2752 | 11959 | Fcgr1 | 4631422O05Rik | 1  |
| 2752 | 12312 | Fcgr1 | Ms4a6d        | 1  |
| 2752 | 12398 | Fcgr1 | Ifi44         | 1  |
| 2752 | 12600 | Fcgr1 | Ifi204        | 1  |
| 2752 | 12969 | Fcgr1 | Xaf1          | 1  |
| 2752 | 13054 | Fcgr1 | Mcm4          | 1  |
| 2752 | 13156 | Fcgr1 | Ifit3         | 1  |
| 2752 | 13172 | Fcgr1 | Epb4.1l3      | 1  |
| 2752 | 13181 | Fcgr1 | Lcp2          | 1  |
| 2752 | 13309 | Fcgr1 | Tgtp          | 1  |
| 2752 | 13455 | Fcgr1 | Cenpe         | 1  |
| 2752 | 13585 | Fcgr1 | Nckap1l       | 1  |
| 2752 | 13654 | Fcgr1 | Stat1         | 1  |
| 2752 | 13780 | Fcgr1 | Pilra         | 1  |
| 2752 | 14237 | Fcgr1 | Rac2          | 1  |
| 2752 | 14258 | Fcgr1 | Ifi47         | 1  |
| 2752 | 14260 | Fcgr1 | Mkl           | 1  |
| 2752 | 14361 | Fcgr1 | Txndc12       | 1  |
| 2752 | 14472 | Fcgr1 | Ahcy          | -1 |
| 2752 | 14506 | Fcgr1 | Slc15a3       | 1  |
| 2752 | 14603 | Fcgr1 | Ly6e          | 1  |
| 2752 | 14880 | Fcgr1 | Ms4a4c        | 1  |
| 2752 | 14883 | Fcgr1 | Itgal         | 1  |
| 2752 | 15280 | Fcgr1 | Cxcl10        | 1  |
| 2752 | 15320 | Fcgr1 | MMT00017479   | -1 |
| 2752 | 15387 | Fcgr1 | Mgl1          | 1  |
| 2752 | 15449 | Fcgr1 | Mitd1         | 1  |
| 2752 | 15504 | Fcgr1 | Mx2           | 1  |
| 2752 | 16102 | Fcgr1 | Cd72          | 1  |
| 2752 | 16147 | Fcgr1 | Tlr2          | 1  |
| 2752 | 16182 | Fcgr1 | Oas1          | 1  |
| 2752 | 16186 | Fcgr1 | Cfp           | 1  |
| 2752 | 16199 | Fcgr1 | Samhd1        | 1  |
| 2752 | 16416 | Fcgr1 | Commd2        | 1  |
| 2752 | 16572 | Fcgr1 | D14Erttd668e  | 1  |
| 2752 | 16854 | Fcgr1 | Kif15         | 1  |

|      |       |       |                    |    |
|------|-------|-------|--------------------|----|
| 2752 | 16874 | Fcgr1 | Fcer1g             | 1  |
| 2752 | 16988 | Fcgr1 | Clec4f             | 1  |
| 2752 | 17197 | Fcgr1 | Igtp               | 1  |
| 2752 | 17216 | Fcgr1 | Nuf2               | 1  |
| 2752 | 17412 | Fcgr1 | Aif1               | 1  |
| 2752 | 17823 | Fcgr1 | D2Erttd750e        | 1  |
| 2752 | 18174 | Fcgr1 | Stat2              | 1  |
| 2752 | 18211 | Fcgr1 | Folr2              | 1  |
| 2752 | 18754 | Fcgr1 | Rbm8a              | 1  |
| 2752 | 19189 | Fcgr1 | Sp100              | 1  |
| 2752 | 19252 | Fcgr1 | Tmsb4x             | 1  |
| 2752 | 19262 | Fcgr1 | Cd274              | 1  |
| 2752 | 19738 | Fcgr1 | Lgals3bp           | 1  |
| 2752 | 19794 | Fcgr1 | Rgs2               | 1  |
| 2752 | 20321 | Fcgr1 | Ms4a6b             | 1  |
| 2752 | 20431 | Fcgr1 | Slc7a7             | 1  |
| 2752 | 20433 | Fcgr1 | Cdca5              | 1  |
| 2752 | 20661 | Fcgr1 | Tuft1              | 1  |
| 2752 | 20997 | Fcgr1 | MMT00028135        | 1  |
| 2752 | 21351 | Fcgr1 | Shisa5             | 1  |
| 2752 | 21440 | Fcgr1 | Tmsb10             | 1  |
| 2752 | 21549 | Fcgr1 | Rtp4               | 1  |
| 2752 | 21824 | Fcgr1 | 5830443L24Rik      | 1  |
| 2752 | 21947 | Fcgr1 | Cdca8              | 1  |
| 2752 | 22037 | Fcgr1 | Oas1g              | 1  |
| 2752 | 22876 | Fcgr1 | Sash3              | 1  |
| 2752 | 23208 | Fcgr1 | Hck                | 1  |
| 2752 | 23403 | Fcgr1 | Ndc80              | 1  |
| 2752 | 23450 | Fcgr1 | D12Erttd647e       | 1  |
| 2756 | 4056  | Pmvk  | Tnfaip811          | -1 |
| 2756 | 7753  | Pmvk  | Gfm1               | 1  |
| 2756 | 8773  | Pmvk  | MMT00027093        | -1 |
| 2756 | 10554 | Pmvk  | ENSMUSG00000074179 | 1  |
| 2756 | 13293 | Pmvk  | Gsta2              | 1  |
| 2756 | 13431 | Pmvk  | MMT00038058        | -1 |
| 2756 | 15205 | Pmvk  | MMT00030262        | -1 |
| 2756 | 21214 | Pmvk  | Scd1               | 1  |
| 2756 | 21575 | Pmvk  | Cyp2c55            | 1  |
| 2756 | 21727 | Pmvk  | Khk                | 1  |
| 2756 | 22406 | Pmvk  | Vnn1               | -1 |
| 2756 | 23640 | Pmvk  | Bdh1               | -1 |
| 2764 | 7492  | Ffar2 | Adfp               | 1  |
| 2766 | 407   | Elp4  | Serpina6           | -1 |
| 2766 | 2399  | Elp4  | MMT00060167        | 1  |
| 2766 | 2829  | Elp4  | Lrfn3              | 1  |
| 2766 | 2850  | Elp4  | Slc16a6            | 1  |
| 2766 | 3214  | Elp4  | Dnmt3b             | 1  |
| 2766 | 5374  | Elp4  | Chka               | 1  |
| 2766 | 5849  | Elp4  | 2310031A18Rik      | 1  |
| 2766 | 5974  | Elp4  | Arntl              | 1  |
| 2766 | 8328  | Elp4  | Klhdc8a            | 1  |

|      |       |             |               |    |
|------|-------|-------------|---------------|----|
| 2766 | 9481  | Elp4        | Ppl           | -1 |
| 2766 | 11741 | Elp4        | Slc30a10      | 1  |
| 2766 | 17884 | Elp4        | Lnx2          | 1  |
| 2766 | 18179 | Elp4        | Dbp           | -1 |
| 2766 | 19671 | Elp4        | Upp2          | -1 |
| 2775 | 18785 | Sec61a2     | Angptl4       | -1 |
| 2780 | 3410  | Fes         | Paqr9         | 1  |
| 2780 | 11129 | Fes         | Ankhd1        | -1 |
| 2788 | 11382 | Galnt10     | Cdca3         | 1  |
| 2793 | 1183  | MMT00005644 | MMT00009390   | -1 |
| 2793 | 2793  | MMT00005644 | MMT00005644   | 1  |
| 2793 | 5989  | MMT00005644 | 2310042D19Rik | 1  |
| 2793 | 12718 | MMT00005644 | Dhrsx         | -1 |
| 2793 | 19026 | MMT00005644 | Isg15         | 1  |
| 2793 | 22077 | MMT00005644 | MMT00057550   | 1  |
| 2793 | 22122 | MMT00005644 | MMT00042954   | -1 |
| 2794 | 147   | Map3k6      | Uox           | 1  |
| 2794 | 213   | Map3k6      | Rgs16         | 1  |
| 2794 | 250   | Map3k6      | Tubb2a-ps2    | -1 |
| 2794 | 269   | Map3k6      | Tuba1b        | -1 |
| 2794 | 337   | Map3k6      | Rasgef1b      | 1  |
| 2794 | 402   | Map3k6      | Timp3         | 1  |
| 2794 | 415   | Map3k6      | Ypel2         | -1 |
| 2794 | 433   | Map3k6      | Pla2g12b      | -1 |
| 2794 | 437   | Map3k6      | Ndrgr1        | -1 |
| 2794 | 530   | Map3k6      | Mest          | -1 |
| 2794 | 547   | Map3k6      | Mknk2         | 1  |
| 2794 | 563   | Map3k6      | D4Bwg0951e    | 1  |
| 2794 | 609   | Map3k6      | MMT00060868   | -1 |
| 2794 | 719   | Map3k6      | Usp2          | 1  |
| 2794 | 937   | Map3k6      | Pi4ka         | 1  |
| 2794 | 1276  | Map3k6      | Col4a1        | -1 |
| 2794 | 1310  | Map3k6      | Cabc1         | -1 |
| 2794 | 1371  | Map3k6      | 1200009I06Rik | -1 |
| 2794 | 1424  | Map3k6      | Dapk1         | -1 |
| 2794 | 1646  | Map3k6      | Slc15a4       | 1  |
| 2794 | 1709  | Map3k6      | Mt2           | 1  |
| 2794 | 1767  | Map3k6      | BC016495      | 1  |
| 2794 | 1805  | Map3k6      | Tmem204       | 1  |
| 2794 | 1853  | Map3k6      | Stat5a        | -1 |
| 2794 | 1877  | Map3k6      | Amica1        | 1  |
| 2794 | 1911  | Map3k6      | 1300007F04Rik | 1  |
| 2794 | 1941  | Map3k6      | MMT00079618   | -1 |
| 2794 | 1960  | Map3k6      | Ubr2          | 1  |
| 2794 | 2110  | Map3k6      | Gtf2ird1      | -1 |
| 2794 | 2126  | Map3k6      | Dgat2         | 1  |
| 2794 | 2200  | Map3k6      | BC006779      | -1 |
| 2794 | 2294  | Map3k6      | AU040829      | 1  |
| 2794 | 2305  | Map3k6      | 2610002M06Rik | -1 |
| 2794 | 2322  | Map3k6      | Tuba4a        | -1 |
| 2794 | 2384  | Map3k6      | Micalcl       | -1 |



|      |      |        |               |    |
|------|------|--------|---------------|----|
| 2794 | 2399 | Map3k6 | MMT00060167   | -1 |
| 2794 | 2447 | Map3k6 | Ubac1         | 1  |
| 2794 | 2483 | Map3k6 | Gmeb1         | 1  |
| 2794 | 2529 | Map3k6 | Hmcn2         | 1  |
| 2794 | 2615 | Map3k6 | EG624862      | 1  |
| 2794 | 2636 | Map3k6 | Tars          | -1 |
| 2794 | 2766 | Map3k6 | Elp4          | -1 |
| 2794 | 2794 | Map3k6 | Map3k6        | 1  |
| 2794 | 2829 | Map3k6 | Lrfr3         | -1 |
| 2794 | 2850 | Map3k6 | Slc16a6       | -1 |
| 2794 | 3040 | Map3k6 | Bcl3          | -1 |
| 2794 | 3170 | Map3k6 | Mcart1        | 1  |
| 2794 | 3196 | Map3k6 | Tat           | 1  |
| 2794 | 3214 | Map3k6 | Dnmt3b        | -1 |
| 2794 | 3235 | Map3k6 | BC029214      | -1 |
| 2794 | 3246 | Map3k6 | Prei4         | 1  |
| 2794 | 3357 | Map3k6 | Rev1          | 1  |
| 2794 | 3410 | Map3k6 | Paqr9         | -1 |
| 2794 | 3452 | Map3k6 | Ccrn4l        | 1  |
| 2794 | 3502 | Map3k6 | Gde1          | 1  |
| 2794 | 3686 | Map3k6 | Psmc9         | 1  |
| 2794 | 3746 | Map3k6 | Osbp15        | 1  |
| 2794 | 3789 | Map3k6 | 4833442J19Rik | 1  |
| 2794 | 3790 | Map3k6 | Mtss1         | 1  |
| 2794 | 3804 | Map3k6 | MMT00015534   | -1 |
| 2794 | 3868 | Map3k6 | Ebpl          | -1 |
| 2794 | 4084 | Map3k6 | Asah3l        | 1  |
| 2794 | 4201 | Map3k6 | Tubb2c        | -1 |
| 2794 | 4235 | Map3k6 | Pfkfb3        | 1  |
| 2794 | 4286 | Map3k6 | Ptp4a1        | 1  |
| 2794 | 4333 | Map3k6 | Sumo3         | -1 |
| 2794 | 4392 | Map3k6 | 1810055G02Rik | 1  |
| 2794 | 4534 | Map3k6 | Ndel1         | 1  |
| 2794 | 4551 | Map3k6 | Cyp2e1        | 1  |
| 2794 | 4678 | Map3k6 | Kank1         | -1 |
| 2794 | 4708 | Map3k6 | Traf3ip2      | -1 |
| 2794 | 4813 | Map3k6 | Agpat6        | 1  |
| 2794 | 5068 | Map3k6 | Afap112       | -1 |
| 2794 | 5142 | Map3k6 | Eppk1         | 1  |
| 2794 | 5183 | Map3k6 | St5           | -1 |
| 2794 | 5187 | Map3k6 | Speer4f       | 1  |
| 2794 | 5259 | Map3k6 | Mat1a         | 1  |
| 2794 | 5345 | Map3k6 | MMT00023326   | 1  |
| 2794 | 5364 | Map3k6 | Kif22         | -1 |
| 2794 | 5374 | Map3k6 | Chka          | -1 |
| 2794 | 5414 | Map3k6 | Etnk2         | 1  |
| 2794 | 5569 | Map3k6 | Pdgfc         | -1 |
| 2794 | 5574 | Map3k6 | Hsd3b7        | -1 |
| 2794 | 5734 | Map3k6 | EG619653      | 1  |
| 2794 | 5791 | Map3k6 | Baiap211      | 1  |
| 2794 | 5802 | Map3k6 | Mad2l2        | -1 |

|      |      |        |               |    |
|------|------|--------|---------------|----|
| 2794 | 5804 | Map3k6 | Thrsp         | 1  |
| 2794 | 5814 | Map3k6 | Nrbp2         | 1  |
| 2794 | 5849 | Map3k6 | 2310031A18Rik | -1 |
| 2794 | 5856 | Map3k6 | Mfsd2         | 1  |
| 2794 | 5858 | Map3k6 | Itch          | 1  |
| 2794 | 5878 | Map3k6 | Iqgap2        | 1  |
| 2794 | 5934 | Map3k6 | S100a10       | -1 |
| 2794 | 5974 | Map3k6 | Arntl         | -1 |
| 2794 | 6019 | Map3k6 | Gdap10        | 1  |
| 2794 | 6028 | Map3k6 | Alas1         | 1  |
| 2794 | 6077 | Map3k6 | Pik3cb        | 1  |
| 2794 | 6118 | Map3k6 | Slc1a4        | -1 |
| 2794 | 6211 | Map3k6 | Arhgap24      | -1 |
| 2794 | 6282 | Map3k6 | Them4         | 1  |
| 2794 | 6338 | Map3k6 | Setd3         | 1  |
| 2794 | 6343 | Map3k6 | Slc20a1       | 1  |
| 2794 | 6370 | Map3k6 | Aqp8          | -1 |
| 2794 | 6386 | Map3k6 | Por           | 1  |
| 2794 | 6394 | Map3k6 | Fbxo6         | -1 |
| 2794 | 6490 | Map3k6 | Il1r1         | 1  |
| 2794 | 6564 | Map3k6 | Cebpd         | 1  |
| 2794 | 6589 | Map3k6 | Mafb          | 1  |
| 2794 | 6675 | Map3k6 | Sfrs4         | 1  |
| 2794 | 6756 | Map3k6 | Sds           | 1  |
| 2794 | 6771 | Map3k6 | Insc          | -1 |
| 2794 | 6788 | Map3k6 | Psen2         | -1 |
| 2794 | 6990 | Map3k6 | Nr1i2         | 1  |
| 2794 | 7061 | Map3k6 | Spsb3         | -1 |
| 2794 | 7066 | Map3k6 | Agtr1b        | 1  |
| 2794 | 7112 | Map3k6 | Apbb3         | 1  |
| 2794 | 7136 | Map3k6 | Id3           | -1 |
| 2794 | 7151 | Map3k6 | MMT00007982   | -1 |
| 2794 | 7414 | Map3k6 | Cipx          | -1 |
| 2794 | 7839 | Map3k6 | Asl           | 1  |
| 2794 | 7862 | Map3k6 | Cpsf4l        | 1  |
| 2794 | 7954 | Map3k6 | Ccdc12        | -1 |
| 2794 | 7963 | Map3k6 | Rxrg          | -1 |
| 2794 | 8054 | Map3k6 | Smarca2       | 1  |
| 2794 | 8328 | Map3k6 | Klhdc8a       | -1 |
| 2794 | 8399 | Map3k6 | Herpud1       | 1  |
| 2794 | 8408 | Map3k6 | Nr1i3         | 1  |
| 2794 | 8428 | Map3k6 | Sorbs3        | 1  |
| 2794 | 8641 | Map3k6 | Slc7a2        | 1  |
| 2794 | 8658 | Map3k6 | Fmo2          | 1  |
| 2794 | 8711 | Map3k6 | 5430432M24Rik | -1 |
| 2794 | 9213 | Map3k6 | Osgin1        | -1 |
| 2794 | 9260 | Map3k6 | Cmtm6         | -1 |
| 2794 | 9275 | Map3k6 | Aass          | 1  |
| 2794 | 9309 | Map3k6 | MMT00035904   | 1  |
| 2794 | 9438 | Map3k6 | Pctk3         | 1  |
| 2794 | 9481 | Map3k6 | Ppl           | 1  |

|      |       |        |               |    |
|------|-------|--------|---------------|----|
| 2794 | 9495  | Map3k6 | Srms          | -1 |
| 2794 | 9587  | Map3k6 | Bri3bp        | -1 |
| 2794 | 9763  | Map3k6 | Tuba3b        | -1 |
| 2794 | 9835  | Map3k6 | Fastkd1       | 1  |
| 2794 | 9907  | Map3k6 | 4932442K08Rik | 1  |
| 2794 | 9910  | Map3k6 | EG666644      | 1  |
| 2794 | 10029 | Map3k6 | Trak1         | 1  |
| 2794 | 10088 | Map3k6 | Ddc           | -1 |
| 2794 | 10166 | Map3k6 | Rhbdd2        | 1  |
| 2794 | 10207 | Map3k6 | MMT00012324   | -1 |
| 2794 | 10215 | Map3k6 | Nampt         | 1  |
| 2794 | 10408 | Map3k6 | Per1          | 1  |
| 2794 | 10486 | Map3k6 | 1300002K09Rik | -1 |
| 2794 | 10642 | Map3k6 | Ngef          | 1  |
| 2794 | 10712 | Map3k6 | Fchsd2        | 1  |
| 2794 | 10775 | Map3k6 | Slc16a1       | -1 |
| 2794 | 11093 | Map3k6 | Zdhhc1        | 1  |
| 2794 | 11129 | Map3k6 | Ankhd1        | 1  |
| 2794 | 11193 | Map3k6 | Tsc22d1       | -1 |
| 2794 | 11412 | Map3k6 | Abcg5         | 1  |
| 2794 | 11574 | Map3k6 | Gne           | 1  |
| 2794 | 11599 | Map3k6 | Coq10b        | 1  |
| 2794 | 11614 | Map3k6 | Sult1e1       | 1  |
| 2794 | 11724 | Map3k6 | Tuba3a        | -1 |
| 2794 | 11740 | Map3k6 | Cpm           | 1  |
| 2794 | 11741 | Map3k6 | Slc30a10      | -1 |
| 2794 | 11807 | Map3k6 | Fbxo31        | 1  |
| 2794 | 11808 | Map3k6 | Pck1          | 1  |
| 2794 | 11949 | Map3k6 | Cldn3         | -1 |
| 2794 | 12040 | Map3k6 | Commd10       | -1 |
| 2794 | 12151 | Map3k6 | MMT00082650   | 1  |
| 2794 | 12193 | Map3k6 | Aco2          | 1  |
| 2794 | 12204 | Map3k6 | Ankmy2        | 1  |
| 2794 | 12420 | Map3k6 | Khlh21        | 1  |
| 2794 | 12433 | Map3k6 | 5033413D22Rik | -1 |
| 2794 | 12436 | Map3k6 | Serinc3       | 1  |
| 2794 | 12460 | Map3k6 | Pnpla2        | 1  |
| 2794 | 12479 | Map3k6 | Ifrd1         | 1  |
| 2794 | 12489 | Map3k6 | Wdr8          | -1 |
| 2794 | 12687 | Map3k6 | Zc3h8         | 1  |
| 2794 | 12761 | Map3k6 | Tsc22d3       | 1  |
| 2794 | 12799 | Map3k6 | Spon2         | -1 |
| 2794 | 12807 | Map3k6 | Faim          | -1 |
| 2794 | 12839 | Map3k6 | Fh1           | 1  |
| 2794 | 12904 | Map3k6 | MMT00040704   | 1  |
| 2794 | 12941 | Map3k6 | Elov15        | -1 |
| 2794 | 12981 | Map3k6 | Nek6          | -1 |
| 2794 | 12982 | Map3k6 | Cars          | -1 |
| 2794 | 13025 | Map3k6 | Irf2          | 1  |
| 2794 | 13078 | Map3k6 | Eps8l2        | -1 |
| 2794 | 13289 | Map3k6 | Dusp10        | -1 |

|      |       |        |               |    |
|------|-------|--------|---------------|----|
| 2794 | 13339 | Map3k6 | D630042F21Rik | 1  |
| 2794 | 13471 | Map3k6 | Cln8          | 1  |
| 2794 | 13705 | Map3k6 | Osbpl1a       | 1  |
| 2794 | 13733 | Map3k6 | Setd3         | 1  |
| 2794 | 13844 | Map3k6 | Trib1         | 1  |
| 2794 | 13889 | Map3k6 | Agpat2        | -1 |
| 2794 | 13962 | Map3k6 | Chd7          | 1  |
| 2794 | 13989 | Map3k6 | Foxp3         | 1  |
| 2794 | 14041 | Map3k6 | Cldn1         | -1 |
| 2794 | 14183 | Map3k6 | Gng11         | -1 |
| 2794 | 14258 | Map3k6 | Ifi47         | -1 |
| 2794 | 14462 | Map3k6 | Zfp385b       | 1  |
| 2794 | 14620 | Map3k6 | Tbc1d8        | 1  |
| 2794 | 14705 | Map3k6 | Slc43a1       | 1  |
| 2794 | 14726 | Map3k6 | Slc19a1       | 1  |
| 2794 | 14806 | Map3k6 | Ccdc45        | 1  |
| 2794 | 14989 | Map3k6 | Map3k5        | 1  |
| 2794 | 15008 | Map3k6 | Chrdl2        | 1  |
| 2794 | 15021 | Map3k6 | Ppargc1a      | 1  |
| 2794 | 15046 | Map3k6 | Arl6ip2       | 1  |
| 2794 | 15049 | Map3k6 | Rnf125        | -1 |
| 2794 | 15320 | Map3k6 | MMT00017479   | 1  |
| 2794 | 15425 | Map3k6 | Adprh         | -1 |
| 2794 | 15481 | Map3k6 | 1110067D22Rik | -1 |
| 2794 | 15521 | Map3k6 | Mast3         | 1  |
| 2794 | 15522 | Map3k6 | 1810011O10Rik | 1  |
| 2794 | 15567 | Map3k6 | 1600002H07Rik | 1  |
| 2794 | 15607 | Map3k6 | Klf13         | 1  |
| 2794 | 15609 | Map3k6 | Mreg          | -1 |
| 2794 | 15624 | Map3k6 | Crcp          | 1  |
| 2794 | 15631 | Map3k6 | Lpin1         | 1  |
| 2794 | 15665 | Map3k6 | Bicap         | -1 |
| 2794 | 15709 | Map3k6 | Tceal1        | 1  |
| 2794 | 15720 | Map3k6 | Trp53i11      | -1 |
| 2794 | 15824 | Map3k6 | D19Ertd721e   | -1 |
| 2794 | 15862 | Map3k6 | Mrap          | -1 |
| 2794 | 15882 | Map3k6 | AA986860      | 1  |
| 2794 | 16060 | Map3k6 | Gys2          | 1  |
| 2794 | 16176 | Map3k6 | St3gal5       | 1  |
| 2794 | 16474 | Map3k6 | Bhlhb2        | 1  |
| 2794 | 16515 | Map3k6 | Gramd4        | -1 |
| 2794 | 16526 | Map3k6 | Sftpa1        | 1  |
| 2794 | 16571 | Map3k6 | Pqlc1         | -1 |
| 2794 | 16580 | Map3k6 | Tnfaip2       | -1 |
| 2794 | 16647 | Map3k6 | D16H22S680E   | 1  |
| 2794 | 16669 | Map3k6 | Tjp2          | -1 |
| 2794 | 16690 | Map3k6 | Tjp3          | -1 |
| 2794 | 16719 | Map3k6 | Slc43a3       | 1  |
| 2794 | 16851 | Map3k6 | Slc34a2       | -1 |
| 2794 | 17078 | Map3k6 | Syde2         | 1  |
| 2794 | 17223 | Map3k6 | 4933426M11Rik | 1  |

|      |       |        |               |    |
|------|-------|--------|---------------|----|
| 2794 | 17247 | Map3k6 | A030007L17Rik | -1 |
| 2794 | 17323 | Map3k6 | Tubb6         | -1 |
| 2794 | 17338 | Map3k6 | Mocos         | -1 |
| 2794 | 17352 | Map3k6 | Cebpb         | 1  |
| 2794 | 17418 | Map3k6 | D1Ert622e     | 1  |
| 2794 | 17444 | Map3k6 | Tuba1a        | -1 |
| 2794 | 17493 | Map3k6 | Rfx4          | -1 |
| 2794 | 17525 | Map3k6 | Ctgf          | 1  |
| 2794 | 17577 | Map3k6 | Med28         | -1 |
| 2794 | 17583 | Map3k6 | Per2          | 1  |
| 2794 | 17593 | Map3k6 | Gfer          | -1 |
| 2794 | 17609 | Map3k6 | Ptpn9         | -1 |
| 2794 | 17617 | Map3k6 | Atp5sl        | 1  |
| 2794 | 17622 | Map3k6 | Foxo1         | 1  |
| 2794 | 17656 | Map3k6 | Hdhd3         | -1 |
| 2794 | 17818 | Map3k6 | Chchd4        | 1  |
| 2794 | 17876 | Map3k6 | Tubb4         | -1 |
| 2794 | 17878 | Map3k6 | Brap          | 1  |
| 2794 | 17884 | Map3k6 | Lnx2          | -1 |
| 2794 | 17952 | Map3k6 | Ripk2         | 1  |
| 2794 | 18027 | Map3k6 | 5730403B10Rik | 1  |
| 2794 | 18147 | Map3k6 | Nhlrc2        | 1  |
| 2794 | 18179 | Map3k6 | Dbp           | 1  |
| 2794 | 18286 | Map3k6 | Slc41a3       | 1  |
| 2794 | 18314 | Map3k6 | 4631416L12Rik | 1  |
| 2794 | 18498 | Map3k6 | Slc5a6        | 1  |
| 2794 | 18552 | Map3k6 | Nr2c2ap       | -1 |
| 2794 | 18586 | Map3k6 | Tns1          | 1  |
| 2794 | 18606 | Map3k6 | A230074B11Rik | 1  |
| 2794 | 18665 | Map3k6 | Hs6st1        | 1  |
| 2794 | 18756 | Map3k6 | Tspan14       | -1 |
| 2794 | 18785 | Map3k6 | Angptl4       | 1  |
| 2794 | 18802 | Map3k6 | Nit2          | -1 |
| 2794 | 18827 | Map3k6 | Oprs1         | -1 |
| 2794 | 19025 | Map3k6 | Slc37a4       | 1  |
| 2794 | 19124 | Map3k6 | Pim3          | 1  |
| 2794 | 19146 | Map3k6 | N4bp2l1       | 1  |
| 2794 | 19217 | Map3k6 | Cyr61         | -1 |
| 2794 | 19234 | Map3k6 | Nrg4          | 1  |
| 2794 | 19277 | Map3k6 | MMT00044927   | 1  |
| 2794 | 19323 | Map3k6 | Bnip3         | 1  |
| 2794 | 19466 | Map3k6 | Pptc7         | 1  |
| 2794 | 19532 | Map3k6 | Med8          | -1 |
| 2794 | 19556 | Map3k6 | Efna1         | -1 |
| 2794 | 19671 | Map3k6 | Upp2          | 1  |
| 2794 | 19723 | Map3k6 | Pfkfb1        | 1  |
| 2794 | 19757 | Map3k6 | Fkbp5         | 1  |
| 2794 | 19790 | Map3k6 | Polg2         | 1  |
| 2794 | 19970 | Map3k6 | Mrpl36        | -1 |
| 2794 | 20085 | Map3k6 | Lpin2         | 1  |
| 2794 | 20217 | Map3k6 | Rab3ip        | 1  |

|      |       |        |               |    |
|------|-------|--------|---------------|----|
| 2794 | 20405 | Map3k6 | Clip1         | 1  |
| 2794 | 20570 | Map3k6 | Ap3m1         | 1  |
| 2794 | 20690 | Map3k6 | Zfp276        | 1  |
| 2794 | 20745 | Map3k6 | Sord          | 1  |
| 2794 | 20803 | Map3k6 | Tmem50a       | 1  |
| 2794 | 20854 | Map3k6 | Commd7        | -1 |
| 2794 | 20907 | Map3k6 | Lims2         | 1  |
| 2794 | 21142 | Map3k6 | Gm129         | 1  |
| 2794 | 21251 | Map3k6 | Cpt1a         | 1  |
| 2794 | 21306 | Map3k6 | Pvrl1         | -1 |
| 2794 | 21331 | Map3k6 | Slc10a6       | 1  |
| 2794 | 21675 | Map3k6 | Mosc2         | 1  |
| 2794 | 21733 | Map3k6 | Rhebl1        | 1  |
| 2794 | 21805 | Map3k6 | Plk3          | 1  |
| 2794 | 21811 | Map3k6 | Ak3l1         | 1  |
| 2794 | 21901 | Map3k6 | BC035537      | -1 |
| 2794 | 21918 | Map3k6 | Snx24         | -1 |
| 2794 | 21934 | Map3k6 | Id2           | -1 |
| 2794 | 21969 | Map3k6 | Tk1           | 1  |
| 2794 | 22012 | Map3k6 | Itgae         | -1 |
| 2794 | 22076 | Map3k6 | Pgm2l1        | 1  |
| 2794 | 22146 | Map3k6 | Aifm2         | 1  |
| 2794 | 22218 | Map3k6 | Rfc3          | -1 |
| 2794 | 22290 | Map3k6 | Tubb2a        | -1 |
| 2794 | 22324 | Map3k6 | MMT00060741   | -1 |
| 2794 | 22388 | Map3k6 | 2410018M08Rik | 1  |
| 2794 | 22443 | Map3k6 | Tuba1c        | -1 |
| 2794 | 22470 | Map3k6 | Ppargc1b      | 1  |
| 2794 | 22630 | Map3k6 | MMT00034355   | -1 |
| 2794 | 22681 | Map3k6 | Gm88          | 1  |
| 2794 | 22715 | Map3k6 | Ap3m1         | 1  |
| 2794 | 22873 | Map3k6 | Slc38a2       | 1  |
| 2794 | 22936 | Map3k6 | Rhobtb1       | 1  |
| 2794 | 23161 | Map3k6 | Gclc          | -1 |
| 2794 | 23183 | Map3k6 | Nnmt          | 1  |
| 2794 | 23201 | Map3k6 | S1pr1         | -1 |
| 2794 | 23202 | Map3k6 | Olf559        | 1  |
| 2794 | 23248 | Map3k6 | Tesk2         | 1  |
| 2794 | 23253 | Map3k6 | D030011O10Rik | 1  |
| 2794 | 23437 | Map3k6 | Efh2          | 1  |
| 2794 | 23558 | Map3k6 | MMT00030937   | 1  |
| 2800 | 14151 | Dusp11 | Slc44a1       | -1 |
| 2801 | 1533  | H2-BI  | BC013712      | 1  |
| 2801 | 2224  | H2-BI  | Oasl2         | 1  |
| 2801 | 3572  | H2-BI  | Ebi3          | 1  |
| 2801 | 3683  | H2-BI  | Oas2          | 1  |
| 2801 | 5554  | H2-BI  | Emr1          | 1  |
| 2801 | 5845  | H2-BI  | Il18bp        | 1  |
| 2801 | 6036  | H2-BI  | Pram1         | 1  |
| 2801 | 6072  | H2-BI  | C1qc          | 1  |
| 2801 | 6824  | H2-BI  | Irf7          | 1  |

|      |       |         |                    |    |
|------|-------|---------|--------------------|----|
| 2801 | 7238  | H2-BI   | Pycard             | 1  |
| 2801 | 7336  | H2-BI   | Cd5l               | 1  |
| 2801 | 8555  | H2-BI   | H2-M3              | 1  |
| 2801 | 9847  | H2-BI   | Ifi27              | 1  |
| 2801 | 9920  | H2-BI   | Syk                | 1  |
| 2801 | 10504 | H2-BI   | Ripk3              | 1  |
| 2801 | 10606 | H2-BI   | Apbb1ip            | 1  |
| 2801 | 11198 | H2-BI   | Gbp1               | 1  |
| 2801 | 12398 | H2-BI   | Ifi44              | 1  |
| 2801 | 13181 | H2-BI   | Lcp2               | 1  |
| 2801 | 13309 | H2-BI   | Tgtp               | 1  |
| 2801 | 13527 | H2-BI   | Ctss               | 1  |
| 2801 | 14506 | H2-BI   | Slc15a3            | 1  |
| 2801 | 14880 | H2-BI   | Ms4a4c             | 1  |
| 2801 | 14883 | H2-BI   | Itgal              | 1  |
| 2801 | 14954 | H2-BI   | Rab19              | 1  |
| 2801 | 15825 | H2-BI   | Fermt3             | 1  |
| 2801 | 16102 | H2-BI   | Cd72               | 1  |
| 2801 | 16147 | H2-BI   | Tlr2               | 1  |
| 2801 | 17412 | H2-BI   | Aif1               | 1  |
| 2801 | 17904 | H2-BI   | Cds1               | 1  |
| 2801 | 19063 | H2-BI   | Evl                | 1  |
| 2801 | 19794 | H2-BI   | Rgs2               | 1  |
| 2801 | 20083 | H2-BI   | ENSMUSG00000073403 | 1  |
| 2801 | 20150 | H2-BI   | Ptprc              | 1  |
| 2801 | 20238 | H2-BI   | H2-T9              | 1  |
| 2801 | 20474 | H2-BI   | Gnb3               | 1  |
| 2801 | 21549 | H2-BI   | Rtp4               | 1  |
| 2801 | 21685 | H2-BI   | Gzma               | 1  |
| 2801 | 21824 | H2-BI   | 5830443L24Rik      | 1  |
| 2801 | 22037 | H2-BI   | Oas1g              | 1  |
| 2801 | 22647 | H2-BI   | Pkib               | 1  |
| 2801 | 23208 | H2-BI   | Hck                | 1  |
| 2801 | 23450 | H2-BI   | D12Ertd647e        | 1  |
| 2815 | 3703  | Eif2ak3 | Ggcx               | -1 |
| 2815 | 15384 | Eif2ak3 | Mat2a              | -1 |
| 2815 | 15708 | Eif2ak3 | Retsat             | -1 |
| 2818 | 18083 | Egr1    | Gadd45a            | 1  |
| 2823 | 269   | Sipa1l2 | Tuba1b             | 1  |
| 2823 | 563   | Sipa1l2 | D4Bwg0951e         | -1 |
| 2823 | 771   | Sipa1l2 | Zbtb45             | 1  |
| 2823 | 1941  | Sipa1l2 | MMT00079618        | 1  |
| 2823 | 2322  | Sipa1l2 | Tuba4a             | 1  |
| 2823 | 3246  | Sipa1l2 | Prei4              | -1 |
| 2823 | 4201  | Sipa1l2 | Tubb2c             | 1  |
| 2823 | 5587  | Sipa1l2 | Rmnd5b             | 1  |
| 2823 | 6380  | Sipa1l2 | 6330569M22Rik      | 1  |
| 2823 | 7151  | Sipa1l2 | MMT00007982        | 1  |
| 2823 | 7862  | Sipa1l2 | Cpsf4l             | -1 |
| 2823 | 9763  | Sipa1l2 | Tuba3b             | 1  |
| 2823 | 11724 | Sipa1l2 | Tuba3a             | 1  |

|      |       |               |               |    |
|------|-------|---------------|---------------|----|
| 2823 | 13489 | Sipa1l2       | D230025D16Rik | -1 |
| 2823 | 17022 | Sipa1l2       | MMT00055891   | 1  |
| 2823 | 17323 | Sipa1l2       | Tubb6         | 1  |
| 2823 | 17444 | Sipa1l2       | Tuba1a        | 1  |
| 2823 | 17656 | Sipa1l2       | Hdhd3         | 1  |
| 2823 | 18785 | Sipa1l2       | Angptl4       | -1 |
| 2823 | 20803 | Sipa1l2       | Tmem50a       | -1 |
| 2823 | 21288 | Sipa1l2       | Tcp11l2       | -1 |
| 2823 | 21604 | Sipa1l2       | Klhl24        | -1 |
| 2823 | 22443 | Sipa1l2       | Tuba1c        | 1  |
| 2830 | 250   | 4632417K18Rik | Tubb2a-ps2    | 1  |
| 2830 | 269   | 4632417K18Rik | Tuba1b        | 1  |
| 2830 | 609   | 4632417K18Rik | MMT00060868   | 1  |
| 2830 | 2850  | 4632417K18Rik | Slc16a6       | 1  |
| 2830 | 3265  | 4632417K18Rik | Dntt          | 1  |
| 2830 | 3410  | 4632417K18Rik | Paqr9         | 1  |
| 2830 | 3804  | 4632417K18Rik | MMT00015534   | 1  |
| 2830 | 4201  | 4632417K18Rik | Tubb2c        | 1  |
| 2830 | 5364  | 4632417K18Rik | Kif22         | 1  |
| 2830 | 5934  | 4632417K18Rik | S100a10       | 1  |
| 2830 | 6386  | 4632417K18Rik | Por           | -1 |
| 2830 | 10802 | 4632417K18Rik | Kcnn2         | -1 |
| 2830 | 11129 | 4632417K18Rik | Ankhd1        | -1 |
| 2830 | 11741 | 4632417K18Rik | Slc30a10      | 1  |
| 2830 | 15320 | 4632417K18Rik | MMT00017479   | -1 |
| 2830 | 17617 | 4632417K18Rik | Atp5sl        | -1 |
| 2830 | 17876 | 4632417K18Rik | Tubb4         | 1  |
| 2830 | 22290 | 4632417K18Rik | Tubb2a        | 1  |
| 2830 | 22630 | 4632417K18Rik | MMT00034355   | 1  |
| 2830 | 22635 | 4632417K18Rik | Nrn1          | -1 |
| 2850 | 719   | Slc16a6       | Usp2          | -1 |
| 2850 | 760   | Slc16a6       | Akr1c19       | -1 |
| 2850 | 1362  | Slc16a6       | Avpr1a        | 1  |
| 2850 | 1711  | Slc16a6       | Grhl1         | 1  |
| 2850 | 2721  | Slc16a6       | Inmt          | -1 |
| 2850 | 2829  | Slc16a6       | Lrfn3         | 1  |
| 2850 | 2850  | Slc16a6       | Slc16a6       | 1  |
| 2850 | 3214  | Slc16a6       | Dnmt3b        | 1  |
| 2850 | 5068  | Slc16a6       | Afap1l2       | 1  |
| 2850 | 5849  | Slc16a6       | 2310031A18Rik | 1  |
| 2850 | 8328  | Slc16a6       | Klhdc8a       | 1  |
| 2850 | 8870  | Slc16a6       | Arid3a        | 1  |
| 2850 | 9495  | Slc16a6       | Srms          | 1  |
| 2850 | 9718  | Slc16a6       | Fmo5          | -1 |
| 2850 | 11233 | Slc16a6       | Tef           | -1 |
| 2850 | 12204 | Slc16a6       | Ankmy2        | -1 |
| 2850 | 16580 | Slc16a6       | Tnfaip2       | 1  |
| 2850 | 19671 | Slc16a6       | Upp2          | -1 |
| 2850 | 19790 | Slc16a6       | Polg2         | -1 |
| 2850 | 20058 | Slc16a6       | Dnaic1        | 1  |
| 2850 | 21142 | Slc16a6       | Gm129         | -1 |



|      |       |        |               |    |
|------|-------|--------|---------------|----|
| 2853 | 250   | Glipr2 | Tubb2a-ps2    | 1  |
| 2853 | 413   | Glipr2 | Acy1          | -1 |
| 2853 | 437   | Glipr2 | Ndrgr1        | 1  |
| 2853 | 609   | Glipr2 | MMT00060868   | 1  |
| 2853 | 719   | Glipr2 | Usp2          | -1 |
| 2853 | 1445  | Glipr2 | Ssbp2         | -1 |
| 2853 | 1767  | Glipr2 | BC016495      | -1 |
| 2853 | 2011  | Glipr2 | Slc2a5        | -1 |
| 2853 | 2126  | Glipr2 | Dgat2         | -1 |
| 2853 | 2399  | Glipr2 | MMT00060167   | 1  |
| 2853 | 2636  | Glipr2 | Tars          | 1  |
| 2853 | 2829  | Glipr2 | Lrfr3         | 1  |
| 2853 | 2850  | Glipr2 | Slc16a6       | 1  |
| 2853 | 3214  | Glipr2 | Dnmt3b        | 1  |
| 2853 | 3265  | Glipr2 | Dntt          | 1  |
| 2853 | 3410  | Glipr2 | Paqr9         | 1  |
| 2853 | 4534  | Glipr2 | Ndel1         | -1 |
| 2853 | 5068  | Glipr2 | Afap12        | 1  |
| 2853 | 5374  | Glipr2 | Chka          | 1  |
| 2853 | 5734  | Glipr2 | EG619653      | -1 |
| 2853 | 5802  | Glipr2 | Mad2l2        | 1  |
| 2853 | 5892  | Glipr2 | MMT00038457   | -1 |
| 2853 | 5974  | Glipr2 | Arntl         | 1  |
| 2853 | 6213  | Glipr2 | Ccl2          | 1  |
| 2853 | 6386  | Glipr2 | Por           | -1 |
| 2853 | 6394  | Glipr2 | Fbxo6         | 1  |
| 2853 | 6816  | Glipr2 | Slc46a3       | -1 |
| 2853 | 7414  | Glipr2 | Clpx          | 1  |
| 2853 | 7492  | Glipr2 | Adfp          | 1  |
| 2853 | 7862  | Glipr2 | Cpsf4l        | -1 |
| 2853 | 8328  | Glipr2 | Klhdc8a       | 1  |
| 2853 | 9700  | Glipr2 | Prodh         | -1 |
| 2853 | 9831  | Glipr2 | Nedd4l        | 1  |
| 2853 | 10642 | Glipr2 | Ngef          | -1 |
| 2853 | 10775 | Glipr2 | Slc16a1       | 1  |
| 2853 | 11599 | Glipr2 | Coq10b        | -1 |
| 2853 | 11741 | Glipr2 | Slc30a10      | 1  |
| 2853 | 12799 | Glipr2 | Spon2         | 1  |
| 2853 | 12941 | Glipr2 | Elovl5        | 1  |
| 2853 | 13094 | Glipr2 | Cnn3          | -1 |
| 2853 | 15320 | Glipr2 | MMT00017479   | -1 |
| 2853 | 15481 | Glipr2 | 1110067D22Rik | 1  |
| 2853 | 15709 | Glipr2 | Tceal1        | -1 |
| 2853 | 16250 | Glipr2 | MMT00069147   | 1  |
| 2853 | 16704 | Glipr2 | Ppif          | -1 |
| 2853 | 17247 | Glipr2 | A030007L17Rik | 1  |
| 2853 | 17876 | Glipr2 | Tubb4         | 1  |
| 2853 | 17884 | Glipr2 | Lnx2          | 1  |
| 2853 | 18069 | Glipr2 | Gpt           | -1 |
| 2853 | 18179 | Glipr2 | Dbp           | -1 |
| 2853 | 18590 | Glipr2 | Fgb           | 1  |

|      |       |          |               |    |
|------|-------|----------|---------------|----|
| 2853 | 18827 | Glipr2   | Oprs1         | 1  |
| 2853 | 19234 | Glipr2   | Nrg4          | -1 |
| 2853 | 19671 | Glipr2   | Upp2          | -1 |
| 2853 | 19701 | Glipr2   | 9930021J17Rik | 1  |
| 2853 | 19790 | Glipr2   | Polg2         | -1 |
| 2853 | 20266 | Glipr2   | Insig2        | 1  |
| 2853 | 20745 | Glipr2   | Sord          | -1 |
| 2853 | 21142 | Glipr2   | Gm129         | -1 |
| 2853 | 21811 | Glipr2   | Ak3l1         | -1 |
| 2853 | 21969 | Glipr2   | Tk1           | -1 |
| 2853 | 22290 | Glipr2   | Tubb2a        | 1  |
| 2853 | 22630 | Glipr2   | MMT00034355   | 1  |
| 2853 | 22653 | Glipr2   | Ric3          | 1  |
| 2853 | 22936 | Glipr2   | Rhobtb1       | -1 |
| 2853 | 23377 | Glipr2   | Pdxk          | -1 |
| 2858 | 437   | Arhgap20 | Ndrp1         | 1  |
| 2858 | 2110  | Arhgap20 | Gtf2ird1      | 1  |
| 2858 | 2399  | Arhgap20 | MMT00060167   | 1  |
| 2858 | 3214  | Arhgap20 | Dnmt3b        | 1  |
| 2858 | 5183  | Arhgap20 | St5           | 1  |
| 2858 | 5374  | Arhgap20 | Chka          | 1  |
| 2858 | 5804  | Arhgap20 | Thrsp         | -1 |
| 2858 | 5849  | Arhgap20 | 2310031A18Rik | 1  |
| 2858 | 5974  | Arhgap20 | Arntl         | 1  |
| 2858 | 7414  | Arhgap20 | Clpx          | 1  |
| 2858 | 9495  | Arhgap20 | Srms          | 1  |
| 2858 | 9831  | Arhgap20 | Nedd4l        | 1  |
| 2858 | 11233 | Arhgap20 | Tef           | -1 |
| 2858 | 11599 | Arhgap20 | Coq10b        | -1 |
| 2858 | 11741 | Arhgap20 | Slc30a10      | 1  |
| 2858 | 13078 | Arhgap20 | Eps8l2        | 1  |
| 2858 | 15824 | Arhgap20 | D19Erttd721e  | 1  |
| 2858 | 17247 | Arhgap20 | A030007L17Rik | 1  |
| 2858 | 17583 | Arhgap20 | Per2          | -1 |
| 2858 | 18438 | Arhgap20 | Map3k7ip2     | 1  |
| 2858 | 19671 | Arhgap20 | Upp2          | -1 |
| 2858 | 19701 | Arhgap20 | 9930021J17Rik | 1  |
| 2858 | 21142 | Arhgap20 | Gm129         | -1 |
| 2874 | 23549 | Nol3     | Es22          | 1  |
| 2877 | 3061  | Pcyt2    | Scarf2        | 1  |
| 2877 | 3119  | Pcyt2    | Mapk10        | 1  |
| 2877 | 3339  | Pcyt2    | Dip2a         | 1  |
| 2877 | 6017  | Pcyt2    | MMT00018015   | -1 |
| 2877 | 6846  | Pcyt2    | Olfrl402      | 1  |
| 2877 | 8791  | Pcyt2    | Sectm1a       | 1  |
| 2877 | 10214 | Pcyt2    | Sectm1b       | 1  |
| 2877 | 13615 | Pcyt2    | Arl16         | -1 |
| 2877 | 15016 | Pcyt2    | MMT00074608   | 1  |
| 2877 | 16613 | Pcyt2    | 1110031I02Rik | 1  |
| 2877 | 17680 | Pcyt2    | 1700069L16Rik | 1  |
| 2877 | 17792 | Pcyt2    | Vmn2r79       | 1  |

|      |       |       |               |    |
|------|-------|-------|---------------|----|
| 2877 | 17897 | Pcyt2 | Gm1019        | 1  |
| 2877 | 21655 | Pcyt2 | Rab40b        | -1 |
| 2879 | 2639  | Ptprv | Abhd2         | 1  |
| 2879 | 20058 | Ptprv | Dnaic1        | 1  |
| 2880 | 6030  | Cd93  | As3mt         | -1 |
| 2880 | 11129 | Cd93  | Ankhd1        | -1 |
| 2880 | 11614 | Cd93  | Sult1e1       | -1 |
| 2880 | 19757 | Cd93  | Fkbp5         | -1 |
| 2880 | 20678 | Cd93  | Cyp39a1       | -1 |
| 2881 | 131   | Hlf   | Irx3          | 1  |
| 2881 | 250   | Hlf   | Tubb2a-ps2    | -1 |
| 2881 | 309   | Hlf   | Slc25a11      | 1  |
| 2881 | 392   | Hlf   | Sec22b        | -1 |
| 2881 | 402   | Hlf   | Timp3         | 1  |
| 2881 | 407   | Hlf   | Serpina6      | 1  |
| 2881 | 413   | Hlf   | Acy1          | 1  |
| 2881 | 415   | Hlf   | Ypel2         | -1 |
| 2881 | 433   | Hlf   | Pla2g12b      | -1 |
| 2881 | 437   | Hlf   | Ndrp1         | -1 |
| 2881 | 530   | Hlf   | Mest          | -1 |
| 2881 | 534   | Hlf   | Plrg1         | -1 |
| 2881 | 547   | Hlf   | Mknk2         | 1  |
| 2881 | 604   | Hlf   | Ppp1r15b      | 1  |
| 2881 | 609   | Hlf   | MMT00060868   | -1 |
| 2881 | 719   | Hlf   | Usp2          | 1  |
| 2881 | 958   | Hlf   | Ppp2r5e       | 1  |
| 2881 | 972   | Hlf   | Sri           | -1 |
| 2881 | 1036  | Hlf   | Dusp19        | -1 |
| 2881 | 1276  | Hlf   | Col4a1        | -1 |
| 2881 | 1310  | Hlf   | Cabc1         | -1 |
| 2881 | 1362  | Hlf   | Avpr1a        | -1 |
| 2881 | 1363  | Hlf   | BC021767      | -1 |
| 2881 | 1445  | Hlf   | Ssbp2         | 1  |
| 2881 | 1453  | Hlf   | Gfod2         | -1 |
| 2881 | 1561  | Hlf   | Aurka         | -1 |
| 2881 | 1646  | Hlf   | Slc15a4       | 1  |
| 2881 | 1767  | Hlf   | BC016495      | 1  |
| 2881 | 1876  | Hlf   | Amdhd1        | -1 |
| 2881 | 1911  | Hlf   | 1300007F04Rik | 1  |
| 2881 | 2011  | Hlf   | Slc2a5        | 1  |
| 2881 | 2054  | Hlf   | Acaa1a        | 1  |
| 2881 | 2110  | Hlf   | Gtf2ird1      | -1 |
| 2881 | 2126  | Hlf   | Dgat2         | 1  |
| 2881 | 2200  | Hlf   | BC006779      | -1 |
| 2881 | 2262  | Hlf   | Papss2        | 1  |
| 2881 | 2339  | Hlf   | 5730449L18Rik | -1 |
| 2881 | 2384  | Hlf   | Micalcl       | -1 |
| 2881 | 2399  | Hlf   | MMT00060167   | -1 |
| 2881 | 2529  | Hlf   | Hmcn2         | 1  |
| 2881 | 2636  | Hlf   | Tars          | -1 |
| 2881 | 2721  | Hlf   | Inmt          | 1  |

|      |      |     |               |    |
|------|------|-----|---------------|----|
| 2881 | 2725 | Hlf | Gm1614        | 1  |
| 2881 | 2766 | Hlf | Elp4          | -1 |
| 2881 | 2823 | Hlf | Sipa112       | 1  |
| 2881 | 2829 | Hlf | Lrfn3         | -1 |
| 2881 | 2850 | Hlf | Slc16a6       | -1 |
| 2881 | 2963 | Hlf | Tmem64        | -1 |
| 2881 | 3079 | Hlf | Gstt3         | 1  |
| 2881 | 3214 | Hlf | Dnmt3b        | -1 |
| 2881 | 3235 | Hlf | BC029214      | -1 |
| 2881 | 3410 | Hlf | Paqr9         | -1 |
| 2881 | 3449 | Hlf | Hes6          | 1  |
| 2881 | 3502 | Hlf | Gde1          | 1  |
| 2881 | 3564 | Hlf | Spcs2         | -1 |
| 2881 | 3746 | Hlf | Osbpl5        | 1  |
| 2881 | 3790 | Hlf | Mtss1         | 1  |
| 2881 | 3804 | Hlf | MMT00015534   | -1 |
| 2881 | 4286 | Hlf | Ptp4a1        | 1  |
| 2881 | 4298 | Hlf | St3gal1       | -1 |
| 2881 | 4333 | Hlf | Sumo3         | -1 |
| 2881 | 4512 | Hlf | Esrra         | 1  |
| 2881 | 4534 | Hlf | Ndel1         | 1  |
| 2881 | 4576 | Hlf | Chchd7        | 1  |
| 2881 | 4686 | Hlf | BC021785      | -1 |
| 2881 | 4708 | Hlf | Traf3ip2      | -1 |
| 2881 | 4715 | Hlf | Tmem120a      | 1  |
| 2881 | 4797 | Hlf | Fbxo25        | -1 |
| 2881 | 5068 | Hlf | Afap112       | -1 |
| 2881 | 5183 | Hlf | St5           | -1 |
| 2881 | 5227 | Hlf | 2310008M10Rik | -1 |
| 2881 | 5364 | Hlf | Kif22         | -1 |
| 2881 | 5374 | Hlf | Chka          | -1 |
| 2881 | 5414 | Hlf | Etnk2         | 1  |
| 2881 | 5492 | Hlf | MMT00039914   | 1  |
| 2881 | 5569 | Hlf | Pdgfc         | -1 |
| 2881 | 5574 | Hlf | Hsd3b7        | -1 |
| 2881 | 5629 | Hlf | Als2          | -1 |
| 2881 | 5729 | Hlf | 2310016C08Rik | -1 |
| 2881 | 5734 | Hlf | EG619653      | 1  |
| 2881 | 5802 | Hlf | Mad212        | -1 |
| 2881 | 5804 | Hlf | Thrsp         | 1  |
| 2881 | 5849 | Hlf | 2310031A18Rik | -1 |
| 2881 | 5892 | Hlf | MMT00038457   | 1  |
| 2881 | 5934 | Hlf | S100a10       | -1 |
| 2881 | 5974 | Hlf | Arntl         | -1 |
| 2881 | 6028 | Hlf | Alas1         | 1  |
| 2881 | 6030 | Hlf | As3mt         | 1  |
| 2881 | 6073 | Hlf | Mthfd2        | -1 |
| 2881 | 6109 | Hlf | Hsd17b2       | -1 |
| 2881 | 6268 | Hlf | Slc45a3       | -1 |
| 2881 | 6343 | Hlf | Slc20a1       | 1  |
| 2881 | 6370 | Hlf | Aqp8          | -1 |

|      |       |     |               |    |
|------|-------|-----|---------------|----|
| 2881 | 6386  | Hlf | Por           | 1  |
| 2881 | 6394  | Hlf | Fbxo6         | -1 |
| 2881 | 6397  | Hlf | Slc2a9        | 1  |
| 2881 | 6529  | Hlf | Apeh          | 1  |
| 2881 | 6657  | Hlf | Irf6          | -1 |
| 2881 | 6705  | Hlf | Sorbs2        | -1 |
| 2881 | 6746  | Hlf | E2f8          | -1 |
| 2881 | 6756  | Hlf | Sds           | 1  |
| 2881 | 6798  | Hlf | Tcea3         | 1  |
| 2881 | 6928  | Hlf | Klh18         | -1 |
| 2881 | 6975  | Hlf | Wdr67         | -1 |
| 2881 | 6990  | Hlf | Nr1i2         | 1  |
| 2881 | 7199  | Hlf | Wee1          | 1  |
| 2881 | 7407  | Hlf | Slc9a3r1      | 1  |
| 2881 | 7414  | Hlf | Clpx          | -1 |
| 2881 | 7492  | Hlf | Adfp          | -1 |
| 2881 | 7619  | Hlf | Pik3ip1       | 1  |
| 2881 | 7761  | Hlf | Nudt19        | 1  |
| 2881 | 7839  | Hlf | Asl           | 1  |
| 2881 | 7842  | Hlf | Pdk2          | 1  |
| 2881 | 7862  | Hlf | Cpsf4l        | 1  |
| 2881 | 7973  | Hlf | Lgals9        | -1 |
| 2881 | 8084  | Hlf | Psm10         | -1 |
| 2881 | 8237  | Hlf | Caprin1       | -1 |
| 2881 | 8328  | Hlf | Klhdc8a       | -1 |
| 2881 | 8399  | Hlf | Herpud1       | 1  |
| 2881 | 8404  | Hlf | Fa2h          | -1 |
| 2881 | 8428  | Hlf | Sorbs3        | 1  |
| 2881 | 8867  | Hlf | Shcbp1        | -1 |
| 2881 | 8882  | Hlf | Adarb1        | 1  |
| 2881 | 9065  | Hlf | Reep4         | -1 |
| 2881 | 9158  | Hlf | Pde9a         | -1 |
| 2881 | 9260  | Hlf | Cmtm6         | -1 |
| 2881 | 9309  | Hlf | MMT00035904   | 1  |
| 2881 | 9379  | Hlf | Ypel2         | -1 |
| 2881 | 9438  | Hlf | Pctk3         | 1  |
| 2881 | 9467  | Hlf | Aoah          | -1 |
| 2881 | 9476  | Hlf | 9130005N14Rik | -1 |
| 2881 | 9481  | Hlf | Ppl           | 1  |
| 2881 | 9495  | Hlf | Srms          | -1 |
| 2881 | 9594  | Hlf | Asb13         | -1 |
| 2881 | 9610  | Hlf | Narf          | 1  |
| 2881 | 9700  | Hlf | Prodh         | 1  |
| 2881 | 9718  | Hlf | Fmo5          | 1  |
| 2881 | 9831  | Hlf | Nedd4l        | -1 |
| 2881 | 9910  | Hlf | EG666644      | 1  |
| 2881 | 10088 | Hlf | Ddc           | -1 |
| 2881 | 10166 | Hlf | Rhbdd2        | 1  |
| 2881 | 10207 | Hlf | MMT00012324   | -1 |
| 2881 | 10215 | Hlf | Nampt         | 1  |
| 2881 | 10408 | Hlf | Per1          | 1  |

|      |       |     |               |    |
|------|-------|-----|---------------|----|
| 2881 | 10483 | Hlf | Crot          | -1 |
| 2881 | 10486 | Hlf | 1300002K09Rik | -1 |
| 2881 | 10642 | Hlf | Ngf           | 1  |
| 2881 | 10775 | Hlf | Slc16a1       | -1 |
| 2881 | 11013 | Hlf | Zfand2b       | 1  |
| 2881 | 11075 | Hlf | Xrcc6bp1      | 1  |
| 2881 | 11102 | Hlf | Gtf2h2        | -1 |
| 2881 | 11154 | Hlf | MMT00037611   | 1  |
| 2881 | 11233 | Hlf | Tef           | 1  |
| 2881 | 11412 | Hlf | Abcg5         | 1  |
| 2881 | 11436 | Hlf | Mapre1        | -1 |
| 2881 | 11506 | Hlf | Rfxank        | -1 |
| 2881 | 11574 | Hlf | Gne           | 1  |
| 2881 | 11576 | Hlf | Gm1381        | 1  |
| 2881 | 11599 | Hlf | Coq10b        | 1  |
| 2881 | 11633 | Hlf | Ier3          | 1  |
| 2881 | 11741 | Hlf | Slc30a10      | -1 |
| 2881 | 11797 | Hlf | Sbk1          | 1  |
| 2881 | 11807 | Hlf | Fbxo31        | 1  |
| 2881 | 12038 | Hlf | Tnks1bp1      | 1  |
| 2881 | 12114 | Hlf | Homer2        | 1  |
| 2881 | 12151 | Hlf | MMT00082650   | 1  |
| 2881 | 12165 | Hlf | Ppp2r1b       | -1 |
| 2881 | 12193 | Hlf | Aco2          | 1  |
| 2881 | 12204 | Hlf | Ankmy2        | 1  |
| 2881 | 12420 | Hlf | Klh121        | 1  |
| 2881 | 12433 | Hlf | 5033413D22Rik | -1 |
| 2881 | 12484 | Hlf | Tcfap2e       | 1  |
| 2881 | 12489 | Hlf | Wdr8          | -1 |
| 2881 | 12513 | Hlf | Whsc2         | -1 |
| 2881 | 12687 | Hlf | Zc3h8         | 1  |
| 2881 | 12799 | Hlf | Spon2         | -1 |
| 2881 | 12807 | Hlf | Faim          | -1 |
| 2881 | 12904 | Hlf | MMT00040704   | 1  |
| 2881 | 12905 | Hlf | Nfil3         | -1 |
| 2881 | 12941 | Hlf | Elovl5        | -1 |
| 2881 | 12982 | Hlf | Cars          | -1 |
| 2881 | 13078 | Hlf | Eps8l2        | -1 |
| 2881 | 13094 | Hlf | Cnn3          | 1  |
| 2881 | 13200 | Hlf | 5730449L18Rik | -1 |
| 2881 | 13630 | Hlf | Cdkn1a        | -1 |
| 2881 | 13770 | Hlf | D5Wsu178e     | -1 |
| 2881 | 13844 | Hlf | Trib1         | 1  |
| 2881 | 13947 | Hlf | Crip2         | -1 |
| 2881 | 14041 | Hlf | Cldn1         | -1 |
| 2881 | 14279 | Hlf | 3930402G23Rik | -1 |
| 2881 | 14357 | Hlf | Ing4          | -1 |
| 2881 | 14380 | Hlf | MMT00051866   | -1 |
| 2881 | 14431 | Hlf | Piwil1        | 1  |
| 2881 | 14462 | Hlf | Zfp385b       | 1  |
| 2881 | 14705 | Hlf | Slc43a1       | 1  |

|      |       |     |               |    |
|------|-------|-----|---------------|----|
| 2881 | 14726 | Hlf | Slc19a1       | 1  |
| 2881 | 14888 | Hlf | Abca8b        | -1 |
| 2881 | 14973 | Hlf | Shf           | 1  |
| 2881 | 15049 | Hlf | Rnf125        | -1 |
| 2881 | 15051 | Hlf | Nin           | -1 |
| 2881 | 15481 | Hlf | 1110067D22Rik | -1 |
| 2881 | 15521 | Hlf | Mast3         | 1  |
| 2881 | 15607 | Hlf | Klf13         | 1  |
| 2881 | 15631 | Hlf | Lpin1         | 1  |
| 2881 | 15665 | Hlf | Blcap         | -1 |
| 2881 | 15709 | Hlf | Tceal1        | 1  |
| 2881 | 15824 | Hlf | D19Erttd721e  | -1 |
| 2881 | 16060 | Hlf | Gys2          | 1  |
| 2881 | 16356 | Hlf | 9030607L17Rik | 1  |
| 2881 | 16474 | Hlf | Bhlhb2        | 1  |
| 2881 | 16515 | Hlf | Gramd4        | -1 |
| 2881 | 16580 | Hlf | Tnfaip2       | -1 |
| 2881 | 16669 | Hlf | Tjp2          | -1 |
| 2881 | 16690 | Hlf | Tjp3          | -1 |
| 2881 | 16704 | Hlf | Ppif          | 1  |
| 2881 | 16712 | Hlf | Pnrc1         | -1 |
| 2881 | 16772 | Hlf | MMT00010554   | 1  |
| 2881 | 16851 | Hlf | Slc34a2       | -1 |
| 2881 | 16860 | Hlf | Cdc42bpa      | -1 |
| 2881 | 16965 | Hlf | Gstt2         | 1  |
| 2881 | 17091 | Hlf | Slc38a3       | 1  |
| 2881 | 17247 | Hlf | A030007L17Rik | -1 |
| 2881 | 17338 | Hlf | Mocos         | -1 |
| 2881 | 17536 | Hlf | Chn2          | 1  |
| 2881 | 17583 | Hlf | Per2          | 1  |
| 2881 | 17617 | Hlf | Atp5sl        | 1  |
| 2881 | 17876 | Hlf | Tubb4         | -1 |
| 2881 | 17884 | Hlf | Lnx2          | -1 |
| 2881 | 17999 | Hlf | A730017L22Rik | -1 |
| 2881 | 18069 | Hlf | Gpt           | 1  |
| 2881 | 18147 | Hlf | Nhlrc2        | 1  |
| 2881 | 18176 | Hlf | Aqp11         | 1  |
| 2881 | 18179 | Hlf | Dbp           | 1  |
| 2881 | 18213 | Hlf | Tomm40        | 1  |
| 2881 | 18438 | Hlf | Map3k7ip2     | -1 |
| 2881 | 18498 | Hlf | Slc5a6        | 1  |
| 2881 | 18572 | Hlf | Stx18         | -1 |
| 2881 | 18586 | Hlf | Tns1          | 1  |
| 2881 | 18590 | Hlf | Fgb           | -1 |
| 2881 | 18607 | Hlf | Acat3         | -1 |
| 2881 | 18649 | Hlf | Ccne1         | 1  |
| 2881 | 18827 | Hlf | Oprs1         | -1 |
| 2881 | 18846 | Hlf | lkbkg         | -1 |
| 2881 | 18983 | Hlf | lfrd2         | 1  |
| 2881 | 19004 | Hlf | Pdk4          | -1 |
| 2881 | 19025 | Hlf | Slc37a4       | 1  |

|      |       |     |               |    |
|------|-------|-----|---------------|----|
| 2881 | 19141 | Hlf | Gorasp1       | 1  |
| 2881 | 19146 | Hlf | N4bp2l1       | 1  |
| 2881 | 19148 | Hlf | Rnf144b       | -1 |
| 2881 | 19234 | Hlf | Nrg4          | 1  |
| 2881 | 19305 | Hlf | Azin1         | 1  |
| 2881 | 19375 | Hlf | Inhba         | -1 |
| 2881 | 19410 | Hlf | Glb1          | 1  |
| 2881 | 19465 | Hlf | Hacl1         | -1 |
| 2881 | 19532 | Hlf | Med8          | -1 |
| 2881 | 19671 | Hlf | Upp2          | 1  |
| 2881 | 19701 | Hlf | 9930021J17Rik | -1 |
| 2881 | 19790 | Hlf | Polg2         | 1  |
| 2881 | 19917 | Hlf | Nek2          | -1 |
| 2881 | 20045 | Hlf | D4Wsu114e     | 1  |
| 2881 | 20068 | Hlf | 2610204M08Rik | 1  |
| 2881 | 20093 | Hlf | Ablim1        | 1  |
| 2881 | 20227 | Hlf | Kras          | -1 |
| 2881 | 20266 | Hlf | Insig2        | -1 |
| 2881 | 20370 | Hlf | Sccpdh        | -1 |
| 2881 | 20457 | Hlf | Gtf2a2        | 1  |
| 2881 | 20611 | Hlf | Map2k3        | 1  |
| 2881 | 20745 | Hlf | Sord          | 1  |
| 2881 | 20830 | Hlf | MMT00057509   | -1 |
| 2881 | 21079 | Hlf | Tfpi2         | -1 |
| 2881 | 21105 | Hlf | Pex26         | 1  |
| 2881 | 21142 | Hlf | Gm129         | 1  |
| 2881 | 21192 | Hlf | 2310047A01Rik | 1  |
| 2881 | 21739 | Hlf | Epb4.1        | 1  |
| 2881 | 21794 | Hlf | Pfkip         | -1 |
| 2881 | 21811 | Hlf | Ak3l1         | 1  |
| 2881 | 21918 | Hlf | Snx24         | -1 |
| 2881 | 21969 | Hlf | Tk1           | 1  |
| 2881 | 21981 | Hlf | Ormdl2        | -1 |
| 2881 | 22012 | Hlf | Itgae         | -1 |
| 2881 | 22290 | Hlf | Tubb2a        | -1 |
| 2881 | 22324 | Hlf | MMT00060741   | -1 |
| 2881 | 22476 | Hlf | Tspan4        | 1  |
| 2881 | 22627 | Hlf | Adck5         | -1 |
| 2881 | 22630 | Hlf | MMT00034355   | -1 |
| 2881 | 22636 | Hlf | Trim2         | -1 |
| 2881 | 22641 | Hlf | Kif1c         | 1  |
| 2881 | 22653 | Hlf | Ric3          | -1 |
| 2881 | 22697 | Hlf | Skil          | -1 |
| 2881 | 22730 | Hlf | Glt8d1        | -1 |
| 2881 | 22936 | Hlf | Rhobtb1       | 1  |
| 2881 | 23007 | Hlf | 2410015N17Rik | 1  |
| 2881 | 23161 | Hlf | Gclc          | -1 |
| 2881 | 23183 | Hlf | Nnmt          | 1  |
| 2881 | 23248 | Hlf | Tesk2         | 1  |
| 2881 | 23377 | Hlf | Pdxk          | 1  |
| 2881 | 23437 | Hlf | Efhd2         | 1  |



|      |       |             |               |    |
|------|-------|-------------|---------------|----|
| 2881 | 23558 | Hlf         | MMT00030937   | 1  |
| 2885 | 2571  | Hebp2       | Rmnd1         | -1 |
| 2885 | 3744  | Hebp2       | Rmnd1         | -1 |
| 2885 | 8786  | Hebp2       | Rmnd1         | -1 |
| 2885 | 19115 | Hebp2       | Rab32         | -1 |
| 2907 | 8815  | MMT00010854 | Mx1           | 1  |
| 2907 | 21214 | MMT00010854 | Scd1          | 1  |
| 2912 | 2388  | Wtip        | Dot1l         | -1 |
| 2912 | 2599  | Wtip        | Lsm14a        | -1 |
| 2912 | 4697  | Wtip        | Cyp2a12       | 1  |
| 2912 | 6371  | Wtip        | Dedd2         | -1 |
| 2915 | 7610  | Nfs1        | Scand1        | 1  |
| 2915 | 23005 | Nfs1        | 4930405A21Rik | -1 |
| 2928 | 1494  | Igf1        | Cyp2c69       | 1  |
| 2928 | 2256  | Igf1        | Serpina9      | 1  |
| 2928 | 2850  | Igf1        | Slc16a6       | 1  |
| 2928 | 3408  | Igf1        | Cyp2c40       | 1  |
| 2928 | 5364  | Igf1        | Kif22         | 1  |
| 2928 | 6109  | Igf1        | Hsd17b2       | 1  |
| 2938 | 327   | H2-T23      | H2-Ea         | 1  |
| 2938 | 510   | H2-T23      | Neu1          | -1 |
| 2938 | 763   | H2-T23      | 4933406E20Rik | 1  |
| 2938 | 1340  | H2-T23      | Tap2          | 1  |
| 2938 | 2325  | H2-T23      | H2-K1         | 1  |
| 2938 | 2801  | H2-T23      | H2-BI         | 1  |
| 2938 | 2938  | H2-T23      | H2-T23        | 1  |
| 2938 | 3599  | H2-T23      | MMT00035426   | -1 |
| 2938 | 3704  | H2-T23      | H2-Q7         | 1  |
| 2938 | 3857  | H2-T23      | 1700001C19Rik | -1 |
| 2938 | 4555  | H2-T23      | Cchcr1        | 1  |
| 2938 | 4958  | H2-T23      | Ndufa7        | -1 |
| 2938 | 5410  | H2-T23      | Cyp4f15       | -1 |
| 2938 | 6360  | H2-T23      | D17H6S56E-3   | -1 |
| 2938 | 6510  | H2-T23      | Plcl2         | 1  |
| 2938 | 7088  | H2-T23      | Slc37a1       | 1  |
| 2938 | 8750  | H2-T23      | 1700010114Rik | 1  |
| 2938 | 8767  | H2-T23      | Rgl2          | 1  |
| 2938 | 9158  | H2-T23      | Pde9a         | -1 |
| 2938 | 9717  | H2-T23      | Psmb9         | 1  |
| 2938 | 10376 | H2-T23      | C920025E04Rik | -1 |
| 2938 | 10394 | H2-T23      | MMT00028435   | 1  |
| 2938 | 10667 | H2-T23      | H2-Eb1        | 1  |
| 2938 | 12335 | H2-T23      | Plcb4         | 1  |
| 2938 | 12355 | H2-T23      | A1507611      | 1  |
| 2938 | 13493 | H2-T23      | Ring1         | -1 |
| 2938 | 13789 | H2-T23      | H2-Q8         | 1  |
| 2938 | 15540 | H2-T23      | C2            | 1  |
| 2938 | 17691 | H2-T23      | Kank3         | 1  |
| 2938 | 18577 | H2-T23      | Btbd9         | -1 |
| 2938 | 18906 | H2-T23      | Zfand3        | 1  |
| 2938 | 20100 | H2-T23      | Guca1b        | -1 |

|      |       |             |               |    |
|------|-------|-------------|---------------|----|
| 2938 | 20238 | H2-T23      | H2-T9         | 1  |
| 2938 | 20346 | H2-T23      | Gna-rs1       | 1  |
| 2938 | 20421 | H2-T23      | Cdkn2c        | 1  |
| 2938 | 21295 | H2-T23      | Snf1lk        | -1 |
| 2938 | 21685 | H2-T23      | Gzma          | 1  |
| 2938 | 22822 | H2-T23      | MMT00013433   | 1  |
| 2938 | 23250 | H2-T23      | Plcl2         | 1  |
| 2938 | 23401 | H2-T23      | H2-Q2         | 1  |
| 2945 | 2945  | MMT00005190 | MMT00005190   | 1  |
| 2945 | 5014  | MMT00005190 | MMT00017503   | 1  |
| 2945 | 5968  | MMT00005190 | MMT00012419   | 1  |
| 2945 | 8341  | MMT00005190 | MMT00017270   | 1  |
| 2945 | 9909  | MMT00005190 | MMT00077883   | 1  |
| 2945 | 14132 | MMT00005190 | Glo1          | -1 |
| 2945 | 14924 | MMT00005190 | Hn1l          | -1 |
| 2945 | 19064 | MMT00005190 | MMT00004867   | -1 |
| 2945 | 19929 | MMT00005190 | MMT00079667   | 1  |
| 2962 | 1416  | AW146154    | 6720460F02Rik | 1  |
| 2962 | 5364  | AW146154    | Kif22         | 1  |
| 2962 | 8416  | AW146154    | Cdc20         | 1  |
| 2962 | 9759  | AW146154    | Cenpn         | 1  |
| 2962 | 11382 | AW146154    | Cdca3         | 1  |
| 2962 | 17823 | AW146154    | D2Ert750e     | 1  |
| 2962 | 19318 | AW146154    | Plk1          | 1  |
| 2962 | 21947 | AW146154    | Cdca8         | 1  |
| 2969 | 250   | Ptpro       | Tubb2a-ps2    | 1  |
| 2969 | 269   | Ptpro       | Tuba1b        | 1  |
| 2969 | 609   | Ptpro       | MMT00060868   | 1  |
| 2969 | 771   | Ptpro       | Zbtb45        | 1  |
| 2969 | 1646  | Ptpro       | Slc15a4       | -1 |
| 2969 | 1941  | Ptpro       | MMT00079618   | 1  |
| 2969 | 3097  | Ptpro       | Ppp1r3g       | -1 |
| 2969 | 3265  | Ptpro       | Dntt          | 1  |
| 2969 | 3410  | Ptpro       | Paqr9         | 1  |
| 2969 | 3804  | Ptpro       | MMT00015534   | 1  |
| 2969 | 4534  | Ptpro       | Ndel1         | -1 |
| 2969 | 4708  | Ptpro       | Traf3ip2      | 1  |
| 2969 | 5364  | Ptpro       | Kif22         | 1  |
| 2969 | 5802  | Ptpro       | Mad2l2        | 1  |
| 2969 | 5934  | Ptpro       | S100a10       | 1  |
| 2969 | 6386  | Ptpro       | Por           | -1 |
| 2969 | 6771  | Ptpro       | Insc          | 1  |
| 2969 | 7151  | Ptpro       | MMT00007982   | 1  |
| 2969 | 7963  | Ptpro       | Rxrg          | 1  |
| 2969 | 8641  | Ptpro       | Slc7a2        | -1 |
| 2969 | 9763  | Ptpro       | Tuba3b        | 1  |
| 2969 | 10486 | Ptpro       | 1300002K09Rik | 1  |
| 2969 | 11093 | Ptpro       | Zdhhc1        | -1 |
| 2969 | 11129 | Ptpro       | Ankhd1        | -1 |
| 2969 | 11149 | Ptpro       | MMT00050488   | 1  |
| 2969 | 11724 | Ptpro       | Tuba3a        | 1  |

|      |       |             |               |    |
|------|-------|-------------|---------------|----|
| 2969 | 11741 | Ptpro       | Slc30a10      | 1  |
| 2969 | 11808 | Ptpro       | Pck1          | -1 |
| 2969 | 12925 | Ptpro       | Farp1         | 1  |
| 2969 | 12981 | Ptpro       | Nek6          | 1  |
| 2969 | 13489 | Ptpro       | D230025D16Rik | -1 |
| 2969 | 13889 | Ptpro       | Agpat2        | 1  |
| 2969 | 15021 | Ptpro       | Ppargc1a      | -1 |
| 2969 | 15862 | Ptpro       | Mrap          | 1  |
| 2969 | 16060 | Ptpro       | Gys2          | -1 |
| 2969 | 16182 | Ptpro       | Oasl1         | 1  |
| 2969 | 16690 | Ptpro       | Tjp3          | 1  |
| 2969 | 17323 | Ptpro       | Tubb6         | 1  |
| 2969 | 17444 | Ptpro       | Tuba1a        | 1  |
| 2969 | 17617 | Ptpro       | Atp5sl        | -1 |
| 2969 | 17629 | Ptpro       | Saa2          | 1  |
| 2969 | 17876 | Ptpro       | Tubb4         | 1  |
| 2969 | 18147 | Ptpro       | Nhlrc2        | -1 |
| 2969 | 18827 | Ptpro       | Oprs1         | 1  |
| 2969 | 19532 | Ptpro       | Med8          | 1  |
| 2969 | 20217 | Ptpro       | Rab3ip        | -1 |
| 2969 | 22290 | Ptpro       | Tubb2a        | 1  |
| 2969 | 22630 | Ptpro       | MMT00034355   | 1  |
| 2969 | 23201 | Ptpro       | S1pr1         | 1  |
| 2969 | 23248 | Ptpro       | Tesk2         | -1 |
| 2969 | 23253 | Ptpro       | D030011O10Rik | -1 |
| 2970 | 18201 | MMT00022996 | MMT00060232   | 1  |
| 2973 | 250   | 4-Sep       | Tubb2a-ps2    | 1  |
| 2973 | 337   | 4-Sep       | Rasgef1b      | -1 |
| 2973 | 563   | 4-Sep       | D4Bwg0951e    | -1 |
| 2973 | 609   | 4-Sep       | MMT00060868   | 1  |
| 2973 | 1310  | 4-Sep       | Cabc1         | 1  |
| 2973 | 2794  | 4-Sep       | Map3k6        | -1 |
| 2973 | 3326  | 4-Sep       | Lysmd2        | -1 |
| 2973 | 3502  | 4-Sep       | Gde1          | -1 |
| 2973 | 3686  | 4-Sep       | Psm9          | -1 |
| 2973 | 3868  | 4-Sep       | Ebpl          | 1  |
| 2973 | 4235  | 4-Sep       | Pfkfb3        | -1 |
| 2973 | 5187  | 4-Sep       | Speer4f       | -1 |
| 2973 | 6044  | 4-Sep       | Sucnr1        | 1  |
| 2973 | 6048  | 4-Sep       | Psm9          | -1 |
| 2973 | 6386  | 4-Sep       | Por           | -1 |
| 2973 | 6564  | 4-Sep       | Cebpd         | -1 |
| 2973 | 8342  | 4-Sep       | Cwf19i1       | 1  |
| 2973 | 8399  | 4-Sep       | Herpud1       | -1 |
| 2973 | 8639  | 4-Sep       | Map1lc3b      | -1 |
| 2973 | 9158  | 4-Sep       | Pde9a         | 1  |
| 2973 | 10384 | 4-Sep       | Chic2         | -1 |
| 2973 | 11093 | 4-Sep       | Zdhc1         | -1 |
| 2973 | 11129 | 4-Sep       | Ankhd1        | -1 |
| 2973 | 11599 | 4-Sep       | Coq10b        | -1 |
| 2973 | 11614 | 4-Sep       | Sult1e1       | -1 |

|      |       |           |               |    |
|------|-------|-----------|---------------|----|
| 2973 | 11807 | 4-Sep     | Fbxo31        | -1 |
| 2973 | 11808 | 4-Sep     | Pck1          | -1 |
| 2973 | 12219 | 4-Sep     | Cyb5b         | 1  |
| 2973 | 12420 | 4-Sep     | Klhl21        | -1 |
| 2973 | 13018 | 4-Sep     | AW544981      | 1  |
| 2973 | 13087 | 4-Sep     | Cxadr         | 1  |
| 2973 | 13471 | 4-Sep     | Cln8          | -1 |
| 2973 | 14138 | 4-Sep     | Anks4b        | 1  |
| 2973 | 15631 | 4-Sep     | Lpin1         | -1 |
| 2973 | 15862 | 4-Sep     | Mrap          | 1  |
| 2973 | 16176 | 4-Sep     | St3gal5       | -1 |
| 2973 | 16647 | 4-Sep     | D16H22S680E   | -1 |
| 2973 | 16669 | 4-Sep     | Tjp2          | 1  |
| 2973 | 17338 | 4-Sep     | Mocos         | 1  |
| 2973 | 17352 | 4-Sep     | Cebpb         | -1 |
| 2973 | 17525 | 4-Sep     | Ctgf          | -1 |
| 2973 | 17622 | 4-Sep     | Foxo1         | -1 |
| 2973 | 17876 | 4-Sep     | Tubb4         | 1  |
| 2973 | 18027 | 4-Sep     | 5730403B10Rik | -1 |
| 2973 | 18275 | 4-Sep     | D730039F16Rik | 1  |
| 2973 | 18785 | 4-Sep     | Angptl4       | -1 |
| 2973 | 18827 | 4-Sep     | Oprs1         | 1  |
| 2973 | 19025 | 4-Sep     | Slc37a4       | -1 |
| 2973 | 19466 | 4-Sep     | Pptc7         | -1 |
| 2973 | 19532 | 4-Sep     | Med8          | 1  |
| 2973 | 19757 | 4-Sep     | Fkbp5         | -1 |
| 2973 | 20246 | 4-Sep     | Pdia5         | -1 |
| 2973 | 21202 | 4-Sep     | Acly          | 1  |
| 2973 | 21331 | 4-Sep     | Slc10a6       | -1 |
| 2973 | 21664 | 4-Sep     | Insig1        | 1  |
| 2973 | 22290 | 4-Sep     | Tubb2a        | 1  |
| 2973 | 22630 | 4-Sep     | MMT00034355   | 1  |
| 2973 | 22732 | 4-Sep     | Cyb5b         | 1  |
| 2973 | 22744 | 4-Sep     | 9-Sep         | 1  |
| 2973 | 23202 | 4-Sep     | Olf559        | -1 |
| 2980 | 2980  | Slc37a2   | Slc37a2       | 1  |
| 2980 | 5364  | Slc37a2   | Kif22         | 1  |
| 2980 | 10558 | Slc37a2   | Cyp2d40       | 1  |
| 2980 | 20468 | Slc37a2   | Spa17         | 1  |
| 2996 | 17673 | Pik3r1    | Nola1         | 1  |
| 2998 | 2011  | Lzic      | Slc2a5        | -1 |
| 3006 | 1258  | Alas2     | Hba-a1        | 1  |
| 3006 | 5919  | Alas2     | B930041F14Rik | 1  |
| 3006 | 17664 | Alas2     | Jup           | 1  |
| 3006 | 21356 | Alas2     | Nkx2-6        | 1  |
| 3009 | 8444  | Serpina1c | Rdh16         | 1  |
| 3009 | 8815  | Serpina1c | Mx1           | 1  |
| 3009 | 10132 | Serpina1c | Ces2          | 1  |
| 3009 | 12910 | Serpina1c | 1110028A07Rik | 1  |
| 3009 | 14017 | Serpina1c | Ces5          | 1  |
| 3009 | 15059 | Serpina1c | Mogat1        | 1  |

|      |       |           |                    |    |
|------|-------|-----------|--------------------|----|
| 3009 | 17996 | Serpina1c | Igfbp2             | -1 |
| 3009 | 18042 | Serpina1c | Aph1c              | -1 |
| 3009 | 18201 | Serpina1c | MMT00060232        | 1  |
| 3009 | 20058 | Serpina1c | Dnaic1             | -1 |
| 3009 | 20079 | Serpina1c | MMT00019254        | -1 |
| 3009 | 21214 | Serpina1c | Scd1               | 1  |
| 3009 | 21575 | Serpina1c | Cyp2c55            | 1  |
| 3009 | 22138 | Serpina1c | Ang                | -1 |
| 3009 | 23026 | Serpina1c | Apom               | -1 |
| 3012 | 21251 | Actl6a    | Cpt1a              | -1 |
| 3015 | 5364  | Arhgef6   | Kif22              | 1  |
| 3015 | 14135 | Arhgef6   | Eepd1              | 1  |
| 3022 | 607   | Als2cr12  | Me1                | 1  |
| 3022 | 874   | Als2cr12  | Aldh1a7            | 1  |
| 3022 | 3377  | Als2cr12  | Cs                 | 1  |
| 3022 | 3832  | Als2cr12  | Sdhb               | 1  |
| 3022 | 4674  | Als2cr12  | Cxcl12             | -1 |
| 3022 | 5884  | Als2cr12  | Gstm2              | 1  |
| 3022 | 6650  | Als2cr12  | MMT00050325        | 1  |
| 3022 | 7430  | Als2cr12  | Gpr137             | 1  |
| 3022 | 7602  | Als2cr12  | Pcca               | 1  |
| 3022 | 7888  | Als2cr12  | Pigz               | 1  |
| 3022 | 8444  | Als2cr12  | Rdh16              | 1  |
| 3022 | 8815  | Als2cr12  | Mx1                | 1  |
| 3022 | 10132 | Als2cr12  | Ces2               | 1  |
| 3022 | 10554 | Als2cr12  | ENSMUSG00000074179 | 1  |
| 3022 | 11086 | Als2cr12  | Pnpla5             | 1  |
| 3022 | 11946 | Als2cr12  | MMT00030953        | 1  |
| 3022 | 12219 | Als2cr12  | Cyb5b              | 1  |
| 3022 | 14017 | Als2cr12  | Ces5               | 1  |
| 3022 | 14147 | Als2cr12  | Acss2              | 1  |
| 3022 | 14442 | Als2cr12  | Ethe1              | 1  |
| 3022 | 16222 | Als2cr12  | Adipor2            | 1  |
| 3022 | 17398 | Als2cr12  | MMT00045090        | 1  |
| 3022 | 17887 | Als2cr12  | Cryl1              | 1  |
| 3022 | 18201 | Als2cr12  | MMT00060232        | 1  |
| 3022 | 20019 | Als2cr12  | Qdpr               | 1  |
| 3022 | 20058 | Als2cr12  | Dnaic1             | -1 |
| 3022 | 20328 | Als2cr12  | Csl                | 1  |
| 3022 | 21214 | Als2cr12  | Scd1               | 1  |
| 3022 | 21575 | Als2cr12  | Cyp2c55            | 1  |
| 3022 | 21727 | Als2cr12  | Khk                | 1  |
| 3022 | 21793 | Als2cr12  | Pla2g12a           | -1 |
| 3022 | 21966 | Als2cr12  | Pcp4l1             | -1 |
| 3022 | 22732 | Als2cr12  | Cyb5b              | 1  |
| 3028 | 21205 | Uhrf1     | Pkmyt1             | 1  |
| 3029 | 3029  | Ybx1      | Ybx1               | 1  |
| 3029 | 8654  | Ybx1      | Fbxl13             | 1  |
| 3029 | 12492 | Ybx1      | Ybx1               | -1 |
| 3029 | 20147 | Ybx1      | Ybx1               | -1 |
| 3029 | 20548 | Ybx1      | 1700041C02Rik      | 1  |

|      |       |        |               |    |
|------|-------|--------|---------------|----|
| 3029 | 23645 | Ybx1   | 1700041C02Rik | 1  |
| 3031 | 3196  | Rab10  | Tat           | 1  |
| 3036 | 8270  | Slamf9 | Clspn         | 1  |
| 3036 | 8800  | Slamf9 | Rnf213        | 1  |
| 3036 | 16182 | Slamf9 | Oasl1         | 1  |
| 3040 | 185   | Bcl3   | Ap2b1         | 1  |
| 3040 | 213   | Bcl3   | Rgs16         | -1 |
| 3040 | 250   | Bcl3   | Tubb2a-ps2    | 1  |
| 3040 | 269   | Bcl3   | Tuba1b        | 1  |
| 3040 | 563   | Bcl3   | D4Bwg0951e    | -1 |
| 3040 | 609   | Bcl3   | MMT00060868   | 1  |
| 3040 | 719   | Bcl3   | Usp2          | -1 |
| 3040 | 1646  | Bcl3   | Slc15a4       | -1 |
| 3040 | 1709  | Bcl3   | Mt2           | -1 |
| 3040 | 1941  | Bcl3   | MMT00079618   | 1  |
| 3040 | 2256  | Bcl3   | Serpina9      | 1  |
| 3040 | 2322  | Bcl3   | Tuba4a        | 1  |
| 3040 | 2615  | Bcl3   | EG624862      | -1 |
| 3040 | 2636  | Bcl3   | Tars          | 1  |
| 3040 | 2794  | Bcl3   | Map3k6        | -1 |
| 3040 | 2829  | Bcl3   | Lrfn3         | 1  |
| 3040 | 2850  | Bcl3   | Slc16a6       | 1  |
| 3040 | 3214  | Bcl3   | Dnmt3b        | 1  |
| 3040 | 3410  | Bcl3   | Paqr9         | 1  |
| 3040 | 3804  | Bcl3   | MMT00015534   | 1  |
| 3040 | 4201  | Bcl3   | Tubb2c        | 1  |
| 3040 | 4286  | Bcl3   | Ptp4a1        | -1 |
| 3040 | 4708  | Bcl3   | Traf3ip2      | 1  |
| 3040 | 5375  | Bcl3   | Sec23b        | 1  |
| 3040 | 5574  | Bcl3   | Hsd3b7        | 1  |
| 3040 | 5791  | Bcl3   | Baiap211      | -1 |
| 3040 | 5974  | Bcl3   | Arntl         | 1  |
| 3040 | 6073  | Bcl3   | Mthfd2        | 1  |
| 3040 | 6386  | Bcl3   | Por           | -1 |
| 3040 | 6771  | Bcl3   | Insc          | 1  |
| 3040 | 7862  | Bcl3   | Cpsf4l        | -1 |
| 3040 | 8328  | Bcl3   | Klhdc8a       | 1  |
| 3040 | 8399  | Bcl3   | Herpud1       | -1 |
| 3040 | 8428  | Bcl3   | Sorbs3        | -1 |
| 3040 | 9763  | Bcl3   | Tuba3b        | 1  |
| 3040 | 9910  | Bcl3   | EG666644      | -1 |
| 3040 | 10088 | Bcl3   | Ddc           | 1  |
| 3040 | 10486 | Bcl3   | 1300002K09Rik | 1  |
| 3040 | 10541 | Bcl3   | Ap2a2         | 1  |
| 3040 | 10802 | Bcl3   | Kcnn2         | -1 |
| 3040 | 10803 | Bcl3   | Wnt5a         | 1  |
| 3040 | 10863 | Bcl3   | Tssc1         | 1  |
| 3040 | 11054 | Bcl3   | Rnase4        | -1 |
| 3040 | 11129 | Bcl3   | Ankhd1        | -1 |
| 3040 | 11233 | Bcl3   | Tef           | -1 |
| 3040 | 11599 | Bcl3   | Coq10b        | -1 |

|      |       |               |               |    |
|------|-------|---------------|---------------|----|
| 3040 | 11735 | Bcl3          | Thoc5         | 1  |
| 3040 | 11741 | Bcl3          | Slc30a10      | 1  |
| 3040 | 11807 | Bcl3          | Fbxo31        | -1 |
| 3040 | 12204 | Bcl3          | Ankmy2        | -1 |
| 3040 | 12420 | Bcl3          | Kihl21        | -1 |
| 3040 | 12489 | Bcl3          | Wdr8          | 1  |
| 3040 | 12799 | Bcl3          | Spon2         | 1  |
| 3040 | 12904 | Bcl3          | MMT00040704   | -1 |
| 3040 | 12905 | Bcl3          | Nfil3         | 1  |
| 3040 | 13471 | Bcl3          | Cln8          | -1 |
| 3040 | 14380 | Bcl3          | MMT00051866   | 1  |
| 3040 | 14462 | Bcl3          | Zfp385b       | -1 |
| 3040 | 15021 | Bcl3          | Ppargc1a      | -1 |
| 3040 | 15425 | Bcl3          | Adprh         | 1  |
| 3040 | 15631 | Bcl3          | Lpin1         | -1 |
| 3040 | 16060 | Bcl3          | Gys2          | -1 |
| 3040 | 16176 | Bcl3          | St3gal5       | -1 |
| 3040 | 16580 | Bcl3          | Tnfaip2       | 1  |
| 3040 | 16647 | Bcl3          | D16H22S680E   | -1 |
| 3040 | 16669 | Bcl3          | Tjp2          | 1  |
| 3040 | 16690 | Bcl3          | Tjp3          | 1  |
| 3040 | 17078 | Bcl3          | Syde2         | -1 |
| 3040 | 17323 | Bcl3          | Tubb6         | 1  |
| 3040 | 17444 | Bcl3          | Tuba1a        | 1  |
| 3040 | 17622 | Bcl3          | Foxo1         | -1 |
| 3040 | 17876 | Bcl3          | Tubb4         | 1  |
| 3040 | 18027 | Bcl3          | 5730403B10Rik | -1 |
| 3040 | 18147 | Bcl3          | Nhlrc2        | -1 |
| 3040 | 18179 | Bcl3          | Dbp           | -1 |
| 3040 | 18314 | Bcl3          | 4631416L12Rik | -1 |
| 3040 | 18653 | Bcl3          | MMT00072901   | -1 |
| 3040 | 18827 | Bcl3          | Oprs1         | 1  |
| 3040 | 19025 | Bcl3          | Slc37a4       | -1 |
| 3040 | 19146 | Bcl3          | N4bp2l1       | -1 |
| 3040 | 19234 | Bcl3          | Nrg4          | -1 |
| 3040 | 19277 | Bcl3          | MMT00044927   | -1 |
| 3040 | 19323 | Bcl3          | Bnip3         | -1 |
| 3040 | 19466 | Bcl3          | Pptc7         | -1 |
| 3040 | 19556 | Bcl3          | Efna1         | 1  |
| 3040 | 19671 | Bcl3          | Upp2          | -1 |
| 3040 | 20830 | Bcl3          | MMT00057509   | 1  |
| 3040 | 21142 | Bcl3          | Gm129         | -1 |
| 3040 | 21331 | Bcl3          | Slc10a6       | -1 |
| 3040 | 21811 | Bcl3          | Ak3l1         | -1 |
| 3040 | 22290 | Bcl3          | Tubb2a        | 1  |
| 3040 | 22630 | Bcl3          | MMT00034355   | 1  |
| 3040 | 23180 | Bcl3          | Sult1d1       | -1 |
| 3040 | 23558 | Bcl3          | MMT00030937   | -1 |
| 3046 | 269   | 6430573F11Rik | Tuba1b        | -1 |
| 3046 | 1145  | 6430573F11Rik | Arhgap6       | 1  |
| 3046 | 3696  | 6430573F11Rik | Elovl6        | -1 |

|      |       |               |               |    |
|------|-------|---------------|---------------|----|
| 3046 | 8896  | 6430573F11Rik | Fasn          | -1 |
| 3046 | 9763  | 6430573F11Rik | Tuba3b        | -1 |
| 3046 | 10612 | 6430573F11Rik | Slc24a6       | 1  |
| 3046 | 11724 | 6430573F11Rik | Tuba3a        | -1 |
| 3046 | 15760 | 6430573F11Rik | Trib3         | 1  |
| 3046 | 16888 | 6430573F11Rik | H6pd          | 1  |
| 3046 | 17730 | 6430573F11Rik | MMT00058199   | 1  |
| 3046 | 17862 | 6430573F11Rik | Fbxo21        | 1  |
| 3046 | 22443 | 6430573F11Rik | Tuba1c        | -1 |
| 3052 | 286   | 9130404D08Rik | MMT00070509   | -1 |
| 3052 | 403   | 9130404D08Rik | Leprotl1      | 1  |
| 3052 | 1755  | 9130404D08Rik | Ocel1         | -1 |
| 3052 | 2703  | 9130404D08Rik | MMT00073763   | -1 |
| 3052 | 2749  | 9130404D08Rik | Naf1          | 1  |
| 3052 | 3055  | 9130404D08Rik | Pde4c         | -1 |
| 3052 | 5433  | 9130404D08Rik | 2410004L22Rik | 1  |
| 3052 | 6760  | 9130404D08Rik | 2810428I15Rik | -1 |
| 3052 | 9304  | 9130404D08Rik | Al449175      | -1 |
| 3052 | 9931  | 9130404D08Rik | Git25d1       | 1  |
| 3052 | 10195 | 9130404D08Rik | Klf1          | -1 |
| 3052 | 13732 | 9130404D08Rik | Tpm4          | 1  |
| 3052 | 14455 | 9130404D08Rik | 2700029M09Rik | 1  |
| 3052 | 15094 | 9130404D08Rik | Pbx4          | 1  |
| 3052 | 15455 | 9130404D08Rik | Lsm4          | 1  |
| 3052 | 16617 | 9130404D08Rik | Sh2d4a        | 1  |
| 3052 | 16849 | 9130404D08Rik | Trmt1         | 1  |
| 3052 | 16858 | 9130404D08Rik | Tmem38a       | 1  |
| 3052 | 17403 | 9130404D08Rik | N4bp1         | 1  |
| 3052 | 18886 | 9130404D08Rik | Slc18a1       | 1  |
| 3052 | 20484 | 9130404D08Rik | Ces1          | 1  |
| 3079 | 18201 | Gstt3         | MMT00060232   | -1 |
| 3086 | 1241  | Tubg2         | Meox1         | 1  |
| 3086 | 13810 | Tubg2         | 1110036O03Rik | 1  |
| 3111 | 213   | Ddefl1        | Rgs16         | -1 |
| 3111 | 250   | Ddefl1        | Tubb2a-ps2    | 1  |
| 3111 | 269   | Ddefl1        | Tuba1b        | 1  |
| 3111 | 563   | Ddefl1        | D4Bwg0951e    | -1 |
| 3111 | 609   | Ddefl1        | MMT00060868   | 1  |
| 3111 | 771   | Ddefl1        | Zbtb45        | 1  |
| 3111 | 1537  | Ddefl1        | 1700052K11Rik | 1  |
| 3111 | 1646  | Ddefl1        | Slc15a4       | -1 |
| 3111 | 1805  | Ddefl1        | Tmem204       | -1 |
| 3111 | 1941  | Ddefl1        | MMT00079618   | 1  |
| 3111 | 2794  | Ddefl1        | Map3k6        | -1 |
| 3111 | 2850  | Ddefl1        | Slc16a6       | 1  |
| 3111 | 3097  | Ddefl1        | Ppp1r3g       | -1 |
| 3111 | 3170  | Ddefl1        | Mcart1        | -1 |
| 3111 | 3410  | Ddefl1        | Paqr9         | 1  |
| 3111 | 3804  | Ddefl1        | MMT00015534   | 1  |
| 3111 | 4286  | Ddefl1        | Ptp4a1        | -1 |
| 3111 | 4534  | Ddefl1        | Ndel1         | -1 |



|      |       |        |               |    |
|------|-------|--------|---------------|----|
| 3111 | 4708  | Ddefl1 | Traf3ip2      | 1  |
| 3111 | 5187  | Ddefl1 | Speer4f       | -1 |
| 3111 | 5587  | Ddefl1 | Rmnd5b        | 1  |
| 3111 | 5994  | Ddefl1 | Olf609        | -1 |
| 3111 | 6756  | Ddefl1 | Sds           | -1 |
| 3111 | 6990  | Ddefl1 | Nr1i2         | -1 |
| 3111 | 7066  | Ddefl1 | Agtr1b        | -1 |
| 3111 | 7140  | Ddefl1 | Mtbp          | 1  |
| 3111 | 7151  | Ddefl1 | MMT00007982   | 1  |
| 3111 | 7963  | Ddefl1 | Rxrg          | 1  |
| 3111 | 8328  | Ddefl1 | Klhdc8a       | 1  |
| 3111 | 8399  | Ddefl1 | Herpud1       | -1 |
| 3111 | 8641  | Ddefl1 | Slc7a2        | -1 |
| 3111 | 9763  | Ddefl1 | Tuba3b        | 1  |
| 3111 | 10207 | Ddefl1 | MMT00012324   | 1  |
| 3111 | 10712 | Ddefl1 | Fchsd2        | -1 |
| 3111 | 11093 | Ddefl1 | Zdhhc1        | -1 |
| 3111 | 11129 | Ddefl1 | Ankhd1        | -1 |
| 3111 | 11724 | Ddefl1 | Tuba3a        | 1  |
| 3111 | 11807 | Ddefl1 | Fbxo31        | -1 |
| 3111 | 11808 | Ddefl1 | Pck1          | -1 |
| 3111 | 12091 | Ddefl1 | 1810015C04Rik | -1 |
| 3111 | 12420 | Ddefl1 | Klh21         | -1 |
| 3111 | 12981 | Ddefl1 | Nek6          | 1  |
| 3111 | 13339 | Ddefl1 | D630042F21Rik | -1 |
| 3111 | 13471 | Ddefl1 | Cln8          | -1 |
| 3111 | 13489 | Ddefl1 | D230025D16Rik | -1 |
| 3111 | 13989 | Ddefl1 | Foxp3         | -1 |
| 3111 | 14462 | Ddefl1 | Zfp385b       | -1 |
| 3111 | 14989 | Ddefl1 | Map3k5        | -1 |
| 3111 | 15021 | Ddefl1 | Ppargc1a      | -1 |
| 3111 | 15284 | Ddefl1 | EG632778      | -1 |
| 3111 | 15631 | Ddefl1 | Lpin1         | -1 |
| 3111 | 15659 | Ddefl1 | MMT00074093   | 1  |
| 3111 | 15862 | Ddefl1 | Mrap          | 1  |
| 3111 | 15990 | Ddefl1 | Dnmbp         | -1 |
| 3111 | 16060 | Ddefl1 | Gys2          | -1 |
| 3111 | 16176 | Ddefl1 | St3gal5       | -1 |
| 3111 | 16580 | Ddefl1 | Tnfaip2       | 1  |
| 3111 | 17022 | Ddefl1 | MMT00055891   | 1  |
| 3111 | 17323 | Ddefl1 | Tubb6         | 1  |
| 3111 | 17352 | Ddefl1 | Cebpb         | -1 |
| 3111 | 17444 | Ddefl1 | Tuba1a        | 1  |
| 3111 | 17525 | Ddefl1 | Ctgf          | -1 |
| 3111 | 17530 | Ddefl1 | MMT00041792   | 1  |
| 3111 | 17622 | Ddefl1 | Foxo1         | -1 |
| 3111 | 17656 | Ddefl1 | Hdhd3         | 1  |
| 3111 | 17876 | Ddefl1 | Tubb4         | 1  |
| 3111 | 18027 | Ddefl1 | 5730403B10Rik | -1 |
| 3111 | 18785 | Ddefl1 | Angptl4       | -1 |
| 3111 | 19025 | Ddefl1 | Slc37a4       | -1 |

|      |       |        |                    |    |
|------|-------|--------|--------------------|----|
| 3111 | 19146 | Ddefl1 | N4bp2l1            | -1 |
| 3111 | 19466 | Ddefl1 | Pptc7              | -1 |
| 3111 | 19532 | Ddefl1 | Med8               | 1  |
| 3111 | 20085 | Ddefl1 | Lpin2              | -1 |
| 3111 | 20777 | Ddefl1 | MMT00010185        | 1  |
| 3111 | 21331 | Ddefl1 | Slc10a6            | -1 |
| 3111 | 22290 | Ddefl1 | Tubb2a             | 1  |
| 3111 | 22443 | Ddefl1 | Tuba1c             | 1  |
| 3111 | 23201 | Ddefl1 | S1pr1              | 1  |
| 3111 | 23202 | Ddefl1 | Olf559             | -1 |
| 3130 | 1129  | Mrpl20 | Gsta4              | 1  |
| 3130 | 3377  | Mrpl20 | Cs                 | 1  |
| 3130 | 5884  | Mrpl20 | Gstm2              | 1  |
| 3130 | 7602  | Mrpl20 | Pcca               | 1  |
| 3130 | 7753  | Mrpl20 | Gfm1               | 1  |
| 3130 | 10554 | Mrpl20 | ENSMUSG00000074179 | 1  |
| 3130 | 11946 | Mrpl20 | MMT00030953        | 1  |
| 3130 | 13293 | Mrpl20 | Gsta2              | 1  |
| 3130 | 13431 | Mrpl20 | MMT00038058        | -1 |
| 3130 | 14869 | Mrpl20 | S100a8             | -1 |
| 3130 | 15205 | Mrpl20 | MMT00030262        | -1 |
| 3130 | 18201 | Mrpl20 | MMT00060232        | 1  |
| 3130 | 20019 | Mrpl20 | Qdpr               | 1  |
| 3130 | 21214 | Mrpl20 | Scd1               | 1  |
| 3134 | 7550  | Usp11  | Rab11fip5          | 1  |
| 3134 | 8815  | Usp11  | Mx1                | -1 |
| 3134 | 21202 | Usp11  | Acly               | -1 |
| 3138 | 8416  | Espl1  | Cdc20              | 1  |
| 3145 | 607   | Idi1   | Me1                | 1  |
| 3145 | 8773  | Idi1   | MMT00027093        | -1 |
| 3145 | 13293 | Idi1   | Gsta2              | 1  |
| 3145 | 18201 | Idi1   | MMT00060232        | 1  |
| 3145 | 21214 | Idi1   | Scd1               | 1  |
| 3145 | 21727 | Idi1   | Khk                | 1  |
| 3147 | 14017 | Higd2a | Ces5               | 1  |
| 3150 | 607   | Syne2  | Me1                | -1 |
| 3150 | 874   | Syne2  | Aldh1a7            | -1 |
| 3150 | 4674  | Syne2  | Cxcl12             | 1  |
| 3150 | 5425  | Syne2  | Ung                | 1  |
| 3150 | 6193  | Syne2  | Lactb2             | -1 |
| 3150 | 11086 | Syne2  | Pnpla5             | -1 |
| 3150 | 14017 | Syne2  | Ces5               | -1 |
| 3150 | 14147 | Syne2  | Acss2              | -1 |
| 3150 | 14323 | Syne2  | Scarb1             | 1  |
| 3150 | 16114 | Syne2  | Lyplal1            | -1 |
| 3150 | 18201 | Syne2  | MMT00060232        | -1 |
| 3150 | 20079 | Syne2  | MMT00019254        | 1  |
| 3150 | 21202 | Syne2  | Acly               | -1 |
| 3150 | 21214 | Syne2  | Scd1               | -1 |
| 3150 | 21251 | Syne2  | Cpt1a              | 1  |
| 3150 | 21793 | Syne2  | Pla2g12a           | 1  |

|      |       |          |               |    |
|------|-------|----------|---------------|----|
| 3162 | 874   | Lep      | Aldh1a7       | 1  |
| 3162 | 3756  | Lep      | Chrne         | 1  |
| 3162 | 4206  | Lep      | Nipsnap1      | 1  |
| 3162 | 5804  | Lep      | Thrsp         | 1  |
| 3162 | 6044  | Lep      | Sucnr1        | 1  |
| 3162 | 11462 | Lep      | Gpam          | 1  |
| 3162 | 12315 | Lep      | Srebf1        | 1  |
| 3162 | 12910 | Lep      | 1110028A07Rik | 1  |
| 3162 | 13304 | Lep      | Gadd45b       | -1 |
| 3162 | 17090 | Lep      | Lass2         | 1  |
| 3162 | 17800 | Lep      | Lrtm1         | 1  |
| 3162 | 20058 | Lep      | Dnaic1        | -1 |
| 3162 | 20079 | Lep      | MMT00019254   | -1 |
| 3162 | 20385 | Lep      | Chd1l         | 1  |
| 3162 | 21202 | Lep      | Acly          | 1  |
| 3162 | 21214 | Lep      | Scd1          | 1  |
| 3162 | 22046 | Lep      | Cml4          | 1  |
| 3162 | 22727 | Lep      | Pdgfra        | -1 |
| 3164 | 5364  | Hsd11b1  | Kif22         | -1 |
| 3164 | 6030  | Hsd11b1  | As3mt         | 1  |
| 3182 | 5934  | Stau1    | S100a10       | -1 |
| 3182 | 6370  | Stau1    | Aqp8          | -1 |
| 3182 | 18827 | Stau1    | Oprs1         | -1 |
| 3189 | 3196  | Ndst2    | Tat           | -1 |
| 3189 | 15566 | Ndst2    | Snn           | 1  |
| 3189 | 16580 | Ndst2    | Tnfaip2       | 1  |
| 3198 | 6193  | Fbxw4    | Lactb2        | -1 |
| 3198 | 17996 | Fbxw4    | Igfbp2        | 1  |
| 3198 | 20079 | Fbxw4    | MMT00019254   | 1  |
| 3198 | 22137 | Fbxw4    | Nudt7         | -1 |
| 3202 | 22138 | Boc      | Ang           | 1  |
| 3206 | 22137 | Gpr160   | Nudt7         | -1 |
| 3209 | 2051  | Lmna     | Ddx27         | -1 |
| 3213 | 8444  | Prdx6    | Rdh16         | 1  |
| 3213 | 8815  | Prdx6    | Mx1           | 1  |
| 3213 | 18201 | Prdx6    | MMT00060232   | 1  |
| 3213 | 20058 | Prdx6    | Dnaic1        | -1 |
| 3214 | 2915  | Dnmt3b   | Nfs1          | -1 |
| 3214 | 6231  | Dnmt3b   | 9030622O22Rik | 1  |
| 3214 | 13355 | Dnmt3b   | Foxs1         | 1  |
| 3214 | 22740 | Dnmt3b   | Manbal        | 1  |
| 3214 | 23599 | Dnmt3b   | Ndr3          | 1  |
| 3223 | 5364  | Ak2      | Kif22         | -1 |
| 3226 | 3587  | Tnfrsf17 | MMT00041940   | -1 |
| 3226 | 5364  | Tnfrsf17 | Kif22         | 1  |
| 3226 | 6021  | Tnfrsf17 | MMT00008784   | -1 |
| 3226 | 8670  | Tnfrsf17 | MMT00051613   | -1 |
| 3226 | 11214 | Tnfrsf17 | MMT00049207   | -1 |
| 3226 | 15675 | Tnfrsf17 | MMT00077535   | -1 |
| 3235 | 13028 | BC029214 | Mesp1         | -1 |
| 3236 | 482   | Tcfap4   | Rnf43         | 1  |

|      |       |               |                    |    |
|------|-------|---------------|--------------------|----|
| 3236 | 8815  | Tcfap4        | Mx1                | -1 |
| 3236 | 10279 | Tcfap4        | Rnf186             | 1  |
| 3236 | 16251 | Tcfap4        | G6pc               | -1 |
| 3236 | 18083 | Tcfap4        | Gadd45a            | 1  |
| 3236 | 21192 | Tcfap4        | 2310047A01Rik      | 1  |
| 3236 | 21214 | Tcfap4        | Scd1               | -1 |
| 3242 | 8828  | 2700049A03Rik | Slc30a2            | 1  |
| 3250 | 607   | Olfm1         | Me1                | 1  |
| 3250 | 874   | Olfm1         | Aldh1a7            | 1  |
| 3250 | 1129  | Olfm1         | Gsta4              | 1  |
| 3250 | 1711  | Olfm1         | Grhl1              | -1 |
| 3250 | 2721  | Olfm1         | Inmt               | 1  |
| 3250 | 3354  | Olfm1         | Ropn1l             | 1  |
| 3250 | 3356  | Olfm1         | Adhfe1             | 1  |
| 3250 | 3565  | Olfm1         | MMT00045908        | 1  |
| 3250 | 3832  | Olfm1         | Sdhb               | 1  |
| 3250 | 4351  | Olfm1         | Plxnb1             | -1 |
| 3250 | 4674  | Olfm1         | Cxcl12             | -1 |
| 3250 | 5804  | Olfm1         | Thrsp              | 1  |
| 3250 | 5884  | Olfm1         | Gstm2              | 1  |
| 3250 | 6044  | Olfm1         | Sucnr1             | 1  |
| 3250 | 6193  | Olfm1         | Lactb2             | 1  |
| 3250 | 6573  | Olfm1         | Pecr               | 1  |
| 3250 | 7550  | Olfm1         | Rab11fip5          | -1 |
| 3250 | 7602  | Olfm1         | Pcca               | 1  |
| 3250 | 8444  | Olfm1         | Rdh16              | 1  |
| 3250 | 8815  | Olfm1         | Mx1                | 1  |
| 3250 | 9427  | Olfm1         | Nqo2               | 1  |
| 3250 | 9842  | Olfm1         | Qdpr               | 1  |
| 3250 | 10132 | Olfm1         | Ces2               | 1  |
| 3250 | 10554 | Olfm1         | ENSMUSG00000074179 | 1  |
| 3250 | 11946 | Olfm1         | MMT00030953        | 1  |
| 3250 | 12213 | Olfm1         | Entpd5             | 1  |
| 3250 | 12556 | Olfm1         | Ass1               | 1  |
| 3250 | 12955 | Olfm1         | Atp5o              | 1  |
| 3250 | 13293 | Olfm1         | Gsta2              | 1  |
| 3250 | 13431 | Olfm1         | MMT00038058        | -1 |
| 3250 | 14017 | Olfm1         | Ces5               | 1  |
| 3250 | 14147 | Olfm1         | Acss2              | 1  |
| 3250 | 14151 | Olfm1         | Slc44a1            | 1  |
| 3250 | 15162 | Olfm1         | Ii18               | 1  |
| 3250 | 15205 | Olfm1         | MMT00030262        | -1 |
| 3250 | 17090 | Olfm1         | Lass2              | 1  |
| 3250 | 17563 | Olfm1         | Aldh1l1            | 1  |
| 3250 | 18201 | Olfm1         | MMT00060232        | 1  |
| 3250 | 18250 | Olfm1         | Mmp14              | -1 |
| 3250 | 18515 | Olfm1         | Ddx28              | -1 |
| 3250 | 18549 | Olfm1         | Robo1              | 1  |
| 3250 | 20019 | Olfm1         | Qdpr               | 1  |
| 3250 | 20058 | Olfm1         | Dnaic1             | -1 |
| 3250 | 20079 | Olfm1         | MMT00019254        | -1 |

|      |       |          |                    |    |
|------|-------|----------|--------------------|----|
| 3250 | 20279 | Olfm1    | Apoa1bp            | 1  |
| 3250 | 21202 | Olfm1    | Acly               | 1  |
| 3250 | 21214 | Olfm1    | Scd1               | 1  |
| 3250 | 21575 | Olfm1    | Cyp2c55            | 1  |
| 3250 | 21727 | Olfm1    | Khk                | 1  |
| 3250 | 22046 | Olfm1    | Cml4               | 1  |
| 3250 | 22271 | Olfm1    | Cyp2c29            | 1  |
| 3250 | 22821 | Olfm1    | Tmem135            | 1  |
| 3250 | 22998 | Olfm1    | Ass1               | 1  |
| 3253 | 5983  | Tbc1d20  | Pcolce2            | -1 |
| 3253 | 7355  | Tbc1d20  | Procr              | -1 |
| 3253 | 14647 | Tbc1d20  | Cst3               | -1 |
| 3257 | 7610  | Map1lc3a | Scand1             | -1 |
| 3257 | 23005 | Map1lc3a | 4930405A21Rik      | 1  |
| 3261 | 6330  | Rpap2    | Dgkq               | 1  |
| 3286 | 3265  | Alox5ap  | Dntt               | 1  |
| 3288 | 662   | Slc26a6  | Mid1ip1            | 1  |
| 3288 | 2051  | Slc26a6  | Ddx27              | -1 |
| 3288 | 6771  | Slc26a6  | Insc               | 1  |
| 3288 | 6966  | Slc26a6  | Mia3               | -1 |
| 3288 | 7659  | Slc26a6  | Rab30              | -1 |
| 3288 | 7944  | Slc26a6  | Al132487           | -1 |
| 3288 | 8896  | Slc26a6  | Fasn               | 1  |
| 3288 | 9408  | Slc26a6  | Hmgcs2             | -1 |
| 3288 | 11724 | Slc26a6  | Tuba3a             | 1  |
| 3288 | 12315 | Slc26a6  | Srebf1             | 1  |
| 3288 | 13018 | Slc26a6  | AW544981           | 1  |
| 3288 | 14400 | Slc26a6  | Scd2               | 1  |
| 3288 | 16027 | Slc26a6  | Ppp2r2d            | -1 |
| 3288 | 17660 | Slc26a6  | Nlrp12             | -1 |
| 3288 | 17800 | Slc26a6  | Lrtm1              | 1  |
| 3288 | 17862 | Slc26a6  | Fbxo21             | -1 |
| 3288 | 17878 | Slc26a6  | Brap               | -1 |
| 3288 | 18785 | Slc26a6  | Angptl4            | -1 |
| 3288 | 20798 | Slc26a6  | Ccp1               | -1 |
| 3288 | 21202 | Slc26a6  | Acly               | 1  |
| 3288 | 21251 | Slc26a6  | Cpt1a              | -1 |
| 3291 | 18418 | Ptk2     | Hspa1b             | 1  |
| 3297 | 294   | Trappc4  | Ehhadh             | 1  |
| 3297 | 607   | Trappc4  | Me1                | 1  |
| 3297 | 874   | Trappc4  | Aldh1a7            | 1  |
| 3297 | 4351  | Trappc4  | Plxnb1             | -1 |
| 3297 | 6193  | Trappc4  | Lactb2             | 1  |
| 3297 | 8444  | Trappc4  | Rdh16              | 1  |
| 3297 | 8815  | Trappc4  | Mx1                | 1  |
| 3297 | 9427  | Trappc4  | Nqo2               | 1  |
| 3297 | 10554 | Trappc4  | ENSMUSG00000074179 | 1  |
| 3297 | 13293 | Trappc4  | Gsta2              | 1  |
| 3297 | 14147 | Trappc4  | Acss2              | 1  |
| 3297 | 18201 | Trappc4  | MMT00060232        | 1  |
| 3297 | 20058 | Trappc4  | Dnaic1             | -1 |

|      |       |               |                    |    |
|------|-------|---------------|--------------------|----|
| 3297 | 21214 | Trappc4       | Scd1               | 1  |
| 3297 | 21575 | Trappc4       | Cyp2c55            | 1  |
| 3297 | 21727 | Trappc4       | Khk                | 1  |
| 3314 | 524   | Wars2         | Hsd3b2             | 1  |
| 3314 | 1466  | Wars2         | Ubap2l             | 1  |
| 3314 | 1867  | Wars2         | Bcas2              | 1  |
| 3314 | 1963  | Wars2         | MMT00039783        | 1  |
| 3314 | 2752  | Wars2         | Fcgr1              | 1  |
| 3314 | 3753  | Wars2         | Setdb1             | -1 |
| 3314 | 6206  | Wars2         | MMT00063701        | 1  |
| 3314 | 7519  | Wars2         | Gstm1              | 1  |
| 3314 | 7810  | Wars2         | Trim45             | 1  |
| 3314 | 8738  | Wars2         | Reg4               | -1 |
| 3314 | 10521 | Wars2         | Ttf2               | 1  |
| 3314 | 10681 | Wars2         | Dgkz               | -1 |
| 3314 | 11121 | Wars2         | Mttr11             | -1 |
| 3314 | 11611 | Wars2         | S100a13            | -1 |
| 3314 | 12367 | Wars2         | MMT00072365        | -1 |
| 3314 | 13134 | Wars2         | Lipg               | -1 |
| 3314 | 16416 | Wars2         | Commd2             | 1  |
| 3314 | 16679 | Wars2         | Ctsk               | -1 |
| 3314 | 16753 | Wars2         | Hfe2               | -1 |
| 3314 | 18754 | Wars2         | Rbm8a              | 1  |
| 3314 | 18911 | Wars2         | Selenbp2           | 1  |
| 3314 | 20385 | Wars2         | Chd1l              | 1  |
| 3314 | 20661 | Wars2         | Tuft1              | 1  |
| 3314 | 20917 | Wars2         | Gstm6              | -1 |
| 3314 | 21814 | Wars2         | Accn5              | 1  |
| 3314 | 22202 | Wars2         | OTTMUSG00000021274 | -1 |
| 3314 | 22570 | Wars2         | Phtf1              | 1  |
| 3314 | 23457 | Wars2         | Selenbp2           | 1  |
| 3315 | 3265  | Serf2         | Dntt               | 1  |
| 3315 | 3836  | Serf2         | 2200001115Rik      | 1  |
| 3315 | 8154  | Serf2         | Neb                | 1  |
| 3315 | 20967 | Serf2         | Fabp2              | 1  |
| 3317 | 3317  | Ak3           | Ak3                | 1  |
| 3318 | 8815  | 2310003F16Rik | Mx1                | 1  |
| 3318 | 14017 | 2310003F16Rik | Ces5               | 1  |
| 3318 | 14147 | 2310003F16Rik | Acss2              | 1  |
| 3318 | 17887 | 2310003F16Rik | Cryl1              | 1  |
| 3318 | 18201 | 2310003F16Rik | MMT00060232        | 1  |
| 3318 | 21214 | 2310003F16Rik | Scd1               | 1  |
| 3325 | 17135 | Plekhj1       | Mum1               | -1 |
| 3325 | 21964 | Plekhj1       | Vwce               | -1 |
| 3332 | 607   | Lrrc59        | Me1                | 1  |
| 3332 | 874   | Lrrc59        | Aldh1a7            | 1  |
| 3332 | 3377  | Lrrc59        | Cs                 | 1  |
| 3332 | 3696  | Lrrc59        | Elovl6             | 1  |
| 3332 | 4351  | Lrrc59        | Plxnb1             | -1 |
| 3332 | 6193  | Lrrc59        | Lactb2             | 1  |
| 3332 | 7602  | Lrrc59        | Pcca               | 1  |

|      |       |          |                    |    |
|------|-------|----------|--------------------|----|
| 3332 | 7753  | Lrrc59   | Gfm1               | 1  |
| 3332 | 8444  | Lrrc59   | Rdh16              | 1  |
| 3332 | 8815  | Lrrc59   | Mx1                | 1  |
| 3332 | 9842  | Lrrc59   | Qdpr               | 1  |
| 3332 | 10554 | Lrrc59   | ENSMUSG00000074179 | 1  |
| 3332 | 12637 | Lrrc59   | Itpka              | -1 |
| 3332 | 13293 | Lrrc59   | Gsta2              | 1  |
| 3332 | 14147 | Lrrc59   | Acss2              | 1  |
| 3332 | 18201 | Lrrc59   | MMT00060232        | 1  |
| 3332 | 20019 | Lrrc59   | Qdpr               | 1  |
| 3332 | 21202 | Lrrc59   | Acly               | 1  |
| 3332 | 21214 | Lrrc59   | Scd1               | 1  |
| 3332 | 21727 | Lrrc59   | Khk                | 1  |
| 3332 | 23640 | Lrrc59   | Bdh1               | -1 |
| 3337 | 7472  | Klra7    | Klra1              | 1  |
| 3345 | 21214 | EG620934 | Scd1               | 1  |
| 3357 | 2399  | Rev1     | MMT00060167        | -1 |
| 3357 | 2636  | Rev1     | Tars               | -1 |
| 3357 | 3502  | Rev1     | Gde1               | 1  |
| 3357 | 5183  | Rev1     | St5                | -1 |
| 3357 | 6163  | Rev1     | Nudt13             | -1 |
| 3357 | 6386  | Rev1     | Por                | 1  |
| 3357 | 6657  | Rev1     | Irf6               | -1 |
| 3357 | 6975  | Rev1     | Wdr67              | -1 |
| 3357 | 7414  | Rev1     | Clpx               | -1 |
| 3357 | 9910  | Rev1     | EG666644           | 1  |
| 3357 | 10775 | Rev1     | Slc16a1            | -1 |
| 3357 | 11741 | Rev1     | Slc30a10           | -1 |
| 3357 | 12941 | Rev1     | Elov5              | -1 |
| 3357 | 15049 | Rev1     | Rnf125             | -1 |
| 3357 | 15709 | Rev1     | Tceal1             | 1  |
| 3357 | 17247 | Rev1     | A030007L17Rik      | -1 |
| 3357 | 17338 | Rev1     | Mocos              | -1 |
| 3357 | 18179 | Rev1     | Dbp                | 1  |
| 3357 | 18438 | Rev1     | Map3k7ip2          | -1 |
| 3357 | 18827 | Rev1     | Oprs1              | -1 |
| 3357 | 20266 | Rev1     | Insig2             | -1 |
| 3357 | 21142 | Rev1     | Gm129              | 1  |
| 3357 | 22324 | Rev1     | MMT00060741        | -1 |
| 3376 | 1709  | Trip4    | Mt2                | 1  |
| 3376 | 23617 | Trip4    | Nme1               | -1 |
| 3379 | 4056  | Cdo1     | Tnfaip8l1          | -1 |
| 3379 | 5364  | Cdo1     | Kif22              | -1 |
| 3379 | 7492  | Cdo1     | Adfp               | -1 |
| 3379 | 7602  | Cdo1     | Pcca               | 1  |
| 3379 | 10554 | Cdo1     | ENSMUSG00000074179 | 1  |
| 3379 | 13293 | Cdo1     | Gsta2              | 1  |
| 3379 | 14055 | Cdo1     | MMT00050438        | -1 |
| 3379 | 14472 | Cdo1     | Ahcy               | 1  |
| 3381 | 2013  | Ctdspl   | Il15ra             | 1  |
| 3381 | 6193  | Ctdspl   | Lactb2             | -1 |

|      |       |             |                    |    |
|------|-------|-------------|--------------------|----|
| 3381 | 6771  | Ctdspl      | Insc               | -1 |
| 3381 | 6966  | Ctdspl      | Mia3               | 1  |
| 3381 | 10486 | Ctdspl      | 1300002K09Rik      | -1 |
| 3381 | 11984 | Ctdspl      | N6amt2             | -1 |
| 3381 | 12420 | Ctdspl      | Klhl21             | 1  |
| 3381 | 15892 | Ctdspl      | Slc22a5            | 1  |
| 3381 | 17338 | Ctdspl      | Mocos              | -1 |
| 3381 | 18147 | Ctdspl      | Nhlrc2             | 1  |
| 3381 | 21251 | Ctdspl      | Cpt1a              | 1  |
| 3391 | 269   | Mfap3       | Tuba1b             | 1  |
| 3391 | 1646  | Mfap3       | Slc15a4            | -1 |
| 3391 | 1941  | Mfap3       | MMT00079618        | 1  |
| 3391 | 3804  | Mfap3       | MMT00015534        | 1  |
| 3391 | 6338  | Mfap3       | Setd3              | -1 |
| 3391 | 7151  | Mfap3       | MMT00007982        | 1  |
| 3391 | 9763  | Mfap3       | Tuba3b             | 1  |
| 3391 | 10911 | Mfap3       | Mcl1               | -1 |
| 3391 | 11724 | Mfap3       | Tuba3a             | 1  |
| 3391 | 12420 | Mfap3       | Klhl21             | -1 |
| 3391 | 15021 | Mfap3       | Ppargc1a           | -1 |
| 3391 | 17444 | Mfap3       | Tuba1a             | 1  |
| 3391 | 20217 | Mfap3       | Rab3ip             | -1 |
| 3394 | 719   | Als2cr13    | Usp2               | 1  |
| 3394 | 5849  | Als2cr13    | 2310031A18Rik      | -1 |
| 3394 | 8399  | Als2cr13    | Herpud1            | 1  |
| 3394 | 21142 | Als2cr13    | Gm129              | 1  |
| 3394 | 23437 | Als2cr13    | Efh2               | 1  |
| 3396 | 16772 | Ctage5      | MMT00010554        | 1  |
| 3411 | 3411  | Rabl2a      | Rabl2a             | 1  |
| 3411 | 3654  | Rabl2a      | St13               | -1 |
| 3411 | 19216 | Rabl2a      | Bik                | 1  |
| 3414 | 21214 | MMT00059380 | Scd1               | 1  |
| 3428 | 21214 | Il1r2       | Scd1               | 1  |
| 3432 | 5822  | EG330963    | Car2               | 1  |
| 3432 | 5938  | EG330963    | Pfn2               | 1  |
| 3432 | 8568  | EG330963    | Tnik               | 1  |
| 3432 | 12367 | EG330963    | MMT00072365        | -1 |
| 3432 | 12784 | EG330963    | Nudt6              | 1  |
| 3432 | 13423 | EG330963    | ENSMUSG00000053749 | 1  |
| 3432 | 15508 | EG330963    | 4632415L05Rik      | 1  |
| 3432 | 16416 | EG330963    | Commd2             | 1  |
| 3432 | 18790 | EG330963    | Car3               | 1  |
| 3432 | 18911 | EG330963    | Selenbp2           | 1  |
| 3432 | 21323 | EG330963    | MMT00074228        | 1  |
| 3432 | 23457 | EG330963    | Selenbp2           | 1  |
| 3446 | 607   | Eno1        | Me1                | 1  |
| 3446 | 8815  | Eno1        | Mx1                | 1  |
| 3446 | 18201 | Eno1        | MMT00060232        | 1  |
| 3446 | 21214 | Eno1        | Scd1               | 1  |
| 3446 | 21575 | Eno1        | Cyp2c55            | 1  |
| 3448 | 12941 | Apobec3     | Elov5              | 1  |



|      |       |               |               |    |
|------|-------|---------------|---------------|----|
| 3460 | 6650  | Ddb2          | MMT00050325   | -1 |
| 3460 | 8815  | Ddb2          | Mx1           | -1 |
| 3460 | 18201 | Ddb2          | MMT00060232   | -1 |
| 3460 | 21214 | Ddb2          | Scd1          | -1 |
| 3464 | 305   | 1700048O20Rik | Cma2          | -1 |
| 3475 | 3475  | 2610305D13Rik | 2610305D13Rik | 1  |
| 3475 | 6191  | 2610305D13Rik | Ddost         | -1 |
| 3475 | 6830  | 2610305D13Rik | Rsc1a1        | -1 |
| 3475 | 13626 | 2610305D13Rik | RP23-395H4.4  | -1 |
| 3475 | 18338 | 2610305D13Rik | Akr1e1        | -1 |
| 3475 | 19924 | 2610305D13Rik | Ubiad1        | 1  |
| 3480 | 2456  | Pnpo          | Mrpl10        | -1 |
| 3480 | 3480  | Pnpo          | Pnpo          | 1  |
| 3480 | 12302 | Pnpo          | Cbx1          | -1 |
| 3493 | 18706 | Wbp4          | Lect1         | 1  |
| 3504 | 5364  | Anpep         | Kif22         | 1  |
| 3513 | 433   | Aloxe3        | Pla2g12b      | -1 |
| 3513 | 3410  | Aloxe3        | Paqr9         | -1 |
| 3513 | 12799 | Aloxe3        | Spon2         | -1 |
| 3513 | 13293 | Aloxe3        | Gsta2         | 1  |
| 3523 | 2200  | Trim34        | BC006779      | 1  |
| 3523 | 2224  | Trim34        | Oasl2         | 1  |
| 3523 | 3683  | Trim34        | Oas2          | 1  |
| 3523 | 4114  | Trim34        | Parp12        | 1  |
| 3523 | 4426  | Trim34        | ligp2         | 1  |
| 3523 | 6824  | Trim34        | Irf7          | 1  |
| 3523 | 8800  | Trim34        | Rnf213        | 1  |
| 3523 | 9820  | Trim34        | BC023105      | 1  |
| 3523 | 9847  | Trim34        | Ifi27         | 1  |
| 3523 | 12398 | Trim34        | Ifi44         | 1  |
| 3523 | 16182 | Trim34        | Oasl1         | 1  |
| 3523 | 18174 | Trim34        | Stat2         | 1  |
| 3523 | 19738 | Trim34        | Lgals3bp      | 1  |
| 3524 | 607   | Erc1          | Me1           | 1  |
| 3524 | 9842  | Erc1          | Qdpr          | 1  |
| 3524 | 10961 | Erc1          | Pgd           | 1  |
| 3524 | 12910 | Erc1          | 1110028A07Rik | 1  |
| 3524 | 14147 | Erc1          | Acss2         | 1  |
| 3524 | 18201 | Erc1          | MMT00060232   | 1  |
| 3524 | 20019 | Erc1          | Qdpr          | 1  |
| 3524 | 21214 | Erc1          | Scd1          | 1  |
| 3531 | 7136  | Tslp          | Id3           | 1  |
| 3531 | 7315  | Tslp          | EG624219      | 1  |
| 3531 | 8632  | Tslp          | Igfbp1        | -1 |
| 3531 | 15826 | Tslp          | Arl4d         | -1 |
| 3531 | 16251 | Tslp          | G6pc          | -1 |
| 3531 | 16517 | Tslp          | D4Wsu53e      | -1 |
| 3531 | 19528 | Tslp          | Zfp503        | 1  |
| 3531 | 22216 | Tslp          | Sp5           | 1  |
| 3532 | 5938  | S100a5        | Pfn2          | 1  |
| 3532 | 12367 | S100a5        | MMT00072365   | -1 |

|      |       |             |               |    |
|------|-------|-------------|---------------|----|
| 3532 | 12784 | S100a5      | Nudt6         | 1  |
| 3532 | 15508 | S100a5      | 4632415L05Rik | 1  |
| 3532 | 16416 | S100a5      | Commd2        | 1  |
| 3532 | 18790 | S100a5      | Car3          | 1  |
| 3535 | 3535  | S100a9      | S100a9        | 1  |
| 3535 | 14869 | S100a9      | S100a8        | 1  |
| 3560 | 12955 | Usp5        | Atp5o         | 1  |
| 3560 | 13431 | Usp5        | MMT00038058   | -1 |
| 3560 | 14151 | Usp5        | Slc44a1       | 1  |
| 3560 | 15205 | Usp5        | MMT00030262   | -1 |
| 3560 | 21214 | Usp5        | Scd1          | 1  |
| 3560 | 21575 | Usp5        | Cyp2c55       | 1  |
| 3560 | 21727 | Usp5        | Khk           | 1  |
| 3561 | 20918 | MMT00020644 | Nxph3         | 1  |
| 3563 | 22138 | MMT00045357 | Ang           | -1 |
| 3577 | 5364  | Ptplad2     | Kif22         | 1  |
| 3587 | 3587  | MMT00041940 | MMT00041940   | 1  |
| 3587 | 4391  | MMT00041940 | Zfp467        | -1 |
| 3587 | 6021  | MMT00041940 | MMT00008784   | 1  |
| 3587 | 6126  | MMT00041940 | MMT00067575   | 1  |
| 3587 | 7798  | MMT00041940 | MMT00077178   | 1  |
| 3587 | 8319  | MMT00041940 | MMT00062477   | 1  |
| 3587 | 8499  | MMT00041940 | C430048L16Rik | 1  |
| 3587 | 8670  | MMT00041940 | MMT00051613   | 1  |
| 3587 | 8891  | MMT00041940 | MMT00071061   | 1  |
| 3587 | 9067  | MMT00041940 | Tra2a         | 1  |
| 3587 | 9258  | MMT00041940 | P4ha1         | 1  |
| 3587 | 9629  | MMT00041940 | Spnb3         | -1 |
| 3587 | 11043 | MMT00041940 | Hsph1         | 1  |
| 3587 | 11214 | MMT00041940 | MMT00049207   | 1  |
| 3587 | 12329 | MMT00041940 | Sox6          | -1 |
| 3587 | 14014 | MMT00041940 | MMT00008376   | 1  |
| 3587 | 14233 | MMT00041940 | Fgfr1         | -1 |
| 3587 | 14298 | MMT00041940 | Atp2a2        | 1  |
| 3587 | 15476 | MMT00041940 | Fem1b         | -1 |
| 3587 | 15675 | MMT00041940 | MMT00077535   | 1  |
| 3587 | 16251 | MMT00041940 | G6pc          | 1  |
| 3587 | 16754 | MMT00041940 | Hsp90aa1      | 1  |
| 3587 | 18083 | MMT00041940 | Gadd45a       | -1 |
| 3587 | 18099 | MMT00041940 | Nfx1          | -1 |
| 3587 | 18215 | MMT00041940 | Gpr146        | -1 |
| 3587 | 18373 | MMT00041940 | Dnajb1        | 1  |
| 3587 | 18418 | MMT00041940 | Hspa1b        | 1  |
| 3587 | 20912 | MMT00041940 | Chordc1       | 1  |
| 3587 | 21389 | MMT00041940 | Odf2          | -1 |
| 3587 | 22139 | MMT00041940 | Stip1         | 1  |
| 3587 | 22303 | MMT00041940 | Cdt1          | -1 |
| 3594 | 4708  | Rasa4       | Traf3ip2      | 1  |
| 3594 | 8328  | Rasa4       | Klhdc8a       | 1  |
| 3594 | 14135 | Rasa4       | Eepd1         | 1  |
| 3594 | 18785 | Rasa4       | Angptl4       | -1 |

|      |       |          |               |    |
|------|-------|----------|---------------|----|
| 3598 | 5934  | Rpo1-3   | S100a10       | 1  |
| 3598 | 6193  | Rpo1-3   | Lactb2        | 1  |
| 3598 | 8815  | Rpo1-3   | Mx1           | 1  |
| 3598 | 10612 | Rpo1-3   | Slc24a6       | -1 |
| 3598 | 21214 | Rpo1-3   | Scd1          | 1  |
| 3603 | 7963  | BC027231 | Rxrg          | -1 |
| 3603 | 10486 | BC027231 | 1300002K09Rik | -1 |
| 3603 | 17818 | BC027231 | Chchd4        | 1  |
| 3617 | 8815  | Rasl10b  | Mx1           | -1 |
| 3617 | 14151 | Rasl10b  | Slc44a1       | -1 |
| 3617 | 22138 | Rasl10b  | Ang           | 1  |
| 3622 | 3622  | Trim21   | Trim21        | 1  |
| 3622 | 9161  | Trim21   | Mrpl17        | 1  |
| 3622 | 22693 | Trim21   | Trim68        | 1  |
| 3624 | 6157  | Pygb     | MMT00041452   | -1 |
| 3631 | 250   | Vps37b   | Tubb2a-ps2    | 1  |
| 3631 | 269   | Vps37b   | Tuba1b        | 1  |
| 3631 | 563   | Vps37b   | D4Bwg0951e    | -1 |
| 3631 | 609   | Vps37b   | MMT00060868   | 1  |
| 3631 | 1941  | Vps37b   | MMT00079618   | 1  |
| 3631 | 2322  | Vps37b   | Tuba4a        | 1  |
| 3631 | 3804  | Vps37b   | MMT00015534   | 1  |
| 3631 | 4201  | Vps37b   | Tubb2c        | 1  |
| 3631 | 7151  | Vps37b   | MMT00007982   | 1  |
| 3631 | 8641  | Vps37b   | Slc7a2        | -1 |
| 3631 | 9763  | Vps37b   | Tuba3b        | 1  |
| 3631 | 11093 | Vps37b   | Zdhhc1        | -1 |
| 3631 | 11724 | Vps37b   | Tuba3a        | 1  |
| 3631 | 11808 | Vps37b   | Pck1          | -1 |
| 3631 | 12420 | Vps37b   | Klhl21        | -1 |
| 3631 | 13489 | Vps37b   | D230025D16Rik | -1 |
| 3631 | 15021 | Vps37b   | Ppargc1a      | -1 |
| 3631 | 15631 | Vps37b   | Lpin1         | -1 |
| 3631 | 15659 | Vps37b   | MMT00074093   | 1  |
| 3631 | 17022 | Vps37b   | MMT00055891   | 1  |
| 3631 | 17323 | Vps37b   | Tubb6         | 1  |
| 3631 | 17444 | Vps37b   | Tuba1a        | 1  |
| 3631 | 17530 | Vps37b   | MMT00041792   | 1  |
| 3631 | 17622 | Vps37b   | Foxo1         | -1 |
| 3631 | 17656 | Vps37b   | Hdhd3         | 1  |
| 3631 | 17876 | Vps37b   | Tubb4         | 1  |
| 3631 | 18027 | Vps37b   | 5730403B10Rik | -1 |
| 3631 | 18785 | Vps37b   | Angptl4       | -1 |
| 3631 | 19466 | Vps37b   | Pptc7         | -1 |
| 3631 | 19970 | Vps37b   | Mrpl36        | 1  |
| 3631 | 22290 | Vps37b   | Tubb2a        | 1  |
| 3631 | 22443 | Vps37b   | Tuba1c        | 1  |
| 3631 | 22630 | Vps37b   | MMT00034355   | 1  |
| 3631 | 23202 | Vps37b   | Olf559        | -1 |
| 3654 | 2805  | St13     | Rhog          | -1 |
| 3654 | 3411  | St13     | Rabl2a        | -1 |

|      |       |          |               |    |
|------|-------|----------|---------------|----|
| 3654 | 3654  | St13     | St13          | 1  |
| 3654 | 5910  | St13     | 1110014J01Rik | -1 |
| 3654 | 6804  | St13     | Cyp2d22       | -1 |
| 3654 | 6974  | St13     | Tmem65        | -1 |
| 3654 | 8653  | St13     | AW124722      | 1  |
| 3654 | 9822  | St13     | Celsr1        | -1 |
| 3654 | 10482 | St13     | Mcat          | -1 |
| 3654 | 10558 | St13     | Cyp2d40       | 1  |
| 3654 | 11503 | St13     | Rangap1       | -1 |
| 3654 | 11968 | St13     | Cenpm         | -1 |
| 3654 | 12468 | St13     | Cyp2d13       | -1 |
| 3654 | 12965 | St13     | Pmm1          | 1  |
| 3654 | 14185 | St13     | Poldip3       | 1  |
| 3654 | 17147 | St13     | Tll12         | -1 |
| 3654 | 19216 | St13     | Bik           | -1 |
| 3659 | 143   | EG236451 | Gvin1         | 1  |
| 3659 | 405   | EG236451 | Emr4          | 1  |
| 3659 | 830   | EG236451 | Socs1         | 1  |
| 3659 | 982   | EG236451 | Ccl7          | 1  |
| 3659 | 1416  | EG236451 | 6720460F02Rik | 1  |
| 3659 | 1447  | EG236451 | Naaa          | 1  |
| 3659 | 1533  | EG236451 | BC013712      | 1  |
| 3659 | 1840  | EG236451 | Fpr1          | 1  |
| 3659 | 1908  | EG236451 | Rnf213        | 1  |
| 3659 | 1932  | EG236451 | Racgap1       | 1  |
| 3659 | 2058  | EG236451 | Hk3           | 1  |
| 3659 | 2200  | EG236451 | BC006779      | 1  |
| 3659 | 2224  | EG236451 | Oasl2         | 1  |
| 3659 | 2550  | EG236451 | MMT00036681   | 1  |
| 3659 | 2578  | EG236451 | Csf2rb2       | 1  |
| 3659 | 2752  | EG236451 | Fcgr1         | 1  |
| 3659 | 2830  | EG236451 | 4632417K18Rik | 1  |
| 3659 | 2969  | EG236451 | Ptpro         | 1  |
| 3659 | 3028  | EG236451 | Uhrf1         | 1  |
| 3659 | 3036  | EG236451 | Slamf9        | 1  |
| 3659 | 3286  | EG236451 | Alox5ap       | 1  |
| 3659 | 3426  | EG236451 | Hap1          | 1  |
| 3659 | 3523  | EG236451 | Trim34        | 1  |
| 3659 | 3572  | EG236451 | Ebi3          | 1  |
| 3659 | 3594  | EG236451 | Rasa4         | 1  |
| 3659 | 3659  | EG236451 | EG236451      | 1  |
| 3659 | 3683  | EG236451 | Oas2          | 1  |
| 3659 | 4114  | EG236451 | Parp12        | 1  |
| 3659 | 4185  | EG236451 | Hmgb2         | 1  |
| 3659 | 4409  | EG236451 | 5430435G22Rik | 1  |
| 3659 | 4426  | EG236451 | Ilgp2         | 1  |
| 3659 | 4508  | EG236451 | Ifit1         | 1  |
| 3659 | 4516  | EG236451 | Rsad2         | 1  |
| 3659 | 4901  | EG236451 | MMT00073557   | 1  |
| 3659 | 5002  | EG236451 | Ifi202b       | 1  |
| 3659 | 5044  | EG236451 | Ifi35         | 1  |

|      |      |          |               |    |
|------|------|----------|---------------|----|
| 3659 | 5216 | EG236451 | Spnb5         | 1  |
| 3659 | 5250 | EG236451 | Ifit2         | 1  |
| 3659 | 5364 | EG236451 | Kif22         | 1  |
| 3659 | 5554 | EG236451 | Emr1          | 1  |
| 3659 | 5556 | EG236451 | Ccl4          | 1  |
| 3659 | 5766 | EG236451 | 5033414D02Rik | 1  |
| 3659 | 5845 | EG236451 | Il18bp        | 1  |
| 3659 | 5853 | EG236451 | Trim30        | 1  |
| 3659 | 5875 | EG236451 | Cd86          | 1  |
| 3659 | 5949 | EG236451 | Zbp1          | 1  |
| 3659 | 5975 | EG236451 | Car13         | 1  |
| 3659 | 6036 | EG236451 | Pram1         | 1  |
| 3659 | 6072 | EG236451 | C1qc          | 1  |
| 3659 | 6098 | EG236451 | Ncf4          | 1  |
| 3659 | 6154 | EG236451 | 1700030G06Rik | 1  |
| 3659 | 6213 | EG236451 | Ccl2          | 1  |
| 3659 | 6386 | EG236451 | Por           | -1 |
| 3659 | 6394 | EG236451 | Fbxo6         | 1  |
| 3659 | 6587 | EG236451 | Irf9          | 1  |
| 3659 | 6595 | EG236451 | Oas1a         | 1  |
| 3659 | 6734 | EG236451 | Ehd4          | 1  |
| 3659 | 6756 | EG236451 | Sds           | -1 |
| 3659 | 6779 | EG236451 | Gbp6          | 1  |
| 3659 | 6806 | EG236451 | Agrn          | 1  |
| 3659 | 6824 | EG236451 | Irf7          | 1  |
| 3659 | 6866 | EG236451 | Gls           | -1 |
| 3659 | 6888 | EG236451 | Cxcl9         | 1  |
| 3659 | 6910 | EG236451 | Ly6c2         | 1  |
| 3659 | 7057 | EG236451 | Stk10         | 1  |
| 3659 | 7069 | EG236451 | Ube1l         | 1  |
| 3659 | 7105 | EG236451 | Plac8         | 1  |
| 3659 | 7238 | EG236451 | Pycard        | 1  |
| 3659 | 7284 | EG236451 | MMT00008674   | 1  |
| 3659 | 7316 | EG236451 | Ifi204        | 1  |
| 3659 | 7336 | EG236451 | Cd5l          | 1  |
| 3659 | 8270 | EG236451 | Clsn          | 1  |
| 3659 | 8328 | EG236451 | Klhdc8a       | 1  |
| 3659 | 8392 | EG236451 | Asf1b         | 1  |
| 3659 | 8555 | EG236451 | H2-M3         | 1  |
| 3659 | 8564 | EG236451 | Pld4          | 1  |
| 3659 | 8659 | EG236451 | Psmb8         | 1  |
| 3659 | 8800 | EG236451 | Rnf213        | 1  |
| 3659 | 8922 | EG236451 | Il10ra        | 1  |
| 3659 | 8951 | EG236451 | Cd97          | 1  |
| 3659 | 9100 | EG236451 | Ms4a6c        | 1  |
| 3659 | 9401 | EG236451 | Fcgr4         | 1  |
| 3659 | 9717 | EG236451 | Psmb9         | 1  |
| 3659 | 9820 | EG236451 | BC023105      | 1  |
| 3659 | 9821 | EG236451 | Pmaip1        | 1  |
| 3659 | 9829 | EG236451 | Stoml1        | 1  |
| 3659 | 9847 | EG236451 | Ifi27         | 1  |

|      |       |          |               |    |
|------|-------|----------|---------------|----|
| 3659 | 9920  | EG236451 | Syk           | 1  |
| 3659 | 9928  | EG236451 | Lgmn          | 1  |
| 3659 | 10109 | EG236451 | Gbp3          | 1  |
| 3659 | 10393 | EG236451 | Slc7a8        | 1  |
| 3659 | 10504 | EG236451 | Ripk3         | 1  |
| 3659 | 10606 | EG236451 | Apbb1ip       | 1  |
| 3659 | 10796 | EG236451 | Spic          | 1  |
| 3659 | 10926 | EG236451 | P2ry13        | 1  |
| 3659 | 11009 | EG236451 | MMT00008885   | 1  |
| 3659 | 11198 | EG236451 | Gbp1          | 1  |
| 3659 | 11204 | EG236451 | AI451617      | 1  |
| 3659 | 11265 | EG236451 | Irgm          | 1  |
| 3659 | 11275 | EG236451 | Fanci         | 1  |
| 3659 | 11437 | EG236451 | Gatm          | 1  |
| 3659 | 11599 | EG236451 | Coq10b        | -1 |
| 3659 | 11701 | EG236451 | Oas1c         | 1  |
| 3659 | 11870 | EG236451 | Apitd1        | 1  |
| 3659 | 11959 | EG236451 | 4631422O05Rik | 1  |
| 3659 | 12126 | EG236451 | Znfx1         | 1  |
| 3659 | 12312 | EG236451 | Ms4a6d        | 1  |
| 3659 | 12398 | EG236451 | Ifi44         | 1  |
| 3659 | 12495 | EG236451 | Casp1         | 1  |
| 3659 | 12600 | EG236451 | Ifi204        | 1  |
| 3659 | 12969 | EG236451 | Xaf1          | 1  |
| 3659 | 13156 | EG236451 | Ifit3         | 1  |
| 3659 | 13172 | EG236451 | Epb4.113      | 1  |
| 3659 | 13181 | EG236451 | Lcp2          | 1  |
| 3659 | 13309 | EG236451 | Tgtp          | 1  |
| 3659 | 13455 | EG236451 | Cenpe         | 1  |
| 3659 | 13514 | EG236451 | Apol9b        | 1  |
| 3659 | 13522 | EG236451 | Sfn5          | 1  |
| 3659 | 13527 | EG236451 | Ctss          | 1  |
| 3659 | 13528 | EG236451 | Capn12        | 1  |
| 3659 | 13585 | EG236451 | Nckap1l       | 1  |
| 3659 | 13654 | EG236451 | Stat1         | 1  |
| 3659 | 13656 | EG236451 | Ly86          | 1  |
| 3659 | 13749 | EG236451 | Parp9         | 1  |
| 3659 | 13780 | EG236451 | Pilra         | 1  |
| 3659 | 13826 | EG236451 | Melk          | 1  |
| 3659 | 13867 | EG236451 | Sgcb          | 1  |
| 3659 | 14029 | EG236451 | 2810022L02Rik | 1  |
| 3659 | 14102 | EG236451 | Evi2a         | 1  |
| 3659 | 14117 | EG236451 | C1qb          | 1  |
| 3659 | 14192 | EG236451 | Trpv2         | 1  |
| 3659 | 14237 | EG236451 | Rac2          | 1  |
| 3659 | 14258 | EG236451 | Ifi47         | 1  |
| 3659 | 14260 | EG236451 | Mlkl          | 1  |
| 3659 | 14472 | EG236451 | Ahcy          | -1 |
| 3659 | 14475 | EG236451 | Abcg1         | 1  |
| 3659 | 14506 | EG236451 | Slc15a3       | 1  |
| 3659 | 14603 | EG236451 | Ly6e          | 1  |

|      |       |          |             |    |
|------|-------|----------|-------------|----|
| 3659 | 14611 | EG236451 | Ddx60       | 1  |
| 3659 | 14880 | EG236451 | Ms4a4c      | 1  |
| 3659 | 14883 | EG236451 | Itgal       | 1  |
| 3659 | 14954 | EG236451 | Rab19       | 1  |
| 3659 | 15074 | EG236451 | Usp18       | 1  |
| 3659 | 15084 | EG236451 | Ccl3        | 1  |
| 3659 | 15159 | EG236451 | Timd4       | 1  |
| 3659 | 15280 | EG236451 | Cxcl10      | 1  |
| 3659 | 15387 | EG236451 | Mgl1        | 1  |
| 3659 | 15449 | EG236451 | Mitd1       | 1  |
| 3659 | 15504 | EG236451 | Mx2         | 1  |
| 3659 | 15709 | EG236451 | Tceal1      | -1 |
| 3659 | 15749 | EG236451 | Cd22        | 1  |
| 3659 | 15825 | EG236451 | Fermt3      | 1  |
| 3659 | 16102 | EG236451 | Cd72        | 1  |
| 3659 | 16147 | EG236451 | Tlr2        | 1  |
| 3659 | 16182 | EG236451 | Oasl1       | 1  |
| 3659 | 16186 | EG236451 | Cfp         | 1  |
| 3659 | 16199 | EG236451 | Samhd1      | 1  |
| 3659 | 16521 | EG236451 | Adar        | 1  |
| 3659 | 16572 | EG236451 | D14Ertd668e | 1  |
| 3659 | 16580 | EG236451 | Tnfaip2     | 1  |
| 3659 | 16854 | EG236451 | Kif15       | 1  |
| 3659 | 16874 | EG236451 | Fcer1g      | 1  |
| 3659 | 16913 | EG236451 | Pira3       | 1  |
| 3659 | 16988 | EG236451 | Clec4f      | 1  |
| 3659 | 17071 | EG236451 | Samd9l      | 1  |
| 3659 | 17083 | EG236451 | Atp1b1      | -1 |
| 3659 | 17197 | EG236451 | Igtp        | 1  |
| 3659 | 17412 | EG236451 | Aif1        | 1  |
| 3659 | 17823 | EG236451 | D2Ertd750e  | 1  |
| 3659 | 17904 | EG236451 | Cds1        | 1  |
| 3659 | 18174 | EG236451 | Stat2       | 1  |
| 3659 | 18186 | EG236451 | Parp14      | 1  |
| 3659 | 18211 | EG236451 | Folr2       | 1  |
| 3659 | 18289 | EG236451 | Tap1        | 1  |
| 3659 | 18662 | EG236451 | Batf3       | 1  |
| 3659 | 19026 | EG236451 | Isg15       | 1  |
| 3659 | 19063 | EG236451 | Evl         | 1  |
| 3659 | 19189 | EG236451 | Sp100       | 1  |
| 3659 | 19252 | EG236451 | Tmsb4x      | 1  |
| 3659 | 19262 | EG236451 | Cd274       | 1  |
| 3659 | 19382 | EG236451 | Slc2a6      | 1  |
| 3659 | 19708 | EG236451 | Ly6a        | 1  |
| 3659 | 19738 | EG236451 | Lgals3bp    | 1  |
| 3659 | 19758 | EG236451 | Snx1        | 1  |
| 3659 | 19794 | EG236451 | Rgs2        | 1  |
| 3659 | 20150 | EG236451 | Ptprc       | 1  |
| 3659 | 20321 | EG236451 | Ms4a6b      | 1  |
| 3659 | 20431 | EG236451 | Slc7a7      | 1  |
| 3659 | 20432 | EG236451 | Smc1b       | 1  |

|      |       |          |               |    |
|------|-------|----------|---------------|----|
| 3659 | 20433 | EG236451 | Cdca5         | 1  |
| 3659 | 20474 | EG236451 | Gnb3          | 1  |
| 3659 | 20791 | EG236451 | MMT00014813   | 1  |
| 3659 | 20997 | EG236451 | MMT00028135   | 1  |
| 3659 | 21351 | EG236451 | Shisa5        | 1  |
| 3659 | 21440 | EG236451 | Tmsb10        | 1  |
| 3659 | 21549 | EG236451 | Rtp4          | 1  |
| 3659 | 21794 | EG236451 | Pfkip         | 1  |
| 3659 | 21824 | EG236451 | 5830443L24Rik | 1  |
| 3659 | 21863 | EG236451 | Dok2          | 1  |
| 3659 | 22037 | EG236451 | Oas1g         | 1  |
| 3659 | 22077 | EG236451 | MMT00057550   | 1  |
| 3659 | 22188 | EG236451 | Top2a         | 1  |
| 3659 | 22327 | EG236451 | Tyrobp        | 1  |
| 3659 | 22647 | EG236451 | Pkib          | 1  |
| 3659 | 22876 | EG236451 | Sash3         | 1  |
| 3659 | 23208 | EG236451 | Hck           | 1  |
| 3659 | 23242 | EG236451 | Gngt2         | 1  |
| 3659 | 23403 | EG236451 | Ndc80         | 1  |
| 3659 | 23450 | EG236451 | D12Ert647e    | 1  |
| 3665 | 1156  | Zfp61    | Rbj           | 1  |
| 3665 | 1957  | Zfp61    | Mansc1        | 1  |
| 3665 | 3587  | Zfp61    | MMT00041940   | -1 |
| 3665 | 18373 | Zfp61    | Dnajb1        | -1 |
| 3676 | 20300 | Ucp2     | Plekhb1       | -1 |
| 3676 | 21425 | Ucp2     | Rab6          | -1 |
| 3683 | 143   | Oas2     | Gvin1         | 1  |
| 3683 | 405   | Oas2     | Emr4          | 1  |
| 3683 | 701   | Oas2     | Polr3g        | -1 |
| 3683 | 1180  | Oas2     | Clec4a3       | 1  |
| 3683 | 1533  | Oas2     | BC013712      | 1  |
| 3683 | 1840  | Oas2     | Fpr1          | 1  |
| 3683 | 2058  | Oas2     | Hk3           | 1  |
| 3683 | 2200  | Oas2     | BC006779      | 1  |
| 3683 | 2224  | Oas2     | Oasl2         | 1  |
| 3683 | 2550  | Oas2     | MMT00036681   | 1  |
| 3683 | 2752  | Oas2     | Fcgr1         | 1  |
| 3683 | 2830  | Oas2     | 4632417K18Rik | 1  |
| 3683 | 3523  | Oas2     | Trim34        | 1  |
| 3683 | 3572  | Oas2     | Ebi3          | 1  |
| 3683 | 3594  | Oas2     | Rasa4         | 1  |
| 3683 | 3659  | Oas2     | EG236451      | 1  |
| 3683 | 3683  | Oas2     | Oas2          | 1  |
| 3683 | 4114  | Oas2     | Parp12        | 1  |
| 3683 | 4409  | Oas2     | 5430435G22Rik | 1  |
| 3683 | 4426  | Oas2     | Iigp2         | 1  |
| 3683 | 4508  | Oas2     | Ifit1         | 1  |
| 3683 | 4516  | Oas2     | Rsad2         | 1  |
| 3683 | 5002  | Oas2     | Ifi202b       | 1  |
| 3683 | 5044  | Oas2     | Ifi35         | 1  |
| 3683 | 5216  | Oas2     | Spnb5         | 1  |



|      |       |      |               |   |
|------|-------|------|---------------|---|
| 3683 | 5250  | Oas2 | Ifit2         | 1 |
| 3683 | 5554  | Oas2 | Emr1          | 1 |
| 3683 | 5765  | Oas2 | Ifitm2        | 1 |
| 3683 | 5766  | Oas2 | 5033414D02Rik | 1 |
| 3683 | 5845  | Oas2 | Il18bp        | 1 |
| 3683 | 5853  | Oas2 | Trim30        | 1 |
| 3683 | 5875  | Oas2 | Cd86          | 1 |
| 3683 | 5949  | Oas2 | Zbp1          | 1 |
| 3683 | 5975  | Oas2 | Car13         | 1 |
| 3683 | 6072  | Oas2 | C1qc          | 1 |
| 3683 | 6098  | Oas2 | Ncf4          | 1 |
| 3683 | 6213  | Oas2 | Ccl2          | 1 |
| 3683 | 6383  | Oas2 | Gbp2          | 1 |
| 3683 | 6587  | Oas2 | Irf9          | 1 |
| 3683 | 6595  | Oas2 | Oas1a         | 1 |
| 3683 | 6734  | Oas2 | Ehd4          | 1 |
| 3683 | 6779  | Oas2 | Gbp6          | 1 |
| 3683 | 6824  | Oas2 | Irf7          | 1 |
| 3683 | 6888  | Oas2 | Cxcl9         | 1 |
| 3683 | 6910  | Oas2 | Ly6c2         | 1 |
| 3683 | 7069  | Oas2 | Ube1l         | 1 |
| 3683 | 7105  | Oas2 | Plac8         | 1 |
| 3683 | 7238  | Oas2 | Pycard        | 1 |
| 3683 | 7284  | Oas2 | MMT00008674   | 1 |
| 3683 | 7316  | Oas2 | Ifi204        | 1 |
| 3683 | 7336  | Oas2 | Cd5l          | 1 |
| 3683 | 8555  | Oas2 | H2-M3         | 1 |
| 3683 | 8659  | Oas2 | Psmb8         | 1 |
| 3683 | 8800  | Oas2 | Rnf213        | 1 |
| 3683 | 8922  | Oas2 | Il10ra        | 1 |
| 3683 | 8951  | Oas2 | Cd97          | 1 |
| 3683 | 9100  | Oas2 | Ms4a6c        | 1 |
| 3683 | 9401  | Oas2 | Fcgr4         | 1 |
| 3683 | 9717  | Oas2 | Psmb9         | 1 |
| 3683 | 9820  | Oas2 | BC023105      | 1 |
| 3683 | 9847  | Oas2 | Ifi27         | 1 |
| 3683 | 9928  | Oas2 | Lgmn          | 1 |
| 3683 | 10109 | Oas2 | Gbp3          | 1 |
| 3683 | 10393 | Oas2 | Slc7a8        | 1 |
| 3683 | 10426 | Oas2 | Ly6f          | 1 |
| 3683 | 10504 | Oas2 | Ripk3         | 1 |
| 3683 | 10606 | Oas2 | Apbb1ip       | 1 |
| 3683 | 10796 | Oas2 | Spic          | 1 |
| 3683 | 10926 | Oas2 | P2ry13        | 1 |
| 3683 | 11009 | Oas2 | MMT00008885   | 1 |
| 3683 | 11204 | Oas2 | A1451617      | 1 |
| 3683 | 11265 | Oas2 | Irgm          | 1 |
| 3683 | 11701 | Oas2 | Oas1c         | 1 |
| 3683 | 11959 | Oas2 | 4631422O05Rik | 1 |
| 3683 | 12126 | Oas2 | Znfx1         | 1 |
| 3683 | 12312 | Oas2 | Ms4a6d        | 1 |

|      |       |      |               |   |
|------|-------|------|---------------|---|
| 3683 | 12398 | Oas2 | Ifi44         | 1 |
| 3683 | 12495 | Oas2 | Casp1         | 1 |
| 3683 | 12600 | Oas2 | Ifi204        | 1 |
| 3683 | 12969 | Oas2 | Xaf1          | 1 |
| 3683 | 13156 | Oas2 | Ifit3         | 1 |
| 3683 | 13181 | Oas2 | Lcp2          | 1 |
| 3683 | 13309 | Oas2 | Tgtp          | 1 |
| 3683 | 13372 | Oas2 | Slc11a1       | 1 |
| 3683 | 13514 | Oas2 | Apol9b        | 1 |
| 3683 | 13522 | Oas2 | Sfn5          | 1 |
| 3683 | 13527 | Oas2 | Ctss          | 1 |
| 3683 | 13528 | Oas2 | Capn12        | 1 |
| 3683 | 13585 | Oas2 | Nckap1l       | 1 |
| 3683 | 13654 | Oas2 | Stat1         | 1 |
| 3683 | 13656 | Oas2 | Ly86          | 1 |
| 3683 | 13749 | Oas2 | Parp9         | 1 |
| 3683 | 13780 | Oas2 | Pilra         | 1 |
| 3683 | 13826 | Oas2 | Melk          | 1 |
| 3683 | 14029 | Oas2 | 2810022L02Rik | 1 |
| 3683 | 14117 | Oas2 | C1qb          | 1 |
| 3683 | 14237 | Oas2 | Rac2          | 1 |
| 3683 | 14258 | Oas2 | Ifi47         | 1 |
| 3683 | 14506 | Oas2 | Slc15a3       | 1 |
| 3683 | 14603 | Oas2 | Ly6e          | 1 |
| 3683 | 14611 | Oas2 | Ddx60         | 1 |
| 3683 | 14880 | Oas2 | Ms4a4c        | 1 |
| 3683 | 14883 | Oas2 | Itgal         | 1 |
| 3683 | 15074 | Oas2 | Usp18         | 1 |
| 3683 | 15159 | Oas2 | Timd4         | 1 |
| 3683 | 15280 | Oas2 | Cxcl10        | 1 |
| 3683 | 15449 | Oas2 | Mitd1         | 1 |
| 3683 | 15504 | Oas2 | Mx2           | 1 |
| 3683 | 15572 | Oas2 | Dtx3l         | 1 |
| 3683 | 15825 | Oas2 | Fermt3        | 1 |
| 3683 | 16102 | Oas2 | Cd72          | 1 |
| 3683 | 16147 | Oas2 | Tlr2          | 1 |
| 3683 | 16182 | Oas2 | Oasl1         | 1 |
| 3683 | 16186 | Oas2 | Cfp           | 1 |
| 3683 | 16199 | Oas2 | Samhd1        | 1 |
| 3683 | 16521 | Oas2 | Adar          | 1 |
| 3683 | 16572 | Oas2 | D14Ert668e    | 1 |
| 3683 | 16874 | Oas2 | Fcer1g        | 1 |
| 3683 | 16913 | Oas2 | Pira3         | 1 |
| 3683 | 16949 | Oas2 | Iigp1         | 1 |
| 3683 | 16988 | Oas2 | Clec4f        | 1 |
| 3683 | 17071 | Oas2 | Samd9l        | 1 |
| 3683 | 17197 | Oas2 | Igtp          | 1 |
| 3683 | 17412 | Oas2 | Aif1          | 1 |
| 3683 | 17472 | Oas2 | Cd53          | 1 |
| 3683 | 17904 | Oas2 | Cds1          | 1 |
| 3683 | 18174 | Oas2 | Stat2         | 1 |

|      |       |        |                    |    |
|------|-------|--------|--------------------|----|
| 3683 | 18186 | Oas2   | Parp14             | 1  |
| 3683 | 18211 | Oas2   | Folr2              | 1  |
| 3683 | 18289 | Oas2   | Tap1               | 1  |
| 3683 | 18762 | Oas2   | Herc5              | 1  |
| 3683 | 18868 | Oas2   | Mpeg1              | 1  |
| 3683 | 19026 | Oas2   | Isg15              | 1  |
| 3683 | 19189 | Oas2   | Sp100              | 1  |
| 3683 | 19252 | Oas2   | Tmsb4x             | 1  |
| 3683 | 19262 | Oas2   | Cd274              | 1  |
| 3683 | 19708 | Oas2   | Ly6a               | 1  |
| 3683 | 19738 | Oas2   | Lgals3bp           | 1  |
| 3683 | 19794 | Oas2   | Rgs2               | 1  |
| 3683 | 20150 | Oas2   | Ptprc              | 1  |
| 3683 | 20321 | Oas2   | Ms4a6b             | 1  |
| 3683 | 20431 | Oas2   | Slc7a7             | 1  |
| 3683 | 20432 | Oas2   | Smc1b              | 1  |
| 3683 | 20474 | Oas2   | Gnb3               | 1  |
| 3683 | 20791 | Oas2   | MMT00014813        | 1  |
| 3683 | 20997 | Oas2   | MMT00028135        | 1  |
| 3683 | 21351 | Oas2   | Shisa5             | 1  |
| 3683 | 21364 | Oas2   | Ppm1h              | 1  |
| 3683 | 21549 | Oas2   | Rtp4               | 1  |
| 3683 | 21824 | Oas2   | 5830443L24Rik      | 1  |
| 3683 | 22037 | Oas2   | Oas1g              | 1  |
| 3683 | 22077 | Oas2   | MMT00057550        | 1  |
| 3683 | 22327 | Oas2   | Tyrobp             | 1  |
| 3683 | 22496 | Oas2   | Sfn1               | 1  |
| 3683 | 22553 | Oas2   | Ms4a8a             | 1  |
| 3683 | 22712 | Oas2   | Phf11              | 1  |
| 3683 | 23038 | Oas2   | Casp4              | 1  |
| 3683 | 23092 | Oas2   | Ifih1              | 1  |
| 3683 | 23208 | Oas2   | Hck                | 1  |
| 3683 | 23242 | Oas2   | Gngt2              | 1  |
| 3683 | 23410 | Oas2   | C1qa               | 1  |
| 3683 | 23450 | Oas2   | D12Ertd647e        | 1  |
| 3685 | 2599  | Apoc1  | Lsm14a             | 1  |
| 3687 | 18785 | Bcl9   | Angptl4            | -1 |
| 3689 | 4534  | Adh1   | Ndel1              | 1  |
| 3689 | 6386  | Adh1   | Por                | 1  |
| 3689 | 11129 | Adh1   | Ankhd1             | 1  |
| 3689 | 11807 | Adh1   | Fbxo31             | 1  |
| 3689 | 14989 | Adh1   | Map3k5             | 1  |
| 3689 | 18827 | Adh1   | Oprs1              | -1 |
| 3689 | 22936 | Adh1   | Rhobtb1            | 1  |
| 3696 | 607   | Elovl6 | Me1                | 1  |
| 3696 | 7887  | Elovl6 | 4930418G15Rik      | 1  |
| 3696 | 10554 | Elovl6 | ENSMUSG00000074179 | 1  |
| 3696 | 13293 | Elovl6 | Gsta2              | 1  |
| 3696 | 18201 | Elovl6 | MMT00060232        | 1  |
| 3696 | 21214 | Elovl6 | Scd1               | 1  |
| 3699 | 1646  | Dscr3  | Slc15a4            | -1 |

|      |       |                    |               |    |
|------|-------|--------------------|---------------|----|
| 3699 | 4534  | Dscr3              | Ndel1         | -1 |
| 3699 | 5802  | Dscr3              | Mad2l2        | 1  |
| 3699 | 5934  | Dscr3              | S100a10       | 1  |
| 3699 | 6386  | Dscr3              | Por           | -1 |
| 3699 | 6394  | Dscr3              | Fbxo6         | 1  |
| 3699 | 8328  | Dscr3              | Klhdc8a       | 1  |
| 3699 | 8641  | Dscr3              | Slc7a2        | -1 |
| 3699 | 11741 | Dscr3              | Slc30a10      | 1  |
| 3699 | 18827 | Dscr3              | Oprs1         | 1  |
| 3699 | 19532 | Dscr3              | Med8          | 1  |
| 3699 | 22936 | Dscr3              | Rhobtb1       | -1 |
| 3703 | 2743  | Ggcx               | Tcf3          | 1  |
| 3703 | 3703  | Ggcx               | Ggcx          | 1  |
| 3703 | 4093  | Ggcx               | Akp5          | 1  |
| 3703 | 7273  | Ggcx               | Rnf103        | -1 |
| 3703 | 11338 | Ggcx               | Vamp8         | 1  |
| 3703 | 11872 | Ggcx               | Vamp5         | 1  |
| 3703 | 13666 | Ggcx               | MMT00039363   | 1  |
| 3703 | 15384 | Ggcx               | Mat2a         | 1  |
| 3703 | 15708 | Ggcx               | Retsat        | 1  |
| 3703 | 16670 | Ggcx               | Csmd2         | -1 |
| 3703 | 18658 | Ggcx               | Gstk1         | 1  |
| 3703 | 22695 | Ggcx               | Tgoln2        | 1  |
| 3704 | 1533  | H2-Q7              | BC013712      | 1  |
| 3704 | 9820  | H2-Q7              | BC023105      | 1  |
| 3704 | 9821  | H2-Q7              | Pmaip1        | 1  |
| 3704 | 9920  | H2-Q7              | Syk           | 1  |
| 3704 | 10504 | H2-Q7              | Ripk3         | 1  |
| 3704 | 11009 | H2-Q7              | MMT00008885   | 1  |
| 3704 | 13309 | H2-Q7              | Tgtp          | 1  |
| 3704 | 13527 | H2-Q7              | Ctss          | 1  |
| 3704 | 14880 | H2-Q7              | Ms4a4c        | 1  |
| 3704 | 16874 | H2-Q7              | Fcer1g        | 1  |
| 3704 | 21685 | H2-Q7              | Gzma          | 1  |
| 3704 | 23208 | H2-Q7              | Hck           | 1  |
| 3706 | 18373 | 2410002O22Rik      | Dnajb1        | 1  |
| 3713 | 3393  | Acot6              | Snhg8         | 1  |
| 3713 | 7678  | Acot6              | Ltbr          | 1  |
| 3713 | 9067  | Acot6              | Tra2a         | -1 |
| 3713 | 12112 | Acot6              | Tmem53        | 1  |
| 3715 | 274   | Mapk14             | Trit1         | -1 |
| 3715 | 354   | Mapk14             | MMT00007996   | 1  |
| 3715 | 7151  | Mapk14             | MMT00007982   | 1  |
| 3715 | 10612 | Mapk14             | Slc24a6       | -1 |
| 3715 | 11376 | Mapk14             | Slc7a11       | 1  |
| 3725 | 15935 | OTTMUSG00000008561 | Pnpla3        | 1  |
| 3725 | 21202 | OTTMUSG00000008561 | Acly          | 1  |
| 3725 | 21251 | OTTMUSG00000008561 | Cpt1a         | -1 |
| 3725 | 21575 | OTTMUSG00000008561 | Cyp2c55       | 1  |
| 3744 | 1041  | Rmnd1              | 3110049J23Rik | -1 |
| 3744 | 1135  | Rmnd1              | Akap12        | 1  |

|      |       |               |                    |    |
|------|-------|---------------|--------------------|----|
| 3744 | 2571  | Rmnd1         | Rmnd1              | 1  |
| 3744 | 3744  | Rmnd1         | Rmnd1              | 1  |
| 3744 | 5965  | Rmnd1         | Pbld               | -1 |
| 3744 | 7620  | Rmnd1         | Foxo3              | -1 |
| 3744 | 8786  | Rmnd1         | Rmnd1              | 1  |
| 3744 | 14169 | Rmnd1         | 1700052N19Rik      | -1 |
| 3744 | 18300 | Rmnd1         | Arg1               | -1 |
| 3744 | 19115 | Rmnd1         | Rab32              | 1  |
| 3753 | 524   | Setdb1        | Hsd3b2             | -1 |
| 3753 | 673   | Setdb1        | Tchh               | 1  |
| 3753 | 1466  | Setdb1        | Ubap2l             | -1 |
| 3753 | 1867  | Setdb1        | Bcas2              | -1 |
| 3753 | 1963  | Setdb1        | MMT00039783        | -1 |
| 3753 | 2752  | Setdb1        | Fcgr1              | -1 |
| 3753 | 3753  | Setdb1        | Setdb1             | 1  |
| 3753 | 5938  | Setdb1        | Pfn2               | -1 |
| 3753 | 6206  | Setdb1        | MMT00063701        | -1 |
| 3753 | 7519  | Setdb1        | Gstm1              | -1 |
| 3753 | 8738  | Setdb1        | Reg4               | 1  |
| 3753 | 10521 | Setdb1        | Ttf2               | -1 |
| 3753 | 10681 | Setdb1        | Dgkz               | 1  |
| 3753 | 11121 | Setdb1        | Mtmr11             | 1  |
| 3753 | 11611 | Setdb1        | S100a13            | 1  |
| 3753 | 12367 | Setdb1        | MMT00072365        | 1  |
| 3753 | 13134 | Setdb1        | Lipg               | 1  |
| 3753 | 15901 | Setdb1        | Tpm3               | 1  |
| 3753 | 16416 | Setdb1        | Commd2             | -1 |
| 3753 | 16679 | Setdb1        | Ctsk               | 1  |
| 3753 | 16753 | Setdb1        | Hfe2               | 1  |
| 3753 | 18138 | Setdb1        | MMT00000385        | -1 |
| 3753 | 18754 | Setdb1        | Rbm8a              | -1 |
| 3753 | 18911 | Setdb1        | Selenbp2           | -1 |
| 3753 | 20385 | Setdb1        | Chd1l              | -1 |
| 3753 | 20661 | Setdb1        | Tuft1              | -1 |
| 3753 | 21650 | Setdb1        | Ap4b1              | -1 |
| 3753 | 21814 | Setdb1        | Accn5              | -1 |
| 3753 | 22202 | Setdb1        | OTTMUSG00000021274 | 1  |
| 3753 | 22570 | Setdb1        | Phf1               | -1 |
| 3753 | 23457 | Setdb1        | Selenbp2           | -1 |
| 3768 | 20194 | Cyp2c44       | PnlDC1             | 1  |
| 3777 | 7379  | Wdr91         | MMT00078052        | -1 |
| 3780 | 607   | Ryk           | Me1                | 1  |
| 3780 | 18201 | Ryk           | MMT00060232        | 1  |
| 3780 | 21214 | Ryk           | Scd1               | 1  |
| 3781 | 12910 | Arpc2         | 1110028A07Rik      | 1  |
| 3789 | 1760  | 4833442J19Rik | Nek8               | 1  |
| 3789 | 6386  | 4833442J19Rik | Por                | 1  |
| 3789 | 11807 | 4833442J19Rik | Fbxo31             | 1  |
| 3789 | 21214 | 4833442J19Rik | Scd1               | -1 |
| 3790 | 5594  | Mtss1         | ErbB3              | -1 |
| 3790 | 6657  | Mtss1         | Irf6               | -1 |

|      |       |             |               |    |
|------|-------|-------------|---------------|----|
| 3790 | 8439  | Mtss1       | Slc25a33      | -1 |
| 3790 | 9831  | Mtss1       | Nedd4l        | -1 |
| 3790 | 12315 | Mtss1       | Srebf1        | 1  |
| 3790 | 21288 | Mtss1       | Tcp11i2       | -1 |
| 3790 | 23130 | Mtss1       | Hps4          | -1 |
| 3794 | 250   | Ywhab       | Tubb2a-ps2    | -1 |
| 3794 | 609   | Ywhab       | MMT00060868   | -1 |
| 3794 | 1767  | Ywhab       | BC016495      | 1  |
| 3794 | 3410  | Ywhab       | Paqr9         | -1 |
| 3794 | 3804  | Ywhab       | MMT00015534   | -1 |
| 3794 | 4201  | Ywhab       | Tubb2c        | -1 |
| 3794 | 4534  | Ywhab       | Ndel1         | 1  |
| 3794 | 4708  | Ywhab       | Traf3ip2      | -1 |
| 3794 | 8641  | Ywhab       | Slc7a2        | 1  |
| 3794 | 11741 | Ywhab       | Slc30a10      | -1 |
| 3794 | 12799 | Ywhab       | Spon2         | -1 |
| 3794 | 12941 | Ywhab       | Elovl5        | -1 |
| 3794 | 12982 | Ywhab       | Cars          | -1 |
| 3794 | 16060 | Ywhab       | Gys2          | 1  |
| 3794 | 16690 | Ywhab       | Tjp3          | -1 |
| 3794 | 17444 | Ywhab       | Tuba1a        | -1 |
| 3794 | 17876 | Ywhab       | Tubb4         | -1 |
| 3794 | 18827 | Ywhab       | Oprs1         | -1 |
| 3794 | 22290 | Ywhab       | Tubb2a        | -1 |
| 3794 | 22630 | Ywhab       | MMT00034355   | -1 |
| 3796 | 624   | D19Bwg1357e | 4931406I20Rik | -1 |
| 3796 | 18215 | D19Bwg1357e | Gpr146        | -1 |
| 3799 | 607   | Serpinh1    | Me1           | 1  |
| 3799 | 874   | Serpinh1    | Aldh1a7       | 1  |
| 3799 | 5884  | Serpinh1    | Gstm2         | 1  |
| 3799 | 8444  | Serpinh1    | Rdh16         | 1  |
| 3799 | 8815  | Serpinh1    | Mx1           | 1  |
| 3799 | 12910 | Serpinh1    | 1110028A07Rik | 1  |
| 3799 | 14017 | Serpinh1    | Ces5          | 1  |
| 3799 | 17996 | Serpinh1    | Igfbp2        | -1 |
| 3799 | 18201 | Serpinh1    | MMT00060232   | 1  |
| 3799 | 20079 | Serpinh1    | MMT00019254   | -1 |
| 3799 | 21214 | Serpinh1    | Scd1          | 1  |
| 3799 | 22138 | Serpinh1    | Ang           | -1 |
| 3799 | 23026 | Serpinh1    | Apom          | -1 |
| 3804 | 9629  | MMT00015534 | Spnb3         | -1 |
| 3804 | 10612 | MMT00015534 | Slc24a6       | -1 |
| 3804 | 12565 | MMT00015534 | Grem2         | -1 |
| 3804 | 18099 | MMT00015534 | Nfx1          | -1 |
| 3804 | 18215 | MMT00015534 | Gpr146        | -1 |
| 3804 | 21389 | MMT00015534 | Odf2          | -1 |
| 3806 | 11129 | MMT00063223 | Ankhd1        | -1 |
| 3806 | 12941 | MMT00063223 | Elovl5        | 1  |
| 3806 | 18827 | MMT00063223 | Oprs1         | 1  |
| 3806 | 22138 | MMT00063223 | Ang           | -1 |
| 3807 | 607   | Vmn2r83     | Me1           | 1  |

|      |       |             |                    |    |
|------|-------|-------------|--------------------|----|
| 3807 | 874   | Vmn2r83     | Aldh1a7            | 1  |
| 3807 | 5884  | Vmn2r83     | Gstm2              | 1  |
| 3807 | 6044  | Vmn2r83     | Sucnr1             | 1  |
| 3807 | 8444  | Vmn2r83     | Rdh16              | 1  |
| 3807 | 8815  | Vmn2r83     | Mx1                | 1  |
| 3807 | 10554 | Vmn2r83     | ENSMUSG00000074179 | 1  |
| 3807 | 10961 | Vmn2r83     | Pgd                | 1  |
| 3807 | 11462 | Vmn2r83     | Gpam               | 1  |
| 3807 | 11946 | Vmn2r83     | MMT00030953        | 1  |
| 3807 | 14017 | Vmn2r83     | Ces5               | 1  |
| 3807 | 14147 | Vmn2r83     | Acss2              | 1  |
| 3807 | 17090 | Vmn2r83     | Lass2              | 1  |
| 3807 | 18201 | Vmn2r83     | MMT00060232        | 1  |
| 3807 | 20019 | Vmn2r83     | Qdpr               | 1  |
| 3807 | 20058 | Vmn2r83     | Dnaic1             | -1 |
| 3807 | 20385 | Vmn2r83     | Chd1l              | 1  |
| 3807 | 21202 | Vmn2r83     | Acly               | 1  |
| 3807 | 21214 | Vmn2r83     | Scd1               | 1  |
| 3807 | 21575 | Vmn2r83     | Cyp2c55            | 1  |
| 3807 | 22138 | Vmn2r83     | Ang                | -1 |
| 3807 | 22732 | Vmn2r83     | Cyb5b              | 1  |
| 3807 | 22821 | Vmn2r83     | Tmem135            | 1  |
| 3807 | 23026 | Vmn2r83     | Apom               | -1 |
| 3807 | 23555 | Vmn2r83     | BC026585           | 1  |
| 3811 | 12565 | MMT00052318 | Grem2              | 1  |
| 3812 | 3812  | Zfyve26     | Zfyve26            | 1  |
| 3812 | 20187 | Zfyve26     | Gphn               | 1  |
| 3825 | 15882 | Uaca        | AA986860           | -1 |
| 3833 | 18201 | Atxn7l1     | MMT00060232        | 1  |
| 3833 | 20019 | Atxn7l1     | Qdpr               | 1  |
| 3849 | 3587  | MMT00047578 | MMT00041940        | 1  |
| 3849 | 6021  | MMT00047578 | MMT00008784        | 1  |
| 3849 | 8670  | MMT00047578 | MMT00051613        | 1  |
| 3849 | 15675 | MMT00047578 | MMT00077535        | 1  |
| 3850 | 12280 | Dach1       | Cln5               | -1 |
| 3860 | 2013  | Mlx         | Il15ra             | -1 |
| 3860 | 10612 | Mlx         | Slc24a6            | -1 |
| 3860 | 19374 | Mlx         | Dclre1c            | -1 |
| 3862 | 1129  | Gpd1        | Gsta4              | 1  |
| 3862 | 2127  | Gpd1        | Ldha               | -1 |
| 3862 | 3356  | Gpd1        | Adhfe1             | 1  |
| 3862 | 6329  | Gpd1        | Cyp2b10            | 1  |
| 3862 | 6420  | Gpd1        | Mipep              | 1  |
| 3862 | 8773  | Gpd1        | MMT00027093        | -1 |
| 3862 | 9842  | Gpd1        | Qdpr               | 1  |
| 3862 | 10554 | Gpd1        | ENSMUSG00000074179 | 1  |
| 3862 | 10598 | Gpd1        | MMT00011231        | -1 |
| 3862 | 13293 | Gpd1        | Gsta2              | 1  |
| 3862 | 13431 | Gpd1        | MMT00038058        | -1 |
| 3862 | 14055 | Gpd1        | MMT00050438        | -1 |
| 3862 | 15205 | Gpd1        | MMT00030262        | -1 |

|      |       |               |               |    |
|------|-------|---------------|---------------|----|
| 3862 | 20019 | Gpd1          | Qdpr          | 1  |
| 3862 | 20058 | Gpd1          | Dnaic1        | -1 |
| 3862 | 21369 | Gpd1          | Cd4           | -1 |
| 3862 | 22907 | Gpd1          | MMT00054594   | -1 |
| 3862 | 22978 | Gpd1          | MMT00043176   | -1 |
| 3862 | 22998 | Gpd1          | Ass1          | 1  |
| 3869 | 7492  | Zadh2         | Adfp          | -1 |
| 3876 | 3907  | Zeb2          | Dkk3          | -1 |
| 3876 | 8995  | Zeb2          | Pxk           | -1 |
| 3876 | 14989 | Zeb2          | Map3k5        | -1 |
| 3876 | 23572 | Zeb2          | 4631426J05Rik | -1 |
| 3882 | 20967 | Itfg3         | Fabp2         | 1  |
| 3885 | 3885  | Apol7c        | Apol7c        | 1  |
| 3885 | 21560 | Apol7c        | Apol7e        | 1  |
| 3885 | 22230 | Apol7c        | Myh9          | -1 |
| 3888 | 3620  | Ran           | Bet1          | 1  |
| 3901 | 14825 | F730047E07Rik | Ube2h         | 1  |
| 3901 | 21947 | F730047E07Rik | Cdca8         | 1  |
| 3905 | 327   | H2-Q1         | H2-Ea         | -1 |
| 3905 | 2938  | H2-Q1         | H2-T23        | -1 |
| 3905 | 3905  | H2-Q1         | H2-Q1         | 1  |
| 3905 | 4004  | H2-Q1         | Thbs2         | 1  |
| 3905 | 8767  | H2-Q1         | Rgl2          | -1 |
| 3905 | 9353  | H2-Q1         | Emilin2       | 1  |
| 3905 | 10376 | H2-Q1         | C920025E04Rik | 1  |
| 3905 | 10667 | H2-Q1         | H2-Eb1        | -1 |
| 3905 | 13493 | H2-Q1         | Ring1         | 1  |
| 3905 | 18251 | H2-Q1         | Susd4         | -1 |
| 3905 | 20346 | H2-Q1         | Gna-rs1       | -1 |
| 3905 | 22822 | H2-Q1         | MMT00013433   | -1 |
| 3907 | 8815  | Dkk3          | Mx1           | -1 |
| 3907 | 21214 | Dkk3          | Scd1          | -1 |
| 3913 | 14431 | Mrpl15        | Piwil1        | -1 |
| 3921 | 2902  | 2300002D11Rik | D4Ertd196e    | 1  |
| 3921 | 3475  | 2300002D11Rik | 2610305D13Rik | 1  |
| 3921 | 3616  | 2300002D11Rik | Dnajc16       | -1 |
| 3921 | 6191  | 2300002D11Rik | Ddost         | -1 |
| 3921 | 8654  | 2300002D11Rik | Fbxl13        | 1  |
| 3921 | 8705  | 2300002D11Rik | Ahdc1         | 1  |
| 3921 | 16287 | 2300002D11Rik | Extl1         | 1  |
| 3923 | 5364  | D9Ertd402e    | Kif22         | -1 |
| 3923 | 11382 | D9Ertd402e    | Cdca3         | -1 |
| 3923 | 14472 | D9Ertd402e    | Ahcy          | 1  |
| 3923 | 14656 | D9Ertd402e    | Grip2         | 1  |
| 3927 | 3377  | MMT00021352   | Cs            | 1  |
| 3927 | 7753  | MMT00021352   | Gfm1          | 1  |
| 3938 | 11094 | Abt1          | Slc17a3       | -1 |
| 3943 | 20058 | Atoh1         | Dnaic1        | -1 |
| 3988 | 20194 | 4933427G17Rik | Pnlcd1        | 1  |
| 4004 | 21214 | Thbs2         | Scd1          | -1 |
| 4004 | 21575 | Thbs2         | Cyp2c55       | -1 |



|      |       |               |               |    |
|------|-------|---------------|---------------|----|
| 4004 | 21793 | Thbs2         | Pla2g12a      | 1  |
| 4009 | 185   | Cotl1         | Ap2b1         | 1  |
| 4009 | 3410  | Cotl1         | Paqr9         | 1  |
| 4009 | 5364  | Cotl1         | Kif22         | 1  |
| 4009 | 6386  | Cotl1         | Por           | -1 |
| 4009 | 8428  | Cotl1         | Sorbs3        | -1 |
| 4009 | 11741 | Cotl1         | Slc30a10      | 1  |
| 4009 | 12941 | Cotl1         | Elovl5        | 1  |
| 4009 | 22630 | Cotl1         | MMT00034355   | 1  |
| 4010 | 5100  | Alkbh2        | Pebp1         | -1 |
| 4010 | 6330  | Alkbh2        | Dgkq          | 1  |
| 4010 | 10978 | Alkbh2        | MMT00078322   | 1  |
| 4010 | 12656 | Alkbh2        | Coq5          | 1  |
| 4010 | 15908 | Alkbh2        | Pebp1         | -1 |
| 4010 | 17716 | Alkbh2        | Rnf10         | -1 |
| 4010 | 17807 | Alkbh2        | Pebp1         | -1 |
| 4022 | 17090 | Gdpd5         | Lass2         | 1  |
| 4022 | 21202 | Gdpd5         | Acly          | 1  |
| 4029 | 5364  | Samsn1        | Kif22         | 1  |
| 4030 | 2850  | Prps1         | Slc16a6       | 1  |
| 4030 | 3265  | Prps1         | Dntt          | 1  |
| 4030 | 5364  | Prps1         | Kif22         | 1  |
| 4030 | 12925 | Prps1         | Farp1         | 1  |
| 4030 | 20967 | Prps1         | Fabp2         | 1  |
| 4032 | 327   | MMT00008594   | H2-Ea         | 1  |
| 4032 | 2325  | MMT00008594   | H2-K1         | 1  |
| 4032 | 2938  | MMT00008594   | H2-T23        | 1  |
| 4032 | 10376 | MMT00008594   | C920025E04Rik | -1 |
| 4032 | 10667 | MMT00008594   | H2-Eb1        | 1  |
| 4032 | 13493 | MMT00008594   | Ring1         | -1 |
| 4032 | 20238 | MMT00008594   | H2-T9         | 1  |
| 4032 | 22822 | MMT00008594   | MMT00013433   | 1  |
| 4038 | 269   | 1200009O22Rik | Tuba1b        | 1  |
| 4038 | 662   | 1200009O22Rik | Mid1ip1       | 1  |
| 4038 | 1941  | 1200009O22Rik | MMT00079618   | 1  |
| 4038 | 2322  | 1200009O22Rik | Tuba4a        | 1  |
| 4038 | 8439  | 1200009O22Rik | Slc25a33      | -1 |
| 4038 | 9763  | 1200009O22Rik | Tuba3b        | 1  |
| 4038 | 11724 | 1200009O22Rik | Tuba3a        | 1  |
| 4038 | 12315 | 1200009O22Rik | Sreb1         | 1  |
| 4038 | 13304 | 1200009O22Rik | Gadd45b       | -1 |
| 4038 | 17444 | 1200009O22Rik | Tuba1a        | 1  |
| 4038 | 17660 | 1200009O22Rik | Nlrp12        | -1 |
| 4038 | 18785 | 1200009O22Rik | Angptl4       | -1 |
| 4038 | 22443 | 1200009O22Rik | Tuba1c        | 1  |
| 4039 | 18201 | Klc3          | MMT00060232   | -1 |
| 4048 | 3587  | BC002230      | MMT00041940   | -1 |
| 4048 | 6021  | BC002230      | MMT00008784   | -1 |
| 4048 | 8554  | BC002230      | Letm2         | -1 |
| 4048 | 8670  | BC002230      | MMT00051613   | -1 |
| 4048 | 11214 | BC002230      | MMT00049207   | -1 |

|      |       |          |               |    |
|------|-------|----------|---------------|----|
| 4048 | 15476 | BC002230 | Fem1b         | 1  |
| 4048 | 15675 | BC002230 | MMT00077535   | -1 |
| 4048 | 16251 | BC002230 | G6pc          | -1 |
| 4048 | 18083 | BC002230 | Gadd45a       | 1  |
| 4048 | 18373 | BC002230 | Dnajb1        | -1 |
| 4048 | 18418 | BC002230 | Hspa1b        | -1 |
| 4048 | 20535 | BC002230 | Rbm4          | -1 |
| 4057 | 760   | Slc2a4   | Akr1c19       | 1  |
| 4057 | 6746  | Slc2a4   | E2f8          | -1 |
| 4057 | 6816  | Slc2a4   | Slc46a3       | 1  |
| 4057 | 7492  | Slc2a4   | Adfp          | -1 |
| 4057 | 8404  | Slc2a4   | Fa2h          | -1 |
| 4057 | 9700  | Slc2a4   | Prodh         | 1  |
| 4057 | 9718  | Slc2a4   | Fmo5          | 1  |
| 4057 | 13271 | Slc2a4   | Idh2          | 1  |
| 4057 | 18069 | Slc2a4   | Gpt           | 1  |
| 4074 | 15522 | Ush2a    | 1810011O10Rik | 1  |
| 4084 | 337   | Asah3l   | Rasgef1b      | 1  |
| 4084 | 530   | Asah3l   | Mest          | -1 |
| 4084 | 563   | Asah3l   | D4Bwg0951e    | 1  |
| 4084 | 719   | Asah3l   | Usp2          | 1  |
| 4084 | 864   | Asah3l   | MMT00031865   | 1  |
| 4084 | 1709  | Asah3l   | Mt2           | 1  |
| 4084 | 2294  | Asah3l   | AU040829      | 1  |
| 4084 | 2483  | Asah3l   | Gmeb1         | 1  |
| 4084 | 2529  | Asah3l   | Hmcn2         | 1  |
| 4084 | 2794  | Asah3l   | Map3k6        | 1  |
| 4084 | 3214  | Asah3l   | Dnmt3b        | -1 |
| 4084 | 3502  | Asah3l   | Gde1          | 1  |
| 4084 | 4286  | Asah3l   | Ptp4a1        | 1  |
| 4084 | 4392  | Asah3l   | 1810055G02Rik | 1  |
| 4084 | 4708  | Asah3l   | Traf3ip2      | -1 |
| 4084 | 5187  | Asah3l   | Speer4f       | 1  |
| 4084 | 5345  | Asah3l   | MMT00023326   | 1  |
| 4084 | 5791  | Asah3l   | Baiap2l1      | 1  |
| 4084 | 5814  | Asah3l   | Nrbp2         | 1  |
| 4084 | 5849  | Asah3l   | 2310031A18Rik | -1 |
| 4084 | 5856  | Asah3l   | Mfsd2         | 1  |
| 4084 | 6211  | Asah3l   | Arhgap24      | -1 |
| 4084 | 6386  | Asah3l   | Por           | 1  |
| 4084 | 6490  | Asah3l   | Il1r1         | 1  |
| 4084 | 8399  | Asah3l   | Herpud1       | 1  |
| 4084 | 8428  | Asah3l   | Sorbs3        | 1  |
| 4084 | 9127  | Asah3l   | Mtfmt         | -1 |
| 4084 | 9910  | Asah3l   | EG666644      | 1  |
| 4084 | 10408 | Asah3l   | Per1          | 1  |
| 4084 | 11093 | Asah3l   | Zdhhc1        | 1  |
| 4084 | 11129 | Asah3l   | Ankhd1        | 1  |
| 4084 | 11574 | Asah3l   | Gne           | 1  |
| 4084 | 11807 | Asah3l   | Fbxo31        | 1  |
| 4084 | 11808 | Asah3l   | Pck1          | 1  |

|      |       |        |               |    |
|------|-------|--------|---------------|----|
| 4084 | 12204 | Asah3l | Ankmy2        | 1  |
| 4084 | 12420 | Asah3l | Klh21         | 1  |
| 4084 | 12436 | Asah3l | Serinc3       | 1  |
| 4084 | 12761 | Asah3l | Tsc22d3       | 1  |
| 4084 | 12807 | Asah3l | Faim          | -1 |
| 4084 | 13289 | Asah3l | Dusp10        | -1 |
| 4084 | 13339 | Asah3l | D630042F21Rik | 1  |
| 4084 | 13471 | Asah3l | Cln8          | 1  |
| 4084 | 15008 | Asah3l | Chrdl2        | 1  |
| 4084 | 15021 | Asah3l | Ppargc1a      | 1  |
| 4084 | 15631 | Asah3l | Lpin1         | 1  |
| 4084 | 15800 | Asah3l | MMT00023224   | 1  |
| 4084 | 15882 | Asah3l | AA986860      | 1  |
| 4084 | 16176 | Asah3l | St3gal5       | 1  |
| 4084 | 16580 | Asah3l | Tnfaip2       | -1 |
| 4084 | 16647 | Asah3l | D16H22S680E   | 1  |
| 4084 | 16669 | Asah3l | Tjp2          | -1 |
| 4084 | 17352 | Asah3l | Cebpb         | 1  |
| 4084 | 17525 | Asah3l | Ctgf          | 1  |
| 4084 | 17622 | Asah3l | Foxo1         | 1  |
| 4084 | 18027 | Asah3l | 5730403B10Rik | 1  |
| 4084 | 18314 | Asah3l | 4631416L12Rik | 1  |
| 4084 | 18785 | Asah3l | Angpt4        | 1  |
| 4084 | 18827 | Asah3l | Oprs1         | -1 |
| 4084 | 19025 | Asah3l | Slc37a4       | 1  |
| 4084 | 19146 | Asah3l | N4bp2l1       | 1  |
| 4084 | 19466 | Asah3l | Pptc7         | 1  |
| 4084 | 19556 | Asah3l | Efna1         | -1 |
| 4084 | 21142 | Asah3l | Gm129         | 1  |
| 4084 | 21331 | Asah3l | Slc10a6       | 1  |
| 4090 | 8711  | Orai3  | 5430432M24Rik | 1  |
| 4090 | 14806 | Orai3  | Ccdc45        | -1 |
| 4090 | 15862 | Orai3  | Mrap          | 1  |
| 4090 | 17323 | Orai3  | Tubb6         | 1  |
| 4114 | 143   | Parp12 | Gvin1         | 1  |
| 4114 | 830   | Parp12 | Socs1         | 1  |
| 4114 | 860   | Parp12 | Psemb10       | 1  |
| 4114 | 1533  | Parp12 | BC013712      | 1  |
| 4114 | 1908  | Parp12 | Rnf213        | 1  |
| 4114 | 2058  | Parp12 | Hk3           | 1  |
| 4114 | 2200  | Parp12 | BC006779      | 1  |
| 4114 | 2224  | Parp12 | Oasl2         | 1  |
| 4114 | 2550  | Parp12 | MMT00036681   | 1  |
| 4114 | 2752  | Parp12 | Fcgr1         | 1  |
| 4114 | 3426  | Parp12 | Hap1          | 1  |
| 4114 | 3523  | Parp12 | Trim34        | 1  |
| 4114 | 3572  | Parp12 | Ebi3          | 1  |
| 4114 | 3594  | Parp12 | Rasa4         | 1  |
| 4114 | 3659  | Parp12 | EG236451      | 1  |
| 4114 | 3683  | Parp12 | Oas2          | 1  |
| 4114 | 3905  | Parp12 | H2-Q1         | 1  |

|      |       |        |               |   |
|------|-------|--------|---------------|---|
| 4114 | 4114  | Parp12 | Parp12        | 1 |
| 4114 | 4409  | Parp12 | 5430435G22Rik | 1 |
| 4114 | 4426  | Parp12 | Iigp2         | 1 |
| 4114 | 4508  | Parp12 | Ifit1         | 1 |
| 4114 | 4516  | Parp12 | Rsad2         | 1 |
| 4114 | 4901  | Parp12 | MMT00073557   | 1 |
| 4114 | 5002  | Parp12 | Ifi202b       | 1 |
| 4114 | 5044  | Parp12 | Ifi35         | 1 |
| 4114 | 5216  | Parp12 | Spnb5         | 1 |
| 4114 | 5250  | Parp12 | Ifit2         | 1 |
| 4114 | 5556  | Parp12 | Ccl4          | 1 |
| 4114 | 5766  | Parp12 | 5033414D02Rik | 1 |
| 4114 | 5845  | Parp12 | Ii18bp        | 1 |
| 4114 | 5853  | Parp12 | Trim30        | 1 |
| 4114 | 5949  | Parp12 | Zbp1          | 1 |
| 4114 | 6072  | Parp12 | C1qc          | 1 |
| 4114 | 6098  | Parp12 | Ncf4          | 1 |
| 4114 | 6587  | Parp12 | Irf9          | 1 |
| 4114 | 6595  | Parp12 | Oas1a         | 1 |
| 4114 | 6779  | Parp12 | Gbp6          | 1 |
| 4114 | 6824  | Parp12 | Irf7          | 1 |
| 4114 | 6910  | Parp12 | Ly6c2         | 1 |
| 4114 | 7069  | Parp12 | Ube1l         | 1 |
| 4114 | 7105  | Parp12 | Plac8         | 1 |
| 4114 | 7238  | Parp12 | Pycard        | 1 |
| 4114 | 7284  | Parp12 | MMT00008674   | 1 |
| 4114 | 7316  | Parp12 | Ifi204        | 1 |
| 4114 | 7336  | Parp12 | Cd5l          | 1 |
| 4114 | 8555  | Parp12 | H2-M3         | 1 |
| 4114 | 8659  | Parp12 | Psmb8         | 1 |
| 4114 | 8800  | Parp12 | Rnf213        | 1 |
| 4114 | 8922  | Parp12 | Ii10ra        | 1 |
| 4114 | 8951  | Parp12 | Cd97          | 1 |
| 4114 | 9320  | Parp12 | Rnf31         | 1 |
| 4114 | 9401  | Parp12 | Fcgr4         | 1 |
| 4114 | 9616  | Parp12 | AI451557      | 1 |
| 4114 | 9717  | Parp12 | Psmb9         | 1 |
| 4114 | 9820  | Parp12 | BC023105      | 1 |
| 4114 | 9821  | Parp12 | Pmaip1        | 1 |
| 4114 | 9847  | Parp12 | Ifi27         | 1 |
| 4114 | 9928  | Parp12 | Lgmn          | 1 |
| 4114 | 10109 | Parp12 | Gbp3          | 1 |
| 4114 | 10393 | Parp12 | Slc7a8        | 1 |
| 4114 | 10504 | Parp12 | Ripk3         | 1 |
| 4114 | 10606 | Parp12 | Apbb1ip       | 1 |
| 4114 | 11009 | Parp12 | MMT00008885   | 1 |
| 4114 | 11204 | Parp12 | AI451617      | 1 |
| 4114 | 11265 | Parp12 | Irgm          | 1 |
| 4114 | 11275 | Parp12 | Fanci         | 1 |
| 4114 | 11437 | Parp12 | Gatm          | 1 |
| 4114 | 11701 | Parp12 | Oas1c         | 1 |

|      |       |        |               |   |
|------|-------|--------|---------------|---|
| 4114 | 12126 | Parp12 | Znfx1         | 1 |
| 4114 | 12312 | Parp12 | Ms4a6d        | 1 |
| 4114 | 12398 | Parp12 | Ifi44         | 1 |
| 4114 | 12600 | Parp12 | Ifi204        | 1 |
| 4114 | 12969 | Parp12 | Xaf1          | 1 |
| 4114 | 13156 | Parp12 | Ifit3         | 1 |
| 4114 | 13181 | Parp12 | Lcp2          | 1 |
| 4114 | 13309 | Parp12 | Tgtp          | 1 |
| 4114 | 13514 | Parp12 | Apol9b        | 1 |
| 4114 | 13522 | Parp12 | Sfn5          | 1 |
| 4114 | 13527 | Parp12 | Ctss          | 1 |
| 4114 | 13528 | Parp12 | Capn12        | 1 |
| 4114 | 13585 | Parp12 | Nckap1l       | 1 |
| 4114 | 13654 | Parp12 | Stat1         | 1 |
| 4114 | 13780 | Parp12 | Pilra         | 1 |
| 4114 | 13826 | Parp12 | Melk          | 1 |
| 4114 | 14029 | Parp12 | 2810022L02Rik | 1 |
| 4114 | 14237 | Parp12 | Rac2          | 1 |
| 4114 | 14258 | Parp12 | Ifi47         | 1 |
| 4114 | 14506 | Parp12 | Slc15a3       | 1 |
| 4114 | 14603 | Parp12 | Ly6e          | 1 |
| 4114 | 14611 | Parp12 | Ddx60         | 1 |
| 4114 | 14880 | Parp12 | Ms4a4c        | 1 |
| 4114 | 14883 | Parp12 | Itgal         | 1 |
| 4114 | 15074 | Parp12 | Usp18         | 1 |
| 4114 | 15280 | Parp12 | Cxcl10        | 1 |
| 4114 | 15449 | Parp12 | Mitd1         | 1 |
| 4114 | 15504 | Parp12 | Mx2           | 1 |
| 4114 | 15749 | Parp12 | Cd22          | 1 |
| 4114 | 15825 | Parp12 | Fermt3        | 1 |
| 4114 | 16102 | Parp12 | Cd72          | 1 |
| 4114 | 16129 | Parp12 | Trafd1        | 1 |
| 4114 | 16182 | Parp12 | Oasl1         | 1 |
| 4114 | 16186 | Parp12 | Cfp           | 1 |
| 4114 | 16199 | Parp12 | Samhd1        | 1 |
| 4114 | 16521 | Parp12 | Adar          | 1 |
| 4114 | 16572 | Parp12 | D14Ertd668e   | 1 |
| 4114 | 16874 | Parp12 | Fcer1g        | 1 |
| 4114 | 16988 | Parp12 | Clec4f        | 1 |
| 4114 | 17071 | Parp12 | Samd9l        | 1 |
| 4114 | 17197 | Parp12 | Igtp          | 1 |
| 4114 | 17412 | Parp12 | Aif1          | 1 |
| 4114 | 17832 | Parp12 | MMT00043412   | 1 |
| 4114 | 17904 | Parp12 | Cds1          | 1 |
| 4114 | 18064 | Parp12 | MMT00035925   | 1 |
| 4114 | 18174 | Parp12 | Stat2         | 1 |
| 4114 | 18186 | Parp12 | Parp14        | 1 |
| 4114 | 18211 | Parp12 | Folr2         | 1 |
| 4114 | 18289 | Parp12 | Tap1          | 1 |
| 4114 | 18686 | Parp12 | Zfp143        | 1 |
| 4114 | 18868 | Parp12 | Mpeg1         | 1 |

|      |       |         |               |    |
|------|-------|---------|---------------|----|
| 4114 | 19026 | Parp12  | Isg15         | 1  |
| 4114 | 19063 | Parp12  | Evl           | 1  |
| 4114 | 19189 | Parp12  | Sp100         | 1  |
| 4114 | 19262 | Parp12  | Cd274         | 1  |
| 4114 | 19708 | Parp12  | Ly6a          | 1  |
| 4114 | 19738 | Parp12  | Lgals3bp      | 1  |
| 4114 | 19794 | Parp12  | Rgs2          | 1  |
| 4114 | 20321 | Parp12  | Ms4a6b        | 1  |
| 4114 | 20431 | Parp12  | Slc7a7        | 1  |
| 4114 | 20474 | Parp12  | Gnb3          | 1  |
| 4114 | 20791 | Parp12  | MMT00014813   | 1  |
| 4114 | 20997 | Parp12  | MMT00028135   | 1  |
| 4114 | 21351 | Parp12  | Shisa5        | 1  |
| 4114 | 21440 | Parp12  | Tmsb10        | 1  |
| 4114 | 21549 | Parp12  | Rtp4          | 1  |
| 4114 | 21824 | Parp12  | 5830443L24Rik | 1  |
| 4114 | 22037 | Parp12  | Oas1g         | 1  |
| 4114 | 22077 | Parp12  | MMT00057550   | 1  |
| 4114 | 22496 | Parp12  | Sfn1          | 1  |
| 4114 | 22712 | Parp12  | Phf11         | 1  |
| 4114 | 23208 | Parp12  | Hck           | 1  |
| 4114 | 23410 | Parp12  | C1qa          | 1  |
| 4114 | 23450 | Parp12  | D12Ert647e    | 1  |
| 4116 | 11406 | Ifi205  | Ifi203        | 1  |
| 4116 | 13149 | Ifi205  | Ifi203        | 1  |
| 4120 | 20194 | Mrpl3   | Pnlnc1        | -1 |
| 4122 | 250   | Ehbp111 | Tubb2a-ps2    | 1  |
| 4122 | 269   | Ehbp111 | Tuba1b        | 1  |
| 4122 | 609   | Ehbp111 | MMT00060868   | 1  |
| 4122 | 1709  | Ehbp111 | Mt2           | -1 |
| 4122 | 1941  | Ehbp111 | MMT00079618   | 1  |
| 4122 | 2051  | Ehbp111 | Ddx27         | -1 |
| 4122 | 2322  | Ehbp111 | Tuba4a        | 1  |
| 4122 | 2794  | Ehbp111 | Map3k6        | -1 |
| 4122 | 3804  | Ehbp111 | MMT00015534   | 1  |
| 4122 | 4201  | Ehbp111 | Tubb2c        | 1  |
| 4122 | 6771  | Ehbp111 | Insc          | 1  |
| 4122 | 7151  | Ehbp111 | MMT00007982   | 1  |
| 4122 | 9763  | Ehbp111 | Tuba3b        | 1  |
| 4122 | 10612 | Ehbp111 | Slc24a6       | -1 |
| 4122 | 11129 | Ehbp111 | Ankhd1        | -1 |
| 4122 | 11724 | Ehbp111 | Tuba3a        | 1  |
| 4122 | 11807 | Ehbp111 | Fbxo31        | -1 |
| 4122 | 12276 | Ehbp111 | Hmga1         | -1 |
| 4122 | 12460 | Ehbp111 | Pnpla2        | -1 |
| 4122 | 14582 | Ehbp111 | Mt1           | -1 |
| 4122 | 14838 | Ehbp111 | MMT00070887   | 1  |
| 4122 | 15252 | Ehbp111 | MMT00019402   | 1  |
| 4122 | 15862 | Ehbp111 | Mrap          | 1  |
| 4122 | 17444 | Ehbp111 | Tuba1a        | 1  |
| 4122 | 17876 | Ehbp111 | Tubb4         | 1  |

|      |       |         |                    |    |
|------|-------|---------|--------------------|----|
| 4122 | 17878 | Ehbp111 | Brap               | -1 |
| 4122 | 18286 | Ehbp111 | Slc41a3            | -1 |
| 4122 | 21251 | Ehbp111 | Cpt1a              | -1 |
| 4122 | 22290 | Ehbp111 | Tubb2a             | 1  |
| 4122 | 22443 | Ehbp111 | Tuba1c             | 1  |
| 4122 | 22630 | Ehbp111 | MMT00034355        | 1  |
| 4133 | 874   | Cbr3    | Aldh1a7            | -1 |
| 4133 | 10132 | Cbr3    | Ces2               | -1 |
| 4133 | 10554 | Cbr3    | ENSMUSG00000074179 | -1 |
| 4133 | 12637 | Cbr3    | Itpka              | 1  |
| 4133 | 13293 | Cbr3    | Gsta2              | -1 |
| 4133 | 14151 | Cbr3    | Slc44a1            | -1 |
| 4133 | 21202 | Cbr3    | Acly               | -1 |
| 4133 | 21214 | Cbr3    | Scd1               | -1 |
| 4143 | 1156  | Zfp286  | Rbj                | 1  |
| 4143 | 7550  | Zfp286  | Rab11fip5          | 1  |
| 4143 | 7602  | Zfp286  | Pcca               | -1 |
| 4143 | 8444  | Zfp286  | Rdh16              | -1 |
| 4143 | 16336 | Zfp286  | 2310040A07Rik      | 1  |
| 4143 | 16695 | Zfp286  | Hs3st6             | 1  |
| 4143 | 18201 | Zfp286  | MMT00060232        | -1 |
| 4143 | 20058 | Zfp286  | Dnaic1             | 1  |
| 4143 | 20341 | Zfp286  | Srebf2             | 1  |
| 4143 | 21214 | Zfp286  | Scd1               | -1 |
| 4146 | 14736 | Cml1    | Pigr               | 1  |
| 4152 | 250   | Lrrc33  | Tubb2a-ps2         | 1  |
| 4152 | 269   | Lrrc33  | Tuba1b             | 1  |
| 4152 | 609   | Lrrc33  | MMT00060868        | 1  |
| 4152 | 771   | Lrrc33  | Zbtb45             | 1  |
| 4152 | 2850  | Lrrc33  | Slc16a6            | 1  |
| 4152 | 3804  | Lrrc33  | MMT00015534        | 1  |
| 4152 | 3868  | Lrrc33  | Ebpl               | 1  |
| 4152 | 4201  | Lrrc33  | Tubb2c             | 1  |
| 4152 | 4286  | Lrrc33  | Ptp4a1             | -1 |
| 4152 | 4534  | Lrrc33  | Ndel1              | -1 |
| 4152 | 4708  | Lrrc33  | Traf3ip2           | 1  |
| 4152 | 6370  | Lrrc33  | Aqp8               | 1  |
| 4152 | 6386  | Lrrc33  | Por                | -1 |
| 4152 | 8428  | Lrrc33  | Sorbs3             | -1 |
| 4152 | 11093 | Lrrc33  | Zdhhc1             | -1 |
| 4152 | 11129 | Lrrc33  | Ankhd1             | -1 |
| 4152 | 11741 | Lrrc33  | Slc30a10           | 1  |
| 4152 | 12941 | Lrrc33  | Elovl5             | 1  |
| 4152 | 13471 | Lrrc33  | Cln8               | -1 |
| 4152 | 15021 | Lrrc33  | Ppargc1a           | -1 |
| 4152 | 15709 | Lrrc33  | Tceal1             | -1 |
| 4152 | 16060 | Lrrc33  | Gys2               | -1 |
| 4152 | 16182 | Lrrc33  | Oasl1              | 1  |
| 4152 | 16669 | Lrrc33  | Tjp2               | 1  |
| 4152 | 17338 | Lrrc33  | Mocos              | 1  |
| 4152 | 17876 | Lrrc33  | Tubb4              | 1  |

|      |       |         |               |    |
|------|-------|---------|---------------|----|
| 4152 | 18027 | Lrrc33  | 5730403B10Rik | -1 |
| 4152 | 18785 | Lrrc33  | Angptl4       | -1 |
| 4152 | 18827 | Lrrc33  | Oprs1         | 1  |
| 4152 | 19466 | Lrrc33  | Pptc7         | -1 |
| 4152 | 20678 | Lrrc33  | Cyp39a1       | -1 |
| 4152 | 22138 | Lrrc33  | Ang           | -1 |
| 4152 | 22290 | Lrrc33  | Tubb2a        | 1  |
| 4152 | 23202 | Lrrc33  | Olf559        | -1 |
| 4165 | 20058 | Cux1    | Dnaic1        | -1 |
| 4186 | 3170  | Car7    | Mcart1        | -1 |
| 4186 | 4469  | Car7    | Cyp3a13       | -1 |
| 4186 | 5449  | Car7    | Got1          | -1 |
| 4186 | 7839  | Car7    | Asl           | -1 |
| 4186 | 8641  | Car7    | Slc7a2        | -1 |
| 4186 | 11614 | Car7    | Sult1e1       | -1 |
| 4186 | 15008 | Car7    | Chrdl2        | -1 |
| 4186 | 15021 | Car7    | Ppargc1a      | -1 |
| 4186 | 16647 | Car7    | D16H22S680E   | -1 |
| 4186 | 23183 | Car7    | Nnmt          | -1 |
| 4188 | 250   | Sult1a1 | Tubb2a-ps2    | -1 |
| 4188 | 609   | Sult1a1 | MMT00060868   | -1 |
| 4188 | 1646  | Sult1a1 | Slc15a4       | 1  |
| 4188 | 1709  | Sult1a1 | Mt2           | 1  |
| 4188 | 2256  | Sult1a1 | Serpina9      | -1 |
| 4188 | 2794  | Sult1a1 | Map3k6        | 1  |
| 4188 | 2850  | Sult1a1 | Slc16a6       | -1 |
| 4188 | 3038  | Sult1a1 | Serpina12     | -1 |
| 4188 | 3410  | Sult1a1 | Paqr9         | -1 |
| 4188 | 3502  | Sult1a1 | Gde1          | 1  |
| 4188 | 4286  | Sult1a1 | Ptp4a1        | 1  |
| 4188 | 4534  | Sult1a1 | Ndel1         | 1  |
| 4188 | 5187  | Sult1a1 | Speer4f       | 1  |
| 4188 | 5259  | Sult1a1 | Mat1a         | 1  |
| 4188 | 5364  | Sult1a1 | Kif22         | -1 |
| 4188 | 5574  | Sult1a1 | Hsd3b7        | -1 |
| 4188 | 5814  | Sult1a1 | Nrbp2         | 1  |
| 4188 | 6030  | Sult1a1 | As3mt         | 1  |
| 4188 | 6370  | Sult1a1 | Aqp8          | -1 |
| 4188 | 6386  | Sult1a1 | Por           | 1  |
| 4188 | 6756  | Sult1a1 | Sds           | 1  |
| 4188 | 6990  | Sult1a1 | Nr1i2         | 1  |
| 4188 | 7839  | Sult1a1 | Asl           | 1  |
| 4188 | 8399  | Sult1a1 | Herpud1       | 1  |
| 4188 | 8428  | Sult1a1 | Sorbs3        | 1  |
| 4188 | 8641  | Sult1a1 | Slc7a2        | 1  |
| 4188 | 8965  | Sult1a1 | Ahcy          | 1  |
| 4188 | 9260  | Sult1a1 | Cmtm6         | -1 |
| 4188 | 9275  | Sult1a1 | Aass          | 1  |
| 4188 | 9587  | Sult1a1 | Bri3bp        | -1 |
| 4188 | 10207 | Sult1a1 | MMT00012324   | -1 |
| 4188 | 10712 | Sult1a1 | Fchsd2        | 1  |



|      |       |         |               |    |
|------|-------|---------|---------------|----|
| 4188 | 11129 | Sult1a1 | Ankhd1        | 1  |
| 4188 | 11193 | Sult1a1 | Tsc22d1       | -1 |
| 4188 | 11248 | Sult1a1 | Glt1d1        | 1  |
| 4188 | 11574 | Sult1a1 | Gne           | 1  |
| 4188 | 11741 | Sult1a1 | Slc30a10      | -1 |
| 4188 | 11807 | Sult1a1 | Fbxo31        | 1  |
| 4188 | 11808 | Sult1a1 | Pck1          | 1  |
| 4188 | 12799 | Sult1a1 | Spon2         | -1 |
| 4188 | 12839 | Sult1a1 | Fh1           | 1  |
| 4188 | 12941 | Sult1a1 | Elovl5        | -1 |
| 4188 | 12981 | Sult1a1 | Nek6          | -1 |
| 4188 | 12982 | Sult1a1 | Cars          | -1 |
| 4188 | 13339 | Sult1a1 | D630042F21Rik | 1  |
| 4188 | 14472 | Sult1a1 | Ahcy          | 1  |
| 4188 | 15021 | Sult1a1 | Ppargc1a      | 1  |
| 4188 | 15320 | Sult1a1 | MMT00017479   | 1  |
| 4188 | 15624 | Sult1a1 | Crcp          | 1  |
| 4188 | 15631 | Sult1a1 | Lpin1         | 1  |
| 4188 | 15709 | Sult1a1 | Tceal1        | 1  |
| 4188 | 15882 | Sult1a1 | AA986860      | 1  |
| 4188 | 16176 | Sult1a1 | St3gal5       | 1  |
| 4188 | 16647 | Sult1a1 | D16H22S680E   | 1  |
| 4188 | 16690 | Sult1a1 | Tjp3          | -1 |
| 4188 | 17323 | Sult1a1 | Tubb6         | -1 |
| 4188 | 17525 | Sult1a1 | Ctgf          | 1  |
| 4188 | 17622 | Sult1a1 | Foxo1         | 1  |
| 4188 | 18027 | Sult1a1 | 5730403B10Rik | 1  |
| 4188 | 18827 | Sult1a1 | Oprs1         | -1 |
| 4188 | 19025 | Sult1a1 | Slc37a4       | 1  |
| 4188 | 19146 | Sult1a1 | N4bp2l1       | 1  |
| 4188 | 19217 | Sult1a1 | Cyr61         | -1 |
| 4188 | 19234 | Sult1a1 | Nrg4          | 1  |
| 4188 | 19277 | Sult1a1 | MMT00044927   | 1  |
| 4188 | 19466 | Sult1a1 | Pptc7         | 1  |
| 4188 | 19671 | Sult1a1 | Upp2          | 1  |
| 4188 | 19723 | Sult1a1 | Pfkfb1        | 1  |
| 4188 | 20678 | Sult1a1 | Cyp39a1       | 1  |
| 4188 | 21331 | Sult1a1 | Slc10a6       | 1  |
| 4188 | 22031 | Sult1a1 | Vcam1         | 1  |
| 4188 | 22138 | Sult1a1 | Ang           | 1  |
| 4188 | 22290 | Sult1a1 | Tubb2a        | -1 |
| 4188 | 22627 | Sult1a1 | Adck5         | -1 |
| 4188 | 22630 | Sult1a1 | MMT00034355   | -1 |
| 4188 | 22936 | Sult1a1 | Rhobtb1       | 1  |
| 4188 | 23183 | Sult1a1 | Nnmt          | 1  |
| 4188 | 23201 | Sult1a1 | S1pr1         | -1 |
| 4188 | 23202 | Sult1a1 | Olf559        | 1  |
| 4188 | 23558 | Sult1a1 | MMT00030937   | 1  |
| 4191 | 5364  | Fbln2   | Kif22         | 1  |
| 4195 | 4336  | Csrp2bp | Rbbp9         | -1 |
| 4195 | 4833  | Csrp2bp | Synpo2        | 1  |

|      |       |         |               |    |
|------|-------|---------|---------------|----|
| 4195 | 6016  | Csrp2bp | A530057A03Rik | -1 |
| 4195 | 6231  | Csrp2bp | 9030622O22Rik | -1 |
| 4195 | 7991  | Csrp2bp | Gpr115        | 1  |
| 4195 | 9762  | Csrp2bp | Snx5          | -1 |
| 4195 | 14647 | Csrp2bp | Cst3          | 1  |
| 4195 | 17043 | Csrp2bp | Tmem127       | -1 |
| 4195 | 19560 | Csrp2bp | Trmt6         | 1  |
| 4195 | 21665 | Csrp2bp | Nat5          | -1 |
| 4195 | 21729 | Csrp2bp | Hdc           | 1  |
| 4196 | 12343 | Atg16l2 | Atf5          | 1  |
| 4258 | 12910 | Rpl5    | 1110028A07Rik | -1 |
| 4284 | 1533  | Irf1    | BC013712      | 1  |
| 4284 | 3594  | Irf1    | Rasa4         | 1  |
| 4284 | 4114  | Irf1    | Parp12        | 1  |
| 4284 | 4284  | Irf1    | Irf1          | 1  |
| 4284 | 4426  | Irf1    | Iigp2         | 1  |
| 4284 | 7105  | Irf1    | Plac8         | 1  |
| 4284 | 9847  | Irf1    | Ilf27         | 1  |
| 4284 | 10393 | Irf1    | Slc7a8        | 1  |
| 4284 | 10504 | Irf1    | Ripk3         | 1  |
| 4284 | 10606 | Irf1    | Apbb1ip       | 1  |
| 4284 | 12126 | Irf1    | Znfx1         | 1  |
| 4284 | 13309 | Irf1    | Tgtp          | 1  |
| 4284 | 14237 | Irf1    | Rac2          | 1  |
| 4284 | 14506 | Irf1    | Slc15a3       | 1  |
| 4284 | 15749 | Irf1    | Cd22          | 1  |
| 4284 | 16874 | Irf1    | Fcer1g        | 1  |
| 4284 | 17197 | Irf1    | Igtp          | 1  |
| 4284 | 21549 | Irf1    | Rtp4          | 1  |
| 4284 | 22327 | Irf1    | Tyrobp        | 1  |
| 4284 | 23208 | Irf1    | Hck           | 1  |
| 4286 | 1711  | Ptp4a1  | Grhl1         | -1 |
| 4286 | 2721  | Ptp4a1  | Inmt          | 1  |
| 4286 | 5804  | Ptp4a1  | Thrsp         | 1  |
| 4286 | 5849  | Ptp4a1  | 2310031A18Rik | -1 |
| 4286 | 5892  | Ptp4a1  | MMT00038457   | 1  |
| 4286 | 6816  | Ptp4a1  | Slc46a3       | 1  |
| 4286 | 7492  | Ptp4a1  | Adfp          | -1 |
| 4286 | 8328  | Ptp4a1  | Klhdc8a       | -1 |
| 4286 | 15931 | Ptp4a1  | Ces3          | 1  |
| 4286 | 18069 | Ptp4a1  | Gpt           | 1  |
| 4286 | 19917 | Ptp4a1  | Nek2          | -1 |
| 4298 | 14298 | St3gal1 | Atp2a2        | 1  |
| 4303 | 3410  | Phkg1   | Paqr9         | 1  |
| 4305 | 269   | Tmem51  | Tuba1b        | 1  |
| 4305 | 2533  | Tmem51  | Arhgef19      | 1  |
| 4305 | 11129 | Tmem51  | Ankhd1        | -1 |
| 4305 | 16690 | Tmem51  | Tjp3          | 1  |
| 4305 | 23201 | Tmem51  | S1pr1         | 1  |
| 4306 | 415   | Cpeb1   | Ypel2         | -1 |
| 4306 | 2348  | Cpeb1   | Irak1         | -1 |

|      |       |             |               |    |
|------|-------|-------------|---------------|----|
| 4306 | 5183  | Cpeb1       | St5           | -1 |
| 4306 | 9065  | Cpeb1       | Reep4         | -1 |
| 4306 | 9910  | Cpeb1       | EG666644      | 1  |
| 4306 | 13630 | Cpeb1       | Cdkn1a        | -1 |
| 4306 | 15049 | Cpeb1       | Rnf125        | -1 |
| 4306 | 18438 | Cpeb1       | Map3k7ip2     | -1 |
| 4306 | 22324 | Cpeb1       | MMT00060741   | -1 |
| 4306 | 23007 | Cpeb1       | 2410015N17Rik | 1  |
| 4308 | 7619  | Nphp3       | Pik3ip1       | 1  |
| 4308 | 18373 | Nphp3       | Dnajb1        | -1 |
| 4313 | 5849  | Ppap2b      | 2310031A18Rik | 1  |
| 4313 | 6990  | Ppap2b      | Nr1i2         | -1 |
| 4313 | 8641  | Ppap2b      | Slc7a2        | -1 |
| 4313 | 13293 | Ppap2b      | Gsta2         | -1 |
| 4313 | 15015 | Ppap2b      | G3bp1         | 1  |
| 4313 | 17530 | Ppap2b      | MMT00041792   | 1  |
| 4321 | 2051  | MMT00066182 | Ddx27         | -1 |
| 4340 | 4708  | Sdk2        | Traf3ip2      | -1 |
| 4340 | 7862  | Sdk2        | Cpsf4l        | 1  |
| 4340 | 7944  | Sdk2        | A1132487      | 1  |
| 4340 | 9910  | Sdk2        | EG666644      | 1  |
| 4340 | 12420 | Sdk2        | Klh121        | 1  |
| 4345 | 8815  | MMT00074600 | Mx1           | 1  |
| 4345 | 21214 | MMT00074600 | Scd1          | 1  |
| 4348 | 8632  | Nedd9       | Igfbp1        | -1 |
| 4348 | 12910 | Nedd9       | 1110028A07Rik | 1  |
| 4348 | 13489 | Nedd9       | D230025D16Rik | -1 |
| 4352 | 17090 | Rtn4rl1     | Lass2         | 1  |
| 4352 | 17660 | Rtn4rl1     | Nlrp12        | -1 |
| 4359 | 607   | Tmem208     | Me1           | 1  |
| 4359 | 874   | Tmem208     | Aldh1a7       | 1  |
| 4359 | 1036  | Tmem208     | Dusp19        | 1  |
| 4359 | 2314  | Tmem208     | Zswim6        | 1  |
| 4359 | 3377  | Tmem208     | Cs            | 1  |
| 4359 | 3504  | Tmem208     | Anpep         | -1 |
| 4359 | 4674  | Tmem208     | Cxcl12        | -1 |
| 4359 | 5425  | Tmem208     | Ung           | -1 |
| 4359 | 5884  | Tmem208     | Gstm2         | 1  |
| 4359 | 5934  | Tmem208     | S100a10       | 1  |
| 4359 | 6193  | Tmem208     | Lactb2        | 1  |
| 4359 | 6392  | Tmem208     | Pdcl3         | 1  |
| 4359 | 8815  | Tmem208     | Mx1           | 1  |
| 4359 | 11946 | Tmem208     | MMT00030953   | 1  |
| 4359 | 12143 | Tmem208     | Thyn1         | 1  |
| 4359 | 12219 | Tmem208     | Cyb5b         | 1  |
| 4359 | 14147 | Tmem208     | Acss2         | 1  |
| 4359 | 18201 | Tmem208     | MMT00060232   | 1  |
| 4359 | 18286 | Tmem208     | Slc41a3       | -1 |
| 4359 | 20019 | Tmem208     | Qdpr          | 1  |
| 4359 | 20328 | Tmem208     | Csl           | 1  |
| 4359 | 21214 | Tmem208     | Scd1          | 1  |

|      |       |         |               |    |
|------|-------|---------|---------------|----|
| 4359 | 21251 | Tmem208 | Cpt1a         | -1 |
| 4359 | 21575 | Tmem208 | Cyp2c55       | 1  |
| 4359 | 21793 | Tmem208 | Pla2g12a      | -1 |
| 4359 | 22732 | Tmem208 | Cyb5b         | 1  |
| 4359 | 22770 | Tmem208 | Slc27a2       | -1 |
| 4369 | 1310  | Acot4   | Cabc1         | -1 |
| 4369 | 3836  | Acot4   | 2200001I15Rik | -1 |
| 4369 | 6030  | Acot4   | As3mt         | 1  |
| 4369 | 6370  | Acot4   | Aqp8          | -1 |
| 4369 | 6386  | Acot4   | Por           | 1  |
| 4369 | 10486 | Acot4   | 1300002K09Rik | -1 |
| 4369 | 12941 | Acot4   | Elov5         | -1 |
| 4369 | 15709 | Acot4   | Tceal1        | 1  |
| 4369 | 18455 | Acot4   | Mtnr1a        | -1 |
| 4369 | 18827 | Acot4   | Oprs1         | -1 |
| 4369 | 21041 | Acot4   | Cyp17a1       | 1  |
| 4369 | 21966 | Acot4   | Pcp4l1        | 1  |
| 4369 | 22138 | Acot4   | Ang           | 1  |
| 4369 | 22336 | Acot4   | Hsd3b5        | -1 |
| 4379 | 250   | Glrx    | Tubb2a-ps2    | 1  |
| 4379 | 402   | Glrx    | Timp3         | -1 |
| 4379 | 609   | Glrx    | MMT00060868   | 1  |
| 4379 | 1310  | Glrx    | Cabc1         | 1  |
| 4379 | 2636  | Glrx    | Tars          | 1  |
| 4379 | 5425  | Glrx    | Ung           | -1 |
| 4379 | 5934  | Glrx    | S100a10       | 1  |
| 4379 | 5974  | Glrx    | Arntl         | 1  |
| 4379 | 6193  | Glrx    | Lactb2        | 1  |
| 4379 | 6386  | Glrx    | Por           | -1 |
| 4379 | 9907  | Glrx    | 4932442K08Rik | -1 |
| 4379 | 10911 | Glrx    | Mcl1          | -1 |
| 4379 | 11741 | Glrx    | Slc30a10      | 1  |
| 4379 | 12420 | Glrx    | Khl21         | -1 |
| 4379 | 14442 | Glrx    | Ethe1         | 1  |
| 4379 | 15481 | Glrx    | 1110067D22Rik | 1  |
| 4379 | 15862 | Glrx    | Mrap          | 1  |
| 4379 | 16060 | Glrx    | Gys2          | -1 |
| 4379 | 16510 | Glrx    | Tspyl4        | 1  |
| 4379 | 16690 | Glrx    | Tjp3          | 1  |
| 4379 | 17338 | Glrx    | Mocos         | 1  |
| 4379 | 18286 | Glrx    | Slc41a3       | -1 |
| 4379 | 18688 | Glrx    | Leap2         | 1  |
| 4379 | 18827 | Glrx    | Oprs1         | 1  |
| 4379 | 19532 | Glrx    | Med8          | 1  |
| 4379 | 20798 | Glrx    | Ccp1          | -1 |
| 4379 | 21251 | Glrx    | Cpt1a         | -1 |
| 4379 | 22138 | Glrx    | Ang           | -1 |
| 4379 | 22290 | Glrx    | Tubb2a        | 1  |
| 4384 | 607   | Gamt    | Me1           | 1  |
| 4384 | 874   | Gamt    | Aldh1a7       | 1  |
| 4384 | 5884  | Gamt    | Gstm2         | 1  |

|      |       |               |                    |    |
|------|-------|---------------|--------------------|----|
| 4384 | 8444  | Gamt          | Rdh16              | 1  |
| 4384 | 8815  | Gamt          | Mx1                | 1  |
| 4384 | 10554 | Gamt          | ENSMUSG00000074179 | 1  |
| 4384 | 11946 | Gamt          | MMT00030953        | 1  |
| 4384 | 13293 | Gamt          | Gsta2              | 1  |
| 4384 | 14017 | Gamt          | Ces5               | 1  |
| 4384 | 18201 | Gamt          | MMT00060232        | 1  |
| 4384 | 19766 | Gamt          | Slc26a4            | 1  |
| 4384 | 20019 | Gamt          | Qdpr               | 1  |
| 4384 | 20058 | Gamt          | Dnaic1             | -1 |
| 4384 | 21214 | Gamt          | Scd1               | 1  |
| 4384 | 21575 | Gamt          | Cyp2c55            | 1  |
| 4384 | 22138 | Gamt          | Ang                | -1 |
| 4384 | 23026 | Gamt          | Apom               | -1 |
| 4387 | 10667 | Frs3          | H2-Eb1             | -1 |
| 4387 | 15531 | Frs3          | Prickle4           | 1  |
| 4387 | 20238 | Frs3          | H2-T9              | -1 |
| 4388 | 8815  | MMT00019672   | Mx1                | 1  |
| 4388 | 21214 | MMT00019672   | Scd1               | 1  |
| 4391 | 662   | Zfp467        | Mid1ip1            | 1  |
| 4391 | 6816  | Zfp467        | Slc46a3            | 1  |
| 4391 | 7659  | Zfp467        | Rab30              | -1 |
| 4391 | 12315 | Zfp467        | Srebf1             | 1  |
| 4391 | 17660 | Zfp467        | Nlrp12             | -1 |
| 4391 | 18785 | Zfp467        | Angptl4            | -1 |
| 4391 | 22561 | Zfp467        | Whdc1              | 1  |
| 4404 | 902   | Commd5        | Slc30a1            | 1  |
| 4404 | 1890  | Commd5        | Nanp               | 1  |
| 4404 | 4404  | Commd5        | Commd5             | 1  |
| 4404 | 15476 | Commd5        | Fem1b              | 1  |
| 4409 | 5364  | 5430435G22Rik | Kif22              | 1  |
| 4411 | 1960  | 2310039H08Rik | Ubr2               | 1  |
| 4411 | 3857  | 2310039H08Rik | 1700001C19Rik      | 1  |
| 4411 | 20100 | 2310039H08Rik | Guca1b             | 1  |
| 4411 | 20966 | 2310039H08Rik | MMT00014378        | -1 |
| 4413 | 143   | MMT00030347   | Gvin1              | 1  |
| 4413 | 1533  | MMT00030347   | BC013712           | 1  |
| 4413 | 2224  | MMT00030347   | Oasl2              | 1  |
| 4413 | 2550  | MMT00030347   | MMT00036681        | 1  |
| 4413 | 2752  | MMT00030347   | Fcgr1              | 1  |
| 4413 | 3659  | MMT00030347   | EG236451           | 1  |
| 4413 | 3683  | MMT00030347   | Oas2               | 1  |
| 4413 | 4114  | MMT00030347   | Parp12             | 1  |
| 4413 | 4426  | MMT00030347   | ligp2              | 1  |
| 4413 | 4508  | MMT00030347   | Ifit1              | 1  |
| 4413 | 5002  | MMT00030347   | Ifi202b            | 1  |
| 4413 | 5250  | MMT00030347   | Ifit2              | 1  |
| 4413 | 5845  | MMT00030347   | I18bp              | 1  |
| 4413 | 5853  | MMT00030347   | Trim30             | 1  |
| 4413 | 5975  | MMT00030347   | Car13              | 1  |
| 4413 | 6824  | MMT00030347   | Irf7               | 1  |

|      |       |             |               |   |
|------|-------|-------------|---------------|---|
| 4413 | 6910  | MMT00030347 | Ly6c2         | 1 |
| 4413 | 7069  | MMT00030347 | Ube1l         | 1 |
| 4413 | 7105  | MMT00030347 | Plac8         | 1 |
| 4413 | 7238  | MMT00030347 | Pycard        | 1 |
| 4413 | 7284  | MMT00030347 | MMT00008674   | 1 |
| 4413 | 7316  | MMT00030347 | Ifi204        | 1 |
| 4413 | 8270  | MMT00030347 | Cispn         | 1 |
| 4413 | 8555  | MMT00030347 | H2-M3         | 1 |
| 4413 | 8659  | MMT00030347 | Psmb8         | 1 |
| 4413 | 8800  | MMT00030347 | Rnf213        | 1 |
| 4413 | 9100  | MMT00030347 | Ms4a6c        | 1 |
| 4413 | 9401  | MMT00030347 | Fcgr4         | 1 |
| 4413 | 9820  | MMT00030347 | BC023105      | 1 |
| 4413 | 9847  | MMT00030347 | Ifi27         | 1 |
| 4413 | 10109 | MMT00030347 | Gbp3          | 1 |
| 4413 | 10926 | MMT00030347 | P2ry13        | 1 |
| 4413 | 11009 | MMT00030347 | MMT00008885   | 1 |
| 4413 | 11204 | MMT00030347 | Al451617      | 1 |
| 4413 | 11265 | MMT00030347 | Irgm          | 1 |
| 4413 | 11701 | MMT00030347 | Oas1c         | 1 |
| 4413 | 12398 | MMT00030347 | Ifi44         | 1 |
| 4413 | 12600 | MMT00030347 | Ifi204        | 1 |
| 4413 | 12969 | MMT00030347 | Xaf1          | 1 |
| 4413 | 13156 | MMT00030347 | Ifit3         | 1 |
| 4413 | 13309 | MMT00030347 | Tgtp          | 1 |
| 4413 | 13514 | MMT00030347 | Apol9b        | 1 |
| 4413 | 13527 | MMT00030347 | Ctss          | 1 |
| 4413 | 13654 | MMT00030347 | Stat1         | 1 |
| 4413 | 13656 | MMT00030347 | Ly86          | 1 |
| 4413 | 13826 | MMT00030347 | Melk          | 1 |
| 4413 | 14029 | MMT00030347 | 2810022L02Rik | 1 |
| 4413 | 14506 | MMT00030347 | Slc15a3       | 1 |
| 4413 | 14603 | MMT00030347 | Ly6e          | 1 |
| 4413 | 14611 | MMT00030347 | Ddx60         | 1 |
| 4413 | 14880 | MMT00030347 | Ms4a4c        | 1 |
| 4413 | 15074 | MMT00030347 | Usp18         | 1 |
| 4413 | 15280 | MMT00030347 | Cxcl10        | 1 |
| 4413 | 15504 | MMT00030347 | Mx2           | 1 |
| 4413 | 16102 | MMT00030347 | Cd72          | 1 |
| 4413 | 16147 | MMT00030347 | Tlr2          | 1 |
| 4413 | 16182 | MMT00030347 | Oasl1         | 1 |
| 4413 | 16199 | MMT00030347 | Samhd1        | 1 |
| 4413 | 16572 | MMT00030347 | D14Ert668e    | 1 |
| 4413 | 16854 | MMT00030347 | Kif15         | 1 |
| 4413 | 17197 | MMT00030347 | Igtp          | 1 |
| 4413 | 17412 | MMT00030347 | Aif1          | 1 |
| 4413 | 18186 | MMT00030347 | Parp14        | 1 |
| 4413 | 19189 | MMT00030347 | Sp100         | 1 |
| 4413 | 19708 | MMT00030347 | Ly6a          | 1 |
| 4413 | 19738 | MMT00030347 | Lgals3bp      | 1 |
| 4413 | 20321 | MMT00030347 | Ms4a6b        | 1 |

|      |       |               |               |    |
|------|-------|---------------|---------------|----|
| 4413 | 20997 | MMT00030347   | MMT00028135   | 1  |
| 4413 | 21351 | MMT00030347   | Shisa5        | 1  |
| 4413 | 21549 | MMT00030347   | Rtp4          | 1  |
| 4413 | 21824 | MMT00030347   | 5830443L24Rik | 1  |
| 4413 | 22037 | MMT00030347   | Oas1g         | 1  |
| 4413 | 23208 | MMT00030347   | Hck           | 1  |
| 4413 | 23450 | MMT00030347   | D12Ert647e    | 1  |
| 4414 | 4414  | 5033406O09Rik | 5033406O09Rik | 1  |
| 4414 | 16191 | 5033406O09Rik | Klc1          | -1 |
| 4418 | 3265  | H2-Aa         | Dntt          | 1  |
| 4418 | 3410  | H2-Aa         | Paqr9         | 1  |
| 4418 | 5364  | H2-Aa         | Kif22         | 1  |
| 4418 | 6030  | H2-Aa         | As3mt         | -1 |
| 4418 | 6386  | H2-Aa         | Por           | -1 |
| 4418 | 8428  | H2-Aa         | Sorbs3        | -1 |
| 4418 | 11129 | H2-Aa         | Ankhd1        | -1 |
| 4418 | 12941 | H2-Aa         | Elov5         | 1  |
| 4418 | 14472 | H2-Aa         | Ahcy          | -1 |
| 4418 | 15709 | H2-Aa         | Tceal1        | -1 |
| 4418 | 18827 | H2-Aa         | Oprs1         | 1  |
| 4418 | 20678 | H2-Aa         | Cyp39a1       | -1 |
| 4418 | 20967 | H2-Aa         | Fabp2         | 1  |
| 4418 | 21041 | H2-Aa         | Cyp17a1       | -1 |
| 4426 | 143   | ligp2         | Gvin1         | 1  |
| 4426 | 405   | ligp2         | Emr4          | 1  |
| 4426 | 830   | ligp2         | Socs1         | 1  |
| 4426 | 860   | ligp2         | Psmb10        | 1  |
| 4426 | 1180  | ligp2         | Clec4a3       | 1  |
| 4426 | 1447  | ligp2         | Naaa          | 1  |
| 4426 | 1513  | ligp2         | Gzmb          | 1  |
| 4426 | 1533  | ligp2         | BC013712      | 1  |
| 4426 | 1840  | ligp2         | Fpr1          | 1  |
| 4426 | 2058  | ligp2         | Hk3           | 1  |
| 4426 | 2200  | ligp2         | BC006779      | 1  |
| 4426 | 2224  | ligp2         | Oasl2         | 1  |
| 4426 | 2550  | ligp2         | MMT00036681   | 1  |
| 4426 | 2578  | ligp2         | Csf2rb2       | 1  |
| 4426 | 2752  | ligp2         | Fcgr1         | 1  |
| 4426 | 3036  | ligp2         | Slamf9        | 1  |
| 4426 | 3286  | ligp2         | Alox5ap       | 1  |
| 4426 | 3426  | ligp2         | Hap1          | 1  |
| 4426 | 3523  | ligp2         | Trim34        | 1  |
| 4426 | 3572  | ligp2         | Ebi3          | 1  |
| 4426 | 3594  | ligp2         | Rasa4         | 1  |
| 4426 | 3659  | ligp2         | EG236451      | 1  |
| 4426 | 3683  | ligp2         | Oas2          | 1  |
| 4426 | 3847  | ligp2         | Tdrd7         | 1  |
| 4426 | 3905  | ligp2         | H2-Q1         | 1  |
| 4426 | 4114  | ligp2         | Parp12        | 1  |
| 4426 | 4409  | ligp2         | 5430435G22Rik | 1  |
| 4426 | 4426  | ligp2         | ligp2         | 1  |

|      |      |       |               |    |
|------|------|-------|---------------|----|
| 4426 | 4508 | ligp2 | Ifit1         | 1  |
| 4426 | 4516 | ligp2 | Rsad2         | 1  |
| 4426 | 5002 | ligp2 | Ifi202b       | 1  |
| 4426 | 5044 | ligp2 | Ifi35         | 1  |
| 4426 | 5216 | ligp2 | Spnb5         | 1  |
| 4426 | 5250 | ligp2 | Ifit2         | 1  |
| 4426 | 5554 | ligp2 | Emr1          | 1  |
| 4426 | 5556 | ligp2 | Ccl4          | 1  |
| 4426 | 5588 | ligp2 | Snx20         | 1  |
| 4426 | 5766 | ligp2 | 5033414D02Rik | 1  |
| 4426 | 5845 | ligp2 | Il18bp        | 1  |
| 4426 | 5853 | ligp2 | Trim30        | 1  |
| 4426 | 5875 | ligp2 | Cd86          | 1  |
| 4426 | 5949 | ligp2 | Zbp1          | 1  |
| 4426 | 5975 | ligp2 | Car13         | 1  |
| 4426 | 6036 | ligp2 | Pram1         | 1  |
| 4426 | 6072 | ligp2 | C1qc          | 1  |
| 4426 | 6098 | ligp2 | Ncf4          | 1  |
| 4426 | 6154 | ligp2 | 1700030G06Rik | 1  |
| 4426 | 6383 | ligp2 | Gbp2          | 1  |
| 4426 | 6587 | ligp2 | Irf9          | 1  |
| 4426 | 6595 | ligp2 | Oas1a         | 1  |
| 4426 | 6734 | ligp2 | Ehd4          | 1  |
| 4426 | 6779 | ligp2 | Gbp6          | 1  |
| 4426 | 6824 | ligp2 | Irf7          | 1  |
| 4426 | 6866 | ligp2 | Gls           | -1 |
| 4426 | 6888 | ligp2 | Cxcl9         | 1  |
| 4426 | 6910 | ligp2 | Ly6c2         | 1  |
| 4426 | 7057 | ligp2 | Stk10         | 1  |
| 4426 | 7069 | ligp2 | Ube1l         | 1  |
| 4426 | 7105 | ligp2 | Plac8         | 1  |
| 4426 | 7238 | ligp2 | Pycard        | 1  |
| 4426 | 7284 | ligp2 | MMT00008674   | 1  |
| 4426 | 7316 | ligp2 | Ifi204        | 1  |
| 4426 | 7336 | ligp2 | Cd5l          | 1  |
| 4426 | 8325 | ligp2 | Psme2         | 1  |
| 4426 | 8555 | ligp2 | H2-M3         | 1  |
| 4426 | 8564 | ligp2 | Pld4          | 1  |
| 4426 | 8659 | ligp2 | Psmb8         | 1  |
| 4426 | 8791 | ligp2 | Sectm1a       | 1  |
| 4426 | 8800 | ligp2 | Rnf213        | 1  |
| 4426 | 8922 | ligp2 | Il10ra        | 1  |
| 4426 | 8951 | ligp2 | Cd97          | 1  |
| 4426 | 8952 | ligp2 | Marco         | 1  |
| 4426 | 9100 | ligp2 | Ms4a6c        | 1  |
| 4426 | 9320 | ligp2 | Rnf31         | 1  |
| 4426 | 9393 | ligp2 | Cd300a        | 1  |
| 4426 | 9401 | ligp2 | Fcgr4         | 1  |
| 4426 | 9616 | ligp2 | AI451557      | 1  |
| 4426 | 9717 | ligp2 | Psmb9         | 1  |
| 4426 | 9820 | ligp2 | BC023105      | 1  |



|      |       |       |               |   |
|------|-------|-------|---------------|---|
| 4426 | 9821  | ligp2 | Pmaip1        | 1 |
| 4426 | 9847  | ligp2 | Ifi27         | 1 |
| 4426 | 9920  | ligp2 | Syk           | 1 |
| 4426 | 9928  | ligp2 | Lgmn          | 1 |
| 4426 | 10109 | ligp2 | Gbp3          | 1 |
| 4426 | 10393 | ligp2 | Slc7a8        | 1 |
| 4426 | 10426 | ligp2 | Ly6f          | 1 |
| 4426 | 10442 | ligp2 | Pla2g4a       | 1 |
| 4426 | 10504 | ligp2 | Ripk3         | 1 |
| 4426 | 10606 | ligp2 | Apbb1ip       | 1 |
| 4426 | 10796 | ligp2 | Spic          | 1 |
| 4426 | 10926 | ligp2 | P2ry13        | 1 |
| 4426 | 11009 | ligp2 | MMT00008885   | 1 |
| 4426 | 11204 | ligp2 | AI451617      | 1 |
| 4426 | 11265 | ligp2 | Irgm          | 1 |
| 4426 | 11701 | ligp2 | Oas1c         | 1 |
| 4426 | 11959 | ligp2 | 4631422O05Rik | 1 |
| 4426 | 12126 | ligp2 | Znfx1         | 1 |
| 4426 | 12312 | ligp2 | Ms4a6d        | 1 |
| 4426 | 12398 | ligp2 | Ifi44         | 1 |
| 4426 | 12469 | ligp2 | Dock10        | 1 |
| 4426 | 12495 | ligp2 | Casp1         | 1 |
| 4426 | 12600 | ligp2 | Ifi204        | 1 |
| 4426 | 12969 | ligp2 | Xaf1          | 1 |
| 4426 | 13156 | ligp2 | Ifit3         | 1 |
| 4426 | 13172 | ligp2 | Epb4.113      | 1 |
| 4426 | 13181 | ligp2 | Lcp2          | 1 |
| 4426 | 13309 | ligp2 | Tgtp          | 1 |
| 4426 | 13367 | ligp2 | MMT00060916   | 1 |
| 4426 | 13372 | ligp2 | Slc11a1       | 1 |
| 4426 | 13504 | ligp2 | Lair1         | 1 |
| 4426 | 13514 | ligp2 | Apol9b        | 1 |
| 4426 | 13522 | ligp2 | Sfn5          | 1 |
| 4426 | 13527 | ligp2 | Ctss          | 1 |
| 4426 | 13528 | ligp2 | Capn12        | 1 |
| 4426 | 13585 | ligp2 | Nckap1l       | 1 |
| 4426 | 13654 | ligp2 | Stat1         | 1 |
| 4426 | 13656 | ligp2 | Ly86          | 1 |
| 4426 | 13749 | ligp2 | Parp9         | 1 |
| 4426 | 13780 | ligp2 | Pilra         | 1 |
| 4426 | 13826 | ligp2 | Melk          | 1 |
| 4426 | 14029 | ligp2 | 2810022L02Rik | 1 |
| 4426 | 14117 | ligp2 | C1qb          | 1 |
| 4426 | 14192 | ligp2 | Trpv2         | 1 |
| 4426 | 14237 | ligp2 | Rac2          | 1 |
| 4426 | 14258 | ligp2 | Ifi47         | 1 |
| 4426 | 14260 | ligp2 | Mkl1          | 1 |
| 4426 | 14453 | ligp2 | Inpp5d        | 1 |
| 4426 | 14475 | ligp2 | Abcg1         | 1 |
| 4426 | 14506 | ligp2 | Slc15a3       | 1 |
| 4426 | 14603 | ligp2 | Ly6e          | 1 |

|      |       |       |               |   |
|------|-------|-------|---------------|---|
| 4426 | 14611 | ligp2 | Ddx60         | 1 |
| 4426 | 14880 | ligp2 | Ms4a4c        | 1 |
| 4426 | 14883 | ligp2 | Itgal         | 1 |
| 4426 | 14954 | ligp2 | Rab19         | 1 |
| 4426 | 15074 | ligp2 | Usp18         | 1 |
| 4426 | 15159 | ligp2 | Timd4         | 1 |
| 4426 | 15280 | ligp2 | Cxcl10        | 1 |
| 4426 | 15387 | ligp2 | Mgl1          | 1 |
| 4426 | 15449 | ligp2 | Mitd1         | 1 |
| 4426 | 15504 | ligp2 | Mx2           | 1 |
| 4426 | 15749 | ligp2 | Cd22          | 1 |
| 4426 | 15825 | ligp2 | Fermt3        | 1 |
| 4426 | 16102 | ligp2 | Cd72          | 1 |
| 4426 | 16129 | ligp2 | Traf1         | 1 |
| 4426 | 16147 | ligp2 | Tlr2          | 1 |
| 4426 | 16182 | ligp2 | Oasl1         | 1 |
| 4426 | 16186 | ligp2 | Cfp           | 1 |
| 4426 | 16199 | ligp2 | Samhd1        | 1 |
| 4426 | 16492 | ligp2 | Hk2           | 1 |
| 4426 | 16521 | ligp2 | Adar          | 1 |
| 4426 | 16572 | ligp2 | D14Ertd668e   | 1 |
| 4426 | 16827 | ligp2 | Arhgdib       | 1 |
| 4426 | 16874 | ligp2 | Fcer1g        | 1 |
| 4426 | 16913 | ligp2 | Pira3         | 1 |
| 4426 | 16988 | ligp2 | Clec4f        | 1 |
| 4426 | 17071 | ligp2 | Samd9l        | 1 |
| 4426 | 17197 | ligp2 | Igtp          | 1 |
| 4426 | 17312 | ligp2 | Sirpa         | 1 |
| 4426 | 17412 | ligp2 | Aif1          | 1 |
| 4426 | 17720 | ligp2 | Rap2b         | 1 |
| 4426 | 17806 | ligp2 | Gpsm3         | 1 |
| 4426 | 17904 | ligp2 | Cds1          | 1 |
| 4426 | 18064 | ligp2 | MMT00035925   | 1 |
| 4426 | 18174 | ligp2 | Stat2         | 1 |
| 4426 | 18186 | ligp2 | Parp14        | 1 |
| 4426 | 18211 | ligp2 | Folr2         | 1 |
| 4426 | 18289 | ligp2 | Tap1          | 1 |
| 4426 | 18594 | ligp2 | 1200002N14Rik | 1 |
| 4426 | 18662 | ligp2 | Batf3         | 1 |
| 4426 | 18686 | ligp2 | Zfp143        | 1 |
| 4426 | 18762 | ligp2 | Herc5         | 1 |
| 4426 | 18868 | ligp2 | Mpeg1         | 1 |
| 4426 | 19026 | ligp2 | Isg15         | 1 |
| 4426 | 19063 | ligp2 | Evl           | 1 |
| 4426 | 19153 | ligp2 | Ptgs1         | 1 |
| 4426 | 19189 | ligp2 | Sp100         | 1 |
| 4426 | 19252 | ligp2 | Tmsb4x        | 1 |
| 4426 | 19262 | ligp2 | Cd274         | 1 |
| 4426 | 19298 | ligp2 | Unc93b1       | 1 |
| 4426 | 19382 | ligp2 | Slc2a6        | 1 |
| 4426 | 19708 | ligp2 | Ly6a          | 1 |

|      |       |          |               |    |
|------|-------|----------|---------------|----|
| 4426 | 19738 | ligp2    | Lgals3bp      | 1  |
| 4426 | 19794 | ligp2    | Rgs2          | 1  |
| 4426 | 20150 | ligp2    | Ptprc         | 1  |
| 4426 | 20321 | ligp2    | Ms4a6b        | 1  |
| 4426 | 20431 | ligp2    | Slc7a7        | 1  |
| 4426 | 20432 | ligp2    | Smc1b         | 1  |
| 4426 | 20474 | ligp2    | Gnb3          | 1  |
| 4426 | 20791 | ligp2    | MMT00014813   | 1  |
| 4426 | 20814 | ligp2    | Ptpn18        | 1  |
| 4426 | 20997 | ligp2    | MMT00028135   | 1  |
| 4426 | 21351 | ligp2    | Shisa5        | 1  |
| 4426 | 21440 | ligp2    | Tmsb10        | 1  |
| 4426 | 21549 | ligp2    | Rtp4          | 1  |
| 4426 | 21685 | ligp2    | Gzma          | 1  |
| 4426 | 21824 | ligp2    | 5830443L24Rik | 1  |
| 4426 | 21837 | ligp2    | BC052328      | 1  |
| 4426 | 21863 | ligp2    | Dok2          | 1  |
| 4426 | 22037 | ligp2    | Oas1g         | 1  |
| 4426 | 22077 | ligp2    | MMT00057550   | 1  |
| 4426 | 22327 | ligp2    | Tyrobp        | 1  |
| 4426 | 22496 | ligp2    | Sfn1          | 1  |
| 4426 | 22647 | ligp2    | Pkib          | 1  |
| 4426 | 22670 | ligp2    | Clec4a1       | 1  |
| 4426 | 22712 | ligp2    | Phf11         | 1  |
| 4426 | 22876 | ligp2    | Sash3         | 1  |
| 4426 | 23038 | ligp2    | Casp4         | 1  |
| 4426 | 23092 | ligp2    | Ifih1         | 1  |
| 4426 | 23208 | ligp2    | Hck           | 1  |
| 4426 | 23242 | ligp2    | Gngt2         | 1  |
| 4426 | 23276 | ligp2    | Evi2b         | 1  |
| 4426 | 23410 | ligp2    | C1qa          | 1  |
| 4426 | 23450 | ligp2    | D12Erttd647e  | 1  |
| 4454 | 250   | BC055107 | Tubb2a-ps2    | -1 |
| 4454 | 269   | BC055107 | Tuba1b        | -1 |
| 4454 | 337   | BC055107 | Rasgef1b      | 1  |
| 4454 | 563   | BC055107 | D4Bwg0951e    | 1  |
| 4454 | 609   | BC055107 | MMT00060868   | -1 |
| 4454 | 662   | BC055107 | Mid1ip1       | -1 |
| 4454 | 1646  | BC055107 | Slc15a4       | 1  |
| 4454 | 1877  | BC055107 | Amica1        | 1  |
| 4454 | 1941  | BC055107 | MMT00079618   | -1 |
| 4454 | 2294  | BC055107 | AU040829      | 1  |
| 4454 | 2483  | BC055107 | Gmeb1         | 1  |
| 4454 | 2794  | BC055107 | Map3k6        | 1  |
| 4454 | 3170  | BC055107 | Mcart1        | 1  |
| 4454 | 3559  | BC055107 | 4933433P14Rik | 1  |
| 4454 | 3686  | BC055107 | Psmc9         | 1  |
| 4454 | 4235  | BC055107 | Pfkfb3        | 1  |
| 4454 | 4286  | BC055107 | Ptp4a1        | 1  |
| 4454 | 4392  | BC055107 | 1810055G02Rik | 1  |
| 4454 | 4708  | BC055107 | Traf3ip2      | -1 |

|      |       |          |               |    |
|------|-------|----------|---------------|----|
| 4454 | 5187  | BC055107 | Speer4f       | 1  |
| 4454 | 5345  | BC055107 | MMT00023326   | 1  |
| 4454 | 5791  | BC055107 | Baiap211      | 1  |
| 4454 | 6048  | BC055107 | Psmd9         | 1  |
| 4454 | 6211  | BC055107 | Arhgap24      | -1 |
| 4454 | 6386  | BC055107 | Por           | 1  |
| 4454 | 6490  | BC055107 | Il1r1         | 1  |
| 4454 | 6564  | BC055107 | Cebpd         | 1  |
| 4454 | 6675  | BC055107 | Sfrs4         | 1  |
| 4454 | 6756  | BC055107 | Sds           | 1  |
| 4454 | 6990  | BC055107 | Nr1i2         | 1  |
| 4454 | 7066  | BC055107 | Agtr1b        | 1  |
| 4454 | 7112  | BC055107 | Apbb3         | 1  |
| 4454 | 7151  | BC055107 | MMT00007982   | -1 |
| 4454 | 7862  | BC055107 | Cpsf4l        | 1  |
| 4454 | 8399  | BC055107 | Herpud1       | 1  |
| 4454 | 8641  | BC055107 | Slc7a2        | 1  |
| 4454 | 9763  | BC055107 | Tuba3b        | -1 |
| 4454 | 9910  | BC055107 | EG666644      | 1  |
| 4454 | 10408 | BC055107 | Per1          | 1  |
| 4454 | 10712 | BC055107 | Fchsd2        | 1  |
| 4454 | 11093 | BC055107 | Zdhhc1        | 1  |
| 4454 | 11129 | BC055107 | Ankhd1        | 1  |
| 4454 | 11574 | BC055107 | Gne           | 1  |
| 4454 | 11599 | BC055107 | Coq10b        | 1  |
| 4454 | 11724 | BC055107 | Tuba3a        | -1 |
| 4454 | 11741 | BC055107 | Slc30a10      | -1 |
| 4454 | 11807 | BC055107 | Fbxo31        | 1  |
| 4454 | 11808 | BC055107 | Pck1          | 1  |
| 4454 | 12219 | BC055107 | Cyb5b         | -1 |
| 4454 | 12420 | BC055107 | Klhl21        | 1  |
| 4454 | 12436 | BC055107 | Serinc3       | 1  |
| 4454 | 12460 | BC055107 | Pnpla2        | 1  |
| 4454 | 12479 | BC055107 | lfrd1         | 1  |
| 4454 | 12761 | BC055107 | Tsc22d3       | 1  |
| 4454 | 13289 | BC055107 | Dusp10        | -1 |
| 4454 | 13339 | BC055107 | D630042F21Rik | 1  |
| 4454 | 13471 | BC055107 | Cln8          | 1  |
| 4454 | 13889 | BC055107 | Agpat2        | -1 |
| 4454 | 13989 | BC055107 | Foxp3         | 1  |
| 4454 | 14989 | BC055107 | Map3k5        | 1  |
| 4454 | 15021 | BC055107 | Ppargc1a      | 1  |
| 4454 | 15522 | BC055107 | 1810011O10Rik | 1  |
| 4454 | 15631 | BC055107 | Lpin1         | 1  |
| 4454 | 15709 | BC055107 | Tceal1        | 1  |
| 4454 | 15862 | BC055107 | Mrap          | -1 |
| 4454 | 15882 | BC055107 | AA986860      | 1  |
| 4454 | 16060 | BC055107 | Gys2          | 1  |
| 4454 | 16176 | BC055107 | St3gal5       | 1  |
| 4454 | 16580 | BC055107 | Tnfaip2       | -1 |
| 4454 | 16647 | BC055107 | D16H22S680E   | 1  |

|      |       |             |               |    |
|------|-------|-------------|---------------|----|
| 4454 | 16690 | BC055107    | Tjp3          | -1 |
| 4454 | 17352 | BC055107    | Cebpb         | 1  |
| 4454 | 17444 | BC055107    | Tuba1a        | -1 |
| 4454 | 17525 | BC055107    | Ctgf          | 1  |
| 4454 | 17622 | BC055107    | Foxo1         | 1  |
| 4454 | 17656 | BC055107    | Hdhd3         | -1 |
| 4454 | 17660 | BC055107    | Nlrp12        | 1  |
| 4454 | 17876 | BC055107    | Tubb4         | -1 |
| 4454 | 17928 | BC055107    | Pex11a        | 1  |
| 4454 | 18027 | BC055107    | 5730403B10Rik | 1  |
| 4454 | 18275 | BC055107    | D730039F16Rik | -1 |
| 4454 | 18286 | BC055107    | Slc41a3       | 1  |
| 4454 | 18314 | BC055107    | 4631416L12Rik | 1  |
| 4454 | 18785 | BC055107    | Angptl4       | 1  |
| 4454 | 18802 | BC055107    | Nit2          | -1 |
| 4454 | 18827 | BC055107    | Oprs1         | -1 |
| 4454 | 19025 | BC055107    | Slc37a4       | 1  |
| 4454 | 19124 | BC055107    | Pim3          | 1  |
| 4454 | 19146 | BC055107    | N4bp2l1       | 1  |
| 4454 | 19466 | BC055107    | Pptc7         | 1  |
| 4454 | 19532 | BC055107    | Med8          | -1 |
| 4454 | 19757 | BC055107    | Fkbp5         | 1  |
| 4454 | 20613 | BC055107    | 4930431B09Rik | 1  |
| 4454 | 20803 | BC055107    | Tmem50a       | 1  |
| 4454 | 21142 | BC055107    | Gm129         | 1  |
| 4454 | 21251 | BC055107    | Cpt1a         | 1  |
| 4454 | 21331 | BC055107    | Slc10a6       | 1  |
| 4454 | 22290 | BC055107    | Tubb2a        | -1 |
| 4454 | 22443 | BC055107    | Tuba1c        | -1 |
| 4454 | 22470 | BC055107    | Ppargc1b      | 1  |
| 4454 | 22630 | BC055107    | MMT00034355   | -1 |
| 4454 | 22732 | BC055107    | Cyb5b         | -1 |
| 4454 | 22936 | BC055107    | Rhobtb1       | 1  |
| 4454 | 23201 | BC055107    | S1pr1         | -1 |
| 4454 | 23202 | BC055107    | Olf559        | 1  |
| 4454 | 23437 | BC055107    | Efh2          | 1  |
| 4454 | 23558 | BC055107    | MMT00030937   | 1  |
| 4457 | 5364  | Cks2        | Kif22         | 1  |
| 4457 | 21947 | Cks2        | Cdca8         | 1  |
| 4462 | 6030  | Cyp1a1      | As3mt         | 1  |
| 4462 | 15631 | Cyp1a1      | Lpin1         | 1  |
| 4484 | 4484  | MMT00014015 | MMT00014015   | 1  |
| 4487 | 20058 | Gdpd2       | Dnaic1        | 1  |
| 4492 | 13293 | Suv420h1    | Gsta2         | 1  |
| 4493 | 337   | Ptgir       | Rasgef1b      | -1 |
| 4493 | 563   | Ptgir       | D4Bwg0951e    | -1 |
| 4493 | 662   | Ptgir       | Mid1ip1       | 1  |
| 4493 | 3196  | Ptgir       | Tat           | -1 |
| 4493 | 4284  | Ptgir       | Irf1          | 1  |
| 4493 | 4391  | Ptgir       | Zfp467        | 1  |
| 4493 | 5889  | Ptgir       | Errfi1        | -1 |

|      |       |               |               |    |
|------|-------|---------------|---------------|----|
| 4493 | 6308  | Ptgir         | 2410075B13Rik | 1  |
| 4493 | 6564  | Ptgir         | Cebpd         | -1 |
| 4493 | 6769  | Ptgir         | Banp          | -1 |
| 4493 | 7136  | Ptgir         | Id3           | 1  |
| 4493 | 7901  | Ptgir         | Slc41a1       | 1  |
| 4493 | 7963  | Ptgir         | Rxrg          | 1  |
| 4493 | 8234  | Ptgir         | Tbpl1         | -1 |
| 4493 | 8632  | Ptgir         | Igfbp1        | -1 |
| 4493 | 9181  | Ptgir         | 1700060H10Rik | 1  |
| 4493 | 10384 | Ptgir         | Chic2         | -1 |
| 4493 | 11093 | Ptgir         | Zdhhc1        | -1 |
| 4493 | 11129 | Ptgir         | Ankhd1        | -1 |
| 4493 | 11590 | Ptgir         | Cbx4          | 1  |
| 4493 | 12479 | Ptgir         | Ifrd1         | -1 |
| 4493 | 12761 | Ptgir         | Tsc22d3       | -1 |
| 4493 | 12910 | Ptgir         | 1110028A07Rik | 1  |
| 4493 | 13018 | Ptgir         | AW544981      | 1  |
| 4493 | 13304 | Ptgir         | Gadd45b       | -1 |
| 4493 | 13489 | Ptgir         | D230025D16Rik | -1 |
| 4493 | 14135 | Ptgir         | Eepd1         | 1  |
| 4493 | 15826 | Ptgir         | Arl4d         | -1 |
| 4493 | 16251 | Ptgir         | G6pc          | -1 |
| 4493 | 16517 | Ptgir         | D4Wsu53e      | -1 |
| 4493 | 17525 | Ptgir         | Ctgf          | -1 |
| 4493 | 17591 | Ptgir         | D930015E06Rik | 1  |
| 4493 | 18083 | Ptgir         | Gadd45a       | 1  |
| 4493 | 18373 | Ptgir         | Dnajb1        | -1 |
| 4493 | 18785 | Ptgir         | Angptl4       | -1 |
| 4493 | 20296 | Ptgir         | C030027H14Rik | -1 |
| 4493 | 21687 | Ptgir         | Zbtb7b        | 1  |
| 4493 | 21934 | Ptgir         | Id2           | 1  |
| 4493 | 22216 | Ptgir         | Sp5           | 1  |
| 4493 | 22873 | Ptgir         | Slc38a2       | -1 |
| 4493 | 23202 | Ptgir         | Olfir559      | -1 |
| 4493 | 23253 | Ptgir         | D030011O10Rik | -1 |
| 4493 | 23668 | Ptgir         | Gse1          | 1  |
| 4499 | 22138 | Enpp2         | Ang           | 1  |
| 4504 | 21214 | 1700113I22Rik | Scd1          | 1  |
| 4508 | 143   | Ifit1         | Gvin1         | 1  |
| 4508 | 701   | Ifit1         | Polr3g        | -1 |
| 4508 | 1513  | Ifit1         | Gzmb          | 1  |
| 4508 | 1533  | Ifit1         | BC013712      | 1  |
| 4508 | 1840  | Ifit1         | Fpr1          | 1  |
| 4508 | 1908  | Ifit1         | Rnf213        | 1  |
| 4508 | 2058  | Ifit1         | Hk3           | 1  |
| 4508 | 2200  | Ifit1         | BC006779      | 1  |
| 4508 | 2224  | Ifit1         | Oasl2         | 1  |
| 4508 | 2550  | Ifit1         | MMT00036681   | 1  |
| 4508 | 2752  | Ifit1         | Fcgr1         | 1  |
| 4508 | 3426  | Ifit1         | Hap1          | 1  |
| 4508 | 3523  | Ifit1         | Trim34        | 1  |

|      |       |       |               |   |
|------|-------|-------|---------------|---|
| 4508 | 3572  | lfit1 | Ebi3          | 1 |
| 4508 | 3594  | lfit1 | Rasa4         | 1 |
| 4508 | 3659  | lfit1 | EG236451      | 1 |
| 4508 | 3683  | lfit1 | Oas2          | 1 |
| 4508 | 4114  | lfit1 | Parp12        | 1 |
| 4508 | 4409  | lfit1 | 5430435G22Rik | 1 |
| 4508 | 4426  | lfit1 | ligp2         | 1 |
| 4508 | 4508  | lfit1 | lfit1         | 1 |
| 4508 | 4516  | lfit1 | Rsad2         | 1 |
| 4508 | 5002  | lfit1 | lfi202b       | 1 |
| 4508 | 5044  | lfit1 | lfi35         | 1 |
| 4508 | 5216  | lfit1 | Spnb5         | 1 |
| 4508 | 5250  | lfit1 | lfit2         | 1 |
| 4508 | 5556  | lfit1 | Ccl4          | 1 |
| 4508 | 5766  | lfit1 | 5033414D02Rik | 1 |
| 4508 | 5845  | lfit1 | Il18bp        | 1 |
| 4508 | 5853  | lfit1 | Trim30        | 1 |
| 4508 | 5949  | lfit1 | Zbp1          | 1 |
| 4508 | 6036  | lfit1 | Pram1         | 1 |
| 4508 | 6072  | lfit1 | C1qc          | 1 |
| 4508 | 6213  | lfit1 | Ccl2          | 1 |
| 4508 | 6576  | lfit1 | Sfn2          | 1 |
| 4508 | 6587  | lfit1 | Irf9          | 1 |
| 4508 | 6595  | lfit1 | Oas1a         | 1 |
| 4508 | 6734  | lfit1 | Ehd4          | 1 |
| 4508 | 6779  | lfit1 | Gbp6          | 1 |
| 4508 | 6806  | lfit1 | Agrn          | 1 |
| 4508 | 6824  | lfit1 | Irf7          | 1 |
| 4508 | 6888  | lfit1 | Cxcl9         | 1 |
| 4508 | 6910  | lfit1 | Ly6c2         | 1 |
| 4508 | 7069  | lfit1 | Ube1l         | 1 |
| 4508 | 7105  | lfit1 | Plac8         | 1 |
| 4508 | 7238  | lfit1 | Pycard        | 1 |
| 4508 | 7284  | lfit1 | MMT00008674   | 1 |
| 4508 | 7316  | lfit1 | lfi204        | 1 |
| 4508 | 7336  | lfit1 | Cd5l          | 1 |
| 4508 | 8325  | lfit1 | Psme2         | 1 |
| 4508 | 8555  | lfit1 | H2-M3         | 1 |
| 4508 | 8564  | lfit1 | Pld4          | 1 |
| 4508 | 8659  | lfit1 | Psmb8         | 1 |
| 4508 | 8800  | lfit1 | Rnf213        | 1 |
| 4508 | 9100  | lfit1 | Ms4a6c        | 1 |
| 4508 | 9320  | lfit1 | Rnf31         | 1 |
| 4508 | 9401  | lfit1 | Fcgr4         | 1 |
| 4508 | 9616  | lfit1 | AI451557      | 1 |
| 4508 | 9717  | lfit1 | Psmb9         | 1 |
| 4508 | 9820  | lfit1 | BC023105      | 1 |
| 4508 | 9821  | lfit1 | Pmaip1        | 1 |
| 4508 | 9847  | lfit1 | lfi27         | 1 |
| 4508 | 9928  | lfit1 | Lgmn          | 1 |
| 4508 | 10109 | lfit1 | Gbp3          | 1 |

|      |       |       |               |   |
|------|-------|-------|---------------|---|
| 4508 | 10426 | lfit1 | Ly6f          | 1 |
| 4508 | 10504 | lfit1 | Ripk3         | 1 |
| 4508 | 10606 | lfit1 | Apbb1ip       | 1 |
| 4508 | 10926 | lfit1 | P2ry13        | 1 |
| 4508 | 11009 | lfit1 | MMT00008885   | 1 |
| 4508 | 11204 | lfit1 | Al451617      | 1 |
| 4508 | 11265 | lfit1 | Irgm          | 1 |
| 4508 | 11701 | lfit1 | Oas1c         | 1 |
| 4508 | 12126 | lfit1 | Znfx1         | 1 |
| 4508 | 12312 | lfit1 | Ms4a6d        | 1 |
| 4508 | 12316 | lfit1 | Mpa2l         | 1 |
| 4508 | 12363 | lfit1 | Ifitm6        | 1 |
| 4508 | 12398 | lfit1 | Ifi44         | 1 |
| 4508 | 12495 | lfit1 | Casp1         | 1 |
| 4508 | 12600 | lfit1 | Ifi204        | 1 |
| 4508 | 12969 | lfit1 | Xaf1          | 1 |
| 4508 | 13156 | lfit1 | Ifit3         | 1 |
| 4508 | 13181 | lfit1 | Lcp2          | 1 |
| 4508 | 13309 | lfit1 | Tgtp          | 1 |
| 4508 | 13514 | lfit1 | Apol9b        | 1 |
| 4508 | 13522 | lfit1 | Sfn5          | 1 |
| 4508 | 13527 | lfit1 | Ctss          | 1 |
| 4508 | 13528 | lfit1 | Capn12        | 1 |
| 4508 | 13585 | lfit1 | Nckap1l       | 1 |
| 4508 | 13654 | lfit1 | Stat1         | 1 |
| 4508 | 13656 | lfit1 | Ly86          | 1 |
| 4508 | 13749 | lfit1 | Parp9         | 1 |
| 4508 | 13826 | lfit1 | Melk          | 1 |
| 4508 | 14029 | lfit1 | 2810022L02Rik | 1 |
| 4508 | 14237 | lfit1 | Rac2          | 1 |
| 4508 | 14258 | lfit1 | Ifi47         | 1 |
| 4508 | 14506 | lfit1 | Slc15a3       | 1 |
| 4508 | 14603 | lfit1 | Ly6e          | 1 |
| 4508 | 14611 | lfit1 | Ddx60         | 1 |
| 4508 | 14880 | lfit1 | Ms4a4c        | 1 |
| 4508 | 14883 | lfit1 | Itgal         | 1 |
| 4508 | 15074 | lfit1 | Usp18         | 1 |
| 4508 | 15280 | lfit1 | Cxcl10        | 1 |
| 4508 | 15348 | lfit1 | Eif2ak2       | 1 |
| 4508 | 15449 | lfit1 | Mitd1         | 1 |
| 4508 | 15504 | lfit1 | Mx2           | 1 |
| 4508 | 15572 | lfit1 | Dtx3l         | 1 |
| 4508 | 16102 | lfit1 | Cd72          | 1 |
| 4508 | 16129 | lfit1 | Trafd1        | 1 |
| 4508 | 16182 | lfit1 | Oasl1         | 1 |
| 4508 | 16186 | lfit1 | Cfp           | 1 |
| 4508 | 16199 | lfit1 | Samhd1        | 1 |
| 4508 | 16521 | lfit1 | Adar          | 1 |
| 4508 | 16572 | lfit1 | D14Ert668e    | 1 |
| 4508 | 16874 | lfit1 | Fcer1g        | 1 |
| 4508 | 16949 | lfit1 | Iigp1         | 1 |



|      |       |       |               |    |
|------|-------|-------|---------------|----|
| 4508 | 16988 | lfit1 | Clec4f        | 1  |
| 4508 | 17071 | lfit1 | Samd9l        | 1  |
| 4508 | 17197 | lfit1 | Igtp          | 1  |
| 4508 | 17412 | lfit1 | Aif1          | 1  |
| 4508 | 17904 | lfit1 | Cds1          | 1  |
| 4508 | 18064 | lfit1 | MMT00035925   | 1  |
| 4508 | 18174 | lfit1 | Stat2         | 1  |
| 4508 | 18186 | lfit1 | Parp14        | 1  |
| 4508 | 18211 | lfit1 | Folr2         | 1  |
| 4508 | 18289 | lfit1 | Tap1          | 1  |
| 4508 | 18686 | lfit1 | Zfp143        | 1  |
| 4508 | 18868 | lfit1 | Mpeg1         | 1  |
| 4508 | 19026 | lfit1 | Isg15         | 1  |
| 4508 | 19063 | lfit1 | Evl           | 1  |
| 4508 | 19189 | lfit1 | Sp100         | 1  |
| 4508 | 19252 | lfit1 | Tmsb4x        | 1  |
| 4508 | 19262 | lfit1 | Cd274         | 1  |
| 4508 | 19708 | lfit1 | Ly6a          | 1  |
| 4508 | 19738 | lfit1 | Lgals3bp      | 1  |
| 4508 | 19794 | lfit1 | Rgs2          | 1  |
| 4508 | 20321 | lfit1 | Ms4a6b        | 1  |
| 4508 | 20474 | lfit1 | Gnb3          | 1  |
| 4508 | 20791 | lfit1 | MMT00014813   | 1  |
| 4508 | 20997 | lfit1 | MMT00028135   | 1  |
| 4508 | 21351 | lfit1 | Shisa5        | 1  |
| 4508 | 21440 | lfit1 | Tmsb10        | 1  |
| 4508 | 21549 | lfit1 | Rtp4          | 1  |
| 4508 | 21824 | lfit1 | 5830443L24Rik | 1  |
| 4508 | 22037 | lfit1 | Oas1g         | 1  |
| 4508 | 22077 | lfit1 | MMT00057550   | 1  |
| 4508 | 22327 | lfit1 | Tyrobp        | 1  |
| 4508 | 22496 | lfit1 | Sfn1          | 1  |
| 4508 | 22712 | lfit1 | Phf11         | 1  |
| 4508 | 23092 | lfit1 | lfih1         | 1  |
| 4508 | 23174 | lfit1 | Psme2         | 1  |
| 4508 | 23208 | lfit1 | Hck           | 1  |
| 4508 | 23242 | lfit1 | Gngt2         | 1  |
| 4508 | 23410 | lfit1 | C1qa          | 1  |
| 4508 | 23450 | lfit1 | D12Ert647e    | 1  |
| 4512 | 1600  | Esrra | Csrp1         | -1 |
| 4512 | 2643  | Esrra | Inhbe         | -1 |
| 4512 | 2721  | Esrra | Inmt          | 1  |
| 4512 | 4056  | Esrra | Tnfaip8l1     | -1 |
| 4512 | 5691  | Esrra | Csrp3         | -1 |
| 4512 | 5804  | Esrra | Thrsp         | 1  |
| 4512 | 6746  | Esrra | E2f8          | -1 |
| 4512 | 6816  | Esrra | Slc46a3       | 1  |
| 4512 | 7492  | Esrra | Adfp          | -1 |
| 4512 | 7659  | Esrra | Rab30         | -1 |
| 4512 | 7761  | Esrra | Nudt19        | 1  |
| 4512 | 8404  | Esrra | Fa2h          | -1 |

|      |       |               |               |    |
|------|-------|---------------|---------------|----|
| 4512 | 9408  | Esrra         | Hmgcs2        | -1 |
| 4512 | 9700  | Esrra         | Prodh         | 1  |
| 4512 | 9718  | Esrra         | Fmo5          | 1  |
| 4512 | 13374 | Esrra         | Wipi1         | -1 |
| 4512 | 14100 | Esrra         | Ccnk          | 1  |
| 4512 | 16525 | Esrra         | Lbp           | -1 |
| 4512 | 17563 | Esrra         | Aldh1l1       | 1  |
| 4512 | 17638 | Esrra         | Adssl1        | 1  |
| 4512 | 17660 | Esrra         | Nlrp12        | -1 |
| 4512 | 18069 | Esrra         | Gpt           | 1  |
| 4512 | 21727 | Esrra         | Khk           | 1  |
| 4512 | 22653 | Esrra         | Ric3          | -1 |
| 4516 | 2224  | Rsad2         | Oasl2         | 1  |
| 4516 | 4114  | Rsad2         | Parp12        | 1  |
| 4516 | 6824  | Rsad2         | Irf7          | 1  |
| 4516 | 7105  | Rsad2         | Plac8         | 1  |
| 4516 | 8392  | Rsad2         | Asf1b         | 1  |
| 4516 | 9847  | Rsad2         | Ifi27         | 1  |
| 4516 | 11870 | Rsad2         | Apitd1        | 1  |
| 4516 | 16182 | Rsad2         | Oasl1         | 1  |
| 4516 | 18174 | Rsad2         | Stat2         | 1  |
| 4516 | 21440 | Rsad2         | Tmsb10        | 1  |
| 4524 | 12910 | Usp12         | 1110028A07Rik | 1  |
| 4524 | 22138 | Usp12         | Ang           | -1 |
| 4526 | 2938  | Satb1         | H2-T23        | 1  |
| 4526 | 3265  | Satb1         | Dntt          | -1 |
| 4526 | 7088  | Satb1         | Slc37a1       | 1  |
| 4526 | 14017 | Satb1         | Ces5          | -1 |
| 4526 | 18201 | Satb1         | MMT00060232   | -1 |
| 4526 | 21214 | Satb1         | Scd1          | -1 |
| 4526 | 22822 | Satb1         | MMT00013433   | 1  |
| 4531 | 5364  | EG434175      | Kif22         | 1  |
| 4531 | 8416  | EG434175      | Cdc20         | 1  |
| 4531 | 18299 | EG434175      | MMT00035424   | 1  |
| 4531 | 19318 | EG434175      | Plk1          | 1  |
| 4531 | 21692 | EG434175      | MMT00013924   | 1  |
| 4532 | 12173 | BC034090      | Acbd6         | 1  |
| 4533 | 12565 | Itgb1         | Grem2         | -1 |
| 4549 | 563   | 9930012K11Rik | D4Bwg0951e    | -1 |
| 4549 | 6564  | 9930012K11Rik | Cebpd         | -1 |
| 4549 | 7315  | 9930012K11Rik | EG624219      | 1  |
| 4549 | 7963  | 9930012K11Rik | Rxrg          | 1  |
| 4549 | 11093 | 9930012K11Rik | Zdhhc1        | -1 |
| 4549 | 13018 | 9930012K11Rik | AW544981      | 1  |
| 4549 | 13471 | 9930012K11Rik | Cln8          | -1 |
| 4549 | 17525 | 9930012K11Rik | Ctgf          | -1 |
| 4549 | 18785 | 9930012K11Rik | Angptl4       | -1 |
| 4550 | 12910 | Stard10       | 1110028A07Rik | -1 |
| 4551 | 3756  | Cyp2e1        | Chrne         | -1 |
| 4551 | 6370  | Cyp2e1        | Aqp8          | -1 |
| 4551 | 11129 | Cyp2e1        | Ankhd1        | 1  |

|      |       |               |               |    |
|------|-------|---------------|---------------|----|
| 4551 | 12910 | Cyp2e1        | 1110028A07Rik | -1 |
| 4551 | 12941 | Cyp2e1        | Elov15        | -1 |
| 4551 | 15135 | Cyp2e1        | Col5a3        | -1 |
| 4551 | 17887 | Cyp2e1        | Cryl1         | -1 |
| 4551 | 21214 | Cyp2e1        | Scd1          | -1 |
| 4551 | 22138 | Cyp2e1        | Ang           | 1  |
| 4557 | 607   | MMT00031263   | Me1           | 1  |
| 4557 | 874   | MMT00031263   | Aldh1a7       | 1  |
| 4557 | 1851  | MMT00031263   | Tmem41a       | -1 |
| 4557 | 6044  | MMT00031263   | Sucnr1        | 1  |
| 4557 | 8815  | MMT00031263   | Mx1           | 1  |
| 4557 | 10132 | MMT00031263   | Ces2          | 1  |
| 4557 | 14017 | MMT00031263   | Ces5          | 1  |
| 4557 | 14147 | MMT00031263   | Acss2         | 1  |
| 4557 | 18201 | MMT00031263   | MMT00060232   | 1  |
| 4557 | 20079 | MMT00031263   | MMT00019254   | -1 |
| 4557 | 20740 | MMT00031263   | Ola1          | 1  |
| 4557 | 21202 | MMT00031263   | Acly          | 1  |
| 4557 | 21214 | MMT00031263   | Scd1          | 1  |
| 4557 | 23026 | MMT00031263   | Apom          | -1 |
| 4558 | 5884  | Alg3          | Gstm2         | 1  |
| 4558 | 7602  | Alg3          | Pcca          | 1  |
| 4558 | 11946 | Alg3          | MMT00030953   | 1  |
| 4558 | 18201 | Alg3          | MMT00060232   | 1  |
| 4558 | 21214 | Alg3          | Scd1          | 1  |
| 4580 | 18785 | Impact        | Angptl4       | -1 |
| 4586 | 3686  | Zfp618        | Psmc9         | -1 |
| 4586 | 4708  | Zfp618        | Traf3ip2      | 1  |
| 4586 | 12420 | Zfp618        | Klhl21        | -1 |
| 4586 | 23201 | Zfp618        | S1pr1         | 1  |
| 4605 | 5364  | Myo1f         | Kif22         | 1  |
| 4605 | 11129 | Myo1f         | Ankhd1        | -1 |
| 4608 | 20385 | Lag3          | Chd1l         | 1  |
| 4612 | 11043 | Hspa5         | Hsph1         | 1  |
| 4617 | 13630 | Agpat9        | Cdkn1a        | -1 |
| 4625 | 8815  | Cwc15         | Mx1           | 1  |
| 4625 | 18201 | Cwc15         | MMT00060232   | 1  |
| 4626 | 4626  | 2310046K01Rik | 2310046K01Rik | 1  |
| 4626 | 6157  | 2310046K01Rik | MMT00041452   | -1 |
| 4626 | 9361  | 2310046K01Rik | Hand1         | 1  |
| 4626 | 13581 | 2310046K01Rik | Srxn1         | 1  |
| 4631 | 18042 | Itgb2         | Aph1c         | -1 |
| 4638 | 1603  | Alkbh4        | Lrwd1         | -1 |
| 4638 | 4638  | Alkbh4        | Alkbh4        | 1  |
| 4642 | 8444  | Dact3         | Rdh16         | -1 |
| 4642 | 20058 | Dact3         | Dnaic1        | 1  |
| 4654 | 8815  | Myl9          | Mx1           | -1 |
| 4655 | 1755  | 1810029B16Rik | Ocel1         | -1 |
| 4655 | 5433  | 1810029B16Rik | 2410004L22Rik | 1  |
| 4655 | 9304  | 1810029B16Rik | AI449175      | -1 |
| 4655 | 13732 | 1810029B16Rik | Tpm4          | 1  |

|      |       |               |               |    |
|------|-------|---------------|---------------|----|
| 4655 | 14455 | 1810029B16Rik | 2700029M09Rik | 1  |
| 4655 | 15455 | 1810029B16Rik | Lsm4          | 1  |
| 4655 | 16617 | 1810029B16Rik | Sh2d4a        | 1  |
| 4655 | 18886 | 1810029B16Rik | Slc18a1       | 1  |
| 4655 | 20484 | 1810029B16Rik | Ces1          | 1  |
| 4665 | 15740 | Dynll1        | 1810010H24Rik | -1 |
| 4671 | 12910 | Itga7         | 1110028A07Rik | 1  |
| 4674 | 1711  | Cxcl12        | Grhl1         | 1  |
| 4674 | 4056  | Cxcl12        | Tnfaip8l1     | 1  |
| 4674 | 5804  | Cxcl12        | Thrsp         | -1 |
| 4674 | 7492  | Cxcl12        | Adfp          | 1  |
| 4674 | 9408  | Cxcl12        | Hmgcs2        | 1  |
| 4674 | 9718  | Cxcl12        | Fmo5          | -1 |
| 4674 | 9842  | Cxcl12        | Qdpr          | -1 |
| 4674 | 12556 | Cxcl12        | Ass1          | -1 |
| 4674 | 16720 | Cxcl12        | Mtmr7         | -1 |
| 4674 | 17225 | Cxcl12        | Impa2         | 1  |
| 4674 | 17563 | Cxcl12        | Aldh1l1       | -1 |
| 4674 | 20385 | Cxcl12        | Chd1l         | -1 |
| 4674 | 21202 | Cxcl12        | Acly          | -1 |
| 4674 | 22406 | Cxcl12        | Vnn1          | 1  |
| 4674 | 22998 | Cxcl12        | Ass1          | -1 |
| 4674 | 23640 | Cxcl12        | Bdh1          | 1  |
| 4676 | 20433 | Cenph         | Cdca5         | 1  |
| 4682 | 7136  | Sertad4       | Id3           | 1  |
| 4686 | 2013  | BC021785      | Il15ra        | -1 |
| 4686 | 5934  | BC021785      | S100a10       | 1  |
| 4686 | 6193  | BC021785      | Lactb2        | 1  |
| 4686 | 7430  | BC021785      | Gpr137        | 1  |
| 4686 | 12219 | BC021785      | Cyb5b         | 1  |
| 4686 | 14442 | BC021785      | Ethe1         | 1  |
| 4686 | 16510 | BC021785      | Tspyl4        | 1  |
| 4686 | 18201 | BC021785      | MMT00060232   | 1  |
| 4686 | 21251 | BC021785      | Cpt1a         | -1 |
| 4686 | 22770 | BC021785      | Slc27a2       | -1 |
| 4686 | 23640 | BC021785      | Bdh1          | -1 |
| 4694 | 2224  | MMT00046622   | Oasl2         | 1  |
| 4695 | 327   | D330027H18Rik | H2-Ea         | -1 |
| 4695 | 510   | D330027H18Rik | Neu1          | 1  |
| 4695 | 763   | D330027H18Rik | 4933406E20Rik | -1 |
| 4695 | 1340  | D330027H18Rik | Tap2          | -1 |
| 4695 | 2325  | D330027H18Rik | H2-K1         | -1 |
| 4695 | 2801  | D330027H18Rik | H2-BI         | -1 |
| 4695 | 2938  | D330027H18Rik | H2-T23        | -1 |
| 4695 | 3599  | D330027H18Rik | MMT00035426   | 1  |
| 4695 | 3704  | D330027H18Rik | H2-Q7         | -1 |
| 4695 | 3857  | D330027H18Rik | 1700001C19Rik | 1  |
| 4695 | 4004  | D330027H18Rik | Thbs2         | 1  |
| 4695 | 5410  | D330027H18Rik | Cyp4f15       | 1  |
| 4695 | 5648  | D330027H18Rik | Zfp213        | 1  |
| 4695 | 6360  | D330027H18Rik | D17H6S56E-3   | 1  |

|      |       |               |               |    |
|------|-------|---------------|---------------|----|
| 4695 | 7088  | D330027H18Rik | Slc37a1       | -1 |
| 4695 | 8750  | D330027H18Rik | 1700010I14Rik | -1 |
| 4695 | 8767  | D330027H18Rik | Rgl2          | -1 |
| 4695 | 9158  | D330027H18Rik | Pde9a         | 1  |
| 4695 | 10376 | D330027H18Rik | C920025E04Rik | 1  |
| 4695 | 10394 | D330027H18Rik | MMT00028435   | -1 |
| 4695 | 10667 | D330027H18Rik | H2-Eb1        | -1 |
| 4695 | 12355 | D330027H18Rik | Al507611      | -1 |
| 4695 | 13493 | D330027H18Rik | Ring1         | 1  |
| 4695 | 13789 | D330027H18Rik | H2-Q8         | -1 |
| 4695 | 15531 | D330027H18Rik | Prickle4      | 1  |
| 4695 | 16153 | D330027H18Rik | Syngr1        | -1 |
| 4695 | 18577 | D330027H18Rik | Btd9          | 1  |
| 4695 | 18906 | D330027H18Rik | Zfand3        | -1 |
| 4695 | 20100 | D330027H18Rik | Guca1b        | 1  |
| 4695 | 20238 | D330027H18Rik | H2-T9         | -1 |
| 4695 | 20346 | D330027H18Rik | Gna-rs1       | -1 |
| 4695 | 21478 | D330027H18Rik | Loxhd1        | 1  |
| 4695 | 22822 | D330027H18Rik | MMT00013433   | -1 |
| 4695 | 23250 | D330027H18Rik | Plcl2         | -1 |
| 4695 | 23401 | D330027H18Rik | H2-Q2         | -1 |
| 4708 | 213   | Traf3ip2      | Rgs16         | -1 |
| 4708 | 269   | Traf3ip2      | Tuba1b        | 1  |
| 4708 | 274   | Traf3ip2      | Trit1         | -1 |
| 4708 | 502   | Traf3ip2      | Iars          | 1  |
| 4708 | 563   | Traf3ip2      | D4Bwg0951e    | -1 |
| 4708 | 662   | Traf3ip2      | Mid1ip1       | 1  |
| 4708 | 865   | Traf3ip2      | Npc1          | -1 |
| 4708 | 1257  | Traf3ip2      | Slc25a45      | 1  |
| 4708 | 1941  | Traf3ip2      | MMT00079618   | 1  |
| 4708 | 2322  | Traf3ip2      | Tuba4a        | 1  |
| 4708 | 2741  | Traf3ip2      | 3230401D17Rik | -1 |
| 4708 | 2868  | Traf3ip2      | Hbp1          | -1 |
| 4708 | 3603  | Traf3ip2      | BC027231      | -1 |
| 4708 | 3686  | Traf3ip2      | Psm9          | -1 |
| 4708 | 3720  | Traf3ip2      | Zbtb44        | -1 |
| 4708 | 4095  | Traf3ip2      | Trub2         | 1  |
| 4708 | 4201  | Traf3ip2      | Tubb2c        | 1  |
| 4708 | 4708  | Traf3ip2      | Traf3ip2      | 1  |
| 4708 | 4819  | Traf3ip2      | MMT00082285   | 1  |
| 4708 | 4983  | Traf3ip2      | Rabgef1       | -1 |
| 4708 | 5456  | Traf3ip2      | Rabgap1l      | -1 |
| 4708 | 5587  | Traf3ip2      | Rmnd5b        | 1  |
| 4708 | 5594  | Traf3ip2      | Erbb3         | -1 |
| 4708 | 6048  | Traf3ip2      | Psm9          | -1 |
| 4708 | 6118  | Traf3ip2      | Slc1a4        | 1  |
| 4708 | 6377  | Traf3ip2      | D18Ertd653e   | -1 |
| 4708 | 6476  | Traf3ip2      | Sntg2         | -1 |
| 4708 | 6759  | Traf3ip2      | Sqle          | 1  |
| 4708 | 6771  | Traf3ip2      | Insc          | 1  |
| 4708 | 6823  | Traf3ip2      | Yars          | 1  |

|      |       |          |               |    |
|------|-------|----------|---------------|----|
| 4708 | 7061  | Traf3ip2 | Spsb3         | 1  |
| 4708 | 7151  | Traf3ip2 | MMT00007982   | 1  |
| 4708 | 7590  | Traf3ip2 | Ankrd40       | 1  |
| 4708 | 7659  | Traf3ip2 | Rab30         | -1 |
| 4708 | 7795  | Traf3ip2 | MMT00071427   | -1 |
| 4708 | 7944  | Traf3ip2 | Al132487      | -1 |
| 4708 | 8268  | Traf3ip2 | Kctd7         | 1  |
| 4708 | 8439  | Traf3ip2 | Slc25a33      | -1 |
| 4708 | 9763  | Traf3ip2 | Tuba3b        | 1  |
| 4708 | 10250 | Traf3ip2 | Pcsk9         | 1  |
| 4708 | 10612 | Traf3ip2 | Slc24a6       | -1 |
| 4708 | 10712 | Traf3ip2 | Fchsd2        | -1 |
| 4708 | 10769 | Traf3ip2 | Hnrnpd        | 1  |
| 4708 | 11724 | Traf3ip2 | Tuba3a        | 1  |
| 4708 | 11808 | Traf3ip2 | Pck1          | -1 |
| 4708 | 12315 | Traf3ip2 | Srebf1        | 1  |
| 4708 | 12420 | Traf3ip2 | Klhl21        | -1 |
| 4708 | 12460 | Traf3ip2 | Pnpla2        | -1 |
| 4708 | 12981 | Traf3ip2 | Nek6          | 1  |
| 4708 | 13263 | Traf3ip2 | Chchd5        | -1 |
| 4708 | 13422 | Traf3ip2 | Usp3          | -1 |
| 4708 | 14099 | Traf3ip2 | Nfe2          | 1  |
| 4708 | 14400 | Traf3ip2 | Scd2          | 1  |
| 4708 | 14626 | Traf3ip2 | Zbtb2         | -1 |
| 4708 | 15659 | Traf3ip2 | MMT00074093   | 1  |
| 4708 | 15668 | Traf3ip2 | 1810032O08Rik | -1 |
| 4708 | 15862 | Traf3ip2 | Mrap          | 1  |
| 4708 | 15990 | Traf3ip2 | Dnmbp         | -1 |
| 4708 | 16060 | Traf3ip2 | Gys2          | -1 |
| 4708 | 16187 | Traf3ip2 | 6530403A03Rik | -1 |
| 4708 | 16692 | Traf3ip2 | Bat4          | -1 |
| 4708 | 17022 | Traf3ip2 | MMT00055891   | 1  |
| 4708 | 17215 | Traf3ip2 | Mvd           | 1  |
| 4708 | 17323 | Traf3ip2 | Tubb6         | 1  |
| 4708 | 17444 | Traf3ip2 | Tuba1a        | 1  |
| 4708 | 17530 | Traf3ip2 | MMT00041792   | 1  |
| 4708 | 17656 | Traf3ip2 | Hdhd3         | 1  |
| 4708 | 17660 | Traf3ip2 | Nlrp12        | -1 |
| 4708 | 17878 | Traf3ip2 | Brap          | -1 |
| 4708 | 17991 | Traf3ip2 | Fbxl20        | -1 |
| 4708 | 18271 | Traf3ip2 | MMT00007507   | 1  |
| 4708 | 18428 | Traf3ip2 | Sfrs2         | 1  |
| 4708 | 18785 | Traf3ip2 | Angptl4       | -1 |
| 4708 | 20798 | Traf3ip2 | Ccp1          | -1 |
| 4708 | 21604 | Traf3ip2 | Klhl24        | -1 |
| 4708 | 22388 | Traf3ip2 | 2410018M08Rik | -1 |
| 4708 | 22443 | Traf3ip2 | Tuba1c        | 1  |
| 4708 | 23201 | Traf3ip2 | S1pr1         | 1  |
| 4708 | 23253 | Traf3ip2 | D030011O10Rik | -1 |
| 4709 | 21214 | Prune2   | Scd1          | 1  |
| 4723 | 8807  | Art3     | Ankrd56       | -1 |

|      |       |               |               |    |
|------|-------|---------------|---------------|----|
| 4729 | 2599  | Slc7a10       | Lsm14a        | -1 |
| 4745 | 3214  | Lhfp          | Dnmt3b        | 1  |
| 4745 | 8328  | Lhfp          | Klhdc8a       | 1  |
| 4745 | 10486 | Lhfp          | 1300002K09Rik | 1  |
| 4745 | 11741 | Lhfp          | Slc30a10      | 1  |
| 4745 | 17323 | Lhfp          | Tubb6         | 1  |
| 4745 | 18827 | Lhfp          | Oprs1         | 1  |
| 4746 | 6529  | 1810007M14Rik | Apeh          | 1  |
| 4780 | 1357  | Sfrs5         | Pabpn1        | 1  |
| 4780 | 6976  | Sfrs5         | Rbm35b        | 1  |
| 4785 | 21727 | ORF63         | Khk           | -1 |
| 4794 | 2127  | Gsdmd         | Ldha          | 1  |
| 4794 | 2200  | Gsdmd         | BC006779      | 1  |
| 4794 | 3535  | Gsdmd         | S100a9        | 1  |
| 4794 | 4686  | Gsdmd         | BC021785      | 1  |
| 4794 | 5364  | Gsdmd         | Kif22         | 1  |
| 4794 | 5472  | Gsdmd         | Mppe1         | 1  |
| 4794 | 5574  | Gsdmd         | Hsd3b7        | 1  |
| 4794 | 5766  | Gsdmd         | 5033414D02Rik | 1  |
| 4794 | 7238  | Gsdmd         | Pycard        | 1  |
| 4794 | 7963  | Gsdmd         | Rxrg          | 1  |
| 4794 | 8328  | Gsdmd         | Klhdc8a       | 1  |
| 4794 | 8773  | Gsdmd         | MMT00027093   | 1  |
| 4794 | 10606 | Gsdmd         | Apbb1ip       | 1  |
| 4794 | 10808 | Gsdmd         | Rab7l1        | 1  |
| 4794 | 11599 | Gsdmd         | Coq10b        | -1 |
| 4794 | 13431 | Gsdmd         | MMT00038058   | 1  |
| 4794 | 14258 | Gsdmd         | Ifi47         | 1  |
| 4794 | 15205 | Gsdmd         | MMT00030262   | 1  |
| 4794 | 15500 | Gsdmd         | MMT00081411   | 1  |
| 4794 | 16580 | Gsdmd         | Tnfaip2       | 1  |
| 4794 | 17880 | Gsdmd         | Ncald         | 1  |
| 4794 | 19794 | Gsdmd         | Rgs2          | 1  |
| 4794 | 22978 | Gsdmd         | MMT00043176   | 1  |
| 4794 | 23208 | Gsdmd         | Hck           | 1  |
| 4801 | 8815  | MMT00057721   | Mx1           | 1  |
| 4801 | 21214 | MMT00057721   | Scd1          | 1  |
| 4802 | 9899  | 5430433G21Rik | D13Wsu177e    | 1  |
| 4802 | 11462 | 5430433G21Rik | Gpam          | -1 |
| 4802 | 20058 | 5430433G21Rik | Dnaic1        | 1  |
| 4810 | 5934  | Vsig8         | S100a10       | 1  |
| 4819 | 2126  | MMT00082285   | Dgat2         | 1  |
| 4819 | 2636  | MMT00082285   | Tars          | -1 |
| 4819 | 3836  | MMT00082285   | 2200001115Rik | -1 |
| 4819 | 6386  | MMT00082285   | Por           | 1  |
| 4819 | 6912  | MMT00082285   | Crym          | 1  |
| 4819 | 7414  | MMT00082285   | Clpx          | -1 |
| 4819 | 7492  | MMT00082285   | Adfp          | -1 |
| 4819 | 7761  | MMT00082285   | Nudt19        | 1  |
| 4819 | 11633 | MMT00082285   | Ier3          | 1  |
| 4819 | 13078 | MMT00082285   | Eps8l2        | -1 |

|      |       |             |               |    |
|------|-------|-------------|---------------|----|
| 4819 | 13271 | MMT00082285 | Idh2          | 1  |
| 4819 | 15709 | MMT00082285 | Tceal1        | 1  |
| 4819 | 18455 | MMT00082285 | Mtnr1a        | -1 |
| 4819 | 18590 | MMT00082285 | Fgb           | -1 |
| 4832 | 5068  | Nxn12       | Afap112       | 1  |
| 4832 | 20058 | Nxn12       | Dnaic1        | 1  |
| 4836 | 6297  | Gtf2h3      | 2310079F23Rik | 1  |
| 4843 | 11129 | Oma1        | Ankhd1        | 1  |
| 4843 | 16647 | Oma1        | D16H22S680E   | 1  |
| 4848 | 12910 | Flt3        | 1110028A07Rik | 1  |
| 4851 | 7619  | Gpn2        | Pik3ip1       | -1 |
| 4864 | 2399  | S100a16     | MMT00060167   | 1  |
| 4864 | 2636  | S100a16     | Tars          | 1  |
| 4864 | 2766  | S100a16     | Elp4          | 1  |
| 4864 | 3868  | S100a16     | Ebpl          | 1  |
| 4864 | 5802  | S100a16     | Mad2l2        | 1  |
| 4864 | 6370  | S100a16     | Aqp8          | 1  |
| 4864 | 6386  | S100a16     | Por           | -1 |
| 4864 | 7414  | S100a16     | C1px          | 1  |
| 4864 | 10775 | S100a16     | Slc16a1       | 1  |
| 4864 | 11741 | S100a16     | Slc30a10      | 1  |
| 4864 | 12420 | S100a16     | Klhl21        | -1 |
| 4864 | 12941 | S100a16     | Elov5         | 1  |
| 4864 | 15709 | S100a16     | Tceal1        | -1 |
| 4864 | 17247 | S100a16     | A030007L17Rik | 1  |
| 4864 | 18179 | S100a16     | Dbp           | -1 |
| 4864 | 18827 | S100a16     | Oprs1         | 1  |
| 4864 | 22138 | S100a16     | Ang           | -1 |
| 4868 | 470   | Mertk       | MMT00076063   | 1  |
| 4868 | 2110  | Mertk       | Gtf2ird1      | -1 |
| 4868 | 2294  | Mertk       | AU040829      | 1  |
| 4868 | 2529  | Mertk       | Hmcn2         | 1  |
| 4868 | 2794  | Mertk       | Map3k6        | 1  |
| 4868 | 3170  | Mertk       | Mcart1        | 1  |
| 4868 | 3196  | Mertk       | Tat           | 1  |
| 4868 | 3214  | Mertk       | Dnmt3b        | -1 |
| 4868 | 3452  | Mertk       | Ccrn4l        | 1  |
| 4868 | 3502  | Mertk       | Gde1          | 1  |
| 4868 | 4286  | Mertk       | Ptp4a1        | 1  |
| 4868 | 4708  | Mertk       | Traf3ip2      | -1 |
| 4868 | 5856  | Mertk       | Mfsd2         | 1  |
| 4868 | 6282  | Mertk       | Them4         | 1  |
| 4868 | 6386  | Mertk       | Por           | 1  |
| 4868 | 6756  | Mertk       | Sds           | 1  |
| 4868 | 6928  | Mertk       | Klhl8         | -1 |
| 4868 | 7963  | Mertk       | Rxrg          | -1 |
| 4868 | 8399  | Mertk       | Herpud1       | 1  |
| 4868 | 8428  | Mertk       | Sorbs3        | 1  |
| 4868 | 11093 | Mertk       | Zdhhc1        | 1  |
| 4868 | 11129 | Mertk       | Ankhd1        | 1  |
| 4868 | 11599 | Mertk       | Coq10b        | 1  |



|      |       |               |               |    |
|------|-------|---------------|---------------|----|
| 4868 | 11808 | Mertk         | Pck1          | 1  |
| 4868 | 12420 | Mertk         | Klh121        | 1  |
| 4868 | 12436 | Mertk         | Serinc3       | 1  |
| 4868 | 12761 | Mertk         | Tsc22d3       | 1  |
| 4868 | 13289 | Mertk         | Dusp10        | -1 |
| 4868 | 14041 | Mertk         | Cldn1         | -1 |
| 4868 | 14620 | Mertk         | Tbc1d8        | 1  |
| 4868 | 15008 | Mertk         | Chrdl2        | 1  |
| 4868 | 15021 | Mertk         | Ppargc1a      | 1  |
| 4868 | 15631 | Mertk         | Lpin1         | 1  |
| 4868 | 15709 | Mertk         | Tceal1        | 1  |
| 4868 | 15882 | Mertk         | AA986860      | 1  |
| 4868 | 16176 | Mertk         | St3gal5       | 1  |
| 4868 | 16580 | Mertk         | Tnfaip2       | -1 |
| 4868 | 16669 | Mertk         | Tjp2          | -1 |
| 4868 | 17622 | Mertk         | Foxo1         | 1  |
| 4868 | 18027 | Mertk         | 5730403B10Rik | 1  |
| 4868 | 18314 | Mertk         | 4631416L12Rik | 1  |
| 4868 | 19025 | Mertk         | Slc37a4       | 1  |
| 4868 | 19146 | Mertk         | N4bp2l1       | 1  |
| 4868 | 19375 | Mertk         | Inhba         | -1 |
| 4868 | 19466 | Mertk         | Pptc7         | 1  |
| 4868 | 19671 | Mertk         | Upp2          | 1  |
| 4868 | 19723 | Mertk         | Pfkfb1        | 1  |
| 4868 | 21041 | Mertk         | Cyp17a1       | 1  |
| 4868 | 21142 | Mertk         | Gm129         | 1  |
| 4868 | 21331 | Mertk         | Slc10a6       | 1  |
| 4868 | 21934 | Mertk         | Id2           | -1 |
| 4868 | 22681 | Mertk         | Gm88          | 1  |
| 4868 | 22873 | Mertk         | Slc38a2       | 1  |
| 4868 | 23183 | Mertk         | Nnmt          | 1  |
| 4901 | 5934  | MMT00073557   | S100a10       | 1  |
| 4901 | 11129 | MMT00073557   | Ankhd1        | -1 |
| 4901 | 12730 | MMT00073557   | 9130019O22Rik | -1 |
| 4901 | 16598 | MMT00073557   | E430018J23Rik | 1  |
| 4901 | 18827 | MMT00073557   | Oprs1         | 1  |
| 4901 | 21251 | MMT00073557   | Cpt1a         | -1 |
| 4901 | 22138 | MMT00073557   | Ang           | -1 |
| 4906 | 15631 | A830059I20Rik | Lpin1         | -1 |
| 4906 | 16580 | A830059I20Rik | Tnfaip2       | 1  |
| 4906 | 17525 | A830059I20Rik | Ctgf          | -1 |
| 4915 | 4833  | Asb18         | Synpo2        | 1  |
| 4933 | 3587  | Clec14a       | MMT00041940   | -1 |
| 4933 | 6976  | Clec14a       | Rbm35b        | 1  |
| 4933 | 8670  | Clec14a       | MMT00051613   | -1 |
| 4933 | 9258  | Clec14a       | P4ha1         | -1 |
| 4933 | 15675 | Clec14a       | MMT00077535   | -1 |
| 4933 | 22216 | Clec14a       | Sp5           | 1  |
| 4938 | 4938  | Mccc2         | Mccc2         | 1  |
| 4938 | 18492 | Mccc2         | Dhfr          | -1 |
| 4938 | 23301 | Mccc2         | Scamp1        | -1 |

|      |       |               |               |    |
|------|-------|---------------|---------------|----|
| 4950 | 14298 | Dnajb10       | Atp2a2        | 1  |
| 4959 | 873   | Optn          | Slc22a3       | 1  |
| 4959 | 1711  | Optn          | Grhl1         | -1 |
| 4959 | 8444  | Optn          | Rdh16         | 1  |
| 4959 | 19790 | Optn          | Polg2         | 1  |
| 4959 | 20058 | Optn          | Dnaic1        | -1 |
| 4959 | 21727 | Optn          | Khk           | 1  |
| 4988 | 6193  | 2400001E08Rik | Lactb2        | 1  |
| 4988 | 8815  | 2400001E08Rik | Mx1           | 1  |
| 4988 | 21214 | 2400001E08Rik | Scd1          | 1  |
| 4988 | 21575 | 2400001E08Rik | Cyp2c55       | 1  |
| 4988 | 22138 | 2400001E08Rik | Ang           | -1 |
| 4996 | 12941 | Echdc3        | Elov5         | -1 |
| 4996 | 21214 | Echdc3        | Scd1          | -1 |
| 4997 | 1257  | Trim24        | Slc25a45      | -1 |
| 4997 | 7862  | Trim24        | Cpsf4l        | 1  |
| 4997 | 12420 | Trim24        | Klhl21        | 1  |
| 4997 | 15015 | Trim24        | G3bp1         | -1 |
| 4997 | 21811 | Trim24        | Ak3l1         | 1  |
| 5002 | 5002  | lfi202b       | lfi202b       | 1  |
| 5002 | 15844 | lfi202b       | Klhdc9        | 1  |
| 5003 | 23201 | 2410081M15Rik | S1pr1         | 1  |
| 5011 | 3377  | A930016P21Rik | Cs            | 1  |
| 5011 | 18201 | A930016P21Rik | MMT00060232   | 1  |
| 5011 | 20019 | A930016P21Rik | Qdpr          | 1  |
| 5011 | 20328 | A930016P21Rik | Csl           | 1  |
| 5011 | 21214 | A930016P21Rik | Scd1          | 1  |
| 5014 | 2945  | MMT00017503   | MMT00005190   | 1  |
| 5014 | 5014  | MMT00017503   | MMT00017503   | 1  |
| 5014 | 5968  | MMT00017503   | MMT00012419   | 1  |
| 5014 | 8341  | MMT00017503   | MMT00017270   | 1  |
| 5014 | 9909  | MMT00017503   | MMT00077883   | 1  |
| 5014 | 14132 | MMT00017503   | Glo1          | -1 |
| 5014 | 14924 | MMT00017503   | Hn1l          | -1 |
| 5014 | 19064 | MMT00017503   | MMT00004867   | -1 |
| 5014 | 19929 | MMT00017503   | MMT00079667   | 1  |
| 5017 | 433   | Plat          | Pla2g12b      | 1  |
| 5017 | 1767  | Plat          | BC016495      | -1 |
| 5017 | 1876  | Plat          | Amdhd1        | 1  |
| 5017 | 3214  | Plat          | Dnmt3b        | 1  |
| 5017 | 3410  | Plat          | Paqr9         | 1  |
| 5017 | 5364  | Plat          | Kif22         | 1  |
| 5017 | 5574  | Plat          | Hsd3b7        | 1  |
| 5017 | 5802  | Plat          | Mad2l2        | 1  |
| 5017 | 8328  | Plat          | Klhdc8a       | 1  |
| 5017 | 10486 | Plat          | 1300002K09Rik | 1  |
| 5017 | 11599 | Plat          | Coq10b        | -1 |
| 5017 | 11741 | Plat          | Slc30a10      | 1  |
| 5017 | 12687 | Plat          | Zc3h8         | -1 |
| 5017 | 16060 | Plat          | Gys2          | -1 |
| 5017 | 16690 | Plat          | Tjp3          | 1  |

|      |       |         |                    |    |
|------|-------|---------|--------------------|----|
| 5017 | 18147 | Plat    | Nhlrc2             | -1 |
| 5017 | 18296 | Plat    | Pcgf5              | -1 |
| 5021 | 1867  | Gdap2   | Bcas2              | -1 |
| 5021 | 3753  | Gdap2   | Setdb1             | 1  |
| 5021 | 6206  | Gdap2   | MMT00063701        | -1 |
| 5021 | 10521 | Gdap2   | Ttf2               | -1 |
| 5021 | 11611 | Gdap2   | S100a13            | 1  |
| 5021 | 16416 | Gdap2   | Commd2             | -1 |
| 5021 | 22202 | Gdap2   | OTTMUSG00000021274 | 1  |
| 5027 | 2294  | Pde4b   | AU040829           | -1 |
| 5044 | 143   | Ifi35   | Gvin1              | 1  |
| 5044 | 2550  | Ifi35   | MMT00036681        | 1  |
| 5044 | 4114  | Ifi35   | Parp12             | 1  |
| 5044 | 4508  | Ifi35   | Ifit1              | 1  |
| 5044 | 5044  | Ifi35   | Ifi35              | 1  |
| 5044 | 5250  | Ifi35   | Ifit2              | 1  |
| 5044 | 5853  | Ifi35   | Trim30             | 1  |
| 5044 | 7316  | Ifi35   | Ifi204             | 1  |
| 5044 | 8800  | Ifi35   | Rnf213             | 1  |
| 5044 | 10109 | Ifi35   | Gbp3               | 1  |
| 5044 | 11009 | Ifi35   | MMT00008885        | 1  |
| 5044 | 11204 | Ifi35   | AI451617           | 1  |
| 5044 | 11265 | Ifi35   | Irgm               | 1  |
| 5044 | 12600 | Ifi35   | Ifi204             | 1  |
| 5044 | 12969 | Ifi35   | Xaf1               | 1  |
| 5044 | 13156 | Ifi35   | Ifit3              | 1  |
| 5044 | 13514 | Ifi35   | Apol9b             | 1  |
| 5044 | 13654 | Ifi35   | Stat1              | 1  |
| 5044 | 14611 | Ifi35   | Ddx60              | 1  |
| 5044 | 15074 | Ifi35   | Usp18              | 1  |
| 5044 | 15449 | Ifi35   | Mitd1              | 1  |
| 5044 | 15504 | Ifi35   | Mx2                | 1  |
| 5044 | 16182 | Ifi35   | Oasl1              | 1  |
| 5044 | 16572 | Ifi35   | D14Ertd668e        | 1  |
| 5044 | 17071 | Ifi35   | Samd9l             | 1  |
| 5044 | 17197 | Ifi35   | Igtp               | 1  |
| 5044 | 18174 | Ifi35   | Stat2              | 1  |
| 5044 | 20997 | Ifi35   | MMT00028135        | 1  |
| 5044 | 21549 | Ifi35   | Rtp4               | 1  |
| 5051 | 15059 | Angpt1  | Mogat1             | -1 |
| 5054 | 8444  | Zfp821  | Rdh16              | -1 |
| 5068 | 147   | Afap1l2 | Uox                | -1 |
| 5068 | 250   | Afap1l2 | Tubb2a-ps2         | 1  |
| 5068 | 269   | Afap1l2 | Tuba1b             | 1  |
| 5068 | 402   | Afap1l2 | Timp3              | -1 |
| 5068 | 563   | Afap1l2 | D4Bwg0951e         | -1 |
| 5068 | 609   | Afap1l2 | MMT00060868        | 1  |
| 5068 | 719   | Afap1l2 | Usp2               | -1 |
| 5068 | 760   | Afap1l2 | Akr1c19            | -1 |
| 5068 | 1767  | Afap1l2 | BC016495           | -1 |
| 5068 | 1853  | Afap1l2 | Stat5a             | 1  |

|      |       |         |               |    |
|------|-------|---------|---------------|----|
| 5068 | 1941  | Afap1I2 | MMT00079618   | 1  |
| 5068 | 2322  | Afap1I2 | Tuba4a        | 1  |
| 5068 | 2794  | Afap1I2 | Map3k6        | -1 |
| 5068 | 2829  | Afap1I2 | Lrfr3         | 1  |
| 5068 | 2850  | Afap1I2 | Slc16a6       | 1  |
| 5068 | 3214  | Afap1I2 | Dnmt3b        | 1  |
| 5068 | 3246  | Afap1I2 | Prei4         | -1 |
| 5068 | 3410  | Afap1I2 | Paqr9         | 1  |
| 5068 | 3804  | Afap1I2 | MMT00015534   | 1  |
| 5068 | 4201  | Afap1I2 | Tubb2c        | 1  |
| 5068 | 4235  | Afap1I2 | Pfkfb3        | -1 |
| 5068 | 4286  | Afap1I2 | Ptp4a1        | -1 |
| 5068 | 4534  | Afap1I2 | Ndel1         | -1 |
| 5068 | 4708  | Afap1I2 | Traf3ip2      | 1  |
| 5068 | 5068  | Afap1I2 | Afap1I2       | 1  |
| 5068 | 5183  | Afap1I2 | St5           | 1  |
| 5068 | 5374  | Afap1I2 | Chka          | 1  |
| 5068 | 5574  | Afap1I2 | Hsd3b7        | 1  |
| 5068 | 5587  | Afap1I2 | Rmnd5b        | 1  |
| 5068 | 5849  | Afap1I2 | 2310031A18Rik | 1  |
| 5068 | 5974  | Afap1I2 | Arntl         | 1  |
| 5068 | 6386  | Afap1I2 | Por           | -1 |
| 5068 | 6476  | Afap1I2 | Sntg2         | -1 |
| 5068 | 6490  | Afap1I2 | Ii1r1         | -1 |
| 5068 | 6756  | Afap1I2 | Sds           | -1 |
| 5068 | 6990  | Afap1I2 | Nr1i2         | -1 |
| 5068 | 7061  | Afap1I2 | Spsb3         | 1  |
| 5068 | 7151  | Afap1I2 | MMT00007982   | 1  |
| 5068 | 7862  | Afap1I2 | Cpsf4l        | -1 |
| 5068 | 8054  | Afap1I2 | Smarca2       | -1 |
| 5068 | 8328  | Afap1I2 | Klhdc8a       | 1  |
| 5068 | 8399  | Afap1I2 | Herpud1       | -1 |
| 5068 | 8641  | Afap1I2 | Slc7a2        | -1 |
| 5068 | 9275  | Afap1I2 | Aass          | -1 |
| 5068 | 9495  | Afap1I2 | Srms          | 1  |
| 5068 | 9763  | Afap1I2 | Tuba3b        | 1  |
| 5068 | 10215 | Afap1I2 | Nampt         | -1 |
| 5068 | 10486 | Afap1I2 | 1300002K09Rik | 1  |
| 5068 | 10712 | Afap1I2 | Fchsd2        | -1 |
| 5068 | 10775 | Afap1I2 | Slc16a1       | 1  |
| 5068 | 11093 | Afap1I2 | Zdhhc1        | -1 |
| 5068 | 11129 | Afap1I2 | Ankhd1        | -1 |
| 5068 | 11599 | Afap1I2 | Coq10b        | -1 |
| 5068 | 11724 | Afap1I2 | Tuba3a        | 1  |
| 5068 | 11741 | Afap1I2 | Slc30a10      | 1  |
| 5068 | 11808 | Afap1I2 | Pck1          | -1 |
| 5068 | 11949 | Afap1I2 | Cldn3         | 1  |
| 5068 | 12151 | Afap1I2 | MMT00082650   | -1 |
| 5068 | 12420 | Afap1I2 | Klhl21        | -1 |
| 5068 | 12489 | Afap1I2 | Wdr8          | 1  |
| 5068 | 12565 | Afap1I2 | Grem2         | -1 |

|      |       |         |               |    |
|------|-------|---------|---------------|----|
| 5068 | 12799 | Afap1I2 | Spon2         | 1  |
| 5068 | 12904 | Afap1I2 | MMT00040704   | -1 |
| 5068 | 13339 | Afap1I2 | D630042F21Rik | -1 |
| 5068 | 13471 | Afap1I2 | Cln8          | -1 |
| 5068 | 13705 | Afap1I2 | Osbp1a        | -1 |
| 5068 | 13733 | Afap1I2 | Setd3         | -1 |
| 5068 | 13989 | Afap1I2 | Foxp3         | -1 |
| 5068 | 14041 | Afap1I2 | Cldn1         | 1  |
| 5068 | 14462 | Afap1I2 | Zfp385b       | -1 |
| 5068 | 14806 | Afap1I2 | Ccdc45        | -1 |
| 5068 | 15021 | Afap1I2 | Ppargc1a      | -1 |
| 5068 | 15258 | Afap1I2 | Coil          | 1  |
| 5068 | 15609 | Afap1I2 | Mreg          | 1  |
| 5068 | 15624 | Afap1I2 | Crcp          | -1 |
| 5068 | 15631 | Afap1I2 | Lpin1         | -1 |
| 5068 | 15709 | Afap1I2 | Tceal1        | -1 |
| 5068 | 15882 | Afap1I2 | AA986860      | -1 |
| 5068 | 16060 | Afap1I2 | Gys2          | -1 |
| 5068 | 16176 | Afap1I2 | St3gal5       | -1 |
| 5068 | 16580 | Afap1I2 | Tnfaip2       | 1  |
| 5068 | 16647 | Afap1I2 | D16H22S680E   | -1 |
| 5068 | 16669 | Afap1I2 | Tjp2          | 1  |
| 5068 | 16690 | Afap1I2 | Tjp3          | 1  |
| 5068 | 16720 | Afap1I2 | Mtmr7         | -1 |
| 5068 | 16851 | Afap1I2 | Slc34a2       | 1  |
| 5068 | 17078 | Afap1I2 | Syde2         | -1 |
| 5068 | 17323 | Afap1I2 | Tubb6         | 1  |
| 5068 | 17444 | Afap1I2 | Tuba1a        | 1  |
| 5068 | 17525 | Afap1I2 | Ctgf          | -1 |
| 5068 | 17530 | Afap1I2 | MMT00041792   | 1  |
| 5068 | 17622 | Afap1I2 | Foxo1         | -1 |
| 5068 | 17876 | Afap1I2 | Tubb4         | 1  |
| 5068 | 17884 | Afap1I2 | Lnx2          | 1  |
| 5068 | 18027 | Afap1I2 | 5730403B10Rik | -1 |
| 5068 | 18250 | Afap1I2 | Mmp14         | 1  |
| 5068 | 18314 | Afap1I2 | 4631416L12Rik | -1 |
| 5068 | 18756 | Afap1I2 | Tspan14       | 1  |
| 5068 | 18827 | Afap1I2 | Oprs1         | 1  |
| 5068 | 19025 | Afap1I2 | Slc37a4       | -1 |
| 5068 | 19146 | Afap1I2 | N4bp2l1       | -1 |
| 5068 | 19234 | Afap1I2 | Nrg4          | -1 |
| 5068 | 19466 | Afap1I2 | Pptc7         | -1 |
| 5068 | 19671 | Afap1I2 | Upp2          | -1 |
| 5068 | 19723 | Afap1I2 | Pfkfb1        | -1 |
| 5068 | 20085 | Afap1I2 | Lpin2         | -1 |
| 5068 | 20803 | Afap1I2 | Tmem50a       | -1 |
| 5068 | 21142 | Afap1I2 | Gm129         | -1 |
| 5068 | 21331 | Afap1I2 | Slc10a6       | -1 |
| 5068 | 21531 | Afap1I2 | Ttc23         | -1 |
| 5068 | 21733 | Afap1I2 | Rhebl1        | -1 |
| 5068 | 21918 | Afap1I2 | Snx24         | 1  |

|      |       |         |               |    |
|------|-------|---------|---------------|----|
| 5068 | 22290 | Afap1I2 | Tubb2a        | 1  |
| 5068 | 22443 | Afap1I2 | Tuba1c        | 1  |
| 5068 | 22630 | Afap1I2 | MMT00034355   | 1  |
| 5068 | 22936 | Afap1I2 | Rhobtb1       | -1 |
| 5068 | 23201 | Afap1I2 | S1pr1         | 1  |
| 5068 | 23202 | Afap1I2 | Olf59         | -1 |
| 5068 | 23248 | Afap1I2 | Tesk2         | -1 |
| 5068 | 23253 | Afap1I2 | D030011O10Rik | -1 |
| 5068 | 23558 | Afap1I2 | MMT00030937   | -1 |
| 5076 | 2766  | Tmem57  | Elp4          | -1 |
| 5076 | 3502  | Tmem57  | Gde1          | 1  |
| 5076 | 5364  | Tmem57  | Kif22         | -1 |
| 5076 | 5802  | Tmem57  | Mad2l2        | -1 |
| 5076 | 6370  | Tmem57  | Aqp8          | -1 |
| 5076 | 6386  | Tmem57  | Por           | 1  |
| 5076 | 7973  | Tmem57  | Lgals9        | -1 |
| 5076 | 10486 | Tmem57  | 1300002K09Rik | -1 |
| 5076 | 11129 | Tmem57  | Ankhd1        | 1  |
| 5076 | 11741 | Tmem57  | Slc30a10      | -1 |
| 5076 | 12799 | Tmem57  | Spon2         | -1 |
| 5076 | 12941 | Tmem57  | Elovl5        | -1 |
| 5076 | 17338 | Tmem57  | Mocos         | -1 |
| 5076 | 18827 | Tmem57  | Oprs1         | -1 |
| 5076 | 22138 | Tmem57  | Ang           | 1  |
| 5092 | 18299 | Ydjc    | MMT00035424   | 1  |
| 5113 | 269   | Nxn1    | Tuba1b        | -1 |
| 5113 | 662   | Nxn1    | Mid1ip1       | -1 |
| 5113 | 1941  | Nxn1    | MMT00079618   | -1 |
| 5113 | 2051  | Nxn1    | Ddx27         | 1  |
| 5113 | 2322  | Nxn1    | Tuba4a        | -1 |
| 5113 | 3326  | Nxn1    | Lysmd2        | 1  |
| 5113 | 3603  | Nxn1    | BC027231      | 1  |
| 5113 | 3686  | Nxn1    | Psmc9         | 1  |
| 5113 | 4897  | Nxn1    | Ciao1         | 1  |
| 5113 | 6048  | Nxn1    | Psmc9         | 1  |
| 5113 | 6197  | Nxn1    | Lss           | -1 |
| 5113 | 6771  | Nxn1    | Insc          | -1 |
| 5113 | 7751  | Nxn1    | Sgk2          | -1 |
| 5113 | 8896  | Nxn1    | Fasn          | -1 |
| 5113 | 9172  | Nxn1    | Tmem131       | 1  |
| 5113 | 9514  | Nxn1    | Vps37a        | 1  |
| 5113 | 9763  | Nxn1    | Tuba3b        | -1 |
| 5113 | 10745 | Nxn1    | Gale          | -1 |
| 5113 | 11129 | Nxn1    | Ankhd1        | 1  |
| 5113 | 11462 | Nxn1    | Gpam          | -1 |
| 5113 | 11724 | Nxn1    | Tuba3a        | -1 |
| 5113 | 12143 | Nxn1    | Thyn1         | -1 |
| 5113 | 12315 | Nxn1    | Srebf1        | -1 |
| 5113 | 12460 | Nxn1    | Pnpla2        | 1  |
| 5113 | 14099 | Nxn1    | Nfe2          | -1 |
| 5113 | 14870 | Nxn1    | Capn2         | -1 |

|      |       |               |               |    |
|------|-------|---------------|---------------|----|
| 5113 | 15758 | Nxn1          | Stx4a         | -1 |
| 5113 | 15935 | Nxn1          | Pnp1a3        | -1 |
| 5113 | 15996 | Nxn1          | Grtp1         | 1  |
| 5113 | 16647 | Nxn1          | D16H22S680E   | 1  |
| 5113 | 18428 | Nxn1          | Sfrs2         | -1 |
| 5113 | 18653 | Nxn1          | MMT00072901   | 1  |
| 5113 | 18785 | Nxn1          | Angptl4       | 1  |
| 5113 | 18886 | Nxn1          | Slc18a1       | 1  |
| 5113 | 20798 | Nxn1          | Ccp1          | 1  |
| 5113 | 21202 | Nxn1          | Acly          | -1 |
| 5113 | 21251 | Nxn1          | Cpt1a         | 1  |
| 5113 | 21408 | Nxn1          | Svil          | -1 |
| 5113 | 21664 | Nxn1          | Insig1        | -1 |
| 5113 | 22443 | Nxn1          | Tuba1c        | -1 |
| 5120 | 8844  | Alkbh7        | 2310037124Rik | -1 |
| 5123 | 5123  | Zfp191        | Zfp191        | 1  |
| 5127 | 5364  | Kif20b        | Kif22         | 1  |
| 5127 | 8416  | Kif20b        | Cdc20         | 1  |
| 5132 | 20079 | 1600016N20Rik | MMT00019254   | 1  |
| 5159 | 21214 | MMT00020962   | Scd1          | 1  |
| 5183 | 3686  | St5           | Psm19         | -1 |
| 5183 | 7659  | St5           | Rab30         | -1 |
| 5183 | 12315 | St5           | Sreb1         | 1  |
| 5183 | 18785 | St5           | Angptl4       | -1 |
| 5188 | 19115 | Cma1          | Rab32         | 1  |
| 5188 | 22146 | Cma1          | Aifm2         | -1 |
| 5208 | 21692 | Plod2         | MMT00013924   | 1  |
| 5215 | 22138 | Col6a1        | Ang           | -1 |
| 5216 | 4516  | Spnb5         | Rsad2         | 1  |
| 5216 | 11009 | Spnb5         | MMT00008885   | 1  |
| 5220 | 11375 | MMT00037083   | Derl2         | 1  |
| 5227 | 2126  | 2310008M10Rik | Dgat2         | -1 |
| 5227 | 2636  | 2310008M10Rik | Tars          | 1  |
| 5227 | 2850  | 2310008M10Rik | Slc16a6       | 1  |
| 5227 | 4612  | 2310008M10Rik | Hspa5         | 1  |
| 5227 | 4966  | 2310008M10Rik | Zscan20       | 1  |
| 5227 | 7619  | 2310008M10Rik | Pik3ip1       | -1 |
| 5227 | 7761  | 2310008M10Rik | Nudt19        | -1 |
| 5227 | 7862  | 2310008M10Rik | Cpsf4l        | -1 |
| 5227 | 9594  | 2310008M10Rik | Asb13         | 1  |
| 5227 | 11741 | 2310008M10Rik | Slc30a10      | 1  |
| 5227 | 14380 | 2310008M10Rik | MMT00051866   | 1  |
| 5227 | 18069 | 2310008M10Rik | Gpt           | -1 |
| 5227 | 18179 | 2310008M10Rik | Dbp           | -1 |
| 5229 | 3565  | Katna1        | MMT00045908   | 1  |
| 5229 | 13293 | Katna1        | Gsta2         | 1  |
| 5229 | 20058 | Katna1        | Dnaic1        | -1 |
| 5229 | 21727 | Katna1        | Khk           | 1  |
| 5230 | 17314 | MMT00077995   | Napa          | 1  |
| 5230 | 19462 | MMT00077995   | 4933439C20Rik | 1  |
| 5232 | 20058 | Arhgef16      | Dnaic1        | 1  |

|      |       |       |               |    |
|------|-------|-------|---------------|----|
| 5233 | 6044  | Pcbd1 | Sucnr1        | 1  |
| 5233 | 12910 | Pcbd1 | 1110028A07Rik | 1  |
| 5233 | 22138 | Pcbd1 | Ang           | -1 |
| 5233 | 23549 | Pcbd1 | Es22          | 1  |
| 5242 | 12761 | Gata3 | Tsc22d3       | -1 |
| 5247 | 12910 | Irak2 | 1110028A07Rik | 1  |
| 5250 | 143   | Ifit2 | Gvin1         | 1  |
| 5250 | 701   | Ifit2 | Polr3g        | -1 |
| 5250 | 860   | Ifit2 | Psmb10        | 1  |
| 5250 | 1533  | Ifit2 | BC013712      | 1  |
| 5250 | 2200  | Ifit2 | BC006779      | 1  |
| 5250 | 2224  | Ifit2 | Oasl2         | 1  |
| 5250 | 2550  | Ifit2 | MMT00036681   | 1  |
| 5250 | 2752  | Ifit2 | Fcgr1         | 1  |
| 5250 | 3426  | Ifit2 | Hap1          | 1  |
| 5250 | 3523  | Ifit2 | Trim34        | 1  |
| 5250 | 3594  | Ifit2 | Rasa4         | 1  |
| 5250 | 3659  | Ifit2 | EG236451      | 1  |
| 5250 | 3683  | Ifit2 | Oas2          | 1  |
| 5250 | 4114  | Ifit2 | Parp12        | 1  |
| 5250 | 4409  | Ifit2 | 5430435G22Rik | 1  |
| 5250 | 4426  | Ifit2 | Ilgp2         | 1  |
| 5250 | 4508  | Ifit2 | Ifit1         | 1  |
| 5250 | 4516  | Ifit2 | Rsad2         | 1  |
| 5250 | 5044  | Ifit2 | Ifi35         | 1  |
| 5250 | 5216  | Ifit2 | Spnb5         | 1  |
| 5250 | 5250  | Ifit2 | Ifit2         | 1  |
| 5250 | 5556  | Ifit2 | Ccl4          | 1  |
| 5250 | 5766  | Ifit2 | 5033414D02Rik | 1  |
| 5250 | 5845  | Ifit2 | Il18bp        | 1  |
| 5250 | 5853  | Ifit2 | Trim30        | 1  |
| 5250 | 5949  | Ifit2 | Zbp1          | 1  |
| 5250 | 5975  | Ifit2 | Car13         | 1  |
| 5250 | 6072  | Ifit2 | C1qc          | 1  |
| 5250 | 6587  | Ifit2 | Irf9          | 1  |
| 5250 | 6595  | Ifit2 | Oas1a         | 1  |
| 5250 | 6779  | Ifit2 | Gbp6          | 1  |
| 5250 | 6824  | Ifit2 | Irf7          | 1  |
| 5250 | 6910  | Ifit2 | Ly6c2         | 1  |
| 5250 | 7069  | Ifit2 | Ube1l         | 1  |
| 5250 | 7105  | Ifit2 | Plac8         | 1  |
| 5250 | 7238  | Ifit2 | Pycard        | 1  |
| 5250 | 7284  | Ifit2 | MMT00008674   | 1  |
| 5250 | 7316  | Ifit2 | Ifi204        | 1  |
| 5250 | 7336  | Ifit2 | Cd5l          | 1  |
| 5250 | 8555  | Ifit2 | H2-M3         | 1  |
| 5250 | 8564  | Ifit2 | Pld4          | 1  |
| 5250 | 8659  | Ifit2 | Psmb8         | 1  |
| 5250 | 8800  | Ifit2 | Rnf213        | 1  |
| 5250 | 9100  | Ifit2 | Ms4a6c        | 1  |
| 5250 | 9401  | Ifit2 | Fcgr4         | 1  |



|      |       |       |               |   |
|------|-------|-------|---------------|---|
| 5250 | 9616  | lfit2 | AI451557      | 1 |
| 5250 | 9717  | lfit2 | Psemb9        | 1 |
| 5250 | 9820  | lfit2 | BC023105      | 1 |
| 5250 | 9821  | lfit2 | Pmaip1        | 1 |
| 5250 | 9847  | lfit2 | lfi27         | 1 |
| 5250 | 10109 | lfit2 | Gbp3          | 1 |
| 5250 | 10504 | lfit2 | Ripk3         | 1 |
| 5250 | 10606 | lfit2 | Apbb1ip       | 1 |
| 5250 | 10926 | lfit2 | P2ry13        | 1 |
| 5250 | 11009 | lfit2 | MMT00008885   | 1 |
| 5250 | 11204 | lfit2 | AI451617      | 1 |
| 5250 | 11265 | lfit2 | Irgm          | 1 |
| 5250 | 11701 | lfit2 | Oas1c         | 1 |
| 5250 | 11845 | lfit2 | Psme1         | 1 |
| 5250 | 12126 | lfit2 | Znfx1         | 1 |
| 5250 | 12312 | lfit2 | Ms4a6d        | 1 |
| 5250 | 12398 | lfit2 | lfi44         | 1 |
| 5250 | 12600 | lfit2 | lfi204        | 1 |
| 5250 | 12969 | lfit2 | Xaf1          | 1 |
| 5250 | 13156 | lfit2 | lfit3         | 1 |
| 5250 | 13309 | lfit2 | Tgtp          | 1 |
| 5250 | 13514 | lfit2 | Apol9b        | 1 |
| 5250 | 13522 | lfit2 | Sfn5          | 1 |
| 5250 | 13527 | lfit2 | Ctss          | 1 |
| 5250 | 13528 | lfit2 | Capn12        | 1 |
| 5250 | 13654 | lfit2 | Stat1         | 1 |
| 5250 | 13656 | lfit2 | Ly86          | 1 |
| 5250 | 13826 | lfit2 | Melk          | 1 |
| 5250 | 14029 | lfit2 | 2810022L02Rik | 1 |
| 5250 | 14237 | lfit2 | Rac2          | 1 |
| 5250 | 14506 | lfit2 | Slc15a3       | 1 |
| 5250 | 14603 | lfit2 | Ly6e          | 1 |
| 5250 | 14611 | lfit2 | Ddx60         | 1 |
| 5250 | 14880 | lfit2 | Ms4a4c        | 1 |
| 5250 | 14883 | lfit2 | Itgal         | 1 |
| 5250 | 14954 | lfit2 | Rab19         | 1 |
| 5250 | 15074 | lfit2 | Usp18         | 1 |
| 5250 | 15504 | lfit2 | Mx2           | 1 |
| 5250 | 15749 | lfit2 | Cd22          | 1 |
| 5250 | 16102 | lfit2 | Cd72          | 1 |
| 5250 | 16129 | lfit2 | Trafd1        | 1 |
| 5250 | 16182 | lfit2 | Oasl1         | 1 |
| 5250 | 16186 | lfit2 | Cfp           | 1 |
| 5250 | 16199 | lfit2 | Samhd1        | 1 |
| 5250 | 16521 | lfit2 | Adar          | 1 |
| 5250 | 16572 | lfit2 | D14Ertd668e   | 1 |
| 5250 | 16874 | lfit2 | Fcer1g        | 1 |
| 5250 | 16988 | lfit2 | Clec4f        | 1 |
| 5250 | 17071 | lfit2 | Samd9l        | 1 |
| 5250 | 17197 | lfit2 | Igtp          | 1 |
| 5250 | 17412 | lfit2 | Aif1          | 1 |

|      |       |         |               |    |
|------|-------|---------|---------------|----|
| 5250 | 17904 | lfit2   | Cds1          | 1  |
| 5250 | 18174 | lfit2   | Stat2         | 1  |
| 5250 | 18186 | lfit2   | Parp14        | 1  |
| 5250 | 18211 | lfit2   | Folr2         | 1  |
| 5250 | 18289 | lfit2   | Tap1          | 1  |
| 5250 | 18686 | lfit2   | Zfp143        | 1  |
| 5250 | 19063 | lfit2   | Evl           | 1  |
| 5250 | 19189 | lfit2   | Sp100         | 1  |
| 5250 | 19262 | lfit2   | Cd274         | 1  |
| 5250 | 19708 | lfit2   | Ly6a          | 1  |
| 5250 | 19738 | lfit2   | Lgals3bp      | 1  |
| 5250 | 19794 | lfit2   | Rgs2          | 1  |
| 5250 | 20321 | lfit2   | Ms4a6b        | 1  |
| 5250 | 20474 | lfit2   | Gnb3          | 1  |
| 5250 | 20791 | lfit2   | MMT00014813   | 1  |
| 5250 | 20997 | lfit2   | MMT00028135   | 1  |
| 5250 | 21351 | lfit2   | Shisa5        | 1  |
| 5250 | 21440 | lfit2   | Tmsb10        | 1  |
| 5250 | 21549 | lfit2   | Rtp4          | 1  |
| 5250 | 21824 | lfit2   | 5830443L24Rik | 1  |
| 5250 | 22037 | lfit2   | Oas1g         | 1  |
| 5250 | 22077 | lfit2   | MMT00057550   | 1  |
| 5250 | 22327 | lfit2   | Tyrobp        | 1  |
| 5250 | 22496 | lfit2   | Sfn1          | 1  |
| 5250 | 22647 | lfit2   | Pkib          | 1  |
| 5250 | 23092 | lfit2   | Ifih1         | 1  |
| 5250 | 23208 | lfit2   | Hck           | 1  |
| 5250 | 23242 | lfit2   | Gngt2         | 1  |
| 5250 | 23450 | lfit2   | D12Ert647e    | 1  |
| 5262 | 1445  | Mecp2   | Ssbp2         | 1  |
| 5262 | 3620  | Mecp2   | Bet1          | -1 |
| 5262 | 5934  | Mecp2   | S100a10       | -1 |
| 5262 | 7862  | Mecp2   | Cpsf4l        | 1  |
| 5263 | 10236 | Anapc13 | EG665033      | -1 |
| 5270 | 415   | Rnf8    | Ypel2         | 1  |
| 5270 | 719   | Rnf8    | Usp2          | -1 |
| 5270 | 1453  | Rnf8    | Gfod2         | 1  |
| 5270 | 2011  | Rnf8    | Slc2a5        | -1 |
| 5270 | 2399  | Rnf8    | MMT00060167   | 1  |
| 5270 | 2829  | Rnf8    | Lrfn3         | 1  |
| 5270 | 3214  | Rnf8    | Dnmt3b        | 1  |
| 5270 | 5374  | Rnf8    | Chka          | 1  |
| 5270 | 5569  | Rnf8    | Pdgfc         | 1  |
| 5270 | 5804  | Rnf8    | Thrsp         | -1 |
| 5270 | 5849  | Rnf8    | 2310031A18Rik | 1  |
| 5270 | 5974  | Rnf8    | Arntl         | 1  |
| 5270 | 6171  | Rnf8    | Abtb2         | 1  |
| 5270 | 6268  | Rnf8    | Slc45a3       | 1  |
| 5270 | 7414  | Rnf8    | Clpx          | 1  |
| 5270 | 9481  | Rnf8    | Ppl           | -1 |
| 5270 | 9831  | Rnf8    | Nedd4l        | 1  |

|      |       |        |               |    |
|------|-------|--------|---------------|----|
| 5270 | 12204 | Rnf8   | Ankmy2        | -1 |
| 5270 | 12315 | Rnf8   | Srebf1        | -1 |
| 5270 | 12513 | Rnf8   | Whsc2         | 1  |
| 5270 | 12905 | Rnf8   | Nfil3         | 1  |
| 5270 | 13630 | Rnf8   | Cdkn1a        | 1  |
| 5270 | 13770 | Rnf8   | D5Wsu178e     | 1  |
| 5270 | 14279 | Rnf8   | 3930402G23Rik | 1  |
| 5270 | 15049 | Rnf8   | Rnf125        | 1  |
| 5270 | 15481 | Rnf8   | 1110067D22Rik | 1  |
| 5270 | 15665 | Rnf8   | Blcap         | 1  |
| 5270 | 16474 | Rnf8   | Bhlhb2        | -1 |
| 5270 | 16712 | Rnf8   | Pnrc1         | 1  |
| 5270 | 16851 | Rnf8   | Slc34a2       | 1  |
| 5270 | 17583 | Rnf8   | Per2          | -1 |
| 5270 | 17884 | Rnf8   | Lnx2          | 1  |
| 5270 | 18179 | Rnf8   | Dbp           | -1 |
| 5270 | 18438 | Rnf8   | Map3k7ip2     | 1  |
| 5270 | 19004 | Rnf8   | Pdk4          | 1  |
| 5270 | 19671 | Rnf8   | Upp2          | -1 |
| 5270 | 21142 | Rnf8   | Gm129         | -1 |
| 5270 | 22324 | Rnf8   | MMT00060741   | 1  |
| 5270 | 22669 | Rnf8   | Ahctf1        | 1  |
| 5272 | 8444  | Grk4   | Rdh16         | -1 |
| 5272 | 21214 | Grk4   | Scd1          | -1 |
| 5295 | 12910 | F2r    | 1110028A07Rik | 1  |
| 5295 | 14151 | F2r    | Slc44a1       | 1  |
| 5295 | 17996 | F2r    | Igfbp2        | -1 |
| 5295 | 20079 | F2r    | MMT00019254   | -1 |
| 5295 | 21202 | F2r    | Acly          | 1  |
| 5295 | 22046 | F2r    | Cml4          | 1  |
| 5296 | 15708 | Rnf181 | Retsat        | 1  |
| 5303 | 7602  | Ndufv2 | Pcca          | 1  |
| 5303 | 12556 | Ndufv2 | Ass1          | 1  |
| 5303 | 22998 | Ndufv2 | Ass1          | 1  |
| 5306 | 760   | Ywhag  | Akr1c19       | 1  |
| 5306 | 1711  | Ywhag  | Grl1          | -1 |
| 5306 | 2110  | Ywhag  | Gtf2ird1      | -1 |
| 5306 | 2850  | Ywhag  | Slc16a6       | -1 |
| 5306 | 3196  | Ywhag  | Tat           | 1  |
| 5306 | 3565  | Ywhag  | MMT00045908   | 1  |
| 5306 | 4056  | Ywhag  | Tnfaip8l1     | -1 |
| 5306 | 5691  | Ywhag  | Csrp3         | -1 |
| 5306 | 5804  | Ywhag  | Thrsp         | 1  |
| 5306 | 5849  | Ywhag  | 2310031A18Rik | -1 |
| 5306 | 6329  | Ywhag  | Cyp2b10       | 1  |
| 5306 | 6746  | Ywhag  | E2f8          | -1 |
| 5306 | 6756  | Ywhag  | Sds           | 1  |
| 5306 | 6816  | Ywhag  | Slc46a3       | 1  |
| 5306 | 6990  | Ywhag  | Nr1i2         | 1  |
| 5306 | 7492  | Ywhag  | Adfp          | -1 |
| 5306 | 7963  | Ywhag  | Rxrg          | -1 |

|      |       |               |               |    |
|------|-------|---------------|---------------|----|
| 5306 | 8328  | Ywhag         | Klhdc8a       | -1 |
| 5306 | 9718  | Ywhag         | Fmo5          | 1  |
| 5306 | 10207 | Ywhag         | MMT00012324   | -1 |
| 5306 | 10775 | Ywhag         | Slc16a1       | -1 |
| 5306 | 11599 | Ywhag         | Coq10b        | 1  |
| 5306 | 12556 | Ywhag         | Ass1          | 1  |
| 5306 | 13293 | Ywhag         | Gsta2         | 1  |
| 5306 | 13431 | Ywhag         | MMT00038058   | -1 |
| 5306 | 15205 | Ywhag         | MMT00030262   | -1 |
| 5306 | 15631 | Ywhag         | Lpin1         | 1  |
| 5306 | 16580 | Ywhag         | Tnfaip2       | -1 |
| 5306 | 16720 | Ywhag         | Mtmr7         | 1  |
| 5306 | 16851 | Ywhag         | Slc34a2       | -1 |
| 5306 | 18250 | Ywhag         | Mmp14         | -1 |
| 5306 | 18438 | Ywhag         | Map3k7ip2     | -1 |
| 5306 | 19234 | Ywhag         | Nrg4          | 1  |
| 5306 | 19671 | Ywhag         | Upp2          | 1  |
| 5306 | 19723 | Ywhag         | Pfkfb1        | 1  |
| 5306 | 20171 | Ywhag         | 1700008G05Rik | -1 |
| 5306 | 20390 | Ywhag         | Cd9           | -1 |
| 5306 | 21643 | Ywhag         | Agtr1a        | -1 |
| 5306 | 21918 | Ywhag         | Snx24         | -1 |
| 5306 | 21934 | Ywhag         | Id2           | -1 |
| 5306 | 22998 | Ywhag         | Ass1          | 1  |
| 5332 | 4686  | Pdlim4        | BC021785      | 1  |
| 5332 | 5574  | Pdlim4        | Hsd3b7        | 1  |
| 5332 | 14258 | Pdlim4        | Ifi47         | 1  |
| 5332 | 15931 | Pdlim4        | Ces3          | -1 |
| 5336 | 3868  | Timeless      | Ebpl          | 1  |
| 5336 | 4708  | Timeless      | Traf3ip2      | 1  |
| 5336 | 5044  | Timeless      | Ifi35         | 1  |
| 5336 | 5949  | Timeless      | Zbp1          | 1  |
| 5336 | 6734  | Timeless      | Ehd4          | 1  |
| 5336 | 8270  | Timeless      | Cispn         | 1  |
| 5336 | 8800  | Timeless      | Rnf213        | 1  |
| 5336 | 10802 | Timeless      | Kcnn2         | -1 |
| 5336 | 11807 | Timeless      | Fbxo31        | -1 |
| 5336 | 11870 | Timeless      | Apitd1        | 1  |
| 5336 | 12420 | Timeless      | Klhl21        | -1 |
| 5336 | 12925 | Timeless      | Farp1         | 1  |
| 5336 | 14258 | Timeless      | Ifi47         | 1  |
| 5336 | 15320 | Timeless      | MMT00017479   | -1 |
| 5336 | 15449 | Timeless      | Mitd1         | 1  |
| 5336 | 16182 | Timeless      | Oasl1         | 1  |
| 5336 | 17083 | Timeless      | Atp1b1        | -1 |
| 5336 | 18174 | Timeless      | Stat2         | 1  |
| 5336 | 19466 | Timeless      | Pptc7         | -1 |
| 5339 | 5339  | 4930488E11Rik | 4930488E11Rik | 1  |
| 5352 | 1985  | Pdcd2l        | Pepd          | -1 |
| 5352 | 2388  | Pdcd2l        | Dot1l         | 1  |
| 5352 | 2599  | Pdcd2l        | Lsm14a        | 1  |

|      |       |             |               |    |
|------|-------|-------------|---------------|----|
| 5352 | 2912  | Pdcd2l      | Wtip          | -1 |
| 5352 | 4697  | Pdcd2l      | Cyp2a12       | -1 |
| 5352 | 5352  | Pdcd2l      | Pdcd2l        | 1  |
| 5352 | 6513  | Pdcd2l      | Qpctl         | 1  |
| 5352 | 10545 | Pdcd2l      | Tmem147       | 1  |
| 5352 | 11321 | Pdcd2l      | 2310014L17Rik | -1 |
| 5352 | 11888 | Pdcd2l      | Myadm         | -1 |
| 5352 | 12423 | Pdcd2l      | Cyp2g1        | -1 |
| 5352 | 16639 | Pdcd2l      | MMT00078937   | -1 |
| 5352 | 17314 | Pdcd2l      | Napa          | -1 |
| 5352 | 18088 | Pdcd2l      | Alkbh6        | 1  |
| 5352 | 19462 | Pdcd2l      | 4933439C20Rik | -1 |
| 5352 | 19854 | Pdcd2l      | Kcnj14        | 1  |
| 5352 | 20606 | Pdcd2l      | MMT00042166   | -1 |
| 5352 | 21438 | Pdcd2l      | Plekha4       | -1 |
| 5352 | 23247 | Pdcd2l      | Ercc1         | -1 |
| 5355 | 5364  | Gpsm2       | Kif22         | 1  |
| 5355 | 6085  | Gpsm2       | MMT00007454   | 1  |
| 5355 | 10532 | Gpsm2       | MMT00057790   | 1  |
| 5355 | 13431 | Gpsm2       | MMT00038058   | 1  |
| 5355 | 14055 | Gpsm2       | MMT00050438   | 1  |
| 5355 | 15205 | Gpsm2       | MMT00030262   | 1  |
| 5355 | 15500 | Gpsm2       | MMT00081411   | 1  |
| 5355 | 21937 | Gpsm2       | MMT00015325   | 1  |
| 5355 | 22978 | Gpsm2       | MMT00043176   | 1  |
| 5357 | 8372  | MMT00021917 | Uap1          | -1 |
| 5357 | 9449  | MMT00021917 | Sft2d2        | 1  |
| 5357 | 11406 | MMT00021917 | Ifi203        | -1 |
| 5357 | 13149 | MMT00021917 | Ifi203        | -1 |
| 5357 | 14052 | MMT00021917 | EG226654      | 1  |
| 5357 | 15844 | MMT00021917 | Klhdc9        | 1  |
| 5357 | 16361 | MMT00021917 | Olfir703      | 1  |
| 5357 | 18276 | MMT00021917 | Apoa2         | 1  |
| 5357 | 19520 | MMT00021917 | Uck2          | 1  |
| 5364 | 1416  | Kif22       | 6720460F02Rik | 1  |
| 5364 | 1561  | Kif22       | Aurka         | 1  |
| 5364 | 1932  | Kif22       | Racgap1       | 1  |
| 5364 | 3836  | Kif22       | 2200001115Rik | 1  |
| 5364 | 5364  | Kif22       | Kif22         | 1  |
| 5364 | 8416  | Kif22       | Cdc20         | 1  |
| 5364 | 11382 | Kif22       | Cdca3         | 1  |
| 5364 | 12799 | Kif22       | Spon2         | 1  |
| 5364 | 12941 | Kif22       | Elov15        | 1  |
| 5364 | 17823 | Kif22       | D2Ertd750e    | 1  |
| 5364 | 18299 | Kif22       | MMT00035424   | 1  |
| 5364 | 19022 | Kif22       | Ccnb2         | 1  |
| 5364 | 19318 | Kif22       | Plk1          | 1  |
| 5364 | 19917 | Kif22       | Nek2          | 1  |
| 5364 | 20433 | Kif22       | Cdca5         | 1  |
| 5364 | 21692 | Kif22       | MMT00013924   | 1  |
| 5364 | 21947 | Kif22       | Cdca8         | 1  |

|      |       |               |                    |    |
|------|-------|---------------|--------------------|----|
| 5364 | 22138 | Kif22         | Ang                | -1 |
| 5365 | 20341 | C87436        | Srebf2             | 1  |
| 5382 | 3410  | Fbn1          | Paqr9              | 1  |
| 5382 | 3689  | Fbn1          | Adh1               | -1 |
| 5382 | 5364  | Fbn1          | Kif22              | 1  |
| 5382 | 6030  | Fbn1          | As3mt              | -1 |
| 5382 | 11741 | Fbn1          | Slc30a10           | 1  |
| 5382 | 12941 | Fbn1          | Elovl5             | 1  |
| 5382 | 14472 | Fbn1          | Ahcy               | -1 |
| 5382 | 15320 | Fbn1          | MMT00017479        | -1 |
| 5425 | 11129 | Ung           | Ankhd1             | 1  |
| 5434 | 3686  | Inpp5b        | Psmc9              | -1 |
| 5434 | 7151  | Inpp5b        | MMT00007982        | 1  |
| 5434 | 9763  | Inpp5b        | Tuba3b             | 1  |
| 5435 | 13376 | Lins2         | Alg2               | 1  |
| 5435 | 15015 | Lins2         | G3bp1              | 1  |
| 5435 | 17530 | Lins2         | MMT00041792        | 1  |
| 5435 | 23201 | Lins2         | S1pr1              | 1  |
| 5440 | 5884  | 1810020G14Rik | Gstm2              | 1  |
| 5440 | 10554 | 1810020G14Rik | ENSMUSG00000074179 | 1  |
| 5440 | 11946 | 1810020G14Rik | MMT00030953        | 1  |
| 5440 | 13293 | 1810020G14Rik | Gsta2              | 1  |
| 5440 | 14147 | 1810020G14Rik | Acss2              | 1  |
| 5440 | 18201 | 1810020G14Rik | MMT00060232        | 1  |
| 5440 | 21214 | 1810020G14Rik | Scd1               | 1  |
| 5450 | 22138 | Nrbp1         | Ang                | -1 |
| 5452 | 607   | Mogat2        | Me1                | 1  |
| 5452 | 874   | Mogat2        | Aldh1a7            | 1  |
| 5452 | 1129  | Mogat2        | Gsta4              | 1  |
| 5452 | 1359  | Mogat2        | 4931406C07Rik      | 1  |
| 5452 | 2314  | Mogat2        | Zswim6             | 1  |
| 5452 | 3356  | Mogat2        | Adhfe1             | 1  |
| 5452 | 3562  | Mogat2        | MMT00011909        | 1  |
| 5452 | 3696  | Mogat2        | Elovl6             | 1  |
| 5452 | 4351  | Mogat2        | Plxnb1             | -1 |
| 5452 | 4517  | Mogat2        | Itih3              | -1 |
| 5452 | 5884  | Mogat2        | Gstm2              | 1  |
| 5452 | 6044  | Mogat2        | Sucnr1             | 1  |
| 5452 | 6193  | Mogat2        | Lactb2             | 1  |
| 5452 | 6420  | Mogat2        | Mipep              | 1  |
| 5452 | 6573  | Mogat2        | Pecr               | 1  |
| 5452 | 7602  | Mogat2        | Pcca               | 1  |
| 5452 | 7887  | Mogat2        | 4930418G15Rik      | 1  |
| 5452 | 8444  | Mogat2        | Rdh16              | 1  |
| 5452 | 8773  | Mogat2        | MMT00027093        | -1 |
| 5452 | 8815  | Mogat2        | Mx1                | 1  |
| 5452 | 9427  | Mogat2        | Nqo2               | 1  |
| 5452 | 9842  | Mogat2        | Qdpr               | 1  |
| 5452 | 10554 | Mogat2        | ENSMUSG00000074179 | 1  |
| 5452 | 11014 | Mogat2        | Hibadh             | 1  |
| 5452 | 11065 | Mogat2        | Mccc1              | 1  |

|      |       |        |                    |    |
|------|-------|--------|--------------------|----|
| 5452 | 11946 | Mogat2 | MMT00030953        | 1  |
| 5452 | 12219 | Mogat2 | Cyb5b              | 1  |
| 5452 | 12556 | Mogat2 | Ass1               | 1  |
| 5452 | 12955 | Mogat2 | Atp5o              | 1  |
| 5452 | 13293 | Mogat2 | Gsta2              | 1  |
| 5452 | 13431 | Mogat2 | MMT00038058        | -1 |
| 5452 | 14017 | Mogat2 | Ces5               | 1  |
| 5452 | 14147 | Mogat2 | Acss2              | 1  |
| 5452 | 14151 | Mogat2 | Slc44a1            | 1  |
| 5452 | 15205 | Mogat2 | MMT00030262        | -1 |
| 5452 | 16336 | Mogat2 | 2310040A07Rik      | -1 |
| 5452 | 18201 | Mogat2 | MMT00060232        | 1  |
| 5452 | 18286 | Mogat2 | Slc41a3            | -1 |
| 5452 | 19766 | Mogat2 | Slc26a4            | 1  |
| 5452 | 20019 | Mogat2 | Qdpr               | 1  |
| 5452 | 20058 | Mogat2 | Dnaic1             | -1 |
| 5452 | 21202 | Mogat2 | Acly               | 1  |
| 5452 | 21214 | Mogat2 | Scd1               | 1  |
| 5452 | 21575 | Mogat2 | Cyp2c55            | 1  |
| 5452 | 21727 | Mogat2 | Khk                | 1  |
| 5452 | 21793 | Mogat2 | Pla2g12a           | -1 |
| 5452 | 22138 | Mogat2 | Ang                | -1 |
| 5452 | 22732 | Mogat2 | Cyb5b              | 1  |
| 5452 | 22821 | Mogat2 | Tmem135            | 1  |
| 5452 | 22998 | Mogat2 | Ass1               | 1  |
| 5452 | 23549 | Mogat2 | Es22               | 1  |
| 5453 | 607   | Odf3l1 | Me1                | 1  |
| 5453 | 760   | Odf3l1 | Akr1c19            | 1  |
| 5453 | 1129  | Odf3l1 | Gsta4              | 1  |
| 5453 | 1711  | Odf3l1 | Grhl1              | -1 |
| 5453 | 2127  | Odf3l1 | Ldha               | -1 |
| 5453 | 2721  | Odf3l1 | Inmt               | 1  |
| 5453 | 3354  | Odf3l1 | Ropn1l             | 1  |
| 5453 | 3356  | Odf3l1 | Adhfe1             | 1  |
| 5453 | 3446  | Odf3l1 | Eno1               | 1  |
| 5453 | 3565  | Odf3l1 | MMT00045908        | 1  |
| 5453 | 3832  | Odf3l1 | Sdhb               | 1  |
| 5453 | 4056  | Odf3l1 | Tnfaip8l1          | -1 |
| 5453 | 5804  | Odf3l1 | Thrsp              | 1  |
| 5453 | 5884  | Odf3l1 | Gstm2              | 1  |
| 5453 | 6085  | Odf3l1 | MMT00007454        | -1 |
| 5453 | 6329  | Odf3l1 | Cyp2b10            | 1  |
| 5453 | 6420  | Odf3l1 | Mipep              | 1  |
| 5453 | 7602  | Odf3l1 | Pcca               | 1  |
| 5453 | 8444  | Odf3l1 | Rdh16              | 1  |
| 5453 | 8773  | Odf3l1 | MMT00027093        | -1 |
| 5453 | 8815  | Odf3l1 | Mx1                | 1  |
| 5453 | 9427  | Odf3l1 | Nqo2               | 1  |
| 5453 | 9718  | Odf3l1 | Fmo5               | 1  |
| 5453 | 9842  | Odf3l1 | Qdpr               | 1  |
| 5453 | 10554 | Odf3l1 | ENSMUSG00000074179 | 1  |

|      |       |               |               |    |
|------|-------|---------------|---------------|----|
| 5453 | 12556 | Odf311        | Ass1          | 1  |
| 5453 | 12955 | Odf311        | Atp5o         | 1  |
| 5453 | 13293 | Odf311        | Gsta2         | 1  |
| 5453 | 13431 | Odf311        | MMT00038058   | -1 |
| 5453 | 14017 | Odf311        | Ces5          | 1  |
| 5453 | 14055 | Odf311        | MMT00050438   | -1 |
| 5453 | 14147 | Odf311        | Acss2         | 1  |
| 5453 | 14151 | Odf311        | Slc44a1       | 1  |
| 5453 | 14314 | Odf311        | 2810405K02Rik | 1  |
| 5453 | 15205 | Odf311        | MMT00030262   | -1 |
| 5453 | 15500 | Odf311        | MMT00081411   | -1 |
| 5453 | 17398 | Odf311        | MMT00045090   | 1  |
| 5453 | 17563 | Odf311        | Aldh111       | 1  |
| 5453 | 17638 | Odf311        | Adssl1        | 1  |
| 5453 | 18113 | Odf311        | MMT00034400   | 1  |
| 5453 | 18201 | Odf311        | MMT00060232   | 1  |
| 5453 | 18549 | Odf311        | Robo1         | 1  |
| 5453 | 19066 | Odf311        | MMT00012632   | 1  |
| 5453 | 20019 | Odf311        | Qdpr          | 1  |
| 5453 | 20058 | Odf311        | Dnaic1        | -1 |
| 5453 | 20804 | Odf311        | Eno1          | 1  |
| 5453 | 21202 | Odf311        | Acly          | 1  |
| 5453 | 21214 | Odf311        | Scd1          | 1  |
| 5453 | 21575 | Odf311        | Cyp2c55       | 1  |
| 5453 | 21727 | Odf311        | Khk           | 1  |
| 5453 | 22978 | Odf311        | MMT00043176   | -1 |
| 5453 | 22998 | Odf311        | Ass1          | 1  |
| 5465 | 5364  | Slamf8        | Kif22         | 1  |
| 5465 | 11129 | Slamf8        | Ankhd1        | -1 |
| 5465 | 16182 | Slamf8        | Oasl1         | 1  |
| 5465 | 20678 | Slamf8        | Cyp39a1       | -1 |
| 5466 | 2850  | 2310047D13Rik | Slc16a6       | 1  |
| 5466 | 12565 | 2310047D13Rik | Grem2         | -1 |
| 5472 | 6024  | Mppe1         | Ddo           | -1 |
| 5472 | 23253 | Mppe1         | D030011O10Rik | -1 |
| 5477 | 2721  | 2210412D01Rik | Inmt          | 1  |
| 5477 | 12315 | 2210412D01Rik | Sreb1         | 1  |
| 5482 | 327   | Cdsn          | H2-Ea         | 1  |
| 5482 | 510   | Cdsn          | Neu1          | -1 |
| 5482 | 763   | Cdsn          | 4933406E20Rik | 1  |
| 5482 | 1340  | Cdsn          | Tap2          | 1  |
| 5482 | 2325  | Cdsn          | H2-K1         | 1  |
| 5482 | 2801  | Cdsn          | H2-BI         | 1  |
| 5482 | 2938  | Cdsn          | H2-T23        | 1  |
| 5482 | 3599  | Cdsn          | MMT00035426   | -1 |
| 5482 | 3704  | Cdsn          | H2-Q7         | 1  |
| 5482 | 3857  | Cdsn          | 1700001C19Rik | -1 |
| 5482 | 4004  | Cdsn          | Thbs2         | -1 |
| 5482 | 4958  | Cdsn          | Ndufa7        | -1 |
| 5482 | 5410  | Cdsn          | Cyp4f15       | -1 |
| 5482 | 5648  | Cdsn          | Zfp213        | -1 |



|      |       |               |                    |    |
|------|-------|---------------|--------------------|----|
| 5482 | 6360  | Cdsn          | D17H6S56E-3        | -1 |
| 5482 | 6510  | Cdsn          | Plcl2              | 1  |
| 5482 | 7088  | Cdsn          | Slc37a1            | 1  |
| 5482 | 8750  | Cdsn          | 1700010I14Rik      | 1  |
| 5482 | 8767  | Cdsn          | Rgl2               | 1  |
| 5482 | 9158  | Cdsn          | Pde9a              | -1 |
| 5482 | 10376 | Cdsn          | C920025E04Rik      | -1 |
| 5482 | 10394 | Cdsn          | MMT00028435        | 1  |
| 5482 | 10667 | Cdsn          | H2-Eb1             | 1  |
| 5482 | 12335 | Cdsn          | Plcb4              | 1  |
| 5482 | 12355 | Cdsn          | AI507611           | 1  |
| 5482 | 13493 | Cdsn          | Ring1              | -1 |
| 5482 | 13789 | Cdsn          | H2-Q8              | 1  |
| 5482 | 15181 | Cdsn          | Enpp4              | -1 |
| 5482 | 15531 | Cdsn          | Prickle4           | -1 |
| 5482 | 17691 | Cdsn          | Kank3              | 1  |
| 5482 | 18906 | Cdsn          | Zfand3             | 1  |
| 5482 | 20100 | Cdsn          | Guca1b             | -1 |
| 5482 | 20238 | Cdsn          | H2-T9              | 1  |
| 5482 | 20346 | Cdsn          | Gna-rs1            | 1  |
| 5482 | 21295 | Cdsn          | Snf1lk             | -1 |
| 5482 | 21478 | Cdsn          | Loxhd1             | -1 |
| 5482 | 22822 | Cdsn          | MMT00013433        | 1  |
| 5482 | 23250 | Cdsn          | Plcl2              | 1  |
| 5482 | 23401 | Cdsn          | H2-Q2              | 1  |
| 5487 | 20194 | Palmd         | Pnlnc1             | 1  |
| 5488 | 2827  | C920009B18Rik | Raet1d             | 1  |
| 5488 | 5488  | C920009B18Rik | C920009B18Rik      | 1  |
| 5508 | 524   | Lrig2         | Hsd3b2             | -1 |
| 5508 | 1466  | Lrig2         | Ubp2l              | -1 |
| 5508 | 1867  | Lrig2         | Bcas2              | -1 |
| 5508 | 1963  | Lrig2         | MMT00039783        | -1 |
| 5508 | 3753  | Lrig2         | Setdb1             | 1  |
| 5508 | 6206  | Lrig2         | MMT00063701        | -1 |
| 5508 | 7519  | Lrig2         | Gstm1              | -1 |
| 5508 | 10521 | Lrig2         | Ttf2               | -1 |
| 5508 | 10681 | Lrig2         | Dgkz               | 1  |
| 5508 | 11121 | Lrig2         | Mtmt11             | 1  |
| 5508 | 11611 | Lrig2         | S100a13            | 1  |
| 5508 | 12367 | Lrig2         | MMT00072365        | 1  |
| 5508 | 16753 | Lrig2         | Hfe2               | 1  |
| 5508 | 18754 | Lrig2         | Rbm8a              | -1 |
| 5508 | 20385 | Lrig2         | Chd1l              | -1 |
| 5508 | 21650 | Lrig2         | Ap4b1              | -1 |
| 5508 | 21814 | Lrig2         | Accn5              | -1 |
| 5508 | 22202 | Lrig2         | OTTMUSG00000021274 | 1  |
| 5508 | 22570 | Lrig2         | Phtf1              | -1 |
| 5511 | 5511  | BC055004      | BC055004           | 1  |
| 5511 | 9077  | BC055004      | Cnpy4              | -1 |
| 5511 | 10995 | BC055004      | Ap4m1              | 1  |
| 5511 | 13780 | BC055004      | Pilra              | -1 |

|      |       |                    |                    |    |
|------|-------|--------------------|--------------------|----|
| 5511 | 15219 | BC055004           | 0910001L09Rik      | -1 |
| 5511 | 16451 | BC055004           | 2010007H12Rik      | 1  |
| 5511 | 17089 | BC055004           | Pilrb1             | -1 |
| 5511 | 17158 | BC055004           | Zfp113             | 1  |
| 5511 | 18881 | BC055004           | Cops6              | 1  |
| 5511 | 19502 | BC055004           | Fbxo24             | 1  |
| 5517 | 12910 | Stx17              | 1110028A07Rik      | 1  |
| 5517 | 20058 | Stx17              | Dnaic1             | -1 |
| 5522 | 6191  | Pink1              | Ddost              | -1 |
| 5552 | 22936 | Rasgrp3            | Rhobtb1            | -1 |
| 5555 | 15029 | Fbln7              | Nudt16l1           | 1  |
| 5555 | 15292 | Fbln7              | 2010107G23Rik      | 1  |
| 5556 | 4426  | Ccl4               | Iigp2              | 1  |
| 5556 | 5044  | Ccl4               | Ifi35              | 1  |
| 5556 | 9717  | Ccl4               | Psemb9             | 1  |
| 5556 | 12126 | Ccl4               | Znfx1              | 1  |
| 5556 | 16147 | Ccl4               | Tlr2               | 1  |
| 5556 | 16182 | Ccl4               | Oasl1              | 1  |
| 5556 | 21549 | Ccl4               | Rtp4               | 1  |
| 5574 | 3354  | Hsd3b7             | Ropn1l             | -1 |
| 5574 | 8815  | Hsd3b7             | Mx1                | -1 |
| 5574 | 9842  | Hsd3b7             | Qdpr               | -1 |
| 5574 | 11086 | Hsd3b7             | Pnpla5             | -1 |
| 5574 | 14147 | Hsd3b7             | Acss2              | -1 |
| 5574 | 14151 | Hsd3b7             | Slc44a1            | -1 |
| 5574 | 18201 | Hsd3b7             | MMT00060232        | -1 |
| 5574 | 21214 | Hsd3b7             | Scd1               | -1 |
| 5586 | 6420  | OTTMUSG00000001246 | Mipep              | 1  |
| 5586 | 7602  | OTTMUSG00000001246 | Pcca               | 1  |
| 5586 | 7753  | OTTMUSG00000001246 | Gfm1               | 1  |
| 5586 | 10554 | OTTMUSG00000001246 | ENSMUSG00000074179 | 1  |
| 5586 | 13293 | OTTMUSG00000001246 | Gsta2              | 1  |
| 5586 | 18201 | OTTMUSG00000001246 | MMT00060232        | 1  |
| 5586 | 21214 | OTTMUSG00000001246 | Scd1               | 1  |
| 5588 | 5934  | Snx20              | S100a10            | 1  |
| 5588 | 11741 | Snx20              | Slc30a10           | 1  |
| 5594 | 8444  | Erb3               | Rdh16              | -1 |
| 5594 | 14017 | Erb3               | Ces5               | -1 |
| 5594 | 21214 | Erb3               | Scd1               | -1 |
| 5597 | 17461 | Ttll4              | Ripk5              | 1  |
| 5601 | 607   | 4933417O08Rik      | Me1                | 1  |
| 5601 | 8444  | 4933417O08Rik      | Rdh16              | 1  |
| 5601 | 8815  | 4933417O08Rik      | Mx1                | 1  |
| 5601 | 12910 | 4933417O08Rik      | 1110028A07Rik      | 1  |
| 5601 | 14017 | 4933417O08Rik      | Ces5               | 1  |
| 5601 | 18201 | 4933417O08Rik      | MMT00060232        | 1  |
| 5601 | 20058 | 4933417O08Rik      | Dnaic1             | -1 |
| 5601 | 21214 | 4933417O08Rik      | Scd1               | 1  |
| 5601 | 23549 | 4933417O08Rik      | Es22               | 1  |
| 5611 | 22470 | Rapgef3            | Ppargc1b           | 1  |
| 5613 | 9842  | Mrpl12             | Qdpr               | 1  |

|      |       |          |                    |    |
|------|-------|----------|--------------------|----|
| 5613 | 10554 | Mrpl12   | ENSMUSG00000074179 | 1  |
| 5613 | 13293 | Mrpl12   | Gsta2              | 1  |
| 5613 | 13431 | Mrpl12   | MMT00038058        | -1 |
| 5613 | 15205 | Mrpl12   | MMT00030262        | -1 |
| 5613 | 20019 | Mrpl12   | Qdpr               | 1  |
| 5613 | 21727 | Mrpl12   | Khk                | 1  |
| 5613 | 23640 | Mrpl12   | Bdh1               | -1 |
| 5619 | 12910 | Rap1gds1 | 1110028A07Rik      | 1  |
| 5619 | 18201 | Rap1gds1 | MMT00060232        | 1  |
| 5632 | 3139  | Reck     | Gba2               | 1  |
| 5632 | 3847  | Reck     | Tdrd7              | -1 |
| 5632 | 8907  | Reck     | Npr2               | 1  |
| 5636 | 8653  | Trmu     | AW124722           | -1 |
| 5639 | 5639  | Gdpd3    | Gdpd3              | 1  |
| 5639 | 13206 | Gdpd3    | Qprt               | -1 |
| 5664 | 23026 | Fez2     | Apom               | -1 |
| 5672 | 5684  | Galnt14  | Ranbp10            | 1  |
| 5672 | 5804  | Galnt14  | Thrsp              | -1 |
| 5672 | 9065  | Galnt14  | Reep4              | 1  |
| 5672 | 17852 | Galnt14  | Cpeb2              | 1  |
| 5672 | 18438 | Galnt14  | Map3k7ip2          | 1  |
| 5680 | 3265  | Lrg1     | Dntt               | 1  |
| 5680 | 3836  | Lrg1     | 2200001115Rik      | 1  |
| 5680 | 5364  | Lrg1     | Kif22              | 1  |
| 5680 | 7839  | Lrg1     | Asl                | -1 |
| 5680 | 8428  | Lrg1     | Sorbs3             | -1 |
| 5680 | 13271 | Lrg1     | Idh2               | -1 |
| 5680 | 14472 | Lrg1     | Ahcy               | -1 |
| 5680 | 18299 | Lrg1     | MMT00035424        | 1  |
| 5680 | 20967 | Lrg1     | Fabp2              | 1  |
| 5680 | 21692 | Lrg1     | MMT00013924        | 1  |
| 5681 | 2023  | Mbd1     | MMT00072215        | 1  |
| 5681 | 5681  | Mbd1     | Mbd1               | 1  |
| 5681 | 22961 | Mbd1     | MMT00055950        | 1  |
| 5686 | 250   | Cys1     | Tubb2a-ps2         | -1 |
| 5686 | 402   | Cys1     | Timp3              | 1  |
| 5686 | 407   | Cys1     | Serpina6           | 1  |
| 5686 | 433   | Cys1     | Pla2g12b           | -1 |
| 5686 | 437   | Cys1     | Ndrgr1             | -1 |
| 5686 | 609   | Cys1     | MMT00060868        | -1 |
| 5686 | 719   | Cys1     | Usp2               | 1  |
| 5686 | 1767  | Cys1     | BC016495           | 1  |
| 5686 | 1911  | Cys1     | 1300007F04Rik      | 1  |
| 5686 | 2011  | Cys1     | Slc2a5             | 1  |
| 5686 | 2126  | Cys1     | Dgat2              | 1  |
| 5686 | 2384  | Cys1     | Micalcl            | -1 |
| 5686 | 2399  | Cys1     | MMT00060167        | -1 |
| 5686 | 2636  | Cys1     | Tars               | -1 |
| 5686 | 2766  | Cys1     | Elp4               | -1 |
| 5686 | 2850  | Cys1     | Slc16a6            | -1 |
| 5686 | 3214  | Cys1     | Dnmt3b             | -1 |

|      |       |      |               |    |
|------|-------|------|---------------|----|
| 5686 | 3410  | Cys1 | Paqr9         | -1 |
| 5686 | 3502  | Cys1 | Gde1          | 1  |
| 5686 | 3790  | Cys1 | Mtss1         | 1  |
| 5686 | 3804  | Cys1 | MMT00015534   | -1 |
| 5686 | 4286  | Cys1 | Ptp4a1        | 1  |
| 5686 | 4333  | Cys1 | Sumo3         | -1 |
| 5686 | 4534  | Cys1 | Ndel1         | 1  |
| 5686 | 4813  | Cys1 | Agpat6        | 1  |
| 5686 | 5183  | Cys1 | St5           | -1 |
| 5686 | 5374  | Cys1 | Chka          | -1 |
| 5686 | 5492  | Cys1 | MMT00039914   | 1  |
| 5686 | 5569  | Cys1 | Pdgfc         | -1 |
| 5686 | 5734  | Cys1 | EG619653      | 1  |
| 5686 | 5802  | Cys1 | Mad2l2        | -1 |
| 5686 | 5804  | Cys1 | Thrsp         | 1  |
| 5686 | 5849  | Cys1 | 2310031A18Rik | -1 |
| 5686 | 5892  | Cys1 | MMT00038457   | 1  |
| 5686 | 5934  | Cys1 | S100a10       | -1 |
| 5686 | 5974  | Cys1 | Arntl         | -1 |
| 5686 | 6030  | Cys1 | As3mt         | 1  |
| 5686 | 6386  | Cys1 | Por           | 1  |
| 5686 | 6394  | Cys1 | Fbxo6         | -1 |
| 5686 | 6544  | Cys1 | A1790298      | -1 |
| 5686 | 6816  | Cys1 | Slc46a3       | 1  |
| 5686 | 7414  | Cys1 | Clpx          | -1 |
| 5686 | 7492  | Cys1 | Adfp          | -1 |
| 5686 | 7839  | Cys1 | Asl           | 1  |
| 5686 | 7862  | Cys1 | Cpsf4l        | 1  |
| 5686 | 8054  | Cys1 | Smarca2       | 1  |
| 5686 | 8328  | Cys1 | Klhdc8a       | -1 |
| 5686 | 8428  | Cys1 | Sorbs3        | 1  |
| 5686 | 8641  | Cys1 | Slc7a2        | 1  |
| 5686 | 9495  | Cys1 | Srms          | -1 |
| 5686 | 9700  | Cys1 | Prodh         | 1  |
| 5686 | 10166 | Cys1 | Rhbdd2        | 1  |
| 5686 | 10642 | Cys1 | Ngef          | 1  |
| 5686 | 10775 | Cys1 | Slc16a1       | -1 |
| 5686 | 11075 | Cys1 | Xrcc6bp1      | 1  |
| 5686 | 11576 | Cys1 | Gm1381        | 1  |
| 5686 | 11599 | Cys1 | Coq10b        | 1  |
| 5686 | 11741 | Cys1 | Slc30a10      | -1 |
| 5686 | 12204 | Cys1 | Ankmy2        | 1  |
| 5686 | 12343 | Cys1 | Atf5          | -1 |
| 5686 | 12799 | Cys1 | Spon2         | -1 |
| 5686 | 12904 | Cys1 | MMT00040704   | 1  |
| 5686 | 12941 | Cys1 | Elovl5        | -1 |
| 5686 | 12982 | Cys1 | Cars          | -1 |
| 5686 | 13078 | Cys1 | Eps8l2        | -1 |
| 5686 | 13094 | Cys1 | Cnn3          | 1  |
| 5686 | 13630 | Cys1 | Cdkn1a        | -1 |
| 5686 | 13947 | Cys1 | Crip2         | -1 |

|      |       |        |               |    |
|------|-------|--------|---------------|----|
| 5686 | 14041 | Cys1   | Cldn1         | -1 |
| 5686 | 14279 | Cys1   | 3930402G23Rik | -1 |
| 5686 | 14462 | Cys1   | Zfp385b       | 1  |
| 5686 | 14705 | Cys1   | Slc43a1       | 1  |
| 5686 | 15481 | Cys1   | 1110067D22Rik | -1 |
| 5686 | 15709 | Cys1   | Tceal1        | 1  |
| 5686 | 15824 | Cys1   | D19Erttd721e  | -1 |
| 5686 | 16060 | Cys1   | Gys2          | 1  |
| 5686 | 16690 | Cys1   | Tjp3          | -1 |
| 5686 | 16851 | Cys1   | Slc34a2       | -1 |
| 5686 | 17247 | Cys1   | A030007L17Rik | -1 |
| 5686 | 17338 | Cys1   | Mocos         | -1 |
| 5686 | 17583 | Cys1   | Per2          | 1  |
| 5686 | 17876 | Cys1   | Tubb4         | -1 |
| 5686 | 17884 | Cys1   | Lnx2          | -1 |
| 5686 | 18069 | Cys1   | Gpt           | 1  |
| 5686 | 18147 | Cys1   | Nhlrc2        | 1  |
| 5686 | 18179 | Cys1   | Dbp           | 1  |
| 5686 | 18498 | Cys1   | Slc5a6        | 1  |
| 5686 | 18827 | Cys1   | Oprs1         | -1 |
| 5686 | 19234 | Cys1   | Nrg4          | 1  |
| 5686 | 19277 | Cys1   | MMT00044927   | 1  |
| 5686 | 19305 | Cys1   | Azin1         | 1  |
| 5686 | 19360 | Cys1   | Aco1          | 1  |
| 5686 | 19671 | Cys1   | Upp2          | 1  |
| 5686 | 19790 | Cys1   | Polg2         | 1  |
| 5686 | 20745 | Cys1   | Sord          | 1  |
| 5686 | 20830 | Cys1   | MMT00057509   | -1 |
| 5686 | 21142 | Cys1   | Gm129         | 1  |
| 5686 | 21733 | Cys1   | Rhebl1        | 1  |
| 5686 | 21811 | Cys1   | Ak3l1         | 1  |
| 5686 | 21918 | Cys1   | Snx24         | -1 |
| 5686 | 21969 | Cys1   | Tk1           | 1  |
| 5686 | 22290 | Cys1   | Tubb2a        | -1 |
| 5686 | 22630 | Cys1   | MMT00034355   | -1 |
| 5686 | 22653 | Cys1   | Ric3          | -1 |
| 5686 | 22936 | Cys1   | Rhobtb1       | 1  |
| 5686 | 23183 | Cys1   | Nnmt          | 1  |
| 5686 | 23248 | Cys1   | Tesk2         | 1  |
| 5693 | 1709  | Zfp809 | Mt2           | 1  |
| 5693 | 11129 | Zfp809 | Ankhd1        | 1  |
| 5693 | 18286 | Zfp809 | Slc41a3       | 1  |
| 5693 | 21214 | Zfp809 | Scd1          | -1 |
| 5693 | 21251 | Zfp809 | Cpt1a         | 1  |
| 5693 | 21575 | Zfp809 | Cyp2c55       | -1 |
| 5693 | 22138 | Zfp809 | Ang           | 1  |
| 5700 | 250   | Tenc1  | Tubb2a-ps2    | -1 |
| 5700 | 609   | Tenc1  | MMT00060868   | -1 |
| 5700 | 2013  | Tenc1  | Ii15ra        | 1  |
| 5700 | 5934  | Tenc1  | S100a10       | -1 |
| 5700 | 5974  | Tenc1  | Arntl         | -1 |

|      |       |                    |               |    |
|------|-------|--------------------|---------------|----|
| 5700 | 6343  | Tenc1              | Slc20a1       | 1  |
| 5700 | 6386  | Tenc1              | Por           | 1  |
| 5700 | 7862  | Tenc1              | Cpsf4l        | 1  |
| 5700 | 8595  | Tenc1              | MMT00019109   | -1 |
| 5700 | 8815  | Tenc1              | Mx1           | -1 |
| 5700 | 12565 | Tenc1              | Grem2         | 1  |
| 5700 | 13886 | Tenc1              | Hnrpd1        | 1  |
| 5700 | 18827 | Tenc1              | Oprs1         | -1 |
| 5700 | 21251 | Tenc1              | Cpt1a         | 1  |
| 5700 | 21733 | Tenc1              | Rhebl1        | 1  |
| 5700 | 22138 | Tenc1              | Ang           | 1  |
| 5700 | 22290 | Tenc1              | Tubb2a        | -1 |
| 5715 | 437   | ENSMUSG00000052976 | Ndrp1         | -1 |
| 5715 | 719   | ENSMUSG00000052976 | Usp2          | 1  |
| 5715 | 2126  | ENSMUSG00000052976 | Dgat2         | 1  |
| 5715 | 2399  | ENSMUSG00000052976 | MMT00060167   | -1 |
| 5715 | 2636  | ENSMUSG00000052976 | Tars          | -1 |
| 5715 | 2850  | ENSMUSG00000052976 | Slc16a6       | -1 |
| 5715 | 5734  | ENSMUSG00000052976 | EG619653      | 1  |
| 5715 | 5804  | ENSMUSG00000052976 | Thrsp         | 1  |
| 5715 | 6386  | ENSMUSG00000052976 | Por           | 1  |
| 5715 | 6746  | ENSMUSG00000052976 | E2f8          | -1 |
| 5715 | 6756  | ENSMUSG00000052976 | Sds           | 1  |
| 5715 | 6816  | ENSMUSG00000052976 | Slc46a3       | 1  |
| 5715 | 7414  | ENSMUSG00000052976 | Clpx          | -1 |
| 5715 | 7492  | ENSMUSG00000052976 | Adfp          | -1 |
| 5715 | 7839  | ENSMUSG00000052976 | Asl           | 1  |
| 5715 | 8428  | ENSMUSG00000052976 | Sorbs3        | 1  |
| 5715 | 9309  | ENSMUSG00000052976 | MMT00035904   | 1  |
| 5715 | 10207 | ENSMUSG00000052976 | MMT00012324   | -1 |
| 5715 | 11599 | ENSMUSG00000052976 | Coq10b        | 1  |
| 5715 | 11741 | ENSMUSG00000052976 | Slc30a10      | -1 |
| 5715 | 12799 | ENSMUSG00000052976 | Spon2         | -1 |
| 5715 | 12941 | ENSMUSG00000052976 | Elovl5        | -1 |
| 5715 | 15709 | ENSMUSG00000052976 | Tceal1        | 1  |
| 5715 | 16250 | ENSMUSG00000052976 | MMT00069147   | -1 |
| 5715 | 16647 | ENSMUSG00000052976 | D16H22S680E   | 1  |
| 5715 | 16704 | ENSMUSG00000052976 | Ppif          | 1  |
| 5715 | 18069 | ENSMUSG00000052976 | Gpt           | 1  |
| 5715 | 18179 | ENSMUSG00000052976 | Dbp           | 1  |
| 5715 | 19234 | ENSMUSG00000052976 | Nrg4          | 1  |
| 5715 | 19360 | ENSMUSG00000052976 | Aco1          | 1  |
| 5715 | 19375 | ENSMUSG00000052976 | Inhba         | -1 |
| 5715 | 19701 | ENSMUSG00000052976 | 9930021J17Rik | -1 |
| 5715 | 20745 | ENSMUSG00000052976 | Sord          | 1  |
| 5715 | 21142 | ENSMUSG00000052976 | Gm129         | 1  |
| 5715 | 22653 | ENSMUSG00000052976 | Ric3          | -1 |
| 5715 | 23183 | ENSMUSG00000052976 | Nnmt          | 1  |
| 5725 | 20967 | 2-Mar              | Fabp2         | 1  |
| 5729 | 250   | 2310016C08Rik      | Tubb2a-ps2    | 1  |
| 5729 | 269   | 2310016C08Rik      | Tuba1b        | 1  |

|      |       |               |               |    |
|------|-------|---------------|---------------|----|
| 5729 | 609   | 2310016C08Rik | MMT00060868   | 1  |
| 5729 | 1031  | 2310016C08Rik | Uros          | 1  |
| 5729 | 1537  | 2310016C08Rik | 1700052K11Rik | 1  |
| 5729 | 1941  | 2310016C08Rik | MMT00079618   | 1  |
| 5729 | 2322  | 2310016C08Rik | Tuba4a        | 1  |
| 5729 | 3332  | 2310016C08Rik | Lrrc59        | 1  |
| 5729 | 3804  | 2310016C08Rik | MMT00015534   | 1  |
| 5729 | 4201  | 2310016C08Rik | Tubb2c        | 1  |
| 5729 | 4286  | 2310016C08Rik | Ptp4a1        | -1 |
| 5729 | 6771  | 2310016C08Rik | Insc          | 1  |
| 5729 | 9763  | 2310016C08Rik | Tuba3b        | 1  |
| 5729 | 11129 | 2310016C08Rik | Ankhd1        | -1 |
| 5729 | 11724 | 2310016C08Rik | Tuba3a        | 1  |
| 5729 | 12981 | 2310016C08Rik | Nek6          | 1  |
| 5729 | 15862 | 2310016C08Rik | Mrap          | 1  |
| 5729 | 17323 | 2310016C08Rik | Tubb6         | 1  |
| 5729 | 17444 | 2310016C08Rik | Tuba1a        | 1  |
| 5729 | 17656 | 2310016C08Rik | Hdhd3         | 1  |
| 5729 | 17876 | 2310016C08Rik | Tubb4         | 1  |
| 5729 | 22290 | 2310016C08Rik | Tubb2a        | 1  |
| 5729 | 22443 | 2310016C08Rik | Tuba1c        | 1  |
| 5734 | 1416  | EG619653      | 6720460F02Rik | 1  |
| 5734 | 3836  | EG619653      | 2200001115Rik | 1  |
| 5734 | 5364  | EG619653      | Kif22         | 1  |
| 5734 | 8416  | EG619653      | Cdc20         | 1  |
| 5734 | 11870 | EG619653      | Apitd1        | 1  |
| 5734 | 13054 | EG619653      | Mcm4          | 1  |
| 5734 | 19318 | EG619653      | Plk1          | 1  |
| 5734 | 20433 | EG619653      | Cdca5         | 1  |
| 5734 | 21947 | EG619653      | Cdca8         | 1  |
| 5747 | 9842  | Fbxl16        | Qdpr          | -1 |
| 5747 | 12955 | Fbxl16        | Atp5o         | -1 |
| 5747 | 20019 | Fbxl16        | Qdpr          | -1 |
| 5747 | 23640 | Fbxl16        | Bdh1          | 1  |
| 5752 | 5822  | Dffa          | Car2          | -1 |
| 5752 | 15508 | Dffa          | 4632415L05Rik | -1 |
| 5752 | 21323 | Dffa          | MMT00074228   | -1 |
| 5758 | 4235  | Tpst1         | Pfkfb3        | -1 |
| 5758 | 6756  | Tpst1         | Sds           | -1 |
| 5758 | 7112  | Tpst1         | Apbb3         | -1 |
| 5758 | 8641  | Tpst1         | Slc7a2        | -1 |
| 5758 | 11599 | Tpst1         | Coq10b        | -1 |
| 5758 | 15624 | Tpst1         | Crcp          | -1 |
| 5758 | 15631 | Tpst1         | Lpin1         | -1 |
| 5758 | 15882 | Tpst1         | AA986860      | -1 |
| 5758 | 17622 | Tpst1         | Foxo1         | -1 |
| 5758 | 18314 | Tpst1         | 4631416L12Rik | -1 |
| 5758 | 19025 | Tpst1         | Slc37a4       | -1 |
| 5758 | 19723 | Tpst1         | Pfkfb1        | -1 |
| 5758 | 22978 | Tpst1         | MMT00043176   | 1  |
| 5762 | 12367 | Trpc3         | MMT00072365   | 1  |

|      |       |        |                    |    |
|------|-------|--------|--------------------|----|
| 5762 | 16416 | Trpc3  | Commd2             | -1 |
| 5765 | 2830  | Ifitm2 | 4632417K18Rik      | 1  |
| 5765 | 5250  | Ifitm2 | Ifit2              | 1  |
| 5765 | 7316  | Ifitm2 | Ifi204             | 1  |
| 5765 | 8800  | Ifitm2 | Rnf213             | 1  |
| 5765 | 10109 | Ifitm2 | Gbp3               | 1  |
| 5765 | 11265 | Ifitm2 | Irgm               | 1  |
| 5765 | 12600 | Ifitm2 | Ifi204             | 1  |
| 5765 | 12969 | Ifitm2 | Xaf1               | 1  |
| 5765 | 13309 | Ifitm2 | Tgtp               | 1  |
| 5765 | 14258 | Ifitm2 | Ifi47              | 1  |
| 5765 | 16572 | Ifitm2 | D14Ertd668e        | 1  |
| 5765 | 17412 | Ifitm2 | Aif1               | 1  |
| 5765 | 21824 | Ifitm2 | 5830443L24Rik      | 1  |
| 5765 | 23208 | Ifitm2 | Hck                | 1  |
| 5786 | 327   | Lta    | H2-Ea              | -1 |
| 5786 | 510   | Lta    | Neu1               | 1  |
| 5786 | 1340  | Lta    | Tap2               | -1 |
| 5786 | 2325  | Lta    | H2-K1              | -1 |
| 5786 | 2801  | Lta    | H2-BI              | -1 |
| 5786 | 2938  | Lta    | H2-T23             | -1 |
| 5786 | 3599  | Lta    | MMT00035426        | 1  |
| 5786 | 3704  | Lta    | H2-Q7              | -1 |
| 5786 | 3857  | Lta    | 1700001C19Rik      | 1  |
| 5786 | 5410  | Lta    | Cyp4f15            | 1  |
| 5786 | 7088  | Lta    | Slc37a1            | -1 |
| 5786 | 8750  | Lta    | 1700010I14Rik      | -1 |
| 5786 | 8767  | Lta    | Rgl2               | -1 |
| 5786 | 10376 | Lta    | C920025E04Rik      | 1  |
| 5786 | 10667 | Lta    | H2-Eb1             | -1 |
| 5786 | 12355 | Lta    | A1507611           | -1 |
| 5786 | 13493 | Lta    | Ring1              | 1  |
| 5786 | 13789 | Lta    | H2-Q8              | -1 |
| 5786 | 15531 | Lta    | Prickle4           | 1  |
| 5786 | 20100 | Lta    | Guca1b             | 1  |
| 5786 | 20238 | Lta    | H2-T9              | -1 |
| 5786 | 22822 | Lta    | MMT00013433        | -1 |
| 5786 | 23250 | Lta    | Picl2              | -1 |
| 5804 | 1594  | Thrsp  | Mrpl24             | 1  |
| 5804 | 3170  | Thrsp  | Mcart1             | 1  |
| 5804 | 3196  | Thrsp  | Tat                | 1  |
| 5804 | 4056  | Thrsp  | Tnfaip8l1          | -1 |
| 5804 | 5364  | Thrsp  | Kif22              | -1 |
| 5804 | 5449  | Thrsp  | Got1               | 1  |
| 5804 | 6329  | Thrsp  | Cyp2b10            | 1  |
| 5804 | 7492  | Thrsp  | Adfp               | -1 |
| 5804 | 8773  | Thrsp  | MMT00027093        | -1 |
| 5804 | 9718  | Thrsp  | Fmo5               | 1  |
| 5804 | 9842  | Thrsp  | Qdpr               | 1  |
| 5804 | 10554 | Thrsp  | ENSMUSG00000074179 | 1  |
| 5804 | 12556 | Thrsp  | Ass1               | 1  |



|      |       |       |               |    |
|------|-------|-------|---------------|----|
| 5804 | 13293 | Thrsp | Gsta2         | 1  |
| 5804 | 13431 | Thrsp | MMT00038058   | -1 |
| 5804 | 14055 | Thrsp | MMT00050438   | -1 |
| 5804 | 14472 | Thrsp | Ahcy          | 1  |
| 5804 | 15205 | Thrsp | MMT00030262   | -1 |
| 5804 | 17225 | Thrsp | Impa2         | -1 |
| 5804 | 19723 | Thrsp | Pfkfb1        | 1  |
| 5804 | 20194 | Thrsp | Pnlhc1        | -1 |
| 5804 | 21727 | Thrsp | Khk           | 1  |
| 5804 | 22998 | Thrsp | Ass1          | 1  |
| 5804 | 23640 | Thrsp | Bdh1          | -1 |
| 5806 | 250   | Prrx2 | Tubb2a-ps2    | 1  |
| 5806 | 269   | Prrx2 | Tuba1b        | 1  |
| 5806 | 407   | Prrx2 | Serpina6      | -1 |
| 5806 | 563   | Prrx2 | D4Bwg0951e    | -1 |
| 5806 | 609   | Prrx2 | MMT00060868   | 1  |
| 5806 | 719   | Prrx2 | Usp2          | -1 |
| 5806 | 760   | Prrx2 | Akr1c19       | -1 |
| 5806 | 771   | Prrx2 | Zbtb45        | 1  |
| 5806 | 1363  | Prrx2 | BC021767      | 1  |
| 5806 | 1941  | Prrx2 | MMT00079618   | 1  |
| 5806 | 2127  | Prrx2 | Ldha          | 1  |
| 5806 | 2276  | Prrx2 | Nelf          | 1  |
| 5806 | 2639  | Prrx2 | Abhd2         | 1  |
| 5806 | 2829  | Prrx2 | Lrfr3         | 1  |
| 5806 | 2850  | Prrx2 | Slc16a6       | 1  |
| 5806 | 3214  | Prrx2 | Dnmt3b        | 1  |
| 5806 | 3246  | Prrx2 | Prei4         | -1 |
| 5806 | 3410  | Prrx2 | Paqr9         | 1  |
| 5806 | 3789  | Prrx2 | 4833442J19Rik | -1 |
| 5806 | 3804  | Prrx2 | MMT00015534   | 1  |
| 5806 | 3836  | Prrx2 | 2200001115Rik | 1  |
| 5806 | 4090  | Prrx2 | Orai3         | 1  |
| 5806 | 4201  | Prrx2 | Tubb2c        | 1  |
| 5806 | 4286  | Prrx2 | Ptp4a1        | -1 |
| 5806 | 4534  | Prrx2 | Ndel1         | -1 |
| 5806 | 4708  | Prrx2 | Traf3ip2      | 1  |
| 5806 | 5364  | Prrx2 | Kif22         | 1  |
| 5806 | 5574  | Prrx2 | Hsd3b7        | 1  |
| 5806 | 5587  | Prrx2 | Rmnd5b        | 1  |
| 5806 | 5802  | Prrx2 | Mad2l2        | 1  |
| 5806 | 5849  | Prrx2 | 2310031A18Rik | 1  |
| 5806 | 6030  | Prrx2 | As3mt         | -1 |
| 5806 | 6070  | Prrx2 | D630003M21Rik | 1  |
| 5806 | 6085  | Prrx2 | MMT00007454   | 1  |
| 5806 | 6118  | Prrx2 | Slc1a4        | 1  |
| 5806 | 6177  | Prrx2 | Thpo          | 1  |
| 5806 | 6380  | Prrx2 | 6330569M22Rik | 1  |
| 5806 | 6386  | Prrx2 | Por           | -1 |
| 5806 | 6771  | Prrx2 | Insc          | 1  |
| 5806 | 6990  | Prrx2 | Nr1i2         | -1 |

|      |       |       |               |    |
|------|-------|-------|---------------|----|
| 5806 | 7061  | Prrx2 | Spsb3         | 1  |
| 5806 | 7862  | Prrx2 | Cpsf4l        | -1 |
| 5806 | 8328  | Prrx2 | Klhdc8a       | 1  |
| 5806 | 8399  | Prrx2 | Herpud1       | -1 |
| 5806 | 8416  | Prrx2 | Cdc20         | 1  |
| 5806 | 8428  | Prrx2 | Sorbs3        | -1 |
| 5806 | 8469  | Prrx2 | Sfrs6         | 1  |
| 5806 | 8641  | Prrx2 | Slc7a2        | -1 |
| 5806 | 8711  | Prrx2 | 5430432M24Rik | 1  |
| 5806 | 8773  | Prrx2 | MMT00027093   | 1  |
| 5806 | 8965  | Prrx2 | Ahcy          | -1 |
| 5806 | 9275  | Prrx2 | Aass          | -1 |
| 5806 | 9495  | Prrx2 | Srms          | 1  |
| 5806 | 9718  | Prrx2 | Fmo5          | -1 |
| 5806 | 10207 | Prrx2 | MMT00012324   | 1  |
| 5806 | 10273 | Prrx2 | Gpt2          | -1 |
| 5806 | 10486 | Prrx2 | 1300002K09Rik | 1  |
| 5806 | 10532 | Prrx2 | MMT00057790   | 1  |
| 5806 | 10673 | Prrx2 | MMT00071544   | -1 |
| 5806 | 10712 | Prrx2 | Fchsd2        | -1 |
| 5806 | 10775 | Prrx2 | Slc16a1       | 1  |
| 5806 | 11129 | Prrx2 | Ankhd1        | -1 |
| 5806 | 11382 | Prrx2 | Cdca3         | 1  |
| 5806 | 11599 | Prrx2 | Coq10b        | -1 |
| 5806 | 11741 | Prrx2 | Slc30a10      | 1  |
| 5806 | 11926 | Prrx2 | Ampd2         | 1  |
| 5806 | 11949 | Prrx2 | Cldn3         | 1  |
| 5806 | 12343 | Prrx2 | Atf5          | 1  |
| 5806 | 12420 | Prrx2 | Klhl21        | -1 |
| 5806 | 12489 | Prrx2 | Wdr8          | 1  |
| 5806 | 12799 | Prrx2 | Spon2         | 1  |
| 5806 | 12904 | Prrx2 | MMT00040704   | -1 |
| 5806 | 12925 | Prrx2 | Farp1         | 1  |
| 5806 | 12941 | Prrx2 | Elovl5        | 1  |
| 5806 | 12981 | Prrx2 | Nek6          | 1  |
| 5806 | 12982 | Prrx2 | Cars          | 1  |
| 5806 | 13293 | Prrx2 | Gsta2         | -1 |
| 5806 | 13431 | Prrx2 | MMT00038058   | 1  |
| 5806 | 14055 | Prrx2 | MMT00050438   | 1  |
| 5806 | 14279 | Prrx2 | 3930402G23Rik | 1  |
| 5806 | 14361 | Prrx2 | Txndc12       | 1  |
| 5806 | 14462 | Prrx2 | Zfp385b       | -1 |
| 5806 | 14472 | Prrx2 | Ahcy          | -1 |
| 5806 | 14928 | Prrx2 | Eme2          | 1  |
| 5806 | 15021 | Prrx2 | Ppargc1a      | -1 |
| 5806 | 15205 | Prrx2 | MMT00030262   | 1  |
| 5806 | 15258 | Prrx2 | Coil          | 1  |
| 5806 | 15320 | Prrx2 | MMT00017479   | -1 |
| 5806 | 15425 | Prrx2 | Adprh         | 1  |
| 5806 | 15447 | Prrx2 | Eif4a3        | 1  |
| 5806 | 15500 | Prrx2 | MMT00081411   | 1  |

|      |       |       |               |    |
|------|-------|-------|---------------|----|
| 5806 | 15631 | Prrx2 | Lpin1         | -1 |
| 5806 | 15758 | Prrx2 | Stx4a         | 1  |
| 5806 | 15824 | Prrx2 | D19Erttd721e  | 1  |
| 5806 | 15931 | Prrx2 | Ces3          | -1 |
| 5806 | 16060 | Prrx2 | Gys2          | -1 |
| 5806 | 16580 | Prrx2 | Tnfaip2       | 1  |
| 5806 | 16669 | Prrx2 | Tjp2          | 1  |
| 5806 | 16690 | Prrx2 | Tjp3          | 1  |
| 5806 | 16851 | Prrx2 | Slc34a2       | 1  |
| 5806 | 17143 | Prrx2 | 2010002N04Rik | 1  |
| 5806 | 17247 | Prrx2 | A030007L17Rik | 1  |
| 5806 | 17323 | Prrx2 | Tubb6         | 1  |
| 5806 | 17530 | Prrx2 | MMT00041792   | 1  |
| 5806 | 17622 | Prrx2 | Foxo1         | -1 |
| 5806 | 17656 | Prrx2 | Hdhd3         | 1  |
| 5806 | 17876 | Prrx2 | Tubb4         | 1  |
| 5806 | 17880 | Prrx2 | Ncald         | 1  |
| 5806 | 17884 | Prrx2 | Lnx2          | 1  |
| 5806 | 17992 | Prrx2 | Gmpr          | 1  |
| 5806 | 18027 | Prrx2 | 5730403B10Rik | -1 |
| 5806 | 18147 | Prrx2 | Nhlrc2        | -1 |
| 5806 | 18179 | Prrx2 | Dbp           | -1 |
| 5806 | 18250 | Prrx2 | Mmp14         | 1  |
| 5806 | 18299 | Prrx2 | MMT00035424   | 1  |
| 5806 | 18314 | Prrx2 | 4631416L12Rik | -1 |
| 5806 | 18756 | Prrx2 | Tspan14       | 1  |
| 5806 | 18827 | Prrx2 | Oprs1         | 1  |
| 5806 | 19025 | Prrx2 | Slc37a4       | -1 |
| 5806 | 19146 | Prrx2 | N4bp2l1       | -1 |
| 5806 | 19234 | Prrx2 | Nrg4          | -1 |
| 5806 | 19305 | Prrx2 | Azin1         | -1 |
| 5806 | 19671 | Prrx2 | Upp2          | -1 |
| 5806 | 19723 | Prrx2 | Pfkfb1        | -1 |
| 5806 | 19790 | Prrx2 | Polg2         | -1 |
| 5806 | 20085 | Prrx2 | Lpin2         | -1 |
| 5806 | 20147 | Prrx2 | Ybx1          | -1 |
| 5806 | 20171 | Prrx2 | 1700008G05Rik | 1  |
| 5806 | 20803 | Prrx2 | Tmem50a       | -1 |
| 5806 | 21675 | Prrx2 | Mosc2         | -1 |
| 5806 | 21692 | Prrx2 | MMT00013924   | 1  |
| 5806 | 21733 | Prrx2 | Rhebl1        | -1 |
| 5806 | 21811 | Prrx2 | Ak3l1         | -1 |
| 5806 | 21937 | Prrx2 | MMT00015325   | 1  |
| 5806 | 22038 | Prrx2 | Tnip1         | 1  |
| 5806 | 22290 | Prrx2 | Tubb2a        | 1  |
| 5806 | 22630 | Prrx2 | MMT00034355   | 1  |
| 5806 | 22907 | Prrx2 | MMT00054594   | 1  |
| 5806 | 22978 | Prrx2 | MMT00043176   | 1  |
| 5806 | 23180 | Prrx2 | Sult1d1       | -1 |
| 5806 | 23201 | Prrx2 | S1pr1         | 1  |
| 5806 | 23202 | Prrx2 | Olfir559      | -1 |

|      |       |               |               |    |
|------|-------|---------------|---------------|----|
| 5806 | 23248 | Prrx2         | Tesk2         | -1 |
| 5811 | 20967 | Col4a2        | Fabp2         | 1  |
| 5814 | 5934  | Nrbp2         | S100a10       | -1 |
| 5814 | 18201 | Nrbp2         | MMT00060232   | -1 |
| 5814 | 20068 | Nrbp2         | 2610204M08Rik | 1  |
| 5814 | 20093 | Nrbp2         | Ablim1        | 1  |
| 5814 | 21969 | Nrbp2         | Tk1           | 1  |
| 5822 | 5822  | Car2          | Car2          | 1  |
| 5827 | 13875 | 6332401O19Rik | Hsd17b10      | -1 |
| 5831 | 6816  | Sh2b3         | Slc46a3       | 1  |
| 5840 | 5840  | Tbc1d9b       | Tbc1d9b       | 1  |
| 5841 | 12910 | Atg12         | 1110028A07Rik | 1  |
| 5842 | 12565 | Cldn6         | Grem2         | 1  |
| 5842 | 21805 | Cldn6         | Plk3          | 1  |
| 5845 | 2224  | Il18bp        | Oasl2         | 1  |
| 5845 | 3028  | Il18bp        | Uhrf1         | 1  |
| 5845 | 5845  | Il18bp        | Il18bp        | 1  |
| 5845 | 8392  | Il18bp        | Asf1b         | 1  |
| 5845 | 9820  | Il18bp        | BC023105      | 1  |
| 5845 | 10356 | Il18bp        | 2810417H13Rik | 1  |
| 5845 | 11870 | Il18bp        | Apitd1        | 1  |
| 5845 | 13309 | Il18bp        | Tgtp          | 1  |
| 5845 | 13455 | Il18bp        | Cenpe         | 1  |
| 5845 | 14258 | Il18bp        | Ifi47         | 1  |
| 5845 | 15280 | Il18bp        | Cxcl10        | 1  |
| 5845 | 16182 | Il18bp        | Oasl1         | 1  |
| 5845 | 17412 | Il18bp        | Aif1          | 1  |
| 5845 | 18174 | Il18bp        | Stat2         | 1  |
| 5845 | 19553 | Il18bp        | Chtf18        | 1  |
| 5845 | 20433 | Il18bp        | Cdca5         | 1  |
| 5845 | 21440 | Il18bp        | Tmsb10        | 1  |
| 5845 | 21824 | Il18bp        | 5830443L24Rik | 1  |
| 5845 | 23208 | Il18bp        | Hck           | 1  |
| 5849 | 12910 | 2310031A18Rik | 1110028A07Rik | 1  |
| 5849 | 15059 | 2310031A18Rik | Mogat1        | 1  |
| 5853 | 1533  | Trim30        | BC013712      | 1  |
| 5853 | 2200  | Trim30        | BC006779      | 1  |
| 5853 | 2224  | Trim30        | Oasl2         | 1  |
| 5853 | 2550  | Trim30        | MMT00036681   | 1  |
| 5853 | 3426  | Trim30        | Hap1          | 1  |
| 5853 | 3594  | Trim30        | Rasa4         | 1  |
| 5853 | 3683  | Trim30        | Oas2          | 1  |
| 5853 | 4114  | Trim30        | Parp12        | 1  |
| 5853 | 4426  | Trim30        | ligp2         | 1  |
| 5853 | 4508  | Trim30        | Ifit1         | 1  |
| 5853 | 5044  | Trim30        | Ifi35         | 1  |
| 5853 | 5216  | Trim30        | Spnb5         | 1  |
| 5853 | 6036  | Trim30        | Pram1         | 1  |
| 5853 | 6072  | Trim30        | C1qc          | 1  |
| 5853 | 6098  | Trim30        | Ncf4          | 1  |
| 5853 | 6587  | Trim30        | Irf9          | 1  |

|      |       |        |             |   |
|------|-------|--------|-------------|---|
| 5853 | 6806  | Trim30 | Agri        | 1 |
| 5853 | 6824  | Trim30 | Irf7        | 1 |
| 5853 | 6910  | Trim30 | Ly6c2       | 1 |
| 5853 | 7069  | Trim30 | Ube1l       | 1 |
| 5853 | 7105  | Trim30 | Plac8       | 1 |
| 5853 | 7238  | Trim30 | Pycard      | 1 |
| 5853 | 7284  | Trim30 | MMT00008674 | 1 |
| 5853 | 7336  | Trim30 | Cd5l        | 1 |
| 5853 | 8659  | Trim30 | Psm8        | 1 |
| 5853 | 8800  | Trim30 | Rnf213      | 1 |
| 5853 | 9320  | Trim30 | Rnf31       | 1 |
| 5853 | 9401  | Trim30 | Fcgr4       | 1 |
| 5853 | 9820  | Trim30 | BC023105    | 1 |
| 5853 | 9847  | Trim30 | Ifi27       | 1 |
| 5853 | 10109 | Trim30 | Gbp3        | 1 |
| 5853 | 10393 | Trim30 | Slc7a8      | 1 |
| 5853 | 11204 | Trim30 | Al451617    | 1 |
| 5853 | 11265 | Trim30 | Irgm        | 1 |
| 5853 | 11701 | Trim30 | Oas1c       | 1 |
| 5853 | 12126 | Trim30 | Znfx1       | 1 |
| 5853 | 12398 | Trim30 | Ifi44       | 1 |
| 5853 | 12600 | Trim30 | Ifi204      | 1 |
| 5853 | 12969 | Trim30 | Xaf1        | 1 |
| 5853 | 13156 | Trim30 | Ifit3       | 1 |
| 5853 | 13309 | Trim30 | Tgtp        | 1 |
| 5853 | 13514 | Trim30 | Apol9b      | 1 |
| 5853 | 13654 | Trim30 | Stat1       | 1 |
| 5853 | 14237 | Trim30 | Rac2        | 1 |
| 5853 | 14506 | Trim30 | Slc15a3     | 1 |
| 5853 | 14603 | Trim30 | Ly6e        | 1 |
| 5853 | 14880 | Trim30 | Ms4a4c      | 1 |
| 5853 | 14883 | Trim30 | Itgal       | 1 |
| 5853 | 15074 | Trim30 | Usp18       | 1 |
| 5853 | 15280 | Trim30 | Cxcl10      | 1 |
| 5853 | 15504 | Trim30 | Mx2         | 1 |
| 5853 | 16102 | Trim30 | Cd72        | 1 |
| 5853 | 16182 | Trim30 | Oasl1       | 1 |
| 5853 | 16521 | Trim30 | Adar        | 1 |
| 5853 | 16988 | Trim30 | Clec4f      | 1 |
| 5853 | 17197 | Trim30 | Igtp        | 1 |
| 5853 | 18174 | Trim30 | Stat2       | 1 |
| 5853 | 19189 | Trim30 | Sp100       | 1 |
| 5853 | 19708 | Trim30 | Ly6a        | 1 |
| 5853 | 19738 | Trim30 | Lgals3bp    | 1 |
| 5853 | 20997 | Trim30 | MMT00028135 | 1 |
| 5853 | 21351 | Trim30 | Shisa5      | 1 |
| 5853 | 21440 | Trim30 | Tmsb10      | 1 |
| 5853 | 21549 | Trim30 | Rtp4        | 1 |
| 5853 | 22037 | Trim30 | Oas1g       | 1 |
| 5853 | 22496 | Trim30 | Sfn1        | 1 |
| 5853 | 23208 | Trim30 | Hck         | 1 |

|      |       |             |               |    |
|------|-------|-------------|---------------|----|
| 5853 | 23450 | Trim30      | D12Ertd647e   | 1  |
| 5854 | 1416  | Kif11       | 6720460F02Rik | 1  |
| 5854 | 1932  | Kif11       | Racgap1       | 1  |
| 5854 | 2428  | Kif11       | Car1          | -1 |
| 5854 | 5364  | Kif11       | Kif22         | 1  |
| 5854 | 8416  | Kif11       | Cdc20         | 1  |
| 5854 | 11382 | Kif11       | Cdca3         | 1  |
| 5854 | 17823 | Kif11       | D2Ertd750e    | 1  |
| 5854 | 18299 | Kif11       | MMT00035424   | 1  |
| 5854 | 19318 | Kif11       | Plk1          | 1  |
| 5854 | 20433 | Kif11       | Cdca5         | 1  |
| 5854 | 21692 | Kif11       | MMT00013924   | 1  |
| 5854 | 21947 | Kif11       | Cdca8         | 1  |
| 5861 | 3689  | Anxa3       | Adh1          | -1 |
| 5869 | 607   | MMT00058347 | Me1           | 1  |
| 5869 | 8444  | MMT00058347 | Rdh16         | 1  |
| 5869 | 8815  | MMT00058347 | Mx1           | 1  |
| 5869 | 11375 | MMT00058347 | Derl2         | 1  |
| 5869 | 12910 | MMT00058347 | 1110028A07Rik | 1  |
| 5869 | 18201 | MMT00058347 | MMT00060232   | 1  |
| 5869 | 21202 | MMT00058347 | Acly          | 1  |
| 5869 | 21214 | MMT00058347 | Scd1          | 1  |
| 5869 | 21251 | MMT00058347 | Cpt1a         | -1 |
| 5869 | 21575 | MMT00058347 | Cyp2c55       | 1  |
| 5869 | 22138 | MMT00058347 | Ang           | -1 |
| 5870 | 269   | Limd1       | Tuba1b        | 1  |
| 5870 | 1941  | Limd1       | MMT00079618   | 1  |
| 5870 | 2322  | Limd1       | Tuba4a        | 1  |
| 5870 | 4201  | Limd1       | Tubb2c        | 1  |
| 5870 | 5594  | Limd1       | Erbb3         | -1 |
| 5870 | 6771  | Limd1       | Insc          | 1  |
| 5870 | 7151  | Limd1       | MMT00007982   | 1  |
| 5870 | 7659  | Limd1       | Rab30         | -1 |
| 5870 | 7944  | Limd1       | A1132487      | -1 |
| 5870 | 8439  | Limd1       | Slc25a33      | -1 |
| 5870 | 9763  | Limd1       | Tuba3b        | 1  |
| 5870 | 11540 | Limd1       | Ctps          | 1  |
| 5870 | 11724 | Limd1       | Tuba3a        | 1  |
| 5870 | 17444 | Limd1       | Tuba1a        | 1  |
| 5870 | 17656 | Limd1       | Hdhd3         | 1  |
| 5870 | 21288 | Limd1       | Tcp11l2       | -1 |
| 5870 | 22443 | Limd1       | Tuba1c        | 1  |
| 5881 | 662   | Fzd4        | Mid1ip1       | 1  |
| 5881 | 6044  | Fzd4        | Sucnr1        | 1  |
| 5881 | 8896  | Fzd4        | Fasn          | 1  |
| 5881 | 10772 | Fzd4        | Aacs          | 1  |
| 5881 | 11462 | Fzd4        | Gpam          | 1  |
| 5881 | 12315 | Fzd4        | Srebf1        | 1  |
| 5881 | 12910 | Fzd4        | 1110028A07Rik | 1  |
| 5881 | 17660 | Fzd4        | Nlrp12        | -1 |
| 5881 | 21202 | Fzd4        | Acly          | 1  |

|      |       |        |                    |    |
|------|-------|--------|--------------------|----|
| 5881 | 22046 | Fzd4   | Cml4               | 1  |
| 5881 | 22137 | Fzd4   | Nudt7              | 1  |
| 5884 | 524   | Gstm2  | Hsd3b2             | -1 |
| 5884 | 1466  | Gstm2  | Ubp2l              | -1 |
| 5884 | 1867  | Gstm2  | Bcas2              | -1 |
| 5884 | 1963  | Gstm2  | MMT00039783        | -1 |
| 5884 | 3753  | Gstm2  | Setdb1             | 1  |
| 5884 | 5938  | Gstm2  | Pfn2               | -1 |
| 5884 | 6206  | Gstm2  | MMT00063701        | -1 |
| 5884 | 7519  | Gstm2  | Gstm1              | -1 |
| 5884 | 8738  | Gstm2  | Reg4               | 1  |
| 5884 | 10521 | Gstm2  | Ttf2               | -1 |
| 5884 | 10681 | Gstm2  | Dgkz               | 1  |
| 5884 | 11121 | Gstm2  | Mtmr11             | 1  |
| 5884 | 11611 | Gstm2  | S100a13            | 1  |
| 5884 | 16416 | Gstm2  | Commd2             | -1 |
| 5884 | 16679 | Gstm2  | Ctsk               | 1  |
| 5884 | 18754 | Gstm2  | Rbm8a              | -1 |
| 5884 | 18911 | Gstm2  | Selenbp2           | -1 |
| 5884 | 20385 | Gstm2  | Chd1l              | -1 |
| 5884 | 20661 | Gstm2  | Tuft1              | -1 |
| 5884 | 20917 | Gstm2  | Gstm6              | 1  |
| 5884 | 22202 | Gstm2  | OTTMUSG00000021274 | 1  |
| 5884 | 22570 | Gstm2  | Phtf1              | -1 |
| 5884 | 23457 | Gstm2  | Selenbp2           | -1 |
| 5889 | 337   | Errfi1 | Rasgef1b           | 1  |
| 5889 | 2294  | Errfi1 | AU040829           | 1  |
| 5889 | 3196  | Errfi1 | Tat                | 1  |
| 5889 | 5889  | Errfi1 | Errfi1             | 1  |
| 5889 | 6564  | Errfi1 | Cebpδ              | 1  |
| 5889 | 7136  | Errfi1 | Id3                | -1 |
| 5889 | 7315  | Errfi1 | EG624219           | -1 |
| 5889 | 8632  | Errfi1 | Igfbp1             | 1  |
| 5889 | 10279 | Errfi1 | Rnf186             | -1 |
| 5889 | 12761 | Errfi1 | Tsc22d3            | 1  |
| 5889 | 14473 | Errfi1 | 6330534C20Rik      | 1  |
| 5889 | 14894 | Errfi1 | G0s2               | -1 |
| 5889 | 15522 | Errfi1 | 1810011O10Rik      | 1  |
| 5889 | 15826 | Errfi1 | Arl4d              | 1  |
| 5889 | 16517 | Errfi1 | D4Wsu53e           | 1  |
| 5889 | 17525 | Errfi1 | Ctgf               | 1  |
| 5889 | 17752 | Errfi1 | Chac1              | 1  |
| 5889 | 18083 | Errfi1 | Gadd45a            | -1 |
| 5889 | 19528 | Errfi1 | Zfp503             | -1 |
| 5889 | 19556 | Errfi1 | Efna1              | -1 |
| 5889 | 21934 | Errfi1 | Id2                | -1 |
| 5889 | 22216 | Errfi1 | Sp5                | -1 |
| 5889 | 22873 | Errfi1 | Slc38a2            | 1  |
| 5889 | 23552 | Errfi1 | Rasl11b            | -1 |
| 5899 | 19115 | Cpa3   | Rab32              | 1  |
| 5900 | 2889  | Igsf21 | Pqlc2              | 1  |

|      |       |               |               |    |
|------|-------|---------------|---------------|----|
| 5905 | 1851  | Nos2          | Tmem41a       | -1 |
| 5905 | 3754  | Nos2          | Dock6         | 1  |
| 5905 | 6044  | Nos2          | Sucnr1        | 1  |
| 5905 | 11462 | Nos2          | Gpam          | 1  |
| 5905 | 12219 | Nos2          | Cyb5b         | 1  |
| 5905 | 14147 | Nos2          | Acss2         | 1  |
| 5905 | 17090 | Nos2          | Lass2         | 1  |
| 5905 | 18286 | Nos2          | Slc41a3       | -1 |
| 5905 | 18790 | Nos2          | Car3          | 1  |
| 5905 | 21202 | Nos2          | Acly          | 1  |
| 5905 | 21251 | Nos2          | Cpt1a         | -1 |
| 5905 | 21575 | Nos2          | Cyp2c55       | 1  |
| 5905 | 22732 | Nos2          | Cyb5b         | 1  |
| 5910 | 19216 | 1110014J01Rik | Bik           | 1  |
| 5918 | 7761  | Ccl9          | Nudt19        | -1 |
| 5919 | 1258  | B930041F14Rik | Hba-a1        | 1  |
| 5919 | 5919  | B930041F14Rik | B930041F14Rik | 1  |
| 5919 | 17664 | B930041F14Rik | Jup           | 1  |
| 5919 | 21356 | B930041F14Rik | Nkx2-6        | 1  |
| 5922 | 21202 | Hyal2         | Acly          | -1 |
| 5930 | 3555  | Mst1r         | Sbds          | -1 |
| 5930 | 4454  | Mst1r         | BC055107      | -1 |
| 5938 | 12367 | Pfn2          | MMT00072365   | 1  |
| 5949 | 143   | Zbp1          | Gvin1         | 1  |
| 5949 | 1533  | Zbp1          | BC013712      | 1  |
| 5949 | 2224  | Zbp1          | Oasl2         | 1  |
| 5949 | 2550  | Zbp1          | MMT00036681   | 1  |
| 5949 | 3523  | Zbp1          | Trim34        | 1  |
| 5949 | 3572  | Zbp1          | Ebi3          | 1  |
| 5949 | 3659  | Zbp1          | EG236451      | 1  |
| 5949 | 3683  | Zbp1          | Oas2          | 1  |
| 5949 | 4409  | Zbp1          | 5430435G22Rik | 1  |
| 5949 | 4426  | Zbp1          | ligp2         | 1  |
| 5949 | 4508  | Zbp1          | Ifit1         | 1  |
| 5949 | 5044  | Zbp1          | Ifi35         | 1  |
| 5949 | 5250  | Zbp1          | Ifit2         | 1  |
| 5949 | 5845  | Zbp1          | I18bp         | 1  |
| 5949 | 5853  | Zbp1          | Trim30        | 1  |
| 5949 | 5949  | Zbp1          | Zbp1          | 1  |
| 5949 | 6595  | Zbp1          | Oas1a         | 1  |
| 5949 | 6824  | Zbp1          | Irf7          | 1  |
| 5949 | 6910  | Zbp1          | Ly6c2         | 1  |
| 5949 | 7069  | Zbp1          | Ube1l         | 1  |
| 5949 | 7105  | Zbp1          | Plac8         | 1  |
| 5949 | 7238  | Zbp1          | Pycard        | 1  |
| 5949 | 7284  | Zbp1          | MMT00008674   | 1  |
| 5949 | 7316  | Zbp1          | Ifi204        | 1  |
| 5949 | 7336  | Zbp1          | Cd5l          | 1  |
| 5949 | 8555  | Zbp1          | H2-M3         | 1  |
| 5949 | 8659  | Zbp1          | Psmb8         | 1  |
| 5949 | 8800  | Zbp1          | Rnf213        | 1  |



|      |       |      |               |   |
|------|-------|------|---------------|---|
| 5949 | 8952  | Zbp1 | Marco         | 1 |
| 5949 | 9100  | Zbp1 | Ms4a6c        | 1 |
| 5949 | 9401  | Zbp1 | Fcgr4         | 1 |
| 5949 | 9847  | Zbp1 | Ifi27         | 1 |
| 5949 | 10109 | Zbp1 | Gbp3          | 1 |
| 5949 | 10426 | Zbp1 | Ly6f          | 1 |
| 5949 | 10796 | Zbp1 | Spic          | 1 |
| 5949 | 11009 | Zbp1 | MMT00008885   | 1 |
| 5949 | 11265 | Zbp1 | Irgm          | 1 |
| 5949 | 11701 | Zbp1 | Oas1c         | 1 |
| 5949 | 12312 | Zbp1 | Ms4a6d        | 1 |
| 5949 | 12398 | Zbp1 | Ifi44         | 1 |
| 5949 | 12600 | Zbp1 | Ifi204        | 1 |
| 5949 | 12969 | Zbp1 | Xaf1          | 1 |
| 5949 | 13156 | Zbp1 | Ifit3         | 1 |
| 5949 | 13309 | Zbp1 | Tgtp          | 1 |
| 5949 | 13522 | Zbp1 | Sfn5          | 1 |
| 5949 | 13527 | Zbp1 | Ctss          | 1 |
| 5949 | 13585 | Zbp1 | Nckap1l       | 1 |
| 5949 | 13654 | Zbp1 | Stat1         | 1 |
| 5949 | 13826 | Zbp1 | Melk          | 1 |
| 5949 | 14506 | Zbp1 | Slc15a3       | 1 |
| 5949 | 14603 | Zbp1 | Ly6e          | 1 |
| 5949 | 14880 | Zbp1 | Ms4a4c        | 1 |
| 5949 | 14883 | Zbp1 | Itgal         | 1 |
| 5949 | 15074 | Zbp1 | Usp18         | 1 |
| 5949 | 15504 | Zbp1 | Mx2           | 1 |
| 5949 | 16147 | Zbp1 | Tlr2          | 1 |
| 5949 | 16182 | Zbp1 | Oasl1         | 1 |
| 5949 | 16199 | Zbp1 | Samhd1        | 1 |
| 5949 | 16521 | Zbp1 | Adar          | 1 |
| 5949 | 16572 | Zbp1 | D14Erttd668e  | 1 |
| 5949 | 16874 | Zbp1 | Fcer1g        | 1 |
| 5949 | 17197 | Zbp1 | Igtp          | 1 |
| 5949 | 17412 | Zbp1 | Aif1          | 1 |
| 5949 | 18186 | Zbp1 | Parp14        | 1 |
| 5949 | 19189 | Zbp1 | Sp100         | 1 |
| 5949 | 19708 | Zbp1 | Ly6a          | 1 |
| 5949 | 19738 | Zbp1 | Lgals3bp      | 1 |
| 5949 | 20321 | Zbp1 | Ms4a6b        | 1 |
| 5949 | 20474 | Zbp1 | Gnb3          | 1 |
| 5949 | 20791 | Zbp1 | MMT00014813   | 1 |
| 5949 | 20997 | Zbp1 | MMT00028135   | 1 |
| 5949 | 21351 | Zbp1 | Shisa5        | 1 |
| 5949 | 21549 | Zbp1 | Rtp4          | 1 |
| 5949 | 21824 | Zbp1 | 5830443L24Rik | 1 |
| 5949 | 22037 | Zbp1 | Oas1g         | 1 |
| 5949 | 22712 | Zbp1 | Phf11         | 1 |
| 5949 | 23038 | Zbp1 | Casp4         | 1 |
| 5949 | 23208 | Zbp1 | Hck           | 1 |
| 5949 | 23450 | Zbp1 | D12Erttd647e  | 1 |

|      |       |             |               |    |
|------|-------|-------------|---------------|----|
| 5965 | 1041  | Pbld        | 3110049J23Rik | 1  |
| 5965 | 5965  | Pbld        | Pbld          | 1  |
| 5965 | 13348 | Pbld        | Ank3          | 1  |
| 5965 | 13688 | Pbld        | Ppa1          | 1  |
| 5965 | 15971 | Pbld        | Aifm2         | 1  |
| 5965 | 18300 | Pbld        | Arg1          | 1  |
| 5965 | 19115 | Pbld        | Rab32         | -1 |
| 5965 | 19392 | Pbld        | Slc25a16      | -1 |
| 5965 | 21105 | Pbld        | Pex26         | 1  |
| 5965 | 22146 | Pbld        | Aifm2         | 1  |
| 5968 | 2945  | MMT00012419 | MMT00005190   | 1  |
| 5968 | 5014  | MMT00012419 | MMT00017503   | 1  |
| 5968 | 8341  | MMT00012419 | MMT00017270   | 1  |
| 5968 | 19064 | MMT00012419 | MMT00004867   | -1 |
| 5974 | 131   | Arntl       | Irx3          | -1 |
| 5974 | 213   | Arntl       | Rgs16         | -1 |
| 5974 | 250   | Arntl       | Tubb2a-ps2    | 1  |
| 5974 | 269   | Arntl       | Tuba1b        | 1  |
| 5974 | 402   | Arntl       | Timp3         | -1 |
| 5974 | 407   | Arntl       | Serpina6      | -1 |
| 5974 | 415   | Arntl       | Ypel2         | 1  |
| 5974 | 433   | Arntl       | Pla2g12b      | 1  |
| 5974 | 437   | Arntl       | Ndr1          | 1  |
| 5974 | 530   | Arntl       | Mest          | 1  |
| 5974 | 547   | Arntl       | Mknk2         | -1 |
| 5974 | 604   | Arntl       | Ppp1r15b      | -1 |
| 5974 | 609   | Arntl       | MMT00060868   | 1  |
| 5974 | 719   | Arntl       | Usp2          | -1 |
| 5974 | 771   | Arntl       | Zbtb45        | 1  |
| 5974 | 793   | Arntl       | Morc3         | -1 |
| 5974 | 849   | Arntl       | Pxmp4         | 1  |
| 5974 | 865   | Arntl       | Npc1          | -1 |
| 5974 | 937   | Arntl       | Pi4ka         | -1 |
| 5974 | 958   | Arntl       | Ppp2r5e       | -1 |
| 5974 | 1031  | Arntl       | Uros          | 1  |
| 5974 | 1036  | Arntl       | Dusp19        | 1  |
| 5974 | 1276  | Arntl       | Col4a1        | 1  |
| 5974 | 1310  | Arntl       | Cabc1         | 1  |
| 5974 | 1326  | Arntl       | Tox           | -1 |
| 5974 | 1362  | Arntl       | Avpr1a        | 1  |
| 5974 | 1363  | Arntl       | BC021767      | 1  |
| 5974 | 1371  | Arntl       | 1200009I06Rik | 1  |
| 5974 | 1424  | Arntl       | Dapk1         | 1  |
| 5974 | 1445  | Arntl       | Ssbp2         | -1 |
| 5974 | 1453  | Arntl       | Gfod2         | 1  |
| 5974 | 1537  | Arntl       | 1700052K11Rik | 1  |
| 5974 | 1585  | Arntl       | Mif4gd        | 1  |
| 5974 | 1615  | Arntl       | Timm10        | -1 |
| 5974 | 1646  | Arntl       | Slc15a4       | -1 |
| 5974 | 1655  | Arntl       | Mgrn1         | -1 |
| 5974 | 1709  | Arntl       | Mt2           | -1 |

|      |      |       |               |    |
|------|------|-------|---------------|----|
| 5974 | 1719 | Arntl | Trak2         | -1 |
| 5974 | 1736 | Arntl | Elovl3        | 1  |
| 5974 | 1760 | Arntl | Nek8          | -1 |
| 5974 | 1767 | Arntl | BC016495      | -1 |
| 5974 | 1805 | Arntl | Tmem204       | -1 |
| 5974 | 1853 | Arntl | Stat5a        | 1  |
| 5974 | 1876 | Arntl | Amdhd1        | 1  |
| 5974 | 1911 | Arntl | 1300007F04Rik | -1 |
| 5974 | 1941 | Arntl | MMT00079618   | 1  |
| 5974 | 2011 | Arntl | Slc2a5        | -1 |
| 5974 | 2013 | Arntl | Ii15ra        | -1 |
| 5974 | 2050 | Arntl | Lpl           | 1  |
| 5974 | 2110 | Arntl | Gtf2ird1      | 1  |
| 5974 | 2126 | Arntl | Dgat2         | -1 |
| 5974 | 2150 | Arntl | Rragc         | -1 |
| 5974 | 2200 | Arntl | BC006779      | 1  |
| 5974 | 2262 | Arntl | Papss2        | -1 |
| 5974 | 2322 | Arntl | Tuba4a        | 1  |
| 5974 | 2384 | Arntl | Micalcl       | 1  |
| 5974 | 2399 | Arntl | MMT00060167   | 1  |
| 5974 | 2447 | Arntl | Ubac1         | -1 |
| 5974 | 2483 | Arntl | Gmeb1         | -1 |
| 5974 | 2615 | Arntl | EG624862      | -1 |
| 5974 | 2636 | Arntl | Tars          | 1  |
| 5974 | 2766 | Arntl | Elp4          | 1  |
| 5974 | 2794 | Arntl | Map3k6        | -1 |
| 5974 | 2823 | Arntl | Sipa112       | -1 |
| 5974 | 2829 | Arntl | Lrfr3         | 1  |
| 5974 | 2850 | Arntl | Slc16a6       | 1  |
| 5974 | 2862 | Arntl | MMT00068885   | 1  |
| 5974 | 2881 | Arntl | Hlf           | -1 |
| 5974 | 3214 | Arntl | Dnmt3b        | 1  |
| 5974 | 3235 | Arntl | BC029214      | 1  |
| 5974 | 3246 | Arntl | Prei4         | -1 |
| 5974 | 3357 | Arntl | Rev1          | -1 |
| 5974 | 3393 | Arntl | Shhg8         | -1 |
| 5974 | 3410 | Arntl | Paqr9         | 1  |
| 5974 | 3452 | Arntl | Ccrn4l        | -1 |
| 5974 | 3468 | Arntl | MMT00009124   | 1  |
| 5974 | 3502 | Arntl | Gde1          | -1 |
| 5974 | 3564 | Arntl | Spcs2         | 1  |
| 5974 | 3603 | Arntl | BC027231      | -1 |
| 5974 | 3620 | Arntl | Bet1          | 1  |
| 5974 | 3746 | Arntl | Osbp15        | -1 |
| 5974 | 3789 | Arntl | 4833442J19Rik | -1 |
| 5974 | 3790 | Arntl | Mtss1         | -1 |
| 5974 | 3804 | Arntl | MMT00015534   | 1  |
| 5974 | 3818 | Arntl | Cep192        | 1  |
| 5974 | 3868 | Arntl | Ebpl          | 1  |
| 5974 | 3892 | Arntl | D0H6S2654E    | 1  |
| 5974 | 4090 | Arntl | Orai3         | 1  |

|      |      |       |               |    |
|------|------|-------|---------------|----|
| 5974 | 4106 | Arntl | MMT00041409   | -1 |
| 5974 | 4192 | Arntl | Zranb1        | -1 |
| 5974 | 4201 | Arntl | Tubb2c        | 1  |
| 5974 | 4235 | Arntl | Pfkfb3        | -1 |
| 5974 | 4286 | Arntl | Ptp4a1        | -1 |
| 5974 | 4298 | Arntl | St3gal1       | 1  |
| 5974 | 4333 | Arntl | Sumo3         | 1  |
| 5974 | 4369 | Arntl | Acot4         | -1 |
| 5974 | 4380 | Arntl | Smarcb1       | 1  |
| 5974 | 4392 | Arntl | 1810055G02Rik | -1 |
| 5974 | 4431 | Arntl | Tmem17        | 1  |
| 5974 | 4499 | Arntl | Enpp2         | -1 |
| 5974 | 4534 | Arntl | Ndel1         | -1 |
| 5974 | 4551 | Arntl | Cyp2e1        | -1 |
| 5974 | 4590 | Arntl | Arhgap21      | -1 |
| 5974 | 4612 | Arntl | Hspa5         | 1  |
| 5974 | 4686 | Arntl | BC021785      | 1  |
| 5974 | 4708 | Arntl | Traf3ip2      | 1  |
| 5974 | 4715 | Arntl | Tmem120a      | -1 |
| 5974 | 4797 | Arntl | Fbxo25        | 1  |
| 5974 | 5068 | Arntl | Afap1l2       | 1  |
| 5974 | 5120 | Arntl | Alkbh7        | 1  |
| 5974 | 5172 | Arntl | Sumo1         | -1 |
| 5974 | 5183 | Arntl | St5           | 1  |
| 5974 | 5187 | Arntl | Speer4f       | -1 |
| 5974 | 5224 | Arntl | MMT00071383   | 1  |
| 5974 | 5227 | Arntl | 2310008M10Rik | 1  |
| 5974 | 5262 | Arntl | Mecp2         | -1 |
| 5974 | 5372 | Arntl | Tor1a         | -1 |
| 5974 | 5374 | Arntl | Chka          | 1  |
| 5974 | 5375 | Arntl | Sec23b        | 1  |
| 5974 | 5414 | Arntl | Etnk2         | -1 |
| 5974 | 5425 | Arntl | Ung           | -1 |
| 5974 | 5492 | Arntl | MMT00039914   | -1 |
| 5974 | 5569 | Arntl | Pdgfc         | 1  |
| 5974 | 5574 | Arntl | Hsd3b7        | 1  |
| 5974 | 5587 | Arntl | Rmnd5b        | 1  |
| 5974 | 5591 | Arntl | Igsf8         | -1 |
| 5974 | 5629 | Arntl | Als2          | 1  |
| 5974 | 5734 | Arntl | EG619653      | -1 |
| 5974 | 5791 | Arntl | Baiap2l1      | -1 |
| 5974 | 5802 | Arntl | Mad2l2        | 1  |
| 5974 | 5804 | Arntl | Thrsp         | -1 |
| 5974 | 5831 | Arntl | Sh2b3         | 1  |
| 5974 | 5849 | Arntl | 2310031A18Rik | 1  |
| 5974 | 5858 | Arntl | Itch          | -1 |
| 5974 | 5892 | Arntl | MMT00038457   | -1 |
| 5974 | 5934 | Arntl | S100a10       | 1  |
| 5974 | 5974 | Arntl | Arntl         | 1  |
| 5974 | 6002 | Arntl | Med24         | 1  |
| 5974 | 6019 | Arntl | Gdap10        | -1 |

|      |      |       |               |    |
|------|------|-------|---------------|----|
| 5974 | 6028 | Arntl | Alas1         | -1 |
| 5974 | 6030 | Arntl | As3mt         | -1 |
| 5974 | 6073 | Arntl | Mthfd2        | 1  |
| 5974 | 6077 | Arntl | Pik3cb        | -1 |
| 5974 | 6096 | Arntl | Acot3         | -1 |
| 5974 | 6109 | Arntl | Hsd17b2       | 1  |
| 5974 | 6118 | Arntl | Slc1a4        | 1  |
| 5974 | 6171 | Arntl | Abtb2         | 1  |
| 5974 | 6177 | Arntl | Thpo          | 1  |
| 5974 | 6211 | Arntl | Arhgap24      | 1  |
| 5974 | 6268 | Arntl | Slc45a3       | 1  |
| 5974 | 6338 | Arntl | Setd3         | -1 |
| 5974 | 6343 | Arntl | Slc20a1       | -1 |
| 5974 | 6370 | Arntl | Aqp8          | 1  |
| 5974 | 6371 | Arntl | Dedd2         | -1 |
| 5974 | 6372 | Arntl | 1110021L09Rik | 1  |
| 5974 | 6380 | Arntl | 6330569M22Rik | 1  |
| 5974 | 6386 | Arntl | Por           | -1 |
| 5974 | 6394 | Arntl | Fbxo6         | 1  |
| 5974 | 6639 | Arntl | Fads3         | 1  |
| 5974 | 6657 | Arntl | Irf6          | 1  |
| 5974 | 6675 | Arntl | Sfrs4         | -1 |
| 5974 | 6705 | Arntl | Sorbs2        | 1  |
| 5974 | 6714 | Arntl | Lima1         | -1 |
| 5974 | 6756 | Arntl | Sds           | -1 |
| 5974 | 6771 | Arntl | Insc          | 1  |
| 5974 | 6788 | Arntl | Psen2         | 1  |
| 5974 | 6823 | Arntl | Yars          | 1  |
| 5974 | 6916 | Arntl | Wdr5b         | 1  |
| 5974 | 6928 | Arntl | Kihl8         | 1  |
| 5974 | 6966 | Arntl | Mia3          | -1 |
| 5974 | 6990 | Arntl | Nr1i2         | -1 |
| 5974 | 7061 | Arntl | Spsb3         | 1  |
| 5974 | 7095 | Arntl | Timm8a1       | -1 |
| 5974 | 7112 | Arntl | Apbb3         | -1 |
| 5974 | 7133 | Arntl | Hook2         | -1 |
| 5974 | 7151 | Arntl | MMT00007982   | 1  |
| 5974 | 7165 | Arntl | Nt5m          | 1  |
| 5974 | 7199 | Arntl | Wee1          | -1 |
| 5974 | 7308 | Arntl | Tmem52        | -1 |
| 5974 | 7397 | Arntl | MMT00020969   | -1 |
| 5974 | 7414 | Arntl | Clpx          | 1  |
| 5974 | 7457 | Arntl | Mrpl22        | 1  |
| 5974 | 7619 | Arntl | Pik3ip1       | -1 |
| 5974 | 7745 | Arntl | C330016O10Rik | 1  |
| 5974 | 7770 | Arntl | Galt          | 1  |
| 5974 | 7839 | Arntl | Asl           | -1 |
| 5974 | 7862 | Arntl | Cpsf4l        | -1 |
| 5974 | 7954 | Arntl | Ccdc12        | 1  |
| 5974 | 7973 | Arntl | Lgals9        | 1  |
| 5974 | 8054 | Arntl | Smarca2       | -1 |

|      |       |       |               |    |
|------|-------|-------|---------------|----|
| 5974 | 8237  | Arntl | Caprin1       | 1  |
| 5974 | 8328  | Arntl | Klhdc8a       | 1  |
| 5974 | 8399  | Arntl | Herpud1       | -1 |
| 5974 | 8408  | Arntl | Nr1i3         | -1 |
| 5974 | 8428  | Arntl | Sorbs3        | -1 |
| 5974 | 8595  | Arntl | MMT00019109   | 1  |
| 5974 | 8641  | Arntl | Slc7a2        | -1 |
| 5974 | 8658  | Arntl | Fmo2          | -1 |
| 5974 | 8683  | Arntl | 3110002H16Rik | -1 |
| 5974 | 8711  | Arntl | 5430432M24Rik | 1  |
| 5974 | 8717  | Arntl | Litaf         | 1  |
| 5974 | 8797  | Arntl | Snrk          | -1 |
| 5974 | 9033  | Arntl | 1810013L24Rik | -1 |
| 5974 | 9065  | Arntl | Reep4         | 1  |
| 5974 | 9127  | Arntl | Mtfmt         | 1  |
| 5974 | 9154  | Arntl | Tfg           | 1  |
| 5974 | 9158  | Arntl | Pde9a         | 1  |
| 5974 | 9260  | Arntl | Cmtm6         | 1  |
| 5974 | 9309  | Arntl | MMT00035904   | -1 |
| 5974 | 9379  | Arntl | Ypel2         | 1  |
| 5974 | 9438  | Arntl | Pctk3         | -1 |
| 5974 | 9481  | Arntl | Ppl           | -1 |
| 5974 | 9495  | Arntl | Srms          | 1  |
| 5974 | 9585  | Arntl | Neu3          | 1  |
| 5974 | 9594  | Arntl | Asb13         | 1  |
| 5974 | 9610  | Arntl | Narf          | -1 |
| 5974 | 9686  | Arntl | Nek4          | 1  |
| 5974 | 9763  | Arntl | Tuba3b        | 1  |
| 5974 | 9831  | Arntl | Nedd4l        | 1  |
| 5974 | 9892  | Arntl | AU022252      | 1  |
| 5974 | 9907  | Arntl | 4932442K08Rik | -1 |
| 5974 | 9910  | Arntl | EG666644      | -1 |
| 5974 | 10029 | Arntl | Trak1         | -1 |
| 5974 | 10042 | Arntl | MMT00028111   | 1  |
| 5974 | 10088 | Arntl | Ddc           | 1  |
| 5974 | 10166 | Arntl | Rhbdd2        | -1 |
| 5974 | 10207 | Arntl | MMT00012324   | 1  |
| 5974 | 10215 | Arntl | Nampt         | -1 |
| 5974 | 10408 | Arntl | Per1          | -1 |
| 5974 | 10444 | Arntl | 1810020D17Rik | -1 |
| 5974 | 10486 | Arntl | 1300002K09Rik | 1  |
| 5974 | 10541 | Arntl | Ap2a2         | 1  |
| 5974 | 10642 | Arntl | Ngef          | -1 |
| 5974 | 10712 | Arntl | Fchsd2        | -1 |
| 5974 | 10745 | Arntl | Gale          | 1  |
| 5974 | 10775 | Arntl | Slc16a1       | 1  |
| 5974 | 10803 | Arntl | Wnt5a         | 1  |
| 5974 | 10863 | Arntl | Tssc1         | 1  |
| 5974 | 10883 | Arntl | Pols          | -1 |
| 5974 | 10911 | Arntl | Mcl1          | -1 |
| 5974 | 11024 | Arntl | MMT00049098   | 1  |

|      |       |       |               |    |
|------|-------|-------|---------------|----|
| 5974 | 11054 | Arntl | Rnase4        | -1 |
| 5974 | 11075 | Arntl | Xrcc6bp1      | -1 |
| 5974 | 11129 | Arntl | Ankhd1        | -1 |
| 5974 | 11154 | Arntl | MMT00037611   | -1 |
| 5974 | 11193 | Arntl | Tsc22d1       | 1  |
| 5974 | 11233 | Arntl | Tef           | -1 |
| 5974 | 11356 | Arntl | Med27         | 1  |
| 5974 | 11412 | Arntl | Abcg5         | -1 |
| 5974 | 11447 | Arntl | Nr1h4         | -1 |
| 5974 | 11506 | Arntl | Rfxank        | 1  |
| 5974 | 11574 | Arntl | Gne           | -1 |
| 5974 | 11599 | Arntl | Coq10b        | -1 |
| 5974 | 11614 | Arntl | Sult1e1       | -1 |
| 5974 | 11633 | Arntl | Ier3          | -1 |
| 5974 | 11724 | Arntl | Tuba3a        | 1  |
| 5974 | 11735 | Arntl | Thoc5         | 1  |
| 5974 | 11741 | Arntl | Slc30a10      | 1  |
| 5974 | 11797 | Arntl | Sbk1          | -1 |
| 5974 | 11807 | Arntl | Fbxo31        | -1 |
| 5974 | 11808 | Arntl | Pck1          | -1 |
| 5974 | 11926 | Arntl | Ampd2         | 1  |
| 5974 | 11937 | Arntl | Snx10         | -1 |
| 5974 | 11984 | Arntl | N6amt2        | 1  |
| 5974 | 12038 | Arntl | Tnks1bp1      | -1 |
| 5974 | 12114 | Arntl | Homer2        | -1 |
| 5974 | 12118 | Arntl | Mtrr          | -1 |
| 5974 | 12151 | Arntl | MMT00082650   | -1 |
| 5974 | 12156 | Arntl | Setd4         | -1 |
| 5974 | 12165 | Arntl | Ppp2r1b       | 1  |
| 5974 | 12193 | Arntl | Aco2          | -1 |
| 5974 | 12204 | Arntl | Ankmy2        | -1 |
| 5974 | 12208 | Arntl | Pnpla7        | 1  |
| 5974 | 12256 | Arntl | Atp10d        | -1 |
| 5974 | 12343 | Arntl | Atf5          | 1  |
| 5974 | 12412 | Arntl | BC004728      | 1  |
| 5974 | 12420 | Arntl | Klhl21        | -1 |
| 5974 | 12433 | Arntl | 5033413D22Rik | 1  |
| 5974 | 12460 | Arntl | Pnpla2        | -1 |
| 5974 | 12479 | Arntl | Ifrd1         | -1 |
| 5974 | 12487 | Arntl | Tbc1d10a      | -1 |
| 5974 | 12489 | Arntl | Wdr8          | 1  |
| 5974 | 12513 | Arntl | Whsc2         | 1  |
| 5974 | 12565 | Arntl | Grem2         | -1 |
| 5974 | 12687 | Arntl | Zc3h8         | -1 |
| 5974 | 12799 | Arntl | Spon2         | 1  |
| 5974 | 12807 | Arntl | Faim          | 1  |
| 5974 | 12858 | Arntl | Lepre1        | 1  |
| 5974 | 12904 | Arntl | MMT00040704   | -1 |
| 5974 | 12905 | Arntl | Nfil3         | 1  |
| 5974 | 12941 | Arntl | Elovl5        | 1  |
| 5974 | 12982 | Arntl | Cars          | 1  |

|      |       |       |               |    |
|------|-------|-------|---------------|----|
| 5974 | 13025 | Arntl | Irf2          | -1 |
| 5974 | 13078 | Arntl | Eps8l2        | 1  |
| 5974 | 13094 | Arntl | Cnn3          | -1 |
| 5974 | 13200 | Arntl | 5730449L18Rik | 1  |
| 5974 | 13210 | Arntl | Nudt1         | 1  |
| 5974 | 13355 | Arntl | Foxs1         | 1  |
| 5974 | 13471 | Arntl | Cln8          | -1 |
| 5974 | 13545 | Arntl | Tmie          | 1  |
| 5974 | 13630 | Arntl | Cdkn1a        | 1  |
| 5974 | 13667 | Arntl | Cbs           | 1  |
| 5974 | 13705 | Arntl | Osbp1a        | -1 |
| 5974 | 13731 | Arntl | 2210408F21Rik | -1 |
| 5974 | 13733 | Arntl | Setd3         | -1 |
| 5974 | 13770 | Arntl | D5Wsu178e     | 1  |
| 5974 | 13844 | Arntl | Trib1         | -1 |
| 5974 | 13864 | Arntl | Larp1         | 1  |
| 5974 | 13886 | Arntl | Hnrpd1        | -1 |
| 5974 | 13889 | Arntl | Agpat2        | 1  |
| 5974 | 13947 | Arntl | Crip2         | 1  |
| 5974 | 13962 | Arntl | Chd7          | -1 |
| 5974 | 14041 | Arntl | Cldn1         | 1  |
| 5974 | 14225 | Arntl | Sva           | -1 |
| 5974 | 14235 | Arntl | MMT00002524   | 1  |
| 5974 | 14279 | Arntl | 3930402G23Rik | 1  |
| 5974 | 14298 | Arntl | Atp2a2        | 1  |
| 5974 | 14380 | Arntl | MMT00051866   | 1  |
| 5974 | 14431 | Arntl | Piwil1        | -1 |
| 5974 | 14442 | Arntl | Ethe1         | 1  |
| 5974 | 14462 | Arntl | Zfp385b       | -1 |
| 5974 | 14468 | Arntl | Tmtc2         | -1 |
| 5974 | 14681 | Arntl | Alg12         | 1  |
| 5974 | 14705 | Arntl | Slc43a1       | -1 |
| 5974 | 14726 | Arntl | Slc19a1       | -1 |
| 5974 | 14929 | Arntl | 2810432D09Rik | 1  |
| 5974 | 14989 | Arntl | Map3k5        | -1 |
| 5974 | 15008 | Arntl | Chrdl2        | -1 |
| 5974 | 15015 | Arntl | G3bp1         | 1  |
| 5974 | 15021 | Arntl | Ppargc1a      | -1 |
| 5974 | 15049 | Arntl | Rnf125        | 1  |
| 5974 | 15224 | Arntl | Cyp2a4        | -1 |
| 5974 | 15425 | Arntl | Adprh         | 1  |
| 5974 | 15447 | Arntl | Eif4a3        | 1  |
| 5974 | 15481 | Arntl | 1110067D22Rik | 1  |
| 5974 | 15607 | Arntl | Klf13         | -1 |
| 5974 | 15609 | Arntl | Mreg          | 1  |
| 5974 | 15624 | Arntl | Crcp          | -1 |
| 5974 | 15631 | Arntl | Lpin1         | -1 |
| 5974 | 15665 | Arntl | Blcap         | 1  |
| 5974 | 15704 | Arntl | MMT00038941   | 1  |
| 5974 | 15709 | Arntl | Tceal1        | -1 |
| 5974 | 15758 | Arntl | Stx4a         | 1  |



|      |       |       |               |    |
|------|-------|-------|---------------|----|
| 5974 | 15824 | Arntl | D19Ertd721e   | 1  |
| 5974 | 15860 | Arntl | BC004004      | 1  |
| 5974 | 15862 | Arntl | Mrap          | 1  |
| 5974 | 15892 | Arntl | Slc22a5       | -1 |
| 5974 | 16048 | Arntl | Nsfl1c        | 1  |
| 5974 | 16060 | Arntl | Gys2          | -1 |
| 5974 | 16167 | Arntl | Stbd1         | -1 |
| 5974 | 16176 | Arntl | St3gal5       | -1 |
| 5974 | 16339 | Arntl | Bach1         | -1 |
| 5974 | 16474 | Arntl | Bhlhb2        | -1 |
| 5974 | 16510 | Arntl | Tspyl4        | 1  |
| 5974 | 16515 | Arntl | Gramd4        | 1  |
| 5974 | 16580 | Arntl | Tnfaip2       | 1  |
| 5974 | 16585 | Arntl | Syvnl         | 1  |
| 5974 | 16647 | Arntl | D16H22S680E   | -1 |
| 5974 | 16669 | Arntl | Tjp2          | 1  |
| 5974 | 16676 | Arntl | Aspa          | -1 |
| 5974 | 16690 | Arntl | Tjp3          | 1  |
| 5974 | 16692 | Arntl | Bat4          | -1 |
| 5974 | 16698 | Arntl | Sumo1         | -1 |
| 5974 | 16704 | Arntl | Ppif          | -1 |
| 5974 | 16712 | Arntl | Pnrc1         | 1  |
| 5974 | 16851 | Arntl | Slc34a2       | 1  |
| 5974 | 16904 | Arntl | Sphk2         | 1  |
| 5974 | 16946 | Arntl | Ivns1abp      | -1 |
| 5974 | 16965 | Arntl | Gstt2         | -1 |
| 5974 | 17078 | Arntl | Syde2         | -1 |
| 5974 | 17083 | Arntl | Atp1b1        | -1 |
| 5974 | 17091 | Arntl | Slc38a3       | -1 |
| 5974 | 17130 | Arntl | Baiap2        | 1  |
| 5974 | 17143 | Arntl | 2010002N04Rik | 1  |
| 5974 | 17247 | Arntl | A030007L17Rik | 1  |
| 5974 | 17323 | Arntl | Tubb6         | 1  |
| 5974 | 17338 | Arntl | Mocos         | 1  |
| 5974 | 17342 | Arntl | Dhx32         | 1  |
| 5974 | 17343 | Arntl | Timm8a1       | -1 |
| 5974 | 17352 | Arntl | Cebpb         | -1 |
| 5974 | 17418 | Arntl | D1Ertd622e    | -1 |
| 5974 | 17444 | Arntl | Tuba1a        | 1  |
| 5974 | 17528 | Arntl | Gmnn          | -1 |
| 5974 | 17530 | Arntl | MMT00041792   | 1  |
| 5974 | 17583 | Arntl | Per2          | -1 |
| 5974 | 17593 | Arntl | Gfer          | 1  |
| 5974 | 17617 | Arntl | Atp5sl        | -1 |
| 5974 | 17622 | Arntl | Foxo1         | -1 |
| 5974 | 17656 | Arntl | Hdhd3         | 1  |
| 5974 | 17697 | Arntl | 1300014I06Rik | 1  |
| 5974 | 17788 | Arntl | Xrcc1         | 1  |
| 5974 | 17876 | Arntl | Tubb4         | 1  |
| 5974 | 17878 | Arntl | Brap          | -1 |
| 5974 | 17884 | Arntl | Lnx2          | 1  |

|      |       |       |               |    |
|------|-------|-------|---------------|----|
| 5974 | 17952 | Arntl | Ripk2         | -1 |
| 5974 | 17999 | Arntl | A730017L22Rik | 1  |
| 5974 | 18027 | Arntl | 5730403B10Rik | -1 |
| 5974 | 18069 | Arntl | Gpt           | -1 |
| 5974 | 18135 | Arntl | Tmed3         | 1  |
| 5974 | 18147 | Arntl | Nhlrc2        | -1 |
| 5974 | 18176 | Arntl | Aqp11         | -1 |
| 5974 | 18179 | Arntl | Dbp           | -1 |
| 5974 | 18215 | Arntl | Gpr146        | -1 |
| 5974 | 18250 | Arntl | Mmp14         | 1  |
| 5974 | 18286 | Arntl | Slc41a3       | -1 |
| 5974 | 18296 | Arntl | Pcgf5         | -1 |
| 5974 | 18314 | Arntl | 4631416L12Rik | -1 |
| 5974 | 18438 | Arntl | Map3k7ip2     | 1  |
| 5974 | 18455 | Arntl | Mtnr1a        | 1  |
| 5974 | 18498 | Arntl | Slc5a6        | -1 |
| 5974 | 18506 | Arntl | Otub2         | 1  |
| 5974 | 18552 | Arntl | Nr2c2ap       | 1  |
| 5974 | 18572 | Arntl | Stx18         | 1  |
| 5974 | 18586 | Arntl | Tns1          | -1 |
| 5974 | 18591 | Arntl | MMT00034813   | -1 |
| 5974 | 18607 | Arntl | Acat3         | 1  |
| 5974 | 18649 | Arntl | Ccne1         | -1 |
| 5974 | 18653 | Arntl | MMT00072901   | -1 |
| 5974 | 18688 | Arntl | Leap2         | 1  |
| 5974 | 18706 | Arntl | Lect1         | -1 |
| 5974 | 18756 | Arntl | Tspan14       | 1  |
| 5974 | 18802 | Arntl | Nit2          | 1  |
| 5974 | 18804 | Arntl | Plip          | 1  |
| 5974 | 18827 | Arntl | Oprs1         | 1  |
| 5974 | 18846 | Arntl | Ikbkg         | 1  |
| 5974 | 19004 | Arntl | Pdk4          | 1  |
| 5974 | 19025 | Arntl | Slc37a4       | -1 |
| 5974 | 19032 | Arntl | Tymp          | 1  |
| 5974 | 19089 | Arntl | Peci          | -1 |
| 5974 | 19108 | Arntl | Armet         | 1  |
| 5974 | 19141 | Arntl | Gorasp1       | -1 |
| 5974 | 19146 | Arntl | N4bp2l1       | -1 |
| 5974 | 19148 | Arntl | Rnf144b       | 1  |
| 5974 | 19157 | Arntl | Rps19bp1      | 1  |
| 5974 | 19217 | Arntl | Cyr61         | 1  |
| 5974 | 19234 | Arntl | Nrg4          | -1 |
| 5974 | 19277 | Arntl | MMT00044927   | -1 |
| 5974 | 19305 | Arntl | Azin1         | -1 |
| 5974 | 19323 | Arntl | Bnip3         | -1 |
| 5974 | 19375 | Arntl | Inhba         | 1  |
| 5974 | 19410 | Arntl | Glb1          | -1 |
| 5974 | 19453 | Arntl | Cdk2ap2       | 1  |
| 5974 | 19465 | Arntl | Hacl1         | 1  |
| 5974 | 19466 | Arntl | Pptc7         | -1 |
| 5974 | 19532 | Arntl | Med8          | 1  |

|      |       |       |               |    |
|------|-------|-------|---------------|----|
| 5974 | 19556 | Arntl | Efna1         | 1  |
| 5974 | 19671 | Arntl | Upp2          | -1 |
| 5974 | 19701 | Arntl | 9930021J17Rik | 1  |
| 5974 | 19723 | Arntl | Pfkfb1        | -1 |
| 5974 | 19757 | Arntl | Fkbp5         | -1 |
| 5974 | 19790 | Arntl | Polg2         | -1 |
| 5974 | 19798 | Arntl | Tnk2          | 1  |
| 5974 | 19970 | Arntl | Mrpl36        | 1  |
| 5974 | 20049 | Arntl | 2310044G17Rik | -1 |
| 5974 | 20085 | Arntl | Lpin2         | -1 |
| 5974 | 20217 | Arntl | Rab3ip        | -1 |
| 5974 | 20266 | Arntl | Insig2        | 1  |
| 5974 | 20457 | Arntl | Gtf2a2        | -1 |
| 5974 | 20488 | Arntl | Bok           | 1  |
| 5974 | 20745 | Arntl | Sord          | -1 |
| 5974 | 20798 | Arntl | Ccpg1         | -1 |
| 5974 | 20803 | Arntl | Tmem50a       | -1 |
| 5974 | 20830 | Arntl | MMT00057509   | 1  |
| 5974 | 20854 | Arntl | Commd7        | 1  |
| 5974 | 20965 | Arntl | Usp28         | -1 |
| 5974 | 21000 | Arntl | Vmo1          | 1  |
| 5974 | 21142 | Arntl | Gm129         | -1 |
| 5974 | 21163 | Arntl | Slc16a5       | -1 |
| 5974 | 21188 | Arntl | Pnkp          | 1  |
| 5974 | 21192 | Arntl | 2310047A01Rik | -1 |
| 5974 | 21251 | Arntl | Cpt1a         | -1 |
| 5974 | 21306 | Arntl | Pvrl1         | 1  |
| 5974 | 21331 | Arntl | Slc10a6       | -1 |
| 5974 | 21380 | Arntl | Ier5          | 1  |
| 5974 | 21409 | Arntl | Gldc          | 1  |
| 5974 | 21531 | Arntl | Ttc23         | -1 |
| 5974 | 21675 | Arntl | Mosc2         | -1 |
| 5974 | 21733 | Arntl | Rhebl1        | -1 |
| 5974 | 21739 | Arntl | Epb4.1        | -1 |
| 5974 | 21794 | Arntl | Pfcp          | 1  |
| 5974 | 21795 | Arntl | 0610009B22Rik | 1  |
| 5974 | 21805 | Arntl | Plk3          | -1 |
| 5974 | 21811 | Arntl | Ak3l1         | -1 |
| 5974 | 21901 | Arntl | BC035537      | 1  |
| 5974 | 21918 | Arntl | Snx24         | 1  |
| 5974 | 21969 | Arntl | Tk1           | -1 |
| 5974 | 22012 | Arntl | Itgae         | 1  |
| 5974 | 22076 | Arntl | Pgm2l1        | -1 |
| 5974 | 22138 | Arntl | Ang           | -1 |
| 5974 | 22146 | Arntl | Aifm2         | -1 |
| 5974 | 22197 | Arntl | Ankrd28       | -1 |
| 5974 | 22244 | Arntl | Slc16a7       | -1 |
| 5974 | 22250 | Arntl | Wdr45l        | -1 |
| 5974 | 22290 | Arntl | Tubb2a        | 1  |
| 5974 | 22324 | Arntl | MMT00060741   | 1  |
| 5974 | 22334 | Arntl | 9430023L20Rik | 1  |

|      |       |        |               |    |
|------|-------|--------|---------------|----|
| 5974 | 22340 | Arntl  | Lnx2          | 1  |
| 5974 | 22388 | Arntl  | 2410018M08Rik | -1 |
| 5974 | 22443 | Arntl  | Tuba1c        | 1  |
| 5974 | 22463 | Arntl  | Gorasp2       | 1  |
| 5974 | 22470 | Arntl  | Ppargc1b      | -1 |
| 5974 | 22474 | Arntl  | Ubqln1        | 1  |
| 5974 | 22476 | Arntl  | Tspan4        | -1 |
| 5974 | 22627 | Arntl  | Adck5         | 1  |
| 5974 | 22630 | Arntl  | MMT00034355   | 1  |
| 5974 | 22636 | Arntl  | Trim2         | 1  |
| 5974 | 22653 | Arntl  | Ric3          | 1  |
| 5974 | 22681 | Arntl  | Gm88          | -1 |
| 5974 | 22744 | Arntl  | 9-Sep         | 1  |
| 5974 | 22933 | Arntl  | Tssc4         | 1  |
| 5974 | 22936 | Arntl  | Rhobtb1       | -1 |
| 5974 | 23007 | Arntl  | 2410015N17Rik | -1 |
| 5974 | 23161 | Arntl  | Gclc          | 1  |
| 5974 | 23183 | Arntl  | Nnmt          | -1 |
| 5974 | 23201 | Arntl  | S1pr1         | 1  |
| 5974 | 23202 | Arntl  | Olf559        | -1 |
| 5974 | 23248 | Arntl  | Tesk2         | -1 |
| 5974 | 23377 | Arntl  | Pdxk          | -1 |
| 5974 | 23437 | Arntl  | Efh2          | -1 |
| 5974 | 23558 | Arntl  | MMT00030937   | -1 |
| 5974 | 23680 | Arntl  | 5730419I09Rik | 1  |
| 5976 | 3265  | Col6a3 | Dntt          | 1  |
| 5976 | 3410  | Col6a3 | Paqr9         | 1  |
| 5976 | 3836  | Col6a3 | 2200001I15Rik | 1  |
| 5976 | 5364  | Col6a3 | Kif22         | 1  |
| 5976 | 6030  | Col6a3 | As3mt         | -1 |
| 5976 | 12624 | Col6a3 | C1ptm1l       | 1  |
| 5976 | 12925 | Col6a3 | Farp1         | 1  |
| 5976 | 12941 | Col6a3 | Elovl5        | 1  |
| 5976 | 15320 | Col6a3 | MMT00017479   | -1 |
| 5976 | 16123 | Col6a3 | Sec11c        | 1  |
| 5976 | 17617 | Col6a3 | Atp5sl        | -1 |
| 5976 | 18299 | Col6a3 | MMT00035424   | 1  |
| 5976 | 21692 | Col6a3 | MMT00013924   | 1  |
| 5976 | 22635 | Col6a3 | Nrn1          | -1 |
| 5979 | 354   | Lmo2   | MMT00007996   | 1  |
| 5979 | 771   | Lmo2   | Zbtb45        | 1  |
| 5979 | 6085  | Lmo2   | MMT00007454   | 1  |
| 5979 | 7151  | Lmo2   | MMT00007982   | 1  |
| 5979 | 8641  | Lmo2   | Slc7a2        | -1 |
| 5979 | 12981 | Lmo2   | Nek6          | 1  |
| 5979 | 13431 | Lmo2   | MMT00038058   | 1  |
| 5979 | 15205 | Lmo2   | MMT00030262   | 1  |
| 5979 | 17323 | Lmo2   | Tubb6         | 1  |
| 5979 | 21733 | Lmo2   | Rhebl1        | -1 |
| 5979 | 21937 | Lmo2   | MMT00015325   | 1  |
| 5979 | 22907 | Lmo2   | MMT00054594   | 1  |

|      |       |               |               |    |
|------|-------|---------------|---------------|----|
| 5979 | 22978 | Lmo2          | MMT00043176   | 1  |
| 5982 | 5934  | Rab3gap1      | S100a10       | -1 |
| 5982 | 6193  | Rab3gap1      | Lactb2        | -1 |
| 5982 | 6370  | Rab3gap1      | Aqp8          | -1 |
| 5982 | 12460 | Rab3gap1      | Pnpla2        | 1  |
| 5982 | 16647 | Rab3gap1      | D16H22S680E   | 1  |
| 5982 | 17878 | Rab3gap1      | Brap          | 1  |
| 5982 | 18827 | Rab3gap1      | Oprs1         | -1 |
| 5982 | 21251 | Rab3gap1      | Cpt1a         | 1  |
| 5982 | 21733 | Rab3gap1      | Rhebl1        | 1  |
| 5983 | 4301  | Pcolce2       | AW049604      | 1  |
| 5983 | 4578  | Pcolce2       | Pglyrp2       | -1 |
| 5983 | 5364  | Pcolce2       | Kif22         | 1  |
| 5983 | 6030  | Pcolce2       | As3mt         | -1 |
| 5983 | 12910 | Pcolce2       | 1110028A07Rik | 1  |
| 5983 | 17996 | Pcolce2       | Igfbp2        | -1 |
| 5983 | 18455 | Pcolce2       | Mtnr1a        | 1  |
| 5983 | 20079 | Pcolce2       | MMT00019254   | -1 |
| 5983 | 20678 | Pcolce2       | Cyp39a1       | -1 |
| 5983 | 20967 | Pcolce2       | Fabp2         | 1  |
| 5983 | 21041 | Pcolce2       | Cyp17a1       | -1 |
| 5989 | 1183  | 2310042D19Rik | MMT00009390   | -1 |
| 5989 | 2793  | 2310042D19Rik | MMT00005644   | 1  |
| 5989 | 5989  | 2310042D19Rik | 2310042D19Rik | 1  |
| 5989 | 12718 | 2310042D19Rik | Dhrsx         | -1 |
| 5989 | 19026 | 2310042D19Rik | Isg15         | 1  |
| 5989 | 22077 | 2310042D19Rik | MMT00057550   | 1  |
| 5991 | 4993  | Tsc22d2       | Tsc22d1       | 1  |
| 5991 | 11129 | Tsc22d2       | Ankhd1        | -1 |
| 5991 | 12910 | Tsc22d2       | 1110028A07Rik | 1  |
| 6002 | 16712 | Med24         | Pnrc1         | 1  |
| 6012 | 18042 | Chid1         | Aph1c         | -1 |
| 6012 | 23026 | Chid1         | Apom          | -1 |
| 6019 | 250   | Gdap10        | Tubb2a-ps2    | -1 |
| 6019 | 337   | Gdap10        | Rasgef1b      | 1  |
| 6019 | 433   | Gdap10        | Pla2g12b      | -1 |
| 6019 | 609   | Gdap10        | MMT00060868   | -1 |
| 6019 | 719   | Gdap10        | Usp2          | 1  |
| 6019 | 1310  | Gdap10        | Cabc1         | -1 |
| 6019 | 1371  | Gdap10        | 1200009I06Rik | -1 |
| 6019 | 1646  | Gdap10        | Slc15a4       | 1  |
| 6019 | 2110  | Gdap10        | Gtf2ird1      | -1 |
| 6019 | 2384  | Gdap10        | Micalcl       | -1 |
| 6019 | 2399  | Gdap10        | MMT00060167   | -1 |
| 6019 | 2483  | Gdap10        | Gmeb1         | 1  |
| 6019 | 2529  | Gdap10        | Hmcn2         | 1  |
| 6019 | 2636  | Gdap10        | Tars          | -1 |
| 6019 | 2766  | Gdap10        | Elp4          | -1 |
| 6019 | 2829  | Gdap10        | Lrfn3         | -1 |
| 6019 | 2850  | Gdap10        | Slc16a6       | -1 |
| 6019 | 3214  | Gdap10        | Dnmt3b        | -1 |

|      |       |        |               |    |
|------|-------|--------|---------------|----|
| 6019 | 3259  | Gdap10 | Chrna6        | 1  |
| 6019 | 3410  | Gdap10 | Paqr9         | -1 |
| 6019 | 3452  | Gdap10 | Ccrn4l        | 1  |
| 6019 | 3502  | Gdap10 | Gde1          | 1  |
| 6019 | 4235  | Gdap10 | Pfkfb3        | 1  |
| 6019 | 4286  | Gdap10 | Ptp4a1        | 1  |
| 6019 | 4534  | Gdap10 | Ndel1         | 1  |
| 6019 | 5183  | Gdap10 | St5           | -1 |
| 6019 | 5187  | Gdap10 | Speer4f       | 1  |
| 6019 | 5374  | Gdap10 | Chka          | -1 |
| 6019 | 5574  | Gdap10 | Hsd3b7        | -1 |
| 6019 | 5849  | Gdap10 | 2310031A18Rik | -1 |
| 6019 | 5974  | Gdap10 | Arntl         | -1 |
| 6019 | 6030  | Gdap10 | As3mt         | 1  |
| 6019 | 6370  | Gdap10 | Aqp8          | -1 |
| 6019 | 6386  | Gdap10 | Por           | 1  |
| 6019 | 6564  | Gdap10 | Cebpd         | 1  |
| 6019 | 6756  | Gdap10 | Sds           | 1  |
| 6019 | 7136  | Gdap10 | Id3           | -1 |
| 6019 | 7414  | Gdap10 | Clpx          | -1 |
| 6019 | 7492  | Gdap10 | Adfp          | -1 |
| 6019 | 8399  | Gdap10 | Herpud1       | 1  |
| 6019 | 8428  | Gdap10 | Sorbs3        | 1  |
| 6019 | 8816  | Gdap10 | Nfkbia        | 1  |
| 6019 | 9260  | Gdap10 | Cmtm6         | -1 |
| 6019 | 9495  | Gdap10 | Srms          | -1 |
| 6019 | 10408 | Gdap10 | Per1          | 1  |
| 6019 | 10486 | Gdap10 | 1300002K09Rik | -1 |
| 6019 | 11129 | Gdap10 | Ankhd1        | 1  |
| 6019 | 11506 | Gdap10 | Rfxank        | -1 |
| 6019 | 11574 | Gdap10 | Gne           | 1  |
| 6019 | 11599 | Gdap10 | Coq10b        | 1  |
| 6019 | 11741 | Gdap10 | Slc30a10      | -1 |
| 6019 | 11807 | Gdap10 | Fbxo31        | 1  |
| 6019 | 12204 | Gdap10 | Ankmy2        | 1  |
| 6019 | 12479 | Gdap10 | Ifrd1         | 1  |
| 6019 | 12489 | Gdap10 | Wdr8          | -1 |
| 6019 | 12761 | Gdap10 | Tsc22d3       | 1  |
| 6019 | 12799 | Gdap10 | Spon2         | -1 |
| 6019 | 12807 | Gdap10 | Faim          | -1 |
| 6019 | 12941 | Gdap10 | Elov5         | -1 |
| 6019 | 14462 | Gdap10 | Zfp385b       | 1  |
| 6019 | 15008 | Gdap10 | Chrdl2        | 1  |
| 6019 | 15021 | Gdap10 | Ppargc1a      | 1  |
| 6019 | 15049 | Gdap10 | Rnf125        | -1 |
| 6019 | 15481 | Gdap10 | 1110067D22Rik | -1 |
| 6019 | 15631 | Gdap10 | Lpin1         | 1  |
| 6019 | 15709 | Gdap10 | Tceal1        | 1  |
| 6019 | 15824 | Gdap10 | D19Ert721e    | -1 |
| 6019 | 15882 | Gdap10 | AA986860      | 1  |
| 6019 | 16176 | Gdap10 | St3gal5       | 1  |

|      |       |             |               |    |
|------|-------|-------------|---------------|----|
| 6019 | 16515 | Gdap10      | Gramd4        | -1 |
| 6019 | 16580 | Gdap10      | Tnfaip2       | -1 |
| 6019 | 16647 | Gdap10      | D16H22S680E   | 1  |
| 6019 | 16669 | Gdap10      | Tjp2          | -1 |
| 6019 | 16690 | Gdap10      | Tjp3          | -1 |
| 6019 | 17247 | Gdap10      | A030007L17Rik | -1 |
| 6019 | 17338 | Gdap10      | Mocos         | -1 |
| 6019 | 17352 | Gdap10      | Cebpb         | 1  |
| 6019 | 17525 | Gdap10      | Ctgf          | 1  |
| 6019 | 17622 | Gdap10      | Foxo1         | 1  |
| 6019 | 17876 | Gdap10      | Tubb4         | -1 |
| 6019 | 18027 | Gdap10      | 5730403B10Rik | 1  |
| 6019 | 18179 | Gdap10      | Dbp           | 1  |
| 6019 | 18455 | Gdap10      | Mtnr1a        | -1 |
| 6019 | 18827 | Gdap10      | Oprs1         | -1 |
| 6019 | 19025 | Gdap10      | Slc37a4       | 1  |
| 6019 | 19234 | Gdap10      | Nrg4          | 1  |
| 6019 | 19277 | Gdap10      | MMT00044927   | 1  |
| 6019 | 19466 | Gdap10      | Pptc7         | 1  |
| 6019 | 19556 | Gdap10      | Efna1         | -1 |
| 6019 | 19671 | Gdap10      | Upp2          | 1  |
| 6019 | 19701 | Gdap10      | 9930021J17Rik | -1 |
| 6019 | 21142 | Gdap10      | Gm129         | 1  |
| 6019 | 21331 | Gdap10      | Slc10a6       | 1  |
| 6019 | 21934 | Gdap10      | Id2           | -1 |
| 6019 | 22138 | Gdap10      | Ang           | 1  |
| 6019 | 22290 | Gdap10      | Tubb2a        | -1 |
| 6019 | 22324 | Gdap10      | MMT00060741   | -1 |
| 6019 | 22630 | Gdap10      | MMT00034355   | -1 |
| 6019 | 22880 | Gdap10      | Slc45a4       | -1 |
| 6019 | 23183 | Gdap10      | Nnmt          | 1  |
| 6019 | 23202 | Gdap10      | Olfir559      | 1  |
| 6019 | 23437 | Gdap10      | Efhd2         | 1  |
| 6021 | 624   | MMT00008784 | 4931406I20Rik | -1 |
| 6021 | 740   | MMT00008784 | Txnrd3        | -1 |
| 6021 | 902   | MMT00008784 | Slc30a1       | -1 |
| 6021 | 1156  | MMT00008784 | Rbj           | -1 |
| 6021 | 1386  | MMT00008784 | Ppid          | 1  |
| 6021 | 2329  | MMT00008784 | Wdr6          | -1 |
| 6021 | 3393  | MMT00008784 | Snhg8         | -1 |
| 6021 | 3587  | MMT00008784 | MMT00041940   | 1  |
| 6021 | 3808  | MMT00008784 | 2010209O12Rik | -1 |
| 6021 | 3913  | MMT00008784 | Mrpl15        | 1  |
| 6021 | 4391  | MMT00008784 | Zfp467        | -1 |
| 6021 | 4966  | MMT00008784 | Zscan20       | 1  |
| 6021 | 5352  | MMT00008784 | Pdcd2l        | -1 |
| 6021 | 5953  | MMT00008784 | MMT00008178   | 1  |
| 6021 | 6021  | MMT00008784 | MMT00008784   | 1  |
| 6021 | 6126  | MMT00008784 | MMT00067575   | 1  |
| 6021 | 6218  | MMT00008784 | Hnrnpc        | 1  |
| 6021 | 6976  | MMT00008784 | Rbm35b        | -1 |

|      |       |             |               |    |
|------|-------|-------------|---------------|----|
| 6021 | 7731  | MMT00008784 | 150001M20Rik  | -1 |
| 6021 | 7798  | MMT00008784 | MMT00077178   | 1  |
| 6021 | 8319  | MMT00008784 | MMT00062477   | 1  |
| 6021 | 8499  | MMT00008784 | C430048L16Rik | 1  |
| 6021 | 8670  | MMT00008784 | MMT00051613   | 1  |
| 6021 | 8891  | MMT00008784 | MMT00071061   | 1  |
| 6021 | 9067  | MMT00008784 | Tra2a         | 1  |
| 6021 | 9258  | MMT00008784 | P4ha1         | 1  |
| 6021 | 9513  | MMT00008784 | Tardbp        | 1  |
| 6021 | 9629  | MMT00008784 | Spnb3         | -1 |
| 6021 | 9899  | MMT00008784 | D13Wsu177e    | 1  |
| 6021 | 10526 | MMT00008784 | MMT00036239   | 1  |
| 6021 | 10769 | MMT00008784 | Hnrnpd        | -1 |
| 6021 | 11043 | MMT00008784 | Hsph1         | 1  |
| 6021 | 11214 | MMT00008784 | MMT00049207   | 1  |
| 6021 | 12112 | MMT00008784 | Tmem53        | -1 |
| 6021 | 12329 | MMT00008784 | Sox6          | -1 |
| 6021 | 12419 | MMT00008784 | MMT00081393   | 1  |
| 6021 | 12487 | MMT00008784 | Tbc1d10a      | -1 |
| 6021 | 12968 | MMT00008784 | Fbxw9         | -1 |
| 6021 | 13521 | MMT00008784 | Ears2         | 1  |
| 6021 | 13741 | MMT00008784 | Hspa4l        | 1  |
| 6021 | 14014 | MMT00008784 | MMT00008376   | 1  |
| 6021 | 14135 | MMT00008784 | Eepd1         | -1 |
| 6021 | 14233 | MMT00008784 | Fgfr1         | -1 |
| 6021 | 14298 | MMT00008784 | Atp2a2        | 1  |
| 6021 | 15024 | MMT00008784 | 2310061J03Rik | -1 |
| 6021 | 15476 | MMT00008784 | Fem1b         | -1 |
| 6021 | 15484 | MMT00008784 | Lrrc42        | -1 |
| 6021 | 15675 | MMT00008784 | MMT00077535   | 1  |
| 6021 | 16251 | MMT00008784 | G6pc          | 1  |
| 6021 | 16754 | MMT00008784 | Hsp90aa1      | 1  |
| 6021 | 17449 | MMT00008784 | Zfp296        | 1  |
| 6021 | 18083 | MMT00008784 | Gadd45a       | -1 |
| 6021 | 18099 | MMT00008784 | Nfx1          | -1 |
| 6021 | 18215 | MMT00008784 | Gpr146        | -1 |
| 6021 | 18373 | MMT00008784 | Dnajb1        | 1  |
| 6021 | 18418 | MMT00008784 | Hspa1b        | 1  |
| 6021 | 18903 | MMT00008784 | Crem          | 1  |
| 6021 | 20194 | MMT00008784 | Pnlnc1        | -1 |
| 6021 | 20535 | MMT00008784 | Rbm4          | 1  |
| 6021 | 20828 | MMT00008784 | MMT00007878   | 1  |
| 6021 | 20912 | MMT00008784 | Chordc1       | 1  |
| 6021 | 20965 | MMT00008784 | Usp28         | -1 |
| 6021 | 21389 | MMT00008784 | Odf2          | -1 |
| 6021 | 21591 | MMT00008784 | Hectd3        | -1 |
| 6021 | 22139 | MMT00008784 | Stip1         | 1  |
| 6021 | 22216 | MMT00008784 | Sp5           | -1 |
| 6021 | 22303 | MMT00008784 | Cdt1          | -1 |
| 6021 | 22561 | MMT00008784 | Whdc1         | -1 |
| 6021 | 22751 | MMT00008784 | Nosip         | -1 |



|      |       |         |               |    |
|------|-------|---------|---------------|----|
| 6028 | 1906  | Alas1   | Ssr3          | 1  |
| 6028 | 3196  | Alas1   | Tat           | 1  |
| 6028 | 5413  | Alas1   | Flot1         | -1 |
| 6028 | 12637 | Alas1   | Itпка         | -1 |
| 6028 | 12761 | Alas1   | Tsc22d3       | 1  |
| 6028 | 15126 | Alas1   | Megf8         | -1 |
| 6028 | 16750 | Alas1   | Casp6         | -1 |
| 6028 | 17862 | Alas1   | Fbxo21        | -1 |
| 6028 | 18099 | Alas1   | Nfx1          | -1 |
| 6028 | 18215 | Alas1   | Gpr146        | -1 |
| 6028 | 19891 | Alas1   | Azi1          | -1 |
| 6028 | 19966 | Alas1   | Thap4         | -1 |
| 6028 | 21389 | Alas1   | Odf2          | -1 |
| 6028 | 22171 | Alas1   | MMT00012636   | 1  |
| 6028 | 22303 | Alas1   | Cdt1          | -1 |
| 6035 | 9304  | Nkd1    | Al449175      | -1 |
| 6035 | 15455 | Nkd1    | Lsm4          | 1  |
| 6035 | 16617 | Nkd1    | Sh2d4a        | 1  |
| 6035 | 18886 | Nkd1    | Slc18a1       | 1  |
| 6035 | 20484 | Nkd1    | Ces1          | 1  |
| 6036 | 327   | Pram1   | H2-Ea         | 1  |
| 6036 | 2325  | Pram1   | H2-K1         | 1  |
| 6036 | 2938  | Pram1   | H2-T23        | 1  |
| 6036 | 7135  | Pram1   | Ezr           | 1  |
| 6036 | 8750  | Pram1   | 1700010114Rik | 1  |
| 6036 | 10667 | Pram1   | H2-Eb1        | 1  |
| 6036 | 20238 | Pram1   | H2-T9         | 1  |
| 6036 | 22822 | Pram1   | MMT00013433   | 1  |
| 6044 | 8632  | Sucnr1  | Igfbp1        | -1 |
| 6059 | 2915  | Dsn1    | Nfs1          | -1 |
| 6059 | 5450  | Dsn1    | Nrbp1         | -1 |
| 6059 | 6059  | Dsn1    | Dsn1          | 1  |
| 6059 | 6250  | Dsn1    | Csnk2a1       | -1 |
| 6059 | 6820  | Dsn1    | MMT00046996   | -1 |
| 6059 | 7610  | Dsn1    | Scand1        | -1 |
| 6059 | 14399 | Dsn1    | Csnk2a1       | -1 |
| 6059 | 14445 | Dsn1    | Arl6          | -1 |
| 6059 | 14647 | Dsn1    | Cst3          | -1 |
| 6059 | 14816 | Dsn1    | Pcdhb9        | 1  |
| 6059 | 20221 | Dsn1    | Ift57         | -1 |
| 6059 | 22740 | Dsn1    | Manbal        | 1  |
| 6059 | 23005 | Dsn1    | 4930405A21Rik | 1  |
| 6059 | 23599 | Dsn1    | Ndr3          | 1  |
| 6060 | 12336 | Tle6    | Timm13        | -1 |
| 6060 | 15247 | Tle6    | Cstb          | 1  |
| 6060 | 17135 | Tle6    | Mum1          | 1  |
| 6060 | 21964 | Tle6    | Vwce          | 1  |
| 6063 | 8328  | Kif21a  | Klhdc8a       | -1 |
| 6066 | 5364  | Ppp1r1a | Kif22         | -1 |
| 6066 | 14472 | Ppp1r1a | Ahcy          | 1  |
| 6072 | 2850  | C1qc    | Slc16a6       | 1  |

|      |       |             |                    |    |
|------|-------|-------------|--------------------|----|
| 6072 | 5554  | C1qc        | Emr1               | 1  |
| 6072 | 6213  | C1qc        | Ccl2               | 1  |
| 6072 | 6888  | C1qc        | Cxcl9              | 1  |
| 6072 | 14258 | C1qc        | Ifi47              | 1  |
| 6072 | 23208 | C1qc        | Hck                | 1  |
| 6077 | 1600  | Pik3cb      | Csrp1              | -1 |
| 6077 | 5691  | Pik3cb      | Csrp3              | -1 |
| 6077 | 5892  | Pik3cb      | MMT00038457        | 1  |
| 6077 | 6816  | Pik3cb      | Slc46a3            | 1  |
| 6077 | 7492  | Pik3cb      | Adfp               | -1 |
| 6077 | 7761  | Pik3cb      | Nudt19             | 1  |
| 6077 | 13630 | Pik3cb      | Cdkn1a             | -1 |
| 6077 | 21966 | Pik3cb      | Pcp4l1             | 1  |
| 6077 | 22653 | Pik3cb      | Ric3               | -1 |
| 6085 | 10554 | MMT00007454 | ENSMUSG00000074179 | 1  |
| 6085 | 11014 | MMT00007454 | Hibadh             | 1  |
| 6085 | 18201 | MMT00007454 | MMT00060232        | 1  |
| 6085 | 21214 | MMT00007454 | Scd1               | 1  |
| 6085 | 21575 | MMT00007454 | Cyp2c55            | 1  |
| 6091 | 20967 | Rbbp4       | Fabp2              | -1 |
| 6092 | 437   | Phlda3      | Ndrp1              | -1 |
| 6092 | 707   | Phlda3      | Bdnf               | 1  |
| 6092 | 760   | Phlda3      | Akr1c19            | 1  |
| 6092 | 1065  | Phlda3      | Hmgcr              | 1  |
| 6092 | 2051  | Phlda3      | Ddx27              | -1 |
| 6092 | 2262  | Phlda3      | Papss2             | 1  |
| 6092 | 2320  | Phlda3      | Spc24              | 1  |
| 6092 | 2619  | Phlda3      | Zfp622             | -1 |
| 6092 | 2721  | Phlda3      | Inmt               | 1  |
| 6092 | 3449  | Phlda3      | Hes6               | 1  |
| 6092 | 3696  | Phlda3      | Elovl6             | 1  |
| 6092 | 3989  | Phlda3      | Wrnip1             | -1 |
| 6092 | 5804  | Phlda3      | Thrsp              | 1  |
| 6092 | 5849  | Phlda3      | 2310031A18Rik      | -1 |
| 6092 | 5892  | Phlda3      | MMT00038457        | 1  |
| 6092 | 6746  | Phlda3      | E2f8               | -1 |
| 6092 | 6816  | Phlda3      | Slc46a3            | 1  |
| 6092 | 7320  | Phlda3      | MMT00051732        | 1  |
| 6092 | 7492  | Phlda3      | Adfp               | -1 |
| 6092 | 7659  | Phlda3      | Rab30              | -1 |
| 6092 | 7761  | Phlda3      | Nudt19             | 1  |
| 6092 | 8404  | Phlda3      | Fa2h               | -1 |
| 6092 | 8896  | Phlda3      | Fasn               | 1  |
| 6092 | 9408  | Phlda3      | Hmgcs2             | -1 |
| 6092 | 9481  | Phlda3      | Ppl                | 1  |
| 6092 | 9718  | Phlda3      | Fmo5               | 1  |
| 6092 | 9831  | Phlda3      | Nedd4l             | -1 |
| 6092 | 11462 | Phlda3      | Gpam               | 1  |
| 6092 | 11576 | Phlda3      | Gm1381             | 1  |
| 6092 | 12114 | Phlda3      | Homer2             | 1  |
| 6092 | 12315 | Phlda3      | Sreb1              | 1  |

|      |       |             |                    |    |
|------|-------|-------------|--------------------|----|
| 6092 | 12499 | Phlda3      | Avpi1              | 1  |
| 6092 | 13078 | Phlda3      | Eps8l2             | -1 |
| 6092 | 14100 | Phlda3      | Ccnk               | 1  |
| 6092 | 14279 | Phlda3      | 3930402G23Rik      | -1 |
| 6092 | 15824 | Phlda3      | D19Ert721e         | -1 |
| 6092 | 16525 | Phlda3      | Lbp                | -1 |
| 6092 | 17090 | Phlda3      | Lass2              | 1  |
| 6092 | 17583 | Phlda3      | Per2               | 1  |
| 6092 | 17660 | Phlda3      | Nlrp12             | -1 |
| 6092 | 17800 | Phlda3      | Lrtm1              | 1  |
| 6092 | 18148 | Phlda3      | Cables1            | -1 |
| 6092 | 18438 | Phlda3      | Map3k7ip2          | -1 |
| 6092 | 18515 | Phlda3      | Ddx28              | -1 |
| 6092 | 19701 | Phlda3      | 9930021J17Rik      | -1 |
| 6092 | 20385 | Phlda3      | Chd1l              | 1  |
| 6092 | 20488 | Phlda3      | Bok                | -1 |
| 6092 | 21693 | Phlda3      | BC029169           | -1 |
| 6092 | 22321 | Phlda3      | Apol7a             | 1  |
| 6092 | 22653 | Phlda3      | Ric3               | -1 |
| 6098 | 185   | Ncf4        | Ap2b1              | 1  |
| 6098 | 2850  | Ncf4        | Slc16a6            | 1  |
| 6098 | 5364  | Ncf4        | Kif22              | 1  |
| 6098 | 5934  | Ncf4        | S100a10            | 1  |
| 6098 | 6213  | Ncf4        | Ccl2               | 1  |
| 6098 | 6386  | Ncf4        | Por                | -1 |
| 6098 | 8428  | Ncf4        | Sorbs3             | -1 |
| 6098 | 11129 | Ncf4        | Ankhd1             | -1 |
| 6098 | 15320 | Ncf4        | MMT00017479        | -1 |
| 6101 | 12910 | Vmn2r71     | 1110028A07Rik      | 1  |
| 6112 | 10554 | Tmem183a    | ENSMUSG00000074179 | 1  |
| 6112 | 13293 | Tmem183a    | Gsta2              | 1  |
| 6116 | 5100  | Pcgf5       | Pebp1              | 1  |
| 6116 | 6330  | Pcgf5       | Dgkq               | -1 |
| 6116 | 8807  | Pcgf5       | Ankrd56            | 1  |
| 6116 | 10978 | Pcgf5       | MMT00078322        | -1 |
| 6116 | 12656 | Pcgf5       | Coq5               | -1 |
| 6116 | 14085 | Pcgf5       | Cdkl2              | -1 |
| 6116 | 15908 | Pcgf5       | Pebp1              | 1  |
| 6116 | 17716 | Pcgf5       | Rnf10              | 1  |
| 6116 | 17807 | Pcgf5       | Pebp1              | 1  |
| 6116 | 19443 | Pcgf5       | Prkab1             | 1  |
| 6126 | 12565 | MMT00067575 | Grem2              | -1 |
| 6126 | 21389 | MMT00067575 | Odf2               | -1 |
| 6134 | 2051  | Hspb8       | Ddx27              | -1 |
| 6134 | 10612 | Hspb8       | Slc24a6            | -1 |
| 6135 | 12910 | Nrg1        | 1110028A07Rik      | -1 |
| 6158 | 6158  | Msh2        | Msh2               | 1  |
| 6177 | 14323 | Thpo        | Scarb1             | 1  |
| 6177 | 21214 | Thpo        | Scd1               | -1 |
| 6191 | 3475  | Ddost       | 2610305D13Rik      | -1 |
| 6191 | 3616  | Ddost       | Dnajc16            | 1  |

|      |       |             |                    |    |
|------|-------|-------------|--------------------|----|
| 6191 | 4305  | Ddost       | Tmem51             | 1  |
| 6191 | 4885  | Ddost       | Fhad1              | -1 |
| 6191 | 5788  | Ddost       | Smpdl3b            | 1  |
| 6191 | 6191  | Ddost       | Ddost              | 1  |
| 6191 | 6830  | Ddost       | Rsc1a1             | 1  |
| 6191 | 6857  | Ddost       | Serinc2            | 1  |
| 6191 | 13626 | Ddost       | RP23-395H4.4       | 1  |
| 6191 | 16287 | Ddost       | Extl1              | -1 |
| 6191 | 18338 | Ddost       | Akr1e1             | 1  |
| 6191 | 19924 | Ddost       | Ubiad1             | -1 |
| 6193 | 607   | Lactb2      | Me1                | 1  |
| 6193 | 1129  | Lactb2      | Gsta4              | 1  |
| 6193 | 2127  | Lactb2      | Ldha               | -1 |
| 6193 | 3565  | Lactb2      | MMT00045908        | 1  |
| 6193 | 4056  | Lactb2      | Tnfaip8l1          | -1 |
| 6193 | 6085  | Lactb2      | MMT00007454        | -1 |
| 6193 | 6193  | Lactb2      | Lactb2             | 1  |
| 6193 | 7602  | Lactb2      | Pcca               | 1  |
| 6193 | 8773  | Lactb2      | MMT00027093        | -1 |
| 6193 | 9408  | Lactb2      | Hmgcs2             | -1 |
| 6193 | 9842  | Lactb2      | Qdpr               | 1  |
| 6193 | 10532 | Lactb2      | MMT00057790        | -1 |
| 6193 | 10554 | Lactb2      | ENSMUSG00000074179 | 1  |
| 6193 | 12556 | Lactb2      | Ass1               | 1  |
| 6193 | 13293 | Lactb2      | Gsta2              | 1  |
| 6193 | 13431 | Lactb2      | MMT00038058        | -1 |
| 6193 | 14055 | Lactb2      | MMT00050438        | -1 |
| 6193 | 14147 | Lactb2      | Acss2              | 1  |
| 6193 | 15205 | Lactb2      | MMT00030262        | -1 |
| 6193 | 15500 | Lactb2      | MMT00081411        | -1 |
| 6193 | 20019 | Lactb2      | Qdpr               | 1  |
| 6193 | 21202 | Lactb2      | Acly               | 1  |
| 6193 | 21214 | Lactb2      | Scd1               | 1  |
| 6193 | 21727 | Lactb2      | Khk                | 1  |
| 6193 | 21937 | Lactb2      | MMT00015325        | -1 |
| 6193 | 22406 | Lactb2      | Vnn1               | -1 |
| 6193 | 22907 | Lactb2      | MMT00054594        | -1 |
| 6193 | 22978 | Lactb2      | MMT00043176        | -1 |
| 6193 | 22998 | Lactb2      | Ass1               | 1  |
| 6197 | 5680  | Lss         | Lrg1               | -1 |
| 6206 | 524   | MMT00063701 | Hsd3b2             | 1  |
| 6206 | 1466  | MMT00063701 | Ubap2l             | 1  |
| 6206 | 1867  | MMT00063701 | Bcas2              | 1  |
| 6206 | 2752  | MMT00063701 | Fcgr1              | 1  |
| 6206 | 3753  | MMT00063701 | Setdb1             | -1 |
| 6206 | 6206  | MMT00063701 | MMT00063701        | 1  |
| 6206 | 8738  | MMT00063701 | Reg4               | -1 |
| 6206 | 10521 | MMT00063701 | Ttf2               | 1  |
| 6206 | 10681 | MMT00063701 | Dgkz               | -1 |
| 6206 | 11121 | MMT00063701 | Mttr11             | -1 |
| 6206 | 11611 | MMT00063701 | S100a13            | -1 |

|      |       |             |                    |    |
|------|-------|-------------|--------------------|----|
| 6206 | 16416 | MMT00063701 | Commd2             | 1  |
| 6206 | 18754 | MMT00063701 | Rbm8a              | 1  |
| 6206 | 20661 | MMT00063701 | Tuft1              | 1  |
| 6206 | 22202 | MMT00063701 | OTTMUSG00000021274 | -1 |
| 6206 | 22570 | MMT00063701 | Phtf1              | 1  |
| 6211 | 184   | Arhgap24    | Sorbs1             | -1 |
| 6211 | 1126  | Arhgap24    | Slc25a14           | -1 |
| 6211 | 1600  | Arhgap24    | Csrp1              | -1 |
| 6211 | 2643  | Arhgap24    | Inhbe              | -1 |
| 6211 | 3449  | Arhgap24    | Hes6               | 1  |
| 6211 | 3565  | Arhgap24    | MMT00045908        | 1  |
| 6211 | 4056  | Arhgap24    | Tnfaip8l1          | -1 |
| 6211 | 5691  | Arhgap24    | Csrp3              | -1 |
| 6211 | 5804  | Arhgap24    | Thrsp              | 1  |
| 6211 | 6816  | Arhgap24    | Slc46a3            | 1  |
| 6211 | 7492  | Arhgap24    | Adfp               | -1 |
| 6211 | 7659  | Arhgap24    | Rab30              | -1 |
| 6211 | 8404  | Arhgap24    | Fa2h               | -1 |
| 6211 | 9408  | Arhgap24    | Hmgcs2             | -1 |
| 6211 | 12032 | Arhgap24    | Cdca7              | -1 |
| 6211 | 17563 | Arhgap24    | Aldh1l1            | 1  |
| 6211 | 17660 | Arhgap24    | Nlrp12             | -1 |
| 6211 | 18050 | Arhgap24    | MMT00003408        | 1  |
| 6211 | 18515 | Arhgap24    | Ddx28              | -1 |
| 6211 | 20385 | Arhgap24    | Chd1l              | 1  |
| 6211 | 21202 | Arhgap24    | Acly               | 1  |
| 6211 | 22271 | Arhgap24    | Cyp2c29            | 1  |
| 6213 | 607   | Ccl2        | Me1                | 1  |
| 6213 | 5934  | Ccl2        | S100a10            | 1  |
| 6213 | 6370  | Ccl2        | Aqp8               | 1  |
| 6213 | 8444  | Ccl2        | Rdh16              | 1  |
| 6213 | 8815  | Ccl2        | Mx1                | 1  |
| 6213 | 10132 | Ccl2        | Ces2               | 1  |
| 6213 | 11129 | Ccl2        | Ankhd1             | -1 |
| 6213 | 12910 | Ccl2        | 1110028A07Rik      | 1  |
| 6213 | 12941 | Ccl2        | Elovl5             | 1  |
| 6213 | 14017 | Ccl2        | Ces5               | 1  |
| 6213 | 15059 | Ccl2        | Mogat1             | 1  |
| 6213 | 17996 | Ccl2        | Igfbp2             | -1 |
| 6213 | 18042 | Ccl2        | Aph1c              | -1 |
| 6213 | 18201 | Ccl2        | MMT00060232        | 1  |
| 6213 | 18827 | Ccl2        | Oprs1              | 1  |
| 6213 | 20058 | Ccl2        | Dnaic1             | -1 |
| 6213 | 20079 | Ccl2        | MMT00019254        | -1 |
| 6213 | 21214 | Ccl2        | Scd1               | 1  |
| 6213 | 22138 | Ccl2        | Ang                | -1 |
| 6213 | 23026 | Ccl2        | Apom               | -1 |
| 6213 | 23549 | Ccl2        | Es22               | 1  |
| 6214 | 20058 | Mmd2        | Dnaic1             | 1  |
| 6218 | 760   | Hnrnpc      | Akr1c19            | -1 |
| 6218 | 1453  | Hnrnpc      | Gfod2              | 1  |

|      |       |             |                    |    |
|------|-------|-------------|--------------------|----|
| 6218 | 3799  | Hnrnpc      | Serpinh1           | 1  |
| 6218 | 5804  | Hnrnpc      | Thrsp              | -1 |
| 6218 | 14279 | Hnrnpc      | 3930402G23Rik      | 1  |
| 6236 | 21214 | MMT00024286 | Scd1               | 1  |
| 6250 | 2915  | Csnk2a1     | Nfs1               | 1  |
| 6250 | 5450  | Csnk2a1     | Nrbp1              | 1  |
| 6250 | 6059  | Csnk2a1     | Dsn1               | -1 |
| 6250 | 6250  | Csnk2a1     | Csnk2a1            | 1  |
| 6250 | 6820  | Csnk2a1     | MMT00046996        | 1  |
| 6250 | 7610  | Csnk2a1     | Scand1             | 1  |
| 6250 | 10028 | Csnk2a1     | Chchd6             | 1  |
| 6250 | 14399 | Csnk2a1     | Csnk2a1            | 1  |
| 6250 | 14647 | Csnk2a1     | Cst3               | 1  |
| 6250 | 15565 | Csnk2a1     | 2310001A20Rik      | 1  |
| 6250 | 22740 | Csnk2a1     | Manbal             | -1 |
| 6250 | 23005 | Csnk2a1     | 4930405A21Rik      | -1 |
| 6250 | 23599 | Csnk2a1     | Ndr3               | -1 |
| 6283 | 524   | Ptpn22      | Hsd3b2             | 1  |
| 6283 | 1466  | Ptpn22      | Ubap2l             | 1  |
| 6283 | 1867  | Ptpn22      | Bcas2              | 1  |
| 6283 | 1963  | Ptpn22      | MMT00039783        | 1  |
| 6283 | 3753  | Ptpn22      | Setdb1             | -1 |
| 6283 | 6206  | Ptpn22      | MMT00063701        | 1  |
| 6283 | 7519  | Ptpn22      | Gstm1              | 1  |
| 6283 | 10521 | Ptpn22      | Ttf2               | 1  |
| 6283 | 10681 | Ptpn22      | Dgkz               | -1 |
| 6283 | 11121 | Ptpn22      | Mtmr11             | -1 |
| 6283 | 11611 | Ptpn22      | S100a13            | -1 |
| 6283 | 20385 | Ptpn22      | Chd1l              | 1  |
| 6283 | 22202 | Ptpn22      | OTTMUSG00000021274 | -1 |
| 6283 | 22570 | Ptpn22      | Phtf1              | 1  |
| 6284 | 8444  | Cacnb2      | Rdh16              | -1 |
| 6293 | 5364  | Pggt1b      | Kif22              | 1  |
| 6295 | 12565 | Parl        | Grem2              | 1  |
| 6306 | 6177  | Dab2        | Thpo               | 1  |
| 6306 | 20570 | Dab2        | Ap3m1              | -1 |
| 6306 | 23201 | Dab2        | S1pr1              | 1  |
| 6322 | 2639  | Pknox2      | Abhd2              | 1  |
| 6330 | 665   | Dgkq        | Slc26a1            | -1 |
| 6330 | 1660  | Dgkq        | Zfp33b             | -1 |
| 6330 | 5100  | Dgkq        | Pebp1              | -1 |
| 6330 | 6330  | Dgkq        | Dgkq               | 1  |
| 6330 | 8547  | Dgkq        | Gbp4               | 1  |
| 6330 | 8807  | Dgkq        | Ankrd56            | -1 |
| 6330 | 10978 | Dgkq        | MMT00078322        | 1  |
| 6330 | 12656 | Dgkq        | Coq5               | 1  |
| 6330 | 14085 | Dgkq        | Cdkl2              | 1  |
| 6330 | 15908 | Dgkq        | Pebp1              | -1 |
| 6330 | 17716 | Dgkq        | Rnf10              | -1 |
| 6330 | 17807 | Dgkq        | Pebp1              | -1 |
| 6330 | 19719 | Dgkq        | EG634650           | 1  |

|      |       |             |               |    |
|------|-------|-------------|---------------|----|
| 6330 | 20118 | Dgkq        | Tmem175       | 1  |
| 6330 | 20269 | Dgkq        | Hsd17b13      | -1 |
| 6330 | 23625 | Dgkq        | Pkd2          | 1  |
| 6333 | 6333  | lqcg        | lqcg          | 1  |
| 6338 | 20058 | Setd3       | Dnaic1        | -1 |
| 6343 | 662   | Slc20a1     | Mid1ip1       | 1  |
| 6343 | 707   | Slc20a1     | Bdnf          | 1  |
| 6343 | 2320  | Slc20a1     | Spc24         | 1  |
| 6343 | 2370  | Slc20a1     | 8430408G22Rik | -1 |
| 6343 | 3449  | Slc20a1     | Hes6          | 1  |
| 6343 | 5435  | Slc20a1     | Lins2         | 1  |
| 6343 | 5594  | Slc20a1     | Erbp3         | -1 |
| 6343 | 5801  | Slc20a1     | MMT00042142   | 1  |
| 6343 | 5804  | Slc20a1     | Thrsp         | 1  |
| 6343 | 6816  | Slc20a1     | Slc46a3       | 1  |
| 6343 | 7659  | Slc20a1     | Rab30         | -1 |
| 6343 | 7944  | Slc20a1     | A1132487      | -1 |
| 6343 | 8439  | Slc20a1     | Slc25a33      | -1 |
| 6343 | 8632  | Slc20a1     | Igfbp1        | -1 |
| 6343 | 11590 | Slc20a1     | Cbx4          | 1  |
| 6343 | 12315 | Slc20a1     | Sreb1         | 1  |
| 6343 | 13304 | Slc20a1     | Gadd45b       | -1 |
| 6343 | 13716 | Slc20a1     | D5Erd579e     | 1  |
| 6343 | 14138 | Slc20a1     | Anks4b        | 1  |
| 6343 | 15990 | Slc20a1     | Dnmbp         | -1 |
| 6343 | 17660 | Slc20a1     | Nlrp12        | -1 |
| 6343 | 17800 | Slc20a1     | Lrtm1         | 1  |
| 6343 | 17852 | Slc20a1     | Cpeb2         | -1 |
| 6343 | 18148 | Slc20a1     | Cables1       | -1 |
| 6343 | 18785 | Slc20a1     | Angptl4       | -1 |
| 6343 | 21160 | Slc20a1     | Irs2          | -1 |
| 6343 | 21288 | Slc20a1     | Tcp11l2       | -1 |
| 6343 | 22046 | Slc20a1     | Cml4          | 1  |
| 6343 | 22111 | Slc20a1     | Ttn           | 1  |
| 6353 | 15631 | Spata13     | Lpin1         | -1 |
| 6353 | 18314 | Spata13     | 4631416L12Rik | -1 |
| 6360 | 327   | D17H6S56E-3 | H2-Ea         | -1 |
| 6360 | 510   | D17H6S56E-3 | Neu1          | 1  |
| 6360 | 2325  | D17H6S56E-3 | H2-K1         | -1 |
| 6360 | 2801  | D17H6S56E-3 | H2-BI         | -1 |
| 6360 | 2938  | D17H6S56E-3 | H2-T23        | -1 |
| 6360 | 3857  | D17H6S56E-3 | 1700001C19Rik | 1  |
| 6360 | 5648  | D17H6S56E-3 | Zfp213        | 1  |
| 6360 | 6177  | D17H6S56E-3 | Thpo          | 1  |
| 6360 | 6360  | D17H6S56E-3 | D17H6S56E-3   | 1  |
| 6360 | 7963  | D17H6S56E-3 | Rxrg          | 1  |
| 6360 | 9158  | D17H6S56E-3 | Pde9a         | 1  |
| 6360 | 10394 | D17H6S56E-3 | MMT00028435   | -1 |
| 6360 | 10667 | D17H6S56E-3 | H2-Eb1        | -1 |
| 6360 | 12355 | D17H6S56E-3 | A1507611      | -1 |
| 6360 | 13493 | D17H6S56E-3 | Ring1         | 1  |

|      |       |               |               |    |
|------|-------|---------------|---------------|----|
| 6360 | 13789 | D17H6S56E-3   | H2-Q8         | -1 |
| 6360 | 14322 | D17H6S56E-3   | Bat1a         | 1  |
| 6360 | 15531 | D17H6S56E-3   | Prickle4      | 1  |
| 6360 | 16348 | D17H6S56E-3   | Tubgcp3       | 1  |
| 6360 | 16753 | D17H6S56E-3   | Hfe2          | 1  |
| 6360 | 17788 | D17H6S56E-3   | Xrcc1         | 1  |
| 6360 | 18577 | D17H6S56E-3   | Btdb9         | 1  |
| 6360 | 19833 | D17H6S56E-3   | Ddah2         | 1  |
| 6360 | 20238 | D17H6S56E-3   | H2-T9         | -1 |
| 6360 | 22822 | D17H6S56E-3   | MMT00013433   | -1 |
| 6362 | 8444  | Crispld2      | Rdh16         | -1 |
| 6362 | 8815  | Crispld2      | Mx1           | -1 |
| 6362 | 20058 | Crispld2      | Dnaic1        | 1  |
| 6362 | 21727 | Crispld2      | Khk           | -1 |
| 6363 | 2571  | 9130014G24Rik | Rmnd1         | -1 |
| 6363 | 3744  | 9130014G24Rik | Rmnd1         | -1 |
| 6363 | 8786  | 9130014G24Rik | Rmnd1         | -1 |
| 6363 | 18300 | 9130014G24Rik | Arg1          | 1  |
| 6363 | 19115 | 9130014G24Rik | Rab32         | -1 |
| 6372 | 5488  | 1110021L09Rik | C920009B18Rik | -1 |
| 6372 | 6372  | 1110021L09Rik | 1110021L09Rik | 1  |
| 6376 | 6376  | Nle1          | Nle1          | 1  |
| 6376 | 10539 | Nle1          | Unc45b        | -1 |
| 6383 | 1533  | Gbp2          | BC013712      | 1  |
| 6383 | 2058  | Gbp2          | Hk3           | 1  |
| 6383 | 2200  | Gbp2          | BC006779      | 1  |
| 6383 | 2224  | Gbp2          | Oasl2         | 1  |
| 6383 | 2550  | Gbp2          | MMT00036681   | 1  |
| 6383 | 2578  | Gbp2          | Csf2rb2       | 1  |
| 6383 | 2752  | Gbp2          | Fcgr1         | 1  |
| 6383 | 3028  | Gbp2          | Uhrf1         | 1  |
| 6383 | 3594  | Gbp2          | Rasa4         | 1  |
| 6383 | 3683  | Gbp2          | Oas2          | 1  |
| 6383 | 4114  | Gbp2          | Parp12        | 1  |
| 6383 | 4409  | Gbp2          | 5430435G22Rik | 1  |
| 6383 | 4426  | Gbp2          | Iigp2         | 1  |
| 6383 | 4508  | Gbp2          | Ifit1         | 1  |
| 6383 | 5044  | Gbp2          | Ifi35         | 1  |
| 6383 | 5332  | Gbp2          | Pdlim4        | 1  |
| 6383 | 5556  | Gbp2          | Ccl4          | 1  |
| 6383 | 5766  | Gbp2          | 5033414D02Rik | 1  |
| 6383 | 5845  | Gbp2          | Il18bp        | 1  |
| 6383 | 5853  | Gbp2          | Trim30        | 1  |
| 6383 | 5949  | Gbp2          | Zbp1          | 1  |
| 6383 | 5975  | Gbp2          | Car13         | 1  |
| 6383 | 6036  | Gbp2          | Pram1         | 1  |
| 6383 | 6072  | Gbp2          | C1qc          | 1  |
| 6383 | 6098  | Gbp2          | Ncf4          | 1  |
| 6383 | 6154  | Gbp2          | 1700030G06Rik | 1  |
| 6383 | 6213  | Gbp2          | Ccl2          | 1  |
| 6383 | 6734  | Gbp2          | Ehd4          | 1  |



|      |       |      |             |   |
|------|-------|------|-------------|---|
| 6383 | 6824  | Gbp2 | Irf7        | 1 |
| 6383 | 6888  | Gbp2 | Cxcl9       | 1 |
| 6383 | 7069  | Gbp2 | Ube1l       | 1 |
| 6383 | 7105  | Gbp2 | Plac8       | 1 |
| 6383 | 7238  | Gbp2 | Pycard      | 1 |
| 6383 | 7284  | Gbp2 | MMT00008674 | 1 |
| 6383 | 7336  | Gbp2 | Cd5l        | 1 |
| 6383 | 8270  | Gbp2 | Cispn       | 1 |
| 6383 | 8392  | Gbp2 | Asf1b       | 1 |
| 6383 | 8555  | Gbp2 | H2-M3       | 1 |
| 6383 | 8564  | Gbp2 | Pld4        | 1 |
| 6383 | 8659  | Gbp2 | Psmb8       | 1 |
| 6383 | 8800  | Gbp2 | Rnf213      | 1 |
| 6383 | 8922  | Gbp2 | Il10ra      | 1 |
| 6383 | 9401  | Gbp2 | Fcgr4       | 1 |
| 6383 | 9820  | Gbp2 | BC023105    | 1 |
| 6383 | 9847  | Gbp2 | Ifi27       | 1 |
| 6383 | 9928  | Gbp2 | Lgmn        | 1 |
| 6383 | 10109 | Gbp2 | Gbp3        | 1 |
| 6383 | 10393 | Gbp2 | Slc7a8      | 1 |
| 6383 | 10504 | Gbp2 | Ripk3       | 1 |
| 6383 | 10606 | Gbp2 | Apbb1ip     | 1 |
| 6383 | 10926 | Gbp2 | P2ry13      | 1 |
| 6383 | 11198 | Gbp2 | Gbp1        | 1 |
| 6383 | 11204 | Gbp2 | AI451617    | 1 |
| 6383 | 11265 | Gbp2 | Irgm        | 1 |
| 6383 | 11275 | Gbp2 | Fanci       | 1 |
| 6383 | 12126 | Gbp2 | Znfx1       | 1 |
| 6383 | 12312 | Gbp2 | Ms4a6d      | 1 |
| 6383 | 12398 | Gbp2 | Ifi44       | 1 |
| 6383 | 12600 | Gbp2 | Ifi204      | 1 |
| 6383 | 12969 | Gbp2 | Xaf1        | 1 |
| 6383 | 13156 | Gbp2 | Ifit3       | 1 |
| 6383 | 13172 | Gbp2 | Epb4.1l3    | 1 |
| 6383 | 13309 | Gbp2 | Tgtp        | 1 |
| 6383 | 13455 | Gbp2 | Cenpe       | 1 |
| 6383 | 13514 | Gbp2 | Apol9b      | 1 |
| 6383 | 13527 | Gbp2 | Ctss        | 1 |
| 6383 | 13585 | Gbp2 | Nckap1l     | 1 |
| 6383 | 13654 | Gbp2 | Stat1       | 1 |
| 6383 | 13656 | Gbp2 | Ly86        | 1 |
| 6383 | 14117 | Gbp2 | C1qb        | 1 |
| 6383 | 14192 | Gbp2 | Trpv2       | 1 |
| 6383 | 14237 | Gbp2 | Rac2        | 1 |
| 6383 | 14258 | Gbp2 | Ifi47       | 1 |
| 6383 | 14475 | Gbp2 | Abcg1       | 1 |
| 6383 | 14506 | Gbp2 | Slc15a3     | 1 |
| 6383 | 14603 | Gbp2 | Ly6e        | 1 |
| 6383 | 14611 | Gbp2 | Ddx60       | 1 |
| 6383 | 14880 | Gbp2 | Ms4a4c      | 1 |
| 6383 | 14883 | Gbp2 | Itgal       | 1 |

|      |       |       |               |    |
|------|-------|-------|---------------|----|
| 6383 | 15074 | Gbp2  | Usp18         | 1  |
| 6383 | 15159 | Gbp2  | Timd4         | 1  |
| 6383 | 15280 | Gbp2  | Cxcl10        | 1  |
| 6383 | 15504 | Gbp2  | Mx2           | 1  |
| 6383 | 15825 | Gbp2  | Fermt3        | 1  |
| 6383 | 16102 | Gbp2  | Cd72          | 1  |
| 6383 | 16147 | Gbp2  | Tlr2          | 1  |
| 6383 | 16182 | Gbp2  | Oasl1         | 1  |
| 6383 | 16186 | Gbp2  | Cfp           | 1  |
| 6383 | 16199 | Gbp2  | Samhd1        | 1  |
| 6383 | 16572 | Gbp2  | D14Ertd668e   | 1  |
| 6383 | 16827 | Gbp2  | Arhgdib       | 1  |
| 6383 | 16874 | Gbp2  | Fcer1g        | 1  |
| 6383 | 16988 | Gbp2  | Clec4f        | 1  |
| 6383 | 17197 | Gbp2  | Igtp          | 1  |
| 6383 | 17412 | Gbp2  | Aif1          | 1  |
| 6383 | 17904 | Gbp2  | Cds1          | 1  |
| 6383 | 18174 | Gbp2  | Stat2         | 1  |
| 6383 | 18211 | Gbp2  | Folr2         | 1  |
| 6383 | 18289 | Gbp2  | Tap1          | 1  |
| 6383 | 19189 | Gbp2  | Sp100         | 1  |
| 6383 | 19252 | Gbp2  | Tmsb4x        | 1  |
| 6383 | 19738 | Gbp2  | Lgals3bp      | 1  |
| 6383 | 19794 | Gbp2  | Rgs2          | 1  |
| 6383 | 20321 | Gbp2  | Ms4a6b        | 1  |
| 6383 | 20474 | Gbp2  | Gnb3          | 1  |
| 6383 | 20814 | Gbp2  | Ptpn18        | 1  |
| 6383 | 20997 | Gbp2  | MMT00028135   | 1  |
| 6383 | 21351 | Gbp2  | Shisa5        | 1  |
| 6383 | 21440 | Gbp2  | Tmsb10        | 1  |
| 6383 | 21549 | Gbp2  | Rtp4          | 1  |
| 6383 | 21824 | Gbp2  | 5830443L24Rik | 1  |
| 6383 | 22037 | Gbp2  | Oas1g         | 1  |
| 6383 | 22327 | Gbp2  | Tyrobp        | 1  |
| 6383 | 23208 | Gbp2  | Hck           | 1  |
| 6383 | 23242 | Gbp2  | Gngt2         | 1  |
| 6383 | 23403 | Gbp2  | Ndc80         | 1  |
| 6384 | 1941  | Rbm12 | MMT00079618   | 1  |
| 6384 | 7151  | Rbm12 | MMT00007982   | 1  |
| 6384 | 9763  | Rbm12 | Tuba3b        | 1  |
| 6384 | 11724 | Rbm12 | Tuba3a        | 1  |
| 6384 | 22388 | Rbm12 | 2410018M08Rik | -1 |
| 6386 | 250   | Por   | Tubb2a-ps2    | -1 |
| 6386 | 437   | Por   | Ndrp1         | -1 |
| 6386 | 609   | Por   | MMT00060868   | -1 |
| 6386 | 719   | Por   | Usp2          | 1  |
| 6386 | 1310  | Por   | Cabc1         | -1 |
| 6386 | 1646  | Por   | Slc15a4       | 1  |
| 6386 | 1767  | Por   | BC016495      | 1  |
| 6386 | 2384  | Por   | Micalcl       | -1 |
| 6386 | 2399  | Por   | MMT00060167   | -1 |

|      |       |               |               |    |
|------|-------|---------------|---------------|----|
| 6386 | 2636  | Por           | Tars          | -1 |
| 6386 | 2850  | Por           | Slc16a6       | -1 |
| 6386 | 3214  | Por           | Dnmt3b        | -1 |
| 6386 | 4286  | Por           | Ptp4a1        | 1  |
| 6386 | 4534  | Por           | Ndel1         | 1  |
| 6386 | 5734  | Por           | EG619653      | 1  |
| 6386 | 5974  | Por           | Arntl         | -1 |
| 6386 | 6370  | Por           | Aqp8          | -1 |
| 6386 | 6386  | Por           | Por           | 1  |
| 6386 | 7414  | Por           | Clpx          | -1 |
| 6386 | 9127  | Por           | Mtfmt         | -1 |
| 6386 | 10486 | Por           | 1300002K09Rik | -1 |
| 6386 | 11129 | Por           | Ankhd1        | 1  |
| 6386 | 11599 | Por           | Coq10b        | 1  |
| 6386 | 11741 | Por           | Slc30a10      | -1 |
| 6386 | 12204 | Por           | Ankmy2        | 1  |
| 6386 | 12799 | Por           | Spon2         | -1 |
| 6386 | 12941 | Por           | Elovl5        | -1 |
| 6386 | 15481 | Por           | 1110067D22Rik | -1 |
| 6386 | 15709 | Por           | Tceal1        | 1  |
| 6386 | 16647 | Por           | D16H22S680E   | 1  |
| 6386 | 16690 | Por           | Tjp3          | -1 |
| 6386 | 17247 | Por           | A030007L17Rik | -1 |
| 6386 | 17338 | Por           | Mocos         | -1 |
| 6386 | 17876 | Por           | Tubb4         | -1 |
| 6386 | 17999 | Por           | A730017L22Rik | -1 |
| 6386 | 18179 | Por           | Dbp           | 1  |
| 6386 | 18827 | Por           | Oprs1         | -1 |
| 6386 | 19234 | Por           | Nrg4          | 1  |
| 6386 | 21733 | Por           | Rhebl1        | 1  |
| 6386 | 21969 | Por           | Tk1           | 1  |
| 6386 | 22138 | Por           | Ang           | 1  |
| 6386 | 22290 | Por           | Tubb2a        | -1 |
| 6386 | 22630 | Por           | MMT00034355   | -1 |
| 6393 | 269   | 3110043O21Rik | Tuba1b        | 1  |
| 6393 | 22443 | 3110043O21Rik | Tuba1c        | 1  |
| 6394 | 6394  | Fbxo6         | Fbxo6         | 1  |
| 6394 | 6830  | Fbxo6         | Rsc1a1        | 1  |
| 6394 | 18338 | Fbxo6         | Akr1e1        | 1  |
| 6394 | 19924 | Fbxo6         | Ubiad1        | -1 |
| 6396 | 2388  | Zfp105        | Dot1l         | -1 |
| 6396 | 2599  | Zfp105        | Lsm14a        | -1 |
| 6396 | 2912  | Zfp105        | Wtip          | 1  |
| 6396 | 4697  | Zfp105        | Cyp2a12       | 1  |
| 6396 | 6513  | Zfp105        | Qpctl         | -1 |
| 6396 | 10545 | Zfp105        | Tmem147       | -1 |
| 6396 | 11321 | Zfp105        | 2310014L17Rik | 1  |
| 6396 | 11888 | Zfp105        | Myadm         | 1  |
| 6396 | 16639 | Zfp105        | MMT00078937   | 1  |
| 6396 | 19462 | Zfp105        | 4933439C20Rik | 1  |
| 6396 | 20606 | Zfp105        | MMT00042166   | 1  |

|      |       |               |                    |    |
|------|-------|---------------|--------------------|----|
| 6396 | 23247 | Zfp105        | Ercc1              | 1  |
| 6397 | 9629  | Slc2a9        | Spnb3              | 1  |
| 6397 | 18099 | Slc2a9        | Nfx1               | 1  |
| 6413 | 6413  | Fbxo4         | Fbxo4              | 1  |
| 6422 | 12565 | Grk5          | Grem2              | -1 |
| 6426 | 18042 | Mfsd4         | Aph1c              | 1  |
| 6428 | 15508 | MMT00035510   | 4632415L05Rik      | -1 |
| 6432 | 12910 | 2010109K11Rik | 1110028A07Rik      | 1  |
| 6449 | 9582  | 1190007F08Rik | MMT00041407        | 1  |
| 6462 | 7659  | Brip1         | Rab30              | 1  |
| 6470 | 524   | Arnt          | Hsd3b2             | -1 |
| 6470 | 1867  | Arnt          | Bcas2              | -1 |
| 6470 | 3753  | Arnt          | Setdb1             | 1  |
| 6470 | 8738  | Arnt          | Reg4               | 1  |
| 6470 | 10521 | Arnt          | Ttf2               | -1 |
| 6470 | 10681 | Arnt          | Dgkz               | 1  |
| 6470 | 11611 | Arnt          | S100a13            | 1  |
| 6470 | 16416 | Arnt          | Commd2             | -1 |
| 6475 | 268   | Sdc4          | Sys1               | 1  |
| 6475 | 6475  | Sdc4          | Sdc4               | 1  |
| 6476 | 760   | Sntg2         | Akr1c19            | -1 |
| 6476 | 1129  | Sntg2         | Gsta4              | -1 |
| 6476 | 1600  | Sntg2         | Csrp1              | 1  |
| 6476 | 1637  | Sntg2         | MMT00071316        | -1 |
| 6476 | 2049  | Sntg2         | Gsta3              | -1 |
| 6476 | 2127  | Sntg2         | Ldha               | 1  |
| 6476 | 2721  | Sntg2         | Inmt               | -1 |
| 6476 | 3689  | Sntg2         | Adh1               | -1 |
| 6476 | 5691  | Sntg2         | Csrp3              | 1  |
| 6476 | 6085  | Sntg2         | MMT00007454        | 1  |
| 6476 | 8773  | Sntg2         | MMT00027093        | 1  |
| 6476 | 9718  | Sntg2         | Fmo5               | -1 |
| 6476 | 9842  | Sntg2         | Qdpr               | -1 |
| 6476 | 10532 | Sntg2         | MMT00057790        | 1  |
| 6476 | 10554 | Sntg2         | ENSMUSG00000074179 | -1 |
| 6476 | 12925 | Sntg2         | Farp1              | 1  |
| 6476 | 13293 | Sntg2         | Gsta2              | -1 |
| 6476 | 13431 | Sntg2         | MMT00038058        | 1  |
| 6476 | 14055 | Sntg2         | MMT00050438        | 1  |
| 6476 | 14100 | Sntg2         | Ccnk               | -1 |
| 6476 | 15205 | Sntg2         | MMT00030262        | 1  |
| 6476 | 15500 | Sntg2         | MMT00081411        | 1  |
| 6476 | 16525 | Sntg2         | Lbp                | 1  |
| 6476 | 16772 | Sntg2         | MMT00010554        | -1 |
| 6476 | 18113 | Sntg2         | MMT00034400        | -1 |
| 6476 | 18590 | Sntg2         | Fgb                | 1  |
| 6476 | 19066 | Sntg2         | MMT00012632        | -1 |
| 6476 | 19790 | Sntg2         | Polg2              | -1 |
| 6476 | 21727 | Sntg2         | Khk                | -1 |
| 6476 | 21937 | Sntg2         | MMT00015325        | 1  |
| 6476 | 22653 | Sntg2         | Ric3               | 1  |

|      |       |                    |               |    |
|------|-------|--------------------|---------------|----|
| 6476 | 22907 | Sntg2              | MMT00054594   | 1  |
| 6476 | 22978 | Sntg2              | MMT00043176   | 1  |
| 6485 | 18373 | Map3k7ip1          | Dnajb1        | -1 |
| 6486 | 16762 | OTTMUSG00000001305 | Atp8a2        | 1  |
| 6491 | 14151 | Rpl5               | Slc44a1       | -1 |
| 6491 | 20058 | Rpl5               | Dnaic1        | 1  |
| 6498 | 1374  | MMT00016809        | Mdn1          | -1 |
| 6498 | 6498  | MMT00016809        | MMT00016809   | 1  |
| 6498 | 6648  | MMT00016809        | Cenpl         | 1  |
| 6498 | 9449  | MMT00016809        | Sft2d2        | 1  |
| 6498 | 11167 | MMT00016809        | Dars2         | 1  |
| 6498 | 11406 | MMT00016809        | Ifi203        | -1 |
| 6498 | 13149 | MMT00016809        | Ifi203        | -1 |
| 6498 | 15844 | MMT00016809        | Klhdc9        | 1  |
| 6500 | 8328  | MMT00069546        | Klhdc8a       | 1  |
| 6500 | 14041 | MMT00069546        | Cldn1         | 1  |
| 6500 | 20171 | MMT00069546        | 1700008G05Rik | 1  |
| 6502 | 8444  | Col15a1            | Rdh16         | 1  |
| 6502 | 8815  | Col15a1            | Mx1           | 1  |
| 6502 | 21214 | Col15a1            | Scd1          | 1  |
| 6502 | 21575 | Col15a1            | Cyp2c55       | 1  |
| 6502 | 22138 | Col15a1            | Ang           | -1 |
| 6504 | 5364  | Alad               | Kif22         | -1 |
| 6504 | 11422 | Alad               | Pltp          | -1 |
| 6504 | 14472 | Alad               | Ahcy          | 1  |
| 6506 | 1041  | Scyl2              | 3110049J23Rik | -1 |
| 6506 | 5965  | Scyl2              | Pbld          | -1 |
| 6506 | 15971 | Scyl2              | Aifm2         | -1 |
| 6506 | 19392 | Scyl2              | Slc25a16      | 1  |
| 6513 | 2388  | Qpctl              | Dot1l         | 1  |
| 6513 | 2599  | Qpctl              | Lsm14a        | 1  |
| 6513 | 2912  | Qpctl              | Wtip          | -1 |
| 6513 | 6513  | Qpctl              | Qpctl         | 1  |
| 6513 | 9122  | Qpctl              | Sepw1         | 1  |
| 6513 | 9322  | Qpctl              | Relt          | -1 |
| 6513 | 10132 | Qpctl              | Ces2          | 1  |
| 6513 | 10545 | Qpctl              | Tmem147       | 1  |
| 6513 | 11321 | Qpctl              | 2310014L17Rik | -1 |
| 6513 | 11888 | Qpctl              | Myadm         | -1 |
| 6513 | 14017 | Qpctl              | Ces5          | 1  |
| 6513 | 16639 | Qpctl              | MMT00078937   | -1 |
| 6513 | 17314 | Qpctl              | Napa          | -1 |
| 6513 | 18201 | Qpctl              | MMT00060232   | 1  |
| 6513 | 19462 | Qpctl              | 4933439C20Rik | -1 |
| 6513 | 19762 | Qpctl              | Pih1d1        | -1 |
| 6513 | 20606 | Qpctl              | MMT00042166   | -1 |
| 6513 | 21438 | Qpctl              | Plekha4       | -1 |
| 6513 | 23247 | Qpctl              | Ercc1         | -1 |
| 6513 | 23557 | Qpctl              | Ppp1r12c      | -1 |
| 6531 | 21214 | EG629557           | Scd1          | 1  |
| 6532 | 6532  | Auh                | Auh           | 1  |

|      |       |         |               |    |
|------|-------|---------|---------------|----|
| 6542 | 3170  | Epor    | Mcart1        | -1 |
| 6542 | 3196  | Epor    | Tat           | -1 |
| 6542 | 20122 | Epor    | Tmem86a       | 1  |
| 6555 | 2938  | Aadacl2 | H2-T23        | -1 |
| 6555 | 10667 | Aadacl2 | H2-Eb1        | -1 |
| 6555 | 13493 | Aadacl2 | Ring1         | 1  |
| 6564 | 337   | Cebpd   | Rasgef1b      | 1  |
| 6564 | 2294  | Cebpd   | AU040829      | 1  |
| 6564 | 2483  | Cebpd   | Gmeb1         | 1  |
| 6564 | 3196  | Cebpd   | Tat           | 1  |
| 6564 | 3452  | Cebpd   | Ccrn4l        | 1  |
| 6564 | 3652  | Cebpd   | Adm           | 1  |
| 6564 | 4205  | Cebpd   | Rgs1          | 1  |
| 6564 | 4235  | Cebpd   | Pfkfb3        | 1  |
| 6564 | 5187  | Cebpd   | Speer4f       | 1  |
| 6564 | 5856  | Cebpd   | Mfsd2         | 1  |
| 6564 | 5889  | Cebpd   | Errfi1        | 1  |
| 6564 | 6019  | Cebpd   | Gdap10        | 1  |
| 6564 | 6308  | Cebpd   | 2410075B13Rik | -1 |
| 6564 | 6564  | Cebpd   | Cebpd         | 1  |
| 6564 | 6589  | Cebpd   | Mafb          | 1  |
| 6564 | 7136  | Cebpd   | Id3           | -1 |
| 6564 | 7315  | Cebpd   | EG624219      | -1 |
| 6564 | 8632  | Cebpd   | Igfbp1        | 1  |
| 6564 | 8816  | Cebpd   | Nfkbia        | 1  |
| 6564 | 9745  | Cebpd   | Gadd45g       | 1  |
| 6564 | 10279 | Cebpd   | Rnf186        | -1 |
| 6564 | 10408 | Cebpd   | Per1          | 1  |
| 6564 | 10842 | Cebpd   | Slc25a25      | 1  |
| 6564 | 11093 | Cebpd   | Zdhhc1        | 1  |
| 6564 | 11808 | Cebpd   | Pck1          | 1  |
| 6564 | 12479 | Cebpd   | lfrd1         | 1  |
| 6564 | 12570 | Cebpd   | Wsb1          | 1  |
| 6564 | 12761 | Cebpd   | Tsc22d3       | 1  |
| 6564 | 13289 | Cebpd   | Dusp10        | -1 |
| 6564 | 13339 | Cebpd   | D630042F21Rik | 1  |
| 6564 | 13491 | Cebpd   | Plk2          | -1 |
| 6564 | 14263 | Cebpd   | Arrdc3        | -1 |
| 6564 | 14894 | Cebpd   | G0s2          | -1 |
| 6564 | 15522 | Cebpd   | 1810011O10Rik | 1  |
| 6564 | 15631 | Cebpd   | Lpin1         | 1  |
| 6564 | 15826 | Cebpd   | Arl4d         | 1  |
| 6564 | 15882 | Cebpd   | AA986860      | 1  |
| 6564 | 16176 | Cebpd   | St3gal5       | 1  |
| 6564 | 16517 | Cebpd   | D4Wsu53e      | 1  |
| 6564 | 16580 | Cebpd   | Tnfaip2       | -1 |
| 6564 | 17352 | Cebpd   | Cebpb         | 1  |
| 6564 | 17525 | Cebpd   | Ctgf          | 1  |
| 6564 | 17752 | Cebpd   | Chac1         | 1  |
| 6564 | 18083 | Cebpd   | Gadd45a       | -1 |
| 6564 | 18785 | Cebpd   | Angptl4       | 1  |

|      |       |               |               |    |
|------|-------|---------------|---------------|----|
| 6564 | 19124 | Cebpd         | Pim3          | 1  |
| 6564 | 19466 | Cebpd         | Pptc7         | 1  |
| 6564 | 19528 | Cebpd         | Zfp503        | -1 |
| 6564 | 19556 | Cebpd         | Efna1         | -1 |
| 6564 | 21331 | Cebpd         | Slc10a6       | 1  |
| 6564 | 21805 | Cebpd         | Plk3          | 1  |
| 6564 | 21934 | Cebpd         | Id2           | -1 |
| 6564 | 22873 | Cebpd         | Slc38a2       | 1  |
| 6564 | 23552 | Cebpd         | Rasl11b       | -1 |
| 6569 | 760   | Itih1         | Akr1c19       | 1  |
| 6569 | 10367 | Itih1         | Coq7          | 1  |
| 6569 | 17090 | Itih1         | Lass2         | 1  |
| 6571 | 1561  | 3000004C01Rik | Aurka         | 1  |
| 6571 | 8416  | 3000004C01Rik | Cdc20         | 1  |
| 6571 | 21947 | 3000004C01Rik | Cdca8         | 1  |
| 6576 | 143   | Slfn2         | Gvin1         | 1  |
| 6576 | 982   | Slfn2         | Ccl7          | 1  |
| 6576 | 2224  | Slfn2         | Oasl2         | 1  |
| 6576 | 4426  | Slfn2         | Iigp2         | 1  |
| 6576 | 4508  | Slfn2         | Ifit1         | 1  |
| 6576 | 5250  | Slfn2         | Ifit2         | 1  |
| 6576 | 6213  | Slfn2         | Ccl2          | 1  |
| 6576 | 6824  | Slfn2         | Irf7          | 1  |
| 6576 | 6888  | Slfn2         | Cxcl9         | 1  |
| 6576 | 7316  | Slfn2         | Ifi204        | 1  |
| 6576 | 8800  | Slfn2         | Rnf213        | 1  |
| 6576 | 9820  | Slfn2         | BC023105      | 1  |
| 6576 | 9847  | Slfn2         | Ifi27         | 1  |
| 6576 | 11009 | Slfn2         | MMT00008885   | 1  |
| 6576 | 11265 | Slfn2         | Irgm          | 1  |
| 6576 | 12398 | Slfn2         | Ifi44         | 1  |
| 6576 | 12600 | Slfn2         | Ifi204        | 1  |
| 6576 | 13156 | Slfn2         | Ifit3         | 1  |
| 6576 | 13309 | Slfn2         | Tgtp          | 1  |
| 6576 | 14258 | Slfn2         | Ifi47         | 1  |
| 6576 | 14880 | Slfn2         | Ms4a4c        | 1  |
| 6576 | 15449 | Slfn2         | Mitd1         | 1  |
| 6576 | 16182 | Slfn2         | Oasl1         | 1  |
| 6576 | 16572 | Slfn2         | D14Ertd668e   | 1  |
| 6576 | 17197 | Slfn2         | Igtp          | 1  |
| 6576 | 17412 | Slfn2         | Aif1          | 1  |
| 6576 | 19189 | Slfn2         | Sp100         | 1  |
| 6576 | 20997 | Slfn2         | MMT00028135   | 1  |
| 6576 | 21549 | Slfn2         | Rtp4          | 1  |
| 6576 | 21824 | Slfn2         | 5830443L24Rik | 1  |
| 6581 | 662   | Cdc42ep1      | Mid1ip1       | 1  |
| 6581 | 2400  | Cdc42ep1      | Gck           | 1  |
| 6581 | 5801  | Cdc42ep1      | MMT00042142   | 1  |
| 6581 | 8234  | Cdc42ep1      | Tbpl1         | -1 |
| 6581 | 8632  | Cdc42ep1      | Igfbp1        | -1 |
| 6581 | 9481  | Cdc42ep1      | Ppl           | 1  |

|      |       |          |               |    |
|------|-------|----------|---------------|----|
| 6581 | 11590 | Cdc42ep1 | Cbx4          | 1  |
| 6581 | 12315 | Cdc42ep1 | Srebf1        | 1  |
| 6581 | 12910 | Cdc42ep1 | 1110028A07Rik | 1  |
| 6581 | 13286 | Cdc42ep1 | Slc23a1       | 1  |
| 6581 | 13304 | Cdc42ep1 | Gadd45b       | -1 |
| 6581 | 14138 | Cdc42ep1 | Anks4b        | 1  |
| 6581 | 14279 | Cdc42ep1 | 3930402G23Rik | -1 |
| 6581 | 18785 | Cdc42ep1 | Angptl4       | -1 |
| 6581 | 21160 | Cdc42ep1 | Irs2          | -1 |
| 6581 | 22561 | Cdc42ep1 | Whdc1         | 1  |
| 6587 | 2224  | Irf9     | Oasl2         | 1  |
| 6587 | 2550  | Irf9     | MMT00036681   | 1  |
| 6587 | 3659  | Irf9     | EG236451      | 1  |
| 6587 | 3683  | Irf9     | Oas2          | 1  |
| 6587 | 4114  | Irf9     | Parp12        | 1  |
| 6587 | 4426  | Irf9     | Iigp2         | 1  |
| 6587 | 4508  | Irf9     | Ifit1         | 1  |
| 6587 | 4918  | Irf9     | Scara5        | -1 |
| 6587 | 5002  | Irf9     | Ifi202b       | 1  |
| 6587 | 5853  | Irf9     | Trim30        | 1  |
| 6587 | 6587  | Irf9     | Irf9          | 1  |
| 6587 | 6824  | Irf9     | Irf7          | 1  |
| 6587 | 7069  | Irf9     | Ube1l         | 1  |
| 6587 | 7105  | Irf9     | Plac8         | 1  |
| 6587 | 8800  | Irf9     | Rnf213        | 1  |
| 6587 | 9401  | Irf9     | Fcgr4         | 1  |
| 6587 | 9847  | Irf9     | Ifi27         | 1  |
| 6587 | 10109 | Irf9     | Gbp3          | 1  |
| 6587 | 11009 | Irf9     | MMT00008885   | 1  |
| 6587 | 11204 | Irf9     | Al451617      | 1  |
| 6587 | 12312 | Irf9     | Ms4a6d        | 1  |
| 6587 | 12398 | Irf9     | Ifi44         | 1  |
| 6587 | 12600 | Irf9     | Ifi204        | 1  |
| 6587 | 12969 | Irf9     | Xaf1          | 1  |
| 6587 | 13156 | Irf9     | Ifit3         | 1  |
| 6587 | 13309 | Irf9     | Tgtp          | 1  |
| 6587 | 13514 | Irf9     | Apol9b        | 1  |
| 6587 | 13617 | Irf9     | Acin1         | -1 |
| 6587 | 14611 | Irf9     | Ddx60         | 1  |
| 6587 | 15074 | Irf9     | Usp18         | 1  |
| 6587 | 17197 | Irf9     | Igtp          | 1  |
| 6587 | 18186 | Irf9     | Parp14        | 1  |
| 6587 | 18686 | Irf9     | Zfp143        | 1  |
| 6587 | 19738 | Irf9     | Lgals3bp      | 1  |
| 6587 | 20321 | Irf9     | Ms4a6b        | 1  |
| 6587 | 20997 | Irf9     | MMT00028135   | 1  |
| 6587 | 21232 | Irf9     | Nkiras1       | -1 |
| 6587 | 21351 | Irf9     | Shisa5        | 1  |
| 6587 | 21549 | Irf9     | Rtp4          | 1  |
| 6587 | 22037 | Irf9     | Oas1g         | 1  |
| 6587 | 23092 | Irf9     | Ifih1         | 1  |



|      |       |         |             |    |
|------|-------|---------|-------------|----|
| 6587 | 23450 | Irf9    | D12Ertd647e | 1  |
| 6594 | 13431 | Zfyve27 | MMT00038058 | -1 |
| 6594 | 15205 | Zfyve27 | MMT00030262 | -1 |
| 6595 | 2224  | Oas1a   | Oasl2       | 1  |
| 6595 | 3523  | Oas1a   | Trim34      | 1  |
| 6595 | 3659  | Oas1a   | EG236451    | 1  |
| 6595 | 3683  | Oas1a   | Oas2        | 1  |
| 6595 | 4114  | Oas1a   | Parp12      | 1  |
| 6595 | 4508  | Oas1a   | Ifit1       | 1  |
| 6595 | 4516  | Oas1a   | Rsad2       | 1  |
| 6595 | 5044  | Oas1a   | Ifi35       | 1  |
| 6595 | 5216  | Oas1a   | Spnb5       | 1  |
| 6595 | 5250  | Oas1a   | Ifit2       | 1  |
| 6595 | 5853  | Oas1a   | Trim30      | 1  |
| 6595 | 6587  | Oas1a   | Irf9        | 1  |
| 6595 | 6595  | Oas1a   | Oas1a       | 1  |
| 6595 | 6824  | Oas1a   | Irf7        | 1  |
| 6595 | 7105  | Oas1a   | Plac8       | 1  |
| 6595 | 7284  | Oas1a   | MMT00008674 | 1  |
| 6595 | 7316  | Oas1a   | Ifi204      | 1  |
| 6595 | 8800  | Oas1a   | Rnf213      | 1  |
| 6595 | 9100  | Oas1a   | Ms4a6c      | 1  |
| 6595 | 9847  | Oas1a   | Ifi27       | 1  |
| 6595 | 10109 | Oas1a   | Gbp3        | 1  |
| 6595 | 11009 | Oas1a   | MMT00008885 | 1  |
| 6595 | 11204 | Oas1a   | AI451617    | 1  |
| 6595 | 11265 | Oas1a   | Irgm        | 1  |
| 6595 | 11701 | Oas1a   | Oas1c       | 1  |
| 6595 | 12312 | Oas1a   | Ms4a6d      | 1  |
| 6595 | 12398 | Oas1a   | Ifi44       | 1  |
| 6595 | 12600 | Oas1a   | Ifi204      | 1  |
| 6595 | 12969 | Oas1a   | Xaf1        | 1  |
| 6595 | 13156 | Oas1a   | Ifit3       | 1  |
| 6595 | 13309 | Oas1a   | Tgtp        | 1  |
| 6595 | 13654 | Oas1a   | Stat1       | 1  |
| 6595 | 13826 | Oas1a   | Melk        | 1  |
| 6595 | 14611 | Oas1a   | Ddx60       | 1  |
| 6595 | 14880 | Oas1a   | Ms4a4c      | 1  |
| 6595 | 15074 | Oas1a   | Usp18       | 1  |
| 6595 | 15449 | Oas1a   | Mitd1       | 1  |
| 6595 | 15504 | Oas1a   | Mx2         | 1  |
| 6595 | 16182 | Oas1a   | Oasl1       | 1  |
| 6595 | 16521 | Oas1a   | Adar        | 1  |
| 6595 | 16572 | Oas1a   | D14Ertd668e | 1  |
| 6595 | 17197 | Oas1a   | Igtp        | 1  |
| 6595 | 18186 | Oas1a   | Parp14      | 1  |
| 6595 | 19189 | Oas1a   | Sp100       | 1  |
| 6595 | 19738 | Oas1a   | Lgals3bp    | 1  |
| 6595 | 20321 | Oas1a   | Ms4a6b      | 1  |
| 6595 | 20791 | Oas1a   | MMT00014813 | 1  |
| 6595 | 20997 | Oas1a   | MMT00028135 | 1  |

|      |       |               |               |    |
|------|-------|---------------|---------------|----|
| 6595 | 21351 | Oas1a         | Shisa5        | 1  |
| 6595 | 21549 | Oas1a         | Rtp4          | 1  |
| 6595 | 21824 | Oas1a         | 5830443L24Rik | 1  |
| 6595 | 22037 | Oas1a         | Oas1g         | 1  |
| 6595 | 22712 | Oas1a         | Phf11         | 1  |
| 6595 | 23208 | Oas1a         | Hck           | 1  |
| 6595 | 23450 | Oas1a         | D12Erttd647e  | 1  |
| 6597 | 21214 | Slc9a5        | Scd1          | 1  |
| 6597 | 21251 | Slc9a5        | Cpt1a         | -1 |
| 6597 | 23640 | Slc9a5        | Bdh1          | -1 |
| 6607 | 8444  | Reln          | Rdh16         | -1 |
| 6614 | 865   | Cd300lg       | Npc1          | 1  |
| 6614 | 1655  | Cd300lg       | Mgrn1         | 1  |
| 6614 | 2013  | Cd300lg       | Il15ra        | 1  |
| 6614 | 6193  | Cd300lg       | Lactb2        | -1 |
| 6614 | 10612 | Cd300lg       | Slc24a6       | 1  |
| 6614 | 11375 | Cd300lg       | Derl2         | -1 |
| 6614 | 17862 | Cd300lg       | Fbxo21        | 1  |
| 6614 | 17878 | Cd300lg       | Brap          | 1  |
| 6614 | 21251 | Cd300lg       | Cpt1a         | 1  |
| 6614 | 21793 | Cd300lg       | Pla2g12a      | 1  |
| 6615 | 939   | 1810023F06Rik | Daxx          | 1  |
| 6615 | 2200  | 1810023F06Rik | BC006779      | 1  |
| 6615 | 2224  | 1810023F06Rik | Oasl2         | 1  |
| 6615 | 3659  | 1810023F06Rik | EG236451      | 1  |
| 6615 | 3683  | 1810023F06Rik | Oas2          | 1  |
| 6615 | 4114  | 1810023F06Rik | Parp12        | 1  |
| 6615 | 4426  | 1810023F06Rik | Iigp2         | 1  |
| 6615 | 4508  | 1810023F06Rik | Ifit1         | 1  |
| 6615 | 5766  | 1810023F06Rik | 5033414D02Rik | 1  |
| 6615 | 5949  | 1810023F06Rik | Zbp1          | 1  |
| 6615 | 6587  | 1810023F06Rik | Irf9          | 1  |
| 6615 | 6595  | 1810023F06Rik | Oas1a         | 1  |
| 6615 | 6806  | 1810023F06Rik | Agrn          | 1  |
| 6615 | 7105  | 1810023F06Rik | Plac8         | 1  |
| 6615 | 7963  | 1810023F06Rik | Rxrg          | 1  |
| 6615 | 8800  | 1810023F06Rik | Rnf213        | 1  |
| 6615 | 9847  | 1810023F06Rik | Ifi27         | 1  |
| 6615 | 10109 | 1810023F06Rik | Gbp3          | 1  |
| 6615 | 11009 | 1810023F06Rik | MMT00008885   | 1  |
| 6615 | 11204 | 1810023F06Rik | AI451617      | 1  |
| 6615 | 11265 | 1810023F06Rik | Irgm          | 1  |
| 6615 | 11701 | 1810023F06Rik | Oas1c         | 1  |
| 6615 | 12126 | 1810023F06Rik | Znfx1         | 1  |
| 6615 | 12398 | 1810023F06Rik | Ifi44         | 1  |
| 6615 | 12600 | 1810023F06Rik | Ifi204        | 1  |
| 6615 | 12969 | 1810023F06Rik | Xaf1          | 1  |
| 6615 | 13156 | 1810023F06Rik | Ifit3         | 1  |
| 6615 | 13309 | 1810023F06Rik | Tgtp          | 1  |
| 6615 | 13522 | 1810023F06Rik | Sfn5          | 1  |
| 6615 | 13654 | 1810023F06Rik | Stat1         | 1  |

|      |       |               |               |    |
|------|-------|---------------|---------------|----|
| 6615 | 14258 | 1810023F06Rik | Ifi47         | 1  |
| 6615 | 14506 | 1810023F06Rik | Slc15a3       | 1  |
| 6615 | 14880 | 1810023F06Rik | Ms4a4c        | 1  |
| 6615 | 15074 | 1810023F06Rik | Usp18         | 1  |
| 6615 | 15504 | 1810023F06Rik | Mx2           | 1  |
| 6615 | 15572 | 1810023F06Rik | Dtx3l         | 1  |
| 6615 | 16182 | 1810023F06Rik | Oasl1         | 1  |
| 6615 | 18174 | 1810023F06Rik | Stat2         | 1  |
| 6615 | 18186 | 1810023F06Rik | Parp14        | 1  |
| 6615 | 19262 | 1810023F06Rik | Cd274         | 1  |
| 6615 | 19738 | 1810023F06Rik | Lgals3bp      | 1  |
| 6615 | 20997 | 1810023F06Rik | MMT00028135   | 1  |
| 6615 | 21549 | 1810023F06Rik | Rtp4          | 1  |
| 6615 | 22037 | 1810023F06Rik | Oas1g         | 1  |
| 6616 | 269   | Prmt3         | Tuba1b        | 1  |
| 6621 | 269   | Zfp521        | Tuba1b        | 1  |
| 6621 | 274   | Zfp521        | Trit1         | -1 |
| 6621 | 1941  | Zfp521        | MMT00079618   | 1  |
| 6621 | 7151  | Zfp521        | MMT00007982   | 1  |
| 6621 | 9763  | Zfp521        | Tuba3b        | 1  |
| 6621 | 11724 | Zfp521        | Tuba3a        | 1  |
| 6621 | 12981 | Zfp521        | Nek6          | 1  |
| 6621 | 15862 | Zfp521        | Mrap          | 1  |
| 6621 | 17215 | Zfp521        | Mvd           | 1  |
| 6621 | 17444 | Zfp521        | Tuba1a        | 1  |
| 6621 | 17656 | Zfp521        | Hdhd3         | 1  |
| 6621 | 22443 | Zfp521        | Tuba1c        | 1  |
| 6639 | 20058 | Fads3         | Dnaic1        | -1 |
| 6639 | 20194 | Fads3         | Pnlcd1        | 1  |
| 6648 | 14740 | Cenpl         | Mfap1b        | 1  |
| 6651 | 5364  | Gpx7          | Kif22         | 1  |
| 6651 | 8773  | Gpx7          | MMT00027093   | 1  |
| 6651 | 13431 | Gpx7          | MMT00038058   | 1  |
| 6651 | 15205 | Gpx7          | MMT00030262   | 1  |
| 6675 | 12910 | Sfrs4         | 1110028A07Rik | -1 |
| 6683 | 8815  | Cd59a         | Mx1           | 1  |
| 6683 | 12910 | Cd59a         | 1110028A07Rik | 1  |
| 6683 | 18201 | Cd59a         | MMT00060232   | 1  |
| 6697 | 5938  | Serpini1      | Pfn2          | 1  |
| 6697 | 11611 | Serpini1      | S100a13       | -1 |
| 6697 | 12367 | Serpini1      | MMT00072365   | -1 |
| 6697 | 16416 | Serpini1      | Commd2        | 1  |
| 6697 | 18911 | Serpini1      | Selenbp2      | 1  |
| 6697 | 23457 | Serpini1      | Selenbp2      | 1  |
| 6716 | 15021 | Cd180         | Ppargc1a      | -1 |
| 6733 | 407   | Mfng          | Serpina6      | 1  |
| 6733 | 719   | Mfng          | Usp2          | 1  |
| 6733 | 2256  | Mfng          | Serpina9      | -1 |
| 6733 | 2636  | Mfng          | Tars          | -1 |
| 6733 | 2850  | Mfng          | Slc16a6       | -1 |
| 6733 | 3214  | Mfng          | Dnmt3b        | -1 |

|      |       |      |               |    |
|------|-------|------|---------------|----|
| 6733 | 3746  | Mfng | Osbpl5        | 1  |
| 6733 | 5374  | Mfng | Chka          | -1 |
| 6733 | 5734  | Mfng | EG619653      | 1  |
| 6733 | 5892  | Mfng | MMT00038457   | 1  |
| 6733 | 5974  | Mfng | Arntl         | -1 |
| 6733 | 8742  | Mfng | Tmem39a       | -1 |
| 6733 | 9481  | Mfng | Ppl           | 1  |
| 6733 | 9910  | Mfng | EG666644      | 1  |
| 6733 | 10642 | Mfng | Ngef          | 1  |
| 6733 | 11565 | Mfng | Serpina3c     | -1 |
| 6733 | 12204 | Mfng | Ankmy2        | 1  |
| 6733 | 13094 | Mfng | Cnn3          | 1  |
| 6733 | 13630 | Mfng | Cdkn1a        | -1 |
| 6733 | 14279 | Mfng | 3930402G23Rik | -1 |
| 6733 | 15481 | Mfng | 1110067D22Rik | -1 |
| 6733 | 16712 | Mfng | Pnrc1         | -1 |
| 6733 | 17884 | Mfng | Lnx2          | -1 |
| 6733 | 18179 | Mfng | Dbp           | 1  |
| 6733 | 18498 | Mfng | Slc5a6        | 1  |
| 6733 | 18846 | Mfng | Ikbkg         | -1 |
| 6733 | 19340 | Mfng | Serpina3k     | -1 |
| 6733 | 19671 | Mfng | Upp2          | 1  |
| 6733 | 19790 | Mfng | Polg2         | 1  |
| 6733 | 20058 | Mfng | Dnaic1        | -1 |
| 6733 | 20745 | Mfng | Sord          | 1  |
| 6733 | 21811 | Mfng | Ak3l1         | 1  |
| 6733 | 21969 | Mfng | Tk1           | 1  |
| 6734 | 5364  | Ehd4 | Kif22         | 1  |
| 6734 | 11393 | Ehd4 | A830007P12Rik | 1  |
| 6734 | 14472 | Ehd4 | Ahcy          | -1 |
| 6734 | 15320 | Ehd4 | MMT00017479   | -1 |
| 6746 | 1416  | E2f8 | 6720460F02Rik | 1  |
| 6746 | 1561  | E2f8 | Aurka         | 1  |
| 6746 | 5364  | E2f8 | Kif22         | 1  |
| 6746 | 8416  | E2f8 | Cdc20         | 1  |
| 6746 | 11870 | E2f8 | Apitd1        | 1  |
| 6746 | 13054 | E2f8 | Mcm4          | 1  |
| 6746 | 17823 | E2f8 | D2Ertd750e    | 1  |
| 6746 | 19318 | E2f8 | Plk1          | 1  |
| 6746 | 20433 | E2f8 | Cdca5         | 1  |
| 6746 | 21205 | E2f8 | Pkmyt1        | 1  |
| 6746 | 21947 | E2f8 | Cdca8         | 1  |
| 6746 | 22138 | E2f8 | Ang           | -1 |
| 6759 | 607   | Sqle | Me1           | 1  |
| 6759 | 3446  | Sqle | Eno1          | 1  |
| 6759 | 3620  | Sqle | Bet1          | 1  |
| 6759 | 6193  | Sqle | Lactb2        | 1  |
| 6759 | 6597  | Sqle | Slc9a5        | 1  |
| 6759 | 11375 | Sqle | Derl2         | 1  |
| 6759 | 12143 | Sqle | Thyn1         | 1  |
| 6759 | 13293 | Sqle | Gsta2         | 1  |

|      |       |              |               |    |
|------|-------|--------------|---------------|----|
| 6759 | 18113 | Sqle         | MMT00034400   | 1  |
| 6759 | 19066 | Sqle         | MMT00012632   | 1  |
| 6759 | 21251 | Sqle         | Cpt1a         | -1 |
| 6759 | 21727 | Sqle         | Khk           | 1  |
| 6759 | 21978 | Sqle         | Txn1          | 1  |
| 6759 | 22732 | Sqle         | Cyb5b         | 1  |
| 6760 | 1709  | 281042815Rik | Mt2           | -1 |
| 6760 | 2051  | 281042815Rik | Ddx27         | -1 |
| 6760 | 3504  | 281042815Rik | Anpep         | -1 |
| 6760 | 5922  | 281042815Rik | Hyal2         | -1 |
| 6760 | 7753  | 281042815Rik | Gfm1          | 1  |
| 6760 | 11807 | 281042815Rik | Fbxo31        | -1 |
| 6760 | 12219 | 281042815Rik | Cyb5b         | 1  |
| 6760 | 12276 | 281042815Rik | Hmga1         | -1 |
| 6760 | 14442 | 281042815Rik | Ethe1         | 1  |
| 6760 | 17001 | 281042815Rik | Hmga1         | -1 |
| 6760 | 17828 | 281042815Rik | Serpina3n     | -1 |
| 6760 | 18286 | 281042815Rik | Slc41a3       | -1 |
| 6760 | 20019 | 281042815Rik | Qdpr          | 1  |
| 6760 | 21251 | 281042815Rik | Cpt1a         | -1 |
| 6760 | 22732 | 281042815Rik | Cyb5b         | 1  |
| 6765 | 2021  | Ldhb         | Atf7ip        | -1 |
| 6765 | 2932  | Ldhb         | Slco1a1       | 1  |
| 6765 | 5902  | Ldhb         | 4930563P21Rik | -1 |
| 6765 | 6765  | Ldhb         | Ldhb          | 1  |
| 6765 | 7452  | Ldhb         | Abcc9         | 1  |
| 6765 | 7911  | Ldhb         | Pik3c2g       | -1 |
| 6765 | 9417  | Ldhb         | Cd163         | -1 |
| 6765 | 14557 | Ldhb         | Pyroxd1       | -1 |
| 6765 | 17391 | Ldhb         | C530028O21Rik | -1 |
| 6765 | 19964 | Ldhb         | Ndufa9        | -1 |
| 6765 | 20127 | Ldhb         | Ipo8          | 1  |
| 6765 | 21126 | Ldhb         | Dera          | -1 |
| 6766 | 8632  | Sspn         | Igfbp1        | -1 |
| 6768 | 1627  | Plekhf2      | 2310030N02Rik | 1  |
| 6768 | 6768  | Plekhf2      | Plekhf2       | 1  |
| 6768 | 13578 | Plekhf2      | Asph          | 1  |
| 6769 | 3587  | Banp         | MMT00041940   | 1  |
| 6769 | 6021  | Banp         | MMT00008784   | 1  |
| 6769 | 6769  | Banp         | Banp          | 1  |
| 6769 | 7619  | Banp         | Pik3ip1       | -1 |
| 6769 | 8499  | Banp         | C430048L16Rik | 1  |
| 6769 | 8662  | Banp         | Brca2         | -1 |
| 6769 | 8670  | Banp         | MMT00051613   | 1  |
| 6769 | 9258  | Banp         | P4ha1         | 1  |
| 6769 | 9899  | Banp         | D13Wsu177e    | 1  |
| 6769 | 10769 | Banp         | Hnrnpd        | -1 |
| 6769 | 11214 | Banp         | MMT00049207   | 1  |
| 6769 | 12513 | Banp         | Whsc2         | 1  |
| 6769 | 13094 | Banp         | Cnn3          | -1 |
| 6769 | 15675 | Banp         | MMT00077535   | 1  |

|      |       |         |                    |    |
|------|-------|---------|--------------------|----|
| 6769 | 17224 | Banp    | 5430407P10Rik      | 1  |
| 6769 | 18215 | Banp    | Gpr146             | -1 |
| 6769 | 18373 | Banp    | Dnajb1             | 1  |
| 6769 | 18418 | Banp    | Hspa1b             | 1  |
| 6769 | 18903 | Banp    | Crem               | 1  |
| 6769 | 20912 | Banp    | Chordc1            | 1  |
| 6769 | 22272 | Banp    | Vpreb1             | 1  |
| 6771 | 719   | Insc    | Usp2               | -1 |
| 6771 | 3410  | Insc    | Paqr9              | 1  |
| 6771 | 5849  | Insc    | 2310031A18Rik      | 1  |
| 6771 | 11741 | Insc    | Slc30a10           | 1  |
| 6771 | 16851 | Insc    | Slc34a2            | 1  |
| 6771 | 19671 | Insc    | Upp2               | -1 |
| 6771 | 21142 | Insc    | Gm129              | -1 |
| 6774 | 11741 | Cilp    | Slc30a10           | 1  |
| 6774 | 12941 | Cilp    | Elov5              | 1  |
| 6774 | 13431 | Cilp    | MMT00038058        | 1  |
| 6774 | 15205 | Cilp    | MMT00030262        | 1  |
| 6774 | 15709 | Cilp    | Tceal1             | -1 |
| 6774 | 17247 | Cilp    | A030007L17Rik      | 1  |
| 6777 | 607   | B3galtl | Me1                | 1  |
| 6777 | 760   | B3galtl | Akr1c19            | 1  |
| 6777 | 1129  | B3galtl | Gsta4              | 1  |
| 6777 | 10367 | B3galtl | Coq7               | 1  |
| 6777 | 10554 | B3galtl | ENSMUSG00000074179 | 1  |
| 6777 | 13293 | B3galtl | Gsta2              | 1  |
| 6777 | 18201 | B3galtl | MMT00060232        | 1  |
| 6777 | 20058 | B3galtl | Dnaic1             | -1 |
| 6779 | 1533  | Gbp6    | BC013712           | 1  |
| 6779 | 2224  | Gbp6    | Oasl2              | 1  |
| 6779 | 2550  | Gbp6    | MMT00036681        | 1  |
| 6779 | 2752  | Gbp6    | Fcgr1              | 1  |
| 6779 | 3659  | Gbp6    | EG236451           | 1  |
| 6779 | 4114  | Gbp6    | Parp12             | 1  |
| 6779 | 4426  | Gbp6    | Ilgp2              | 1  |
| 6779 | 4508  | Gbp6    | Ifit1              | 1  |
| 6779 | 5044  | Gbp6    | Ifi35              | 1  |
| 6779 | 5845  | Gbp6    | Ii18bp             | 1  |
| 6779 | 5853  | Gbp6    | Trim30             | 1  |
| 6779 | 6576  | Gbp6    | Sfn2               | 1  |
| 6779 | 6587  | Gbp6    | Irf9               | 1  |
| 6779 | 6824  | Gbp6    | Irf7               | 1  |
| 6779 | 6866  | Gbp6    | Gls                | -1 |
| 6779 | 7069  | Gbp6    | Ube1l              | 1  |
| 6779 | 7105  | Gbp6    | Plac8              | 1  |
| 6779 | 8800  | Gbp6    | Rnf213             | 1  |
| 6779 | 9401  | Gbp6    | Fcgr4              | 1  |
| 6779 | 9820  | Gbp6    | BC023105           | 1  |
| 6779 | 9847  | Gbp6    | Ifi27              | 1  |
| 6779 | 10109 | Gbp6    | Gbp3               | 1  |
| 6779 | 11204 | Gbp6    | AI451617           | 1  |

|      |       |         |               |    |
|------|-------|---------|---------------|----|
| 6779 | 12398 | Gbp6    | Ifi44         | 1  |
| 6779 | 12600 | Gbp6    | Ifi204        | 1  |
| 6779 | 12969 | Gbp6    | Xaf1          | 1  |
| 6779 | 13309 | Gbp6    | Tgtp          | 1  |
| 6779 | 13514 | Gbp6    | Apol9b        | 1  |
| 6779 | 13527 | Gbp6    | Ctss          | 1  |
| 6779 | 13656 | Gbp6    | Ly86          | 1  |
| 6779 | 14611 | Gbp6    | Ddx60         | 1  |
| 6779 | 15074 | Gbp6    | Usp18         | 1  |
| 6779 | 16102 | Gbp6    | Cd72          | 1  |
| 6779 | 16182 | Gbp6    | Oasl1         | 1  |
| 6779 | 17197 | Gbp6    | Igtp          | 1  |
| 6779 | 18686 | Gbp6    | Zfp143        | 1  |
| 6779 | 19189 | Gbp6    | Sp100         | 1  |
| 6779 | 19738 | Gbp6    | Lgals3bp      | 1  |
| 6779 | 20321 | Gbp6    | Ms4a6b        | 1  |
| 6779 | 20997 | Gbp6    | MMT00028135   | 1  |
| 6779 | 21351 | Gbp6    | Shisa5        | 1  |
| 6779 | 21549 | Gbp6    | Rtp4          | 1  |
| 6779 | 23208 | Gbp6    | Hck           | 1  |
| 6795 | 6599  | Cdyl2   | 1700020C11Rik | 1  |
| 6795 | 17660 | Cdyl2   | Nlrp12        | -1 |
| 6797 | 23026 | Blvra   | Apom          | -1 |
| 6804 | 2805  | Cyp2d22 | Rhog          | 1  |
| 6804 | 3654  | Cyp2d22 | St13          | -1 |
| 6804 | 6804  | Cyp2d22 | Cyp2d22       | 1  |
| 6804 | 10558 | Cyp2d22 | Cyp2d40       | -1 |
| 6804 | 12468 | Cyp2d22 | Cyp2d13       | 1  |
| 6804 | 19216 | Cyp2d22 | Bik           | 1  |
| 6805 | 5884  | Rrbp1   | Gstm2         | 1  |
| 6805 | 8815  | Rrbp1   | Mx1           | 1  |
| 6805 | 11946 | Rrbp1   | MMT00030953   | 1  |
| 6805 | 18201 | Rrbp1   | MMT00060232   | 1  |
| 6806 | 2224  | Agrn    | Oasl2         | 1  |
| 6806 | 3426  | Agrn    | Hap1          | 1  |
| 6806 | 3523  | Agrn    | Trim34        | 1  |
| 6806 | 3659  | Agrn    | EG236451      | 1  |
| 6806 | 3683  | Agrn    | Oas2          | 1  |
| 6806 | 4114  | Agrn    | Parp12        | 1  |
| 6806 | 4426  | Agrn    | Iigp2         | 1  |
| 6806 | 4508  | Agrn    | Ifit1         | 1  |
| 6806 | 5250  | Agrn    | Ifit2         | 1  |
| 6806 | 5766  | Agrn    | 5033414D02Rik | 1  |
| 6806 | 6806  | Agrn    | Agrn          | 1  |
| 6806 | 6824  | Agrn    | Irf7          | 1  |
| 6806 | 7069  | Agrn    | Ube1l         | 1  |
| 6806 | 7105  | Agrn    | Plac8         | 1  |
| 6806 | 8800  | Agrn    | Rnf213        | 1  |
| 6806 | 9616  | Agrn    | AI451557      | 1  |
| 6806 | 9847  | Agrn    | Ifi27         | 1  |
| 6806 | 10109 | Agrn    | Gbp3          | 1  |

|      |       |          |               |    |
|------|-------|----------|---------------|----|
| 6806 | 11204 | Agrn     | Al451617      | 1  |
| 6806 | 11701 | Agrn     | Oas1c         | 1  |
| 6806 | 12398 | Agrn     | Ifi44         | 1  |
| 6806 | 12600 | Agrn     | Ifi204        | 1  |
| 6806 | 12969 | Agrn     | Xaf1          | 1  |
| 6806 | 13156 | Agrn     | Ifit3         | 1  |
| 6806 | 13522 | Agrn     | Sfn5          | 1  |
| 6806 | 14611 | Agrn     | Ddx60         | 1  |
| 6806 | 14880 | Agrn     | Ms4a4c        | 1  |
| 6806 | 15074 | Agrn     | Usp18         | 1  |
| 6806 | 15504 | Agrn     | Mx2           | 1  |
| 6806 | 16521 | Agrn     | Adar          | 1  |
| 6806 | 17071 | Agrn     | Samd9l        | 1  |
| 6806 | 17197 | Agrn     | Igtp          | 1  |
| 6806 | 18186 | Agrn     | Parp14        | 1  |
| 6806 | 19189 | Agrn     | Sp100         | 1  |
| 6806 | 19738 | Agrn     | Lgals3bp      | 1  |
| 6806 | 20791 | Agrn     | MMT00014813   | 1  |
| 6806 | 20997 | Agrn     | MMT00028135   | 1  |
| 6806 | 21351 | Agrn     | Shisa5        | 1  |
| 6806 | 21549 | Agrn     | Rtp4          | 1  |
| 6806 | 21824 | Agrn     | 5830443L24Rik | 1  |
| 6806 | 22037 | Agrn     | Oas1g         | 1  |
| 6806 | 23208 | Agrn     | Hck           | 1  |
| 6806 | 23450 | Agrn     | D12Ert647e    | 1  |
| 6818 | 5364  | BC030183 | Kif22         | 1  |
| 6818 | 14472 | BC030183 | Ahcy          | -1 |
| 6818 | 15320 | BC030183 | MMT00017479   | -1 |
| 6824 | 143   | Irf7     | Gvin1         | 1  |
| 6824 | 405   | Irf7     | Emr4          | 1  |
| 6824 | 701   | Irf7     | Polr3g        | -1 |
| 6824 | 860   | Irf7     | Psmb10        | 1  |
| 6824 | 1180  | Irf7     | Clec4a3       | 1  |
| 6824 | 1513  | Irf7     | Gzmb          | 1  |
| 6824 | 1533  | Irf7     | BC013712      | 1  |
| 6824 | 1612  | Irf7     | Clec1b        | 1  |
| 6824 | 1840  | Irf7     | Fpr1          | 1  |
| 6824 | 2058  | Irf7     | Hk3           | 1  |
| 6824 | 2224  | Irf7     | Oasl2         | 1  |
| 6824 | 2550  | Irf7     | MMT00036681   | 1  |
| 6824 | 2752  | Irf7     | Fcgr1         | 1  |
| 6824 | 3103  | Irf7     | MMT00062748   | 1  |
| 6824 | 3426  | Irf7     | Hap1          | 1  |
| 6824 | 3523  | Irf7     | Trim34        | 1  |
| 6824 | 3572  | Irf7     | Ebi3          | 1  |
| 6824 | 3594  | Irf7     | Rasa4         | 1  |
| 6824 | 3659  | Irf7     | EG236451      | 1  |
| 6824 | 3683  | Irf7     | Oas2          | 1  |
| 6824 | 4114  | Irf7     | Parp12        | 1  |
| 6824 | 4310  | Irf7     | B3gnt8        | 1  |
| 6824 | 4409  | Irf7     | 5430435G22Rik | 1  |



|      |       |      |               |   |
|------|-------|------|---------------|---|
| 6824 | 4426  | lrf7 | ligp2         | 1 |
| 6824 | 4508  | lrf7 | lfit1         | 1 |
| 6824 | 4516  | lrf7 | Rsad2         | 1 |
| 6824 | 5002  | lrf7 | lfi202b       | 1 |
| 6824 | 5044  | lrf7 | lfi35         | 1 |
| 6824 | 5216  | lrf7 | Spnb5         | 1 |
| 6824 | 5250  | lrf7 | lfit2         | 1 |
| 6824 | 5554  | lrf7 | Emr1          | 1 |
| 6824 | 5766  | lrf7 | 5033414D02Rik | 1 |
| 6824 | 5845  | lrf7 | l118bp        | 1 |
| 6824 | 5853  | lrf7 | Trim30        | 1 |
| 6824 | 5875  | lrf7 | Cd86          | 1 |
| 6824 | 5949  | lrf7 | Zbp1          | 1 |
| 6824 | 6072  | lrf7 | C1qc          | 1 |
| 6824 | 6098  | lrf7 | Ncf4          | 1 |
| 6824 | 6587  | lrf7 | lrf9          | 1 |
| 6824 | 6595  | lrf7 | Oas1a         | 1 |
| 6824 | 6734  | lrf7 | Ehd4          | 1 |
| 6824 | 6779  | lrf7 | Gbp6          | 1 |
| 6824 | 6824  | lrf7 | lrf7          | 1 |
| 6824 | 6910  | lrf7 | Ly6c2         | 1 |
| 6824 | 7069  | lrf7 | Ube1l         | 1 |
| 6824 | 7105  | lrf7 | Plac8         | 1 |
| 6824 | 7238  | lrf7 | Pycard        | 1 |
| 6824 | 7284  | lrf7 | MMT00008674   | 1 |
| 6824 | 7316  | lrf7 | lfi204        | 1 |
| 6824 | 7336  | lrf7 | Cd5l          | 1 |
| 6824 | 8325  | lrf7 | Psme2         | 1 |
| 6824 | 8555  | lrf7 | H2-M3         | 1 |
| 6824 | 8659  | lrf7 | Psmb8         | 1 |
| 6824 | 8800  | lrf7 | Rnf213        | 1 |
| 6824 | 8951  | lrf7 | Cd97          | 1 |
| 6824 | 8952  | lrf7 | Marco         | 1 |
| 6824 | 9100  | lrf7 | Ms4a6c        | 1 |
| 6824 | 9320  | lrf7 | Rnf31         | 1 |
| 6824 | 9401  | lrf7 | Fcgr4         | 1 |
| 6824 | 9616  | lrf7 | AI451557      | 1 |
| 6824 | 9717  | lrf7 | Psmb9         | 1 |
| 6824 | 9820  | lrf7 | BC023105      | 1 |
| 6824 | 9821  | lrf7 | Pmaip1        | 1 |
| 6824 | 9847  | lrf7 | lfi27         | 1 |
| 6824 | 9928  | lrf7 | Lgmn          | 1 |
| 6824 | 10109 | lrf7 | Gbp3          | 1 |
| 6824 | 10426 | lrf7 | Ly6f          | 1 |
| 6824 | 10504 | lrf7 | Ripk3         | 1 |
| 6824 | 10606 | lrf7 | Apbb1ip       | 1 |
| 6824 | 10796 | lrf7 | Spic          | 1 |
| 6824 | 10926 | lrf7 | P2ry13        | 1 |
| 6824 | 11009 | lrf7 | MMT00008885   | 1 |
| 6824 | 11204 | lrf7 | AI451617      | 1 |
| 6824 | 11265 | lrf7 | lrgm          | 1 |

|      |       |      |               |   |
|------|-------|------|---------------|---|
| 6824 | 11701 | Irf7 | Oas1c         | 1 |
| 6824 | 11845 | Irf7 | Psme1         | 1 |
| 6824 | 12126 | Irf7 | Znfx1         | 1 |
| 6824 | 12312 | Irf7 | Ms4a6d        | 1 |
| 6824 | 12398 | Irf7 | Ifi44         | 1 |
| 6824 | 12493 | Irf7 | Ankfy1        | 1 |
| 6824 | 12495 | Irf7 | Casp1         | 1 |
| 6824 | 12600 | Irf7 | Ifi204        | 1 |
| 6824 | 12969 | Irf7 | Xaf1          | 1 |
| 6824 | 13156 | Irf7 | Ifit3         | 1 |
| 6824 | 13181 | Irf7 | Lcp2          | 1 |
| 6824 | 13309 | Irf7 | Tgtp          | 1 |
| 6824 | 13514 | Irf7 | Apol9b        | 1 |
| 6824 | 13522 | Irf7 | Sfn5          | 1 |
| 6824 | 13527 | Irf7 | Ctss          | 1 |
| 6824 | 13528 | Irf7 | Capn12        | 1 |
| 6824 | 13585 | Irf7 | Nckap1l       | 1 |
| 6824 | 13654 | Irf7 | Stat1         | 1 |
| 6824 | 13656 | Irf7 | Ly86          | 1 |
| 6824 | 13749 | Irf7 | Parp9         | 1 |
| 6824 | 13780 | Irf7 | Pilra         | 1 |
| 6824 | 13826 | Irf7 | Melk          | 1 |
| 6824 | 14029 | Irf7 | 2810022L02Rik | 1 |
| 6824 | 14258 | Irf7 | Ifi47         | 1 |
| 6824 | 14506 | Irf7 | Slc15a3       | 1 |
| 6824 | 14603 | Irf7 | Ly6e          | 1 |
| 6824 | 14611 | Irf7 | Ddx60         | 1 |
| 6824 | 14880 | Irf7 | Ms4a4c        | 1 |
| 6824 | 14883 | Irf7 | Itgal         | 1 |
| 6824 | 15074 | Irf7 | Usp18         | 1 |
| 6824 | 15280 | Irf7 | Cxcl10        | 1 |
| 6824 | 15449 | Irf7 | Mitd1         | 1 |
| 6824 | 15504 | Irf7 | Mx2           | 1 |
| 6824 | 15572 | Irf7 | Dtx3l         | 1 |
| 6824 | 16102 | Irf7 | Cd72          | 1 |
| 6824 | 16129 | Irf7 | Trafd1        | 1 |
| 6824 | 16147 | Irf7 | Tlr2          | 1 |
| 6824 | 16182 | Irf7 | Oasl1         | 1 |
| 6824 | 16186 | Irf7 | Cfp           | 1 |
| 6824 | 16199 | Irf7 | Samhd1        | 1 |
| 6824 | 16521 | Irf7 | Adar          | 1 |
| 6824 | 16572 | Irf7 | D14Ert668e    | 1 |
| 6824 | 16650 | Irf7 | Cd300a        | 1 |
| 6824 | 16874 | Irf7 | Fcer1g        | 1 |
| 6824 | 16913 | Irf7 | Pira3         | 1 |
| 6824 | 16988 | Irf7 | Clec4f        | 1 |
| 6824 | 17071 | Irf7 | Samd9l        | 1 |
| 6824 | 17197 | Irf7 | Igtp          | 1 |
| 6824 | 17412 | Irf7 | Aif1          | 1 |
| 6824 | 17904 | Irf7 | Cds1          | 1 |
| 6824 | 18064 | Irf7 | MMT00035925   | 1 |

|      |       |          |               |    |
|------|-------|----------|---------------|----|
| 6824 | 18174 | Irf7     | Stat2         | 1  |
| 6824 | 18186 | Irf7     | Parp14        | 1  |
| 6824 | 18211 | Irf7     | Folr2         | 1  |
| 6824 | 18235 | Irf7     | Epsti1        | 1  |
| 6824 | 18289 | Irf7     | Tap1          | 1  |
| 6824 | 18686 | Irf7     | Zfp143        | 1  |
| 6824 | 18762 | Irf7     | Herc5         | 1  |
| 6824 | 18868 | Irf7     | Mpeg1         | 1  |
| 6824 | 19026 | Irf7     | Isg15         | 1  |
| 6824 | 19063 | Irf7     | Evl           | 1  |
| 6824 | 19189 | Irf7     | Sp100         | 1  |
| 6824 | 19262 | Irf7     | Cd274         | 1  |
| 6824 | 19298 | Irf7     | Unc93b1       | 1  |
| 6824 | 19589 | Irf7     | Slc16a9       | 1  |
| 6824 | 19708 | Irf7     | Ly6a          | 1  |
| 6824 | 19738 | Irf7     | Lgals3bp      | 1  |
| 6824 | 19794 | Irf7     | Rgs2          | 1  |
| 6824 | 20150 | Irf7     | Ptprc         | 1  |
| 6824 | 20321 | Irf7     | Ms4a6b        | 1  |
| 6824 | 20431 | Irf7     | Slc7a7        | 1  |
| 6824 | 20474 | Irf7     | Gnb3          | 1  |
| 6824 | 20791 | Irf7     | MMT00014813   | 1  |
| 6824 | 20997 | Irf7     | MMT00028135   | 1  |
| 6824 | 21351 | Irf7     | Shisa5        | 1  |
| 6824 | 21549 | Irf7     | Rtp4          | 1  |
| 6824 | 21685 | Irf7     | Gzma          | 1  |
| 6824 | 21824 | Irf7     | 5830443L24Rik | 1  |
| 6824 | 22037 | Irf7     | Oas1g         | 1  |
| 6824 | 22077 | Irf7     | MMT00057550   | 1  |
| 6824 | 22496 | Irf7     | Sfn1          | 1  |
| 6824 | 22670 | Irf7     | Clec4a1       | 1  |
| 6824 | 22712 | Irf7     | Phf11         | 1  |
| 6824 | 23092 | Irf7     | Ifih1         | 1  |
| 6824 | 23174 | Irf7     | Psme2         | 1  |
| 6824 | 23208 | Irf7     | Hck           | 1  |
| 6824 | 23242 | Irf7     | Gngt2         | 1  |
| 6824 | 23410 | Irf7     | C1qa          | 1  |
| 6824 | 23450 | Irf7     | D12Ertd647e   | 1  |
| 6837 | 5934  | Arhgap25 | S100a10       | 1  |
| 6837 | 12910 | Arhgap25 | 1110028A07Rik | 1  |
| 6837 | 20678 | Arhgap25 | Cyp39a1       | -1 |
| 6838 | 11129 | Nod2     | Ankhd1        | -1 |
| 6838 | 17083 | Nod2     | Atp1b1        | -1 |
| 6838 | 20678 | Nod2     | Cyp39a1       | -1 |
| 6846 | 3061  | Olfr1402 | Scarf2        | 1  |
| 6846 | 3119  | Olfr1402 | Mapk10        | 1  |
| 6846 | 6017  | Olfr1402 | MMT00018015   | -1 |
| 6846 | 6846  | Olfr1402 | Olfr1402      | 1  |
| 6846 | 10214 | Olfr1402 | Sectm1b       | 1  |
| 6846 | 13615 | Olfr1402 | Arl16         | -1 |
| 6846 | 15016 | Olfr1402 | MMT00074608   | 1  |

|      |       |         |               |    |
|------|-------|---------|---------------|----|
| 6846 | 17680 | Olf1402 | 1700069L16Rik | 1  |
| 6846 | 17792 | Olf1402 | Vmn2r79       | 1  |
| 6846 | 17897 | Olf1402 | Gm1019        | 1  |
| 6866 | 13309 | Gls     | Tgtp          | -1 |
| 6888 | 1447  | Cxcl9   | Naaa          | 1  |
| 6888 | 1660  | Cxcl9   | Zfp33b        | 1  |
| 6888 | 5100  | Cxcl9   | Pebp1         | 1  |
| 6888 | 6330  | Cxcl9   | Dgkq          | -1 |
| 6888 | 8807  | Cxcl9   | Ankrd56       | 1  |
| 6888 | 10550 | Cxcl9   | Rchy1         | 1  |
| 6888 | 10978 | Cxcl9   | MMT00078322   | -1 |
| 6888 | 12656 | Cxcl9   | Coq5          | -1 |
| 6888 | 14085 | Cxcl9   | Cdkl2         | -1 |
| 6888 | 15908 | Cxcl9   | Pebp1         | 1  |
| 6888 | 17807 | Cxcl9   | Pebp1         | 1  |
| 6908 | 12910 | Mmp12   | 1110028A07Rik | 1  |
| 6908 | 18042 | Mmp12   | Aph1c         | -1 |
| 6908 | 20194 | Mmp12   | Pnlcd1        | 1  |
| 6908 | 23026 | Mmp12   | Apom          | -1 |
| 6910 | 143   | Ly6c2   | Gvin1         | 1  |
| 6910 | 1533  | Ly6c2   | BC013712      | 1  |
| 6910 | 2200  | Ly6c2   | BC006779      | 1  |
| 6910 | 2224  | Ly6c2   | Oasl2         | 1  |
| 6910 | 2830  | Ly6c2   | 4632417K18Rik | 1  |
| 6910 | 3426  | Ly6c2   | Hap1          | 1  |
| 6910 | 3683  | Ly6c2   | Oas2          | 1  |
| 6910 | 4409  | Ly6c2   | 5430435G22Rik | 1  |
| 6910 | 4426  | Ly6c2   | Iigp2         | 1  |
| 6910 | 4508  | Ly6c2   | Ifit1         | 1  |
| 6910 | 5250  | Ly6c2   | Ifit2         | 1  |
| 6910 | 5554  | Ly6c2   | Emr1          | 1  |
| 6910 | 6098  | Ly6c2   | Ncf4          | 1  |
| 6910 | 7105  | Ly6c2   | Plac8         | 1  |
| 6910 | 7316  | Ly6c2   | Ifi204        | 1  |
| 6910 | 7336  | Ly6c2   | Cd5l          | 1  |
| 6910 | 8800  | Ly6c2   | Rnf213        | 1  |
| 6910 | 9100  | Ly6c2   | Ms4a6c        | 1  |
| 6910 | 9427  | Ly6c2   | Nqo2          | -1 |
| 6910 | 9847  | Ly6c2   | Ifi27         | 1  |
| 6910 | 10109 | Ly6c2   | Gbp3          | 1  |
| 6910 | 10356 | Ly6c2   | 2810417H13Rik | 1  |
| 6910 | 10606 | Ly6c2   | Apbb1ip       | 1  |
| 6910 | 11265 | Ly6c2   | Irgm          | 1  |
| 6910 | 12312 | Ly6c2   | Ms4a6d        | 1  |
| 6910 | 12398 | Ly6c2   | Ifi44         | 1  |
| 6910 | 12600 | Ly6c2   | Ifi204        | 1  |
| 6910 | 12969 | Ly6c2   | Xaf1          | 1  |
| 6910 | 13156 | Ly6c2   | Ifit3         | 1  |
| 6910 | 13181 | Ly6c2   | Lcp2          | 1  |
| 6910 | 13309 | Ly6c2   | Tgtp          | 1  |
| 6910 | 13522 | Ly6c2   | Sln5          | 1  |

|      |       |        |               |    |
|------|-------|--------|---------------|----|
| 6910 | 13527 | Ly6c2  | Ctss          | 1  |
| 6910 | 13654 | Ly6c2  | Stat1         | 1  |
| 6910 | 14258 | Ly6c2  | Ifi47         | 1  |
| 6910 | 14506 | Ly6c2  | Slc15a3       | 1  |
| 6910 | 14880 | Ly6c2  | Ms4a4c        | 1  |
| 6910 | 14883 | Ly6c2  | Ilgal         | 1  |
| 6910 | 15572 | Ly6c2  | Dtx3l         | 1  |
| 6910 | 16102 | Ly6c2  | Cd72          | 1  |
| 6910 | 16199 | Ly6c2  | Samhd1        | 1  |
| 6910 | 16521 | Ly6c2  | Adar          | 1  |
| 6910 | 16874 | Ly6c2  | Fcer1g        | 1  |
| 6910 | 17197 | Ly6c2  | Igtp          | 1  |
| 6910 | 17412 | Ly6c2  | Aif1          | 1  |
| 6910 | 17904 | Ly6c2  | Cds1          | 1  |
| 6910 | 18174 | Ly6c2  | Stat2         | 1  |
| 6910 | 18186 | Ly6c2  | Parp14        | 1  |
| 6910 | 18594 | Ly6c2  | 1200002N14Rik | 1  |
| 6910 | 19189 | Ly6c2  | Sp100         | 1  |
| 6910 | 19794 | Ly6c2  | Rgs2          | 1  |
| 6910 | 20431 | Ly6c2  | Slc7a7        | 1  |
| 6910 | 20791 | Ly6c2  | MMT00014813   | 1  |
| 6910 | 20997 | Ly6c2  | MMT00028135   | 1  |
| 6910 | 21549 | Ly6c2  | Rtp4          | 1  |
| 6910 | 21824 | Ly6c2  | 5830443L24Rik | 1  |
| 6910 | 22037 | Ly6c2  | Oas1g         | 1  |
| 6910 | 22077 | Ly6c2  | MMT00057550   | 1  |
| 6910 | 23038 | Ly6c2  | Casp4         | 1  |
| 6910 | 23208 | Ly6c2  | Hck           | 1  |
| 6918 | 366   | Cog8   | Adcy6         | -1 |
| 6918 | 1167  | Cog8   | Atg2a         | -1 |
| 6918 | 1305  | Cog8   | 4930485B16Rik | -1 |
| 6918 | 1760  | Cog8   | Nek8          | -1 |
| 6918 | 2013  | Cog8   | Ii15ra        | -1 |
| 6918 | 5615  | Cog8   | Sertad2       | -1 |
| 6918 | 5684  | Cog8   | Ranbp10       | -1 |
| 6918 | 6193  | Cog8   | Lactb2        | 1  |
| 6918 | 6675  | Cog8   | Sfrs4         | -1 |
| 6918 | 7133  | Cog8   | Hook2         | -1 |
| 6918 | 7900  | Cog8   | Myo18a        | -1 |
| 6918 | 8662  | Cog8   | Brca2         | -1 |
| 6918 | 9135  | Cog8   | Mbd6          | -1 |
| 6918 | 9696  | Cog8   | Setd1b        | -1 |
| 6918 | 10450 | Cog8   | C330006K01Rik | -1 |
| 6918 | 10612 | Cog8   | Slc24a6       | -1 |
| 6918 | 10862 | Cog8   | Zfp703        | -1 |
| 6918 | 12460 | Cog8   | Pnpla2        | -1 |
| 6918 | 16811 | Cog8   | Rere          | -1 |
| 6918 | 18099 | Cog8   | Nfx1          | -1 |
| 6918 | 19031 | Cog8   | Mms19         | -1 |
| 6918 | 22303 | Cog8   | Cdt1          | -1 |
| 6921 | 354   | Olfml1 | MMT00007996   | 1  |

|      |       |         |               |    |
|------|-------|---------|---------------|----|
| 6921 | 7151  | Olfml1  | MMT00007982   | 1  |
| 6921 | 9763  | Olfml1  | Tuba3b        | 1  |
| 6921 | 11724 | Olfml1  | Tuba3a        | 1  |
| 6921 | 17444 | Olfml1  | Tuba1a        | 1  |
| 6922 | 17314 | Tmem86b | Napa          | 1  |
| 6922 | 19462 | Tmem86b | 4933439C20Rik | 1  |
| 6931 | 6931  | Hrsp12  | Hrsp12        | 1  |
| 6931 | 11992 | Hrsp12  | Mrpl19        | 1  |
| 6931 | 13648 | Hrsp12  | Dap           | 1  |
| 6931 | 20209 | Hrsp12  | 5730557B15Rik | 1  |
| 6931 | 20871 | Hrsp12  | Pop1          | -1 |
| 6931 | 22362 | Hrsp12  | Laptm4b       | 1  |
| 6934 | 5822  | Panx3   | Car2          | -1 |
| 6935 | 17323 | Arsj    | Tubb6         | 1  |
| 6950 | 17838 | Zfp710  | Apoc3         | -1 |
| 6959 | 250   | Slc1a5  | Tubb2a-ps2    | -1 |
| 6959 | 433   | Slc1a5  | Pla2g12b      | -1 |
| 6959 | 437   | Slc1a5  | Ndrp1         | -1 |
| 6959 | 609   | Slc1a5  | MMT00060868   | -1 |
| 6959 | 719   | Slc1a5  | Usp2          | 1  |
| 6959 | 1767  | Slc1a5  | BC016495      | 1  |
| 6959 | 1853  | Slc1a5  | Stat5a        | -1 |
| 6959 | 2110  | Slc1a5  | Gtf2ird1      | -1 |
| 6959 | 2384  | Slc1a5  | Micalcl       | -1 |
| 6959 | 2399  | Slc1a5  | MMT00060167   | -1 |
| 6959 | 2829  | Slc1a5  | Lrfr3         | -1 |
| 6959 | 2850  | Slc1a5  | Slc16a6       | -1 |
| 6959 | 3214  | Slc1a5  | Dnmt3b        | -1 |
| 6959 | 3804  | Slc1a5  | MMT00015534   | -1 |
| 6959 | 5183  | Slc1a5  | St5           | -1 |
| 6959 | 5374  | Slc1a5  | Chka          | -1 |
| 6959 | 5804  | Slc1a5  | Thrsp         | 1  |
| 6959 | 5849  | Slc1a5  | 2310031A18Rik | -1 |
| 6959 | 5974  | Slc1a5  | Arntl         | -1 |
| 6959 | 6816  | Slc1a5  | Slc46a3       | 1  |
| 6959 | 8328  | Slc1a5  | Klhdc8a       | -1 |
| 6959 | 9495  | Slc1a5  | Srms          | -1 |
| 6959 | 9831  | Slc1a5  | Nedd4l        | -1 |
| 6959 | 10215 | Slc1a5  | Nampt         | 1  |
| 6959 | 10775 | Slc1a5  | Slc16a1       | -1 |
| 6959 | 11599 | Slc1a5  | Coq10b        | 1  |
| 6959 | 11741 | Slc1a5  | Slc30a10      | -1 |
| 6959 | 11926 | Slc1a5  | Ampd2         | -1 |
| 6959 | 12904 | Slc1a5  | MMT00040704   | 1  |
| 6959 | 13078 | Slc1a5  | Eps8l2        | -1 |
| 6959 | 14041 | Slc1a5  | Cldn1         | -1 |
| 6959 | 14279 | Slc1a5  | 3930402G23Rik | -1 |
| 6959 | 15481 | Slc1a5  | 1110067D22Rik | -1 |
| 6959 | 15824 | Slc1a5  | D19Ertd721e   | -1 |
| 6959 | 16515 | Slc1a5  | Gramd4        | -1 |
| 6959 | 16690 | Slc1a5  | Tjp3          | -1 |

|      |       |        |               |    |
|------|-------|--------|---------------|----|
| 6959 | 17583 | Slc1a5 | Per2          | 1  |
| 6959 | 17876 | Slc1a5 | Tubb4         | -1 |
| 6959 | 17884 | Slc1a5 | Lnx2          | -1 |
| 6959 | 18250 | Slc1a5 | Mmp14         | -1 |
| 6959 | 18438 | Slc1a5 | Map3k7ip2     | -1 |
| 6959 | 19234 | Slc1a5 | Nrg4          | 1  |
| 6959 | 19671 | Slc1a5 | Upp2          | 1  |
| 6959 | 19701 | Slc1a5 | 9930021J17Rik | -1 |
| 6959 | 19790 | Slc1a5 | Polg2         | 1  |
| 6959 | 20830 | Slc1a5 | MMT00057509   | -1 |
| 6959 | 21142 | Slc1a5 | Gm129         | 1  |
| 6959 | 22290 | Slc1a5 | Tubb2a        | -1 |
| 6959 | 22630 | Slc1a5 | MMT00034355   | -1 |
| 6962 | 21214 | Cyp1b1 | Scd1          | -1 |
| 6974 | 6974  | Tmem65 | Tmem65        | 1  |
| 6994 | 153   | Glul   | 2010011I20Rik | -1 |
| 6994 | 250   | Glul   | Tubb2a-ps2    | -1 |
| 6994 | 269   | Glul   | Tuba1b        | -1 |
| 6994 | 339   | Glul   | Hmgcs1        | -1 |
| 6994 | 402   | Glul   | Timp3         | 1  |
| 6994 | 563   | Glul   | D4Bwg0951e    | 1  |
| 6994 | 609   | Glul   | MMT00060868   | -1 |
| 6994 | 719   | Glul   | Usp2          | 1  |
| 6994 | 771   | Glul   | Zbtb45        | -1 |
| 6994 | 1310  | Glul   | Cabc1         | -1 |
| 6994 | 1646  | Glul   | Slc15a4       | 1  |
| 6994 | 1709  | Glul   | Mt2           | 1  |
| 6994 | 1767  | Glul   | BC016495      | 1  |
| 6994 | 1805  | Glul   | Tmem204       | 1  |
| 6994 | 1941  | Glul   | MMT00079618   | -1 |
| 6994 | 2003  | Glul   | Ppapdc1       | -1 |
| 6994 | 2110  | Glul   | Gtf2ird1      | -1 |
| 6994 | 2126  | Glul   | Dgat2         | 1  |
| 6994 | 2200  | Glul   | BC006779      | -1 |
| 6994 | 2256  | Glul   | Serpina9      | -1 |
| 6994 | 2322  | Glul   | Tuba4a        | -1 |
| 6994 | 2329  | Glul   | Wdr6          | -1 |
| 6994 | 2399  | Glul   | MMT00060167   | -1 |
| 6994 | 2636  | Glul   | Tars          | -1 |
| 6994 | 2766  | Glul   | Elp4          | -1 |
| 6994 | 2794  | Glul   | Map3k6        | 1  |
| 6994 | 2829  | Glul   | Lrfr3         | -1 |
| 6994 | 2850  | Glul   | Slc16a6       | -1 |
| 6994 | 3038  | Glul   | Serpina12     | -1 |
| 6994 | 3170  | Glul   | Mcart1        | 1  |
| 6994 | 3214  | Glul   | Dnmt3b        | -1 |
| 6994 | 3410  | Glul   | Paqr9         | -1 |
| 6994 | 3502  | Glul   | Gde1          | 1  |
| 6994 | 3804  | Glul   | MMT00015534   | -1 |
| 6994 | 3868  | Glul   | Ebpl          | -1 |
| 6994 | 4201  | Glul   | Tubb2c        | -1 |

|      |       |      |               |    |
|------|-------|------|---------------|----|
| 6994 | 4286  | Glul | Ptp4a1        | 1  |
| 6994 | 4333  | Glul | Sumo3         | -1 |
| 6994 | 4534  | Glul | Ndel1         | 1  |
| 6994 | 4708  | Glul | Traf3ip2      | -1 |
| 6994 | 5183  | Glul | St5           | -1 |
| 6994 | 5187  | Glul | Speer4f       | 1  |
| 6994 | 5259  | Glul | Mat1a         | 1  |
| 6994 | 5364  | Glul | Kif22         | -1 |
| 6994 | 5574  | Glul | Hsd3b7        | -1 |
| 6994 | 5791  | Glul | Baiap211      | 1  |
| 6994 | 5802  | Glul | Mad2l2        | -1 |
| 6994 | 5934  | Glul | S100a10       | -1 |
| 6994 | 5974  | Glul | Arntl         | -1 |
| 6994 | 6118  | Glul | Slc1a4        | -1 |
| 6994 | 6338  | Glul | Setd3         | 1  |
| 6994 | 6370  | Glul | Aqp8          | -1 |
| 6994 | 6386  | Glul | Por           | 1  |
| 6994 | 6394  | Glul | Fbxo6         | -1 |
| 6994 | 6675  | Glul | Sfrs4         | 1  |
| 6994 | 6756  | Glul | Sds           | 1  |
| 6994 | 6771  | Glul | Insc          | -1 |
| 6994 | 6990  | Glul | Nr1i2         | 1  |
| 6994 | 7066  | Glul | Agtr1b        | 1  |
| 6994 | 7151  | Glul | MMT00007982   | -1 |
| 6994 | 7751  | Glul | Sgk2          | -1 |
| 6994 | 7839  | Glul | Asl           | 1  |
| 6994 | 7954  | Glul | Ccdc12        | -1 |
| 6994 | 8328  | Glul | Klhdc8a       | -1 |
| 6994 | 8399  | Glul | Herpud1       | 1  |
| 6994 | 8428  | Glul | Sorbs3        | 1  |
| 6994 | 8641  | Glul | Slc7a2        | 1  |
| 6994 | 8658  | Glul | Fmo2          | 1  |
| 6994 | 8965  | Glul | Ahcy          | 1  |
| 6994 | 9275  | Glul | Aass          | 1  |
| 6994 | 9309  | Glul | MMT00035904   | 1  |
| 6994 | 9763  | Glul | Tuba3b        | -1 |
| 6994 | 10207 | Glul | MMT00012324   | -1 |
| 6994 | 10486 | Glul | 1300002K09Rik | -1 |
| 6994 | 10642 | Glul | Ngef          | 1  |
| 6994 | 10673 | Glul | MMT00071544   | 1  |
| 6994 | 10712 | Glul | Fchsd2        | 1  |
| 6994 | 10775 | Glul | Slc16a1       | -1 |
| 6994 | 11075 | Glul | Xrcc6bp1      | 1  |
| 6994 | 11093 | Glul | Zdhhc1        | 1  |
| 6994 | 11129 | Glul | Ankhd1        | 1  |
| 6994 | 11574 | Glul | Gne           | 1  |
| 6994 | 11599 | Glul | Coq10b        | 1  |
| 6994 | 11662 | Glul | Mre11a        | -1 |
| 6994 | 11724 | Glul | Tuba3a        | -1 |
| 6994 | 11741 | Glul | Slc30a10      | -1 |
| 6994 | 11807 | Glul | Fbxo31        | 1  |



|      |       |      |               |    |
|------|-------|------|---------------|----|
| 6994 | 11808 | Glul | Pck1          | 1  |
| 6994 | 12040 | Glul | Commd10       | -1 |
| 6994 | 12204 | Glul | Ankmy2        | 1  |
| 6994 | 12208 | Glul | Pnpla7        | -1 |
| 6994 | 12420 | Glul | Klhl21        | 1  |
| 6994 | 12433 | Glul | 5033413D22Rik | -1 |
| 6994 | 12460 | Glul | Pnpla2        | 1  |
| 6994 | 12489 | Glul | Wdr8          | -1 |
| 6994 | 12799 | Glul | Spon2         | -1 |
| 6994 | 12807 | Glul | Faim          | -1 |
| 6994 | 12839 | Glul | Fh1           | 1  |
| 6994 | 12925 | Glul | Farp1         | -1 |
| 6994 | 12941 | Glul | Elov5         | -1 |
| 6994 | 12981 | Glul | Nek6          | -1 |
| 6994 | 12982 | Glul | Cars          | -1 |
| 6994 | 13471 | Glul | Cln8          | 1  |
| 6994 | 13889 | Glul | Agpat2        | -1 |
| 6994 | 14462 | Glul | Zfp385b       | 1  |
| 6994 | 14472 | Glul | Ahcy          | 1  |
| 6994 | 14928 | Glul | Eme2          | -1 |
| 6994 | 14989 | Glul | Map3k5        | 1  |
| 6994 | 15021 | Glul | Ppargc1a      | 1  |
| 6994 | 15284 | Glul | EG632778      | 1  |
| 6994 | 15320 | Glul | MMT00017479   | 1  |
| 6994 | 15631 | Glul | Lpin1         | 1  |
| 6994 | 15709 | Glul | Tceal1        | 1  |
| 6994 | 15758 | Glul | Stx4a         | -1 |
| 6994 | 15862 | Glul | Mrap          | -1 |
| 6994 | 16060 | Glul | Gys2          | 1  |
| 6994 | 16176 | Glul | St3gal5       | 1  |
| 6994 | 16647 | Glul | D16H22S680E   | 1  |
| 6994 | 16669 | Glul | Tjp2          | -1 |
| 6994 | 16690 | Glul | Tjp3          | -1 |
| 6994 | 17083 | Glul | Atp1b1        | 1  |
| 6994 | 17247 | Glul | A030007L17Rik | -1 |
| 6994 | 17338 | Glul | Mocos         | -1 |
| 6994 | 17444 | Glul | Tuba1a        | -1 |
| 6994 | 17617 | Glul | Atp5sl        | 1  |
| 6994 | 17622 | Glul | Foxo1         | 1  |
| 6994 | 17656 | Glul | Hdhd3         | -1 |
| 6994 | 17818 | Glul | Chchd4        | 1  |
| 6994 | 17876 | Glul | Tubb4         | -1 |
| 6994 | 18027 | Glul | 5730403B10Rik | 1  |
| 6994 | 18147 | Glul | Nhlrc2        | 1  |
| 6994 | 18174 | Glul | Stat2         | -1 |
| 6994 | 18179 | Glul | Dbp           | 1  |
| 6994 | 18300 | Glul | Arg1          | 1  |
| 6994 | 18314 | Glul | 4631416L12Rik | 1  |
| 6994 | 18498 | Glul | Slc5a6        | 1  |
| 6994 | 18785 | Glul | Angptl4       | 1  |
| 6994 | 18802 | Glul | Nit2          | -1 |

|      |       |             |               |    |
|------|-------|-------------|---------------|----|
| 6994 | 18827 | Glul        | Oprs1         | -1 |
| 6994 | 19025 | Glul        | Slc37a4       | 1  |
| 6994 | 19234 | Glul        | Nrg4          | 1  |
| 6994 | 19277 | Glul        | MMT00044927   | 1  |
| 6994 | 19375 | Glul        | Inhba         | -1 |
| 6994 | 19466 | Glul        | Pptc7         | 1  |
| 6994 | 19532 | Glul        | Med8          | -1 |
| 6994 | 19671 | Glul        | Upp2          | 1  |
| 6994 | 19723 | Glul        | Pfkfb1        | 1  |
| 6994 | 20217 | Glul        | Rab3ip        | 1  |
| 6994 | 20854 | Glul        | Commd7        | -1 |
| 6994 | 21142 | Glul        | Gm129         | 1  |
| 6994 | 21675 | Glul        | Mosc2         | 1  |
| 6994 | 21733 | Glul        | Rhebl1        | 1  |
| 6994 | 21811 | Glul        | Ak3l1         | 1  |
| 6994 | 21918 | Glul        | Snx24         | -1 |
| 6994 | 22076 | Glul        | Pgm2l1        | 1  |
| 6994 | 22138 | Glul        | Ang           | 1  |
| 6994 | 22146 | Glul        | Aifm2         | 1  |
| 6994 | 22218 | Glul        | Rfc3          | -1 |
| 6994 | 22290 | Glul        | Tubb2a        | -1 |
| 6994 | 22443 | Glul        | Tuba1c        | -1 |
| 6994 | 22630 | Glul        | MMT00034355   | -1 |
| 6994 | 22936 | Glul        | Rhobtb1       | 1  |
| 6994 | 23161 | Glul        | Gclc          | -1 |
| 6994 | 23180 | Glul        | Sult1d1       | 1  |
| 6994 | 23183 | Glul        | Nnmt          | 1  |
| 6994 | 23201 | Glul        | S1pr1         | -1 |
| 6994 | 23202 | Glul        | Olf559        | 1  |
| 6994 | 23248 | Glul        | Tesk2         | 1  |
| 6994 | 23558 | Glul        | MMT00030937   | 1  |
| 7012 | 269   | Dennd4a     | Tuba1b        | 1  |
| 7012 | 1941  | Dennd4a     | MMT00079618   | 1  |
| 7012 | 7151  | Dennd4a     | MMT00007982   | 1  |
| 7012 | 8896  | Dennd4a     | Fasn          | 1  |
| 7012 | 9763  | Dennd4a     | Tuba3b        | 1  |
| 7012 | 11724 | Dennd4a     | Tuba3a        | 1  |
| 7012 | 12910 | Dennd4a     | 1110028A07Rik | 1  |
| 7012 | 22443 | Dennd4a     | Tuba1c        | 1  |
| 7020 | 3196  | Fbln5       | Tat           | -1 |
| 7020 | 3535  | Fbln5       | S100a9        | 1  |
| 7020 | 5364  | Fbln5       | Kif22         | 1  |
| 7020 | 8773  | Fbln5       | MMT00027093   | 1  |
| 7020 | 13431 | Fbln5       | MMT00038058   | 1  |
| 7020 | 14055 | Fbln5       | MMT00050438   | 1  |
| 7020 | 15205 | Fbln5       | MMT00030262   | 1  |
| 7020 | 22907 | Fbln5       | MMT00054594   | 1  |
| 7020 | 22978 | Fbln5       | MMT00043176   | 1  |
| 7029 | 4369  | MMT00072012 | Acot4         | -1 |
| 7029 | 5974  | MMT00072012 | Arntl         | 1  |
| 7029 | 10088 | MMT00072012 | Ddc           | 1  |

|      |       |             |                    |    |
|------|-------|-------------|--------------------|----|
| 7029 | 16060 | MMT00072012 | Gys2               | -1 |
| 7029 | 17952 | MMT00072012 | Ripk2              | -1 |
| 7029 | 22388 | MMT00072012 | 2410018M08Rik      | -1 |
| 7047 | 8815  | MMT00019310 | Mx1                | 1  |
| 7047 | 21214 | MMT00019310 | Scd1               | 1  |
| 7049 | 607   | Psm14       | Me1                | 1  |
| 7049 | 10554 | Psm14       | ENSMUSG00000074179 | 1  |
| 7049 | 13293 | Psm14       | Gsta2              | 1  |
| 7049 | 14147 | Psm14       | Acss2              | 1  |
| 7049 | 21727 | Psm14       | Khk                | 1  |
| 7057 | 11129 | Stk10       | Ankhd1             | -1 |
| 7057 | 12910 | Stk10       | 1110028A07Rik      | 1  |
| 7069 | 143   | Ube1l       | Gvin1              | 1  |
| 7069 | 387   | Ube1l       | Rgs10              | 1  |
| 7069 | 405   | Ube1l       | Emr4               | 1  |
| 7069 | 701   | Ube1l       | Polr3g             | -1 |
| 7069 | 1533  | Ube1l       | BC013712           | 1  |
| 7069 | 1722  | Ube1l       | Iqgap1             | 1  |
| 7069 | 2058  | Ube1l       | Hk3                | 1  |
| 7069 | 2178  | Ube1l       | Slc8a1             | 1  |
| 7069 | 2200  | Ube1l       | BC006779           | 1  |
| 7069 | 2224  | Ube1l       | Oasl2              | 1  |
| 7069 | 2578  | Ube1l       | Csf2rb2            | 1  |
| 7069 | 2752  | Ube1l       | Fcgr1              | 1  |
| 7069 | 2830  | Ube1l       | 4632417K18Rik      | 1  |
| 7069 | 2969  | Ube1l       | Ptpro              | 1  |
| 7069 | 3028  | Ube1l       | Uhrf1              | 1  |
| 7069 | 3036  | Ube1l       | Slamf9             | 1  |
| 7069 | 3286  | Ube1l       | Alox5ap            | 1  |
| 7069 | 3426  | Ube1l       | Hap1               | 1  |
| 7069 | 3523  | Ube1l       | Trim34             | 1  |
| 7069 | 3572  | Ube1l       | Ebi3               | 1  |
| 7069 | 3594  | Ube1l       | Rasa4              | 1  |
| 7069 | 3659  | Ube1l       | EG236451           | 1  |
| 7069 | 3683  | Ube1l       | Oas2               | 1  |
| 7069 | 3721  | Ube1l       | Me2                | 1  |
| 7069 | 4114  | Ube1l       | Parp12             | 1  |
| 7069 | 4152  | Ube1l       | Lrrc33             | 1  |
| 7069 | 4185  | Ube1l       | Hmgb2              | 1  |
| 7069 | 4284  | Ube1l       | Irf1               | 1  |
| 7069 | 4409  | Ube1l       | 5430435G22Rik      | 1  |
| 7069 | 4426  | Ube1l       | Iigp2              | 1  |
| 7069 | 4508  | Ube1l       | Ifit1              | 1  |
| 7069 | 4901  | Ube1l       | MMT00073557        | 1  |
| 7069 | 5044  | Ube1l       | Ifi35              | 1  |
| 7069 | 5216  | Ube1l       | Spnb5              | 1  |
| 7069 | 5250  | Ube1l       | Ifit2              | 1  |
| 7069 | 5554  | Ube1l       | Emr1               | 1  |
| 7069 | 5556  | Ube1l       | Ccl4               | 1  |
| 7069 | 5766  | Ube1l       | 5033414D02Rik      | 1  |
| 7069 | 5845  | Ube1l       | Il18bp             | 1  |

|      |       |       |               |   |
|------|-------|-------|---------------|---|
| 7069 | 5853  | Ube1l | Trim30        | 1 |
| 7069 | 5875  | Ube1l | Cd86          | 1 |
| 7069 | 5949  | Ube1l | Zbp1          | 1 |
| 7069 | 5975  | Ube1l | Car13         | 1 |
| 7069 | 6036  | Ube1l | Pram1         | 1 |
| 7069 | 6072  | Ube1l | C1qc          | 1 |
| 7069 | 6098  | Ube1l | Ncf4          | 1 |
| 7069 | 6154  | Ube1l | 1700030G06Rik | 1 |
| 7069 | 6383  | Ube1l | Gbp2          | 1 |
| 7069 | 6587  | Ube1l | Irf9          | 1 |
| 7069 | 6595  | Ube1l | Oas1a         | 1 |
| 7069 | 6734  | Ube1l | Ehd4          | 1 |
| 7069 | 6779  | Ube1l | Gbp6          | 1 |
| 7069 | 6806  | Ube1l | Agrn          | 1 |
| 7069 | 6824  | Ube1l | Irf7          | 1 |
| 7069 | 6910  | Ube1l | Ly6c2         | 1 |
| 7069 | 7057  | Ube1l | Stk10         | 1 |
| 7069 | 7069  | Ube1l | Ube1l         | 1 |
| 7069 | 7073  | Ube1l | Arhgap4       | 1 |
| 7069 | 7105  | Ube1l | Plac8         | 1 |
| 7069 | 7238  | Ube1l | Pycard        | 1 |
| 7069 | 7284  | Ube1l | MMT00008674   | 1 |
| 7069 | 7316  | Ube1l | Ifi204        | 1 |
| 7069 | 7336  | Ube1l | Cd5l          | 1 |
| 7069 | 8270  | Ube1l | Clsn          | 1 |
| 7069 | 8555  | Ube1l | H2-M3         | 1 |
| 7069 | 8564  | Ube1l | Pld4          | 1 |
| 7069 | 8659  | Ube1l | Psmb8         | 1 |
| 7069 | 8800  | Ube1l | Rnf213        | 1 |
| 7069 | 8922  | Ube1l | Il10ra        | 1 |
| 7069 | 8951  | Ube1l | Cd97          | 1 |
| 7069 | 9100  | Ube1l | Ms4a6c        | 1 |
| 7069 | 9320  | Ube1l | Rnf31         | 1 |
| 7069 | 9393  | Ube1l | Cd300a        | 1 |
| 7069 | 9401  | Ube1l | Fcgr4         | 1 |
| 7069 | 9616  | Ube1l | AI451557      | 1 |
| 7069 | 9779  | Ube1l | Laptn5        | 1 |
| 7069 | 9820  | Ube1l | BC023105      | 1 |
| 7069 | 9821  | Ube1l | Pmaip1        | 1 |
| 7069 | 9847  | Ube1l | Ifi27         | 1 |
| 7069 | 9920  | Ube1l | Syk           | 1 |
| 7069 | 9928  | Ube1l | Lgmn          | 1 |
| 7069 | 10109 | Ube1l | Gbp3          | 1 |
| 7069 | 10393 | Ube1l | Slc7a8        | 1 |
| 7069 | 10504 | Ube1l | Ripk3         | 1 |
| 7069 | 10606 | Ube1l | Apbb1ip       | 1 |
| 7069 | 10796 | Ube1l | Spic          | 1 |
| 7069 | 10926 | Ube1l | P2ry13        | 1 |
| 7069 | 11009 | Ube1l | MMT00008885   | 1 |
| 7069 | 11198 | Ube1l | Gbp1          | 1 |
| 7069 | 11204 | Ube1l | AI451617      | 1 |

|      |       |       |          |   |
|------|-------|-------|----------|---|
| 7069 | 11265 | Ube1l | Irgm     | 1 |
| 7069 | 11275 | Ube1l | Fanci    | 1 |
| 7069 | 11406 | Ube1l | Ifi203   | 1 |
| 7069 | 11437 | Ube1l | Gatm     | 1 |
| 7069 | 11701 | Ube1l | Oas1c    | 1 |
| 7069 | 11836 | Ube1l | Csf1r    | 1 |
| 7069 | 12126 | Ube1l | Znfx1    | 1 |
| 7069 | 12312 | Ube1l | Ms4a6d   | 1 |
| 7069 | 12398 | Ube1l | Ifi44    | 1 |
| 7069 | 12495 | Ube1l | Casp1    | 1 |
| 7069 | 12572 | Ube1l | Zfp90    | 1 |
| 7069 | 12600 | Ube1l | Ifi204   | 1 |
| 7069 | 12969 | Ube1l | Xaf1     | 1 |
| 7069 | 13156 | Ube1l | Ifit3    | 1 |
| 7069 | 13172 | Ube1l | Epb4.1l3 | 1 |
| 7069 | 13181 | Ube1l | Lcp2     | 1 |
| 7069 | 13309 | Ube1l | Tgtp     | 1 |
| 7069 | 13372 | Ube1l | Slc11a1  | 1 |
| 7069 | 13455 | Ube1l | Cenpe    | 1 |
| 7069 | 13504 | Ube1l | Lair1    | 1 |
| 7069 | 13522 | Ube1l | Sfn5     | 1 |
| 7069 | 13527 | Ube1l | Ctss     | 1 |
| 7069 | 13528 | Ube1l | Capn12   | 1 |
| 7069 | 13585 | Ube1l | Nckap1l  | 1 |
| 7069 | 13654 | Ube1l | Stat1    | 1 |
| 7069 | 13656 | Ube1l | Ly86     | 1 |
| 7069 | 13749 | Ube1l | Parp9    | 1 |
| 7069 | 13780 | Ube1l | Pilra    | 1 |
| 7069 | 13826 | Ube1l | Melk     | 1 |
| 7069 | 14102 | Ube1l | Evi2a    | 1 |
| 7069 | 14117 | Ube1l | C1qb     | 1 |
| 7069 | 14192 | Ube1l | Trpv2    | 1 |
| 7069 | 14237 | Ube1l | Rac2     | 1 |
| 7069 | 14258 | Ube1l | Ifi47    | 1 |
| 7069 | 14260 | Ube1l | Mkl1     | 1 |
| 7069 | 14453 | Ube1l | Inpp5d   | 1 |
| 7069 | 14475 | Ube1l | Abcg1    | 1 |
| 7069 | 14506 | Ube1l | Slc15a3  | 1 |
| 7069 | 14603 | Ube1l | Ly6e     | 1 |
| 7069 | 14611 | Ube1l | Ddx60    | 1 |
| 7069 | 14880 | Ube1l | Ms4a4c   | 1 |
| 7069 | 14883 | Ube1l | Itgal    | 1 |
| 7069 | 14954 | Ube1l | Rab19    | 1 |
| 7069 | 15074 | Ube1l | Usp18    | 1 |
| 7069 | 15159 | Ube1l | Timd4    | 1 |
| 7069 | 15280 | Ube1l | Cxcl10   | 1 |
| 7069 | 15387 | Ube1l | Mgl1     | 1 |
| 7069 | 15449 | Ube1l | Mitd1    | 1 |
| 7069 | 15504 | Ube1l | Mx2      | 1 |
| 7069 | 15572 | Ube1l | Dtx3l    | 1 |
| 7069 | 15677 | Ube1l | Slc9a9   | 1 |

|      |       |       |               |   |
|------|-------|-------|---------------|---|
| 7069 | 15749 | Ube1l | Cd22          | 1 |
| 7069 | 15825 | Ube1l | Fermt3        | 1 |
| 7069 | 16102 | Ube1l | Cd72          | 1 |
| 7069 | 16147 | Ube1l | Tlr2          | 1 |
| 7069 | 16182 | Ube1l | Oasl1         | 1 |
| 7069 | 16186 | Ube1l | Cfp           | 1 |
| 7069 | 16199 | Ube1l | Samhd1        | 1 |
| 7069 | 16521 | Ube1l | Adar          | 1 |
| 7069 | 16572 | Ube1l | D14Erttd668e  | 1 |
| 7069 | 16580 | Ube1l | Tnfaip2       | 1 |
| 7069 | 16827 | Ube1l | Arhgdib       | 1 |
| 7069 | 16854 | Ube1l | Kif15         | 1 |
| 7069 | 16874 | Ube1l | Fcer1g        | 1 |
| 7069 | 16913 | Ube1l | Pira3         | 1 |
| 7069 | 16988 | Ube1l | Clec4f        | 1 |
| 7069 | 17197 | Ube1l | Igtp          | 1 |
| 7069 | 17312 | Ube1l | Sirpa         | 1 |
| 7069 | 17412 | Ube1l | Aif1          | 1 |
| 7069 | 17472 | Ube1l | Cd53          | 1 |
| 7069 | 17720 | Ube1l | Rap2b         | 1 |
| 7069 | 17806 | Ube1l | Gpsm3         | 1 |
| 7069 | 17904 | Ube1l | Cds1          | 1 |
| 7069 | 18174 | Ube1l | Stat2         | 1 |
| 7069 | 18186 | Ube1l | Parp14        | 1 |
| 7069 | 18211 | Ube1l | Folr2         | 1 |
| 7069 | 18289 | Ube1l | Tap1          | 1 |
| 7069 | 18594 | Ube1l | 1200002N14Rik | 1 |
| 7069 | 18662 | Ube1l | Batf3         | 1 |
| 7069 | 18868 | Ube1l | Mpeg1         | 1 |
| 7069 | 19026 | Ube1l | Isg15         | 1 |
| 7069 | 19063 | Ube1l | Evl           | 1 |
| 7069 | 19153 | Ube1l | Ptgs1         | 1 |
| 7069 | 19189 | Ube1l | Sp100         | 1 |
| 7069 | 19252 | Ube1l | Tmsb4x        | 1 |
| 7069 | 19262 | Ube1l | Cd274         | 1 |
| 7069 | 19298 | Ube1l | Unc93b1       | 1 |
| 7069 | 19382 | Ube1l | Slc2a6        | 1 |
| 7069 | 19708 | Ube1l | Ly6a          | 1 |
| 7069 | 19738 | Ube1l | Lgals3bp      | 1 |
| 7069 | 19794 | Ube1l | Rgs2          | 1 |
| 7069 | 20122 | Ube1l | Tmem86a       | 1 |
| 7069 | 20150 | Ube1l | Ptprc         | 1 |
| 7069 | 20321 | Ube1l | Ms4a6b        | 1 |
| 7069 | 20431 | Ube1l | Slc7a7        | 1 |
| 7069 | 20432 | Ube1l | Smc1b         | 1 |
| 7069 | 20433 | Ube1l | Cdca5         | 1 |
| 7069 | 20474 | Ube1l | Gnb3          | 1 |
| 7069 | 20791 | Ube1l | MMT00014813   | 1 |
| 7069 | 20814 | Ube1l | Ptpn18        | 1 |
| 7069 | 20997 | Ube1l | MMT00028135   | 1 |
| 7069 | 21351 | Ube1l | Shisa5        | 1 |

|      |       |             |               |    |
|------|-------|-------------|---------------|----|
| 7069 | 21440 | Ube1l       | Tmsb10        | 1  |
| 7069 | 21549 | Ube1l       | Rtp4          | 1  |
| 7069 | 21751 | Ube1l       | Ptpn6         | 1  |
| 7069 | 21794 | Ube1l       | Pfkip         | 1  |
| 7069 | 21824 | Ube1l       | 5830443L24Rik | 1  |
| 7069 | 21837 | Ube1l       | BC052328      | 1  |
| 7069 | 21863 | Ube1l       | Dok2          | 1  |
| 7069 | 21988 | Ube1l       | MMT00015654   | 1  |
| 7069 | 22037 | Ube1l       | Oas1g         | 1  |
| 7069 | 22077 | Ube1l       | MMT00057550   | 1  |
| 7069 | 22327 | Ube1l       | Tyrobp        | 1  |
| 7069 | 22553 | Ube1l       | Ms4a8a        | 1  |
| 7069 | 22647 | Ube1l       | Pkib          | 1  |
| 7069 | 22670 | Ube1l       | Clec4a1       | 1  |
| 7069 | 22712 | Ube1l       | Phf11         | 1  |
| 7069 | 22863 | Ube1l       | Prkd2         | 1  |
| 7069 | 22876 | Ube1l       | Sash3         | 1  |
| 7069 | 23038 | Ube1l       | Casp4         | 1  |
| 7069 | 23208 | Ube1l       | Hck           | 1  |
| 7069 | 23242 | Ube1l       | Gngt2         | 1  |
| 7069 | 23403 | Ube1l       | Ndc80         | 1  |
| 7069 | 23410 | Ube1l       | C1qa          | 1  |
| 7069 | 23450 | Ube1l       | D12Ertd647e   | 1  |
| 7074 | 3265  | Dcbld2      | Dntt          | 1  |
| 7083 | 2115  | MMT00044154 | Gpr12         | -1 |
| 7088 | 327   | Slc37a1     | H2-Ea         | 1  |
| 7088 | 763   | Slc37a1     | 4933406E20Rik | 1  |
| 7088 | 1340  | Slc37a1     | Tap2          | 1  |
| 7088 | 2325  | Slc37a1     | H2-K1         | 1  |
| 7088 | 2801  | Slc37a1     | H2-BI         | 1  |
| 7088 | 2938  | Slc37a1     | H2-T23        | 1  |
| 7088 | 3599  | Slc37a1     | MMT00035426   | -1 |
| 7088 | 3704  | Slc37a1     | H2-Q7         | 1  |
| 7088 | 3857  | Slc37a1     | 1700001C19Rik | -1 |
| 7088 | 4001  | Slc37a1     | Apoa4         | -1 |
| 7088 | 4004  | Slc37a1     | Thbs2         | -1 |
| 7088 | 4958  | Slc37a1     | Ndufa7        | -1 |
| 7088 | 5410  | Slc37a1     | Cyp4f15       | -1 |
| 7088 | 5648  | Slc37a1     | Zfp213        | -1 |
| 7088 | 6510  | Slc37a1     | Plcl2         | 1  |
| 7088 | 7088  | Slc37a1     | Slc37a1       | 1  |
| 7088 | 8649  | Slc37a1     | MMT00072863   | -1 |
| 7088 | 8750  | Slc37a1     | 1700010I14Rik | 1  |
| 7088 | 8767  | Slc37a1     | Rgl2          | 1  |
| 7088 | 9158  | Slc37a1     | Pde9a         | -1 |
| 7088 | 9717  | Slc37a1     | Psmb9         | 1  |
| 7088 | 10376 | Slc37a1     | C920025E04Rik | -1 |
| 7088 | 10394 | Slc37a1     | MMT00028435   | 1  |
| 7088 | 10667 | Slc37a1     | H2-Eb1        | 1  |
| 7088 | 12335 | Slc37a1     | Plcb4         | 1  |
| 7088 | 12355 | Slc37a1     | AI507611      | 1  |

|      |       |         |               |    |
|------|-------|---------|---------------|----|
| 7088 | 12694 | Slc37a1 | Riok2         | -1 |
| 7088 | 13285 | Slc37a1 | Cd276         | 1  |
| 7088 | 13493 | Slc37a1 | Ring1         | -1 |
| 7088 | 13667 | Slc37a1 | Cbs           | -1 |
| 7088 | 13789 | Slc37a1 | H2-Q8         | 1  |
| 7088 | 14132 | Slc37a1 | Glo1          | 1  |
| 7088 | 15531 | Slc37a1 | Prickle4      | -1 |
| 7088 | 15540 | Slc37a1 | C2            | 1  |
| 7088 | 16153 | Slc37a1 | Syng1         | 1  |
| 7088 | 17691 | Slc37a1 | Kank3         | 1  |
| 7088 | 17707 | Slc37a1 | Rsh12b        | 1  |
| 7088 | 18003 | Slc37a1 | Tff3          | -1 |
| 7088 | 18251 | Slc37a1 | Susd4         | 1  |
| 7088 | 18577 | Slc37a1 | Btd9          | -1 |
| 7088 | 18906 | Slc37a1 | Zfand3        | 1  |
| 7088 | 20100 | Slc37a1 | Guca1b        | -1 |
| 7088 | 20238 | Slc37a1 | H2-T9         | 1  |
| 7088 | 20346 | Slc37a1 | Gna-rs1       | 1  |
| 7088 | 20511 | Slc37a1 | Decr2         | 1  |
| 7088 | 21295 | Slc37a1 | Snf1lk        | -1 |
| 7088 | 21478 | Slc37a1 | Loxhd1        | -1 |
| 7088 | 22822 | Slc37a1 | MMT00013433   | 1  |
| 7088 | 23250 | Slc37a1 | Plcl2         | 1  |
| 7088 | 23401 | Slc37a1 | H2-Q2         | 1  |
| 7095 | 607   | Timm8a1 | Me1           | 1  |
| 7095 | 3377  | Timm8a1 | Cs            | 1  |
| 7095 | 8815  | Timm8a1 | Mx1           | 1  |
| 7095 | 18201 | Timm8a1 | MMT00060232   | 1  |
| 7095 | 21214 | Timm8a1 | Scd1          | 1  |
| 7095 | 21727 | Timm8a1 | Khk           | 1  |
| 7100 | 3654  | Tomm22  | St13          | -1 |
| 7100 | 6804  | Tomm22  | Cyp2d22       | 1  |
| 7100 | 7100  | Tomm22  | Tomm22        | 1  |
| 7100 | 8653  | Tomm22  | AW124722      | -1 |
| 7100 | 11503 | Tomm22  | Rangap1       | 1  |
| 7105 | 1533  | Plac8   | BC013712      | 1  |
| 7105 | 2224  | Plac8   | Oasl2         | 1  |
| 7105 | 3036  | Plac8   | Slamf9        | 1  |
| 7105 | 3594  | Plac8   | Rasa4         | 1  |
| 7105 | 3683  | Plac8   | Oas2          | 1  |
| 7105 | 4114  | Plac8   | Parp12        | 1  |
| 7105 | 4409  | Plac8   | 5430435G22Rik | 1  |
| 7105 | 4426  | Plac8   | ligp2         | 1  |
| 7105 | 6072  | Plac8   | C1qc          | 1  |
| 7105 | 6576  | Plac8   | Sfn2          | 1  |
| 7105 | 6587  | Plac8   | Irf9          | 1  |
| 7105 | 6910  | Plac8   | Ly6c2         | 1  |
| 7105 | 7105  | Plac8   | Plac8         | 1  |
| 7105 | 7336  | Plac8   | Cd5l          | 1  |
| 7105 | 8555  | Plac8   | H2-M3         | 1  |
| 7105 | 8800  | Plac8   | Rnf213        | 1  |



|      |       |         |               |    |
|------|-------|---------|---------------|----|
| 7105 | 9847  | Plac8   | Ifi27         | 1  |
| 7105 | 9928  | Plac8   | Lgmn          | 1  |
| 7105 | 10606 | Plac8   | Apbb1ip       | 1  |
| 7105 | 11701 | Plac8   | Oas1c         | 1  |
| 7105 | 12126 | Plac8   | Znfx1         | 1  |
| 7105 | 12312 | Plac8   | Ms4a6d        | 1  |
| 7105 | 12398 | Plac8   | Ifi44         | 1  |
| 7105 | 12491 | Plac8   | Ptma          | 1  |
| 7105 | 13780 | Plac8   | Pilra         | 1  |
| 7105 | 14102 | Plac8   | Evi2a         | 1  |
| 7105 | 14506 | Plac8   | Slc15a3       | 1  |
| 7105 | 14880 | Plac8   | Ms4a4c        | 1  |
| 7105 | 14883 | Plac8   | Itgal         | 1  |
| 7105 | 15074 | Plac8   | Usp18         | 1  |
| 7105 | 16102 | Plac8   | Cd72          | 1  |
| 7105 | 16182 | Plac8   | Oasl1         | 1  |
| 7105 | 16186 | Plac8   | Cfp           | 1  |
| 7105 | 16199 | Plac8   | Samhd1        | 1  |
| 7105 | 16874 | Plac8   | Fcer1g        | 1  |
| 7105 | 16913 | Plac8   | Pira3         | 1  |
| 7105 | 17806 | Plac8   | Gpsm3         | 1  |
| 7105 | 18174 | Plac8   | Stat2         | 1  |
| 7105 | 19382 | Plac8   | Slc2a6        | 1  |
| 7105 | 19738 | Plac8   | Lgals3bp      | 1  |
| 7105 | 20321 | Plac8   | Ms4a6b        | 1  |
| 7105 | 20997 | Plac8   | MMT00028135   | 1  |
| 7105 | 21351 | Plac8   | Shisa5        | 1  |
| 7105 | 21549 | Plac8   | Rtp4          | 1  |
| 7105 | 21863 | Plac8   | Dok2          | 1  |
| 7105 | 22037 | Plac8   | Oas1g         | 1  |
| 7105 | 22496 | Plac8   | Sfn1          | 1  |
| 7105 | 23208 | Plac8   | Hck           | 1  |
| 7105 | 23410 | Plac8   | C1qa          | 1  |
| 7105 | 23450 | Plac8   | D12Ertd647e   | 1  |
| 7108 | 8444  | Adamts1 | Rdh16         | -1 |
| 7108 | 8815  | Adamts1 | Mx1           | -1 |
| 7108 | 12910 | Adamts1 | 1110028A07Rik | -1 |
| 7108 | 18201 | Adamts1 | MMT00060232   | -1 |
| 7108 | 20058 | Adamts1 | Dnaic1        | 1  |
| 7108 | 21214 | Adamts1 | Scd1          | -1 |
| 7112 | 12219 | Apbb3   | Cyb5b         | -1 |
| 7116 | 1162  | Katnal1 | Cpsf4         | -1 |
| 7116 | 2115  | Katnal1 | Gpr12         | -1 |
| 7116 | 8022  | Katnal1 | MMT00004959   | 1  |
| 7116 | 8906  | Katnal1 | MMT00004929   | 1  |
| 7120 | 2972  | Dusp1   | Zfp3          | -1 |
| 7120 | 7120  | Dusp1   | Dusp1         | 1  |
| 7120 | 9745  | Dusp1   | Gadd45g       | 1  |
| 7120 | 12732 | Dusp1   | Hsd17b1       | 1  |
| 7128 | 8815  | Gemin8  | Mx1           | -1 |
| 7128 | 21214 | Gemin8  | Scd1          | -1 |

|      |       |               |               |    |
|------|-------|---------------|---------------|----|
| 7131 | 22271 | 1810037117Rik | Cyp2c29       | -1 |
| 7135 | 7909  | Ezr           | Oas3          | 1  |
| 7135 | 21754 | Ezr           | Synj2         | -1 |
| 7136 | 337   | Id3           | Rasgef1b      | -1 |
| 7136 | 482   | Id3           | Rnf43         | 1  |
| 7136 | 563   | Id3           | D4Bwg0951e    | -1 |
| 7136 | 3097  | Id3           | Ppp1r3g       | -1 |
| 7136 | 3196  | Id3           | Tat           | -1 |
| 7136 | 4404  | Id3           | Commd5        | 1  |
| 7136 | 5889  | Id3           | Errfi1        | -1 |
| 7136 | 6308  | Id3           | 2410075B13Rik | 1  |
| 7136 | 6564  | Id3           | Cebpd         | -1 |
| 7136 | 7066  | Id3           | Agtr1b        | -1 |
| 7136 | 7136  | Id3           | Id3           | 1  |
| 7136 | 7315  | Id3           | EG624219      | 1  |
| 7136 | 8554  | Id3           | Letm2         | -1 |
| 7136 | 8632  | Id3           | Igfbp1        | -1 |
| 7136 | 8816  | Id3           | Nfkbia        | -1 |
| 7136 | 11093 | Id3           | Zdhhc1        | -1 |
| 7136 | 11590 | Id3           | Cbx4          | 1  |
| 7136 | 11808 | Id3           | Pck1          | -1 |
| 7136 | 12761 | Id3           | Tsc22d3       | -1 |
| 7136 | 15021 | Id3           | Ppargc1a      | -1 |
| 7136 | 15476 | Id3           | Fem1b         | 1  |
| 7136 | 15826 | Id3           | Arl4d         | -1 |
| 7136 | 16251 | Id3           | G6pc          | -1 |
| 7136 | 16517 | Id3           | D4Wsu53e      | -1 |
| 7136 | 16580 | Id3           | Tnfaip2       | 1  |
| 7136 | 17525 | Id3           | Ctgf          | -1 |
| 7136 | 17752 | Id3           | Chac1         | -1 |
| 7136 | 18083 | Id3           | Gadd45a       | 1  |
| 7136 | 18282 | Id3           | Tbcc          | 1  |
| 7136 | 18785 | Id3           | Angptl4       | -1 |
| 7136 | 19528 | Id3           | Zfp503        | 1  |
| 7136 | 21805 | Id3           | Plk3          | -1 |
| 7136 | 21934 | Id3           | Id2           | 1  |
| 7136 | 22216 | Id3           | Sp5           | 1  |
| 7136 | 23419 | Id3           | Tipin         | 1  |
| 7136 | 23552 | Id3           | Rasl11b       | 1  |
| 7139 | 20967 | Pld3          | Fabp2         | 1  |
| 7140 | 9213  | Mtbp          | Osgin1        | 1  |
| 7140 | 10782 | Mtbp          | 4933403O08Rik | -1 |
| 7140 | 12761 | Mtbp          | Tsc22d3       | -1 |
| 7140 | 20570 | Mtbp          | Ap3m1         | -1 |
| 7143 | 609   | Cxcr7         | MMT00060868   | 1  |
| 7143 | 5934  | Cxcr7         | S100a10       | 1  |
| 7143 | 16060 | Cxcr7         | Gys2          | -1 |
| 7151 | 607   | MMT00007982   | Me1           | 1  |
| 7151 | 874   | MMT00007982   | Aldh1a7       | 1  |
| 7151 | 4351  | MMT00007982   | Plxnb1        | -1 |
| 7151 | 6193  | MMT00007982   | Lactb2        | 1  |

|      |       |               |               |    |
|------|-------|---------------|---------------|----|
| 7151 | 6370  | MMT00007982   | Aqp8          | 1  |
| 7151 | 8444  | MMT00007982   | Rdh16         | 1  |
| 7151 | 8815  | MMT00007982   | Mx1           | 1  |
| 7151 | 11375 | MMT00007982   | Derl2         | 1  |
| 7151 | 11462 | MMT00007982   | Gpam          | 1  |
| 7151 | 12219 | MMT00007982   | Cyb5b         | 1  |
| 7151 | 12910 | MMT00007982   | 1110028A07Rik | 1  |
| 7151 | 14017 | MMT00007982   | Ces5          | 1  |
| 7151 | 18201 | MMT00007982   | MMT00060232   | 1  |
| 7151 | 18286 | MMT00007982   | Slc41a3       | -1 |
| 7151 | 20079 | MMT00007982   | MMT00019254   | -1 |
| 7151 | 21202 | MMT00007982   | Acly          | 1  |
| 7151 | 21214 | MMT00007982   | Scd1          | 1  |
| 7151 | 21251 | MMT00007982   | Cpt1a         | -1 |
| 7151 | 21575 | MMT00007982   | Cyp2c55       | 1  |
| 7151 | 22138 | MMT00007982   | Ang           | -1 |
| 7151 | 22732 | MMT00007982   | Cyb5b         | 1  |
| 7151 | 23008 | MMT00007982   | Ctsz          | -1 |
| 7151 | 23026 | MMT00007982   | Apom          | -1 |
| 7151 | 23549 | MMT00007982   | Es22          | 1  |
| 7153 | 8444  | Glt6d1        | Rdh16         | 1  |
| 7153 | 8815  | Glt6d1        | Mx1           | 1  |
| 7153 | 12910 | Glt6d1        | 1110028A07Rik | 1  |
| 7153 | 14017 | Glt6d1        | Ces5          | 1  |
| 7153 | 15059 | Glt6d1        | Mogat1        | 1  |
| 7153 | 18201 | Glt6d1        | MMT00060232   | 1  |
| 7153 | 20058 | Glt6d1        | Dnaic1        | -1 |
| 7153 | 21214 | Glt6d1        | Scd1          | 1  |
| 7153 | 22138 | Glt6d1        | Ang           | -1 |
| 7153 | 23026 | Glt6d1        | Apom          | -1 |
| 7156 | 13293 | Tmem1         | Gsta2         | 1  |
| 7159 | 7159  | 1700031F05Rik | 1700031F05Rik | 1  |
| 7159 | 17447 | 1700031F05Rik | Ctsf          | -1 |
| 7163 | 771   | Ptplb         | Zbtb45        | -1 |
| 7163 | 2329  | Ptplb         | Wdr6          | -1 |
| 7163 | 3410  | Ptplb         | Paqr9         | -1 |
| 7163 | 3502  | Ptplb         | Gde1          | 1  |
| 7163 | 3789  | Ptplb         | 4833442J19Rik | 1  |
| 7163 | 4286  | Ptplb         | Ptp4a1        | 1  |
| 7163 | 4708  | Ptplb         | Traf3ip2      | -1 |
| 7163 | 5364  | Ptplb         | Kif22         | -1 |
| 7163 | 5382  | Ptplb         | Fbn1          | -1 |
| 7163 | 6030  | Ptplb         | As3mt         | 1  |
| 7163 | 6370  | Ptplb         | Aqp8          | -1 |
| 7163 | 6394  | Ptplb         | Fbxo6         | -1 |
| 7163 | 7066  | Ptplb         | Agtr1b        | 1  |
| 7163 | 7954  | Ptplb         | Ccdc12        | -1 |
| 7163 | 8965  | Ptplb         | Ahcy          | 1  |
| 7163 | 9127  | Ptplb         | Mtfmt         | -1 |
| 7163 | 9275  | Ptplb         | Aass          | 1  |
| 7163 | 9587  | Ptplb         | Bri3bp        | -1 |

|      |       |        |                    |    |
|------|-------|--------|--------------------|----|
| 7163 | 10486 | Ptplb  | 1300002K09Rik      | -1 |
| 7163 | 11129 | Ptplb  | Ankhd1             | 1  |
| 7163 | 11599 | Ptplb  | Coq10b             | 1  |
| 7163 | 11614 | Ptplb  | Sult1e1            | 1  |
| 7163 | 11741 | Ptplb  | Slc30a10           | -1 |
| 7163 | 11808 | Ptplb  | Pck1               | 1  |
| 7163 | 12799 | Ptplb  | Spon2              | -1 |
| 7163 | 12839 | Ptplb  | Fh1                | 1  |
| 7163 | 12941 | Ptplb  | Elovl5             | -1 |
| 7163 | 12982 | Ptplb  | Cars               | -1 |
| 7163 | 14472 | Ptplb  | Ahcy               | 1  |
| 7163 | 15021 | Ptplb  | Ppargc1a           | 1  |
| 7163 | 15320 | Ptplb  | MMT00017479        | 1  |
| 7163 | 15631 | Ptplb  | Lpin1              | 1  |
| 7163 | 16647 | Ptplb  | D16H22S680E        | 1  |
| 7163 | 17323 | Ptplb  | Tubb6              | -1 |
| 7163 | 18027 | Ptplb  | 5730403B10Rik      | 1  |
| 7163 | 18827 | Ptplb  | Oprs1              | -1 |
| 7163 | 19025 | Ptplb  | Slc37a4            | 1  |
| 7163 | 19277 | Ptplb  | MMT00044927        | 1  |
| 7163 | 19375 | Ptplb  | Inhba              | -1 |
| 7163 | 19723 | Ptplb  | Pfkfb1             | 1  |
| 7163 | 21675 | Ptplb  | Mosc2              | 1  |
| 7163 | 22218 | Ptplb  | Rfc3               | -1 |
| 7163 | 22681 | Ptplb  | Gm88               | 1  |
| 7163 | 23180 | Ptplb  | Sult1d1            | 1  |
| 7163 | 23183 | Ptplb  | Nnmt               | 1  |
| 7163 | 23202 | Ptplb  | Olfir559           | 1  |
| 7165 | 5884  | Nt5m   | Gstm2              | 1  |
| 7165 | 10554 | Nt5m   | ENSMUSG00000074179 | 1  |
| 7165 | 14147 | Nt5m   | Acss2              | 1  |
| 7165 | 20019 | Nt5m   | Qdpr               | 1  |
| 7165 | 21214 | Nt5m   | Scd1               | 1  |
| 7165 | 21643 | Nt5m   | Agtr1a             | -1 |
| 7165 | 21727 | Nt5m   | Khk                | 1  |
| 7173 | 1416  | Trim59 | 6720460F02Rik      | 1  |
| 7173 | 5364  | Trim59 | Kif22              | 1  |
| 7173 | 5822  | Trim59 | Car2               | 1  |
| 7173 | 5938  | Trim59 | Pfn2               | 1  |
| 7173 | 6206  | Trim59 | MMT00063701        | 1  |
| 7173 | 8416  | Trim59 | Cdc20              | 1  |
| 7173 | 10521 | Trim59 | Ttf2               | 1  |
| 7173 | 11382 | Trim59 | Cdca3              | 1  |
| 7173 | 12367 | Trim59 | MMT00072365        | -1 |
| 7173 | 16416 | Trim59 | Commd2             | 1  |
| 7173 | 17823 | Trim59 | D2Ertd750e         | 1  |
| 7173 | 19318 | Trim59 | Plk1               | 1  |
| 7185 | 12910 | Ostf1  | 1110028A07Rik      | 1  |
| 7185 | 23026 | Ostf1  | Apom               | -1 |
| 7199 | 7824  | Wee1   | MMT00001823        | -1 |
| 7209 | 13810 | Gpa33  | 1110036O03Rik      | -1 |

|      |       |               |                    |    |
|------|-------|---------------|--------------------|----|
| 7224 | 22137 | Pafah2        | Nudt7              | 1  |
| 7224 | 22138 | Pafah2        | Ang                | -1 |
| 7225 | 11129 | Tiam1         | Ankhd1             | -1 |
| 7225 | 12910 | Tiam1         | 1110028A07Rik      | 1  |
| 7225 | 15135 | Tiam1         | Col5a3             | 1  |
| 7225 | 22727 | Tiam1         | Pdgfra             | -1 |
| 7229 | 9158  | H2-DMb1       | Pde9a              | 1  |
| 7229 | 12565 | H2-DMb1       | Grem2              | -1 |
| 7229 | 20967 | H2-DMb1       | Fabp2              | 1  |
| 7232 | 13529 | MMT00078948   | Abi3bp             | -1 |
| 7238 | 5364  | Pycard        | Kif22              | 1  |
| 7238 | 14472 | Pycard        | Ahcy               | -1 |
| 7240 | 18790 | C730007P19Rik | Car3               | 1  |
| 7241 | 607   | Ptpn11        | Me1                | 1  |
| 7241 | 10554 | Ptpn11        | ENSMUSG00000074179 | 1  |
| 7241 | 14147 | Ptpn11        | Acss2              | 1  |
| 7241 | 18201 | Ptpn11        | MMT00060232        | 1  |
| 7241 | 21202 | Ptpn11        | Acly               | 1  |
| 7251 | 5884  | MMT00018228   | Gstm2              | 1  |
| 7251 | 7602  | MMT00018228   | Pcca               | 1  |
| 7251 | 10554 | MMT00018228   | ENSMUSG00000074179 | 1  |
| 7251 | 13293 | MMT00018228   | Gsta2              | 1  |
| 7258 | 4675  | Bmp2k         | Sparcl1            | -1 |
| 7258 | 5100  | Bmp2k         | Pebp1              | 1  |
| 7258 | 6330  | Bmp2k         | Dgkq               | -1 |
| 7258 | 7258  | Bmp2k         | Bmp2k              | 1  |
| 7258 | 8807  | Bmp2k         | Ankrd56            | 1  |
| 7258 | 14085 | Bmp2k         | Cdkl2              | -1 |
| 7258 | 15908 | Bmp2k         | Pebp1              | 1  |
| 7258 | 17807 | Bmp2k         | Pebp1              | 1  |
| 7258 | 23625 | Bmp2k         | Pkd2               | -1 |
| 7261 | 607   | Ttc7b         | Me1                | 1  |
| 7261 | 874   | Ttc7b         | Aldh1a7            | 1  |
| 7261 | 4351  | Ttc7b         | Plxnb1             | -1 |
| 7261 | 6044  | Ttc7b         | Sucnr1             | 1  |
| 7261 | 6502  | Ttc7b         | Col15a1            | 1  |
| 7261 | 8444  | Ttc7b         | Rdh16              | 1  |
| 7261 | 8815  | Ttc7b         | Mx1                | 1  |
| 7261 | 10132 | Ttc7b         | Ces2               | 1  |
| 7261 | 12910 | Ttc7b         | 1110028A07Rik      | 1  |
| 7261 | 14017 | Ttc7b         | Ces5               | 1  |
| 7261 | 14147 | Ttc7b         | Acss2              | 1  |
| 7261 | 15059 | Ttc7b         | Mogat1             | 1  |
| 7261 | 17996 | Ttc7b         | Igfbp2             | -1 |
| 7261 | 18201 | Ttc7b         | MMT00060232        | 1  |
| 7261 | 20058 | Ttc7b         | Dnaic1             | -1 |
| 7261 | 20079 | Ttc7b         | MMT00019254        | -1 |
| 7261 | 21202 | Ttc7b         | Acly               | 1  |
| 7261 | 21214 | Ttc7b         | Scd1               | 1  |
| 7261 | 22138 | Ttc7b         | Ang                | -1 |
| 7261 | 23549 | Ttc7b         | Es22               | 1  |

|      |       |             |             |    |
|------|-------|-------------|-------------|----|
| 7274 | 16616 | Laptm4b     | Paox        | -1 |
| 7274 | 21214 | Laptm4b     | Scd1        | -1 |
| 7282 | 5364  | Ppic        | Kif22       | 1  |
| 7282 | 6030  | Ppic        | As3mt       | -1 |
| 7282 | 6912  | Ppic        | Crym        | -1 |
| 7282 | 23026 | Ppic        | Apom        | -1 |
| 7284 | 143   | MMT00008674 | Gvin1       | 1  |
| 7284 | 1533  | MMT00008674 | BC013712    | 1  |
| 7284 | 2200  | MMT00008674 | BC006779    | 1  |
| 7284 | 2224  | MMT00008674 | Oasl2       | 1  |
| 7284 | 2550  | MMT00008674 | MMT00036681 | 1  |
| 7284 | 3523  | MMT00008674 | Trim34      | 1  |
| 7284 | 3659  | MMT00008674 | EG236451    | 1  |
| 7284 | 3683  | MMT00008674 | Oas2        | 1  |
| 7284 | 4114  | MMT00008674 | Parp12      | 1  |
| 7284 | 4426  | MMT00008674 | Iigp2       | 1  |
| 7284 | 4508  | MMT00008674 | Ifit1       | 1  |
| 7284 | 4516  | MMT00008674 | Rsad2       | 1  |
| 7284 | 5044  | MMT00008674 | Ifi35       | 1  |
| 7284 | 5216  | MMT00008674 | Spnb5       | 1  |
| 7284 | 5250  | MMT00008674 | Ifit2       | 1  |
| 7284 | 5853  | MMT00008674 | Trim30      | 1  |
| 7284 | 5949  | MMT00008674 | Zbp1        | 1  |
| 7284 | 6587  | MMT00008674 | Irf9        | 1  |
| 7284 | 6595  | MMT00008674 | Oas1a       | 1  |
| 7284 | 6779  | MMT00008674 | Gbp6        | 1  |
| 7284 | 6806  | MMT00008674 | Agrn        | 1  |
| 7284 | 6824  | MMT00008674 | Irf7        | 1  |
| 7284 | 6910  | MMT00008674 | Ly6c2       | 1  |
| 7284 | 7069  | MMT00008674 | Ube1l       | 1  |
| 7284 | 7105  | MMT00008674 | Plac8       | 1  |
| 7284 | 7284  | MMT00008674 | MMT00008674 | 1  |
| 7284 | 7316  | MMT00008674 | Ifi204      | 1  |
| 7284 | 8392  | MMT00008674 | Asf1b       | 1  |
| 7284 | 8800  | MMT00008674 | Rnf213      | 1  |
| 7284 | 9100  | MMT00008674 | Ms4a6c      | 1  |
| 7284 | 9820  | MMT00008674 | BC023105    | 1  |
| 7284 | 9847  | MMT00008674 | Ifi27       | 1  |
| 7284 | 10109 | MMT00008674 | Gbp3        | 1  |
| 7284 | 10504 | MMT00008674 | Ripk3       | 1  |
| 7284 | 11009 | MMT00008674 | MMT00008885 | 1  |
| 7284 | 11204 | MMT00008674 | Al451617    | 1  |
| 7284 | 11265 | MMT00008674 | Irgm        | 1  |
| 7284 | 11701 | MMT00008674 | Oas1c       | 1  |
| 7284 | 12126 | MMT00008674 | Znfx1       | 1  |
| 7284 | 12398 | MMT00008674 | Ifi44       | 1  |
| 7284 | 12600 | MMT00008674 | Ifi204      | 1  |
| 7284 | 12969 | MMT00008674 | Xaf1        | 1  |
| 7284 | 13156 | MMT00008674 | Ifit3       | 1  |
| 7284 | 13309 | MMT00008674 | Tgtp        | 1  |
| 7284 | 13514 | MMT00008674 | Apol9b      | 1  |

|      |       |             |               |    |
|------|-------|-------------|---------------|----|
| 7284 | 13528 | MMT00008674 | Capn12        | 1  |
| 7284 | 13654 | MMT00008674 | Stat1         | 1  |
| 7284 | 14258 | MMT00008674 | Ifi47         | 1  |
| 7284 | 14506 | MMT00008674 | Slc15a3       | 1  |
| 7284 | 14603 | MMT00008674 | Ly6e          | 1  |
| 7284 | 14880 | MMT00008674 | Ms4a4c        | 1  |
| 7284 | 15074 | MMT00008674 | Usp18         | 1  |
| 7284 | 15280 | MMT00008674 | Cxcl10        | 1  |
| 7284 | 15449 | MMT00008674 | Mitd1         | 1  |
| 7284 | 15504 | MMT00008674 | Mx2           | 1  |
| 7284 | 16182 | MMT00008674 | Oasl1         | 1  |
| 7284 | 16199 | MMT00008674 | Samhd1        | 1  |
| 7284 | 16521 | MMT00008674 | Adar          | 1  |
| 7284 | 16572 | MMT00008674 | D14Ert668e    | 1  |
| 7284 | 17197 | MMT00008674 | Igtp          | 1  |
| 7284 | 18174 | MMT00008674 | Stat2         | 1  |
| 7284 | 18186 | MMT00008674 | Parp14        | 1  |
| 7284 | 19189 | MMT00008674 | Sp100         | 1  |
| 7284 | 19708 | MMT00008674 | Ly6a          | 1  |
| 7284 | 19738 | MMT00008674 | Lgals3bp      | 1  |
| 7284 | 20997 | MMT00008674 | MMT00028135   | 1  |
| 7284 | 21351 | MMT00008674 | Shisa5        | 1  |
| 7284 | 21549 | MMT00008674 | Rtp4          | 1  |
| 7284 | 21824 | MMT00008674 | 5830443L24Rik | 1  |
| 7284 | 22037 | MMT00008674 | Oas1g         | 1  |
| 7284 | 23208 | MMT00008674 | Hck           | 1  |
| 7284 | 23450 | MMT00008674 | D12Ert647e    | 1  |
| 7285 | 7492  | Tbc1d4      | Adfp          | -1 |
| 7285 | 8404  | Tbc1d4      | Fa2h          | -1 |
| 7286 | 607   | Noxo1       | Me1           | -1 |
| 7286 | 4674  | Noxo1       | Cxcl12        | 1  |
| 7286 | 7602  | Noxo1       | Pcca          | -1 |
| 7286 | 8444  | Noxo1       | Rdh16         | -1 |
| 7286 | 8815  | Noxo1       | Mx1           | -1 |
| 7286 | 12143 | Noxo1       | Thyn1         | -1 |
| 7286 | 18201 | Noxo1       | MMT00060232   | -1 |
| 7286 | 20079 | Noxo1       | MMT00019254   | 1  |
| 7286 | 21214 | Noxo1       | Scd1          | -1 |
| 7292 | 1258  | Spna1       | Hba-a1        | 1  |
| 7292 | 1379  | Spna1       | A930041C12Rik | -1 |
| 7292 | 5364  | Spna1       | Kif22         | 1  |
| 7292 | 5919  | Spna1       | B930041F14Rik | 1  |
| 7292 | 21356 | Spna1       | Nkx2-6        | 1  |
| 7303 | 607   | Tmem182     | Me1           | 1  |
| 7303 | 8444  | Tmem182     | Rdh16         | 1  |
| 7303 | 8815  | Tmem182     | Mx1           | 1  |
| 7303 | 9427  | Tmem182     | Nqo2          | 1  |
| 7303 | 12910 | Tmem182     | 1110028A07Rik | 1  |
| 7303 | 18201 | Tmem182     | MMT00060232   | 1  |
| 7303 | 20058 | Tmem182     | Dnaic1        | -1 |
| 7303 | 21214 | Tmem182     | Scd1          | 1  |

|      |       |               |               |    |
|------|-------|---------------|---------------|----|
| 7311 | 18886 | Lsm6          | Slc18a1       | 1  |
| 7315 | 21214 | EG624219      | Scd1          | 1  |
| 7320 | 18846 | MMT00051732   | Ikbkg         | 1  |
| 7320 | 21214 | MMT00051732   | Scd1          | 1  |
| 7320 | 21251 | MMT00051732   | Cpt1a         | -1 |
| 7321 | 327   | Rdbp          | H2-Ea         | -1 |
| 7321 | 2325  | Rdbp          | H2-K1         | -1 |
| 7321 | 2938  | Rdbp          | H2-T23        | -1 |
| 7321 | 10667 | Rdbp          | H2-Eb1        | -1 |
| 7321 | 20238 | Rdbp          | H2-T9         | -1 |
| 7321 | 22822 | Rdbp          | MMT00013433   | -1 |
| 7362 | 22138 | Rrm2          | Ang           | -1 |
| 7367 | 5364  | Gchfr         | Kif22         | -1 |
| 7367 | 14472 | Gchfr         | Ahcy          | 1  |
| 7367 | 20678 | Gchfr         | Cyp39a1       | 1  |
| 7367 | 21512 | Gchfr         | Gas6          | -1 |
| 7368 | 12910 | Adam8         | 1110028A07Rik | 1  |
| 7370 | 2456  | Spop          | Mrpl10        | -1 |
| 7370 | 7370  | Spop          | Spop          | 1  |
| 7370 | 12302 | Spop          | Cbx1          | -1 |
| 7377 | 10978 | Suds3         | MMT00078322   | 1  |
| 7377 | 12656 | Suds3         | Coq5          | 1  |
| 7378 | 3598  | 1700001J03Rik | Rpo1-3        | 1  |
| 7378 | 5225  | 1700001J03Rik | Maf1          | 1  |
| 7378 | 10435 | 1700001J03Rik | Nab2          | 1  |
| 7378 | 10612 | 1700001J03Rik | Slc24a6       | 1  |
| 7378 | 17862 | 1700001J03Rik | Fbxo21        | 1  |
| 7389 | 1357  | Sfrs5         | Pabpn1        | 1  |
| 7396 | 213   | Lao1          | Rgs16         | 1  |
| 7396 | 250   | Lao1          | Tubb2a-ps2    | -1 |
| 7396 | 269   | Lao1          | Tuba1b        | -1 |
| 7396 | 337   | Lao1          | Rasgef1b      | 1  |
| 7396 | 402   | Lao1          | Timp3         | 1  |
| 7396 | 407   | Lao1          | Serpina6      | 1  |
| 7396 | 413   | Lao1          | Acy1          | 1  |
| 7396 | 437   | Lao1          | Ndrp1         | -1 |
| 7396 | 530   | Lao1          | Mest          | -1 |
| 7396 | 563   | Lao1          | D4Bwg0951e    | 1  |
| 7396 | 609   | Lao1          | MMT00060868   | -1 |
| 7396 | 719   | Lao1          | Usp2          | 1  |
| 7396 | 1646  | Lao1          | Slc15a4       | 1  |
| 7396 | 1709  | Lao1          | Mt2           | 1  |
| 7396 | 1767  | Lao1          | BC016495      | 1  |
| 7396 | 1805  | Lao1          | Tmem204       | 1  |
| 7396 | 1941  | Lao1          | MMT00079618   | -1 |
| 7396 | 2110  | Lao1          | Gtf2ird1      | -1 |
| 7396 | 2126  | Lao1          | Dgat2         | 1  |
| 7396 | 2200  | Lao1          | BC006779      | -1 |
| 7396 | 2294  | Lao1          | AU040829      | 1  |
| 7396 | 2305  | Lao1          | 2610002M06Rik | -1 |
| 7396 | 2322  | Lao1          | Tuba4a        | -1 |



|      |      |      |               |    |
|------|------|------|---------------|----|
| 7396 | 2399 | Lao1 | MMT00060167   | -1 |
| 7396 | 2483 | Lao1 | Gmeb1         | 1  |
| 7396 | 2529 | Lao1 | Hmcn2         | 1  |
| 7396 | 2636 | Lao1 | Tars          | -1 |
| 7396 | 2794 | Lao1 | Map3k6        | 1  |
| 7396 | 2829 | Lao1 | Lrfn3         | -1 |
| 7396 | 2850 | Lao1 | Slc16a6       | -1 |
| 7396 | 3170 | Lao1 | Mcart1        | 1  |
| 7396 | 3214 | Lao1 | Dnmt3b        | -1 |
| 7396 | 3246 | Lao1 | Prei4         | 1  |
| 7396 | 3410 | Lao1 | Paqr9         | -1 |
| 7396 | 3502 | Lao1 | Gde1          | 1  |
| 7396 | 3603 | Lao1 | BC027231      | 1  |
| 7396 | 3686 | Lao1 | Psmc9         | 1  |
| 7396 | 3746 | Lao1 | Osbpl5        | 1  |
| 7396 | 3790 | Lao1 | Mtss1         | 1  |
| 7396 | 3804 | Lao1 | MMT00015534   | -1 |
| 7396 | 4201 | Lao1 | Tubb2c        | -1 |
| 7396 | 4235 | Lao1 | Pfkfb3        | 1  |
| 7396 | 4286 | Lao1 | Ptp4a1        | 1  |
| 7396 | 4333 | Lao1 | Sumo3         | -1 |
| 7396 | 4392 | Lao1 | 1810055G02Rik | 1  |
| 7396 | 4534 | Lao1 | Ndel1         | 1  |
| 7396 | 4678 | Lao1 | Kank1         | -1 |
| 7396 | 4686 | Lao1 | BC021785      | -1 |
| 7396 | 4708 | Lao1 | Traf3ip2      | -1 |
| 7396 | 5068 | Lao1 | Afap112       | -1 |
| 7396 | 5183 | Lao1 | St5           | -1 |
| 7396 | 5187 | Lao1 | Speer4f       | 1  |
| 7396 | 5345 | Lao1 | MMT00023326   | 1  |
| 7396 | 5374 | Lao1 | Chka          | -1 |
| 7396 | 5569 | Lao1 | Pdgfc         | -1 |
| 7396 | 5574 | Lao1 | Hsd3b7        | -1 |
| 7396 | 5734 | Lao1 | EG619653      | 1  |
| 7396 | 5791 | Lao1 | Baiap211      | 1  |
| 7396 | 5814 | Lao1 | Nrbp2         | 1  |
| 7396 | 5849 | Lao1 | 2310031A18Rik | -1 |
| 7396 | 5856 | Lao1 | Mfsd2         | 1  |
| 7396 | 5934 | Lao1 | S100a10       | -1 |
| 7396 | 5974 | Lao1 | Arntl         | -1 |
| 7396 | 6118 | Lao1 | Slc1a4        | -1 |
| 7396 | 6211 | Lao1 | Arhgap24      | -1 |
| 7396 | 6282 | Lao1 | Them4         | 1  |
| 7396 | 6343 | Lao1 | Slc20a1       | 1  |
| 7396 | 6386 | Lao1 | Por           | 1  |
| 7396 | 6490 | Lao1 | Il1r1         | 1  |
| 7396 | 6675 | Lao1 | Sfrs4         | 1  |
| 7396 | 6756 | Lao1 | Sds           | 1  |
| 7396 | 6771 | Lao1 | Insc          | -1 |
| 7396 | 6788 | Lao1 | Psen2         | -1 |
| 7396 | 6928 | Lao1 | Klhl8         | -1 |

|      |       |      |               |    |
|------|-------|------|---------------|----|
| 7396 | 6990  | Lao1 | Nr1i2         | 1  |
| 7396 | 7061  | Lao1 | Spsb3         | -1 |
| 7396 | 7066  | Lao1 | Agtr1b        | 1  |
| 7396 | 7112  | Lao1 | Apbb3         | 1  |
| 7396 | 7151  | Lao1 | MMT00007982   | -1 |
| 7396 | 7414  | Lao1 | Clpx          | -1 |
| 7396 | 7839  | Lao1 | Asl           | 1  |
| 7396 | 7842  | Lao1 | Pdk2          | 1  |
| 7396 | 7862  | Lao1 | Cpsf4l        | 1  |
| 7396 | 7963  | Lao1 | Rxrg          | -1 |
| 7396 | 8200  | Lao1 | Dfna5h        | -1 |
| 7396 | 8328  | Lao1 | Klhdc8a       | -1 |
| 7396 | 8399  | Lao1 | Herpud1       | 1  |
| 7396 | 8428  | Lao1 | Sorbs3        | 1  |
| 7396 | 8641  | Lao1 | Slc7a2        | 1  |
| 7396 | 9260  | Lao1 | Cmtm6         | -1 |
| 7396 | 9309  | Lao1 | MMT00035904   | 1  |
| 7396 | 9438  | Lao1 | Pctk3         | 1  |
| 7396 | 9495  | Lao1 | Srms          | -1 |
| 7396 | 9763  | Lao1 | Tuba3b        | -1 |
| 7396 | 9910  | Lao1 | EG666644      | 1  |
| 7396 | 10029 | Lao1 | Trak1         | 1  |
| 7396 | 10088 | Lao1 | Ddc           | -1 |
| 7396 | 10166 | Lao1 | Rhbdd2        | 1  |
| 7396 | 10207 | Lao1 | MMT00012324   | -1 |
| 7396 | 10215 | Lao1 | Nampt         | 1  |
| 7396 | 10408 | Lao1 | Per1          | 1  |
| 7396 | 10486 | Lao1 | 1300002K09Rik | -1 |
| 7396 | 10642 | Lao1 | Ngef          | 1  |
| 7396 | 10712 | Lao1 | Fchsd2        | 1  |
| 7396 | 10775 | Lao1 | Slc16a1       | -1 |
| 7396 | 11093 | Lao1 | Zdhhc1        | 1  |
| 7396 | 11129 | Lao1 | Ankhd1        | 1  |
| 7396 | 11412 | Lao1 | Abcg5         | 1  |
| 7396 | 11574 | Lao1 | Gne           | 1  |
| 7396 | 11599 | Lao1 | Coq10b        | 1  |
| 7396 | 11724 | Lao1 | Tuba3a        | -1 |
| 7396 | 11741 | Lao1 | Slc30a10      | -1 |
| 7396 | 11807 | Lao1 | Fbxo31        | 1  |
| 7396 | 11808 | Lao1 | Pck1          | 1  |
| 7396 | 11949 | Lao1 | Cldn3         | -1 |
| 7396 | 12151 | Lao1 | MMT00082650   | 1  |
| 7396 | 12193 | Lao1 | Aco2          | 1  |
| 7396 | 12204 | Lao1 | Ankmy2        | 1  |
| 7396 | 12420 | Lao1 | Klh21         | 1  |
| 7396 | 12460 | Lao1 | Pnpla2        | 1  |
| 7396 | 12479 | Lao1 | Ifrd1         | 1  |
| 7396 | 12489 | Lao1 | Wdr8          | -1 |
| 7396 | 12761 | Lao1 | Tsc22d3       | 1  |
| 7396 | 12799 | Lao1 | Spon2         | -1 |
| 7396 | 12981 | Lao1 | Nek6          | -1 |

|      |       |      |               |    |
|------|-------|------|---------------|----|
| 7396 | 12995 | Lao1 | Tmed9         | -1 |
| 7396 | 13289 | Lao1 | Dusp10        | -1 |
| 7396 | 13339 | Lao1 | D630042F21Rik | 1  |
| 7396 | 13471 | Lao1 | Cln8          | 1  |
| 7396 | 13962 | Lao1 | Chd7          | 1  |
| 7396 | 13989 | Lao1 | Foxp3         | 1  |
| 7396 | 14041 | Lao1 | Cldn1         | -1 |
| 7396 | 14258 | Lao1 | Ifi47         | -1 |
| 7396 | 14380 | Lao1 | MMT00051866   | -1 |
| 7396 | 14462 | Lao1 | Zfp385b       | 1  |
| 7396 | 14620 | Lao1 | Tbc1d8        | 1  |
| 7396 | 14626 | Lao1 | Zbtb2         | 1  |
| 7396 | 14705 | Lao1 | Slc43a1       | 1  |
| 7396 | 14726 | Lao1 | Slc19a1       | 1  |
| 7396 | 14989 | Lao1 | Map3k5        | 1  |
| 7396 | 15021 | Lao1 | Ppargc1a      | 1  |
| 7396 | 15052 | Lao1 | Kifc3         | -1 |
| 7396 | 15280 | Lao1 | Cxcl10        | -1 |
| 7396 | 15481 | Lao1 | 1110067D22Rik | -1 |
| 7396 | 15521 | Lao1 | Mast3         | 1  |
| 7396 | 15522 | Lao1 | 1810011O10Rik | 1  |
| 7396 | 15607 | Lao1 | Klf13         | 1  |
| 7396 | 15609 | Lao1 | Mreg          | -1 |
| 7396 | 15624 | Lao1 | Crcp          | 1  |
| 7396 | 15631 | Lao1 | Lpin1         | 1  |
| 7396 | 15709 | Lao1 | Tceal1        | 1  |
| 7396 | 15882 | Lao1 | AA986860      | 1  |
| 7396 | 16060 | Lao1 | Gys2          | 1  |
| 7396 | 16176 | Lao1 | St3gal5       | 1  |
| 7396 | 16515 | Lao1 | Gramd4        | -1 |
| 7396 | 16580 | Lao1 | Tnfaip2       | -1 |
| 7396 | 16647 | Lao1 | D16H22S680E   | 1  |
| 7396 | 16669 | Lao1 | Tjp2          | -1 |
| 7396 | 16690 | Lao1 | Tjp3          | -1 |
| 7396 | 16851 | Lao1 | Slc34a2       | -1 |
| 7396 | 17022 | Lao1 | MMT00055891   | -1 |
| 7396 | 17091 | Lao1 | Slc38a3       | 1  |
| 7396 | 17223 | Lao1 | 4933426M11Rik | 1  |
| 7396 | 17323 | Lao1 | Tubb6         | -1 |
| 7396 | 17338 | Lao1 | Mocos         | -1 |
| 7396 | 17352 | Lao1 | Cebpb         | 1  |
| 7396 | 17444 | Lao1 | Tuba1a        | -1 |
| 7396 | 17525 | Lao1 | Ctgf          | 1  |
| 7396 | 17530 | Lao1 | MMT00041792   | -1 |
| 7396 | 17577 | Lao1 | Med28         | -1 |
| 7396 | 17617 | Lao1 | Atp5sl        | 1  |
| 7396 | 17622 | Lao1 | Foxo1         | 1  |
| 7396 | 17656 | Lao1 | Hdhd3         | -1 |
| 7396 | 17876 | Lao1 | Tubb4         | -1 |
| 7396 | 17878 | Lao1 | Brap          | 1  |
| 7396 | 17880 | Lao1 | Ncald         | -1 |

|      |       |      |               |    |
|------|-------|------|---------------|----|
| 7396 | 18027 | Lao1 | 5730403B10Rik | 1  |
| 7396 | 18174 | Lao1 | Stat2         | -1 |
| 7396 | 18179 | Lao1 | Dbp           | 1  |
| 7396 | 18314 | Lao1 | 4631416L12Rik | 1  |
| 7396 | 18498 | Lao1 | Slc5a6        | 1  |
| 7396 | 18586 | Lao1 | Tns1          | 1  |
| 7396 | 18785 | Lao1 | Angptl4       | 1  |
| 7396 | 18802 | Lao1 | Nit2          | -1 |
| 7396 | 18827 | Lao1 | Oprs1         | -1 |
| 7396 | 19025 | Lao1 | Slc37a4       | 1  |
| 7396 | 19124 | Lao1 | Pim3          | 1  |
| 7396 | 19146 | Lao1 | N4bp2l1       | 1  |
| 7396 | 19217 | Lao1 | Cyr61         | -1 |
| 7396 | 19234 | Lao1 | Nrg4          | 1  |
| 7396 | 19453 | Lao1 | Cdk2ap2       | -1 |
| 7396 | 19466 | Lao1 | Pptc7         | 1  |
| 7396 | 19532 | Lao1 | Med8          | -1 |
| 7396 | 19671 | Lao1 | Upp2          | 1  |
| 7396 | 19723 | Lao1 | Pfkfb1        | 1  |
| 7396 | 19757 | Lao1 | Fkbp5         | 1  |
| 7396 | 19790 | Lao1 | Polg2         | 1  |
| 7396 | 19970 | Lao1 | Mrpl36        | -1 |
| 7396 | 20085 | Lao1 | Lpin2         | 1  |
| 7396 | 20803 | Lao1 | Tmem50a       | 1  |
| 7396 | 20854 | Lao1 | Commd7        | -1 |
| 7396 | 20907 | Lao1 | Lims2         | 1  |
| 7396 | 21142 | Lao1 | Gm129         | 1  |
| 7396 | 21331 | Lao1 | Slc10a6       | 1  |
| 7396 | 21733 | Lao1 | Rhebl1        | 1  |
| 7396 | 21811 | Lao1 | Ak3l1         | 1  |
| 7396 | 21918 | Lao1 | Snx24         | -1 |
| 7396 | 21934 | Lao1 | Id2           | -1 |
| 7396 | 21969 | Lao1 | Tk1           | 1  |
| 7396 | 22012 | Lao1 | Itgae         | -1 |
| 7396 | 22076 | Lao1 | Pgm2l1        | 1  |
| 7396 | 22146 | Lao1 | Aifm2         | 1  |
| 7396 | 22290 | Lao1 | Tubb2a        | -1 |
| 7396 | 22443 | Lao1 | Tuba1c        | -1 |
| 7396 | 22470 | Lao1 | Ppargc1b      | 1  |
| 7396 | 22630 | Lao1 | MMT00034355   | -1 |
| 7396 | 22681 | Lao1 | Gm88          | 1  |
| 7396 | 22936 | Lao1 | Rhobtb1       | 1  |
| 7396 | 23161 | Lao1 | Gclc          | -1 |
| 7396 | 23183 | Lao1 | Nnmt          | 1  |
| 7396 | 23201 | Lao1 | S1pr1         | -1 |
| 7396 | 23202 | Lao1 | Olf559        | 1  |
| 7396 | 23248 | Lao1 | Tesk2         | 1  |
| 7396 | 23253 | Lao1 | D030011O10Rik | 1  |
| 7396 | 23437 | Lao1 | Efh2          | 1  |
| 7396 | 23558 | Lao1 | MMT00030937   | 1  |
| 7396 | 23680 | Lao1 | 5730419I09Rik | -1 |

|      |       |        |               |    |
|------|-------|--------|---------------|----|
| 7400 | 6171  | Cars2  | Abtb2         | 1  |
| 7400 | 14442 | Cars2  | Ethe1         | 1  |
| 7400 | 16712 | Cars2  | Pnrc1         | 1  |
| 7400 | 21251 | Cars2  | Cpt1a         | -1 |
| 7400 | 23640 | Cars2  | Bdh1          | -1 |
| 7419 | 6746  | Arid5a | E2f8          | 1  |
| 7419 | 17638 | Arid5a | Adssl1        | -1 |
| 7424 | 3377  | Cdkn1c | Cs            | -1 |
| 7452 | 2932  | Abcc9  | Slco1a1       | 1  |
| 7452 | 6765  | Abcc9  | Ldhb          | 1  |
| 7472 | 7472  | Klra1  | Klra1         | 1  |
| 7479 | 563   | Mcf2l  | D4Bwg0951e    | 1  |
| 7479 | 1646  | Mcf2l  | Slc15a4       | 1  |
| 7479 | 1877  | Mcf2l  | Amica1        | 1  |
| 7479 | 2294  | Mcf2l  | AU040829      | 1  |
| 7479 | 2794  | Mcf2l  | Map3k6        | 1  |
| 7479 | 3559  | Mcf2l  | 4933433P14Rik | 1  |
| 7479 | 3686  | Mcf2l  | Psmc9         | 1  |
| 7479 | 4235  | Mcf2l  | Pfkfb3        | 1  |
| 7479 | 4392  | Mcf2l  | 1810055G02Rik | 1  |
| 7479 | 4678  | Mcf2l  | Kank1         | -1 |
| 7479 | 5345  | Mcf2l  | MMT00023326   | 1  |
| 7479 | 5791  | Mcf2l  | Baiap2l1      | 1  |
| 7479 | 6490  | Mcf2l  | Ii1r1         | 1  |
| 7479 | 6675  | Mcf2l  | Sfrs4         | 1  |
| 7479 | 6771  | Mcf2l  | Insc          | -1 |
| 7479 | 6990  | Mcf2l  | Nr1i2         | 1  |
| 7479 | 8399  | Mcf2l  | Herpud1       | 1  |
| 7479 | 11193 | Mcf2l  | Tsc22d1       | -1 |
| 7479 | 11807 | Mcf2l  | Fbxo31        | 1  |
| 7479 | 11808 | Mcf2l  | Pck1          | 1  |
| 7479 | 12420 | Mcf2l  | Klh21         | 1  |
| 7479 | 12460 | Mcf2l  | Pnpla2        | 1  |
| 7479 | 12489 | Mcf2l  | Wdr8          | -1 |
| 7479 | 13471 | Mcf2l  | Cln8          | 1  |
| 7479 | 14620 | Mcf2l  | Tbc1d8        | 1  |
| 7479 | 14626 | Mcf2l  | Zbtb2         | 1  |
| 7479 | 15021 | Mcf2l  | Ppargc1a      | 1  |
| 7479 | 15631 | Mcf2l  | Lpin1         | 1  |
| 7479 | 15668 | Mcf2l  | 1810032O08Rik | 1  |
| 7479 | 15882 | Mcf2l  | AA986860      | 1  |
| 7479 | 16176 | Mcf2l  | St3gal5       | 1  |
| 7479 | 16580 | Mcf2l  | Tnfaip2       | -1 |
| 7479 | 17622 | Mcf2l  | Foxo1         | 1  |
| 7479 | 18027 | Mcf2l  | 5730403B10Rik | 1  |
| 7479 | 18314 | Mcf2l  | 4631416L12Rik | 1  |
| 7479 | 18785 | Mcf2l  | Angptl4       | 1  |
| 7479 | 18802 | Mcf2l  | Nit2          | -1 |
| 7479 | 19025 | Mcf2l  | Slc37a4       | 1  |
| 7479 | 19146 | Mcf2l  | N4bp2l1       | 1  |
| 7479 | 19466 | Mcf2l  | Pptc7         | 1  |

|      |       |               |                    |    |
|------|-------|---------------|--------------------|----|
| 7479 | 21331 | Mcf2l         | Slc10a6            | 1  |
| 7479 | 22076 | Mcf2l         | Pgm211             | 1  |
| 7479 | 22388 | Mcf2l         | 2410018M08Rik      | 1  |
| 7479 | 23201 | Mcf2l         | S1pr1              | -1 |
| 7480 | 760   | 4930506M07Rik | Akr1c19            | -1 |
| 7480 | 771   | 4930506M07Rik | Zbtb45             | 1  |
| 7480 | 4286  | 4930506M07Rik | Ptp4a1             | -1 |
| 7480 | 4534  | 4930506M07Rik | Ndel1              | -1 |
| 7480 | 5364  | 4930506M07Rik | Kif22              | 1  |
| 7480 | 8641  | 4930506M07Rik | Slc7a2             | -1 |
| 7480 | 11741 | 4930506M07Rik | Slc30a10           | 1  |
| 7480 | 12799 | 4930506M07Rik | Spon2              | 1  |
| 7480 | 16690 | 4930506M07Rik | Tjp3               | 1  |
| 7480 | 17323 | 4930506M07Rik | Tubb6              | 1  |
| 7480 | 18827 | 4930506M07Rik | Oprs1              | 1  |
| 7480 | 23248 | 4930506M07Rik | Tesk2              | -1 |
| 7495 | 5822  | Ugt2b5        | Car2               | 1  |
| 7495 | 5938  | Ugt2b5        | Pfn2               | 1  |
| 7495 | 8568  | Ugt2b5        | Tnik               | 1  |
| 7495 | 12367 | Ugt2b5        | MMT00072365        | -1 |
| 7495 | 12784 | Ugt2b5        | Nudt6              | 1  |
| 7495 | 13423 | Ugt2b5        | ENSMUSG00000053749 | 1  |
| 7495 | 15508 | Ugt2b5        | 4632415L05Rik      | 1  |
| 7495 | 16416 | Ugt2b5        | Commd2             | 1  |
| 7495 | 18790 | Ugt2b5        | Car3               | 1  |
| 7495 | 21323 | Ugt2b5        | MMT00074228        | 1  |
| 7496 | 250   | Arsi          | Tubb2a-ps2         | 1  |
| 7496 | 609   | Arsi          | MMT00060868        | 1  |
| 7496 | 719   | Arsi          | Usp2               | -1 |
| 7496 | 1561  | Arsi          | Aurka              | 1  |
| 7496 | 2384  | Arsi          | Micalcl            | 1  |
| 7496 | 2399  | Arsi          | MMT00060167        | 1  |
| 7496 | 2636  | Arsi          | Tars               | 1  |
| 7496 | 2766  | Arsi          | Elp4               | 1  |
| 7496 | 2850  | Arsi          | Slc16a6            | 1  |
| 7496 | 2963  | Arsi          | Tmem64             | 1  |
| 7496 | 3214  | Arsi          | Dnmt3b             | 1  |
| 7496 | 3410  | Arsi          | Paqr9              | 1  |
| 7496 | 3804  | Arsi          | MMT00015534        | 1  |
| 7496 | 5068  | Arsi          | Afap112            | 1  |
| 7496 | 5183  | Arsi          | St5                | 1  |
| 7496 | 5364  | Arsi          | Kif22              | 1  |
| 7496 | 5374  | Arsi          | Chka               | 1  |
| 7496 | 5974  | Arsi          | Arntl              | 1  |
| 7496 | 6213  | Arsi          | Ccl2               | 1  |
| 7496 | 6386  | Arsi          | Por                | -1 |
| 7496 | 7414  | Arsi          | Clpx               | 1  |
| 7496 | 7492  | Arsi          | Adfp               | 1  |
| 7496 | 7862  | Arsi          | Cpsf4l             | -1 |
| 7496 | 8416  | Arsi          | Cdc20              | 1  |
| 7496 | 8428  | Arsi          | Sorbs3             | -1 |

|      |       |           |               |    |
|------|-------|-----------|---------------|----|
| 7496 | 9700  | Arsi      | Prodh         | -1 |
| 7496 | 9910  | Arsi      | EG666644      | -1 |
| 7496 | 10775 | Arsi      | Slc16a1       | 1  |
| 7496 | 11233 | Arsi      | Tef           | -1 |
| 7496 | 11741 | Arsi      | Slc30a10      | 1  |
| 7496 | 12420 | Arsi      | Klhl21        | -1 |
| 7496 | 12799 | Arsi      | Spon2         | 1  |
| 7496 | 12904 | Arsi      | MMT00040704   | -1 |
| 7496 | 12941 | Arsi      | Elov15        | 1  |
| 7496 | 13054 | Arsi      | Mcm4          | 1  |
| 7496 | 15008 | Arsi      | Chrdl2        | -1 |
| 7496 | 15049 | Arsi      | Rnf125        | 1  |
| 7496 | 15320 | Arsi      | MMT00017479   | -1 |
| 7496 | 15481 | Arsi      | 1110067D22Rik | 1  |
| 7496 | 15709 | Arsi      | Tceal1        | -1 |
| 7496 | 17216 | Arsi      | Nuf2          | 1  |
| 7496 | 17247 | Arsi      | A030007L17Rik | 1  |
| 7496 | 17876 | Arsi      | Tubb4         | 1  |
| 7496 | 18069 | Arsi      | Gpt           | -1 |
| 7496 | 18179 | Arsi      | Dbp           | -1 |
| 7496 | 18827 | Arsi      | Oprs1         | 1  |
| 7496 | 19234 | Arsi      | Nrg4          | -1 |
| 7496 | 19466 | Arsi      | Pptc7         | -1 |
| 7496 | 19671 | Arsi      | Upp2          | -1 |
| 7496 | 19790 | Arsi      | Polg2         | -1 |
| 7496 | 20433 | Arsi      | Cdca5         | 1  |
| 7496 | 21142 | Arsi      | Gm129         | -1 |
| 7496 | 21947 | Arsi      | Cdca8         | 1  |
| 7496 | 22290 | Arsi      | Tubb2a        | 1  |
| 7496 | 22630 | Arsi      | MMT00034355   | 1  |
| 7499 | 607   | Nipa1     | Me1           | 1  |
| 7499 | 5934  | Nipa1     | S100a10       | 1  |
| 7499 | 6193  | Nipa1     | Lactb2        | 1  |
| 7499 | 6370  | Nipa1     | Aqp8          | 1  |
| 7499 | 8815  | Nipa1     | Mx1           | 1  |
| 7499 | 10961 | Nipa1     | Pgd           | 1  |
| 7499 | 11129 | Nipa1     | Ankhd1        | -1 |
| 7499 | 12910 | Nipa1     | 1110028A07Rik | 1  |
| 7499 | 13889 | Nipa1     | Agpat2        | 1  |
| 7499 | 14017 | Nipa1     | Ces5          | 1  |
| 7499 | 15862 | Nipa1     | Mrap          | 1  |
| 7499 | 18201 | Nipa1     | MMT00060232   | 1  |
| 7499 | 18827 | Nipa1     | Oprs1         | 1  |
| 7499 | 21202 | Nipa1     | Acly          | 1  |
| 7499 | 21214 | Nipa1     | Scd1          | 1  |
| 7499 | 21251 | Nipa1     | Cpt1a         | -1 |
| 7499 | 22138 | Nipa1     | Ang           | -1 |
| 7503 | 403   | Rab11fip1 | Leprotl1      | -1 |
| 7503 | 13004 | Rab11fip1 | Arhgef10      | 1  |
| 7503 | 16617 | Rab11fip1 | Sh2d4a        | -1 |
| 7503 | 17553 | Rab11fip1 | Eif4ebp1      | 1  |

|      |       |               |                    |    |
|------|-------|---------------|--------------------|----|
| 7503 | 18886 | Rab11fip1     | Slc18a1            | -1 |
| 7507 | 18201 | Ccdc136       | MMT00060232        | -1 |
| 7513 | 21331 | Nr5a2         | Slc10a6            | -1 |
| 7519 | 524   | Gstm1         | Hsd3b2             | 1  |
| 7519 | 1466  | Gstm1         | Ubap2l             | 1  |
| 7519 | 1867  | Gstm1         | Bcas2              | 1  |
| 7519 | 1963  | Gstm1         | MMT00039783        | 1  |
| 7519 | 3753  | Gstm1         | Setdb1             | -1 |
| 7519 | 7519  | Gstm1         | Gstm1              | 1  |
| 7519 | 10521 | Gstm1         | Ttf2               | 1  |
| 7519 | 10681 | Gstm1         | Dgkz               | -1 |
| 7519 | 11121 | Gstm1         | Mtmr11             | -1 |
| 7519 | 11611 | Gstm1         | S100a13            | -1 |
| 7519 | 16679 | Gstm1         | Ctsk               | -1 |
| 7519 | 20385 | Gstm1         | Chd1l              | 1  |
| 7519 | 21814 | Gstm1         | Accn5              | 1  |
| 7519 | 22202 | Gstm1         | OTTMUSG00000021274 | -1 |
| 7519 | 22570 | Gstm1         | Phtf1              | 1  |
| 7520 | 13034 | MMT00070057   | 4933437I04Rik      | -1 |
| 7524 | 337   | Aldh4a1       | Rasgef1b           | 1  |
| 7524 | 4235  | Aldh4a1       | Pfkfb3             | 1  |
| 7524 | 12761 | Aldh4a1       | Tsc22d3            | 1  |
| 7524 | 15522 | Aldh4a1       | 1810011O10Rik      | 1  |
| 7524 | 15882 | Aldh4a1       | AA986860           | 1  |
| 7524 | 16517 | Aldh4a1       | D4Wsu53e           | 1  |
| 7524 | 16580 | Aldh4a1       | Tnfaip2            | -1 |
| 7524 | 17525 | Aldh4a1       | Ctgf               | 1  |
| 7524 | 23552 | Aldh4a1       | Rasl11b            | -1 |
| 7543 | 12910 | Cct5          | 1110028A07Rik      | -1 |
| 7546 | 6380  | Dhdh1         | 6330569M22Rik      | 1  |
| 7550 | 250   | Rab11fip5     | Tubb2a-ps2         | 1  |
| 7550 | 609   | Rab11fip5     | MMT00060868        | 1  |
| 7550 | 4286  | Rab11fip5     | Ptp4a1             | -1 |
| 7550 | 4534  | Rab11fip5     | Ndel1              | -1 |
| 7550 | 5364  | Rab11fip5     | Kif22              | 1  |
| 7550 | 5574  | Rab11fip5     | Hsd3b7             | 1  |
| 7550 | 6386  | Rab11fip5     | Por                | -1 |
| 7550 | 8399  | Rab11fip5     | Herpud1            | -1 |
| 7550 | 11093 | Rab11fip5     | Zdhhc1             | -1 |
| 7550 | 11129 | Rab11fip5     | Ankhd1             | -1 |
| 7550 | 11599 | Rab11fip5     | Coq10b             | -1 |
| 7550 | 11741 | Rab11fip5     | Slc30a10           | 1  |
| 7550 | 15631 | Rab11fip5     | Lpin1              | -1 |
| 7550 | 15709 | Rab11fip5     | Tceal1             | -1 |
| 7550 | 16176 | Rab11fip5     | St3gal5            | -1 |
| 7550 | 17622 | Rab11fip5     | Foxo1              | -1 |
| 7550 | 18027 | Rab11fip5     | 5730403B10Rik      | -1 |
| 7550 | 22290 | Rab11fip5     | Tubb2a             | 1  |
| 7550 | 23202 | Rab11fip5     | Olfir559           | -1 |
| 7556 | 23693 | A530050D06Rik | A530016L24Rik      | 1  |
| 7560 | 8444  | Cyp2r1        | Rdh16              | 1  |



|      |       |          |               |    |
|------|-------|----------|---------------|----|
| 7560 | 8815  | Cyp2r1   | Mx1           | 1  |
| 7560 | 10132 | Cyp2r1   | Ces2          | 1  |
| 7560 | 12910 | Cyp2r1   | 1110028A07Rik | 1  |
| 7560 | 14017 | Cyp2r1   | Ces5          | 1  |
| 7560 | 17887 | Cyp2r1   | Cryl1         | 1  |
| 7560 | 18201 | Cyp2r1   | MMT00060232   | 1  |
| 7560 | 21214 | Cyp2r1   | Scd1          | 1  |
| 7580 | 327   | Slc22a20 | H2-Ea         | 1  |
| 7580 | 510   | Slc22a20 | Neu1          | -1 |
| 7580 | 1340  | Slc22a20 | Tap2          | 1  |
| 7580 | 2325  | Slc22a20 | H2-K1         | 1  |
| 7580 | 2801  | Slc22a20 | H2-BI         | 1  |
| 7580 | 2938  | Slc22a20 | H2-T23        | 1  |
| 7580 | 3599  | Slc22a20 | MMT00035426   | -1 |
| 7580 | 3704  | Slc22a20 | H2-Q7         | 1  |
| 7580 | 3857  | Slc22a20 | 1700001C19Rik | -1 |
| 7580 | 5410  | Slc22a20 | Cyp4f15       | -1 |
| 7580 | 7088  | Slc22a20 | Slc37a1       | 1  |
| 7580 | 8750  | Slc22a20 | 1700010I14Rik | 1  |
| 7580 | 8767  | Slc22a20 | Rgl2          | 1  |
| 7580 | 10376 | Slc22a20 | C920025E04Rik | -1 |
| 7580 | 10394 | Slc22a20 | MMT00028435   | 1  |
| 7580 | 10667 | Slc22a20 | H2-Eb1        | 1  |
| 7580 | 12355 | Slc22a20 | AI507611      | 1  |
| 7580 | 13493 | Slc22a20 | Ring1         | -1 |
| 7580 | 13789 | Slc22a20 | H2-Q8         | 1  |
| 7580 | 15531 | Slc22a20 | Prickle4      | -1 |
| 7580 | 18906 | Slc22a20 | Zfand3        | 1  |
| 7580 | 20100 | Slc22a20 | Guca1b        | -1 |
| 7580 | 20238 | Slc22a20 | H2-T9         | 1  |
| 7580 | 20346 | Slc22a20 | Gna-rs1       | 1  |
| 7580 | 21295 | Slc22a20 | Snf1lk        | -1 |
| 7580 | 22822 | Slc22a20 | MMT00013433   | 1  |
| 7580 | 23250 | Slc22a20 | Plcl2         | 1  |
| 7590 | 607   | Ankrd40  | Me1           | 1  |
| 7590 | 874   | Ankrd40  | Aldh1a7       | 1  |
| 7590 | 2051  | Ankrd40  | Ddx27         | -1 |
| 7590 | 2314  | Ankrd40  | Zswim6        | 1  |
| 7590 | 3696  | Ankrd40  | Elovl6        | 1  |
| 7590 | 4351  | Ankrd40  | Plxnb1        | -1 |
| 7590 | 5425  | Ankrd40  | Ung           | -1 |
| 7590 | 6044  | Ankrd40  | Sucnr1        | 1  |
| 7590 | 6193  | Ankrd40  | Lactb2        | 1  |
| 7590 | 6502  | Ankrd40  | Col15a1       | 1  |
| 7590 | 8815  | Ankrd40  | Mx1           | 1  |
| 7590 | 8896  | Ankrd40  | Fasn          | 1  |
| 7590 | 9408  | Ankrd40  | Hmgcs2        | -1 |
| 7590 | 9427  | Ankrd40  | Nqo2          | 1  |
| 7590 | 9842  | Ankrd40  | Qdpr          | 1  |
| 7590 | 10961 | Ankrd40  | Pgd           | 1  |
| 7590 | 11129 | Ankrd40  | Ankhd1        | -1 |

|      |       |             |               |    |
|------|-------|-------------|---------------|----|
| 7590 | 11462 | Ankrd40     | Gpam          | 1  |
| 7590 | 12219 | Ankrd40     | Cyb5b         | 1  |
| 7590 | 12910 | Ankrd40     | 1110028A07Rik | 1  |
| 7590 | 14147 | Ankrd40     | Acss2         | 1  |
| 7590 | 14151 | Ankrd40     | Slc44a1       | 1  |
| 7590 | 17660 | Ankrd40     | Nlrp12        | -1 |
| 7590 | 18201 | Ankrd40     | MMT00060232   | 1  |
| 7590 | 18286 | Ankrd40     | Slc41a3       | -1 |
| 7590 | 19766 | Ankrd40     | Slc26a4       | 1  |
| 7590 | 20019 | Ankrd40     | Qdpr          | 1  |
| 7590 | 20058 | Ankrd40     | Dnaic1        | -1 |
| 7590 | 21202 | Ankrd40     | Acly          | 1  |
| 7590 | 21214 | Ankrd40     | Scd1          | 1  |
| 7590 | 21251 | Ankrd40     | Cpt1a         | -1 |
| 7590 | 21575 | Ankrd40     | Cyp2c55       | 1  |
| 7590 | 21727 | Ankrd40     | Khk           | 1  |
| 7590 | 22046 | Ankrd40     | Cml4          | 1  |
| 7590 | 22137 | Ankrd40     | Nudt7         | 1  |
| 7590 | 22138 | Ankrd40     | Ang           | -1 |
| 7590 | 22732 | Ankrd40     | Cyb5b         | 1  |
| 7590 | 22770 | Ankrd40     | Slc27a2       | -1 |
| 7590 | 23623 | Ankrd40     | 2010305C02Rik | 1  |
| 7601 | 12315 | Kcne3       | Srebf1        | 1  |
| 7610 | 2915  | Scand1      | Nfs1          | 1  |
| 7610 | 7610  | Scand1      | Scand1        | 1  |
| 7610 | 14647 | Scand1      | Cst3          | 1  |
| 7610 | 14816 | Scand1      | Pcdhb9        | -1 |
| 7610 | 23005 | Scand1      | 4930405A21Rik | -1 |
| 7610 | 23599 | Scand1      | Ndr3          | -1 |
| 7612 | 12565 | MMT00014216 | Grem2         | -1 |
| 7619 | 719   | Pik3ip1     | Usp2          | 1  |
| 7619 | 958   | Pik3ip1     | Ppp2r5e       | 1  |
| 7619 | 2399  | Pik3ip1     | MMT00060167   | -1 |
| 7619 | 2636  | Pik3ip1     | Tars          | -1 |
| 7619 | 3587  | Pik3ip1     | MMT00041940   | -1 |
| 7619 | 3620  | Pik3ip1     | Bet1          | -1 |
| 7619 | 4966  | Pik3ip1     | Zscan20       | -1 |
| 7619 | 6657  | Pik3ip1     | Irf6          | -1 |
| 7619 | 7619  | Pik3ip1     | Pik3ip1       | 1  |
| 7619 | 7678  | Pik3ip1     | Ltbr          | 1  |
| 7619 | 8684  | Pik3ip1     | Il15          | 1  |
| 7619 | 9067  | Pik3ip1     | Tra2a         | -1 |
| 7619 | 9831  | Pik3ip1     | Nedd4l        | -1 |
| 7619 | 10769 | Pik3ip1     | Hnrnpd        | 1  |
| 7619 | 11481 | Pik3ip1     | Morn1         | 1  |
| 7619 | 13094 | Pik3ip1     | Cnn3          | 1  |
| 7619 | 13839 | Pik3ip1     | Gypc          | 1  |
| 7619 | 16251 | Pik3ip1     | G6pc          | -1 |
| 7619 | 18179 | Pik3ip1     | Dbp           | 1  |
| 7619 | 18201 | Pik3ip1     | MMT00060232   | -1 |
| 7619 | 18373 | Pik3ip1     | Dnajb1        | -1 |

|      |       |             |               |    |
|------|-------|-------------|---------------|----|
| 7619 | 18418 | Pik3ip1     | Hspa1b        | -1 |
| 7619 | 18846 | Pik3ip1     | Ikbkg         | -1 |
| 7619 | 18903 | Pik3ip1     | Crem          | -1 |
| 7619 | 19004 | Pik3ip1     | Pdk4          | -1 |
| 7619 | 20068 | Pik3ip1     | 2610204M08Rik | 1  |
| 7619 | 21142 | Pik3ip1     | Gm129         | 1  |
| 7637 | 327   | MMT00056309 | H2-Ea         | 1  |
| 7637 | 510   | MMT00056309 | Neu1          | -1 |
| 7637 | 1340  | MMT00056309 | Tap2          | 1  |
| 7637 | 2325  | MMT00056309 | H2-K1         | 1  |
| 7637 | 2938  | MMT00056309 | H2-T23        | 1  |
| 7637 | 3599  | MMT00056309 | MMT00035426   | -1 |
| 7637 | 3857  | MMT00056309 | 1700001C19Rik | -1 |
| 7637 | 4958  | MMT00056309 | Ndufa7        | -1 |
| 7637 | 5648  | MMT00056309 | Zfp213        | -1 |
| 7637 | 7088  | MMT00056309 | Slc37a1       | 1  |
| 7637 | 8750  | MMT00056309 | 1700010I14Rik | 1  |
| 7637 | 8767  | MMT00056309 | Rgl2          | 1  |
| 7637 | 10376 | MMT00056309 | C920025E04Rik | -1 |
| 7637 | 10667 | MMT00056309 | H2-Eb1        | 1  |
| 7637 | 12355 | MMT00056309 | A1507611      | 1  |
| 7637 | 13493 | MMT00056309 | Ring1         | -1 |
| 7637 | 20238 | MMT00056309 | H2-T9         | 1  |
| 7637 | 21478 | MMT00056309 | Loxhd1        | -1 |
| 7637 | 22822 | MMT00056309 | MMT00013433   | 1  |
| 7643 | 5884  | Mrps28      | Gstm2         | 1  |
| 7643 | 8815  | Mrps28      | Mx1           | 1  |
| 7643 | 18201 | Mrps28      | MMT00060232   | 1  |
| 7643 | 21214 | Mrps28      | Scd1          | 1  |
| 7654 | 7654  | Ptpmt1      | Ptpmt1        | 1  |
| 7654 | 15365 | Ptpmt1      | Ext2          | -1 |
| 7654 | 23474 | Ptpmt1      | MMT00011721   | -1 |
| 7659 | 213   | Rab30       | Rgs16         | -1 |
| 7659 | 250   | Rab30       | Tubb2a-ps2    | 1  |
| 7659 | 269   | Rab30       | Tuba1b        | 1  |
| 7659 | 354   | Rab30       | MMT00007996   | 1  |
| 7659 | 577   | Rab30       | Rrp12         | 1  |
| 7659 | 609   | Rab30       | MMT00060868   | 1  |
| 7659 | 827   | Rab30       | Flcn          | -1 |
| 7659 | 865   | Rab30       | Npc1          | -1 |
| 7659 | 1257  | Rab30       | Slc25a45      | 1  |
| 7659 | 1537  | Rab30       | 1700052K11Rik | 1  |
| 7659 | 1646  | Rab30       | Slc15a4       | -1 |
| 7659 | 1709  | Rab30       | Mt2           | -1 |
| 7659 | 1941  | Rab30       | MMT00079618   | 1  |
| 7659 | 2322  | Rab30       | Tuba4a        | 1  |
| 7659 | 3309  | Rab30       | Grpel2        | -1 |
| 7659 | 3804  | Rab30       | MMT00015534   | 1  |
| 7659 | 4201  | Rab30       | Tubb2c        | 1  |
| 7659 | 4993  | Rab30       | Tsc22d1       | 1  |
| 7659 | 5594  | Rab30       | Erb3          | -1 |

|      |       |               |               |    |
|------|-------|---------------|---------------|----|
| 7659 | 6771  | Rab30         | Insc          | 1  |
| 7659 | 6918  | Rab30         | Cog8          | 1  |
| 7659 | 6966  | Rab30         | Mia3          | -1 |
| 7659 | 7151  | Rab30         | MMT00007982   | 1  |
| 7659 | 7944  | Rab30         | Al132487      | -1 |
| 7659 | 9763  | Rab30         | Tuba3b        | 1  |
| 7659 | 10612 | Rab30         | Slc24a6       | -1 |
| 7659 | 10911 | Rab30         | Mcl1          | -1 |
| 7659 | 11149 | Rab30         | MMT00050488   | 1  |
| 7659 | 11540 | Rab30         | Ctps          | 1  |
| 7659 | 11724 | Rab30         | Tuba3a        | 1  |
| 7659 | 12091 | Rab30         | 1810015C04Rik | -1 |
| 7659 | 12981 | Rab30         | Nek6          | 1  |
| 7659 | 13471 | Rab30         | Cln8          | -1 |
| 7659 | 13489 | Rab30         | D230025D16Rik | -1 |
| 7659 | 13889 | Rab30         | Agpat2        | 1  |
| 7659 | 13990 | Rab30         | MMT00040357   | 1  |
| 7659 | 14838 | Rab30         | MMT00070887   | 1  |
| 7659 | 15252 | Rab30         | MMT00019402   | 1  |
| 7659 | 15760 | Rab30         | Trib3         | -1 |
| 7659 | 15862 | Rab30         | Mrap          | 1  |
| 7659 | 15990 | Rab30         | Dnmbp         | -1 |
| 7659 | 16060 | Rab30         | Gys2          | -1 |
| 7659 | 16692 | Rab30         | Bat4          | -1 |
| 7659 | 17022 | Rab30         | MMT00055891   | 1  |
| 7659 | 17323 | Rab30         | Tubb6         | 1  |
| 7659 | 17444 | Rab30         | Tuba1a        | 1  |
| 7659 | 17530 | Rab30         | MMT00041792   | 1  |
| 7659 | 17656 | Rab30         | Hdhd3         | 1  |
| 7659 | 17660 | Rab30         | Nlrp12        | -1 |
| 7659 | 17876 | Rab30         | Tubb4         | 1  |
| 7659 | 17878 | Rab30         | Brap          | -1 |
| 7659 | 18785 | Rab30         | Angptl4       | -1 |
| 7659 | 21143 | Rab30         | Ypel3         | -1 |
| 7659 | 21288 | Rab30         | Tcp11l2       | -1 |
| 7659 | 21733 | Rab30         | Rhebl1        | -1 |
| 7659 | 22290 | Rab30         | Tubb2a        | 1  |
| 7659 | 22388 | Rab30         | 2410018M08Rik | -1 |
| 7659 | 22443 | Rab30         | Tuba1c        | 1  |
| 7659 | 22470 | Rab30         | Ppargc1b      | -1 |
| 7659 | 23130 | Rab30         | Hps4          | -1 |
| 7659 | 23201 | Rab30         | S1pr1         | 1  |
| 7662 | 4534  | Lyz1          | Ndel1         | -1 |
| 7662 | 5364  | Lyz1          | Kif22         | 1  |
| 7662 | 5934  | Lyz1          | S100a10       | 1  |
| 7662 | 10642 | Lyz1          | Ngef          | -1 |
| 7662 | 20266 | Lyz1          | Insig2        | 1  |
| 7662 | 21969 | Lyz1          | Tk1           | -1 |
| 7662 | 22290 | Lyz1          | Tubb2a        | 1  |
| 7674 | 22138 | Spata7        | Ang           | 1  |
| 7690 | 4056  | 4632417N05Rik | Tnfaip8l1     | 1  |

|      |       |               |               |    |
|------|-------|---------------|---------------|----|
| 7690 | 6214  | 4632417N05Rik | Mmd2          | -1 |
| 7690 | 7492  | 4632417N05Rik | Adfp          | 1  |
| 7700 | 7140  | lqce          | Mtbp          | 1  |
| 7749 | 20678 | Mul1          | Cyp39a1       | 1  |
| 7755 | 2721  | B230317C12Rik | Inmt          | 1  |
| 7755 | 4056  | B230317C12Rik | Tnfaip8l1     | -1 |
| 7755 | 5804  | B230317C12Rik | Thrsp         | 1  |
| 7755 | 6214  | B230317C12Rik | Mmd2          | 1  |
| 7755 | 6746  | B230317C12Rik | E2f8          | -1 |
| 7755 | 6816  | B230317C12Rik | Slc46a3       | 1  |
| 7755 | 7492  | B230317C12Rik | Adfp          | -1 |
| 7755 | 7659  | B230317C12Rik | Rab30         | -1 |
| 7755 | 9408  | B230317C12Rik | Hmgcs2        | -1 |
| 7755 | 9700  | B230317C12Rik | Prodh         | 1  |
| 7755 | 16525 | B230317C12Rik | Lbp           | -1 |
| 7755 | 17563 | B230317C12Rik | Aldh1l1       | 1  |
| 7755 | 17638 | B230317C12Rik | Adssl1        | 1  |
| 7755 | 17660 | B230317C12Rik | Nlrp12        | -1 |
| 7755 | 18050 | B230317C12Rik | MMT00003408   | 1  |
| 7755 | 18069 | B230317C12Rik | Gpt           | 1  |
| 7756 | 8399  | Ecd3          | Herpud1       | 1  |
| 7756 | 15631 | Ecd3          | Lpin1         | 1  |
| 7761 | 1985  | Nudt19        | Pepd          | -1 |
| 7761 | 2388  | Nudt19        | Dot1l         | 1  |
| 7761 | 2599  | Nudt19        | Lsm14a        | 1  |
| 7761 | 4697  | Nudt19        | Cyp2a12       | -1 |
| 7761 | 5352  | Nudt19        | Pdcd2l        | 1  |
| 7761 | 6513  | Nudt19        | Qpctl         | 1  |
| 7761 | 7761  | Nudt19        | Nudt19        | 1  |
| 7761 | 11321 | Nudt19        | 2310014L17Rik | -1 |
| 7761 | 16639 | Nudt19        | MMT00078937   | -1 |
| 7761 | 19462 | Nudt19        | 4933439C20Rik | -1 |
| 7761 | 22841 | Nudt19        | Cib1          | -1 |
| 7761 | 23247 | Nudt19        | Ercc1         | -1 |
| 7761 | 23595 | Nudt19        | Gm550         | 1  |
| 7775 | 10612 | Nif3l1        | Slc24a6       | -1 |
| 7775 | 18099 | Nif3l1        | Nfx1          | -1 |
| 7775 | 21143 | Nif3l1        | Ypel3         | -1 |
| 7788 | 22138 | 1600021P15Rik | Ang           | -1 |
| 7791 | 250   | Dtx4          | Tubb2a-ps2    | 1  |
| 7791 | 609   | Dtx4          | MMT00060868   | 1  |
| 7791 | 719   | Dtx4          | Usp2          | -1 |
| 7791 | 2399  | Dtx4          | MMT00060167   | 1  |
| 7791 | 2636  | Dtx4          | Tars          | 1  |
| 7791 | 3214  | Dtx4          | Dnmt3b        | 1  |
| 7791 | 3235  | Dtx4          | BC029214      | 1  |
| 7791 | 4534  | Dtx4          | Ndel1         | -1 |
| 7791 | 5831  | Dtx4          | Sh2b3         | 1  |
| 7791 | 5974  | Dtx4          | Arntl         | 1  |
| 7791 | 6386  | Dtx4          | Por           | -1 |
| 7791 | 7862  | Dtx4          | Cpsf4l        | -1 |

|      |       |       |               |    |
|------|-------|-------|---------------|----|
| 7791 | 9910  | Dtx4  | EG666644      | -1 |
| 7791 | 10088 | Dtx4  | Ddc           | 1  |
| 7791 | 11129 | Dtx4  | Ankhd1        | -1 |
| 7791 | 11574 | Dtx4  | Gne           | -1 |
| 7791 | 11599 | Dtx4  | Coq10b        | -1 |
| 7791 | 11741 | Dtx4  | Slc30a10      | 1  |
| 7791 | 11807 | Dtx4  | Fbxo31        | -1 |
| 7791 | 12420 | Dtx4  | Klhl21        | -1 |
| 7791 | 12460 | Dtx4  | Pnpla2        | -1 |
| 7791 | 13731 | Dtx4  | 2210408F21Rik | -1 |
| 7791 | 15481 | Dtx4  | 1110067D22Rik | 1  |
| 7791 | 15709 | Dtx4  | Tceal1        | -1 |
| 7791 | 16060 | Dtx4  | Gys2          | -1 |
| 7791 | 16690 | Dtx4  | Tjp3          | 1  |
| 7791 | 17876 | Dtx4  | Tubb4         | 1  |
| 7791 | 18179 | Dtx4  | Dbp           | -1 |
| 7791 | 18286 | Dtx4  | Slc41a3       | -1 |
| 7791 | 18498 | Dtx4  | Slc5a6        | -1 |
| 7791 | 21251 | Dtx4  | Cpt1a         | -1 |
| 7791 | 22012 | Dtx4  | Itgae         | 1  |
| 7791 | 22290 | Dtx4  | Tubb2a        | 1  |
| 7791 | 22630 | Dtx4  | MMT00034355   | 1  |
| 7797 | 12910 | Ddx47 | 1110028A07Rik | -1 |
| 7802 | 9408  | Adcy4 | Hmgcs2        | 1  |
| 7813 | 213   | Stac  | Rgs16         | -1 |
| 7813 | 250   | Stac  | Tubb2a-ps2    | 1  |
| 7813 | 269   | Stac  | Tuba1b        | 1  |
| 7813 | 354   | Stac  | MMT00007996   | 1  |
| 7813 | 563   | Stac  | D4Bwg0951e    | -1 |
| 7813 | 609   | Stac  | MMT00060868   | 1  |
| 7813 | 719   | Stac  | Usp2          | -1 |
| 7813 | 771   | Stac  | Zbtb45        | 1  |
| 7813 | 865   | Stac  | Npc1          | -1 |
| 7813 | 937   | Stac  | Pi4ka         | -1 |
| 7813 | 1257  | Stac  | Slc25a45      | 1  |
| 7813 | 1709  | Stac  | Mt2           | -1 |
| 7813 | 1941  | Stac  | MMT00079618   | 1  |
| 7813 | 2011  | Stac  | Slc2a5        | -1 |
| 7813 | 2013  | Stac  | Il15ra        | -1 |
| 7813 | 2322  | Stac  | Tuba4a        | 1  |
| 7813 | 2615  | Stac  | EG624862      | -1 |
| 7813 | 2794  | Stac  | Map3k6        | -1 |
| 7813 | 2829  | Stac  | Lrfn3         | 1  |
| 7813 | 2850  | Stac  | Slc16a6       | 1  |
| 7813 | 3214  | Stac  | Dnmt3b        | 1  |
| 7813 | 3246  | Stac  | Prei4         | -1 |
| 7813 | 3555  | Stac  | Sbds          | -1 |
| 7813 | 3559  | Stac  | 4933433P14Rik | -1 |
| 7813 | 3603  | Stac  | BC027231      | -1 |
| 7813 | 3686  | Stac  | Psmc9         | -1 |
| 7813 | 3804  | Stac  | MMT00015534   | 1  |

|      |       |      |               |    |
|------|-------|------|---------------|----|
| 7813 | 4106  | Stac | MMT00041409   | -1 |
| 7813 | 4201  | Stac | Tubb2c        | 1  |
| 7813 | 4235  | Stac | Pfkfb3        | -1 |
| 7813 | 4286  | Stac | Ptp4a1        | -1 |
| 7813 | 4392  | Stac | 1810055G02Rik | -1 |
| 7813 | 4534  | Stac | Ndel1         | -1 |
| 7813 | 4708  | Stac | Traf3ip2      | 1  |
| 7813 | 5120  | Stac | Alkbh7        | 1  |
| 7813 | 5416  | Stac | Jhdm1d        | -1 |
| 7813 | 5791  | Stac | Baiap2l1      | -1 |
| 7813 | 5974  | Stac | Arntl         | 1  |
| 7813 | 6048  | Stac | Psmc9         | -1 |
| 7813 | 6118  | Stac | Slc1a4        | 1  |
| 7813 | 6338  | Stac | Setd3         | -1 |
| 7813 | 6343  | Stac | Slc20a1       | -1 |
| 7813 | 6380  | Stac | 6330569M22Rik | 1  |
| 7813 | 6386  | Stac | Por           | -1 |
| 7813 | 6490  | Stac | Il1r1         | -1 |
| 7813 | 6771  | Stac | Insc          | 1  |
| 7813 | 6966  | Stac | Mia3          | -1 |
| 7813 | 7061  | Stac | Spsb3         | 1  |
| 7813 | 7151  | Stac | MMT00007982   | 1  |
| 7813 | 7795  | Stac | MMT00071427   | -1 |
| 7813 | 7862  | Stac | Cpsf4l        | -1 |
| 7813 | 7944  | Stac | A1132487      | -1 |
| 7813 | 8399  | Stac | Herpud1       | -1 |
| 7813 | 8641  | Stac | Slc7a2        | -1 |
| 7813 | 9033  | Stac | 1810013L24Rik | -1 |
| 7813 | 9495  | Stac | Srms          | 1  |
| 7813 | 9585  | Stac | Neu3          | 1  |
| 7813 | 9763  | Stac | Tuba3b        | 1  |
| 7813 | 9910  | Stac | EG666644      | -1 |
| 7813 | 10215 | Stac | Nampt         | -1 |
| 7813 | 10486 | Stac | 1300002K09Rik | 1  |
| 7813 | 10612 | Stac | Slc24a6       | -1 |
| 7813 | 10712 | Stac | Fchsd2        | -1 |
| 7813 | 10863 | Stac | Tssc1         | 1  |
| 7813 | 11129 | Stac | Ankhd1        | -1 |
| 7813 | 11149 | Stac | MMT00050488   | 1  |
| 7813 | 11376 | Stac | Slc7a11       | 1  |
| 7813 | 11574 | Stac | Gne           | -1 |
| 7813 | 11599 | Stac | Coq10b        | -1 |
| 7813 | 11724 | Stac | Tuba3a        | 1  |
| 7813 | 11741 | Stac | Slc30a10      | 1  |
| 7813 | 11807 | Stac | Fbxo31        | -1 |
| 7813 | 11808 | Stac | Pck1          | -1 |
| 7813 | 12091 | Stac | 1810015C04Rik | -1 |
| 7813 | 12420 | Stac | Klhl21        | -1 |
| 7813 | 12460 | Stac | Pnpla2        | -1 |
| 7813 | 12479 | Stac | Ifrd1         | -1 |
| 7813 | 12489 | Stac | Wdr8          | 1  |

|      |       |      |               |    |
|------|-------|------|---------------|----|
| 7813 | 12904 | Stac | MMT00040704   | -1 |
| 7813 | 13025 | Stac | Irf2          | -1 |
| 7813 | 13471 | Stac | Cln8          | -1 |
| 7813 | 13705 | Stac | Osbpl1a       | -1 |
| 7813 | 13731 | Stac | 2210408F21Rik | -1 |
| 7813 | 13886 | Stac | Hnrpd1        | -1 |
| 7813 | 13889 | Stac | Agpat2        | 1  |
| 7813 | 14462 | Stac | Zfp385b       | -1 |
| 7813 | 14989 | Stac | Map3k5        | -1 |
| 7813 | 15015 | Stac | G3bp1         | 1  |
| 7813 | 15021 | Stac | Ppargc1a      | -1 |
| 7813 | 15252 | Stac | MMT00019402   | 1  |
| 7813 | 15304 | Stac | Kin           | -1 |
| 7813 | 15631 | Stac | Lpin1         | -1 |
| 7813 | 15668 | Stac | 1810032O08Rik | -1 |
| 7813 | 15696 | Stac | Pycr2         | 1  |
| 7813 | 15862 | Stac | Mrap          | 1  |
| 7813 | 15892 | Stac | Slc22a5       | -1 |
| 7813 | 16027 | Stac | Ppp2r2d       | -1 |
| 7813 | 16060 | Stac | Gys2          | -1 |
| 7813 | 16176 | Stac | St3gal5       | -1 |
| 7813 | 16669 | Stac | Tjp2          | 1  |
| 7813 | 16690 | Stac | Tjp3          | 1  |
| 7813 | 16692 | Stac | Bat4          | -1 |
| 7813 | 16851 | Stac | Slc34a2       | 1  |
| 7813 | 16915 | Stac | MMT00019508   | 1  |
| 7813 | 17022 | Stac | MMT00055891   | 1  |
| 7813 | 17323 | Stac | Tubb6         | 1  |
| 7813 | 17444 | Stac | Tuba1a        | 1  |
| 7813 | 17656 | Stac | Hdhd3         | 1  |
| 7813 | 17876 | Stac | Tubb4         | 1  |
| 7813 | 17878 | Stac | Brap          | -1 |
| 7813 | 17952 | Stac | Ripk2         | -1 |
| 7813 | 18027 | Stac | 5730403B10Rik | -1 |
| 7813 | 18296 | Stac | Pcgf5         | -1 |
| 7813 | 18314 | Stac | 4631416L12Rik | -1 |
| 7813 | 18552 | Stac | Nr2c2ap       | 1  |
| 7813 | 18653 | Stac | MMT00072901   | -1 |
| 7813 | 18785 | Stac | Angptl4       | -1 |
| 7813 | 18827 | Stac | Oprs1         | 1  |
| 7813 | 19089 | Stac | Peci          | -1 |
| 7813 | 19146 | Stac | N4bp2l1       | -1 |
| 7813 | 19466 | Stac | Pptc7         | -1 |
| 7813 | 19532 | Stac | Med8          | 1  |
| 7813 | 19671 | Stac | Upp2          | -1 |
| 7813 | 19757 | Stac | Fkbp5         | -1 |
| 7813 | 19970 | Stac | Mrpl36        | 1  |
| 7813 | 20085 | Stac | Lpin2         | -1 |
| 7813 | 21251 | Stac | Cpt1a         | -1 |
| 7813 | 21288 | Stac | Tcp11l2       | -1 |
| 7813 | 21331 | Stac | Slc10a6       | -1 |



|      |       |             |               |    |
|------|-------|-------------|---------------|----|
| 7813 | 21604 | Stac        | Klh24         | -1 |
| 7813 | 21733 | Stac        | Rhebl1        | -1 |
| 7813 | 22290 | Stac        | Tubb2a        | 1  |
| 7813 | 22388 | Stac        | 2410018M08Rik | -1 |
| 7813 | 22443 | Stac        | Tuba1c        | 1  |
| 7813 | 22470 | Stac        | Ppargc1b      | -1 |
| 7813 | 22630 | Stac        | MMT00034355   | 1  |
| 7813 | 23201 | Stac        | S1pr1         | 1  |
| 7813 | 23202 | Stac        | Olf59         | -1 |
| 7813 | 23558 | Stac        | MMT00030937   | -1 |
| 7813 | 23626 | Stac        | MMT00003764   | 1  |
| 7824 | 3562  | MMT00001823 | MMT00011909   | 1  |
| 7824 | 8444  | MMT00001823 | Rdh16         | 1  |
| 7824 | 20058 | MMT00001823 | Dnaic1        | -1 |
| 7842 | 607   | Pdk2        | Me1           | -1 |
| 7842 | 874   | Pdk2        | Aldh1a7       | -1 |
| 7842 | 1310  | Pdk2        | Cabc1         | -1 |
| 7842 | 1650  | Pdk2        | Ctdsp2        | 1  |
| 7842 | 1851  | Pdk2        | Tmem41a       | 1  |
| 7842 | 2636  | Pdk2        | Tars          | -1 |
| 7842 | 2766  | Pdk2        | Elp4          | -1 |
| 7842 | 4431  | Pdk2        | Tmem17        | -1 |
| 7842 | 5425  | Pdk2        | Ung           | 1  |
| 7842 | 5934  | Pdk2        | S100a10       | -1 |
| 7842 | 6044  | Pdk2        | Sucnr1        | -1 |
| 7842 | 6193  | Pdk2        | Lactb2        | -1 |
| 7842 | 6370  | Pdk2        | Aqp8          | -1 |
| 7842 | 6386  | Pdk2        | Por           | 1  |
| 7842 | 7560  | Pdk2        | Cyp2r1        | -1 |
| 7842 | 8815  | Pdk2        | Mx1           | -1 |
| 7842 | 10486 | Pdk2        | 1300002K09Rik | -1 |
| 7842 | 10961 | Pdk2        | Pgd           | -1 |
| 7842 | 11129 | Pdk2        | Ankhd1        | 1  |
| 7842 | 11462 | Pdk2        | Gpam          | -1 |
| 7842 | 11633 | Pdk2        | Ier3          | 1  |
| 7842 | 11807 | Pdk2        | Fbxo31        | 1  |
| 7842 | 11857 | Pdk2        | Arv1          | -1 |
| 7842 | 12040 | Pdk2        | Commd10       | -1 |
| 7842 | 12143 | Pdk2        | Thyn1         | -1 |
| 7842 | 12219 | Pdk2        | Cyb5b         | -1 |
| 7842 | 12433 | Pdk2        | 5033413D22Rik | -1 |
| 7842 | 12941 | Pdk2        | Elovl5        | -1 |
| 7842 | 14017 | Pdk2        | Ces5          | -1 |
| 7842 | 14147 | Pdk2        | Acss2         | -1 |
| 7842 | 14442 | Pdk2        | Ethe1         | -1 |
| 7842 | 15709 | Pdk2        | Tceal1        | 1  |
| 7842 | 15892 | Pdk2        | Slc22a5       | 1  |
| 7842 | 16222 | Pdk2        | Adipor2       | -1 |
| 7842 | 16510 | Pdk2        | Tspyl4        | -1 |
| 7842 | 17338 | Pdk2        | Mocos         | -1 |
| 7842 | 17617 | Pdk2        | Atp5sl        | 1  |

|      |       |             |               |    |
|------|-------|-------------|---------------|----|
| 7842 | 17854 | Pdk2        | Rdh11         | -1 |
| 7842 | 17878 | Pdk2        | Brap          | 1  |
| 7842 | 17996 | Pdk2        | Igfbp2        | 1  |
| 7842 | 18201 | Pdk2        | MMT00060232   | -1 |
| 7842 | 18286 | Pdk2        | Slc41a3       | 1  |
| 7842 | 18827 | Pdk2        | Oprs1         | -1 |
| 7842 | 20079 | Pdk2        | MMT00019254   | 1  |
| 7842 | 20798 | Pdk2        | Ccpg1         | 1  |
| 7842 | 21079 | Pdk2        | Tfpi2         | -1 |
| 7842 | 21202 | Pdk2        | Acly          | -1 |
| 7842 | 21214 | Pdk2        | Scd1          | -1 |
| 7842 | 21251 | Pdk2        | Cpt1a         | 1  |
| 7842 | 21575 | Pdk2        | Cyp2c55       | -1 |
| 7842 | 21966 | Pdk2        | Pcp4l1        | 1  |
| 7842 | 22138 | Pdk2        | Ang           | 1  |
| 7842 | 22732 | Pdk2        | Cyb5b         | -1 |
| 7842 | 23026 | Pdk2        | Apom          | 1  |
| 7842 | 23623 | Pdk2        | 2010305C02Rik | -1 |
| 7861 | 3329  | Klhdc4      | Car5a         | -1 |
| 7861 | 7861  | Klhdc4      | Klhdc4        | 1  |
| 7861 | 13218 | Klhdc4      | C330043M08Rik | -1 |
| 7873 | 1646  | Steap4      | Slc15a4       | -1 |
| 7873 | 4534  | Steap4      | Ndel1         | -1 |
| 7873 | 4993  | Steap4      | Tsc22d1       | 1  |
| 7873 | 6386  | Steap4      | Por           | -1 |
| 7873 | 12982 | Steap4      | Cars          | 1  |
| 7873 | 16060 | Steap4      | Gys2          | -1 |
| 7873 | 16647 | Steap4      | D16H22S680E   | -1 |
| 7873 | 18827 | Steap4      | Oprs1         | 1  |
| 7877 | 15015 | Obfc2a      | G3bp1         | 1  |
| 7879 | 5853  | Ifitm3      | Trim30        | 1  |
| 7879 | 6213  | Ifitm3      | Ccl2          | 1  |
| 7879 | 11009 | Ifitm3      | MMT00008885   | 1  |
| 7879 | 16949 | Ifitm3      | Iigp1         | 1  |
| 7888 | 5259  | Pigz        | Mat1a         | -1 |
| 7894 | 8444  | MMT00029319 | Rdh16         | -1 |
| 7894 | 8815  | MMT00029319 | Mx1           | -1 |
| 7894 | 14017 | MMT00029319 | Ces5          | -1 |
| 7894 | 18201 | MMT00029319 | MMT00060232   | -1 |
| 7894 | 21214 | MMT00029319 | Scd1          | -1 |
| 7909 | 7135  | Oas3        | Ezr           | 1  |
| 7909 | 7909  | Oas3        | Oas3          | 1  |
| 7909 | 8750  | Oas3        | 1700010I14Rik | 1  |
| 7909 | 11435 | Oas3        | Rnaset2a      | 1  |
| 7909 | 17760 | Oas3        | Ccr6          | -1 |
| 7909 | 21754 | Oas3        | Synj2         | -1 |
| 7918 | 269   | Rtn4ip1     | Tuba1b        | -1 |
| 7918 | 1941  | Rtn4ip1     | MMT00079618   | -1 |
| 7918 | 7151  | Rtn4ip1     | MMT00007982   | -1 |
| 7918 | 11724 | Rtn4ip1     | Tuba3a        | -1 |
| 7918 | 17444 | Rtn4ip1     | Tuba1a        | -1 |

|      |       |             |             |    |
|------|-------|-------------|-------------|----|
| 7918 | 22443 | Rtn4ip1     | Tuba1c      | -1 |
| 7922 | 1941  | Casp7       | MMT00079618 | 1  |
| 7922 | 3246  | Casp7       | Prei4       | -1 |
| 7922 | 7151  | Casp7       | MMT00007982 | 1  |
| 7922 | 9763  | Casp7       | Tuba3b      | 1  |
| 7922 | 14806 | Casp7       | Ccdc45      | -1 |
| 7936 | 11406 | MMT00061970 | Ifi203      | 1  |
| 7936 | 13149 | MMT00061970 | Ifi203      | 1  |
| 7945 | 13780 | Gpc2        | Pilra       | 1  |
| 7973 | 2200  | Lgals9      | BC006779    | 1  |
| 7973 | 2224  | Lgals9      | Oasl2       | 1  |
| 7973 | 2550  | Lgals9      | MMT00036681 | 1  |
| 7973 | 3523  | Lgals9      | Trim34      | 1  |
| 7973 | 3659  | Lgals9      | EG236451    | 1  |
| 7973 | 3683  | Lgals9      | Oas2        | 1  |
| 7973 | 4114  | Lgals9      | Parp12      | 1  |
| 7973 | 4426  | Lgals9      | Iigp2       | 1  |
| 7973 | 4508  | Lgals9      | Ifit1       | 1  |
| 7973 | 4516  | Lgals9      | Rsad2       | 1  |
| 7973 | 5044  | Lgals9      | Ifi35       | 1  |
| 7973 | 5216  | Lgals9      | Spnb5       | 1  |
| 7973 | 5250  | Lgals9      | Ifit2       | 1  |
| 7973 | 5853  | Lgals9      | Trim30      | 1  |
| 7973 | 6595  | Lgals9      | Oas1a       | 1  |
| 7973 | 6824  | Lgals9      | Irf7        | 1  |
| 7973 | 7105  | Lgals9      | Plac8       | 1  |
| 7973 | 7284  | Lgals9      | MMT00008674 | 1  |
| 7973 | 7316  | Lgals9      | Ifi204      | 1  |
| 7973 | 8800  | Lgals9      | Rnf213      | 1  |
| 7973 | 9847  | Lgals9      | Ifi27       | 1  |
| 7973 | 10109 | Lgals9      | Gbp3        | 1  |
| 7973 | 11009 | Lgals9      | MMT00008885 | 1  |
| 7973 | 11204 | Lgals9      | AI451617    | 1  |
| 7973 | 11265 | Lgals9      | Irgm        | 1  |
| 7973 | 12126 | Lgals9      | Znfx1       | 1  |
| 7973 | 12398 | Lgals9      | Ifi44       | 1  |
| 7973 | 12600 | Lgals9      | Ifi204      | 1  |
| 7973 | 12969 | Lgals9      | Xaf1        | 1  |
| 7973 | 13156 | Lgals9      | Ifit3       | 1  |
| 7973 | 13309 | Lgals9      | Tgtp        | 1  |
| 7973 | 13514 | Lgals9      | Apol9b      | 1  |
| 7973 | 13654 | Lgals9      | Stat1       | 1  |
| 7973 | 14611 | Lgals9      | Ddx60       | 1  |
| 7973 | 14880 | Lgals9      | Ms4a4c      | 1  |
| 7973 | 15074 | Lgals9      | Usp18       | 1  |
| 7973 | 15449 | Lgals9      | Mitd1       | 1  |
| 7973 | 15504 | Lgals9      | Mx2         | 1  |
| 7973 | 16182 | Lgals9      | Oasl1       | 1  |
| 7973 | 16521 | Lgals9      | Adar        | 1  |
| 7973 | 16572 | Lgals9      | D14Ertd668e | 1  |
| 7973 | 17071 | Lgals9      | Samd9l      | 1  |

|      |       |             |               |    |
|------|-------|-------------|---------------|----|
| 7973 | 17197 | Lgals9      | Igtp          | 1  |
| 7973 | 18174 | Lgals9      | Stat2         | 1  |
| 7973 | 18186 | Lgals9      | Parp14        | 1  |
| 7973 | 19189 | Lgals9      | Sp100         | 1  |
| 7973 | 19738 | Lgals9      | Lgals3bp      | 1  |
| 7973 | 20791 | Lgals9      | MMT00014813   | 1  |
| 7973 | 20997 | Lgals9      | MMT00028135   | 1  |
| 7973 | 21351 | Lgals9      | Shisa5        | 1  |
| 7973 | 21549 | Lgals9      | Rtp4          | 1  |
| 7973 | 21824 | Lgals9      | 5830443L24Rik | 1  |
| 7973 | 22037 | Lgals9      | Oas1g         | 1  |
| 7973 | 23450 | Lgals9      | D12Ertd647e   | 1  |
| 7975 | 7975  | Lancl1      | Lancl1        | 1  |
| 7991 | 7088  | Gpr115      | Slc37a1       | -1 |
| 7991 | 15531 | Gpr115      | Prickle4      | 1  |
| 8020 | 18250 | Nope        | Mmp14         | 1  |
| 8037 | 2433  | MMT00052151 | Armc10        | -1 |
| 8037 | 3196  | MMT00052151 | Tat           | 1  |
| 8037 | 3587  | MMT00052151 | MMT00041940   | 1  |
| 8037 | 6021  | MMT00052151 | MMT00008784   | 1  |
| 8037 | 8122  | MMT00052151 | Hexim1        | 1  |
| 8037 | 8319  | MMT00052151 | MMT00062477   | 1  |
| 8037 | 8662  | MMT00052151 | Brca2         | -1 |
| 8037 | 8670  | MMT00052151 | MMT00051613   | 1  |
| 8037 | 11043 | MMT00052151 | Hsph1         | 1  |
| 8037 | 11201 | MMT00052151 | Sunc1         | -1 |
| 8037 | 11214 | MMT00052151 | MMT00049207   | 1  |
| 8037 | 12329 | MMT00052151 | Sox6          | -1 |
| 8037 | 12761 | MMT00052151 | Tsc22d3       | 1  |
| 8037 | 15476 | MMT00052151 | Fem1b         | -1 |
| 8037 | 15675 | MMT00052151 | MMT00077535   | 1  |
| 8037 | 16750 | MMT00052151 | Casp6         | -1 |
| 8037 | 18099 | MMT00052151 | Nfx1          | -1 |
| 8037 | 18215 | MMT00052151 | Gpr146        | -1 |
| 8037 | 18373 | MMT00052151 | Dnajb1        | 1  |
| 8037 | 18418 | MMT00052151 | Hspa1b        | 1  |
| 8037 | 19540 | MMT00052151 | Zfp428        | 1  |
| 8037 | 20965 | MMT00052151 | Usp28         | -1 |
| 8037 | 21389 | MMT00052151 | Odf2          | -1 |
| 8037 | 21775 | MMT00052151 | MMT00051649   | -1 |
| 8037 | 22139 | MMT00052151 | Stip1         | 1  |
| 8037 | 22303 | MMT00052151 | Cdt1          | -1 |
| 8045 | 6193  | Pgam5       | Lactb2        | 1  |
| 8049 | 12910 | Pon1        | 1110028A07Rik | -1 |
| 8049 | 18455 | Pon1        | Mtnr1a        | -1 |
| 8049 | 20194 | Pon1        | Pnlcd1        | -1 |
| 8049 | 22046 | Pon1        | Cml4          | -1 |
| 8055 | 2743  | Ptcd3       | Tcf3          | 1  |
| 8055 | 3703  | Ptcd3       | Ggcx          | 1  |
| 8055 | 4093  | Ptcd3       | Akp5          | 1  |
| 8055 | 11338 | Ptcd3       | Vamp8         | 1  |

|      |       |             |                    |    |
|------|-------|-------------|--------------------|----|
| 8055 | 11872 | Ptcd3       | Vamp5              | 1  |
| 8055 | 12182 | Ptcd3       | Immt               | 1  |
| 8055 | 15384 | Ptcd3       | Mat2a              | 1  |
| 8055 | 15708 | Ptcd3       | Retsat             | 1  |
| 8055 | 16670 | Ptcd3       | Csmd2              | -1 |
| 8055 | 17317 | Ptcd3       | Jmjd1a             | -1 |
| 8055 | 18658 | Ptcd3       | Gstk1              | 1  |
| 8058 | 1129  | Epb4.9      | Gsta4              | 1  |
| 8058 | 2721  | Epb4.9      | Inmt               | 1  |
| 8058 | 5804  | Epb4.9      | Thrsp              | 1  |
| 8058 | 8444  | Epb4.9      | Rdh16              | 1  |
| 8058 | 10554 | Epb4.9      | ENSMUSG00000074179 | 1  |
| 8058 | 13293 | Epb4.9      | Gsta2              | 1  |
| 8058 | 17090 | Epb4.9      | Lass2              | 1  |
| 8058 | 20058 | Epb4.9      | Dnaic1             | -1 |
| 8072 | 8967  | Zcchc9      | Acot12             | -1 |
| 8079 | 12751 | Pts         | Sorl1              | -1 |
| 8079 | 13382 | Pts         | Bco2               | -1 |
| 8079 | 21165 | Pts         | Hmbs               | -1 |
| 8085 | 21214 | MMT00057439 | Scd1               | 1  |
| 8088 | 1310  | Negr1       | Cabc1              | -1 |
| 8088 | 5934  | Negr1       | S100a10            | -1 |
| 8088 | 6193  | Negr1       | Lactb2             | -1 |
| 8088 | 6370  | Negr1       | Aqp8               | -1 |
| 8088 | 6386  | Negr1       | Por                | 1  |
| 8088 | 8815  | Negr1       | Mx1                | -1 |
| 8088 | 10486 | Negr1       | 1300002K09Rik      | -1 |
| 8088 | 10745 | Negr1       | Gale               | -1 |
| 8088 | 10961 | Negr1       | Pgd                | -1 |
| 8088 | 11129 | Negr1       | Ankhd1             | 1  |
| 8088 | 11807 | Negr1       | Fbxo31             | 1  |
| 8088 | 11984 | Negr1       | N6amt2             | -1 |
| 8088 | 12910 | Negr1       | 1110028A07Rik      | -1 |
| 8088 | 12941 | Negr1       | Elovl5             | -1 |
| 8088 | 17996 | Negr1       | Igfbp2             | 1  |
| 8088 | 18286 | Negr1       | Slc41a3            | 1  |
| 8088 | 18827 | Negr1       | Oprs1              | -1 |
| 8088 | 20079 | Negr1       | MMT00019254        | 1  |
| 8088 | 20798 | Negr1       | Ccp1               | 1  |
| 8088 | 21202 | Negr1       | Acly               | -1 |
| 8088 | 21251 | Negr1       | Cpt1a              | 1  |
| 8088 | 22138 | Negr1       | Ang                | 1  |
| 8102 | 12315 | Hivep2      | Srebf1             | 1  |
| 8114 | 1755  | Kcnn1       | Ocel1              | 1  |
| 8114 | 2703  | Kcnn1       | MMT00073763        | 1  |
| 8114 | 2749  | Kcnn1       | Naf1               | -1 |
| 8114 | 3052  | Kcnn1       | 9130404D08Rik      | -1 |
| 8114 | 3055  | Kcnn1       | Pde4c              | 1  |
| 8114 | 5433  | Kcnn1       | 2410004L22Rik      | -1 |
| 8114 | 9304  | Kcnn1       | AI449175           | 1  |
| 8114 | 9931  | Kcnn1       | Glit25d1           | -1 |

|      |       |               |               |    |
|------|-------|---------------|---------------|----|
| 8114 | 10273 | Kcnn1         | Gpt2          | 1  |
| 8114 | 13732 | Kcnn1         | Tpm4          | -1 |
| 8114 | 15455 | Kcnn1         | Lsm4          | -1 |
| 8114 | 16617 | Kcnn1         | Sh2d4a        | -1 |
| 8114 | 16849 | Kcnn1         | Trmt1         | -1 |
| 8114 | 18886 | Kcnn1         | Slc18a1       | -1 |
| 8117 | 3535  | Ngp           | S100a9        | 1  |
| 8122 | 7659  | Hexim1        | Rab30         | -1 |
| 8122 | 7944  | Hexim1        | Al132487      | -1 |
| 8122 | 16695 | Hexim1        | Hs3st6        | 1  |
| 8127 | 18606 | Hmg20b        | A230074B11Rik | -1 |
| 8129 | 22138 | Gtse1         | Ang           | -1 |
| 8147 | 607   | 1700029J07Rik | Me1           | -1 |
| 8147 | 6193  | 1700029J07Rik | Lactb2        | -1 |
| 8147 | 8444  | 1700029J07Rik | Rdh16         | -1 |
| 8147 | 8815  | 1700029J07Rik | Mx1           | -1 |
| 8147 | 14017 | 1700029J07Rik | Ces5          | -1 |
| 8147 | 14147 | 1700029J07Rik | Acss2         | -1 |
| 8147 | 18201 | 1700029J07Rik | MMT00060232   | -1 |
| 8147 | 20079 | 1700029J07Rik | MMT00019254   | 1  |
| 8147 | 21202 | 1700029J07Rik | Acly          | -1 |
| 8147 | 21214 | 1700029J07Rik | Scd1          | -1 |
| 8155 | 1371  | Mark3         | 1200009I06Rik | 1  |
| 8155 | 5829  | Mark3         | 2810455K09Rik | -1 |
| 8155 | 7099  | Mark3         | Kcnk10        | 1  |
| 8155 | 7388  | Mark3         | Amn           | 1  |
| 8155 | 8155  | Mark3         | Mark3         | 1  |
| 8155 | 8925  | Mark3         | MMT00026932   | -1 |
| 8155 | 9678  | Mark3         | AW555464      | 1  |
| 8155 | 10526 | Mark3         | MMT00036239   | -1 |
| 8155 | 12238 | Mark3         | Traf3         | -1 |
| 8155 | 13027 | Mark3         | Ppp2r5c       | -1 |
| 8155 | 13988 | Mark3         | Cntnap2       | 1  |
| 8155 | 15984 | Mark3         | MMT00075074   | 1  |
| 8155 | 16191 | Mark3         | Klc1          | -1 |
| 8155 | 23693 | Mark3         | A530016L24Rik | 1  |
| 8156 | 6804  | Ttl1          | Cyp2d22       | -1 |
| 8156 | 19216 | Ttl1          | Bik           | -1 |
| 8161 | 14147 | MMT00031928   | Acss2         | 1  |
| 8161 | 21214 | MMT00031928   | Scd1          | 1  |
| 8161 | 21251 | MMT00031928   | Cpt1a         | -1 |
| 8161 | 23640 | MMT00031928   | Bdh1          | -1 |
| 8171 | 17106 | Spink8        | Cep192        | -1 |
| 8171 | 20624 | Spink8        | Utp15         | -1 |
| 8187 | 3377  | Gins1         | Cs            | 1  |
| 8193 | 8815  | Pi4k2a        | Mx1           | 1  |
| 8193 | 12910 | Pi4k2a        | 1110028A07Rik | 1  |
| 8194 | 9417  | MMT00077789   | Cd163         | 1  |
| 8194 | 16322 | MMT00077789   | Lmod3         | -1 |
| 8194 | 17391 | MMT00077789   | C530028O21Rik | 1  |
| 8194 | 19964 | MMT00077789   | Ndufa9        | 1  |

|      |       |             |                    |    |
|------|-------|-------------|--------------------|----|
| 8200 | 294   | Dfna5h      | Ehhadh             | 1  |
| 8200 | 607   | Dfna5h      | Me1                | 1  |
| 8200 | 3446  | Dfna5h      | Eno1               | 1  |
| 8200 | 3562  | Dfna5h      | MMT00011909        | 1  |
| 8200 | 3696  | Dfna5h      | Elov16             | 1  |
| 8200 | 4351  | Dfna5h      | Plxnb1             | -1 |
| 8200 | 6193  | Dfna5h      | Lactb2             | 1  |
| 8200 | 8444  | Dfna5h      | Rdh16              | 1  |
| 8200 | 8815  | Dfna5h      | Mx1                | 1  |
| 8200 | 10132 | Dfna5h      | Ces2               | 1  |
| 8200 | 10554 | Dfna5h      | ENSMUSG00000074179 | 1  |
| 8200 | 13293 | Dfna5h      | Gsta2              | 1  |
| 8200 | 18113 | Dfna5h      | MMT00034400        | 1  |
| 8200 | 18201 | Dfna5h      | MMT00060232        | 1  |
| 8200 | 19066 | Dfna5h      | MMT00012632        | 1  |
| 8200 | 20058 | Dfna5h      | Dnaic1             | -1 |
| 8200 | 20804 | Dfna5h      | Eno1               | 1  |
| 8200 | 21214 | Dfna5h      | Scd1               | 1  |
| 8200 | 21727 | Dfna5h      | Khk                | 1  |
| 8209 | 8815  | MMT00072546 | Mx1                | 1  |
| 8209 | 21214 | MMT00072546 | Scd1               | 1  |
| 8210 | 8210  | Hspa12a     | Hspa12a            | 1  |
| 8210 | 10115 | Hspa12a     | Ptk2               | 1  |
| 8210 | 10387 | Hspa12a     | 4933427D06Rik      | 1  |
| 8210 | 10466 | Hspa12a     | S1pr5              | 1  |
| 8210 | 11598 | Hspa12a     | MMT00031533        | 1  |
| 8210 | 13219 | Hspa12a     | Trhde              | 1  |
| 8210 | 14550 | Hspa12a     | Acot7              | 1  |
| 8210 | 15135 | Hspa12a     | Col5a3             | -1 |
| 8210 | 19629 | Hspa12a     | Smarcd3            | 1  |
| 8210 | 20628 | Hspa12a     | Hoxd10             | 1  |
| 8210 | 21099 | Hspa12a     | Rapgef6            | 1  |
| 8210 | 21218 | Hspa12a     | Col9a2             | 1  |
| 8210 | 23034 | Hspa12a     | Slc25a29           | 1  |
| 8223 | 8444  | Pdlim3      | Rdh16              | -1 |
| 8234 | 19790 | Tbpl1       | Polg2              | -1 |
| 8252 | 6386  | Plcl1       | Por                | 1  |
| 8254 | 607   | Bbs2        | Me1                | -1 |
| 8254 | 874   | Bbs2        | Aldh1a7            | -1 |
| 8254 | 4579  | Bbs2        | Dpys               | 1  |
| 8254 | 5884  | Bbs2        | Gstm2              | -1 |
| 8254 | 6044  | Bbs2        | Sucnr1             | -1 |
| 8254 | 6193  | Bbs2        | Lactb2             | -1 |
| 8254 | 6370  | Bbs2        | Aqp8               | -1 |
| 8254 | 8815  | Bbs2        | Mx1                | -1 |
| 8254 | 10132 | Bbs2        | Ces2               | -1 |
| 8254 | 11946 | Bbs2        | MMT00030953        | -1 |
| 8254 | 12219 | Bbs2        | Cyb5b              | -1 |
| 8254 | 12941 | Bbs2        | Elov15             | -1 |
| 8254 | 14017 | Bbs2        | Ces5               | -1 |
| 8254 | 14147 | Bbs2        | Acss2              | -1 |

|      |       |             |               |    |
|------|-------|-------------|---------------|----|
| 8254 | 14151 | Bbs2        | Slc44a1       | -1 |
| 8254 | 14323 | Bbs2        | Scarb1        | 1  |
| 8254 | 16661 | Bbs2        | Tmprss4       | -1 |
| 8254 | 18201 | Bbs2        | MMT00060232   | -1 |
| 8254 | 20019 | Bbs2        | Qdpr          | -1 |
| 8254 | 20328 | Bbs2        | Csl           | -1 |
| 8254 | 21214 | Bbs2        | Scd1          | -1 |
| 8254 | 21251 | Bbs2        | Cpt1a         | 1  |
| 8254 | 21575 | Bbs2        | Cyp2c55       | -1 |
| 8254 | 21793 | Bbs2        | Pla2g12a      | 1  |
| 8254 | 22138 | Bbs2        | Ang           | 1  |
| 8254 | 22732 | Bbs2        | Cyb5b         | -1 |
| 8254 | 23026 | Bbs2        | Apom          | 1  |
| 8268 | 563   | Kctd7       | D4Bwg0951e    | -1 |
| 8268 | 771   | Kctd7       | Zbtb45        | 1  |
| 8268 | 1941  | Kctd7       | MMT00079618   | 1  |
| 8268 | 4391  | Kctd7       | Zfp467        | 1  |
| 8268 | 4535  | Kctd7       | MMT00025220   | 1  |
| 8268 | 5587  | Kctd7       | Rmnd5b        | 1  |
| 8268 | 6976  | Kctd7       | Rbm35b        | 1  |
| 8268 | 7612  | Kctd7       | MMT00014216   | 1  |
| 8268 | 9418  | Kctd7       | MMT00034311   | 1  |
| 8268 | 9860  | Kctd7       | MMT00060113   | 1  |
| 8268 | 11169 | Kctd7       | MMT00078034   | 1  |
| 8268 | 11444 | Kctd7       | Rnpep         | 1  |
| 8268 | 12803 | Kctd7       | Ranbp3        | 1  |
| 8268 | 14335 | Kctd7       | Olf33         | -1 |
| 8268 | 15659 | Kctd7       | MMT00074093   | 1  |
| 8268 | 18785 | Kctd7       | Angptl4       | -1 |
| 8268 | 20076 | Kctd7       | Dbnl          | 1  |
| 8268 | 20777 | Kctd7       | MMT00010185   | 1  |
| 8268 | 21722 | Kctd7       | MMT00054655   | 1  |
| 8270 | 1416  | Clspn       | 6720460F02Rik | 1  |
| 8270 | 5364  | Clspn       | Kif22         | 1  |
| 8270 | 8416  | Clspn       | Cdc20         | 1  |
| 8270 | 11382 | Clspn       | Cdca3         | 1  |
| 8270 | 20433 | Clspn       | Cdca5         | 1  |
| 8270 | 21947 | Clspn       | Cdca8         | 1  |
| 8270 | 22138 | Clspn       | Ang           | -1 |
| 8274 | 8274  | Zc3h11a     | Zc3h11a       | 1  |
| 8274 | 12232 | Zc3h11a     | MMT00060943   | 1  |
| 8274 | 17461 | Zc3h11a     | Ripk5         | 1  |
| 8279 | 6193  | Kif13a      | Lactb2        | -1 |
| 8284 | 9161  | EG209380    | Mrpl17        | 1  |
| 8284 | 13206 | EG209380    | Qprt          | 1  |
| 8300 | 9700  | MMT00043905 | Prodh         | -1 |
| 8300 | 10710 | MMT00043905 | Smoc1         | -1 |
| 8300 | 11565 | MMT00043905 | Serpina3c     | 1  |
| 8300 | 13839 | MMT00043905 | Gypc          | -1 |
| 8300 | 17638 | MMT00043905 | Adssl1        | -1 |
| 8300 | 20058 | MMT00043905 | Dnaic1        | 1  |



|      |       |             |                    |    |
|------|-------|-------------|--------------------|----|
| 8300 | 20567 | MMT00043905 | Ggt6               | -1 |
| 8304 | 2051  | Fubp1       | Ddx27              | -1 |
| 8304 | 3449  | Fubp1       | Hes6               | 1  |
| 8304 | 6599  | Fubp1       | 1700020C11Rik      | 1  |
| 8304 | 10250 | Fubp1       | Pcsk9              | 1  |
| 8304 | 13422 | Fubp1       | Usp3               | -1 |
| 8304 | 16750 | Fubp1       | Casp6              | -1 |
| 8304 | 21354 | Fubp1       | Xpa                | -1 |
| 8314 | 7862  | Armc6       | Cpsf4l             | -1 |
| 8319 | 10554 | MMT00062477 | ENSMUSG00000074179 | 1  |
| 8319 | 13293 | MMT00062477 | Gsta2              | 1  |
| 8320 | 8815  | Nme3        | Mx1                | -1 |
| 8325 | 23174 | Psme2       | Psme2              | 1  |
| 8332 | 16972 | Tmem206     | Nenf               | -1 |
| 8340 | 9910  | Pde1a       | EG666644           | 1  |
| 8340 | 12941 | Pde1a       | Elov5              | -1 |
| 8341 | 2945  | MMT00017270 | MMT00005190        | 1  |
| 8341 | 3998  | MMT00017270 | 4930528F23Rik      | 1  |
| 8341 | 5014  | MMT00017270 | MMT00017503        | 1  |
| 8341 | 5968  | MMT00017270 | MMT00012419        | 1  |
| 8341 | 8341  | MMT00017270 | MMT00017270        | 1  |
| 8341 | 9909  | MMT00017270 | MMT00077883        | 1  |
| 8341 | 14132 | MMT00017270 | Glo1               | -1 |
| 8341 | 14924 | MMT00017270 | Hn1l               | -1 |
| 8341 | 19064 | MMT00017270 | MMT00004867        | -1 |
| 8341 | 19929 | MMT00017270 | MMT00079667        | 1  |
| 8356 | 21575 | Fbxl12      | Cyp2c55            | -1 |
| 8368 | 1745  | Rad51l3     | Gas7               | -1 |
| 8368 | 6376  | Rad51l3     | Nle1               | 1  |
| 8368 | 10539 | Rad51l3     | Unc45b             | -1 |
| 8368 | 15127 | Rad51l3     | Cct6b              | -1 |
| 8372 | 7449  | Uap1        | Creg1              | 1  |
| 8372 | 8372  | Uap1        | Uap1               | 1  |
| 8372 | 9449  | Uap1        | Sft2d2             | -1 |
| 8372 | 16361 | Uap1        | Olf703             | -1 |
| 8372 | 19520 | Uap1        | Uck2               | -1 |
| 8372 | 23466 | Uap1        | Pou2f1             | -1 |
| 8392 | 22138 | Asf1b       | Ang                | -1 |
| 8394 | 2599  | Dpy19l3     | Lsm14a             | 1  |
| 8394 | 6513  | Dpy19l3     | Qpctl              | 1  |
| 8394 | 10545 | Dpy19l3     | Tmem147            | 1  |
| 8399 | 437   | Herpud1     | Ndrg1              | -1 |
| 8399 | 1772  | Herpud1     | Stampb             | -1 |
| 8399 | 2126  | Herpud1     | Dgat2              | 1  |
| 8399 | 2399  | Herpud1     | MMT00060167        | -1 |
| 8399 | 2636  | Herpud1     | Tars               | -1 |
| 8399 | 2766  | Herpud1     | Elp4               | -1 |
| 8399 | 3452  | Herpud1     | Ccrn4l             | 1  |
| 8399 | 3502  | Herpud1     | Gde1               | 1  |
| 8399 | 3790  | Herpud1     | Mtss1              | 1  |
| 8399 | 5183  | Herpud1     | St5                | -1 |

|      |       |          |               |    |
|------|-------|----------|---------------|----|
| 8399 | 5934  | Herpud1  | S100a10       | -1 |
| 8399 | 6028  | Herpud1  | Alas1         | 1  |
| 8399 | 6386  | Herpud1  | Por           | 1  |
| 8399 | 6394  | Herpud1  | Fbxo6         | -1 |
| 8399 | 7414  | Herpud1  | Clpx          | -1 |
| 8399 | 8399  | Herpud1  | Herpud1       | 1  |
| 8399 | 8882  | Herpud1  | Adarb1        | 1  |
| 8399 | 10408 | Herpud1  | Per1          | 1  |
| 8399 | 11599 | Herpud1  | Coq10b        | 1  |
| 8399 | 11857 | Herpud1  | Arv1          | -1 |
| 8399 | 12799 | Herpud1  | Spon2         | -1 |
| 8399 | 12807 | Herpud1  | Faim          | -1 |
| 8399 | 14041 | Herpud1  | Cldn1         | -1 |
| 8399 | 15860 | Herpud1  | BC004004      | -1 |
| 8399 | 16176 | Herpud1  | St3gal5       | 1  |
| 8399 | 17338 | Herpud1  | Mocos         | -1 |
| 8399 | 17583 | Herpud1  | Per2          | 1  |
| 8399 | 18179 | Herpud1  | Dbp           | 1  |
| 8399 | 18827 | Herpud1  | Oprs1         | -1 |
| 8399 | 19532 | Herpud1  | Med8          | -1 |
| 8399 | 21142 | Herpud1  | Gm129         | 1  |
| 8399 | 22218 | Herpud1  | Rfc3          | -1 |
| 8399 | 22936 | Herpud1  | Rhobtb1       | 1  |
| 8399 | 23437 | Herpud1  | Efhd2         | 1  |
| 8416 | 1416  | Cdc20    | 6720460F02Rik | 1  |
| 8416 | 2428  | Cdc20    | Car1          | -1 |
| 8416 | 5364  | Cdc20    | Kif22         | 1  |
| 8416 | 7492  | Cdc20    | Adfp          | 1  |
| 8416 | 8416  | Cdc20    | Cdc20         | 1  |
| 8416 | 11382 | Cdc20    | Cdca3         | 1  |
| 8416 | 12799 | Cdc20    | Spon2         | 1  |
| 8416 | 17823 | Cdc20    | D2Ertd750e    | 1  |
| 8416 | 18299 | Cdc20    | MMT00035424   | 1  |
| 8416 | 19318 | Cdc20    | Plk1          | 1  |
| 8416 | 20171 | Cdc20    | 1700008G05Rik | 1  |
| 8416 | 21692 | Cdc20    | MMT00013924   | 1  |
| 8416 | 21947 | Cdc20    | Cdca8         | 1  |
| 8430 | 12055 | Pttg1ip  | 1810008A18Rik | 1  |
| 8430 | 22786 | Pttg1ip  | Mterfd3       | 1  |
| 8432 | 3502  | Fgf18    | Gde1          | -1 |
| 8432 | 10486 | Fgf18    | 1300002K09Rik | 1  |
| 8438 | 20300 | Mrpl48   | Plekhb1       | 1  |
| 8438 | 21425 | Mrpl48   | Rab6          | 1  |
| 8439 | 407   | Slc25a33 | Serpina6      | 1  |
| 8439 | 415   | Slc25a33 | Ypel2         | -1 |
| 8439 | 433   | Slc25a33 | Pla2g12b      | -1 |
| 8439 | 437   | Slc25a33 | Ndrp1         | -1 |
| 8439 | 530   | Slc25a33 | Mest          | -1 |
| 8439 | 604   | Slc25a33 | Ppp1r15b      | 1  |
| 8439 | 707   | Slc25a33 | Bdnf          | 1  |
| 8439 | 719   | Slc25a33 | Usp2          | 1  |

|      |      |          |               |    |
|------|------|----------|---------------|----|
| 8439 | 793  | Slc25a33 | Morc3         | 1  |
| 8439 | 958  | Slc25a33 | Ppp2r5e       | 1  |
| 8439 | 1276 | Slc25a33 | Col4a1        | -1 |
| 8439 | 1362 | Slc25a33 | Avpr1a        | -1 |
| 8439 | 1363 | Slc25a33 | BC021767      | -1 |
| 8439 | 1646 | Slc25a33 | Slc15a4       | 1  |
| 8439 | 1767 | Slc25a33 | BC016495      | 1  |
| 8439 | 1853 | Slc25a33 | Stat5a        | -1 |
| 8439 | 2110 | Slc25a33 | Gtf2ird1      | -1 |
| 8439 | 2126 | Slc25a33 | Dgat2         | 1  |
| 8439 | 2200 | Slc25a33 | BC006779      | -1 |
| 8439 | 2384 | Slc25a33 | Micalcl       | -1 |
| 8439 | 2399 | Slc25a33 | MMT00060167   | -1 |
| 8439 | 2529 | Slc25a33 | Hmcn2         | 1  |
| 8439 | 2636 | Slc25a33 | Tars          | -1 |
| 8439 | 2721 | Slc25a33 | Inmt          | 1  |
| 8439 | 2725 | Slc25a33 | Gm1614        | 1  |
| 8439 | 2766 | Slc25a33 | Elp4          | -1 |
| 8439 | 2829 | Slc25a33 | Lrfr3         | -1 |
| 8439 | 2850 | Slc25a33 | Slc16a6       | -1 |
| 8439 | 3214 | Slc25a33 | Dnmt3b        | -1 |
| 8439 | 3410 | Slc25a33 | Paqr9         | -1 |
| 8439 | 3502 | Slc25a33 | Gde1          | 1  |
| 8439 | 3746 | Slc25a33 | Osbp15        | 1  |
| 8439 | 3790 | Slc25a33 | Mtss1         | 1  |
| 8439 | 4057 | Slc25a33 | Slc2a4        | 1  |
| 8439 | 4286 | Slc25a33 | Ptp4a1        | 1  |
| 8439 | 4298 | Slc25a33 | St3gal1       | -1 |
| 8439 | 4333 | Slc25a33 | Sumo3         | -1 |
| 8439 | 4379 | Slc25a33 | Glrx          | 1  |
| 8439 | 4512 | Slc25a33 | Esrra         | 1  |
| 8439 | 4534 | Slc25a33 | Ndel1         | 1  |
| 8439 | 4576 | Slc25a33 | Chchd7        | 1  |
| 8439 | 5068 | Slc25a33 | Afap112       | -1 |
| 8439 | 5183 | Slc25a33 | St5           | -1 |
| 8439 | 5364 | Slc25a33 | Kif22         | -1 |
| 8439 | 5374 | Slc25a33 | Chka          | -1 |
| 8439 | 5414 | Slc25a33 | Etnk2         | 1  |
| 8439 | 5569 | Slc25a33 | Pdgfc         | -1 |
| 8439 | 5574 | Slc25a33 | Hsd3b7        | -1 |
| 8439 | 5734 | Slc25a33 | EG619653      | 1  |
| 8439 | 5802 | Slc25a33 | Mad2l2        | -1 |
| 8439 | 5804 | Slc25a33 | Thrsp         | 1  |
| 8439 | 5849 | Slc25a33 | 2310031A18Rik | -1 |
| 8439 | 5892 | Slc25a33 | MMT00038457   | 1  |
| 8439 | 5974 | Slc25a33 | Arntl         | -1 |
| 8439 | 5983 | Slc25a33 | Pcolce2       | -1 |
| 8439 | 6028 | Slc25a33 | Alas1         | 1  |
| 8439 | 6030 | Slc25a33 | As3mt         | 1  |
| 8439 | 6109 | Slc25a33 | Hsd17b2       | -1 |
| 8439 | 6343 | Slc25a33 | Slc20a1       | 1  |

|      |       |          |               |    |
|------|-------|----------|---------------|----|
| 8439 | 6386  | Slc25a33 | Por           | 1  |
| 8439 | 6394  | Slc25a33 | Fbxo6         | -1 |
| 8439 | 6657  | Slc25a33 | Irf6          | -1 |
| 8439 | 6746  | Slc25a33 | E2f8          | -1 |
| 8439 | 6756  | Slc25a33 | Sds           | 1  |
| 8439 | 6990  | Slc25a33 | Nr1i2         | 1  |
| 8439 | 7414  | Slc25a33 | Clpx          | -1 |
| 8439 | 7492  | Slc25a33 | Adfp          | -1 |
| 8439 | 7761  | Slc25a33 | Nudt19        | 1  |
| 8439 | 7839  | Slc25a33 | Asl           | 1  |
| 8439 | 8328  | Slc25a33 | Klhdc8a       | -1 |
| 8439 | 8399  | Slc25a33 | Herpud1       | 1  |
| 8439 | 8416  | Slc25a33 | Cdc20         | -1 |
| 8439 | 9309  | Slc25a33 | MMT00035904   | 1  |
| 8439 | 9481  | Slc25a33 | Ppl           | 1  |
| 8439 | 9495  | Slc25a33 | Srms          | -1 |
| 8439 | 9700  | Slc25a33 | Prodh         | 1  |
| 8439 | 9718  | Slc25a33 | Fmo5          | 1  |
| 8439 | 9831  | Slc25a33 | Nedd4l        | -1 |
| 8439 | 9910  | Slc25a33 | EG666644      | 1  |
| 8439 | 10166 | Slc25a33 | Rhbdd2        | 1  |
| 8439 | 10207 | Slc25a33 | MMT00012324   | -1 |
| 8439 | 10408 | Slc25a33 | Per1          | 1  |
| 8439 | 10486 | Slc25a33 | 1300002K09Rik | -1 |
| 8439 | 10641 | Slc25a33 | Hpdl          | 1  |
| 8439 | 10642 | Slc25a33 | Ngef          | 1  |
| 8439 | 10775 | Slc25a33 | Slc16a1       | -1 |
| 8439 | 11154 | Slc25a33 | MMT00037611   | 1  |
| 8439 | 11233 | Slc25a33 | Tef           | 1  |
| 8439 | 11412 | Slc25a33 | Abcg5         | 1  |
| 8439 | 11506 | Slc25a33 | Rfxank        | -1 |
| 8439 | 11599 | Slc25a33 | Coq10b        | 1  |
| 8439 | 11729 | Slc25a33 | Ncr1          | 1  |
| 8439 | 11741 | Slc25a33 | Slc30a10      | -1 |
| 8439 | 11797 | Slc25a33 | Sbk1          | 1  |
| 8439 | 12151 | Slc25a33 | MMT00082650   | 1  |
| 8439 | 12193 | Slc25a33 | Aco2          | 1  |
| 8439 | 12204 | Slc25a33 | Ankmy2        | 1  |
| 8439 | 12799 | Slc25a33 | Spon2         | -1 |
| 8439 | 12807 | Slc25a33 | Faim          | -1 |
| 8439 | 13078 | Slc25a33 | Eps8l2        | -1 |
| 8439 | 14041 | Slc25a33 | Cldn1         | -1 |
| 8439 | 14258 | Slc25a33 | Ifi47         | -1 |
| 8439 | 14279 | Slc25a33 | 3930402G23Rik | -1 |
| 8439 | 14357 | Slc25a33 | Ing4          | -1 |
| 8439 | 14361 | Slc25a33 | Txndc12       | -1 |
| 8439 | 14462 | Slc25a33 | Zfp385b       | 1  |
| 8439 | 14829 | Slc25a33 | 1110007M04Rik | 1  |
| 8439 | 15008 | Slc25a33 | Chrdl2        | 1  |
| 8439 | 15049 | Slc25a33 | Rnf125        | -1 |
| 8439 | 15320 | Slc25a33 | MMT00017479   | 1  |

|      |       |          |               |    |
|------|-------|----------|---------------|----|
| 8439 | 15481 | Slc25a33 | 1110067D22Rik | -1 |
| 8439 | 15631 | Slc25a33 | Lpin1         | 1  |
| 8439 | 15709 | Slc25a33 | Tceal1        | 1  |
| 8439 | 15758 | Slc25a33 | Stx4a         | -1 |
| 8439 | 15824 | Slc25a33 | D19Ert721e    | -1 |
| 8439 | 15882 | Slc25a33 | AA986860      | 1  |
| 8439 | 16131 | Slc25a33 | Ptpre         | -1 |
| 8439 | 16580 | Slc25a33 | Tnfaip2       | -1 |
| 8439 | 16690 | Slc25a33 | Tjp3          | -1 |
| 8439 | 16851 | Slc25a33 | Slc34a2       | -1 |
| 8439 | 17083 | Slc25a33 | Atp1b1        | 1  |
| 8439 | 17247 | Slc25a33 | A030007L17Rik | -1 |
| 8439 | 17338 | Slc25a33 | Mocos         | -1 |
| 8439 | 17583 | Slc25a33 | Per2          | 1  |
| 8439 | 17884 | Slc25a33 | Lnx2          | -1 |
| 8439 | 18069 | Slc25a33 | Gpt           | 1  |
| 8439 | 18147 | Slc25a33 | Nhlrc2        | 1  |
| 8439 | 18176 | Slc25a33 | Aqp11         | 1  |
| 8439 | 18179 | Slc25a33 | Dbp           | 1  |
| 8439 | 18438 | Slc25a33 | Map3k7ip2     | -1 |
| 8439 | 18498 | Slc25a33 | Slc5a6        | 1  |
| 8439 | 18590 | Slc25a33 | Fgb           | -1 |
| 8439 | 18827 | Slc25a33 | Oprs1         | -1 |
| 8439 | 19025 | Slc25a33 | Slc37a4       | 1  |
| 8439 | 19234 | Slc25a33 | Nrg4          | 1  |
| 8439 | 19305 | Slc25a33 | Azin1         | 1  |
| 8439 | 19375 | Slc25a33 | Inhba         | -1 |
| 8439 | 19465 | Slc25a33 | Hacl1         | -1 |
| 8439 | 19671 | Slc25a33 | Upp2          | 1  |
| 8439 | 19701 | Slc25a33 | 9930021J17Rik | -1 |
| 8439 | 19790 | Slc25a33 | Polg2         | 1  |
| 8439 | 20266 | Slc25a33 | Insig2        | -1 |
| 8439 | 20488 | Slc25a33 | Bok           | -1 |
| 8439 | 20830 | Slc25a33 | MMT00057509   | -1 |
| 8439 | 21142 | Slc25a33 | Gm129         | 1  |
| 8439 | 21794 | Slc25a33 | Pfcp          | -1 |
| 8439 | 21811 | Slc25a33 | Ak3l1         | 1  |
| 8439 | 21918 | Slc25a33 | Snx24         | -1 |
| 8439 | 21969 | Slc25a33 | Tk1           | 1  |
| 8439 | 22218 | Slc25a33 | Rfc3          | -1 |
| 8439 | 22324 | Slc25a33 | MMT00060741   | -1 |
| 8439 | 22627 | Slc25a33 | Adck5         | -1 |
| 8439 | 22630 | Slc25a33 | MMT00034355   | -1 |
| 8439 | 22653 | Slc25a33 | Ric3          | -1 |
| 8439 | 22730 | Slc25a33 | Git8d1        | -1 |
| 8439 | 22936 | Slc25a33 | Rhobtb1       | 1  |
| 8439 | 23183 | Slc25a33 | Nnmt          | 1  |
| 8439 | 23437 | Slc25a33 | Efh2          | 1  |
| 8443 | 8443  | Pola2    | Pola2         | 1  |
| 8448 | 17321 | Sucla2   | Hepacam       | 1  |
| 8449 | 2329  | Vash2    | Wdr6          | 1  |

|      |       |               |                    |    |
|------|-------|---------------|--------------------|----|
| 8449 | 5364  | Vash2         | Kif22              | 1  |
| 8449 | 8416  | Vash2         | Cdc20              | 1  |
| 8449 | 9587  | Vash2         | Bri3bp             | 1  |
| 8449 | 11382 | Vash2         | Cdca3              | 1  |
| 8449 | 16202 | Vash2         | Ccmd1              | 1  |
| 8449 | 19723 | Vash2         | Pfkfb1             | -1 |
| 8458 | 10554 | MMT00063985   | ENSMUSG00000074179 | 1  |
| 8458 | 13293 | MMT00063985   | Gsta2              | 1  |
| 8469 | 1820  | Sfrs6         | Mat2b              | -1 |
| 8486 | 17996 | Plod3         | Igfbp2             | -1 |
| 8486 | 18042 | Plod3         | Aph1c              | -1 |
| 8486 | 20079 | Plod3         | MMT00019254        | -1 |
| 8499 | 1956  | C430048L16Rik | Usp50              | 1  |
| 8499 | 4833  | C430048L16Rik | Synpo2             | -1 |
| 8499 | 6016  | C430048L16Rik | A530057A03Rik      | 1  |
| 8499 | 6231  | C430048L16Rik | 9030622O22Rik      | 1  |
| 8499 | 7991  | C430048L16Rik | Gpr115             | -1 |
| 8499 | 14740 | C430048L16Rik | Mfap1b             | -1 |
| 8499 | 17043 | C430048L16Rik | Tmem127            | 1  |
| 8499 | 21729 | C430048L16Rik | Hdc                | -1 |
| 8499 | 22857 | C430048L16Rik | Fahd2a             | 1  |
| 8500 | 7315  | Ddit3         | EG624219           | 1  |
| 8510 | 8637  | Tbl2          | Tnpo2              | 1  |
| 8510 | 14043 | Tbl2          | 4930455C21Rik      | 1  |
| 8516 | 13431 | Plxnb2        | MMT00038058        | 1  |
| 8516 | 15205 | Plxnb2        | MMT00030262        | 1  |
| 8516 | 17880 | Plxnb2        | Ncald              | 1  |
| 8516 | 21937 | Plxnb2        | MMT00015325        | 1  |
| 8516 | 22907 | Plxnb2        | MMT00054594        | 1  |
| 8516 | 22978 | Plxnb2        | MMT00043176        | 1  |
| 8524 | 6370  | Cbr1          | Aqp8               | -1 |
| 8530 | 1258  | Snca          | Hba-a1             | 1  |
| 8530 | 5919  | Snca          | B930041F14Rik      | 1  |
| 8530 | 8530  | Snca          | Snca               | 1  |
| 8530 | 15132 | Snca          | MMT00007672        | 1  |
| 8530 | 15529 | Snca          | MMT00011590        | 1  |
| 8530 | 17664 | Snca          | Jup                | 1  |
| 8530 | 21335 | Snca          | Trp53rk            | 1  |
| 8530 | 21356 | Snca          | Nkx2-6             | 1  |
| 8530 | 21387 | Snca          | Cnot7              | 1  |
| 8541 | 3393  | Tubb5         | Snhg8              | -1 |
| 8541 | 4966  | Tubb5         | Zscan20            | 1  |
| 8541 | 16251 | Tubb5         | G6pc               | 1  |
| 8547 | 1533  | Gbp4          | BC013712           | 1  |
| 8547 | 2058  | Gbp4          | Hk3                | 1  |
| 8547 | 2200  | Gbp4          | BC006779           | 1  |
| 8547 | 2224  | Gbp4          | Oasl2              | 1  |
| 8547 | 2578  | Gbp4          | Csf2rb2            | 1  |
| 8547 | 2752  | Gbp4          | Fcgr1              | 1  |
| 8547 | 3036  | Gbp4          | Slamf9             | 1  |
| 8547 | 3286  | Gbp4          | Alox5ap            | 1  |

|      |       |      |             |   |
|------|-------|------|-------------|---|
| 8547 | 3572  | Gbp4 | Ebi3        | 1 |
| 8547 | 3594  | Gbp4 | Rasa4       | 1 |
| 8547 | 3683  | Gbp4 | Oas2        | 1 |
| 8547 | 4114  | Gbp4 | Parp12      | 1 |
| 8547 | 4426  | Gbp4 | Ilgp2       | 1 |
| 8547 | 5044  | Gbp4 | Ifi35       | 1 |
| 8547 | 5556  | Gbp4 | Ccl4        | 1 |
| 8547 | 5845  | Gbp4 | Il18bp      | 1 |
| 8547 | 5853  | Gbp4 | Trim30      | 1 |
| 8547 | 6072  | Gbp4 | C1qc        | 1 |
| 8547 | 6098  | Gbp4 | Ncf4        | 1 |
| 8547 | 6587  | Gbp4 | Irf9        | 1 |
| 8547 | 6824  | Gbp4 | Irf7        | 1 |
| 8547 | 6910  | Gbp4 | Ly6c2       | 1 |
| 8547 | 7069  | Gbp4 | Ube1l       | 1 |
| 8547 | 7105  | Gbp4 | Plac8       | 1 |
| 8547 | 7238  | Gbp4 | Pycard      | 1 |
| 8547 | 7284  | Gbp4 | MMT00008674 | 1 |
| 8547 | 7336  | Gbp4 | Cd5l        | 1 |
| 8547 | 8392  | Gbp4 | Asf1b       | 1 |
| 8547 | 8533  | Gbp4 | Ptprcap     | 1 |
| 8547 | 8555  | Gbp4 | H2-M3       | 1 |
| 8547 | 8564  | Gbp4 | Pld4        | 1 |
| 8547 | 8659  | Gbp4 | Psmb8       | 1 |
| 8547 | 8800  | Gbp4 | Rnf213      | 1 |
| 8547 | 9401  | Gbp4 | Fcgr4       | 1 |
| 8547 | 9820  | Gbp4 | BC023105    | 1 |
| 8547 | 9821  | Gbp4 | Pmaip1      | 1 |
| 8547 | 9847  | Gbp4 | Ifi27       | 1 |
| 8547 | 9920  | Gbp4 | Syk         | 1 |
| 8547 | 9928  | Gbp4 | Lgmn        | 1 |
| 8547 | 10109 | Gbp4 | Gbp3        | 1 |
| 8547 | 10504 | Gbp4 | Ripk3       | 1 |
| 8547 | 10606 | Gbp4 | Apbb1ip     | 1 |
| 8547 | 10926 | Gbp4 | P2ry13      | 1 |
| 8547 | 11204 | Gbp4 | AI451617    | 1 |
| 8547 | 12398 | Gbp4 | Ifi44       | 1 |
| 8547 | 12969 | Gbp4 | Xaf1        | 1 |
| 8547 | 13181 | Gbp4 | Lcp2        | 1 |
| 8547 | 13309 | Gbp4 | Tgtp        | 1 |
| 8547 | 13527 | Gbp4 | Ctss        | 1 |
| 8547 | 13585 | Gbp4 | Nckap1l     | 1 |
| 8547 | 13656 | Gbp4 | Ly86        | 1 |
| 8547 | 13780 | Gbp4 | Pilra       | 1 |
| 8547 | 14117 | Gbp4 | C1qb        | 1 |
| 8547 | 14192 | Gbp4 | Trpv2       | 1 |
| 8547 | 14237 | Gbp4 | Rac2        | 1 |
| 8547 | 14258 | Gbp4 | Ifi47       | 1 |
| 8547 | 14453 | Gbp4 | Inpp5d      | 1 |
| 8547 | 14506 | Gbp4 | Slc15a3     | 1 |
| 8547 | 14880 | Gbp4 | Ms4a4c      | 1 |

|      |       |       |               |    |
|------|-------|-------|---------------|----|
| 8547 | 14883 | Gbp4  | Itgal         | 1  |
| 8547 | 15074 | Gbp4  | Usp18         | 1  |
| 8547 | 15280 | Gbp4  | Cxcl10        | 1  |
| 8547 | 15387 | Gbp4  | Mgl1          | 1  |
| 8547 | 15749 | Gbp4  | Cd22          | 1  |
| 8547 | 15825 | Gbp4  | Fermt3        | 1  |
| 8547 | 16102 | Gbp4  | Cd72          | 1  |
| 8547 | 16147 | Gbp4  | Tlr2          | 1  |
| 8547 | 16182 | Gbp4  | Oasl1         | 1  |
| 8547 | 16186 | Gbp4  | Cfp           | 1  |
| 8547 | 16874 | Gbp4  | Fcer1g        | 1  |
| 8547 | 16988 | Gbp4  | Clec4f        | 1  |
| 8547 | 17197 | Gbp4  | Igtp          | 1  |
| 8547 | 17412 | Gbp4  | Aif1          | 1  |
| 8547 | 18174 | Gbp4  | Stat2         | 1  |
| 8547 | 18289 | Gbp4  | Tap1          | 1  |
| 8547 | 18901 | Gbp4  | Hpx           | 1  |
| 8547 | 19063 | Gbp4  | Evl           | 1  |
| 8547 | 19189 | Gbp4  | Sp100         | 1  |
| 8547 | 19252 | Gbp4  | Tmsb4x        | 1  |
| 8547 | 19382 | Gbp4  | Slc2a6        | 1  |
| 8547 | 19738 | Gbp4  | Lgals3bp      | 1  |
| 8547 | 19794 | Gbp4  | Rgs2          | 1  |
| 8547 | 20321 | Gbp4  | Ms4a6b        | 1  |
| 8547 | 20814 | Gbp4  | Ptpn18        | 1  |
| 8547 | 21351 | Gbp4  | Shisa5        | 1  |
| 8547 | 21440 | Gbp4  | Tmsb10        | 1  |
| 8547 | 21549 | Gbp4  | Rtp4          | 1  |
| 8547 | 21824 | Gbp4  | 5830443L24Rik | 1  |
| 8547 | 21863 | Gbp4  | Dok2          | 1  |
| 8547 | 22037 | Gbp4  | Oas1g         | 1  |
| 8547 | 22327 | Gbp4  | Tyrobp        | 1  |
| 8547 | 22670 | Gbp4  | Clec4a1       | 1  |
| 8547 | 22876 | Gbp4  | Sash3         | 1  |
| 8547 | 23208 | Gbp4  | Hck           | 1  |
| 8547 | 23242 | Gbp4  | Gngt2         | 1  |
| 8547 | 23394 | Gbp4  | Psd4          | 1  |
| 8547 | 23410 | Gbp4  | C1qa          | 1  |
| 8547 | 23625 | Gbp4  | Pkd2          | 1  |
| 8554 | 607   | Letm2 | Me1           | -1 |
| 8554 | 6193  | Letm2 | Lactb2        | -1 |
| 8554 | 8815  | Letm2 | Mx1           | -1 |
| 8554 | 18201 | Letm2 | MMT00060232   | -1 |
| 8554 | 23026 | Letm2 | Apom          | 1  |
| 8555 | 387   | H2-M3 | Rgs10         | 1  |
| 8555 | 405   | H2-M3 | Emr4          | 1  |
| 8555 | 1533  | H2-M3 | BC013712      | 1  |
| 8555 | 1612  | H2-M3 | Clec1b        | 1  |
| 8555 | 2058  | H2-M3 | Hk3           | 1  |
| 8555 | 2200  | H2-M3 | BC006779      | 1  |
| 8555 | 2224  | H2-M3 | Oasl2         | 1  |



|      |       |       |               |    |
|------|-------|-------|---------------|----|
| 8555 | 2490  | H2-M3 | MMT00070880   | 1  |
| 8555 | 2578  | H2-M3 | Csf2rb2       | 1  |
| 8555 | 2752  | H2-M3 | Fcgr1         | 1  |
| 8555 | 3286  | H2-M3 | Alox5ap       | 1  |
| 8555 | 3535  | H2-M3 | S100a9        | 1  |
| 8555 | 3572  | H2-M3 | Ebi3          | 1  |
| 8555 | 3577  | H2-M3 | Ptplad2       | 1  |
| 8555 | 3594  | H2-M3 | Rasa4         | 1  |
| 8555 | 3683  | H2-M3 | Oas2          | 1  |
| 8555 | 4114  | H2-M3 | Parp12        | 1  |
| 8555 | 4409  | H2-M3 | 5430435G22Rik | 1  |
| 8555 | 4426  | H2-M3 | Iigp2         | 1  |
| 8555 | 4901  | H2-M3 | MMT00073557   | 1  |
| 8555 | 5044  | H2-M3 | Ifi35         | 1  |
| 8555 | 5364  | H2-M3 | Kif22         | 1  |
| 8555 | 5766  | H2-M3 | 5033414D02Rik | 1  |
| 8555 | 5845  | H2-M3 | Il18bp        | 1  |
| 8555 | 5853  | H2-M3 | Trim30        | 1  |
| 8555 | 5975  | H2-M3 | Car13         | 1  |
| 8555 | 6036  | H2-M3 | Pram1         | 1  |
| 8555 | 6072  | H2-M3 | C1qc          | 1  |
| 8555 | 6098  | H2-M3 | Ncf4          | 1  |
| 8555 | 6154  | H2-M3 | 1700030G06Rik | 1  |
| 8555 | 6420  | H2-M3 | Mipep         | -1 |
| 8555 | 6824  | H2-M3 | Irf7          | 1  |
| 8555 | 7069  | H2-M3 | Ube1l         | 1  |
| 8555 | 7105  | H2-M3 | Plac8         | 1  |
| 8555 | 7238  | H2-M3 | Pycard        | 1  |
| 8555 | 7265  | H2-M3 | Dok1          | 1  |
| 8555 | 7284  | H2-M3 | MMT00008674   | 1  |
| 8555 | 7336  | H2-M3 | Cd5l          | 1  |
| 8555 | 8392  | H2-M3 | Asf1b         | 1  |
| 8555 | 8533  | H2-M3 | Ptprcap       | 1  |
| 8555 | 8555  | H2-M3 | H2-M3         | 1  |
| 8555 | 8564  | H2-M3 | Pld4          | 1  |
| 8555 | 8659  | H2-M3 | Psmb8         | 1  |
| 8555 | 8800  | H2-M3 | Rnf213        | 1  |
| 8555 | 8922  | H2-M3 | Il10ra        | 1  |
| 8555 | 8951  | H2-M3 | Cd97          | 1  |
| 8555 | 9401  | H2-M3 | Fcgr4         | 1  |
| 8555 | 9821  | H2-M3 | Pmaip1        | 1  |
| 8555 | 9847  | H2-M3 | Ifi27         | 1  |
| 8555 | 9920  | H2-M3 | Syk           | 1  |
| 8555 | 9928  | H2-M3 | Lgmn          | 1  |
| 8555 | 10109 | H2-M3 | Gbp3          | 1  |
| 8555 | 10393 | H2-M3 | Slc7a8        | 1  |
| 8555 | 10504 | H2-M3 | Ripk3         | 1  |
| 8555 | 10606 | H2-M3 | Apbb1ip       | 1  |
| 8555 | 10926 | H2-M3 | P2ry13        | 1  |
| 8555 | 11204 | H2-M3 | AI451617      | 1  |
| 8555 | 11701 | H2-M3 | Oas1c         | 1  |

|      |       |       |          |    |
|------|-------|-------|----------|----|
| 8555 | 11836 | H2-M3 | Csf1r    | 1  |
| 8555 | 12398 | H2-M3 | Ifi44    | 1  |
| 8555 | 12469 | H2-M3 | Dock10   | 1  |
| 8555 | 12495 | H2-M3 | Casp1    | 1  |
| 8555 | 12600 | H2-M3 | Ifi204   | 1  |
| 8555 | 12969 | H2-M3 | Xaf1     | 1  |
| 8555 | 13019 | H2-M3 | Als2cr2  | -1 |
| 8555 | 13172 | H2-M3 | Epb4.1l3 | 1  |
| 8555 | 13181 | H2-M3 | Lcp2     | 1  |
| 8555 | 13309 | H2-M3 | Tgtp     | 1  |
| 8555 | 13455 | H2-M3 | Cenpe    | 1  |
| 8555 | 13527 | H2-M3 | Ctss     | 1  |
| 8555 | 13585 | H2-M3 | Nckap1l  | 1  |
| 8555 | 13656 | H2-M3 | Ly86     | 1  |
| 8555 | 13780 | H2-M3 | Pilra    | 1  |
| 8555 | 13826 | H2-M3 | Melk     | 1  |
| 8555 | 13885 | H2-M3 | Clec7a   | 1  |
| 8555 | 14117 | H2-M3 | C1qb     | 1  |
| 8555 | 14192 | H2-M3 | Trpv2    | 1  |
| 8555 | 14237 | H2-M3 | Rac2     | 1  |
| 8555 | 14258 | H2-M3 | Ifi47    | 1  |
| 8555 | 14453 | H2-M3 | Inpp5d   | 1  |
| 8555 | 14475 | H2-M3 | Abcg1    | 1  |
| 8555 | 14506 | H2-M3 | Slc15a3  | 1  |
| 8555 | 14603 | H2-M3 | Ly6e     | 1  |
| 8555 | 14880 | H2-M3 | Ms4a4c   | 1  |
| 8555 | 14883 | H2-M3 | Itgal    | 1  |
| 8555 | 15074 | H2-M3 | Usp18    | 1  |
| 8555 | 15159 | H2-M3 | Timd4    | 1  |
| 8555 | 15387 | H2-M3 | Mgl1     | 1  |
| 8555 | 15504 | H2-M3 | Mx2      | 1  |
| 8555 | 15677 | H2-M3 | Slc9a9   | 1  |
| 8555 | 15749 | H2-M3 | Cd22     | 1  |
| 8555 | 15825 | H2-M3 | Fermt3   | 1  |
| 8555 | 16102 | H2-M3 | Cd72     | 1  |
| 8555 | 16147 | H2-M3 | Tlr2     | 1  |
| 8555 | 16182 | H2-M3 | Oasl1    | 1  |
| 8555 | 16186 | H2-M3 | Cfp      | 1  |
| 8555 | 16199 | H2-M3 | Samhd1   | 1  |
| 8555 | 16827 | H2-M3 | Arhgdib  | 1  |
| 8555 | 16874 | H2-M3 | Fcer1g   | 1  |
| 8555 | 16913 | H2-M3 | Pira3    | 1  |
| 8555 | 16988 | H2-M3 | Clec4f   | 1  |
| 8555 | 17197 | H2-M3 | Igtp     | 1  |
| 8555 | 17412 | H2-M3 | Aif1     | 1  |
| 8555 | 17806 | H2-M3 | Gpsm3    | 1  |
| 8555 | 17904 | H2-M3 | Cds1     | 1  |
| 8555 | 18174 | H2-M3 | Stat2    | 1  |
| 8555 | 18211 | H2-M3 | Folr2    | 1  |
| 8555 | 18289 | H2-M3 | Tap1     | 1  |
| 8555 | 18662 | H2-M3 | Batf3    | 1  |

|      |       |        |               |    |
|------|-------|--------|---------------|----|
| 8555 | 19063 | H2-M3  | Evl           | 1  |
| 8555 | 19153 | H2-M3  | Ptgs1         | 1  |
| 8555 | 19189 | H2-M3  | Sp100         | 1  |
| 8555 | 19252 | H2-M3  | Tmsb4x        | 1  |
| 8555 | 19382 | H2-M3  | Slc2a6        | 1  |
| 8555 | 19738 | H2-M3  | Lgals3bp      | 1  |
| 8555 | 19794 | H2-M3  | Rgs2          | 1  |
| 8555 | 20150 | H2-M3  | Ptprc         | 1  |
| 8555 | 20217 | H2-M3  | Rab3ip        | -1 |
| 8555 | 20321 | H2-M3  | Ms4a6b        | 1  |
| 8555 | 20431 | H2-M3  | Slc7a7        | 1  |
| 8555 | 20474 | H2-M3  | Gnb3          | 1  |
| 8555 | 20814 | H2-M3  | Ptpn18        | 1  |
| 8555 | 21351 | H2-M3  | Shisa5        | 1  |
| 8555 | 21440 | H2-M3  | Tmsb10        | 1  |
| 8555 | 21549 | H2-M3  | Rtp4          | 1  |
| 8555 | 21751 | H2-M3  | Ptpn6         | 1  |
| 8555 | 21824 | H2-M3  | 5830443L24Rik | 1  |
| 8555 | 21837 | H2-M3  | BC052328      | 1  |
| 8555 | 21863 | H2-M3  | Dok2          | 1  |
| 8555 | 22037 | H2-M3  | Oas1g         | 1  |
| 8555 | 22327 | H2-M3  | Tyrobp        | 1  |
| 8555 | 22496 | H2-M3  | Sfn1          | 1  |
| 8555 | 22647 | H2-M3  | Pkib          | 1  |
| 8555 | 22670 | H2-M3  | Clec4a1       | 1  |
| 8555 | 22876 | H2-M3  | Sash3         | 1  |
| 8555 | 23208 | H2-M3  | Hck           | 1  |
| 8555 | 23242 | H2-M3  | Gngt2         | 1  |
| 8555 | 23276 | H2-M3  | Evi2b         | 1  |
| 8555 | 23394 | H2-M3  | Psd4          | 1  |
| 8555 | 23403 | H2-M3  | Ndc80         | 1  |
| 8555 | 23410 | H2-M3  | C1qa          | 1  |
| 8559 | 14147 | Rangrf | Acss2         | 1  |
| 8559 | 21214 | Rangrf | Scd1          | 1  |
| 8559 | 21251 | Rangrf | Cpt1a         | -1 |
| 8559 | 23640 | Rangrf | Bdh1          | -1 |
| 8563 | 2599  | Leng1  | Lsm14a        | 1  |
| 8563 | 9322  | Leng1  | Relt          | -1 |
| 8563 | 19462 | Leng1  | 4933439C20Rik | -1 |
| 8563 | 20606 | Leng1  | MMT00042166   | -1 |
| 8563 | 23247 | Leng1  | Ercc1         | -1 |
| 8564 | 2200  | Pld4   | BC006779      | 1  |
| 8564 | 5364  | Pld4   | Kif22         | 1  |
| 8564 | 5766  | Pld4   | 5033414D02Rik | 1  |
| 8564 | 11382 | Pld4   | Cdca3         | 1  |
| 8564 | 14472 | Pld4   | Ahcy          | -1 |
| 8564 | 15320 | Pld4   | MMT00017479   | -1 |
| 8578 | 8444  | Wdr19  | Rdh16         | -1 |
| 8578 | 21214 | Wdr19  | Scd1          | -1 |
| 8582 | 147   | Igsf10 | Uox           | -1 |
| 8582 | 760   | Igsf10 | Akr1c19       | -1 |

|      |       |             |                    |    |
|------|-------|-------------|--------------------|----|
| 8582 | 2639  | Igsf10      | Abhd2              | 1  |
| 8582 | 3535  | Igsf10      | S100a9             | 1  |
| 8582 | 5364  | Igsf10      | Kif22              | 1  |
| 8582 | 5849  | Igsf10      | 2310031A18Rik      | 1  |
| 8582 | 6085  | Igsf10      | MMT00007454        | 1  |
| 8582 | 7954  | Igsf10      | Ccdc12             | 1  |
| 8582 | 8328  | Igsf10      | Klhdc8a            | 1  |
| 8582 | 8416  | Igsf10      | Cdc20              | 1  |
| 8582 | 8773  | Igsf10      | MMT00027093        | 1  |
| 8582 | 9718  | Igsf10      | Fmo5               | -1 |
| 8582 | 10532 | Igsf10      | MMT00057790        | 1  |
| 8582 | 10554 | Igsf10      | ENSMUSG00000074179 | -1 |
| 8582 | 11382 | Igsf10      | Cdca3              | 1  |
| 8582 | 12982 | Igsf10      | Cars               | 1  |
| 8582 | 13293 | Igsf10      | Gsta2              | -1 |
| 8582 | 13431 | Igsf10      | MMT00038058        | 1  |
| 8582 | 14055 | Igsf10      | MMT00050438        | 1  |
| 8582 | 14472 | Igsf10      | Ahcy               | -1 |
| 8582 | 15205 | Igsf10      | MMT00030262        | 1  |
| 8582 | 15320 | Igsf10      | MMT00017479        | -1 |
| 8582 | 15500 | Igsf10      | MMT00081411        | 1  |
| 8582 | 17823 | Igsf10      | D2Erd750e          | 1  |
| 8582 | 18250 | Igsf10      | Mmp14              | 1  |
| 8582 | 19723 | Igsf10      | Pfkfb1             | -1 |
| 8582 | 19790 | Igsf10      | Polg2              | -1 |
| 8582 | 20171 | Igsf10      | 1700008G05Rik      | 1  |
| 8582 | 21937 | Igsf10      | MMT00015325        | 1  |
| 8582 | 22907 | Igsf10      | MMT00054594        | 1  |
| 8582 | 22978 | Igsf10      | MMT00043176        | 1  |
| 8588 | 14279 | Notch4      | 3930402G23Rik      | -1 |
| 8606 | 8637  | Cntnap5c    | Tnpo2              | 1  |
| 8606 | 14043 | Cntnap5c    | 4930455C21Rik      | 1  |
| 8610 | 3616  | Padi4       | Dnajc16            | 1  |
| 8610 | 6191  | Padi4       | Ddost              | 1  |
| 8610 | 7307  | Padi4       | Agmat              | 1  |
| 8610 | 8610  | Padi4       | Padi4              | 1  |
| 8610 | 9301  | Padi4       | MMT00050551        | -1 |
| 8610 | 9634  | Padi4       | Atp13a2            | 1  |
| 8610 | 16287 | Padi4       | Extl1              | -1 |
| 8634 | 20058 | MMT00047654 | Dnaic1             | 1  |
| 8637 | 8637  | Tnpo2       | Tnpo2              | 1  |
| 8637 | 13813 | Tnpo2       | Ktelc1             | -1 |
| 8637 | 14043 | Tnpo2       | 4930455C21Rik      | 1  |
| 8639 | 2721  | Map1lc3b    | Inmt               | -1 |
| 8639 | 7519  | Map1lc3b    | Gstm1              | -1 |
| 8639 | 9408  | Map1lc3b    | Hmgcs2             | 1  |
| 8639 | 9842  | Map1lc3b    | Qdpr               | -1 |
| 8639 | 10554 | Map1lc3b    | ENSMUSG00000074179 | -1 |
| 8639 | 13293 | Map1lc3b    | Gsta2              | -1 |
| 8639 | 14147 | Map1lc3b    | Acss2              | -1 |
| 8639 | 14151 | Map1lc3b    | Slc44a1            | -1 |

|      |       |             |               |    |
|------|-------|-------------|---------------|----|
| 8639 | 21202 | Map1lc3b    | Acly          | -1 |
| 8639 | 21214 | Map1lc3b    | Scd1          | -1 |
| 8639 | 21727 | Map1lc3b    | Khk           | -1 |
| 8639 | 23640 | Map1lc3b    | Bdh1          | 1  |
| 8642 | 1767  | Serpinb9    | BC016495      | -1 |
| 8642 | 11741 | Serpinb9    | Slc30a10      | 1  |
| 8642 | 16060 | Serpinb9    | Gys2          | -1 |
| 8649 | 327   | MMT00072863 | H2-Ea         | -1 |
| 8649 | 7088  | MMT00072863 | Slc37a1       | -1 |
| 8649 | 8750  | MMT00072863 | 1700010114Rik | -1 |
| 8649 | 13493 | MMT00072863 | Ring1         | 1  |
| 8649 | 22822 | MMT00072863 | MMT00013433   | -1 |
| 8652 | 3502  | Krt7        | Gde1          | -1 |
| 8653 | 3654  | AW124722    | St13          | 1  |
| 8653 | 6183  | AW124722    | Atxn10        | 1  |
| 8653 | 8653  | AW124722    | AW124722      | 1  |
| 8653 | 9822  | AW124722    | Celsr1        | -1 |
| 8658 | 2110  | Fmo2        | Gtf2ird1      | -1 |
| 8658 | 5068  | Fmo2        | Afap112       | -1 |
| 8658 | 5849  | Fmo2        | 2310031A18Rik | -1 |
| 8658 | 6975  | Fmo2        | Wdr67         | -1 |
| 8658 | 9910  | Fmo2        | EG666644      | 1  |
| 8658 | 19671 | Fmo2        | Upp2          | 1  |
| 8658 | 22630 | Fmo2        | MMT00034355   | -1 |
| 8658 | 22681 | Fmo2        | Gm88          | 1  |
| 8659 | 143   | Psmb8       | Gvin1         | 1  |
| 8659 | 300   | Psmb8       | Kcnk13        | 1  |
| 8659 | 405   | Psmb8       | Emr4          | 1  |
| 8659 | 1533  | Psmb8       | BC013712      | 1  |
| 8659 | 1840  | Psmb8       | Fpr1          | 1  |
| 8659 | 2058  | Psmb8       | Hk3           | 1  |
| 8659 | 2200  | Psmb8       | BC006779      | 1  |
| 8659 | 2224  | Psmb8       | Oasl2         | 1  |
| 8659 | 2578  | Psmb8       | Csf2rb2       | 1  |
| 8659 | 2752  | Psmb8       | Fcgr1         | 1  |
| 8659 | 2830  | Psmb8       | 4632417K18Rik | 1  |
| 8659 | 3286  | Psmb8       | Alox5ap       | 1  |
| 8659 | 3523  | Psmb8       | Trim34        | 1  |
| 8659 | 3572  | Psmb8       | Ebi3          | 1  |
| 8659 | 3594  | Psmb8       | Rasa4         | 1  |
| 8659 | 3683  | Psmb8       | Oas2          | 1  |
| 8659 | 3905  | Psmb8       | H2-Q1         | 1  |
| 8659 | 4114  | Psmb8       | Parp12        | 1  |
| 8659 | 4409  | Psmb8       | 5430435G22Rik | 1  |
| 8659 | 4426  | Psmb8       | ligp2         | 1  |
| 8659 | 5044  | Psmb8       | Ifi35         | 1  |
| 8659 | 5554  | Psmb8       | Emr1          | 1  |
| 8659 | 5556  | Psmb8       | Ccl4          | 1  |
| 8659 | 5766  | Psmb8       | 5033414D02Rik | 1  |
| 8659 | 5845  | Psmb8       | Il18bp        | 1  |
| 8659 | 5853  | Psmb8       | Trim30        | 1  |

|      |       |       |               |   |
|------|-------|-------|---------------|---|
| 8659 | 5875  | Psmb8 | Cd86          | 1 |
| 8659 | 6072  | Psmb8 | C1qc          | 1 |
| 8659 | 6098  | Psmb8 | Ncf4          | 1 |
| 8659 | 6154  | Psmb8 | 1700030G06Rik | 1 |
| 8659 | 6587  | Psmb8 | Irf9          | 1 |
| 8659 | 6734  | Psmb8 | Ehd4          | 1 |
| 8659 | 6824  | Psmb8 | Irf7          | 1 |
| 8659 | 7057  | Psmb8 | Stk10         | 1 |
| 8659 | 7069  | Psmb8 | Ube1l         | 1 |
| 8659 | 7105  | Psmb8 | Plac8         | 1 |
| 8659 | 7238  | Psmb8 | Pycard        | 1 |
| 8659 | 7284  | Psmb8 | MMT00008674   | 1 |
| 8659 | 7316  | Psmb8 | Ifi204        | 1 |
| 8659 | 7336  | Psmb8 | Cd5l          | 1 |
| 8659 | 8270  | Psmb8 | Clspn         | 1 |
| 8659 | 8392  | Psmb8 | Asf1b         | 1 |
| 8659 | 8555  | Psmb8 | H2-M3         | 1 |
| 8659 | 8564  | Psmb8 | Pld4          | 1 |
| 8659 | 8659  | Psmb8 | Psmb8         | 1 |
| 8659 | 8800  | Psmb8 | Rnf213        | 1 |
| 8659 | 8922  | Psmb8 | Ii10ra        | 1 |
| 8659 | 8951  | Psmb8 | Cd97          | 1 |
| 8659 | 9353  | Psmb8 | Emilin2       | 1 |
| 8659 | 9401  | Psmb8 | Fcgr4         | 1 |
| 8659 | 9820  | Psmb8 | BC023105      | 1 |
| 8659 | 9821  | Psmb8 | Pmaip1        | 1 |
| 8659 | 9847  | Psmb8 | Ifi27         | 1 |
| 8659 | 9920  | Psmb8 | Syk           | 1 |
| 8659 | 9928  | Psmb8 | Lgmn          | 1 |
| 8659 | 10109 | Psmb8 | Gbp3          | 1 |
| 8659 | 10393 | Psmb8 | Slc7a8        | 1 |
| 8659 | 10442 | Psmb8 | Pla2g4a       | 1 |
| 8659 | 10504 | Psmb8 | Ripk3         | 1 |
| 8659 | 10606 | Psmb8 | Apb1ip        | 1 |
| 8659 | 10796 | Psmb8 | Spic          | 1 |
| 8659 | 10926 | Psmb8 | P2ry13        | 1 |
| 8659 | 11009 | Psmb8 | MMT00008885   | 1 |
| 8659 | 11198 | Psmb8 | Gbp1          | 1 |
| 8659 | 11204 | Psmb8 | AI451617      | 1 |
| 8659 | 11265 | Psmb8 | Irgm          | 1 |
| 8659 | 11437 | Psmb8 | Gatm          | 1 |
| 8659 | 11836 | Psmb8 | Csf1r         | 1 |
| 8659 | 11959 | Psmb8 | 4631422O05Rik | 1 |
| 8659 | 12312 | Psmb8 | Ms4a6d        | 1 |
| 8659 | 12398 | Psmb8 | Ifi44         | 1 |
| 8659 | 12469 | Psmb8 | Dock10        | 1 |
| 8659 | 12495 | Psmb8 | Casp1         | 1 |
| 8659 | 12600 | Psmb8 | Ifi204        | 1 |
| 8659 | 12969 | Psmb8 | Xaf1          | 1 |
| 8659 | 13172 | Psmb8 | Epb4.113      | 1 |
| 8659 | 13181 | Psmb8 | Lcp2          | 1 |

|      |       |       |            |   |
|------|-------|-------|------------|---|
| 8659 | 13309 | Psmb8 | Tgtp       | 1 |
| 8659 | 13527 | Psmb8 | Ctss       | 1 |
| 8659 | 13585 | Psmb8 | Nckap1l    | 1 |
| 8659 | 13654 | Psmb8 | Stat1      | 1 |
| 8659 | 13656 | Psmb8 | Ly86       | 1 |
| 8659 | 13885 | Psmb8 | Clec7a     | 1 |
| 8659 | 13964 | Psmb8 | Lpcat2     | 1 |
| 8659 | 14117 | Psmb8 | C1qb       | 1 |
| 8659 | 14192 | Psmb8 | Trpv2      | 1 |
| 8659 | 14237 | Psmb8 | Rac2       | 1 |
| 8659 | 14258 | Psmb8 | Ifi47      | 1 |
| 8659 | 14453 | Psmb8 | Inpp5d     | 1 |
| 8659 | 14475 | Psmb8 | Abcg1      | 1 |
| 8659 | 14506 | Psmb8 | Slc15a3    | 1 |
| 8659 | 14603 | Psmb8 | Ly6e       | 1 |
| 8659 | 14611 | Psmb8 | Ddx60      | 1 |
| 8659 | 14880 | Psmb8 | Ms4a4c     | 1 |
| 8659 | 14883 | Psmb8 | Ilgal      | 1 |
| 8659 | 14954 | Psmb8 | Rab19      | 1 |
| 8659 | 15074 | Psmb8 | Usp18      | 1 |
| 8659 | 15159 | Psmb8 | Timd4      | 1 |
| 8659 | 15387 | Psmb8 | Mgl1       | 1 |
| 8659 | 15825 | Psmb8 | Fermt3     | 1 |
| 8659 | 16102 | Psmb8 | Cd72       | 1 |
| 8659 | 16147 | Psmb8 | Tlr2       | 1 |
| 8659 | 16182 | Psmb8 | Oasl1      | 1 |
| 8659 | 16186 | Psmb8 | Cfp        | 1 |
| 8659 | 16199 | Psmb8 | Samhd1     | 1 |
| 8659 | 16572 | Psmb8 | D14Ert668e | 1 |
| 8659 | 16874 | Psmb8 | Fcer1g     | 1 |
| 8659 | 16913 | Psmb8 | Pira3      | 1 |
| 8659 | 16988 | Psmb8 | Clec4f     | 1 |
| 8659 | 17197 | Psmb8 | Igtp       | 1 |
| 8659 | 17412 | Psmb8 | Aif1       | 1 |
| 8659 | 17472 | Psmb8 | Cd53       | 1 |
| 8659 | 17904 | Psmb8 | Cds1       | 1 |
| 8659 | 18174 | Psmb8 | Stat2      | 1 |
| 8659 | 18186 | Psmb8 | Parp14     | 1 |
| 8659 | 18211 | Psmb8 | Folr2      | 1 |
| 8659 | 18289 | Psmb8 | Tap1       | 1 |
| 8659 | 18868 | Psmb8 | Mpeg1      | 1 |
| 8659 | 19063 | Psmb8 | Evl        | 1 |
| 8659 | 19153 | Psmb8 | Ptgs1      | 1 |
| 8659 | 19189 | Psmb8 | Sp100      | 1 |
| 8659 | 19252 | Psmb8 | Tmsb4x     | 1 |
| 8659 | 19262 | Psmb8 | Cd274      | 1 |
| 8659 | 19738 | Psmb8 | Lgals3bp   | 1 |
| 8659 | 19794 | Psmb8 | Rgs2       | 1 |
| 8659 | 20150 | Psmb8 | Ptprc      | 1 |
| 8659 | 20321 | Psmb8 | Ms4a6b     | 1 |
| 8659 | 20431 | Psmb8 | Slc7a7     | 1 |

|      |       |             |               |    |
|------|-------|-------------|---------------|----|
| 8659 | 20474 | Psemb8      | Gnb3          | 1  |
| 8659 | 20814 | Psemb8      | Ptpn18        | 1  |
| 8659 | 20997 | Psemb8      | MMT00028135   | 1  |
| 8659 | 21223 | Psemb8      | Pira1         | 1  |
| 8659 | 21351 | Psemb8      | Shisa5        | 1  |
| 8659 | 21440 | Psemb8      | Tmsb10        | 1  |
| 8659 | 21549 | Psemb8      | Rtp4          | 1  |
| 8659 | 21794 | Psemb8      | Pfkip         | 1  |
| 8659 | 21824 | Psemb8      | 5830443L24Rik | 1  |
| 8659 | 21837 | Psemb8      | BC052328      | 1  |
| 8659 | 21863 | Psemb8      | Dok2          | 1  |
| 8659 | 21988 | Psemb8      | MMT00015654   | 1  |
| 8659 | 22037 | Psemb8      | Oas1g         | 1  |
| 8659 | 22327 | Psemb8      | Tyrobp        | 1  |
| 8659 | 22553 | Psemb8      | Ms4a8a        | 1  |
| 8659 | 22647 | Psemb8      | Pkib          | 1  |
| 8659 | 22876 | Psemb8      | Sash3         | 1  |
| 8659 | 23208 | Psemb8      | Hck           | 1  |
| 8659 | 23242 | Psemb8      | Gngt2         | 1  |
| 8659 | 23410 | Psemb8      | C1qa          | 1  |
| 8659 | 23450 | Psemb8      | D12Ertd647e   | 1  |
| 8670 | 624   | MMT00051613 | 4931406I20Rik | -1 |
| 8670 | 740   | MMT00051613 | Txnrd3        | -1 |
| 8670 | 902   | MMT00051613 | Slc30a1       | -1 |
| 8670 | 1156  | MMT00051613 | Rbj           | -1 |
| 8670 | 1386  | MMT00051613 | Ppid          | 1  |
| 8670 | 2329  | MMT00051613 | Wdr6          | -1 |
| 8670 | 3170  | MMT00051613 | Mcart1        | 1  |
| 8670 | 3587  | MMT00051613 | MMT00041940   | 1  |
| 8670 | 3808  | MMT00051613 | 2010209O12Rik | -1 |
| 8670 | 3913  | MMT00051613 | Mrpl15        | 1  |
| 8670 | 4391  | MMT00051613 | Zfp467        | -1 |
| 8670 | 4966  | MMT00051613 | Zscan20       | 1  |
| 8670 | 5352  | MMT00051613 | Pdcd2l        | -1 |
| 8670 | 5953  | MMT00051613 | MMT00008178   | 1  |
| 8670 | 6021  | MMT00051613 | MMT00008784   | 1  |
| 8670 | 6126  | MMT00051613 | MMT00067575   | 1  |
| 8670 | 6218  | MMT00051613 | Hnrnpc        | 1  |
| 8670 | 6976  | MMT00051613 | Rbm35b        | -1 |
| 8670 | 7731  | MMT00051613 | 1500001M20Rik | -1 |
| 8670 | 7798  | MMT00051613 | MMT00077178   | 1  |
| 8670 | 8319  | MMT00051613 | MMT00062477   | 1  |
| 8670 | 8499  | MMT00051613 | C430048L16Rik | 1  |
| 8670 | 8670  | MMT00051613 | MMT00051613   | 1  |
| 8670 | 8891  | MMT00051613 | MMT00071061   | 1  |
| 8670 | 9067  | MMT00051613 | Tra2a         | 1  |
| 8670 | 9258  | MMT00051613 | P4ha1         | 1  |
| 8670 | 9513  | MMT00051613 | Tardbp        | 1  |
| 8670 | 9629  | MMT00051613 | Spnb3         | -1 |
| 8670 | 9899  | MMT00051613 | D13Wsu177e    | 1  |
| 8670 | 10526 | MMT00051613 | MMT00036239   | 1  |



|      |       |             |               |    |
|------|-------|-------------|---------------|----|
| 8670 | 10769 | MMT00051613 | Hnrnpd        | -1 |
| 8670 | 11043 | MMT00051613 | Hsph1         | 1  |
| 8670 | 11214 | MMT00051613 | MMT00049207   | 1  |
| 8670 | 12329 | MMT00051613 | Sox6          | -1 |
| 8670 | 12419 | MMT00051613 | MMT00081393   | 1  |
| 8670 | 12968 | MMT00051613 | Fbxw9         | -1 |
| 8670 | 13521 | MMT00051613 | Ears2         | 1  |
| 8670 | 13741 | MMT00051613 | Hspa4l        | 1  |
| 8670 | 14014 | MMT00051613 | MMT00008376   | 1  |
| 8670 | 14135 | MMT00051613 | Eepd1         | -1 |
| 8670 | 14233 | MMT00051613 | Fgfr1         | -1 |
| 8670 | 14298 | MMT00051613 | Atp2a2        | 1  |
| 8670 | 15024 | MMT00051613 | 2310061J03Rik | -1 |
| 8670 | 15476 | MMT00051613 | Fem1b         | -1 |
| 8670 | 15484 | MMT00051613 | Lrrc42        | -1 |
| 8670 | 15675 | MMT00051613 | MMT00077535   | 1  |
| 8670 | 16251 | MMT00051613 | G6pc          | 1  |
| 8670 | 16754 | MMT00051613 | Hsp90aa1      | 1  |
| 8670 | 18083 | MMT00051613 | Gadd45a       | -1 |
| 8670 | 18099 | MMT00051613 | Nfx1          | -1 |
| 8670 | 18215 | MMT00051613 | Gpr146        | -1 |
| 8670 | 18373 | MMT00051613 | Dnajb1        | 1  |
| 8670 | 18418 | MMT00051613 | Hspa1b        | 1  |
| 8670 | 18903 | MMT00051613 | Crem          | 1  |
| 8670 | 20194 | MMT00051613 | Pnlcd1        | -1 |
| 8670 | 20535 | MMT00051613 | Rbm4          | 1  |
| 8670 | 20828 | MMT00051613 | MMT00007878   | 1  |
| 8670 | 20912 | MMT00051613 | Chordc1       | 1  |
| 8670 | 20965 | MMT00051613 | Usp28         | -1 |
| 8670 | 21322 | MMT00051613 | Usp1          | 1  |
| 8670 | 21389 | MMT00051613 | Odf2          | -1 |
| 8670 | 21591 | MMT00051613 | Hectd3        | -1 |
| 8670 | 22139 | MMT00051613 | Stip1         | 1  |
| 8670 | 22216 | MMT00051613 | Sp5           | -1 |
| 8670 | 22303 | MMT00051613 | Cdt1          | -1 |
| 8670 | 22561 | MMT00051613 | Whdc1         | -1 |
| 8670 | 22751 | MMT00051613 | Nosip         | -1 |
| 8677 | 8654  | Zbtb8os     | Fbxl13        | -1 |
| 8680 | 17090 | C1qtnf9     | Lass2         | 1  |
| 8680 | 17660 | C1qtnf9     | Nlrp12        | -1 |
| 8680 | 22321 | C1qtnf9     | Apol7a        | 1  |
| 8684 | 662   | Il15        | Mid1ip1       | 1  |
| 8684 | 5044  | Il15        | Ifi35         | 1  |
| 8684 | 6588  | Il15        | Rbmx          | 1  |
| 8684 | 8439  | Il15        | Slc25a33      | -1 |
| 8684 | 10772 | Il15        | Aacs          | 1  |
| 8684 | 11808 | Il15        | Pck1          | -1 |
| 8684 | 14099 | Il15        | Nfe2          | 1  |
| 8684 | 18785 | Il15        | Angptl4       | -1 |
| 8687 | 250   | AB041803    | Tubb2a-ps2    | -1 |
| 8687 | 609   | AB041803    | MMT00060868   | -1 |

|      |       |               |               |    |
|------|-------|---------------|---------------|----|
| 8687 | 3804  | AB041803      | MMT00015534   | -1 |
| 8687 | 4201  | AB041803      | Tubb2c        | -1 |
| 8687 | 11741 | AB041803      | Slc30a10      | -1 |
| 8687 | 16060 | AB041803      | Gys2          | 1  |
| 8687 | 17323 | AB041803      | Tubb6         | -1 |
| 8687 | 17876 | AB041803      | Tubb4         | -1 |
| 8687 | 22138 | AB041803      | Ang           | 1  |
| 8687 | 22290 | AB041803      | Tubb2a        | -1 |
| 8687 | 22630 | AB041803      | MMT00034355   | -1 |
| 8690 | 5364  | Cd84          | Kif22         | 1  |
| 8690 | 5934  | Cd84          | S100a10       | 1  |
| 8690 | 12910 | Cd84          | 1110028A07Rik | 1  |
| 8703 | 17447 | Gstp1         | Ctsf          | -1 |
| 8711 | 3214  | 5430432M24Rik | Dnmt3b        | 1  |
| 8711 | 12982 | 5430432M24Rik | Cars          | 1  |
| 8711 | 22138 | 5430432M24Rik | Ang           | -1 |
| 8711 | 23005 | 5430432M24Rik | 4930405A21Rik | 1  |
| 8717 | 609   | Litaf         | MMT00060868   | 1  |
| 8717 | 719   | Litaf         | Usp2          | -1 |
| 8717 | 1767  | Litaf         | BC016495      | -1 |
| 8717 | 2399  | Litaf         | MMT00060167   | 1  |
| 8717 | 2636  | Litaf         | Tars          | 1  |
| 8717 | 2829  | Litaf         | Lrfn3         | 1  |
| 8717 | 4534  | Litaf         | Ndel1         | -1 |
| 8717 | 5734  | Litaf         | EG619653      | -1 |
| 8717 | 5802  | Litaf         | Mad2l2        | 1  |
| 8717 | 5892  | Litaf         | MMT00038457   | -1 |
| 8717 | 5974  | Litaf         | Arntl         | 1  |
| 8717 | 6386  | Litaf         | Por           | -1 |
| 8717 | 7414  | Litaf         | Clpx          | 1  |
| 8717 | 10642 | Litaf         | Ngef          | -1 |
| 8717 | 10775 | Litaf         | Slc16a1       | 1  |
| 8717 | 11599 | Litaf         | Coq10b        | -1 |
| 8717 | 11741 | Litaf         | Slc30a10      | 1  |
| 8717 | 12433 | Litaf         | 5033413D22Rik | 1  |
| 8717 | 15709 | Litaf         | Tceal1        | -1 |
| 8717 | 16690 | Litaf         | Tjp3          | 1  |
| 8717 | 18069 | Litaf         | Gpt           | -1 |
| 8717 | 18179 | Litaf         | Dbp           | -1 |
| 8717 | 18827 | Litaf         | Oprs1         | 1  |
| 8717 | 20266 | Litaf         | Insig2        | 1  |
| 8717 | 21142 | Litaf         | Gm129         | -1 |
| 8717 | 21969 | Litaf         | Tk1           | -1 |
| 8717 | 22290 | Litaf         | Tubb2a        | 1  |
| 8717 | 22630 | Litaf         | MMT00034355   | 1  |
| 8717 | 23377 | Litaf         | Pdxk          | -1 |
| 8721 | 676   | Tbc1d10c      | Ms4a4d        | 1  |
| 8721 | 8721  | Tbc1d10c      | Tbc1d10c      | 1  |
| 8721 | 11812 | Tbc1d10c      | Mrpl16        | 1  |
| 8721 | 17447 | Tbc1d10c      | Ctsf          | 1  |
| 8727 | 433   | Slc27a3       | Pla2g12b      | 1  |

|      |       |         |               |    |
|------|-------|---------|---------------|----|
| 8727 | 760   | Slc27a3 | Akr1c19       | -1 |
| 8727 | 1853  | Slc27a3 | Stat5a        | 1  |
| 8727 | 2850  | Slc27a3 | Slc16a6       | 1  |
| 8727 | 3214  | Slc27a3 | Dnmt3b        | 1  |
| 8727 | 3410  | Slc27a3 | Paqr9         | 1  |
| 8727 | 4056  | Slc27a3 | Tnfaip8l1     | 1  |
| 8727 | 4286  | Slc27a3 | Ptp4a1        | -1 |
| 8727 | 5364  | Slc27a3 | Kif22         | 1  |
| 8727 | 5574  | Slc27a3 | Hsd3b7        | 1  |
| 8727 | 5849  | Slc27a3 | 2310031A18Rik | 1  |
| 8727 | 8328  | Slc27a3 | Klhdc8a       | 1  |
| 8727 | 8416  | Slc27a3 | Cdc20         | 1  |
| 8727 | 8711  | Slc27a3 | 5430432M24Rik | 1  |
| 8727 | 9275  | Slc27a3 | Aass          | -1 |
| 8727 | 10775 | Slc27a3 | Slc16a1       | 1  |
| 8727 | 11382 | Slc27a3 | Cdca3         | 1  |
| 8727 | 11599 | Slc27a3 | Coq10b        | -1 |
| 8727 | 11741 | Slc27a3 | Slc30a10      | 1  |
| 8727 | 15631 | Slc27a3 | Lpin1         | -1 |
| 8727 | 16580 | Slc27a3 | Tnfaip2       | 1  |
| 8727 | 16690 | Slc27a3 | Tjp3          | 1  |
| 8727 | 16851 | Slc27a3 | Slc34a2       | 1  |
| 8727 | 17323 | Slc27a3 | Tubb6         | 1  |
| 8727 | 19234 | Slc27a3 | Nrg4          | -1 |
| 8727 | 19671 | Slc27a3 | Upp2          | -1 |
| 8727 | 19917 | Slc27a3 | Nek2          | 1  |
| 8727 | 20085 | Slc27a3 | Lpin2         | -1 |
| 8727 | 20803 | Slc27a3 | Tmem50a       | -1 |
| 8727 | 20830 | Slc27a3 | MMT00057509   | 1  |
| 8727 | 22630 | Slc27a3 | MMT00034355   | 1  |
| 8740 | 5259  | Car5b   | Mat1a         | 1  |
| 8740 | 5364  | Car5b   | Kif22         | -1 |
| 8740 | 5382  | Car5b   | Fbn1          | -1 |
| 8740 | 7520  | Car5b   | MMT00070057   | 1  |
| 8740 | 7839  | Car5b   | Asl           | 1  |
| 8740 | 8416  | Car5b   | Cdc20         | -1 |
| 8740 | 8428  | Car5b   | Sorbs3        | 1  |
| 8740 | 8641  | Car5b   | Slc7a2        | 1  |
| 8740 | 8965  | Car5b   | Ahcy          | 1  |
| 8740 | 9275  | Car5b   | Aass          | 1  |
| 8740 | 10673 | Car5b   | MMT00071544   | 1  |
| 8740 | 11129 | Car5b   | Ankhd1        | 1  |
| 8740 | 11382 | Car5b   | Cdca3         | -1 |
| 8740 | 11870 | Car5b   | Apitd1        | -1 |
| 8740 | 12839 | Car5b   | Fh1           | 1  |
| 8740 | 12982 | Car5b   | Cars          | -1 |
| 8740 | 14472 | Car5b   | Ahcy          | 1  |
| 8740 | 15320 | Car5b   | MMT00017479   | 1  |
| 8740 | 16647 | Car5b   | D16H22S680E   | 1  |
| 8740 | 18027 | Car5b   | 5730403B10Rik | 1  |
| 8740 | 19342 | Car5b   | Cth           | 1  |

|      |       |       |               |    |
|------|-------|-------|---------------|----|
| 8740 | 19723 | Car5b | Pfkfb1        | 1  |
| 8740 | 20678 | Car5b | Cyp39a1       | 1  |
| 8740 | 21512 | Car5b | Gas6          | -1 |
| 8740 | 23180 | Car5b | Sult1d1       | 1  |
| 8740 | 23183 | Car5b | Nnmt          | 1  |
| 8743 | 607   | Pkp4  | Me1           | -1 |
| 8743 | 1709  | Pkp4  | Mt2           | 1  |
| 8743 | 1851  | Pkp4  | Tmem41a       | 1  |
| 8743 | 2051  | Pkp4  | Ddx27         | 1  |
| 8743 | 2314  | Pkp4  | Zswim6        | -1 |
| 8743 | 2681  | Pkp4  | Hectd1        | 1  |
| 8743 | 2794  | Pkp4  | Map3k6        | 1  |
| 8743 | 4619  | Pkp4  | Htra3         | 1  |
| 8743 | 5425  | Pkp4  | Ung           | 1  |
| 8743 | 6044  | Pkp4  | Sucnr1        | -1 |
| 8743 | 6193  | Pkp4  | Lactb2        | -1 |
| 8743 | 6370  | Pkp4  | Aqp8          | -1 |
| 8743 | 6771  | Pkp4  | Insc          | -1 |
| 8743 | 6966  | Pkp4  | Mia3          | 1  |
| 8743 | 8896  | Pkp4  | Fasn          | -1 |
| 8743 | 9408  | Pkp4  | Hmgcs2        | 1  |
| 8743 | 9842  | Pkp4  | Qdpr          | -1 |
| 8743 | 9981  | Pkp4  | Snrpn         | -1 |
| 8743 | 10961 | Pkp4  | Pgd           | -1 |
| 8743 | 11129 | Pkp4  | Ankhd1        | 1  |
| 8743 | 11462 | Pkp4  | Gpam          | -1 |
| 8743 | 11807 | Pkp4  | Fbxo31        | 1  |
| 8743 | 12004 | Pkp4  | Lgals6        | 1  |
| 8743 | 12143 | Pkp4  | Thyn1         | -1 |
| 8743 | 12219 | Pkp4  | Cyb5b         | -1 |
| 8743 | 12315 | Pkp4  | Srebf1        | -1 |
| 8743 | 12460 | Pkp4  | Pnpla2        | 1  |
| 8743 | 13990 | Pkp4  | MMT00040357   | -1 |
| 8743 | 14147 | Pkp4  | Acss2         | -1 |
| 8743 | 14151 | Pkp4  | Slc44a1       | -1 |
| 8743 | 14323 | Pkp4  | Scarb1        | 1  |
| 8743 | 14582 | Pkp4  | Mt1           | 1  |
| 8743 | 15892 | Pkp4  | Slc22a5       | 1  |
| 8743 | 16114 | Pkp4  | Lyplal1       | -1 |
| 8743 | 16176 | Pkp4  | St3gal5       | 1  |
| 8743 | 16525 | Pkp4  | Lbp           | 1  |
| 8743 | 16824 | Pkp4  | 2310076L09Rik | 1  |
| 8743 | 16888 | Pkp4  | H6pd          | 1  |
| 8743 | 17338 | Pkp4  | Mocos         | -1 |
| 8743 | 17660 | Pkp4  | Nlrp12        | 1  |
| 8743 | 17828 | Pkp4  | Serpina3n     | 1  |
| 8743 | 17878 | Pkp4  | Brap          | 1  |
| 8743 | 18286 | Pkp4  | Slc41a3       | 1  |
| 8743 | 19084 | Pkp4  | Mmab          | -1 |
| 8743 | 19089 | Pkp4  | Peci          | 1  |
| 8743 | 19200 | Pkp4  | Hemk1         | -1 |

|      |       |               |                    |    |
|------|-------|---------------|--------------------|----|
| 8743 | 20019 | Pkp4          | Qdpr               | -1 |
| 8743 | 20798 | Pkp4          | Ccpg1              | 1  |
| 8743 | 21202 | Pkp4          | Acly               | -1 |
| 8743 | 21251 | Pkp4          | Cpt1a              | 1  |
| 8743 | 21408 | Pkp4          | Svil               | -1 |
| 8743 | 21575 | Pkp4          | Cyp2c55            | -1 |
| 8743 | 21793 | Pkp4          | Pla2g12a           | 1  |
| 8743 | 22137 | Pkp4          | Nudt7              | -1 |
| 8743 | 22138 | Pkp4          | Ang                | 1  |
| 8743 | 22732 | Pkp4          | Cyb5b              | -1 |
| 8743 | 22770 | Pkp4          | Slc27a2            | 1  |
| 8743 | 23623 | Pkp4          | 2010305C02Rik      | -1 |
| 8750 | 327   | 1700010I14Rik | H2-Ea              | 1  |
| 8750 | 2325  | 1700010I14Rik | H2-K1              | 1  |
| 8750 | 2938  | 1700010I14Rik | H2-T23             | 1  |
| 8750 | 4004  | 1700010I14Rik | Thbs2              | -1 |
| 8750 | 5410  | 1700010I14Rik | Cyp4f15            | -1 |
| 8750 | 5648  | 1700010I14Rik | Zfp213             | -1 |
| 8750 | 7088  | 1700010I14Rik | Slc37a1            | 1  |
| 8750 | 7135  | 1700010I14Rik | Ezr                | 1  |
| 8750 | 7909  | 1700010I14Rik | Oas3               | 1  |
| 8750 | 8649  | 1700010I14Rik | MMT00072863        | -1 |
| 8750 | 8750  | 1700010I14Rik | 1700010I14Rik      | 1  |
| 8750 | 8767  | 1700010I14Rik | Rgl2               | 1  |
| 8750 | 9158  | 1700010I14Rik | Pde9a              | -1 |
| 8750 | 10376 | 1700010I14Rik | C920025E04Rik      | -1 |
| 8750 | 10667 | 1700010I14Rik | H2-Eb1             | 1  |
| 8750 | 11435 | 1700010I14Rik | Rnaset2a           | 1  |
| 8750 | 12335 | 1700010I14Rik | Plcb4              | 1  |
| 8750 | 12355 | 1700010I14Rik | A1507611           | 1  |
| 8750 | 12694 | 1700010I14Rik | Riok2              | -1 |
| 8750 | 13285 | 1700010I14Rik | Cd276              | 1  |
| 8750 | 13493 | 1700010I14Rik | Ring1              | -1 |
| 8750 | 14132 | 1700010I14Rik | Glo1               | 1  |
| 8750 | 17707 | 1700010I14Rik | Rshl2b             | 1  |
| 8750 | 18906 | 1700010I14Rik | Zfand3             | 1  |
| 8750 | 20238 | 1700010I14Rik | H2-T9              | 1  |
| 8750 | 20346 | 1700010I14Rik | Gna-rs1            | 1  |
| 8750 | 21295 | 1700010I14Rik | Snf1lk             | -1 |
| 8750 | 21754 | 1700010I14Rik | Synj2              | -1 |
| 8750 | 22822 | 1700010I14Rik | MMT00013433        | 1  |
| 8766 | 563   | Irs3          | D4Bwg0951e         | -1 |
| 8766 | 4708  | Irs3          | Traf3ip2           | 1  |
| 8766 | 5587  | Irs3          | Rmnd5b             | 1  |
| 8766 | 23201 | Irs3          | S1pr1              | 1  |
| 8770 | 8444  | Cpxm2         | Rdh16              | -1 |
| 8773 | 7602  | MMT00027093   | Pcca               | 1  |
| 8773 | 10554 | MMT00027093   | ENSMUSG00000074179 | 1  |
| 8773 | 13293 | MMT00027093   | Gsta2              | 1  |
| 8773 | 23668 | MMT00027093   | Gse1               | -1 |
| 8776 | 8815  | Aox3          | Mx1                | -1 |

|      |       |               |               |    |
|------|-------|---------------|---------------|----|
| 8776 | 14017 | Aox3          | Ces5          | -1 |
| 8776 | 18201 | Aox3          | MMT00060232   | -1 |
| 8776 | 21214 | Aox3          | Scd1          | -1 |
| 8776 | 22138 | Aox3          | Ang           | 1  |
| 8783 | 3856  | Zfyve16       | Slc30a5       | -1 |
| 8783 | 4896  | Zfyve16       | 4930405M20Rik | -1 |
| 8783 | 4938  | Zfyve16       | Mccc2         | 1  |
| 8783 | 8783  | Zfyve16       | Zfyve16       | 1  |
| 8783 | 18492 | Zfyve16       | Dhfr          | -1 |
| 8783 | 23301 | Zfyve16       | Scamp1        | -1 |
| 8786 | 1041  | Rmnd1         | 3110049J23Rik | -1 |
| 8786 | 1135  | Rmnd1         | Akap12        | 1  |
| 8786 | 2571  | Rmnd1         | Rmnd1         | 1  |
| 8786 | 3744  | Rmnd1         | Rmnd1         | 1  |
| 8786 | 5965  | Rmnd1         | Pbld          | -1 |
| 8786 | 7620  | Rmnd1         | Foxo3         | -1 |
| 8786 | 8786  | Rmnd1         | Rmnd1         | 1  |
| 8786 | 14169 | Rmnd1         | 1700052N19Rik | -1 |
| 8786 | 15971 | Rmnd1         | Aifm2         | -1 |
| 8786 | 18300 | Rmnd1         | Arg1          | -1 |
| 8786 | 19115 | Rmnd1         | Rab32         | 1  |
| 8786 | 19392 | Rmnd1         | Slc25a16      | 1  |
| 8786 | 22146 | Rmnd1         | Aifm2         | -1 |
| 8790 | 1336  | Galnt2        | MMT00069537   | 1  |
| 8790 | 2243  | Galnt2        | Gcsh          | 1  |
| 8790 | 11404 | Galnt2        | Gnpat         | 1  |
| 8790 | 14391 | Galnt2        | MMT00017335   | -1 |
| 8792 | 3377  | Bop1          | Cs            | 1  |
| 8792 | 5884  | Bop1          | Gstm2         | 1  |
| 8792 | 11946 | Bop1          | MMT00030953   | 1  |
| 8792 | 21214 | Bop1          | Scd1          | 1  |
| 8794 | 10978 | 1500011B03Rik | MMT00078322   | 1  |
| 8794 | 12656 | 1500011B03Rik | Coq5          | 1  |
| 8794 | 17807 | 1500011B03Rik | Pebp1         | -1 |
| 8795 | 21575 | EG629966      | Cyp2c55       | 1  |
| 8797 | 213   | Snrk          | Rgs16         | 1  |
| 8797 | 250   | Snrk          | Tubb2a-ps2    | -1 |
| 8797 | 563   | Snrk          | D4Bwg0951e    | 1  |
| 8797 | 609   | Snrk          | MMT00060868   | -1 |
| 8797 | 719   | Snrk          | Usp2          | 1  |
| 8797 | 1646  | Snrk          | Slc15a4       | 1  |
| 8797 | 2294  | Snrk          | AU040829      | 1  |
| 8797 | 2483  | Snrk          | Gmeb1         | 1  |
| 8797 | 2529  | Snrk          | Hmcn2         | 1  |
| 8797 | 2636  | Snrk          | Tars          | -1 |
| 8797 | 2794  | Snrk          | Map3k6        | 1  |
| 8797 | 2850  | Snrk          | Slc16a6       | -1 |
| 8797 | 3214  | Snrk          | Dnmt3b        | -1 |
| 8797 | 4286  | Snrk          | Ptp4a1        | 1  |
| 8797 | 4708  | Snrk          | Traf3ip2      | -1 |
| 8797 | 5187  | Snrk          | Speer4f       | 1  |

|      |       |      |               |    |
|------|-------|------|---------------|----|
| 8797 | 5791  | Snrk | Baiap211      | 1  |
| 8797 | 6386  | Snrk | Por           | 1  |
| 8797 | 6675  | Snrk | Sfrs4         | 1  |
| 8797 | 6756  | Snrk | Sds           | 1  |
| 8797 | 6990  | Snrk | Nr1i2         | 1  |
| 8797 | 7862  | Snrk | Cpsf4l        | 1  |
| 8797 | 8399  | Snrk | Herpud1       | 1  |
| 8797 | 8428  | Snrk | Sorbs3        | 1  |
| 8797 | 8641  | Snrk | Slc7a2        | 1  |
| 8797 | 9910  | Snrk | EG666644      | 1  |
| 8797 | 10408 | Snrk | Per1          | 1  |
| 8797 | 10712 | Snrk | Fchsd2        | 1  |
| 8797 | 10775 | Snrk | Slc16a1       | -1 |
| 8797 | 11574 | Snrk | Gne           | 1  |
| 8797 | 11599 | Snrk | Coq10b        | 1  |
| 8797 | 11741 | Snrk | Slc30a10      | -1 |
| 8797 | 11807 | Snrk | Fbxo31        | 1  |
| 8797 | 11808 | Snrk | Pck1          | 1  |
| 8797 | 12204 | Snrk | Ankmy2        | 1  |
| 8797 | 12420 | Snrk | Khl21         | 1  |
| 8797 | 12460 | Snrk | Pnpla2        | 1  |
| 8797 | 12799 | Snrk | Spon2         | -1 |
| 8797 | 12904 | Snrk | MMT00040704   | 1  |
| 8797 | 13289 | Snrk | Dusp10        | -1 |
| 8797 | 13339 | Snrk | D630042F21Rik | 1  |
| 8797 | 13471 | Snrk | Cln8          | 1  |
| 8797 | 14258 | Snrk | Ifi47         | -1 |
| 8797 | 14462 | Snrk | Zfp385b       | 1  |
| 8797 | 15021 | Snrk | Ppargc1a      | 1  |
| 8797 | 15521 | Snrk | Mast3         | 1  |
| 8797 | 15631 | Snrk | Lpin1         | 1  |
| 8797 | 15709 | Snrk | Tceal1        | 1  |
| 8797 | 15882 | Snrk | AA986860      | 1  |
| 8797 | 16176 | Snrk | St3gal5       | 1  |
| 8797 | 16580 | Snrk | Tnfaip2       | -1 |
| 8797 | 16669 | Snrk | Tjp2          | -1 |
| 8797 | 16690 | Snrk | Tjp3          | -1 |
| 8797 | 17078 | Snrk | Syde2         | 1  |
| 8797 | 17622 | Snrk | Foxo1         | 1  |
| 8797 | 17876 | Snrk | Tubb4         | -1 |
| 8797 | 18027 | Snrk | 5730403B10Rik | 1  |
| 8797 | 18179 | Snrk | Dbp           | 1  |
| 8797 | 18785 | Snrk | Angptl4       | 1  |
| 8797 | 18827 | Snrk | Oprs1         | -1 |
| 8797 | 19025 | Snrk | Slc37a4       | 1  |
| 8797 | 19146 | Snrk | N4bp2l1       | 1  |
| 8797 | 19453 | Snrk | Cdk2ap2       | -1 |
| 8797 | 19466 | Snrk | Pptc7         | 1  |
| 8797 | 19671 | Snrk | Upp2          | 1  |
| 8797 | 19970 | Snrk | Mrpl36        | -1 |
| 8797 | 20085 | Snrk | Lpin2         | 1  |

|      |       |        |               |    |
|------|-------|--------|---------------|----|
| 8797 | 21142 | Snrk   | Gm129         | 1  |
| 8797 | 21331 | Snrk   | Slc10a6       | 1  |
| 8797 | 22290 | Snrk   | Tubb2a        | -1 |
| 8797 | 22470 | Snrk   | Ppargc1b      | 1  |
| 8797 | 22630 | Snrk   | MMT00034355   | -1 |
| 8797 | 23201 | Snrk   | S1pr1         | -1 |
| 8797 | 23202 | Snrk   | Olf559        | 1  |
| 8797 | 23558 | Snrk   | MMT00030937   | 1  |
| 8800 | 143   | Rnf213 | Gvin1         | 1  |
| 8800 | 830   | Rnf213 | Socs1         | 1  |
| 8800 | 860   | Rnf213 | Psmb10        | 1  |
| 8800 | 1533  | Rnf213 | BC013712      | 1  |
| 8800 | 1840  | Rnf213 | Fpr1          | 1  |
| 8800 | 1908  | Rnf213 | Rnf213        | 1  |
| 8800 | 2058  | Rnf213 | Hk3           | 1  |
| 8800 | 2200  | Rnf213 | BC006779      | 1  |
| 8800 | 2224  | Rnf213 | Oasl2         | 1  |
| 8800 | 2550  | Rnf213 | MMT00036681   | 1  |
| 8800 | 2752  | Rnf213 | Fcgr1         | 1  |
| 8800 | 3036  | Rnf213 | Slamf9        | 1  |
| 8800 | 3426  | Rnf213 | Hap1          | 1  |
| 8800 | 3523  | Rnf213 | Trim34        | 1  |
| 8800 | 3572  | Rnf213 | Ebi3          | 1  |
| 8800 | 3594  | Rnf213 | Rasa4         | 1  |
| 8800 | 3659  | Rnf213 | EG236451      | 1  |
| 8800 | 3683  | Rnf213 | Oas2          | 1  |
| 8800 | 4114  | Rnf213 | Parp12        | 1  |
| 8800 | 4409  | Rnf213 | 5430435G22Rik | 1  |
| 8800 | 4426  | Rnf213 | Iigp2         | 1  |
| 8800 | 4508  | Rnf213 | Ifit1         | 1  |
| 8800 | 4516  | Rnf213 | Rsad2         | 1  |
| 8800 | 5002  | Rnf213 | Ifi202b       | 1  |
| 8800 | 5044  | Rnf213 | Ifi35         | 1  |
| 8800 | 5216  | Rnf213 | Spnb5         | 1  |
| 8800 | 5250  | Rnf213 | Ifit2         | 1  |
| 8800 | 5556  | Rnf213 | Ccl4          | 1  |
| 8800 | 5765  | Rnf213 | Ifitm2        | 1  |
| 8800 | 5766  | Rnf213 | 5033414D02Rik | 1  |
| 8800 | 5845  | Rnf213 | Il18bp        | 1  |
| 8800 | 5853  | Rnf213 | Trim30        | 1  |
| 8800 | 5949  | Rnf213 | Zbp1          | 1  |
| 8800 | 5975  | Rnf213 | Car13         | 1  |
| 8800 | 6036  | Rnf213 | Pram1         | 1  |
| 8800 | 6072  | Rnf213 | C1qc          | 1  |
| 8800 | 6098  | Rnf213 | Ncf4          | 1  |
| 8800 | 6213  | Rnf213 | Ccl2          | 1  |
| 8800 | 6576  | Rnf213 | Sfn2          | 1  |
| 8800 | 6587  | Rnf213 | Irf9          | 1  |
| 8800 | 6595  | Rnf213 | Oas1a         | 1  |
| 8800 | 6734  | Rnf213 | Ehd4          | 1  |
| 8800 | 6779  | Rnf213 | Gbp6          | 1  |



|      |       |        |             |    |
|------|-------|--------|-------------|----|
| 8800 | 6806  | Rnf213 | Agrrn       | 1  |
| 8800 | 6824  | Rnf213 | Irf7        | 1  |
| 8800 | 6866  | Rnf213 | Gls         | -1 |
| 8800 | 6910  | Rnf213 | Ly6c2       | 1  |
| 8800 | 7069  | Rnf213 | Ube1l       | 1  |
| 8800 | 7105  | Rnf213 | Plac8       | 1  |
| 8800 | 7238  | Rnf213 | Pycard      | 1  |
| 8800 | 7284  | Rnf213 | MMT00008674 | 1  |
| 8800 | 7316  | Rnf213 | Ifi204      | 1  |
| 8800 | 7336  | Rnf213 | Cd5l        | 1  |
| 8800 | 8270  | Rnf213 | Clsn        | 1  |
| 8800 | 8555  | Rnf213 | H2-M3       | 1  |
| 8800 | 8564  | Rnf213 | Pld4        | 1  |
| 8800 | 8659  | Rnf213 | Psmb8       | 1  |
| 8800 | 8800  | Rnf213 | Rnf213      | 1  |
| 8800 | 8951  | Rnf213 | Cd97        | 1  |
| 8800 | 9100  | Rnf213 | Ms4a6c      | 1  |
| 8800 | 9320  | Rnf213 | Rnf31       | 1  |
| 8800 | 9401  | Rnf213 | Fcgr4       | 1  |
| 8800 | 9616  | Rnf213 | Al451557    | 1  |
| 8800 | 9717  | Rnf213 | Psmb9       | 1  |
| 8800 | 9820  | Rnf213 | BC023105    | 1  |
| 8800 | 9821  | Rnf213 | Pmaip1      | 1  |
| 8800 | 9847  | Rnf213 | Ifi27       | 1  |
| 8800 | 9928  | Rnf213 | Lgmn        | 1  |
| 8800 | 10109 | Rnf213 | Gbp3        | 1  |
| 8800 | 10393 | Rnf213 | Slc7a8      | 1  |
| 8800 | 10426 | Rnf213 | Ly6f        | 1  |
| 8800 | 10504 | Rnf213 | Ripk3       | 1  |
| 8800 | 10606 | Rnf213 | Apbb1ip     | 1  |
| 8800 | 10926 | Rnf213 | P2ry13      | 1  |
| 8800 | 11009 | Rnf213 | MMT00008885 | 1  |
| 8800 | 11204 | Rnf213 | Al451617    | 1  |
| 8800 | 11265 | Rnf213 | Irgm        | 1  |
| 8800 | 11701 | Rnf213 | Oas1c       | 1  |
| 8800 | 12126 | Rnf213 | Znfx1       | 1  |
| 8800 | 12312 | Rnf213 | Ms4a6d      | 1  |
| 8800 | 12398 | Rnf213 | Ifi44       | 1  |
| 8800 | 12495 | Rnf213 | Casp1       | 1  |
| 8800 | 12600 | Rnf213 | Ifi204      | 1  |
| 8800 | 12969 | Rnf213 | Xaf1        | 1  |
| 8800 | 13156 | Rnf213 | Ifit3       | 1  |
| 8800 | 13181 | Rnf213 | Lcp2        | 1  |
| 8800 | 13309 | Rnf213 | Tgtp        | 1  |
| 8800 | 13514 | Rnf213 | Apol9b      | 1  |
| 8800 | 13522 | Rnf213 | Sfn5        | 1  |
| 8800 | 13527 | Rnf213 | Ctss        | 1  |
| 8800 | 13528 | Rnf213 | Capn12      | 1  |
| 8800 | 13585 | Rnf213 | Nckap1l     | 1  |
| 8800 | 13654 | Rnf213 | Stat1       | 1  |
| 8800 | 13656 | Rnf213 | Ly86        | 1  |

|      |       |        |               |   |
|------|-------|--------|---------------|---|
| 8800 | 13780 | Rnf213 | Pilra         | 1 |
| 8800 | 13826 | Rnf213 | Melk          | 1 |
| 8800 | 14029 | Rnf213 | 2810022L02Rik | 1 |
| 8800 | 14102 | Rnf213 | Evi2a         | 1 |
| 8800 | 14117 | Rnf213 | C1qb          | 1 |
| 8800 | 14237 | Rnf213 | Rac2          | 1 |
| 8800 | 14258 | Rnf213 | Ifi47         | 1 |
| 8800 | 14453 | Rnf213 | Inpp5d        | 1 |
| 8800 | 14506 | Rnf213 | Slc15a3       | 1 |
| 8800 | 14603 | Rnf213 | Ly6e          | 1 |
| 8800 | 14611 | Rnf213 | Ddx60         | 1 |
| 8800 | 14880 | Rnf213 | Ms4a4c        | 1 |
| 8800 | 14883 | Rnf213 | Itgal         | 1 |
| 8800 | 15074 | Rnf213 | Usp18         | 1 |
| 8800 | 15280 | Rnf213 | Cxcl10        | 1 |
| 8800 | 15449 | Rnf213 | Mitd1         | 1 |
| 8800 | 15504 | Rnf213 | Mx2           | 1 |
| 8800 | 15749 | Rnf213 | Cd22          | 1 |
| 8800 | 15825 | Rnf213 | Fermt3        | 1 |
| 8800 | 16102 | Rnf213 | Cd72          | 1 |
| 8800 | 16129 | Rnf213 | Trafd1        | 1 |
| 8800 | 16147 | Rnf213 | Tlr2          | 1 |
| 8800 | 16182 | Rnf213 | Oasl1         | 1 |
| 8800 | 16186 | Rnf213 | Cfp           | 1 |
| 8800 | 16199 | Rnf213 | Samhd1        | 1 |
| 8800 | 16521 | Rnf213 | Adar          | 1 |
| 8800 | 16572 | Rnf213 | D14Ert668e    | 1 |
| 8800 | 16874 | Rnf213 | Fcer1g        | 1 |
| 8800 | 16913 | Rnf213 | Pira3         | 1 |
| 8800 | 16988 | Rnf213 | Clec4f        | 1 |
| 8800 | 17071 | Rnf213 | Samd9l        | 1 |
| 8800 | 17197 | Rnf213 | Igtp          | 1 |
| 8800 | 17412 | Rnf213 | Aif1          | 1 |
| 8800 | 17904 | Rnf213 | Cds1          | 1 |
| 8800 | 18064 | Rnf213 | MMT00035925   | 1 |
| 8800 | 18174 | Rnf213 | Stat2         | 1 |
| 8800 | 18186 | Rnf213 | Parp14        | 1 |
| 8800 | 18211 | Rnf213 | Folr2         | 1 |
| 8800 | 18289 | Rnf213 | Tap1          | 1 |
| 8800 | 18686 | Rnf213 | Zfp143        | 1 |
| 8800 | 18868 | Rnf213 | Mpeg1         | 1 |
| 8800 | 19026 | Rnf213 | Isg15         | 1 |
| 8800 | 19063 | Rnf213 | Evl           | 1 |
| 8800 | 19189 | Rnf213 | Sp100         | 1 |
| 8800 | 19252 | Rnf213 | Tmsb4x        | 1 |
| 8800 | 19262 | Rnf213 | Cd274         | 1 |
| 8800 | 19708 | Rnf213 | Ly6a          | 1 |
| 8800 | 19738 | Rnf213 | Lgals3bp      | 1 |
| 8800 | 19794 | Rnf213 | Rgs2          | 1 |
| 8800 | 20321 | Rnf213 | Ms4a6b        | 1 |
| 8800 | 20431 | Rnf213 | Slc7a7        | 1 |

|      |       |               |               |    |
|------|-------|---------------|---------------|----|
| 8800 | 20474 | Rnf213        | Gnb3          | 1  |
| 8800 | 20791 | Rnf213        | MMT00014813   | 1  |
| 8800 | 20997 | Rnf213        | MMT00028135   | 1  |
| 8800 | 21351 | Rnf213        | Shisa5        | 1  |
| 8800 | 21440 | Rnf213        | Tmsb10        | 1  |
| 8800 | 21549 | Rnf213        | Rtp4          | 1  |
| 8800 | 21824 | Rnf213        | 5830443L24Rik | 1  |
| 8800 | 21863 | Rnf213        | Dok2          | 1  |
| 8800 | 22037 | Rnf213        | Oas1g         | 1  |
| 8800 | 22077 | Rnf213        | MMT00057550   | 1  |
| 8800 | 22327 | Rnf213        | Tyropb        | 1  |
| 8800 | 22496 | Rnf213        | Sfn1          | 1  |
| 8800 | 23208 | Rnf213        | Hck           | 1  |
| 8800 | 23242 | Rnf213        | Gngt2         | 1  |
| 8800 | 23410 | Rnf213        | C1qa          | 1  |
| 8800 | 23450 | Rnf213        | D12Ert647e    | 1  |
| 8808 | 3377  | RP23-136K12.4 | Cs            | -1 |
| 8808 | 4966  | RP23-136K12.4 | Zscan20       | -1 |
| 8808 | 18846 | RP23-136K12.4 | Ikbkg         | -1 |
| 8808 | 21214 | RP23-136K12.4 | Scd1          | -1 |
| 8816 | 213   | Nfkbia        | Rgs16         | 1  |
| 8816 | 250   | Nfkbia        | Tubb2a-ps2    | -1 |
| 8816 | 337   | Nfkbia        | Rasgef1b      | 1  |
| 8816 | 609   | Nfkbia        | MMT00060868   | -1 |
| 8816 | 1941  | Nfkbia        | MMT00079618   | -1 |
| 8816 | 2322  | Nfkbia        | Tuba4a        | -1 |
| 8816 | 2483  | Nfkbia        | Gmeb1         | 1  |
| 8816 | 2794  | Nfkbia        | Map3k6        | 1  |
| 8816 | 3652  | Nfkbia        | Adm           | 1  |
| 8816 | 3804  | Nfkbia        | MMT00015534   | -1 |
| 8816 | 4205  | Nfkbia        | Rgs1          | 1  |
| 8816 | 4235  | Nfkbia        | Pfkfb3        | 1  |
| 8816 | 5187  | Nfkbia        | Speer4f       | 1  |
| 8816 | 5889  | Nfkbia        | Errfi1        | 1  |
| 8816 | 6019  | Nfkbia        | Gdap10        | 1  |
| 8816 | 6564  | Nfkbia        | Cebpd         | 1  |
| 8816 | 8399  | Nfkbia        | Herpud1       | 1  |
| 8816 | 8632  | Nfkbia        | Igfbp1        | 1  |
| 8816 | 8816  | Nfkbia        | Nfkbia        | 1  |
| 8816 | 9745  | Nfkbia        | Gadd45g       | 1  |
| 8816 | 9763  | Nfkbia        | Tuba3b        | -1 |
| 8816 | 11129 | Nfkbia        | Ankhd1        | 1  |
| 8816 | 11574 | Nfkbia        | Gne           | 1  |
| 8816 | 11724 | Nfkbia        | Tuba3a        | -1 |
| 8816 | 11807 | Nfkbia        | Fbxo31        | 1  |
| 8816 | 11808 | Nfkbia        | Pck1          | 1  |
| 8816 | 12460 | Nfkbia        | Pnpla2        | 1  |
| 8816 | 12479 | Nfkbia        | Ifrd1         | 1  |
| 8816 | 13339 | Nfkbia        | D630042F21Rik | 1  |
| 8816 | 13471 | Nfkbia        | Cln8          | 1  |
| 8816 | 15021 | Nfkbia        | Ppargc1a      | 1  |

|      |       |               |                    |    |
|------|-------|---------------|--------------------|----|
| 8816 | 15631 | Nfkbia        | Lpin1              | 1  |
| 8816 | 16176 | Nfkbia        | St3gal5            | 1  |
| 8816 | 17352 | Nfkbia        | Cebpb              | 1  |
| 8816 | 17525 | Nfkbia        | Ctgf               | 1  |
| 8816 | 18785 | Nfkbia        | Angptl4            | 1  |
| 8816 | 19025 | Nfkbia        | Slc37a4            | 1  |
| 8816 | 19124 | Nfkbia        | Pim3               | 1  |
| 8816 | 19556 | Nfkbia        | Efna1              | -1 |
| 8816 | 22290 | Nfkbia        | Tubb2a             | -1 |
| 8817 | 2256  | Ptpn1         | Serpina9           | 1  |
| 8822 | 6376  | Galntl4       | Nle1               | 1  |
| 8826 | 2829  | 4933406C10Rik | Lrfr3              | -1 |
| 8826 | 2850  | 4933406C10Rik | Slc16a6            | -1 |
| 8826 | 6386  | 4933406C10Rik | Por                | 1  |
| 8826 | 9910  | 4933406C10Rik | EG666644           | 1  |
| 8826 | 11233 | 4933406C10Rik | Tef                | 1  |
| 8826 | 11741 | 4933406C10Rik | Slc30a10           | -1 |
| 8844 | 20589 | 2310037124Rik | Frmd8              | 1  |
| 8849 | 2230  | Cachd1        | Slc35d1            | 1  |
| 8849 | 10772 | Cachd1        | Aacs               | 1  |
| 8851 | 12315 | Pdcd4         | Srebf1             | 1  |
| 8855 | 607   | Psph          | Me1                | 1  |
| 8855 | 2013  | Psph          | Il15ra             | -1 |
| 8855 | 6193  | Psph          | Lactb2             | 1  |
| 8855 | 10612 | Psph          | Slc24a6            | -1 |
| 8855 | 17878 | Psph          | Brap               | -1 |
| 8855 | 21251 | Psph          | Cpt1a              | -1 |
| 8864 | 12367 | MMT00046672   | MMT00072365        | -1 |
| 8864 | 12784 | MMT00046672   | Nudt6              | 1  |
| 8864 | 13423 | MMT00046672   | ENSMUSG00000053749 | 1  |
| 8864 | 15508 | MMT00046672   | 4632415L05Rik      | 1  |
| 8864 | 16416 | MMT00046672   | Commd2             | 1  |
| 8864 | 18790 | MMT00046672   | Car3               | 1  |
| 8867 | 1416  | Shcbp1        | 6720460F02Rik      | 1  |
| 8867 | 5364  | Shcbp1        | Kif22              | 1  |
| 8867 | 8416  | Shcbp1        | Cdc20              | 1  |
| 8867 | 11382 | Shcbp1        | Cdca3              | 1  |
| 8867 | 17823 | Shcbp1        | D2Ertd750e         | 1  |
| 8867 | 19318 | Shcbp1        | Plk1               | 1  |
| 8867 | 20433 | Shcbp1        | Cdca5              | 1  |
| 8867 | 21947 | Shcbp1        | Cdca8              | 1  |
| 8870 | 5364  | Arid3a        | Kif22              | 1  |
| 8882 | 4678  | Adarb1        | Kank1              | -1 |
| 8882 | 7061  | Adarb1        | Spsb3              | -1 |
| 8882 | 16580 | Adarb1        | Tnfaip2            | -1 |
| 8882 | 21188 | Adarb1        | Pnkp               | -1 |
| 8887 | 2243  | Dpep1         | Gcsh               | -1 |
| 8887 | 11404 | Dpep1         | Gnpat              | -1 |
| 8887 | 18697 | Dpep1         | Afg3l1             | -1 |
| 8887 | 21394 | Dpep1         | Cdh15              | 1  |
| 8887 | 22909 | Dpep1         | Nup133             | -1 |

|      |       |             |                    |    |
|------|-------|-------------|--------------------|----|
| 8891 | 6021  | MMT00071061 | MMT00008784        | 1  |
| 8891 | 8670  | MMT00071061 | MMT00051613        | 1  |
| 8891 | 11043 | MMT00071061 | Hsph1              | 1  |
| 8891 | 18373 | MMT00071061 | Dnajb1             | 1  |
| 8896 | 3832  | Fasn        | Sdhb               | 1  |
| 8896 | 5680  | Fasn        | Lrg1               | -1 |
| 8896 | 6420  | Fasn        | Mipep              | 1  |
| 8896 | 7602  | Fasn        | Pcca               | 1  |
| 8896 | 10554 | Fasn        | ENSMUSG00000074179 | 1  |
| 8896 | 12556 | Fasn        | Ass1               | 1  |
| 8896 | 12955 | Fasn        | Atp5o              | 1  |
| 8896 | 13293 | Fasn        | Gsta2              | 1  |
| 8896 | 21214 | Fasn        | Scd1               | 1  |
| 8896 | 22998 | Fasn        | Ass1               | 1  |
| 8902 | 8902  | Aldh3b1     | Aldh3b1            | 1  |
| 8902 | 10629 | Aldh3b1     | BC021614           | -1 |
| 8906 | 1162  | MMT00004929 | Cpsf4              | -1 |
| 8906 | 2115  | MMT00004929 | Gpr12              | -1 |
| 8922 | 5364  | Il10ra      | Kif22              | 1  |
| 8925 | 2454  | MMT00026932 | MMT00045890        | -1 |
| 8925 | 7388  | MMT00026932 | Amn                | -1 |
| 8925 | 8357  | MMT00026932 | Siva1              | -1 |
| 8925 | 8925  | MMT00026932 | MMT00026932        | 1  |
| 8925 | 12084 | MMT00026932 | Siva1              | -1 |
| 8925 | 12238 | MMT00026932 | Traf3              | 1  |
| 8925 | 17638 | MMT00026932 | Adssl1             | -1 |
| 8925 | 23693 | MMT00026932 | A530016L24Rik      | -1 |
| 8949 | 250   | Prkcd       | Tubb2a-ps2         | 1  |
| 8949 | 269   | Prkcd       | Tuba1b             | 1  |
| 8949 | 609   | Prkcd       | MMT00060868        | 1  |
| 8949 | 1941  | Prkcd       | MMT00079618        | 1  |
| 8949 | 2322  | Prkcd       | Tuba4a             | 1  |
| 8949 | 3804  | Prkcd       | MMT00015534        | 1  |
| 8949 | 4201  | Prkcd       | Tubb2c             | 1  |
| 8949 | 5934  | Prkcd       | S100a10            | 1  |
| 8949 | 7151  | Prkcd       | MMT00007982        | 1  |
| 8949 | 9763  | Prkcd       | Tuba3b             | 1  |
| 8949 | 11129 | Prkcd       | Ankhd1             | -1 |
| 8949 | 11724 | Prkcd       | Tuba3a             | 1  |
| 8949 | 11741 | Prkcd       | Slc30a10           | 1  |
| 8949 | 15862 | Prkcd       | Mrap               | 1  |
| 8949 | 16060 | Prkcd       | Gys2               | -1 |
| 8949 | 16690 | Prkcd       | Tjp3               | 1  |
| 8949 | 17338 | Prkcd       | Mocos              | 1  |
| 8949 | 17444 | Prkcd       | Tuba1a             | 1  |
| 8949 | 17876 | Prkcd       | Tubb4              | 1  |
| 8949 | 18827 | Prkcd       | Oprs1              | 1  |
| 8949 | 20798 | Prkcd       | Ccp1               | -1 |
| 8949 | 21251 | Prkcd       | Cpt1a              | -1 |
| 8949 | 22290 | Prkcd       | Tubb2a             | 1  |
| 8949 | 22443 | Prkcd       | Tuba1c             | 1  |

|      |       |               |                    |    |
|------|-------|---------------|--------------------|----|
| 8980 | 337   | Plekhf1       | Rasgef1b           | 1  |
| 8980 | 2294  | Plekhf1       | AU040829           | 1  |
| 8980 | 3452  | Plekhf1       | Ccrn4l             | 1  |
| 8980 | 9213  | Plekhf1       | Osgin1             | -1 |
| 8980 | 12761 | Plekhf1       | Tsc22d3            | 1  |
| 8980 | 15522 | Plekhf1       | 1810011O10Rik      | 1  |
| 8980 | 15882 | Plekhf1       | AA986860           | 1  |
| 8980 | 16580 | Plekhf1       | Tnfaip2            | -1 |
| 8980 | 19556 | Plekhf1       | Efna1              | -1 |
| 8980 | 21331 | Plekhf1       | Slc10a6            | 1  |
| 8995 | 1357  | Pxk           | Pabpn1             | -1 |
| 8996 | 7492  | Timp1         | Adfp               | 1  |
| 8996 | 13271 | Timp1         | Idh2               | -1 |
| 8996 | 14472 | Timp1         | Ahcy               | -1 |
| 8996 | 15931 | Timp1         | Ces3               | -1 |
| 8996 | 18069 | Timp1         | Gpt                | -1 |
| 8996 | 18299 | Timp1         | MMT00035424        | 1  |
| 8996 | 20171 | Timp1         | 1700008G05Rik      | 1  |
| 8996 | 21692 | Timp1         | MMT00013924        | 1  |
| 9005 | 9005  | Mapk1ip1l     | Mapk1ip1l          | 1  |
| 9010 | 9010  | 8430419L09Rik | 8430419L09Rik      | 1  |
| 9010 | 19964 | 8430419L09Rik | Ndufa9             | -1 |
| 9026 | 13423 | Cep135        | ENSMUSG00000053749 | 1  |
| 9026 | 15508 | Cep135        | 4632415L05Rik      | 1  |
| 9026 | 18790 | Cep135        | Car3               | 1  |
| 9026 | 21323 | Cep135        | MMT00074228        | 1  |
| 9028 | 22841 | Unc45a        | Cib1               | 1  |
| 9049 | 21214 | 1810046J19Rik | Scd1               | 1  |
| 9052 | 20952 | A730037C10Rik | Zdhhc9             | 1  |
| 9066 | 2013  | 2210020M01Rik | Il15ra             | 1  |
| 9066 | 18709 | 2210020M01Rik | Srp68              | -1 |
| 9066 | 21793 | 2210020M01Rik | Pla2g12a           | 1  |
| 9077 | 5511  | Cnpy4         | BC055004           | -1 |
| 9077 | 9077  | Cnpy4         | Cnpy4              | 1  |
| 9077 | 13780 | Cnpy4         | Pilra              | 1  |
| 9077 | 16451 | Cnpy4         | 2010007H12Rik      | -1 |
| 9077 | 17089 | Cnpy4         | Pilrb1             | 1  |
| 9077 | 17158 | Cnpy4         | Zfp113             | -1 |
| 9077 | 19502 | Cnpy4         | Fbxo24             | -1 |
| 9081 | 12910 | EG229746      | 1110028A07Rik      | -1 |
| 9097 | 1853  | Endod1        | Stat5a             | 1  |
| 9097 | 5574  | Endod1        | Hsd3b7             | 1  |
| 9100 | 6888  | Ms4a6c        | Cxcl9              | 1  |
| 9107 | 2013  | Lrrc20        | Il15ra             | 1  |
| 9107 | 21793 | Lrrc20        | Pla2g12a           | 1  |
| 9116 | 2320  | M6prbp1       | Spc24              | 1  |
| 9116 | 5776  | M6prbp1       | Rpa1               | 1  |
| 9116 | 20019 | M6prbp1       | Qdpr               | 1  |
| 9122 | 2599  | Sepw1         | Lsm14a             | 1  |
| 9122 | 6513  | Sepw1         | Qpctl              | 1  |
| 9122 | 11321 | Sepw1         | 2310014L17Rik      | -1 |

|      |       |             |               |    |
|------|-------|-------------|---------------|----|
| 9122 | 11888 | Sepw1       | Myadm         | -1 |
| 9122 | 17314 | Sepw1       | Napa          | -1 |
| 9122 | 19462 | Sepw1       | 4933439C20Rik | -1 |
| 9122 | 20606 | Sepw1       | MMT00042166   | -1 |
| 9127 | 482   | Mtfmt       | Rnf43         | 1  |
| 9137 | 20058 | Hunk        | Dnaic1        | 1  |
| 9146 | 5764  | Ergic1      | Ltb4dh        | 1  |
| 9154 | 8815  | Tfg         | Mx1           | 1  |
| 9154 | 21214 | Tfg         | Scd1          | 1  |
| 9156 | 7472  | Klra23      | Klra1         | 1  |
| 9157 | 6771  | Txnrd1      | Insc          | 1  |
| 9157 | 16060 | Txnrd1      | Gys2          | -1 |
| 9157 | 19671 | Txnrd1      | Upp2          | -1 |
| 9161 | 1901  | Mrpl17      | Tpp1          | -1 |
| 9161 | 6912  | Mrpl17      | Crym          | -1 |
| 9161 | 9161  | Mrpl17      | Mrpl17        | 1  |
| 9161 | 22693 | Mrpl17      | Trim68        | 1  |
| 9164 | 607   | Uba5        | Me1           | 1  |
| 9164 | 8444  | Uba5        | Rdh16         | 1  |
| 9164 | 8815  | Uba5        | Mx1           | 1  |
| 9164 | 11086 | Uba5        | Pnpla5        | 1  |
| 9164 | 14147 | Uba5        | Acss2         | 1  |
| 9164 | 18201 | Uba5        | MMT00060232   | 1  |
| 9164 | 20058 | Uba5        | Dnaic1        | -1 |
| 9164 | 21214 | Uba5        | Scd1          | 1  |
| 9175 | 17530 | MMT00081793 | MMT00041792   | -1 |
| 9191 | 9230  | Lbxcor1     | 1700027N10Rik | -1 |
| 9191 | 14027 | Lbxcor1     | Rpo1-1        | 1  |
| 9191 | 15318 | Lbxcor1     | Aars2         | -1 |
| 9191 | 18574 | Lbxcor1     | Parc          | 1  |
| 9191 | 18772 | Lbxcor1     | BC048355      | -1 |
| 9192 | 2023  | MMT00042303 | MMT00072215   | -1 |
| 9200 | 387   | Sdc1        | Rgs10         | 1  |
| 9200 | 1533  | Sdc1        | BC013712      | 1  |
| 9200 | 2578  | Sdc1        | Csf2rb2       | 1  |
| 9200 | 3286  | Sdc1        | Alox5ap       | 1  |
| 9200 | 3905  | Sdc1        | H2-Q1         | 1  |
| 9200 | 5588  | Sdc1        | Snx20         | 1  |
| 9200 | 5845  | Sdc1        | Il18bp        | 1  |
| 9200 | 6072  | Sdc1        | C1qc          | 1  |
| 9200 | 6098  | Sdc1        | Ncf4          | 1  |
| 9200 | 6154  | Sdc1        | 1700030G06Rik | 1  |
| 9200 | 7336  | Sdc1        | Cd5l          | 1  |
| 9200 | 8533  | Sdc1        | Ptprcap       | 1  |
| 9200 | 9353  | Sdc1        | Emilin2       | 1  |
| 9200 | 9847  | Sdc1        | Ifi27         | 1  |
| 9200 | 9920  | Sdc1        | Syk           | 1  |
| 9200 | 10504 | Sdc1        | Ripk3         | 1  |
| 9200 | 10606 | Sdc1        | Apbb1ip       | 1  |
| 9200 | 11393 | Sdc1        | A830007P12Rik | 1  |
| 9200 | 11836 | Sdc1        | Csf1r         | 1  |

|      |       |               |               |    |
|------|-------|---------------|---------------|----|
| 9200 | 13181 | Sdc1          | Lcp2          | 1  |
| 9200 | 13585 | Sdc1          | Nckap1l       | 1  |
| 9200 | 14192 | Sdc1          | Trpv2         | 1  |
| 9200 | 14237 | Sdc1          | Rac2          | 1  |
| 9200 | 14506 | Sdc1          | Slc15a3       | 1  |
| 9200 | 14883 | Sdc1          | Itgal         | 1  |
| 9200 | 15387 | Sdc1          | Mgl1          | 1  |
| 9200 | 15677 | Sdc1          | Slc9a9        | 1  |
| 9200 | 15749 | Sdc1          | Cd22          | 1  |
| 9200 | 15825 | Sdc1          | Fermt3        | 1  |
| 9200 | 16186 | Sdc1          | Cfp           | 1  |
| 9200 | 16874 | Sdc1          | Fcer1g        | 1  |
| 9200 | 16988 | Sdc1          | Clec4f        | 1  |
| 9200 | 17806 | Sdc1          | Gpsm3         | 1  |
| 9200 | 18211 | Sdc1          | Folr2         | 1  |
| 9200 | 20814 | Sdc1          | Ptpn18        | 1  |
| 9200 | 21440 | Sdc1          | Tmsb10        | 1  |
| 9200 | 21863 | Sdc1          | Dok2          | 1  |
| 9200 | 22876 | Sdc1          | Sash3         | 1  |
| 9200 | 23208 | Sdc1          | Hck           | 1  |
| 9200 | 23410 | Sdc1          | C1qa          | 1  |
| 9212 | 12565 | Pde6d         | Grem2         | -1 |
| 9219 | 18772 | Mad2l1bp      | BC048355      | 1  |
| 9224 | 12565 | MMT00013510   | Grem2         | -1 |
| 9230 | 9230  | 1700027N10Rik | 1700027N10Rik | -1 |
| 9230 | 14027 | 1700027N10Rik | Rpo1-1        | 1  |
| 9230 | 15318 | 1700027N10Rik | Aars2         | -1 |
| 9230 | 18574 | 1700027N10Rik | Parc          | 1  |
| 9230 | 18772 | 1700027N10Rik | BC048355      | -1 |
| 9233 | 12219 | Acss3         | Cyb5b         | -1 |
| 9233 | 21202 | Acss3         | Acly          | -1 |
| 9233 | 22732 | Acss3         | Cyb5b         | -1 |
| 9234 | 12565 | Arf1          | Grem2         | -1 |
| 9252 | 6030  | Slc22a2       | As3mt         | -1 |
| 9252 | 8815  | Slc22a2       | Mx1           | 1  |
| 9252 | 12910 | Slc22a2       | 1110028A07Rik | 1  |
| 9252 | 12941 | Slc22a2       | Elov15        | 1  |
| 9252 | 14017 | Slc22a2       | Ces5          | 1  |
| 9252 | 18201 | Slc22a2       | MMT00060232   | 1  |
| 9252 | 18455 | Slc22a2       | Mtnr1a        | 1  |
| 9252 | 21214 | Slc22a2       | Scd1          | 1  |
| 9252 | 21575 | Slc22a2       | Cyp2c55       | 1  |
| 9252 | 21966 | Slc22a2       | Pcp4l1        | -1 |
| 9252 | 22138 | Slc22a2       | Ang           | -1 |
| 9252 | 23026 | Slc22a2       | Apom          | -1 |
| 9255 | 3265  | Emp3          | Dntt          | 1  |
| 9255 | 3410  | Emp3          | Paqr9         | 1  |
| 9255 | 5934  | Emp3          | S100a10       | 1  |
| 9255 | 6386  | Emp3          | Por           | -1 |
| 9255 | 11741 | Emp3          | Slc30a10      | 1  |
| 9255 | 12208 | Emp3          | Pnpla7        | 1  |



|      |       |       |               |    |
|------|-------|-------|---------------|----|
| 9255 | 12941 | Emp3  | Elov5         | 1  |
| 9255 | 15320 | Emp3  | MMT00017479   | -1 |
| 9255 | 18827 | Emp3  | Oprs1         | 1  |
| 9256 | 1357  | Psm4  | Pabpn1        | -1 |
| 9258 | 3799  | P4ha1 | Serpinh1      | 1  |
| 9258 | 4298  | P4ha1 | St3gal1       | 1  |
| 9258 | 14222 | P4ha1 | MMT00076410   | -1 |
| 9258 | 15713 | P4ha1 | Rbm3          | -1 |
| 9258 | 20965 | P4ha1 | Usp28         | -1 |
| 9260 | 250   | Cmtm6 | Tubb2a-ps2    | 1  |
| 9260 | 269   | Cmtm6 | Tuba1b        | 1  |
| 9260 | 402   | Cmtm6 | Timp3         | -1 |
| 9260 | 407   | Cmtm6 | Serpina6      | -1 |
| 9260 | 433   | Cmtm6 | Pla2g12b      | 1  |
| 9260 | 437   | Cmtm6 | Ndr1          | 1  |
| 9260 | 609   | Cmtm6 | MMT00060868   | 1  |
| 9260 | 719   | Cmtm6 | Usp2          | -1 |
| 9260 | 793   | Cmtm6 | Morc3         | -1 |
| 9260 | 1276  | Cmtm6 | Col4a1        | 1  |
| 9260 | 1310  | Cmtm6 | Cabc1         | 1  |
| 9260 | 1646  | Cmtm6 | Slc15a4       | -1 |
| 9260 | 1767  | Cmtm6 | BC016495      | -1 |
| 9260 | 1853  | Cmtm6 | Stat5a        | 1  |
| 9260 | 1941  | Cmtm6 | MMT00079618   | 1  |
| 9260 | 2322  | Cmtm6 | Tuba4a        | 1  |
| 9260 | 2384  | Cmtm6 | Micalcl       | 1  |
| 9260 | 2399  | Cmtm6 | MMT00060167   | 1  |
| 9260 | 2636  | Cmtm6 | Tars          | 1  |
| 9260 | 2829  | Cmtm6 | Lrfr3         | 1  |
| 9260 | 2850  | Cmtm6 | Slc16a6       | 1  |
| 9260 | 3214  | Cmtm6 | Dnmt3b        | 1  |
| 9260 | 3410  | Cmtm6 | Paqr9         | 1  |
| 9260 | 3804  | Cmtm6 | MMT00015534   | 1  |
| 9260 | 4201  | Cmtm6 | Tubb2c        | 1  |
| 9260 | 4286  | Cmtm6 | Ptp4a1        | -1 |
| 9260 | 4333  | Cmtm6 | Sumo3         | 1  |
| 9260 | 4369  | Cmtm6 | Acot4         | -1 |
| 9260 | 4534  | Cmtm6 | Ndel1         | -1 |
| 9260 | 4708  | Cmtm6 | Traf3ip2      | 1  |
| 9260 | 5183  | Cmtm6 | St5           | 1  |
| 9260 | 5374  | Cmtm6 | Chka          | 1  |
| 9260 | 5492  | Cmtm6 | MMT00039914   | -1 |
| 9260 | 5574  | Cmtm6 | Hsd3b7        | 1  |
| 9260 | 5734  | Cmtm6 | EG619653      | -1 |
| 9260 | 5802  | Cmtm6 | Mad2l2        | 1  |
| 9260 | 5849  | Cmtm6 | 2310031A18Rik | 1  |
| 9260 | 5934  | Cmtm6 | S100a10       | 1  |
| 9260 | 5974  | Cmtm6 | Arntl         | 1  |
| 9260 | 6024  | Cmtm6 | Ddo           | -1 |
| 9260 | 6109  | Cmtm6 | Hsd17b2       | 1  |
| 9260 | 6386  | Cmtm6 | Por           | -1 |

|      |       |       |               |    |
|------|-------|-------|---------------|----|
| 9260 | 6394  | Cmtm6 | Fbxo6         | 1  |
| 9260 | 6771  | Cmtm6 | Insc          | 1  |
| 9260 | 6788  | Cmtm6 | Psen2         | 1  |
| 9260 | 6990  | Cmtm6 | Nr1i2         | -1 |
| 9260 | 7151  | Cmtm6 | MMT00007982   | 1  |
| 9260 | 7414  | Cmtm6 | Clpx          | 1  |
| 9260 | 7862  | Cmtm6 | Cpsf4l        | -1 |
| 9260 | 8054  | Cmtm6 | Smarca2       | -1 |
| 9260 | 8328  | Cmtm6 | Klhdc8a       | 1  |
| 9260 | 8399  | Cmtm6 | Herpud1       | -1 |
| 9260 | 8641  | Cmtm6 | Slc7a2        | -1 |
| 9260 | 8658  | Cmtm6 | Fmo2          | -1 |
| 9260 | 9260  | Cmtm6 | Cmtm6         | 1  |
| 9260 | 9495  | Cmtm6 | Srms          | 1  |
| 9260 | 9763  | Cmtm6 | Tuba3b        | 1  |
| 9260 | 9907  | Cmtm6 | 4932442K08Rik | -1 |
| 9260 | 9910  | Cmtm6 | EG666644      | -1 |
| 9260 | 10088 | Cmtm6 | Ddc           | 1  |
| 9260 | 10215 | Cmtm6 | Nampt         | -1 |
| 9260 | 10408 | Cmtm6 | Per1          | -1 |
| 9260 | 10486 | Cmtm6 | 1300002K09Rik | 1  |
| 9260 | 10642 | Cmtm6 | Ngef          | -1 |
| 9260 | 10712 | Cmtm6 | Fchsd2        | -1 |
| 9260 | 11075 | Cmtm6 | Xrcc6bp1      | -1 |
| 9260 | 11129 | Cmtm6 | Ankhd1        | -1 |
| 9260 | 11149 | Cmtm6 | MMT00050488   | 1  |
| 9260 | 11193 | Cmtm6 | Tsc22d1       | 1  |
| 9260 | 11233 | Cmtm6 | Tef           | -1 |
| 9260 | 11599 | Cmtm6 | Coq10b        | -1 |
| 9260 | 11724 | Cmtm6 | Tuba3a        | 1  |
| 9260 | 11741 | Cmtm6 | Slc30a10      | 1  |
| 9260 | 11808 | Cmtm6 | Pck1          | -1 |
| 9260 | 12204 | Cmtm6 | Ankmy2        | -1 |
| 9260 | 12420 | Cmtm6 | Khl21         | -1 |
| 9260 | 12433 | Cmtm6 | 5033413D22Rik | 1  |
| 9260 | 12489 | Cmtm6 | Wdr8          | 1  |
| 9260 | 12687 | Cmtm6 | Zc3h8         | -1 |
| 9260 | 12799 | Cmtm6 | Spon2         | 1  |
| 9260 | 12904 | Cmtm6 | MMT00040704   | -1 |
| 9260 | 12981 | Cmtm6 | Nek6          | 1  |
| 9260 | 12982 | Cmtm6 | Cars          | 1  |
| 9260 | 13078 | Cmtm6 | Eps8l2        | 1  |
| 9260 | 13889 | Cmtm6 | Agpat2        | 1  |
| 9260 | 14041 | Cmtm6 | Cldn1         | 1  |
| 9260 | 14462 | Cmtm6 | Zfp385b       | -1 |
| 9260 | 15021 | Cmtm6 | Ppargc1a      | -1 |
| 9260 | 15284 | Cmtm6 | EG632778      | -1 |
| 9260 | 15631 | Cmtm6 | Lpin1         | -1 |
| 9260 | 15709 | Cmtm6 | Tceal1        | -1 |
| 9260 | 15824 | Cmtm6 | D19Ertd721e   | 1  |
| 9260 | 15862 | Cmtm6 | Mrap          | 1  |

|      |       |             |               |    |
|------|-------|-------------|---------------|----|
| 9260 | 16060 | Cmtm6       | Gys2          | -1 |
| 9260 | 16176 | Cmtm6       | St3gal5       | -1 |
| 9260 | 16580 | Cmtm6       | Tnfaip2       | 1  |
| 9260 | 16647 | Cmtm6       | D16H22S680E   | -1 |
| 9260 | 16690 | Cmtm6       | Tjp3          | 1  |
| 9260 | 17338 | Cmtm6       | Mocos         | 1  |
| 9260 | 17444 | Cmtm6       | Tuba1a        | 1  |
| 9260 | 17583 | Cmtm6       | Per2          | -1 |
| 9260 | 17617 | Cmtm6       | Atp5sl        | -1 |
| 9260 | 17622 | Cmtm6       | Foxo1         | -1 |
| 9260 | 17876 | Cmtm6       | Tubb4         | 1  |
| 9260 | 18147 | Cmtm6       | Nhlrc2        | -1 |
| 9260 | 18179 | Cmtm6       | Dbp           | -1 |
| 9260 | 18296 | Cmtm6       | Pcgf5         | -1 |
| 9260 | 18314 | Cmtm6       | 4631416L12Rik | -1 |
| 9260 | 18455 | Cmtm6       | Mtnr1a        | 1  |
| 9260 | 18498 | Cmtm6       | Slc5a6        | -1 |
| 9260 | 18827 | Cmtm6       | Oprs1         | 1  |
| 9260 | 19025 | Cmtm6       | Slc37a4       | -1 |
| 9260 | 19146 | Cmtm6       | N4bp2l1       | -1 |
| 9260 | 19234 | Cmtm6       | Nrg4          | -1 |
| 9260 | 19277 | Cmtm6       | MMT00044927   | -1 |
| 9260 | 19305 | Cmtm6       | Azin1         | -1 |
| 9260 | 19466 | Cmtm6       | Pptc7         | -1 |
| 9260 | 19532 | Cmtm6       | Med8          | 1  |
| 9260 | 19671 | Cmtm6       | Upp2          | -1 |
| 9260 | 19723 | Cmtm6       | Pfkfb1        | -1 |
| 9260 | 19757 | Cmtm6       | Fkbp5         | -1 |
| 9260 | 19790 | Cmtm6       | Polg2         | -1 |
| 9260 | 20085 | Cmtm6       | Lpin2         | -1 |
| 9260 | 20803 | Cmtm6       | Tmem50a       | -1 |
| 9260 | 21142 | Cmtm6       | Gm129         | -1 |
| 9260 | 21163 | Cmtm6       | Slc16a5       | -1 |
| 9260 | 21811 | Cmtm6       | Ak3l1         | -1 |
| 9260 | 21918 | Cmtm6       | Snx24         | 1  |
| 9260 | 21969 | Cmtm6       | Tk1           | -1 |
| 9260 | 22076 | Cmtm6       | Pgm2l1        | -1 |
| 9260 | 22290 | Cmtm6       | Tubb2a        | 1  |
| 9260 | 22443 | Cmtm6       | Tuba1c        | 1  |
| 9260 | 22630 | Cmtm6       | MMT00034355   | 1  |
| 9260 | 22936 | Cmtm6       | Rhobtb1       | -1 |
| 9260 | 22978 | Cmtm6       | MMT00043176   | 1  |
| 9260 | 23253 | Cmtm6       | D030011O10Rik | -1 |
| 9260 | 23437 | Cmtm6       | Efhd2         | -1 |
| 9263 | 14472 | Fbxo27      | Ahcy          | -1 |
| 9278 | 9278  | Clec2i      | Clec2i        | 1  |
| 9279 | 12565 | MMT00066808 | Grem2         | -1 |
| 9281 | 3196  | Rnf122      | Tat           | -1 |
| 9281 | 5684  | Rnf122      | Ranbp10       | 1  |
| 9281 | 5804  | Rnf122      | Thrsp         | -1 |
| 9281 | 21934 | Rnf122      | Id2           | 1  |

|      |       |             |                    |    |
|------|-------|-------------|--------------------|----|
| 9290 | 8444  | Cd1d1       | Rdh16              | 1  |
| 9301 | 8610  | MMT00050551 | Padi4              | -1 |
| 9304 | 286   | AI449175    | MMT00070509        | 1  |
| 9304 | 403   | AI449175    | Leprotl1           | -1 |
| 9304 | 769   | AI449175    | 5430437P03Rik      | -1 |
| 9304 | 1099  | AI449175    | Ap1m1              | 1  |
| 9304 | 1755  | AI449175    | Ocel1              | 1  |
| 9304 | 2703  | AI449175    | MMT00073763        | 1  |
| 9304 | 2749  | AI449175    | Naf1               | -1 |
| 9304 | 3052  | AI449175    | 9130404D08Rik      | -1 |
| 9304 | 3055  | AI449175    | Pde4c              | 1  |
| 9304 | 5433  | AI449175    | 2410004L22Rik      | -1 |
| 9304 | 6760  | AI449175    | 2810428I15Rik      | 1  |
| 9304 | 8114  | AI449175    | Kcnn1              | 1  |
| 9304 | 9304  | AI449175    | AI449175           | 1  |
| 9304 | 9931  | AI449175    | Glit25d1           | -1 |
| 9304 | 10195 | AI449175    | Klf1               | 1  |
| 9304 | 10273 | AI449175    | Gpt2               | 1  |
| 9304 | 13004 | AI449175    | Arhgef10           | 1  |
| 9304 | 13732 | AI449175    | Tpm4               | -1 |
| 9304 | 14455 | AI449175    | 2700029M09Rik      | -1 |
| 9304 | 15094 | AI449175    | Pbx4               | -1 |
| 9304 | 15455 | AI449175    | Lsm4               | -1 |
| 9304 | 16617 | AI449175    | Sh2d4a             | -1 |
| 9304 | 16849 | AI449175    | Trmt1              | -1 |
| 9304 | 16858 | AI449175    | Tmem38a            | -1 |
| 9304 | 18886 | AI449175    | Slc18a1            | -1 |
| 9304 | 20484 | AI449175    | Ces1               | -1 |
| 9304 | 22776 | AI449175    | Gsr                | 1  |
| 9306 | 1748  | Spon1       | Rbp1               | 1  |
| 9306 | 2639  | Spon1       | Abhd2              | 1  |
| 9306 | 2721  | Spon1       | Inmt               | -1 |
| 9306 | 3356  | Spon1       | Adhfe1             | -1 |
| 9306 | 3565  | Spon1       | MMT00045908        | -1 |
| 9306 | 8444  | Spon1       | Rdh16              | -1 |
| 9306 | 9427  | Spon1       | Nqo2               | -1 |
| 9306 | 9481  | Spon1       | Ppl                | -1 |
| 9306 | 10554 | Spon1       | ENSMUSG00000074179 | -1 |
| 9306 | 12910 | Spon1       | 1110028A07Rik      | -1 |
| 9306 | 13293 | Spon1       | Gsta2              | -1 |
| 9306 | 14314 | Spon1       | 2810405K02Rik      | -1 |
| 9306 | 17486 | Spon1       | Cnn2               | 1  |
| 9306 | 19766 | Spon1       | Slc26a4            | -1 |
| 9306 | 20058 | Spon1       | Dnaic1             | 1  |
| 9306 | 20171 | Spon1       | 1700008G05Rik      | 1  |
| 9306 | 21727 | Spon1       | Khk                | -1 |
| 9306 | 22046 | Spon1       | Cml4               | -1 |
| 9306 | 22271 | Spon1       | Cyp2c29            | -1 |
| 9318 | 827   | C79267      | Flcn               | -1 |
| 9318 | 10612 | C79267      | Slc24a6            | -1 |
| 9318 | 17656 | C79267      | Hdhd3              | 1  |

|      |       |        |               |    |
|------|-------|--------|---------------|----|
| 9318 | 21062 | C79267 | Rpl711        | 1  |
| 9318 | 21288 | C79267 | Tcp1112       | -1 |
| 9320 | 143   | Rnf31  | Gvin1         | 1  |
| 9320 | 1533  | Rnf31  | BC013712      | 1  |
| 9320 | 2224  | Rnf31  | Oasl2         | 1  |
| 9320 | 2830  | Rnf31  | 4632417K18Rik | 1  |
| 9320 | 3523  | Rnf31  | Trim34        | 1  |
| 9320 | 4508  | Rnf31  | Ifit1         | 1  |
| 9320 | 5250  | Rnf31  | Ifit2         | 1  |
| 9320 | 5766  | Rnf31  | 5033414D02Rik | 1  |
| 9320 | 5853  | Rnf31  | Trim30        | 1  |
| 9320 | 7105  | Rnf31  | Plac8         | 1  |
| 9320 | 7316  | Rnf31  | Ifi204        | 1  |
| 9320 | 8800  | Rnf31  | Rnf213        | 1  |
| 9320 | 9100  | Rnf31  | Ms4a6c        | 1  |
| 9320 | 9821  | Rnf31  | Pmaip1        | 1  |
| 9320 | 9847  | Rnf31  | Ifi27         | 1  |
| 9320 | 10109 | Rnf31  | Gbp3          | 1  |
| 9320 | 10245 | Rnf31  | Dus1l         | -1 |
| 9320 | 10442 | Rnf31  | Pla2g4a       | 1  |
| 9320 | 11009 | Rnf31  | MMT00008885   | 1  |
| 9320 | 11204 | Rnf31  | Al451617      | 1  |
| 9320 | 11265 | Rnf31  | Irgm          | 1  |
| 9320 | 12398 | Rnf31  | Ifi44         | 1  |
| 9320 | 12495 | Rnf31  | Casp1         | 1  |
| 9320 | 12600 | Rnf31  | Ifi204        | 1  |
| 9320 | 12969 | Rnf31  | Xaf1          | 1  |
| 9320 | 13156 | Rnf31  | Ifit3         | 1  |
| 9320 | 13309 | Rnf31  | Tgtp          | 1  |
| 9320 | 13522 | Rnf31  | Sln5          | 1  |
| 9320 | 13527 | Rnf31  | Ctss          | 1  |
| 9320 | 14611 | Rnf31  | Ddx60         | 1  |
| 9320 | 14880 | Rnf31  | Ms4a4c        | 1  |
| 9320 | 15074 | Rnf31  | Usp18         | 1  |
| 9320 | 15504 | Rnf31  | Mx2           | 1  |
| 9320 | 16572 | Rnf31  | D14Ertd668e   | 1  |
| 9320 | 17071 | Rnf31  | Samd9l        | 1  |
| 9320 | 18186 | Rnf31  | Parp14        | 1  |
| 9320 | 18762 | Rnf31  | Herc5         | 1  |
| 9320 | 19189 | Rnf31  | Sp100         | 1  |
| 9320 | 20150 | Rnf31  | Ptpcr         | 1  |
| 9320 | 20321 | Rnf31  | Ms4a6b        | 1  |
| 9320 | 20791 | Rnf31  | MMT00014813   | 1  |
| 9320 | 20997 | Rnf31  | MMT00028135   | 1  |
| 9320 | 21549 | Rnf31  | Rtp4          | 1  |
| 9320 | 21824 | Rnf31  | 5830443L24Rik | 1  |
| 9320 | 22037 | Rnf31  | Oas1g         | 1  |
| 9320 | 23038 | Rnf31  | Casp4         | 1  |
| 9320 | 23208 | Rnf31  | Hck           | 1  |
| 9322 | 2599  | Relt   | Lsm14a        | -1 |
| 9322 | 6513  | Relt   | Qpctl         | -1 |

|      |       |           |               |    |
|------|-------|-----------|---------------|----|
| 9329 | 4674  | Serpina3m | Cxcl12        | -1 |
| 9329 | 7550  | Serpina3m | Rab11fip5     | -1 |
| 9329 | 10132 | Serpina3m | Ces2          | 1  |
| 9329 | 18250 | Serpina3m | Mmp14         | -1 |
| 9330 | 9127  | Tapt1     | Mtfmt         | -1 |
| 9330 | 9910  | Tapt1     | EG666644      | 1  |
| 9338 | 607   | Zfp313    | Me1           | -1 |
| 9338 | 2224  | Zfp313    | Oasl2         | 1  |
| 9338 | 6072  | Zfp313    | C1qc          | 1  |
| 9338 | 7105  | Zfp313    | Plac8         | 1  |
| 9338 | 7602  | Zfp313    | Pcca          | -1 |
| 9338 | 9842  | Zfp313    | Qdpr          | -1 |
| 9338 | 9847  | Zfp313    | Ifi27         | 1  |
| 9338 | 9920  | Zfp313    | Syk           | 1  |
| 9338 | 14147 | Zfp313    | Acss2         | -1 |
| 9338 | 14506 | Zfp313    | Slc15a3       | 1  |
| 9338 | 18201 | Zfp313    | MMT00060232   | -1 |
| 9338 | 20122 | Zfp313    | Tmem86a       | 1  |
| 9338 | 21202 | Zfp313    | Acly          | -1 |
| 9338 | 21214 | Zfp313    | Scd1          | -1 |
| 9338 | 21549 | Zfp313    | Rtp4          | 1  |
| 9338 | 21575 | Zfp313    | Cyp2c55       | -1 |
| 9338 | 22406 | Zfp313    | Vnn1          | 1  |
| 9338 | 22562 | Zfp313    | Sdha          | -1 |
| 9338 | 23208 | Zfp313    | Hck           | 1  |
| 9385 | 4351  | Hmg20a    | Plxnb1        | 1  |
| 9385 | 8815  | Hmg20a    | Mx1           | -1 |
| 9385 | 18201 | Hmg20a    | MMT00060232   | -1 |
| 9385 | 21214 | Hmg20a    | Scd1          | -1 |
| 9393 | 7492  | Cd300a    | Adfp          | 1  |
| 9393 | 20967 | Cd300a    | Fabp2         | 1  |
| 9401 | 143   | Fcgr4     | Gvin1         | 1  |
| 9401 | 1533  | Fcgr4     | BC013712      | 1  |
| 9401 | 2200  | Fcgr4     | BC006779      | 1  |
| 9401 | 2224  | Fcgr4     | Oasl2         | 1  |
| 9401 | 2830  | Fcgr4     | 4632417K18Rik | 1  |
| 9401 | 3683  | Fcgr4     | Oas2          | 1  |
| 9401 | 4426  | Fcgr4     | Iigp2         | 1  |
| 9401 | 4508  | Fcgr4     | Ifit1         | 1  |
| 9401 | 5250  | Fcgr4     | Ifit2         | 1  |
| 9401 | 5554  | Fcgr4     | Emr1          | 1  |
| 9401 | 6779  | Fcgr4     | Gbp6          | 1  |
| 9401 | 6824  | Fcgr4     | Irf7          | 1  |
| 9401 | 6888  | Fcgr4     | Cxcl9         | 1  |
| 9401 | 7238  | Fcgr4     | Pycard        | 1  |
| 9401 | 7316  | Fcgr4     | Ifi204        | 1  |
| 9401 | 7336  | Fcgr4     | Cd5l          | 1  |
| 9401 | 8270  | Fcgr4     | Cispn         | 1  |
| 9401 | 8555  | Fcgr4     | H2-M3         | 1  |
| 9401 | 8800  | Fcgr4     | Rnf213        | 1  |
| 9401 | 8952  | Fcgr4     | Marco         | 1  |

|      |       |        |               |    |
|------|-------|--------|---------------|----|
| 9401 | 9100  | Fcgr4  | Ms4a6c        | 1  |
| 9401 | 9717  | Fcgr4  | Psmb9         | 1  |
| 9401 | 9847  | Fcgr4  | Ifi27         | 1  |
| 9401 | 10109 | Fcgr4  | Gbp3          | 1  |
| 9401 | 10504 | Fcgr4  | Ripk3         | 1  |
| 9401 | 10926 | Fcgr4  | P2ry13        | 1  |
| 9401 | 11009 | Fcgr4  | MMT00008885   | 1  |
| 9401 | 11265 | Fcgr4  | Irgm          | 1  |
| 9401 | 12398 | Fcgr4  | Ifi44         | 1  |
| 9401 | 12600 | Fcgr4  | Ifi204        | 1  |
| 9401 | 12969 | Fcgr4  | Xaf1          | 1  |
| 9401 | 13309 | Fcgr4  | Tgtp          | 1  |
| 9401 | 13455 | Fcgr4  | Cenpe         | 1  |
| 9401 | 13527 | Fcgr4  | Ctss          | 1  |
| 9401 | 13585 | Fcgr4  | Nckap1l       | 1  |
| 9401 | 13654 | Fcgr4  | Stat1         | 1  |
| 9401 | 13656 | Fcgr4  | Ly86          | 1  |
| 9401 | 13826 | Fcgr4  | Melk          | 1  |
| 9401 | 13867 | Fcgr4  | Sgcb          | 1  |
| 9401 | 14258 | Fcgr4  | Ifi47         | 1  |
| 9401 | 14880 | Fcgr4  | Ms4a4c        | 1  |
| 9401 | 15057 | Fcgr4  | Atad2         | 1  |
| 9401 | 15280 | Fcgr4  | Cxcl10        | 1  |
| 9401 | 16102 | Fcgr4  | Cd72          | 1  |
| 9401 | 16147 | Fcgr4  | Tlr2          | 1  |
| 9401 | 16182 | Fcgr4  | Oasl1         | 1  |
| 9401 | 16199 | Fcgr4  | Samhd1        | 1  |
| 9401 | 16572 | Fcgr4  | D14Ert668e    | 1  |
| 9401 | 16854 | Fcgr4  | Kif15         | 1  |
| 9401 | 17197 | Fcgr4  | Igtp          | 1  |
| 9401 | 17412 | Fcgr4  | Aif1          | 1  |
| 9401 | 17904 | Fcgr4  | Cds1          | 1  |
| 9401 | 18174 | Fcgr4  | Stat2         | 1  |
| 9401 | 18186 | Fcgr4  | Parp14        | 1  |
| 9401 | 19189 | Fcgr4  | Sp100         | 1  |
| 9401 | 19382 | Fcgr4  | Slc2a6        | 1  |
| 9401 | 19738 | Fcgr4  | Lgals3bp      | 1  |
| 9401 | 20321 | Fcgr4  | Ms4a6b        | 1  |
| 9401 | 20433 | Fcgr4  | Cdca5         | 1  |
| 9401 | 20997 | Fcgr4  | MMT00028135   | 1  |
| 9401 | 21549 | Fcgr4  | Rtp4          | 1  |
| 9401 | 21824 | Fcgr4  | 5830443L24Rik | 1  |
| 9401 | 22037 | Fcgr4  | Oas1g         | 1  |
| 9401 | 22188 | Fcgr4  | Top2a         | 1  |
| 9401 | 23208 | Fcgr4  | Hck           | 1  |
| 9407 | 16762 | Cmah   | Atp8a2        | 1  |
| 9408 | 524   | Hmgcs2 | Hsd3b2        | -1 |
| 9408 | 1963  | Hmgcs2 | MMT00039783   | -1 |
| 9408 | 6206  | Hmgcs2 | MMT00063701   | -1 |
| 9408 | 7519  | Hmgcs2 | Gstm1         | -1 |
| 9408 | 8815  | Hmgcs2 | Mx1           | -1 |

|      |       |               |               |    |
|------|-------|---------------|---------------|----|
| 9408 | 9408  | Hmgcs2        | Hmgcs2        | 1  |
| 9408 | 10681 | Hmgcs2        | Dgkz          | 1  |
| 9408 | 10961 | Hmgcs2        | Pgd           | -1 |
| 9408 | 14147 | Hmgcs2        | Acss2         | -1 |
| 9408 | 14151 | Hmgcs2        | Slc44a1       | -1 |
| 9408 | 18201 | Hmgcs2        | MMT00060232   | -1 |
| 9408 | 19084 | Hmgcs2        | Mmab          | -1 |
| 9408 | 20385 | Hmgcs2        | Chd1l         | -1 |
| 9408 | 21202 | Hmgcs2        | Acly          | -1 |
| 9408 | 21214 | Hmgcs2        | Scd1          | -1 |
| 9408 | 21251 | Hmgcs2        | Cpt1a         | 1  |
| 9408 | 21575 | Hmgcs2        | Cyp2c55       | -1 |
| 9408 | 22138 | Hmgcs2        | Ang           | 1  |
| 9410 | 7140  | Zmym3         | Mtbp          | 1  |
| 9410 | 12112 | Zmym3         | Tmem53        | 1  |
| 9417 | 630   | Cd163         | C1s           | -1 |
| 9417 | 3078  | Cd163         | 9630033F20Rik | 1  |
| 9417 | 7678  | Cd163         | Ltbr          | 1  |
| 9417 | 9417  | Cd163         | Cd163         | 1  |
| 9417 | 17391 | Cd163         | C530028O21Rik | 1  |
| 9417 | 17743 | Cd163         | Phb2          | 1  |
| 9417 | 19964 | Cd163         | Ndufa9        | 1  |
| 9417 | 20127 | Cd163         | Ipo8          | -1 |
| 9425 | 18042 | Gusb          | Aph1c         | -1 |
| 9427 | 874   | Nqo2          | Aldh1a7       | 1  |
| 9427 | 1985  | Nqo2          | Pepd          | 1  |
| 9427 | 3377  | Nqo2          | Cs            | 1  |
| 9427 | 5884  | Nqo2          | Gstm2         | 1  |
| 9427 | 14147 | Nqo2          | Acss2         | 1  |
| 9451 | 607   | Gpr180        | Me1           | 1  |
| 9454 | 126   | 2810426N06Rik | 0610012D14Rik | -1 |
| 9454 | 2388  | 2810426N06Rik | Dot1l         | 1  |
| 9454 | 2599  | 2810426N06Rik | Lsm14a        | 1  |
| 9454 | 4697  | 2810426N06Rik | Cyp2a12       | -1 |
| 9454 | 6513  | 2810426N06Rik | Qpctl         | 1  |
| 9454 | 7761  | 2810426N06Rik | Nudt19        | 1  |
| 9454 | 9454  | 2810426N06Rik | 2810426N06Rik | 1  |
| 9454 | 16639 | 2810426N06Rik | MMT00078937   | -1 |
| 9454 | 19462 | 2810426N06Rik | 4933439C20Rik | -1 |
| 9454 | 19762 | 2810426N06Rik | Pih1d1        | -1 |
| 9454 | 19854 | 2810426N06Rik | Kcnj14        | 1  |
| 9454 | 20490 | 2810426N06Rik | Tmem143       | -1 |
| 9454 | 21438 | 2810426N06Rik | Plekha4       | -1 |
| 9454 | 23247 | 2810426N06Rik | Ercc1         | -1 |
| 9454 | 23595 | 2810426N06Rik | Gm550         | 1  |
| 9473 | 8444  | Gfra3         | Rdh16         | -1 |
| 9473 | 8815  | Gfra3         | Mx1           | -1 |
| 9473 | 20058 | Gfra3         | Dnaic1        | 1  |
| 9476 | 3265  | 9130005N14Rik | Dntt          | 1  |
| 9480 | 12910 | A430107O13Rik | 1110028A07Rik | -1 |
| 9480 | 15059 | A430107O13Rik | Mogat1        | -1 |



|      |       |               |               |    |
|------|-------|---------------|---------------|----|
| 9480 | 20058 | A430107O13Rik | Dnaic1        | 1  |
| 9494 | 20058 | Cib2          | Dnaic1        | -1 |
| 9513 | 2643  | Tardbp        | Inhbe         | -1 |
| 9513 | 3196  | Tardbp        | Tat           | 1  |
| 9513 | 3587  | Tardbp        | MMT00041940   | 1  |
| 9513 | 6021  | Tardbp        | MMT00008784   | 1  |
| 9513 | 8670  | Tardbp        | MMT00051613   | 1  |
| 9513 | 11043 | Tardbp        | Hsph1         | 1  |
| 9513 | 11214 | Tardbp        | MMT00049207   | 1  |
| 9513 | 11379 | Tardbp        | Dnttip1       | -1 |
| 9513 | 11843 | Tardbp        | Dusp22        | -1 |
| 9513 | 15476 | Tardbp        | Fem1b         | -1 |
| 9513 | 15675 | Tardbp        | MMT00077535   | 1  |
| 9513 | 16517 | Tardbp        | D4Wsu53e      | 1  |
| 9513 | 16750 | Tardbp        | Casp6         | -1 |
| 9513 | 20194 | Tardbp        | Pnlcd1        | -1 |
| 9513 | 20967 | Tardbp        | Fabp2         | -1 |
| 9513 | 21643 | Tardbp        | Agtr1a        | -1 |
| 9513 | 22139 | Tardbp        | Stip1         | 1  |
| 9513 | 22216 | Tardbp        | Sp5           | -1 |
| 9514 | 14151 | Vps37a        | Slc44a1       | -1 |
| 9534 | 6329  | MMT00042032   | Cyp2b10       | 1  |
| 9534 | 6420  | MMT00042032   | Mipep         | 1  |
| 9534 | 15205 | MMT00042032   | MMT00030262   | -1 |
| 9540 | 6386  | Csnk1e        | Por           | 1  |
| 9540 | 10166 | Csnk1e        | Rhbdd2        | 1  |
| 9541 | 8610  | Npal3         | Padi4         | 1  |
| 9541 | 9301  | Npal3         | MMT00050551   | -1 |
| 9547 | 2472  | MMT00006479   | MMT00014056   | 1  |
| 9547 | 7192  | MMT00006479   | Ttc21b        | 1  |
| 9547 | 7654  | MMT00006479   | Ptpmt1        | -1 |
| 9547 | 9547  | MMT00006479   | MMT00006479   | 1  |
| 9547 | 14757 | MMT00006479   | Hdx           | 1  |
| 9547 | 16881 | MMT00006479   | MMT00031504   | 1  |
| 9547 | 17295 | MMT00006479   | MMT00082577   | 1  |
| 9547 | 19763 | MMT00006479   | Acp2          | 1  |
| 9547 | 19803 | MMT00006479   | BC003993      | 1  |
| 9547 | 22320 | MMT00006479   | MMT00047284   | 1  |
| 9547 | 23474 | MMT00006479   | MMT00011721   | 1  |
| 9552 | 4351  | Dnmt3a        | Plxnb1        | -1 |
| 9552 | 8444  | Dnmt3a        | Rdh16         | 1  |
| 9552 | 8815  | Dnmt3a        | Mx1           | 1  |
| 9552 | 18201 | Dnmt3a        | MMT00060232   | 1  |
| 9552 | 20058 | Dnmt3a        | Dnaic1        | -1 |
| 9552 | 21214 | Dnmt3a        | Scd1          | 1  |
| 9558 | 2533  | Akr7a5        | Arhgef19      | 1  |
| 9558 | 2889  | Akr7a5        | Pqlc2         | 1  |
| 9558 | 3616  | Akr7a5        | Dnajc16       | -1 |
| 9558 | 4657  | Akr7a5        | C230096C10Rik | -1 |
| 9558 | 6191  | Akr7a5        | Ddost         | -1 |
| 9558 | 7524  | Akr7a5        | Aldh4a1       | 1  |

|      |       |           |               |    |
|------|-------|-----------|---------------|----|
| 9558 | 19924 | Akr7a5    | Ubiad1        | 1  |
| 9574 | 11095 | Mphosph10 | Bag3          | 1  |
| 9574 | 20363 | Mphosph10 | Dcun1d2       | 1  |
| 9586 | 3832  | Mrpl53    | Sdhb          | 1  |
| 9586 | 7430  | Mrpl53    | Gpr137        | 1  |
| 9586 | 20058 | Mrpl53    | Dnaic1        | -1 |
| 9587 | 20058 | Bri3bp    | Dnaic1        | 1  |
| 9597 | 7550  | Tnfsf13b  | Rab11fip5     | 1  |
| 9597 | 10393 | Tnfsf13b  | Slc7a8        | 1  |
| 9597 | 16580 | Tnfsf13b  | Tnfaip2       | 1  |
| 9597 | 20341 | Tnfsf13b  | Srebf2        | 1  |
| 9611 | 15569 | Ncf2      | BC003331      | 1  |
| 9611 | 17850 | Ncf2      | Prg4          | -1 |
| 9616 | 143   | AI451557  | Gvin1         | 1  |
| 9616 | 830   | AI451557  | Socs1         | 1  |
| 9616 | 860   | AI451557  | Psmb10        | 1  |
| 9616 | 1533  | AI451557  | BC013712      | 1  |
| 9616 | 2058  | AI451557  | Hk3           | 1  |
| 9616 | 2224  | AI451557  | Oasl2         | 1  |
| 9616 | 2550  | AI451557  | MMT00036681   | 1  |
| 9616 | 2578  | AI451557  | Csf2rb2       | 1  |
| 9616 | 2752  | AI451557  | Fcgr1         | 1  |
| 9616 | 3036  | AI451557  | Slamf9        | 1  |
| 9616 | 3572  | AI451557  | Ebi3          | 1  |
| 9616 | 3594  | AI451557  | Rasa4         | 1  |
| 9616 | 3683  | AI451557  | Oas2          | 1  |
| 9616 | 3905  | AI451557  | H2-Q1         | 1  |
| 9616 | 4114  | AI451557  | Parp12        | 1  |
| 9616 | 4409  | AI451557  | 5430435G22Rik | 1  |
| 9616 | 4426  | AI451557  | ligp2         | 1  |
| 9616 | 4508  | AI451557  | lfit1         | 1  |
| 9616 | 5044  | AI451557  | lfi35         | 1  |
| 9616 | 5216  | AI451557  | Spnb5         | 1  |
| 9616 | 5556  | AI451557  | Ccl4          | 1  |
| 9616 | 5765  | AI451557  | lfitm2        | 1  |
| 9616 | 5845  | AI451557  | Il18bp        | 1  |
| 9616 | 5853  | AI451557  | Trim30        | 1  |
| 9616 | 6072  | AI451557  | C1qc          | 1  |
| 9616 | 6098  | AI451557  | Ncf4          | 1  |
| 9616 | 6576  | AI451557  | Slfm2         | 1  |
| 9616 | 6587  | AI451557  | Irf9          | 1  |
| 9616 | 6824  | AI451557  | Irf7          | 1  |
| 9616 | 6910  | AI451557  | Ly6c2         | 1  |
| 9616 | 7069  | AI451557  | Ube1l         | 1  |
| 9616 | 7105  | AI451557  | Plac8         | 1  |
| 9616 | 7238  | AI451557  | Pycard        | 1  |
| 9616 | 7284  | AI451557  | MMT00008674   | 1  |
| 9616 | 7336  | AI451557  | Cd5l          | 1  |
| 9616 | 8555  | AI451557  | H2-M3         | 1  |
| 9616 | 8564  | AI451557  | Pld4          | 1  |
| 9616 | 8659  | AI451557  | Psmb8         | 1  |

|      |       |          |          |   |
|------|-------|----------|----------|---|
| 9616 | 8800  | AI451557 | Rnf213   | 1 |
| 9616 | 9401  | AI451557 | Fcgr4    | 1 |
| 9616 | 9616  | AI451557 | AI451557 | 1 |
| 9616 | 9820  | AI451557 | BC023105 | 1 |
| 9616 | 9821  | AI451557 | Pmaip1   | 1 |
| 9616 | 9847  | AI451557 | Ifi27    | 1 |
| 9616 | 10109 | AI451557 | Gbp3     | 1 |
| 9616 | 10426 | AI451557 | Ly6f     | 1 |
| 9616 | 10504 | AI451557 | Ripk3    | 1 |
| 9616 | 10926 | AI451557 | P2ry13   | 1 |
| 9616 | 11204 | AI451557 | AI451617 | 1 |
| 9616 | 12126 | AI451557 | Znfx1    | 1 |
| 9616 | 12312 | AI451557 | Ms4a6d   | 1 |
| 9616 | 12398 | AI451557 | Ifi44    | 1 |
| 9616 | 12600 | AI451557 | Ifi204   | 1 |
| 9616 | 12969 | AI451557 | Xaf1     | 1 |
| 9616 | 13156 | AI451557 | Ifit3    | 1 |
| 9616 | 13309 | AI451557 | Tgtp     | 1 |
| 9616 | 13514 | AI451557 | Apol9b   | 1 |
| 9616 | 13528 | AI451557 | Capn12   | 1 |
| 9616 | 13654 | AI451557 | Stat1    | 1 |
| 9616 | 14192 | AI451557 | Trpv2    | 1 |
| 9616 | 14237 | AI451557 | Rac2     | 1 |
| 9616 | 14453 | AI451557 | Inpp5d   | 1 |
| 9616 | 14506 | AI451557 | Slc15a3  | 1 |
| 9616 | 14603 | AI451557 | Ly6e     | 1 |
| 9616 | 14611 | AI451557 | Ddx60    | 1 |
| 9616 | 14880 | AI451557 | Ms4a4c   | 1 |
| 9616 | 14883 | AI451557 | Itgal    | 1 |
| 9616 | 15074 | AI451557 | Usp18    | 1 |
| 9616 | 15280 | AI451557 | Cxcl10   | 1 |
| 9616 | 15504 | AI451557 | Mx2      | 1 |
| 9616 | 16102 | AI451557 | Cd72     | 1 |
| 9616 | 16129 | AI451557 | Trafd1   | 1 |
| 9616 | 16182 | AI451557 | Oasl1    | 1 |
| 9616 | 16186 | AI451557 | Cfp      | 1 |
| 9616 | 16874 | AI451557 | Fcer1g   | 1 |
| 9616 | 16988 | AI451557 | Clec4f   | 1 |
| 9616 | 17197 | AI451557 | Igtp     | 1 |
| 9616 | 17412 | AI451557 | Aif1     | 1 |
| 9616 | 18174 | AI451557 | Stat2    | 1 |
| 9616 | 18186 | AI451557 | Parp14   | 1 |
| 9616 | 18686 | AI451557 | Zfp143   | 1 |
| 9616 | 18868 | AI451557 | Mpeg1    | 1 |
| 9616 | 19063 | AI451557 | Evl      | 1 |
| 9616 | 19189 | AI451557 | Sp100    | 1 |
| 9616 | 19262 | AI451557 | Cd274    | 1 |
| 9616 | 19708 | AI451557 | Ly6a     | 1 |
| 9616 | 19738 | AI451557 | Lgals3bp | 1 |
| 9616 | 20321 | AI451557 | Ms4a6b   | 1 |
| 9616 | 20474 | AI451557 | Gnb3     | 1 |

|      |       |          |               |    |
|------|-------|----------|---------------|----|
| 9616 | 20814 | AI451557 | Ptpn18        | 1  |
| 9616 | 20997 | AI451557 | MMT00028135   | 1  |
| 9616 | 21351 | AI451557 | Shisa5        | 1  |
| 9616 | 21440 | AI451557 | Tmsb10        | 1  |
| 9616 | 21549 | AI451557 | Rtp4          | 1  |
| 9616 | 21824 | AI451557 | 5830443L24Rik | 1  |
| 9616 | 22037 | AI451557 | Oas1g         | 1  |
| 9616 | 22496 | AI451557 | Slfn1         | 1  |
| 9616 | 23208 | AI451557 | Hck           | 1  |
| 9616 | 23410 | AI451557 | C1qa          | 1  |
| 9616 | 23450 | AI451557 | D12Ert647e    | 1  |
| 9627 | 8444  | Cbx6     | Rdh16         | -1 |
| 9629 | 250   | Spnb3    | Tubb2a-ps2    | -1 |
| 9629 | 433   | Spnb3    | Pla2g12b      | -1 |
| 9629 | 604   | Spnb3    | Ppp1r15b      | 1  |
| 9629 | 609   | Spnb3    | MMT00060868   | -1 |
| 9629 | 719   | Spnb3    | Usp2          | 1  |
| 9629 | 1031  | Spnb3    | Uros          | -1 |
| 9629 | 1326  | Spnb3    | Tox           | 1  |
| 9629 | 2126  | Spnb3    | Dgat2         | 1  |
| 9629 | 2256  | Spnb3    | Serpina9      | -1 |
| 9629 | 2399  | Spnb3    | MMT00060167   | -1 |
| 9629 | 2636  | Spnb3    | Tars          | -1 |
| 9629 | 2766  | Spnb3    | Elp4          | -1 |
| 9629 | 2850  | Spnb3    | Slc16a6       | -1 |
| 9629 | 3214  | Spnb3    | Dnmt3b        | -1 |
| 9629 | 3804  | Spnb3    | MMT00015534   | -1 |
| 9629 | 4201  | Spnb3    | Tubb2c        | -1 |
| 9629 | 4286  | Spnb3    | Ptp4a1        | 1  |
| 9629 | 4534  | Spnb3    | Ndel1         | 1  |
| 9629 | 4708  | Spnb3    | Traf3ip2      | -1 |
| 9629 | 5574  | Spnb3    | Hsd3b7        | -1 |
| 9629 | 5802  | Spnb3    | Mad2l2        | -1 |
| 9629 | 5974  | Spnb3    | Arntl         | -1 |
| 9629 | 6386  | Spnb3    | Por           | 1  |
| 9629 | 6771  | Spnb3    | Insc          | -1 |
| 9629 | 7414  | Spnb3    | Clpx          | -1 |
| 9629 | 7839  | Spnb3    | Asl           | 1  |
| 9629 | 9910  | Spnb3    | EG666644      | 1  |
| 9629 | 10775 | Spnb3    | Slc16a1       | -1 |
| 9629 | 11233 | Spnb3    | Tef           | 1  |
| 9629 | 11599 | Spnb3    | Coq10b        | 1  |
| 9629 | 11741 | Spnb3    | Slc30a10      | -1 |
| 9629 | 12204 | Spnb3    | Ankmy2        | 1  |
| 9629 | 12420 | Spnb3    | Klh21         | 1  |
| 9629 | 15320 | Spnb3    | MMT00017479   | 1  |
| 9629 | 15481 | Spnb3    | 1110067D22Rik | -1 |
| 9629 | 15709 | Spnb3    | Tceal1        | 1  |
| 9629 | 16060 | Spnb3    | Gys2          | 1  |
| 9629 | 16690 | Spnb3    | Tjp3          | -1 |
| 9629 | 17083 | Spnb3    | Atp1b1        | 1  |

|      |       |         |               |    |
|------|-------|---------|---------------|----|
| 9629 | 17247 | Spnb3   | A030007L17Rik | -1 |
| 9629 | 17338 | Spnb3   | Mocos         | -1 |
| 9629 | 17876 | Spnb3   | Tubb4         | -1 |
| 9629 | 18147 | Spnb3   | Nhlrc2        | 1  |
| 9629 | 18179 | Spnb3   | Dbp           | 1  |
| 9629 | 18498 | Spnb3   | Slc5a6        | 1  |
| 9629 | 18590 | Spnb3   | Fgb           | -1 |
| 9629 | 18827 | Spnb3   | Oprs1         | -1 |
| 9629 | 19234 | Spnb3   | Nrg4          | 1  |
| 9629 | 19277 | Spnb3   | MMT00044927   | 1  |
| 9629 | 19375 | Spnb3   | Inhba         | -1 |
| 9629 | 21142 | Spnb3   | Gm129         | 1  |
| 9629 | 21811 | Spnb3   | Ak3l1         | 1  |
| 9629 | 22290 | Spnb3   | Tubb2a        | -1 |
| 9629 | 22630 | Spnb3   | MMT00034355   | -1 |
| 9634 | 3616  | Atp13a2 | Dnajc16       | 1  |
| 9634 | 8610  | Atp13a2 | Padi4         | 1  |
| 9651 | 269   | Cxxc5   | Tuba1b        | 1  |
| 9651 | 482   | Cxxc5   | Rnf43         | 1  |
| 9651 | 563   | Cxxc5   | D4Bwg0951e    | -1 |
| 9651 | 633   | Cxxc5   | Ap1b1         | 1  |
| 9651 | 662   | Cxxc5   | Mid1ip1       | 1  |
| 9651 | 1257  | Cxxc5   | Slc25a45      | 1  |
| 9651 | 1827  | Cxxc5   | Gnb1l         | 1  |
| 9651 | 1941  | Cxxc5   | MMT00079618   | 1  |
| 9651 | 2322  | Cxxc5   | Tuba4a        | 1  |
| 9651 | 2741  | Cxxc5   | 3230401D17Rik | -1 |
| 9651 | 3201  | Cxxc5   | Ptcd2         | 1  |
| 9651 | 3209  | Cxxc5   | Lmna          | 1  |
| 9651 | 4391  | Cxxc5   | Zfp467        | 1  |
| 9651 | 4983  | Cxxc5   | Rabgef1       | -1 |
| 9651 | 5587  | Cxxc5   | Rmnd5b        | 1  |
| 9651 | 5594  | Cxxc5   | Erbp3         | -1 |
| 9651 | 6476  | Cxxc5   | Sntg2         | -1 |
| 9651 | 6551  | Cxxc5   | Slc35b4       | 1  |
| 9651 | 7151  | Cxxc5   | MMT00007982   | 1  |
| 9651 | 7590  | Cxxc5   | Ankrd40       | 1  |
| 9651 | 7659  | Cxxc5   | Rab30         | -1 |
| 9651 | 7725  | Cxxc5   | 3230401D17Rik | -1 |
| 9651 | 7944  | Cxxc5   | Al132487      | -1 |
| 9651 | 8268  | Cxxc5   | Kctd7         | 1  |
| 9651 | 9763  | Cxxc5   | Tuba3b        | 1  |
| 9651 | 10250 | Cxxc5   | Pcsk9         | 1  |
| 9651 | 11056 | Cxxc5   | Surf4         | 1  |
| 9651 | 11071 | Cxxc5   | Pcbp1         | 1  |
| 9651 | 11724 | Cxxc5   | Tuba3a        | 1  |
| 9651 | 11808 | Cxxc5   | Pck1          | -1 |
| 9651 | 12315 | Cxxc5   | Srebf1        | 1  |
| 9651 | 13351 | Cxxc5   | Zrsr1         | -1 |
| 9651 | 13422 | Cxxc5   | Usp3          | -1 |
| 9651 | 13489 | Cxxc5   | D230025D16Rik | -1 |

|      |       |         |               |    |
|------|-------|---------|---------------|----|
| 9651 | 14099 | Cxxc5   | Nfe2          | 1  |
| 9651 | 14335 | Cxxc5   | Olf33         | -1 |
| 9651 | 14400 | Cxxc5   | Scd2          | 1  |
| 9651 | 14626 | Cxxc5   | Zbtb2         | -1 |
| 9651 | 14928 | Cxxc5   | Eme2          | 1  |
| 9651 | 14946 | Cxxc5   | Txndc5        | 1  |
| 9651 | 15659 | Cxxc5   | MMT00074093   | 1  |
| 9651 | 16187 | Cxxc5   | 6530403A03Rik | -1 |
| 9651 | 16449 | Cxxc5   | BC004044      | 1  |
| 9651 | 16695 | Cxxc5   | Hs3st6        | 1  |
| 9651 | 17022 | Cxxc5   | MMT00055891   | 1  |
| 9651 | 17215 | Cxxc5   | Mvd           | 1  |
| 9651 | 17323 | Cxxc5   | Tubb6         | 1  |
| 9651 | 17444 | Cxxc5   | Tuba1a        | 1  |
| 9651 | 17530 | Cxxc5   | MMT00041792   | 1  |
| 9651 | 17656 | Cxxc5   | Hdhd3         | 1  |
| 9651 | 18428 | Cxxc5   | Sfrs2         | 1  |
| 9651 | 18542 | Cxxc5   | Ankra2        | -1 |
| 9651 | 18742 | Cxxc5   | Rnf217        | -1 |
| 9651 | 18785 | Cxxc5   | Angptl4       | -1 |
| 9651 | 20076 | Cxxc5   | Dbnl          | 1  |
| 9651 | 21288 | Cxxc5   | Tcp11l2       | -1 |
| 9651 | 21604 | Cxxc5   | Klhl24        | -1 |
| 9651 | 22443 | Cxxc5   | Tuba1c        | 1  |
| 9651 | 23201 | Cxxc5   | S1pr1         | 1  |
| 9651 | 23202 | Cxxc5   | Olf559        | -1 |
| 9655 | 2256  | Sult2b1 | Serpina9      | -1 |
| 9655 | 3038  | Sult2b1 | Serpina12     | -1 |
| 9655 | 4286  | Sult2b1 | Ptp4a1        | 1  |
| 9655 | 5259  | Sult2b1 | Mat1a         | 1  |
| 9655 | 5364  | Sult2b1 | Kif22         | -1 |
| 9655 | 8428  | Sult2b1 | Sorbs3        | 1  |
| 9655 | 12941 | Sult2b1 | Elovl5        | -1 |
| 9655 | 14472 | Sult2b1 | Ahcy          | 1  |
| 9655 | 15631 | Sult2b1 | Lpin1         | 1  |
| 9655 | 16176 | Sult2b1 | St3gal5       | 1  |
| 9655 | 16647 | Sult2b1 | D16H22S680E   | 1  |
| 9655 | 18027 | Sult2b1 | 5730403B10Rik | 1  |
| 9655 | 19025 | Sult2b1 | Slc37a4       | 1  |
| 9655 | 19146 | Sult2b1 | N4bp2l1       | 1  |
| 9655 | 19277 | Sult2b1 | MMT00044927   | 1  |
| 9655 | 19466 | Sult2b1 | Pptc7         | 1  |
| 9655 | 20678 | Sult2b1 | Cyp39a1       | 1  |
| 9655 | 21331 | Sult2b1 | Slc10a6       | 1  |
| 9658 | 563   | Abr     | D4Bwg0951e    | -1 |
| 9658 | 3214  | Abr     | Dnmt3b        | 1  |
| 9658 | 4708  | Abr     | Traf3ip2      | 1  |
| 9658 | 8328  | Abr     | Klhc8a        | 1  |
| 9658 | 19671 | Abr     | Upp2          | -1 |
| 9672 | 16851 | Tmem101 | Slc34a2       | 1  |
| 9674 | 8815  | Pea15a  | Mx1           | -1 |

|      |       |                    |               |    |
|------|-------|--------------------|---------------|----|
| 9674 | 12910 | Pea15a             | 1110028A07Rik | -1 |
| 9674 | 15059 | Pea15a             | Mogat1        | -1 |
| 9674 | 20194 | Pea15a             | Pnlcdc1       | -1 |
| 9674 | 21214 | Pea15a             | Scd1          | -1 |
| 9680 | 12565 | Ahsa1              | Grem2         | -1 |
| 9685 | 12315 | Bcl9l              | Srebf1        | 1  |
| 9689 | 3170  | 4432416J03Rik      | Mcart1        | -1 |
| 9689 | 13285 | 4432416J03Rik      | Cd276         | 1  |
| 9697 | 6044  | Mterf              | Sucnr1        | -1 |
| 9702 | 7192  | Stk39              | Ttc21b        | -1 |
| 9712 | 12112 | Cct3               | Tmem53        | -1 |
| 9715 | 3265  | OTTMUSG00000004551 | Dntt          | -1 |
| 9715 | 22912 | OTTMUSG00000004551 | Stap1         | -1 |
| 9717 | 143   | Psmb9              | Gvin1         | 1  |
| 9717 | 387   | Psmb9              | Rgs10         | 1  |
| 9717 | 405   | Psmb9              | Emr4          | 1  |
| 9717 | 1447  | Psmb9              | Naaa          | 1  |
| 9717 | 1533  | Psmb9              | BC013712      | 1  |
| 9717 | 2058  | Psmb9              | Hk3           | 1  |
| 9717 | 2200  | Psmb9              | BC006779      | 1  |
| 9717 | 2224  | Psmb9              | Oasl2         | 1  |
| 9717 | 2578  | Psmb9              | Csf2rb2       | 1  |
| 9717 | 2752  | Psmb9              | Fcgr1         | 1  |
| 9717 | 3286  | Psmb9              | Alox5ap       | 1  |
| 9717 | 3572  | Psmb9              | Ebi3          | 1  |
| 9717 | 3594  | Psmb9              | Rasa4         | 1  |
| 9717 | 3659  | Psmb9              | EG236451      | 1  |
| 9717 | 3683  | Psmb9              | Oas2          | 1  |
| 9717 | 3905  | Psmb9              | H2-Q1         | 1  |
| 9717 | 4114  | Psmb9              | Parp12        | 1  |
| 9717 | 4185  | Psmb9              | Hmgb2         | 1  |
| 9717 | 4409  | Psmb9              | 5430435G22Rik | 1  |
| 9717 | 4426  | Psmb9              | ligp2         | 1  |
| 9717 | 4508  | Psmb9              | Ifit1         | 1  |
| 9717 | 5044  | Psmb9              | Ifi35         | 1  |
| 9717 | 5250  | Psmb9              | Ifit2         | 1  |
| 9717 | 5554  | Psmb9              | Emr1          | 1  |
| 9717 | 5556  | Psmb9              | Ccl4          | 1  |
| 9717 | 5766  | Psmb9              | 5033414D02Rik | 1  |
| 9717 | 5845  | Psmb9              | Il18bp        | 1  |
| 9717 | 5853  | Psmb9              | Trim30        | 1  |
| 9717 | 5875  | Psmb9              | Cd86          | 1  |
| 9717 | 5949  | Psmb9              | Zbp1          | 1  |
| 9717 | 6072  | Psmb9              | C1qc          | 1  |
| 9717 | 6098  | Psmb9              | Ncf4          | 1  |
| 9717 | 6154  | Psmb9              | 1700030G06Rik | 1  |
| 9717 | 6734  | Psmb9              | Ehd4          | 1  |
| 9717 | 6824  | Psmb9              | Irf7          | 1  |
| 9717 | 6888  | Psmb9              | Cxcl9         | 1  |
| 9717 | 6910  | Psmb9              | Ly6c2         | 1  |
| 9717 | 7057  | Psmb9              | Stk10         | 1  |

|      |       |       |               |   |
|------|-------|-------|---------------|---|
| 9717 | 7069  | Psmb9 | Ube1l         | 1 |
| 9717 | 7105  | Psmb9 | Plac8         | 1 |
| 9717 | 7238  | Psmb9 | Pycard        | 1 |
| 9717 | 7284  | Psmb9 | MMT00008674   | 1 |
| 9717 | 7316  | Psmb9 | Ifi204        | 1 |
| 9717 | 7336  | Psmb9 | Cd5l          | 1 |
| 9717 | 8270  | Psmb9 | Cispn         | 1 |
| 9717 | 8392  | Psmb9 | Asf1b         | 1 |
| 9717 | 8555  | Psmb9 | H2-M3         | 1 |
| 9717 | 8564  | Psmb9 | Pld4          | 1 |
| 9717 | 8659  | Psmb9 | Psmb8         | 1 |
| 9717 | 8800  | Psmb9 | Rnf213        | 1 |
| 9717 | 8922  | Psmb9 | Ii10ra        | 1 |
| 9717 | 9401  | Psmb9 | Fcgr4         | 1 |
| 9717 | 9717  | Psmb9 | Psmb9         | 1 |
| 9717 | 9820  | Psmb9 | BC023105      | 1 |
| 9717 | 9821  | Psmb9 | Pmaip1        | 1 |
| 9717 | 9847  | Psmb9 | Ifi27         | 1 |
| 9717 | 9920  | Psmb9 | Syk           | 1 |
| 9717 | 9928  | Psmb9 | Lgmn          | 1 |
| 9717 | 10109 | Psmb9 | Gbp3          | 1 |
| 9717 | 10393 | Psmb9 | Slc7a8        | 1 |
| 9717 | 10442 | Psmb9 | Pla2g4a       | 1 |
| 9717 | 10504 | Psmb9 | Ripk3         | 1 |
| 9717 | 10606 | Psmb9 | Apbb1ip       | 1 |
| 9717 | 10796 | Psmb9 | Spic          | 1 |
| 9717 | 10926 | Psmb9 | P2ry13        | 1 |
| 9717 | 11009 | Psmb9 | MMT00008885   | 1 |
| 9717 | 11198 | Psmb9 | Gbp1          | 1 |
| 9717 | 11204 | Psmb9 | A1451617      | 1 |
| 9717 | 11265 | Psmb9 | Irgm          | 1 |
| 9717 | 11275 | Psmb9 | Fanci         | 1 |
| 9717 | 11701 | Psmb9 | Oas1c         | 1 |
| 9717 | 11959 | Psmb9 | 4631422O05Rik | 1 |
| 9717 | 12312 | Psmb9 | Ms4a6d        | 1 |
| 9717 | 12398 | Psmb9 | Ifi44         | 1 |
| 9717 | 12469 | Psmb9 | Dock10        | 1 |
| 9717 | 12495 | Psmb9 | Casp1         | 1 |
| 9717 | 12600 | Psmb9 | Ifi204        | 1 |
| 9717 | 12969 | Psmb9 | Xaf1          | 1 |
| 9717 | 13156 | Psmb9 | Ifit3         | 1 |
| 9717 | 13172 | Psmb9 | Epb4.1l3      | 1 |
| 9717 | 13181 | Psmb9 | Lcp2          | 1 |
| 9717 | 13309 | Psmb9 | Tgtp          | 1 |
| 9717 | 13455 | Psmb9 | Cenpe         | 1 |
| 9717 | 13527 | Psmb9 | Ctss          | 1 |
| 9717 | 13585 | Psmb9 | Nckap1l       | 1 |
| 9717 | 13654 | Psmb9 | Stat1         | 1 |
| 9717 | 13656 | Psmb9 | Ly86          | 1 |
| 9717 | 13826 | Psmb9 | Melk          | 1 |
| 9717 | 13867 | Psmb9 | Sgcb          | 1 |



|      |       |       |             |   |
|------|-------|-------|-------------|---|
| 9717 | 13885 | Psmb9 | Clec7a      | 1 |
| 9717 | 13964 | Psmb9 | Lpcat2      | 1 |
| 9717 | 14192 | Psmb9 | Trpv2       | 1 |
| 9717 | 14237 | Psmb9 | Rac2        | 1 |
| 9717 | 14258 | Psmb9 | Ifi47       | 1 |
| 9717 | 14453 | Psmb9 | Inpp5d      | 1 |
| 9717 | 14475 | Psmb9 | Abcg1       | 1 |
| 9717 | 14506 | Psmb9 | Slc15a3     | 1 |
| 9717 | 14603 | Psmb9 | Ly6e        | 1 |
| 9717 | 14611 | Psmb9 | Ddx60       | 1 |
| 9717 | 14880 | Psmb9 | Ms4a4c      | 1 |
| 9717 | 14883 | Psmb9 | Itgal       | 1 |
| 9717 | 14954 | Psmb9 | Rab19       | 1 |
| 9717 | 15074 | Psmb9 | Usp18       | 1 |
| 9717 | 15159 | Psmb9 | Timd4       | 1 |
| 9717 | 15387 | Psmb9 | Mgl1        | 1 |
| 9717 | 15749 | Psmb9 | Cd22        | 1 |
| 9717 | 15825 | Psmb9 | Fermt3      | 1 |
| 9717 | 16102 | Psmb9 | Cd72        | 1 |
| 9717 | 16147 | Psmb9 | Tlr2        | 1 |
| 9717 | 16182 | Psmb9 | Oasl1       | 1 |
| 9717 | 16186 | Psmb9 | Cfp         | 1 |
| 9717 | 16199 | Psmb9 | Samhd1      | 1 |
| 9717 | 16572 | Psmb9 | D14Ert668e  | 1 |
| 9717 | 16874 | Psmb9 | Fcer1g      | 1 |
| 9717 | 16913 | Psmb9 | Pira3       | 1 |
| 9717 | 16988 | Psmb9 | Clec4f      | 1 |
| 9717 | 17197 | Psmb9 | Igtp        | 1 |
| 9717 | 17412 | Psmb9 | Aif1        | 1 |
| 9717 | 17720 | Psmb9 | Rap2b       | 1 |
| 9717 | 17904 | Psmb9 | Cds1        | 1 |
| 9717 | 18174 | Psmb9 | Stat2       | 1 |
| 9717 | 18186 | Psmb9 | Parp14      | 1 |
| 9717 | 18211 | Psmb9 | Folr2       | 1 |
| 9717 | 18289 | Psmb9 | Tap1        | 1 |
| 9717 | 18662 | Psmb9 | Batf3       | 1 |
| 9717 | 19063 | Psmb9 | Evl         | 1 |
| 9717 | 19153 | Psmb9 | Ptgs1       | 1 |
| 9717 | 19189 | Psmb9 | Sp100       | 1 |
| 9717 | 19252 | Psmb9 | Tmsb4x      | 1 |
| 9717 | 19262 | Psmb9 | Cd274       | 1 |
| 9717 | 19738 | Psmb9 | Lgals3bp    | 1 |
| 9717 | 19794 | Psmb9 | Rgs2        | 1 |
| 9717 | 20150 | Psmb9 | Ptprc       | 1 |
| 9717 | 20321 | Psmb9 | Ms4a6b      | 1 |
| 9717 | 20431 | Psmb9 | Slc7a7      | 1 |
| 9717 | 20433 | Psmb9 | Cdca5       | 1 |
| 9717 | 20474 | Psmb9 | Gnb3        | 1 |
| 9717 | 20814 | Psmb9 | Ptpn18      | 1 |
| 9717 | 20997 | Psmb9 | MMT00028135 | 1 |
| 9717 | 21351 | Psmb9 | Shisa5      | 1 |

|      |       |             |               |    |
|------|-------|-------------|---------------|----|
| 9717 | 21440 | Psemb9      | Tmsb10        | 1  |
| 9717 | 21549 | Psemb9      | Rtp4          | 1  |
| 9717 | 21685 | Psemb9      | Gzma          | 1  |
| 9717 | 21794 | Psemb9      | Pfkip         | 1  |
| 9717 | 21824 | Psemb9      | 5830443L24Rik | 1  |
| 9717 | 21837 | Psemb9      | BC052328      | 1  |
| 9717 | 21863 | Psemb9      | Dok2          | 1  |
| 9717 | 22037 | Psemb9      | Oas1g         | 1  |
| 9717 | 22327 | Psemb9      | Tyropb        | 1  |
| 9717 | 22647 | Psemb9      | Pkib          | 1  |
| 9717 | 22876 | Psemb9      | Sash3         | 1  |
| 9717 | 23208 | Psemb9      | Hck           | 1  |
| 9717 | 23242 | Psemb9      | Gngt2         | 1  |
| 9717 | 23403 | Psemb9      | Ndc80         | 1  |
| 9717 | 23410 | Psemb9      | C1qa          | 1  |
| 9717 | 23450 | Psemb9      | D12Ert647e    | 1  |
| 9718 | 524   | Fmo5        | Hsd3b2        | -1 |
| 9718 | 1867  | Fmo5        | Bcas2         | -1 |
| 9718 | 3753  | Fmo5        | Setdb1        | 1  |
| 9718 | 9408  | Fmo5        | Hmgcs2        | 1  |
| 9718 | 10681 | Fmo5        | Dgkz          | 1  |
| 9718 | 11611 | Fmo5        | S100a13       | 1  |
| 9718 | 18754 | Fmo5        | Rbm8a         | -1 |
| 9729 | 286   | Got111      | MMT00070509   | -1 |
| 9729 | 403   | Got111      | Leprotl1      | 1  |
| 9729 | 1755  | Got111      | Ocel1         | -1 |
| 9729 | 5433  | Got111      | 2410004L22Rik | 1  |
| 9729 | 9304  | Got111      | AI449175      | -1 |
| 9729 | 13004 | Got111      | Arhgef10      | -1 |
| 9729 | 13732 | Got111      | Tpm4          | 1  |
| 9729 | 15455 | Got111      | Lsm4          | 1  |
| 9729 | 16617 | Got111      | Sh2d4a        | 1  |
| 9729 | 17553 | Got111      | Eif4ebp1      | -1 |
| 9729 | 18886 | Got111      | Slc18a1       | 1  |
| 9729 | 20484 | Got111      | Ces1          | 1  |
| 9729 | 22776 | Got111      | Gsr           | -1 |
| 9745 | 223   | Gadd45g     | Trp53inp2     | 1  |
| 9745 | 9745  | Gadd45g     | Gadd45g       | 1  |
| 9755 | 1162  | MMT00066614 | Cpsf4         | 1  |
| 9755 | 2115  | MMT00066614 | Gpr12         | 1  |
| 9759 | 1561  | Cenpn       | Aurka         | 1  |
| 9759 | 5364  | Cenpn       | Kif22         | 1  |
| 9759 | 8416  | Cenpn       | Cdc20         | 1  |
| 9759 | 11382 | Cenpn       | Cdca3         | 1  |
| 9759 | 17823 | Cenpn       | D2Ert750e     | 1  |
| 9759 | 18299 | Cenpn       | MMT00035424   | 1  |
| 9759 | 19022 | Cenpn       | Ccnb2         | 1  |
| 9759 | 21692 | Cenpn       | MMT00013924   | 1  |
| 9762 | 1956  | Snx5        | Usp50         | 1  |
| 9762 | 4336  | Snx5        | Rbbp9         | 1  |
| 9762 | 4833  | Snx5        | Synpo2        | -1 |

|      |       |             |               |    |
|------|-------|-------------|---------------|----|
| 9762 | 6016  | Snx5        | A530057A03Rik | 1  |
| 9762 | 6231  | Snx5        | 9030622O22Rik | 1  |
| 9762 | 7991  | Snx5        | Gpr115        | -1 |
| 9762 | 9762  | Snx5        | Snx5          | 1  |
| 9762 | 11705 | Snx5        | Polr3f        | -1 |
| 9762 | 12388 | Snx5        | 8430406I07Rik | -1 |
| 9762 | 14647 | Snx5        | Cst3          | -1 |
| 9762 | 14740 | Snx5        | Mfap1b        | -1 |
| 9762 | 17043 | Snx5        | Tmem127       | 1  |
| 9762 | 17221 | Snx5        | Zfp264        | 1  |
| 9762 | 21665 | Snx5        | Nat5          | 1  |
| 9762 | 21729 | Snx5        | Hdc           | -1 |
| 9762 | 22740 | Snx5        | Manbal        | 1  |
| 9763 | 607   | Tuba3b      | Me1           | 1  |
| 9763 | 874   | Tuba3b      | Aldh1a7       | 1  |
| 9763 | 4351  | Tuba3b      | Plxnb1        | -1 |
| 9763 | 6193  | Tuba3b      | Lactb2        | 1  |
| 9763 | 6370  | Tuba3b      | Aqp8          | 1  |
| 9763 | 8444  | Tuba3b      | Rdh16         | 1  |
| 9763 | 8815  | Tuba3b      | Mx1           | 1  |
| 9763 | 12219 | Tuba3b      | Cyb5b         | 1  |
| 9763 | 14017 | Tuba3b      | Ces5          | 1  |
| 9763 | 18042 | Tuba3b      | Aph1c         | -1 |
| 9763 | 18201 | Tuba3b      | MMT00060232   | 1  |
| 9763 | 18286 | Tuba3b      | Slc41a3       | -1 |
| 9763 | 21202 | Tuba3b      | Acly          | 1  |
| 9763 | 21214 | Tuba3b      | Scd1          | 1  |
| 9763 | 21251 | Tuba3b      | Cpt1a         | -1 |
| 9763 | 21575 | Tuba3b      | Cyp2c55       | 1  |
| 9763 | 22138 | Tuba3b      | Ang           | -1 |
| 9763 | 22732 | Tuba3b      | Cyb5b         | 1  |
| 9763 | 23008 | Tuba3b      | Ctsz          | -1 |
| 9763 | 23026 | Tuba3b      | Apom          | -1 |
| 9766 | 14017 | MMT00050414 | Ces5          | 1  |
| 9766 | 15059 | MMT00050414 | Mogat1        | 1  |
| 9781 | 2320  | Prune       | Spc24         | 1  |
| 9782 | 21214 | Dnase2a     | Scd1          | -1 |
| 9800 | 607   | Phf7        | Me1           | -1 |
| 9800 | 18201 | Phf7        | MMT00060232   | -1 |
| 9805 | 7909  | Tagap       | Oas3          | -1 |
| 9805 | 11435 | Tagap       | Rnaset2a      | -1 |
| 9805 | 21754 | Tagap       | Synj2         | 1  |
| 9820 | 4426  | BC023105    | ligp2         | 1  |
| 9820 | 4508  | BC023105    | Ifit1         | 1  |
| 9820 | 8800  | BC023105    | Rnf213        | 1  |
| 9820 | 9820  | BC023105    | BC023105      | 1  |
| 9820 | 10109 | BC023105    | Gbp3          | 1  |
| 9820 | 12398 | BC023105    | Ifi44         | 1  |
| 9820 | 12600 | BC023105    | Ifi204        | 1  |
| 9820 | 13156 | BC023105    | Ifit3         | 1  |
| 9820 | 14880 | BC023105    | Ms4a4c        | 1  |

|      |       |             |               |    |
|------|-------|-------------|---------------|----|
| 9820 | 15074 | BC023105    | Usp18         | 1  |
| 9820 | 17197 | BC023105    | Igtp          | 1  |
| 9820 | 18186 | BC023105    | Parp14        | 1  |
| 9820 | 19026 | BC023105    | Isg15         | 1  |
| 9820 | 19189 | BC023105    | Sp100         | 1  |
| 9820 | 21549 | BC023105    | Rtp4          | 1  |
| 9820 | 21824 | BC023105    | 5830443L24Rik | 1  |
| 9820 | 22077 | BC023105    | MMT00057550   | 1  |
| 9825 | 12910 | MMT00007741 | 1110028A07Rik | -1 |
| 9827 | 5364  | Pam         | Kif22         | 1  |
| 9827 | 12910 | Pam         | 1110028A07Rik | 1  |
| 9827 | 20194 | Pam         | Pnlcd1        | 1  |
| 9829 | 7963  | Stoml1      | Rxrg          | 1  |
| 9830 | 11859 | Rbks        | Poln          | -1 |
| 9830 | 12385 | Rbks        | Mrpl33        | -1 |
| 9830 | 15205 | Rbks        | MMT00030262   | -1 |
| 9830 | 17880 | Rbks        | Ncald         | -1 |
| 9832 | 1371  | Brf1        | 1200009I06Rik | -1 |
| 9832 | 7388  | Brf1        | Amn           | -1 |
| 9832 | 8155  | Brf1        | Mark3         | -1 |
| 9832 | 12238 | Brf1        | Traf3         | 1  |
| 9832 | 13027 | Brf1        | Ppp2r5c       | 1  |
| 9832 | 15984 | Brf1        | MMT00075074   | -1 |
| 9839 | 5934  | Ift20       | S100a10       | 1  |
| 9852 | 12910 | Ilkap       | 1110028A07Rik | -1 |
| 9856 | 3804  | Tnf         | MMT00015534   | 1  |
| 9856 | 9763  | Tnf         | Tuba3b        | 1  |
| 9856 | 11129 | Tnf         | Ankhd1        | -1 |
| 9856 | 16182 | Tnf         | Oasl1         | 1  |
| 9856 | 17876 | Tnf         | Tubb4         | 1  |
| 9856 | 22630 | Tnf         | MMT00034355   | 1  |
| 9860 | 12565 | MMT00060113 | Grem2         | -1 |
| 9861 | 17528 | Serpnb6b    | Gmnn          | -1 |
| 9862 | 5845  | AW112010    | Il18bp        | 1  |
| 9862 | 8659  | AW112010    | Psm8          | 1  |
| 9867 | 1416  | Psrc1       | 6720460F02Rik | 1  |
| 9867 | 2850  | Psrc1       | Slc16a6       | 1  |
| 9867 | 3836  | Psrc1       | 2200001115Rik | 1  |
| 9867 | 5364  | Psrc1       | Kif22         | 1  |
| 9867 | 8416  | Psrc1       | Cdc20         | 1  |
| 9867 | 11382 | Psrc1       | Cdca3         | 1  |
| 9867 | 14472 | Psrc1       | Ahcy          | -1 |
| 9867 | 17823 | Psrc1       | D2Ert750e     | 1  |
| 9867 | 19318 | Psrc1       | Plk1          | 1  |
| 9867 | 21947 | Psrc1       | Cdca8         | 1  |
| 9875 | 2456  | Cdk5rap3    | Mrpl10        | -1 |
| 9875 | 3480  | Cdk5rap3    | Pnp0          | 1  |
| 9875 | 12302 | Cdk5rap3    | Cbx1          | -1 |
| 9875 | 13983 | Cdk5rap3    | Copz2         | -1 |
| 9877 | 1416  | Cdc2a       | 6720460F02Rik | 1  |
| 9877 | 1561  | Cdc2a       | Aurka         | 1  |

|      |       |               |               |    |
|------|-------|---------------|---------------|----|
| 9877 | 1932  | Cdc2a         | Racgap1       | 1  |
| 9877 | 5364  | Cdc2a         | Kif22         | 1  |
| 9877 | 8416  | Cdc2a         | Cdc20         | 1  |
| 9877 | 11382 | Cdc2a         | Cdca3         | 1  |
| 9877 | 13455 | Cdc2a         | Cenpe         | 1  |
| 9877 | 17823 | Cdc2a         | D2Ert750e     | 1  |
| 9877 | 18299 | Cdc2a         | MMT00035424   | 1  |
| 9877 | 19022 | Cdc2a         | Ccnb2         | 1  |
| 9877 | 19318 | Cdc2a         | Plk1          | 1  |
| 9877 | 20433 | Cdc2a         | Cdca5         | 1  |
| 9877 | 21692 | Cdc2a         | MMT00013924   | 1  |
| 9877 | 21947 | Cdc2a         | Cdca8         | 1  |
| 9885 | 8637  | 4930401F20Rik | Tnp2          | 1  |
| 9885 | 13813 | 4930401F20Rik | Ktelc1        | -1 |
| 9885 | 14043 | 4930401F20Rik | 4930455C21Rik | 1  |
| 9886 | 607   | Degs1         | Me1           | 1  |
| 9886 | 874   | Degs1         | Aldh1a7       | 1  |
| 9886 | 4517  | Degs1         | Itih3         | -1 |
| 9886 | 5884  | Degs1         | Gstm2         | 1  |
| 9886 | 8444  | Degs1         | Rdh16         | 1  |
| 9886 | 8815  | Degs1         | Mx1           | 1  |
| 9886 | 10132 | Degs1         | Ces2          | 1  |
| 9886 | 12910 | Degs1         | 1110028A07Rik | 1  |
| 9886 | 14017 | Degs1         | Ces5          | 1  |
| 9886 | 14147 | Degs1         | Acss2         | 1  |
| 9886 | 16336 | Degs1         | 2310040A07Rik | -1 |
| 9886 | 17996 | Degs1         | Igfbp2        | -1 |
| 9886 | 18201 | Degs1         | MMT00060232   | 1  |
| 9886 | 20058 | Degs1         | Dnaic1        | -1 |
| 9886 | 20079 | Degs1         | MMT00019254   | -1 |
| 9886 | 21214 | Degs1         | Scd1          | 1  |
| 9886 | 21575 | Degs1         | Cyp2c55       | 1  |
| 9886 | 23026 | Degs1         | Apom          | -1 |
| 9887 | 21214 | MMT00062394   | Scd1          | 1  |
| 9899 | 4201  | D13Wsu177e    | Tubb2c        | 1  |
| 9899 | 7510  | D13Wsu177e    | Gins3         | 1  |
| 9899 | 7619  | D13Wsu177e    | Pik3ip1       | -1 |
| 9899 | 7862  | D13Wsu177e    | Cpsf4l        | -1 |
| 9899 | 10612 | D13Wsu177e    | Slc24a6       | -1 |
| 9899 | 11095 | D13Wsu177e    | Bag3          | 1  |
| 9899 | 16704 | D13Wsu177e    | Ppif          | -1 |
| 9904 | 12910 | Hbegf         | 1110028A07Rik | 1  |
| 9907 | 6193  | 4932442K08Rik | Lactb2        | -1 |
| 9907 | 8815  | 4932442K08Rik | Mx1           | -1 |
| 9907 | 11462 | 4932442K08Rik | Gpam          | -1 |
| 9907 | 12143 | 4932442K08Rik | Thyn1         | -1 |
| 9907 | 14151 | 4932442K08Rik | Slc44a1       | -1 |
| 9907 | 21202 | 4932442K08Rik | Acly          | -1 |
| 9907 | 21214 | 4932442K08Rik | Scd1          | -1 |
| 9907 | 21251 | 4932442K08Rik | Cpt1a         | 1  |
| 9907 | 21575 | 4932442K08Rik | Cyp2c55       | -1 |

|      |       |               |               |    |
|------|-------|---------------|---------------|----|
| 9907 | 22138 | 4932442K08Rik | Ang           | 1  |
| 9909 | 2945  | MMT00077883   | MMT00005190   | 1  |
| 9909 | 5014  | MMT00077883   | MMT00017503   | 1  |
| 9909 | 8341  | MMT00077883   | MMT00017270   | 1  |
| 9909 | 19064 | MMT00077883   | MMT00004867   | -1 |
| 9910 | 1310  | EG666644      | Cabc1         | -1 |
| 9910 | 2636  | EG666644      | Tars          | -1 |
| 9910 | 2766  | EG666644      | Elp4          | -1 |
| 9910 | 3868  | EG666644      | Ebpl          | -1 |
| 9910 | 6370  | EG666644      | Aqp8          | -1 |
| 9910 | 6386  | EG666644      | Por           | 1  |
| 9910 | 10486 | EG666644      | 1300002K09Rik | -1 |
| 9910 | 11129 | EG666644      | Ankhd1        | 1  |
| 9910 | 12941 | EG666644      | Elov5         | -1 |
| 9910 | 14442 | EG666644      | Ethe1         | -1 |
| 9910 | 18827 | EG666644      | Oprs1         | -1 |
| 9910 | 22138 | EG666644      | Ang           | 1  |
| 9912 | 9912  | Ttc27         | Ttc27         | 1  |
| 9912 | 12451 | Ttc27         | Srd5a2        | 1  |
| 9912 | 16886 | Ttc27         | Dpy30         | 1  |
| 9918 | 1416  | Mki67         | 6720460F02Rik | 1  |
| 9918 | 9759  | Mki67         | Cenpn         | 1  |
| 9920 | 5364  | Syk           | Kif22         | 1  |
| 9926 | 250   | Snx18         | Tubb2a-ps2    | 1  |
| 9926 | 609   | Snx18         | MMT00060868   | 1  |
| 9926 | 1941  | Snx18         | MMT00079618   | 1  |
| 9926 | 3804  | Snx18         | MMT00015534   | 1  |
| 9926 | 11129 | Snx18         | Ankhd1        | -1 |
| 9926 | 11599 | Snx18         | Coq10b        | -1 |
| 9926 | 11741 | Snx18         | Slc30a10      | 1  |
| 9926 | 12565 | Snx18         | Grem2         | -1 |
| 9926 | 15631 | Snx18         | Lpin1         | -1 |
| 9926 | 16060 | Snx18         | Gys2          | -1 |
| 9926 | 16690 | Snx18         | Tjp3          | 1  |
| 9926 | 17323 | Snx18         | Tubb6         | 1  |
| 9926 | 17876 | Snx18         | Tubb4         | 1  |
| 9926 | 20803 | Snx18         | Tmem50a       | -1 |
| 9926 | 22290 | Snx18         | Tubb2a        | 1  |
| 9926 | 22630 | Snx18         | MMT00034355   | 1  |
| 9928 | 2127  | Lgmn          | Ldha          | 1  |
| 9928 | 5364  | Lgmn          | Kif22         | 1  |
| 9928 | 6085  | Lgmn          | MMT00007454   | 1  |
| 9928 | 8773  | Lgmn          | MMT00027093   | 1  |
| 9928 | 10532 | Lgmn          | MMT00057790   | 1  |
| 9928 | 13271 | Lgmn          | ldh2          | -1 |
| 9928 | 13431 | Lgmn          | MMT00038058   | 1  |
| 9928 | 15205 | Lgmn          | MMT00030262   | 1  |
| 9928 | 15500 | Lgmn          | MMT00081411   | 1  |
| 9928 | 21937 | Lgmn          | MMT00015325   | 1  |
| 9928 | 22978 | Lgmn          | MMT00043176   | 1  |
| 9930 | 10195 | Phyhip        | Kif1          | -1 |

|      |       |             |               |    |
|------|-------|-------------|---------------|----|
| 9931 | 286   | Glt25d1     | MMT00070509   | -1 |
| 9931 | 1755  | Glt25d1     | Ocel1         | -1 |
| 9931 | 13732 | Glt25d1     | Tpm4          | 1  |
| 9931 | 15455 | Glt25d1     | Lsm4          | 1  |
| 9931 | 16617 | Glt25d1     | Sh2d4a        | 1  |
| 9931 | 18886 | Glt25d1     | Slc18a1       | 1  |
| 9934 | 18438 | MMT00002304 | Map3k7ip2     | -1 |
| 9935 | 16647 | Prnd        | D16H22S680E   | -1 |
| 9935 | 18286 | Prnd        | Slc41a3       | -1 |
| 9935 | 18827 | Prnd        | Oprs1         | 1  |
| 9935 | 21575 | Prnd        | Cyp2c55       | 1  |
| 9935 | 22138 | Prnd        | Ang           | -1 |
| 9935 | 22732 | Prnd        | Cyb5b         | 1  |
| 9935 | 23549 | Prnd        | Es22          | 1  |
| 9951 | 327   | Rpp21       | H2-Ea         | -1 |
| 9951 | 763   | Rpp21       | 4933406E20Rik | -1 |
| 9951 | 2325  | Rpp21       | H2-K1         | -1 |
| 9951 | 2938  | Rpp21       | H2-T23        | -1 |
| 9951 | 3599  | Rpp21       | MMT00035426   | 1  |
| 9951 | 3857  | Rpp21       | 1700001C19Rik | 1  |
| 9951 | 5410  | Rpp21       | Cyp4f15       | 1  |
| 9951 | 7088  | Rpp21       | Slc37a1       | -1 |
| 9951 | 8750  | Rpp21       | 1700010I14Rik | -1 |
| 9951 | 8767  | Rpp21       | Rgl2          | -1 |
| 9951 | 9158  | Rpp21       | Pde9a         | 1  |
| 9951 | 10376 | Rpp21       | C920025E04Rik | 1  |
| 9951 | 10558 | Rpp21       | Cyp2d40       | 1  |
| 9951 | 10667 | Rpp21       | H2-Eb1        | -1 |
| 9951 | 12355 | Rpp21       | A1507611      | -1 |
| 9951 | 13438 | Rpp21       | Btg3          | -1 |
| 9951 | 13493 | Rpp21       | Ring1         | 1  |
| 9951 | 16153 | Rpp21       | Syng1         | -1 |
| 9951 | 18906 | Rpp21       | Zfand3        | -1 |
| 9951 | 20100 | Rpp21       | Guca1b        | 1  |
| 9951 | 20238 | Rpp21       | H2-T9         | -1 |
| 9951 | 20346 | Rpp21       | Gna-rs1       | -1 |
| 9951 | 22822 | Rpp21       | MMT00013433   | -1 |
| 9951 | 23250 | Rpp21       | Plcl2         | -1 |
| 9955 | 5360  | Psmg2       | Cep76         | 1  |
| 9963 | 760   | Rcn3        | Akr1c19       | -1 |
| 9963 | 2049  | Rcn3        | Gsta3         | -1 |
| 9963 | 2721  | Rcn3        | Inmt          | -1 |
| 9963 | 3565  | Rcn3        | MMT00045908   | -1 |
| 9963 | 8773  | Rcn3        | MMT00027093   | 1  |
| 9963 | 13431 | Rcn3        | MMT00038058   | 1  |
| 9963 | 14472 | Rcn3        | Ahcy          | -1 |
| 9963 | 15205 | Rcn3        | MMT00030262   | 1  |
| 9963 | 16525 | Rcn3        | Lbp           | 1  |
| 9963 | 20171 | Rcn3        | 1700008G05Rik | 1  |
| 9963 | 21727 | Rcn3        | Khk           | -1 |
| 9980 | 13357 | MMT00008758 | Rpp14         | 1  |

|       |       |             |               |    |
|-------|-------|-------------|---------------|----|
| 9981  | 8444  | Snrpn       | Rdh16         | 1  |
| 9981  | 12910 | Snrpn       | 1110028A07Rik | 1  |
| 9981  | 20058 | Snrpn       | Dnaic1        | -1 |
| 9982  | 8815  | MMT00002004 | Mx1           | 1  |
| 9982  | 21214 | MMT00002004 | Scd1          | 1  |
| 9996  | 337   | Rassf9      | Rasgef1b      | -1 |
| 9996  | 1711  | Rassf9      | Grhl1         | 1  |
| 9996  | 2730  | Rassf9      | Bcor          | 1  |
| 9996  | 3196  | Rassf9      | Tat           | -1 |
| 9996  | 3452  | Rassf9      | Ccrn4l        | -1 |
| 9996  | 3631  | Rassf9      | Vps37b        | 1  |
| 9996  | 4056  | Rassf9      | Tnfaip8l1     | 1  |
| 9996  | 5804  | Rassf9      | Thrsp         | -1 |
| 9996  | 5849  | Rassf9      | 2310031A18Rik | 1  |
| 9996  | 5889  | Rassf9      | Errfi1        | -1 |
| 9996  | 6028  | Rassf9      | Alas1         | -1 |
| 9996  | 6420  | Rassf9      | Mipep         | -1 |
| 9996  | 6756  | Rassf9      | Sds           | -1 |
| 9996  | 7136  | Rassf9      | Id3           | 1  |
| 9996  | 7550  | Rassf9      | Rab11fip5     | 1  |
| 9996  | 8328  | Rassf9      | Klhdc8a       | 1  |
| 9996  | 9213  | Rassf9      | Osgin1        | 1  |
| 9996  | 12556 | Rassf9      | Ass1          | -1 |
| 9996  | 12761 | Rassf9      | Tsc22d3       | -1 |
| 9996  | 15227 | Rassf9      | Ifngr1        | 1  |
| 9996  | 15522 | Rassf9      | 1810011O10Rik | -1 |
| 9996  | 15631 | Rassf9      | Lpin1         | -1 |
| 9996  | 15882 | Rassf9      | AA986860      | -1 |
| 9996  | 16517 | Rassf9      | D4Wsu53e      | -1 |
| 9996  | 16580 | Rassf9      | Tnfaip2       | 1  |
| 9996  | 16720 | Rassf9      | Mtmr7         | -1 |
| 9996  | 17525 | Rassf9      | Ctgf          | -1 |
| 9996  | 17622 | Rassf9      | Foxo1         | -1 |
| 9996  | 18314 | Rassf9      | 4631416L12Rik | -1 |
| 9996  | 18515 | Rassf9      | Ddx28         | 1  |
| 9996  | 19528 | Rassf9      | Zfp503        | 1  |
| 9996  | 19556 | Rassf9      | Efna1         | 1  |
| 9996  | 19671 | Rassf9      | Upp2          | -1 |
| 9996  | 21934 | Rassf9      | Id2           | 1  |
| 9996  | 22216 | Rassf9      | Sp5           | 1  |
| 9996  | 22998 | Rassf9      | Ass1          | -1 |
| 9996  | 23552 | Rassf9      | Rasl11b       | 1  |
| 10002 | 10132 | Krt79       | Ces2          | 1  |
| 10002 | 12910 | Krt79       | 1110028A07Rik | 1  |
| 10002 | 20058 | Krt79       | Dnaic1        | -1 |
| 10002 | 23026 | Krt79       | Apom          | -1 |
| 10003 | 21214 | B4galt7     | Scd1          | 1  |
| 10006 | 607   | Ephx2       | Me1           | -1 |
| 10006 | 874   | Ephx2       | Aldh1a7       | -1 |
| 10006 | 3696  | Ephx2       | Elovl6        | -1 |
| 10006 | 5884  | Ephx2       | Gstm2         | -1 |



|       |       |               |                    |    |
|-------|-------|---------------|--------------------|----|
| 10006 | 6193  | Ephx2         | Lactb2             | -1 |
| 10006 | 6370  | Ephx2         | Aqp8               | -1 |
| 10006 | 8815  | Ephx2         | Mx1                | -1 |
| 10006 | 8896  | Ephx2         | Fasn               | -1 |
| 10006 | 9408  | Ephx2         | Hmgcs2             | 1  |
| 10006 | 9842  | Ephx2         | Qdpr               | -1 |
| 10006 | 10132 | Ephx2         | Ces2               | -1 |
| 10006 | 10961 | Ephx2         | Pgd                | -1 |
| 10006 | 11086 | Ephx2         | Pnpla5             | -1 |
| 10006 | 11462 | Ephx2         | Gpam               | -1 |
| 10006 | 12219 | Ephx2         | Cyb5b              | -1 |
| 10006 | 14147 | Ephx2         | Acss2              | -1 |
| 10006 | 14151 | Ephx2         | Slc44a1            | -1 |
| 10006 | 16616 | Ephx2         | Paox               | -1 |
| 10006 | 17996 | Ephx2         | Igfbp2             | 1  |
| 10006 | 18201 | Ephx2         | MMT00060232        | -1 |
| 10006 | 20019 | Ephx2         | Qdpr               | -1 |
| 10006 | 20079 | Ephx2         | MMT00019254        | 1  |
| 10006 | 21202 | Ephx2         | Acly               | -1 |
| 10006 | 21214 | Ephx2         | Scd1               | -1 |
| 10006 | 21575 | Ephx2         | Cyp2c55            | -1 |
| 10006 | 22137 | Ephx2         | Nudt7              | -1 |
| 10006 | 22732 | Ephx2         | Cyb5b              | -1 |
| 10006 | 23623 | Ephx2         | 2010305C02Rik      | -1 |
| 10011 | 7602  | Brp44         | Pcca               | 1  |
| 10011 | 8815  | Brp44         | Mx1                | 1  |
| 10011 | 10554 | Brp44         | ENSMUSG00000074179 | 1  |
| 10011 | 13293 | Brp44         | Gsta2              | 1  |
| 10011 | 14055 | Brp44         | MMT00050438        | -1 |
| 10011 | 15205 | Brp44         | MMT00030262        | -1 |
| 10011 | 18113 | Brp44         | MMT00034400        | 1  |
| 10011 | 18201 | Brp44         | MMT00060232        | 1  |
| 10011 | 21214 | Brp44         | Scd1               | 1  |
| 10011 | 21727 | Brp44         | Khk                | 1  |
| 10017 | 12910 | Wdr73         | 1110028A07Rik      | -1 |
| 10027 | 7140  | Mcm9          | Mtbp               | 1  |
| 10028 | 19342 | Chchd6        | Cth                | 1  |
| 10029 | 5804  | Trak1         | Thrsp              | 1  |
| 10029 | 6746  | Trak1         | E2f8               | -1 |
| 10029 | 6816  | Trak1         | Slc46a3            | 1  |
| 10029 | 7492  | Trak1         | Adfp               | -1 |
| 10029 | 11576 | Trak1         | Gm1381             | 1  |
| 10029 | 17563 | Trak1         | Aldh11             | 1  |
| 10029 | 17638 | Trak1         | Adssl1             | 1  |
| 10029 | 20385 | Trak1         | Chd1l              | 1  |
| 10052 | 4056  | 6530404N21Rik | Tnfaip8l1          | -1 |
| 10052 | 8815  | 6530404N21Rik | Mx1                | 1  |
| 10052 | 10554 | 6530404N21Rik | ENSMUSG00000074179 | 1  |
| 10052 | 13293 | 6530404N21Rik | Gsta2              | 1  |
| 10052 | 21214 | 6530404N21Rik | Scd1               | 1  |
| 10052 | 21727 | 6530404N21Rik | Khk                | 1  |

|       |       |               |               |    |
|-------|-------|---------------|---------------|----|
| 10056 | 3535  | Cmtm3         | S100a9        | 1  |
| 10056 | 5364  | Cmtm3         | Kif22         | 1  |
| 10056 | 5574  | Cmtm3         | Hsd3b7        | 1  |
| 10056 | 8416  | Cmtm3         | Cdc20         | 1  |
| 10056 | 11382 | Cmtm3         | Cdca3         | 1  |
| 10056 | 14472 | Cmtm3         | Ahcy          | -1 |
| 10056 | 15631 | Cmtm3         | Lpin1         | -1 |
| 10056 | 17323 | Cmtm3         | Tubb6         | 1  |
| 10056 | 18455 | Cmtm3         | Mtnr1a        | 1  |
| 10056 | 19917 | Cmtm3         | Nek2          | 1  |
| 10061 | 1129  | Nsd1          | Gsta4         | 1  |
| 10061 | 9427  | Nsd1          | Nqo2          | 1  |
| 10061 | 13431 | Nsd1          | MMT00038058   | -1 |
| 10061 | 15205 | Nsd1          | MMT00030262   | -1 |
| 10061 | 16525 | Nsd1          | Lbp           | -1 |
| 10061 | 17638 | Nsd1          | Adssl1        | 1  |
| 10061 | 17660 | Nsd1          | Nlrp12        | -1 |
| 10073 | 21251 | 2010321M09Rik | Cpt1a         | -1 |
| 10077 | 3780  | Cep63         | Ryk           | -1 |
| 10077 | 10077 | Cep63         | Cep63         | 1  |
| 10081 | 23097 | Fth1          | Pip4k2c       | -1 |
| 10099 | 9842  | Smyd3         | Qdpr          | -1 |
| 10099 | 14147 | Smyd3         | Acss2         | -1 |
| 10108 | 407   | Ctsh          | Serpina6      | -1 |
| 10108 | 760   | Ctsh          | Akr1c19       | -1 |
| 10108 | 2127  | Ctsh          | Ldha          | 1  |
| 10108 | 2262  | Ctsh          | Papss2        | -1 |
| 10108 | 3565  | Ctsh          | MMT00045908   | -1 |
| 10108 | 4056  | Ctsh          | Tnfaip8l1     | 1  |
| 10108 | 5364  | Ctsh          | Kif22         | 1  |
| 10108 | 5983  | Ctsh          | Pcolce2       | 1  |
| 10108 | 6085  | Ctsh          | MMT00007454   | 1  |
| 10108 | 6329  | Ctsh          | Cyp2b10       | -1 |
| 10108 | 7492  | Ctsh          | Adfp          | 1  |
| 10108 | 7761  | Ctsh          | Nudt19        | -1 |
| 10108 | 8328  | Ctsh          | Klhdc8a       | 1  |
| 10108 | 8416  | Ctsh          | Cdc20         | 1  |
| 10108 | 8428  | Ctsh          | Sorbs3        | -1 |
| 10108 | 8773  | Ctsh          | MMT00027093   | 1  |
| 10108 | 10532 | Ctsh          | MMT00057790   | 1  |
| 10108 | 13271 | Ctsh          | Idh2          | -1 |
| 10108 | 13293 | Ctsh          | Gsta2         | -1 |
| 10108 | 13431 | Ctsh          | MMT00038058   | 1  |
| 10108 | 14055 | Ctsh          | MMT00050438   | 1  |
| 10108 | 14279 | Ctsh          | 3930402G23Rik | 1  |
| 10108 | 14472 | Ctsh          | Ahcy          | -1 |
| 10108 | 15205 | Ctsh          | MMT00030262   | 1  |
| 10108 | 15500 | Ctsh          | MMT00081411   | 1  |
| 10108 | 15931 | Ctsh          | Ces3          | -1 |
| 10108 | 17563 | Ctsh          | Aldh1l1       | -1 |
| 10108 | 17638 | Ctsh          | Adssl1        | -1 |

|       |       |      |               |    |
|-------|-------|------|---------------|----|
| 10108 | 18069 | Ctsh | Gpt           | -1 |
| 10108 | 18299 | Ctsh | MMT00035424   | 1  |
| 10108 | 19790 | Ctsh | Polg2         | -1 |
| 10108 | 20171 | Ctsh | 1700008G05Rik | 1  |
| 10108 | 21692 | Ctsh | MMT00013924   | 1  |
| 10108 | 21727 | Ctsh | Khk           | -1 |
| 10108 | 21937 | Ctsh | MMT00015325   | 1  |
| 10108 | 22907 | Ctsh | MMT00054594   | 1  |
| 10108 | 22978 | Ctsh | MMT00043176   | 1  |
| 10109 | 143   | Gbp3 | Gvin1         | 1  |
| 10109 | 1533  | Gbp3 | BC013712      | 1  |
| 10109 | 2058  | Gbp3 | Hk3           | 1  |
| 10109 | 2200  | Gbp3 | BC006779      | 1  |
| 10109 | 2224  | Gbp3 | Oasl2         | 1  |
| 10109 | 2550  | Gbp3 | MMT00036681   | 1  |
| 10109 | 2578  | Gbp3 | Csf2rb2       | 1  |
| 10109 | 2752  | Gbp3 | Fcgr1         | 1  |
| 10109 | 3036  | Gbp3 | Slamf9        | 1  |
| 10109 | 3523  | Gbp3 | Trim34        | 1  |
| 10109 | 3572  | Gbp3 | Ebi3          | 1  |
| 10109 | 3594  | Gbp3 | Rasa4         | 1  |
| 10109 | 3659  | Gbp3 | EG236451      | 1  |
| 10109 | 3683  | Gbp3 | Oas2          | 1  |
| 10109 | 4114  | Gbp3 | Parp12        | 1  |
| 10109 | 4409  | Gbp3 | 5430435G22Rik | 1  |
| 10109 | 4426  | Gbp3 | Iigp2         | 1  |
| 10109 | 4508  | Gbp3 | Ifit1         | 1  |
| 10109 | 4516  | Gbp3 | Rsad2         | 1  |
| 10109 | 5002  | Gbp3 | Ifi202b       | 1  |
| 10109 | 5044  | Gbp3 | Ifi35         | 1  |
| 10109 | 5216  | Gbp3 | Spnb5         | 1  |
| 10109 | 5250  | Gbp3 | Ifit2         | 1  |
| 10109 | 5556  | Gbp3 | Ccl4          | 1  |
| 10109 | 5766  | Gbp3 | 5033414D02Rik | 1  |
| 10109 | 5845  | Gbp3 | I118bp        | 1  |
| 10109 | 5853  | Gbp3 | Trim30        | 1  |
| 10109 | 5949  | Gbp3 | Zbp1          | 1  |
| 10109 | 5975  | Gbp3 | Car13         | 1  |
| 10109 | 6072  | Gbp3 | C1qc          | 1  |
| 10109 | 6098  | Gbp3 | Ncf4          | 1  |
| 10109 | 6576  | Gbp3 | Slfn2         | 1  |
| 10109 | 6587  | Gbp3 | Irf9          | 1  |
| 10109 | 6595  | Gbp3 | Oas1a         | 1  |
| 10109 | 6734  | Gbp3 | Ehd4          | 1  |
| 10109 | 6779  | Gbp3 | Gbp6          | 1  |
| 10109 | 6824  | Gbp3 | Irf7          | 1  |
| 10109 | 6910  | Gbp3 | Ly6c2         | 1  |
| 10109 | 7069  | Gbp3 | Ube1l         | 1  |
| 10109 | 7105  | Gbp3 | Plac8         | 1  |
| 10109 | 7238  | Gbp3 | Pycard        | 1  |
| 10109 | 7284  | Gbp3 | MMT00008674   | 1  |

|       |       |      |               |   |
|-------|-------|------|---------------|---|
| 10109 | 7316  | Gbp3 | Ifi204        | 1 |
| 10109 | 7336  | Gbp3 | Cd5l          | 1 |
| 10109 | 8325  | Gbp3 | Psme2         | 1 |
| 10109 | 8392  | Gbp3 | Asf1b         | 1 |
| 10109 | 8555  | Gbp3 | H2-M3         | 1 |
| 10109 | 8564  | Gbp3 | Pld4          | 1 |
| 10109 | 8659  | Gbp3 | Psemb8        | 1 |
| 10109 | 8800  | Gbp3 | Rnf213        | 1 |
| 10109 | 9100  | Gbp3 | Ms4a6c        | 1 |
| 10109 | 9401  | Gbp3 | Fcgr4         | 1 |
| 10109 | 9717  | Gbp3 | Psemb9        | 1 |
| 10109 | 9820  | Gbp3 | BC023105      | 1 |
| 10109 | 9821  | Gbp3 | Pmaip1        | 1 |
| 10109 | 9847  | Gbp3 | Ifi27         | 1 |
| 10109 | 9928  | Gbp3 | Lgmn          | 1 |
| 10109 | 10109 | Gbp3 | Gbp3          | 1 |
| 10109 | 10426 | Gbp3 | Ly6f          | 1 |
| 10109 | 10504 | Gbp3 | Ripk3         | 1 |
| 10109 | 10606 | Gbp3 | Apbb1ip       | 1 |
| 10109 | 10926 | Gbp3 | P2ry13        | 1 |
| 10109 | 11009 | Gbp3 | MMT00008885   | 1 |
| 10109 | 11204 | Gbp3 | AI451617      | 1 |
| 10109 | 11265 | Gbp3 | Irgm          | 1 |
| 10109 | 11701 | Gbp3 | Oas1c         | 1 |
| 10109 | 12126 | Gbp3 | Znfx1         | 1 |
| 10109 | 12312 | Gbp3 | Ms4a6d        | 1 |
| 10109 | 12316 | Gbp3 | Mpa2l         | 1 |
| 10109 | 12363 | Gbp3 | Ifitm6        | 1 |
| 10109 | 12398 | Gbp3 | Ifi44         | 1 |
| 10109 | 12469 | Gbp3 | Dock10        | 1 |
| 10109 | 12495 | Gbp3 | Casp1         | 1 |
| 10109 | 12600 | Gbp3 | Ifi204        | 1 |
| 10109 | 12969 | Gbp3 | Xaf1          | 1 |
| 10109 | 13156 | Gbp3 | Ifit3         | 1 |
| 10109 | 13172 | Gbp3 | Epb4.1l3      | 1 |
| 10109 | 13309 | Gbp3 | Tgtp          | 1 |
| 10109 | 13514 | Gbp3 | Apol9b        | 1 |
| 10109 | 13522 | Gbp3 | Sifn5         | 1 |
| 10109 | 13527 | Gbp3 | Ctss          | 1 |
| 10109 | 13528 | Gbp3 | Capn12        | 1 |
| 10109 | 13585 | Gbp3 | Nckap1l       | 1 |
| 10109 | 13654 | Gbp3 | Stat1         | 1 |
| 10109 | 13656 | Gbp3 | Ly86          | 1 |
| 10109 | 13826 | Gbp3 | Melk          | 1 |
| 10109 | 14029 | Gbp3 | 2810022L02Rik | 1 |
| 10109 | 14117 | Gbp3 | C1qb          | 1 |
| 10109 | 14192 | Gbp3 | Trpv2         | 1 |
| 10109 | 14237 | Gbp3 | Rac2          | 1 |
| 10109 | 14258 | Gbp3 | Ifi47         | 1 |
| 10109 | 14453 | Gbp3 | Inpp5d        | 1 |
| 10109 | 14506 | Gbp3 | Slc15a3       | 1 |

|       |       |      |               |   |
|-------|-------|------|---------------|---|
| 10109 | 14603 | Gbp3 | Ly6e          | 1 |
| 10109 | 14611 | Gbp3 | Ddx60         | 1 |
| 10109 | 14880 | Gbp3 | Ms4a4c        | 1 |
| 10109 | 14883 | Gbp3 | Itgal         | 1 |
| 10109 | 15074 | Gbp3 | Usp18         | 1 |
| 10109 | 15280 | Gbp3 | Cxcl10        | 1 |
| 10109 | 15449 | Gbp3 | Mitd1         | 1 |
| 10109 | 15504 | Gbp3 | Mx2           | 1 |
| 10109 | 15749 | Gbp3 | Cd22          | 1 |
| 10109 | 16102 | Gbp3 | Cd72          | 1 |
| 10109 | 16147 | Gbp3 | Tlr2          | 1 |
| 10109 | 16182 | Gbp3 | Oasl1         | 1 |
| 10109 | 16186 | Gbp3 | Cfp           | 1 |
| 10109 | 16199 | Gbp3 | Samhd1        | 1 |
| 10109 | 16521 | Gbp3 | Adar          | 1 |
| 10109 | 16572 | Gbp3 | D14Ert668e    | 1 |
| 10109 | 16874 | Gbp3 | Fcer1g        | 1 |
| 10109 | 16913 | Gbp3 | Pira3         | 1 |
| 10109 | 16988 | Gbp3 | Clec4f        | 1 |
| 10109 | 17071 | Gbp3 | Samd9l        | 1 |
| 10109 | 17197 | Gbp3 | Igtp          | 1 |
| 10109 | 17412 | Gbp3 | Aif1          | 1 |
| 10109 | 17904 | Gbp3 | Cds1          | 1 |
| 10109 | 18064 | Gbp3 | MMT00035925   | 1 |
| 10109 | 18174 | Gbp3 | Stat2         | 1 |
| 10109 | 18186 | Gbp3 | Parp14        | 1 |
| 10109 | 18211 | Gbp3 | Folr2         | 1 |
| 10109 | 18289 | Gbp3 | Tap1          | 1 |
| 10109 | 18686 | Gbp3 | Zfp143        | 1 |
| 10109 | 18868 | Gbp3 | Mpeg1         | 1 |
| 10109 | 19063 | Gbp3 | Evl           | 1 |
| 10109 | 19153 | Gbp3 | Ptgs1         | 1 |
| 10109 | 19189 | Gbp3 | Sp100         | 1 |
| 10109 | 19252 | Gbp3 | Tmsb4x        | 1 |
| 10109 | 19262 | Gbp3 | Cd274         | 1 |
| 10109 | 19708 | Gbp3 | Ly6a          | 1 |
| 10109 | 19738 | Gbp3 | Lgals3bp      | 1 |
| 10109 | 19794 | Gbp3 | Rgs2          | 1 |
| 10109 | 20321 | Gbp3 | Ms4a6b        | 1 |
| 10109 | 20474 | Gbp3 | Gnb3          | 1 |
| 10109 | 20791 | Gbp3 | MMT00014813   | 1 |
| 10109 | 20814 | Gbp3 | Ptpn18        | 1 |
| 10109 | 20997 | Gbp3 | MMT00028135   | 1 |
| 10109 | 21351 | Gbp3 | Shisa5        | 1 |
| 10109 | 21440 | Gbp3 | Tmsb10        | 1 |
| 10109 | 21549 | Gbp3 | Rtp4          | 1 |
| 10109 | 21824 | Gbp3 | 5830443L24Rik | 1 |
| 10109 | 22037 | Gbp3 | Oas1g         | 1 |
| 10109 | 22327 | Gbp3 | Tyrobp        | 1 |
| 10109 | 22496 | Gbp3 | Sfn1          | 1 |
| 10109 | 22670 | Gbp3 | Clec4a1       | 1 |

|       |       |             |               |    |
|-------|-------|-------------|---------------|----|
| 10109 | 23092 | Gbp3        | Ifih1         | 1  |
| 10109 | 23174 | Gbp3        | Psme2         | 1  |
| 10109 | 23208 | Gbp3        | Hck           | 1  |
| 10109 | 23242 | Gbp3        | Gngt2         | 1  |
| 10109 | 23410 | Gbp3        | C1qa          | 1  |
| 10109 | 23450 | Gbp3        | D12Ert647e    | 1  |
| 10112 | 20803 | Kcns1       | Tmem50a       | 1  |
| 10116 | 5884  | Mettl7b     | Gstm2         | 1  |
| 10116 | 10132 | Mettl7b     | Ces2          | 1  |
| 10116 | 11946 | Mettl7b     | MMT00030953   | 1  |
| 10116 | 13947 | Mettl7b     | Crip2         | -1 |
| 10116 | 18201 | Mettl7b     | MMT00060232   | 1  |
| 10147 | 5364  | Itgax       | Kif22         | 1  |
| 10147 | 12910 | Itgax       | 1110028A07Rik | 1  |
| 10147 | 14017 | Itgax       | Ces5          | 1  |
| 10147 | 18042 | Itgax       | Aph1c         | -1 |
| 10147 | 20194 | Itgax       | Pnlnc1        | 1  |
| 10147 | 20967 | Itgax       | Fabp2         | 1  |
| 10147 | 23026 | Itgax       | Apom          | -1 |
| 10166 | 5364  | Rhbdd2      | Kif22         | -1 |
| 10189 | 12637 | Cage1       | Itпка         | 1  |
| 10189 | 17996 | Cage1       | Igfbp2        | 1  |
| 10189 | 18515 | Cage1       | Ddx28         | 1  |
| 10189 | 20079 | Cage1       | MMT00019254   | 1  |
| 10190 | 5804  | Pcdh7       | Thrsp         | 1  |
| 10199 | 607   | MMT00050019 | Me1           | 1  |
| 10199 | 874   | MMT00050019 | Aldh1a7       | 1  |
| 10199 | 5884  | MMT00050019 | Gstm2         | 1  |
| 10199 | 7602  | MMT00050019 | Pcca          | 1  |
| 10199 | 8815  | MMT00050019 | Mx1           | 1  |
| 10199 | 14147 | MMT00050019 | Acss2         | 1  |
| 10199 | 14442 | MMT00050019 | Ethe1         | 1  |
| 10199 | 18201 | MMT00050019 | MMT00060232   | 1  |
| 10199 | 18286 | MMT00050019 | Slc41a3       | -1 |
| 10199 | 20019 | MMT00050019 | Qdpr          | 1  |
| 10199 | 21214 | MMT00050019 | Scd1          | 1  |
| 10199 | 21575 | MMT00050019 | Cyp2c55       | 1  |
| 10199 | 22732 | MMT00050019 | Cyb5b         | 1  |
| 10210 | 2256  | Sgms1       | Serpina9      | -1 |
| 10210 | 6386  | Sgms1       | Por           | 1  |
| 10210 | 8428  | Sgms1       | Sorbs3        | 1  |
| 10210 | 15631 | Sgms1       | Lpin1         | 1  |
| 10210 | 16580 | Sgms1       | Tnfaip2       | -1 |
| 10210 | 17622 | Sgms1       | Foxo1         | 1  |
| 10210 | 19556 | Sgms1       | Efna1         | -1 |
| 10215 | 433   | Nampt       | Pla2g12b      | -1 |
| 10215 | 437   | Nampt       | Ndrp1         | -1 |
| 10215 | 2110  | Nampt       | Gtf2ird1      | -1 |
| 10215 | 2399  | Nampt       | MMT00060167   | -1 |
| 10215 | 2850  | Nampt       | Slc16a6       | -1 |
| 10215 | 3410  | Nampt       | Paqr9         | -1 |

|       |       |          |                    |    |
|-------|-------|----------|--------------------|----|
| 10215 | 3502  | Nampt    | Gde1               | 1  |
| 10215 | 5183  | Nampt    | St5                | -1 |
| 10215 | 5574  | Nampt    | Hsd3b7             | -1 |
| 10215 | 5849  | Nampt    | 2310031A18Rik      | -1 |
| 10215 | 6030  | Nampt    | As3mt              | 1  |
| 10215 | 6386  | Nampt    | Por                | 1  |
| 10215 | 6657  | Nampt    | Irf6               | -1 |
| 10215 | 6756  | Nampt    | Sds                | 1  |
| 10215 | 7414  | Nampt    | Clpx               | -1 |
| 10215 | 7492  | Nampt    | Adfp               | -1 |
| 10215 | 8404  | Nampt    | Fa2h               | -1 |
| 10215 | 10775 | Nampt    | Slc16a1            | -1 |
| 10215 | 11599 | Nampt    | Coq10b             | 1  |
| 10215 | 11741 | Nampt    | Slc30a10           | -1 |
| 10215 | 12941 | Nampt    | Elovl5             | -1 |
| 10215 | 13078 | Nampt    | Eps8l2             | -1 |
| 10215 | 15049 | Nampt    | Rnf125             | -1 |
| 10215 | 15631 | Nampt    | Lpin1              | 1  |
| 10215 | 15709 | Nampt    | Tceal1             | 1  |
| 10215 | 15824 | Nampt    | D19Erttd721e       | -1 |
| 10215 | 17247 | Nampt    | A030007L17Rik      | -1 |
| 10215 | 18827 | Nampt    | Oprs1              | -1 |
| 10215 | 19234 | Nampt    | Nrg4               | 1  |
| 10215 | 19701 | Nampt    | 9930021J17Rik      | -1 |
| 10215 | 21142 | Nampt    | Gm129              | 1  |
| 10215 | 21934 | Nampt    | Id2                | -1 |
| 10215 | 22324 | Nampt    | MMT00060741        | -1 |
| 10215 | 23183 | Nampt    | Nnmt               | 1  |
| 10218 | 12910 | Vps41    | 1110028A07Rik      | 1  |
| 10236 | 8444  | EG665033 | Rdh16              | -1 |
| 10236 | 8815  | EG665033 | Mx1                | -1 |
| 10236 | 21214 | EG665033 | Scd1               | -1 |
| 10247 | 12367 | V1rc20   | MMT00072365        | -1 |
| 10247 | 12784 | V1rc20   | Nudt6              | 1  |
| 10247 | 13423 | V1rc20   | ENSMUSG00000053749 | 1  |
| 10247 | 15508 | V1rc20   | 4632415L05Rik      | 1  |
| 10247 | 16416 | V1rc20   | Commd2             | 1  |
| 10247 | 18790 | V1rc20   | Car3               | 1  |
| 10273 | 250   | Gpt2     | Tubb2a-ps2         | -1 |
| 10273 | 269   | Gpt2     | Tuba1b             | -1 |
| 10273 | 609   | Gpt2     | MMT00060868        | -1 |
| 10273 | 2485  | Gpt2     | Adck1              | -1 |
| 10273 | 3135  | Gpt2     | Gcdh               | 1  |
| 10273 | 3410  | Gpt2     | Paqr9              | -1 |
| 10273 | 3804  | Gpt2     | MMT00015534        | -1 |
| 10273 | 4286  | Gpt2     | Ptp4a1             | 1  |
| 10273 | 4708  | Gpt2     | Traf3ip2           | -1 |
| 10273 | 5259  | Gpt2     | Mat1a              | 1  |
| 10273 | 5364  | Gpt2     | Kif22              | -1 |
| 10273 | 5574  | Gpt2     | Hsd3b7             | -1 |
| 10273 | 6386  | Gpt2     | Por                | 1  |

|       |       |               |               |    |
|-------|-------|---------------|---------------|----|
| 10273 | 6771  | Gpt2          | Insc          | -1 |
| 10273 | 8428  | Gpt2          | Sorbs3        | 1  |
| 10273 | 8641  | Gpt2          | Slc7a2        | 1  |
| 10273 | 8965  | Gpt2          | Ahcy          | 1  |
| 10273 | 9275  | Gpt2          | Aass          | 1  |
| 10273 | 11129 | Gpt2          | Ankhd1        | 1  |
| 10273 | 11444 | Gpt2          | Rnpep         | -1 |
| 10273 | 12420 | Gpt2          | Klhl21        | 1  |
| 10273 | 12799 | Gpt2          | Spon2         | -1 |
| 10273 | 12925 | Gpt2          | Farp1         | -1 |
| 10273 | 12981 | Gpt2          | Nek6          | -1 |
| 10273 | 13293 | Gpt2          | Gsta2         | 1  |
| 10273 | 14472 | Gpt2          | Ahcy          | 1  |
| 10273 | 15021 | Gpt2          | Ppargc1a      | 1  |
| 10273 | 15320 | Gpt2          | MMT00017479   | 1  |
| 10273 | 15425 | Gpt2          | Adprh         | -1 |
| 10273 | 15631 | Gpt2          | Lpin1         | 1  |
| 10273 | 15862 | Gpt2          | Mrap          | -1 |
| 10273 | 16182 | Gpt2          | Oasl1         | -1 |
| 10273 | 16669 | Gpt2          | Tjp2          | -1 |
| 10273 | 16958 | Gpt2          | Gpc1          | -1 |
| 10273 | 17323 | Gpt2          | Tubb6         | -1 |
| 10273 | 17444 | Gpt2          | Tuba1a        | -1 |
| 10273 | 17876 | Gpt2          | Tubb4         | -1 |
| 10273 | 18027 | Gpt2          | 5730403B10Rik | 1  |
| 10273 | 19466 | Gpt2          | Pptc7         | 1  |
| 10273 | 19723 | Gpt2          | Pfkfb1        | 1  |
| 10273 | 20076 | Gpt2          | Dbnl          | -1 |
| 10273 | 20678 | Gpt2          | Cyp39a1       | 1  |
| 10273 | 22290 | Gpt2          | Tubb2a        | -1 |
| 10273 | 22630 | Gpt2          | MMT00034355   | -1 |
| 10273 | 23180 | Gpt2          | Sult1d1       | 1  |
| 10273 | 23183 | Gpt2          | Nnmt          | 1  |
| 10345 | 2829  | Camkk1        | Lrfn3         | 1  |
| 10345 | 4686  | Camkk1        | BC021785      | 1  |
| 10345 | 7862  | Camkk1        | Cpsf4l        | -1 |
| 10345 | 10486 | Camkk1        | 1300002K09Rik | 1  |
| 10345 | 11741 | Camkk1        | Slc30a10      | 1  |
| 10345 | 16690 | Camkk1        | Tjp3          | 1  |
| 10345 | 16851 | Camkk1        | Slc34a2       | 1  |
| 10345 | 17323 | Camkk1        | Tubb6         | 1  |
| 10345 | 22290 | Camkk1        | Tubb2a        | 1  |
| 10356 | 9759  | 2810417H13Rik | Cenpn         | 1  |
| 10356 | 20433 | 2810417H13Rik | Cdca5         | 1  |
| 10359 | 12910 | Foxf2         | 1110028A07Rik | 1  |
| 10367 | 607   | Coq7          | Me1           | 1  |
| 10367 | 1129  | Coq7          | Gsta4         | 1  |
| 10367 | 2127  | Coq7          | Ldha          | -1 |
| 10367 | 3356  | Coq7          | Adhfe1        | 1  |
| 10367 | 3377  | Coq7          | Cs            | 1  |
| 10367 | 3832  | Coq7          | Sdhb          | 1  |



|       |       |               |                    |    |
|-------|-------|---------------|--------------------|----|
| 10367 | 4056  | Coq7          | Tnfaip8l1          | -1 |
| 10367 | 6085  | Coq7          | MMT00007454        | -1 |
| 10367 | 7602  | Coq7          | Pcca               | 1  |
| 10367 | 7753  | Coq7          | Gfm1               | 1  |
| 10367 | 8773  | Coq7          | MMT00027093        | -1 |
| 10367 | 10554 | Coq7          | ENSMUSG00000074179 | 1  |
| 10367 | 13293 | Coq7          | Gsta2              | 1  |
| 10367 | 13431 | Coq7          | MMT00038058        | -1 |
| 10367 | 14055 | Coq7          | MMT00050438        | -1 |
| 10367 | 14147 | Coq7          | Acss2              | 1  |
| 10367 | 15205 | Coq7          | MMT00030262        | -1 |
| 10367 | 17880 | Coq7          | Ncald              | -1 |
| 10367 | 18549 | Coq7          | Robo1              | 1  |
| 10367 | 20019 | Coq7          | Qdpr               | 1  |
| 10367 | 21727 | Coq7          | Khk                | 1  |
| 10367 | 21937 | Coq7          | MMT00015325        | -1 |
| 10367 | 22907 | Coq7          | MMT00054594        | -1 |
| 10367 | 22978 | Coq7          | MMT00043176        | -1 |
| 10367 | 23640 | Coq7          | Bdh1               | -1 |
| 10376 | 327   | C920025E04Rik | H2-Ea              | -1 |
| 10376 | 510   | C920025E04Rik | Neu1               | 1  |
| 10376 | 763   | C920025E04Rik | 4933406E20Rik      | -1 |
| 10376 | 1340  | C920025E04Rik | Tap2               | -1 |
| 10376 | 2325  | C920025E04Rik | H2-K1              | -1 |
| 10376 | 2801  | C920025E04Rik | H2-BI              | -1 |
| 10376 | 2938  | C920025E04Rik | H2-T23             | -1 |
| 10376 | 3265  | C920025E04Rik | Dntt               | 1  |
| 10376 | 3599  | C920025E04Rik | MMT00035426        | 1  |
| 10376 | 3704  | C920025E04Rik | H2-Q7              | -1 |
| 10376 | 3857  | C920025E04Rik | 1700001C19Rik      | 1  |
| 10376 | 4004  | C920025E04Rik | Thbs2              | 1  |
| 10376 | 5410  | C920025E04Rik | Cyp4f15            | 1  |
| 10376 | 5648  | C920025E04Rik | Zfp213             | 1  |
| 10376 | 7088  | C920025E04Rik | Slc37a1            | -1 |
| 10376 | 8750  | C920025E04Rik | 1700010114Rik      | -1 |
| 10376 | 8767  | C920025E04Rik | Rgl2               | -1 |
| 10376 | 9158  | C920025E04Rik | Pde9a              | 1  |
| 10376 | 10376 | C920025E04Rik | C920025E04Rik      | 1  |
| 10376 | 10394 | C920025E04Rik | MMT00028435        | -1 |
| 10376 | 10667 | C920025E04Rik | H2-Eb1             | -1 |
| 10376 | 12355 | C920025E04Rik | Al507611           | -1 |
| 10376 | 12694 | C920025E04Rik | Riok2              | 1  |
| 10376 | 13493 | C920025E04Rik | Ring1              | 1  |
| 10376 | 13789 | C920025E04Rik | H2-Q8              | -1 |
| 10376 | 15181 | C920025E04Rik | Enpp4              | 1  |
| 10376 | 15531 | C920025E04Rik | Prickle4           | 1  |
| 10376 | 16153 | C920025E04Rik | Syng1              | -1 |
| 10376 | 16629 | C920025E04Rik | Sall2              | -1 |
| 10376 | 16692 | C920025E04Rik | Bat4               | -1 |
| 10376 | 17691 | C920025E04Rik | Kank3              | -1 |
| 10376 | 18906 | C920025E04Rik | Zfand3             | -1 |

|       |       |               |               |    |
|-------|-------|---------------|---------------|----|
| 10376 | 20100 | C920025E04Rik | Guca1b        | 1  |
| 10376 | 20238 | C920025E04Rik | H2-T9         | -1 |
| 10376 | 20346 | C920025E04Rik | Gna-rs1       | -1 |
| 10376 | 22822 | C920025E04Rik | MMT00013433   | -1 |
| 10376 | 23250 | C920025E04Rik | Plcl2         | -1 |
| 10387 | 8210  | 4933427D06Rik | Hspa12a       | 1  |
| 10387 | 10115 | 4933427D06Rik | Ptk2          | 1  |
| 10387 | 10387 | 4933427D06Rik | 4933427D06Rik | 1  |
| 10387 | 10466 | 4933427D06Rik | S1pr5         | 1  |
| 10387 | 11598 | 4933427D06Rik | MMT00031533   | 1  |
| 10387 | 13219 | 4933427D06Rik | Trhde         | 1  |
| 10387 | 14550 | 4933427D06Rik | Acot7         | 1  |
| 10387 | 20628 | 4933427D06Rik | Hoxd10        | 1  |
| 10387 | 21017 | 4933427D06Rik | Gstz1         | 1  |
| 10387 | 21099 | 4933427D06Rik | Rapgef6       | 1  |
| 10387 | 21218 | 4933427D06Rik | Col9a2        | 1  |
| 10393 | 4203  | Slc7a8        | Fermt2        | 1  |
| 10393 | 4837  | Slc7a8        | Ear2          | 1  |
| 10393 | 4918  | Slc7a8        | Scara5        | 1  |
| 10393 | 7802  | Slc7a8        | Adcy4         | 1  |
| 10393 | 10711 | Slc7a8        | 1700108F19Rik | 1  |
| 10393 | 12280 | Slc7a8        | Cln5          | -1 |
| 10393 | 13617 | Slc7a8        | Acin1         | 1  |
| 10393 | 21232 | Slc7a8        | Nkiras1       | 1  |
| 10393 | 22138 | Slc7a8        | Ang           | -1 |
| 10395 | 719   | Abcg2         | Usp2          | 1  |
| 10395 | 1065  | Abcg2         | Hmgcr         | 1  |
| 10395 | 2399  | Abcg2         | MMT00060167   | -1 |
| 10395 | 2636  | Abcg2         | Tars          | -1 |
| 10395 | 5068  | Abcg2         | Afap112       | -1 |
| 10395 | 5849  | Abcg2         | 2310031A18Rik | -1 |
| 10395 | 6657  | Abcg2         | Irf6          | -1 |
| 10395 | 7414  | Abcg2         | Clpx          | -1 |
| 10395 | 8404  | Abcg2         | Fa2h          | -1 |
| 10395 | 15049 | Abcg2         | Rnf125        | -1 |
| 10395 | 16704 | Abcg2         | Ppif          | 1  |
| 10395 | 21142 | Abcg2         | Gm129         | 1  |
| 10395 | 22324 | Abcg2         | MMT00060741   | -1 |
| 10395 | 23437 | Abcg2         | Efh2          | 1  |
| 10396 | 250   | MMT00072312   | Tubb2a-ps2    | -1 |
| 10396 | 269   | MMT00072312   | Tuba1b        | -1 |
| 10396 | 609   | MMT00072312   | MMT00060868   | -1 |
| 10396 | 1709  | MMT00072312   | Mt2           | 1  |
| 10396 | 1941  | MMT00072312   | MMT00079618   | -1 |
| 10396 | 2636  | MMT00072312   | Tars          | -1 |
| 10396 | 2850  | MMT00072312   | Slc16a6       | -1 |
| 10396 | 3502  | MMT00072312   | Gde1          | 1  |
| 10396 | 3804  | MMT00072312   | MMT00015534   | -1 |
| 10396 | 4201  | MMT00072312   | Tubb2c        | -1 |
| 10396 | 4286  | MMT00072312   | Ptp4a1        | 1  |
| 10396 | 4993  | MMT00072312   | Tsc22d1       | -1 |

|       |       |             |               |    |
|-------|-------|-------------|---------------|----|
| 10396 | 5934  | MMT00072312 | S100a10       | -1 |
| 10396 | 6030  | MMT00072312 | As3mt         | 1  |
| 10396 | 6044  | MMT00072312 | Sucnr1        | -1 |
| 10396 | 6260  | MMT00072312 | MMT00002928   | -1 |
| 10396 | 6370  | MMT00072312 | Aqp8          | -1 |
| 10396 | 6386  | MMT00072312 | Por           | 1  |
| 10396 | 6788  | MMT00072312 | Psen2         | -1 |
| 10396 | 8428  | MMT00072312 | Sorbs3        | 1  |
| 10396 | 9763  | MMT00072312 | Tuba3b        | -1 |
| 10396 | 10384 | MMT00072312 | Chic2         | 1  |
| 10396 | 10486 | MMT00072312 | 1300002K09Rik | -1 |
| 10396 | 11129 | MMT00072312 | Ankhd1        | 1  |
| 10396 | 11193 | MMT00072312 | Tsc22d1       | -1 |
| 10396 | 11545 | MMT00072312 | Ppcs          | -1 |
| 10396 | 11633 | MMT00072312 | Ier3          | 1  |
| 10396 | 11724 | MMT00072312 | Tuba3a        | -1 |
| 10396 | 11741 | MMT00072312 | Slc30a10      | -1 |
| 10396 | 11762 | MMT00072312 | Ggt5          | 1  |
| 10396 | 11807 | MMT00072312 | Fbxo31        | 1  |
| 10396 | 12208 | MMT00072312 | Pnpla7        | -1 |
| 10396 | 12910 | MMT00072312 | 1110028A07Rik | -1 |
| 10396 | 12941 | MMT00072312 | Elovl5        | -1 |
| 10396 | 14989 | MMT00072312 | Map3k5        | 1  |
| 10396 | 15021 | MMT00072312 | Ppargc1a      | 1  |
| 10396 | 15709 | MMT00072312 | Tceal1        | 1  |
| 10396 | 16690 | MMT00072312 | Tjp3          | -1 |
| 10396 | 17323 | MMT00072312 | Tubb6         | -1 |
| 10396 | 17338 | MMT00072312 | Mocos         | -1 |
| 10396 | 17444 | MMT00072312 | Tuba1a        | -1 |
| 10396 | 17876 | MMT00072312 | Tubb4         | -1 |
| 10396 | 18286 | MMT00072312 | Slc41a3       | 1  |
| 10396 | 18827 | MMT00072312 | Oprs1         | -1 |
| 10396 | 19277 | MMT00072312 | MMT00044927   | 1  |
| 10396 | 20678 | MMT00072312 | Cyp39a1       | 1  |
| 10396 | 21251 | MMT00072312 | Cpt1a         | 1  |
| 10396 | 22031 | MMT00072312 | Vcam1         | 1  |
| 10396 | 22290 | MMT00072312 | Tubb2a        | -1 |
| 10396 | 22443 | MMT00072312 | Tuba1c        | -1 |
| 10396 | 22727 | MMT00072312 | Pdgfra        | 1  |
| 10396 | 22830 | MMT00072312 | MMT00081088   | 1  |
| 10407 | 3616  | Gpatch3     | Dnajc16       | -1 |
| 10408 | 213   | Per1        | Rgs16         | 1  |
| 10408 | 250   | Per1        | Tubb2a-ps2    | -1 |
| 10408 | 337   | Per1        | Rasgef1b      | 1  |
| 10408 | 402   | Per1        | Timp3         | 1  |
| 10408 | 609   | Per1        | MMT00060868   | -1 |
| 10408 | 719   | Per1        | Usp2          | 1  |
| 10408 | 793   | Per1        | Morc3         | 1  |
| 10408 | 1438  | Per1        | Dclre1b       | 1  |
| 10408 | 1646  | Per1        | Slc15a4       | 1  |
| 10408 | 1877  | Per1        | Amica1        | 1  |

|       |       |      |               |    |
|-------|-------|------|---------------|----|
| 10408 | 2294  | Per1 | AU040829      | 1  |
| 10408 | 2794  | Per1 | Map3k6        | 1  |
| 10408 | 3196  | Per1 | Tat           | 1  |
| 10408 | 3214  | Per1 | Dnmt3b        | -1 |
| 10408 | 3452  | Per1 | Ccrn4l        | 1  |
| 10408 | 3790  | Per1 | Mtss1         | 1  |
| 10408 | 4235  | Per1 | Pfkfb3        | 1  |
| 10408 | 4286  | Per1 | Ptp4a1        | 1  |
| 10408 | 5187  | Per1 | Speer4f       | 1  |
| 10408 | 5574  | Per1 | Hsd3b7        | -1 |
| 10408 | 5889  | Per1 | Errfi1        | 1  |
| 10408 | 5974  | Per1 | Arntl         | -1 |
| 10408 | 6028  | Per1 | Alas1         | 1  |
| 10408 | 6386  | Per1 | Por           | 1  |
| 10408 | 6564  | Per1 | Cebpd         | 1  |
| 10408 | 6756  | Per1 | Sds           | 1  |
| 10408 | 7112  | Per1 | Apbb3         | 1  |
| 10408 | 7136  | Per1 | Id3           | -1 |
| 10408 | 8399  | Per1 | Herpud1       | 1  |
| 10408 | 8816  | Per1 | Nfkbia        | 1  |
| 10408 | 9213  | Per1 | Osgin1        | -1 |
| 10408 | 10408 | Per1 | Per1          | 1  |
| 10408 | 11599 | Per1 | Coq10b        | 1  |
| 10408 | 11808 | Per1 | Pck1          | 1  |
| 10408 | 12420 | Per1 | Klhl21        | 1  |
| 10408 | 12479 | Per1 | lfrd1         | 1  |
| 10408 | 12489 | Per1 | Wdr8          | -1 |
| 10408 | 12761 | Per1 | Tsc22d3       | 1  |
| 10408 | 14041 | Per1 | Cldn1         | -1 |
| 10408 | 14462 | Per1 | Zfp385b       | 1  |
| 10408 | 15522 | Per1 | 1810011O10Rik | 1  |
| 10408 | 15624 | Per1 | Crcp          | 1  |
| 10408 | 15631 | Per1 | Lpin1         | 1  |
| 10408 | 15882 | Per1 | AA986860      | 1  |
| 10408 | 16060 | Per1 | Gys2          | 1  |
| 10408 | 16176 | Per1 | St3gal5       | 1  |
| 10408 | 16580 | Per1 | Tnfaip2       | -1 |
| 10408 | 16647 | Per1 | D16H22S680E   | 1  |
| 10408 | 16690 | Per1 | Tjp3          | -1 |
| 10408 | 16712 | Per1 | Pnrc1         | -1 |
| 10408 | 17352 | Per1 | Cebpb         | 1  |
| 10408 | 17525 | Per1 | Ctgf          | 1  |
| 10408 | 17622 | Per1 | Foxo1         | 1  |
| 10408 | 17876 | Per1 | Tubb4         | -1 |
| 10408 | 18027 | Per1 | 5730403B10Rik | 1  |
| 10408 | 18314 | Per1 | 4631416L12Rik | 1  |
| 10408 | 19025 | Per1 | Slc37a4       | 1  |
| 10408 | 19124 | Per1 | Pim3          | 1  |
| 10408 | 19146 | Per1 | N4bp2l1       | 1  |
| 10408 | 19466 | Per1 | Pptc7         | 1  |
| 10408 | 19556 | Per1 | Efna1         | -1 |

|       |       |             |               |    |
|-------|-------|-------------|---------------|----|
| 10408 | 19671 | Per1        | Upp2          | 1  |
| 10408 | 20690 | Per1        | Zfp276        | 1  |
| 10408 | 20803 | Per1        | Tmem50a       | 1  |
| 10408 | 21142 | Per1        | Gm129         | 1  |
| 10408 | 21331 | Per1        | Slc10a6       | 1  |
| 10408 | 21934 | Per1        | Id2           | -1 |
| 10408 | 22290 | Per1        | Tubb2a        | -1 |
| 10408 | 22334 | Per1        | 9430023L20Rik | -1 |
| 10408 | 22630 | Per1        | MMT00034355   | -1 |
| 10408 | 22873 | Per1        | Slc38a2       | 1  |
| 10408 | 23437 | Per1        | Efh2          | 1  |
| 10408 | 23558 | Per1        | MMT00030937   | 1  |
| 10416 | 14870 | Eaf2        | Capn2         | -1 |
| 10421 | 18069 | MMT00016905 | Gpt           | -1 |
| 10426 | 1533  | Ly6f        | BC013712      | 1  |
| 10426 | 2200  | Ly6f        | BC006779      | 1  |
| 10426 | 2224  | Ly6f        | Oasl2         | 1  |
| 10426 | 3028  | Ly6f        | Uhrf1         | 1  |
| 10426 | 3426  | Ly6f        | Hap1          | 1  |
| 10426 | 3594  | Ly6f        | Rasa4         | 1  |
| 10426 | 3683  | Ly6f        | Oas2          | 1  |
| 10426 | 4409  | Ly6f        | 5430435G22Rik | 1  |
| 10426 | 4426  | Ly6f        | Ilgp2         | 1  |
| 10426 | 4508  | Ly6f        | Ifit1         | 1  |
| 10426 | 5250  | Ly6f        | Ifit2         | 1  |
| 10426 | 6072  | Ly6f        | C1qc          | 1  |
| 10426 | 6098  | Ly6f        | Ncf4          | 1  |
| 10426 | 6213  | Ly6f        | Ccl2          | 1  |
| 10426 | 6595  | Ly6f        | Oas1a         | 1  |
| 10426 | 6734  | Ly6f        | Ehd4          | 1  |
| 10426 | 6806  | Ly6f        | Agri          | 1  |
| 10426 | 6824  | Ly6f        | Irf7          | 1  |
| 10426 | 6910  | Ly6f        | Ly6c2         | 1  |
| 10426 | 7105  | Ly6f        | Plac8         | 1  |
| 10426 | 7316  | Ly6f        | Ifi204        | 1  |
| 10426 | 8800  | Ly6f        | Rnf213        | 1  |
| 10426 | 9100  | Ly6f        | Ms4a6c        | 1  |
| 10426 | 9401  | Ly6f        | Fcgr4         | 1  |
| 10426 | 9847  | Ly6f        | Ifi27         | 1  |
| 10426 | 10606 | Ly6f        | Apbb1ip       | 1  |
| 10426 | 11265 | Ly6f        | Irgm          | 1  |
| 10426 | 12312 | Ly6f        | Ms4a6d        | 1  |
| 10426 | 12398 | Ly6f        | Ifi44         | 1  |
| 10426 | 12600 | Ly6f        | Ifi204        | 1  |
| 10426 | 12969 | Ly6f        | Xaf1          | 1  |
| 10426 | 13156 | Ly6f        | Ifit3         | 1  |
| 10426 | 13181 | Ly6f        | Lcp2          | 1  |
| 10426 | 13309 | Ly6f        | Tgtp          | 1  |
| 10426 | 13585 | Ly6f        | Nckap1l       | 1  |
| 10426 | 13654 | Ly6f        | Stat1         | 1  |
| 10426 | 13780 | Ly6f        | Pilra         | 1  |

|       |       |               |                    |    |
|-------|-------|---------------|--------------------|----|
| 10426 | 14237 | Ly6f          | Rac2               | 1  |
| 10426 | 14258 | Ly6f          | Ifi47              | 1  |
| 10426 | 14506 | Ly6f          | Slc15a3            | 1  |
| 10426 | 14880 | Ly6f          | Ms4a4c             | 1  |
| 10426 | 14883 | Ly6f          | Ilgal              | 1  |
| 10426 | 15504 | Ly6f          | Mx2                | 1  |
| 10426 | 15572 | Ly6f          | Dtx3l              | 1  |
| 10426 | 15825 | Ly6f          | Fermt3             | 1  |
| 10426 | 16102 | Ly6f          | Cd72               | 1  |
| 10426 | 16186 | Ly6f          | Cfp                | 1  |
| 10426 | 16199 | Ly6f          | Samhd1             | 1  |
| 10426 | 16521 | Ly6f          | Adar               | 1  |
| 10426 | 16572 | Ly6f          | D14Ertd668e        | 1  |
| 10426 | 16874 | Ly6f          | Fcer1g             | 1  |
| 10426 | 16913 | Ly6f          | Pira3              | 1  |
| 10426 | 17197 | Ly6f          | Igtp               | 1  |
| 10426 | 17412 | Ly6f          | Aif1               | 1  |
| 10426 | 17904 | Ly6f          | Cds1               | 1  |
| 10426 | 18174 | Ly6f          | Stat2              | 1  |
| 10426 | 19189 | Ly6f          | Sp100              | 1  |
| 10426 | 19708 | Ly6f          | Ly6a               | 1  |
| 10426 | 19738 | Ly6f          | Lgals3bp           | 1  |
| 10426 | 19794 | Ly6f          | Rgs2               | 1  |
| 10426 | 20321 | Ly6f          | Ms4a6b             | 1  |
| 10426 | 20431 | Ly6f          | Slc7a7             | 1  |
| 10426 | 20791 | Ly6f          | MMT00014813        | 1  |
| 10426 | 20997 | Ly6f          | MMT00028135        | 1  |
| 10426 | 21351 | Ly6f          | Shisa5             | 1  |
| 10426 | 21440 | Ly6f          | Tmsb10             | 1  |
| 10426 | 21549 | Ly6f          | Rtp4               | 1  |
| 10426 | 21824 | Ly6f          | 5830443L24Rik      | 1  |
| 10426 | 22037 | Ly6f          | Oas1g              | 1  |
| 10426 | 22089 | Ly6f          | Niban              | 1  |
| 10426 | 22876 | Ly6f          | Sash3              | 1  |
| 10426 | 23038 | Ly6f          | Casp4              | 1  |
| 10426 | 23208 | Ly6f          | Hck                | 1  |
| 10434 | 4056  | Ppp2r5a       | Tnfaip8l1          | -1 |
| 10434 | 21727 | Ppp2r5a       | Khk                | 1  |
| 10443 | 6513  | Pvrl2         | Qpctl              | 1  |
| 10444 | 1129  | 1810020D17Rik | Gsta4              | 1  |
| 10444 | 5884  | 1810020D17Rik | Gstm2              | 1  |
| 10444 | 7602  | 1810020D17Rik | Pcca               | 1  |
| 10444 | 9427  | 1810020D17Rik | Nqo2               | 1  |
| 10444 | 10554 | 1810020D17Rik | ENSMUSG00000074179 | 1  |
| 10444 | 12556 | 1810020D17Rik | Ass1               | 1  |
| 10444 | 13293 | 1810020D17Rik | Gsta2              | 1  |
| 10444 | 21214 | 1810020D17Rik | Scd1               | 1  |
| 10444 | 22998 | 1810020D17Rik | Ass1               | 1  |
| 10467 | 563   | MMT00074572   | D4Bwg0951e         | -1 |
| 10467 | 662   | MMT00074572   | Mid1ip1            | 1  |
| 10467 | 8439  | MMT00074572   | Slc25a33           | -1 |

|       |       |             |               |    |
|-------|-------|-------------|---------------|----|
| 10467 | 10638 | MMT00074572 | Gpr97         | 1  |
| 10467 | 12315 | MMT00074572 | Srebf1        | 1  |
| 10467 | 13018 | MMT00074572 | AW544981      | 1  |
| 10467 | 13489 | MMT00074572 | D230025D16Rik | -1 |
| 10467 | 18785 | MMT00074572 | Angptl4       | -1 |
| 10470 | 13233 | Zmym4       | Oaz2          | 1  |
| 10470 | 23369 | Zmym4       | Oaz2          | 1  |
| 10475 | 1416  | Ccna2       | 6720460F02Rik | 1  |
| 10475 | 1932  | Ccna2       | Racgap1       | 1  |
| 10475 | 3836  | Ccna2       | 2200001115Rik | 1  |
| 10475 | 5364  | Ccna2       | Kif22         | 1  |
| 10475 | 8416  | Ccna2       | Cdc20         | 1  |
| 10475 | 11382 | Ccna2       | Cdca3         | 1  |
| 10475 | 17823 | Ccna2       | D2Ertd750e    | 1  |
| 10475 | 18299 | Ccna2       | MMT00035424   | 1  |
| 10475 | 19318 | Ccna2       | Plk1          | 1  |
| 10475 | 20433 | Ccna2       | Cdca5         | 1  |
| 10475 | 21692 | Ccna2       | MMT00013924   | 1  |
| 10475 | 21947 | Ccna2       | Cdca8         | 1  |
| 10482 | 3654  | Mcat        | St13          | -1 |
| 10482 | 5910  | Mcat        | 1110014J01Rik | 1  |
| 10482 | 6804  | Mcat        | Cyp2d22       | 1  |
| 10482 | 8653  | Mcat        | AW124722      | -1 |
| 10482 | 10482 | Mcat        | Mcat          | 1  |
| 10482 | 10558 | Mcat        | Cyp2d40       | -1 |
| 10482 | 11503 | Mcat        | Rangap1       | 1  |
| 10482 | 12468 | Mcat        | Cyp2d13       | 1  |
| 10482 | 14185 | Mcat        | Poldip3       | -1 |
| 10482 | 19216 | Mcat        | Bik           | 1  |
| 10484 | 18099 | Dnajb11     | Nfx1          | -1 |
| 10490 | 3377  | Peg3        | Cs            | -1 |
| 10490 | 9842  | Peg3        | Qdpr          | -1 |
| 10490 | 22406 | Peg3        | Vnn1          | 1  |
| 10497 | 10273 | Man2b1      | Gpt2          | -1 |
| 10499 | 269   | Camkk2      | Tuba1b        | 1  |
| 10499 | 577   | Camkk2      | Rrp12         | 1  |
| 10499 | 620   | Camkk2      | Prpf31        | 1  |
| 10499 | 1709  | Camkk2      | Mt2           | -1 |
| 10499 | 1941  | Camkk2      | MMT00079618   | 1  |
| 10499 | 2051  | Camkk2      | Ddx27         | -1 |
| 10499 | 6771  | Camkk2      | Insc          | 1  |
| 10499 | 6823  | Camkk2      | Yars          | 1  |
| 10499 | 7944  | Camkk2      | A1132487      | -1 |
| 10499 | 9763  | Camkk2      | Tuba3b        | 1  |
| 10499 | 10612 | Camkk2      | Slc24a6       | -1 |
| 10499 | 11724 | Camkk2      | Tuba3a        | 1  |
| 10504 | 2850  | Ripk3       | Slc16a6       | 1  |
| 10504 | 5364  | Ripk3       | Kif22         | 1  |
| 10504 | 5892  | Ripk3       | MMT00038457   | -1 |
| 10504 | 6329  | Ripk3       | Cyp2b10       | -1 |
| 10504 | 7492  | Ripk3       | Adfp          | 1  |

|       |       |             |                    |    |
|-------|-------|-------------|--------------------|----|
| 10504 | 7761  | Ripk3       | Nudt19             | -1 |
| 10504 | 7839  | Ripk3       | Asl                | -1 |
| 10504 | 9700  | Ripk3       | Prodh              | -1 |
| 10504 | 9718  | Ripk3       | Fmo5               | -1 |
| 10504 | 10775 | Ripk3       | Slc16a1            | 1  |
| 10504 | 14472 | Ripk3       | Ahcy               | -1 |
| 10504 | 15320 | Ripk3       | MMT00017479        | -1 |
| 10504 | 17638 | Ripk3       | Adssl1             | -1 |
| 10504 | 18069 | Ripk3       | Gpt                | -1 |
| 10504 | 18299 | Ripk3       | MMT00035424        | 1  |
| 10504 | 21692 | Ripk3       | MMT00013924        | 1  |
| 10504 | 22009 | Ripk3       | Tmem14a            | -1 |
| 10521 | 524   | Ttf2        | Hsd3b2             | 1  |
| 10521 | 1466  | Ttf2        | Ubap2l             | 1  |
| 10521 | 1867  | Ttf2        | Bcas2              | 1  |
| 10521 | 1963  | Ttf2        | MMT00039783        | 1  |
| 10521 | 3753  | Ttf2        | Setdb1             | -1 |
| 10521 | 5021  | Ttf2        | Gdap2              | -1 |
| 10521 | 6206  | Ttf2        | MMT00063701        | 1  |
| 10521 | 7519  | Ttf2        | Gstm1              | 1  |
| 10521 | 8738  | Ttf2        | Reg4               | -1 |
| 10521 | 10521 | Ttf2        | Ttf2               | 1  |
| 10521 | 11611 | Ttf2        | S100a13            | -1 |
| 10521 | 20661 | Ttf2        | Tuft1              | 1  |
| 10521 | 22202 | Ttf2        | OTTMUSG00000021274 | -1 |
| 10521 | 22570 | Ttf2        | Phtf1              | 1  |
| 10526 | 1371  | MMT00036239 | 1200009I06Rik      | -1 |
| 10526 | 4414  | MMT00036239 | 5033406O09Rik      | -1 |
| 10526 | 5829  | MMT00036239 | 2810455K09Rik      | 1  |
| 10526 | 7388  | MMT00036239 | Amn                | -1 |
| 10526 | 8155  | MMT00036239 | Mark3              | -1 |
| 10526 | 10526 | MMT00036239 | MMT00036239        | 1  |
| 10526 | 12238 | MMT00036239 | Traf3              | 1  |
| 10526 | 13027 | MMT00036239 | Ppp2r5c            | 1  |
| 10526 | 15984 | MMT00036239 | MMT00075074        | -1 |
| 10526 | 16191 | MMT00036239 | Klc1               | 1  |
| 10532 | 18201 | MMT00057790 | MMT00060232        | 1  |
| 10539 | 6376  | Unc45b      | Nle1               | -1 |
| 10539 | 10539 | Unc45b      | Unc45b             | 1  |
| 10541 | 7492  | Ap2a2       | Adfp               | 1  |
| 10576 | 250   | Xrcc3       | Tubb2a-ps2         | 1  |
| 10576 | 415   | Xrcc3       | Ypel2              | 1  |
| 10576 | 437   | Xrcc3       | Ndrg1              | 1  |
| 10576 | 609   | Xrcc3       | MMT00060868        | 1  |
| 10576 | 719   | Xrcc3       | Usp2               | -1 |
| 10576 | 1310  | Xrcc3       | Cabc1              | 1  |
| 10576 | 1362  | Xrcc3       | Avpr1a             | 1  |
| 10576 | 1767  | Xrcc3       | BC016495           | -1 |
| 10576 | 2384  | Xrcc3       | Micalcl            | 1  |
| 10576 | 2399  | Xrcc3       | MMT00060167        | 1  |
| 10576 | 2636  | Xrcc3       | Tars               | 1  |



|       |       |       |               |    |
|-------|-------|-------|---------------|----|
| 10576 | 2766  | Xrcc3 | Elp4          | 1  |
| 10576 | 2829  | Xrcc3 | Lrfr3         | 1  |
| 10576 | 2850  | Xrcc3 | Slc16a6       | 1  |
| 10576 | 3214  | Xrcc3 | Dnmt3b        | 1  |
| 10576 | 3410  | Xrcc3 | Paqr9         | 1  |
| 10576 | 3502  | Xrcc3 | Gde1          | -1 |
| 10576 | 3746  | Xrcc3 | Osbpl5        | -1 |
| 10576 | 3804  | Xrcc3 | MMT00015534   | 1  |
| 10576 | 5068  | Xrcc3 | Afap1l2       | 1  |
| 10576 | 5183  | Xrcc3 | St5           | 1  |
| 10576 | 5374  | Xrcc3 | Chka          | 1  |
| 10576 | 5569  | Xrcc3 | Pdgfc         | 1  |
| 10576 | 5629  | Xrcc3 | Als2          | 1  |
| 10576 | 5849  | Xrcc3 | 2310031A18Rik | 1  |
| 10576 | 5974  | Xrcc3 | Arntl         | 1  |
| 10576 | 6171  | Xrcc3 | Abtb2         | 1  |
| 10576 | 6343  | Xrcc3 | Slc20a1       | -1 |
| 10576 | 6386  | Xrcc3 | Por           | -1 |
| 10576 | 6657  | Xrcc3 | Irf6          | 1  |
| 10576 | 7414  | Xrcc3 | Clpx          | 1  |
| 10576 | 8328  | Xrcc3 | Klhdc8a       | 1  |
| 10576 | 9127  | Xrcc3 | Mtfmt         | 1  |
| 10576 | 9495  | Xrcc3 | Srms          | 1  |
| 10576 | 9831  | Xrcc3 | Nedd4l        | 1  |
| 10576 | 9910  | Xrcc3 | EG666644      | -1 |
| 10576 | 10088 | Xrcc3 | Ddc           | 1  |
| 10576 | 10486 | Xrcc3 | 1300002K09Rik | 1  |
| 10576 | 10642 | Xrcc3 | Ngf           | -1 |
| 10576 | 10775 | Xrcc3 | Slc16a1       | 1  |
| 10576 | 11233 | Xrcc3 | Tef           | -1 |
| 10576 | 11574 | Xrcc3 | Gne           | -1 |
| 10576 | 11599 | Xrcc3 | Coq10b        | -1 |
| 10576 | 11741 | Xrcc3 | Slc30a10      | 1  |
| 10576 | 11807 | Xrcc3 | Fbxo31        | -1 |
| 10576 | 12204 | Xrcc3 | Ankmy2        | -1 |
| 10576 | 12489 | Xrcc3 | Wdr8          | 1  |
| 10576 | 12905 | Xrcc3 | Nfil3         | 1  |
| 10576 | 15049 | Xrcc3 | Rnf125        | 1  |
| 10576 | 15481 | Xrcc3 | 1110067D22Rik | 1  |
| 10576 | 15665 | Xrcc3 | Blcap         | 1  |
| 10576 | 15709 | Xrcc3 | Tceal1        | -1 |
| 10576 | 16060 | Xrcc3 | Gys2          | -1 |
| 10576 | 16669 | Xrcc3 | Tjp2          | 1  |
| 10576 | 16690 | Xrcc3 | Tjp3          | 1  |
| 10576 | 16712 | Xrcc3 | Pnrc1         | 1  |
| 10576 | 16851 | Xrcc3 | Slc34a2       | 1  |
| 10576 | 17247 | Xrcc3 | A030007L17Rik | 1  |
| 10576 | 17338 | Xrcc3 | Mocos         | 1  |
| 10576 | 17583 | Xrcc3 | Per2          | -1 |
| 10576 | 17876 | Xrcc3 | Tubb4         | 1  |
| 10576 | 17884 | Xrcc3 | Lnx2          | 1  |

|       |       |       |                    |    |
|-------|-------|-------|--------------------|----|
| 10576 | 18179 | Xrcc3 | Dbp                | -1 |
| 10576 | 18438 | Xrcc3 | Map3k7ip2          | 1  |
| 10576 | 18498 | Xrcc3 | Slc5a6             | -1 |
| 10576 | 18607 | Xrcc3 | Acat3              | 1  |
| 10576 | 18827 | Xrcc3 | Oprs1              | 1  |
| 10576 | 19004 | Xrcc3 | Pdk4               | 1  |
| 10576 | 19148 | Xrcc3 | Rnf144b            | 1  |
| 10576 | 19465 | Xrcc3 | Hacl1              | 1  |
| 10576 | 19671 | Xrcc3 | Upp2               | -1 |
| 10576 | 20266 | Xrcc3 | Insig2             | 1  |
| 10576 | 21142 | Xrcc3 | Gm129              | -1 |
| 10576 | 22290 | Xrcc3 | Tubb2a             | 1  |
| 10576 | 22324 | Xrcc3 | MMT00060741        | 1  |
| 10576 | 22630 | Xrcc3 | MMT00034355        | 1  |
| 10576 | 22636 | Xrcc3 | Trim2              | 1  |
| 10576 | 23437 | Xrcc3 | Efh2               | -1 |
| 10591 | 607   | Pmp22 | Me1                | 1  |
| 10591 | 707   | Pmp22 | Bdnf               | 1  |
| 10591 | 760   | Pmp22 | Akr1c19            | 1  |
| 10591 | 1129  | Pmp22 | Gsta4              | 1  |
| 10591 | 2721  | Pmp22 | Inmt               | 1  |
| 10591 | 3449  | Pmp22 | Hes6               | 1  |
| 10591 | 3562  | Pmp22 | MMT00011909        | 1  |
| 10591 | 3565  | Pmp22 | MMT00045908        | 1  |
| 10591 | 3754  | Pmp22 | Dock6              | 1  |
| 10591 | 4056  | Pmp22 | Tnfaip8l1          | -1 |
| 10591 | 5804  | Pmp22 | Thrsp              | 1  |
| 10591 | 6573  | Pmp22 | Pecr               | 1  |
| 10591 | 6746  | Pmp22 | E2f8               | -1 |
| 10591 | 6816  | Pmp22 | Slc46a3            | 1  |
| 10591 | 7602  | Pmp22 | Pcca               | 1  |
| 10591 | 9408  | Pmp22 | Hmgcs2             | -1 |
| 10591 | 9427  | Pmp22 | Nqo2               | 1  |
| 10591 | 9700  | Pmp22 | Prodh              | 1  |
| 10591 | 9718  | Pmp22 | Fmo5               | 1  |
| 10591 | 9842  | Pmp22 | Qdpr               | 1  |
| 10591 | 10554 | Pmp22 | ENSMUSG00000074179 | 1  |
| 10591 | 12556 | Pmp22 | Ass1               | 1  |
| 10591 | 13293 | Pmp22 | Gsta2              | 1  |
| 10591 | 14147 | Pmp22 | Acss2              | 1  |
| 10591 | 16525 | Pmp22 | Lbp                | -1 |
| 10591 | 17563 | Pmp22 | Aldh1l1            | 1  |
| 10591 | 17660 | Pmp22 | Nlrp12             | -1 |
| 10591 | 18201 | Pmp22 | MMT00060232        | 1  |
| 10591 | 18515 | Pmp22 | Ddx28              | -1 |
| 10591 | 20058 | Pmp22 | Dnaic1             | -1 |
| 10591 | 20385 | Pmp22 | Chd1l              | 1  |
| 10591 | 21202 | Pmp22 | Acly               | 1  |
| 10591 | 21214 | Pmp22 | Scd1               | 1  |
| 10591 | 21727 | Pmp22 | Khk                | 1  |
| 10591 | 22406 | Pmp22 | Vnn1               | -1 |

|       |       |       |               |    |
|-------|-------|-------|---------------|----|
| 10591 | 22653 | Pmp22 | Ric3          | -1 |
| 10591 | 22998 | Pmp22 | Ass1          | 1  |
| 10593 | 12565 | Wdr53 | Grem2         | 1  |
| 10638 | 10638 | Gpr97 | Gpr97         | 1  |
| 10641 | 1310  | Hpd1  | Cabc1         | 1  |
| 10641 | 6370  | Hpd1  | Aqp8          | 1  |
| 10641 | 14442 | Hpd1  | Ethe1         | 1  |
| 10641 | 18827 | Hpd1  | Oprs1         | 1  |
| 10641 | 19766 | Hpd1  | Slc26a4       | 1  |
| 10641 | 22138 | Hpd1  | Ang           | -1 |
| 10663 | 250   | Sytl2 | Tubb2a-ps2    | 1  |
| 10663 | 269   | Sytl2 | Tuba1b        | 1  |
| 10663 | 563   | Sytl2 | D4Bwg0951e    | -1 |
| 10663 | 609   | Sytl2 | MMT00060868   | 1  |
| 10663 | 719   | Sytl2 | Usp2          | -1 |
| 10663 | 1310  | Sytl2 | Cabc1         | 1  |
| 10663 | 1646  | Sytl2 | Slc15a4       | -1 |
| 10663 | 1767  | Sytl2 | BC016495      | -1 |
| 10663 | 1827  | Sytl2 | Gnb1l         | 1  |
| 10663 | 1853  | Sytl2 | Stat5a        | 1  |
| 10663 | 1892  | Sytl2 | A1bg          | 1  |
| 10663 | 1941  | Sytl2 | MMT00079618   | 1  |
| 10663 | 2322  | Sytl2 | Tuba4a        | 1  |
| 10663 | 2399  | Sytl2 | MMT00060167   | 1  |
| 10663 | 2829  | Sytl2 | Lrfr3         | 1  |
| 10663 | 2850  | Sytl2 | Slc16a6       | 1  |
| 10663 | 3040  | Sytl2 | Bcl3          | 1  |
| 10663 | 3097  | Sytl2 | Ppp1r3g       | -1 |
| 10663 | 3214  | Sytl2 | Dnmt3b        | 1  |
| 10663 | 3246  | Sytl2 | Prei4         | -1 |
| 10663 | 3410  | Sytl2 | Paqr9         | 1  |
| 10663 | 3535  | Sytl2 | S100a9        | 1  |
| 10663 | 3804  | Sytl2 | MMT00015534   | 1  |
| 10663 | 4201  | Sytl2 | Tubb2c        | 1  |
| 10663 | 4286  | Sytl2 | Ptp4a1        | -1 |
| 10663 | 4534  | Sytl2 | Ndel1         | -1 |
| 10663 | 4708  | Sytl2 | Traf3ip2      | 1  |
| 10663 | 5183  | Sytl2 | St5           | 1  |
| 10663 | 5364  | Sytl2 | Kif22         | 1  |
| 10663 | 5374  | Sytl2 | Chka          | 1  |
| 10663 | 5574  | Sytl2 | Hsd3b7        | 1  |
| 10663 | 5802  | Sytl2 | Mad2l2        | 1  |
| 10663 | 5849  | Sytl2 | 2310031A18Rik | 1  |
| 10663 | 5974  | Sytl2 | Arntl         | 1  |
| 10663 | 6118  | Sytl2 | Slc1a4        | 1  |
| 10663 | 6177  | Sytl2 | Thpo          | 1  |
| 10663 | 6386  | Sytl2 | Por           | -1 |
| 10663 | 6788  | Sytl2 | Psen2         | 1  |
| 10663 | 7136  | Sytl2 | Id3           | 1  |
| 10663 | 7151  | Sytl2 | MMT00007982   | 1  |
| 10663 | 7862  | Sytl2 | Cpsf4l        | -1 |

|       |       |       |               |    |
|-------|-------|-------|---------------|----|
| 10663 | 7954  | Sytl2 | Ccdc12        | 1  |
| 10663 | 7963  | Sytl2 | Rxrg          | 1  |
| 10663 | 8328  | Sytl2 | Klhdc8a       | 1  |
| 10663 | 8399  | Sytl2 | Herpud1       | -1 |
| 10663 | 8641  | Sytl2 | Slc7a2        | -1 |
| 10663 | 8711  | Sytl2 | 5430432M24Rik | 1  |
| 10663 | 9309  | Sytl2 | MMT00035904   | -1 |
| 10663 | 9495  | Sytl2 | Srms          | 1  |
| 10663 | 9763  | Sytl2 | Tuba3b        | 1  |
| 10663 | 10215 | Sytl2 | Nampt         | -1 |
| 10663 | 10486 | Sytl2 | 1300002K09Rik | 1  |
| 10663 | 10642 | Sytl2 | Ngef          | -1 |
| 10663 | 10775 | Sytl2 | Slc16a1       | 1  |
| 10663 | 11129 | Sytl2 | Ankhd1        | -1 |
| 10663 | 11382 | Sytl2 | Cdca3         | 1  |
| 10663 | 11599 | Sytl2 | Coq10b        | -1 |
| 10663 | 11724 | Sytl2 | Tuba3a        | 1  |
| 10663 | 11741 | Sytl2 | Slc30a10      | 1  |
| 10663 | 11808 | Sytl2 | Pck1          | -1 |
| 10663 | 12151 | Sytl2 | MMT00082650   | -1 |
| 10663 | 12420 | Sytl2 | Khl21         | -1 |
| 10663 | 12489 | Sytl2 | Wdr8          | 1  |
| 10663 | 12687 | Sytl2 | Zc3h8         | -1 |
| 10663 | 12839 | Sytl2 | Fh1           | -1 |
| 10663 | 12904 | Sytl2 | MMT00040704   | -1 |
| 10663 | 12982 | Sytl2 | Cars          | 1  |
| 10663 | 13471 | Sytl2 | Cln8          | -1 |
| 10663 | 14041 | Sytl2 | Cldn1         | 1  |
| 10663 | 14055 | Sytl2 | MMT00050438   | 1  |
| 10663 | 14462 | Sytl2 | Zfp385b       | -1 |
| 10663 | 15021 | Sytl2 | Ppargc1a      | -1 |
| 10663 | 15284 | Sytl2 | EG632778      | -1 |
| 10663 | 15500 | Sytl2 | MMT00081411   | 1  |
| 10663 | 15624 | Sytl2 | Crcp          | -1 |
| 10663 | 15631 | Sytl2 | Lpin1         | -1 |
| 10663 | 15709 | Sytl2 | Tceal1        | -1 |
| 10663 | 15862 | Sytl2 | Mrap          | 1  |
| 10663 | 16060 | Sytl2 | Gys2          | -1 |
| 10663 | 16176 | Sytl2 | St3gal5       | -1 |
| 10663 | 16515 | Sytl2 | Gramd4        | 1  |
| 10663 | 16580 | Sytl2 | Tnfaip2       | 1  |
| 10663 | 16669 | Sytl2 | Tjp2          | 1  |
| 10663 | 16690 | Sytl2 | Tjp3          | 1  |
| 10663 | 16851 | Sytl2 | Slc34a2       | 1  |
| 10663 | 17022 | Sytl2 | MMT00055891   | 1  |
| 10663 | 17143 | Sytl2 | 2010002N04Rik | 1  |
| 10663 | 17247 | Sytl2 | A030007L17Rik | 1  |
| 10663 | 17323 | Sytl2 | Tubb6         | 1  |
| 10663 | 17444 | Sytl2 | Tuba1a        | 1  |
| 10663 | 17622 | Sytl2 | Foxo1         | -1 |
| 10663 | 17656 | Sytl2 | Hdhd3         | 1  |

|       |       |        |               |    |
|-------|-------|--------|---------------|----|
| 10663 | 17876 | Sytl2  | Tubb4         | 1  |
| 10663 | 17884 | Sytl2  | Lnx2          | 1  |
| 10663 | 18027 | Sytl2  | 5730403B10Rik | -1 |
| 10663 | 18147 | Sytl2  | Nhlrc2        | -1 |
| 10663 | 18179 | Sytl2  | Dbp           | -1 |
| 10663 | 18250 | Sytl2  | Mmp14         | 1  |
| 10663 | 18314 | Sytl2  | 4631416L12Rik | -1 |
| 10663 | 18455 | Sytl2  | Mtnr1a        | 1  |
| 10663 | 18827 | Sytl2  | Oprs1         | 1  |
| 10663 | 19025 | Sytl2  | Slc37a4       | -1 |
| 10663 | 19146 | Sytl2  | N4bp2l1       | -1 |
| 10663 | 19305 | Sytl2  | Azin1         | -1 |
| 10663 | 19532 | Sytl2  | Med8          | 1  |
| 10663 | 19671 | Sytl2  | Upp2          | -1 |
| 10663 | 19723 | Sytl2  | Pfkfb1        | -1 |
| 10663 | 20085 | Sytl2  | Lpin2         | -1 |
| 10663 | 20803 | Sytl2  | Tmem50a       | -1 |
| 10663 | 21409 | Sytl2  | Gldc          | 1  |
| 10663 | 21733 | Sytl2  | Rhebl1        | -1 |
| 10663 | 21918 | Sytl2  | Snx24         | 1  |
| 10663 | 22290 | Sytl2  | Tubb2a        | 1  |
| 10663 | 22334 | Sytl2  | 9430023L20Rik | 1  |
| 10663 | 22630 | Sytl2  | MMT00034355   | 1  |
| 10663 | 22978 | Sytl2  | MMT00043176   | 1  |
| 10663 | 23201 | Sytl2  | S1pr1         | 1  |
| 10663 | 23202 | Sytl2  | Olf559        | -1 |
| 10667 | 327   | H2-Eb1 | H2-Ea         | 1  |
| 10667 | 510   | H2-Eb1 | Neu1          | -1 |
| 10667 | 763   | H2-Eb1 | 4933406E20Rik | 1  |
| 10667 | 1340  | H2-Eb1 | Tap2          | 1  |
| 10667 | 2325  | H2-Eb1 | H2-K1         | 1  |
| 10667 | 2801  | H2-Eb1 | H2-BI         | 1  |
| 10667 | 2938  | H2-Eb1 | H2-T23        | 1  |
| 10667 | 3599  | H2-Eb1 | MMT00035426   | -1 |
| 10667 | 3704  | H2-Eb1 | H2-Q7         | 1  |
| 10667 | 3857  | H2-Eb1 | 1700001C19Rik | -1 |
| 10667 | 4004  | H2-Eb1 | Thbs2         | -1 |
| 10667 | 4958  | H2-Eb1 | Ndufa7        | -1 |
| 10667 | 5410  | H2-Eb1 | Cyp4f15       | -1 |
| 10667 | 6360  | H2-Eb1 | D17H6S56E-3   | -1 |
| 10667 | 7088  | H2-Eb1 | Slc37a1       | 1  |
| 10667 | 8750  | H2-Eb1 | 1700010I14Rik | 1  |
| 10667 | 8767  | H2-Eb1 | Rgl2          | 1  |
| 10667 | 9158  | H2-Eb1 | Pde9a         | -1 |
| 10667 | 9717  | H2-Eb1 | Psmb9         | 1  |
| 10667 | 10376 | H2-Eb1 | C920025E04Rik | -1 |
| 10667 | 10394 | H2-Eb1 | MMT00028435   | 1  |
| 10667 | 10667 | H2-Eb1 | H2-Eb1        | 1  |
| 10667 | 12355 | H2-Eb1 | AI507611      | 1  |
| 10667 | 13493 | H2-Eb1 | Ring1         | -1 |
| 10667 | 13789 | H2-Eb1 | H2-Q8         | 1  |

|       |       |          |               |    |
|-------|-------|----------|---------------|----|
| 10667 | 15531 | H2-Eb1   | Prickle4      | -1 |
| 10667 | 18906 | H2-Eb1   | Zfand3        | 1  |
| 10667 | 20100 | H2-Eb1   | Guca1b        | -1 |
| 10667 | 20238 | H2-Eb1   | H2-T9         | 1  |
| 10667 | 20346 | H2-Eb1   | Gna-rs1       | 1  |
| 10667 | 21295 | H2-Eb1   | Snf1lk        | -1 |
| 10667 | 21478 | H2-Eb1   | Loxhd1        | -1 |
| 10667 | 22822 | H2-Eb1   | MMT00013433   | 1  |
| 10667 | 23250 | H2-Eb1   | Plcl2         | 1  |
| 10667 | 23401 | H2-Eb1   | H2-Q2         | 1  |
| 10668 | 1336  | Kars     | MMT00069537   | 1  |
| 10668 | 2243  | Kars     | Gcsh          | 1  |
| 10668 | 10668 | Kars     | Kars          | 1  |
| 10668 | 11128 | Kars     | Aars          | -1 |
| 10668 | 14391 | Kars     | MMT00017335   | -1 |
| 10672 | 213   | BC031353 | Rgs16         | 1  |
| 10672 | 250   | BC031353 | Tubb2a-ps2    | -1 |
| 10672 | 269   | BC031353 | Tuba1b        | -1 |
| 10672 | 563   | BC031353 | D4Bwg0951e    | 1  |
| 10672 | 609   | BC031353 | MMT00060868   | -1 |
| 10672 | 662   | BC031353 | Mid1ip1       | -1 |
| 10672 | 771   | BC031353 | Zbtb45        | -1 |
| 10672 | 864   | BC031353 | MMT00031865   | 1  |
| 10672 | 865   | BC031353 | Npc1          | 1  |
| 10672 | 1026  | BC031353 | Ftsj2         | -1 |
| 10672 | 1257  | BC031353 | Slc25a45      | -1 |
| 10672 | 1310  | BC031353 | Cabc1         | -1 |
| 10672 | 1326  | BC031353 | Tox           | 1  |
| 10672 | 1371  | BC031353 | 1200009I06Rik | -1 |
| 10672 | 1646  | BC031353 | Slc15a4       | 1  |
| 10672 | 1709  | BC031353 | Mt2           | 1  |
| 10672 | 1827  | BC031353 | Gnb1l         | -1 |
| 10672 | 1941  | BC031353 | MMT00079618   | -1 |
| 10672 | 2294  | BC031353 | AU040829      | 1  |
| 10672 | 2322  | BC031353 | Tuba4a        | -1 |
| 10672 | 2615  | BC031353 | EG624862      | 1  |
| 10672 | 2636  | BC031353 | Tars          | -1 |
| 10672 | 2794  | BC031353 | Map3k6        | 1  |
| 10672 | 2850  | BC031353 | Slc16a6       | -1 |
| 10672 | 3040  | BC031353 | Bcl3          | -1 |
| 10672 | 3097  | BC031353 | Ppp1r3g       | 1  |
| 10672 | 3214  | BC031353 | Dnmt3b        | -1 |
| 10672 | 3235  | BC031353 | BC029214      | -1 |
| 10672 | 3246  | BC031353 | Prei4         | 1  |
| 10672 | 3410  | BC031353 | Paqr9         | -1 |
| 10672 | 3502  | BC031353 | Gde1          | 1  |
| 10672 | 3686  | BC031353 | Psmc9         | 1  |
| 10672 | 3804  | BC031353 | MMT00015534   | -1 |
| 10672 | 3868  | BC031353 | Ebpl          | -1 |
| 10672 | 4084  | BC031353 | Asah3l        | 1  |
| 10672 | 4090  | BC031353 | Orai3         | -1 |

|       |       |          |               |    |
|-------|-------|----------|---------------|----|
| 10672 | 4201  | BC031353 | Tubb2c        | -1 |
| 10672 | 4286  | BC031353 | Ptp4a1        | 1  |
| 10672 | 4327  | BC031353 | Klf10         | 1  |
| 10672 | 4392  | BC031353 | 1810055G02Rik | 1  |
| 10672 | 4534  | BC031353 | Ndel1         | 1  |
| 10672 | 4708  | BC031353 | Traf3ip2      | -1 |
| 10672 | 4993  | BC031353 | Tsc22d1       | -1 |
| 10672 | 5027  | BC031353 | Pde4b         | -1 |
| 10672 | 5185  | BC031353 | Dus2l         | -1 |
| 10672 | 5187  | BC031353 | Speer4f       | 1  |
| 10672 | 5313  | BC031353 | 9630058J23Rik | 1  |
| 10672 | 5574  | BC031353 | Hsd3b7        | -1 |
| 10672 | 5587  | BC031353 | Rmnd5b        | -1 |
| 10672 | 5791  | BC031353 | Baiap211      | 1  |
| 10672 | 6048  | BC031353 | Psmd9         | 1  |
| 10672 | 6118  | BC031353 | Slc1a4        | -1 |
| 10672 | 6177  | BC031353 | Thpo          | -1 |
| 10672 | 6211  | BC031353 | Arhgap24      | -1 |
| 10672 | 6370  | BC031353 | Aqp8          | -1 |
| 10672 | 6371  | BC031353 | Dedd2         | 1  |
| 10672 | 6386  | BC031353 | Por           | 1  |
| 10672 | 6393  | BC031353 | 3110043O21Rik | 1  |
| 10672 | 6490  | BC031353 | Il1r1         | 1  |
| 10672 | 6675  | BC031353 | Sfrs4         | 1  |
| 10672 | 6771  | BC031353 | Insc          | -1 |
| 10672 | 6788  | BC031353 | Psen2         | -1 |
| 10672 | 6823  | BC031353 | Yars          | -1 |
| 10672 | 6916  | BC031353 | Wdr5b         | -1 |
| 10672 | 6928  | BC031353 | Klhl8         | -1 |
| 10672 | 6966  | BC031353 | Mia3          | 1  |
| 10672 | 7066  | BC031353 | Agtr1b        | 1  |
| 10672 | 7151  | BC031353 | MMT00007982   | -1 |
| 10672 | 7397  | BC031353 | MMT00020969   | 1  |
| 10672 | 7862  | BC031353 | Cpsf4l        | 1  |
| 10672 | 7944  | BC031353 | A1132487      | 1  |
| 10672 | 7963  | BC031353 | Rxrg          | -1 |
| 10672 | 8156  | BC031353 | Tll1          | -1 |
| 10672 | 8200  | BC031353 | Dfna5h        | -1 |
| 10672 | 8399  | BC031353 | Herpud1       | 1  |
| 10672 | 8639  | BC031353 | Map1lc3b      | 1  |
| 10672 | 8641  | BC031353 | Slc7a2        | 1  |
| 10672 | 8816  | BC031353 | Nfkbia        | 1  |
| 10672 | 8843  | BC031353 | Eil2          | 1  |
| 10672 | 8896  | BC031353 | Fasn          | -1 |
| 10672 | 9127  | BC031353 | Mtfmt         | -1 |
| 10672 | 9181  | BC031353 | 1700060H10Rik | -1 |
| 10672 | 9587  | BC031353 | Bri3bp        | -1 |
| 10672 | 9763  | BC031353 | Tuba3b        | -1 |
| 10672 | 9910  | BC031353 | EG666644      | 1  |
| 10672 | 10088 | BC031353 | Ddc           | -1 |
| 10672 | 10207 | BC031353 | MMT00012324   | -1 |

|       |       |          |               |    |
|-------|-------|----------|---------------|----|
| 10672 | 10384 | BC031353 | Chic2         | 1  |
| 10672 | 10486 | BC031353 | 1300002K09Rik | -1 |
| 10672 | 10612 | BC031353 | Slc24a6       | 1  |
| 10672 | 10712 | BC031353 | Fchsd2        | 1  |
| 10672 | 10802 | BC031353 | Kcnn2         | 1  |
| 10672 | 11093 | BC031353 | Zdhhc1        | 1  |
| 10672 | 11129 | BC031353 | Ankhd1        | 1  |
| 10672 | 11193 | BC031353 | Tsc22d1       | -1 |
| 10672 | 11444 | BC031353 | Rnpep         | -1 |
| 10672 | 11545 | BC031353 | Ppcs          | -1 |
| 10672 | 11574 | BC031353 | Gne           | 1  |
| 10672 | 11599 | BC031353 | Coq10b        | 1  |
| 10672 | 11724 | BC031353 | Tuba3a        | -1 |
| 10672 | 11741 | BC031353 | Slc30a10      | -1 |
| 10672 | 11807 | BC031353 | Fbxo31        | 1  |
| 10672 | 11808 | BC031353 | Pck1          | 1  |
| 10672 | 11926 | BC031353 | Ampd2         | -1 |
| 10672 | 11984 | BC031353 | N6amt2        | -1 |
| 10672 | 12091 | BC031353 | 1810015C04Rik | 1  |
| 10672 | 12190 | BC031353 | Krt18         | -1 |
| 10672 | 12219 | BC031353 | Cyb5b         | -1 |
| 10672 | 12315 | BC031353 | Srebf1        | -1 |
| 10672 | 12420 | BC031353 | Klhl21        | 1  |
| 10672 | 12436 | BC031353 | Serinc3       | 1  |
| 10672 | 12460 | BC031353 | Pnpla2        | 1  |
| 10672 | 12489 | BC031353 | Wdr8          | -1 |
| 10672 | 12904 | BC031353 | MMT00040704   | 1  |
| 10672 | 12981 | BC031353 | Nek6          | -1 |
| 10672 | 12982 | BC031353 | Cars          | -1 |
| 10672 | 13018 | BC031353 | AW544981      | -1 |
| 10672 | 13289 | BC031353 | Dusp10        | -1 |
| 10672 | 13339 | BC031353 | D630042F21Rik | 1  |
| 10672 | 13376 | BC031353 | Alg2          | -1 |
| 10672 | 13471 | BC031353 | Cln8          | 1  |
| 10672 | 13489 | BC031353 | D230025D16Rik | 1  |
| 10672 | 13581 | BC031353 | Srxn1         | -1 |
| 10672 | 13889 | BC031353 | Agpat2        | -1 |
| 10672 | 13989 | BC031353 | Foxp3         | 1  |
| 10672 | 13990 | BC031353 | MMT00040357   | -1 |
| 10672 | 14099 | BC031353 | Nfe2          | -1 |
| 10672 | 14138 | BC031353 | Anks4b        | -1 |
| 10672 | 14335 | BC031353 | Olf33         | 1  |
| 10672 | 14471 | BC031353 | Pdgfrl        | 1  |
| 10672 | 14620 | BC031353 | Tbc1d8        | 1  |
| 10672 | 14626 | BC031353 | Zbtb2         | 1  |
| 10672 | 15021 | BC031353 | Ppargc1a      | 1  |
| 10672 | 15029 | BC031353 | Nudt16l1      | -1 |
| 10672 | 15052 | BC031353 | Kifc3         | -1 |
| 10672 | 15320 | BC031353 | MMT00017479   | 1  |
| 10672 | 15425 | BC031353 | Adprh         | -1 |
| 10672 | 15631 | BC031353 | Lpin1         | 1  |



|       |       |          |               |    |
|-------|-------|----------|---------------|----|
| 10672 | 15709 | BC031353 | Tceal1        | 1  |
| 10672 | 15862 | BC031353 | Mrap          | -1 |
| 10672 | 15892 | BC031353 | Slc22a5       | 1  |
| 10672 | 15990 | BC031353 | Dnmbp         | 1  |
| 10672 | 16060 | BC031353 | Gys2          | 1  |
| 10672 | 16176 | BC031353 | St3gal5       | 1  |
| 10672 | 16182 | BC031353 | Oasl1         | -1 |
| 10672 | 16212 | BC031353 | Med19         | -1 |
| 10672 | 16647 | BC031353 | D16H22S680E   | 1  |
| 10672 | 16669 | BC031353 | Tjp2          | -1 |
| 10672 | 16690 | BC031353 | Tjp3          | -1 |
| 10672 | 17323 | BC031353 | Tubb6         | -1 |
| 10672 | 17338 | BC031353 | Mocos         | -1 |
| 10672 | 17352 | BC031353 | Cebpb         | 1  |
| 10672 | 17444 | BC031353 | Tuba1a        | -1 |
| 10672 | 17622 | BC031353 | Foxo1         | 1  |
| 10672 | 17656 | BC031353 | Hdhd3         | -1 |
| 10672 | 17660 | BC031353 | Nlrp12        | 1  |
| 10672 | 17876 | BC031353 | Tubb4         | -1 |
| 10672 | 18027 | BC031353 | 5730403B10Rik | 1  |
| 10672 | 18144 | BC031353 | Dmap1         | -1 |
| 10672 | 18275 | BC031353 | D730039F16Rik | -1 |
| 10672 | 18282 | BC031353 | Tbcc          | -1 |
| 10672 | 18314 | BC031353 | 4631416L12Rik | 1  |
| 10672 | 18785 | BC031353 | Angptl4       | 1  |
| 10672 | 18802 | BC031353 | Nit2          | -1 |
| 10672 | 18827 | BC031353 | Oprs1         | -1 |
| 10672 | 19025 | BC031353 | Slc37a4       | 1  |
| 10672 | 19089 | BC031353 | Peci          | 1  |
| 10672 | 19146 | BC031353 | N4bp2l1       | 1  |
| 10672 | 19277 | BC031353 | MMT00044927   | 1  |
| 10672 | 19323 | BC031353 | Bnip3         | 1  |
| 10672 | 19375 | BC031353 | Inhba         | -1 |
| 10672 | 19466 | BC031353 | Pptc7         | 1  |
| 10672 | 19532 | BC031353 | Med8          | -1 |
| 10672 | 19671 | BC031353 | Upp2          | 1  |
| 10672 | 19723 | BC031353 | Pfkfb1        | 1  |
| 10672 | 19757 | BC031353 | Fkbp5         | 1  |
| 10672 | 19970 | BC031353 | Mrpl36        | -1 |
| 10672 | 20076 | BC031353 | Dbnl          | -1 |
| 10672 | 20085 | BC031353 | Lpin2         | 1  |
| 10672 | 20219 | BC031353 | MMT00076423   | 1  |
| 10672 | 20798 | BC031353 | Ccpg1         | 1  |
| 10672 | 21000 | BC031353 | Vmo1          | -1 |
| 10672 | 21062 | BC031353 | Rpl7l1        | -1 |
| 10672 | 21070 | BC031353 | Cnot8         | -1 |
| 10672 | 21167 | BC031353 | Irf5          | -1 |
| 10672 | 21188 | BC031353 | Pnkp          | -1 |
| 10672 | 21251 | BC031353 | Cpt1a         | 1  |
| 10672 | 21288 | BC031353 | Tcp11l2       | 1  |
| 10672 | 21331 | BC031353 | Slc10a6       | 1  |

|       |       |             |               |    |
|-------|-------|-------------|---------------|----|
| 10672 | 21408 | BC031353    | Svil          | -1 |
| 10672 | 21733 | BC031353    | Rhebl1        | 1  |
| 10672 | 21901 | BC031353    | BC035537      | -1 |
| 10672 | 22076 | BC031353    | Pgm2l1        | 1  |
| 10672 | 22290 | BC031353    | Tubb2a        | -1 |
| 10672 | 22373 | BC031353    | Txnip         | 1  |
| 10672 | 22388 | BC031353    | 2410018M08Rik | 1  |
| 10672 | 22443 | BC031353    | Tuba1c        | -1 |
| 10672 | 22470 | BC031353    | Ppargc1b      | 1  |
| 10672 | 22630 | BC031353    | MMT00034355   | -1 |
| 10672 | 22681 | BC031353    | Gm88          | 1  |
| 10672 | 22732 | BC031353    | Cyb5b         | -1 |
| 10672 | 22744 | BC031353    | 9-Sep         | -1 |
| 10672 | 22873 | BC031353    | Slc38a2       | 1  |
| 10672 | 23201 | BC031353    | S1pr1         | -1 |
| 10672 | 23202 | BC031353    | Olf559        | 1  |
| 10672 | 23558 | BC031353    | MMT00030937   | 1  |
| 10674 | 16510 | Antxr2      | Tspyl4        | 1  |
| 10675 | 10675 | Mobkl2a     | Mobkl2a       | 1  |
| 10686 | 719   | MMT00001732 | Usp2          | 1  |
| 10686 | 1646  | MMT00001732 | Slc15a4       | 1  |
| 10686 | 2399  | MMT00001732 | MMT00060167   | -1 |
| 10686 | 2829  | MMT00001732 | Lrfn3         | -1 |
| 10686 | 2850  | MMT00001732 | Slc16a6       | -1 |
| 10686 | 3214  | MMT00001732 | Dnmt3b        | -1 |
| 10686 | 4286  | MMT00001732 | Ptp4a1        | 1  |
| 10686 | 5849  | MMT00001732 | 2310031A18Rik | -1 |
| 10686 | 5974  | MMT00001732 | Arntl         | -1 |
| 10686 | 6028  | MMT00001732 | Alas1         | 1  |
| 10686 | 6386  | MMT00001732 | Por           | 1  |
| 10686 | 6756  | MMT00001732 | Sds           | 1  |
| 10686 | 6990  | MMT00001732 | Nr1i2         | 1  |
| 10686 | 8399  | MMT00001732 | Herpud1       | 1  |
| 10686 | 11129 | MMT00001732 | Ankhd1        | 1  |
| 10686 | 11599 | MMT00001732 | Coq10b        | 1  |
| 10686 | 11741 | MMT00001732 | Slc30a10      | -1 |
| 10686 | 14462 | MMT00001732 | Zfp385b       | 1  |
| 10686 | 15631 | MMT00001732 | Lpin1         | 1  |
| 10686 | 15709 | MMT00001732 | Tceal1        | 1  |
| 10686 | 15882 | MMT00001732 | AA986860      | 1  |
| 10686 | 16580 | MMT00001732 | Tnfaip2       | -1 |
| 10686 | 16647 | MMT00001732 | D16H22S680E   | 1  |
| 10686 | 16690 | MMT00001732 | Tjp3          | -1 |
| 10686 | 18179 | MMT00001732 | Dbp           | 1  |
| 10686 | 18827 | MMT00001732 | Oprs1         | -1 |
| 10686 | 19025 | MMT00001732 | Slc37a4       | 1  |
| 10686 | 19217 | MMT00001732 | Cyr61         | -1 |
| 10686 | 19234 | MMT00001732 | Nrg4          | 1  |
| 10686 | 19671 | MMT00001732 | Upp2          | 1  |
| 10686 | 21142 | MMT00001732 | Gm129         | 1  |
| 10686 | 21918 | MMT00001732 | Snx24         | -1 |

|       |       |               |                    |    |
|-------|-------|---------------|--------------------|----|
| 10686 | 22290 | MMT00001732   | Tubb2a             | -1 |
| 10686 | 23248 | MMT00001732   | Tesk2              | 1  |
| 10686 | 23437 | MMT00001732   | Efh2               | 1  |
| 10689 | 7735  | Pitpnb        | Traip              | -1 |
| 10710 | 1129  | Smoc1         | Gsta4              | -1 |
| 10710 | 3282  | Smoc1         | Ndufs6             | -1 |
| 10710 | 3565  | Smoc1         | MMT00045908        | -1 |
| 10710 | 4454  | Smoc1         | BC055107           | -1 |
| 10710 | 6193  | Smoc1         | Lactb2             | -1 |
| 10710 | 7602  | Smoc1         | Pcca               | -1 |
| 10710 | 8773  | Smoc1         | MMT00027093        | 1  |
| 10710 | 9427  | Smoc1         | Nqo2               | -1 |
| 10710 | 10554 | Smoc1         | ENSMUSG00000074179 | -1 |
| 10710 | 12556 | Smoc1         | Ass1               | -1 |
| 10710 | 12955 | Smoc1         | Atp5o              | -1 |
| 10710 | 13293 | Smoc1         | Gsta2              | -1 |
| 10710 | 15205 | Smoc1         | MMT00030262        | 1  |
| 10710 | 20341 | Smoc1         | Srebf2             | 1  |
| 10710 | 21214 | Smoc1         | Scd1               | -1 |
| 10710 | 21727 | Smoc1         | Khk                | -1 |
| 10710 | 21793 | Smoc1         | Pla2g12a           | 1  |
| 10710 | 22406 | Smoc1         | Vnn1               | 1  |
| 10710 | 22998 | Smoc1         | Ass1               | -1 |
| 10710 | 23640 | Smoc1         | Bdh1               | 1  |
| 10711 | 10711 | 1700108F19Rik | 1700108F19Rik      | 1  |
| 10711 | 13588 | 1700108F19Rik | MMT00042387        | 1  |
| 10712 | 7151  | Fchsd2        | MMT00007982        | 1  |
| 10727 | 7472  | Klra3         | Klra1              | 1  |
| 10729 | 6510  | Fgd2          | Plcl2              | 1  |
| 10729 | 7088  | Fgd2          | Slc37a1            | 1  |
| 10729 | 8341  | Fgd2          | MMT00017270        | -1 |
| 10729 | 12335 | Fgd2          | Plcb4              | 1  |
| 10729 | 14132 | Fgd2          | Glo1               | 1  |
| 10729 | 23250 | Fgd2          | Plcl2              | 1  |
| 10732 | 2110  | Iars2         | Gtf2ird1           | -1 |
| 10732 | 5183  | Iars2         | St5                | -1 |
| 10732 | 14472 | Iars2         | Ahcy               | 1  |
| 10733 | 3410  | Kctd6         | Paqr9              | -1 |
| 10733 | 5364  | Kctd6         | Kif22              | -1 |
| 10733 | 7414  | Kctd6         | Clpx               | -1 |
| 10733 | 10775 | Kctd6         | Slc16a1            | -1 |
| 10733 | 11599 | Kctd6         | Coq10b             | 1  |
| 10733 | 11741 | Kctd6         | Slc30a10           | -1 |
| 10733 | 12204 | Kctd6         | Ankmy2             | 1  |
| 10733 | 12807 | Kctd6         | Faim               | -1 |
| 10733 | 13054 | Kctd6         | Mcm4               | -1 |
| 10733 | 14472 | Kctd6         | Ahcy               | 1  |
| 10733 | 15049 | Kctd6         | Rnf125             | -1 |
| 10733 | 15320 | Kctd6         | MMT00017479        | 1  |
| 10733 | 15709 | Kctd6         | Tceal1             | 1  |
| 10733 | 15758 | Kctd6         | Stx4a              | -1 |

|       |       |               |               |    |
|-------|-------|---------------|---------------|----|
| 10733 | 17247 | Kctd6         | A030007L17Rik | -1 |
| 10733 | 18179 | Kctd6         | Dbp           | 1  |
| 10733 | 21142 | Kctd6         | Gm129         | 1  |
| 10733 | 22324 | Kctd6         | MMT00060741   | -1 |
| 10745 | 18286 | Gale          | Slc41a3       | -1 |
| 10745 | 21251 | Gale          | Cpt1a         | -1 |
| 10747 | 18018 | Abcf2         | Gaint11       | 1  |
| 10758 | 286   | Gdf1          | MMT00070509   | 1  |
| 10758 | 1755  | Gdf1          | Ocel1         | 1  |
| 10758 | 3055  | Gdf1          | Pde4c         | 1  |
| 10758 | 5433  | Gdf1          | 2410004L22Rik | -1 |
| 10758 | 8114  | Gdf1          | Kcnn1         | 1  |
| 10758 | 9304  | Gdf1          | AI449175      | 1  |
| 10758 | 10195 | Gdf1          | Klf1          | 1  |
| 10758 | 13732 | Gdf1          | Tpm4          | -1 |
| 10758 | 15455 | Gdf1          | Lsm4          | -1 |
| 10758 | 16617 | Gdf1          | Sh2d4a        | -1 |
| 10758 | 18886 | Gdf1          | Slc18a1       | -1 |
| 10758 | 20484 | Gdf1          | Ces1          | -1 |
| 10765 | 1572  | Retnla        | Saa3          | 1  |
| 10765 | 3228  | Retnla        | Saa1          | 1  |
| 10767 | 11065 | Plscr2        | Mccc1         | -1 |
| 10774 | 6044  | Ehd3          | Sucnr1        | 1  |
| 10774 | 11462 | Ehd3          | Gpam          | 1  |
| 10774 | 12910 | Ehd3          | 1110028A07Rik | 1  |
| 10774 | 22046 | Ehd3          | Cml4          | 1  |
| 10775 | 250   | Slc16a1       | Tubb2a-ps2    | 1  |
| 10775 | 609   | Slc16a1       | MMT00060868   | 1  |
| 10775 | 1767  | Slc16a1       | BC016495      | -1 |
| 10775 | 2636  | Slc16a1       | Tars          | 1  |
| 10775 | 2829  | Slc16a1       | Lrnf3         | 1  |
| 10775 | 2850  | Slc16a1       | Slc16a6       | 1  |
| 10775 | 3804  | Slc16a1       | MMT00015534   | 1  |
| 10775 | 5974  | Slc16a1       | Arntl         | 1  |
| 10775 | 6386  | Slc16a1       | Por           | -1 |
| 10775 | 10642 | Slc16a1       | Ngef          | -1 |
| 10775 | 11075 | Slc16a1       | Xrcc6bp1      | -1 |
| 10775 | 11741 | Slc16a1       | Slc30a10      | 1  |
| 10775 | 12433 | Slc16a1       | 5033413D22Rik | 1  |
| 10775 | 15709 | Slc16a1       | Tceal1        | -1 |
| 10775 | 16060 | Slc16a1       | Gys2          | -1 |
| 10775 | 16647 | Slc16a1       | D16H22S680E   | -1 |
| 10775 | 18498 | Slc16a1       | Slc5a6        | -1 |
| 10775 | 18827 | Slc16a1       | Oprs1         | 1  |
| 10775 | 19234 | Slc16a1       | Nrg4          | -1 |
| 10775 | 21251 | Slc16a1       | Cpt1a         | -1 |
| 10775 | 22290 | Slc16a1       | Tubb2a        | 1  |
| 10782 | 2433  | 4933403O08Rik | Armc10        | -1 |
| 10782 | 3196  | 4933403O08Rik | Tat           | 1  |
| 10782 | 3587  | 4933403O08Rik | MMT00041940   | 1  |
| 10782 | 6021  | 4933403O08Rik | MMT00008784   | 1  |

|       |       |               |               |    |
|-------|-------|---------------|---------------|----|
| 10782 | 8670  | 4933403O08Rik | MMT00051613   | 1  |
| 10782 | 11043 | 4933403O08Rik | Hsph1         | 1  |
| 10782 | 12761 | 4933403O08Rik | Tsc22d3       | 1  |
| 10782 | 15476 | 4933403O08Rik | Fem1b         | -1 |
| 10782 | 15675 | 4933403O08Rik | MMT00077535   | 1  |
| 10782 | 18373 | 4933403O08Rik | Dnajb1        | 1  |
| 10782 | 20194 | 4933403O08Rik | Pnlcd1        | -1 |
| 10782 | 20296 | 4933403O08Rik | C030027H14Rik | 1  |
| 10782 | 20535 | 4933403O08Rik | Rbm4          | 1  |
| 10782 | 21643 | 4933403O08Rik | Agtr1a        | -1 |
| 10782 | 22303 | 4933403O08Rik | Cdt1          | -1 |
| 10788 | 1711  | D430019H16Rik | Grhl1         | -1 |
| 10788 | 2721  | D430019H16Rik | Inmt          | 1  |
| 10788 | 3989  | D430019H16Rik | Wrnip1        | -1 |
| 10788 | 5804  | D430019H16Rik | Thrsp         | 1  |
| 10788 | 17090 | D430019H16Rik | Lass2         | 1  |
| 10796 | 15826 | Spic          | Arl4d         | -1 |
| 10796 | 17525 | Spic          | Ctgf          | -1 |
| 10808 | 1646  | Rab7l1        | Slc15a4       | -1 |
| 10808 | 2850  | Rab7l1        | Slc16a6       | 1  |
| 10808 | 3038  | Rab7l1        | Serpina12     | 1  |
| 10808 | 3265  | Rab7l1        | Dntt          | 1  |
| 10808 | 3410  | Rab7l1        | Paqr9         | 1  |
| 10808 | 3836  | Rab7l1        | 2200001115Rik | 1  |
| 10808 | 4993  | Rab7l1        | Tsc22d1       | 1  |
| 10808 | 5364  | Rab7l1        | Kif22         | 1  |
| 10808 | 5934  | Rab7l1        | S100a10       | 1  |
| 10808 | 6030  | Rab7l1        | As3mt         | -1 |
| 10808 | 6109  | Rab7l1        | Hsd17b2       | 1  |
| 10808 | 6386  | Rab7l1        | Por           | -1 |
| 10808 | 8428  | Rab7l1        | Sorbs3        | -1 |
| 10808 | 11741 | Rab7l1        | Slc30a10      | 1  |
| 10808 | 12208 | Rab7l1        | Pnpla7        | 1  |
| 10808 | 12925 | Rab7l1        | Farp1         | 1  |
| 10808 | 12941 | Rab7l1        | Elov5         | 1  |
| 10808 | 13271 | Rab7l1        | Idh2          | -1 |
| 10808 | 14017 | Rab7l1        | Ces5          | 1  |
| 10808 | 14472 | Rab7l1        | Ahcy          | -1 |
| 10808 | 15320 | Rab7l1        | MMT00017479   | -1 |
| 10808 | 15709 | Rab7l1        | Tceal1        | -1 |
| 10808 | 15862 | Rab7l1        | Mrap          | 1  |
| 10808 | 17617 | Rab7l1        | Atp5sl        | -1 |
| 10808 | 18455 | Rab7l1        | Mtnr1a        | 1  |
| 10808 | 18827 | Rab7l1        | Oprs1         | 1  |
| 10808 | 20967 | Rab7l1        | Fabp2         | 1  |
| 10808 | 23026 | Rab7l1        | Apom          | -1 |
| 10812 | 6085  | 9330101J02Rik | MMT00007454   | -1 |
| 10812 | 8773  | 9330101J02Rik | MMT00027093   | -1 |
| 10812 | 13431 | 9330101J02Rik | MMT00038058   | -1 |
| 10812 | 14055 | 9330101J02Rik | MMT00050438   | -1 |
| 10812 | 15205 | 9330101J02Rik | MMT00030262   | -1 |

|       |       |               |               |    |
|-------|-------|---------------|---------------|----|
| 10812 | 22978 | 9330101J02Rik | MMT00043176   | -1 |
| 10824 | 6370  | Vegfa         | Aqp8          | -1 |
| 10824 | 16616 | Vegfa         | Paox          | -1 |
| 10849 | 6976  | 9330159F19Rik | Rbm35b        | -1 |
| 10849 | 10769 | 9330159F19Rik | Hnrnpd        | -1 |
| 10849 | 18083 | 9330159F19Rik | Gadd45a       | -1 |
| 10851 | 937   | Tax1bp3       | Pi4ka         | -1 |
| 10851 | 5934  | Tax1bp3       | S100a10       | 1  |
| 10851 | 6338  | Tax1bp3       | Setd3         | -1 |
| 10851 | 6370  | Tax1bp3       | Aqp8          | 1  |
| 10851 | 6386  | Tax1bp3       | Por           | -1 |
| 10851 | 11129 | Tax1bp3       | Ankhd1        | -1 |
| 10851 | 11807 | Tax1bp3       | Fbxo31        | -1 |
| 10851 | 12460 | Tax1bp3       | Pnpla2        | -1 |
| 10851 | 15709 | Tax1bp3       | Tceal1        | -1 |
| 10851 | 17617 | Tax1bp3       | Atp5sl        | -1 |
| 10851 | 17878 | Tax1bp3       | Brap          | -1 |
| 10851 | 18286 | Tax1bp3       | Slc41a3       | -1 |
| 10851 | 18827 | Tax1bp3       | Oprs1         | 1  |
| 10851 | 21251 | Tax1bp3       | Cpt1a         | -1 |
| 10851 | 22138 | Tax1bp3       | Ang           | -1 |
| 10852 | 1416  | Sgol1         | 6720460F02Rik | 1  |
| 10852 | 1561  | Sgol1         | Aurka         | 1  |
| 10852 | 5364  | Sgol1         | Kif22         | 1  |
| 10852 | 8416  | Sgol1         | Cdc20         | 1  |
| 10852 | 11382 | Sgol1         | Cdca3         | 1  |
| 10852 | 17823 | Sgol1         | D2Ertd750e    | 1  |
| 10852 | 19318 | Sgol1         | Plk1          | 1  |
| 10852 | 21947 | Sgol1         | Cdca8         | 1  |
| 10863 | 20019 | Tssc1         | Qdpr          | 1  |
| 10865 | 5364  | Cd248         | Kif22         | 1  |
| 10876 | 13045 | Steap1        | A330021E22Rik | 1  |
| 10879 | 21202 | Slc9a6        | Acly          | -1 |
| 10879 | 22770 | Slc9a6        | Slc27a2       | 1  |
| 10880 | 7472  | Klra8         | Klra1         | 1  |
| 10885 | 12565 | Bri3          | Grem2         | 1  |
| 10888 | 20058 | Eya2          | Dnaic1        | -1 |
| 10889 | 2256  | Adamts15      | Serpina9      | 1  |
| 10889 | 2850  | Adamts15      | Slc16a6       | 1  |
| 10889 | 3214  | Adamts15      | Dnmt3b        | 1  |
| 10889 | 5849  | Adamts15      | 2310031A18Rik | 1  |
| 10889 | 7862  | Adamts15      | Cpsf4l        | -1 |
| 10889 | 9481  | Adamts15      | Ppl           | -1 |
| 10889 | 16060 | Adamts15      | Gys2          | -1 |
| 10889 | 19148 | Adamts15      | Rnf144b       | 1  |
| 10889 | 23201 | Adamts15      | S1pr1         | 1  |
| 10901 | 250   | 2810051F02Rik | Tubb2a-ps2    | 1  |
| 10901 | 609   | 2810051F02Rik | MMT00060868   | 1  |
| 10901 | 2636  | 2810051F02Rik | Tars          | 1  |
| 10901 | 2850  | 2810051F02Rik | Slc16a6       | 1  |
| 10901 | 3214  | 2810051F02Rik | Dnmt3b        | 1  |

|       |       |               |                    |    |
|-------|-------|---------------|--------------------|----|
| 10901 | 3235  | 2810051F02Rik | BC029214           | 1  |
| 10901 | 3410  | 2810051F02Rik | Paqr9              | 1  |
| 10901 | 3804  | 2810051F02Rik | MMT00015534        | 1  |
| 10901 | 4201  | 2810051F02Rik | Tubb2c             | 1  |
| 10901 | 5374  | 2810051F02Rik | Chka               | 1  |
| 10901 | 5574  | 2810051F02Rik | Hsd3b7             | 1  |
| 10901 | 5974  | 2810051F02Rik | Arntl              | 1  |
| 10901 | 6386  | 2810051F02Rik | Por                | -1 |
| 10901 | 9158  | 2810051F02Rik | Pde9a              | 1  |
| 10901 | 9495  | 2810051F02Rik | Srms               | 1  |
| 10901 | 9910  | 2810051F02Rik | EG666644           | -1 |
| 10901 | 10088 | 2810051F02Rik | Ddc                | 1  |
| 10901 | 10215 | 2810051F02Rik | Nampt              | -1 |
| 10901 | 10486 | 2810051F02Rik | 1300002K09Rik      | 1  |
| 10901 | 10642 | 2810051F02Rik | Ngef               | -1 |
| 10901 | 10775 | 2810051F02Rik | Slc16a1            | 1  |
| 10901 | 11741 | 2810051F02Rik | Slc30a10           | 1  |
| 10901 | 12904 | 2810051F02Rik | MMT00040704        | -1 |
| 10901 | 16060 | 2810051F02Rik | Gys2               | -1 |
| 10901 | 16690 | 2810051F02Rik | Tjp3               | 1  |
| 10901 | 17876 | 2810051F02Rik | Tubb4              | 1  |
| 10901 | 18572 | 2810051F02Rik | Stx18              | 1  |
| 10901 | 19671 | 2810051F02Rik | Upp2               | -1 |
| 10901 | 22290 | 2810051F02Rik | Tubb2a             | 1  |
| 10901 | 22630 | 2810051F02Rik | MMT00034355        | 1  |
| 10926 | 16517 | P2ry13        | D4Wsu53e           | -1 |
| 10926 | 16753 | P2ry13        | Hfe2               | 1  |
| 10926 | 21814 | P2ry13        | Accn5              | -1 |
| 10938 | 11462 | Zbtb5         | Gpam               | -1 |
| 10938 | 13304 | Zbtb5         | Gadd45b            | 1  |
| 10938 | 21160 | Zbtb5         | Irs2               | 1  |
| 10938 | 21202 | Zbtb5         | Acly               | -1 |
| 10938 | 22138 | Zbtb5         | Ang                | 1  |
| 10941 | 3040  | Pcdh18        | Bcl3               | 1  |
| 10941 | 7136  | Pcdh18        | Id3                | 1  |
| 10941 | 8632  | Pcdh18        | Igfbp1             | -1 |
| 10941 | 16517 | Pcdh18        | D4Wsu53e           | -1 |
| 10941 | 23552 | Pcdh18        | Rasl11b            | 1  |
| 10961 | 607   | Pgd           | Me1                | 1  |
| 10961 | 3832  | Pgd           | Sdhb               | 1  |
| 10961 | 5680  | Pgd           | Lrg1               | -1 |
| 10961 | 5884  | Pgd           | Gstm2              | 1  |
| 10961 | 7602  | Pgd           | Pcca               | 1  |
| 10961 | 7753  | Pgd           | Gfm1               | 1  |
| 10961 | 10554 | Pgd           | ENSMUSG00000074179 | 1  |
| 10961 | 11014 | Pgd           | Hibadh             | 1  |
| 10961 | 11104 | Pgd           | MMT00014375        | 1  |
| 10961 | 13293 | Pgd           | Gsta2              | 1  |
| 10961 | 18201 | Pgd           | MMT00060232        | 1  |
| 10961 | 20019 | Pgd           | Qdpr               | 1  |
| 10961 | 21214 | Pgd           | Scd1               | 1  |

|       |       |               |               |    |
|-------|-------|---------------|---------------|----|
| 10961 | 21575 | Pgd           | Cyp2c55       | 1  |
| 10961 | 23640 | Pgd           | Bdh1          | -1 |
| 10972 | 3265  | Lrig1         | Dntt          | -1 |
| 10972 | 20967 | Lrig1         | Fabp2         | -1 |
| 10972 | 22912 | Lrig1         | Stap1         | -1 |
| 10978 | 4617  | MMT00078322   | Agpat9        | -1 |
| 10978 | 5100  | MMT00078322   | Pebp1         | -1 |
| 10978 | 6116  | MMT00078322   | Pcgf5         | -1 |
| 10978 | 6330  | MMT00078322   | Dgkq          | 1  |
| 10978 | 8807  | MMT00078322   | Ankrd56       | -1 |
| 10978 | 10978 | MMT00078322   | MMT00078322   | 1  |
| 10978 | 12656 | MMT00078322   | Coq5          | 1  |
| 10978 | 14085 | MMT00078322   | Cdkl2         | 1  |
| 10978 | 15908 | MMT00078322   | Pebp1         | -1 |
| 10978 | 17716 | MMT00078322   | Rnf10         | -1 |
| 10978 | 17807 | MMT00078322   | Pebp1         | -1 |
| 10978 | 19443 | MMT00078322   | Prkab1        | -1 |
| 10978 | 20118 | MMT00078322   | Tmem175       | 1  |
| 10978 | 21652 | MMT00078322   | Olf700        | -1 |
| 10986 | 20058 | Pappa         | Dnaic1        | 1  |
| 10995 | 9077  | Ap4m1         | Cnpy4         | -1 |
| 10995 | 13780 | Ap4m1         | Pilra         | -1 |
| 10995 | 13875 | Ap4m1         | Hsd17b10      | 1  |
| 10995 | 19502 | Ap4m1         | Fbxo24        | 1  |
| 10995 | 20019 | Ap4m1         | Qdpr          | 1  |
| 10998 | 14017 | 2310061C15Rik | Ces5          | 1  |
| 11002 | 1709  | Smg5          | Mt2           | -1 |
| 11002 | 2051  | Smg5          | Ddx27         | -1 |
| 11002 | 8896  | Smg5          | Fasn          | 1  |
| 11002 | 10612 | Smg5          | Slc24a6       | -1 |
| 11009 | 2224  | MMT00008885   | Oasl2         | 1  |
| 11009 | 5044  | MMT00008885   | Ifi35         | 1  |
| 11009 | 6824  | MMT00008885   | Irf7          | 1  |
| 11009 | 9847  | MMT00008885   | Ifi27         | 1  |
| 11009 | 16182 | MMT00008885   | Oasl1         | 1  |
| 11027 | 20723 | Prkar2b       | Cdh1          | -1 |
| 11034 | 2721  | Kcnh2         | Inmt          | 1  |
| 11034 | 5804  | Kcnh2         | Thrsp         | 1  |
| 11034 | 11462 | Kcnh2         | Gpam          | 1  |
| 11034 | 12315 | Kcnh2         | Srebf1        | 1  |
| 11034 | 14151 | Kcnh2         | Slc44a1       | 1  |
| 11034 | 21202 | Kcnh2         | Acly          | 1  |
| 11043 | 499   | Hsph1         | 2310057J16Rik | 1  |
| 11043 | 624   | Hsph1         | 4931406I20Rik | -1 |
| 11043 | 740   | Hsph1         | Txnrd3        | -1 |
| 11043 | 902   | Hsph1         | Slc30a1       | -1 |
| 11043 | 1156  | Hsph1         | Rbj           | -1 |
| 11043 | 1311  | Hsph1         | Mpp4          | 1  |
| 11043 | 1569  | Hsph1         | Tmco4         | -1 |
| 11043 | 1612  | Hsph1         | Clec1b        | -1 |
| 11043 | 1697  | Hsph1         | Sf4           | 1  |



|       |       |       |               |    |
|-------|-------|-------|---------------|----|
| 11043 | 1849  | Hsph1 | MMT00063181   | 1  |
| 11043 | 2329  | Hsph1 | Wdr6          | -1 |
| 11043 | 2433  | Hsph1 | Armc10        | -1 |
| 11043 | 2570  | Hsph1 | Tmod4         | 1  |
| 11043 | 2718  | Hsph1 | Scrn3         | -1 |
| 11043 | 3170  | Hsph1 | Mcart1        | 1  |
| 11043 | 3462  | Hsph1 | Nmnat3        | -1 |
| 11043 | 3587  | Hsph1 | MMT00041940   | 1  |
| 11043 | 3799  | Hsph1 | Serpinh1      | 1  |
| 11043 | 3849  | Hsph1 | MMT00047578   | 1  |
| 11043 | 3913  | Hsph1 | Mrpl15        | 1  |
| 11043 | 4192  | Hsph1 | Zranb1        | -1 |
| 11043 | 4510  | Hsph1 | Ttf1          | 1  |
| 11043 | 4612  | Hsph1 | Hspa5         | 1  |
| 11043 | 4950  | Hsph1 | Dnajb10       | 1  |
| 11043 | 4966  | Hsph1 | Zscan20       | 1  |
| 11043 | 6021  | Hsph1 | MMT00008784   | 1  |
| 11043 | 6126  | Hsph1 | MMT00067575   | 1  |
| 11043 | 6171  | Hsph1 | Abtb2         | 1  |
| 11043 | 6218  | Hsph1 | Hnrnpc        | 1  |
| 11043 | 6261  | Hsph1 | 2810026P18Rik | -1 |
| 11043 | 6769  | Hsph1 | Banp          | 1  |
| 11043 | 7140  | Hsph1 | Mtbp          | -1 |
| 11043 | 7619  | Hsph1 | Pik3ip1       | -1 |
| 11043 | 7731  | Hsph1 | 1500001M20Rik | -1 |
| 11043 | 7798  | Hsph1 | MMT00077178   | 1  |
| 11043 | 8122  | Hsph1 | Hexim1        | 1  |
| 11043 | 8319  | Hsph1 | MMT00062477   | 1  |
| 11043 | 8464  | Hsph1 | Snapin        | -1 |
| 11043 | 8499  | Hsph1 | C430048L16Rik | 1  |
| 11043 | 8662  | Hsph1 | Brca2         | -1 |
| 11043 | 8670  | Hsph1 | MMT00051613   | 1  |
| 11043 | 8684  | Hsph1 | Il15          | -1 |
| 11043 | 8891  | Hsph1 | MMT00071061   | 1  |
| 11043 | 9067  | Hsph1 | Tra2a         | 1  |
| 11043 | 9258  | Hsph1 | P4ha1         | 1  |
| 11043 | 9629  | Hsph1 | Spnb3         | -1 |
| 11043 | 9680  | Hsph1 | Ahsa1         | 1  |
| 11043 | 9899  | Hsph1 | D13Wsu177e    | 1  |
| 11043 | 10267 | Hsph1 | Setdb2        | -1 |
| 11043 | 10435 | Hsph1 | Nab2          | -1 |
| 11043 | 10769 | Hsph1 | Hnrnpd        | -1 |
| 11043 | 11043 | Hsph1 | Hsph1         | 1  |
| 11043 | 11095 | Hsph1 | Bag3          | 1  |
| 11043 | 11201 | Hsph1 | Sunc1         | -1 |
| 11043 | 11214 | Hsph1 | MMT00049207   | 1  |
| 11043 | 11379 | Hsph1 | Dnttip1       | -1 |
| 11043 | 11697 | Hsph1 | Rasl2-9       | -1 |
| 11043 | 11818 | Hsph1 | MMT00048396   | 1  |
| 11043 | 12329 | Hsph1 | Sox6          | -1 |
| 11043 | 12388 | Hsph1 | 8430406I07Rik | 1  |

|       |       |        |               |    |
|-------|-------|--------|---------------|----|
| 11043 | 12419 | Hsph1  | MMT00081393   | 1  |
| 11043 | 12905 | Hsph1  | Nfil3         | 1  |
| 11043 | 13052 | Hsph1  | Tnfrsf19      | -1 |
| 11043 | 13521 | Hsph1  | Ears2         | 1  |
| 11043 | 13741 | Hsph1  | Hspa4l        | 1  |
| 11043 | 14014 | Hsph1  | MMT00008376   | 1  |
| 11043 | 14135 | Hsph1  | Eepd1         | -1 |
| 11043 | 14233 | Hsph1  | Fgfr1         | -1 |
| 11043 | 14298 | Hsph1  | Atp2a2        | 1  |
| 11043 | 14333 | Hsph1  | Zcchc17       | 1  |
| 11043 | 15024 | Hsph1  | 2310061J03Rik | -1 |
| 11043 | 15476 | Hsph1  | Fem1b         | -1 |
| 11043 | 15675 | Hsph1  | MMT00077535   | 1  |
| 11043 | 15740 | Hsph1  | 1810010H24Rik | -1 |
| 11043 | 16043 | Hsph1  | Sult1c2       | -1 |
| 11043 | 16251 | Hsph1  | G6pc          | 1  |
| 11043 | 16299 | Hsph1  | Creld2        | 1  |
| 11043 | 16585 | Hsph1  | Syvn1         | 1  |
| 11043 | 16754 | Hsph1  | Hsp90aa1      | 1  |
| 11043 | 17224 | Hsph1  | 5430407P10Rik | 1  |
| 11043 | 17449 | Hsph1  | Zfp296        | 1  |
| 11043 | 17595 | Hsph1  | MMT00048325   | 1  |
| 11043 | 18083 | Hsph1  | Gadd45a       | -1 |
| 11043 | 18099 | Hsph1  | Nfx1          | -1 |
| 11043 | 18215 | Hsph1  | Gpr146        | -1 |
| 11043 | 18373 | Hsph1  | Dnajb1        | 1  |
| 11043 | 18418 | Hsph1  | Hspa1b        | 1  |
| 11043 | 18454 | Hsph1  | Tor1aip1      | -1 |
| 11043 | 18903 | Hsph1  | Creml         | 1  |
| 11043 | 19540 | Hsph1  | Zfp428        | 1  |
| 11043 | 20194 | Hsph1  | Pnlnc1        | -1 |
| 11043 | 20332 | Hsph1  | Stau2         | -1 |
| 11043 | 20535 | Hsph1  | Rbm4          | 1  |
| 11043 | 20828 | Hsph1  | MMT00007878   | 1  |
| 11043 | 20912 | Hsph1  | Chordc1       | 1  |
| 11043 | 20965 | Hsph1  | Usp28         | -1 |
| 11043 | 21389 | Hsph1  | Odf2          | -1 |
| 11043 | 21775 | Hsph1  | MMT00051649   | -1 |
| 11043 | 22139 | Hsph1  | Stip1         | 1  |
| 11043 | 22216 | Hsph1  | Sp5           | -1 |
| 11043 | 22272 | Hsph1  | Vpreb1        | 1  |
| 11043 | 22303 | Hsph1  | Cdt1          | -1 |
| 11043 | 22751 | Hsph1  | Nosip         | -1 |
| 11043 | 23646 | Hsph1  | Hsp90ab1      | 1  |
| 11056 | 3410  | Surf4  | Paqr9         | 1  |
| 11056 | 4534  | Surf4  | Ndel1         | -1 |
| 11056 | 6386  | Surf4  | Por           | -1 |
| 11056 | 11741 | Surf4  | Slc30a10      | 1  |
| 11056 | 18827 | Surf4  | Oprs1         | 1  |
| 11074 | 12910 | Lpgat1 | 1110028A07Rik | 1  |
| 11083 | 8444  | Kctd3  | Rdh16         | 1  |

|       |       |             |                    |    |
|-------|-------|-------------|--------------------|----|
| 11083 | 14279 | Kctd3       | 3930402G23Rik      | -1 |
| 11083 | 20058 | Kctd3       | Dnaic1             | -1 |
| 11083 | 21727 | Kctd3       | Khk                | 1  |
| 11086 | 7602  | Pnpla5      | Pcca               | 1  |
| 11086 | 13293 | Pnpla5      | Gsta2              | 1  |
| 11086 | 21727 | Pnpla5      | Khk                | 1  |
| 11099 | 6193  | Klhdc8b     | Lactb2             | -1 |
| 11099 | 21214 | Klhdc8b     | Scd1               | -1 |
| 11125 | 8815  | Trim39      | Mx1                | -1 |
| 11125 | 18201 | Trim39      | MMT00060232        | -1 |
| 11125 | 21214 | Trim39      | Scd1               | -1 |
| 11125 | 21575 | Trim39      | Cyp2c55            | -1 |
| 11129 | 12910 | Ankhd1      | 1110028A07Rik      | -1 |
| 11129 | 15862 | Ankhd1      | Mrap               | -1 |
| 11145 | 7134  | Dctn3       | Krba1              | -1 |
| 11145 | 7550  | Dctn3       | Rab11fip5          | -1 |
| 11145 | 12112 | Dctn3       | Tmem53             | -1 |
| 11145 | 17641 | Dctn3       | Mapk7              | -1 |
| 11145 | 18250 | Dctn3       | Mmp14              | -1 |
| 11145 | 18271 | Dctn3       | MMT00007507        | -1 |
| 11148 | 3323  | Htra4       | Idh3b              | -1 |
| 11148 | 5364  | Htra4       | Kif22              | 1  |
| 11148 | 6420  | Htra4       | Mipep              | -1 |
| 11148 | 10554 | Htra4       | ENSMUSG00000074179 | -1 |
| 11148 | 12925 | Htra4       | Farp1              | 1  |
| 11148 | 13293 | Htra4       | Gsta2              | -1 |
| 11148 | 14055 | Htra4       | MMT00050438        | 1  |
| 11148 | 14472 | Htra4       | Ahcy               | -1 |
| 11148 | 22271 | Htra4       | Cyp2c29            | -1 |
| 11148 | 23267 | Htra4       | Hsd17b11           | -1 |
| 11154 | 5364  | MMT00037611 | Kif22              | -1 |
| 11154 | 11382 | MMT00037611 | Cdca3              | -1 |
| 11166 | 23005 | Uqcc        | 4930405A21Rik      | 1  |
| 11167 | 6498  | Dars2       | MMT00016809        | 1  |
| 11169 | 12565 | MMT00078034 | Grem2              | -1 |
| 11183 | 1129  | Pank3       | Gsta4              | 1  |
| 11183 | 2721  | Pank3       | Inmt               | 1  |
| 11183 | 3565  | Pank3       | MMT00045908        | 1  |
| 11183 | 4056  | Pank3       | Tnfaip8l1          | -1 |
| 11183 | 5804  | Pank3       | Thrsp              | 1  |
| 11183 | 8444  | Pank3       | Rdh16              | 1  |
| 11183 | 8815  | Pank3       | Mx1                | 1  |
| 11183 | 10554 | Pank3       | ENSMUSG00000074179 | 1  |
| 11183 | 12556 | Pank3       | Ass1               | 1  |
| 11183 | 13293 | Pank3       | Gsta2              | 1  |
| 11183 | 13431 | Pank3       | MMT00038058        | -1 |
| 11183 | 15205 | Pank3       | MMT00030262        | -1 |
| 11183 | 18201 | Pank3       | MMT00060232        | 1  |
| 11183 | 20385 | Pank3       | Chd1l              | 1  |
| 11183 | 21202 | Pank3       | Acly               | 1  |
| 11183 | 21214 | Pank3       | Scd1               | 1  |

|       |       |          |               |    |
|-------|-------|----------|---------------|----|
| 11183 | 21727 | Pank3    | Khk           | 1  |
| 11183 | 22998 | Pank3    | Ass1          | 1  |
| 11195 | 8637  | Fmn1     | Tnpo2         | 1  |
| 11195 | 14043 | Fmn1     | 4930455C21Rik | 1  |
| 11198 | 1533  | Gbp1     | BC013712      | 1  |
| 11198 | 2200  | Gbp1     | BC006779      | 1  |
| 11198 | 3535  | Gbp1     | S100a9        | 1  |
| 11198 | 5364  | Gbp1     | Kif22         | 1  |
| 11198 | 5845  | Gbp1     | Il18bp        | 1  |
| 11198 | 5934  | Gbp1     | S100a10       | 1  |
| 11198 | 5975  | Gbp1     | Car13         | 1  |
| 11198 | 5983  | Gbp1     | Pcolce2       | 1  |
| 11198 | 6036  | Gbp1     | Pram1         | 1  |
| 11198 | 6072  | Gbp1     | C1qc          | 1  |
| 11198 | 6386  | Gbp1     | Por           | -1 |
| 11198 | 7238  | Gbp1     | Pycard        | 1  |
| 11198 | 9847  | Gbp1     | Ifi27         | 1  |
| 11198 | 10504 | Gbp1     | Ripk3         | 1  |
| 11198 | 10606 | Gbp1     | Apbb1ip       | 1  |
| 11198 | 11198 | Gbp1     | Gbp1          | 1  |
| 11198 | 14117 | Gbp1     | C1qb          | 1  |
| 11198 | 14237 | Gbp1     | Rac2          | 1  |
| 11198 | 14506 | Gbp1     | Slc15a3       | 1  |
| 11198 | 14869 | Gbp1     | S100a8        | 1  |
| 11198 | 14883 | Gbp1     | Itgal         | 1  |
| 11198 | 14989 | Gbp1     | Map3k5        | -1 |
| 11198 | 16147 | Gbp1     | Tlr2          | 1  |
| 11198 | 16580 | Gbp1     | Tnfaip2       | 1  |
| 11198 | 16874 | Gbp1     | Fcer1g        | 1  |
| 11198 | 18147 | Gbp1     | Nhlrc2        | -1 |
| 11198 | 18174 | Gbp1     | Stat2         | 1  |
| 11198 | 18211 | Gbp1     | Folr2         | 1  |
| 11198 | 19252 | Gbp1     | Tmsb4x        | 1  |
| 11198 | 19794 | Gbp1     | Rgs2          | 1  |
| 11198 | 20745 | Gbp1     | Sord          | -1 |
| 11198 | 23208 | Gbp1     | Hck           | 1  |
| 11199 | 3061  | Sirt7    | Scarf2        | -1 |
| 11199 | 3119  | Sirt7    | Mapk10        | -1 |
| 11199 | 6426  | Sirt7    | Mfsd4         | -1 |
| 11199 | 6846  | Sirt7    | Olf1402       | -1 |
| 11199 | 8791  | Sirt7    | Sectm1a       | -1 |
| 11199 | 15016 | Sirt7    | MMT00074608   | -1 |
| 11199 | 16613 | Sirt7    | 1110031102Rik | -1 |
| 11199 | 17792 | Sirt7    | Vmn2r79       | -1 |
| 11199 | 17897 | Sirt7    | Gm1019        | -1 |
| 11204 | 2200  | AI451617 | BC006779      | 1  |
| 11204 | 2224  | AI451617 | Oasl2         | 1  |
| 11204 | 3426  | AI451617 | Hap1          | 1  |
| 11204 | 4426  | AI451617 | Iigp2         | 1  |
| 11204 | 6824  | AI451617 | Irf7          | 1  |
| 11204 | 8800  | AI451617 | Rnf213        | 1  |

|       |       |             |               |    |
|-------|-------|-------------|---------------|----|
| 11204 | 9847  | AI451617    | Ifi27         | 1  |
| 11204 | 11204 | AI451617    | AI451617      | 1  |
| 11204 | 11701 | AI451617    | Oas1c         | 1  |
| 11204 | 12398 | AI451617    | Ifi44         | 1  |
| 11204 | 12969 | AI451617    | Xaf1          | 1  |
| 11204 | 14506 | AI451617    | Slc15a3       | 1  |
| 11204 | 14880 | AI451617    | Ms4a4c        | 1  |
| 11204 | 15504 | AI451617    | Mx2           | 1  |
| 11204 | 16182 | AI451617    | Oasl1         | 1  |
| 11204 | 19738 | AI451617    | Lgals3bp      | 1  |
| 11204 | 20997 | AI451617    | MMT00028135   | 1  |
| 11204 | 21351 | AI451617    | Shisa5        | 1  |
| 11204 | 21549 | AI451617    | Rtp4          | 1  |
| 11204 | 22037 | AI451617    | Oas1g         | 1  |
| 11214 | 624   | MMT00049207 | 4931406I20Rik | -1 |
| 11214 | 740   | MMT00049207 | Txnrd3        | -1 |
| 11214 | 902   | MMT00049207 | Slc30a1       | -1 |
| 11214 | 1156  | MMT00049207 | Rbj           | -1 |
| 11214 | 1311  | MMT00049207 | Mpp4          | 1  |
| 11214 | 1386  | MMT00049207 | Ppid          | 1  |
| 11214 | 1569  | MMT00049207 | Tmco4         | -1 |
| 11214 | 3170  | MMT00049207 | Mcart1        | 1  |
| 11214 | 3587  | MMT00049207 | MMT00041940   | 1  |
| 11214 | 4391  | MMT00049207 | Zfp467        | -1 |
| 11214 | 4966  | MMT00049207 | Zscan20       | 1  |
| 11214 | 5352  | MMT00049207 | Pdcd2l        | -1 |
| 11214 | 5953  | MMT00049207 | MMT00008178   | 1  |
| 11214 | 6021  | MMT00049207 | MMT00008784   | 1  |
| 11214 | 6126  | MMT00049207 | MMT00067575   | 1  |
| 11214 | 6218  | MMT00049207 | Hnrnpc        | 1  |
| 11214 | 7731  | MMT00049207 | 1500001M20Rik | -1 |
| 11214 | 7798  | MMT00049207 | MMT00077178   | 1  |
| 11214 | 8037  | MMT00049207 | MMT00052151   | 1  |
| 11214 | 8319  | MMT00049207 | MMT00062477   | 1  |
| 11214 | 8499  | MMT00049207 | C430048L16Rik | 1  |
| 11214 | 8670  | MMT00049207 | MMT00051613   | 1  |
| 11214 | 8891  | MMT00049207 | MMT00071061   | 1  |
| 11214 | 9067  | MMT00049207 | Tra2a         | 1  |
| 11214 | 9258  | MMT00049207 | P4ha1         | 1  |
| 11214 | 9513  | MMT00049207 | Tardbp        | 1  |
| 11214 | 9629  | MMT00049207 | Spnb3         | -1 |
| 11214 | 10435 | MMT00049207 | Nab2          | -1 |
| 11214 | 10526 | MMT00049207 | MMT00036239   | 1  |
| 11214 | 10769 | MMT00049207 | Hnrnpd        | -1 |
| 11214 | 10782 | MMT00049207 | 4933403O08Rik | 1  |
| 11214 | 11043 | MMT00049207 | Hsph1         | 1  |
| 11214 | 11095 | MMT00049207 | Bag3          | 1  |
| 11214 | 11214 | MMT00049207 | MMT00049207   | 1  |
| 11214 | 12329 | MMT00049207 | Sox6          | -1 |
| 11214 | 12419 | MMT00049207 | MMT00081393   | 1  |
| 11214 | 13521 | MMT00049207 | Ears2         | 1  |

|       |       |             |                    |    |
|-------|-------|-------------|--------------------|----|
| 11214 | 13741 | MMT00049207 | Hspa4l             | 1  |
| 11214 | 14014 | MMT00049207 | MMT00008376        | 1  |
| 11214 | 14233 | MMT00049207 | Fgfr1              | -1 |
| 11214 | 14298 | MMT00049207 | Atp2a2             | 1  |
| 11214 | 15024 | MMT00049207 | 2310061J03Rik      | -1 |
| 11214 | 15177 | MMT00049207 | Bmpr2              | 1  |
| 11214 | 15476 | MMT00049207 | Fem1b              | -1 |
| 11214 | 15675 | MMT00049207 | MMT00077535        | 1  |
| 11214 | 15740 | MMT00049207 | 1810010H24Rik      | -1 |
| 11214 | 16251 | MMT00049207 | G6pc               | 1  |
| 11214 | 16754 | MMT00049207 | Hsp90aa1           | 1  |
| 11214 | 18083 | MMT00049207 | Gadd45a            | -1 |
| 11214 | 18099 | MMT00049207 | Nfx1               | -1 |
| 11214 | 18215 | MMT00049207 | Gpr146             | -1 |
| 11214 | 18373 | MMT00049207 | Dnajb1             | 1  |
| 11214 | 18418 | MMT00049207 | Hspa1b             | 1  |
| 11214 | 18903 | MMT00049207 | Crem               | 1  |
| 11214 | 20828 | MMT00049207 | MMT00007878        | 1  |
| 11214 | 20912 | MMT00049207 | Chordc1            | 1  |
| 11214 | 20965 | MMT00049207 | Usp28              | -1 |
| 11214 | 21322 | MMT00049207 | Usp1               | 1  |
| 11214 | 21389 | MMT00049207 | Odf2               | -1 |
| 11214 | 22139 | MMT00049207 | Stip1              | 1  |
| 11214 | 22303 | MMT00049207 | Cdt1               | -1 |
| 11219 | 18574 | Mrps18a     | Parc               | -1 |
| 11220 | 1090  | AU021092    | 5730409G15Rik      | -1 |
| 11231 | 1572  | B2m         | Saa3               | 1  |
| 11231 | 3228  | B2m         | Saa1               | 1  |
| 11231 | 11198 | B2m         | Gbp1               | 1  |
| 11231 | 14439 | B2m         | Ubd                | 1  |
| 11231 | 17629 | B2m         | Saa2               | 1  |
| 11231 | 20565 | B2m         | MMT00065821        | 1  |
| 11235 | 760   | Itga2b      | Akr1c19            | -1 |
| 11235 | 1711  | Itga2b      | Grhl1              | 1  |
| 11235 | 2049  | Itga2b      | Gsta3              | -1 |
| 11235 | 2639  | Itga2b      | Abhd2              | 1  |
| 11235 | 3446  | Itga2b      | Eno1               | -1 |
| 11235 | 6086  | Itga2b      | Fgl1               | 1  |
| 11235 | 8328  | Itga2b      | Klhdc8a            | 1  |
| 11235 | 9842  | Itga2b      | Qdpr               | -1 |
| 11235 | 10554 | Itga2b      | ENSMUSG00000074179 | -1 |
| 11235 | 13293 | Itga2b      | Gsta2              | -1 |
| 11235 | 13431 | Itga2b      | MMT00038058        | 1  |
| 11235 | 15205 | Itga2b      | MMT00030262        | 1  |
| 11235 | 18113 | Itga2b      | MMT00034400        | -1 |
| 11235 | 19772 | Itga2b      | Gnmt               | -1 |
| 11235 | 20171 | Itga2b      | 1700008G05Rik      | 1  |
| 11235 | 21727 | Itga2b      | Khk                | -1 |
| 11246 | 8815  | Apex1       | Mx1                | 1  |
| 11246 | 21214 | Apex1       | Scd1               | 1  |
| 11255 | 2235  | Srpx        | Ndufv1             | -1 |

|       |       |        |               |    |
|-------|-------|--------|---------------|----|
| 11255 | 5364  | Srpx   | Kif22         | 1  |
| 11255 | 12925 | Srpx   | Farp1         | 1  |
| 11255 | 13293 | Srpx   | Gsta2         | -1 |
| 11255 | 14472 | Srpx   | Ahcy          | -1 |
| 11255 | 18299 | Srpx   | MMT00035424   | 1  |
| 11255 | 20171 | Srpx   | 1700008G05Rik | 1  |
| 11255 | 21692 | Srpx   | MMT00013924   | 1  |
| 11259 | 9495  | Ccdc69 | Srms          | 1  |
| 11259 | 11201 | Ccdc69 | Sunc1         | -1 |
| 11259 | 13947 | Ccdc69 | Crip2         | 1  |
| 11259 | 19671 | Ccdc69 | Upp2          | -1 |
| 11259 | 21531 | Ccdc69 | Ttc23         | -1 |
| 11265 | 143   | Irgm   | Gvin1         | 1  |
| 11265 | 1533  | Irgm   | BC013712      | 1  |
| 11265 | 2058  | Irgm   | Hk3           | 1  |
| 11265 | 2200  | Irgm   | BC006779      | 1  |
| 11265 | 2224  | Irgm   | Oasl2         | 1  |
| 11265 | 2550  | Irgm   | MMT00036681   | 1  |
| 11265 | 2752  | Irgm   | Fcgr1         | 1  |
| 11265 | 3523  | Irgm   | Trim34        | 1  |
| 11265 | 3594  | Irgm   | Rasa4         | 1  |
| 11265 | 3659  | Irgm   | EG236451      | 1  |
| 11265 | 3683  | Irgm   | Oas2          | 1  |
| 11265 | 4114  | Irgm   | Parp12        | 1  |
| 11265 | 4409  | Irgm   | 5430435G22Rik | 1  |
| 11265 | 4426  | Irgm   | Iigp2         | 1  |
| 11265 | 4508  | Irgm   | Ifit1         | 1  |
| 11265 | 4516  | Irgm   | Rsad2         | 1  |
| 11265 | 5002  | Irgm   | Ifi202b       | 1  |
| 11265 | 5044  | Irgm   | Ifi35         | 1  |
| 11265 | 5216  | Irgm   | Spnb5         | 1  |
| 11265 | 5250  | Irgm   | Ifit2         | 1  |
| 11265 | 5556  | Irgm   | Ccl4          | 1  |
| 11265 | 5845  | Irgm   | I118bp        | 1  |
| 11265 | 5853  | Irgm   | Trim30        | 1  |
| 11265 | 5949  | Irgm   | Zbp1          | 1  |
| 11265 | 5975  | Irgm   | Car13         | 1  |
| 11265 | 6072  | Irgm   | C1qc          | 1  |
| 11265 | 6576  | Irgm   | Sifn2         | 1  |
| 11265 | 6587  | Irgm   | Irf9          | 1  |
| 11265 | 6595  | Irgm   | Oas1a         | 1  |
| 11265 | 6824  | Irgm   | Irf7          | 1  |
| 11265 | 6910  | Irgm   | Ly6c2         | 1  |
| 11265 | 7069  | Irgm   | Ube1l         | 1  |
| 11265 | 7105  | Irgm   | Plac8         | 1  |
| 11265 | 7238  | Irgm   | Pycard        | 1  |
| 11265 | 7284  | Irgm   | MMT00008674   | 1  |
| 11265 | 7316  | Irgm   | Ifi204        | 1  |
| 11265 | 7336  | Irgm   | Cd5l          | 1  |
| 11265 | 8392  | Irgm   | Asf1b         | 1  |
| 11265 | 8555  | Irgm   | H2-M3         | 1  |

|       |       |      |             |   |
|-------|-------|------|-------------|---|
| 11265 | 8564  | Irgm | Pld4        | 1 |
| 11265 | 8659  | Irgm | Psmb8       | 1 |
| 11265 | 8800  | Irgm | Rnf213      | 1 |
| 11265 | 9401  | Irgm | Fcgr4       | 1 |
| 11265 | 9820  | Irgm | BC023105    | 1 |
| 11265 | 9821  | Irgm | Pmaip1      | 1 |
| 11265 | 9847  | Irgm | Ifi27       | 1 |
| 11265 | 9928  | Irgm | Lgmn        | 1 |
| 11265 | 10109 | Irgm | Gbp3        | 1 |
| 11265 | 10504 | Irgm | Ripk3       | 1 |
| 11265 | 10606 | Irgm | Apbb1ip     | 1 |
| 11265 | 10926 | Irgm | P2ry13      | 1 |
| 11265 | 11009 | Irgm | MMT00008885 | 1 |
| 11265 | 11204 | Irgm | AI451617    | 1 |
| 11265 | 11265 | Irgm | Irgm        | 1 |
| 11265 | 11701 | Irgm | Oas1c       | 1 |
| 11265 | 12126 | Irgm | Znfx1       | 1 |
| 11265 | 12312 | Irgm | Ms4a6d      | 1 |
| 11265 | 12363 | Irgm | Ifitm6      | 1 |
| 11265 | 12398 | Irgm | Ifi44       | 1 |
| 11265 | 12600 | Irgm | Ifi204      | 1 |
| 11265 | 12969 | Irgm | Xaf1        | 1 |
| 11265 | 13156 | Irgm | Ifit3       | 1 |
| 11265 | 13309 | Irgm | Tgtp        | 1 |
| 11265 | 13514 | Irgm | Apol9b      | 1 |
| 11265 | 13527 | Irgm | Ctss        | 1 |
| 11265 | 13654 | Irgm | Stat1       | 1 |
| 11265 | 13656 | Irgm | Ly86        | 1 |
| 11265 | 13826 | Irgm | Melk        | 1 |
| 11265 | 14258 | Irgm | Ifi47       | 1 |
| 11265 | 14506 | Irgm | Slc15a3     | 1 |
| 11265 | 14611 | Irgm | Ddx60       | 1 |
| 11265 | 14880 | Irgm | Ms4a4c      | 1 |
| 11265 | 15074 | Irgm | Usp18       | 1 |
| 11265 | 15280 | Irgm | Cxcl10      | 1 |
| 11265 | 15504 | Irgm | Mx2         | 1 |
| 11265 | 16102 | Irgm | Cd72        | 1 |
| 11265 | 16182 | Irgm | Oasl1       | 1 |
| 11265 | 16186 | Irgm | Cfp         | 1 |
| 11265 | 16199 | Irgm | Samhd1      | 1 |
| 11265 | 16521 | Irgm | Adar        | 1 |
| 11265 | 16572 | Irgm | D14Ert668e  | 1 |
| 11265 | 16874 | Irgm | Fcer1g      | 1 |
| 11265 | 16988 | Irgm | Clec4f      | 1 |
| 11265 | 17071 | Irgm | Samd9l      | 1 |
| 11265 | 17197 | Irgm | Igtp        | 1 |
| 11265 | 17412 | Irgm | Aif1        | 1 |
| 11265 | 18174 | Irgm | Stat2       | 1 |
| 11265 | 18186 | Irgm | Parp14      | 1 |
| 11265 | 18686 | Irgm | Zfp143      | 1 |
| 11265 | 19189 | Irgm | Sp100       | 1 |



|       |       |         |               |    |
|-------|-------|---------|---------------|----|
| 11265 | 19708 | Irgm    | Ly6a          | 1  |
| 11265 | 19738 | Irgm    | Lgals3bp      | 1  |
| 11265 | 20321 | Irgm    | Ms4a6b        | 1  |
| 11265 | 20814 | Irgm    | Ptpn18        | 1  |
| 11265 | 20997 | Irgm    | MMT00028135   | 1  |
| 11265 | 21351 | Irgm    | Shisa5        | 1  |
| 11265 | 21440 | Irgm    | Tmsb10        | 1  |
| 11265 | 21549 | Irgm    | Rtp4          | 1  |
| 11265 | 21824 | Irgm    | 5830443L24Rik | 1  |
| 11265 | 22037 | Irgm    | Oas1g         | 1  |
| 11265 | 22496 | Irgm    | Sfn1          | 1  |
| 11265 | 23208 | Irgm    | Hck           | 1  |
| 11265 | 23450 | Irgm    | D12Ertd647e   | 1  |
| 11275 | 1416  | Fanci   | 6720460F02Rik | 1  |
| 11275 | 1561  | Fanci   | Aurka         | 1  |
| 11275 | 1932  | Fanci   | Racgap1       | 1  |
| 11275 | 5364  | Fanci   | Kif22         | 1  |
| 11275 | 8416  | Fanci   | Cdc20         | 1  |
| 11275 | 9759  | Fanci   | Cenpn         | 1  |
| 11275 | 11382 | Fanci   | Cdca3         | 1  |
| 11275 | 11870 | Fanci   | Apitd1        | 1  |
| 11275 | 13455 | Fanci   | Cenpe         | 1  |
| 11275 | 17216 | Fanci   | Nuf2          | 1  |
| 11275 | 17823 | Fanci   | D2Ertd750e    | 1  |
| 11275 | 18299 | Fanci   | MMT00035424   | 1  |
| 11275 | 19022 | Fanci   | Ccnb2         | 1  |
| 11275 | 19318 | Fanci   | Plk1          | 1  |
| 11275 | 20433 | Fanci   | Cdca5         | 1  |
| 11275 | 21205 | Fanci   | Pkmyt1        | 1  |
| 11275 | 21692 | Fanci   | MMT00013924   | 1  |
| 11275 | 21947 | Fanci   | Cdca8         | 1  |
| 11292 | 286   | Nr2f6   | MMT00070509   | -1 |
| 11292 | 403   | Nr2f6   | Leprotl1      | 1  |
| 11292 | 1755  | Nr2f6   | Ocel1         | -1 |
| 11292 | 2749  | Nr2f6   | Naf1          | 1  |
| 11292 | 3055  | Nr2f6   | Pde4c         | -1 |
| 11292 | 5433  | Nr2f6   | 2410004L22Rik | 1  |
| 11292 | 6760  | Nr2f6   | 2810428I15Rik | -1 |
| 11292 | 9304  | Nr2f6   | AI449175      | -1 |
| 11292 | 9931  | Nr2f6   | Glt25d1       | 1  |
| 11292 | 13732 | Nr2f6   | Tpm4          | 1  |
| 11292 | 15094 | Nr2f6   | Pbx4          | 1  |
| 11292 | 15455 | Nr2f6   | Lsm4          | 1  |
| 11292 | 16617 | Nr2f6   | Sh2d4a        | 1  |
| 11292 | 16849 | Nr2f6   | Trmt1         | 1  |
| 11292 | 16858 | Nr2f6   | Tmem38a       | 1  |
| 11292 | 18886 | Nr2f6   | Slc18a1       | 1  |
| 11305 | 958   | Galntl2 | Ppp2r5e       | 1  |
| 11305 | 10769 | Galntl2 | Hnrnpd        | 1  |
| 11305 | 18418 | Galntl2 | Hspa1b        | -1 |
| 11305 | 20068 | Galntl2 | 2610204M08Rik | 1  |

|       |       |               |               |    |
|-------|-------|---------------|---------------|----|
| 11330 | 21143 | MMT00024873   | Ypel3         | -1 |
| 11340 | 9910  | Syn2          | EG666644      | 1  |
| 11340 | 15425 | Syn2          | Adprh         | -1 |
| 11369 | 676   | Stx3          | Ms4a4d        | 1  |
| 11369 | 11369 | Stx3          | Stx3          | 1  |
| 11369 | 11812 | Stx3          | Mrpl16        | 1  |
| 11369 | 17447 | Stx3          | Ctsf          | 1  |
| 11376 | 607   | Slc7a11       | Me1           | 1  |
| 11376 | 8815  | Slc7a11       | Mx1           | 1  |
| 11376 | 12910 | Slc7a11       | 1110028A07Rik | 1  |
| 11376 | 18201 | Slc7a11       | MMT00060232   | 1  |
| 11376 | 21214 | Slc7a11       | Scd1          | 1  |
| 11376 | 22138 | Slc7a11       | Ang           | -1 |
| 11382 | 1416  | Cdca3         | 6720460F02Rik | 1  |
| 11382 | 5364  | Cdca3         | Kif22         | 1  |
| 11382 | 8416  | Cdca3         | Cdc20         | 1  |
| 11382 | 11382 | Cdca3         | Cdca3         | 1  |
| 11382 | 19318 | Cdca3         | Plk1          | 1  |
| 11382 | 21947 | Cdca3         | Cdca8         | 1  |
| 11393 | 563   | A830007P12Rik | D4Bwg0951e    | -1 |
| 11393 | 719   | A830007P12Rik | Usp2          | -1 |
| 11393 | 3214  | A830007P12Rik | Dnmt3b        | 1  |
| 11393 | 4708  | A830007P12Rik | Traf3ip2      | 1  |
| 11393 | 5849  | A830007P12Rik | 2310031A18Rik | 1  |
| 11393 | 6990  | A830007P12Rik | Nr1i2         | -1 |
| 11393 | 8328  | A830007P12Rik | Klhdc8a       | 1  |
| 11393 | 8641  | A830007P12Rik | Slc7a2        | -1 |
| 11393 | 9495  | A830007P12Rik | Srms          | 1  |
| 11393 | 10408 | A830007P12Rik | Per1          | -1 |
| 11393 | 10712 | A830007P12Rik | Fchsd2        | -1 |
| 11393 | 11393 | A830007P12Rik | A830007P12Rik | 1  |
| 11393 | 11599 | A830007P12Rik | Coq10b        | -1 |
| 11393 | 11741 | A830007P12Rik | Slc30a10      | 1  |
| 11393 | 11808 | A830007P12Rik | Pck1          | -1 |
| 11393 | 12420 | A830007P12Rik | Klhl21        | -1 |
| 11393 | 15631 | A830007P12Rik | Lpin1         | -1 |
| 11393 | 15659 | A830007P12Rik | MMT00074093   | 1  |
| 11393 | 16060 | A830007P12Rik | Gys2          | -1 |
| 11393 | 16580 | A830007P12Rik | Tnfaip2       | 1  |
| 11393 | 16690 | A830007P12Rik | Tjp3          | 1  |
| 11393 | 16851 | A830007P12Rik | Slc34a2       | 1  |
| 11393 | 17323 | A830007P12Rik | Tubb6         | 1  |
| 11393 | 17444 | A830007P12Rik | Tuba1a        | 1  |
| 11393 | 17525 | A830007P12Rik | Ctgf          | -1 |
| 11393 | 17530 | A830007P12Rik | MMT00041792   | 1  |
| 11393 | 18027 | A830007P12Rik | 5730403B10Rik | -1 |
| 11393 | 18250 | A830007P12Rik | Mmp14         | 1  |
| 11393 | 19671 | A830007P12Rik | Upp2          | -1 |
| 11393 | 20803 | A830007P12Rik | Tmem50a       | -1 |
| 11393 | 21805 | A830007P12Rik | Plk3          | -1 |
| 11393 | 22290 | A830007P12Rik | Tubb2a        | 1  |

|       |       |               |                    |    |
|-------|-------|---------------|--------------------|----|
| 11393 | 23201 | A830007P12Rik | S1pr1              | 1  |
| 11393 | 23202 | A830007P12Rik | Olf559             | -1 |
| 11403 | 607   | 2210016F16Rik | Me1                | 1  |
| 11403 | 874   | 2210016F16Rik | Aldh1a7            | 1  |
| 11403 | 3377  | 2210016F16Rik | Cs                 | 1  |
| 11403 | 4351  | 2210016F16Rik | Plxnb1             | -1 |
| 11403 | 5884  | 2210016F16Rik | Gstm2              | 1  |
| 11403 | 6502  | 2210016F16Rik | Col15a1            | 1  |
| 11403 | 7602  | 2210016F16Rik | Pcca               | 1  |
| 11403 | 8444  | 2210016F16Rik | Rdh16              | 1  |
| 11403 | 8815  | 2210016F16Rik | Mx1                | 1  |
| 11403 | 9842  | 2210016F16Rik | Qdpr               | 1  |
| 11403 | 10554 | 2210016F16Rik | ENSMUSG00000074179 | 1  |
| 11403 | 11086 | 2210016F16Rik | Pnpla5             | 1  |
| 11403 | 12219 | 2210016F16Rik | Cyb5b              | 1  |
| 11403 | 14147 | 2210016F16Rik | Acss2              | 1  |
| 11403 | 14151 | 2210016F16Rik | Slc44a1            | 1  |
| 11403 | 14323 | 2210016F16Rik | Scarb1             | -1 |
| 11403 | 17996 | 2210016F16Rik | Igfbp2             | -1 |
| 11403 | 18201 | 2210016F16Rik | MMT00060232        | 1  |
| 11403 | 20019 | 2210016F16Rik | Qdpr               | 1  |
| 11403 | 20058 | 2210016F16Rik | Dnaic1             | -1 |
| 11403 | 20079 | 2210016F16Rik | MMT00019254        | -1 |
| 11403 | 20328 | 2210016F16Rik | Csl                | 1  |
| 11403 | 21202 | 2210016F16Rik | Acly               | 1  |
| 11403 | 21214 | 2210016F16Rik | Scd1               | 1  |
| 11403 | 21575 | 2210016F16Rik | Cyp2c55            | 1  |
| 11403 | 21793 | 2210016F16Rik | Pla2g12a           | -1 |
| 11403 | 22732 | 2210016F16Rik | Cyb5b              | 1  |
| 11403 | 23026 | 2210016F16Rik | Apom               | -1 |
| 11406 | 9449  | Ifi203        | Sft2d2             | -1 |
| 11406 | 11406 | Ifi203        | Ifi203             | 1  |
| 11406 | 13149 | Ifi203        | Ifi203             | 1  |
| 11406 | 15844 | Ifi203        | Klhdc9             | -1 |
| 11406 | 16361 | Ifi203        | Olf703             | -1 |
| 11406 | 19520 | Ifi203        | Uck2               | -1 |
| 11409 | 563   | Phf16         | D4Bwg0951e         | 1  |
| 11409 | 719   | Phf16         | Usp2               | 1  |
| 11409 | 1646  | Phf16         | Slc15a4            | 1  |
| 11409 | 2294  | Phf16         | AU040829           | 1  |
| 11409 | 2529  | Phf16         | Hmcn2              | 1  |
| 11409 | 2794  | Phf16         | Map3k6             | 1  |
| 11409 | 3686  | Phf16         | Psmc9              | 1  |
| 11409 | 4235  | Phf16         | Pfkfb3             | 1  |
| 11409 | 4392  | Phf16         | 1810055G02Rik      | 1  |
| 11409 | 4708  | Phf16         | Traf3ip2           | -1 |
| 11409 | 5187  | Phf16         | Speer4f            | 1  |
| 11409 | 5791  | Phf16         | Baiap2l1           | 1  |
| 11409 | 5849  | Phf16         | 2310031A18Rik      | -1 |
| 11409 | 6211  | Phf16         | Arhgap24           | -1 |
| 11409 | 6386  | Phf16         | Por                | 1  |

|       |       |       |               |    |
|-------|-------|-------|---------------|----|
| 11409 | 6490  | Phf16 | Il1r1         | 1  |
| 11409 | 6675  | Phf16 | Sfrs4         | 1  |
| 11409 | 6756  | Phf16 | Sds           | 1  |
| 11409 | 6990  | Phf16 | Nr1i2         | 1  |
| 11409 | 7066  | Phf16 | Agtr1b        | 1  |
| 11409 | 7862  | Phf16 | Cpsf4l        | 1  |
| 11409 | 7963  | Phf16 | Rxrg          | -1 |
| 11409 | 8399  | Phf16 | Herpud1       | 1  |
| 11409 | 8641  | Phf16 | Slc7a2        | 1  |
| 11409 | 10207 | Phf16 | MMT00012324   | -1 |
| 11409 | 10712 | Phf16 | Fchsd2        | 1  |
| 11409 | 11093 | Phf16 | Zdhhc1        | 1  |
| 11409 | 11129 | Phf16 | Ankhd1        | 1  |
| 11409 | 11574 | Phf16 | Gne           | 1  |
| 11409 | 11599 | Phf16 | Coq10b        | 1  |
| 11409 | 11741 | Phf16 | Slc30a10      | -1 |
| 11409 | 11807 | Phf16 | Fbxo31        | 1  |
| 11409 | 11808 | Phf16 | Pck1          | 1  |
| 11409 | 12420 | Phf16 | Klhl21        | 1  |
| 11409 | 12761 | Phf16 | Tsc22d3       | 1  |
| 11409 | 12799 | Phf16 | Spon2         | -1 |
| 11409 | 13471 | Phf16 | Cln8          | 1  |
| 11409 | 13989 | Phf16 | Foxp3         | 1  |
| 11409 | 14050 | Phf16 | Il12rb1       | 1  |
| 11409 | 15021 | Phf16 | Ppargc1a      | 1  |
| 11409 | 15521 | Phf16 | Mast3         | 1  |
| 11409 | 15631 | Phf16 | Lpin1         | 1  |
| 11409 | 15882 | Phf16 | AA986860      | 1  |
| 11409 | 15914 | Phf16 | Dapk2         | -1 |
| 11409 | 16176 | Phf16 | St3gal5       | 1  |
| 11409 | 16474 | Phf16 | Bhlhb2        | 1  |
| 11409 | 16647 | Phf16 | D16H22S680E   | 1  |
| 11409 | 16690 | Phf16 | Tjp3          | -1 |
| 11409 | 17622 | Phf16 | Foxo1         | 1  |
| 11409 | 18027 | Phf16 | 5730403B10Rik | 1  |
| 11409 | 18314 | Phf16 | 4631416L12Rik | 1  |
| 11409 | 18785 | Phf16 | Angptl4       | 1  |
| 11409 | 18802 | Phf16 | Nit2          | -1 |
| 11409 | 19025 | Phf16 | Slc37a4       | 1  |
| 11409 | 19146 | Phf16 | N4bp2l1       | 1  |
| 11409 | 19234 | Phf16 | Nrg4          | 1  |
| 11409 | 19375 | Phf16 | Inhba         | -1 |
| 11409 | 19466 | Phf16 | Pptc7         | 1  |
| 11409 | 19671 | Phf16 | Upp2          | 1  |
| 11409 | 19723 | Phf16 | Pfkfb1        | 1  |
| 11409 | 20854 | Phf16 | Commd7        | -1 |
| 11409 | 21142 | Phf16 | Gm129         | 1  |
| 11409 | 21331 | Phf16 | Slc10a6       | 1  |
| 11409 | 21565 | Phf16 | Pde6h         | 1  |
| 11409 | 21733 | Phf16 | Rhebl1        | 1  |
| 11409 | 22936 | Phf16 | Rhobtb1       | 1  |

|       |       |               |               |    |
|-------|-------|---------------|---------------|----|
| 11409 | 23201 | Phf16         | S1pr1         | -1 |
| 11409 | 23202 | Phf16         | Olf559        | 1  |
| 11409 | 23248 | Phf16         | Tesk2         | 1  |
| 11409 | 23558 | Phf16         | MMT00030937   | 1  |
| 11422 | 5364  | Pltp          | Kif22         | 1  |
| 11422 | 11382 | Pltp          | Cdca3         | 1  |
| 11422 | 14472 | Pltp          | Ahcy          | -1 |
| 11423 | 11423 | 6720463M24Rik | 6720463M24Rik | 1  |
| 11432 | 3754  | Dynll2        | Dock6         | 1  |
| 11432 | 21202 | Dynll2        | Acly          | 1  |
| 11432 | 21575 | Dynll2        | Cyp2c55       | 1  |
| 11435 | 7135  | Rnaset2a      | Ezr           | 1  |
| 11435 | 7909  | Rnaset2a      | Oas3          | 1  |
| 11435 | 8750  | Rnaset2a      | 1700010I14Rik | 1  |
| 11435 | 11435 | Rnaset2a      | Rnaset2a      | 1  |
| 11435 | 17760 | Rnaset2a      | Ccr6          | -1 |
| 11435 | 21754 | Rnaset2a      | Synj2         | -1 |
| 11445 | 874   | Atp1a2        | Aldh1a7       | 1  |
| 11445 | 3265  | Atp1a2        | Dntt          | 1  |
| 11445 | 3836  | Atp1a2        | 2200001I15Rik | 1  |
| 11445 | 4674  | Atp1a2        | Cxcl12        | -1 |
| 11445 | 6030  | Atp1a2        | As3mt         | -1 |
| 11445 | 6370  | Atp1a2        | Aqp8          | 1  |
| 11445 | 8815  | Atp1a2        | Mx1           | 1  |
| 11445 | 10132 | Atp1a2        | Ces2          | 1  |
| 11445 | 11086 | Atp1a2        | Pnpla5        | 1  |
| 11445 | 12910 | Atp1a2        | 1110028A07Rik | 1  |
| 11445 | 12941 | Atp1a2        | Elovl5        | 1  |
| 11445 | 14017 | Atp1a2        | Ces5          | 1  |
| 11445 | 14147 | Atp1a2        | Acss2         | 1  |
| 11445 | 16114 | Atp1a2        | Lyplal1       | 1  |
| 11445 | 16222 | Atp1a2        | Adipor2       | 1  |
| 11445 | 16328 | Atp1a2        | Slc10a2       | 1  |
| 11445 | 17996 | Atp1a2        | Igfbp2        | -1 |
| 11445 | 18201 | Atp1a2        | MMT00060232   | 1  |
| 11445 | 20079 | Atp1a2        | MMT00019254   | -1 |
| 11445 | 21214 | Atp1a2        | Scd1          | 1  |
| 11445 | 21966 | Atp1a2        | Pcp4l1        | -1 |
| 11445 | 22138 | Atp1a2        | Ang           | -1 |
| 11445 | 22727 | Atp1a2        | Pdgfra        | -1 |
| 11445 | 23026 | Atp1a2        | Apom          | -1 |
| 11445 | 23648 | Atp1a2        | Pigy          | 1  |
| 11446 | 8632  | Dock8         | Igfbp1        | -1 |
| 11446 | 11446 | Dock8         | Dock8         | 1  |
| 11446 | 12910 | Dock8         | 1110028A07Rik | 1  |
| 11448 | 1985  | Arl1          | Pepd          | 1  |
| 11448 | 21211 | Arl1          | 2010301N04Rik | 1  |
| 11449 | 5804  | Ppap2a        | Thrsp         | -1 |
| 11449 | 9408  | Ppap2a        | Hmgcs2        | 1  |
| 11453 | 14296 | Adc           | Slc35b1       | -1 |
| 11465 | 1985  | Eif3k         | Pepd          | -1 |

|       |       |               |               |    |
|-------|-------|---------------|---------------|----|
| 11465 | 2599  | Eif3k         | Lsm14a        | 1  |
| 11465 | 4697  | Eif3k         | Cyp2a12       | -1 |
| 11465 | 11465 | Eif3k         | Eif3k         | 1  |
| 11465 | 16639 | Eif3k         | MMT00078937   | -1 |
| 11465 | 19462 | Eif3k         | 4933439C20Rik | -1 |
| 11481 | 8444  | Morn1         | Rdh16         | -1 |
| 11481 | 14017 | Morn1         | Ces5          | -1 |
| 11481 | 21214 | Morn1         | Scd1          | -1 |
| 11486 | 1416  | Tacc3         | 6720460F02Rik | 1  |
| 11486 | 5364  | Tacc3         | Kif22         | 1  |
| 11486 | 8416  | Tacc3         | Cdc20         | 1  |
| 11486 | 11382 | Tacc3         | Cdca3         | 1  |
| 11486 | 11422 | Tacc3         | Pltp          | 1  |
| 11486 | 17823 | Tacc3         | D2Ertd750e    | 1  |
| 11486 | 18299 | Tacc3         | MMT00035424   | 1  |
| 11486 | 19318 | Tacc3         | Plk1          | 1  |
| 11486 | 21692 | Tacc3         | MMT00013924   | 1  |
| 11486 | 21947 | Tacc3         | Cdca8         | 1  |
| 11486 | 22138 | Tacc3         | Ang           | -1 |
| 11500 | 327   | 3300001P08Rik | H2-Ea         | -1 |
| 11500 | 2938  | 3300001P08Rik | H2-T23        | -1 |
| 11500 | 10667 | 3300001P08Rik | H2-Eb1        | -1 |
| 11500 | 13493 | 3300001P08Rik | Ring1         | 1  |
| 11500 | 22822 | 3300001P08Rik | MMT00013433   | -1 |
| 11513 | 12941 | Serpinf1      | Elov5         | 1  |
| 11513 | 20967 | Serpinf1      | Fabp2         | 1  |
| 11515 | 21727 | EG544707      | Khk           | -1 |
| 11521 | 3196  | Dnaja1        | Tat           | 1  |
| 11534 | 13431 | Ndufs4        | MMT00038058   | -1 |
| 11534 | 15205 | Ndufs4        | MMT00030262   | -1 |
| 11542 | 8815  | Taz           | Mx1           | -1 |
| 11542 | 18201 | Taz           | MMT00060232   | -1 |
| 11542 | 21214 | Taz           | Scd1          | -1 |
| 11549 | 18851 | Depdc6        | Apip          | 1  |
| 11557 | 5364  | Blnk          | Kif22         | 1  |
| 11571 | 16361 | Bpnt1         | Olf703        | -1 |
| 11581 | 12910 | Cast          | 1110028A07Rik | 1  |
| 11590 | 482   | Cbx4          | Rnf43         | 1  |
| 11590 | 662   | Cbx4          | Mid1ip1       | 1  |
| 11590 | 2282  | Cbx4          | Cbx8          | 1  |
| 11590 | 2329  | Cbx4          | Wdr6          | 1  |
| 11590 | 3040  | Cbx4          | Bcl3          | 1  |
| 11590 | 3556  | Cbx4          | Al661453      | 1  |
| 11590 | 4391  | Cbx4          | Zfp467        | 1  |
| 11590 | 4404  | Cbx4          | Commd5        | 1  |
| 11590 | 6308  | Cbx4          | 2410075B13Rik | 1  |
| 11590 | 6393  | Cbx4          | 3110043O21Rik | -1 |
| 11590 | 6581  | Cbx4          | Cdc42ep1      | 1  |
| 11590 | 7136  | Cbx4          | Id3           | 1  |
| 11590 | 7315  | Cbx4          | EG624219      | 1  |
| 11590 | 7659  | Cbx4          | Rab30         | -1 |

|       |       |             |               |    |
|-------|-------|-------------|---------------|----|
| 11590 | 7901  | Cbx4        | Slc41a1       | 1  |
| 11590 | 8499  | Cbx4        | C430048L16Rik | -1 |
| 11590 | 8632  | Cbx4        | Igfbp1        | -1 |
| 11590 | 11590 | Cbx4        | Cbx4          | 1  |
| 11590 | 12315 | Cbx4        | Srebf1        | 1  |
| 11590 | 13489 | Cbx4        | D230025D16Rik | -1 |
| 11590 | 15604 | Cbx4        | Arl4a         | -1 |
| 11590 | 15990 | Cbx4        | Dnmbp         | -1 |
| 11590 | 16251 | Cbx4        | G6pc          | -1 |
| 11590 | 16517 | Cbx4        | D4Wsu53e      | -1 |
| 11590 | 17660 | Cbx4        | Nlrp12        | -1 |
| 11590 | 18083 | Cbx4        | Gadd45a       | 1  |
| 11590 | 18785 | Cbx4        | Angptl4       | -1 |
| 11590 | 18903 | Cbx4        | Crem          | -1 |
| 11590 | 21160 | Cbx4        | Irs2          | -1 |
| 11590 | 21687 | Cbx4        | Zbtb7b        | 1  |
| 11590 | 21901 | Cbx4        | BC035537      | 1  |
| 11590 | 22216 | Cbx4        | Sp5           | 1  |
| 11590 | 22373 | Cbx4        | Txnip         | -1 |
| 11590 | 22561 | Cbx4        | Whdc1         | 1  |
| 11590 | 23668 | Cbx4        | Gse1          | 1  |
| 11593 | 14052 | Usf1        | EG226654      | -1 |
| 11593 | 15844 | Usf1        | Klhdc9        | -1 |
| 11598 | 8210  | MMT00031533 | Hspa12a       | 1  |
| 11598 | 10387 | MMT00031533 | 4933427D06Rik | 1  |
| 11598 | 14550 | MMT00031533 | Acot7         | 1  |
| 11598 | 20628 | MMT00031533 | Hoxd10        | 1  |
| 11598 | 21099 | MMT00031533 | Rapgef6       | 1  |
| 11598 | 21218 | MMT00031533 | Col9a2        | 1  |
| 11610 | 8632  | Hey1        | Igfbp1        | -1 |
| 11620 | 11620 | Zfr         | Zfr           | 1  |
| 11621 | 7975  | Mixl1       | Lancl1        | 1  |
| 11621 | 18714 | Mixl1       | Farsb         | 1  |
| 11621 | 23119 | Mixl1       | Cps1          | 1  |
| 11633 | 18083 | Ier3        | Gadd45a       | 1  |
| 11648 | 7088  | Lrfn2       | Slc37a1       | 1  |
| 11648 | 12862 | Lrfn2       | Trem2         | 1  |
| 11649 | 8815  | Hfe         | Mx1           | 1  |
| 11649 | 10189 | Hfe         | Cage1         | 1  |
| 11649 | 11094 | Hfe         | Slc17a3       | -1 |
| 11649 | 11649 | Hfe         | Hfe           | 1  |
| 11649 | 12910 | Hfe         | 1110028A07Rik | 1  |
| 11649 | 15698 | Hfe         | Them2         | -1 |
| 11649 | 17528 | Hfe         | Gmnn          | -1 |
| 11649 | 20759 | Hfe         | Slc17a1       | -1 |
| 11649 | 23118 | Hfe         | Ttrap         | -1 |
| 11652 | 10612 | Ddx56       | Slc24a6       | -1 |
| 11652 | 21143 | Ddx56       | Ypel3         | -1 |
| 11656 | 1941  | Prkag2      | MMT00079618   | 1  |
| 11656 | 2322  | Prkag2      | Tuba4a        | 1  |
| 11656 | 7151  | Prkag2      | MMT00007982   | 1  |

|       |       |        |               |    |
|-------|-------|--------|---------------|----|
| 11656 | 20341 | Prkag2 | Srebf2        | 1  |
| 11671 | 3689  | Postn  | Adh1          | -1 |
| 11682 | 10911 | Nutf2  | Mcl1          | -1 |
| 11685 | 1572  | Cd83   | Saa3          | 1  |
| 11685 | 3228  | Cd83   | Saa1          | 1  |
| 11685 | 5364  | Cd83   | Kif22         | 1  |
| 11685 | 5934  | Cd83   | S100a10       | 1  |
| 11685 | 15752 | Cd83   | Cyp4a14       | -1 |
| 11685 | 17629 | Cd83   | Saa2          | 1  |
| 11701 | 939   | Oas1c  | Daxx          | 1  |
| 11701 | 1533  | Oas1c  | BC013712      | 1  |
| 11701 | 1957  | Oas1c  | Mansc1        | 1  |
| 11701 | 2200  | Oas1c  | BC006779      | 1  |
| 11701 | 2224  | Oas1c  | Oasl2         | 1  |
| 11701 | 2550  | Oas1c  | MMT00036681   | 1  |
| 11701 | 3426  | Oas1c  | Hap1          | 1  |
| 11701 | 3587  | Oas1c  | MMT00041940   | -1 |
| 11701 | 3594  | Oas1c  | Rasa4         | 1  |
| 11701 | 4114  | Oas1c  | Parp12        | 1  |
| 11701 | 4426  | Oas1c  | Iigp2         | 1  |
| 11701 | 4508  | Oas1c  | Ifit1         | 1  |
| 11701 | 5044  | Oas1c  | Ifi35         | 1  |
| 11701 | 5250  | Oas1c  | Ifit2         | 1  |
| 11701 | 5406  | Oas1c  | Cd207         | -1 |
| 11701 | 5766  | Oas1c  | 5033414D02Rik | 1  |
| 11701 | 6021  | Oas1c  | MMT00008784   | -1 |
| 11701 | 6824  | Oas1c  | Irf7          | 1  |
| 11701 | 7069  | Oas1c  | Ube1l         | 1  |
| 11701 | 7105  | Oas1c  | Plac8         | 1  |
| 11701 | 7140  | Oas1c  | Mtbp          | 1  |
| 11701 | 7238  | Oas1c  | Pycard        | 1  |
| 11701 | 7284  | Oas1c  | MMT00008674   | 1  |
| 11701 | 7963  | Oas1c  | Rxrg          | 1  |
| 11701 | 8122  | Oas1c  | Hexim1        | -1 |
| 11701 | 8555  | Oas1c  | H2-M3         | 1  |
| 11701 | 8659  | Oas1c  | Psmb8         | 1  |
| 11701 | 8670  | Oas1c  | MMT00051613   | -1 |
| 11701 | 8800  | Oas1c  | Rnf213        | 1  |
| 11701 | 9258  | Oas1c  | P4ha1         | -1 |
| 11701 | 9616  | Oas1c  | AI451557      | 1  |
| 11701 | 9717  | Oas1c  | Psmb9         | 1  |
| 11701 | 9829  | Oas1c  | Stoml1        | 1  |
| 11701 | 9847  | Oas1c  | Ifi27         | 1  |
| 11701 | 10109 | Oas1c  | Gbp3          | 1  |
| 11701 | 10606 | Oas1c  | Apbb1ip       | 1  |
| 11701 | 10769 | Oas1c  | Hnrnpd        | 1  |
| 11701 | 11043 | Oas1c  | Hsph1         | -1 |
| 11701 | 11204 | Oas1c  | AI451617      | 1  |
| 11701 | 11214 | Oas1c  | MMT00049207   | -1 |
| 11701 | 11265 | Oas1c  | Irgm          | 1  |
| 11701 | 11701 | Oas1c  | Oas1c         | 1  |



|       |       |       |               |    |
|-------|-------|-------|---------------|----|
| 11701 | 12126 | Oas1c | Znfx1         | 1  |
| 11701 | 12398 | Oas1c | Ifi44         | 1  |
| 11701 | 12969 | Oas1c | Xaf1          | 1  |
| 11701 | 13156 | Oas1c | Ifit3         | 1  |
| 11701 | 13654 | Oas1c | Stat1         | 1  |
| 11701 | 14260 | Oas1c | Mkl           | 1  |
| 11701 | 14506 | Oas1c | Slc15a3       | 1  |
| 11701 | 14603 | Oas1c | Ly6e          | 1  |
| 11701 | 14611 | Oas1c | Ddx60         | 1  |
| 11701 | 14880 | Oas1c | Ms4a4c        | 1  |
| 11701 | 14954 | Oas1c | Rab19         | 1  |
| 11701 | 15074 | Oas1c | Usp18         | 1  |
| 11701 | 15504 | Oas1c | Mx2           | 1  |
| 11701 | 15675 | Oas1c | MMT00077535   | -1 |
| 11701 | 16182 | Oas1c | Oasl1         | 1  |
| 11701 | 16199 | Oas1c | Samhd1        | 1  |
| 11701 | 16521 | Oas1c | Adar          | 1  |
| 11701 | 16753 | Oas1c | Hfe2          | 1  |
| 11701 | 17197 | Oas1c | Igtp          | 1  |
| 11701 | 18186 | Oas1c | Parp14        | 1  |
| 11701 | 18373 | Oas1c | Dnajb1        | -1 |
| 11701 | 19189 | Oas1c | Sp100         | 1  |
| 11701 | 19262 | Oas1c | Cd274         | 1  |
| 11701 | 19738 | Oas1c | Lgals3bp      | 1  |
| 11701 | 20076 | Oas1c | Dbnl          | 1  |
| 11701 | 20791 | Oas1c | MMT00014813   | 1  |
| 11701 | 20997 | Oas1c | MMT00028135   | 1  |
| 11701 | 21351 | Oas1c | Shisa5        | 1  |
| 11701 | 21549 | Oas1c | Rtp4          | 1  |
| 11701 | 21775 | Oas1c | MMT00051649   | 1  |
| 11701 | 21824 | Oas1c | 5830443L24Rik | 1  |
| 11701 | 22037 | Oas1c | Oas1g         | 1  |
| 11701 | 23208 | Oas1c | Hck           | 1  |
| 11709 | 8444  | Asb2  | Rdh16         | -1 |
| 11718 | 250   | Nmb   | Tubb2a-ps2    | -1 |
| 11718 | 402   | Nmb   | Timp3         | 1  |
| 11718 | 433   | Nmb   | Pla2g12b      | -1 |
| 11718 | 437   | Nmb   | Ndrg1         | -1 |
| 11718 | 609   | Nmb   | MMT00060868   | -1 |
| 11718 | 719   | Nmb   | Usp2          | 1  |
| 11718 | 1935  | Nmb   | 2810439F02Rik | 1  |
| 11718 | 2003  | Nmb   | Ppapdc1       | -1 |
| 11718 | 2294  | Nmb   | AU040829      | 1  |
| 11718 | 2399  | Nmb   | MMT00060167   | -1 |
| 11718 | 2529  | Nmb   | Hmcn2         | 1  |
| 11718 | 2636  | Nmb   | Tars          | -1 |
| 11718 | 2766  | Nmb   | Elp4          | -1 |
| 11718 | 2829  | Nmb   | Lrfn3         | -1 |
| 11718 | 2850  | Nmb   | Slc16a6       | -1 |
| 11718 | 3214  | Nmb   | Dnmt3b        | -1 |
| 11718 | 3410  | Nmb   | Paqr9         | -1 |

|       |       |     |               |    |
|-------|-------|-----|---------------|----|
| 11718 | 3502  | Nmb | Gde1          | 1  |
| 11718 | 3789  | Nmb | 4833442J19Rik | 1  |
| 11718 | 3804  | Nmb | MMT00015534   | -1 |
| 11718 | 4333  | Nmb | Sumo3         | -1 |
| 11718 | 4534  | Nmb | Ndel1         | 1  |
| 11718 | 4708  | Nmb | Traf3ip2      | -1 |
| 11718 | 5068  | Nmb | Afap1l2       | -1 |
| 11718 | 5183  | Nmb | St5           | -1 |
| 11718 | 5187  | Nmb | Speer4f       | 1  |
| 11718 | 5374  | Nmb | Chka          | -1 |
| 11718 | 5734  | Nmb | EG619653      | 1  |
| 11718 | 5802  | Nmb | Mad2l2        | -1 |
| 11718 | 5849  | Nmb | 2310031A18Rik | -1 |
| 11718 | 5974  | Nmb | Arntl         | -1 |
| 11718 | 6028  | Nmb | Alas1         | 1  |
| 11718 | 6213  | Nmb | Ccl2          | -1 |
| 11718 | 6386  | Nmb | Por           | 1  |
| 11718 | 6394  | Nmb | Fbxo6         | -1 |
| 11718 | 6490  | Nmb | Ii1r1         | 1  |
| 11718 | 6657  | Nmb | Irf6          | -1 |
| 11718 | 6756  | Nmb | Sds           | 1  |
| 11718 | 6990  | Nmb | Nr1i2         | 1  |
| 11718 | 7414  | Nmb | Clpx          | -1 |
| 11718 | 7839  | Nmb | Asl           | 1  |
| 11718 | 7862  | Nmb | Cpsf4l        | 1  |
| 11718 | 8328  | Nmb | Klhdc8a       | -1 |
| 11718 | 8399  | Nmb | Herpud1       | 1  |
| 11718 | 8641  | Nmb | Slc7a2        | 1  |
| 11718 | 9495  | Nmb | Srms          | -1 |
| 11718 | 9718  | Nmb | Fmo5          | 1  |
| 11718 | 10273 | Nmb | Gpt2          | 1  |
| 11718 | 10775 | Nmb | Slc16a1       | -1 |
| 11718 | 11129 | Nmb | Ankhd1        | 1  |
| 11718 | 11574 | Nmb | Gne           | 1  |
| 11718 | 11599 | Nmb | Coq10b        | 1  |
| 11718 | 11740 | Nmb | Cpm           | 1  |
| 11718 | 11741 | Nmb | Slc30a10      | -1 |
| 11718 | 11807 | Nmb | Fbxo31        | 1  |
| 11718 | 12420 | Nmb | Klhl21        | 1  |
| 11718 | 12799 | Nmb | Spon2         | -1 |
| 11718 | 12839 | Nmb | Fh1           | 1  |
| 11718 | 12941 | Nmb | Elov5         | -1 |
| 11718 | 12982 | Nmb | Cars          | -1 |
| 11718 | 13289 | Nmb | Dusp10        | -1 |
| 11718 | 14380 | Nmb | MMT00051866   | -1 |
| 11718 | 14989 | Nmb | Map3k5        | 1  |
| 11718 | 15481 | Nmb | 1110067D22Rik | -1 |
| 11718 | 15631 | Nmb | Lpin1         | 1  |
| 11718 | 15709 | Nmb | Tceal1        | 1  |
| 11718 | 15824 | Nmb | D19Ertd721e   | -1 |
| 11718 | 16580 | Nmb | Tnfaip2       | -1 |

|       |       |        |               |    |
|-------|-------|--------|---------------|----|
| 11718 | 16647 | Nmb    | D16H22S680E   | 1  |
| 11718 | 16690 | Nmb    | Tjp3          | -1 |
| 11718 | 17247 | Nmb    | A030007L17Rik | -1 |
| 11718 | 17323 | Nmb    | Tubb6         | -1 |
| 11718 | 17352 | Nmb    | Cebpb         | 1  |
| 11718 | 17622 | Nmb    | Foxo1         | 1  |
| 11718 | 17876 | Nmb    | Tubb4         | -1 |
| 11718 | 18027 | Nmb    | 5730403B10Rik | 1  |
| 11718 | 18069 | Nmb    | Gpt           | 1  |
| 11718 | 18179 | Nmb    | Dbp           | 1  |
| 11718 | 18300 | Nmb    | Arg1          | 1  |
| 11718 | 18827 | Nmb    | Oprs1         | -1 |
| 11718 | 19025 | Nmb    | Slc37a4       | 1  |
| 11718 | 19115 | Nmb    | Rab32         | -1 |
| 11718 | 19234 | Nmb    | Nrg4          | 1  |
| 11718 | 19375 | Nmb    | Inhba         | -1 |
| 11718 | 19466 | Nmb    | Pptc7         | 1  |
| 11718 | 19671 | Nmb    | Upp2          | 1  |
| 11718 | 19790 | Nmb    | Polg2         | 1  |
| 11718 | 20803 | Nmb    | Tmem50a       | 1  |
| 11718 | 21142 | Nmb    | Gm129         | 1  |
| 11718 | 21331 | Nmb    | Slc10a6       | 1  |
| 11718 | 21565 | Nmb    | Pde6h         | 1  |
| 11718 | 21794 | Nmb    | Pfkip         | -1 |
| 11718 | 21969 | Nmb    | Tk1           | 1  |
| 11718 | 22290 | Nmb    | Tubb2a        | -1 |
| 11718 | 22630 | Nmb    | MMT00034355   | -1 |
| 11718 | 22681 | Nmb    | Gm88          | 1  |
| 11718 | 22936 | Nmb    | Rhobtb1       | 1  |
| 11718 | 23248 | Nmb    | Tesk2         | 1  |
| 11724 | 607   | Tuba3a | Me1           | 1  |
| 11724 | 874   | Tuba3a | Aldh1a7       | 1  |
| 11724 | 2314  | Tuba3a | Zswim6        | 1  |
| 11724 | 3696  | Tuba3a | Elovl6        | 1  |
| 11724 | 4351  | Tuba3a | Plxnb1        | -1 |
| 11724 | 4517  | Tuba3a | Itih3         | -1 |
| 11724 | 4674  | Tuba3a | Cxcl12        | -1 |
| 11724 | 5425  | Tuba3a | Ung           | -1 |
| 11724 | 5934  | Tuba3a | S100a10       | 1  |
| 11724 | 6044  | Tuba3a | Sucnr1        | 1  |
| 11724 | 6193  | Tuba3a | Lactb2        | 1  |
| 11724 | 6370  | Tuba3a | Aqp8          | 1  |
| 11724 | 7887  | Tuba3a | 4930418G15Rik | 1  |
| 11724 | 8444  | Tuba3a | Rdh16         | 1  |
| 11724 | 8815  | Tuba3a | Mx1           | 1  |
| 11724 | 10961 | Tuba3a | Pgd           | 1  |
| 11724 | 11086 | Tuba3a | Pnpla5        | 1  |
| 11724 | 11375 | Tuba3a | Derl2         | 1  |
| 11724 | 11462 | Tuba3a | Gpam          | 1  |
| 11724 | 12219 | Tuba3a | Cyb5b         | 1  |
| 11724 | 12910 | Tuba3a | 1110028A07Rik | 1  |

|       |       |            |               |    |
|-------|-------|------------|---------------|----|
| 11724 | 12941 | Tuba3a     | Elov5         | 1  |
| 11724 | 14017 | Tuba3a     | Ces5          | 1  |
| 11724 | 14147 | Tuba3a     | Acss2         | 1  |
| 11724 | 14323 | Tuba3a     | Scarb1        | -1 |
| 11724 | 15059 | Tuba3a     | Mogat1        | 1  |
| 11724 | 16222 | Tuba3a     | Adipor2       | 1  |
| 11724 | 18201 | Tuba3a     | MMT00060232   | 1  |
| 11724 | 18286 | Tuba3a     | Slc41a3       | -1 |
| 11724 | 18827 | Tuba3a     | Oprs1         | 1  |
| 11724 | 20019 | Tuba3a     | Qdpr          | 1  |
| 11724 | 20058 | Tuba3a     | Dnaic1        | -1 |
| 11724 | 20079 | Tuba3a     | MMT00019254   | -1 |
| 11724 | 21079 | Tuba3a     | Tfpi2         | 1  |
| 11724 | 21202 | Tuba3a     | Acly          | 1  |
| 11724 | 21214 | Tuba3a     | Scd1          | 1  |
| 11724 | 21251 | Tuba3a     | Cpt1a         | -1 |
| 11724 | 21575 | Tuba3a     | Cyp2c55       | 1  |
| 11724 | 21793 | Tuba3a     | Pla2g12a      | -1 |
| 11724 | 22138 | Tuba3a     | Ang           | -1 |
| 11724 | 22732 | Tuba3a     | Cyb5b         | 1  |
| 11724 | 22821 | Tuba3a     | Tmem135       | 1  |
| 11724 | 23008 | Tuba3a     | Ctsz          | -1 |
| 11724 | 23026 | Tuba3a     | Apom          | -1 |
| 11724 | 23549 | Tuba3a     | Es22          | 1  |
| 11725 | 11406 | Itln1      | Ifi203        | 1  |
| 11725 | 14052 | Itln1      | EG226654      | -1 |
| 11725 | 15844 | Itln1      | Klhdc9        | -1 |
| 11725 | 18276 | Itln1      | Apoa2         | -1 |
| 11725 | 19844 | Itln1      | Ngf           | -1 |
| 11725 | 22043 | Itln1      | Rdh8          | -1 |
| 11740 | 250   | Cpm        | Tubb2a-ps2    | -1 |
| 11740 | 609   | Cpm        | MMT00060868   | -1 |
| 11740 | 2829  | Cpm        | Lrfn3         | -1 |
| 11740 | 2850  | Cpm        | Slc16a6       | -1 |
| 11740 | 3214  | Cpm        | Dnmt3b        | -1 |
| 11740 | 4286  | Cpm        | Ptp4a1        | 1  |
| 11740 | 4708  | Cpm        | Traf3ip2      | -1 |
| 11740 | 5183  | Cpm        | St5           | -1 |
| 11740 | 6386  | Cpm        | Por           | 1  |
| 11740 | 8328  | Cpm        | Klhdc8a       | -1 |
| 11740 | 11129 | Cpm        | Ankhd1        | 1  |
| 11740 | 12799 | Cpm        | Spon2         | -1 |
| 11740 | 12982 | Cpm        | Cars          | -1 |
| 11740 | 16580 | Cpm        | Tnfaip2       | -1 |
| 11740 | 16647 | Cpm        | D16H22S680E   | 1  |
| 11740 | 18314 | Cpm        | 4631416L12Rik | 1  |
| 11740 | 18827 | Cpm        | Oprs1         | -1 |
| 11740 | 19671 | Cpm        | Upp2          | 1  |
| 11740 | 22290 | Cpm        | Tubb2a        | -1 |
| 11740 | 22630 | Cpm        | MMT00034355   | -1 |
| 11753 | 12910 | CU075549.1 | 1110028A07Rik | -1 |

|       |       |               |                    |    |
|-------|-------|---------------|--------------------|----|
| 11753 | 15135 | CU075549.1    | Col5a3             | -1 |
| 11761 | 7944  | Ankrd37       | AI132487           | -1 |
| 11761 | 22443 | Ankrd37       | Tuba1c             | 1  |
| 11762 | 3446  | Ggt5          | Eno1               | -1 |
| 11762 | 10554 | Ggt5          | ENSMUSG00000074179 | -1 |
| 11762 | 13293 | Ggt5          | Gsta2              | -1 |
| 11762 | 18113 | Ggt5          | MMT00034400        | -1 |
| 11762 | 19066 | Ggt5          | MMT00012632        | -1 |
| 11762 | 20058 | Ggt5          | Dnaic1             | 1  |
| 11762 | 20804 | Ggt5          | Eno1               | -1 |
| 11762 | 21727 | Ggt5          | Khk                | -1 |
| 11776 | 16617 | Ifi30         | Sh2d4a             | -1 |
| 11785 | 21214 | MMT00075578   | Scd1               | 1  |
| 11789 | 11789 | Ccdc90a       | Ccdc90a            | 1  |
| 11789 | 15022 | Ccdc90a       | Tmem14c            | 1  |
| 11795 | 6376  | Gps2          | Nle1               | -1 |
| 11797 | 1637  | Sbk1          | MMT00071316        | 1  |
| 11797 | 2721  | Sbk1          | Inmt               | 1  |
| 11797 | 9718  | Sbk1          | Fmo5               | 1  |
| 11797 | 10554 | Sbk1          | ENSMUSG00000074179 | 1  |
| 11797 | 13293 | Sbk1          | Gsta2              | 1  |
| 11797 | 16772 | Sbk1          | MMT00010554        | 1  |
| 11797 | 21727 | Sbk1          | Khk                | 1  |
| 11798 | 12367 | A530082C11Rik | MMT00072365        | -1 |
| 11798 | 12784 | A530082C11Rik | Nudt6              | 1  |
| 11798 | 13423 | A530082C11Rik | ENSMUSG00000053749 | 1  |
| 11798 | 18790 | A530082C11Rik | Car3               | 1  |
| 11807 | 12219 | Fbxo31        | Cyb5b              | -1 |
| 11807 | 17996 | Fbxo31        | Igfbp2             | 1  |
| 11807 | 19737 | Fbxo31        | Enpp1              | 1  |
| 11807 | 20079 | Fbxo31        | MMT00019254        | 1  |
| 11807 | 21202 | Fbxo31        | Acly               | -1 |
| 11807 | 22732 | Fbxo31        | Cyb5b              | -1 |
| 11808 | 7659  | Pck1          | Rab30              | 1  |
| 11812 | 676   | Mrpl16        | Ms4a4d             | 1  |
| 11812 | 11369 | Mrpl16        | Stx3               | 1  |
| 11812 | 11812 | Mrpl16        | Mrpl16             | 1  |
| 11812 | 17447 | Mrpl16        | Ctsf               | 1  |
| 11816 | 11816 | Ccdc99        | Ccdc99             | 1  |
| 11817 | 3410  | Dpysl3        | Paqr9              | 1  |
| 11817 | 11741 | Dpysl3        | Slc30a10           | 1  |
| 11820 | 1257  | Abcg4         | Slc25a45           | 1  |
| 11820 | 17656 | Abcg4         | Hdhd3              | 1  |
| 11825 | 15205 | MMT00024508   | MMT00030262        | -1 |
| 11836 | 3502  | Csf1r         | Gde1               | -1 |
| 11836 | 5364  | Csf1r         | Kif22              | 1  |
| 11836 | 8416  | Csf1r         | Cdc20              | 1  |
| 11836 | 11382 | Csf1r         | Cdca3              | 1  |
| 11836 | 11599 | Csf1r         | Coq10b             | -1 |
| 11836 | 14472 | Csf1r         | Ahcy               | -1 |
| 11836 | 15320 | Csf1r         | MMT00017479        | -1 |

|       |       |       |                    |    |
|-------|-------|-------|--------------------|----|
| 11836 | 15709 | Csf1r | Tceal1             | -1 |
| 11836 | 17247 | Csf1r | A030007L17Rik      | 1  |
| 11845 | 7316  | Psme1 | Ifi204             | 1  |
| 11859 | 607   | Poln  | Me1                | 1  |
| 11859 | 760   | Poln  | Akr1c19            | 1  |
| 11859 | 874   | Poln  | Aldh1a7            | 1  |
| 11859 | 1129  | Poln  | Gsta4              | 1  |
| 11859 | 2308  | Poln  | A930005I04Rik      | 1  |
| 11859 | 3356  | Poln  | Adhfe1             | 1  |
| 11859 | 3377  | Poln  | Cs                 | 1  |
| 11859 | 5884  | Poln  | Gstm2              | 1  |
| 11859 | 6085  | Poln  | MMT00007454        | -1 |
| 11859 | 7602  | Poln  | Pcca               | 1  |
| 11859 | 8444  | Poln  | Rdh16              | 1  |
| 11859 | 8815  | Poln  | Mx1                | 1  |
| 11859 | 9427  | Poln  | Nqo2               | 1  |
| 11859 | 10132 | Poln  | Ces2               | 1  |
| 11859 | 10554 | Poln  | ENSMUSG00000074179 | 1  |
| 11859 | 11859 | Poln  | Poln               | -1 |
| 11859 | 11946 | Poln  | MMT00030953        | 1  |
| 11859 | 12213 | Poln  | Entpd5             | 1  |
| 11859 | 12385 | Poln  | Mrpl33             | -1 |
| 11859 | 13293 | Poln  | Gsta2              | 1  |
| 11859 | 13431 | Poln  | MMT00038058        | -1 |
| 11859 | 14055 | Poln  | MMT00050438        | -1 |
| 11859 | 15205 | Poln  | MMT00030262        | -1 |
| 11859 | 15500 | Poln  | MMT00081411        | -1 |
| 11859 | 17880 | Poln  | Ncald              | -1 |
| 11859 | 18201 | Poln  | MMT00060232        | 1  |
| 11859 | 18549 | Poln  | Robo1              | 1  |
| 11859 | 20058 | Poln  | Dnaic1             | -1 |
| 11859 | 21214 | Poln  | Scd1               | 1  |
| 11859 | 21575 | Poln  | Cyp2c55            | 1  |
| 11859 | 22907 | Poln  | MMT00054594        | -1 |
| 11859 | 22978 | Poln  | MMT00043176        | -1 |
| 11864 | 11864 | Dis3l | Dis3l              | 1  |
| 11867 | 184   | Rcor3 | Sorbs1             | -1 |
| 11867 | 2051  | Rcor3 | Ddx27              | -1 |
| 11867 | 11201 | Rcor3 | Sunc1              | -1 |
| 11867 | 18099 | Rcor3 | Nfx1               | -1 |
| 11867 | 20194 | Rcor3 | Pnlnc1             | -1 |
| 11869 | 607   | Pcsk5 | Me1                | -1 |
| 11869 | 8444  | Pcsk5 | Rdh16              | -1 |
| 11869 | 8815  | Pcsk5 | Mx1                | -1 |
| 11869 | 12910 | Pcsk5 | 1110028A07Rik      | -1 |
| 11869 | 18201 | Pcsk5 | MMT00060232        | -1 |
| 11869 | 20058 | Pcsk5 | Dnaic1             | 1  |
| 11869 | 21214 | Pcsk5 | Scd1               | -1 |
| 11869 | 21727 | Pcsk5 | Khk                | -1 |
| 11872 | 2743  | Vamp5 | Tcf3               | 1  |
| 11872 | 3703  | Vamp5 | Ggcx               | 1  |

|       |       |               |               |    |
|-------|-------|---------------|---------------|----|
| 11872 | 11872 | Vamp5         | Vamp5         | 1  |
| 11872 | 15384 | Vamp5         | Mat2a         | 1  |
| 11872 | 15708 | Vamp5         | Retsat        | 1  |
| 11873 | 294   | Mmp2          | Ehhadh        | -1 |
| 11873 | 5364  | Mmp2          | Kif22         | 1  |
| 11873 | 11382 | Mmp2          | Cdca3         | 1  |
| 11873 | 13293 | Mmp2          | Gsta2         | -1 |
| 11873 | 15205 | Mmp2          | MMT00030262   | 1  |
| 11873 | 15500 | Mmp2          | MMT00081411   | 1  |
| 11873 | 18113 | Mmp2          | MMT00034400   | -1 |
| 11873 | 19066 | Mmp2          | MMT00012632   | -1 |
| 11873 | 20058 | Mmp2          | Dnaic1        | 1  |
| 11873 | 20804 | Mmp2          | Eno1          | -1 |
| 11873 | 21214 | Mmp2          | Scd1          | -1 |
| 11873 | 21727 | Mmp2          | Khk           | -1 |
| 11880 | 4056  | Svep1         | Tnfaip8l1     | 1  |
| 11880 | 6193  | Svep1         | Lactb2        | -1 |
| 11880 | 12955 | Svep1         | Atp5o         | -1 |
| 11880 | 16720 | Svep1         | Mtmr7         | -1 |
| 11880 | 22406 | Svep1         | Vnn1          | 1  |
| 11880 | 23640 | Svep1         | Bdh1          | 1  |
| 11886 | 22443 | Cep250        | Tuba1c        | -1 |
| 11886 | 23253 | Cep250        | D030011O10Rik | 1  |
| 11888 | 1985  | Myadm         | Pepd          | 1  |
| 11888 | 2599  | Myadm         | Lsm14a        | -1 |
| 11888 | 4697  | Myadm         | Cyp2a12       | 1  |
| 11888 | 5352  | Myadm         | Pdcd2l        | -1 |
| 11888 | 6513  | Myadm         | Qpctl         | -1 |
| 11888 | 7761  | Myadm         | Nudt19        | -1 |
| 11888 | 9122  | Myadm         | Sepw1         | -1 |
| 11888 | 9322  | Myadm         | Relt          | 1  |
| 11888 | 11321 | Myadm         | 2310014L17Rik | 1  |
| 11888 | 11465 | Myadm         | Eif3k         | -1 |
| 11888 | 11888 | Myadm         | Myadm         | 1  |
| 11888 | 16639 | Myadm         | MMT00078937   | 1  |
| 11888 | 17314 | Myadm         | Napa          | 1  |
| 11888 | 19462 | Myadm         | 4933439C20Rik | 1  |
| 11888 | 20606 | Myadm         | MMT00042166   | 1  |
| 11888 | 23247 | Myadm         | Ercc1         | 1  |
| 11891 | 12910 | Rtn2          | 1110028A07Rik | 1  |
| 11892 | 6193  | D430042O09Rik | Lactb2        | -1 |
| 11895 | 7619  | 2810405J04Rik | Pik3ip1       | -1 |
| 11895 | 10911 | 2810405J04Rik | Mcl1          | -1 |
| 11895 | 11095 | 2810405J04Rik | Bag3          | 1  |
| 11895 | 18201 | 2810405J04Rik | MMT00060232   | 1  |
| 11915 | 607   | Calm1         | Me1           | 1  |
| 11915 | 874   | Calm1         | Aldh1a7       | 1  |
| 11915 | 8444  | Calm1         | Rdh16         | 1  |
| 11915 | 8815  | Calm1         | Mx1           | 1  |
| 11915 | 14147 | Calm1         | Acss2         | 1  |
| 11915 | 18201 | Calm1         | MMT00060232   | 1  |

|       |       |                    |               |    |
|-------|-------|--------------------|---------------|----|
| 11915 | 20079 | Calm1              | MMT00019254   | -1 |
| 11915 | 21214 | Calm1              | Scd1          | 1  |
| 11917 | 14870 | Fahd1              | Capn2         | -1 |
| 11922 | 12910 | Cox19              | 1110028A07Rik | 1  |
| 11923 | 3868  | Pde3b              | Ebpl          | -1 |
| 11923 | 6370  | Pde3b              | Aqp8          | -1 |
| 11923 | 12941 | Pde3b              | Elovl5        | -1 |
| 11923 | 21966 | Pde3b              | Pcp4l1        | 1  |
| 11923 | 22138 | Pde3b              | Ang           | 1  |
| 11926 | 18606 | Ampd2              | A230074B11Rik | -1 |
| 11930 | 22138 | Igh-VJ558          | Ang           | -1 |
| 11932 | 707   | Pkp1               | Bdnf          | 1  |
| 11932 | 719   | Pkp1               | Usp2          | 1  |
| 11932 | 1711  | Pkp1               | Grhl1         | -1 |
| 11932 | 2721  | Pkp1               | Inmt          | 1  |
| 11932 | 5804  | Pkp1               | Thrsp         | 1  |
| 11932 | 5849  | Pkp1               | 2310031A18Rik | -1 |
| 11932 | 8328  | Pkp1               | Klhdc8a       | -1 |
| 11932 | 8444  | Pkp1               | Rdh16         | 1  |
| 11932 | 19790 | Pkp1               | Polg2         | 1  |
| 11932 | 20058 | Pkp1               | Dnaic1        | -1 |
| 11940 | 9707  | Chi3l1             | Golt1a        | -1 |
| 11951 | 6193  | Denr               | Lactb2        | 1  |
| 11951 | 8815  | Denr               | Mx1           | 1  |
| 11951 | 12910 | Denr               | 1110028A07Rik | 1  |
| 11951 | 20058 | Denr               | Dnaic1        | -1 |
| 11951 | 21214 | Denr               | Scd1          | 1  |
| 11955 | 18069 | Ccl6               | Gpt           | -1 |
| 11956 | 8444  | Bmper              | Rdh16         | -1 |
| 11956 | 20058 | Bmper              | Dnaic1        | 1  |
| 11957 | 8399  | Elmod1             | Herpud1       | 1  |
| 11968 | 1416  | Cenpm              | 6720460F02Rik | 1  |
| 11968 | 18299 | Cenpm              | MMT00035424   | 1  |
| 11968 | 21692 | Cenpm              | MMT00013924   | 1  |
| 11970 | 8742  | AA408296           | Tmem39a       | 1  |
| 11974 | 3804  | 1700023B02Rik      | MMT00015534   | -1 |
| 11984 | 607   | N6amt2             | Me1           | 1  |
| 11984 | 874   | N6amt2             | Aldh1a7       | 1  |
| 11984 | 3377  | N6amt2             | Cs            | 1  |
| 11984 | 6193  | N6amt2             | Lactb2        | 1  |
| 11984 | 14147 | N6amt2             | Acss2         | 1  |
| 11984 | 18201 | N6amt2             | MMT00060232   | 1  |
| 11984 | 21214 | N6amt2             | Scd1          | 1  |
| 11984 | 21793 | N6amt2             | Pla2g12a      | -1 |
| 11992 | 14017 | Mrpl19             | Ces5          | 1  |
| 12000 | 1310  | Tmem16h            | Cabc1         | 1  |
| 12000 | 21575 | Tmem16h            | Cyp2c55       | 1  |
| 12004 | 12004 | Lgals6             | Lgals6        | 1  |
| 12024 | 6824  | OTTMUSG00000016644 | Irf7          | 1  |
| 12024 | 12969 | OTTMUSG00000016644 | Xaf1          | 1  |
| 12024 | 14880 | OTTMUSG00000016644 | Ms4a4c        | 1  |



|       |       |               |               |    |
|-------|-------|---------------|---------------|----|
| 12029 | 3836  | Tcf19         | 2200001I15Rik | 1  |
| 12029 | 5364  | Tcf19         | Kif22         | 1  |
| 12029 | 8416  | Tcf19         | Cdc20         | 1  |
| 12029 | 11382 | Tcf19         | Cdca3         | 1  |
| 12029 | 17823 | Tcf19         | D2Ertd750e    | 1  |
| 12029 | 20433 | Tcf19         | Cdca5         | 1  |
| 12029 | 21947 | Tcf19         | Cdca8         | 1  |
| 12029 | 22138 | Tcf19         | Ang           | -1 |
| 12032 | 17348 | Cdca7         | Pf4           | 1  |
| 12032 | 20058 | Cdca7         | Dnaic1        | 1  |
| 12035 | 22138 | Ncoa1         | Ang           | 1  |
| 12053 | 9842  | 2310005L22Rik | Qdpr          | -1 |
| 12053 | 10367 | 2310005L22Rik | Coq7          | -1 |
| 12053 | 12219 | 2310005L22Rik | Cyb5b         | -1 |
| 12053 | 14147 | 2310005L22Rik | Acss2         | -1 |
| 12053 | 18201 | 2310005L22Rik | MMT00060232   | -1 |
| 12053 | 20019 | 2310005L22Rik | Qdpr          | -1 |
| 12053 | 21214 | 2310005L22Rik | Scd1          | -1 |
| 12053 | 21575 | 2310005L22Rik | Cyp2c55       | -1 |
| 12053 | 22732 | 2310005L22Rik | Cyb5b         | -1 |
| 12055 | 3496  | 1810008A18Rik | Slc41a2       | -1 |
| 12055 | 12055 | 1810008A18Rik | 1810008A18Rik | 1  |
| 12055 | 19995 | 1810008A18Rik | Pwp1          | 1  |
| 12055 | 20979 | 1810008A18Rik | D10Jhu81e     | -1 |
| 12055 | 22222 | 1810008A18Rik | Gstt1         | 1  |
| 12055 | 22786 | 1810008A18Rik | Mterfd3       | 1  |
| 12070 | 12070 | Adat2         | Adat2         | 1  |
| 12097 | 3475  | 9430015G10Rik | 2610305D13Rik | 1  |
| 12097 | 3616  | 9430015G10Rik | Dnajc16       | -1 |
| 12097 | 4305  | 9430015G10Rik | Tmem51        | -1 |
| 12097 | 7307  | 9430015G10Rik | Agmat         | -1 |
| 12097 | 12097 | 9430015G10Rik | 9430015G10Rik | 1  |
| 12097 | 18338 | 9430015G10Rik | Akr1e1        | -1 |
| 12097 | 19924 | 9430015G10Rik | Ubiad1        | 1  |
| 12104 | 21214 | MMT00063115   | Scd1          | 1  |
| 12115 | 1416  | Hist1h2an     | 6720460F02Rik | 1  |
| 12115 | 2850  | Hist1h2an     | Slc16a6       | 1  |
| 12115 | 3836  | Hist1h2an     | 2200001I15Rik | 1  |
| 12115 | 5364  | Hist1h2an     | Kif22         | 1  |
| 12115 | 6030  | Hist1h2an     | As3mt         | -1 |
| 12115 | 8416  | Hist1h2an     | Cdc20         | 1  |
| 12115 | 12941 | Hist1h2an     | Elov5         | 1  |
| 12115 | 18299 | Hist1h2an     | MMT00035424   | 1  |
| 12115 | 21692 | Hist1h2an     | MMT00013924   | 1  |
| 12115 | 21947 | Hist1h2an     | Cdca8         | 1  |
| 12115 | 22138 | Hist1h2an     | Ang           | -1 |
| 12115 | 23026 | Hist1h2an     | Apom          | -1 |
| 12120 | 1416  | Rad51         | 6720460F02Rik | 1  |
| 12126 | 2224  | Znfx1         | Oasl2         | 1  |
| 12126 | 2550  | Znfx1         | MMT00036681   | 1  |
| 12126 | 3523  | Znfx1         | Trim34        | 1  |

|       |       |       |                    |    |
|-------|-------|-------|--------------------|----|
| 12126 | 4114  | Znfx1 | Parp12             | 1  |
| 12126 | 4508  | Znfx1 | Ifit1              | 1  |
| 12126 | 5044  | Znfx1 | Ifi35              | 1  |
| 12126 | 6587  | Znfx1 | Irf9               | 1  |
| 12126 | 6595  | Znfx1 | Oas1a              | 1  |
| 12126 | 6824  | Znfx1 | Irf7               | 1  |
| 12126 | 7105  | Znfx1 | Plac8              | 1  |
| 12126 | 9847  | Znfx1 | Ifi27              | 1  |
| 12126 | 12126 | Znfx1 | Znfx1              | 1  |
| 12126 | 12969 | Znfx1 | Xaf1               | 1  |
| 12126 | 13514 | Znfx1 | Apol9b             | 1  |
| 12126 | 14611 | Znfx1 | Ddx60              | 1  |
| 12126 | 15074 | Znfx1 | Usp18              | 1  |
| 12126 | 16182 | Znfx1 | Oas1               | 1  |
| 12126 | 17197 | Znfx1 | Igtp               | 1  |
| 12126 | 18174 | Znfx1 | Stat2              | 1  |
| 12126 | 18686 | Znfx1 | Zfp143             | 1  |
| 12126 | 19738 | Znfx1 | Lgals3bp           | 1  |
| 12126 | 20997 | Znfx1 | MMT00028135        | 1  |
| 12126 | 21351 | Znfx1 | Shisa5             | 1  |
| 12126 | 21549 | Znfx1 | Rtp4               | 1  |
| 12126 | 22037 | Znfx1 | Oas1g              | 1  |
| 12126 | 23450 | Znfx1 | D12Ert647e         | 1  |
| 12139 | 13423 | Cmtm4 | ENSMUSG00000053749 | 1  |
| 12139 | 18790 | Cmtm4 | Car3               | 1  |
| 12143 | 3377  | Thyn1 | Cs                 | 1  |
| 12143 | 10554 | Thyn1 | ENSMUSG00000074179 | 1  |
| 12143 | 11946 | Thyn1 | MMT00030953        | 1  |
| 12143 | 14147 | Thyn1 | Acss2              | 1  |
| 12143 | 18201 | Thyn1 | MMT00060232        | 1  |
| 12143 | 20328 | Thyn1 | Csl                | 1  |
| 12143 | 21214 | Thyn1 | Scd1               | 1  |
| 12146 | 12565 | Hddc2 | Grem2              | 1  |
| 12156 | 269   | Setd4 | Tuba1b             | -1 |
| 12156 | 607   | Setd4 | Me1                | -1 |
| 12156 | 609   | Setd4 | MMT00060868        | -1 |
| 12156 | 662   | Setd4 | Mid1ip1            | -1 |
| 12156 | 865   | Setd4 | Npc1               | 1  |
| 12156 | 874   | Setd4 | Aldh1a7            | -1 |
| 12156 | 1031  | Setd4 | Uros               | -1 |
| 12156 | 1650  | Setd4 | Ctdsp2             | 1  |
| 12156 | 1655  | Setd4 | Mgrn1              | 1  |
| 12156 | 1709  | Setd4 | Mt2                | 1  |
| 12156 | 1760  | Setd4 | Nek8               | 1  |
| 12156 | 1941  | Setd4 | MMT00079618        | -1 |
| 12156 | 2013  | Setd4 | Il15ra             | 1  |
| 12156 | 2051  | Setd4 | Ddx27              | 1  |
| 12156 | 2322  | Setd4 | Tuba4a             | -1 |
| 12156 | 3149  | Setd4 | 1190005I06Rik      | 1  |
| 12156 | 3253  | Setd4 | Tbc1d20            | 1  |
| 12156 | 3309  | Setd4 | Grpel2             | 1  |

|       |       |       |               |    |
|-------|-------|-------|---------------|----|
| 12156 | 3449  | Setd4 | Hes6          | -1 |
| 12156 | 3696  | Setd4 | Elovl6        | -1 |
| 12156 | 3754  | Setd4 | Dock6         | -1 |
| 12156 | 3804  | Setd4 | MMT00015534   | -1 |
| 12156 | 4201  | Setd4 | Tubb2c        | -1 |
| 12156 | 5225  | Setd4 | Maf1          | 1  |
| 12156 | 5294  | Setd4 | C730048C13Rik | -1 |
| 12156 | 5425  | Setd4 | Ung           | 1  |
| 12156 | 5594  | Setd4 | Erbp3         | 1  |
| 12156 | 5684  | Setd4 | Ranbp10       | 1  |
| 12156 | 5922  | Setd4 | Hyal2         | 1  |
| 12156 | 6044  | Setd4 | Sucnr1        | -1 |
| 12156 | 6096  | Setd4 | Acot3         | 1  |
| 12156 | 6193  | Setd4 | Lactb2        | -1 |
| 12156 | 6523  | Setd4 | Hapln1        | -1 |
| 12156 | 6542  | Setd4 | Epor          | 1  |
| 12156 | 6771  | Setd4 | Insc          | -1 |
| 12156 | 6966  | Setd4 | Mia3          | 1  |
| 12156 | 7151  | Setd4 | MMT00007982   | -1 |
| 12156 | 7619  | Setd4 | Pik3ip1       | 1  |
| 12156 | 7659  | Setd4 | Rab30         | 1  |
| 12156 | 7944  | Setd4 | A1132487      | 1  |
| 12156 | 8896  | Setd4 | Fasn          | -1 |
| 12156 | 9406  | Setd4 | Calcoco1      | 1  |
| 12156 | 9408  | Setd4 | Hmgcs2        | 1  |
| 12156 | 9763  | Setd4 | Tuba3b        | -1 |
| 12156 | 10435 | Setd4 | Nab2          | 1  |
| 12156 | 10612 | Setd4 | Slc24a6       | 1  |
| 12156 | 10621 | Setd4 | 4833420G17Rik | 1  |
| 12156 | 10961 | Setd4 | Pgd           | -1 |
| 12156 | 11462 | Setd4 | Gpam          | -1 |
| 12156 | 11724 | Setd4 | Tuba3a        | -1 |
| 12156 | 11807 | Setd4 | Fbxo31        | 1  |
| 12156 | 11984 | Setd4 | N6amt2        | -1 |
| 12156 | 12004 | Setd4 | Lgals6        | 1  |
| 12156 | 12143 | Setd4 | Thyn1         | -1 |
| 12156 | 12219 | Setd4 | Cyb5b         | -1 |
| 12156 | 12276 | Setd4 | Hmga1         | 1  |
| 12156 | 12315 | Setd4 | Srebf1        | -1 |
| 12156 | 12460 | Setd4 | Pnpla2        | 1  |
| 12156 | 12553 | Setd4 | Kpnb1         | -1 |
| 12156 | 12637 | Setd4 | Itpka         | 1  |
| 12156 | 12960 | Setd4 | Arrdc4        | 1  |
| 12156 | 13990 | Setd4 | MMT00040357   | -1 |
| 12156 | 14147 | Setd4 | Acss2         | -1 |
| 12156 | 14323 | Setd4 | Scarb1        | 1  |
| 12156 | 14418 | Setd4 | Vcan          | 1  |
| 12156 | 14582 | Setd4 | Mt1           | 1  |
| 12156 | 14838 | Setd4 | MMT00070887   | -1 |
| 12156 | 15668 | Setd4 | 1810032O08Rik | 1  |
| 12156 | 15760 | Setd4 | Trib3         | 1  |

|       |       |         |               |    |
|-------|-------|---------|---------------|----|
| 12156 | 15862 | Setd4   | Mrap          | -1 |
| 12156 | 15892 | Setd4   | Slc22a5       | 1  |
| 12156 | 16027 | Setd4   | Ppp2r2d       | 1  |
| 12156 | 16060 | Setd4   | Gys2          | 1  |
| 12156 | 16328 | Setd4   | Slc10a2       | -1 |
| 12156 | 16525 | Setd4   | Lbp           | 1  |
| 12156 | 16616 | Setd4   | Paox          | -1 |
| 12156 | 16692 | Setd4   | Bat4          | 1  |
| 12156 | 16788 | Setd4   | Imp3          | 1  |
| 12156 | 16888 | Setd4   | H6pd          | 1  |
| 12156 | 17001 | Setd4   | Hmga1         | 1  |
| 12156 | 17408 | Setd4   | Iqwd1         | 1  |
| 12156 | 17444 | Setd4   | Tuba1a        | -1 |
| 12156 | 17656 | Setd4   | Hdhd3         | -1 |
| 12156 | 17660 | Setd4   | Nlrp12        | 1  |
| 12156 | 17730 | Setd4   | MMT00058199   | 1  |
| 12156 | 17862 | Setd4   | Fbxo21        | 1  |
| 12156 | 17878 | Setd4   | Brap          | 1  |
| 12156 | 17996 | Setd4   | Igfbp2        | 1  |
| 12156 | 18122 | Setd4   | Snx21         | 1  |
| 12156 | 18148 | Setd4   | Cables1       | 1  |
| 12156 | 18286 | Setd4   | Slc41a3       | 1  |
| 12156 | 18515 | Setd4   | Ddx28         | 1  |
| 12156 | 18653 | Setd4   | MMT00072901   | 1  |
| 12156 | 18884 | Setd4   | Eil           | 1  |
| 12156 | 19084 | Setd4   | Mmab          | -1 |
| 12156 | 19089 | Setd4   | Peci          | 1  |
| 12156 | 19912 | Setd4   | Inpp1         | 1  |
| 12156 | 20019 | Setd4   | Qdpr          | -1 |
| 12156 | 20079 | Setd4   | MMT00019254   | 1  |
| 12156 | 20740 | Setd4   | Ola1          | -1 |
| 12156 | 20798 | Setd4   | Ccpg1         | 1  |
| 12156 | 20896 | Setd4   | Rasa3         | 1  |
| 12156 | 21143 | Setd4   | Ypel3         | 1  |
| 12156 | 21202 | Setd4   | Acly          | -1 |
| 12156 | 21251 | Setd4   | Cpt1a         | 1  |
| 12156 | 21793 | Setd4   | Pla2g12a      | 1  |
| 12156 | 22046 | Setd4   | Cml4          | -1 |
| 12156 | 22137 | Setd4   | Nudt7         | -1 |
| 12156 | 22217 | Setd4   | Flvcr2        | 1  |
| 12156 | 22303 | Setd4   | Cdt1          | 1  |
| 12156 | 22388 | Setd4   | 2410018M08Rik | 1  |
| 12156 | 22406 | Setd4   | Vnn1          | 1  |
| 12156 | 22443 | Setd4   | Tuba1c        | -1 |
| 12156 | 22732 | Setd4   | Cyb5b         | -1 |
| 12156 | 22770 | Setd4   | Slc27a2       | 1  |
| 12156 | 22830 | Setd4   | MMT00081088   | 1  |
| 12156 | 23026 | Setd4   | Apom          | 1  |
| 12156 | 23617 | Setd4   | Nme1          | -1 |
| 12156 | 23623 | Setd4   | 2010305C02Rik | -1 |
| 12157 | 719   | Gal3st4 | Usp2          | -1 |

|       |       |               |                    |    |
|-------|-------|---------------|--------------------|----|
| 12157 | 1767  | Gal3st4       | BC016495           | -1 |
| 12157 | 3214  | Gal3st4       | Dnmt3b             | 1  |
| 12157 | 5804  | Gal3st4       | Thrsp              | -1 |
| 12157 | 5849  | Gal3st4       | 2310031A18Rik      | 1  |
| 12157 | 5974  | Gal3st4       | Arntl              | 1  |
| 12157 | 7457  | Gal3st4       | Mrpl22             | 1  |
| 12157 | 14279 | Gal3st4       | 3930402G23Rik      | 1  |
| 12157 | 15824 | Gal3st4       | D19Ertd721e        | 1  |
| 12157 | 17583 | Gal3st4       | Per2               | -1 |
| 12157 | 19234 | Gal3st4       | Nrg4               | -1 |
| 12157 | 20171 | Gal3st4       | 1700008G05Rik      | 1  |
| 12157 | 21531 | Gal3st4       | Ttc23              | -1 |
| 12157 | 21811 | Gal3st4       | Ak3l1              | -1 |
| 12168 | 6370  | H2-Ke6        | Aqp8               | -1 |
| 12168 | 8444  | H2-Ke6        | Rdh16              | -1 |
| 12168 | 8815  | H2-Ke6        | Mx1                | -1 |
| 12168 | 12910 | H2-Ke6        | 1110028A07Rik      | -1 |
| 12169 | 8815  | MMT00013125   | Mx1                | 1  |
| 12169 | 21214 | MMT00013125   | Scd1               | 1  |
| 12173 | 8176  | Acbd6         | Stx6               | -1 |
| 12173 | 12173 | Acbd6         | Acbd6              | 1  |
| 12174 | 4768  | 2610027C15Rik | Lsm10              | -1 |
| 12174 | 4885  | 2610027C15Rik | Fhad1              | 1  |
| 12174 | 6191  | 2610027C15Rik | Ddost              | -1 |
| 12174 | 8654  | 2610027C15Rik | Fbxl13             | 1  |
| 12177 | 5364  | Tmem35        | Kif22              | 1  |
| 12178 | 4517  | Slc16a2       | Itih3              | 1  |
| 12178 | 7550  | Slc16a2       | Rab11fip5          | 1  |
| 12178 | 7602  | Slc16a2       | Pcca               | -1 |
| 12178 | 8444  | Slc16a2       | Rdh16              | -1 |
| 12178 | 8815  | Slc16a2       | Mx1                | -1 |
| 12178 | 10554 | Slc16a2       | ENSMUSG00000074179 | -1 |
| 12178 | 13293 | Slc16a2       | Gsta2              | -1 |
| 12178 | 16336 | Slc16a2       | 2310040A07Rik      | 1  |
| 12178 | 18201 | Slc16a2       | MMT00060232        | -1 |
| 12178 | 20058 | Slc16a2       | Dnaic1             | 1  |
| 12178 | 21214 | Slc16a2       | Scd1               | -1 |
| 12178 | 21727 | Slc16a2       | Khk                | -1 |
| 12180 | 607   | Ank           | Me1                | 1  |
| 12180 | 3565  | Ank           | MMT00045908        | 1  |
| 12180 | 9842  | Ank           | Qdpr               | 1  |
| 12180 | 10961 | Ank           | Pgd                | 1  |
| 12180 | 14147 | Ank           | Acss2              | 1  |
| 12180 | 21202 | Ank           | Acly               | 1  |
| 12180 | 21727 | Ank           | Khk                | 1  |
| 12181 | 21793 | Bcl2l10       | Pla2g12a           | -1 |
| 12182 | 23640 | Immt          | Bdh1               | -1 |
| 12191 | 4674  | Zfp704        | Cxcl12             | 1  |
| 12191 | 5884  | Zfp704        | Gstm2              | -1 |
| 12191 | 7602  | Zfp704        | Pcca               | -1 |
| 12204 | 2636  | Ankmy2        | Tars               | -1 |

|       |       |        |               |    |
|-------|-------|--------|---------------|----|
| 12204 | 4192  | Ankmy2 | Zranb1        | 1  |
| 12204 | 5892  | Ankmy2 | MMT00038457   | 1  |
| 12204 | 5934  | Ankmy2 | S100a10       | -1 |
| 12204 | 5974  | Ankmy2 | Arntl         | -1 |
| 12204 | 6386  | Ankmy2 | Por           | 1  |
| 12204 | 7619  | Ankmy2 | Pik3ip1       | 1  |
| 12204 | 10486 | Ankmy2 | 1300002K09Rik | -1 |
| 12204 | 11741 | Ankmy2 | Slc30a10      | -1 |
| 12204 | 13094 | Ankmy2 | Cnn3          | 1  |
| 12204 | 18179 | Ankmy2 | Dbp           | 1  |
| 12204 | 18286 | Ankmy2 | Slc41a3       | 1  |
| 12204 | 18498 | Ankmy2 | Slc5a6        | 1  |
| 12204 | 18827 | Ankmy2 | Oprs1         | -1 |
| 12204 | 20965 | Ankmy2 | Usp28         | 1  |
| 12204 | 21811 | Ankmy2 | Ak3l1         | 1  |
| 12204 | 21969 | Ankmy2 | Tk1           | 1  |
| 12208 | 1709  | Pnpla7 | Mt2           | 1  |
| 12208 | 2756  | Pnpla7 | Pmvk          | -1 |
| 12208 | 4619  | Pnpla7 | Htra3         | 1  |
| 12208 | 6193  | Pnpla7 | Lactb2        | -1 |
| 12208 | 6370  | Pnpla7 | Aqp8          | -1 |
| 12208 | 8896  | Pnpla7 | Fasn          | -1 |
| 12208 | 9408  | Pnpla7 | Hmgcs2        | 1  |
| 12208 | 10961 | Pnpla7 | Pgd           | -1 |
| 12208 | 11462 | Pnpla7 | Gpam          | -1 |
| 12208 | 12219 | Pnpla7 | Cyb5b         | -1 |
| 12208 | 12460 | Pnpla7 | Pnpla2        | 1  |
| 12208 | 14147 | Pnpla7 | Acss2         | -1 |
| 12208 | 14151 | Pnpla7 | Slc44a1       | -1 |
| 12208 | 15892 | Pnpla7 | Slc22a5       | 1  |
| 12208 | 16647 | Pnpla7 | D16H22S680E   | 1  |
| 12208 | 17660 | Pnpla7 | Nlrp12        | 1  |
| 12208 | 17878 | Pnpla7 | Brap          | 1  |
| 12208 | 18286 | Pnpla7 | Slc41a3       | 1  |
| 12208 | 19089 | Pnpla7 | Peci          | 1  |
| 12208 | 20798 | Pnpla7 | Ccp1          | 1  |
| 12208 | 21202 | Pnpla7 | Acly          | -1 |
| 12208 | 21251 | Pnpla7 | Cpt1a         | 1  |
| 12208 | 22137 | Pnpla7 | Nudt7         | -1 |
| 12208 | 22732 | Pnpla7 | Cyb5b         | -1 |
| 12208 | 22770 | Pnpla7 | Slc27a2       | 1  |
| 12219 | 607   | Cyb5b  | Me1           | 1  |
| 12219 | 937   | Cyb5b  | Pi4ka         | -1 |
| 12219 | 1310  | Cyb5b  | Cabc1         | 1  |
| 12219 | 1655  | Cyb5b  | Mgn1          | -1 |
| 12219 | 1760  | Cyb5b  | Nek8          | -1 |
| 12219 | 2013  | Cyb5b  | Ii15ra        | -1 |
| 12219 | 2636  | Cyb5b  | Tars          | 1  |
| 12219 | 3504  | Cyb5b  | Anpep         | -1 |
| 12219 | 3620  | Cyb5b  | Bet1          | 1  |
| 12219 | 4351  | Cyb5b  | Plxnb1        | -1 |

|       |       |       |                    |    |
|-------|-------|-------|--------------------|----|
| 12219 | 4687  | Cyb5b | Gtpbp8             | 1  |
| 12219 | 5425  | Cyb5b | Ung                | -1 |
| 12219 | 5934  | Cyb5b | S100a10            | 1  |
| 12219 | 6193  | Cyb5b | Lactb2             | 1  |
| 12219 | 7430  | Cyb5b | Gpr137             | 1  |
| 12219 | 8815  | Cyb5b | Mx1                | 1  |
| 12219 | 9408  | Cyb5b | Hmgcs2             | -1 |
| 12219 | 9427  | Cyb5b | Nqo2               | 1  |
| 12219 | 9842  | Cyb5b | Qdpr               | 1  |
| 12219 | 10554 | Cyb5b | ENSMUSG00000074179 | 1  |
| 12219 | 10961 | Cyb5b | Pgd                | 1  |
| 12219 | 11375 | Cyb5b | Derl2              | 1  |
| 12219 | 12219 | Cyb5b | Cyb5b              | 1  |
| 12219 | 12556 | Cyb5b | Ass1               | 1  |
| 12219 | 14147 | Cyb5b | Acss2              | 1  |
| 12219 | 14442 | Cyb5b | Ethe1              | 1  |
| 12219 | 15892 | Cyb5b | Slc22a5            | -1 |
| 12219 | 16510 | Cyb5b | Tspyl4             | 1  |
| 12219 | 16842 | Cyb5b | 2310003L22Rik      | 1  |
| 12219 | 17878 | Cyb5b | Brap               | -1 |
| 12219 | 18201 | Cyb5b | MMT00060232        | 1  |
| 12219 | 18286 | Cyb5b | Slc41a3            | -1 |
| 12219 | 18790 | Cyb5b | Car3               | 1  |
| 12219 | 18827 | Cyb5b | Oprs1              | 1  |
| 12219 | 19089 | Cyb5b | Peci               | -1 |
| 12219 | 20019 | Cyb5b | Qdpr               | 1  |
| 12219 | 21202 | Cyb5b | Acly               | 1  |
| 12219 | 21214 | Cyb5b | Scd1               | 1  |
| 12219 | 21251 | Cyb5b | Cpt1a              | -1 |
| 12219 | 21575 | Cyb5b | Cyp2c55            | 1  |
| 12219 | 21727 | Cyb5b | Khk                | 1  |
| 12219 | 21793 | Cyb5b | Pla2g12a           | -1 |
| 12219 | 22406 | Cyb5b | Vnn1               | -1 |
| 12219 | 22732 | Cyb5b | Cyb5b              | 1  |
| 12219 | 22770 | Cyb5b | Slc27a2            | -1 |
| 12219 | 22998 | Cyb5b | Ass1               | 1  |
| 12219 | 23623 | Cyb5b | 2010305C02Rik      | 1  |
| 12219 | 23640 | Cyb5b | Bdh1               | -1 |
| 12225 | 250   | Tsr1  | Tubb2a-ps2         | 1  |
| 12225 | 269   | Tsr1  | Tuba1b             | 1  |
| 12225 | 502   | Tsr1  | Iars               | 1  |
| 12225 | 609   | Tsr1  | MMT00060868        | 1  |
| 12225 | 1941  | Tsr1  | MMT00079618        | 1  |
| 12225 | 2322  | Tsr1  | Tuba4a             | 1  |
| 12225 | 3804  | Tsr1  | MMT00015534        | 1  |
| 12225 | 4201  | Tsr1  | Tubb2c             | 1  |
| 12225 | 7151  | Tsr1  | MMT00007982        | 1  |
| 12225 | 7862  | Tsr1  | Cpsf4l             | -1 |
| 12225 | 9763  | Tsr1  | Tuba3b             | 1  |
| 12225 | 10612 | Tsr1  | Slc24a6            | -1 |
| 12225 | 11724 | Tsr1  | Tuba3a             | 1  |

|       |       |        |               |    |
|-------|-------|--------|---------------|----|
| 12225 | 12460 | Tsr1   | Pnpla2        | -1 |
| 12225 | 17444 | Tsr1   | Tuba1a        | 1  |
| 12225 | 17876 | Tsr1   | Tubb4         | 1  |
| 12225 | 22290 | Tsr1   | Tubb2a        | 1  |
| 12225 | 22443 | Tsr1   | Tuba1c        | 1  |
| 12225 | 22630 | Tsr1   | MMT00034355   | 1  |
| 12228 | 11382 | Grpel1 | Cdca3         | -1 |
| 12228 | 14472 | Grpel1 | Ahcy          | 1  |
| 12228 | 19342 | Grpel1 | Cth           | 1  |
| 12228 | 23180 | Grpel1 | Sult1d1       | 1  |
| 12229 | 250   | Sash1  | Tubb2a-ps2    | 1  |
| 12229 | 269   | Sash1  | Tuba1b        | 1  |
| 12229 | 609   | Sash1  | MMT00060868   | 1  |
| 12229 | 771   | Sash1  | Zbtb45        | 1  |
| 12229 | 1941  | Sash1  | MMT00079618   | 1  |
| 12229 | 2322  | Sash1  | Tuba4a        | 1  |
| 12229 | 3804  | Sash1  | MMT00015534   | 1  |
| 12229 | 4201  | Sash1  | Tubb2c        | 1  |
| 12229 | 4286  | Sash1  | Ptp4a1        | -1 |
| 12229 | 4534  | Sash1  | Ndel1         | -1 |
| 12229 | 6386  | Sash1  | Por           | -1 |
| 12229 | 7151  | Sash1  | MMT00007982   | 1  |
| 12229 | 9763  | Sash1  | Tuba3b        | 1  |
| 12229 | 10911 | Sash1  | Mcl1          | -1 |
| 12229 | 11129 | Sash1  | Ankhd1        | -1 |
| 12229 | 11149 | Sash1  | MMT00050488   | 1  |
| 12229 | 11724 | Sash1  | Tuba3a        | 1  |
| 12229 | 11741 | Sash1  | Slc30a10      | 1  |
| 12229 | 12433 | Sash1  | 5033413D22Rik | 1  |
| 12229 | 12910 | Sash1  | 1110028A07Rik | 1  |
| 12229 | 12982 | Sash1  | Cars          | 1  |
| 12229 | 15862 | Sash1  | Mrap          | 1  |
| 12229 | 16060 | Sash1  | Gys2          | -1 |
| 12229 | 17323 | Sash1  | Tubb6         | 1  |
| 12229 | 17444 | Sash1  | Tuba1a        | 1  |
| 12229 | 17876 | Sash1  | Tubb4         | 1  |
| 12229 | 18827 | Sash1  | Oprs1         | 1  |
| 12229 | 19532 | Sash1  | Med8          | 1  |
| 12229 | 22290 | Sash1  | Tubb2a        | 1  |
| 12229 | 22443 | Sash1  | Tuba1c        | 1  |
| 12229 | 22630 | Sash1  | MMT00034355   | 1  |
| 12238 | 269   | Traf3  | Tuba1b        | 1  |
| 12238 | 1941  | Traf3  | MMT00079618   | 1  |
| 12238 | 2322  | Traf3  | Tuba4a        | 1  |
| 12238 | 3804  | Traf3  | MMT00015534   | 1  |
| 12238 | 4201  | Traf3  | Tubb2c        | 1  |
| 12238 | 7151  | Traf3  | MMT00007982   | 1  |
| 12238 | 9763  | Traf3  | Tuba3b        | 1  |
| 12238 | 11129 | Traf3  | Ankhd1        | -1 |
| 12238 | 11724 | Traf3  | Tuba3a        | 1  |
| 12238 | 12910 | Traf3  | 1110028A07Rik | 1  |



|       |       |               |               |    |
|-------|-------|---------------|---------------|----|
| 12238 | 17444 | Traf3         | Tuba1a        | 1  |
| 12238 | 21251 | Traf3         | Cpt1a         | -1 |
| 12238 | 22443 | Traf3         | Tuba1c        | 1  |
| 12239 | 1041  | A630077B13Rik | 3110049J23Rik | -1 |
| 12239 | 12239 | A630077B13Rik | A630077B13Rik | 1  |
| 12239 | 14989 | A630077B13Rik | Map3k5        | -1 |
| 12239 | 18300 | A630077B13Rik | Arg1          | -1 |
| 12239 | 21258 | A630077B13Rik | 2010003K15Rik | 1  |
| 12239 | 22146 | A630077B13Rik | Aifm2         | -1 |
| 12245 | 11094 | Zfp322a       | Slc17a3       | -1 |
| 12250 | 5364  | P2ry14        | Kif22         | 1  |
| 12259 | 7602  | MMT00080137   | Pcca          | 1  |
| 12259 | 18201 | MMT00080137   | MMT00060232   | 1  |
| 12263 | 5364  | Atp6v0d2      | Kif22         | 1  |
| 12270 | 6193  | Slc7a6        | Lactb2        | 1  |
| 12278 | 5574  | Plxna4        | Hsd3b7        | 1  |
| 12280 | 12280 | Cln5          | Cln5          | 1  |
| 12280 | 15353 | Cln5          | Ednrb         | -1 |
| 12280 | 23342 | Cln5          | Ndfip2        | -1 |
| 12281 | 1310  | Tacc2         | Cabc1         | -1 |
| 12281 | 2636  | Tacc2         | Tars          | -1 |
| 12281 | 3235  | Tacc2         | BC029214      | -1 |
| 12281 | 6386  | Tacc2         | Por           | 1  |
| 12281 | 12799 | Tacc2         | Spon2         | -1 |
| 12281 | 18147 | Tacc2         | Nhlrc2        | 1  |
| 12281 | 18827 | Tacc2         | Oprs1         | -1 |
| 12289 | 8641  | Ext1          | Slc7a2        | -1 |
| 12296 | 250   | Rrad          | Tubb2a-ps2    | 1  |
| 12296 | 269   | Rrad          | Tuba1b        | 1  |
| 12296 | 609   | Rrad          | MMT00060868   | 1  |
| 12296 | 662   | Rrad          | Mid1ip1       | 1  |
| 12296 | 1537  | Rrad          | 1700052K11Rik | 1  |
| 12296 | 1650  | Rrad          | Ctdsp2        | -1 |
| 12296 | 1709  | Rrad          | Mt2           | -1 |
| 12296 | 1941  | Rrad          | MMT00079618   | 1  |
| 12296 | 2322  | Rrad          | Tuba4a        | 1  |
| 12296 | 3804  | Rrad          | MMT00015534   | 1  |
| 12296 | 4201  | Rrad          | Tubb2c        | 1  |
| 12296 | 4708  | Rrad          | Traf3ip2      | 1  |
| 12296 | 6044  | Rrad          | Sucnr1        | 1  |
| 12296 | 6048  | Rrad          | Psmc9         | -1 |
| 12296 | 7944  | Rrad          | AI132487      | -1 |
| 12296 | 8639  | Rrad          | Map1lc3b      | -1 |
| 12296 | 9763  | Rrad          | Tuba3b        | 1  |
| 12296 | 10612 | Rrad          | Slc24a6       | -1 |
| 12296 | 10911 | Rrad          | Mcl1          | -1 |
| 12296 | 11093 | Rrad          | Zdhhc1        | -1 |
| 12296 | 11129 | Rrad          | Ankhd1        | -1 |
| 12296 | 11574 | Rrad          | Gne           | -1 |
| 12296 | 11724 | Rrad          | Tuba3a        | 1  |
| 12296 | 11741 | Rrad          | Slc30a10      | 1  |

|       |       |       |               |    |
|-------|-------|-------|---------------|----|
| 12296 | 11807 | Rrad  | Fbxo31        | -1 |
| 12296 | 12315 | Rrad  | Srebfl        | 1  |
| 12296 | 12420 | Rrad  | Klhl21        | -1 |
| 12296 | 12460 | Rrad  | Pnpla2        | -1 |
| 12296 | 13471 | Rrad  | Cln8          | -1 |
| 12296 | 14138 | Rrad  | Anks4b        | 1  |
| 12296 | 14582 | Rrad  | Mt1           | -1 |
| 12296 | 15704 | Rrad  | MMT00038941   | 1  |
| 12296 | 17444 | Rrad  | Tuba1a        | 1  |
| 12296 | 17656 | Rrad  | Hdhd3         | 1  |
| 12296 | 17876 | Rrad  | Tubb4         | 1  |
| 12296 | 18785 | Rrad  | Angptl4       | -1 |
| 12296 | 21251 | Rrad  | Cpt1a         | -1 |
| 12296 | 22290 | Rrad  | Tubb2a        | 1  |
| 12296 | 22443 | Rrad  | Tuba1c        | 1  |
| 12296 | 22630 | Rrad  | MMT00034355   | 1  |
| 12296 | 23201 | Rrad  | S1pr1         | 1  |
| 12297 | 10486 | Upk1b | 1300002K09Rik | 1  |
| 12299 | 1600  | Thbs1 | Csrp1         | 1  |
| 12299 | 1853  | Thbs1 | Stat5a        | 1  |
| 12299 | 2110  | Thbs1 | Gtf2ird1      | 1  |
| 12299 | 2399  | Thbs1 | MMT00060167   | 1  |
| 12299 | 2721  | Thbs1 | Inmt          | -1 |
| 12299 | 4056  | Thbs1 | Tnfaip8l1     | 1  |
| 12299 | 5691  | Thbs1 | Csrp3         | 1  |
| 12299 | 5804  | Thbs1 | Thrsp         | -1 |
| 12299 | 5849  | Thbs1 | 2310031A18Rik | 1  |
| 12299 | 6746  | Thbs1 | E2f8          | 1  |
| 12299 | 6756  | Thbs1 | Sds           | -1 |
| 12299 | 6816  | Thbs1 | Slc46a3       | -1 |
| 12299 | 7492  | Thbs1 | Adfp          | 1  |
| 12299 | 8328  | Thbs1 | Klhdc8a       | 1  |
| 12299 | 8404  | Thbs1 | Fa2h          | 1  |
| 12299 | 9700  | Thbs1 | Prodh         | -1 |
| 12299 | 9718  | Thbs1 | Fmo5          | -1 |
| 12299 | 9831  | Thbs1 | Nedd4l        | 1  |
| 12299 | 11576 | Thbs1 | Gm1381        | -1 |
| 12299 | 11729 | Thbs1 | Ncr1          | -1 |
| 12299 | 12799 | Thbs1 | Spon2         | 1  |
| 12299 | 13078 | Thbs1 | Eps8l2        | 1  |
| 12299 | 15824 | Thbs1 | D19Erttd721e  | 1  |
| 12299 | 18069 | Thbs1 | Gpt           | -1 |
| 12299 | 19234 | Thbs1 | Nrg4          | -1 |
| 12299 | 19360 | Thbs1 | Aco1          | -1 |
| 12299 | 19701 | Thbs1 | 9930021J17Rik | 1  |
| 12299 | 19790 | Thbs1 | Polg2         | -1 |
| 12299 | 21142 | Thbs1 | Gm129         | -1 |
| 12299 | 22653 | Thbs1 | Ric3          | 1  |
| 12299 | 23183 | Thbs1 | Nnmt          | -1 |
| 12302 | 2456  | Cbx1  | Mrpl10        | 1  |
| 12302 | 3480  | Cbx1  | Pnpo          | -1 |

|       |       |          |               |    |
|-------|-------|----------|---------------|----|
| 12302 | 5661  | Cbx1     | Lrrc46        | -1 |
| 12302 | 7370  | Cbx1     | Spop          | -1 |
| 12302 | 9875  | Cbx1     | Cdk5rap3      | -1 |
| 12302 | 12302 | Cbx1     | Cbx1          | 1  |
| 12302 | 13810 | Cbx1     | 1110036O03Rik | -1 |
| 12302 | 13983 | Cbx1     | Copz2         | 1  |
| 12302 | 14384 | Cbx1     | Dnajc7        | -1 |
| 12302 | 16340 | Cbx1     | Scrn2         | -1 |
| 12302 | 19092 | Cbx1     | MMT00045362   | 1  |
| 12302 | 23295 | Cbx1     | Snx11         | 1  |
| 12312 | 17447 | Ms4a6d   | Ctsf          | -1 |
| 12315 | 1065  | Srebf1   | Hmgcr         | 1  |
| 12315 | 3449  | Srebf1   | Hes6          | 1  |
| 12315 | 7492  | Srebf1   | Adfp          | -1 |
| 12315 | 7659  | Srebf1   | Rab30         | -1 |
| 12315 | 8404  | Srebf1   | Fa2h          | -1 |
| 12315 | 18438 | Srebf1   | Map3k7ip2     | -1 |
| 12315 | 19701 | Srebf1   | 9930021J17Rik | -1 |
| 12316 | 2752  | Mpa2l    | Fcgr1         | 1  |
| 12316 | 3159  | Mpa2l    | Pld1          | 1  |
| 12316 | 5938  | Mpa2l    | Pfn2          | 1  |
| 12316 | 8568  | Mpa2l    | Tnik          | 1  |
| 12316 | 9820  | Mpa2l    | BC023105      | 1  |
| 12316 | 12316 | Mpa2l    | Mpa2l         | 1  |
| 12316 | 12367 | Mpa2l    | MMT00072365   | -1 |
| 12316 | 12398 | Mpa2l    | Ifi44         | 1  |
| 12316 | 14880 | Mpa2l    | Ms4a4c        | 1  |
| 12316 | 15508 | Mpa2l    | 4632415L05Rik | 1  |
| 12316 | 16416 | Mpa2l    | Commd2        | 1  |
| 12316 | 18790 | Mpa2l    | Car3          | 1  |
| 12316 | 21824 | Mpa2l    | 5830443L24Rik | 1  |
| 12319 | 5364  | Mfap2    | Kif22         | 1  |
| 12319 | 8416  | Mfap2    | Cdc20         | 1  |
| 12319 | 11382 | Mfap2    | Cdca3         | 1  |
| 12319 | 13431 | Mfap2    | MMT00038058   | 1  |
| 12319 | 15205 | Mfap2    | MMT00030262   | 1  |
| 12319 | 18250 | Mfap2    | Mmp14         | 1  |
| 12319 | 20171 | Mfap2    | 1700008G05Rik | 1  |
| 12336 | 17135 | Timm13   | Mum1          | -1 |
| 12341 | 1627  | EG330731 | 2310030N02Rik | 1  |
| 12341 | 6768  | EG330731 | Plekhf2       | 1  |
| 12341 | 13578 | EG330731 | Asph          | 1  |
| 12355 | 327   | AI507611 | H2-Ea         | -1 |
| 12355 | 2938  | AI507611 | H2-T23        | -1 |
| 12355 | 3265  | AI507611 | Dntt          | 1  |
| 12355 | 3599  | AI507611 | MMT00035426   | 1  |
| 12355 | 4004  | AI507611 | Thbs2         | 1  |
| 12355 | 5410  | AI507611 | Cyp4f15       | 1  |
| 12355 | 8767  | AI507611 | Rgl2          | -1 |
| 12355 | 9158  | AI507611 | Pde9a         | 1  |
| 12355 | 10376 | AI507611 | C920025E04Rik | 1  |

|       |       |               |                    |    |
|-------|-------|---------------|--------------------|----|
| 12355 | 10667 | AI507611      | H2-Eb1             | -1 |
| 12355 | 13493 | AI507611      | Ring1              | 1  |
| 12355 | 18906 | AI507611      | Zfand3             | -1 |
| 12355 | 20266 | AI507611      | Insig2             | 1  |
| 12355 | 20346 | AI507611      | Gna-rs1            | -1 |
| 12355 | 22822 | AI507611      | MMT00013433        | -1 |
| 12360 | 17996 | EG630825      | Igfbp2             | -1 |
| 12360 | 20967 | EG630825      | Fabp2              | 1  |
| 12367 | 524   | MMT00072365   | Hsd3b2             | -1 |
| 12367 | 1466  | MMT00072365   | Ubap2l             | -1 |
| 12367 | 1867  | MMT00072365   | Bcas2              | -1 |
| 12367 | 2752  | MMT00072365   | Fcgr1              | -1 |
| 12367 | 3159  | MMT00072365   | Pld1               | -1 |
| 12367 | 3206  | MMT00072365   | Gpr160             | -1 |
| 12367 | 3753  | MMT00072365   | Setdb1             | 1  |
| 12367 | 5822  | MMT00072365   | Car2               | -1 |
| 12367 | 5938  | MMT00072365   | Pfn2               | -1 |
| 12367 | 6206  | MMT00072365   | MMT00063701        | -1 |
| 12367 | 10521 | MMT00072365   | Ttf2               | -1 |
| 12367 | 10681 | MMT00072365   | Dgkz               | 1  |
| 12367 | 11121 | MMT00072365   | Mtmr11             | 1  |
| 12367 | 11611 | MMT00072365   | S100a13            | 1  |
| 12367 | 12250 | MMT00072365   | P2ry14             | -1 |
| 12367 | 12367 | MMT00072365   | MMT00072365        | 1  |
| 12367 | 13134 | MMT00072365   | Lipg               | 1  |
| 12367 | 13423 | MMT00072365   | ENSMUSG00000053749 | -1 |
| 12367 | 15508 | MMT00072365   | 4632415L05Rik      | -1 |
| 12367 | 16416 | MMT00072365   | Commd2             | -1 |
| 12367 | 18754 | MMT00072365   | Rbm8a              | -1 |
| 12367 | 18911 | MMT00072365   | Selenbp2           | -1 |
| 12367 | 20661 | MMT00072365   | Tuft1              | -1 |
| 12367 | 21814 | MMT00072365   | Accn5              | -1 |
| 12367 | 22202 | MMT00072365   | OTTMUSG00000021274 | 1  |
| 12367 | 22570 | MMT00072365   | Phtf1              | -1 |
| 12367 | 23457 | MMT00072365   | Selenbp2           | -1 |
| 12380 | 12380 | Rftn2         | Rftn2              | 1  |
| 12380 | 14781 | Rftn2         | Mars2              | 1  |
| 12380 | 19578 | Rftn2         | Aox1               | -1 |
| 12380 | 22333 | Rftn2         | Hnrnp3             | 1  |
| 12385 | 2157  | Mrpl33        | 0610007C21Rik      | -1 |
| 12385 | 9830  | Mrpl33        | Rbks               | -1 |
| 12385 | 11859 | Mrpl33        | Poln               | 1  |
| 12385 | 12385 | Mrpl33        | Mrpl33             | 1  |
| 12388 | 1956  | 8430406I07Rik | Usp50              | -1 |
| 12388 | 4833  | 8430406I07Rik | Synpo2             | 1  |
| 12388 | 6231  | 8430406I07Rik | 9030622O22Rik      | -1 |
| 12388 | 12388 | 8430406I07Rik | 8430406I07Rik      | 1  |
| 12388 | 14647 | 8430406I07Rik | Cst3               | 1  |
| 12388 | 21729 | 8430406I07Rik | Hdc                | 1  |
| 12388 | 22740 | 8430406I07Rik | Manbal             | -1 |
| 12398 | 143   | Ifi44         | Gvin1              | 1  |

|       |       |       |               |    |
|-------|-------|-------|---------------|----|
| 12398 | 1533  | Ifi44 | BC013712      | 1  |
| 12398 | 2200  | Ifi44 | BC006779      | 1  |
| 12398 | 2224  | Ifi44 | Oasl2         | 1  |
| 12398 | 2550  | Ifi44 | MMT00036681   | 1  |
| 12398 | 2752  | Ifi44 | Fcgr1         | 1  |
| 12398 | 3426  | Ifi44 | Hap1          | 1  |
| 12398 | 3523  | Ifi44 | Trim34        | 1  |
| 12398 | 3594  | Ifi44 | Rasa4         | 1  |
| 12398 | 3659  | Ifi44 | EG236451      | 1  |
| 12398 | 3683  | Ifi44 | Oas2          | 1  |
| 12398 | 4114  | Ifi44 | Parp12        | 1  |
| 12398 | 4409  | Ifi44 | 5430435G22Rik | 1  |
| 12398 | 4426  | Ifi44 | Iigp2         | 1  |
| 12398 | 4508  | Ifi44 | Ifit1         | 1  |
| 12398 | 4516  | Ifi44 | Rsad2         | 1  |
| 12398 | 5002  | Ifi44 | Ifi202b       | 1  |
| 12398 | 5044  | Ifi44 | Ifi35         | 1  |
| 12398 | 5216  | Ifi44 | Spnb5         | 1  |
| 12398 | 5250  | Ifi44 | Ifit2         | 1  |
| 12398 | 5406  | Ifi44 | Cd207         | -1 |
| 12398 | 5766  | Ifi44 | 5033414D02Rik | 1  |
| 12398 | 5845  | Ifi44 | I118bp        | 1  |
| 12398 | 5853  | Ifi44 | Trim30        | 1  |
| 12398 | 5949  | Ifi44 | Zbp1          | 1  |
| 12398 | 6072  | Ifi44 | C1qc          | 1  |
| 12398 | 6587  | Ifi44 | Irf9          | 1  |
| 12398 | 6595  | Ifi44 | Oas1a         | 1  |
| 12398 | 6734  | Ifi44 | Ehd4          | 1  |
| 12398 | 6779  | Ifi44 | Gbp6          | 1  |
| 12398 | 6824  | Ifi44 | Irf7          | 1  |
| 12398 | 6910  | Ifi44 | Ly6c2         | 1  |
| 12398 | 7069  | Ifi44 | Ube1l         | 1  |
| 12398 | 7105  | Ifi44 | Plac8         | 1  |
| 12398 | 7238  | Ifi44 | Pycard        | 1  |
| 12398 | 7284  | Ifi44 | MMT00008674   | 1  |
| 12398 | 7316  | Ifi44 | Ifi204        | 1  |
| 12398 | 7336  | Ifi44 | Cd5l          | 1  |
| 12398 | 8325  | Ifi44 | Psme2         | 1  |
| 12398 | 8555  | Ifi44 | H2-M3         | 1  |
| 12398 | 8659  | Ifi44 | Psmb8         | 1  |
| 12398 | 8800  | Ifi44 | Rnf213        | 1  |
| 12398 | 9100  | Ifi44 | Ms4a6c        | 1  |
| 12398 | 9401  | Ifi44 | Fcgr4         | 1  |
| 12398 | 9717  | Ifi44 | Psmb9         | 1  |
| 12398 | 9820  | Ifi44 | BC023105      | 1  |
| 12398 | 9821  | Ifi44 | Pmaip1        | 1  |
| 12398 | 9847  | Ifi44 | Ifi27         | 1  |
| 12398 | 9928  | Ifi44 | Lgmn          | 1  |
| 12398 | 10109 | Ifi44 | Gbp3          | 1  |
| 12398 | 10504 | Ifi44 | Ripk3         | 1  |
| 12398 | 10926 | Ifi44 | P2ry13        | 1  |

|       |       |       |               |   |
|-------|-------|-------|---------------|---|
| 12398 | 11009 | lfi44 | MMT00008885   | 1 |
| 12398 | 11204 | lfi44 | AI451617      | 1 |
| 12398 | 11265 | lfi44 | Irgm          | 1 |
| 12398 | 11701 | lfi44 | Oas1c         | 1 |
| 12398 | 12126 | lfi44 | Znfx1         | 1 |
| 12398 | 12312 | lfi44 | Ms4a6d        | 1 |
| 12398 | 12398 | lfi44 | lfi44         | 1 |
| 12398 | 12495 | lfi44 | Casp1         | 1 |
| 12398 | 12600 | lfi44 | lfi204        | 1 |
| 12398 | 12969 | lfi44 | Xaf1          | 1 |
| 12398 | 13156 | lfi44 | lfit3         | 1 |
| 12398 | 13181 | lfi44 | Lcp2          | 1 |
| 12398 | 13309 | lfi44 | Tgtp          | 1 |
| 12398 | 13514 | lfi44 | Apol9b        | 1 |
| 12398 | 13522 | lfi44 | Sfn5          | 1 |
| 12398 | 13527 | lfi44 | Ctss          | 1 |
| 12398 | 13528 | lfi44 | Capn12        | 1 |
| 12398 | 13654 | lfi44 | Stat1         | 1 |
| 12398 | 13656 | lfi44 | Ly86          | 1 |
| 12398 | 13749 | lfi44 | Parp9         | 1 |
| 12398 | 13780 | lfi44 | Pilra         | 1 |
| 12398 | 13826 | lfi44 | Melk          | 1 |
| 12398 | 14029 | lfi44 | 2810022L02Rik | 1 |
| 12398 | 14258 | lfi44 | lfi47         | 1 |
| 12398 | 14506 | lfi44 | Slc15a3       | 1 |
| 12398 | 14603 | lfi44 | Ly6e          | 1 |
| 12398 | 14611 | lfi44 | Ddx60         | 1 |
| 12398 | 14880 | lfi44 | Ms4a4c        | 1 |
| 12398 | 14883 | lfi44 | Itgal         | 1 |
| 12398 | 14954 | lfi44 | Rab19         | 1 |
| 12398 | 15074 | lfi44 | Usp18         | 1 |
| 12398 | 15280 | lfi44 | Cxcl10        | 1 |
| 12398 | 15449 | lfi44 | Mitd1         | 1 |
| 12398 | 15504 | lfi44 | Mx2           | 1 |
| 12398 | 16102 | lfi44 | Cd72          | 1 |
| 12398 | 16147 | lfi44 | Tlr2          | 1 |
| 12398 | 16182 | lfi44 | Oasl1         | 1 |
| 12398 | 16186 | lfi44 | Cfp           | 1 |
| 12398 | 16199 | lfi44 | Samhd1        | 1 |
| 12398 | 16521 | lfi44 | Adar          | 1 |
| 12398 | 16572 | lfi44 | D14Ert668e    | 1 |
| 12398 | 16874 | lfi44 | Fcer1g        | 1 |
| 12398 | 16988 | lfi44 | Clec4f        | 1 |
| 12398 | 17071 | lfi44 | Samd9l        | 1 |
| 12398 | 17197 | lfi44 | Igtp          | 1 |
| 12398 | 17412 | lfi44 | Aif1          | 1 |
| 12398 | 17904 | lfi44 | Cds1          | 1 |
| 12398 | 18174 | lfi44 | Stat2         | 1 |
| 12398 | 18186 | lfi44 | Parp14        | 1 |
| 12398 | 18289 | lfi44 | Tap1          | 1 |
| 12398 | 19026 | lfi44 | Isg15         | 1 |

|       |       |             |                    |    |
|-------|-------|-------------|--------------------|----|
| 12398 | 19189 | lfi44       | Sp100              | 1  |
| 12398 | 19262 | lfi44       | Cd274              | 1  |
| 12398 | 19276 | lfi44       | H28                | 1  |
| 12398 | 19708 | lfi44       | Ly6a               | 1  |
| 12398 | 19738 | lfi44       | Lgals3bp           | 1  |
| 12398 | 19794 | lfi44       | Rgs2               | 1  |
| 12398 | 20321 | lfi44       | Ms4a6b             | 1  |
| 12398 | 20474 | lfi44       | Gnb3               | 1  |
| 12398 | 20791 | lfi44       | MMT00014813        | 1  |
| 12398 | 20997 | lfi44       | MMT00028135        | 1  |
| 12398 | 21351 | lfi44       | Shisa5             | 1  |
| 12398 | 21549 | lfi44       | Rtp4               | 1  |
| 12398 | 21824 | lfi44       | 5830443L24Rik      | 1  |
| 12398 | 22037 | lfi44       | Oas1g              | 1  |
| 12398 | 22077 | lfi44       | MMT00057550        | 1  |
| 12398 | 22712 | lfi44       | Phf11              | 1  |
| 12398 | 23092 | lfi44       | Ifih1              | 1  |
| 12398 | 23174 | lfi44       | Psme2              | 1  |
| 12398 | 23208 | lfi44       | Hck                | 1  |
| 12398 | 23242 | lfi44       | Gngt2              | 1  |
| 12398 | 23450 | lfi44       | D12Erttd647e       | 1  |
| 12404 | 5364  | Col16a1     | Kif22              | 1  |
| 12404 | 7761  | Col16a1     | Nudt19             | -1 |
| 12404 | 11382 | Col16a1     | Cdca3              | 1  |
| 12404 | 14472 | Col16a1     | Ahcy               | -1 |
| 12404 | 15205 | Col16a1     | MMT00030262        | 1  |
| 12404 | 20171 | Col16a1     | 1700008G05Rik      | 1  |
| 12405 | 9427  | Cyp4f14     | Nqo2               | 1  |
| 12405 | 10554 | Cyp4f14     | ENSMUSG00000074179 | 1  |
| 12405 | 13293 | Cyp4f14     | Gsta2              | 1  |
| 12405 | 20058 | Cyp4f14     | Dnaic1             | -1 |
| 12412 | 3862  | BC004728    | Gpd1               | 1  |
| 12412 | 6804  | BC004728    | Cyp2d22            | -1 |
| 12412 | 12412 | BC004728    | BC004728           | 1  |
| 12412 | 12468 | BC004728    | Cyp2d13            | -1 |
| 12412 | 19037 | BC004728    | Slc11a2            | 1  |
| 12412 | 19216 | BC004728    | Bik                | -1 |
| 12412 | 21060 | BC004728    | Ela1               | 1  |
| 12417 | 6044  | Mtap7d1     | Sucnr1             | 1  |
| 12417 | 10132 | Mtap7d1     | Ces2               | 1  |
| 12417 | 11462 | Mtap7d1     | Gpam               | 1  |
| 12417 | 12910 | Mtap7d1     | 1110028A07Rik      | 1  |
| 12417 | 17090 | Mtap7d1     | Lass2              | 1  |
| 12417 | 21070 | Mtap7d1     | Cnot8              | 1  |
| 12417 | 22046 | Mtap7d1     | Cml4               | 1  |
| 12417 | 23026 | Mtap7d1     | Apom               | -1 |
| 12419 | 11043 | MMT00081393 | Hsph1              | 1  |
| 12420 | 874   | Klhl21      | Aldh1a7            | -1 |
| 12420 | 2013  | Klhl21      | Il15ra             | 1  |
| 12420 | 4141  | Klhl21      | Pank4              | 1  |
| 12420 | 6193  | Klhl21      | Lactb2             | -1 |

|       |       |               |               |    |
|-------|-------|---------------|---------------|----|
| 12420 | 8815  | Klhl21        | Mx1           | -1 |
| 12420 | 12143 | Klhl21        | Thyn1         | -1 |
| 12420 | 12219 | Klhl21        | Cyb5b         | -1 |
| 12420 | 14323 | Klhl21        | Scarb1        | 1  |
| 12420 | 17862 | Klhl21        | Fbxo21        | 1  |
| 12420 | 17878 | Klhl21        | Brap          | 1  |
| 12420 | 18201 | Klhl21        | MMT00060232   | -1 |
| 12420 | 21143 | Klhl21        | Ypel3         | 1  |
| 12420 | 21202 | Klhl21        | Acly          | -1 |
| 12420 | 21214 | Klhl21        | Scd1          | -1 |
| 12420 | 21251 | Klhl21        | Cpt1a         | 1  |
| 12420 | 21575 | Klhl21        | Cyp2c55       | -1 |
| 12420 | 21793 | Klhl21        | Pla2g12a      | 1  |
| 12420 | 22732 | Klhl21        | Cyb5b         | -1 |
| 12420 | 23026 | Klhl21        | Apom          | 1  |
| 12430 | 274   | Fst           | Trit1         | -1 |
| 12430 | 23318 | Fst           | Cul2          | 1  |
| 12440 | 2243  | Sult5a1       | Gcsh          | -1 |
| 12460 | 6370  | Pnpla2        | Aqp8          | -1 |
| 12477 | 9554  | 3-Mar         | Hmgb2l1       | -1 |
| 12478 | 8444  | Rhot2         | Rdh16         | -1 |
| 12478 | 8815  | Rhot2         | Mx1           | -1 |
| 12478 | 20058 | Rhot2         | Dnaic1        | 1  |
| 12478 | 21214 | Rhot2         | Scd1          | -1 |
| 12479 | 2294  | lfrd1         | AU040829      | 1  |
| 12479 | 3196  | lfrd1         | Tat           | 1  |
| 12479 | 3502  | lfrd1         | Gde1          | 1  |
| 12479 | 5766  | lfrd1         | 5033414D02Rik | -1 |
| 12479 | 6916  | lfrd1         | Wdr5b         | -1 |
| 12479 | 10775 | lfrd1         | Slc16a1       | -1 |
| 12479 | 14361 | lfrd1         | Txndc12       | -1 |
| 12479 | 20296 | lfrd1         | C030027H14Rik | 1  |
| 12480 | 13810 | Cdc42bpg      | 1110036O03Rik | -1 |
| 12483 | 21251 | 5133401N09Rik | Cpt1a         | -1 |
| 12486 | 407   | Aldh18a1      | Serpina6      | -1 |
| 12486 | 2850  | Aldh18a1      | Slc16a6       | 1  |
| 12486 | 3410  | Aldh18a1      | Paqr9         | 1  |
| 12486 | 3836  | Aldh18a1      | 2200001115Rik | 1  |
| 12486 | 5364  | Aldh18a1      | Kif22         | 1  |
| 12486 | 7761  | Aldh18a1      | Nudt19        | -1 |
| 12486 | 8416  | Aldh18a1      | Cdc20         | 1  |
| 12486 | 11382 | Aldh18a1      | Cdca3         | 1  |
| 12486 | 13271 | Aldh18a1      | ldh2          | -1 |
| 12486 | 14472 | Aldh18a1      | Ahcy          | -1 |
| 12486 | 15320 | Aldh18a1      | MMT00017479   | -1 |
| 12486 | 18299 | Aldh18a1      | MMT00035424   | 1  |
| 12486 | 20171 | Aldh18a1      | 1700008G05Rik | 1  |
| 12486 | 21692 | Aldh18a1      | MMT00013924   | 1  |
| 12489 | 269   | Wdr8          | Tuba1b        | 1  |
| 12489 | 662   | Wdr8          | Mid1ip1       | 1  |
| 12489 | 937   | Wdr8          | Pi4ka         | -1 |



|       |       |             |             |    |
|-------|-------|-------------|-------------|----|
| 12489 | 1709  | Wdr8        | Mt2         | -1 |
| 12489 | 1941  | Wdr8        | MMT00079618 | 1  |
| 12489 | 2013  | Wdr8        | Il15ra      | -1 |
| 12489 | 3868  | Wdr8        | Ebpl        | 1  |
| 12489 | 6193  | Wdr8        | Lactb2      | 1  |
| 12489 | 6771  | Wdr8        | Insc        | 1  |
| 12489 | 6966  | Wdr8        | Mia3        | -1 |
| 12489 | 7151  | Wdr8        | MMT00007982 | 1  |
| 12489 | 8896  | Wdr8        | Fasn        | 1  |
| 12489 | 9408  | Wdr8        | Hmgcs2      | -1 |
| 12489 | 9763  | Wdr8        | Tuba3b      | 1  |
| 12489 | 10612 | Wdr8        | Slc24a6     | -1 |
| 12489 | 10961 | Wdr8        | Pgd         | 1  |
| 12489 | 11129 | Wdr8        | Ankhd1      | -1 |
| 12489 | 11724 | Wdr8        | Tuba3a      | 1  |
| 12489 | 11807 | Wdr8        | Fbxo31      | -1 |
| 12489 | 12219 | Wdr8        | Cyb5b       | 1  |
| 12489 | 12420 | Wdr8        | Klhl21      | -1 |
| 12489 | 12460 | Wdr8        | Pnpla2      | -1 |
| 12489 | 13018 | Wdr8        | AW544981    | 1  |
| 12489 | 15862 | Wdr8        | Mrap        | 1  |
| 12489 | 15892 | Wdr8        | Slc22a5     | -1 |
| 12489 | 17444 | Wdr8        | Tuba1a      | 1  |
| 12489 | 17656 | Wdr8        | Hdhd3       | 1  |
| 12489 | 17660 | Wdr8        | Nlrp12      | -1 |
| 12489 | 17878 | Wdr8        | Brap        | -1 |
| 12489 | 18785 | Wdr8        | Angptl4     | -1 |
| 12489 | 19089 | Wdr8        | Peci        | -1 |
| 12489 | 20217 | Wdr8        | Rab3ip      | -1 |
| 12489 | 20798 | Wdr8        | Ccpg1       | -1 |
| 12489 | 21202 | Wdr8        | Acly        | 1  |
| 12489 | 21251 | Wdr8        | Cpt1a       | -1 |
| 12489 | 22443 | Wdr8        | Tuba1c      | 1  |
| 12489 | 22732 | Wdr8        | Cyb5b       | 1  |
| 12489 | 22770 | Wdr8        | Slc27a2     | -1 |
| 12493 | 2224  | Ankfy1      | Oasl2       | 1  |
| 12493 | 8800  | Ankfy1      | Rnf213      | 1  |
| 12493 | 9847  | Ankfy1      | Ifi27       | 1  |
| 12493 | 14880 | Ankfy1      | Ms4a4c      | 1  |
| 12493 | 15504 | Ankfy1      | Mx2         | 1  |
| 12493 | 21549 | Ankfy1      | Rtp4        | 1  |
| 12495 | 6386  | Casp1       | Por         | -1 |
| 12495 | 11198 | Casp1       | Gbp1        | 1  |
| 12515 | 6163  | N4bp2       | Nudt13      | -1 |
| 12520 | 607   | MMT00057426 | Me1         | 1  |
| 12520 | 4351  | MMT00057426 | Plxnb1      | -1 |
| 12520 | 7602  | MMT00057426 | Pcca        | 1  |
| 12520 | 8815  | MMT00057426 | Mx1         | 1  |
| 12520 | 18201 | MMT00057426 | MMT00060232 | 1  |
| 12520 | 21214 | MMT00057426 | Scd1        | 1  |
| 12520 | 21575 | MMT00057426 | Cyp2c55     | 1  |

|       |       |         |               |    |
|-------|-------|---------|---------------|----|
| 12540 | 8444  | Smarca1 | Rdh16         | -1 |
| 12546 | 3061  | Cd7     | Scarf2        | 1  |
| 12546 | 3119  | Cd7     | Mapk10        | 1  |
| 12546 | 3339  | Cd7     | Dip2a         | 1  |
| 12546 | 6017  | Cd7     | MMT00018015   | -1 |
| 12546 | 6426  | Cd7     | Mfsd4         | 1  |
| 12546 | 6846  | Cd7     | Olf1402       | 1  |
| 12546 | 8791  | Cd7     | Sectm1a       | 1  |
| 12546 | 10214 | Cd7     | Sectm1b       | 1  |
| 12546 | 12546 | Cd7     | Cd7           | 1  |
| 12546 | 13615 | Cd7     | Arl16         | -1 |
| 12546 | 15016 | Cd7     | MMT00074608   | 1  |
| 12546 | 16613 | Cd7     | 1110031I02Rik | 1  |
| 12546 | 17680 | Cd7     | 1700069L16Rik | 1  |
| 12546 | 17792 | Cd7     | Vmn2r79       | 1  |
| 12546 | 17897 | Cd7     | Gm1019        | 1  |
| 12546 | 22557 | Cd7     | P4hb          | -1 |
| 12552 | 4349  | Gm967   | Mrpl27        | -1 |
| 12552 | 5133  | Gm967   | 6430517E21Rik | -1 |
| 12552 | 5804  | Gm967   | Thrsp         | -1 |
| 12552 | 9408  | Gm967   | Hmgcs2        | 1  |
| 12552 | 11462 | Gm967   | Gpam          | -1 |
| 12552 | 13251 | Gm967   | EG622268      | -1 |
| 12552 | 14147 | Gm967   | Acss2         | -1 |
| 12552 | 18515 | Gm967   | Ddx28         | 1  |
| 12552 | 20385 | Gm967   | Chd1l         | -1 |
| 12552 | 21202 | Gm967   | Acly          | -1 |
| 12552 | 22770 | Gm967   | Slc27a2       | 1  |
| 12553 | 607   | Kpnb1   | Me1           | 1  |
| 12553 | 3377  | Kpnb1   | Cs            | 1  |
| 12553 | 8815  | Kpnb1   | Mx1           | 1  |
| 12553 | 11086 | Kpnb1   | Pnpla5        | 1  |
| 12553 | 11234 | Kpnb1   | Pygl          | 1  |
| 12553 | 14147 | Kpnb1   | Acss2         | 1  |
| 12553 | 14323 | Kpnb1   | Scarb1        | -1 |
| 12553 | 17887 | Kpnb1   | Cryl1         | 1  |
| 12553 | 18201 | Kpnb1   | MMT00060232   | 1  |
| 12553 | 20328 | Kpnb1   | Csl           | 1  |
| 12553 | 21202 | Kpnb1   | Acly          | 1  |
| 12553 | 21214 | Kpnb1   | Scd1          | 1  |
| 12565 | 8444  | Grem2   | Rdh16         | -1 |
| 12565 | 8815  | Grem2   | Mx1           | -1 |
| 12565 | 12910 | Grem2   | 1110028A07Rik | -1 |
| 12565 | 14017 | Grem2   | Ces5          | -1 |
| 12565 | 15059 | Grem2   | Mogat1        | -1 |
| 12565 | 20058 | Grem2   | Dnaic1        | 1  |
| 12565 | 21214 | Grem2   | Scd1          | -1 |
| 12565 | 22138 | Grem2   | Ang           | 1  |
| 12572 | 3097  | Zfp90   | Ppp1r3g       | -1 |
| 12572 | 3170  | Zfp90   | Mcart1        | -1 |
| 12572 | 3196  | Zfp90   | Tat           | -1 |

|       |       |               |                    |    |
|-------|-------|---------------|--------------------|----|
| 12572 | 3587  | Zfp90         | MMT00041940        | -1 |
| 12572 | 6021  | Zfp90         | MMT00008784        | -1 |
| 12572 | 7140  | Zfp90         | Mtbp               | 1  |
| 12572 | 7963  | Zfp90         | Rxrg               | 1  |
| 12572 | 8670  | Zfp90         | MMT00051613        | -1 |
| 12572 | 12761 | Zfp90         | Tsc22d3            | -1 |
| 12572 | 15675 | Zfp90         | MMT00077535        | -1 |
| 12572 | 15826 | Zfp90         | Arl4d              | -1 |
| 12572 | 17525 | Zfp90         | Ctgf               | -1 |
| 12572 | 18373 | Zfp90         | Dnajb1             | -1 |
| 12581 | 8444  | Mpp3          | Rdh16              | -1 |
| 12592 | 5364  | F13a1         | Kif22              | 1  |
| 12592 | 11382 | F13a1         | Cdca3              | 1  |
| 12599 | 7911  | Golt1b        | Pik3c2g            | -1 |
| 12599 | 12599 | Golt1b        | Golt1b             | 1  |
| 12600 | 2224  | Ifi204        | Oasl2              | 1  |
| 12600 | 3659  | Ifi204        | EG236451           | 1  |
| 12600 | 3683  | Ifi204        | Oas2               | 1  |
| 12600 | 6587  | Ifi204        | Irf9               | 1  |
| 12600 | 6824  | Ifi204        | Irf7               | 1  |
| 12600 | 8800  | Ifi204        | Rnf213             | 1  |
| 12600 | 9100  | Ifi204        | Ms4a6c             | 1  |
| 12600 | 9847  | Ifi204        | Ifi27              | 1  |
| 12600 | 12312 | Ifi204        | Ms4a6d             | 1  |
| 12600 | 12398 | Ifi204        | Ifi44              | 1  |
| 12600 | 12600 | Ifi204        | Ifi204             | 1  |
| 12600 | 20321 | Ifi204        | Ms4a6b             | 1  |
| 12600 | 22712 | Ifi204        | Phf11              | 1  |
| 12619 | 15631 | Igf2r         | Lpin1              | -1 |
| 12625 | 3496  | Al597468      | Slc41a2            | 1  |
| 12626 | 5364  | Fut7          | Kif22              | 1  |
| 12634 | 12634 | Olf1372-ps1   | Olf1372-ps1        | 1  |
| 12636 | 12380 | MMT00000549   | Rftn2              | -1 |
| 12636 | 19578 | MMT00000549   | Aox1               | 1  |
| 12636 | 22333 | MMT00000549   | Hnrnp3             | -1 |
| 12649 | 2875  | Itgad         | Wfdc2              | 1  |
| 12649 | 5364  | Itgad         | Kif22              | 1  |
| 12649 | 12910 | Itgad         | 1110028A07Rik      | 1  |
| 12649 | 15059 | Itgad         | Mogat1             | 1  |
| 12649 | 20194 | Itgad         | Pnlcd1             | 1  |
| 12654 | 10554 | 4930485B16Rik | ENSMUSG00000074179 | 1  |
| 12654 | 13293 | 4930485B16Rik | Gsta2              | 1  |
| 12656 | 5100  | Coq5          | Pebp1              | -1 |
| 12656 | 10978 | Coq5          | MMT00078322        | 1  |
| 12656 | 12656 | Coq5          | Coq5               | 1  |
| 12656 | 15908 | Coq5          | Pebp1              | -1 |
| 12656 | 17716 | Coq5          | Rnf10              | -1 |
| 12656 | 17807 | Coq5          | Pebp1              | -1 |
| 12687 | 20967 | Zc3h8         | Fabp2              | -1 |
| 12694 | 327   | Riok2         | H2-Ea              | -1 |
| 12694 | 2938  | Riok2         | H2-T23             | -1 |

|       |       |               |                    |    |
|-------|-------|---------------|--------------------|----|
| 12694 | 5410  | Riok2         | Cyp4f15            | 1  |
| 12694 | 8750  | Riok2         | 1700010I14Rik      | -1 |
| 12694 | 12694 | Riok2         | Riok2              | 1  |
| 12694 | 13493 | Riok2         | Ring1              | 1  |
| 12694 | 18906 | Riok2         | Zfand3             | -1 |
| 12694 | 22822 | Riok2         | MMT00013433        | -1 |
| 12703 | 10675 | Pcsk1         | Mobkl2a            | 1  |
| 12707 | 563   | Dmrt2         | D4Bwg0951e         | -1 |
| 12707 | 662   | Dmrt2         | Mid1ip1            | 1  |
| 12707 | 8439  | Dmrt2         | Slc25a33           | -1 |
| 12707 | 8632  | Dmrt2         | Igfbp1             | -1 |
| 12707 | 12315 | Dmrt2         | Srebf1             | 1  |
| 12707 | 13489 | Dmrt2         | D230025D16Rik      | -1 |
| 12707 | 15990 | Dmrt2         | Dnmbp              | -1 |
| 12707 | 17660 | Dmrt2         | Nlrp12             | -1 |
| 12707 | 18785 | Dmrt2         | Angptl4            | -1 |
| 12711 | 6085  | Nap1l4        | MMT00007454        | -1 |
| 12711 | 8773  | Nap1l4        | MMT00027093        | -1 |
| 12711 | 13431 | Nap1l4        | MMT00038058        | -1 |
| 12711 | 14055 | Nap1l4        | MMT00050438        | -1 |
| 12711 | 15205 | Nap1l4        | MMT00030262        | -1 |
| 12711 | 17323 | Nap1l4        | Tubb6              | -1 |
| 12711 | 18250 | Nap1l4        | Mmp14              | -1 |
| 12711 | 21937 | Nap1l4        | MMT00015325        | -1 |
| 12711 | 22978 | Nap1l4        | MMT00043176        | -1 |
| 12716 | 524   | 5830417I10Rik | Hsd3b2             | -1 |
| 12716 | 1466  | 5830417I10Rik | Ubp2l              | -1 |
| 12716 | 1867  | 5830417I10Rik | Bcas2              | -1 |
| 12716 | 1963  | 5830417I10Rik | MMT00039783        | -1 |
| 12716 | 3753  | 5830417I10Rik | Setdb1             | 1  |
| 12716 | 5938  | 5830417I10Rik | Pfn2               | -1 |
| 12716 | 6206  | 5830417I10Rik | MMT00063701        | -1 |
| 12716 | 10521 | 5830417I10Rik | Ttf2               | -1 |
| 12716 | 11611 | 5830417I10Rik | S100a13            | 1  |
| 12716 | 16416 | 5830417I10Rik | Commd2             | -1 |
| 12716 | 22202 | 5830417I10Rik | OTTMUSG00000021274 | 1  |
| 12718 | 1183  | Dhrsx         | MMT00009390        | 1  |
| 12718 | 2793  | Dhrsx         | MMT00005644        | -1 |
| 12718 | 5989  | Dhrsx         | 2310042D19Rik      | -1 |
| 12718 | 12718 | Dhrsx         | Dhrsx              | 1  |
| 12718 | 18033 | Dhrsx         | Klhl17             | 1  |
| 12718 | 19026 | Dhrsx         | Isg15              | -1 |
| 12718 | 22077 | Dhrsx         | MMT00057550        | -1 |
| 12728 | 1036  | Hax1          | Dusp19             | 1  |
| 12728 | 4351  | Hax1          | Plxnb1             | -1 |
| 12728 | 12112 | Hax1          | Tmem53             | -1 |
| 12730 | 9655  | 9130019O22Rik | Sult2b1            | 1  |
| 12730 | 12730 | 9130019O22Rik | 9130019O22Rik      | 1  |
| 12730 | 16598 | 9130019O22Rik | E430018J23Rik      | -1 |
| 12730 | 22361 | 9130019O22Rik | Sephs2             | 1  |
| 12751 | 2980  | Sorl1         | Slc37a2            | -1 |

|       |       |         |               |    |
|-------|-------|---------|---------------|----|
| 12751 | 18162 | Sor1    | BC049352      | 1  |
| 12751 | 20061 | Sor1    | EG383436      | 1  |
| 12751 | 20468 | Sor1    | Spa17         | -1 |
| 12761 | 337   | Tsc22d3 | Rasgef1b      | 1  |
| 12761 | 437   | Tsc22d3 | Ndr1          | -1 |
| 12761 | 530   | Tsc22d3 | Mest          | -1 |
| 12761 | 719   | Tsc22d3 | Usp2          | 1  |
| 12761 | 1711  | Tsc22d3 | Grhl1         | -1 |
| 12761 | 1767  | Tsc22d3 | BC016495      | 1  |
| 12761 | 2110  | Tsc22d3 | Gtf2ird1      | -1 |
| 12761 | 2294  | Tsc22d3 | AU040829      | 1  |
| 12761 | 2399  | Tsc22d3 | MMT00060167   | -1 |
| 12761 | 2433  | Tsc22d3 | Armc10        | -1 |
| 12761 | 2529  | Tsc22d3 | Hmcn2         | 1  |
| 12761 | 2794  | Tsc22d3 | Map3k6        | 1  |
| 12761 | 2829  | Tsc22d3 | Lrfn3         | -1 |
| 12761 | 3170  | Tsc22d3 | Mcart1        | 1  |
| 12761 | 3196  | Tsc22d3 | Tat           | 1  |
| 12761 | 3214  | Tsc22d3 | Dnmt3b        | -1 |
| 12761 | 3410  | Tsc22d3 | Paqr9         | -1 |
| 12761 | 3452  | Tsc22d3 | Ccrn4l        | 1  |
| 12761 | 3502  | Tsc22d3 | Gde1          | 1  |
| 12761 | 3789  | Tsc22d3 | 4833442J19Rik | 1  |
| 12761 | 3838  | Tsc22d3 | Trim32        | -1 |
| 12761 | 3989  | Tsc22d3 | Wrnip1        | -1 |
| 12761 | 4235  | Tsc22d3 | Pfkfb3        | 1  |
| 12761 | 4286  | Tsc22d3 | Ptp4a1        | 1  |
| 12761 | 4404  | Tsc22d3 | Commd5        | -1 |
| 12761 | 4678  | Tsc22d3 | Kank1         | -1 |
| 12761 | 4708  | Tsc22d3 | Traf3ip2      | -1 |
| 12761 | 5068  | Tsc22d3 | Afap1l2       | -1 |
| 12761 | 5183  | Tsc22d3 | St5           | -1 |
| 12761 | 5187  | Tsc22d3 | Speer4f       | 1  |
| 12761 | 5374  | Tsc22d3 | Chka          | -1 |
| 12761 | 5569  | Tsc22d3 | Pdgfc         | -1 |
| 12761 | 5574  | Tsc22d3 | Hsd3b7        | -1 |
| 12761 | 5727  | Tsc22d3 | Camk2g        | -1 |
| 12761 | 5729  | Tsc22d3 | 2310016C08Rik | -1 |
| 12761 | 5804  | Tsc22d3 | Thrsp         | 1  |
| 12761 | 5849  | Tsc22d3 | 2310031A18Rik | -1 |
| 12761 | 5856  | Tsc22d3 | Mfsd2         | 1  |
| 12761 | 5974  | Tsc22d3 | Arntl         | -1 |
| 12761 | 6023  | Tsc22d3 | Saa4          | 1  |
| 12761 | 6028  | Tsc22d3 | Alas1         | 1  |
| 12761 | 6211  | Tsc22d3 | Arhgap24      | -1 |
| 12761 | 6282  | Tsc22d3 | Them4         | 1  |
| 12761 | 6386  | Tsc22d3 | Por           | 1  |
| 12761 | 6564  | Tsc22d3 | Cebpd         | 1  |
| 12761 | 6756  | Tsc22d3 | Sds           | 1  |
| 12761 | 6990  | Tsc22d3 | Nr1i2         | 1  |
| 12761 | 7128  | Tsc22d3 | Gemin8        | -1 |

|       |       |         |               |    |
|-------|-------|---------|---------------|----|
| 12761 | 7136  | Tsc22d3 | Id3           | -1 |
| 12761 | 7492  | Tsc22d3 | Adfp          | -1 |
| 12761 | 7550  | Tsc22d3 | Rab11fip5     | -1 |
| 12761 | 7963  | Tsc22d3 | Rxrg          | -1 |
| 12761 | 8328  | Tsc22d3 | Klhdc8a       | -1 |
| 12761 | 8399  | Tsc22d3 | Herpud1       | 1  |
| 12761 | 8404  | Tsc22d3 | Fa2h          | -1 |
| 12761 | 8428  | Tsc22d3 | Sorbs3        | 1  |
| 12761 | 8641  | Tsc22d3 | Slc7a2        | 1  |
| 12761 | 9213  | Tsc22d3 | Osgin1        | -1 |
| 12761 | 9275  | Tsc22d3 | Aass          | 1  |
| 12761 | 9481  | Tsc22d3 | Ppl           | 1  |
| 12761 | 9495  | Tsc22d3 | Srms          | -1 |
| 12761 | 9554  | Tsc22d3 | Hmgb2l1       | -1 |
| 12761 | 9718  | Tsc22d3 | Fmo5          | 1  |
| 12761 | 10207 | Tsc22d3 | MMT00012324   | -1 |
| 12761 | 10215 | Tsc22d3 | Nampt         | 1  |
| 12761 | 10273 | Tsc22d3 | Gpt2          | 1  |
| 12761 | 10408 | Tsc22d3 | Per1          | 1  |
| 12761 | 10775 | Tsc22d3 | Slc16a1       | -1 |
| 12761 | 11093 | Tsc22d3 | Zdhhc1        | 1  |
| 12761 | 11576 | Tsc22d3 | Gm1381        | 1  |
| 12761 | 11599 | Tsc22d3 | Coq10b        | 1  |
| 12761 | 11614 | Tsc22d3 | Sult1e1       | 1  |
| 12761 | 11741 | Tsc22d3 | Slc30a10      | -1 |
| 12761 | 11808 | Tsc22d3 | Pck1          | 1  |
| 12761 | 11949 | Tsc22d3 | Cldn3         | -1 |
| 12761 | 12114 | Tsc22d3 | Homer2        | 1  |
| 12761 | 12204 | Tsc22d3 | Ankmy2        | 1  |
| 12761 | 12232 | Tsc22d3 | MMT00060943   | 1  |
| 12761 | 12420 | Tsc22d3 | Klhl21        | 1  |
| 12761 | 12489 | Tsc22d3 | Wdr8          | -1 |
| 12761 | 12761 | Tsc22d3 | Tsc22d3       | 1  |
| 12761 | 12799 | Tsc22d3 | Spon2         | -1 |
| 12761 | 12807 | Tsc22d3 | Faim          | -1 |
| 12761 | 13000 | Tsc22d3 | 9130404D14Rik | -1 |
| 12761 | 13078 | Tsc22d3 | Eps8l2        | -1 |
| 12761 | 13289 | Tsc22d3 | Dusp10        | -1 |
| 12761 | 13339 | Tsc22d3 | D630042F21Rik | 1  |
| 12761 | 13989 | Tsc22d3 | Foxp3         | 1  |
| 12761 | 14041 | Tsc22d3 | Cldn1         | -1 |
| 12761 | 14279 | Tsc22d3 | 3930402G23Rik | -1 |
| 12761 | 14462 | Tsc22d3 | Zfp385b       | 1  |
| 12761 | 15008 | Tsc22d3 | Chrdl2        | 1  |
| 12761 | 15021 | Tsc22d3 | Ppargc1a      | 1  |
| 12761 | 15049 | Tsc22d3 | Rnf125        | -1 |
| 12761 | 15521 | Tsc22d3 | Mast3         | 1  |
| 12761 | 15522 | Tsc22d3 | 1810011O10Rik | 1  |
| 12761 | 15566 | Tsc22d3 | Snn           | -1 |
| 12761 | 15624 | Tsc22d3 | Crcp          | 1  |
| 12761 | 15631 | Tsc22d3 | Lpin1         | 1  |

|       |       |         |               |    |
|-------|-------|---------|---------------|----|
| 12761 | 15695 | Tsc22d3 | Tead4         | 1  |
| 12761 | 15709 | Tsc22d3 | Tceal1        | 1  |
| 12761 | 15824 | Tsc22d3 | D19Ertd721e   | -1 |
| 12761 | 15882 | Tsc22d3 | AA986860      | 1  |
| 12761 | 16176 | Tsc22d3 | St3gal5       | 1  |
| 12761 | 16515 | Tsc22d3 | Gramd4        | -1 |
| 12761 | 16517 | Tsc22d3 | D4Wsu53e      | 1  |
| 12761 | 16580 | Tsc22d3 | Tnfaip2       | -1 |
| 12761 | 16669 | Tsc22d3 | Tjp2          | -1 |
| 12761 | 16690 | Tsc22d3 | Tjp3          | -1 |
| 12761 | 16720 | Tsc22d3 | Mtmr7         | 1  |
| 12761 | 16851 | Tsc22d3 | Slc34a2       | -1 |
| 12761 | 17352 | Tsc22d3 | Cebpb         | 1  |
| 12761 | 17493 | Tsc22d3 | Rfx4          | -1 |
| 12761 | 17525 | Tsc22d3 | Ctgf          | 1  |
| 12761 | 17583 | Tsc22d3 | Per2          | 1  |
| 12761 | 17622 | Tsc22d3 | Foxo1         | 1  |
| 12761 | 17992 | Tsc22d3 | Gmpr          | -1 |
| 12761 | 18027 | Tsc22d3 | 5730403B10Rik | 1  |
| 12761 | 18179 | Tsc22d3 | Dbp           | 1  |
| 12761 | 18250 | Tsc22d3 | Mmp14         | -1 |
| 12761 | 18314 | Tsc22d3 | 4631416L12Rik | 1  |
| 12761 | 19025 | Tsc22d3 | Slc37a4       | 1  |
| 12761 | 19146 | Tsc22d3 | N4bp2l1       | 1  |
| 12761 | 19234 | Tsc22d3 | Nrg4          | 1  |
| 12761 | 19466 | Tsc22d3 | Pptc7         | 1  |
| 12761 | 19556 | Tsc22d3 | Efna1         | -1 |
| 12761 | 19671 | Tsc22d3 | Upp2          | 1  |
| 12761 | 19723 | Tsc22d3 | Pfkfb1        | 1  |
| 12761 | 19790 | Tsc22d3 | Polg2         | 1  |
| 12761 | 20171 | Tsc22d3 | 1700008G05Rik | -1 |
| 12761 | 20570 | Tsc22d3 | Ap3m1         | 1  |
| 12761 | 20689 | Tsc22d3 | Cnksr3        | -1 |
| 12761 | 20830 | Tsc22d3 | MMT00057509   | -1 |
| 12761 | 21142 | Tsc22d3 | Gm129         | 1  |
| 12761 | 21331 | Tsc22d3 | Slc10a6       | 1  |
| 12761 | 21805 | Tsc22d3 | Plk3          | 1  |
| 12761 | 21918 | Tsc22d3 | Snx24         | -1 |
| 12761 | 21934 | Tsc22d3 | Id2           | -1 |
| 12761 | 22324 | Tsc22d3 | MMT00060741   | -1 |
| 12761 | 22630 | Tsc22d3 | MMT00034355   | -1 |
| 12761 | 22681 | Tsc22d3 | Gm88          | 1  |
| 12761 | 22715 | Tsc22d3 | Ap3m1         | 1  |
| 12761 | 22873 | Tsc22d3 | Slc38a2       | 1  |
| 12761 | 22936 | Tsc22d3 | Rhobtb1       | 1  |
| 12761 | 23183 | Tsc22d3 | Nnmt          | 1  |
| 12761 | 23202 | Tsc22d3 | Olfir559      | 1  |
| 12761 | 23211 | Tsc22d3 | Pscd3         | -1 |
| 12761 | 23552 | Tsc22d3 | Rasl11b       | -1 |
| 12770 | 3345  | Nola2   | EG620934      | 1  |
| 12770 | 3377  | Nola2   | Cs            | 1  |

|       |       |               |                    |    |
|-------|-------|---------------|--------------------|----|
| 12770 | 5884  | Nola2         | Gstm2              | 1  |
| 12770 | 8815  | Nola2         | Mx1                | 1  |
| 12770 | 11946 | Nola2         | MMT00030953        | 1  |
| 12770 | 18201 | Nola2         | MMT00060232        | 1  |
| 12770 | 20328 | Nola2         | Csl                | 1  |
| 12770 | 21214 | Nola2         | Scd1               | 1  |
| 12775 | 1985  | Vstm2b        | Pepd               | 1  |
| 12775 | 2599  | Vstm2b        | Lsm14a             | -1 |
| 12775 | 4697  | Vstm2b        | Cyp2a12            | 1  |
| 12775 | 6513  | Vstm2b        | Qpctl              | -1 |
| 12775 | 7761  | Vstm2b        | Nudt19             | -1 |
| 12775 | 9454  | Vstm2b        | 2810426N06Rik      | -1 |
| 12775 | 16639 | Vstm2b        | MMT00078937        | 1  |
| 12775 | 19462 | Vstm2b        | 4933439C20Rik      | 1  |
| 12775 | 19762 | Vstm2b        | Pih1d1             | 1  |
| 12775 | 19854 | Vstm2b        | Kcnj14             | -1 |
| 12778 | 6308  | 1700024P16Rik | 2410075B13Rik      | -1 |
| 12778 | 6788  | 1700024P16Rik | Psen2              | -1 |
| 12778 | 11093 | 1700024P16Rik | Zdhhc1             | 1  |
| 12778 | 11129 | 1700024P16Rik | Ankhd1             | 1  |
| 12778 | 11808 | 1700024P16Rik | Pck1               | 1  |
| 12778 | 12479 | 1700024P16Rik | Ifrd1              | 1  |
| 12778 | 20087 | 1700024P16Rik | Cd44               | 1  |
| 12784 | 3159  | Nudt6         | Pld1               | 1  |
| 12784 | 5822  | Nudt6         | Car2               | 1  |
| 12784 | 5938  | Nudt6         | Pfn2               | 1  |
| 12784 | 8568  | Nudt6         | Tnik               | 1  |
| 12784 | 12367 | Nudt6         | MMT00072365        | -1 |
| 12784 | 12784 | Nudt6         | Nudt6              | 1  |
| 12784 | 13423 | Nudt6         | ENSMUSG00000053749 | 1  |
| 12784 | 15508 | Nudt6         | 4632415L05Rik      | 1  |
| 12784 | 16416 | Nudt6         | Commd2             | 1  |
| 12784 | 18790 | Nudt6         | Car3               | 1  |
| 12794 | 18338 | MMT00082139   | Akr1e1             | -1 |
| 12795 | 3038  | Slc20a2       | Serpina12          | -1 |
| 12795 | 3265  | Slc20a2       | Dntt               | -1 |
| 12795 | 3836  | Slc20a2       | 2200001115Rik      | -1 |
| 12795 | 6030  | Slc20a2       | As3mt              | 1  |
| 12795 | 6370  | Slc20a2       | Aqp8               | -1 |
| 12795 | 12941 | Slc20a2       | Elovl5             | -1 |
| 12795 | 14017 | Slc20a2       | Ces5               | -1 |
| 12795 | 17996 | Slc20a2       | Igfbp2             | 1  |
| 12795 | 18299 | Slc20a2       | MMT00035424        | -1 |
| 12795 | 18827 | Slc20a2       | Oprs1              | -1 |
| 12795 | 20079 | Slc20a2       | MMT00019254        | 1  |
| 12795 | 20678 | Slc20a2       | Cyp39a1            | 1  |
| 12795 | 21692 | Slc20a2       | MMT00013924        | -1 |
| 12799 | 250   | Spon2         | Tubb2a-ps2         | 1  |
| 12799 | 402   | Spon2         | Timp3              | -1 |
| 12799 | 407   | Spon2         | Serpina6           | -1 |
| 12799 | 415   | Spon2         | Ypel2              | 1  |



|       |      |       |               |    |
|-------|------|-------|---------------|----|
| 12799 | 433  | Spon2 | Pla2g12b      | 1  |
| 12799 | 437  | Spon2 | Ndrgr1        | 1  |
| 12799 | 530  | Spon2 | Mest          | 1  |
| 12799 | 604  | Spon2 | Ppp1r15b      | -1 |
| 12799 | 609  | Spon2 | MMT00060868   | 1  |
| 12799 | 719  | Spon2 | Usp2          | -1 |
| 12799 | 760  | Spon2 | Akr1c19       | -1 |
| 12799 | 1276 | Spon2 | Col4a1        | 1  |
| 12799 | 1362 | Spon2 | Avpr1a        | 1  |
| 12799 | 1363 | Spon2 | BC021767      | 1  |
| 12799 | 1424 | Spon2 | Dapk1         | 1  |
| 12799 | 1445 | Spon2 | Ssbp2         | -1 |
| 12799 | 1453 | Spon2 | Gfod2         | 1  |
| 12799 | 1767 | Spon2 | BC016495      | -1 |
| 12799 | 1853 | Spon2 | Stat5a        | 1  |
| 12799 | 2003 | Spon2 | Ppapdc1       | 1  |
| 12799 | 2011 | Spon2 | Slc2a5        | -1 |
| 12799 | 2110 | Spon2 | Gtf2ird1      | 1  |
| 12799 | 2126 | Spon2 | Dgat2         | -1 |
| 12799 | 2200 | Spon2 | BC006779      | 1  |
| 12799 | 2339 | Spon2 | 5730449L18Rik | 1  |
| 12799 | 2384 | Spon2 | Micalcl       | 1  |
| 12799 | 2399 | Spon2 | MMT00060167   | 1  |
| 12799 | 2615 | Spon2 | EG624862      | -1 |
| 12799 | 2636 | Spon2 | Tars          | 1  |
| 12799 | 2721 | Spon2 | Inmt          | -1 |
| 12799 | 2766 | Spon2 | Elp4          | 1  |
| 12799 | 2829 | Spon2 | Lrfr3         | 1  |
| 12799 | 2850 | Spon2 | Slc16a6       | 1  |
| 12799 | 3214 | Spon2 | Dnmt3b        | 1  |
| 12799 | 3235 | Spon2 | BC029214      | 1  |
| 12799 | 3393 | Spon2 | Snhg8         | -1 |
| 12799 | 3410 | Spon2 | Paqr9         | 1  |
| 12799 | 3746 | Spon2 | Osbpl5        | -1 |
| 12799 | 3804 | Spon2 | MMT00015534   | 1  |
| 12799 | 4057 | Spon2 | Slc2a4        | -1 |
| 12799 | 4090 | Spon2 | Orai3         | 1  |
| 12799 | 4201 | Spon2 | Tubb2c        | 1  |
| 12799 | 4286 | Spon2 | Ptp4a1        | -1 |
| 12799 | 4298 | Spon2 | St3gal1       | 1  |
| 12799 | 4463 | Spon2 | Ncoa5         | 1  |
| 12799 | 4534 | Spon2 | Ndel1         | -1 |
| 12799 | 4686 | Spon2 | BC021785      | 1  |
| 12799 | 4708 | Spon2 | Traf3ip2      | 1  |
| 12799 | 5068 | Spon2 | Afap1l2       | 1  |
| 12799 | 5183 | Spon2 | St5           | 1  |
| 12799 | 5227 | Spon2 | 2310008M10Rik | 1  |
| 12799 | 5374 | Spon2 | Chka          | 1  |
| 12799 | 5569 | Spon2 | Pdgfc         | 1  |
| 12799 | 5574 | Spon2 | Hsd3b7        | 1  |
| 12799 | 5734 | Spon2 | EG619653      | -1 |

|       |       |       |               |    |
|-------|-------|-------|---------------|----|
| 12799 | 5802  | Spon2 | Mad2l2        | 1  |
| 12799 | 5804  | Spon2 | Thrsp         | -1 |
| 12799 | 5849  | Spon2 | 2310031A18Rik | 1  |
| 12799 | 5892  | Spon2 | MMT00038457   | -1 |
| 12799 | 5974  | Spon2 | Arntl         | 1  |
| 12799 | 6268  | Spon2 | Slc45a3       | 1  |
| 12799 | 6338  | Spon2 | Setd3         | -1 |
| 12799 | 6343  | Spon2 | Slc20a1       | -1 |
| 12799 | 6386  | Spon2 | Por           | -1 |
| 12799 | 6394  | Spon2 | Fbxo6         | 1  |
| 12799 | 6657  | Spon2 | Irf6          | 1  |
| 12799 | 6756  | Spon2 | Sds           | -1 |
| 12799 | 6990  | Spon2 | Nr1i2         | -1 |
| 12799 | 7061  | Spon2 | Spsb3         | 1  |
| 12799 | 7414  | Spon2 | Clpx          | 1  |
| 12799 | 7862  | Spon2 | Cpsf4l        | -1 |
| 12799 | 8328  | Spon2 | Klhdc8a       | 1  |
| 12799 | 8329  | Spon2 | Pipox         | -1 |
| 12799 | 8399  | Spon2 | Herpud1       | -1 |
| 12799 | 8717  | Spon2 | Litaf         | 1  |
| 12799 | 8787  | Spon2 | Sdf2l1        | 1  |
| 12799 | 9481  | Spon2 | Ppl           | -1 |
| 12799 | 9495  | Spon2 | Srms          | 1  |
| 12799 | 9686  | Spon2 | Nek4          | 1  |
| 12799 | 9700  | Spon2 | Prodh         | -1 |
| 12799 | 9718  | Spon2 | Fmo5          | -1 |
| 12799 | 9831  | Spon2 | Nedd4l        | 1  |
| 12799 | 9910  | Spon2 | EG666644      | -1 |
| 12799 | 10215 | Spon2 | Nampt         | -1 |
| 12799 | 10273 | Spon2 | Gpt2          | -1 |
| 12799 | 10486 | Spon2 | 1300002K09Rik | 1  |
| 12799 | 10541 | Spon2 | Ap2a2         | 1  |
| 12799 | 10642 | Spon2 | Ngef          | -1 |
| 12799 | 10775 | Spon2 | Slc16a1       | 1  |
| 12799 | 11233 | Spon2 | Tef           | -1 |
| 12799 | 11506 | Spon2 | Rfxank        | 1  |
| 12799 | 11599 | Spon2 | Coq10b        | -1 |
| 12799 | 11741 | Spon2 | Slc30a10      | 1  |
| 12799 | 12059 | Spon2 | 2700049P18Rik | -1 |
| 12799 | 12165 | Spon2 | Ppp2r1b       | 1  |
| 12799 | 12204 | Spon2 | Ankmy2        | -1 |
| 12799 | 12420 | Spon2 | Klhl21        | -1 |
| 12799 | 12489 | Spon2 | Wdr8          | 1  |
| 12799 | 12513 | Spon2 | Whsc2         | 1  |
| 12799 | 12799 | Spon2 | Spon2         | 1  |
| 12799 | 12858 | Spon2 | Lepre1        | 1  |
| 12799 | 12904 | Spon2 | MMT00040704   | -1 |
| 12799 | 12905 | Spon2 | Nfil3         | 1  |
| 12799 | 12925 | Spon2 | Farp1         | 1  |
| 12799 | 13078 | Spon2 | Eps8l2        | 1  |
| 12799 | 13200 | Spon2 | 5730449L18Rik | 1  |

|       |       |       |               |    |
|-------|-------|-------|---------------|----|
| 12799 | 13630 | Spon2 | Cdkn1a        | 1  |
| 12799 | 13947 | Spon2 | Crip2         | 1  |
| 12799 | 14041 | Spon2 | Cldn1         | 1  |
| 12799 | 14258 | Spon2 | Ifi47         | 1  |
| 12799 | 14279 | Spon2 | 3930402G23Rik | 1  |
| 12799 | 14298 | Spon2 | Atp2a2        | 1  |
| 12799 | 14357 | Spon2 | Ing4          | 1  |
| 12799 | 14361 | Spon2 | Txndc12       | 1  |
| 12799 | 14380 | Spon2 | MMT00051866   | 1  |
| 12799 | 14462 | Spon2 | Zfp385b       | -1 |
| 12799 | 14705 | Spon2 | Slc43a1       | -1 |
| 12799 | 14929 | Spon2 | 2810432D09Rik | 1  |
| 12799 | 15049 | Spon2 | Rnf125        | 1  |
| 12799 | 15320 | Spon2 | MMT00017479   | -1 |
| 12799 | 15425 | Spon2 | Adprh         | 1  |
| 12799 | 15481 | Spon2 | 1110067D22Rik | 1  |
| 12799 | 15631 | Spon2 | Lpin1         | -1 |
| 12799 | 15665 | Spon2 | Blcap         | 1  |
| 12799 | 15696 | Spon2 | Pycr2         | 1  |
| 12799 | 15709 | Spon2 | Tceal1        | -1 |
| 12799 | 15824 | Spon2 | D19Erttd721e  | 1  |
| 12799 | 16060 | Spon2 | Gys2          | -1 |
| 12799 | 16117 | Spon2 | Id4           | 1  |
| 12799 | 16515 | Spon2 | Gramd4        | 1  |
| 12799 | 16580 | Spon2 | Tnfaip2       | 1  |
| 12799 | 16585 | Spon2 | Syvn1         | 1  |
| 12799 | 16669 | Spon2 | Tjp2          | 1  |
| 12799 | 16690 | Spon2 | Tjp3          | 1  |
| 12799 | 16704 | Spon2 | Ppif          | -1 |
| 12799 | 16712 | Spon2 | Pnrc1         | 1  |
| 12799 | 16851 | Spon2 | Slc34a2       | 1  |
| 12799 | 16965 | Spon2 | Gstt2         | -1 |
| 12799 | 17083 | Spon2 | Atp1b1        | -1 |
| 12799 | 17091 | Spon2 | Slc38a3       | -1 |
| 12799 | 17247 | Spon2 | A030007L17Rik | 1  |
| 12799 | 17323 | Spon2 | Tubb6         | 1  |
| 12799 | 17343 | Spon2 | Timm8a1       | -1 |
| 12799 | 17583 | Spon2 | Per2          | -1 |
| 12799 | 17638 | Spon2 | Adssl1        | -1 |
| 12799 | 17876 | Spon2 | Tubb4         | 1  |
| 12799 | 17884 | Spon2 | Lnx2          | 1  |
| 12799 | 18069 | Spon2 | Gpt           | -1 |
| 12799 | 18147 | Spon2 | Nhlrc2        | -1 |
| 12799 | 18174 | Spon2 | Stat2         | 1  |
| 12799 | 18179 | Spon2 | Dbp           | -1 |
| 12799 | 18250 | Spon2 | Mmp14         | 1  |
| 12799 | 18438 | Spon2 | Map3k7ip2     | 1  |
| 12799 | 18498 | Spon2 | Slc5a6        | -1 |
| 12799 | 18590 | Spon2 | Fgb           | 1  |
| 12799 | 18756 | Spon2 | Tspan14       | 1  |
| 12799 | 18827 | Spon2 | Oprs1         | 1  |

|       |       |         |               |    |
|-------|-------|---------|---------------|----|
| 12799 | 19004 | Spon2   | Pdk4          | 1  |
| 12799 | 19025 | Spon2   | Slc37a4       | -1 |
| 12799 | 19148 | Spon2   | Rnf144b       | 1  |
| 12799 | 19234 | Spon2   | Nrg4          | -1 |
| 12799 | 19305 | Spon2   | Azin1         | -1 |
| 12799 | 19323 | Spon2   | Bnip3         | -1 |
| 12799 | 19453 | Spon2   | Cdk2ap2       | 1  |
| 12799 | 19465 | Spon2   | Hacl1         | 1  |
| 12799 | 19466 | Spon2   | Pptc7         | -1 |
| 12799 | 19532 | Spon2   | Med8          | 1  |
| 12799 | 19671 | Spon2   | Upp2          | -1 |
| 12799 | 19701 | Spon2   | 9930021J17Rik | 1  |
| 12799 | 19790 | Spon2   | Polg2         | -1 |
| 12799 | 19917 | Spon2   | Nek2          | 1  |
| 12799 | 19970 | Spon2   | Mrpl36        | 1  |
| 12799 | 20085 | Spon2   | Lpin2         | -1 |
| 12799 | 20266 | Spon2   | Insig2        | 1  |
| 12799 | 20488 | Spon2   | Bok           | 1  |
| 12799 | 20745 | Spon2   | Sord          | -1 |
| 12799 | 20830 | Spon2   | MMT00057509   | 1  |
| 12799 | 21142 | Spon2   | Gm129         | -1 |
| 12799 | 21693 | Spon2   | BC029169      | 1  |
| 12799 | 21794 | Spon2   | Pfkp          | 1  |
| 12799 | 21811 | Spon2   | Ak3l1         | -1 |
| 12799 | 21918 | Spon2   | Snx24         | 1  |
| 12799 | 21969 | Spon2   | Tk1           | -1 |
| 12799 | 22290 | Spon2   | Tubb2a        | 1  |
| 12799 | 22324 | Spon2   | MMT00060741   | 1  |
| 12799 | 22630 | Spon2   | MMT00034355   | 1  |
| 12799 | 22653 | Spon2   | Ric3          | 1  |
| 12799 | 22936 | Spon2   | Rhobtb1       | -1 |
| 12799 | 23377 | Spon2   | Pdxk          | -1 |
| 12823 | 269   | Rab3il1 | Tuba1b        | 1  |
| 12823 | 662   | Rab3il1 | Mid1ip1       | 1  |
| 12823 | 1827  | Rab3il1 | Gnb1l         | 1  |
| 12823 | 1941  | Rab3il1 | MMT00079618   | 1  |
| 12823 | 2322  | Rab3il1 | Tuba4a        | 1  |
| 12823 | 2329  | Rab3il1 | Wdr6          | 1  |
| 12823 | 2400  | Rab3il1 | Gck           | 1  |
| 12823 | 3040  | Rab3il1 | Bcl3          | 1  |
| 12823 | 3246  | Rab3il1 | Prei4         | -1 |
| 12823 | 5587  | Rab3il1 | Rmnd5b        | 1  |
| 12823 | 6308  | Rab3il1 | 2410075B13Rik | 1  |
| 12823 | 7151  | Rab3il1 | MMT00007982   | 1  |
| 12823 | 8234  | Rab3il1 | Tbpl1         | -1 |
| 12823 | 8632  | Rab3il1 | Igfbp1        | -1 |
| 12823 | 9763  | Rab3il1 | Tuba3b        | 1  |
| 12823 | 10384 | Rab3il1 | Chic2         | -1 |
| 12823 | 11129 | Rab3il1 | Ankhd1        | -1 |
| 12823 | 11149 | Rab3il1 | MMT00050488   | 1  |
| 12823 | 11724 | Rab3il1 | Tuba3a        | 1  |

|       |       |         |               |    |
|-------|-------|---------|---------------|----|
| 12823 | 11808 | Rab3il1 | Pck1          | -1 |
| 12823 | 12315 | Rab3il1 | Srebf1        | 1  |
| 12823 | 12910 | Rab3il1 | 1110028A07Rik | 1  |
| 12823 | 12981 | Rab3il1 | Nek6          | 1  |
| 12823 | 13489 | Rab3il1 | D230025D16Rik | -1 |
| 12823 | 14135 | Rab3il1 | Eepd1         | 1  |
| 12823 | 14335 | Rab3il1 | Olf33         | -1 |
| 12823 | 15021 | Rab3il1 | Ppargc1a      | -1 |
| 12823 | 15029 | Rab3il1 | Nudt16l1      | 1  |
| 12823 | 15862 | Rab3il1 | Mrap          | 1  |
| 12823 | 15990 | Rab3il1 | Dnmbp         | -1 |
| 12823 | 17323 | Rab3il1 | Tubb6         | 1  |
| 12823 | 17444 | Rab3il1 | Tuba1a        | 1  |
| 12823 | 17656 | Rab3il1 | Hdhd3         | 1  |
| 12823 | 18785 | Rab3il1 | Angptl4       | -1 |
| 12823 | 21160 | Rab3il1 | Irs2          | -1 |
| 12823 | 22443 | Rab3il1 | Tuba1c        | 1  |
| 12823 | 23202 | Rab3il1 | Olf559        | -1 |
| 12823 | 23253 | Rab3il1 | D030011O10Rik | -1 |
| 12833 | 2639  | Drp2    | Abhd2         | 1  |
| 12833 | 20058 | Drp2    | Dnaic1        | 1  |
| 12834 | 433   | Fabp7   | Pla2g12b      | 1  |
| 12834 | 1767  | Fabp7   | BC016495      | -1 |
| 12834 | 2384  | Fabp7   | Micalcl       | 1  |
| 12834 | 2721  | Fabp7   | Inmt          | -1 |
| 12834 | 3410  | Fabp7   | Paqr9         | 1  |
| 12834 | 5574  | Fabp7   | Hsd3b7        | 1  |
| 12834 | 6386  | Fabp7   | Por           | -1 |
| 12834 | 11741 | Fabp7   | Slc30a10      | 1  |
| 12834 | 15824 | Fabp7   | D19Ert721e    | 1  |
| 12834 | 16690 | Fabp7   | Tjp3          | 1  |
| 12834 | 19671 | Fabp7   | Upp2          | -1 |
| 12834 | 19701 | Fabp7   | 9930021J17Rik | 1  |
| 12854 | 9304  | Ndufa13 | A1449175      | 1  |
| 12854 | 16617 | Ndufa13 | Sh2d4a        | -1 |
| 12854 | 18886 | Ndufa13 | Slc18a1       | -1 |
| 12856 | 630   | Clstn3  | C1s           | -1 |
| 12856 | 3078  | Clstn3  | 9630033F20Rik | 1  |
| 12856 | 9417  | Clstn3  | Cd163         | 1  |
| 12856 | 17391 | Clstn3  | C530028O21Rik | 1  |
| 12856 | 17743 | Clstn3  | Phb2          | 1  |
| 12856 | 19964 | Clstn3  | Ndufa9        | 1  |
| 12856 | 20127 | Clstn3  | Ipo8          | -1 |
| 12856 | 22075 | Clstn3  | C1s           | -1 |
| 12862 | 11565 | Trem2   | Serpina3c     | 1  |
| 12862 | 12845 | Trem2   | F11           | 1  |
| 12862 | 13271 | Trem2   | Idh2          | -1 |
| 12862 | 13273 | Trem2   | MMT00033789   | 1  |
| 12862 | 14408 | Trem2   | 1100001H23Rik | 1  |
| 12862 | 18590 | Trem2   | Fgb           | 1  |
| 12862 | 19340 | Trem2   | Serpina3k     | 1  |

|       |       |               |               |    |
|-------|-------|---------------|---------------|----|
| 12862 | 20171 | Trem2         | 1700008G05Rik | 1  |
| 12862 | 22568 | Trem2         | MMT00033197   | 1  |
| 12863 | 3753  | Fgg           | Setdb1        | 1  |
| 12863 | 16416 | Fgg           | Commd2        | -1 |
| 12863 | 18754 | Fgg           | Rbm8a         | -1 |
| 12864 | 2850  | Myh10         | Slc16a6       | 1  |
| 12864 | 10486 | Myh10         | 1300002K09Rik | 1  |
| 12864 | 11599 | Myh10         | Coq10b        | -1 |
| 12864 | 13078 | Myh10         | Eps8l2        | 1  |
| 12866 | 6820  | 4921517L17Rik | MMT00046996   | 1  |
| 12866 | 7610  | 4921517L17Rik | Scand1        | 1  |
| 12866 | 14647 | 4921517L17Rik | Cst3          | 1  |
| 12866 | 21214 | 4921517L17Rik | Scd1          | -1 |
| 12866 | 23005 | 4921517L17Rik | 4930405A21Rik | -1 |
| 12869 | 607   | 0610011F06Rik | Me1           | -1 |
| 12869 | 8444  | 0610011F06Rik | Rdh16         | -1 |
| 12869 | 8815  | 0610011F06Rik | Mx1           | -1 |
| 12869 | 14017 | 0610011F06Rik | Ces5          | -1 |
| 12869 | 18201 | 0610011F06Rik | MMT00060232   | -1 |
| 12869 | 21214 | 0610011F06Rik | Scd1          | -1 |
| 12879 | 10132 | Ermp1         | Ces2          | 1  |
| 12879 | 12910 | Ermp1         | 1110028A07Rik | 1  |
| 12881 | 22406 | Lgals8        | Vnn1          | 1  |
| 12885 | 1162  | Ccl24         | Cpsf4         | -1 |
| 12885 | 6330  | Ccl24         | Dgkq          | 1  |
| 12885 | 12885 | Ccl24         | Ccl24         | 1  |
| 12886 | 1600  | Acp6          | Csrp1         | -1 |
| 12886 | 4056  | Acp6          | Tnfaip8l1     | -1 |
| 12886 | 5364  | Acp6          | Kif22         | -1 |
| 12886 | 5691  | Acp6          | Csrp3         | -1 |
| 12886 | 6746  | Acp6          | E2f8          | -1 |
| 12886 | 6816  | Acp6          | Slc46a3       | 1  |
| 12886 | 7492  | Acp6          | Adfp          | -1 |
| 12886 | 7659  | Acp6          | Rab30         | -1 |
| 12886 | 8404  | Acp6          | Fa2h          | -1 |
| 12886 | 17563 | Acp6          | Aldh1l1       | 1  |
| 12892 | 14757 | 1700019L03Rik | Hdx           | 1  |
| 12892 | 23474 | 1700019L03Rik | MMT00011721   | 1  |
| 12904 | 213   | MMT00040704   | Rgs16         | 1  |
| 12904 | 250   | MMT00040704   | Tubb2a-ps2    | -1 |
| 12904 | 402   | MMT00040704   | Timp3         | 1  |
| 12904 | 407   | MMT00040704   | Serpina6      | 1  |
| 12904 | 413   | MMT00040704   | Acy1          | 1  |
| 12904 | 415   | MMT00040704   | Ypel2         | -1 |
| 12904 | 433   | MMT00040704   | Pla2g12b      | -1 |
| 12904 | 437   | MMT00040704   | Ndrp1         | -1 |
| 12904 | 604   | MMT00040704   | Ppp1r15b      | 1  |
| 12904 | 609   | MMT00040704   | MMT00060868   | -1 |
| 12904 | 719   | MMT00040704   | Usp2          | 1  |
| 12904 | 865   | MMT00040704   | Npc1          | 1  |
| 12904 | 1036  | MMT00040704   | Dusp19        | -1 |

|       |      |             |               |    |
|-------|------|-------------|---------------|----|
| 12904 | 1310 | MMT00040704 | Cabc1         | -1 |
| 12904 | 1326 | MMT00040704 | Tox           | 1  |
| 12904 | 1363 | MMT00040704 | BC021767      | -1 |
| 12904 | 1453 | MMT00040704 | Gfod2         | -1 |
| 12904 | 1655 | MMT00040704 | Mgrn1         | 1  |
| 12904 | 1760 | MMT00040704 | Nek8          | 1  |
| 12904 | 1767 | MMT00040704 | BC016495      | 1  |
| 12904 | 2011 | MMT00040704 | Slc2a5        | 1  |
| 12904 | 2013 | MMT00040704 | Il15ra        | 1  |
| 12904 | 2126 | MMT00040704 | Dgat2         | 1  |
| 12904 | 2339 | MMT00040704 | 5730449L18Rik | -1 |
| 12904 | 2384 | MMT00040704 | Micalcl       | -1 |
| 12904 | 2399 | MMT00040704 | MMT00060167   | -1 |
| 12904 | 2615 | MMT00040704 | EG624862      | 1  |
| 12904 | 2636 | MMT00040704 | Tars          | -1 |
| 12904 | 2766 | MMT00040704 | Elp4          | -1 |
| 12904 | 2823 | MMT00040704 | Sipa1l2       | 1  |
| 12904 | 2829 | MMT00040704 | Lrfr3         | -1 |
| 12904 | 2850 | MMT00040704 | Slc16a6       | -1 |
| 12904 | 3214 | MMT00040704 | Dnmt3b        | -1 |
| 12904 | 3235 | MMT00040704 | BC029214      | -1 |
| 12904 | 3393 | MMT00040704 | Shhg8         | 1  |
| 12904 | 3410 | MMT00040704 | Paqr9         | -1 |
| 12904 | 3502 | MMT00040704 | Gde1          | 1  |
| 12904 | 3564 | MMT00040704 | Spcs2         | -1 |
| 12904 | 3746 | MMT00040704 | Osbpl5        | 1  |
| 12904 | 3790 | MMT00040704 | Mtss1         | 1  |
| 12904 | 3804 | MMT00040704 | MMT00015534   | -1 |
| 12904 | 4201 | MMT00040704 | Tubb2c        | -1 |
| 12904 | 4286 | MMT00040704 | Ptp4a1        | 1  |
| 12904 | 4298 | MMT00040704 | St3gal1       | -1 |
| 12904 | 4534 | MMT00040704 | Ndel1         | 1  |
| 12904 | 4686 | MMT00040704 | BC021785      | -1 |
| 12904 | 4708 | MMT00040704 | Traf3ip2      | -1 |
| 12904 | 5068 | MMT00040704 | Afap1l2       | -1 |
| 12904 | 5120 | MMT00040704 | Alkbh7        | -1 |
| 12904 | 5183 | MMT00040704 | St5           | -1 |
| 12904 | 5227 | MMT00040704 | 2310008M10Rik | -1 |
| 12904 | 5374 | MMT00040704 | Chka          | -1 |
| 12904 | 5414 | MMT00040704 | Etnk2         | 1  |
| 12904 | 5569 | MMT00040704 | Pdgfc         | -1 |
| 12904 | 5700 | MMT00040704 | Tenc1         | 1  |
| 12904 | 5729 | MMT00040704 | 2310016C08Rik | -1 |
| 12904 | 5734 | MMT00040704 | EG619653      | 1  |
| 12904 | 5791 | MMT00040704 | Baiap2l1      | 1  |
| 12904 | 5802 | MMT00040704 | Mad2l2        | -1 |
| 12904 | 5804 | MMT00040704 | Thrsp         | 1  |
| 12904 | 5849 | MMT00040704 | 2310031A18Rik | -1 |
| 12904 | 5892 | MMT00040704 | MMT00038457   | 1  |
| 12904 | 5934 | MMT00040704 | S100a10       | -1 |
| 12904 | 5974 | MMT00040704 | Arntl         | -1 |

|       |       |             |               |    |
|-------|-------|-------------|---------------|----|
| 12904 | 6019  | MMT00040704 | Gdap10        | 1  |
| 12904 | 6030  | MMT00040704 | As3mt         | 1  |
| 12904 | 6171  | MMT00040704 | Abtb2         | -1 |
| 12904 | 6268  | MMT00040704 | Slc45a3       | -1 |
| 12904 | 6338  | MMT00040704 | Setd3         | 1  |
| 12904 | 6343  | MMT00040704 | Slc20a1       | 1  |
| 12904 | 6370  | MMT00040704 | Aqp8          | -1 |
| 12904 | 6371  | MMT00040704 | Dedd2         | 1  |
| 12904 | 6386  | MMT00040704 | Por           | 1  |
| 12904 | 6394  | MMT00040704 | Fbxo6         | -1 |
| 12904 | 6657  | MMT00040704 | Irf6          | -1 |
| 12904 | 6714  | MMT00040704 | Lima1         | 1  |
| 12904 | 6756  | MMT00040704 | Sds           | 1  |
| 12904 | 6771  | MMT00040704 | Insc          | -1 |
| 12904 | 6788  | MMT00040704 | Psen2         | -1 |
| 12904 | 7414  | MMT00040704 | Clpx          | -1 |
| 12904 | 7510  | MMT00040704 | Gins3         | -1 |
| 12904 | 7619  | MMT00040704 | Pik3ip1       | 1  |
| 12904 | 7862  | MMT00040704 | Cpsf4l        | 1  |
| 12904 | 8328  | MMT00040704 | Klhdc8a       | -1 |
| 12904 | 8399  | MMT00040704 | Herpud1       | 1  |
| 12904 | 8428  | MMT00040704 | Sorbs3        | 1  |
| 12904 | 8595  | MMT00040704 | MMT00019109   | -1 |
| 12904 | 8641  | MMT00040704 | Slc7a2        | 1  |
| 12904 | 9033  | MMT00040704 | 1810013L24Rik | 1  |
| 12904 | 9158  | MMT00040704 | Pde9a         | -1 |
| 12904 | 9379  | MMT00040704 | Ypel2         | -1 |
| 12904 | 9481  | MMT00040704 | Ppl           | 1  |
| 12904 | 9495  | MMT00040704 | Srms          | -1 |
| 12904 | 9585  | MMT00040704 | Neu3          | -1 |
| 12904 | 9630  | MMT00040704 | 5830417C01Rik | -1 |
| 12904 | 9831  | MMT00040704 | Nedd4l        | -1 |
| 12904 | 9910  | MMT00040704 | EG666644      | 1  |
| 12904 | 10029 | MMT00040704 | Trak1         | 1  |
| 12904 | 10088 | MMT00040704 | Ddc           | -1 |
| 12904 | 10166 | MMT00040704 | Rhbdd2        | 1  |
| 12904 | 10207 | MMT00040704 | MMT00012324   | -1 |
| 12904 | 10215 | MMT00040704 | Nampt         | 1  |
| 12904 | 10486 | MMT00040704 | 1300002K09Rik | -1 |
| 12904 | 10502 | MMT00040704 | Axud1         | 1  |
| 12904 | 10612 | MMT00040704 | Slc24a6       | 1  |
| 12904 | 10642 | MMT00040704 | Ngef          | 1  |
| 12904 | 10712 | MMT00040704 | Fchsd2        | 1  |
| 12904 | 10775 | MMT00040704 | Slc16a1       | -1 |
| 12904 | 10911 | MMT00040704 | Mcl1          | 1  |
| 12904 | 11129 | MMT00040704 | Ankhd1        | 1  |
| 12904 | 11233 | MMT00040704 | Tef           | 1  |
| 12904 | 11412 | MMT00040704 | Abcg5         | 1  |
| 12904 | 11574 | MMT00040704 | Gne           | 1  |
| 12904 | 11599 | MMT00040704 | Coq10b        | 1  |
| 12904 | 11633 | MMT00040704 | Ier3          | 1  |



|       |       |             |               |    |
|-------|-------|-------------|---------------|----|
| 12904 | 11741 | MMT00040704 | Slc30a10      | -1 |
| 12904 | 11807 | MMT00040704 | Fbxo31        | 1  |
| 12904 | 11984 | MMT00040704 | N6amt2        | -1 |
| 12904 | 12151 | MMT00040704 | MMT00082650   | 1  |
| 12904 | 12204 | MMT00040704 | Ankmy2        | 1  |
| 12904 | 12420 | MMT00040704 | Kihl21        | 1  |
| 12904 | 12460 | MMT00040704 | Pnpla2        | 1  |
| 12904 | 12487 | MMT00040704 | Tbc1d10a      | 1  |
| 12904 | 12489 | MMT00040704 | Wdr8          | -1 |
| 12904 | 12513 | MMT00040704 | Whsc2         | -1 |
| 12904 | 12565 | MMT00040704 | Grem2         | 1  |
| 12904 | 12687 | MMT00040704 | Zc3h8         | 1  |
| 12904 | 12799 | MMT00040704 | Spon2         | -1 |
| 12904 | 12807 | MMT00040704 | Faim          | -1 |
| 12904 | 12904 | MMT00040704 | MMT00040704   | 1  |
| 12904 | 12905 | MMT00040704 | Nfil3         | -1 |
| 12904 | 12941 | MMT00040704 | Elov5         | -1 |
| 12904 | 13078 | MMT00040704 | Eps8l2        | -1 |
| 12904 | 13094 | MMT00040704 | Cnn3          | 1  |
| 12904 | 13200 | MMT00040704 | 5730449L18Rik | -1 |
| 12904 | 13630 | MMT00040704 | Cdkn1a        | -1 |
| 12904 | 13844 | MMT00040704 | Trib1         | 1  |
| 12904 | 13889 | MMT00040704 | Agpat2        | -1 |
| 12904 | 14041 | MMT00040704 | Cldn1         | -1 |
| 12904 | 14225 | MMT00040704 | Sva           | 1  |
| 12904 | 14279 | MMT00040704 | 3930402G23Rik | -1 |
| 12904 | 14380 | MMT00040704 | MMT00051866   | -1 |
| 12904 | 14431 | MMT00040704 | Piwil1        | 1  |
| 12904 | 14462 | MMT00040704 | Zfp385b       | 1  |
| 12904 | 14705 | MMT00040704 | Slc43a1       | 1  |
| 12904 | 14726 | MMT00040704 | Slc19a1       | 1  |
| 12904 | 15049 | MMT00040704 | Rnf125        | -1 |
| 12904 | 15481 | MMT00040704 | 1110067D22Rik | -1 |
| 12904 | 15607 | MMT00040704 | Klf13         | 1  |
| 12904 | 15609 | MMT00040704 | Mreg          | -1 |
| 12904 | 15631 | MMT00040704 | Lpin1         | 1  |
| 12904 | 15665 | MMT00040704 | Blcap         | -1 |
| 12904 | 15709 | MMT00040704 | Tceal1        | 1  |
| 12904 | 15824 | MMT00040704 | D19Erttd721e  | -1 |
| 12904 | 15862 | MMT00040704 | Mrap          | -1 |
| 12904 | 16060 | MMT00040704 | Gys2          | 1  |
| 12904 | 16176 | MMT00040704 | St3gal5       | 1  |
| 12904 | 16339 | MMT00040704 | Bach1         | 1  |
| 12904 | 16474 | MMT00040704 | Bhlhb2        | 1  |
| 12904 | 16669 | MMT00040704 | Tjp2          | -1 |
| 12904 | 16690 | MMT00040704 | Tjp3          | -1 |
| 12904 | 16712 | MMT00040704 | Pnrc1         | -1 |
| 12904 | 16851 | MMT00040704 | Slc34a2       | -1 |
| 12904 | 16965 | MMT00040704 | Gstt2         | 1  |
| 12904 | 17091 | MMT00040704 | Slc38a3       | 1  |
| 12904 | 17247 | MMT00040704 | A030007L17Rik | -1 |

|       |       |             |               |    |
|-------|-------|-------------|---------------|----|
| 12904 | 17338 | MMT00040704 | Mocos         | -1 |
| 12904 | 17528 | MMT00040704 | Gmnn          | 1  |
| 12904 | 17583 | MMT00040704 | Per2          | 1  |
| 12904 | 17617 | MMT00040704 | Atp5sl        | 1  |
| 12904 | 17876 | MMT00040704 | Tubb4         | -1 |
| 12904 | 17878 | MMT00040704 | Brap          | 1  |
| 12904 | 17884 | MMT00040704 | Lnx2          | -1 |
| 12904 | 17935 | MMT00040704 | Pde6c         | 1  |
| 12904 | 17952 | MMT00040704 | Ripk2         | 1  |
| 12904 | 18147 | MMT00040704 | Nhlrc2        | 1  |
| 12904 | 18179 | MMT00040704 | Dbp           | 1  |
| 12904 | 18215 | MMT00040704 | Gpr146        | 1  |
| 12904 | 18286 | MMT00040704 | Slc41a3       | 1  |
| 12904 | 18438 | MMT00040704 | Map3k7ip2     | -1 |
| 12904 | 18498 | MMT00040704 | Slc5a6        | 1  |
| 12904 | 18572 | MMT00040704 | Stx18         | -1 |
| 12904 | 18688 | MMT00040704 | Leap2         | -1 |
| 12904 | 18827 | MMT00040704 | Oprs1         | -1 |
| 12904 | 18846 | MMT00040704 | Ikbkg         | -1 |
| 12904 | 19004 | MMT00040704 | Pdk4          | -1 |
| 12904 | 19025 | MMT00040704 | Slc37a4       | 1  |
| 12904 | 19108 | MMT00040704 | Armet         | -1 |
| 12904 | 19146 | MMT00040704 | N4bp2l1       | 1  |
| 12904 | 19148 | MMT00040704 | Rnf144b       | -1 |
| 12904 | 19192 | MMT00040704 | Hist1h1c      | -1 |
| 12904 | 19234 | MMT00040704 | Nrg4          | 1  |
| 12904 | 19305 | MMT00040704 | Azin1         | 1  |
| 12904 | 19323 | MMT00040704 | Bnip3         | 1  |
| 12904 | 19410 | MMT00040704 | Glb1          | 1  |
| 12904 | 19465 | MMT00040704 | Hacl1         | -1 |
| 12904 | 19532 | MMT00040704 | Med8          | -1 |
| 12904 | 19671 | MMT00040704 | Upp2          | 1  |
| 12904 | 19701 | MMT00040704 | 9930021J17Rik | -1 |
| 12904 | 19790 | MMT00040704 | Polg2         | 1  |
| 12904 | 19970 | MMT00040704 | Mrpl36        | -1 |
| 12904 | 20068 | MMT00040704 | 2610204M08Rik | 1  |
| 12904 | 20085 | MMT00040704 | Lpin2         | 1  |
| 12904 | 20266 | MMT00040704 | Insig2        | -1 |
| 12904 | 20457 | MMT00040704 | Gtf2a2        | 1  |
| 12904 | 20745 | MMT00040704 | Sord          | 1  |
| 12904 | 21142 | MMT00040704 | Gm129         | 1  |
| 12904 | 21251 | MMT00040704 | Cpt1a         | 1  |
| 12904 | 21733 | MMT00040704 | Rhebl1        | 1  |
| 12904 | 21795 | MMT00040704 | 0610009B22Rik | -1 |
| 12904 | 21811 | MMT00040704 | Ak3l1         | 1  |
| 12904 | 21969 | MMT00040704 | Tk1           | 1  |
| 12904 | 22012 | MMT00040704 | Itgae         | -1 |
| 12904 | 22138 | MMT00040704 | Ang           | 1  |
| 12904 | 22213 | MMT00040704 | Adora1        | 1  |
| 12904 | 22290 | MMT00040704 | Tubb2a        | -1 |
| 12904 | 22324 | MMT00040704 | MMT00060741   | -1 |

|       |       |             |               |    |
|-------|-------|-------------|---------------|----|
| 12904 | 22470 | MMT00040704 | Ppargc1b      | 1  |
| 12904 | 22630 | MMT00040704 | MMT00034355   | -1 |
| 12904 | 23252 | MMT00040704 | Snrpd1        | -1 |
| 12904 | 23377 | MMT00040704 | Pdxk          | 1  |
| 12904 | 23437 | MMT00040704 | Efhd2         | 1  |
| 12905 | 213   | Nfil3       | Rgs16         | -1 |
| 12905 | 250   | Nfil3       | Tubb2a-ps2    | 1  |
| 12905 | 269   | Nfil3       | Tuba1b        | 1  |
| 12905 | 381   | Nfil3       | Rbmxrt        | 1  |
| 12905 | 407   | Nfil3       | Serpina6      | -1 |
| 12905 | 609   | Nfil3       | MMT00060868   | 1  |
| 12905 | 719   | Nfil3       | Usp2          | -1 |
| 12905 | 771   | Nfil3       | Zbtb45        | 1  |
| 12905 | 827   | Nfil3       | Flcn          | -1 |
| 12905 | 865   | Nfil3       | Npc1          | -1 |
| 12905 | 1412  | Nfil3       | Phf17         | -1 |
| 12905 | 1537  | Nfil3       | 1700052K11Rik | 1  |
| 12905 | 1655  | Nfil3       | Mgrn1         | -1 |
| 12905 | 1806  | Nfil3       | Nola3         | 1  |
| 12905 | 2011  | Nfil3       | Slc2a5        | -1 |
| 12905 | 2013  | Nfil3       | Il15ra        | -1 |
| 12905 | 2322  | Nfil3       | Tuba4a        | 1  |
| 12905 | 2334  | Nfil3       | Gch1          | -1 |
| 12905 | 2399  | Nfil3       | MMT00060167   | 1  |
| 12905 | 2471  | Nfil3       | Ccdc134       | 1  |
| 12905 | 2615  | Nfil3       | EG624862      | -1 |
| 12905 | 2636  | Nfil3       | Tars          | 1  |
| 12905 | 2829  | Nfil3       | Lrfr3         | 1  |
| 12905 | 2850  | Nfil3       | Slc16a6       | 1  |
| 12905 | 3214  | Nfil3       | Dnmt3b        | 1  |
| 12905 | 3235  | Nfil3       | BC029214      | 1  |
| 12905 | 3393  | Nfil3       | Snhg8         | -1 |
| 12905 | 3804  | Nfil3       | MMT00015534   | 1  |
| 12905 | 4201  | Nfil3       | Tubb2c        | 1  |
| 12905 | 4298  | Nfil3       | St3gal1       | 1  |
| 12905 | 4534  | Nfil3       | Ndel1         | -1 |
| 12905 | 4708  | Nfil3       | Traf3ip2      | 1  |
| 12905 | 4836  | Nfil3       | Gtf2h3        | 1  |
| 12905 | 4966  | Nfil3       | Zscan20       | 1  |
| 12905 | 5120  | Nfil3       | Alkbh7        | 1  |
| 12905 | 5225  | Nfil3       | Maf1          | -1 |
| 12905 | 5374  | Nfil3       | Chka          | 1  |
| 12905 | 5700  | Nfil3       | Tenc1         | -1 |
| 12905 | 5892  | Nfil3       | MMT00038457   | -1 |
| 12905 | 5974  | Nfil3       | Arntl         | 1  |
| 12905 | 6268  | Nfil3       | Slc45a3       | 1  |
| 12905 | 6371  | Nfil3       | Dedd2         | -1 |
| 12905 | 6386  | Nfil3       | Por           | -1 |
| 12905 | 6771  | Nfil3       | Insc          | 1  |
| 12905 | 6966  | Nfil3       | Mia3          | -1 |
| 12905 | 7397  | Nfil3       | MMT00020969   | -1 |

|       |       |       |               |    |
|-------|-------|-------|---------------|----|
| 12905 | 7398  | Nfil3 | Rbmxrt        | 1  |
| 12905 | 7414  | Nfil3 | Clpx          | 1  |
| 12905 | 7510  | Nfil3 | Gins3         | 1  |
| 12905 | 7619  | Nfil3 | Pik3ip1       | -1 |
| 12905 | 7795  | Nfil3 | MMT00071427   | -1 |
| 12905 | 7862  | Nfil3 | Cpsf4l        | -1 |
| 12905 | 8742  | Nfil3 | Tmem39a       | 1  |
| 12905 | 8844  | Nfil3 | 2310037I24Rik | -1 |
| 12905 | 9033  | Nfil3 | 1810013L24Rik | -1 |
| 12905 | 9495  | Nfil3 | Srms          | 1  |
| 12905 | 9576  | Nfil3 | Polr1e        | 1  |
| 12905 | 9585  | Nfil3 | Neu3          | 1  |
| 12905 | 9910  | Nfil3 | EG666644      | -1 |
| 12905 | 10042 | Nfil3 | MMT00028111   | 1  |
| 12905 | 10088 | Nfil3 | Ddc           | 1  |
| 12905 | 10140 | Nfil3 | Cdc2l6        | -1 |
| 12905 | 10486 | Nfil3 | 1300002K09Rik | 1  |
| 12905 | 10612 | Nfil3 | Slc24a6       | -1 |
| 12905 | 10642 | Nfil3 | Ngef          | -1 |
| 12905 | 10712 | Nfil3 | Fchsd2        | -1 |
| 12905 | 10911 | Nfil3 | Mcl1          | -1 |
| 12905 | 11412 | Nfil3 | Abcg5         | -1 |
| 12905 | 11574 | Nfil3 | Gne           | -1 |
| 12905 | 11741 | Nfil3 | Slc30a10      | 1  |
| 12905 | 11807 | Nfil3 | Fbxo31        | -1 |
| 12905 | 12204 | Nfil3 | Ankmy2        | -1 |
| 12905 | 12420 | Nfil3 | Klh121        | -1 |
| 12905 | 12460 | Nfil3 | Pnpla2        | -1 |
| 12905 | 12487 | Nfil3 | Tbc1d10a      | -1 |
| 12905 | 12513 | Nfil3 | Whsc2         | 1  |
| 12905 | 12904 | Nfil3 | MMT00040704   | -1 |
| 12905 | 12905 | Nfil3 | Nfil3         | 1  |
| 12905 | 13094 | Nfil3 | Cnn3          | -1 |
| 12905 | 13297 | Nfil3 | Emb           | 1  |
| 12905 | 13630 | Nfil3 | Cdkn1a        | 1  |
| 12905 | 14298 | Nfil3 | Atp2a2        | 1  |
| 12905 | 14431 | Nfil3 | Piwil1        | -1 |
| 12905 | 14681 | Nfil3 | Alg12         | 1  |
| 12905 | 14726 | Nfil3 | Slc19a1       | -1 |
| 12905 | 14785 | Nfil3 | F3            | -1 |
| 12905 | 15015 | Nfil3 | G3bp1         | 1  |
| 12905 | 15481 | Nfil3 | 1110067D22Rik | 1  |
| 12905 | 15760 | Nfil3 | Trib3         | -1 |
| 12905 | 15862 | Nfil3 | Mrap          | 1  |
| 12905 | 16060 | Nfil3 | Gys2          | -1 |
| 12905 | 16474 | Nfil3 | Bhlhb2        | -1 |
| 12905 | 16584 | Nfil3 | Nup35         | 1  |
| 12905 | 16690 | Nfil3 | Tjp3          | 1  |
| 12905 | 16712 | Nfil3 | Pnrc1         | 1  |
| 12905 | 16851 | Nfil3 | Slc34a2       | 1  |
| 12905 | 16965 | Nfil3 | Gstt2         | -1 |

|       |       |        |               |    |
|-------|-------|--------|---------------|----|
| 12905 | 17247 | Nfil3  | A030007L17Rik | 1  |
| 12905 | 17323 | Nfil3  | Tubb6         | 1  |
| 12905 | 17876 | Nfil3  | Tubb4         | 1  |
| 12905 | 17878 | Nfil3  | Brap          | -1 |
| 12905 | 17884 | Nfil3  | Lnx2          | 1  |
| 12905 | 17952 | Nfil3  | Ripk2         | -1 |
| 12905 | 18179 | Nfil3  | Dbp           | -1 |
| 12905 | 18215 | Nfil3  | Gpr146        | -1 |
| 12905 | 18498 | Nfil3  | Slc5a6        | -1 |
| 12905 | 18506 | Nfil3  | Otub2         | 1  |
| 12905 | 18572 | Nfil3  | Stx18         | 1  |
| 12905 | 18827 | Nfil3  | Oprs1         | 1  |
| 12905 | 19148 | Nfil3  | Rnf144b       | 1  |
| 12905 | 19323 | Nfil3  | Bnip3         | -1 |
| 12905 | 19671 | Nfil3  | Upp2          | -1 |
| 12905 | 20085 | Nfil3  | Lpin2         | -1 |
| 12905 | 20980 | Nfil3  | Taf12         | 1  |
| 12905 | 21251 | Nfil3  | Cpt1a         | -1 |
| 12905 | 21620 | Nfil3  | Tmem166       | -1 |
| 12905 | 21733 | Nfil3  | Rhebl1        | -1 |
| 12905 | 21793 | Nfil3  | Pla2g12a      | -1 |
| 12905 | 21811 | Nfil3  | Ak3l1         | -1 |
| 12905 | 22012 | Nfil3  | Itgae         | 1  |
| 12905 | 22290 | Nfil3  | Tubb2a        | 1  |
| 12905 | 22388 | Nfil3  | 2410018M08Rik | -1 |
| 12905 | 22443 | Nfil3  | Tuba1c        | 1  |
| 12905 | 22470 | Nfil3  | Ppargc1b      | -1 |
| 12905 | 22630 | Nfil3  | MMT00034355   | 1  |
| 12905 | 23201 | Nfil3  | S1pr1         | 1  |
| 12905 | 23252 | Nfil3  | Snrpd1        | 1  |
| 12908 | 15522 | Jdp2   | 1810011O10Rik | 1  |
| 12917 | 3377  | Nubp1  | Cs            | 1  |
| 12917 | 5884  | Nubp1  | Gstm2         | 1  |
| 12917 | 11946 | Nubp1  | MMT00030953   | 1  |
| 12917 | 14147 | Nubp1  | Acss2         | 1  |
| 12917 | 20019 | Nubp1  | Qdpr          | 1  |
| 12917 | 21214 | Nubp1  | Scd1          | 1  |
| 12922 | 12910 | Lilrb4 | 1110028A07Rik | 1  |
| 12926 | 20745 | Lrmp   | Sord          | -1 |
| 12934 | 269   | Rbp7   | Tuba1b        | -1 |
| 12934 | 563   | Rbp7   | D4Bwg0951e    | 1  |
| 12934 | 662   | Rbp7   | Mid1ip1       | -1 |
| 12934 | 1244  | Rbp7   | Tmem150       | -1 |
| 12934 | 1941  | Rbp7   | MMT00079618   | -1 |
| 12934 | 2051  | Rbp7   | Ddx27         | 1  |
| 12934 | 2322  | Rbp7   | Tuba4a        | -1 |
| 12934 | 2400  | Rbp7   | Gck           | -1 |
| 12934 | 2681  | Rbp7   | Hectd1        | 1  |
| 12934 | 2741  | Rbp7   | 3230401D17Rik | 1  |
| 12934 | 2917  | Rbp7   | Scly          | -1 |
| 12934 | 3449  | Rbp7   | Hes6          | -1 |

|       |       |      |               |    |
|-------|-------|------|---------------|----|
| 12934 | 3686  | Rbp7 | Psmc9         | 1  |
| 12934 | 4095  | Rbp7 | Trub2         | -1 |
| 12934 | 4708  | Rbp7 | Traf3ip2      | -1 |
| 12934 | 5296  | Rbp7 | Rnf181        | -1 |
| 12934 | 5594  | Rbp7 | Erbp3         | 1  |
| 12934 | 6048  | Rbp7 | Psmc9         | 1  |
| 12934 | 6377  | Rbp7 | D18Ert653e    | 1  |
| 12934 | 6393  | Rbp7 | 3110043O21Rik | 1  |
| 12934 | 6771  | Rbp7 | Insc          | -1 |
| 12934 | 7151  | Rbp7 | MMT00007982   | -1 |
| 12934 | 7659  | Rbp7 | Rab30         | 1  |
| 12934 | 7944  | Rbp7 | AI132487      | 1  |
| 12934 | 8234  | Rbp7 | Tbpl1         | 1  |
| 12934 | 8439  | Rbp7 | Slc25a33      | 1  |
| 12934 | 8896  | Rbp7 | Fasn          | -1 |
| 12934 | 9181  | Rbp7 | 1700060H10Rik | -1 |
| 12934 | 9635  | Rbp7 | Rabggtb       | 1  |
| 12934 | 9763  | Rbp7 | Tuba3b        | -1 |
| 12934 | 10772 | Rbp7 | Aacs          | -1 |
| 12934 | 11444 | Rbp7 | Rnpep         | -1 |
| 12934 | 11462 | Rbp7 | Gpam          | -1 |
| 12934 | 11724 | Rbp7 | Tuba3a        | -1 |
| 12934 | 12004 | Rbp7 | Lgals6        | 1  |
| 12934 | 12315 | Rbp7 | Sreb1         | -1 |
| 12934 | 12420 | Rbp7 | Klhl21        | 1  |
| 12934 | 12460 | Rbp7 | Pnpla2        | 1  |
| 12934 | 12499 | Rbp7 | Avpi1         | -1 |
| 12934 | 12981 | Rbp7 | Nek6          | -1 |
| 12934 | 13018 | Rbp7 | AW544981      | -1 |
| 12934 | 13263 | Rbp7 | Chchd5        | 1  |
| 12934 | 13304 | Rbp7 | Gadd45b       | 1  |
| 12934 | 13471 | Rbp7 | Cln8          | 1  |
| 12934 | 13990 | Rbp7 | MMT00040357   | -1 |
| 12934 | 14099 | Rbp7 | Nfe2          | -1 |
| 12934 | 14400 | Rbp7 | Scd2          | -1 |
| 12934 | 14626 | Rbp7 | Zbtb2         | 1  |
| 12934 | 15862 | Rbp7 | Mrap          | -1 |
| 12934 | 15892 | Rbp7 | Slc22a5       | 1  |
| 12934 | 15990 | Rbp7 | Dnmbp         | 1  |
| 12934 | 16182 | Rbp7 | Oasl1         | -1 |
| 12934 | 16187 | Rbp7 | 6530403A03Rik | 1  |
| 12934 | 16212 | Rbp7 | Med19         | -1 |
| 12934 | 16888 | Rbp7 | H6pd          | 1  |
| 12934 | 17444 | Rbp7 | Tuba1a        | -1 |
| 12934 | 17656 | Rbp7 | Hdhd3         | -1 |
| 12934 | 17660 | Rbp7 | Nlrp12        | 1  |
| 12934 | 17800 | Rbp7 | Lrtm1         | -1 |
| 12934 | 17862 | Rbp7 | Fbxo21        | 1  |
| 12934 | 18428 | Rbp7 | Sfrs2         | -1 |
| 12934 | 18785 | Rbp7 | Angptl4       | 1  |
| 12934 | 19089 | Rbp7 | Peci          | 1  |

|       |       |             |               |    |
|-------|-------|-------------|---------------|----|
| 12934 | 20076 | Rbp7        | Dbnl          | -1 |
| 12934 | 20273 | Rbp7        | 4733401H18Rik | -1 |
| 12934 | 20798 | Rbp7        | Ccpg1         | 1  |
| 12934 | 21202 | Rbp7        | Acly          | -1 |
| 12934 | 21251 | Rbp7        | Cpt1a         | 1  |
| 12934 | 21288 | Rbp7        | Tcp11l2       | 1  |
| 12934 | 21664 | Rbp7        | Insig1        | -1 |
| 12934 | 22443 | Rbp7        | Tuba1c        | -1 |
| 12934 | 23201 | Rbp7        | S1pr1         | -1 |
| 12948 | 2743  | MMT00009927 | Tcf3          | -1 |
| 12948 | 3265  | MMT00009927 | Dntt          | 1  |
| 12948 | 3703  | MMT00009927 | Ggcx          | -1 |
| 12948 | 11338 | MMT00009927 | Vamp8         | -1 |
| 12948 | 11872 | MMT00009927 | Vamp5         | -1 |
| 12948 | 15384 | MMT00009927 | Mat2a         | -1 |
| 12948 | 15708 | MMT00009927 | Retsat        | -1 |
| 12948 | 16670 | MMT00009927 | Csmd2         | 1  |
| 12954 | 662   | Gli2        | Mid1ip1       | 1  |
| 12954 | 1065  | Gli2        | Hmgcr         | 1  |
| 12954 | 2631  | Gli2        | Aldh1l1       | 1  |
| 12954 | 2741  | Gli2        | 3230401D17Rik | -1 |
| 12954 | 3449  | Gli2        | Hes6          | 1  |
| 12954 | 3989  | Gli2        | Wrnip1        | -1 |
| 12954 | 5594  | Gli2        | Erb3          | -1 |
| 12954 | 5729  | Gli2        | 2310016C08Rik | -1 |
| 12954 | 5801  | Gli2        | MMT00042142   | 1  |
| 12954 | 5804  | Gli2        | Thrsp         | 1  |
| 12954 | 6759  | Gli2        | Sqle          | 1  |
| 12954 | 6816  | Gli2        | Slc46a3       | 1  |
| 12954 | 7492  | Gli2        | Adfp          | -1 |
| 12954 | 7659  | Gli2        | Rab30         | -1 |
| 12954 | 7725  | Gli2        | 3230401D17Rik | -1 |
| 12954 | 7944  | Gli2        | A1132487      | -1 |
| 12954 | 8404  | Gli2        | Fa2h          | -1 |
| 12954 | 8439  | Gli2        | Slc25a33      | -1 |
| 12954 | 9481  | Gli2        | Ppl           | 1  |
| 12954 | 10250 | Gli2        | Pcsk9         | 1  |
| 12954 | 11576 | Gli2        | Gm1381        | 1  |
| 12954 | 12315 | Gli2        | Srebf1        | 1  |
| 12954 | 13263 | Gli2        | Chchd5        | -1 |
| 12954 | 13513 | Gli2        | Trim25        | -1 |
| 12954 | 16990 | Gli2        | Sc4mol        | 1  |
| 12954 | 17660 | Gli2        | Nlrp12        | -1 |
| 12954 | 17730 | Gli2        | MMT00058199   | -1 |
| 12954 | 17800 | Gli2        | Lrtm1         | 1  |
| 12954 | 17852 | Gli2        | Cpeb2         | -1 |
| 12954 | 18148 | Gli2        | Cables1       | -1 |
| 12954 | 20488 | Gli2        | Bok           | -1 |
| 12954 | 20715 | Gli2        | Tmem179b      | -1 |
| 12954 | 21288 | Gli2        | Tcp11l2       | -1 |
| 12954 | 22111 | Gli2        | Ttn           | 1  |

|       |       |        |               |    |
|-------|-------|--------|---------------|----|
| 12960 | 2918  | Arrdc4 | Mttr10        | -1 |
| 12960 | 3587  | Arrdc4 | MMT00041940   | -1 |
| 12960 | 6021  | Arrdc4 | MMT00008784   | -1 |
| 12960 | 8670  | Arrdc4 | MMT00051613   | -1 |
| 12960 | 11043 | Arrdc4 | Hsph1         | -1 |
| 12960 | 11214 | Arrdc4 | MMT00049207   | -1 |
| 12960 | 13018 | Arrdc4 | AW544981      | 1  |
| 12960 | 13087 | Arrdc4 | Cxadr         | 1  |
| 12960 | 15675 | Arrdc4 | MMT00077535   | -1 |
| 12960 | 18373 | Arrdc4 | Dnajb1        | -1 |
| 12965 | 5691  | Pmm1   | Csrp3         | -1 |
| 12965 | 6816  | Pmm1   | Slc46a3       | 1  |
| 12965 | 7492  | Pmm1   | Adfp          | -1 |
| 12965 | 7839  | Pmm1   | Asl           | 1  |
| 12965 | 12799 | Pmm1   | Spon2         | -1 |
| 12965 | 17816 | Pmm1   | 3110003A17Rik | -1 |
| 12965 | 22925 | Pmm1   | Parp16        | 1  |
| 12965 | 23183 | Pmm1   | Nnmt          | 1  |
| 12969 | 143   | Xaf1   | Gvin1         | 1  |
| 12969 | 1180  | Xaf1   | Clec4a3       | 1  |
| 12969 | 1533  | Xaf1   | BC013712      | 1  |
| 12969 | 2058  | Xaf1   | Hk3           | 1  |
| 12969 | 2200  | Xaf1   | BC006779      | 1  |
| 12969 | 2224  | Xaf1   | Oasl2         | 1  |
| 12969 | 2550  | Xaf1   | MMT00036681   | 1  |
| 12969 | 2752  | Xaf1   | Fcgr1         | 1  |
| 12969 | 3523  | Xaf1   | Trim34        | 1  |
| 12969 | 3594  | Xaf1   | Rasa4         | 1  |
| 12969 | 3659  | Xaf1   | EG236451      | 1  |
| 12969 | 3683  | Xaf1   | Oas2          | 1  |
| 12969 | 4114  | Xaf1   | Parp12        | 1  |
| 12969 | 4426  | Xaf1   | ligp2         | 1  |
| 12969 | 4508  | Xaf1   | Ifit1         | 1  |
| 12969 | 4516  | Xaf1   | Rsad2         | 1  |
| 12969 | 5002  | Xaf1   | Ifi202b       | 1  |
| 12969 | 5044  | Xaf1   | Ifi35         | 1  |
| 12969 | 5216  | Xaf1   | Spnb5         | 1  |
| 12969 | 5250  | Xaf1   | Ifit2         | 1  |
| 12969 | 5556  | Xaf1   | Ccl4          | 1  |
| 12969 | 5766  | Xaf1   | 5033414D02Rik | 1  |
| 12969 | 5845  | Xaf1   | Il18bp        | 1  |
| 12969 | 5853  | Xaf1   | Trim30        | 1  |
| 12969 | 5949  | Xaf1   | Zbp1          | 1  |
| 12969 | 6072  | Xaf1   | C1qc          | 1  |
| 12969 | 6213  | Xaf1   | Ccl2          | 1  |
| 12969 | 6576  | Xaf1   | Sfn2          | 1  |
| 12969 | 6587  | Xaf1   | Irf9          | 1  |
| 12969 | 6595  | Xaf1   | Oas1a         | 1  |
| 12969 | 6734  | Xaf1   | Ehd4          | 1  |
| 12969 | 6779  | Xaf1   | Gbp6          | 1  |
| 12969 | 6824  | Xaf1   | Irf7          | 1  |



|       |       |      |               |   |
|-------|-------|------|---------------|---|
| 12969 | 6888  | Xaf1 | Cxcl9         | 1 |
| 12969 | 6910  | Xaf1 | Ly6c2         | 1 |
| 12969 | 7069  | Xaf1 | Ube1l         | 1 |
| 12969 | 7105  | Xaf1 | Plac8         | 1 |
| 12969 | 7238  | Xaf1 | Pycard        | 1 |
| 12969 | 7284  | Xaf1 | MMT00008674   | 1 |
| 12969 | 7316  | Xaf1 | Ifi204        | 1 |
| 12969 | 7336  | Xaf1 | Cd5l          | 1 |
| 12969 | 8392  | Xaf1 | Asf1b         | 1 |
| 12969 | 8555  | Xaf1 | H2-M3         | 1 |
| 12969 | 8659  | Xaf1 | Psmb8         | 1 |
| 12969 | 8800  | Xaf1 | Rnf213        | 1 |
| 12969 | 9100  | Xaf1 | Ms4a6c        | 1 |
| 12969 | 9401  | Xaf1 | Fcgr4         | 1 |
| 12969 | 9820  | Xaf1 | BC023105      | 1 |
| 12969 | 9821  | Xaf1 | Pmaip1        | 1 |
| 12969 | 9847  | Xaf1 | Ifi27         | 1 |
| 12969 | 10109 | Xaf1 | Gbp3          | 1 |
| 12969 | 10504 | Xaf1 | Ripk3         | 1 |
| 12969 | 10926 | Xaf1 | P2ry13        | 1 |
| 12969 | 11009 | Xaf1 | MMT00008885   | 1 |
| 12969 | 11204 | Xaf1 | AI451617      | 1 |
| 12969 | 11265 | Xaf1 | Irgm          | 1 |
| 12969 | 11701 | Xaf1 | Oas1c         | 1 |
| 12969 | 12126 | Xaf1 | Znfx1         | 1 |
| 12969 | 12312 | Xaf1 | Ms4a6d        | 1 |
| 12969 | 12316 | Xaf1 | Mpa2l         | 1 |
| 12969 | 12398 | Xaf1 | Ifi44         | 1 |
| 12969 | 12495 | Xaf1 | Casp1         | 1 |
| 12969 | 12600 | Xaf1 | Ifi204        | 1 |
| 12969 | 12969 | Xaf1 | Xaf1          | 1 |
| 12969 | 13156 | Xaf1 | Ifit3         | 1 |
| 12969 | 13309 | Xaf1 | Tgtp          | 1 |
| 12969 | 13514 | Xaf1 | Apol9b        | 1 |
| 12969 | 13522 | Xaf1 | Sfn5          | 1 |
| 12969 | 13527 | Xaf1 | Ctss          | 1 |
| 12969 | 13528 | Xaf1 | Capn12        | 1 |
| 12969 | 13654 | Xaf1 | Stat1         | 1 |
| 12969 | 13656 | Xaf1 | Ly86          | 1 |
| 12969 | 13749 | Xaf1 | Parp9         | 1 |
| 12969 | 13826 | Xaf1 | Melk          | 1 |
| 12969 | 14029 | Xaf1 | 2810022L02Rik | 1 |
| 12969 | 14258 | Xaf1 | Ifi47         | 1 |
| 12969 | 14506 | Xaf1 | Slc15a3       | 1 |
| 12969 | 14603 | Xaf1 | Ly6e          | 1 |
| 12969 | 14611 | Xaf1 | Ddx60         | 1 |
| 12969 | 14880 | Xaf1 | Ms4a4c        | 1 |
| 12969 | 15074 | Xaf1 | Usp18         | 1 |
| 12969 | 15280 | Xaf1 | Cxcl10        | 1 |
| 12969 | 15449 | Xaf1 | Mitd1         | 1 |
| 12969 | 15504 | Xaf1 | Mx2           | 1 |

|       |       |        |               |    |
|-------|-------|--------|---------------|----|
| 12969 | 16102 | Xaf1   | Cd72          | 1  |
| 12969 | 16182 | Xaf1   | Oasl1         | 1  |
| 12969 | 16186 | Xaf1   | Cfp           | 1  |
| 12969 | 16199 | Xaf1   | Samhd1        | 1  |
| 12969 | 16521 | Xaf1   | Adar          | 1  |
| 12969 | 16572 | Xaf1   | D14Ertid668e  | 1  |
| 12969 | 16874 | Xaf1   | Fcer1g        | 1  |
| 12969 | 16949 | Xaf1   | ligp1         | 1  |
| 12969 | 16988 | Xaf1   | Clec4f        | 1  |
| 12969 | 17071 | Xaf1   | Samd9l        | 1  |
| 12969 | 17197 | Xaf1   | Igtp          | 1  |
| 12969 | 17412 | Xaf1   | Aif1          | 1  |
| 12969 | 18064 | Xaf1   | MMT00035925   | 1  |
| 12969 | 18174 | Xaf1   | Stat2         | 1  |
| 12969 | 18186 | Xaf1   | Parp14        | 1  |
| 12969 | 18211 | Xaf1   | Folr2         | 1  |
| 12969 | 18289 | Xaf1   | Tap1          | 1  |
| 12969 | 18686 | Xaf1   | Zfp143        | 1  |
| 12969 | 18868 | Xaf1   | Mpeg1         | 1  |
| 12969 | 19026 | Xaf1   | Isg15         | 1  |
| 12969 | 19189 | Xaf1   | Sp100         | 1  |
| 12969 | 19252 | Xaf1   | Tmsb4x        | 1  |
| 12969 | 19262 | Xaf1   | Cd274         | 1  |
| 12969 | 19708 | Xaf1   | Ly6a          | 1  |
| 12969 | 19738 | Xaf1   | Lgals3bp      | 1  |
| 12969 | 19794 | Xaf1   | Rgs2          | 1  |
| 12969 | 20321 | Xaf1   | Ms4a6b        | 1  |
| 12969 | 20474 | Xaf1   | Gnb3          | 1  |
| 12969 | 20791 | Xaf1   | MMT00014813   | 1  |
| 12969 | 20997 | Xaf1   | MMT00028135   | 1  |
| 12969 | 21351 | Xaf1   | Shisa5        | 1  |
| 12969 | 21440 | Xaf1   | Tmsb10        | 1  |
| 12969 | 21549 | Xaf1   | Rtp4          | 1  |
| 12969 | 21824 | Xaf1   | 5830443L24Rik | 1  |
| 12969 | 22037 | Xaf1   | Oas1g         | 1  |
| 12969 | 22077 | Xaf1   | MMT00057550   | 1  |
| 12969 | 22496 | Xaf1   | Sfn1          | 1  |
| 12969 | 22712 | Xaf1   | Phf11         | 1  |
| 12969 | 23092 | Xaf1   | Ifih1         | 1  |
| 12969 | 23208 | Xaf1   | Hck           | 1  |
| 12969 | 23242 | Xaf1   | Gngt2         | 1  |
| 12969 | 23403 | Xaf1   | Ndc80         | 1  |
| 12969 | 23450 | Xaf1   | D12Ertid647e  | 1  |
| 12974 | 437   | Slc1a6 | Ndrp1         | -1 |
| 12974 | 719   | Slc1a6 | Usp2          | 1  |
| 12974 | 1767  | Slc1a6 | BC016495      | 1  |
| 12974 | 2399  | Slc1a6 | MMT00060167   | -1 |
| 12974 | 3037  | Slc1a6 | MMT00017312   | 1  |
| 12974 | 3449  | Slc1a6 | Hes6          | 1  |
| 12974 | 5734  | Slc1a6 | EG619653      | 1  |
| 12974 | 5804  | Slc1a6 | Thrsp         | 1  |

|       |       |             |               |    |
|-------|-------|-------------|---------------|----|
| 12974 | 5849  | Slc1a6      | 2310031A18Rik | -1 |
| 12974 | 6394  | Slc1a6      | Fbxo6         | -1 |
| 12974 | 6816  | Slc1a6      | Slc46a3       | 1  |
| 12974 | 8054  | Slc1a6      | Smarca2       | 1  |
| 12974 | 8255  | Slc1a6      | Prkar1a       | -1 |
| 12974 | 9438  | Slc1a6      | Pctk3         | 1  |
| 12974 | 9481  | Slc1a6      | Ppl           | 1  |
| 12974 | 9517  | Slc1a6      | Med7          | -1 |
| 12974 | 11576 | Slc1a6      | Gm1381        | 1  |
| 12974 | 15824 | Slc1a6      | D19Ert721e    | -1 |
| 12974 | 17583 | Slc1a6      | Per2          | 1  |
| 12974 | 19360 | Slc1a6      | Aco1          | 1  |
| 12974 | 21643 | Slc1a6      | Agtr1a        | -1 |
| 12974 | 21969 | Slc1a6      | Tk1           | 1  |
| 12974 | 22653 | Slc1a6      | Ric3          | -1 |
| 12976 | 18201 | MMT00066041 | MMT00060232   | 1  |
| 12981 | 10132 | Nek6        | Ces2          | 1  |
| 12981 | 11259 | Nek6        | Ccdc69        | 1  |
| 12981 | 11462 | Nek6        | Gpam          | 1  |
| 12981 | 12910 | Nek6        | 1110028A07Rik | 1  |
| 12981 | 17244 | Nek6        | Myef2         | 1  |
| 12981 | 18042 | Nek6        | Aph1c         | -1 |
| 12981 | 18201 | Nek6        | MMT00060232   | 1  |
| 12981 | 23026 | Nek6        | Apom          | -1 |
| 12984 | 2674  | Cyb5        | 1810005K13Rik | -1 |
| 12984 | 4415  | Cyb5        | B230399E16Rik | 1  |
| 12984 | 8871  | Cyb5        | Gm443         | 1  |
| 12984 | 12984 | Cyb5        | Cyb5          | 1  |
| 12984 | 18592 | Cyb5        | Txnl4a        | 1  |
| 12984 | 21162 | Cyb5        | MMT00008728   | -1 |
| 12986 | 6085  | Cox4i2      | MMT00007454   | -1 |
| 12986 | 10532 | Cox4i2      | MMT00057790   | -1 |
| 12999 | 719   | Igfbp6      | Usp2          | -1 |
| 12999 | 760   | Igfbp6      | Akr1c19       | -1 |
| 12999 | 2721  | Igfbp6      | Inmt          | -1 |
| 12999 | 2850  | Igfbp6      | Slc16a6       | 1  |
| 12999 | 9718  | Igfbp6      | Fmo5          | -1 |
| 12999 | 18590 | Igfbp6      | Fgb           | 1  |
| 12999 | 20171 | Igfbp6      | 1700008G05Rik | 1  |
| 13004 | 12910 | Arhgef10    | 1110028A07Rik | 1  |
| 13009 | 13009 | MMT00017557 | MMT00017557   | 1  |
| 13018 | 3196  | AW544981    | Tat           | -1 |
| 13018 | 3587  | AW544981    | MMT00041940   | -1 |
| 13018 | 5364  | AW544981    | Kif22         | 1  |
| 13018 | 6021  | AW544981    | MMT00008784   | -1 |
| 13018 | 8122  | AW544981    | Hexim1        | -1 |
| 13018 | 8670  | AW544981    | MMT00051613   | -1 |
| 13018 | 11382 | AW544981    | Cdca3         | 1  |
| 13018 | 12761 | AW544981    | Tsc22d3       | -1 |
| 13018 | 15675 | AW544981    | MMT00077535   | -1 |
| 13018 | 16251 | AW544981    | G6pc          | -1 |

|       |       |               |               |    |
|-------|-------|---------------|---------------|----|
| 13018 | 18083 | AW544981      | Gadd45a       | 1  |
| 13018 | 18215 | AW544981      | Gpr146        | 1  |
| 13018 | 18373 | AW544981      | Dnajb1        | -1 |
| 13018 | 18418 | AW544981      | Hspa1b        | -1 |
| 13018 | 20194 | AW544981      | PnlDC1        | 1  |
| 13018 | 20296 | AW544981      | C030027H14Rik | -1 |
| 13018 | 21903 | AW544981      | Nr1d1         | 1  |
| 13018 | 22303 | AW544981      | Cdt1          | 1  |
| 13027 | 1371  | Ppp2r5c       | 1200009I06Rik | -1 |
| 13027 | 4414  | Ppp2r5c       | 5033406O09Rik | -1 |
| 13027 | 5829  | Ppp2r5c       | 2810455K09Rik | 1  |
| 13027 | 7388  | Ppp2r5c       | Amn           | -1 |
| 13027 | 8155  | Ppp2r5c       | Mark3         | -1 |
| 13027 | 8925  | Ppp2r5c       | MMT00026932   | 1  |
| 13027 | 10526 | Ppp2r5c       | MMT00036239   | 1  |
| 13027 | 12238 | Ppp2r5c       | Traf3         | 1  |
| 13027 | 13027 | Ppp2r5c       | Ppp2r5c       | 1  |
| 13027 | 15984 | Ppp2r5c       | MMT00075074   | -1 |
| 13027 | 16191 | Ppp2r5c       | Klc1          | 1  |
| 13027 | 23693 | Ppp2r5c       | A530016L24Rik | -1 |
| 13028 | 337   | Mesp1         | Rasgef1b      | -1 |
| 13028 | 2050  | Mesp1         | Lpl           | 1  |
| 13028 | 3170  | Mesp1         | Mcart1        | -1 |
| 13028 | 3196  | Mesp1         | Tat           | -1 |
| 13028 | 5364  | Mesp1         | Kif22         | 1  |
| 13028 | 6756  | Mesp1         | Sds           | -1 |
| 13028 | 8428  | Mesp1         | Sorbs3        | -1 |
| 13028 | 12761 | Mesp1         | Tsc22d3       | -1 |
| 13028 | 13000 | Mesp1         | 9130404D14Rik | 1  |
| 13028 | 15008 | Mesp1         | Chrdl2        | -1 |
| 13028 | 17622 | Mesp1         | Foxo1         | -1 |
| 13028 | 18455 | Mesp1         | Mtnr1a        | 1  |
| 13028 | 21934 | Mesp1         | Id2           | 1  |
| 13028 | 23183 | Mesp1         | Nnmt          | -1 |
| 13032 | 7590  | Gpinbp1       | Ankrd40       | -1 |
| 13037 | 8815  | Serpnb3b      | Mx1           | -1 |
| 13037 | 12910 | Serpnb3b      | 1110028A07Rik | -1 |
| 13037 | 21214 | Serpnb3b      | Scd1          | -1 |
| 13037 | 22138 | Serpnb3b      | Ang           | 1  |
| 13044 | 1964  | 5730596K20Rik | C730048C13Rik | -1 |
| 13044 | 13044 | 5730596K20Rik | 5730596K20Rik | 1  |
| 13045 | 13045 | A330021E22Rik | A330021E22Rik | 1  |
| 13049 | 269   | Sh3tc1        | Tuba1b        | 1  |
| 13049 | 662   | Sh3tc1        | Mid1ip1       | 1  |
| 13049 | 1941  | Sh3tc1        | MMT00079618   | 1  |
| 13049 | 2322  | Sh3tc1        | Tuba4a        | 1  |
| 13049 | 2400  | Sh3tc1        | Gck           | 1  |
| 13049 | 3449  | Sh3tc1        | Hes6          | 1  |
| 13049 | 5587  | Sh3tc1        | Rmnd5b        | 1  |
| 13049 | 5594  | Sh3tc1        | ErbB3         | -1 |
| 13049 | 5776  | Sh3tc1        | Rpa1          | 1  |

|       |       |               |               |    |
|-------|-------|---------------|---------------|----|
| 13049 | 5801  | Sh3tc1        | MMT00042142   | 1  |
| 13049 | 7151  | Sh3tc1        | MMT00007982   | 1  |
| 13049 | 7659  | Sh3tc1        | Rab30         | -1 |
| 13049 | 7944  | Sh3tc1        | Al132487      | -1 |
| 13049 | 8439  | Sh3tc1        | Slc25a33      | -1 |
| 13049 | 8896  | Sh3tc1        | Fasn          | 1  |
| 13049 | 9763  | Sh3tc1        | Tuba3b        | 1  |
| 13049 | 11444 | Sh3tc1        | Rnpep         | 1  |
| 13049 | 11724 | Sh3tc1        | Tuba3a        | 1  |
| 13049 | 12315 | Sh3tc1        | Srebf1        | 1  |
| 13049 | 12910 | Sh3tc1        | 1110028A07Rik | 1  |
| 13049 | 13304 | Sh3tc1        | Gadd45b       | -1 |
| 13049 | 13990 | Sh3tc1        | MMT00040357   | 1  |
| 13049 | 15862 | Sh3tc1        | Mrap          | 1  |
| 13049 | 16187 | Sh3tc1        | 6530403A03Rik | -1 |
| 13049 | 17444 | Sh3tc1        | Tuba1a        | 1  |
| 13049 | 17656 | Sh3tc1        | Hdhd3         | 1  |
| 13049 | 17660 | Sh3tc1        | Nlrp12        | -1 |
| 13049 | 18785 | Sh3tc1        | Angptl4       | -1 |
| 13049 | 21288 | Sh3tc1        | Tcp11l2       | -1 |
| 13049 | 22321 | Sh3tc1        | Apol7a        | 1  |
| 13049 | 22443 | Sh3tc1        | Tuba1c        | 1  |
| 13058 | 8444  | Gpx3          | Rdh16         | -1 |
| 13058 | 8815  | Gpx3          | Mx1           | -1 |
| 13058 | 12910 | Gpx3          | 1110028A07Rik | -1 |
| 13058 | 14017 | Gpx3          | Ces5          | -1 |
| 13058 | 14151 | Gpx3          | Slc44a1       | -1 |
| 13058 | 18201 | Gpx3          | MMT00060232   | -1 |
| 13058 | 20058 | Gpx3          | Dnaic1        | 1  |
| 13058 | 21214 | Gpx3          | Scd1          | -1 |
| 13058 | 21575 | Gpx3          | Cyp2c55       | -1 |
| 13072 | 2454  | BC022687      | MMT00045890   | 1  |
| 13072 | 7388  | BC022687      | Amn           | 1  |
| 13072 | 8155  | BC022687      | Mark3         | 1  |
| 13072 | 8357  | BC022687      | Siva1         | 1  |
| 13072 | 9678  | BC022687      | AW555464      | 1  |
| 13072 | 12084 | BC022687      | Siva1         | 1  |
| 13072 | 13072 | BC022687      | BC022687      | 1  |
| 13072 | 15984 | BC022687      | MMT00075074   | 1  |
| 13072 | 23693 | BC022687      | A530016L24Rik | 1  |
| 13087 | 21214 | Cxadr         | Scd1          | -1 |
| 13113 | 1101  | Man2a2        | Sec11a        | -1 |
| 13113 | 22841 | Man2a2        | Cib1          | 1  |
| 13115 | 4404  | B230120H23Rik | Comm5         | 1  |
| 13127 | 3836  | Col5a1        | 2200001115Rik | 1  |
| 13127 | 5364  | Col5a1        | Kif22         | 1  |
| 13127 | 6912  | Col5a1        | Crym          | -1 |
| 13127 | 8416  | Col5a1        | Cdc20         | 1  |
| 13127 | 11382 | Col5a1        | Cdca3         | 1  |
| 13127 | 14472 | Col5a1        | Ahcy          | -1 |
| 13139 | 13139 | Mid1          | Mid1          | 1  |

|       |       |        |               |    |
|-------|-------|--------|---------------|----|
| 13143 | 607   | Zmym6  | Me1           | -1 |
| 13143 | 874   | Zmym6  | Aldh1a7       | -1 |
| 13143 | 8444  | Zmym6  | Rdh16         | -1 |
| 13143 | 9427  | Zmym6  | Nqo2          | -1 |
| 13143 | 12556 | Zmym6  | Ass1          | -1 |
| 13143 | 14147 | Zmym6  | Acss2         | -1 |
| 13143 | 18201 | Zmym6  | MMT00060232   | -1 |
| 13143 | 20058 | Zmym6  | Dnaic1        | 1  |
| 13143 | 21214 | Zmym6  | Scd1          | -1 |
| 13143 | 22998 | Zmym6  | Ass1          | -1 |
| 13149 | 11406 | Ifi203 | Ifi203        | 1  |
| 13149 | 13149 | Ifi203 | Ifi203        | 1  |
| 13149 | 15844 | Ifi203 | Klhdc9        | -1 |
| 13149 | 16361 | Ifi203 | Olf703        | -1 |
| 13149 | 18276 | Ifi203 | Apoa2         | -1 |
| 13149 | 19520 | Ifi203 | Uck2          | -1 |
| 13156 | 143   | Ifit3  | Gvin1         | 1  |
| 13156 | 701   | Ifit3  | Polr3g        | -1 |
| 13156 | 860   | Ifit3  | Psmb10        | 1  |
| 13156 | 1180  | Ifit3  | Clec4a3       | 1  |
| 13156 | 1513  | Ifit3  | Gzmb          | 1  |
| 13156 | 1533  | Ifit3  | BC013712      | 1  |
| 13156 | 1612  | Ifit3  | Clec1b        | 1  |
| 13156 | 1908  | Ifit3  | Rnf213        | 1  |
| 13156 | 2058  | Ifit3  | Hk3           | 1  |
| 13156 | 2224  | Ifit3  | Oasl2         | 1  |
| 13156 | 2550  | Ifit3  | MMT00036681   | 1  |
| 13156 | 2752  | Ifit3  | Fcgr1         | 1  |
| 13156 | 3523  | Ifit3  | Trim34        | 1  |
| 13156 | 3594  | Ifit3  | Rasa4         | 1  |
| 13156 | 3659  | Ifit3  | EG236451      | 1  |
| 13156 | 3683  | Ifit3  | Oas2          | 1  |
| 13156 | 4114  | Ifit3  | Parp12        | 1  |
| 13156 | 4409  | Ifit3  | 5430435G22Rik | 1  |
| 13156 | 4426  | Ifit3  | Ilgp2         | 1  |
| 13156 | 4508  | Ifit3  | Ifit1         | 1  |
| 13156 | 4516  | Ifit3  | Rsad2         | 1  |
| 13156 | 5002  | Ifit3  | Ifi202b       | 1  |
| 13156 | 5044  | Ifit3  | Ifi35         | 1  |
| 13156 | 5216  | Ifit3  | Spnb5         | 1  |
| 13156 | 5250  | Ifit3  | Ifit2         | 1  |
| 13156 | 5406  | Ifit3  | Cd207         | -1 |
| 13156 | 5766  | Ifit3  | 5033414D02Rik | 1  |
| 13156 | 5845  | Ifit3  | Il18bp        | 1  |
| 13156 | 5853  | Ifit3  | Trim30        | 1  |
| 13156 | 5949  | Ifit3  | Zbp1          | 1  |
| 13156 | 6072  | Ifit3  | C1qc          | 1  |
| 13156 | 6576  | Ifit3  | Sfn2          | 1  |
| 13156 | 6587  | Ifit3  | Irf9          | 1  |
| 13156 | 6595  | Ifit3  | Oas1a         | 1  |
| 13156 | 6734  | Ifit3  | Ehd4          | 1  |

|       |       |       |             |   |
|-------|-------|-------|-------------|---|
| 13156 | 6779  | Ifit3 | Gbp6        | 1 |
| 13156 | 6824  | Ifit3 | Irf7        | 1 |
| 13156 | 6910  | Ifit3 | Ly6c2       | 1 |
| 13156 | 7069  | Ifit3 | Ube1l       | 1 |
| 13156 | 7105  | Ifit3 | Plac8       | 1 |
| 13156 | 7238  | Ifit3 | Pycard      | 1 |
| 13156 | 7284  | Ifit3 | MMT00008674 | 1 |
| 13156 | 7316  | Ifit3 | Ifi204      | 1 |
| 13156 | 7336  | Ifit3 | Cd5l        | 1 |
| 13156 | 8325  | Ifit3 | Psme2       | 1 |
| 13156 | 8555  | Ifit3 | H2-M3       | 1 |
| 13156 | 8564  | Ifit3 | Pld4        | 1 |
| 13156 | 8659  | Ifit3 | Psmb8       | 1 |
| 13156 | 8800  | Ifit3 | Rnf213      | 1 |
| 13156 | 9100  | Ifit3 | Ms4a6c      | 1 |
| 13156 | 9401  | Ifit3 | Fcgr4       | 1 |
| 13156 | 9616  | Ifit3 | AI451557    | 1 |
| 13156 | 9717  | Ifit3 | Psmb9       | 1 |
| 13156 | 9820  | Ifit3 | BC023105    | 1 |
| 13156 | 9847  | Ifit3 | Ifi27       | 1 |
| 13156 | 10109 | Ifit3 | Gbp3        | 1 |
| 13156 | 10426 | Ifit3 | Ly6f        | 1 |
| 13156 | 10504 | Ifit3 | Ripk3       | 1 |
| 13156 | 10606 | Ifit3 | Apbb1ip     | 1 |
| 13156 | 10796 | Ifit3 | Spic        | 1 |
| 13156 | 10926 | Ifit3 | P2ry13      | 1 |
| 13156 | 11009 | Ifit3 | MMT00008885 | 1 |
| 13156 | 11204 | Ifit3 | AI451617    | 1 |
| 13156 | 11265 | Ifit3 | Irgm        | 1 |
| 13156 | 11701 | Ifit3 | Oas1c       | 1 |
| 13156 | 11845 | Ifit3 | Psme1       | 1 |
| 13156 | 12126 | Ifit3 | Znfx1       | 1 |
| 13156 | 12312 | Ifit3 | Ms4a6d      | 1 |
| 13156 | 12363 | Ifit3 | Ifitm6      | 1 |
| 13156 | 12398 | Ifit3 | Ifi44       | 1 |
| 13156 | 12495 | Ifit3 | Casp1       | 1 |
| 13156 | 12600 | Ifit3 | Ifi204      | 1 |
| 13156 | 12969 | Ifit3 | Xaf1        | 1 |
| 13156 | 13156 | Ifit3 | Ifit3       | 1 |
| 13156 | 13309 | Ifit3 | Tgtp        | 1 |
| 13156 | 13514 | Ifit3 | Apol9b      | 1 |
| 13156 | 13522 | Ifit3 | Sln5        | 1 |
| 13156 | 13527 | Ifit3 | Ctss        | 1 |
| 13156 | 13528 | Ifit3 | Capn12      | 1 |
| 13156 | 13654 | Ifit3 | Stat1       | 1 |
| 13156 | 13656 | Ifit3 | Ly86        | 1 |
| 13156 | 13749 | Ifit3 | Parp9       | 1 |
| 13156 | 13826 | Ifit3 | Melk        | 1 |
| 13156 | 14258 | Ifit3 | Ifi47       | 1 |
| 13156 | 14506 | Ifit3 | Slc15a3     | 1 |
| 13156 | 14603 | Ifit3 | Ly6e        | 1 |

|       |       |        |               |    |
|-------|-------|--------|---------------|----|
| 13156 | 14611 | lfit3  | Ddx60         | 1  |
| 13156 | 14880 | lfit3  | Ms4a4c        | 1  |
| 13156 | 15074 | lfit3  | Usp18         | 1  |
| 13156 | 15504 | lfit3  | Mx2           | 1  |
| 13156 | 16102 | lfit3  | Cd72          | 1  |
| 13156 | 16182 | lfit3  | Oasl1         | 1  |
| 13156 | 16186 | lfit3  | Cfp           | 1  |
| 13156 | 16199 | lfit3  | Samhd1        | 1  |
| 13156 | 16521 | lfit3  | Adar          | 1  |
| 13156 | 16572 | lfit3  | D14Ertd668e   | 1  |
| 13156 | 16874 | lfit3  | Fcer1g        | 1  |
| 13156 | 16988 | lfit3  | Clec4f        | 1  |
| 13156 | 17071 | lfit3  | Samd9l        | 1  |
| 13156 | 17197 | lfit3  | Igtp          | 1  |
| 13156 | 17412 | lfit3  | Aif1          | 1  |
| 13156 | 18064 | lfit3  | MMT00035925   | 1  |
| 13156 | 18174 | lfit3  | Stat2         | 1  |
| 13156 | 18186 | lfit3  | Parp14        | 1  |
| 13156 | 18235 | lfit3  | Epsti1        | 1  |
| 13156 | 18686 | lfit3  | Zfp143        | 1  |
| 13156 | 18868 | lfit3  | Mpeg1         | 1  |
| 13156 | 19026 | lfit3  | Isg15         | 1  |
| 13156 | 19063 | lfit3  | Evl           | 1  |
| 13156 | 19189 | lfit3  | Sp100         | 1  |
| 13156 | 19262 | lfit3  | Cd274         | 1  |
| 13156 | 19708 | lfit3  | Ly6a          | 1  |
| 13156 | 19738 | lfit3  | Lgals3bp      | 1  |
| 13156 | 19794 | lfit3  | Rgs2          | 1  |
| 13156 | 20321 | lfit3  | Ms4a6b        | 1  |
| 13156 | 20474 | lfit3  | Gnb3          | 1  |
| 13156 | 20791 | lfit3  | MMT00014813   | 1  |
| 13156 | 20997 | lfit3  | MMT00028135   | 1  |
| 13156 | 21351 | lfit3  | Shisa5        | 1  |
| 13156 | 21549 | lfit3  | Rtp4          | 1  |
| 13156 | 21685 | lfit3  | Gzma          | 1  |
| 13156 | 21824 | lfit3  | 5830443L24Rik | 1  |
| 13156 | 22037 | lfit3  | Oas1g         | 1  |
| 13156 | 22077 | lfit3  | MMT00057550   | 1  |
| 13156 | 22496 | lfit3  | Sfn1          | 1  |
| 13156 | 22647 | lfit3  | Pkib          | 1  |
| 13156 | 22670 | lfit3  | Clec4a1       | 1  |
| 13156 | 22712 | lfit3  | Phf11         | 1  |
| 13156 | 23092 | lfit3  | Ifih1         | 1  |
| 13156 | 23174 | lfit3  | Psme2         | 1  |
| 13156 | 23208 | lfit3  | Hck           | 1  |
| 13156 | 23450 | lfit3  | D12Ertd647e   | 1  |
| 13159 | 11129 | Map4k4 | Ankhd1        | -1 |
| 13159 | 12910 | Map4k4 | 1110028A07Rik | 1  |
| 13164 | 5068  | Il4ra  | Afap112       | 1  |
| 13164 | 6213  | Il4ra  | Ccl2          | 1  |
| 13164 | 8787  | Il4ra  | Sdf211        | 1  |



|       |       |          |                    |    |
|-------|-------|----------|--------------------|----|
| 13164 | 18069 | Il4ra    | Gpt                | -1 |
| 13164 | 19234 | Il4ra    | Nrg4               | -1 |
| 13164 | 23377 | Il4ra    | Pdxk               | -1 |
| 13167 | 607   | Idi1     | Me1                | 1  |
| 13167 | 4351  | Idi1     | Plxnb1             | -1 |
| 13167 | 6193  | Idi1     | Lactb2             | 1  |
| 13167 | 10554 | Idi1     | ENSMUSG00000074179 | 1  |
| 13167 | 13293 | Idi1     | Gsta2              | 1  |
| 13167 | 18201 | Idi1     | MMT00060232        | 1  |
| 13167 | 21727 | Idi1     | Khk                | 1  |
| 13168 | 20967 | Col8a1   | Fabp2              | 1  |
| 13172 | 7590  | Epb4.1l3 | Ankrd40            | 1  |
| 13181 | 250   | Lcp2     | Tubb2a-ps2         | 1  |
| 13181 | 269   | Lcp2     | Tuba1b             | 1  |
| 13181 | 402   | Lcp2     | Timp3              | -1 |
| 13181 | 433   | Lcp2     | Pla2g12b           | 1  |
| 13181 | 609   | Lcp2     | MMT00060868        | 1  |
| 13181 | 719   | Lcp2     | Usp2               | -1 |
| 13181 | 1646  | Lcp2     | Slc15a4            | -1 |
| 13181 | 1767  | Lcp2     | BC016495           | -1 |
| 13181 | 2126  | Lcp2     | Dgat2              | -1 |
| 13181 | 2200  | Lcp2     | BC006779           | 1  |
| 13181 | 2399  | Lcp2     | MMT00060167        | 1  |
| 13181 | 2636  | Lcp2     | Tars               | 1  |
| 13181 | 2829  | Lcp2     | Lrfr3              | 1  |
| 13181 | 2850  | Lcp2     | Slc16a6            | 1  |
| 13181 | 3214  | Lcp2     | Dnmt3b             | 1  |
| 13181 | 3410  | Lcp2     | Paqr9              | 1  |
| 13181 | 3804  | Lcp2     | MMT00015534        | 1  |
| 13181 | 4201  | Lcp2     | Tubb2c             | 1  |
| 13181 | 4286  | Lcp2     | Ptp4a1             | -1 |
| 13181 | 4534  | Lcp2     | Ndel1              | -1 |
| 13181 | 4708  | Lcp2     | Traf3ip2           | 1  |
| 13181 | 5734  | Lcp2     | EG619653           | -1 |
| 13181 | 5934  | Lcp2     | S100a10            | 1  |
| 13181 | 5974  | Lcp2     | Arntl              | 1  |
| 13181 | 6213  | Lcp2     | Ccl2               | 1  |
| 13181 | 6386  | Lcp2     | Por                | -1 |
| 13181 | 6756  | Lcp2     | Sds                | -1 |
| 13181 | 7862  | Lcp2     | Cpsf4l             | -1 |
| 13181 | 8328  | Lcp2     | Klhdc8a            | 1  |
| 13181 | 8399  | Lcp2     | Herpud1            | -1 |
| 13181 | 8641  | Lcp2     | Slc7a2             | -1 |
| 13181 | 10642 | Lcp2     | Ngef               | -1 |
| 13181 | 11129 | Lcp2     | Ankhd1             | -1 |
| 13181 | 11599 | Lcp2     | Coq10b             | -1 |
| 13181 | 11741 | Lcp2     | Slc30a10           | 1  |
| 13181 | 11807 | Lcp2     | Fbxo31             | -1 |
| 13181 | 12420 | Lcp2     | Klhl21             | -1 |
| 13181 | 12799 | Lcp2     | Spon2              | 1  |
| 13181 | 14462 | Lcp2     | Zfp385b            | -1 |

|       |       |               |                    |    |
|-------|-------|---------------|--------------------|----|
| 13181 | 15320 | Lcp2          | MMT00017479        | -1 |
| 13181 | 15709 | Lcp2          | Tceal1             | -1 |
| 13181 | 16060 | Lcp2          | Gys2               | -1 |
| 13181 | 16690 | Lcp2          | Tjp3               | 1  |
| 13181 | 17338 | Lcp2          | Mocos              | 1  |
| 13181 | 17617 | Lcp2          | Atp5sl             | -1 |
| 13181 | 17876 | Lcp2          | Tubb4              | 1  |
| 13181 | 18069 | Lcp2          | Gpt                | -1 |
| 13181 | 18179 | Lcp2          | Dbp                | -1 |
| 13181 | 18827 | Lcp2          | Oprs1              | 1  |
| 13181 | 19234 | Lcp2          | Nrg4               | -1 |
| 13181 | 19671 | Lcp2          | Upp2               | -1 |
| 13181 | 19790 | Lcp2          | Polg2              | -1 |
| 13181 | 20745 | Lcp2          | Sord               | -1 |
| 13181 | 21142 | Lcp2          | Gm129              | -1 |
| 13181 | 21811 | Lcp2          | Ak3l1              | -1 |
| 13181 | 21969 | Lcp2          | Tk1                | -1 |
| 13181 | 22290 | Lcp2          | Tubb2a             | 1  |
| 13181 | 22630 | Lcp2          | MMT00034355        | 1  |
| 13181 | 22936 | Lcp2          | Rhobtb1            | -1 |
| 13181 | 23248 | Lcp2          | Tesk2              | -1 |
| 13181 | 23558 | Lcp2          | MMT00030937        | -1 |
| 13188 | 3907  | Sumf2         | Dkk3               | -1 |
| 13190 | 1572  | Igsf6         | Saa3               | 1  |
| 13190 | 3228  | Igsf6         | Saa1               | 1  |
| 13190 | 5364  | Igsf6         | Kif22              | 1  |
| 13190 | 5934  | Igsf6         | S100a10            | 1  |
| 13190 | 10808 | Igsf6         | Rab7l1             | 1  |
| 13190 | 17629 | Igsf6         | Saa2               | 1  |
| 13195 | 13195 | Mtif2         | Mtif2              | 1  |
| 13195 | 21444 | Mtif2         | Pnpt1              | 1  |
| 13218 | 3329  | C330043M08Rik | Car5a              | 1  |
| 13218 | 7861  | C330043M08Rik | Klhdc4             | -1 |
| 13218 | 13218 | C330043M08Rik | C330043M08Rik      | 1  |
| 13218 | 22894 | C330043M08Rik | MMT00016059        | -1 |
| 13219 | 607   | Trhde         | Me1                | 1  |
| 13219 | 1129  | Trhde         | Gsta4              | 1  |
| 13219 | 3446  | Trhde         | Eno1               | 1  |
| 13219 | 4056  | Trhde         | Tnfaip8l1          | -1 |
| 13219 | 8444  | Trhde         | Rdh16              | 1  |
| 13219 | 10554 | Trhde         | ENSMUSG00000074179 | 1  |
| 13219 | 13293 | Trhde         | Gsta2              | 1  |
| 13219 | 18113 | Trhde         | MMT00034400        | 1  |
| 13221 | 1536  | Srd5a3        | Hopx               | 1  |
| 13221 | 13221 | Srd5a3        | Srd5a3             | 1  |
| 13223 | 20967 | BC022651      | Fabp2              | 1  |
| 13224 | 3159  | Cp            | Pld1               | 1  |
| 13224 | 3206  | Cp            | Gpr160             | 1  |
| 13224 | 5822  | Cp            | Car2               | 1  |
| 13224 | 5938  | Cp            | Pfn2               | 1  |
| 13224 | 8568  | Cp            | Tnik               | 1  |

|       |       |               |               |    |
|-------|-------|---------------|---------------|----|
| 13224 | 12367 | Cp            | MMT00072365   | -1 |
| 13224 | 15508 | Cp            | 4632415L05Rik | 1  |
| 13224 | 16416 | Cp            | Commd2        | 1  |
| 13224 | 21323 | Cp            | MMT00074228   | 1  |
| 13236 | 2721  | Pak1ip1       | Inmt          | 1  |
| 13236 | 3377  | Pak1ip1       | Cs            | 1  |
| 13236 | 6086  | Pak1ip1       | Fgl1          | -1 |
| 13236 | 8815  | Pak1ip1       | Mx1           | 1  |
| 13236 | 9408  | Pak1ip1       | Hmgcs2        | -1 |
| 13236 | 9981  | Pak1ip1       | Snrpn         | 1  |
| 13236 | 10132 | Pak1ip1       | Ces2          | 1  |
| 13236 | 14147 | Pak1ip1       | Acss2         | 1  |
| 13236 | 14151 | Pak1ip1       | Slc44a1       | 1  |
| 13236 | 18201 | Pak1ip1       | MMT00060232   | 1  |
| 13236 | 21214 | Pak1ip1       | Scd1          | 1  |
| 13236 | 21727 | Pak1ip1       | Khk           | 1  |
| 13238 | 12799 | Nr1h3         | Spon2         | -1 |
| 13238 | 16647 | Nr1h3         | D16H22S680E   | 1  |
| 13246 | 18772 | Klc4          | BC048355      | 1  |
| 13253 | 269   | Mtvr2         | Tuba1b        | 1  |
| 13253 | 662   | Mtvr2         | Mid1ip1       | 1  |
| 13253 | 1709  | Mtvr2         | Mt2           | -1 |
| 13253 | 1941  | Mtvr2         | MMT00079618   | 1  |
| 13253 | 2051  | Mtvr2         | Ddx27         | -1 |
| 13253 | 7151  | Mtvr2         | MMT00007982   | 1  |
| 13253 | 8896  | Mtvr2         | Fasn          | 1  |
| 13253 | 9763  | Mtvr2         | Tuba3b        | 1  |
| 13253 | 10612 | Mtvr2         | Slc24a6       | -1 |
| 13253 | 11462 | Mtvr2         | Gpam          | 1  |
| 13253 | 11724 | Mtvr2         | Tuba3a        | 1  |
| 13253 | 12315 | Mtvr2         | Srebf1        | 1  |
| 13253 | 12460 | Mtvr2         | Pnpla2        | -1 |
| 13253 | 15892 | Mtvr2         | Slc22a5       | -1 |
| 13253 | 16888 | Mtvr2         | H6pd          | -1 |
| 13253 | 17444 | Mtvr2         | Tuba1a        | 1  |
| 13253 | 17660 | Mtvr2         | Nlrp12        | -1 |
| 13253 | 17862 | Mtvr2         | Fbxo21        | -1 |
| 13253 | 17878 | Mtvr2         | Brap          | -1 |
| 13253 | 20798 | Mtvr2         | Ccpg1         | -1 |
| 13253 | 21202 | Mtvr2         | Acly          | 1  |
| 13253 | 21251 | Mtvr2         | Cpt1a         | -1 |
| 13253 | 22443 | Mtvr2         | Tuba1c        | 1  |
| 13266 | 2850  | Man1c1        | Slc16a6       | 1  |
| 13266 | 5364  | Man1c1        | Kif22         | 1  |
| 13266 | 17323 | Man1c1        | Tubb6         | 1  |
| 13266 | 18455 | Man1c1        | Mtnr1a        | 1  |
| 13269 | 18069 | MMT00039476   | Gpt           | -1 |
| 13277 | 8210  | 9530015I07Rik | Hspa12a       | -1 |
| 13277 | 10387 | 9530015I07Rik | 4933427D06Rik | -1 |
| 13277 | 10466 | 9530015I07Rik | S1pr5         | -1 |
| 13277 | 11598 | 9530015I07Rik | MMT00031533   | -1 |

|       |       |               |               |    |
|-------|-------|---------------|---------------|----|
| 13277 | 20628 | 9530015I07Rik | Hoxd10        | -1 |
| 13277 | 21099 | 9530015I07Rik | Rapgef6       | -1 |
| 13282 | 22406 | 2310005N03Rik | Vnn1          | -1 |
| 13285 | 3410  | Cd276         | Paqr9         | 1  |
| 13285 | 5364  | Cd276         | Kif22         | 1  |
| 13285 | 5574  | Cd276         | Hsd3b7        | 1  |
| 13285 | 6177  | Cd276         | Thpo          | 1  |
| 13285 | 8416  | Cd276         | Cdc20         | 1  |
| 13285 | 8965  | Cd276         | Ahcy          | -1 |
| 13285 | 10486 | Cd276         | 1300002K09Rik | 1  |
| 13285 | 10673 | Cd276         | MMT00071544   | -1 |
| 13285 | 11382 | Cd276         | Cdca3         | 1  |
| 13285 | 13285 | Cd276         | Cd276         | 1  |
| 13285 | 14472 | Cd276         | Ahcy          | -1 |
| 13285 | 15320 | Cd276         | MMT00017479   | -1 |
| 13285 | 15631 | Cd276         | Lpin1         | -1 |
| 13285 | 16647 | Cd276         | D16H22S680E   | -1 |
| 13285 | 19025 | Cd276         | Slc37a4       | -1 |
| 13285 | 19723 | Cd276         | Pfkfb1        | -1 |
| 13285 | 20076 | Cd276         | Dbnl          | 1  |
| 13285 | 23201 | Cd276         | S1pr1         | 1  |
| 13289 | 213   | Dusp10        | Rgs16         | -1 |
| 13289 | 250   | Dusp10        | Tubb2a-ps2    | 1  |
| 13289 | 269   | Dusp10        | Tuba1b        | 1  |
| 13289 | 354   | Dusp10        | MMT00007996   | 1  |
| 13289 | 402   | Dusp10        | Timp3         | -1 |
| 13289 | 563   | Dusp10        | D4Bwg0951e    | -1 |
| 13289 | 609   | Dusp10        | MMT00060868   | 1  |
| 13289 | 662   | Dusp10        | Mid1ip1       | 1  |
| 13289 | 771   | Dusp10        | Zbtb45        | 1  |
| 13289 | 784   | Dusp10        | Actg1         | 1  |
| 13289 | 865   | Dusp10        | Npc1          | -1 |
| 13289 | 1257  | Dusp10        | Slc25a45      | 1  |
| 13289 | 1363  | Dusp10        | BC021767      | 1  |
| 13289 | 1445  | Dusp10        | Ssbp2         | -1 |
| 13289 | 1709  | Dusp10        | Mt2           | -1 |
| 13289 | 1767  | Dusp10        | BC016495      | -1 |
| 13289 | 1853  | Dusp10        | Stat5a        | 1  |
| 13289 | 1941  | Dusp10        | MMT00079618   | 1  |
| 13289 | 2322  | Dusp10        | Tuba4a        | 1  |
| 13289 | 2400  | Dusp10        | Gck           | 1  |
| 13289 | 2615  | Dusp10        | EG624862      | -1 |
| 13289 | 2636  | Dusp10        | Tars          | 1  |
| 13289 | 2794  | Dusp10        | Map3k6        | -1 |
| 13289 | 2829  | Dusp10        | Lrfr3         | 1  |
| 13289 | 2850  | Dusp10        | Slc16a6       | 1  |
| 13289 | 3040  | Dusp10        | Bcl3          | 1  |
| 13289 | 3214  | Dusp10        | Dnmt3b        | 1  |
| 13289 | 3235  | Dusp10        | BC029214      | 1  |
| 13289 | 3246  | Dusp10        | Prei4         | -1 |
| 13289 | 3410  | Dusp10        | Paqr9         | 1  |

|       |       |        |               |    |
|-------|-------|--------|---------------|----|
| 13289 | 3468  | Dusp10 | MMT00009124   | 1  |
| 13289 | 3603  | Dusp10 | BC027231      | -1 |
| 13289 | 3686  | Dusp10 | Psmc9         | -1 |
| 13289 | 3804  | Dusp10 | MMT00015534   | 1  |
| 13289 | 3980  | Dusp10 | Gkap1         | -1 |
| 13289 | 4201  | Dusp10 | Tubb2c        | 1  |
| 13289 | 4286  | Dusp10 | Ptp4a1        | -1 |
| 13289 | 4534  | Dusp10 | Ndel1         | -1 |
| 13289 | 4708  | Dusp10 | Traf3ip2      | 1  |
| 13289 | 4993  | Dusp10 | Tsc22d1       | 1  |
| 13289 | 5027  | Dusp10 | Pde4b         | 1  |
| 13289 | 5120  | Dusp10 | Alkbh7        | 1  |
| 13289 | 5187  | Dusp10 | Speer4f       | -1 |
| 13289 | 5374  | Dusp10 | Chka          | 1  |
| 13289 | 5375  | Dusp10 | Sec23b        | 1  |
| 13289 | 5574  | Dusp10 | Hsd3b7        | 1  |
| 13289 | 5587  | Dusp10 | Rmnd5b        | 1  |
| 13289 | 5974  | Dusp10 | Arntl         | 1  |
| 13289 | 6118  | Dusp10 | Slc1a4        | 1  |
| 13289 | 6211  | Dusp10 | Arhgap24      | 1  |
| 13289 | 6338  | Dusp10 | Setd3         | -1 |
| 13289 | 6380  | Dusp10 | 6330569M22Rik | 1  |
| 13289 | 6386  | Dusp10 | Por           | -1 |
| 13289 | 6551  | Dusp10 | Slc35b4       | 1  |
| 13289 | 6771  | Dusp10 | Insc          | 1  |
| 13289 | 7061  | Dusp10 | Spsb3         | 1  |
| 13289 | 7151  | Dusp10 | MMT00007982   | 1  |
| 13289 | 7590  | Dusp10 | Ankrd40       | 1  |
| 13289 | 7745  | Dusp10 | C330016O10Rik | 1  |
| 13289 | 7862  | Dusp10 | Cpsf4l        | -1 |
| 13289 | 7944  | Dusp10 | Al132487      | -1 |
| 13289 | 8328  | Dusp10 | Klhdc8a       | 1  |
| 13289 | 8399  | Dusp10 | Herpud1       | -1 |
| 13289 | 8639  | Dusp10 | Map1lc3b      | -1 |
| 13289 | 8641  | Dusp10 | Slc7a2        | -1 |
| 13289 | 8711  | Dusp10 | 5430432M24Rik | 1  |
| 13289 | 9763  | Dusp10 | Tuba3b        | 1  |
| 13289 | 9910  | Dusp10 | EG666644      | -1 |
| 13289 | 10088 | Dusp10 | Ddc           | 1  |
| 13289 | 10384 | Dusp10 | Chic2         | -1 |
| 13289 | 10486 | Dusp10 | 1300002K09Rik | 1  |
| 13289 | 10612 | Dusp10 | Slc24a6       | -1 |
| 13289 | 10712 | Dusp10 | Fchsd2        | -1 |
| 13289 | 10911 | Dusp10 | Mcl1          | -1 |
| 13289 | 11093 | Dusp10 | Zdhhc1        | -1 |
| 13289 | 11095 | Dusp10 | Bag3          | 1  |
| 13289 | 11129 | Dusp10 | Ankhd1        | -1 |
| 13289 | 11149 | Dusp10 | MMT00050488   | 1  |
| 13289 | 11193 | Dusp10 | Tsc22d1       | 1  |
| 13289 | 11356 | Dusp10 | Med27         | 1  |
| 13289 | 11376 | Dusp10 | Slc7a11       | 1  |

|       |       |        |               |    |
|-------|-------|--------|---------------|----|
| 13289 | 11444 | Dusp10 | Rnpep         | 1  |
| 13289 | 11574 | Dusp10 | Gne           | -1 |
| 13289 | 11599 | Dusp10 | Coq10b        | -1 |
| 13289 | 11724 | Dusp10 | Tuba3a        | 1  |
| 13289 | 11741 | Dusp10 | Slc30a10      | 1  |
| 13289 | 11807 | Dusp10 | Fbxo31        | -1 |
| 13289 | 11808 | Dusp10 | Pck1          | -1 |
| 13289 | 11926 | Dusp10 | Ampd2         | 1  |
| 13289 | 12091 | Dusp10 | 1810015C04Rik | -1 |
| 13289 | 12420 | Dusp10 | Klh21         | -1 |
| 13289 | 12460 | Dusp10 | Pnpla2        | -1 |
| 13289 | 12479 | Dusp10 | Ifrd1         | -1 |
| 13289 | 12489 | Dusp10 | Wdr8          | 1  |
| 13289 | 12565 | Dusp10 | Grem2         | -1 |
| 13289 | 12799 | Dusp10 | Spon2         | 1  |
| 13289 | 12904 | Dusp10 | MMT00040704   | -1 |
| 13289 | 12981 | Dusp10 | Nek6          | 1  |
| 13289 | 12982 | Dusp10 | Cars          | 1  |
| 13289 | 13376 | Dusp10 | Alg2          | 1  |
| 13289 | 13471 | Dusp10 | Cln8          | -1 |
| 13289 | 13489 | Dusp10 | D230025D16Rik | -1 |
| 13289 | 13705 | Dusp10 | Osbp1a        | -1 |
| 13289 | 13889 | Dusp10 | Agpat2        | 1  |
| 13289 | 14462 | Dusp10 | Zfp385b       | -1 |
| 13289 | 14582 | Dusp10 | Mt1           | -1 |
| 13289 | 15021 | Dusp10 | Ppargc1a      | -1 |
| 13289 | 15052 | Dusp10 | Kifc3         | 1  |
| 13289 | 15252 | Dusp10 | MMT00019402   | 1  |
| 13289 | 15320 | Dusp10 | MMT00017479   | -1 |
| 13289 | 15481 | Dusp10 | 1110067D22Rik | 1  |
| 13289 | 15631 | Dusp10 | Lpin1         | -1 |
| 13289 | 15668 | Dusp10 | 1810032O08Rik | -1 |
| 13289 | 15704 | Dusp10 | MMT00038941   | 1  |
| 13289 | 15709 | Dusp10 | Tceal1        | -1 |
| 13289 | 15862 | Dusp10 | Mrap          | 1  |
| 13289 | 15990 | Dusp10 | Dnmbp         | -1 |
| 13289 | 16013 | Dusp10 | Nt5c3         | -1 |
| 13289 | 16060 | Dusp10 | Gys2          | -1 |
| 13289 | 16176 | Dusp10 | St3gal5       | -1 |
| 13289 | 16580 | Dusp10 | Tnfaip2       | 1  |
| 13289 | 16647 | Dusp10 | D16H22S680E   | -1 |
| 13289 | 16669 | Dusp10 | Tjp2          | 1  |
| 13289 | 16690 | Dusp10 | Tjp3          | 1  |
| 13289 | 16692 | Dusp10 | Bat4          | -1 |
| 13289 | 16946 | Dusp10 | Ivns1abp      | -1 |
| 13289 | 17022 | Dusp10 | MMT00055891   | 1  |
| 13289 | 17323 | Dusp10 | Tubb6         | 1  |
| 13289 | 17338 | Dusp10 | Mocos         | 1  |
| 13289 | 17352 | Dusp10 | Cebpb         | -1 |
| 13289 | 17444 | Dusp10 | Tuba1a        | 1  |
| 13289 | 17530 | Dusp10 | MMT00041792   | 1  |

|       |       |        |               |    |
|-------|-------|--------|---------------|----|
| 13289 | 17656 | Dusp10 | Hdhd3         | 1  |
| 13289 | 17660 | Dusp10 | Nlrp12        | -1 |
| 13289 | 17876 | Dusp10 | Tubb4         | 1  |
| 13289 | 17878 | Dusp10 | Brap          | -1 |
| 13289 | 17884 | Dusp10 | Lnx2          | 1  |
| 13289 | 17999 | Dusp10 | A730017L22Rik | 1  |
| 13289 | 18027 | Dusp10 | 5730403B10Rik | -1 |
| 13289 | 18174 | Dusp10 | Stat2         | 1  |
| 13289 | 18179 | Dusp10 | Dbp           | -1 |
| 13289 | 18314 | Dusp10 | 4631416L12Rik | -1 |
| 13289 | 18606 | Dusp10 | A230074B11Rik | -1 |
| 13289 | 18653 | Dusp10 | MMT00072901   | -1 |
| 13289 | 18688 | Dusp10 | Leap2         | 1  |
| 13289 | 18785 | Dusp10 | Angptl4       | -1 |
| 13289 | 18827 | Dusp10 | Oprs1         | 1  |
| 13289 | 19025 | Dusp10 | Slc37a4       | -1 |
| 13289 | 19234 | Dusp10 | Nrg4          | -1 |
| 13289 | 19277 | Dusp10 | MMT00044927   | -1 |
| 13289 | 19466 | Dusp10 | Pptc7         | -1 |
| 13289 | 19532 | Dusp10 | Med8          | 1  |
| 13289 | 19660 | Dusp10 | Gkap1         | -1 |
| 13289 | 19671 | Dusp10 | Upp2          | -1 |
| 13289 | 19723 | Dusp10 | Pfkfb1        | -1 |
| 13289 | 20798 | Dusp10 | Ccpg1         | -1 |
| 13289 | 20803 | Dusp10 | Tmem50a       | -1 |
| 13289 | 20854 | Dusp10 | Commd7        | 1  |
| 13289 | 21251 | Dusp10 | Cpt1a         | -1 |
| 13289 | 21288 | Dusp10 | Tcp11l2       | -1 |
| 13289 | 21331 | Dusp10 | Slc10a6       | -1 |
| 13289 | 21408 | Dusp10 | Svil          | 1  |
| 13289 | 21604 | Dusp10 | Kihl24        | -1 |
| 13289 | 21733 | Dusp10 | Rhebl1        | -1 |
| 13289 | 21811 | Dusp10 | Ak3l1         | -1 |
| 13289 | 21901 | Dusp10 | BC035537      | 1  |
| 13289 | 22076 | Dusp10 | Pgm2l1        | -1 |
| 13289 | 22290 | Dusp10 | Tubb2a        | 1  |
| 13289 | 22373 | Dusp10 | Txnip         | -1 |
| 13289 | 22388 | Dusp10 | 2410018M08Rik | -1 |
| 13289 | 22443 | Dusp10 | Tuba1c        | 1  |
| 13289 | 22630 | Dusp10 | MMT00034355   | 1  |
| 13289 | 22744 | Dusp10 | 9-Sep         | 1  |
| 13289 | 23180 | Dusp10 | Sult1d1       | -1 |
| 13289 | 23201 | Dusp10 | S1pr1         | 1  |
| 13289 | 23202 | Dusp10 | Olfir559      | -1 |
| 13289 | 23246 | Dusp10 | Cited2        | 1  |
| 13289 | 23248 | Dusp10 | Tesk2         | -1 |
| 13289 | 23626 | Dusp10 | MMT00003764   | 1  |
| 13309 | 143   | Tgtp   | Gvin1         | 1  |
| 13309 | 405   | Tgtp   | Emr4          | 1  |
| 13309 | 830   | Tgtp   | Socs1         | 1  |
| 13309 | 860   | Tgtp   | Psmb10        | 1  |

|       |      |      |               |   |
|-------|------|------|---------------|---|
| 13309 | 917  | Tgtp | Kal1          | 1 |
| 13309 | 1180 | Tgtp | Clec4a3       | 1 |
| 13309 | 1353 | Tgtp | Plcg2         | 1 |
| 13309 | 1533 | Tgtp | BC013712      | 1 |
| 13309 | 1840 | Tgtp | Fpr1          | 1 |
| 13309 | 2058 | Tgtp | Hk3           | 1 |
| 13309 | 2200 | Tgtp | BC006779      | 1 |
| 13309 | 2224 | Tgtp | Oasl2         | 1 |
| 13309 | 2550 | Tgtp | MMT00036681   | 1 |
| 13309 | 2578 | Tgtp | Csf2rb2       | 1 |
| 13309 | 2752 | Tgtp | Fcgr1         | 1 |
| 13309 | 3036 | Tgtp | Slamf9        | 1 |
| 13309 | 3286 | Tgtp | Alox5ap       | 1 |
| 13309 | 3426 | Tgtp | Hap1          | 1 |
| 13309 | 3523 | Tgtp | Trim34        | 1 |
| 13309 | 3572 | Tgtp | Ebi3          | 1 |
| 13309 | 3594 | Tgtp | Rasa4         | 1 |
| 13309 | 3659 | Tgtp | EG236451      | 1 |
| 13309 | 3683 | Tgtp | Oas2          | 1 |
| 13309 | 3721 | Tgtp | Me2           | 1 |
| 13309 | 3905 | Tgtp | H2-Q1         | 1 |
| 13309 | 4114 | Tgtp | Parp12        | 1 |
| 13309 | 4409 | Tgtp | 5430435G22Rik | 1 |
| 13309 | 4426 | Tgtp | ligp2         | 1 |
| 13309 | 4508 | Tgtp | Ifit1         | 1 |
| 13309 | 5002 | Tgtp | Ifi202b       | 1 |
| 13309 | 5044 | Tgtp | Ifi35         | 1 |
| 13309 | 5216 | Tgtp | Spnb5         | 1 |
| 13309 | 5250 | Tgtp | Ifit2         | 1 |
| 13309 | 5554 | Tgtp | Emr1          | 1 |
| 13309 | 5556 | Tgtp | Ccl4          | 1 |
| 13309 | 5588 | Tgtp | Snx20         | 1 |
| 13309 | 5766 | Tgtp | 5033414D02Rik | 1 |
| 13309 | 5845 | Tgtp | Il18bp        | 1 |
| 13309 | 5853 | Tgtp | Trim30        | 1 |
| 13309 | 5949 | Tgtp | Zbp1          | 1 |
| 13309 | 5975 | Tgtp | Car13         | 1 |
| 13309 | 6036 | Tgtp | Pram1         | 1 |
| 13309 | 6072 | Tgtp | C1qc          | 1 |
| 13309 | 6098 | Tgtp | Ncf4          | 1 |
| 13309 | 6154 | Tgtp | 1700030G06Rik | 1 |
| 13309 | 6213 | Tgtp | Ccl2          | 1 |
| 13309 | 6576 | Tgtp | Sfn2          | 1 |
| 13309 | 6587 | Tgtp | Irf9          | 1 |
| 13309 | 6595 | Tgtp | Oas1a         | 1 |
| 13309 | 6734 | Tgtp | Ehd4          | 1 |
| 13309 | 6779 | Tgtp | Gbp6          | 1 |
| 13309 | 6824 | Tgtp | Irf7          | 1 |
| 13309 | 6888 | Tgtp | Cxcl9         | 1 |
| 13309 | 6910 | Tgtp | Ly6c2         | 1 |
| 13309 | 7069 | Tgtp | Ube1l         | 1 |



|       |       |      |               |   |
|-------|-------|------|---------------|---|
| 13309 | 7105  | Tgtp | Plac8         | 1 |
| 13309 | 7238  | Tgtp | Pycard        | 1 |
| 13309 | 7284  | Tgtp | MMT00008674   | 1 |
| 13309 | 7316  | Tgtp | Ifi204        | 1 |
| 13309 | 7336  | Tgtp | Cd5l          | 1 |
| 13309 | 8270  | Tgtp | Clspn         | 1 |
| 13309 | 8325  | Tgtp | Psme2         | 1 |
| 13309 | 8392  | Tgtp | Asf1b         | 1 |
| 13309 | 8555  | Tgtp | H2-M3         | 1 |
| 13309 | 8564  | Tgtp | Pld4          | 1 |
| 13309 | 8659  | Tgtp | Psmb8         | 1 |
| 13309 | 8800  | Tgtp | Rnf213        | 1 |
| 13309 | 8922  | Tgtp | Ii10ra        | 1 |
| 13309 | 8951  | Tgtp | Cd97          | 1 |
| 13309 | 9100  | Tgtp | Ms4a6c        | 1 |
| 13309 | 9401  | Tgtp | Fcgr4         | 1 |
| 13309 | 9717  | Tgtp | Psmb9         | 1 |
| 13309 | 9820  | Tgtp | BC023105      | 1 |
| 13309 | 9821  | Tgtp | Pmaip1        | 1 |
| 13309 | 9847  | Tgtp | Ifi27         | 1 |
| 13309 | 9920  | Tgtp | Syk           | 1 |
| 13309 | 9928  | Tgtp | Lgmn          | 1 |
| 13309 | 10109 | Tgtp | Gbp3          | 1 |
| 13309 | 10393 | Tgtp | Slc7a8        | 1 |
| 13309 | 10426 | Tgtp | Ly6f          | 1 |
| 13309 | 10504 | Tgtp | Ripk3         | 1 |
| 13309 | 10606 | Tgtp | Apbb1ip       | 1 |
| 13309 | 10736 | Tgtp | Cyba          | 1 |
| 13309 | 10796 | Tgtp | Spic          | 1 |
| 13309 | 10926 | Tgtp | P2ry13        | 1 |
| 13309 | 11009 | Tgtp | MMT00008885   | 1 |
| 13309 | 11198 | Tgtp | Gbp1          | 1 |
| 13309 | 11204 | Tgtp | Al451617      | 1 |
| 13309 | 11265 | Tgtp | Irgm          | 1 |
| 13309 | 11275 | Tgtp | Fanci         | 1 |
| 13309 | 11701 | Tgtp | Oas1c         | 1 |
| 13309 | 11836 | Tgtp | Csf1r         | 1 |
| 13309 | 11845 | Tgtp | Psme1         | 1 |
| 13309 | 11959 | Tgtp | 4631422O05Rik | 1 |
| 13309 | 12126 | Tgtp | Znfx1         | 1 |
| 13309 | 12312 | Tgtp | Ms4a6d        | 1 |
| 13309 | 12363 | Tgtp | Ifitm6        | 1 |
| 13309 | 12398 | Tgtp | Ifi44         | 1 |
| 13309 | 12469 | Tgtp | Dock10        | 1 |
| 13309 | 12486 | Tgtp | Aldh18a1      | 1 |
| 13309 | 12495 | Tgtp | Casp1         | 1 |
| 13309 | 12600 | Tgtp | Ifi204        | 1 |
| 13309 | 12969 | Tgtp | Xaf1          | 1 |
| 13309 | 13156 | Tgtp | Ifit3         | 1 |
| 13309 | 13172 | Tgtp | Epb4.113      | 1 |
| 13309 | 13181 | Tgtp | Lcp2          | 1 |

|       |       |      |               |   |
|-------|-------|------|---------------|---|
| 13309 | 13309 | Tgtp | Tgtp          | 1 |
| 13309 | 13504 | Tgtp | Lair1         | 1 |
| 13309 | 13514 | Tgtp | Apol9b        | 1 |
| 13309 | 13522 | Tgtp | Slfn5         | 1 |
| 13309 | 13527 | Tgtp | Ctss          | 1 |
| 13309 | 13528 | Tgtp | Capn12        | 1 |
| 13309 | 13585 | Tgtp | Nckap1l       | 1 |
| 13309 | 13654 | Tgtp | Stat1         | 1 |
| 13309 | 13656 | Tgtp | Ly86          | 1 |
| 13309 | 13780 | Tgtp | Pilra         | 1 |
| 13309 | 13826 | Tgtp | Melk          | 1 |
| 13309 | 13867 | Tgtp | Sgcb          | 1 |
| 13309 | 14029 | Tgtp | 2810022L02Rik | 1 |
| 13309 | 14117 | Tgtp | C1qb          | 1 |
| 13309 | 14192 | Tgtp | Trpv2         | 1 |
| 13309 | 14237 | Tgtp | Rac2          | 1 |
| 13309 | 14258 | Tgtp | Ifi47         | 1 |
| 13309 | 14260 | Tgtp | Mkl           | 1 |
| 13309 | 14453 | Tgtp | Inpp5d        | 1 |
| 13309 | 14475 | Tgtp | Abcg1         | 1 |
| 13309 | 14506 | Tgtp | Slc15a3       | 1 |
| 13309 | 14603 | Tgtp | Ly6e          | 1 |
| 13309 | 14611 | Tgtp | Ddx60         | 1 |
| 13309 | 14880 | Tgtp | Ms4a4c        | 1 |
| 13309 | 14883 | Tgtp | Itgal         | 1 |
| 13309 | 14954 | Tgtp | Rab19         | 1 |
| 13309 | 15074 | Tgtp | Usp18         | 1 |
| 13309 | 15159 | Tgtp | Timd4         | 1 |
| 13309 | 15280 | Tgtp | Cxcl10        | 1 |
| 13309 | 15387 | Tgtp | Mgl1          | 1 |
| 13309 | 15449 | Tgtp | Mitd1         | 1 |
| 13309 | 15504 | Tgtp | Mx2           | 1 |
| 13309 | 15749 | Tgtp | Cd22          | 1 |
| 13309 | 15825 | Tgtp | Fermt3        | 1 |
| 13309 | 16102 | Tgtp | Cd72          | 1 |
| 13309 | 16129 | Tgtp | Trafd1        | 1 |
| 13309 | 16147 | Tgtp | Tlr2          | 1 |
| 13309 | 16182 | Tgtp | Oasl1         | 1 |
| 13309 | 16186 | Tgtp | Cfp           | 1 |
| 13309 | 16199 | Tgtp | Samhd1        | 1 |
| 13309 | 16521 | Tgtp | Adar          | 1 |
| 13309 | 16572 | Tgtp | D14Ert668e    | 1 |
| 13309 | 16827 | Tgtp | Arhgdib       | 1 |
| 13309 | 16874 | Tgtp | Fcer1g        | 1 |
| 13309 | 16913 | Tgtp | Pira3         | 1 |
| 13309 | 16988 | Tgtp | Clec4f        | 1 |
| 13309 | 17197 | Tgtp | Igtp          | 1 |
| 13309 | 17412 | Tgtp | Aif1          | 1 |
| 13309 | 17806 | Tgtp | Gpsm3         | 1 |
| 13309 | 17832 | Tgtp | MMT00043412   | 1 |
| 13309 | 17904 | Tgtp | Cds1          | 1 |

|       |       |          |                    |    |
|-------|-------|----------|--------------------|----|
| 13309 | 18174 | Tgtp     | Stat2              | 1  |
| 13309 | 18186 | Tgtp     | Parp14             | 1  |
| 13309 | 18211 | Tgtp     | Folr2              | 1  |
| 13309 | 18289 | Tgtp     | Tap1               | 1  |
| 13309 | 18662 | Tgtp     | Batf3              | 1  |
| 13309 | 18686 | Tgtp     | Zfp143             | 1  |
| 13309 | 18868 | Tgtp     | Mpeg1              | 1  |
| 13309 | 19026 | Tgtp     | Isg15              | 1  |
| 13309 | 19063 | Tgtp     | Evl                | 1  |
| 13309 | 19153 | Tgtp     | Ptgs1              | 1  |
| 13309 | 19189 | Tgtp     | Sp100              | 1  |
| 13309 | 19252 | Tgtp     | Tmsb4x             | 1  |
| 13309 | 19262 | Tgtp     | Cd274              | 1  |
| 13309 | 19382 | Tgtp     | Slc2a6             | 1  |
| 13309 | 19708 | Tgtp     | Ly6a               | 1  |
| 13309 | 19738 | Tgtp     | Lgals3bp           | 1  |
| 13309 | 19794 | Tgtp     | Rgs2               | 1  |
| 13309 | 20083 | Tgtp     | ENSMUSG00000073403 | 1  |
| 13309 | 20150 | Tgtp     | Ptprc              | 1  |
| 13309 | 20321 | Tgtp     | Ms4a6b             | 1  |
| 13309 | 20335 | Tgtp     | Srgn               | 1  |
| 13309 | 20431 | Tgtp     | Slc7a7             | 1  |
| 13309 | 20432 | Tgtp     | Smc1b              | 1  |
| 13309 | 20474 | Tgtp     | Gnb3               | 1  |
| 13309 | 20791 | Tgtp     | MMT00014813        | 1  |
| 13309 | 20814 | Tgtp     | Ptpn18             | 1  |
| 13309 | 20997 | Tgtp     | MMT00028135        | 1  |
| 13309 | 21351 | Tgtp     | Shisa5             | 1  |
| 13309 | 21364 | Tgtp     | Ppm1h              | 1  |
| 13309 | 21440 | Tgtp     | Tmsb10             | 1  |
| 13309 | 21549 | Tgtp     | Rtp4               | 1  |
| 13309 | 21685 | Tgtp     | Gzma               | 1  |
| 13309 | 21824 | Tgtp     | 5830443L24Rik      | 1  |
| 13309 | 21837 | Tgtp     | BC052328           | 1  |
| 13309 | 21863 | Tgtp     | Dok2               | 1  |
| 13309 | 22037 | Tgtp     | Oas1g              | 1  |
| 13309 | 22327 | Tgtp     | Tyrobp             | 1  |
| 13309 | 22496 | Tgtp     | Sifn1              | 1  |
| 13309 | 22647 | Tgtp     | Pkib               | 1  |
| 13309 | 22670 | Tgtp     | Clec4a1            | 1  |
| 13309 | 22712 | Tgtp     | Phf11              | 1  |
| 13309 | 22876 | Tgtp     | Sash3              | 1  |
| 13309 | 23174 | Tgtp     | Psme2              | 1  |
| 13309 | 23208 | Tgtp     | Hck                | 1  |
| 13309 | 23242 | Tgtp     | Gngt2              | 1  |
| 13309 | 23276 | Tgtp     | Evi2b              | 1  |
| 13309 | 23410 | Tgtp     | C1qa               | 1  |
| 13309 | 23450 | Tgtp     | D12Ert647e         | 1  |
| 13318 | 10132 | Adamtsl2 | Ces2               | 1  |
| 13318 | 18042 | Adamtsl2 | Aph1c              | -1 |
| 13329 | 9158  | Osbp2    | Pde9a              | 1  |

|       |       |         |                    |    |
|-------|-------|---------|--------------------|----|
| 13347 | 5822  | Abi3    | Car2               | -1 |
| 13347 | 5938  | Abi3    | Pfn2               | -1 |
| 13347 | 13423 | Abi3    | ENSMUSG00000053749 | -1 |
| 13347 | 15508 | Abi3    | 4632415L05Rik      | -1 |
| 13347 | 16416 | Abi3    | Commd2             | -1 |
| 13347 | 18790 | Abi3    | Car3               | -1 |
| 13347 | 21323 | Abi3    | MMT00074228        | -1 |
| 13351 | 6193  | Zrsr1   | Lactb2             | -1 |
| 13351 | 8815  | Zrsr1   | Mx1                | -1 |
| 13351 | 18201 | Zrsr1   | MMT00060232        | -1 |
| 13351 | 18286 | Zrsr1   | Slc41a3            | 1  |
| 13351 | 21214 | Zrsr1   | Scd1               | -1 |
| 13351 | 21251 | Zrsr1   | Cpt1a              | 1  |
| 13351 | 21575 | Zrsr1   | Cyp2c55            | -1 |
| 13351 | 22138 | Zrsr1   | Ang                | 1  |
| 13355 | 2915  | Foxs1   | Nfs1               | -1 |
| 13355 | 6059  | Foxs1   | Dsn1               | 1  |
| 13355 | 6231  | Foxs1   | 9030622O22Rik      | 1  |
| 13355 | 6250  | Foxs1   | Csnk2a1            | -1 |
| 13355 | 6820  | Foxs1   | MMT00046996        | -1 |
| 13355 | 7610  | Foxs1   | Scand1             | -1 |
| 13355 | 13355 | Foxs1   | Foxs1              | 1  |
| 13355 | 14647 | Foxs1   | Cst3               | -1 |
| 13355 | 22740 | Foxs1   | Manbal             | 1  |
| 13355 | 23005 | Foxs1   | 4930405A21Rik      | 1  |
| 13355 | 23599 | Foxs1   | Ndr3               | 1  |
| 13356 | 8444  | Aldh3b2 | Rdh16              | 1  |
| 13356 | 8815  | Aldh3b2 | Mx1                | 1  |
| 13356 | 8902  | Aldh3b2 | Aldh3b1            | -1 |
| 13356 | 14017 | Aldh3b2 | Ces5               | 1  |
| 13356 | 21214 | Aldh3b2 | Scd1               | 1  |
| 13357 | 13357 | Rpp14   | Rpp14              | 1  |
| 13372 | 4534  | Slc11a1 | Ndel1              | -1 |
| 13372 | 5364  | Slc11a1 | Kif22              | 1  |
| 13372 | 8773  | Slc11a1 | MMT00027093        | 1  |
| 13372 | 10808 | Slc11a1 | Rab711             | 1  |
| 13372 | 18455 | Slc11a1 | Mtnr1a             | 1  |
| 13372 | 20745 | Slc11a1 | Sord               | -1 |
| 13372 | 20967 | Slc11a1 | Fabp2              | 1  |
| 13377 | 662   | Nod1    | Mid1ip1            | 1  |
| 13377 | 18785 | Nod1    | Angptl4            | -1 |
| 13388 | 7472  | Klra18  | Klra1              | 1  |
| 13390 | 2850  | Ddx31   | Slc16a6            | 1  |
| 13390 | 4201  | Ddx31   | Tubb2c             | 1  |
| 13390 | 6021  | Ddx31   | MMT00008784        | 1  |
| 13390 | 7619  | Ddx31   | Pik3ip1            | -1 |
| 13390 | 7862  | Ddx31   | Cpsf4l             | -1 |
| 13390 | 8670  | Ddx31   | MMT00051613        | 1  |
| 13390 | 9258  | Ddx31   | P4ha1              | 1  |
| 13390 | 10612 | Ddx31   | Slc24a6            | -1 |
| 13390 | 10642 | Ddx31   | Ngef               | -1 |

|       |       |               |                    |    |
|-------|-------|---------------|--------------------|----|
| 13390 | 11043 | Ddx31         | Hsph1              | 1  |
| 13390 | 11095 | Ddx31         | Bag3               | 1  |
| 13390 | 11214 | Ddx31         | MMT00049207        | 1  |
| 13390 | 12329 | Ddx31         | Sox6               | -1 |
| 13390 | 14298 | Ddx31         | Atp2a2             | 1  |
| 13390 | 14726 | Ddx31         | Slc19a1            | -1 |
| 13390 | 15675 | Ddx31         | MMT00077535        | 1  |
| 13390 | 18099 | Ddx31         | Nfx1               | -1 |
| 13390 | 18373 | Ddx31         | Dnajb1             | 1  |
| 13390 | 18418 | Ddx31         | Hspa1b             | 1  |
| 13390 | 21389 | Ddx31         | Odf2               | -1 |
| 13390 | 23377 | Ddx31         | Pdxk               | -1 |
| 13405 | 4404  | Rabep2        | Commd5             | 1  |
| 13417 | 15569 | 1700025G04Rik | BC003331           | 1  |
| 13417 | 17463 | 1700025G04Rik | Rgl1               | 1  |
| 13417 | 17850 | 1700025G04Rik | Prg4               | -1 |
| 13422 | 607   | Usp3          | Me1                | -1 |
| 13422 | 2051  | Usp3          | Ddx27              | 1  |
| 13422 | 6193  | Usp3          | Lactb2             | -1 |
| 13422 | 10961 | Usp3          | Pgd                | -1 |
| 13422 | 11375 | Usp3          | Derl2              | -1 |
| 13422 | 12143 | Usp3          | Thyn1              | -1 |
| 13422 | 12219 | Usp3          | Cyb5b              | -1 |
| 13422 | 18201 | Usp3          | MMT00060232        | -1 |
| 13422 | 18286 | Usp3          | Slc41a3            | 1  |
| 13422 | 21202 | Usp3          | Acly               | -1 |
| 13422 | 21214 | Usp3          | Scd1               | -1 |
| 13422 | 21251 | Usp3          | Cpt1a              | 1  |
| 13422 | 21575 | Usp3          | Cyp2c55            | -1 |
| 13422 | 22732 | Usp3          | Cyb5b              | -1 |
| 13422 | 22770 | Usp3          | Slc27a2            | 1  |
| 13431 | 3504  | MMT00038058   | Anpep              | -1 |
| 13431 | 3832  | MMT00038058   | Sdhb               | 1  |
| 13431 | 5884  | MMT00038058   | Gstm2              | 1  |
| 13431 | 6193  | MMT00038058   | Lactb2             | 1  |
| 13431 | 7430  | MMT00038058   | Gpr137             | 1  |
| 13431 | 7602  | MMT00038058   | Pcca               | 1  |
| 13431 | 8815  | MMT00038058   | Mx1                | 1  |
| 13431 | 10554 | MMT00038058   | ENSMUSG00000074179 | 1  |
| 13431 | 11014 | MMT00038058   | Hibadh             | 1  |
| 13431 | 11104 | MMT00038058   | MMT00014375        | 1  |
| 13431 | 12955 | MMT00038058   | Atp5o              | 1  |
| 13431 | 13293 | MMT00038058   | Gsta2              | 1  |
| 13431 | 18201 | MMT00038058   | MMT00060232        | 1  |
| 13431 | 21214 | MMT00038058   | Scd1               | 1  |
| 13431 | 21575 | MMT00038058   | Cyp2c55            | 1  |
| 13431 | 23640 | MMT00038058   | Bdh1               | -1 |
| 13449 | 3097  | Tmem103       | Ppp1r3g            | -1 |
| 13449 | 16517 | Tmem103       | D4Wsu53e           | -1 |
| 13451 | 21214 | Tbcb          | Scd1               | 1  |
| 13455 | 1416  | Cenpe         | 6720460F02Rik      | 1  |

|       |       |               |               |    |
|-------|-------|---------------|---------------|----|
| 13455 | 1561  | Cenpe         | Aurka         | 1  |
| 13455 | 5364  | Cenpe         | Kif22         | 1  |
| 13455 | 8416  | Cenpe         | Cdc20         | 1  |
| 13455 | 11382 | Cenpe         | Cdca3         | 1  |
| 13455 | 15271 | Cenpe         | Dbf4          | 1  |
| 13455 | 17823 | Cenpe         | D2Ert750e     | 1  |
| 13455 | 18299 | Cenpe         | MMT00035424   | 1  |
| 13455 | 19022 | Cenpe         | Ccnb2         | 1  |
| 13455 | 19318 | Cenpe         | Plk1          | 1  |
| 13455 | 20433 | Cenpe         | Cdca5         | 1  |
| 13455 | 21692 | Cenpe         | MMT00013924   | 1  |
| 13455 | 21947 | Cenpe         | Cdca8         | 1  |
| 13457 | 7492  | Hexa          | Adfp          | 1  |
| 13459 | 12910 | Rgs4          | 1110028A07Rik | 1  |
| 13459 | 14017 | Rgs4          | Ces5          | 1  |
| 13459 | 15059 | Rgs4          | Mogat1        | 1  |
| 13459 | 20058 | Rgs4          | Dnaic1        | -1 |
| 13459 | 20194 | Rgs4          | Pnlcd1        | 1  |
| 13459 | 20967 | Rgs4          | Fabp2         | 1  |
| 13459 | 23026 | Rgs4          | Apom          | -1 |
| 13470 | 12565 | Actr3         | Grem2         | -1 |
| 13471 | 269   | Cln8          | Tuba1b        | 1  |
| 13471 | 354   | Cln8          | MMT00007996   | 1  |
| 13471 | 1257  | Cln8          | Slc25a45      | 1  |
| 13471 | 1941  | Cln8          | MMT00079618   | 1  |
| 13471 | 7151  | Cln8          | MMT00007982   | 1  |
| 13471 | 8641  | Cln8          | Slc7a2        | -1 |
| 13471 | 9763  | Cln8          | Tuba3b        | 1  |
| 13471 | 11376 | Cln8          | Slc7a11       | 1  |
| 13471 | 11724 | Cln8          | Tuba3a        | 1  |
| 13471 | 17444 | Cln8          | Tuba1a        | 1  |
| 13471 | 22443 | Cln8          | Tuba1c        | 1  |
| 13475 | 13475 | Morn2         | Morn2         | 1  |
| 13489 | 269   | D230025D16Rik | Tuba1b        | -1 |
| 13489 | 563   | D230025D16Rik | D4Bwg0951e    | 1  |
| 13489 | 662   | D230025D16Rik | Mid1ip1       | -1 |
| 13489 | 1310  | D230025D16Rik | Cabc1         | -1 |
| 13489 | 1827  | D230025D16Rik | Gnb1l         | -1 |
| 13489 | 1941  | D230025D16Rik | MMT00079618   | -1 |
| 13489 | 2322  | D230025D16Rik | Tuba4a        | -1 |
| 13489 | 2681  | D230025D16Rik | Hectd1        | 1  |
| 13489 | 3097  | D230025D16Rik | Ppp1r3g       | 1  |
| 13489 | 3246  | D230025D16Rik | Prei4         | 1  |
| 13489 | 3410  | D230025D16Rik | Paqr9         | -1 |
| 13489 | 4286  | D230025D16Rik | Ptp4a1        | 1  |
| 13489 | 4469  | D230025D16Rik | Cyp3a13       | 1  |
| 13489 | 4708  | D230025D16Rik | Traf3ip2      | -1 |
| 13489 | 4988  | D230025D16Rik | 2400001E08Rik | -1 |
| 13489 | 5364  | D230025D16Rik | Kif22         | -1 |
| 13489 | 5587  | D230025D16Rik | Rmnd5b        | -1 |
| 13489 | 6282  | D230025D16Rik | Them4         | 1  |

|       |       |               |               |    |
|-------|-------|---------------|---------------|----|
| 13489 | 6308  | D230025D16Rik | 2410075B13Rik | -1 |
| 13489 | 6370  | D230025D16Rik | Aqp8          | -1 |
| 13489 | 6393  | D230025D16Rik | 3110043O21Rik | 1  |
| 13489 | 6490  | D230025D16Rik | Il1r1         | 1  |
| 13489 | 6771  | D230025D16Rik | Insc          | -1 |
| 13489 | 7151  | D230025D16Rik | MMT00007982   | -1 |
| 13489 | 8641  | D230025D16Rik | Slc7a2        | 1  |
| 13489 | 8711  | D230025D16Rik | 5430432M24Rik | -1 |
| 13489 | 8896  | D230025D16Rik | Fasn          | -1 |
| 13489 | 9275  | D230025D16Rik | Aass          | 1  |
| 13489 | 9587  | D230025D16Rik | Bri3bp        | -1 |
| 13489 | 9763  | D230025D16Rik | Tuba3b        | -1 |
| 13489 | 10486 | D230025D16Rik | 1300002K09Rik | -1 |
| 13489 | 11093 | D230025D16Rik | Zdhhc1        | 1  |
| 13489 | 11129 | D230025D16Rik | Ankhd1        | 1  |
| 13489 | 11193 | D230025D16Rik | Tsc22d1       | -1 |
| 13489 | 11444 | D230025D16Rik | Rnpep         | -1 |
| 13489 | 11724 | D230025D16Rik | Tuba3a        | -1 |
| 13489 | 11808 | D230025D16Rik | Pck1          | 1  |
| 13489 | 11893 | D230025D16Rik | Cdc40         | 1  |
| 13489 | 12091 | D230025D16Rik | 1810015C04Rik | 1  |
| 13489 | 12298 | D230025D16Rik | Lad1          | -1 |
| 13489 | 12489 | D230025D16Rik | Wdr8          | -1 |
| 13489 | 12799 | D230025D16Rik | Spon2         | -1 |
| 13489 | 12907 | D230025D16Rik | Zkscan1       | 1  |
| 13489 | 12910 | D230025D16Rik | 1110028A07Rik | -1 |
| 13489 | 12981 | D230025D16Rik | Nek6          | -1 |
| 13489 | 12982 | D230025D16Rik | Cars          | -1 |
| 13489 | 13471 | D230025D16Rik | Cln8          | 1  |
| 13489 | 13889 | D230025D16Rik | Agpat2        | -1 |
| 13489 | 14335 | D230025D16Rik | Olfcr33       | 1  |
| 13489 | 15021 | D230025D16Rik | Ppargc1a      | 1  |
| 13489 | 15029 | D230025D16Rik | Nudt16l1      | -1 |
| 13489 | 15258 | D230025D16Rik | Coil          | -1 |
| 13489 | 15631 | D230025D16Rik | Lpin1         | 1  |
| 13489 | 15862 | D230025D16Rik | Mrap          | -1 |
| 13489 | 16176 | D230025D16Rik | St3gal5       | 1  |
| 13489 | 16647 | D230025D16Rik | D16H22S680E   | 1  |
| 13489 | 16690 | D230025D16Rik | Tjp3          | -1 |
| 13489 | 17323 | D230025D16Rik | Tubb6         | -1 |
| 13489 | 17338 | D230025D16Rik | Mocos         | -1 |
| 13489 | 17444 | D230025D16Rik | Tuba1a        | -1 |
| 13489 | 17512 | D230025D16Rik | EG433216      | -1 |
| 13489 | 17656 | D230025D16Rik | Hdhd3         | -1 |
| 13489 | 17660 | D230025D16Rik | Nlrp12        | 1  |
| 13489 | 18027 | D230025D16Rik | 5730403B10Rik | 1  |
| 13489 | 18403 | D230025D16Rik | Itpr1         | 1  |
| 13489 | 18785 | D230025D16Rik | Angptl4       | 1  |
| 13489 | 18827 | D230025D16Rik | Oprs1         | -1 |
| 13489 | 20519 | D230025D16Rik | Col1a1        | -1 |
| 13489 | 21306 | D230025D16Rik | Pvrl1         | -1 |

|       |       |               |               |    |
|-------|-------|---------------|---------------|----|
| 13489 | 22138 | D230025D16Rik | Ang           | 1  |
| 13489 | 22443 | D230025D16Rik | Tuba1c        | -1 |
| 13489 | 22744 | D230025D16Rik | 9-Sep         | -1 |
| 13489 | 23201 | D230025D16Rik | S1pr1         | -1 |
| 13489 | 23202 | D230025D16Rik | Olf559        | 1  |
| 13489 | 23253 | D230025D16Rik | D030011O10Rik | 1  |
| 13491 | 250   | PIk2          | Tubb2a-ps2    | 1  |
| 13491 | 269   | PIk2          | Tuba1b        | 1  |
| 13491 | 337   | PIk2          | Rasgef1b      | -1 |
| 13491 | 563   | PIk2          | D4Bwg0951e    | -1 |
| 13491 | 609   | PIk2          | MMT00060868   | 1  |
| 13491 | 662   | PIk2          | Mid1ip1       | 1  |
| 13491 | 1941  | PIk2          | MMT00079618   | 1  |
| 13491 | 2322  | PIk2          | Tuba4a        | 1  |
| 13491 | 3804  | PIk2          | MMT00015534   | 1  |
| 13491 | 4201  | PIk2          | Tubb2c        | 1  |
| 13491 | 4235  | PIk2          | Pfkb3         | -1 |
| 13491 | 4708  | PIk2          | Traf3ip2      | 1  |
| 13491 | 7151  | PIk2          | MMT00007982   | 1  |
| 13491 | 8632  | PIk2          | Igfbp1        | -1 |
| 13491 | 9763  | PIk2          | Tuba3b        | 1  |
| 13491 | 10911 | PIk2          | Mcl1          | -1 |
| 13491 | 11093 | PIk2          | Zdhhc1        | -1 |
| 13491 | 11129 | PIk2          | Ankhd1        | -1 |
| 13491 | 11724 | PIk2          | Tuba3a        | 1  |
| 13491 | 11808 | PIk2          | Pck1          | -1 |
| 13491 | 12420 | PIk2          | Klh21         | -1 |
| 13491 | 12910 | PIk2          | 1110028A07Rik | 1  |
| 13491 | 12981 | PIk2          | Nek6          | 1  |
| 13491 | 13471 | PIk2          | Cln8          | -1 |
| 13491 | 13489 | PIk2          | D230025D16Rik | -1 |
| 13491 | 14989 | PIk2          | Map3k5        | -1 |
| 13491 | 15021 | PIk2          | Ppargc1a      | -1 |
| 13491 | 15252 | PIk2          | MMT00019402   | 1  |
| 13491 | 15284 | PIk2          | EG632778      | -1 |
| 13491 | 15631 | PIk2          | Lpin1         | -1 |
| 13491 | 15862 | PIk2          | Mrap          | 1  |
| 13491 | 15990 | PIk2          | Dnmbp         | -1 |
| 13491 | 16176 | PIk2          | St3gal5       | -1 |
| 13491 | 16647 | PIk2          | D16H22S680E   | -1 |
| 13491 | 17323 | PIk2          | Tubb6         | 1  |
| 13491 | 17444 | PIk2          | Tuba1a        | 1  |
| 13491 | 17525 | PIk2          | Ctgf          | -1 |
| 13491 | 17622 | PIk2          | Foxo1         | -1 |
| 13491 | 17656 | PIk2          | Hdhd3         | 1  |
| 13491 | 17876 | PIk2          | Tubb4         | 1  |
| 13491 | 18027 | PIk2          | 5730403B10Rik | -1 |
| 13491 | 18606 | PIk2          | A230074B11Rik | -1 |
| 13491 | 18785 | PIk2          | Angptl4       | -1 |
| 13491 | 18827 | PIk2          | Oprs1         | 1  |
| 13491 | 20803 | PIk2          | Tmem50a       | -1 |



|       |       |        |               |    |
|-------|-------|--------|---------------|----|
| 13491 | 21331 | Plk2   | Slc10a6       | -1 |
| 13491 | 22290 | Plk2   | Tubb2a        | 1  |
| 13491 | 22443 | Plk2   | Tuba1c        | 1  |
| 13491 | 22630 | Plk2   | MMT00034355   | 1  |
| 13491 | 23202 | Plk2   | Olf559        | -1 |
| 13493 | 327   | Ring1  | H2-Ea         | -1 |
| 13493 | 2325  | Ring1  | H2-K1         | -1 |
| 13493 | 2938  | Ring1  | H2-T23        | -1 |
| 13493 | 4004  | Ring1  | Thbs2         | 1  |
| 13493 | 9158  | Ring1  | Pde9a         | 1  |
| 13493 | 10667 | Ring1  | H2-Eb1        | -1 |
| 13493 | 13493 | Ring1  | Ring1         | 1  |
| 13493 | 20238 | Ring1  | H2-T9         | -1 |
| 13493 | 22822 | Ring1  | MMT00013433   | -1 |
| 13504 | 19462 | Lair1  | 4933439C20Rik | -1 |
| 13507 | 9230  | Spats1 | 1700027N10Rik | 1  |
| 13507 | 14027 | Spats1 | Rpo1-1        | -1 |
| 13507 | 15318 | Spats1 | Aars2         | 1  |
| 13507 | 18574 | Spats1 | Parc          | -1 |
| 13507 | 18772 | Spats1 | BC048355      | 1  |
| 13507 | 22004 | Spats1 | Gtpbp2        | -1 |
| 13511 | 15508 | Aytl1b | 4632415L05Rik | 1  |
| 13513 | 1533  | Trim25 | BC013712      | 1  |
| 13513 | 2200  | Trim25 | BC006779      | 1  |
| 13513 | 2224  | Trim25 | Oasl2         | 1  |
| 13513 | 3426  | Trim25 | Hap1          | 1  |
| 13513 | 3683  | Trim25 | Oas2          | 1  |
| 13513 | 4114  | Trim25 | Parp12        | 1  |
| 13513 | 4426  | Trim25 | ligp2         | 1  |
| 13513 | 5853  | Trim25 | Trim30        | 1  |
| 13513 | 6072  | Trim25 | C1qc          | 1  |
| 13513 | 6587  | Trim25 | Irf9          | 1  |
| 13513 | 6824  | Trim25 | Irf7          | 1  |
| 13513 | 7105  | Trim25 | Plac8         | 1  |
| 13513 | 7336  | Trim25 | Cd5l          | 1  |
| 13513 | 8800  | Trim25 | Rnf213        | 1  |
| 13513 | 9821  | Trim25 | Pmaip1        | 1  |
| 13513 | 9847  | Trim25 | Ifi27         | 1  |
| 13513 | 9920  | Trim25 | Syk           | 1  |
| 13513 | 10393 | Trim25 | Slc7a8        | 1  |
| 13513 | 11204 | Trim25 | AI451617      | 1  |
| 13513 | 12398 | Trim25 | Ifi44         | 1  |
| 13513 | 12600 | Trim25 | Ifi204        | 1  |
| 13513 | 12969 | Trim25 | Xaf1          | 1  |
| 13513 | 13513 | Trim25 | Trim25        | 1  |
| 13513 | 13527 | Trim25 | Ctss          | 1  |
| 13513 | 14237 | Trim25 | Rac2          | 1  |
| 13513 | 14475 | Trim25 | Abcg1         | 1  |
| 13513 | 14506 | Trim25 | Slc15a3       | 1  |
| 13513 | 14883 | Trim25 | Itgal         | 1  |
| 13513 | 15074 | Trim25 | Usp18         | 1  |

|       |       |        |               |   |
|-------|-------|--------|---------------|---|
| 13513 | 16186 | Trim25 | Cfp           | 1 |
| 13513 | 16874 | Trim25 | Fcer1g        | 1 |
| 13513 | 16988 | Trim25 | Clec4f        | 1 |
| 13513 | 18174 | Trim25 | Stat2         | 1 |
| 13513 | 18186 | Trim25 | Parp14        | 1 |
| 13513 | 18289 | Trim25 | Tap1          | 1 |
| 13513 | 19189 | Trim25 | Sp100         | 1 |
| 13513 | 19738 | Trim25 | Lgals3bp      | 1 |
| 13513 | 20431 | Trim25 | Slc7a7        | 1 |
| 13513 | 20997 | Trim25 | MMT00028135   | 1 |
| 13513 | 21351 | Trim25 | Shisa5        | 1 |
| 13513 | 21549 | Trim25 | Rtp4          | 1 |
| 13513 | 22037 | Trim25 | Oas1g         | 1 |
| 13513 | 23208 | Trim25 | Hck           | 1 |
| 13514 | 143   | Apol9b | Gvin1         | 1 |
| 13514 | 1533  | Apol9b | BC013712      | 1 |
| 13514 | 1908  | Apol9b | Rnf213        | 1 |
| 13514 | 2200  | Apol9b | BC006779      | 1 |
| 13514 | 2224  | Apol9b | Oas2          | 1 |
| 13514 | 2550  | Apol9b | MMT00036681   | 1 |
| 13514 | 2830  | Apol9b | 4632417K18Rik | 1 |
| 13514 | 3523  | Apol9b | Trim34        | 1 |
| 13514 | 3659  | Apol9b | EG236451      | 1 |
| 13514 | 3683  | Apol9b | Oas2          | 1 |
| 13514 | 4114  | Apol9b | Parp12        | 1 |
| 13514 | 4409  | Apol9b | 5430435G22Rik | 1 |
| 13514 | 4426  | Apol9b | Iigp2         | 1 |
| 13514 | 4508  | Apol9b | Ifit1         | 1 |
| 13514 | 4516  | Apol9b | Rsad2         | 1 |
| 13514 | 5002  | Apol9b | Ifi202b       | 1 |
| 13514 | 5044  | Apol9b | Ifi35         | 1 |
| 13514 | 5216  | Apol9b | Spnb5         | 1 |
| 13514 | 5250  | Apol9b | Ifit2         | 1 |
| 13514 | 5766  | Apol9b | 5033414D02Rik | 1 |
| 13514 | 5853  | Apol9b | Trim30        | 1 |
| 13514 | 5875  | Apol9b | Cd86          | 1 |
| 13514 | 5949  | Apol9b | Zbp1          | 1 |
| 13514 | 6383  | Apol9b | Gbp2          | 1 |
| 13514 | 6587  | Apol9b | Irf9          | 1 |
| 13514 | 6595  | Apol9b | Oas1a         | 1 |
| 13514 | 6779  | Apol9b | Gbp6          | 1 |
| 13514 | 6824  | Apol9b | Irf7          | 1 |
| 13514 | 7069  | Apol9b | Ube1l         | 1 |
| 13514 | 7105  | Apol9b | Plac8         | 1 |
| 13514 | 7238  | Apol9b | Pycard        | 1 |
| 13514 | 7284  | Apol9b | MMT00008674   | 1 |
| 13514 | 7316  | Apol9b | Ifi204        | 1 |
| 13514 | 8555  | Apol9b | H2-M3         | 1 |
| 13514 | 8800  | Apol9b | Rnf213        | 1 |
| 13514 | 9100  | Apol9b | Ms4a6c        | 1 |
| 13514 | 9401  | Apol9b | Fcgr4         | 1 |

|       |       |        |             |   |
|-------|-------|--------|-------------|---|
| 13514 | 9616  | Apol9b | Al451557    | 1 |
| 13514 | 9820  | Apol9b | BC023105    | 1 |
| 13514 | 9847  | Apol9b | Ifi27       | 1 |
| 13514 | 10109 | Apol9b | Gbp3        | 1 |
| 13514 | 10926 | Apol9b | P2ry13      | 1 |
| 13514 | 11009 | Apol9b | MMT00008885 | 1 |
| 13514 | 11204 | Apol9b | Al451617    | 1 |
| 13514 | 11265 | Apol9b | Irgm        | 1 |
| 13514 | 11701 | Apol9b | Oas1c       | 1 |
| 13514 | 12126 | Apol9b | Znfx1       | 1 |
| 13514 | 12312 | Apol9b | Ms4a6d      | 1 |
| 13514 | 12398 | Apol9b | Ifi44       | 1 |
| 13514 | 12493 | Apol9b | Ankfy1      | 1 |
| 13514 | 12600 | Apol9b | Ifi204      | 1 |
| 13514 | 12969 | Apol9b | Xaf1        | 1 |
| 13514 | 13156 | Apol9b | Ifit3       | 1 |
| 13514 | 13181 | Apol9b | Lcp2        | 1 |
| 13514 | 13309 | Apol9b | Tgtp        | 1 |
| 13514 | 13514 | Apol9b | Apol9b      | 1 |
| 13514 | 13522 | Apol9b | Sfn5        | 1 |
| 13514 | 13527 | Apol9b | Ctss        | 1 |
| 13514 | 13528 | Apol9b | Capn12      | 1 |
| 13514 | 13654 | Apol9b | Stat1       | 1 |
| 13514 | 13749 | Apol9b | Parp9       | 1 |
| 13514 | 14258 | Apol9b | Ifi47       | 1 |
| 13514 | 14603 | Apol9b | Ly6e        | 1 |
| 13514 | 14880 | Apol9b | Ms4a4c      | 1 |
| 13514 | 15074 | Apol9b | Usp18       | 1 |
| 13514 | 15280 | Apol9b | Cxcl10      | 1 |
| 13514 | 15348 | Apol9b | Eif2ak2     | 1 |
| 13514 | 15449 | Apol9b | Mitd1       | 1 |
| 13514 | 15504 | Apol9b | Mx2         | 1 |
| 13514 | 15572 | Apol9b | Dtx3l       | 1 |
| 13514 | 16182 | Apol9b | Oasl1       | 1 |
| 13514 | 16199 | Apol9b | Samhd1      | 1 |
| 13514 | 16238 | Apol9b | Nmi         | 1 |
| 13514 | 16521 | Apol9b | Adar        | 1 |
| 13514 | 16572 | Apol9b | D14Ertd668e | 1 |
| 13514 | 16949 | Apol9b | Iigp1       | 1 |
| 13514 | 17071 | Apol9b | Samd9l      | 1 |
| 13514 | 17197 | Apol9b | Igtp        | 1 |
| 13514 | 17412 | Apol9b | Aif1        | 1 |
| 13514 | 17904 | Apol9b | Cds1        | 1 |
| 13514 | 18174 | Apol9b | Stat2       | 1 |
| 13514 | 18186 | Apol9b | Parp14      | 1 |
| 13514 | 19026 | Apol9b | Isg15       | 1 |
| 13514 | 19189 | Apol9b | Sp100       | 1 |
| 13514 | 19262 | Apol9b | Cd274       | 1 |
| 13514 | 19708 | Apol9b | Ly6a        | 1 |
| 13514 | 19738 | Apol9b | Lgals3bp    | 1 |
| 13514 | 20321 | Apol9b | Ms4a6b      | 1 |

|       |       |               |               |    |
|-------|-------|---------------|---------------|----|
| 13514 | 20791 | Apol9b        | MMT00014813   | 1  |
| 13514 | 20997 | Apol9b        | MMT00028135   | 1  |
| 13514 | 21351 | Apol9b        | Shisa5        | 1  |
| 13514 | 21549 | Apol9b        | Rtp4          | 1  |
| 13514 | 21824 | Apol9b        | 5830443L24Rik | 1  |
| 13514 | 22037 | Apol9b        | Oas1g         | 1  |
| 13514 | 22077 | Apol9b        | MMT00057550   | 1  |
| 13514 | 22712 | Apol9b        | Phf11         | 1  |
| 13514 | 23092 | Apol9b        | Ifih1         | 1  |
| 13514 | 23208 | Apol9b        | Hck           | 1  |
| 13514 | 23450 | Apol9b        | D12Erttd647e  | 1  |
| 13527 | 1572  | Ctss          | Saa3          | 1  |
| 13527 | 3228  | Ctss          | Saa1          | 1  |
| 13527 | 5364  | Ctss          | Kif22         | 1  |
| 13527 | 16182 | Ctss          | Oasl1         | 1  |
| 13527 | 17629 | Ctss          | Saa2          | 1  |
| 13544 | 3535  | Parp8         | S100a9        | 1  |
| 13544 | 23201 | Parp8         | S1pr1         | 1  |
| 13554 | 13554 | Aqr           | Aqr           | 1  |
| 13554 | 14647 | Aqr           | Cst3          | -1 |
| 13554 | 23609 | Aqr           | Trim44        | 1  |
| 13563 | 7550  | 9930023K05Rik | Rab11fip5     | 1  |
| 13563 | 7602  | 9930023K05Rik | Pcca          | -1 |
| 13563 | 8444  | 9930023K05Rik | Rdh16         | -1 |
| 13563 | 12637 | 9930023K05Rik | Itpka         | 1  |
| 13563 | 15227 | 9930023K05Rik | Ifngr1        | 1  |
| 13563 | 20058 | 9930023K05Rik | Dnaic1        | 1  |
| 13564 | 2013  | Qrs1          | Il15ra        | -1 |
| 13564 | 21251 | Qrs1          | Cpt1a         | -1 |
| 13569 | 6816  | 1190003M12Rik | Slc46a3       | 1  |
| 13569 | 14100 | 1190003M12Rik | Ccnk          | 1  |
| 13569 | 17090 | 1190003M12Rik | Lass2         | 1  |
| 13578 | 1627  | Asph          | 2310030N02Rik | 1  |
| 13578 | 6768  | Asph          | Plekhf2       | 1  |
| 13581 | 4626  | Srxn1         | 2310046K01Rik | 1  |
| 13581 | 13581 | Srxn1         | Srxn1         | 1  |
| 13585 | 2850  | Nckap1l       | Slc16a6       | 1  |
| 13585 | 4286  | Nckap1l       | Ptp4a1        | -1 |
| 13585 | 5259  | Nckap1l       | Mat1a         | -1 |
| 13585 | 5364  | Nckap1l       | Kif22         | 1  |
| 13585 | 5934  | Nckap1l       | S100a10       | 1  |
| 13585 | 6386  | Nckap1l       | Por           | -1 |
| 13585 | 8428  | Nckap1l       | Sorbs3        | -1 |
| 13585 | 11129 | Nckap1l       | Ankhd1        | -1 |
| 13585 | 11382 | Nckap1l       | Cdca3         | 1  |
| 13585 | 11393 | Nckap1l       | A830007P12Rik | 1  |
| 13585 | 14472 | Nckap1l       | Ahcy          | -1 |
| 13585 | 15320 | Nckap1l       | MMT00017479   | -1 |
| 13588 | 5259  | MMT00042387   | Mat1a         | -1 |
| 13588 | 5364  | MMT00042387   | Kif22         | 1  |
| 13588 | 6386  | MMT00042387   | Por           | -1 |

|       |       |             |               |    |
|-------|-------|-------------|---------------|----|
| 13588 | 8428  | MMT00042387 | Sorbs3        | -1 |
| 13588 | 11614 | MMT00042387 | Sult1e1       | -1 |
| 13588 | 14472 | MMT00042387 | Ahcy          | -1 |
| 13588 | 15320 | MMT00042387 | MMT00017479   | -1 |
| 13615 | 3061  | Arl16       | Scarf2        | -1 |
| 13615 | 3119  | Arl16       | Mapk10        | -1 |
| 13615 | 3892  | Arl16       | D0H6S2654E    | -1 |
| 13615 | 6017  | Arl16       | MMT00018015   | 1  |
| 13615 | 6426  | Arl16       | Mfsd4         | -1 |
| 13615 | 6846  | Arl16       | Olf1402       | -1 |
| 13615 | 8791  | Arl16       | Sectm1a       | -1 |
| 13615 | 10214 | Arl16       | Sectm1b       | -1 |
| 13615 | 12546 | Arl16       | Cd7           | -1 |
| 13615 | 13615 | Arl16       | Arl16         | 1  |
| 13615 | 15016 | Arl16       | MMT00074608   | -1 |
| 13615 | 16613 | Arl16       | 1110031I02Rik | -1 |
| 13615 | 17333 | Arl16       | Slc25a10      | 1  |
| 13615 | 17680 | Arl16       | 1700069L16Rik | -1 |
| 13615 | 17792 | Arl16       | Vmn2r79       | -1 |
| 13615 | 17897 | Arl16       | Gm1019        | -1 |
| 13615 | 22557 | Arl16       | P4hb          | 1  |
| 13624 | 443   | Ubc         | Xpo5          | -1 |
| 13624 | 1443  | Ubc         | Znhit2        | -1 |
| 13624 | 2328  | Ubc         | Traf3ip1      | -1 |
| 13624 | 3965  | Ubc         | Pwp2          | -1 |
| 13624 | 5594  | Ubc         | Erb3          | 1  |
| 13624 | 6035  | Ubc         | Nkd1          | -1 |
| 13624 | 6357  | Ubc         | Ankrd9        | -1 |
| 13624 | 7039  | Ubc         | Zmat3         | -1 |
| 13624 | 8920  | Ubc         | Nol5a         | -1 |
| 13624 | 9544  | Ubc         | 2410018C17Rik | -1 |
| 13624 | 10700 | Ubc         | Grwd1         | -1 |
| 13624 | 12111 | Ubc         | AA474455      | -1 |
| 13624 | 12838 | Ubc         | Tec           | 1  |
| 13624 | 13376 | Ubc         | Alg2          | -1 |
| 13624 | 14526 | Ubc         | Pacsin3       | -1 |
| 13624 | 14935 | Ubc         | Ppfia1        | -1 |
| 13624 | 14966 | Ubc         | Ddx51         | -1 |
| 13624 | 15815 | Ubc         | MMT00080242   | -1 |
| 13624 | 16000 | Ubc         | Nol10         | -1 |
| 13624 | 16380 | Ubc         | Vasn          | -1 |
| 13624 | 16974 | Ubc         | Eif2b4        | -1 |
| 13624 | 17808 | Ubc         | Ncor2         | -1 |
| 13624 | 18271 | Ubc         | MMT00007507   | -1 |
| 13624 | 18622 | Ubc         | Pwp2          | -1 |
| 13624 | 20102 | Ubc         | Caskin2       | -1 |
| 13624 | 20363 | Ubc         | Dcun1d2       | -1 |
| 13624 | 21288 | Ubc         | Tcp11l2       | 1  |
| 13624 | 21888 | Ubc         | Kti12         | -1 |
| 13624 | 22116 | Ubc         | Fbxo42        | -1 |
| 13624 | 22289 | Ubc         | Smn1          | -1 |

|       |       |          |                    |    |
|-------|-------|----------|--------------------|----|
| 13624 | 22689 | Ubc      | 2610028A01Rik      | -1 |
| 13625 | 5364  | Apobec1  | Kif22              | 1  |
| 13625 | 10808 | Apobec1  | Rab7l1             | 1  |
| 13625 | 11393 | Apobec1  | A830007P12Rik      | 1  |
| 13625 | 18455 | Apobec1  | Mtnr1a             | 1  |
| 13630 | 2636  | Cdkn1a   | Tars               | 1  |
| 13630 | 4351  | Cdkn1a   | Plxnb1             | -1 |
| 13630 | 4674  | Cdkn1a   | Cxcl12             | -1 |
| 13630 | 11633 | Cdkn1a   | Ier3               | -1 |
| 13630 | 13094 | Cdkn1a   | Cnn3               | -1 |
| 13630 | 13630 | Cdkn1a   | Cdkn1a             | 1  |
| 13630 | 18215 | Cdkn1a   | Gpr146             | -1 |
| 13630 | 22138 | Cdkn1a   | Ang                | -1 |
| 13640 | 15059 | Atp6v0a1 | Mogat1             | 1  |
| 13640 | 20058 | Atp6v0a1 | Dnaic1             | -1 |
| 13648 | 12910 | Dap      | 1110028A07Rik      | 1  |
| 13648 | 18042 | Dap      | Aph1c              | -1 |
| 13650 | 10554 | Cntn1    | ENSMUSG00000074179 | -1 |
| 13650 | 12910 | Cntn1    | 1110028A07Rik      | -1 |
| 13650 | 13293 | Cntn1    | Gsta2              | -1 |
| 13650 | 20058 | Cntn1    | Dnaic1             | 1  |
| 13650 | 21727 | Cntn1    | Khk                | -1 |
| 13654 | 1533  | Stat1    | BC013712           | 1  |
| 13654 | 2224  | Stat1    | Oasl2              | 1  |
| 13654 | 2550  | Stat1    | MMT00036681        | 1  |
| 13654 | 2752  | Stat1    | Fcgr1              | 1  |
| 13654 | 3683  | Stat1    | Oas2               | 1  |
| 13654 | 4114  | Stat1    | Parp12             | 1  |
| 13654 | 5216  | Stat1    | Spnb5              | 1  |
| 13654 | 6072  | Stat1    | C1qc               | 1  |
| 13654 | 6587  | Stat1    | Irf9               | 1  |
| 13654 | 6824  | Stat1    | Irf7               | 1  |
| 13654 | 7105  | Stat1    | Plac8              | 1  |
| 13654 | 7284  | Stat1    | MMT00008674        | 1  |
| 13654 | 8392  | Stat1    | Asf1b              | 1  |
| 13654 | 9847  | Stat1    | Ifi27              | 1  |
| 13654 | 11204 | Stat1    | AI451617           | 1  |
| 13654 | 12126 | Stat1    | Znfx1              | 1  |
| 13654 | 12312 | Stat1    | Ms4a6d             | 1  |
| 13654 | 13309 | Stat1    | Tgtp               | 1  |
| 13654 | 13514 | Stat1    | Apol9b             | 1  |
| 13654 | 13528 | Stat1    | Capn12             | 1  |
| 13654 | 14506 | Stat1    | Slc15a3            | 1  |
| 13654 | 15280 | Stat1    | Cxcl10             | 1  |
| 13654 | 16182 | Stat1    | Oasl1              | 1  |
| 13654 | 16186 | Stat1    | Cfp                | 1  |
| 13654 | 16572 | Stat1    | D14Ertd668e        | 1  |
| 13654 | 16988 | Stat1    | Clec4f             | 1  |
| 13654 | 18174 | Stat1    | Stat2              | 1  |
| 13654 | 18686 | Stat1    | Zfp143             | 1  |
| 13654 | 19738 | Stat1    | Lgals3bp           | 1  |

|       |       |             |               |    |
|-------|-------|-------------|---------------|----|
| 13654 | 21549 | Stat1       | Rtp4          | 1  |
| 13654 | 22037 | Stat1       | Oas1g         | 1  |
| 13654 | 23410 | Stat1       | C1qa          | 1  |
| 13654 | 23450 | Stat1       | D12Ert647e    | 1  |
| 13656 | 4426  | Ly86        | Iigp2         | 1  |
| 13656 | 5364  | Ly86        | Kif22         | 1  |
| 13656 | 7238  | Ly86        | Pycard        | 1  |
| 13656 | 9717  | Ly86        | Psmb9         | 1  |
| 13656 | 10606 | Ly86        | Apbb1ip       | 1  |
| 13656 | 13656 | Ly86        | Ly86          | 1  |
| 13656 | 14880 | Ly86        | Ms4a4c        | 1  |
| 13656 | 16182 | Ly86        | Oasl1         | 1  |
| 13656 | 17197 | Ly86        | Igtp          | 1  |
| 13656 | 17412 | Ly86        | Aif1          | 1  |
| 13656 | 21549 | Ly86        | Rtp4          | 1  |
| 13656 | 21824 | Ly86        | 5830443L24Rik | 1  |
| 13656 | 23208 | Ly86        | Hck           | 1  |
| 13657 | 8815  | MMT00065461 | Mx1           | 1  |
| 13677 | 7659  | Tinagl      | Rab30         | 1  |
| 13677 | 9408  | Tinagl      | Hmgcs2        | 1  |
| 13677 | 12315 | Tinagl      | Srebf1        | -1 |
| 13677 | 15892 | Tinagl      | Slc22a5       | 1  |
| 13677 | 17660 | Tinagl      | Nlrp12        | 1  |
| 13677 | 18050 | Tinagl      | MMT00003408   | -1 |
| 13682 | 327   | BC051142    | H2-Ea         | 1  |
| 13682 | 2938  | BC051142    | H2-T23        | 1  |
| 13682 | 10667 | BC051142    | H2-Eb1        | 1  |
| 13682 | 13493 | BC051142    | Ring1         | -1 |
| 13682 | 20238 | BC051142    | H2-T9         | 1  |
| 13682 | 22822 | BC051142    | MMT00013433   | 1  |
| 13693 | 8815  | Copb2       | Mx1           | 1  |
| 13693 | 18201 | Copb2       | MMT00060232   | 1  |
| 13693 | 21214 | Copb2       | Scd1          | 1  |
| 13714 | 6044  | Igfals      | Sucnr1        | 1  |
| 13714 | 8815  | Igfals      | Mx1           | 1  |
| 13714 | 21202 | Igfals      | Acly          | 1  |
| 13714 | 21214 | Igfals      | Scd1          | 1  |
| 13714 | 21251 | Igfals      | Cpt1a         | -1 |
| 13714 | 21575 | Igfals      | Cyp2c55       | 1  |
| 13714 | 21793 | Igfals      | Pla2g12a      | -1 |
| 13714 | 22138 | Igfals      | Ang           | -1 |
| 13716 | 7102  | D5Ert647e   | Hnrnpm        | -1 |
| 13720 | 6816  | Serpina11   | Slc46a3       | 1  |
| 13732 | 286   | Tpm4        | MMT00070509   | -1 |
| 13732 | 769   | Tpm4        | 5430437P03Rik | 1  |
| 13732 | 1755  | Tpm4        | Ocel1         | -1 |
| 13732 | 3055  | Tpm4        | Pde4c         | -1 |
| 13732 | 5433  | Tpm4        | 2410004L22Rik | 1  |
| 13732 | 6760  | Tpm4        | 2810428115Rik | -1 |
| 13732 | 8114  | Tpm4        | Kcnn1         | -1 |
| 13732 | 9304  | Tpm4        | AI449175      | -1 |

|       |       |               |               |    |
|-------|-------|---------------|---------------|----|
| 13732 | 9931  | Tpm4          | Glit25d1      | 1  |
| 13732 | 10195 | Tpm4          | Klf1          | -1 |
| 13732 | 13732 | Tpm4          | Tpm4          | 1  |
| 13732 | 14455 | Tpm4          | 2700029M09Rik | 1  |
| 13732 | 15094 | Tpm4          | Pbx4          | 1  |
| 13732 | 15455 | Tpm4          | Lsm4          | 1  |
| 13732 | 16617 | Tpm4          | Sh2d4a        | 1  |
| 13732 | 16849 | Tpm4          | Trmt1         | 1  |
| 13732 | 16858 | Tpm4          | Tmem38a       | 1  |
| 13732 | 18886 | Tpm4          | Slc18a1       | 1  |
| 13732 | 20484 | Tpm4          | Ces1          | 1  |
| 13746 | 2127  | E330013P04Rik | Ldha          | -1 |
| 13746 | 6085  | E330013P04Rik | MMT00007454   | -1 |
| 13746 | 8773  | E330013P04Rik | MMT00027093   | -1 |
| 13746 | 13431 | E330013P04Rik | MMT00038058   | -1 |
| 13746 | 14055 | E330013P04Rik | MMT00050438   | -1 |
| 13746 | 15205 | E330013P04Rik | MMT00030262   | -1 |
| 13746 | 21937 | E330013P04Rik | MMT00015325   | -1 |
| 13746 | 22907 | E330013P04Rik | MMT00054594   | -1 |
| 13746 | 22978 | E330013P04Rik | MMT00043176   | -1 |
| 13749 | 2224  | Parp9         | Oasl2         | 1  |
| 13749 | 2550  | Parp9         | MMT00036681   | 1  |
| 13749 | 4114  | Parp9         | Parp12        | 1  |
| 13749 | 4508  | Parp9         | Ifit1         | 1  |
| 13749 | 5853  | Parp9         | Trim30        | 1  |
| 13749 | 6824  | Parp9         | Irf7          | 1  |
| 13749 | 7069  | Parp9         | Ube1l         | 1  |
| 13749 | 7284  | Parp9         | MMT00008674   | 1  |
| 13749 | 8800  | Parp9         | Rnf213        | 1  |
| 13749 | 9847  | Parp9         | Ifi27         | 1  |
| 13749 | 10109 | Parp9         | Gbp3          | 1  |
| 13749 | 11204 | Parp9         | Al451617      | 1  |
| 13749 | 12398 | Parp9         | Ifi44         | 1  |
| 13749 | 12600 | Parp9         | Ifi204        | 1  |
| 13749 | 12969 | Parp9         | Xaf1          | 1  |
| 13749 | 13156 | Parp9         | Ifit3         | 1  |
| 13749 | 13514 | Parp9         | Apol9b        | 1  |
| 13749 | 14611 | Parp9         | Ddx60         | 1  |
| 13749 | 14880 | Parp9         | Ms4a4c        | 1  |
| 13749 | 15074 | Parp9         | Usp18         | 1  |
| 13749 | 15504 | Parp9         | Mx2           | 1  |
| 13749 | 16182 | Parp9         | Oasl1         | 1  |
| 13749 | 18454 | Parp9         | Tor1aip1      | 1  |
| 13749 | 19189 | Parp9         | Sp100         | 1  |
| 13749 | 19738 | Parp9         | Lgals3bp      | 1  |
| 13749 | 21351 | Parp9         | Shisa5        | 1  |
| 13749 | 21549 | Parp9         | Rtp4          | 1  |
| 13749 | 21824 | Parp9         | 5830443L24Rik | 1  |
| 13758 | 11129 | Ubtd2         | Ankhd1        | -1 |
| 13767 | 6085  | Kcnk15        | MMT00007454   | -1 |
| 13767 | 10532 | Kcnk15        | MMT00057790   | -1 |



|       |       |          |                    |    |
|-------|-------|----------|--------------------|----|
| 13767 | 13431 | Kcnk15   | MMT00038058        | -1 |
| 13767 | 14055 | Kcnk15   | MMT00050438        | -1 |
| 13767 | 15205 | Kcnk15   | MMT00030262        | -1 |
| 13767 | 22406 | Kcnk15   | Vnn1               | -1 |
| 13767 | 22978 | Kcnk15   | MMT00043176        | -1 |
| 13780 | 185   | Pilra    | Ap2b1              | 1  |
| 13780 | 3410  | Pilra    | Paqr9              | 1  |
| 13780 | 4469  | Pilra    | Cyp3a13            | -1 |
| 13780 | 5364  | Pilra    | Kif22              | 1  |
| 13780 | 13780 | Pilra    | Pilra              | 1  |
| 13780 | 14472 | Pilra    | Ahcy               | -1 |
| 13780 | 17089 | Pilra    | Pilrb1             | 1  |
| 13789 | 10667 | H2-Q8    | H2-Eb1             | 1  |
| 13789 | 20238 | H2-Q8    | H2-T9              | 1  |
| 13792 | 2127  | Slc25a35 | Ldha               | -1 |
| 13792 | 3565  | Slc25a35 | MMT00045908        | 1  |
| 13792 | 6085  | Slc25a35 | MMT00007454        | -1 |
| 13792 | 7492  | Slc25a35 | Adfp               | -1 |
| 13792 | 7602  | Slc25a35 | Pcca               | 1  |
| 13792 | 8773  | Slc25a35 | MMT00027093        | -1 |
| 13792 | 9700  | Slc25a35 | Prodh              | 1  |
| 13792 | 9842  | Slc25a35 | Qdpr               | 1  |
| 13792 | 10554 | Slc25a35 | ENSMUSG00000074179 | 1  |
| 13792 | 12556 | Slc25a35 | Ass1               | 1  |
| 13792 | 13431 | Slc25a35 | MMT00038058        | -1 |
| 13792 | 15205 | Slc25a35 | MMT00030262        | -1 |
| 13792 | 17563 | Slc25a35 | Aldh111            | 1  |
| 13792 | 21727 | Slc25a35 | Khk                | 1  |
| 13792 | 21937 | Slc25a35 | MMT00015325        | -1 |
| 13792 | 22406 | Slc25a35 | Vnn1               | -1 |
| 13792 | 22998 | Slc25a35 | Ass1               | 1  |
| 13794 | 1129  | Higd1a   | Gsta4              | 1  |
| 13794 | 3377  | Higd1a   | Cs                 | 1  |
| 13794 | 3565  | Higd1a   | MMT00045908        | 1  |
| 13794 | 5884  | Higd1a   | Gstm2              | 1  |
| 13794 | 7602  | Higd1a   | Pcca               | 1  |
| 13794 | 7753  | Higd1a   | Gfm1               | 1  |
| 13794 | 8773  | Higd1a   | MMT00027093        | -1 |
| 13794 | 8815  | Higd1a   | Mx1                | 1  |
| 13794 | 10132 | Higd1a   | Ces2               | 1  |
| 13794 | 10554 | Higd1a   | ENSMUSG00000074179 | 1  |
| 13794 | 11946 | Higd1a   | MMT00030953        | 1  |
| 13794 | 13293 | Higd1a   | Gsta2              | 1  |
| 13794 | 13431 | Higd1a   | MMT00038058        | -1 |
| 13794 | 14147 | Higd1a   | Acss2              | 1  |
| 13794 | 15205 | Higd1a   | MMT00030262        | -1 |
| 13794 | 17563 | Higd1a   | Aldh111            | 1  |
| 13794 | 18201 | Higd1a   | MMT00060232        | 1  |
| 13794 | 18549 | Higd1a   | Robo1              | 1  |
| 13794 | 20019 | Higd1a   | Qdpr               | 1  |
| 13794 | 20328 | Higd1a   | Csl                | 1  |

|       |       |               |               |    |
|-------|-------|---------------|---------------|----|
| 13794 | 21214 | Higd1a        | Scd1          | 1  |
| 13794 | 21727 | Higd1a        | Khk           | 1  |
| 13794 | 22406 | Higd1a        | Vnn1          | -1 |
| 13794 | 22998 | Higd1a        | Ass1          | 1  |
| 13794 | 23640 | Higd1a        | Bdh1          | -1 |
| 13801 | 11257 | Adh4          | Trem3         | -1 |
| 13801 | 20810 | Adh4          | Mttp          | 1  |
| 13801 | 22640 | Adh4          | Bud13         | -1 |
| 13810 | 1654  | 1110036O03Rik | Dhx58         | -1 |
| 13810 | 13810 | 1110036O03Rik | 1110036O03Rik | 1  |
| 13810 | 14384 | 1110036O03Rik | Dnajc7        | 1  |
| 13813 | 8637  | Ktelc1        | Tnp2          | -1 |
| 13813 | 13813 | Ktelc1        | Ktelc1        | 1  |
| 13813 | 14043 | Ktelc1        | 4930455C21Rik | -1 |
| 13823 | 8637  | Olfr1043      | Tnp2          | 1  |
| 13826 | 1416  | Melk          | 6720460F02Rik | 1  |
| 13826 | 1932  | Melk          | Racgap1       | 1  |
| 13826 | 3028  | Melk          | Uhrf1         | 1  |
| 13826 | 5364  | Melk          | Kif22         | 1  |
| 13826 | 5949  | Melk          | Zbp1          | 1  |
| 13826 | 6824  | Melk          | Irf7          | 1  |
| 13826 | 8270  | Melk          | Clsn          | 1  |
| 13826 | 8416  | Melk          | Cdc20         | 1  |
| 13826 | 11275 | Melk          | Fanci         | 1  |
| 13826 | 11382 | Melk          | Cdca3         | 1  |
| 13826 | 11870 | Melk          | Apitd1        | 1  |
| 13826 | 13054 | Melk          | Mcm4          | 1  |
| 13826 | 13309 | Melk          | Tgtp          | 1  |
| 13826 | 13455 | Melk          | Cenpe         | 1  |
| 13826 | 13826 | Melk          | Melk          | 1  |
| 13826 | 16182 | Melk          | Oasl1         | 1  |
| 13826 | 17216 | Melk          | Nuf2          | 1  |
| 13826 | 17661 | Melk          | Birc5         | 1  |
| 13826 | 17823 | Melk          | D2Ertd750e    | 1  |
| 13826 | 18299 | Melk          | MMT00035424   | 1  |
| 13826 | 19022 | Melk          | Ccnb2         | 1  |
| 13826 | 19318 | Melk          | Plk1          | 1  |
| 13826 | 20433 | Melk          | Cdca5         | 1  |
| 13826 | 21205 | Melk          | Pkmyt1        | 1  |
| 13826 | 21549 | Melk          | Rtp4          | 1  |
| 13826 | 21692 | Melk          | MMT00013924   | 1  |
| 13826 | 21947 | Melk          | Cdca8         | 1  |
| 13826 | 22258 | Melk          | Ttk           | 1  |
| 13826 | 23403 | Melk          | Ndc80         | 1  |
| 13839 | 607   | Gypc          | Me1           | 1  |
| 13839 | 1310  | Gypc          | Cabc1         | 1  |
| 13839 | 1709  | Gypc          | Mt2           | -1 |
| 13839 | 2013  | Gypc          | Il15ra        | -1 |
| 13839 | 2051  | Gypc          | Ddx27         | -1 |
| 13839 | 2681  | Gypc          | Hectd1        | -1 |
| 13839 | 3754  | Gypc          | Dock6         | 1  |

|       |       |      |               |    |
|-------|-------|------|---------------|----|
| 13839 | 4056  | Gypc | Tnfaip8l1     | -1 |
| 13839 | 5425  | Gypc | Ung           | -1 |
| 13839 | 5934  | Gypc | S100a10       | 1  |
| 13839 | 6044  | Gypc | Sucnr1        | 1  |
| 13839 | 6193  | Gypc | Lactb2        | 1  |
| 13839 | 6502  | Gypc | Col15a1       | 1  |
| 13839 | 6788  | Gypc | Psen2         | 1  |
| 13839 | 6966  | Gypc | Mia3          | -1 |
| 13839 | 7659  | Gypc | Rab30         | -1 |
| 13839 | 8217  | Gypc | Bhmt          | 1  |
| 13839 | 8896  | Gypc | Fasn          | 1  |
| 13839 | 9408  | Gypc | Hmgcs2        | -1 |
| 13839 | 9842  | Gypc | Qdpr          | 1  |
| 13839 | 10486 | Gypc | 1300002K09Rik | 1  |
| 13839 | 10745 | Gypc | Gale          | 1  |
| 13839 | 10961 | Gypc | Pgd           | 1  |
| 13839 | 11129 | Gypc | Ankhd1        | -1 |
| 13839 | 11234 | Gypc | Pygl          | 1  |
| 13839 | 11462 | Gypc | Gpam          | 1  |
| 13839 | 11807 | Gypc | Fbxo31        | -1 |
| 13839 | 12143 | Gypc | Thyn1         | 1  |
| 13839 | 12219 | Gypc | Cyb5b         | 1  |
| 13839 | 12460 | Gypc | Pnpla2        | -1 |
| 13839 | 12637 | Gypc | Itpka         | -1 |
| 13839 | 13018 | Gypc | AW544981      | 1  |
| 13839 | 13889 | Gypc | Agpat2        | 1  |
| 13839 | 13990 | Gypc | MMT00040357   | 1  |
| 13839 | 14147 | Gypc | Acss2         | 1  |
| 13839 | 14151 | Gypc | Slc44a1       | 1  |
| 13839 | 14442 | Gypc | Ethe1         | 1  |
| 13839 | 15252 | Gypc | MMT00019402   | 1  |
| 13839 | 15862 | Gypc | Mrap          | 1  |
| 13839 | 15892 | Gypc | Slc22a5       | -1 |
| 13839 | 16027 | Gypc | Ppp2r2d       | -1 |
| 13839 | 16176 | Gypc | St3gal5       | -1 |
| 13839 | 16510 | Gypc | Tspyl4        | 1  |
| 13839 | 17090 | Gypc | Lass2         | 1  |
| 13839 | 17338 | Gypc | Mocos         | 1  |
| 13839 | 17660 | Gypc | Nlrp12        | -1 |
| 13839 | 17862 | Gypc | Fbxo21        | -1 |
| 13839 | 17878 | Gypc | Brap          | -1 |
| 13839 | 18286 | Gypc | Slc41a3       | -1 |
| 13839 | 18827 | Gypc | Oprs1         | 1  |
| 13839 | 19010 | Gypc | Bhmt          | 1  |
| 13839 | 19089 | Gypc | Peci          | -1 |
| 13839 | 19757 | Gypc | Fkbp5         | -1 |
| 13839 | 19766 | Gypc | Slc26a4       | 1  |
| 13839 | 20019 | Gypc | Qdpr          | 1  |
| 13839 | 20798 | Gypc | Ccpg1         | -1 |
| 13839 | 21143 | Gypc | Ypel3         | -1 |
| 13839 | 21202 | Gypc | Acly          | 1  |

|       |       |          |                    |    |
|-------|-------|----------|--------------------|----|
| 13839 | 21251 | Gypc     | Cpt1a              | -1 |
| 13839 | 21575 | Gypc     | Cyp2c55            | 1  |
| 13839 | 21793 | Gypc     | Pla2g12a           | -1 |
| 13839 | 22137 | Gypc     | Nudt7              | 1  |
| 13839 | 22138 | Gypc     | Ang                | -1 |
| 13839 | 22406 | Gypc     | Vnn1               | -1 |
| 13839 | 22732 | Gypc     | Cyb5b              | 1  |
| 13839 | 22770 | Gypc     | Slc27a2            | -1 |
| 13839 | 23623 | Gypc     | 2010305C02Rik      | 1  |
| 13847 | 21214 | Tmigd1   | Scd1               | -1 |
| 13877 | 13877 | Btnl9    | Btnl9              | 1  |
| 13883 | 15740 | EG627788 | 1810010H24Rik      | -1 |
| 13884 | 9067  | Aven     | Tra2a              | 1  |
| 13884 | 9258  | Aven     | P4ha1              | 1  |
| 13885 | 5364  | Clec7a   | Kif22              | 1  |
| 13885 | 15826 | Clec7a   | Arl4d              | -1 |
| 13886 | 1476  | Hnrpd1   | 2610020H08Rik      | -1 |
| 13889 | 1600  | Agpat2   | Csrp1              | -1 |
| 13889 | 2721  | Agpat2   | Inmt               | 1  |
| 13889 | 4056  | Agpat2   | Tnfaip8l1          | -1 |
| 13889 | 5691  | Agpat2   | Csrp3              | -1 |
| 13889 | 6746  | Agpat2   | E2f8               | -1 |
| 13889 | 6816  | Agpat2   | Slc46a3            | 1  |
| 13889 | 7492  | Agpat2   | Adfp               | -1 |
| 13889 | 9700  | Agpat2   | Prodh              | 1  |
| 13889 | 9718  | Agpat2   | Fmo5               | 1  |
| 13889 | 10554 | Agpat2   | ENSMUSG00000074179 | 1  |
| 13889 | 13293 | Agpat2   | Gsta2              | 1  |
| 13889 | 13431 | Agpat2   | MMT00038058        | -1 |
| 13889 | 15205 | Agpat2   | MMT00030262        | -1 |
| 13889 | 17563 | Agpat2   | Aldh1l1            | 1  |
| 13889 | 21727 | Agpat2   | Khk                | 1  |
| 13889 | 22653 | Agpat2   | Ric3               | -1 |
| 13893 | 6177  | Slc6a2   | Thpo               | -1 |
| 13893 | 19323 | Slc6a2   | Bnip3              | 1  |
| 13919 | 662   | Synpo    | Mid1ip1            | -1 |
| 13919 | 2918  | Synpo    | Mttr10             | 1  |
| 13919 | 5804  | Synpo    | Thrsp              | -1 |
| 13919 | 6816  | Synpo    | Slc46a3            | -1 |
| 13919 | 7659  | Synpo    | Rab30              | 1  |
| 13919 | 8404  | Synpo    | Fa2h               | 1  |
| 13919 | 8439  | Synpo    | Slc25a33           | 1  |
| 13919 | 9408  | Synpo    | Hmgcs2             | 1  |
| 13919 | 9700  | Synpo    | Prodh              | -1 |
| 13919 | 12315 | Synpo    | Sreb1              | -1 |
| 13919 | 12499 | Synpo    | Avpi1              | -1 |
| 13919 | 17660 | Synpo    | Nlrp12             | 1  |
| 13919 | 18631 | Synpo    | Gja1               | 1  |
| 13919 | 20567 | Synpo    | Ggt6               | -1 |
| 13919 | 22009 | Synpo    | Tmem14a            | -1 |
| 13919 | 22321 | Synpo    | Apol7a             | -1 |

|       |       |               |               |    |
|-------|-------|---------------|---------------|----|
| 13929 | 16361 | Lamb3         | Olf703        | -1 |
| 13929 | 18042 | Lamb3         | Aph1c         | -1 |
| 13937 | 607   | A230107C01Rik | Me1           | -1 |
| 13937 | 4351  | A230107C01Rik | Plxnb1        | 1  |
| 13937 | 6193  | A230107C01Rik | Lactb2        | -1 |
| 13937 | 18201 | A230107C01Rik | MMT00060232   | -1 |
| 13937 | 18286 | A230107C01Rik | Slc41a3       | 1  |
| 13937 | 21214 | A230107C01Rik | Scd1          | -1 |
| 13937 | 21251 | A230107C01Rik | Cpt1a         | 1  |
| 13942 | 14806 | Psg21         | Ccdc45        | 1  |
| 13946 | 9230  | Slc35b2       | 1700027N10Rik | 1  |
| 13946 | 14027 | Slc35b2       | Rpo1-1        | -1 |
| 13946 | 15318 | Slc35b2       | Aars2         | 1  |
| 13946 | 18574 | Slc35b2       | Parc          | -1 |
| 13946 | 18772 | Slc35b2       | BC048355      | 1  |
| 13954 | 1310  | Chst1         | Cabc1         | -1 |
| 13954 | 2636  | Chst1         | Tars          | -1 |
| 13954 | 3836  | Chst1         | 2200001115Rik | -1 |
| 13954 | 4551  | Chst1         | Cyp2e1        | 1  |
| 13954 | 5425  | Chst1         | Ung           | 1  |
| 13954 | 5934  | Chst1         | S100a10       | -1 |
| 13954 | 6193  | Chst1         | Lactb2        | -1 |
| 13954 | 6370  | Chst1         | Aqp8          | -1 |
| 13954 | 6386  | Chst1         | Por           | 1  |
| 13954 | 6771  | Chst1         | Insc          | -1 |
| 13954 | 6966  | Chst1         | Mia3          | 1  |
| 13954 | 9260  | Chst1         | Cmtm6         | -1 |
| 13954 | 9910  | Chst1         | EG666644      | 1  |
| 13954 | 10486 | Chst1         | 1300002K09Rik | -1 |
| 13954 | 10961 | Chst1         | Pgd           | -1 |
| 13954 | 11741 | Chst1         | Slc30a10      | -1 |
| 13954 | 11807 | Chst1         | Fbxo31        | 1  |
| 13954 | 11984 | Chst1         | N6amt2        | -1 |
| 13954 | 12204 | Chst1         | Ankmy2        | 1  |
| 13954 | 12208 | Chst1         | Pnpla7        | -1 |
| 13954 | 12219 | Chst1         | Cyb5b         | -1 |
| 13954 | 12941 | Chst1         | Elov15        | -1 |
| 13954 | 14442 | Chst1         | Ethe1         | -1 |
| 13954 | 15709 | Chst1         | Tceal1        | 1  |
| 13954 | 15892 | Chst1         | Slc22a5       | 1  |
| 13954 | 16647 | Chst1         | D16H22S680E   | 1  |
| 13954 | 16796 | Chst1         | Agt           | 1  |
| 13954 | 17338 | Chst1         | Mocos         | -1 |
| 13954 | 17617 | Chst1         | Atp5sl        | 1  |
| 13954 | 18179 | Chst1         | Dbp           | 1  |
| 13954 | 18827 | Chst1         | Oprs1         | -1 |
| 13954 | 21202 | Chst1         | Acly          | -1 |
| 13954 | 21251 | Chst1         | Cpt1a         | 1  |
| 13954 | 21793 | Chst1         | Pla2g12a      | 1  |
| 13954 | 21966 | Chst1         | Pcp4l1        | 1  |
| 13954 | 22137 | Chst1         | Nudt7         | -1 |

|       |       |               |             |    |
|-------|-------|---------------|-------------|----|
| 13954 | 22138 | Chst1         | Ang         | 1  |
| 13954 | 22732 | Chst1         | Cyb5b       | -1 |
| 13964 | 147   | Lpcat2        | Uox         | -1 |
| 13964 | 1853  | Lpcat2        | Stat5a      | 1  |
| 13964 | 2110  | Lpcat2        | Gtf2ird1    | 1  |
| 13964 | 2850  | Lpcat2        | Slc16a6     | 1  |
| 13964 | 5259  | Lpcat2        | Mat1a       | -1 |
| 13964 | 5364  | Lpcat2        | Kif22       | 1  |
| 13964 | 8416  | Lpcat2        | Cdc20       | 1  |
| 13964 | 11382 | Lpcat2        | Cdca3       | 1  |
| 13964 | 12799 | Lpcat2        | Spon2       | 1  |
| 13964 | 16690 | Lpcat2        | Tjp3        | 1  |
| 13964 | 17323 | Lpcat2        | Tubb6       | 1  |
| 13964 | 19723 | Lpcat2        | Pfkfb1      | -1 |
| 13966 | 19766 | Aatk          | Slc26a4     | 1  |
| 13982 | 250   | Tnfaip6       | Tubb2a-ps2  | 1  |
| 13982 | 609   | Tnfaip6       | MMT00060868 | 1  |
| 13982 | 719   | Tnfaip6       | Usp2        | -1 |
| 13982 | 1767  | Tnfaip6       | BC016495    | -1 |
| 13982 | 2011  | Tnfaip6       | Slc2a5      | -1 |
| 13982 | 2636  | Tnfaip6       | Tars        | 1  |
| 13982 | 2829  | Tnfaip6       | Lrfr3       | 1  |
| 13982 | 2850  | Tnfaip6       | Slc16a6     | 1  |
| 13982 | 3804  | Tnfaip6       | MMT00015534 | 1  |
| 13982 | 4201  | Tnfaip6       | Tubb2c      | 1  |
| 13982 | 5934  | Tnfaip6       | S100a10     | 1  |
| 13982 | 5974  | Tnfaip6       | Arntl       | 1  |
| 13982 | 6386  | Tnfaip6       | Por         | -1 |
| 13982 | 7862  | Tnfaip6       | Cpsf4l      | -1 |
| 13982 | 10642 | Tnfaip6       | Ngef        | -1 |
| 13982 | 11741 | Tnfaip6       | Slc30a10    | 1  |
| 13982 | 16060 | Tnfaip6       | Gys2        | -1 |
| 13982 | 16690 | Tnfaip6       | Tjp3        | 1  |
| 13982 | 17876 | Tnfaip6       | Tubb4       | 1  |
| 13982 | 18179 | Tnfaip6       | Dbp         | -1 |
| 13982 | 18827 | Tnfaip6       | Oprs1       | 1  |
| 13982 | 19671 | Tnfaip6       | Upp2        | -1 |
| 13982 | 21142 | Tnfaip6       | Gm129       | -1 |
| 13982 | 21969 | Tnfaip6       | Tk1         | -1 |
| 13982 | 22290 | Tnfaip6       | Tubb2a      | 1  |
| 13982 | 22630 | Tnfaip6       | MMT00034355 | 1  |
| 13984 | 8444  | Thap3         | Rdh16       | -1 |
| 13984 | 8815  | Thap3         | Mx1         | -1 |
| 13984 | 18201 | Thap3         | MMT00060232 | -1 |
| 13984 | 21575 | Thap3         | Cyp2c55     | -1 |
| 13988 | 13988 | Cntnap2       | Cntnap2     | 1  |
| 14002 | 5002  | 1700055M20Rik | Ifi202b     | 1  |
| 14009 | 21214 | 2310030G06Rik | Scd1        | -1 |
| 14014 | 407   | MMT00008376   | Serpina6    | -1 |
| 14014 | 760   | MMT00008376   | Akr1c19     | -1 |
| 14014 | 1453  | MMT00008376   | Gfod2       | 1  |

|       |       |               |               |    |
|-------|-------|---------------|---------------|----|
| 14014 | 2721  | MMT00008376   | Inmt          | -1 |
| 14014 | 2850  | MMT00008376   | Slc16a6       | 1  |
| 14014 | 3799  | MMT00008376   | Serpinh1      | 1  |
| 14014 | 5804  | MMT00008376   | Thrsp         | -1 |
| 14014 | 5849  | MMT00008376   | 2310031A18Rik | 1  |
| 14014 | 7558  | MMT00008376   | Rbm10         | 1  |
| 14014 | 14222 | MMT00008376   | MMT00076410   | -1 |
| 14014 | 14279 | MMT00008376   | 3930402G23Rik | 1  |
| 14014 | 15713 | MMT00008376   | Rbm3          | -1 |
| 14014 | 16585 | MMT00008376   | Syv1          | 1  |
| 14014 | 17712 | MMT00008376   | Nup62         | 1  |
| 14014 | 19671 | MMT00008376   | Upp2          | -1 |
| 14027 | 9230  | Rpo1-1        | 1700027N10Rik | -1 |
| 14027 | 14027 | Rpo1-1        | Rpo1-1        | 1  |
| 14027 | 18772 | Rpo1-1        | BC048355      | -1 |
| 14029 | 2200  | 2810022L02Rik | BC006779      | 1  |
| 14029 | 14258 | 2810022L02Rik | Ifi47         | 1  |
| 14029 | 16060 | 2810022L02Rik | Gys2          | -1 |
| 14029 | 16182 | 2810022L02Rik | Oasl1         | 1  |
| 14029 | 18174 | 2810022L02Rik | Stat2         | 1  |
| 14030 | 8444  | Csrp2         | Rdh16         | -1 |
| 14030 | 8815  | Csrp2         | Mx1           | -1 |
| 14030 | 12910 | Csrp2         | 1110028A07Rik | -1 |
| 14030 | 14017 | Csrp2         | Ces5          | -1 |
| 14030 | 14151 | Csrp2         | Slc44a1       | -1 |
| 14030 | 16336 | Csrp2         | 2310040A07Rik | 1  |
| 14030 | 18201 | Csrp2         | MMT00060232   | -1 |
| 14030 | 19766 | Csrp2         | Slc26a4       | -1 |
| 14030 | 20058 | Csrp2         | Dnaic1        | 1  |
| 14030 | 21214 | Csrp2         | Scd1          | -1 |
| 14030 | 22046 | Csrp2         | Cml4          | -1 |
| 14030 | 23549 | Csrp2         | Es22          | -1 |
| 14032 | 4745  | Cog6          | Lhfp          | 1  |
| 14032 | 14032 | Cog6          | Cog6          | 1  |
| 14043 | 13813 | 4930455C21Rik | Ktelc1        | -1 |
| 14043 | 14043 | 4930455C21Rik | 4930455C21Rik | 1  |
| 14045 | 14045 | Rps4y2        | Rps4y2        | 1  |
| 14049 | 2126  | Fdft1         | Dgat2         | 1  |
| 14049 | 2636  | Fdft1         | Tars          | -1 |
| 14049 | 3328  | Fdft1         | Acsm2         | -1 |
| 14049 | 3836  | Fdft1         | 2200001115Rik | -1 |
| 14049 | 5892  | Fdft1         | MMT00038457   | 1  |
| 14049 | 6386  | Fdft1         | Por           | 1  |
| 14049 | 6912  | Fdft1         | Crym          | 1  |
| 14049 | 7414  | Fdft1         | Clpx          | -1 |
| 14049 | 7492  | Fdft1         | Adfp          | -1 |
| 14049 | 7761  | Fdft1         | Nudt19        | 1  |
| 14049 | 11633 | Fdft1         | Ier3          | 1  |
| 14049 | 12208 | Fdft1         | Pnpla7        | -1 |
| 14049 | 13078 | Fdft1         | Eps8l2        | -1 |
| 14049 | 13271 | Fdft1         | Idh2          | 1  |

|       |       |               |               |    |
|-------|-------|---------------|---------------|----|
| 14049 | 15709 | Fdft1         | Tceal1        | 1  |
| 14049 | 18455 | Fdft1         | Mtnr1a        | -1 |
| 14049 | 18590 | Fdft1         | Fgb           | -1 |
| 14049 | 20079 | Fdft1         | MMT00019254   | 1  |
| 14059 | 286   | Cyp4f18       | MMT00070509   | -1 |
| 14059 | 1755  | Cyp4f18       | Ocel1         | -1 |
| 14059 | 3055  | Cyp4f18       | Pde4c         | -1 |
| 14059 | 5433  | Cyp4f18       | 2410004L22Rik | 1  |
| 14059 | 6760  | Cyp4f18       | 2810428115Rik | -1 |
| 14059 | 9304  | Cyp4f18       | AI449175      | -1 |
| 14059 | 9931  | Cyp4f18       | Glt25d1       | 1  |
| 14059 | 13732 | Cyp4f18       | Tpm4          | 1  |
| 14059 | 15455 | Cyp4f18       | Lsm4          | 1  |
| 14059 | 16617 | Cyp4f18       | Sh2d4a        | 1  |
| 14059 | 18886 | Cyp4f18       | Slc18a1       | 1  |
| 14062 | 2115  | Pan3          | Gpr12         | -1 |
| 14062 | 7116  | Pan3          | Katnal1       | 1  |
| 14062 | 14062 | Pan3          | Pan3          | 1  |
| 14084 | 14084 | D530033C11Rik | D530033C11Rik | 1  |
| 14085 | 1660  | Cdkl2         | Zfp33b        | -1 |
| 14085 | 6330  | Cdkl2         | Dgkq          | 1  |
| 14085 | 8807  | Cdkl2         | Ankrd56       | -1 |
| 14085 | 14085 | Cdkl2         | Cdkl2         | 1  |
| 14085 | 15908 | Cdkl2         | Pebp1         | -1 |
| 14100 | 4286  | Ccnk          | Ptp4a1        | 1  |
| 14100 | 6386  | Ccnk          | Por           | 1  |
| 14100 | 11129 | Ccnk          | Ankhd1        | 1  |
| 14100 | 11807 | Ccnk          | Fbxo31        | 1  |
| 14100 | 14989 | Ccnk          | Map3k5        | 1  |
| 14100 | 22936 | Ccnk          | Rhobtb1       | 1  |
| 14100 | 23437 | Ccnk          | Efhd2         | 1  |
| 14101 | 18518 | Zfp69         | Cap1          | 1  |
| 14102 | 269   | Evi2a         | Tuba1b        | 1  |
| 14102 | 563   | Evi2a         | D4Bwg0951e    | -1 |
| 14102 | 1613  | Evi2a         | Trim26        | 1  |
| 14102 | 1646  | Evi2a         | Slc15a4       | -1 |
| 14102 | 1853  | Evi2a         | Stat5a        | 1  |
| 14102 | 2200  | Evi2a         | BC006779      | 1  |
| 14102 | 3040  | Evi2a         | Bcl3          | 1  |
| 14102 | 3097  | Evi2a         | Ppp1r3g       | -1 |
| 14102 | 4286  | Evi2a         | Ptp4a1        | -1 |
| 14102 | 4534  | Evi2a         | Ndel1         | -1 |
| 14102 | 4708  | Evi2a         | Traf3ip2      | 1  |
| 14102 | 5364  | Evi2a         | Kif22         | 1  |
| 14102 | 6021  | Evi2a         | MMT00008784   | -1 |
| 14102 | 6308  | Evi2a         | 2410075B13Rik | 1  |
| 14102 | 7066  | Evi2a         | Agtr1b        | -1 |
| 14102 | 7140  | Evi2a         | Mtbp          | 1  |
| 14102 | 7612  | Evi2a         | MMT00014216   | 1  |
| 14102 | 7963  | Evi2a         | Rxrg          | 1  |
| 14102 | 8328  | Evi2a         | Klhdc8a       | 1  |



|       |       |       |               |    |
|-------|-------|-------|---------------|----|
| 14102 | 8632  | Evi2a | Igfbp1        | -1 |
| 14102 | 8711  | Evi2a | 5430432M24Rik | 1  |
| 14102 | 9181  | Evi2a | 1700060H10Rik | 1  |
| 14102 | 9418  | Evi2a | MMT00034311   | 1  |
| 14102 | 9763  | Evi2a | Tuba3b        | 1  |
| 14102 | 9860  | Evi2a | MMT00060113   | 1  |
| 14102 | 10808 | Evi2a | Rab711        | 1  |
| 14102 | 11093 | Evi2a | Zdhhc1        | -1 |
| 14102 | 11129 | Evi2a | Ankhd1        | -1 |
| 14102 | 11393 | Evi2a | A830007P12Rik | 1  |
| 14102 | 11808 | Evi2a | Pck1          | -1 |
| 14102 | 12981 | Evi2a | Nek6          | 1  |
| 14102 | 13018 | Evi2a | AW544981      | 1  |
| 14102 | 13489 | Evi2a | D230025D16Rik | -1 |
| 14102 | 14135 | Evi2a | Eepd1         | 1  |
| 14102 | 14472 | Evi2a | Ahcy          | -1 |
| 14102 | 15021 | Evi2a | Ppargc1a      | -1 |
| 14102 | 15284 | Evi2a | EG632778      | -1 |
| 14102 | 15631 | Evi2a | Lpin1         | -1 |
| 14102 | 15659 | Evi2a | MMT00074093   | 1  |
| 14102 | 15675 | Evi2a | MMT00077535   | -1 |
| 14102 | 15826 | Evi2a | Arl4d         | -1 |
| 14102 | 15862 | Evi2a | Mrap          | 1  |
| 14102 | 15990 | Evi2a | Dnmbp         | -1 |
| 14102 | 16182 | Evi2a | Oasl1         | 1  |
| 14102 | 16517 | Evi2a | D4Wsu53e      | -1 |
| 14102 | 16526 | Evi2a | Sftpa1        | -1 |
| 14102 | 17323 | Evi2a | Tubb6         | 1  |
| 14102 | 17444 | Evi2a | Tuba1a        | 1  |
| 14102 | 17525 | Evi2a | Ctgf          | -1 |
| 14102 | 18027 | Evi2a | 5730403B10Rik | -1 |
| 14102 | 18455 | Evi2a | Mtnr1a        | 1  |
| 14102 | 18785 | Evi2a | Angptl4       | -1 |
| 14102 | 20777 | Evi2a | MMT00010185   | 1  |
| 14102 | 21160 | Evi2a | Irs2          | -1 |
| 14102 | 21722 | Evi2a | MMT00054655   | 1  |
| 14102 | 23201 | Evi2a | S1pr1         | 1  |
| 14102 | 23202 | Evi2a | Olf559        | -1 |
| 14102 | 23253 | Evi2a | D030011O10Rik | -1 |
| 14117 | 2850  | C1qb  | Slc16a6       | 1  |
| 14132 | 2945  | Glo1  | MMT00005190   | -1 |
| 14132 | 3430  | Glo1  | Rhof          | 1  |
| 14132 | 5014  | Glo1  | MMT00017503   | -1 |
| 14132 | 5648  | Glo1  | Zfp213        | -1 |
| 14132 | 6510  | Glo1  | Plcl2         | 1  |
| 14132 | 7088  | Glo1  | Slc37a1       | 1  |
| 14132 | 8341  | Glo1  | MMT00017270   | -1 |
| 14132 | 12335 | Glo1  | Plcb4         | 1  |
| 14132 | 14132 | Glo1  | Glo1          | 1  |
| 14132 | 14190 | Glo1  | Ppil1         | -1 |
| 14132 | 15318 | Glo1  | Aars2         | -1 |

|       |       |               |                    |    |
|-------|-------|---------------|--------------------|----|
| 14132 | 15531 | Glo1          | Prickle4           | -1 |
| 14132 | 23250 | Glo1          | Plcl2              | 1  |
| 14136 | 18042 | F7            | Aph1c              | -1 |
| 14136 | 20967 | F7            | Fabp2              | 1  |
| 14142 | 563   | MMT00021961   | D4Bwg0951e         | 1  |
| 14142 | 6028  | MMT00021961   | Alas1              | 1  |
| 14142 | 6564  | MMT00021961   | Cebpd              | 1  |
| 14142 | 11129 | MMT00021961   | Ankhd1             | 1  |
| 14142 | 16176 | MMT00021961   | St3gal5            | 1  |
| 14142 | 19556 | MMT00021961   | Efna1              | -1 |
| 14147 | 294   | Acss2         | Ehhadh             | 1  |
| 14147 | 607   | Acss2         | Me1                | 1  |
| 14147 | 3446  | Acss2         | Eno1               | 1  |
| 14147 | 7602  | Acss2         | Pcca               | 1  |
| 14147 | 8815  | Acss2         | Mx1                | 1  |
| 14147 | 9842  | Acss2         | Qdpr               | 1  |
| 14147 | 10554 | Acss2         | ENSMUSG00000074179 | 1  |
| 14147 | 13293 | Acss2         | Gsta2              | 1  |
| 14147 | 14147 | Acss2         | Acss2              | 1  |
| 14147 | 18113 | Acss2         | MMT00034400        | 1  |
| 14147 | 18201 | Acss2         | MMT00060232        | 1  |
| 14147 | 19066 | Acss2         | MMT00012632        | 1  |
| 14147 | 20019 | Acss2         | Qdpr               | 1  |
| 14147 | 21214 | Acss2         | Scd1               | 1  |
| 14147 | 21727 | Acss2         | Khk                | 1  |
| 14151 | 8815  | Slc44a1       | Mx1                | -1 |
| 14151 | 21214 | Slc44a1       | Scd1               | -1 |
| 14156 | 8444  | Med9          | Rdh16              | 1  |
| 14156 | 21214 | Med9          | Scd1               | 1  |
| 14167 | 8416  | Exo1          | Cdc20              | 1  |
| 14167 | 18299 | Exo1          | MMT00035424        | 1  |
| 14167 | 21692 | Exo1          | MMT00013924        | 1  |
| 14169 | 1041  | 1700052N19Rik | 3110049J23Rik      | 1  |
| 14169 | 1135  | 1700052N19Rik | Akap12             | -1 |
| 14169 | 2571  | 1700052N19Rik | Rmnd1              | -1 |
| 14169 | 3744  | 1700052N19Rik | Rmnd1              | -1 |
| 14169 | 5965  | 1700052N19Rik | Pbld               | 1  |
| 14169 | 8786  | 1700052N19Rik | Rmnd1              | -1 |
| 14169 | 14169 | 1700052N19Rik | 1700052N19Rik      | 1  |
| 14169 | 18300 | 1700052N19Rik | Arg1               | 1  |
| 14169 | 19115 | 1700052N19Rik | Rab32              | -1 |
| 14169 | 19392 | 1700052N19Rik | Slc25a16           | -1 |
| 14180 | 14180 | Xlr3c         | Xlr3c              | 1  |
| 14180 | 22112 | Xlr3c         | Xlr4a              | 1  |
| 14188 | 6615  | Ttc8          | 1810023F06Rik      | -1 |
| 14188 | 7099  | Ttc8          | Kcnk10             | 1  |
| 14188 | 14188 | Ttc8          | Ttc8               | 1  |
| 14190 | 7088  | Ppil1         | Slc37a1            | -1 |
| 14190 | 12335 | Ppil1         | Plcb4              | -1 |
| 14190 | 14132 | Ppil1         | Glo1               | -1 |
| 14190 | 14190 | Ppil1         | Ppil1              | 1  |

|       |       |               |                    |    |
|-------|-------|---------------|--------------------|----|
| 14190 | 23617 | Ppil1         | Nme1               | 1  |
| 14192 | 223   | Trpv2         | Trp53inp2          | 1  |
| 14192 | 760   | Trpv2         | Akr1c19            | -1 |
| 14192 | 786   | Trpv2         | Macrocl1           | -1 |
| 14192 | 2721  | Trpv2         | Inmt               | -1 |
| 14192 | 2850  | Trpv2         | Slc16a6            | 1  |
| 14192 | 4056  | Trpv2         | Tnfaip81           | 1  |
| 14192 | 5849  | Trpv2         | 2310031A18Rik      | 1  |
| 14192 | 13271 | Trpv2         | ldh2               | -1 |
| 14192 | 14408 | Trpv2         | 1100001H23Rik      | 1  |
| 14192 | 19548 | Trpv2         | Mgst3              | -1 |
| 14192 | 19701 | Trpv2         | 9930021J17Rik      | 1  |
| 14213 | 5804  | Rcor2         | Thrsp              | 1  |
| 14213 | 12315 | Rcor2         | Srebf1             | 1  |
| 14227 | 607   | Lrrc39        | Me1                | 1  |
| 14227 | 760   | Lrrc39        | Akr1c19            | 1  |
| 14227 | 1129  | Lrrc39        | Gsta4              | 1  |
| 14227 | 1711  | Lrrc39        | Grhl1              | -1 |
| 14227 | 2049  | Lrrc39        | Gsta3              | 1  |
| 14227 | 2127  | Lrrc39        | Ldha               | -1 |
| 14227 | 2721  | Lrrc39        | Inmt               | 1  |
| 14227 | 3565  | Lrrc39        | MMT00045908        | 1  |
| 14227 | 4056  | Lrrc39        | Tnfaip81           | -1 |
| 14227 | 6085  | Lrrc39        | MMT00007454        | -1 |
| 14227 | 6329  | Lrrc39        | Cyp2b10            | 1  |
| 14227 | 7492  | Lrrc39        | Adfp               | -1 |
| 14227 | 7602  | Lrrc39        | Pcca               | 1  |
| 14227 | 8773  | Lrrc39        | MMT00027093        | -1 |
| 14227 | 9408  | Lrrc39        | Hmgcs2             | -1 |
| 14227 | 9427  | Lrrc39        | Nqo2               | 1  |
| 14227 | 10532 | Lrrc39        | MMT00057790        | -1 |
| 14227 | 10554 | Lrrc39        | ENSMUSG00000074179 | 1  |
| 14227 | 12556 | Lrrc39        | Ass1               | 1  |
| 14227 | 13293 | Lrrc39        | Gsta2              | 1  |
| 14227 | 13431 | Lrrc39        | MMT00038058        | -1 |
| 14227 | 14055 | Lrrc39        | MMT00050438        | -1 |
| 14227 | 15205 | Lrrc39        | MMT00030262        | -1 |
| 14227 | 15500 | Lrrc39        | MMT00081411        | -1 |
| 14227 | 17046 | Lrrc39        | Fggy               | 1  |
| 14227 | 18201 | Lrrc39        | MMT00060232        | 1  |
| 14227 | 18549 | Lrrc39        | Robo1              | 1  |
| 14227 | 20058 | Lrrc39        | Dnaic1             | -1 |
| 14227 | 21727 | Lrrc39        | Khk                | 1  |
| 14227 | 21937 | Lrrc39        | MMT00015325        | -1 |
| 14227 | 22907 | Lrrc39        | MMT00054594        | -1 |
| 14227 | 22978 | Lrrc39        | MMT00043176        | -1 |
| 14227 | 22998 | Lrrc39        | Ass1               | 1  |
| 14237 | 6386  | Rac2          | Por                | -1 |
| 14237 | 18027 | Rac2          | 5730403B10Rik      | -1 |
| 14241 | 8815  | C130074G19Rik | Mx1                | 1  |
| 14241 | 20058 | C130074G19Rik | Dnaic1             | -1 |

|       |       |       |               |    |
|-------|-------|-------|---------------|----|
| 14251 | 5364  | Efhd1 | Kif22         | 1  |
| 14251 | 7492  | Efhd1 | Adfp          | 1  |
| 14251 | 8328  | Efhd1 | Klhdc8a       | 1  |
| 14251 | 8416  | Efhd1 | Cdc20         | 1  |
| 14251 | 9718  | Efhd1 | Fmo5          | -1 |
| 14251 | 11741 | Efhd1 | Slc30a10      | 1  |
| 14251 | 12343 | Efhd1 | Atf5          | 1  |
| 14251 | 13293 | Efhd1 | Gsta2         | -1 |
| 14251 | 15500 | Efhd1 | MMT00081411   | 1  |
| 14251 | 19790 | Efhd1 | Polg2         | -1 |
| 14251 | 19917 | Efhd1 | Nek2          | 1  |
| 14251 | 21693 | Efhd1 | BC029169      | 1  |
| 14258 | 143   | Ifi47 | Gvin1         | 1  |
| 14258 | 405   | Ifi47 | Emr4          | 1  |
| 14258 | 830   | Ifi47 | Socs1         | 1  |
| 14258 | 860   | Ifi47 | Psmb10        | 1  |
| 14258 | 917   | Ifi47 | Kal1          | 1  |
| 14258 | 1180  | Ifi47 | Clec4a3       | 1  |
| 14258 | 1353  | Ifi47 | Plcg2         | 1  |
| 14258 | 1447  | Ifi47 | Naaa          | 1  |
| 14258 | 1533  | Ifi47 | BC013712      | 1  |
| 14258 | 1764  | Ifi47 | Tifab         | 1  |
| 14258 | 1840  | Ifi47 | Fpr1          | 1  |
| 14258 | 1967  | Ifi47 | Brwd1         | -1 |
| 14258 | 1986  | Ifi47 | Crebl2        | -1 |
| 14258 | 2058  | Ifi47 | Hk3           | 1  |
| 14258 | 2200  | Ifi47 | BC006779      | 1  |
| 14258 | 2224  | Ifi47 | Oasl2         | 1  |
| 14258 | 2490  | Ifi47 | MMT00070880   | 1  |
| 14258 | 2550  | Ifi47 | MMT00036681   | 1  |
| 14258 | 2578  | Ifi47 | Csf2rb2       | 1  |
| 14258 | 2752  | Ifi47 | Fcgr1         | 1  |
| 14258 | 3036  | Ifi47 | Slamf9        | 1  |
| 14258 | 3286  | Ifi47 | Alox5ap       | 1  |
| 14258 | 3523  | Ifi47 | Trim34        | 1  |
| 14258 | 3572  | Ifi47 | Ebi3          | 1  |
| 14258 | 3594  | Ifi47 | Rasa4         | 1  |
| 14258 | 3659  | Ifi47 | EG236451      | 1  |
| 14258 | 3683  | Ifi47 | Oas2          | 1  |
| 14258 | 3905  | Ifi47 | H2-Q1         | 1  |
| 14258 | 4114  | Ifi47 | Parp12        | 1  |
| 14258 | 4409  | Ifi47 | 5430435G22Rik | 1  |
| 14258 | 4426  | Ifi47 | Iigp2         | 1  |
| 14258 | 4508  | Ifi47 | Ifit1         | 1  |
| 14258 | 4516  | Ifi47 | Rsad2         | 1  |
| 14258 | 4920  | Ifi47 | Rbl1          | 1  |
| 14258 | 5044  | Ifi47 | Ifi35         | 1  |
| 14258 | 5216  | Ifi47 | Spnb5         | 1  |
| 14258 | 5250  | Ifi47 | Ifit2         | 1  |
| 14258 | 5554  | Ifi47 | Emr1          | 1  |
| 14258 | 5556  | Ifi47 | Ccl4          | 1  |

|       |       |       |               |    |
|-------|-------|-------|---------------|----|
| 14258 | 5588  | lfi47 | Snx20         | 1  |
| 14258 | 5766  | lfi47 | 5033414D02Rik | 1  |
| 14258 | 5845  | lfi47 | Il18bp        | 1  |
| 14258 | 5853  | lfi47 | Trim30        | 1  |
| 14258 | 5949  | lfi47 | Zbp1          | 1  |
| 14258 | 5975  | lfi47 | Car13         | 1  |
| 14258 | 6036  | lfi47 | Pram1         | 1  |
| 14258 | 6072  | lfi47 | C1qc          | 1  |
| 14258 | 6098  | lfi47 | Ncf4          | 1  |
| 14258 | 6154  | lfi47 | 1700030G06Rik | 1  |
| 14258 | 6213  | lfi47 | Ccl2          | 1  |
| 14258 | 6394  | lfi47 | Fbxo6         | 1  |
| 14258 | 6576  | lfi47 | Sfn2          | 1  |
| 14258 | 6587  | lfi47 | Irf9          | 1  |
| 14258 | 6595  | lfi47 | Oas1a         | 1  |
| 14258 | 6734  | lfi47 | Ehd4          | 1  |
| 14258 | 6779  | lfi47 | Gbp6          | 1  |
| 14258 | 6824  | lfi47 | Irf7          | 1  |
| 14258 | 6866  | lfi47 | Gls           | -1 |
| 14258 | 6888  | lfi47 | Cxcl9         | 1  |
| 14258 | 6910  | lfi47 | Ly6c2         | 1  |
| 14258 | 7069  | lfi47 | Ube1l         | 1  |
| 14258 | 7105  | lfi47 | Plac8         | 1  |
| 14258 | 7238  | lfi47 | Pycard        | 1  |
| 14258 | 7284  | lfi47 | MMT00008674   | 1  |
| 14258 | 7316  | lfi47 | Ifi204        | 1  |
| 14258 | 7336  | lfi47 | Cd5l          | 1  |
| 14258 | 8270  | lfi47 | Clspn         | 1  |
| 14258 | 8392  | lfi47 | Asf1b         | 1  |
| 14258 | 8555  | lfi47 | H2-M3         | 1  |
| 14258 | 8564  | lfi47 | Pld4          | 1  |
| 14258 | 8641  | lfi47 | Slc7a2        | -1 |
| 14258 | 8659  | lfi47 | Psmb8         | 1  |
| 14258 | 8800  | lfi47 | Rnf213        | 1  |
| 14258 | 8922  | lfi47 | Il10ra        | 1  |
| 14258 | 9100  | lfi47 | Ms4a6c        | 1  |
| 14258 | 9401  | lfi47 | Fcgr4         | 1  |
| 14258 | 9717  | lfi47 | Psmb9         | 1  |
| 14258 | 9820  | lfi47 | BC023105      | 1  |
| 14258 | 9821  | lfi47 | Pmaip1        | 1  |
| 14258 | 9835  | lfi47 | Fastkd1       | -1 |
| 14258 | 9847  | lfi47 | Ifi27         | 1  |
| 14258 | 9920  | lfi47 | Syk           | 1  |
| 14258 | 9928  | lfi47 | Lgmn          | 1  |
| 14258 | 10109 | lfi47 | Gbp3          | 1  |
| 14258 | 10393 | lfi47 | Slc7a8        | 1  |
| 14258 | 10426 | lfi47 | Ly6f          | 1  |
| 14258 | 10504 | lfi47 | Ripk3         | 1  |
| 14258 | 10606 | lfi47 | Apbb1ip       | 1  |
| 14258 | 10796 | lfi47 | Spic          | 1  |
| 14258 | 10926 | lfi47 | P2ry13        | 1  |

|       |       |       |               |   |
|-------|-------|-------|---------------|---|
| 14258 | 11009 | Ifi47 | MMT00008885   | 1 |
| 14258 | 11198 | Ifi47 | Gbp1          | 1 |
| 14258 | 11204 | Ifi47 | AI451617      | 1 |
| 14258 | 11265 | Ifi47 | Irgm          | 1 |
| 14258 | 11275 | Ifi47 | Fanci         | 1 |
| 14258 | 11701 | Ifi47 | Oas1c         | 1 |
| 14258 | 11870 | Ifi47 | Apitd1        | 1 |
| 14258 | 11959 | Ifi47 | 4631422O05Rik | 1 |
| 14258 | 12126 | Ifi47 | Znfx1         | 1 |
| 14258 | 12312 | Ifi47 | Ms4a6d        | 1 |
| 14258 | 12363 | Ifi47 | Ifitm6        | 1 |
| 14258 | 12398 | Ifi47 | Ifi44         | 1 |
| 14258 | 12469 | Ifi47 | Dock10        | 1 |
| 14258 | 12495 | Ifi47 | Casp1         | 1 |
| 14258 | 12600 | Ifi47 | Ifi204        | 1 |
| 14258 | 12969 | Ifi47 | Xaf1          | 1 |
| 14258 | 13156 | Ifi47 | Ifit3         | 1 |
| 14258 | 13172 | Ifi47 | Epb4.113      | 1 |
| 14258 | 13181 | Ifi47 | Lcp2          | 1 |
| 14258 | 13309 | Ifi47 | Tgtp          | 1 |
| 14258 | 13504 | Ifi47 | Lair1         | 1 |
| 14258 | 13514 | Ifi47 | Apol9b        | 1 |
| 14258 | 13527 | Ifi47 | Ctss          | 1 |
| 14258 | 13528 | Ifi47 | Capn12        | 1 |
| 14258 | 13585 | Ifi47 | Nckap1l       | 1 |
| 14258 | 13654 | Ifi47 | Stat1         | 1 |
| 14258 | 13656 | Ifi47 | Ly86          | 1 |
| 14258 | 13780 | Ifi47 | Pilra         | 1 |
| 14258 | 13826 | Ifi47 | Melk          | 1 |
| 14258 | 14029 | Ifi47 | 2810022L02Rik | 1 |
| 14258 | 14102 | Ifi47 | Evi2a         | 1 |
| 14258 | 14117 | Ifi47 | C1qb          | 1 |
| 14258 | 14192 | Ifi47 | Trpv2         | 1 |
| 14258 | 14237 | Ifi47 | Rac2          | 1 |
| 14258 | 14258 | Ifi47 | Ifi47         | 1 |
| 14258 | 14260 | Ifi47 | Mkl           | 1 |
| 14258 | 14453 | Ifi47 | Inpp5d        | 1 |
| 14258 | 14475 | Ifi47 | Abcg1         | 1 |
| 14258 | 14506 | Ifi47 | Slc15a3       | 1 |
| 14258 | 14603 | Ifi47 | Ly6e          | 1 |
| 14258 | 14611 | Ifi47 | Ddx60         | 1 |
| 14258 | 14880 | Ifi47 | Ms4a4c        | 1 |
| 14258 | 14883 | Ifi47 | Itgal         | 1 |
| 14258 | 15074 | Ifi47 | Usp18         | 1 |
| 14258 | 15159 | Ifi47 | Timd4         | 1 |
| 14258 | 15280 | Ifi47 | Cxcl10        | 1 |
| 14258 | 15387 | Ifi47 | Mgl1          | 1 |
| 14258 | 15449 | Ifi47 | Mitd1         | 1 |
| 14258 | 15504 | Ifi47 | Mx2           | 1 |
| 14258 | 15749 | Ifi47 | Cd22          | 1 |
| 14258 | 15825 | Ifi47 | Fermt3        | 1 |

|       |       |       |               |    |
|-------|-------|-------|---------------|----|
| 14258 | 16102 | lfi47 | Cd72          | 1  |
| 14258 | 16147 | lfi47 | Tlr2          | 1  |
| 14258 | 16182 | lfi47 | Oasl1         | 1  |
| 14258 | 16186 | lfi47 | Cfp           | 1  |
| 14258 | 16199 | lfi47 | Samhd1        | 1  |
| 14258 | 16521 | lfi47 | Adar          | 1  |
| 14258 | 16572 | lfi47 | D14Ertid668e  | 1  |
| 14258 | 16874 | lfi47 | Fcer1g        | 1  |
| 14258 | 16913 | lfi47 | Pira3         | 1  |
| 14258 | 16988 | lfi47 | Clec4f        | 1  |
| 14258 | 17197 | lfi47 | Igtp          | 1  |
| 14258 | 17412 | lfi47 | Aif1          | 1  |
| 14258 | 17577 | lfi47 | Med28         | 1  |
| 14258 | 17806 | lfi47 | Gpsm3         | 1  |
| 14258 | 17904 | lfi47 | Cds1          | 1  |
| 14258 | 18147 | lfi47 | Nhlrc2        | -1 |
| 14258 | 18174 | lfi47 | Stat2         | 1  |
| 14258 | 18186 | lfi47 | Parp14        | 1  |
| 14258 | 18211 | lfi47 | Folr2         | 1  |
| 14258 | 18289 | lfi47 | Tap1          | 1  |
| 14258 | 18662 | lfi47 | Batf3         | 1  |
| 14258 | 18686 | lfi47 | Zfp143        | 1  |
| 14258 | 18868 | lfi47 | Mpeg1         | 1  |
| 14258 | 18901 | lfi47 | Hpx           | 1  |
| 14258 | 19026 | lfi47 | Isg15         | 1  |
| 14258 | 19063 | lfi47 | Evl           | 1  |
| 14258 | 19189 | lfi47 | Sp100         | 1  |
| 14258 | 19252 | lfi47 | Tmsb4x        | 1  |
| 14258 | 19262 | lfi47 | Cd274         | 1  |
| 14258 | 19382 | lfi47 | Slc2a6        | 1  |
| 14258 | 19708 | lfi47 | Ly6a          | 1  |
| 14258 | 19738 | lfi47 | Lgals3bp      | 1  |
| 14258 | 19790 | lfi47 | Polg2         | -1 |
| 14258 | 19794 | lfi47 | Rgs2          | 1  |
| 14258 | 20150 | lfi47 | Ptprc         | 1  |
| 14258 | 20217 | lfi47 | Rab3ip        | -1 |
| 14258 | 20321 | lfi47 | Ms4a6b        | 1  |
| 14258 | 20431 | lfi47 | Slc7a7        | 1  |
| 14258 | 20432 | lfi47 | Smc1b         | 1  |
| 14258 | 20474 | lfi47 | Gnb3          | 1  |
| 14258 | 20814 | lfi47 | Ptpn18        | 1  |
| 14258 | 20997 | lfi47 | MMT00028135   | 1  |
| 14258 | 21351 | lfi47 | Shisa5        | 1  |
| 14258 | 21440 | lfi47 | Tmsb10        | 1  |
| 14258 | 21549 | lfi47 | Rtp4          | 1  |
| 14258 | 21824 | lfi47 | 5830443L24Rik | 1  |
| 14258 | 21837 | lfi47 | BC052328      | 1  |
| 14258 | 21863 | lfi47 | Dok2          | 1  |
| 14258 | 22037 | lfi47 | Oas1g         | 1  |
| 14258 | 22077 | lfi47 | MMT00057550   | 1  |
| 14258 | 22327 | lfi47 | Tyrobp        | 1  |

|       |       |               |               |    |
|-------|-------|---------------|---------------|----|
| 14258 | 22496 | Ifi47         | Slfn1         | 1  |
| 14258 | 22647 | Ifi47         | Pkib          | 1  |
| 14258 | 22670 | Ifi47         | Clec4a1       | 1  |
| 14258 | 22876 | Ifi47         | Sash3         | 1  |
| 14258 | 23208 | Ifi47         | Hck           | 1  |
| 14258 | 23242 | Ifi47         | Gngt2         | 1  |
| 14258 | 23394 | Ifi47         | Psd4          | 1  |
| 14258 | 23403 | Ifi47         | Ndc80         | 1  |
| 14258 | 23410 | Ifi47         | C1qa          | 1  |
| 14258 | 23450 | Ifi47         | D12Ertd647e   | 1  |
| 14260 | 6824  | Mlkl          | Irf7          | 1  |
| 14260 | 7069  | Mlkl          | Ube1l         | 1  |
| 14260 | 8659  | Mlkl          | Psmb8         | 1  |
| 14260 | 8800  | Mlkl          | Rnf213        | 1  |
| 14260 | 9717  | Mlkl          | Psmb9         | 1  |
| 14260 | 11204 | Mlkl          | Al451617      | 1  |
| 14260 | 12316 | Mlkl          | Mpa2l         | 1  |
| 14260 | 14603 | Mlkl          | Ly6e          | 1  |
| 14260 | 16182 | Mlkl          | Oasl1         | 1  |
| 14260 | 17197 | Mlkl          | Igtp          | 1  |
| 14260 | 21549 | Mlkl          | Rtp4          | 1  |
| 14260 | 22037 | Mlkl          | Oas1g         | 1  |
| 14261 | 563   | 2310066E14Rik | D4Bwg0951e    | -1 |
| 14262 | 760   | Tcfec         | Akr1c19       | -1 |
| 14262 | 2262  | Tcfec         | Papss2        | -1 |
| 14262 | 6746  | Tcfec         | E2f8          | 1  |
| 14262 | 8416  | Tcfec         | Cdc20         | 1  |
| 14262 | 12799 | Tcfec         | Spon2         | 1  |
| 14263 | 337   | Arrdc3        | Rasgef1b      | 1  |
| 14263 | 6308  | Arrdc3        | 2410075B13Rik | -1 |
| 14263 | 6564  | Arrdc3        | Cebpd         | 1  |
| 14263 | 11093 | Arrdc3        | Zdhhc1        | 1  |
| 14263 | 12761 | Arrdc3        | Tsc22d3       | 1  |
| 14263 | 12908 | Arrdc3        | Jdp2          | 1  |
| 14263 | 14138 | Arrdc3        | Anks4b        | -1 |
| 14263 | 17525 | Arrdc3        | Ctgf          | 1  |
| 14263 | 18785 | Arrdc3        | Angptl4       | 1  |
| 14263 | 22873 | Arrdc3        | Slc38a2       | 1  |
| 14266 | 14266 | Sox13         | Sox13         | 1  |
| 14279 | 13004 | 3930402G23Rik | Arhgef10      | 1  |
| 14296 | 12302 | Slc35b1       | Cbx1          | -1 |
| 14296 | 19092 | Slc35b1       | MMT00045362   | -1 |
| 14304 | 20300 | Mrpl48        | Plekhb1       | 1  |
| 14304 | 21425 | Mrpl48        | Rab6          | 1  |
| 14307 | 482   | Kcnj8         | Rnf43         | 1  |
| 14307 | 563   | Kcnj8         | D4Bwg0951e    | -1 |
| 14307 | 662   | Kcnj8         | Mid1ip1       | 1  |
| 14307 | 740   | Kcnj8         | Txnrd3        | 1  |
| 14307 | 1156  | Kcnj8         | Rbj           | 1  |
| 14307 | 1957  | Kcnj8         | Mansc1        | 1  |
| 14307 | 2619  | Kcnj8         | Zfp622        | -1 |



|       |       |       |               |    |
|-------|-------|-------|---------------|----|
| 14307 | 2741  | Kcnj8 | 3230401D17Rik | -1 |
| 14307 | 2918  | Kcnj8 | Mtmr10        | -1 |
| 14307 | 3097  | Kcnj8 | Ppp1r3g       | -1 |
| 14307 | 3462  | Kcnj8 | Nmnat3        | 1  |
| 14307 | 3587  | Kcnj8 | MMT00041940   | -1 |
| 14307 | 4391  | Kcnj8 | Zfp467        | 1  |
| 14307 | 4819  | Kcnj8 | MMT00082285   | 1  |
| 14307 | 4966  | Kcnj8 | Zscan20       | -1 |
| 14307 | 4983  | Kcnj8 | Rabgef1       | -1 |
| 14307 | 6021  | Kcnj8 | MMT00008784   | -1 |
| 14307 | 6126  | Kcnj8 | MMT00067575   | -1 |
| 14307 | 6769  | Kcnj8 | Banp          | -1 |
| 14307 | 6816  | Kcnj8 | Slc46a3       | 1  |
| 14307 | 6976  | Kcnj8 | Rbm35b        | 1  |
| 14307 | 7140  | Kcnj8 | Mtbp          | 1  |
| 14307 | 7659  | Kcnj8 | Rab30         | -1 |
| 14307 | 7725  | Kcnj8 | 3230401D17Rik | -1 |
| 14307 | 8234  | Kcnj8 | Tbpl1         | -1 |
| 14307 | 8319  | Kcnj8 | MMT00062477   | -1 |
| 14307 | 8439  | Kcnj8 | Slc25a33      | -1 |
| 14307 | 8464  | Kcnj8 | Snapin        | 1  |
| 14307 | 8632  | Kcnj8 | Igfbp1        | -1 |
| 14307 | 8670  | Kcnj8 | MMT00051613   | -1 |
| 14307 | 8684  | Kcnj8 | Ii15          | 1  |
| 14307 | 9258  | Kcnj8 | P4ha1         | -1 |
| 14307 | 9514  | Kcnj8 | Vps37a        | -1 |
| 14307 | 9899  | Kcnj8 | D13Wsu177e    | -1 |
| 14307 | 10492 | Kcnj8 | 1810046K07Rik | 1  |
| 14307 | 10769 | Kcnj8 | Hnrnpd        | 1  |
| 14307 | 11043 | Kcnj8 | Hsph1         | -1 |
| 14307 | 11093 | Kcnj8 | Zdhhc1        | -1 |
| 14307 | 11214 | Kcnj8 | MMT00049207   | -1 |
| 14307 | 12315 | Kcnj8 | Sreb1         | 1  |
| 14307 | 13018 | Kcnj8 | AW544981      | 1  |
| 14307 | 13087 | Kcnj8 | Cxadr         | 1  |
| 14307 | 13304 | Kcnj8 | Gadd45b       | -1 |
| 14307 | 13471 | Kcnj8 | Cln8          | -1 |
| 14307 | 13839 | Kcnj8 | Gypc          | 1  |
| 14307 | 14049 | Kcnj8 | Fdft1         | 1  |
| 14307 | 14099 | Kcnj8 | Nfe2          | 1  |
| 14307 | 14135 | Kcnj8 | Eepd1         | 1  |
| 14307 | 14138 | Kcnj8 | Anks4b        | 1  |
| 14307 | 15177 | Kcnj8 | Bmpr2         | -1 |
| 14307 | 15604 | Kcnj8 | Arl4a         | -1 |
| 14307 | 15675 | Kcnj8 | MMT00077535   | -1 |
| 14307 | 15990 | Kcnj8 | Dnmbp         | -1 |
| 14307 | 16251 | Kcnj8 | G6pc          | -1 |
| 14307 | 16990 | Kcnj8 | Sc4mol        | 1  |
| 14307 | 17525 | Kcnj8 | Ctgf          | -1 |
| 14307 | 17660 | Kcnj8 | Nlrp12        | -1 |
| 14307 | 17712 | Kcnj8 | Nup62         | -1 |

|       |       |               |                    |    |
|-------|-------|---------------|--------------------|----|
| 14307 | 17800 | Kcnj8         | Lrtm1              | 1  |
| 14307 | 18083 | Kcnj8         | Gadd45a            | 1  |
| 14307 | 18203 | Kcnj8         | Ablim3             | -1 |
| 14307 | 18373 | Kcnj8         | Dnajb1             | -1 |
| 14307 | 18418 | Kcnj8         | Hspa1b             | -1 |
| 14307 | 18785 | Kcnj8         | Angptl4            | -1 |
| 14307 | 20332 | Kcnj8         | Stau2              | 1  |
| 14307 | 20535 | Kcnj8         | Rbm4               | -1 |
| 14307 | 20613 | Kcnj8         | 4930431B09Rik      | -1 |
| 14307 | 20792 | Kcnj8         | MMT00032790        | -1 |
| 14307 | 20912 | Kcnj8         | Chordc1            | -1 |
| 14307 | 22561 | Kcnj8         | Whdc1              | 1  |
| 14310 | 21211 | MMT00073582   | 2010301N04Rik      | 1  |
| 14314 | 874   | 2810405K02Rik | Aldh1a7            | 1  |
| 14314 | 7887  | 2810405K02Rik | 4930418G15Rik      | 1  |
| 14314 | 8444  | 2810405K02Rik | Rdh16              | 1  |
| 14314 | 8815  | 2810405K02Rik | Mx1                | 1  |
| 14314 | 10554 | 2810405K02Rik | ENSMUSG00000074179 | 1  |
| 14314 | 14017 | 2810405K02Rik | Ces5               | 1  |
| 14314 | 18201 | 2810405K02Rik | MMT00060232        | 1  |
| 14314 | 20058 | 2810405K02Rik | Dnaic1             | -1 |
| 14314 | 21214 | 2810405K02Rik | Scd1               | 1  |
| 14314 | 21575 | 2810405K02Rik | Cyp2c55            | 1  |
| 14314 | 22138 | 2810405K02Rik | Ang                | -1 |
| 14333 | 874   | Zcchc17       | Aldh1a7            | 1  |
| 14333 | 2636  | Zcchc17       | Tars               | 1  |
| 14333 | 4351  | Zcchc17       | Plxnb1             | -1 |
| 14333 | 4674  | Zcchc17       | Cxcl12             | -1 |
| 14333 | 5934  | Zcchc17       | S100a10            | 1  |
| 14333 | 6370  | Zcchc17       | Aqp8               | 1  |
| 14333 | 8444  | Zcchc17       | Rdh16              | 1  |
| 14333 | 8815  | Zcchc17       | Mx1                | 1  |
| 14333 | 14017 | Zcchc17       | Ces5               | 1  |
| 14333 | 17996 | Zcchc17       | Igfbp2             | -1 |
| 14333 | 18201 | Zcchc17       | MMT00060232        | 1  |
| 14333 | 20079 | Zcchc17       | MMT00019254        | -1 |
| 14333 | 21214 | Zcchc17       | Scd1               | 1  |
| 14333 | 21793 | Zcchc17       | Pla2g12a           | -1 |
| 14333 | 21966 | Zcchc17       | Pcp4l1             | -1 |
| 14333 | 22138 | Zcchc17       | Ang                | -1 |
| 14333 | 23026 | Zcchc17       | Apom               | -1 |
| 14334 | 2388  | Fxyd3         | Dot1l              | -1 |
| 14334 | 2599  | Fxyd3         | Lsm14a             | -1 |
| 14334 | 4697  | Fxyd3         | Cyp2a12            | 1  |
| 14334 | 6513  | Fxyd3         | Qpctl              | -1 |
| 14334 | 7761  | Fxyd3         | Nudt19             | -1 |
| 14334 | 10545 | Fxyd3         | Tmem147            | -1 |
| 14334 | 23247 | Fxyd3         | Ercc1              | 1  |
| 14343 | 14343 | Hnrnpa0       | Hnrnpa0            | 1  |
| 14343 | 15979 | Hnrnpa0       | Rmi1               | 1  |
| 14350 | 3265  | Adamts2       | Dntt               | 1  |

|       |       |               |               |    |
|-------|-------|---------------|---------------|----|
| 14350 | 3836  | Adamts2       | 2200001I15Rik | 1  |
| 14350 | 5364  | Adamts2       | Kif22         | 1  |
| 14350 | 6912  | Adamts2       | Crym          | -1 |
| 14350 | 13271 | Adamts2       | Idh2          | -1 |
| 14350 | 14361 | Adamts2       | Txndc12       | 1  |
| 14350 | 14472 | Adamts2       | Ahcy          | -1 |
| 14350 | 17247 | Adamts2       | A030007L17Rik | 1  |
| 14350 | 18590 | Adamts2       | Fgb           | 1  |
| 14350 | 20171 | Adamts2       | 1700008G05Rik | 1  |
| 14350 | 20967 | Adamts2       | Fabp2         | 1  |
| 14350 | 23377 | Adamts2       | Pdxk          | -1 |
| 14355 | 1357  | Tle1          | Pabpn1        | -1 |
| 14355 | 8711  | Tle1          | 5430432M24Rik | -1 |
| 14355 | 14656 | Tle1          | Grip2         | 1  |
| 14355 | 15052 | Tle1          | Kifc3         | -1 |
| 14355 | 17135 | Tle1          | Mum1          | -1 |
| 14358 | 12799 | Wdr1          | Spon2         | 1  |
| 14359 | 5934  | Hist2h2bb     | S100a10       | 1  |
| 14359 | 8815  | Hist2h2bb     | Mx1           | 1  |
| 14359 | 12910 | Hist2h2bb     | 1110028A07Rik | 1  |
| 14359 | 14017 | Hist2h2bb     | Ces5          | 1  |
| 14359 | 15059 | Hist2h2bb     | Mogat1        | 1  |
| 14359 | 17996 | Hist2h2bb     | Igfbp2        | -1 |
| 14359 | 18201 | Hist2h2bb     | MMT00060232   | 1  |
| 14359 | 20058 | Hist2h2bb     | Dnaic1        | -1 |
| 14359 | 20079 | Hist2h2bb     | MMT00019254   | -1 |
| 14363 | 413   | Cxcl16        | Acy1          | -1 |
| 14363 | 3565  | Cxcl16        | MMT00045908   | -1 |
| 14363 | 9700  | Cxcl16        | Prodh         | -1 |
| 14363 | 17638 | Cxcl16        | Adssl1        | -1 |
| 14363 | 18069 | Cxcl16        | Gpt           | -1 |
| 14363 | 19790 | Cxcl16        | Polg2         | -1 |
| 14363 | 20058 | Cxcl16        | Dnaic1        | 1  |
| 14363 | 20171 | Cxcl16        | 1700008G05Rik | 1  |
| 14363 | 23377 | Cxcl16        | Pdxk          | -1 |
| 14368 | 760   | 9330128J19Rik | Akr1c19       | 1  |
| 14368 | 6085  | 9330128J19Rik | MMT00007454   | -1 |
| 14368 | 7602  | 9330128J19Rik | Pcca          | 1  |
| 14368 | 13431 | 9330128J19Rik | MMT00038058   | -1 |
| 14368 | 14055 | 9330128J19Rik | MMT00050438   | -1 |
| 14368 | 15205 | 9330128J19Rik | MMT00030262   | -1 |
| 14368 | 22978 | 9330128J19Rik | MMT00043176   | -1 |
| 14369 | 15508 | MMT00057201   | 4632415L05Rik | 1  |
| 14375 | 327   | D17H6S56E-5   | H2-Ea         | 1  |
| 14375 | 2938  | D17H6S56E-5   | H2-T23        | 1  |
| 14375 | 7088  | D17H6S56E-5   | Slc37a1       | 1  |
| 14375 | 10667 | D17H6S56E-5   | H2-Eb1        | 1  |
| 14375 | 13493 | D17H6S56E-5   | Ring1         | -1 |
| 14375 | 20238 | D17H6S56E-5   | H2-T9         | 1  |
| 14375 | 22822 | D17H6S56E-5   | MMT00013433   | 1  |
| 14379 | 19772 | Car12         | Gnmt          | -1 |

|       |       |             |                    |    |
|-------|-------|-------------|--------------------|----|
| 14384 | 1241  | Dnajc7      | Meox1              | 1  |
| 14384 | 1654  | Dnajc7      | Dhx58              | -1 |
| 14384 | 2456  | Dnajc7      | Mrpl10             | -1 |
| 14384 | 6376  | Dnajc7      | Nle1               | -1 |
| 14384 | 12302 | Dnajc7      | Cbx1               | -1 |
| 14384 | 13810 | Dnajc7      | 1110036O03Rik      | 1  |
| 14384 | 14384 | Dnajc7      | Dnajc7             | 1  |
| 14391 | 1336  | MMT00017335 | MMT00069537        | -1 |
| 14391 | 2243  | MMT00017335 | Gcsh               | -1 |
| 14391 | 9770  | MMT00017335 | Bcmo1              | 1  |
| 14391 | 10195 | MMT00017335 | Klf1               | -1 |
| 14391 | 14391 | MMT00017335 | MMT00017335        | 1  |
| 14391 | 14511 | MMT00017335 | Sostdc1            | 1  |
| 14391 | 15455 | MMT00017335 | Lsm4               | 1  |
| 14391 | 15953 | MMT00017335 | Acsf3              | 1  |
| 14391 | 16617 | MMT00017335 | Sh2d4a             | 1  |
| 14391 | 18886 | MMT00017335 | Slc18a1            | 1  |
| 14391 | 20484 | MMT00017335 | Ces1               | 1  |
| 14391 | 21394 | MMT00017335 | Cdh15              | 1  |
| 14391 | 22909 | MMT00017335 | Nup133             | -1 |
| 14399 | 2915  | Csnk2a1     | Nfs1               | 1  |
| 14399 | 5450  | Csnk2a1     | Nrbp1              | 1  |
| 14399 | 6059  | Csnk2a1     | Dsn1               | -1 |
| 14399 | 6250  | Csnk2a1     | Csnk2a1            | 1  |
| 14399 | 6820  | Csnk2a1     | MMT00046996        | 1  |
| 14399 | 7610  | Csnk2a1     | Scand1             | 1  |
| 14399 | 10028 | Csnk2a1     | Chchd6             | 1  |
| 14399 | 14399 | Csnk2a1     | Csnk2a1            | 1  |
| 14399 | 14647 | Csnk2a1     | Cst3               | 1  |
| 14399 | 15565 | Csnk2a1     | 2310001A20Rik      | 1  |
| 14399 | 22740 | Csnk2a1     | Manbal             | -1 |
| 14399 | 23005 | Csnk2a1     | 4930405A21Rik      | -1 |
| 14399 | 23599 | Csnk2a1     | Ndr3               | -1 |
| 14400 | 607   | Scd2        | Me1                | 1  |
| 14400 | 1129  | Scd2        | Gsta4              | 1  |
| 14400 | 2127  | Scd2        | Ldha               | -1 |
| 14400 | 2721  | Scd2        | Inmt               | 1  |
| 14400 | 3377  | Scd2        | Cs                 | 1  |
| 14400 | 3446  | Scd2        | Eno1               | 1  |
| 14400 | 4056  | Scd2        | Tnfaip8l1          | -1 |
| 14400 | 6193  | Scd2        | Lactb2             | 1  |
| 14400 | 6573  | Scd2        | Pecr               | 1  |
| 14400 | 8773  | Scd2        | MMT00027093        | -1 |
| 14400 | 8815  | Scd2        | Mx1                | 1  |
| 14400 | 9408  | Scd2        | Hmgcs2             | -1 |
| 14400 | 9427  | Scd2        | Nqo2               | 1  |
| 14400 | 9842  | Scd2        | Qdpr               | 1  |
| 14400 | 10554 | Scd2        | ENSMUSG00000074179 | 1  |
| 14400 | 10961 | Scd2        | Pgd                | 1  |
| 14400 | 12219 | Scd2        | Cyb5b              | 1  |
| 14400 | 12556 | Scd2        | Ass1               | 1  |

|       |       |               |               |    |
|-------|-------|---------------|---------------|----|
| 14400 | 12955 | Scd2          | Atp5o         | 1  |
| 14400 | 13293 | Scd2          | Gsta2         | 1  |
| 14400 | 13431 | Scd2          | MMT00038058   | -1 |
| 14400 | 14147 | Scd2          | Acss2         | 1  |
| 14400 | 14151 | Scd2          | Slc44a1       | 1  |
| 14400 | 14285 | Scd2          | C1qbp         | 1  |
| 14400 | 15205 | Scd2          | MMT00030262   | -1 |
| 14400 | 18113 | Scd2          | MMT00034400   | 1  |
| 14400 | 18173 | Scd2          | Arpp19        | 1  |
| 14400 | 18201 | Scd2          | MMT00060232   | 1  |
| 14400 | 19066 | Scd2          | MMT00012632   | 1  |
| 14400 | 20019 | Scd2          | Qdpr          | 1  |
| 14400 | 21202 | Scd2          | Acly          | 1  |
| 14400 | 21214 | Scd2          | Scd1          | 1  |
| 14400 | 21251 | Scd2          | Cpt1a         | -1 |
| 14400 | 21575 | Scd2          | Cyp2c55       | 1  |
| 14400 | 21727 | Scd2          | Khk           | 1  |
| 14400 | 21793 | Scd2          | Pla2g12a      | -1 |
| 14400 | 22732 | Scd2          | Cyb5b         | 1  |
| 14400 | 23640 | Scd2          | Bdh1          | -1 |
| 14408 | 4993  | 1100001H23Rik | Tsc22d1       | 1  |
| 14418 | 18069 | Vcan          | Gpt           | -1 |
| 14427 | 8632  | Hoxa1         | Igfbp1        | -1 |
| 14427 | 16251 | Hoxa1         | G6pc          | -1 |
| 14427 | 17525 | Hoxa1         | Ctgf          | -1 |
| 14427 | 18083 | Hoxa1         | Gadd45a       | 1  |
| 14431 | 5974  | Piwil1        | Arntl         | -1 |
| 14431 | 12905 | Piwil1        | Nfil3         | -1 |
| 14439 | 5364  | Ubd           | Kif22         | 1  |
| 14455 | 9304  | 2700029M09Rik | Al449175      | -1 |
| 14455 | 16617 | 2700029M09Rik | Sh2d4a        | 1  |
| 14455 | 20484 | 2700029M09Rik | Ces1          | 1  |
| 14469 | 5684  | Ripply3       | Ranbp10       | 1  |
| 14470 | 3562  | Taf1a         | MMT00011909   | -1 |
| 14470 | 8444  | Taf1a         | Rdh16         | -1 |
| 14470 | 8815  | Taf1a         | Mx1           | -1 |
| 14470 | 21214 | Taf1a         | Scd1          | -1 |
| 14476 | 21966 | Akr1b8        | Pcp4l1        | -1 |
| 14479 | 2721  | Ada           | Inmt          | -1 |
| 14479 | 5892  | Ada           | MMT00038457   | -1 |
| 14479 | 6816  | Ada           | Slc46a3       | -1 |
| 14479 | 7492  | Ada           | Adfp          | 1  |
| 14479 | 7659  | Ada           | Rab30         | 1  |
| 14479 | 9700  | Ada           | Prodh         | -1 |
| 14479 | 9718  | Ada           | Fmo5          | -1 |
| 14479 | 14408 | Ada           | 1100001H23Rik | 1  |
| 14479 | 17563 | Ada           | Aldh1l1       | -1 |
| 14479 | 17638 | Ada           | Adssl1        | -1 |
| 14479 | 18069 | Ada           | Gpt           | -1 |
| 14498 | 661   | Layn          | Siglec1       | 1  |
| 14498 | 14498 | Layn          | Layn          | 1  |

|       |       |         |                    |    |
|-------|-------|---------|--------------------|----|
| 14506 | 2200  | Slc15a3 | BC006779           | 1  |
| 14506 | 5364  | Slc15a3 | Kif22              | 1  |
| 14506 | 6213  | Slc15a3 | Ccl2               | 1  |
| 14506 | 6386  | Slc15a3 | Por                | -1 |
| 14506 | 6888  | Slc15a3 | Cxcl9              | 1  |
| 14506 | 8800  | Slc15a3 | Rnf213             | 1  |
| 14506 | 10808 | Slc15a3 | Rab711             | 1  |
| 14506 | 12941 | Slc15a3 | Elovl5             | 1  |
| 14506 | 14880 | Slc15a3 | Ms4a4c             | 1  |
| 14506 | 16182 | Slc15a3 | Oasl1              | 1  |
| 14506 | 17338 | Slc15a3 | Mocos              | 1  |
| 14506 | 20967 | Slc15a3 | Fabp2              | 1  |
| 14506 | 21824 | Slc15a3 | 5830443L24Rik      | 1  |
| 14507 | 12910 | Ttc13   | 1110028A07Rik      | 1  |
| 14511 | 14511 | Sostdc1 | Sostdc1            | 1  |
| 14512 | 607   | Tubg1   | Me1                | 1  |
| 14512 | 874   | Tubg1   | Aldh1a7            | 1  |
| 14512 | 3377  | Tubg1   | Cs                 | 1  |
| 14512 | 4351  | Tubg1   | Plxnb1             | -1 |
| 14512 | 5884  | Tubg1   | Gstm2              | 1  |
| 14512 | 6650  | Tubg1   | MMT00050325        | 1  |
| 14512 | 7430  | Tubg1   | Gpr137             | 1  |
| 14512 | 7602  | Tubg1   | Pcca               | 1  |
| 14512 | 7753  | Tubg1   | Gfm1               | 1  |
| 14512 | 8444  | Tubg1   | Rdh16              | 1  |
| 14512 | 8815  | Tubg1   | Mx1                | 1  |
| 14512 | 10554 | Tubg1   | ENSMUSG00000074179 | 1  |
| 14512 | 11014 | Tubg1   | Hibadh             | 1  |
| 14512 | 11946 | Tubg1   | MMT00030953        | 1  |
| 14512 | 13293 | Tubg1   | Gsta2              | 1  |
| 14512 | 14147 | Tubg1   | Acss2              | 1  |
| 14512 | 18201 | Tubg1   | MMT00060232        | 1  |
| 14512 | 20019 | Tubg1   | Qdpr               | 1  |
| 14512 | 20058 | Tubg1   | Dnaic1             | -1 |
| 14512 | 21214 | Tubg1   | Scd1               | 1  |
| 14512 | 21575 | Tubg1   | Cyp2c55            | 1  |
| 14512 | 21727 | Tubg1   | Khk                | 1  |
| 14524 | 1031  | Rarres2 | Uros               | 1  |
| 14526 | 2472  | Pacsin3 | MMT00014056        | 1  |
| 14526 | 9547  | Pacsin3 | MMT00006479        | 1  |
| 14526 | 14757 | Pacsin3 | Hdx                | 1  |
| 14526 | 16881 | Pacsin3 | MMT00031504        | 1  |
| 14526 | 17295 | Pacsin3 | MMT00082577        | 1  |
| 14526 | 19763 | Pacsin3 | Acp2               | 1  |
| 14526 | 19803 | Pacsin3 | BC003993           | 1  |
| 14526 | 22320 | Pacsin3 | MMT00047284        | 1  |
| 14526 | 23474 | Pacsin3 | MMT00011721        | 1  |
| 14540 | 2051  | Tmem140 | Ddx27              | 1  |
| 14540 | 3696  | Tmem140 | Elovl6             | -1 |
| 14540 | 5684  | Tmem140 | Ranbp10            | 1  |
| 14540 | 5804  | Tmem140 | Thrsp              | -1 |

|       |       |               |               |    |
|-------|-------|---------------|---------------|----|
| 14540 | 6193  | Tmem140       | Lactb2        | -1 |
| 14540 | 6816  | Tmem140       | Slc46a3       | -1 |
| 14540 | 8896  | Tmem140       | Fasn          | -1 |
| 14540 | 9408  | Tmem140       | Hmgcs2        | 1  |
| 14540 | 9842  | Tmem140       | Qdpr          | -1 |
| 14540 | 10961 | Tmem140       | Pgd           | -1 |
| 14540 | 14147 | Tmem140       | Acss2         | -1 |
| 14540 | 14151 | Tmem140       | Slc44a1       | -1 |
| 14540 | 16525 | Tmem140       | Lbp           | 1  |
| 14540 | 17660 | Tmem140       | Nlrp12        | 1  |
| 14540 | 21202 | Tmem140       | Acly          | -1 |
| 14540 | 22137 | Tmem140       | Nudt7         | -1 |
| 14546 | 5849  | 1810011H11Rik | 2310031A18Rik | 1  |
| 14546 | 6756  | 1810011H11Rik | Sds           | -1 |
| 14554 | 607   | Dll4          | Me1           | 1  |
| 14554 | 662   | Dll4          | Mid1ip1       | 1  |
| 14554 | 1129  | Dll4          | Gsta4         | 1  |
| 14554 | 2631  | Dll4          | Aldh1l1       | 1  |
| 14554 | 2721  | Dll4          | Inmt          | 1  |
| 14554 | 3356  | Dll4          | Adhfe1        | 1  |
| 14554 | 3565  | Dll4          | MMT00045908   | 1  |
| 14554 | 3754  | Dll4          | Dock6         | 1  |
| 14554 | 5804  | Dll4          | Thrsp         | 1  |
| 14554 | 6044  | Dll4          | Sucnr1        | 1  |
| 14554 | 6263  | Dll4          | Slc7a4        | 1  |
| 14554 | 6502  | Dll4          | Col15a1       | 1  |
| 14554 | 6573  | Dll4          | Pecr          | 1  |
| 14554 | 6816  | Dll4          | Slc46a3       | 1  |
| 14554 | 7659  | Dll4          | Rab30         | -1 |
| 14554 | 8439  | Dll4          | Slc25a33      | -1 |
| 14554 | 8896  | Dll4          | Fasn          | 1  |
| 14554 | 9408  | Dll4          | Hmgcs2        | -1 |
| 14554 | 9427  | Dll4          | Nqo2          | 1  |
| 14554 | 9842  | Dll4          | Qdpr          | 1  |
| 14554 | 10961 | Dll4          | Pgd           | 1  |
| 14554 | 11462 | Dll4          | Gpam          | 1  |
| 14554 | 12219 | Dll4          | Cyb5b         | 1  |
| 14554 | 12315 | Dll4          | Sreb1         | 1  |
| 14554 | 12910 | Dll4          | 1110028A07Rik | 1  |
| 14554 | 13018 | Dll4          | AW544981      | 1  |
| 14554 | 14147 | Dll4          | Acss2         | 1  |
| 14554 | 14151 | Dll4          | Slc44a1       | 1  |
| 14554 | 14279 | Dll4          | 3930402G23Rik | -1 |
| 14554 | 15892 | Dll4          | Slc22a5       | -1 |
| 14554 | 16525 | Dll4          | Lbp           | -1 |
| 14554 | 17090 | Dll4          | Lass2         | 1  |
| 14554 | 17563 | Dll4          | Aldh1l1       | 1  |
| 14554 | 17660 | Dll4          | Nlrp12        | -1 |
| 14554 | 17800 | Dll4          | Lrtm1         | 1  |
| 14554 | 18286 | Dll4          | Slc41a3       | -1 |
| 14554 | 18515 | Dll4          | Ddx28         | -1 |

|       |       |               |               |    |
|-------|-------|---------------|---------------|----|
| 14554 | 18785 | Dll4          | Angptl4       | -1 |
| 14554 | 19089 | Dll4          | Peci          | -1 |
| 14554 | 19766 | Dll4          | Slc26a4       | 1  |
| 14554 | 20019 | Dll4          | Qdpr          | 1  |
| 14554 | 20058 | Dll4          | Dnaic1        | -1 |
| 14554 | 20246 | Dll4          | Pdia5         | -1 |
| 14554 | 20385 | Dll4          | Chd1l         | 1  |
| 14554 | 20567 | Dll4          | Ggt6          | 1  |
| 14554 | 20798 | Dll4          | Ccp1          | -1 |
| 14554 | 21202 | Dll4          | Acly          | 1  |
| 14554 | 21251 | Dll4          | Cpt1a         | -1 |
| 14554 | 21369 | Dll4          | Cd4           | -1 |
| 14554 | 21575 | Dll4          | Cyp2c55       | 1  |
| 14554 | 21727 | Dll4          | Khk           | 1  |
| 14554 | 22046 | Dll4          | Cml4          | 1  |
| 14554 | 22321 | Dll4          | Apol7a        | 1  |
| 14554 | 22732 | Dll4          | Cyb5b         | 1  |
| 14554 | 22770 | Dll4          | Slc27a2       | -1 |
| 14554 | 22954 | Dll4          | Slc25a30      | -1 |
| 14554 | 23623 | Dll4          | 2010305C02Rik | 1  |
| 14556 | 18201 | Txndc14       | MMT00060232   | 1  |
| 14557 | 2021  | Pyroxd1       | Atf7ip        | 1  |
| 14557 | 2932  | Pyroxd1       | Slco1a1       | -1 |
| 14557 | 5902  | Pyroxd1       | 4930563P21Rik | 1  |
| 14557 | 6765  | Pyroxd1       | Ldhd          | -1 |
| 14557 | 7452  | Pyroxd1       | Abcc9         | -1 |
| 14557 | 7911  | Pyroxd1       | Pik3c2g       | 1  |
| 14557 | 14307 | Pyroxd1       | Kcnj8         | -1 |
| 14557 | 14557 | Pyroxd1       | Pyroxd1       | 1  |
| 14557 | 20127 | Pyroxd1       | Ipo8          | -1 |
| 14557 | 21126 | Pyroxd1       | Dera          | 1  |
| 14559 | 524   | Frrs1         | Hsd3b2        | 1  |
| 14559 | 1014  | Frrs1         | Rtcd1         | 1  |
| 14559 | 1867  | Frrs1         | Bcas2         | 1  |
| 14559 | 1963  | Frrs1         | MMT00039783   | 1  |
| 14559 | 10681 | Frrs1         | Dgkz          | -1 |
| 14563 | 12910 | Dna2          | 1110028A07Rik | 1  |
| 14570 | 14570 | Erdr1         | Erdr1         | 1  |
| 14571 | 8815  | MMT00079617   | Mx1           | 1  |
| 14571 | 21214 | MMT00079617   | Scd1          | 1  |
| 14577 | 2433  | Cdc37l1       | Armc10        | -1 |
| 14577 | 3317  | Cdc37l1       | Ak3           | 1  |
| 14577 | 14577 | Cdc37l1       | Cdc37l1       | 1  |
| 14577 | 20296 | Cdc37l1       | C030027H14Rik | 1  |
| 14577 | 21934 | Cdc37l1       | Id2           | -1 |
| 14579 | 6193  | 2610015P09Rik | Lactb2        | -1 |
| 14579 | 11462 | 2610015P09Rik | Gpam          | -1 |
| 14579 | 14323 | 2610015P09Rik | Scarb1        | 1  |
| 14579 | 21202 | 2610015P09Rik | Acly          | -1 |
| 14579 | 21214 | 2610015P09Rik | Scd1          | -1 |
| 14579 | 21251 | 2610015P09Rik | Cpt1a         | 1  |



|       |       |               |               |   |
|-------|-------|---------------|---------------|---|
| 14579 | 21793 | 2610015P09Rik | Pla2g12a      | 1 |
| 14579 | 22138 | 2610015P09Rik | Ang           | 1 |
| 14581 | 1416  | Casc5         | 6720460F02Rik | 1 |
| 14581 | 5364  | Casc5         | Kif22         | 1 |
| 14581 | 18299 | Casc5         | MMT00035424   | 1 |
| 14581 | 19318 | Casc5         | Plk1          | 1 |
| 14581 | 21692 | Casc5         | MMT00013924   | 1 |
| 14585 | 18418 | Bxdc1         | Hspa1b        | 1 |
| 14603 | 143   | Ly6e          | Gvin1         | 1 |
| 14603 | 1533  | Ly6e          | BC013712      | 1 |
| 14603 | 2200  | Ly6e          | BC006779      | 1 |
| 14603 | 2224  | Ly6e          | Oasl2         | 1 |
| 14603 | 2550  | Ly6e          | MMT00036681   | 1 |
| 14603 | 2752  | Ly6e          | Fcgr1         | 1 |
| 14603 | 3523  | Ly6e          | Trim34        | 1 |
| 14603 | 3594  | Ly6e          | Rasa4         | 1 |
| 14603 | 3659  | Ly6e          | EG236451      | 1 |
| 14603 | 3683  | Ly6e          | Oas2          | 1 |
| 14603 | 4114  | Ly6e          | Parp12        | 1 |
| 14603 | 4409  | Ly6e          | 5430435G22Rik | 1 |
| 14603 | 4426  | Ly6e          | Ilgp2         | 1 |
| 14603 | 4508  | Ly6e          | Ifit1         | 1 |
| 14603 | 5044  | Ly6e          | Ifi35         | 1 |
| 14603 | 5216  | Ly6e          | Spnb5         | 1 |
| 14603 | 5250  | Ly6e          | Ifit2         | 1 |
| 14603 | 5766  | Ly6e          | 5033414D02Rik | 1 |
| 14603 | 5845  | Ly6e          | Il18bp        | 1 |
| 14603 | 5853  | Ly6e          | Trim30        | 1 |
| 14603 | 5949  | Ly6e          | Zbp1          | 1 |
| 14603 | 6213  | Ly6e          | Ccl2          | 1 |
| 14603 | 6587  | Ly6e          | Irf9          | 1 |
| 14603 | 6595  | Ly6e          | Oas1a         | 1 |
| 14603 | 6734  | Ly6e          | Ehd4          | 1 |
| 14603 | 6824  | Ly6e          | Irf7          | 1 |
| 14603 | 7069  | Ly6e          | Ube1l         | 1 |
| 14603 | 7105  | Ly6e          | Plac8         | 1 |
| 14603 | 7238  | Ly6e          | Pycard        | 1 |
| 14603 | 7316  | Ly6e          | Ifi204        | 1 |
| 14603 | 7336  | Ly6e          | Cd5l          | 1 |
| 14603 | 8555  | Ly6e          | H2-M3         | 1 |
| 14603 | 8800  | Ly6e          | Rnf213        | 1 |
| 14603 | 9401  | Ly6e          | Fcgr4         | 1 |
| 14603 | 9820  | Ly6e          | BC023105      | 1 |
| 14603 | 9847  | Ly6e          | Ifi27         | 1 |
| 14603 | 10109 | Ly6e          | Gbp3          | 1 |
| 14603 | 10504 | Ly6e          | Ripk3         | 1 |
| 14603 | 11009 | Ly6e          | MMT00008885   | 1 |
| 14603 | 11204 | Ly6e          | AI451617      | 1 |
| 14603 | 11265 | Ly6e          | Irgm          | 1 |
| 14603 | 11701 | Ly6e          | Oas1c         | 1 |
| 14603 | 12398 | Ly6e          | Ifi44         | 1 |

|       |       |       |               |   |
|-------|-------|-------|---------------|---|
| 14603 | 12600 | Ly6e  | Ifi204        | 1 |
| 14603 | 12969 | Ly6e  | Xaf1          | 1 |
| 14603 | 13156 | Ly6e  | Ifit3         | 1 |
| 14603 | 13309 | Ly6e  | Tgtp          | 1 |
| 14603 | 13514 | Ly6e  | Apol9b        | 1 |
| 14603 | 13527 | Ly6e  | Ctss          | 1 |
| 14603 | 13654 | Ly6e  | Stat1         | 1 |
| 14603 | 14258 | Ly6e  | Ifi47         | 1 |
| 14603 | 14506 | Ly6e  | Slc15a3       | 1 |
| 14603 | 14603 | Ly6e  | Ly6e          | 1 |
| 14603 | 14611 | Ly6e  | Ddx60         | 1 |
| 14603 | 14880 | Ly6e  | Ms4a4c        | 1 |
| 14603 | 15074 | Ly6e  | Usp18         | 1 |
| 14603 | 15280 | Ly6e  | Cxcl10        | 1 |
| 14603 | 15449 | Ly6e  | Mitd1         | 1 |
| 14603 | 15504 | Ly6e  | Mx2           | 1 |
| 14603 | 16182 | Ly6e  | Oasl1         | 1 |
| 14603 | 16521 | Ly6e  | Adar          | 1 |
| 14603 | 16572 | Ly6e  | D14Ertd668e   | 1 |
| 14603 | 16874 | Ly6e  | Fcer1g        | 1 |
| 14603 | 16988 | Ly6e  | Clec4f        | 1 |
| 14603 | 17197 | Ly6e  | Igtp          | 1 |
| 14603 | 18174 | Ly6e  | Stat2         | 1 |
| 14603 | 18186 | Ly6e  | Parp14        | 1 |
| 14603 | 18211 | Ly6e  | Folr2         | 1 |
| 14603 | 19189 | Ly6e  | Sp100         | 1 |
| 14603 | 19708 | Ly6e  | Ly6a          | 1 |
| 14603 | 19738 | Ly6e  | Lgals3bp      | 1 |
| 14603 | 20321 | Ly6e  | Ms4a6b        | 1 |
| 14603 | 20474 | Ly6e  | Gnb3          | 1 |
| 14603 | 20997 | Ly6e  | MMT00028135   | 1 |
| 14603 | 21351 | Ly6e  | Shisa5        | 1 |
| 14603 | 21440 | Ly6e  | Tmsb10        | 1 |
| 14603 | 21549 | Ly6e  | Rtp4          | 1 |
| 14603 | 21824 | Ly6e  | 5830443L24Rik | 1 |
| 14603 | 22037 | Ly6e  | Oas1g         | 1 |
| 14603 | 23208 | Ly6e  | Hck           | 1 |
| 14603 | 23450 | Ly6e  | D12Ertd647e   | 1 |
| 14611 | 1755  | Ddx60 | Ocel1         | 1 |
| 14611 | 2224  | Ddx60 | Oasl2         | 1 |
| 14611 | 2550  | Ddx60 | MMT00036681   | 1 |
| 14611 | 3594  | Ddx60 | Rasa4         | 1 |
| 14611 | 4114  | Ddx60 | Parp12        | 1 |
| 14611 | 4426  | Ddx60 | Iigp2         | 1 |
| 14611 | 5044  | Ddx60 | Ifi35         | 1 |
| 14611 | 6576  | Ddx60 | Slfn2         | 1 |
| 14611 | 6824  | Ddx60 | Irf7          | 1 |
| 14611 | 7105  | Ddx60 | Plac8         | 1 |
| 14611 | 7284  | Ddx60 | MMT00008674   | 1 |
| 14611 | 8800  | Ddx60 | Rnf213        | 1 |
| 14611 | 9304  | Ddx60 | AI449175      | 1 |

|       |       |               |               |    |
|-------|-------|---------------|---------------|----|
| 14611 | 9847  | Ddx60         | Ifi27         | 1  |
| 14611 | 10195 | Ddx60         | Klf1          | 1  |
| 14611 | 11204 | Ddx60         | Al451617      | 1  |
| 14611 | 12126 | Ddx60         | Znfx1         | 1  |
| 14611 | 12398 | Ddx60         | Ifi44         | 1  |
| 14611 | 12969 | Ddx60         | Xaf1          | 1  |
| 14611 | 13156 | Ddx60         | Ifit3         | 1  |
| 14611 | 13261 | Ddx60         | Aldh7a1       | -1 |
| 14611 | 13514 | Ddx60         | Apol9b        | 1  |
| 14611 | 13732 | Ddx60         | Tpm4          | -1 |
| 14611 | 14506 | Ddx60         | Slc15a3       | 1  |
| 14611 | 14611 | Ddx60         | Ddx60         | 1  |
| 14611 | 14880 | Ddx60         | Ms4a4c        | 1  |
| 14611 | 15074 | Ddx60         | Usp18         | 1  |
| 14611 | 15504 | Ddx60         | Mx2           | 1  |
| 14611 | 16182 | Ddx60         | Oasl1         | 1  |
| 14611 | 16521 | Ddx60         | Adar          | 1  |
| 14611 | 17197 | Ddx60         | Igtp          | 1  |
| 14611 | 18686 | Ddx60         | Zfp143        | 1  |
| 14611 | 18886 | Ddx60         | Slc18a1       | -1 |
| 14611 | 19738 | Ddx60         | Lgals3bp      | 1  |
| 14611 | 20484 | Ddx60         | Ces1          | -1 |
| 14611 | 20997 | Ddx60         | MMT00028135   | 1  |
| 14611 | 21351 | Ddx60         | Shisa5        | 1  |
| 14611 | 21549 | Ddx60         | Rtp4          | 1  |
| 14617 | 8815  | MMT00033859   | Mx1           | -1 |
| 14621 | 7619  | Six4          | Pik3ip1       | 1  |
| 14621 | 11633 | Six4          | Ier3          | 1  |
| 14629 | 22138 | Nfkb2         | Ang           | -1 |
| 14631 | 14631 | Stag3         | Stag3         | 1  |
| 14640 | 21214 | Tmem97        | Scd1          | 1  |
| 14647 | 6231  | Cst3          | 9030622O22Rik | -1 |
| 14647 | 14647 | Cst3          | Cst3          | 1  |
| 14647 | 19560 | Cst3          | Trmt6         | 1  |
| 14647 | 22740 | Cst3          | Manbal        | -1 |
| 14650 | 1561  | 2810433K01Rik | Aurka         | 1  |
| 14650 | 8416  | 2810433K01Rik | Cdc20         | 1  |
| 14650 | 11382 | 2810433K01Rik | Cdca3         | 1  |
| 14650 | 19318 | 2810433K01Rik | Plk1          | 1  |
| 14650 | 20433 | 2810433K01Rik | Cdca5         | 1  |
| 14650 | 21947 | 2810433K01Rik | Cdca8         | 1  |
| 14657 | 6370  | Mefv          | Aqp8          | 1  |
| 14657 | 8428  | Mefv          | Sorbs3        | -1 |
| 14657 | 12941 | Mefv          | Elovl5        | 1  |
| 14657 | 14017 | Mefv          | Ces5          | 1  |
| 14657 | 18827 | Mefv          | Oprs1         | 1  |
| 14662 | 13431 | MMT00070823   | MMT00038058   | -1 |
| 14662 | 15205 | MMT00070823   | MMT00030262   | -1 |
| 14662 | 22978 | MMT00070823   | MMT00043176   | -1 |
| 14667 | 16760 | Fggy          | 1600029D21Rik | 1  |
| 14677 | 3496  | S100b         | Slc41a2       | 1  |

|       |       |          |               |    |
|-------|-------|----------|---------------|----|
| 14677 | 12055 | S100b    | 1810008A18Rik | -1 |
| 14677 | 15451 | S100b    | Ftcd          | 1  |
| 14677 | 22222 | S100b    | Gstt1         | -1 |
| 14683 | 5364  | Dennd1c  | Kif22         | 1  |
| 14683 | 11382 | Dennd1c  | Cdca3         | 1  |
| 14683 | 11393 | Dennd1c  | A830007P12Rik | 1  |
| 14733 | 14733 | Fhit     | Fhit          | 1  |
| 14737 | 604   | Cldn12   | Ppp1r15b      | 1  |
| 14737 | 3502  | Cldn12   | Gde1          | 1  |
| 14737 | 5364  | Cldn12   | Kif22         | -1 |
| 14737 | 5892  | Cldn12   | MMT00038457   | 1  |
| 14737 | 6030  | Cldn12   | As3mt         | 1  |
| 14737 | 7414  | Cldn12   | Clpx          | -1 |
| 14737 | 7492  | Cldn12   | Adfp          | -1 |
| 14737 | 11599 | Cldn12   | Coq10b        | 1  |
| 14737 | 11741 | Cldn12   | Slc30a10      | -1 |
| 14737 | 12799 | Cldn12   | Spon2         | -1 |
| 14737 | 12941 | Cldn12   | Elovl5        | -1 |
| 14737 | 13078 | Cldn12   | Eps8l2        | -1 |
| 14737 | 14472 | Cldn12   | Ahcy          | 1  |
| 14737 | 15824 | Cldn12   | D19Erttd721e  | -1 |
| 14737 | 17247 | Cldn12   | A030007L17Rik | -1 |
| 14737 | 20147 | Cldn12   | Ybx1          | 1  |
| 14737 | 20745 | Cldn12   | Sord          | 1  |
| 14737 | 20967 | Cldn12   | Fabp2         | -1 |
| 14740 | 1956  | Mfap1b   | Usp50         | -1 |
| 14740 | 4833  | Mfap1b   | Synpo2        | 1  |
| 14740 | 6016  | Mfap1b   | A530057A03Rik | -1 |
| 14740 | 6231  | Mfap1b   | 9030622O22Rik | -1 |
| 14740 | 7991  | Mfap1b   | Gpr115        | 1  |
| 14740 | 14647 | Mfap1b   | Cst3          | 1  |
| 14740 | 14740 | Mfap1b   | Mfap1b        | 1  |
| 14740 | 17043 | Mfap1b   | Tmem127       | -1 |
| 14740 | 21729 | Mfap1b   | Hdc           | 1  |
| 14740 | 22857 | Mfap1b   | Fahd2a        | -1 |
| 14740 | 23609 | Mfap1b   | Trim44        | -1 |
| 14753 | 1709  | Slc25a19 | Mt2           | -1 |
| 14753 | 2051  | Slc25a19 | Ddx27         | -1 |
| 14753 | 6193  | Slc25a19 | Lactb2        | 1  |
| 14753 | 6816  | Slc25a19 | Slc46a3       | 1  |
| 14753 | 8896  | Slc25a19 | Fasn          | 1  |
| 14753 | 9408  | Slc25a19 | Hmgcs2        | -1 |
| 14753 | 10612 | Slc25a19 | Slc24a6       | -1 |
| 14753 | 11462 | Slc25a19 | Gpam          | 1  |
| 14753 | 11576 | Slc25a19 | Gm1381        | 1  |
| 14753 | 12553 | Slc25a19 | Kpnb1         | 1  |
| 14753 | 13990 | Slc25a19 | MMT00040357   | 1  |
| 14753 | 15252 | Slc25a19 | MMT00019402   | 1  |
| 14753 | 16027 | Slc25a19 | Ppp2r2d       | -1 |
| 14753 | 16888 | Slc25a19 | H6pd          | -1 |
| 14753 | 17660 | Slc25a19 | Nlrp12        | -1 |

|       |       |             |                    |    |
|-------|-------|-------------|--------------------|----|
| 14753 | 17862 | Slc25a19    | Fbxo21             | -1 |
| 14753 | 18515 | Slc25a19    | Ddx28              | -1 |
| 14753 | 18653 | Slc25a19    | MMT00072901        | -1 |
| 14753 | 20058 | Slc25a19    | Dnaic1             | -1 |
| 14753 | 20385 | Slc25a19    | Chd1l              | 1  |
| 14753 | 21143 | Slc25a19    | Ypel3              | -1 |
| 14753 | 21202 | Slc25a19    | Acly               | 1  |
| 14753 | 21251 | Slc25a19    | Cpt1a              | -1 |
| 14757 | 2472  | Hdx         | MMT00014056        | 1  |
| 14757 | 7192  | Hdx         | Ttc21b             | 1  |
| 14757 | 7654  | Hdx         | Ptpmt1             | -1 |
| 14757 | 9547  | Hdx         | MMT00006479        | 1  |
| 14757 | 14757 | Hdx         | Hdx                | 1  |
| 14757 | 16881 | Hdx         | MMT00031504        | 1  |
| 14757 | 17295 | Hdx         | MMT00082577        | 1  |
| 14757 | 19763 | Hdx         | Acp2               | 1  |
| 14757 | 19803 | Hdx         | BC003993           | 1  |
| 14757 | 22320 | Hdx         | MMT00047284        | 1  |
| 14757 | 23474 | Hdx         | MMT00011721        | 1  |
| 14781 | 1693  | Mars2       | Ufsp1              | 1  |
| 14797 | 5364  | Ecsit       | Kif22              | -1 |
| 14804 | 5364  | Naalad2     | Kif22              | 1  |
| 14804 | 11382 | Naalad2     | Cdca3              | 1  |
| 14815 | 16580 | Lpin3       | Tnfaip2            | -1 |
| 14838 | 294   | MMT00070887 | Ehhadh             | 1  |
| 14838 | 607   | MMT00070887 | Me1                | 1  |
| 14838 | 1129  | MMT00070887 | Gsta4              | 1  |
| 14838 | 3377  | MMT00070887 | Cs                 | 1  |
| 14838 | 3446  | MMT00070887 | Eno1               | 1  |
| 14838 | 3696  | MMT00070887 | Elov16             | 1  |
| 14838 | 4351  | MMT00070887 | Plxnb1             | -1 |
| 14838 | 5884  | MMT00070887 | Gstm2              | 1  |
| 14838 | 6193  | MMT00070887 | Lactb2             | 1  |
| 14838 | 6650  | MMT00070887 | MMT00050325        | 1  |
| 14838 | 7519  | MMT00070887 | Gstm1              | 1  |
| 14838 | 7602  | MMT00070887 | Pcca               | 1  |
| 14838 | 8444  | MMT00070887 | Rdh16              | 1  |
| 14838 | 8815  | MMT00070887 | Mx1                | 1  |
| 14838 | 9427  | MMT00070887 | Nqo2               | 1  |
| 14838 | 9842  | MMT00070887 | Qdpr               | 1  |
| 14838 | 10554 | MMT00070887 | ENSMUSG00000074179 | 1  |
| 14838 | 11086 | MMT00070887 | Pnpla5             | 1  |
| 14838 | 13293 | MMT00070887 | Gsta2              | 1  |
| 14838 | 14147 | MMT00070887 | Acss2              | 1  |
| 14838 | 17398 | MMT00070887 | MMT00045090        | 1  |
| 14838 | 18113 | MMT00070887 | MMT00034400        | 1  |
| 14838 | 18201 | MMT00070887 | MMT00060232        | 1  |
| 14838 | 19066 | MMT00070887 | MMT00012632        | 1  |
| 14838 | 20019 | MMT00070887 | Qdpr               | 1  |
| 14838 | 20328 | MMT00070887 | Csl                | 1  |
| 14838 | 20804 | MMT00070887 | Eno1               | 1  |

|       |       |             |                    |    |
|-------|-------|-------------|--------------------|----|
| 14838 | 21202 | MMT00070887 | Acly               | 1  |
| 14838 | 21214 | MMT00070887 | Scd1               | 1  |
| 14838 | 21575 | MMT00070887 | Cyp2c55            | 1  |
| 14838 | 21727 | MMT00070887 | Khk                | 1  |
| 14842 | 2599  | Gipr        | Lsm14a             | 1  |
| 14842 | 4697  | Gipr        | Cyp2a12            | -1 |
| 14842 | 6513  | Gipr        | Qpctl              | 1  |
| 14842 | 6519  | Gipr        | Phldb3             | 1  |
| 14842 | 11321 | Gipr        | 2310014L17Rik      | -1 |
| 14842 | 11888 | Gipr        | Myadm              | -1 |
| 14842 | 16639 | Gipr        | MMT00078937        | -1 |
| 14842 | 17314 | Gipr        | Napa               | -1 |
| 14842 | 19462 | Gipr        | 4933439C20Rik      | -1 |
| 14842 | 20606 | Gipr        | MMT00042166        | -1 |
| 14842 | 23247 | Gipr        | Ercc1              | -1 |
| 14850 | 8815  | MMT00057793 | Mx1                | 1  |
| 14850 | 21214 | MMT00057793 | Scd1               | 1  |
| 14858 | 21214 | ltpr3       | Scd1               | -1 |
| 14862 | 1129  | Dhrs7       | Gsta4              | 1  |
| 14862 | 2127  | Dhrs7       | Ldha               | -1 |
| 14862 | 3832  | Dhrs7       | Sdha               | 1  |
| 14862 | 4056  | Dhrs7       | Tnfaip81           | -1 |
| 14862 | 6085  | Dhrs7       | MMT00007454        | -1 |
| 14862 | 7492  | Dhrs7       | Adfp               | -1 |
| 14862 | 7602  | Dhrs7       | Pcca               | 1  |
| 14862 | 8773  | Dhrs7       | MMT00027093        | -1 |
| 14862 | 9427  | Dhrs7       | Nqo2               | 1  |
| 14862 | 9842  | Dhrs7       | Qdpr               | 1  |
| 14862 | 10532 | Dhrs7       | MMT00057790        | -1 |
| 14862 | 10554 | Dhrs7       | ENSMUSG00000074179 | 1  |
| 14862 | 12556 | Dhrs7       | Ass1               | 1  |
| 14862 | 12955 | Dhrs7       | Atp5o              | 1  |
| 14862 | 13293 | Dhrs7       | Gsta2              | 1  |
| 14862 | 13431 | Dhrs7       | MMT00038058        | -1 |
| 14862 | 14055 | Dhrs7       | MMT00050438        | -1 |
| 14862 | 15205 | Dhrs7       | MMT00030262        | -1 |
| 14862 | 15500 | Dhrs7       | MMT00081411        | -1 |
| 14862 | 16720 | Dhrs7       | Mttr7              | 1  |
| 14862 | 21727 | Dhrs7       | Khk                | 1  |
| 14862 | 21937 | Dhrs7       | MMT00015325        | -1 |
| 14862 | 22406 | Dhrs7       | Vnn1               | -1 |
| 14862 | 22907 | Dhrs7       | MMT00054594        | -1 |
| 14862 | 22978 | Dhrs7       | MMT00043176        | -1 |
| 14862 | 22998 | Dhrs7       | Ass1               | 1  |
| 14862 | 23640 | Dhrs7       | Bdh1               | -1 |
| 14866 | 16337 | Kctd2       | Grin2c             | 1  |
| 14866 | 18709 | Kctd2       | Srp68              | -1 |
| 14868 | 6912  | Tmem159     | Crym               | 1  |
| 14877 | 1363  | Ptx3        | BC021767           | 1  |
| 14877 | 2850  | Ptx3        | Slc16a6            | 1  |
| 14877 | 5364  | Ptx3        | Kif22              | 1  |

|       |       |          |               |    |
|-------|-------|----------|---------------|----|
| 14877 | 7761  | Ptx3     | Nudt19        | -1 |
| 14877 | 8416  | Ptx3     | Cdc20         | 1  |
| 14877 | 11382 | Ptx3     | Cdca3         | 1  |
| 14877 | 11741 | Ptx3     | Slc30a10      | 1  |
| 14877 | 12799 | Ptx3     | Spon2         | 1  |
| 14879 | 607   | EG636544 | Me1           | 1  |
| 14879 | 874   | EG636544 | Aldh1a7       | 1  |
| 14879 | 3562  | EG636544 | MMT00011909   | 1  |
| 14879 | 7602  | EG636544 | Pcca          | 1  |
| 14879 | 8444  | EG636544 | Rdh16         | 1  |
| 14879 | 8815  | EG636544 | Mx1           | 1  |
| 14879 | 18201 | EG636544 | MMT00060232   | 1  |
| 14879 | 21214 | EG636544 | Scd1          | 1  |
| 14879 | 21575 | EG636544 | Cyp2c55       | 1  |
| 14880 | 1533  | Ms4a4c   | BC013712      | 1  |
| 14880 | 2200  | Ms4a4c   | BC006779      | 1  |
| 14880 | 2224  | Ms4a4c   | Oasl2         | 1  |
| 14880 | 4409  | Ms4a4c   | 5430435G22Rik | 1  |
| 14880 | 4426  | Ms4a4c   | Iigp2         | 1  |
| 14880 | 5250  | Ms4a4c   | Ifit2         | 1  |
| 14880 | 5556  | Ms4a4c   | Ccl4          | 1  |
| 14880 | 5845  | Ms4a4c   | I118bp        | 1  |
| 14880 | 5853  | Ms4a4c   | Trim30        | 1  |
| 14880 | 6213  | Ms4a4c   | Ccl2          | 1  |
| 14880 | 6824  | Ms4a4c   | Irf7          | 1  |
| 14880 | 6888  | Ms4a4c   | Cxcl9         | 1  |
| 14880 | 6910  | Ms4a4c   | Ly6c2         | 1  |
| 14880 | 7069  | Ms4a4c   | Ube1l         | 1  |
| 14880 | 7105  | Ms4a4c   | Plac8         | 1  |
| 14880 | 7238  | Ms4a4c   | Pycard        | 1  |
| 14880 | 7284  | Ms4a4c   | MMT00008674   | 1  |
| 14880 | 7316  | Ms4a4c   | Ifi204        | 1  |
| 14880 | 7336  | Ms4a4c   | Cd5l          | 1  |
| 14880 | 8270  | Ms4a4c   | Cispn         | 1  |
| 14880 | 8555  | Ms4a4c   | H2-M3         | 1  |
| 14880 | 8659  | Ms4a4c   | Psmb8         | 1  |
| 14880 | 8800  | Ms4a4c   | Rnf213        | 1  |
| 14880 | 9847  | Ms4a4c   | Ifi27         | 1  |
| 14880 | 10109 | Ms4a4c   | Gbp3          | 1  |
| 14880 | 11009 | Ms4a4c   | MMT00008885   | 1  |
| 14880 | 11275 | Ms4a4c   | Fanci         | 1  |
| 14880 | 11870 | Ms4a4c   | Apitd1        | 1  |
| 14880 | 12398 | Ms4a4c   | Ifi44         | 1  |
| 14880 | 12600 | Ms4a4c   | Ifi204        | 1  |
| 14880 | 12969 | Ms4a4c   | Xaf1          | 1  |
| 14880 | 13527 | Ms4a4c   | Ctss          | 1  |
| 14880 | 14603 | Ms4a4c   | Ly6e          | 1  |
| 14880 | 14880 | Ms4a4c   | Ms4a4c        | 1  |
| 14880 | 15280 | Ms4a4c   | Cxcl10        | 1  |
| 14880 | 16147 | Ms4a4c   | Tlr2          | 1  |
| 14880 | 16182 | Ms4a4c   | Oasl1         | 1  |

|       |       |        |                    |    |
|-------|-------|--------|--------------------|----|
| 14880 | 16572 | Ms4a4c | D14Ertd668e        | 1  |
| 14880 | 17412 | Ms4a4c | Aif1               | 1  |
| 14880 | 19189 | Ms4a4c | Sp100              | 1  |
| 14880 | 19708 | Ms4a4c | Ly6a               | 1  |
| 14880 | 19738 | Ms4a4c | Lgals3bp           | 1  |
| 14880 | 20321 | Ms4a4c | Ms4a6b             | 1  |
| 14880 | 20433 | Ms4a4c | Cdca5              | 1  |
| 14880 | 21351 | Ms4a4c | Shisa5             | 1  |
| 14880 | 21549 | Ms4a4c | Rtp4               | 1  |
| 14880 | 21824 | Ms4a4c | 5830443L24Rik      | 1  |
| 14880 | 22037 | Ms4a4c | Oas1g              | 1  |
| 14880 | 23208 | Ms4a4c | Hck                | 1  |
| 14883 | 16147 | Itgal  | Tlr2               | 1  |
| 14883 | 18027 | Itgal  | 5730403B10Rik      | -1 |
| 14884 | 2127  | Mrps22 | Ldha               | -1 |
| 14884 | 6085  | Mrps22 | MMT00007454        | -1 |
| 14884 | 6329  | Mrps22 | Cyp2b10            | 1  |
| 14884 | 7602  | Mrps22 | Pcca               | 1  |
| 14884 | 8773  | Mrps22 | MMT00027093        | -1 |
| 14884 | 10554 | Mrps22 | ENSMUSG00000074179 | 1  |
| 14884 | 13293 | Mrps22 | Gsta2              | 1  |
| 14884 | 13431 | Mrps22 | MMT00038058        | -1 |
| 14884 | 15205 | Mrps22 | MMT00030262        | -1 |
| 14884 | 21937 | Mrps22 | MMT00015325        | -1 |
| 14884 | 22907 | Mrps22 | MMT00054594        | -1 |
| 14884 | 22978 | Mrps22 | MMT00043176        | -1 |
| 14894 | 192   | G0s2   | Eif3d              | 1  |
| 14894 | 213   | G0s2   | Rgs16              | -1 |
| 14894 | 250   | G0s2   | Tubb2a-ps2         | 1  |
| 14894 | 269   | G0s2   | Tuba1b             | 1  |
| 14894 | 354   | G0s2   | MMT00007996        | 1  |
| 14894 | 563   | G0s2   | D4Bwg0951e         | -1 |
| 14894 | 577   | G0s2   | Rrp12              | 1  |
| 14894 | 609   | G0s2   | MMT00060868        | 1  |
| 14894 | 662   | G0s2   | Mid1ip1            | 1  |
| 14894 | 771   | G0s2   | Zbtb45             | 1  |
| 14894 | 1026  | G0s2   | Ftsj2              | 1  |
| 14894 | 1257  | G0s2   | Slc25a45           | 1  |
| 14894 | 1709  | G0s2   | Mt2                | -1 |
| 14894 | 1827  | G0s2   | Gnb1l              | 1  |
| 14894 | 1829  | G0s2   | MMT00030026        | 1  |
| 14894 | 1941  | G0s2   | MMT00079618        | 1  |
| 14894 | 2322  | G0s2   | Tuba4a             | 1  |
| 14894 | 2794  | G0s2   | Map3k6             | -1 |
| 14894 | 3097  | G0s2   | Ppp1r3g            | -1 |
| 14894 | 3246  | G0s2   | Prei4              | -1 |
| 14894 | 3309  | G0s2   | Grpel2             | -1 |
| 14894 | 3410  | G0s2   | Paqr9              | 1  |
| 14894 | 3804  | G0s2   | MMT00015534        | 1  |
| 14894 | 4084  | G0s2   | Asah3l             | -1 |
| 14894 | 4201  | G0s2   | Tubb2c             | 1  |



|       |       |      |               |    |
|-------|-------|------|---------------|----|
| 14894 | 4286  | G0s2 | Ptp4a1        | -1 |
| 14894 | 4708  | G0s2 | Traf3ip2      | 1  |
| 14894 | 4993  | G0s2 | Tsc22d1       | 1  |
| 14894 | 5375  | G0s2 | Sec23b        | 1  |
| 14894 | 5587  | G0s2 | Rmnd5b        | 1  |
| 14894 | 5594  | G0s2 | Erbp3         | -1 |
| 14894 | 6551  | G0s2 | Slc35b4       | 1  |
| 14894 | 6771  | G0s2 | Insc          | 1  |
| 14894 | 6823  | G0s2 | Yars          | 1  |
| 14894 | 6918  | G0s2 | Cog8          | 1  |
| 14894 | 6966  | G0s2 | Mia3          | -1 |
| 14894 | 7151  | G0s2 | MMT00007982   | 1  |
| 14894 | 7590  | G0s2 | Ankrd40       | 1  |
| 14894 | 7944  | G0s2 | AI132487      | -1 |
| 14894 | 8658  | G0s2 | Fmo2          | -1 |
| 14894 | 8816  | G0s2 | Nfkbia        | -1 |
| 14894 | 9154  | G0s2 | Tfg           | 1  |
| 14894 | 9763  | G0s2 | Tuba3b        | 1  |
| 14894 | 10384 | G0s2 | Chic2         | -1 |
| 14894 | 10612 | G0s2 | Slc24a6       | -1 |
| 14894 | 10712 | G0s2 | Fchsd2        | -1 |
| 14894 | 10863 | G0s2 | Tssc1         | 1  |
| 14894 | 11093 | G0s2 | Zdhhc1        | -1 |
| 14894 | 11129 | G0s2 | Ankhd1        | -1 |
| 14894 | 11149 | G0s2 | MMT00050488   | 1  |
| 14894 | 11193 | G0s2 | Tsc22d1       | 1  |
| 14894 | 11444 | G0s2 | Rnpep         | 1  |
| 14894 | 11574 | G0s2 | Gne           | -1 |
| 14894 | 11724 | G0s2 | Tuba3a        | 1  |
| 14894 | 11807 | G0s2 | Fbxo31        | -1 |
| 14894 | 11808 | G0s2 | Pck1          | -1 |
| 14894 | 11984 | G0s2 | N6amt2        | 1  |
| 14894 | 12091 | G0s2 | 1810015C04Rik | -1 |
| 14894 | 12460 | G0s2 | Pnpla2        | -1 |
| 14894 | 12904 | G0s2 | MMT00040704   | -1 |
| 14894 | 12981 | G0s2 | Nek6          | 1  |
| 14894 | 13376 | G0s2 | Alg2          | 1  |
| 14894 | 13471 | G0s2 | Cln8          | -1 |
| 14894 | 13489 | G0s2 | D230025D16Rik | -1 |
| 14894 | 13564 | G0s2 | Qrsl1         | 1  |
| 14894 | 13889 | G0s2 | Agpat2        | 1  |
| 14894 | 13990 | G0s2 | MMT00040357   | 1  |
| 14894 | 14462 | G0s2 | Zfp385b       | -1 |
| 14894 | 14620 | G0s2 | Tbc1d8        | -1 |
| 14894 | 15021 | G0s2 | Ppargc1a      | -1 |
| 14894 | 15631 | G0s2 | Lpin1         | -1 |
| 14894 | 15668 | G0s2 | 1810032O08Rik | -1 |
| 14894 | 15862 | G0s2 | Mrap          | 1  |
| 14894 | 15990 | G0s2 | Dnmbp         | -1 |
| 14894 | 16060 | G0s2 | Gys2          | -1 |
| 14894 | 16176 | G0s2 | St3gal5       | -1 |

|       |       |       |               |    |
|-------|-------|-------|---------------|----|
| 14894 | 16692 | G0s2  | Bat4          | -1 |
| 14894 | 16947 | G0s2  | Wfs1          | 1  |
| 14894 | 17323 | G0s2  | Tubb6         | 1  |
| 14894 | 17444 | G0s2  | Tuba1a        | 1  |
| 14894 | 17622 | G0s2  | Foxo1         | -1 |
| 14894 | 17656 | G0s2  | Hdhd3         | 1  |
| 14894 | 17660 | G0s2  | Nlrp12        | -1 |
| 14894 | 17876 | G0s2  | Tubb4         | 1  |
| 14894 | 18027 | G0s2  | 5730403B10Rik | -1 |
| 14894 | 18038 | G0s2  | Sec24c        | 1  |
| 14894 | 18314 | G0s2  | 4631416L12Rik | -1 |
| 14894 | 18653 | G0s2  | MMT00072901   | -1 |
| 14894 | 18785 | G0s2  | Angptl4       | -1 |
| 14894 | 19089 | G0s2  | Peci          | -1 |
| 14894 | 19146 | G0s2  | N4bp2l1       | -1 |
| 14894 | 19217 | G0s2  | Cyr61         | 1  |
| 14894 | 21288 | G0s2  | Tcp11l2       | -1 |
| 14894 | 21331 | G0s2  | Slc10a6       | -1 |
| 14894 | 22031 | G0s2  | Vcam1         | -1 |
| 14894 | 22130 | G0s2  | Cks1b         | 1  |
| 14894 | 22290 | G0s2  | Tubb2a        | 1  |
| 14894 | 22373 | G0s2  | Txnip         | -1 |
| 14894 | 22388 | G0s2  | 2410018M08Rik | -1 |
| 14894 | 22443 | G0s2  | Tuba1c        | 1  |
| 14894 | 22470 | G0s2  | Ppargc1b      | -1 |
| 14894 | 23150 | G0s2  | EG622657      | 1  |
| 14894 | 23201 | G0s2  | S1pr1         | 1  |
| 14894 | 23626 | G0s2  | MMT00003764   | 1  |
| 14898 | 8444  | Orm1  | Rdh16         | 1  |
| 14898 | 8815  | Orm1  | Mx1           | 1  |
| 14898 | 16336 | Orm1  | 2310040A07Rik | -1 |
| 14912 | 18846 | Gpr1  | lkbkg         | -1 |
| 14917 | 719   | Gjb5  | Usp2          | -1 |
| 14917 | 1031  | Gjb5  | Uros          | 1  |
| 14917 | 2399  | Gjb5  | MMT00060167   | 1  |
| 14917 | 4298  | Gjb5  | St3gal1       | 1  |
| 14917 | 5374  | Gjb5  | Chka          | 1  |
| 14917 | 7414  | Gjb5  | Clpx          | 1  |
| 14917 | 9495  | Gjb5  | Srms          | 1  |
| 14917 | 11233 | Gjb5  | Tef           | -1 |
| 14917 | 19234 | Gjb5  | Nrg4          | -1 |
| 14917 | 19560 | Gjb5  | Trmt6         | 1  |
| 14917 | 21142 | Gjb5  | Gm129         | -1 |
| 14951 | 3265  | Dpep3 | Dntt          | 1  |
| 14951 | 20967 | Dpep3 | Fabp2         | 1  |
| 14954 | 7550  | Rab19 | Rab11fip5     | 1  |
| 14966 | 274   | Ddx51 | Trit1         | -1 |
| 14966 | 1941  | Ddx51 | MMT00079618   | 1  |
| 14966 | 7151  | Ddx51 | MMT00007982   | 1  |
| 14966 | 9763  | Ddx51 | Tuba3b        | 1  |
| 14966 | 10612 | Ddx51 | Slc24a6       | -1 |

|       |       |               |               |    |
|-------|-------|---------------|---------------|----|
| 14966 | 11724 | Ddx51         | Tuba3a        | 1  |
| 14966 | 18099 | Ddx51         | Nfx1          | -1 |
| 14966 | 19031 | Ddx51         | Mms19         | -1 |
| 14966 | 22443 | Ddx51         | Tuba1c        | 1  |
| 14966 | 22470 | Ddx51         | Ppargc1b      | -1 |
| 14989 | 18300 | Map3k5        | Arg1          | 1  |
| 14989 | 19115 | Map3k5        | Rab32         | -1 |
| 15000 | 22936 | Tbx18         | Rhobtb1       | -1 |
| 15002 | 1416  | Ncapg         | 6720460F02Rik | 1  |
| 15002 | 1561  | Ncapg         | Aurka         | 1  |
| 15002 | 5364  | Ncapg         | Kif22         | 1  |
| 15002 | 8416  | Ncapg         | Cdc20         | 1  |
| 15002 | 13054 | Ncapg         | Mcm4          | 1  |
| 15002 | 15271 | Ncapg         | Dbf4          | 1  |
| 15002 | 17823 | Ncapg         | D2Ert750e     | 1  |
| 15002 | 18299 | Ncapg         | MMT00035424   | 1  |
| 15002 | 21692 | Ncapg         | MMT00013924   | 1  |
| 15002 | 21947 | Ncapg         | Cdca8         | 1  |
| 15013 | 12565 | Nfkb1         | Grem2         | -1 |
| 15016 | 3061  | MMT00074608   | Scarf2        | 1  |
| 15016 | 3119  | MMT00074608   | Mapk10        | 1  |
| 15016 | 3339  | MMT00074608   | Dip2a         | 1  |
| 15016 | 6017  | MMT00074608   | MMT00018015   | -1 |
| 15016 | 6426  | MMT00074608   | Mfsd4         | 1  |
| 15016 | 6846  | MMT00074608   | Olf1402       | 1  |
| 15016 | 8791  | MMT00074608   | Sectm1a       | 1  |
| 15016 | 10214 | MMT00074608   | Sectm1b       | 1  |
| 15016 | 13615 | MMT00074608   | Arl16         | -1 |
| 15016 | 15016 | MMT00074608   | MMT00074608   | 1  |
| 15016 | 17680 | MMT00074608   | 1700069L16Rik | 1  |
| 15016 | 17792 | MMT00074608   | Vmn2r79       | 1  |
| 15016 | 17897 | MMT00074608   | Gm1019        | 1  |
| 15021 | 11422 | Ppargc1a      | Pltp          | -1 |
| 15022 | 11789 | Tmem14c       | Ccdc90a       | 1  |
| 15022 | 15022 | Tmem14c       | Tmem14c       | 1  |
| 15024 | 185   | 2310061J03Rik | Ap2b1         | -1 |
| 15024 | 6193  | 2310061J03Rik | Lactb2        | -1 |
| 15024 | 8597  | 2310061J03Rik | Papss1        | -1 |
| 15024 | 16788 | 2310061J03Rik | Imp3          | 1  |
| 15024 | 19743 | 2310061J03Rik | Atg16l1       | 1  |
| 15024 | 21202 | 2310061J03Rik | Acly          | -1 |
| 15024 | 21251 | 2310061J03Rik | Cpt1a         | 1  |
| 15039 | 2639  | Zmynd15       | Abhd2         | 1  |
| 15039 | 14279 | Zmynd15       | 3930402G23Rik | 1  |
| 15039 | 19234 | Zmynd15       | Nrg4          | -1 |
| 15039 | 19790 | Zmynd15       | Polg2         | -1 |
| 15039 | 20058 | Zmynd15       | Dnaic1        | 1  |
| 15039 | 20171 | Zmynd15       | 1700008G05Rik | 1  |
| 15049 | 662   | Rnf125        | Mid1ip1       | -1 |
| 15049 | 5804  | Rnf125        | Thrsp         | -1 |
| 15049 | 8632  | Rnf125        | Igfbp1        | 1  |

|       |       |             |               |    |
|-------|-------|-------------|---------------|----|
| 15049 | 9831  | Rnf125      | Nedd4l        | 1  |
| 15049 | 11981 | Rnf125      | Sh3bp2        | -1 |
| 15049 | 12315 | Rnf125      | Srebf1        | -1 |
| 15049 | 13304 | Rnf125      | Gadd45b       | 1  |
| 15049 | 14135 | Rnf125      | Eepd1         | -1 |
| 15049 | 16251 | Rnf125      | G6pc          | 1  |
| 15049 | 18083 | Rnf125      | Gadd45a       | -1 |
| 15062 | 17525 | P2ry5       | Ctgf          | -1 |
| 15069 | 607   | MMT00014274 | Me1           | 1  |
| 15069 | 3620  | MMT00014274 | Bet1          | 1  |
| 15072 | 23609 | Commd9      | Trim44        | 1  |
| 15074 | 143   | Usp18       | Gvin1         | 1  |
| 15074 | 701   | Usp18       | Polr3g        | -1 |
| 15074 | 860   | Usp18       | Psmb10        | 1  |
| 15074 | 939   | Usp18       | Daxx          | 1  |
| 15074 | 1180  | Usp18       | Clec4a3       | 1  |
| 15074 | 1513  | Usp18       | Gzmb          | 1  |
| 15074 | 1533  | Usp18       | BC013712      | 1  |
| 15074 | 1908  | Usp18       | Rnf213        | 1  |
| 15074 | 2058  | Usp18       | Hk3           | 1  |
| 15074 | 2200  | Usp18       | BC006779      | 1  |
| 15074 | 2224  | Usp18       | Oasl2         | 1  |
| 15074 | 2550  | Usp18       | MMT00036681   | 1  |
| 15074 | 2752  | Usp18       | Fcgr1         | 1  |
| 15074 | 3103  | Usp18       | MMT00062748   | 1  |
| 15074 | 3426  | Usp18       | Hap1          | 1  |
| 15074 | 3523  | Usp18       | Trim34        | 1  |
| 15074 | 3572  | Usp18       | Ebi3          | 1  |
| 15074 | 3594  | Usp18       | Rasa4         | 1  |
| 15074 | 3659  | Usp18       | EG236451      | 1  |
| 15074 | 3683  | Usp18       | Oas2          | 1  |
| 15074 | 4114  | Usp18       | Parp12        | 1  |
| 15074 | 4310  | Usp18       | B3gnt8        | 1  |
| 15074 | 4409  | Usp18       | 5430435G22Rik | 1  |
| 15074 | 4426  | Usp18       | Ilgp2         | 1  |
| 15074 | 4508  | Usp18       | Ifit1         | 1  |
| 15074 | 4516  | Usp18       | Rsad2         | 1  |
| 15074 | 5002  | Usp18       | Ifi202b       | 1  |
| 15074 | 5044  | Usp18       | Ifi35         | 1  |
| 15074 | 5216  | Usp18       | Spnb5         | 1  |
| 15074 | 5250  | Usp18       | Ifit2         | 1  |
| 15074 | 5406  | Usp18       | Cd207         | -1 |
| 15074 | 5765  | Usp18       | Ifitm2        | 1  |
| 15074 | 5766  | Usp18       | 5033414D02Rik | 1  |
| 15074 | 5845  | Usp18       | Ii18bp        | 1  |
| 15074 | 5853  | Usp18       | Trim30        | 1  |
| 15074 | 5875  | Usp18       | Cd86          | 1  |
| 15074 | 5949  | Usp18       | Zbp1          | 1  |
| 15074 | 5975  | Usp18       | Car13         | 1  |
| 15074 | 6072  | Usp18       | C1qc          | 1  |
| 15074 | 6098  | Usp18       | Ncf4          | 1  |

|       |       |       |             |    |
|-------|-------|-------|-------------|----|
| 15074 | 6576  | Usp18 | Slfn2       | 1  |
| 15074 | 6587  | Usp18 | Irf9        | 1  |
| 15074 | 6595  | Usp18 | Oas1a       | 1  |
| 15074 | 6734  | Usp18 | Ehd4        | 1  |
| 15074 | 6779  | Usp18 | Gbp6        | 1  |
| 15074 | 6806  | Usp18 | Agri        | 1  |
| 15074 | 6824  | Usp18 | Irf7        | 1  |
| 15074 | 6866  | Usp18 | Gls         | -1 |
| 15074 | 6910  | Usp18 | Ly6c2       | 1  |
| 15074 | 7069  | Usp18 | Ube1l       | 1  |
| 15074 | 7105  | Usp18 | Plac8       | 1  |
| 15074 | 7238  | Usp18 | Pycard      | 1  |
| 15074 | 7284  | Usp18 | MMT00008674 | 1  |
| 15074 | 7316  | Usp18 | Ifi204      | 1  |
| 15074 | 7336  | Usp18 | Cd5l        | 1  |
| 15074 | 7879  | Usp18 | Ifitm3      | 1  |
| 15074 | 8325  | Usp18 | Psme2       | 1  |
| 15074 | 8555  | Usp18 | H2-M3       | 1  |
| 15074 | 8564  | Usp18 | Pld4        | 1  |
| 15074 | 8659  | Usp18 | Psmb8       | 1  |
| 15074 | 8800  | Usp18 | Rnf213      | 1  |
| 15074 | 8951  | Usp18 | Cd97        | 1  |
| 15074 | 9100  | Usp18 | Ms4a6c      | 1  |
| 15074 | 9320  | Usp18 | Rnf31       | 1  |
| 15074 | 9401  | Usp18 | Fcgr4       | 1  |
| 15074 | 9616  | Usp18 | AI451557    | 1  |
| 15074 | 9717  | Usp18 | Psmb9       | 1  |
| 15074 | 9820  | Usp18 | BC023105    | 1  |
| 15074 | 9821  | Usp18 | Pmaip1      | 1  |
| 15074 | 9847  | Usp18 | Ifi27       | 1  |
| 15074 | 9928  | Usp18 | Lgmn        | 1  |
| 15074 | 10109 | Usp18 | Gbp3        | 1  |
| 15074 | 10393 | Usp18 | Slc7a8      | 1  |
| 15074 | 10426 | Usp18 | Ly6f        | 1  |
| 15074 | 10504 | Usp18 | Ripk3       | 1  |
| 15074 | 10606 | Usp18 | Apbb1ip     | 1  |
| 15074 | 10796 | Usp18 | Spic        | 1  |
| 15074 | 10926 | Usp18 | P2ry13      | 1  |
| 15074 | 11009 | Usp18 | MMT00008885 | 1  |
| 15074 | 11204 | Usp18 | AI451617    | 1  |
| 15074 | 11265 | Usp18 | Irgm        | 1  |
| 15074 | 11406 | Usp18 | Ifi203      | 1  |
| 15074 | 11701 | Usp18 | Oas1c       | 1  |
| 15074 | 11845 | Usp18 | Psme1       | 1  |
| 15074 | 12126 | Usp18 | Znfx1       | 1  |
| 15074 | 12312 | Usp18 | Ms4a6d      | 1  |
| 15074 | 12363 | Usp18 | Ifitm6      | 1  |
| 15074 | 12398 | Usp18 | Ifi44       | 1  |
| 15074 | 12495 | Usp18 | Casp1       | 1  |
| 15074 | 12600 | Usp18 | Ifi204      | 1  |
| 15074 | 12969 | Usp18 | Xaf1        | 1  |

|       |       |       |               |   |
|-------|-------|-------|---------------|---|
| 15074 | 13156 | Usp18 | Ifit3         | 1 |
| 15074 | 13181 | Usp18 | Lcp2          | 1 |
| 15074 | 13309 | Usp18 | Tgtp          | 1 |
| 15074 | 13514 | Usp18 | Apol9b        | 1 |
| 15074 | 13522 | Usp18 | Slfn5         | 1 |
| 15074 | 13527 | Usp18 | Ctss          | 1 |
| 15074 | 13528 | Usp18 | Capn12        | 1 |
| 15074 | 13585 | Usp18 | Nckap1l       | 1 |
| 15074 | 13654 | Usp18 | Stat1         | 1 |
| 15074 | 13656 | Usp18 | Ly86          | 1 |
| 15074 | 13749 | Usp18 | Parp9         | 1 |
| 15074 | 13780 | Usp18 | Pilra         | 1 |
| 15074 | 13826 | Usp18 | Melk          | 1 |
| 15074 | 14029 | Usp18 | 2810022L02Rik | 1 |
| 15074 | 14117 | Usp18 | C1qb          | 1 |
| 15074 | 14237 | Usp18 | Rac2          | 1 |
| 15074 | 14258 | Usp18 | Ifi47         | 1 |
| 15074 | 14260 | Usp18 | Mkl           | 1 |
| 15074 | 14453 | Usp18 | Inpp5d        | 1 |
| 15074 | 14506 | Usp18 | Slc15a3       | 1 |
| 15074 | 14603 | Usp18 | Ly6e          | 1 |
| 15074 | 14611 | Usp18 | Ddx60         | 1 |
| 15074 | 14880 | Usp18 | Ms4a4c        | 1 |
| 15074 | 14883 | Usp18 | Itgal         | 1 |
| 15074 | 15074 | Usp18 | Usp18         | 1 |
| 15074 | 15280 | Usp18 | Cxcl10        | 1 |
| 15074 | 15348 | Usp18 | Eif2ak2       | 1 |
| 15074 | 15449 | Usp18 | Mitd1         | 1 |
| 15074 | 15504 | Usp18 | Mx2           | 1 |
| 15074 | 15572 | Usp18 | Dtx3l         | 1 |
| 15074 | 15749 | Usp18 | Cd22          | 1 |
| 15074 | 15825 | Usp18 | Fermt3        | 1 |
| 15074 | 16102 | Usp18 | Cd72          | 1 |
| 15074 | 16129 | Usp18 | Trafd1        | 1 |
| 15074 | 16147 | Usp18 | Tlr2          | 1 |
| 15074 | 16182 | Usp18 | Oasl1         | 1 |
| 15074 | 16186 | Usp18 | Cfp           | 1 |
| 15074 | 16199 | Usp18 | Samhd1        | 1 |
| 15074 | 16521 | Usp18 | Adar          | 1 |
| 15074 | 16572 | Usp18 | D14Ert668e    | 1 |
| 15074 | 16874 | Usp18 | Fcer1g        | 1 |
| 15074 | 16913 | Usp18 | Pira3         | 1 |
| 15074 | 16988 | Usp18 | Clec4f        | 1 |
| 15074 | 17071 | Usp18 | Samd9l        | 1 |
| 15074 | 17197 | Usp18 | Igtp          | 1 |
| 15074 | 17412 | Usp18 | Aif1          | 1 |
| 15074 | 17904 | Usp18 | Cds1          | 1 |
| 15074 | 18064 | Usp18 | MMT00035925   | 1 |
| 15074 | 18174 | Usp18 | Stat2         | 1 |
| 15074 | 18186 | Usp18 | Parp14        | 1 |
| 15074 | 18211 | Usp18 | Folr2         | 1 |

|       |       |               |               |    |
|-------|-------|---------------|---------------|----|
| 15074 | 18289 | Usp18         | Tap1          | 1  |
| 15074 | 18686 | Usp18         | Zfp143        | 1  |
| 15074 | 18868 | Usp18         | Mpeg1         | 1  |
| 15074 | 19026 | Usp18         | Isg15         | 1  |
| 15074 | 19063 | Usp18         | Evl           | 1  |
| 15074 | 19189 | Usp18         | Sp100         | 1  |
| 15074 | 19252 | Usp18         | Tmsb4x        | 1  |
| 15074 | 19262 | Usp18         | Cd274         | 1  |
| 15074 | 19298 | Usp18         | Unc93b1       | 1  |
| 15074 | 19708 | Usp18         | Ly6a          | 1  |
| 15074 | 19738 | Usp18         | Lgals3bp      | 1  |
| 15074 | 19794 | Usp18         | Rgs2          | 1  |
| 15074 | 20321 | Usp18         | Ms4a6b        | 1  |
| 15074 | 20431 | Usp18         | Slc7a7        | 1  |
| 15074 | 20474 | Usp18         | Gnb3          | 1  |
| 15074 | 20791 | Usp18         | MMT00014813   | 1  |
| 15074 | 20997 | Usp18         | MMT00028135   | 1  |
| 15074 | 21351 | Usp18         | Shisa5        | 1  |
| 15074 | 21440 | Usp18         | Tmsb10        | 1  |
| 15074 | 21549 | Usp18         | Rtp4          | 1  |
| 15074 | 21685 | Usp18         | Gzma          | 1  |
| 15074 | 21824 | Usp18         | 5830443L24Rik | 1  |
| 15074 | 22037 | Usp18         | Oas1g         | 1  |
| 15074 | 22077 | Usp18         | MMT00057550   | 1  |
| 15074 | 22327 | Usp18         | Tyrobp        | 1  |
| 15074 | 22496 | Usp18         | Sfn1          | 1  |
| 15074 | 22670 | Usp18         | Clec4a1       | 1  |
| 15074 | 22712 | Usp18         | Phf11         | 1  |
| 15074 | 23092 | Usp18         | Ifih1         | 1  |
| 15074 | 23174 | Usp18         | Psme2         | 1  |
| 15074 | 23208 | Usp18         | Hck           | 1  |
| 15074 | 23242 | Usp18         | Gngt2         | 1  |
| 15074 | 23403 | Usp18         | Ndc80         | 1  |
| 15074 | 23410 | Usp18         | C1qa          | 1  |
| 15074 | 23450 | Usp18         | D12Ert647e    | 1  |
| 15078 | 14825 | Slc1a3        | Ube2h         | -1 |
| 15079 | 3377  | Plcd3         | Cs            | -1 |
| 15079 | 10132 | Plcd3         | Ces2          | -1 |
| 15079 | 14323 | Plcd3         | Scarb1        | 1  |
| 15084 | 8632  | Ccl3          | Igfbp1        | -1 |
| 15084 | 15826 | Ccl3          | Arl4d         | -1 |
| 15088 | 8155  | 2810452K22Rik | Mark3         | 1  |
| 15088 | 16191 | 2810452K22Rik | Klc1          | -1 |
| 15089 | 13431 | Pla2g7        | MMT00038058   | 1  |
| 15089 | 14100 | Pla2g7        | Ccnk          | -1 |
| 15108 | 12556 | Fuca1         | Ass1          | -1 |
| 15108 | 22998 | Fuca1         | Ass1          | -1 |
| 15121 | 11406 | Itln1         | Ifi203        | 1  |
| 15121 | 13149 | Itln1         | Ifi203        | 1  |
| 15121 | 14052 | Itln1         | EG226654      | -1 |
| 15121 | 15235 | Itln1         | Ankrd13d      | -1 |

|       |       |             |               |    |
|-------|-------|-------------|---------------|----|
| 15121 | 15844 | Itln1       | Klhdc9        | -1 |
| 15121 | 18276 | Itln1       | Apoa2         | -1 |
| 15121 | 19844 | Itln1       | Ngf           | -1 |
| 15121 | 22043 | Itln1       | Rdh8          | -1 |
| 15127 | 607   | Cct6b       | Me1           | -1 |
| 15127 | 2051  | Cct6b       | Ddx27         | 1  |
| 15127 | 3696  | Cct6b       | Elovl6        | -1 |
| 15127 | 3754  | Cct6b       | Dock6         | -1 |
| 15127 | 5684  | Cct6b       | Ranbp10       | 1  |
| 15127 | 6193  | Cct6b       | Lactb2        | -1 |
| 15127 | 10612 | Cct6b       | Slc24a6       | 1  |
| 15127 | 12143 | Cct6b       | Thyn1         | -1 |
| 15127 | 14147 | Cct6b       | Acss2         | -1 |
| 15127 | 17862 | Cct6b       | Fbxo21        | 1  |
| 15127 | 18201 | Cct6b       | MMT00060232   | -1 |
| 15127 | 18286 | Cct6b       | Slc41a3       | 1  |
| 15127 | 21202 | Cct6b       | Acly          | -1 |
| 15127 | 21214 | Cct6b       | Scd1          | -1 |
| 15127 | 21251 | Cct6b       | Cpt1a         | 1  |
| 15127 | 21575 | Cct6b       | Cyp2c55       | -1 |
| 15127 | 22137 | Cct6b       | Nudt7         | -1 |
| 15127 | 22217 | Cct6b       | Flvcr2        | 1  |
| 15131 | 12219 | Atf6        | Cyb5b         | 1  |
| 15132 | 1258  | MMT00007672 | Hba-a1        | 1  |
| 15132 | 5919  | MMT00007672 | B930041F14Rik | 1  |
| 15132 | 15132 | MMT00007672 | MMT00007672   | 1  |
| 15132 | 15529 | MMT00007672 | MMT00011590   | 1  |
| 15132 | 17664 | MMT00007672 | Jup           | 1  |
| 15132 | 21335 | MMT00007672 | Trp53rk       | 1  |
| 15132 | 21356 | MMT00007672 | Nkx2-6        | 1  |
| 15135 | 22138 | Col5a3      | Ang           | -1 |
| 15157 | 607   | Eno1        | Me1           | 1  |
| 15157 | 18201 | Eno1        | MMT00060232   | 1  |
| 15157 | 21575 | Eno1        | Cyp2c55       | 1  |
| 15160 | 563   | Vezf1       | D4Bwg0951e    | -1 |
| 15160 | 17525 | Vezf1       | Ctgf          | -1 |
| 15160 | 18785 | Vezf1       | Angptl4       | -1 |
| 15161 | 269   | Ppp4r1      | Tuba1b        | 1  |
| 15161 | 607   | Ppp4r1      | Me1           | 1  |
| 15161 | 1941  | Ppp4r1      | MMT00079618   | 1  |
| 15161 | 2322  | Ppp4r1      | Tuba4a        | 1  |
| 15161 | 7151  | Ppp4r1      | MMT00007982   | 1  |
| 15161 | 8896  | Ppp4r1      | Fasn          | 1  |
| 15161 | 9763  | Ppp4r1      | Tuba3b        | 1  |
| 15161 | 11724 | Ppp4r1      | Tuba3a        | 1  |
| 15161 | 12910 | Ppp4r1      | 1110028A07Rik | 1  |
| 15161 | 15862 | Ppp4r1      | Mrap          | 1  |
| 15161 | 17444 | Ppp4r1      | Tuba1a        | 1  |
| 15161 | 17660 | Ppp4r1      | Nlrp12        | -1 |
| 15161 | 21251 | Ppp4r1      | Cpt1a         | -1 |
| 15161 | 22443 | Ppp4r1      | Tuba1c        | 1  |



|       |       |             |                    |    |
|-------|-------|-------------|--------------------|----|
| 15170 | 4578  | Tspan17     | Pglyrp2            | -1 |
| 15170 | 12910 | Tspan17     | 1110028A07Rik      | 1  |
| 15170 | 20967 | Tspan17     | Fabp2              | 1  |
| 15170 | 23026 | Tspan17     | Apom               | -1 |
| 15181 | 327   | Enpp4       | H2-Ea              | -1 |
| 15189 | 1637  | BC005764    | MMT00071316        | -1 |
| 15189 | 3446  | BC005764    | Eno1               | -1 |
| 15189 | 8444  | BC005764    | Rdh16              | -1 |
| 15189 | 8815  | BC005764    | Mx1                | -1 |
| 15189 | 16772 | BC005764    | MMT00010554        | -1 |
| 15189 | 18113 | BC005764    | MMT00034400        | -1 |
| 15189 | 19066 | BC005764    | MMT00012632        | -1 |
| 15189 | 20058 | BC005764    | Dnaic1             | 1  |
| 15189 | 20804 | BC005764    | Eno1               | -1 |
| 15189 | 21727 | BC005764    | Khk                | -1 |
| 15189 | 22271 | BC005764    | Cyp2c29            | -1 |
| 15195 | 10554 | Slc25a1     | ENSMUSG00000074179 | 1  |
| 15195 | 21214 | Slc25a1     | Scd1               | 1  |
| 15195 | 21575 | Slc25a1     | Cyp2c55            | 1  |
| 15195 | 21727 | Slc25a1     | Khk                | 1  |
| 15205 | 3504  | MMT00030262 | Anpep              | -1 |
| 15205 | 3832  | MMT00030262 | Sdhb               | 1  |
| 15205 | 4635  | MMT00030262 | MMT00023332        | 1  |
| 15205 | 5884  | MMT00030262 | Gstm2              | 1  |
| 15205 | 6193  | MMT00030262 | Lactb2             | 1  |
| 15205 | 7430  | MMT00030262 | Gpr137             | 1  |
| 15205 | 7602  | MMT00030262 | Pcca               | 1  |
| 15205 | 8815  | MMT00030262 | Mx1                | 1  |
| 15205 | 10554 | MMT00030262 | ENSMUSG00000074179 | 1  |
| 15205 | 11014 | MMT00030262 | Hibadh             | 1  |
| 15205 | 12955 | MMT00030262 | Atp5o              | 1  |
| 15205 | 13293 | MMT00030262 | Gsta2              | 1  |
| 15205 | 18201 | MMT00030262 | MMT00060232        | 1  |
| 15205 | 21214 | MMT00030262 | Scd1               | 1  |
| 15205 | 21575 | MMT00030262 | Cyp2c55            | 1  |
| 15208 | 760   | Tmem70      | Akr1c19            | 1  |
| 15208 | 1129  | Tmem70      | Gsta4              | 1  |
| 15208 | 2127  | Tmem70      | Ldha               | -1 |
| 15208 | 3565  | Tmem70      | MMT00045908        | 1  |
| 15208 | 6085  | Tmem70      | MMT00007454        | -1 |
| 15208 | 7602  | Tmem70      | Pcca               | 1  |
| 15208 | 8773  | Tmem70      | MMT00027093        | -1 |
| 15208 | 10532 | Tmem70      | MMT00057790        | -1 |
| 15208 | 10554 | Tmem70      | ENSMUSG00000074179 | 1  |
| 15208 | 13293 | Tmem70      | Gsta2              | 1  |
| 15208 | 13431 | Tmem70      | MMT00038058        | -1 |
| 15208 | 14055 | Tmem70      | MMT00050438        | -1 |
| 15208 | 14147 | Tmem70      | Acss2              | 1  |
| 15208 | 15205 | Tmem70      | MMT00030262        | -1 |
| 15208 | 15500 | Tmem70      | MMT00081411        | -1 |
| 15208 | 21937 | Tmem70      | MMT00015325        | -1 |

|       |       |               |                    |    |
|-------|-------|---------------|--------------------|----|
| 15208 | 22907 | Tmem70        | MMT00054594        | -1 |
| 15208 | 22978 | Tmem70        | MMT00043176        | -1 |
| 15210 | 8815  | Osr1          | Mx1                | -1 |
| 15210 | 14017 | Osr1          | Ces5               | -1 |
| 15210 | 14151 | Osr1          | Slc44a1            | -1 |
| 15210 | 21214 | Osr1          | Scd1               | -1 |
| 15210 | 22138 | Osr1          | Ang                | 1  |
| 15247 | 20967 | Cstb          | Fabp2              | 1  |
| 15247 | 23026 | Cstb          | Apom               | -1 |
| 15258 | 15258 | Coil          | Coil               | 1  |
| 15264 | 15264 | Flywch2       | Flywch2            | 1  |
| 15271 | 5364  | Dbf4          | Kif22              | 1  |
| 15271 | 15271 | Dbf4          | Dbf4               | 1  |
| 15273 | 11129 | Relb          | Ankhd1             | -1 |
| 15277 | 4414  | 2810002N01Rik | 5033406O09Rik      | 1  |
| 15277 | 8155  | 2810002N01Rik | Mark3              | 1  |
| 15277 | 16191 | 2810002N01Rik | Klc1               | -1 |
| 15280 | 1447  | Cxcl10        | Naaa               | 1  |
| 15280 | 5934  | Cxcl10        | S100a10            | 1  |
| 15280 | 6866  | Cxcl10        | Gls                | -1 |
| 15280 | 8392  | Cxcl10        | Asf1b              | 1  |
| 15280 | 16182 | Cxcl10        | Oasl1              | 1  |
| 15280 | 21497 | Cxcl10        | Pias2              | -1 |
| 15287 | 607   | St6galnac5    | Me1                | -1 |
| 15287 | 3377  | St6galnac5    | Cs                 | -1 |
| 15287 | 8815  | St6galnac5    | Mx1                | -1 |
| 15287 | 9408  | St6galnac5    | Hmgcs2             | 1  |
| 15287 | 9842  | St6galnac5    | Qdpr               | -1 |
| 15287 | 10961 | St6galnac5    | Pgd                | -1 |
| 15287 | 12219 | St6galnac5    | Cyb5b              | -1 |
| 15287 | 13423 | St6galnac5    | ENSMUSG00000053749 | -1 |
| 15287 | 14147 | St6galnac5    | Acss2              | -1 |
| 15287 | 14151 | St6galnac5    | Slc44a1            | -1 |
| 15287 | 18201 | St6galnac5    | MMT00060232        | -1 |
| 15287 | 20385 | St6galnac5    | Chd1l              | -1 |
| 15287 | 21202 | St6galnac5    | Acly               | -1 |
| 15287 | 21214 | St6galnac5    | Scd1               | -1 |
| 15287 | 21251 | St6galnac5    | Cpt1a              | 1  |
| 15287 | 21575 | St6galnac5    | Cyp2c55            | -1 |
| 15287 | 21727 | St6galnac5    | Khk                | -1 |
| 15287 | 21793 | St6galnac5    | Pla2g12a           | 1  |
| 15287 | 22732 | St6galnac5    | Cyb5b              | -1 |
| 15287 | 22770 | St6galnac5    | Slc27a2            | 1  |
| 15288 | 607   | Pet112l       | Me1                | 1  |
| 15288 | 874   | Pet112l       | Aldh1a7            | 1  |
| 15288 | 4351  | Pet112l       | Plxnb1             | -1 |
| 15288 | 6193  | Pet112l       | Lactb2             | 1  |
| 15288 | 7602  | Pet112l       | Pcca               | 1  |
| 15288 | 9842  | Pet112l       | Qdpr               | 1  |
| 15288 | 11234 | Pet112l       | Pygl               | 1  |
| 15288 | 12637 | Pet112l       | Itпка              | -1 |

|       |       |             |               |    |
|-------|-------|-------------|---------------|----|
| 15288 | 16525 | Pet112l     | Lbp           | -1 |
| 15288 | 18201 | Pet112l     | MMT00060232   | 1  |
| 15288 | 18286 | Pet112l     | Slc41a3       | -1 |
| 15288 | 20019 | Pet112l     | Qdpr          | 1  |
| 15288 | 21202 | Pet112l     | Acly          | 1  |
| 15288 | 21214 | Pet112l     | Scd1          | 1  |
| 15288 | 21575 | Pet112l     | Cyp2c55       | 1  |
| 15288 | 21793 | Pet112l     | Pla2g12a      | -1 |
| 15293 | 8815  | MMT00001423 | Mx1           | 1  |
| 15293 | 21214 | MMT00001423 | Scd1          | 1  |
| 15296 | 9931  | Mier3       | Glt25d1       | -1 |
| 15301 | 662   | Dyrk2       | Mid1ip1       | 1  |
| 15301 | 2400  | Dyrk2       | Gck           | 1  |
| 15301 | 6357  | Dyrk2       | Ankrd9        | 1  |
| 15301 | 6976  | Dyrk2       | Rbm35b        | 1  |
| 15301 | 7659  | Dyrk2       | Rab30         | -1 |
| 15301 | 8563  | Dyrk2       | Leng1         | 1  |
| 15301 | 12315 | Dyrk2       | Srebf1        | 1  |
| 15301 | 16449 | Dyrk2       | BC004044      | 1  |
| 15301 | 17660 | Dyrk2       | Nlrp12        | -1 |
| 15301 | 18785 | Dyrk2       | Angptl4       | -1 |
| 15301 | 22443 | Dyrk2       | Tuba1c        | 1  |
| 15303 | 21733 | Spcs3       | Rhebl1        | -1 |
| 15306 | 9912  | Dpy30       | Ttc27         | 1  |
| 15306 | 12451 | Dpy30       | Srd5a2        | 1  |
| 15306 | 15306 | Dpy30       | Dpy30         | 1  |
| 15306 | 16886 | Dpy30       | Dpy30         | 1  |
| 15310 | 1600  | Mlxipl      | Csrp1         | -1 |
| 15310 | 2643  | Mlxipl      | Inhbe         | -1 |
| 15310 | 3196  | Mlxipl      | Tat           | 1  |
| 15310 | 4056  | Mlxipl      | Tnfaip8l1     | -1 |
| 15310 | 5364  | Mlxipl      | Kif22         | -1 |
| 15310 | 5691  | Mlxipl      | Csrp3         | -1 |
| 15310 | 7492  | Mlxipl      | Adfp          | -1 |
| 15310 | 20194 | Mlxipl      | Pnlc1         | -1 |
| 15316 | 4286  | MMT00077385 | Ptp4a1        | 1  |
| 15316 | 11129 | MMT00077385 | Ankhd1        | 1  |
| 15318 | 9230  | Aars2       | 1700027N10Rik | 1  |
| 15318 | 14027 | Aars2       | Rpo1-1        | -1 |
| 15318 | 15318 | Aars2       | Aars2         | 1  |
| 15318 | 18574 | Aars2       | Parc          | -1 |
| 15318 | 18772 | Aars2       | BC048355      | 1  |
| 15318 | 22004 | Aars2       | Gtpbp2        | -1 |
| 15321 | 15321 | Pus7        | Pus7          | 1  |
| 15321 | 20413 | Pus7        | Wdr86         | 1  |
| 15322 | 269   | Rasl12      | Tuba1b        | 1  |
| 15322 | 662   | Rasl12      | Mid1ip1       | 1  |
| 15322 | 1941  | Rasl12      | MMT00079618   | 1  |
| 15322 | 2322  | Rasl12      | Tuba4a        | 1  |
| 15322 | 7151  | Rasl12      | MMT00007982   | 1  |
| 15322 | 8896  | Rasl12      | Fasn          | 1  |

|       |       |          |               |    |
|-------|-------|----------|---------------|----|
| 15322 | 9763  | Rasl12   | Tuba3b        | 1  |
| 15322 | 11724 | Rasl12   | Tuba3a        | 1  |
| 15322 | 12315 | Rasl12   | Srebf1        | 1  |
| 15322 | 12910 | Rasl12   | 1110028A07Rik | 1  |
| 15322 | 13304 | Rasl12   | Gadd45b       | -1 |
| 15322 | 17444 | Rasl12   | Tuba1a        | 1  |
| 15322 | 17660 | Rasl12   | Nlrp12        | -1 |
| 15322 | 22443 | Rasl12   | Tuba1c        | 1  |
| 15322 | 23130 | Rasl12   | Hps4          | -1 |
| 15340 | 662   | Cdk5rap1 | Mid1ip1       | 1  |
| 15340 | 1065  | Cdk5rap1 | Hmgcr         | 1  |
| 15340 | 1185  | Cdk5rap1 | Atxn2         | -1 |
| 15340 | 2013  | Cdk5rap1 | Il15ra        | -1 |
| 15340 | 2051  | Cdk5rap1 | Ddx27         | -1 |
| 15340 | 2631  | Cdk5rap1 | Aldh1l1       | 1  |
| 15340 | 2741  | Cdk5rap1 | 3230401D17Rik | -1 |
| 15340 | 3309  | Cdk5rap1 | Gpnl2         | -1 |
| 15340 | 3449  | Cdk5rap1 | Hes6          | 1  |
| 15340 | 4056  | Cdk5rap1 | Tnfaip8l1     | -1 |
| 15340 | 5594  | Cdk5rap1 | Erbp3         | -1 |
| 15340 | 5684  | Cdk5rap1 | Ranbp10       | -1 |
| 15340 | 5804  | Cdk5rap1 | Thrsp         | 1  |
| 15340 | 5849  | Cdk5rap1 | 2310031A18Rik | -1 |
| 15340 | 6193  | Cdk5rap1 | Lactb2        | 1  |
| 15340 | 6353  | Cdk5rap1 | Spata13       | -1 |
| 15340 | 6461  | Cdk5rap1 | Mtmt3         | -1 |
| 15340 | 6746  | Cdk5rap1 | E2f8          | -1 |
| 15340 | 6816  | Cdk5rap1 | Slc46a3       | 1  |
| 15340 | 7492  | Cdk5rap1 | Adfp          | -1 |
| 15340 | 7659  | Cdk5rap1 | Rab30         | -1 |
| 15340 | 7725  | Cdk5rap1 | 3230401D17Rik | -1 |
| 15340 | 8067  | Cdk5rap1 | Taok3         | -1 |
| 15340 | 8404  | Cdk5rap1 | Fa2h          | -1 |
| 15340 | 8439  | Cdk5rap1 | Slc25a33      | -1 |
| 15340 | 8896  | Cdk5rap1 | Fasn          | 1  |
| 15340 | 8957  | Cdk5rap1 | Zfp511        | -1 |
| 15340 | 9408  | Cdk5rap1 | Hmgcs2        | -1 |
| 15340 | 9474  | Cdk5rap1 | Cops7b        | -1 |
| 15340 | 9718  | Cdk5rap1 | Fmo5          | 1  |
| 15340 | 9831  | Cdk5rap1 | Nedd4l        | -1 |
| 15340 | 9999  | Cdk5rap1 | Zswim3        | -1 |
| 15340 | 10100 | Cdk5rap1 | Mterfd2       | -1 |
| 15340 | 10612 | Cdk5rap1 | Slc24a6       | -1 |
| 15340 | 10772 | Cdk5rap1 | Aacs          | 1  |
| 15340 | 11462 | Cdk5rap1 | Gpam          | 1  |
| 15340 | 11576 | Cdk5rap1 | Gm1381        | 1  |
| 15340 | 11663 | Cdk5rap1 | Dusp5         | -1 |
| 15340 | 12315 | Cdk5rap1 | Srebf1        | 1  |
| 15340 | 12499 | Cdk5rap1 | Avpi1         | 1  |
| 15340 | 13142 | Cdk5rap1 | Wdr81         | -1 |
| 15340 | 13341 | Cdk5rap1 | Tnlp2         | -1 |

|       |       |          |             |    |
|-------|-------|----------|-------------|----|
| 15340 | 13513 | Cdk5rap1 | Trim25      | -1 |
| 15340 | 14288 | Cdk5rap1 | Atmin       | -1 |
| 15340 | 14357 | Cdk5rap1 | Ing4        | -1 |
| 15340 | 15049 | Cdk5rap1 | Rnf125      | -1 |
| 15340 | 15367 | Cdk5rap1 | Vegfc       | -1 |
| 15340 | 15892 | Cdk5rap1 | Slc22a5     | -1 |
| 15340 | 16027 | Cdk5rap1 | Ppp2r2d     | -1 |
| 15340 | 16131 | Cdk5rap1 | Ptpre       | -1 |
| 15340 | 16525 | Cdk5rap1 | Lbp         | -1 |
| 15340 | 16888 | Cdk5rap1 | H6pd        | -1 |
| 15340 | 17408 | Cdk5rap1 | Iqwd1       | -1 |
| 15340 | 17660 | Cdk5rap1 | Nlrp12      | -1 |
| 15340 | 17862 | Cdk5rap1 | Fbxo21      | -1 |
| 15340 | 18148 | Cdk5rap1 | Cables1     | -1 |
| 15340 | 18438 | Cdk5rap1 | Map3k7ip2   | -1 |
| 15340 | 18495 | Cdk5rap1 | C2cd3       | -1 |
| 15340 | 18515 | Cdk5rap1 | Ddx28       | -1 |
| 15340 | 19056 | Cdk5rap1 | Zfp7        | -1 |
| 15340 | 20385 | Cdk5rap1 | Chd1l       | 1  |
| 15340 | 20488 | Cdk5rap1 | Bok         | -1 |
| 15340 | 21143 | Cdk5rap1 | Ypel3       | -1 |
| 15340 | 21693 | Cdk5rap1 | BC029169    | -1 |
| 15340 | 22217 | Cdk5rap1 | Flvcr2      | -1 |
| 15340 | 23130 | Cdk5rap1 | Hps4        | -1 |
| 15345 | 2348  | Tcstv3   | Irak1       | -1 |
| 15345 | 16310 | Tcstv3   | Sae1        | -1 |
| 15345 | 20622 | Tcstv3   | Cd47        | 1  |
| 15348 | 2224  | Eif2ak2  | Oasl2       | 1  |
| 15348 | 3659  | Eif2ak2  | EG236451    | 1  |
| 15348 | 3683  | Eif2ak2  | Oas2        | 1  |
| 15348 | 4114  | Eif2ak2  | Parp12      | 1  |
| 15348 | 4508  | Eif2ak2  | Ifit1       | 1  |
| 15348 | 4516  | Eif2ak2  | Rsad2       | 1  |
| 15348 | 5044  | Eif2ak2  | Ifi35       | 1  |
| 15348 | 5250  | Eif2ak2  | Ifit2       | 1  |
| 15348 | 5853  | Eif2ak2  | Trim30      | 1  |
| 15348 | 6587  | Eif2ak2  | Irf9        | 1  |
| 15348 | 6824  | Eif2ak2  | Irf7        | 1  |
| 15348 | 7069  | Eif2ak2  | Ube1l       | 1  |
| 15348 | 7105  | Eif2ak2  | Plac8       | 1  |
| 15348 | 7284  | Eif2ak2  | MMT00008674 | 1  |
| 15348 | 7316  | Eif2ak2  | Ifi204      | 1  |
| 15348 | 8659  | Eif2ak2  | Psmb8       | 1  |
| 15348 | 8800  | Eif2ak2  | Rnf213      | 1  |
| 15348 | 9100  | Eif2ak2  | Ms4a6c      | 1  |
| 15348 | 9847  | Eif2ak2  | Ifi27       | 1  |
| 15348 | 10109 | Eif2ak2  | Gbp3        | 1  |
| 15348 | 11701 | Eif2ak2  | Oas1c       | 1  |
| 15348 | 12398 | Eif2ak2  | Ifi44       | 1  |
| 15348 | 12493 | Eif2ak2  | Ankfy1      | 1  |
| 15348 | 12600 | Eif2ak2  | Ifi204      | 1  |

|       |       |         |               |    |
|-------|-------|---------|---------------|----|
| 15348 | 12969 | Eif2ak2 | Xaf1          | 1  |
| 15348 | 13156 | Eif2ak2 | Ifit3         | 1  |
| 15348 | 13522 | Eif2ak2 | Slfn5         | 1  |
| 15348 | 13654 | Eif2ak2 | Stat1         | 1  |
| 15348 | 13826 | Eif2ak2 | Melk          | 1  |
| 15348 | 14880 | Eif2ak2 | Ms4a4c        | 1  |
| 15348 | 15074 | Eif2ak2 | Usp18         | 1  |
| 15348 | 15504 | Eif2ak2 | Mx2           | 1  |
| 15348 | 16199 | Eif2ak2 | Samhd1        | 1  |
| 15348 | 16521 | Eif2ak2 | Adar          | 1  |
| 15348 | 16572 | Eif2ak2 | D14Ertd668e   | 1  |
| 15348 | 18186 | Eif2ak2 | Parp14        | 1  |
| 15348 | 19189 | Eif2ak2 | Sp100         | 1  |
| 15348 | 19738 | Eif2ak2 | Lgals3bp      | 1  |
| 15348 | 20791 | Eif2ak2 | MMT00014813   | 1  |
| 15348 | 20997 | Eif2ak2 | MMT00028135   | 1  |
| 15348 | 21351 | Eif2ak2 | Shisa5        | 1  |
| 15348 | 21549 | Eif2ak2 | Rtp4          | 1  |
| 15348 | 21824 | Eif2ak2 | 5830443L24Rik | 1  |
| 15348 | 22037 | Eif2ak2 | Oas1g         | 1  |
| 15348 | 22712 | Eif2ak2 | Phf11         | 1  |
| 15348 | 23450 | Eif2ak2 | D12Ertd647e   | 1  |
| 15352 | 17638 | Socs2   | Adssl1        | -1 |
| 15360 | 269   | Tcfe3   | Tuba1b        | 1  |
| 15360 | 563   | Tcfe3   | D4Bwg0951e    | -1 |
| 15360 | 662   | Tcfe3   | Mid1ip1       | 1  |
| 15360 | 1257  | Tcfe3   | Slc25a45      | 1  |
| 15360 | 1941  | Tcfe3   | MMT00079618   | 1  |
| 15360 | 7151  | Tcfe3   | MMT00007982   | 1  |
| 15360 | 9763  | Tcfe3   | Tuba3b        | 1  |
| 15360 | 11724 | Tcfe3   | Tuba3a        | 1  |
| 15360 | 12315 | Tcfe3   | Srebf1        | 1  |
| 15360 | 17444 | Tcfe3   | Tuba1a        | 1  |
| 15360 | 17656 | Tcfe3   | Hdhd3         | 1  |
| 15360 | 18606 | Tcfe3   | A230074B11Rik | -1 |
| 15360 | 18785 | Tcfe3   | Angptl4       | -1 |
| 15360 | 22443 | Tcfe3   | Tuba1c        | 1  |
| 15360 | 23202 | Tcfe3   | Olfir559      | -1 |
| 15361 | 6918  | Mrm1    | Cog8          | 1  |
| 15367 | 212   | Vegfc   | 1700026J04Rik | -1 |
| 15367 | 250   | Vegfc   | Tubb2a-ps2    | 1  |
| 15367 | 269   | Vegfc   | Tuba1b        | 1  |
| 15367 | 563   | Vegfc   | D4Bwg0951e    | -1 |
| 15367 | 1646  | Vegfc   | Slc15a4       | -1 |
| 15367 | 1941  | Vegfc   | MMT00079618   | 1  |
| 15367 | 2322  | Vegfc   | Tuba4a        | 1  |
| 15367 | 2794  | Vegfc   | Map3k6        | -1 |
| 15367 | 3686  | Vegfc   | Psmc9         | -1 |
| 15367 | 3804  | Vegfc   | MMT00015534   | 1  |
| 15367 | 4286  | Vegfc   | Ptp4a1        | -1 |
| 15367 | 4708  | Vegfc   | Traf3ip2      | 1  |

|       |       |               |               |    |
|-------|-------|---------------|---------------|----|
| 15367 | 5791  | Vegfc         | Baiap211      | -1 |
| 15367 | 6048  | Vegfc         | Psmc9         | -1 |
| 15367 | 8342  | Vegfc         | Cwf19l1       | 1  |
| 15367 | 8399  | Vegfc         | Herpud1       | -1 |
| 15367 | 9763  | Vegfc         | Tuba3b        | 1  |
| 15367 | 10384 | Vegfc         | Chic2         | -1 |
| 15367 | 11093 | Vegfc         | Zdhhc1        | -1 |
| 15367 | 11129 | Vegfc         | Ankhd1        | -1 |
| 15367 | 11724 | Vegfc         | Tuba3a        | 1  |
| 15367 | 11807 | Vegfc         | Fbxo31        | -1 |
| 15367 | 11808 | Vegfc         | Pck1          | -1 |
| 15367 | 12420 | Vegfc         | Klh21         | -1 |
| 15367 | 13018 | Vegfc         | AW544981      | 1  |
| 15367 | 13471 | Vegfc         | Cln8          | -1 |
| 15367 | 14099 | Vegfc         | Nfe2          | 1  |
| 15367 | 15631 | Vegfc         | Lpin1         | -1 |
| 15367 | 15862 | Vegfc         | Mrap          | 1  |
| 15367 | 16060 | Vegfc         | Gys2          | -1 |
| 15367 | 16176 | Vegfc         | St3gal5       | -1 |
| 15367 | 16690 | Vegfc         | Tjp3          | 1  |
| 15367 | 17215 | Vegfc         | Mvd           | 1  |
| 15367 | 17338 | Vegfc         | Mocos         | 1  |
| 15367 | 17656 | Vegfc         | Hdhd3         | 1  |
| 15367 | 17660 | Vegfc         | Nlrp12        | -1 |
| 15367 | 18027 | Vegfc         | 5730403B10Rik | -1 |
| 15367 | 18785 | Vegfc         | Angptl4       | -1 |
| 15367 | 18827 | Vegfc         | Oprs1         | 1  |
| 15367 | 19757 | Vegfc         | Fkbp5         | -1 |
| 15367 | 22290 | Vegfc         | Tubb2a        | 1  |
| 15367 | 22443 | Vegfc         | Tuba1c        | 1  |
| 15367 | 23201 | Vegfc         | S1pr1         | 1  |
| 15384 | 2743  | Mat2a         | Tcf3          | 1  |
| 15384 | 3703  | Mat2a         | Ggcx          | 1  |
| 15384 | 11338 | Mat2a         | Vamp8         | 1  |
| 15384 | 15384 | Mat2a         | Mat2a         | 1  |
| 15384 | 15708 | Mat2a         | Retsat        | 1  |
| 15387 | 5364  | Mgl1          | Kif22         | 1  |
| 15393 | 20058 | Sec22a        | Dnaic1        | -1 |
| 15403 | 13293 | C330046G03Rik | Gsta2         | 1  |
| 15403 | 13431 | C330046G03Rik | MMT00038058   | -1 |
| 15403 | 15205 | C330046G03Rik | MMT00030262   | -1 |
| 15403 | 21937 | C330046G03Rik | MMT00015325   | -1 |
| 15403 | 22978 | C330046G03Rik | MMT00043176   | -1 |
| 15406 | 8444  | Mdfl          | Rdh16         | -1 |
| 15406 | 20058 | Mdfl          | Dnaic1        | 1  |
| 15413 | 3446  | Brp44l        | Eno1          | 1  |
| 15413 | 13293 | Brp44l        | Gsta2         | 1  |
| 15414 | 269   | Arhgap18      | Tuba1b        | 1  |
| 15414 | 563   | Arhgap18      | D4Bwg0951e    | -1 |
| 15414 | 662   | Arhgap18      | Mid1ip1       | 1  |
| 15414 | 1941  | Arhgap18      | MMT00079618   | 1  |

|       |       |               |               |    |
|-------|-------|---------------|---------------|----|
| 15414 | 2322  | Arhgap18      | Tuba4a        | 1  |
| 15414 | 2794  | Arhgap18      | Map3k6        | -1 |
| 15414 | 3686  | Arhgap18      | Psmc9         | -1 |
| 15414 | 4235  | Arhgap18      | Pfkfb3        | -1 |
| 15414 | 6048  | Arhgap18      | Psmc9         | -1 |
| 15414 | 6490  | Arhgap18      | Illr1         | -1 |
| 15414 | 7151  | Arhgap18      | MMT00007982   | 1  |
| 15414 | 8399  | Arhgap18      | Herpud1       | -1 |
| 15414 | 8641  | Arhgap18      | Slc7a2        | -1 |
| 15414 | 9763  | Arhgap18      | Tuba3b        | 1  |
| 15414 | 10384 | Arhgap18      | Chic2         | -1 |
| 15414 | 11129 | Arhgap18      | Ankhd1        | -1 |
| 15414 | 11149 | Arhgap18      | MMT00050488   | 1  |
| 15414 | 11724 | Arhgap18      | Tuba3a        | 1  |
| 15414 | 11807 | Arhgap18      | Fbxo31        | -1 |
| 15414 | 11808 | Arhgap18      | Pck1          | -1 |
| 15414 | 12479 | Arhgap18      | Ifrd1         | -1 |
| 15414 | 13471 | Arhgap18      | Cln8          | -1 |
| 15414 | 13889 | Arhgap18      | Agpat2        | 1  |
| 15414 | 14099 | Arhgap18      | Nfe2          | 1  |
| 15414 | 14989 | Arhgap18      | Map3k5        | -1 |
| 15414 | 15631 | Arhgap18      | Lpin1         | -1 |
| 15414 | 15862 | Arhgap18      | Mrap          | 1  |
| 15414 | 16176 | Arhgap18      | St3gal5       | -1 |
| 15414 | 16647 | Arhgap18      | D16H22S680E   | -1 |
| 15414 | 16690 | Arhgap18      | Tjp3          | 1  |
| 15414 | 17215 | Arhgap18      | Mvd           | 1  |
| 15414 | 17323 | Arhgap18      | Tubb6         | 1  |
| 15414 | 17444 | Arhgap18      | Tuba1a        | 1  |
| 15414 | 17660 | Arhgap18      | Nlrp12        | -1 |
| 15414 | 18027 | Arhgap18      | 5730403B10Rik | -1 |
| 15414 | 18314 | Arhgap18      | 4631416L12Rik | -1 |
| 15414 | 18785 | Arhgap18      | Angptl4       | -1 |
| 15414 | 19025 | Arhgap18      | Slc37a4       | -1 |
| 15414 | 19466 | Arhgap18      | Pptc7         | -1 |
| 15414 | 19757 | Arhgap18      | Fkbp5         | -1 |
| 15414 | 21331 | Arhgap18      | Slc10a6       | -1 |
| 15414 | 22388 | Arhgap18      | 2410018M08Rik | -1 |
| 15414 | 22443 | Arhgap18      | Tuba1c        | 1  |
| 15414 | 22744 | Arhgap18      | 9-Sep         | 1  |
| 15414 | 23201 | Arhgap18      | S1pr1         | 1  |
| 15427 | 8815  | MMT00009375   | Mx1           | 1  |
| 15427 | 21214 | MMT00009375   | Scd1          | 1  |
| 15436 | 8815  | 3000002C10Rik | Mx1           | 1  |
| 15436 | 21214 | 3000002C10Rik | Scd1          | 1  |
| 15449 | 2200  | Mitd1         | BC006779      | 1  |
| 15449 | 5044  | Mitd1         | Ifi35         | 1  |
| 15449 | 6824  | Mitd1         | Irf7          | 1  |
| 15449 | 7151  | Mitd1         | MMT00007982   | 1  |
| 15449 | 8392  | Mitd1         | Asf1b         | 1  |
| 15449 | 9847  | Mitd1         | Ifi27         | 1  |



|       |       |             |               |    |
|-------|-------|-------------|---------------|----|
| 15449 | 11265 | Mitd1       | Irgm          | 1  |
| 15449 | 12126 | Mitd1       | Znfx1         | 1  |
| 15449 | 12969 | Mitd1       | Xaf1          | 1  |
| 15449 | 16182 | Mitd1       | Oasl1         | 1  |
| 15449 | 17022 | Mitd1       | MMT00055891   | 1  |
| 15449 | 18174 | Mitd1       | Stat2         | 1  |
| 15449 | 21549 | Mitd1       | Rtp4          | 1  |
| 15455 | 286   | Lsm4        | MMT00070509   | -1 |
| 15455 | 403   | Lsm4        | Leprotl1      | 1  |
| 15455 | 1755  | Lsm4        | Ocel1         | -1 |
| 15455 | 3055  | Lsm4        | Pde4c         | -1 |
| 15455 | 5433  | Lsm4        | 2410004L22Rik | 1  |
| 15455 | 6760  | Lsm4        | 2810428I15Rik | -1 |
| 15455 | 8114  | Lsm4        | Kcnn1         | -1 |
| 15455 | 9304  | Lsm4        | AI449175      | -1 |
| 15455 | 9931  | Lsm4        | GlT25d1       | 1  |
| 15455 | 10195 | Lsm4        | Klf1          | -1 |
| 15455 | 13732 | Lsm4        | Tpm4          | 1  |
| 15455 | 15455 | Lsm4        | Lsm4          | 1  |
| 15455 | 16617 | Lsm4        | Sh2d4a        | 1  |
| 15455 | 18886 | Lsm4        | Slc18a1       | 1  |
| 15455 | 20484 | Lsm4        | Ces1          | 1  |
| 15456 | 524   | Chi3l3      | Hsd3b2        | 1  |
| 15456 | 3753  | Chi3l3      | Setdb1        | -1 |
| 15456 | 15456 | Chi3l3      | Chi3l3        | 1  |
| 15466 | 5100  | Gm136       | Pebp1         | 1  |
| 15466 | 10978 | Gm136       | MMT00078322   | -1 |
| 15466 | 12656 | Gm136       | Coq5          | -1 |
| 15466 | 15908 | Gm136       | Pebp1         | 1  |
| 15466 | 17716 | Gm136       | Rnf10         | 1  |
| 15466 | 17807 | Gm136       | Pebp1         | 1  |
| 15476 | 9258  | Fem1b       | P4ha1         | -1 |
| 15476 | 12960 | Fem1b       | Arrdc4        | 1  |
| 15476 | 22216 | Fem1b       | Sp5           | 1  |
| 15480 | 2115  | MMT00078167 | Gpr12         | -1 |
| 15483 | 6370  | Il17rb      | Aqp8          | -1 |
| 15483 | 11129 | Il17rb      | Ankhd1        | 1  |
| 15483 | 11807 | Il17rb      | Fbxo31        | 1  |
| 15483 | 12941 | Il17rb      | Elovl5        | -1 |
| 15483 | 21214 | Il17rb      | Scd1          | -1 |
| 15483 | 22138 | Il17rb      | Ang           | 1  |
| 15489 | 7602  | Tmem158     | Pcca          | 1  |
| 15489 | 21214 | Tmem158     | Scd1          | 1  |
| 15492 | 760   | Efnb1       | Akr1c19       | -1 |
| 15492 | 1711  | Efnb1       | Grhl1         | 1  |
| 15492 | 4056  | Efnb1       | TnfaiP8l1     | 1  |
| 15492 | 5804  | Efnb1       | Thrsp         | -1 |
| 15492 | 5849  | Efnb1       | 2310031A18Rik | 1  |
| 15492 | 6756  | Efnb1       | Sds           | -1 |
| 15492 | 6990  | Efnb1       | Nr1i2         | -1 |
| 15492 | 8328  | Efnb1       | Klhdc8a       | 1  |

|       |       |             |               |    |
|-------|-------|-------------|---------------|----|
| 15492 | 10367 | Efnb1       | Coq7          | -1 |
| 15492 | 16720 | Efnb1       | Mtmr7         | -1 |
| 15499 | 8632  | Dact1       | Igfbp1        | -1 |
| 15500 | 18201 | MMT00081411 | MMT00060232   | 1  |
| 15500 | 21575 | MMT00081411 | Cyp2c55       | 1  |
| 15504 | 143   | Mx2         | Gvin1         | 1  |
| 15504 | 701   | Mx2         | Polr3g        | -1 |
| 15504 | 1533  | Mx2         | BC013712      | 1  |
| 15504 | 1908  | Mx2         | Rnf213        | 1  |
| 15504 | 2200  | Mx2         | BC006779      | 1  |
| 15504 | 2224  | Mx2         | Oasl2         | 1  |
| 15504 | 2550  | Mx2         | MMT00036681   | 1  |
| 15504 | 2752  | Mx2         | Fcgr1         | 1  |
| 15504 | 3523  | Mx2         | Trim34        | 1  |
| 15504 | 3594  | Mx2         | Rasa4         | 1  |
| 15504 | 3659  | Mx2         | EG236451      | 1  |
| 15504 | 3683  | Mx2         | Oas2          | 1  |
| 15504 | 4114  | Mx2         | Parp12        | 1  |
| 15504 | 4409  | Mx2         | 5430435G22Rik | 1  |
| 15504 | 4426  | Mx2         | Iigp2         | 1  |
| 15504 | 4508  | Mx2         | Ifit1         | 1  |
| 15504 | 4516  | Mx2         | Rsad2         | 1  |
| 15504 | 5002  | Mx2         | Ifi202b       | 1  |
| 15504 | 5044  | Mx2         | Ifi35         | 1  |
| 15504 | 5216  | Mx2         | Spnb5         | 1  |
| 15504 | 5250  | Mx2         | Ifit2         | 1  |
| 15504 | 5556  | Mx2         | Ccl4          | 1  |
| 15504 | 5766  | Mx2         | 5033414D02Rik | 1  |
| 15504 | 5845  | Mx2         | Il18bp        | 1  |
| 15504 | 5853  | Mx2         | Trim30        | 1  |
| 15504 | 5949  | Mx2         | Zbp1          | 1  |
| 15504 | 6072  | Mx2         | C1qc          | 1  |
| 15504 | 6576  | Mx2         | Sfn2          | 1  |
| 15504 | 6587  | Mx2         | Irf9          | 1  |
| 15504 | 6595  | Mx2         | Oas1a         | 1  |
| 15504 | 6734  | Mx2         | Ehd4          | 1  |
| 15504 | 6779  | Mx2         | Gbp6          | 1  |
| 15504 | 6824  | Mx2         | Irf7          | 1  |
| 15504 | 6866  | Mx2         | Gls           | -1 |
| 15504 | 6888  | Mx2         | Cxcl9         | 1  |
| 15504 | 6910  | Mx2         | Ly6c2         | 1  |
| 15504 | 7069  | Mx2         | Ube1l         | 1  |
| 15504 | 7105  | Mx2         | Plac8         | 1  |
| 15504 | 7238  | Mx2         | Pycard        | 1  |
| 15504 | 7284  | Mx2         | MMT00008674   | 1  |
| 15504 | 7316  | Mx2         | Ifi204        | 1  |
| 15504 | 7336  | Mx2         | Cd5l          | 1  |
| 15504 | 8270  | Mx2         | Cispn         | 1  |
| 15504 | 8555  | Mx2         | H2-M3         | 1  |
| 15504 | 8659  | Mx2         | Psmb8         | 1  |
| 15504 | 8800  | Mx2         | Rnf213        | 1  |

|       |       |     |               |   |
|-------|-------|-----|---------------|---|
| 15504 | 9100  | Mx2 | Ms4a6c        | 1 |
| 15504 | 9401  | Mx2 | Fcgr4         | 1 |
| 15504 | 9717  | Mx2 | Psmb9         | 1 |
| 15504 | 9820  | Mx2 | BC023105      | 1 |
| 15504 | 9821  | Mx2 | Pmaip1        | 1 |
| 15504 | 9847  | Mx2 | Ifi27         | 1 |
| 15504 | 10109 | Mx2 | Gbp3          | 1 |
| 15504 | 10426 | Mx2 | Ly6f          | 1 |
| 15504 | 10504 | Mx2 | Ripk3         | 1 |
| 15504 | 11009 | Mx2 | MMT00008885   | 1 |
| 15504 | 11204 | Mx2 | AI451617      | 1 |
| 15504 | 11265 | Mx2 | Irgm          | 1 |
| 15504 | 11701 | Mx2 | Oas1c         | 1 |
| 15504 | 12126 | Mx2 | Znfx1         | 1 |
| 15504 | 12312 | Mx2 | Ms4a6d        | 1 |
| 15504 | 12398 | Mx2 | Ifi44         | 1 |
| 15504 | 12600 | Mx2 | Ifi204        | 1 |
| 15504 | 12969 | Mx2 | Xaf1          | 1 |
| 15504 | 13156 | Mx2 | Ifit3         | 1 |
| 15504 | 13309 | Mx2 | Tgtp          | 1 |
| 15504 | 13514 | Mx2 | Apol9b        | 1 |
| 15504 | 13522 | Mx2 | Sfn5          | 1 |
| 15504 | 13527 | Mx2 | Ctss          | 1 |
| 15504 | 13528 | Mx2 | Capn12        | 1 |
| 15504 | 13654 | Mx2 | Stat1         | 1 |
| 15504 | 13656 | Mx2 | Ly86          | 1 |
| 15504 | 13749 | Mx2 | Parp9         | 1 |
| 15504 | 13826 | Mx2 | Melk          | 1 |
| 15504 | 14029 | Mx2 | 2810022L02Rik | 1 |
| 15504 | 14258 | Mx2 | Ifi47         | 1 |
| 15504 | 14506 | Mx2 | Slc15a3       | 1 |
| 15504 | 14603 | Mx2 | Ly6e          | 1 |
| 15504 | 14611 | Mx2 | Ddx60         | 1 |
| 15504 | 14880 | Mx2 | Ms4a4c        | 1 |
| 15504 | 15074 | Mx2 | Usp18         | 1 |
| 15504 | 15280 | Mx2 | Cxcl10        | 1 |
| 15504 | 15449 | Mx2 | Mitd1         | 1 |
| 15504 | 15504 | Mx2 | Mx2           | 1 |
| 15504 | 15572 | Mx2 | Dtx3l         | 1 |
| 15504 | 16102 | Mx2 | Cd72          | 1 |
| 15504 | 16182 | Mx2 | Oasl1         | 1 |
| 15504 | 16186 | Mx2 | Cfp           | 1 |
| 15504 | 16199 | Mx2 | Samhd1        | 1 |
| 15504 | 16521 | Mx2 | Adar          | 1 |
| 15504 | 16572 | Mx2 | D14Ert668e    | 1 |
| 15504 | 16854 | Mx2 | Kif15         | 1 |
| 15504 | 16874 | Mx2 | Fcer1g        | 1 |
| 15504 | 16988 | Mx2 | Clec4f        | 1 |
| 15504 | 17071 | Mx2 | Samd9l        | 1 |
| 15504 | 17197 | Mx2 | Igtp          | 1 |
| 15504 | 17412 | Mx2 | Aif1          | 1 |

|       |       |               |                    |    |
|-------|-------|---------------|--------------------|----|
| 15504 | 17904 | Mx2           | Cds1               | 1  |
| 15504 | 18174 | Mx2           | Stat2              | 1  |
| 15504 | 18186 | Mx2           | Parp14             | 1  |
| 15504 | 18211 | Mx2           | Folr2              | 1  |
| 15504 | 18289 | Mx2           | Tap1               | 1  |
| 15504 | 18686 | Mx2           | Zfp143             | 1  |
| 15504 | 19026 | Mx2           | Isg15              | 1  |
| 15504 | 19189 | Mx2           | Sp100              | 1  |
| 15504 | 19262 | Mx2           | Cd274              | 1  |
| 15504 | 19708 | Mx2           | Ly6a               | 1  |
| 15504 | 19738 | Mx2           | Lgals3bp           | 1  |
| 15504 | 19794 | Mx2           | Rgs2               | 1  |
| 15504 | 20321 | Mx2           | Ms4a6b             | 1  |
| 15504 | 20474 | Mx2           | Gnb3               | 1  |
| 15504 | 20791 | Mx2           | MMT00014813        | 1  |
| 15504 | 20997 | Mx2           | MMT00028135        | 1  |
| 15504 | 21351 | Mx2           | Shisa5             | 1  |
| 15504 | 21440 | Mx2           | Tmsb10             | 1  |
| 15504 | 21549 | Mx2           | Rtp4               | 1  |
| 15504 | 21824 | Mx2           | 5830443L24Rik      | 1  |
| 15504 | 22037 | Mx2           | Oas1g              | 1  |
| 15504 | 22077 | Mx2           | MMT00057550        | 1  |
| 15504 | 22496 | Mx2           | Sfn1               | 1  |
| 15504 | 22712 | Mx2           | Phf11              | 1  |
| 15504 | 23092 | Mx2           | Ifih1              | 1  |
| 15504 | 23208 | Mx2           | Hck                | 1  |
| 15504 | 23242 | Mx2           | Gngt2              | 1  |
| 15504 | 23403 | Mx2           | Ndc80              | 1  |
| 15504 | 23450 | Mx2           | D12Ert647e         | 1  |
| 15508 | 3159  | 4632415L05Rik | Pld1               | 1  |
| 15508 | 3206  | 4632415L05Rik | Gpr160             | 1  |
| 15508 | 5822  | 4632415L05Rik | Car2               | 1  |
| 15508 | 5938  | 4632415L05Rik | Pfn2               | 1  |
| 15508 | 8568  | 4632415L05Rik | Tnik               | 1  |
| 15508 | 12367 | 4632415L05Rik | MMT00072365        | -1 |
| 15508 | 13423 | 4632415L05Rik | ENSMUSG00000053749 | 1  |
| 15508 | 15508 | 4632415L05Rik | 4632415L05Rik      | 1  |
| 15508 | 16416 | 4632415L05Rik | Commd2             | 1  |
| 15508 | 18790 | 4632415L05Rik | Car3               | 1  |
| 15508 | 21323 | 4632415L05Rik | MMT00074228        | 1  |
| 15512 | 11054 | Mitf          | Rnase4             | 1  |
| 15522 | 4392  | 1810011O10Rik | 1810055G02Rik      | 1  |
| 15522 | 7944  | 1810011O10Rik | Al132487           | 1  |
| 15522 | 16176 | 1810011O10Rik | St3gal5            | 1  |
| 15522 | 18785 | 1810011O10Rik | Angptl4            | 1  |
| 15522 | 21251 | 1810011O10Rik | Cpt1a              | 1  |
| 15529 | 1258  | MMT00011590   | Hba-a1             | 1  |
| 15529 | 5919  | MMT00011590   | B930041F14Rik      | 1  |
| 15529 | 15132 | MMT00011590   | MMT00007672        | 1  |
| 15529 | 15529 | MMT00011590   | MMT00011590        | 1  |
| 15529 | 17664 | MMT00011590   | Jup                | 1  |

|       |       |             |               |    |
|-------|-------|-------------|---------------|----|
| 15529 | 21356 | MMT00011590 | Nkx2-6        | 1  |
| 15531 | 327   | Prickle4    | H2-Ea         | -1 |
| 15531 | 510   | Prickle4    | Neu1          | 1  |
| 15531 | 1340  | Prickle4    | Tap2          | -1 |
| 15531 | 1515  | Prickle4    | Med20         | 1  |
| 15531 | 2938  | Prickle4    | H2-T23        | -1 |
| 15531 | 3857  | Prickle4    | 1700001C19Rik | 1  |
| 15531 | 4958  | Prickle4    | Ndufa7        | 1  |
| 15531 | 6510  | Prickle4    | Plcl2         | -1 |
| 15531 | 7088  | Prickle4    | Slc37a1       | -1 |
| 15531 | 8750  | Prickle4    | 1700010114Rik | -1 |
| 15531 | 10376 | Prickle4    | C920025E04Rik | 1  |
| 15531 | 10667 | Prickle4    | H2-Eb1        | -1 |
| 15531 | 13493 | Prickle4    | Ring1         | 1  |
| 15531 | 15531 | Prickle4    | Prickle4      | 1  |
| 15531 | 20100 | Prickle4    | Guca1b        | 1  |
| 15531 | 20238 | Prickle4    | H2-T9         | -1 |
| 15531 | 21295 | Prickle4    | Snf1lk        | 1  |
| 15531 | 22822 | Prickle4    | MMT00013433   | -1 |
| 15531 | 23250 | Prickle4    | Plcl2         | -1 |
| 15533 | 250   | Olfml2b     | Tubb2a-ps2    | 1  |
| 15533 | 609   | Olfml2b     | MMT00060868   | 1  |
| 15533 | 719   | Olfml2b     | Usp2          | -1 |
| 15533 | 937   | Olfml2b     | Pi4ka         | -1 |
| 15533 | 1310  | Olfml2b     | Cabc1         | 1  |
| 15533 | 1767  | Olfml2b     | BC016495      | -1 |
| 15533 | 2829  | Olfml2b     | Lrfr3         | 1  |
| 15533 | 3214  | Olfml2b     | Dnmt3b        | 1  |
| 15533 | 3410  | Olfml2b     | Paqr9         | 1  |
| 15533 | 3603  | Olfml2b     | BC027231      | -1 |
| 15533 | 3804  | Olfml2b     | MMT00015534   | 1  |
| 15533 | 4286  | Olfml2b     | Ptp4a1        | -1 |
| 15533 | 5183  | Olfml2b     | St5           | 1  |
| 15533 | 5574  | Olfml2b     | Hsd3b7        | 1  |
| 15533 | 5791  | Olfml2b     | Baiap211      | -1 |
| 15533 | 5934  | Olfml2b     | S100a10       | 1  |
| 15533 | 5974  | Olfml2b     | Arntl         | 1  |
| 15533 | 6109  | Olfml2b     | Hsd17b2       | 1  |
| 15533 | 6118  | Olfml2b     | Slc1a4        | 1  |
| 15533 | 6261  | Olfml2b     | 2810026P18Rik | -1 |
| 15533 | 6338  | Olfml2b     | Setd3         | -1 |
| 15533 | 6343  | Olfml2b     | Slc20a1       | -1 |
| 15533 | 6386  | Olfml2b     | Por           | -1 |
| 15533 | 6771  | Olfml2b     | Insc          | 1  |
| 15533 | 6788  | Olfml2b     | Psen2         | 1  |
| 15533 | 6966  | Olfml2b     | Mia3          | -1 |
| 15533 | 7862  | Olfml2b     | Cpsf4l        | -1 |
| 15533 | 8399  | Olfml2b     | Herpud1       | -1 |
| 15533 | 9763  | Olfml2b     | Tuba3b        | 1  |
| 15533 | 9907  | Olfml2b     | 4932442K08Rik | -1 |
| 15533 | 10486 | Olfml2b     | 1300002K09Rik | 1  |

|       |       |               |               |    |
|-------|-------|---------------|---------------|----|
| 15533 | 10745 | Olfml2b       | Gale          | 1  |
| 15533 | 11129 | Olfml2b       | Ankhd1        | -1 |
| 15533 | 11599 | Olfml2b       | Coq10b        | -1 |
| 15533 | 11724 | Olfml2b       | Tuba3a        | 1  |
| 15533 | 11741 | Olfml2b       | Slc30a10      | 1  |
| 15533 | 11807 | Olfml2b       | Fbxo31        | -1 |
| 15533 | 11984 | Olfml2b       | N6amt2        | 1  |
| 15533 | 12420 | Olfml2b       | Klhl21        | -1 |
| 15533 | 12460 | Olfml2b       | Pnpla2        | -1 |
| 15533 | 12489 | Olfml2b       | Wdr8          | 1  |
| 15533 | 12687 | Olfml2b       | Zc3h8         | -1 |
| 15533 | 13889 | Olfml2b       | Agpat2        | 1  |
| 15533 | 15862 | Olfml2b       | Mrap          | 1  |
| 15533 | 16060 | Olfml2b       | Gys2          | -1 |
| 15533 | 16176 | Olfml2b       | St3gal5       | -1 |
| 15533 | 16690 | Olfml2b       | Tjp3          | 1  |
| 15533 | 17338 | Olfml2b       | Mocos         | 1  |
| 15533 | 17876 | Olfml2b       | Tubb4         | 1  |
| 15533 | 18027 | Olfml2b       | 5730403B10Rik | -1 |
| 15533 | 18147 | Olfml2b       | Nhlrc2        | -1 |
| 15533 | 18179 | Olfml2b       | Dbp           | -1 |
| 15533 | 18296 | Olfml2b       | Pcgf5         | -1 |
| 15533 | 18827 | Olfml2b       | Oprs1         | 1  |
| 15533 | 19025 | Olfml2b       | Slc37a4       | -1 |
| 15533 | 21811 | Olfml2b       | Ak3l1         | -1 |
| 15533 | 22290 | Olfml2b       | Tubb2a        | 1  |
| 15533 | 22630 | Olfml2b       | MMT00034355   | 1  |
| 15536 | 8632  | Garnl4        | Igfbp1        | -1 |
| 15536 | 12910 | Garnl4        | 1110028A07Rik | 1  |
| 15536 | 15059 | Garnl4        | Mogat1        | 1  |
| 15536 | 20058 | Garnl4        | Dnaic1        | -1 |
| 15536 | 23026 | Garnl4        | Apom          | -1 |
| 15538 | 1957  | B130024G19Rik | Mansc1        | 1  |
| 15538 | 3587  | B130024G19Rik | MMT00041940   | -1 |
| 15538 | 4391  | B130024G19Rik | Zfp467        | 1  |
| 15538 | 6976  | B130024G19Rik | Rbm35b        | 1  |
| 15538 | 7659  | B130024G19Rik | Rab30         | -1 |
| 15538 | 8499  | B130024G19Rik | C430048L16Rik | -1 |
| 15538 | 10769 | B130024G19Rik | Hnrnpd        | 1  |
| 15538 | 12315 | B130024G19Rik | Srebf1        | 1  |
| 15538 | 13285 | B130024G19Rik | Cd276         | 1  |
| 15538 | 18373 | B130024G19Rik | Dnajb1        | -1 |
| 15540 | 294   | C2            | Ehhadh        | -1 |
| 15540 | 8444  | C2            | Rdh16         | -1 |
| 15540 | 8815  | C2            | Mx1           | -1 |
| 15540 | 14258 | C2            | Ifi47         | 1  |
| 15540 | 21214 | C2            | Scd1          | -1 |
| 15560 | 2636  | Lrrc25        | Tars          | 1  |
| 15560 | 2850  | Lrrc25        | Slc16a6       | 1  |
| 15560 | 4286  | Lrrc25        | Ptp4a1        | -1 |
| 15560 | 6386  | Lrrc25        | Por           | -1 |

|       |       |               |               |    |
|-------|-------|---------------|---------------|----|
| 15560 | 11741 | Lrrc25        | Slc30a10      | 1  |
| 15560 | 15709 | Lrrc25        | Tceal1        | -1 |
| 15565 | 6157  | 2310001A20Rik | MMT00041452   | 1  |
| 15565 | 13581 | 2310001A20Rik | Srxn1         | -1 |
| 15566 | 250   | Snn           | Tubb2a-ps2    | 1  |
| 15566 | 4235  | Snn           | Pfkfb3        | -1 |
| 15566 | 4286  | Snn           | Ptp4a1        | -1 |
| 15566 | 6386  | Snn           | Por           | -1 |
| 15566 | 11129 | Snn           | Ankhd1        | -1 |
| 15566 | 11599 | Snn           | Coq10b        | -1 |
| 15566 | 11614 | Snn           | Sult1e1       | -1 |
| 15566 | 15631 | Snn           | Lpin1         | -1 |
| 15566 | 16176 | Snn           | St3gal5       | -1 |
| 15566 | 16647 | Snn           | D16H22S680E   | -1 |
| 15566 | 18027 | Snn           | 5730403B10Rik | -1 |
| 15566 | 18314 | Snn           | 4631416L12Rik | -1 |
| 15566 | 18827 | Snn           | Oprs1         | 1  |
| 15566 | 19466 | Snn           | Pptc7         | -1 |
| 15566 | 19757 | Snn           | Fkbp5         | -1 |
| 15566 | 21331 | Snn           | Slc10a6       | -1 |
| 15566 | 22290 | Snn           | Tubb2a        | 1  |
| 15566 | 22630 | Snn           | MMT00034355   | 1  |
| 15569 | 15569 | BC003331      | BC003331      | 1  |
| 15569 | 17850 | BC003331      | Prg4          | -1 |
| 15572 | 2224  | Dtx3l         | Oasl2         | 1  |
| 15572 | 3594  | Dtx3l         | Rasa4         | 1  |
| 15572 | 7284  | Dtx3l         | MMT00008674   | 1  |
| 15572 | 9847  | Dtx3l         | Ifi27         | 1  |
| 15572 | 12126 | Dtx3l         | Znfx1         | 1  |
| 15572 | 14880 | Dtx3l         | Ms4a4c        | 1  |
| 15572 | 15504 | Dtx3l         | Mx2           | 1  |
| 15572 | 21549 | Dtx3l         | Rtp4          | 1  |
| 15573 | 12367 | Aipl1         | MMT00072365   | -1 |
| 15577 | 4602  | Glt8d4        | Pdzrn3        | 1  |
| 15578 | 3686  | Lrrc3b        | Psmc9         | -1 |
| 15578 | 7944  | Lrrc3b        | A1132487      | -1 |
| 15578 | 17656 | Lrrc3b        | Hdhd3         | 1  |
| 15594 | 6370  | Gm1967        | Aqp8          | -1 |
| 15594 | 10961 | Gm1967        | Pgd           | -1 |
| 15594 | 12941 | Gm1967        | Elovl5        | -1 |
| 15594 | 18827 | Gm1967        | Oprs1         | -1 |
| 15594 | 21214 | Gm1967        | Scd1          | -1 |
| 15594 | 22138 | Gm1967        | Ang           | 1  |
| 15602 | 2721  | Sctr          | Inmt          | -1 |
| 15602 | 4056  | Sctr          | Tnfaip8l1     | 1  |
| 15602 | 5804  | Sctr          | Thrsp         | -1 |
| 15602 | 8773  | Sctr          | MMT00027093   | 1  |
| 15602 | 8815  | Sctr          | Mx1           | -1 |
| 15602 | 9427  | Sctr          | Nqo2          | -1 |
| 15602 | 14151 | Sctr          | Slc44a1       | -1 |
| 15602 | 15205 | Sctr          | MMT00030262   | 1  |

|       |       |       |               |    |
|-------|-------|-------|---------------|----|
| 15602 | 21202 | Sctr  | Acly          | -1 |
| 15602 | 21214 | Sctr  | Scd1          | -1 |
| 15602 | 21727 | Sctr  | Khk           | -1 |
| 15604 | 337   | Arl4a | Rasgef1b      | 1  |
| 15604 | 3196  | Arl4a | Tat           | 1  |
| 15604 | 7492  | Arl4a | Adfp          | -1 |
| 15604 | 11393 | Arl4a | A830007P12Rik | -1 |
| 15604 | 12761 | Arl4a | Tsc22d3       | 1  |
| 15604 | 20296 | Arl4a | C030027H14Rik | 1  |
| 15604 | 21934 | Arl4a | Id2           | -1 |
| 15604 | 23183 | Arl4a | Nnmt          | 1  |
| 15625 | 2743  | Capg  | Tcf3          | 1  |
| 15625 | 3703  | Capg  | Ggcx          | 1  |
| 15625 | 15384 | Capg  | Mat2a         | 1  |
| 15625 | 15708 | Capg  | Retsat        | 1  |
| 15631 | 147   | Lpin1 | Uox           | 1  |
| 15631 | 213   | Lpin1 | Rgs16         | 1  |
| 15631 | 250   | Lpin1 | Tubb2a-ps2    | -1 |
| 15631 | 402   | Lpin1 | Timp3         | 1  |
| 15631 | 407   | Lpin1 | Serpina6      | 1  |
| 15631 | 413   | Lpin1 | Acy1          | 1  |
| 15631 | 433   | Lpin1 | Pla2g12b      | -1 |
| 15631 | 437   | Lpin1 | Ndr1          | -1 |
| 15631 | 530   | Lpin1 | Mest          | -1 |
| 15631 | 547   | Lpin1 | Mknk2         | 1  |
| 15631 | 563   | Lpin1 | D4Bwg0951e    | 1  |
| 15631 | 609   | Lpin1 | MMT00060868   | -1 |
| 15631 | 719   | Lpin1 | Usp2          | 1  |
| 15631 | 760   | Lpin1 | Akr1c19       | 1  |
| 15631 | 1276  | Lpin1 | Col4a1        | -1 |
| 15631 | 1362  | Lpin1 | Avpr1a        | -1 |
| 15631 | 1363  | Lpin1 | BC021767      | -1 |
| 15631 | 1371  | Lpin1 | 1200009I06Rik | -1 |
| 15631 | 1600  | Lpin1 | Csrp1         | -1 |
| 15631 | 1646  | Lpin1 | Slc15a4       | 1  |
| 15631 | 1711  | Lpin1 | Grl1          | -1 |
| 15631 | 1767  | Lpin1 | BC016495      | 1  |
| 15631 | 1853  | Lpin1 | Stat5a        | -1 |
| 15631 | 2110  | Lpin1 | Gtf2ird1      | -1 |
| 15631 | 2126  | Lpin1 | Dgat2         | 1  |
| 15631 | 2200  | Lpin1 | BC006779      | -1 |
| 15631 | 2256  | Lpin1 | Serpina9      | -1 |
| 15631 | 2294  | Lpin1 | AU040829      | 1  |
| 15631 | 2384  | Lpin1 | Micalcl       | -1 |
| 15631 | 2399  | Lpin1 | MMT00060167   | -1 |
| 15631 | 2507  | Lpin1 | Oaf           | 1  |
| 15631 | 2529  | Lpin1 | Hmcn2         | 1  |
| 15631 | 2636  | Lpin1 | Tars          | -1 |
| 15631 | 2725  | Lpin1 | Gm1614        | 1  |
| 15631 | 2794  | Lpin1 | Map3k6        | 1  |
| 15631 | 2829  | Lpin1 | Lrfn3         | -1 |



|       |      |       |               |    |
|-------|------|-------|---------------|----|
| 15631 | 2850 | Lpin1 | Slc16a6       | -1 |
| 15631 | 3079 | Lpin1 | Gstt3         | 1  |
| 15631 | 3097 | Lpin1 | Ppp1r3g       | 1  |
| 15631 | 3170 | Lpin1 | Mcart1        | 1  |
| 15631 | 3196 | Lpin1 | Tat           | 1  |
| 15631 | 3214 | Lpin1 | Dnmt3b        | -1 |
| 15631 | 3410 | Lpin1 | Paqr9         | -1 |
| 15631 | 3452 | Lpin1 | Ccrn4l        | 1  |
| 15631 | 3502 | Lpin1 | Gde1          | 1  |
| 15631 | 3746 | Lpin1 | Osbp15        | 1  |
| 15631 | 3789 | Lpin1 | 4833442J19Rik | 1  |
| 15631 | 3790 | Lpin1 | Mtss1         | 1  |
| 15631 | 3804 | Lpin1 | MMT00015534   | -1 |
| 15631 | 4056 | Lpin1 | Tnfaip8l1     | -1 |
| 15631 | 4090 | Lpin1 | Orai3         | -1 |
| 15631 | 4201 | Lpin1 | Tubb2c        | -1 |
| 15631 | 4286 | Lpin1 | Ptp4a1        | 1  |
| 15631 | 4534 | Lpin1 | Ndel1         | 1  |
| 15631 | 4708 | Lpin1 | Traf3ip2      | -1 |
| 15631 | 5068 | Lpin1 | Afap1l2       | -1 |
| 15631 | 5183 | Lpin1 | St5           | -1 |
| 15631 | 5187 | Lpin1 | Speer4f       | 1  |
| 15631 | 5259 | Lpin1 | Mat1a         | 1  |
| 15631 | 5364 | Lpin1 | Kif22         | -1 |
| 15631 | 5374 | Lpin1 | Chka          | -1 |
| 15631 | 5414 | Lpin1 | Etnk2         | 1  |
| 15631 | 5449 | Lpin1 | Got1          | 1  |
| 15631 | 5569 | Lpin1 | Pdgfc         | -1 |
| 15631 | 5574 | Lpin1 | Hsd3b7        | -1 |
| 15631 | 5691 | Lpin1 | Csrp3         | -1 |
| 15631 | 5734 | Lpin1 | EG619653      | 1  |
| 15631 | 5766 | Lpin1 | 5033414D02Rik | -1 |
| 15631 | 5791 | Lpin1 | Baiap2l1      | 1  |
| 15631 | 5802 | Lpin1 | Mad2l2        | -1 |
| 15631 | 5804 | Lpin1 | Thrsp         | 1  |
| 15631 | 5849 | Lpin1 | 2310031A18Rik | -1 |
| 15631 | 5856 | Lpin1 | Mfsd2         | 1  |
| 15631 | 5892 | Lpin1 | MMT00038457   | 1  |
| 15631 | 5974 | Lpin1 | Arntl         | -1 |
| 15631 | 5983 | Lpin1 | Pcolce2       | -1 |
| 15631 | 6030 | Lpin1 | As3mt         | 1  |
| 15631 | 6177 | Lpin1 | Thpo          | -1 |
| 15631 | 6282 | Lpin1 | Them4         | 1  |
| 15631 | 6329 | Lpin1 | Cyp2b10       | 1  |
| 15631 | 6386 | Lpin1 | Por           | 1  |
| 15631 | 6394 | Lpin1 | Fbxo6         | -1 |
| 15631 | 6420 | Lpin1 | Mipep         | 1  |
| 15631 | 6746 | Lpin1 | E2f8          | -1 |
| 15631 | 6756 | Lpin1 | Sds           | 1  |
| 15631 | 6916 | Lpin1 | Wdr5b         | -1 |
| 15631 | 6990 | Lpin1 | Nr1i2         | 1  |

|       |       |       |               |    |
|-------|-------|-------|---------------|----|
| 15631 | 7066  | Lpin1 | Agtr1b        | 1  |
| 15631 | 7414  | Lpin1 | Clpx          | -1 |
| 15631 | 7482  | Lpin1 | Tdg           | -1 |
| 15631 | 7492  | Lpin1 | Adfp          | -1 |
| 15631 | 7734  | Lpin1 | Cyp2b23       | 1  |
| 15631 | 7761  | Lpin1 | Nudt19        | 1  |
| 15631 | 7839  | Lpin1 | Asl           | 1  |
| 15631 | 7862  | Lpin1 | Cpsf4l        | 1  |
| 15631 | 7954  | Lpin1 | Ccdc12        | -1 |
| 15631 | 7963  | Lpin1 | Rxrg          | -1 |
| 15631 | 8328  | Lpin1 | Klhdc8a       | -1 |
| 15631 | 8399  | Lpin1 | Herpud1       | 1  |
| 15631 | 8404  | Lpin1 | Fa2h          | -1 |
| 15631 | 8416  | Lpin1 | Cdc20         | -1 |
| 15631 | 8428  | Lpin1 | Sorbs3        | 1  |
| 15631 | 8641  | Lpin1 | Slc7a2        | 1  |
| 15631 | 8711  | Lpin1 | 5430432M24Rik | -1 |
| 15631 | 8965  | Lpin1 | Ahcy          | 1  |
| 15631 | 9127  | Lpin1 | Mtfmt         | -1 |
| 15631 | 9213  | Lpin1 | Osgin1        | -1 |
| 15631 | 9260  | Lpin1 | Cmtm6         | -1 |
| 15631 | 9275  | Lpin1 | Aass          | 1  |
| 15631 | 9309  | Lpin1 | MMT00035904   | 1  |
| 15631 | 9481  | Lpin1 | Ppl           | 1  |
| 15631 | 9495  | Lpin1 | Srms          | -1 |
| 15631 | 9686  | Lpin1 | Nek4          | -1 |
| 15631 | 9718  | Lpin1 | Fmo5          | 1  |
| 15631 | 9867  | Lpin1 | Psrc1         | -1 |
| 15631 | 9910  | Lpin1 | EG666644      | 1  |
| 15631 | 10207 | Lpin1 | MMT00012324   | -1 |
| 15631 | 10273 | Lpin1 | Gpt2          | 1  |
| 15631 | 10408 | Lpin1 | Per1          | 1  |
| 15631 | 10499 | Lpin1 | Camkk2        | -1 |
| 15631 | 10546 | Lpin1 | Prpf6         | -1 |
| 15631 | 10642 | Lpin1 | Ngef          | 1  |
| 15631 | 10712 | Lpin1 | Fchsd2        | 1  |
| 15631 | 10775 | Lpin1 | Slc16a1       | -1 |
| 15631 | 10802 | Lpin1 | Kcnn2         | 1  |
| 15631 | 10803 | Lpin1 | Wnt5a         | -1 |
| 15631 | 10928 | Lpin1 | Arid1a        | -1 |
| 15631 | 11093 | Lpin1 | Zdhhc1        | 1  |
| 15631 | 11129 | Lpin1 | Ankhd1        | 1  |
| 15631 | 11233 | Lpin1 | Tef           | 1  |
| 15631 | 11382 | Lpin1 | Cdca3         | -1 |
| 15631 | 11599 | Lpin1 | Coq10b        | 1  |
| 15631 | 11614 | Lpin1 | Sult1e1       | 1  |
| 15631 | 11741 | Lpin1 | Slc30a10      | -1 |
| 15631 | 11807 | Lpin1 | Fbxo31        | 1  |
| 15631 | 11808 | Lpin1 | Pck1          | 1  |
| 15631 | 12114 | Lpin1 | Homer2        | 1  |
| 15631 | 12151 | Lpin1 | MMT00082650   | 1  |

|       |       |       |               |    |
|-------|-------|-------|---------------|----|
| 15631 | 12165 | Lpin1 | Ppp2r1b       | -1 |
| 15631 | 12193 | Lpin1 | Aco2          | 1  |
| 15631 | 12204 | Lpin1 | Ankmy2        | 1  |
| 15631 | 12420 | Lpin1 | Klhl21        | 1  |
| 15631 | 12489 | Lpin1 | Wdr8          | -1 |
| 15631 | 12556 | Lpin1 | Ass1          | 1  |
| 15631 | 12761 | Lpin1 | Tsc22d3       | 1  |
| 15631 | 12799 | Lpin1 | Spon2         | -1 |
| 15631 | 12807 | Lpin1 | Faim          | -1 |
| 15631 | 12839 | Lpin1 | Fh1           | 1  |
| 15631 | 12904 | Lpin1 | MMT00040704   | 1  |
| 15631 | 12925 | Lpin1 | Farp1         | -1 |
| 15631 | 12982 | Lpin1 | Cars          | -1 |
| 15631 | 13078 | Lpin1 | Eps8l2        | -1 |
| 15631 | 13181 | Lpin1 | Lcp2          | -1 |
| 15631 | 13216 | Lpin1 | Ccdc106       | 1  |
| 15631 | 13271 | Lpin1 | Idh2          | 1  |
| 15631 | 13289 | Lpin1 | Dusp10        | -1 |
| 15631 | 13339 | Lpin1 | D630042F21Rik | 1  |
| 15631 | 13431 | Lpin1 | MMT00038058   | -1 |
| 15631 | 13471 | Lpin1 | Cln8          | 1  |
| 15631 | 13989 | Lpin1 | Foxp3         | 1  |
| 15631 | 14041 | Lpin1 | Cldn1         | -1 |
| 15631 | 14258 | Lpin1 | Ifi47         | -1 |
| 15631 | 14462 | Lpin1 | Zfp385b       | 1  |
| 15631 | 14472 | Lpin1 | Ahcy          | 1  |
| 15631 | 15008 | Lpin1 | Chrdl2        | 1  |
| 15631 | 15021 | Lpin1 | Ppargc1a      | 1  |
| 15631 | 15049 | Lpin1 | Rnf125        | -1 |
| 15631 | 15205 | Lpin1 | MMT00030262   | -1 |
| 15631 | 15258 | Lpin1 | Coil          | -1 |
| 15631 | 15320 | Lpin1 | MMT00017479   | 1  |
| 15631 | 15481 | Lpin1 | 1110067D22Rik | -1 |
| 15631 | 15521 | Lpin1 | Mast3         | 1  |
| 15631 | 15607 | Lpin1 | Klf13         | 1  |
| 15631 | 15624 | Lpin1 | Crcp          | 1  |
| 15631 | 15631 | Lpin1 | Lpin1         | 1  |
| 15631 | 15665 | Lpin1 | Blcap         | -1 |
| 15631 | 15709 | Lpin1 | Tceal1        | 1  |
| 15631 | 15758 | Lpin1 | Stx4a         | -1 |
| 15631 | 15824 | Lpin1 | D19Ert721e    | -1 |
| 15631 | 15882 | Lpin1 | AA986860      | 1  |
| 15631 | 16060 | Lpin1 | Gys2          | 1  |
| 15631 | 16131 | Lpin1 | Ptpre         | -1 |
| 15631 | 16176 | Lpin1 | St3gal5       | 1  |
| 15631 | 16474 | Lpin1 | Bhlhb2        | 1  |
| 15631 | 16515 | Lpin1 | Gramd4        | -1 |
| 15631 | 16580 | Lpin1 | Tnfaip2       | -1 |
| 15631 | 16647 | Lpin1 | D16H22S680E   | 1  |
| 15631 | 16669 | Lpin1 | Tjp2          | -1 |
| 15631 | 16690 | Lpin1 | Tjp3          | -1 |

|       |       |       |               |    |
|-------|-------|-------|---------------|----|
| 15631 | 16720 | Lpin1 | Mtmr7         | 1  |
| 15631 | 16851 | Lpin1 | Slc34a2       | -1 |
| 15631 | 17078 | Lpin1 | Syde2         | 1  |
| 15631 | 17247 | Lpin1 | A030007L17Rik | -1 |
| 15631 | 17323 | Lpin1 | Tubb6         | -1 |
| 15631 | 17338 | Lpin1 | Mocos         | -1 |
| 15631 | 17418 | Lpin1 | D1Ertd622e    | 1  |
| 15631 | 17525 | Lpin1 | Ctgf          | 1  |
| 15631 | 17583 | Lpin1 | Per2          | 1  |
| 15631 | 17622 | Lpin1 | Foxo1         | 1  |
| 15631 | 17823 | Lpin1 | D2Ertd750e    | -1 |
| 15631 | 17876 | Lpin1 | Tubb4         | -1 |
| 15631 | 17884 | Lpin1 | Lnx2          | -1 |
| 15631 | 17999 | Lpin1 | A730017L22Rik | -1 |
| 15631 | 18027 | Lpin1 | 5730403B10Rik | 1  |
| 15631 | 18069 | Lpin1 | Gpt           | 1  |
| 15631 | 18147 | Lpin1 | Nhlrc2        | 1  |
| 15631 | 18174 | Lpin1 | Stat2         | -1 |
| 15631 | 18179 | Lpin1 | Dbp           | 1  |
| 15631 | 18250 | Lpin1 | Mmp14         | -1 |
| 15631 | 18314 | Lpin1 | 4631416L12Rik | 1  |
| 15631 | 18438 | Lpin1 | Map3k7ip2     | -1 |
| 15631 | 18455 | Lpin1 | Mtnr1a        | -1 |
| 15631 | 18756 | Lpin1 | Tspan14       | -1 |
| 15631 | 18827 | Lpin1 | Oprs1         | -1 |
| 15631 | 19025 | Lpin1 | Slc37a4       | 1  |
| 15631 | 19146 | Lpin1 | N4bp2l1       | 1  |
| 15631 | 19234 | Lpin1 | Nrg4          | 1  |
| 15631 | 19277 | Lpin1 | MMT00044927   | 1  |
| 15631 | 19305 | Lpin1 | Azin1         | 1  |
| 15631 | 19375 | Lpin1 | Inhba         | -1 |
| 15631 | 19465 | Lpin1 | Hacl1         | -1 |
| 15631 | 19466 | Lpin1 | Pptc7         | 1  |
| 15631 | 19532 | Lpin1 | Med8          | -1 |
| 15631 | 19671 | Lpin1 | Upp2          | 1  |
| 15631 | 19701 | Lpin1 | 9930021J17Rik | -1 |
| 15631 | 19723 | Lpin1 | Pfkfb1        | 1  |
| 15631 | 19790 | Lpin1 | Polg2         | 1  |
| 15631 | 19917 | Lpin1 | Nek2          | -1 |
| 15631 | 19970 | Lpin1 | Mrpl36        | -1 |
| 15631 | 20085 | Lpin1 | Lpin2         | 1  |
| 15631 | 20171 | Lpin1 | 1700008G05Rik | -1 |
| 15631 | 20296 | Lpin1 | C030027H14Rik | 1  |
| 15631 | 20390 | Lpin1 | Cd9           | -1 |
| 15631 | 20689 | Lpin1 | Cnksr3        | -1 |
| 15631 | 20745 | Lpin1 | Sord          | 1  |
| 15631 | 20803 | Lpin1 | Tmem50a       | 1  |
| 15631 | 20830 | Lpin1 | MMT00057509   | -1 |
| 15631 | 20854 | Lpin1 | Commd7        | -1 |
| 15631 | 21142 | Lpin1 | Gm129         | 1  |
| 15631 | 21167 | Lpin1 | Irf5          | -1 |

|       |       |               |               |    |
|-------|-------|---------------|---------------|----|
| 15631 | 21331 | Lpin1         | Slc10a6       | 1  |
| 15631 | 21733 | Lpin1         | Rhebl1        | 1  |
| 15631 | 21805 | Lpin1         | Plk3          | 1  |
| 15631 | 21811 | Lpin1         | Ak3l1         | 1  |
| 15631 | 21918 | Lpin1         | Snx24         | -1 |
| 15631 | 21934 | Lpin1         | Id2           | -1 |
| 15631 | 21969 | Lpin1         | Tk1           | 1  |
| 15631 | 22218 | Lpin1         | Rfc3          | -1 |
| 15631 | 22290 | Lpin1         | Tubb2a        | -1 |
| 15631 | 22324 | Lpin1         | MMT00060741   | -1 |
| 15631 | 22627 | Lpin1         | Adck5         | -1 |
| 15631 | 22630 | Lpin1         | MMT00034355   | -1 |
| 15631 | 22653 | Lpin1         | Ric3          | -1 |
| 15631 | 22681 | Lpin1         | Gm88          | 1  |
| 15631 | 22863 | Lpin1         | Prkd2         | -1 |
| 15631 | 22873 | Lpin1         | Slc38a2       | 1  |
| 15631 | 22936 | Lpin1         | Rhobtb1       | 1  |
| 15631 | 22998 | Lpin1         | Ass1          | 1  |
| 15631 | 23180 | Lpin1         | Sult1d1       | 1  |
| 15631 | 23183 | Lpin1         | Nnmt          | 1  |
| 15631 | 23201 | Lpin1         | S1pr1         | -1 |
| 15631 | 23202 | Lpin1         | Olf559        | 1  |
| 15631 | 23211 | Lpin1         | Pscd3         | -1 |
| 15631 | 23248 | Lpin1         | Tesk2         | 1  |
| 15631 | 23419 | Lpin1         | Tipin         | -1 |
| 15631 | 23558 | Lpin1         | MMT00030937   | 1  |
| 15632 | 13293 | Gsc           | Gsta2         | -1 |
| 15657 | 3038  | Zfyve28       | Serpina12     | 1  |
| 15657 | 3265  | Zfyve28       | Dntt          | 1  |
| 15657 | 5364  | Zfyve28       | Kif22         | 1  |
| 15657 | 12910 | Zfyve28       | 1110028A07Rik | 1  |
| 15657 | 20967 | Zfyve28       | Fabp2         | 1  |
| 15658 | 2200  | Slfn8         | BC006779      | 1  |
| 15658 | 17197 | Slfn8         | Igtp          | 1  |
| 15658 | 18174 | Slfn8         | Stat2         | 1  |
| 15659 | 23097 | MMT00074093   | Pip4k2c       | -1 |
| 15668 | 20058 | 1810032O08Rik | Dnaic1        | 1  |
| 15672 | 13431 | Ahi1          | MMT00038058   | 1  |
| 15672 | 14151 | Ahi1          | Slc44a1       | -1 |
| 15672 | 17090 | Ahi1          | Lass2         | -1 |
| 15672 | 20019 | Ahi1          | Qdpr          | -1 |
| 15672 | 20058 | Ahi1          | Dnaic1        | 1  |
| 15675 | 624   | MMT00077535   | 4931406I20Rik | -1 |
| 15675 | 740   | MMT00077535   | Txnrd3        | -1 |
| 15675 | 902   | MMT00077535   | Slc30a1       | -1 |
| 15675 | 1156  | MMT00077535   | Rbj           | -1 |
| 15675 | 1386  | MMT00077535   | Ppid          | 1  |
| 15675 | 1828  | MMT00077535   | Elmo3         | -1 |
| 15675 | 2041  | MMT00077535   | Cct7          | 1  |
| 15675 | 2043  | MMT00077535   | Arl2bp        | -1 |
| 15675 | 2329  | MMT00077535   | Wdr6          | -1 |

|       |       |             |               |    |
|-------|-------|-------------|---------------|----|
| 15675 | 3170  | MMT00077535 | Mcart1        | 1  |
| 15675 | 3393  | MMT00077535 | Snhg8         | -1 |
| 15675 | 3587  | MMT00077535 | MMT00041940   | 1  |
| 15675 | 3808  | MMT00077535 | 2010209O12Rik | -1 |
| 15675 | 3837  | MMT00077535 | Tradd         | -1 |
| 15675 | 3913  | MMT00077535 | Mrpl15        | 1  |
| 15675 | 4391  | MMT00077535 | Zfp467        | -1 |
| 15675 | 4404  | MMT00077535 | Commd5        | -1 |
| 15675 | 4966  | MMT00077535 | Zscan20       | 1  |
| 15675 | 5352  | MMT00077535 | Pdcd2l        | -1 |
| 15675 | 5953  | MMT00077535 | MMT00008178   | 1  |
| 15675 | 6021  | MMT00077535 | MMT00008784   | 1  |
| 15675 | 6126  | MMT00077535 | MMT00067575   | 1  |
| 15675 | 6218  | MMT00077535 | Hnrnpc        | 1  |
| 15675 | 6972  | MMT00077535 | Trspap1       | -1 |
| 15675 | 6976  | MMT00077535 | Rbm35b        | -1 |
| 15675 | 7731  | MMT00077535 | 1500001M20Rik | -1 |
| 15675 | 7798  | MMT00077535 | MMT00077178   | 1  |
| 15675 | 8319  | MMT00077535 | MMT00062477   | 1  |
| 15675 | 8499  | MMT00077535 | C430048L16Rik | 1  |
| 15675 | 8670  | MMT00077535 | MMT00051613   | 1  |
| 15675 | 8891  | MMT00077535 | MMT00071061   | 1  |
| 15675 | 9067  | MMT00077535 | Tra2a         | 1  |
| 15675 | 9258  | MMT00077535 | P4ha1         | 1  |
| 15675 | 9513  | MMT00077535 | Tardbp        | 1  |
| 15675 | 10769 | MMT00077535 | Hnrnpd        | -1 |
| 15675 | 11043 | MMT00077535 | Hsph1         | 1  |
| 15675 | 11214 | MMT00077535 | MMT00049207   | 1  |
| 15675 | 11697 | MMT00077535 | Rasl2-9       | -1 |
| 15675 | 12112 | MMT00077535 | Tmem53        | -1 |
| 15675 | 12419 | MMT00077535 | MMT00081393   | 1  |
| 15675 | 12795 | MMT00077535 | Slc20a2       | -1 |
| 15675 | 12960 | MMT00077535 | Arrdc4        | -1 |
| 15675 | 12968 | MMT00077535 | Fbxw9         | -1 |
| 15675 | 13285 | MMT00077535 | Cd276         | -1 |
| 15675 | 13741 | MMT00077535 | Hspa4l        | 1  |
| 15675 | 14014 | MMT00077535 | MMT00008376   | 1  |
| 15675 | 14135 | MMT00077535 | Eepd1         | -1 |
| 15675 | 14233 | MMT00077535 | Fgfr1         | -1 |
| 15675 | 14298 | MMT00077535 | Atp2a2        | 1  |
| 15675 | 15024 | MMT00077535 | 2310061J03Rik | -1 |
| 15675 | 15476 | MMT00077535 | Fem1b         | -1 |
| 15675 | 15484 | MMT00077535 | Lrrc42        | -1 |
| 15675 | 15675 | MMT00077535 | MMT00077535   | 1  |
| 15675 | 15740 | MMT00077535 | 1810010H24Rik | -1 |
| 15675 | 16251 | MMT00077535 | G6pc          | 1  |
| 15675 | 16517 | MMT00077535 | D4Wsu53e      | 1  |
| 15675 | 16754 | MMT00077535 | Hsp90aa1      | 1  |
| 15675 | 17449 | MMT00077535 | Zfp296        | 1  |
| 15675 | 17595 | MMT00077535 | MMT00048325   | 1  |
| 15675 | 18083 | MMT00077535 | Gadd45a       | -1 |

|       |       |             |               |    |
|-------|-------|-------------|---------------|----|
| 15675 | 18099 | MMT00077535 | Nfx1          | -1 |
| 15675 | 18215 | MMT00077535 | Gpr146        | -1 |
| 15675 | 18336 | MMT00077535 | Lrpap1        | -1 |
| 15675 | 18373 | MMT00077535 | Dnajb1        | 1  |
| 15675 | 18418 | MMT00077535 | Hspa1b        | 1  |
| 15675 | 18903 | MMT00077535 | Crem          | 1  |
| 15675 | 19728 | MMT00077535 | 1110007L15Rik | -1 |
| 15675 | 20535 | MMT00077535 | Rbm4          | 1  |
| 15675 | 20828 | MMT00077535 | MMT00007878   | 1  |
| 15675 | 20912 | MMT00077535 | Chordc1       | 1  |
| 15675 | 21322 | MMT00077535 | Usp1          | 1  |
| 15675 | 21389 | MMT00077535 | Odf2          | -1 |
| 15675 | 21687 | MMT00077535 | Zbtb7b        | -1 |
| 15675 | 21909 | MMT00077535 | Neurl2        | -1 |
| 15675 | 22139 | MMT00077535 | Stip1         | 1  |
| 15675 | 22216 | MMT00077535 | Sp5           | -1 |
| 15675 | 22303 | MMT00077535 | Cdt1          | -1 |
| 15675 | 22751 | MMT00077535 | Nosip         | -1 |
| 15677 | 5364  | Slc9a9      | Kif22         | 1  |
| 15698 | 10189 | Them2       | Cage1         | -1 |
| 15698 | 11094 | Them2       | Slc17a3       | 1  |
| 15698 | 15698 | Them2       | Them2         | 1  |
| 15698 | 17528 | Them2       | Gmnn          | 1  |
| 15698 | 20759 | Them2       | Slc17a1       | 1  |
| 15698 | 23118 | Them2       | Ttrap         | 1  |
| 15708 | 2743  | Retsat      | Tcf3          | -1 |
| 15708 | 3703  | Retsat      | Ggcx          | -1 |
| 15708 | 4086  | Retsat      | Adamts8       | -1 |
| 15708 | 11338 | Retsat      | Vamp8         | -1 |
| 15708 | 11872 | Retsat      | Vamp5         | -1 |
| 15708 | 15384 | Retsat      | Mat2a         | -1 |
| 15708 | 15708 | Retsat      | Retsat        | -1 |
| 15708 | 16670 | Retsat      | Csmd2         | 1  |
| 15708 | 17317 | Retsat      | Jmjd1a        | 1  |
| 15708 | 22695 | Retsat      | Tgoln2        | -1 |
| 15709 | 433   | Tceal1      | Pla2g12b      | -1 |
| 15709 | 1646  | Tceal1      | Slc15a4       | 1  |
| 15709 | 2636  | Tceal1      | Tars          | -1 |
| 15709 | 2850  | Tceal1      | Slc16a6       | -1 |
| 15709 | 6370  | Tceal1      | Aqp8          | -1 |
| 15709 | 6386  | Tceal1      | Por           | 1  |
| 15709 | 7414  | Tceal1      | Clpx          | -1 |
| 15709 | 11741 | Tceal1      | Slc30a10      | -1 |
| 15709 | 15709 | Tceal1      | Tceal1        | 1  |
| 15709 | 18827 | Tceal1      | Oprs1         | -1 |
| 15709 | 22138 | Tceal1      | Ang           | 1  |
| 15711 | 874   | Anxa1       | Aldh1a7       | 1  |
| 15711 | 23026 | Anxa1       | Apom          | -1 |
| 15718 | 3354  | Macrod2     | Ropn1l        | 1  |
| 15718 | 3377  | Macrod2     | Cs            | 1  |
| 15718 | 5884  | Macrod2     | Gstm2         | 1  |

|       |       |               |               |    |
|-------|-------|---------------|---------------|----|
| 15718 | 11946 | Macrod2       | MMT00030953   | 1  |
| 15718 | 13431 | Macrod2       | MMT00038058   | -1 |
| 15718 | 14147 | Macrod2       | Acss2         | 1  |
| 15718 | 15205 | Macrod2       | MMT00030262   | -1 |
| 15718 | 21214 | Macrod2       | Scd1          | 1  |
| 15720 | 250   | Trp53i11      | Tubb2a-ps2    | 1  |
| 15720 | 609   | Trp53i11      | MMT00060868   | 1  |
| 15720 | 1310  | Trp53i11      | Cabc1         | 1  |
| 15720 | 3326  | Trp53i11      | Lysmd2        | -1 |
| 15720 | 3502  | Trp53i11      | Gde1          | -1 |
| 15720 | 3868  | Trp53i11      | Ebpl          | 1  |
| 15720 | 5183  | Trp53i11      | St5           | 1  |
| 15720 | 6386  | Trp53i11      | Por           | -1 |
| 15720 | 11129 | Trp53i11      | Ankhd1        | -1 |
| 15720 | 11599 | Trp53i11      | Coq10b        | -1 |
| 15720 | 11614 | Trp53i11      | Sult1e1       | -1 |
| 15720 | 11741 | Trp53i11      | Slc30a10      | 1  |
| 15720 | 11807 | Trp53i11      | Fbxo31        | -1 |
| 15720 | 12151 | Trp53i11      | MMT00082650   | -1 |
| 15720 | 15135 | Trp53i11      | Col5a3        | 1  |
| 15720 | 15709 | Trp53i11      | Tceal1        | -1 |
| 15720 | 16176 | Trp53i11      | St3gal5       | -1 |
| 15720 | 16647 | Trp53i11      | D16H22S680E   | -1 |
| 15720 | 16690 | Trp53i11      | Tjp3          | 1  |
| 15720 | 17338 | Trp53i11      | Mocos         | 1  |
| 15720 | 17876 | Trp53i11      | Tubb4         | 1  |
| 15720 | 18827 | Trp53i11      | Oprs1         | 1  |
| 15720 | 19466 | Trp53i11      | Pptc7         | -1 |
| 15720 | 22290 | Trp53i11      | Tubb2a        | 1  |
| 15720 | 22630 | Trp53i11      | MMT00034355   | 1  |
| 15720 | 22744 | Trp53i11      | 9-Sep         | 1  |
| 15720 | 23183 | Trp53i11      | Nnmt          | -1 |
| 15722 | 2599  | Ccdc9         | Lsm14a        | 1  |
| 15740 | 14323 | 1810010H24Rik | Scarb1        | 1  |
| 15742 | 6370  | 2900062L11Rik | Aqp8          | -1 |
| 15742 | 12941 | 2900062L11Rik | Elov5         | -1 |
| 15742 | 21214 | 2900062L11Rik | Scd1          | -1 |
| 15742 | 22138 | 2900062L11Rik | Ang           | 1  |
| 15743 | 269   | Hoxc6         | Tuba1b        | 1  |
| 15743 | 563   | Hoxc6         | D4Bwg0951e    | -1 |
| 15743 | 662   | Hoxc6         | Mid1ip1       | 1  |
| 15743 | 1257  | Hoxc6         | Slc25a45      | 1  |
| 15743 | 1709  | Hoxc6         | Mt2           | -1 |
| 15743 | 1941  | Hoxc6         | MMT00079618   | 1  |
| 15743 | 2322  | Hoxc6         | Tuba4a        | 1  |
| 15743 | 3967  | Hoxc6         | Tysnd1        | 1  |
| 15743 | 5296  | Hoxc6         | Rnf181        | 1  |
| 15743 | 5587  | Hoxc6         | Rmnd5b        | 1  |
| 15743 | 6599  | Hoxc6         | 1700020C11Rik | 1  |
| 15743 | 6976  | Hoxc6         | Rbm35b        | 1  |
| 15743 | 7151  | Hoxc6         | MMT00007982   | 1  |



|       |       |             |               |    |
|-------|-------|-------------|---------------|----|
| 15743 | 7659  | Hoxc6       | Rab30         | -1 |
| 15743 | 7944  | Hoxc6       | Al132487      | -1 |
| 15743 | 8268  | Hoxc6       | Kctd7         | 1  |
| 15743 | 8439  | Hoxc6       | Slc25a33      | -1 |
| 15743 | 9763  | Hoxc6       | Tuba3b        | 1  |
| 15743 | 9913  | Hoxc6       | Tbc1d25       | 1  |
| 15743 | 10384 | Hoxc6       | Chic2         | -1 |
| 15743 | 10612 | Hoxc6       | Slc24a6       | -1 |
| 15743 | 11444 | Hoxc6       | Rnpep         | 1  |
| 15743 | 11724 | Hoxc6       | Tuba3a        | 1  |
| 15743 | 12315 | Hoxc6       | Srebf1        | 1  |
| 15743 | 13376 | Hoxc6       | Alg2          | 1  |
| 15743 | 16000 | Hoxc6       | Nol10         | 1  |
| 15743 | 16449 | Hoxc6       | BC004044      | 1  |
| 15743 | 17444 | Hoxc6       | Tuba1a        | 1  |
| 15743 | 17656 | Hoxc6       | Hdhd3         | 1  |
| 15743 | 17660 | Hoxc6       | Nlrp12        | -1 |
| 15743 | 17852 | Hoxc6       | Cpeb2         | -1 |
| 15743 | 18785 | Hoxc6       | Angptl4       | -1 |
| 15743 | 19611 | Hoxc6       | Cog8          | 1  |
| 15743 | 21062 | Hoxc6       | Rpl7l1        | 1  |
| 15743 | 21288 | Hoxc6       | Tcp11l2       | -1 |
| 15743 | 22443 | Hoxc6       | Tuba1c        | 1  |
| 15743 | 23295 | Hoxc6       | Snx11         | 1  |
| 15773 | 8637  | MMT00069895 | Tnpo2         | 1  |
| 15773 | 14043 | MMT00069895 | 4930455C21Rik | 1  |
| 15787 | 15015 | Wdr92       | G3bp1         | 1  |
| 15792 | 16858 | Use1        | Tmem38a       | 1  |
| 15800 | 7602  | MMT00023224 | Pcca          | 1  |
| 15800 | 13431 | MMT00023224 | MMT00038058   | -1 |
| 15800 | 15205 | MMT00023224 | MMT00030262   | -1 |
| 15801 | 6370  | Efna2       | Aqp8          | -1 |
| 15815 | 20871 | MMT00080242 | Pop1          | 1  |
| 15825 | 5364  | Fermt3      | Kif22         | 1  |
| 15825 | 11393 | Fermt3      | A830007P12Rik | 1  |
| 15830 | 874   | Sema5a      | Aldh1a7       | -1 |
| 15830 | 8815  | Sema5a      | Mx1           | -1 |
| 15830 | 18201 | Sema5a      | MMT00060232   | -1 |
| 15830 | 21214 | Sema5a      | Scd1          | -1 |
| 15830 | 21575 | Sema5a      | Cyp2c55       | -1 |
| 15830 | 22138 | Sema5a      | Ang           | 1  |
| 15839 | 3565  | MMT00045078 | MMT00045908   | -1 |
| 15841 | 8815  | Ndufb6      | Mx1           | 1  |
| 15841 | 18201 | Ndufb6      | MMT00060232   | 1  |
| 15841 | 21214 | Ndufb6      | Scd1          | 1  |
| 15842 | 524   | Med12l      | Hsd3b2        | 1  |
| 15842 | 20385 | Med12l      | Chd1l         | 1  |
| 15844 | 11406 | Klhdc9      | Ifi203        | -1 |
| 15844 | 13149 | Klhdc9      | Ifi203        | -1 |
| 15844 | 14052 | Klhdc9      | EG226654      | 1  |
| 15844 | 15844 | Klhdc9      | Klhdc9        | 1  |

|       |       |               |                    |    |
|-------|-------|---------------|--------------------|----|
| 15844 | 18276 | Klhdc9        | Apoa2              | 1  |
| 15844 | 22043 | Klhdc9        | Rdh8               | 1  |
| 15862 | 1129  | Mrap          | Gsta4              | 1  |
| 15862 | 3377  | Mrap          | Cs                 | 1  |
| 15862 | 5804  | Mrap          | Thrsp              | 1  |
| 15862 | 5884  | Mrap          | Gstm2              | 1  |
| 15862 | 6085  | Mrap          | MMT00007454        | -1 |
| 15862 | 6573  | Mrap          | Pecr               | 1  |
| 15862 | 7602  | Mrap          | Pcca               | 1  |
| 15862 | 9718  | Mrap          | Fmo5               | 1  |
| 15862 | 10132 | Mrap          | Ces2               | 1  |
| 15862 | 10554 | Mrap          | ENSMUSG00000074179 | 1  |
| 15862 | 13293 | Mrap          | Gsta2              | 1  |
| 15862 | 13431 | Mrap          | MMT00038058        | -1 |
| 15862 | 15205 | Mrap          | MMT00030262        | -1 |
| 15862 | 16525 | Mrap          | Lbp                | -1 |
| 15862 | 16720 | Mrap          | Mtmr7              | 1  |
| 15862 | 18250 | Mrap          | Mmp14              | -1 |
| 15862 | 21214 | Mrap          | Scd1               | 1  |
| 15862 | 21727 | Mrap          | Khk                | 1  |
| 15862 | 22406 | Mrap          | Vnn1               | -1 |
| 15862 | 23640 | Mrap          | Bdh1               | -1 |
| 15864 | 7909  | Rps6ka2       | Oas3               | -1 |
| 15864 | 11435 | Rps6ka2       | Rnaset2a           | -1 |
| 15864 | 17760 | Rps6ka2       | Ccr6               | 1  |
| 15864 | 21754 | Rps6ka2       | Synj2              | 1  |
| 15870 | 3393  | Aqp5          | Snhg8              | -1 |
| 15870 | 5068  | Aqp5          | Afap112            | 1  |
| 15870 | 10938 | Aqp5          | Zbtb5              | 1  |
| 15872 | 20194 | 4933424B01Rik | Pnlcd1             | -1 |
| 15882 | 9408  | AA986860      | Hmgcs2             | 1  |
| 15882 | 9842  | AA986860      | Qdpr               | -1 |
| 15882 | 22406 | AA986860      | Vnn1               | 1  |
| 15882 | 22732 | AA986860      | Cyb5b              | -1 |
| 15883 | 213   | Tulp3         | Rgs16              | -1 |
| 15883 | 250   | Tulp3         | Tubb2a-ps2         | 1  |
| 15883 | 269   | Tulp3         | Tuba1b             | 1  |
| 15883 | 354   | Tulp3         | MMT00007996        | 1  |
| 15883 | 577   | Tulp3         | Rrp12              | 1  |
| 15883 | 609   | Tulp3         | MMT00060868        | 1  |
| 15883 | 771   | Tulp3         | Zbtb45             | 1  |
| 15883 | 865   | Tulp3         | Npc1               | -1 |
| 15883 | 1031  | Tulp3         | Uros               | 1  |
| 15883 | 1257  | Tulp3         | Slc25a45           | 1  |
| 15883 | 1650  | Tulp3         | Ctdsp2             | -1 |
| 15883 | 1709  | Tulp3         | Mt2                | -1 |
| 15883 | 1941  | Tulp3         | MMT00079618        | 1  |
| 15883 | 2322  | Tulp3         | Tuba4a             | 1  |
| 15883 | 2523  | Tulp3         | Pgs1               | 1  |
| 15883 | 2829  | Tulp3         | Lrfn3              | 1  |
| 15883 | 2850  | Tulp3         | Slc16a6            | 1  |

|       |       |       |                    |    |
|-------|-------|-------|--------------------|----|
| 15883 | 3214  | Tulp3 | Dnmt3b             | 1  |
| 15883 | 3309  | Tulp3 | Grpel2             | -1 |
| 15883 | 3468  | Tulp3 | MMT00009124        | 1  |
| 15883 | 3804  | Tulp3 | MMT00015534        | 1  |
| 15883 | 3965  | Tulp3 | Pwp2               | 1  |
| 15883 | 4201  | Tulp3 | Tubb2c             | 1  |
| 15883 | 4708  | Tulp3 | Traf3ip2           | 1  |
| 15883 | 5120  | Tulp3 | Alkbh7             | 1  |
| 15883 | 5375  | Tulp3 | Sec23b             | 1  |
| 15883 | 5587  | Tulp3 | Rmnd5b             | 1  |
| 15883 | 5594  | Tulp3 | Erbp3              | -1 |
| 15883 | 5715  | Tulp3 | ENSMUSG00000052976 | -1 |
| 15883 | 6380  | Tulp3 | 6330569M22Rik      | 1  |
| 15883 | 6771  | Tulp3 | Insc               | 1  |
| 15883 | 7151  | Tulp3 | MMT00007982        | 1  |
| 15883 | 7619  | Tulp3 | Pik3ip1            | -1 |
| 15883 | 7795  | Tulp3 | MMT00071427        | -1 |
| 15883 | 7862  | Tulp3 | Cpsf4l             | -1 |
| 15883 | 8469  | Tulp3 | Sfrs6              | 1  |
| 15883 | 9763  | Tulp3 | Tuba3b             | 1  |
| 15883 | 10612 | Tulp3 | Slc24a6            | -1 |
| 15883 | 10712 | Tulp3 | Fchsd2             | -1 |
| 15883 | 10911 | Tulp3 | Mcl1               | -1 |
| 15883 | 11095 | Tulp3 | Bag3               | 1  |
| 15883 | 11149 | Tulp3 | MMT00050488        | 1  |
| 15883 | 11356 | Tulp3 | Med27              | 1  |
| 15883 | 11540 | Tulp3 | Ctps               | 1  |
| 15883 | 11724 | Tulp3 | Tuba3a             | 1  |
| 15883 | 11741 | Tulp3 | Slc30a10           | 1  |
| 15883 | 12091 | Tulp3 | 1810015C04Rik      | -1 |
| 15883 | 12298 | Tulp3 | Lad1               | 1  |
| 15883 | 12420 | Tulp3 | Klh21              | -1 |
| 15883 | 12904 | Tulp3 | MMT00040704        | -1 |
| 15883 | 13376 | Tulp3 | Alg2               | 1  |
| 15883 | 13390 | Tulp3 | Ddx31              | 1  |
| 15883 | 13564 | Tulp3 | Qrs1               | 1  |
| 15883 | 13889 | Tulp3 | Agpat2             | 1  |
| 15883 | 14838 | Tulp3 | MMT00070887        | 1  |
| 15883 | 15015 | Tulp3 | G3bp1              | 1  |
| 15883 | 15252 | Tulp3 | MMT00019402        | 1  |
| 15883 | 15704 | Tulp3 | MMT00038941        | 1  |
| 15883 | 15862 | Tulp3 | Mrap               | 1  |
| 15883 | 16060 | Tulp3 | Gys2               | -1 |
| 15883 | 16690 | Tulp3 | Tjp3               | 1  |
| 15883 | 16692 | Tulp3 | Bat4               | -1 |
| 15883 | 16915 | Tulp3 | MMT00019508        | 1  |
| 15883 | 17022 | Tulp3 | MMT00055891        | 1  |
| 15883 | 17323 | Tulp3 | Tubb6              | 1  |
| 15883 | 17444 | Tulp3 | Tuba1a             | 1  |
| 15883 | 17530 | Tulp3 | MMT00041792        | 1  |
| 15883 | 17656 | Tulp3 | Hdhd3              | 1  |

|       |       |             |               |    |
|-------|-------|-------------|---------------|----|
| 15883 | 17876 | Tulp3       | Tubb4         | 1  |
| 15883 | 18622 | Tulp3       | Pwp2          | 1  |
| 15883 | 19671 | Tulp3       | Upp2          | -1 |
| 15883 | 20803 | Tulp3       | Tmem50a       | -1 |
| 15883 | 21288 | Tulp3       | Tcp11l2       | -1 |
| 15883 | 21604 | Tulp3       | Klhl24        | -1 |
| 15883 | 21733 | Tulp3       | Rhebl1        | -1 |
| 15883 | 22290 | Tulp3       | Tubb2a        | 1  |
| 15883 | 22388 | Tulp3       | 2410018M08Rik | -1 |
| 15883 | 22443 | Tulp3       | Tuba1c        | 1  |
| 15883 | 22470 | Tulp3       | Ppargc1b      | -1 |
| 15883 | 22630 | Tulp3       | MMT00034355   | 1  |
| 15883 | 22689 | Tulp3       | 2610028A01Rik | 1  |
| 15883 | 23201 | Tulp3       | S1pr1         | 1  |
| 15892 | 5884  | Slc22a5     | Gstm2         | -1 |
| 15892 | 6085  | Slc22a5     | MMT00007454   | 1  |
| 15892 | 6263  | Slc22a5     | Slc7a4        | -1 |
| 15892 | 8773  | Slc22a5     | MMT00027093   | 1  |
| 15892 | 9427  | Slc22a5     | Nqo2          | -1 |
| 15892 | 10532 | Slc22a5     | MMT00057790   | 1  |
| 15892 | 13431 | Slc22a5     | MMT00038058   | 1  |
| 15892 | 14151 | Slc22a5     | Slc44a1       | -1 |
| 15892 | 15205 | Slc22a5     | MMT00030262   | 1  |
| 15892 | 21214 | Slc22a5     | Scd1          | -1 |
| 15892 | 21937 | Slc22a5     | MMT00015325   | 1  |
| 15892 | 22907 | Slc22a5     | MMT00054594   | 1  |
| 15892 | 22978 | Slc22a5     | MMT00043176   | 1  |
| 15895 | 2348  | MMT00080717 | Irak1         | -1 |
| 15895 | 5364  | MMT00080717 | Kif22         | -1 |
| 15895 | 14472 | MMT00080717 | Ahcy          | 1  |
| 15896 | 563   | Pdgfrb      | D4Bwg0951e    | -1 |
| 15896 | 7140  | Pdgfrb      | Mtbp          | 1  |
| 15896 | 11093 | Pdgfrb      | Zdhhc1        | -1 |
| 15896 | 13018 | Pdgfrb      | AW544981      | 1  |
| 15896 | 13471 | Pdgfrb      | Cln8          | -1 |
| 15896 | 13989 | Pdgfrb      | Foxp3         | -1 |
| 15896 | 15021 | Pdgfrb      | Ppargc1a      | -1 |
| 15896 | 15631 | Pdgfrb      | Lpin1         | -1 |
| 15896 | 18373 | Pdgfrb      | Dnajb1        | -1 |
| 15896 | 18785 | Pdgfrb      | Angptl4       | -1 |
| 15897 | 12055 | D10Jhu81e   | 1810008A18Rik | -1 |
| 15897 | 22222 | D10Jhu81e   | Gstt1         | -1 |
| 15907 | 607   | Hyou1       | Me1           | 1  |
| 15907 | 874   | Hyou1       | Aldh1a7       | 1  |
| 15907 | 3377  | Hyou1       | Cs            | 1  |
| 15907 | 5884  | Hyou1       | Gstm2         | 1  |
| 15907 | 7602  | Hyou1       | Pcca          | 1  |
| 15907 | 8444  | Hyou1       | Rdh16         | 1  |
| 15907 | 8815  | Hyou1       | Mx1           | 1  |
| 15907 | 14017 | Hyou1       | Ces5          | 1  |
| 15907 | 18201 | Hyou1       | MMT00060232   | 1  |

|       |       |               |               |    |
|-------|-------|---------------|---------------|----|
| 15907 | 21214 | Hyou1         | Scd1          | 1  |
| 15907 | 21575 | Hyou1         | Cyp2c55       | 1  |
| 15907 | 21966 | Hyou1         | Pcp4l1        | -1 |
| 15907 | 22138 | Hyou1         | Ang           | -1 |
| 15915 | 15508 | Spata21       | 4632415L05Rik | -1 |
| 15918 | 3565  | Fkbp11        | MMT00045908   | -1 |
| 15918 | 7492  | Fkbp11        | Adfp          | 1  |
| 15918 | 7761  | Fkbp11        | Nudt19        | -1 |
| 15918 | 9700  | Fkbp11        | Prodh         | -1 |
| 15918 | 9718  | Fkbp11        | Fmo5          | -1 |
| 15918 | 17563 | Fkbp11        | Aldh1l1       | -1 |
| 15918 | 18069 | Fkbp11        | Gpt           | -1 |
| 15918 | 19772 | Fkbp11        | Gnmt          | -1 |
| 15918 | 20171 | Fkbp11        | 1700008G05Rik | 1  |
| 15920 | 13009 | A630001G21Rik | MMT00017557   | -1 |
| 15924 | 5892  | Rbm38         | MMT00038457   | 1  |
| 15924 | 6746  | Rbm38         | E2f8          | -1 |
| 15924 | 7492  | Rbm38         | Adfp          | -1 |
| 15924 | 7659  | Rbm38         | Rab30         | -1 |
| 15926 | 2051  | Kctd20        | Ddx27         | -1 |
| 15926 | 10612 | Kctd20        | Slc24a6       | -1 |
| 15931 | 22138 | Ces3          | Ang           | 1  |
| 15935 | 2719  | Pnpla3        | St6galnac2    | -1 |
| 15935 | 3654  | Pnpla3        | St13          | -1 |
| 15935 | 6804  | Pnpla3        | Cyp2d22       | 1  |
| 15935 | 7492  | Pnpla3        | Adfp          | -1 |
| 15935 | 7659  | Pnpla3        | Rab30         | -1 |
| 15935 | 9408  | Pnpla3        | Hmgcs2        | -1 |
| 15935 | 10558 | Pnpla3        | Cyp2d40       | -1 |
| 15935 | 12468 | Pnpla3        | Cyp2d13       | 1  |
| 15935 | 17147 | Pnpla3        | Ttll12        | 1  |
| 15935 | 17660 | Pnpla3        | Nlrp12        | -1 |
| 15935 | 22321 | Pnpla3        | Apol7a        | 1  |
| 15935 | 22406 | Pnpla3        | Vnn1          | -1 |
| 15937 | 407   | Adamts4       | Serpina6      | -1 |
| 15937 | 415   | Adamts4       | Ypel2         | 1  |
| 15937 | 433   | Adamts4       | Pla2g12b      | 1  |
| 15937 | 437   | Adamts4       | Ndrp1         | 1  |
| 15937 | 530   | Adamts4       | Mest          | 1  |
| 15937 | 604   | Adamts4       | Ppp1r15b      | -1 |
| 15937 | 659   | Adamts4       | Bace1         | 1  |
| 15937 | 662   | Adamts4       | Mid1ip1       | -1 |
| 15937 | 719   | Adamts4       | Usp2          | -1 |
| 15937 | 760   | Adamts4       | Akr1c19       | -1 |
| 15937 | 849   | Adamts4       | Pxmp4         | 1  |
| 15937 | 1065  | Adamts4       | Hmgcr         | -1 |
| 15937 | 1453  | Adamts4       | Gfod2         | 1  |
| 15937 | 1711  | Adamts4       | Grhl1         | 1  |
| 15937 | 1767  | Adamts4       | BC016495      | -1 |
| 15937 | 1853  | Adamts4       | Stat5a        | 1  |
| 15937 | 2011  | Adamts4       | Slc2a5        | -1 |

|       |      |         |               |    |
|-------|------|---------|---------------|----|
| 15937 | 2110 | Adamts4 | Gtf2ird1      | 1  |
| 15937 | 2126 | Adamts4 | Dgat2         | -1 |
| 15937 | 2262 | Adamts4 | Papss2        | -1 |
| 15937 | 2384 | Adamts4 | Micalcl       | 1  |
| 15937 | 2399 | Adamts4 | MMT00060167   | 1  |
| 15937 | 2619 | Adamts4 | Zfp622        | 1  |
| 15937 | 2636 | Adamts4 | Tars          | 1  |
| 15937 | 2721 | Adamts4 | Inmt          | -1 |
| 15937 | 2741 | Adamts4 | 3230401D17Rik | 1  |
| 15937 | 2829 | Adamts4 | Lrfn3         | 1  |
| 15937 | 2850 | Adamts4 | Slc16a6       | 1  |
| 15937 | 3214 | Adamts4 | Dnmt3b        | 1  |
| 15937 | 3410 | Adamts4 | Paqr9         | 1  |
| 15937 | 3449 | Adamts4 | Hes6          | -1 |
| 15937 | 3689 | Adamts4 | Adh1          | -1 |
| 15937 | 3746 | Adamts4 | Osbp15        | -1 |
| 15937 | 3790 | Adamts4 | Mtss1         | -1 |
| 15937 | 3989 | Adamts4 | Wrnip1        | 1  |
| 15937 | 4057 | Adamts4 | Slc2a4        | -1 |
| 15937 | 4285 | Adamts4 | Dnajc19       | -1 |
| 15937 | 4298 | Adamts4 | St3gal1       | 1  |
| 15937 | 4966 | Adamts4 | Zscan20       | 1  |
| 15937 | 5068 | Adamts4 | Afap112       | 1  |
| 15937 | 5183 | Adamts4 | St5           | 1  |
| 15937 | 5247 | Adamts4 | Irak2         | 1  |
| 15937 | 5374 | Adamts4 | Chka          | 1  |
| 15937 | 5414 | Adamts4 | Etnk2         | -1 |
| 15937 | 5569 | Adamts4 | Pdgfc         | 1  |
| 15937 | 5729 | Adamts4 | 2310016C08Rik | 1  |
| 15937 | 5734 | Adamts4 | EG619653      | -1 |
| 15937 | 5804 | Adamts4 | Thrsp         | -1 |
| 15937 | 5849 | Adamts4 | 2310031A18Rik | 1  |
| 15937 | 5892 | Adamts4 | MMT00038457   | -1 |
| 15937 | 5974 | Adamts4 | Arntl         | 1  |
| 15937 | 6171 | Adamts4 | Abtb2         | 1  |
| 15937 | 6268 | Adamts4 | Slc45a3       | 1  |
| 15937 | 6386 | Adamts4 | Por           | -1 |
| 15937 | 6573 | Adamts4 | Pecr          | -1 |
| 15937 | 6657 | Adamts4 | Irf6          | 1  |
| 15937 | 6696 | Adamts4 | Zfp740        | 1  |
| 15937 | 6746 | Adamts4 | E2f8          | 1  |
| 15937 | 6756 | Adamts4 | Sds           | -1 |
| 15937 | 6816 | Adamts4 | Slc46a3       | -1 |
| 15937 | 7414 | Adamts4 | Clpx          | 1  |
| 15937 | 7492 | Adamts4 | Adfp          | 1  |
| 15937 | 7659 | Adamts4 | Rab30         | 1  |
| 15937 | 7725 | Adamts4 | 3230401D17Rik | 1  |
| 15937 | 7761 | Adamts4 | Nudt19        | -1 |
| 15937 | 7862 | Adamts4 | Cpsf4l        | -1 |
| 15937 | 8328 | Adamts4 | Klhdc8a       | 1  |
| 15937 | 8388 | Adamts4 | Zfyve21       | -1 |

|       |       |         |               |    |
|-------|-------|---------|---------------|----|
| 15937 | 8404  | Adamts4 | Fa2h          | 1  |
| 15937 | 8684  | Adamts4 | Il15          | -1 |
| 15937 | 8870  | Adamts4 | Arid3a        | 1  |
| 15937 | 9065  | Adamts4 | Reep4         | 1  |
| 15937 | 9379  | Adamts4 | Ypel2         | 1  |
| 15937 | 9408  | Adamts4 | Hmgcs2        | 1  |
| 15937 | 9481  | Adamts4 | Ppl           | -1 |
| 15937 | 9495  | Adamts4 | Srms          | 1  |
| 15937 | 9630  | Adamts4 | 5830417C01Rik | 1  |
| 15937 | 9700  | Adamts4 | Prodh         | -1 |
| 15937 | 9718  | Adamts4 | Fmo5          | -1 |
| 15937 | 9831  | Adamts4 | Nedd4l        | 1  |
| 15937 | 9999  | Adamts4 | Zswim3        | 1  |
| 15937 | 10215 | Adamts4 | Nampt         | -1 |
| 15937 | 10273 | Adamts4 | Gpt2          | -1 |
| 15937 | 10468 | Adamts4 | Tspan33       | 1  |
| 15937 | 10492 | Adamts4 | 1810046K07Rik | -1 |
| 15937 | 10642 | Adamts4 | Ngef          | -1 |
| 15937 | 10775 | Adamts4 | Slc16a1       | 1  |
| 15937 | 10938 | Adamts4 | Zbtb5         | 1  |
| 15937 | 11233 | Adamts4 | Tef           | -1 |
| 15937 | 11576 | Adamts4 | Gm1381        | -1 |
| 15937 | 11599 | Adamts4 | Coq10b        | -1 |
| 15937 | 11741 | Adamts4 | Slc30a10      | 1  |
| 15937 | 12032 | Adamts4 | Cdca7         | 1  |
| 15937 | 12114 | Adamts4 | Homer2        | -1 |
| 15937 | 12204 | Adamts4 | Ankmy2        | -1 |
| 15937 | 12315 | Adamts4 | Srebf1        | -1 |
| 15937 | 12386 | Adamts4 | 4930579G24Rik | 1  |
| 15937 | 12484 | Adamts4 | Tcfap2e       | -1 |
| 15937 | 12499 | Adamts4 | Avpi1         | -1 |
| 15937 | 12513 | Adamts4 | Whsc2         | 1  |
| 15937 | 12799 | Adamts4 | Spon2         | 1  |
| 15937 | 12904 | Adamts4 | MMT00040704   | -1 |
| 15937 | 12905 | Adamts4 | Nfil3         | 1  |
| 15937 | 13078 | Adamts4 | Eps8l2        | 1  |
| 15937 | 13094 | Adamts4 | Cnn3          | -1 |
| 15937 | 13281 | Adamts4 | Tmcc2         | 1  |
| 15937 | 13630 | Adamts4 | Cdkn1a        | 1  |
| 15937 | 13947 | Adamts4 | Crip2         | 1  |
| 15937 | 14041 | Adamts4 | Cldn1         | 1  |
| 15937 | 14100 | Adamts4 | Ccnk          | -1 |
| 15937 | 14222 | Adamts4 | MMT00076410   | -1 |
| 15937 | 14279 | Adamts4 | 3930402G23Rik | 1  |
| 15937 | 14298 | Adamts4 | Atp2a2        | 1  |
| 15937 | 14357 | Adamts4 | Ing4          | 1  |
| 15937 | 14462 | Adamts4 | Zfp385b       | -1 |
| 15937 | 14705 | Adamts4 | Slc43a1       | -1 |
| 15937 | 15049 | Adamts4 | Rnf125        | 1  |
| 15937 | 15481 | Adamts4 | 1110067D22Rik | 1  |
| 15937 | 15665 | Adamts4 | Blcap         | 1  |

|       |       |         |               |    |
|-------|-------|---------|---------------|----|
| 15937 | 15713 | Adamts4 | Rbm3          | -1 |
| 15937 | 15740 | Adamts4 | 1810010H24Rik | -1 |
| 15937 | 15824 | Adamts4 | D19Ertd721e   | 1  |
| 15937 | 16043 | Adamts4 | Sult1c2       | -1 |
| 15937 | 16356 | Adamts4 | 9030607L17Rik | -1 |
| 15937 | 16525 | Adamts4 | Lbp           | 1  |
| 15937 | 16580 | Adamts4 | Tnfaip2       | 1  |
| 15937 | 16690 | Adamts4 | Tjp3          | 1  |
| 15937 | 16712 | Adamts4 | Pnrc1         | 1  |
| 15937 | 16823 | Adamts4 | Inhbb         | 1  |
| 15937 | 16851 | Adamts4 | Slc34a2       | 1  |
| 15937 | 16860 | Adamts4 | Cdc42bpa      | 1  |
| 15937 | 17091 | Adamts4 | Slc38a3       | -1 |
| 15937 | 17247 | Adamts4 | A030007L17Rik | 1  |
| 15937 | 17461 | Adamts4 | Ripk5         | 1  |
| 15937 | 17583 | Adamts4 | Per2          | -1 |
| 15937 | 17638 | Adamts4 | Adssl1        | -1 |
| 15937 | 17712 | Adamts4 | Nup62         | 1  |
| 15937 | 17852 | Adamts4 | Cpeb2         | 1  |
| 15937 | 17884 | Adamts4 | Lnx2          | 1  |
| 15937 | 18069 | Adamts4 | Gpt           | -1 |
| 15937 | 18096 | Adamts4 | Slc39a6       | 1  |
| 15937 | 18179 | Adamts4 | Dbp           | -1 |
| 15937 | 18250 | Adamts4 | Mmp14         | 1  |
| 15937 | 18438 | Adamts4 | Map3k7ip2     | 1  |
| 15937 | 18498 | Adamts4 | Slc5a6        | -1 |
| 15937 | 18756 | Adamts4 | Tspan14       | 1  |
| 15937 | 18905 | Adamts4 | Prmt2         | 1  |
| 15937 | 19004 | Adamts4 | Pdk4          | 1  |
| 15937 | 19148 | Adamts4 | Rnf144b       | 1  |
| 15937 | 19234 | Adamts4 | Nrg4          | -1 |
| 15937 | 19305 | Adamts4 | Azin1         | -1 |
| 15937 | 19360 | Adamts4 | Aco1          | -1 |
| 15937 | 19478 | Adamts4 | Rnaseh2b      | -1 |
| 15937 | 19671 | Adamts4 | Upp2          | -1 |
| 15937 | 19701 | Adamts4 | 9930021J17Rik | 1  |
| 15937 | 19790 | Adamts4 | Polg2         | -1 |
| 15937 | 20171 | Adamts4 | 1700008G05Rik | 1  |
| 15937 | 20266 | Adamts4 | Insig2        | 1  |
| 15937 | 20385 | Adamts4 | Chd1l         | -1 |
| 15937 | 20488 | Adamts4 | Bok           | 1  |
| 15937 | 20567 | Adamts4 | Ggt6          | -1 |
| 15937 | 20745 | Adamts4 | Sord          | -1 |
| 15937 | 20830 | Adamts4 | MMT00057509   | 1  |
| 15937 | 20854 | Adamts4 | Commd7        | 1  |
| 15937 | 21142 | Adamts4 | Gm129         | -1 |
| 15937 | 21693 | Adamts4 | BC029169      | 1  |
| 15937 | 21811 | Adamts4 | Ak3l1         | -1 |
| 15937 | 21969 | Adamts4 | Tk1           | -1 |
| 15937 | 22009 | Adamts4 | Tmem14a       | -1 |
| 15937 | 22290 | Adamts4 | Tubb2a        | 1  |



|       |       |               |               |    |
|-------|-------|---------------|---------------|----|
| 15937 | 22321 | Adamts4       | Apol7a        | -1 |
| 15937 | 22324 | Adamts4       | MMT00060741   | 1  |
| 15937 | 22627 | Adamts4       | Adck5         | 1  |
| 15937 | 22630 | Adamts4       | MMT00034355   | 1  |
| 15937 | 22653 | Adamts4       | Ric3          | 1  |
| 15937 | 23377 | Adamts4       | Pdxk          | -1 |
| 15937 | 23437 | Adamts4       | Efhd2         | -1 |
| 15953 | 15953 | Acsf3         | Acsf3         | 1  |
| 15970 | 13979 | Npal1         | Ociad2        | -1 |
| 15970 | 19766 | Npal1         | Slc26a4       | -1 |
| 15970 | 20058 | Npal1         | Dnaic1        | 1  |
| 15971 | 1041  | Aifm2         | 3110049J23Rik | 1  |
| 15971 | 2662  | Aifm2         | Sgpl1         | -1 |
| 15971 | 5965  | Aifm2         | Pbld          | 1  |
| 15971 | 12239 | Aifm2         | A630077B13Rik | -1 |
| 15971 | 13348 | Aifm2         | Ank3          | 1  |
| 15971 | 13688 | Aifm2         | Ppa1          | 1  |
| 15971 | 15971 | Aifm2         | Aifm2         | 1  |
| 15971 | 18300 | Aifm2         | Arg1          | 1  |
| 15971 | 18893 | Aifm2         | Lace1         | -1 |
| 15971 | 19115 | Aifm2         | Rab32         | -1 |
| 15971 | 19392 | Aifm2         | Slc25a16      | -1 |
| 15971 | 21105 | Aifm2         | Pex26         | 1  |
| 15971 | 21258 | Aifm2         | 2010003K15Rik | -1 |
| 15971 | 22146 | Aifm2         | Aifm2         | 1  |
| 15977 | 5364  | Phca          | Kif22         | 1  |
| 15977 | 12799 | Phca          | Spon2         | 1  |
| 15977 | 18455 | Phca          | Mtnr1a        | 1  |
| 15994 | 13271 | 9130213B05Rik | Idh2          | 1  |
| 15994 | 20967 | 9130213B05Rik | Fabp2         | -1 |
| 15996 | 874   | Grtp1         | Aldh1a7       | 1  |
| 15996 | 4351  | Grtp1         | Plxnb1        | -1 |
| 15996 | 12219 | Grtp1         | Cyb5b         | 1  |
| 15996 | 18286 | Grtp1         | Slc41a3       | -1 |
| 15996 | 23026 | Grtp1         | Apom          | -1 |
| 16000 | 16000 | Nol10         | Nol10         | 1  |
| 16006 | 874   | Anxa2         | Aldh1a7       | 1  |
| 16006 | 8815  | Anxa2         | Mx1           | 1  |
| 16006 | 12910 | Anxa2         | 1110028A07Rik | 1  |
| 16006 | 12941 | Anxa2         | Elov15        | 1  |
| 16006 | 14017 | Anxa2         | Ces5          | 1  |
| 16006 | 15059 | Anxa2         | Mogat1        | 1  |
| 16006 | 17996 | Anxa2         | Igfbp2        | -1 |
| 16006 | 18042 | Anxa2         | Aph1c         | -1 |
| 16006 | 18201 | Anxa2         | MMT00060232   | 1  |
| 16006 | 20079 | Anxa2         | MMT00019254   | -1 |
| 16006 | 21214 | Anxa2         | Scd1          | 1  |
| 16006 | 22138 | Anxa2         | Ang           | -1 |
| 16006 | 23026 | Anxa2         | Apom          | -1 |
| 16024 | 5364  | P2ry6         | Kif22         | 1  |
| 16024 | 11382 | P2ry6         | Cdca3         | 1  |

|       |       |         |                    |    |
|-------|-------|---------|--------------------|----|
| 16024 | 14472 | P2ry6   | Ahcy               | -1 |
| 16024 | 15320 | P2ry6   | MMT00017479        | -1 |
| 16032 | 294   | Cyp27a1 | Ehhadh             | -1 |
| 16032 | 8444  | Cyp27a1 | Rdh16              | -1 |
| 16032 | 8815  | Cyp27a1 | Mx1                | -1 |
| 16032 | 21214 | Cyp27a1 | Scd1               | -1 |
| 16047 | 250   | Irf8    | Tubb2a-ps2         | 1  |
| 16047 | 269   | Irf8    | Tuba1b             | 1  |
| 16047 | 609   | Irf8    | MMT00060868        | 1  |
| 16047 | 771   | Irf8    | Zbtb45             | 1  |
| 16047 | 1941  | Irf8    | MMT00079618        | 1  |
| 16047 | 3804  | Irf8    | MMT00015534        | 1  |
| 16047 | 4201  | Irf8    | Tubb2c             | 1  |
| 16047 | 5934  | Irf8    | S100a10            | 1  |
| 16047 | 7151  | Irf8    | MMT00007982        | 1  |
| 16047 | 7862  | Irf8    | Cpsf4l             | -1 |
| 16047 | 8896  | Irf8    | Fasn               | 1  |
| 16047 | 9763  | Irf8    | Tuba3b             | 1  |
| 16047 | 11129 | Irf8    | Ankhd1             | -1 |
| 16047 | 11724 | Irf8    | Tuba3a             | 1  |
| 16047 | 11807 | Irf8    | Fbxo31             | -1 |
| 16047 | 12565 | Irf8    | Grem2              | -1 |
| 16047 | 12910 | Irf8    | 1110028A07Rik      | 1  |
| 16047 | 15862 | Irf8    | Mrap               | 1  |
| 16047 | 16060 | Irf8    | Gys2               | -1 |
| 16047 | 16182 | Irf8    | Oasl1              | 1  |
| 16047 | 17323 | Irf8    | Tubb6              | 1  |
| 16047 | 17338 | Irf8    | Mocos              | 1  |
| 16047 | 17444 | Irf8    | Tuba1a             | 1  |
| 16047 | 17660 | Irf8    | Nlrp12             | -1 |
| 16047 | 17876 | Irf8    | Tubb4              | 1  |
| 16047 | 18827 | Irf8    | Oprs1              | 1  |
| 16047 | 22138 | Irf8    | Ang                | -1 |
| 16047 | 22290 | Irf8    | Tubb2a             | 1  |
| 16047 | 22443 | Irf8    | Tuba1c             | 1  |
| 16047 | 22630 | Irf8    | MMT00034355        | 1  |
| 16052 | 8815  | Tsg101  | Mx1                | 1  |
| 16052 | 10554 | Tsg101  | ENSMUSG00000074179 | 1  |
| 16052 | 13293 | Tsg101  | Gsta2              | 1  |
| 16052 | 18201 | Tsg101  | MMT00060232        | 1  |
| 16052 | 20058 | Tsg101  | Dnaic1             | -1 |
| 16052 | 21214 | Tsg101  | Scd1               | 1  |
| 16052 | 21727 | Tsg101  | Khk                | 1  |
| 16060 | 607   | Gys2    | Me1                | 1  |
| 16060 | 2021  | Gys2    | Atf7ip             | -1 |
| 16060 | 2932  | Gys2    | Slco1a1            | 1  |
| 16060 | 3377  | Gys2    | Cs                 | 1  |
| 16060 | 4517  | Gys2    | Itih3              | -1 |
| 16060 | 6765  | Gys2    | Ldhd               | 1  |
| 16060 | 10554 | Gys2    | ENSMUSG00000074179 | 1  |
| 16060 | 12213 | Gys2    | Entpd5             | 1  |

|       |       |         |                    |    |
|-------|-------|---------|--------------------|----|
| 16060 | 14557 | Gys2    | Pyroxd1            | -1 |
| 16060 | 18201 | Gys2    | MMT00060232        | 1  |
| 16060 | 21214 | Gys2    | Scd1               | 1  |
| 16066 | 4617  | Coq2    | Agpat9             | -1 |
| 16066 | 7258  | Coq2    | Bmp2k              | -1 |
| 16066 | 8807  | Coq2    | Ankrd56            | -1 |
| 16073 | 5934  | Car11   | S100a10            | -1 |
| 16073 | 6370  | Car11   | Aqp8               | -1 |
| 16073 | 6816  | Car11   | Slc46a3            | 1  |
| 16073 | 12799 | Car11   | Spon2              | -1 |
| 16077 | 10554 | Mocs2   | ENSMUSG00000074179 | 1  |
| 16077 | 13293 | Mocs2   | Gsta2              | 1  |
| 16077 | 20058 | Mocs2   | Dnaic1             | -1 |
| 16080 | 185   | Prkcdbp | Ap2b1              | 1  |
| 16080 | 252   | Prkcdbp | C730027P07Rik      | 1  |
| 16080 | 433   | Prkcdbp | Pla2g12b           | 1  |
| 16080 | 607   | Prkcdbp | Me1                | 1  |
| 16080 | 874   | Prkcdbp | Aldh1a7            | 1  |
| 16080 | 2636  | Prkcdbp | Tars               | 1  |
| 16080 | 2766  | Prkcdbp | Elp4               | 1  |
| 16080 | 3265  | Prkcdbp | Dntt               | 1  |
| 16080 | 3410  | Prkcdbp | Paqr9              | 1  |
| 16080 | 3502  | Prkcdbp | Gde1               | -1 |
| 16080 | 3868  | Prkcdbp | Ebpl               | 1  |
| 16080 | 4431  | Prkcdbp | Tmem17             | 1  |
| 16080 | 5934  | Prkcdbp | S100a10            | 1  |
| 16080 | 6030  | Prkcdbp | As3mt              | -1 |
| 16080 | 6044  | Prkcdbp | Sucnr1             | 1  |
| 16080 | 6370  | Prkcdbp | Aqp8               | 1  |
| 16080 | 6386  | Prkcdbp | Por                | -1 |
| 16080 | 7414  | Prkcdbp | Clpx               | 1  |
| 16080 | 7770  | Prkcdbp | Galt               | 1  |
| 16080 | 7973  | Prkcdbp | Lgals9             | 1  |
| 16080 | 8815  | Prkcdbp | Mx1                | 1  |
| 16080 | 11129 | Prkcdbp | Ankhd1             | -1 |
| 16080 | 11741 | Prkcdbp | Slc30a10           | 1  |
| 16080 | 11807 | Prkcdbp | Fbxo31             | -1 |
| 16080 | 12807 | Prkcdbp | Faim               | 1  |
| 16080 | 12941 | Prkcdbp | Elovl5             | 1  |
| 16080 | 14017 | Prkcdbp | Ces5               | 1  |
| 16080 | 15709 | Prkcdbp | Tceal1             | -1 |
| 16080 | 16222 | Prkcdbp | Adipor2            | 1  |
| 16080 | 17247 | Prkcdbp | A030007L17Rik      | 1  |
| 16080 | 17338 | Prkcdbp | Mocos              | 1  |
| 16080 | 17996 | Prkcdbp | Igfbp2             | -1 |
| 16080 | 18201 | Prkcdbp | MMT00060232        | 1  |
| 16080 | 18827 | Prkcdbp | Oprs1              | 1  |
| 16080 | 19655 | Prkcdbp | 3110040N11Rik      | 1  |
| 16080 | 20079 | Prkcdbp | MMT00019254        | -1 |
| 16080 | 21214 | Prkcdbp | Scd1               | 1  |
| 16080 | 21966 | Prkcdbp | Pcp4l1             | -1 |

|       |       |               |               |    |
|-------|-------|---------------|---------------|----|
| 16080 | 22138 | Prkcdbp       | Ang           | -1 |
| 16080 | 23026 | Prkcdbp       | Apom          | -1 |
| 16080 | 23648 | Prkcdbp       | Pigy          | 1  |
| 16093 | 213   | 4732473B16Rik | Rgs16         | 1  |
| 16093 | 250   | 4732473B16Rik | Tubb2a-ps2    | -1 |
| 16093 | 269   | 4732473B16Rik | Tuba1b        | -1 |
| 16093 | 337   | 4732473B16Rik | Rasgef1b      | 1  |
| 16093 | 354   | 4732473B16Rik | MMT00007996   | -1 |
| 16093 | 563   | 4732473B16Rik | D4Bwg0951e    | 1  |
| 16093 | 609   | 4732473B16Rik | MMT00060868   | -1 |
| 16093 | 771   | 4732473B16Rik | Zbtb45        | -1 |
| 16093 | 1646  | 4732473B16Rik | Slc15a4       | 1  |
| 16093 | 1877  | 4732473B16Rik | Amica1        | 1  |
| 16093 | 1941  | 4732473B16Rik | MMT00079618   | -1 |
| 16093 | 2294  | 4732473B16Rik | AU040829      | 1  |
| 16093 | 2322  | 4732473B16Rik | Tuba4a        | -1 |
| 16093 | 2794  | 4732473B16Rik | Map3k6        | 1  |
| 16093 | 3040  | 4732473B16Rik | Bcl3          | -1 |
| 16093 | 3097  | 4732473B16Rik | Ppp1r3g       | 1  |
| 16093 | 3170  | 4732473B16Rik | Mcart1        | 1  |
| 16093 | 3246  | 4732473B16Rik | Prei4         | 1  |
| 16093 | 3804  | 4732473B16Rik | MMT00015534   | -1 |
| 16093 | 4201  | 4732473B16Rik | Tubb2c        | -1 |
| 16093 | 4235  | 4732473B16Rik | Pfkfb3        | 1  |
| 16093 | 4708  | 4732473B16Rik | Traf3ip2      | -1 |
| 16093 | 5187  | 4732473B16Rik | Speer4f       | 1  |
| 16093 | 5587  | 4732473B16Rik | Rmnd5b        | -1 |
| 16093 | 5889  | 4732473B16Rik | Errfi1        | 1  |
| 16093 | 6393  | 4732473B16Rik | 3110043O21Rik | 1  |
| 16093 | 6490  | 4732473B16Rik | Il1r1         | 1  |
| 16093 | 6589  | 4732473B16Rik | Mafb          | 1  |
| 16093 | 6756  | 4732473B16Rik | Sds           | 1  |
| 16093 | 7066  | 4732473B16Rik | Agtr1b        | 1  |
| 16093 | 7112  | 4732473B16Rik | Apbb3         | 1  |
| 16093 | 7136  | 4732473B16Rik | Id3           | -1 |
| 16093 | 7151  | 4732473B16Rik | MMT00007982   | -1 |
| 16093 | 7862  | 4732473B16Rik | Cpsf4l        | 1  |
| 16093 | 8328  | 4732473B16Rik | Klhdc8a       | -1 |
| 16093 | 8399  | 4732473B16Rik | Herpud1       | 1  |
| 16093 | 8641  | 4732473B16Rik | Slc7a2        | 1  |
| 16093 | 9275  | 4732473B16Rik | Aass          | 1  |
| 16093 | 9763  | 4732473B16Rik | Tuba3b        | -1 |
| 16093 | 10408 | 4732473B16Rik | Per1          | 1  |
| 16093 | 10712 | 4732473B16Rik | Fchsd2        | 1  |
| 16093 | 11093 | 4732473B16Rik | Zdhhc1        | 1  |
| 16093 | 11129 | 4732473B16Rik | Ankhd1        | 1  |
| 16093 | 11376 | 4732473B16Rik | Slc7a11       | -1 |
| 16093 | 11574 | 4732473B16Rik | Gne           | 1  |
| 16093 | 11599 | 4732473B16Rik | Coq10b        | 1  |
| 16093 | 11724 | 4732473B16Rik | Tuba3a        | -1 |
| 16093 | 11808 | 4732473B16Rik | Pck1          | 1  |

|       |       |               |               |    |
|-------|-------|---------------|---------------|----|
| 16093 | 11949 | 4732473B16Rik | Cldn3         | -1 |
| 16093 | 12091 | 4732473B16Rik | 1810015C04Rik | 1  |
| 16093 | 12420 | 4732473B16Rik | Klhl21        | 1  |
| 16093 | 12479 | 4732473B16Rik | lfrd1         | 1  |
| 16093 | 12565 | 4732473B16Rik | Grem2         | 1  |
| 16093 | 12761 | 4732473B16Rik | Tsc22d3       | 1  |
| 16093 | 12981 | 4732473B16Rik | Nek6          | -1 |
| 16093 | 13025 | 4732473B16Rik | lrf2          | 1  |
| 16093 | 13289 | 4732473B16Rik | Dusp10        | -1 |
| 16093 | 13339 | 4732473B16Rik | D630042F21Rik | 1  |
| 16093 | 13471 | 4732473B16Rik | Cln8          | 1  |
| 16093 | 13489 | 4732473B16Rik | D230025D16Rik | 1  |
| 16093 | 13989 | 4732473B16Rik | Foxp3         | 1  |
| 16093 | 14462 | 4732473B16Rik | Zfp385b       | 1  |
| 16093 | 14928 | 4732473B16Rik | Eme2          | -1 |
| 16093 | 14989 | 4732473B16Rik | Map3k5        | 1  |
| 16093 | 15021 | 4732473B16Rik | Ppargc1a      | 1  |
| 16093 | 15522 | 4732473B16Rik | 1810011O10Rik | 1  |
| 16093 | 15624 | 4732473B16Rik | Crcp          | 1  |
| 16093 | 15631 | 4732473B16Rik | Lpin1         | 1  |
| 16093 | 15862 | 4732473B16Rik | Mrap          | -1 |
| 16093 | 15882 | 4732473B16Rik | AA986860      | 1  |
| 16093 | 16176 | 4732473B16Rik | St3gal5       | 1  |
| 16093 | 16517 | 4732473B16Rik | D4Wsu53e      | 1  |
| 16093 | 16580 | 4732473B16Rik | Tnfaip2       | -1 |
| 16093 | 16690 | 4732473B16Rik | Tjp3          | -1 |
| 16093 | 17323 | 4732473B16Rik | Tubb6         | -1 |
| 16093 | 17352 | 4732473B16Rik | Cebpb         | 1  |
| 16093 | 17444 | 4732473B16Rik | Tuba1a        | -1 |
| 16093 | 17525 | 4732473B16Rik | Ctgf          | 1  |
| 16093 | 17622 | 4732473B16Rik | Foxo1         | 1  |
| 16093 | 17656 | 4732473B16Rik | Hdhd3         | -1 |
| 16093 | 17876 | 4732473B16Rik | Tubb4         | -1 |
| 16093 | 18027 | 4732473B16Rik | 5730403B10Rik | 1  |
| 16093 | 18250 | 4732473B16Rik | Mmp14         | -1 |
| 16093 | 18314 | 4732473B16Rik | 4631416L12Rik | 1  |
| 16093 | 18606 | 4732473B16Rik | A230074B11Rik | 1  |
| 16093 | 18785 | 4732473B16Rik | Angptl4       | 1  |
| 16093 | 19025 | 4732473B16Rik | Slc37a4       | 1  |
| 16093 | 19124 | 4732473B16Rik | Pim3          | 1  |
| 16093 | 19146 | 4732473B16Rik | N4bp2l1       | 1  |
| 16093 | 19466 | 4732473B16Rik | Pptc7         | 1  |
| 16093 | 19671 | 4732473B16Rik | Upp2          | 1  |
| 16093 | 19723 | 4732473B16Rik | Pfkfb1        | 1  |
| 16093 | 19970 | 4732473B16Rik | Mrpl36        | -1 |
| 16093 | 20085 | 4732473B16Rik | Lpin2         | 1  |
| 16093 | 20803 | 4732473B16Rik | Tmem50a       | 1  |
| 16093 | 21331 | 4732473B16Rik | Slc10a6       | 1  |
| 16093 | 21380 | 4732473B16Rik | Ier5          | -1 |
| 16093 | 22290 | 4732473B16Rik | Tubb2a        | -1 |
| 16093 | 22443 | 4732473B16Rik | Tuba1c        | -1 |

|       |       |               |               |    |
|-------|-------|---------------|---------------|----|
| 16093 | 22630 | 4732473B16Rik | MMT00034355   | -1 |
| 16093 | 22873 | 4732473B16Rik | Slc38a2       | 1  |
| 16093 | 23201 | 4732473B16Rik | S1pr1         | -1 |
| 16093 | 23202 | 4732473B16Rik | Olf559        | 1  |
| 16093 | 23248 | 4732473B16Rik | Tesk2         | 1  |
| 16093 | 23253 | 4732473B16Rik | D030011O10Rik | 1  |
| 16093 | 23558 | 4732473B16Rik | MMT00030937   | 1  |
| 16097 | 607   | Dnmt3l        | Me1           | 1  |
| 16097 | 874   | Dnmt3l        | Aldh1a7       | 1  |
| 16097 | 2314  | Dnmt3l        | Zswim6        | 1  |
| 16097 | 4351  | Dnmt3l        | Plxnb1        | -1 |
| 16097 | 4635  | Dnmt3l        | MMT00023332   | 1  |
| 16097 | 5884  | Dnmt3l        | Gstm2         | 1  |
| 16097 | 6193  | Dnmt3l        | Lactb2        | 1  |
| 16097 | 7602  | Dnmt3l        | Pcca          | 1  |
| 16097 | 7887  | Dnmt3l        | 4930418G15Rik | 1  |
| 16097 | 8444  | Dnmt3l        | Rdh16         | 1  |
| 16097 | 8815  | Dnmt3l        | Mx1           | 1  |
| 16097 | 9427  | Dnmt3l        | Nqo2          | 1  |
| 16097 | 10132 | Dnmt3l        | Ces2          | 1  |
| 16097 | 10961 | Dnmt3l        | Pgd           | 1  |
| 16097 | 11462 | Dnmt3l        | Gpam          | 1  |
| 16097 | 11946 | Dnmt3l        | MMT00030953   | 1  |
| 16097 | 12143 | Dnmt3l        | Thyn1         | 1  |
| 16097 | 12219 | Dnmt3l        | Cyb5b         | 1  |
| 16097 | 12910 | Dnmt3l        | 1110028A07Rik | 1  |
| 16097 | 14017 | Dnmt3l        | Ces5          | 1  |
| 16097 | 14147 | Dnmt3l        | Acss2         | 1  |
| 16097 | 14151 | Dnmt3l        | Slc44a1       | 1  |
| 16097 | 14323 | Dnmt3l        | Scarb1        | -1 |
| 16097 | 17887 | Dnmt3l        | Cryl1         | 1  |
| 16097 | 18201 | Dnmt3l        | MMT00060232   | 1  |
| 16097 | 18286 | Dnmt3l        | Slc41a3       | -1 |
| 16097 | 20019 | Dnmt3l        | Qdpr          | 1  |
| 16097 | 21202 | Dnmt3l        | Acly          | 1  |
| 16097 | 21214 | Dnmt3l        | Scd1          | 1  |
| 16097 | 21251 | Dnmt3l        | Cpt1a         | -1 |
| 16097 | 21575 | Dnmt3l        | Cyp2c55       | 1  |
| 16097 | 21793 | Dnmt3l        | Pla2g12a      | -1 |
| 16097 | 22046 | Dnmt3l        | Cml4          | 1  |
| 16097 | 22138 | Dnmt3l        | Ang           | -1 |
| 16097 | 22732 | Dnmt3l        | Cyb5b         | 1  |
| 16102 | 2200  | Cd72          | BC006779      | 1  |
| 16102 | 6213  | Cd72          | Ccl2          | 1  |
| 16102 | 6888  | Cd72          | Cxcl9         | 1  |
| 16102 | 8800  | Cd72          | Rnf213        | 1  |
| 16102 | 11265 | Cd72          | Irgm          | 1  |
| 16102 | 12398 | Cd72          | Ifi44         | 1  |
| 16102 | 14258 | Cd72          | Ifi47         | 1  |
| 16102 | 16182 | Cd72          | Oasl1         | 1  |
| 16102 | 16572 | Cd72          | D14Ertd668e   | 1  |

|       |       |         |               |    |
|-------|-------|---------|---------------|----|
| 16102 | 17197 | Cd72    | Igtp          | 1  |
| 16102 | 21549 | Cd72    | Rtp4          | 1  |
| 16102 | 21824 | Cd72    | 5830443L24Rik | 1  |
| 16104 | 6030  | Ugt3a2  | As3mt         | -1 |
| 16104 | 20079 | Ugt3a2  | MMT00019254   | -1 |
| 16104 | 23026 | Ugt3a2  | Apom          | -1 |
| 16115 | 12910 | Mup3    | 1110028A07Rik | -1 |
| 16130 | 8815  | Gosr2   | Mx1           | 1  |
| 16130 | 21214 | Gosr2   | Scd1          | 1  |
| 16131 | 250   | Ptpre   | Tubb2a-ps2    | 1  |
| 16131 | 269   | Ptpre   | Tuba1b        | 1  |
| 16131 | 563   | Ptpre   | D4Bwg0951e    | -1 |
| 16131 | 609   | Ptpre   | MMT00060868   | 1  |
| 16131 | 1941  | Ptpre   | MMT00079618   | 1  |
| 16131 | 2322  | Ptpre   | Tuba4a        | 1  |
| 16131 | 2794  | Ptpre   | Map3k6        | -1 |
| 16131 | 3326  | Ptpre   | Lysmd2        | -1 |
| 16131 | 3804  | Ptpre   | MMT00015534   | 1  |
| 16131 | 4286  | Ptpre   | Ptp4a1        | -1 |
| 16131 | 6386  | Ptpre   | Por           | -1 |
| 16131 | 8399  | Ptpre   | Herpud1       | -1 |
| 16131 | 9763  | Ptpre   | Tuba3b        | 1  |
| 16131 | 10384 | Ptpre   | Chic2         | -1 |
| 16131 | 11129 | Ptpre   | Ankhd1        | -1 |
| 16131 | 11807 | Ptpre   | Fbxo31        | -1 |
| 16131 | 12910 | Ptpre   | 1110028A07Rik | 1  |
| 16131 | 13018 | Ptpre   | AW544981      | 1  |
| 16131 | 13471 | Ptpre   | Cln8          | -1 |
| 16131 | 15631 | Ptpre   | Lpin1         | -1 |
| 16131 | 15862 | Ptpre   | Mrap          | 1  |
| 16131 | 16176 | Ptpre   | St3gal5       | -1 |
| 16131 | 16647 | Ptpre   | D16H22S680E   | -1 |
| 16131 | 16690 | Ptpre   | Tjp3          | 1  |
| 16131 | 17323 | Ptpre   | Tubb6         | 1  |
| 16131 | 17338 | Ptpre   | Mocos         | 1  |
| 16131 | 18027 | Ptpre   | 5730403B10Rik | -1 |
| 16131 | 18785 | Ptpre   | Angptl4       | -1 |
| 16131 | 18827 | Ptpre   | Oprs1         | 1  |
| 16131 | 22290 | Ptpre   | Tubb2a        | 1  |
| 16131 | 22744 | Ptpre   | 9-Sep         | 1  |
| 16143 | 3836  | Cd209d  | 2200001115Rik | 1  |
| 16146 | 3753  | Gucy1a3 | Setdb1        | -1 |
| 16146 | 5938  | Gucy1a3 | Pfn2          | 1  |
| 16146 | 6206  | Gucy1a3 | MMT00063701   | 1  |
| 16146 | 10521 | Gucy1a3 | Ttf2          | 1  |
| 16146 | 11611 | Gucy1a3 | S100a13       | -1 |
| 16146 | 12367 | Gucy1a3 | MMT00072365   | -1 |
| 16146 | 16416 | Gucy1a3 | Commd2        | 1  |
| 16147 | 269   | Tlr2    | Tuba1b        | 1  |
| 16147 | 563   | Tlr2    | D4Bwg0951e    | -1 |
| 16147 | 1941  | Tlr2    | MMT00079618   | 1  |

|       |       |             |                    |    |
|-------|-------|-------------|--------------------|----|
| 16147 | 3097  | Tlr2        | Ppp1r3g            | -1 |
| 16147 | 4286  | Tlr2        | Ptp4a1             | -1 |
| 16147 | 4708  | Tlr2        | Traf3ip2           | 1  |
| 16147 | 5364  | Tlr2        | Kif22              | 1  |
| 16147 | 7066  | Tlr2        | Agtr1b             | -1 |
| 16147 | 7612  | Tlr2        | MMT00014216        | 1  |
| 16147 | 7963  | Tlr2        | Rxrg               | 1  |
| 16147 | 8328  | Tlr2        | Klhdc8a            | 1  |
| 16147 | 8399  | Tlr2        | Herpud1            | -1 |
| 16147 | 9418  | Tlr2        | MMT00034311        | 1  |
| 16147 | 9763  | Tlr2        | Tuba3b             | 1  |
| 16147 | 9860  | Tlr2        | MMT00060113        | 1  |
| 16147 | 11093 | Tlr2        | Zdhhc1             | -1 |
| 16147 | 11169 | Tlr2        | MMT00078034        | 1  |
| 16147 | 11724 | Tlr2        | Tuba3a             | 1  |
| 16147 | 12981 | Tlr2        | Nek6               | 1  |
| 16147 | 15021 | Tlr2        | Ppargc1a           | -1 |
| 16147 | 15631 | Tlr2        | Lpin1              | -1 |
| 16147 | 15659 | Tlr2        | MMT00074093        | 1  |
| 16147 | 15990 | Tlr2        | Dnmbp              | -1 |
| 16147 | 16182 | Tlr2        | Oasl1              | 1  |
| 16147 | 16580 | Tlr2        | Tnfaip2            | 1  |
| 16147 | 17323 | Tlr2        | Tubb6              | 1  |
| 16147 | 17444 | Tlr2        | Tuba1a             | 1  |
| 16147 | 18027 | Tlr2        | 5730403B10Rik      | -1 |
| 16147 | 18785 | Tlr2        | Angptl4            | -1 |
| 16147 | 21375 | Tlr2        | MMT00043149        | 1  |
| 16147 | 21722 | Tlr2        | MMT00054655        | 1  |
| 16147 | 23201 | Tlr2        | S1pr1              | 1  |
| 16147 | 23202 | Tlr2        | Olf559             | -1 |
| 16147 | 23253 | Tlr2        | D030011O10Rik      | -1 |
| 16155 | 8473  | Dusp12      | Clint1             | 1  |
| 16164 | 10554 | Fdps        | ENSMUSG00000074179 | 1  |
| 16164 | 13293 | Fdps        | Gsta2              | 1  |
| 16168 | 14472 | Crlf2       | Ahcy               | -1 |
| 16168 | 15292 | Crlf2       | 2010107G23Rik      | 1  |
| 16168 | 16168 | Crlf2       | Crlf2              | 1  |
| 16168 | 16958 | Crlf2       | Gpc1               | 1  |
| 16168 | 20194 | Crlf2       | PnlDC1             | 1  |
| 16168 | 20967 | Crlf2       | Fabp2              | 1  |
| 16168 | 23183 | Crlf2       | Nnmt               | -1 |
| 16176 | 2743  | St3gal5     | Tcf3               | -1 |
| 16176 | 3703  | St3gal5     | Ggcx               | -1 |
| 16176 | 11338 | St3gal5     | Vamp8              | -1 |
| 16176 | 15384 | St3gal5     | Mat2a              | -1 |
| 16176 | 15708 | St3gal5     | Retsat             | -1 |
| 16176 | 16670 | St3gal5     | Csmd2              | 1  |
| 16179 | 18785 | Gulo        | Angptl4            | -1 |
| 16181 | 6476  | MMT00078660 | Sntg2              | -1 |
| 16181 | 11065 | MMT00078660 | Mccc1              | -1 |
| 16181 | 16695 | MMT00078660 | Hs3st6             | 1  |



|       |       |             |               |    |
|-------|-------|-------------|---------------|----|
| 16181 | 20341 | MMT00078660 | Srebf2        | 1  |
| 16181 | 23253 | MMT00078660 | D030011O10Rik | -1 |
| 16182 | 143   | Oasl1       | Gvin1         | 1  |
| 16182 | 1533  | Oasl1       | BC013712      | 1  |
| 16182 | 2200  | Oasl1       | BC006779      | 1  |
| 16182 | 2224  | Oasl1       | Oasl2         | 1  |
| 16182 | 2550  | Oasl1       | MMT00036681   | 1  |
| 16182 | 2752  | Oasl1       | Fcgr1         | 1  |
| 16182 | 3028  | Oasl1       | Uhrf1         | 1  |
| 16182 | 3426  | Oasl1       | Hap1          | 1  |
| 16182 | 3523  | Oasl1       | Trim34        | 1  |
| 16182 | 3594  | Oasl1       | Rasa4         | 1  |
| 16182 | 3659  | Oasl1       | EG236451      | 1  |
| 16182 | 3683  | Oasl1       | Oas2          | 1  |
| 16182 | 4114  | Oasl1       | Parp12        | 1  |
| 16182 | 4185  | Oasl1       | Hmgb2         | 1  |
| 16182 | 4409  | Oasl1       | 5430435G22Rik | 1  |
| 16182 | 4426  | Oasl1       | Iigp2         | 1  |
| 16182 | 4508  | Oasl1       | Iffit1        | 1  |
| 16182 | 4516  | Oasl1       | Rsad2         | 1  |
| 16182 | 5002  | Oasl1       | Iffi202b      | 1  |
| 16182 | 5044  | Oasl1       | Iffi35        | 1  |
| 16182 | 5216  | Oasl1       | Spnb5         | 1  |
| 16182 | 5250  | Oasl1       | Iffit2        | 1  |
| 16182 | 5554  | Oasl1       | Emr1          | 1  |
| 16182 | 5766  | Oasl1       | 5033414D02Rik | 1  |
| 16182 | 5845  | Oasl1       | Ii18bp        | 1  |
| 16182 | 5853  | Oasl1       | Trim30        | 1  |
| 16182 | 5875  | Oasl1       | Cd86          | 1  |
| 16182 | 5949  | Oasl1       | Zbp1          | 1  |
| 16182 | 6072  | Oasl1       | C1qc          | 1  |
| 16182 | 6098  | Oasl1       | Ncf4          | 1  |
| 16182 | 6213  | Oasl1       | Ccl2          | 1  |
| 16182 | 6587  | Oasl1       | Irf9          | 1  |
| 16182 | 6595  | Oasl1       | Oas1a         | 1  |
| 16182 | 6734  | Oasl1       | Ehd4          | 1  |
| 16182 | 6779  | Oasl1       | Gbp6          | 1  |
| 16182 | 6824  | Oasl1       | Irf7          | 1  |
| 16182 | 6866  | Oasl1       | Gls           | -1 |
| 16182 | 6888  | Oasl1       | Cxcl9         | 1  |
| 16182 | 6910  | Oasl1       | Ly6c2         | 1  |
| 16182 | 7069  | Oasl1       | Ube1l         | 1  |
| 16182 | 7105  | Oasl1       | Plac8         | 1  |
| 16182 | 7238  | Oasl1       | Pycard        | 1  |
| 16182 | 7284  | Oasl1       | MMT00008674   | 1  |
| 16182 | 7316  | Oasl1       | Iffi204       | 1  |
| 16182 | 7336  | Oasl1       | Cd5l          | 1  |
| 16182 | 8270  | Oasl1       | Cispn         | 1  |
| 16182 | 8555  | Oasl1       | H2-M3         | 1  |
| 16182 | 8659  | Oasl1       | Psm8          | 1  |
| 16182 | 8800  | Oasl1       | Rnf213        | 1  |

|       |       |       |               |   |
|-------|-------|-------|---------------|---|
| 16182 | 9100  | Oasl1 | Ms4a6c        | 1 |
| 16182 | 9320  | Oasl1 | Rnf31         | 1 |
| 16182 | 9401  | Oasl1 | Fcgr4         | 1 |
| 16182 | 9717  | Oasl1 | Psmb9         | 1 |
| 16182 | 9847  | Oasl1 | Ifi27         | 1 |
| 16182 | 10109 | Oasl1 | Gbp3          | 1 |
| 16182 | 10504 | Oasl1 | Ripk3         | 1 |
| 16182 | 10606 | Oasl1 | Apbb1ip       | 1 |
| 16182 | 10926 | Oasl1 | P2ry13        | 1 |
| 16182 | 11009 | Oasl1 | MMT00008885   | 1 |
| 16182 | 11204 | Oasl1 | AI451617      | 1 |
| 16182 | 11265 | Oasl1 | Irgm          | 1 |
| 16182 | 11275 | Oasl1 | Fanci         | 1 |
| 16182 | 11701 | Oasl1 | Oas1c         | 1 |
| 16182 | 12126 | Oasl1 | Znfx1         | 1 |
| 16182 | 12312 | Oasl1 | Ms4a6d        | 1 |
| 16182 | 12398 | Oasl1 | Ifi44         | 1 |
| 16182 | 12600 | Oasl1 | Ifi204        | 1 |
| 16182 | 12969 | Oasl1 | Xaf1          | 1 |
| 16182 | 13156 | Oasl1 | Ifit3         | 1 |
| 16182 | 13181 | Oasl1 | Lcp2          | 1 |
| 16182 | 13309 | Oasl1 | Tgtp          | 1 |
| 16182 | 13514 | Oasl1 | Apol9b        | 1 |
| 16182 | 13522 | Oasl1 | Sfn5          | 1 |
| 16182 | 13527 | Oasl1 | Ctss          | 1 |
| 16182 | 13528 | Oasl1 | Capn12        | 1 |
| 16182 | 13585 | Oasl1 | Nckap1l       | 1 |
| 16182 | 13654 | Oasl1 | Stat1         | 1 |
| 16182 | 13656 | Oasl1 | Ly86          | 1 |
| 16182 | 13749 | Oasl1 | Parp9         | 1 |
| 16182 | 13826 | Oasl1 | Melk          | 1 |
| 16182 | 14029 | Oasl1 | 2810022L02Rik | 1 |
| 16182 | 14237 | Oasl1 | Rac2          | 1 |
| 16182 | 14258 | Oasl1 | Ifi47         | 1 |
| 16182 | 14260 | Oasl1 | Mkl1          | 1 |
| 16182 | 14506 | Oasl1 | Slc15a3       | 1 |
| 16182 | 14603 | Oasl1 | Ly6e          | 1 |
| 16182 | 14611 | Oasl1 | Ddx60         | 1 |
| 16182 | 14880 | Oasl1 | Ms4a4c        | 1 |
| 16182 | 14883 | Oasl1 | Itgal         | 1 |
| 16182 | 14954 | Oasl1 | Rab19         | 1 |
| 16182 | 15074 | Oasl1 | Usp18         | 1 |
| 16182 | 15159 | Oasl1 | Timd4         | 1 |
| 16182 | 15280 | Oasl1 | Cxcl10        | 1 |
| 16182 | 15449 | Oasl1 | Mitd1         | 1 |
| 16182 | 15504 | Oasl1 | Mx2           | 1 |
| 16182 | 15572 | Oasl1 | Dtx3l         | 1 |
| 16182 | 15825 | Oasl1 | Fermt3        | 1 |
| 16182 | 16102 | Oasl1 | Cd72          | 1 |
| 16182 | 16147 | Oasl1 | Tlr2          | 1 |
| 16182 | 16182 | Oasl1 | Oasl1         | 1 |

|       |       |         |               |    |
|-------|-------|---------|---------------|----|
| 16182 | 16186 | Oasl1   | Cfp           | 1  |
| 16182 | 16199 | Oasl1   | Samhd1        | 1  |
| 16182 | 16521 | Oasl1   | Adar          | 1  |
| 16182 | 16572 | Oasl1   | D14Ertid668e  | 1  |
| 16182 | 16874 | Oasl1   | Fcer1g        | 1  |
| 16182 | 16988 | Oasl1   | Clec4f        | 1  |
| 16182 | 17071 | Oasl1   | Samd9l        | 1  |
| 16182 | 17197 | Oasl1   | Igtp          | 1  |
| 16182 | 17412 | Oasl1   | Aif1          | 1  |
| 16182 | 17904 | Oasl1   | Cds1          | 1  |
| 16182 | 18174 | Oasl1   | Stat2         | 1  |
| 16182 | 18186 | Oasl1   | Parp14        | 1  |
| 16182 | 18211 | Oasl1   | Folr2         | 1  |
| 16182 | 18289 | Oasl1   | Tap1          | 1  |
| 16182 | 19026 | Oasl1   | Isg15         | 1  |
| 16182 | 19063 | Oasl1   | Evl           | 1  |
| 16182 | 19189 | Oasl1   | Sp100         | 1  |
| 16182 | 19262 | Oasl1   | Cd274         | 1  |
| 16182 | 19708 | Oasl1   | Ly6a          | 1  |
| 16182 | 19738 | Oasl1   | Lgals3bp      | 1  |
| 16182 | 19794 | Oasl1   | Rgs2          | 1  |
| 16182 | 20150 | Oasl1   | Ptprc         | 1  |
| 16182 | 20321 | Oasl1   | Ms4a6b        | 1  |
| 16182 | 20432 | Oasl1   | Smc1b         | 1  |
| 16182 | 20433 | Oasl1   | Cdca5         | 1  |
| 16182 | 20474 | Oasl1   | Gnb3          | 1  |
| 16182 | 20791 | Oasl1   | MMT00014813   | 1  |
| 16182 | 20997 | Oasl1   | MMT00028135   | 1  |
| 16182 | 21351 | Oasl1   | Shisa5        | 1  |
| 16182 | 21549 | Oasl1   | Rtp4          | 1  |
| 16182 | 21824 | Oasl1   | 5830443L24Rik | 1  |
| 16182 | 22037 | Oasl1   | Oas1g         | 1  |
| 16182 | 22077 | Oasl1   | MMT00057550   | 1  |
| 16182 | 22712 | Oasl1   | Phf11         | 1  |
| 16182 | 23038 | Oasl1   | Casp4         | 1  |
| 16182 | 23092 | Oasl1   | Ifih1         | 1  |
| 16182 | 23208 | Oasl1   | Hck           | 1  |
| 16182 | 23242 | Oasl1   | Gngt2         | 1  |
| 16182 | 23450 | Oasl1   | D12Ertid647e  | 1  |
| 16186 | 2721  | Cfp     | Inmt          | -1 |
| 16186 | 2850  | Cfp     | Slc16a6       | 1  |
| 16186 | 5364  | Cfp     | Kif22         | 1  |
| 16186 | 5849  | Cfp     | 2310031A18Rik | 1  |
| 16186 | 8328  | Cfp     | Klhdc8a       | 1  |
| 16186 | 14472 | Cfp     | Ahcy          | -1 |
| 16186 | 18069 | Cfp     | Gpt           | -1 |
| 16190 | 3393  | Osbpl11 | Snhg8         | 1  |
| 16190 | 11807 | Osbpl11 | Fbxo31        | 1  |
| 16190 | 21202 | Osbpl11 | Acly          | -1 |
| 16191 | 4414  | Klc1    | 5033406O09Rik | -1 |
| 16191 | 7388  | Klc1    | Amn           | -1 |

|       |       |        |               |    |
|-------|-------|--------|---------------|----|
| 16191 | 8155  | Klc1   | Mark3         | -1 |
| 16191 | 16191 | Klc1   | Klc1          | 1  |
| 16199 | 1533  | Samhd1 | BC013712      | 1  |
| 16199 | 2224  | Samhd1 | Oasl2         | 1  |
| 16199 | 2490  | Samhd1 | MMT00070880   | 1  |
| 16199 | 2752  | Samhd1 | Fcgr1         | 1  |
| 16199 | 3594  | Samhd1 | Rasa4         | 1  |
| 16199 | 4426  | Samhd1 | ligp2         | 1  |
| 16199 | 4508  | Samhd1 | Ifit1         | 1  |
| 16199 | 5044  | Samhd1 | Ifi35         | 1  |
| 16199 | 5766  | Samhd1 | 5033414D02Rik | 1  |
| 16199 | 5845  | Samhd1 | Il18bp        | 1  |
| 16199 | 5975  | Samhd1 | Car13         | 1  |
| 16199 | 6824  | Samhd1 | Irf7          | 1  |
| 16199 | 7105  | Samhd1 | Plac8         | 1  |
| 16199 | 7238  | Samhd1 | Pycard        | 1  |
| 16199 | 7284  | Samhd1 | MMT00008674   | 1  |
| 16199 | 7336  | Samhd1 | Cd5l          | 1  |
| 16199 | 8392  | Samhd1 | Asf1b         | 1  |
| 16199 | 8555  | Samhd1 | H2-M3         | 1  |
| 16199 | 8800  | Samhd1 | Rnf213        | 1  |
| 16199 | 9401  | Samhd1 | Fcgr4         | 1  |
| 16199 | 9847  | Samhd1 | Ifi27         | 1  |
| 16199 | 10109 | Samhd1 | Gbp3          | 1  |
| 16199 | 10504 | Samhd1 | Ripk3         | 1  |
| 16199 | 10606 | Samhd1 | Apbb1ip       | 1  |
| 16199 | 10926 | Samhd1 | P2ry13        | 1  |
| 16199 | 11204 | Samhd1 | AI451617      | 1  |
| 16199 | 11701 | Samhd1 | Oas1c         | 1  |
| 16199 | 12398 | Samhd1 | Ifi44         | 1  |
| 16199 | 12600 | Samhd1 | Ifi204        | 1  |
| 16199 | 12969 | Samhd1 | Xaf1          | 1  |
| 16199 | 13156 | Samhd1 | Ifit3         | 1  |
| 16199 | 13293 | Samhd1 | Gsta2         | -1 |
| 16199 | 13309 | Samhd1 | Tgtp          | 1  |
| 16199 | 13527 | Samhd1 | Ctss          | 1  |
| 16199 | 13585 | Samhd1 | Nckap1l       | 1  |
| 16199 | 13656 | Samhd1 | Ly86          | 1  |
| 16199 | 13885 | Samhd1 | Clec7a        | 1  |
| 16199 | 14237 | Samhd1 | Rac2          | 1  |
| 16199 | 14506 | Samhd1 | Slc15a3       | 1  |
| 16199 | 14880 | Samhd1 | Ms4a4c        | 1  |
| 16199 | 16182 | Samhd1 | Oasl1         | 1  |
| 16199 | 16199 | Samhd1 | Samhd1        | 1  |
| 16199 | 16854 | Samhd1 | Kif15         | 1  |
| 16199 | 16874 | Samhd1 | Fcer1g        | 1  |
| 16199 | 17197 | Samhd1 | Igtp          | 1  |
| 16199 | 17412 | Samhd1 | Aif1          | 1  |
| 16199 | 18174 | Samhd1 | Stat2         | 1  |
| 16199 | 18289 | Samhd1 | Tap1          | 1  |
| 16199 | 19189 | Samhd1 | Sp100         | 1  |

|       |       |               |                    |    |
|-------|-------|---------------|--------------------|----|
| 16199 | 19262 | Samhd1        | Cd274              | 1  |
| 16199 | 19738 | Samhd1        | Lgals3bp           | 1  |
| 16199 | 19794 | Samhd1        | Rgs2               | 1  |
| 16199 | 20321 | Samhd1        | Ms4a6b             | 1  |
| 16199 | 20474 | Samhd1        | Gnb3               | 1  |
| 16199 | 21351 | Samhd1        | Shisa5             | 1  |
| 16199 | 21549 | Samhd1        | Rtp4               | 1  |
| 16199 | 21824 | Samhd1        | 5830443L24Rik      | 1  |
| 16199 | 22647 | Samhd1        | Pkib               | 1  |
| 16199 | 23208 | Samhd1        | Hck                | 1  |
| 16199 | 23242 | Samhd1        | Gngt2              | 1  |
| 16203 | 5364  | Tspan6        | Kif22              | 1  |
| 16208 | 2850  | Ppara         | Slc16a6            | -1 |
| 16210 | 3265  | Metrl         | Dntt               | 1  |
| 16210 | 5364  | Metrl         | Kif22              | 1  |
| 16210 | 14472 | Metrl         | Ahcy               | -1 |
| 16212 | 15205 | Med19         | MMT00030262        | -1 |
| 16222 | 9842  | Adipor2       | Qdpr               | -1 |
| 16222 | 13423 | Adipor2       | ENSMUSG00000053749 | -1 |
| 16222 | 14442 | Adipor2       | Ethe1              | -1 |
| 16227 | 21512 | Rarres1       | Gas6               | -1 |
| 16231 | 7807  | Rnf4          | 2410004N09Rik      | 1  |
| 16233 | 10490 | 1600027J07Rik | Peg3               | 1  |
| 16233 | 17563 | 1600027J07Rik | Aldh1l1            | -1 |
| 16233 | 17638 | 1600027J07Rik | Adssl1             | -1 |
| 16233 | 22009 | 1600027J07Rik | Tmem14a            | -1 |
| 16238 | 701   | Nmi           | Polr3g             | -1 |
| 16238 | 1533  | Nmi           | BC013712           | 1  |
| 16238 | 2200  | Nmi           | BC006779           | 1  |
| 16238 | 2224  | Nmi           | Oasl2              | 1  |
| 16238 | 3426  | Nmi           | Hap1               | 1  |
| 16238 | 3594  | Nmi           | Rasa4              | 1  |
| 16238 | 3659  | Nmi           | EG236451           | 1  |
| 16238 | 3683  | Nmi           | Oas2               | 1  |
| 16238 | 4114  | Nmi           | Parp12             | 1  |
| 16238 | 4409  | Nmi           | 5430435G22Rik      | 1  |
| 16238 | 4426  | Nmi           | Iigp2              | 1  |
| 16238 | 4508  | Nmi           | Ifit1              | 1  |
| 16238 | 5044  | Nmi           | Ifi35              | 1  |
| 16238 | 5250  | Nmi           | Ifit2              | 1  |
| 16238 | 5766  | Nmi           | 5033414D02Rik      | 1  |
| 16238 | 5845  | Nmi           | Il18bp             | 1  |
| 16238 | 5853  | Nmi           | Trim30             | 1  |
| 16238 | 6587  | Nmi           | Irf9               | 1  |
| 16238 | 6779  | Nmi           | Gbp6               | 1  |
| 16238 | 6824  | Nmi           | Irf7               | 1  |
| 16238 | 7069  | Nmi           | Ube1l              | 1  |
| 16238 | 7105  | Nmi           | Plac8              | 1  |
| 16238 | 7238  | Nmi           | Pycard             | 1  |
| 16238 | 7284  | Nmi           | MMT00008674        | 1  |
| 16238 | 7336  | Nmi           | Cd5l               | 1  |

|       |       |             |               |    |
|-------|-------|-------------|---------------|----|
| 16238 | 8555  | Nmi         | H2-M3         | 1  |
| 16238 | 8659  | Nmi         | Psmb8         | 1  |
| 16238 | 8800  | Nmi         | Rnf213        | 1  |
| 16238 | 9847  | Nmi         | Ifi27         | 1  |
| 16238 | 10109 | Nmi         | Gbp3          | 1  |
| 16238 | 10393 | Nmi         | Slc7a8        | 1  |
| 16238 | 10606 | Nmi         | Apbb1ip       | 1  |
| 16238 | 11275 | Nmi         | Fanci         | 1  |
| 16238 | 11701 | Nmi         | Oas1c         | 1  |
| 16238 | 12398 | Nmi         | Ifi44         | 1  |
| 16238 | 12600 | Nmi         | Ifi204        | 1  |
| 16238 | 12969 | Nmi         | Xaf1          | 1  |
| 16238 | 13156 | Nmi         | Ifit3         | 1  |
| 16238 | 13522 | Nmi         | Sfn5          | 1  |
| 16238 | 13654 | Nmi         | Stat1         | 1  |
| 16238 | 13826 | Nmi         | Melk          | 1  |
| 16238 | 14506 | Nmi         | Slc15a3       | 1  |
| 16238 | 14880 | Nmi         | Ms4a4c        | 1  |
| 16238 | 15074 | Nmi         | Usp18         | 1  |
| 16238 | 15504 | Nmi         | Mx2           | 1  |
| 16238 | 16182 | Nmi         | Oasl1         | 1  |
| 16238 | 16199 | Nmi         | Samhd1        | 1  |
| 16238 | 16521 | Nmi         | Adar          | 1  |
| 16238 | 17412 | Nmi         | Aif1          | 1  |
| 16238 | 17904 | Nmi         | Cds1          | 1  |
| 16238 | 18186 | Nmi         | Parp14        | 1  |
| 16238 | 19063 | Nmi         | Evl           | 1  |
| 16238 | 19189 | Nmi         | Sp100         | 1  |
| 16238 | 19262 | Nmi         | Cd274         | 1  |
| 16238 | 19738 | Nmi         | Lgals3bp      | 1  |
| 16238 | 19794 | Nmi         | Rgs2          | 1  |
| 16238 | 20431 | Nmi         | Slc7a7        | 1  |
| 16238 | 20791 | Nmi         | MMT00014813   | 1  |
| 16238 | 20997 | Nmi         | MMT00028135   | 1  |
| 16238 | 21351 | Nmi         | Shisa5        | 1  |
| 16238 | 21549 | Nmi         | Rtp4          | 1  |
| 16238 | 21824 | Nmi         | 5830443L24Rik | 1  |
| 16238 | 22037 | Nmi         | Oas1g         | 1  |
| 16238 | 22712 | Nmi         | Phf11         | 1  |
| 16238 | 23208 | Nmi         | Hck           | 1  |
| 16238 | 23403 | Nmi         | Ndc80         | 1  |
| 16238 | 23450 | Nmi         | D12Ert647e    | 1  |
| 16242 | 16242 | MMT00053207 | MMT00053207   | 1  |
| 16248 | 607   | Cdr2        | Me1           | 1  |
| 16248 | 874   | Cdr2        | Aldh1a7       | 1  |
| 16248 | 6370  | Cdr2        | Aqp8          | 1  |
| 16248 | 7619  | Cdr2        | Pik3ip1       | -1 |
| 16248 | 16510 | Cdr2        | Tspyl4        | 1  |
| 16248 | 17996 | Cdr2        | Igfbp2        | -1 |
| 16248 | 18827 | Cdr2        | Oprs1         | 1  |
| 16248 | 20079 | Cdr2        | MMT00019254   | -1 |

|       |       |          |             |    |
|-------|-------|----------|-------------|----|
| 16248 | 23026 | Cdr2     | Apom        | -1 |
| 16252 | 707   | Ubtd1    | Bdnf        | 1  |
| 16252 | 2051  | Ubtd1    | Ddx27       | -1 |
| 16252 | 3696  | Ubtd1    | Elov6       | 1  |
| 16252 | 5804  | Ubtd1    | Thrsp       | 1  |
| 16252 | 8896  | Ubtd1    | Fasn        | 1  |
| 16252 | 11462 | Ubtd1    | Gpam        | 1  |
| 16252 | 11576 | Ubtd1    | Gm1381      | 1  |
| 16252 | 12315 | Ubtd1    | Srebf1      | 1  |
| 16252 | 15760 | Ubtd1    | Trib3       | -1 |
| 16252 | 17862 | Ubtd1    | Fbxo21      | -1 |
| 16252 | 21202 | Ubtd1    | Acly        | 1  |
| 16270 | 12941 | Lgals12  | Elov5       | -1 |
| 16270 | 22138 | Lgals12  | Ang         | 1  |
| 16283 | 524   | EG627427 | Hsd3b2      | -1 |
| 16283 | 1867  | EG627427 | Bcas2       | -1 |
| 16283 | 3753  | EG627427 | Setdb1      | 1  |
| 16283 | 5884  | EG627427 | Gstm2       | 1  |
| 16283 | 6206  | EG627427 | MMT00063701 | -1 |
| 16283 | 7810  | EG627427 | Trim45      | -1 |
| 16283 | 8738  | EG627427 | Reg4        | 1  |
| 16283 | 10521 | EG627427 | Ttf2        | -1 |
| 16283 | 11611 | EG627427 | S100a13     | 1  |
| 16283 | 18754 | EG627427 | Rbm8a       | -1 |
| 16283 | 20058 | EG627427 | Dnaic1      | -1 |
| 16283 | 20661 | EG627427 | Tuft1       | -1 |
| 16283 | 20917 | EG627427 | Gstm6       | 1  |
| 16283 | 22570 | EG627427 | Phtf1       | -1 |
| 16284 | 250   | Rasl11a  | Tubb2a-ps2  | 1  |
| 16284 | 609   | Rasl11a  | MMT00060868 | 1  |
| 16284 | 719   | Rasl11a  | Usp2        | -1 |
| 16284 | 865   | Rasl11a  | Npc1        | -1 |
| 16284 | 3214  | Rasl11a  | Dnmt3b      | 1  |
| 16284 | 4534  | Rasl11a  | Ndel1       | -1 |
| 16284 | 5974  | Rasl11a  | Arntl       | 1  |
| 16284 | 6756  | Rasl11a  | Sds         | -1 |
| 16284 | 7112  | Rasl11a  | Apbb3       | -1 |
| 16284 | 8641  | Rasl11a  | Slc7a2      | -1 |
| 16284 | 11599 | Rasl11a  | Coq10b      | -1 |
| 16284 | 11741 | Rasl11a  | Slc30a10    | 1  |
| 16284 | 11808 | Rasl11a  | Pck1        | -1 |
| 16284 | 12420 | Rasl11a  | Klhl21      | -1 |
| 16284 | 13471 | Rasl11a  | Cln8        | -1 |
| 16284 | 14041 | Rasl11a  | Cldn1       | 1  |
| 16284 | 15021 | Rasl11a  | Ppargc1a    | -1 |
| 16284 | 15624 | Rasl11a  | Crcp        | -1 |
| 16284 | 15631 | Rasl11a  | Lpin1       | -1 |
| 16284 | 16060 | Rasl11a  | Gys2        | -1 |
| 16284 | 16690 | Rasl11a  | Tjp3        | 1  |
| 16284 | 17323 | Rasl11a  | Tubb6       | 1  |
| 16284 | 17876 | Rasl11a  | Tubb4       | 1  |

|       |       |         |               |    |
|-------|-------|---------|---------------|----|
| 16284 | 19466 | Rasl11a | Pptc7         | -1 |
| 16284 | 19671 | Rasl11a | Upp2          | -1 |
| 16284 | 19723 | Rasl11a | Pfkfb1        | -1 |
| 16284 | 20085 | Rasl11a | Lpin2         | -1 |
| 16284 | 21733 | Rasl11a | Rhebl1        | -1 |
| 16284 | 22290 | Rasl11a | Tubb2a        | 1  |
| 16284 | 22630 | Rasl11a | MMT00034355   | 1  |
| 16284 | 23201 | Rasl11a | S1pr1         | 1  |
| 16289 | 4057  | Myocd   | Slc2a4        | 1  |
| 16289 | 6376  | Myocd   | Nle1          | -1 |
| 16294 | 250   | Chst7   | Tubb2a-ps2    | 1  |
| 16294 | 269   | Chst7   | Tuba1b        | 1  |
| 16294 | 563   | Chst7   | D4Bwg0951e    | -1 |
| 16294 | 609   | Chst7   | MMT00060868   | 1  |
| 16294 | 1310  | Chst7   | Cabc1         | 1  |
| 16294 | 1709  | Chst7   | Mt2           | -1 |
| 16294 | 1941  | Chst7   | MMT00079618   | 1  |
| 16294 | 2322  | Chst7   | Tuba4a        | 1  |
| 16294 | 2794  | Chst7   | Map3k6        | -1 |
| 16294 | 3502  | Chst7   | Gde1          | -1 |
| 16294 | 3804  | Chst7   | MMT00015534   | 1  |
| 16294 | 4201  | Chst7   | Tubb2c        | 1  |
| 16294 | 4286  | Chst7   | Ptp4a1        | -1 |
| 16294 | 5364  | Chst7   | Kif22         | 1  |
| 16294 | 5934  | Chst7   | S100a10       | 1  |
| 16294 | 6030  | Chst7   | As3mt         | -1 |
| 16294 | 6338  | Chst7   | Setd3         | -1 |
| 16294 | 6386  | Chst7   | Por           | -1 |
| 16294 | 7151  | Chst7   | MMT00007982   | 1  |
| 16294 | 8641  | Chst7   | Slc7a2        | -1 |
| 16294 | 9763  | Chst7   | Tuba3b        | 1  |
| 16294 | 10486 | Chst7   | 1300002K09Rik | 1  |
| 16294 | 11129 | Chst7   | Ankhd1        | -1 |
| 16294 | 11614 | Chst7   | Sult1e1       | -1 |
| 16294 | 11724 | Chst7   | Tuba3a        | 1  |
| 16294 | 11741 | Chst7   | Slc30a10      | 1  |
| 16294 | 11807 | Chst7   | Fbxo31        | -1 |
| 16294 | 11808 | Chst7   | Pck1          | -1 |
| 16294 | 13471 | Chst7   | Cln8          | -1 |
| 16294 | 13889 | Chst7   | Agpat2        | 1  |
| 16294 | 15021 | Chst7   | Ppargc1a      | -1 |
| 16294 | 15320 | Chst7   | MMT00017479   | -1 |
| 16294 | 15631 | Chst7   | Lpin1         | -1 |
| 16294 | 15709 | Chst7   | Tceal1        | -1 |
| 16294 | 15862 | Chst7   | Mrap          | 1  |
| 16294 | 15882 | Chst7   | AA986860      | -1 |
| 16294 | 16060 | Chst7   | Gys2          | -1 |
| 16294 | 16176 | Chst7   | St3gal5       | -1 |
| 16294 | 16647 | Chst7   | D16H22S680E   | -1 |
| 16294 | 16690 | Chst7   | Tjp3          | 1  |
| 16294 | 17338 | Chst7   | Mocos         | 1  |



|       |       |        |               |    |
|-------|-------|--------|---------------|----|
| 16294 | 17444 | Chst7  | Tuba1a        | 1  |
| 16294 | 17876 | Chst7  | Tubb4         | 1  |
| 16294 | 18286 | Chst7  | Slc41a3       | -1 |
| 16294 | 18827 | Chst7  | Oprs1         | 1  |
| 16294 | 19217 | Chst7  | Cyr61         | 1  |
| 16294 | 19466 | Chst7  | Pptc7         | -1 |
| 16294 | 19757 | Chst7  | Fkbp5         | -1 |
| 16294 | 21041 | Chst7  | Cyp17a1       | -1 |
| 16294 | 21331 | Chst7  | Slc10a6       | -1 |
| 16294 | 22290 | Chst7  | Tubb2a        | 1  |
| 16294 | 22630 | Chst7  | MMT00034355   | 1  |
| 16294 | 22744 | Chst7  | 9-Sep         | 1  |
| 16294 | 23558 | Chst7  | MMT00030937   | -1 |
| 16295 | 16295 | Nlrp14 | Nlrp14        | 1  |
| 16295 | 21095 | Nlrp14 | 9130401M01Rik | 1  |
| 16299 | 1453  | Creld2 | Gfod2         | 1  |
| 16299 | 2339  | Creld2 | 5730449L18Rik | 1  |
| 16299 | 3587  | Creld2 | MMT00041940   | 1  |
| 16299 | 3799  | Creld2 | Serpinh1      | 1  |
| 16299 | 3913  | Creld2 | Mrpl15        | 1  |
| 16299 | 4192  | Creld2 | Zranb1        | -1 |
| 16299 | 4612  | Creld2 | Hspa5         | 1  |
| 16299 | 4966  | Creld2 | Zscan20       | 1  |
| 16299 | 5068  | Creld2 | Afap1l2       | 1  |
| 16299 | 6021  | Creld2 | MMT00008784   | 1  |
| 16299 | 6218  | Creld2 | Hnrnpc        | 1  |
| 16299 | 7731  | Creld2 | 1500001M20Rik | -1 |
| 16299 | 7862  | Creld2 | Cpsf4l        | -1 |
| 16299 | 8670  | Creld2 | MMT00051613   | 1  |
| 16299 | 8787  | Creld2 | Sdf2l1        | 1  |
| 16299 | 9067  | Creld2 | Tra2a         | 1  |
| 16299 | 9258  | Creld2 | P4ha1         | 1  |
| 16299 | 9831  | Creld2 | Nedd4l        | 1  |
| 16299 | 11043 | Creld2 | Hsph1         | 1  |
| 16299 | 11214 | Creld2 | MMT00049207   | 1  |
| 16299 | 12905 | Creld2 | Nfil3         | 1  |
| 16299 | 13521 | Creld2 | Ears2         | 1  |
| 16299 | 13568 | Creld2 | Cad           | 1  |
| 16299 | 14014 | Creld2 | MMT00008376   | 1  |
| 16299 | 14298 | Creld2 | Atp2a2        | 1  |
| 16299 | 14681 | Creld2 | Alg12         | 1  |
| 16299 | 15476 | Creld2 | Fem1b         | -1 |
| 16299 | 15675 | Creld2 | MMT00077535   | 1  |
| 16299 | 16299 | Creld2 | Creld2        | 1  |
| 16299 | 16585 | Creld2 | Syvn1         | 1  |
| 16299 | 16754 | Creld2 | Hsp90aa1      | 1  |
| 16299 | 18099 | Creld2 | Nfx1          | -1 |
| 16299 | 18135 | Creld2 | Tmed3         | 1  |
| 16299 | 19108 | Creld2 | Armet         | 1  |
| 16299 | 19453 | Creld2 | Cdk2ap2       | 1  |
| 16299 | 19671 | Creld2 | Upp2          | -1 |

|       |       |               |                    |    |
|-------|-------|---------------|--------------------|----|
| 16299 | 20332 | Creld2        | Stau2              | -1 |
| 16299 | 20912 | Creld2        | Chordc1            | 1  |
| 16299 | 22139 | Creld2        | Stip1              | 1  |
| 16299 | 22943 | Creld2        | Tpd52l1            | -1 |
| 16299 | 23377 | Creld2        | Pdxk               | -1 |
| 16300 | 7950  | Gab3          | Efha1              | 1  |
| 16331 | 7602  | Setd8         | Pcca               | 1  |
| 16331 | 8444  | Setd8         | Rdh16              | 1  |
| 16331 | 10554 | Setd8         | ENSMUSG00000074179 | 1  |
| 16331 | 13293 | Setd8         | Gsta2              | 1  |
| 16331 | 13431 | Setd8         | MMT00038058        | -1 |
| 16331 | 15205 | Setd8         | MMT00030262        | -1 |
| 16331 | 18201 | Setd8         | MMT00060232        | 1  |
| 16331 | 21214 | Setd8         | Scd1               | 1  |
| 16331 | 23640 | Setd8         | Bdh1               | -1 |
| 16333 | 3159  | Wdr64         | Pld1               | -1 |
| 16333 | 5822  | Wdr64         | Car2               | -1 |
| 16333 | 15508 | Wdr64         | 4632415L05Rik      | -1 |
| 16333 | 18790 | Wdr64         | Car3               | -1 |
| 16335 | 607   | Otop1         | Me1                | 1  |
| 16335 | 12910 | Otop1         | 1110028A07Rik      | 1  |
| 16335 | 18201 | Otop1         | MMT00060232        | 1  |
| 16335 | 22138 | Otop1         | Ang                | -1 |
| 16340 | 12302 | Scrn2         | Cbx1               | -1 |
| 16347 | 2932  | Mgp           | Slco1a1            | 1  |
| 16347 | 6765  | Mgp           | Ldhd               | 1  |
| 16356 | 12336 | 9030607L17Rik | Timm13             | -1 |
| 16356 | 17135 | 9030607L17Rik | Mum1               | 1  |
| 16356 | 21964 | 9030607L17Rik | Vwce               | 1  |
| 16363 | 8965  | Adh5          | Ahcy               | 1  |
| 16366 | 607   | Glis3         | Me1                | 1  |
| 16366 | 761   | Glis3         | Amigo1             | -1 |
| 16366 | 874   | Glis3         | Aldh1a7            | 1  |
| 16366 | 5884  | Glis3         | Gstm2              | 1  |
| 16366 | 6044  | Glis3         | Sucnr1             | 1  |
| 16366 | 7602  | Glis3         | Pcca               | 1  |
| 16366 | 8815  | Glis3         | Mx1                | 1  |
| 16366 | 9713  | Glis3         | Ykt6               | 1  |
| 16366 | 10132 | Glis3         | Ces2               | 1  |
| 16366 | 11065 | Glis3         | Mccc1              | 1  |
| 16366 | 12219 | Glis3         | Cyb5b              | 1  |
| 16366 | 12910 | Glis3         | 1110028A07Rik      | 1  |
| 16366 | 14017 | Glis3         | Ces5               | 1  |
| 16366 | 14147 | Glis3         | Acss2              | 1  |
| 16366 | 17995 | Glis3         | Hist1h4d           | -1 |
| 16366 | 18201 | Glis3         | MMT00060232        | 1  |
| 16366 | 20019 | Glis3         | Qdpr               | 1  |
| 16366 | 21202 | Glis3         | Acly               | 1  |
| 16366 | 21214 | Glis3         | Scd1               | 1  |
| 16366 | 21575 | Glis3         | Cyp2c55            | 1  |
| 16366 | 22138 | Glis3         | Ang                | -1 |

|       |       |       |               |    |
|-------|-------|-------|---------------|----|
| 16366 | 22732 | Glis3 | Cyb5b         | 1  |
| 16366 | 23008 | Glis3 | Ctsz          | -1 |
| 16366 | 23026 | Glis3 | Apom          | -1 |
| 16379 | 250   | Tppp3 | Tubb2a-ps2    | 1  |
| 16379 | 609   | Tppp3 | MMT00060868   | 1  |
| 16379 | 719   | Tppp3 | Usp2          | -1 |
| 16379 | 1767  | Tppp3 | BC016495      | -1 |
| 16379 | 2399  | Tppp3 | MMT00060167   | 1  |
| 16379 | 2636  | Tppp3 | Tars          | 1  |
| 16379 | 2829  | Tppp3 | Lrfr3         | 1  |
| 16379 | 3410  | Tppp3 | Paqr9         | 1  |
| 16379 | 3804  | Tppp3 | MMT00015534   | 1  |
| 16379 | 4192  | Tppp3 | Zranb1        | -1 |
| 16379 | 4686  | Tppp3 | BC021785      | 1  |
| 16379 | 5068  | Tppp3 | Afap1l2       | 1  |
| 16379 | 5183  | Tppp3 | St5           | 1  |
| 16379 | 5374  | Tppp3 | Chka          | 1  |
| 16379 | 5934  | Tppp3 | S100a10       | 1  |
| 16379 | 5974  | Tppp3 | Arntl         | 1  |
| 16379 | 6213  | Tppp3 | Ccl2          | 1  |
| 16379 | 6386  | Tppp3 | Por           | -1 |
| 16379 | 7414  | Tppp3 | Clpx          | 1  |
| 16379 | 7718  | Tppp3 | Pdia6         | 1  |
| 16379 | 7862  | Tppp3 | Cpsf4l        | -1 |
| 16379 | 8787  | Tppp3 | Sdf2l1        | 1  |
| 16379 | 10642 | Tppp3 | Ngef          | -1 |
| 16379 | 11412 | Tppp3 | Abcg5         | -1 |
| 16379 | 11741 | Tppp3 | Slc30a10      | 1  |
| 16379 | 11807 | Tppp3 | Fbxo31        | -1 |
| 16379 | 12565 | Tppp3 | Grem2         | -1 |
| 16379 | 15481 | Tppp3 | 1110067D22Rik | 1  |
| 16379 | 15709 | Tppp3 | Tceal1        | -1 |
| 16379 | 16060 | Tppp3 | Gys2          | -1 |
| 16379 | 16704 | Tppp3 | Ppif          | -1 |
| 16379 | 17091 | Tppp3 | Slc38a3       | -1 |
| 16379 | 17247 | Tppp3 | A030007L17Rik | 1  |
| 16379 | 17876 | Tppp3 | Tubb4         | 1  |
| 16379 | 18099 | Tppp3 | Nfx1          | -1 |
| 16379 | 18179 | Tppp3 | Dbp           | -1 |
| 16379 | 18498 | Tppp3 | Slc5a6        | -1 |
| 16379 | 19671 | Tppp3 | Upp2          | -1 |
| 16379 | 20266 | Tppp3 | Insig2        | 1  |
| 16379 | 21142 | Tppp3 | Gm129         | -1 |
| 16379 | 22012 | Tppp3 | Itgae         | 1  |
| 16379 | 22290 | Tppp3 | Tubb2a        | 1  |
| 16379 | 22630 | Tppp3 | MMT00034355   | 1  |
| 16379 | 23377 | Tppp3 | Pdxk          | -1 |
| 16379 | 23437 | Tppp3 | Efh2          | -1 |
| 16380 | 482   | Vasn  | Rnf43         | 1  |
| 16380 | 662   | Vasn  | Mid1ip1       | 1  |
| 16380 | 5804  | Vasn  | Thrsp         | 1  |

|       |       |               |                    |    |
|-------|-------|---------------|--------------------|----|
| 16380 | 7315  | Vasn          | EG624219           | 1  |
| 16380 | 7659  | Vasn          | Rab30              | -1 |
| 16380 | 8439  | Vasn          | Slc25a33           | -1 |
| 16380 | 8632  | Vasn          | Igfbp1             | -1 |
| 16380 | 11590 | Vasn          | Cbx4               | 1  |
| 16380 | 12315 | Vasn          | Srebf1             | 1  |
| 16380 | 14138 | Vasn          | Anks4b             | 1  |
| 16380 | 17852 | Vasn          | Cpeb2              | -1 |
| 16380 | 21160 | Vasn          | Irs2               | -1 |
| 16385 | 23640 | MMT00073590   | Bdh1               | -1 |
| 16397 | 8815  | 1700112E06Rik | Mx1                | 1  |
| 16397 | 10554 | 1700112E06Rik | ENSMUSG00000074179 | 1  |
| 16397 | 13293 | 1700112E06Rik | Gsta2              | 1  |
| 16397 | 18201 | 1700112E06Rik | MMT00060232        | 1  |
| 16397 | 21214 | 1700112E06Rik | Scd1               | 1  |
| 16397 | 21727 | 1700112E06Rik | Khk                | 1  |
| 16412 | 12910 | Tank          | 1110028A07Rik      | 1  |
| 16416 | 524   | Commd2        | Hsd3b2             | 1  |
| 16416 | 1466  | Commd2        | Ubp2l              | 1  |
| 16416 | 1867  | Commd2        | Bcas2              | 1  |
| 16416 | 2752  | Commd2        | Fcgr1              | 1  |
| 16416 | 3753  | Commd2        | Setdb1             | -1 |
| 16416 | 5822  | Commd2        | Car2               | 1  |
| 16416 | 5938  | Commd2        | Pfn2               | 1  |
| 16416 | 6206  | Commd2        | MMT00063701        | 1  |
| 16416 | 10521 | Commd2        | Ttf2               | 1  |
| 16416 | 10681 | Commd2        | Dgkz               | -1 |
| 16416 | 11121 | Commd2        | Mtmr11             | -1 |
| 16416 | 11611 | Commd2        | S100a13            | -1 |
| 16416 | 12250 | Commd2        | P2ry14             | 1  |
| 16416 | 12367 | Commd2        | MMT00072365        | -1 |
| 16416 | 12784 | Commd2        | Nudt6              | 1  |
| 16416 | 15508 | Commd2        | 4632415L05Rik      | 1  |
| 16416 | 16416 | Commd2        | Commd2             | 1  |
| 16416 | 16753 | Commd2        | Hfe2               | -1 |
| 16416 | 18754 | Commd2        | Rbm8a              | 1  |
| 16416 | 18911 | Commd2        | Selenbp2           | 1  |
| 16416 | 20385 | Commd2        | Chd1l              | 1  |
| 16416 | 20661 | Commd2        | Tuft1              | 1  |
| 16416 | 22202 | Commd2        | OTTMUSG00000021274 | -1 |
| 16416 | 22570 | Commd2        | Phtf1              | 1  |
| 16416 | 23457 | Commd2        | Selenbp2           | 1  |
| 16430 | 607   | Vac14         | Me1                | 1  |
| 16430 | 874   | Vac14         | Aldh1a7            | 1  |
| 16430 | 8815  | Vac14         | Mx1                | 1  |
| 16430 | 18201 | Vac14         | MMT00060232        | 1  |
| 16430 | 21214 | Vac14         | Scd1               | 1  |
| 16430 | 21575 | Vac14         | Cyp2c55            | 1  |
| 16430 | 21793 | Vac14         | Pla2g12a           | -1 |
| 16437 | 2127  | Tkt           | Ldha               | -1 |
| 16437 | 8773  | Tkt           | MMT00027093        | -1 |

|       |       |               |               |    |
|-------|-------|---------------|---------------|----|
| 16437 | 14055 | Tkt           | MMT00050438   | -1 |
| 16440 | 8554  | Gprc5a        | Letm2         | 1  |
| 16443 | 16443 | Ccdc59        | Ccdc59        | 1  |
| 16449 | 707   | BC004044      | Bdnf          | 1  |
| 16449 | 1711  | BC004044      | Grhl1         | -1 |
| 16449 | 2320  | BC004044      | Spc24         | 1  |
| 16449 | 2619  | BC004044      | Zfp622        | -1 |
| 16449 | 2721  | BC004044      | Inmt          | 1  |
| 16449 | 3449  | BC004044      | Hes6          | 1  |
| 16449 | 3696  | BC004044      | Elovl6        | 1  |
| 16449 | 5804  | BC004044      | Thrsp         | 1  |
| 16449 | 6816  | BC004044      | Slc46a3       | 1  |
| 16449 | 8896  | BC004044      | Fasn          | 1  |
| 16449 | 9481  | BC004044      | Ppl           | 1  |
| 16449 | 11385 | BC004044      | MMT00081444   | 1  |
| 16449 | 11462 | BC004044      | Gpam          | 1  |
| 16449 | 11576 | BC004044      | Gm1381        | 1  |
| 16449 | 12315 | BC004044      | Sreb1         | 1  |
| 16449 | 12910 | BC004044      | 1110028A07Rik | 1  |
| 16449 | 13304 | BC004044      | Gadd45b       | -1 |
| 16449 | 14279 | BC004044      | 3930402G23Rik | -1 |
| 16449 | 15824 | BC004044      | D19Ertd721e   | -1 |
| 16449 | 17583 | BC004044      | Per2          | 1  |
| 16449 | 17660 | BC004044      | Nlrp12        | -1 |
| 16449 | 18438 | BC004044      | Map3k7ip2     | -1 |
| 16449 | 18515 | BC004044      | Ddx28         | -1 |
| 16449 | 20058 | BC004044      | Dnaic1        | -1 |
| 16449 | 20385 | BC004044      | Chd1l         | 1  |
| 16449 | 20567 | BC004044      | Ggt6          | 1  |
| 16449 | 22321 | BC004044      | Apol7a        | 1  |
| 16449 | 22653 | BC004044      | Ric3          | -1 |
| 16451 | 5511  | 2010007H12Rik | BC055004      | 1  |
| 16451 | 9077  | 2010007H12Rik | Cnpy4         | -1 |
| 16451 | 13780 | 2010007H12Rik | Pilra         | -1 |
| 16451 | 16451 | 2010007H12Rik | 2010007H12Rik | 1  |
| 16451 | 17089 | 2010007H12Rik | Pilrb1        | -1 |
| 16451 | 19502 | 2010007H12Rik | Fbxo24        | 1  |
| 16454 | 21733 | 2310038H17Rik | Rhebl1        | -1 |
| 16456 | 22138 | Il33          | Ang           | 1  |
| 16457 | 5364  | BC106175      | Kif22         | -1 |
| 16457 | 14472 | BC106175      | Ahcy          | 1  |
| 16474 | 415   | Bhlhb2        | Ypel2         | -1 |
| 16474 | 482   | Bhlhb2        | Rnf43         | 1  |
| 16474 | 662   | Bhlhb2        | Mid1ip1       | 1  |
| 16474 | 719   | Bhlhb2        | Usp2          | 1  |
| 16474 | 2011  | Bhlhb2        | Slc2a5        | 1  |
| 16474 | 2823  | Bhlhb2        | Sipa1l2       | 1  |
| 16474 | 3790  | Bhlhb2        | Mtss1         | 1  |
| 16474 | 5804  | Bhlhb2        | Thrsp         | 1  |
| 16474 | 5974  | Bhlhb2        | Arntl         | -1 |
| 16474 | 6171  | Bhlhb2        | Abtb2         | -1 |

|       |       |        |               |    |
|-------|-------|--------|---------------|----|
| 16474 | 6268  | Bhlhb2 | Slc45a3       | -1 |
| 16474 | 6343  | Bhlhb2 | Slc20a1       | 1  |
| 16474 | 6714  | Bhlhb2 | Lima1         | 1  |
| 16474 | 7901  | Bhlhb2 | Slc41a1       | 1  |
| 16474 | 8388  | Bhlhb2 | Zfyve21       | 1  |
| 16474 | 8632  | Bhlhb2 | Igfbp1        | -1 |
| 16474 | 9379  | Bhlhb2 | Ypel2         | -1 |
| 16474 | 9481  | Bhlhb2 | Ppl           | 1  |
| 16474 | 10435 | Bhlhb2 | Nab2          | 1  |
| 16474 | 10502 | Bhlhb2 | Axud1         | 1  |
| 16474 | 11981 | Bhlhb2 | Sh3bp2        | 1  |
| 16474 | 12315 | Bhlhb2 | Sreb1         | 1  |
| 16474 | 12571 | Bhlhb2 | Cdkn2d        | 1  |
| 16474 | 12905 | Bhlhb2 | Nfil3         | -1 |
| 16474 | 13052 | Bhlhb2 | Tnfrsf19      | 1  |
| 16474 | 13094 | Bhlhb2 | Cnn3          | 1  |
| 16474 | 13297 | Bhlhb2 | Emb           | -1 |
| 16474 | 14135 | Bhlhb2 | Eepd1         | 1  |
| 16474 | 14225 | Bhlhb2 | Sva           | 1  |
| 16474 | 14298 | Bhlhb2 | Atp2a2        | -1 |
| 16474 | 15604 | Bhlhb2 | Arl4a         | -1 |
| 16474 | 16251 | Bhlhb2 | G6pc          | -1 |
| 16474 | 17224 | Bhlhb2 | 5430407P10Rik | -1 |
| 16474 | 17712 | Bhlhb2 | Nup62         | -1 |
| 16474 | 17884 | Bhlhb2 | Lnx2          | -1 |
| 16474 | 18083 | Bhlhb2 | Gadd45a       | 1  |
| 16474 | 18179 | Bhlhb2 | Dbp           | 1  |
| 16474 | 18215 | Bhlhb2 | Gpr146        | 1  |
| 16474 | 18498 | Bhlhb2 | Slc5a6        | 1  |
| 16474 | 18903 | Bhlhb2 | Crem          | -1 |
| 16474 | 19004 | Bhlhb2 | Pdk4          | -1 |
| 16474 | 20965 | Bhlhb2 | Usp28         | 1  |
| 16474 | 21142 | Bhlhb2 | Gm129         | 1  |
| 16474 | 21743 | Bhlhb2 | Ccno          | 1  |
| 16474 | 22216 | Bhlhb2 | Sp5           | 1  |
| 16479 | 7151  | Pcsk7  | MMT00007982   | 1  |
| 16492 | 413   | Hk2    | Acy1          | 1  |
| 16492 | 604   | Hk2    | Ppp1r15b      | 1  |
| 16492 | 719   | Hk2    | Usp2          | 1  |
| 16492 | 1065  | Hk2    | Hmgcr         | 1  |
| 16492 | 2127  | Hk2    | Ldha          | -1 |
| 16492 | 2262  | Hk2    | Papss2        | 1  |
| 16492 | 2399  | Hk2    | MMT00060167   | -1 |
| 16492 | 3449  | Hk2    | Hes6          | 1  |
| 16492 | 3790  | Hk2    | Mtss1         | 1  |
| 16492 | 5183  | Hk2    | St5           | -1 |
| 16492 | 5729  | Hk2    | 2310016C08Rik | -1 |
| 16492 | 5734  | Hk2    | EG619653      | 1  |
| 16492 | 5804  | Hk2    | Thrsp         | 1  |
| 16492 | 5849  | Hk2    | 2310031A18Rik | -1 |
| 16492 | 5974  | Hk2    | Arntl         | -1 |

|       |       |               |               |    |
|-------|-------|---------------|---------------|----|
| 16492 | 6657  | Hk2           | Irf6          | -1 |
| 16492 | 6746  | Hk2           | E2f8          | -1 |
| 16492 | 6756  | Hk2           | Sds           | 1  |
| 16492 | 6816  | Hk2           | Slc46a3       | 1  |
| 16492 | 7414  | Hk2           | Clpx          | -1 |
| 16492 | 7492  | Hk2           | Adfp          | -1 |
| 16492 | 7659  | Hk2           | Rab30         | -1 |
| 16492 | 8404  | Hk2           | Fa2h          | -1 |
| 16492 | 9481  | Hk2           | Ppl           | 1  |
| 16492 | 9831  | Hk2           | Nedd4l        | -1 |
| 16492 | 11576 | Hk2           | Gm1381        | 1  |
| 16492 | 11599 | Hk2           | Coq10b        | 1  |
| 16492 | 12114 | Hk2           | Homer2        | 1  |
| 16492 | 12315 | Hk2           | Srebf1        | 1  |
| 16492 | 13431 | Hk2           | MMT00038058   | -1 |
| 16492 | 14279 | Hk2           | 3930402G23Rik | -1 |
| 16492 | 15049 | Hk2           | Rnf125        | -1 |
| 16492 | 15205 | Hk2           | MMT00030262   | -1 |
| 16492 | 15824 | Hk2           | D19Ert721e    | -1 |
| 16492 | 16525 | Hk2           | Lbp           | -1 |
| 16492 | 17583 | Hk2           | Per2          | 1  |
| 16492 | 17852 | Hk2           | Cpeb2         | -1 |
| 16492 | 18069 | Hk2           | Gpt           | 1  |
| 16492 | 18148 | Hk2           | Cables1       | -1 |
| 16492 | 18179 | Hk2           | Dbp           | 1  |
| 16492 | 18438 | Hk2           | Map3k7ip2     | -1 |
| 16492 | 19360 | Hk2           | Aco1          | 1  |
| 16492 | 19701 | Hk2           | 9930021J17Rik | -1 |
| 16492 | 20266 | Hk2           | Insig2        | -1 |
| 16492 | 21142 | Hk2           | Gm129         | 1  |
| 16492 | 21969 | Hk2           | Tk1           | 1  |
| 16492 | 22324 | Hk2           | MMT00060741   | -1 |
| 16494 | 6059  | 2310007D09Rik | Dsn1          | 1  |
| 16494 | 23005 | 2310007D09Rik | 4930405A21Rik | 1  |
| 16501 | 2980  | Loh11cr2a     | Slc37a2       | -1 |
| 16501 | 20468 | Loh11cr2a     | Spa17         | -1 |
| 16502 | 269   | Chsy1         | Tuba1b        | 1  |
| 16502 | 827   | Chsy1         | Ficn          | -1 |
| 16502 | 1941  | Chsy1         | MMT00079618   | 1  |
| 16502 | 5594  | Chsy1         | Erb3          | -1 |
| 16502 | 7151  | Chsy1         | MMT00007982   | 1  |
| 16502 | 9763  | Chsy1         | Tuba3b        | 1  |
| 16502 | 10612 | Chsy1         | Slc24a6       | -1 |
| 16502 | 11724 | Chsy1         | Tuba3a        | 1  |
| 16502 | 12091 | Chsy1         | 1810015C04Rik | -1 |
| 16502 | 13376 | Chsy1         | Alg2          | 1  |
| 16502 | 15252 | Chsy1         | MMT00019402   | 1  |
| 16502 | 17656 | Chsy1         | Hdhd3         | 1  |
| 16502 | 21288 | Chsy1         | Tcp11l2       | -1 |
| 16502 | 22443 | Chsy1         | Tuba1c        | 1  |
| 16510 | 23201 | Tspyl4        | S1pr1         | 1  |

|       |       |          |               |    |
|-------|-------|----------|---------------|----|
| 16515 | 7151  | Gramd4   | MMT00007982   | 1  |
| 16515 | 9763  | Gramd4   | Tuba3b        | 1  |
| 16515 | 11129 | Gramd4   | Ankhd1        | -1 |
| 16515 | 12433 | Gramd4   | 5033413D22Rik | 1  |
| 16515 | 18827 | Gramd4   | Oprs1         | 1  |
| 16517 | 8815  | D4Wsu53e | Mx1           | -1 |
| 16521 | 143   | Adar     | Gvin1         | 1  |
| 16521 | 1533  | Adar     | BC013712      | 1  |
| 16521 | 2200  | Adar     | BC006779      | 1  |
| 16521 | 2224  | Adar     | Oasl2         | 1  |
| 16521 | 2550  | Adar     | MMT00036681   | 1  |
| 16521 | 3523  | Adar     | Trim34        | 1  |
| 16521 | 3594  | Adar     | Rasa4         | 1  |
| 16521 | 3659  | Adar     | EG236451      | 1  |
| 16521 | 3683  | Adar     | Oas2          | 1  |
| 16521 | 4114  | Adar     | Parp12        | 1  |
| 16521 | 4426  | Adar     | Iigp2         | 1  |
| 16521 | 4508  | Adar     | Iffit1        | 1  |
| 16521 | 4516  | Adar     | Rsad2         | 1  |
| 16521 | 5002  | Adar     | Iffi202b      | 1  |
| 16521 | 5044  | Adar     | Iffi35        | 1  |
| 16521 | 5216  | Adar     | Spnb5         | 1  |
| 16521 | 5250  | Adar     | Iffit2        | 1  |
| 16521 | 5766  | Adar     | 5033414D02Rik | 1  |
| 16521 | 5845  | Adar     | Ili18bp       | 1  |
| 16521 | 5853  | Adar     | Trim30        | 1  |
| 16521 | 5949  | Adar     | Zbp1          | 1  |
| 16521 | 6072  | Adar     | C1qc          | 1  |
| 16521 | 6587  | Adar     | Irf9          | 1  |
| 16521 | 6595  | Adar     | Oas1a         | 1  |
| 16521 | 6779  | Adar     | Gbp6          | 1  |
| 16521 | 6824  | Adar     | Irf7          | 1  |
| 16521 | 6910  | Adar     | Ly6c2         | 1  |
| 16521 | 7069  | Adar     | Ube1l         | 1  |
| 16521 | 7105  | Adar     | Plac8         | 1  |
| 16521 | 7284  | Adar     | MMT00008674   | 1  |
| 16521 | 7316  | Adar     | Iffi204       | 1  |
| 16521 | 8659  | Adar     | Psemb8        | 1  |
| 16521 | 8800  | Adar     | Rnf213        | 1  |
| 16521 | 9320  | Adar     | Rnf31         | 1  |
| 16521 | 9401  | Adar     | Fcgr4         | 1  |
| 16521 | 9616  | Adar     | AI451557      | 1  |
| 16521 | 9820  | Adar     | BC023105      | 1  |
| 16521 | 9821  | Adar     | Pmaip1        | 1  |
| 16521 | 9847  | Adar     | Iffi27        | 1  |
| 16521 | 10109 | Adar     | Gbp3          | 1  |
| 16521 | 11009 | Adar     | MMT00008885   | 1  |
| 16521 | 11204 | Adar     | AI451617      | 1  |
| 16521 | 11265 | Adar     | Irgm          | 1  |
| 16521 | 11701 | Adar     | Oas1c         | 1  |
| 16521 | 12126 | Adar     | Znfx1         | 1  |



|       |       |      |               |   |
|-------|-------|------|---------------|---|
| 16521 | 12312 | Adar | Ms4a6d        | 1 |
| 16521 | 12398 | Adar | Ifi44         | 1 |
| 16521 | 12600 | Adar | Ifi204        | 1 |
| 16521 | 12969 | Adar | Xaf1          | 1 |
| 16521 | 13156 | Adar | Ifit3         | 1 |
| 16521 | 13309 | Adar | Tgtp          | 1 |
| 16521 | 13514 | Adar | Apol9b        | 1 |
| 16521 | 13522 | Adar | Sfn5          | 1 |
| 16521 | 13527 | Adar | Ctss          | 1 |
| 16521 | 13528 | Adar | Capn12        | 1 |
| 16521 | 13654 | Adar | Stat1         | 1 |
| 16521 | 13749 | Adar | Parp9         | 1 |
| 16521 | 14258 | Adar | Ifi47         | 1 |
| 16521 | 14506 | Adar | Slc15a3       | 1 |
| 16521 | 14603 | Adar | Ly6e          | 1 |
| 16521 | 14611 | Adar | Ddx60         | 1 |
| 16521 | 14880 | Adar | Ms4a4c        | 1 |
| 16521 | 15074 | Adar | Usp18         | 1 |
| 16521 | 15280 | Adar | Cxcl10        | 1 |
| 16521 | 15449 | Adar | Mitd1         | 1 |
| 16521 | 15504 | Adar | Mx2           | 1 |
| 16521 | 15572 | Adar | Dtx3l         | 1 |
| 16521 | 16182 | Adar | Oasl1         | 1 |
| 16521 | 16186 | Adar | Cfp           | 1 |
| 16521 | 16199 | Adar | Samhd1        | 1 |
| 16521 | 16521 | Adar | Adar          | 1 |
| 16521 | 16572 | Adar | D14Erttd668e  | 1 |
| 16521 | 16874 | Adar | Fcer1g        | 1 |
| 16521 | 16949 | Adar | Iigp1         | 1 |
| 16521 | 16988 | Adar | Clec4f        | 1 |
| 16521 | 17071 | Adar | Samd9l        | 1 |
| 16521 | 17197 | Adar | Igtp          | 1 |
| 16521 | 17412 | Adar | Aif1          | 1 |
| 16521 | 18174 | Adar | Stat2         | 1 |
| 16521 | 18186 | Adar | Parp14        | 1 |
| 16521 | 18289 | Adar | Tap1          | 1 |
| 16521 | 19026 | Adar | Isg15         | 1 |
| 16521 | 19189 | Adar | Sp100         | 1 |
| 16521 | 19708 | Adar | Ly6a          | 1 |
| 16521 | 19738 | Adar | Lgals3bp      | 1 |
| 16521 | 20321 | Adar | Ms4a6b        | 1 |
| 16521 | 20791 | Adar | MMT00014813   | 1 |
| 16521 | 20997 | Adar | MMT00028135   | 1 |
| 16521 | 21351 | Adar | Shisa5        | 1 |
| 16521 | 21549 | Adar | Rtp4          | 1 |
| 16521 | 21824 | Adar | 5830443L24Rik | 1 |
| 16521 | 22037 | Adar | Oas1g         | 1 |
| 16521 | 22077 | Adar | MMT00057550   | 1 |
| 16521 | 22712 | Adar | Phf11         | 1 |
| 16521 | 23208 | Adar | Hck           | 1 |
| 16521 | 23450 | Adar | D12Erttd647e  | 1 |

|       |       |               |               |    |
|-------|-------|---------------|---------------|----|
| 16525 | 21966 | Lbp           | Pcp4l1        | -1 |
| 16528 | 23466 | Ddr2          | Pou2f1        | 1  |
| 16535 | 8444  | Kctd9         | Rdh16         | 1  |
| 16535 | 12910 | Kctd9         | 1110028A07Rik | 1  |
| 16547 | 607   | 1500002O20Rik | Me1           | -1 |
| 16547 | 6193  | 1500002O20Rik | Lactb2        | -1 |
| 16547 | 6370  | 1500002O20Rik | Aqp8          | -1 |
| 16547 | 8815  | 1500002O20Rik | Mx1           | -1 |
| 16547 | 10961 | 1500002O20Rik | Pgd           | -1 |
| 16547 | 14017 | 1500002O20Rik | Ces5          | -1 |
| 16547 | 14147 | 1500002O20Rik | Acss2         | -1 |
| 16547 | 14151 | 1500002O20Rik | Slc44a1       | -1 |
| 16547 | 18201 | 1500002O20Rik | MMT00060232   | -1 |
| 16547 | 20079 | 1500002O20Rik | MMT00019254   | 1  |
| 16547 | 21202 | 1500002O20Rik | Acly          | -1 |
| 16547 | 21214 | 1500002O20Rik | Scd1          | -1 |
| 16557 | 403   | Rbpms         | Leprotl1      | -1 |
| 16559 | 6085  | MMT00001400   | MMT00007454   | -1 |
| 16559 | 13431 | MMT00001400   | MMT00038058   | -1 |
| 16559 | 14055 | MMT00001400   | MMT00050438   | -1 |
| 16559 | 15205 | MMT00001400   | MMT00030262   | -1 |
| 16559 | 15500 | MMT00001400   | MMT00081411   | -1 |
| 16559 | 22978 | MMT00001400   | MMT00043176   | -1 |
| 16571 | 563   | Pqlc1         | D4Bwg0951e    | -1 |
| 16571 | 662   | Pqlc1         | Mid1ip1       | 1  |
| 16571 | 3097  | Pqlc1         | Ppp1r3g       | -1 |
| 16571 | 4404  | Pqlc1         | Commd5        | 1  |
| 16571 | 4983  | Pqlc1         | Rabgef1       | -1 |
| 16571 | 8632  | Pqlc1         | Igfbp1        | -1 |
| 16571 | 11093 | Pqlc1         | Zdhhc1        | -1 |
| 16571 | 11808 | Pqlc1         | Pck1          | -1 |
| 16571 | 13489 | Pqlc1         | D230025D16Rik | -1 |
| 16571 | 14335 | Pqlc1         | Olfir33       | -1 |
| 16571 | 15021 | Pqlc1         | Ppargc1a      | -1 |
| 16571 | 15631 | Pqlc1         | Lpin1         | -1 |
| 16571 | 16571 | Pqlc1         | Pqlc1         | 1  |
| 16571 | 17323 | Pqlc1         | Tubb6         | 1  |
| 16571 | 17444 | Pqlc1         | Tuba1a        | 1  |
| 16571 | 18785 | Pqlc1         | Angptl4       | -1 |
| 16571 | 23201 | Pqlc1         | S1pr1         | 1  |
| 16572 | 143   | D14Ertd668e   | Gvin1         | 1  |
| 16572 | 405   | D14Ertd668e   | Emr4          | 1  |
| 16572 | 1533  | D14Ertd668e   | BC013712      | 1  |
| 16572 | 2058  | D14Ertd668e   | Hk3           | 1  |
| 16572 | 2200  | D14Ertd668e   | BC006779      | 1  |
| 16572 | 2224  | D14Ertd668e   | Oasl2         | 1  |
| 16572 | 2550  | D14Ertd668e   | MMT00036681   | 1  |
| 16572 | 2752  | D14Ertd668e   | Fcgr1         | 1  |
| 16572 | 3523  | D14Ertd668e   | Trim34        | 1  |
| 16572 | 3594  | D14Ertd668e   | Rasa4         | 1  |
| 16572 | 3659  | D14Ertd668e   | EG236451      | 1  |

|       |       |             |               |   |
|-------|-------|-------------|---------------|---|
| 16572 | 3683  | D14Ertd668e | Oas2          | 1 |
| 16572 | 4114  | D14Ertd668e | Parp12        | 1 |
| 16572 | 4409  | D14Ertd668e | 5430435G22Rik | 1 |
| 16572 | 4426  | D14Ertd668e | ligp2         | 1 |
| 16572 | 4508  | D14Ertd668e | Ifit1         | 1 |
| 16572 | 4516  | D14Ertd668e | Rsad2         | 1 |
| 16572 | 5002  | D14Ertd668e | Ifi202b       | 1 |
| 16572 | 5044  | D14Ertd668e | Ifi35         | 1 |
| 16572 | 5216  | D14Ertd668e | Spnb5         | 1 |
| 16572 | 5250  | D14Ertd668e | Ifit2         | 1 |
| 16572 | 5556  | D14Ertd668e | Ccl4          | 1 |
| 16572 | 5766  | D14Ertd668e | 5033414D02Rik | 1 |
| 16572 | 5845  | D14Ertd668e | Il18bp        | 1 |
| 16572 | 5853  | D14Ertd668e | Trim30        | 1 |
| 16572 | 5975  | D14Ertd668e | Car13         | 1 |
| 16572 | 6036  | D14Ertd668e | Pram1         | 1 |
| 16572 | 6072  | D14Ertd668e | C1qc          | 1 |
| 16572 | 6098  | D14Ertd668e | Ncf4          | 1 |
| 16572 | 6587  | D14Ertd668e | Irf9          | 1 |
| 16572 | 6595  | D14Ertd668e | Oas1a         | 1 |
| 16572 | 6734  | D14Ertd668e | Ehd4          | 1 |
| 16572 | 6779  | D14Ertd668e | Gbp6          | 1 |
| 16572 | 6824  | D14Ertd668e | Irf7          | 1 |
| 16572 | 6910  | D14Ertd668e | Ly6c2         | 1 |
| 16572 | 7069  | D14Ertd668e | Ube1l         | 1 |
| 16572 | 7105  | D14Ertd668e | Plac8         | 1 |
| 16572 | 7238  | D14Ertd668e | Pycard        | 1 |
| 16572 | 7284  | D14Ertd668e | MMT00008674   | 1 |
| 16572 | 7316  | D14Ertd668e | Ifi204        | 1 |
| 16572 | 7336  | D14Ertd668e | Cd5l          | 1 |
| 16572 | 8555  | D14Ertd668e | H2-M3         | 1 |
| 16572 | 8659  | D14Ertd668e | Psmb8         | 1 |
| 16572 | 8800  | D14Ertd668e | Rnf213        | 1 |
| 16572 | 9100  | D14Ertd668e | Ms4a6c        | 1 |
| 16572 | 9401  | D14Ertd668e | Fcgr4         | 1 |
| 16572 | 9820  | D14Ertd668e | BC023105      | 1 |
| 16572 | 9821  | D14Ertd668e | Pmaip1        | 1 |
| 16572 | 9847  | D14Ertd668e | Ifi27         | 1 |
| 16572 | 10109 | D14Ertd668e | Gbp3          | 1 |
| 16572 | 10504 | D14Ertd668e | Ripk3         | 1 |
| 16572 | 10606 | D14Ertd668e | Apbb1ip       | 1 |
| 16572 | 10926 | D14Ertd668e | P2ry13        | 1 |
| 16572 | 11009 | D14Ertd668e | MMT00008885   | 1 |
| 16572 | 11204 | D14Ertd668e | Al451617      | 1 |
| 16572 | 11265 | D14Ertd668e | Irgm          | 1 |
| 16572 | 11701 | D14Ertd668e | Oas1c         | 1 |
| 16572 | 12126 | D14Ertd668e | Znfx1         | 1 |
| 16572 | 12312 | D14Ertd668e | Ms4a6d        | 1 |
| 16572 | 12398 | D14Ertd668e | Ifi44         | 1 |
| 16572 | 12495 | D14Ertd668e | Casp1         | 1 |
| 16572 | 12600 | D14Ertd668e | Ifi204        | 1 |

|       |       |             |               |   |
|-------|-------|-------------|---------------|---|
| 16572 | 12969 | D14Ertd668e | Xaf1          | 1 |
| 16572 | 13156 | D14Ertd668e | Ifit3         | 1 |
| 16572 | 13181 | D14Ertd668e | Lcp2          | 1 |
| 16572 | 13309 | D14Ertd668e | Tgtp          | 1 |
| 16572 | 13514 | D14Ertd668e | Apol9b        | 1 |
| 16572 | 13522 | D14Ertd668e | Sfn5          | 1 |
| 16572 | 13527 | D14Ertd668e | Ctss          | 1 |
| 16572 | 13528 | D14Ertd668e | Capn12        | 1 |
| 16572 | 13585 | D14Ertd668e | Nckap1l       | 1 |
| 16572 | 13654 | D14Ertd668e | Stat1         | 1 |
| 16572 | 13656 | D14Ertd668e | Ly86          | 1 |
| 16572 | 13749 | D14Ertd668e | Parp9         | 1 |
| 16572 | 14029 | D14Ertd668e | 2810022L02Rik | 1 |
| 16572 | 14237 | D14Ertd668e | Rac2          | 1 |
| 16572 | 14258 | D14Ertd668e | Ifi47         | 1 |
| 16572 | 14506 | D14Ertd668e | Slc15a3       | 1 |
| 16572 | 14603 | D14Ertd668e | Ly6e          | 1 |
| 16572 | 14611 | D14Ertd668e | Ddx60         | 1 |
| 16572 | 14880 | D14Ertd668e | Ms4a4c        | 1 |
| 16572 | 14883 | D14Ertd668e | Itgal         | 1 |
| 16572 | 15074 | D14Ertd668e | Usp18         | 1 |
| 16572 | 15159 | D14Ertd668e | Timd4         | 1 |
| 16572 | 15280 | D14Ertd668e | Cxcl10        | 1 |
| 16572 | 15449 | D14Ertd668e | Mitd1         | 1 |
| 16572 | 15504 | D14Ertd668e | Mx2           | 1 |
| 16572 | 16102 | D14Ertd668e | Cd72          | 1 |
| 16572 | 16147 | D14Ertd668e | Tlr2          | 1 |
| 16572 | 16182 | D14Ertd668e | Oasl1         | 1 |
| 16572 | 16186 | D14Ertd668e | Cfp           | 1 |
| 16572 | 16199 | D14Ertd668e | Samhd1        | 1 |
| 16572 | 16521 | D14Ertd668e | Adar          | 1 |
| 16572 | 16572 | D14Ertd668e | D14Ertd668e   | 1 |
| 16572 | 16874 | D14Ertd668e | Fcer1g        | 1 |
| 16572 | 16988 | D14Ertd668e | Clec4f        | 1 |
| 16572 | 17071 | D14Ertd668e | Samd9l        | 1 |
| 16572 | 17197 | D14Ertd668e | Igtp          | 1 |
| 16572 | 17412 | D14Ertd668e | Aif1          | 1 |
| 16572 | 17904 | D14Ertd668e | Cds1          | 1 |
| 16572 | 18174 | D14Ertd668e | Stat2         | 1 |
| 16572 | 18186 | D14Ertd668e | Parp14        | 1 |
| 16572 | 18211 | D14Ertd668e | Folr2         | 1 |
| 16572 | 18289 | D14Ertd668e | Tap1          | 1 |
| 16572 | 18686 | D14Ertd668e | Zfp143        | 1 |
| 16572 | 18868 | D14Ertd668e | Mpeg1         | 1 |
| 16572 | 19189 | D14Ertd668e | Sp100         | 1 |
| 16572 | 19252 | D14Ertd668e | Tmsb4x        | 1 |
| 16572 | 19708 | D14Ertd668e | Ly6a          | 1 |
| 16572 | 19738 | D14Ertd668e | Lgals3bp      | 1 |
| 16572 | 19794 | D14Ertd668e | Rgs2          | 1 |
| 16572 | 20150 | D14Ertd668e | Ptprc         | 1 |
| 16572 | 20321 | D14Ertd668e | Ms4a6b        | 1 |

|       |       |               |               |    |
|-------|-------|---------------|---------------|----|
| 16572 | 20474 | D14Ertd668e   | Gnb3          | 1  |
| 16572 | 20791 | D14Ertd668e   | MMT00014813   | 1  |
| 16572 | 20997 | D14Ertd668e   | MMT00028135   | 1  |
| 16572 | 21351 | D14Ertd668e   | Shisa5        | 1  |
| 16572 | 21440 | D14Ertd668e   | Tmsb10        | 1  |
| 16572 | 21549 | D14Ertd668e   | Rtp4          | 1  |
| 16572 | 21824 | D14Ertd668e   | 5830443L24Rik | 1  |
| 16572 | 22037 | D14Ertd668e   | Oas1g         | 1  |
| 16572 | 22496 | D14Ertd668e   | Sfn1          | 1  |
| 16572 | 22647 | D14Ertd668e   | Pkib          | 1  |
| 16572 | 23092 | D14Ertd668e   | Ifih1         | 1  |
| 16572 | 23208 | D14Ertd668e   | Hck           | 1  |
| 16572 | 23242 | D14Ertd668e   | Gngt2         | 1  |
| 16572 | 23450 | D14Ertd668e   | D12Ertd647e   | 1  |
| 16580 | 7388  | Tnfaip2       | Amn           | -1 |
| 16580 | 8155  | Tnfaip2       | Mark3         | -1 |
| 16580 | 12238 | Tnfaip2       | Traf3         | 1  |
| 16586 | 13431 | Adamts8       | MMT00038058   | -1 |
| 16592 | 6157  | Psmf1         | MMT00041452   | 1  |
| 16606 | 607   | 4930579G22Rik | Me1           | -1 |
| 16606 | 874   | 4930579G22Rik | Aldh1a7       | -1 |
| 16606 | 2051  | 4930579G22Rik | Ddx27         | 1  |
| 16606 | 3754  | 4930579G22Rik | Dock6         | -1 |
| 16606 | 4351  | 4930579G22Rik | Plxnb1        | 1  |
| 16606 | 5425  | 4930579G22Rik | Ung           | 1  |
| 16606 | 6044  | 4930579G22Rik | Sucnr1        | -1 |
| 16606 | 6193  | 4930579G22Rik | Lactb2        | -1 |
| 16606 | 8815  | 4930579G22Rik | Mx1           | -1 |
| 16606 | 8896  | 4930579G22Rik | Fasn          | -1 |
| 16606 | 9408  | 4930579G22Rik | Hmgcs2        | 1  |
| 16606 | 9842  | 4930579G22Rik | Qdpr          | -1 |
| 16606 | 10132 | 4930579G22Rik | Ces2          | -1 |
| 16606 | 10961 | 4930579G22Rik | Pgd           | -1 |
| 16606 | 11086 | 4930579G22Rik | Pnpla5        | -1 |
| 16606 | 11234 | 4930579G22Rik | Pygl          | -1 |
| 16606 | 11462 | 4930579G22Rik | Gpam          | -1 |
| 16606 | 12219 | 4930579G22Rik | Cyb5b         | -1 |
| 16606 | 12637 | 4930579G22Rik | Itпка         | 1  |
| 16606 | 14147 | 4930579G22Rik | Acss2         | -1 |
| 16606 | 14151 | 4930579G22Rik | Slc44a1       | -1 |
| 16606 | 14323 | 4930579G22Rik | Scarb1        | 1  |
| 16606 | 14442 | 4930579G22Rik | Ethe1         | -1 |
| 16606 | 16616 | 4930579G22Rik | Paox          | -1 |
| 16606 | 17090 | 4930579G22Rik | Lass2         | -1 |
| 16606 | 17996 | 4930579G22Rik | Igfbp2        | 1  |
| 16606 | 18201 | 4930579G22Rik | MMT00060232   | -1 |
| 16606 | 18286 | 4930579G22Rik | Slc41a3       | 1  |
| 16606 | 18515 | 4930579G22Rik | Ddx28         | 1  |
| 16606 | 20019 | 4930579G22Rik | Qdpr          | -1 |
| 16606 | 20079 | 4930579G22Rik | MMT00019254   | 1  |
| 16606 | 20740 | 4930579G22Rik | Ola1          | -1 |

|       |       |               |               |    |
|-------|-------|---------------|---------------|----|
| 16606 | 21202 | 4930579G22Rik | Acly          | -1 |
| 16606 | 21214 | 4930579G22Rik | Scd1          | -1 |
| 16606 | 21251 | 4930579G22Rik | Cpt1a         | 1  |
| 16606 | 21575 | 4930579G22Rik | Cyp2c55       | -1 |
| 16606 | 22046 | 4930579G22Rik | Cml4          | -1 |
| 16606 | 22137 | 4930579G22Rik | Nudt7         | -1 |
| 16606 | 22406 | 4930579G22Rik | Vnn1          | 1  |
| 16606 | 22732 | 4930579G22Rik | Cyb5b         | -1 |
| 16606 | 22770 | 4930579G22Rik | Slc27a2       | 1  |
| 16606 | 22830 | 4930579G22Rik | MMT00081088   | 1  |
| 16606 | 23623 | 4930579G22Rik | 2010305C02Rik | -1 |
| 16607 | 12905 | Gpx2          | Nfil3         | -1 |
| 16613 | 3061  | 1110031I02Rik | Scarf2        | 1  |
| 16613 | 3119  | 1110031I02Rik | Mapk10        | 1  |
| 16613 | 6017  | 1110031I02Rik | MMT00018015   | -1 |
| 16613 | 6846  | 1110031I02Rik | Olf1402       | 1  |
| 16613 | 13615 | 1110031I02Rik | Arl16         | -1 |
| 16613 | 15016 | 1110031I02Rik | MMT00074608   | 1  |
| 16613 | 16613 | 1110031I02Rik | 1110031I02Rik | 1  |
| 16613 | 17792 | 1110031I02Rik | Vmn2r79       | 1  |
| 16613 | 17897 | 1110031I02Rik | Gm1019        | 1  |
| 16613 | 21655 | 1110031I02Rik | Rab40b        | -1 |
| 16615 | 3265  | Chdh          | Dntt          | -1 |
| 16615 | 6370  | Chdh          | Aqp8          | -1 |
| 16615 | 11129 | Chdh          | Ankhd1        | 1  |
| 16615 | 12941 | Chdh          | Elov5         | -1 |
| 16615 | 18827 | Chdh          | Oprs1         | -1 |
| 16617 | 286   | Sh2d4a        | MMT00070509   | -1 |
| 16617 | 403   | Sh2d4a        | Leprotl1      | 1  |
| 16617 | 769   | Sh2d4a        | 5430437P03Rik | 1  |
| 16617 | 1755  | Sh2d4a        | Ocel1         | -1 |
| 16617 | 2671  | Sh2d4a        | Sh3rf1        | 1  |
| 16617 | 2703  | Sh2d4a        | MMT00073763   | -1 |
| 16617 | 2749  | Sh2d4a        | Naf1          | 1  |
| 16617 | 3052  | Sh2d4a        | 9130404D08Rik | 1  |
| 16617 | 3055  | Sh2d4a        | Pde4c         | -1 |
| 16617 | 5433  | Sh2d4a        | 2410004L22Rik | 1  |
| 16617 | 6760  | Sh2d4a        | 2810428I15Rik | -1 |
| 16617 | 9304  | Sh2d4a        | AI449175      | -1 |
| 16617 | 9931  | Sh2d4a        | Glit25d1      | 1  |
| 16617 | 10195 | Sh2d4a        | Klf1          | -1 |
| 16617 | 10273 | Sh2d4a        | Gpt2          | -1 |
| 16617 | 13004 | Sh2d4a        | Arhgef10      | -1 |
| 16617 | 13732 | Sh2d4a        | Tpm4          | 1  |
| 16617 | 13774 | Sh2d4a        | Gdf15         | 1  |
| 16617 | 14391 | Sh2d4a        | MMT00017335   | 1  |
| 16617 | 14455 | Sh2d4a        | 2700029M09Rik | 1  |
| 16617 | 15094 | Sh2d4a        | Pbx4          | 1  |
| 16617 | 15455 | Sh2d4a        | Lsm4          | 1  |
| 16617 | 16617 | Sh2d4a        | Sh2d4a        | 1  |
| 16617 | 16849 | Sh2d4a        | Trmt1         | 1  |

|       |       |               |                    |    |
|-------|-------|---------------|--------------------|----|
| 16617 | 16858 | Sh2d4a        | Tmem38a            | 1  |
| 16617 | 17553 | Sh2d4a        | Eif4ebp1           | -1 |
| 16617 | 17703 | Sh2d4a        | Large              | 1  |
| 16617 | 18886 | Sh2d4a        | Slc18a1            | 1  |
| 16617 | 20484 | Sh2d4a        | Ces1               | 1  |
| 16617 | 22776 | Sh2d4a        | Gsr                | -1 |
| 16619 | 11095 | Anks1         | Bag3               | 1  |
| 16624 | 16624 | Psmas8        | Psmas8             | 1  |
| 16629 | 1156  | Sall2         | Rbj                | 1  |
| 16629 | 4391  | Sall2         | Zfp467             | 1  |
| 16629 | 7140  | Sall2         | Mtbp               | 1  |
| 16629 | 7550  | Sall2         | Rab11fip5          | 1  |
| 16629 | 8444  | Sall2         | Rdh16              | -1 |
| 16629 | 21214 | Sall2         | Scd1               | -1 |
| 16636 | 12910 | Tmem189       | 1110028A07Rik      | 1  |
| 16636 | 20058 | Tmem189       | Dnaic1             | -1 |
| 16664 | 5804  | Car4          | Thrsp              | -1 |
| 16664 | 13251 | Car4          | EG622268           | -1 |
| 16664 | 21202 | Car4          | Acly               | -1 |
| 16679 | 524   | Ctsk          | Hsd3b2             | -1 |
| 16679 | 3753  | Ctsk          | Setdb1             | 1  |
| 16679 | 7519  | Ctsk          | Gstm1              | -1 |
| 16679 | 11121 | Ctsk          | Mtmr11             | 1  |
| 16679 | 11611 | Ctsk          | S100a13            | 1  |
| 16679 | 12367 | Ctsk          | MMT00072365        | 1  |
| 16679 | 16753 | Ctsk          | Hfe2               | 1  |
| 16679 | 18754 | Ctsk          | Rbm8a              | -1 |
| 16679 | 18911 | Ctsk          | Selenbp2           | -1 |
| 16679 | 22202 | Ctsk          | OTTMUSG00000021274 | 1  |
| 16692 | 9158  | Bat4          | Pde9a              | -1 |
| 16702 | 1755  | 2810422J05Rik | Ocel1              | -1 |
| 16702 | 2749  | 2810422J05Rik | Naf1               | 1  |
| 16702 | 5433  | 2810422J05Rik | 2410004L22Rik      | 1  |
| 16702 | 9304  | 2810422J05Rik | A1449175           | -1 |
| 16702 | 9931  | 2810422J05Rik | Glt25d1            | 1  |
| 16702 | 15455 | 2810422J05Rik | Lsm4               | 1  |
| 16702 | 16617 | 2810422J05Rik | Sh2d4a             | 1  |
| 16702 | 16858 | 2810422J05Rik | Tmem38a            | 1  |
| 16702 | 18886 | 2810422J05Rik | Slc18a1            | 1  |
| 16704 | 3446  | Ppif          | Eno1               | 1  |
| 16704 | 18113 | Ppif          | MMT00034400        | 1  |
| 16704 | 19066 | Ppif          | MMT00012632        | 1  |
| 16719 | 6928  | Slc43a3       | Kih18              | -1 |
| 16719 | 15631 | Slc43a3       | Lpin1              | 1  |
| 16719 | 16580 | Slc43a3       | Tnfaip2            | -1 |
| 16719 | 18027 | Slc43a3       | 5730403B10Rik      | 1  |
| 16719 | 19025 | Slc43a3       | Slc37a4            | 1  |
| 16719 | 22681 | Slc43a3       | Gm88               | 1  |
| 16721 | 20871 | Stk3          | Pop1               | -1 |
| 16730 | 6816  | Osbpl3        | Slc46a3            | -1 |
| 16743 | 11054 | Bad           | Rnase4             | -1 |

|       |       |               |             |    |
|-------|-------|---------------|-------------|----|
| 16743 | 23026 | Bad           | Apom        | -1 |
| 16761 | 8815  | MMT00018149   | Mx1         | 1  |
| 16776 | 1310  | 1110032O16Rik | Cabc1       | 1  |
| 16776 | 2636  | 1110032O16Rik | Tars        | 1  |
| 16776 | 6370  | 1110032O16Rik | Aqp8        | 1  |
| 16776 | 6386  | 1110032O16Rik | Por         | -1 |
| 16776 | 7770  | 1110032O16Rik | Galt        | 1  |
| 16776 | 7973  | 1110032O16Rik | Lgals9      | 1  |
| 16776 | 10088 | 1110032O16Rik | Ddc         | 1  |
| 16776 | 15892 | 1110032O16Rik | Slc22a5     | -1 |
| 16776 | 18201 | 1110032O16Rik | MMT00060232 | 1  |
| 16776 | 18827 | 1110032O16Rik | Oprs1       | 1  |
| 16777 | 8815  | MMT00053707   | Mx1         | 1  |
| 16777 | 21214 | MMT00053707   | Scd1        | 1  |
| 16788 | 8815  | Imp3          | Mx1         | -1 |
| 16788 | 18201 | Imp3          | MMT00060232 | -1 |
| 16788 | 21214 | Imp3          | Scd1        | -1 |
| 16788 | 22138 | Imp3          | Ang         | 1  |
| 16793 | 20967 | Arl11         | Fabp2       | 1  |
| 16796 | 6030  | Agt           | As3mt       | 1  |
| 16796 | 14017 | Agt           | Ces5        | -1 |
| 16802 | 21394 | Def8          | Cdh15       | 1  |
| 16811 | 250   | Rere          | Tubb2a-ps2  | -1 |
| 16811 | 402   | Rere          | Timp3       | 1  |
| 16811 | 415   | Rere          | Ypel2       | -1 |
| 16811 | 609   | Rere          | MMT00060868 | -1 |
| 16811 | 719   | Rere          | Usp2        | 1  |
| 16811 | 1036  | Rere          | Dusp19      | -1 |
| 16811 | 1655  | Rere          | Mgrn1       | 1  |
| 16811 | 2126  | Rere          | Dgat2       | 1  |
| 16811 | 2399  | Rere          | MMT00060167 | -1 |
| 16811 | 2636  | Rere          | Tars        | -1 |
| 16811 | 2766  | Rere          | Elp4        | -1 |
| 16811 | 3214  | Rere          | Dnmt3b      | -1 |
| 16811 | 3502  | Rere          | Gde1        | 1  |
| 16811 | 3564  | Rere          | Spcs2       | -1 |
| 16811 | 3790  | Rere          | Mtss1       | 1  |
| 16811 | 5183  | Rere          | St5         | -1 |
| 16811 | 5374  | Rere          | Chka        | -1 |
| 16811 | 5425  | Rere          | Ung         | 1  |
| 16811 | 5569  | Rere          | Pdgfc       | -1 |
| 16811 | 5591  | Rere          | Igsf8       | 1  |
| 16811 | 5934  | Rere          | S100a10     | -1 |
| 16811 | 5974  | Rere          | Arntl       | -1 |
| 16811 | 6386  | Rere          | Por         | 1  |
| 16811 | 6657  | Rere          | Irf6        | -1 |
| 16811 | 6705  | Rere          | Sorbs2      | -1 |
| 16811 | 7414  | Rere          | Clpx        | -1 |
| 16811 | 7619  | Rere          | Pik3ip1     | 1  |
| 16811 | 8399  | Rere          | Herpud1     | 1  |
| 16811 | 9594  | Rere          | Asb13       | -1 |



|       |       |          |               |    |
|-------|-------|----------|---------------|----|
| 16811 | 10088 | Rere     | Ddc           | -1 |
| 16811 | 10642 | Rere     | Ngef          | 1  |
| 16811 | 10775 | Rere     | Slc16a1       | -1 |
| 16811 | 11129 | Rere     | Ankhd1        | 1  |
| 16811 | 11574 | Rere     | Gne           | 1  |
| 16811 | 11599 | Rere     | Coq10b        | 1  |
| 16811 | 11741 | Rere     | Slc30a10      | -1 |
| 16811 | 11807 | Rere     | Fbxo31        | 1  |
| 16811 | 12204 | Rere     | Ankmy2        | 1  |
| 16811 | 12807 | Rere     | Faim          | -1 |
| 16811 | 13630 | Rere     | Cdkn1a        | -1 |
| 16811 | 14380 | Rere     | MMT00051866   | -1 |
| 16811 | 14431 | Rere     | Piwil1        | 1  |
| 16811 | 15049 | Rere     | Rnf125        | -1 |
| 16811 | 15481 | Rere     | 1110067D22Rik | -1 |
| 16811 | 15709 | Rere     | Tceal1        | 1  |
| 16811 | 16510 | Rere     | Tspyl4        | -1 |
| 16811 | 16690 | Rere     | Tjp3          | -1 |
| 16811 | 16788 | Rere     | Imp3          | 1  |
| 16811 | 17091 | Rere     | Slc38a3       | 1  |
| 16811 | 17247 | Rere     | A030007L17Rik | -1 |
| 16811 | 17338 | Rere     | Mocos         | -1 |
| 16811 | 17876 | Rere     | Tubb4         | -1 |
| 16811 | 17884 | Rere     | Lnx2          | -1 |
| 16811 | 18179 | Rere     | Dbp           | 1  |
| 16811 | 18286 | Rere     | Slc41a3       | 1  |
| 16811 | 18498 | Rere     | Slc5a6        | 1  |
| 16811 | 18607 | Rere     | Acat3         | -1 |
| 16811 | 18827 | Rere     | Oprs1         | -1 |
| 16811 | 20266 | Rere     | Insig2        | -1 |
| 16811 | 21105 | Rere     | Pex26         | 1  |
| 16811 | 21142 | Rere     | Gm129         | 1  |
| 16811 | 21192 | Rere     | 2310047A01Rik | 1  |
| 16811 | 22012 | Rere     | Itgae         | -1 |
| 16811 | 22290 | Rere     | Tubb2a        | -1 |
| 16811 | 22324 | Rere     | MMT00060741   | -1 |
| 16811 | 22476 | Rere     | Tspan4        | 1  |
| 16811 | 22630 | Rere     | MMT00034355   | -1 |
| 16811 | 23377 | Rere     | Pdxk          | 1  |
| 16811 | 23437 | Rere     | Efh2          | 1  |
| 16814 | 2850  | AU042651 | Slc16a6       | -1 |
| 16814 | 7492  | AU042651 | Adfp          | -1 |
| 16814 | 16814 | AU042651 | AU042651      | 1  |
| 16823 | 11129 | Inhbb    | Ankhd1        | -1 |
| 16827 | 185   | Arhgdib  | Ap2b1         | 1  |
| 16827 | 2850  | Arhgdib  | Slc16a6       | 1  |
| 16832 | 8637  | Trim63   | Tnpo2         | 1  |
| 16832 | 14043 | Trim63   | 4930455C21Rik | 1  |
| 16849 | 286   | Trmt1    | MMT00070509   | -1 |
| 16849 | 403   | Trmt1    | Leprotl1      | 1  |
| 16849 | 769   | Trmt1    | 5430437P03Rik | 1  |

|       |       |               |               |    |
|-------|-------|---------------|---------------|----|
| 16849 | 1336  | Trmt1         | MMT00069537   | -1 |
| 16849 | 1755  | Trmt1         | Ocel1         | -1 |
| 16849 | 2082  | Trmt1         | AU018778      | -1 |
| 16849 | 2243  | Trmt1         | Gcsh          | -1 |
| 16849 | 2297  | Trmt1         | Syce2         | -1 |
| 16849 | 2703  | Trmt1         | MMT00073763   | -1 |
| 16849 | 2749  | Trmt1         | Naf1          | 1  |
| 16849 | 3052  | Trmt1         | 9130404D08Rik | 1  |
| 16849 | 3055  | Trmt1         | Pde4c         | -1 |
| 16849 | 5433  | Trmt1         | 2410004L22Rik | 1  |
| 16849 | 6760  | Trmt1         | 2810428115Rik | -1 |
| 16849 | 9304  | Trmt1         | AI449175      | -1 |
| 16849 | 9931  | Trmt1         | GlT25d1       | 1  |
| 16849 | 10195 | Trmt1         | Klf1          | -1 |
| 16849 | 10273 | Trmt1         | Gpt2          | -1 |
| 16849 | 13732 | Trmt1         | Tpm4          | 1  |
| 16849 | 14391 | Trmt1         | MMT00017335   | 1  |
| 16849 | 14455 | Trmt1         | 2700029M09Rik | 1  |
| 16849 | 14511 | Trmt1         | Sostdc1       | 1  |
| 16849 | 14845 | Trmt1         | Tmem188       | -1 |
| 16849 | 15094 | Trmt1         | Pbx4          | 1  |
| 16849 | 15455 | Trmt1         | Lsm4          | 1  |
| 16849 | 16617 | Trmt1         | Sh2d4a        | 1  |
| 16849 | 16849 | Trmt1         | Trmt1         | 1  |
| 16849 | 17403 | Trmt1         | N4bp1         | 1  |
| 16849 | 17703 | Trmt1         | Large         | 1  |
| 16849 | 18886 | Trmt1         | Slc18a1       | 1  |
| 16849 | 20484 | Trmt1         | Ces1          | 1  |
| 16854 | 1416  | Kif15         | 6720460F02Rik | 1  |
| 16854 | 1561  | Kif15         | Aurka         | 1  |
| 16854 | 1932  | Kif15         | Racgap1       | 1  |
| 16854 | 2428  | Kif15         | Car1          | -1 |
| 16854 | 5364  | Kif15         | Kif22         | 1  |
| 16854 | 8416  | Kif15         | Cdc20         | 1  |
| 16854 | 11382 | Kif15         | Cdca3         | 1  |
| 16854 | 11422 | Kif15         | Pltp          | 1  |
| 16854 | 17823 | Kif15         | D2Ertd750e    | 1  |
| 16854 | 18299 | Kif15         | MMT00035424   | 1  |
| 16854 | 19022 | Kif15         | Ccnb2         | 1  |
| 16854 | 19318 | Kif15         | Plk1          | 1  |
| 16854 | 20433 | Kif15         | Cdca5         | 1  |
| 16854 | 21692 | Kif15         | MMT00013924   | 1  |
| 16854 | 21947 | Kif15         | Cdca8         | 1  |
| 16857 | 14017 | Perp          | Ces5          | -1 |
| 16858 | 1755  | Tmem38a       | Ocel1         | -1 |
| 16859 | 269   | 0610007L01Rik | Tuba1b        | 1  |
| 16859 | 1941  | 0610007L01Rik | MMT00079618   | 1  |
| 16859 | 2322  | 0610007L01Rik | Tuba4a        | 1  |
| 16859 | 7151  | 0610007L01Rik | MMT00007982   | 1  |
| 16859 | 9763  | 0610007L01Rik | Tuba3b        | 1  |
| 16859 | 10712 | 0610007L01Rik | Fchsd2        | -1 |

|       |       |               |               |    |
|-------|-------|---------------|---------------|----|
| 16859 | 11724 | 0610007L01Rik | Tuba3a        | 1  |
| 16859 | 17444 | 0610007L01Rik | Tuba1a        | 1  |
| 16859 | 17530 | 0610007L01Rik | MMT00041792   | 1  |
| 16859 | 22443 | 0610007L01Rik | Tuba1c        | 1  |
| 16861 | 9912  | Nlrc4         | Ttc27         | 1  |
| 16861 | 12451 | Nlrc4         | Srd5a2        | 1  |
| 16861 | 15306 | Nlrc4         | Dpy30         | 1  |
| 16861 | 16886 | Nlrc4         | Dpy30         | 1  |
| 16866 | 5364  | Scara3        | Kif22         | 1  |
| 16874 | 185   | Fcer1g        | Ap2b1         | 1  |
| 16874 | 5364  | Fcer1g        | Kif22         | 1  |
| 16874 | 6888  | Fcer1g        | Cxcl9         | 1  |
| 16874 | 14472 | Fcer1g        | Ahcy          | -1 |
| 16874 | 15320 | Fcer1g        | MMT00017479   | -1 |
| 16880 | 11422 | Depdc1b       | Pltp          | 1  |
| 16881 | 2472  | MMT00031504   | MMT00014056   | 1  |
| 16881 | 7654  | MMT00031504   | Ptpmt1        | -1 |
| 16881 | 9547  | MMT00031504   | MMT00006479   | 1  |
| 16881 | 14757 | MMT00031504   | Hdx           | 1  |
| 16881 | 16881 | MMT00031504   | MMT00031504   | 1  |
| 16881 | 17295 | MMT00031504   | MMT00082577   | 1  |
| 16881 | 19763 | MMT00031504   | Acp2          | 1  |
| 16881 | 19803 | MMT00031504   | BC003993      | 1  |
| 16881 | 22320 | MMT00031504   | MMT00047284   | 1  |
| 16881 | 23474 | MMT00031504   | MMT00011721   | 1  |
| 16886 | 12451 | Dpy30         | Srd5a2        | 1  |
| 16886 | 15306 | Dpy30         | Dpy30         | 1  |
| 16886 | 16886 | Dpy30         | Dpy30         | 1  |
| 16888 | 20967 | H6pd          | Fabp2         | 1  |
| 16890 | 2325  | H2-Eb2        | H2-K1         | 1  |
| 16890 | 10667 | H2-Eb2        | H2-Eb1        | 1  |
| 16910 | 16910 | Ptprr         | Ptprr         | 1  |
| 16913 | 4697  | Pira3         | Cyp2a12       | 1  |
| 16913 | 6513  | Pira3         | Qpctl         | -1 |
| 16913 | 6888  | Pira3         | Cxcl9         | 1  |
| 16913 | 7761  | Pira3         | Nudt19        | -1 |
| 16913 | 11888 | Pira3         | Myadm         | 1  |
| 16913 | 19462 | Pira3         | 4933439C20Rik | 1  |
| 16919 | 3265  | Pea15a        | Dntt          | 1  |
| 16919 | 4578  | Pea15a        | Pglyrp2       | -1 |
| 16919 | 12941 | Pea15a        | Elov15        | 1  |
| 16919 | 17996 | Pea15a        | Igfbp2        | -1 |
| 16919 | 20079 | Pea15a        | MMT00019254   | -1 |
| 16919 | 20967 | Pea15a        | Fabp2         | 1  |
| 16919 | 23026 | Pea15a        | Apom          | -1 |
| 16920 | 4286  | Acsl1         | Ptp4a1        | 1  |
| 16920 | 5574  | Acsl1         | Hsd3b7        | -1 |
| 16920 | 9910  | Acsl1         | EG666644      | 1  |
| 16920 | 15605 | Acsl1         | Cyp2c39       | 1  |
| 16946 | 2013  | Ivns1abp      | Il15ra        | 1  |
| 16946 | 3504  | Ivns1abp      | Anpep         | 1  |

|       |       |          |               |    |
|-------|-------|----------|---------------|----|
| 16946 | 4674  | lvns1abp | Cxcl12        | 1  |
| 16946 | 5425  | lvns1abp | Ung           | 1  |
| 16946 | 5934  | lvns1abp | S100a10       | -1 |
| 16946 | 6193  | lvns1abp | Lactb2        | -1 |
| 16946 | 21575 | lvns1abp | Cyp2c55       | -1 |
| 16946 | 21739 | lvns1abp | Epb4.1        | 1  |
| 16946 | 21793 | lvns1abp | Pla2g12a      | 1  |
| 16946 | 21966 | lvns1abp | Pcp4l1        | 1  |
| 16946 | 22770 | lvns1abp | Slc27a2       | 1  |
| 16949 | 143   | ligp1    | Gvin1         | 1  |
| 16949 | 860   | ligp1    | Psmb10        | 1  |
| 16949 | 1447  | ligp1    | Naaa          | 1  |
| 16949 | 1513  | ligp1    | Gzmb          | 1  |
| 16949 | 1533  | ligp1    | BC013712      | 1  |
| 16949 | 1612  | ligp1    | Clec1b        | 1  |
| 16949 | 1840  | ligp1    | Fpr1          | 1  |
| 16949 | 2058  | ligp1    | Hk3           | 1  |
| 16949 | 2200  | ligp1    | BC006779      | 1  |
| 16949 | 2224  | ligp1    | Oasl2         | 1  |
| 16949 | 2550  | ligp1    | MMT00036681   | 1  |
| 16949 | 2752  | ligp1    | Fcgr1         | 1  |
| 16949 | 3036  | ligp1    | Slamf9        | 1  |
| 16949 | 3286  | ligp1    | Alox5ap       | 1  |
| 16949 | 3426  | ligp1    | Hap1          | 1  |
| 16949 | 3523  | ligp1    | Trim34        | 1  |
| 16949 | 3572  | ligp1    | Ebi3          | 1  |
| 16949 | 3594  | ligp1    | Rasa4         | 1  |
| 16949 | 3659  | ligp1    | EG236451      | 1  |
| 16949 | 3683  | ligp1    | Oas2          | 1  |
| 16949 | 3721  | ligp1    | Me2           | 1  |
| 16949 | 4114  | ligp1    | Parp12        | 1  |
| 16949 | 4409  | ligp1    | 5430435G22Rik | 1  |
| 16949 | 4426  | ligp1    | ligp2         | 1  |
| 16949 | 4508  | ligp1    | Ifit1         | 1  |
| 16949 | 4516  | ligp1    | Rsad2         | 1  |
| 16949 | 5044  | ligp1    | Ifi35         | 1  |
| 16949 | 5216  | ligp1    | Spnb5         | 1  |
| 16949 | 5250  | ligp1    | Ifit2         | 1  |
| 16949 | 5554  | ligp1    | Emr1          | 1  |
| 16949 | 5556  | ligp1    | Ccl4          | 1  |
| 16949 | 5588  | ligp1    | Snx20         | 1  |
| 16949 | 5766  | ligp1    | 5033414D02Rik | 1  |
| 16949 | 5845  | ligp1    | Il18bp        | 1  |
| 16949 | 5853  | ligp1    | Trim30        | 1  |
| 16949 | 5949  | ligp1    | Zbp1          | 1  |
| 16949 | 5975  | ligp1    | Car13         | 1  |
| 16949 | 6036  | ligp1    | Pram1         | 1  |
| 16949 | 6072  | ligp1    | C1qc          | 1  |
| 16949 | 6098  | ligp1    | Ncf4          | 1  |
| 16949 | 6154  | ligp1    | 1700030G06Rik | 1  |
| 16949 | 6587  | ligp1    | Irf9          | 1  |

|       |       |       |             |   |
|-------|-------|-------|-------------|---|
| 16949 | 6595  | ligp1 | Oas1a       | 1 |
| 16949 | 6734  | ligp1 | Ehd4        | 1 |
| 16949 | 6779  | ligp1 | Gbp6        | 1 |
| 16949 | 6824  | ligp1 | Irf7        | 1 |
| 16949 | 6888  | ligp1 | Cxcl9       | 1 |
| 16949 | 6910  | ligp1 | Ly6c2       | 1 |
| 16949 | 7069  | ligp1 | Ube1l       | 1 |
| 16949 | 7105  | ligp1 | Plac8       | 1 |
| 16949 | 7238  | ligp1 | Pycard      | 1 |
| 16949 | 7284  | ligp1 | MMT00008674 | 1 |
| 16949 | 7316  | ligp1 | Ifi204      | 1 |
| 16949 | 7336  | ligp1 | Cd5l        | 1 |
| 16949 | 8270  | ligp1 | Ctspn       | 1 |
| 16949 | 8325  | ligp1 | Psme2       | 1 |
| 16949 | 8392  | ligp1 | Asf1b       | 1 |
| 16949 | 8555  | ligp1 | H2-M3       | 1 |
| 16949 | 8564  | ligp1 | Pld4        | 1 |
| 16949 | 8659  | ligp1 | Psmb8       | 1 |
| 16949 | 8800  | ligp1 | Rnf213      | 1 |
| 16949 | 8922  | ligp1 | Ii10ra      | 1 |
| 16949 | 9100  | ligp1 | Ms4a6c      | 1 |
| 16949 | 9401  | ligp1 | Fcgr4       | 1 |
| 16949 | 9616  | ligp1 | AI451557    | 1 |
| 16949 | 9717  | ligp1 | Psmb9       | 1 |
| 16949 | 9820  | ligp1 | BC023105    | 1 |
| 16949 | 9821  | ligp1 | Pmaip1      | 1 |
| 16949 | 9847  | ligp1 | Ifi27       | 1 |
| 16949 | 9920  | ligp1 | Syk         | 1 |
| 16949 | 9928  | ligp1 | Lgmn        | 1 |
| 16949 | 10109 | ligp1 | Gbp3        | 1 |
| 16949 | 10393 | ligp1 | Slc7a8      | 1 |
| 16949 | 10426 | ligp1 | Ly6f        | 1 |
| 16949 | 10504 | ligp1 | Ripk3       | 1 |
| 16949 | 10606 | ligp1 | Apbb1ip     | 1 |
| 16949 | 10796 | ligp1 | Spic        | 1 |
| 16949 | 10926 | ligp1 | P2ry13      | 1 |
| 16949 | 11009 | ligp1 | MMT00008885 | 1 |
| 16949 | 11198 | ligp1 | Gbp1        | 1 |
| 16949 | 11204 | ligp1 | AI451617    | 1 |
| 16949 | 11265 | ligp1 | Irgm        | 1 |
| 16949 | 11275 | ligp1 | Fanci       | 1 |
| 16949 | 11701 | ligp1 | Oas1c       | 1 |
| 16949 | 11845 | ligp1 | Psme1       | 1 |
| 16949 | 12126 | ligp1 | Znfx1       | 1 |
| 16949 | 12312 | ligp1 | Ms4a6d      | 1 |
| 16949 | 12398 | ligp1 | Ifi44       | 1 |
| 16949 | 12469 | ligp1 | Dock10      | 1 |
| 16949 | 12495 | ligp1 | Casp1       | 1 |
| 16949 | 12600 | ligp1 | Ifi204      | 1 |
| 16949 | 12969 | ligp1 | Xaf1        | 1 |
| 16949 | 13156 | ligp1 | Ifit3       | 1 |

|       |       |       |               |   |
|-------|-------|-------|---------------|---|
| 16949 | 13172 | ligp1 | Epb4.113      | 1 |
| 16949 | 13181 | ligp1 | Lcp2          | 1 |
| 16949 | 13309 | ligp1 | Tgtp          | 1 |
| 16949 | 13367 | ligp1 | MMT00060916   | 1 |
| 16949 | 13504 | ligp1 | Lair1         | 1 |
| 16949 | 13514 | ligp1 | Apol9b        | 1 |
| 16949 | 13522 | ligp1 | Sfn5          | 1 |
| 16949 | 13527 | ligp1 | Ctss          | 1 |
| 16949 | 13528 | ligp1 | Capn12        | 1 |
| 16949 | 13585 | ligp1 | Nckap1l       | 1 |
| 16949 | 13654 | ligp1 | Stat1         | 1 |
| 16949 | 13656 | ligp1 | Ly86          | 1 |
| 16949 | 13780 | ligp1 | Pilra         | 1 |
| 16949 | 13826 | ligp1 | Melk          | 1 |
| 16949 | 14029 | ligp1 | 2810022L02Rik | 1 |
| 16949 | 14117 | ligp1 | C1qb          | 1 |
| 16949 | 14192 | ligp1 | Trpv2         | 1 |
| 16949 | 14237 | ligp1 | Rac2          | 1 |
| 16949 | 14258 | ligp1 | Ifi47         | 1 |
| 16949 | 14260 | ligp1 | Mkl           | 1 |
| 16949 | 14453 | ligp1 | Inpp5d        | 1 |
| 16949 | 14475 | ligp1 | Abcg1         | 1 |
| 16949 | 14506 | ligp1 | Slc15a3       | 1 |
| 16949 | 14603 | ligp1 | Ly6e          | 1 |
| 16949 | 14611 | ligp1 | Ddx60         | 1 |
| 16949 | 14880 | ligp1 | Ms4a4c        | 1 |
| 16949 | 14883 | ligp1 | Itgal         | 1 |
| 16949 | 14954 | ligp1 | Rab19         | 1 |
| 16949 | 15074 | ligp1 | Usp18         | 1 |
| 16949 | 15159 | ligp1 | Timd4         | 1 |
| 16949 | 15255 | ligp1 | Ccl8          | 1 |
| 16949 | 15280 | ligp1 | Cxcl10        | 1 |
| 16949 | 15504 | ligp1 | Mx2           | 1 |
| 16949 | 15749 | ligp1 | Cd22          | 1 |
| 16949 | 15825 | ligp1 | Fermt3        | 1 |
| 16949 | 16102 | ligp1 | Cd72          | 1 |
| 16949 | 16129 | ligp1 | Traf1         | 1 |
| 16949 | 16147 | ligp1 | Tlr2          | 1 |
| 16949 | 16182 | ligp1 | Oasl1         | 1 |
| 16949 | 16186 | ligp1 | Cfp           | 1 |
| 16949 | 16199 | ligp1 | Samhd1        | 1 |
| 16949 | 16492 | ligp1 | Hk2           | 1 |
| 16949 | 16521 | ligp1 | Adar          | 1 |
| 16949 | 16572 | ligp1 | D14Ertd668e   | 1 |
| 16949 | 16874 | ligp1 | Fcer1g        | 1 |
| 16949 | 16988 | ligp1 | Clec4f        | 1 |
| 16949 | 17197 | ligp1 | Igtp          | 1 |
| 16949 | 17412 | ligp1 | Aif1          | 1 |
| 16949 | 17806 | ligp1 | Gpsm3         | 1 |
| 16949 | 17832 | ligp1 | MMT00043412   | 1 |
| 16949 | 17904 | ligp1 | Cds1          | 1 |

|       |       |         |                    |   |
|-------|-------|---------|--------------------|---|
| 16949 | 18064 | ligp1   | MMT00035925        | 1 |
| 16949 | 18174 | ligp1   | Stat2              | 1 |
| 16949 | 18186 | ligp1   | Parp14             | 1 |
| 16949 | 18211 | ligp1   | Folr2              | 1 |
| 16949 | 18289 | ligp1   | Tap1               | 1 |
| 16949 | 18662 | ligp1   | Batf3              | 1 |
| 16949 | 18686 | ligp1   | Zfp143             | 1 |
| 16949 | 18868 | ligp1   | Mpeg1              | 1 |
| 16949 | 19026 | ligp1   | Isg15              | 1 |
| 16949 | 19063 | ligp1   | Evl                | 1 |
| 16949 | 19189 | ligp1   | Sp100              | 1 |
| 16949 | 19252 | ligp1   | Tmsb4x             | 1 |
| 16949 | 19262 | ligp1   | Cd274              | 1 |
| 16949 | 19298 | ligp1   | Unc93b1            | 1 |
| 16949 | 19382 | ligp1   | Slc2a6             | 1 |
| 16949 | 19708 | ligp1   | Ly6a               | 1 |
| 16949 | 19738 | ligp1   | Lgals3bp           | 1 |
| 16949 | 19794 | ligp1   | Rgs2               | 1 |
| 16949 | 20083 | ligp1   | ENSMUSG00000073403 | 1 |
| 16949 | 20150 | ligp1   | Ptprc              | 1 |
| 16949 | 20321 | ligp1   | Ms4a6b             | 1 |
| 16949 | 20431 | ligp1   | Slc7a7             | 1 |
| 16949 | 20474 | ligp1   | Gnb3               | 1 |
| 16949 | 20791 | ligp1   | MMT00014813        | 1 |
| 16949 | 20814 | ligp1   | Ptpn18             | 1 |
| 16949 | 20997 | ligp1   | MMT00028135        | 1 |
| 16949 | 21351 | ligp1   | Shisa5             | 1 |
| 16949 | 21440 | ligp1   | Tmsb10             | 1 |
| 16949 | 21549 | ligp1   | Rtp4               | 1 |
| 16949 | 21685 | ligp1   | Gzma               | 1 |
| 16949 | 21751 | ligp1   | Ptpn6              | 1 |
| 16949 | 21824 | ligp1   | 5830443L24Rik      | 1 |
| 16949 | 21837 | ligp1   | BC052328           | 1 |
| 16949 | 21863 | ligp1   | Dok2               | 1 |
| 16949 | 22037 | ligp1   | Oas1g              | 1 |
| 16949 | 22077 | ligp1   | MMT00057550        | 1 |
| 16949 | 22115 | ligp1   | Ccl5               | 1 |
| 16949 | 22327 | ligp1   | Tyrobp             | 1 |
| 16949 | 22647 | ligp1   | Pkib               | 1 |
| 16949 | 22670 | ligp1   | Clec4a1            | 1 |
| 16949 | 22876 | ligp1   | Sash3              | 1 |
| 16949 | 23092 | ligp1   | Ifih1              | 1 |
| 16949 | 23174 | ligp1   | Psme2              | 1 |
| 16949 | 23208 | ligp1   | Hck                | 1 |
| 16949 | 23242 | ligp1   | Gngt2              | 1 |
| 16949 | 23276 | ligp1   | Evi2b              | 1 |
| 16949 | 23403 | ligp1   | Ndc80              | 1 |
| 16949 | 23410 | ligp1   | C1qa               | 1 |
| 16949 | 23450 | ligp1   | D12Ert647e         | 1 |
| 16954 | 22470 | Sh3glb1 | Ppargc1b           | 1 |
| 16958 | 12910 | Gpc1    | 1110028A07Rik      | 1 |

|       |       |             |               |    |
|-------|-------|-------------|---------------|----|
| 16965 | 3620  | Gstt2       | Bet1          | -1 |
| 16965 | 6193  | Gstt2       | Lactb2        | -1 |
| 16965 | 8815  | Gstt2       | Mx1           | -1 |
| 16965 | 14442 | Gstt2       | Ethe1         | -1 |
| 16965 | 18201 | Gstt2       | MMT00060232   | -1 |
| 16965 | 21214 | Gstt2       | Scd1          | -1 |
| 16965 | 21251 | Gstt2       | Cpt1a         | 1  |
| 16965 | 21575 | Gstt2       | Cyp2c55       | -1 |
| 16965 | 21793 | Gstt2       | Pla2g12a      | 1  |
| 16965 | 22138 | Gstt2       | Ang           | 1  |
| 16972 | 16972 | Nenf        | Nenf          | 1  |
| 16973 | 5884  | MMT00027196 | Gstm2         | 1  |
| 16973 | 10521 | MMT00027196 | Ttf2          | -1 |
| 16973 | 11611 | MMT00027196 | S100a13       | 1  |
| 16973 | 20058 | MMT00027196 | Dnaic1        | -1 |
| 16990 | 3446  | Sc4mol      | Eno1          | 1  |
| 16990 | 10612 | Sc4mol      | Slc24a6       | -1 |
| 16990 | 18113 | Sc4mol      | MMT00034400   | 1  |
| 16990 | 19066 | Sc4mol      | MMT00012632   | 1  |
| 16994 | 12910 | Trove2      | 1110028A07Rik | -1 |
| 17022 | 607   | MMT00055891 | Me1           | 1  |
| 17022 | 874   | MMT00055891 | Aldh1a7       | 1  |
| 17022 | 6370  | MMT00055891 | Aqp8          | 1  |
| 17022 | 8444  | MMT00055891 | Rdh16         | 1  |
| 17022 | 8815  | MMT00055891 | Mx1           | 1  |
| 17022 | 12910 | MMT00055891 | 1110028A07Rik | 1  |
| 17022 | 18201 | MMT00055891 | MMT00060232   | 1  |
| 17022 | 21214 | MMT00055891 | Scd1          | 1  |
| 17022 | 21575 | MMT00055891 | Cyp2c55       | 1  |
| 17022 | 22138 | MMT00055891 | Ang           | -1 |
| 17022 | 23026 | MMT00055891 | Apom          | -1 |
| 17036 | 21214 | Tctn3       | Scd1          | 1  |
| 17046 | 16760 | Fggy        | 1600029D21Rik | 1  |
| 17053 | 4833  | MMT00068622 | Synpo2        | -1 |
| 17053 | 14740 | MMT00068622 | Mfap1b        | -1 |
| 17053 | 21729 | MMT00068622 | Hdc           | -1 |
| 17064 | 5364  | Cd48        | Kif22         | 1  |
| 17071 | 143   | Samd9l      | Gvin1         | 1  |
| 17071 | 1533  | Samd9l      | BC013712      | 1  |
| 17071 | 2200  | Samd9l      | BC006779      | 1  |
| 17071 | 2224  | Samd9l      | Oasl2         | 1  |
| 17071 | 2550  | Samd9l      | MMT00036681   | 1  |
| 17071 | 2752  | Samd9l      | Fcgr1         | 1  |
| 17071 | 3523  | Samd9l      | Trim34        | 1  |
| 17071 | 3594  | Samd9l      | Rasa4         | 1  |
| 17071 | 3659  | Samd9l      | EG236451      | 1  |
| 17071 | 3683  | Samd9l      | Oas2          | 1  |
| 17071 | 4114  | Samd9l      | Parp12        | 1  |
| 17071 | 4409  | Samd9l      | 5430435G22Rik | 1  |
| 17071 | 4426  | Samd9l      | Iigp2         | 1  |
| 17071 | 4508  | Samd9l      | Ifit1         | 1  |



|       |       |        |             |   |
|-------|-------|--------|-------------|---|
| 17071 | 4516  | Samd9l | Rsad2       | 1 |
| 17071 | 5002  | Samd9l | Ifi202b     | 1 |
| 17071 | 5044  | Samd9l | Ifi35       | 1 |
| 17071 | 5216  | Samd9l | Spnb5       | 1 |
| 17071 | 5250  | Samd9l | Ifit2       | 1 |
| 17071 | 5845  | Samd9l | Il18bp      | 1 |
| 17071 | 5853  | Samd9l | Trim30      | 1 |
| 17071 | 5949  | Samd9l | Zbp1        | 1 |
| 17071 | 6587  | Samd9l | Irf9        | 1 |
| 17071 | 6595  | Samd9l | Oas1a       | 1 |
| 17071 | 6824  | Samd9l | Irf7        | 1 |
| 17071 | 6910  | Samd9l | Ly6c2       | 1 |
| 17071 | 7069  | Samd9l | Ube1l       | 1 |
| 17071 | 7105  | Samd9l | Plac8       | 1 |
| 17071 | 7238  | Samd9l | Pycard      | 1 |
| 17071 | 7284  | Samd9l | MMT00008674 | 1 |
| 17071 | 7316  | Samd9l | Ifi204      | 1 |
| 17071 | 7336  | Samd9l | Cd5l        | 1 |
| 17071 | 8555  | Samd9l | H2-M3       | 1 |
| 17071 | 8659  | Samd9l | Psmb8       | 1 |
| 17071 | 8800  | Samd9l | Rnf213      | 1 |
| 17071 | 9401  | Samd9l | Fcgr4       | 1 |
| 17071 | 9717  | Samd9l | Psmb9       | 1 |
| 17071 | 9820  | Samd9l | BC023105    | 1 |
| 17071 | 9847  | Samd9l | Ifi27       | 1 |
| 17071 | 10109 | Samd9l | Gbp3        | 1 |
| 17071 | 10504 | Samd9l | Ripk3       | 1 |
| 17071 | 11009 | Samd9l | MMT00008885 | 1 |
| 17071 | 11204 | Samd9l | Al451617    | 1 |
| 17071 | 11265 | Samd9l | Irgm        | 1 |
| 17071 | 11701 | Samd9l | Oas1c       | 1 |
| 17071 | 12126 | Samd9l | Znfx1       | 1 |
| 17071 | 12398 | Samd9l | Ifi44       | 1 |
| 17071 | 12600 | Samd9l | Ifi204      | 1 |
| 17071 | 12969 | Samd9l | Xaf1        | 1 |
| 17071 | 13156 | Samd9l | Ifit3       | 1 |
| 17071 | 13309 | Samd9l | Tgtp        | 1 |
| 17071 | 13514 | Samd9l | Apol9b      | 1 |
| 17071 | 13522 | Samd9l | Sifn5       | 1 |
| 17071 | 13527 | Samd9l | Ctss        | 1 |
| 17071 | 13528 | Samd9l | Capn12      | 1 |
| 17071 | 13654 | Samd9l | Stat1       | 1 |
| 17071 | 13749 | Samd9l | Parp9       | 1 |
| 17071 | 13826 | Samd9l | Melk        | 1 |
| 17071 | 14258 | Samd9l | Ifi47       | 1 |
| 17071 | 14506 | Samd9l | Slc15a3     | 1 |
| 17071 | 14603 | Samd9l | Ly6e        | 1 |
| 17071 | 14611 | Samd9l | Ddx60       | 1 |
| 17071 | 14880 | Samd9l | Ms4a4c      | 1 |
| 17071 | 15074 | Samd9l | Usp18       | 1 |
| 17071 | 15348 | Samd9l | Eif2ak2     | 1 |

|       |       |               |               |    |
|-------|-------|---------------|---------------|----|
| 17071 | 15504 | Samd9l        | Mx2           | 1  |
| 17071 | 16102 | Samd9l        | Cd72          | 1  |
| 17071 | 16182 | Samd9l        | Oasl1         | 1  |
| 17071 | 16199 | Samd9l        | Samhd1        | 1  |
| 17071 | 16521 | Samd9l        | Adar          | 1  |
| 17071 | 16572 | Samd9l        | D14Ert668e    | 1  |
| 17071 | 17071 | Samd9l        | Samd9l        | 1  |
| 17071 | 17197 | Samd9l        | Igtp          | 1  |
| 17071 | 17412 | Samd9l        | Aif1          | 1  |
| 17071 | 18174 | Samd9l        | Stat2         | 1  |
| 17071 | 18186 | Samd9l        | Parp14        | 1  |
| 17071 | 18686 | Samd9l        | Zfp143        | 1  |
| 17071 | 19026 | Samd9l        | Isg15         | 1  |
| 17071 | 19189 | Samd9l        | Sp100         | 1  |
| 17071 | 19708 | Samd9l        | Ly6a          | 1  |
| 17071 | 19738 | Samd9l        | Lgals3bp      | 1  |
| 17071 | 20321 | Samd9l        | Ms4a6b        | 1  |
| 17071 | 20791 | Samd9l        | MMT00014813   | 1  |
| 17071 | 20997 | Samd9l        | MMT00028135   | 1  |
| 17071 | 21351 | Samd9l        | Shisa5        | 1  |
| 17071 | 21549 | Samd9l        | Rtp4          | 1  |
| 17071 | 21824 | Samd9l        | 5830443L24Rik | 1  |
| 17071 | 22037 | Samd9l        | Oas1g         | 1  |
| 17071 | 23092 | Samd9l        | Ifih1         | 1  |
| 17071 | 23208 | Samd9l        | Hck           | 1  |
| 17071 | 23242 | Samd9l        | Gngt2         | 1  |
| 17071 | 23450 | Samd9l        | D12Ert647e    | 1  |
| 17073 | 6017  | 1810049H13Rik | MMT00018015   | -1 |
| 17073 | 6846  | 1810049H13Rik | Olf1402       | 1  |
| 17073 | 13615 | 1810049H13Rik | Arl16         | -1 |
| 17073 | 15016 | 1810049H13Rik | MMT00074608   | 1  |
| 17073 | 17792 | 1810049H13Rik | Vmn2r79       | 1  |
| 17073 | 17897 | 1810049H13Rik | Gm1019        | 1  |
| 17078 | 15049 | Syde2         | Rnf125        | -1 |
| 17078 | 21142 | Syde2         | Gm129         | 1  |
| 17090 | 3753  | Lass2         | Setdb1        | 1  |
| 17090 | 7519  | Lass2         | Gstm1         | -1 |
| 17090 | 10681 | Lass2         | Dgkz          | 1  |
| 17090 | 11121 | Lass2         | Mttr11        | 1  |
| 17090 | 11611 | Lass2         | S100a13       | 1  |
| 17090 | 18754 | Lass2         | Rbm8a         | -1 |
| 17090 | 20661 | Lass2         | Tuft1         | -1 |
| 17093 | 19964 | Opa1          | Ndufa9        | 1  |
| 17109 | 5364  | C430049B03Rik | Kif22         | 1  |
| 17109 | 9275  | C430049B03Rik | Aass          | -1 |
| 17109 | 11129 | C430049B03Rik | Ankhd1        | -1 |
| 17109 | 12910 | C430049B03Rik | 1110028A07Rik | 1  |
| 17109 | 15631 | C430049B03Rik | Lpin1         | -1 |
| 17109 | 17323 | C430049B03Rik | Tubb6         | 1  |
| 17109 | 18455 | C430049B03Rik | Mtnr1a        | 1  |
| 17109 | 23180 | C430049B03Rik | Sult1d1       | -1 |

|       |       |          |               |    |
|-------|-------|----------|---------------|----|
| 17135 | 17135 | Mum1     | Mum1          | 1  |
| 17135 | 21964 | Mum1     | Vwce          | 1  |
| 17136 | 2051  | Slc35a4  | Ddx27         | -1 |
| 17137 | 607   | Nudt4    | Me1           | 1  |
| 17137 | 8444  | Nudt4    | Rdh16         | 1  |
| 17137 | 8815  | Nudt4    | Mx1           | 1  |
| 17137 | 18201 | Nudt4    | MMT00060232   | 1  |
| 17137 | 21214 | Nudt4    | Scd1          | 1  |
| 17147 | 3411  | Ttll12   | Rabl2a        | 1  |
| 17147 | 3654  | Ttll12   | St13          | -1 |
| 17147 | 5910  | Ttll12   | 1110014J01Rik | 1  |
| 17147 | 6804  | Ttll12   | Cyp2d22       | 1  |
| 17147 | 10482 | Ttll12   | Mcat          | 1  |
| 17147 | 10558 | Ttll12   | Cyp2d40       | -1 |
| 17147 | 11503 | Ttll12   | Rangap1       | 1  |
| 17147 | 12468 | Ttll12   | Cyp2d13       | 1  |
| 17147 | 17147 | Ttll12   | Ttll12        | 1  |
| 17147 | 19216 | Ttll12   | Bik           | 1  |
| 17158 | 9077  | Zfp113   | Cnpy4         | -1 |
| 17158 | 16451 | Zfp113   | 2010007H12Rik | 1  |
| 17158 | 19502 | Zfp113   | Fbxo24        | 1  |
| 17164 | 3061  | Slc38a10 | Scarf2        | -1 |
| 17164 | 3119  | Slc38a10 | Mapk10        | -1 |
| 17164 | 15016 | Slc38a10 | MMT00074608   | -1 |
| 17164 | 17897 | Slc38a10 | Gm1019        | -1 |
| 17178 | 563   | Ifnar2   | D4Bwg0951e    | -1 |
| 17178 | 2794  | Ifnar2   | Map3k6        | -1 |
| 17178 | 4235  | Ifnar2   | Pfkfb3        | -1 |
| 17178 | 11808 | Ifnar2   | Pck1          | -1 |
| 17178 | 13471 | Ifnar2   | Cln8          | -1 |
| 17178 | 15631 | Ifnar2   | Lpin1         | -1 |
| 17178 | 15882 | Ifnar2   | AA986860      | -1 |
| 17178 | 16176 | Ifnar2   | St3gal5       | -1 |
| 17178 | 17525 | Ifnar2   | Ctgf          | -1 |
| 17178 | 17622 | Ifnar2   | Foxo1         | -1 |
| 17178 | 18027 | Ifnar2   | 5730403B10Rik | -1 |
| 17178 | 19466 | Ifnar2   | Pptc7         | -1 |
| 17178 | 21331 | Ifnar2   | Slc10a6       | -1 |
| 17189 | 874   | Gm263    | Aldh1a7       | 1  |
| 17189 | 3504  | Gm263    | Anpep         | -1 |
| 17189 | 11946 | Gm263    | MMT00030953   | 1  |
| 17197 | 143   | Igtp     | Gvin1         | 1  |
| 17197 | 830   | Igtp     | Socs1         | 1  |
| 17197 | 860   | Igtp     | Psmb10        | 1  |
| 17197 | 917   | Igtp     | Kal1          | 1  |
| 17197 | 1180  | Igtp     | Clec4a3       | 1  |
| 17197 | 1447  | Igtp     | Naaa          | 1  |
| 17197 | 1513  | Igtp     | Gzmb          | 1  |
| 17197 | 1533  | Igtp     | BC013712      | 1  |
| 17197 | 1840  | Igtp     | Fpr1          | 1  |
| 17197 | 1967  | Igtp     | Brwd1         | -1 |

|       |      |      |               |    |
|-------|------|------|---------------|----|
| 17197 | 1986 | Igtp | Crebl2        | -1 |
| 17197 | 2058 | Igtp | Hk3           | 1  |
| 17197 | 2200 | Igtp | BC006779      | 1  |
| 17197 | 2224 | Igtp | Oasl2         | 1  |
| 17197 | 2550 | Igtp | MMT00036681   | 1  |
| 17197 | 2659 | Igtp | Kcng2         | 1  |
| 17197 | 2752 | Igtp | Fcgr1         | 1  |
| 17197 | 3036 | Igtp | Slamf9        | 1  |
| 17197 | 3523 | Igtp | Trim34        | 1  |
| 17197 | 3572 | Igtp | Ebi3          | 1  |
| 17197 | 3594 | Igtp | Rasa4         | 1  |
| 17197 | 3659 | Igtp | EG236451      | 1  |
| 17197 | 3683 | Igtp | Oas2          | 1  |
| 17197 | 3905 | Igtp | H2-Q1         | 1  |
| 17197 | 4114 | Igtp | Parp12        | 1  |
| 17197 | 4409 | Igtp | 5430435G22Rik | 1  |
| 17197 | 4426 | Igtp | Iigp2         | 1  |
| 17197 | 4508 | Igtp | Ifit1         | 1  |
| 17197 | 4516 | Igtp | Rsad2         | 1  |
| 17197 | 5044 | Igtp | Ifi35         | 1  |
| 17197 | 5216 | Igtp | Spnb5         | 1  |
| 17197 | 5250 | Igtp | Ifit2         | 1  |
| 17197 | 5554 | Igtp | Emr1          | 1  |
| 17197 | 5556 | Igtp | Ccl4          | 1  |
| 17197 | 5766 | Igtp | 5033414D02Rik | 1  |
| 17197 | 5845 | Igtp | Il18bp        | 1  |
| 17197 | 5853 | Igtp | Trim30        | 1  |
| 17197 | 5949 | Igtp | Zbp1          | 1  |
| 17197 | 5975 | Igtp | Car13         | 1  |
| 17197 | 6036 | Igtp | Pram1         | 1  |
| 17197 | 6072 | Igtp | C1qc          | 1  |
| 17197 | 6098 | Igtp | Ncf4          | 1  |
| 17197 | 6154 | Igtp | 1700030G06Rik | 1  |
| 17197 | 6213 | Igtp | Ccl2          | 1  |
| 17197 | 6576 | Igtp | Sfn2          | 1  |
| 17197 | 6587 | Igtp | Irf9          | 1  |
| 17197 | 6595 | Igtp | Oas1a         | 1  |
| 17197 | 6734 | Igtp | Ehd4          | 1  |
| 17197 | 6779 | Igtp | Gbp6          | 1  |
| 17197 | 6824 | Igtp | Irf7          | 1  |
| 17197 | 6866 | Igtp | Gls           | -1 |
| 17197 | 6888 | Igtp | Cxcl9         | 1  |
| 17197 | 6910 | Igtp | Ly6c2         | 1  |
| 17197 | 7069 | Igtp | Ube1l         | 1  |
| 17197 | 7105 | Igtp | Plac8         | 1  |
| 17197 | 7238 | Igtp | Pycard        | 1  |
| 17197 | 7284 | Igtp | MMT00008674   | 1  |
| 17197 | 7316 | Igtp | Ifi204        | 1  |
| 17197 | 7336 | Igtp | Cd5l          | 1  |
| 17197 | 8392 | Igtp | Asf1b         | 1  |
| 17197 | 8555 | Igtp | H2-M3         | 1  |

|       |       |      |             |   |
|-------|-------|------|-------------|---|
| 17197 | 8564  | Igtp | Pld4        | 1 |
| 17197 | 8659  | Igtp | Psemb8      | 1 |
| 17197 | 8800  | Igtp | Rnf213      | 1 |
| 17197 | 9401  | Igtp | Fcgr4       | 1 |
| 17197 | 9717  | Igtp | Psemb9      | 1 |
| 17197 | 9820  | Igtp | BC023105    | 1 |
| 17197 | 9821  | Igtp | Pmaip1      | 1 |
| 17197 | 9847  | Igtp | Ifi27       | 1 |
| 17197 | 9920  | Igtp | Syk         | 1 |
| 17197 | 9928  | Igtp | Lgmn        | 1 |
| 17197 | 10109 | Igtp | Gbp3        | 1 |
| 17197 | 10393 | Igtp | Slc7a8      | 1 |
| 17197 | 10426 | Igtp | Ly6f        | 1 |
| 17197 | 10504 | Igtp | Ripk3       | 1 |
| 17197 | 10606 | Igtp | Apbb1ip     | 1 |
| 17197 | 10926 | Igtp | P2ry13      | 1 |
| 17197 | 11009 | Igtp | MMT00008885 | 1 |
| 17197 | 11198 | Igtp | Gbp1        | 1 |
| 17197 | 11204 | Igtp | AI451617    | 1 |
| 17197 | 11265 | Igtp | Irgm        | 1 |
| 17197 | 11701 | Igtp | Oas1c       | 1 |
| 17197 | 12126 | Igtp | Znfx1       | 1 |
| 17197 | 12312 | Igtp | Ms4a6d      | 1 |
| 17197 | 12363 | Igtp | Ifitm6      | 1 |
| 17197 | 12398 | Igtp | Ifi44       | 1 |
| 17197 | 12469 | Igtp | Dock10      | 1 |
| 17197 | 12495 | Igtp | Casp1       | 1 |
| 17197 | 12600 | Igtp | Ifi204      | 1 |
| 17197 | 12969 | Igtp | Xaf1        | 1 |
| 17197 | 13156 | Igtp | Ifit3       | 1 |
| 17197 | 13172 | Igtp | Epb4.1i3    | 1 |
| 17197 | 13181 | Igtp | Lcp2        | 1 |
| 17197 | 13309 | Igtp | Tgtp        | 1 |
| 17197 | 13367 | Igtp | MMT00060916 | 1 |
| 17197 | 13514 | Igtp | Apol9b      | 1 |
| 17197 | 13527 | Igtp | Ctss        | 1 |
| 17197 | 13528 | Igtp | Capn12      | 1 |
| 17197 | 13585 | Igtp | Nckap1l     | 1 |
| 17197 | 13654 | Igtp | Stat1       | 1 |
| 17197 | 13656 | Igtp | Ly86        | 1 |
| 17197 | 13780 | Igtp | Pilra       | 1 |
| 17197 | 13826 | Igtp | Melk        | 1 |
| 17197 | 14117 | Igtp | C1qb        | 1 |
| 17197 | 14192 | Igtp | Trpv2       | 1 |
| 17197 | 14237 | Igtp | Rac2        | 1 |
| 17197 | 14258 | Igtp | Ifi47       | 1 |
| 17197 | 14453 | Igtp | Inpp5d      | 1 |
| 17197 | 14506 | Igtp | Slc15a3     | 1 |
| 17197 | 14603 | Igtp | Ly6e        | 1 |
| 17197 | 14611 | Igtp | Ddx60       | 1 |
| 17197 | 14880 | Igtp | Ms4a4c      | 1 |

|       |       |      |               |   |
|-------|-------|------|---------------|---|
| 17197 | 14883 | Igtp | Ilgal         | 1 |
| 17197 | 15074 | Igtp | Usp18         | 1 |
| 17197 | 15159 | Igtp | Timd4         | 1 |
| 17197 | 15255 | Igtp | Ccl8          | 1 |
| 17197 | 15280 | Igtp | Cxcl10        | 1 |
| 17197 | 15449 | Igtp | Mitd1         | 1 |
| 17197 | 15504 | Igtp | Mx2           | 1 |
| 17197 | 15749 | Igtp | Cd22          | 1 |
| 17197 | 15825 | Igtp | Fermt3        | 1 |
| 17197 | 16102 | Igtp | Cd72          | 1 |
| 17197 | 16147 | Igtp | Tlr2          | 1 |
| 17197 | 16182 | Igtp | Oasl1         | 1 |
| 17197 | 16186 | Igtp | Cfp           | 1 |
| 17197 | 16199 | Igtp | Samhd1        | 1 |
| 17197 | 16378 | Igtp | Ccl8          | 1 |
| 17197 | 16521 | Igtp | Adar          | 1 |
| 17197 | 16572 | Igtp | D14Ertid668e  | 1 |
| 17197 | 16874 | Igtp | Fcer1g        | 1 |
| 17197 | 16913 | Igtp | Pira3         | 1 |
| 17197 | 16988 | Igtp | Clec4f        | 1 |
| 17197 | 17071 | Igtp | Samd9l        | 1 |
| 17197 | 17197 | Igtp | Igtp          | 1 |
| 17197 | 17412 | Igtp | Aif1          | 1 |
| 17197 | 17577 | Igtp | Med28         | 1 |
| 17197 | 17883 | Igtp | D730040F13Rik | 1 |
| 17197 | 17904 | Igtp | Cds1          | 1 |
| 17197 | 18064 | Igtp | MMT00035925   | 1 |
| 17197 | 18174 | Igtp | Stat2         | 1 |
| 17197 | 18186 | Igtp | Parp14        | 1 |
| 17197 | 18211 | Igtp | Folr2         | 1 |
| 17197 | 18289 | Igtp | Tap1          | 1 |
| 17197 | 18686 | Igtp | Zfp143        | 1 |
| 17197 | 18868 | Igtp | Mpeg1         | 1 |
| 17197 | 19026 | Igtp | Isg15         | 1 |
| 17197 | 19063 | Igtp | Evl           | 1 |
| 17197 | 19189 | Igtp | Sp100         | 1 |
| 17197 | 19252 | Igtp | Tmsb4x        | 1 |
| 17197 | 19262 | Igtp | Cd274         | 1 |
| 17197 | 19382 | Igtp | Slc2a6        | 1 |
| 17197 | 19708 | Igtp | Ly6a          | 1 |
| 17197 | 19738 | Igtp | Lgals3bp      | 1 |
| 17197 | 19794 | Igtp | Rgs2          | 1 |
| 17197 | 20150 | Igtp | Ptprc         | 1 |
| 17197 | 20321 | Igtp | Ms4a6b        | 1 |
| 17197 | 20431 | Igtp | Slc7a7        | 1 |
| 17197 | 20474 | Igtp | Gnb3          | 1 |
| 17197 | 20814 | Igtp | Ptpn18        | 1 |
| 17197 | 20997 | Igtp | MMT00028135   | 1 |
| 17197 | 21351 | Igtp | Shisa5        | 1 |
| 17197 | 21440 | Igtp | Tmsb10        | 1 |
| 17197 | 21549 | Igtp | Rtp4          | 1 |

|       |       |               |                    |    |
|-------|-------|---------------|--------------------|----|
| 17197 | 21685 | Igtp          | Gzma               | 1  |
| 17197 | 21824 | Igtp          | 5830443L24Rik      | 1  |
| 17197 | 21863 | Igtp          | Dok2               | 1  |
| 17197 | 22037 | Igtp          | Oas1g              | 1  |
| 17197 | 22327 | Igtp          | Tyropb             | 1  |
| 17197 | 22496 | Igtp          | Slfn1              | 1  |
| 17197 | 22647 | Igtp          | Pkib               | 1  |
| 17197 | 22670 | Igtp          | Clec4a1            | 1  |
| 17197 | 22876 | Igtp          | Sash3              | 1  |
| 17197 | 22957 | Igtp          | 1300018I05Rik      | 1  |
| 17197 | 23208 | Igtp          | Hck                | 1  |
| 17197 | 23242 | Igtp          | Gngt2              | 1  |
| 17197 | 23394 | Igtp          | Psd4               | 1  |
| 17197 | 23410 | Igtp          | C1qa               | 1  |
| 17197 | 23450 | Igtp          | D12Ert647e         | 1  |
| 17215 | 3620  | Mvd           | Bet1               | 1  |
| 17215 | 10612 | Mvd           | Slc24a6            | -1 |
| 17216 | 1416  | Nuf2          | 6720460F02Rik      | 1  |
| 17216 | 1932  | Nuf2          | Racgap1            | 1  |
| 17216 | 5364  | Nuf2          | Kif22              | 1  |
| 17216 | 8416  | Nuf2          | Cdc20              | 1  |
| 17216 | 11382 | Nuf2          | Cdca3              | 1  |
| 17216 | 13455 | Nuf2          | Cenpe              | 1  |
| 17216 | 17823 | Nuf2          | D2Ert750e          | 1  |
| 17216 | 18299 | Nuf2          | MMT00035424        | 1  |
| 17216 | 19318 | Nuf2          | Plk1               | 1  |
| 17216 | 20433 | Nuf2          | Cdca5              | 1  |
| 17216 | 21692 | Nuf2          | MMT00013924        | 1  |
| 17216 | 21947 | Nuf2          | Cdca8              | 1  |
| 17221 | 4833  | Zfp264        | Synpo2             | -1 |
| 17221 | 6231  | Zfp264        | 9030622O22Rik      | 1  |
| 17221 | 21665 | Zfp264        | Nat5               | 1  |
| 17221 | 21729 | Zfp264        | Hdc                | -1 |
| 17223 | 1941  | 4933426M11Rik | MMT00079618        | 1  |
| 17223 | 7151  | 4933426M11Rik | MMT00007982        | 1  |
| 17233 | 17525 | Nmur1         | Ctgf               | 1  |
| 17243 | 1709  | Bcl6b         | Mt2                | -1 |
| 17243 | 11129 | Bcl6b         | Ankhd1             | -1 |
| 17243 | 12219 | Bcl6b         | Cyb5b              | 1  |
| 17243 | 16176 | Bcl6b         | St3gal5            | -1 |
| 17243 | 18286 | Bcl6b         | Slc41a3            | -1 |
| 17243 | 21251 | Bcl6b         | Cpt1a              | -1 |
| 17243 | 22732 | Bcl6b         | Cyb5b              | 1  |
| 17269 | 20058 | Spsb1         | Dnaic1             | -1 |
| 17282 | 3446  | Pdhb          | Eno1               | 1  |
| 17282 | 4056  | Pdhb          | Tnfaip8l1          | -1 |
| 17282 | 5364  | Pdhb          | Kif22              | -1 |
| 17282 | 5449  | Pdhb          | Got1               | 1  |
| 17282 | 8773  | Pdhb          | MMT00027093        | -1 |
| 17282 | 9842  | Pdhb          | Qdpr               | 1  |
| 17282 | 10554 | Pdhb          | ENSMUSG00000074179 | 1  |

|       |       |               |               |    |
|-------|-------|---------------|---------------|----|
| 17282 | 12556 | Pdhb          | Ass1          | 1  |
| 17282 | 13293 | Pdhb          | Gsta2         | 1  |
| 17282 | 14055 | Pdhb          | MMT00050438   | -1 |
| 17282 | 15205 | Pdhb          | MMT00030262   | -1 |
| 17282 | 18549 | Pdhb          | Robo1         | 1  |
| 17282 | 21727 | Pdhb          | Khk           | 1  |
| 17282 | 22998 | Pdhb          | Ass1          | 1  |
| 17282 | 23640 | Pdhb          | Bdh1          | -1 |
| 17285 | 2485  | 1700019E19Rik | Adck1         | 1  |
| 17285 | 6755  | 1700019E19Rik | Wdr22         | 1  |
| 17285 | 7388  | 1700019E19Rik | Amn           | 1  |
| 17285 | 13988 | 1700019E19Rik | Cntnap2       | 1  |
| 17285 | 15618 | 1700019E19Rik | Sel1l         | -1 |
| 17285 | 17285 | 1700019E19Rik | 1700019E19Rik | 1  |
| 17285 | 20292 | 1700019E19Rik | 1810048J11Rik | 1  |
| 17285 | 22297 | 1700019E19Rik | Zfyve1        | -1 |
| 17292 | 12910 | Atp6v1b2      | 1110028A07Rik | 1  |
| 17295 | 2472  | MMT00082577   | MMT00014056   | 1  |
| 17295 | 7192  | MMT00082577   | Ttc21b        | 1  |
| 17295 | 7654  | MMT00082577   | Ptpmt1        | -1 |
| 17295 | 9547  | MMT00082577   | MMT00006479   | 1  |
| 17295 | 14757 | MMT00082577   | Hdx           | 1  |
| 17295 | 16881 | MMT00082577   | MMT00031504   | 1  |
| 17295 | 17295 | MMT00082577   | MMT00082577   | 1  |
| 17295 | 19763 | MMT00082577   | Acp2          | 1  |
| 17295 | 19803 | MMT00082577   | BC003993      | 1  |
| 17295 | 22320 | MMT00082577   | MMT00047284   | 1  |
| 17295 | 23474 | MMT00082577   | MMT00011721   | 1  |
| 17314 | 1985  | Napa          | Pepd          | 1  |
| 17314 | 2599  | Napa          | Lsm14a        | -1 |
| 17314 | 4697  | Napa          | Cyp2a12       | 1  |
| 17314 | 6513  | Napa          | Qpctl         | -1 |
| 17314 | 9122  | Napa          | Sepw1         | -1 |
| 17314 | 11888 | Napa          | Myadm         | 1  |
| 17314 | 13293 | Napa          | Gsta2         | 1  |
| 17314 | 16639 | Napa          | MMT00078937   | 1  |
| 17314 | 17314 | Napa          | Napa          | 1  |
| 17314 | 19462 | Napa          | 4933439C20Rik | 1  |
| 17314 | 20606 | Napa          | MMT00042166   | 1  |
| 17314 | 23247 | Napa          | Ercc1         | 1  |
| 17317 | 15708 | Jmjd1a        | Retsat        | -1 |
| 17321 | 2179  | Hepacam       | Trim3         | 1  |
| 17321 | 4796  | Hepacam       | Rcctb2        | 1  |
| 17321 | 10711 | Hepacam       | 1700108F19Rik | 1  |
| 17321 | 12280 | Hepacam       | Cln5          | -1 |
| 17321 | 13588 | Hepacam       | MMT00042387   | 1  |
| 17321 | 17321 | Hepacam       | Hepacam       | 1  |
| 17322 | 13493 | Zfp758        | Ring1         | 1  |
| 17323 | 7718  | Tubb6         | Pdia6         | 1  |
| 17323 | 18846 | Tubb6         | Ikbkg         | 1  |
| 17328 | 607   | H2afv         | Me1           | -1 |



|       |       |             |                    |    |
|-------|-------|-------------|--------------------|----|
| 17329 | 12910 | MMT00035807 | 1110028A07Rik      | 1  |
| 17333 | 607   | Slc25a10    | Me1                | 1  |
| 17333 | 1129  | Slc25a10    | Gsta4              | 1  |
| 17333 | 3832  | Slc25a10    | Sdhb               | 1  |
| 17333 | 4056  | Slc25a10    | Tnfaip8l1          | -1 |
| 17333 | 5680  | Slc25a10    | Lrg1               | -1 |
| 17333 | 7602  | Slc25a10    | Pcca               | 1  |
| 17333 | 10554 | Slc25a10    | ENSMUSG00000074179 | 1  |
| 17333 | 13293 | Slc25a10    | Gsta2              | 1  |
| 17333 | 15205 | Slc25a10    | MMT00030262        | -1 |
| 17333 | 18201 | Slc25a10    | MMT00060232        | 1  |
| 17333 | 20019 | Slc25a10    | Qdpr               | 1  |
| 17333 | 21214 | Slc25a10    | Scd1               | 1  |
| 17333 | 21575 | Slc25a10    | Cyp2c55            | 1  |
| 17333 | 21727 | Slc25a10    | Khk                | 1  |
| 17342 | 607   | Dhx32       | Me1                | 1  |
| 17342 | 1941  | Dhx32       | MMT00079618        | 1  |
| 17342 | 2013  | Dhx32       | Il15ra             | -1 |
| 17342 | 2051  | Dhx32       | Ddx27              | -1 |
| 17342 | 2322  | Dhx32       | Tuba4a             | 1  |
| 17342 | 6193  | Dhx32       | Lactb2             | 1  |
| 17342 | 7151  | Dhx32       | MMT00007982        | 1  |
| 17342 | 8896  | Dhx32       | Fasn               | 1  |
| 17342 | 9763  | Dhx32       | Tuba3b             | 1  |
| 17342 | 10612 | Dhx32       | Slc24a6            | -1 |
| 17342 | 11462 | Dhx32       | Gpam               | 1  |
| 17342 | 11724 | Dhx32       | Tuba3a             | 1  |
| 17342 | 12219 | Dhx32       | Cyb5b              | 1  |
| 17342 | 12460 | Dhx32       | Pnpla2             | -1 |
| 17342 | 14147 | Dhx32       | Acss2              | 1  |
| 17342 | 15252 | Dhx32       | MMT00019402        | 1  |
| 17342 | 15935 | Dhx32       | Pnpla3             | 1  |
| 17342 | 17660 | Dhx32       | Nlrp12             | -1 |
| 17342 | 17862 | Dhx32       | Fbxo21             | -1 |
| 17342 | 17878 | Dhx32       | Brap               | -1 |
| 17342 | 18286 | Dhx32       | Slc41a3            | -1 |
| 17342 | 20798 | Dhx32       | Ccp1               | -1 |
| 17342 | 21143 | Dhx32       | Ypel3              | -1 |
| 17342 | 21202 | Dhx32       | Acly               | 1  |
| 17342 | 21251 | Dhx32       | Cpt1a              | -1 |
| 17342 | 22443 | Dhx32       | Tuba1c             | 1  |
| 17342 | 22732 | Dhx32       | Cyb5b              | 1  |
| 17343 | 607   | Timm8a1     | Me1                | 1  |
| 17343 | 3377  | Timm8a1     | Cs                 | 1  |
| 17343 | 8815  | Timm8a1     | Mx1                | 1  |
| 17343 | 18201 | Timm8a1     | MMT00060232        | 1  |
| 17343 | 21214 | Timm8a1     | Scd1               | 1  |
| 17343 | 21727 | Timm8a1     | Khk                | 1  |
| 17344 | 5680  | Lonrf2      | Lrg1               | -1 |
| 17344 | 7602  | Lonrf2      | Pcca               | 1  |
| 17344 | 10554 | Lonrf2      | ENSMUSG00000074179 | 1  |

|       |       |               |                    |    |
|-------|-------|---------------|--------------------|----|
| 17344 | 13293 | Lonrf2        | Gsta2              | 1  |
| 17348 | 5364  | Pf4           | Kif22              | 1  |
| 17348 | 14472 | Pf4           | Ahcy               | -1 |
| 17348 | 15320 | Pf4           | MMT00017479        | -1 |
| 17351 | 11382 | Rtkn2         | Cdca3              | 1  |
| 17352 | 3242  | Cebpb         | 2700049A03Rik      | -1 |
| 17352 | 17591 | Cebpb         | D930015E06Rik      | -1 |
| 17352 | 18099 | Cebpb         | Nfx1               | -1 |
| 17356 | 5227  | Rgnf          | 2310008M10Rik      | -1 |
| 17363 | 9010  | Aebp2         | 8430419L09Rik      | -1 |
| 17363 | 17391 | Aebp2         | C530028O21Rik      | 1  |
| 17363 | 19964 | Aebp2         | Ndufa9             | 1  |
| 17365 | 15501 | Isl2          | Smad7              | 1  |
| 17371 | 3159  | Emx2          | Pld1               | -1 |
| 17371 | 5822  | Emx2          | Car2               | -1 |
| 17371 | 5938  | Emx2          | Pfn2               | -1 |
| 17371 | 13423 | Emx2          | ENSMUSG00000053749 | -1 |
| 17371 | 15508 | Emx2          | 4632415L05Rik      | -1 |
| 17371 | 16416 | Emx2          | Commd2             | -1 |
| 17371 | 18790 | Emx2          | Car3               | -1 |
| 17371 | 21323 | Emx2          | MMT00074228        | -1 |
| 17376 | 5884  | MMT00032526   | Gstm2              | -1 |
| 17376 | 6370  | MMT00032526   | Aqp8               | -1 |
| 17376 | 8815  | MMT00032526   | Mx1                | -1 |
| 17376 | 11054 | MMT00032526   | Rnase4             | 1  |
| 17376 | 14147 | MMT00032526   | Acss2              | -1 |
| 17376 | 14151 | MMT00032526   | Slc44a1            | -1 |
| 17376 | 20019 | MMT00032526   | Qdpr               | -1 |
| 17376 | 21214 | MMT00032526   | Scd1               | -1 |
| 17376 | 21575 | MMT00032526   | Cyp2c55            | -1 |
| 17376 | 21966 | MMT00032526   | Pcp4l1             | 1  |
| 17376 | 22138 | MMT00032526   | Ang                | 1  |
| 17385 | 5804  | Asah3         | Thrsp              | 1  |
| 17389 | 1985  | Pop4          | Pepd               | 1  |
| 17389 | 3698  | Pop4          | 1600014C10Rik      | -1 |
| 17389 | 17389 | Pop4          | Pop4               | 1  |
| 17389 | 18053 | Pop4          | Psmc4              | -1 |
| 17389 | 23283 | Pop4          | Mrps12             | -1 |
| 17391 | 630   | C530028O21Rik | C1s                | -1 |
| 17391 | 1444  | C530028O21Rik | C1r                | -1 |
| 17391 | 2932  | C530028O21Rik | Slco1a1            | -1 |
| 17391 | 3078  | C530028O21Rik | 9630033F20Rik      | 1  |
| 17391 | 7678  | C530028O21Rik | Ltbr               | 1  |
| 17391 | 8194  | C530028O21Rik | MMT00077789        | 1  |
| 17391 | 9010  | C530028O21Rik | 8430419L09Rik      | -1 |
| 17391 | 9417  | C530028O21Rik | Cd163              | 1  |
| 17391 | 14557 | C530028O21Rik | Pyroxd1            | 1  |
| 17391 | 17391 | C530028O21Rik | C530028O21Rik      | 1  |
| 17391 | 17743 | C530028O21Rik | Phb2               | 1  |
| 17391 | 19964 | C530028O21Rik | Ndufa9             | 1  |
| 17391 | 19999 | C530028O21Rik | Ift122             | -1 |

|       |       |               |               |    |
|-------|-------|---------------|---------------|----|
| 17391 | 20127 | C530028O21Rik | Ipo8          | -1 |
| 17391 | 22075 | C530028O21Rik | C1s           | -1 |
| 17393 | 269   | MMT00063804   | Tuba1b        | 1  |
| 17393 | 827   | MMT00063804   | Flcn          | -1 |
| 17393 | 1941  | MMT00063804   | MMT00079618   | 1  |
| 17393 | 5594  | MMT00063804   | Erb3          | -1 |
| 17393 | 7151  | MMT00063804   | MMT00007982   | 1  |
| 17393 | 9763  | MMT00063804   | Tuba3b        | 1  |
| 17393 | 10612 | MMT00063804   | Slc24a6       | -1 |
| 17393 | 11724 | MMT00063804   | Tuba3a        | 1  |
| 17393 | 17444 | MMT00063804   | Tuba1a        | 1  |
| 17393 | 17656 | MMT00063804   | Hdhd3         | 1  |
| 17393 | 21733 | MMT00063804   | Rheb1         | -1 |
| 17393 | 22388 | MMT00063804   | 2410018M08Rik | -1 |
| 17393 | 22443 | MMT00063804   | Tuba1c        | 1  |
| 17403 | 2703  | N4bp1         | MMT00073763   | -1 |
| 17403 | 3052  | N4bp1         | 9130404D08Rik | 1  |
| 17403 | 3055  | N4bp1         | Pde4c         | -1 |
| 17403 | 5433  | N4bp1         | 2410004L22Rik | 1  |
| 17403 | 7503  | N4bp1         | Rab11fip1     | -1 |
| 17403 | 10195 | N4bp1         | Klf1          | -1 |
| 17403 | 10273 | N4bp1         | Gpt2          | -1 |
| 17404 | 5364  | Ctsb          | Kif22         | 1  |
| 17404 | 20967 | Ctsb          | Fabp2         | 1  |
| 17406 | 21733 | 4933428G09Rik | Rheb1         | -1 |
| 17412 | 6888  | Aif1          | Cxcl9         | 1  |
| 17412 | 7238  | Aif1          | Pycard        | 1  |
| 17412 | 7316  | Aif1          | Ifi204        | 1  |
| 17412 | 8555  | Aif1          | H2-M3         | 1  |
| 17412 | 8800  | Aif1          | Rnf213        | 1  |
| 17412 | 9717  | Aif1          | Psm9          | 1  |
| 17412 | 12398 | Aif1          | Ifi44         | 1  |
| 17412 | 12600 | Aif1          | Ifi204        | 1  |
| 17412 | 13527 | Aif1          | Ctss          | 1  |
| 17412 | 14258 | Aif1          | Ifi47         | 1  |
| 17412 | 14880 | Aif1          | Ms4a4c        | 1  |
| 17412 | 15449 | Aif1          | Mitd1         | 1  |
| 17412 | 16147 | Aif1          | Tlr2          | 1  |
| 17412 | 16182 | Aif1          | Oasl1         | 1  |
| 17412 | 21549 | Aif1          | Rtp4          | 1  |
| 17412 | 21824 | Aif1          | 5830443L24Rik | 1  |
| 17412 | 23208 | Aif1          | Hck           | 1  |
| 17420 | 6931  | Vps13b        | Hrsp12        | -1 |
| 17420 | 11992 | Vps13b        | Mrpl19        | -1 |
| 17420 | 13648 | Vps13b        | Dap           | -1 |
| 17420 | 17082 | Vps13b        | MMT00013155   | -1 |
| 17420 | 20209 | Vps13b        | 5730557B15Rik | -1 |
| 17420 | 20871 | Vps13b        | Pop1          | 1  |
| 17420 | 22362 | Vps13b        | Laptm4b       | -1 |
| 17421 | 21214 | MMT00002048   | Scd1          | 1  |
| 17422 | 7619  | Dctd          | Pik3ip1       | -1 |

|       |       |         |                    |    |
|-------|-------|---------|--------------------|----|
| 17429 | 874   | Tpi1    | Aldh1a7            | 1  |
| 17429 | 3377  | Tpi1    | Cs                 | 1  |
| 17429 | 5884  | Tpi1    | Gstm2              | 1  |
| 17429 | 8815  | Tpi1    | Mx1                | 1  |
| 17429 | 18201 | Tpi1    | MMT00060232        | 1  |
| 17429 | 21214 | Tpi1    | Scd1               | 1  |
| 17429 | 21575 | Tpi1    | Cyp2c55            | 1  |
| 17429 | 21966 | Tpi1    | Pcp4l1             | -1 |
| 17429 | 22562 | Tpi1    | Sdha               | 1  |
| 17444 | 607   | Tuba1a  | Me1                | 1  |
| 17444 | 874   | Tuba1a  | Aldh1a7            | 1  |
| 17444 | 4351  | Tuba1a  | Plxnb1             | -1 |
| 17444 | 6193  | Tuba1a  | Lactb2             | 1  |
| 17444 | 8444  | Tuba1a  | Rdh16              | 1  |
| 17444 | 8815  | Tuba1a  | Mx1                | 1  |
| 17444 | 12910 | Tuba1a  | 1110028A07Rik      | 1  |
| 17444 | 14017 | Tuba1a  | Ces5               | 1  |
| 17444 | 18201 | Tuba1a  | MMT00060232        | 1  |
| 17444 | 18286 | Tuba1a  | Slc41a3            | -1 |
| 17444 | 20079 | Tuba1a  | MMT00019254        | -1 |
| 17444 | 21202 | Tuba1a  | Acly               | 1  |
| 17444 | 21214 | Tuba1a  | Scd1               | 1  |
| 17444 | 21575 | Tuba1a  | Cyp2c55            | 1  |
| 17444 | 22138 | Tuba1a  | Ang                | -1 |
| 17444 | 23008 | Tuba1a  | Ctsz               | -1 |
| 17444 | 23026 | Tuba1a  | Apom               | -1 |
| 17447 | 8721  | Ctsf    | Tbc1d10c           | 1  |
| 17447 | 17447 | Ctsf    | Ctsf               | 1  |
| 17461 | 12232 | Ripk5   | MMT00060943        | 1  |
| 17461 | 13140 | Ripk5   | MMT00005814        | 1  |
| 17461 | 17461 | Ripk5   | Ripk5              | 1  |
| 17463 | 246   | Rgl1    | MMT00053742        | 1  |
| 17463 | 9611  | Rgl1    | Ncf2               | 1  |
| 17463 | 15569 | Rgl1    | BC003331           | 1  |
| 17463 | 17463 | Rgl1    | Rgl1               | 1  |
| 17472 | 5364  | Cd53    | Kif22              | 1  |
| 17485 | 12556 | Ndufab1 | Ass1               | 1  |
| 17485 | 22998 | Ndufab1 | Ass1               | 1  |
| 17497 | 1129  | Ptges   | Gsta4              | 1  |
| 17497 | 4056  | Ptges   | Tnfaip8l1          | -1 |
| 17497 | 5449  | Ptges   | Got1               | 1  |
| 17497 | 6085  | Ptges   | MMT00007454        | -1 |
| 17497 | 7602  | Ptges   | Pcca               | 1  |
| 17497 | 8773  | Ptges   | MMT00027093        | -1 |
| 17497 | 9842  | Ptges   | Qdpr               | 1  |
| 17497 | 10554 | Ptges   | ENSMUSG00000074179 | 1  |
| 17497 | 12556 | Ptges   | Ass1               | 1  |
| 17497 | 12955 | Ptges   | Atp5o              | 1  |
| 17497 | 13293 | Ptges   | Gsta2              | 1  |
| 17497 | 13431 | Ptges   | MMT00038058        | -1 |
| 17497 | 14055 | Ptges   | MMT00050438        | -1 |

|       |       |          |               |    |
|-------|-------|----------|---------------|----|
| 17497 | 14147 | Ptges    | Acss2         | 1  |
| 17497 | 15205 | Ptges    | MMT00030262   | -1 |
| 17497 | 15500 | Ptges    | MMT00081411   | -1 |
| 17497 | 18201 | Ptges    | MMT00060232   | 1  |
| 17497 | 20019 | Ptges    | Qdpr          | 1  |
| 17497 | 21202 | Ptges    | Acly          | 1  |
| 17497 | 21214 | Ptges    | Scd1          | 1  |
| 17497 | 21727 | Ptges    | Khk           | 1  |
| 17497 | 22406 | Ptges    | Vnn1          | -1 |
| 17497 | 22732 | Ptges    | Cyb5b         | 1  |
| 17497 | 22907 | Ptges    | MMT00054594   | -1 |
| 17497 | 22978 | Ptges    | MMT00043176   | -1 |
| 17497 | 22998 | Ptges    | Ass1          | 1  |
| 17497 | 23640 | Ptges    | Bdh1          | -1 |
| 17503 | 607   | Cnm2     | Me1           | 1  |
| 17503 | 12910 | Cnm2     | 1110028A07Rik | 1  |
| 17503 | 18201 | Cnm2     | MMT00060232   | 1  |
| 17503 | 20058 | Cnm2     | Dnaic1        | -1 |
| 17512 | 6193  | EG433216 | Lactb2        | 1  |
| 17512 | 8815  | EG433216 | Mx1           | 1  |
| 17512 | 14017 | EG433216 | Ces5          | 1  |
| 17512 | 18201 | EG433216 | MMT00060232   | 1  |
| 17512 | 21214 | EG433216 | Scd1          | 1  |
| 17512 | 21575 | EG433216 | Cyp2c55       | 1  |
| 17512 | 22138 | EG433216 | Ang           | -1 |
| 17513 | 18050 | Rin1     | MMT00003408   | -1 |
| 17514 | 6157  | Thbd     | MMT00041452   | -1 |
| 17514 | 12916 | Thbd     | Fkbp1a        | 1  |
| 17514 | 13581 | Thbd     | Srxn1         | 1  |
| 17525 | 337   | Ctgf     | Rasgef1b      | 1  |
| 17525 | 563   | Ctgf     | D4Bwg0951e    | 1  |
| 17525 | 2294  | Ctgf     | AU040829      | 1  |
| 17525 | 3097  | Ctgf     | Ppp1r3g       | 1  |
| 17525 | 3196  | Ctgf     | Tat           | 1  |
| 17525 | 4286  | Ctgf     | Ptp4a1        | 1  |
| 17525 | 4708  | Ctgf     | Traf3ip2      | -1 |
| 17525 | 5449  | Ctgf     | Got1          | 1  |
| 17525 | 5889  | Ctgf     | Errfi1        | 1  |
| 17525 | 6564  | Ctgf     | Cebpd         | 1  |
| 17525 | 6756  | Ctgf     | Sds           | 1  |
| 17525 | 8816  | Ctgf     | Nfkbia        | 1  |
| 17525 | 9213  | Ctgf     | Osgin1        | -1 |
| 17525 | 9275  | Ctgf     | Aass          | 1  |
| 17525 | 10408 | Ctgf     | Per1          | 1  |
| 17525 | 11808 | Ctgf     | Pck1          | 1  |
| 17525 | 12761 | Ctgf     | Tsc22d3       | 1  |
| 17525 | 14462 | Ctgf     | Zfp385b       | 1  |
| 17525 | 15021 | Ctgf     | Ppargc1a      | 1  |
| 17525 | 15631 | Ctgf     | Lpin1         | 1  |
| 17525 | 15882 | Ctgf     | AA986860      | 1  |
| 17525 | 16517 | Ctgf     | D4Wsu53e      | 1  |

|       |       |               |               |    |
|-------|-------|---------------|---------------|----|
| 17525 | 16580 | Ctgf          | Tnfaip2       | -1 |
| 17525 | 17352 | Ctgf          | Cebpb         | 1  |
| 17525 | 17525 | Ctgf          | Ctgf          | 1  |
| 17525 | 17622 | Ctgf          | Foxo1         | 1  |
| 17525 | 18027 | Ctgf          | 5730403B10Rik | 1  |
| 17525 | 18083 | Ctgf          | Gadd45a       | -1 |
| 17525 | 18785 | Ctgf          | Angptl4       | 1  |
| 17525 | 19025 | Ctgf          | Slc37a4       | 1  |
| 17525 | 19466 | Ctgf          | Pptc7         | 1  |
| 17525 | 21331 | Ctgf          | Slc10a6       | 1  |
| 17525 | 22873 | Ctgf          | Slc38a2       | 1  |
| 17525 | 23552 | Ctgf          | Rasl11b       | -1 |
| 17528 | 1580  | Gmnn          | Mrs2          | -1 |
| 17528 | 3938  | Gmnn          | Abt1          | -1 |
| 17528 | 10189 | Gmnn          | Cage1         | -1 |
| 17528 | 11094 | Gmnn          | Slc17a3       | 1  |
| 17528 | 11649 | Gmnn          | Hfe           | -1 |
| 17528 | 15698 | Gmnn          | Them2         | 1  |
| 17528 | 17528 | Gmnn          | Gmnn          | 1  |
| 17528 | 20759 | Gmnn          | Slc17a1       | 1  |
| 17528 | 23118 | Gmnn          | Ttrap         | 1  |
| 17529 | 17147 | Tnfrsf13c     | Ttll12        | 1  |
| 17529 | 19216 | Tnfrsf13c     | Bik           | 1  |
| 17535 | 2115  | MMT00008110   | Gpr12         | -1 |
| 17542 | 4286  | MMT00044805   | Ptp4a1        | 1  |
| 17542 | 5574  | MMT00044805   | Hsd3b7        | -1 |
| 17542 | 11129 | MMT00044805   | Ankhd1        | 1  |
| 17542 | 11744 | MMT00044805   | Ctnnb1        | -1 |
| 17542 | 11807 | MMT00044805   | Fbxo31        | 1  |
| 17542 | 16176 | MMT00044805   | St3gal5       | 1  |
| 17542 | 16647 | MMT00044805   | D16H22S680E   | 1  |
| 17542 | 18827 | MMT00044805   | Oprs1         | -1 |
| 17542 | 19277 | MMT00044805   | MMT00044927   | 1  |
| 17562 | 1655  | Rbed1         | Mgrn1         | 1  |
| 17562 | 2743  | Rbed1         | Tcf3          | 1  |
| 17562 | 3620  | Rbed1         | Bet1          | -1 |
| 17562 | 3703  | Rbed1         | Ggcx          | 1  |
| 17562 | 5934  | Rbed1         | S100a10       | -1 |
| 17562 | 11338 | Rbed1         | Vamp8         | 1  |
| 17562 | 11807 | Rbed1         | Fbxo31        | 1  |
| 17562 | 11872 | Rbed1         | Vamp5         | 1  |
| 17562 | 15384 | Rbed1         | Mat2a         | 1  |
| 17562 | 15708 | Rbed1         | Retsat        | 1  |
| 17562 | 16670 | Rbed1         | Csmd2         | -1 |
| 17562 | 21251 | Rbed1         | Cpt1a         | 1  |
| 17568 | 8815  | Rexo2         | Mx1           | 1  |
| 17568 | 18201 | Rexo2         | MMT00060232   | 1  |
| 17568 | 21214 | Rexo2         | Scd1          | 1  |
| 17568 | 21575 | Rexo2         | Cyp2c55       | 1  |
| 17569 | 8444  | 1810058124Rik | Rdh16         | 1  |
| 17569 | 20058 | 1810058124Rik | Dnaic1        | -1 |

|       |       |        |               |    |
|-------|-------|--------|---------------|----|
| 17574 | 5232  | Prdm16 | Arhgef16      | 1  |
| 17574 | 17574 | Prdm16 | Prdm16        | 1  |
| 17583 | 250   | Per2   | Tubb2a-ps2    | -1 |
| 17583 | 337   | Per2   | Rasgef1b      | 1  |
| 17583 | 402   | Per2   | Timp3         | 1  |
| 17583 | 407   | Per2   | Serpina6      | 1  |
| 17583 | 415   | Per2   | Ypel2         | -1 |
| 17583 | 433   | Per2   | Pla2g12b      | -1 |
| 17583 | 437   | Per2   | Ndrp1         | -1 |
| 17583 | 530   | Per2   | Mest          | -1 |
| 17583 | 547   | Per2   | Mknk2         | 1  |
| 17583 | 604   | Per2   | Ppp1r15b      | 1  |
| 17583 | 609   | Per2   | MMT00060868   | -1 |
| 17583 | 719   | Per2   | Usp2          | 1  |
| 17583 | 793   | Per2   | Morc3         | 1  |
| 17583 | 1310  | Per2   | Cabc1         | -1 |
| 17583 | 1362  | Per2   | Avpr1a        | -1 |
| 17583 | 1363  | Per2   | BC021767      | -1 |
| 17583 | 1371  | Per2   | 1200009106Rik | -1 |
| 17583 | 1646  | Per2   | Slc15a4       | 1  |
| 17583 | 1767  | Per2   | BC016495      | 1  |
| 17583 | 1853  | Per2   | Stat5a        | -1 |
| 17583 | 1876  | Per2   | Amdhd1        | -1 |
| 17583 | 2050  | Per2   | Lpl           | -1 |
| 17583 | 2110  | Per2   | Gtf2ird1      | -1 |
| 17583 | 2126  | Per2   | Dgat2         | 1  |
| 17583 | 2200  | Per2   | BC006779      | -1 |
| 17583 | 2384  | Per2   | Micalcl       | -1 |
| 17583 | 2399  | Per2   | MMT00060167   | -1 |
| 17583 | 2529  | Per2   | Hmcn2         | 1  |
| 17583 | 2615  | Per2   | EG624862      | 1  |
| 17583 | 2636  | Per2   | Tars          | -1 |
| 17583 | 2766  | Per2   | Elp4          | -1 |
| 17583 | 2794  | Per2   | Map3k6        | 1  |
| 17583 | 2829  | Per2   | Lrfr3         | -1 |
| 17583 | 2850  | Per2   | Slc16a6       | -1 |
| 17583 | 3170  | Per2   | Mcart1        | 1  |
| 17583 | 3196  | Per2   | Tat           | 1  |
| 17583 | 3214  | Per2   | Dnmt3b        | -1 |
| 17583 | 3235  | Per2   | BC029214      | -1 |
| 17583 | 3410  | Per2   | Paqr9         | -1 |
| 17583 | 3452  | Per2   | Ccrn4l        | 1  |
| 17583 | 3502  | Per2   | Gde1          | 1  |
| 17583 | 3746  | Per2   | Ospl5         | 1  |
| 17583 | 3789  | Per2   | 4833442J19Rik | 1  |
| 17583 | 3790  | Per2   | Mtss1         | 1  |
| 17583 | 3804  | Per2   | MMT00015534   | -1 |
| 17583 | 4235  | Per2   | Pfkb3         | 1  |
| 17583 | 4286  | Per2   | Ptp4a1        | 1  |
| 17583 | 4333  | Per2   | Sumo3         | -1 |
| 17583 | 4392  | Per2   | 1810055G02Rik | 1  |

|       |      |      |               |    |
|-------|------|------|---------------|----|
| 17583 | 4534 | Per2 | Ndel1         | 1  |
| 17583 | 4678 | Per2 | Kank1         | -1 |
| 17583 | 4708 | Per2 | Traf3ip2      | -1 |
| 17583 | 4797 | Per2 | Fbxo25        | -1 |
| 17583 | 5068 | Per2 | Afap1i2       | -1 |
| 17583 | 5183 | Per2 | St5           | -1 |
| 17583 | 5187 | Per2 | Speer4f       | 1  |
| 17583 | 5364 | Per2 | Kif22         | -1 |
| 17583 | 5374 | Per2 | Chka          | -1 |
| 17583 | 5569 | Per2 | Pdgfc         | -1 |
| 17583 | 5574 | Per2 | Hsd3b7        | -1 |
| 17583 | 5734 | Per2 | EG619653      | 1  |
| 17583 | 5791 | Per2 | Baiap2i1      | 1  |
| 17583 | 5802 | Per2 | Mad2i2        | -1 |
| 17583 | 5804 | Per2 | Thrsp         | 1  |
| 17583 | 5849 | Per2 | 2310031A18Rik | -1 |
| 17583 | 5856 | Per2 | Mfsd2         | 1  |
| 17583 | 5858 | Per2 | Itch          | 1  |
| 17583 | 5892 | Per2 | MMT00038457   | 1  |
| 17583 | 5934 | Per2 | S100a10       | -1 |
| 17583 | 5974 | Per2 | Arntl         | -1 |
| 17583 | 6019 | Per2 | Gdap10        | 1  |
| 17583 | 6028 | Per2 | Alas1         | 1  |
| 17583 | 6030 | Per2 | As3mt         | 1  |
| 17583 | 6118 | Per2 | Slc1a4        | -1 |
| 17583 | 6211 | Per2 | Arhgap24      | -1 |
| 17583 | 6282 | Per2 | Them4         | 1  |
| 17583 | 6343 | Per2 | Slc20a1       | 1  |
| 17583 | 6370 | Per2 | Aqp8          | -1 |
| 17583 | 6386 | Per2 | Por           | 1  |
| 17583 | 6394 | Per2 | Fbxo6         | -1 |
| 17583 | 6564 | Per2 | Cebpd         | 1  |
| 17583 | 6589 | Per2 | Mafb          | 1  |
| 17583 | 6639 | Per2 | Fads3         | -1 |
| 17583 | 6657 | Per2 | Irf6          | -1 |
| 17583 | 6756 | Per2 | Sds           | 1  |
| 17583 | 6788 | Per2 | Psen2         | -1 |
| 17583 | 6916 | Per2 | Wdr5b         | -1 |
| 17583 | 6928 | Per2 | Klhl8         | -1 |
| 17583 | 6990 | Per2 | Nr1i2         | 1  |
| 17583 | 7061 | Per2 | Spsb3         | -1 |
| 17583 | 7112 | Per2 | Apbb3         | 1  |
| 17583 | 7414 | Per2 | Clpx          | -1 |
| 17583 | 7492 | Per2 | Adfp          | -1 |
| 17583 | 7862 | Per2 | Cpsf4l        | 1  |
| 17583 | 7954 | Per2 | Ccdc12        | -1 |
| 17583 | 7963 | Per2 | Rxrg          | -1 |
| 17583 | 7973 | Per2 | Lgals9        | -1 |
| 17583 | 8328 | Per2 | Klhdc8a       | -1 |
| 17583 | 8399 | Per2 | Herpud1       | 1  |
| 17583 | 8404 | Per2 | Fa2h          | -1 |



|       |       |      |               |    |
|-------|-------|------|---------------|----|
| 17583 | 8428  | Per2 | Sorbs3        | 1  |
| 17583 | 8641  | Per2 | Slc7a2        | 1  |
| 17583 | 8711  | Per2 | 5430432M24Rik | -1 |
| 17583 | 9065  | Per2 | Reep4         | -1 |
| 17583 | 9127  | Per2 | Mtfmt         | -1 |
| 17583 | 9158  | Per2 | Pde9a         | -1 |
| 17583 | 9213  | Per2 | Osgin1        | -1 |
| 17583 | 9260  | Per2 | Cmtm6         | -1 |
| 17583 | 9309  | Per2 | MMT00035904   | 1  |
| 17583 | 9379  | Per2 | Ypel2         | -1 |
| 17583 | 9481  | Per2 | Ppl           | 1  |
| 17583 | 9495  | Per2 | Srms          | -1 |
| 17583 | 9554  | Per2 | Hmgb211       | -1 |
| 17583 | 9831  | Per2 | Nedd4l        | -1 |
| 17583 | 9910  | Per2 | EG666644      | 1  |
| 17583 | 10088 | Per2 | Ddc           | -1 |
| 17583 | 10166 | Per2 | Rhbdd2        | 1  |
| 17583 | 10207 | Per2 | MMT00012324   | -1 |
| 17583 | 10215 | Per2 | Nampt         | 1  |
| 17583 | 10408 | Per2 | Per1          | 1  |
| 17583 | 10486 | Per2 | 1300002K09Rik | -1 |
| 17583 | 10642 | Per2 | Ngef          | 1  |
| 17583 | 10712 | Per2 | Fchsd2        | 1  |
| 17583 | 10775 | Per2 | Slc16a1       | -1 |
| 17583 | 11093 | Per2 | Zdhhc1        | 1  |
| 17583 | 11129 | Per2 | Ankhd1        | 1  |
| 17583 | 11193 | Per2 | Tsc22d1       | -1 |
| 17583 | 11233 | Per2 | Tef           | 1  |
| 17583 | 11506 | Per2 | Rfxank        | -1 |
| 17583 | 11574 | Per2 | Gne           | 1  |
| 17583 | 11576 | Per2 | Gm1381        | 1  |
| 17583 | 11599 | Per2 | Coq10b        | 1  |
| 17583 | 11614 | Per2 | Sult1e1       | 1  |
| 17583 | 11741 | Per2 | Slc30a10      | -1 |
| 17583 | 11807 | Per2 | Fbxo31        | 1  |
| 17583 | 11808 | Per2 | Pck1          | 1  |
| 17583 | 11857 | Per2 | Arv1          | -1 |
| 17583 | 12114 | Per2 | Homer2        | 1  |
| 17583 | 12151 | Per2 | MMT00082650   | 1  |
| 17583 | 12165 | Per2 | Ppp2r1b       | -1 |
| 17583 | 12193 | Per2 | Aco2          | 1  |
| 17583 | 12204 | Per2 | Ankmy2        | 1  |
| 17583 | 12420 | Per2 | Klhl21        | 1  |
| 17583 | 12489 | Per2 | Wdr8          | -1 |
| 17583 | 12687 | Per2 | Zc3h8         | 1  |
| 17583 | 12761 | Per2 | Tsc22d3       | 1  |
| 17583 | 12799 | Per2 | Spon2         | -1 |
| 17583 | 12807 | Per2 | Faim          | -1 |
| 17583 | 12904 | Per2 | MMT00040704   | 1  |
| 17583 | 12905 | Per2 | Nfil3         | -1 |
| 17583 | 12941 | Per2 | Elovl5        | -1 |

|       |       |      |               |    |
|-------|-------|------|---------------|----|
| 17583 | 12982 | Per2 | Cars          | -1 |
| 17583 | 13078 | Per2 | Eps8l2        | -1 |
| 17583 | 13289 | Per2 | Dusp10        | -1 |
| 17583 | 13471 | Per2 | Cln8          | 1  |
| 17583 | 13630 | Per2 | Cdkn1a        | -1 |
| 17583 | 14041 | Per2 | Cldn1         | -1 |
| 17583 | 14050 | Per2 | Il12rb1       | 1  |
| 17583 | 14258 | Per2 | Ifi47         | -1 |
| 17583 | 14279 | Per2 | 3930402G23Rik | -1 |
| 17583 | 14442 | Per2 | Ethe1         | -1 |
| 17583 | 14462 | Per2 | Zfp385b       | 1  |
| 17583 | 14620 | Per2 | Tbc1d8        | 1  |
| 17583 | 15008 | Per2 | Chrdl2        | 1  |
| 17583 | 15021 | Per2 | Ppargc1a      | 1  |
| 17583 | 15049 | Per2 | Rnf125        | -1 |
| 17583 | 15425 | Per2 | Adprh         | -1 |
| 17583 | 15481 | Per2 | 1110067D22Rik | -1 |
| 17583 | 15521 | Per2 | Mast3         | 1  |
| 17583 | 15607 | Per2 | Klf13         | 1  |
| 17583 | 15609 | Per2 | Mreg          | -1 |
| 17583 | 15631 | Per2 | Lpin1         | 1  |
| 17583 | 15665 | Per2 | Blcap         | -1 |
| 17583 | 15709 | Per2 | Tceal1        | 1  |
| 17583 | 15758 | Per2 | Stx4a         | -1 |
| 17583 | 15824 | Per2 | D19Erttd721e  | -1 |
| 17583 | 15882 | Per2 | AA986860      | 1  |
| 17583 | 16060 | Per2 | Gys2          | 1  |
| 17583 | 16176 | Per2 | St3gal5       | 1  |
| 17583 | 16334 | Per2 | Parp2         | -1 |
| 17583 | 16474 | Per2 | Bhlhb2        | 1  |
| 17583 | 16515 | Per2 | Gramd4        | -1 |
| 17583 | 16580 | Per2 | Tnfaip2       | -1 |
| 17583 | 16647 | Per2 | D16H22S680E   | 1  |
| 17583 | 16669 | Per2 | Tjp2          | -1 |
| 17583 | 16690 | Per2 | Tjp3          | -1 |
| 17583 | 16712 | Per2 | Pnrc1         | -1 |
| 17583 | 16753 | Per2 | Hfe2          | -1 |
| 17583 | 16851 | Per2 | Slc34a2       | -1 |
| 17583 | 17078 | Per2 | Syde2         | 1  |
| 17583 | 17247 | Per2 | A030007L17Rik | -1 |
| 17583 | 17338 | Per2 | Mocos         | -1 |
| 17583 | 17352 | Per2 | Cebpb         | 1  |
| 17583 | 17493 | Per2 | Rfx4          | -1 |
| 17583 | 17525 | Per2 | Ctgf          | 1  |
| 17583 | 17583 | Per2 | Per2          | 1  |
| 17583 | 17622 | Per2 | Foxo1         | 1  |
| 17583 | 17876 | Per2 | Tubb4         | -1 |
| 17583 | 17884 | Per2 | Lnx2          | -1 |
| 17583 | 17952 | Per2 | Ripk2         | 1  |
| 17583 | 17999 | Per2 | A730017L22Rik | -1 |
| 17583 | 18027 | Per2 | 5730403B10Rik | 1  |

|       |       |      |               |    |
|-------|-------|------|---------------|----|
| 17583 | 18147 | Per2 | Nhlrc2        | 1  |
| 17583 | 18179 | Per2 | Dbp           | 1  |
| 17583 | 18314 | Per2 | 4631416L12Rik | 1  |
| 17583 | 18438 | Per2 | Map3k7ip2     | -1 |
| 17583 | 18455 | Per2 | Mtnr1a        | -1 |
| 17583 | 18498 | Per2 | Slc5a6        | 1  |
| 17583 | 18586 | Per2 | Tns1          | 1  |
| 17583 | 18607 | Per2 | Acat3         | -1 |
| 17583 | 18802 | Per2 | Nit2          | -1 |
| 17583 | 18827 | Per2 | Oprs1         | -1 |
| 17583 | 19004 | Per2 | Pdk4          | -1 |
| 17583 | 19025 | Per2 | Slc37a4       | 1  |
| 17583 | 19032 | Per2 | Tymp          | -1 |
| 17583 | 19136 | Per2 | Trim13        | -1 |
| 17583 | 19146 | Per2 | N4bp2l1       | 1  |
| 17583 | 19148 | Per2 | Rnf144b       | -1 |
| 17583 | 19217 | Per2 | Cyr61         | -1 |
| 17583 | 19234 | Per2 | Nrg4          | 1  |
| 17583 | 19277 | Per2 | MMT00044927   | 1  |
| 17583 | 19305 | Per2 | Azin1         | 1  |
| 17583 | 19323 | Per2 | Bnip3         | 1  |
| 17583 | 19375 | Per2 | Inhba         | -1 |
| 17583 | 19465 | Per2 | Hacl1         | -1 |
| 17583 | 19466 | Per2 | Pptc7         | 1  |
| 17583 | 19532 | Per2 | Med8          | -1 |
| 17583 | 19556 | Per2 | Efna1         | -1 |
| 17583 | 19671 | Per2 | Upp2          | 1  |
| 17583 | 19701 | Per2 | 9930021J17Rik | -1 |
| 17583 | 19723 | Per2 | Pfkfb1        | 1  |
| 17583 | 19757 | Per2 | Fkbp5         | 1  |
| 17583 | 19790 | Per2 | Polg2         | 1  |
| 17583 | 19917 | Per2 | Nek2          | -1 |
| 17583 | 20085 | Per2 | Lpin2         | 1  |
| 17583 | 20266 | Per2 | Insig2        | -1 |
| 17583 | 20689 | Per2 | Cnksr3        | -1 |
| 17583 | 20745 | Per2 | Sord          | 1  |
| 17583 | 20830 | Per2 | MMT00057509   | -1 |
| 17583 | 20854 | Per2 | Commd7        | -1 |
| 17583 | 21041 | Per2 | Cyp17a1       | 1  |
| 17583 | 21142 | Per2 | Gm129         | 1  |
| 17583 | 21188 | Per2 | Pnkp          | -1 |
| 17583 | 21313 | Per2 | Rhou          | -1 |
| 17583 | 21331 | Per2 | Slc10a6       | 1  |
| 17583 | 21409 | Per2 | Gldc          | -1 |
| 17583 | 21805 | Per2 | Plk3          | 1  |
| 17583 | 21811 | Per2 | Ak3l1         | 1  |
| 17583 | 21918 | Per2 | Snx24         | -1 |
| 17583 | 21934 | Per2 | Id2           | -1 |
| 17583 | 21969 | Per2 | Tk1           | 1  |
| 17583 | 22138 | Per2 | Ang           | 1  |
| 17583 | 22218 | Per2 | Rfc3          | -1 |

|       |       |               |               |    |
|-------|-------|---------------|---------------|----|
| 17583 | 22290 | Per2          | Tubb2a        | -1 |
| 17583 | 22324 | Per2          | MMT00060741   | -1 |
| 17583 | 22334 | Per2          | 9430023L20Rik | -1 |
| 17583 | 22476 | Per2          | Tspan4        | 1  |
| 17583 | 22627 | Per2          | Adck5         | -1 |
| 17583 | 22630 | Per2          | MMT00034355   | -1 |
| 17583 | 22636 | Per2          | Trim2         | -1 |
| 17583 | 22681 | Per2          | Gm88          | 1  |
| 17583 | 22863 | Per2          | Prkd2         | -1 |
| 17583 | 22873 | Per2          | Slc38a2       | 1  |
| 17583 | 22880 | Per2          | Slc45a4       | -1 |
| 17583 | 22936 | Per2          | Rhobtb1       | 1  |
| 17583 | 23161 | Per2          | Gclc          | -1 |
| 17583 | 23183 | Per2          | Nnmt          | 1  |
| 17583 | 23201 | Per2          | S1pr1         | -1 |
| 17583 | 23202 | Per2          | Olf559        | 1  |
| 17583 | 23437 | Per2          | Efh2          | 1  |
| 17583 | 23558 | Per2          | MMT00030937   | 1  |
| 17584 | 719   | F11r          | Usp2          | -1 |
| 17584 | 5372  | F11r          | Tor1a         | -1 |
| 17584 | 5974  | F11r          | Arntl         | 1  |
| 17584 | 10215 | F11r          | Nampt         | -1 |
| 17584 | 11599 | F11r          | Coq10b        | -1 |
| 17584 | 16690 | F11r          | Tjp3          | 1  |
| 17584 | 21142 | F11r          | Gm129         | -1 |
| 17584 | 23437 | F11r          | Efh2          | -1 |
| 17585 | 2388  | Gramd1a       | Dot1l         | 1  |
| 17585 | 2599  | Gramd1a       | Lsm14a        | 1  |
| 17585 | 2912  | Gramd1a       | Wtip          | -1 |
| 17585 | 4697  | Gramd1a       | Cyp2a12       | -1 |
| 17585 | 6513  | Gramd1a       | Qpctl         | 1  |
| 17585 | 10545 | Gramd1a       | Tmem147       | 1  |
| 17585 | 11321 | Gramd1a       | 2310014L17Rik | -1 |
| 17585 | 16639 | Gramd1a       | MMT00078937   | -1 |
| 17585 | 19462 | Gramd1a       | 4933439C20Rik | -1 |
| 17585 | 20606 | Gramd1a       | MMT00042166   | -1 |
| 17585 | 23247 | Gramd1a       | Ercc1         | -1 |
| 17600 | 3502  | Kcnq5         | Gde1          | -1 |
| 17600 | 6386  | Kcnq5         | Por           | -1 |
| 17606 | 20967 | Tmem90a       | Fabp2         | 1  |
| 17619 | 6513  | Zfp551        | Qpctl         | 1  |
| 17619 | 19462 | Zfp551        | 4933439C20Rik | -1 |
| 17621 | 719   | D930001I22Rik | Usp2          | 1  |
| 17621 | 2126  | D930001I22Rik | Dgat2         | 1  |
| 17621 | 2399  | D930001I22Rik | MMT00060167   | -1 |
| 17621 | 2636  | D930001I22Rik | Tars          | -1 |
| 17621 | 2850  | D930001I22Rik | Slc16a6       | -1 |
| 17621 | 3214  | D930001I22Rik | Dnmt3b        | -1 |
| 17621 | 3502  | D930001I22Rik | Gde1          | 1  |
| 17621 | 7414  | D930001I22Rik | Clpx          | -1 |
| 17621 | 9718  | D930001I22Rik | Fmo5          | 1  |

|       |       |               |                    |    |
|-------|-------|---------------|--------------------|----|
| 17621 | 10207 | D930001I22Rik | MMT00012324        | -1 |
| 17621 | 10775 | D930001I22Rik | Slc16a1            | -1 |
| 17621 | 11233 | D930001I22Rik | Tef                | 1  |
| 17621 | 11599 | D930001I22Rik | Coq10b             | 1  |
| 17621 | 11741 | D930001I22Rik | Slc30a10           | -1 |
| 17621 | 15049 | D930001I22Rik | Rnf125             | -1 |
| 17621 | 15709 | D930001I22Rik | Tceal1             | 1  |
| 17621 | 16131 | D930001I22Rik | Ptpre              | -1 |
| 17621 | 17247 | D930001I22Rik | A030007L17Rik      | -1 |
| 17621 | 18179 | D930001I22Rik | Dbp                | 1  |
| 17621 | 18590 | D930001I22Rik | Fgb                | -1 |
| 17621 | 19234 | D930001I22Rik | Nrg4               | 1  |
| 17621 | 19375 | D930001I22Rik | Inhba              | -1 |
| 17621 | 21142 | D930001I22Rik | Gm129              | 1  |
| 17622 | 1877  | Foxo1         | Amica1             | 1  |
| 17622 | 2294  | Foxo1         | AU040829           | 1  |
| 17622 | 3170  | Foxo1         | Mcart1             | 1  |
| 17622 | 3196  | Foxo1         | Tat                | 1  |
| 17622 | 3452  | Foxo1         | Ccrn4l             | 1  |
| 17622 | 5804  | Foxo1         | Thrsp              | 1  |
| 17622 | 5849  | Foxo1         | 2310031A18Rik      | -1 |
| 17622 | 6308  | Foxo1         | 2410075B13Rik      | -1 |
| 17622 | 6756  | Foxo1         | Sds                | 1  |
| 17622 | 7136  | Foxo1         | Id3                | -1 |
| 17622 | 7492  | Foxo1         | Adfp               | -1 |
| 17622 | 8399  | Foxo1         | Herpud1            | 1  |
| 17622 | 9213  | Foxo1         | Osgin1             | -1 |
| 17622 | 11599 | Foxo1         | Coq10b             | 1  |
| 17622 | 12761 | Foxo1         | Tsc22d3            | 1  |
| 17622 | 15008 | Foxo1         | Chrdl2             | 1  |
| 17622 | 15522 | Foxo1         | 1810011O10Rik      | 1  |
| 17622 | 15624 | Foxo1         | Crcp               | 1  |
| 17622 | 15631 | Foxo1         | Lpin1              | 1  |
| 17622 | 15882 | Foxo1         | AA986860           | 1  |
| 17622 | 16580 | Foxo1         | Tnfai2             | -1 |
| 17622 | 16720 | Foxo1         | Mtmr7              | 1  |
| 17622 | 19146 | Foxo1         | N4bp2l1            | 1  |
| 17622 | 19671 | Foxo1         | Upp2               | 1  |
| 17622 | 19723 | Foxo1         | Pfkfb1             | 1  |
| 17622 | 21331 | Foxo1         | Slc10a6            | 1  |
| 17622 | 21934 | Foxo1         | Id2                | -1 |
| 17622 | 22873 | Foxo1         | Slc38a2            | 1  |
| 17646 | 5680  | C4b           | Lrg1               | 1  |
| 17646 | 10554 | C4b           | ENSMUSG00000074179 | -1 |
| 17646 | 13293 | C4b           | Gsta2              | -1 |
| 17661 | 1416  | Birc5         | 6720460F02Rik      | 1  |
| 17661 | 1561  | Birc5         | Aurka              | 1  |
| 17661 | 1932  | Birc5         | Racgap1            | 1  |
| 17661 | 2428  | Birc5         | Car1               | -1 |
| 17661 | 3836  | Birc5         | 2200001I15Rik      | 1  |
| 17661 | 5364  | Birc5         | Kif22              | 1  |

|       |       |          |               |    |
|-------|-------|----------|---------------|----|
| 17661 | 7492  | Birc5    | Adfp          | 1  |
| 17661 | 8416  | Birc5    | Cdc20         | 1  |
| 17661 | 11382 | Birc5    | Cdca3         | 1  |
| 17661 | 11422 | Birc5    | Pltp          | 1  |
| 17661 | 12799 | Birc5    | Spon2         | 1  |
| 17661 | 13455 | Birc5    | Cenpe         | 1  |
| 17661 | 17216 | Birc5    | Nuf2          | 1  |
| 17661 | 17823 | Birc5    | D2Erttd750e   | 1  |
| 17661 | 18299 | Birc5    | MMT00035424   | 1  |
| 17661 | 19022 | Birc5    | Ccnb2         | 1  |
| 17661 | 19318 | Birc5    | Plk1          | 1  |
| 17661 | 20433 | Birc5    | Cdca5         | 1  |
| 17661 | 21692 | Birc5    | MMT00013924   | 1  |
| 17661 | 21947 | Birc5    | Cdca8         | 1  |
| 17661 | 22138 | Birc5    | Ang           | -1 |
| 17666 | 7492  | Fstl1    | Adfp          | 1  |
| 17667 | 6021  | Phactr1  | MMT00008784   | -1 |
| 17667 | 8670  | Phactr1  | MMT00051613   | -1 |
| 17667 | 15675 | Phactr1  | MMT00077535   | -1 |
| 17667 | 16219 | Phactr1  | 4932415G12Rik | 1  |
| 17667 | 18373 | Phactr1  | Dnajb1        | -1 |
| 17676 | 3410  | Amz1     | Paqr9         | 1  |
| 17676 | 5364  | Amz1     | Kif22         | 1  |
| 17676 | 12910 | Amz1     | 1110028A07Rik | 1  |
| 17676 | 12941 | Amz1     | Elov15        | 1  |
| 17676 | 18455 | Amz1     | Mtnr1a        | 1  |
| 17676 | 19917 | Amz1     | Nek2          | 1  |
| 17676 | 20194 | Amz1     | Pnlcd1        | 1  |
| 17676 | 21512 | Amz1     | Gas6          | 1  |
| 17676 | 23026 | Amz1     | Apom          | -1 |
| 17679 | 17679 | Col3a1   | Col3a1        | 1  |
| 17679 | 23361 | Col3a1   | Bivm          | -1 |
| 17682 | 482   | Zfp386   | Rnf43         | 1  |
| 17682 | 8632  | Zfp386   | Igfbp1        | -1 |
| 17682 | 16251 | Zfp386   | G6pc          | -1 |
| 17682 | 16517 | Zfp386   | D4Wsu53e      | -1 |
| 17682 | 18903 | Zfp386   | Crem          | -1 |
| 17690 | 1655  | Mtap7d3  | Mgrn1         | 1  |
| 17690 | 21793 | Mtap7d3  | Pla2g12a      | 1  |
| 17694 | 2013  | Ppp1r14b | Il15ra        | -1 |
| 17694 | 2051  | Ppp1r14b | Ddx27         | -1 |
| 17694 | 6193  | Ppp1r14b | Lactb2        | 1  |
| 17694 | 6771  | Ppp1r14b | Insc          | 1  |
| 17694 | 10612 | Ppp1r14b | Slc24a6       | -1 |
| 17694 | 12460 | Ppp1r14b | Pnpla2        | -1 |
| 17694 | 18286 | Ppp1r14b | Slc41a3       | -1 |
| 17694 | 21251 | Ppp1r14b | Cpt1a         | -1 |
| 17703 | 286   | Large    | MMT00070509   | -1 |
| 17703 | 607   | Large    | Me1           | 1  |
| 17703 | 8444  | Large    | Rdh16         | 1  |
| 17703 | 8815  | Large    | Mx1           | 1  |

|       |       |        |               |    |
|-------|-------|--------|---------------|----|
| 17703 | 12910 | Large  | 1110028A07Rik | 1  |
| 17703 | 14017 | Large  | Ces5          | 1  |
| 17703 | 16617 | Large  | Sh2d4a        | 1  |
| 17703 | 18201 | Large  | MMT00060232   | 1  |
| 17703 | 20058 | Large  | Dnaic1        | -1 |
| 17707 | 7088  | Rshl2b | Slc37a1       | 1  |
| 17707 | 7135  | Rshl2b | Ezr           | 1  |
| 17707 | 7909  | Rshl2b | Oas3          | 1  |
| 17707 | 8750  | Rshl2b | 1700010I14Rik | 1  |
| 17707 | 11435 | Rshl2b | Rnaset2a      | 1  |
| 17707 | 15864 | Rshl2b | Rps6ka2       | 1  |
| 17707 | 17707 | Rshl2b | Rshl2b        | 1  |
| 17707 | 17760 | Rshl2b | Ccr6          | -1 |
| 17707 | 21754 | Rshl2b | Synj2         | -1 |
| 17707 | 21952 | Rshl2b | Tfb1m         | -1 |
| 17716 | 5100  | Rnf10  | Pebp1         | 1  |
| 17716 | 6116  | Rnf10  | Pcgf5         | 1  |
| 17716 | 6330  | Rnf10  | Dgkq          | -1 |
| 17716 | 8807  | Rnf10  | Ankrd56       | 1  |
| 17716 | 10978 | Rnf10  | MMT00078322   | -1 |
| 17716 | 12656 | Rnf10  | Coq5          | -1 |
| 17716 | 14085 | Rnf10  | Cdkl2         | -1 |
| 17716 | 15908 | Rnf10  | Pebp1         | 1  |
| 17716 | 17716 | Rnf10  | Rnf10         | 1  |
| 17716 | 17807 | Rnf10  | Pebp1         | 1  |
| 17716 | 19443 | Rnf10  | Prkab1        | 1  |
| 17716 | 20118 | Rnf10  | Tmem175       | -1 |
| 17720 | 17656 | Rap2b  | Hdhd3         | 1  |
| 17729 | 17729 | Prim2  | Prim2         | 1  |
| 17729 | 20077 | Prim2  | Ccdc115       | 1  |
| 17743 | 630   | Phb2   | C1s           | -1 |
| 17743 | 1444  | Phb2   | C1r           | -1 |
| 17743 | 9417  | Phb2   | Cd163         | 1  |
| 17743 | 17391 | Phb2   | C530028O21Rik | 1  |
| 17743 | 19964 | Phb2   | Ndufa9        | 1  |
| 17743 | 22075 | Phb2   | C1s           | -1 |
| 17752 | 563   | Chac1  | D4Bwg0951e    | 1  |
| 17752 | 662   | Chac1  | Mid1ip1       | -1 |
| 17752 | 1310  | Chac1  | Cabc1         | -1 |
| 17752 | 2794  | Chac1  | Map3k6        | 1  |
| 17752 | 3097  | Chac1  | Ppp1r3g       | 1  |
| 17752 | 3502  | Chac1  | Gde1          | 1  |
| 17752 | 4286  | Chac1  | Ptp4a1        | 1  |
| 17752 | 4708  | Chac1  | Traf3ip2      | -1 |
| 17752 | 5425  | Chac1  | Ung           | 1  |
| 17752 | 5574  | Chac1  | Hsd3b7        | -1 |
| 17752 | 5856  | Chac1  | Mfsd2         | 1  |
| 17752 | 5934  | Chac1  | S100a10       | -1 |
| 17752 | 6211  | Chac1  | Arhgap24      | -1 |
| 17752 | 6308  | Chac1  | 2410075B13Rik | -1 |
| 17752 | 6370  | Chac1  | Aqp8          | -1 |

|       |       |          |               |    |
|-------|-------|----------|---------------|----|
| 17752 | 6386  | Chac1    | Por           | 1  |
| 17752 | 6564  | Chac1    | Cebpd         | 1  |
| 17752 | 6788  | Chac1    | Psen2         | -1 |
| 17752 | 9127  | Chac1    | Mtfmt         | -1 |
| 17752 | 9427  | Chac1    | Nqo2          | -1 |
| 17752 | 9842  | Chac1    | Qdpr          | -1 |
| 17752 | 10486 | Chac1    | 1300002K09Rik | -1 |
| 17752 | 11093 | Chac1    | Zdhhc1        | 1  |
| 17752 | 11129 | Chac1    | Ankhd1        | 1  |
| 17752 | 11614 | Chac1    | Sult1e1       | 1  |
| 17752 | 11807 | Chac1    | Fbxo31        | 1  |
| 17752 | 11808 | Chac1    | Pck1          | 1  |
| 17752 | 12219 | Chac1    | Cyb5b         | -1 |
| 17752 | 12908 | Chac1    | Jdp2          | 1  |
| 17752 | 13471 | Chac1    | Cln8          | 1  |
| 17752 | 14138 | Chac1    | Anks4b        | -1 |
| 17752 | 14442 | Chac1    | Ethe1         | -1 |
| 17752 | 15021 | Chac1    | Ppargc1a      | 1  |
| 17752 | 15292 | Chac1    | 2010107G23Rik | -1 |
| 17752 | 15631 | Chac1    | Lpin1         | 1  |
| 17752 | 16176 | Chac1    | St3gal5       | 1  |
| 17752 | 16526 | Chac1    | Sftpa1        | 1  |
| 17752 | 16647 | Chac1    | D16H22S680E   | 1  |
| 17752 | 17338 | Chac1    | Mocos         | -1 |
| 17752 | 17660 | Chac1    | Nlrp12        | 1  |
| 17752 | 18275 | Chac1    | D730039F16Rik | -1 |
| 17752 | 18286 | Chac1    | Slc41a3       | 1  |
| 17752 | 18607 | Chac1    | Acat3         | -1 |
| 17752 | 18785 | Chac1    | Angptl4       | 1  |
| 17752 | 18827 | Chac1    | Oprs1         | -1 |
| 17752 | 18990 | Chac1    | Hal           | -1 |
| 17752 | 19532 | Chac1    | Med8          | -1 |
| 17752 | 19757 | Chac1    | Fkbp5         | 1  |
| 17752 | 20019 | Chac1    | Qdpr          | -1 |
| 17752 | 20246 | Chac1    | Pdia5         | 1  |
| 17752 | 21251 | Chac1    | Cpt1a         | 1  |
| 17752 | 21901 | Chac1    | BC035537      | -1 |
| 17752 | 22138 | Chac1    | Ang           | 1  |
| 17752 | 22732 | Chac1    | Cyb5b         | -1 |
| 17752 | 23201 | Chac1    | S1pr1         | -1 |
| 17752 | 23202 | Chac1    | Olf559        | 1  |
| 17776 | 250   | BC043118 | Tubb2a-ps2    | 1  |
| 17776 | 433   | BC043118 | Pla2g12b      | 1  |
| 17776 | 609   | BC043118 | MMT00060868   | 1  |
| 17776 | 1310  | BC043118 | Cabc1         | 1  |
| 17776 | 1585  | BC043118 | Mif4gd        | 1  |
| 17776 | 1767  | BC043118 | BC016495      | -1 |
| 17776 | 1876  | BC043118 | Amdhd1        | 1  |
| 17776 | 2636  | BC043118 | Tars          | 1  |
| 17776 | 2766  | BC043118 | Elp4          | 1  |
| 17776 | 3214  | BC043118 | Dnmt3b        | 1  |



|       |       |             |                    |    |
|-------|-------|-------------|--------------------|----|
| 17776 | 4286  | BC043118    | Ptp4a1             | -1 |
| 17776 | 4534  | BC043118    | Ndel1              | -1 |
| 17776 | 5574  | BC043118    | Hsd3b7             | 1  |
| 17776 | 5802  | BC043118    | Mad2l2             | 1  |
| 17776 | 5934  | BC043118    | S100a10            | 1  |
| 17776 | 5974  | BC043118    | Arntl              | 1  |
| 17776 | 6370  | BC043118    | Aqp8               | 1  |
| 17776 | 6386  | BC043118    | Por                | -1 |
| 17776 | 6788  | BC043118    | Psen2              | 1  |
| 17776 | 10486 | BC043118    | 1300002K09Rik      | 1  |
| 17776 | 11129 | BC043118    | Ankhd1             | -1 |
| 17776 | 11599 | BC043118    | Coq10b             | -1 |
| 17776 | 11741 | BC043118    | Slc30a10           | 1  |
| 17776 | 12799 | BC043118    | Spon2              | 1  |
| 17776 | 12910 | BC043118    | 1110028A07Rik      | 1  |
| 17776 | 13889 | BC043118    | Agpat2             | 1  |
| 17776 | 15862 | BC043118    | Mrap               | 1  |
| 17776 | 16690 | BC043118    | Tjp3               | 1  |
| 17776 | 17338 | BC043118    | Mocos              | 1  |
| 17776 | 17876 | BC043118    | Tubb4              | 1  |
| 17776 | 18147 | BC043118    | Nhlrc2             | -1 |
| 17776 | 18455 | BC043118    | Mtnr1a             | 1  |
| 17776 | 18607 | BC043118    | Acat3              | 1  |
| 17776 | 18827 | BC043118    | Oprs1              | 1  |
| 17776 | 19305 | BC043118    | Azin1              | -1 |
| 17776 | 19532 | BC043118    | Med8               | 1  |
| 17776 | 22290 | BC043118    | Tubb2a             | 1  |
| 17776 | 22630 | BC043118    | MMT00034355        | 1  |
| 17793 | 4400  | MMT00000967 | 9030425E11Rik      | -1 |
| 17793 | 5364  | MMT00000967 | Kif22              | -1 |
| 17793 | 14656 | MMT00000967 | Grip2              | 1  |
| 17801 | 1129  | Syt12       | Gsta4              | 1  |
| 17801 | 1853  | Syt12       | Stat5a             | -1 |
| 17801 | 2721  | Syt12       | Inmt               | 1  |
| 17801 | 3196  | Syt12       | Tat                | 1  |
| 17801 | 3754  | Syt12       | Dock6              | 1  |
| 17801 | 3952  | Syt12       | Bcar1              | -1 |
| 17801 | 4056  | Syt12       | Tnfaip8l1          | -1 |
| 17801 | 5804  | Syt12       | Thrsp              | 1  |
| 17801 | 8328  | Syt12       | Klhdc8a            | -1 |
| 17801 | 9718  | Syt12       | Fmo5               | 1  |
| 17801 | 9842  | Syt12       | Qdpr               | 1  |
| 17801 | 10554 | Syt12       | ENSMUSG00000074179 | 1  |
| 17801 | 13293 | Syt12       | Gsta2              | 1  |
| 17801 | 13431 | Syt12       | MMT00038058        | -1 |
| 17801 | 14055 | Syt12       | MMT00050438        | -1 |
| 17801 | 15205 | Syt12       | MMT00030262        | -1 |
| 17801 | 20385 | Syt12       | Chd1l              | 1  |
| 17801 | 21214 | Syt12       | Scd1               | 1  |
| 17801 | 21239 | Syt12       | Ctdp1              | -1 |
| 17801 | 22171 | Syt12       | MMT00012636        | 1  |

|       |       |               |                    |    |
|-------|-------|---------------|--------------------|----|
| 17805 | 17805 | Slc39a12      | Slc39a12           | 1  |
| 17805 | 18702 | Slc39a12      | Mrc1               | -1 |
| 17805 | 22724 | Slc39a12      | Adamts13           | 1  |
| 17806 | 5364  | Gpsm3         | Kif22              | 1  |
| 17806 | 11393 | Gpsm3         | A830007P12Rik      | 1  |
| 17806 | 14472 | Gpsm3         | Ahcy               | -1 |
| 17808 | 2619  | Ncor2         | Zfp622             | -1 |
| 17808 | 5804  | Ncor2         | Thrsp              | 1  |
| 17808 | 8896  | Ncor2         | Fasn               | 1  |
| 17808 | 11462 | Ncor2         | Gpam               | 1  |
| 17808 | 11576 | Ncor2         | Gm1381             | 1  |
| 17808 | 12315 | Ncor2         | Srebf1             | 1  |
| 17808 | 17660 | Ncor2         | Nlrp12             | -1 |
| 17808 | 21202 | Ncor2         | Acly               | 1  |
| 17808 | 22321 | Ncor2         | Apol7a             | 1  |
| 17811 | 3446  | D10Ert761e    | Eno1               | 1  |
| 17811 | 3832  | D10Ert761e    | Sdhd               | 1  |
| 17811 | 8815  | D10Ert761e    | Mx1                | 1  |
| 17811 | 10554 | D10Ert761e    | ENSMUSG00000074179 | 1  |
| 17811 | 13293 | D10Ert761e    | Gsta2              | 1  |
| 17811 | 18113 | D10Ert761e    | MMT00034400        | 1  |
| 17811 | 21727 | D10Ert761e    | Khk                | 1  |
| 17823 | 1416  | D2Ert750e     | 6720460F02Rik      | 1  |
| 17823 | 1561  | D2Ert750e     | Aurka              | 1  |
| 17823 | 1932  | D2Ert750e     | Racgap1            | 1  |
| 17823 | 2428  | D2Ert750e     | Car1               | -1 |
| 17823 | 3836  | D2Ert750e     | 2200001I15Rik      | 1  |
| 17823 | 5364  | D2Ert750e     | Kif22              | 1  |
| 17823 | 7492  | D2Ert750e     | Adfp               | 1  |
| 17823 | 8416  | D2Ert750e     | Cdc20              | 1  |
| 17823 | 11382 | D2Ert750e     | Cdca3              | 1  |
| 17823 | 13455 | D2Ert750e     | Cenpe              | 1  |
| 17823 | 17216 | D2Ert750e     | Nuf2               | 1  |
| 17823 | 17823 | D2Ert750e     | D2Ert750e          | 1  |
| 17823 | 18299 | D2Ert750e     | MMT00035424        | 1  |
| 17823 | 18483 | D2Ert750e     | Mthfd1             | -1 |
| 17823 | 19022 | D2Ert750e     | Ccnb2              | 1  |
| 17823 | 19318 | D2Ert750e     | Plk1               | 1  |
| 17823 | 20171 | D2Ert750e     | 1700008G05Rik      | 1  |
| 17823 | 20433 | D2Ert750e     | Cdca5              | 1  |
| 17823 | 21692 | D2Ert750e     | MMT00013924        | 1  |
| 17823 | 21947 | D2Ert750e     | Cdca8              | 1  |
| 17826 | 5934  | 3300001G02Rik | S100a10            | 1  |
| 17826 | 8815  | 3300001G02Rik | Mx1                | 1  |
| 17826 | 12941 | 3300001G02Rik | Elov15             | 1  |
| 17826 | 14017 | 3300001G02Rik | Ces5               | 1  |
| 17826 | 21214 | 3300001G02Rik | Scd1               | 1  |
| 17826 | 23026 | 3300001G02Rik | Apom               | -1 |
| 17827 | 250   | Klhl13        | Tubb2a-ps2         | 1  |
| 17827 | 609   | Klhl13        | MMT00060868        | 1  |
| 17827 | 1767  | Klhl13        | BC016495           | -1 |

|       |       |        |               |    |
|-------|-------|--------|---------------|----|
| 17827 | 1853  | Klhl13 | Stat5a        | 1  |
| 17827 | 2399  | Klhl13 | MMT00060167   | 1  |
| 17827 | 2636  | Klhl13 | Tars          | 1  |
| 17827 | 2850  | Klhl13 | Slc16a6       | 1  |
| 17827 | 3214  | Klhl13 | Dnmt3b        | 1  |
| 17827 | 3235  | Klhl13 | BC029214      | 1  |
| 17827 | 3410  | Klhl13 | Paqr9         | 1  |
| 17827 | 3804  | Klhl13 | MMT00015534   | 1  |
| 17827 | 4201  | Klhl13 | Tubb2c        | 1  |
| 17827 | 4286  | Klhl13 | Ptp4a1        | -1 |
| 17827 | 4534  | Klhl13 | Ndel1         | -1 |
| 17827 | 4708  | Klhl13 | Traf3ip2      | 1  |
| 17827 | 4993  | Klhl13 | Tsc22d1       | 1  |
| 17827 | 5364  | Klhl13 | Kif22         | 1  |
| 17827 | 5574  | Klhl13 | Hsd3b7        | 1  |
| 17827 | 5802  | Klhl13 | Mad2l2        | 1  |
| 17827 | 5849  | Klhl13 | 2310031A18Rik | 1  |
| 17827 | 5974  | Klhl13 | Arntl         | 1  |
| 17827 | 6386  | Klhl13 | Por           | -1 |
| 17827 | 7414  | Klhl13 | Clpx          | 1  |
| 17827 | 7954  | Klhl13 | Ccdc12        | 1  |
| 17827 | 9910  | Klhl13 | EG666644      | -1 |
| 17827 | 10486 | Klhl13 | 1300002K09Rik | 1  |
| 17827 | 10642 | Klhl13 | Ngef          | -1 |
| 17827 | 11075 | Klhl13 | Xrcc6bp1      | -1 |
| 17827 | 11129 | Klhl13 | Ankhd1        | -1 |
| 17827 | 11233 | Klhl13 | Tef           | -1 |
| 17827 | 11599 | Klhl13 | Coq10b        | -1 |
| 17827 | 11741 | Klhl13 | Slc30a10      | 1  |
| 17827 | 12433 | Klhl13 | 5033413D22Rik | 1  |
| 17827 | 12799 | Klhl13 | Spon2         | 1  |
| 17827 | 12981 | Klhl13 | Nek6          | 1  |
| 17827 | 12982 | Klhl13 | Cars          | 1  |
| 17827 | 15709 | Klhl13 | Tceal1        | -1 |
| 17827 | 15758 | Klhl13 | Stx4a         | 1  |
| 17827 | 15824 | Klhl13 | D19Ert721e    | 1  |
| 17827 | 16060 | Klhl13 | Gys2          | -1 |
| 17827 | 16690 | Klhl13 | Tjp3          | 1  |
| 17827 | 17247 | Klhl13 | A030007L17Rik | 1  |
| 17827 | 17323 | Klhl13 | Tubb6         | 1  |
| 17827 | 17338 | Klhl13 | Mocos         | 1  |
| 17827 | 17876 | Klhl13 | Tubb4         | 1  |
| 17827 | 18147 | Klhl13 | Nhlrc2        | -1 |
| 17827 | 18179 | Klhl13 | Dbp           | -1 |
| 17827 | 18296 | Klhl13 | Pcgf5         | -1 |
| 17827 | 18455 | Klhl13 | Mtnr1a        | 1  |
| 17827 | 18607 | Klhl13 | Acat3         | 1  |
| 17827 | 18827 | Klhl13 | Oprs1         | 1  |
| 17827 | 19277 | Klhl13 | MMT00044927   | -1 |
| 17827 | 19305 | Klhl13 | Azin1         | -1 |
| 17827 | 20745 | Klhl13 | Sord          | -1 |

|       |       |               |                    |    |
|-------|-------|---------------|--------------------|----|
| 17827 | 22290 | Klhl13        | Tubb2a             | 1  |
| 17827 | 22630 | Klhl13        | MMT00034355        | 1  |
| 17834 | 21335 | Hemgn         | Trp53rk            | 1  |
| 17837 | 607   | Polr3gl       | Me1                | -1 |
| 17837 | 1963  | Polr3gl       | MMT00039783        | -1 |
| 17837 | 5934  | Polr3gl       | S100a10            | -1 |
| 17837 | 6193  | Polr3gl       | Lactb2             | -1 |
| 17837 | 6370  | Polr3gl       | Aqp8               | -1 |
| 17837 | 7519  | Polr3gl       | Gstm1              | -1 |
| 17837 | 8815  | Polr3gl       | Mx1                | -1 |
| 17837 | 9408  | Polr3gl       | Hmgcs2             | 1  |
| 17837 | 10961 | Polr3gl       | Pgd                | -1 |
| 17837 | 11375 | Polr3gl       | Derl2              | -1 |
| 17837 | 12219 | Polr3gl       | Cyb5b              | -1 |
| 17837 | 13423 | Polr3gl       | ENSMUSG00000053749 | -1 |
| 17837 | 14147 | Polr3gl       | Acss2              | -1 |
| 17837 | 14151 | Polr3gl       | Slc44a1            | -1 |
| 17837 | 14442 | Polr3gl       | Ethe1              | -1 |
| 17837 | 18201 | Polr3gl       | MMT00060232        | -1 |
| 17837 | 18286 | Polr3gl       | Slc41a3            | 1  |
| 17837 | 21202 | Polr3gl       | Acly               | -1 |
| 17837 | 21214 | Polr3gl       | Scd1               | -1 |
| 17837 | 21251 | Polr3gl       | Cpt1a              | 1  |
| 17837 | 21575 | Polr3gl       | Cyp2c55            | -1 |
| 17837 | 22732 | Polr3gl       | Cyb5b              | -1 |
| 17837 | 22770 | Polr3gl       | Slc27a2            | 1  |
| 17840 | 269   | 1110029L17Rik | Tuba1b             | 1  |
| 17840 | 354   | 1110029L17Rik | MMT00007996        | 1  |
| 17840 | 1941  | 1110029L17Rik | MMT00079618        | 1  |
| 17840 | 2322  | 1110029L17Rik | Tuba4a             | 1  |
| 17840 | 5594  | 1110029L17Rik | Erb3               | -1 |
| 17840 | 7151  | 1110029L17Rik | MMT00007982        | 1  |
| 17840 | 8896  | 1110029L17Rik | Fasn               | 1  |
| 17840 | 9763  | 1110029L17Rik | Tuba3b             | 1  |
| 17840 | 10612 | 1110029L17Rik | Slc24a6            | -1 |
| 17840 | 11724 | 1110029L17Rik | Tuba3a             | 1  |
| 17840 | 12910 | 1110029L17Rik | 1110028A07Rik      | 1  |
| 17840 | 15252 | 1110029L17Rik | MMT00019402        | 1  |
| 17840 | 17444 | 1110029L17Rik | Tuba1a             | 1  |
| 17840 | 17660 | 1110029L17Rik | Nlrp12             | -1 |
| 17840 | 18148 | 1110029L17Rik | Cables1            | -1 |
| 17840 | 22443 | 1110029L17Rik | Tuba1c             | 1  |
| 17840 | 23130 | 1110029L17Rik | Hps4               | -1 |
| 17852 | 2049  | Cpeb2         | Gsta3              | 1  |
| 17852 | 18549 | Cpeb2         | Robo1              | 1  |
| 17852 | 20058 | Cpeb2         | Dnaic1             | -1 |
| 17857 | 11462 | C1qtnf7       | Gpam               | 1  |
| 17857 | 14138 | C1qtnf7       | Anks4b             | 1  |
| 17862 | 185   | Fbxo21        | Ap2b1              | -1 |
| 17862 | 250   | Fbxo21        | Tubb2a-ps2         | -1 |
| 17862 | 269   | Fbxo21        | Tuba1b             | -1 |

|       |       |        |               |    |
|-------|-------|--------|---------------|----|
| 17862 | 609   | Fbxo21 | MMT00060868   | -1 |
| 17862 | 865   | Fbxo21 | Npc1          | 1  |
| 17862 | 937   | Fbxo21 | Pi4ka         | 1  |
| 17862 | 1036  | Fbxo21 | Dusp19        | -1 |
| 17862 | 1201  | Fbxo21 | Ptger3        | 1  |
| 17862 | 1310  | Fbxo21 | Cabc1         | -1 |
| 17862 | 1655  | Fbxo21 | Mgrn1         | 1  |
| 17862 | 1709  | Fbxo21 | Mt2           | 1  |
| 17862 | 1760  | Fbxo21 | Nek8          | 1  |
| 17862 | 2013  | Fbxo21 | Ii15ra        | 1  |
| 17862 | 2051  | Fbxo21 | Ddx27         | 1  |
| 17862 | 2615  | Fbxo21 | EG624862      | 1  |
| 17862 | 2636  | Fbxo21 | Tars          | -1 |
| 17862 | 2681  | Fbxo21 | Hectd1        | 1  |
| 17862 | 2766  | Fbxo21 | Elp4          | -1 |
| 17862 | 3393  | Fbxo21 | Snhg8         | 1  |
| 17862 | 3804  | Fbxo21 | MMT00015534   | -1 |
| 17862 | 4551  | Fbxo21 | Cyp2e1        | 1  |
| 17862 | 4708  | Fbxo21 | Traf3ip2      | -1 |
| 17862 | 5375  | Fbxo21 | Sec23b        | -1 |
| 17862 | 5425  | Fbxo21 | Ung           | 1  |
| 17862 | 5934  | Fbxo21 | S100a10       | -1 |
| 17862 | 5974  | Fbxo21 | Arntl         | -1 |
| 17862 | 6193  | Fbxo21 | Lactb2        | -1 |
| 17862 | 6343  | Fbxo21 | Slc20a1       | 1  |
| 17862 | 6370  | Fbxo21 | Aqp8          | -1 |
| 17862 | 6386  | Fbxo21 | Por           | 1  |
| 17862 | 6502  | Fbxo21 | Col15a1       | -1 |
| 17862 | 6675  | Fbxo21 | Sfrs4         | 1  |
| 17862 | 6771  | Fbxo21 | Insc          | -1 |
| 17862 | 6788  | Fbxo21 | Psen2         | -1 |
| 17862 | 6966  | Fbxo21 | Mia3          | 1  |
| 17862 | 7862  | Fbxo21 | Cpsf4l        | 1  |
| 17862 | 7944  | Fbxo21 | Al132487      | 1  |
| 17862 | 8408  | Fbxo21 | Nr1i3         | 1  |
| 17862 | 8896  | Fbxo21 | Fasn          | -1 |
| 17862 | 9842  | Fbxo21 | Qdpr          | -1 |
| 17862 | 9910  | Fbxo21 | EG666644      | 1  |
| 17862 | 10486 | Fbxo21 | 1300002K09Rik | -1 |
| 17862 | 10612 | Fbxo21 | Slc24a6       | 1  |
| 17862 | 10961 | Fbxo21 | Pgd           | -1 |
| 17862 | 11129 | Fbxo21 | Ankhd1        | 1  |
| 17862 | 11724 | Fbxo21 | Tuba3a        | -1 |
| 17862 | 11741 | Fbxo21 | Slc30a10      | -1 |
| 17862 | 11807 | Fbxo21 | Fbxo31        | 1  |
| 17862 | 11984 | Fbxo21 | N6amt2        | -1 |
| 17862 | 12143 | Fbxo21 | Thyn1         | -1 |
| 17862 | 12204 | Fbxo21 | Ankmy2        | 1  |
| 17862 | 12219 | Fbxo21 | Cyb5b         | -1 |
| 17862 | 12420 | Fbxo21 | Klhl21        | 1  |
| 17862 | 12460 | Fbxo21 | Pnpla2        | 1  |

|       |       |        |               |    |
|-------|-------|--------|---------------|----|
| 17862 | 12904 | Fbxo21 | MMT00040704   | 1  |
| 17862 | 13581 | Fbxo21 | Srxn1         | -1 |
| 17862 | 13889 | Fbxo21 | Agpat2        | -1 |
| 17862 | 13990 | Fbxo21 | MMT00040357   | -1 |
| 17862 | 14147 | Fbxo21 | Acss2         | -1 |
| 17862 | 14323 | Fbxo21 | Scarb1        | 1  |
| 17862 | 14380 | Fbxo21 | MMT00051866   | -1 |
| 17862 | 14442 | Fbxo21 | Ethe1         | -1 |
| 17862 | 15862 | Fbxo21 | Mrap          | -1 |
| 17862 | 15892 | Fbxo21 | Slc22a5       | 1  |
| 17862 | 16060 | Fbxo21 | Gys2          | 1  |
| 17862 | 16176 | Fbxo21 | St3gal5       | 1  |
| 17862 | 17338 | Fbxo21 | Mocos         | -1 |
| 17862 | 17617 | Fbxo21 | Atp5sl        | 1  |
| 17862 | 17660 | Fbxo21 | Nlrp12        | 1  |
| 17862 | 17862 | Fbxo21 | Fbxo21        | 1  |
| 17862 | 17876 | Fbxo21 | Tubb4         | -1 |
| 17862 | 17878 | Fbxo21 | Brap          | 1  |
| 17862 | 18179 | Fbxo21 | Dbp           | 1  |
| 17862 | 18286 | Fbxo21 | Slc41a3       | 1  |
| 17862 | 18498 | Fbxo21 | Slc5a6        | 1  |
| 17862 | 18653 | Fbxo21 | MMT00072901   | 1  |
| 17862 | 18827 | Fbxo21 | Oprs1         | -1 |
| 17862 | 19089 | Fbxo21 | Peci          | 1  |
| 17862 | 20798 | Fbxo21 | Ccp1          | 1  |
| 17862 | 20960 | Fbxo21 | Abcc3         | 1  |
| 17862 | 21192 | Fbxo21 | 2310047A01Rik | 1  |
| 17862 | 21202 | Fbxo21 | Acly          | -1 |
| 17862 | 21251 | Fbxo21 | Cpt1a         | 1  |
| 17862 | 21575 | Fbxo21 | Cyp2c55       | -1 |
| 17862 | 21793 | Fbxo21 | Pla2g12a      | 1  |
| 17862 | 21811 | Fbxo21 | Ak3l1         | 1  |
| 17862 | 22076 | Fbxo21 | Pgm2l1        | 1  |
| 17862 | 22137 | Fbxo21 | Nudt7         | -1 |
| 17862 | 22290 | Fbxo21 | Tubb2a        | -1 |
| 17862 | 22388 | Fbxo21 | 2410018M08Rik | 1  |
| 17862 | 22443 | Fbxo21 | Tuba1c        | -1 |
| 17862 | 22470 | Fbxo21 | Ppargc1b      | 1  |
| 17862 | 22732 | Fbxo21 | Cyb5b         | -1 |
| 17862 | 22770 | Fbxo21 | Slc27a2       | 1  |
| 17862 | 22830 | Fbxo21 | MMT00081088   | 1  |
| 17862 | 23623 | Fbxo21 | 2010305C02Rik | -1 |
| 17862 | 23640 | Fbxo21 | Bdh1          | 1  |
| 17872 | 11376 | Akap10 | Slc7a11       | 1  |
| 17876 | 10612 | Tubb4  | Slc24a6       | -1 |
| 17876 | 18099 | Tubb4  | Nfx1          | -1 |
| 17876 | 18215 | Tubb4  | Gpr146        | -1 |
| 17882 | 5884  | Ddx26b | Gstm2         | -1 |
| 17882 | 8815  | Ddx26b | Mx1           | -1 |
| 17882 | 18201 | Ddx26b | MMT00060232   | -1 |
| 17882 | 21214 | Ddx26b | Scd1          | -1 |

|       |       |        |               |    |
|-------|-------|--------|---------------|----|
| 17882 | 21575 | Ddx26b | Cyp2c55       | -1 |
| 17884 | 250   | Lnx2   | Tubb2a-ps2    | 1  |
| 17884 | 269   | Lnx2   | Tuba1b        | 1  |
| 17884 | 354   | Lnx2   | MMT00007996   | 1  |
| 17884 | 577   | Lnx2   | Rrp12         | 1  |
| 17884 | 609   | Lnx2   | MMT00060868   | 1  |
| 17884 | 827   | Lnx2   | Flcn          | -1 |
| 17884 | 865   | Lnx2   | Npc1          | -1 |
| 17884 | 1257  | Lnx2   | Slc25a45      | 1  |
| 17884 | 1709  | Lnx2   | Mt2           | -1 |
| 17884 | 1941  | Lnx2   | MMT00079618   | 1  |
| 17884 | 2013  | Lnx2   | Il15ra        | -1 |
| 17884 | 2322  | Lnx2   | Tuba4a        | 1  |
| 17884 | 3804  | Lnx2   | MMT00015534   | 1  |
| 17884 | 4201  | Lnx2   | Tubb2c        | 1  |
| 17884 | 5375  | Lnx2   | Sec23b        | 1  |
| 17884 | 6476  | Lnx2   | Sntg2         | -1 |
| 17884 | 6771  | Lnx2   | Insc          | 1  |
| 17884 | 6823  | Lnx2   | Yars          | 1  |
| 17884 | 6966  | Lnx2   | Mia3          | -1 |
| 17884 | 7151  | Lnx2   | MMT00007982   | 1  |
| 17884 | 7795  | Lnx2   | MMT00071427   | -1 |
| 17884 | 8980  | Lnx2   | Plekhf1       | -1 |
| 17884 | 9033  | Lnx2   | 1810013L24Rik | -1 |
| 17884 | 9763  | Lnx2   | Tuba3b        | 1  |
| 17884 | 10140 | Lnx2   | Cdc2l6        | -1 |
| 17884 | 10612 | Lnx2   | Slc24a6       | -1 |
| 17884 | 10712 | Lnx2   | Fchsd2        | -1 |
| 17884 | 10911 | Lnx2   | Mcl1          | -1 |
| 17884 | 11149 | Lnx2   | MMT00050488   | 1  |
| 17884 | 11376 | Lnx2   | Slc7a11       | 1  |
| 17884 | 11724 | Lnx2   | Tuba3a        | 1  |
| 17884 | 12420 | Lnx2   | Klh21         | -1 |
| 17884 | 12904 | Lnx2   | MMT00040704   | -1 |
| 17884 | 13889 | Lnx2   | Agpat2        | 1  |
| 17884 | 15668 | Lnx2   | 1810032O08Rik | -1 |
| 17884 | 15862 | Lnx2   | Mrap          | 1  |
| 17884 | 16013 | Lnx2   | Nt5c3         | -1 |
| 17884 | 16060 | Lnx2   | Gys2          | -1 |
| 17884 | 16692 | Lnx2   | Bat4          | -1 |
| 17884 | 17444 | Lnx2   | Tuba1a        | 1  |
| 17884 | 17656 | Lnx2   | Hdhd3         | 1  |
| 17884 | 17862 | Lnx2   | Fbxo21        | -1 |
| 17884 | 17878 | Lnx2   | Brap          | -1 |
| 17884 | 18653 | Lnx2   | MMT00072901   | -1 |
| 17884 | 20798 | Lnx2   | Ccp1          | -1 |
| 17884 | 21251 | Lnx2   | Cpt1a         | -1 |
| 17884 | 21604 | Lnx2   | Klh24         | -1 |
| 17884 | 22388 | Lnx2   | 2410018M08Rik | -1 |
| 17884 | 22443 | Lnx2   | Tuba1c        | 1  |
| 17884 | 22470 | Lnx2   | Ppargc1b      | -1 |

|       |       |             |               |    |
|-------|-------|-------------|---------------|----|
| 17888 | 607   | MMT00075624 | Me1           | -1 |
| 17888 | 5884  | MMT00075624 | Gstm2         | -1 |
| 17888 | 8815  | MMT00075624 | Mx1           | -1 |
| 17888 | 10132 | MMT00075624 | Ces2          | -1 |
| 17888 | 11946 | MMT00075624 | MMT00030953   | -1 |
| 17888 | 14017 | MMT00075624 | Ces5          | -1 |
| 17888 | 18201 | MMT00075624 | MMT00060232   | -1 |
| 17888 | 20079 | MMT00075624 | MMT00019254   | 1  |
| 17888 | 21214 | MMT00075624 | Scd1          | -1 |
| 17897 | 3061  | Gm1019      | Scarf2        | 1  |
| 17897 | 3119  | Gm1019      | Mapk10        | 1  |
| 17897 | 3339  | Gm1019      | Dip2a         | 1  |
| 17897 | 6017  | Gm1019      | MMT00018015   | -1 |
| 17897 | 6426  | Gm1019      | Mfsd4         | 1  |
| 17897 | 6846  | Gm1019      | Olf1402       | 1  |
| 17897 | 8791  | Gm1019      | Sectm1a       | 1  |
| 17897 | 10214 | Gm1019      | Sectm1b       | 1  |
| 17897 | 13615 | Gm1019      | Arl16         | -1 |
| 17897 | 15016 | Gm1019      | MMT00074608   | 1  |
| 17897 | 17680 | Gm1019      | 1700069L16Rik | 1  |
| 17897 | 17792 | Gm1019      | Vmn2r79       | 1  |
| 17897 | 17897 | Gm1019      | Gm1019        | 1  |
| 17897 | 21655 | Gm1019      | Rab40b        | -1 |
| 17900 | 5884  | Ift81       | Gstm2         | -1 |
| 17900 | 7602  | Ift81       | Pcca          | -1 |
| 17900 | 21214 | Ift81       | Scd1          | -1 |
| 17909 | 250   | Mesdc1      | Tubb2a-ps2    | 1  |
| 17909 | 269   | Mesdc1      | Tuba1b        | 1  |
| 17909 | 609   | Mesdc1      | MMT00060868   | 1  |
| 17909 | 1941  | Mesdc1      | MMT00079618   | 1  |
| 17909 | 2850  | Mesdc1      | Slc16a6       | 1  |
| 17909 | 3804  | Mesdc1      | MMT00015534   | 1  |
| 17909 | 4201  | Mesdc1      | Tubb2c        | 1  |
| 17909 | 6771  | Mesdc1      | Insc          | 1  |
| 17909 | 8328  | Mesdc1      | Klhdc8a       | 1  |
| 17909 | 9763  | Mesdc1      | Tuba3b        | 1  |
| 17909 | 10911 | Mesdc1      | Mcl1          | -1 |
| 17909 | 11095 | Mesdc1      | Bag3          | 1  |
| 17909 | 11356 | Mesdc1      | Med27         | 1  |
| 17909 | 12091 | Mesdc1      | 1810015C04Rik | -1 |
| 17909 | 12904 | Mesdc1      | MMT00040704   | -1 |
| 17909 | 13376 | Mesdc1      | Alg2          | 1  |
| 17909 | 13390 | Mesdc1      | Ddx31         | 1  |
| 17909 | 17323 | Mesdc1      | Tubb6         | 1  |
| 17909 | 17444 | Mesdc1      | Tuba1a        | 1  |
| 17909 | 17876 | Mesdc1      | Tubb4         | 1  |
| 17909 | 19671 | Mesdc1      | Upp2          | -1 |
| 17909 | 22290 | Mesdc1      | Tubb2a        | 1  |
| 17909 | 22443 | Mesdc1      | Tuba1c        | 1  |
| 17909 | 22630 | Mesdc1      | MMT00034355   | 1  |
| 17920 | 2200  | Nlgn2       | BC006779      | 1  |



|       |       |             |               |    |
|-------|-------|-------------|---------------|----|
| 17920 | 15008 | Nlgn2       | Chrdl2        | -1 |
| 17928 | 1594  | Pex11a      | Mrpl24        | 1  |
| 17940 | 269   | Zfp706      | Tuba1b        | 1  |
| 17940 | 354   | Zfp706      | MMT00007996   | 1  |
| 17940 | 1941  | Zfp706      | MMT00079618   | 1  |
| 17940 | 7151  | Zfp706      | MMT00007982   | 1  |
| 17940 | 9763  | Zfp706      | Tuba3b        | 1  |
| 17940 | 11724 | Zfp706      | Tuba3a        | 1  |
| 17940 | 17323 | Zfp706      | Tubb6         | 1  |
| 17940 | 17444 | Zfp706      | Tuba1a        | 1  |
| 17940 | 20803 | Zfp706      | Tmem50a       | -1 |
| 17940 | 22443 | Zfp706      | Tuba1c        | 1  |
| 17956 | 8444  | Serpina1d   | Rdh16         | 1  |
| 17956 | 8815  | Serpina1d   | Mx1           | 1  |
| 17956 | 10132 | Serpina1d   | Ces2          | 1  |
| 17956 | 12910 | Serpina1d   | 1110028A07Rik | 1  |
| 17956 | 14017 | Serpina1d   | Ces5          | 1  |
| 17956 | 15059 | Serpina1d   | Mogat1        | 1  |
| 17956 | 17996 | Serpina1d   | Igfbp2        | -1 |
| 17956 | 18042 | Serpina1d   | Aph1c         | -1 |
| 17956 | 18201 | Serpina1d   | MMT00060232   | 1  |
| 17956 | 20058 | Serpina1d   | Dnaic1        | -1 |
| 17956 | 20079 | Serpina1d   | MMT00019254   | -1 |
| 17956 | 21214 | Serpina1d   | Scd1          | 1  |
| 17956 | 22138 | Serpina1d   | Ang           | -1 |
| 17956 | 23026 | Serpina1d   | Apom          | -1 |
| 17981 | 20058 | MMT00036029 | Dnaic1        | 1  |
| 18018 | 18018 | Galnt11     | Galnt11       | 1  |
| 18037 | 6756  | Klf9        | Sds           | 1  |
| 18037 | 9910  | Klf9        | EG666644      | 1  |
| 18037 | 21142 | Klf9        | Gm129         | 1  |
| 18042 | 5364  | Aph1c       | Kif22         | 1  |
| 18045 | 2681  | Klk10       | Hectd1        | 1  |
| 18045 | 8896  | Klk10       | Fasn          | -1 |
| 18045 | 9408  | Klk10       | Hmgcs2        | 1  |
| 18045 | 11462 | Klk10       | Gpam          | -1 |
| 18045 | 12219 | Klk10       | Cyb5b         | -1 |
| 18045 | 12315 | Klk10       | Srebf1        | -1 |
| 18045 | 13018 | Klk10       | AW544981      | -1 |
| 18045 | 15892 | Klk10       | Slc22a5       | 1  |
| 18045 | 21202 | Klk10       | Acly          | -1 |
| 18045 | 21251 | Klk10       | Cpt1a         | 1  |
| 18045 | 22732 | Klk10       | Cyb5b         | -1 |
| 18045 | 22770 | Klk10       | Slc27a2       | 1  |
| 18049 | 5804  | Ribc1       | Thrsp         | -1 |
| 18049 | 13304 | Ribc1       | Gadd45b       | 1  |
| 18053 | 7602  | Psmc4       | Pcca          | 1  |
| 18053 | 18053 | Psmc4       | Psmc4         | 1  |
| 18053 | 18201 | Psmc4       | MMT00060232   | 1  |
| 18061 | 8815  | MMT00002521 | Mx1           | 1  |
| 18061 | 21214 | MMT00002521 | Scd1          | 1  |

|       |       |         |                    |    |
|-------|-------|---------|--------------------|----|
| 18065 | 14017 | Peo1    | Ces5               | -1 |
| 18069 | 607   | Gpt     | Me1                | 1  |
| 18069 | 874   | Gpt     | Aldh1a7            | 1  |
| 18069 | 1129  | Gpt     | Gsta4              | 1  |
| 18069 | 3356  | Gpt     | Adhfe1             | 1  |
| 18069 | 3832  | Gpt     | Sdhb               | 1  |
| 18069 | 4351  | Gpt     | Plxnb1             | -1 |
| 18069 | 5680  | Gpt     | Lrg1               | -1 |
| 18069 | 5884  | Gpt     | Gstm2              | 1  |
| 18069 | 6573  | Gpt     | Pecr               | 1  |
| 18069 | 7602  | Gpt     | Pcca               | 1  |
| 18069 | 7887  | Gpt     | 4930418G15Rik      | 1  |
| 18069 | 8444  | Gpt     | Rdh16              | 1  |
| 18069 | 8815  | Gpt     | Mx1                | 1  |
| 18069 | 9427  | Gpt     | Nqo2               | 1  |
| 18069 | 9842  | Gpt     | Qdpr               | 1  |
| 18069 | 10554 | Gpt     | ENSMUSG00000074179 | 1  |
| 18069 | 10598 | Gpt     | MMT00011231        | -1 |
| 18069 | 11014 | Gpt     | Hibadh             | 1  |
| 18069 | 11065 | Gpt     | Mccc1              | 1  |
| 18069 | 11234 | Gpt     | Pygl               | 1  |
| 18069 | 12556 | Gpt     | Ass1               | 1  |
| 18069 | 12955 | Gpt     | Atp5o              | 1  |
| 18069 | 13293 | Gpt     | Gsta2              | 1  |
| 18069 | 13431 | Gpt     | MMT00038058        | -1 |
| 18069 | 14017 | Gpt     | Ces5               | 1  |
| 18069 | 14055 | Gpt     | MMT00050438        | -1 |
| 18069 | 15205 | Gpt     | MMT00030262        | -1 |
| 18069 | 16336 | Gpt     | 2310040A07Rik      | -1 |
| 18069 | 18201 | Gpt     | MMT00060232        | 1  |
| 18069 | 18549 | Gpt     | Robo1              | 1  |
| 18069 | 20019 | Gpt     | Qdpr               | 1  |
| 18069 | 20058 | Gpt     | Dnaic1             | -1 |
| 18069 | 21214 | Gpt     | Scd1               | 1  |
| 18069 | 21369 | Gpt     | Cd4                | -1 |
| 18069 | 21575 | Gpt     | Cyp2c55            | 1  |
| 18069 | 21727 | Gpt     | Khk                | 1  |
| 18069 | 22998 | Gpt     | Ass1               | 1  |
| 18069 | 23640 | Gpt     | Bdh1               | -1 |
| 18083 | 250   | Gadd45a | Tubb2a-ps2         | 1  |
| 18083 | 269   | Gadd45a | Tuba1b             | 1  |
| 18083 | 354   | Gadd45a | MMT00007996        | 1  |
| 18083 | 563   | Gadd45a | D4Bwg0951e         | -1 |
| 18083 | 609   | Gadd45a | MMT00060868        | 1  |
| 18083 | 771   | Gadd45a | Zbtb45             | 1  |
| 18083 | 1941  | Gadd45a | MMT00079618        | 1  |
| 18083 | 2322  | Gadd45a | Tuba4a             | 1  |
| 18083 | 2794  | Gadd45a | Map3k6             | -1 |
| 18083 | 3246  | Gadd45a | Prei4              | -1 |
| 18083 | 3804  | Gadd45a | MMT00015534        | 1  |
| 18083 | 4201  | Gadd45a | Tubb2c             | 1  |

|       |       |         |               |    |
|-------|-------|---------|---------------|----|
| 18083 | 4708  | Gadd45a | Traf3ip2      | 1  |
| 18083 | 5587  | Gadd45a | Rmnd5b        | 1  |
| 18083 | 6048  | Gadd45a | Psmc9         | -1 |
| 18083 | 6380  | Gadd45a | 6330569M22Rik | 1  |
| 18083 | 7151  | Gadd45a | MMT00007982   | 1  |
| 18083 | 7612  | Gadd45a | MMT00014216   | 1  |
| 18083 | 7862  | Gadd45a | Cpsf4l        | -1 |
| 18083 | 8641  | Gadd45a | Slc7a2        | -1 |
| 18083 | 9418  | Gadd45a | MMT00034311   | 1  |
| 18083 | 9763  | Gadd45a | Tuba3b        | 1  |
| 18083 | 9860  | Gadd45a | MMT00060113   | 1  |
| 18083 | 10911 | Gadd45a | Mcl1          | -1 |
| 18083 | 11129 | Gadd45a | Ankhd1        | -1 |
| 18083 | 11149 | Gadd45a | MMT00050488   | 1  |
| 18083 | 11724 | Gadd45a | Tuba3a        | 1  |
| 18083 | 11808 | Gadd45a | Pck1          | -1 |
| 18083 | 12420 | Gadd45a | Klhl21        | -1 |
| 18083 | 12565 | Gadd45a | Grem2         | -1 |
| 18083 | 13471 | Gadd45a | Cln8          | -1 |
| 18083 | 13489 | Gadd45a | D230025D16Rik | -1 |
| 18083 | 15021 | Gadd45a | Ppargc1a      | -1 |
| 18083 | 15252 | Gadd45a | MMT00019402   | 1  |
| 18083 | 15631 | Gadd45a | Lpin1         | -1 |
| 18083 | 15659 | Gadd45a | MMT00074093   | 1  |
| 18083 | 16060 | Gadd45a | Gys2          | -1 |
| 18083 | 16720 | Gadd45a | Mtmr7         | -1 |
| 18083 | 17143 | Gadd45a | 2010002N04Rik | 1  |
| 18083 | 17323 | Gadd45a | Tubb6         | 1  |
| 18083 | 17444 | Gadd45a | Tuba1a        | 1  |
| 18083 | 17525 | Gadd45a | Ctgf          | -1 |
| 18083 | 17656 | Gadd45a | Hdhd3         | 1  |
| 18083 | 17876 | Gadd45a | Tubb4         | 1  |
| 18083 | 18250 | Gadd45a | Mmp14         | 1  |
| 18083 | 18314 | Gadd45a | 4631416L12Rik | -1 |
| 18083 | 18606 | Gadd45a | A230074B11Rik | -1 |
| 18083 | 18785 | Gadd45a | Angpt4        | -1 |
| 18083 | 20777 | Gadd45a | MMT00010185   | 1  |
| 18083 | 20803 | Gadd45a | Tmem50a       | -1 |
| 18083 | 21722 | Gadd45a | MMT00054655   | 1  |
| 18083 | 21733 | Gadd45a | Rhebl1        | -1 |
| 18083 | 22290 | Gadd45a | Tubb2a        | 1  |
| 18083 | 22443 | Gadd45a | Tuba1c        | 1  |
| 18083 | 22630 | Gadd45a | MMT00034355   | 1  |
| 18083 | 23201 | Gadd45a | S1pr1         | 1  |
| 18083 | 23202 | Gadd45a | Olf559        | -1 |
| 18088 | 2388  | Alkbh6  | Dot1l         | 1  |
| 18088 | 2599  | Alkbh6  | Lsm14a        | 1  |
| 18099 | 185   | Nfx1    | Ap2b1         | -1 |
| 18099 | 1655  | Nfx1    | Mgrn1         | 1  |
| 18099 | 1806  | Nfx1    | Nola3         | -1 |
| 18099 | 2051  | Nfx1    | Ddx27         | 1  |

|       |       |             |                    |    |
|-------|-------|-------------|--------------------|----|
| 18099 | 4635  | Nfx1        | MMT00023332        | -1 |
| 18099 | 5227  | Nfx1        | 2310008M10Rik      | -1 |
| 18099 | 6012  | Nfx1        | Chid1              | -1 |
| 18099 | 6193  | Nfx1        | Lactb2             | -1 |
| 18099 | 6261  | Nfx1        | 2810026P18Rik      | 1  |
| 18099 | 7862  | Nfx1        | Cpsf4l             | 1  |
| 18099 | 8597  | Nfx1        | Papss1             | -1 |
| 18099 | 8844  | Nfx1        | 2310037I24Rik      | 1  |
| 18099 | 10612 | Nfx1        | Slc24a6            | 1  |
| 18099 | 11807 | Nfx1        | Fbxo31             | 1  |
| 18099 | 12143 | Nfx1        | Thyn1              | -1 |
| 18099 | 12219 | Nfx1        | Cyb5b              | -1 |
| 18099 | 12276 | Nfx1        | Hmga1              | 1  |
| 18099 | 12460 | Nfx1        | Pnpla2             | 1  |
| 18099 | 12637 | Nfx1        | Itпка              | 1  |
| 18099 | 14380 | Nfx1        | MMT00051866        | -1 |
| 18099 | 15154 | Nfx1        | Dhx29              | -1 |
| 18099 | 16393 | Nfx1        | MMT00023354        | -1 |
| 18099 | 17001 | Nfx1        | Hmga1              | 1  |
| 18099 | 17862 | Nfx1        | Fbxo21             | 1  |
| 18099 | 17878 | Nfx1        | Brap               | 1  |
| 18099 | 18099 | Nfx1        | Nfx1               | 1  |
| 18099 | 18286 | Nfx1        | Slc41a3            | 1  |
| 18099 | 18419 | Nfx1        | Srprb              | -1 |
| 18099 | 18653 | Nfx1        | MMT00072901        | 1  |
| 18099 | 19108 | Nfx1        | Armet              | -1 |
| 18099 | 21143 | Nfx1        | Ypel3              | 1  |
| 18099 | 21251 | Nfx1        | Cpt1a              | 1  |
| 18099 | 21575 | Nfx1        | Cyp2c55            | -1 |
| 18099 | 21793 | Nfx1        | Pla2g12a           | 1  |
| 18099 | 22732 | Nfx1        | Cyb5b              | -1 |
| 18099 | 22770 | Nfx1        | Slc27a2            | 1  |
| 18099 | 23617 | Nfx1        | Nme1               | -1 |
| 18100 | 20058 | Sdsl        | Dnaic1             | -1 |
| 18103 | 14017 | Spaca1      | Ces5               | 1  |
| 18113 | 607   | MMT00034400 | Me1                | 1  |
| 18113 | 8815  | MMT00034400 | Mx1                | 1  |
| 18113 | 18201 | MMT00034400 | MMT00060232        | 1  |
| 18113 | 21214 | MMT00034400 | Scd1               | 1  |
| 18113 | 21575 | MMT00034400 | Cyp2c55            | 1  |
| 18114 | 607   | Lmtk2       | Me1                | 1  |
| 18114 | 874   | Lmtk2       | Aldh1a7            | 1  |
| 18114 | 3565  | Lmtk2       | MMT00045908        | 1  |
| 18114 | 4351  | Lmtk2       | Plxnb1             | -1 |
| 18114 | 6044  | Lmtk2       | Sucnr1             | 1  |
| 18114 | 8444  | Lmtk2       | Rdh16              | 1  |
| 18114 | 8815  | Lmtk2       | Mx1                | 1  |
| 18114 | 9408  | Lmtk2       | Hmgcs2             | -1 |
| 18114 | 9427  | Lmtk2       | Nqo2               | 1  |
| 18114 | 9842  | Lmtk2       | Qdpr               | 1  |
| 18114 | 10554 | Lmtk2       | ENSMUSG00000074179 | 1  |

|       |       |         |               |    |
|-------|-------|---------|---------------|----|
| 18114 | 12219 | Lmtk2   | Cyb5b         | 1  |
| 18114 | 12910 | Lmtk2   | 1110028A07Rik | 1  |
| 18114 | 13293 | Lmtk2   | Gsta2         | 1  |
| 18114 | 14147 | Lmtk2   | Acss2         | 1  |
| 18114 | 14151 | Lmtk2   | Slc44a1       | 1  |
| 18114 | 17563 | Lmtk2   | Aldh111       | 1  |
| 18114 | 17660 | Lmtk2   | Nlrp12        | -1 |
| 18114 | 17887 | Lmtk2   | Cryl1         | 1  |
| 18114 | 18201 | Lmtk2   | MMT00060232   | 1  |
| 18114 | 19766 | Lmtk2   | Slc26a4       | 1  |
| 18114 | 20019 | Lmtk2   | Qdpr          | 1  |
| 18114 | 20058 | Lmtk2   | Dnaic1        | -1 |
| 18114 | 20385 | Lmtk2   | Chd1l         | 1  |
| 18114 | 21202 | Lmtk2   | Acly          | 1  |
| 18114 | 21214 | Lmtk2   | Scd1          | 1  |
| 18114 | 21575 | Lmtk2   | Cyp2c55       | 1  |
| 18114 | 21727 | Lmtk2   | Khk           | 1  |
| 18114 | 22046 | Lmtk2   | Cml4          | 1  |
| 18114 | 22732 | Lmtk2   | Cyb5b         | 1  |
| 18120 | 18120 | Tmem201 | Tmem201       | 1  |
| 18128 | 18201 | Tpi1    | MMT00060232   | 1  |
| 18135 | 2235  | Tmed3   | Ndufv1        | -1 |
| 18135 | 18069 | Tmed3   | Gpt           | -1 |
| 18135 | 20967 | Tmed3   | Fabp2         | 1  |
| 18140 | 397   | Atg2b   | Ak7           | -1 |
| 18140 | 18140 | Atg2b   | Atg2b         | 1  |
| 18143 | 23259 | Dnajc1  | Dnajc1        | 1  |
| 18148 | 250   | Cables1 | Tubb2a-ps2    | 1  |
| 18148 | 269   | Cables1 | Tuba1b        | 1  |
| 18148 | 609   | Cables1 | MMT00060868   | 1  |
| 18148 | 865   | Cables1 | Npc1          | -1 |
| 18148 | 1709  | Cables1 | Mt2           | -1 |
| 18148 | 1760  | Cables1 | Nek8          | -1 |
| 18148 | 1793  | Cables1 | D3Ucla1       | 1  |
| 18148 | 1941  | Cables1 | MMT00079618   | 1  |
| 18148 | 2051  | Cables1 | Ddx27         | -1 |
| 18148 | 2322  | Cables1 | Tuba4a        | 1  |
| 18148 | 3253  | Cables1 | Tbc1d20       | -1 |
| 18148 | 3332  | Cables1 | Lrrc59        | 1  |
| 18148 | 3804  | Cables1 | MMT00015534   | 1  |
| 18148 | 5487  | Cables1 | Palmd         | -1 |
| 18148 | 6523  | Cables1 | Hapln1        | 1  |
| 18148 | 7151  | Cables1 | MMT00007982   | 1  |
| 18148 | 9406  | Cables1 | Calcoco1      | -1 |
| 18148 | 9763  | Cables1 | Tuba3b        | 1  |
| 18148 | 10612 | Cables1 | Slc24a6       | -1 |
| 18148 | 11724 | Cables1 | Tuba3a        | 1  |
| 18148 | 14838 | Cables1 | MMT00070887   | 1  |
| 18148 | 15252 | Cables1 | MMT00019402   | 1  |
| 18148 | 16327 | Cables1 | Ubfd1         | 1  |
| 18148 | 16792 | Cables1 | Sh3yl1        | -1 |

|       |       |               |                    |    |
|-------|-------|---------------|--------------------|----|
| 18148 | 17444 | Cables1       | Tuba1a             | 1  |
| 18148 | 17876 | Cables1       | Tubb4              | 1  |
| 18148 | 18099 | Cables1       | Nfx1               | -1 |
| 18148 | 18215 | Cables1       | Gpr146             | -1 |
| 18148 | 21143 | Cables1       | Ypel3              | -1 |
| 18148 | 22290 | Cables1       | Tubb2a             | 1  |
| 18148 | 22443 | Cables1       | Tuba1c             | 1  |
| 18148 | 23617 | Cables1       | Nme1               | 1  |
| 18151 | 5934  | Naip2         | S100a10            | 1  |
| 18151 | 12799 | Naip2         | Spon2              | 1  |
| 18151 | 23248 | Naip2         | Tesk2              | -1 |
| 18160 | 13271 | Bace2         | Idh2               | -1 |
| 18164 | 6213  | Gdf10         | Ccl2               | -1 |
| 18165 | 1985  | 5830482F20Rik | Pepd               | -1 |
| 18165 | 2599  | 5830482F20Rik | Lsm14a             | 1  |
| 18165 | 14208 | 5830482F20Rik | Ech1               | 1  |
| 18165 | 18053 | 5830482F20Rik | Psmc4              | 1  |
| 18165 | 23283 | 5830482F20Rik | Mrps12             | 1  |
| 18169 | 9882  | Cbl1          | OTTMUSG00000005148 | 1  |
| 18172 | 5639  | Nupr1         | Gdpd3              | 1  |
| 18172 | 19631 | Nupr1         | Nsmce1             | -1 |
| 18173 | 13431 | Arpp19        | MMT00038058        | -1 |
| 18174 | 143   | Stat2         | Gvin1              | 1  |
| 18174 | 939   | Stat2         | Daxx               | 1  |
| 18174 | 1533  | Stat2         | BC013712           | 1  |
| 18174 | 1722  | Stat2         | Iqgap1             | 1  |
| 18174 | 2058  | Stat2         | Hk3                | 1  |
| 18174 | 2200  | Stat2         | BC006779           | 1  |
| 18174 | 2224  | Stat2         | Oasl2              | 1  |
| 18174 | 2550  | Stat2         | MMT00036681        | 1  |
| 18174 | 2752  | Stat2         | Fcgr1              | 1  |
| 18174 | 3028  | Stat2         | Uhrf1              | 1  |
| 18174 | 3426  | Stat2         | Hap1               | 1  |
| 18174 | 3523  | Stat2         | Trim34             | 1  |
| 18174 | 3572  | Stat2         | Ebi3               | 1  |
| 18174 | 3594  | Stat2         | Rasa4              | 1  |
| 18174 | 3659  | Stat2         | EG236451           | 1  |
| 18174 | 3683  | Stat2         | Oas2               | 1  |
| 18174 | 3721  | Stat2         | Me2                | 1  |
| 18174 | 4114  | Stat2         | Parp12             | 1  |
| 18174 | 4185  | Stat2         | Hmgb2              | 1  |
| 18174 | 4409  | Stat2         | 5430435G22Rik      | 1  |
| 18174 | 4426  | Stat2         | Iigp2              | 1  |
| 18174 | 4508  | Stat2         | Ifit1              | 1  |
| 18174 | 4516  | Stat2         | Rsad2              | 1  |
| 18174 | 5002  | Stat2         | Ifi202b            | 1  |
| 18174 | 5044  | Stat2         | Ifi35              | 1  |
| 18174 | 5216  | Stat2         | Spnb5              | 1  |
| 18174 | 5250  | Stat2         | Ifit2              | 1  |
| 18174 | 5554  | Stat2         | Emr1               | 1  |
| 18174 | 5556  | Stat2         | Ccl4               | 1  |

|       |       |       |               |   |
|-------|-------|-------|---------------|---|
| 18174 | 5766  | Stat2 | 5033414D02Rik | 1 |
| 18174 | 5845  | Stat2 | Il18bp        | 1 |
| 18174 | 5853  | Stat2 | Trim30        | 1 |
| 18174 | 5875  | Stat2 | Cd86          | 1 |
| 18174 | 5949  | Stat2 | Zbp1          | 1 |
| 18174 | 6036  | Stat2 | Pram1         | 1 |
| 18174 | 6072  | Stat2 | C1qc          | 1 |
| 18174 | 6098  | Stat2 | Ncf4          | 1 |
| 18174 | 6383  | Stat2 | Gbp2          | 1 |
| 18174 | 6587  | Stat2 | Irf9          | 1 |
| 18174 | 6595  | Stat2 | Oas1a         | 1 |
| 18174 | 6734  | Stat2 | Ehd4          | 1 |
| 18174 | 6779  | Stat2 | Gbp6          | 1 |
| 18174 | 6806  | Stat2 | Agrn          | 1 |
| 18174 | 6824  | Stat2 | Irf7          | 1 |
| 18174 | 6910  | Stat2 | Ly6c2         | 1 |
| 18174 | 7057  | Stat2 | Stk10         | 1 |
| 18174 | 7069  | Stat2 | Ube1l         | 1 |
| 18174 | 7105  | Stat2 | Plac8         | 1 |
| 18174 | 7238  | Stat2 | Pycard        | 1 |
| 18174 | 7284  | Stat2 | MMT00008674   | 1 |
| 18174 | 7316  | Stat2 | Ifi204        | 1 |
| 18174 | 7336  | Stat2 | Cd5l          | 1 |
| 18174 | 8270  | Stat2 | Clsn          | 1 |
| 18174 | 8555  | Stat2 | H2-M3         | 1 |
| 18174 | 8659  | Stat2 | Psmb8         | 1 |
| 18174 | 8800  | Stat2 | Rnf213        | 1 |
| 18174 | 8951  | Stat2 | Cd97          | 1 |
| 18174 | 8952  | Stat2 | Marco         | 1 |
| 18174 | 9100  | Stat2 | Ms4a6c        | 1 |
| 18174 | 9320  | Stat2 | Rnf31         | 1 |
| 18174 | 9401  | Stat2 | Fcgr4         | 1 |
| 18174 | 9616  | Stat2 | Al451557      | 1 |
| 18174 | 9717  | Stat2 | Psmb9         | 1 |
| 18174 | 9820  | Stat2 | BC023105      | 1 |
| 18174 | 9847  | Stat2 | Ifi27         | 1 |
| 18174 | 9920  | Stat2 | Syk           | 1 |
| 18174 | 10109 | Stat2 | Gbp3          | 1 |
| 18174 | 10393 | Stat2 | Slc7a8        | 1 |
| 18174 | 10426 | Stat2 | Ly6f          | 1 |
| 18174 | 10504 | Stat2 | Ripk3         | 1 |
| 18174 | 10606 | Stat2 | Apbb1ip       | 1 |
| 18174 | 10796 | Stat2 | Spic          | 1 |
| 18174 | 10926 | Stat2 | P2ry13        | 1 |
| 18174 | 11009 | Stat2 | MMT00008885   | 1 |
| 18174 | 11204 | Stat2 | Al451617      | 1 |
| 18174 | 11265 | Stat2 | Irgm          | 1 |
| 18174 | 11701 | Stat2 | Oas1c         | 1 |
| 18174 | 11845 | Stat2 | Psme1         | 1 |
| 18174 | 12126 | Stat2 | Znfx1         | 1 |
| 18174 | 12312 | Stat2 | Ms4a6d        | 1 |

|       |       |       |               |   |
|-------|-------|-------|---------------|---|
| 18174 | 12398 | Stat2 | Ifi44         | 1 |
| 18174 | 12600 | Stat2 | Ifi204        | 1 |
| 18174 | 12969 | Stat2 | Xaf1          | 1 |
| 18174 | 13156 | Stat2 | Ifit3         | 1 |
| 18174 | 13181 | Stat2 | Lcp2          | 1 |
| 18174 | 13309 | Stat2 | Tgtp          | 1 |
| 18174 | 13504 | Stat2 | Lair1         | 1 |
| 18174 | 13514 | Stat2 | Apol9b        | 1 |
| 18174 | 13522 | Stat2 | Sfn5          | 1 |
| 18174 | 13527 | Stat2 | Ctss          | 1 |
| 18174 | 13528 | Stat2 | Capn12        | 1 |
| 18174 | 13585 | Stat2 | Nckap1l       | 1 |
| 18174 | 13654 | Stat2 | Stat1         | 1 |
| 18174 | 13656 | Stat2 | Ly86          | 1 |
| 18174 | 13749 | Stat2 | Parp9         | 1 |
| 18174 | 13780 | Stat2 | Pilra         | 1 |
| 18174 | 13826 | Stat2 | Melk          | 1 |
| 18174 | 14029 | Stat2 | 2810022L02Rik | 1 |
| 18174 | 14237 | Stat2 | Rac2          | 1 |
| 18174 | 14258 | Stat2 | Ifi47         | 1 |
| 18174 | 14260 | Stat2 | Mkl1          | 1 |
| 18174 | 14453 | Stat2 | Inpp5d        | 1 |
| 18174 | 14475 | Stat2 | Abcg1         | 1 |
| 18174 | 14506 | Stat2 | Slc15a3       | 1 |
| 18174 | 14603 | Stat2 | Ly6e          | 1 |
| 18174 | 14611 | Stat2 | Ddx60         | 1 |
| 18174 | 14880 | Stat2 | Ms4a4c        | 1 |
| 18174 | 14883 | Stat2 | Itgal         | 1 |
| 18174 | 14954 | Stat2 | Rab19         | 1 |
| 18174 | 15074 | Stat2 | Usp18         | 1 |
| 18174 | 15280 | Stat2 | Cxcl10        | 1 |
| 18174 | 15387 | Stat2 | Mgl1          | 1 |
| 18174 | 15449 | Stat2 | Mitd1         | 1 |
| 18174 | 15504 | Stat2 | Mx2           | 1 |
| 18174 | 15572 | Stat2 | Dtx3l         | 1 |
| 18174 | 15749 | Stat2 | Cd22          | 1 |
| 18174 | 15825 | Stat2 | Fermt3        | 1 |
| 18174 | 16102 | Stat2 | Cd72          | 1 |
| 18174 | 16129 | Stat2 | Traf1         | 1 |
| 18174 | 16147 | Stat2 | Tlr2          | 1 |
| 18174 | 16182 | Stat2 | Oasl1         | 1 |
| 18174 | 16186 | Stat2 | Cfp           | 1 |
| 18174 | 16199 | Stat2 | Samhd1        | 1 |
| 18174 | 16521 | Stat2 | Adar          | 1 |
| 18174 | 16572 | Stat2 | D14Ert668e    | 1 |
| 18174 | 16874 | Stat2 | Fcer1g        | 1 |
| 18174 | 16913 | Stat2 | Pira3         | 1 |
| 18174 | 16988 | Stat2 | Clec4f        | 1 |
| 18174 | 17071 | Stat2 | Samd9l        | 1 |
| 18174 | 17197 | Stat2 | Igtp          | 1 |
| 18174 | 17312 | Stat2 | Sirpa         | 1 |



|       |       |        |                    |    |
|-------|-------|--------|--------------------|----|
| 18174 | 17412 | Stat2  | Aif1               | 1  |
| 18174 | 17720 | Stat2  | Rap2b              | 1  |
| 18174 | 17832 | Stat2  | MMT00043412        | 1  |
| 18174 | 17904 | Stat2  | Cds1               | 1  |
| 18174 | 18174 | Stat2  | Stat2              | 1  |
| 18174 | 18186 | Stat2  | Parp14             | 1  |
| 18174 | 18289 | Stat2  | Tap1               | 1  |
| 18174 | 19026 | Stat2  | Isg15              | 1  |
| 18174 | 19063 | Stat2  | Evl                | 1  |
| 18174 | 19189 | Stat2  | Sp100              | 1  |
| 18174 | 19262 | Stat2  | Cd274              | 1  |
| 18174 | 19298 | Stat2  | Unc93b1            | 1  |
| 18174 | 19708 | Stat2  | Ly6a               | 1  |
| 18174 | 19738 | Stat2  | Lgals3bp           | 1  |
| 18174 | 19794 | Stat2  | Rgs2               | 1  |
| 18174 | 20047 | Stat2  | Dysf               | 1  |
| 18174 | 20150 | Stat2  | Ptprc              | 1  |
| 18174 | 20321 | Stat2  | Ms4a6b             | 1  |
| 18174 | 20431 | Stat2  | Slc7a7             | 1  |
| 18174 | 20474 | Stat2  | Gnb3               | 1  |
| 18174 | 20791 | Stat2  | MMT00014813        | 1  |
| 18174 | 20997 | Stat2  | MMT00028135        | 1  |
| 18174 | 21351 | Stat2  | Shisa5             | 1  |
| 18174 | 21440 | Stat2  | Tmsb10             | 1  |
| 18174 | 21549 | Stat2  | Rtp4               | 1  |
| 18174 | 21824 | Stat2  | 5830443L24Rik      | 1  |
| 18174 | 22037 | Stat2  | Oas1g              | 1  |
| 18174 | 22077 | Stat2  | MMT00057550        | 1  |
| 18174 | 22327 | Stat2  | Tyrobp             | 1  |
| 18174 | 22647 | Stat2  | Pkib               | 1  |
| 18174 | 22712 | Stat2  | Phf11              | 1  |
| 18174 | 23038 | Stat2  | Casp4              | 1  |
| 18174 | 23208 | Stat2  | Hck                | 1  |
| 18174 | 23242 | Stat2  | Gngt2              | 1  |
| 18174 | 23276 | Stat2  | Evi2b              | 1  |
| 18174 | 23450 | Stat2  | D12Ert647e         | 1  |
| 18176 | 1129  | Aqp11  | Gsta4              | 1  |
| 18176 | 3356  | Aqp11  | Adhfe1             | 1  |
| 18176 | 7602  | Aqp11  | Pcca               | 1  |
| 18176 | 9427  | Aqp11  | Nqo2               | 1  |
| 18176 | 9842  | Aqp11  | Qdpr               | 1  |
| 18176 | 10554 | Aqp11  | ENSMUSG00000074179 | 1  |
| 18176 | 12955 | Aqp11  | Atp5o              | 1  |
| 18176 | 13293 | Aqp11  | Gsta2              | 1  |
| 18176 | 21214 | Aqp11  | Scd1               | 1  |
| 18176 | 21425 | Aqp11  | Rab6               | -1 |
| 18176 | 23640 | Aqp11  | Bdh1               | -1 |
| 18177 | 20058 | Cyp7b1 | Dnaic1             | 1  |
| 18177 | 22226 | Cyp7b1 | Pm20d1             | -1 |
| 18179 | 250   | Dbp    | Tubb2a-ps2         | -1 |
| 18179 | 402   | Dbp    | Timp3              | 1  |

|       |      |     |             |    |
|-------|------|-----|-------------|----|
| 18179 | 407  | Dbp | Serpina6    | 1  |
| 18179 | 415  | Dbp | Ypel2       | -1 |
| 18179 | 433  | Dbp | Pla2g12b    | -1 |
| 18179 | 437  | Dbp | Ndrp1       | -1 |
| 18179 | 604  | Dbp | Ppp1r15b    | 1  |
| 18179 | 609  | Dbp | MMT00060868 | -1 |
| 18179 | 719  | Dbp | Usp2        | 1  |
| 18179 | 793  | Dbp | Morc3       | 1  |
| 18179 | 849  | Dbp | Pxmp4       | -1 |
| 18179 | 865  | Dbp | Npc1        | 1  |
| 18179 | 958  | Dbp | Ppp2r5e     | 1  |
| 18179 | 1310 | Dbp | Cabc1       | -1 |
| 18179 | 1326 | Dbp | Tox         | 1  |
| 18179 | 1363 | Dbp | BC021767    | -1 |
| 18179 | 1424 | Dbp | Dapk1       | -1 |
| 18179 | 1445 | Dbp | Ssbp2       | 1  |
| 18179 | 1453 | Dbp | Gfod2       | -1 |
| 18179 | 1501 | Dbp | Rnf145      | 1  |
| 18179 | 1585 | Dbp | Mif4gd      | -1 |
| 18179 | 1646 | Dbp | Slc15a4     | 1  |
| 18179 | 1655 | Dbp | Mgn1        | 1  |
| 18179 | 1760 | Dbp | Nek8        | 1  |
| 18179 | 1767 | Dbp | BC016495    | 1  |
| 18179 | 1853 | Dbp | Stat5a      | -1 |
| 18179 | 2011 | Dbp | Slc2a5      | 1  |
| 18179 | 2013 | Dbp | Il15ra      | 1  |
| 18179 | 2110 | Dbp | Gtf2ird1    | -1 |
| 18179 | 2126 | Dbp | Dgat2       | 1  |
| 18179 | 2150 | Dbp | Rragc       | 1  |
| 18179 | 2200 | Dbp | BC006779    | -1 |
| 18179 | 2262 | Dbp | Papss2      | 1  |
| 18179 | 2317 | Dbp | Ankar       | -1 |
| 18179 | 2384 | Dbp | Micalcl     | -1 |
| 18179 | 2399 | Dbp | MMT00060167 | -1 |
| 18179 | 2447 | Dbp | Ubac1       | 1  |
| 18179 | 2615 | Dbp | EG624862    | 1  |
| 18179 | 2636 | Dbp | Tars        | -1 |
| 18179 | 2766 | Dbp | Elp4        | -1 |
| 18179 | 2823 | Dbp | Sipa112     | 1  |
| 18179 | 2829 | Dbp | Lrfr3       | -1 |
| 18179 | 2850 | Dbp | Slc16a6     | -1 |
| 18179 | 2881 | Dbp | Hlf         | 1  |
| 18179 | 3214 | Dbp | Dnmt3b      | -1 |
| 18179 | 3235 | Dbp | BC029214    | -1 |
| 18179 | 3246 | Dbp | Prei4       | 1  |
| 18179 | 3357 | Dbp | Rev1        | 1  |
| 18179 | 3410 | Dbp | Paqr9       | -1 |
| 18179 | 3746 | Dbp | Osbp15      | 1  |
| 18179 | 3790 | Dbp | Mtss1       | 1  |
| 18179 | 3804 | Dbp | MMT00015534 | -1 |
| 18179 | 3989 | Dbp | Wrnip1      | -1 |

|       |      |     |               |    |
|-------|------|-----|---------------|----|
| 18179 | 4106 | Dbp | MMT00041409   | 1  |
| 18179 | 4192 | Dbp | Zranb1        | 1  |
| 18179 | 4201 | Dbp | Tubb2c        | -1 |
| 18179 | 4286 | Dbp | Ptp4a1        | 1  |
| 18179 | 4298 | Dbp | St3gal1       | -1 |
| 18179 | 4333 | Dbp | Sumo3         | -1 |
| 18179 | 4392 | Dbp | 1810055G02Rik | 1  |
| 18179 | 4534 | Dbp | Ndel1         | 1  |
| 18179 | 4590 | Dbp | Arhgap21      | 1  |
| 18179 | 4612 | Dbp | Hspa5         | -1 |
| 18179 | 4686 | Dbp | BC021785      | -1 |
| 18179 | 4966 | Dbp | Zscan20       | -1 |
| 18179 | 5068 | Dbp | Afap112       | -1 |
| 18179 | 5120 | Dbp | Alkbh7        | -1 |
| 18179 | 5183 | Dbp | St5           | -1 |
| 18179 | 5224 | Dbp | MMT00071383   | -1 |
| 18179 | 5372 | Dbp | Tor1a         | 1  |
| 18179 | 5374 | Dbp | Chka          | -1 |
| 18179 | 5414 | Dbp | Etnk2         | 1  |
| 18179 | 5569 | Dbp | Pdgfc         | -1 |
| 18179 | 5574 | Dbp | Hsd3b7        | -1 |
| 18179 | 5729 | Dbp | 2310016C08Rik | -1 |
| 18179 | 5734 | Dbp | EG619653      | 1  |
| 18179 | 5802 | Dbp | Mad2l2        | -1 |
| 18179 | 5804 | Dbp | Thrsp         | 1  |
| 18179 | 5849 | Dbp | 2310031A18Rik | -1 |
| 18179 | 5892 | Dbp | MMT00038457   | 1  |
| 18179 | 5934 | Dbp | S100a10       | -1 |
| 18179 | 5974 | Dbp | Arntl         | -1 |
| 18179 | 6019 | Dbp | Gdap10        | 1  |
| 18179 | 6073 | Dbp | Mthfd2        | -1 |
| 18179 | 6077 | Dbp | Pik3cb        | 1  |
| 18179 | 6171 | Dbp | Abtb2         | -1 |
| 18179 | 6268 | Dbp | Slc45a3       | -1 |
| 18179 | 6343 | Dbp | Slc20a1       | 1  |
| 18179 | 6386 | Dbp | Por           | 1  |
| 18179 | 6394 | Dbp | Fbxo6         | -1 |
| 18179 | 6639 | Dbp | Fads3         | -1 |
| 18179 | 6657 | Dbp | Irf6          | -1 |
| 18179 | 6714 | Dbp | Lima1         | 1  |
| 18179 | 6756 | Dbp | Sds           | 1  |
| 18179 | 6771 | Dbp | Insc          | -1 |
| 18179 | 6788 | Dbp | Psen2         | -1 |
| 18179 | 7061 | Dbp | Spsb3         | -1 |
| 18179 | 7308 | Dbp | Tmem52        | 1  |
| 18179 | 7414 | Dbp | Clpx          | -1 |
| 18179 | 7619 | Dbp | Pik3ip1       | 1  |
| 18179 | 7862 | Dbp | Cpsf4l        | 1  |
| 18179 | 8054 | Dbp | Smarca2       | 1  |
| 18179 | 8328 | Dbp | Klhdc8a       | -1 |
| 18179 | 8399 | Dbp | Herpud1       | 1  |

|       |       |     |               |    |
|-------|-------|-----|---------------|----|
| 18179 | 8595  | Dbp | MMT00019109   | -1 |
| 18179 | 8641  | Dbp | Slc7a2        | 1  |
| 18179 | 8684  | Dbp | Il15          | 1  |
| 18179 | 9033  | Dbp | 1810013L24Rik | 1  |
| 18179 | 9158  | Dbp | Pde9a         | -1 |
| 18179 | 9379  | Dbp | Ypel2         | -1 |
| 18179 | 9438  | Dbp | Pctk3         | 1  |
| 18179 | 9481  | Dbp | Ppl           | 1  |
| 18179 | 9495  | Dbp | Srms          | -1 |
| 18179 | 9585  | Dbp | Neu3          | -1 |
| 18179 | 9831  | Dbp | Nedd4l        | -1 |
| 18179 | 9907  | Dbp | 4932442K08Rik | 1  |
| 18179 | 9910  | Dbp | EG666644      | 1  |
| 18179 | 10029 | Dbp | Trak1         | 1  |
| 18179 | 10088 | Dbp | Ddc           | -1 |
| 18179 | 10166 | Dbp | Rhbdd2        | 1  |
| 18179 | 10215 | Dbp | Nampt         | 1  |
| 18179 | 10486 | Dbp | 1300002K09Rik | -1 |
| 18179 | 10541 | Dbp | Ap2a2         | -1 |
| 18179 | 10642 | Dbp | Ngef          | 1  |
| 18179 | 10712 | Dbp | Fchsd2        | 1  |
| 18179 | 10775 | Dbp | Slc16a1       | -1 |
| 18179 | 10883 | Dbp | Pols          | 1  |
| 18179 | 10911 | Dbp | Mcl1          | 1  |
| 18179 | 11024 | Dbp | MMT00049098   | -1 |
| 18179 | 11075 | Dbp | Xrcc6bp1      | 1  |
| 18179 | 11233 | Dbp | Tef           | 1  |
| 18179 | 11412 | Dbp | Abcg5         | 1  |
| 18179 | 11447 | Dbp | Nr1h4         | 1  |
| 18179 | 11557 | Dbp | Blnk          | 1  |
| 18179 | 11574 | Dbp | Gne           | 1  |
| 18179 | 11599 | Dbp | Coq10b        | 1  |
| 18179 | 11633 | Dbp | Ier3          | 1  |
| 18179 | 11741 | Dbp | Slc30a10      | -1 |
| 18179 | 11807 | Dbp | Fbxo31        | 1  |
| 18179 | 12118 | Dbp | Mtrr          | 1  |
| 18179 | 12151 | Dbp | MMT00082650   | 1  |
| 18179 | 12204 | Dbp | Ankmy2        | 1  |
| 18179 | 12343 | Dbp | Atf5          | -1 |
| 18179 | 12420 | Dbp | Klhl21        | 1  |
| 18179 | 12460 | Dbp | Pnpla2        | 1  |
| 18179 | 12487 | Dbp | Tbc1d10a      | 1  |
| 18179 | 12489 | Dbp | Wdr8          | -1 |
| 18179 | 12513 | Dbp | Whsc2         | -1 |
| 18179 | 12565 | Dbp | Grem2         | 1  |
| 18179 | 12687 | Dbp | Zc3h8         | 1  |
| 18179 | 12799 | Dbp | Spon2         | -1 |
| 18179 | 12904 | Dbp | MMT00040704   | 1  |
| 18179 | 12905 | Dbp | Nfil3         | -1 |
| 18179 | 12982 | Dbp | Cars          | -1 |
| 18179 | 13052 | Dbp | Tnfrsf19      | 1  |

|       |       |     |               |    |
|-------|-------|-----|---------------|----|
| 18179 | 13078 | Dbp | Eps8l2        | -1 |
| 18179 | 13094 | Dbp | Cnn3          | 1  |
| 18179 | 13297 | Dbp | Emb           | -1 |
| 18179 | 13348 | Dbp | Ank3          | 1  |
| 18179 | 13630 | Dbp | Cdkn1a        | -1 |
| 18179 | 13705 | Dbp | Osbpl1a       | 1  |
| 18179 | 13716 | Dbp | D5Erttd579e   | 1  |
| 18179 | 13770 | Dbp | D5Wsu178e     | -1 |
| 18179 | 13844 | Dbp | Trib1         | 1  |
| 18179 | 13864 | Dbp | Larp1         | -1 |
| 18179 | 13886 | Dbp | Hnrpd1        | 1  |
| 18179 | 13889 | Dbp | Agpat2        | -1 |
| 18179 | 13947 | Dbp | Crip2         | -1 |
| 18179 | 14041 | Dbp | Cldn1         | -1 |
| 18179 | 14279 | Dbp | 3930402G23Rik | -1 |
| 18179 | 14298 | Dbp | Atp2a2        | -1 |
| 18179 | 14380 | Dbp | MMT00051866   | -1 |
| 18179 | 14431 | Dbp | Piwil1        | 1  |
| 18179 | 14462 | Dbp | Zfp385b       | 1  |
| 18179 | 14705 | Dbp | Slc43a1       | 1  |
| 18179 | 14726 | Dbp | Slc19a1       | 1  |
| 18179 | 15049 | Dbp | Rnf125        | -1 |
| 18179 | 15224 | Dbp | Cyp2a4        | 1  |
| 18179 | 15481 | Dbp | 1110067D22Rik | -1 |
| 18179 | 15607 | Dbp | Klf13         | 1  |
| 18179 | 15624 | Dbp | Crcp          | 1  |
| 18179 | 15631 | Dbp | Lpin1         | 1  |
| 18179 | 15665 | Dbp | Blcap         | -1 |
| 18179 | 15709 | Dbp | Tceal1        | 1  |
| 18179 | 15824 | Dbp | D19Erttd721e  | -1 |
| 18179 | 15862 | Dbp | Mrap          | -1 |
| 18179 | 16043 | Dbp | Sult1c2       | 1  |
| 18179 | 16060 | Dbp | Gys2          | 1  |
| 18179 | 16167 | Dbp | Stbd1         | 1  |
| 18179 | 16339 | Dbp | Bach1         | 1  |
| 18179 | 16474 | Dbp | Bhlhb2        | 1  |
| 18179 | 16515 | Dbp | Gramd4        | -1 |
| 18179 | 16580 | Dbp | Tnfaip2       | -1 |
| 18179 | 16647 | Dbp | D16H22S680E   | 1  |
| 18179 | 16669 | Dbp | Tjp2          | -1 |
| 18179 | 16690 | Dbp | Tjp3          | -1 |
| 18179 | 16704 | Dbp | Ppif          | 1  |
| 18179 | 16712 | Dbp | Pnrc1         | -1 |
| 18179 | 16811 | Dbp | Rere          | 1  |
| 18179 | 16851 | Dbp | Slc34a2       | -1 |
| 18179 | 16965 | Dbp | Gstt2         | 1  |
| 18179 | 17078 | Dbp | Syde2         | 1  |
| 18179 | 17091 | Dbp | Slc38a3       | 1  |
| 18179 | 17130 | Dbp | Baiap2        | -1 |
| 18179 | 17224 | Dbp | 5430407P10Rik | -1 |
| 18179 | 17247 | Dbp | A030007L17Rik | -1 |

|       |       |     |               |    |
|-------|-------|-----|---------------|----|
| 18179 | 17323 | Dbp | Tubb6         | -1 |
| 18179 | 17338 | Dbp | Mocos         | -1 |
| 18179 | 17343 | Dbp | Timm8a1       | 1  |
| 18179 | 17528 | Dbp | Gmnn          | 1  |
| 18179 | 17583 | Dbp | Per2          | 1  |
| 18179 | 17593 | Dbp | Gfer          | -1 |
| 18179 | 17852 | Dbp | Cpeb2         | -1 |
| 18179 | 17876 | Dbp | Tubb4         | -1 |
| 18179 | 17884 | Dbp | Lnx2          | -1 |
| 18179 | 17952 | Dbp | Ripk2         | 1  |
| 18179 | 18099 | Dbp | Nfx1          | 1  |
| 18179 | 18147 | Dbp | Nhlrc2        | 1  |
| 18179 | 18179 | Dbp | Dbp           | 1  |
| 18179 | 18215 | Dbp | Gpr146        | 1  |
| 18179 | 18286 | Dbp | Slc41a3       | 1  |
| 18179 | 18296 | Dbp | Pcgf5         | 1  |
| 18179 | 18438 | Dbp | Map3k7ip2     | -1 |
| 18179 | 18498 | Dbp | Slc5a6        | 1  |
| 18179 | 18552 | Dbp | Nr2c2ap       | -1 |
| 18179 | 18607 | Dbp | Acat3         | -1 |
| 18179 | 18756 | Dbp | Tspan14       | -1 |
| 18179 | 18827 | Dbp | Oprs1         | -1 |
| 18179 | 19004 | Dbp | Pdk4          | -1 |
| 18179 | 19025 | Dbp | Slc37a4       | 1  |
| 18179 | 19032 | Dbp | Tymp          | -1 |
| 18179 | 19108 | Dbp | Armet         | -1 |
| 18179 | 19146 | Dbp | N4bp2l1       | 1  |
| 18179 | 19148 | Dbp | Rnf144b       | -1 |
| 18179 | 19234 | Dbp | Nrg4          | 1  |
| 18179 | 19305 | Dbp | Azin1         | 1  |
| 18179 | 19323 | Dbp | Bnip3         | 1  |
| 18179 | 19410 | Dbp | Glb1          | 1  |
| 18179 | 19453 | Dbp | Cdk2ap2       | -1 |
| 18179 | 19465 | Dbp | Hacl1         | -1 |
| 18179 | 19532 | Dbp | Med8          | -1 |
| 18179 | 19671 | Dbp | Upp2          | 1  |
| 18179 | 19701 | Dbp | 9930021J17Rik | -1 |
| 18179 | 19726 | Dbp | Erp29         | -1 |
| 18179 | 19790 | Dbp | Polg2         | 1  |
| 18179 | 20085 | Dbp | Lpin2         | 1  |
| 18179 | 20266 | Dbp | Insig2        | -1 |
| 18179 | 20488 | Dbp | Bok           | -1 |
| 18179 | 20745 | Dbp | Sord          | 1  |
| 18179 | 20830 | Dbp | MMT00057509   | -1 |
| 18179 | 20854 | Dbp | Commd7        | -1 |
| 18179 | 20965 | Dbp | Usp28         | 1  |
| 18179 | 21142 | Dbp | Gm129         | 1  |
| 18179 | 21192 | Dbp | 2310047A01Rik | 1  |
| 18179 | 21251 | Dbp | Cpt1a         | 1  |
| 18179 | 21389 | Dbp | Odf2          | 1  |
| 18179 | 21409 | Dbp | Gldc          | -1 |

|       |       |          |               |    |
|-------|-------|----------|---------------|----|
| 18179 | 21531 | Dbp      | Ttc23         | 1  |
| 18179 | 21733 | Dbp      | Rhebl1        | 1  |
| 18179 | 21795 | Dbp      | 0610009B22Rik | -1 |
| 18179 | 21811 | Dbp      | Ak3l1         | 1  |
| 18179 | 21918 | Dbp      | Snx24         | -1 |
| 18179 | 21969 | Dbp      | Tk1           | 1  |
| 18179 | 22012 | Dbp      | Itgae         | -1 |
| 18179 | 22213 | Dbp      | Adora1        | 1  |
| 18179 | 22290 | Dbp      | Tubb2a        | -1 |
| 18179 | 22324 | Dbp      | MMT00060741   | -1 |
| 18179 | 22334 | Dbp      | 9430023L20Rik | -1 |
| 18179 | 22340 | Dbp      | Lnx2          | -1 |
| 18179 | 22470 | Dbp      | Ppargc1b      | 1  |
| 18179 | 22627 | Dbp      | Adck5         | -1 |
| 18179 | 22630 | Dbp      | MMT00034355   | -1 |
| 18179 | 22653 | Dbp      | Ric3          | -1 |
| 18179 | 22933 | Dbp      | Tssc4         | -1 |
| 18179 | 22936 | Dbp      | Rhobtb1       | 1  |
| 18179 | 23248 | Dbp      | Tesk2         | 1  |
| 18179 | 23377 | Dbp      | Pdxk          | 1  |
| 18179 | 23437 | Dbp      | Efhd2         | 1  |
| 18179 | 23458 | Dbp      | Clic4         | -1 |
| 18179 | 23558 | Dbp      | MMT00030937   | 1  |
| 18181 | 5804  | Epb4.1l2 | Thrsp         | 1  |
| 18181 | 6329  | Epb4.1l2 | Cyp2b10       | 1  |
| 18181 | 13293 | Epb4.1l2 | Gsta2         | 1  |
| 18181 | 19772 | Epb4.1l2 | Gnmt          | 1  |
| 18181 | 20058 | Epb4.1l2 | Dnaic1        | -1 |
| 18181 | 22271 | Epb4.1l2 | Cyp2c29       | 1  |
| 18184 | 9278  | Klrb1b   | Clec2i        | 1  |
| 18185 | 15476 | Ndufb2   | Fem1b         | -1 |
| 18186 | 143   | Parp14   | Gvin1         | 1  |
| 18186 | 405   | Parp14   | Emr4          | 1  |
| 18186 | 701   | Parp14   | Polr3g        | -1 |
| 18186 | 830   | Parp14   | Socs1         | 1  |
| 18186 | 860   | Parp14   | Psmb10        | 1  |
| 18186 | 917   | Parp14   | Kal1          | 1  |
| 18186 | 1533  | Parp14   | BC013712      | 1  |
| 18186 | 1840  | Parp14   | Fpr1          | 1  |
| 18186 | 1908  | Parp14   | Rnf213        | 1  |
| 18186 | 2058  | Parp14   | Hk3           | 1  |
| 18186 | 2200  | Parp14   | BC006779      | 1  |
| 18186 | 2224  | Parp14   | Oasl2         | 1  |
| 18186 | 2550  | Parp14   | MMT00036681   | 1  |
| 18186 | 2578  | Parp14   | Csf2rb2       | 1  |
| 18186 | 2752  | Parp14   | Fcgr1         | 1  |
| 18186 | 2830  | Parp14   | 4632417K18Rik | 1  |
| 18186 | 2969  | Parp14   | Ptpro         | 1  |
| 18186 | 3426  | Parp14   | Hap1          | 1  |
| 18186 | 3523  | Parp14   | Trim34        | 1  |
| 18186 | 3572  | Parp14   | Ebi3          | 1  |

|       |      |        |               |   |
|-------|------|--------|---------------|---|
| 18186 | 3594 | Parp14 | Rasa4         | 1 |
| 18186 | 3659 | Parp14 | EG236451      | 1 |
| 18186 | 3683 | Parp14 | Oas2          | 1 |
| 18186 | 3905 | Parp14 | H2-Q1         | 1 |
| 18186 | 4114 | Parp14 | Parp12        | 1 |
| 18186 | 4409 | Parp14 | 5430435G22Rik | 1 |
| 18186 | 4426 | Parp14 | ligp2         | 1 |
| 18186 | 4508 | Parp14 | Ifit1         | 1 |
| 18186 | 4516 | Parp14 | Rsad2         | 1 |
| 18186 | 4901 | Parp14 | MMT00073557   | 1 |
| 18186 | 5002 | Parp14 | Ifi202b       | 1 |
| 18186 | 5044 | Parp14 | Ifi35         | 1 |
| 18186 | 5216 | Parp14 | Spnb5         | 1 |
| 18186 | 5250 | Parp14 | Ifit2         | 1 |
| 18186 | 5554 | Parp14 | Emr1          | 1 |
| 18186 | 5556 | Parp14 | Ccl4          | 1 |
| 18186 | 5766 | Parp14 | 5033414D02Rik | 1 |
| 18186 | 5845 | Parp14 | Il18bp        | 1 |
| 18186 | 5853 | Parp14 | Trim30        | 1 |
| 18186 | 5875 | Parp14 | Cd86          | 1 |
| 18186 | 5949 | Parp14 | Zbp1          | 1 |
| 18186 | 5975 | Parp14 | Car13         | 1 |
| 18186 | 6036 | Parp14 | Pram1         | 1 |
| 18186 | 6072 | Parp14 | C1qc          | 1 |
| 18186 | 6098 | Parp14 | Ncf4          | 1 |
| 18186 | 6213 | Parp14 | Ccl2          | 1 |
| 18186 | 6383 | Parp14 | Gbp2          | 1 |
| 18186 | 6587 | Parp14 | Irf9          | 1 |
| 18186 | 6595 | Parp14 | Oas1a         | 1 |
| 18186 | 6734 | Parp14 | Ehd4          | 1 |
| 18186 | 6779 | Parp14 | Gbp6          | 1 |
| 18186 | 6806 | Parp14 | Agri          | 1 |
| 18186 | 6824 | Parp14 | Irf7          | 1 |
| 18186 | 6888 | Parp14 | Cxcl9         | 1 |
| 18186 | 6910 | Parp14 | Ly6c2         | 1 |
| 18186 | 7057 | Parp14 | Stk10         | 1 |
| 18186 | 7069 | Parp14 | Ube1l         | 1 |
| 18186 | 7105 | Parp14 | Plac8         | 1 |
| 18186 | 7238 | Parp14 | Pycard        | 1 |
| 18186 | 7284 | Parp14 | MMT00008674   | 1 |
| 18186 | 7316 | Parp14 | Ifi204        | 1 |
| 18186 | 7336 | Parp14 | Cd5l          | 1 |
| 18186 | 8270 | Parp14 | Clsn          | 1 |
| 18186 | 8555 | Parp14 | H2-M3         | 1 |
| 18186 | 8564 | Parp14 | Pld4          | 1 |
| 18186 | 8659 | Parp14 | Psmb8         | 1 |
| 18186 | 8800 | Parp14 | Rnf213        | 1 |
| 18186 | 8922 | Parp14 | Il10ra        | 1 |
| 18186 | 8951 | Parp14 | Cd97          | 1 |
| 18186 | 9100 | Parp14 | Ms4a6c        | 1 |
| 18186 | 9320 | Parp14 | Rnf31         | 1 |



|       |       |        |               |   |
|-------|-------|--------|---------------|---|
| 18186 | 9401  | Parp14 | Fcgr4         | 1 |
| 18186 | 9616  | Parp14 | Al451557      | 1 |
| 18186 | 9717  | Parp14 | Psemb9        | 1 |
| 18186 | 9820  | Parp14 | BC023105      | 1 |
| 18186 | 9821  | Parp14 | Pmaip1        | 1 |
| 18186 | 9847  | Parp14 | Ifi27         | 1 |
| 18186 | 9920  | Parp14 | Syk           | 1 |
| 18186 | 9928  | Parp14 | Lgmn          | 1 |
| 18186 | 10109 | Parp14 | Gbp3          | 1 |
| 18186 | 10393 | Parp14 | Slc7a8        | 1 |
| 18186 | 10504 | Parp14 | Ripk3         | 1 |
| 18186 | 10606 | Parp14 | Apbb1ip       | 1 |
| 18186 | 10796 | Parp14 | Spic          | 1 |
| 18186 | 10926 | Parp14 | P2ry13        | 1 |
| 18186 | 11009 | Parp14 | MMT00008885   | 1 |
| 18186 | 11204 | Parp14 | Al451617      | 1 |
| 18186 | 11265 | Parp14 | Irgm          | 1 |
| 18186 | 11275 | Parp14 | Fanci         | 1 |
| 18186 | 11437 | Parp14 | Gatm          | 1 |
| 18186 | 11701 | Parp14 | Oas1c         | 1 |
| 18186 | 12126 | Parp14 | Znfx1         | 1 |
| 18186 | 12312 | Parp14 | Ms4a6d        | 1 |
| 18186 | 12398 | Parp14 | Ifi44         | 1 |
| 18186 | 12495 | Parp14 | Casp1         | 1 |
| 18186 | 12600 | Parp14 | Ifi204        | 1 |
| 18186 | 12969 | Parp14 | Xaf1          | 1 |
| 18186 | 13156 | Parp14 | Ifit3         | 1 |
| 18186 | 13172 | Parp14 | Epb4.1l3      | 1 |
| 18186 | 13181 | Parp14 | Lcp2          | 1 |
| 18186 | 13309 | Parp14 | Tgtp          | 1 |
| 18186 | 13372 | Parp14 | Slc11a1       | 1 |
| 18186 | 13504 | Parp14 | Lair1         | 1 |
| 18186 | 13514 | Parp14 | Apol9b        | 1 |
| 18186 | 13522 | Parp14 | Sfn5          | 1 |
| 18186 | 13527 | Parp14 | Ctss          | 1 |
| 18186 | 13528 | Parp14 | Capn12        | 1 |
| 18186 | 13585 | Parp14 | Nckap1l       | 1 |
| 18186 | 13654 | Parp14 | Stat1         | 1 |
| 18186 | 13656 | Parp14 | Ly86          | 1 |
| 18186 | 13749 | Parp14 | Parp9         | 1 |
| 18186 | 13780 | Parp14 | Pilra         | 1 |
| 18186 | 13826 | Parp14 | Melk          | 1 |
| 18186 | 14029 | Parp14 | 2810022L02Rik | 1 |
| 18186 | 14117 | Parp14 | C1qb          | 1 |
| 18186 | 14192 | Parp14 | Trpv2         | 1 |
| 18186 | 14237 | Parp14 | Rac2          | 1 |
| 18186 | 14258 | Parp14 | Ifi47         | 1 |
| 18186 | 14260 | Parp14 | Mlkl          | 1 |
| 18186 | 14453 | Parp14 | Inpp5d        | 1 |
| 18186 | 14475 | Parp14 | Abcg1         | 1 |
| 18186 | 14506 | Parp14 | Slc15a3       | 1 |

|       |       |        |            |   |
|-------|-------|--------|------------|---|
| 18186 | 14603 | Parp14 | Ly6e       | 1 |
| 18186 | 14611 | Parp14 | Ddx60      | 1 |
| 18186 | 14880 | Parp14 | Ms4a4c     | 1 |
| 18186 | 14883 | Parp14 | Itgal      | 1 |
| 18186 | 14954 | Parp14 | Rab19      | 1 |
| 18186 | 15074 | Parp14 | Usp18      | 1 |
| 18186 | 15159 | Parp14 | Timd4      | 1 |
| 18186 | 15280 | Parp14 | Cxcl10     | 1 |
| 18186 | 15348 | Parp14 | Eif2ak2    | 1 |
| 18186 | 15387 | Parp14 | Mgl1       | 1 |
| 18186 | 15449 | Parp14 | Mitd1      | 1 |
| 18186 | 15504 | Parp14 | Mx2        | 1 |
| 18186 | 15572 | Parp14 | Dtx3l      | 1 |
| 18186 | 15749 | Parp14 | Cd22       | 1 |
| 18186 | 15825 | Parp14 | Fermt3     | 1 |
| 18186 | 16102 | Parp14 | Cd72       | 1 |
| 18186 | 16129 | Parp14 | Trafd1     | 1 |
| 18186 | 16147 | Parp14 | Tlr2       | 1 |
| 18186 | 16182 | Parp14 | Oasl1      | 1 |
| 18186 | 16186 | Parp14 | Cfp        | 1 |
| 18186 | 16199 | Parp14 | Samhd1     | 1 |
| 18186 | 16521 | Parp14 | Adar       | 1 |
| 18186 | 16572 | Parp14 | D14Ert668e | 1 |
| 18186 | 16827 | Parp14 | Arhgdib    | 1 |
| 18186 | 16874 | Parp14 | Fcer1g     | 1 |
| 18186 | 16913 | Parp14 | Pira3      | 1 |
| 18186 | 16949 | Parp14 | Iigp1      | 1 |
| 18186 | 16988 | Parp14 | Clec4f     | 1 |
| 18186 | 17071 | Parp14 | Samd9l     | 1 |
| 18186 | 17197 | Parp14 | Igtp       | 1 |
| 18186 | 17312 | Parp14 | Sirpa      | 1 |
| 18186 | 17412 | Parp14 | Aif1       | 1 |
| 18186 | 17904 | Parp14 | Cds1       | 1 |
| 18186 | 18174 | Parp14 | Stat2      | 1 |
| 18186 | 18186 | Parp14 | Parp14     | 1 |
| 18186 | 18211 | Parp14 | Folr2      | 1 |
| 18186 | 18289 | Parp14 | Tap1       | 1 |
| 18186 | 18662 | Parp14 | Batf3      | 1 |
| 18186 | 18686 | Parp14 | Zfp143     | 1 |
| 18186 | 18868 | Parp14 | Mpeg1      | 1 |
| 18186 | 19026 | Parp14 | Isg15      | 1 |
| 18186 | 19063 | Parp14 | Evi        | 1 |
| 18186 | 19153 | Parp14 | Ptgs1      | 1 |
| 18186 | 19189 | Parp14 | Sp100      | 1 |
| 18186 | 19252 | Parp14 | Tmsb4x     | 1 |
| 18186 | 19262 | Parp14 | Cd274      | 1 |
| 18186 | 19298 | Parp14 | Unc93b1    | 1 |
| 18186 | 19382 | Parp14 | Slc2a6     | 1 |
| 18186 | 19708 | Parp14 | Ly6a       | 1 |
| 18186 | 19738 | Parp14 | Lgals3bp   | 1 |
| 18186 | 19794 | Parp14 | Rgs2       | 1 |

|       |       |             |                    |    |
|-------|-------|-------------|--------------------|----|
| 18186 | 20150 | Parp14      | Ptprc              | 1  |
| 18186 | 20321 | Parp14      | Ms4a6b             | 1  |
| 18186 | 20431 | Parp14      | Slc7a7             | 1  |
| 18186 | 20432 | Parp14      | Smc1b              | 1  |
| 18186 | 20474 | Parp14      | Gnb3               | 1  |
| 18186 | 20791 | Parp14      | MMT00014813        | 1  |
| 18186 | 20997 | Parp14      | MMT00028135        | 1  |
| 18186 | 21351 | Parp14      | Shisa5             | 1  |
| 18186 | 21440 | Parp14      | Tmsb10             | 1  |
| 18186 | 21549 | Parp14      | Rtp4               | 1  |
| 18186 | 21751 | Parp14      | Ptpn6              | 1  |
| 18186 | 21794 | Parp14      | Pfkip              | 1  |
| 18186 | 21824 | Parp14      | 5830443L24Rik      | 1  |
| 18186 | 21988 | Parp14      | MMT00015654        | 1  |
| 18186 | 22037 | Parp14      | Oas1g              | 1  |
| 18186 | 22077 | Parp14      | MMT00057550        | 1  |
| 18186 | 22327 | Parp14      | Tyropb             | 1  |
| 18186 | 22647 | Parp14      | Pkib               | 1  |
| 18186 | 22712 | Parp14      | Phf11              | 1  |
| 18186 | 22863 | Parp14      | Prkd2              | 1  |
| 18186 | 22876 | Parp14      | Sash3              | 1  |
| 18186 | 23092 | Parp14      | Ifih1              | 1  |
| 18186 | 23208 | Parp14      | Hck                | 1  |
| 18186 | 23242 | Parp14      | Gngt2              | 1  |
| 18186 | 23276 | Parp14      | Evi2b              | 1  |
| 18186 | 23410 | Parp14      | C1qa               | 1  |
| 18186 | 23450 | Parp14      | D12Ert647e         | 1  |
| 18195 | 18195 | Mafk        | Mafk               | 1  |
| 18201 | 607   | MMT00060232 | Me1                | 1  |
| 18201 | 3446  | MMT00060232 | Eno1               | 1  |
| 18201 | 10554 | MMT00060232 | ENSMUSG00000074179 | 1  |
| 18201 | 13293 | MMT00060232 | Gsta2              | 1  |
| 18201 | 18113 | MMT00060232 | MMT00034400        | 1  |
| 18201 | 19066 | MMT00060232 | MMT00012632        | 1  |
| 18201 | 21727 | MMT00060232 | Khk                | 1  |
| 18211 | 1572  | Folr2       | Saa3               | 1  |
| 18211 | 2850  | Folr2       | Slc16a6            | 1  |
| 18211 | 3228  | Folr2       | Saa1               | 1  |
| 18211 | 3836  | Folr2       | 2200001115Rik      | 1  |
| 18211 | 5364  | Folr2       | Kif22              | 1  |
| 18211 | 7761  | Folr2       | Nudt19             | -1 |
| 18211 | 8416  | Folr2       | Cdc20              | 1  |
| 18211 | 11382 | Folr2       | Cdca3              | 1  |
| 18211 | 13455 | Folr2       | Cenpe              | 1  |
| 18211 | 14472 | Folr2       | Ahcy               | -1 |
| 18211 | 15320 | Folr2       | MMT00017479        | -1 |
| 18212 | 607   | Ttc3        | Me1                | -1 |
| 18212 | 874   | Ttc3        | Aldh1a7            | -1 |
| 18212 | 8444  | Ttc3        | Rdh16              | -1 |
| 18212 | 8815  | Ttc3        | Mx1                | -1 |
| 18212 | 18201 | Ttc3        | MMT00060232        | -1 |

|       |       |        |               |    |
|-------|-------|--------|---------------|----|
| 18213 | 15205 | Tomm40 | MMT00030262   | -1 |
| 18215 | 415   | Gpr146 | Ypel2         | -1 |
| 18215 | 482   | Gpr146 | Rnf43         | 1  |
| 18215 | 2726  | Gpr146 | Chd9          | 1  |
| 18215 | 4966  | Gpr146 | Zscan20       | -1 |
| 18215 | 9379  | Gpr146 | Ypel2         | -1 |
| 18215 | 9831  | Gpr146 | Nedd4l        | -1 |
| 18215 | 12905 | Gpr146 | Nfil3         | -1 |
| 18215 | 13297 | Gpr146 | Emb           | -1 |
| 18215 | 13630 | Gpr146 | Cdkn1a        | -1 |
| 18215 | 15049 | Gpr146 | Rnf125        | -1 |
| 18215 | 16251 | Gpr146 | G6pc          | -1 |
| 18215 | 17852 | Gpr146 | Cpeb2         | -1 |
| 18215 | 18083 | Gpr146 | Gadd45a       | 1  |
| 18215 | 18438 | Gpr146 | Map3k7ip2     | -1 |
| 18215 | 18504 | Gpr146 | 0610040J01Rik | 1  |
| 18218 | 874   | Sepx1  | Aldh1a7       | 1  |
| 18218 | 10132 | Sepx1  | Ces2          | 1  |
| 18235 | 405   | Epsti1 | Emr4          | 1  |
| 18235 | 1533  | Epsti1 | BC013712      | 1  |
| 18235 | 1612  | Epsti1 | Clec1b        | 1  |
| 18235 | 2200  | Epsti1 | BC006779      | 1  |
| 18235 | 2224  | Epsti1 | Oasl2         | 1  |
| 18235 | 2490  | Epsti1 | MMT00070880   | 1  |
| 18235 | 4426  | Epsti1 | Iigp2         | 1  |
| 18235 | 5250  | Epsti1 | Ifit2         | 1  |
| 18235 | 5364  | Epsti1 | Kif22         | 1  |
| 18235 | 5554  | Epsti1 | Emr1          | 1  |
| 18235 | 5766  | Epsti1 | 5033414D02Rik | 1  |
| 18235 | 5845  | Epsti1 | Il18bp        | 1  |
| 18235 | 6824  | Epsti1 | Irf7          | 1  |
| 18235 | 6888  | Epsti1 | Cxcl9         | 1  |
| 18235 | 7105  | Epsti1 | Plac8         | 1  |
| 18235 | 7238  | Epsti1 | Pycard        | 1  |
| 18235 | 7316  | Epsti1 | Ifi204        | 1  |
| 18235 | 8555  | Epsti1 | H2-M3         | 1  |
| 18235 | 8800  | Epsti1 | Rnf213        | 1  |
| 18235 | 9717  | Epsti1 | Psmb9         | 1  |
| 18235 | 9820  | Epsti1 | BC023105      | 1  |
| 18235 | 9821  | Epsti1 | Pmaip1        | 1  |
| 18235 | 9847  | Epsti1 | Ifi27         | 1  |
| 18235 | 9920  | Epsti1 | Syk           | 1  |
| 18235 | 10109 | Epsti1 | Gbp3          | 1  |
| 18235 | 10606 | Epsti1 | Apbb1ip       | 1  |
| 18235 | 10926 | Epsti1 | P2ry13        | 1  |
| 18235 | 11009 | Epsti1 | MMT00008885   | 1  |
| 18235 | 11198 | Epsti1 | Gbp1          | 1  |
| 18235 | 12398 | Epsti1 | Ifi44         | 1  |
| 18235 | 12600 | Epsti1 | Ifi204        | 1  |
| 18235 | 13156 | Epsti1 | Ifit3         | 1  |
| 18235 | 13309 | Epsti1 | Tgtp          | 1  |

|       |       |        |                    |    |
|-------|-------|--------|--------------------|----|
| 18235 | 13455 | Epsti1 | Cenpe              | 1  |
| 18235 | 13527 | Epsti1 | Ctss               | 1  |
| 18235 | 13585 | Epsti1 | Nckap1l            | 1  |
| 18235 | 13656 | Epsti1 | Ly86               | 1  |
| 18235 | 13867 | Epsti1 | Sgcb               | 1  |
| 18235 | 13885 | Epsti1 | Clec7a             | 1  |
| 18235 | 14258 | Epsti1 | Ifi47              | 1  |
| 18235 | 14472 | Epsti1 | Ahcy               | -1 |
| 18235 | 14880 | Epsti1 | Ms4a4c             | 1  |
| 18235 | 14883 | Epsti1 | Itgal              | 1  |
| 18235 | 14954 | Epsti1 | Rab19              | 1  |
| 18235 | 15159 | Epsti1 | Timd4              | 1  |
| 18235 | 15280 | Epsti1 | Cxcl10             | 1  |
| 18235 | 16147 | Epsti1 | Tlr2               | 1  |
| 18235 | 16199 | Epsti1 | Samhd1             | 1  |
| 18235 | 16572 | Epsti1 | D14Ertd668e        | 1  |
| 18235 | 16874 | Epsti1 | Fcer1g             | 1  |
| 18235 | 17197 | Epsti1 | Igtp               | 1  |
| 18235 | 17412 | Epsti1 | Aif1               | 1  |
| 18235 | 17472 | Epsti1 | Cd53               | 1  |
| 18235 | 18186 | Epsti1 | Parp14             | 1  |
| 18235 | 18662 | Epsti1 | Batf3              | 1  |
| 18235 | 19189 | Epsti1 | Sp100              | 1  |
| 18235 | 19252 | Epsti1 | Tmsb4x             | 1  |
| 18235 | 19738 | Epsti1 | Lgals3bp           | 1  |
| 18235 | 19794 | Epsti1 | Rgs2               | 1  |
| 18235 | 20150 | Epsti1 | Ptprc              | 1  |
| 18235 | 20321 | Epsti1 | Ms4a6b             | 1  |
| 18235 | 20997 | Epsti1 | MMT00028135        | 1  |
| 18235 | 21351 | Epsti1 | Shisa5             | 1  |
| 18235 | 21549 | Epsti1 | Rtp4               | 1  |
| 18235 | 21824 | Epsti1 | 5830443L24Rik      | 1  |
| 18235 | 23208 | Epsti1 | Hck                | 1  |
| 18235 | 23242 | Epsti1 | Gngt2              | 1  |
| 18235 | 23403 | Epsti1 | Ndc80              | 1  |
| 18250 | 5364  | Mmp14  | Kif22              | 1  |
| 18250 | 8641  | Mmp14  | Slc7a2             | -1 |
| 18250 | 10486 | Mmp14  | 1300002K09Rik      | 1  |
| 18250 | 10554 | Mmp14  | ENSMUSG00000074179 | -1 |
| 18250 | 13293 | Mmp14  | Gsta2              | -1 |
| 18250 | 13431 | Mmp14  | MMT00038058        | 1  |
| 18250 | 17880 | Mmp14  | Ncald              | 1  |
| 18250 | 19723 | Mmp14  | Pfkfb1             | -1 |
| 18250 | 22907 | Mmp14  | MMT00054594        | 1  |
| 18250 | 22978 | Mmp14  | MMT00043176        | 1  |
| 18250 | 23201 | Mmp14  | S1pr1              | 1  |
| 18260 | 607   | Nid2   | Me1                | 1  |
| 18260 | 874   | Nid2   | Aldh1a7            | 1  |
| 18260 | 5425  | Nid2   | Ung                | -1 |
| 18260 | 6193  | Nid2   | Lactb2             | 1  |
| 18260 | 9408  | Nid2   | Hmgcs2             | -1 |

|       |       |               |                    |    |
|-------|-------|---------------|--------------------|----|
| 18260 | 9427  | Nid2          | Nqo2               | 1  |
| 18260 | 12219 | Nid2          | Cyb5b              | 1  |
| 18260 | 14147 | Nid2          | Acss2              | 1  |
| 18260 | 14151 | Nid2          | Slc44a1            | 1  |
| 18260 | 18201 | Nid2          | MMT00060232        | 1  |
| 18260 | 18286 | Nid2          | Slc41a3            | -1 |
| 18260 | 18790 | Nid2          | Car3               | 1  |
| 18260 | 21202 | Nid2          | Acly               | 1  |
| 18260 | 21575 | Nid2          | Cyp2c55            | 1  |
| 18260 | 22732 | Nid2          | Cyb5b              | 1  |
| 18271 | 11129 | MMT00007507   | Ankhd1             | -1 |
| 18271 | 13018 | MMT00007507   | AW544981           | 1  |
| 18271 | 17660 | MMT00007507   | Nlrp12             | -1 |
| 18271 | 18785 | MMT00007507   | Angptl4            | -1 |
| 18271 | 20246 | MMT00007507   | Pdia5              | -1 |
| 18278 | 1416  | Aspm          | 6720460F02Rik      | 1  |
| 18278 | 1932  | Aspm          | Racgap1            | 1  |
| 18278 | 2428  | Aspm          | Car1               | -1 |
| 18278 | 5364  | Aspm          | Kif22              | 1  |
| 18278 | 7492  | Aspm          | Adfp               | 1  |
| 18278 | 8416  | Aspm          | Cdc20              | 1  |
| 18278 | 11382 | Aspm          | Cdca3              | 1  |
| 18278 | 11422 | Aspm          | Pltp               | 1  |
| 18278 | 17823 | Aspm          | D2Erd750e          | 1  |
| 18278 | 18299 | Aspm          | MMT00035424        | 1  |
| 18278 | 19318 | Aspm          | Plk1               | 1  |
| 18278 | 20433 | Aspm          | Cdca5              | 1  |
| 18278 | 21692 | Aspm          | MMT00013924        | 1  |
| 18278 | 21947 | Aspm          | Cdca8              | 1  |
| 18283 | 23617 | 5730593F17Rik | Nme1               | -1 |
| 18286 | 10132 | Slc41a3       | Ces2               | 1  |
| 18286 | 11462 | Slc41a3       | Gpam               | 1  |
| 18286 | 13304 | Slc41a3       | Gadd45b            | -1 |
| 18289 | 1533  | Tap1          | BC013712           | 1  |
| 18289 | 4114  | Tap1          | Parp12             | 1  |
| 18289 | 7105  | Tap1          | Plac8              | 1  |
| 18289 | 8392  | Tap1          | Asf1b              | 1  |
| 18289 | 9821  | Tap1          | Pmaip1             | 1  |
| 18289 | 9847  | Tap1          | Ifi27              | 1  |
| 18289 | 11204 | Tap1          | AI451617           | 1  |
| 18289 | 13309 | Tap1          | Tgtp               | 1  |
| 18289 | 14258 | Tap1          | Ifi47              | 1  |
| 18289 | 14880 | Tap1          | Ms4a4c             | 1  |
| 18289 | 18174 | Tap1          | Stat2              | 1  |
| 18289 | 21440 | Tap1          | Tmsb10             | 1  |
| 18298 | 1258  | Slc25a37      | Hba-a1             | 1  |
| 18299 | 10554 | MMT00035424   | ENSMUSG00000074179 | 1  |
| 18308 | 18308 | Zfp672        | Zfp672             | 1  |
| 18308 | 20363 | Zfp672        | Dcun1d2            | 1  |
| 18324 | 4966  | 4930546H06Rik | Zscan20            | -1 |
| 18332 | 1386  | Gpr19         | Ppid               | -1 |

|       |       |        |               |    |
|-------|-------|--------|---------------|----|
| 18332 | 1569  | Gpr19  | Tmco4         | 1  |
| 18332 | 2051  | Gpr19  | Ddx27         | 1  |
| 18332 | 3332  | Gpr19  | Lrrc59        | -1 |
| 18332 | 5352  | Gpr19  | Pdcd2l        | 1  |
| 18332 | 5922  | Gpr19  | Hyal2         | 1  |
| 18332 | 5953  | Gpr19  | MMT00008178   | -1 |
| 18332 | 6464  | Gpr19  | Pcbp4         | 1  |
| 18332 | 8597  | Gpr19  | Papss1        | -1 |
| 18332 | 8891  | Gpr19  | MMT00071061   | -1 |
| 18332 | 9164  | Gpr19  | Uba5          | -1 |
| 18332 | 9258  | Gpr19  | P4ha1         | -1 |
| 18332 | 10435 | Gpr19  | Nab2          | 1  |
| 18332 | 11043 | Gpr19  | Hsph1         | -1 |
| 18332 | 12276 | Gpr19  | Hmga1         | 1  |
| 18332 | 12419 | Gpr19  | MMT00081393   | -1 |
| 18332 | 12637 | Gpr19  | Itпка         | 1  |
| 18332 | 12960 | Gpr19  | Arrdc4        | 1  |
| 18332 | 14380 | Gpr19  | MMT00051866   | -1 |
| 18332 | 15024 | Gpr19  | 2310061J03Rik | 1  |
| 18332 | 15154 | Gpr19  | Dhx29         | -1 |
| 18332 | 16130 | Gpr19  | Gosr2         | -1 |
| 18332 | 16344 | Gpr19  | Arcp5l        | -1 |
| 18332 | 16720 | Gpr19  | Mtmr7         | -1 |
| 18332 | 16754 | Gpr19  | Hsp90aa1      | -1 |
| 18332 | 16788 | Gpr19  | Imp3          | 1  |
| 18332 | 16898 | Gpr19  | Invs          | -1 |
| 18332 | 17001 | Gpr19  | Hmga1         | 1  |
| 18332 | 18419 | Gpr19  | Srprb         | -1 |
| 18332 | 18653 | Gpr19  | MMT00072901   | 1  |
| 18332 | 19108 | Gpr19  | Armet         | -1 |
| 18332 | 19866 | Gpr19  | Uso1          | -1 |
| 18332 | 20122 | Gpr19  | Tmem86a       | 1  |
| 18332 | 21143 | Gpr19  | Ypel3         | 1  |
| 18332 | 22139 | Gpr19  | Stip1         | -1 |
| 18332 | 22216 | Gpr19  | Sp5           | 1  |
| 18332 | 23617 | Gpr19  | Nme1          | -1 |
| 18333 | 20127 | Rassf8 | Ipo8          | -1 |
| 18338 | 3475  | Akr1e1 | 2610305D13Rik | -1 |
| 18338 | 4305  | Akr1e1 | Tmem51        | 1  |
| 18338 | 6191  | Akr1e1 | Ddost         | 1  |
| 18338 | 6830  | Akr1e1 | Rsc1a1        | 1  |
| 18338 | 12097 | Akr1e1 | 9430015G10Rik | -1 |
| 18338 | 18338 | Akr1e1 | Akr1e1        | 1  |
| 18338 | 19924 | Akr1e1 | Ubiad1        | -1 |
| 18359 | 15624 | Otop2  | Crcp          | 1  |
| 18373 | 11697 | Dnajb1 | Rasl2-9       | -1 |
| 18373 | 18373 | Dnajb1 | Dnajb1        | 1  |
| 18373 | 20535 | Dnajb1 | Rbm4          | 1  |
| 18384 | 19556 | Klf6   | Efna1         | -1 |
| 18388 | 563   | Lnx1   | D4Bwg0951e    | 1  |
| 18388 | 8399  | Lnx1   | Herpud1       | 1  |

|       |       |             |               |    |
|-------|-------|-------------|---------------|----|
| 18388 | 15021 | Lnx1        | Ppargc1a      | 1  |
| 18388 | 15631 | Lnx1        | Lpin1         | 1  |
| 18388 | 16580 | Lnx1        | Tnfaip2       | -1 |
| 18388 | 17622 | Lnx1        | Foxo1         | 1  |
| 18388 | 18785 | Lnx1        | Angptl4       | 1  |
| 18388 | 19466 | Lnx1        | Pptc7         | 1  |
| 18388 | 21331 | Lnx1        | Slc10a6       | 1  |
| 18394 | 5364  | Cxcr3       | Kif22         | 1  |
| 18394 | 11382 | Cxcr3       | Cdca3         | 1  |
| 18394 | 18027 | Cxcr3       | 5730403B10Rik | -1 |
| 18394 | 19466 | Cxcr3       | Pptc7         | -1 |
| 18397 | 607   | Ccng1       | Me1           | 1  |
| 18397 | 18201 | Ccng1       | MMT00060232   | 1  |
| 18427 | 8328  | Serpib1a    | Klhdc8a       | 1  |
| 18427 | 10273 | Serpib1a    | Gpt2          | -1 |
| 18427 | 19234 | Serpib1a    | Nrg4          | -1 |
| 18429 | 5364  | Hmha1       | Kif22         | 1  |
| 18429 | 11393 | Hmha1       | A830007P12Rik | 1  |
| 18439 | 8428  | Cd209f      | Sorbs3        | -1 |
| 18439 | 9481  | Cd209f      | Ppl           | -1 |
| 18439 | 15320 | Cd209f      | MMT00017479   | -1 |
| 18474 | 8444  | MMT00070175 | Rdh16         | 1  |
| 18474 | 8815  | MMT00070175 | Mx1           | 1  |
| 18474 | 20058 | MMT00070175 | Dnaic1        | -1 |
| 18483 | 2051  | Mthfd1      | Ddx27         | -1 |
| 18486 | 8815  | Lrfn4       | Mx1           | -1 |
| 18486 | 17808 | Lrfn4       | Ncor2         | 1  |
| 18495 | 21202 | C2cd3       | Acly          | -1 |
| 18496 | 7151  | Mbd4        | MMT00007982   | 1  |
| 18496 | 9763  | Mbd4        | Tuba3b        | 1  |
| 18496 | 11724 | Mbd4        | Tuba3a        | 1  |
| 18496 | 15021 | Mbd4        | Ppargc1a      | -1 |
| 18496 | 15862 | Mbd4        | Mrap          | 1  |
| 18496 | 16060 | Mbd4        | Gys2          | -1 |
| 18496 | 17391 | Mbd4        | C530028O21Rik | 1  |
| 18498 | 250   | Slc5a6      | Tubb2a-ps2    | -1 |
| 18498 | 609   | Slc5a6      | MMT00060868   | -1 |
| 18498 | 719   | Slc5a6      | Usp2          | 1  |
| 18498 | 1326  | Slc5a6      | Tox           | 1  |
| 18498 | 2126  | Slc5a6      | Dgat2         | 1  |
| 18498 | 2384  | Slc5a6      | Micalcl       | -1 |
| 18498 | 2399  | Slc5a6      | MMT00060167   | -1 |
| 18498 | 2636  | Slc5a6      | Tars          | -1 |
| 18498 | 2829  | Slc5a6      | Lrfn3         | -1 |
| 18498 | 2850  | Slc5a6      | Slc16a6       | -1 |
| 18498 | 3214  | Slc5a6      | Dnmt3b        | -1 |
| 18498 | 3235  | Slc5a6      | BC029214      | -1 |
| 18498 | 3804  | Slc5a6      | MMT00015534   | -1 |
| 18498 | 4534  | Slc5a6      | Ndel1         | 1  |
| 18498 | 5183  | Slc5a6      | St5           | -1 |
| 18498 | 5374  | Slc5a6      | Chka          | -1 |



|       |       |               |               |    |
|-------|-------|---------------|---------------|----|
| 18498 | 5934  | Slc5a6        | S100a10       | -1 |
| 18498 | 5974  | Slc5a6        | Arntl         | -1 |
| 18498 | 6386  | Slc5a6        | Por           | 1  |
| 18498 | 7414  | Slc5a6        | Clpx          | -1 |
| 18498 | 8399  | Slc5a6        | Herpud1       | 1  |
| 18498 | 9910  | Slc5a6        | EG666644      | 1  |
| 18498 | 10088 | Slc5a6        | Ddc           | -1 |
| 18498 | 10486 | Slc5a6        | 1300002K09Rik | -1 |
| 18498 | 10642 | Slc5a6        | Ngef          | 1  |
| 18498 | 11129 | Slc5a6        | Ankhd1        | 1  |
| 18498 | 11574 | Slc5a6        | Gne           | 1  |
| 18498 | 11599 | Slc5a6        | Coq10b        | 1  |
| 18498 | 11633 | Slc5a6        | Ier3          | 1  |
| 18498 | 11741 | Slc5a6        | Slc30a10      | -1 |
| 18498 | 11807 | Slc5a6        | Fbxo31        | 1  |
| 18498 | 12204 | Slc5a6        | Ankmy2        | 1  |
| 18498 | 12489 | Slc5a6        | Wdr8          | -1 |
| 18498 | 12799 | Slc5a6        | Spon2         | -1 |
| 18498 | 15481 | Slc5a6        | 1110067D22Rik | -1 |
| 18498 | 15709 | Slc5a6        | Tceal1        | 1  |
| 18498 | 16060 | Slc5a6        | Gys2          | 1  |
| 18498 | 16690 | Slc5a6        | Tjp3          | -1 |
| 18498 | 17247 | Slc5a6        | A030007L17Rik | -1 |
| 18498 | 17323 | Slc5a6        | Tubb6         | -1 |
| 18498 | 17338 | Slc5a6        | Mocos         | -1 |
| 18498 | 17876 | Slc5a6        | Tubb4         | -1 |
| 18498 | 17884 | Slc5a6        | Lnx2          | -1 |
| 18498 | 18179 | Slc5a6        | Dbp           | 1  |
| 18498 | 18498 | Slc5a6        | Slc5a6        | 1  |
| 18498 | 18827 | Slc5a6        | Oprs1         | -1 |
| 18498 | 19234 | Slc5a6        | Nrg4          | 1  |
| 18498 | 20266 | Slc5a6        | Insig2        | -1 |
| 18498 | 21142 | Slc5a6        | Gm129         | 1  |
| 18498 | 22012 | Slc5a6        | Itgae         | -1 |
| 18498 | 22290 | Slc5a6        | Tubb2a        | -1 |
| 18498 | 22630 | Slc5a6        | MMT00034355   | -1 |
| 18498 | 23437 | Slc5a6        | Efh2          | 1  |
| 18501 | 14656 | 1700012G19Rik | Grip2         | 1  |
| 18509 | 7753  | MMT00038317   | Gfm1          | 1  |
| 18509 | 14147 | MMT00038317   | Acss2         | 1  |
| 18509 | 21214 | MMT00038317   | Scd1          | 1  |
| 18509 | 21251 | MMT00038317   | Cpt1a         | -1 |
| 18509 | 22732 | MMT00038317   | Cyb5b         | 1  |
| 18509 | 23640 | MMT00038317   | Bdh1          | -1 |
| 18513 | 21214 | MMT00044275   | Scd1          | 1  |
| 18514 | 3139  | 4930412F15Rik | Gba2          | -1 |
| 18517 | 5364  | Klc2          | Kif22         | -1 |
| 18518 | 18518 | Cap1          | Cap1          | 1  |
| 18520 | 3654  | MMT00005421   | St13          | 1  |
| 18541 | 8444  | Rab15         | Rdh16         | -1 |
| 18541 | 13293 | Rab15         | Gsta2         | -1 |

|       |       |         |               |    |
|-------|-------|---------|---------------|----|
| 18541 | 20058 | Rab15   | Dnaic1        | 1  |
| 18541 | 21214 | Rab15   | Scd1          | -1 |
| 18552 | 18286 | Nr2c2ap | Slc41a3       | -1 |
| 18552 | 21251 | Nr2c2ap | Cpt1a         | -1 |
| 18555 | 1709  | Sdcbp2  | Mt2           | 1  |
| 18555 | 2013  | Sdcbp2  | Il15ra        | 1  |
| 18555 | 2051  | Sdcbp2  | Ddx27         | 1  |
| 18555 | 2681  | Sdcbp2  | Hectd1        | 1  |
| 18555 | 3686  | Sdcbp2  | Psm9          | 1  |
| 18555 | 3754  | Sdcbp2  | Dock6         | -1 |
| 18555 | 4056  | Sdcbp2  | Tnfrsf811     | 1  |
| 18555 | 5922  | Sdcbp2  | Hyal2         | 1  |
| 18555 | 6048  | Sdcbp2  | Psm9          | 1  |
| 18555 | 6193  | Sdcbp2  | Lactb2        | -1 |
| 18555 | 6771  | Sdcbp2  | Insc          | -1 |
| 18555 | 6816  | Sdcbp2  | Slc46a3       | -1 |
| 18555 | 7492  | Sdcbp2  | Adfp          | 1  |
| 18555 | 7659  | Sdcbp2  | Rab30         | 1  |
| 18555 | 7944  | Sdcbp2  | Al132487      | 1  |
| 18555 | 8896  | Sdcbp2  | Fasn          | -1 |
| 18555 | 9408  | Sdcbp2  | Hmgcs2        | 1  |
| 18555 | 10612 | Sdcbp2  | Slc24a6       | 1  |
| 18555 | 10961 | Sdcbp2  | Pgd           | -1 |
| 18555 | 11462 | Sdcbp2  | Gpam          | -1 |
| 18555 | 11807 | Sdcbp2  | Fbxo31        | 1  |
| 18555 | 12315 | Sdcbp2  | Srebf1        | -1 |
| 18555 | 12460 | Sdcbp2  | Pnpla2        | 1  |
| 18555 | 13263 | Sdcbp2  | Chchd5        | 1  |
| 18555 | 14418 | Sdcbp2  | Vcan          | 1  |
| 18555 | 14582 | Sdcbp2  | Mt1           | 1  |
| 18555 | 15892 | Sdcbp2  | Slc22a5       | 1  |
| 18555 | 16027 | Sdcbp2  | Ppp2r2d       | 1  |
| 18555 | 16616 | Sdcbp2  | Paox          | -1 |
| 18555 | 17660 | Sdcbp2  | Nlrp12        | 1  |
| 18555 | 17862 | Sdcbp2  | Fbxo21        | 1  |
| 18555 | 17878 | Sdcbp2  | Brap          | 1  |
| 18555 | 18515 | Sdcbp2  | Ddx28         | 1  |
| 18555 | 18653 | Sdcbp2  | MMT00072901   | 1  |
| 18555 | 19089 | Sdcbp2  | Peci          | 1  |
| 18555 | 21202 | Sdcbp2  | Acly          | -1 |
| 18555 | 21251 | Sdcbp2  | Cpt1a         | 1  |
| 18555 | 22137 | Sdcbp2  | Nudt7         | -1 |
| 18555 | 22732 | Sdcbp2  | Cyb5b         | -1 |
| 18555 | 22770 | Sdcbp2  | Slc27a2       | 1  |
| 18557 | 11129 | Limch1  | Ankhd1        | -1 |
| 18557 | 12910 | Limch1  | 1110028A07Rik | 1  |
| 18558 | 8554  | Nol11   | Letm2         | -1 |
| 18558 | 11724 | Nol11   | Tuba3a        | 1  |
| 18558 | 12797 | Nol11   | Brdt          | -1 |
| 18558 | 14806 | Nol11   | Ccdc45        | -1 |
| 18558 | 16517 | Nol11   | D4Wsu53e      | -1 |

|       |       |               |               |    |
|-------|-------|---------------|---------------|----|
| 18558 | 17656 | Nol11         | Hdhd3         | 1  |
| 18574 | 9230  | Parc          | 1700027N10Rik | -1 |
| 18574 | 14027 | Parc          | Rpo1-1        | 1  |
| 18574 | 18574 | Parc          | Parc          | 1  |
| 18574 | 18772 | Parc          | BC048355      | -1 |
| 18577 | 10667 | Btbd9         | H2-Eb1        | -1 |
| 18577 | 13493 | Btbd9         | Ring1         | 1  |
| 18577 | 22822 | Btbd9         | MMT00013433   | -1 |
| 18582 | 18201 | Krtap6-2      | MMT00060232   | 1  |
| 18586 | 18250 | Tns1          | Mmp14         | -1 |
| 18586 | 22046 | Tns1          | Cml4          | 1  |
| 18592 | 2674  | Txnl4a        | 1810005K13Rik | -1 |
| 18592 | 12984 | Txnl4a        | Cyb5          | 1  |
| 18592 | 18592 | Txnl4a        | Txnl4a        | 1  |
| 18592 | 19689 | Txnl4a        | 1110032A13Rik | -1 |
| 18592 | 21162 | Txnl4a        | MMT00008728   | -1 |
| 18593 | 1600  | Rgs7bp        | Csrp1         | -1 |
| 18593 | 4056  | Rgs7bp        | Tnfaip8l1     | -1 |
| 18593 | 5691  | Rgs7bp        | Csrp3         | -1 |
| 18593 | 5804  | Rgs7bp        | Thrsp         | 1  |
| 18593 | 7492  | Rgs7bp        | Adfp          | -1 |
| 18593 | 11576 | Rgs7bp        | Gm1381        | 1  |
| 18593 | 12114 | Rgs7bp        | Homer2        | 1  |
| 18593 | 12556 | Rgs7bp        | Ass1          | 1  |
| 18593 | 18515 | Rgs7bp        | Ddx28         | -1 |
| 18593 | 22998 | Rgs7bp        | Ass1          | 1  |
| 18594 | 1646  | 1200002N14Rik | Slc15a4       | -1 |
| 18594 | 7112  | 1200002N14Rik | Apbb3         | -1 |
| 18594 | 7839  | 1200002N14Rik | Asl           | -1 |
| 18594 | 9718  | 1200002N14Rik | Fmo5          | -1 |
| 18594 | 15021 | 1200002N14Rik | Ppargc1a      | -1 |
| 18594 | 15631 | 1200002N14Rik | Lpin1         | -1 |
| 18594 | 19532 | 1200002N14Rik | Med8          | 1  |
| 18594 | 22936 | 1200002N14Rik | Rhobtb1       | -1 |
| 18597 | 8637  | Ganc          | Tnp2          | 1  |
| 18597 | 14043 | Ganc          | 4930455C21Rik | 1  |
| 18609 | 14017 | Lrrc1         | Ces5          | -1 |
| 18611 | 10486 | C1qtnf3       | 1300002K09Rik | 1  |
| 18625 | 5364  | Cit           | Kif22         | 1  |
| 18625 | 10978 | Cit           | MMT00078322   | 1  |
| 18625 | 15320 | Cit           | MMT00017479   | -1 |
| 18625 | 17807 | Cit           | Pebp1         | -1 |
| 18625 | 18299 | Cit           | MMT00035424   | 1  |
| 18625 | 21692 | Cit           | MMT00013924   | 1  |
| 18632 | 16251 | Asxl1         | G6pc          | -1 |
| 18632 | 16517 | Asxl1         | D4Wsu53e      | -1 |
| 18642 | 8444  | Hdac11        | Rdh16         | -1 |
| 18642 | 18201 | Hdac11        | MMT00060232   | -1 |
| 18649 | 21214 | Ccne1         | Scd1          | 1  |
| 18655 | 269   | Angpt2        | Tuba1b        | 1  |
| 18655 | 662   | Angpt2        | Mid1ip1       | 1  |

|       |       |        |             |    |
|-------|-------|--------|-------------|----|
| 18655 | 1941  | Angpt2 | MMT00079618 | 1  |
| 18655 | 2051  | Angpt2 | Ddx27       | -1 |
| 18655 | 3754  | Angpt2 | Dock6       | 1  |
| 18655 | 6044  | Angpt2 | Sucnr1      | 1  |
| 18655 | 6193  | Angpt2 | Lactb2      | 1  |
| 18655 | 7151  | Angpt2 | MMT00007982 | 1  |
| 18655 | 8439  | Angpt2 | Slc25a33    | -1 |
| 18655 | 8896  | Angpt2 | Fasn        | 1  |
| 18655 | 9408  | Angpt2 | Hmgcs2      | -1 |
| 18655 | 9763  | Angpt2 | Tuba3b      | 1  |
| 18655 | 10384 | Angpt2 | Chic2       | -1 |
| 18655 | 11462 | Angpt2 | Gpam        | 1  |
| 18655 | 11724 | Angpt2 | Tuba3a      | 1  |
| 18655 | 11807 | Angpt2 | Fbxo31      | -1 |
| 18655 | 12219 | Angpt2 | Cyb5b       | 1  |
| 18655 | 12315 | Angpt2 | Srebf1      | 1  |
| 18655 | 12460 | Angpt2 | Pnpla2      | -1 |
| 18655 | 13889 | Angpt2 | Agpat2      | 1  |
| 18655 | 13990 | Angpt2 | MMT00040357 | 1  |
| 18655 | 14147 | Angpt2 | Acss2       | 1  |
| 18655 | 15862 | Angpt2 | Mrap        | 1  |
| 18655 | 16027 | Angpt2 | Ppp2r2d     | -1 |
| 18655 | 17444 | Angpt2 | Tuba1a      | 1  |
| 18655 | 17660 | Angpt2 | Nlrp12      | -1 |
| 18655 | 17730 | Angpt2 | MMT00058199 | -1 |
| 18655 | 17800 | Angpt2 | Lrtm1       | 1  |
| 18655 | 18785 | Angpt2 | Angptl4     | -1 |
| 18655 | 19089 | Angpt2 | Peci        | -1 |
| 18655 | 20798 | Angpt2 | Ccpg1       | -1 |
| 18655 | 21143 | Angpt2 | Ypel3       | -1 |
| 18655 | 21202 | Angpt2 | Acly        | 1  |
| 18655 | 21251 | Angpt2 | Cpt1a       | -1 |
| 18655 | 22321 | Angpt2 | Apol7a      | 1  |
| 18655 | 22443 | Angpt2 | Tuba1c      | 1  |
| 18655 | 22732 | Angpt2 | Cyb5b       | 1  |
| 18655 | 22770 | Angpt2 | Slc27a2     | -1 |
| 18662 | 6386  | Batf3  | Por         | -1 |
| 18662 | 11129 | Batf3  | Ankhd1      | -1 |
| 18662 | 15709 | Batf3  | Tceal1      | -1 |
| 18662 | 16361 | Batf3  | Olf703      | -1 |
| 18662 | 16972 | Batf3  | Nenf        | 1  |
| 18669 | 3265  | Fxyd5  | Dntt        | 1  |
| 18669 | 3410  | Fxyd5  | Paqr9       | 1  |
| 18669 | 10558 | Fxyd5  | Cyp2d40     | 1  |
| 18669 | 11741 | Fxyd5  | Slc30a10    | 1  |
| 18669 | 12941 | Fxyd5  | Elov15      | 1  |
| 18669 | 20266 | Fxyd5  | Insig2      | 1  |
| 18669 | 20967 | Fxyd5  | Fabp2       | 1  |
| 18673 | 524   | Muc1   | Hsd3b2      | 1  |
| 18673 | 1466  | Muc1   | Ubap2l      | 1  |
| 18673 | 1867  | Muc1   | Bcas2       | 1  |

|       |       |               |                    |    |
|-------|-------|---------------|--------------------|----|
| 18673 | 3753  | Muc1          | Setdb1             | -1 |
| 18673 | 5938  | Muc1          | Pfn2               | 1  |
| 18673 | 6206  | Muc1          | MMT00063701        | 1  |
| 18673 | 10521 | Muc1          | Ttf2               | 1  |
| 18673 | 11611 | Muc1          | S100a13            | -1 |
| 18673 | 12367 | Muc1          | MMT00072365        | -1 |
| 18673 | 16416 | Muc1          | Commd2             | 1  |
| 18673 | 18754 | Muc1          | Rbm8a              | 1  |
| 18673 | 20661 | Muc1          | Tuft1              | 1  |
| 18673 | 21814 | Muc1          | Accn5              | 1  |
| 18673 | 22202 | Muc1          | OTTMUSG00000021274 | -1 |
| 18673 | 22570 | Muc1          | Phf1               | 1  |
| 18693 | 7659  | Klf4          | Rab30              | 1  |
| 18693 | 12315 | Klf4          | Sreb1              | -1 |
| 18693 | 18785 | Klf4          | Angptl4            | 1  |
| 18700 | 2243  | Trappc2l      | Gcsh               | 1  |
| 18702 | 17805 | Mrc1          | Slc39a12           | -1 |
| 18702 | 18702 | Mrc1          | Mrc1               | 1  |
| 18702 | 22724 | Mrc1          | Adams13            | -1 |
| 18709 | 14753 | Srp68         | Slc25a19           | -1 |
| 18709 | 16337 | Srp68         | Grin2c             | -1 |
| 18709 | 18709 | Srp68         | Srp68              | 1  |
| 18711 | 2051  | Usp10         | Ddx27              | -1 |
| 18713 | 3214  | 3110037116Rik | Dnmt3b             | 1  |
| 18713 | 5574  | 3110037116Rik | Hsd3b7             | 1  |
| 18713 | 5849  | 3110037116Rik | 2310031A18Rik      | 1  |
| 18713 | 8328  | 3110037116Rik | Klhdc8a            | 1  |
| 18713 | 11599 | 3110037116Rik | Coq10b             | -1 |
| 18713 | 15631 | 3110037116Rik | Lpin1              | -1 |
| 18713 | 16580 | 3110037116Rik | Tnfaip2            | 1  |
| 18713 | 16690 | 3110037116Rik | Tjp3               | 1  |
| 18713 | 16851 | 3110037116Rik | Slc34a2            | 1  |
| 18713 | 18314 | 3110037116Rik | 4631416L12Rik      | -1 |
| 18713 | 19671 | 3110037116Rik | Upp2               | -1 |
| 18713 | 19723 | 3110037116Rik | Pfkfb1             | -1 |
| 18713 | 20570 | 3110037116Rik | Ap3m1              | -1 |
| 18714 | 2848  | Farsb         | Serpine2           | 1  |
| 18714 | 7043  | Farsb         | Cyp11b2            | 1  |
| 18714 | 18714 | Farsb         | Farsb              | 1  |
| 18743 | 3462  | Ruvbl1        | Nmnat3             | -1 |
| 18743 | 8632  | Ruvbl1        | Igfbp1             | 1  |
| 18743 | 13304 | Ruvbl1        | Gadd45b            | 1  |
| 18743 | 20567 | Ruvbl1        | Ggt6               | -1 |
| 18752 | 12367 | Fgf7          | MMT00072365        | -1 |
| 18754 | 524   | Rbm8a         | Hsd3b2             | 1  |
| 18754 | 1466  | Rbm8a         | Ubp2l              | 1  |
| 18754 | 1867  | Rbm8a         | Bcas2              | 1  |
| 18754 | 1963  | Rbm8a         | MMT00039783        | 1  |
| 18754 | 2752  | Rbm8a         | Fcgr1              | 1  |
| 18754 | 3753  | Rbm8a         | Setdb1             | -1 |
| 18754 | 5938  | Rbm8a         | Pfn2               | 1  |

|       |       |         |                    |    |
|-------|-------|---------|--------------------|----|
| 18754 | 6206  | Rbm8a   | MMT00063701        | 1  |
| 18754 | 7519  | Rbm8a   | Gstm1              | 1  |
| 18754 | 7810  | Rbm8a   | Trim45             | 1  |
| 18754 | 8738  | Rbm8a   | Reg4               | -1 |
| 18754 | 10521 | Rbm8a   | Ttf2               | 1  |
| 18754 | 10681 | Rbm8a   | Dgkz               | -1 |
| 18754 | 11121 | Rbm8a   | Mtmr11             | -1 |
| 18754 | 11611 | Rbm8a   | S100a13            | -1 |
| 18754 | 12367 | Rbm8a   | MMT00072365        | -1 |
| 18754 | 12886 | Rbm8a   | Acp6               | 1  |
| 18754 | 13134 | Rbm8a   | Lipg               | -1 |
| 18754 | 16416 | Rbm8a   | Commd2             | 1  |
| 18754 | 16679 | Rbm8a   | Ctsk               | -1 |
| 18754 | 16753 | Rbm8a   | Hfe2               | -1 |
| 18754 | 18138 | Rbm8a   | MMT00000385        | 1  |
| 18754 | 18754 | Rbm8a   | Rbm8a              | 1  |
| 18754 | 18911 | Rbm8a   | Selenbp2           | 1  |
| 18754 | 20385 | Rbm8a   | Chd1l              | 1  |
| 18754 | 20661 | Rbm8a   | Tuft1              | 1  |
| 18754 | 21650 | Rbm8a   | Ap4b1              | 1  |
| 18754 | 21814 | Rbm8a   | Accn5              | 1  |
| 18754 | 22202 | Rbm8a   | OTTMUSG00000021274 | -1 |
| 18754 | 22570 | Rbm8a   | Phtf1              | 1  |
| 18754 | 23457 | Rbm8a   | Selenbp2           | 1  |
| 18756 | 1941  | Tspan14 | MMT00079618        | 1  |
| 18756 | 6599  | Tspan14 | 1700020C11Rik      | 1  |
| 18756 | 7151  | Tspan14 | MMT00007982        | 1  |
| 18756 | 9763  | Tspan14 | Tuba3b             | 1  |
| 18756 | 10612 | Tspan14 | Slc24a6            | -1 |
| 18756 | 10759 | Tspan14 | Rbms1              | -1 |
| 18756 | 11724 | Tspan14 | Tuba3a             | 1  |
| 18756 | 17444 | Tspan14 | Tuba1a             | 1  |
| 18762 | 1533  | Herc5   | BC013712           | 1  |
| 18762 | 2224  | Herc5   | Oasl2              | 1  |
| 18762 | 4114  | Herc5   | Parp12             | 1  |
| 18762 | 4426  | Herc5   | ligp2              | 1  |
| 18762 | 5044  | Herc5   | Ifi35              | 1  |
| 18762 | 6824  | Herc5   | Irf7               | 1  |
| 18762 | 6910  | Herc5   | Ly6c2              | 1  |
| 18762 | 7069  | Herc5   | Ube1l              | 1  |
| 18762 | 7284  | Herc5   | MMT00008674        | 1  |
| 18762 | 8659  | Herc5   | Psmb8              | 1  |
| 18762 | 8800  | Herc5   | Rnf213             | 1  |
| 18762 | 9847  | Herc5   | Ifi27              | 1  |
| 18762 | 10109 | Herc5   | Gbp3               | 1  |
| 18762 | 11204 | Herc5   | Al451617           | 1  |
| 18762 | 12398 | Herc5   | Ifi44              | 1  |
| 18762 | 12600 | Herc5   | Ifi204             | 1  |
| 18762 | 12969 | Herc5   | Xaf1               | 1  |
| 18762 | 13528 | Herc5   | Capn12             | 1  |
| 18762 | 14506 | Herc5   | Slc15a3            | 1  |

|       |       |             |                    |    |
|-------|-------|-------------|--------------------|----|
| 18762 | 14603 | Herc5       | Ly6e               | 1  |
| 18762 | 14880 | Herc5       | Ms4a4c             | 1  |
| 18762 | 15074 | Herc5       | Usp18              | 1  |
| 18762 | 15504 | Herc5       | Mx2                | 1  |
| 18762 | 16182 | Herc5       | Oasl1              | 1  |
| 18762 | 19189 | Herc5       | Sp100              | 1  |
| 18762 | 19708 | Herc5       | Ly6a               | 1  |
| 18762 | 19738 | Herc5       | Lgals3bp           | 1  |
| 18762 | 20997 | Herc5       | MMT00028135        | 1  |
| 18762 | 21351 | Herc5       | Shisa5             | 1  |
| 18762 | 21549 | Herc5       | Rtp4               | 1  |
| 18762 | 22037 | Herc5       | Oas1g              | 1  |
| 18774 | 8815  | MMT00054062 | Mx1                | 1  |
| 18774 | 21214 | MMT00054062 | Scd1               | 1  |
| 18778 | 482   | Prickle1    | Rnf43              | 1  |
| 18778 | 4351  | Prickle1    | Plxnb1             | 1  |
| 18785 | 662   | Angptl4     | Mid1ip1            | -1 |
| 18785 | 2721  | Angptl4     | Inmt               | -1 |
| 18785 | 5804  | Angptl4     | Thrsp              | -1 |
| 18785 | 12315 | Angptl4     | Srebf1             | -1 |
| 18789 | 8815  | MMT00071096 | Mx1                | 1  |
| 18798 | 2850  | Ndufa4l2    | Slc16a6            | 1  |
| 18798 | 3265  | Ndufa4l2    | Dntt               | 1  |
| 18798 | 3410  | Ndufa4l2    | Paqr9              | 1  |
| 18798 | 3836  | Ndufa4l2    | 2200001115Rik      | 1  |
| 18798 | 5364  | Ndufa4l2    | Kif22              | 1  |
| 18798 | 7761  | Ndufa4l2    | Nudt19             | -1 |
| 18798 | 9718  | Ndufa4l2    | Fmo5               | -1 |
| 18798 | 14472 | Ndufa4l2    | Ahcy               | -1 |
| 18798 | 15320 | Ndufa4l2    | MMT00017479        | -1 |
| 18798 | 20967 | Ndufa4l2    | Fabp2              | 1  |
| 18827 | 607   | Oprs1       | Me1                | 1  |
| 18827 | 874   | Oprs1       | Aldh1a7            | 1  |
| 18827 | 3504  | Oprs1       | Anpep              | -1 |
| 18827 | 4351  | Oprs1       | Plxnb1             | -1 |
| 18827 | 5884  | Oprs1       | Gstm2              | 1  |
| 18827 | 6193  | Oprs1       | Lactb2             | 1  |
| 18827 | 6812  | Oprs1       | MMT00040104        | 1  |
| 18827 | 7430  | Oprs1       | Gpr137             | 1  |
| 18827 | 7602  | Oprs1       | Pcca               | 1  |
| 18827 | 8444  | Oprs1       | Rdh16              | 1  |
| 18827 | 8815  | Oprs1       | Mx1                | 1  |
| 18827 | 10132 | Oprs1       | Ces2               | 1  |
| 18827 | 10554 | Oprs1       | ENSMUSG00000074179 | 1  |
| 18827 | 11946 | Oprs1       | MMT00030953        | 1  |
| 18827 | 13293 | Oprs1       | Gsta2              | 1  |
| 18827 | 14017 | Oprs1       | Ces5               | 1  |
| 18827 | 18201 | Oprs1       | MMT00060232        | 1  |
| 18827 | 20058 | Oprs1       | Dnaic1             | -1 |
| 18827 | 20079 | Oprs1       | MMT00019254        | -1 |
| 18827 | 21214 | Oprs1       | Scd1               | 1  |

|       |       |             |                    |    |
|-------|-------|-------------|--------------------|----|
| 18827 | 21575 | Oprs1       | Cyp2c55            | 1  |
| 18827 | 23026 | Oprs1       | Apom               | -1 |
| 18835 | 1956  | Dtwd1       | Usp50              | 1  |
| 18835 | 4833  | Dtwd1       | Synpo2             | -1 |
| 18835 | 6016  | Dtwd1       | A530057A03Rik      | 1  |
| 18835 | 6231  | Dtwd1       | 9030622O22Rik      | 1  |
| 18835 | 6797  | Dtwd1       | Blvra              | 1  |
| 18835 | 7991  | Dtwd1       | Gpr115             | -1 |
| 18835 | 12388 | Dtwd1       | 8430406I07Rik      | -1 |
| 18835 | 14740 | Dtwd1       | Mfap1b             | -1 |
| 18835 | 17043 | Dtwd1       | Tmem127            | 1  |
| 18835 | 18835 | Dtwd1       | Dtwd1              | 1  |
| 18835 | 21729 | Dtwd1       | Hdc                | -1 |
| 18835 | 22857 | Dtwd1       | Fahd2a             | 1  |
| 18842 | 3841  | Phlda1      | MMT00014519        | -1 |
| 18851 | 2127  | Apip        | Ldha               | -1 |
| 18851 | 3565  | Apip        | MMT00045908        | 1  |
| 18851 | 6085  | Apip        | MMT00007454        | -1 |
| 18851 | 8773  | Apip        | MMT00027093        | -1 |
| 18851 | 13431 | Apip        | MMT00038058        | -1 |
| 18851 | 14055 | Apip        | MMT00050438        | -1 |
| 18851 | 15205 | Apip        | MMT00030262        | -1 |
| 18851 | 22978 | Apip        | MMT00043176        | -1 |
| 18866 | 13431 | MMT00038112 | MMT00038058        | -1 |
| 18866 | 15205 | MMT00038112 | MMT00030262        | -1 |
| 18866 | 22978 | MMT00038112 | MMT00043176        | -1 |
| 18868 | 5364  | Mpeg1       | Kif22              | 1  |
| 18868 | 18455 | Mpeg1       | Mtnr1a             | 1  |
| 18875 | 21214 | EG636756    | Scd1               | 1  |
| 18876 | 5587  | Klf16       | Rmnd5b             | 1  |
| 18878 | 524   | Pde4dip     | Hsd3b2             | -1 |
| 18878 | 1466  | Pde4dip     | Ubap2l             | -1 |
| 18878 | 1867  | Pde4dip     | Bcas2              | -1 |
| 18878 | 1963  | Pde4dip     | MMT00039783        | -1 |
| 18878 | 2752  | Pde4dip     | Fcgr1              | -1 |
| 18878 | 3753  | Pde4dip     | Setdb1             | 1  |
| 18878 | 5938  | Pde4dip     | Pfn2               | -1 |
| 18878 | 6206  | Pde4dip     | MMT00063701        | -1 |
| 18878 | 10681 | Pde4dip     | Dgkz               | 1  |
| 18878 | 11121 | Pde4dip     | Mtnr11             | 1  |
| 18878 | 11611 | Pde4dip     | S100a13            | 1  |
| 18878 | 12367 | Pde4dip     | MMT00072365        | 1  |
| 18878 | 13134 | Pde4dip     | Lipg               | 1  |
| 18878 | 13423 | Pde4dip     | ENSMUSG00000053749 | -1 |
| 18878 | 16416 | Pde4dip     | Commd2             | -1 |
| 18878 | 16753 | Pde4dip     | Hfe2               | 1  |
| 18878 | 18754 | Pde4dip     | Rbm8a              | -1 |
| 18878 | 18911 | Pde4dip     | Selenbp2           | -1 |
| 18878 | 20385 | Pde4dip     | Chd1l              | -1 |
| 18878 | 20661 | Pde4dip     | Tuft1              | -1 |
| 18878 | 23457 | Pde4dip     | Selenbp2           | -1 |



|       |       |          |               |    |
|-------|-------|----------|---------------|----|
| 18882 | 17730 | Tbc1d2   | MMT00058199   | 1  |
| 18889 | 4056  | Shq1     | Tnfaip8l1     | 1  |
| 18906 | 327   | Zfand3   | H2-Ea         | 1  |
| 18906 | 2938  | Zfand3   | H2-T23        | 1  |
| 18906 | 5410  | Zfand3   | Cyp4f15       | -1 |
| 18906 | 7088  | Zfand3   | Slc37a1       | 1  |
| 18906 | 8750  | Zfand3   | 1700010l14Rik | 1  |
| 18906 | 12335 | Zfand3   | Plcb4         | 1  |
| 18906 | 13493 | Zfand3   | Ring1         | -1 |
| 18906 | 18906 | Zfand3   | Zfand3        | 1  |
| 18906 | 22822 | Zfand3   | MMT00013433   | 1  |
| 18911 | 20058 | Selenbp2 | Dnaic1        | -1 |
| 18923 | 563   | BC025816 | D4Bwg0951e    | -1 |
| 18923 | 7140  | BC025816 | Mtbp          | 1  |
| 18923 | 14335 | BC025816 | Olf33         | -1 |
| 18928 | 607   | Ttc28    | Me1           | 1  |
| 18928 | 662   | Ttc28    | Mid1ip1       | 1  |
| 18928 | 5776  | Ttc28    | Rpa1          | 1  |
| 18928 | 6044  | Ttc28    | Sucnr1        | 1  |
| 18928 | 6370  | Ttc28    | Aqp8          | 1  |
| 18928 | 8815  | Ttc28    | Mx1           | 1  |
| 18928 | 8896  | Ttc28    | Fasn          | 1  |
| 18928 | 9408  | Ttc28    | Hmgcs2        | -1 |
| 18928 | 10132 | Ttc28    | Ces2          | 1  |
| 18928 | 10961 | Ttc28    | Pgd           | 1  |
| 18928 | 11462 | Ttc28    | Gpam          | 1  |
| 18928 | 12315 | Ttc28    | Srebf1        | 1  |
| 18928 | 12910 | Ttc28    | 1110028A07Rik | 1  |
| 18928 | 13018 | Ttc28    | AW544981      | 1  |
| 18928 | 13512 | Ttc28    | Tmem144       | 1  |
| 18928 | 14138 | Ttc28    | Anks4b        | 1  |
| 18928 | 14147 | Ttc28    | Acss2         | 1  |
| 18928 | 14151 | Ttc28    | Slc44a1       | 1  |
| 18928 | 15059 | Ttc28    | Mogat1        | 1  |
| 18928 | 17660 | Ttc28    | Nlrp12        | -1 |
| 18928 | 18201 | Ttc28    | MMT00060232   | 1  |
| 18928 | 19766 | Ttc28    | Slc26a4       | 1  |
| 18928 | 20246 | Ttc28    | Pdia5         | -1 |
| 18928 | 20385 | Ttc28    | Chd1l         | 1  |
| 18928 | 21202 | Ttc28    | Acly          | 1  |
| 18928 | 21214 | Ttc28    | Scd1          | 1  |
| 18928 | 21575 | Ttc28    | Cyp2c55       | 1  |
| 18928 | 21727 | Ttc28    | Khk           | 1  |
| 18928 | 22138 | Ttc28    | Ang           | -1 |
| 18932 | 23130 | Cebpg    | Hps4          | -1 |
| 18939 | 6931  | Matn2    | Hrsp12        | -1 |
| 18939 | 13648 | Matn2    | Dap           | -1 |
| 18939 | 17082 | Matn2    | MMT00013155   | -1 |
| 18939 | 20871 | Matn2    | Pop1          | 1  |
| 18939 | 22362 | Matn2    | Laptm4b       | -1 |
| 18947 | 18947 | Ctse     | Ctse          | 1  |

|       |       |             |                    |    |
|-------|-------|-------------|--------------------|----|
| 18948 | 2743  | Olfr1270    | Tcf3               | -1 |
| 18948 | 3703  | Olfr1270    | Ggcx               | -1 |
| 18948 | 11338 | Olfr1270    | Vamp8              | -1 |
| 18948 | 15384 | Olfr1270    | Mat2a              | -1 |
| 18948 | 15708 | Olfr1270    | Retsat             | -1 |
| 18983 | 4534  | lfrd2       | Ndel1              | 1  |
| 18984 | 1941  | Pias3       | MMT00079618        | 1  |
| 19004 | 662   | Pdk4        | Mid1ip1            | -1 |
| 19004 | 1330  | Pdk4        | Fgf21              | 1  |
| 19004 | 2721  | Pdk4        | Inmt               | -1 |
| 19004 | 3754  | Pdk4        | Dock6              | -1 |
| 19004 | 3756  | Pdk4        | Chrne              | -1 |
| 19004 | 5804  | Pdk4        | Thrsp              | -1 |
| 19004 | 6044  | Pdk4        | Sucnr1             | -1 |
| 19004 | 6263  | Pdk4        | Slc7a4             | -1 |
| 19004 | 7659  | Pdk4        | Rab30              | 1  |
| 19004 | 8439  | Pdk4        | Slc25a33           | 1  |
| 19004 | 8896  | Pdk4        | Fasn               | -1 |
| 19004 | 9408  | Pdk4        | Hmgcs2             | 1  |
| 19004 | 9981  | Pdk4        | Snrpn              | -1 |
| 19004 | 11462 | Pdk4        | Gpam               | -1 |
| 19004 | 12315 | Pdk4        | Srebf1             | -1 |
| 19004 | 13304 | Pdk4        | Gadd45b            | 1  |
| 19004 | 13423 | Pdk4        | ENSMUSG00000053749 | -1 |
| 19004 | 14138 | Pdk4        | Anks4b             | -1 |
| 19004 | 14151 | Pdk4        | Slc44a1            | -1 |
| 19004 | 15604 | Pdk4        | Arl4a              | 1  |
| 19004 | 16525 | Pdk4        | Lbp                | 1  |
| 19004 | 16823 | Pdk4        | Inhbb              | 1  |
| 19004 | 17090 | Pdk4        | Lass2              | -1 |
| 19004 | 17660 | Pdk4        | Nlrp12             | 1  |
| 19004 | 18785 | Pdk4        | Angptl4            | 1  |
| 19004 | 21202 | Pdk4        | Acly               | -1 |
| 19022 | 1416  | Ccnb2       | 6720460F02Rik      | 1  |
| 19022 | 2428  | Ccnb2       | Car1               | -1 |
| 19022 | 5364  | Ccnb2       | Kif22              | 1  |
| 19022 | 7492  | Ccnb2       | Adfp               | 1  |
| 19022 | 8416  | Ccnb2       | Cdc20              | 1  |
| 19022 | 11382 | Ccnb2       | Cdca3              | 1  |
| 19022 | 11422 | Ccnb2       | Pltp               | 1  |
| 19022 | 12799 | Ccnb2       | Spon2              | 1  |
| 19022 | 17823 | Ccnb2       | D2Ert750e          | 1  |
| 19022 | 18299 | Ccnb2       | MMT00035424        | 1  |
| 19022 | 18483 | Ccnb2       | Mthfd1             | -1 |
| 19022 | 19318 | Ccnb2       | Plk1               | 1  |
| 19022 | 20433 | Ccnb2       | Cdca5              | 1  |
| 19022 | 21692 | Ccnb2       | MMT00013924        | 1  |
| 19022 | 21947 | Ccnb2       | Cdca8              | 1  |
| 19026 | 12969 | Isg15       | Xaf1               | 1  |
| 19027 | 21575 | MMT00058026 | Cyp2c55            | 1  |
| 19030 | 8815  | MMT00011246 | Mx1                | 1  |

|       |       |             |                    |    |
|-------|-------|-------------|--------------------|----|
| 19030 | 18201 | MMT00011246 | MMT00060232        | 1  |
| 19030 | 21214 | MMT00011246 | Scd1               | 1  |
| 19034 | 17862 | Bag4        | Fbxo21             | 1  |
| 19034 | 17996 | Bag4        | Igfbp2             | 1  |
| 19034 | 20079 | Bag4        | MMT00019254        | 1  |
| 19034 | 21202 | Bag4        | Acly               | -1 |
| 19037 | 1092  | Slc11a2     | MMT00024026        | -1 |
| 19037 | 3862  | Slc11a2     | Gpd1               | 1  |
| 19037 | 12412 | Slc11a2     | BC004728           | 1  |
| 19037 | 19037 | Slc11a2     | Slc11a2            | 1  |
| 19037 | 21060 | Slc11a2     | Ela1               | 1  |
| 19040 | 10612 | Cdk2ap1     | Slc24a6            | -1 |
| 19051 | 10195 | Podnl1      | Klf1               | -1 |
| 19056 | 5252  | Zfp7        | Mfsd3              | 1  |
| 19063 | 18455 | Evl         | Mtnr1a             | 1  |
| 19064 | 8341  | MMT00004867 | MMT00017270        | -1 |
| 19064 | 14924 | MMT00004867 | Hn1l               | 1  |
| 19064 | 15264 | MMT00004867 | Flywch2            | -1 |
| 19064 | 19064 | MMT00004867 | MMT00004867        | 1  |
| 19066 | 607   | MMT00012632 | Me1                | 1  |
| 19066 | 8815  | MMT00012632 | Mx1                | 1  |
| 19066 | 18201 | MMT00012632 | MMT00060232        | 1  |
| 19066 | 21214 | MMT00012632 | Scd1               | 1  |
| 19066 | 21575 | MMT00012632 | Cyp2c55            | 1  |
| 19067 | 607   | BC023882    | Me1                | 1  |
| 19067 | 1129  | BC023882    | Gsta4              | 1  |
| 19067 | 5884  | BC023882    | Gstm2              | 1  |
| 19067 | 8444  | BC023882    | Rdh16              | 1  |
| 19067 | 8815  | BC023882    | Mx1                | 1  |
| 19067 | 10554 | BC023882    | ENSMUSG00000074179 | 1  |
| 19067 | 13293 | BC023882    | Gsta2              | 1  |
| 19067 | 14017 | BC023882    | Ces5               | 1  |
| 19067 | 18201 | BC023882    | MMT00060232        | 1  |
| 19067 | 21214 | BC023882    | Scd1               | 1  |
| 19067 | 21575 | BC023882    | Cyp2c55            | 1  |
| 19071 | 3446  | Actr10      | Eno1               | 1  |
| 19071 | 18113 | Actr10      | MMT00034400        | 1  |
| 19071 | 19066 | Actr10      | MMT00012632        | 1  |
| 19071 | 20804 | Actr10      | Eno1               | 1  |
| 19071 | 21727 | Actr10      | Khk                | 1  |
| 19077 | 250   | Has2        | Tubb2a-ps2         | 1  |
| 19077 | 609   | Has2        | MMT00060868        | 1  |
| 19077 | 2850  | Has2        | Slc16a6            | 1  |
| 19077 | 3214  | Has2        | Dnmt3b             | 1  |
| 19077 | 3804  | Has2        | MMT00015534        | 1  |
| 19077 | 4192  | Has2        | Zranb1             | -1 |
| 19077 | 4201  | Has2        | Tubb2c             | 1  |
| 19077 | 4286  | Has2        | Ptp4a1             | -1 |
| 19077 | 6386  | Has2        | Por                | -1 |
| 19077 | 7862  | Has2        | Cpsf4l             | -1 |
| 19077 | 8399  | Has2        | Herpud1            | -1 |

|       |       |             |               |    |
|-------|-------|-------------|---------------|----|
| 19077 | 10541 | Has2        | Ap2a2         | 1  |
| 19077 | 11741 | Has2        | Slc30a10      | 1  |
| 19077 | 12420 | Has2        | Klhl21        | -1 |
| 19077 | 12904 | Has2        | MMT00040704   | -1 |
| 19077 | 15631 | Has2        | Lpin1         | -1 |
| 19077 | 16060 | Has2        | Gys2          | -1 |
| 19077 | 16690 | Has2        | Tjp3          | 1  |
| 19077 | 17323 | Has2        | Tubb6         | 1  |
| 19077 | 17622 | Has2        | Foxo1         | -1 |
| 19077 | 17876 | Has2        | Tubb4         | 1  |
| 19077 | 18653 | Has2        | MMT00072901   | -1 |
| 19077 | 19234 | Has2        | Nrg4          | -1 |
| 19077 | 19466 | Has2        | Pptc7         | -1 |
| 19077 | 19671 | Has2        | Upp2          | -1 |
| 19077 | 21251 | Has2        | Cpt1a         | -1 |
| 19077 | 21331 | Has2        | Slc10a6       | -1 |
| 19077 | 22290 | Has2        | Tubb2a        | 1  |
| 19077 | 22630 | Has2        | MMT00034355   | 1  |
| 19078 | 19078 | EG668139    | EG668139      | 1  |
| 19092 | 2456  | MMT00045362 | Mrpl10        | 1  |
| 19092 | 3480  | MMT00045362 | Pnpo          | -1 |
| 19092 | 12302 | MMT00045362 | Cbx1          | 1  |
| 19092 | 19092 | MMT00045362 | MMT00045362   | 1  |
| 19094 | 16647 | Fscn1       | D16H22S680E   | -1 |
| 19094 | 21575 | Fscn1       | Cyp2c55       | 1  |
| 19108 | 407   | Armet       | Serpina6      | -1 |
| 19108 | 415   | Armet       | Ypel2         | 1  |
| 19108 | 1453  | Armet       | Gfod2         | 1  |
| 19108 | 2339  | Armet       | 5730449L18Rik | 1  |
| 19108 | 2348  | Armet       | Irak1         | 1  |
| 19108 | 2384  | Armet       | Micalcl       | 1  |
| 19108 | 2829  | Armet       | Lrfn3         | 1  |
| 19108 | 2850  | Armet       | Slc16a6       | 1  |
| 19108 | 3393  | Armet       | Snhg8         | -1 |
| 19108 | 3799  | Armet       | Serpinh1      | 1  |
| 19108 | 4192  | Armet       | Zranb1        | -1 |
| 19108 | 4966  | Armet       | Zscan20       | 1  |
| 19108 | 5068  | Armet       | Afap112       | 1  |
| 19108 | 5374  | Armet       | Chka          | 1  |
| 19108 | 5689  | Armet       | Dsg2          | -1 |
| 19108 | 7731  | Armet       | 1500001M20Rik | -1 |
| 19108 | 8670  | Armet       | MMT00051613   | 1  |
| 19108 | 9067  | Armet       | Tra2a         | 1  |
| 19108 | 9258  | Armet       | P4ha1         | 1  |
| 19108 | 9831  | Armet       | Nedd4l        | 1  |
| 19108 | 10492 | Armet       | 1810046K07Rik | -1 |
| 19108 | 10938 | Armet       | Zbtb5         | 1  |
| 19108 | 11043 | Armet       | Hsph1         | 1  |
| 19108 | 12905 | Armet       | Nfil3         | 1  |
| 19108 | 13297 | Armet       | Emb           | 1  |
| 19108 | 14279 | Armet       | 3930402G23Rik | 1  |

|       |       |             |               |    |
|-------|-------|-------------|---------------|----|
| 19108 | 14298 | Armet       | Atp2a2        | 1  |
| 19108 | 15675 | Armet       | MMT00077535   | 1  |
| 19108 | 15740 | Armet       | 1810010H24Rik | -1 |
| 19108 | 16043 | Armet       | Sult1c2       | -1 |
| 19108 | 16585 | Armet       | Syvn1         | 1  |
| 19108 | 17536 | Armet       | Chn2          | -1 |
| 19108 | 18438 | Armet       | Map3k7ip2     | 1  |
| 19108 | 19671 | Armet       | Upp2          | -1 |
| 19108 | 22474 | Armet       | Ubqln1        | 1  |
| 19108 | 22697 | Armet       | Skil          | 1  |
| 19110 | 22830 | Gm114       | MMT00081088   | 1  |
| 19115 | 1041  | Rab32       | 3110049J23Rik | -1 |
| 19115 | 1135  | Rab32       | Akap12        | 1  |
| 19115 | 2571  | Rab32       | Rmnd1         | 1  |
| 19115 | 3744  | Rab32       | Rmnd1         | 1  |
| 19115 | 5965  | Rab32       | Pbld          | -1 |
| 19115 | 8786  | Rab32       | Rmnd1         | 1  |
| 19115 | 14169 | Rab32       | 1700052N19Rik | -1 |
| 19115 | 14989 | Rab32       | Map3k5        | -1 |
| 19115 | 15971 | Rab32       | Aifm2         | -1 |
| 19115 | 18300 | Rab32       | Arg1          | -1 |
| 19115 | 19115 | Rab32       | Rab32         | 1  |
| 19115 | 19392 | Rab32       | Slc25a16      | 1  |
| 19115 | 21143 | Rab32       | Ypel3         | -1 |
| 19115 | 21258 | Rab32       | 2010003K15Rik | 1  |
| 19115 | 22146 | Rab32       | Aifm2         | -1 |
| 19129 | 3265  | Serf2       | Dntt          | 1  |
| 19129 | 3836  | Serf2       | 2200001I15Rik | 1  |
| 19129 | 20967 | Serf2       | Fabp2         | 1  |
| 19134 | 3061  | Fn3k        | Scarf2        | 1  |
| 19134 | 3119  | Fn3k        | Mapk10        | 1  |
| 19134 | 6846  | Fn3k        | Olf1402       | 1  |
| 19134 | 15016 | Fn3k        | MMT00074608   | 1  |
| 19134 | 16613 | Fn3k        | 1110031I02Rik | 1  |
| 19134 | 17680 | Fn3k        | 1700069L16Rik | 1  |
| 19134 | 17792 | Fn3k        | Vmn2r79       | 1  |
| 19134 | 17897 | Fn3k        | Gm1019        | 1  |
| 19142 | 2599  | Gpatch1     | Lsm14a        | 1  |
| 19142 | 6513  | Gpatch1     | Qpctl         | 1  |
| 19143 | 11946 | Mrpl40      | MMT00030953   | 1  |
| 19160 | 10711 | MMT00042532 | 1700108F19Rik | -1 |
| 19160 | 12910 | MMT00042532 | 1110028A07Rik | -1 |
| 19160 | 13588 | MMT00042532 | MMT00042387   | -1 |
| 19161 | 5706  | Cav2        | Cyp1a2        | 1  |
| 19161 | 7739  | Cav2        | Grm8          | 1  |
| 19161 | 13431 | Cav2        | MMT00038058   | -1 |
| 19161 | 15205 | Cav2        | MMT00030262   | -1 |
| 19163 | 874   | Cadps2      | Aldh1a7       | -1 |
| 19163 | 14017 | Cadps2      | Ces5          | -1 |
| 19163 | 18201 | Cadps2      | MMT00060232   | -1 |
| 19163 | 20058 | Cadps2      | Dnaic1        | 1  |

|       |       |        |                    |    |
|-------|-------|--------|--------------------|----|
| 19163 | 20079 | Cadps2 | MMT00019254        | 1  |
| 19163 | 21214 | Cadps2 | Scd1               | -1 |
| 19163 | 22046 | Cadps2 | Cml4               | -1 |
| 19169 | 1985  | Atp10a | Pepd               | 1  |
| 19169 | 2051  | Atp10a | Ddx27              | -1 |
| 19169 | 12219 | Atp10a | Cyb5b              | 1  |
| 19169 | 12637 | Atp10a | Itпка              | -1 |
| 19169 | 21202 | Atp10a | Acly               | 1  |
| 19169 | 22732 | Atp10a | Cyb5b              | 1  |
| 19182 | 4056  | Igsf2  | Tnfaiр811          | 1  |
| 19187 | 5938  | Chrm3  | Pfn2               | 1  |
| 19187 | 12367 | Chrm3  | MMT00072365        | -1 |
| 19187 | 13423 | Chrm3  | ENSMUSG00000053749 | 1  |
| 19187 | 15508 | Chrm3  | 4632415L05Rik      | 1  |
| 19187 | 16416 | Chrm3  | Commd2             | 1  |
| 19187 | 18790 | Chrm3  | Car3               | 1  |
| 19187 | 21323 | Chrm3  | MMT00074228        | 1  |
| 19189 | 143   | Sp100  | Gvin1              | 1  |
| 19189 | 701   | Sp100  | Polr3g             | -1 |
| 19189 | 860   | Sp100  | Psmb10             | 1  |
| 19189 | 1533  | Sp100  | BC013712           | 1  |
| 19189 | 1908  | Sp100  | Rnf213             | 1  |
| 19189 | 2200  | Sp100  | BC006779           | 1  |
| 19189 | 2224  | Sp100  | Oasl2              | 1  |
| 19189 | 2550  | Sp100  | MMT00036681        | 1  |
| 19189 | 2752  | Sp100  | Fcgr1              | 1  |
| 19189 | 3426  | Sp100  | Hap1               | 1  |
| 19189 | 3523  | Sp100  | Trim34             | 1  |
| 19189 | 3594  | Sp100  | Rasa4              | 1  |
| 19189 | 3659  | Sp100  | EG236451           | 1  |
| 19189 | 3683  | Sp100  | Oas2               | 1  |
| 19189 | 4114  | Sp100  | Parp12             | 1  |
| 19189 | 4409  | Sp100  | 5430435G22Rik      | 1  |
| 19189 | 4426  | Sp100  | Iigp2              | 1  |
| 19189 | 4508  | Sp100  | Ifit1              | 1  |
| 19189 | 4516  | Sp100  | Rsad2              | 1  |
| 19189 | 5044  | Sp100  | Ifi35              | 1  |
| 19189 | 5216  | Sp100  | Spnb5              | 1  |
| 19189 | 5250  | Sp100  | Ifit2              | 1  |
| 19189 | 5556  | Sp100  | Ccl4               | 1  |
| 19189 | 5766  | Sp100  | 5033414D02Rik      | 1  |
| 19189 | 5845  | Sp100  | Il18bp             | 1  |
| 19189 | 5853  | Sp100  | Trim30             | 1  |
| 19189 | 5949  | Sp100  | Zbp1               | 1  |
| 19189 | 5975  | Sp100  | Car13              | 1  |
| 19189 | 6072  | Sp100  | C1qc               | 1  |
| 19189 | 6098  | Sp100  | Ncf4               | 1  |
| 19189 | 6587  | Sp100  | Irf9               | 1  |
| 19189 | 6595  | Sp100  | Oas1a              | 1  |
| 19189 | 6734  | Sp100  | Ehd4               | 1  |
| 19189 | 6779  | Sp100  | Gbp6               | 1  |

|       |       |       |               |   |
|-------|-------|-------|---------------|---|
| 19189 | 6824  | Sp100 | Irf7          | 1 |
| 19189 | 6910  | Sp100 | Ly6c2         | 1 |
| 19189 | 7069  | Sp100 | Ube1l         | 1 |
| 19189 | 7105  | Sp100 | Plac8         | 1 |
| 19189 | 7238  | Sp100 | Pycard        | 1 |
| 19189 | 7284  | Sp100 | MMT00008674   | 1 |
| 19189 | 7316  | Sp100 | Ifi204        | 1 |
| 19189 | 7336  | Sp100 | Cd5l          | 1 |
| 19189 | 7963  | Sp100 | Rxrg          | 1 |
| 19189 | 8270  | Sp100 | Cispn         | 1 |
| 19189 | 8555  | Sp100 | H2-M3         | 1 |
| 19189 | 8659  | Sp100 | Psmb8         | 1 |
| 19189 | 8800  | Sp100 | Rnf213        | 1 |
| 19189 | 9100  | Sp100 | Ms4a6c        | 1 |
| 19189 | 9320  | Sp100 | Rnf31         | 1 |
| 19189 | 9401  | Sp100 | Fcgr4         | 1 |
| 19189 | 9616  | Sp100 | AI451557      | 1 |
| 19189 | 9717  | Sp100 | Psmb9         | 1 |
| 19189 | 9829  | Sp100 | Stoml1        | 1 |
| 19189 | 9847  | Sp100 | Ifi27         | 1 |
| 19189 | 10109 | Sp100 | Gbp3          | 1 |
| 19189 | 10393 | Sp100 | Slc7a8        | 1 |
| 19189 | 10504 | Sp100 | Ripk3         | 1 |
| 19189 | 10606 | Sp100 | Apbb1ip       | 1 |
| 19189 | 10926 | Sp100 | P2ry13        | 1 |
| 19189 | 11009 | Sp100 | MMT00008885   | 1 |
| 19189 | 11204 | Sp100 | AI451617      | 1 |
| 19189 | 11265 | Sp100 | Irgm          | 1 |
| 19189 | 11275 | Sp100 | Fanci         | 1 |
| 19189 | 11701 | Sp100 | Oas1c         | 1 |
| 19189 | 12126 | Sp100 | Znfx1         | 1 |
| 19189 | 12398 | Sp100 | Ifi44         | 1 |
| 19189 | 12600 | Sp100 | Ifi204        | 1 |
| 19189 | 12969 | Sp100 | Xaf1          | 1 |
| 19189 | 13156 | Sp100 | Ifit3         | 1 |
| 19189 | 13309 | Sp100 | Tgtp          | 1 |
| 19189 | 13504 | Sp100 | Lair1         | 1 |
| 19189 | 13514 | Sp100 | Apol9b        | 1 |
| 19189 | 13522 | Sp100 | Sfn5          | 1 |
| 19189 | 13527 | Sp100 | Ctss          | 1 |
| 19189 | 13528 | Sp100 | Capn12        | 1 |
| 19189 | 13585 | Sp100 | Nckap1l       | 1 |
| 19189 | 13654 | Sp100 | Stat1         | 1 |
| 19189 | 13656 | Sp100 | Ly86          | 1 |
| 19189 | 13749 | Sp100 | Parp9         | 1 |
| 19189 | 13780 | Sp100 | Pilra         | 1 |
| 19189 | 13826 | Sp100 | Melk          | 1 |
| 19189 | 14029 | Sp100 | 2810022L02Rik | 1 |
| 19189 | 14237 | Sp100 | Rac2          | 1 |
| 19189 | 14258 | Sp100 | Ifi47         | 1 |
| 19189 | 14260 | Sp100 | Mikl          | 1 |

|       |       |       |               |   |
|-------|-------|-------|---------------|---|
| 19189 | 14475 | Sp100 | Abcg1         | 1 |
| 19189 | 14506 | Sp100 | Slc15a3       | 1 |
| 19189 | 14603 | Sp100 | Ly6e          | 1 |
| 19189 | 14611 | Sp100 | Ddx60         | 1 |
| 19189 | 14880 | Sp100 | Ms4a4c        | 1 |
| 19189 | 14883 | Sp100 | Itgal         | 1 |
| 19189 | 14954 | Sp100 | Rab19         | 1 |
| 19189 | 15074 | Sp100 | Usp18         | 1 |
| 19189 | 15280 | Sp100 | Cxcl10        | 1 |
| 19189 | 15449 | Sp100 | Mitd1         | 1 |
| 19189 | 15504 | Sp100 | Mx2           | 1 |
| 19189 | 15572 | Sp100 | Dtx3l         | 1 |
| 19189 | 15749 | Sp100 | Cd22          | 1 |
| 19189 | 15825 | Sp100 | Fermt3        | 1 |
| 19189 | 16102 | Sp100 | Cd72          | 1 |
| 19189 | 16147 | Sp100 | Tlr2          | 1 |
| 19189 | 16182 | Sp100 | Oasl1         | 1 |
| 19189 | 16186 | Sp100 | Cfp           | 1 |
| 19189 | 16199 | Sp100 | Samhd1        | 1 |
| 19189 | 16521 | Sp100 | Adar          | 1 |
| 19189 | 16572 | Sp100 | D14Ert668e    | 1 |
| 19189 | 16874 | Sp100 | Fcer1g        | 1 |
| 19189 | 16988 | Sp100 | Clec4f        | 1 |
| 19189 | 17071 | Sp100 | Samd9l        | 1 |
| 19189 | 17197 | Sp100 | Igtp          | 1 |
| 19189 | 17312 | Sp100 | Sirpa         | 1 |
| 19189 | 17412 | Sp100 | Aif1          | 1 |
| 19189 | 17904 | Sp100 | Cds1          | 1 |
| 19189 | 18174 | Sp100 | Stat2         | 1 |
| 19189 | 18186 | Sp100 | Parp14        | 1 |
| 19189 | 18211 | Sp100 | Folr2         | 1 |
| 19189 | 18289 | Sp100 | Tap1          | 1 |
| 19189 | 19026 | Sp100 | Isg15         | 1 |
| 19189 | 19063 | Sp100 | Evl           | 1 |
| 19189 | 19189 | Sp100 | Sp100         | 1 |
| 19189 | 19262 | Sp100 | Cd274         | 1 |
| 19189 | 19298 | Sp100 | Unc93b1       | 1 |
| 19189 | 19708 | Sp100 | Ly6a          | 1 |
| 19189 | 19738 | Sp100 | Lgals3bp      | 1 |
| 19189 | 19794 | Sp100 | Rgs2          | 1 |
| 19189 | 20321 | Sp100 | Ms4a6b        | 1 |
| 19189 | 20431 | Sp100 | Slc7a7        | 1 |
| 19189 | 20474 | Sp100 | Gnb3          | 1 |
| 19189 | 20791 | Sp100 | MMT00014813   | 1 |
| 19189 | 20997 | Sp100 | MMT00028135   | 1 |
| 19189 | 21351 | Sp100 | Shisa5        | 1 |
| 19189 | 21440 | Sp100 | Tmsb10        | 1 |
| 19189 | 21549 | Sp100 | Rtp4          | 1 |
| 19189 | 21824 | Sp100 | 5830443L24Rik | 1 |
| 19189 | 22037 | Sp100 | Oas1g         | 1 |
| 19189 | 22077 | Sp100 | MMT00057550   | 1 |



|       |       |               |               |    |
|-------|-------|---------------|---------------|----|
| 19189 | 22327 | Sp100         | Tyrobp        | 1  |
| 19189 | 22496 | Sp100         | Slfn1         | 1  |
| 19189 | 22647 | Sp100         | Pkib          | 1  |
| 19189 | 23092 | Sp100         | Ifih1         | 1  |
| 19189 | 23208 | Sp100         | Hck           | 1  |
| 19189 | 23242 | Sp100         | Gngt2         | 1  |
| 19189 | 23276 | Sp100         | Evi2b         | 1  |
| 19189 | 23403 | Sp100         | Ndc80         | 1  |
| 19189 | 23450 | Sp100         | D12Erttd647e  | 1  |
| 19192 | 11094 | Hist1h1c      | Slc17a3       | -1 |
| 19192 | 19192 | Hist1h1c      | Hist1h1c      | 1  |
| 19195 | 21575 | Reep6         | Cyp2c55       | 1  |
| 19202 | 16983 | 1500031L02Rik | Pigx          | 1  |
| 19204 | 185   | Prr13         | Ap2b1         | 1  |
| 19204 | 250   | Prr13         | Tubb2a-ps2    | 1  |
| 19204 | 402   | Prr13         | Timp3         | -1 |
| 19204 | 433   | Prr13         | Pla2g12b      | 1  |
| 19204 | 437   | Prr13         | Ndr1          | 1  |
| 19204 | 609   | Prr13         | MMT00060868   | 1  |
| 19204 | 719   | Prr13         | Usp2          | -1 |
| 19204 | 1276  | Prr13         | Col4a1        | 1  |
| 19204 | 1310  | Prr13         | Cabc1         | 1  |
| 19204 | 1326  | Prr13         | Tox           | -1 |
| 19204 | 1445  | Prr13         | Ssbp2         | -1 |
| 19204 | 1767  | Prr13         | BC016495      | -1 |
| 19204 | 2399  | Prr13         | MMT00060167   | 1  |
| 19204 | 2615  | Prr13         | EG624862      | -1 |
| 19204 | 2636  | Prr13         | Tars          | 1  |
| 19204 | 2766  | Prr13         | Elp4          | 1  |
| 19204 | 2829  | Prr13         | Lrfn3         | 1  |
| 19204 | 2850  | Prr13         | Slc16a6       | 1  |
| 19204 | 3214  | Prr13         | Dnmt3b        | 1  |
| 19204 | 3410  | Prr13         | Paqr9         | 1  |
| 19204 | 3502  | Prr13         | Gde1          | -1 |
| 19204 | 3804  | Prr13         | MMT00015534   | 1  |
| 19204 | 3868  | Prr13         | Ebpl          | 1  |
| 19204 | 4201  | Prr13         | Tubb2c        | 1  |
| 19204 | 4286  | Prr13         | Ptp4a1        | -1 |
| 19204 | 4298  | Prr13         | St3gal1       | 1  |
| 19204 | 4534  | Prr13         | Ndel1         | -1 |
| 19204 | 4708  | Prr13         | Traf3ip2      | 1  |
| 19204 | 5183  | Prr13         | St5           | 1  |
| 19204 | 5374  | Prr13         | Chka          | 1  |
| 19204 | 5574  | Prr13         | Hsd3b7        | 1  |
| 19204 | 5802  | Prr13         | Mad2l2        | 1  |
| 19204 | 5849  | Prr13         | 2310031A18Rik | 1  |
| 19204 | 5934  | Prr13         | S100a10       | 1  |
| 19204 | 5974  | Prr13         | Arntl         | 1  |
| 19204 | 6386  | Prr13         | Por           | -1 |
| 19204 | 6394  | Prr13         | Fbxo6         | 1  |
| 19204 | 6788  | Prr13         | Psen2         | 1  |

|       |       |       |               |    |
|-------|-------|-------|---------------|----|
| 19204 | 7414  | Prr13 | Clpx          | 1  |
| 19204 | 7862  | Prr13 | Cpsf4l        | -1 |
| 19204 | 7973  | Prr13 | Lgals9        | 1  |
| 19204 | 8328  | Prr13 | Klhdc8a       | 1  |
| 19204 | 8399  | Prr13 | Herpud1       | -1 |
| 19204 | 8641  | Prr13 | Slc7a2        | -1 |
| 19204 | 9158  | Prr13 | Pde9a         | 1  |
| 19204 | 9910  | Prr13 | EG666644      | -1 |
| 19204 | 10166 | Prr13 | Rhbdd2        | -1 |
| 19204 | 10215 | Prr13 | Nampt         | -1 |
| 19204 | 10486 | Prr13 | 1300002K09Rik | 1  |
| 19204 | 10775 | Prr13 | Slc16a1       | 1  |
| 19204 | 11129 | Prr13 | Ankhd1        | -1 |
| 19204 | 11154 | Prr13 | MMT00037611   | -1 |
| 19204 | 11233 | Prr13 | Tef           | -1 |
| 19204 | 11599 | Prr13 | Coq10b        | -1 |
| 19204 | 11741 | Prr13 | Slc30a10      | 1  |
| 19204 | 12151 | Prr13 | MMT00082650   | -1 |
| 19204 | 12420 | Prr13 | Klhl21        | -1 |
| 19204 | 12433 | Prr13 | 5033413D22Rik | 1  |
| 19204 | 12479 | Prr13 | lfrd1         | -1 |
| 19204 | 12687 | Prr13 | Zc3h8         | -1 |
| 19204 | 12799 | Prr13 | Spon2         | 1  |
| 19204 | 12904 | Prr13 | MMT00040704   | -1 |
| 19204 | 12941 | Prr13 | Elov15        | 1  |
| 19204 | 13078 | Prr13 | Eps8l2        | 1  |
| 19204 | 13889 | Prr13 | Agpat2        | 1  |
| 19204 | 14462 | Prr13 | Zfp385b       | -1 |
| 19204 | 15021 | Prr13 | Ppargc1a      | -1 |
| 19204 | 15631 | Prr13 | Lpin1         | -1 |
| 19204 | 15709 | Prr13 | Tceal1        | -1 |
| 19204 | 15931 | Prr13 | Ces3          | -1 |
| 19204 | 16060 | Prr13 | Gys2          | -1 |
| 19204 | 16176 | Prr13 | St3gal5       | -1 |
| 19204 | 16339 | Prr13 | Bach1         | -1 |
| 19204 | 16580 | Prr13 | Tnfaip2       | 1  |
| 19204 | 16669 | Prr13 | Tjp2          | 1  |
| 19204 | 16690 | Prr13 | Tjp3          | 1  |
| 19204 | 17083 | Prr13 | Atp1b1        | -1 |
| 19204 | 17247 | Prr13 | A030007L17Rik | 1  |
| 19204 | 17323 | Prr13 | Tubb6         | 1  |
| 19204 | 17338 | Prr13 | Mocos         | 1  |
| 19204 | 17622 | Prr13 | Foxo1         | -1 |
| 19204 | 17876 | Prr13 | Tubb4         | 1  |
| 19204 | 18147 | Prr13 | Nhlrc2        | -1 |
| 19204 | 18179 | Prr13 | Dbp           | -1 |
| 19204 | 18296 | Prr13 | Pcgf5         | -1 |
| 19204 | 18827 | Prr13 | Oprs1         | 1  |
| 19204 | 19234 | Prr13 | Nrg4          | -1 |
| 19204 | 19277 | Prr13 | MMT00044927   | -1 |
| 19204 | 19532 | Prr13 | Med8          | 1  |

|       |       |        |               |    |
|-------|-------|--------|---------------|----|
| 19204 | 19671 | Prr13  | Upp2          | -1 |
| 19204 | 19701 | Prr13  | 9930021J17Rik | 1  |
| 19204 | 20085 | Prr13  | Lpin2         | -1 |
| 19204 | 20266 | Prr13  | Insig2        | 1  |
| 19204 | 20678 | Prr13  | Cyp39a1       | -1 |
| 19204 | 21142 | Prr13  | Gm129         | -1 |
| 19204 | 21811 | Prr13  | Ak3l1         | -1 |
| 19204 | 22290 | Prr13  | Tubb2a        | 1  |
| 19204 | 22630 | Prr13  | MMT00034355   | 1  |
| 19204 | 22936 | Prr13  | Rhobtb1       | -1 |
| 19204 | 23180 | Prr13  | Sult1d1       | -1 |
| 19214 | 19214 | Snapc1 | Snapc1        | 1  |
| 19216 | 269   | Bik    | Tuba1b        | 1  |
| 19216 | 563   | Bik    | D4Bwg0951e    | -1 |
| 19216 | 662   | Bik    | Mid1ip1       | 1  |
| 19216 | 1941  | Bik    | MMT00079618   | 1  |
| 19216 | 2322  | Bik    | Tuba4a        | 1  |
| 19216 | 4201  | Bik    | Tubb2c        | 1  |
| 19216 | 5587  | Bik    | Rmnd5b        | 1  |
| 19216 | 7659  | Bik    | Rab30         | -1 |
| 19216 | 7944  | Bik    | A1132487      | -1 |
| 19216 | 9763  | Bik    | Tuba3b        | 1  |
| 19216 | 10384 | Bik    | Chic2         | -1 |
| 19216 | 11724 | Bik    | Tuba3a        | 1  |
| 19216 | 12315 | Bik    | Srebf1        | 1  |
| 19216 | 13471 | Bik    | Cln8          | -1 |
| 19216 | 17656 | Bik    | Hdhd3         | 1  |
| 19216 | 18785 | Bik    | Angptl4       | -1 |
| 19216 | 21288 | Bik    | Tcp11i2       | -1 |
| 19216 | 22443 | Bik    | Tuba1c        | 1  |
| 19226 | 12910 | Nras   | 1110028A07Rik | 1  |
| 19234 | 402   | Nrg4   | Timp3         | 1  |
| 19234 | 433   | Nrg4   | Pla2g12b      | -1 |
| 19234 | 437   | Nrg4   | Ndrgr1        | -1 |
| 19234 | 719   | Nrg4   | Usp2          | 1  |
| 19234 | 1310  | Nrg4   | Cabc1         | -1 |
| 19234 | 1326  | Nrg4   | Tox           | 1  |
| 19234 | 1767  | Nrg4   | BC016495      | 1  |
| 19234 | 2384  | Nrg4   | Micalcl       | -1 |
| 19234 | 2399  | Nrg4   | MMT00060167   | -1 |
| 19234 | 2636  | Nrg4   | Tars          | -1 |
| 19234 | 2850  | Nrg4   | Slc16a6       | -1 |
| 19234 | 3214  | Nrg4   | Dnmt3b        | -1 |
| 19234 | 3502  | Nrg4   | Gde1          | 1  |
| 19234 | 4534  | Nrg4   | Ndel1         | 1  |
| 19234 | 4590  | Nrg4   | Arhgap21      | 1  |
| 19234 | 5183  | Nrg4   | St5           | -1 |
| 19234 | 5374  | Nrg4   | Chka          | -1 |
| 19234 | 5734  | Nrg4   | EG619653      | 1  |
| 19234 | 5892  | Nrg4   | MMT00038457   | 1  |
| 19234 | 5974  | Nrg4   | Arntl         | -1 |

|       |       |        |               |    |
|-------|-------|--------|---------------|----|
| 19234 | 6370  | Nrg4   | Aqp8          | -1 |
| 19234 | 6386  | Nrg4   | Por           | 1  |
| 19234 | 6394  | Nrg4   | Fbxo6         | -1 |
| 19234 | 7414  | Nrg4   | Clpx          | -1 |
| 19234 | 9309  | Nrg4   | MMT00035904   | 1  |
| 19234 | 9495  | Nrg4   | Srms          | -1 |
| 19234 | 9831  | Nrg4   | Nedd4l        | -1 |
| 19234 | 9910  | Nrg4   | EG666644      | 1  |
| 19234 | 10215 | Nrg4   | Nampt         | 1  |
| 19234 | 10486 | Nrg4   | 1300002K09Rik | -1 |
| 19234 | 10642 | Nrg4   | Ngef          | 1  |
| 19234 | 10775 | Nrg4   | Slc16a1       | -1 |
| 19234 | 11233 | Nrg4   | Tef           | 1  |
| 19234 | 11599 | Nrg4   | Coq10b        | 1  |
| 19234 | 11741 | Nrg4   | Slc30a10      | -1 |
| 19234 | 12193 | Nrg4   | Aco2          | 1  |
| 19234 | 12204 | Nrg4   | Ankmy2        | 1  |
| 19234 | 13078 | Nrg4   | Eps8l2        | -1 |
| 19234 | 13630 | Nrg4   | Cdkn1a        | -1 |
| 19234 | 14041 | Nrg4   | Cldn1         | -1 |
| 19234 | 15049 | Nrg4   | Rnf125        | -1 |
| 19234 | 15481 | Nrg4   | 1110067D22Rik | -1 |
| 19234 | 15709 | Nrg4   | Tceal1        | 1  |
| 19234 | 15824 | Nrg4   | D19Ert721e    | -1 |
| 19234 | 16690 | Nrg4   | Tjp3          | -1 |
| 19234 | 17247 | Nrg4   | A030007L17Rik | -1 |
| 19234 | 17338 | Nrg4   | Mocos         | -1 |
| 19234 | 17583 | Nrg4   | Per2          | 1  |
| 19234 | 17884 | Nrg4   | Lnx2          | -1 |
| 19234 | 18147 | Nrg4   | Nhlrc2        | 1  |
| 19234 | 18179 | Nrg4   | Dbp           | 1  |
| 19234 | 18438 | Nrg4   | Map3k7ip2     | -1 |
| 19234 | 18827 | Nrg4   | Oprs1         | -1 |
| 19234 | 19234 | Nrg4   | Nrg4          | 1  |
| 19234 | 19671 | Nrg4   | Upp2          | 1  |
| 19234 | 19701 | Nrg4   | 9930021J17Rik | -1 |
| 19234 | 21142 | Nrg4   | Gm129         | 1  |
| 19234 | 21811 | Nrg4   | Ak3l1         | 1  |
| 19234 | 21918 | Nrg4   | Snx24         | -1 |
| 19234 | 22340 | Nrg4   | Lnx2          | -1 |
| 19234 | 22476 | Nrg4   | Tspan4        | 1  |
| 19238 | 13431 | Ttc35  | MMT00038058   | -1 |
| 19242 | 3377  | Ran    | Cs            | 1  |
| 19242 | 3620  | Ran    | Bet1          | 1  |
| 19242 | 6193  | Ran    | Lactb2        | 1  |
| 19242 | 21214 | Ran    | Scd1          | 1  |
| 19242 | 21978 | Ran    | Txn1l         | 1  |
| 19242 | 23640 | Ran    | Bdh1          | -1 |
| 19244 | 20058 | Impdh2 | Dnaic1        | 1  |
| 19247 | 20967 | Prelp  | Fabp2         | 1  |
| 19262 | 269   | Cd274  | Tuba1b        | 1  |

|       |       |       |               |    |
|-------|-------|-------|---------------|----|
| 19262 | 354   | Cd274 | MMT00007996   | 1  |
| 19262 | 662   | Cd274 | Mid1ip1       | 1  |
| 19262 | 739   | Cd274 | Ric8b         | -1 |
| 19262 | 1941  | Cd274 | MMT00079618   | 1  |
| 19262 | 1967  | Cd274 | Brwd1         | -1 |
| 19262 | 2550  | Cd274 | MMT00036681   | 1  |
| 19262 | 2681  | Cd274 | Hectd1        | -1 |
| 19262 | 3222  | Cd274 | Zbtb10        | -1 |
| 19262 | 3309  | Cd274 | Grpel2        | -1 |
| 19262 | 3449  | Cd274 | Hes6          | 1  |
| 19262 | 3584  | Cd274 | Foxp1         | -1 |
| 19262 | 3686  | Cd274 | Psmc9         | -1 |
| 19262 | 5044  | Cd274 | Ifi35         | 1  |
| 19262 | 5296  | Cd274 | Rnf181        | 1  |
| 19262 | 6216  | Cd274 | Gm944         | -1 |
| 19262 | 6966  | Cd274 | Mia3          | -1 |
| 19262 | 7151  | Cd274 | MMT00007982   | 1  |
| 19262 | 7659  | Cd274 | Rab30         | -1 |
| 19262 | 8439  | Cd274 | Slc25a33      | -1 |
| 19262 | 8896  | Cd274 | Fasn          | 1  |
| 19262 | 9052  | Cd274 | A730037C10Rik | -1 |
| 19262 | 9635  | Cd274 | Rabggtb       | -1 |
| 19262 | 9763  | Cd274 | Tuba3b        | 1  |
| 19262 | 10612 | Cd274 | Slc24a6       | -1 |
| 19262 | 10772 | Cd274 | Aacs          | 1  |
| 19262 | 11149 | Cd274 | MMT00050488   | 1  |
| 19262 | 11376 | Cd274 | Slc7a11       | 1  |
| 19262 | 11462 | Cd274 | Gpam          | 1  |
| 19262 | 11724 | Cd274 | Tuba3a        | 1  |
| 19262 | 12315 | Cd274 | Srebf1        | 1  |
| 19262 | 12499 | Cd274 | Avpi1         | 1  |
| 19262 | 12813 | Cd274 | MMT00041243   | -1 |
| 19262 | 12981 | Cd274 | Nek6          | 1  |
| 19262 | 13018 | Cd274 | AW544981      | 1  |
| 19262 | 13304 | Cd274 | Gadd45b       | -1 |
| 19262 | 13514 | Cd274 | Apol9b        | 1  |
| 19262 | 13889 | Cd274 | Agpat2        | 1  |
| 19262 | 15252 | Cd274 | MMT00019402   | 1  |
| 19262 | 15862 | Cd274 | Mrap          | 1  |
| 19262 | 15892 | Cd274 | Slc22a5       | -1 |
| 19262 | 16182 | Cd274 | Oasl1         | 1  |
| 19262 | 16187 | Cd274 | 6530403A03Rik | -1 |
| 19262 | 16888 | Cd274 | H6pd          | -1 |
| 19262 | 17408 | Cd274 | lqwd1         | -1 |
| 19262 | 17444 | Cd274 | Tuba1a        | 1  |
| 19262 | 17656 | Cd274 | Hdhd3         | 1  |
| 19262 | 17660 | Cd274 | Nlrp12        | -1 |
| 19262 | 17862 | Cd274 | Fbxo21        | -1 |
| 19262 | 18050 | Cd274 | MMT00003408   | 1  |
| 19262 | 18148 | Cd274 | Cables1       | -1 |
| 19262 | 18495 | Cd274 | C2cd3         | -1 |

|       |       |          |               |    |
|-------|-------|----------|---------------|----|
| 19262 | 18686 | Cd274    | Zfp143        | 1  |
| 19262 | 18785 | Cd274    | Angptl4       | -1 |
| 19262 | 20567 | Cd274    | Ggt6          | 1  |
| 19262 | 20613 | Cd274    | 4930431B09Rik | -1 |
| 19262 | 21202 | Cd274    | Acly          | 1  |
| 19262 | 21666 | Cd274    | Ncor1         | -1 |
| 19262 | 22076 | Cd274    | Pgm2l1        | -1 |
| 19262 | 22321 | Cd274    | Apol7a        | 1  |
| 19262 | 22443 | Cd274    | Tuba1c        | 1  |
| 19262 | 23130 | Cd274    | Hps4          | -1 |
| 19276 | 19276 | H28      | H28           | 1  |
| 19282 | 269   | Tbx3     | Tuba1b        | -1 |
| 19282 | 865   | Tbx3     | Npc1          | 1  |
| 19282 | 1650  | Tbx3     | Ctdsp2        | 1  |
| 19282 | 1941  | Tbx3     | MMT00079618   | -1 |
| 19282 | 2013  | Tbx3     | Il15ra        | 1  |
| 19282 | 2051  | Tbx3     | Ddx27         | 1  |
| 19282 | 2322  | Tbx3     | Tuba4a        | -1 |
| 19282 | 7151  | Tbx3     | MMT00007982   | -1 |
| 19282 | 8439  | Tbx3     | Slc25a33      | 1  |
| 19282 | 9763  | Tbx3     | Tuba3b        | -1 |
| 19282 | 10612 | Tbx3     | Slc24a6       | 1  |
| 19282 | 10911 | Tbx3     | Mcl1          | 1  |
| 19282 | 11724 | Tbx3     | Tuba3a        | -1 |
| 19282 | 12460 | Tbx3     | Pnpla2        | 1  |
| 19282 | 16888 | Tbx3     | H6pd          | 1  |
| 19282 | 17444 | Tbx3     | Tuba1a        | -1 |
| 19282 | 17862 | Tbx3     | Fbxo21        | 1  |
| 19282 | 17878 | Tbx3     | Brap          | 1  |
| 19282 | 21251 | Tbx3     | Cpt1a         | 1  |
| 19282 | 22443 | Tbx3     | Tuba1c        | -1 |
| 19282 | 23130 | Tbx3     | Hps4          | 1  |
| 19298 | 5364  | Unc93b1  | Kif22         | 1  |
| 19298 | 8428  | Unc93b1  | Sorbs3        | -1 |
| 19298 | 11382 | Unc93b1  | Cdca3         | 1  |
| 19298 | 14472 | Unc93b1  | Ahcy          | -1 |
| 19298 | 15320 | Unc93b1  | MMT00017479   | -1 |
| 19298 | 19917 | Unc93b1  | Nek2          | 1  |
| 19298 | 20967 | Unc93b1  | Fabp2         | 1  |
| 19317 | 16510 | EG626952 | Tspsyl4       | 1  |
| 19318 | 1416  | Plk1     | 6720460F02Rik | 1  |
| 19318 | 5364  | Plk1     | Kif22         | 1  |
| 19318 | 8416  | Plk1     | Cdc20         | 1  |
| 19318 | 11382 | Plk1     | Cdca3         | 1  |
| 19318 | 17823 | Plk1     | D2Ertd750e    | 1  |
| 19318 | 18299 | Plk1     | MMT00035424   | 1  |
| 19318 | 19318 | Plk1     | Plk1          | 1  |
| 19318 | 20433 | Plk1     | Cdca5         | 1  |
| 19318 | 21692 | Plk1     | MMT00013924   | 1  |
| 19318 | 21947 | Plk1     | Cdca8         | 1  |
| 19332 | 16361 | Bpnt1    | Olf703        | -1 |

|       |       |         |               |    |
|-------|-------|---------|---------------|----|
| 19350 | 5364  | Siglec5 | Kif22         | 1  |
| 19356 | 16251 | Herc1   | G6pc          | -1 |
| 19356 | 18903 | Herc1   | Crem          | -1 |
| 19360 | 21575 | Aco1    | Cyp2c55       | 1  |
| 19360 | 21727 | Aco1    | Khk           | 1  |
| 19362 | 3170  | Gper    | Mcart1        | -1 |
| 19362 | 3587  | Gper    | MMT00041940   | -1 |
| 19362 | 6021  | Gper    | MMT00008784   | -1 |
| 19362 | 6171  | Gper    | Abtb2         | -1 |
| 19362 | 7315  | Gper    | EG624219      | 1  |
| 19362 | 8464  | Gper    | Snapin        | 1  |
| 19362 | 8632  | Gper    | Igfbp1        | -1 |
| 19362 | 8670  | Gper    | MMT00051613   | -1 |
| 19362 | 9067  | Gper    | Tra2a         | -1 |
| 19362 | 9899  | Gper    | D13Wsu177e    | -1 |
| 19362 | 11043 | Gper    | Hsph1         | -1 |
| 19362 | 11201 | Gper    | Sunc1         | 1  |
| 19362 | 11214 | Gper    | MMT00049207   | -1 |
| 19362 | 13304 | Gper    | Gadd45b       | -1 |
| 19362 | 14135 | Gper    | Eepd1         | 1  |
| 19362 | 15476 | Gper    | Fem1b         | 1  |
| 19362 | 15675 | Gper    | MMT00077535   | -1 |
| 19362 | 15826 | Gper    | Arl4d         | -1 |
| 19362 | 16251 | Gper    | G6pc          | -1 |
| 19362 | 18373 | Gper    | Dnajb1        | -1 |
| 19362 | 20194 | Gper    | Pnlcd1        | 1  |
| 19362 | 20535 | Gper    | Rbm4          | -1 |
| 19362 | 21160 | Gper    | Irs2          | -1 |
| 19362 | 22216 | Gper    | Sp5           | 1  |
| 19382 | 185   | Slc2a6  | Ap2b1         | 1  |
| 19382 | 5364  | Slc2a6  | Kif22         | 1  |
| 19382 | 6213  | Slc2a6  | Ccl2          | 1  |
| 19382 | 11393 | Slc2a6  | A830007P12Rik | 1  |
| 19389 | 12910 | Iqcb1   | 1110028A07Rik | -1 |
| 19389 | 18042 | Iqcb1   | Aph1c         | 1  |
| 19389 | 20079 | Iqcb1   | MMT00019254   | 1  |
| 19389 | 20967 | Iqcb1   | Fabp2         | -1 |
| 19389 | 23026 | Iqcb1   | Apom          | 1  |
| 19391 | 184   | Apex2   | Sorbs1        | -1 |
| 19391 | 577   | Apex2   | Rrp12         | 1  |
| 19391 | 6353  | Apex2   | Spata13       | -1 |
| 19391 | 6599  | Apex2   | 1700020C11Rik | 1  |
| 19391 | 7659  | Apex2   | Rab30         | -1 |
| 19391 | 7795  | Apex2   | MMT00071427   | -1 |
| 19391 | 10612 | Apex2   | Slc24a6       | -1 |
| 19391 | 11095 | Apex2   | Bag3          | 1  |
| 19391 | 11724 | Apex2   | Tuba3a        | 1  |
| 19391 | 13390 | Apex2   | Ddx31         | 1  |
| 19391 | 14935 | Apex2   | Ppfia1        | 1  |
| 19391 | 15760 | Apex2   | Trib3         | -1 |
| 19391 | 21288 | Apex2   | Tcp11l2       | -1 |

|       |       |               |               |    |
|-------|-------|---------------|---------------|----|
| 19391 | 21604 | Apex2         | Klh24         | -1 |
| 19391 | 22203 | Apex2         | Txndc11       | 1  |
| 19391 | 22217 | Apex2         | Flvcr2        | -1 |
| 19392 | 1041  | Slc25a16      | 3110049J23Rik | -1 |
| 19392 | 5965  | Slc25a16      | Pbld          | -1 |
| 19392 | 13688 | Slc25a16      | Ppa1          | -1 |
| 19392 | 15971 | Slc25a16      | Aifm2         | -1 |
| 19392 | 19392 | Slc25a16      | Slc25a16      | 1  |
| 19392 | 22146 | Slc25a16      | Aifm2         | -1 |
| 19394 | 20058 | Decr1         | Dnaic1        | -1 |
| 19410 | 22406 | Glb1          | Vnn1          | 1  |
| 19414 | 8815  | MMT00065577   | Mx1           | 1  |
| 19414 | 21214 | MMT00065577   | Scd1          | 1  |
| 19421 | 19421 | Mbd2          | Mbd2          | 1  |
| 19421 | 20958 | Mbd2          | 4933403F05Rik | 1  |
| 19422 | 3587  | Fkbp1b        | MMT00041940   | -1 |
| 19422 | 5364  | Fkbp1b        | Kif22         | 1  |
| 19422 | 7963  | Fkbp1b        | Rxrg          | 1  |
| 19422 | 11382 | Fkbp1b        | Cdca3         | 1  |
| 19422 | 15675 | Fkbp1b        | MMT00077535   | -1 |
| 19422 | 16753 | Fkbp1b        | Hfe2          | 1  |
| 19422 | 20076 | Fkbp1b        | Dbnl          | 1  |
| 19440 | 3753  | Anxa9         | Setdb1        | 1  |
| 19443 | 5100  | Prkab1        | Pebp1         | 1  |
| 19443 | 8807  | Prkab1        | Ankrd56       | 1  |
| 19443 | 15908 | Prkab1        | Pebp1         | 1  |
| 19443 | 17807 | Prkab1        | Pebp1         | 1  |
| 19447 | 12097 | MMT00004670   | 9430015G10Rik | -1 |
| 19451 | 4286  | Armc7         | Ptp4a1        | -1 |
| 19451 | 5574  | Armc7         | Hsd3b7        | 1  |
| 19451 | 5849  | Armc7         | 2310031A18Rik | 1  |
| 19451 | 6386  | Armc7         | Por           | -1 |
| 19451 | 15631 | Armc7         | Lpin1         | -1 |
| 19451 | 16580 | Armc7         | Tnfaip2       | 1  |
| 19451 | 19671 | Armc7         | Upp2          | -1 |
| 19462 | 1985  | 4933439C20Rik | Pepd          | 1  |
| 19462 | 2388  | 4933439C20Rik | Dot1l         | -1 |
| 19462 | 2599  | 4933439C20Rik | Lsm14a        | -1 |
| 19462 | 2912  | 4933439C20Rik | Wtip          | 1  |
| 19462 | 4697  | 4933439C20Rik | Cyp2a12       | 1  |
| 19462 | 5352  | 4933439C20Rik | Pdcd2l        | -1 |
| 19462 | 6371  | 4933439C20Rik | Dedd2         | -1 |
| 19462 | 6396  | 4933439C20Rik | Zfp105        | 1  |
| 19462 | 6513  | 4933439C20Rik | Qpctl         | -1 |
| 19462 | 6519  | 4933439C20Rik | Phldb3        | -1 |
| 19462 | 7761  | 4933439C20Rik | Nudt19        | -1 |
| 19462 | 8521  | 4933439C20Rik | Ceacam1       | 1  |
| 19462 | 9122  | 4933439C20Rik | Sepw1         | -1 |
| 19462 | 9322  | 4933439C20Rik | Relt          | 1  |
| 19462 | 9359  | 4933439C20Rik | Dhx34         | 1  |
| 19462 | 10545 | 4933439C20Rik | Tmem147       | -1 |



|       |       |               |               |    |
|-------|-------|---------------|---------------|----|
| 19462 | 11321 | 4933439C20Rik | 2310014L17Rik | 1  |
| 19462 | 11465 | 4933439C20Rik | Eif3k         | -1 |
| 19462 | 11888 | 4933439C20Rik | Myadm         | 1  |
| 19462 | 16639 | 4933439C20Rik | MMT00078937   | 1  |
| 19462 | 17314 | 4933439C20Rik | Napa          | 1  |
| 19462 | 18053 | 4933439C20Rik | Psmc4         | -1 |
| 19462 | 19462 | 4933439C20Rik | 4933439C20Rik | 1  |
| 19462 | 20606 | 4933439C20Rik | MMT00042166   | 1  |
| 19462 | 23247 | 4933439C20Rik | Ercc1         | 1  |
| 19462 | 23557 | 4933439C20Rik | Ppp1r12c      | 1  |
| 19462 | 23595 | 4933439C20Rik | Gm550         | -1 |
| 19465 | 3754  | Hacl1         | Dock6         | -1 |
| 19465 | 9842  | Hacl1         | Qdpr          | -1 |
| 19465 | 11462 | Hacl1         | Gpam          | -1 |
| 19465 | 14151 | Hacl1         | Slc44a1       | -1 |
| 19465 | 21202 | Hacl1         | Acly          | -1 |
| 19465 | 22137 | Hacl1         | Nudt7         | -1 |
| 19465 | 22406 | Hacl1         | Vnn1          | 1  |
| 19487 | 23180 | Adh5          | Sult1d1       | 1  |
| 19502 | 9077  | Fbxo24        | Cnpy4         | -1 |
| 19502 | 13780 | Fbxo24        | Pilra         | -1 |
| 19502 | 15219 | Fbxo24        | 0910001L09Rik | -1 |
| 19502 | 16451 | Fbxo24        | 2010007H12Rik | 1  |
| 19502 | 17089 | Fbxo24        | Pilrb1        | -1 |
| 19502 | 18881 | Fbxo24        | Cops6         | 1  |
| 19502 | 19502 | Fbxo24        | Fbxo24        | 1  |
| 19519 | 9230  | BC011248      | 1700027N10Rik | 1  |
| 19519 | 18574 | BC011248      | Parc          | -1 |
| 19519 | 18772 | BC011248      | BC048355      | 1  |
| 19520 | 6193  | Uck2          | Lactb2        | 1  |
| 19520 | 8597  | Uck2          | Papss1        | 1  |
| 19520 | 14323 | Uck2          | Scarb1        | -1 |
| 19520 | 17617 | Uck2          | Atp5sl        | -1 |
| 19528 | 4404  | Zfp503        | Comm5         | 1  |
| 19528 | 8563  | Zfp503        | Leng1         | 1  |
| 19528 | 16251 | Zfp503        | G6pc          | -1 |
| 19553 | 1561  | Chtf18        | Aurka         | 1  |
| 19553 | 21947 | Chtf18        | Cdca8         | 1  |
| 19556 | 269   | Efna1         | Tuba1b        | 1  |
| 19556 | 337   | Efna1         | Rasgef1b      | -1 |
| 19556 | 563   | Efna1         | D4Bwg0951e    | -1 |
| 19556 | 662   | Efna1         | Mid1ip1       | 1  |
| 19556 | 1941  | Efna1         | MMT00079618   | 1  |
| 19556 | 2322  | Efna1         | Tuba4a        | 1  |
| 19556 | 3686  | Efna1         | Psmc9         | -1 |
| 19556 | 6564  | Efna1         | Cebpd         | -1 |
| 19556 | 7151  | Efna1         | MMT00007982   | 1  |
| 19556 | 7315  | Efna1         | EG624219      | 1  |
| 19556 | 8342  | Efna1         | Cwf19l1       | 1  |
| 19556 | 8439  | Efna1         | Slc25a33      | -1 |
| 19556 | 8816  | Efna1         | Nfkbia        | -1 |

|       |       |             |               |    |
|-------|-------|-------------|---------------|----|
| 19556 | 9763  | Efna1       | Tuba3b        | 1  |
| 19556 | 11093 | Efna1       | Zdhhc1        | -1 |
| 19556 | 11129 | Efna1       | Ankhd1        | -1 |
| 19556 | 11724 | Efna1       | Tuba3a        | 1  |
| 19556 | 11808 | Efna1       | Pck1          | -1 |
| 19556 | 13018 | Efna1       | AW544981      | 1  |
| 19556 | 13471 | Efna1       | Cln8          | -1 |
| 19556 | 17444 | Efna1       | Tuba1a        | 1  |
| 19556 | 17525 | Efna1       | Ctgf          | -1 |
| 19556 | 18785 | Efna1       | Angptl4       | -1 |
| 19556 | 22443 | Efna1       | Tuba1c        | 1  |
| 19560 | 4833  | Trmt6       | Synpo2        | 1  |
| 19560 | 6231  | Trmt6       | 9030622O22Rik | -1 |
| 19560 | 19560 | Trmt6       | Trmt6         | 1  |
| 19573 | 437   | Serpine1    | Ndrp1         | -1 |
| 19573 | 719   | Serpine1    | Usp2          | 1  |
| 19573 | 2823  | Serpine1    | Sipa1l2       | 1  |
| 19573 | 3452  | Serpine1    | Ccrn4l        | 1  |
| 19573 | 4392  | Serpine1    | 1810055G02Rik | 1  |
| 19573 | 5048  | Serpine1    | Mgl1          | 1  |
| 19573 | 5183  | Serpine1    | St5           | -1 |
| 19573 | 5569  | Serpine1    | Pdgfc         | -1 |
| 19573 | 5729  | Serpine1    | 2310016C08Rik | -1 |
| 19573 | 5804  | Serpine1    | Thrsp         | 1  |
| 19573 | 5974  | Serpine1    | Arntl         | -1 |
| 19573 | 6343  | Serpine1    | Slc20a1       | 1  |
| 19573 | 9481  | Serpine1    | Ppl           | 1  |
| 19573 | 10408 | Serpine1    | Per1          | 1  |
| 19573 | 12905 | Serpine1    | Nfil3         | -1 |
| 19573 | 14041 | Serpine1    | Cldn1         | -1 |
| 19573 | 14050 | Serpine1    | Il12rb1       | 1  |
| 19573 | 14279 | Serpine1    | 3930402G23Rik | -1 |
| 19573 | 15049 | Serpine1    | Rnf125        | -1 |
| 19573 | 15522 | Serpine1    | 1810011O10Rik | 1  |
| 19573 | 16176 | Serpine1    | St3gal5       | 1  |
| 19573 | 16580 | Serpine1    | Tnfaip2       | -1 |
| 19573 | 16712 | Serpine1    | Pnrc1         | -1 |
| 19573 | 17583 | Serpine1    | Per2          | 1  |
| 19573 | 17852 | Serpine1    | Cpeb2         | -1 |
| 19573 | 18179 | Serpine1    | Dbp           | 1  |
| 19573 | 18438 | Serpine1    | Map3k7ip2     | -1 |
| 19573 | 21142 | Serpine1    | Gm129         | 1  |
| 19573 | 23437 | Serpine1    | Efhd2         | 1  |
| 19578 | 12380 | Aox1        | Rftn2         | -1 |
| 19578 | 12636 | Aox1        | MMT00000549   | 1  |
| 19578 | 14029 | Aox1        | 2810022L02Rik | 1  |
| 19578 | 19578 | Aox1        | Aox1          | 1  |
| 19578 | 22333 | Aox1        | Hnrnp3        | -1 |
| 19590 | 21214 | MMT00026015 | Scd1          | 1  |
| 19619 | 5468  | Zfp438      | MMT00053630   | 1  |
| 19620 | 607   | Zfand2a     | Me1           | 1  |

|       |       |               |                    |    |
|-------|-------|---------------|--------------------|----|
| 19620 | 874   | Zfand2a       | Aldh1a7            | 1  |
| 19620 | 6044  | Zfand2a       | Sucnr1             | 1  |
| 19620 | 8217  | Zfand2a       | Bhmt               | 1  |
| 19620 | 10132 | Zfand2a       | Ces2               | 1  |
| 19620 | 10554 | Zfand2a       | ENSMUSG00000074179 | 1  |
| 19620 | 11462 | Zfand2a       | Gpam               | 1  |
| 19620 | 12219 | Zfand2a       | Cyb5b              | 1  |
| 19620 | 12637 | Zfand2a       | Itпка              | -1 |
| 19620 | 14147 | Zfand2a       | Acss2              | 1  |
| 19620 | 18201 | Zfand2a       | MMT00060232        | 1  |
| 19620 | 19010 | Zfand2a       | Bhmt               | 1  |
| 19620 | 20019 | Zfand2a       | Qdpr               | 1  |
| 19620 | 21202 | Zfand2a       | Acly               | 1  |
| 19620 | 22732 | Zfand2a       | Cyb5b              | 1  |
| 19621 | 719   | Cldn5         | Usp2               | -1 |
| 19621 | 2447  | Cldn5         | Ubac1              | -1 |
| 19621 | 4235  | Cldn5         | Pfkfb3             | -1 |
| 19621 | 5804  | Cldn5         | Thrsp              | -1 |
| 19621 | 5974  | Cldn5         | Arntl              | 1  |
| 19621 | 12565 | Cldn5         | Grem2              | -1 |
| 19621 | 21142 | Cldn5         | Gm129              | -1 |
| 19621 | 23437 | Cldn5         | Efhd2              | -1 |
| 19633 | 3616  | Gm694         | Dnajc16            | 1  |
| 19633 | 8610  | Gm694         | Padi4              | 1  |
| 19655 | 18042 | 3110040N11Rik | Aph1c              | -1 |
| 19661 | 5804  | Epb4.1l2      | Thrsp              | 1  |
| 19661 | 20058 | Epb4.1l2      | Dnaic1             | -1 |
| 19661 | 21727 | Epb4.1l2      | Khk                | 1  |
| 19670 | 563   | Fbxl14        | D4Bwg0951e         | -1 |
| 19670 | 662   | Fbxl14        | Mid1ip1            | 1  |
| 19670 | 7659  | Fbxl14        | Rab30              | -1 |
| 19670 | 7944  | Fbxl14        | A1132487           | -1 |
| 19670 | 17660 | Fbxl14        | Nlrp12             | -1 |
| 19670 | 18785 | Fbxl14        | Angptl4            | -1 |
| 19670 | 23201 | Fbxl14        | S1pr1              | 1  |
| 19675 | 874   | Rer1          | Aldh1a7            | 1  |
| 19675 | 4351  | Rer1          | Plxnb1             | -1 |
| 19675 | 4674  | Rer1          | Cxcl12             | -1 |
| 19675 | 8444  | Rer1          | Rdh16              | 1  |
| 19675 | 18201 | Rer1          | MMT00060232        | 1  |
| 19675 | 20068 | Rer1          | 2610204M08Rik      | -1 |
| 19675 | 21214 | Rer1          | Scd1               | 1  |
| 19688 | 5364  | Fap           | Kif22              | 1  |
| 19688 | 6030  | Fap           | As3mt              | -1 |
| 19688 | 17823 | Fap           | D2Ertd750e         | 1  |
| 19688 | 19917 | Fap           | Nek2               | 1  |
| 19698 | 5934  | Sema3c        | S100a10            | 1  |
| 19698 | 8444  | Sema3c        | Rdh16              | 1  |
| 19698 | 8815  | Sema3c        | Mx1                | 1  |
| 19698 | 12910 | Sema3c        | 1110028A07Rik      | 1  |
| 19698 | 14017 | Sema3c        | Ces5               | 1  |

|       |       |               |               |    |
|-------|-------|---------------|---------------|----|
| 19698 | 20058 | Sema3c        | Dnaic1        | -1 |
| 19698 | 23026 | Sema3c        | Apom          | -1 |
| 19701 | 2721  | 9930021J17Rik | Inmt          | 1  |
| 19701 | 3449  | 9930021J17Rik | Hes6          | 1  |
| 19701 | 5804  | 9930021J17Rik | Thrsp         | 1  |
| 19701 | 5849  | 9930021J17Rik | 2310031A18Rik | -1 |
| 19701 | 6816  | 9930021J17Rik | Slc46a3       | 1  |
| 19701 | 7492  | 9930021J17Rik | Adfp          | -1 |
| 19701 | 9831  | 9930021J17Rik | Nedd4l        | -1 |
| 19701 | 12114 | 9930021J17Rik | Homer2        | 1  |
| 19701 | 12315 | 9930021J17Rik | Srebf1        | 1  |
| 19701 | 18069 | 9930021J17Rik | Gpt           | 1  |
| 19708 | 143   | Ly6a          | Gvin1         | 1  |
| 19708 | 1533  | Ly6a          | BC013712      | 1  |
| 19708 | 2200  | Ly6a          | BC006779      | 1  |
| 19708 | 2224  | Ly6a          | Oasl2         | 1  |
| 19708 | 2830  | Ly6a          | 4632417K18Rik | 1  |
| 19708 | 3659  | Ly6a          | EG236451      | 1  |
| 19708 | 3683  | Ly6a          | Oas2          | 1  |
| 19708 | 4426  | Ly6a          | Iigp2         | 1  |
| 19708 | 4508  | Ly6a          | Ifit1         | 1  |
| 19708 | 5250  | Ly6a          | Ifit2         | 1  |
| 19708 | 5853  | Ly6a          | Trim30        | 1  |
| 19708 | 5949  | Ly6a          | Zbp1          | 1  |
| 19708 | 6213  | Ly6a          | Ccl2          | 1  |
| 19708 | 6595  | Ly6a          | Oas1a         | 1  |
| 19708 | 6910  | Ly6a          | Ly6c2         | 1  |
| 19708 | 7105  | Ly6a          | Plac8         | 1  |
| 19708 | 7284  | Ly6a          | MMT00008674   | 1  |
| 19708 | 7316  | Ly6a          | Ifi204        | 1  |
| 19708 | 8800  | Ly6a          | Rnf213        | 1  |
| 19708 | 9100  | Ly6a          | Ms4a6c        | 1  |
| 19708 | 9401  | Ly6a          | Fcgr4         | 1  |
| 19708 | 9820  | Ly6a          | BC023105      | 1  |
| 19708 | 9847  | Ly6a          | Ifi27         | 1  |
| 19708 | 10109 | Ly6a          | Gbp3          | 1  |
| 19708 | 10504 | Ly6a          | Ripk3         | 1  |
| 19708 | 11009 | Ly6a          | MMT00008885   | 1  |
| 19708 | 11265 | Ly6a          | Irgm          | 1  |
| 19708 | 12312 | Ly6a          | Ms4a6d        | 1  |
| 19708 | 12398 | Ly6a          | Ifi44         | 1  |
| 19708 | 12600 | Ly6a          | Ifi204        | 1  |
| 19708 | 12969 | Ly6a          | Xaf1          | 1  |
| 19708 | 13156 | Ly6a          | Ifit3         | 1  |
| 19708 | 13181 | Ly6a          | Lcp2          | 1  |
| 19708 | 13309 | Ly6a          | Tgtp          | 1  |
| 19708 | 13527 | Ly6a          | Ctss          | 1  |
| 19708 | 13654 | Ly6a          | Stat1         | 1  |
| 19708 | 14258 | Ly6a          | Ifi47         | 1  |
| 19708 | 14506 | Ly6a          | Slc15a3       | 1  |
| 19708 | 14880 | Ly6a          | Ms4a4c        | 1  |

|       |       |               |               |    |
|-------|-------|---------------|---------------|----|
| 19708 | 14883 | Ly6a          | Itgal         | 1  |
| 19708 | 15572 | Ly6a          | Dtx3l         | 1  |
| 19708 | 16102 | Ly6a          | Cd72          | 1  |
| 19708 | 16186 | Ly6a          | Cfp           | 1  |
| 19708 | 16199 | Ly6a          | Samhd1        | 1  |
| 19708 | 16521 | Ly6a          | Adar          | 1  |
| 19708 | 16572 | Ly6a          | D14Erttd668e  | 1  |
| 19708 | 16854 | Ly6a          | Kif15         | 1  |
| 19708 | 16874 | Ly6a          | Fcer1g        | 1  |
| 19708 | 16949 | Ly6a          | Ilgp1         | 1  |
| 19708 | 17197 | Ly6a          | Igtp          | 1  |
| 19708 | 17412 | Ly6a          | Aif1          | 1  |
| 19708 | 17638 | Ly6a          | Adssl1        | -1 |
| 19708 | 18174 | Ly6a          | Stat2         | 1  |
| 19708 | 18186 | Ly6a          | Parp14        | 1  |
| 19708 | 18289 | Ly6a          | Tap1          | 1  |
| 19708 | 19189 | Ly6a          | Sp100         | 1  |
| 19708 | 19708 | Ly6a          | Ly6a          | 1  |
| 19708 | 19738 | Ly6a          | Lgals3bp      | 1  |
| 19708 | 19794 | Ly6a          | Rgs2          | 1  |
| 19708 | 20321 | Ly6a          | Ms4a6b        | 1  |
| 19708 | 20432 | Ly6a          | Smc1b         | 1  |
| 19708 | 20791 | Ly6a          | MMT00014813   | 1  |
| 19708 | 20997 | Ly6a          | MMT00028135   | 1  |
| 19708 | 21440 | Ly6a          | Tmsb10        | 1  |
| 19708 | 21549 | Ly6a          | Rtp4          | 1  |
| 19708 | 21824 | Ly6a          | 5830443L24Rik | 1  |
| 19708 | 22037 | Ly6a          | Oas1g         | 1  |
| 19708 | 23208 | Ly6a          | Hck           | 1  |
| 19713 | 10189 | BC048599      | Cage1         | -1 |
| 19719 | 8547  | EG634650      | Gbp4          | 1  |
| 19719 | 19719 | EG634650      | EG634650      | 1  |
| 19719 | 21824 | EG634650      | 5830443L24Rik | 1  |
| 19725 | 19725 | Dcp2          | Dcp2          | 1  |
| 19728 | 1310  | 1110007L15Rik | Cabc1         | 1  |
| 19730 | 13431 | Mamdc2        | MMT00038058   | 1  |
| 19730 | 15205 | Mamdc2        | MMT00030262   | 1  |
| 19730 | 22978 | Mamdc2        | MMT00043176   | 1  |
| 19734 | 11129 | Dchs1         | Ankhd1        | -1 |
| 19738 | 143   | Lgals3bp      | Gvin1         | 1  |
| 19738 | 300   | Lgals3bp      | Kcnk13        | 1  |
| 19738 | 387   | Lgals3bp      | Rgs10         | 1  |
| 19738 | 405   | Lgals3bp      | Emr4          | 1  |
| 19738 | 701   | Lgals3bp      | Polr3g        | -1 |
| 19738 | 1180  | Lgals3bp      | Clec4a3       | 1  |
| 19738 | 1513  | Lgals3bp      | Gzmb          | 1  |
| 19738 | 1533  | Lgals3bp      | BC013712      | 1  |
| 19738 | 1612  | Lgals3bp      | Clec1b        | 1  |
| 19738 | 1840  | Lgals3bp      | Fpr1          | 1  |
| 19738 | 2058  | Lgals3bp      | Hk3           | 1  |
| 19738 | 2200  | Lgals3bp      | BC006779      | 1  |

|       |      |          |               |   |
|-------|------|----------|---------------|---|
| 19738 | 2224 | Lgals3bp | Oas2          | 1 |
| 19738 | 2550 | Lgals3bp | MMT00036681   | 1 |
| 19738 | 2578 | Lgals3bp | Csf2rb2       | 1 |
| 19738 | 2752 | Lgals3bp | Fcgr1         | 1 |
| 19738 | 3103 | Lgals3bp | MMT00062748   | 1 |
| 19738 | 3286 | Lgals3bp | Alox5ap       | 1 |
| 19738 | 3426 | Lgals3bp | Hap1          | 1 |
| 19738 | 3523 | Lgals3bp | Trim34        | 1 |
| 19738 | 3572 | Lgals3bp | Ebi3          | 1 |
| 19738 | 3594 | Lgals3bp | Rasa4         | 1 |
| 19738 | 3659 | Lgals3bp | EG236451      | 1 |
| 19738 | 3683 | Lgals3bp | Oas2          | 1 |
| 19738 | 3905 | Lgals3bp | H2-Q1         | 1 |
| 19738 | 4114 | Lgals3bp | Parp12        | 1 |
| 19738 | 4310 | Lgals3bp | B3gnt8        | 1 |
| 19738 | 4409 | Lgals3bp | 5430435G22Rik | 1 |
| 19738 | 4426 | Lgals3bp | ligp2         | 1 |
| 19738 | 4508 | Lgals3bp | Ifit1         | 1 |
| 19738 | 4516 | Lgals3bp | Rsad2         | 1 |
| 19738 | 4518 | Lgals3bp | Gpr65         | 1 |
| 19738 | 5002 | Lgals3bp | Ifi202b       | 1 |
| 19738 | 5044 | Lgals3bp | Ifi35         | 1 |
| 19738 | 5216 | Lgals3bp | Spnb5         | 1 |
| 19738 | 5250 | Lgals3bp | Ifit2         | 1 |
| 19738 | 5554 | Lgals3bp | Emr1          | 1 |
| 19738 | 5766 | Lgals3bp | 5033414D02Rik | 1 |
| 19738 | 5845 | Lgals3bp | Il18bp        | 1 |
| 19738 | 5853 | Lgals3bp | Trim30        | 1 |
| 19738 | 5875 | Lgals3bp | Cd86          | 1 |
| 19738 | 5949 | Lgals3bp | Zbp1          | 1 |
| 19738 | 5975 | Lgals3bp | Car13         | 1 |
| 19738 | 6072 | Lgals3bp | C1qc          | 1 |
| 19738 | 6098 | Lgals3bp | Ncf4          | 1 |
| 19738 | 6154 | Lgals3bp | 1700030G06Rik | 1 |
| 19738 | 6587 | Lgals3bp | Irf9          | 1 |
| 19738 | 6595 | Lgals3bp | Oas1a         | 1 |
| 19738 | 6734 | Lgals3bp | Ehd4          | 1 |
| 19738 | 6779 | Lgals3bp | Gbp6          | 1 |
| 19738 | 6824 | Lgals3bp | Irf7          | 1 |
| 19738 | 6910 | Lgals3bp | Ly6c2         | 1 |
| 19738 | 7057 | Lgals3bp | Stk10         | 1 |
| 19738 | 7069 | Lgals3bp | Ube1l         | 1 |
| 19738 | 7105 | Lgals3bp | Plac8         | 1 |
| 19738 | 7238 | Lgals3bp | Pycard        | 1 |
| 19738 | 7284 | Lgals3bp | MMT00008674   | 1 |
| 19738 | 7316 | Lgals3bp | Ifi204        | 1 |
| 19738 | 7336 | Lgals3bp | Cd5l          | 1 |
| 19738 | 8555 | Lgals3bp | H2-M3         | 1 |
| 19738 | 8564 | Lgals3bp | Pld4          | 1 |
| 19738 | 8659 | Lgals3bp | Psmb8         | 1 |
| 19738 | 8800 | Lgals3bp | Rnf213        | 1 |

|       |       |          |               |   |
|-------|-------|----------|---------------|---|
| 19738 | 8922  | Lgals3bp | Ii10ra        | 1 |
| 19738 | 8951  | Lgals3bp | Cd97          | 1 |
| 19738 | 8952  | Lgals3bp | Marco         | 1 |
| 19738 | 9100  | Lgals3bp | Ms4a6c        | 1 |
| 19738 | 9393  | Lgals3bp | Cd300a        | 1 |
| 19738 | 9401  | Lgals3bp | Fcgr4         | 1 |
| 19738 | 9616  | Lgals3bp | Al451557      | 1 |
| 19738 | 9717  | Lgals3bp | Psmb9         | 1 |
| 19738 | 9820  | Lgals3bp | BC023105      | 1 |
| 19738 | 9821  | Lgals3bp | Pmaip1        | 1 |
| 19738 | 9847  | Lgals3bp | Ifi27         | 1 |
| 19738 | 9920  | Lgals3bp | Syk           | 1 |
| 19738 | 9928  | Lgals3bp | Lgmh          | 1 |
| 19738 | 10109 | Lgals3bp | Gbp3          | 1 |
| 19738 | 10393 | Lgals3bp | Slc7a8        | 1 |
| 19738 | 10426 | Lgals3bp | Ly6f          | 1 |
| 19738 | 10442 | Lgals3bp | Pla2g4a       | 1 |
| 19738 | 10504 | Lgals3bp | Ripk3         | 1 |
| 19738 | 10606 | Lgals3bp | Apbb1ip       | 1 |
| 19738 | 10796 | Lgals3bp | Spic          | 1 |
| 19738 | 10926 | Lgals3bp | P2ry13        | 1 |
| 19738 | 11009 | Lgals3bp | MMT00008885   | 1 |
| 19738 | 11119 | Lgals3bp | Frmd4a        | 1 |
| 19738 | 11204 | Lgals3bp | Al451617      | 1 |
| 19738 | 11265 | Lgals3bp | Irgm          | 1 |
| 19738 | 11701 | Lgals3bp | Oas1c         | 1 |
| 19738 | 11836 | Lgals3bp | Csf1r         | 1 |
| 19738 | 11959 | Lgals3bp | 4631422O05Rik | 1 |
| 19738 | 12126 | Lgals3bp | Znfx1         | 1 |
| 19738 | 12312 | Lgals3bp | Ms4a6d        | 1 |
| 19738 | 12398 | Lgals3bp | Ifi44         | 1 |
| 19738 | 12469 | Lgals3bp | Dock10        | 1 |
| 19738 | 12495 | Lgals3bp | Casp1         | 1 |
| 19738 | 12600 | Lgals3bp | Ifi204        | 1 |
| 19738 | 12969 | Lgals3bp | Xaf1          | 1 |
| 19738 | 13156 | Lgals3bp | Ifit3         | 1 |
| 19738 | 13181 | Lgals3bp | Lcp2          | 1 |
| 19738 | 13309 | Lgals3bp | Tgtp          | 1 |
| 19738 | 13372 | Lgals3bp | Slc11a1       | 1 |
| 19738 | 13504 | Lgals3bp | Lair1         | 1 |
| 19738 | 13514 | Lgals3bp | Apol9b        | 1 |
| 19738 | 13522 | Lgals3bp | Sln5          | 1 |
| 19738 | 13527 | Lgals3bp | Ctss          | 1 |
| 19738 | 13528 | Lgals3bp | Capn12        | 1 |
| 19738 | 13585 | Lgals3bp | Nckap1l       | 1 |
| 19738 | 13654 | Lgals3bp | Stat1         | 1 |
| 19738 | 13656 | Lgals3bp | Ly86          | 1 |
| 19738 | 13749 | Lgals3bp | Parp9         | 1 |
| 19738 | 13780 | Lgals3bp | Pilra         | 1 |
| 19738 | 13826 | Lgals3bp | Melk          | 1 |
| 19738 | 13867 | Lgals3bp | Sgcb          | 1 |

|       |       |          |               |   |
|-------|-------|----------|---------------|---|
| 19738 | 13885 | Lgals3bp | Clec7a        | 1 |
| 19738 | 14029 | Lgals3bp | 2810022L02Rik | 1 |
| 19738 | 14117 | Lgals3bp | C1qb          | 1 |
| 19738 | 14192 | Lgals3bp | Trpv2         | 1 |
| 19738 | 14237 | Lgals3bp | Rac2          | 1 |
| 19738 | 14258 | Lgals3bp | Ifi47         | 1 |
| 19738 | 14453 | Lgals3bp | Inpp5d        | 1 |
| 19738 | 14475 | Lgals3bp | Abcg1         | 1 |
| 19738 | 14506 | Lgals3bp | Slc15a3       | 1 |
| 19738 | 14603 | Lgals3bp | Ly6e          | 1 |
| 19738 | 14611 | Lgals3bp | Ddx60         | 1 |
| 19738 | 14880 | Lgals3bp | Ms4a4c        | 1 |
| 19738 | 14883 | Lgals3bp | Itgal         | 1 |
| 19738 | 15074 | Lgals3bp | Usp18         | 1 |
| 19738 | 15159 | Lgals3bp | Timd4         | 1 |
| 19738 | 15387 | Lgals3bp | Mgl1          | 1 |
| 19738 | 15504 | Lgals3bp | Mx2           | 1 |
| 19738 | 15582 | Lgals3bp | Klrk1         | 1 |
| 19738 | 15677 | Lgals3bp | Slc9a9        | 1 |
| 19738 | 15749 | Lgals3bp | Cd22          | 1 |
| 19738 | 15825 | Lgals3bp | Fermt3        | 1 |
| 19738 | 16102 | Lgals3bp | Cd72          | 1 |
| 19738 | 16129 | Lgals3bp | Trafd1        | 1 |
| 19738 | 16147 | Lgals3bp | Tlr2          | 1 |
| 19738 | 16182 | Lgals3bp | Oasl1         | 1 |
| 19738 | 16186 | Lgals3bp | Cfp           | 1 |
| 19738 | 16199 | Lgals3bp | Samhd1        | 1 |
| 19738 | 16521 | Lgals3bp | Adar          | 1 |
| 19738 | 16572 | Lgals3bp | D14Ert668e    | 1 |
| 19738 | 16650 | Lgals3bp | Cd300a        | 1 |
| 19738 | 16827 | Lgals3bp | Arhgdib       | 1 |
| 19738 | 16874 | Lgals3bp | Fcer1g        | 1 |
| 19738 | 16913 | Lgals3bp | Pira3         | 1 |
| 19738 | 16988 | Lgals3bp | Clec4f        | 1 |
| 19738 | 17071 | Lgals3bp | Samd9l        | 1 |
| 19738 | 17197 | Lgals3bp | Igtp          | 1 |
| 19738 | 17312 | Lgals3bp | Sirpa         | 1 |
| 19738 | 17412 | Lgals3bp | Aif1          | 1 |
| 19738 | 17472 | Lgals3bp | Cd53          | 1 |
| 19738 | 17720 | Lgals3bp | Rap2b         | 1 |
| 19738 | 17806 | Lgals3bp | Gpsm3         | 1 |
| 19738 | 17904 | Lgals3bp | Cds1          | 1 |
| 19738 | 18064 | Lgals3bp | MMT00035925   | 1 |
| 19738 | 18174 | Lgals3bp | Stat2         | 1 |
| 19738 | 18186 | Lgals3bp | Parp14        | 1 |
| 19738 | 18211 | Lgals3bp | Folr2         | 1 |
| 19738 | 18235 | Lgals3bp | Epsti1        | 1 |
| 19738 | 18289 | Lgals3bp | Tap1          | 1 |
| 19738 | 18594 | Lgals3bp | 1200002N14Rik | 1 |
| 19738 | 18662 | Lgals3bp | Batf3         | 1 |
| 19738 | 18686 | Lgals3bp | Zfp143        | 1 |



|       |       |          |               |    |
|-------|-------|----------|---------------|----|
| 19738 | 18868 | Lgals3bp | Mpeg1         | 1  |
| 19738 | 19063 | Lgals3bp | Evl           | 1  |
| 19738 | 19153 | Lgals3bp | Ptgs1         | 1  |
| 19738 | 19189 | Lgals3bp | Sp100         | 1  |
| 19738 | 19252 | Lgals3bp | Tmsb4x        | 1  |
| 19738 | 19262 | Lgals3bp | Cd274         | 1  |
| 19738 | 19298 | Lgals3bp | Unc93b1       | 1  |
| 19738 | 19589 | Lgals3bp | Slc16a9       | 1  |
| 19738 | 19708 | Lgals3bp | Ly6a          | 1  |
| 19738 | 19738 | Lgals3bp | Lgals3bp      | 1  |
| 19738 | 19794 | Lgals3bp | Rgs2          | 1  |
| 19738 | 20150 | Lgals3bp | Ptprc         | 1  |
| 19738 | 20321 | Lgals3bp | Ms4a6b        | 1  |
| 19738 | 20335 | Lgals3bp | Srgn          | 1  |
| 19738 | 20431 | Lgals3bp | Slc7a7        | 1  |
| 19738 | 20474 | Lgals3bp | Gnb3          | 1  |
| 19738 | 20791 | Lgals3bp | MMT00014813   | 1  |
| 19738 | 20997 | Lgals3bp | MMT00028135   | 1  |
| 19738 | 21223 | Lgals3bp | Pira1         | 1  |
| 19738 | 21351 | Lgals3bp | Shisa5        | 1  |
| 19738 | 21364 | Lgals3bp | Ppm1h         | 1  |
| 19738 | 21549 | Lgals3bp | Rtp4          | 1  |
| 19738 | 21685 | Lgals3bp | Gzma          | 1  |
| 19738 | 21824 | Lgals3bp | 5830443L24Rik | 1  |
| 19738 | 21837 | Lgals3bp | BC052328      | 1  |
| 19738 | 21988 | Lgals3bp | MMT00015654   | 1  |
| 19738 | 22037 | Lgals3bp | Oas1g         | 1  |
| 19738 | 22115 | Lgals3bp | Ccl5          | 1  |
| 19738 | 22327 | Lgals3bp | Tyrobp        | 1  |
| 19738 | 22496 | Lgals3bp | Sfn1          | 1  |
| 19738 | 22553 | Lgals3bp | Ms4a8a        | 1  |
| 19738 | 22647 | Lgals3bp | Pkib          | 1  |
| 19738 | 22670 | Lgals3bp | Clec4a1       | 1  |
| 19738 | 22712 | Lgals3bp | Phf11         | 1  |
| 19738 | 22876 | Lgals3bp | Sash3         | 1  |
| 19738 | 23084 | Lgals3bp | Vsig4         | 1  |
| 19738 | 23092 | Lgals3bp | Ifih1         | 1  |
| 19738 | 23208 | Lgals3bp | Hck           | 1  |
| 19738 | 23242 | Lgals3bp | Gngt2         | 1  |
| 19738 | 23410 | Lgals3bp | C1qa          | 1  |
| 19738 | 23450 | Lgals3bp | D12Ert647e    | 1  |
| 19748 | 8815  | Cpa2     | Mx1           | 1  |
| 19748 | 14017 | Cpa2     | Ces5          | 1  |
| 19748 | 18201 | Cpa2     | MMT00060232   | 1  |
| 19751 | 5449  | Kbtbd5   | Got1          | 1  |
| 19757 | 530   | Fkbp5    | Mest          | -1 |
| 19757 | 563   | Fkbp5    | D4Bwg0951e    | 1  |
| 19757 | 719   | Fkbp5    | Usp2          | 1  |
| 19757 | 961   | Fkbp5    | Rwdd4a        | 1  |
| 19757 | 1877  | Fkbp5    | Amica1        | 1  |
| 19757 | 2110  | Fkbp5    | Gtf2ird1      | -1 |

|       |       |       |               |    |
|-------|-------|-------|---------------|----|
| 19757 | 2294  | Fkbp5 | AU040829      | 1  |
| 19757 | 2529  | Fkbp5 | Hmcn2         | 1  |
| 19757 | 2794  | Fkbp5 | Map3k6        | 1  |
| 19757 | 3502  | Fkbp5 | Gde1          | 1  |
| 19757 | 4286  | Fkbp5 | Ptp4a1        | 1  |
| 19757 | 4379  | Fkbp5 | Glrx          | 1  |
| 19757 | 4392  | Fkbp5 | 1810055G02Rik | 1  |
| 19757 | 4708  | Fkbp5 | Traf3ip2      | -1 |
| 19757 | 5187  | Fkbp5 | Speer4f       | 1  |
| 19757 | 5791  | Fkbp5 | Baiap2l1      | 1  |
| 19757 | 5849  | Fkbp5 | 2310031A18Rik | -1 |
| 19757 | 6211  | Fkbp5 | Arhgap24      | -1 |
| 19757 | 6386  | Fkbp5 | Por           | 1  |
| 19757 | 6490  | Fkbp5 | Il1r1         | 1  |
| 19757 | 6756  | Fkbp5 | Sds           | 1  |
| 19757 | 6928  | Fkbp5 | Klhl8         | -1 |
| 19757 | 6990  | Fkbp5 | Nr1i2         | 1  |
| 19757 | 8399  | Fkbp5 | Herpud1       | 1  |
| 19757 | 9718  | Fkbp5 | Fmo5          | 1  |
| 19757 | 9910  | Fkbp5 | EG666644      | 1  |
| 19757 | 10273 | Fkbp5 | Gpt2          | 1  |
| 19757 | 11129 | Fkbp5 | Ankhd1        | 1  |
| 19757 | 11599 | Fkbp5 | Coq10b        | 1  |
| 19757 | 11807 | Fkbp5 | Fbxo31        | 1  |
| 19757 | 12761 | Fkbp5 | Tsc22d3       | 1  |
| 19757 | 12908 | Fkbp5 | Jdp2          | 1  |
| 19757 | 13289 | Fkbp5 | Dusp10        | -1 |
| 19757 | 14041 | Fkbp5 | Cldn1         | -1 |
| 19757 | 15273 | Fkbp5 | Relb          | -1 |
| 19757 | 15631 | Fkbp5 | Lpin1         | 1  |
| 19757 | 15824 | Fkbp5 | D19Ert721e    | -1 |
| 19757 | 16131 | Fkbp5 | Ptpre         | -1 |
| 19757 | 16176 | Fkbp5 | St3gal5       | 1  |
| 19757 | 16580 | Fkbp5 | Tnfaip2       | -1 |
| 19757 | 16647 | Fkbp5 | D16H22S680E   | 1  |
| 19757 | 16669 | Fkbp5 | Tjp2          | -1 |
| 19757 | 17622 | Fkbp5 | Foxo1         | 1  |
| 19757 | 18027 | Fkbp5 | 5730403B10Rik | 1  |
| 19757 | 18314 | Fkbp5 | 4631416L12Rik | 1  |
| 19757 | 19025 | Fkbp5 | Slc37a4       | 1  |
| 19757 | 19146 | Fkbp5 | N4bp2l1       | 1  |
| 19757 | 19234 | Fkbp5 | Nrg4          | 1  |
| 19757 | 19375 | Fkbp5 | Inhba         | -1 |
| 19757 | 19466 | Fkbp5 | Pptc7         | 1  |
| 19757 | 19671 | Fkbp5 | Upp2          | 1  |
| 19757 | 19723 | Fkbp5 | Pfkfb1        | 1  |
| 19757 | 19757 | Fkbp5 | Fkbp5         | 1  |
| 19757 | 21142 | Fkbp5 | Gm129         | 1  |
| 19757 | 21331 | Fkbp5 | Slc10a6       | 1  |
| 19757 | 22218 | Fkbp5 | Rfc3          | -1 |
| 19757 | 22681 | Fkbp5 | Gm88          | 1  |

|       |       |       |             |    |
|-------|-------|-------|-------------|----|
| 19757 | 22936 | Fkbp5 | Rhobtb1     | 1  |
| 19757 | 23183 | Fkbp5 | Nnmt        | 1  |
| 19763 | 2472  | Acp2  | MMT00014056 | 1  |
| 19763 | 7192  | Acp2  | Ttc21b      | 1  |
| 19763 | 9547  | Acp2  | MMT00006479 | 1  |
| 19763 | 14757 | Acp2  | Hdx         | 1  |
| 19763 | 16881 | Acp2  | MMT00031504 | 1  |
| 19763 | 17295 | Acp2  | MMT00082577 | 1  |
| 19763 | 19763 | Acp2  | Acp2        | 1  |
| 19763 | 19803 | Acp2  | BC003993    | 1  |
| 19763 | 22320 | Acp2  | MMT00047284 | 1  |
| 19763 | 23474 | Acp2  | MMT00011721 | 1  |
| 19763 | 23609 | Acp2  | Trim44      | 1  |
| 19767 | 19767 | Etv6  | Etv6        | 1  |
| 19767 | 20965 | Etv6  | Usp28       | -1 |
| 19794 | 3097  | Rgs2  | Ppp1r3g     | 1  |
| 19794 | 10384 | Rgs2  | Chic2       | 1  |
| 19797 | 14472 | Coq9  | Ahcy        | 1  |
| 19797 | 23180 | Coq9  | Sult1d1     | 1  |
| 19798 | 269   | Tnk2  | Tuba1b      | 1  |
| 19798 | 662   | Tnk2  | Mid1ip1     | 1  |
| 19798 | 1709  | Tnk2  | Mt2         | -1 |
| 19798 | 1941  | Tnk2  | MMT00079618 | 1  |
| 19798 | 2051  | Tnk2  | Ddx27       | -1 |
| 19798 | 2322  | Tnk2  | Tuba4a      | 1  |
| 19798 | 2619  | Tnk2  | Zfp622      | -1 |
| 19798 | 2794  | Tnk2  | Map3k6      | -1 |
| 19798 | 3332  | Tnk2  | Lrrc59      | 1  |
| 19798 | 3344  | Tnk2  | Rad1        | -1 |
| 19798 | 3686  | Tnk2  | Psmc9       | -1 |
| 19798 | 4897  | Tnk2  | Ciao1       | -1 |
| 19798 | 6048  | Tnk2  | Psmc9       | -1 |
| 19798 | 6490  | Tnk2  | Il1r1       | -1 |
| 19798 | 7151  | Tnk2  | MMT00007982 | 1  |
| 19798 | 7944  | Tnk2  | A1132487    | -1 |
| 19798 | 8234  | Tnk2  | Tbpl1       | -1 |
| 19798 | 8747  | Tnk2  | Nme6        | 1  |
| 19798 | 8896  | Tnk2  | Fasn        | 1  |
| 19798 | 9763  | Tnk2  | Tuba3b      | 1  |
| 19798 | 10745 | Tnk2  | Gale        | 1  |
| 19798 | 11129 | Tnk2  | Ankhd1      | -1 |
| 19798 | 11240 | Tnk2  | Ppm1d       | -1 |
| 19798 | 11462 | Tnk2  | Gpam        | 1  |
| 19798 | 11574 | Tnk2  | Gne         | -1 |
| 19798 | 11724 | Tnk2  | Tuba3a      | 1  |
| 19798 | 11807 | Tnk2  | Fbxo31      | -1 |
| 19798 | 12315 | Tnk2  | Srebf1      | 1  |
| 19798 | 12460 | Tnk2  | Pnpla2      | -1 |
| 19798 | 12553 | Tnk2  | Kpnb1       | 1  |
| 19798 | 13422 | Tnk2  | Usp3        | -1 |
| 19798 | 13568 | Tnk2  | Cad         | 1  |

|       |       |          |               |    |
|-------|-------|----------|---------------|----|
| 19798 | 13990 | Tnk2     | MMT00040357   | 1  |
| 19798 | 14099 | Tnk2     | Nfe2          | 1  |
| 19798 | 14135 | Tnk2     | Eepd1         | 1  |
| 19798 | 14176 | Tnk2     | 1500011H22Rik | -1 |
| 19798 | 14582 | Tnk2     | Mt1           | -1 |
| 19798 | 14626 | Tnk2     | Zbtb2         | -1 |
| 19798 | 14928 | Tnk2     | Eme2          | 1  |
| 19798 | 15154 | Tnk2     | Dhx29         | 1  |
| 19798 | 16187 | Tnk2     | 6530403A03Rik | -1 |
| 19798 | 16692 | Tnk2     | Bat4          | -1 |
| 19798 | 16888 | Tnk2     | H6pd          | -1 |
| 19798 | 17152 | Tnk2     | Scfd2         | 1  |
| 19798 | 17444 | Tnk2     | Tuba1a        | 1  |
| 19798 | 17660 | Tnk2     | Nlrp12        | -1 |
| 19798 | 18428 | Tnk2     | Sfrs2         | 1  |
| 19798 | 18785 | Tnk2     | Angptl4       | -1 |
| 19798 | 19866 | Tnk2     | Uso1          | 1  |
| 19798 | 19997 | Tnk2     | Ikbke         | 1  |
| 19798 | 21143 | Tnk2     | Ypel3         | -1 |
| 19798 | 21664 | Tnk2     | Insig1        | 1  |
| 19798 | 22443 | Tnk2     | Tuba1c        | 1  |
| 19798 | 22744 | Tnk2     | 9-Sep         | 1  |
| 19803 | 2472  | BC003993 | MMT00014056   | 1  |
| 19803 | 7654  | BC003993 | Ptpmt1        | -1 |
| 19803 | 9547  | BC003993 | MMT00006479   | 1  |
| 19803 | 14757 | BC003993 | Hdx           | 1  |
| 19803 | 16881 | BC003993 | MMT00031504   | 1  |
| 19803 | 17295 | BC003993 | MMT00082577   | 1  |
| 19803 | 19763 | BC003993 | Acp2          | 1  |
| 19803 | 19803 | BC003993 | BC003993      | 1  |
| 19803 | 22320 | BC003993 | MMT00047284   | 1  |
| 19803 | 23474 | BC003993 | MMT00011721   | 1  |
| 19812 | 147   | Armcx2   | Uox           | -1 |
| 19812 | 407   | Armcx2   | Serpina6      | -1 |
| 19812 | 719   | Armcx2   | Usp2          | -1 |
| 19812 | 760   | Armcx2   | Akr1c19       | -1 |
| 19812 | 1767  | Armcx2   | BC016495      | -1 |
| 19812 | 2829  | Armcx2   | Lfn3          | 1  |
| 19812 | 3214  | Armcx2   | Dnmt3b        | 1  |
| 19812 | 4286  | Armcx2   | Ptp4a1        | -1 |
| 19812 | 5574  | Armcx2   | Hsd3b7        | 1  |
| 19812 | 5804  | Armcx2   | Thrsp         | -1 |
| 19812 | 5849  | Armcx2   | 2310031A18Rik | 1  |
| 19812 | 6085  | Armcx2   | MMT00007454   | 1  |
| 19812 | 6329  | Armcx2   | Cyp2b10       | -1 |
| 19812 | 7734  | Armcx2   | Cyp2b23       | -1 |
| 19812 | 8328  | Armcx2   | Klhdc8a       | 1  |
| 19812 | 9309  | Armcx2   | MMT00035904   | -1 |
| 19812 | 12204 | Armcx2   | Ankmy2        | -1 |
| 19812 | 13431 | Armcx2   | MMT00038058   | 1  |
| 19812 | 15205 | Armcx2   | MMT00030262   | 1  |

|       |       |               |               |    |
|-------|-------|---------------|---------------|----|
| 19812 | 15631 | Armcx2        | Lpin1         | -1 |
| 19812 | 16851 | Armcx2        | Slc34a2       | 1  |
| 19812 | 19025 | Armcx2        | Slc37a4       | -1 |
| 19812 | 19234 | Armcx2        | Nrg4          | -1 |
| 19812 | 19671 | Armcx2        | Upp2          | -1 |
| 19812 | 20171 | Armcx2        | 1700008G05Rik | 1  |
| 19812 | 21531 | Armcx2        | Ttc23         | -1 |
| 19812 | 22978 | Armcx2        | MMT00043176   | 1  |
| 19814 | 4517  | 4930458L03Rik | Itih3         | 1  |
| 19814 | 8444  | 4930458L03Rik | Rdh16         | -1 |
| 19814 | 8815  | 4930458L03Rik | Mx1           | -1 |
| 19814 | 12910 | 4930458L03Rik | 1110028A07Rik | -1 |
| 19814 | 18201 | 4930458L03Rik | MMT00060232   | -1 |
| 19814 | 20058 | 4930458L03Rik | Dnaic1        | 1  |
| 19814 | 21214 | 4930458L03Rik | Scd1          | -1 |
| 19814 | 21575 | 4930458L03Rik | Cyp2c55       | -1 |
| 19826 | 604   | Nanp          | Ppp1r15b      | 1  |
| 19826 | 719   | Nanp          | Usp2          | 1  |
| 19826 | 2399  | Nanp          | MMT00060167   | -1 |
| 19826 | 2636  | Nanp          | Tars          | -1 |
| 19826 | 2766  | Nanp          | Elp4          | -1 |
| 19826 | 6386  | Nanp          | Por           | 1  |
| 19826 | 6657  | Nanp          | Irf6          | -1 |
| 19826 | 7414  | Nanp          | Clpx          | -1 |
| 19826 | 11741 | Nanp          | Slc30a10      | -1 |
| 19826 | 15481 | Nanp          | 1110067D22Rik | -1 |
| 19826 | 15709 | Nanp          | Tceal1        | 1  |
| 19826 | 18179 | Nanp          | Dbp           | 1  |
| 19826 | 21142 | Nanp          | Gm129         | 1  |
| 19830 | 662   | Irf4          | Mid1ip1       | -1 |
| 19830 | 3097  | Irf4          | Ppp1r3g       | 1  |
| 19830 | 4391  | Irf4          | Zfp467        | -1 |
| 19830 | 6308  | Irf4          | 2410075B13Rik | -1 |
| 19830 | 6393  | Irf4          | 3110043O21Rik | 1  |
| 19830 | 6976  | Irf4          | Rbm35b        | -1 |
| 19830 | 8632  | Irf4          | Igfbp1        | 1  |
| 19830 | 10384 | Irf4          | Chic2         | 1  |
| 19830 | 11614 | Irf4          | Sult1e1       | 1  |
| 19830 | 12315 | Irf4          | Srebf1        | -1 |
| 19830 | 16251 | Irf4          | G6pc          | 1  |
| 19830 | 18083 | Irf4          | Gadd45a       | -1 |
| 19830 | 18785 | Irf4          | Angptl4       | 1  |
| 19830 | 18903 | Irf4          | Crem          | 1  |
| 19835 | 11571 | Iars2         | Bpnt1         | 1  |
| 19835 | 16361 | Iars2         | Olfir703      | -1 |
| 19835 | 19332 | Iars2         | Bpnt1         | 1  |
| 19835 | 19835 | Iars2         | Iars2         | 1  |
| 19840 | 8444  | Kcnip3        | Rdh16         | -1 |
| 19840 | 8815  | Kcnip3        | Mx1           | -1 |
| 19840 | 14017 | Kcnip3        | Ces5          | -1 |
| 19840 | 18201 | Kcnip3        | MMT00060232   | -1 |

|       |       |             |                    |    |
|-------|-------|-------------|--------------------|----|
| 19840 | 20058 | Kcnip3      | Dnaic1             | 1  |
| 19840 | 21214 | Kcnip3      | Scd1               | -1 |
| 19843 | 19843 | Rbm45       | Rbm45              | 1  |
| 19851 | 269   | Gnb4        | Tuba1b             | 1  |
| 19851 | 354   | Gnb4        | MMT00007996        | 1  |
| 19851 | 11149 | Gnb4        | MMT00050488        | 1  |
| 19851 | 11808 | Gnb4        | Pck1               | -1 |
| 19851 | 17660 | Gnb4        | Nlrp12             | -1 |
| 19851 | 18686 | Gnb4        | Zfp143             | 1  |
| 19851 | 18785 | Gnb4        | Angptl4            | -1 |
| 19851 | 20798 | Gnb4        | Ccp1               | -1 |
| 19854 | 607   | Kcnj14      | Me1                | 1  |
| 19854 | 8444  | Kcnj14      | Rdh16              | 1  |
| 19854 | 8815  | Kcnj14      | Mx1                | 1  |
| 19854 | 10132 | Kcnj14      | Ces2               | 1  |
| 19854 | 11462 | Kcnj14      | Gpam               | 1  |
| 19854 | 12910 | Kcnj14      | 1110028A07Rik      | 1  |
| 19854 | 14017 | Kcnj14      | Ces5               | 1  |
| 19854 | 17090 | Kcnj14      | Lass2              | 1  |
| 19854 | 17887 | Kcnj14      | Cry1               | 1  |
| 19854 | 18201 | Kcnj14      | MMT00060232        | 1  |
| 19854 | 19762 | Kcnj14      | Pih1d1             | -1 |
| 19854 | 20058 | Kcnj14      | Dnaic1             | -1 |
| 19854 | 21202 | Kcnj14      | Acly               | 1  |
| 19854 | 21214 | Kcnj14      | Scd1               | 1  |
| 19854 | 22138 | Kcnj14      | Ang                | -1 |
| 19868 | 11393 | Was         | A830007P12Rik      | 1  |
| 19890 | 2721  | Tmem119     | Inmt               | -1 |
| 19890 | 17638 | Tmem119     | Adssl1             | -1 |
| 19924 | 2533  | Ubiad1      | Arhgef19           | 1  |
| 19924 | 3475  | Ubiad1      | 2610305D13Rik      | 1  |
| 19924 | 3616  | Ubiad1      | Dnajc16            | -1 |
| 19924 | 4305  | Ubiad1      | Tmem51             | -1 |
| 19924 | 6191  | Ubiad1      | Ddost              | -1 |
| 19924 | 6830  | Ubiad1      | Rsc1a1             | -1 |
| 19924 | 6857  | Ubiad1      | Serinc2            | -1 |
| 19924 | 7307  | Ubiad1      | Agmat              | -1 |
| 19924 | 13626 | Ubiad1      | RP23-395H4.4       | -1 |
| 19924 | 16287 | Ubiad1      | Extl1              | 1  |
| 19924 | 18338 | Ubiad1      | Akr1e1             | -1 |
| 19924 | 19924 | Ubiad1      | Ubiad1             | 1  |
| 19929 | 2945  | MMT00079667 | MMT00005190        | 1  |
| 19929 | 5014  | MMT00079667 | MMT00017503        | 1  |
| 19929 | 8341  | MMT00079667 | MMT00017270        | 1  |
| 19929 | 19064 | MMT00079667 | MMT00004867        | -1 |
| 19933 | 3654  | Pi16        | St13               | 1  |
| 19933 | 9822  | Pi16        | Celsr1             | -1 |
| 19952 | 1129  | Tlcd1       | Gsta4              | 1  |
| 19952 | 3170  | Tlcd1       | Mcart1             | 1  |
| 19952 | 10554 | Tlcd1       | ENSMUSG00000074179 | 1  |
| 19952 | 13293 | Tlcd1       | Gsta2              | 1  |

|       |       |                    |               |    |
|-------|-------|--------------------|---------------|----|
| 19952 | 13431 | Tlcd1              | MMT00038058   | -1 |
| 19952 | 15205 | Tlcd1              | MMT00030262   | -1 |
| 19952 | 20019 | Tlcd1              | Qdpr          | 1  |
| 19952 | 21727 | Tlcd1              | Khk           | 1  |
| 19958 | 4301  | Rab38              | AW049604      | 1  |
| 19958 | 15292 | Rab38              | 2010107G23Rik | 1  |
| 19964 | 630   | Ndufa9             | C1s           | -1 |
| 19964 | 1444  | Ndufa9             | C1r           | -1 |
| 19964 | 2932  | Ndufa9             | Slco1a1       | -1 |
| 19964 | 3078  | Ndufa9             | 9630033F20Rik | 1  |
| 19964 | 8194  | Ndufa9             | MMT00077789   | 1  |
| 19964 | 9417  | Ndufa9             | Cd163         | 1  |
| 19964 | 14557 | Ndufa9             | Pyroxd1       | 1  |
| 19964 | 17391 | Ndufa9             | C530028O21Rik | 1  |
| 19964 | 17743 | Ndufa9             | Phb2          | 1  |
| 19964 | 19964 | Ndufa9             | Ndufa9        | 1  |
| 19964 | 19999 | Ndufa9             | Ift122        | -1 |
| 19964 | 20127 | Ndufa9             | Ipo8          | -1 |
| 19964 | 22075 | Ndufa9             | C1s           | -1 |
| 19966 | 17090 | Thap4              | Lass2         | -1 |
| 19970 | 13376 | Mrpl36             | Alg2          | 1  |
| 19970 | 15015 | Mrpl36             | G3bp1         | 1  |
| 19971 | 6157  | B930046C15Rik      | MMT00041452   | -1 |
| 19982 | 1709  | ENSMUSG00000071036 | Mt2           | 1  |
| 19982 | 2794  | ENSMUSG00000071036 | Map3k6        | 1  |
| 19982 | 3620  | ENSMUSG00000071036 | Bet1          | -1 |
| 19982 | 4392  | ENSMUSG00000071036 | 1810055G02Rik | 1  |
| 19982 | 5068  | ENSMUSG00000071036 | Afap112       | -1 |
| 19982 | 6343  | ENSMUSG00000071036 | Slc20a1       | 1  |
| 19982 | 7862  | ENSMUSG00000071036 | Cpsf4l        | 1  |
| 19982 | 11807 | ENSMUSG00000071036 | Fbxo31        | 1  |
| 19982 | 12460 | ENSMUSG00000071036 | Pnpla2        | 1  |
| 19982 | 18286 | ENSMUSG00000071036 | Slc41a3       | 1  |
| 19982 | 18552 | ENSMUSG00000071036 | Nr2c2ap       | -1 |
| 19982 | 19146 | ENSMUSG00000071036 | N4bp2l1       | 1  |
| 19982 | 19671 | ENSMUSG00000071036 | Upp2          | 1  |
| 19982 | 21251 | ENSMUSG00000071036 | Cpt1a         | 1  |
| 19985 | 16032 | Gstcd              | Cyp27a1       | 1  |
| 19987 | 662   | Tspan13            | Mid1ip1       | 1  |
| 19987 | 3449  | Tspan13            | Hes6          | 1  |
| 19987 | 6816  | Tspan13            | Slc46a3       | 1  |
| 19987 | 7659  | Tspan13            | Rab30         | -1 |
| 19987 | 12315 | Tspan13            | Srebf1        | 1  |
| 19987 | 18785 | Tspan13            | Angptl4       | -1 |
| 19995 | 3496  | Pwp1               | Slc41a2       | -1 |
| 19995 | 19995 | Pwp1               | Pwp1          | 1  |
| 19995 | 23102 | Pwp1               | Fbxo7         | -1 |
| 19999 | 9417  | Ift122             | Cd163         | -1 |
| 19999 | 17391 | Ift122             | C530028O21Rik | -1 |
| 19999 | 17743 | Ift122             | Phb2          | -1 |
| 19999 | 19999 | Ift122             | Ift122        | 1  |

|       |       |                    |               |    |
|-------|-------|--------------------|---------------|----|
| 20004 | 3587  | 1190005F20Rik      | MMT00041940   | 1  |
| 20004 | 6021  | 1190005F20Rik      | MMT00008784   | 1  |
| 20004 | 6769  | 1190005F20Rik      | Banp          | 1  |
| 20004 | 8670  | 1190005F20Rik      | MMT00051613   | 1  |
| 20004 | 9258  | 1190005F20Rik      | P4ha1         | 1  |
| 20004 | 11214 | 1190005F20Rik      | MMT00049207   | 1  |
| 20004 | 15675 | 1190005F20Rik      | MMT00077535   | 1  |
| 20004 | 18373 | 1190005F20Rik      | Dnajb1        | 1  |
| 20004 | 18418 | 1190005F20Rik      | Hspa1b        | 1  |
| 20017 | 607   | MMT00006294        | Me1           | 1  |
| 20017 | 6193  | MMT00006294        | Lactb2        | 1  |
| 20017 | 21202 | MMT00006294        | Acly          | 1  |
| 20024 | 4056  | Lrrc32             | Tnfaip8l1     | 1  |
| 20024 | 5804  | Lrrc32             | Thrsp         | -1 |
| 20024 | 5849  | Lrrc32             | 2310031A18Rik | 1  |
| 20024 | 6756  | Lrrc32             | Sds           | -1 |
| 20024 | 6816  | Lrrc32             | Slc46a3       | -1 |
| 20024 | 7492  | Lrrc32             | Adfp          | 1  |
| 20024 | 7659  | Lrrc32             | Rab30         | 1  |
| 20024 | 9408  | Lrrc32             | Hmgcs2        | 1  |
| 20024 | 9718  | Lrrc32             | Fmo5          | -1 |
| 20024 | 9831  | Lrrc32             | Nedd4l        | 1  |
| 20024 | 12315 | Lrrc32             | Srebf1        | -1 |
| 20035 | 16720 | Zbtb46             | Mttr7         | -1 |
| 20035 | 22216 | Zbtb46             | Sp5           | 1  |
| 20068 | 8925  | 2610204M08Rik      | MMT00026932   | -1 |
| 20068 | 12238 | 2610204M08Rik      | Traf3         | -1 |
| 20068 | 23693 | 2610204M08Rik      | A530016L24Rik | 1  |
| 20077 | 8664  | Ccdc115            | MMT00014895   | -1 |
| 20077 | 17729 | Ccdc115            | Prim2         | 1  |
| 20077 | 18606 | Ccdc115            | A230074B11Rik | -1 |
| 20077 | 20077 | Ccdc115            | Ccdc115       | 1  |
| 20083 | 9821  | ENSMUSG00000073403 | Pmaip1        | 1  |
| 20083 | 21440 | ENSMUSG00000073403 | Tmsb10        | 1  |
| 20087 | 20079 | Cd44               | MMT00019254   | -1 |
| 20100 | 1960  | Guca1b             | Ubr2          | 1  |
| 20100 | 2938  | Guca1b             | H2-T23        | -1 |
| 20100 | 3857  | Guca1b             | 1700001C19Rik | 1  |
| 20100 | 4411  | Guca1b             | 2310039H08Rik | 1  |
| 20100 | 7088  | Guca1b             | Slc37a1       | -1 |
| 20100 | 10667 | Guca1b             | H2-Eb1        | -1 |
| 20100 | 13493 | Guca1b             | Ring1         | 1  |
| 20100 | 15531 | Guca1b             | Prickle4      | 1  |
| 20100 | 20100 | Guca1b             | Guca1b        | 1  |
| 20100 | 20238 | Guca1b             | H2-T9         | -1 |
| 20100 | 20966 | Guca1b             | MMT00014378   | -1 |
| 20100 | 22822 | Guca1b             | MMT00013433   | -1 |
| 20100 | 23250 | Guca1b             | Plcl2         | -1 |
| 20118 | 665   | Tmem175            | Slc26a1       | -1 |
| 20118 | 1660  | Tmem175            | Zfp33b        | -1 |
| 20118 | 5100  | Tmem175            | Pebp1         | -1 |



|       |       |               |               |    |
|-------|-------|---------------|---------------|----|
| 20118 | 6330  | Tmem175       | Dgkq          | 1  |
| 20118 | 8807  | Tmem175       | Ankrd56       | -1 |
| 20118 | 10978 | Tmem175       | MMT00078322   | 1  |
| 20118 | 12656 | Tmem175       | Coq5          | 1  |
| 20118 | 14085 | Tmem175       | Cdkl2         | 1  |
| 20118 | 15908 | Tmem175       | Pebp1         | -1 |
| 20118 | 17807 | Tmem175       | Pebp1         | -1 |
| 20118 | 20118 | Tmem175       | Tmem175       | 1  |
| 20118 | 23625 | Tmem175       | Pkd2          | 1  |
| 20119 | 3654  | Polr3h        | St13          | -1 |
| 20122 | 3196  | Tmem86a       | Tat           | -1 |
| 20122 | 9842  | Tmem86a       | Qdpr          | -1 |
| 20122 | 12556 | Tmem86a       | Ass1          | -1 |
| 20122 | 14147 | Tmem86a       | Acss2         | -1 |
| 20122 | 14442 | Tmem86a       | Ethe1         | -1 |
| 20122 | 21202 | Tmem86a       | Acly          | -1 |
| 20122 | 21251 | Tmem86a       | Cpt1a         | 1  |
| 20122 | 22303 | Tmem86a       | Cdt1          | 1  |
| 20122 | 22406 | Tmem86a       | Vnn1          | 1  |
| 20122 | 22770 | Tmem86a       | Slc27a2       | 1  |
| 20122 | 22830 | Tmem86a       | MMT00081088   | 1  |
| 20122 | 22998 | Tmem86a       | Ass1          | -1 |
| 20122 | 23640 | Tmem86a       | Bdh1          | 1  |
| 20124 | 3565  | 1700021F05Rik | MMT00045908   | 1  |
| 20124 | 12556 | 1700021F05Rik | Ass1          | 1  |
| 20124 | 22998 | 1700021F05Rik | Ass1          | 1  |
| 20127 | 6765  | Ipo8          | Ldhb          | 1  |
| 20127 | 9417  | Ipo8          | Cd163         | -1 |
| 20127 | 14557 | Ipo8          | Pyroxd1       | -1 |
| 20127 | 17391 | Ipo8          | C530028O21Rik | -1 |
| 20127 | 19964 | Ipo8          | Ndufa9        | -1 |
| 20127 | 20127 | Ipo8          | Ipo8          | 1  |
| 20135 | 5884  | Gramd3        | Gstm2         | 1  |
| 20135 | 8444  | Gramd3        | Rdh16         | 1  |
| 20135 | 8815  | Gramd3        | Mx1           | 1  |
| 20135 | 11086 | Gramd3        | Pnpla5        | 1  |
| 20135 | 11946 | Gramd3        | MMT00030953   | 1  |
| 20135 | 14017 | Gramd3        | Ces5          | 1  |
| 20135 | 18201 | Gramd3        | MMT00060232   | 1  |
| 20135 | 20058 | Gramd3        | Dnaic1        | -1 |
| 20135 | 20246 | Gramd3        | Pdia5         | -1 |
| 20135 | 21214 | Gramd3        | Scd1          | 1  |
| 20135 | 22138 | Gramd3        | Ang           | -1 |
| 20148 | 1416  | Pttg1         | 6720460F02Rik | 1  |
| 20148 | 5364  | Pttg1         | Kif22         | 1  |
| 20148 | 8416  | Pttg1         | Cdc20         | 1  |
| 20148 | 11382 | Pttg1         | Cdca3         | 1  |
| 20148 | 17823 | Pttg1         | D2Erttd750e   | 1  |
| 20148 | 19318 | Pttg1         | Plk1          | 1  |
| 20149 | 2794  | Cabyr         | Map3k6        | 1  |
| 20150 | 11129 | Ptprc         | Ankhd1        | -1 |

|       |       |               |               |    |
|-------|-------|---------------|---------------|----|
| 20150 | 17323 | Ptprc         | Tubb6         | 1  |
| 20156 | 1380  | Apoc2         | Sycp3         | 1  |
| 20156 | 13864 | Apoc2         | Larp1         | -1 |
| 20156 | 16336 | Apoc2         | 2310040A07Rik | -1 |
| 20169 | 662   | Ralgds        | Mid1ip1       | 1  |
| 20169 | 1330  | Ralgds        | Fgf21         | -1 |
| 20169 | 3686  | Ralgds        | Psmc9         | -1 |
| 20169 | 6048  | Ralgds        | Psmc9         | -1 |
| 20169 | 7944  | Ralgds        | Al132487      | -1 |
| 20169 | 8439  | Ralgds        | Slc25a33      | -1 |
| 20169 | 8896  | Ralgds        | Fasn          | 1  |
| 20169 | 12315 | Ralgds        | Sreb1         | 1  |
| 20169 | 17660 | Ralgds        | Nlrp12        | -1 |
| 20169 | 18785 | Ralgds        | Angptl4       | -1 |
| 20169 | 21202 | Ralgds        | Acly          | 1  |
| 20169 | 22321 | Ralgds        | Apol7a        | 1  |
| 20172 | 20194 | 4930502E18Rik | Pnlc1         | 1  |
| 20174 | 2743  | Ctnna2        | Tcf3          | -1 |
| 20174 | 3703  | Ctnna2        | Ggcx          | -1 |
| 20174 | 4093  | Ctnna2        | Akp5          | -1 |
| 20174 | 8194  | Ctnna2        | MMT00077789   | 1  |
| 20174 | 11338 | Ctnna2        | Vamp8         | -1 |
| 20174 | 11872 | Ctnna2        | Vamp5         | -1 |
| 20174 | 15384 | Ctnna2        | Mat2a         | -1 |
| 20174 | 15708 | Ctnna2        | Retsat        | -1 |
| 20174 | 16670 | Ctnna2        | Csmc2         | 1  |
| 20174 | 17391 | Ctnna2        | C530028O21Rik | 1  |
| 20174 | 18658 | Ctnna2        | Gstk1         | -1 |
| 20175 | 7315  | Hoxb2         | EG624219      | 1  |
| 20175 | 17525 | Hoxb2         | Ctgf          | -1 |
| 20191 | 16647 | Clca5         | D16H22S680E   | -1 |
| 20191 | 21575 | Clca5         | Cyp2c55       | 1  |
| 20216 | 5364  | BC028528      | Kif22         | 1  |
| 20220 | 10132 | MMT00080766   | Ces2          | 1  |
| 20223 | 607   | Sc5d          | Me1           | 1  |
| 20223 | 2051  | Sc5d          | Ddx27         | -1 |
| 20223 | 3446  | Sc5d          | Eno1          | 1  |
| 20223 | 3449  | Sc5d          | Hes6          | 1  |
| 20223 | 4056  | Sc5d          | Tnfrsf8l1     | -1 |
| 20223 | 5804  | Sc5d          | Thrsp         | 1  |
| 20223 | 6523  | Sc5d          | Hapln1        | 1  |
| 20223 | 7492  | Sc5d          | Adfp          | -1 |
| 20223 | 9408  | Sc5d          | Hmgcs2        | -1 |
| 20223 | 17660 | Sc5d          | Nlrp12        | -1 |
| 20223 | 18515 | Sc5d          | Ddx28         | -1 |
| 20223 | 21202 | Sc5d          | Acly          | 1  |
| 20223 | 21727 | Sc5d          | Khk           | 1  |
| 20230 | 2013  | Ppp1r14b      | I15ra         | -1 |
| 20230 | 2051  | Ppp1r14b      | Ddx27         | -1 |
| 20230 | 6193  | Ppp1r14b      | Lactb2        | 1  |
| 20230 | 6771  | Ppp1r14b      | Insc          | 1  |

|       |       |          |               |    |
|-------|-------|----------|---------------|----|
| 20230 | 10612 | Ppp1r14b | Slc24a6       | -1 |
| 20230 | 12460 | Ppp1r14b | Pnp1a2        | -1 |
| 20230 | 18286 | Ppp1r14b | Slc41a3       | -1 |
| 20230 | 21251 | Ppp1r14b | Cpt1a         | -1 |
| 20238 | 327   | H2-T9    | H2-Ea         | 1  |
| 20238 | 510   | H2-T9    | Neu1          | -1 |
| 20238 | 763   | H2-T9    | 4933406E20Rik | 1  |
| 20238 | 1340  | H2-T9    | Tap2          | 1  |
| 20238 | 2325  | H2-T9    | H2-K1         | 1  |
| 20238 | 2801  | H2-T9    | H2-BI         | 1  |
| 20238 | 2938  | H2-T9    | H2-T23        | 1  |
| 20238 | 3599  | H2-T9    | MMT00035426   | -1 |
| 20238 | 3704  | H2-T9    | H2-Q7         | 1  |
| 20238 | 3857  | H2-T9    | 1700001C19Rik | -1 |
| 20238 | 5410  | H2-T9    | Cyp4f15       | -1 |
| 20238 | 6360  | H2-T9    | D17H6S56E-3   | -1 |
| 20238 | 7088  | H2-T9    | Slc37a1       | 1  |
| 20238 | 8750  | H2-T9    | 1700010I14Rik | 1  |
| 20238 | 8767  | H2-T9    | Rgl2          | 1  |
| 20238 | 9158  | H2-T9    | Pde9a         | -1 |
| 20238 | 9717  | H2-T9    | Psmb9         | 1  |
| 20238 | 10376 | H2-T9    | C920025E04Rik | -1 |
| 20238 | 10394 | H2-T9    | MMT00028435   | 1  |
| 20238 | 10667 | H2-T9    | H2-Eb1        | 1  |
| 20238 | 12335 | H2-T9    | Plcb4         | 1  |
| 20238 | 12355 | H2-T9    | A1507611      | 1  |
| 20238 | 13493 | H2-T9    | Ring1         | -1 |
| 20238 | 13789 | H2-T9    | H2-Q8         | 1  |
| 20238 | 15540 | H2-T9    | C2            | 1  |
| 20238 | 17691 | H2-T9    | Kank3         | 1  |
| 20238 | 18577 | H2-T9    | Btbd9         | -1 |
| 20238 | 18906 | H2-T9    | Zfand3        | 1  |
| 20238 | 20100 | H2-T9    | Guca1b        | -1 |
| 20238 | 20238 | H2-T9    | H2-T9         | 1  |
| 20238 | 20346 | H2-T9    | Gna-rs1       | 1  |
| 20238 | 20421 | H2-T9    | Cdkn2c        | 1  |
| 20238 | 21295 | H2-T9    | Snf1lk        | -1 |
| 20238 | 21685 | H2-T9    | Gzma          | 1  |
| 20238 | 22822 | H2-T9    | MMT00013433   | 1  |
| 20238 | 23250 | H2-T9    | Plcl2         | 1  |
| 20238 | 23401 | H2-T9    | H2-Q2         | 1  |
| 20246 | 3836  | Pdia5    | 2200001I15Rik | 1  |
| 20246 | 5364  | Pdia5    | Kif22         | 1  |
| 20267 | 874   | Lgals1   | Aldh1a7       | 1  |
| 20267 | 5884  | Lgals1   | Gstm2         | 1  |
| 20274 | 4687  | Klf2     | Gtpbp8        | -1 |
| 20275 | 14468 | Igfbp5   | Tmtc2         | -1 |
| 20275 | 23180 | Igfbp5   | Sult1d1       | -1 |
| 20281 | 4578  | Naip1    | Pglyrp2       | -1 |
| 20281 | 12910 | Naip1    | 1110028A07Rik | 1  |
| 20281 | 20967 | Naip1    | Fabp2         | 1  |

|       |       |               |               |    |
|-------|-------|---------------|---------------|----|
| 20292 | 9022  | 1810048J11Rik | Plek2         | -1 |
| 20292 | 20292 | 1810048J11Rik | 1810048J11Rik | 1  |
| 20292 | 20393 | 1810048J11Rik | 1110018G07Rik | -1 |
| 20300 | 8444  | Plekhb1       | Rdh16         | -1 |
| 20300 | 20300 | Plekhb1       | Plekhb1       | 1  |
| 20300 | 21425 | Plekhb1       | Rab6          | 1  |
| 20312 | 607   | Htt           | Me1           | 1  |
| 20312 | 11946 | Htt           | MMT00030953   | 1  |
| 20312 | 18201 | Htt           | MMT00060232   | 1  |
| 20312 | 20019 | Htt           | Qdpr          | 1  |
| 20312 | 21214 | Htt           | Scd1          | 1  |
| 20333 | 6370  | Calca         | Aqp8          | -1 |
| 20333 | 18827 | Calca         | Oprs1         | -1 |
| 20333 | 22138 | Calca         | Ang           | 1  |
| 20335 | 1041  | Srgn          | 3110049J23Rik | -1 |
| 20335 | 5364  | Srgn          | Kif22         | 1  |
| 20337 | 2529  | St6galnac4    | Hmcn2         | -1 |
| 20343 | 3502  | Ttc19         | Gde1          | 1  |
| 20343 | 6030  | Ttc19         | As3mt         | 1  |
| 20343 | 7414  | Ttc19         | Clpx          | -1 |
| 20343 | 7492  | Ttc19         | Adfp          | -1 |
| 20343 | 13078 | Ttc19         | Eps8l2        | -1 |
| 20343 | 20967 | Ttc19         | Fabp2         | -1 |
| 20343 | 23183 | Ttc19         | Nnmt          | 1  |
| 20346 | 2938  | Gna-rs1       | H2-T23        | 1  |
| 20353 | 269   | Antxr1        | Tuba1b        | 1  |
| 20353 | 1941  | Antxr1        | MMT00079618   | 1  |
| 20353 | 3535  | Antxr1        | S100a9        | 1  |
| 20353 | 3555  | Antxr1        | Sbds          | -1 |
| 20353 | 6085  | Antxr1        | MMT00007454   | 1  |
| 20353 | 7151  | Antxr1        | MMT00007982   | 1  |
| 20353 | 7862  | Antxr1        | Cpsf4l        | -1 |
| 20353 | 11724 | Antxr1        | Tuba3a        | 1  |
| 20353 | 13293 | Antxr1        | Gsta2         | -1 |
| 20353 | 14055 | Antxr1        | MMT00050438   | 1  |
| 20353 | 14869 | Antxr1        | S100a8        | 1  |
| 20353 | 15205 | Antxr1        | MMT00030262   | 1  |
| 20353 | 15500 | Antxr1        | MMT00081411   | 1  |
| 20353 | 16060 | Antxr1        | Gys2          | -1 |
| 20353 | 17323 | Antxr1        | Tubb6         | 1  |
| 20353 | 17444 | Antxr1        | Tuba1a        | 1  |
| 20353 | 22907 | Antxr1        | MMT00054594   | 1  |
| 20353 | 22978 | Antxr1        | MMT00043176   | 1  |
| 20356 | 5364  | Mrps35        | Kif22         | -1 |
| 20356 | 12941 | Mrps35        | Elov15        | -1 |
| 20356 | 20678 | Mrps35        | Cyp39a1       | 1  |
| 20361 | 8399  | Mtmr14        | Herpud1       | 1  |
| 20361 | 11807 | Mtmr14        | Fbxo31        | 1  |
| 20361 | 15631 | Mtmr14        | Lpin1         | 1  |
| 20361 | 18027 | Mtmr14        | 5730403B10Rik | 1  |
| 20361 | 19025 | Mtmr14        | Slc37a4       | 1  |

|       |       |         |               |    |
|-------|-------|---------|---------------|----|
| 20362 | 12315 | Sh3bp5l | Srebf1        | 1  |
| 20363 | 250   | Dcun1d2 | Tubb2a-ps2    | 1  |
| 20363 | 269   | Dcun1d2 | Tuba1b        | 1  |
| 20363 | 577   | Dcun1d2 | Rrp12         | 1  |
| 20363 | 609   | Dcun1d2 | MMT00060868   | 1  |
| 20363 | 662   | Dcun1d2 | Mid1ip1       | 1  |
| 20363 | 827   | Dcun1d2 | Ficn          | -1 |
| 20363 | 865   | Dcun1d2 | Npc1          | -1 |
| 20363 | 1257  | Dcun1d2 | Slc25a45      | 1  |
| 20363 | 1709  | Dcun1d2 | Mt2           | -1 |
| 20363 | 1829  | Dcun1d2 | MMT00030026   | 1  |
| 20363 | 1941  | Dcun1d2 | MMT00079618   | 1  |
| 20363 | 2013  | Dcun1d2 | Il15ra        | -1 |
| 20363 | 2322  | Dcun1d2 | Tuba4a        | 1  |
| 20363 | 3309  | Dcun1d2 | Grpel2        | -1 |
| 20363 | 3804  | Dcun1d2 | MMT00015534   | 1  |
| 20363 | 4201  | Dcun1d2 | Tubb2c        | 1  |
| 20363 | 4851  | Dcun1d2 | Gpn2          | 1  |
| 20363 | 5375  | Dcun1d2 | Sec23b        | 1  |
| 20363 | 5587  | Dcun1d2 | Rmnd5b        | 1  |
| 20363 | 5594  | Dcun1d2 | Erb3          | -1 |
| 20363 | 6260  | Dcun1d2 | MMT00002928   | 1  |
| 20363 | 6599  | Dcun1d2 | 1700020C11Rik | 1  |
| 20363 | 6771  | Dcun1d2 | Insc          | 1  |
| 20363 | 6918  | Dcun1d2 | Cog8          | 1  |
| 20363 | 6966  | Dcun1d2 | Mia3          | -1 |
| 20363 | 7151  | Dcun1d2 | MMT00007982   | 1  |
| 20363 | 7659  | Dcun1d2 | Rab30         | -1 |
| 20363 | 7795  | Dcun1d2 | MMT00071427   | -1 |
| 20363 | 7944  | Dcun1d2 | A1132487      | -1 |
| 20363 | 8268  | Dcun1d2 | Kctd7         | 1  |
| 20363 | 8896  | Dcun1d2 | Fasn          | 1  |
| 20363 | 9763  | Dcun1d2 | Tuba3b        | 1  |
| 20363 | 10612 | Dcun1d2 | Slc24a6       | -1 |
| 20363 | 10911 | Dcun1d2 | Mcl1          | -1 |
| 20363 | 11095 | Dcun1d2 | Bag3          | 1  |
| 20363 | 11356 | Dcun1d2 | Med27         | 1  |
| 20363 | 11540 | Dcun1d2 | Ctps          | 1  |
| 20363 | 11545 | Dcun1d2 | Ppcs          | 1  |
| 20363 | 11724 | Dcun1d2 | Tuba3a        | 1  |
| 20363 | 12091 | Dcun1d2 | 1810015C04Rik | -1 |
| 20363 | 12904 | Dcun1d2 | MMT00040704   | -1 |
| 20363 | 13376 | Dcun1d2 | Alg2          | 1  |
| 20363 | 13390 | Dcun1d2 | Ddx31         | 1  |
| 20363 | 13889 | Dcun1d2 | Agpat2        | 1  |
| 20363 | 13990 | Dcun1d2 | MMT00040357   | 1  |
| 20363 | 15252 | Dcun1d2 | MMT00019402   | 1  |
| 20363 | 15862 | Dcun1d2 | Mrap          | 1  |
| 20363 | 15892 | Dcun1d2 | Slc22a5       | -1 |
| 20363 | 16060 | Dcun1d2 | Gys2          | -1 |
| 20363 | 17444 | Dcun1d2 | Tuba1a        | 1  |

|       |       |          |                    |    |
|-------|-------|----------|--------------------|----|
| 20363 | 17656 | Dcun1d2  | Hdhd3              | 1  |
| 20363 | 17660 | Dcun1d2  | Nlrp12             | -1 |
| 20363 | 19089 | Dcun1d2  | Peci               | -1 |
| 20363 | 20363 | Dcun1d2  | Dcun1d2            | 1  |
| 20363 | 20635 | Dcun1d2  | Jmjd6              | 1  |
| 20363 | 21251 | Dcun1d2  | Cpt1a              | -1 |
| 20363 | 21288 | Dcun1d2  | Tcp11l2            | -1 |
| 20363 | 21604 | Dcun1d2  | Klhl24             | -1 |
| 20363 | 22031 | Dcun1d2  | Vcam1              | -1 |
| 20363 | 22130 | Dcun1d2  | Cks1b              | 1  |
| 20363 | 22203 | Dcun1d2  | Txndc11            | 1  |
| 20363 | 22388 | Dcun1d2  | 2410018M08Rik      | -1 |
| 20363 | 22443 | Dcun1d2  | Tuba1c             | 1  |
| 20363 | 22770 | Dcun1d2  | Slc27a2            | -1 |
| 20363 | 23150 | Dcun1d2  | EG622657           | 1  |
| 20370 | 5364  | Sccpdh   | Kif22              | -1 |
| 20370 | 10554 | Sccpdh   | ENSMUSG00000074179 | 1  |
| 20370 | 11382 | Sccpdh   | Cdca3              | -1 |
| 20370 | 13293 | Sccpdh   | Gsta2              | 1  |
| 20370 | 14472 | Sccpdh   | Ahcy               | 1  |
| 20370 | 20967 | Sccpdh   | Fabp2              | -1 |
| 20372 | 4966  | Heatr1   | Zscan20            | 1  |
| 20372 | 7619  | Heatr1   | Pik3ip1            | -1 |
| 20372 | 18135 | Heatr1   | Tmed3              | 1  |
| 20381 | 6386  | Vtn      | Por                | -1 |
| 20381 | 11129 | Vtn      | Ankhd1             | -1 |
| 20381 | 16060 | Vtn      | Gys2               | -1 |
| 20384 | 20384 | BC034069 | BC034069           | 1  |
| 20385 | 16679 | Chd1l    | Ctsk               | 1  |
| 20413 | 563   | Wdr86    | D4Bwg0951e         | -1 |
| 20413 | 2043  | Wdr86    | Arl2bp             | 1  |
| 20413 | 2329  | Wdr86    | Wdr6               | 1  |
| 20413 | 3097  | Wdr86    | Ppp1r3g            | -1 |
| 20413 | 3170  | Wdr86    | Mcart1             | -1 |
| 20413 | 3196  | Wdr86    | Tat                | -1 |
| 20413 | 4708  | Wdr86    | Traf3ip2           | 1  |
| 20413 | 5364  | Wdr86    | Kif22              | 1  |
| 20413 | 5449  | Wdr86    | Got1               | -1 |
| 20413 | 5994  | Wdr86    | Olf609             | -1 |
| 20413 | 6661  | Wdr86    | Hdac1              | 1  |
| 20413 | 7066  | Wdr86    | Agtr1b             | -1 |
| 20413 | 7140  | Wdr86    | Mtbp               | 1  |
| 20413 | 7963  | Wdr86    | Rxrg               | 1  |
| 20413 | 8328  | Wdr86    | Klhdc8a            | 1  |
| 20413 | 8670  | Wdr86    | MMT00051613        | -1 |
| 20413 | 9275  | Wdr86    | Aass               | -1 |
| 20413 | 10207 | Wdr86    | MMT00012324        | 1  |
| 20413 | 11093 | Wdr86    | Zdhhc1             | -1 |
| 20413 | 11382 | Wdr86    | Cdca3              | 1  |
| 20413 | 11808 | Wdr86    | Pck1               | -1 |
| 20413 | 12761 | Wdr86    | Tsc22d3            | -1 |

|       |       |        |               |    |
|-------|-------|--------|---------------|----|
| 20413 | 12839 | Wdr86  | Fh1           | -1 |
| 20413 | 12981 | Wdr86  | Nek6          | 1  |
| 20413 | 13285 | Wdr86  | Cd276         | 1  |
| 20413 | 13293 | Wdr86  | Gsta2         | -1 |
| 20413 | 13339 | Wdr86  | D630042F21Rik | -1 |
| 20413 | 13471 | Wdr86  | Cln8          | -1 |
| 20413 | 14472 | Wdr86  | Ahcy          | -1 |
| 20413 | 15021 | Wdr86  | Ppargc1a      | -1 |
| 20413 | 15284 | Wdr86  | EG632778      | -1 |
| 20413 | 15631 | Wdr86  | Lpin1         | -1 |
| 20413 | 17622 | Wdr86  | Foxo1         | -1 |
| 20413 | 17656 | Wdr86  | Hdhd3         | 1  |
| 20413 | 18027 | Wdr86  | 5730403B10Rik | -1 |
| 20413 | 18785 | Wdr86  | Angptl4       | -1 |
| 20413 | 19375 | Wdr86  | Inhba         | 1  |
| 20413 | 19466 | Wdr86  | Pptc7         | -1 |
| 20413 | 19723 | Wdr86  | Pfkfb1        | -1 |
| 20413 | 20171 | Wdr86  | 1700008G05Rik | 1  |
| 20413 | 23201 | Wdr86  | S1pr1         | 1  |
| 20413 | 23202 | Wdr86  | Olf559        | -1 |
| 20416 | 8444  | Cnn1   | Rdh16         | -1 |
| 20421 | 9408  | Cdkn2c | Hmgcs2        | -1 |
| 20421 | 9842  | Cdkn2c | Qdpr          | 1  |
| 20421 | 17563 | Cdkn2c | Aldh111       | 1  |
| 20421 | 17660 | Cdkn2c | Nlrp12        | -1 |
| 20423 | 19964 | 8-Mar  | Ndufa9        | -1 |
| 20423 | 21793 | 8-Mar  | Pla2g12a      | 1  |
| 20431 | 250   | Slc7a7 | Tubb2a-ps2    | 1  |
| 20431 | 269   | Slc7a7 | Tuba1b        | 1  |
| 20431 | 609   | Slc7a7 | MMT00060868   | 1  |
| 20431 | 1941  | Slc7a7 | MMT00079618   | 1  |
| 20431 | 2850  | Slc7a7 | Slc16a6       | 1  |
| 20431 | 3410  | Slc7a7 | Paqr9         | 1  |
| 20431 | 3804  | Slc7a7 | MMT00015534   | 1  |
| 20431 | 4201  | Slc7a7 | Tubb2c        | 1  |
| 20431 | 4534  | Slc7a7 | Ndel1         | -1 |
| 20431 | 4708  | Slc7a7 | Traf3ip2      | 1  |
| 20431 | 5734  | Slc7a7 | EG619653      | -1 |
| 20431 | 6338  | Slc7a7 | Setd3         | -1 |
| 20431 | 6386  | Slc7a7 | Por           | -1 |
| 20431 | 7151  | Slc7a7 | MMT00007982   | 1  |
| 20431 | 7862  | Slc7a7 | Cpsf4l        | -1 |
| 20431 | 9763  | Slc7a7 | Tuba3b        | 1  |
| 20431 | 10775 | Slc7a7 | Slc16a1       | 1  |
| 20431 | 11129 | Slc7a7 | Ankhd1        | -1 |
| 20431 | 11724 | Slc7a7 | Tuba3a        | 1  |
| 20431 | 11741 | Slc7a7 | Slc30a10      | 1  |
| 20431 | 12420 | Slc7a7 | Klh21         | -1 |
| 20431 | 12799 | Slc7a7 | Spon2         | 1  |
| 20431 | 14462 | Slc7a7 | Zfp385b       | -1 |
| 20431 | 15021 | Slc7a7 | Ppargc1a      | -1 |

|       |       |               |                    |    |
|-------|-------|---------------|--------------------|----|
| 20431 | 15320 | Slc7a7        | MMT00017479        | -1 |
| 20431 | 15709 | Slc7a7        | Tceal1             | -1 |
| 20431 | 16060 | Slc7a7        | Gys2               | -1 |
| 20431 | 17323 | Slc7a7        | Tubb6              | 1  |
| 20431 | 17444 | Slc7a7        | Tuba1a             | 1  |
| 20431 | 17617 | Slc7a7        | Atp5sl             | -1 |
| 20431 | 17876 | Slc7a7        | Tubb4              | 1  |
| 20431 | 18027 | Slc7a7        | 5730403B10Rik      | -1 |
| 20431 | 21969 | Slc7a7        | Tk1                | -1 |
| 20431 | 22290 | Slc7a7        | Tubb2a             | 1  |
| 20431 | 22443 | Slc7a7        | Tuba1c             | 1  |
| 20431 | 22630 | Slc7a7        | MMT00034355        | 1  |
| 20433 | 1416  | Cdca5         | 6720460F02Rik      | 1  |
| 20433 | 1561  | Cdca5         | Aurka              | 1  |
| 20433 | 5364  | Cdca5         | Kif22              | 1  |
| 20433 | 8416  | Cdca5         | Cdc20              | 1  |
| 20433 | 18299 | Cdca5         | MMT00035424        | 1  |
| 20433 | 19318 | Cdca5         | Plk1               | 1  |
| 20433 | 20433 | Cdca5         | Cdca5              | 1  |
| 20433 | 21692 | Cdca5         | MMT00013924        | 1  |
| 20433 | 21947 | Cdca5         | Cdca8              | 1  |
| 20433 | 22138 | Cdca5         | Ang                | -1 |
| 20460 | 22321 | Emcn          | Apol7a             | 1  |
| 20461 | 12941 | H2-Ab1        | Elov5              | 1  |
| 20473 | 12910 | Gpr137b-ps    | 1110028A07Rik      | 1  |
| 20482 | 294   | Vwa1          | Ehhadh             | -1 |
| 20482 | 5804  | Vwa1          | Thrsp              | -1 |
| 20482 | 8444  | Vwa1          | Rdh16              | -1 |
| 20482 | 10554 | Vwa1          | ENSMUSG00000074179 | -1 |
| 20482 | 13293 | Vwa1          | Gsta2              | -1 |
| 20482 | 21727 | Vwa1          | Khk                | -1 |
| 20484 | 2703  | Ces1          | MMT00073763        | 1  |
| 20484 | 9304  | Ces1          | A1449175           | 1  |
| 20484 | 10195 | Ces1          | Klf1               | 1  |
| 20484 | 16849 | Ces1          | Trmt1              | -1 |
| 20484 | 17403 | Ces1          | N4bp1              | -1 |
| 20484 | 18886 | Ces1          | Slc18a1            | -1 |
| 20484 | 20484 | Ces1          | Ces1               | -1 |
| 20485 | 415   | 6430520M22Rik | Ypel2              | -1 |
| 20485 | 604   | 6430520M22Rik | Ppp1r15b           | 1  |
| 20485 | 719   | 6430520M22Rik | Usp2               | 1  |
| 20485 | 1767  | 6430520M22Rik | BC016495           | 1  |
| 20485 | 2011  | 6430520M22Rik | Slc2a5             | 1  |
| 20485 | 2399  | 6430520M22Rik | MMT00060167        | -1 |
| 20485 | 2636  | 6430520M22Rik | Tars               | -1 |
| 20485 | 2823  | 6430520M22Rik | Sipa112            | 1  |
| 20485 | 2829  | 6430520M22Rik | Lrfn3              | -1 |
| 20485 | 3790  | 6430520M22Rik | Mtss1              | 1  |
| 20485 | 5183  | 6430520M22Rik | St5                | -1 |
| 20485 | 5374  | 6430520M22Rik | Chka               | -1 |
| 20485 | 5804  | 6430520M22Rik | Thrsp              | 1  |



|       |       |               |               |    |
|-------|-------|---------------|---------------|----|
| 20485 | 5974  | 6430520M22Rik | Arntl         | -1 |
| 20485 | 6171  | 6430520M22Rik | Abtb2         | -1 |
| 20485 | 6268  | 6430520M22Rik | Slc45a3       | -1 |
| 20485 | 6343  | 6430520M22Rik | Slc20a1       | 1  |
| 20485 | 9379  | 6430520M22Rik | Ypel2         | -1 |
| 20485 | 9831  | 6430520M22Rik | Nedd4l        | -1 |
| 20485 | 12905 | 6430520M22Rik | Nfil3         | -1 |
| 20485 | 13052 | 6430520M22Rik | Tnfrsf19      | 1  |
| 20485 | 13094 | 6430520M22Rik | Cnn3          | 1  |
| 20485 | 13630 | 6430520M22Rik | Cdkn1a        | -1 |
| 20485 | 16251 | 6430520M22Rik | G6pc          | -1 |
| 20485 | 16704 | 6430520M22Rik | Ppif          | 1  |
| 20485 | 17583 | 6430520M22Rik | Per2          | 1  |
| 20485 | 17884 | 6430520M22Rik | Lnx2          | -1 |
| 20485 | 18179 | 6430520M22Rik | Dbp           | 1  |
| 20485 | 18215 | 6430520M22Rik | Gpr146        | 1  |
| 20485 | 18498 | 6430520M22Rik | Slc5a6        | 1  |
| 20485 | 19004 | 6430520M22Rik | Pdk4          | -1 |
| 20485 | 21142 | 6430520M22Rik | Gm129         | 1  |
| 20486 | 3265  | C1qtnf1       | Dntt          | 1  |
| 20486 | 5364  | C1qtnf1       | Kif22         | 1  |
| 20486 | 20967 | C1qtnf1       | Fabp2         | 1  |
| 20490 | 6513  | Tmem143       | Qpctl         | -1 |
| 20490 | 19762 | Tmem143       | Pih1d1        | 1  |
| 20490 | 19854 | Tmem143       | Kcnj14        | -1 |
| 20490 | 20490 | Tmem143       | Tmem143       | 1  |
| 20496 | 2963  | Mtpn          | Tmem64        | 1  |
| 20496 | 8815  | Mtpn          | Mx1           | 1  |
| 20496 | 12941 | Mtpn          | Elov5         | 1  |
| 20496 | 18201 | Mtpn          | MMT00060232   | 1  |
| 20496 | 22138 | Mtpn          | Ang           | -1 |
| 20496 | 23026 | Mtpn          | Apom          | -1 |
| 20498 | 8815  | Porcn         | Mx1           | -1 |
| 20498 | 21214 | Porcn         | Scd1          | -1 |
| 20500 | 6966  | 2810441K11Rik | Mia3          | 1  |
| 20511 | 5645  | Decr2         | Tmem8         | 1  |
| 20511 | 7088  | Decr2         | Slc37a1       | 1  |
| 20511 | 17707 | Decr2         | Rshl2b        | 1  |
| 20511 | 20511 | Decr2         | Decr2         | 1  |
| 20515 | 2472  | Dimt1         | MMT00014056   | 1  |
| 20515 | 9547  | Dimt1         | MMT00006479   | 1  |
| 20515 | 14757 | Dimt1         | Hdx           | 1  |
| 20515 | 16881 | Dimt1         | MMT00031504   | 1  |
| 20515 | 17295 | Dimt1         | MMT00082577   | 1  |
| 20515 | 19763 | Dimt1         | Acp2          | 1  |
| 20515 | 19803 | Dimt1         | BC003993      | 1  |
| 20515 | 22320 | Dimt1         | MMT00047284   | 1  |
| 20515 | 23474 | Dimt1         | MMT00011721   | 1  |
| 20519 | 3836  | Col1a1        | 2200001115Rik | 1  |
| 20519 | 5364  | Col1a1        | Kif22         | 1  |
| 20519 | 6030  | Col1a1        | As3mt         | -1 |

|       |       |             |               |    |
|-------|-------|-------------|---------------|----|
| 20519 | 12941 | Col1a1      | Elov5         | 1  |
| 20519 | 18299 | Col1a1      | MMT00035424   | 1  |
| 20519 | 18827 | Col1a1      | Oprs1         | 1  |
| 20519 | 21692 | Col1a1      | MMT00013924   | 1  |
| 20521 | 20521 | BC057079    | BC057079      | 1  |
| 20534 | 250   | Stk24       | Tubb2a-ps2    | 1  |
| 20534 | 269   | Stk24       | Tuba1b        | 1  |
| 20534 | 609   | Stk24       | MMT00060868   | 1  |
| 20534 | 1257  | Stk24       | Slc25a45      | 1  |
| 20534 | 1767  | Stk24       | BC016495      | -1 |
| 20534 | 1941  | Stk24       | MMT00079618   | 1  |
| 20534 | 3804  | Stk24       | MMT00015534   | 1  |
| 20534 | 4201  | Stk24       | Tubb2c        | 1  |
| 20534 | 4534  | Stk24       | Ndel1         | -1 |
| 20534 | 5574  | Stk24       | Hsd3b7        | 1  |
| 20534 | 5587  | Stk24       | Rmnd5b        | 1  |
| 20534 | 6918  | Stk24       | Cog8          | 1  |
| 20534 | 7151  | Stk24       | MMT00007982   | 1  |
| 20534 | 9763  | Stk24       | Tuba3b        | 1  |
| 20534 | 11724 | Stk24       | Tuba3a        | 1  |
| 20534 | 11741 | Stk24       | Slc30a10      | 1  |
| 20534 | 12904 | Stk24       | MMT00040704   | -1 |
| 20534 | 13889 | Stk24       | Agpat2        | 1  |
| 20534 | 15862 | Stk24       | Mrap          | 1  |
| 20534 | 16060 | Stk24       | Gys2          | -1 |
| 20534 | 16690 | Stk24       | Tjp3          | 1  |
| 20534 | 17323 | Stk24       | Tubb6         | 1  |
| 20534 | 17444 | Stk24       | Tuba1a        | 1  |
| 20534 | 17876 | Stk24       | Tubb4         | 1  |
| 20534 | 19671 | Stk24       | Upp2          | -1 |
| 20534 | 22290 | Stk24       | Tubb2a        | 1  |
| 20534 | 22443 | Stk24       | Tuba1c        | 1  |
| 20534 | 22630 | Stk24       | MMT00034355   | 1  |
| 20535 | 8742  | Rbm4        | Tmem39a       | 1  |
| 20535 | 9899  | Rbm4        | D13Wsu177e    | 1  |
| 20537 | 269   | Mmp13       | Tuba1b        | 1  |
| 20537 | 9763  | Mmp13       | Tuba3b        | 1  |
| 20541 | 12910 | Vapa        | 1110028A07Rik | 1  |
| 20553 | 14017 | Echdc2      | Ces5          | -1 |
| 20572 | 3754  | Rdh5        | Dock6         | 1  |
| 20572 | 21575 | Rdh5        | Cyp2c55       | 1  |
| 20573 | 10711 | MMT00040001 | 1700108F19Rik | -1 |
| 20585 | 607   | Snx7        | Me1           | 1  |
| 20585 | 8444  | Snx7        | Rdh16         | 1  |
| 20585 | 8815  | Snx7        | Mx1           | 1  |
| 20585 | 12910 | Snx7        | 1110028A07Rik | 1  |
| 20585 | 18201 | Snx7        | MMT00060232   | 1  |
| 20585 | 20058 | Snx7        | Dnaic1        | -1 |
| 20585 | 21214 | Snx7        | Scd1          | 1  |
| 20606 | 2599  | MMT00042166 | Lsm14a        | -1 |
| 20606 | 4697  | MMT00042166 | Cyp2a12       | 1  |

|       |       |               |                    |    |
|-------|-------|---------------|--------------------|----|
| 20606 | 5352  | MMT00042166   | Pdcd2l             | -1 |
| 20606 | 6513  | MMT00042166   | Qpctl              | -1 |
| 20606 | 10545 | MMT00042166   | Tmem147            | -1 |
| 20606 | 11321 | MMT00042166   | 2310014L17Rik      | 1  |
| 20606 | 11888 | MMT00042166   | Myadm              | 1  |
| 20606 | 16639 | MMT00042166   | MMT00078937        | 1  |
| 20606 | 19462 | MMT00042166   | 4933439C20Rik      | 1  |
| 20606 | 20606 | MMT00042166   | MMT00042166        | 1  |
| 20606 | 23247 | MMT00042166   | Ercc1              | 1  |
| 20611 | 22001 | Map2k3        | Gtlf3b             | -1 |
| 20628 | 8210  | Hoxd10        | Hspa12a            | 1  |
| 20628 | 10387 | Hoxd10        | 4933427D06Rik      | 1  |
| 20628 | 10466 | Hoxd10        | S1pr5              | 1  |
| 20628 | 11598 | Hoxd10        | MMT00031533        | 1  |
| 20628 | 19629 | Hoxd10        | Smarcd3            | 1  |
| 20628 | 20628 | Hoxd10        | Hoxd10             | 1  |
| 20628 | 21099 | Hoxd10        | Rapgef6            | 1  |
| 20628 | 21218 | Hoxd10        | Col9a2             | 1  |
| 20635 | 7151  | Jmjd6         | MMT00007982        | 1  |
| 20635 | 10612 | Jmjd6         | Slc24a6            | -1 |
| 20635 | 11376 | Jmjd6         | Slc7a11            | 1  |
| 20644 | 20967 | Lct           | Fabp2              | 1  |
| 20648 | 8815  | B430212C06Rik | Mx1                | 1  |
| 20648 | 12910 | B430212C06Rik | 1110028A07Rik      | 1  |
| 20648 | 14017 | B430212C06Rik | Ces5               | 1  |
| 20648 | 15059 | B430212C06Rik | Mogat1             | 1  |
| 20648 | 18201 | B430212C06Rik | MMT00060232        | 1  |
| 20648 | 20058 | B430212C06Rik | Dnaic1             | -1 |
| 20648 | 20194 | B430212C06Rik | Pnlnc1             | 1  |
| 20648 | 22138 | B430212C06Rik | Ang                | -1 |
| 20648 | 23026 | B430212C06Rik | Apom               | -1 |
| 20661 | 524   | Tuft1         | Hsd3b2             | -1 |
| 20661 | 3753  | Tuft1         | Setdb1             | 1  |
| 20661 | 9408  | Tuft1         | Hmgcs2             | 1  |
| 20661 | 10681 | Tuft1         | Dgkz               | 1  |
| 20661 | 11121 | Tuft1         | Mtmr11             | 1  |
| 20661 | 12367 | Tuft1         | MMT00072365        | 1  |
| 20661 | 16416 | Tuft1         | Commd2             | -1 |
| 20661 | 20385 | Tuft1         | Chd1l              | -1 |
| 20661 | 20661 | Tuft1         | Tuft1              | -1 |
| 20661 | 22202 | Tuft1         | OTTMUSG00000021274 | 1  |
| 20666 | 8815  | Mosc1         | Mx1                | 1  |
| 20666 | 11571 | Mosc1         | Bpnt1              | 1  |
| 20666 | 16361 | Mosc1         | Olf703             | -1 |
| 20666 | 18201 | Mosc1         | MMT00060232        | 1  |
| 20666 | 20666 | Mosc1         | Mosc1              | 1  |
| 20666 | 21214 | Mosc1         | Scd1               | 1  |
| 20690 | 2243  | Zfp276        | Gcsh               | -1 |
| 20690 | 14391 | Zfp276        | MMT00017335        | 1  |
| 20690 | 21394 | Zfp276        | Cdh15              | 1  |
| 20705 | 3565  | Supv3l1       | MMT00045908        | 1  |

|       |       |               |                    |    |
|-------|-------|---------------|--------------------|----|
| 20705 | 7492  | Supv311       | Adfp               | -1 |
| 20705 | 9700  | Supv311       | Prodh              | 1  |
| 20705 | 10554 | Supv311       | ENSMUSG00000074179 | 1  |
| 20705 | 13293 | Supv311       | Gsta2              | 1  |
| 20705 | 13431 | Supv311       | MMT00038058        | -1 |
| 20705 | 15205 | Supv311       | MMT00030262        | -1 |
| 20705 | 18549 | Supv311       | Robo1              | 1  |
| 20717 | 12565 | Snf8          | Grem2              | -1 |
| 20721 | 2082  | 4432412L15Rik | AU018778           | -1 |
| 20721 | 2703  | 4432412L15Rik | MMT00073763        | -1 |
| 20721 | 10273 | 4432412L15Rik | Gpt2               | -1 |
| 20721 | 16849 | 4432412L15Rik | Trmt1              | 1  |
| 20726 | 5802  | Ei24          | Mad2l2             | 1  |
| 20726 | 10911 | Ei24          | Mcl1               | -1 |
| 20726 | 11741 | Ei24          | Slc30a10           | 1  |
| 20726 | 19532 | Ei24          | Med8               | 1  |
| 20727 | 1941  | Mmp11         | MMT00079618        | 1  |
| 20727 | 7659  | Mmp11         | Rab30              | -1 |
| 20727 | 8439  | Mmp11         | Slc25a33           | -1 |
| 20727 | 11724 | Mmp11         | Tuba3a             | 1  |
| 20727 | 13018 | Mmp11         | AW544981           | 1  |
| 20727 | 14335 | Mmp11         | Olf33              | -1 |
| 20727 | 17660 | Mmp11         | Nlrp12             | -1 |
| 20727 | 18785 | Mmp11         | Angptl4            | -1 |
| 20729 | 607   | Ttc28         | Me1                | 1  |
| 20729 | 874   | Ttc28         | Aldh1a7            | 1  |
| 20729 | 2051  | Ttc28         | Ddx27              | -1 |
| 20729 | 3696  | Ttc28         | Elovl6             | 1  |
| 20729 | 4206  | Ttc28         | Nipsnap1           | 1  |
| 20729 | 4351  | Ttc28         | Ptxnb1             | -1 |
| 20729 | 5425  | Ttc28         | Ung                | -1 |
| 20729 | 6044  | Ttc28         | Sucnr1             | 1  |
| 20729 | 6193  | Ttc28         | Lactb2             | 1  |
| 20729 | 6482  | Ttc28         | Nudt2              | 1  |
| 20729 | 8896  | Ttc28         | Fasn               | 1  |
| 20729 | 9408  | Ttc28         | Hmgcs2             | -1 |
| 20729 | 11462 | Ttc28         | Gpam               | 1  |
| 20729 | 14147 | Ttc28         | Acss2              | 1  |
| 20729 | 16486 | Ttc28         | Slc25a22           | -1 |
| 20729 | 16525 | Ttc28         | Lbp                | -1 |
| 20729 | 17090 | Ttc28         | Lass2              | 1  |
| 20729 | 17660 | Ttc28         | Nlrp12             | -1 |
| 20729 | 18286 | Ttc28         | Slc41a3            | -1 |
| 20729 | 18515 | Ttc28         | Ddx28              | -1 |
| 20729 | 20058 | Ttc28         | Dnaic1             | -1 |
| 20729 | 20079 | Ttc28         | MMT00019254        | -1 |
| 20729 | 20740 | Ttc28         | Ola1               | 1  |
| 20729 | 21202 | Ttc28         | Acly               | 1  |
| 20729 | 21214 | Ttc28         | Scd1               | 1  |
| 20729 | 21575 | Ttc28         | Cyp2c55            | 1  |
| 20729 | 22137 | Ttc28         | Nudt7              | 1  |

|       |       |               |                    |    |
|-------|-------|---------------|--------------------|----|
| 20729 | 22321 | Ttc28         | Apol7a             | 1  |
| 20729 | 22732 | Ttc28         | Cyb5b              | 1  |
| 20729 | 22821 | Ttc28         | Tmem135            | 1  |
| 20729 | 23623 | Ttc28         | 2010305C02Rik      | 1  |
| 20740 | 607   | Ola1          | Me1                | 1  |
| 20740 | 8444  | Ola1          | Rdh16              | 1  |
| 20740 | 8815  | Ola1          | Mx1                | 1  |
| 20740 | 10554 | Ola1          | ENSMUSG00000074179 | 1  |
| 20740 | 13293 | Ola1          | Gsta2              | 1  |
| 20740 | 14147 | Ola1          | Acss2              | 1  |
| 20740 | 18201 | Ola1          | MMT00060232        | 1  |
| 20740 | 21214 | Ola1          | Scd1               | 1  |
| 20740 | 21727 | Ola1          | Khk                | 1  |
| 20742 | 22138 | Birc2         | Ang                | 1  |
| 20757 | 3703  | Suclg1        | Ggcx               | 1  |
| 20757 | 11338 | Suclg1        | Vamp8              | 1  |
| 20757 | 15708 | Suclg1        | Retsat             | 1  |
| 20774 | 10769 | Atp6v1c2      | Hnrnpd             | 1  |
| 20784 | 10132 | Csad          | Ces2               | -1 |
| 20791 | 2550  | MMT00014813   | MMT00036681        | 1  |
| 20791 | 3659  | MMT00014813   | EG236451           | 1  |
| 20791 | 9847  | MMT00014813   | Ifi27              | 1  |
| 20791 | 12969 | MMT00014813   | Xaf1               | 1  |
| 20791 | 13156 | MMT00014813   | Ifit3              | 1  |
| 20791 | 13514 | MMT00014813   | Apol9b             | 1  |
| 20791 | 18686 | MMT00014813   | Zfp143             | 1  |
| 20791 | 19189 | MMT00014813   | Sp100              | 1  |
| 20791 | 19738 | MMT00014813   | Lgals3bp           | 1  |
| 20796 | 6085  | E130113E03Rik | MMT00007454        | -1 |
| 20801 | 20670 | Mrps11        | Kihl25             | -1 |
| 20801 | 22841 | Mrps11        | Cib1               | 1  |
| 20804 | 607   | Eno1          | Me1                | 1  |
| 20804 | 8815  | Eno1          | Mx1                | 1  |
| 20804 | 18201 | Eno1          | MMT00060232        | 1  |
| 20804 | 21214 | Eno1          | Scd1               | 1  |
| 20804 | 21575 | Eno1          | Cyp2c55            | 1  |
| 20808 | 8844  | Bms1          | 2310037I24Rik      | -1 |
| 20810 | 3859  | Mttp          | Fpr2               | 1  |
| 20810 | 11814 | Mttp          | Pdim5              | 1  |
| 20810 | 20810 | Mttp          | Mttp               | 1  |
| 20810 | 22570 | Mttp          | Phtf1              | -1 |
| 20810 | 22640 | Mttp          | Bud13              | -1 |
| 20811 | 21727 | Dlst          | Khk                | 1  |
| 20814 | 5364  | Ptpn18        | Kif22              | 1  |
| 20831 | 607   | MMT00057242   | Me1                | 1  |
| 20831 | 18201 | MMT00057242   | MMT00060232        | 1  |
| 20837 | 2915  | Dlgap4        | Nfs1               | 1  |
| 20837 | 6059  | Dlgap4        | Dsn1               | -1 |
| 20852 | 22782 | Extl2         | Frrs1              | -1 |
| 20861 | 1466  | Dcst1         | Ubap2l             | -1 |
| 20861 | 1867  | Dcst1         | Bcas2              | -1 |

|       |       |       |                    |    |
|-------|-------|-------|--------------------|----|
| 20861 | 3753  | Dcst1 | Setdb1             | 1  |
| 20861 | 6206  | Dcst1 | MMT00063701        | -1 |
| 20861 | 10521 | Dcst1 | Ttf2               | -1 |
| 20861 | 11611 | Dcst1 | S100a13            | 1  |
| 20861 | 16416 | Dcst1 | Commd2             | -1 |
| 20861 | 22202 | Dcst1 | OTTMUSG00000021274 | 1  |
| 20867 | 8444  | Cnih  | Rdh16              | 1  |
| 20867 | 8815  | Cnih  | Mx1                | 1  |
| 20867 | 12910 | Cnih  | 1110028A07Rik      | 1  |
| 20867 | 15059 | Cnih  | Mogat1             | 1  |
| 20867 | 18201 | Cnih  | MMT00060232        | 1  |
| 20867 | 21214 | Cnih  | Scd1               | 1  |
| 20871 | 6931  | Pop1  | Hrsp12             | -1 |
| 20871 | 13648 | Pop1  | Dap                | -1 |
| 20871 | 20871 | Pop1  | Pop1               | 1  |
| 20880 | 184   | Raf1  | Sorbs1             | -1 |
| 20880 | 269   | Raf1  | Tuba1b             | 1  |
| 20880 | 274   | Raf1  | Trit1              | -1 |
| 20880 | 354   | Raf1  | MMT00007996        | 1  |
| 20880 | 662   | Raf1  | Mid1ip1            | 1  |
| 20880 | 865   | Raf1  | Npc1               | -1 |
| 20880 | 1065  | Raf1  | Hmgcr              | 1  |
| 20880 | 1709  | Raf1  | Mt2                | -1 |
| 20880 | 1760  | Raf1  | Nek8               | -1 |
| 20880 | 1941  | Raf1  | MMT00079618        | 1  |
| 20880 | 2013  | Raf1  | Il15ra             | -1 |
| 20880 | 2051  | Raf1  | Ddx27              | -1 |
| 20880 | 3253  | Raf1  | Tbc1d20            | -1 |
| 20880 | 3449  | Raf1  | Hes6               | 1  |
| 20880 | 4687  | Raf1  | Gtpbp8             | 1  |
| 20880 | 4752  | Raf1  | Pik3r4             | -1 |
| 20880 | 5375  | Raf1  | Sec23b             | 1  |
| 20880 | 5487  | Raf1  | Palmd              | -1 |
| 20880 | 5684  | Raf1  | Ranbp10            | -1 |
| 20880 | 6193  | Raf1  | Lactb2             | 1  |
| 20880 | 6353  | Raf1  | Spata13            | -1 |
| 20880 | 6599  | Raf1  | 1700020C11Rik      | 1  |
| 20880 | 6816  | Raf1  | Slc46a3            | 1  |
| 20880 | 7151  | Raf1  | MMT00007982        | 1  |
| 20880 | 7320  | Raf1  | MMT00051732        | 1  |
| 20880 | 7492  | Raf1  | Adfp               | -1 |
| 20880 | 7659  | Raf1  | Rab30              | -1 |
| 20880 | 8067  | Raf1  | Taok3              | -1 |
| 20880 | 8439  | Raf1  | Slc25a33           | -1 |
| 20880 | 8896  | Raf1  | Fasn               | 1  |
| 20880 | 8957  | Raf1  | Zfp511             | -1 |
| 20880 | 9408  | Raf1  | Hmgcs2             | -1 |
| 20880 | 9763  | Raf1  | Tuba3b             | 1  |
| 20880 | 10299 | Raf1  | Rad52              | -1 |
| 20880 | 10612 | Raf1  | Slc24a6            | -1 |
| 20880 | 11376 | Raf1  | Slc7a11            | 1  |

|       |       |             |               |    |
|-------|-------|-------------|---------------|----|
| 20880 | 11724 | Raf1        | Tuba3a        | 1  |
| 20880 | 12460 | Raf1        | Pnp1a2        | -1 |
| 20880 | 13341 | Raf1        | Tnip2         | -1 |
| 20880 | 13374 | Raf1        | Wipi1         | -1 |
| 20880 | 13422 | Raf1        | Usp3          | -1 |
| 20880 | 15252 | Raf1        | MMT00019402   | 1  |
| 20880 | 15668 | Raf1        | 1810032O08Rik | -1 |
| 20880 | 15892 | Raf1        | Slc22a5       | -1 |
| 20880 | 16027 | Raf1        | Ppp2r2d       | -1 |
| 20880 | 16525 | Raf1        | Lbp           | -1 |
| 20880 | 17444 | Raf1        | Tuba1a        | 1  |
| 20880 | 17660 | Raf1        | Nlrp12        | -1 |
| 20880 | 17862 | Raf1        | Fbxo21        | -1 |
| 20880 | 18515 | Raf1        | Ddx28         | -1 |
| 20880 | 19573 | Raf1        | Serpine1      | -1 |
| 20880 | 20589 | Raf1        | Frmd8         | 1  |
| 20880 | 21143 | Raf1        | Ypel3         | -1 |
| 20880 | 21202 | Raf1        | Acly          | 1  |
| 20880 | 21251 | Raf1        | Cpt1a         | -1 |
| 20880 | 21727 | Raf1        | Khk           | 1  |
| 20880 | 22217 | Raf1        | Flvcr2        | -1 |
| 20880 | 22271 | Raf1        | Cyp2c29       | 1  |
| 20880 | 22303 | Raf1        | Cdt1          | -1 |
| 20880 | 22443 | Raf1        | Tuba1c        | 1  |
| 20880 | 22770 | Raf1        | Slc27a2       | -1 |
| 20880 | 23130 | Raf1        | Hps4          | -1 |
| 20885 | 7492  | MMT00004673 | Adfp          | 1  |
| 20903 | 3703  | Rpia        | Ggcx          | -1 |
| 20903 | 13376 | Rpia        | Alg2          | 1  |
| 20903 | 15708 | Rpia        | Retsat        | -1 |
| 20903 | 18785 | Rpia        | Angptl4       | -1 |
| 20907 | 2013  | Lims2       | Il15ra        | 1  |
| 20912 | 1156  | Chordc1     | Rbj           | -1 |
| 20912 | 2433  | Chordc1     | Armc10        | -1 |
| 20912 | 3196  | Chordc1     | Tat           | 1  |
| 20912 | 3587  | Chordc1     | MMT00041940   | 1  |
| 20912 | 4966  | Chordc1     | Zscan20       | 1  |
| 20912 | 6021  | Chordc1     | MMT00008784   | 1  |
| 20912 | 6126  | Chordc1     | MMT00067575   | 1  |
| 20912 | 6286  | Chordc1     | Rfc1          | -1 |
| 20912 | 6769  | Chordc1     | Banp          | 1  |
| 20912 | 7674  | Chordc1     | Spata7        | -1 |
| 20912 | 8122  | Chordc1     | Hexim1        | 1  |
| 20912 | 8319  | Chordc1     | MMT00062477   | 1  |
| 20912 | 8464  | Chordc1     | Snapin        | -1 |
| 20912 | 8662  | Chordc1     | Brca2         | -1 |
| 20912 | 8670  | Chordc1     | MMT00051613   | 1  |
| 20912 | 8684  | Chordc1     | Il15          | -1 |
| 20912 | 9258  | Chordc1     | P4ha1         | 1  |
| 20912 | 9899  | Chordc1     | D13Wsu177e    | 1  |
| 20912 | 10435 | Chordc1     | Nab2          | -1 |

|       |       |               |               |    |
|-------|-------|---------------|---------------|----|
| 20912 | 10769 | Chordc1       | Hnrnpd        | -1 |
| 20912 | 10994 | Chordc1       | EG625253      | 1  |
| 20912 | 11043 | Chordc1       | Hsph1         | 1  |
| 20912 | 11095 | Chordc1       | Bag3          | 1  |
| 20912 | 11214 | Chordc1       | MMT00049207   | 1  |
| 20912 | 12761 | Chordc1       | Tsc22d3       | 1  |
| 20912 | 14298 | Chordc1       | Atp2a2        | 1  |
| 20912 | 14859 | Chordc1       | Hspa1a        | 1  |
| 20912 | 15476 | Chordc1       | Fem1b         | -1 |
| 20912 | 15675 | Chordc1       | MMT00077535   | 1  |
| 20912 | 16251 | Chordc1       | G6pc          | 1  |
| 20912 | 17160 | Chordc1       | Ccdc127       | 1  |
| 20912 | 18099 | Chordc1       | Nfx1          | -1 |
| 20912 | 18215 | Chordc1       | Gpr146        | -1 |
| 20912 | 18373 | Chordc1       | Dnajb1        | 1  |
| 20912 | 18418 | Chordc1       | Hspa1b        | 1  |
| 20912 | 20535 | Chordc1       | Rbm4          | 1  |
| 20912 | 20912 | Chordc1       | Chordc1       | 1  |
| 20912 | 20965 | Chordc1       | Usp28         | -1 |
| 20912 | 21389 | Chordc1       | Odf2          | -1 |
| 20912 | 21775 | Chordc1       | MMT00051649   | -1 |
| 20912 | 21955 | Chordc1       | Atxn711       | -1 |
| 20912 | 22303 | Chordc1       | Cdt1          | -1 |
| 20918 | 2456  | Nxph3         | Mrpl10        | 1  |
| 20918 | 3480  | Nxph3         | Pnpo          | -1 |
| 20918 | 5661  | Nxph3         | Lrrc46        | -1 |
| 20918 | 12302 | Nxph3         | Cbx1          | 1  |
| 20918 | 19092 | Nxph3         | MMT00045362   | 1  |
| 20943 | 2643  | 1700113H08Rik | Inhbe         | 1  |
| 20943 | 8313  | 1700113H08Rik | Frap1         | 1  |
| 20943 | 21251 | 1700113H08Rik | Cpt1a         | 1  |
| 20943 | 22406 | 1700113H08Rik | Vnn1          | 1  |
| 20943 | 22732 | 1700113H08Rik | Cyb5b         | -1 |
| 20946 | 482   | Nufip2        | Rnf43         | 1  |
| 20946 | 662   | Nufip2        | Mid1ip1       | 1  |
| 20946 | 7678  | Nufip2        | Ltbr          | 1  |
| 20946 | 8632  | Nufip2        | Igfbp1        | -1 |
| 20946 | 12315 | Nufip2        | Srebf1        | 1  |
| 20946 | 14135 | Nufip2        | Eepd1         | 1  |
| 20946 | 15604 | Nufip2        | Arl4a         | -1 |
| 20958 | 19421 | 4933403F05Rik | Mbd2          | 1  |
| 20973 | 3754  | Stx2          | Dock6         | 1  |
| 20979 | 12055 | D10Jhu81e     | 1810008A18Rik | -1 |
| 20979 | 22222 | D10Jhu81e     | Gstt1         | -1 |
| 20980 | 1569  | Taf12         | Tmco4         | -1 |
| 20980 | 3393  | Taf12         | Snhg8         | -1 |
| 20980 | 3587  | Taf12         | MMT00041940   | 1  |
| 20980 | 4966  | Taf12         | Zscan20       | 1  |
| 20980 | 6021  | Taf12         | MMT00008784   | 1  |
| 20980 | 6126  | Taf12         | MMT00067575   | 1  |
| 20980 | 7619  | Taf12         | Pik3ip1       | -1 |



|       |       |               |               |    |
|-------|-------|---------------|---------------|----|
| 20980 | 8319  | Taf12         | MMT00062477   | 1  |
| 20980 | 8670  | Taf12         | MMT00051613   | 1  |
| 20980 | 8891  | Taf12         | MMT00071061   | 1  |
| 20980 | 9067  | Taf12         | Tra2a         | 1  |
| 20980 | 9258  | Taf12         | P4ha1         | 1  |
| 20980 | 11043 | Taf12         | Hsph1         | 1  |
| 20980 | 11051 | Taf12         | A130042E20Rik | -1 |
| 20980 | 11095 | Taf12         | Bag3          | 1  |
| 20980 | 11214 | Taf12         | MMT00049207   | 1  |
| 20980 | 14014 | Taf12         | MMT00008376   | 1  |
| 20980 | 14298 | Taf12         | Atp2a2        | 1  |
| 20980 | 15675 | Taf12         | MMT00077535   | 1  |
| 20980 | 15740 | Taf12         | 1810010H24Rik | -1 |
| 20980 | 16251 | Taf12         | G6pc          | 1  |
| 20980 | 17160 | Taf12         | Ccdc127       | 1  |
| 20980 | 18099 | Taf12         | Nfx1          | -1 |
| 20980 | 18215 | Taf12         | Gpr146        | -1 |
| 20980 | 18373 | Taf12         | Dnajb1        | 1  |
| 20980 | 18418 | Taf12         | Hspa1b        | 1  |
| 20980 | 20912 | Taf12         | Chordc1       | 1  |
| 20980 | 20965 | Taf12         | Usp28         | -1 |
| 20980 | 21333 | Taf12         | Cirbp         | -1 |
| 20983 | 563   | Hlx           | D4Bwg0951e    | -1 |
| 20983 | 3040  | Hlx           | Bcl3          | 1  |
| 20983 | 3097  | Hlx           | Ppp1r3g       | -1 |
| 20983 | 7315  | Hlx           | EG624219      | 1  |
| 20983 | 8632  | Hlx           | Igfbp1        | -1 |
| 20983 | 10384 | Hlx           | Chic2         | -1 |
| 20983 | 11093 | Hlx           | Zdhhc1        | -1 |
| 20983 | 11808 | Hlx           | Pck1          | -1 |
| 20983 | 12981 | Hlx           | Nek6          | 1  |
| 20983 | 13471 | Hlx           | Cln8          | -1 |
| 20983 | 13489 | Hlx           | D230025D16Rik | -1 |
| 20983 | 15021 | Hlx           | Ppargc1a      | -1 |
| 20983 | 15631 | Hlx           | Lpin1         | -1 |
| 20983 | 15862 | Hlx           | Mrap          | 1  |
| 20983 | 15990 | Hlx           | Dnmbp         | -1 |
| 20983 | 18785 | Hlx           | Angptl4       | -1 |
| 20983 | 20085 | Hlx           | Lpin2         | -1 |
| 20983 | 21160 | Hlx           | Irs2          | -1 |
| 20983 | 22373 | Hlx           | Txnip         | -1 |
| 20983 | 22443 | Hlx           | Tuba1c        | 1  |
| 20991 | 8815  | 2900093K20Rik | Mx1           | -1 |
| 20997 | 143   | MMT00028135   | Gvin1         | 1  |
| 20997 | 2200  | MMT00028135   | BC006779      | 1  |
| 20997 | 2224  | MMT00028135   | Oasl2         | 1  |
| 20997 | 4114  | MMT00028135   | Parp12        | 1  |
| 20997 | 4426  | MMT00028135   | Iigp2         | 1  |
| 20997 | 4508  | MMT00028135   | Ifit1         | 1  |
| 20997 | 7105  | MMT00028135   | Plac8         | 1  |
| 20997 | 8800  | MMT00028135   | Rnf213        | 1  |

|       |       |               |               |    |
|-------|-------|---------------|---------------|----|
| 20997 | 9820  | MMT00028135   | BC023105      | 1  |
| 20997 | 9847  | MMT00028135   | Ifi27         | 1  |
| 20997 | 11009 | MMT00028135   | MMT00008885   | 1  |
| 20997 | 11204 | MMT00028135   | Al451617      | 1  |
| 20997 | 12398 | MMT00028135   | Ifi44         | 1  |
| 20997 | 12969 | MMT00028135   | Xaf1          | 1  |
| 20997 | 13309 | MMT00028135   | Tgtp          | 1  |
| 20997 | 14258 | MMT00028135   | Ifi47         | 1  |
| 20997 | 14611 | MMT00028135   | Ddx60         | 1  |
| 20997 | 14880 | MMT00028135   | Ms4a4c        | 1  |
| 20997 | 16182 | MMT00028135   | Oasl1         | 1  |
| 20997 | 18174 | MMT00028135   | Stat2         | 1  |
| 20997 | 19026 | MMT00028135   | Isg15         | 1  |
| 20997 | 19738 | MMT00028135   | Lgals3bp      | 1  |
| 20997 | 20997 | MMT00028135   | MMT00028135   | 1  |
| 20997 | 21549 | MMT00028135   | Rtp4          | 1  |
| 20997 | 22077 | MMT00028135   | MMT00057550   | 1  |
| 20999 | 3616  | 1110049F12Rik | Dnajc16       | -1 |
| 21003 | 8815  | Uckl1         | Mx1           | -1 |
| 21003 | 21202 | Uckl1         | Acly          | -1 |
| 21003 | 21214 | Uckl1         | Scd1          | -1 |
| 21013 | 6044  | Vnn3          | Sucnr1        | -1 |
| 21013 | 6370  | Vnn3          | Aqp8          | -1 |
| 21013 | 10132 | Vnn3          | Ces2          | -1 |
| 21013 | 10961 | Vnn3          | Pgd           | -1 |
| 21013 | 12941 | Vnn3          | Elov15        | -1 |
| 21013 | 17887 | Vnn3          | Cryl1         | -1 |
| 21013 | 18827 | Vnn3          | Oprs1         | -1 |
| 21013 | 21214 | Vnn3          | Scd1          | -1 |
| 21013 | 22046 | Vnn3          | Cml4          | -1 |
| 21013 | 22137 | Vnn3          | Nudt7         | -1 |
| 21013 | 22138 | Vnn3          | Ang           | 1  |
| 21014 | 6030  | Usp54         | As3mt         | 1  |
| 21014 | 6370  | Usp54         | Aqp8          | -1 |
| 21014 | 8815  | Usp54         | Mx1           | -1 |
| 21014 | 11129 | Usp54         | Ankhd1        | 1  |
| 21014 | 12910 | Usp54         | 1110028A07Rik | -1 |
| 21014 | 14017 | Usp54         | Ces5          | -1 |
| 21014 | 18201 | Usp54         | MMT00060232   | -1 |
| 21014 | 18827 | Usp54         | Oprs1         | -1 |
| 21014 | 21214 | Usp54         | Scd1          | -1 |
| 21014 | 21575 | Usp54         | Cyp2c55       | -1 |
| 21014 | 22138 | Usp54         | Ang           | 1  |
| 21019 | 2294  | Picalm        | AU040829      | 1  |
| 21030 | 17660 | Ccdc80        | Nlrp12        | 1  |
| 21039 | 7954  | Pcnxl2        | Ccdc12        | 1  |
| 21048 | 12776 | Cdrt4         | MMT00061492   | -1 |
| 21060 | 2789  | Ela1          | Sirt5         | 1  |
| 21060 | 10132 | Ela1          | Ces2          | 1  |
| 21060 | 12412 | Ela1          | BC004728      | 1  |
| 21060 | 12910 | Ela1          | 1110028A07Rik | 1  |

|       |       |             |                    |    |
|-------|-------|-------------|--------------------|----|
| 21060 | 23026 | Ela1        | Apom               | -1 |
| 21062 | 250   | Rpl711      | Tubb2a-ps2         | 1  |
| 21062 | 269   | Rpl711      | Tuba1b             | 1  |
| 21062 | 609   | Rpl711      | MMT00060868        | 1  |
| 21062 | 1941  | Rpl711      | MMT00079618        | 1  |
| 21062 | 3804  | Rpl711      | MMT00015534        | 1  |
| 21062 | 5375  | Rpl711      | Sec23b             | 1  |
| 21062 | 6771  | Rpl711      | Insc               | 1  |
| 21062 | 7151  | Rpl711      | MMT00007982        | 1  |
| 21062 | 9763  | Rpl711      | Tuba3b             | 1  |
| 21062 | 10911 | Rpl711      | Mcl1               | -1 |
| 21062 | 11724 | Rpl711      | Tuba3a             | 1  |
| 21062 | 11741 | Rpl711      | Slc30a10           | 1  |
| 21062 | 14838 | Rpl711      | MMT00070887        | 1  |
| 21062 | 15252 | Rpl711      | MMT00019402        | 1  |
| 21062 | 15862 | Rpl711      | Mrap               | 1  |
| 21062 | 16060 | Rpl711      | Gys2               | -1 |
| 21062 | 17444 | Rpl711      | Tuba1a             | 1  |
| 21062 | 17876 | Rpl711      | Tubb4              | 1  |
| 21062 | 21251 | Rpl711      | Cpt1a              | -1 |
| 21062 | 22290 | Rpl711      | Tubb2a             | 1  |
| 21062 | 22443 | Rpl711      | Tuba1c             | 1  |
| 21062 | 22630 | Rpl711      | MMT00034355        | 1  |
| 21071 | 11614 | Il4i1       | Sult1e1            | -1 |
| 21071 | 12190 | Il4i1       | Krt18              | 1  |
| 21071 | 19723 | Il4i1       | Pfkfb1             | -1 |
| 21075 | 5884  | Gtf2h5      | Gstm2              | 1  |
| 21075 | 6650  | Gtf2h5      | MMT00050325        | 1  |
| 21075 | 7909  | Gtf2h5      | Oas3               | -1 |
| 21075 | 8444  | Gtf2h5      | Rdh16              | 1  |
| 21075 | 11435 | Gtf2h5      | Rnaset2a           | -1 |
| 21075 | 11946 | Gtf2h5      | MMT00030953        | 1  |
| 21075 | 18201 | Gtf2h5      | MMT00060232        | 1  |
| 21075 | 20058 | Gtf2h5      | Dnaic1             | -1 |
| 21075 | 21754 | Gtf2h5      | Synj2              | 1  |
| 21078 | 6420  | MMT00067065 | Mipep              | 1  |
| 21078 | 7602  | MMT00067065 | Pcca               | 1  |
| 21078 | 7753  | MMT00067065 | Gfm1               | 1  |
| 21078 | 10554 | MMT00067065 | ENSMUSG00000074179 | 1  |
| 21078 | 13293 | MMT00067065 | Gsta2              | 1  |
| 21079 | 5364  | Tfpi2       | Kif22              | 1  |
| 21084 | 21214 | Nkiras2     | Scd1               | 1  |
| 21099 | 8210  | Rapgef6     | Hspa12a            | 1  |
| 21099 | 10387 | Rapgef6     | 4933427D06Rik      | 1  |
| 21099 | 10466 | Rapgef6     | S1pr5              | 1  |
| 21099 | 11598 | Rapgef6     | MMT00031533        | 1  |
| 21099 | 13219 | Rapgef6     | Trhde              | 1  |
| 21099 | 14550 | Rapgef6     | Acot7              | 1  |
| 21099 | 19629 | Rapgef6     | Smarcd3            | 1  |
| 21099 | 20628 | Rapgef6     | Hoxd10             | 1  |
| 21099 | 21099 | Rapgef6     | Rapgef6            | 1  |

|       |       |          |                    |    |
|-------|-------|----------|--------------------|----|
| 21099 | 21218 | Rapgef6  | Col9a2             | 1  |
| 21099 | 23034 | Rapgef6  | Slc25a29           | 1  |
| 21102 | 250   | Cmtm7    | Tubb2a-ps2         | 1  |
| 21102 | 433   | Cmtm7    | Pla2g12b           | 1  |
| 21102 | 609   | Cmtm7    | MMT00060868        | 1  |
| 21102 | 719   | Cmtm7    | Usp2               | -1 |
| 21102 | 1031  | Cmtm7    | Uros               | 1  |
| 21102 | 1537  | Cmtm7    | 1700052K11Rik      | 1  |
| 21102 | 1646  | Cmtm7    | Slc15a4            | -1 |
| 21102 | 1767  | Cmtm7    | BC016495           | -1 |
| 21102 | 2399  | Cmtm7    | MMT00060167        | 1  |
| 21102 | 2829  | Cmtm7    | Lrfr3              | 1  |
| 21102 | 2850  | Cmtm7    | Slc16a6            | 1  |
| 21102 | 3214  | Cmtm7    | Dnmt3b             | 1  |
| 21102 | 3410  | Cmtm7    | Paqr9              | 1  |
| 21102 | 3804  | Cmtm7    | MMT00015534        | 1  |
| 21102 | 4201  | Cmtm7    | Tubb2c             | 1  |
| 21102 | 4286  | Cmtm7    | Ptp4a1             | -1 |
| 21102 | 4534  | Cmtm7    | Ndel1              | -1 |
| 21102 | 4708  | Cmtm7    | Traf3ip2           | 1  |
| 21102 | 5374  | Cmtm7    | Chka               | 1  |
| 21102 | 5574  | Cmtm7    | Hsd3b7             | 1  |
| 21102 | 5849  | Cmtm7    | 2310031A18Rik      | 1  |
| 21102 | 5934  | Cmtm7    | S100a10            | 1  |
| 21102 | 6386  | Cmtm7    | Por                | -1 |
| 21102 | 7414  | Cmtm7    | Clpx               | 1  |
| 21102 | 7862  | Cmtm7    | Cpsf4l             | -1 |
| 21102 | 8328  | Cmtm7    | Klhdc8a            | 1  |
| 21102 | 9260  | Cmtm7    | Cmtm6              | 1  |
| 21102 | 9495  | Cmtm7    | Srms               | 1  |
| 21102 | 11599 | Cmtm7    | Coq10b             | -1 |
| 21102 | 11741 | Cmtm7    | Slc30a10           | 1  |
| 21102 | 14462 | Cmtm7    | Zfp385b            | -1 |
| 21102 | 15709 | Cmtm7    | Tceal1             | -1 |
| 21102 | 16060 | Cmtm7    | Gys2               | -1 |
| 21102 | 16690 | Cmtm7    | Tjp3               | 1  |
| 21102 | 18827 | Cmtm7    | Oprs1              | 1  |
| 21102 | 19234 | Cmtm7    | Nrg4               | -1 |
| 21102 | 19671 | Cmtm7    | Upp2               | -1 |
| 21102 | 19790 | Cmtm7    | Polg2              | -1 |
| 21102 | 21811 | Cmtm7    | Ak3l1              | -1 |
| 21102 | 22290 | Cmtm7    | Tubb2a             | 1  |
| 21102 | 22630 | Cmtm7    | MMT00034355        | 1  |
| 21102 | 23606 | Cmtm7    | Cmtm8              | -1 |
| 21109 | 10554 | Col8a2   | ENSMUSG00000074179 | -1 |
| 21111 | 14017 | Tmem132c | Ces5               | -1 |
| 21125 | 1162  | Mtif3    | Cpsf4              | 1  |
| 21125 | 2115  | Mtif3    | Gpr12              | 1  |
| 21125 | 15480 | Mtif3    | MMT00078167        | -1 |
| 21125 | 17535 | Mtif3    | MMT00008110        | -1 |
| 21125 | 17676 | Mtif3    | Amz1               | -1 |

|       |       |             |               |    |
|-------|-------|-------------|---------------|----|
| 21125 | 21125 | Mtif3       | Mtif3         | 1  |
| 21126 | 2932  | Dera        | Slco1a1       | -1 |
| 21126 | 5902  | Dera        | 4930563P21Rik | 1  |
| 21126 | 6765  | Dera        | Ldhb          | -1 |
| 21126 | 7452  | Dera        | Abcc9         | -1 |
| 21126 | 13488 | Dera        | Art4          | -1 |
| 21126 | 14557 | Dera        | Pyroxd1       | 1  |
| 21126 | 19041 | Dera        | 9830102E05Rik | 1  |
| 21126 | 21126 | Dera        | Dera          | 1  |
| 21126 | 22095 | Dera        | Mgst1         | 1  |
| 21130 | 7602  | MMT00011706 | Pcca          | 1  |
| 21130 | 13431 | MMT00011706 | MMT00038058   | -1 |
| 21130 | 15205 | MMT00011706 | MMT00030262   | -1 |
| 21130 | 20019 | MMT00011706 | Qdpr          | 1  |
| 21134 | 354   | Ppp2r2a     | MMT00007996   | 1  |
| 21134 | 7151  | Ppp2r2a     | MMT00007982   | 1  |
| 21142 | 250   | Gm129       | Tubb2a-ps2    | -1 |
| 21142 | 269   | Gm129       | Tuba1b        | -1 |
| 21142 | 402   | Gm129       | Timp3         | 1  |
| 21142 | 407   | Gm129       | Serpina6      | 1  |
| 21142 | 415   | Gm129       | Ypel2         | -1 |
| 21142 | 433   | Gm129       | Pla2g12b      | -1 |
| 21142 | 437   | Gm129       | Ndr1          | -1 |
| 21142 | 609   | Gm129       | MMT00060868   | -1 |
| 21142 | 719   | Gm129       | Usp2          | 1  |
| 21142 | 1310  | Gm129       | Cabc1         | -1 |
| 21142 | 1363  | Gm129       | BC021767      | -1 |
| 21142 | 1453  | Gm129       | Gfod2         | -1 |
| 21142 | 1767  | Gm129       | BC016495      | 1  |
| 21142 | 1941  | Gm129       | MMT00079618   | -1 |
| 21142 | 2011  | Gm129       | Slc2a5        | 1  |
| 21142 | 2126  | Gm129       | Dgat2         | 1  |
| 21142 | 2322  | Gm129       | Tuba4a        | -1 |
| 21142 | 2384  | Gm129       | Micalcl       | -1 |
| 21142 | 2399  | Gm129       | MMT00060167   | -1 |
| 21142 | 2636  | Gm129       | Tars          | -1 |
| 21142 | 2794  | Gm129       | Map3k6        | 1  |
| 21142 | 2823  | Gm129       | Sipa112       | 1  |
| 21142 | 2829  | Gm129       | Lrfr3         | -1 |
| 21142 | 2850  | Gm129       | Slc16a6       | -1 |
| 21142 | 3214  | Gm129       | Dnmt3b        | -1 |
| 21142 | 3235  | Gm129       | BC029214      | -1 |
| 21142 | 3246  | Gm129       | Prei4         | 1  |
| 21142 | 3410  | Gm129       | Paqr9         | -1 |
| 21142 | 3603  | Gm129       | BC027231      | 1  |
| 21142 | 3746  | Gm129       | Osbp15        | 1  |
| 21142 | 3790  | Gm129       | Mtss1         | 1  |
| 21142 | 3804  | Gm129       | MMT00015534   | -1 |
| 21142 | 4192  | Gm129       | Zranb1        | 1  |
| 21142 | 4201  | Gm129       | Tubb2c        | -1 |
| 21142 | 4235  | Gm129       | Pfkfb3        | 1  |

|       |       |       |               |    |
|-------|-------|-------|---------------|----|
| 21142 | 4286  | Gm129 | Ptp4a1        | 1  |
| 21142 | 4298  | Gm129 | St3gal1       | -1 |
| 21142 | 4333  | Gm129 | Sumo3         | -1 |
| 21142 | 4392  | Gm129 | 1810055G02Rik | 1  |
| 21142 | 4534  | Gm129 | Ndel1         | 1  |
| 21142 | 4686  | Gm129 | BC021785      | -1 |
| 21142 | 4708  | Gm129 | Traf3ip2      | -1 |
| 21142 | 5068  | Gm129 | Afap1l2       | -1 |
| 21142 | 5120  | Gm129 | Alkbh7        | -1 |
| 21142 | 5183  | Gm129 | St5           | -1 |
| 21142 | 5334  | Gm129 | MMT00021505   | -1 |
| 21142 | 5374  | Gm129 | Chka          | -1 |
| 21142 | 5569  | Gm129 | Pdgfc         | -1 |
| 21142 | 5574  | Gm129 | Hsd3b7        | -1 |
| 21142 | 5734  | Gm129 | EG619653      | 1  |
| 21142 | 5802  | Gm129 | Mad2l2        | -1 |
| 21142 | 5804  | Gm129 | Thrsp         | 1  |
| 21142 | 5849  | Gm129 | 2310031A18Rik | -1 |
| 21142 | 5934  | Gm129 | S100a10       | -1 |
| 21142 | 5974  | Gm129 | Arntl         | -1 |
| 21142 | 6028  | Gm129 | Alas1         | 1  |
| 21142 | 6073  | Gm129 | Mthfd2        | -1 |
| 21142 | 6171  | Gm129 | Abtb2         | -1 |
| 21142 | 6268  | Gm129 | Slc45a3       | -1 |
| 21142 | 6338  | Gm129 | Setd3         | 1  |
| 21142 | 6343  | Gm129 | Slc20a1       | 1  |
| 21142 | 6386  | Gm129 | Por           | 1  |
| 21142 | 6771  | Gm129 | Insc          | -1 |
| 21142 | 6990  | Gm129 | Nr1i2         | 1  |
| 21142 | 7061  | Gm129 | Spsb3         | -1 |
| 21142 | 7151  | Gm129 | MMT00007982   | -1 |
| 21142 | 7414  | Gm129 | Clpx          | -1 |
| 21142 | 7862  | Gm129 | Cpsf4l        | 1  |
| 21142 | 8328  | Gm129 | Klhdc8a       | -1 |
| 21142 | 8399  | Gm129 | Herpud1       | 1  |
| 21142 | 8595  | Gm129 | MMT00019109   | -1 |
| 21142 | 9379  | Gm129 | Ypel2         | -1 |
| 21142 | 9495  | Gm129 | Srms          | -1 |
| 21142 | 9763  | Gm129 | Tuba3b        | -1 |
| 21142 | 9831  | Gm129 | Nedd4l        | -1 |
| 21142 | 9907  | Gm129 | 4932442K08Rik | 1  |
| 21142 | 9910  | Gm129 | EG666644      | 1  |
| 21142 | 10029 | Gm129 | Trak1         | 1  |
| 21142 | 10088 | Gm129 | Ddc           | -1 |
| 21142 | 10215 | Gm129 | Nampt         | 1  |
| 21142 | 10408 | Gm129 | Per1          | 1  |
| 21142 | 10486 | Gm129 | 1300002K09Rik | -1 |
| 21142 | 10541 | Gm129 | Ap2a2         | -1 |
| 21142 | 10642 | Gm129 | Ngef          | 1  |
| 21142 | 10712 | Gm129 | Fchsd2        | 1  |
| 21142 | 10775 | Gm129 | Slc16a1       | -1 |

|       |       |       |               |    |
|-------|-------|-------|---------------|----|
| 21142 | 10863 | Gm129 | Tssc1         | -1 |
| 21142 | 11075 | Gm129 | Xrcc6bp1      | 1  |
| 21142 | 11129 | Gm129 | Ankhd1        | 1  |
| 21142 | 11233 | Gm129 | Tef           | 1  |
| 21142 | 11574 | Gm129 | Gne           | 1  |
| 21142 | 11599 | Gm129 | Coq10b        | 1  |
| 21142 | 11741 | Gm129 | Slc30a10      | -1 |
| 21142 | 11807 | Gm129 | Fbxo31        | 1  |
| 21142 | 12151 | Gm129 | MMT00082650   | 1  |
| 21142 | 12204 | Gm129 | Ankmy2        | 1  |
| 21142 | 12420 | Gm129 | Klh21         | 1  |
| 21142 | 12460 | Gm129 | Pnpla2        | 1  |
| 21142 | 12489 | Gm129 | Wdr8          | -1 |
| 21142 | 12565 | Gm129 | Grem2         | 1  |
| 21142 | 12687 | Gm129 | Zc3h8         | 1  |
| 21142 | 12799 | Gm129 | Spon2         | -1 |
| 21142 | 12904 | Gm129 | MMT00040704   | 1  |
| 21142 | 12905 | Gm129 | Nfil3         | -1 |
| 21142 | 13889 | Gm129 | Agpat2        | -1 |
| 21142 | 13947 | Gm129 | Crip2         | -1 |
| 21142 | 14041 | Gm129 | Cldn1         | -1 |
| 21142 | 14279 | Gm129 | 3930402G23Rik | -1 |
| 21142 | 14298 | Gm129 | Atp2a2        | -1 |
| 21142 | 14380 | Gm129 | MMT00051866   | -1 |
| 21142 | 14462 | Gm129 | Zfp385b       | 1  |
| 21142 | 14726 | Gm129 | Slc19a1       | 1  |
| 21142 | 14989 | Gm129 | Map3k5        | 1  |
| 21142 | 15481 | Gm129 | 1110067D22Rik | -1 |
| 21142 | 15609 | Gm129 | Mreg          | -1 |
| 21142 | 15631 | Gm129 | Lpin1         | 1  |
| 21142 | 15665 | Gm129 | Blcap         | -1 |
| 21142 | 15709 | Gm129 | Tceal1        | 1  |
| 21142 | 15862 | Gm129 | Mrap          | -1 |
| 21142 | 16060 | Gm129 | Gys2          | 1  |
| 21142 | 16176 | Gm129 | St3gal5       | 1  |
| 21142 | 16580 | Gm129 | Tnfaip2       | -1 |
| 21142 | 16669 | Gm129 | Tjp2          | -1 |
| 21142 | 16690 | Gm129 | Tjp3          | -1 |
| 21142 | 16712 | Gm129 | Pnrc1         | -1 |
| 21142 | 16851 | Gm129 | Slc34a2       | -1 |
| 21142 | 16965 | Gm129 | Gst2          | 1  |
| 21142 | 17091 | Gm129 | Slc38a3       | 1  |
| 21142 | 17247 | Gm129 | A030007L17Rik | -1 |
| 21142 | 17323 | Gm129 | Tubb6         | -1 |
| 21142 | 17338 | Gm129 | Mocos         | -1 |
| 21142 | 17444 | Gm129 | Tuba1a        | -1 |
| 21142 | 17583 | Gm129 | Per2          | 1  |
| 21142 | 17617 | Gm129 | Atp5sl        | 1  |
| 21142 | 17876 | Gm129 | Tubb4         | -1 |
| 21142 | 17878 | Gm129 | Brap          | 1  |
| 21142 | 17884 | Gm129 | Lnx2          | -1 |

|       |       |       |             |    |
|-------|-------|-------|-------------|----|
| 21142 | 17952 | Gm129 | Ripk2       | 1  |
| 21142 | 18147 | Gm129 | Nhlrc2      | 1  |
| 21142 | 18179 | Gm129 | Dbp         | 1  |
| 21142 | 18296 | Gm129 | Pcgf5       | 1  |
| 21142 | 18498 | Gm129 | Slc5a6      | 1  |
| 21142 | 18552 | Gm129 | Nr2c2ap     | -1 |
| 21142 | 18756 | Gm129 | Tspan14     | -1 |
| 21142 | 18827 | Gm129 | Oprs1       | -1 |
| 21142 | 19004 | Gm129 | Pdk4        | -1 |
| 21142 | 19025 | Gm129 | Slc37a4     | 1  |
| 21142 | 19146 | Gm129 | N4bp2l1     | 1  |
| 21142 | 19234 | Gm129 | Nrg4        | 1  |
| 21142 | 19305 | Gm129 | Azin1       | 1  |
| 21142 | 19532 | Gm129 | Med8        | -1 |
| 21142 | 19671 | Gm129 | Upp2        | 1  |
| 21142 | 19790 | Gm129 | Polg2       | 1  |
| 21142 | 20266 | Gm129 | Insig2      | -1 |
| 21142 | 20803 | Gm129 | Tmem50a     | 1  |
| 21142 | 20830 | Gm129 | MMT00057509 | -1 |
| 21142 | 20854 | Gm129 | Commd7      | -1 |
| 21142 | 21142 | Gm129 | Gm129       | 1  |
| 21142 | 21251 | Gm129 | Cpt1a       | 1  |
| 21142 | 21409 | Gm129 | Gldc        | -1 |
| 21142 | 21531 | Gm129 | Ttc23       | 1  |
| 21142 | 21733 | Gm129 | Rhebl1      | 1  |
| 21142 | 21811 | Gm129 | Ak3l1       | 1  |
| 21142 | 21918 | Gm129 | Snx24       | -1 |
| 21142 | 21969 | Gm129 | Tk1         | 1  |
| 21142 | 22012 | Gm129 | Iltgae      | -1 |
| 21142 | 22290 | Gm129 | Tubb2a      | -1 |
| 21142 | 22443 | Gm129 | Tuba1c      | -1 |
| 21142 | 22470 | Gm129 | Ppargc1b    | 1  |
| 21142 | 22630 | Gm129 | MMT00034355 | -1 |
| 21142 | 22936 | Gm129 | Rhobtb1     | 1  |
| 21142 | 23248 | Gm129 | Tesk2       | 1  |
| 21142 | 23377 | Gm129 | Pdxk        | 1  |
| 21142 | 23437 | Gm129 | Efh2        | 1  |
| 21142 | 23558 | Gm129 | MMT00030937 | 1  |
| 21143 | 607   | Ypel3 | Me1         | -1 |
| 21143 | 3377  | Ypel3 | Cs          | -1 |
| 21143 | 6193  | Ypel3 | Lactb2      | -1 |
| 21143 | 10961 | Ypel3 | Pgd         | -1 |
| 21143 | 11086 | Ypel3 | Pnpla5      | -1 |
| 21143 | 14147 | Ypel3 | Acss2       | -1 |
| 21143 | 14323 | Ypel3 | Scarb1      | 1  |
| 21143 | 18201 | Ypel3 | MMT00060232 | -1 |
| 21143 | 21202 | Ypel3 | Acly        | -1 |
| 21143 | 21214 | Ypel3 | Scd1        | -1 |
| 21143 | 21251 | Ypel3 | Cpt1a       | 1  |
| 21167 | 250   | Irf5  | Tubb2a-ps2  | 1  |
| 21167 | 433   | Irf5  | Pla2g12b    | 1  |



|       |       |        |                    |    |
|-------|-------|--------|--------------------|----|
| 21167 | 609   | Irf5   | MMT00060868        | 1  |
| 21167 | 3410  | Irf5   | Paqr9              | 1  |
| 21167 | 4286  | Irf5   | Ptp4a1             | -1 |
| 21167 | 5364  | Irf5   | Kif22              | 1  |
| 21167 | 5934  | Irf5   | S100a10            | 1  |
| 21167 | 6386  | Irf5   | Por                | -1 |
| 21167 | 8416  | Irf5   | Cdc20              | 1  |
| 21167 | 10558 | Irf5   | Cyp2d40            | 1  |
| 21167 | 11129 | Irf5   | Ankhd1             | -1 |
| 21167 | 11382 | Irf5   | Cdca3              | 1  |
| 21167 | 11393 | Irf5   | A830007P12Rik      | 1  |
| 21167 | 11741 | Irf5   | Slc30a10           | 1  |
| 21167 | 13054 | Irf5   | Mcm4               | 1  |
| 21167 | 14472 | Irf5   | Ahcy               | -1 |
| 21167 | 15320 | Irf5   | MMT00017479        | -1 |
| 21167 | 17338 | Irf5   | Mocos              | 1  |
| 21167 | 17876 | Irf5   | Tubb4              | 1  |
| 21167 | 18455 | Irf5   | Mtnr1a             | 1  |
| 21167 | 19917 | Irf5   | Nek2               | 1  |
| 21167 | 21947 | Irf5   | Cdca8              | 1  |
| 21167 | 22290 | Irf5   | Tubb2a             | 1  |
| 21167 | 22630 | Irf5   | MMT00034355        | 1  |
| 21173 | 6044  | Rassf6 | Sucnr1             | -1 |
| 21173 | 20079 | Rassf6 | MMT00019254        | 1  |
| 21173 | 23026 | Rassf6 | Apom               | 1  |
| 21195 | 18201 | Tbc1d7 | MMT00060232        | 1  |
| 21202 | 1129  | Acly   | Gsta4              | 1  |
| 21202 | 2127  | Acly   | Ldha               | -1 |
| 21202 | 3446  | Acly   | Eno1               | 1  |
| 21202 | 6085  | Acly   | MMT00007454        | -1 |
| 21202 | 6420  | Acly   | Mipep              | 1  |
| 21202 | 7602  | Acly   | Pcca               | 1  |
| 21202 | 8773  | Acly   | MMT00027093        | -1 |
| 21202 | 9427  | Acly   | Nqo2               | 1  |
| 21202 | 9842  | Acly   | Qdpr               | 1  |
| 21202 | 10554 | Acly   | ENSMUSG00000074179 | 1  |
| 21202 | 12556 | Acly   | Ass1               | 1  |
| 21202 | 12955 | Acly   | Atp5o              | 1  |
| 21202 | 13293 | Acly   | Gsta2              | 1  |
| 21202 | 13431 | Acly   | MMT00038058        | -1 |
| 21202 | 14055 | Acly   | MMT00050438        | -1 |
| 21202 | 15205 | Acly   | MMT00030262        | -1 |
| 21202 | 15500 | Acly   | MMT00081411        | -1 |
| 21202 | 19066 | Acly   | MMT00012632        | 1  |
| 21202 | 20019 | Acly   | Qdpr               | 1  |
| 21202 | 21214 | Acly   | Scd1               | 1  |
| 21202 | 21727 | Acly   | Khk                | 1  |
| 21202 | 21937 | Acly   | MMT00015325        | -1 |
| 21202 | 22907 | Acly   | MMT00054594        | -1 |
| 21202 | 22978 | Acly   | MMT00043176        | -1 |
| 21202 | 22998 | Acly   | Ass1               | 1  |

|       |       |             |                    |    |
|-------|-------|-------------|--------------------|----|
| 21202 | 23640 | Acly        | Bdh1               | -1 |
| 21209 | 11465 | Ebf4        | Eif3k              | -1 |
| 21223 | 2599  | Pira1       | Lsm14a             | -1 |
| 21223 | 4697  | Pira1       | Cyp2a12            | 1  |
| 21223 | 6513  | Pira1       | Qpctl              | -1 |
| 21223 | 7761  | Pira1       | Nudt19             | -1 |
| 21223 | 11321 | Pira1       | 2310014L17Rik      | 1  |
| 21223 | 11888 | Pira1       | Myadm              | 1  |
| 21223 | 19462 | Pira1       | 4933439C20Rik      | 1  |
| 21232 | 6650  | Nkiras1     | MMT00050325        | 1  |
| 21232 | 8815  | Nkiras1     | Mx1                | 1  |
| 21232 | 20058 | Nkiras1     | Dnaic1             | -1 |
| 21232 | 21232 | Nkiras1     | Nkiras1            | 1  |
| 21236 | 7602  | Glx5        | Pcca               | 1  |
| 21236 | 8444  | Glx5        | Rdh16              | 1  |
| 21236 | 8815  | Glx5        | Mx1                | 1  |
| 21236 | 10554 | Glx5        | ENSMUSG00000074179 | 1  |
| 21236 | 13293 | Glx5        | Gsta2              | 1  |
| 21236 | 18201 | Glx5        | MMT00060232        | 1  |
| 21236 | 20058 | Glx5        | Dnaic1             | -1 |
| 21236 | 21214 | Glx5        | Scd1               | 1  |
| 21236 | 21727 | Glx5        | Khk                | 1  |
| 21237 | 6193  | Poli        | Lactb2             | -1 |
| 21251 | 5364  | Cpt1a       | Kif22              | 1  |
| 21251 | 11382 | Cpt1a       | Cdca3              | 1  |
| 21251 | 14472 | Cpt1a       | Ahcy               | -1 |
| 21253 | 250   | MMT00068187 | Tubb2a-ps2         | 1  |
| 21253 | 415   | MMT00068187 | Ypel2              | 1  |
| 21253 | 437   | MMT00068187 | Ndrg1              | 1  |
| 21253 | 609   | MMT00068187 | MMT00060868        | 1  |
| 21253 | 719   | MMT00068187 | Usp2               | -1 |
| 21253 | 1935  | MMT00068187 | 2810439F02Rik      | -1 |
| 21253 | 2011  | MMT00068187 | Slc2a5             | -1 |
| 21253 | 2126  | MMT00068187 | Dgat2              | -1 |
| 21253 | 2399  | MMT00068187 | MMT00060167        | 1  |
| 21253 | 2636  | MMT00068187 | Tars               | 1  |
| 21253 | 2766  | MMT00068187 | Elp4               | 1  |
| 21253 | 2829  | MMT00068187 | Lrfr3              | 1  |
| 21253 | 2850  | MMT00068187 | Slc16a6            | 1  |
| 21253 | 3214  | MMT00068187 | Dnmt3b             | 1  |
| 21253 | 3410  | MMT00068187 | Paqr9              | 1  |
| 21253 | 3804  | MMT00068187 | MMT00015534        | 1  |
| 21253 | 4298  | MMT00068187 | St3gal1            | 1  |
| 21253 | 4534  | MMT00068187 | Ndel1              | -1 |
| 21253 | 5183  | MMT00068187 | St5                | 1  |
| 21253 | 5374  | MMT00068187 | Chka               | 1  |
| 21253 | 5734  | MMT00068187 | EG619653           | -1 |
| 21253 | 5802  | MMT00068187 | Mad2l2             | 1  |
| 21253 | 5849  | MMT00068187 | 2310031A18Rik      | 1  |
| 21253 | 5974  | MMT00068187 | Arntl              | 1  |
| 21253 | 6043  | MMT00068187 | Cyp2ab1            | 1  |

|       |       |             |               |    |
|-------|-------|-------------|---------------|----|
| 21253 | 6386  | MMT00068187 | Por           | -1 |
| 21253 | 7414  | MMT00068187 | Clpx          | 1  |
| 21253 | 7862  | MMT00068187 | Cpsf4l        | -1 |
| 21253 | 9594  | MMT00068187 | Asb13         | 1  |
| 21253 | 9831  | MMT00068187 | Nedd4l        | 1  |
| 21253 | 10088 | MMT00068187 | Ddc           | 1  |
| 21253 | 10642 | MMT00068187 | Ngef          | -1 |
| 21253 | 11075 | MMT00068187 | Xrcc6bp1      | -1 |
| 21253 | 11233 | MMT00068187 | Tef           | -1 |
| 21253 | 11599 | MMT00068187 | Coq10b        | -1 |
| 21253 | 11740 | MMT00068187 | Cpm           | -1 |
| 21253 | 11741 | MMT00068187 | Slc30a10      | 1  |
| 21253 | 11807 | MMT00068187 | Fbxo31        | -1 |
| 21253 | 12204 | MMT00068187 | Ankmy2        | -1 |
| 21253 | 12433 | MMT00068187 | 5033413D22Rik | 1  |
| 21253 | 12565 | MMT00068187 | Grem2         | -1 |
| 21253 | 15481 | MMT00068187 | 1110067D22Rik | 1  |
| 21253 | 15824 | MMT00068187 | D19Ert721e    | 1  |
| 21253 | 16060 | MMT00068187 | Gys2          | -1 |
| 21253 | 16690 | MMT00068187 | Tjp3          | 1  |
| 21253 | 16704 | MMT00068187 | Ppif          | -1 |
| 21253 | 17247 | MMT00068187 | A030007L17Rik | 1  |
| 21253 | 17876 | MMT00068187 | Tubb4         | 1  |
| 21253 | 17884 | MMT00068187 | Ln timer      | 1  |
| 21253 | 18179 | MMT00068187 | Dbp           | -1 |
| 21253 | 18498 | MMT00068187 | Slc5a6        | -1 |
| 21253 | 18827 | MMT00068187 | Oprs1         | 1  |
| 21253 | 19234 | MMT00068187 | Nrg4          | -1 |
| 21253 | 19305 | MMT00068187 | Azin1         | -1 |
| 21253 | 19465 | MMT00068187 | Hacl1         | 1  |
| 21253 | 19671 | MMT00068187 | Upp2          | -1 |
| 21253 | 20266 | MMT00068187 | Insig2        | 1  |
| 21253 | 20745 | MMT00068187 | Sord          | -1 |
| 21253 | 21142 | MMT00068187 | Gm129         | -1 |
| 21253 | 21969 | MMT00068187 | Tk1           | -1 |
| 21253 | 22290 | MMT00068187 | Tubb2a        | 1  |
| 21253 | 22630 | MMT00068187 | MMT00034355   | 1  |
| 21255 | 21322 | Kif18a      | Usp1          | -1 |
| 21266 | 5364  | Cercam      | Kif22         | 1  |
| 21266 | 11382 | Cercam      | Cdca3         | 1  |
| 21266 | 14472 | Cercam      | Ahcy          | -1 |
| 21266 | 20967 | Cercam      | Fabp2         | 1  |
| 21270 | 3228  | V1rg6       | Saa1          | 1  |
| 21295 | 327   | Snf1lk      | H2-Ea         | -1 |
| 21295 | 5410  | Snf1lk      | Cyp4f15       | 1  |
| 21295 | 7088  | Snf1lk      | Slc37a1       | -1 |
| 21295 | 8750  | Snf1lk      | 1700010114Rik | -1 |
| 21295 | 10667 | Snf1lk      | H2-Eb1        | -1 |
| 21295 | 13493 | Snf1lk      | Ring1         | 1  |
| 21295 | 21295 | Snf1lk      | Snf1lk        | 1  |
| 21295 | 22822 | Snf1lk      | MMT00013433   | -1 |

|       |       |         |               |    |
|-------|-------|---------|---------------|----|
| 21296 | 7761  | Rpl14   | Nudt19        | -1 |
| 21307 | 2743  | Krcc1   | Tcf3          | 1  |
| 21307 | 3703  | Krcc1   | Ggcx          | 1  |
| 21307 | 15384 | Krcc1   | Mat2a         | 1  |
| 21307 | 15708 | Krcc1   | Retsat        | 1  |
| 21313 | 21214 | Rhou    | Scd1          | -1 |
| 21313 | 21531 | Rhou    | Ttc23         | -1 |
| 21314 | 8632  | Mycbp2  | Igfbp1        | -1 |
| 21314 | 12910 | Mycbp2  | 1110028A07Rik | 1  |
| 21314 | 14135 | Mycbp2  | Eepd1         | 1  |
| 21320 | 12910 | Kcne1l  | 1110028A07Rik | 1  |
| 21331 | 337   | Slc10a6 | Rasgef1b      | 1  |
| 21331 | 1877  | Slc10a6 | Amica1        | 1  |
| 21331 | 2294  | Slc10a6 | AU040829      | 1  |
| 21331 | 3196  | Slc10a6 | Tat           | 1  |
| 21331 | 3452  | Slc10a6 | Ccrn4l        | 1  |
| 21331 | 4678  | Slc10a6 | Kank1         | -1 |
| 21331 | 5889  | Slc10a6 | Errfi1        | 1  |
| 21331 | 6564  | Slc10a6 | Cebpd         | 1  |
| 21331 | 7136  | Slc10a6 | Id3           | -1 |
| 21331 | 9213  | Slc10a6 | Osgin1        | -1 |
| 21331 | 10279 | Slc10a6 | Rnf186        | -1 |
| 21331 | 12761 | Slc10a6 | Tsc22d3       | 1  |
| 21331 | 13289 | Slc10a6 | Dusp10        | -1 |
| 21331 | 14347 | Slc10a6 | Dact2         | -1 |
| 21331 | 15522 | Slc10a6 | 1810011O10Rik | 1  |
| 21331 | 15631 | Slc10a6 | Lpin1         | 1  |
| 21331 | 15882 | Slc10a6 | AA986860      | 1  |
| 21331 | 16176 | Slc10a6 | St3gal5       | 1  |
| 21331 | 16580 | Slc10a6 | Tnfaip2       | -1 |
| 21331 | 17525 | Slc10a6 | Ctgf          | 1  |
| 21331 | 18314 | Slc10a6 | 4631416L12Rik | 1  |
| 21331 | 19466 | Slc10a6 | Pptc7         | 1  |
| 21331 | 19556 | Slc10a6 | Efna1         | -1 |
| 21331 | 21331 | Slc10a6 | Slc10a6       | 1  |
| 21331 | 21934 | Slc10a6 | Id2           | -1 |
| 21331 | 22873 | Slc10a6 | Slc38a2       | 1  |
| 21335 | 1258  | Trp53rk | Hba-a1        | 1  |
| 21335 | 5919  | Trp53rk | B930041F14Rik | 1  |
| 21335 | 15132 | Trp53rk | MMT00007672   | 1  |
| 21335 | 15529 | Trp53rk | MMT00011590   | 1  |
| 21335 | 17664 | Trp53rk | Jup           | 1  |
| 21335 | 21335 | Trp53rk | Trp53rk       | 1  |
| 21335 | 21356 | Trp53rk | Nkx2-6        | 1  |
| 21340 | 502   | Armc1   | Iars          | 1  |
| 21340 | 10612 | Armc1   | Slc24a6       | -1 |
| 21351 | 1533  | Shisa5  | BC013712      | 1  |
| 21351 | 2200  | Shisa5  | BC006779      | 1  |
| 21351 | 2224  | Shisa5  | Oasl2         | 1  |
| 21351 | 3028  | Shisa5  | Uhrf1         | 1  |
| 21351 | 3683  | Shisa5  | Oas2          | 1  |

|       |       |        |               |   |
|-------|-------|--------|---------------|---|
| 21351 | 4426  | Shisa5 | Iigp2         | 1 |
| 21351 | 4508  | Shisa5 | Ifit1         | 1 |
| 21351 | 5044  | Shisa5 | Ifi35         | 1 |
| 21351 | 5250  | Shisa5 | Ifit2         | 1 |
| 21351 | 5766  | Shisa5 | 5033414D02Rik | 1 |
| 21351 | 5853  | Shisa5 | Trim30        | 1 |
| 21351 | 6595  | Shisa5 | Oas1a         | 1 |
| 21351 | 6734  | Shisa5 | Ehd4          | 1 |
| 21351 | 6824  | Shisa5 | Irf7          | 1 |
| 21351 | 7105  | Shisa5 | Plac8         | 1 |
| 21351 | 7284  | Shisa5 | MMT00008674   | 1 |
| 21351 | 7316  | Shisa5 | Ifi204        | 1 |
| 21351 | 7336  | Shisa5 | Cd5l          | 1 |
| 21351 | 8270  | Shisa5 | Clspn         | 1 |
| 21351 | 8659  | Shisa5 | Psmb8         | 1 |
| 21351 | 8800  | Shisa5 | Rnf213        | 1 |
| 21351 | 9847  | Shisa5 | Ifi27         | 1 |
| 21351 | 10109 | Shisa5 | Gbp3          | 1 |
| 21351 | 11009 | Shisa5 | MMT00008885   | 1 |
| 21351 | 11265 | Shisa5 | Irgm          | 1 |
| 21351 | 11393 | Shisa5 | A830007P12Rik | 1 |
| 21351 | 12398 | Shisa5 | Ifi44         | 1 |
| 21351 | 12600 | Shisa5 | Ifi204        | 1 |
| 21351 | 12969 | Shisa5 | Xaf1          | 1 |
| 21351 | 13156 | Shisa5 | Ifit3         | 1 |
| 21351 | 13181 | Shisa5 | Lcp2          | 1 |
| 21351 | 13309 | Shisa5 | Tgtp          | 1 |
| 21351 | 13654 | Shisa5 | Stat1         | 1 |
| 21351 | 14258 | Shisa5 | Ifi47         | 1 |
| 21351 | 14506 | Shisa5 | Slc15a3       | 1 |
| 21351 | 14880 | Shisa5 | Ms4a4c        | 1 |
| 21351 | 14883 | Shisa5 | Itgal         | 1 |
| 21351 | 15074 | Shisa5 | Usp18         | 1 |
| 21351 | 15504 | Shisa5 | Mx2           | 1 |
| 21351 | 16182 | Shisa5 | Oasl1         | 1 |
| 21351 | 16521 | Shisa5 | Adar          | 1 |
| 21351 | 16572 | Shisa5 | D14Ertd668e   | 1 |
| 21351 | 16874 | Shisa5 | Fcer1g        | 1 |
| 21351 | 16988 | Shisa5 | Clec4f        | 1 |
| 21351 | 17197 | Shisa5 | Igtp          | 1 |
| 21351 | 17412 | Shisa5 | Aif1          | 1 |
| 21351 | 17904 | Shisa5 | Cds1          | 1 |
| 21351 | 18174 | Shisa5 | Stat2         | 1 |
| 21351 | 18186 | Shisa5 | Parp14        | 1 |
| 21351 | 18289 | Shisa5 | Tap1          | 1 |
| 21351 | 19189 | Shisa5 | Sp100         | 1 |
| 21351 | 19738 | Shisa5 | Lgals3bp      | 1 |
| 21351 | 20997 | Shisa5 | MMT00028135   | 1 |
| 21351 | 21351 | Shisa5 | Shisa5        | 1 |
| 21351 | 21549 | Shisa5 | Rtp4          | 1 |
| 21351 | 21824 | Shisa5 | 5830443L24Rik | 1 |

|       |       |             |                    |    |
|-------|-------|-------------|--------------------|----|
| 21351 | 22037 | Shisa5      | Oas1g              | 1  |
| 21351 | 23208 | Shisa5      | Hck                | 1  |
| 21354 | 7862  | Xpa         | Cpsf4l             | 1  |
| 21354 | 10612 | Xpa         | Slc24a6            | 1  |
| 21354 | 21251 | Xpa         | Cpt1a              | 1  |
| 21356 | 1258  | Nkx2-6      | Hba-a1             | 1  |
| 21356 | 5919  | Nkx2-6      | B930041F14Rik      | 1  |
| 21356 | 21356 | Nkx2-6      | Nkx2-6             | 1  |
| 21364 | 12910 | Ppm1h       | 1110028A07Rik      | 1  |
| 21364 | 14151 | Ppm1h       | Slc44a1            | 1  |
| 21375 | 12565 | MMT00043149 | Grem2              | -1 |
| 21380 | 2110  | Ier5        | Gtf2ird1           | 1  |
| 21380 | 5804  | Ier5        | Thrsp              | -1 |
| 21380 | 5849  | Ier5        | 2310031A18Rik      | 1  |
| 21380 | 6746  | Ier5        | E2f8               | 1  |
| 21380 | 6756  | Ier5        | Sds                | -1 |
| 21380 | 7136  | Ier5        | Id3                | 1  |
| 21380 | 8328  | Ier5        | Klhdc8a            | 1  |
| 21380 | 9213  | Ier5        | Osgin1             | 1  |
| 21380 | 12761 | Ier5        | Tsc22d3            | -1 |
| 21380 | 16580 | Ier5        | Tnfaip2            | 1  |
| 21380 | 19671 | Ier5        | Upp2               | -1 |
| 21380 | 21934 | Ier5        | Id2                | 1  |
| 21381 | 269   | Rilpl2      | Tuba1b             | 1  |
| 21381 | 274   | Rilpl2      | Trit1              | -1 |
| 21381 | 1941  | Rilpl2      | MMT00079618        | 1  |
| 21381 | 2013  | Rilpl2      | Il15ra             | -1 |
| 21381 | 7151  | Rilpl2      | MMT00007982        | 1  |
| 21381 | 7944  | Rilpl2      | A1132487           | -1 |
| 21381 | 8439  | Rilpl2      | Slc25a33           | -1 |
| 21381 | 9763  | Rilpl2      | Tuba3b             | 1  |
| 21381 | 10612 | Rilpl2      | Slc24a6            | -1 |
| 21381 | 11724 | Rilpl2      | Tuba3a             | 1  |
| 21381 | 12460 | Rilpl2      | Pnpla2             | -1 |
| 21381 | 16027 | Rilpl2      | Ppp2r2d            | -1 |
| 21381 | 16250 | Rilpl2      | MMT00069147        | -1 |
| 21381 | 17444 | Rilpl2      | Tuba1a             | 1  |
| 21381 | 17660 | Rilpl2      | Nlrp12             | -1 |
| 21381 | 18785 | Rilpl2      | Angptl4            | -1 |
| 21381 | 22388 | Rilpl2      | 2410018M08Rik      | -1 |
| 21381 | 22443 | Rilpl2      | Tuba1c             | 1  |
| 21381 | 23130 | Rilpl2      | Hps4               | -1 |
| 21388 | 1637  | Gbe1        | MMT00071316        | 1  |
| 21388 | 3446  | Gbe1        | Eno1               | 1  |
| 21388 | 3565  | Gbe1        | MMT00045908        | 1  |
| 21388 | 4056  | Gbe1        | Tnfaip8l1          | -1 |
| 21388 | 6329  | Gbe1        | Cyp2b10            | 1  |
| 21388 | 7492  | Gbe1        | Adfp               | -1 |
| 21388 | 9718  | Gbe1        | Fmo5               | 1  |
| 21388 | 10554 | Gbe1        | ENSMUSG00000074179 | 1  |
| 21388 | 12556 | Gbe1        | Ass1               | 1  |

|       |       |         |               |    |
|-------|-------|---------|---------------|----|
| 21388 | 13271 | Gbe1    | Idh2          | 1  |
| 21388 | 13293 | Gbe1    | Gsta2         | 1  |
| 21388 | 15205 | Gbe1    | MMT00030262   | -1 |
| 21388 | 18113 | Gbe1    | MMT00034400   | 1  |
| 21388 | 19066 | Gbe1    | MMT00012632   | 1  |
| 21388 | 19772 | Gbe1    | Gnmt          | 1  |
| 21388 | 19917 | Gbe1    | Nek2          | -1 |
| 21388 | 20804 | Gbe1    | Eno1          | 1  |
| 21388 | 20967 | Gbe1    | Fabp2         | -1 |
| 21388 | 21727 | Gbe1    | Khk           | 1  |
| 21388 | 22998 | Gbe1    | Ass1          | 1  |
| 21412 | 9408  | Afap111 | Hmgcs2        | -1 |
| 21424 | 5364  | Supt3h  | Kif22         | -1 |
| 21425 | 20300 | Rab6    | Plekha1       | 1  |
| 21425 | 21425 | Rab6    | Rab6          | 1  |
| 21431 | 21431 | Xbp1    | Xbp1          | 1  |
| 21438 | 4426  | Plekha4 | Iigp2         | 1  |
| 21438 | 5766  | Plekha4 | 5033414D02Rik | 1  |
| 21438 | 7105  | Plekha4 | Plac8         | 1  |
| 21438 | 14258 | Plekha4 | Ifi47         | 1  |
| 21438 | 14361 | Plekha4 | Txndc12       | 1  |
| 21438 | 15572 | Plekha4 | Dtx3l         | 1  |
| 21438 | 16525 | Plekha4 | Lbp           | 1  |
| 21438 | 17577 | Plekha4 | Med28         | 1  |
| 21438 | 18186 | Plekha4 | Parp14        | 1  |
| 21438 | 19762 | Plekha4 | Pih1d1        | 1  |
| 21438 | 20997 | Plekha4 | MMT00028135   | 1  |
| 21438 | 21438 | Plekha4 | Plekha4       | 1  |
| 21438 | 21549 | Plekha4 | Rtp4          | 1  |
| 21440 | 3265  | Tmsb10  | Dntt          | 1  |
| 21440 | 5364  | Tmsb10  | Kif22         | 1  |
| 21440 | 17216 | Tmsb10  | Nuf2          | 1  |
| 21440 | 20967 | Tmsb10  | Fabp2         | 1  |
| 21446 | 2200  | Ccl12   | BC006779      | 1  |
| 21446 | 5949  | Ccl12   | Zbp1          | 1  |
| 21446 | 12126 | Ccl12   | Znfx1         | 1  |
| 21446 | 18174 | Ccl12   | Stat2         | 1  |
| 21446 | 20997 | Ccl12   | MMT00028135   | 1  |
| 21448 | 3495  | Paqr7   | EG633752      | 1  |
| 21448 | 3989  | Paqr7   | Wrnip1        | -1 |
| 21448 | 5804  | Paqr7   | Thrsp         | 1  |
| 21448 | 6044  | Paqr7   | Sucnr1        | 1  |
| 21448 | 6816  | Paqr7   | Slc46a3       | 1  |
| 21448 | 10132 | Paqr7   | Ces2          | 1  |
| 21448 | 11462 | Paqr7   | Gpam          | 1  |
| 21448 | 12315 | Paqr7   | Sreb1         | 1  |
| 21448 | 12910 | Paqr7   | 1110028A07Rik | 1  |
| 21448 | 13304 | Paqr7   | Gadd45b       | -1 |
| 21448 | 14151 | Paqr7   | Slc44a1       | 1  |
| 21448 | 14279 | Paqr7   | 3930402G23Rik | -1 |
| 21448 | 16616 | Paqr7   | Paox          | 1  |

|       |       |       |                    |    |
|-------|-------|-------|--------------------|----|
| 21448 | 17090 | Paqr7 | Lass2              | 1  |
| 21448 | 17660 | Paqr7 | Nlrp12             | -1 |
| 21448 | 18515 | Paqr7 | Ddx28              | -1 |
| 21448 | 20246 | Paqr7 | Pdia5              | -1 |
| 21448 | 21202 | Paqr7 | Acly               | 1  |
| 21448 | 22046 | Paqr7 | Cml4               | 1  |
| 21448 | 22321 | Paqr7 | Apol7a             | 1  |
| 21459 | 20967 | Hpse  | Fabp2              | 1  |
| 21465 | 1767  | Nxn   | BC016495           | -1 |
| 21471 | 21202 | Stmn2 | Acly               | -1 |
| 21483 | 16949 | Ippk  | Iigp1              | -1 |
| 21506 | 607   | St7   | Me1                | 1  |
| 21506 | 18201 | St7   | MMT00060232        | 1  |
| 21512 | 407   | Gas6  | Serpina6           | -1 |
| 21512 | 433   | Gas6  | Pla2g12b           | 1  |
| 21512 | 760   | Gas6  | Akr1c19            | -1 |
| 21512 | 1379  | Gas6  | A930041C12Rik      | -1 |
| 21512 | 2127  | Gas6  | Ldha               | 1  |
| 21512 | 2256  | Gas6  | Serpina9           | 1  |
| 21512 | 2639  | Gas6  | Abhd2              | 1  |
| 21512 | 2850  | Gas6  | Slc16a6            | 1  |
| 21512 | 3836  | Gas6  | 2200001115Rik      | 1  |
| 21512 | 4534  | Gas6  | Ndel1              | -1 |
| 21512 | 5259  | Gas6  | Mat1a              | -1 |
| 21512 | 5364  | Gas6  | Kif22              | 1  |
| 21512 | 5691  | Gas6  | Csrp3              | 1  |
| 21512 | 5983  | Gas6  | Pcolce2            | 1  |
| 21512 | 6085  | Gas6  | MMT00007454        | 1  |
| 21512 | 6109  | Gas6  | Hsd17b2            | 1  |
| 21512 | 6329  | Gas6  | Cyp2b10            | -1 |
| 21512 | 7761  | Gas6  | Nudt19             | -1 |
| 21512 | 7839  | Gas6  | Asl                | -1 |
| 21512 | 8328  | Gas6  | Klhdc8a            | 1  |
| 21512 | 8428  | Gas6  | Sorbs3             | -1 |
| 21512 | 8773  | Gas6  | MMT00027093        | 1  |
| 21512 | 9329  | Gas6  | Serpina3m          | 1  |
| 21512 | 9481  | Gas6  | Ppl                | -1 |
| 21512 | 9718  | Gas6  | Fmo5               | -1 |
| 21512 | 10554 | Gas6  | ENSMUSG00000074179 | -1 |
| 21512 | 11565 | Gas6  | Serpina3c          | 1  |
| 21512 | 12845 | Gas6  | F11                | 1  |
| 21512 | 12925 | Gas6  | Farp1              | 1  |
| 21512 | 13271 | Gas6  | Idh2               | -1 |
| 21512 | 13273 | Gas6  | MMT00033789        | 1  |
| 21512 | 13293 | Gas6  | Gsta2              | -1 |
| 21512 | 13431 | Gas6  | MMT00038058        | 1  |
| 21512 | 14055 | Gas6  | MMT00050438        | 1  |
| 21512 | 14472 | Gas6  | Ahcy               | -1 |
| 21512 | 15205 | Gas6  | MMT00030262        | 1  |
| 21512 | 15320 | Gas6  | MMT00017479        | -1 |
| 21512 | 15425 | Gas6  | Adprh              | 1  |



|       |       |      |               |    |
|-------|-------|------|---------------|----|
| 21512 | 15500 | Gas6 | MMT00081411   | 1  |
| 21512 | 17638 | Gas6 | Adssl1        | -1 |
| 21512 | 18069 | Gas6 | Gpt           | -1 |
| 21512 | 18299 | Gas6 | MMT00035424   | 1  |
| 21512 | 18590 | Gas6 | Fgb           | 1  |
| 21512 | 19340 | Gas6 | Serpina3k     | 1  |
| 21512 | 19790 | Gas6 | Polg2         | -1 |
| 21512 | 20058 | Gas6 | Dnaic1        | 1  |
| 21512 | 20171 | Gas6 | 1700008G05Rik | 1  |
| 21512 | 21692 | Gas6 | MMT00013924   | 1  |
| 21512 | 21937 | Gas6 | MMT00015325   | 1  |
| 21512 | 22238 | Gas6 | Sardh         | -1 |
| 21512 | 22568 | Gas6 | MMT00033197   | 1  |
| 21512 | 22907 | Gas6 | MMT00054594   | 1  |
| 21512 | 22978 | Gas6 | MMT00043176   | 1  |
| 21541 | 13004 | Brf2 | Arhgef10      | 1  |
| 21547 | 15280 | Il10 | Cxcl10        | 1  |
| 21547 | 16147 | Il10 | Tlr2          | 1  |
| 21547 | 16517 | Il10 | D4Wsu53e      | -1 |
| 21549 | 143   | Rtp4 | Gvin1         | 1  |
| 21549 | 405   | Rtp4 | Emr4          | 1  |
| 21549 | 701   | Rtp4 | Polr3g        | -1 |
| 21549 | 830   | Rtp4 | Socs1         | 1  |
| 21549 | 860   | Rtp4 | Psmb10        | 1  |
| 21549 | 1180  | Rtp4 | Clec4a3       | 1  |
| 21549 | 1513  | Rtp4 | Gzmb          | 1  |
| 21549 | 1533  | Rtp4 | BC013712      | 1  |
| 21549 | 1840  | Rtp4 | Fpr1          | 1  |
| 21549 | 1908  | Rtp4 | Rnf213        | 1  |
| 21549 | 2058  | Rtp4 | Hk3           | 1  |
| 21549 | 2200  | Rtp4 | BC006779      | 1  |
| 21549 | 2224  | Rtp4 | Oasl2         | 1  |
| 21549 | 2550  | Rtp4 | MMT00036681   | 1  |
| 21549 | 2578  | Rtp4 | Csf2rb2       | 1  |
| 21549 | 2752  | Rtp4 | Fcgr1         | 1  |
| 21549 | 3036  | Rtp4 | Slamf9        | 1  |
| 21549 | 3103  | Rtp4 | MMT00062748   | 1  |
| 21549 | 3426  | Rtp4 | Hap1          | 1  |
| 21549 | 3523  | Rtp4 | Trim34        | 1  |
| 21549 | 3572  | Rtp4 | Ebi3          | 1  |
| 21549 | 3594  | Rtp4 | Rasa4         | 1  |
| 21549 | 3659  | Rtp4 | EG236451      | 1  |
| 21549 | 3683  | Rtp4 | Oas2          | 1  |
| 21549 | 3905  | Rtp4 | H2-Q1         | 1  |
| 21549 | 4114  | Rtp4 | Parp12        | 1  |
| 21549 | 4310  | Rtp4 | B3gnt8        | 1  |
| 21549 | 4409  | Rtp4 | 5430435G22Rik | 1  |
| 21549 | 4426  | Rtp4 | Ilgp2         | 1  |
| 21549 | 4508  | Rtp4 | Ifit1         | 1  |
| 21549 | 4516  | Rtp4 | Rsad2         | 1  |
| 21549 | 5002  | Rtp4 | Ifi202b       | 1  |

|       |       |      |               |    |
|-------|-------|------|---------------|----|
| 21549 | 5044  | Rtp4 | Ifi35         | 1  |
| 21549 | 5216  | Rtp4 | Spnb5         | 1  |
| 21549 | 5250  | Rtp4 | Ifit2         | 1  |
| 21549 | 5406  | Rtp4 | Cd207         | -1 |
| 21549 | 5554  | Rtp4 | Emr1          | 1  |
| 21549 | 5556  | Rtp4 | Ccl4          | 1  |
| 21549 | 5765  | Rtp4 | Ifitm2        | 1  |
| 21549 | 5766  | Rtp4 | 5033414D02Rik | 1  |
| 21549 | 5845  | Rtp4 | Il18bp        | 1  |
| 21549 | 5853  | Rtp4 | Trim30        | 1  |
| 21549 | 5949  | Rtp4 | Zbp1          | 1  |
| 21549 | 5975  | Rtp4 | Car13         | 1  |
| 21549 | 6036  | Rtp4 | Pram1         | 1  |
| 21549 | 6072  | Rtp4 | C1qc          | 1  |
| 21549 | 6098  | Rtp4 | Ncf4          | 1  |
| 21549 | 6213  | Rtp4 | Ccl2          | 1  |
| 21549 | 6576  | Rtp4 | Sfn2          | 1  |
| 21549 | 6587  | Rtp4 | Irf9          | 1  |
| 21549 | 6595  | Rtp4 | Oas1a         | 1  |
| 21549 | 6734  | Rtp4 | Ehd4          | 1  |
| 21549 | 6779  | Rtp4 | Gbp6          | 1  |
| 21549 | 6806  | Rtp4 | Agrn          | 1  |
| 21549 | 6824  | Rtp4 | Irf7          | 1  |
| 21549 | 6866  | Rtp4 | Gls           | -1 |
| 21549 | 6888  | Rtp4 | Cxcl9         | 1  |
| 21549 | 6910  | Rtp4 | Ly6c2         | 1  |
| 21549 | 7069  | Rtp4 | Ube1l         | 1  |
| 21549 | 7105  | Rtp4 | Plac8         | 1  |
| 21549 | 7238  | Rtp4 | Pycard        | 1  |
| 21549 | 7284  | Rtp4 | MMT00008674   | 1  |
| 21549 | 7316  | Rtp4 | Ifi204        | 1  |
| 21549 | 7336  | Rtp4 | Cd5l          | 1  |
| 21549 | 7879  | Rtp4 | Ifitm3        | 1  |
| 21549 | 8325  | Rtp4 | Psme2         | 1  |
| 21549 | 8392  | Rtp4 | Asf1b         | 1  |
| 21549 | 8555  | Rtp4 | H2-M3         | 1  |
| 21549 | 8564  | Rtp4 | Pld4          | 1  |
| 21549 | 8659  | Rtp4 | Psmb8         | 1  |
| 21549 | 8800  | Rtp4 | Rnf213        | 1  |
| 21549 | 8922  | Rtp4 | Il10ra        | 1  |
| 21549 | 8951  | Rtp4 | Cd97          | 1  |
| 21549 | 9100  | Rtp4 | Ms4a6c        | 1  |
| 21549 | 9320  | Rtp4 | Rnf31         | 1  |
| 21549 | 9401  | Rtp4 | Fcgr4         | 1  |
| 21549 | 9616  | Rtp4 | AI451557      | 1  |
| 21549 | 9717  | Rtp4 | Psmb9         | 1  |
| 21549 | 9820  | Rtp4 | BC023105      | 1  |
| 21549 | 9821  | Rtp4 | Pmaip1        | 1  |
| 21549 | 9847  | Rtp4 | Ifi27         | 1  |
| 21549 | 9928  | Rtp4 | Lgmn          | 1  |
| 21549 | 10109 | Rtp4 | Gbp3          | 1  |

|       |       |      |               |   |
|-------|-------|------|---------------|---|
| 21549 | 10393 | Rtp4 | Slc7a8        | 1 |
| 21549 | 10426 | Rtp4 | Ly6f          | 1 |
| 21549 | 10504 | Rtp4 | Ripk3         | 1 |
| 21549 | 10606 | Rtp4 | Apbb1ip       | 1 |
| 21549 | 10796 | Rtp4 | Spic          | 1 |
| 21549 | 10926 | Rtp4 | P2ry13        | 1 |
| 21549 | 11009 | Rtp4 | MMT00008885   | 1 |
| 21549 | 11204 | Rtp4 | Al451617      | 1 |
| 21549 | 11265 | Rtp4 | Irgm          | 1 |
| 21549 | 11701 | Rtp4 | Oas1c         | 1 |
| 21549 | 11845 | Rtp4 | Psme1         | 1 |
| 21549 | 12126 | Rtp4 | Znfx1         | 1 |
| 21549 | 12312 | Rtp4 | Ms4a6d        | 1 |
| 21549 | 12363 | Rtp4 | Ifitm6        | 1 |
| 21549 | 12398 | Rtp4 | Ifi44         | 1 |
| 21549 | 12495 | Rtp4 | Casp1         | 1 |
| 21549 | 12600 | Rtp4 | Ifi204        | 1 |
| 21549 | 12969 | Rtp4 | Xaf1          | 1 |
| 21549 | 13156 | Rtp4 | Ifit3         | 1 |
| 21549 | 13181 | Rtp4 | Lcp2          | 1 |
| 21549 | 13309 | Rtp4 | Tgtp          | 1 |
| 21549 | 13514 | Rtp4 | Apol9b        | 1 |
| 21549 | 13522 | Rtp4 | Sfn5          | 1 |
| 21549 | 13527 | Rtp4 | Ctss          | 1 |
| 21549 | 13528 | Rtp4 | Capn12        | 1 |
| 21549 | 13585 | Rtp4 | Nckap1l       | 1 |
| 21549 | 13654 | Rtp4 | Stat1         | 1 |
| 21549 | 13656 | Rtp4 | Ly86          | 1 |
| 21549 | 13749 | Rtp4 | Parp9         | 1 |
| 21549 | 13780 | Rtp4 | Pilra         | 1 |
| 21549 | 13826 | Rtp4 | Melk          | 1 |
| 21549 | 14029 | Rtp4 | 2810022L02Rik | 1 |
| 21549 | 14117 | Rtp4 | C1qb          | 1 |
| 21549 | 14237 | Rtp4 | Rac2          | 1 |
| 21549 | 14258 | Rtp4 | Ifi47         | 1 |
| 21549 | 14260 | Rtp4 | Mkl1          | 1 |
| 21549 | 14453 | Rtp4 | Inpp5d        | 1 |
| 21549 | 14506 | Rtp4 | Slc15a3       | 1 |
| 21549 | 14603 | Rtp4 | Ly6e          | 1 |
| 21549 | 14611 | Rtp4 | Ddx60         | 1 |
| 21549 | 14880 | Rtp4 | Ms4a4c        | 1 |
| 21549 | 14883 | Rtp4 | Itgal         | 1 |
| 21549 | 15074 | Rtp4 | Usp18         | 1 |
| 21549 | 15159 | Rtp4 | Timd4         | 1 |
| 21549 | 15280 | Rtp4 | Cxcl10        | 1 |
| 21549 | 15449 | Rtp4 | Mitd1         | 1 |
| 21549 | 15504 | Rtp4 | Mx2           | 1 |
| 21549 | 15582 | Rtp4 | Klrk1         | 1 |
| 21549 | 15749 | Rtp4 | Cd22          | 1 |
| 21549 | 15825 | Rtp4 | Fermt3        | 1 |
| 21549 | 16102 | Rtp4 | Cd72          | 1 |

|       |       |      |               |   |
|-------|-------|------|---------------|---|
| 21549 | 16129 | Rtp4 | Trafd1        | 1 |
| 21549 | 16147 | Rtp4 | Tlr2          | 1 |
| 21549 | 16182 | Rtp4 | Oasl1         | 1 |
| 21549 | 16186 | Rtp4 | Cfp           | 1 |
| 21549 | 16199 | Rtp4 | Samhd1        | 1 |
| 21549 | 16521 | Rtp4 | Adar          | 1 |
| 21549 | 16572 | Rtp4 | D14Ertid668e  | 1 |
| 21549 | 16874 | Rtp4 | Fcer1g        | 1 |
| 21549 | 16913 | Rtp4 | Pira3         | 1 |
| 21549 | 16988 | Rtp4 | Clec4f        | 1 |
| 21549 | 17071 | Rtp4 | Samd9l        | 1 |
| 21549 | 17197 | Rtp4 | Igtp          | 1 |
| 21549 | 17412 | Rtp4 | Aif1          | 1 |
| 21549 | 17577 | Rtp4 | Med28         | 1 |
| 21549 | 17806 | Rtp4 | Gpsm3         | 1 |
| 21549 | 17832 | Rtp4 | MMT00043412   | 1 |
| 21549 | 17904 | Rtp4 | Cds1          | 1 |
| 21549 | 18064 | Rtp4 | MMT00035925   | 1 |
| 21549 | 18174 | Rtp4 | Stat2         | 1 |
| 21549 | 18186 | Rtp4 | Parp14        | 1 |
| 21549 | 18211 | Rtp4 | Folr2         | 1 |
| 21549 | 18279 | Rtp4 | Ogfr          | 1 |
| 21549 | 18289 | Rtp4 | Tap1          | 1 |
| 21549 | 18686 | Rtp4 | Zfp143        | 1 |
| 21549 | 18868 | Rtp4 | Mpeg1         | 1 |
| 21549 | 19026 | Rtp4 | Isg15         | 1 |
| 21549 | 19063 | Rtp4 | Evl           | 1 |
| 21549 | 19189 | Rtp4 | Sp100         | 1 |
| 21549 | 19252 | Rtp4 | Tmsb4x        | 1 |
| 21549 | 19262 | Rtp4 | Cd274         | 1 |
| 21549 | 19382 | Rtp4 | Slc2a6        | 1 |
| 21549 | 19708 | Rtp4 | Ly6a          | 1 |
| 21549 | 19738 | Rtp4 | Lgals3bp      | 1 |
| 21549 | 19794 | Rtp4 | Rgs2          | 1 |
| 21549 | 20321 | Rtp4 | Ms4a6b        | 1 |
| 21549 | 20431 | Rtp4 | Slc7a7        | 1 |
| 21549 | 20474 | Rtp4 | Gnb3          | 1 |
| 21549 | 20791 | Rtp4 | MMT00014813   | 1 |
| 21549 | 20814 | Rtp4 | Ptpn18        | 1 |
| 21549 | 20997 | Rtp4 | MMT00028135   | 1 |
| 21549 | 21351 | Rtp4 | Shisa5        | 1 |
| 21549 | 21440 | Rtp4 | Tmsb10        | 1 |
| 21549 | 21549 | Rtp4 | Rtp4          | 1 |
| 21549 | 21685 | Rtp4 | Gzma          | 1 |
| 21549 | 21824 | Rtp4 | 5830443L24Rik | 1 |
| 21549 | 21863 | Rtp4 | Dok2          | 1 |
| 21549 | 22037 | Rtp4 | Oas1g         | 1 |
| 21549 | 22077 | Rtp4 | MMT00057550   | 1 |
| 21549 | 22327 | Rtp4 | Tyrobp        | 1 |
| 21549 | 22496 | Rtp4 | Sifn1         | 1 |
| 21549 | 22647 | Rtp4 | Pkib          | 1 |

|       |       |             |               |    |
|-------|-------|-------------|---------------|----|
| 21549 | 22670 | Rtp4        | Clec4a1       | 1  |
| 21549 | 22712 | Rtp4        | Phf11         | 1  |
| 21549 | 23092 | Rtp4        | Ifih1         | 1  |
| 21549 | 23174 | Rtp4        | Psme2         | 1  |
| 21549 | 23208 | Rtp4        | Hck           | 1  |
| 21549 | 23242 | Rtp4        | Gngt2         | 1  |
| 21549 | 23410 | Rtp4        | C1qa          | 1  |
| 21549 | 23450 | Rtp4        | D12Erttd647e  | 1  |
| 21550 | 8444  | Sgcd        | Rdh16         | 1  |
| 21550 | 18042 | Sgcd        | Aph1c         | -1 |
| 21550 | 18201 | Sgcd        | MMT00060232   | 1  |
| 21563 | 5364  | Arhgap9     | Kif22         | 1  |
| 21583 | 7602  | Gstz1       | Pcca          | 1  |
| 21583 | 19766 | Gstz1       | Slc26a4       | 1  |
| 21583 | 20019 | Gstz1       | Qdpr          | 1  |
| 21583 | 20058 | Gstz1       | Dnaic1        | -1 |
| 21583 | 21727 | Gstz1       | Khk           | 1  |
| 21585 | 2938  | Hipk1       | H2-T23        | -1 |
| 21591 | 3565  | Hectd3      | MMT00045908   | 1  |
| 21591 | 9700  | Hectd3      | Prodh         | 1  |
| 21604 | 1709  | Klhl24      | Mt2           | 1  |
| 21604 | 6771  | Klhl24      | Insc          | -1 |
| 21604 | 10745 | Klhl24      | Gale          | -1 |
| 21604 | 11054 | Klhl24      | Rnase4        | 1  |
| 21604 | 11984 | Klhl24      | N6amt2        | -1 |
| 21604 | 21575 | Klhl24      | Cyp2c55       | -1 |
| 21604 | 22137 | Klhl24      | Nudt7         | -1 |
| 21604 | 22138 | Klhl24      | Ang           | 1  |
| 21607 | 7159  | Aldh1a1     | 1700031F05Rik | -1 |
| 21609 | 12910 | MMT00039978 | 1110028A07Rik | -1 |
| 21620 | 4206  | Tmem166     | Nipsnap1      | -1 |
| 21620 | 7602  | Tmem166     | Pcca          | -1 |
| 21620 | 11065 | Tmem166     | Mccc1         | -1 |
| 21627 | 5364  | Fcgr3       | Kif22         | 1  |
| 21627 | 15931 | Fcgr3       | Ces3          | -1 |
| 21630 | 2370  | Ahcyl2      | 8430408G22Rik | -1 |
| 21640 | 269   | Hspa14      | Tuba1b        | 1  |
| 21640 | 607   | Hspa14      | Me1           | 1  |
| 21640 | 662   | Hspa14      | Mid1ip1       | 1  |
| 21640 | 1112  | Hspa14      | Ccdc56        | 1  |
| 21640 | 1941  | Hspa14      | MMT00079618   | 1  |
| 21640 | 2051  | Hspa14      | Ddx27         | -1 |
| 21640 | 2400  | Hspa14      | Gck           | 1  |
| 21640 | 3696  | Hspa14      | Elovl6        | 1  |
| 21640 | 4687  | Hspa14      | Gtpbp8        | 1  |
| 21640 | 5684  | Hspa14      | Ranbp10       | -1 |
| 21640 | 5804  | Hspa14      | Thrsp         | 1  |
| 21640 | 6193  | Hspa14      | Lactb2        | 1  |
| 21640 | 6461  | Hspa14      | Mttr3         | -1 |
| 21640 | 7151  | Hspa14      | MMT00007982   | 1  |
| 21640 | 8815  | Hspa14      | Mx1           | 1  |

|       |       |        |               |    |
|-------|-------|--------|---------------|----|
| 21640 | 8896  | Hspa14 | Fasn          | 1  |
| 21640 | 9408  | Hspa14 | Hmgcs2        | -1 |
| 21640 | 9763  | Hspa14 | Tuba3b        | 1  |
| 21640 | 10612 | Hspa14 | Slc24a6       | -1 |
| 21640 | 10772 | Hspa14 | Aacs          | 1  |
| 21640 | 10961 | Hspa14 | Pgd           | 1  |
| 21640 | 11375 | Hspa14 | Derl2         | 1  |
| 21640 | 11462 | Hspa14 | Gpam          | 1  |
| 21640 | 11724 | Hspa14 | Tuba3a        | 1  |
| 21640 | 12143 | Hspa14 | Thyn1         | 1  |
| 21640 | 12219 | Hspa14 | Cyb5b         | 1  |
| 21640 | 12315 | Hspa14 | Sreb1         | 1  |
| 21640 | 14147 | Hspa14 | Acss2         | 1  |
| 21640 | 14151 | Hspa14 | Slc44a1       | 1  |
| 21640 | 15252 | Hspa14 | MMT00019402   | 1  |
| 21640 | 15892 | Hspa14 | Slc22a5       | -1 |
| 21640 | 17408 | Hspa14 | Iqwd1         | -1 |
| 21640 | 17660 | Hspa14 | Nlrp12        | -1 |
| 21640 | 17862 | Hspa14 | Fbxo21        | -1 |
| 21640 | 17878 | Hspa14 | Brap          | -1 |
| 21640 | 18201 | Hspa14 | MMT00060232   | 1  |
| 21640 | 18286 | Hspa14 | Slc41a3       | -1 |
| 21640 | 18515 | Hspa14 | Ddx28         | -1 |
| 21640 | 20058 | Hspa14 | Dnaic1        | -1 |
| 21640 | 20798 | Hspa14 | Ccpg1         | -1 |
| 21640 | 21143 | Hspa14 | Ypel3         | -1 |
| 21640 | 21202 | Hspa14 | Acly          | 1  |
| 21640 | 21214 | Hspa14 | Scd1          | 1  |
| 21640 | 21251 | Hspa14 | Cpt1a         | -1 |
| 21640 | 21727 | Hspa14 | Khk           | 1  |
| 21640 | 22217 | Hspa14 | Flvcr2        | -1 |
| 21640 | 22732 | Hspa14 | Cyb5b         | 1  |
| 21643 | 3170  | Agtr1a | Mcart1        | -1 |
| 21643 | 3462  | Agtr1a | Nmnat3        | 1  |
| 21643 | 3587  | Agtr1a | MMT00041940   | -1 |
| 21643 | 6021  | Agtr1a | MMT00008784   | -1 |
| 21643 | 8670  | Agtr1a | MMT00051613   | -1 |
| 21643 | 9258  | Agtr1a | P4ha1         | -1 |
| 21643 | 11043 | Agtr1a | Hsph1         | -1 |
| 21643 | 11214 | Agtr1a | MMT00049207   | -1 |
| 21643 | 15675 | Agtr1a | MMT00077535   | -1 |
| 21643 | 16251 | Agtr1a | G6pc          | -1 |
| 21643 | 18373 | Agtr1a | Dnajb1        | -1 |
| 21643 | 18903 | Agtr1a | Crem          | -1 |
| 21643 | 20912 | Agtr1a | Chordc1       | -1 |
| 21643 | 22216 | Agtr1a | Sp5           | 1  |
| 21643 | 22303 | Agtr1a | Cdt1          | 1  |
| 21655 | 15016 | Rab40b | MMT00074608   | -1 |
| 21655 | 16613 | Rab40b | 1110031102Rik | -1 |
| 21655 | 17792 | Rab40b | Vmn2r79       | -1 |
| 21655 | 17897 | Rab40b | Gm1019        | -1 |

|       |       |               |                    |    |
|-------|-------|---------------|--------------------|----|
| 21655 | 21655 | Rab40b        | Rab40b             | 1  |
| 21662 | 12799 | A530088I07Rik | Spon2              | 1  |
| 21664 | 7519  | Insig1        | Gstm1              | 1  |
| 21664 | 10554 | Insig1        | ENSMUSG00000074179 | 1  |
| 21665 | 4336  | Nat5          | Rbbp9              | 1  |
| 21665 | 4833  | Nat5          | Synpo2             | -1 |
| 21665 | 6231  | Nat5          | 9030622O22Rik      | 1  |
| 21665 | 14647 | Nat5          | Cst3               | -1 |
| 21665 | 14740 | Nat5          | Mfap1b             | -1 |
| 21665 | 21665 | Nat5          | Nat5               | 1  |
| 21665 | 21729 | Nat5          | Hdc                | -1 |
| 21666 | 2721  | Ncor1         | Inmt               | -1 |
| 21685 | 1447  | Gzma          | Naaa               | 1  |
| 21685 | 2550  | Gzma          | MMT00036681        | 1  |
| 21685 | 2752  | Gzma          | Fcgr1              | 1  |
| 21685 | 5845  | Gzma          | Il18bp             | 1  |
| 21685 | 6824  | Gzma          | Irf7               | 1  |
| 21685 | 7069  | Gzma          | Ube1l              | 1  |
| 21685 | 7238  | Gzma          | Pycard             | 1  |
| 21685 | 8555  | Gzma          | H2-M3              | 1  |
| 21685 | 8659  | Gzma          | Psmb8              | 1  |
| 21685 | 9717  | Gzma          | Psmb9              | 1  |
| 21685 | 9821  | Gzma          | Pmaip1             | 1  |
| 21685 | 9847  | Gzma          | Ifi27              | 1  |
| 21685 | 10109 | Gzma          | Gbp3               | 1  |
| 21685 | 10504 | Gzma          | Ripk3              | 1  |
| 21685 | 11204 | Gzma          | AI451617           | 1  |
| 21685 | 12398 | Gzma          | Ifi44              | 1  |
| 21685 | 12969 | Gzma          | Xaf1               | 1  |
| 21685 | 13501 | Gzma          | Prkx               | 1  |
| 21685 | 13656 | Gzma          | Ly86               | 1  |
| 21685 | 14880 | Gzma          | Ms4a4c             | 1  |
| 21685 | 14954 | Gzma          | Rab19              | 1  |
| 21685 | 15074 | Gzma          | Usp18              | 1  |
| 21685 | 15708 | Gzma          | Retsat             | -1 |
| 21685 | 16147 | Gzma          | Tlr2               | 1  |
| 21685 | 16199 | Gzma          | Samhd1             | 1  |
| 21685 | 20814 | Gzma          | Ptpn18             | 1  |
| 21685 | 21351 | Gzma          | Shisa5             | 1  |
| 21685 | 21549 | Gzma          | Rtp4               | 1  |
| 21685 | 21685 | Gzma          | Gzma               | 1  |
| 21685 | 22037 | Gzma          | Oas1g              | 1  |
| 21685 | 22115 | Gzma          | Ccl5               | 1  |
| 21685 | 23242 | Gzma          | Gngt2              | 1  |
| 21703 | 8815  | Tmem38b       | Mx1                | 1  |
| 21703 | 12910 | Tmem38b       | 1110028A07Rik      | 1  |
| 21703 | 18201 | Tmem38b       | MMT00060232        | 1  |
| 21703 | 20058 | Tmem38b       | Dnaic1             | -1 |
| 21712 | 21712 | Ttc5          | Ttc5               | 1  |
| 21722 | 12565 | MMT00054655   | Grem2              | -1 |
| 21729 | 4833  | Hdc           | Synpo2             | 1  |

|       |       |        |               |    |
|-------|-------|--------|---------------|----|
| 21729 | 6231  | Hdc    | 9030622O22Rik | -1 |
| 21729 | 7991  | Hdc    | Gpr115        | 1  |
| 21729 | 17043 | Hdc    | Tmem127       | -1 |
| 21729 | 21729 | Hdc    | Hdc           | 1  |
| 21729 | 22046 | Hdc    | Cml4          | -1 |
| 21729 | 22857 | Hdc    | Fahd2a        | -1 |
| 21733 | 407   | Rhebl1 | Serpina6      | 1  |
| 21733 | 482   | Rhebl1 | Rnf43         | 1  |
| 21733 | 719   | Rhebl1 | Usp2          | 1  |
| 21733 | 958   | Rhebl1 | Ppp2r5e       | 1  |
| 21733 | 1036  | Rhebl1 | Dusp19        | -1 |
| 21733 | 2126  | Rhebl1 | Dgat2         | 1  |
| 21733 | 2636  | Rhebl1 | Tars          | -1 |
| 21733 | 3393  | Rhebl1 | Snhg8         | 1  |
| 21733 | 3620  | Rhebl1 | Bet1          | -1 |
| 21733 | 4192  | Rhebl1 | Zranb1        | 1  |
| 21733 | 4966  | Rhebl1 | Zscan20       | -1 |
| 21733 | 5227  | Rhebl1 | 2310008M10Rik | -1 |
| 21733 | 5974  | Rhebl1 | Arntl         | -1 |
| 21733 | 6343  | Rhebl1 | Slc20a1       | 1  |
| 21733 | 6386  | Rhebl1 | Por           | 1  |
| 21733 | 7619  | Rhebl1 | Pik3ip1       | 1  |
| 21733 | 7862  | Rhebl1 | Cpsf4l        | 1  |
| 21733 | 8632  | Rhebl1 | Igfbp1        | -1 |
| 21733 | 9067  | Rhebl1 | Tra2a         | -1 |
| 21733 | 10642 | Rhebl1 | Ngef          | 1  |
| 21733 | 11590 | Rhebl1 | Cbx4          | 1  |
| 21733 | 11807 | Rhebl1 | Fbxo31        | 1  |
| 21733 | 12204 | Rhebl1 | Ankmy2        | 1  |
| 21733 | 12487 | Rhebl1 | Tbc1d10a      | 1  |
| 21733 | 12905 | Rhebl1 | Nfil3         | -1 |
| 21733 | 13094 | Rhebl1 | Cnn3          | 1  |
| 21733 | 13630 | Rhebl1 | Cdkn1a        | -1 |
| 21733 | 14380 | Rhebl1 | MMT00051866   | -1 |
| 21733 | 15481 | Rhebl1 | 1110067D22Rik | -1 |
| 21733 | 15740 | Rhebl1 | 1810010H24Rik | 1  |
| 21733 | 16251 | Rhebl1 | G6pc          | -1 |
| 21733 | 17591 | Rhebl1 | D930015E06Rik | 1  |
| 21733 | 17884 | Rhebl1 | Lnx2          | -1 |
| 21733 | 18083 | Rhebl1 | Gadd45a       | 1  |
| 21733 | 18179 | Rhebl1 | Dbp           | 1  |
| 21733 | 18373 | Rhebl1 | Dnajb1        | -1 |
| 21733 | 18418 | Rhebl1 | Hspa1b        | -1 |
| 21733 | 18498 | Rhebl1 | Slc5a6        | 1  |
| 21733 | 18586 | Rhebl1 | Tns1          | 1  |
| 21733 | 18846 | Rhebl1 | Ikbkg         | -1 |
| 21733 | 18903 | Rhebl1 | Crem          | -1 |
| 21733 | 19108 | Rhebl1 | Armet         | -1 |
| 21733 | 19671 | Rhebl1 | Upp2          | 1  |
| 21733 | 20068 | Rhebl1 | 2610204M08Rik | 1  |
| 21733 | 21142 | Rhebl1 | Gm129         | 1  |



|       |       |            |               |    |
|-------|-------|------------|---------------|----|
| 21733 | 21389 | Rhebl1     | Odf2          | 1  |
| 21733 | 21743 | Rhebl1     | Ccno          | 1  |
| 21733 | 22213 | Rhebl1     | Adora1        | 1  |
| 21733 | 22216 | Rhebl1     | Sp5           | 1  |
| 21733 | 23437 | Rhebl1     | Efhd2         | 1  |
| 21733 | 23617 | Rhebl1     | Nme1          | -1 |
| 21739 | 8597  | Epb4.1     | Papss1        | -1 |
| 21739 | 12143 | Epb4.1     | Thyn1         | -1 |
| 21750 | 269   | Rab31      | Tuba1b        | 1  |
| 21750 | 1941  | Rab31      | MMT00079618   | 1  |
| 21750 | 3265  | Rab31      | Dntt          | 1  |
| 21750 | 5934  | Rab31      | S100a10       | 1  |
| 21750 | 7151  | Rab31      | MMT00007982   | 1  |
| 21750 | 9763  | Rab31      | Tuba3b        | 1  |
| 21750 | 11129 | Rab31      | Ankhd1        | -1 |
| 21750 | 11807 | Rab31      | Fbxo31        | -1 |
| 21750 | 12624 | Rab31      | Ciptm1l       | 1  |
| 21750 | 12910 | Rab31      | 1110028A07Rik | 1  |
| 21750 | 13018 | Rab31      | AW544981      | 1  |
| 21750 | 15862 | Rab31      | Mrap          | 1  |
| 21750 | 16692 | Rab31      | Bat4          | -1 |
| 21750 | 17444 | Rab31      | Tuba1a        | 1  |
| 21750 | 20798 | Rab31      | Ccpg1         | -1 |
| 21751 | 3804  | Ptpn6      | MMT00015534   | 1  |
| 21751 | 4708  | Ptpn6      | Traf3ip2      | 1  |
| 21751 | 11393 | Ptpn6      | A830007P12Rik | 1  |
| 21751 | 11741 | Ptpn6      | Slc30a10      | 1  |
| 21751 | 15280 | Ptpn6      | Cxcl10        | 1  |
| 21751 | 16182 | Ptpn6      | Oasl1         | 1  |
| 21751 | 18027 | Ptpn6      | 5730403B10Rik | -1 |
| 21761 | 21761 | D14Erd449e | D14Erd449e    | 1  |
| 21762 | 16510 | Lage3      | Tspyl4        | 1  |
| 21765 | 13431 | Arpp19     | MMT00038058   | -1 |
| 21765 | 15205 | Arpp19     | MMT00030262   | -1 |
| 21780 | 524   | Ankrd35    | Hsd3b2        | -1 |
| 21780 | 673   | Ankrd35    | Tchh          | 1  |
| 21780 | 1466  | Ankrd35    | Ubap2l        | -1 |
| 21780 | 1867  | Ankrd35    | Bcas2         | -1 |
| 21780 | 1963  | Ankrd35    | MMT00039783   | -1 |
| 21780 | 2752  | Ankrd35    | Fcgr1         | -1 |
| 21780 | 3753  | Ankrd35    | Setdb1        | 1  |
| 21780 | 3823  | Ankrd35    | Slc22a15      | 1  |
| 21780 | 6206  | Ankrd35    | MMT00063701   | -1 |
| 21780 | 7519  | Ankrd35    | Gstm1         | -1 |
| 21780 | 8738  | Ankrd35    | Reg4          | 1  |
| 21780 | 10521 | Ankrd35    | Ttf2          | -1 |
| 21780 | 10681 | Ankrd35    | Dgkz          | 1  |
| 21780 | 11121 | Ankrd35    | Mttr11        | 1  |
| 21780 | 11611 | Ankrd35    | S100a13       | 1  |
| 21780 | 12367 | Ankrd35    | MMT00072365   | 1  |
| 21780 | 13134 | Ankrd35    | Lipg          | 1  |

|       |       |         |                    |    |
|-------|-------|---------|--------------------|----|
| 21780 | 16416 | Ankrd35 | Commd2             | -1 |
| 21780 | 16679 | Ankrd35 | Ctsk               | 1  |
| 21780 | 16753 | Ankrd35 | Hfe2               | 1  |
| 21780 | 18138 | Ankrd35 | MMT00000385        | -1 |
| 21780 | 18754 | Ankrd35 | Rbm8a              | -1 |
| 21780 | 18911 | Ankrd35 | Selenbp2           | -1 |
| 21780 | 20385 | Ankrd35 | Chd1l              | -1 |
| 21780 | 20661 | Ankrd35 | Tuft1              | -1 |
| 21780 | 21814 | Ankrd35 | Accn5              | -1 |
| 21780 | 22202 | Ankrd35 | OTTMUSG00000021274 | 1  |
| 21780 | 22570 | Ankrd35 | Phf1               | -1 |
| 21780 | 23457 | Ankrd35 | Selenbp2           | -1 |
| 21794 | 607   | Pfkp    | Me1                | 1  |
| 21794 | 874   | Pfkp    | Aldh1a7            | 1  |
| 21794 | 1036  | Pfkp    | Dusp19             | 1  |
| 21794 | 1310  | Pfkp    | Cabc1              | 1  |
| 21794 | 2013  | Pfkp    | Il15ra             | -1 |
| 21794 | 2636  | Pfkp    | Tars               | 1  |
| 21794 | 5224  | Pfkp    | MMT00071383        | 1  |
| 21794 | 5425  | Pfkp    | Ung                | -1 |
| 21794 | 5934  | Pfkp    | S100a10            | 1  |
| 21794 | 6189  | Pfkp    | MMT00020987        | 1  |
| 21794 | 6193  | Pfkp    | Lactb2             | 1  |
| 21794 | 6788  | Pfkp    | Psen2              | 1  |
| 21794 | 7888  | Pfkp    | Pigz               | 1  |
| 21794 | 8217  | Pfkp    | Bhmt               | 1  |
| 21794 | 8815  | Pfkp    | Mx1                | 1  |
| 21794 | 9427  | Pfkp    | Nqo2               | 1  |
| 21794 | 9842  | Pfkp    | Qdpr               | 1  |
| 21794 | 10554 | Pfkp    | ENSMUSG00000074179 | 1  |
| 21794 | 10961 | Pfkp    | Pgd                | 1  |
| 21794 | 11234 | Pfkp    | Pygl               | 1  |
| 21794 | 11807 | Pfkp    | Fbxo31             | -1 |
| 21794 | 12219 | Pfkp    | Cyb5b              | 1  |
| 21794 | 14017 | Pfkp    | Ces5               | 1  |
| 21794 | 14147 | Pfkp    | Acss2              | 1  |
| 21794 | 14442 | Pfkp    | Ethe1              | 1  |
| 21794 | 16510 | Pfkp    | Tspyl4             | 1  |
| 21794 | 17338 | Pfkp    | Mocos              | 1  |
| 21794 | 18201 | Pfkp    | MMT00060232        | 1  |
| 21794 | 18286 | Pfkp    | Slc41a3            | -1 |
| 21794 | 18827 | Pfkp    | Oprs1              | 1  |
| 21794 | 19010 | Pfkp    | Bhmt               | 1  |
| 21794 | 20019 | Pfkp    | Qdpr               | 1  |
| 21794 | 20058 | Pfkp    | Dnaic1             | -1 |
| 21794 | 21202 | Pfkp    | Acly               | 1  |
| 21794 | 21214 | Pfkp    | Scd1               | 1  |
| 21794 | 21251 | Pfkp    | Cpt1a              | -1 |
| 21794 | 21369 | Pfkp    | Cd4                | -1 |
| 21794 | 21575 | Pfkp    | Cyp2c55            | 1  |
| 21794 | 21727 | Pfkp    | Khk                | 1  |

|       |       |               |               |    |
|-------|-------|---------------|---------------|----|
| 21794 | 21793 | Pfkp          | Pla2g12a      | -1 |
| 21794 | 22046 | Pfkp          | Cml4          | 1  |
| 21794 | 22138 | Pfkp          | Ang           | -1 |
| 21794 | 22732 | Pfkp          | Cyb5b         | 1  |
| 21794 | 23640 | Pfkp          | Bdh1          | -1 |
| 21797 | 12910 | Dst           | 1110028A07Rik | 1  |
| 21797 | 20194 | Dst           | Pnlcd1        | 1  |
| 21799 | 13431 | Cops5         | MMT00038058   | -1 |
| 21799 | 15205 | Cops5         | MMT00030262   | -1 |
| 21801 | 5364  | Serpnb6a      | Kif22         | 1  |
| 21823 | 22138 | Atp6v0d1      | Ang           | -1 |
| 21824 | 1533  | 5830443L24Rik | BC013712      | 1  |
| 21824 | 1660  | 5830443L24Rik | Zfp33b        | -1 |
| 21824 | 2058  | 5830443L24Rik | Hk3           | 1  |
| 21824 | 2200  | 5830443L24Rik | BC006779      | 1  |
| 21824 | 2224  | 5830443L24Rik | Oasl2         | 1  |
| 21824 | 2550  | 5830443L24Rik | MMT00036681   | 1  |
| 21824 | 2752  | 5830443L24Rik | Fcgr1         | 1  |
| 21824 | 3594  | 5830443L24Rik | Rasa4         | 1  |
| 21824 | 3683  | 5830443L24Rik | Oas2          | 1  |
| 21824 | 4114  | 5830443L24Rik | Parp12        | 1  |
| 21824 | 4185  | 5830443L24Rik | Hmgb2         | 1  |
| 21824 | 4426  | 5830443L24Rik | Iigp2         | 1  |
| 21824 | 4508  | 5830443L24Rik | Ifit1         | 1  |
| 21824 | 4516  | 5830443L24Rik | Rsad2         | 1  |
| 21824 | 5044  | 5830443L24Rik | Ifi35         | 1  |
| 21824 | 5250  | 5830443L24Rik | Ifit2         | 1  |
| 21824 | 5556  | 5830443L24Rik | Ccl4          | 1  |
| 21824 | 5766  | 5830443L24Rik | 5033414D02Rik | 1  |
| 21824 | 5845  | 5830443L24Rik | Il18bp        | 1  |
| 21824 | 5853  | 5830443L24Rik | Trim30        | 1  |
| 21824 | 6036  | 5830443L24Rik | Pram1         | 1  |
| 21824 | 6072  | 5830443L24Rik | C1qc          | 1  |
| 21824 | 6824  | 5830443L24Rik | Irf7          | 1  |
| 21824 | 6910  | 5830443L24Rik | Ly6c2         | 1  |
| 21824 | 7069  | 5830443L24Rik | Ube1l         | 1  |
| 21824 | 7105  | 5830443L24Rik | Plac8         | 1  |
| 21824 | 7238  | 5830443L24Rik | Pycard        | 1  |
| 21824 | 7284  | 5830443L24Rik | MMT00008674   | 1  |
| 21824 | 7336  | 5830443L24Rik | Cd5l          | 1  |
| 21824 | 8270  | 5830443L24Rik | Clspn         | 1  |
| 21824 | 8547  | 5830443L24Rik | Gbp4          | 1  |
| 21824 | 8555  | 5830443L24Rik | H2-M3         | 1  |
| 21824 | 8659  | 5830443L24Rik | Psm8          | 1  |
| 21824 | 8800  | 5830443L24Rik | Rnf213        | 1  |
| 21824 | 9401  | 5830443L24Rik | Fcgr4         | 1  |
| 21824 | 9820  | 5830443L24Rik | BC023105      | 1  |
| 21824 | 9821  | 5830443L24Rik | Pmaip1        | 1  |
| 21824 | 9847  | 5830443L24Rik | Ifi27         | 1  |
| 21824 | 9928  | 5830443L24Rik | Lgmn          | 1  |
| 21824 | 10109 | 5830443L24Rik | Gbp3          | 1  |

|       |       |               |             |   |
|-------|-------|---------------|-------------|---|
| 21824 | 10393 | 5830443L24Rik | Slc7a8      | 1 |
| 21824 | 10504 | 5830443L24Rik | Ripk3       | 1 |
| 21824 | 10606 | 5830443L24Rik | Apbb1ip     | 1 |
| 21824 | 10926 | 5830443L24Rik | P2ry13      | 1 |
| 21824 | 11198 | 5830443L24Rik | Gbp1        | 1 |
| 21824 | 11204 | 5830443L24Rik | Al451617    | 1 |
| 21824 | 11265 | 5830443L24Rik | Irgm        | 1 |
| 21824 | 11275 | 5830443L24Rik | Fanci       | 1 |
| 21824 | 11701 | 5830443L24Rik | Oas1c       | 1 |
| 21824 | 12316 | 5830443L24Rik | Mpa2l       | 1 |
| 21824 | 12398 | 5830443L24Rik | Ifi44       | 1 |
| 21824 | 12600 | 5830443L24Rik | Ifi204      | 1 |
| 21824 | 12969 | 5830443L24Rik | Xaf1        | 1 |
| 21824 | 13156 | 5830443L24Rik | Ifit3       | 1 |
| 21824 | 13181 | 5830443L24Rik | Lcp2        | 1 |
| 21824 | 13309 | 5830443L24Rik | Tgtp        | 1 |
| 21824 | 13527 | 5830443L24Rik | Ctss        | 1 |
| 21824 | 13585 | 5830443L24Rik | Nckap1l     | 1 |
| 21824 | 13654 | 5830443L24Rik | Stat1       | 1 |
| 21824 | 13656 | 5830443L24Rik | Ly86        | 1 |
| 21824 | 13780 | 5830443L24Rik | Pilra       | 1 |
| 21824 | 13826 | 5830443L24Rik | Melk        | 1 |
| 21824 | 14192 | 5830443L24Rik | Trpv2       | 1 |
| 21824 | 14237 | 5830443L24Rik | Rac2        | 1 |
| 21824 | 14258 | 5830443L24Rik | Ifi47       | 1 |
| 21824 | 14506 | 5830443L24Rik | Slc15a3     | 1 |
| 21824 | 14603 | 5830443L24Rik | Ly6e        | 1 |
| 21824 | 14611 | 5830443L24Rik | Ddx60       | 1 |
| 21824 | 14880 | 5830443L24Rik | Ms4a4c      | 1 |
| 21824 | 14883 | 5830443L24Rik | Iltgal      | 1 |
| 21824 | 14954 | 5830443L24Rik | Rab19       | 1 |
| 21824 | 15074 | 5830443L24Rik | Usp18       | 1 |
| 21824 | 15159 | 5830443L24Rik | Timd4       | 1 |
| 21824 | 15280 | 5830443L24Rik | Cxcl10      | 1 |
| 21824 | 15504 | 5830443L24Rik | Mx2         | 1 |
| 21824 | 15749 | 5830443L24Rik | Cd22        | 1 |
| 21824 | 15825 | 5830443L24Rik | Fermt3      | 1 |
| 21824 | 16102 | 5830443L24Rik | Cd72        | 1 |
| 21824 | 16147 | 5830443L24Rik | Tlr2        | 1 |
| 21824 | 16182 | 5830443L24Rik | Oasl1       | 1 |
| 21824 | 16186 | 5830443L24Rik | Cfp         | 1 |
| 21824 | 16199 | 5830443L24Rik | Samhd1      | 1 |
| 21824 | 16572 | 5830443L24Rik | D14Ertd668e | 1 |
| 21824 | 16874 | 5830443L24Rik | Fcer1g      | 1 |
| 21824 | 16988 | 5830443L24Rik | Clec4f      | 1 |
| 21824 | 17197 | 5830443L24Rik | Igtp        | 1 |
| 21824 | 17412 | 5830443L24Rik | Aif1        | 1 |
| 21824 | 17904 | 5830443L24Rik | Cds1        | 1 |
| 21824 | 18174 | 5830443L24Rik | Stat2       | 1 |
| 21824 | 18186 | 5830443L24Rik | Parp14      | 1 |
| 21824 | 18289 | 5830443L24Rik | Tap1        | 1 |

|       |       |               |               |    |
|-------|-------|---------------|---------------|----|
| 21824 | 19063 | 5830443L24Rik | Evl           | 1  |
| 21824 | 19189 | 5830443L24Rik | Sp100         | 1  |
| 21824 | 19262 | 5830443L24Rik | Cd274         | 1  |
| 21824 | 19382 | 5830443L24Rik | Slc2a6        | 1  |
| 21824 | 19708 | 5830443L24Rik | Ly6a          | 1  |
| 21824 | 19719 | 5830443L24Rik | EG634650      | 1  |
| 21824 | 19738 | 5830443L24Rik | Lgals3bp      | 1  |
| 21824 | 19794 | 5830443L24Rik | Rgs2          | 1  |
| 21824 | 20321 | 5830443L24Rik | Ms4a6b        | 1  |
| 21824 | 20432 | 5830443L24Rik | Smc1b         | 1  |
| 21824 | 20474 | 5830443L24Rik | Gnb3          | 1  |
| 21824 | 20791 | 5830443L24Rik | MMT00014813   | 1  |
| 21824 | 20814 | 5830443L24Rik | Ptpn18        | 1  |
| 21824 | 20997 | 5830443L24Rik | MMT00028135   | 1  |
| 21824 | 21351 | 5830443L24Rik | Shisa5        | 1  |
| 21824 | 21440 | 5830443L24Rik | Tmsb10        | 1  |
| 21824 | 21549 | 5830443L24Rik | Rtp4          | 1  |
| 21824 | 21824 | 5830443L24Rik | 5830443L24Rik | 1  |
| 21824 | 22037 | 5830443L24Rik | Oas1g         | 1  |
| 21824 | 22647 | 5830443L24Rik | Pkib          | 1  |
| 21824 | 22876 | 5830443L24Rik | Sash3         | 1  |
| 21824 | 23208 | 5830443L24Rik | Hck           | 1  |
| 21824 | 23242 | 5830443L24Rik | Gngt2         | 1  |
| 21824 | 23450 | 5830443L24Rik | D12Ert647e    | 1  |
| 21827 | 21214 | MMT00010458   | Scd1          | 1  |
| 21837 | 5364  | BC052328      | Kif22         | 1  |
| 21837 | 11382 | BC052328      | Cdca3         | 1  |
| 21837 | 12910 | BC052328      | 1110028A07Rik | 1  |
| 21839 | 8444  | Gprasp1       | Rdh16         | -1 |
| 21839 | 14017 | Gprasp1       | Ces5          | -1 |
| 21839 | 18201 | Gprasp1       | MMT00060232   | -1 |
| 21839 | 21214 | Gprasp1       | Scd1          | -1 |
| 21844 | 8054  | Ncoa7         | Smarca2       | -1 |
| 21844 | 8641  | Ncoa7         | Slc7a2        | -1 |
| 21844 | 10831 | Ncoa7         | Dmn           | -1 |
| 21849 | 5892  | Icam2         | MMT00038457   | -1 |
| 21849 | 6386  | Icam2         | Por           | -1 |
| 21849 | 6756  | Icam2         | Sds           | -1 |
| 21849 | 9718  | Icam2         | Fmo5          | -1 |
| 21849 | 11614 | Icam2         | Sult1e1       | -1 |
| 21849 | 14472 | Icam2         | Ahcy          | -1 |
| 21849 | 15320 | Icam2         | MMT00017479   | -1 |
| 21849 | 15709 | Icam2         | Tceal1        | -1 |
| 21849 | 17083 | Icam2         | Atp1b1        | -1 |
| 21849 | 21142 | Icam2         | Gm129         | -1 |
| 21853 | 19762 | 5430432N15Rik | Pih1d1        | 1  |
| 21853 | 19854 | 5430432N15Rik | Kcnj14        | -1 |
| 21853 | 20490 | 5430432N15Rik | Tmem143       | 1  |
| 21853 | 21438 | 5430432N15Rik | Plekha4       | 1  |
| 21858 | 1416  | Neil3         | 6720460F02Rik | 1  |
| 21858 | 1932  | Neil3         | Racgap1       | 1  |

|       |       |       |               |    |
|-------|-------|-------|---------------|----|
| 21858 | 5364  | Neil3 | Kif22         | 1  |
| 21858 | 8416  | Neil3 | Cdc20         | 1  |
| 21858 | 11382 | Neil3 | Cdca3         | 1  |
| 21858 | 11422 | Neil3 | Pltp          | 1  |
| 21858 | 17823 | Neil3 | D2Ertd750e    | 1  |
| 21858 | 18299 | Neil3 | MMT00035424   | 1  |
| 21858 | 19318 | Neil3 | Plk1          | 1  |
| 21858 | 20433 | Neil3 | Cdca5         | 1  |
| 21858 | 21692 | Neil3 | MMT00013924   | 1  |
| 21858 | 21947 | Neil3 | Cdca8         | 1  |
| 21863 | 185   | Dok2  | Ap2b1         | 1  |
| 21863 | 250   | Dok2  | Tubb2a-ps2    | 1  |
| 21863 | 433   | Dok2  | Pla2g12b      | 1  |
| 21863 | 609   | Dok2  | MMT00060868   | 1  |
| 21863 | 2636  | Dok2  | Tars          | 1  |
| 21863 | 2766  | Dok2  | Elp4          | 1  |
| 21863 | 2850  | Dok2  | Slc16a6       | 1  |
| 21863 | 3265  | Dok2  | Dntt          | 1  |
| 21863 | 3410  | Dok2  | Paqr9         | 1  |
| 21863 | 3502  | Dok2  | Gde1          | -1 |
| 21863 | 3804  | Dok2  | MMT00015534   | 1  |
| 21863 | 3836  | Dok2  | 2200001115Rik | 1  |
| 21863 | 3868  | Dok2  | Ebpl          | 1  |
| 21863 | 4286  | Dok2  | Ptp4a1        | -1 |
| 21863 | 4534  | Dok2  | Ndel1         | -1 |
| 21863 | 5364  | Dok2  | Kif22         | 1  |
| 21863 | 5802  | Dok2  | Mad2l2        | 1  |
| 21863 | 5934  | Dok2  | S100a10       | 1  |
| 21863 | 6213  | Dok2  | Ccl2          | 1  |
| 21863 | 6370  | Dok2  | Aqp8          | 1  |
| 21863 | 6386  | Dok2  | Por           | -1 |
| 21863 | 6394  | Dok2  | Fbxo6         | 1  |
| 21863 | 7973  | Dok2  | Lgals9        | 1  |
| 21863 | 8428  | Dok2  | Sorbs3        | -1 |
| 21863 | 9158  | Dok2  | Pde9a         | 1  |
| 21863 | 10486 | Dok2  | 1300002K09Rik | 1  |
| 21863 | 11129 | Dok2  | Ankhd1        | -1 |
| 21863 | 11741 | Dok2  | Slc30a10      | 1  |
| 21863 | 11807 | Dok2  | Fbxo31        | -1 |
| 21863 | 12208 | Dok2  | Pnpla7        | 1  |
| 21863 | 12799 | Dok2  | Spon2         | 1  |
| 21863 | 12807 | Dok2  | Faim          | 1  |
| 21863 | 12941 | Dok2  | Elovl5        | 1  |
| 21863 | 14017 | Dok2  | Ces5          | 1  |
| 21863 | 15320 | Dok2  | MMT00017479   | -1 |
| 21863 | 15709 | Dok2  | Tceal1        | -1 |
| 21863 | 17083 | Dok2  | Atp1b1        | -1 |
| 21863 | 17338 | Dok2  | Mocos         | 1  |
| 21863 | 17617 | Dok2  | Atp5sl        | -1 |
| 21863 | 17876 | Dok2  | Tubb4         | 1  |
| 21863 | 18042 | Dok2  | Aph1c         | -1 |

|       |       |             |               |    |
|-------|-------|-------------|---------------|----|
| 21863 | 18827 | Dok2        | Oprs1         | 1  |
| 21863 | 19532 | Dok2        | Med8          | 1  |
| 21863 | 20266 | Dok2        | Insig2        | 1  |
| 21863 | 20967 | Dok2        | Fabp2         | 1  |
| 21863 | 22138 | Dok2        | Ang           | -1 |
| 21863 | 22290 | Dok2        | Tubb2a        | 1  |
| 21863 | 22630 | Dok2        | MMT00034355   | 1  |
| 21863 | 23026 | Dok2        | Apom          | -1 |
| 21872 | 3265  | Stambpl1    | Dntt          | 1  |
| 21872 | 3789  | Stambpl1    | 4833442J19Rik | -1 |
| 21872 | 5364  | Stambpl1    | Kif22         | 1  |
| 21872 | 11129 | Stambpl1    | Ankhd1        | -1 |
| 21872 | 11382 | Stambpl1    | Cdca3         | 1  |
| 21872 | 12910 | Stambpl1    | 1110028A07Rik | 1  |
| 21872 | 12941 | Stambpl1    | Elov15        | 1  |
| 21872 | 14017 | Stambpl1    | Ces5          | 1  |
| 21872 | 14138 | Stambpl1    | Anks4b        | 1  |
| 21872 | 14472 | Stambpl1    | Ahcy          | -1 |
| 21872 | 20967 | Stambpl1    | Fabp2         | 1  |
| 21872 | 22085 | Stambpl1    | MMT00036089   | 1  |
| 21872 | 22138 | Stambpl1    | Ang           | -1 |
| 21881 | 21214 | MMT00038325 | Scd1          | 1  |
| 21889 | 662   | Mgat3       | Mid1ip1       | -1 |
| 21889 | 2051  | Mgat3       | Ddx27         | 1  |
| 21889 | 2322  | Mgat3       | Tuba4a        | -1 |
| 21889 | 3686  | Mgat3       | Psmc9         | 1  |
| 21889 | 7659  | Mgat3       | Rab30         | 1  |
| 21889 | 7944  | Mgat3       | A1132487      | 1  |
| 21889 | 8896  | Mgat3       | Fasn          | -1 |
| 21889 | 12315 | Mgat3       | Srebf1        | -1 |
| 21889 | 14626 | Mgat3       | Zbtb2         | 1  |
| 21889 | 17656 | Mgat3       | Hdhd3         | -1 |
| 21889 | 17660 | Mgat3       | Nlrp12        | 1  |
| 21889 | 18785 | Mgat3       | Angptl4       | 1  |
| 21889 | 21251 | Mgat3       | Cpt1a         | 1  |
| 21891 | 20341 | Nnt         | Srebf2        | 1  |
| 21903 | 202   | Nr1d1       | Naif1         | -1 |
| 21903 | 482   | Nr1d1       | Rnf43         | 1  |
| 21903 | 1412  | Nr1d1       | Phf17         | 1  |
| 21903 | 3587  | Nr1d1       | MMT00041940   | -1 |
| 21903 | 4966  | Nr1d1       | Zscan20       | -1 |
| 21903 | 6021  | Nr1d1       | MMT00008784   | -1 |
| 21903 | 6171  | Nr1d1       | Abtb2         | -1 |
| 21903 | 8632  | Nr1d1       | Igfbp1        | -1 |
| 21903 | 8670  | Nr1d1       | MMT00051613   | -1 |
| 21903 | 9067  | Nr1d1       | Tra2a         | -1 |
| 21903 | 9258  | Nr1d1       | P4ha1         | -1 |
| 21903 | 10279 | Nr1d1       | Rnf186        | 1  |
| 21903 | 10938 | Nr1d1       | Zbtb5         | -1 |
| 21903 | 11043 | Nr1d1       | Hsph1         | -1 |
| 21903 | 11201 | Nr1d1       | Sunc1         | 1  |

|       |       |             |               |    |
|-------|-------|-------------|---------------|----|
| 21903 | 11214 | Nr1d1       | MMT00049207   | -1 |
| 21903 | 12487 | Nr1d1       | Tbc1d10a      | 1  |
| 21903 | 12905 | Nr1d1       | Nfil3         | -1 |
| 21903 | 13052 | Nr1d1       | Tnfrsf19      | 1  |
| 21903 | 13297 | Nr1d1       | Emb           | -1 |
| 21903 | 14263 | Nr1d1       | Arrdc3        | 1  |
| 21903 | 14785 | Nr1d1       | F3            | 1  |
| 21903 | 15476 | Nr1d1       | Fem1b         | 1  |
| 21903 | 15675 | Nr1d1       | MMT00077535   | -1 |
| 21903 | 15740 | Nr1d1       | 1810010H24Rik | 1  |
| 21903 | 15760 | Nr1d1       | Trib3         | 1  |
| 21903 | 16251 | Nr1d1       | G6pc          | -1 |
| 21903 | 16517 | Nr1d1       | D4Wsu53e      | -1 |
| 21903 | 16750 | Nr1d1       | Casp6         | 1  |
| 21903 | 16843 | Nr1d1       | Cry1          | -1 |
| 21903 | 18083 | Nr1d1       | Gadd45a       | 1  |
| 21903 | 18215 | Nr1d1       | Gpr146        | 1  |
| 21903 | 18373 | Nr1d1       | Dnajb1        | -1 |
| 21903 | 19528 | Nr1d1       | Zfp503        | 1  |
| 21903 | 20535 | Nr1d1       | Rbm4          | -1 |
| 21903 | 21389 | Nr1d1       | Odf2          | 1  |
| 21903 | 21903 | Nr1d1       | Nr1d1         | 1  |
| 21903 | 22216 | Nr1d1       | Sp5           | 1  |
| 21903 | 23617 | Nr1d1       | Nme1          | -1 |
| 21907 | 23005 | Dynlrb1     | 4930405A21Rik | 1  |
| 21937 | 11014 | MMT00015325 | Hibadh        | 1  |
| 21937 | 18201 | MMT00015325 | MMT00060232   | 1  |
| 21937 | 21214 | MMT00015325 | Scd1          | 1  |
| 21947 | 1416  | Cdca8       | 6720460F02Rik | 1  |
| 21947 | 1561  | Cdca8       | Aurka         | 1  |
| 21947 | 3836  | Cdca8       | 2200001I15Rik | 1  |
| 21947 | 5364  | Cdca8       | Kif22         | 1  |
| 21947 | 8416  | Cdca8       | Cdc20         | 1  |
| 21947 | 12799 | Cdca8       | Spon2         | 1  |
| 21947 | 12941 | Cdca8       | Elovl5        | 1  |
| 21947 | 18299 | Cdca8       | MMT00035424   | 1  |
| 21947 | 21692 | Cdca8       | MMT00013924   | 1  |
| 21947 | 21947 | Cdca8       | Cdca8         | 1  |
| 21947 | 22138 | Cdca8       | Ang           | -1 |
| 21952 | 7088  | Tfb1m       | Slc37a1       | -1 |
| 21952 | 7135  | Tfb1m       | Ezr           | -1 |
| 21952 | 7909  | Tfb1m       | Oas3          | -1 |
| 21952 | 10667 | Tfb1m       | H2-Eb1        | -1 |
| 21952 | 11435 | Tfb1m       | Rnaset2a      | -1 |
| 21952 | 17707 | Tfb1m       | Rshl2b        | -1 |
| 21952 | 21754 | Tfb1m       | Synj2         | 1  |
| 21966 | 8444  | Pcp4l1      | Rdh16         | -1 |
| 21966 | 8815  | Pcp4l1      | Mx1           | -1 |
| 21969 | 1416  | Tk1         | 6720460F02Rik | 1  |
| 21969 | 1932  | Tk1         | Racgap1       | 1  |
| 21969 | 3836  | Tk1         | 2200001I15Rik | 1  |



|       |       |               |               |    |
|-------|-------|---------------|---------------|----|
| 21969 | 5364  | Tk1           | Kif22         | 1  |
| 21969 | 8416  | Tk1           | Cdc20         | 1  |
| 21969 | 11382 | Tk1           | Cdca3         | 1  |
| 21969 | 11870 | Tk1           | Apitd1        | 1  |
| 21969 | 17823 | Tk1           | D2Ert750e     | 1  |
| 21969 | 18299 | Tk1           | MMT00035424   | 1  |
| 21969 | 19318 | Tk1           | Plk1          | 1  |
| 21969 | 20433 | Tk1           | Cdca5         | 1  |
| 21969 | 21692 | Tk1           | MMT00013924   | 1  |
| 21969 | 21947 | Tk1           | Cdca8         | 1  |
| 21969 | 22138 | Tk1           | Ang           | -1 |
| 21970 | 607   | Eif3f         | Me1           | -1 |
| 21970 | 8444  | Eif3f         | Rdh16         | -1 |
| 21970 | 8815  | Eif3f         | Mx1           | -1 |
| 21970 | 18201 | Eif3f         | MMT00060232   | -1 |
| 21970 | 21214 | Eif3f         | Scd1          | -1 |
| 21973 | 1594  | Faf1          | Mrpl24        | 1  |
| 21973 | 9127  | Faf1          | Mtfmt         | -1 |
| 21973 | 9260  | Faf1          | Cmtm6         | -1 |
| 21973 | 19917 | Faf1          | Nek2          | -1 |
| 21975 | 1941  | MMT00008417   | MMT00079618   | 1  |
| 21975 | 7151  | MMT00008417   | MMT00007982   | 1  |
| 21975 | 18653 | MMT00008417   | MMT00072901   | -1 |
| 21983 | 12315 | C130022K22Rik | Srebf1        | -1 |
| 21983 | 21251 | C130022K22Rik | Cpt1a         | 1  |
| 21986 | 6117  | Cstf1         | Atp9a         | 1  |
| 21986 | 16863 | Cstf1         | 2410001C21Rik | -1 |
| 21986 | 23353 | Cstf1         | Slmo2         | 1  |
| 21988 | 2388  | MMT00015654   | Dot1l         | -1 |
| 21988 | 4697  | MMT00015654   | Cyp2a12       | 1  |
| 21988 | 6513  | MMT00015654   | Qpctl         | -1 |
| 21988 | 6888  | MMT00015654   | Cxcl9         | 1  |
| 21988 | 7761  | MMT00015654   | Nudt19        | -1 |
| 21988 | 11321 | MMT00015654   | 2310014L17Rik | 1  |
| 21988 | 11888 | MMT00015654   | Myadm         | 1  |
| 21988 | 19462 | MMT00015654   | 4933439C20Rik | 1  |
| 21993 | 6044  | D430015B01Rik | Sucnr1        | -1 |
| 21993 | 11129 | D430015B01Rik | Ankhd1        | 1  |
| 21993 | 11807 | D430015B01Rik | Fbxo31        | 1  |
| 21993 | 12315 | D430015B01Rik | Srebf1        | -1 |
| 21993 | 13471 | D430015B01Rik | Cln8          | 1  |
| 21993 | 14138 | D430015B01Rik | Anks4b        | -1 |
| 21993 | 17660 | D430015B01Rik | Nlrp12        | 1  |
| 21993 | 18785 | D430015B01Rik | Angptl4       | 1  |
| 21993 | 21070 | D430015B01Rik | Cnot8         | -1 |
| 21993 | 21202 | D430015B01Rik | Acly          | -1 |
| 21993 | 21251 | D430015B01Rik | Cpt1a         | 1  |
| 21993 | 21408 | D430015B01Rik | Svil          | -1 |
| 21993 | 22138 | D430015B01Rik | Ang           | 1  |
| 21998 | 8444  | Nomo1         | Rdh16         | 1  |
| 21998 | 8815  | Nomo1         | Mx1           | 1  |

|       |       |        |               |    |
|-------|-------|--------|---------------|----|
| 21998 | 18201 | Nomo1  | MMT00060232   | 1  |
| 21998 | 20058 | Nomo1  | Dnaic1        | -1 |
| 22001 | 1899  | Gtlf3b | 1110031B06Rik | -1 |
| 22001 | 2130  | Gtlf3b | Smcr7         | 1  |
| 22001 | 22001 | Gtlf3b | Gtlf3b        | 1  |
| 22010 | 703   | Ccdc41 | Spryd4        | -1 |
| 22010 | 8554  | Ccdc41 | Letm2         | 1  |
| 22010 | 8632  | Ccdc41 | Igfbp1        | 1  |
| 22010 | 8684  | Ccdc41 | Ii15          | -1 |
| 22010 | 12315 | Ccdc41 | Srebf1        | -1 |
| 22010 | 13489 | Ccdc41 | D230025D16Rik | 1  |
| 22010 | 15659 | Ccdc41 | MMT00074093   | -1 |
| 22010 | 15990 | Ccdc41 | Dnmbp         | 1  |
| 22010 | 16251 | Ccdc41 | G6pc          | 1  |
| 22010 | 18083 | Ccdc41 | Gadd45a       | -1 |
| 22010 | 18203 | Ccdc41 | Ablim3        | 1  |
| 22010 | 18373 | Ccdc41 | Dnajb1        | 1  |
| 22010 | 18418 | Ccdc41 | Hspa1b        | 1  |
| 22010 | 18785 | Ccdc41 | Angptl4       | 1  |
| 22010 | 20535 | Ccdc41 | Rbm4          | 1  |
| 22010 | 20777 | Ccdc41 | MMT00010185   | -1 |
| 22012 | 1717  | Itgae  | Ndufs2        | 1  |
| 22012 | 3170  | Itgae  | Mcart1        | 1  |
| 22012 | 3196  | Itgae  | Tat           | 1  |
| 22012 | 3446  | Itgae  | Eno1          | 1  |
| 22012 | 3832  | Itgae  | Sdhb          | 1  |
| 22012 | 4056  | Itgae  | Tnfaip8l1     | -1 |
| 22012 | 5449  | Itgae  | Got1          | 1  |
| 22012 | 6329  | Itgae  | Cyp2b10       | 1  |
| 22012 | 6756  | Itgae  | Sds           | 1  |
| 22012 | 7492  | Itgae  | Adfp          | -1 |
| 22012 | 9700  | Itgae  | Prodh         | 1  |
| 22012 | 14472 | Itgae  | Ahcy          | 1  |
| 22012 | 17563 | Itgae  | Aldh1l1       | 1  |
| 22012 | 18113 | Itgae  | MMT00034400   | 1  |
| 22012 | 18549 | Itgae  | Robo1         | 1  |
| 22012 | 19066 | Itgae  | MMT00012632   | 1  |
| 22012 | 19772 | Itgae  | Gnmt          | 1  |
| 22012 | 20967 | Itgae  | Fabp2         | -1 |
| 22012 | 21727 | Itgae  | Khk           | 1  |
| 22021 | 10214 | Csnk1d | Sectm1b       | -1 |
| 22021 | 15016 | Csnk1d | MMT00074608   | -1 |
| 22021 | 17680 | Csnk1d | 1700069L16Rik | -1 |
| 22021 | 17792 | Csnk1d | Vmn2r79       | -1 |
| 22021 | 17897 | Csnk1d | Gm1019        | -1 |
| 22037 | 143   | Oas1g  | Gvin1         | 1  |
| 22037 | 1533  | Oas1g  | BC013712      | 1  |
| 22037 | 2200  | Oas1g  | BC006779      | 1  |
| 22037 | 2224  | Oas1g  | Oasl2         | 1  |
| 22037 | 2550  | Oas1g  | MMT00036681   | 1  |
| 22037 | 2578  | Oas1g  | Csf2rb2       | 1  |

|       |       |       |               |   |
|-------|-------|-------|---------------|---|
| 22037 | 2752  | Oas1g | Fcgr1         | 1 |
| 22037 | 2830  | Oas1g | 4632417K18Rik | 1 |
| 22037 | 3523  | Oas1g | Trim34        | 1 |
| 22037 | 3659  | Oas1g | EG236451      | 1 |
| 22037 | 3683  | Oas1g | Oas2          | 1 |
| 22037 | 4114  | Oas1g | Parp12        | 1 |
| 22037 | 4409  | Oas1g | 5430435G22Rik | 1 |
| 22037 | 4426  | Oas1g | ligp2         | 1 |
| 22037 | 4508  | Oas1g | Ifit1         | 1 |
| 22037 | 4516  | Oas1g | Rsad2         | 1 |
| 22037 | 5002  | Oas1g | Ifi202b       | 1 |
| 22037 | 5044  | Oas1g | Ifi35         | 1 |
| 22037 | 5216  | Oas1g | Spnb5         | 1 |
| 22037 | 5250  | Oas1g | Ifit2         | 1 |
| 22037 | 5766  | Oas1g | 5033414D02Rik | 1 |
| 22037 | 5845  | Oas1g | Il18bp        | 1 |
| 22037 | 5853  | Oas1g | Trim30        | 1 |
| 22037 | 5949  | Oas1g | Zbp1          | 1 |
| 22037 | 6072  | Oas1g | C1qc          | 1 |
| 22037 | 6098  | Oas1g | Ncf4          | 1 |
| 22037 | 6213  | Oas1g | Ccl2          | 1 |
| 22037 | 6587  | Oas1g | Irf9          | 1 |
| 22037 | 6595  | Oas1g | Oas1a         | 1 |
| 22037 | 6779  | Oas1g | Gbp6          | 1 |
| 22037 | 6824  | Oas1g | Irf7          | 1 |
| 22037 | 6888  | Oas1g | Cxcl9         | 1 |
| 22037 | 6910  | Oas1g | Ly6c2         | 1 |
| 22037 | 7069  | Oas1g | Ube1l         | 1 |
| 22037 | 7105  | Oas1g | Plac8         | 1 |
| 22037 | 7238  | Oas1g | Pycard        | 1 |
| 22037 | 7284  | Oas1g | MMT00008674   | 1 |
| 22037 | 7316  | Oas1g | Ifi204        | 1 |
| 22037 | 7336  | Oas1g | Cd5l          | 1 |
| 22037 | 8392  | Oas1g | Asf1b         | 1 |
| 22037 | 8555  | Oas1g | H2-M3         | 1 |
| 22037 | 8659  | Oas1g | Psmb8         | 1 |
| 22037 | 8800  | Oas1g | Rnf213        | 1 |
| 22037 | 9100  | Oas1g | Ms4a6c        | 1 |
| 22037 | 9401  | Oas1g | Fcgr4         | 1 |
| 22037 | 9820  | Oas1g | BC023105      | 1 |
| 22037 | 9821  | Oas1g | Pmaip1        | 1 |
| 22037 | 9847  | Oas1g | Ifi27         | 1 |
| 22037 | 10109 | Oas1g | Gbp3          | 1 |
| 22037 | 10504 | Oas1g | Ripk3         | 1 |
| 22037 | 11009 | Oas1g | MMT00008885   | 1 |
| 22037 | 11204 | Oas1g | A1451617      | 1 |
| 22037 | 11265 | Oas1g | Irgm          | 1 |
| 22037 | 11701 | Oas1g | Oas1c         | 1 |
| 22037 | 12126 | Oas1g | Znfx1         | 1 |
| 22037 | 12312 | Oas1g | Ms4a6d        | 1 |
| 22037 | 12316 | Oas1g | Mpa2l         | 1 |

|       |       |       |             |   |
|-------|-------|-------|-------------|---|
| 22037 | 12398 | Oas1g | Ifi44       | 1 |
| 22037 | 12600 | Oas1g | Ifi204      | 1 |
| 22037 | 12969 | Oas1g | Xaf1        | 1 |
| 22037 | 13156 | Oas1g | Ifit3       | 1 |
| 22037 | 13172 | Oas1g | Epb4.1l3    | 1 |
| 22037 | 13181 | Oas1g | Lcp2        | 1 |
| 22037 | 13309 | Oas1g | Tgtp        | 1 |
| 22037 | 13514 | Oas1g | Apol9b      | 1 |
| 22037 | 13522 | Oas1g | Sfn5        | 1 |
| 22037 | 13527 | Oas1g | Ctss        | 1 |
| 22037 | 13528 | Oas1g | Capn12      | 1 |
| 22037 | 13654 | Oas1g | Stat1       | 1 |
| 22037 | 13749 | Oas1g | Parp9       | 1 |
| 22037 | 14237 | Oas1g | Rac2        | 1 |
| 22037 | 14258 | Oas1g | Ifi47       | 1 |
| 22037 | 14506 | Oas1g | Slc15a3     | 1 |
| 22037 | 14603 | Oas1g | Ly6e        | 1 |
| 22037 | 14611 | Oas1g | Ddx60       | 1 |
| 22037 | 14880 | Oas1g | Ms4a4c      | 1 |
| 22037 | 14883 | Oas1g | Itgal       | 1 |
| 22037 | 15074 | Oas1g | Usp18       | 1 |
| 22037 | 15280 | Oas1g | Cxcl10      | 1 |
| 22037 | 15449 | Oas1g | Mitd1       | 1 |
| 22037 | 15504 | Oas1g | Mx2         | 1 |
| 22037 | 16182 | Oas1g | Oasl1       | 1 |
| 22037 | 16186 | Oas1g | Cfp         | 1 |
| 22037 | 16199 | Oas1g | Samhd1      | 1 |
| 22037 | 16521 | Oas1g | Adar        | 1 |
| 22037 | 16572 | Oas1g | D14Ert668e  | 1 |
| 22037 | 16874 | Oas1g | Fcer1g      | 1 |
| 22037 | 16988 | Oas1g | Clec4f      | 1 |
| 22037 | 17071 | Oas1g | Samd9l      | 1 |
| 22037 | 17197 | Oas1g | Igtp        | 1 |
| 22037 | 17412 | Oas1g | Aif1        | 1 |
| 22037 | 17904 | Oas1g | Cds1        | 1 |
| 22037 | 18174 | Oas1g | Stat2       | 1 |
| 22037 | 18186 | Oas1g | Parp14      | 1 |
| 22037 | 18211 | Oas1g | Folr2       | 1 |
| 22037 | 18289 | Oas1g | Tap1        | 1 |
| 22037 | 18868 | Oas1g | Mpeg1       | 1 |
| 22037 | 19026 | Oas1g | Isg15       | 1 |
| 22037 | 19189 | Oas1g | Sp100       | 1 |
| 22037 | 19252 | Oas1g | Tmsb4x      | 1 |
| 22037 | 19708 | Oas1g | Ly6a        | 1 |
| 22037 | 19738 | Oas1g | Lgals3bp    | 1 |
| 22037 | 19794 | Oas1g | Rgs2        | 1 |
| 22037 | 20321 | Oas1g | Ms4a6b      | 1 |
| 22037 | 20791 | Oas1g | MMT00014813 | 1 |
| 22037 | 20997 | Oas1g | MMT00028135 | 1 |
| 22037 | 21351 | Oas1g | Shisa5      | 1 |
| 22037 | 21440 | Oas1g | Tmsb10      | 1 |

|       |       |               |               |    |
|-------|-------|---------------|---------------|----|
| 22037 | 21549 | Oas1g         | Rtp4          | 1  |
| 22037 | 21824 | Oas1g         | 5830443L24Rik | 1  |
| 22037 | 22037 | Oas1g         | Oas1g         | 1  |
| 22037 | 22077 | Oas1g         | MMT00057550   | 1  |
| 22037 | 22712 | Oas1g         | Phf11         | 1  |
| 22037 | 23092 | Oas1g         | Ifih1         | 1  |
| 22037 | 23208 | Oas1g         | Hck           | 1  |
| 22037 | 23450 | Oas1g         | D12Erttd647e  | 1  |
| 22039 | 20967 | Npc2          | Fabp2         | 1  |
| 22075 | 630   | C1s           | C1s           | 1  |
| 22075 | 1444  | C1s           | C1r           | 1  |
| 22075 | 6625  | C1s           | C1s           | 1  |
| 22075 | 9417  | C1s           | Cd163         | -1 |
| 22075 | 17391 | C1s           | C530028O21Rik | -1 |
| 22075 | 19964 | C1s           | Ndufa9        | -1 |
| 22075 | 22075 | C1s           | C1s           | 1  |
| 22077 | 12969 | MMT00057550   | Xaf1          | 1  |
| 22077 | 19026 | MMT00057550   | Isg15         | 1  |
| 22077 | 22077 | MMT00057550   | MMT00057550   | 1  |
| 22085 | 11201 | MMT00036089   | Sunc1         | -1 |
| 22090 | 6476  | Plscr1        | Sntg2         | -1 |
| 22090 | 11065 | Plscr1        | Mccc1         | -1 |
| 22090 | 13431 | Plscr1        | MMT00038058   | 1  |
| 22090 | 16695 | Plscr1        | Hs3st6        | 1  |
| 22090 | 23253 | Plscr1        | D030011O10Rik | -1 |
| 22095 | 2932  | Mgst1         | Slco1a1       | -1 |
| 22103 | 2681  | Hvcn1         | Hectd1        | -1 |
| 22104 | 7088  | Rnf123        | Slc37a1       | 1  |
| 22104 | 7135  | Rnf123        | Ezr           | 1  |
| 22104 | 7909  | Rnf123        | Oas3          | 1  |
| 22104 | 8750  | Rnf123        | 1700010I14Rik | 1  |
| 22104 | 11435 | Rnf123        | Rnaset2a      | 1  |
| 22104 | 17707 | Rnf123        | Rshl2b        | 1  |
| 22104 | 17760 | Rnf123        | Ccr6          | -1 |
| 22104 | 21754 | Rnf123        | Synj2         | -1 |
| 22104 | 21952 | Rnf123        | Tfb1m         | -1 |
| 22104 | 22104 | Rnf123        | Rnf123        | 1  |
| 22106 | 250   | Mmp15         | Tubb2a-ps2    | 1  |
| 22106 | 609   | Mmp15         | MMT00060868   | 1  |
| 22106 | 3804  | Mmp15         | MMT00015534   | 1  |
| 22106 | 9763  | Mmp15         | Tuba3b        | 1  |
| 22106 | 12565 | Mmp15         | Grem2         | -1 |
| 22106 | 16060 | Mmp15         | Gys2          | -1 |
| 22106 | 17876 | Mmp15         | Tubb4         | 1  |
| 22106 | 22290 | Mmp15         | Tubb2a        | 1  |
| 22115 | 22115 | Ccl5          | Ccl5          | 1  |
| 22126 | 5766  | RP23-303F24.3 | 5033414D02Rik | 1  |
| 22126 | 15566 | RP23-303F24.3 | Snn           | 1  |
| 22126 | 15749 | RP23-303F24.3 | Cd22          | 1  |
| 22135 | 8815  | MMT00033583   | Mx1           | 1  |
| 22135 | 18201 | MMT00033583   | MMT00060232   | 1  |

|       |       |             |               |    |
|-------|-------|-------------|---------------|----|
| 22135 | 21214 | MMT00033583 | Scd1          | 1  |
| 22135 | 21575 | MMT00033583 | Cyp2c55       | 1  |
| 22139 | 3587  | Stip1       | MMT00041940   | 1  |
| 22139 | 4966  | Stip1       | Zscan20       | 1  |
| 22139 | 6021  | Stip1       | MMT00008784   | 1  |
| 22139 | 8319  | Stip1       | MMT00062477   | 1  |
| 22139 | 8670  | Stip1       | MMT00051613   | 1  |
| 22139 | 8891  | Stip1       | MMT00071061   | 1  |
| 22139 | 9067  | Stip1       | Tra2a         | 1  |
| 22139 | 9258  | Stip1       | P4ha1         | 1  |
| 22139 | 11043 | Stip1       | Hsph1         | 1  |
| 22139 | 11214 | Stip1       | MMT00049207   | 1  |
| 22139 | 12419 | Stip1       | MMT00081393   | 1  |
| 22139 | 14014 | Stip1       | MMT00008376   | 1  |
| 22139 | 14298 | Stip1       | Atp2a2        | 1  |
| 22139 | 15675 | Stip1       | MMT00077535   | 1  |
| 22139 | 18373 | Stip1       | Dnajb1        | 1  |
| 22139 | 18418 | Stip1       | Hspa1b        | 1  |
| 22139 | 18903 | Stip1       | Crem          | 1  |
| 22139 | 20457 | Stip1       | Gtf2a2        | -1 |
| 22139 | 20912 | Stip1       | Chordc1       | 1  |
| 22146 | 1041  | Aifm2       | 3110049J23Rik | 1  |
| 22146 | 5965  | Aifm2       | Pbld          | 1  |
| 22146 | 13688 | Aifm2       | Ppa1          | 1  |
| 22146 | 15971 | Aifm2       | Aifm2         | 1  |
| 22146 | 19115 | Aifm2       | Rab32         | -1 |
| 22146 | 19392 | Aifm2       | Slc25a16      | -1 |
| 22146 | 21105 | Aifm2       | Pex26         | 1  |
| 22146 | 22146 | Aifm2       | Aifm2         | 1  |
| 22147 | 5884  | Ap1s1       | Gstm2         | 1  |
| 22147 | 14017 | Ap1s1       | Ces5          | 1  |
| 22147 | 18201 | Ap1s1       | MMT00060232   | 1  |
| 22147 | 21214 | Ap1s1       | Scd1          | 1  |
| 22149 | 21041 | MMT00059396 | Cyp17a1       | -1 |
| 22151 | 185   | Plxnd1      | Ap2b1         | 1  |
| 22151 | 269   | Plxnd1      | Tuba1b        | 1  |
| 22151 | 662   | Plxnd1      | Mid1ip1       | 1  |
| 22151 | 1201  | Plxnd1      | Ptger3        | -1 |
| 22151 | 1709  | Plxnd1      | Mt2           | -1 |
| 22151 | 2051  | Plxnd1      | Ddx27         | -1 |
| 22151 | 2794  | Plxnd1      | Map3k6        | -1 |
| 22151 | 3686  | Plxnd1      | Psmc9         | -1 |
| 22151 | 3754  | Plxnd1      | Dock6         | 1  |
| 22151 | 5027  | Plxnd1      | Pde4b         | 1  |
| 22151 | 5185  | Plxnd1      | Dus2l         | 1  |
| 22151 | 6044  | Plxnd1      | Sucnr1        | 1  |
| 22151 | 6048  | Plxnd1      | Psmc9         | -1 |
| 22151 | 6502  | Plxnd1      | Col15a1       | 1  |
| 22151 | 6771  | Plxnd1      | Insc          | 1  |
| 22151 | 6966  | Plxnd1      | Mia3          | -1 |
| 22151 | 8639  | Plxnd1      | Map1lc3b      | -1 |

|       |       |             |                    |    |
|-------|-------|-------------|--------------------|----|
| 22151 | 8896  | Plxnd1      | Fasn               | 1  |
| 22151 | 10802 | Plxnd1      | Kcnn2              | -1 |
| 22151 | 10961 | Plxnd1      | Pgd                | 1  |
| 22151 | 11129 | Plxnd1      | Ankhd1             | -1 |
| 22151 | 11462 | Plxnd1      | Gpam               | 1  |
| 22151 | 11807 | Plxnd1      | Fbxo31             | -1 |
| 22151 | 11984 | Plxnd1      | N6amt2             | 1  |
| 22151 | 12190 | Plxnd1      | Krt18              | 1  |
| 22151 | 12219 | Plxnd1      | Cyb5b              | 1  |
| 22151 | 12420 | Plxnd1      | Klhl21             | -1 |
| 22151 | 13018 | Plxnd1      | AW544981           | 1  |
| 22151 | 13471 | Plxnd1      | Cln8               | -1 |
| 22151 | 13990 | Plxnd1      | MMT00040357        | 1  |
| 22151 | 15862 | Plxnd1      | Mrap               | 1  |
| 22151 | 16176 | Plxnd1      | St3gal5            | -1 |
| 22151 | 17090 | Plxnd1      | Lass2              | 1  |
| 22151 | 17338 | Plxnd1      | Mocos              | 1  |
| 22151 | 17660 | Plxnd1      | Nlrp12             | -1 |
| 22151 | 18286 | Plxnd1      | Slc41a3            | -1 |
| 22151 | 18785 | Plxnd1      | Angptl4            | -1 |
| 22151 | 18827 | Plxnd1      | Oprs1              | 1  |
| 22151 | 19466 | Plxnd1      | Pptc7              | -1 |
| 22151 | 19757 | Plxnd1      | Fkbp5              | -1 |
| 22151 | 21202 | Plxnd1      | Acly               | 1  |
| 22151 | 21251 | Plxnd1      | Cpt1a              | -1 |
| 22151 | 21575 | Plxnd1      | Cyp2c55            | 1  |
| 22151 | 22137 | Plxnd1      | Nudt7              | 1  |
| 22151 | 22138 | Plxnd1      | Ang                | -1 |
| 22151 | 22732 | Plxnd1      | Cyb5b              | 1  |
| 22151 | 22744 | Plxnd1      | 9-Sep              | 1  |
| 22151 | 22770 | Plxnd1      | Slc27a2            | -1 |
| 22157 | 5364  | Mxra8       | Kif22              | 1  |
| 22157 | 15862 | Mxra8       | Mrap               | 1  |
| 22161 | 22138 | Tmem132a    | Ang                | -1 |
| 22161 | 23026 | Tmem132a    | Apom               | -1 |
| 22165 | 662   | St8sia4     | Mid1ip1            | 1  |
| 22165 | 6393  | St8sia4     | 3110043O21Rik      | -1 |
| 22166 | 3410  | Traf1       | Paqr9              | 1  |
| 22166 | 5364  | Traf1       | Kif22              | 1  |
| 22171 | 1129  | MMT00012636 | Gsta4              | 1  |
| 22171 | 3377  | MMT00012636 | Cs                 | 1  |
| 22171 | 3565  | MMT00012636 | MMT00045908        | 1  |
| 22171 | 5884  | MMT00012636 | Gstm2              | 1  |
| 22171 | 7602  | MMT00012636 | Pcca               | 1  |
| 22171 | 7753  | MMT00012636 | Gfm1               | 1  |
| 22171 | 8773  | MMT00012636 | MMT00027093        | -1 |
| 22171 | 8815  | MMT00012636 | Mx1                | 1  |
| 22171 | 10132 | MMT00012636 | Ces2               | 1  |
| 22171 | 10554 | MMT00012636 | ENSMUSG00000074179 | 1  |
| 22171 | 11946 | MMT00012636 | MMT00030953        | 1  |
| 22171 | 13293 | MMT00012636 | Gsta2              | 1  |

|       |       |                    |                    |    |
|-------|-------|--------------------|--------------------|----|
| 22171 | 13431 | MMT00012636        | MMT00038058        | -1 |
| 22171 | 14147 | MMT00012636        | Acss2              | 1  |
| 22171 | 15205 | MMT00012636        | MMT00030262        | -1 |
| 22171 | 17563 | MMT00012636        | Aldh111            | 1  |
| 22171 | 18201 | MMT00012636        | MMT00060232        | 1  |
| 22171 | 18549 | MMT00012636        | Robo1              | 1  |
| 22171 | 20019 | MMT00012636        | Qdpr               | 1  |
| 22171 | 20328 | MMT00012636        | Csl                | 1  |
| 22171 | 21214 | MMT00012636        | Scd1               | 1  |
| 22171 | 21727 | MMT00012636        | Khk                | 1  |
| 22171 | 22406 | MMT00012636        | Vnn1               | -1 |
| 22171 | 22998 | MMT00012636        | Ass1               | 1  |
| 22171 | 23640 | MMT00012636        | Bdh1               | -1 |
| 22188 | 1416  | Top2a              | 6720460F02Rik      | 1  |
| 22188 | 5364  | Top2a              | Kif22              | 1  |
| 22188 | 7492  | Top2a              | Adfp               | 1  |
| 22188 | 8416  | Top2a              | Cdc20              | 1  |
| 22188 | 12799 | Top2a              | Spon2              | 1  |
| 22188 | 18299 | Top2a              | MMT00035424        | 1  |
| 22188 | 19790 | Top2a              | Polg2              | -1 |
| 22188 | 21692 | Top2a              | MMT00013924        | 1  |
| 22188 | 22138 | Top2a              | Ang                | -1 |
| 22192 | 20967 | 9030205A07Rik      | Fabp2              | 1  |
| 22199 | 269   | Acsm5              | Tuba1b             | -1 |
| 22199 | 1941  | Acsm5              | MMT00079618        | -1 |
| 22199 | 2322  | Acsm5              | Tuba4a             | -1 |
| 22199 | 7151  | Acsm5              | MMT00007982        | -1 |
| 22199 | 9763  | Acsm5              | Tuba3b             | -1 |
| 22199 | 11724 | Acsm5              | Tuba3a             | -1 |
| 22199 | 17444 | Acsm5              | Tuba1a             | -1 |
| 22199 | 22443 | Acsm5              | Tuba1c             | -1 |
| 22202 | 1867  | OTTMUSG00000021274 | Bcas2              | -1 |
| 22202 | 3753  | OTTMUSG00000021274 | Setdb1             | 1  |
| 22202 | 6206  | OTTMUSG00000021274 | MMT00063701        | -1 |
| 22202 | 11611 | OTTMUSG00000021274 | S100a13            | 1  |
| 22202 | 16416 | OTTMUSG00000021274 | Commd2             | -1 |
| 22202 | 20917 | OTTMUSG00000021274 | Gstm6              | 1  |
| 22202 | 22202 | OTTMUSG00000021274 | OTTMUSG00000021274 | 1  |
| 22208 | 5574  | Me3                | Hsd3b7             | 1  |
| 22208 | 13293 | Me3                | Gsta2              | -1 |
| 22213 | 250   | Adora1             | Tubb2a-ps2         | -1 |
| 22213 | 269   | Adora1             | Tuba1b             | -1 |
| 22213 | 402   | Adora1             | Timp3              | 1  |
| 22213 | 407   | Adora1             | Serpina6           | 1  |
| 22213 | 413   | Adora1             | Acy1               | 1  |
| 22213 | 433   | Adora1             | Pla2g12b           | -1 |
| 22213 | 437   | Adora1             | Ndr1               | -1 |
| 22213 | 609   | Adora1             | MMT00060868        | -1 |
| 22213 | 719   | Adora1             | Usp2               | 1  |
| 22213 | 771   | Adora1             | Zbtb45             | -1 |
| 22213 | 1326  | Adora1             | Tox                | 1  |



|       |      |        |               |    |
|-------|------|--------|---------------|----|
| 22213 | 1537 | Adora1 | 1700052K11Rik | -1 |
| 22213 | 1646 | Adora1 | Slc15a4       | 1  |
| 22213 | 1767 | Adora1 | BC016495      | 1  |
| 22213 | 1941 | Adora1 | MMT00079618   | -1 |
| 22213 | 2011 | Adora1 | Slc2a5        | 1  |
| 22213 | 2126 | Adora1 | Dgat2         | 1  |
| 22213 | 2200 | Adora1 | BC006779      | -1 |
| 22213 | 2256 | Adora1 | Serpina9      | -1 |
| 22213 | 2262 | Adora1 | Papss2        | 1  |
| 22213 | 2399 | Adora1 | MMT00060167   | -1 |
| 22213 | 2636 | Adora1 | Tars          | -1 |
| 22213 | 2766 | Adora1 | Elp4          | -1 |
| 22213 | 2829 | Adora1 | Lrfr3         | -1 |
| 22213 | 2850 | Adora1 | Slc16a6       | -1 |
| 22213 | 3214 | Adora1 | Dnmt3b        | -1 |
| 22213 | 3410 | Adora1 | Paqr9         | -1 |
| 22213 | 3804 | Adora1 | MMT00015534   | -1 |
| 22213 | 4090 | Adora1 | Orai3         | -1 |
| 22213 | 4201 | Adora1 | Tubb2c        | -1 |
| 22213 | 4286 | Adora1 | Ptp4a1        | 1  |
| 22213 | 4534 | Adora1 | Ndel1         | 1  |
| 22213 | 4708 | Adora1 | Traf3ip2      | -1 |
| 22213 | 5183 | Adora1 | St5           | -1 |
| 22213 | 5187 | Adora1 | Speer4f       | 1  |
| 22213 | 5259 | Adora1 | Mat1a         | 1  |
| 22213 | 5374 | Adora1 | Chka          | -1 |
| 22213 | 5569 | Adora1 | Pdgfc         | -1 |
| 22213 | 5574 | Adora1 | Hsd3b7        | -1 |
| 22213 | 5734 | Adora1 | EG619653      | 1  |
| 22213 | 5802 | Adora1 | Mad2l2        | -1 |
| 22213 | 5849 | Adora1 | 2310031A18Rik | -1 |
| 22213 | 5892 | Adora1 | MMT00038457   | 1  |
| 22213 | 5934 | Adora1 | S100a10       | -1 |
| 22213 | 5974 | Adora1 | Arntl         | -1 |
| 22213 | 6329 | Adora1 | Cyp2b10       | 1  |
| 22213 | 6338 | Adora1 | Setd3         | 1  |
| 22213 | 6370 | Adora1 | Aqp8          | -1 |
| 22213 | 6386 | Adora1 | Por           | 1  |
| 22213 | 6394 | Adora1 | Fbxo6         | -1 |
| 22213 | 6675 | Adora1 | Sfrs4         | 1  |
| 22213 | 6756 | Adora1 | Sds           | 1  |
| 22213 | 6771 | Adora1 | Insc          | -1 |
| 22213 | 6990 | Adora1 | Nr1i2         | 1  |
| 22213 | 7414 | Adora1 | Clpx          | -1 |
| 22213 | 7619 | Adora1 | Pik3ip1       | 1  |
| 22213 | 7839 | Adora1 | Asl           | 1  |
| 22213 | 7862 | Adora1 | Cpsf4l        | 1  |
| 22213 | 8054 | Adora1 | Smarca2       | 1  |
| 22213 | 8328 | Adora1 | Klhdc8a       | -1 |
| 22213 | 8399 | Adora1 | Herpud1       | 1  |
| 22213 | 8428 | Adora1 | Sorbs3        | 1  |

|       |       |        |               |    |
|-------|-------|--------|---------------|----|
| 22213 | 8469  | Adora1 | Sfrs6         | -1 |
| 22213 | 8641  | Adora1 | Slc7a2        | 1  |
| 22213 | 8965  | Adora1 | Ahcy          | 1  |
| 22213 | 9260  | Adora1 | Cmtm6         | -1 |
| 22213 | 9275  | Adora1 | Aass          | 1  |
| 22213 | 9309  | Adora1 | MMT00035904   | 1  |
| 22213 | 9438  | Adora1 | Pctk3         | 1  |
| 22213 | 9481  | Adora1 | Ppl           | 1  |
| 22213 | 9495  | Adora1 | Srms          | -1 |
| 22213 | 10088 | Adora1 | Ddc           | -1 |
| 22213 | 10166 | Adora1 | Rhbdd2        | 1  |
| 22213 | 10207 | Adora1 | MMT00012324   | -1 |
| 22213 | 10408 | Adora1 | Per1          | 1  |
| 22213 | 10486 | Adora1 | 1300002K09Rik | -1 |
| 22213 | 10642 | Adora1 | Ngef          | 1  |
| 22213 | 10712 | Adora1 | Fchsd2        | 1  |
| 22213 | 10775 | Adora1 | Slc16a1       | -1 |
| 22213 | 10911 | Adora1 | Mcl1          | 1  |
| 22213 | 11075 | Adora1 | Xrcc6bp1      | 1  |
| 22213 | 11129 | Adora1 | Ankhd1        | 1  |
| 22213 | 11412 | Adora1 | Abcg5         | 1  |
| 22213 | 11574 | Adora1 | Gne           | 1  |
| 22213 | 11599 | Adora1 | Coq10b        | 1  |
| 22213 | 11741 | Adora1 | Slc30a10      | -1 |
| 22213 | 11807 | Adora1 | Fbxo31        | 1  |
| 22213 | 11808 | Adora1 | Pck1          | 1  |
| 22213 | 12151 | Adora1 | MMT00082650   | 1  |
| 22213 | 12193 | Adora1 | Aco2          | 1  |
| 22213 | 12204 | Adora1 | Ankmy2        | 1  |
| 22213 | 12420 | Adora1 | Klhl21        | 1  |
| 22213 | 12433 | Adora1 | 5033413D22Rik | -1 |
| 22213 | 12460 | Adora1 | Pnpla2        | 1  |
| 22213 | 12489 | Adora1 | Wdr8          | -1 |
| 22213 | 12799 | Adora1 | Spon2         | -1 |
| 22213 | 12904 | Adora1 | MMT00040704   | 1  |
| 22213 | 12925 | Adora1 | Farp1         | -1 |
| 22213 | 12941 | Adora1 | Elov5         | -1 |
| 22213 | 12981 | Adora1 | Nek6          | -1 |
| 22213 | 12982 | Adora1 | Cars          | -1 |
| 22213 | 13078 | Adora1 | Eps8l2        | -1 |
| 22213 | 13094 | Adora1 | Cnn3          | 1  |
| 22213 | 13733 | Adora1 | Setd3         | 1  |
| 22213 | 13844 | Adora1 | Trib1         | 1  |
| 22213 | 14041 | Adora1 | Cldn1         | -1 |
| 22213 | 14258 | Adora1 | Ifi47         | -1 |
| 22213 | 14462 | Adora1 | Zfp385b       | 1  |
| 22213 | 14705 | Adora1 | Slc43a1       | 1  |
| 22213 | 14989 | Adora1 | Map3k5        | 1  |
| 22213 | 15015 | Adora1 | G3bp1         | -1 |
| 22213 | 15021 | Adora1 | Ppargc1a      | 1  |
| 22213 | 15320 | Adora1 | MMT00017479   | 1  |

|       |       |        |               |    |
|-------|-------|--------|---------------|----|
| 22213 | 15481 | Adora1 | 1110067D22Rik | -1 |
| 22213 | 15624 | Adora1 | Crcp          | 1  |
| 22213 | 15631 | Adora1 | Lpin1         | 1  |
| 22213 | 15709 | Adora1 | Tceal1        | 1  |
| 22213 | 15862 | Adora1 | Mrap          | -1 |
| 22213 | 16060 | Adora1 | Gys2          | 1  |
| 22213 | 16176 | Adora1 | St3gal5       | 1  |
| 22213 | 16647 | Adora1 | D16H22S680E   | 1  |
| 22213 | 16669 | Adora1 | Tjp2          | -1 |
| 22213 | 16690 | Adora1 | Tjp3          | -1 |
| 22213 | 16692 | Adora1 | Bat4          | 1  |
| 22213 | 16851 | Adora1 | Slc34a2       | -1 |
| 22213 | 17247 | Adora1 | A030007L17Rik | -1 |
| 22213 | 17323 | Adora1 | Tubb6         | -1 |
| 22213 | 17338 | Adora1 | Mocos         | -1 |
| 22213 | 17530 | Adora1 | MMT00041792   | -1 |
| 22213 | 17583 | Adora1 | Per2          | 1  |
| 22213 | 17617 | Adora1 | Atp5sl        | 1  |
| 22213 | 17622 | Adora1 | Foxo1         | 1  |
| 22213 | 17656 | Adora1 | Hdhd3         | -1 |
| 22213 | 17876 | Adora1 | Tubb4         | -1 |
| 22213 | 17884 | Adora1 | Lnx2          | -1 |
| 22213 | 18027 | Adora1 | 5730403B10Rik | 1  |
| 22213 | 18069 | Adora1 | Gpt           | 1  |
| 22213 | 18147 | Adora1 | Nhlrc2        | 1  |
| 22213 | 18174 | Adora1 | Stat2         | -1 |
| 22213 | 18179 | Adora1 | Dbp           | 1  |
| 22213 | 18498 | Adora1 | Slc5a6        | 1  |
| 22213 | 18827 | Adora1 | Oprs1         | -1 |
| 22213 | 19025 | Adora1 | Slc37a4       | 1  |
| 22213 | 19115 | Adora1 | Rab32         | -1 |
| 22213 | 19146 | Adora1 | N4bp2l1       | 1  |
| 22213 | 19234 | Adora1 | Nrg4          | 1  |
| 22213 | 19305 | Adora1 | Azin1         | 1  |
| 22213 | 19375 | Adora1 | Inhba         | -1 |
| 22213 | 19465 | Adora1 | Hacl1         | -1 |
| 22213 | 19466 | Adora1 | Pptc7         | 1  |
| 22213 | 19532 | Adora1 | Med8          | -1 |
| 22213 | 19671 | Adora1 | Upp2          | 1  |
| 22213 | 19723 | Adora1 | Pfkfb1        | 1  |
| 22213 | 19790 | Adora1 | Polg2         | 1  |
| 22213 | 20085 | Adora1 | Lpin2         | 1  |
| 22213 | 20744 | Adora1 | lpmk          | 1  |
| 22213 | 20745 | Adora1 | Sord          | 1  |
| 22213 | 21142 | Adora1 | Gm129         | 1  |
| 22213 | 21675 | Adora1 | Mosc2         | 1  |
| 22213 | 21733 | Adora1 | Rhebl1        | 1  |
| 22213 | 21811 | Adora1 | Ak3l1         | 1  |
| 22213 | 21918 | Adora1 | Snx24         | -1 |
| 22213 | 21969 | Adora1 | Tk1           | 1  |
| 22213 | 22012 | Adora1 | Itgae         | -1 |

|       |       |               |               |    |
|-------|-------|---------------|---------------|----|
| 22213 | 22146 | Adora1        | Aifm2         | 1  |
| 22213 | 22290 | Adora1        | Tubb2a        | -1 |
| 22213 | 22443 | Adora1        | Tuba1c        | -1 |
| 22213 | 22470 | Adora1        | Ppargc1b      | 1  |
| 22213 | 22630 | Adora1        | MMT00034355   | -1 |
| 22213 | 22925 | Adora1        | Parp16        | 1  |
| 22213 | 22936 | Adora1        | Rhobtb1       | 1  |
| 22213 | 23183 | Adora1        | Nnmt          | 1  |
| 22213 | 23201 | Adora1        | S1pr1         | -1 |
| 22213 | 23202 | Adora1        | Olfir559      | 1  |
| 22213 | 23558 | Adora1        | MMT00030937   | 1  |
| 22217 | 10132 | Flvcr2        | Ces2          | -1 |
| 22226 | 18947 | Pm20d1        | Ctse          | 1  |
| 22226 | 22226 | Pm20d1        | Pm20d1        | 1  |
| 22232 | 12302 | Krt19         | Cbx1          | -1 |
| 22238 | 21214 | Sardh         | Scd1          | 1  |
| 22255 | 20068 | 2900010M23Rik | 2610204M08Rik | -1 |
| 22258 | 1416  | Ttk           | 6720460F02Rik | 1  |
| 22258 | 5364  | Ttk           | Kif22         | 1  |
| 22258 | 8416  | Ttk           | Cdc20         | 1  |
| 22258 | 11422 | Ttk           | Pltp          | 1  |
| 22258 | 18299 | Ttk           | MMT00035424   | 1  |
| 22258 | 21692 | Ttk           | MMT00013924   | 1  |
| 22260 | 21214 | Slc38a4       | Scd1          | -1 |
| 22286 | 607   | Mmachc        | Me1           | 1  |
| 22286 | 3565  | Mmachc        | MMT00045908   | 1  |
| 22286 | 9842  | Mmachc        | Qdpr          | 1  |
| 22286 | 14147 | Mmachc        | Acss2         | 1  |
| 22286 | 18201 | Mmachc        | MMT00060232   | 1  |
| 22286 | 20019 | Mmachc        | Qdpr          | 1  |
| 22286 | 20058 | Mmachc        | Dnaic1        | -1 |
| 22286 | 21214 | Mmachc        | Scd1          | 1  |
| 22286 | 21727 | Mmachc        | Khk           | 1  |
| 22290 | 185   | Tubb2a        | Ap2b1         | 1  |
| 22290 | 250   | Tubb2a        | Tubb2a-ps2    | 1  |
| 22290 | 392   | Tubb2a        | Sec22b        | 1  |
| 22290 | 433   | Tubb2a        | Pla2g12b      | 1  |
| 22290 | 604   | Tubb2a        | Ppp1r15b      | -1 |
| 22290 | 609   | Tubb2a        | MMT00060868   | 1  |
| 22290 | 719   | Tubb2a        | Usp2          | -1 |
| 22290 | 1036  | Tubb2a        | Dusp19        | 1  |
| 22290 | 1310  | Tubb2a        | Cabc1         | 1  |
| 22290 | 1445  | Tubb2a        | Ssbp2         | -1 |
| 22290 | 1767  | Tubb2a        | BC016495      | -1 |
| 22290 | 1806  | Tubb2a        | Nola3         | 1  |
| 22290 | 2339  | Tubb2a        | 5730449L18Rik | 1  |
| 22290 | 2399  | Tubb2a        | MMT00060167   | 1  |
| 22290 | 2636  | Tubb2a        | Tars          | 1  |
| 22290 | 2766  | Tubb2a        | Elp4          | 1  |
| 22290 | 2850  | Tubb2a        | Slc16a6       | 1  |
| 22290 | 3393  | Tubb2a        | Snhg8         | -1 |

|       |       |        |               |    |
|-------|-------|--------|---------------|----|
| 22290 | 3564  | Tubb2a | Spcs2         | 1  |
| 22290 | 3620  | Tubb2a | Bet1          | 1  |
| 22290 | 3804  | Tubb2a | MMT00015534   | 1  |
| 22290 | 4590  | Tubb2a | Arhgap21      | -1 |
| 22290 | 4966  | Tubb2a | Zscan20       | 1  |
| 22290 | 5183  | Tubb2a | St5           | 1  |
| 22290 | 5934  | Tubb2a | S100a10       | 1  |
| 22290 | 5974  | Tubb2a | Arntl         | 1  |
| 22290 | 6370  | Tubb2a | Aqp8          | 1  |
| 22290 | 6386  | Tubb2a | Por           | -1 |
| 22290 | 6650  | Tubb2a | MMT00050325   | 1  |
| 22290 | 7414  | Tubb2a | Clpx          | 1  |
| 22290 | 7619  | Tubb2a | Pik3ip1       | -1 |
| 22290 | 7862  | Tubb2a | Cpsf4l        | -1 |
| 22290 | 7973  | Tubb2a | Lgals9        | 1  |
| 22290 | 9910  | Tubb2a | EG666644      | -1 |
| 22290 | 10486 | Tubb2a | 1300002K09Rik | 1  |
| 22290 | 10642 | Tubb2a | Ngef          | -1 |
| 22290 | 11054 | Tubb2a | Rnase4        | -1 |
| 22290 | 11233 | Tubb2a | Tef           | -1 |
| 22290 | 11741 | Tubb2a | Slc30a10      | 1  |
| 22290 | 11807 | Tubb2a | Fbxo31        | -1 |
| 22290 | 12204 | Tubb2a | Ankmy2        | -1 |
| 22290 | 12941 | Tubb2a | Elov15        | 1  |
| 22290 | 13200 | Tubb2a | 5730449L18Rik | 1  |
| 22290 | 13630 | Tubb2a | Cdkn1a        | 1  |
| 22290 | 14380 | Tubb2a | MMT00051866   | 1  |
| 22290 | 14442 | Tubb2a | Ethe1         | 1  |
| 22290 | 15481 | Tubb2a | 1110067D22Rik | 1  |
| 22290 | 15709 | Tubb2a | Tceal1        | -1 |
| 22290 | 16251 | Tubb2a | G6pc          | 1  |
| 22290 | 16690 | Tubb2a | Tjp3          | 1  |
| 22290 | 17247 | Tubb2a | A030007L17Rik | 1  |
| 22290 | 17338 | Tubb2a | Mocos         | 1  |
| 22290 | 17876 | Tubb2a | Tubb4         | 1  |
| 22290 | 18179 | Tubb2a | Dbp           | -1 |
| 22290 | 18201 | Tubb2a | MMT00060232   | 1  |
| 22290 | 18286 | Tubb2a | Slc41a3       | -1 |
| 22290 | 18572 | Tubb2a | Stx18         | 1  |
| 22290 | 18607 | Tubb2a | Acat3         | 1  |
| 22290 | 18827 | Tubb2a | Oprs1         | 1  |
| 22290 | 18846 | Tubb2a | Ikbkg         | 1  |
| 22290 | 20266 | Tubb2a | Insig2        | 1  |
| 22290 | 21142 | Tubb2a | Gm129         | -1 |
| 22290 | 21214 | Tubb2a | Scd1          | 1  |
| 22290 | 21251 | Tubb2a | Cpt1a         | -1 |
| 22290 | 21811 | Tubb2a | Ak3l1         | -1 |
| 22290 | 22138 | Tubb2a | Ang           | -1 |
| 22290 | 22290 | Tubb2a | Tubb2a        | 1  |
| 22290 | 22630 | Tubb2a | MMT00034355   | 1  |
| 22290 | 22830 | Tubb2a | MMT00081088   | -1 |

|       |       |               |                    |    |
|-------|-------|---------------|--------------------|----|
| 22290 | 23437 | Tubb2a        | Efhd2              | -1 |
| 22290 | 23617 | Tubb2a        | Nme1               | 1  |
| 22297 | 13988 | Zfyve1        | Cntnap2            | -1 |
| 22297 | 22297 | Zfyve1        | Zfyve1             | 1  |
| 22302 | 607   | MMT00041810   | Me1                | 1  |
| 22302 | 8815  | MMT00041810   | Mx1                | 1  |
| 22302 | 18201 | MMT00041810   | MMT00060232        | 1  |
| 22302 | 21214 | MMT00041810   | Scd1               | 1  |
| 22312 | 15844 | Itln1         | Klhdc9             | -1 |
| 22320 | 2472  | MMT00047284   | MMT00014056        | 1  |
| 22320 | 7192  | MMT00047284   | Ttc21b             | 1  |
| 22320 | 7654  | MMT00047284   | Ptpmt1             | -1 |
| 22320 | 9547  | MMT00047284   | MMT00006479        | 1  |
| 22320 | 14757 | MMT00047284   | Hdx                | 1  |
| 22320 | 16881 | MMT00047284   | MMT00031504        | 1  |
| 22320 | 17295 | MMT00047284   | MMT00082577        | 1  |
| 22320 | 19763 | MMT00047284   | Acp2               | 1  |
| 22320 | 19803 | MMT00047284   | BC003993           | 1  |
| 22320 | 22320 | MMT00047284   | MMT00047284        | 1  |
| 22320 | 23474 | MMT00047284   | MMT00011721        | 1  |
| 22324 | 5974  | MMT00060741   | Arntl              | 1  |
| 22324 | 8662  | MMT00060741   | Brca2              | -1 |
| 22324 | 8684  | MMT00060741   | Ii15               | -1 |
| 22324 | 9831  | MMT00060741   | Nedd4l             | 1  |
| 22324 | 11557 | MMT00060741   | Blnk               | -1 |
| 22324 | 12315 | MMT00060741   | Srebf1             | -1 |
| 22324 | 20965 | MMT00060741   | Usp28              | -1 |
| 22324 | 22561 | MMT00060741   | Whdc1              | -1 |
| 22327 | 5364  | Tyropb        | Kif22              | 1  |
| 22333 | 1041  | Hnrnph3       | 3110049J23Rik      | 1  |
| 22333 | 5965  | Hnrnph3       | Pbld               | 1  |
| 22333 | 12380 | Hnrnph3       | Rftn2              | 1  |
| 22333 | 13688 | Hnrnph3       | Ppa1               | 1  |
| 22333 | 15971 | Hnrnph3       | Aifm2              | 1  |
| 22333 | 19392 | Hnrnph3       | Slc25a16           | -1 |
| 22333 | 21105 | Hnrnph3       | Pex26              | 1  |
| 22333 | 22146 | Hnrnph3       | Aifm2              | 1  |
| 22333 | 22333 | Hnrnph3       | Hnrnph3            | 1  |
| 22338 | 607   | Unc119        | Me1                | 1  |
| 22351 | 1336  | Fanca         | MMT00069537        | -1 |
| 22351 | 2243  | Fanca         | Gcsh               | -1 |
| 22351 | 7910  | Fanca         | AK122209           | -1 |
| 22351 | 14391 | Fanca         | MMT00017335        | 1  |
| 22351 | 15953 | Fanca         | Acsf3              | 1  |
| 22351 | 18697 | Fanca         | Afg31              | -1 |
| 22351 | 21394 | Fanca         | Cdh15              | 1  |
| 22351 | 22351 | Fanca         | Fanca              | 1  |
| 22361 | 20079 | Sephs2        | MMT00019254        | 1  |
| 22365 | 15740 | Jun           | 1810010H24Rik      | -1 |
| 22371 | 7602  | 1810063B05Rik | Pcca               | 1  |
| 22371 | 10554 | 1810063B05Rik | ENSMUSG00000074179 | 1  |

|       |       |               |                    |    |
|-------|-------|---------------|--------------------|----|
| 22371 | 13293 | 1810063B05Rik | Gsta2              | 1  |
| 22371 | 21214 | 1810063B05Rik | Scd1               | 1  |
| 22371 | 21727 | 1810063B05Rik | Khk                | 1  |
| 22390 | 607   | Dhcr7         | Me1                | 1  |
| 22390 | 1129  | Dhcr7         | Gsta4              | 1  |
| 22390 | 3446  | Dhcr7         | Eno1               | 1  |
| 22390 | 3620  | Dhcr7         | Bet1               | 1  |
| 22390 | 4351  | Dhcr7         | Plxnb1             | -1 |
| 22390 | 5884  | Dhcr7         | Gstm2              | 1  |
| 22390 | 6193  | Dhcr7         | Lactb2             | 1  |
| 22390 | 7430  | Dhcr7         | Gpr137             | 1  |
| 22390 | 7519  | Dhcr7         | Gstm1              | 1  |
| 22390 | 7602  | Dhcr7         | Pcca               | 1  |
| 22390 | 8444  | Dhcr7         | Rdh16              | 1  |
| 22390 | 8815  | Dhcr7         | Mx1                | 1  |
| 22390 | 9408  | Dhcr7         | Hmgcs2             | -1 |
| 22390 | 9427  | Dhcr7         | Nqo2               | 1  |
| 22390 | 9842  | Dhcr7         | Qdpr               | 1  |
| 22390 | 10554 | Dhcr7         | ENSMUSG00000074179 | 1  |
| 22390 | 10961 | Dhcr7         | Pgd                | 1  |
| 22390 | 11086 | Dhcr7         | Pnpla5             | 1  |
| 22390 | 12219 | Dhcr7         | Cyb5b              | 1  |
| 22390 | 12556 | Dhcr7         | Ass1               | 1  |
| 22390 | 13293 | Dhcr7         | Gsta2              | 1  |
| 22390 | 14017 | Dhcr7         | Ces5               | 1  |
| 22390 | 14147 | Dhcr7         | Acss2              | 1  |
| 22390 | 14151 | Dhcr7         | Slc44a1            | 1  |
| 22390 | 15205 | Dhcr7         | MMT00030262        | -1 |
| 22390 | 18113 | Dhcr7         | MMT00034400        | 1  |
| 22390 | 18201 | Dhcr7         | MMT00060232        | 1  |
| 22390 | 18286 | Dhcr7         | Slc41a3            | -1 |
| 22390 | 20019 | Dhcr7         | Qdpr               | 1  |
| 22390 | 20058 | Dhcr7         | Dnaic1             | -1 |
| 22390 | 21202 | Dhcr7         | Acly               | 1  |
| 22390 | 21214 | Dhcr7         | Scd1               | 1  |
| 22390 | 21251 | Dhcr7         | Cpt1a              | -1 |
| 22390 | 21575 | Dhcr7         | Cyp2c55            | 1  |
| 22390 | 21727 | Dhcr7         | Khk                | 1  |
| 22390 | 22732 | Dhcr7         | Cyb5b              | 1  |
| 22390 | 22770 | Dhcr7         | Slc27a2            | -1 |
| 22390 | 22998 | Dhcr7         | Ass1               | 1  |
| 22390 | 23640 | Dhcr7         | Bdh1               | -1 |
| 22395 | 14557 | Kcna1         | Pyroxd1            | -1 |
| 22395 | 17391 | Kcna1         | C530028O21Rik      | -1 |
| 22395 | 19964 | Kcna1         | Ndufa9             | -1 |
| 22403 | 8328  | Bank1         | Klhdc8a            | 1  |
| 22403 | 13947 | Bank1         | Crip2              | 1  |
| 22403 | 19790 | Bank1         | Polg2              | -1 |
| 22403 | 22640 | Bank1         | Bud13              | -1 |
| 22403 | 22936 | Bank1         | Rhobtb1            | -1 |
| 22406 | 607   | Vnn1          | Me1                | -1 |

|       |       |      |                    |    |
|-------|-------|------|--------------------|----|
| 22406 | 1129  | Vnn1 | Gsta4              | -1 |
| 22406 | 2049  | Vnn1 | Gsta3              | -1 |
| 22406 | 2127  | Vnn1 | Ldha               | 1  |
| 22406 | 2721  | Vnn1 | Inmt               | -1 |
| 22406 | 3354  | Vnn1 | Ropn1l             | -1 |
| 22406 | 3446  | Vnn1 | Eno1               | -1 |
| 22406 | 3565  | Vnn1 | MMT00045908        | -1 |
| 22406 | 3754  | Vnn1 | Dock6              | -1 |
| 22406 | 4056  | Vnn1 | Tnfaip8l1          | 1  |
| 22406 | 5804  | Vnn1 | Thrsp              | -1 |
| 22406 | 5884  | Vnn1 | Gstm2              | -1 |
| 22406 | 6085  | Vnn1 | MMT00007454        | 1  |
| 22406 | 6086  | Vnn1 | Fgl1               | 1  |
| 22406 | 6193  | Vnn1 | Lactb2             | -1 |
| 22406 | 6263  | Vnn1 | Slc7a4             | -1 |
| 22406 | 6573  | Vnn1 | Pecr               | -1 |
| 22406 | 6767  | Vnn1 | Erc2               | -1 |
| 22406 | 7602  | Vnn1 | Pcca               | -1 |
| 22406 | 8444  | Vnn1 | Rdh16              | -1 |
| 22406 | 8477  | Vnn1 | MMT00002146        | -1 |
| 22406 | 8773  | Vnn1 | MMT00027093        | 1  |
| 22406 | 8815  | Vnn1 | Mx1                | -1 |
| 22406 | 8896  | Vnn1 | Fasn               | -1 |
| 22406 | 9408  | Vnn1 | Hmgcs2             | 1  |
| 22406 | 9427  | Vnn1 | Nqo2               | -1 |
| 22406 | 9718  | Vnn1 | Fmo5               | -1 |
| 22406 | 9842  | Vnn1 | Qdpr               | -1 |
| 22406 | 10367 | Vnn1 | Coq7               | -1 |
| 22406 | 10532 | Vnn1 | MMT00057790        | 1  |
| 22406 | 10554 | Vnn1 | ENSMUSG00000074179 | -1 |
| 22406 | 10961 | Vnn1 | Pgd                | -1 |
| 22406 | 11086 | Vnn1 | Pnpla5             | -1 |
| 22406 | 12219 | Vnn1 | Cyb5b              | -1 |
| 22406 | 12556 | Vnn1 | Ass1               | -1 |
| 22406 | 12955 | Vnn1 | Atp5o              | -1 |
| 22406 | 13293 | Vnn1 | Gsta2              | -1 |
| 22406 | 13431 | Vnn1 | MMT00038058        | 1  |
| 22406 | 14055 | Vnn1 | MMT00050438        | 1  |
| 22406 | 14147 | Vnn1 | Acss2              | -1 |
| 22406 | 14151 | Vnn1 | Slc44a1            | -1 |
| 22406 | 14285 | Vnn1 | C1qbp              | -1 |
| 22406 | 14442 | Vnn1 | Ethe1              | -1 |
| 22406 | 15205 | Vnn1 | MMT00030262        | 1  |
| 22406 | 15500 | Vnn1 | MMT00081411        | 1  |
| 22406 | 16525 | Vnn1 | Lbp                | 1  |
| 22406 | 17563 | Vnn1 | Aldh1l1            | -1 |
| 22406 | 17638 | Vnn1 | Adssl1             | -1 |
| 22406 | 17660 | Vnn1 | Nlrp12             | 1  |
| 22406 | 17887 | Vnn1 | Cryl1              | -1 |
| 22406 | 18113 | Vnn1 | MMT00034400        | -1 |
| 22406 | 18173 | Vnn1 | Arpp19             | -1 |



|       |       |        |               |    |
|-------|-------|--------|---------------|----|
| 22406 | 18201 | Vnn1   | MMT00060232   | -1 |
| 22406 | 18549 | Vnn1   | Robo1         | -1 |
| 22406 | 19066 | Vnn1   | MMT00012632   | -1 |
| 22406 | 20019 | Vnn1   | Qdpr          | -1 |
| 22406 | 20058 | Vnn1   | Dnaic1        | 1  |
| 22406 | 20804 | Vnn1   | Eno1          | -1 |
| 22406 | 21202 | Vnn1   | Acly          | -1 |
| 22406 | 21214 | Vnn1   | Scd1          | -1 |
| 22406 | 21251 | Vnn1   | Cpt1a         | 1  |
| 22406 | 21575 | Vnn1   | Cyp2c55       | -1 |
| 22406 | 21727 | Vnn1   | Khk           | -1 |
| 22406 | 21765 | Vnn1   | Arpp19        | -1 |
| 22406 | 21793 | Vnn1   | Pla2g12a      | 1  |
| 22406 | 21937 | Vnn1   | MMT00015325   | 1  |
| 22406 | 22406 | Vnn1   | Vnn1          | 1  |
| 22406 | 22462 | Vnn1   | MMT00026054   | -1 |
| 22406 | 22732 | Vnn1   | Cyb5b         | -1 |
| 22406 | 22770 | Vnn1   | Slc27a2       | 1  |
| 22406 | 22907 | Vnn1   | MMT00054594   | 1  |
| 22406 | 22978 | Vnn1   | MMT00043176   | 1  |
| 22406 | 22998 | Vnn1   | Ass1          | -1 |
| 22406 | 23623 | Vnn1   | 2010305C02Rik | -1 |
| 22406 | 23640 | Vnn1   | Bdh1          | 1  |
| 22407 | 269   | Rhbdf2 | Tuba1b        | 1  |
| 22407 | 771   | Rhbdf2 | Zbtb45        | 1  |
| 22407 | 1941  | Rhbdf2 | MMT00079618   | 1  |
| 22407 | 4201  | Rhbdf2 | Tubb2c        | 1  |
| 22407 | 5587  | Rhbdf2 | Rmnd5b        | 1  |
| 22407 | 7151  | Rhbdf2 | MMT00007982   | 1  |
| 22407 | 9763  | Rhbdf2 | Tuba3b        | 1  |
| 22407 | 11724 | Rhbdf2 | Tuba3a        | 1  |
| 22407 | 17444 | Rhbdf2 | Tuba1a        | 1  |
| 22407 | 17656 | Rhbdf2 | Hdhd3         | 1  |
| 22407 | 18606 | Rhbdf2 | A230074B11Rik | -1 |
| 22407 | 18785 | Rhbdf2 | Angptl4       | -1 |
| 22407 | 22443 | Rhbdf2 | Tuba1c        | 1  |
| 22408 | 286   | Calr3  | MMT00070509   | 1  |
| 22408 | 1755  | Calr3  | Ocel1         | 1  |
| 22408 | 3055  | Calr3  | Pde4c         | 1  |
| 22408 | 5433  | Calr3  | 2410004L22Rik | -1 |
| 22408 | 9304  | Calr3  | Al449175      | 1  |
| 22408 | 9931  | Calr3  | Glit25d1      | -1 |
| 22408 | 13732 | Calr3  | Tpm4          | -1 |
| 22408 | 15094 | Calr3  | Pbx4          | -1 |
| 22408 | 15455 | Calr3  | Lsm4          | -1 |
| 22408 | 16617 | Calr3  | Sh2d4a        | -1 |
| 22408 | 16858 | Calr3  | Tmem38a       | -1 |
| 22408 | 18886 | Calr3  | Slc18a1       | -1 |
| 22409 | 2049  | Larp2  | Gsta3         | 1  |
| 22409 | 3354  | Larp2  | Ropn1l        | 1  |
| 22409 | 3446  | Larp2  | Eno1          | 1  |

|       |       |          |                    |    |
|-------|-------|----------|--------------------|----|
| 22409 | 3565  | Larp2    | MMT00045908        | 1  |
| 22409 | 4056  | Larp2    | Tnfaip8l1          | -1 |
| 22409 | 10554 | Larp2    | ENSMUSG00000074179 | 1  |
| 22409 | 13293 | Larp2    | Gsta2              | 1  |
| 22409 | 17563 | Larp2    | Aldh1l1            | 1  |
| 22409 | 18549 | Larp2    | Robo1              | 1  |
| 22409 | 19772 | Larp2    | Gnmt               | 1  |
| 22409 | 21727 | Larp2    | Khk                | 1  |
| 22411 | 3139  | Reck     | Gba2               | 1  |
| 22411 | 3847  | Reck     | Tdrd7              | -1 |
| 22411 | 8907  | Reck     | Npr2               | 1  |
| 22435 | 10486 | Tmem98   | 1300002K09Rik      | 1  |
| 22463 | 8815  | Gorasp2  | Mx1                | 1  |
| 22463 | 20079 | Gorasp2  | MMT00019254        | -1 |
| 22463 | 21214 | Gorasp2  | Scd1               | 1  |
| 22470 | 482   | Ppargc1b | Rnf43              | 1  |
| 22474 | 2013  | Ubqln1   | Il15ra             | -1 |
| 22474 | 8662  | Ubqln1   | Brca2              | -1 |
| 22474 | 10612 | Ubqln1   | Slc24a6            | -1 |
| 22474 | 18099 | Ubqln1   | Nfx1               | -1 |
| 22474 | 18418 | Ubqln1   | Hspa1b             | 1  |
| 22474 | 20965 | Ubqln1   | Usp28              | -1 |
| 22474 | 21389 | Ubqln1   | Odf2               | -1 |
| 22476 | 250   | Tspan4   | Tubb2a-ps2         | -1 |
| 22476 | 402   | Tspan4   | Timp3              | 1  |
| 22476 | 407   | Tspan4   | Serpina6           | 1  |
| 22476 | 415   | Tspan4   | Ypel2              | -1 |
| 22476 | 433   | Tspan4   | Pla2g12b           | -1 |
| 22476 | 437   | Tspan4   | Ndrp1              | -1 |
| 22476 | 604   | Tspan4   | Ppp1r15b           | 1  |
| 22476 | 609   | Tspan4   | MMT00060868        | -1 |
| 22476 | 719   | Tspan4   | Usp2               | 1  |
| 22476 | 1310  | Tspan4   | Cabc1              | -1 |
| 22476 | 1326  | Tspan4   | Tox                | 1  |
| 22476 | 1585  | Tspan4   | Mif4gd             | -1 |
| 22476 | 1655  | Tspan4   | Mgn1               | 1  |
| 22476 | 1760  | Tspan4   | Nek8               | 1  |
| 22476 | 1767  | Tspan4   | BC016495           | 1  |
| 22476 | 2011  | Tspan4   | Slc2a5             | 1  |
| 22476 | 2013  | Tspan4   | Il15ra             | 1  |
| 22476 | 2126  | Tspan4   | Dgat2              | 1  |
| 22476 | 2384  | Tspan4   | Micalcl            | -1 |
| 22476 | 2399  | Tspan4   | MMT00060167        | -1 |
| 22476 | 2636  | Tspan4   | Tars               | -1 |
| 22476 | 2651  | Tspan4   | Ttc7               | 1  |
| 22476 | 2766  | Tspan4   | Elp4               | -1 |
| 22476 | 2829  | Tspan4   | Lrfr3              | -1 |
| 22476 | 3214  | Tspan4   | Dnmt3b             | -1 |
| 22476 | 3235  | Tspan4   | BC029214           | -1 |
| 22476 | 3357  | Tspan4   | Rev1               | 1  |
| 22476 | 3502  | Tspan4   | Gde1               | 1  |

|       |       |        |               |    |
|-------|-------|--------|---------------|----|
| 22476 | 3746  | Tspan4 | Osbp15        | 1  |
| 22476 | 3790  | Tspan4 | Mtss1         | 1  |
| 22476 | 3804  | Tspan4 | MMT00015534   | -1 |
| 22476 | 4286  | Tspan4 | Ptp4a1        | 1  |
| 22476 | 4333  | Tspan4 | Sumo3         | -1 |
| 22476 | 4534  | Tspan4 | Ndel1         | 1  |
| 22476 | 5183  | Tspan4 | St5           | -1 |
| 22476 | 5224  | Tspan4 | MMT00071383   | -1 |
| 22476 | 5374  | Tspan4 | Chka          | -1 |
| 22476 | 5569  | Tspan4 | Pdgfc         | -1 |
| 22476 | 5574  | Tspan4 | Hsd3b7        | -1 |
| 22476 | 5591  | Tspan4 | Igsf8         | 1  |
| 22476 | 5734  | Tspan4 | EG619653      | 1  |
| 22476 | 5802  | Tspan4 | Mad2l2        | -1 |
| 22476 | 5849  | Tspan4 | 2310031A18Rik | -1 |
| 22476 | 5892  | Tspan4 | MMT00038457   | 1  |
| 22476 | 5934  | Tspan4 | S100a10       | -1 |
| 22476 | 5974  | Tspan4 | Arntl         | -1 |
| 22476 | 6019  | Tspan4 | Gdap10        | 1  |
| 22476 | 6171  | Tspan4 | Abtb2         | -1 |
| 22476 | 6268  | Tspan4 | Slc45a3       | -1 |
| 22476 | 6343  | Tspan4 | Slc20a1       | 1  |
| 22476 | 6370  | Tspan4 | Aqp8          | -1 |
| 22476 | 6386  | Tspan4 | Por           | 1  |
| 22476 | 6394  | Tspan4 | Fbxo6         | -1 |
| 22476 | 6639  | Tspan4 | Fads3         | -1 |
| 22476 | 6714  | Tspan4 | Lima1         | 1  |
| 22476 | 6788  | Tspan4 | Psen2         | -1 |
| 22476 | 7414  | Tspan4 | Clpx          | -1 |
| 22476 | 7862  | Tspan4 | Cpsf4l        | 1  |
| 22476 | 7973  | Tspan4 | Lgals9        | -1 |
| 22476 | 8595  | Tspan4 | MMT00019109   | -1 |
| 22476 | 9379  | Tspan4 | Ypel2         | -1 |
| 22476 | 9495  | Tspan4 | Srms          | -1 |
| 22476 | 9831  | Tspan4 | Nedd4l        | -1 |
| 22476 | 9907  | Tspan4 | 4932442K08Rik | 1  |
| 22476 | 9910  | Tspan4 | EG666644      | 1  |
| 22476 | 10029 | Tspan4 | Trak1         | 1  |
| 22476 | 10088 | Tspan4 | Ddc           | -1 |
| 22476 | 10166 | Tspan4 | Rhbdd2        | 1  |
| 22476 | 10215 | Tspan4 | Nampt         | 1  |
| 22476 | 10486 | Tspan4 | 1300002K09Rik | -1 |
| 22476 | 10642 | Tspan4 | Ngef          | 1  |
| 22476 | 10712 | Tspan4 | Fchsd2        | 1  |
| 22476 | 10775 | Tspan4 | Slc16a1       | -1 |
| 22476 | 10911 | Tspan4 | Mcl1          | 1  |
| 22476 | 11075 | Tspan4 | Xrcc6bp1      | 1  |
| 22476 | 11129 | Tspan4 | Ankhd1        | 1  |
| 22476 | 11193 | Tspan4 | Tsc22d1       | -1 |
| 22476 | 11233 | Tspan4 | Tef           | 1  |
| 22476 | 11599 | Tspan4 | Coq10b        | 1  |

|       |       |        |               |    |
|-------|-------|--------|---------------|----|
| 22476 | 11633 | Tspan4 | Ier3          | 1  |
| 22476 | 11741 | Tspan4 | Slc30a10      | -1 |
| 22476 | 12151 | Tspan4 | MMT00082650   | 1  |
| 22476 | 12204 | Tspan4 | Ankmy2        | 1  |
| 22476 | 12420 | Tspan4 | Klhl21        | 1  |
| 22476 | 12433 | Tspan4 | 5033413D22Rik | -1 |
| 22476 | 12489 | Tspan4 | Wdr8          | -1 |
| 22476 | 12565 | Tspan4 | Grem2         | 1  |
| 22476 | 12687 | Tspan4 | Zc3h8         | 1  |
| 22476 | 12799 | Tspan4 | Spon2         | -1 |
| 22476 | 12904 | Tspan4 | MMT00040704   | 1  |
| 22476 | 12905 | Tspan4 | Nfil3         | -1 |
| 22476 | 12941 | Tspan4 | Elov5         | -1 |
| 22476 | 12982 | Tspan4 | Cars          | -1 |
| 22476 | 13078 | Tspan4 | Eps8l2        | -1 |
| 22476 | 13094 | Tspan4 | Cnn3          | 1  |
| 22476 | 13355 | Tspan4 | Foxs1         | -1 |
| 22476 | 13545 | Tspan4 | Tmie          | -1 |
| 22476 | 13630 | Tspan4 | Cdkn1a        | -1 |
| 22476 | 13705 | Tspan4 | Osbp1a        | 1  |
| 22476 | 13889 | Tspan4 | Agpat2        | -1 |
| 22476 | 13947 | Tspan4 | Crip2         | -1 |
| 22476 | 14041 | Tspan4 | Cldn1         | -1 |
| 22476 | 14279 | Tspan4 | 3930402G23Rik | -1 |
| 22476 | 14442 | Tspan4 | Ethe1         | -1 |
| 22476 | 14705 | Tspan4 | Slc43a1       | 1  |
| 22476 | 15049 | Tspan4 | Rnf125        | -1 |
| 22476 | 15481 | Tspan4 | 1110067D22Rik | -1 |
| 22476 | 15665 | Tspan4 | Blcap         | -1 |
| 22476 | 15709 | Tspan4 | Tceal1        | 1  |
| 22476 | 15824 | Tspan4 | D19Ert721e    | -1 |
| 22476 | 16060 | Tspan4 | Gys2          | 1  |
| 22476 | 16339 | Tspan4 | Bach1         | 1  |
| 22476 | 16690 | Tspan4 | Tjp3          | -1 |
| 22476 | 16712 | Tspan4 | Pnrc1         | -1 |
| 22476 | 16851 | Tspan4 | Slc34a2       | -1 |
| 22476 | 17224 | Tspan4 | 5430407P10Rik | -1 |
| 22476 | 17247 | Tspan4 | A030007L17Rik | -1 |
| 22476 | 17338 | Tspan4 | Mocos         | -1 |
| 22476 | 17583 | Tspan4 | Per2          | 1  |
| 22476 | 17593 | Tspan4 | Gfer          | -1 |
| 22476 | 17876 | Tspan4 | Tubb4         | -1 |
| 22476 | 17884 | Tspan4 | Lnx2          | -1 |
| 22476 | 17952 | Tspan4 | Ripk2         | 1  |
| 22476 | 17999 | Tspan4 | A730017L22Rik | -1 |
| 22476 | 18147 | Tspan4 | Nhlrc2        | 1  |
| 22476 | 18179 | Tspan4 | Dbp           | 1  |
| 22476 | 18215 | Tspan4 | Gpr146        | 1  |
| 22476 | 18286 | Tspan4 | Slc41a3       | 1  |
| 22476 | 18296 | Tspan4 | Pcgf5         | 1  |
| 22476 | 18438 | Tspan4 | Map3k7ip2     | -1 |

|       |       |          |               |    |
|-------|-------|----------|---------------|----|
| 22476 | 18498 | Tspan4   | Slc5a6        | 1  |
| 22476 | 18552 | Tspan4   | Nr2c2ap       | -1 |
| 22476 | 18607 | Tspan4   | Acat3         | -1 |
| 22476 | 18756 | Tspan4   | Tspan14       | -1 |
| 22476 | 18827 | Tspan4   | Oprs1         | -1 |
| 22476 | 19004 | Tspan4   | Pdk4          | -1 |
| 22476 | 19032 | Tspan4   | Tymp          | -1 |
| 22476 | 19234 | Tspan4   | Nrg4          | 1  |
| 22476 | 19305 | Tspan4   | Azin1         | 1  |
| 22476 | 19532 | Tspan4   | Med8          | -1 |
| 22476 | 19671 | Tspan4   | Upp2          | 1  |
| 22476 | 19701 | Tspan4   | 9930021J17Rik | -1 |
| 22476 | 20266 | Tspan4   | Insig2        | -1 |
| 22476 | 20745 | Tspan4   | Sord          | 1  |
| 22476 | 21142 | Tspan4   | Gm129         | 1  |
| 22476 | 21188 | Tspan4   | Pnkp          | -1 |
| 22476 | 21251 | Tspan4   | Cpt1a         | 1  |
| 22476 | 21306 | Tspan4   | Pvrl1         | -1 |
| 22476 | 21409 | Tspan4   | Gldc          | -1 |
| 22476 | 21733 | Tspan4   | Rhebl1        | 1  |
| 22476 | 21811 | Tspan4   | Ak3l1         | 1  |
| 22476 | 21969 | Tspan4   | Tk1           | 1  |
| 22476 | 22012 | Tspan4   | Itgae         | -1 |
| 22476 | 22138 | Tspan4   | Ang           | 1  |
| 22476 | 22290 | Tspan4   | Tubb2a        | -1 |
| 22476 | 22324 | Tspan4   | MMT00060741   | -1 |
| 22476 | 22476 | Tspan4   | Tspan4        | 1  |
| 22476 | 22630 | Tspan4   | MMT00034355   | -1 |
| 22476 | 23437 | Tspan4   | Efhd2         | 1  |
| 22478 | 12910 | Tanc1    | 1110028A07Rik | 1  |
| 22479 | 18196 | Ascc2    | Camk2b        | 1  |
| 22486 | 185   | Sh3bgrl3 | Ap2b1         | 1  |
| 22486 | 3265  | Sh3bgrl3 | Dntt          | 1  |
| 22486 | 3410  | Sh3bgrl3 | Paqr9         | 1  |
| 22486 | 3836  | Sh3bgrl3 | 2200001115Rik | 1  |
| 22486 | 5364  | Sh3bgrl3 | Kif22         | 1  |
| 22486 | 7761  | Sh3bgrl3 | Nudt19        | -1 |
| 22486 | 11382 | Sh3bgrl3 | Cdca3         | 1  |
| 22486 | 12941 | Sh3bgrl3 | Elov15        | 1  |
| 22486 | 14472 | Sh3bgrl3 | Ahcy          | -1 |
| 22486 | 15320 | Sh3bgrl3 | MMT00017479   | -1 |
| 22486 | 20967 | Sh3bgrl3 | Fabp2         | 1  |
| 22487 | 11419 | Trub1    | Atrnl1        | -1 |
| 22493 | 18201 | Slc35a2  | MMT00060232   | 1  |
| 22496 | 143   | Slfn1    | Gvin1         | 1  |
| 22496 | 1533  | Slfn1    | BC013712      | 1  |
| 22496 | 2200  | Slfn1    | BC006779      | 1  |
| 22496 | 2224  | Slfn1    | Oasl2         | 1  |
| 22496 | 3659  | Slfn1    | EG236451      | 1  |
| 22496 | 3683  | Slfn1    | Oas2          | 1  |
| 22496 | 4426  | Slfn1    | Iigp2         | 1  |

|       |       |       |             |   |
|-------|-------|-------|-------------|---|
| 22496 | 4508  | Slfn1 | Ifit1       | 1 |
| 22496 | 5216  | Slfn1 | Spnb5       | 1 |
| 22496 | 5250  | Slfn1 | Ifit2       | 1 |
| 22496 | 5556  | Slfn1 | Ccl4        | 1 |
| 22496 | 5853  | Slfn1 | Trim30      | 1 |
| 22496 | 6213  | Slfn1 | Ccl2        | 1 |
| 22496 | 6595  | Slfn1 | Oas1a       | 1 |
| 22496 | 6779  | Slfn1 | Gbp6        | 1 |
| 22496 | 6824  | Slfn1 | Irf7        | 1 |
| 22496 | 6910  | Slfn1 | Ly6c2       | 1 |
| 22496 | 7105  | Slfn1 | Plac8       | 1 |
| 22496 | 7284  | Slfn1 | MMT00008674 | 1 |
| 22496 | 7316  | Slfn1 | Ifi204      | 1 |
| 22496 | 8555  | Slfn1 | H2-M3       | 1 |
| 22496 | 8800  | Slfn1 | Rnf213      | 1 |
| 22496 | 9100  | Slfn1 | Ms4a6c      | 1 |
| 22496 | 9401  | Slfn1 | Fcgr4       | 1 |
| 22496 | 9820  | Slfn1 | BC023105    | 1 |
| 22496 | 9847  | Slfn1 | Ifi27       | 1 |
| 22496 | 10109 | Slfn1 | Gbp3        | 1 |
| 22496 | 11009 | Slfn1 | MMT00008885 | 1 |
| 22496 | 11265 | Slfn1 | Irgm        | 1 |
| 22496 | 11701 | Slfn1 | Oas1c       | 1 |
| 22496 | 12398 | Slfn1 | Ifi44       | 1 |
| 22496 | 12600 | Slfn1 | Ifi204      | 1 |
| 22496 | 12969 | Slfn1 | Xaf1        | 1 |
| 22496 | 13156 | Slfn1 | Ifit3       | 1 |
| 22496 | 13309 | Slfn1 | Tgtp        | 1 |
| 22496 | 13522 | Slfn1 | Slfn5       | 1 |
| 22496 | 13527 | Slfn1 | Ctss        | 1 |
| 22496 | 13654 | Slfn1 | Stat1       | 1 |
| 22496 | 14258 | Slfn1 | Ifi47       | 1 |
| 22496 | 14880 | Slfn1 | Ms4a4c      | 1 |
| 22496 | 15074 | Slfn1 | Usp18       | 1 |
| 22496 | 15280 | Slfn1 | Cxcl10      | 1 |
| 22496 | 15449 | Slfn1 | Mitd1       | 1 |
| 22496 | 15504 | Slfn1 | Mx2         | 1 |
| 22496 | 16182 | Slfn1 | Oasl1       | 1 |
| 22496 | 16199 | Slfn1 | Samhd1      | 1 |
| 22496 | 16572 | Slfn1 | D14Ert668e  | 1 |
| 22496 | 16874 | Slfn1 | Fcer1g      | 1 |
| 22496 | 17197 | Slfn1 | Igtp        | 1 |
| 22496 | 17412 | Slfn1 | Aif1        | 1 |
| 22496 | 18174 | Slfn1 | Stat2       | 1 |
| 22496 | 18186 | Slfn1 | Parp14      | 1 |
| 22496 | 19026 | Slfn1 | Isg15       | 1 |
| 22496 | 19189 | Slfn1 | Sp100       | 1 |
| 22496 | 19708 | Slfn1 | Ly6a        | 1 |
| 22496 | 19738 | Slfn1 | Lgals3bp    | 1 |
| 22496 | 19794 | Slfn1 | Rgs2        | 1 |
| 22496 | 20321 | Slfn1 | Ms4a6b      | 1 |

|       |       |       |                    |    |
|-------|-------|-------|--------------------|----|
| 22496 | 20791 | Slfn1 | MMT00014813        | 1  |
| 22496 | 20997 | Slfn1 | MMT00028135        | 1  |
| 22496 | 21351 | Slfn1 | Shisa5             | 1  |
| 22496 | 21549 | Slfn1 | Rtp4               | 1  |
| 22496 | 21824 | Slfn1 | 5830443L24Rik      | 1  |
| 22496 | 22037 | Slfn1 | Oas1g              | 1  |
| 22496 | 22077 | Slfn1 | MMT00057550        | 1  |
| 22496 | 23208 | Slfn1 | Hck                | 1  |
| 22496 | 23450 | Slfn1 | D12Ertd647e        | 1  |
| 22508 | 607   | Setd8 | Me1                | 1  |
| 22508 | 3446  | Setd8 | Eno1               | 1  |
| 22508 | 8444  | Setd8 | Rdh16              | 1  |
| 22508 | 8815  | Setd8 | Mx1                | 1  |
| 22508 | 9842  | Setd8 | Qdpr               | 1  |
| 22508 | 12910 | Setd8 | 1110028A07Rik      | 1  |
| 22508 | 18113 | Setd8 | MMT00034400        | 1  |
| 22508 | 18201 | Setd8 | MMT00060232        | 1  |
| 22508 | 19066 | Setd8 | MMT00012632        | 1  |
| 22508 | 20058 | Setd8 | Dnaic1             | -1 |
| 22508 | 21214 | Setd8 | Scd1               | 1  |
| 22508 | 21575 | Setd8 | Cyp2c55            | 1  |
| 22508 | 21727 | Setd8 | Khk                | 1  |
| 22508 | 22138 | Setd8 | Ang                | -1 |
| 22520 | 607   | Sec13 | Me1                | 1  |
| 22520 | 874   | Sec13 | Aldh1a7            | 1  |
| 22520 | 3377  | Sec13 | Cs                 | 1  |
| 22520 | 3504  | Sec13 | Anpep              | -1 |
| 22520 | 4674  | Sec13 | Cxcl12             | -1 |
| 22520 | 5884  | Sec13 | Gstm2              | 1  |
| 22520 | 6370  | Sec13 | Aqp8               | 1  |
| 22520 | 6650  | Sec13 | MMT00050325        | 1  |
| 22520 | 7602  | Sec13 | Pcca               | 1  |
| 22520 | 8444  | Sec13 | Rdh16              | 1  |
| 22520 | 8815  | Sec13 | Mx1                | 1  |
| 22520 | 10132 | Sec13 | Ces2               | 1  |
| 22520 | 10554 | Sec13 | ENSMUSG00000074179 | 1  |
| 22520 | 11234 | Sec13 | Pygl               | 1  |
| 22520 | 11946 | Sec13 | MMT00030953        | 1  |
| 22520 | 12219 | Sec13 | Cyb5b              | 1  |
| 22520 | 14017 | Sec13 | Ces5               | 1  |
| 22520 | 14147 | Sec13 | Acss2              | 1  |
| 22520 | 14323 | Sec13 | Scarb1             | -1 |
| 22520 | 17996 | Sec13 | Igfbp2             | -1 |
| 22520 | 18201 | Sec13 | MMT00060232        | 1  |
| 22520 | 18846 | Sec13 | Ikbkg              | 1  |
| 22520 | 20019 | Sec13 | Qdpr               | 1  |
| 22520 | 20079 | Sec13 | MMT00019254        | -1 |
| 22520 | 20328 | Sec13 | Csl                | 1  |
| 22520 | 20498 | Sec13 | Porcn              | -1 |
| 22520 | 21202 | Sec13 | Acly               | 1  |
| 22520 | 21214 | Sec13 | Scd1               | 1  |

|       |       |         |               |    |
|-------|-------|---------|---------------|----|
| 22520 | 21575 | Sec13   | Cyp2c55       | 1  |
| 22520 | 21793 | Sec13   | Pla2g12a      | -1 |
| 22520 | 21966 | Sec13   | Pcp4l1        | -1 |
| 22520 | 22138 | Sec13   | Ang           | -1 |
| 22520 | 22732 | Sec13   | Cyb5b         | 1  |
| 22520 | 23026 | Sec13   | Apom          | -1 |
| 22521 | 3799  | Hsp90b1 | Serpinh1      | 1  |
| 22521 | 3913  | Hsp90b1 | Mrpl15        | 1  |
| 22521 | 7731  | Hsp90b1 | 1500001M20Rik | -1 |
| 22521 | 11043 | Hsp90b1 | Hsph1         | 1  |
| 22521 | 12315 | Hsp90b1 | Srebf1        | -1 |
| 22521 | 14279 | Hsp90b1 | 3930402G23Rik | 1  |
| 22521 | 16299 | Hsp90b1 | Creld2        | 1  |
| 22521 | 17468 | Hsp90b1 | Anubl1        | -1 |
| 22534 | 7659  | Pik3r2  | Rab30         | -1 |
| 22534 | 7944  | Pik3r2  | Al132487      | -1 |
| 22534 | 8439  | Pik3r2  | Slc25a33      | -1 |
| 22534 | 12315 | Pik3r2  | Srebf1        | 1  |
| 22534 | 16823 | Pik3r2  | Inhbb         | -1 |
| 22534 | 17660 | Pik3r2  | Nlrp12        | -1 |
| 22534 | 18050 | Pik3r2  | MMT00003408   | 1  |
| 22551 | 3061  | Anapc11 | Scarf2        | -1 |
| 22551 | 6846  | Anapc11 | Olf1402       | -1 |
| 22551 | 17792 | Anapc11 | Vmn2r79       | -1 |
| 22551 | 17897 | Anapc11 | Gm1019        | -1 |
| 22557 | 6017  | P4hb    | MMT00018015   | 1  |
| 22557 | 13615 | P4hb    | Arl16         | 1  |
| 22560 | 2794  | Gpr56   | Map3k6        | 1  |
| 22560 | 6675  | Gpr56   | Sfrs4         | 1  |
| 22560 | 8399  | Gpr56   | Herpud1       | 1  |
| 22560 | 11807 | Gpr56   | Fbxo31        | 1  |
| 22560 | 11808 | Gpr56   | Pck1          | 1  |
| 22560 | 12981 | Gpr56   | Nek6          | -1 |
| 22560 | 14989 | Gpr56   | Map3k5        | 1  |
| 22560 | 15021 | Gpr56   | Ppargc1a      | 1  |
| 22560 | 16176 | Gpr56   | St3gal5       | 1  |
| 22560 | 17622 | Gpr56   | Foxo1         | 1  |
| 22560 | 18027 | Gpr56   | 5730403B10Rik | 1  |
| 22560 | 18785 | Gpr56   | Angptl4       | 1  |
| 22560 | 22936 | Gpr56   | Rhobtb1       | 1  |
| 22560 | 23318 | Gpr56   | Cul2          | -1 |
| 22570 | 524   | Phtf1   | Hsd3b2        | 1  |
| 22570 | 1466  | Phtf1   | Ubp2l         | 1  |
| 22570 | 1867  | Phtf1   | Bcas2         | 1  |
| 22570 | 1963  | Phtf1   | MMT00039783   | 1  |
| 22570 | 3753  | Phtf1   | Setdb1        | -1 |
| 22570 | 6206  | Phtf1   | MMT00063701   | 1  |
| 22570 | 10521 | Phtf1   | Ttf2          | 1  |
| 22570 | 10681 | Phtf1   | Dgkz          | -1 |
| 22570 | 11611 | Phtf1   | S100a13       | -1 |
| 22570 | 20661 | Phtf1   | Tuft1         | 1  |



|       |       |               |                    |    |
|-------|-------|---------------|--------------------|----|
| 22570 | 22202 | Phtf1         | OTTMUSG00000021274 | -1 |
| 22570 | 22570 | Phtf1         | Phtf1              | 1  |
| 22573 | 5822  | Kif2c         | Car2               | 1  |
| 22573 | 19318 | Kif2c         | Plk1               | 1  |
| 22579 | 6370  | Eif4a2        | Aqp8               | -1 |
| 22579 | 8815  | Eif4a2        | Mx1                | -1 |
| 22579 | 11054 | Eif4a2        | Rnase4             | 1  |
| 22579 | 14147 | Eif4a2        | Acss2              | -1 |
| 22579 | 14151 | Eif4a2        | Slc44a1            | -1 |
| 22579 | 20019 | Eif4a2        | Qdpr               | -1 |
| 22579 | 21214 | Eif4a2        | Scd1               | -1 |
| 22579 | 21575 | Eif4a2        | Cyp2c55            | -1 |
| 22579 | 21966 | Eif4a2        | Pcp4l1             | 1  |
| 22579 | 22138 | Eif4a2        | Ang                | 1  |
| 22598 | 3587  | 4930402H24Rik | MMT00041940        | 1  |
| 22598 | 16251 | 4930402H24Rik | G6pc               | 1  |
| 22621 | 2850  | Cklf          | Slc16a6            | 1  |
| 22624 | 8444  | Kcnj15        | Rdh16              | 1  |
| 22624 | 10554 | Kcnj15        | ENSMUSG00000074179 | 1  |
| 22624 | 13293 | Kcnj15        | Gsta2              | 1  |
| 22624 | 20058 | Kcnj15        | Dnaic1             | -1 |
| 22627 | 3565  | Adck5         | MMT00045908        | -1 |
| 22627 | 8444  | Adck5         | Rdh16              | -1 |
| 22627 | 8815  | Adck5         | Mx1                | -1 |
| 22627 | 20058 | Adck5         | Dnaic1             | 1  |
| 22627 | 21214 | Adck5         | Scd1               | -1 |
| 22627 | 21727 | Adck5         | Khk                | -1 |
| 22628 | 15321 | EG626903      | Pus7               | 1  |
| 22630 | 12565 | MMT00034355   | Grem2              | -1 |
| 22631 | 13431 | MMT00054932   | MMT00038058        | -1 |
| 22631 | 15205 | MMT00054932   | MMT00030262        | -1 |
| 22642 | 2639  | Uts2          | Abhd2              | 1  |
| 22642 | 11565 | Uts2          | Serpina3c          | 1  |
| 22647 | 5364  | Pkib          | Kif22              | 1  |
| 22647 | 12981 | Pkib          | Nek6               | 1  |
| 22647 | 15284 | Pkib          | EG632778           | -1 |
| 22647 | 16182 | Pkib          | Oasl1              | 1  |
| 22647 | 17323 | Pkib          | Tubb6              | 1  |
| 22660 | 1416  | Kif4          | 6720460F02Rik      | 1  |
| 22660 | 7492  | Kif4          | Adfp               | 1  |
| 22660 | 8416  | Kif4          | Cdc20              | 1  |
| 22660 | 9759  | Kif4          | Cenpn              | 1  |
| 22668 | 7492  | Rai14         | Adfp               | 1  |
| 22668 | 9700  | Rai14         | Prodh              | -1 |
| 22668 | 17563 | Rai14         | Aldh1l1            | -1 |
| 22668 | 18069 | Rai14         | Gpt                | -1 |
| 22668 | 18299 | Rai14         | MMT00035424        | 1  |
| 22688 | 7151  | 4930432K21Rik | MMT00007982        | -1 |
| 22689 | 385   | 2610028A01Rik | Cog3               | 1  |
| 22691 | 5364  | Ercc6l        | Kif22              | 1  |
| 22691 | 11870 | Ercc6l        | Apitd1             | 1  |

|       |       |        |               |    |
|-------|-------|--------|---------------|----|
| 22691 | 19318 | Ercc6l | Plk1          | 1  |
| 22691 | 20433 | Ercc6l | Cdca5         | 1  |
| 22691 | 21947 | Ercc6l | Cdca8         | 1  |
| 22693 | 3622  | Trim68 | Trim21        | 1  |
| 22693 | 9161  | Trim68 | Mrpl17        | 1  |
| 22693 | 22693 | Trim68 | Trim68        | 1  |
| 22712 | 143   | Phf11  | Gvin1         | 1  |
| 22712 | 1533  | Phf11  | BC013712      | 1  |
| 22712 | 2058  | Phf11  | Hk3           | 1  |
| 22712 | 2200  | Phf11  | BC006779      | 1  |
| 22712 | 2224  | Phf11  | Oasl2         | 1  |
| 22712 | 2550  | Phf11  | MMT00036681   | 1  |
| 22712 | 2752  | Phf11  | Fcgr1         | 1  |
| 22712 | 3523  | Phf11  | Trim34        | 1  |
| 22712 | 3594  | Phf11  | Rasa4         | 1  |
| 22712 | 3659  | Phf11  | EG236451      | 1  |
| 22712 | 3683  | Phf11  | Oas2          | 1  |
| 22712 | 4114  | Phf11  | Parp12        | 1  |
| 22712 | 4409  | Phf11  | 5430435G22Rik | 1  |
| 22712 | 4426  | Phf11  | ligp2         | 1  |
| 22712 | 4508  | Phf11  | Ifit1         | 1  |
| 22712 | 4516  | Phf11  | Rsad2         | 1  |
| 22712 | 4920  | Phf11  | Rbl1          | 1  |
| 22712 | 5002  | Phf11  | Ifi202b       | 1  |
| 22712 | 5044  | Phf11  | Ifi35         | 1  |
| 22712 | 5216  | Phf11  | Spnb5         | 1  |
| 22712 | 5250  | Phf11  | Ifit2         | 1  |
| 22712 | 5556  | Phf11  | Ccl4          | 1  |
| 22712 | 5845  | Phf11  | Il18bp        | 1  |
| 22712 | 5853  | Phf11  | Trim30        | 1  |
| 22712 | 5975  | Phf11  | Car13         | 1  |
| 22712 | 6072  | Phf11  | C1qc          | 1  |
| 22712 | 6098  | Phf11  | Ncf4          | 1  |
| 22712 | 6213  | Phf11  | Ccl2          | 1  |
| 22712 | 6576  | Phf11  | Sfn2          | 1  |
| 22712 | 6587  | Phf11  | Irf9          | 1  |
| 22712 | 6595  | Phf11  | Oas1a         | 1  |
| 22712 | 6734  | Phf11  | Ehd4          | 1  |
| 22712 | 6824  | Phf11  | Irf7          | 1  |
| 22712 | 6866  | Phf11  | Gls           | -1 |
| 22712 | 6910  | Phf11  | Ly6c2         | 1  |
| 22712 | 7069  | Phf11  | Ube1l         | 1  |
| 22712 | 7105  | Phf11  | Plac8         | 1  |
| 22712 | 7238  | Phf11  | Pycard        | 1  |
| 22712 | 7284  | Phf11  | MMT00008674   | 1  |
| 22712 | 7316  | Phf11  | Ifi204        | 1  |
| 22712 | 7336  | Phf11  | Cd5l          | 1  |
| 22712 | 8392  | Phf11  | Asf1b         | 1  |
| 22712 | 8555  | Phf11  | H2-M3         | 1  |
| 22712 | 8564  | Phf11  | Pld4          | 1  |
| 22712 | 8659  | Phf11  | Psmb8         | 1  |

|       |       |       |              |   |
|-------|-------|-------|--------------|---|
| 22712 | 8800  | Phf11 | Rnf213       | 1 |
| 22712 | 9100  | Phf11 | Ms4a6c       | 1 |
| 22712 | 9401  | Phf11 | Fcgr4        | 1 |
| 22712 | 9820  | Phf11 | BC023105     | 1 |
| 22712 | 9821  | Phf11 | Pmaip1       | 1 |
| 22712 | 9847  | Phf11 | Ifi27        | 1 |
| 22712 | 9928  | Phf11 | Lgmn         | 1 |
| 22712 | 10109 | Phf11 | Gbp3         | 1 |
| 22712 | 10393 | Phf11 | Slc7a8       | 1 |
| 22712 | 10504 | Phf11 | Ripk3        | 1 |
| 22712 | 10606 | Phf11 | Apbb1ip      | 1 |
| 22712 | 10926 | Phf11 | P2ry13       | 1 |
| 22712 | 11009 | Phf11 | MMT00008885  | 1 |
| 22712 | 11204 | Phf11 | AI451617     | 1 |
| 22712 | 11265 | Phf11 | Irgm         | 1 |
| 22712 | 11701 | Phf11 | Oas1c        | 1 |
| 22712 | 12126 | Phf11 | Znfx1        | 1 |
| 22712 | 12312 | Phf11 | Ms4a6d       | 1 |
| 22712 | 12398 | Phf11 | Ifi44        | 1 |
| 22712 | 12495 | Phf11 | Casp1        | 1 |
| 22712 | 12600 | Phf11 | Ifi204       | 1 |
| 22712 | 12969 | Phf11 | Xaf1         | 1 |
| 22712 | 13156 | Phf11 | Ifit3        | 1 |
| 22712 | 13309 | Phf11 | Tgtp         | 1 |
| 22712 | 13514 | Phf11 | Apol9b       | 1 |
| 22712 | 13527 | Phf11 | Ctss         | 1 |
| 22712 | 13528 | Phf11 | Capn12       | 1 |
| 22712 | 13585 | Phf11 | Nckap1l      | 1 |
| 22712 | 13654 | Phf11 | Stat1        | 1 |
| 22712 | 13656 | Phf11 | Ly86         | 1 |
| 22712 | 13780 | Phf11 | Pilra        | 1 |
| 22712 | 14192 | Phf11 | Trpv2        | 1 |
| 22712 | 14237 | Phf11 | Rac2         | 1 |
| 22712 | 14258 | Phf11 | Ifi47        | 1 |
| 22712 | 14453 | Phf11 | Inpp5d       | 1 |
| 22712 | 14506 | Phf11 | Slc15a3      | 1 |
| 22712 | 14603 | Phf11 | Ly6e         | 1 |
| 22712 | 14611 | Phf11 | Ddx60        | 1 |
| 22712 | 14880 | Phf11 | Ms4a4c       | 1 |
| 22712 | 14883 | Phf11 | Itgal        | 1 |
| 22712 | 15074 | Phf11 | Usp18        | 1 |
| 22712 | 15280 | Phf11 | Cxcl10       | 1 |
| 22712 | 15449 | Phf11 | Mitd1        | 1 |
| 22712 | 15504 | Phf11 | Mx2          | 1 |
| 22712 | 16102 | Phf11 | Cd72         | 1 |
| 22712 | 16182 | Phf11 | Oasl1        | 1 |
| 22712 | 16186 | Phf11 | Cfp          | 1 |
| 22712 | 16199 | Phf11 | Samhd1       | 1 |
| 22712 | 16521 | Phf11 | Adar         | 1 |
| 22712 | 16572 | Phf11 | D14Erttd668e | 1 |
| 22712 | 16874 | Phf11 | Fcer1g       | 1 |

|       |       |        |                    |    |
|-------|-------|--------|--------------------|----|
| 22712 | 16988 | Phf11  | Clec4f             | 1  |
| 22712 | 17071 | Phf11  | Samd9l             | 1  |
| 22712 | 17197 | Phf11  | Igtp               | 1  |
| 22712 | 17412 | Phf11  | Aif1               | 1  |
| 22712 | 17904 | Phf11  | Cds1               | 1  |
| 22712 | 18174 | Phf11  | Stat2              | 1  |
| 22712 | 18186 | Phf11  | Parp14             | 1  |
| 22712 | 18211 | Phf11  | Folr2              | 1  |
| 22712 | 18289 | Phf11  | Tap1               | 1  |
| 22712 | 18686 | Phf11  | Zfp143             | 1  |
| 22712 | 19063 | Phf11  | Evl                | 1  |
| 22712 | 19189 | Phf11  | Sp100              | 1  |
| 22712 | 19252 | Phf11  | Tmsb4x             | 1  |
| 22712 | 19708 | Phf11  | Ly6a               | 1  |
| 22712 | 19738 | Phf11  | Lgals3bp           | 1  |
| 22712 | 19794 | Phf11  | Rgs2               | 1  |
| 22712 | 20321 | Phf11  | Ms4a6b             | 1  |
| 22712 | 20474 | Phf11  | Gnb3               | 1  |
| 22712 | 20997 | Phf11  | MMT00028135        | 1  |
| 22712 | 21351 | Phf11  | Shisa5             | 1  |
| 22712 | 21440 | Phf11  | Tmsb10             | 1  |
| 22712 | 21549 | Phf11  | Rtp4               | 1  |
| 22712 | 21824 | Phf11  | 5830443L24Rik      | 1  |
| 22712 | 22037 | Phf11  | Oas1g              | 1  |
| 22712 | 22327 | Phf11  | Tyrobp             | 1  |
| 22712 | 22496 | Phf11  | Sfn1               | 1  |
| 22712 | 22647 | Phf11  | Pkib               | 1  |
| 22712 | 23208 | Phf11  | Hck                | 1  |
| 22712 | 23242 | Phf11  | Gngt2              | 1  |
| 22712 | 23410 | Phf11  | C1qa               | 1  |
| 22712 | 23450 | Phf11  | D12Ert647e         | 1  |
| 22727 | 214   | Pdgfra | Lrp1               | 1  |
| 22727 | 624   | Pdgfra | 4931406I20Rik      | 1  |
| 22727 | 874   | Pdgfra | Aldh1a7            | -1 |
| 22727 | 1156  | Pdgfra | Rbj                | 1  |
| 22727 | 3170  | Pdgfra | Mcart1             | -1 |
| 22727 | 4391  | Pdgfra | Zfp467             | 1  |
| 22727 | 4748  | Pdgfra | Xylt2              | 1  |
| 22727 | 5884  | Pdgfra | Gstm2              | -1 |
| 22727 | 6976  | Pdgfra | Rbm35b             | 1  |
| 22727 | 7550  | Pdgfra | Rab11fip5          | 1  |
| 22727 | 7753  | Pdgfra | Gfm1               | -1 |
| 22727 | 10554 | Pdgfra | ENSMUSG00000074179 | -1 |
| 22727 | 10769 | Pdgfra | Hnrnpd             | 1  |
| 22727 | 13189 | Pdgfra | Dnajb4             | -1 |
| 22727 | 13293 | Pdgfra | Gsta2              | -1 |
| 22727 | 16251 | Pdgfra | G6pc               | -1 |
| 22727 | 18201 | Pdgfra | MMT00060232        | -1 |
| 22727 | 21214 | Pdgfra | Scd1               | -1 |
| 22732 | 607   | Cyb5b  | Me1                | 1  |
| 22732 | 937   | Cyb5b  | Pi4ka              | -1 |

|       |       |        |                    |    |
|-------|-------|--------|--------------------|----|
| 22732 | 1310  | Cyb5b  | Cabc1              | 1  |
| 22732 | 1760  | Cyb5b  | Nek8               | -1 |
| 22732 | 2013  | Cyb5b  | Il15ra             | -1 |
| 22732 | 2636  | Cyb5b  | Tars               | 1  |
| 22732 | 2766  | Cyb5b  | Elp4               | 1  |
| 22732 | 3504  | Cyb5b  | Anpep              | -1 |
| 22732 | 3620  | Cyb5b  | Bet1               | 1  |
| 22732 | 4351  | Cyb5b  | Plxnb1             | -1 |
| 22732 | 4687  | Cyb5b  | Gtpbp8             | 1  |
| 22732 | 5425  | Cyb5b  | Ung                | -1 |
| 22732 | 5934  | Cyb5b  | S100a10            | 1  |
| 22732 | 6193  | Cyb5b  | Lactb2             | 1  |
| 22732 | 7430  | Cyb5b  | Gpr137             | 1  |
| 22732 | 8815  | Cyb5b  | Mx1                | 1  |
| 22732 | 9408  | Cyb5b  | Hmgcs2             | -1 |
| 22732 | 9427  | Cyb5b  | Nqo2               | 1  |
| 22732 | 9842  | Cyb5b  | Qdpr               | 1  |
| 22732 | 10554 | Cyb5b  | ENSMUSG00000074179 | 1  |
| 22732 | 10961 | Cyb5b  | Pgd                | 1  |
| 22732 | 11375 | Cyb5b  | Derl2              | 1  |
| 22732 | 12143 | Cyb5b  | Thyn1              | 1  |
| 22732 | 12219 | Cyb5b  | Cyb5b              | 1  |
| 22732 | 12556 | Cyb5b  | Ass1               | 1  |
| 22732 | 12955 | Cyb5b  | Atp5o              | 1  |
| 22732 | 13889 | Cyb5b  | Agpat2             | 1  |
| 22732 | 14147 | Cyb5b  | Acss2              | 1  |
| 22732 | 14442 | Cyb5b  | Ethe1              | 1  |
| 22732 | 15892 | Cyb5b  | Slc22a5            | -1 |
| 22732 | 16510 | Cyb5b  | Tspyl4             | 1  |
| 22732 | 16842 | Cyb5b  | 2310003L22Rik      | 1  |
| 22732 | 17878 | Cyb5b  | Brap               | -1 |
| 22732 | 18201 | Cyb5b  | MMT00060232        | 1  |
| 22732 | 18286 | Cyb5b  | Slc41a3            | -1 |
| 22732 | 18790 | Cyb5b  | Car3               | 1  |
| 22732 | 18827 | Cyb5b  | Oprs1              | 1  |
| 22732 | 19089 | Cyb5b  | Peci               | -1 |
| 22732 | 20019 | Cyb5b  | Qdpr               | 1  |
| 22732 | 21202 | Cyb5b  | Acly               | 1  |
| 22732 | 21214 | Cyb5b  | Scd1               | 1  |
| 22732 | 21251 | Cyb5b  | Cpt1a              | -1 |
| 22732 | 21575 | Cyb5b  | Cyp2c55            | 1  |
| 22732 | 21727 | Cyb5b  | Khk                | 1  |
| 22732 | 21793 | Cyb5b  | Pla2g12a           | -1 |
| 22732 | 22732 | Cyb5b  | Cyb5b              | 1  |
| 22732 | 22770 | Cyb5b  | Slc27a2            | -1 |
| 22732 | 22998 | Cyb5b  | Ass1               | 1  |
| 22732 | 23623 | Cyb5b  | 2010305C02Rik      | 1  |
| 22732 | 23640 | Cyb5b  | Bdh1               | -1 |
| 22740 | 6231  | Manbal | 9030622O22Rik      | 1  |
| 22740 | 14647 | Manbal | Cst3               | -1 |
| 22740 | 22740 | Manbal | Manbal             | 1  |

|       |       |             |               |    |
|-------|-------|-------------|---------------|----|
| 22740 | 23005 | Manbal      | 4930405A21Rik | 1  |
| 22743 | 8750  | Igh-2       | 1700010I14Rik | 1  |
| 22744 | 607   | 9-Sep       | Me1           | 1  |
| 22744 | 1310  | 9-Sep       | Cabc1         | 1  |
| 22744 | 5934  | 9-Sep       | S100a10       | 1  |
| 22744 | 6370  | 9-Sep       | Aqp8          | 1  |
| 22744 | 8815  | 9-Sep       | Mx1           | 1  |
| 22744 | 12910 | 9-Sep       | 1110028A07Rik | 1  |
| 22744 | 12941 | 9-Sep       | Elov15        | 1  |
| 22744 | 18201 | 9-Sep       | MMT00060232   | 1  |
| 22744 | 18827 | 9-Sep       | Oprs1         | 1  |
| 22744 | 22138 | 9-Sep       | Ang           | -1 |
| 22753 | 6916  | Sidt2       | Wdr5b         | 1  |
| 22759 | 607   | Btbd10      | Me1           | 1  |
| 22759 | 14147 | Btbd10      | Acss2         | 1  |
| 22762 | 21214 | Slc6a4      | Scd1          | -1 |
| 22762 | 22337 | Slc6a4      | Nlk           | 1  |
| 22763 | 8444  | Alcam       | Rdh16         | 1  |
| 22763 | 8815  | Alcam       | Mx1           | 1  |
| 22763 | 12910 | Alcam       | 1110028A07Rik | 1  |
| 22763 | 14151 | Alcam       | Slc44a1       | 1  |
| 22763 | 18201 | Alcam       | MMT00060232   | 1  |
| 22763 | 21214 | Alcam       | Scd1          | 1  |
| 22763 | 21575 | Alcam       | Cyp2c55       | 1  |
| 22771 | 607   | Dhx37       | Me1           | 1  |
| 22771 | 14147 | Dhx37       | Acss2         | 1  |
| 22776 | 286   | Gsr         | MMT00070509   | 1  |
| 22776 | 403   | Gsr         | Leprotl1      | -1 |
| 22776 | 1097  | Gsr         | Dctn6         | 1  |
| 22776 | 1755  | Gsr         | Ocel1         | 1  |
| 22776 | 5433  | Gsr         | 2410004L22Rik | -1 |
| 22776 | 6760  | Gsr         | 2810428I15Rik | 1  |
| 22776 | 10195 | Gsr         | Klf1          | 1  |
| 22776 | 13004 | Gsr         | Arhgef10      | 1  |
| 22776 | 13732 | Gsr         | Tpm4          | -1 |
| 22776 | 15455 | Gsr         | Lsm4          | -1 |
| 22776 | 16617 | Gsr         | Sh2d4a        | -1 |
| 22776 | 18886 | Gsr         | Slc18a1       | -1 |
| 22776 | 20484 | Gsr         | Ces1          | -1 |
| 22776 | 22776 | Gsr         | Gsr           | 1  |
| 22777 | 8637  | Duox2       | Tnpo2         | 1  |
| 22777 | 14043 | Duox2       | 4930455C21Rik | 1  |
| 22781 | 22138 | Hibch       | Ang           | 1  |
| 22782 | 1014  | Frrs1       | Rtcd1         | 1  |
| 22786 | 3565  | Mterfd3     | MMT00045908   | 1  |
| 22786 | 9700  | Mterfd3     | Prodh         | 1  |
| 22786 | 18069 | Mterfd3     | Gpt           | 1  |
| 22821 | 12910 | Tmem135     | 1110028A07Rik | 1  |
| 22821 | 18201 | Tmem135     | MMT00060232   | 1  |
| 22821 | 20058 | Tmem135     | Dnaic1        | -1 |
| 22822 | 327   | MMT00013433 | H2-Ea         | 1  |

|       |       |             |                    |    |
|-------|-------|-------------|--------------------|----|
| 22822 | 763   | MMT00013433 | 4933406E20Rik      | 1  |
| 22822 | 1340  | MMT00013433 | Tap2               | 1  |
| 22822 | 2325  | MMT00013433 | H2-K1              | 1  |
| 22822 | 2801  | MMT00013433 | H2-BI              | 1  |
| 22822 | 2938  | MMT00013433 | H2-T23             | 1  |
| 22822 | 3599  | MMT00013433 | MMT00035426        | -1 |
| 22822 | 3704  | MMT00013433 | H2-Q7              | 1  |
| 22822 | 3857  | MMT00013433 | 1700001C19Rik      | -1 |
| 22822 | 5410  | MMT00013433 | Cyp4f15            | -1 |
| 22822 | 7088  | MMT00013433 | Slc37a1            | 1  |
| 22822 | 8750  | MMT00013433 | 1700010I14Rik      | 1  |
| 22822 | 8767  | MMT00013433 | Rgl2               | 1  |
| 22822 | 9158  | MMT00013433 | Pde9a              | -1 |
| 22822 | 10376 | MMT00013433 | C920025E04Rik      | -1 |
| 22822 | 10667 | MMT00013433 | H2-Eb1             | 1  |
| 22822 | 12335 | MMT00013433 | Plcb4              | 1  |
| 22822 | 12355 | MMT00013433 | Al507611           | 1  |
| 22822 | 13493 | MMT00013433 | Ring1              | -1 |
| 22822 | 13789 | MMT00013433 | H2-Q8              | 1  |
| 22822 | 18906 | MMT00013433 | Zfand3             | 1  |
| 22822 | 20238 | MMT00013433 | H2-T9              | 1  |
| 22822 | 20346 | MMT00013433 | Gna-rs1            | 1  |
| 22822 | 21295 | MMT00013433 | Snf1lk             | -1 |
| 22822 | 22822 | MMT00013433 | MMT00013433        | 1  |
| 22822 | 23250 | MMT00013433 | Plcl2              | 1  |
| 22822 | 23401 | MMT00013433 | H2-Q2              | 1  |
| 22827 | 5364  | Clec4a2     | Kif22              | 1  |
| 22833 | 7602  | Acat2       | Pcca               | 1  |
| 22833 | 10554 | Acat2       | ENSMUSG00000074179 | 1  |
| 22833 | 13293 | Acat2       | Gsta2              | 1  |
| 22833 | 13431 | Acat2       | MMT00038058        | -1 |
| 22833 | 15205 | Acat2       | MMT00030262        | -1 |
| 22833 | 17563 | Acat2       | Aldh1l1            | 1  |
| 22833 | 21727 | Acat2       | Khk                | 1  |
| 22852 | 250   | Nepn        | Tubb2a-ps2         | 1  |
| 22852 | 609   | Nepn        | MMT00060868        | 1  |
| 22852 | 3410  | Nepn        | Paqr9              | 1  |
| 22852 | 3804  | Nepn        | MMT00015534        | 1  |
| 22852 | 4286  | Nepn        | Ptp4a1             | -1 |
| 22852 | 5259  | Nepn        | Mat1a              | -1 |
| 22852 | 5364  | Nepn        | Kif22              | 1  |
| 22852 | 6386  | Nepn        | Por                | -1 |
| 22852 | 11129 | Nepn        | Ankhd1             | -1 |
| 22852 | 12799 | Nepn        | Spon2              | 1  |
| 22852 | 12839 | Nepn        | Fh1                | -1 |
| 22852 | 16647 | Nepn        | D16H22S680E        | -1 |
| 22852 | 16657 | Nepn        | Atpif1             | -1 |
| 22852 | 17876 | Nepn        | Tubb4              | 1  |
| 22852 | 18455 | Nepn        | Mtnr1a             | 1  |
| 22852 | 18827 | Nepn        | Oprs1              | 1  |
| 22852 | 22290 | Nepn        | Tubb2a             | 1  |

|       |       |        |             |    |
|-------|-------|--------|-------------|----|
| 22852 | 22630 | Nepn   | MMT00034355 | 1  |
| 22852 | 23183 | Nepn   | Nnmt        | -1 |
| 22858 | 3907  | Fbxl17 | Dkk3        | -1 |
| 22860 | 250   | Dtx2   | Tubb2a-ps2  | 1  |
| 22860 | 269   | Dtx2   | Tuba1b      | 1  |
| 22860 | 609   | Dtx2   | MMT00060868 | 1  |
| 22860 | 1941  | Dtx2   | MMT00079618 | 1  |
| 22860 | 2322  | Dtx2   | Tuba4a      | 1  |
| 22860 | 2794  | Dtx2   | Map3k6      | -1 |
| 22860 | 3804  | Dtx2   | MMT00015534 | 1  |
| 22860 | 4201  | Dtx2   | Tubb2c      | 1  |
| 22860 | 4708  | Dtx2   | Traf3ip2    | 1  |
| 22860 | 5791  | Dtx2   | Baiap211    | -1 |
| 22860 | 6386  | Dtx2   | Por         | -1 |
| 22860 | 7151  | Dtx2   | MMT00007982 | 1  |
| 22860 | 9763  | Dtx2   | Tuba3b      | 1  |
| 22860 | 10088 | Dtx2   | Ddc         | 1  |
| 22860 | 11129 | Dtx2   | Ankhd1      | -1 |
| 22860 | 11724 | Dtx2   | Tuba3a      | 1  |
| 22860 | 11741 | Dtx2   | Slc30a10    | 1  |
| 22860 | 11807 | Dtx2   | Fbxo31      | -1 |
| 22860 | 12420 | Dtx2   | Klh121      | -1 |
| 22860 | 12460 | Dtx2   | Pnpla2      | -1 |
| 22860 | 16060 | Dtx2   | Gys2        | -1 |
| 22860 | 16176 | Dtx2   | St3gal5     | -1 |
| 22860 | 17444 | Dtx2   | Tuba1a      | 1  |
| 22860 | 17530 | Dtx2   | MMT00041792 | 1  |
| 22860 | 17622 | Dtx2   | Foxo1       | -1 |
| 22860 | 17876 | Dtx2   | Tubb4       | 1  |
| 22860 | 17878 | Dtx2   | Brap        | -1 |
| 22860 | 18286 | Dtx2   | Slc41a3     | -1 |
| 22860 | 22290 | Dtx2   | Tubb2a      | 1  |
| 22860 | 22443 | Dtx2   | Tuba1c      | 1  |
| 22860 | 22630 | Dtx2   | MMT00034355 | 1  |
| 22867 | 327   | Vps52  | H2-Ea       | 1  |
| 22867 | 10667 | Vps52  | H2-Eb1      | 1  |
| 22867 | 13493 | Vps52  | Ring1       | -1 |
| 22867 | 22822 | Vps52  | MMT00013433 | 1  |
| 22871 | 18113 | Pgrmc2 | MMT00034400 | 1  |
| 22871 | 19066 | Pgrmc2 | MMT00012632 | 1  |
| 22871 | 19772 | Pgrmc2 | Gnmt        | 1  |
| 22871 | 20804 | Pgrmc2 | Eno1        | 1  |
| 22871 | 21727 | Pgrmc2 | Khk         | 1  |
| 22876 | 250   | Sash3  | Tubb2a-ps2  | 1  |
| 22876 | 433   | Sash3  | Pla2g12b    | 1  |
| 22876 | 609   | Sash3  | MMT00060868 | 1  |
| 22876 | 2636  | Sash3  | Tars        | 1  |
| 22876 | 2850  | Sash3  | Slc16a6     | 1  |
| 22876 | 3410  | Sash3  | Paqr9       | 1  |
| 22876 | 3804  | Sash3  | MMT00015534 | 1  |
| 22876 | 4286  | Sash3  | Ptp4a1      | -1 |



|       |       |         |               |    |
|-------|-------|---------|---------------|----|
| 22876 | 4534  | Sash3   | Ndel1         | -1 |
| 22876 | 5259  | Sash3   | Mat1a         | -1 |
| 22876 | 5364  | Sash3   | Kif22         | 1  |
| 22876 | 5934  | Sash3   | S100a10       | 1  |
| 22876 | 6030  | Sash3   | As3mt         | -1 |
| 22876 | 6370  | Sash3   | Aqp8          | 1  |
| 22876 | 6386  | Sash3   | Por           | -1 |
| 22876 | 7973  | Sash3   | Lgals9        | 1  |
| 22876 | 8416  | Sash3   | Cdc20         | 1  |
| 22876 | 8428  | Sash3   | Sorbs3        | -1 |
| 22876 | 9275  | Sash3   | Aass          | -1 |
| 22876 | 11129 | Sash3   | Ankhd1        | -1 |
| 22876 | 11382 | Sash3   | Cdca3         | 1  |
| 22876 | 11393 | Sash3   | A830007P12Rik | 1  |
| 22876 | 11599 | Sash3   | Coq10b        | -1 |
| 22876 | 11614 | Sash3   | Sult1e1       | -1 |
| 22876 | 11741 | Sash3   | Slc30a10      | 1  |
| 22876 | 12208 | Sash3   | Pnpla7        | 1  |
| 22876 | 12799 | Sash3   | Spon2         | 1  |
| 22876 | 12941 | Sash3   | Elov15        | 1  |
| 22876 | 14472 | Sash3   | Ahcy          | -1 |
| 22876 | 15021 | Sash3   | Ppargc1a      | -1 |
| 22876 | 15320 | Sash3   | MMT00017479   | -1 |
| 22876 | 15709 | Sash3   | Tceal1        | -1 |
| 22876 | 16690 | Sash3   | Tjp3          | 1  |
| 22876 | 17338 | Sash3   | Mocos         | 1  |
| 22876 | 17876 | Sash3   | Tubb4         | 1  |
| 22876 | 18147 | Sash3   | Nhlrc2        | -1 |
| 22876 | 18455 | Sash3   | Mtnr1a        | 1  |
| 22876 | 18827 | Sash3   | Oprs1         | 1  |
| 22876 | 19917 | Sash3   | Nek2          | 1  |
| 22876 | 20678 | Sash3   | Cyp39a1       | -1 |
| 22876 | 20745 | Sash3   | Sord          | -1 |
| 22876 | 21041 | Sash3   | Cyp17a1       | -1 |
| 22876 | 21966 | Sash3   | Pcp4l1        | -1 |
| 22876 | 22138 | Sash3   | Ang           | -1 |
| 22876 | 22290 | Sash3   | Tubb2a        | 1  |
| 22876 | 22630 | Sash3   | MMT00034355   | 1  |
| 22880 | 269   | Slc45a4 | Tuba1b        | 1  |
| 22880 | 354   | Slc45a4 | MMT00007996   | 1  |
| 22880 | 1941  | Slc45a4 | MMT00079618   | 1  |
| 22880 | 2322  | Slc45a4 | Tuba4a        | 1  |
| 22880 | 6771  | Slc45a4 | Insc          | 1  |
| 22880 | 7151  | Slc45a4 | MMT00007982   | 1  |
| 22880 | 9763  | Slc45a4 | Tuba3b        | 1  |
| 22880 | 10911 | Slc45a4 | Mcl1          | -1 |
| 22880 | 11724 | Slc45a4 | Tuba3a        | 1  |
| 22880 | 12420 | Slc45a4 | Klhl21        | -1 |
| 22880 | 13018 | Slc45a4 | AW544981      | 1  |
| 22880 | 15284 | Slc45a4 | EG632778      | -1 |
| 22880 | 15862 | Slc45a4 | Mrap          | 1  |

|       |       |               |               |    |
|-------|-------|---------------|---------------|----|
| 22880 | 16060 | Slc45a4       | Gys2          | -1 |
| 22880 | 16692 | Slc45a4       | Bat4          | -1 |
| 22880 | 17444 | Slc45a4       | Tuba1a        | 1  |
| 22880 | 17656 | Slc45a4       | Hdhd3         | 1  |
| 22880 | 17878 | Slc45a4       | Brap          | -1 |
| 22880 | 18785 | Slc45a4       | Angptl4       | -1 |
| 22880 | 20217 | Slc45a4       | Rab3ip        | -1 |
| 22880 | 20798 | Slc45a4       | Ccp1          | -1 |
| 22880 | 21733 | Slc45a4       | Rhebl1        | -1 |
| 22880 | 22443 | Slc45a4       | Tuba1c        | 1  |
| 22894 | 13218 | MMT00016059   | C330043M08Rik | -1 |
| 22907 | 21575 | MMT00054594   | Cyp2c55       | 1  |
| 22909 | 1336  | Nup133        | MMT00069537   | 1  |
| 22909 | 2243  | Nup133        | Gcsh          | 1  |
| 22909 | 11404 | Nup133        | Gnpat         | 1  |
| 22909 | 14391 | Nup133        | MMT00017335   | -1 |
| 22909 | 21394 | Nup133        | Cdh15         | -1 |
| 22925 | 1663  | Parp16        | Fkbp4         | 1  |
| 22925 | 6504  | Parp16        | Alad          | 1  |
| 22925 | 7492  | Parp16        | Adfp          | -1 |
| 22925 | 9700  | Parp16        | Prodh         | 1  |
| 22925 | 10250 | Parp16        | Pcsk9         | 1  |
| 22925 | 10492 | Parp16        | 1810046K07Rik | 1  |
| 22925 | 11576 | Parp16        | Gm1381        | 1  |
| 22925 | 20567 | Parp16        | Ggt6          | 1  |
| 22927 | 8815  | 1700001L05Rik | Mx1           | 1  |
| 22927 | 14151 | 1700001L05Rik | Slc44a1       | 1  |
| 22927 | 21214 | 1700001L05Rik | Scd1          | 1  |
| 22927 | 21575 | 1700001L05Rik | Cyp2c55       | 1  |
| 22936 | 6163  | Rhobtb1       | Nudt13        | -1 |
| 22943 | 14017 | Tpd5211       | Ces5          | -1 |
| 22944 | 22944 | Tmem44        | Tmem44        | 1  |
| 22961 | 2023  | MMT00055950   | MMT00072215   | 1  |
| 22961 | 3167  | MMT00055950   | Dym           | -1 |
| 22961 | 5681  | MMT00055950   | Mbd1          | 1  |
| 22961 | 9192  | MMT00055950   | MMT00042303   | -1 |
| 22961 | 12109 | MMT00055950   | Smad4         | -1 |
| 22961 | 22961 | MMT00055950   | MMT00055950   | 1  |
| 22978 | 18201 | MMT00043176   | MMT00060232   | 1  |
| 22978 | 20068 | MMT00043176   | 2610204M08Rik | -1 |
| 22978 | 21575 | MMT00043176   | Cyp2c55       | 1  |
| 22981 | 8815  | Bcar3         | Mx1           | 1  |
| 22981 | 8896  | Bcar3         | Fasn          | 1  |
| 22981 | 11462 | Bcar3         | Gpam          | 1  |
| 22981 | 12910 | Bcar3         | 1110028A07Rik | 1  |
| 22981 | 14135 | Bcar3         | Eepd1         | 1  |
| 22981 | 20058 | Bcar3         | Dnaic1        | -1 |
| 22981 | 21202 | Bcar3         | Acly          | 1  |
| 22989 | 250   | Lmcd1         | Tubb2a-ps2    | 1  |
| 22989 | 269   | Lmcd1         | Tuba1b        | 1  |
| 22989 | 563   | Lmcd1         | D4Bwg0951e    | -1 |

|       |       |               |               |    |
|-------|-------|---------------|---------------|----|
| 22989 | 609   | Lmcd1         | MMT00060868   | 1  |
| 22989 | 1941  | Lmcd1         | MMT00079618   | 1  |
| 22989 | 2322  | Lmcd1         | Tuba4a        | 1  |
| 22989 | 2829  | Lmcd1         | Lrfr3         | 1  |
| 22989 | 3214  | Lmcd1         | Dnmt3b        | 1  |
| 22989 | 3804  | Lmcd1         | MMT00015534   | 1  |
| 22989 | 4201  | Lmcd1         | Tubb2c        | 1  |
| 22989 | 4708  | Lmcd1         | Traf3ip2      | 1  |
| 22989 | 6490  | Lmcd1         | I1r1          | -1 |
| 22989 | 7151  | Lmcd1         | MMT00007982   | 1  |
| 22989 | 9763  | Lmcd1         | Tuba3b        | 1  |
| 22989 | 11724 | Lmcd1         | Tuba3a        | 1  |
| 22989 | 12420 | Lmcd1         | Klh21         | -1 |
| 22989 | 15631 | Lmcd1         | Lpin1         | -1 |
| 22989 | 16060 | Lmcd1         | Gys2          | -1 |
| 22989 | 16669 | Lmcd1         | Tjp2          | 1  |
| 22989 | 16690 | Lmcd1         | Tjp3          | 1  |
| 22989 | 17323 | Lmcd1         | Tubb6         | 1  |
| 22989 | 17444 | Lmcd1         | Tuba1a        | 1  |
| 22989 | 17876 | Lmcd1         | Tubb4         | 1  |
| 22989 | 19466 | Lmcd1         | Pptc7         | -1 |
| 22989 | 20803 | Lmcd1         | Tmem50a       | -1 |
| 22989 | 22290 | Lmcd1         | Tubb2a        | 1  |
| 22989 | 22443 | Lmcd1         | Tuba1c        | 1  |
| 22989 | 22630 | Lmcd1         | MMT00034355   | 1  |
| 23000 | 327   | Faim2         | H2-Ea         | -1 |
| 23000 | 2938  | Faim2         | H2-T23        | -1 |
| 23000 | 10376 | Faim2         | C920025E04Rik | 1  |
| 23000 | 10667 | Faim2         | H2-Eb1        | -1 |
| 23000 | 13493 | Faim2         | Ring1         | 1  |
| 23005 | 1325  | 4930405A21Rik | Pigu          | 1  |
| 23005 | 2915  | 4930405A21Rik | Nfs1          | -1 |
| 23005 | 5450  | 4930405A21Rik | Nrbp1         | -1 |
| 23005 | 5504  | 4930405A21Rik | Its1          | 1  |
| 23005 | 6059  | 4930405A21Rik | Dsn1          | 1  |
| 23005 | 6250  | 4930405A21Rik | Csnk2a1       | -1 |
| 23005 | 6820  | 4930405A21Rik | MMT00046996   | -1 |
| 23005 | 7610  | 4930405A21Rik | Scand1        | -1 |
| 23005 | 10028 | 4930405A21Rik | Chchd6        | -1 |
| 23005 | 14399 | 4930405A21Rik | Csnk2a1       | -1 |
| 23005 | 14647 | 4930405A21Rik | Cst3          | -1 |
| 23005 | 14816 | 4930405A21Rik | Pcdhb9        | 1  |
| 23005 | 20221 | 4930405A21Rik | Ift57         | -1 |
| 23005 | 22740 | 4930405A21Rik | Manbal        | 1  |
| 23005 | 23005 | 4930405A21Rik | 4930405A21Rik | 1  |
| 23005 | 23599 | 4930405A21Rik | Ndr3          | 1  |
| 23008 | 16863 | Ctsz          | 2410001C21Rik | 1  |
| 23012 | 524   | Spg20         | Hsd3b2        | -1 |
| 23012 | 3159  | Spg20         | Pld1          | -1 |
| 23012 | 3753  | Spg20         | Setdb1        | 1  |
| 23012 | 5938  | Spg20         | Pfn2          | -1 |

|       |       |         |                    |    |
|-------|-------|---------|--------------------|----|
| 23012 | 6206  | Spg20   | MMT00063701        | -1 |
| 23012 | 8568  | Spg20   | Tnik               | -1 |
| 23012 | 10681 | Spg20   | Dgkz               | 1  |
| 23012 | 11121 | Spg20   | Mtmr11             | 1  |
| 23012 | 11611 | Spg20   | S100a13            | 1  |
| 23012 | 12250 | Spg20   | P2ry14             | -1 |
| 23012 | 12367 | Spg20   | MMT00072365        | 1  |
| 23012 | 12784 | Spg20   | Nudt6              | -1 |
| 23012 | 13423 | Spg20   | ENSMUSG00000053749 | -1 |
| 23012 | 16416 | Spg20   | Commd2             | -1 |
| 23012 | 16753 | Spg20   | Hfe2               | 1  |
| 23012 | 18754 | Spg20   | Rbm8a              | -1 |
| 23012 | 18790 | Spg20   | Car3               | -1 |
| 23012 | 18911 | Spg20   | Selenbp2           | -1 |
| 23012 | 20661 | Spg20   | Tuft1              | -1 |
| 23012 | 22202 | Spg20   | OTTMUSG00000021274 | 1  |
| 23012 | 23457 | Spg20   | Selenbp2           | -1 |
| 23022 | 14151 | Kif3a   | Slc44a1            | -1 |
| 23032 | 217   | Mett10d | Ubx2               | 1  |
| 23032 | 381   | Mett10d | Rbmxrt             | 1  |
| 23032 | 4612  | Mett10d | Hspa5              | 1  |
| 23032 | 6021  | Mett10d | MMT00008784        | 1  |
| 23032 | 7398  | Mett10d | Rbmxrt             | 1  |
| 23032 | 7619  | Mett10d | Pik3ip1            | -1 |
| 23032 | 7862  | Mett10d | Cpsf4l             | -1 |
| 23032 | 8742  | Mett10d | Tmem39a            | 1  |
| 23032 | 8891  | Mett10d | MMT00071061        | 1  |
| 23032 | 9258  | Mett10d | P4ha1              | 1  |
| 23032 | 10042 | Mett10d | MMT00028111        | 1  |
| 23032 | 10612 | Mett10d | Slc24a6            | -1 |
| 23032 | 11043 | Mett10d | Hsph1              | 1  |
| 23032 | 11201 | Mett10d | Sunc1              | -1 |
| 23032 | 12487 | Mett10d | Tbc1d10a           | -1 |
| 23032 | 14233 | Mett10d | Fgfr1              | -1 |
| 23032 | 14298 | Mett10d | Atp2a2             | 1  |
| 23032 | 14380 | Mett10d | MMT00051866        | 1  |
| 23032 | 14681 | Mett10d | Alg12              | 1  |
| 23032 | 15576 | Mett10d | Mboat5             | -1 |
| 23032 | 17591 | Mett10d | D930015E06Rik      | -1 |
| 23032 | 18099 | Mett10d | Nfx1               | -1 |
| 23032 | 18135 | Mett10d | Tmed3              | 1  |
| 23032 | 18215 | Mett10d | Gpr146             | -1 |
| 23032 | 18373 | Mett10d | Dnajb1             | 1  |
| 23032 | 18498 | Mett10d | Slc5a6             | -1 |
| 23032 | 18572 | Mett10d | Stx18              | 1  |
| 23032 | 19108 | Mett10d | Armet              | 1  |
| 23032 | 20194 | Mett10d | Pnlcd1             | -1 |
| 23032 | 20912 | Mett10d | Chordc1            | 1  |
| 23032 | 20965 | Mett10d | Usp28              | -1 |
| 23032 | 21995 | Mett10d | Nktr               | 1  |
| 23032 | 22388 | Mett10d | 2410018M08Rik      | -1 |

|       |       |               |               |    |
|-------|-------|---------------|---------------|----|
| 23032 | 23032 | Mett10d       | Mett10d       | 1  |
| 23032 | 23252 | Mett10d       | Snrpd1        | 1  |
| 23037 | 18590 | Thbs3         | Fgb           | 1  |
| 23037 | 20266 | Thbs3         | Insig2        | 1  |
| 23059 | 12910 | Fbxl20        | 1110028A07Rik | 1  |
| 23061 | 1416  | Pole2         | 6720460F02Rik | 1  |
| 23061 | 5364  | Pole2         | Kif22         | 1  |
| 23061 | 8641  | Pole2         | Slc7a2        | -1 |
| 23061 | 9275  | Pole2         | Aass          | -1 |
| 23061 | 12799 | Pole2         | Spon2         | 1  |
| 23061 | 12839 | Pole2         | Fh1           | -1 |
| 23061 | 14806 | Pole2         | Ccdc45        | -1 |
| 23061 | 19342 | Pole2         | Cth           | -1 |
| 23077 | 5364  | Daam2         | Kif22         | 1  |
| 23087 | 1416  | Nusap1        | 6720460F02Rik | 1  |
| 23087 | 5364  | Nusap1        | Kif22         | 1  |
| 23087 | 7492  | Nusap1        | Adfp          | 1  |
| 23087 | 8416  | Nusap1        | Cdc20         | 1  |
| 23087 | 11422 | Nusap1        | Pltp          | 1  |
| 23087 | 18299 | Nusap1        | MMT00035424   | 1  |
| 23087 | 21692 | Nusap1        | MMT00013924   | 1  |
| 23088 | 14323 | 1700009N14Rik | Scarb1        | -1 |
| 23092 | 2224  | Ifih1         | Oasl2         | 1  |
| 23092 | 4114  | Ifih1         | Parp12        | 1  |
| 23092 | 6824  | Ifih1         | Irf7          | 1  |
| 23092 | 7284  | Ifih1         | MMT00008674   | 1  |
| 23092 | 8800  | Ifih1         | Rnf213        | 1  |
| 23092 | 9847  | Ifih1         | Ifi27         | 1  |
| 23092 | 11204 | Ifih1         | Al451617      | 1  |
| 23092 | 12398 | Ifih1         | Ifi44         | 1  |
| 23092 | 12969 | Ifih1         | Xaf1          | 1  |
| 23092 | 14880 | Ifih1         | Ms4a4c        | 1  |
| 23092 | 15074 | Ifih1         | Usp18         | 1  |
| 23092 | 15504 | Ifih1         | Mx2           | 1  |
| 23092 | 16182 | Ifih1         | Oasl1         | 1  |
| 23092 | 19738 | Ifih1         | Lgals3bp      | 1  |
| 23092 | 21351 | Ifih1         | Shisa5        | 1  |
| 23092 | 21549 | Ifih1         | Rtp4          | 1  |
| 23118 | 3938  | Ttrap         | Abt1          | -1 |
| 23118 | 11094 | Ttrap         | Slc17a3       | 1  |
| 23118 | 15698 | Ttrap         | Them2         | 1  |
| 23118 | 20759 | Ttrap         | Slc17a1       | 1  |
| 23118 | 23118 | Ttrap         | Ttrap         | 1  |
| 23131 | 3836  | Pla1a         | 2200001115Rik | 1  |
| 23131 | 5364  | Pla1a         | Kif22         | 1  |
| 23131 | 7761  | Pla1a         | Nudt19        | -1 |
| 23131 | 12925 | Pla1a         | Farp1         | 1  |
| 23131 | 13271 | Pla1a         | Idh2          | -1 |
| 23131 | 13293 | Pla1a         | Gsta2         | -1 |
| 23131 | 14472 | Pla1a         | Ahcy          | -1 |
| 23131 | 18069 | Pla1a         | Gpt           | -1 |

|       |       |        |                    |    |
|-------|-------|--------|--------------------|----|
| 23131 | 18299 | Pla1a  | MMT00035424        | 1  |
| 23131 | 18590 | Pla1a  | Fgb                | 1  |
| 23131 | 21692 | Pla1a  | MMT00013924        | 1  |
| 23138 | 4206  | Osbpl6 | Nipsnap1           | -1 |
| 23138 | 14017 | Osbpl6 | Ces5               | -1 |
| 23138 | 18201 | Osbpl6 | MMT00060232        | -1 |
| 23141 | 5884  | Ebf2   | Gstm2              | -1 |
| 23149 | 8815  | Nln    | Mx1                | 1  |
| 23149 | 12910 | Nln    | 1110028A07Rik      | 1  |
| 23149 | 18201 | Nln    | MMT00060232        | 1  |
| 23149 | 21575 | Nln    | Cyp2c55            | 1  |
| 23174 | 23174 | Psme2  | Psme2              | 1  |
| 23183 | 8815  | Nnmt   | Mx1                | 1  |
| 23183 | 10554 | Nnmt   | ENSMUSG00000074179 | 1  |
| 23183 | 18201 | Nnmt   | MMT00060232        | 1  |
| 23183 | 20058 | Nnmt   | Dnaic1             | -1 |
| 23183 | 21214 | Nnmt   | Scd1               | 1  |
| 23185 | 20967 | Ndufs1 | Fabp2              | -1 |
| 23189 | 607   | Rbm28  | Me1                | 1  |
| 23189 | 662   | Rbm28  | Mid1ip1            | 1  |
| 23189 | 1065  | Rbm28  | Hmgcr              | 1  |
| 23189 | 1711  | Rbm28  | Grhl1              | -1 |
| 23189 | 2631  | Rbm28  | Aldh1l1            | 1  |
| 23189 | 2721  | Rbm28  | Inmt               | 1  |
| 23189 | 3356  | Rbm28  | Adhfe1             | 1  |
| 23189 | 3449  | Rbm28  | Hes6               | 1  |
| 23189 | 3565  | Rbm28  | MMT00045908        | 1  |
| 23189 | 3696  | Rbm28  | Elov6              | 1  |
| 23189 | 3989  | Rbm28  | Wrnip1             | -1 |
| 23189 | 4056  | Rbm28  | Tnfaip8l1          | -1 |
| 23189 | 5804  | Rbm28  | Thrsp              | 1  |
| 23189 | 5849  | Rbm28  | 2310031A18Rik      | -1 |
| 23189 | 6044  | Rbm28  | Sucnr1             | 1  |
| 23189 | 6086  | Rbm28  | Fgl1               | -1 |
| 23189 | 6193  | Rbm28  | Lactb2             | 1  |
| 23189 | 6573  | Rbm28  | Pecr               | 1  |
| 23189 | 6816  | Rbm28  | Slc46a3            | 1  |
| 23189 | 7659  | Rbm28  | Rab30              | -1 |
| 23189 | 8896  | Rbm28  | Fasn               | 1  |
| 23189 | 9408  | Rbm28  | Hmgcs2             | -1 |
| 23189 | 9427  | Rbm28  | Nqo2               | 1  |
| 23189 | 9999  | Rbm28  | Zswim3             | -1 |
| 23189 | 10132 | Rbm28  | Ces2               | 1  |
| 23189 | 10367 | Rbm28  | Coq7               | 1  |
| 23189 | 10772 | Rbm28  | Aacs               | 1  |
| 23189 | 11462 | Rbm28  | Gpam               | 1  |
| 23189 | 11576 | Rbm28  | Gm1381             | 1  |
| 23189 | 11663 | Rbm28  | Dusp5              | -1 |
| 23189 | 12315 | Rbm28  | Srebf1             | 1  |
| 23189 | 12499 | Rbm28  | Avpi1              | 1  |
| 23189 | 12910 | Rbm28  | 1110028A07Rik      | 1  |

|       |       |       |               |    |
|-------|-------|-------|---------------|----|
| 23189 | 13120 | Rbm28 | Lactb         | 1  |
| 23189 | 13304 | Rbm28 | Gadd45b       | -1 |
| 23189 | 14147 | Rbm28 | Acss2         | 1  |
| 23189 | 14279 | Rbm28 | 3930402G23Rik | -1 |
| 23189 | 15227 | Rbm28 | Ifngr1        | -1 |
| 23189 | 16525 | Rbm28 | Lbp           | -1 |
| 23189 | 17090 | Rbm28 | Lass2         | 1  |
| 23189 | 17660 | Rbm28 | Nlrp12        | -1 |
| 23189 | 17800 | Rbm28 | Lrtm1         | 1  |
| 23189 | 18148 | Rbm28 | Cables1       | -1 |
| 23189 | 18201 | Rbm28 | MMT00060232   | 1  |
| 23189 | 18461 | Rbm28 | Klra5         | 1  |
| 23189 | 18515 | Rbm28 | Ddx28         | -1 |
| 23189 | 19766 | Rbm28 | Slc26a4       | 1  |
| 23189 | 20019 | Rbm28 | Qdpr          | 1  |
| 23189 | 20058 | Rbm28 | Dnaic1        | -1 |
| 23189 | 20385 | Rbm28 | Chd1l         | 1  |
| 23189 | 20488 | Rbm28 | Bok           | -1 |
| 23189 | 21143 | Rbm28 | Ypel3         | -1 |
| 23189 | 21202 | Rbm28 | Acly          | 1  |
| 23189 | 21607 | Rbm28 | Aldh1a1       | 1  |
| 23189 | 21693 | Rbm28 | BC029169      | -1 |
| 23189 | 21727 | Rbm28 | Khk           | 1  |
| 23189 | 22046 | Rbm28 | Cml4          | 1  |
| 23189 | 22137 | Rbm28 | Nudt7         | 1  |
| 23189 | 22217 | Rbm28 | Flvcr2        | -1 |
| 23201 | 337   | S1pr1 | Rasgef1b      | 1  |
| 23201 | 5889  | S1pr1 | Errfi1        | 1  |
| 23201 | 6564  | S1pr1 | Cebpd         | 1  |
| 23208 | 2200  | Hck   | BC006779      | 1  |
| 23208 | 4708  | Hck   | Traf3ip2      | 1  |
| 23208 | 6386  | Hck   | Por           | -1 |
| 23208 | 6888  | Hck   | Cxcl9         | 1  |
| 23208 | 11741 | Hck   | Slc30a10      | 1  |
| 23208 | 15280 | Hck   | Cxcl10        | 1  |
| 23208 | 16147 | Hck   | Tlr2          | 1  |
| 23208 | 16182 | Hck   | Oasl1         | 1  |
| 23208 | 17876 | Hck   | Tubb4         | 1  |
| 23208 | 22630 | Hck   | MMT00034355   | 1  |
| 23217 | 8444  | Acyp2 | Rdh16         | 1  |
| 23217 | 20058 | Acyp2 | Dnaic1        | -1 |
| 23226 | 20135 | Suox  | Gramd3        | -1 |
| 23229 | 22561 | Phf12 | Whdc1         | 1  |
| 23233 | 8341  | Npw   | MMT00017270   | -1 |
| 23233 | 19064 | Npw   | MMT00004867   | 1  |
| 23245 | 6816  | Nfib  | Slc46a3       | 1  |
| 23247 | 662   | Ercc1 | Mid1ip1       | -1 |
| 23247 | 3686  | Ercc1 | Psmc9         | 1  |
| 23247 | 7659  | Ercc1 | Rab30         | 1  |
| 23247 | 12315 | Ercc1 | Srebfl        | -1 |
| 23247 | 17660 | Ercc1 | Nlrp12        | 1  |

|       |       |               |               |    |
|-------|-------|---------------|---------------|----|
| 23247 | 18785 | Ercc1         | Angptl4       | 1  |
| 23259 | 23259 | Dnajc1        | Dnajc1        | 1  |
| 23262 | 23262 | C530043G21Rik | C530043G21Rik | 1  |
| 23267 | 607   | Hsd17b11      | Me1           | -1 |
| 23267 | 3756  | Hsd17b11      | Chrne         | -1 |
| 23267 | 6044  | Hsd17b11      | Sucnr1        | -1 |
| 23267 | 8444  | Hsd17b11      | Rdh16         | -1 |
| 23267 | 10132 | Hsd17b11      | Ces2          | -1 |
| 23267 | 10367 | Hsd17b11      | Coq7          | -1 |
| 23267 | 14017 | Hsd17b11      | Ces5          | -1 |
| 23267 | 14151 | Hsd17b11      | Slc44a1       | -1 |
| 23267 | 17090 | Hsd17b11      | Lass2         | -1 |
| 23267 | 17887 | Hsd17b11      | Cryl1         | -1 |
| 23267 | 17996 | Hsd17b11      | Igfbp2        | 1  |
| 23267 | 18201 | Hsd17b11      | MMT00060232   | -1 |
| 23267 | 20246 | Hsd17b11      | Pdia5         | 1  |
| 23267 | 21202 | Hsd17b11      | Acly          | -1 |
| 23267 | 21214 | Hsd17b11      | Scd1          | -1 |
| 23267 | 21575 | Hsd17b11      | Cyp2c55       | -1 |
| 23274 | 17660 | 1700054O13Rik | Nlrp12        | 1  |
| 23276 | 5364  | Evi2b         | Kif22         | 1  |
| 23276 | 12910 | Evi2b         | 1110028A07Rik | 1  |
| 23276 | 14472 | Evi2b         | Ahcy          | -1 |
| 23283 | 1985  | Mrps12        | Pepd          | -1 |
| 23283 | 14208 | Mrps12        | Ech1          | 1  |
| 23283 | 18053 | Mrps12        | Psmc4         | 1  |
| 23283 | 23283 | Mrps12        | Mrps12        | 1  |
| 23287 | 15935 | Supt4h1       | Pnpla3        | -1 |
| 23308 | 1036  | Dock9         | Dusp19        | -1 |
| 23324 | 147   | Prdx6         | Uox           | 1  |
| 23324 | 707   | Prdx6         | Bdnf          | 1  |
| 23324 | 2721  | Prdx6         | Inmt          | 1  |
| 23324 | 3356  | Prdx6         | Adhfe1        | 1  |
| 23324 | 5804  | Prdx6         | Thrsp         | 1  |
| 23324 | 5849  | Prdx6         | 2310031A18Rik | -1 |
| 23324 | 5884  | Prdx6         | Gstm2         | 1  |
| 23324 | 7602  | Prdx6         | Pcca          | 1  |
| 23324 | 9718  | Prdx6         | Fmo5          | 1  |
| 23324 | 13293 | Prdx6         | Gsta2         | 1  |
| 23324 | 14147 | Prdx6         | Acss2         | 1  |
| 23324 | 14690 | Prdx6         | Atf4          | -1 |
| 23324 | 15631 | Prdx6         | Lpin1         | 1  |
| 23324 | 17282 | Prdx6         | Pdhb          | 1  |
| 23324 | 18250 | Prdx6         | Mmp14         | -1 |
| 23324 | 19723 | Prdx6         | Pfkfb1        | 1  |
| 23324 | 19790 | Prdx6         | Polg2         | 1  |
| 23324 | 20058 | Prdx6         | Dnaic1        | -1 |
| 23324 | 21214 | Prdx6         | Scd1          | 1  |
| 23324 | 21388 | Prdx6         | Gbe1          | 1  |
| 23324 | 21727 | Prdx6         | Khk           | 1  |
| 23328 | 2256  | Rora          | Serpina9      | -1 |



|       |       |        |               |    |
|-------|-------|--------|---------------|----|
| 23328 | 2850  | Rora   | Slc16a6       | -1 |
| 23328 | 4286  | Rora   | Ptp4a1        | 1  |
| 23328 | 7695  | Rora   | Cpsf1         | -1 |
| 23328 | 9910  | Rora   | EG666644      | 1  |
| 23328 | 11054 | Rora   | Rnase4        | 1  |
| 23328 | 11819 | Rora   | Mcee          | 1  |
| 23328 | 14656 | Rora   | Grip2         | 1  |
| 23328 | 15049 | Rora   | Rnf125        | -1 |
| 23328 | 22681 | Rora   | Gm88          | 1  |
| 23342 | 10711 | Ndfip2 | 1700108F19Rik | 1  |
| 23342 | 12280 | Ndfip2 | Cln5          | -1 |
| 23342 | 23342 | Ndfip2 | Ndfip2        | 1  |
| 23351 | 437   | Zfp598 | Ndrp1         | -1 |
| 23351 | 1310  | Zfp598 | Cabc1         | -1 |
| 23351 | 1876  | Zfp598 | Amdhd1        | -1 |
| 23351 | 2399  | Zfp598 | MMT00060167   | -1 |
| 23351 | 2636  | Zfp598 | Tars          | -1 |
| 23351 | 5048  | Zfp598 | Mgll          | 1  |
| 23351 | 5974  | Zfp598 | Arntl         | -1 |
| 23351 | 6370  | Zfp598 | Aqp8          | -1 |
| 23351 | 14442 | Zfp598 | Ethe1         | -1 |
| 23351 | 15824 | Zfp598 | D19Ertd721e   | -1 |
| 23351 | 17583 | Zfp598 | Per2          | 1  |
| 23351 | 18438 | Zfp598 | Map3k7ip2     | -1 |
| 23351 | 18827 | Zfp598 | Oprs1         | -1 |
| 23351 | 21966 | Zfp598 | Pcp4l1        | 1  |
| 23353 | 294   | Slmo2  | Ehhadh        | 1  |
| 23353 | 8444  | Slmo2  | Rdh16         | 1  |
| 23353 | 12402 | Slmo2  | Th1l          | -1 |
| 23353 | 16863 | Slmo2  | 2410001C21Rik | -1 |
| 23353 | 20058 | Slmo2  | Dnaic1        | -1 |
| 23353 | 21727 | Slmo2  | Khk           | 1  |
| 23353 | 23008 | Slmo2  | Ctsz          | -1 |
| 23353 | 23353 | Slmo2  | Slmo2         | 1  |
| 23367 | 1031  | Tm2d2  | Uros          | 1  |
| 23367 | 3038  | Tm2d2  | Serpina12     | 1  |
| 23367 | 3265  | Tm2d2  | Dntt          | 1  |
| 23367 | 5934  | Tm2d2  | S100a10       | 1  |
| 23367 | 15862 | Tm2d2  | Mrap          | 1  |
| 23367 | 16510 | Tm2d2  | Tspyl4        | 1  |
| 23367 | 20967 | Tm2d2  | Fabp2         | 1  |
| 23367 | 21070 | Tm2d2  | Cnot8         | 1  |
| 23371 | 1572  | Cfb    | Saa3          | 1  |
| 23371 | 3228  | Cfb    | Saa1          | 1  |
| 23371 | 5364  | Cfb    | Kif22         | 1  |
| 23371 | 5845  | Cfb    | Il18bp        | 1  |
| 23371 | 7336  | Cfb    | Cd5l          | 1  |
| 23371 | 8659  | Cfb    | Psmb8         | 1  |
| 23371 | 15931 | Cfb    | Ces3          | -1 |
| 23371 | 17629 | Cfb    | Saa2          | 1  |
| 23371 | 18289 | Cfb    | Tap1          | 1  |

|       |       |          |               |    |
|-------|-------|----------|---------------|----|
| 23371 | 23208 | Cfb      | Hck           | 1  |
| 23372 | 4934  | Rbm5     | Abca13        | -1 |
| 23377 | 5804  | Pdxk     | Thrsp         | 1  |
| 23377 | 13078 | Pdxk     | Eps8l2        | -1 |
| 23397 | 6370  | Ccnjl    | Aqp8          | -1 |
| 23397 | 7950  | Ccnjl    | Efha1         | -1 |
| 23397 | 15162 | Ccnjl    | Il18          | -1 |
| 23397 | 17854 | Ccnjl    | Rdh11         | -1 |
| 23397 | 18790 | Ccnjl    | Car3          | -1 |
| 23397 | 21202 | Ccnjl    | Acly          | -1 |
| 23398 | 7315  | Adamts5  | EG624219      | 1  |
| 23398 | 8632  | Adamts5  | Igfbp1        | -1 |
| 23403 | 1416  | Ndc80    | 6720460F02Rik | 1  |
| 23403 | 10164 | Ndc80    | 2310004N24Rik | 1  |
| 23403 | 18299 | Ndc80    | MMT00035424   | 1  |
| 23403 | 21692 | Ndc80    | MMT00013924   | 1  |
| 23410 | 6888  | C1qa     | Cxcl9         | 1  |
| 23410 | 14258 | C1qa     | Ifi47         | 1  |
| 23430 | 8444  | Aifm3    | Rdh16         | -1 |
| 23445 | 5884  | Crlf1    | Gstm2         | 1  |
| 23445 | 18201 | Crlf1    | MMT00060232   | 1  |
| 23445 | 21575 | Crlf1    | Cyp2c55       | 1  |
| 23445 | 21966 | Crlf1    | Pcp4l1        | -1 |
| 23457 | 14279 | Selenbp2 | 3930402G23Rik | -1 |
| 23462 | 7388  | Bag5     | Amn           | 1  |
| 23462 | 8155  | Bag5     | Mark3         | 1  |
| 23462 | 16191 | Bag5     | Klc1          | -1 |
| 23463 | 250   | Gimap1   | Tubb2a-ps2    | 1  |
| 23463 | 269   | Gimap1   | Tuba1b        | 1  |
| 23463 | 354   | Gimap1   | MMT00007996   | 1  |
| 23463 | 563   | Gimap1   | D4Bwg0951e    | -1 |
| 23463 | 609   | Gimap1   | MMT00060868   | 1  |
| 23463 | 1941  | Gimap1   | MMT00079618   | 1  |
| 23463 | 2322  | Gimap1   | Tuba4a        | 1  |
| 23463 | 3686  | Gimap1   | Psm9          | -1 |
| 23463 | 3804  | Gimap1   | MMT00015534   | 1  |
| 23463 | 4201  | Gimap1   | Tubb2c        | 1  |
| 23463 | 6048  | Gimap1   | Psm9          | -1 |
| 23463 | 7151  | Gimap1   | MMT00007982   | 1  |
| 23463 | 8641  | Gimap1   | Slc7a2        | -1 |
| 23463 | 9763  | Gimap1   | Tuba3b        | 1  |
| 23463 | 11376 | Gimap1   | Slc7a11       | 1  |
| 23463 | 11724 | Gimap1   | Tuba3a        | 1  |
| 23463 | 12420 | Gimap1   | Klhl21        | -1 |
| 23463 | 12460 | Gimap1   | Pnpla2        | -1 |
| 23463 | 12565 | Gimap1   | Grem2         | -1 |
| 23463 | 15021 | Gimap1   | Ppargc1a      | -1 |
| 23463 | 15631 | Gimap1   | Lpin1         | -1 |
| 23463 | 15862 | Gimap1   | Mrap          | 1  |
| 23463 | 16060 | Gimap1   | Gys2          | -1 |
| 23463 | 17444 | Gimap1   | Tuba1a        | 1  |

|       |       |             |               |    |
|-------|-------|-------------|---------------|----|
| 23463 | 17656 | Gimap1      | Hdhd3         | 1  |
| 23463 | 17876 | Gimap1      | Tubb4         | 1  |
| 23463 | 22290 | Gimap1      | Tubb2a        | 1  |
| 23463 | 22443 | Gimap1      | Tuba1c        | 1  |
| 23463 | 22630 | Gimap1      | MMT00034355   | 1  |
| 23463 | 23201 | Gimap1      | S1pr1         | 1  |
| 23465 | 12910 | Afp         | 1110028A07Rik | 1  |
| 23465 | 15059 | Afp         | Mogat1        | 1  |
| 23465 | 23026 | Afp         | Apom          | -1 |
| 23466 | 23466 | Pou2f1      | Pou2f1        | 1  |
| 23474 | 2472  | MMT00011721 | MMT00014056   | 1  |
| 23474 | 7192  | MMT00011721 | Ttc21b        | 1  |
| 23474 | 7654  | MMT00011721 | Ptpmt1        | -1 |
| 23474 | 9547  | MMT00011721 | MMT00006479   | 1  |
| 23474 | 14757 | MMT00011721 | Hdx           | 1  |
| 23474 | 16881 | MMT00011721 | MMT00031504   | 1  |
| 23474 | 17295 | MMT00011721 | MMT00082577   | 1  |
| 23474 | 19763 | MMT00011721 | Acp2          | 1  |
| 23474 | 19803 | MMT00011721 | BC003993      | 1  |
| 23474 | 22320 | MMT00011721 | MMT00047284   | 1  |
| 23474 | 23474 | MMT00011721 | MMT00011721   | 1  |
| 23493 | 1627  | Tgs1        | 2310030N02Rik | 1  |
| 23493 | 6768  | Tgs1        | Plekhf2       | 1  |
| 23493 | 13578 | Tgs1        | Asph          | 1  |
| 23495 | 8079  | Cryab       | Pts           | -1 |
| 23495 | 12751 | Cryab       | Sorl1         | 1  |
| 23495 | 13382 | Cryab       | Bco2          | 1  |
| 23495 | 16242 | Cryab       | MMT00053207   | 1  |
| 23495 | 21165 | Cryab       | Hmbs          | 1  |
| 23500 | 2639  | BC055004    | Abhd2         | 1  |
| 23500 | 2850  | BC055004    | Slc16a6       | 1  |
| 23500 | 4469  | BC055004    | Cyp3a13       | -1 |
| 23500 | 5364  | BC055004    | Kif22         | 1  |
| 23500 | 5511  | BC055004    | BC055004      | -1 |
| 23500 | 5983  | BC055004    | Pcolce2       | 1  |
| 23500 | 8416  | BC055004    | Cdc20         | 1  |
| 23500 | 9275  | BC055004    | Aass          | -1 |
| 23500 | 11382 | BC055004    | Cdca3         | 1  |
| 23500 | 13780 | BC055004    | Pilra         | 1  |
| 23500 | 14472 | BC055004    | Ahcy          | -1 |
| 23500 | 15320 | BC055004    | MMT00017479   | -1 |
| 23500 | 17089 | BC055004    | Pilrb1        | 1  |
| 23500 | 18299 | BC055004    | MMT00035424   | 1  |
| 23500 | 20171 | BC055004    | 1700008G05Rik | 1  |
| 23500 | 21692 | BC055004    | MMT00013924   | 1  |
| 23522 | 23466 | Adcy10      | Pou2f1        | -1 |
| 23543 | 7102  | Rufy3       | Hnrnpm        | -1 |
| 23547 | 3654  | Tmed7       | St13          | 1  |
| 23547 | 6804  | Tmed7       | Cyp2d22       | -1 |
| 23547 | 12468 | Tmed7       | Cyp2d13       | -1 |
| 23547 | 19216 | Tmed7       | Bik           | -1 |

|       |       |               |               |    |
|-------|-------|---------------|---------------|----|
| 23548 | 719   | Crtac1        | Usp2          | 1  |
| 23548 | 1362  | Crtac1        | Avpr1a        | -1 |
| 23548 | 5974  | Crtac1        | Arntl         | -1 |
| 23548 | 6171  | Crtac1        | Abtb2         | -1 |
| 23548 | 9495  | Crtac1        | Srms          | -1 |
| 23548 | 12910 | Crtac1        | 1110028A07Rik | 1  |
| 23548 | 14279 | Crtac1        | 3930402G23Rik | -1 |
| 23548 | 16167 | Crtac1        | Stbd1         | 1  |
| 23548 | 20194 | Crtac1        | Pnlcd1        | 1  |
| 23552 | 3743  | Rasl11b       | Corin         | -1 |
| 23552 | 21431 | Rasl11b       | Xbp1          | 1  |
| 23563 | 8815  | MMT00004841   | Mx1           | 1  |
| 23563 | 21214 | MMT00004841   | Scd1          | 1  |
| 23572 | 2348  | 4631426J05Rik | Irak1         | -1 |
| 23579 | 4298  | Gm98          | St3gal1       | 1  |
| 23579 | 17880 | Gm98          | Ncald         | 1  |
| 23584 | 269   | Adamts5       | Tuba1b        | 1  |
| 23584 | 662   | Adamts5       | Mid1ip1       | 1  |
| 23584 | 1941  | Adamts5       | MMT00079618   | 1  |
| 23584 | 2322  | Adamts5       | Tuba4a        | 1  |
| 23584 | 6044  | Adamts5       | Sucnr1        | 1  |
| 23584 | 7151  | Adamts5       | MMT00007982   | 1  |
| 23584 | 8439  | Adamts5       | Slc25a33      | -1 |
| 23584 | 8896  | Adamts5       | Fasn          | 1  |
| 23584 | 9763  | Adamts5       | Tuba3b        | 1  |
| 23584 | 11129 | Adamts5       | Ankhd1        | -1 |
| 23584 | 11462 | Adamts5       | Gpam          | 1  |
| 23584 | 11724 | Adamts5       | Tuba3a        | 1  |
| 23584 | 11807 | Adamts5       | Fbxo31        | -1 |
| 23584 | 12219 | Adamts5       | Cyb5b         | 1  |
| 23584 | 12910 | Adamts5       | 1110028A07Rik | 1  |
| 23584 | 12981 | Adamts5       | Nek6          | 1  |
| 23584 | 13018 | Adamts5       | AW544981      | 1  |
| 23584 | 13304 | Adamts5       | Gadd45b       | -1 |
| 23584 | 15862 | Adamts5       | Mrap          | 1  |
| 23584 | 17444 | Adamts5       | Tuba1a        | 1  |
| 23584 | 17656 | Adamts5       | Hdhd3         | 1  |
| 23584 | 17660 | Adamts5       | Nlrp12        | -1 |
| 23584 | 18785 | Adamts5       | Angptl4       | -1 |
| 23584 | 21202 | Adamts5       | Acly          | 1  |
| 23584 | 22046 | Adamts5       | Cml4          | 1  |
| 23584 | 22443 | Adamts5       | Tuba1c        | 1  |
| 23599 | 403   | Ndr3          | Leprtl1       | 1  |
| 23599 | 13004 | Ndr3          | Arhgef10      | -1 |
| 23604 | 563   | Ephb3         | D4Bwg0951e    | -1 |
| 23604 | 662   | Ephb3         | Mid1ip1       | 1  |
| 23604 | 1357  | Ephb3         | Pabpn1        | 1  |
| 23604 | 8234  | Ephb3         | Tbpl1         | -1 |
| 23604 | 8632  | Ephb3         | Igfbp1        | -1 |
| 23604 | 10384 | Ephb3         | Chic2         | -1 |
| 23604 | 11382 | Ephb3         | Cdca3         | 1  |

|       |       |               |                    |    |
|-------|-------|---------------|--------------------|----|
| 23604 | 12315 | Ephb3         | Srebf1             | 1  |
| 23604 | 13018 | Ephb3         | AW544981           | 1  |
| 23604 | 13304 | Ephb3         | Gadd45b            | -1 |
| 23604 | 13489 | Ephb3         | D230025D16Rik      | -1 |
| 23604 | 14135 | Ephb3         | Eepd1              | 1  |
| 23604 | 14138 | Ephb3         | Anks4b             | 1  |
| 23604 | 18083 | Ephb3         | Gadd45a            | 1  |
| 23604 | 18785 | Ephb3         | Angptl4            | -1 |
| 23604 | 20076 | Ephb3         | Dbnl               | 1  |
| 23604 | 21160 | Ephb3         | Irs2               | -1 |
| 23617 | 2636  | Nme1          | Tars               | 1  |
| 23617 | 12204 | Nme1          | Ankmy2             | -1 |
| 23617 | 18201 | Nme1          | MMT00060232        | 1  |
| 23617 | 18846 | Nme1          | Ikbkg              | 1  |
| 23623 | 1129  | 2010305C02Rik | Gsta4              | 1  |
| 23623 | 5884  | 2010305C02Rik | Gstm2              | 1  |
| 23623 | 7602  | 2010305C02Rik | Pcca               | 1  |
| 23623 | 10132 | 2010305C02Rik | Ces2               | 1  |
| 23623 | 10554 | 2010305C02Rik | ENSMUSG00000074179 | 1  |
| 23623 | 12556 | 2010305C02Rik | Ass1               | 1  |
| 23623 | 13293 | 2010305C02Rik | Gsta2              | 1  |
| 23623 | 13431 | 2010305C02Rik | MMT00038058        | -1 |
| 23623 | 15205 | 2010305C02Rik | MMT00030262        | -1 |
| 23623 | 21214 | 2010305C02Rik | Scd1               | 1  |
| 23623 | 21575 | 2010305C02Rik | Cyp2c55            | 1  |
| 23623 | 21727 | 2010305C02Rik | Khk                | 1  |
| 23623 | 22406 | 2010305C02Rik | Vnn1               | -1 |
| 23623 | 22998 | 2010305C02Rik | Ass1               | 1  |
| 23625 | 665   | Pkd2          | Slc26a1            | -1 |
| 23625 | 1660  | Pkd2          | Zfp33b             | -1 |
| 23625 | 5100  | Pkd2          | Pebp1              | -1 |
| 23625 | 5728  | Pkd2          | MMT00044077        | -1 |
| 23625 | 6330  | Pkd2          | Dgkq               | 1  |
| 23625 | 8547  | Pkd2          | Gbp4               | 1  |
| 23625 | 8807  | Pkd2          | Ankrd56            | -1 |
| 23625 | 14085 | Pkd2          | Cdkl2              | 1  |
| 23625 | 15908 | Pkd2          | Pebp1              | -1 |
| 23625 | 17807 | Pkd2          | Pebp1              | -1 |
| 23625 | 19719 | Pkd2          | EG634650           | 1  |
| 23625 | 20118 | Pkd2          | Tmem175            | 1  |
| 23625 | 20269 | Pkd2          | Hsd17b13           | -1 |
| 23625 | 23625 | Pkd2          | Pkd2               | 1  |
| 23626 | 607   | MMT00003764   | Me1                | 1  |
| 23626 | 8444  | MMT00003764   | Rdh16              | 1  |
| 23626 | 8815  | MMT00003764   | Mx1                | 1  |
| 23626 | 12910 | MMT00003764   | 1110028A07Rik      | 1  |
| 23626 | 15059 | MMT00003764   | Mogat1             | 1  |
| 23626 | 18201 | MMT00003764   | MMT00060232        | 1  |
| 23626 | 21214 | MMT00003764   | Scd1               | 1  |
| 23626 | 21575 | MMT00003764   | Cyp2c55            | 1  |
| 23626 | 22138 | MMT00003764   | Ang                | -1 |

|       |       |             |               |    |
|-------|-------|-------------|---------------|----|
| 23626 | 23026 | MMT00003764 | Apom          | -1 |
| 23636 | 143   | Bst2        | Gvin1         | 1  |
| 23636 | 1180  | Bst2        | Clec4a3       | 1  |
| 23636 | 1533  | Bst2        | BC013712      | 1  |
| 23636 | 2200  | Bst2        | BC006779      | 1  |
| 23636 | 2224  | Bst2        | Oasl2         | 1  |
| 23636 | 2550  | Bst2        | MMT00036681   | 1  |
| 23636 | 2752  | Bst2        | Fcgr1         | 1  |
| 23636 | 3594  | Bst2        | Rasa4         | 1  |
| 23636 | 3659  | Bst2        | EG236451      | 1  |
| 23636 | 3683  | Bst2        | Oas2          | 1  |
| 23636 | 4114  | Bst2        | Parp12        | 1  |
| 23636 | 4409  | Bst2        | 5430435G22Rik | 1  |
| 23636 | 4426  | Bst2        | Iigp2         | 1  |
| 23636 | 4508  | Bst2        | Ifit1         | 1  |
| 23636 | 5250  | Bst2        | Ifit2         | 1  |
| 23636 | 5766  | Bst2        | 5033414D02Rik | 1  |
| 23636 | 5845  | Bst2        | Il18bp        | 1  |
| 23636 | 5853  | Bst2        | Trim30        | 1  |
| 23636 | 5875  | Bst2        | Cd86          | 1  |
| 23636 | 5949  | Bst2        | Zbp1          | 1  |
| 23636 | 6072  | Bst2        | C1qc          | 1  |
| 23636 | 6098  | Bst2        | Ncf4          | 1  |
| 23636 | 6213  | Bst2        | Ccl2          | 1  |
| 23636 | 6587  | Bst2        | Irf9          | 1  |
| 23636 | 6595  | Bst2        | Oas1a         | 1  |
| 23636 | 6734  | Bst2        | Ehd4          | 1  |
| 23636 | 6824  | Bst2        | Irf7          | 1  |
| 23636 | 7069  | Bst2        | Ube1l         | 1  |
| 23636 | 7105  | Bst2        | Plac8         | 1  |
| 23636 | 7316  | Bst2        | Ifi204        | 1  |
| 23636 | 7336  | Bst2        | Cd5l          | 1  |
| 23636 | 8555  | Bst2        | H2-M3         | 1  |
| 23636 | 8659  | Bst2        | Psmb8         | 1  |
| 23636 | 8800  | Bst2        | Rnf213        | 1  |
| 23636 | 9100  | Bst2        | Ms4a6c        | 1  |
| 23636 | 9401  | Bst2        | Fcgr4         | 1  |
| 23636 | 9820  | Bst2        | BC023105      | 1  |
| 23636 | 9847  | Bst2        | Ifi27         | 1  |
| 23636 | 9928  | Bst2        | Lgmn          | 1  |
| 23636 | 10109 | Bst2        | Gbp3          | 1  |
| 23636 | 10504 | Bst2        | Ripk3         | 1  |
| 23636 | 10606 | Bst2        | Apbb1ip       | 1  |
| 23636 | 10926 | Bst2        | P2ry13        | 1  |
| 23636 | 11009 | Bst2        | MMT00008885   | 1  |
| 23636 | 11204 | Bst2        | A1451617      | 1  |
| 23636 | 11265 | Bst2        | Irgm          | 1  |
| 23636 | 11406 | Bst2        | Ifi203        | 1  |
| 23636 | 11959 | Bst2        | 4631422O05Rik | 1  |
| 23636 | 12312 | Bst2        | Ms4a6d        | 1  |
| 23636 | 12398 | Bst2        | Ifi44         | 1  |

|       |       |      |               |   |
|-------|-------|------|---------------|---|
| 23636 | 12600 | Bst2 | Ifi204        | 1 |
| 23636 | 12969 | Bst2 | Xaf1          | 1 |
| 23636 | 13156 | Bst2 | Ifit3         | 1 |
| 23636 | 13309 | Bst2 | Tgtp          | 1 |
| 23636 | 13514 | Bst2 | Apol9b        | 1 |
| 23636 | 13527 | Bst2 | Ctss          | 1 |
| 23636 | 13654 | Bst2 | Stat1         | 1 |
| 23636 | 13656 | Bst2 | Ly86          | 1 |
| 23636 | 14117 | Bst2 | C1qb          | 1 |
| 23636 | 14237 | Bst2 | Rac2          | 1 |
| 23636 | 14258 | Bst2 | Ifi47         | 1 |
| 23636 | 14506 | Bst2 | Slc15a3       | 1 |
| 23636 | 14603 | Bst2 | Ly6e          | 1 |
| 23636 | 14880 | Bst2 | Ms4a4c        | 1 |
| 23636 | 14883 | Bst2 | Itgal         | 1 |
| 23636 | 15074 | Bst2 | Usp18         | 1 |
| 23636 | 15280 | Bst2 | Cxcl10        | 1 |
| 23636 | 16102 | Bst2 | Cd72          | 1 |
| 23636 | 16147 | Bst2 | Tlr2          | 1 |
| 23636 | 16182 | Bst2 | Oasl1         | 1 |
| 23636 | 16186 | Bst2 | Cfp           | 1 |
| 23636 | 16199 | Bst2 | Samhd1        | 1 |
| 23636 | 16572 | Bst2 | D14Erttd668e  | 1 |
| 23636 | 16874 | Bst2 | Fcer1g        | 1 |
| 23636 | 16988 | Bst2 | Clec4f        | 1 |
| 23636 | 17197 | Bst2 | Igtp          | 1 |
| 23636 | 17412 | Bst2 | Aif1          | 1 |
| 23636 | 17904 | Bst2 | Cds1          | 1 |
| 23636 | 18174 | Bst2 | Stat2         | 1 |
| 23636 | 18186 | Bst2 | Parp14        | 1 |
| 23636 | 18211 | Bst2 | Folr2         | 1 |
| 23636 | 18868 | Bst2 | Mpeg1         | 1 |
| 23636 | 19189 | Bst2 | Sp100         | 1 |
| 23636 | 19252 | Bst2 | Tmsb4x        | 1 |
| 23636 | 19262 | Bst2 | Cd274         | 1 |
| 23636 | 19738 | Bst2 | Lgals3bp      | 1 |
| 23636 | 20321 | Bst2 | Ms4a6b        | 1 |
| 23636 | 20997 | Bst2 | MMT00028135   | 1 |
| 23636 | 21351 | Bst2 | Shisa5        | 1 |
| 23636 | 21440 | Bst2 | Tmsb10        | 1 |
| 23636 | 21549 | Bst2 | Rtp4          | 1 |
| 23636 | 21824 | Bst2 | 5830443L24Rik | 1 |
| 23636 | 22037 | Bst2 | Oas1g         | 1 |
| 23636 | 23208 | Bst2 | Hck           | 1 |
| 23636 | 23450 | Bst2 | D12Erttd647e  | 1 |
| 23638 | 3696  | Ddr1 | Elovl6        | 1 |
| 23638 | 8896  | Ddr1 | Fasn          | 1 |
| 23638 | 11462 | Ddr1 | Gpam          | 1 |
| 23638 | 12315 | Ddr1 | Srebf1        | 1 |
| 23638 | 12910 | Ddr1 | 1110028A07Rik | 1 |
| 23638 | 18201 | Ddr1 | MMT00060232   | 1 |

|       |       |               |               |    |
|-------|-------|---------------|---------------|----|
| 23638 | 23008 | Ddr1          | Ctsz          | -1 |
| 23640 | 8444  | Bdh1          | Rdh16         | -1 |
| 23640 | 8815  | Bdh1          | Mx1           | -1 |
| 23646 | 499   | Hsp90ab1      | 2310057J16Rik | 1  |
| 23646 | 3799  | Hsp90ab1      | Serpinh1      | 1  |
| 23646 | 5974  | Hsp90ab1      | Arntl         | 1  |
| 23646 | 14279 | Hsp90ab1      | 3930402G23Rik | 1  |
| 23660 | 7539  | Dpyd          | Eef2          | 1  |
| 23660 | 14094 | Dpyd          | Srpk2         | -1 |
| 23663 | 415   | Dab2ip        | Ypel2         | -1 |
| 23663 | 958   | Dab2ip        | Ppp2r5e       | 1  |
| 23663 | 2823  | Dab2ip        | Sipa1l2       | 1  |
| 23663 | 4966  | Dab2ip        | Zscan20       | -1 |
| 23663 | 6171  | Dab2ip        | Abtb2         | -1 |
| 23663 | 8632  | Dab2ip        | Igfbp1        | -1 |
| 23663 | 9831  | Dab2ip        | Nedd4l        | -1 |
| 23663 | 12204 | Dab2ip        | Ankmy2        | 1  |
| 23663 | 12905 | Dab2ip        | Nfil3         | -1 |
| 23663 | 13297 | Dab2ip        | Emb           | -1 |
| 23663 | 13630 | Dab2ip        | Cdkn1a        | -1 |
| 23663 | 14279 | Dab2ip        | 3930402G23Rik | -1 |
| 23663 | 17884 | Dab2ip        | Lnx2          | -1 |
| 23663 | 18179 | Dab2ip        | Dbp           | 1  |
| 23663 | 18438 | Dab2ip        | Map3k7ip2     | -1 |
| 23664 | 2011  | Btg1          | Slc2a5        | -1 |
| 23664 | 5764  | Btg1          | Ltb4dh        | -1 |
| 23664 | 8684  | Btg1          | Il15          | -1 |
| 23664 | 14298 | Btg1          | Atp2a2        | 1  |
| 23664 | 21389 | Btg1          | Odf2          | -1 |
| 23668 | 662   | Gse1          | Mid1ip1       | 1  |
| 23668 | 1827  | Gse1          | Gnb1l         | 1  |
| 23668 | 6976  | Gse1          | Rbm35b        | 1  |
| 23668 | 8234  | Gse1          | Tbpl1         | -1 |
| 23668 | 8632  | Gse1          | Igfbp1        | -1 |
| 23668 | 11444 | Gse1          | Rnpep         | 1  |
| 23668 | 14135 | Gse1          | Eepd1         | 1  |
| 23668 | 20076 | Gse1          | Dbnl          | 1  |
| 23668 | 22744 | Gse1          | 9-Sep         | 1  |
| 23682 | 17656 | Trim8         | Hdhd3         | 1  |
| 23685 | 7492  | Tbxas1        | Adfp          | 1  |
| 23693 | 1129  | A530016L24Rik | Gsta4         | 1  |
| 23693 | 1711  | A530016L24Rik | Grhl1         | -1 |
| 23693 | 2454  | A530016L24Rik | MMT00045890   | 1  |
| 23693 | 2721  | A530016L24Rik | Inmt          | 1  |
| 23693 | 5804  | A530016L24Rik | Thrsp         | 1  |
| 23693 | 5892  | A530016L24Rik | MMT00038457   | 1  |
| 23693 | 6214  | A530016L24Rik | Mmd2          | 1  |
| 23693 | 6746  | A530016L24Rik | E2f8          | -1 |
| 23693 | 8357  | A530016L24Rik | Siva1         | 1  |
| 23693 | 9700  | A530016L24Rik | Prodh         | 1  |
| 23693 | 12084 | A530016L24Rik | Siva1         | 1  |



|       |       |               |               |    |
|-------|-------|---------------|---------------|----|
| 23693 | 13271 | A530016L24Rik | Idh2          | 1  |
| 23693 | 17638 | A530016L24Rik | Adssl1        | 1  |
| 23693 | 19790 | A530016L24Rik | Polg2         | 1  |
| 23693 | 20058 | A530016L24Rik | Dnaic1        | -1 |
| 23693 | 21727 | A530016L24Rik | Khk           | 1  |
| 23693 | 23693 | A530016L24Rik | A530016L24Rik | 1  |



**Table T10:** AH Subnetworks

| Subnetwork | Probe_id | Tissue       | Gene_Symbol   | Entrez_ID |
|------------|----------|--------------|---------------|-----------|
| C1         | 10       | adipose      | NAN           |           |
| C1         | 661      | adipose      | Siglec1       | 20612     |
| C1         | 663      | adipose      | Muc19         | 239611    |
| C1         | 1436     | adipose      | Nfu1          | 56748     |
| C1         | 1771     | adipose      | Park2         | 50873     |
| C1         | 1795     | adipose      | Rabgap1l      | 29809     |
| C1         | 1920     | adipose      | Oas1e         | 231699    |
| C1         | 2819     | adipose      | Kcnk5         | 16529     |
| C1         | 4079     | adipose      | Emilin3       | 280635    |
| C1         | 4199     | adipose      | B3galt5       | 93961     |
| C1         | 5694     | adipose      | Sp7           | 170574    |
| C1         | 6719     | adipose      | Cacng8        | 81905     |
| C1         | 7084     | adipose      | Spz1          | 79401     |
| C1         | 7094     | adipose      | Cyp2c54       | 404195    |
| C1         | 7436     | adipose      | 1700063K16Rik | 76610     |
| C1         | 8256     | adipose      | Tjap1         | 74094     |
| C1         | 8703     | adipose      | Gstp1         | 14870     |
| C1         | 9990     | adipose      | MMT00081303   |           |
| C1         | 10055    | adipose      | Tpte          | 234129    |
| C1         | 11016    | adipose      | Pcp2          | 18545     |
| C1         | 11966    | adipose      | Zfp280b       | 64453     |
| C1         | 12248    | adipose      | Tnp2          | 21959     |
| C1         | 13311    | adipose      | Prl3c1        | 27372     |
| C1         | 13890    | adipose      | Olf1263       | 258790    |
| C1         | 14398    | adipose      | Snn           | 20621     |
| C1         | 14498    | adipose      | Layn          | 244864    |
| C1         | 14519    | adipose      | Trex1         | 22040     |
| C1         | 16491    | adipose      | 6330500D04Rik | 193385    |
| C1         | 17413    | adipose      | MMT00043948   |           |
| C1         | 17750    | adipose      | Hs6st2        | 50786     |
| C1         | 19219    | adipose      | MMT00015104   |           |
| C1         | 19483    | adipose      | Depdc2        | 109294    |
| C1         | 19672    | adipose      | Cldn19        | 242653    |
| C1         | 19717    | adipose      | Ccdc27        | 381580    |
| C1         | 20419    | adipose      | Adra1b        | 11548     |
| C1         | 20532    | adipose      | Rnf26         | 213211    |
| C1         | 20908    | adipose      | Olf1583       | 258752    |
| C1         | 22555    | adipose      | Ela2          | 50701     |
| C1         | 22966    | adipose      | Epha4         | 13838     |
| C1         | 23546    | adipose      | Zzef1         | 195018    |
| C1         | 23591    | adipose      | Dlg4          | 13385     |
| C1         | 10       | hypothalamus | NAN           |           |
| C1         | 83       | hypothalamus | NAN           |           |
| C1         | 98       | hypothalamus | NAN           |           |
| C1         | 115      | hypothalamus | NAN           |           |
| C1         | 141      | hypothalamus | Jag1          | 16449     |
| C1         | 219      | hypothalamus | MMT00058440   |           |
| C1         | 225      | hypothalamus | MMT00073704   | 635169    |
| C1         | 236      | hypothalamus | Bbs9          | 319845    |

|    |      |              |               |        |
|----|------|--------------|---------------|--------|
| C1 | 316  | hypothalamus | 4930471G03Rik | 74966  |
| C1 | 317  | hypothalamus | Ceacam13      | 69785  |
| C1 | 346  | hypothalamus | Olfr1484      | 258288 |
| C1 | 352  | hypothalamus | 4732415M23Rik | 320869 |
| C1 | 391  | hypothalamus | 4933416I08Rik | 71159  |
| C1 | 484  | hypothalamus | Atp4a         | 11944  |
| C1 | 486  | hypothalamus | Josd2         | 66124  |
| C1 | 552  | hypothalamus | MMT00013481   |        |
| C1 | 558  | hypothalamus | Crebl1        | 12915  |
| C1 | 584  | hypothalamus | Tmem207       | 224058 |
| C1 | 658  | hypothalamus | Vmn2r-ps88    | 209786 |
| C1 | 661  | hypothalamus | Siglec1       | 20612  |
| C1 | 663  | hypothalamus | Muc19         | 239611 |
| C1 | 985  | hypothalamus | Hsd3b6        | 15497  |
| C1 | 1021 | hypothalamus | Rhpn2         | 52428  |
| C1 | 1058 | hypothalamus | Olfr868       | 258552 |
| C1 | 1059 | hypothalamus | P2rx6         | 18440  |
| C1 | 1122 | hypothalamus | Pax3          | 18505  |
| C1 | 1127 | hypothalamus | Pomt2         | 217734 |
| C1 | 1136 | hypothalamus | Kdelr3        | 105785 |
| C1 | 1137 | hypothalamus | Mlxip         | 208104 |
| C1 | 1148 | hypothalamus | Pak1          | 18479  |
| C1 | 1170 | hypothalamus | Faim3         | 69169  |
| C1 | 1239 | hypothalamus | Cerkl         | 228094 |
| C1 | 1256 | hypothalamus | Baiap2l2      | 207495 |
| C1 | 1354 | hypothalamus | Lsmd1         | 78304  |
| C1 | 1436 | hypothalamus | Nfu1          | 56748  |
| C1 | 1457 | hypothalamus | Efr3b         | 668212 |
| C1 | 1518 | hypothalamus | Amigo2        | 105827 |
| C1 | 1570 | hypothalamus | Olfr522       | 258954 |
| C1 | 1593 | hypothalamus | D3Ert300e     | 56790  |
| C1 | 1619 | hypothalamus | Fbxw17        | 109082 |
| C1 | 1679 | hypothalamus | MMT00009278   |        |
| C1 | 1696 | hypothalamus | V1re9         | 252904 |
| C1 | 1771 | hypothalamus | Park2         | 50873  |
| C1 | 1795 | hypothalamus | Rabgap1l      | 29809  |
| C1 | 1829 | hypothalamus | MMT00030026   |        |
| C1 | 1876 | hypothalamus | Amdhd1        | 71761  |
| C1 | 1881 | hypothalamus | Slc16a14      | 71781  |
| C1 | 1907 | hypothalamus | D230010M03Rik | 241547 |
| C1 | 1920 | hypothalamus | Oas1e         | 231699 |
| C1 | 2067 | hypothalamus | Myo1a         | 432516 |
| C1 | 2177 | hypothalamus | Htati2        | 53415  |
| C1 | 2226 | hypothalamus | Amt           | 434437 |
| C1 | 2283 | hypothalamus | MMT00029554   |        |
| C1 | 2326 | hypothalamus | zfp507        | 668501 |
| C1 | 2648 | hypothalamus | MMT00005098   |        |
| C1 | 2658 | hypothalamus | Fzd2          | 57265  |
| C1 | 2675 | hypothalamus | Nfyc          | 18046  |
| C1 | 2737 | hypothalamus | Milt10        | 17354  |
| C1 | 2767 | hypothalamus | MMT00031206   |        |

|    |      |              |               |        |
|----|------|--------------|---------------|--------|
| C1 | 2778 | hypothalamus | Coro1a        | 12721  |
| C1 | 2802 | hypothalamus | Lin7c         | 22343  |
| C1 | 2819 | hypothalamus | Kcnk5         | 16529  |
| C1 | 2851 | hypothalamus | Inpp5e        | 64436  |
| C1 | 2870 | hypothalamus | D5Ert577e     | 320549 |
| C1 | 2879 | hypothalamus | Ptpv          | 13924  |
| C1 | 2935 | hypothalamus | Slc28a1       | 434203 |
| C1 | 3067 | hypothalamus | Ucp3          | 22229  |
| C1 | 3080 | hypothalamus | MMT00014480   |        |
| C1 | 3127 | hypothalamus | Plcd1         | 18799  |
| C1 | 3144 | hypothalamus | Ube2j2        | 140499 |
| C1 | 3145 | hypothalamus | Idi1          | 319554 |
| C1 | 3166 | hypothalamus | Vmn2r57       | 269902 |
| C1 | 3208 | hypothalamus | 4930511I11Rik | 67645  |
| C1 | 3220 | hypothalamus | Ap2s1         | 232910 |
| C1 | 3254 | hypothalamus | Grifin        | 77998  |
| C1 | 3284 | hypothalamus | Plekha7       | 233765 |
| C1 | 3349 | hypothalamus | MMT00043953   |        |
| C1 | 3362 | hypothalamus | Fgf8          | 14179  |
| C1 | 3379 | hypothalamus | Cdo1          | 12583  |
| C1 | 3383 | hypothalamus | Cd99          | 673094 |
| C1 | 3402 | hypothalamus | A930018P22Rik | 68243  |
| C1 | 3459 | hypothalamus | Nags          | 217214 |
| C1 | 3511 | hypothalamus | Rnf182        | 328234 |
| C1 | 3640 | hypothalamus | D11Bwg0517e   | 52897  |
| C1 | 3841 | hypothalamus | MMT00014519   |        |
| C1 | 3867 | hypothalamus | Slc           | 66402  |
| C1 | 3886 | hypothalamus | MMT00047275   | 546271 |
| C1 | 3948 | hypothalamus | V1rb4         | 113854 |
| C1 | 3986 | hypothalamus | Ep400         | 75560  |
| C1 | 4012 | hypothalamus | Ctsw          | 13041  |
| C1 | 4079 | hypothalamus | Emilin3       | 280635 |
| C1 | 4088 | hypothalamus | Pdcl2         | 79455  |
| C1 | 4166 | hypothalamus | Cblc          | 80794  |
| C1 | 4173 | hypothalamus | MMT00008170   |        |
| C1 | 4199 | hypothalamus | B3galt5       | 93961  |
| C1 | 4246 | hypothalamus | Fbxw12        | 434440 |
| C1 | 4311 | hypothalamus | MMT00033987   |        |
| C1 | 4337 | hypothalamus | Myst3         | 244349 |
| C1 | 4407 | hypothalamus | 4930429B21Rik | 67576  |
| C1 | 4425 | hypothalamus | Olf1346       | 258918 |
| C1 | 4430 | hypothalamus | Ankrd36       | 76389  |
| C1 | 4444 | hypothalamus | Ksr2          | 333050 |
| C1 | 4468 | hypothalamus | MMT00052724   |        |
| C1 | 4578 | hypothalamus | Pglyrp2       | 57757  |
| C1 | 4683 | hypothalamus | E330013P04Rik | 107376 |
| C1 | 4717 | hypothalamus | Cd177         | 68891  |
| C1 | 4870 | hypothalamus | Olf550        | 259108 |
| C1 | 5083 | hypothalamus | Gprc5b        | 64297  |
| C1 | 5126 | hypothalamus | Fcnb          | 14134  |
| C1 | 5265 | hypothalamus | A3galt2       | 215493 |

|    |      |              |               |        |
|----|------|--------------|---------------|--------|
| C1 | 5377 | hypothalamus | MMT00077700   |        |
| C1 | 5380 | hypothalamus | Olf1403       | 258645 |
| C1 | 5455 | hypothalamus | Kcnab3        | 16499  |
| C1 | 5494 | hypothalamus | Gpr101        | 245424 |
| C1 | 5505 | hypothalamus | Thap2         | 66816  |
| C1 | 5527 | hypothalamus | Zfp398        | 272347 |
| C1 | 5577 | hypothalamus | MMT00009628   |        |
| C1 | 5694 | hypothalamus | Sp7           | 170574 |
| C1 | 5748 | hypothalamus | Brsk2         | 75770  |
| C1 | 5783 | hypothalamus | 4833413O15Rik | 242286 |
| C1 | 5908 | hypothalamus | MMT00027552   |        |
| C1 | 5929 | hypothalamus | Cpz           | 242939 |
| C1 | 5946 | hypothalamus | MMT00048659   |        |
| C1 | 6049 | hypothalamus | Cpeb2         | 231207 |
| C1 | 6185 | hypothalamus | Icam4         | 78369  |
| C1 | 6193 | hypothalamus | Lactb2        | 212442 |
| C1 | 6367 | hypothalamus | Lhfp          | 108927 |
| C1 | 6382 | hypothalamus | Col23a1       | 237759 |
| C1 | 6390 | hypothalamus | MMT00073452   |        |
| C1 | 6403 | hypothalamus | MMT00039607   |        |
| C1 | 6422 | hypothalamus | Grk5          | 14773  |
| C1 | 6429 | hypothalamus | Sim2          | 20465  |
| C1 | 6520 | hypothalamus | Arnt2         | 11864  |
| C1 | 6687 | hypothalamus | Ogfod1        | 270086 |
| C1 | 6719 | hypothalamus | Cacng8        | 81905  |
| C1 | 6754 | hypothalamus | Trpv3         | 246788 |
| C1 | 6756 | hypothalamus | Sds           | 231691 |
| C1 | 6784 | hypothalamus | Al182371      | 98870  |
| C1 | 6880 | hypothalamus | Dmrtb1        | 56296  |
| C1 | 6992 | hypothalamus | Olf172        | 259003 |
| C1 | 7041 | hypothalamus | Sp140         | 434484 |
| C1 | 7078 | hypothalamus | Olf463        | 258408 |
| C1 | 7084 | hypothalamus | Spz1          | 79401  |
| C1 | 7085 | hypothalamus | St8sia2       | 20450  |
| C1 | 7094 | hypothalamus | Cyp2c54       | 404195 |
| C1 | 7132 | hypothalamus | Sp9           | 381373 |
| C1 | 7279 | hypothalamus | Cldn13        | 57255  |
| C1 | 7340 | hypothalamus | Ascc3l1       | 320632 |
| C1 | 7436 | hypothalamus | 1700063K16Rik | 76610  |
| C1 | 7439 | hypothalamus | Syt17         | 110058 |
| C1 | 7577 | hypothalamus | Cldn8         | 54420  |
| C1 | 7618 | hypothalamus | Glis2         | 83396  |
| C1 | 7698 | hypothalamus | Klrb1a        | 17057  |
| C1 | 7721 | hypothalamus | MMT00000356   |        |
| C1 | 7860 | hypothalamus | Bmp6          | 12161  |
| C1 | 7875 | hypothalamus | Crat          | 12908  |
| C1 | 7879 | hypothalamus | Ifitm3        | 66141  |
| C1 | 7916 | hypothalamus | MMT00016293   |        |
| C1 | 7959 | hypothalamus | Tbx5          | 21388  |
| C1 | 7974 | hypothalamus | Arhgef7       | 54126  |
| C1 | 8109 | hypothalamus | 6330545A04Rik | 76166  |

|    |       |              |               |        |
|----|-------|--------------|---------------|--------|
| C1 | 8157  | hypothalamus | MMT00005305   |        |
| C1 | 8170  | hypothalamus | Snx22         | 382083 |
| C1 | 8189  | hypothalamus | Cflar         | 12633  |
| C1 | 8256  | hypothalamus | Tjap1         | 74094  |
| C1 | 8488  | hypothalamus | Opcml         | 330908 |
| C1 | 8617  | hypothalamus | 2210412E05Rik | 75690  |
| C1 | 8620  | hypothalamus | MMT00048670   |        |
| C1 | 8644  | hypothalamus | V1rg11        | 171267 |
| C1 | 8703  | hypothalamus | Gstp1         | 14870  |
| C1 | 8709  | hypothalamus | Trim58        | 216781 |
| C1 | 8730  | hypothalamus | MMT00008620   |        |
| C1 | 8784  | hypothalamus | Hgd           | 15233  |
| C1 | 8905  | hypothalamus | Trim67        | 330863 |
| C1 | 8952  | hypothalamus | Marco         | 17167  |
| C1 | 9128  | hypothalamus | Nxph1         | 18231  |
| C1 | 9233  | hypothalamus | Acss3         | 380660 |
| C1 | 9240  | hypothalamus | Olfr401       | 258701 |
| C1 | 9340  | hypothalamus | Cdc42ep2      | 104252 |
| C1 | 9421  | hypothalamus | Serpinf2      | 18816  |
| C1 | 9436  | hypothalamus | Cntnap2       | 66797  |
| C1 | 9446  | hypothalamus | MMT00017417   |        |
| C1 | 9463  | hypothalamus | Zdhhc23       | 332175 |
| C1 | 9468  | hypothalamus | Gtf2a1l       | 71828  |
| C1 | 9485  | hypothalamus | 2700081O15Rik | 108899 |
| C1 | 9743  | hypothalamus | Gm189         | 235952 |
| C1 | 9868  | hypothalamus | Sult4a1       | 29859  |
| C1 | 9923  | hypothalamus | Tssk6         | 83984  |
| C1 | 9946  | hypothalamus | Stam2         | 56324  |
| C1 | 9954  | hypothalamus | MMT00047280   |        |
| C1 | 9990  | hypothalamus | MMT00081303   |        |
| C1 | 10055 | hypothalamus | Tpte          | 234129 |
| C1 | 10078 | hypothalamus | Tbc1d14       | 100855 |
| C1 | 10195 | hypothalamus | Klf1          | 16596  |
| C1 | 10234 | hypothalamus | C230093N12Rik | 98952  |
| C1 | 10240 | hypothalamus | Cyp2w1        | 545817 |
| C1 | 10260 | hypothalamus | Zfp36l2       | 12193  |
| C1 | 10281 | hypothalamus | Slc15a1       | 56643  |
| C1 | 10377 | hypothalamus | A430105I19Rik | 214239 |
| C1 | 10452 | hypothalamus | Grn           | 14824  |
| C1 | 10457 | hypothalamus | Olfr853       | 258908 |
| C1 | 10520 | hypothalamus | Xkr6          | 219149 |
| C1 | 10576 | hypothalamus | Xrcc3         | 74335  |
| C1 | 10657 | hypothalamus | Rnf12         | 19820  |
| C1 | 10687 | hypothalamus | Itpkb         | 320404 |
| C1 | 10689 | hypothalamus | Pitpnb        | 56305  |
| C1 | 10700 | hypothalamus | Grwd1         | 101612 |
| C1 | 10723 | hypothalamus | 4930556N09Rik | 75301  |
| C1 | 10806 | hypothalamus | Rnf212        | 671564 |
| C1 | 10835 | hypothalamus | Kcnd2         | 16508  |
| C1 | 10838 | hypothalamus | Spdef         | 30051  |
| C1 | 10880 | hypothalamus | Klra8         | 16639  |

|    |       |              |               |        |
|----|-------|--------------|---------------|--------|
| C1 | 10886 | hypothalamus | Fndc3b        | 72007  |
| C1 | 10974 | hypothalamus | Vmn2r25       | 545874 |
| C1 | 11001 | hypothalamus | Pou6f2        | 218030 |
| C1 | 11016 | hypothalamus | Pcp2          | 18545  |
| C1 | 11017 | hypothalamus | Olfr926       | 258811 |
| C1 | 11050 | hypothalamus | 2210010C04Rik | 67373  |
| C1 | 11256 | hypothalamus | H2-DMa        | 14998  |
| C1 | 11303 | hypothalamus | Slc5a12       | 241612 |
| C1 | 11350 | hypothalamus | 9030420J04Rik | 71544  |
| C1 | 11424 | hypothalamus | lqcf3         | 68265  |
| C1 | 11425 | hypothalamus | Evx2          | 14029  |
| C1 | 11507 | hypothalamus | Adarb2        | 94191  |
| C1 | 11645 | hypothalamus | Prtn3         | 19152  |
| C1 | 11665 | hypothalamus | Hyal1         | 15586  |
| C1 | 11677 | hypothalamus | 5730507C01Rik | 236366 |
| C1 | 11689 | hypothalamus | MMT00078109   |        |
| C1 | 11805 | hypothalamus | Bat2          | 53761  |
| C1 | 11809 | hypothalamus | 4930534B04Rik | 75216  |
| C1 | 11837 | hypothalamus | Paqr6         | 68957  |
| C1 | 11881 | hypothalamus | Mpl           | 17480  |
| C1 | 11966 | hypothalamus | Zfp280b       | 64453  |
| C1 | 12046 | hypothalamus | Impdh1        | 23917  |
| C1 | 12062 | hypothalamus | Dzip1l        | 72507  |
| C1 | 12188 | hypothalamus | Chek2         | 50883  |
| C1 | 12198 | hypothalamus | Atp13a5       | 268878 |
| C1 | 12248 | hypothalamus | Tnp2          | 21959  |
| C1 | 12272 | hypothalamus | Fshr          | 14309  |
| C1 | 12371 | hypothalamus | 1700128F08Rik | 76669  |
| C1 | 12372 | hypothalamus | MMT00039397   |        |
| C1 | 12422 | hypothalamus | Eme1          | 268465 |
| C1 | 12430 | hypothalamus | Fst           | 14313  |
| C1 | 12451 | hypothalamus | Srd5a2        | 94224  |
| C1 | 12457 | hypothalamus | MMT00072579   |        |
| C1 | 12464 | hypothalamus | MMT00047924   | 20947  |
| C1 | 12471 | hypothalamus | Olfr1020      | 258573 |
| C1 | 12497 | hypothalamus | Kir3dl2       | 245615 |
| C1 | 12568 | hypothalamus | Lrrc37a       | 237954 |
| C1 | 12604 | hypothalamus | Acr           | 11434  |
| C1 | 12633 | hypothalamus | Klk4          | 56640  |
| C1 | 12651 | hypothalamus | Tsc22d4       | 78829  |
| C1 | 12696 | hypothalamus | RP23-392P11.3 | 545481 |
| C1 | 12753 | hypothalamus | MMT00043344   |        |
| C1 | 12772 | hypothalamus | Axl           | 26362  |
| C1 | 12826 | hypothalamus | Zfp354c       | 30944  |
| C1 | 12919 | hypothalamus | Nup210l       | 77595  |
| C1 | 13102 | hypothalamus | Prkaa1        | 105787 |
| C1 | 13141 | hypothalamus | MMT00071569   |        |
| C1 | 13184 | hypothalamus | MMT00017268   |        |
| C1 | 13201 | hypothalamus | Rbl2          | 19651  |
| C1 | 13311 | hypothalamus | Prl3c1        | 27372  |
| C1 | 13428 | hypothalamus | Gpr20         | 239530 |



|    |       |              |               |        |
|----|-------|--------------|---------------|--------|
| C1 | 13487 | hypothalamus | A230051G13Rik | 216792 |
| C1 | 13496 | hypothalamus | H1fnt         | 70069  |
| C1 | 13570 | hypothalamus | Olf171        | 258960 |
| C1 | 13676 | hypothalamus | MMT00010979   |        |
| C1 | 13712 | hypothalamus | Lypd5         | 76942  |
| C1 | 13742 | hypothalamus | 1700024P16Rik | 242594 |
| C1 | 13767 | hypothalamus | Kcnk15        | 241769 |
| C1 | 13800 | hypothalamus | Lrp5          | 16973  |
| C1 | 13860 | hypothalamus | Cpt1b         | 12895  |
| C1 | 13890 | hypothalamus | Olf1263       | 258790 |
| C1 | 14035 | hypothalamus | Lrrc52        | 240899 |
| C1 | 14075 | hypothalamus | E030049G20Rik | 210356 |
| C1 | 14149 | hypothalamus | BC048562      | 434439 |
| C1 | 14293 | hypothalamus | Col9a1        | 12839  |
| C1 | 14303 | hypothalamus | V1ri2         | 171253 |
| C1 | 14313 | hypothalamus | Tnk1          | 83813  |
| C1 | 14364 | hypothalamus | Robo1         | 19876  |
| C1 | 14495 | hypothalamus | A630018P17Rik | 245695 |
| C1 | 14498 | hypothalamus | Layn          | 244864 |
| C1 | 14510 | hypothalamus | Olf1643       | 259081 |
| C1 | 14519 | hypothalamus | Trex1         | 22040  |
| C1 | 14565 | hypothalamus | Rnf207        | 433809 |
| C1 | 14643 | hypothalamus | Ets2          | 23872  |
| C1 | 14754 | hypothalamus | Atoh8         | 71093  |
| C1 | 14993 | hypothalamus | MMT00015245   |        |
| C1 | 15200 | hypothalamus | Gk2           | 14626  |
| C1 | 15424 | hypothalamus | Atp6v1g2      | 66237  |
| C1 | 15446 | hypothalamus | Cd320         | 54219  |
| C1 | 15601 | hypothalamus | Plekhm3       | 241075 |
| C1 | 15626 | hypothalamus | MMT00035685   |        |
| C1 | 15697 | hypothalamus | Tbc1d8b       | 245638 |
| C1 | 15743 | hypothalamus | Hoxc6         | 15425  |
| C1 | 15747 | hypothalamus | Sfrs1         | 110809 |
| C1 | 15813 | hypothalamus | Vpreb3        | 22364  |
| C1 | 15847 | hypothalamus | Gm392         | 235858 |
| C1 | 15881 | hypothalamus | Hcn4          | 330953 |
| C1 | 15885 | hypothalamus | Adamts7       | 108153 |
| C1 | 16001 | hypothalamus | D330027H18Rik | 101359 |
| C1 | 16018 | hypothalamus | MMT00074939   |        |
| C1 | 16104 | hypothalamus | Ugt3a2        | 223337 |
| C1 | 16157 | hypothalamus | D9Ert280e     | 272636 |
| C1 | 16197 | hypothalamus | MMT00065977   |        |
| C1 | 16226 | hypothalamus | MMT00033542   |        |
| C1 | 16318 | hypothalamus | Ms4a15        | 545279 |
| C1 | 16323 | hypothalamus | Smpd3         | 58994  |
| C1 | 16390 | hypothalamus | Plb1          | 665270 |
| C1 | 16491 | hypothalamus | 6330500D04Rik | 193385 |
| C1 | 16553 | hypothalamus | Cilp2         | 68709  |
| C1 | 16664 | hypothalamus | Car4          | 12351  |
| C1 | 16672 | hypothalamus | Tmem82        | 213989 |
| C1 | 16718 | hypothalamus | Zbtb7c        | 207259 |

|    |       |              |               |        |
|----|-------|--------------|---------------|--------|
| C1 | 16794 | hypothalamus | Chrnbl        | 11443  |
| C1 | 16957 | hypothalamus | MMT00046108   |        |
| C1 | 17044 | hypothalamus | Gpr55         | 227326 |
| C1 | 17068 | hypothalamus | Olfr661       | 258743 |
| C1 | 17122 | hypothalamus | MMT00068814   |        |
| C1 | 17123 | hypothalamus | Olfr1511      | 258268 |
| C1 | 17149 | hypothalamus | Pms2          | 18861  |
| C1 | 17171 | hypothalamus | MMT00045847   |        |
| C1 | 17263 | hypothalamus | Ccnb3         | 209091 |
| C1 | 17337 | hypothalamus | 1810065E05Rik | 69864  |
| C1 | 17413 | hypothalamus | MMT00043948   |        |
| C1 | 17417 | hypothalamus | Pxn           | 19303  |
| C1 | 17422 | hypothalamus | Dctd          | 320685 |
| C1 | 17524 | hypothalamus | MMT00006341   |        |
| C1 | 17547 | hypothalamus | C730007P19Rik | 20865  |
| C1 | 17578 | hypothalamus | Kif19a        | 286942 |
| C1 | 17612 | hypothalamus | Vhlh          | 22346  |
| C1 | 17613 | hypothalamus | P2rx7         | 18439  |
| C1 | 17750 | hypothalamus | Hs6st2        | 50786  |
| C1 | 17783 | hypothalamus | D630012G11Rik | 320904 |
| C1 | 17890 | hypothalamus | 2610021K21Rik | 78767  |
| C1 | 17960 | hypothalamus | Yod1          | 226418 |
| C1 | 18124 | hypothalamus | Ptprt         | 19281  |
| C1 | 18162 | hypothalamus | BC049352      | 408059 |
| C1 | 18171 | hypothalamus | MMT00007396   |        |
| C1 | 18214 | hypothalamus | Ankrd40       | 71452  |
| C1 | 18240 | hypothalamus | Scrt2         | 545474 |
| C1 | 18325 | hypothalamus | Cst10         | 58214  |
| C1 | 18351 | hypothalamus | Nfyc          | 18046  |
| C1 | 18409 | hypothalamus | Nicn1         | 66257  |
| C1 | 18451 | hypothalamus | Csgalnact1    | 234356 |
| C1 | 18525 | hypothalamus | Mpped1        | 223726 |
| C1 | 18562 | hypothalamus | Nup188        | 227699 |
| C1 | 18620 | hypothalamus | Slmap         | 83997  |
| C1 | 18651 | hypothalamus | Tulp2         | 56734  |
| C1 | 18684 | hypothalamus | Ctnn          | 13043  |
| C1 | 18699 | hypothalamus | 2700089E24Rik | 381820 |
| C1 | 18773 | hypothalamus | MMT00014972   |        |
| C1 | 18790 | hypothalamus | Car3          | 12350  |
| C1 | 18847 | hypothalamus | Armetl1       | 227526 |
| C1 | 18892 | hypothalamus | Cyp4f40       | 631304 |
| C1 | 18980 | hypothalamus | Il7           | 16196  |
| C1 | 19219 | hypothalamus | MMT00015104   |        |
| C1 | 19265 | hypothalamus | EG546036      | 546036 |
| C1 | 19267 | hypothalamus | Olfr341       | 258952 |
| C1 | 19333 | hypothalamus | Ccdc13        | 434446 |
| C1 | 19334 | hypothalamus | Gpr44         | 14764  |
| C1 | 19351 | hypothalamus | Prkcsh        | 19089  |
| C1 | 19420 | hypothalamus | Lcn8          | 78076  |
| C1 | 19432 | hypothalamus | MMT00068429   |        |
| C1 | 19436 | hypothalamus | Dapp1         | 26377  |

|    |       |              |               |        |
|----|-------|--------------|---------------|--------|
| C1 | 19483 | hypothalamus | Depdc2        | 109294 |
| C1 | 19542 | hypothalamus | Hspb7         | 29818  |
| C1 | 19645 | hypothalamus | Il12rb2       | 16162  |
| C1 | 19658 | hypothalamus | Cldnd2        | 74276  |
| C1 | 19672 | hypothalamus | Cldn19        | 242653 |
| C1 | 19699 | hypothalamus | Rnf180        | 71816  |
| C1 | 19709 | hypothalamus | 1-Sep         | 54204  |
| C1 | 19722 | hypothalamus | Pvrl1         | 58235  |
| C1 | 19806 | hypothalamus | 4732429D16Rik | 217305 |
| C1 | 19941 | hypothalamus | 1700080E11Rik | 73532  |
| C1 | 20089 | hypothalamus | MMT00015975   |        |
| C1 | 20158 | hypothalamus | Slc38a1       | 105727 |
| C1 | 20255 | hypothalamus | Elfn2         | 207393 |
| C1 | 20319 | hypothalamus | Syne2         | 319565 |
| C1 | 20406 | hypothalamus | Cacng2        | 12300  |
| C1 | 20419 | hypothalamus | Adra1b        | 11548  |
| C1 | 20506 | hypothalamus | 1700011F03Rik | 74221  |
| C1 | 20532 | hypothalamus | Rnf26         | 213211 |
| C1 | 20566 | hypothalamus | Tnni2         | 21953  |
| C1 | 20588 | hypothalamus | Brd2          | 14312  |
| C1 | 20735 | hypothalamus | Tnrc6b        | 213988 |
| C1 | 20736 | hypothalamus | Itgb1bp1      | 16413  |
| C1 | 20802 | hypothalamus | Cdc42se2      | 72729  |
| C1 | 20858 | hypothalamus | Duox1         | 99439  |
| C1 | 20908 | hypothalamus | Olf583        | 258752 |
| C1 | 20925 | hypothalamus | 2810410L24Rik | 76377  |
| C1 | 20944 | hypothalamus | Tmem164       | 209497 |
| C1 | 20971 | hypothalamus | Tsga13        | 116732 |
| C1 | 21070 | hypothalamus | Cnot8         | 69125  |
| C1 | 21209 | hypothalamus | Ebf4          | 228598 |
| C1 | 21261 | hypothalamus | Pax2          | 18504  |
| C1 | 21270 | hypothalamus | V1rg6         | 171241 |
| C1 | 21291 | hypothalamus | Slc39a4       | 72027  |
| C1 | 21511 | hypothalamus | MMT00054100   |        |
| C1 | 21563 | hypothalamus | Arhgap9       | 216445 |
| C1 | 21595 | hypothalamus | Trpv1         | 193034 |
| C1 | 21602 | hypothalamus | V1ra5         | 113847 |
| C1 | 21717 | hypothalamus | EG628893      | 628893 |
| C1 | 21723 | hypothalamus | Homer1        | 26556  |
| C1 | 21866 | hypothalamus | Hhip1         | 214305 |
| C1 | 21923 | hypothalamus | Olf585        | 259091 |
| C1 | 21931 | hypothalamus | Nrxn3         | 18191  |
| C1 | 21996 | hypothalamus | Mme           | 17380  |
| C1 | 22015 | hypothalamus | 2410127E18Rik | 76788  |
| C1 | 22073 | hypothalamus | Lrig3         | 320398 |
| C1 | 22093 | hypothalamus | Zbbx          | 213234 |
| C1 | 22125 | hypothalamus | Gab1          | 14388  |
| C1 | 22148 | hypothalamus | MMT00035976   |        |
| C1 | 22150 | hypothalamus | Fhdc1         | 229474 |
| C1 | 22271 | hypothalamus | Cyp2c29       | 13095  |
| C1 | 22366 | hypothalamus | MMT00005283   |        |

|    |       |              |               |        |
|----|-------|--------------|---------------|--------|
| C1 | 22434 | hypothalamus | Olf125        | 258979 |
| C1 | 22445 | hypothalamus | Prkag3        | 241113 |
| C1 | 22541 | hypothalamus | 4632413I24Rik | 74031  |
| C1 | 22555 | hypothalamus | Ela2          | 50701  |
| C1 | 22559 | hypothalamus | MMT00031309   |        |
| C1 | 22733 | hypothalamus | Alpk3         | 116904 |
| C1 | 22750 | hypothalamus | Mupcdh        | 72040  |
| C1 | 22762 | hypothalamus | Slc6a4        | 15567  |
| C1 | 22802 | hypothalamus | Svs2          | 53878  |
| C1 | 22954 | hypothalamus | Slc25a30      | 67554  |
| C1 | 22966 | hypothalamus | Epha4         | 13838  |
| C1 | 23056 | hypothalamus | Ccdc135       | 330830 |
| C1 | 23070 | hypothalamus | BC024659      | 108934 |
| C1 | 23079 | hypothalamus | Spag17        | 74362  |
| C1 | 23109 | hypothalamus | A430088P11Rik | 106059 |
| C1 | 23111 | hypothalamus | Eml5          | 319670 |
| C1 | 23112 | hypothalamus | Gys1          | 14936  |
| C1 | 23119 | hypothalamus | Cps1          | 227231 |
| C1 | 23291 | hypothalamus | Rexo1         | 66932  |
| C1 | 23454 | hypothalamus | Znhit1        | 70103  |
| C1 | 23528 | hypothalamus | 0610038L08Rik | 74092  |
| C1 | 23531 | hypothalamus | Foxb2         | 14240  |
| C1 | 23546 | hypothalamus | Zzef1         | 195018 |
| C1 | 23561 | hypothalamus | Sox14         | 20669  |
| C1 | 23591 | hypothalamus | Dlg4          | 13385  |
| C1 | 23614 | hypothalamus | G630016D24Rik | 619301 |
| C1 | 23651 | hypothalamus | MMT00027295   |        |
| C1 | 23685 | hypothalamus | Tbxas1        | 21391  |
| C2 | 213   | adipose      | Rgs16         | 19734  |
| C2 | 274   | adipose      | Trit1         | 66966  |
| C2 | 402   | adipose      | Timp3         | 21859  |
| C2 | 544   | adipose      | Il16          | 16170  |
| C2 | 755   | adipose      | Ppp1r13l      | 333654 |
| C2 | 791   | adipose      | Il18r1        | 16182  |
| C2 | 830   | adipose      | Socs1         | 12703  |
| C2 | 894   | adipose      | Ddit4         | 74747  |
| C2 | 929   | adipose      | Dusp4         | 319520 |
| C2 | 942   | adipose      | Kcna5         | 16493  |
| C2 | 1424  | adipose      | Dapk1         | 69635  |
| C2 | 1709  | adipose      | Mt2           | 17750  |
| C2 | 1751  | adipose      | Xdh           | 22436  |
| C2 | 1759  | adipose      | Rgs3          | 50780  |
| C2 | 1790  | adipose      | Hic1          | 15248  |
| C2 | 1889  | adipose      | Dcun1d3       | 233805 |
| C2 | 1957  | adipose      | Mansc1        | 67729  |
| C2 | 2110  | adipose      | Gtf2ird1      | 57080  |
| C2 | 2113  | adipose      | Rasd1         | 19416  |
| C2 | 2199  | adipose      | Aff1          | 17355  |
| C2 | 2223  | adipose      | Slc28a2       | 269346 |
| C2 | 2294  | adipose      | AU040829      | 216831 |
| C2 | 2370  | adipose      | 8430408G22Rik | 213393 |

|    |      |         |               |        |
|----|------|---------|---------------|--------|
| C2 | 2578 | adipose | Csf2rb2       | 12984  |
| C2 | 2625 | adipose | MMT00077446   |        |
| C2 | 2708 | adipose | Sgk1          | 20393  |
| C2 | 2794 | adipose | Map3k6        | 53608  |
| C2 | 2830 | adipose | 4632417K18Rik | 107373 |
| C2 | 2850 | adipose | Slc16a6       | 104681 |
| C2 | 2858 | adipose | Arhgap20      | 244867 |
| C2 | 2881 | adipose | Hlf           | 217082 |
| C2 | 2973 | adipose | 4-Sep         | 18952  |
| C2 | 3040 | adipose | Bcl3          | 12051  |
| C2 | 3111 | adipose | Ddefl1        | 230837 |
| C2 | 3531 | adipose | Tslp          | 53603  |
| C2 | 3631 | adipose | Vps37b        | 330192 |
| C2 | 3687 | adipose | Bcl9          | 77578  |
| C2 | 3689 | adipose | Adh1          | 11522  |
| C2 | 3699 | adipose | Dscr3         | 13185  |
| C2 | 3825 | adipose | Uaca          | 72565  |
| C2 | 4084 | adipose | Asah3l        | 230379 |
| C2 | 4152 | adipose | Lrrc33        | 224109 |
| C2 | 4186 | adipose | Car7          | 12354  |
| C2 | 4188 | adipose | Sult1a1       | 20887  |
| C2 | 4454 | adipose | BC055107      | 268709 |
| C2 | 4708 | adipose | Traf3ip2      | 103213 |
| C2 | 4805 | adipose | Hspb1         | 15507  |
| C2 | 4868 | adipose | Mertk         | 17289  |
| C2 | 4906 | adipose | A830059I20Rik | 58238  |
| C2 | 5027 | adipose | Pde4b         | 18578  |
| C2 | 5068 | adipose | Afap1l2       | 226250 |
| C2 | 5113 | adipose | Nxn1          | 234404 |
| C2 | 5425 | adipose | Ung           | 22256  |
| C2 | 5686 | adipose | Cys1          | 12879  |
| C2 | 5758 | adipose | Tpst1         | 22021  |
| C2 | 5889 | adipose | Errfi1        | 74155  |
| C2 | 5974 | adipose | Arntl         | 11865  |
| C2 | 6019 | adipose | Gdap10        | 14546  |
| C2 | 6218 | adipose | Hnrnpc        | 15381  |
| C2 | 6353 | adipose | Spata13       | 219140 |
| C2 | 6386 | adipose | Por           | 18984  |
| C2 | 6417 | adipose | Rasgef1c      | 74563  |
| C2 | 6564 | adipose | Cebpd         | 12609  |
| C2 | 6994 | adipose | Glul          | 14645  |
| C2 | 7136 | adipose | Id3           | 15903  |
| C2 | 7163 | adipose | Ptplb         | 70757  |
| C2 | 7209 | adipose | Gpa33         | 59290  |
| C2 | 7396 | adipose | Lao1          | 100470 |
| C2 | 7479 | adipose | Mcf2l         | 17207  |
| C2 | 7492 | adipose | Adfp          | 11520  |
| C2 | 7524 | adipose | Aldh4a1       | 212647 |
| C2 | 7813 | adipose | Stac          | 20840  |
| C2 | 7877 | adipose | Obfc2a        | 109019 |
| C2 | 8268 | adipose | Kctd7         | 212919 |

|    |       |         |               |        |
|----|-------|---------|---------------|--------|
| C2 | 8439  | adipose | Slc25a33      | 70556  |
| C2 | 8727  | adipose | Slc27a3       | 26568  |
| C2 | 8797  | adipose | Snrk          | 20623  |
| C2 | 8816  | adipose | Nfkbia        | 18035  |
| C2 | 8980  | adipose | Plekhf1       | 72287  |
| C2 | 9258  | adipose | P4ha1         | 18451  |
| C2 | 9260  | adipose | Cmtm6         | 67213  |
| C2 | 9651  | adipose | Cxxc5         | 67393  |
| C2 | 9655  | adipose | Sult2b1       | 54200  |
| C2 | 9926  | adipose | Snx18         | 170625 |
| C2 | 9996  | adipose | Rassf9        | 237504 |
| C2 | 10210 | adipose | Sgms1         | 208449 |
| C2 | 10215 | adipose | Nampt         | 59027  |
| C2 | 10273 | adipose | Gpt2          | 108682 |
| C2 | 10408 | adipose | Per1          | 18626  |
| C2 | 10663 | adipose | Sytl2         | 83671  |
| C2 | 10672 | adipose | BC031353      | 235493 |
| C2 | 10686 | adipose | MMT00001732   |        |
| C2 | 11233 | adipose | Tef           | 21685  |
| C2 | 11259 | adipose | Ccdc69        | 52570  |
| C2 | 11393 | adipose | A830007P12Rik | 227612 |
| C2 | 11409 | adipose | Phf16         | 382207 |
| C2 | 11718 | adipose | Nmb           | 68039  |
| C2 | 11740 | adipose | Cpm           | 70574  |
| C2 | 12761 | adipose | Tsc22d3       | 14605  |
| C2 | 12799 | adipose | Spon2         | 100689 |
| C2 | 12834 | adipose | Fabp7         | 12140  |
| C2 | 12904 | adipose | MMT00040704   | 676923 |
| C2 | 12905 | adipose | Nfil3         | 18030  |
| C2 | 12974 | adipose | Slc1a6        | 20513  |
| C2 | 13181 | adipose | Lcp2          | 16822  |
| C2 | 13238 | adipose | Nr1h3         | 22259  |
| C2 | 13289 | adipose | Dusp10        | 63953  |
| C2 | 13306 | adipose | Cables2       | 252966 |
| C2 | 13371 | adipose | Peli2         | 93834  |
| C2 | 13489 | adipose | D230025D16Rik | 234678 |
| C2 | 14014 | adipose | MMT00008376   |        |
| C2 | 14100 | adipose | Ccnk          | 12454  |
| C2 | 14142 | adipose | MMT00021961   |        |
| C2 | 14263 | adipose | Arrdc3        | 105171 |
| C2 | 14894 | adipose | G0s2          | 14373  |
| C2 | 14954 | adipose | Rab19         | 19331  |
| C2 | 15062 | adipose | P2ry5         | 67168  |
| C2 | 15160 | adipose | Vezf1         | 22344  |
| C2 | 15316 | adipose | MMT00077385   |        |
| C2 | 15367 | adipose | Vegfc         | 22341  |
| C2 | 15414 | adipose | Arhgap18      | 73910  |
| C2 | 15522 | adipose | 1810011O10Rik | 69068  |
| C2 | 15566 | adipose | Snn           | 20621  |
| C2 | 15631 | adipose | Lpin1         | 14245  |
| C2 | 15720 | adipose | Trp53i11      | 277414 |

|    |       |         |                    |           |
|----|-------|---------|--------------------|-----------|
| C2 | 15937 | adipose | Adamts4            | 240913    |
| C2 | 16037 | adipose | MMT00011022        |           |
| C2 | 16093 | adipose | 4732473B16Rik      | 100342    |
| C2 | 16131 | adipose | Ptpre              | 19267     |
| C2 | 16179 | adipose | Gulo               | 268756    |
| C2 | 16284 | adipose | Ras11a             | 68895     |
| C2 | 16294 | adipose | Chst7              | 60322     |
| C2 | 16629 | adipose | Sall2              | 50524     |
| C2 | 16719 | adipose | Slc43a3            | 58207     |
| C2 | 17109 | adipose | C430049B03Rik      | 72575     |
| C2 | 17178 | adipose | lfnar2             | 15976     |
| C2 | 17233 | adipose | Nmur1              | 14767     |
| C2 | 17243 | adipose | Bcl6b              | 12029     |
| C2 | 17269 | adipose | Spsb1              | 74646     |
| C2 | 17449 | adipose | Zfp296             | 63872     |
| C2 | 17525 | adipose | Ctgf               | 14219     |
| C2 | 17542 | adipose | MMT00044805        | 240219    |
| C2 | 17583 | adipose | Per2               | 18627     |
| C2 | 17622 | adipose | Foxo1              | 56458     |
| C2 | 17752 | adipose | Chac1              | 69065     |
| C2 | 17827 | adipose | Klhl13             | 67455     |
| C2 | 17862 | adipose | Fbxo21             | 231670    |
| C2 | 18083 | adipose | Gadd45a            | 13197     |
| C2 | 18179 | adipose | Dbp                | 13170     |
| C2 | 18314 | adipose | 4631416L12Rik      | 622434    |
| C2 | 18324 | adipose | 4930546H06Rik      | 75202     |
| C2 | 18388 | adipose | Lnx1               | 16924     |
| C2 | 18496 | adipose | Mbd4               | 17193     |
| C2 | 18713 | adipose | 3110037I16Rik      | 73172     |
| C2 | 19077 | adipose | Has2               | 15117     |
| C2 | 19234 | adipose | Nrg4               | 83961     |
| C2 | 19451 | adipose | Armc7              | 276905    |
| C2 | 19556 | adipose | Efna1              | 13636     |
| C2 | 19573 | adipose | Serpine1           | 18787     |
| C2 | 19621 | adipose | Cldn5              | 12741     |
| C2 | 19670 | adipose | Fbxl14             | 101358    |
| C2 | 19757 | adipose | Fkbp5              | 14229     |
| C2 | 19812 | adipose | Armcx2             | 67416     |
| C2 | 19982 | adipose | ENSMUSG00000071036 | 100038711 |
| C2 | 20175 | adipose | Hoxb2              | 103889    |
| C2 | 20361 | adipose | Mttr14             | 97287     |
| C2 | 20431 | adipose | Slc7a7             | 20540     |
| C2 | 20485 | adipose | 6430520M22Rik      | 319716    |
| C2 | 20727 | adipose | Mmp11              | 17385     |
| C2 | 20730 | adipose | Dusp26             | 66959     |
| C2 | 21019 | adipose | Picalm             | 233489    |
| C2 | 21142 | adipose | Gm129              | 229599    |
| C2 | 21212 | adipose | Klb                | 83379     |
| C2 | 21331 | adipose | Slc10a6            | 75750     |
| C2 | 21380 | adipose | Ier5               | 15939     |
| C2 | 21849 | adipose | Icam2              | 15896     |

|    |       |              |                    |        |
|----|-------|--------------|--------------------|--------|
| C2 | 22213 | adipose      | Adora1             | 11539  |
| C2 | 22272 | adipose      | Vpreb1             | 22362  |
| C2 | 22476 | adipose      | Tspan4             | 64540  |
| C2 | 22560 | adipose      | Gpr56              | 14766  |
| C2 | 22688 | adipose      | 4930432K21Rik      | 74666  |
| C2 | 22989 | adipose      | Lmcd1              | 30937  |
| C2 | 23247 | adipose      | Erc1               | 13870  |
| C2 | 23351 | adipose      | Zfp598             | 213753 |
| C2 | 23463 | adipose      | Gimap1             | 16205  |
| C2 | 719   | hypothalamus | Usp2               | 53376  |
| C2 | 1241  | hypothalamus | Meox1              | 17285  |
| C2 | 1751  | hypothalamus | Xdh                | 22436  |
| C2 | 1874  | hypothalamus | Slc19a2            | 116914 |
| C2 | 2049  | hypothalamus | Gsta3              | 14859  |
| C2 | 2294  | hypothalamus | AU040829           | 216831 |
| C2 | 2708  | hypothalamus | Sgk1               | 20393  |
| C2 | 2794  | hypothalamus | Map3k6             | 53608  |
| C2 | 2880  | hypothalamus | Cd93               | 17064  |
| C2 | 3359  | hypothalamus | Pp11r              | 19011  |
| C2 | 3531  | hypothalamus | Tslp               | 53603  |
| C2 | 4084  | hypothalamus | Asah3l             | 230379 |
| C2 | 4152  | hypothalamus | Lrrc33             | 224109 |
| C2 | 4375  | hypothalamus | Cysltr2            | 70086  |
| C2 | 4454  | hypothalamus | BC055107           | 268709 |
| C2 | 4864  | hypothalamus | S100a16            | 67860  |
| C2 | 5345  | hypothalamus | MMT00023326        | 57435  |
| C2 | 5715  | hypothalamus | ENSMUSG00000052976 | 433237 |
| C2 | 5974  | hypothalamus | Arntl              | 11865  |
| C2 | 6038  | hypothalamus | Acot1              | 26897  |
| C2 | 6564  | hypothalamus | Cebpd              | 12609  |
| C2 | 7285  | hypothalamus | Tbc1d4             | 210789 |
| C2 | 7990  | hypothalamus | Nostrin            | 329416 |
| C2 | 8171  | hypothalamus | Spink8             | 78709  |
| C2 | 8495  | hypothalamus | Lox                | 16948  |
| C2 | 8816  | hypothalamus | Nfkbia             | 18035  |
| C2 | 8980  | hypothalamus | Plekhf1            | 72287  |
| C2 | 9745  | hypothalamus | Gadd45g            | 23882  |
| C2 | 9821  | hypothalamus | Pmaip1             | 58801  |
| C2 | 10273 | hypothalamus | Gpt2               | 108682 |
| C2 | 11305 | hypothalamus | Galnt2             | 78754  |
| C2 | 11345 | hypothalamus | Slc40a1            | 53945  |
| C2 | 12649 | hypothalamus | Ilgad              | 381924 |
| C2 | 12761 | hypothalamus | Tsc22d3            | 14605  |
| C2 | 12834 | hypothalamus | Fabp7              | 12140  |
| C2 | 12989 | hypothalamus | 1190002H23Rik      | 66214  |
| C2 | 14050 | hypothalamus | Ii12rb1            | 16161  |
| C2 | 14222 | hypothalamus | MMT00076410        |        |
| C2 | 14233 | hypothalamus | Fgfr1              | 116701 |
| C2 | 14486 | hypothalamus | Sox7               | 20680  |
| C2 | 15713 | hypothalamus | Rbm3               | 19652  |
| C2 | 15826 | hypothalamus | Arl4d              | 80981  |



|    |       |              |               |        |
|----|-------|--------------|---------------|--------|
| C2 | 16494 | hypothalamus | 2310007D09Rik | 71878  |
| C2 | 16951 | hypothalamus | R74862        | 97423  |
| C2 | 17143 | hypothalamus | 2010002N04Rik | 106878 |
| C2 | 18036 | hypothalamus | Tmem100       | 67888  |
| C2 | 18179 | hypothalamus | Dbp           | 13170  |
| C2 | 18427 | hypothalamus | Serpib1a      | 66222  |
| C2 | 18553 | hypothalamus | Tekt4         | 71840  |
| C2 | 19004 | hypothalamus | Pdk4          | 27273  |
| C2 | 19182 | hypothalamus | Igsf2         | 630146 |
| C2 | 19573 | hypothalamus | Serpine1      | 18787  |
| C2 | 19621 | hypothalamus | Cldn5         | 12741  |
| C2 | 20571 | hypothalamus | Tmem45a       | 56277  |
| C2 | 20983 | hypothalamus | Hlx           | 15284  |
| C2 | 21142 | hypothalamus | Gm129         | 229599 |
| C2 | 21259 | hypothalamus | 5430416O09Rik | 71406  |
| C2 | 21313 | hypothalamus | Rhou          | 69581  |
| C2 | 21333 | hypothalamus | Cirbp         | 12696  |
| C2 | 21380 | hypothalamus | Ier5          | 15939  |
| C2 | 21574 | hypothalamus | Acot11        | 329910 |
| C2 | 21643 | hypothalamus | Agtr1a        | 11607  |
| C2 | 21935 | hypothalamus | Prok2         | 50501  |
| C2 | 21992 | hypothalamus | Lap3          | 66988  |
| C2 | 22600 | hypothalamus | 2410018C20Rik | 67873  |
| C2 | 22604 | hypothalamus | Zc3h6         | 78751  |
| C2 | 22758 | hypothalamus | 2810003C17Rik | 108897 |
| C2 | 22989 | hypothalamus | Lmcd1         | 30937  |
| C3 | 250   | adipose      | Tubb2a-ps2    | 627110 |
| C3 | 525   | adipose      | Lyl1          | 17095  |
| C3 | 577   | adipose      | Rrp12         | 107094 |
| C3 | 1635  | adipose      | 8430427H17Rik | 329540 |
| C3 | 1646  | adipose      | Slc15a4       | 100561 |
| C3 | 2362  | adipose      | Mkks          | 59030  |
| C3 | 2918  | adipose      | Mtmr10        | 233315 |
| C3 | 3226  | adipose      | Tnfrsf17      | 21935  |
| C3 | 3587  | adipose      | MMT00041940   |        |
| C3 | 3706  | adipose      | 2410002O22Rik | 66975  |
| C3 | 3713  | adipose      | Acot6         | 217700 |
| C3 | 3849  | adipose      | MMT00047578   |        |
| C3 | 4048  | adipose      | BC002230      | 217827 |
| C3 | 4308  | adipose      | Nphp3         | 74025  |
| C3 | 4493  | adipose      | Ptgir         | 19222  |
| C3 | 4612  | adipose      | Hspa5         | 14828  |
| C3 | 5332  | adipose      | Pdim4         | 30794  |
| C3 | 5644  | adipose      | Spsb2         | 14794  |
| C3 | 5875  | adipose      | Cd86          | 12524  |
| C3 | 6021  | adipose      | MMT00008784   |        |
| C3 | 6769  | adipose      | Banp          | 53325  |
| C3 | 6916  | adipose      | Wdr5b         | 69544  |
| C3 | 7120  | adipose      | Dusp1         | 19252  |
| C3 | 7619  | adipose      | Pik3ip1       | 216505 |
| C3 | 7680  | adipose      | EG667232      | 667232 |

|    |       |         |               |           |
|----|-------|---------|---------------|-----------|
| C3 | 7892  | adipose | Ccr2          | 12772     |
| C3 | 8037  | adipose | MMT00052151   |           |
| C3 | 8449  | adipose | Vash2         | 226841    |
| C3 | 8670  | adipose | MMT00051613   |           |
| C3 | 8684  | adipose | Il15          | 16168     |
| C3 | 8891  | adipose | MMT00071061   |           |
| C3 | 9513  | adipose | Tardbp        | 230908    |
| C3 | 9689  | adipose | 4432416J03Rik | 78252     |
| C3 | 9829  | adipose | Stoml1        | 69106     |
| C3 | 10467 | adipose | MMT00074572   | 100038888 |
| C3 | 10782 | adipose | 4933403O08Rik | 71030     |
| C3 | 11043 | adipose | Hsph1         | 15505     |
| C3 | 11214 | adipose | MMT00049207   |           |
| C3 | 11521 | adipose | Dnaja1        | 15502     |
| C3 | 11701 | adipose | Oas1c         | 114643    |
| C3 | 12572 | adipose | Zfp90         | 22751     |
| C3 | 13018 | adipose | AW544981      | 213956    |
| C3 | 13285 | adipose | Cd276         | 102657    |
| C3 | 13390 | adipose | Ddx31         | 227674    |
| C3 | 13449 | adipose | Tmem103       | 72341     |
| C3 | 13499 | adipose | St7l          | 229681    |
| C3 | 13521 | adipose | Ears2         | 67417     |
| C3 | 13551 | adipose | Zfp623        | 78834     |
| C3 | 13741 | adipose | Hspa4l        | 18415     |
| C3 | 13884 | adipose | Aven          | 74268     |
| C3 | 14048 | adipose | Ccny          | 67974     |
| C3 | 14102 | adipose | Evi2a         | 14017     |
| C3 | 14281 | adipose | 5031414D18Rik | 271221    |
| C3 | 14307 | adipose | Kcnj8         | 16523     |
| C3 | 14577 | adipose | Cdc37l1       | 67072     |
| C3 | 15301 | adipose | Dyrk2         | 69181     |
| C3 | 15393 | adipose | Sec22a        | 317717    |
| C3 | 15476 | adipose | Fem1b         | 14155     |
| C3 | 15538 | adipose | B130024G19Rik | 434198    |
| C3 | 15675 | adipose | MMT00077535   | 641192    |
| C3 | 15896 | adipose | Pdgfrb        | 18596     |
| C3 | 16299 | adipose | Creld2        | 76737     |
| C3 | 16440 | adipose | Gprc5a        | 232431    |
| C3 | 16474 | adipose | Bhlhb2        | 20893     |
| C3 | 16614 | adipose | Zscan21       | 22697     |
| C3 | 17160 | adipose | Ccdc127       | 67433     |
| C3 | 18022 | adipose | Adamts17      | 233332    |
| C3 | 18373 | adipose | Dnajb1        | 81489     |
| C3 | 18632 | adipose | Asxl1         | 228790    |
| C3 | 18743 | adipose | Ruvbl1        | 56505     |
| C3 | 18903 | adipose | Crem          | 12916     |
| C3 | 19108 | adipose | Armet         | 74840     |
| C3 | 19362 | adipose | Gper          | 76854     |
| C3 | 19391 | adipose | Apex2         | 77622     |
| C3 | 19422 | adipose | Fkbp1b        | 14226     |
| C3 | 20004 | adipose | 1190005F20Rik | 98685     |

|    |       |              |               |        |
|----|-------|--------------|---------------|--------|
| C3 | 20413 | adipose      | Wdr86         | 269633 |
| C3 | 20535 | adipose      | Rbm4          | 19653  |
| C3 | 20912 | adipose      | Chordc1       | 66917  |
| C3 | 20980 | adipose      | Taf12         | 66464  |
| C3 | 21415 | adipose      | Has1          | 15116  |
| C3 | 21643 | adipose      | Agtr1a        | 11607  |
| C3 | 21733 | adipose      | Rhebl1        | 69159  |
| C3 | 21903 | adipose      | Nr1d1         | 217166 |
| C3 | 22010 | adipose      | Ccdc41        | 77048  |
| C3 | 22139 | adipose      | Stip1         | 20867  |
| C3 | 22290 | adipose      | Tubb2a        | 22151  |
| C3 | 22479 | adipose      | Ascc2         | 75452  |
| C3 | 22521 | adipose      | Hsp90b1       | 22027  |
| C3 | 22598 | adipose      | 4930402H24Rik | 228602 |
| C3 | 22727 | adipose      | Pdgfra        | 18595  |
| C3 | 23032 | adipose      | Mett10d       | 67493  |
| C3 | 23604 | adipose      | Ephb3         | 13845  |
| C3 | 23646 | adipose      | Hsp90ab1      | 15516  |
| C3 | 265   | hypothalamus | Taf9          | 108143 |
| C3 | 575   | hypothalamus | Edn1          | 13614  |
| C3 | 684   | hypothalamus | 1700102P08Rik | 112418 |
| C3 | 863   | hypothalamus | Dnajc14       | 74330  |
| C3 | 1006  | hypothalamus | 2600011E07Rik | 72125  |
| C3 | 1027  | hypothalamus | Accs          | 329470 |
| C3 | 1039  | hypothalamus | Zfp207        | 22680  |
| C3 | 1214  | hypothalamus | Trip13        | 69716  |
| C3 | 1281  | hypothalamus | Alkbh3        | 69113  |
| C3 | 1351  | hypothalamus | Whsc111       | 234135 |
| C3 | 1427  | hypothalamus | Ahrr          | 11624  |
| C3 | 1455  | hypothalamus | Smek1         | 68734  |
| C3 | 1594  | hypothalamus | Mrpl24        | 67707  |
| C3 | 2037  | hypothalamus | Ankrd16       | 320816 |
| C3 | 2273  | hypothalamus | Haghl         | 68977  |
| C3 | 2362  | hypothalamus | Mkks          | 59030  |
| C3 | 2558  | hypothalamus | Tmem132b      | 208151 |
| C3 | 3293  | hypothalamus | Nup153        | 218210 |
| C3 | 3620  | hypothalamus | Bet1          | 12068  |
| C3 | 3666  | hypothalamus | Tas1r1        | 110326 |
| C3 | 3706  | hypothalamus | 2410002O22Rik | 66975  |
| C3 | 3790  | hypothalamus | Mtss1         | 211401 |
| C3 | 3922  | hypothalamus | Clec11a       | 20256  |
| C3 | 4048  | hypothalamus | BC002230      | 217827 |
| C3 | 4106  | hypothalamus | MMT00041409   |        |
| C3 | 4192  | hypothalamus | Zranb1        | 360216 |
| C3 | 4235  | hypothalamus | Pfkfb3        | 170768 |
| C3 | 4308  | hypothalamus | Nphp3         | 74025  |
| C3 | 4443  | hypothalamus | Zfp790        | 233056 |
| C3 | 4612  | hypothalamus | Hspa5         | 14828  |
| C3 | 4731  | hypothalamus | Zmynd12       | 332934 |
| C3 | 4805  | hypothalamus | Hspb1         | 15507  |
| C3 | 5247  | hypothalamus | Irak2         | 108960 |

|    |       |              |               |           |
|----|-------|--------------|---------------|-----------|
| C3 | 5322  | hypothalamus | Slpi          | 20568     |
| C3 | 5364  | hypothalamus | Kif22         | 110033    |
| C3 | 5385  | hypothalamus | Tubb2b        | 73710     |
| C3 | 5634  | hypothalamus | Creb1         | 12912     |
| C3 | 6234  | hypothalamus | P4ha2         | 18452     |
| C3 | 6588  | hypothalamus | Rbmx          | 19655     |
| C3 | 6769  | hypothalamus | Banp          | 53325     |
| C3 | 6828  | hypothalamus | Pigh          | 110417    |
| C3 | 7149  | hypothalamus | 9530077C05Rik | 68283     |
| C3 | 7263  | hypothalamus | Narg1l        | 66897     |
| C3 | 7368  | hypothalamus | Adam8         | 11501     |
| C3 | 7751  | hypothalamus | Sgk2          | 27219     |
| C3 | 7894  | hypothalamus | MMT00029319   | 100039284 |
| C3 | 7922  | hypothalamus | Casp7         | 12369     |
| C3 | 8122  | hypothalamus | Hexim1        | 192231    |
| C3 | 8399  | hypothalamus | Herpud1       | 64209     |
| C3 | 8465  | hypothalamus | BC023814      | 229503    |
| C3 | 8469  | hypothalamus | Sfrs6         | 67996     |
| C3 | 8662  | hypothalamus | Brca2         | 12190     |
| C3 | 8787  | hypothalamus | Sdf2l1        | 64136     |
| C3 | 8939  | hypothalamus | MMT00024195   |           |
| C3 | 8988  | hypothalamus | 1110007A13Rik | 210711    |
| C3 | 9067  | hypothalamus | Tra2a         | 101214    |
| C3 | 9258  | hypothalamus | P4ha1         | 18451     |
| C3 | 9513  | hypothalamus | Tardbp        | 230908    |
| C3 | 9514  | hypothalamus | Vps37a        | 52348     |
| C3 | 9672  | hypothalamus | Tmem101       | 76547     |
| C3 | 9829  | hypothalamus | Stoml1        | 69106     |
| C3 | 9899  | hypothalamus | D13Wsu177e    | 28126     |
| C3 | 10054 | hypothalamus | Fsip1         | 71313     |
| C3 | 10397 | hypothalamus | Gtf2e2        | 68153     |
| C3 | 10606 | hypothalamus | Apbb1ip       | 54519     |
| C3 | 11043 | hypothalamus | Hsph1         | 15505     |
| C3 | 11063 | hypothalamus | Phf8          | 320595    |
| C3 | 11486 | hypothalamus | Tacc3         | 21335     |
| C3 | 11756 | hypothalamus | 2810011L19Rik | 69952     |
| C3 | 11867 | hypothalamus | Rcor3         | 214742    |
| C3 | 12219 | hypothalamus | Cyb5b         | 66427     |
| C3 | 12513 | hypothalamus | Whsc2         | 24116     |
| C3 | 12667 | hypothalamus | Slc39a2       | 214922    |
| C3 | 12732 | hypothalamus | Hsd17b1       | 15485     |
| C3 | 12937 | hypothalamus | Uhrf2         | 109113    |
| C3 | 13285 | hypothalamus | Cd276         | 102657    |
| C3 | 13571 | hypothalamus | Samd8         | 67630     |
| C3 | 13741 | hypothalamus | Hspa4l        | 18415     |
| C3 | 14014 | hypothalamus | MMT00008376   |           |
| C3 | 14095 | hypothalamus | Nav1          | 215690    |
| C3 | 14134 | hypothalamus | Phf10         | 72057     |
| C3 | 14517 | hypothalamus | Cln4-2        | 12727     |
| C3 | 14529 | hypothalamus | Rax           | 19434     |
| C3 | 14577 | hypothalamus | Cdc37l1       | 67072     |

|    |       |              |                |           |
|----|-------|--------------|----------------|-----------|
| C3 | 14626 | hypothalamus | Zbtb2          | 381990    |
| C3 | 14860 | hypothalamus | MMT00051231    | 100041002 |
| C3 | 15015 | hypothalamus | G3bp1          | 27041     |
| C3 | 15177 | hypothalamus | Bmpr2          | 12168     |
| C3 | 15476 | hypothalamus | Fem1b          | 14155     |
| C3 | 15594 | hypothalamus | Gm1967         | 381411    |
| C3 | 15680 | hypothalamus | 2810030E01Rik  | 72668     |
| C3 | 15731 | hypothalamus | Mfhas1         | 52065     |
| C3 | 15780 | hypothalamus | Pde4d          | 238871    |
| C3 | 16030 | hypothalamus | Prpf3          | 70767     |
| C3 | 16098 | hypothalamus | Rps20          | 67427     |
| C3 | 16224 | hypothalamus | Cdc2l5         | 69562     |
| C3 | 16748 | hypothalamus | Zfp810         | 235050    |
| C3 | 16823 | hypothalamus | Inhbb          | 16324     |
| C3 | 17112 | hypothalamus | Dok7           | 231134    |
| C3 | 17207 | hypothalamus | 2700050L05Rik  | 214764    |
| C3 | 17449 | hypothalamus | Zfp296         | 63872     |
| C3 | 17884 | hypothalamus | Lnx2           | 140887    |
| C3 | 18065 | hypothalamus | Peo1           | 226153    |
| C3 | 18373 | hypothalamus | Dnajb1         | 81489     |
| C3 | 18418 | hypothalamus | Hspa1b         | 15511     |
| C3 | 18619 | hypothalamus | 2810406K13Rik  | 72184     |
| C3 | 18726 | hypothalamus | D630004A14Rik  | 382137    |
| C3 | 18846 | hypothalamus | lkbkg          | 16151     |
| C3 | 18889 | hypothalamus | Shq1           | 72171     |
| C3 | 18903 | hypothalamus | Crem           | 12916     |
| C3 | 19389 | hypothalamus | Iqcb1          | 320299    |
| C3 | 19391 | hypothalamus | Apex2          | 77622     |
| C3 | 19651 | hypothalamus | Thex1          | 67276     |
| C3 | 19936 | hypothalamus | Egf            | 13645     |
| C3 | 20237 | hypothalamus | RP23-433P19.11 | 574418    |
| C3 | 20457 | hypothalamus | Gtf2a2         | 235459    |
| C3 | 20470 | hypothalamus | Scml4          | 268297    |
| C3 | 20535 | hypothalamus | Rbm4           | 19653     |
| C3 | 20559 | hypothalamus | Nat13          | 72117     |
| C3 | 20912 | hypothalamus | Chordc1        | 66917     |
| C3 | 20946 | hypothalamus | Nufip2         | 68564     |
| C3 | 20980 | hypothalamus | Taf12          | 66464     |
| C3 | 21389 | hypothalamus | Odf2           | 18286     |
| C3 | 21431 | hypothalamus | Xbp1           | 22433     |
| C3 | 21483 | hypothalamus | lppk           | 75678     |
| C3 | 21903 | hypothalamus | Nr1d1          | 217166    |
| C3 | 21981 | hypothalamus | Ormdl2         | 66844     |
| C3 | 22012 | hypothalamus | Itgae          | 16407     |
| C3 | 22141 | hypothalamus | Rorb           | 225998    |
| C3 | 22272 | hypothalamus | Vpreb1         | 22362     |
| C3 | 22673 | hypothalamus | Prpf38b        | 66921     |
| C3 | 22732 | hypothalamus | Cyb5b          | 66427     |
| C3 | 23094 | hypothalamus | Sap30          | 60406     |
| C3 | 23116 | hypothalamus | 2810032G03Rik  | 72669     |
| C3 | 23318 | hypothalamus | Cul2           | 71745     |

|    |       |              |               |        |
|----|-------|--------------|---------------|--------|
| C3 | 23419 | hypothalamus | Tipin         | 66131  |
| C4 | 230   | adipose      | MMT00000744   |        |
| C4 | 344   | adipose      | MMT00036566   |        |
| C4 | 451   | adipose      | Milt11        | 56772  |
| C4 | 1014  | adipose      | Rtcd1         | 66368  |
| C4 | 1438  | adipose      | Dclre1b       | 140917 |
| C4 | 1466  | adipose      | Ubap2l        | 74383  |
| C4 | 1554  | adipose      | Rph3al        | 380714 |
| C4 | 1867  | adipose      | Bcas2         | 68183  |
| C4 | 2012  | adipose      | Cetn4         | 207175 |
| C4 | 2084  | adipose      | Pftk1         | 18647  |
| C4 | 2457  | adipose      | 1110032E23Rik | 68659  |
| C4 | 2632  | adipose      | Aph1a         | 226548 |
| C4 | 2694  | adipose      | Siah2         | 20439  |
| C4 | 2752  | adipose      | Fcgr1         | 14129  |
| C4 | 3159  | adipose      | Pld1          | 18805  |
| C4 | 3204  | adipose      | Gm24          | 195236 |
| C4 | 3314  | adipose      | Wars2         | 70560  |
| C4 | 3432  | adipose      | EG330963      | 330963 |
| C4 | 3532  | adipose      | S100a5        | 20199  |
| C4 | 3753  | adipose      | Setdb1        | 84505  |
| C4 | 5021  | adipose      | Gdap2         | 14547  |
| C4 | 5153  | adipose      | MMT00072251   |        |
| C4 | 5508  | adipose      | Lrig2         | 269473 |
| C4 | 5752  | adipose      | Dffa          | 13347  |
| C4 | 5762  | adipose      | Trpc3         | 22065  |
| C4 | 5884  | adipose      | Gstm2         | 14863  |
| C4 | 5934  | adipose      | S100a10       | 20194  |
| C4 | 6206  | adipose      | MMT00063701   |        |
| C4 | 6283  | adipose      | Ptpn22        | 19260  |
| C4 | 6428  | adipose      | MMT00035510   |        |
| C4 | 6470  | adipose      | Arnt          | 11863  |
| C4 | 6697  | adipose      | Serpini1      | 20713  |
| C4 | 6815  | adipose      | Sort1         | 20661  |
| C4 | 6934  | adipose      | Panx3         | 208098 |
| C4 | 7173  | adipose      | Trim59        | 66949  |
| C4 | 7240  | adipose      | C730007P19Rik | 20865  |
| C4 | 7342  | adipose      | Anp32e        | 66471  |
| C4 | 7495  | adipose      | Ugt2b5        | 22238  |
| C4 | 7519  | adipose      | Gstm1         | 14862  |
| C4 | 8441  | adipose      | Tmem54        | 66260  |
| C4 | 8568  | adipose      | Tnik          | 665113 |
| C4 | 8679  | adipose      | Tiparp        | 99929  |
| C4 | 8860  | adipose      | Prkab2        | 108097 |
| C4 | 8864  | adipose      | MMT00046672   |        |
| C4 | 9026  | adipose      | Cep135        | 381644 |
| C4 | 9392  | adipose      | 4922505G16Rik | 629499 |
| C4 | 9408  | adipose      | Hmgcs2        | 15360  |
| C4 | 9460  | adipose      | Fer1l4        | 74562  |
| C4 | 9718  | adipose      | Fmo5          | 14263  |
| C4 | 9757  | adipose      | Olfir502      | 258734 |

|    |       |         |               |        |
|----|-------|---------|---------------|--------|
| C4 | 10247 | adipose | V1rc20        | 171193 |
| C4 | 10298 | adipose | Olf1015       | 258564 |
| C4 | 10503 | adipose | MMT00043055   |        |
| C4 | 10521 | adipose | Ttf2          | 74044  |
| C4 | 10827 | adipose | MMT00063568   |        |
| C4 | 11798 | adipose | A530082C11Rik | 320541 |
| C4 | 11946 | adipose | MMT00030953   |        |
| C4 | 11953 | adipose | Gtf2b         | 229906 |
| C4 | 12139 | adipose | Cmtm4         | 97487  |
| C4 | 12316 | adipose | Mpa2l         | 100702 |
| C4 | 12367 | adipose | MMT00072365   |        |
| C4 | 12661 | adipose | 4932438A13Rik | 229227 |
| C4 | 12716 | adipose | 5830417110Rik | 76022  |
| C4 | 12784 | adipose | Nudt6         | 229228 |
| C4 | 12863 | adipose | Fgg           | 99571  |
| C4 | 13224 | adipose | Cp            | 12870  |
| C4 | 13347 | adipose | Abi3          | 66610  |
| C4 | 13511 | adipose | Ayt11b        | 70902  |
| C4 | 13801 | adipose | Adh4          | 26876  |
| C4 | 14369 | adipose | MMT00057201   |        |
| C4 | 14559 | adipose | Frrs1         | 20321  |
| C4 | 15066 | adipose | Tmcc1         | 330401 |
| C4 | 15241 | adipose | EG636752      | 636752 |
| C4 | 15276 | adipose | Eif4e         | 13684  |
| C4 | 15456 | adipose | Chi3l3        | 12655  |
| C4 | 15508 | adipose | 4632415L05Rik | 70808  |
| C4 | 15573 | adipose | Aipl1         | 114230 |
| C4 | 15842 | adipose | Med12l        | 329650 |
| C4 | 15915 | adipose | Spata21       | 329972 |
| C4 | 16100 | adipose | Tnni3         | 21954  |
| C4 | 16146 | adipose | Gucy1a3       | 60596  |
| C4 | 16283 | adipose | EG627427      | 627427 |
| C4 | 16333 | adipose | Wdr64         | 75820  |
| C4 | 16416 | adipose | Commd2        | 52245  |
| C4 | 16618 | adipose | Hps3          | 12807  |
| C4 | 16679 | adipose | Ctsk          | 13038  |
| C4 | 16973 | adipose | MMT00027196   |        |
| C4 | 17090 | adipose | Lass2         | 76893  |
| C4 | 17371 | adipose | Emx2          | 13797  |
| C4 | 17579 | adipose | MMT00078068   |        |
| C4 | 17837 | adipose | Polr3gl       | 69870  |
| C4 | 18046 | adipose | Ublcp1        | 79560  |
| C4 | 18673 | adipose | Muc1          | 17829  |
| C4 | 18680 | adipose | EG633285      | 633285 |
| C4 | 18752 | adipose | Fgf7          | 14178  |
| C4 | 18754 | adipose | Rbm8a         | 60365  |
| C4 | 18878 | adipose | Pde4dip       | 83679  |
| C4 | 18971 | adipose | Dok7          | 231134 |
| C4 | 19095 | adipose | MMT00006438   |        |
| C4 | 19187 | adipose | Chrm3         | 12671  |
| C4 | 19440 | adipose | Anxa9         | 71790  |

|    |       |              |                    |        |
|----|-------|--------------|--------------------|--------|
| C4 | 20385 | adipose      | Chd1l              | 68058  |
| C4 | 20661 | adipose      | Tuft1              | 22156  |
| C4 | 20810 | adipose      | Mttp               | 17777  |
| C4 | 20861 | adipose      | Dcst1              | 77772  |
| C4 | 21780 | adipose      | Ankrd35            | 213121 |
| C4 | 22202 | adipose      | OTTMUSG00000021274 | 545539 |
| C4 | 22570 | adipose      | Phtf1              | 18685  |
| C4 | 22573 | adipose      | Kif2c              | 73804  |
| C4 | 22782 | adipose      | Frrs1              | 20321  |
| C4 | 23012 | adipose      | Spg20              | 229285 |
| C4 | 230   | hypothalamus | MMT00000744        |        |
| C4 | 1014  | hypothalamus | Rtcd1              | 66368  |
| C4 | 1438  | hypothalamus | Dclre1b            | 140917 |
| C4 | 1466  | hypothalamus | Ubap2l             | 74383  |
| C4 | 1867  | hypothalamus | Bcas2              | 68183  |
| C4 | 2012  | hypothalamus | Cetn4              | 207175 |
| C4 | 2253  | hypothalamus | Lysmd1             | 217779 |
| C4 | 2632  | hypothalamus | Aph1a              | 226548 |
| C4 | 2752  | hypothalamus | Fcgr1              | 14129  |
| C4 | 2904  | hypothalamus | Gzme               | 14942  |
| C4 | 3159  | hypothalamus | Pld1               | 18805  |
| C4 | 3206  | hypothalamus | Gpr160             | 71862  |
| C4 | 3314  | hypothalamus | Wars2              | 70560  |
| C4 | 3874  | hypothalamus | Slitrk3            | 386750 |
| C4 | 3957  | hypothalamus | Dennd1b            | 329260 |
| C4 | 4666  | hypothalamus | Exosc9             | 50911  |
| C4 | 5021  | hypothalamus | Gdap2              | 14547  |
| C4 | 5508  | hypothalamus | Lrig2              | 269473 |
| C4 | 5687  | hypothalamus | Klf11              | 194655 |
| C4 | 5762  | hypothalamus | Trpc3              | 22065  |
| C4 | 6206  | hypothalamus | MMT00063701        |        |
| C4 | 6283  | hypothalamus | Ptpn22             | 19260  |
| C4 | 6470  | hypothalamus | Arnt               | 11863  |
| C4 | 6708  | hypothalamus | Serpini2           | 67931  |
| C4 | 7173  | hypothalamus | Trim59             | 66949  |
| C4 | 7334  | hypothalamus | Lor                | 16939  |
| C4 | 7810  | hypothalamus | Trim45             | 229644 |
| C4 | 8464  | hypothalamus | Snapin             | 20615  |
| C4 | 8523  | hypothalamus | Ddit4l             | 73284  |
| C4 | 8679  | hypothalamus | Tiparp             | 99929  |
| C4 | 9360  | hypothalamus | Taf1c              | 21341  |
| C4 | 9408  | hypothalamus | Hmgcs2             | 15360  |
| C4 | 9519  | hypothalamus | Fstl5              | 213262 |
| C4 | 10521 | hypothalamus | Ttf2               | 74044  |
| C4 | 11121 | hypothalamus | Mttr11             | 194126 |
| C4 | 12367 | hypothalamus | MMT00072365        |        |
| C4 | 12716 | hypothalamus | 5830417110Rik      | 76022  |
| C4 | 12784 | hypothalamus | Nudt6              | 229228 |
| C4 | 12824 | hypothalamus | Dbt                | 13171  |
| C4 | 12853 | hypothalamus | Phc3               | 241915 |
| C4 | 12863 | hypothalamus | Fgg                | 99571  |



|    |       |              |               |        |
|----|-------|--------------|---------------|--------|
| C4 | 12886 | hypothalamus | Acp6          | 66659  |
| C4 | 13512 | hypothalamus | Tmem144       | 70652  |
| C4 | 13527 | hypothalamus | Ctss          | 13040  |
| C4 | 14559 | hypothalamus | Frrs1         | 20321  |
| C4 | 15276 | hypothalamus | Eif4e         | 13684  |
| C4 | 15299 | hypothalamus | Mrps21        | 66292  |
| C4 | 15508 | hypothalamus | 4632415L05Rik | 70808  |
| C4 | 15550 | hypothalamus | 2010200O16Rik | 67495  |
| C4 | 15901 | hypothalamus | Tpm3          | 59069  |
| C4 | 16170 | hypothalamus | S100a11       | 20195  |
| C4 | 16283 | hypothalamus | EG627427      | 627427 |
| C4 | 16416 | hypothalamus | Commd2        | 52245  |
| C4 | 16618 | hypothalamus | Hps3          | 12807  |
| C4 | 16753 | hypothalamus | Hfe2          | 69585  |
| C4 | 17669 | hypothalamus | 2310007A19Rik | 66353  |
| C4 | 17837 | hypothalamus | Polr3gl       | 69870  |
| C4 | 18376 | hypothalamus | Pex11b        | 18632  |
| C4 | 18673 | hypothalamus | Muc1          | 17829  |
| C4 | 19700 | hypothalamus | E030011K20Rik | 208613 |
| C4 | 20385 | hypothalamus | Chd1l         | 68058  |
| C4 | 20661 | hypothalamus | Tuft1         | 22156  |
| C4 | 20810 | hypothalamus | Mttp          | 17777  |
| C4 | 20890 | hypothalamus | Psmb4         | 19172  |
| C4 | 21650 | hypothalamus | Ap4b1         | 67489  |
| C4 | 21780 | hypothalamus | Ankrd35       | 213121 |
| C4 | 22120 | hypothalamus | Ccna1         | 12427  |
| C4 | 22570 | hypothalamus | Phtf1         | 18685  |
| C4 | 23037 | hypothalamus | Thbs3         | 21827  |
| C5 | 146   | adipose      | Rlbp1l2       | 215890 |
| C5 | 413   | adipose      | Acy1          | 109652 |
| C5 | 514   | adipose      | Abca6         | 76184  |
| C5 | 609   | adipose      | MMT00060868   |        |
| C5 | 1136  | adipose      | Kdelr3        | 105785 |
| C5 | 1280  | adipose      | Mesdc2        | 67943  |
| C5 | 1561  | adipose      | Aurka         | 20878  |
| C5 | 1619  | adipose      | Fbxw17        | 109082 |
| C5 | 1802  | adipose      | Ipo4          | 75751  |
| C5 | 1805  | adipose      | Tmem204       | 407831 |
| C5 | 2088  | adipose      | Ppan          | 235036 |
| C5 | 2166  | adipose      | Amd1          | 11702  |
| C5 | 2770  | adipose      | Fbl           | 14113  |
| C5 | 2841  | adipose      | Kcne4         | 57814  |
| C5 | 2879  | adipose      | Ptpv          | 13924  |
| C5 | 2984  | adipose      | MMT00029895   |        |
| C5 | 3008  | adipose      | Nxt1          | 56488  |
| C5 | 3028  | adipose      | Uhrf1         | 18140  |
| C5 | 3096  | adipose      | Ugt1a6a       | 94284  |
| C5 | 3154  | adipose      | Mcm5          | 17218  |
| C5 | 3253  | adipose      | Tbc1d20       | 67231  |
| C5 | 3468  | adipose      | MMT00009124   |        |
| C5 | 3721  | adipose      | Me2           | 107029 |

|    |       |         |               |           |
|----|-------|---------|---------------|-----------|
| C5 | 3796  | adipose | D19Bwg1357e   | 52874     |
| C5 | 3811  | adipose | MMT00052318   |           |
| C5 | 3888  | adipose | Ran           | 19384     |
| C5 | 4072  | adipose | Adcy2         | 210044    |
| C5 | 4298  | adipose | St3gal1       | 20442     |
| C5 | 4400  | adipose | 9030425E11Rik | 71566     |
| C5 | 4433  | adipose | Snrpa1        | 68981     |
| C5 | 4776  | adipose | Dclk1         | 13175     |
| C5 | 4802  | adipose | 5430433G21Rik | 319909    |
| C5 | 4832  | adipose | Nxn12         | 75124     |
| C5 | 4849  | adipose | Zxdc          | 80292     |
| C5 | 4864  | adipose | S100a16       | 67860     |
| C5 | 4918  | adipose | Scara5        | 71145     |
| C5 | 4959  | adipose | Optn          | 71648     |
| C5 | 5156  | adipose | Srm           | 20810     |
| C5 | 5208  | adipose | Plod2         | 26432     |
| C5 | 5227  | adipose | 2310008M10Rik | 66357     |
| C5 | 5272  | adipose | Grk4          | 14772     |
| C5 | 5587  | adipose | Rmnd5b        | 66089     |
| C5 | 5734  | adipose | EG619653      | 619653    |
| C5 | 5776  | adipose | Rpa1          | 68275     |
| C5 | 6011  | adipose | Fbx13         | 320118    |
| C5 | 6041  | adipose | Penk1         | 18619     |
| C5 | 6322  | adipose | Pknox2        | 208076    |
| C5 | 6456  | adipose | Tyms          | 22171     |
| C5 | 6525  | adipose | Uchl5ip       | 73738     |
| C5 | 6670  | adipose | Nat10         | 98956     |
| C5 | 6733  | adipose | Mfng          | 17305     |
| C5 | 6932  | adipose | Ckap4         | 216197    |
| C5 | 7496  | adipose | Arsi          | 545260    |
| C5 | 7693  | adipose | B3galt6       | 117592    |
| C5 | 8270  | adipose | Clsn          | 269582    |
| C5 | 8300  | adipose | MMT00043905   |           |
| C5 | 8446  | adipose | Cybrd1        | 73649     |
| C5 | 8477  | adipose | MMT00002146   | 100041835 |
| C5 | 8541  | adipose | Tubb5         | 22154     |
| C5 | 8638  | adipose | Fkbp14        | 231997    |
| C5 | 8745  | adipose | Mcm2          | 17216     |
| C5 | 8915  | adipose | Nob1          | 67619     |
| C5 | 9137  | adipose | Hunk          | 26559     |
| C5 | 9235  | adipose | Tnfrsf12a     | 27279     |
| C5 | 9306  | adipose | Spon1         | 233744    |
| C5 | 9620  | adipose | Sdpr          | 20324     |
| C5 | 9683  | adipose | Prdm8         | 77630     |
| C5 | 9713  | adipose | Ykt6          | 56418     |
| C5 | 9861  | adipose | Serpinb6b     | 20708     |
| C5 | 9899  | adipose | D13Wsu177e    | 28126     |
| C5 | 10484 | adipose | Dnajb11       | 67838     |
| C5 | 10504 | adipose | Ripk3         | 56532     |
| C5 | 10881 | adipose | Uchl5ip       | 73738     |
| C5 | 10885 | adipose | Bri3          | 55950     |

|    |       |         |               |        |
|----|-------|---------|---------------|--------|
| C5 | 11275 | adipose | Fanci         | 208836 |
| C5 | 11308 | adipose | Cmbl          | 69574  |
| C5 | 11339 | adipose | Eef1g         | 67160  |
| C5 | 11462 | adipose | Gpam          | 14732  |
| C5 | 11503 | adipose | Rangap1       | 19387  |
| C5 | 11717 | adipose | Wdhd1         | 218973 |
| C5 | 12032 | adipose | Cdca7         | 66953  |
| C5 | 12104 | adipose | MMT00063115   | 231872 |
| C5 | 12120 | adipose | Rad51         | 19361  |
| C5 | 12230 | adipose | MMT00005802   |        |
| C5 | 12770 | adipose | Nola2         | 52530  |
| C5 | 12778 | adipose | 1700024P16Rik | 242594 |
| C5 | 12833 | adipose | Drp2          | 13497  |
| C5 | 12862 | adipose | Trem2         | 83433  |
| C5 | 12999 | adipose | Igfbp6        | 16012  |
| C5 | 13023 | adipose | Adamts1       | 11504  |
| C5 | 13129 | adipose | Bmp8a         | 12163  |
| C5 | 13164 | adipose | Il4ra         | 16190  |
| C5 | 13211 | adipose | Sbno2         | 216161 |
| C5 | 13516 | adipose | Fibcd1        | 98970  |
| C5 | 13870 | adipose | 4921521F21Rik | 70861  |
| C5 | 13885 | adipose | Clec7a        | 56644  |
| C5 | 13919 | adipose | Synpo         | 104027 |
| C5 | 14167 | adipose | Exo1          | 26909  |
| C5 | 14363 | adipose | Cxcl16        | 66102  |
| C5 | 14379 | adipose | Car12         | 76459  |
| C5 | 14818 | adipose | Il17ra        | 16172  |
| C5 | 15039 | adipose | Zmynd15       | 574428 |
| C5 | 15069 | adipose | MMT00014274   |        |
| C5 | 15125 | adipose | Oxtr          | 18430  |
| C5 | 15352 | adipose | Socs2         | 216233 |
| C5 | 15446 | adipose | Cd320         | 54219  |
| C5 | 15499 | adipose | Dact1         | 59036  |
| C5 | 15558 | adipose | Pnp1          | 18950  |
| C5 | 15575 | adipose | Bckdhb        | 12040  |
| C5 | 15723 | adipose | Csf1          | 12977  |
| C5 | 15870 | adipose | Aqp5          | 11830  |
| C5 | 15918 | adipose | Fkbp11        | 66120  |
| C5 | 16233 | adipose | 1600027J07Rik | 69794  |
| C5 | 16819 | adipose | Lyve1         | 114332 |
| C5 | 17297 | adipose | Comtd1        | 69156  |
| C5 | 17323 | adipose | Tubb6         | 67951  |
| C5 | 17339 | adipose | Acaa1b        | 235674 |
| C5 | 17422 | adipose | Dctd          | 320685 |
| C5 | 17631 | adipose | Pla2r1        | 18779  |
| C5 | 17673 | adipose | Nola1         | 68147  |
| C5 | 17876 | adipose | Tubb4         | 22153  |
| C5 | 17884 | adipose | Lnx2          | 140887 |
| C5 | 17909 | adipose | Mesdc1        | 80889  |
| C5 | 18164 | adipose | Gdf10         | 14560  |
| C5 | 18177 | adipose | Cyp7b1        | 13123  |

|    |       |              |               |           |
|----|-------|--------------|---------------|-----------|
| C5 | 19075 | adipose      | Lmnb2         | 16907     |
| C5 | 19244 | adipose      | Impdh2        | 23918     |
| C5 | 19373 | adipose      | MMT00018326   |           |
| C5 | 19522 | adipose      | Tcf21         | 21412     |
| C5 | 19547 | adipose      | MMT00022553   |           |
| C5 | 19606 | adipose      | Egr2          | 13654     |
| C5 | 19623 | adipose      | Myl7          | 17898     |
| C5 | 20372 | adipose      | Heatr1        | 217995    |
| C5 | 20571 | adipose      | Tmem45a       | 56277     |
| C5 | 20703 | adipose      | Itga11        | 319480    |
| C5 | 21070 | adipose      | Cnot8         | 69125     |
| C5 | 21207 | adipose      | Pi15          | 94227     |
| C5 | 21354 | adipose      | Xpa           | 22590     |
| C5 | 21391 | adipose      | Lgi2          | 246316    |
| C5 | 21512 | adipose      | Gas6          | 14456     |
| C5 | 21747 | adipose      | H2afx         | 15270     |
| C5 | 21969 | adipose      | Tk1           | 21877     |
| C5 | 22188 | adipose      | Top2a         | 21973     |
| C5 | 22229 | adipose      | Dnmt1         | 13433     |
| C5 | 22412 | adipose      | Ptpn5         | 19259     |
| C5 | 22462 | adipose      | MMT00026054   | 100041835 |
| C5 | 22630 | adipose      | MMT00034355   |           |
| C5 | 22642 | adipose      | Uts2          | 24111     |
| C5 | 22689 | adipose      | 2610028A01Rik | 72400     |
| C5 | 22696 | adipose      | Ypel4         | 241525    |
| C5 | 22861 | adipose      | E430002G05Rik | 210622    |
| C5 | 22919 | adipose      | Lig1          | 16881     |
| C5 | 22992 | adipose      | A430107O13Rik | 214642    |
| C5 | 23034 | adipose      | Slc25a29      | 214663    |
| C5 | 23044 | adipose      | Ctr9          | 22083     |
| C5 | 23061 | adipose      | Pole2         | 18974     |
| C5 | 23132 | adipose      | Mcm6          | 17219     |
| C5 | 23550 | adipose      | Ap2m1         | 11773     |
| C5 | 23617 | adipose      | Nme1          | 18102     |
| C5 | 280   | hypothalamus | Snai2         | 20583     |
| C5 | 4899  | hypothalamus | Nr4a2         | 18227     |
| C5 | 5342  | hypothalamus | Eps8l3        | 99662     |
| C5 | 9002  | hypothalamus | Col24a1       | 71355     |
| C5 | 9684  | hypothalamus | Phf21b        | 271305    |
| C5 | 11630 | hypothalamus | Mug-ps1       | 17835     |
| C5 | 13464 | hypothalamus | Mc4r          | 17202     |
| C5 | 15352 | hypothalamus | Socs2         | 216233    |
| C5 | 15870 | hypothalamus | Aqp5          | 11830     |
| C5 | 17981 | hypothalamus | MMT00036029   | 268527    |
| C5 | 18987 | hypothalamus | Treh          | 58866     |
| C5 | 22982 | hypothalamus | Mug2          | 17837     |
| C6 | 199   | adipose      | Gabrb3        | 14402     |
| C6 | 327   | adipose      | H2-Ea         | 14968     |
| C6 | 623   | adipose      | Lmf1          | 76483     |
| C6 | 1515  | adipose      | Med20         | 56771     |
| C6 | 1613  | adipose      | Trim26        | 22670     |

|    |       |         |                    |           |
|----|-------|---------|--------------------|-----------|
| C6 | 1960  | adipose | Ubr2               | 224826    |
| C6 | 1972  | adipose | Ly6g6e             | 70274     |
| C6 | 2938  | adipose | H2-T23             | 15040     |
| C6 | 2945  | adipose | MMT00005190        |           |
| C6 | 3905  | adipose | H2-Q1              | 15006     |
| C6 | 4032  | adipose | MMT00008594        |           |
| C6 | 4387  | adipose | Frs3               | 107971    |
| C6 | 4411  | adipose | 2310039H08Rik      | 67101     |
| C6 | 4526  | adipose | Satb1              | 20230     |
| C6 | 4695  | adipose | D330027H18Rik      | 101359    |
| C6 | 5014  | adipose | MMT00017503        |           |
| C6 | 5218  | adipose | ENSMUSG00000046088 | 194612    |
| C6 | 5482  | adipose | Cdsn               | 386463    |
| C6 | 5786  | adipose | Lta                | 16992     |
| C6 | 5968  | adipose | MMT00012419        |           |
| C6 | 6036  | adipose | Pram1              | 378460    |
| C6 | 6360  | adipose | D17H6S56E-3        | 27762     |
| C6 | 6555  | adipose | Aadacl2            | 639634    |
| C6 | 7088  | adipose | Slc37a1            | 224674    |
| C6 | 7135  | adipose | Ezr                | 22350     |
| C6 | 7321  | adipose | Rdbp               | 27632     |
| C6 | 7580  | adipose | Slc22a20           | 381203    |
| C6 | 7637  | adipose | MMT00056309        | 382035    |
| C6 | 7909  | adipose | Oas3               | 246727    |
| C6 | 7991  | adipose | Gpr115             | 78249     |
| C6 | 8341  | adipose | MMT00017270        |           |
| C6 | 8649  | adipose | MMT00072863        | 77652     |
| C6 | 8750  | adipose | 1700010I14Rik      | 66931     |
| C6 | 9805  | adipose | Tagap              | 72536     |
| C6 | 9859  | adipose | Cx3cl1             | 20312     |
| C6 | 9909  | adipose | MMT00077883        |           |
| C6 | 9951  | adipose | Rpp21              | 67676     |
| C6 | 10376 | adipose | C920025E04Rik      | 667803    |
| C6 | 10667 | adipose | H2-Eb1             | 14969     |
| C6 | 10729 | adipose | Fgd2               | 26382     |
| C6 | 10931 | adipose | Pkn3               | 263803    |
| C6 | 11435 | adipose | Rnaset2a           | 100037283 |
| C6 | 11500 | adipose | 3300001P08Rik      | 67684     |
| C6 | 11590 | adipose | Cbx4               | 12418     |
| C6 | 11648 | adipose | Lrfr2              | 70530     |
| C6 | 12355 | adipose | Al507611           | 245884    |
| C6 | 12694 | adipose | Riok2              | 67045     |
| C6 | 12943 | adipose | Slc25a27           | 74011     |
| C6 | 13329 | adipose | Osbp2              | 74309     |
| C6 | 13493 | adipose | Ring1              | 19763     |
| C6 | 13682 | adipose | BC051142           | 407788    |
| C6 | 13768 | adipose | Mrps10             | 64657     |
| C6 | 13789 | adipose | H2-Q8              | 15019     |
| C6 | 14132 | adipose | Glo1               | 109801    |
| C6 | 14190 | adipose | Ppil1              | 68816     |
| C6 | 14375 | adipose | D17H6S56E-5        | 110956    |

|    |       |              |                    |           |
|----|-------|--------------|--------------------|-----------|
| C6 | 14475 | adipose      | Abcg1              | 11307     |
| C6 | 14965 | adipose      | Csnk2b             | 13001     |
| C6 | 15056 | adipose      | D930020B18Rik      | 216393    |
| C6 | 15181 | adipose      | Enpp4              | 224794    |
| C6 | 15264 | adipose      | Flywch2            | 76917     |
| C6 | 15531 | adipose      | Prickle4           | 66119     |
| C6 | 15864 | adipose      | Rps6ka2            | 20112     |
| C6 | 16514 | adipose      | Vps52              | 224705    |
| C6 | 16549 | adipose      | Wtap               | 60532     |
| C6 | 16692 | adipose      | Bat4               | 81845     |
| C6 | 16890 | adipose      | H2-Eb2             | 381091    |
| C6 | 17322 | adipose      | Zfp758             | 224598    |
| C6 | 17707 | adipose      | Rsh12b             | 100037282 |
| C6 | 18577 | adipose      | Btbd9              | 224671    |
| C6 | 18871 | adipose      | Al314976           | 106821    |
| C6 | 18906 | adipose      | Zfand3             | 21769     |
| C6 | 19064 | adipose      | MMT00004867        |           |
| C6 | 19929 | adipose      | MMT00079667        |           |
| C6 | 20083 | adipose      | ENSMUSG00000073403 | 69717     |
| C6 | 20100 | adipose      | Guca1b             | 107477    |
| C6 | 20238 | adipose      | H2-T9              | 15051     |
| C6 | 20346 | adipose      | Gna-rs1            | 14670     |
| C6 | 20511 | adipose      | Decr2              | 26378     |
| C6 | 21075 | adipose      | Gtf2h5             | 66467     |
| C6 | 21295 | adipose      | Snf1lk             | 17691     |
| C6 | 21585 | adipose      | Hipk1              | 15257     |
| C6 | 21952 | adipose      | Tfb1m              | 224481    |
| C6 | 22104 | adipose      | Rnf123             | 84585     |
| C6 | 22822 | adipose      | MMT00013433        |           |
| C6 | 22867 | adipose      | Vps52              | 224705    |
| C6 | 23000 | adipose      | Faim2              | 72393     |
| C6 | 812   | hypothalamus | En2                | 13799     |
| C6 | 897   | hypothalamus | Mut                | 17850     |
| C6 | 1515  | hypothalamus | Med20              | 56771     |
| C6 | 1960  | hypothalamus | Ubr2               | 224826    |
| C6 | 2424  | hypothalamus | Unc5cl             | 76589     |
| C6 | 2644  | hypothalamus | Srrm2              | 75956     |
| C6 | 2801  | hypothalamus | H2-BI              | 14963     |
| C6 | 2938  | hypothalamus | H2-T23             | 15040     |
| C6 | 2945  | hypothalamus | MMT00005190        |           |
| C6 | 3859  | hypothalamus | Fpr2               | 14289     |
| C6 | 4555  | hypothalamus | Cchcr1             | 240084    |
| C6 | 4584  | hypothalamus | MMT00022168        |           |
| C6 | 4958  | hypothalamus | Ndufa7             | 66416     |
| C6 | 5014  | hypothalamus | MMT00017503        |           |
| C6 | 5232  | hypothalamus | Arhgef16           | 230972    |
| C6 | 5669  | hypothalamus | Fndc1              | 68655     |
| C6 | 5968  | hypothalamus | MMT00012419        |           |
| C6 | 6070  | hypothalamus | D630003M21Rik      | 228846    |
| C6 | 6406  | hypothalamus | Sh3rf2             | 269016    |
| C6 | 6437  | hypothalamus | Gnptg              | 214505    |

|    |       |              |               |           |
|----|-------|--------------|---------------|-----------|
| C6 | 7054  | hypothalamus | Trerf1        | 224829    |
| C6 | 7088  | hypothalamus | Slc37a1       | 224674    |
| C6 | 7135  | hypothalamus | Ezr           | 22350     |
| C6 | 7286  | hypothalamus | Noxo1         | 71893     |
| C6 | 7339  | hypothalamus | Tdp1          | 104884    |
| C6 | 7603  | hypothalamus | Sod2          | 20656     |
| C6 | 7909  | hypothalamus | Oas3          | 246727    |
| C6 | 7965  | hypothalamus | Enpp5         | 83965     |
| C6 | 7991  | hypothalamus | Gpr115        | 78249     |
| C6 | 8341  | hypothalamus | MMT00017270   |           |
| C6 | 8750  | hypothalamus | 1700010I14Rik | 66931     |
| C6 | 8767  | hypothalamus | Rgl2          | 19732     |
| C6 | 8904  | hypothalamus | Trerf1        | 224829    |
| C6 | 9805  | hypothalamus | Tagap         | 72536     |
| C6 | 9909  | hypothalamus | MMT00077883   |           |
| C6 | 10374 | hypothalamus | Trim15        | 69097     |
| C6 | 10667 | hypothalamus | H2-Eb1        | 14969     |
| C6 | 10729 | hypothalamus | Fgd2          | 26382     |
| C6 | 10931 | hypothalamus | Pkn3          | 263803    |
| C6 | 11291 | hypothalamus | 1110018H23Rik | 68509     |
| C6 | 11435 | hypothalamus | Rnaset2a      | 100037283 |
| C6 | 11475 | hypothalamus | H2-D1         | 14964     |
| C6 | 12168 | hypothalamus | H2-Ke6        | 14979     |
| C6 | 12694 | hypothalamus | Riok2         | 67045     |
| C6 | 12943 | hypothalamus | Slc25a27      | 74011     |
| C6 | 13075 | hypothalamus | Mrps2         | 118451    |
| C6 | 13117 | hypothalamus | Tmprss5       | 80893     |
| C6 | 13493 | hypothalamus | Ring1         | 19763     |
| C6 | 13682 | hypothalamus | BC051142      | 407788    |
| C6 | 14132 | hypothalamus | Glo1          | 109801    |
| C6 | 14190 | hypothalamus | Ppil1         | 68816     |
| C6 | 14322 | hypothalamus | Bat1a         | 53817     |
| C6 | 14488 | hypothalamus | Tshb          | 22094     |
| C6 | 15153 | hypothalamus | Foxm1         | 14235     |
| C6 | 15580 | hypothalamus | MMT00077001   |           |
| C6 | 16067 | hypothalamus | Pcaf          | 18519     |
| C6 | 16692 | hypothalamus | Bat4          | 81845     |
| C6 | 16695 | hypothalamus | Hs3st6        | 328779    |
| C6 | 17322 | hypothalamus | Zfp758        | 224598    |
| C6 | 17412 | hypothalamus | Aif1          | 11629     |
| C6 | 17646 | hypothalamus | C4b           | 12268     |
| C6 | 17707 | hypothalamus | Rshl2b        | 100037282 |
| C6 | 17760 | hypothalamus | Ccr6          | 12458     |
| C6 | 18577 | hypothalamus | Btbd9         | 224671    |
| C6 | 18871 | hypothalamus | Al314976      | 106821    |
| C6 | 19011 | hypothalamus | Rpl3l         | 66211     |
| C6 | 19064 | hypothalamus | MMT00004867   |           |
| C6 | 20100 | hypothalamus | Guca1b        | 107477    |
| C6 | 20238 | hypothalamus | H2-T9         | 15051     |
| C6 | 20243 | hypothalamus | Wfikkn1       | 215001    |
| C6 | 20511 | hypothalamus | Decr2         | 26378     |

|    |       |              |             |           |
|----|-------|--------------|-------------|-----------|
| C6 | 20966 | hypothalamus | MMT00014378 |           |
| C6 | 21062 | hypothalamus | Rpl7l1      | 66229     |
| C6 | 21246 | hypothalamus | Telo2       | 71718     |
| C6 | 21295 | hypothalamus | Snf1lk      | 17691     |
| C6 | 21415 | hypothalamus | Has1        | 15116     |
| C6 | 21952 | hypothalamus | Tfb1m       | 224481    |
| C6 | 22104 | hypothalamus | Rnf123      | 84585     |
| C6 | 23250 | hypothalamus | Plcl2       | 224860    |
| C6 | 23371 | hypothalamus | Cfb         | 14962     |
| C7 | 143   | adipose      | Gvin1       | 74558     |
| C7 | 860   | adipose      | Psmb10      | 19171     |
| C7 | 2200  | adipose      | BC006779    | 229003    |
| C7 | 2224  | adipose      | Oasl2       | 23962     |
| C7 | 2550  | adipose      | MMT00036681 |           |
| C7 | 2801  | adipose      | H2-BI       | 14963     |
| C7 | 3659  | adipose      | EG236451    | 236451    |
| C7 | 3683  | adipose      | Oas2        | 246728    |
| C7 | 4114  | adipose      | Parp12      | 243771    |
| C7 | 4413  | adipose      | MMT00030347 |           |
| C7 | 4426  | adipose      | ligp2       | 54396     |
| C7 | 4508  | adipose      | Ifit1       | 15957     |
| C7 | 4516  | adipose      | Rsad2       | 58185     |
| C7 | 4694  | adipose      | MMT00046622 |           |
| C7 | 5044  | adipose      | Ifi35       | 70110     |
| C7 | 5250  | adipose      | Ifit2       | 15958     |
| C7 | 5845  | adipose      | Il18bp      | 16068     |
| C7 | 5853  | adipose      | Trim30      | 20128     |
| C7 | 5949  | adipose      | Zbp1        | 58203     |
| C7 | 6576  | adipose      | Slfn2       | 20556     |
| C7 | 6806  | adipose      | Agrn        | 11603     |
| C7 | 6824  | adipose      | Irf7        | 54123     |
| C7 | 6910  | adipose      | Ly6c2       | 100093633 |
| C7 | 7069  | adipose      | Ube1l       | 74153     |
| C7 | 7105  | adipose      | Plac8       | 231507    |
| C7 | 7284  | adipose      | MMT00008674 |           |
| C7 | 7973  | adipose      | Lgals9      | 16859     |
| C7 | 8547  | adipose      | Gbp4        | 17472     |
| C7 | 8555  | adipose      | H2-M3       | 14991     |
| C7 | 8659  | adipose      | Psmb8       | 16913     |
| C7 | 8800  | adipose      | Rnf213      | 629974    |
| C7 | 9320  | adipose      | Rnf31       | 268749    |
| C7 | 9616  | adipose      | AI451557    | 102084    |
| C7 | 9717  | adipose      | Psmb9       | 16912     |
| C7 | 9820  | adipose      | BC023105    | 207269    |
| C7 | 10109 | adipose      | Gbp3        | 55932     |
| C7 | 10426 | adipose      | Ly6f        | 17071     |
| C7 | 11198 | adipose      | Gbp1        | 14468     |
| C7 | 11204 | adipose      | AI451617    | 209387    |
| C7 | 11265 | adipose      | Irgm        | 15944     |
| C7 | 12126 | adipose      | Znfx1       | 98999     |
| C7 | 12398 | adipose      | Ifi44       | 99899     |



|    |       |              |               |        |
|----|-------|--------------|---------------|--------|
| C7 | 12969 | adipose      | Xaf1          | 327959 |
| C7 | 13156 | adipose      | Ifit3         | 15959  |
| C7 | 13309 | adipose      | Tgtp          | 21822  |
| C7 | 13513 | adipose      | Trim25        | 217069 |
| C7 | 13514 | adipose      | Apol9b        | 71898  |
| C7 | 13654 | adipose      | Stat1         | 20846  |
| C7 | 13826 | adipose      | Melk          | 17279  |
| C7 | 14258 | adipose      | Ifi47         | 15953  |
| C7 | 14603 | adipose      | Ly6e          | 17069  |
| C7 | 14880 | adipose      | Ms4a4c        | 64380  |
| C7 | 15074 | adipose      | Usp18         | 24110  |
| C7 | 15258 | adipose      | Coil          | 12812  |
| C7 | 15504 | adipose      | Mx2           | 17858  |
| C7 | 16182 | adipose      | Oas1          | 231655 |
| C7 | 16199 | adipose      | Samhd1        | 56045  |
| C7 | 16238 | adipose      | Nmi           | 64685  |
| C7 | 16521 | adipose      | Adar          | 56417  |
| C7 | 16572 | adipose      | D14Ert668e    | 219132 |
| C7 | 16949 | adipose      | Iigp1         | 60440  |
| C7 | 17071 | adipose      | Samd9l        | 209086 |
| C7 | 17197 | adipose      | Igtp          | 16145  |
| C7 | 18174 | adipose      | Stat2         | 20847  |
| C7 | 18186 | adipose      | Parp14        | 547253 |
| C7 | 18235 | adipose      | Epsti1        | 108670 |
| C7 | 18762 | adipose      | Herc5         | 67138  |
| C7 | 19189 | adipose      | Sp100         | 20684  |
| C7 | 19708 | adipose      | Ly6a          | 110454 |
| C7 | 19738 | adipose      | Lgals3bp      | 19039  |
| C7 | 20997 | adipose      | MMT00028135   | 631323 |
| C7 | 21351 | adipose      | Shisa5        | 66940  |
| C7 | 21549 | adipose      | Rtp4          | 67775  |
| C7 | 21824 | adipose      | 5830443L24Rik | 76074  |
| C7 | 22037 | adipose      | Oas1g         | 23960  |
| C7 | 22496 | adipose      | Slfn1         | 20555  |
| C7 | 22712 | adipose      | Phf11         | 219131 |
| C7 | 23636 | adipose      | Bst2          | 69550  |
| C7 | 143   | hypothalamus | Gvin1         | 74558  |
| C7 | 2224  | hypothalamus | Oas12         | 23962  |
| C7 | 3683  | hypothalamus | Oas2          | 246728 |
| C7 | 4114  | hypothalamus | Parp12        | 243771 |
| C7 | 4426  | hypothalamus | Iigp2         | 54396  |
| C7 | 5853  | hypothalamus | Trim30        | 20128  |
| C7 | 6824  | hypothalamus | Irf7          | 54123  |
| C7 | 7069  | hypothalamus | Ube1l         | 74153  |
| C7 | 7105  | hypothalamus | Plac8         | 231507 |
| C7 | 8547  | hypothalamus | Gbp4          | 17472  |
| C7 | 8800  | hypothalamus | Rnf213        | 629974 |
| C7 | 9616  | hypothalamus | Al451557      | 102084 |
| C7 | 9847  | hypothalamus | Ifi27         | 76933  |
| C7 | 11204 | hypothalamus | Al451617      | 209387 |
| C7 | 12398 | hypothalamus | Ifi44         | 99899  |

|    |       |              |               |           |
|----|-------|--------------|---------------|-----------|
| C7 | 12969 | hypothalamus | Xaf1          | 327959    |
| C7 | 13156 | hypothalamus | Ifit3         | 15959     |
| C7 | 13309 | hypothalamus | Tgtp          | 21822     |
| C7 | 13513 | hypothalamus | Trim25        | 217069    |
| C7 | 14258 | hypothalamus | Ifi47         | 15953     |
| C7 | 15074 | hypothalamus | Usp18         | 24110     |
| C7 | 15258 | hypothalamus | Coil          | 12812     |
| C7 | 15572 | hypothalamus | Dtx3l         | 209200    |
| C7 | 16949 | hypothalamus | ligp1         | 60440     |
| C7 | 18186 | hypothalamus | Parp14        | 547253    |
| C7 | 19189 | hypothalamus | Sp100         | 20684     |
| C7 | 19738 | hypothalamus | Lgals3bp      | 19039     |
| C7 | 21549 | hypothalamus | Rtp4          | 67775     |
| C7 | 21824 | hypothalamus | 5830443L24Rik | 76074     |
| C7 | 23450 | hypothalamus | D12Ert647e    | 52668     |
| C8 | 286   | adipose      | MMT00070509   | 100037278 |
| C8 | 403   | adipose      | Leprotl1      | 68192     |
| C8 | 700   | adipose      | 4930529C04Rik | 619677    |
| C8 | 769   | adipose      | 5430437P03Rik | 68251     |
| C8 | 1097  | adipose      | Dctn6         | 22428     |
| C8 | 1604  | adipose      | Ssbp4         | 76900     |
| C8 | 1697  | adipose      | Sf4           | 70616     |
| C8 | 1755  | adipose      | Ocel1         | 77090     |
| C8 | 2749  | adipose      | Naf1          | 234344    |
| C8 | 3052  | adipose      | 9130404D08Rik | 74549     |
| C8 | 3847  | adipose      | Tdrd7         | 100121    |
| C8 | 4418  | adipose      | H2-Aa         | 14960     |
| C8 | 4655  | adipose      | 1810029B16Rik | 66282     |
| C8 | 5433  | adipose      | 2410004L22Rik | 76478     |
| C8 | 5456  | adipose      | Rabgap1l      | 29809     |
| C8 | 6035  | adipose      | Nkd1          | 93960     |
| C8 | 7311  | adipose      | Lsm6          | 78651     |
| C8 | 7503  | adipose      | Rab11fip1     | 75767     |
| C8 | 8114  | adipose      | Kcnn1         | 84036     |
| C8 | 9304  | adipose      | Al449175      | 234362    |
| C8 | 9729  | adipose      | Got1l1        | 76615     |
| C8 | 9931  | adipose      | Glt25d1       | 234407    |
| C8 | 10758 | adipose      | Gdf1          | 14559     |
| C8 | 11292 | adipose      | Nr2f6         | 13864     |
| C8 | 11776 | adipose      | Ifi30         | 65972     |
| C8 | 12854 | adipose      | Ndufa13       | 67184     |
| C8 | 13732 | adipose      | Tpm4          | 326618    |
| C8 | 14059 | adipose      | Cyp4f18       | 72054     |
| C8 | 14455 | adipose      | 2700029M09Rik | 72612     |
| C8 | 14511 | adipose      | Sostdc1       | 66042     |
| C8 | 14611 | adipose      | Ddx60         | 234311    |
| C8 | 15027 | adipose      | Brd7          | 26992     |
| C8 | 15455 | adipose      | Lsm4          | 50783     |
| C8 | 15521 | adipose      | Mast3         | 546071    |
| C8 | 15792 | adipose      | Use1          | 67023     |
| C8 | 16557 | adipose      | Rbpms         | 19663     |

|    |       |              |               |           |
|----|-------|--------------|---------------|-----------|
| C8 | 16617 | adipose      | Sh2d4a        | 72281     |
| C8 | 16702 | adipose      | 2810422J05Rik | 75620     |
| C8 | 16849 | adipose      | Trmt1         | 212528    |
| C8 | 16858 | adipose      | Tmem38a       | 74166     |
| C8 | 17403 | adipose      | N4bp1         | 80750     |
| C8 | 17703 | adipose      | Large         | 16795     |
| C8 | 18886 | adipose      | Slc18a1       | 110877    |
| C8 | 19051 | adipose      | Podn1         | 244550    |
| C8 | 20333 | adipose      | Calca         | 12310     |
| C8 | 20484 | adipose      | Ces1          | 12623     |
| C8 | 20721 | adipose      | 4432412L15Rik | 74337     |
| C8 | 21433 | adipose      | Ubx6          | 108159    |
| C8 | 21541 | adipose      | Brf2          | 66653     |
| C8 | 22408 | adipose      | Calr3         | 73316     |
| C8 | 22776 | adipose      | Gsr           | 14782     |
| C8 | 23599 | adipose      | Ndr3          | 29812     |
| C8 | 283   | hypothalamus | Gmcl1         | 71847     |
| C8 | 286   | hypothalamus | MMT00070509   | 100037278 |
| C8 | 403   | hypothalamus | Leprot1       | 68192     |
| C8 | 1097  | hypothalamus | Dctn6         | 22428     |
| C8 | 1604  | hypothalamus | Ssbp4         | 76900     |
| C8 | 1755  | hypothalamus | Ocel1         | 77090     |
| C8 | 2749  | hypothalamus | Naf1          | 234344    |
| C8 | 3052  | hypothalamus | 9130404D08Rik | 74549     |
| C8 | 3609  | hypothalamus | Plvap         | 84094     |
| C8 | 4655  | hypothalamus | 1810029B16Rik | 66282     |
| C8 | 5433  | hypothalamus | 2410004L22Rik | 76478     |
| C8 | 5925  | hypothalamus | Tmem59l       | 67937     |
| C8 | 6035  | hypothalamus | Nkd1          | 93960     |
| C8 | 6760  | hypothalamus | 2810428I15Rik | 66462     |
| C8 | 8951  | hypothalamus | Cd97          | 26364     |
| C8 | 9304  | hypothalamus | Al449175      | 234362    |
| C8 | 9569  | hypothalamus | Dda1          | 66498     |
| C8 | 9729  | hypothalamus | Got11         | 76615     |
| C8 | 9906  | hypothalamus | Ninj2         | 29862     |
| C8 | 10373 | hypothalamus | Tmem141       | 51875     |
| C8 | 10497 | hypothalamus | Man2b1        | 17159     |
| C8 | 10758 | hypothalamus | Gdf1          | 14559     |
| C8 | 11109 | hypothalamus | Al931714      | 102182    |
| C8 | 12966 | hypothalamus | Slc39a1       | 30791     |
| C8 | 13732 | hypothalamus | Tpm4          | 326618    |
| C8 | 13862 | hypothalamus | Myh15         | 667772    |
| C8 | 14951 | hypothalamus | Dpep3         | 71854     |
| C8 | 15094 | hypothalamus | Pbx4          | 80720     |
| C8 | 15296 | hypothalamus | Mier3         | 218613    |
| C8 | 15455 | hypothalamus | Lsm4          | 50783     |
| C8 | 16371 | hypothalamus | Ppp2cb        | 19053     |
| C8 | 16617 | hypothalamus | Sh2d4a        | 72281     |
| C8 | 16702 | hypothalamus | 2810422J05Rik | 75620     |
| C8 | 16849 | hypothalamus | Trmt1         | 212528    |
| C8 | 16858 | hypothalamus | Tmem38a       | 74166     |

|    |       |              |               |           |
|----|-------|--------------|---------------|-----------|
| C8 | 17553 | hypothalamus | Eif4ebp1      | 13685     |
| C8 | 17648 | hypothalamus | Scrg1         | 20284     |
| C8 | 17703 | hypothalamus | Large         | 16795     |
| C8 | 18886 | hypothalamus | Slc18a1       | 110877    |
| C8 | 19286 | hypothalamus | 1110012M11Rik | 73711     |
| C8 | 20721 | hypothalamus | 4432412L15Rik | 74337     |
| C8 | 21433 | hypothalamus | Ubx6          | 108159    |
| C8 | 21681 | hypothalamus | 9130011J15Rik | 66818     |
| C8 | 21840 | hypothalamus | Tmie          | 20776     |
| C8 | 22408 | hypothalamus | Calr3         | 73316     |
| C8 | 23445 | hypothalamus | Crlf1         | 12931     |
| C8 | 23636 | hypothalamus | Bst2          | 69550     |
| C9 | 223   | adipose      | Trp53inp2     | 68728     |
| C9 | 678   | adipose      | Ncaph         | 215387    |
| C9 | 1547  | adipose      | Eid1          | 58521     |
| C9 | 1618  | adipose      | Mfap1a        | 67532     |
| C9 | 1678  | adipose      | Tcf15         | 21407     |
| C9 | 2915  | adipose      | Nfs1          | 18041     |
| C9 | 3214  | adipose      | Dnmt3b        | 13436     |
| C9 | 3257  | adipose      | Map1lc3a      | 66734     |
| C9 | 4189  | adipose      | Epb4.111      | 13821     |
| C9 | 4195  | adipose      | Csrp2bp       | 228714    |
| C9 | 4336  | adipose      | Rbbp9         | 26450     |
| C9 | 5258  | adipose      | Mcts2         | 66405     |
| C9 | 5539  | adipose      | Eif2s2        | 67204     |
| C9 | 5603  | adipose      | BC020535      | 228788    |
| C9 | 5858  | adipose      | Itch          | 16396     |
| C9 | 6059  | adipose      | Dsn1          | 66934     |
| C9 | 6250  | adipose      | Csnk2a1       | 12995     |
| C9 | 6528  | adipose      | Dusp15        | 252864    |
| C9 | 6648  | adipose      | Cenpl         | 70454     |
| C9 | 6820  | adipose      | MMT00046996   |           |
| C9 | 6907  | adipose      | Usp50         | 75083     |
| C9 | 7610  | adipose      | Scand1        | 19018     |
| C9 | 8499  | adipose      | C430048L16Rik | 77604     |
| C9 | 8711  | adipose      | 5430432M24Rik | 73847     |
| C9 | 9310  | adipose      | Pdrg1         | 68559     |
| C9 | 9762  | adipose      | Snx5          | 69178     |
| C9 | 11166 | adipose      | Uqcc          | 56046     |
| C9 | 12388 | adipose      | 8430406I07Rik | 74528     |
| C9 | 12866 | adipose      | 4921517L17Rik | 70873     |
| C9 | 13355 | adipose      | Foxs1         | 14239     |
| C9 | 14399 | adipose      | Csnk2a1       | 12995     |
| C9 | 14647 | adipose      | Cst3          | 13010     |
| C9 | 14740 | adipose      | Mfap1b        | 100034361 |
| C9 | 14816 | adipose      | Pcdhb9        | 93880     |
| C9 | 16494 | adipose      | 2310007D09Rik | 71878     |
| C9 | 17043 | adipose      | Tmem127       | 69470     |
| C9 | 17053 | adipose      | MMT00068622   |           |
| C9 | 17221 | adipose      | Zfp264        | 116812    |
| C9 | 18835 | adipose      | Dtwd1         | 69185     |

|     |       |              |               |           |
|-----|-------|--------------|---------------|-----------|
| C9  | 19560 | adipose      | Trmt6         | 66926     |
| C9  | 20837 | adipose      | Dlgap4        | 228836    |
| C9  | 21665 | adipose      | Nat5          | 67877     |
| C9  | 21729 | adipose      | Hdc           | 15186     |
| C9  | 21907 | adipose      | Dynlrb1       | 67068     |
| C9  | 22740 | adipose      | Manbal        | 69161     |
| C9  | 23005 | adipose      | 4930405A21Rik | 74846     |
| C9  | 223   | hypothalamus | Trp53inp2     | 68728     |
| C9  | 678   | hypothalamus | Ncaph         | 215387    |
| C9  | 1325  | hypothalamus | Pigu          | 228812    |
| C9  | 2351  | hypothalamus | 1110008F13Rik | 67388     |
| C9  | 2915  | hypothalamus | Nfs1          | 18041     |
| C9  | 3214  | hypothalamus | Dnmt3b        | 13436     |
| C9  | 3257  | hypothalamus | Map1lc3a      | 66734     |
| C9  | 4195  | hypothalamus | Csrp2bp       | 228714    |
| C9  | 4897  | hypothalamus | Ciao1         | 26371     |
| C9  | 5258  | hypothalamus | Mcts2         | 66405     |
| C9  | 5539  | hypothalamus | Eif2s2        | 67204     |
| C9  | 5603  | hypothalamus | BC020535      | 228788    |
| C9  | 5737  | hypothalamus | Nkx2-2        | 18088     |
| C9  | 5858  | hypothalamus | Itch          | 16396     |
| C9  | 6059  | hypothalamus | Dsn1          | 66934     |
| C9  | 6188  | hypothalamus | Myh7b         | 668940    |
| C9  | 6250  | hypothalamus | Csnk2a1       | 12995     |
| C9  | 6805  | hypothalamus | Rrbp1         | 81910     |
| C9  | 9762  | hypothalamus | Snx5          | 69178     |
| C9  | 11166 | hypothalamus | Uqcc          | 56046     |
| C9  | 11705 | hypothalamus | Polr3f        | 70408     |
| C9  | 12243 | hypothalamus | Edar          | 13608     |
| C9  | 12388 | hypothalamus | 8430406I07Rik | 74528     |
| C9  | 12866 | hypothalamus | 4921517L17Rik | 70873     |
| C9  | 13355 | hypothalamus | Foxs1         | 14239     |
| C9  | 14399 | hypothalamus | Csnk2a1       | 12995     |
| C9  | 14403 | hypothalamus | S100g         | 12309     |
| C9  | 14649 | hypothalamus | 5430405G05Rik | 108832    |
| C9  | 14734 | hypothalamus | Nrsn2         | 228777    |
| C9  | 14740 | hypothalamus | Mfap1b        | 100034361 |
| C9  | 15760 | hypothalamus | Trib3         | 228775    |
| C9  | 16715 | hypothalamus | 2610034M16Rik | 69239     |
| C9  | 17043 | hypothalamus | Tmem127       | 69470     |
| C9  | 17523 | hypothalamus | Gdf5          | 14563     |
| C9  | 17814 | hypothalamus | Napb          | 17957     |
| C9  | 18835 | hypothalamus | Dtwd1         | 69185     |
| C9  | 19110 | hypothalamus | Gm114         | 228730    |
| C9  | 20055 | hypothalamus | Ghrh          | 14601     |
| C9  | 20505 | hypothalamus | Tll9          | 74711     |
| C9  | 20837 | hypothalamus | Dlgap4        | 228836    |
| C9  | 23005 | hypothalamus | 4930405A21Rik | 74846     |
| C10 | 245   | adipose      | Sqrdl         | 59010     |
| C10 | 295   | adipose      | Pdlim1        | 54132     |
| C10 | 445   | adipose      | 2610029I01Rik | 77032     |

|     |       |         |               |        |
|-----|-------|---------|---------------|--------|
| C10 | 982   | adipose | Ccl7          | 20306  |
| C10 | 1476  | adipose | 2610020H08Rik | 434234 |
| C10 | 1661  | adipose | Duoxa1        | 213696 |
| C10 | 1764  | adipose | Tifab         | 212937 |
| C10 | 1766  | adipose | Srpx2         | 68792  |
| C10 | 2074  | adipose | Sfxn1         | 14057  |
| C10 | 2301  | adipose | Pcyox1        | 66881  |
| C10 | 2421  | adipose | Itgb5         | 16419  |
| C10 | 2598  | adipose | Naglu         | 27419  |
| C10 | 2969  | adipose | Ptpro         | 19277  |
| C10 | 3009  | adipose | Serpina1c     | 20702  |
| C10 | 3799  | adipose | Serpinh1      | 12406  |
| C10 | 4369  | adipose | Acot4         | 171282 |
| C10 | 4384  | adipose | Gamt          | 14431  |
| C10 | 4551  | adipose | Cyp2e1        | 13106  |
| C10 | 4650  | adipose | RP23-438H3.2  | 69357  |
| C10 | 5233  | adipose | Pcbd1         | 13180  |
| C10 | 5295  | adipose | F2r           | 14062  |
| C10 | 6012  | adipose | Chid1         | 68038  |
| C10 | 6091  | adipose | Rbbp4         | 19646  |
| C10 | 6213  | adipose | Ccl2          | 20296  |
| C10 | 7057  | adipose | Stk10         | 20868  |
| C10 | 7224  | adipose | Pafah2        | 100163 |
| C10 | 7225  | adipose | Tiam1         | 21844  |
| C10 | 7261  | adipose | Ttc7b         | 104718 |
| C10 | 7590  | adipose | Ankrd40       | 71452  |
| C10 | 8088  | adipose | Negr1         | 320840 |
| C10 | 8193  | adipose | Pi4k2a        | 84095  |
| C10 | 9082  | adipose | Nrarp         | 67122  |
| C10 | 9252  | adipose | Slc22a2       | 20518  |
| C10 | 9674  | adipose | Pea15a        | 18611  |
| C10 | 10002 | adipose | Krt79         | 223917 |
| C10 | 10087 | adipose | Bmp3          | 110075 |
| C10 | 10774 | adipose | Ehd3          | 57440  |
| C10 | 11445 | adipose | Atp1a2        | 98660  |
| C10 | 11446 | adipose | Dock8         | 76088  |
| C10 | 11519 | adipose | Slc2a10       | 170441 |
| C10 | 11724 | adipose | Tuba3a        | 22144  |
| C10 | 11917 | adipose | Fahd1         | 68636  |
| C10 | 12168 | adipose | H2-Ke6        | 14979  |
| C10 | 12238 | adipose | Traf3         | 22031  |
| C10 | 12565 | adipose | Grem2         | 23893  |
| C10 | 12936 | adipose | Pdlim1        | 54132  |
| C10 | 12981 | adipose | Nek6          | 59126  |
| C10 | 13037 | adipose | Serpinb3b     | 383548 |
| C10 | 14333 | adipose | Zcchc17       | 619605 |
| C10 | 15170 | adipose | Tspan17       | 74257  |
| C10 | 15536 | adipose | Garnl4        | 380711 |
| C10 | 15594 | adipose | Gm1967        | 381411 |
| C10 | 15742 | adipose | 2900062L11Rik | 76976  |
| C10 | 16006 | adipose | Anxa2         | 12306  |

|     |       |              |               |        |
|-----|-------|--------------|---------------|--------|
| C10 | 16047 | adipose      | Irf8          | 15900  |
| C10 | 16080 | adipose      | Prkcdbp       | 109042 |
| C10 | 16104 | adipose      | Ugt3a2        | 223337 |
| C10 | 16248 | adipose      | Cdr2          | 12585  |
| C10 | 16965 | adipose      | Gstt2         | 14872  |
| C10 | 16994 | adipose      | Trove2        | 20822  |
| C10 | 17826 | adipose      | 3300001G02Rik | 78372  |
| C10 | 18928 | adipose      | Ttc28         | 209683 |
| C10 | 19034 | adipose      | Bag4          | 67384  |
| C10 | 19163 | adipose      | Cadps2        | 320405 |
| C10 | 19247 | adipose      | Prelp         | 116847 |
| C10 | 19854 | adipose      | Kcnj14        | 211480 |
| C10 | 20648 | adipose      | B430212C06Rik | 338360 |
| C10 | 21013 | adipose      | Vnn3          | 26464  |
| C10 | 21364 | adipose      | Ppm1h         | 319468 |
| C10 | 21448 | adipose      | Paqr7         | 71904  |
| C10 | 21872 | adipose      | Stambpl1      | 76630  |
| C10 | 22151 | adipose      | Plxnd1        | 67784  |
| C10 | 22161 | adipose      | Tmem132a      | 98170  |
| C10 | 22361 | adipose      | Sephs2        | 20768  |
| C10 | 22486 | adipose      | Sh3bgrl3      | 73723  |
| C10 | 22744 | adipose      | 9-Sep         | 53860  |
| C10 | 23267 | adipose      | Hsd17b11      | 114664 |
| C10 | 1297  | hypothalamus | Phox2a        | 11859  |
| C11 | 468   | adipose      | 2610020C07Rik | 69918  |
| C11 | 630   | adipose      | C1s           | 50908  |
| C11 | 1444  | adipose      | C1r           | 50909  |
| C11 | 2021  | adipose      | Atf7ip        | 54343  |
| C11 | 2090  | adipose      | Rpo1-2        | 20017  |
| C11 | 5677  | adipose      | Cmas          | 12764  |
| C11 | 6765  | adipose      | Ldhb          | 16832  |
| C11 | 7452  | adipose      | Abcc9         | 20928  |
| C11 | 8194  | adipose      | MMT00077789   |        |
| C11 | 9010  | adipose      | 8430419L09Rik | 74525  |
| C11 | 9417  | adipose      | Cd163         | 93671  |
| C11 | 12856 | adipose      | Clstn3        | 232370 |
| C11 | 14557 | adipose      | Pyroxd1       | 232491 |
| C11 | 16060 | adipose      | Gys2          | 232493 |
| C11 | 17093 | adipose      | Opa1          | 74143  |
| C11 | 17363 | adipose      | Aebp2         | 11569  |
| C11 | 17391 | adipose      | C530028O21Rik | 319352 |
| C11 | 17743 | adipose      | Phb2          | 12034  |
| C11 | 18333 | adipose      | Rassf8        | 71323  |
| C11 | 19964 | adipose      | Ndufa9        | 66108  |
| C11 | 19999 | adipose      | Ift122        | 81896  |
| C11 | 20127 | adipose      | Ipo8          | 320727 |
| C11 | 21126 | adipose      | Dera          | 232449 |
| C11 | 22075 | adipose      | C1s           | 50908  |
| C11 | 22095 | adipose      | Mgst1         | 56615  |
| C11 | 22395 | adipose      | Kcna1         | 16485  |
| C11 | 468   | hypothalamus | 2610020C07Rik | 69918  |

|     |       |              |               |        |
|-----|-------|--------------|---------------|--------|
| C11 | 630   | hypothalamus | C1s           | 50908  |
| C11 | 1375  | hypothalamus | Strap         | 20901  |
| C11 | 1957  | hypothalamus | Mansc1        | 67729  |
| C11 | 2021  | hypothalamus | Atf7ip        | 54343  |
| C11 | 2464  | hypothalamus | A130022J15Rik | 101351 |
| C11 | 3078  | hypothalamus | 9630033F20Rik | 319801 |
| C11 | 3141  | hypothalamus | Tmf1          | 232286 |
| C11 | 4850  | hypothalamus | Fancd2        | 211651 |
| C11 | 6765  | hypothalamus | Ldhb          | 16832  |
| C11 | 8141  | hypothalamus | Scnn1a        | 20276  |
| C11 | 8194  | hypothalamus | MMT00077789   |        |
| C11 | 9010  | hypothalamus | 8430419L09Rik | 74525  |
| C11 | 9417  | hypothalamus | Cd163         | 93671  |
| C11 | 9622  | hypothalamus | Rasgef1a      | 70727  |
| C11 | 11130 | hypothalamus | Slco1c1       | 58807  |
| C11 | 11701 | hypothalamus | Oas1c         | 114643 |
| C11 | 14307 | hypothalamus | Kcnj8         | 16523  |
| C11 | 14557 | hypothalamus | Pyroxd1       | 232491 |
| C11 | 15719 | hypothalamus | BC060267      | 212516 |
| C11 | 17363 | hypothalamus | Aebp2         | 11569  |
| C11 | 17743 | hypothalamus | Phb2          | 12034  |
| C11 | 18333 | hypothalamus | Rassf8        | 71323  |
| C11 | 19964 | hypothalamus | Ndufa9        | 66108  |
| C11 | 19999 | hypothalamus | Ift122        | 81896  |
| C11 | 20423 | hypothalamus | 8-Mar         | 71779  |
| C11 | 21126 | hypothalamus | Dera          | 232449 |
| C11 | 21937 | hypothalamus | MMT00015325   |        |
| C11 | 22075 | hypothalamus | C1s           | 50908  |
| C11 | 22395 | hypothalamus | Kcna1         | 16485  |
| C11 | 22907 | hypothalamus | MMT00054594   |        |
| C11 | 22978 | hypothalamus | MMT00043176   |        |
| C12 | 725   | adipose      | BC005561      | 243171 |
| C12 | 1660  | adipose      | Zfp33b        | 69623  |
| C12 | 2901  | adipose      | Tmem132d      | 243274 |
| C12 | 3261  | adipose      | Rpap2         | 231571 |
| C12 | 4010  | adipose      | Alkbh2        | 231642 |
| C12 | 4474  | adipose      | EG627022      | 627022 |
| C12 | 4617  | adipose      | Agpat9        | 231510 |
| C12 | 4723  | adipose      | Art3          | 109979 |
| C12 | 6116  | adipose      | Pcgf5         | 76073  |
| C12 | 6330  | adipose      | Dgkq          | 110524 |
| C12 | 6888  | adipose      | Cxcl9         | 17329  |
| C12 | 7258  | adipose      | Bmp2k         | 140780 |
| C12 | 7377  | adipose      | Suds3         | 71954  |
| C12 | 8794  | adipose      | 1500011B03Rik | 66236  |
| C12 | 10978 | adipose      | MMT00078322   |        |
| C12 | 12656 | adipose      | Coq5          | 52064  |
| C12 | 12797 | adipose      | Brdt          | 114642 |
| C12 | 14085 | adipose      | Cdkl2         | 53886  |
| C12 | 14129 | adipose      | 5430403G16Rik | 77200  |
| C12 | 15466 | adipose      | Gm136         | 214568 |



|     |       |              |               |        |
|-----|-------|--------------|---------------|--------|
| C12 | 16066 | adipose      | Coq2          | 71883  |
| C12 | 16168 | adipose      | Crif2         | 57914  |
| C12 | 17159 | adipose      | Gtpbp6        | 107999 |
| C12 | 17716 | adipose      | Rnf10         | 50849  |
| C12 | 19191 | adipose      | Ccng2         | 12452  |
| C12 | 19443 | adipose      | Prkab1        | 19079  |
| C12 | 19719 | adipose      | EG634650      | 634650 |
| C12 | 20118 | adipose      | Tmem175       | 72392  |
| C12 | 22298 | adipose      | Zfp259        | 22687  |
| C12 | 22988 | adipose      | Hscb          | 100900 |
| C12 | 23625 | adipose      | Pkd2          | 18764  |
| C12 | 478   | hypothalamus | Sfrs9         | 108014 |
| C12 | 665   | hypothalamus | Slc26a1       | 231583 |
| C12 | 1447  | hypothalamus | Naaa          | 67111  |
| C12 | 1660  | hypothalamus | Zfp33b        | 69623  |
| C12 | 5425  | hypothalamus | Ung           | 22256  |
| C12 | 6330  | hypothalamus | Dgkq          | 110524 |
| C12 | 6487  | hypothalamus | Slc4a4        | 54403  |
| C12 | 8794  | hypothalamus | 1500011B03Rik | 66236  |
| C12 | 8807  | hypothalamus | Ankrd56       | 78088  |
| C12 | 10978 | hypothalamus | MMT00078322   |        |
| C12 | 11257 | hypothalamus | Trem3         | 58218  |
| C12 | 12656 | hypothalamus | Coq5          | 52064  |
| C12 | 12797 | hypothalamus | Brdt          | 114642 |
| C12 | 15466 | hypothalamus | Gm136         | 214568 |
| C12 | 16066 | hypothalamus | Coq2          | 71883  |
| C12 | 16168 | hypothalamus | Crif2         | 57914  |
| C12 | 17716 | hypothalamus | Rnf10         | 50849  |
| C12 | 19151 | hypothalamus | Dmp1          | 13406  |
| C12 | 19990 | hypothalamus | 4921515J06Rik | 66715  |
| C12 | 20729 | hypothalamus | Ttc28         | 209683 |
| C12 | 22298 | hypothalamus | Zfp259        | 22687  |
| C12 | 22988 | hypothalamus | Hscb          | 100900 |
| C12 | 23625 | hypothalamus | Pkd2          | 18764  |
| C13 | 1371  | adipose      | 1200009I06Rik | 74190  |
| C13 | 2485  | adipose      | Adck1         | 72113  |
| C13 | 3559  | adipose      | 4933433P14Rik | 66787  |
| C13 | 3812  | adipose      | Zfyve26       | 211978 |
| C13 | 4414  | adipose      | 5033406O09Rik | 77675  |
| C13 | 6828  | adipose      | Pigh          | 110417 |
| C13 | 8155  | adipose      | Mark3         | 17169  |
| C13 | 8925  | adipose      | MMT00026932   |        |
| C13 | 9832  | adipose      | Brf1          | 72308  |
| C13 | 10526 | adipose      | MMT00036239   |        |
| C13 | 10788 | adipose      | D430019H16Rik | 268595 |
| C13 | 13027 | adipose      | Ppp2r5c       | 26931  |
| C13 | 13072 | adipose      | BC022687      | 217887 |
| C13 | 13988 | adipose      | Cntnap2       | 66797  |
| C13 | 15088 | adipose      | 2810452K22Rik | 67236  |
| C13 | 15277 | adipose      | 2810002N01Rik | 68020  |
| C13 | 16191 | adipose      | Klc1          | 16593  |

|     |       |              |               |        |
|-----|-------|--------------|---------------|--------|
| C13 | 16580 | adipose      | Tnfaip2       | 21928  |
| C13 | 16852 | adipose      | Vash1         | 238328 |
| C13 | 17285 | adipose      | 1700019E19Rik | 76411  |
| C13 | 17854 | adipose      | Rdh11         | 17252  |
| C13 | 18140 | adipose      | Atg2b         | 76559  |
| C13 | 19214 | adipose      | Snopc1        | 75627  |
| C13 | 20068 | adipose      | 2610204M08Rik | 70435  |
| C13 | 21442 | adipose      | Rad5111       | 19363  |
| C13 | 22297 | adipose      | Zfyve1        | 217695 |
| C13 | 23462 | adipose      | Bag5          | 70369  |
| C13 | 23693 | adipose      | A530016L24Rik | 319942 |
| C13 | 1371  | hypothalamus | 1200009I06Rik | 74190  |
| C13 | 2485  | hypothalamus | Adck1         | 72113  |
| C13 | 3812  | hypothalamus | Zfyve26       | 211978 |
| C13 | 4414  | hypothalamus | 5033406O09Rik | 77675  |
| C13 | 6357  | hypothalamus | Ankrd9        | 74251  |
| C13 | 7388  | hypothalamus | Amn           | 93835  |
| C13 | 8155  | hypothalamus | Mark3         | 17169  |
| C13 | 8724  | hypothalamus | Tgfb3         | 21809  |
| C13 | 9832  | hypothalamus | Brf1          | 72308  |
| C13 | 10526 | hypothalamus | MMT00036239   |        |
| C13 | 10788 | hypothalamus | D430019H16Rik | 268595 |
| C13 | 12517 | hypothalamus | 4930573I19Rik | 104859 |
| C13 | 13027 | hypothalamus | Ppp2r5c       | 26931  |
| C13 | 13207 | hypothalamus | Sptlc2        | 20773  |
| C13 | 13389 | hypothalamus | Six6os1       | 75801  |
| C13 | 15277 | hypothalamus | 2810002N01Rik | 68020  |
| C13 | 15984 | hypothalamus | MMT00075074   |        |
| C13 | 16580 | hypothalamus | Tnfaip2       | 21928  |
| C13 | 17957 | hypothalamus | 1700086L19Rik | 74284  |
| C13 | 18140 | hypothalamus | Atg2b         | 76559  |
| C13 | 19214 | hypothalamus | Snopc1        | 75627  |
| C13 | 21149 | hypothalamus | A230065H16Rik | 380787 |
| C13 | 22297 | hypothalamus | Zfyve1        | 217695 |
| C13 | 23462 | hypothalamus | Bag5          | 70369  |
| C13 | 23693 | hypothalamus | A530016L24Rik | 319942 |
| C14 | 676   | adipose      | Ms4a4d        | 66607  |
| C14 | 874   | adipose      | Aldh1a7       | 26358  |
| C14 | 1257  | adipose      | Slc25a45      | 107375 |
| C14 | 1324  | adipose      | Rfc5          | 72151  |
| C14 | 1936  | adipose      | Cbwd1         | 226043 |
| C14 | 2232  | adipose      | Strn          | 268980 |
| C14 | 2273  | adipose      | Haghl         | 68977  |
| C14 | 5833  | adipose      | Kcnk7         | 16530  |
| C14 | 7159  | adipose      | 1700031F05Rik | 73300  |
| C14 | 8443  | adipose      | Pola2         | 18969  |
| C14 | 8721  | adipose      | Tbc1d10c      | 108995 |
| C14 | 8902  | adipose      | Aldh3b1       | 67689  |
| C14 | 9158  | adipose      | Pde9a         | 18585  |
| C14 | 10360 | adipose      | Nrxn2         | 18190  |
| C14 | 11369 | adipose      | Stx3          | 20908  |

|     |       |              |               |        |
|-----|-------|--------------|---------------|--------|
| C14 | 11812 | adipose      | Mrpl16        | 94063  |
| C14 | 12312 | adipose      | Ms4a6d        | 68774  |
| C14 | 13044 | adipose      | 5730596K20Rik | 109168 |
| C14 | 13356 | adipose      | Aldh3b2       | 621603 |
| C14 | 15334 | adipose      | Rnaseh2c      | 68209  |
| C14 | 15676 | adipose      | Fads1         | 76267  |
| C14 | 17447 | adipose      | Ctsf          | 56464  |
| C14 | 21015 | adipose      | MMT00014048   |        |
| C14 | 21607 | adipose      | Aldh1a1       | 11668  |
| C14 | 676   | hypothalamus | Ms4a4d        | 66607  |
| C14 | 874   | hypothalamus | Aldh1a7       | 26358  |
| C14 | 1257  | hypothalamus | Slc25a45      | 107375 |
| C14 | 1936  | hypothalamus | Cbwd1         | 226043 |
| C14 | 2830  | hypothalamus | 4632417K18Rik | 107373 |
| C14 | 4643  | hypothalamus | Mbl2          | 17195  |
| C14 | 4678  | hypothalamus | Kank1         | 107351 |
| C14 | 5833  | hypothalamus | Kcnk7         | 16530  |
| C14 | 7159  | hypothalamus | 1700031F05Rik | 73300  |
| C14 | 8443  | hypothalamus | Pola2         | 18969  |
| C14 | 8721  | hypothalamus | Tbc1d10c      | 108995 |
| C14 | 8902  | hypothalamus | Aldh3b1       | 67689  |
| C14 | 11369 | hypothalamus | Stx3          | 20908  |
| C14 | 11812 | hypothalamus | Mrpl16        | 94063  |
| C14 | 12312 | hypothalamus | Ms4a6d        | 68774  |
| C14 | 15334 | hypothalamus | Rnaseh2c      | 68209  |
| C14 | 16669 | hypothalamus | Tjp2          | 21873  |
| C14 | 17447 | hypothalamus | Ctsf          | 56464  |
| C14 | 17600 | hypothalamus | Kcnq5         | 226922 |
| C14 | 18868 | hypothalamus | Mpeg1         | 17476  |
| C14 | 19744 | hypothalamus | Acy3          | 71670  |
| C14 | 19857 | hypothalamus | Rab1b         | 76308  |
| C14 | 21015 | hypothalamus | MMT00014048   |        |
| C15 | 1568  | adipose      | Frmd4b        | 232288 |
| C15 | 2743  | adipose      | Tcf3          | 21415  |
| C15 | 2815  | adipose      | Eif2ak3       | 13666  |
| C15 | 3141  | adipose      | Tmf1          | 232286 |
| C15 | 3307  | adipose      | Cd8b1         | 12526  |
| C15 | 3703  | adipose      | Ggcx          | 56316  |
| C15 | 4038  | adipose      | 1200009O22Rik | 66873  |
| C15 | 7273  | adipose      | Rnf103        | 22644  |
| C15 | 8016  | adipose      | Mrpl35        | 66223  |
| C15 | 8055  | adipose      | Ptcd3         | 69956  |
| C15 | 11147 | adipose      | Gng12         | 14701  |
| C15 | 11872 | adipose      | Vamp5         | 53620  |
| C15 | 12948 | adipose      | MMT00009927   |        |
| C15 | 13569 | adipose      | 1190003M12Rik | 68888  |
| C15 | 15384 | adipose      | Mat2a         | 232087 |
| C15 | 15625 | adipose      | Capg          | 12332  |
| C15 | 15708 | adipose      | Retsat        | 67442  |
| C15 | 16176 | adipose      | St3gal5       | 20454  |
| C15 | 17317 | adipose      | Jmjd1a        | 104263 |

|     |       |              |               |        |
|-----|-------|--------------|---------------|--------|
| C15 | 17562 | adipose      | Rbed1         | 232089 |
| C15 | 18798 | adipose      | Ndufa4l2      | 407790 |
| C15 | 18948 | adipose      | Olf1270       | 258987 |
| C15 | 20174 | adipose      | Ctnna2        | 12386  |
| C15 | 20757 | adipose      | Suclg1        | 56451  |
| C15 | 20903 | adipose      | Rpia          | 19895  |
| C15 | 21307 | adipose      | Krcc1         | 57896  |
| C15 | 1918  | hypothalamus | Usp39         | 28035  |
| C15 | 2743  | hypothalamus | Tcf3          | 21415  |
| C15 | 2815  | hypothalamus | Eif2ak3       | 13666  |
| C15 | 3703  | hypothalamus | Ggcx          | 56316  |
| C15 | 4038  | hypothalamus | 1200009O22Rik | 66873  |
| C15 | 5296  | hypothalamus | Rnf181        | 66510  |
| C15 | 7273  | hypothalamus | Rnf103        | 22644  |
| C15 | 8016  | hypothalamus | Mrpl35        | 66223  |
| C15 | 8055  | hypothalamus | Ptcd3         | 69956  |
| C15 | 8889  | hypothalamus | Dnahc6        | 330355 |
| C15 | 9355  | hypothalamus | Reep1         | 52250  |
| C15 | 11147 | hypothalamus | Gng12         | 14701  |
| C15 | 11338 | hypothalamus | Vamp8         | 22320  |
| C15 | 13569 | hypothalamus | 1190003M12Rik | 68888  |
| C15 | 14584 | hypothalamus | Vps24         | 66700  |
| C15 | 15384 | hypothalamus | Mat2a         | 232087 |
| C15 | 15625 | hypothalamus | Capg          | 12332  |
| C15 | 16255 | hypothalamus | Reg3b         | 18489  |
| C15 | 17562 | hypothalamus | Rbed1         | 232089 |
| C15 | 18948 | hypothalamus | Olf1270       | 258987 |
| C15 | 20507 | hypothalamus | Sh2d6         | 71130  |
| C16 | 1177  | adipose      | EG545391      | 545391 |
| C16 | 2044  | adipose      | Hsd17b7       | 15490  |
| C16 | 4116  | adipose      | Ifi205        | 226695 |
| C16 | 5357  | adipose      | MMT00021917   |        |
| C16 | 7936  | adipose      | MMT00061970   |        |
| C16 | 8372  | adipose      | Uap1          | 107652 |
| C16 | 11406 | adipose      | Ifi203        | 15950  |
| C16 | 11571 | adipose      | Bpnt1         | 23827  |
| C16 | 11593 | adipose      | Usf1          | 22278  |
| C16 | 12012 | adipose      | Cd247         | 12503  |
| C16 | 13149 | adipose      | Ifi203        | 15950  |
| C16 | 13929 | adipose      | Lamb3         | 16780  |
| C16 | 15121 | adipose      | Itln1         | 16429  |
| C16 | 15844 | adipose      | Klhdc9        | 68874  |
| C16 | 16528 | adipose      | Ddr2          | 18214  |
| C16 | 16972 | adipose      | Nenf          | 66208  |
| C16 | 17408 | adipose      | lqwd1         | 74106  |
| C16 | 18662 | adipose      | Batf3         | 381319 |
| C16 | 19332 | adipose      | Bpnt1         | 23827  |
| C16 | 19835 | adipose      | lars2         | 381314 |
| C16 | 20666 | adipose      | Mosc1         | 66112  |
| C16 | 22648 | adipose      | Mpzl1         | 68481  |
| C16 | 23466 | adipose      | Pou2f1        | 18986  |

|     |       |              |               |        |
|-----|-------|--------------|---------------|--------|
| C16 | 1177  | hypothalamus | EG545391      | 545391 |
| C16 | 3164  | hypothalamus | Hsd11b1       | 15483  |
| C16 | 6484  | hypothalamus | A130010J15Rik | 319266 |
| C16 | 7449  | hypothalamus | Creg1         | 433375 |
| C16 | 7963  | hypothalamus | Rxrg          | 20183  |
| C16 | 8332  | hypothalamus | Tmem206       | 66950  |
| C16 | 8857  | hypothalamus | Rab3gap2      | 98732  |
| C16 | 9449  | hypothalamus | Sft2d2        | 108735 |
| C16 | 11406 | hypothalamus | Ifi203        | 15950  |
| C16 | 11445 | hypothalamus | Atp1a2        | 98660  |
| C16 | 11571 | hypothalamus | Bpnt1         | 23827  |
| C16 | 11741 | hypothalamus | Slc30a10      | 226781 |
| C16 | 12712 | hypothalamus | MMT00059415   |        |
| C16 | 13149 | hypothalamus | Ifi203        | 15950  |
| C16 | 14864 | hypothalamus | Cdk4          | 12567  |
| C16 | 16163 | hypothalamus | Tmco1         | 68944  |
| C16 | 19332 | hypothalamus | Bpnt1         | 23827  |
| C16 | 19731 | hypothalamus | Olfr275       | 258857 |
| C16 | 19835 | hypothalamus | Iars2         | 381314 |
| C16 | 21916 | hypothalamus | Cdk4          | 12567  |
| C16 | 21967 | hypothalamus | Tyk2          | 54721  |
| C16 | 23466 | hypothalamus | Pou2f1        | 18986  |
| C17 | 290   | adipose      | B230118H07Rik | 68170  |
| C17 | 1956  | adipose      | Usp50         | 75083  |
| C17 | 1991  | adipose      | Ttc17         | 74569  |
| C17 | 2472  | adipose      | MMT00014056   |        |
| C17 | 4778  | adipose      | Cyct          | 13067  |
| C17 | 6016  | adipose      | A530057A03Rik | 215456 |
| C17 | 7654  | adipose      | Ptpmt1        | 66461  |
| C17 | 8337  | adipose      | Lgr4          | 107515 |
| C17 | 9547  | adipose      | MMT00006479   |        |
| C17 | 12892 | adipose      | 1700019L03Rik | 227736 |
| C17 | 13554 | adipose      | Aqr           | 11834  |
| C17 | 14526 | adipose      | Pacsin3       | 80708  |
| C17 | 14757 | adipose      | Hdx           | 245596 |
| C17 | 15072 | adipose      | Commd9        | 76501  |
| C17 | 16881 | adipose      | MMT00031504   |        |
| C17 | 17295 | adipose      | MMT00082577   |        |
| C17 | 19763 | adipose      | Acp2          | 11432  |
| C17 | 19803 | adipose      | BC003993      | 80744  |
| C17 | 19843 | adipose      | Rbm45         | 241490 |
| C17 | 20515 | adipose      | Dimt1         | 66254  |
| C17 | 21017 | adipose      | Gstz1         | 14874  |
| C17 | 22184 | adipose      | MMT00033856   |        |
| C17 | 22320 | adipose      | MMT00047284   |        |
| C17 | 23474 | adipose      | MMT00011721   |        |
| C17 | 290   | hypothalamus | B230118H07Rik | 68170  |
| C17 | 1510  | hypothalamus | A530058N18Rik | 320846 |
| C17 | 1806  | hypothalamus | Nola3         | 66181  |
| C17 | 1991  | hypothalamus | Ttc17         | 74569  |
| C17 | 2472  | hypothalamus | MMT00014056   |        |

|     |       |              |               |        |
|-----|-------|--------------|---------------|--------|
| C17 | 4778  | hypothalamus | Cyct          | 13067  |
| C17 | 6016  | hypothalamus | A530057A03Rik | 215456 |
| C17 | 8987  | hypothalamus | F2            | 14061  |
| C17 | 9547  | hypothalamus | MMT00006479   |        |
| C17 | 13554 | hypothalamus | Aqr           | 11834  |
| C17 | 14757 | hypothalamus | Hdx           | 245596 |
| C17 | 16881 | hypothalamus | MMT00031504   |        |
| C17 | 17295 | hypothalamus | MMT00082577   |        |
| C17 | 18368 | hypothalamus | Mpped2        | 77015  |
| C17 | 19763 | hypothalamus | Acp2          | 11432  |
| C17 | 19803 | hypothalamus | BC003993      | 80744  |
| C17 | 19843 | hypothalamus | Rbm45         | 241490 |
| C17 | 21017 | hypothalamus | Gstz1         | 14874  |
| C17 | 22320 | hypothalamus | MMT00047284   |        |
| C17 | 23474 | hypothalamus | MMT00011721   |        |
| C18 | 1654  | adipose      | Dhx58         | 80861  |
| C18 | 2456  | adipose      | Mrpl10        | 107732 |
| C18 | 3086  | adipose      | Tubg2         | 103768 |
| C18 | 3480  | adipose      | Pnpo          | 103711 |
| C18 | 4124  | adipose      | 1110037F02Rik | 66185  |
| C18 | 6376  | adipose      | Nle1          | 217011 |
| C18 | 7370  | adipose      | Spop          | 20747  |
| C18 | 8368  | adipose      | Rad51l3       | 19364  |
| C18 | 8822  | adipose      | Galntl4       | 233733 |
| C18 | 9875  | adipose      | Cdk5rap3      | 80280  |
| C18 | 10539 | adipose      | Unc45b        | 217012 |
| C18 | 12302 | adipose      | Cbx1          | 12412  |
| C18 | 12480 | adipose      | Cdc42bpg      | 240505 |
| C18 | 13810 | adipose      | 1110036O03Rik | 66180  |
| C18 | 14296 | adipose      | Slc35b1       | 110172 |
| C18 | 14384 | adipose      | Dnajc7        | 56354  |
| C18 | 16340 | adipose      | Scrn2         | 217140 |
| C18 | 17991 | adipose      | Fbxl20        | 72194  |
| C18 | 19092 | adipose      | MMT00045362   |        |
| C18 | 19134 | adipose      | Fn3k          | 63828  |
| C18 | 20918 | adipose      | Nxph3         | 104079 |
| C18 | 2456  | hypothalamus | Mrpl10        | 107732 |
| C18 | 2470  | hypothalamus | Grb7          | 14786  |
| C18 | 2881  | hypothalamus | Hlf           | 217082 |
| C18 | 3480  | hypothalamus | Pnpo          | 103711 |
| C18 | 4046  | hypothalamus | Phb           | 18673  |
| C18 | 4272  | hypothalamus | Hsd17b6       | 27400  |
| C18 | 5661  | hypothalamus | Lrrc46        | 69297  |
| C18 | 6376  | hypothalamus | Nle1          | 217011 |
| C18 | 9875  | hypothalamus | Cdk5rap3      | 80280  |
| C18 | 10498 | hypothalamus | Ube2z         | 268470 |
| C18 | 10539 | hypothalamus | Unc45b        | 217012 |
| C18 | 12302 | hypothalamus | Cbx1          | 12412  |
| C18 | 13810 | hypothalamus | 1110036O03Rik | 66180  |
| C18 | 14384 | hypothalamus | Dnajc7        | 56354  |
| C18 | 15127 | hypothalamus | Cct6b         | 12467  |

|     |       |              |             |           |
|-----|-------|--------------|-------------|-----------|
| C18 | 18448 | hypothalamus | Klh11       | 217194    |
| C18 | 19092 | hypothalamus | MMT00045362 |           |
| C18 | 19196 | hypothalamus | Nfe2l1      | 18023     |
| C18 | 21189 | hypothalamus | Arl5c       | 217151    |
| C18 | 22868 | hypothalamus | Krt15       | 16665     |
| C18 | 23295 | hypothalamus | Snx11       | 74479     |
| C18 | 23307 | hypothalamus | Myst2       | 217127    |
| C19 | 1336  | adipose      | MMT00069537 |           |
| C19 | 1629  | adipose      | Gcsh        | 68133     |
| C19 | 8790  | adipose      | Galnt2      | 108148    |
| C19 | 8887  | adipose      | Dpep1       | 13479     |
| C19 | 10668 | adipose      | Kars        | 85305     |
| C19 | 11128 | adipose      | Aars        | 234734    |
| C19 | 11560 | adipose      | MMT00001695 |           |
| C19 | 12440 | adipose      | Sult5a1     | 57429     |
| C19 | 14391 | adipose      | MMT00017335 | 100043120 |
| C19 | 15953 | adipose      | Acsf3       | 257633    |
| C19 | 16802 | adipose      | Def8        | 23854     |
| C19 | 18700 | adipose      | Trappc2l    | 59005     |
| C19 | 19402 | adipose      | Ddx19a      | 13680     |
| C19 | 20690 | adipose      | Zfp276      | 57247     |
| C19 | 21313 | adipose      | Rhou        | 69581     |
| C19 | 22351 | adipose      | Fanca       | 14087     |
| C19 | 22909 | adipose      | Nup133      | 234865    |
| C19 | 1336  | hypothalamus | MMT00069537 |           |
| C19 | 1629  | hypothalamus | Gcsh        | 68133     |
| C19 | 2243  | hypothalamus | Gcsh        | 68133     |
| C19 | 3865  | hypothalamus | Acta1       | 11459     |
| C19 | 6065  | hypothalamus | Plce1       | 74055     |
| C19 | 7910  | hypothalamus | AK122209    | 382038    |
| C19 | 10308 | hypothalamus | Fuk         | 234730    |
| C19 | 10668 | hypothalamus | Kars        | 85305     |
| C19 | 11057 | hypothalamus | MMT00032844 | 353287    |
| C19 | 12440 | hypothalamus | Sult5a1     | 57429     |
| C19 | 14391 | hypothalamus | MMT00017335 | 100043120 |
| C19 | 15953 | hypothalamus | Acsf3       | 257633    |
| C19 | 18700 | hypothalamus | Trappc2l    | 59005     |
| C19 | 20690 | hypothalamus | Zfp276      | 57247     |
| C19 | 22201 | hypothalamus | Pard3       | 93742     |
| C19 | 22351 | hypothalamus | Fanca       | 14087     |
| C19 | 22809 | hypothalamus | Mrv1        | 17540     |
| C19 | 22810 | hypothalamus | MMT00038169 |           |
| C20 | 2950  | adipose      | Mical1      | 27008     |
| C20 | 3411  | adipose      | Rabl2a      | 68708     |
| C20 | 3654  | adipose      | St13        | 70356     |
| C20 | 6804  | adipose      | Cyp2d22     | 56448     |
| C20 | 6974  | adipose      | Tmem65      | 74868     |
| C20 | 7100  | adipose      | Tomm22      | 223696    |
| C20 | 8653  | adipose      | AW124722    | 239570    |
| C20 | 10482 | adipose      | Mcat        | 223722    |
| C20 | 15935 | adipose      | Pnpla3      | 116939    |

|     |       |              |               |        |
|-----|-------|--------------|---------------|--------|
| C20 | 17147 | adipose      | Ttll12        | 223723 |
| C20 | 17529 | adipose      | Tnfrsf13c     | 72049  |
| C20 | 18520 | adipose      | MMT00005421   |        |
| C20 | 19925 | adipose      | Arsa          | 11883  |
| C20 | 19933 | adipose      | Pi16          | 74116  |
| C20 | 20119 | adipose      | Polr3h        | 78929  |
| C20 | 21127 | adipose      | Triobp        | 110253 |
| C20 | 23547 | adipose      | Tmed7         | 66676  |
| C20 | 3411  | hypothalamus | Rabl2a        | 68708  |
| C20 | 3654  | hypothalamus | St13          | 70356  |
| C20 | 6733  | hypothalamus | Mfng          | 17305  |
| C20 | 6804  | hypothalamus | Cyp2d22       | 56448  |
| C20 | 6974  | hypothalamus | Tmem65        | 74868  |
| C20 | 7021  | hypothalamus | Slc16a8       | 57274  |
| C20 | 7100  | hypothalamus | Tomm22        | 223696 |
| C20 | 8653  | hypothalamus | AW124722      | 239570 |
| C20 | 9540  | hypothalamus | Csnk1e        | 27373  |
| C20 | 10482 | hypothalamus | Mcat          | 223722 |
| C20 | 14145 | hypothalamus | Sgsm3         | 105835 |
| C20 | 16153 | hypothalamus | Syng1         | 20972  |
| C20 | 16467 | hypothalamus | Card10        | 105844 |
| C20 | 16522 | hypothalamus | Ccdc85a       | 216613 |
| C20 | 17831 | hypothalamus | Ndufa6        | 67130  |
| C20 | 19955 | hypothalamus | Cbx2          | 12416  |
| C20 | 21526 | hypothalamus | Mkl1          | 223701 |
| C20 | 22475 | hypothalamus | Sh3bp1        | 20401  |
| C21 | 1894  | adipose      | Lrp4          | 228357 |
| C21 | 2705  | adipose      | Hrbl          | 231801 |
| C21 | 3701  | adipose      | Zfp68         | 24135  |
| C21 | 5511  | adipose      | BC055004      | 381680 |
| C21 | 7945  | adipose      | Gpc2          | 71951  |
| C21 | 9077  | adipose      | Cnpy4         | 66455  |
| C21 | 10995 | adipose      | Ap4m1         | 11781  |
| C21 | 13780 | adipose      | Pilra         | 231805 |
| C21 | 14631 | adipose      | Stag3         | 50878  |
| C21 | 16451 | adipose      | 2010007H12Rik | 69871  |
| C21 | 17158 | adipose      | Zfp113        | 56314  |
| C21 | 18195 | adipose      | Mafk          | 17135  |
| C21 | 19502 | adipose      | Fbxo24        | 71176  |
| C21 | 23500 | adipose      | BC055004      | 381680 |
| C21 | 649   | hypothalamus | Pop7          | 74097  |
| C21 | 2705  | hypothalamus | Hrbl          | 231801 |
| C21 | 3701  | hypothalamus | Zfp68         | 24135  |
| C21 | 7945  | hypothalamus | Gpc2          | 71951  |
| C21 | 8992  | hypothalamus | Trfr2         | 50765  |
| C21 | 9077  | hypothalamus | Cnpy4         | 66455  |
| C21 | 10995 | hypothalamus | Ap4m1         | 11781  |
| C21 | 12157 | hypothalamus | Gal3st4       | 330217 |
| C21 | 12907 | hypothalamus | Zkscan1       | 74570  |
| C21 | 13780 | hypothalamus | Pilra         | 231805 |
| C21 | 14631 | hypothalamus | Stag3         | 50878  |



|     |       |              |               |        |
|-----|-------|--------------|---------------|--------|
| C21 | 15587 | hypothalamus | Actl6b        | 83766  |
| C21 | 16451 | hypothalamus | 2010007H12Rik | 69871  |
| C21 | 17158 | hypothalamus | Zfp113        | 56314  |
| C21 | 18195 | hypothalamus | Mafk          | 17135  |
| C21 | 19502 | hypothalamus | Fbxo24        | 71176  |
| C22 | 1162  | adipose      | Cpsf4         | 54188  |
| C22 | 2755  | adipose      | EG382421      | 382421 |
| C22 | 7083  | adipose      | MMT00044154   |        |
| C22 | 7116  | adipose      | Katnal1       | 231912 |
| C22 | 7378  | adipose      | 1700001J03Rik | 69282  |
| C22 | 8022  | adipose      | MMT00004959   |        |
| C22 | 8906  | adipose      | MMT00004929   |        |
| C22 | 9755  | adipose      | MMT00066614   | 667386 |
| C22 | 12377 | adipose      | MMT00050540   |        |
| C22 | 12885 | adipose      | Ccl24         | 56221  |
| C22 | 14062 | adipose      | Pan3          | 72587  |
| C22 | 15480 | adipose      | MMT00078167   |        |
| C22 | 17535 | adipose      | MMT00008110   |        |
| C22 | 19565 | adipose      | EG385454      | 385454 |
| C22 | 21125 | adipose      | Mtif3         | 76366  |
| C22 | 1162  | hypothalamus | Cpsf4         | 54188  |
| C22 | 2755  | hypothalamus | EG382421      | 382421 |
| C22 | 7083  | hypothalamus | MMT00044154   |        |
| C22 | 7116  | hypothalamus | Katnal1       | 231912 |
| C22 | 7378  | hypothalamus | 1700001J03Rik | 69282  |
| C22 | 7821  | hypothalamus | MMT00042003   |        |
| C22 | 8182  | hypothalamus | Tbx1          | 21380  |
| C22 | 12377 | hypothalamus | MMT00050540   |        |
| C22 | 15297 | hypothalamus | MMT00048291   |        |
| C22 | 15480 | hypothalamus | MMT00078167   |        |
| C22 | 17535 | hypothalamus | MMT00008110   |        |
| C22 | 17616 | hypothalamus | Flt1          | 14254  |
| C22 | 19565 | hypothalamus | EG385454      | 385454 |
| C22 | 21125 | hypothalamus | Mtif3         | 76366  |
| C23 | 387   | adipose      | Rgs10         | 67865  |
| C23 | 409   | adipose      | Lxn           | 17035  |
| C23 | 1085  | adipose      | Col5a2        | 12832  |
| C23 | 1255  | adipose      | Grhpr         | 76238  |
| C23 | 1549  | adipose      | Gmfg          | 63986  |
| C23 | 2928  | adipose      | Igf1          | 16000  |
| C23 | 3150  | adipose      | Syne2         | 319565 |
| C23 | 5336  | adipose      | Timeless      | 21853  |
| C23 | 5364  | adipose      | Kif22         | 110033 |
| C23 | 5806  | adipose      | Prrx2         | 20204  |
| C23 | 7873  | adipose      | Steap4        | 117167 |
| C23 | 9686  | adipose      | Nek4          | 23955  |
| C23 | 10808 | adipose      | Rab711        | 226422 |
| C23 | 11340 | adipose      | Syn2          | 20965  |
| C23 | 12029 | adipose      | Tcf19         | 106795 |
| C23 | 12115 | adipose      | Hist1h2an     | 319170 |
| C23 | 13455 | adipose      | Cenpe         | 229841 |

|     |       |              |               |        |
|-----|-------|--------------|---------------|--------|
| C23 | 13588 | adipose      | MMT00042387   |        |
| C23 | 14877 | adipose      | Ptx3          | 19288  |
| C23 | 16024 | adipose      | P2ry6         | 233571 |
| C23 | 16210 | adipose      | Metrn1        | 210029 |
| C23 | 17472 | adipose      | Cd53          | 12508  |
| C23 | 20216 | adipose      | BC028528      | 229600 |
| C23 | 1416  | hypothalamus | 6720460F02Rik | 109212 |
| C23 | 5271  | hypothalamus | Npy           | 109648 |
| C23 | 5410  | hypothalamus | Cyp4f15       | 106648 |
| C23 | 6133  | hypothalamus | Agrp          | 11604  |
| C24 | 419   | adipose      | Foxk2         | 68837  |
| C24 | 2877  | adipose      | Pcyt2         | 68671  |
| C24 | 6846  | adipose      | Olf1402       | 258272 |
| C24 | 11199 | adipose      | Sirt7         | 209011 |
| C24 | 12546 | adipose      | Cd7           | 12516  |
| C24 | 13615 | adipose      | Arl16         | 70317  |
| C24 | 15016 | adipose      | MMT00074608   |        |
| C24 | 16613 | adipose      | 1110031I02Rik | 66179  |
| C24 | 17073 | adipose      | 1810049H13Rik | 66431  |
| C24 | 17897 | adipose      | Gm1019        | 368202 |
| C24 | 21655 | adipose      | Rab40b        | 217371 |
| C24 | 22021 | adipose      | Csnk1d        | 104318 |
| C24 | 22557 | adipose      | P4hb          | 18453  |
| C24 | 872   | hypothalamus | MMT00004441   |        |
| C24 | 7670  | hypothalamus | Ccdc57        | 71276  |
| C24 | 9790  | hypothalamus | Tspan10       | 208634 |
| C24 | 11199 | hypothalamus | Sirt7         | 209011 |
| C24 | 13615 | hypothalamus | Arl16         | 70317  |
| C24 | 13923 | hypothalamus | Nploc4        | 217365 |
| C24 | 16210 | hypothalamus | Metrn1        | 210029 |
| C24 | 16613 | hypothalamus | 1110031I02Rik | 66179  |
| C24 | 16782 | hypothalamus | 1110012N22Rik | 68515  |
| C24 | 17193 | hypothalamus | Npb           | 208990 |
| C24 | 17897 | hypothalamus | Gm1019        | 368202 |
| C24 | 21414 | hypothalamus | BC017643      | 217370 |
| C24 | 22021 | hypothalamus | Csnk1d        | 104318 |
| C24 | 22250 | hypothalamus | Wdr45l        | 66840  |
| C25 | 246   | adipose      | MMT00053742   |        |
| C25 | 3191  | adipose      | Lamc2         | 16782  |
| C25 | 5465  | adipose      | Slamf8        | 74748  |
| C25 | 9611  | adipose      | Ncf2          | 17970  |
| C25 | 10553 | adipose      | Dusp23        | 68440  |
| C25 | 13417 | adipose      | 1700025G04Rik | 69399  |
| C25 | 15569 | adipose      | BC003331      | 226499 |
| C25 | 17463 | adipose      | Rgl1          | 19731  |
| C25 | 23262 | adipose      | C530043G21Rik | 215015 |
| C25 | 246   | hypothalamus | MMT00053742   |        |
| C25 | 1625  | hypothalamus | AW146154      | 101835 |
| C25 | 1712  | hypothalamus | Rnf2          | 19821  |
| C25 | 4810  | hypothalamus | Vsig8         | 240916 |
| C25 | 5465  | hypothalamus | Slamf8        | 74748  |

|     |       |              |               |        |
|-----|-------|--------------|---------------|--------|
| C25 | 8933  | hypothalamus | Arpc5         | 67771  |
| C25 | 9402  | hypothalamus | 1200016B10Rik | 66875  |
| C25 | 9611  | hypothalamus | Ncf2          | 17970  |
| C25 | 11233 | hypothalamus | Tef           | 21685  |
| C25 | 13417 | hypothalamus | 1700025G04Rik | 69399  |
| C25 | 15569 | hypothalamus | BC003331      | 226499 |
| C25 | 15614 | hypothalamus | Tpr           | 108989 |
| C25 | 17463 | hypothalamus | Rgl1          | 19731  |
| C25 | 20004 | hypothalamus | 1190005F20Rik | 98685  |
| C26 | 3624  | adipose      | Pygb          | 110078 |
| C26 | 4181  | adipose      | Gzf1          | 74533  |
| C26 | 4626  | adipose      | 2310046K01Rik | 69698  |
| C26 | 4628  | adipose      | MMT00040865   |        |
| C26 | 9141  | adipose      | MMT00028469   |        |
| C26 | 9361  | adipose      | Hand1         | 15110  |
| C26 | 13581 | adipose      | Srxn1         | 76650  |
| C26 | 15565 | adipose      | 2310001A20Rik | 71881  |
| C26 | 16048 | adipose      | Nsfl1c        | 386649 |
| C26 | 16107 | adipose      | Entpd6        | 12497  |
| C26 | 16592 | adipose      | Psmf1         | 228769 |
| C26 | 17514 | adipose      | Thbd          | 21824  |
| C26 | 19971 | adipose      | B930046C15Rik | 544998 |
| C26 | 1890  | hypothalamus | Nanp          | 67311  |
| C26 | 3624  | hypothalamus | Pygb          | 110078 |
| C26 | 4626  | hypothalamus | 2310046K01Rik | 69698  |
| C26 | 6202  | hypothalamus | Hrk           | 12123  |
| C26 | 9361  | hypothalamus | Hand1         | 15110  |
| C26 | 13581 | hypothalamus | Srxn1         | 76650  |
| C26 | 18555 | hypothalamus | Sdcbp2        | 228765 |
| C26 | 19826 | hypothalamus | Nanp          | 67311  |
| C26 | 19971 | hypothalamus | B930046C15Rik | 544998 |
| C27 | 716   | adipose      | Dbpht1        | 20749  |
| C27 | 2128  | adipose      | 4930447K03Rik | 432745 |
| C27 | 3938  | adipose      | Abt1          | 30946  |
| C27 | 11649 | adipose      | Hfe           | 15216  |
| C27 | 12245 | adipose      | Zfp322a       | 218100 |
| C27 | 15674 | adipose      | Riok1         | 71340  |
| C27 | 15698 | adipose      | Them2         | 66834  |
| C27 | 16224 | adipose      | Cdc2l5        | 69562  |
| C27 | 17528 | adipose      | Gmnn          | 57441  |
| C27 | 19192 | adipose      | Hist1h1c      | 50708  |
| C27 | 19713 | adipose      | BC048599      | 232717 |
| C27 | 23118 | adipose      | Ttrap         | 56196  |
| C27 | 2128  | hypothalamus | 4930447K03Rik | 432745 |
| C27 | 3938  | hypothalamus | Abt1          | 30946  |
| C27 | 10189 | hypothalamus | Cage1         | 71213  |
| C27 | 11649 | hypothalamus | Hfe           | 15216  |
| C27 | 13656 | hypothalamus | Ly86          | 17084  |
| C27 | 14822 | hypothalamus | Nrsn1         | 22360  |
| C27 | 15698 | hypothalamus | Them2         | 66834  |
| C27 | 17528 | hypothalamus | Gmnn          | 57441  |

|     |       |              |                    |           |
|-----|-------|--------------|--------------------|-----------|
| C27 | 23118 | hypothalamus | Ttrap              | 56196     |
| C28 | 9191  | adipose      | Lbxcor1            | 207667    |
| C28 | 9219  | adipose      | Mad2l1bp           | 66591     |
| C28 | 9230  | adipose      | 1700027N10Rik      | 75564     |
| C28 | 13246 | adipose      | Klc4               | 74764     |
| C28 | 13507 | adipose      | Spats1             | 71020     |
| C28 | 13946 | adipose      | Slc35b2            | 73836     |
| C28 | 14027 | adipose      | Rpo1-1             | 20016     |
| C28 | 15318 | adipose      | Aars2              | 224805    |
| C28 | 18574 | adipose      | Parc               | 78309     |
| C28 | 19519 | adipose      | BC011248           | 224823    |
| C28 | 1886  | hypothalamus | Tcte1              | 21645     |
| C28 | 9191  | hypothalamus | Lbxcor1            | 207667    |
| C28 | 9230  | hypothalamus | 1700027N10Rik      | 75564     |
| C28 | 10824 | hypothalamus | Vegfa              | 22339     |
| C28 | 13946 | hypothalamus | Slc35b2            | 73836     |
| C28 | 14027 | hypothalamus | Rpo1-1             | 20016     |
| C28 | 15318 | hypothalamus | Aars2              | 224805    |
| C28 | 18772 | hypothalamus | BC048355           | 381101    |
| C28 | 19519 | hypothalamus | BC011248           | 224823    |
| C29 | 6931  | adipose      | Hrsp12             | 15473     |
| C29 | 13648 | adipose      | Dap                | 223453    |
| C29 | 15815 | adipose      | MMT00080242        |           |
| C29 | 16721 | adipose      | Stk3               | 56274     |
| C29 | 17420 | adipose      | Vps13b             | 666173    |
| C29 | 18939 | adipose      | Matn2              | 17181     |
| C29 | 20871 | adipose      | Pop1               | 67724     |
| C29 | 6873  | hypothalamus | BC023055           | 226123    |
| C29 | 6931  | hypothalamus | Hrsp12             | 15473     |
| C29 | 11549 | hypothalamus | Depdc6             | 97998     |
| C29 | 12091 | hypothalamus | 1810015C04Rik      | 66270     |
| C29 | 12655 | hypothalamus | Tmem180            | 75146     |
| C29 | 13648 | hypothalamus | Dap                | 223453    |
| C29 | 18939 | hypothalamus | Matn2              | 17181     |
| C29 | 20871 | hypothalamus | Pop1               | 67724     |
| C29 | 22734 | hypothalamus | Ap3s2              | 11778     |
| C30 | 2319  | adipose      | E2f1               | 13555     |
| C30 | 2541  | adipose      | Ppa2               | 74776     |
| C30 | 7011  | adipose      | 1810022C23Rik      | 69123     |
| C30 | 7282  | adipose      | Ppic               | 19038     |
| C30 | 7368  | adipose      | Adam8              | 11501     |
| C30 | 9715  | adipose      | OTTMUSG00000004551 | 100038514 |
| C30 | 10147 | adipose      | Itgax              | 16411     |
| C30 | 13947 | adipose      | Crip2              | 68337     |
| C30 | 16525 | adipose      | Lbp                | 16803     |
| C30 | 16919 | adipose      | Pea15a             | 18611     |
| C30 | 20281 | adipose      | Naip1              | 17940     |
| C30 | 21378 | adipose      | Havcr2             | 171285    |
| C30 | 21863 | adipose      | Dok2               | 13449     |
| C30 | 15255 | hypothalamus | Ccl8               | 20307     |
| C30 | 16378 | hypothalamus | Ccl8               | 20307     |

|     |       |              |               |        |
|-----|-------|--------------|---------------|--------|
| C31 | 2832  | adipose      | 2810021J22Rik | 69944  |
| C31 | 3021  | adipose      | Gdf9          | 14566  |
| C31 | 4344  | adipose      | 1810073G14Rik | 67726  |
| C31 | 6234  | adipose      | P4ha2         | 18452  |
| C31 | 11795 | adipose      | Gps2          | 56310  |
| C31 | 16289 | adipose      | Myocd         | 214384 |
| C31 | 2832  | hypothalamus | 2810021J22Rik | 69944  |
| C31 | 3021  | hypothalamus | Gdf9          | 14566  |
| C31 | 4057  | hypothalamus | Slc2a4        | 20528  |
| C31 | 5332  | hypothalamus | Pdlim4        | 30794  |
| C31 | 19032 | hypothalamus | Tymp          | 72962  |
| C32 | 3622  | adipose      | Trim21        | 20821  |
| C32 | 4466  | adipose      | MMT00014327   | 233575 |
| C32 | 8284  | adipose      | EG209380      | 209380 |
| C32 | 9161  | adipose      | Mrpl17        | 27397  |
| C32 | 19078 | adipose      | EG668139      | 668139 |
| C32 | 19734 | adipose      | Dchs1         | 233651 |
| C32 | 22693 | adipose      | Trim68        | 101700 |
| C32 | 1901  | hypothalamus | Tpp1          | 12751  |
| C32 | 9161  | hypothalamus | Mrpl17        | 27397  |
| C32 | 19734 | hypothalamus | Dchs1         | 233651 |
| C32 | 22693 | hypothalamus | Trim68        | 101700 |
| C33 | 5158  | adipose      | Rtn4          | 68585  |
| C33 | 11816 | adipose      | Ccdc99        | 70385  |
| C33 | 13195 | adipose      | Mtif2         | 76784  |
| C33 | 21444 | adipose      | Pnpt1         | 71701  |
| C33 | 7057  | hypothalamus | Stk10         | 20868  |
| C33 | 11816 | hypothalamus | Ccdc99        | 70385  |
| C33 | 13181 | hypothalamus | Lcp2          | 16822  |
| C33 | 13195 | hypothalamus | Mtif2         | 76784  |
| C33 | 21371 | hypothalamus | Spnb2         | 20742  |
| C33 | 21444 | hypothalamus | Pnpt1         | 71701  |
| C34 | 4901  | adipose      | MMT00073557   | 171504 |
| C34 | 5639  | adipose      | Gdpd3         | 68616  |
| C34 | 12730 | adipose      | 9130019O22Rik | 78921  |
| C34 | 18172 | adipose      | Nupr1         | 56312  |
| C34 | 2278  | hypothalamus | Gtf3c1        | 233863 |
| C34 | 4901  | hypothalamus | MMT00073557   | 171504 |
| C34 | 5639  | hypothalamus | Gdpd3         | 68616  |
| C34 | 6856  | hypothalamus | Tnrc6a        | 233833 |
| C34 | 12730 | hypothalamus | 9130019O22Rik | 78921  |
| C34 | 18442 | hypothalamus | Zfp764        | 233893 |
| C35 | 9912  | adipose      | Ttc27         | 74196  |
| C35 | 11467 | adipose      | Ypel5         | 383295 |
| C35 | 14913 | adipose      | Yipf4         | 67864  |
| C35 | 15306 | adipose      | Dpy30         | 66310  |
| C35 | 16861 | adipose      | Nlrc4         | 268973 |
| C35 | 16886 | adipose      | Dpy30         | 66310  |
| C35 | 1423  | hypothalamus | Spdya         | 70891  |
| C35 | 9912  | hypothalamus | Ttc27         | 74196  |
| C35 | 11467 | hypothalamus | Ypel5         | 383295 |

|     |       |              |               |           |
|-----|-------|--------------|---------------|-----------|
| C35 | 16861 | hypothalamus | Nlrc4         | 268973    |
| C36 | 6270  | adipose      | Cysltr1       | 58861     |
| C36 | 11419 | adipose      | Atrnl1        | 226255    |
| C36 | 1495  | hypothalamus | Zfp445        | 235682    |
| C36 | 4325  | hypothalamus | Slc16a4       | 229699    |
| C36 | 4332  | hypothalamus | Sf3b1         | 81898     |
| C36 | 6179  | hypothalamus | Cxcl5         | 20311     |
| C36 | 11906 | hypothalamus | Nfe2l3        | 18025     |
| C36 | 13390 | hypothalamus | Ddx31         | 227674    |
| C36 | 23397 | hypothalamus | Ccnj1         | 380694    |
| C37 | 1374  | adipose      | Mdn1          | 100019    |
| C37 | 6498  | adipose      | MMT00016809   | 100048067 |
| C37 | 11167 | adipose      | Dars2         | 226539    |
| C37 | 585   | hypothalamus | Tas2r119      | 57254     |
| C37 | 794   | hypothalamus | Mrps14        | 64659     |
| C37 | 5456  | hypothalamus | Rabgap1l      | 29809     |
| C37 | 6498  | hypothalamus | MMT00016809   | 100048067 |
| C37 | 11167 | hypothalamus | Dars2         | 226539    |
| C37 | 22984 | hypothalamus | Tnnt2         | 21956     |
| C38 | 5098  | adipose      | 1700029J11Rik | 76426     |
| C38 | 12402 | adipose      | Th1l          | 57314     |
| C38 | 21053 | adipose      | Ypel1         | 106369    |
| C38 | 21986 | adipose      | Cstf1         | 67337     |
| C38 | 23008 | adipose      | Ctsz          | 64138     |
| C38 | 23353 | adipose      | Slmo2         | 66390     |
| C38 | 153   | hypothalamus | 2010011I20Rik | 67017     |
| C38 | 23008 | hypothalamus | Ctsz          | 64138     |
| C39 | 20292 | adipose      | 1810048J11Rik | 67708     |
| C39 | 12437 | hypothalamus | Six6          | 20476     |
| C39 | 14621 | hypothalamus | Six4          | 20474     |
| C39 | 14862 | hypothalamus | Dhrs7         | 66375     |
| C39 | 20292 | hypothalamus | 1810048J11Rik | 67708     |
| C39 | 21369 | hypothalamus | Cd4           | 12504     |
| C39 | 21442 | hypothalamus | Rad51l1       | 19363     |
| C39 | 22256 | hypothalamus | Arg2          | 11847     |
| C40 | 14733 | adipose      | Fhit          | 14198     |
| C40 | 17081 | adipose      | 3830406C13Rik | 218734    |
| C40 | 21454 | adipose      | MMT00068006   |           |
| C40 | 14733 | hypothalamus | Fhit          | 14198     |
| C40 | 17081 | hypothalamus | 3830406C13Rik | 218734    |
| C40 | 18526 | hypothalamus | Dydc2         | 71200     |
| C40 | 21075 | hypothalamus | Gtf2h5        | 66467     |
| C41 | 4549  | adipose      | 9930012K11Rik | 268759    |
| C41 | 6845  | adipose      | Cyb561d1      | 72023     |
| C41 | 12626 | adipose      | Fut7          | 14347     |
| C41 | 13142 | adipose      | Wdr81         | 192652    |
| C41 | 14714 | adipose      | Ccdc102a      | 234582    |
| C41 | 5256  | hypothalamus | Tnfrsf13c     | 72049     |
| C41 | 11382 | hypothalamus | Cdca3         | 14793     |
| C42 | 3006  | adipose      | Alas2         | 11656     |
| C42 | 5919  | adipose      | B930041F14Rik | 230991    |

|     |       |              |          |        |
|-----|-------|--------------|----------|--------|
| C42 | 8530  | adipose      | Snca     | 20617  |
| C42 | 3006  | hypothalamus | Alas2    | 11656  |
| C42 | 18298 | hypothalamus | Slc25a37 | 67712  |
| C42 | 21335 | hypothalamus | Trp53rk  | 76367  |
| C42 | 21387 | hypothalamus | Cnot7    | 18983  |
| C43 | 8743  | adipose      | Pkp4     | 227937 |
| C43 | 12219 | adipose      | Cyb5b    | 66427  |
| C43 | 12420 | adipose      | Klhl21   | 242785 |
| C43 | 13839 | adipose      | Gypc     | 71683  |
| C43 | 22732 | adipose      | Cyb5b    | 66427  |
| C43 | 989   | hypothalamus | Phyhd1   | 227696 |
| C43 | 12208 | hypothalamus | Pnpla7   | 241274 |
| C44 | 548   | adipose      | Gpr109a  | 80885  |
| C44 | 16380 | adipose      | Vasn     | 246154 |
| C44 | 16492 | adipose      | Hk2      | 15277  |
| C44 | 19004 | adipose      | Pdk4     | 27273  |
| C44 | 20024 | adipose      | Lrrc32   | 434215 |
| C44 | 23189 | adipose      | Rbm28    | 68272  |
| C44 | 18785 | hypothalamus | Angptl4  | 57875  |
| C45 | 6413  | adipose      | Fbxo4    | 106052 |
| C45 | 9195  | adipose      | Sub1     | 20024  |
| C45 | 11620 | adipose      | Zfr      | 22763  |
| C45 | 9195  | hypothalamus | Sub1     | 20024  |
| C45 | 11620 | hypothalamus | Zfr      | 22763  |

**Table T11: HL Subnetworks**

| Subnetwork | Probe_id | Tissue       | Gene_Symbol   | Entrez_ID |  |  |
|------------|----------|--------------|---------------|-----------|--|--|
| C1         | 265      | hypothalamus | Taf9          | 108143    |  |  |
| C1         | 286      | hypothalamus | MMT00070509   | 100037278 |  |  |
| C1         | 684      | hypothalamus | 1700102P08Rik | 112418    |  |  |
| C1         | 824      | hypothalamus | Esco1         | 77805     |  |  |
| C1         | 857      | hypothalamus | Sfrs12        | 218543    |  |  |
| C1         | 863      | hypothalamus | Dnajc14       | 74330     |  |  |
| C1         | 904      | hypothalamus | MMT00003579   |           |  |  |
| C1         | 984      | hypothalamus | Derl3         | 70377     |  |  |
| C1         | 1006     | hypothalamus | 2600011E07Rik | 72125     |  |  |
| C1         | 1027     | hypothalamus | Accs          | 329470    |  |  |
| C1         | 1036     | hypothalamus | Dusp19        | 68082     |  |  |
| C1         | 1039     | hypothalamus | Zfp207        | 22680     |  |  |
| C1         | 1086     | hypothalamus | 2610205E22Rik | 66617     |  |  |
| C1         | 1214     | hypothalamus | Trip13        | 69716     |  |  |
| C1         | 1281     | hypothalamus | Alkbh3        | 69113     |  |  |
| C1         | 1296     | hypothalamus | 5330401P04Rik | 227094    |  |  |
| C1         | 1325     | hypothalamus | Pigu          | 228812    |  |  |
| C1         | 1351     | hypothalamus | Whsc111       | 234135    |  |  |
| C1         | 1455     | hypothalamus | Smek1         | 68734     |  |  |
| C1         | 1594     | hypothalamus | Mrpl24        | 67707     |  |  |
| C1         | 1646     | hypothalamus | Slc15a4       | 100561    |  |  |
| C1         | 2190     | hypothalamus | Heyl          | 56198     |  |  |
| C1         | 2210     | hypothalamus | Chn1          | 108699    |  |  |
| C1         | 2273     | hypothalamus | Haghl         | 68977     |  |  |
| C1         | 2362     | hypothalamus | Mkks          | 59030     |  |  |
| C1         | 2370     | hypothalamus | 8430408G22Rik | 213393    |  |  |
| C1         | 2558     | hypothalamus | Tmem132b      | 208151    |  |  |
| C1         | 2789     | hypothalamus | Sirt5         | 68346     |  |  |
| C1         | 2800     | hypothalamus | Dusp11        | 72102     |  |  |
| C1         | 3016     | hypothalamus | Bsdc1         | 100383    |  |  |
| C1         | 3041     | hypothalamus | 2410004A20Rik | 66991     |  |  |
| C1         | 3293     | hypothalamus | Nup153        | 218210    |  |  |
| C1         | 3322     | hypothalamus | Ofd1          | 237222    |  |  |
| C1         | 3462     | hypothalamus | Nmnat3        | 74080     |  |  |
| C1         | 3620     | hypothalamus | Bet1          | 12068     |  |  |
| C1         | 3666     | hypothalamus | Tas1r1        | 110326    |  |  |
| C1         | 3706     | hypothalamus | 2410002O22Rik | 66975     |  |  |
| C1         | 3808     | hypothalamus | 2010209O12Rik | 100910    |  |  |
| C1         | 4048     | hypothalamus | BC002230      | 217827    |  |  |
| C1         | 4106     | hypothalamus | MMT00041409   |           |  |  |
| C1         | 4192     | hypothalamus | Zranb1        | 360216    |  |  |
| C1         | 4235     | hypothalamus | Pfkfb3        | 170768    |  |  |
| C1         | 4308     | hypothalamus | Nphp3         | 74025     |  |  |
| C1         | 4346     | hypothalamus | Ccdc46        | 76380     |  |  |
| C1         | 4363     | hypothalamus | 2810002I04Rik | 72350     |  |  |
| C1         | 4443     | hypothalamus | Zfp790        | 233056    |  |  |
| C1         | 4612     | hypothalamus | Hspa5         | 14828     |  |  |
| C1         | 4665     | hypothalamus | Dynll1        | 56455     |  |  |
| C1         | 4731     | hypothalamus | Zmynd12       | 332934    |  |  |



|    |      |              |               |        |  |  |
|----|------|--------------|---------------|--------|--|--|
| C1 | 4787 | hypothalamus | Parn          | 74108  |  |  |
| C1 | 4805 | hypothalamus | Hspb1         | 15507  |  |  |
| C1 | 4849 | hypothalamus | Zxdc          | 80292  |  |  |
| C1 | 4904 | hypothalamus | Tinf2         | 28113  |  |  |
| C1 | 4906 | hypothalamus | A830059I20Rik | 58238  |  |  |
| C1 | 4966 | hypothalamus | Zscan20       | 269585 |  |  |
| C1 | 5010 | hypothalamus | Gnpda2        | 67980  |  |  |
| C1 | 5011 | hypothalamus | A930016P21Rik | 68073  |  |  |
| C1 | 5023 | hypothalamus | Spast         | 50850  |  |  |
| C1 | 5232 | hypothalamus | Arhgef16      | 230972 |  |  |
| C1 | 5247 | hypothalamus | Irak2         | 108960 |  |  |
| C1 | 5274 | hypothalamus | MMT00065196   |        |  |  |
| C1 | 5364 | hypothalamus | Kif22         | 110033 |  |  |
| C1 | 5385 | hypothalamus | Tubb2b        | 73710  |  |  |
| C1 | 5422 | hypothalamus | 4933422A05Rik | 71133  |  |  |
| C1 | 5572 | hypothalamus | Opalin        | 226115 |  |  |
| C1 | 5634 | hypothalamus | Creb1         | 12912  |  |  |
| C1 | 5686 | hypothalamus | Cys1          | 12879  |  |  |
| C1 | 5735 | hypothalamus | Nkapl         | 66707  |  |  |
| C1 | 5786 | hypothalamus | Lta           | 16992  |  |  |
| C1 | 5792 | hypothalamus | Tpd52l2       | 66314  |  |  |
| C1 | 5841 | hypothalamus | Atg12         | 67526  |  |  |
| C1 | 6012 | hypothalamus | Chid1         | 68038  |  |  |
| C1 | 6077 | hypothalamus | Pik3cb        | 74769  |  |  |
| C1 | 6143 | hypothalamus | Pacsin2       | 23970  |  |  |
| C1 | 6218 | hypothalamus | Hnrnpc        | 15381  |  |  |
| C1 | 6234 | hypothalamus | P4ha2         | 18452  |  |  |
| C1 | 6445 | hypothalamus | Mllt3         | 70122  |  |  |
| C1 | 6588 | hypothalamus | Rbmx          | 19655  |  |  |
| C1 | 6673 | hypothalamus | Nasp          | 50927  |  |  |
| C1 | 6769 | hypothalamus | Banp          | 53325  |  |  |
| C1 | 6828 | hypothalamus | Pigh          | 110417 |  |  |
| C1 | 6972 | hypothalamus | Trspap1       | 71787  |  |  |
| C1 | 7149 | hypothalamus | 9530077C05Rik | 68283  |  |  |
| C1 | 7263 | hypothalamus | Narg1l        | 66897  |  |  |
| C1 | 7303 | hypothalamus | Tmem182       | 381339 |  |  |
| C1 | 7368 | hypothalamus | Adam8         | 11501  |  |  |
| C1 | 7378 | hypothalamus | 1700001J03Rik | 69282  |  |  |
| C1 | 7407 | hypothalamus | Slc9a3r1      | 26941  |  |  |
| C1 | 7751 | hypothalamus | Sgk2          | 27219  |  |  |
| C1 | 7888 | hypothalamus | Pigz          | 239827 |  |  |
| C1 | 7922 | hypothalamus | Casp7         | 12369  |  |  |
| C1 | 8081 | hypothalamus | Rhot1         | 59040  |  |  |
| C1 | 8174 | hypothalamus | 5330426P16Rik | 68190  |  |  |
| C1 | 8234 | hypothalamus | Tbpl1         | 237336 |  |  |
| C1 | 8399 | hypothalamus | Herpud1       | 64209  |  |  |
| C1 | 8449 | hypothalamus | Vash2         | 226841 |  |  |
| C1 | 8465 | hypothalamus | BC023814      | 229503 |  |  |
| C1 | 8469 | hypothalamus | Sfrs6         | 67996  |  |  |
| C1 | 8574 | hypothalamus | Top1mt        | 72960  |  |  |
| C1 | 8662 | hypothalamus | Brca2         | 12190  |  |  |

|    |       |              |               |        |  |  |
|----|-------|--------------|---------------|--------|--|--|
| C1 | 8787  | hypothalamus | Sdf2l1        | 64136  |  |  |
| C1 | 8891  | hypothalamus | MMT00071061   |        |  |  |
| C1 | 8939  | hypothalamus | MMT00024195   |        |  |  |
| C1 | 8988  | hypothalamus | 1110007A13Rik | 210711 |  |  |
| C1 | 9067  | hypothalamus | Tra2a         | 101214 |  |  |
| C1 | 9258  | hypothalamus | P4ha1         | 18451  |  |  |
| C1 | 9402  | hypothalamus | 1200016B10Rik | 66875  |  |  |
| C1 | 9419  | hypothalamus | Acox2         | 93732  |  |  |
| C1 | 9513  | hypothalamus | Tardbp        | 230908 |  |  |
| C1 | 9514  | hypothalamus | Vps37a        | 52348  |  |  |
| C1 | 9552  | hypothalamus | Dnmt3a        | 13435  |  |  |
| C1 | 9672  | hypothalamus | Tmem101       | 76547  |  |  |
| C1 | 9899  | hypothalamus | D13Wsu177e    | 28126  |  |  |
| C1 | 9973  | hypothalamus | Tmem5         | 216395 |  |  |
| C1 | 9999  | hypothalamus | Zswim3        | 67538  |  |  |
| C1 | 10027 | hypothalamus | Mcm9          | 71567  |  |  |
| C1 | 10054 | hypothalamus | Fsip1         | 71313  |  |  |
| C1 | 10397 | hypothalamus | Gtf2e2        | 68153  |  |  |
| C1 | 10606 | hypothalamus | Apbb1ip       | 54519  |  |  |
| C1 | 10641 | hypothalamus | Hpdl          | 242642 |  |  |
| C1 | 10672 | hypothalamus | BC031353      | 235493 |  |  |
| C1 | 10769 | hypothalamus | Hnrnpd        | 11991  |  |  |
| C1 | 10824 | hypothalamus | Vegfa         | 22339  |  |  |
| C1 | 10883 | hypothalamus | Pols          | 210106 |  |  |
| C1 | 11043 | hypothalamus | Hsph1         | 15505  |  |  |
| C1 | 11063 | hypothalamus | Phf8          | 320595 |  |  |
| C1 | 11208 | hypothalamus | Hspb1         | 15507  |  |  |
| C1 | 11240 | hypothalamus | Ppm1d         | 53892  |  |  |
| C1 | 11315 | hypothalamus | Dok3          | 27261  |  |  |
| C1 | 11486 | hypothalamus | Tacc3         | 21335  |  |  |
| C1 | 11545 | hypothalamus | Ppcs          | 106564 |  |  |
| C1 | 11756 | hypothalamus | 2810011L19Rik | 69952  |  |  |
| C1 | 11867 | hypothalamus | Rcor3         | 214742 |  |  |
| C1 | 11903 | hypothalamus | 4933437F05Rik | 71275  |  |  |
| C1 | 12117 | hypothalamus | 1700024G13Rik | 67085  |  |  |
| C1 | 12219 | hypothalamus | Cyb5b         | 66427  |  |  |
| C1 | 12513 | hypothalamus | Whsc2         | 24116  |  |  |
| C1 | 12515 | hypothalamus | N4bp2         | 333789 |  |  |
| C1 | 12602 | hypothalamus | Filip1        | 70598  |  |  |
| C1 | 12648 | hypothalamus | Nt5dc1        | 319638 |  |  |
| C1 | 12667 | hypothalamus | Slc39a2       | 214922 |  |  |
| C1 | 12681 | hypothalamus | Eif2c2        | 239528 |  |  |
| C1 | 12732 | hypothalamus | Hsd17b1       | 15485  |  |  |
| C1 | 12739 | hypothalamus | Insl5         | 23919  |  |  |
| C1 | 12769 | hypothalamus | Tmem177       | 66343  |  |  |
| C1 | 12872 | hypothalamus | Rg9mtd3       | 69934  |  |  |
| C1 | 12937 | hypothalamus | Uhrf2         | 109113 |  |  |
| C1 | 12960 | hypothalamus | Arrdc4        | 66412  |  |  |
| C1 | 13015 | hypothalamus | D14Ert500e    | 219072 |  |  |
| C1 | 13086 | hypothalamus | Ccdc79        | 320022 |  |  |
| C1 | 13103 | hypothalamus | Erlin1        | 226144 |  |  |

|    |       |              |               |           |  |  |
|----|-------|--------------|---------------|-----------|--|--|
| C1 | 13115 | hypothalamus | B230120H23Rik | 65964     |  |  |
| C1 | 13214 | hypothalamus | Slc12a8       | 171286    |  |  |
| C1 | 13285 | hypothalamus | Cd276         | 102657    |  |  |
| C1 | 13390 | hypothalamus | Ddx31         | 227674    |  |  |
| C1 | 13571 | hypothalamus | Samd8         | 67630     |  |  |
| C1 | 13741 | hypothalamus | Hspa4l        | 18415     |  |  |
| C1 | 13883 | hypothalamus | EG627788      | 627788    |  |  |
| C1 | 14014 | hypothalamus | MMT00008376   |           |  |  |
| C1 | 14095 | hypothalamus | Nav1          | 215690    |  |  |
| C1 | 14134 | hypothalamus | Phf10         | 72057     |  |  |
| C1 | 14139 | hypothalamus | 2410005O16Rik | 66302     |  |  |
| C1 | 14202 | hypothalamus | Fnbp4         | 55935     |  |  |
| C1 | 14222 | hypothalamus | MMT00076410   |           |  |  |
| C1 | 14457 | hypothalamus | 4921507P07Rik | 70821     |  |  |
| C1 | 14517 | hypothalamus | Clcn4-2       | 12727     |  |  |
| C1 | 14577 | hypothalamus | Cdc37l1       | 67072     |  |  |
| C1 | 14626 | hypothalamus | Zbtb2         | 381990    |  |  |
| C1 | 14860 | hypothalamus | MMT00051231   | 100041002 |  |  |
| C1 | 15015 | hypothalamus | G3bp1         | 27041     |  |  |
| C1 | 15024 | hypothalamus | 2310061J03Rik | 66391     |  |  |
| C1 | 15152 | hypothalamus | F730047E07Rik | 212377    |  |  |
| C1 | 15177 | hypothalamus | Bmpr2         | 12168     |  |  |
| C1 | 15414 | hypothalamus | Arhgap18      | 73910     |  |  |
| C1 | 15476 | hypothalamus | Fem1b         | 14155     |  |  |
| C1 | 15594 | hypothalamus | Gm1967        | 381411    |  |  |
| C1 | 15635 | hypothalamus | Crkrs         | 69131     |  |  |
| C1 | 15713 | hypothalamus | Rbm3          | 19652     |  |  |
| C1 | 15731 | hypothalamus | Mfhas1        | 52065     |  |  |
| C1 | 15746 | hypothalamus | Calr          | 12317     |  |  |
| C1 | 15787 | hypothalamus | Wdr92         | 103784    |  |  |
| C1 | 16030 | hypothalamus | Prpf3         | 70767     |  |  |
| C1 | 16098 | hypothalamus | Rps20         | 67427     |  |  |
| C1 | 16186 | hypothalamus | Cfp           | 18636     |  |  |
| C1 | 16299 | hypothalamus | Creld2        | 76737     |  |  |
| C1 | 16406 | hypothalamus | Mettl6        | 67011     |  |  |
| C1 | 16616 | hypothalamus | Paox          | 212503    |  |  |
| C1 | 16675 | hypothalamus | Flrt2         | 399558    |  |  |
| C1 | 16748 | hypothalamus | Zfp810        | 235050    |  |  |
| C1 | 16855 | hypothalamus | Itk           | 16428     |  |  |
| C1 | 16951 | hypothalamus | R74862        | 97423     |  |  |
| C1 | 16976 | hypothalamus | Zhx3          | 320799    |  |  |
| C1 | 17016 | hypothalamus | Dnajc11       | 230935    |  |  |
| C1 | 17160 | hypothalamus | Ccdc127       | 67433     |  |  |
| C1 | 17174 | hypothalamus | Dmrtc1a       | 70887     |  |  |
| C1 | 17196 | hypothalamus | Fkrp          | 243853    |  |  |
| C1 | 17207 | hypothalamus | 2700050L05Rik | 214764    |  |  |
| C1 | 17449 | hypothalamus | Zfp296        | 63872     |  |  |
| C1 | 17887 | hypothalamus | Cryl1         | 68631     |  |  |
| C1 | 18185 | hypothalamus | Ndufb2        | 68198     |  |  |
| C1 | 18373 | hypothalamus | Dnajb1        | 81489     |  |  |
| C1 | 18418 | hypothalamus | Hspa1b        | 15511     |  |  |

|    |       |              |                    |        |  |  |
|----|-------|--------------|--------------------|--------|--|--|
| C1 | 18485 | hypothalamus | Wdr31              | 71354  |  |  |
| C1 | 18572 | hypothalamus | Stx18              | 71116  |  |  |
| C1 | 18619 | hypothalamus | 2810406K13Rik      | 72184  |  |  |
| C1 | 18635 | hypothalamus | Hps1               | 192236 |  |  |
| C1 | 18726 | hypothalamus | D630004A14Rik      | 382137 |  |  |
| C1 | 18846 | hypothalamus | lkbkg              | 16151  |  |  |
| C1 | 18889 | hypothalamus | Shq1               | 72171  |  |  |
| C1 | 18903 | hypothalamus | Crem               | 12916  |  |  |
| C1 | 19022 | hypothalamus | Ccnb2              | 12442  |  |  |
| C1 | 19108 | hypothalamus | Armet              | 74840  |  |  |
| C1 | 19227 | hypothalamus | MMT00058471        |        |  |  |
| C1 | 19389 | hypothalamus | lqcb1              | 320299 |  |  |
| C1 | 19391 | hypothalamus | Apex2              | 77622  |  |  |
| C1 | 19533 | hypothalamus | Gpr62              | 436090 |  |  |
| C1 | 19606 | hypothalamus | Egr2               | 13654  |  |  |
| C1 | 19651 | hypothalamus | Thex1              | 67276  |  |  |
| C1 | 19936 | hypothalamus | Egf                | 13645  |  |  |
| C1 | 19949 | hypothalamus | Tubgcp2            | 74237  |  |  |
| C1 | 20004 | hypothalamus | 1190005F20Rik      | 98685  |  |  |
| C1 | 20237 | hypothalamus | RP23-433P19.11     | 574418 |  |  |
| C1 | 20457 | hypothalamus | Gtf2a2             | 235459 |  |  |
| C1 | 20470 | hypothalamus | Scml4              | 268297 |  |  |
| C1 | 20520 | hypothalamus | EG546143           | 546143 |  |  |
| C1 | 20535 | hypothalamus | Rbm4               | 19653  |  |  |
| C1 | 20559 | hypothalamus | Nat13              | 72117  |  |  |
| C1 | 20563 | hypothalamus | Mns1               | 17427  |  |  |
| C1 | 20912 | hypothalamus | Chordc1            | 66917  |  |  |
| C1 | 20980 | hypothalamus | Taf12              | 66464  |  |  |
| C1 | 21135 | hypothalamus | Gm711              | 279029 |  |  |
| C1 | 21151 | hypothalamus | Nkap               | 67050  |  |  |
| C1 | 21333 | hypothalamus | Cirbp              | 12696  |  |  |
| C1 | 21389 | hypothalamus | Odf2               | 18286  |  |  |
| C1 | 21421 | hypothalamus | Usp34              | 17847  |  |  |
| C1 | 21431 | hypothalamus | Xbp1               | 22433  |  |  |
| C1 | 21483 | hypothalamus | lppk               | 75678  |  |  |
| C1 | 21568 | hypothalamus | Cdc73              | 214498 |  |  |
| C1 | 21903 | hypothalamus | Nr1d1              | 217166 |  |  |
| C1 | 21909 | hypothalamus | Neurl2             | 415115 |  |  |
| C1 | 21955 | hypothalamus | Atxn7l1            | 380753 |  |  |
| C1 | 21981 | hypothalamus | Ormdl2             | 66844  |  |  |
| C1 | 22012 | hypothalamus | Itgae              | 16407  |  |  |
| C1 | 22141 | hypothalamus | Rorb               | 225998 |  |  |
| C1 | 22272 | hypothalamus | Vpreb1             | 22362  |  |  |
| C1 | 22310 | hypothalamus | Asb5               | 76294  |  |  |
| C1 | 22361 | hypothalamus | Sephs2             | 20768  |  |  |
| C1 | 22600 | hypothalamus | 2410018C20Rik      | 67873  |  |  |
| C1 | 22673 | hypothalamus | Prpf38b            | 66921  |  |  |
| C1 | 22732 | hypothalamus | Cyb5b              | 66427  |  |  |
| C1 | 22751 | hypothalamus | Nosip              | 66394  |  |  |
| C1 | 23019 | hypothalamus | ENSMUSG00000063087 | 791318 |  |  |
| C1 | 23116 | hypothalamus | 2810032G03Rik      | 72669  |  |  |

|    |       |              |               |           |  |  |
|----|-------|--------------|---------------|-----------|--|--|
| C1 | 23318 | hypothalamus | Cul2          | 71745     |  |  |
| C1 | 23377 | hypothalamus | Pdxk          | 216134    |  |  |
| C1 | 23419 | hypothalamus | Tipin         | 66131     |  |  |
| C1 | 23453 | hypothalamus | Dnajc3a       | 100037258 |  |  |
| C1 | 23495 | hypothalamus | Cryab         | 12955     |  |  |
| C1 | 202   | liver        | Naif1         | 71254     |  |  |
| C1 | 423   | liver        | Klhl5         | 71778     |  |  |
| C1 | 482   | liver        | Rnf43         | 207742    |  |  |
| C1 | 499   | liver        | 2310057J16Rik | 69697     |  |  |
| C1 | 523   | liver        | 1700040L02Rik | 73287     |  |  |
| C1 | 575   | liver        | Edn1          | 13614     |  |  |
| C1 | 740   | liver        | Txnrd3        | 232223    |  |  |
| C1 | 768   | liver        | Samd1         | 666704    |  |  |
| C1 | 902   | liver        | Slc30a1       | 22782     |  |  |
| C1 | 1039  | liver        | Zfp207        | 22680     |  |  |
| C1 | 1156  | liver        | Rbj           | 217378    |  |  |
| C1 | 1280  | liver        | Mesdc2        | 67943     |  |  |
| C1 | 1281  | liver        | Alkbh3        | 69113     |  |  |
| C1 | 1293  | liver        | Safb          | 224903    |  |  |
| C1 | 1311  | liver        | Mpp4          | 227157    |  |  |
| C1 | 1383  | liver        | Bhlhb9        | 70237     |  |  |
| C1 | 1411  | liver        | Tada3l        | 101206    |  |  |
| C1 | 1435  | liver        | Ptges3        | 56351     |  |  |
| C1 | 1453  | liver        | Gfod2         | 70575     |  |  |
| C1 | 1663  | liver        | Fkbp4         | 14228     |  |  |
| C1 | 1697  | liver        | Sf4           | 70616     |  |  |
| C1 | 1820  | liver        | Mat2b         | 108645    |  |  |
| C1 | 1849  | liver        | MMT00063181   |           |  |  |
| C1 | 1858  | liver        | 2810432L12Rik | 67063     |  |  |
| C1 | 1968  | liver        | Nudc          | 18221     |  |  |
| C1 | 2041  | liver        | Cct7          | 12468     |  |  |
| C1 | 2043  | liver        | Arl2bp        | 107566    |  |  |
| C1 | 2315  | liver        | Abcb1a        | 18671     |  |  |
| C1 | 2329  | liver        | Wdr6          | 83669     |  |  |
| C1 | 2433  | liver        | Armc10        | 67211     |  |  |
| C1 | 2490  | liver        | MMT00070880   |           |  |  |
| C1 | 2570  | liver        | Tmod4         | 50874     |  |  |
| C1 | 2718  | liver        | Scrn3         | 74616     |  |  |
| C1 | 2721  | liver        | Inmt          | 21743     |  |  |
| C1 | 2813  | liver        | Mrpl55        | 67212     |  |  |
| C1 | 2823  | liver        | Sipa1l2       | 244668    |  |  |
| C1 | 3054  | liver        | Hnrnpa1       | 15382     |  |  |
| C1 | 3059  | liver        | Tctex1d2      | 66061     |  |  |
| C1 | 3170  | liver        | Mcart1        | 230125    |  |  |
| C1 | 3196  | liver        | Tat           | 234724    |  |  |
| C1 | 3291  | liver        | Ptk2          | 14083     |  |  |
| C1 | 3317  | liver        | Ak3           | 56248     |  |  |
| C1 | 3376  | liver        | Trip4         | 56404     |  |  |
| C1 | 3462  | liver        | Nmnat3        | 74080     |  |  |
| C1 | 3587  | liver        | MMT00041940   |           |  |  |
| C1 | 3799  | liver        | Serpinh1      | 12406     |  |  |

|    |      |       |               |        |  |  |
|----|------|-------|---------------|--------|--|--|
| C1 | 3808 | liver | 2010209O12Rik | 100910 |  |  |
| C1 | 3812 | liver | Zfyve26       | 211978 |  |  |
| C1 | 3849 | liver | MMT00047578   |        |  |  |
| C1 | 3869 | liver | Zadh2         | 225791 |  |  |
| C1 | 3908 | liver | Fundc2        | 67391  |  |  |
| C1 | 3910 | liver | Trpm7         | 58800  |  |  |
| C1 | 3913 | liver | Mrpl15        | 27395  |  |  |
| C1 | 3929 | liver | Sfrs11        | 69207  |  |  |
| C1 | 3970 | liver | 4931414P19Rik | 74359  |  |  |
| C1 | 3998 | liver | 4930528F23Rik | 75178  |  |  |
| C1 | 4048 | liver | BC002230      | 217827 |  |  |
| C1 | 4192 | liver | Zranb1        | 360216 |  |  |
| C1 | 4261 | liver | MMT00014970   |        |  |  |
| C1 | 4298 | liver | St3gal1       | 20442  |  |  |
| C1 | 4338 | liver | EG328280      | 328280 |  |  |
| C1 | 4355 | liver | Pard6a        | 56513  |  |  |
| C1 | 4391 | liver | Zfp467        | 68910  |  |  |
| C1 | 4404 | liver | Commd5        | 66398  |  |  |
| C1 | 4612 | liver | Hspa5         | 14828  |  |  |
| C1 | 4780 | liver | Sfrs5         | 20384  |  |  |
| C1 | 4784 | liver | Slc2a2        | 20526  |  |  |
| C1 | 4805 | liver | Hspb1         | 15507  |  |  |
| C1 | 4849 | liver | Zxdc          | 80292  |  |  |
| C1 | 4950 | liver | Dnajb10       | 56812  |  |  |
| C1 | 4966 | liver | Zscan20       | 269585 |  |  |
| C1 | 5013 | liver | Fancl         | 67030  |  |  |
| C1 | 5086 | liver | Ccnh          | 66671  |  |  |
| C1 | 5107 | liver | Gprc5c        | 70355  |  |  |
| C1 | 5332 | liver | Pdlim4        | 30794  |  |  |
| C1 | 5544 | liver | Camsap1       | 227634 |  |  |
| C1 | 5727 | liver | Camk2g        | 12325  |  |  |
| C1 | 5766 | liver | 5033414D02Rik | 67759  |  |  |
| C1 | 5881 | liver | Fzd4          | 14366  |  |  |
| C1 | 5944 | liver | Sp3           | 20687  |  |  |
| C1 | 6021 | liver | MMT00008784   |        |  |  |
| C1 | 6126 | liver | MMT00067575   |        |  |  |
| C1 | 6171 | liver | Abtb2         | 99382  |  |  |
| C1 | 6218 | liver | Hnrnpc        | 15381  |  |  |
| C1 | 6234 | liver | P4ha2         | 18452  |  |  |
| C1 | 6268 | liver | Slc45a3       | 212980 |  |  |
| C1 | 6286 | liver | Rfc1          | 19687  |  |  |
| C1 | 6485 | liver | Map3k7ip1     | 66513  |  |  |
| C1 | 6525 | liver | Uchl5ip       | 73738  |  |  |
| C1 | 6592 | liver | Lgals2        | 107753 |  |  |
| C1 | 6729 | liver | Hnrnpa1       | 15382  |  |  |
| C1 | 6769 | liver | Banp          | 53325  |  |  |
| C1 | 6976 | liver | Rbm35b        | 77411  |  |  |
| C1 | 7109 | liver | Bxdc2         | 67832  |  |  |
| C1 | 7140 | liver | Mtbp          | 105837 |  |  |
| C1 | 7165 | liver | Nt5m          | 103850 |  |  |
| C1 | 7211 | liver | 2410014A08Rik | 109154 |  |  |

|    |       |       |               |        |  |  |
|----|-------|-------|---------------|--------|--|--|
| C1 | 7389  | liver | Sfrs5         | 20384  |  |  |
| C1 | 7416  | liver | 6430548M08Rik | 234797 |  |  |
| C1 | 7444  | liver | Hspe1         | 15528  |  |  |
| C1 | 7619  | liver | Pik3ip1       | 216505 |  |  |
| C1 | 7674  | liver | Spata7        | 104871 |  |  |
| C1 | 7731  | liver | 1500001M20Rik | 68971  |  |  |
| C1 | 7787  | liver | MMT00043009   |        |  |  |
| C1 | 7798  | liver | MMT00077178   |        |  |  |
| C1 | 7865  | liver | MMT00062659   |        |  |  |
| C1 | 7963  | liver | Rxrg          | 20183  |  |  |
| C1 | 8021  | liver | 1600002K03Rik | 69770  |  |  |
| C1 | 8037  | liver | MMT00052151   |        |  |  |
| C1 | 8122  | liver | Hexim1        | 192231 |  |  |
| C1 | 8181  | liver | Thap1         | 73754  |  |  |
| C1 | 8184  | liver | Rbm26         | 74213  |  |  |
| C1 | 8262  | liver | Syp           | 20977  |  |  |
| C1 | 8314  | liver | Armc6         | 76813  |  |  |
| C1 | 8319  | liver | MMT00062477   |        |  |  |
| C1 | 8464  | liver | Snapin        | 20615  |  |  |
| C1 | 8486  | liver | Plod3         | 26433  |  |  |
| C1 | 8499  | liver | C430048L16Rik | 77604  |  |  |
| C1 | 8554  | liver | Letm2         | 270035 |  |  |
| C1 | 8618  | liver | EG433865      | 433865 |  |  |
| C1 | 8662  | liver | Brca2         | 12190  |  |  |
| C1 | 8670  | liver | MMT00051613   |        |  |  |
| C1 | 8684  | liver | Il15          | 16168  |  |  |
| C1 | 8727  | liver | Slc27a3       | 26568  |  |  |
| C1 | 8742  | liver | Tmem39a       | 67846  |  |  |
| C1 | 8787  | liver | Sdf2l1        | 64136  |  |  |
| C1 | 8891  | liver | MMT00071061   |        |  |  |
| C1 | 9067  | liver | Tra2a         | 101214 |  |  |
| C1 | 9224  | liver | MMT00013510   | 227885 |  |  |
| C1 | 9258  | liver | P4ha1         | 18451  |  |  |
| C1 | 9279  | liver | MMT00066808   |        |  |  |
| C1 | 9285  | liver | Mtcp1         | 17763  |  |  |
| C1 | 9513  | liver | Tardbp        | 230908 |  |  |
| C1 | 9514  | liver | Vps37a        | 52348  |  |  |
| C1 | 9570  | liver | Creld1        | 171508 |  |  |
| C1 | 9616  | liver | Al451557      | 102084 |  |  |
| C1 | 9629  | liver | Spnb3         | 20743  |  |  |
| C1 | 9672  | liver | Tmem101       | 76547  |  |  |
| C1 | 9680  | liver | Ahsa1         | 217737 |  |  |
| C1 | 9831  | liver | Nedd4l        | 83814  |  |  |
| C1 | 9899  | liver | D13Wsu177e    | 28126  |  |  |
| C1 | 10102 | liver | Lman2l        | 214895 |  |  |
| C1 | 10116 | liver | Mettl7b       | 71664  |  |  |
| C1 | 10177 | liver | Osgep         | 66246  |  |  |
| C1 | 10267 | liver | Setdb2        | 239122 |  |  |
| C1 | 10357 | liver | Tm4sf1        | 17112  |  |  |
| C1 | 10435 | liver | Nab2          | 17937  |  |  |
| C1 | 10484 | liver | Dnajb11       | 67838  |  |  |

|    |       |       |               |        |  |  |
|----|-------|-------|---------------|--------|--|--|
| C1 | 10492 | liver | 1810046K07Rik | 69809  |  |  |
| C1 | 10526 | liver | MMT00036239   |        |  |  |
| C1 | 10769 | liver | Hnrnpd        | 11991  |  |  |
| C1 | 10824 | liver | Vegfa         | 22339  |  |  |
| C1 | 10878 | liver | Tsnax         | 53424  |  |  |
| C1 | 10881 | liver | Uchl5ip       | 73738  |  |  |
| C1 | 11043 | liver | Hsph1         | 15505  |  |  |
| C1 | 11095 | liver | Bag3          | 29810  |  |  |
| C1 | 11161 | liver | Gpatch2       | 67769  |  |  |
| C1 | 11201 | liver | Sunc1         | 194974 |  |  |
| C1 | 11208 | liver | Hspb1         | 15507  |  |  |
| C1 | 11214 | liver | MMT00049207   |        |  |  |
| C1 | 11379 | liver | Dnttip1       | 76233  |  |  |
| C1 | 11392 | liver | AU021838      | 328099 |  |  |
| C1 | 11412 | liver | Abcg5         | 27409  |  |  |
| C1 | 11610 | liver | Hey1          | 15213  |  |  |
| C1 | 11665 | liver | Hyal1         | 15586  |  |  |
| C1 | 11697 | liver | Rasl2-9       | 19428  |  |  |
| C1 | 11818 | liver | MMT00048396   |        |  |  |
| C1 | 11857 | liver | Arv1          | 68865  |  |  |
| C1 | 12040 | liver | Commd10       | 69456  |  |  |
| C1 | 12329 | liver | Sox6          | 20679  |  |  |
| C1 | 12419 | liver | MMT00081393   |        |  |  |
| C1 | 12487 | liver | Tbc1d10a      | 103724 |  |  |
| C1 | 12498 | liver | Abcg8         | 67470  |  |  |
| C1 | 12513 | liver | Whsc2         | 24116  |  |  |
| C1 | 12571 | liver | Cdkn2d        | 12581  |  |  |
| C1 | 12761 | liver | Tsc22d3       | 14605  |  |  |
| C1 | 12905 | liver | Nfil3         | 18030  |  |  |
| C1 | 12960 | liver | Arrdc4        | 66412  |  |  |
| C1 | 12968 | liver | Fbxw9         | 68628  |  |  |
| C1 | 13052 | liver | Tnfrsf19      | 29820  |  |  |
| C1 | 13087 | liver | Cxadr         | 13052  |  |  |
| C1 | 13094 | liver | Cnn3          | 71994  |  |  |
| C1 | 13189 | liver | Dnajb4        | 67035  |  |  |
| C1 | 13257 | liver | Nadk          | 192185 |  |  |
| C1 | 13285 | liver | Cd276         | 102657 |  |  |
| C1 | 13521 | liver | Ears2         | 67417  |  |  |
| C1 | 13563 | liver | 9930023K05Rik | 226245 |  |  |
| C1 | 13741 | liver | Hspa4l        | 18415  |  |  |
| C1 | 13884 | liver | Aven          | 74268  |  |  |
| C1 | 14014 | liver | MMT00008376   |        |  |  |
| C1 | 14114 | liver | Ccdc23        | 69216  |  |  |
| C1 | 14135 | liver | Eepd1         | 67484  |  |  |
| C1 | 14139 | liver | 2410005O16Rik | 66302  |  |  |
| C1 | 14222 | liver | MMT00076410   |        |  |  |
| C1 | 14227 | liver | Lrrc39        | 109245 |  |  |
| C1 | 14249 | liver | Lzts2         | 226154 |  |  |
| C1 | 14298 | liver | Atp2a2        | 11938  |  |  |
| C1 | 14333 | liver | Zcchc17       | 619605 |  |  |
| C1 | 14577 | liver | Cdc3711       | 67072  |  |  |



|    |       |       |               |        |  |  |
|----|-------|-------|---------------|--------|--|--|
| C1 | 14785 | liver | F3            | 14066  |  |  |
| C1 | 14859 | liver | Hspa1a        | 193740 |  |  |
| C1 | 15014 | liver | Mrp63         | 67840  |  |  |
| C1 | 15162 | liver | Il18          | 16173  |  |  |
| C1 | 15177 | liver | Bmpr2         | 12168  |  |  |
| C1 | 15476 | liver | Fem1b         | 14155  |  |  |
| C1 | 15484 | liver | Lrrc42        | 77809  |  |  |
| C1 | 15566 | liver | Snn           | 20621  |  |  |
| C1 | 15635 | liver | Crks          | 69131  |  |  |
| C1 | 15675 | liver | MMT00077535   | 641192 |  |  |
| C1 | 15713 | liver | Rbm3          | 19652  |  |  |
| C1 | 15740 | liver | 1810010H24Rik | 69066  |  |  |
| C1 | 15746 | liver | Calr          | 12317  |  |  |
| C1 | 15826 | liver | Arl4d         | 80981  |  |  |
| C1 | 16030 | liver | Prpf3         | 70767  |  |  |
| C1 | 16037 | liver | MMT00011022   |        |  |  |
| C1 | 16043 | liver | Sult1c2       | 69083  |  |  |
| C1 | 16251 | liver | G6pc          | 14377  |  |  |
| C1 | 16299 | liver | Creld2        | 76737  |  |  |
| C1 | 16517 | liver | D4Wsu53e      | 27981  |  |  |
| C1 | 16585 | liver | Syn1          | 74126  |  |  |
| C1 | 16630 | liver | Armcx5        | 494468 |  |  |
| C1 | 16750 | liver | Casp6         | 12368  |  |  |
| C1 | 16754 | liver | Hsp90aa1      | 15519  |  |  |
| C1 | 17137 | liver | Nudt4         | 71207  |  |  |
| C1 | 17160 | liver | Ccdc127       | 67433  |  |  |
| C1 | 17224 | liver | 5430407P10Rik | 227545 |  |  |
| C1 | 17449 | liver | Zfp296        | 63872  |  |  |
| C1 | 17569 | liver | 1810058I24Rik | 67705  |  |  |
| C1 | 17591 | liver | D930015E06Rik | 229473 |  |  |
| C1 | 17595 | liver | MMT00048325   |        |  |  |
| C1 | 17712 | liver | Nup62         | 18226  |  |  |
| C1 | 17887 | liver | Cryl1         | 68631  |  |  |
| C1 | 18065 | liver | Peo1          | 226153 |  |  |
| C1 | 18083 | liver | Gadd45a       | 13197  |  |  |
| C1 | 18099 | liver | Nfx1          | 74164  |  |  |
| C1 | 18118 | liver | Cacybp        | 12301  |  |  |
| C1 | 18203 | liver | Ablim3        | 319713 |  |  |
| C1 | 18215 | liver | Gpr146        | 80290  |  |  |
| C1 | 18336 | liver | Lrpap1        | 16976  |  |  |
| C1 | 18373 | liver | Dnajb1        | 81489  |  |  |
| C1 | 18418 | liver | Hspa1b        | 15511  |  |  |
| C1 | 18487 | liver | Serpina5      | 268591 |  |  |
| C1 | 18666 | liver | Hint3         | 66847  |  |  |
| C1 | 18696 | liver | MMT00042876   |        |  |  |
| C1 | 18713 | liver | 3110037I16Rik | 73172  |  |  |
| C1 | 18865 | liver | Ptges3        | 56351  |  |  |
| C1 | 18903 | liver | Crem          | 12916  |  |  |
| C1 | 19052 | liver | Mkrn2         | 67027  |  |  |
| C1 | 19176 | liver | 2210404J11Rik | 381062 |  |  |
| C1 | 19317 | liver | EG626952      | 626952 |  |  |

|    |       |              |               |        |  |  |
|----|-------|--------------|---------------|--------|--|--|
| C1 | 19540 | liver        | Zfp428        | 232969 |  |  |
| C1 | 19607 | liver        | Birc3         | 11796  |  |  |
| C1 | 19620 | liver        | Zfand2a       | 100494 |  |  |
| C1 | 19726 | liver        | Erp29         | 67397  |  |  |
| C1 | 20035 | liver        | Zbtb46        | 72147  |  |  |
| C1 | 20122 | liver        | Tmem86a       | 67893  |  |  |
| C1 | 20194 | liver        | Pnlcd1        | 240023 |  |  |
| C1 | 20246 | liver        | Pdia5         | 72599  |  |  |
| C1 | 20293 | liver        | MMT00017521   |        |  |  |
| C1 | 20304 | liver        | Ccrk          | 105278 |  |  |
| C1 | 20332 | liver        | Stau2         | 29819  |  |  |
| C1 | 20454 | liver        | MMT00018457   |        |  |  |
| C1 | 20535 | liver        | Rbm4          | 19653  |  |  |
| C1 | 20822 | liver        | Smurf1        | 75788  |  |  |
| C1 | 20828 | liver        | MMT00007878   |        |  |  |
| C1 | 20855 | liver        | Phldb2        | 208177 |  |  |
| C1 | 20912 | liver        | Chordc1       | 66917  |  |  |
| C1 | 20946 | liver        | Nufip2        | 68564  |  |  |
| C1 | 20965 | liver        | Usp28         | 235323 |  |  |
| C1 | 20980 | liver        | Taf12         | 66464  |  |  |
| C1 | 21229 | liver        | Acss1         | 68738  |  |  |
| C1 | 21307 | liver        | Krcc1         | 57896  |  |  |
| C1 | 21322 | liver        | Usp1          | 231915 |  |  |
| C1 | 21333 | liver        | Cirbp         | 12696  |  |  |
| C1 | 21352 | liver        | Dtnbp1        | 94245  |  |  |
| C1 | 21389 | liver        | Odf2          | 18286  |  |  |
| C1 | 21553 | liver        | EG628438      | 628438 |  |  |
| C1 | 21556 | liver        | 4930579F01Rik | 67741  |  |  |
| C1 | 21588 | liver        | Snrpa         | 53607  |  |  |
| C1 | 21643 | liver        | Agtr1a        | 11607  |  |  |
| C1 | 21715 | liver        | Siah1a        | 20437  |  |  |
| C1 | 21775 | liver        | MMT00051649   |        |  |  |
| C1 | 21872 | liver        | Stambpl1      | 76630  |  |  |
| C1 | 21995 | liver        | Nktr          | 18087  |  |  |
| C1 | 22139 | liver        | Stip1         | 20867  |  |  |
| C1 | 22216 | liver        | Sp5           | 64406  |  |  |
| C1 | 22272 | liver        | Vpreb1        | 22362  |  |  |
| C1 | 22303 | liver        | Cdt1          | 67177  |  |  |
| C1 | 22521 | liver        | Hsp90b1       | 22027  |  |  |
| C1 | 22710 | liver        | MMT00075201   |        |  |  |
| C1 | 22751 | liver        | Nosip         | 66394  |  |  |
| C1 | 23215 | liver        | Mphosph6      | 68533  |  |  |
| C1 | 23253 | liver        | D030011O10Rik | 320560 |  |  |
| C1 | 23458 | liver        | Clic4         | 29876  |  |  |
| C1 | 23471 | liver        | Ddx46         | 212880 |  |  |
| C1 | 23527 | liver        | MMT00021936   |        |  |  |
| C1 | 23569 | liver        | Atp5s         | 68055  |  |  |
| C1 | 23646 | liver        | Hsp90ab1      | 15516  |  |  |
| C1 | 23668 | liver        | Gse1          | 382034 |  |  |
| C2 | 719   | hypothalamus | Usp2          | 53376  |  |  |
| C2 | 942   | hypothalamus | Kcna5         | 16493  |  |  |

|    |       |              |               |        |  |  |
|----|-------|--------------|---------------|--------|--|--|
| C2 | 1079  | hypothalamus | Hr            | 15460  |  |  |
| C2 | 1241  | hypothalamus | Meox1         | 17285  |  |  |
| C2 | 1709  | hypothalamus | Mt2           | 17750  |  |  |
| C2 | 1751  | hypothalamus | Xdh           | 22436  |  |  |
| C2 | 2294  | hypothalamus | AU040829      | 216831 |  |  |
| C2 | 2708  | hypothalamus | Sgk1          | 20393  |  |  |
| C2 | 2794  | hypothalamus | Map3k6        | 53608  |  |  |
| C2 | 2880  | hypothalamus | Cd93          | 17064  |  |  |
| C2 | 3017  | hypothalamus | Fas           | 14102  |  |  |
| C2 | 3365  | hypothalamus | Tiam2         | 24001  |  |  |
| C2 | 4084  | hypothalamus | Asah3l        | 230379 |  |  |
| C2 | 4152  | hypothalamus | Lrrc33        | 224109 |  |  |
| C2 | 4454  | hypothalamus | BC055107      | 268709 |  |  |
| C2 | 4674  | hypothalamus | Cxcl12        | 20315  |  |  |
| C2 | 5345  | hypothalamus | MMT00023326   | 57435  |  |  |
| C2 | 5410  | hypothalamus | Cyp4f15       | 106648 |  |  |
| C2 | 5974  | hypothalamus | Arntl         | 11865  |  |  |
| C2 | 6038  | hypothalamus | Acot1         | 26897  |  |  |
| C2 | 6133  | hypothalamus | Agrp          | 11604  |  |  |
| C2 | 6426  | hypothalamus | Mfsd4         | 213006 |  |  |
| C2 | 6564  | hypothalamus | Cebpd         | 12609  |  |  |
| C2 | 7029  | hypothalamus | MMT00072012   |        |  |  |
| C2 | 7990  | hypothalamus | Nostrin       | 329416 |  |  |
| C2 | 8122  | hypothalamus | Hexim1        | 192231 |  |  |
| C2 | 8171  | hypothalamus | Spink8        | 78709  |  |  |
| C2 | 8816  | hypothalamus | Nfkbia        | 18035  |  |  |
| C2 | 8980  | hypothalamus | Plekhf1       | 72287  |  |  |
| C2 | 9745  | hypothalamus | Gadd45g       | 23882  |  |  |
| C2 | 9821  | hypothalamus | Pmaip1        | 58801  |  |  |
| C2 | 11305 | hypothalamus | Galntl2       | 78754  |  |  |
| C2 | 11345 | hypothalamus | Slc40a1       | 53945  |  |  |
| C2 | 12157 | hypothalamus | Gal3st4       | 330217 |  |  |
| C2 | 12208 | hypothalamus | Pnpla7        | 241274 |  |  |
| C2 | 12649 | hypothalamus | Itgad         | 381924 |  |  |
| C2 | 12761 | hypothalamus | Tsc22d3       | 14605  |  |  |
| C2 | 12834 | hypothalamus | Fabp7         | 12140  |  |  |
| C2 | 12989 | hypothalamus | 1190002H23Rik | 66214  |  |  |
| C2 | 14050 | hypothalamus | Ii12rb1       | 16161  |  |  |
| C2 | 14135 | hypothalamus | Eepd1         | 67484  |  |  |
| C2 | 14233 | hypothalamus | Fgfr1         | 116701 |  |  |
| C2 | 14486 | hypothalamus | Sox7          | 20680  |  |  |
| C2 | 14785 | hypothalamus | F3            | 14066  |  |  |
| C2 | 15258 | hypothalamus | Coil          | 12812  |  |  |
| C2 | 15352 | hypothalamus | Socs2         | 216233 |  |  |
| C2 | 15826 | hypothalamus | Arl4d         | 80981  |  |  |
| C2 | 15896 | hypothalamus | Pdgfrb        | 18596  |  |  |
| C2 | 15924 | hypothalamus | Rbm38         | 56190  |  |  |
| C2 | 16494 | hypothalamus | 2310007D09Rik | 71878  |  |  |
| C2 | 17143 | hypothalamus | 2010002N04Rik | 106878 |  |  |
| C2 | 17583 | hypothalamus | Per2          | 18627  |  |  |
| C2 | 18036 | hypothalamus | Tmem100       | 67888  |  |  |

|    |       |              |               |        |  |  |
|----|-------|--------------|---------------|--------|--|--|
| C2 | 18179 | hypothalamus | Dbp           | 13170  |  |  |
| C2 | 18427 | hypothalamus | Serpinb1a     | 66222  |  |  |
| C2 | 18553 | hypothalamus | Tekt4         | 71840  |  |  |
| C2 | 18785 | hypothalamus | Angptl4       | 57875  |  |  |
| C2 | 19004 | hypothalamus | Pdk4          | 27273  |  |  |
| C2 | 19182 | hypothalamus | Igsf2         | 630146 |  |  |
| C2 | 19339 | hypothalamus | Gem           | 14579  |  |  |
| C2 | 19573 | hypothalamus | Serpine1      | 18787  |  |  |
| C2 | 19621 | hypothalamus | Cldn5         | 12741  |  |  |
| C2 | 20571 | hypothalamus | Tmem45a       | 56277  |  |  |
| C2 | 21142 | hypothalamus | Gm129         | 229599 |  |  |
| C2 | 21259 | hypothalamus | 5430416O09Rik | 71406  |  |  |
| C2 | 21313 | hypothalamus | Rhou          | 69581  |  |  |
| C2 | 21331 | hypothalamus | Slc10a6       | 75750  |  |  |
| C2 | 21380 | hypothalamus | Ier5          | 15939  |  |  |
| C2 | 21574 | hypothalamus | Acot11        | 329910 |  |  |
| C2 | 21620 | hypothalamus | Tmem166       | 232146 |  |  |
| C2 | 21643 | hypothalamus | Agtr1a        | 11607  |  |  |
| C2 | 21935 | hypothalamus | Prok2         | 50501  |  |  |
| C2 | 21992 | hypothalamus | Lap3          | 66988  |  |  |
| C2 | 22079 | hypothalamus | Tmem81        | 74626  |  |  |
| C2 | 22226 | hypothalamus | Pm20d1        | 212933 |  |  |
| C2 | 22989 | hypothalamus | Lmcd1         | 30937  |  |  |
| C2 | 23094 | hypothalamus | Sap30         | 60406  |  |  |
| C2 | 213   | liver        | Rgs16         | 19734  |  |  |
| C2 | 250   | liver        | Tubb2a-ps2    | 627110 |  |  |
| C2 | 266   | liver        | Nr2f2         | 11819  |  |  |
| C2 | 269   | liver        | Tuba1b        | 22143  |  |  |
| C2 | 337   | liver        | Rasgef1b      | 320292 |  |  |
| C2 | 402   | liver        | Timp3         | 21859  |  |  |
| C2 | 407   | liver        | Serpina6      | 12401  |  |  |
| C2 | 415   | liver        | Ypel2         | 77864  |  |  |
| C2 | 433   | liver        | Pla2g12b      | 69836  |  |  |
| C2 | 437   | liver        | Ndrp1         | 17988  |  |  |
| C2 | 530   | liver        | Mest          | 17294  |  |  |
| C2 | 547   | liver        | Mknk2         | 17347  |  |  |
| C2 | 563   | liver        | D4Bwg0951e    | 52829  |  |  |
| C2 | 609   | liver        | MMT00060868   |        |  |  |
| C2 | 662   | liver        | Mid1ip1       | 68041  |  |  |
| C2 | 689   | liver        | 2010004A03Rik | 76527  |  |  |
| C2 | 719   | liver        | Usp2          | 53376  |  |  |
| C2 | 793   | liver        | Morc3         | 338467 |  |  |
| C2 | 864   | liver        | MMT00031865   | 329122 |  |  |
| C2 | 992   | liver        | 8430410A17Rik | 232210 |  |  |
| C2 | 1310  | liver        | Cabc1         | 67426  |  |  |
| C2 | 1326  | liver        | Tox           | 252838 |  |  |
| C2 | 1362  | liver        | Avpr1a        | 54140  |  |  |
| C2 | 1363  | liver        | BC021767      | 545551 |  |  |
| C2 | 1438  | liver        | Dclre1b       | 140917 |  |  |
| C2 | 1447  | liver        | Naaa          | 67111  |  |  |
| C2 | 1615  | liver        | Timm10        | 30059  |  |  |

|    |      |       |               |        |  |  |
|----|------|-------|---------------|--------|--|--|
| C2 | 1646 | liver | Slc15a4       | 100561 |  |  |
| C2 | 1709 | liver | Mt2           | 17750  |  |  |
| C2 | 1736 | liver | Elovl3        | 12686  |  |  |
| C2 | 1767 | liver | BC016495      | 225994 |  |  |
| C2 | 1805 | liver | Tmem204       | 407831 |  |  |
| C2 | 1827 | liver | Gnb1l         | 13972  |  |  |
| C2 | 1851 | liver | Tmem41a       | 66664  |  |  |
| C2 | 1853 | liver | Stat5a        | 20850  |  |  |
| C2 | 1876 | liver | Amdhd1        | 71761  |  |  |
| C2 | 1877 | liver | Amica1        | 270152 |  |  |
| C2 | 1911 | liver | 1300007F04Rik | 67477  |  |  |
| C2 | 1941 | liver | MMT00079618   |        |  |  |
| C2 | 2011 | liver | Slc2a5        | 56485  |  |  |
| C2 | 2027 | liver | Wnt5b         | 22419  |  |  |
| C2 | 2110 | liver | Gtf2ird1      | 57080  |  |  |
| C2 | 2126 | liver | Dgat2         | 67800  |  |  |
| C2 | 2190 | liver | Heyl          | 56198  |  |  |
| C2 | 2256 | liver | Serpina9      | 71907  |  |  |
| C2 | 2294 | liver | AU040829      | 216831 |  |  |
| C2 | 2322 | liver | Tuba4a        | 22145  |  |  |
| C2 | 2384 | liver | Micalcl       | 70877  |  |  |
| C2 | 2399 | liver | MMT00060167   |        |  |  |
| C2 | 2471 | liver | Ccdc134       | 76457  |  |  |
| C2 | 2483 | liver | Gmeb1         | 56809  |  |  |
| C2 | 2529 | liver | Hmcn2         | 665700 |  |  |
| C2 | 2615 | liver | EG624862      | 624862 |  |  |
| C2 | 2636 | liver | Tars          | 110960 |  |  |
| C2 | 2766 | liver | Elp4          | 77766  |  |  |
| C2 | 2794 | liver | Map3k6        | 53608  |  |  |
| C2 | 2829 | liver | Lrfr3         | 233067 |  |  |
| C2 | 2850 | liver | Slc16a6       | 104681 |  |  |
| C2 | 3040 | liver | Bcl3          | 12051  |  |  |
| C2 | 3097 | liver | Ppp1r3g       | 76487  |  |  |
| C2 | 3214 | liver | Dnmt3b        | 13436  |  |  |
| C2 | 3235 | liver | BC029214      | 227622 |  |  |
| C2 | 3246 | liver | Prei4         | 74182  |  |  |
| C2 | 3410 | liver | Paqr9         | 75552  |  |  |
| C2 | 3452 | liver | Ccrn4l        | 12457  |  |  |
| C2 | 3502 | liver | Gde1          | 56209  |  |  |
| C2 | 3556 | liver | Al661453      | 224833 |  |  |
| C2 | 3559 | liver | 4933433P14Rik | 66787  |  |  |
| C2 | 3652 | liver | Adm           | 11535  |  |  |
| C2 | 3686 | liver | Psmc9         | 67151  |  |  |
| C2 | 3746 | liver | Osbpl5        | 79196  |  |  |
| C2 | 3789 | liver | 4833442J19Rik | 320204 |  |  |
| C2 | 3790 | liver | Mtss1         | 211401 |  |  |
| C2 | 3804 | liver | MMT00015534   |        |  |  |
| C2 | 3868 | liver | Ebpl          | 68177  |  |  |
| C2 | 3989 | liver | Wrnip1        | 78903  |  |  |
| C2 | 4084 | liver | Asah3l        | 230379 |  |  |
| C2 | 4201 | liver | Tubb2c        | 227613 |  |  |

|    |      |       |               |        |  |  |
|----|------|-------|---------------|--------|--|--|
| C2 | 4205 | liver | Rgs1          | 50778  |  |  |
| C2 | 4235 | liver | Pfkfb3        | 170768 |  |  |
| C2 | 4286 | liver | Ptp4a1        | 19243  |  |  |
| C2 | 4333 | liver | Sumo3         | 20610  |  |  |
| C2 | 4379 | liver | Glrx          | 93692  |  |  |
| C2 | 4380 | liver | Smarcb1       | 20587  |  |  |
| C2 | 4392 | liver | 1810055G02Rik | 72056  |  |  |
| C2 | 4463 | liver | Ncoa5         | 228869 |  |  |
| C2 | 4512 | liver | Esrra         | 26379  |  |  |
| C2 | 4534 | liver | Ndel1         | 83431  |  |  |
| C2 | 4678 | liver | Kank1         | 107351 |  |  |
| C2 | 4708 | liver | Traf3ip2      | 103213 |  |  |
| C2 | 4715 | liver | Tmem120a      | 215210 |  |  |
| C2 | 5068 | liver | Afap1l2       | 226250 |  |  |
| C2 | 5120 | liver | Alkbh7        | 66400  |  |  |
| C2 | 5183 | liver | St5           | 76954  |  |  |
| C2 | 5187 | liver | Speer4f       | 70935  |  |  |
| C2 | 5247 | liver | Irak2         | 108960 |  |  |
| C2 | 5259 | liver | Mat1a         | 11720  |  |  |
| C2 | 5330 | liver | Cbfa2t3       | 12398  |  |  |
| C2 | 5345 | liver | MMT00023326   | 57435  |  |  |
| C2 | 5355 | liver | Gpsm2         | 76123  |  |  |
| C2 | 5374 | liver | Chka          | 12660  |  |  |
| C2 | 5492 | liver | MMT00039914   |        |  |  |
| C2 | 5569 | liver | Pdgfc         | 54635  |  |  |
| C2 | 5574 | liver | Hsd3b7        | 101502 |  |  |
| C2 | 5587 | liver | Rmnd5b        | 66089  |  |  |
| C2 | 5629 | liver | Als2          | 74018  |  |  |
| C2 | 5734 | liver | EG619653      | 619653 |  |  |
| C2 | 5791 | liver | Baiap2l1      | 66898  |  |  |
| C2 | 5802 | liver | Mad2l2        | 71890  |  |  |
| C2 | 5804 | liver | Thrsp         | 21835  |  |  |
| C2 | 5814 | liver | Nrbp2         | 223649 |  |  |
| C2 | 5831 | liver | Sh2b3         | 16923  |  |  |
| C2 | 5849 | liver | 2310031A18Rik | 69627  |  |  |
| C2 | 5856 | liver | Mfsd2         | 76574  |  |  |
| C2 | 5858 | liver | Itch          | 16396  |  |  |
| C2 | 5889 | liver | Errfi1        | 74155  |  |  |
| C2 | 5892 | liver | MMT00038457   |        |  |  |
| C2 | 5934 | liver | S100a10       | 20194  |  |  |
| C2 | 5974 | liver | Arntl         | 11865  |  |  |
| C2 | 5994 | liver | Olfr609       | 259086 |  |  |
| C2 | 6019 | liver | Gdap10        | 14546  |  |  |
| C2 | 6028 | liver | Alas1         | 11655  |  |  |
| C2 | 6030 | liver | As3mt         | 57344  |  |  |
| C2 | 6048 | liver | Psmc9         | 67151  |  |  |
| C2 | 6073 | liver | Mthfd2        | 17768  |  |  |
| C2 | 6109 | liver | Hsd17b2       | 15486  |  |  |
| C2 | 6118 | liver | Slc1a4        | 55963  |  |  |
| C2 | 6211 | liver | Arhgap24      | 231532 |  |  |
| C2 | 6338 | liver | Setd3         | 52690  |  |  |

|    |      |       |               |        |  |  |
|----|------|-------|---------------|--------|--|--|
| C2 | 6343 | liver | Slc20a1       | 20515  |  |  |
| C2 | 6370 | liver | Aqp8          | 11833  |  |  |
| C2 | 6386 | liver | Por           | 18984  |  |  |
| C2 | 6393 | liver | 3110043O21Rik | 73205  |  |  |
| C2 | 6490 | liver | Il1r1         | 16177  |  |  |
| C2 | 6564 | liver | Cebpd         | 12609  |  |  |
| C2 | 6589 | liver | Mafb          | 16658  |  |  |
| C2 | 6657 | liver | Irf6          | 54139  |  |  |
| C2 | 6670 | liver | Nat10         | 98956  |  |  |
| C2 | 6675 | liver | Sfrs4         | 57317  |  |  |
| C2 | 6756 | liver | Sds           | 231691 |  |  |
| C2 | 6771 | liver | Insc          | 233752 |  |  |
| C2 | 6788 | liver | Psen2         | 19165  |  |  |
| C2 | 6928 | liver | Klhl8         | 246293 |  |  |
| C2 | 6990 | liver | Nr1i2         | 18171  |  |  |
| C2 | 7061 | liver | Spsb3         | 79043  |  |  |
| C2 | 7066 | liver | Agtr1b        | 11608  |  |  |
| C2 | 7095 | liver | Timm8a1       | 30058  |  |  |
| C2 | 7112 | liver | Apbb3         | 225372 |  |  |
| C2 | 7120 | liver | Dusp1         | 19252  |  |  |
| C2 | 7136 | liver | Id3           | 15903  |  |  |
| C2 | 7151 | liver | MMT00007982   |        |  |  |
| C2 | 7199 | liver | Wee1          | 22390  |  |  |
| C2 | 7315 | liver | EG624219      | 624219 |  |  |
| C2 | 7397 | liver | MMT00020969   |        |  |  |
| C2 | 7414 | liver | Clpx          | 270166 |  |  |
| C2 | 7751 | liver | Sgk2          | 27219  |  |  |
| C2 | 7770 | liver | Galt          | 14430  |  |  |
| C2 | 7839 | liver | Asl           | 109900 |  |  |
| C2 | 7862 | liver | Cpsf4l        | 52670  |  |  |
| C2 | 7944 | liver | A1132487      | 104910 |  |  |
| C2 | 7954 | liver | Ccdc12        | 72654  |  |  |
| C2 | 7973 | liver | Lgals9        | 16859  |  |  |
| C2 | 8200 | liver | Dfna5h        | 54722  |  |  |
| C2 | 8328 | liver | Klhdc8a       | 213417 |  |  |
| C2 | 8399 | liver | Herpud1       | 64209  |  |  |
| C2 | 8408 | liver | Nr1i3         | 12355  |  |  |
| C2 | 8428 | liver | Sorbs3        | 20410  |  |  |
| C2 | 8507 | liver | 1700054F22Rik | 73398  |  |  |
| C2 | 8632 | liver | Igfbp1        | 16006  |  |  |
| C2 | 8639 | liver | Map1lc3b      | 67443  |  |  |
| C2 | 8641 | liver | Slc7a2        | 11988  |  |  |
| C2 | 8658 | liver | Fmo2          | 55990  |  |  |
| C2 | 8711 | liver | 5430432M24Rik | 73847  |  |  |
| C2 | 8816 | liver | Nfkbia        | 18035  |  |  |
| C2 | 8843 | liver | Eil2          | 192657 |  |  |
| C2 | 8870 | liver | Arid3a        | 13496  |  |  |
| C2 | 9213 | liver | Osgin1        | 71839  |  |  |
| C2 | 9260 | liver | Cmtm6         | 67213  |  |  |
| C2 | 9275 | liver | Aass          | 30956  |  |  |
| C2 | 9309 | liver | MMT00035904   |        |  |  |

|    |       |       |               |        |  |  |
|----|-------|-------|---------------|--------|--|--|
| C2 | 9379  | liver | Ypel2         | 77864  |  |  |
| C2 | 9438  | liver | Pctk3         | 18557  |  |  |
| C2 | 9481  | liver | Ppl           | 19041  |  |  |
| C2 | 9495  | liver | Srms          | 20811  |  |  |
| C2 | 9585  | liver | Neu3          | 50877  |  |  |
| C2 | 9587  | liver | Bri3bp        | 76809  |  |  |
| C2 | 9745  | liver | Gadd45g       | 23882  |  |  |
| C2 | 9763  | liver | Tuba3b        | 22147  |  |  |
| C2 | 9910  | liver | EG666644      | 666644 |  |  |
| C2 | 10088 | liver | Ddc           | 13195  |  |  |
| C2 | 10166 | liver | Rhbdd2        | 215160 |  |  |
| C2 | 10176 | liver | Snrpg         | 68011  |  |  |
| C2 | 10207 | liver | MMT00012324   | 328192 |  |  |
| C2 | 10215 | liver | Nampt         | 59027  |  |  |
| C2 | 10279 | liver | Rnf186        | 66825  |  |  |
| C2 | 10382 | liver | Mtmr4         | 170749 |  |  |
| C2 | 10384 | liver | Chic2         | 74277  |  |  |
| C2 | 10408 | liver | Per1          | 18626  |  |  |
| C2 | 10444 | liver | 1810020D17Rik | 66273  |  |  |
| C2 | 10486 | liver | 1300002K09Rik | 74152  |  |  |
| C2 | 10541 | liver | Ap2a2         | 11772  |  |  |
| C2 | 10546 | liver | Prpf6         | 68879  |  |  |
| C2 | 10642 | liver | Ngef          | 53972  |  |  |
| C2 | 10712 | liver | Fchsd2        | 207278 |  |  |
| C2 | 10775 | liver | Slc16a1       | 20501  |  |  |
| C2 | 10803 | liver | Wnt5a         | 22418  |  |  |
| C2 | 10842 | liver | Slc25a25      | 227731 |  |  |
| C2 | 10863 | liver | Tssc1         | 380752 |  |  |
| C2 | 11075 | liver | Xrcc6bp1      | 68876  |  |  |
| C2 | 11093 | liver | Zdhhc1        | 70796  |  |  |
| C2 | 11129 | liver | Ankhd1        | 108857 |  |  |
| C2 | 11193 | liver | Tsc22d1       | 21807  |  |  |
| C2 | 11312 | liver | 2210016H18Rik | 70125  |  |  |
| C2 | 11574 | liver | Gne           | 50798  |  |  |
| C2 | 11576 | liver | Gm1381        | 384198 |  |  |
| C2 | 11599 | liver | Coq10b        | 67876  |  |  |
| C2 | 11614 | liver | Sult1e1       | 20860  |  |  |
| C2 | 11724 | liver | Tuba3a        | 22144  |  |  |
| C2 | 11735 | liver | Thoc5         | 107829 |  |  |
| C2 | 11741 | liver | Slc30a10      | 226781 |  |  |
| C2 | 11807 | liver | Fbxo31        | 76454  |  |  |
| C2 | 11808 | liver | Pck1          | 18534  |  |  |
| C2 | 11823 | liver | Mmp7          | 17393  |  |  |
| C2 | 11926 | liver | Ampd2         | 109674 |  |  |
| C2 | 11937 | liver | Snx10         | 71982  |  |  |
| C2 | 11949 | liver | Cldn3         | 12739  |  |  |
| C2 | 12114 | liver | Homer2        | 26557  |  |  |
| C2 | 12151 | liver | MMT00082650   |        |  |  |
| C2 | 12165 | liver | Ppp2r1b       | 73699  |  |  |
| C2 | 12190 | liver | Krt18         | 16668  |  |  |
| C2 | 12193 | liver | Aco2          | 11429  |  |  |



|    |       |       |               |           |  |  |
|----|-------|-------|---------------|-----------|--|--|
| C2 | 12204 | liver | Ankmy2        | 217473    |  |  |
| C2 | 12219 | liver | Cyb5b         | 66427     |  |  |
| C2 | 12232 | liver | MMT00060943   | 100039903 |  |  |
| C2 | 12315 | liver | Srebf1        | 20787     |  |  |
| C2 | 12420 | liver | Klhl21        | 242785    |  |  |
| C2 | 12433 | liver | 5033413D22Rik | 75973     |  |  |
| C2 | 12436 | liver | Serinc3       | 26943     |  |  |
| C2 | 12460 | liver | Pnpla2        | 66853     |  |  |
| C2 | 12479 | liver | lfrd1         | 15982     |  |  |
| C2 | 12489 | liver | Wdr8          | 59002     |  |  |
| C2 | 12687 | liver | Zc3h8         | 57432     |  |  |
| C2 | 12754 | liver | E130304F04Rik | 245269    |  |  |
| C2 | 12799 | liver | Spon2         | 100689    |  |  |
| C2 | 12807 | liver | Faim          | 23873     |  |  |
| C2 | 12839 | liver | Fh1           | 14194     |  |  |
| C2 | 12904 | liver | MMT00040704   | 676923    |  |  |
| C2 | 12908 | liver | Jdp2          | 81703     |  |  |
| C2 | 12930 | liver | Pthr1         | 19228     |  |  |
| C2 | 12941 | liver | Elovl5        | 68801     |  |  |
| C2 | 12981 | liver | Nek6          | 59126     |  |  |
| C2 | 12982 | liver | Cars          | 27267     |  |  |
| C2 | 12995 | liver | Tmed9         | 67511     |  |  |
| C2 | 13000 | liver | 9130404D14Rik | 227737    |  |  |
| C2 | 13018 | liver | AW544981      | 213956    |  |  |
| C2 | 13025 | liver | lrf2          | 16363     |  |  |
| C2 | 13078 | liver | Eps8l2        | 98845     |  |  |
| C2 | 13140 | liver | MMT00005814   |           |  |  |
| C2 | 13210 | liver | Nudt1         | 17766     |  |  |
| C2 | 13289 | liver | Dusp10        | 63953     |  |  |
| C2 | 13339 | liver | D630042F21Rik | 330428    |  |  |
| C2 | 13471 | liver | Cln8          | 26889     |  |  |
| C2 | 13489 | liver | D230025D16Rik | 234678    |  |  |
| C2 | 13568 | liver | Cad           | 69719     |  |  |
| C2 | 13684 | liver | Abcd4         | 19300     |  |  |
| C2 | 13705 | liver | Osbp1a        | 64291     |  |  |
| C2 | 13864 | liver | Larp1         | 73158     |  |  |
| C2 | 13947 | liver | Crip2         | 68337     |  |  |
| C2 | 13962 | liver | Chd7          | 320790    |  |  |
| C2 | 13989 | liver | Foxp3         | 20371     |  |  |
| C2 | 14041 | liver | Cldn1         | 12737     |  |  |
| C2 | 14138 | liver | Anks4b        | 72074     |  |  |
| C2 | 14263 | liver | Arrdc3        | 105171    |  |  |
| C2 | 14279 | liver | 3930402G23Rik | 74027     |  |  |
| C2 | 14335 | liver | Olfr33        | 18332     |  |  |
| C2 | 14442 | liver | Ethe1         | 66071     |  |  |
| C2 | 14462 | liver | Zfp385b       | 241494    |  |  |
| C2 | 14472 | liver | Ahcy          | 269378    |  |  |
| C2 | 14473 | liver | 6330534C20Rik | 434778    |  |  |
| C2 | 14582 | liver | Mt1           | 17748     |  |  |
| C2 | 14620 | liver | Tbc1d8        | 54610     |  |  |
| C2 | 14681 | liver | Alg12         | 223774    |  |  |

|    |       |       |               |        |  |  |
|----|-------|-------|---------------|--------|--|--|
| C2 | 14726 | liver | Slc19a1       | 20509  |  |  |
| C2 | 14894 | liver | G0s2          | 14373  |  |  |
| C2 | 15008 | liver | Chrdl2        | 69121  |  |  |
| C2 | 15021 | liver | Ppargc1a      | 19017  |  |  |
| C2 | 15046 | liver | Arl6ip2       | 56298  |  |  |
| C2 | 15049 | liver | Rnf125        | 67664  |  |  |
| C2 | 15052 | liver | Kifc3         | 16582  |  |  |
| C2 | 15258 | liver | Coil          | 12812  |  |  |
| C2 | 15284 | liver | EG632778      | 632778 |  |  |
| C2 | 15292 | liver | 2010107G23Rik | 69894  |  |  |
| C2 | 15320 | liver | MMT00017479   |        |  |  |
| C2 | 15425 | liver | Adprh         | 11544  |  |  |
| C2 | 15481 | liver | 1110067D22Rik | 216551 |  |  |
| C2 | 15521 | liver | Mast3         | 546071 |  |  |
| C2 | 15522 | liver | 1810011O10Rik | 69068  |  |  |
| C2 | 15567 | liver | 1600002H07Rik | 72016  |  |  |
| C2 | 15607 | liver | Klf13         | 50794  |  |  |
| C2 | 15609 | liver | Mreg          | 381269 |  |  |
| C2 | 15624 | liver | Crcp          | 12909  |  |  |
| C2 | 15631 | liver | Lpin1         | 14245  |  |  |
| C2 | 15665 | liver | Bicap         | 53619  |  |  |
| C2 | 15709 | liver | Tceal1        | 237052 |  |  |
| C2 | 15758 | liver | Stx4a         | 20909  |  |  |
| C2 | 15824 | liver | D19Ert721e    | 225896 |  |  |
| C2 | 15862 | liver | Mrap          | 77037  |  |  |
| C2 | 15882 | liver | AA986860      | 212439 |  |  |
| C2 | 16060 | liver | Gys2          | 232493 |  |  |
| C2 | 16176 | liver | St3gal5       | 20454  |  |  |
| C2 | 16327 | liver | Ubfd1         | 28018  |  |  |
| C2 | 16515 | liver | Gramd4        | 223752 |  |  |
| C2 | 16580 | liver | Tnfaip2       | 21928  |  |  |
| C2 | 16647 | liver | D16H22S680E   | 27883  |  |  |
| C2 | 16669 | liver | Tjp2          | 21873  |  |  |
| C2 | 16690 | liver | Tjp3          | 27375  |  |  |
| C2 | 16712 | liver | Pnrc1         | 108767 |  |  |
| C2 | 16851 | liver | Slc34a2       | 20531  |  |  |
| C2 | 16946 | liver | Ivns1abp      | 117198 |  |  |
| C2 | 17078 | liver | Syde2         | 214804 |  |  |
| C2 | 17223 | liver | 4933426M11Rik | 217684 |  |  |
| C2 | 17247 | liver | A030007L17Rik | 68252  |  |  |
| C2 | 17323 | liver | Tubb6         | 67951  |  |  |
| C2 | 17338 | liver | Mocos         | 68591  |  |  |
| C2 | 17342 | liver | Dhx32         | 101437 |  |  |
| C2 | 17352 | liver | Cebpb         | 12608  |  |  |
| C2 | 17418 | liver | D1Ert622e     | 52392  |  |  |
| C2 | 17444 | liver | Tuba1a        | 22142  |  |  |
| C2 | 17525 | liver | Ctgf          | 14219  |  |  |
| C2 | 17530 | liver | MMT00041792   |        |  |  |
| C2 | 17583 | liver | Per2          | 18627  |  |  |
| C2 | 17617 | liver | Atp5sl        | 66349  |  |  |
| C2 | 17622 | liver | Foxo1         | 56458  |  |  |

|    |       |       |               |        |  |  |
|----|-------|-------|---------------|--------|--|--|
| C2 | 17656 | liver | Hdhd3         | 72748  |  |  |
| C2 | 17660 | liver | Nlrp12        | 378425 |  |  |
| C2 | 17752 | liver | Chac1         | 69065  |  |  |
| C2 | 17876 | liver | Tubb4         | 22153  |  |  |
| C2 | 17884 | liver | Lnx2          | 140887 |  |  |
| C2 | 17928 | liver | Pex11a        | 18631  |  |  |
| C2 | 17952 | liver | Ripk2         | 192656 |  |  |
| C2 | 17994 | liver | Zh2c2         | 252876 |  |  |
| C2 | 17999 | liver | A730017L22Rik | 613258 |  |  |
| C2 | 18027 | liver | 5730403B10Rik | 66626  |  |  |
| C2 | 18135 | liver | Tmed3         | 66111  |  |  |
| C2 | 18147 | liver | Nhlrc2        | 66866  |  |  |
| C2 | 18179 | liver | Dbp           | 13170  |  |  |
| C2 | 18250 | liver | Mmp14         | 17387  |  |  |
| C2 | 18275 | liver | D730039F16Rik | 77996  |  |  |
| C2 | 18286 | liver | Slc41a3       | 71699  |  |  |
| C2 | 18314 | liver | 4631416L12Rik | 622434 |  |  |
| C2 | 18438 | liver | Map3k7ip2     | 68652  |  |  |
| C2 | 18455 | liver | Mtnr1a        | 17773  |  |  |
| C2 | 18498 | liver | Slc5a6        | 330064 |  |  |
| C2 | 18552 | liver | Nr2c2ap       | 75692  |  |  |
| C2 | 18586 | liver | Tns1          | 21961  |  |  |
| C2 | 18607 | liver | Acat3         | 224530 |  |  |
| C2 | 18756 | liver | Tspan14       | 52588  |  |  |
| C2 | 18785 | liver | Angptl4       | 57875  |  |  |
| C2 | 18802 | liver | Nit2          | 52633  |  |  |
| C2 | 18827 | liver | Oprs1         | 18391  |  |  |
| C2 | 18905 | liver | Prmt2         | 15468  |  |  |
| C2 | 18947 | liver | Ctse          | 13034  |  |  |
| C2 | 18990 | liver | Hal           | 15109  |  |  |
| C2 | 19025 | liver | Slc37a4       | 14385  |  |  |
| C2 | 19032 | liver | Tymp          | 72962  |  |  |
| C2 | 19108 | liver | Armet         | 74840  |  |  |
| C2 | 19124 | liver | Pim3          | 223775 |  |  |
| C2 | 19134 | liver | Fn3k          | 63828  |  |  |
| C2 | 19141 | liver | Gorasp1       | 74498  |  |  |
| C2 | 19146 | liver | N4bp2l1       | 100637 |  |  |
| C2 | 19217 | liver | Cyr61         | 16007  |  |  |
| C2 | 19234 | liver | Nrg4          | 83961  |  |  |
| C2 | 19277 | liver | MMT00044927   |        |  |  |
| C2 | 19305 | liver | Azin1         | 54375  |  |  |
| C2 | 19323 | liver | Bnip3         | 12176  |  |  |
| C2 | 19453 | liver | Cdk2ap2       | 52004  |  |  |
| C2 | 19465 | liver | Hacl1         | 56794  |  |  |
| C2 | 19466 | liver | Pptc7         | 320717 |  |  |
| C2 | 19528 | liver | Zfp503        | 218820 |  |  |
| C2 | 19532 | liver | Med8          | 80509  |  |  |
| C2 | 19556 | liver | Efna1         | 13636  |  |  |
| C2 | 19621 | liver | Cldn5         | 12741  |  |  |
| C2 | 19671 | liver | Upp2          | 76654  |  |  |
| C2 | 19701 | liver | 9930021J17Rik | 229488 |  |  |

|    |       |       |               |        |  |  |
|----|-------|-------|---------------|--------|--|--|
| C2 | 19723 | liver | Pfkfb1        | 18639  |  |  |
| C2 | 19757 | liver | Fkbp5         | 14229  |  |  |
| C2 | 19790 | liver | Polg2         | 50776  |  |  |
| C2 | 19970 | liver | Mrpl36        | 94066  |  |  |
| C2 | 20085 | liver | Lpin2         | 64898  |  |  |
| C2 | 20266 | liver | Insig2        | 72999  |  |  |
| C2 | 20296 | liver | C030027H14Rik | 77465  |  |  |
| C2 | 20345 | liver | Al842396      | 103844 |  |  |
| C2 | 20370 | liver | Sccpdh        | 109232 |  |  |
| C2 | 20570 | liver | Ap3m1         | 55946  |  |  |
| C2 | 20689 | liver | Cnksr3        | 215748 |  |  |
| C2 | 20690 | liver | Zfp276        | 57247  |  |  |
| C2 | 20745 | liver | Sord          | 20322  |  |  |
| C2 | 20746 | liver | 2210015D19Rik | 76508  |  |  |
| C2 | 20803 | liver | Tmem50a       | 71817  |  |  |
| C2 | 20854 | liver | Commd7        | 99311  |  |  |
| C2 | 20880 | liver | Raf1          | 110157 |  |  |
| C2 | 20907 | liver | Lims2         | 225341 |  |  |
| C2 | 20999 | liver | 1110049F12Rik | 66193  |  |  |
| C2 | 21142 | liver | Gm129         | 229599 |  |  |
| C2 | 21163 | liver | Slc16a5       | 217316 |  |  |
| C2 | 21167 | liver | Irf5          | 27056  |  |  |
| C2 | 21188 | liver | Pnkp          | 59047  |  |  |
| C2 | 21251 | liver | Cpt1a         | 12894  |  |  |
| C2 | 21331 | liver | Slc10a6       | 75750  |  |  |
| C2 | 21408 | liver | Svil          | 225115 |  |  |
| C2 | 21409 | liver | Gldc          | 104174 |  |  |
| C2 | 21531 | liver | Ttc23         | 67009  |  |  |
| C2 | 21805 | liver | Plk3          | 12795  |  |  |
| C2 | 21811 | liver | Ak3l1         | 11639  |  |  |
| C2 | 21901 | liver | BC035537      | 212326 |  |  |
| C2 | 21903 | liver | Nr1d1         | 217166 |  |  |
| C2 | 21918 | liver | Snx24         | 69226  |  |  |
| C2 | 21934 | liver | Id2           | 15902  |  |  |
| C2 | 21969 | liver | Tk1           | 21877  |  |  |
| C2 | 22031 | liver | Vcam1         | 22329  |  |  |
| C2 | 22076 | liver | Pgm2l1        | 70974  |  |  |
| C2 | 22218 | liver | Rfc3          | 69263  |  |  |
| C2 | 22226 | liver | Pm20d1        | 212933 |  |  |
| C2 | 22290 | liver | Tubb2a        | 22151  |  |  |
| C2 | 22324 | liver | MMT00060741   |        |  |  |
| C2 | 22388 | liver | 2410018M08Rik | 71970  |  |  |
| C2 | 22443 | liver | Tuba1c        | 22146  |  |  |
| C2 | 22470 | liver | Ppargc1b      | 170826 |  |  |
| C2 | 22474 | liver | Ubqln1        | 56085  |  |  |
| C2 | 22476 | liver | Tspan4        | 64540  |  |  |
| C2 | 22627 | liver | Adck5         | 268822 |  |  |
| C2 | 22630 | liver | MMT00034355   |        |  |  |
| C2 | 22636 | liver | Trim2         | 80890  |  |  |
| C2 | 22681 | liver | Gm88          | 224813 |  |  |
| C2 | 22732 | liver | Cyb5b         | 66427  |  |  |

|    |       |              |               |        |  |  |
|----|-------|--------------|---------------|--------|--|--|
| C2 | 22863 | liver        | Prkd2         | 101540 |  |  |
| C2 | 22873 | liver        | Slc38a2       | 67760  |  |  |
| C2 | 22933 | liver        | Tssc4         | 56844  |  |  |
| C2 | 22936 | liver        | Rhobtb1       | 69288  |  |  |
| C2 | 23161 | liver        | Gclc          | 14629  |  |  |
| C2 | 23180 | liver        | Sult1d1       | 53315  |  |  |
| C2 | 23183 | liver        | Nnmt          | 18113  |  |  |
| C2 | 23201 | liver        | S1pr1         | 13609  |  |  |
| C2 | 23202 | liver        | Olf559        | 259116 |  |  |
| C2 | 23437 | liver        | Efh2          | 27984  |  |  |
| C2 | 23552 | liver        | Ras11b        | 68939  |  |  |
| C2 | 23558 | liver        | MMT00030937   |        |  |  |
| C2 | 23680 | liver        | 5730419I09Rik | 74741  |  |  |
| C3 | 10    | hypothalamus | NAN           |        |  |  |
| C3 | 115   | hypothalamus | NAN           |        |  |  |
| C3 | 141   | hypothalamus | Jag1          | 16449  |  |  |
| C3 | 219   | hypothalamus | MMT00058440   |        |  |  |
| C3 | 225   | hypothalamus | MMT00073704   | 635169 |  |  |
| C3 | 316   | hypothalamus | 4930471G03Rik | 74966  |  |  |
| C3 | 317   | hypothalamus | Ceacam13      | 69785  |  |  |
| C3 | 346   | hypothalamus | Olf1484       | 258288 |  |  |
| C3 | 352   | hypothalamus | 4732415M23Rik | 320869 |  |  |
| C3 | 391   | hypothalamus | 4933416I08Rik | 71159  |  |  |
| C3 | 484   | hypothalamus | Atp4a         | 11944  |  |  |
| C3 | 486   | hypothalamus | Josd2         | 66124  |  |  |
| C3 | 558   | hypothalamus | Crebl1        | 12915  |  |  |
| C3 | 584   | hypothalamus | Tmem207       | 224058 |  |  |
| C3 | 658   | hypothalamus | Vmn2r-ps88    | 209786 |  |  |
| C3 | 663   | hypothalamus | Muc19         | 239611 |  |  |
| C3 | 985   | hypothalamus | Hsd3b6        | 15497  |  |  |
| C3 | 1021  | hypothalamus | Rhpn2         | 52428  |  |  |
| C3 | 1058  | hypothalamus | Olf868        | 258552 |  |  |
| C3 | 1059  | hypothalamus | P2rx6         | 18440  |  |  |
| C3 | 1122  | hypothalamus | Pax3          | 18505  |  |  |
| C3 | 1134  | hypothalamus | Vmn2r19       | 232358 |  |  |
| C3 | 1136  | hypothalamus | Kdelr3        | 105785 |  |  |
| C3 | 1137  | hypothalamus | Mlxip         | 208104 |  |  |
| C3 | 1170  | hypothalamus | Faim3         | 69169  |  |  |
| C3 | 1239  | hypothalamus | Cerkl         | 228094 |  |  |
| C3 | 1256  | hypothalamus | Baiap2l2      | 207495 |  |  |
| C3 | 1294  | hypothalamus | MMT00016640   |        |  |  |
| C3 | 1354  | hypothalamus | Lsmd1         | 78304  |  |  |
| C3 | 1374  | hypothalamus | Mdn1          | 100019 |  |  |
| C3 | 1436  | hypothalamus | Nfu1          | 56748  |  |  |
| C3 | 1518  | hypothalamus | Amigo2        | 105827 |  |  |
| C3 | 1570  | hypothalamus | Olf522        | 258954 |  |  |
| C3 | 1593  | hypothalamus | D3Ert300e     | 56790  |  |  |
| C3 | 1619  | hypothalamus | Fbxw17        | 109082 |  |  |
| C3 | 1679  | hypothalamus | MMT00009278   |        |  |  |
| C3 | 1696  | hypothalamus | V1re9         | 252904 |  |  |
| C3 | 1770  | hypothalamus | BC054059      | 246747 |  |  |

|    |      |              |               |        |  |  |
|----|------|--------------|---------------|--------|--|--|
| C3 | 1771 | hypothalamus | Park2         | 50873  |  |  |
| C3 | 1795 | hypothalamus | Rabgap1l      | 29809  |  |  |
| C3 | 1804 | hypothalamus | Tgm2          | 21817  |  |  |
| C3 | 1829 | hypothalamus | MMT00030026   |        |  |  |
| C3 | 1876 | hypothalamus | Amdhd1        | 71761  |  |  |
| C3 | 1920 | hypothalamus | Oas1e         | 231699 |  |  |
| C3 | 2067 | hypothalamus | Myo1a         | 432516 |  |  |
| C3 | 2226 | hypothalamus | Amt           | 434437 |  |  |
| C3 | 2283 | hypothalamus | MMT00029554   |        |  |  |
| C3 | 2326 | hypothalamus | zfp507        | 668501 |  |  |
| C3 | 2675 | hypothalamus | Nfyc          | 18046  |  |  |
| C3 | 2819 | hypothalamus | Kcnk5         | 16529  |  |  |
| C3 | 2870 | hypothalamus | D5Erttd577e   | 320549 |  |  |
| C3 | 3067 | hypothalamus | Ucp3          | 22229  |  |  |
| C3 | 3080 | hypothalamus | MMT00014480   |        |  |  |
| C3 | 3127 | hypothalamus | Plcd1         | 18799  |  |  |
| C3 | 3144 | hypothalamus | Ube2j2        | 140499 |  |  |
| C3 | 3163 | hypothalamus | MMT00039919   |        |  |  |
| C3 | 3166 | hypothalamus | Vmn2r57       | 269902 |  |  |
| C3 | 3208 | hypothalamus | 493051111Rik  | 67645  |  |  |
| C3 | 3349 | hypothalamus | MMT00043953   |        |  |  |
| C3 | 3362 | hypothalamus | Fgf8          | 14179  |  |  |
| C3 | 3379 | hypothalamus | Cdo1          | 12583  |  |  |
| C3 | 3383 | hypothalamus | Cd99          | 673094 |  |  |
| C3 | 3402 | hypothalamus | A930018P22Rik | 68243  |  |  |
| C3 | 3511 | hypothalamus | Rnf182        | 328234 |  |  |
| C3 | 3886 | hypothalamus | MMT00047275   | 546271 |  |  |
| C3 | 3948 | hypothalamus | V1rb4         | 113854 |  |  |
| C3 | 3956 | hypothalamus | Psat1         | 107272 |  |  |
| C3 | 3986 | hypothalamus | Ep400         | 75560  |  |  |
| C3 | 4079 | hypothalamus | Emilin3       | 280635 |  |  |
| C3 | 4088 | hypothalamus | Pdcl2         | 79455  |  |  |
| C3 | 4166 | hypothalamus | Cblc          | 80794  |  |  |
| C3 | 4173 | hypothalamus | MMT00008170   |        |  |  |
| C3 | 4199 | hypothalamus | B3galt5       | 93961  |  |  |
| C3 | 4246 | hypothalamus | Fbxw12        | 434440 |  |  |
| C3 | 4311 | hypothalamus | MMT00033987   |        |  |  |
| C3 | 4337 | hypothalamus | Myst3         | 244349 |  |  |
| C3 | 4407 | hypothalamus | 4930429B21Rik | 67576  |  |  |
| C3 | 4425 | hypothalamus | Olf1346       | 258918 |  |  |
| C3 | 4430 | hypothalamus | Ankrd36       | 76389  |  |  |
| C3 | 4444 | hypothalamus | Ksr2          | 333050 |  |  |
| C3 | 4717 | hypothalamus | Cd177         | 68891  |  |  |
| C3 | 4870 | hypothalamus | Olf1550       | 259108 |  |  |
| C3 | 5083 | hypothalamus | Gprc5b        | 64297  |  |  |
| C3 | 5126 | hypothalamus | Fcnb          | 14134  |  |  |
| C3 | 5158 | hypothalamus | Rtn4          | 68585  |  |  |
| C3 | 5175 | hypothalamus | MMT00032221   |        |  |  |
| C3 | 5265 | hypothalamus | A3galt2       | 215493 |  |  |
| C3 | 5377 | hypothalamus | MMT00077700   |        |  |  |
| C3 | 5380 | hypothalamus | Olf1403       | 258645 |  |  |

|    |      |              |               |        |  |  |
|----|------|--------------|---------------|--------|--|--|
| C3 | 5494 | hypothalamus | Gpr101        | 245424 |  |  |
| C3 | 5505 | hypothalamus | Thap2         | 66816  |  |  |
| C3 | 5527 | hypothalamus | Zfp398        | 272347 |  |  |
| C3 | 5577 | hypothalamus | MMT00009628   |        |  |  |
| C3 | 5694 | hypothalamus | Sp7           | 170574 |  |  |
| C3 | 5748 | hypothalamus | Brsk2         | 75770  |  |  |
| C3 | 5908 | hypothalamus | MMT00027552   |        |  |  |
| C3 | 5929 | hypothalamus | Cpz           | 242939 |  |  |
| C3 | 6049 | hypothalamus | Cpeb2         | 231207 |  |  |
| C3 | 6185 | hypothalamus | Icam4         | 78369  |  |  |
| C3 | 6277 | hypothalamus | Prdm1         | 12142  |  |  |
| C3 | 6367 | hypothalamus | Lhfp          | 108927 |  |  |
| C3 | 6403 | hypothalamus | MMT00039607   |        |  |  |
| C3 | 6422 | hypothalamus | Grk5          | 14773  |  |  |
| C3 | 6429 | hypothalamus | Sim2          | 20465  |  |  |
| C3 | 6520 | hypothalamus | Arnt2         | 11864  |  |  |
| C3 | 6632 | hypothalamus | Dio1          | 13370  |  |  |
| C3 | 6719 | hypothalamus | Cacng8        | 81905  |  |  |
| C3 | 6754 | hypothalamus | Trpv3         | 246788 |  |  |
| C3 | 6784 | hypothalamus | Al182371      | 98870  |  |  |
| C3 | 6992 | hypothalamus | Olf172        | 259003 |  |  |
| C3 | 7041 | hypothalamus | Sp140         | 434484 |  |  |
| C3 | 7084 | hypothalamus | Spz1          | 79401  |  |  |
| C3 | 7085 | hypothalamus | St8sia2       | 20450  |  |  |
| C3 | 7094 | hypothalamus | Cyp2c54       | 404195 |  |  |
| C3 | 7132 | hypothalamus | Sp9           | 381373 |  |  |
| C3 | 7279 | hypothalamus | Cldn13        | 57255  |  |  |
| C3 | 7289 | hypothalamus | L1cam         | 16728  |  |  |
| C3 | 7436 | hypothalamus | 1700063K16Rik | 76610  |  |  |
| C3 | 7577 | hypothalamus | Cldn8         | 54420  |  |  |
| C3 | 7698 | hypothalamus | Klrb1a        | 17057  |  |  |
| C3 | 7721 | hypothalamus | MMT00000356   |        |  |  |
| C3 | 7879 | hypothalamus | Ifitm3        | 66141  |  |  |
| C3 | 7916 | hypothalamus | MMT00016293   |        |  |  |
| C3 | 7974 | hypothalamus | Arhgef7       | 54126  |  |  |
| C3 | 8109 | hypothalamus | 6330545A04Rik | 76166  |  |  |
| C3 | 8157 | hypothalamus | MMT00005305   |        |  |  |
| C3 | 8170 | hypothalamus | Snx22         | 382083 |  |  |
| C3 | 8189 | hypothalamus | Cflar         | 12633  |  |  |
| C3 | 8256 | hypothalamus | Tjap1         | 74094  |  |  |
| C3 | 8488 | hypothalamus | Opcml         | 330908 |  |  |
| C3 | 8617 | hypothalamus | 2210412E05Rik | 75690  |  |  |
| C3 | 8620 | hypothalamus | MMT00048670   |        |  |  |
| C3 | 8644 | hypothalamus | V1rg11        | 171267 |  |  |
| C3 | 8709 | hypothalamus | Trim58        | 216781 |  |  |
| C3 | 8905 | hypothalamus | Trim67        | 330863 |  |  |
| C3 | 9240 | hypothalamus | Olf401        | 258701 |  |  |
| C3 | 9363 | hypothalamus | Wisp2         | 22403  |  |  |
| C3 | 9421 | hypothalamus | Serpinf2      | 18816  |  |  |
| C3 | 9436 | hypothalamus | Cntnap2       | 66797  |  |  |
| C3 | 9463 | hypothalamus | Zdhhc23       | 332175 |  |  |

|    |       |              |               |        |  |  |
|----|-------|--------------|---------------|--------|--|--|
| C3 | 9468  | hypothalamus | Gtf2a1l       | 71828  |  |  |
| C3 | 9946  | hypothalamus | Stam2         | 56324  |  |  |
| C3 | 9954  | hypothalamus | MMT00047280   |        |  |  |
| C3 | 9990  | hypothalamus | MMT00081303   |        |  |  |
| C3 | 10055 | hypothalamus | Tpte          | 234129 |  |  |
| C3 | 10195 | hypothalamus | Klf1          | 16596  |  |  |
| C3 | 10234 | hypothalamus | C230093N12Rik | 98952  |  |  |
| C3 | 10240 | hypothalamus | Cyp2w1        | 545817 |  |  |
| C3 | 10281 | hypothalamus | Slc15a1       | 56643  |  |  |
| C3 | 10377 | hypothalamus | A430105I19Rik | 214239 |  |  |
| C3 | 10452 | hypothalamus | Grn           | 14824  |  |  |
| C3 | 10520 | hypothalamus | Xkr6          | 219149 |  |  |
| C3 | 10576 | hypothalamus | Xrcc3         | 74335  |  |  |
| C3 | 10657 | hypothalamus | Rnf12         | 19820  |  |  |
| C3 | 10687 | hypothalamus | Itpkb         | 320404 |  |  |
| C3 | 10835 | hypothalamus | Kcnd2         | 16508  |  |  |
| C3 | 10838 | hypothalamus | Spdef         | 30051  |  |  |
| C3 | 10886 | hypothalamus | Fndc3b        | 72007  |  |  |
| C3 | 10908 | hypothalamus | Hipk4         | 233020 |  |  |
| C3 | 10974 | hypothalamus | Vmn2r25       | 545874 |  |  |
| C3 | 11001 | hypothalamus | Pou6f2        | 218030 |  |  |
| C3 | 11016 | hypothalamus | Pcp2          | 18545  |  |  |
| C3 | 11050 | hypothalamus | 2210010C04Rik | 67373  |  |  |
| C3 | 11256 | hypothalamus | H2-DMa        | 14998  |  |  |
| C3 | 11350 | hypothalamus | 9030420J04Rik | 71544  |  |  |
| C3 | 11424 | hypothalamus | Iqcf3         | 68265  |  |  |
| C3 | 11425 | hypothalamus | Evx2          | 14029  |  |  |
| C3 | 11507 | hypothalamus | Adarb2        | 94191  |  |  |
| C3 | 11665 | hypothalamus | Hyal1         | 15586  |  |  |
| C3 | 11689 | hypothalamus | MMT00078109   |        |  |  |
| C3 | 11805 | hypothalamus | Bat2          | 53761  |  |  |
| C3 | 11809 | hypothalamus | 4930534B04Rik | 75216  |  |  |
| C3 | 11837 | hypothalamus | Paqr6         | 68957  |  |  |
| C3 | 11966 | hypothalamus | Zfp280b       | 64453  |  |  |
| C3 | 12046 | hypothalamus | Impdh1        | 23917  |  |  |
| C3 | 12062 | hypothalamus | Dzip1l        | 72507  |  |  |
| C3 | 12248 | hypothalamus | Tnp2          | 21959  |  |  |
| C3 | 12272 | hypothalamus | Fshr          | 14309  |  |  |
| C3 | 12347 | hypothalamus | MMT00014037   |        |  |  |
| C3 | 12372 | hypothalamus | MMT00039397   |        |  |  |
| C3 | 12422 | hypothalamus | Eme1          | 268465 |  |  |
| C3 | 12430 | hypothalamus | Fst           | 14313  |  |  |
| C3 | 12457 | hypothalamus | MMT00072579   |        |  |  |
| C3 | 12471 | hypothalamus | Olfr1020      | 258573 |  |  |
| C3 | 12604 | hypothalamus | Acr           | 11434  |  |  |
| C3 | 12651 | hypothalamus | Tsc22d4       | 78829  |  |  |
| C3 | 12696 | hypothalamus | RP23-392P11.3 | 545481 |  |  |
| C3 | 12753 | hypothalamus | MMT00043344   |        |  |  |
| C3 | 12772 | hypothalamus | Axl           | 26362  |  |  |
| C3 | 12826 | hypothalamus | Zfp354c       | 30944  |  |  |
| C3 | 13102 | hypothalamus | Prkaa1        | 105787 |  |  |



|    |       |              |               |           |  |  |
|----|-------|--------------|---------------|-----------|--|--|
| C3 | 13141 | hypothalamus | MMT00071569   |           |  |  |
| C3 | 13201 | hypothalamus | Rbl2          | 19651     |  |  |
| C3 | 13311 | hypothalamus | Prl3c1        | 27372     |  |  |
| C3 | 13487 | hypothalamus | A230051G13Rik | 216792    |  |  |
| C3 | 13496 | hypothalamus | H1fnt         | 70069     |  |  |
| C3 | 13676 | hypothalamus | MMT00010979   |           |  |  |
| C3 | 13742 | hypothalamus | 1700024P16Rik | 242594    |  |  |
| C3 | 13767 | hypothalamus | Kcnk15        | 241769    |  |  |
| C3 | 13800 | hypothalamus | Lrp5          | 16973     |  |  |
| C3 | 13860 | hypothalamus | Cpt1b         | 12895     |  |  |
| C3 | 13890 | hypothalamus | Olfr1263      | 258790    |  |  |
| C3 | 14035 | hypothalamus | Lrrc52        | 240899    |  |  |
| C3 | 14075 | hypothalamus | E030049G20Rik | 210356    |  |  |
| C3 | 14149 | hypothalamus | BC048562      | 434439    |  |  |
| C3 | 14204 | hypothalamus | Gm317         | 207209    |  |  |
| C3 | 14242 | hypothalamus | Prss29        | 114662    |  |  |
| C3 | 14313 | hypothalamus | Tnk1          | 83813     |  |  |
| C3 | 14316 | hypothalamus | MMT00012375   |           |  |  |
| C3 | 14510 | hypothalamus | Olfr643       | 259081    |  |  |
| C3 | 14519 | hypothalamus | Trex1         | 22040     |  |  |
| C3 | 14565 | hypothalamus | Rnf207        | 433809    |  |  |
| C3 | 14643 | hypothalamus | Ets2          | 23872     |  |  |
| C3 | 14754 | hypothalamus | Atoh8         | 71093     |  |  |
| C3 | 14830 | hypothalamus | Olfr421       | 258715    |  |  |
| C3 | 14993 | hypothalamus | MMT00015245   |           |  |  |
| C3 | 15137 | hypothalamus | Olfr1403      | 258645    |  |  |
| C3 | 15200 | hypothalamus | Gk2           | 14626     |  |  |
| C3 | 15252 | hypothalamus | MMT00019402   |           |  |  |
| C3 | 15424 | hypothalamus | Atp6v1g2      | 66237     |  |  |
| C3 | 15446 | hypothalamus | Cd320         | 54219     |  |  |
| C3 | 15539 | hypothalamus | MMT00028325   | 100040304 |  |  |
| C3 | 15573 | hypothalamus | Aipl1         | 114230    |  |  |
| C3 | 15626 | hypothalamus | MMT00035685   |           |  |  |
| C3 | 15697 | hypothalamus | Tbc1d8b       | 245638    |  |  |
| C3 | 15743 | hypothalamus | Hoxc6         | 15425     |  |  |
| C3 | 15747 | hypothalamus | Sfrs1         | 110809    |  |  |
| C3 | 15766 | hypothalamus | Bmp2          | 12156     |  |  |
| C3 | 15847 | hypothalamus | Gm392         | 235858    |  |  |
| C3 | 15885 | hypothalamus | Adamts7       | 108153    |  |  |
| C3 | 16018 | hypothalamus | MMT00074939   |           |  |  |
| C3 | 16157 | hypothalamus | D9Ert280e     | 272636    |  |  |
| C3 | 16197 | hypothalamus | MMT00065977   |           |  |  |
| C3 | 16323 | hypothalamus | Smpd3         | 58994     |  |  |
| C3 | 16390 | hypothalamus | Plb1          | 665270    |  |  |
| C3 | 16553 | hypothalamus | Cilp2         | 68709     |  |  |
| C3 | 16637 | hypothalamus | Vmn2r85       | 623734    |  |  |
| C3 | 16664 | hypothalamus | Car4          | 12351     |  |  |
| C3 | 16672 | hypothalamus | Tmem82        | 213989    |  |  |
| C3 | 16718 | hypothalamus | Zbtb7c        | 207259    |  |  |
| C3 | 16794 | hypothalamus | Chrn1         | 11443     |  |  |
| C3 | 16957 | hypothalamus | MMT00046108   |           |  |  |

|    |       |              |               |        |  |  |
|----|-------|--------------|---------------|--------|--|--|
| C3 | 17010 | hypothalamus | Galns         | 50917  |  |  |
| C3 | 17044 | hypothalamus | Gpr55         | 227326 |  |  |
| C3 | 17068 | hypothalamus | Olfr661       | 258743 |  |  |
| C3 | 17122 | hypothalamus | MMT00068814   |        |  |  |
| C3 | 17123 | hypothalamus | Olfr1511      | 258268 |  |  |
| C3 | 17149 | hypothalamus | Pms2          | 18861  |  |  |
| C3 | 17171 | hypothalamus | MMT00045847   |        |  |  |
| C3 | 17337 | hypothalamus | 1810065E05Rik | 69864  |  |  |
| C3 | 17413 | hypothalamus | MMT00043948   |        |  |  |
| C3 | 17417 | hypothalamus | Pxn           | 19303  |  |  |
| C3 | 17612 | hypothalamus | Vhlh          | 22346  |  |  |
| C3 | 17613 | hypothalamus | P2rx7         | 18439  |  |  |
| C3 | 17750 | hypothalamus | Hs6st2        | 50786  |  |  |
| C3 | 17810 | hypothalamus | MMT00054025   |        |  |  |
| C3 | 17960 | hypothalamus | Yod1          | 226418 |  |  |
| C3 | 18124 | hypothalamus | Ptprt         | 19281  |  |  |
| C3 | 18214 | hypothalamus | Ankrd40       | 71452  |  |  |
| C3 | 18325 | hypothalamus | Cst10         | 58214  |  |  |
| C3 | 18409 | hypothalamus | Nicn1         | 66257  |  |  |
| C3 | 18620 | hypothalamus | Smap          | 83997  |  |  |
| C3 | 18651 | hypothalamus | Tulp2         | 56734  |  |  |
| C3 | 18699 | hypothalamus | 2700089E24Rik | 381820 |  |  |
| C3 | 18790 | hypothalamus | Car3          | 12350  |  |  |
| C3 | 18847 | hypothalamus | Armetl1       | 227526 |  |  |
| C3 | 18980 | hypothalamus | Il7           | 16196  |  |  |
| C3 | 19219 | hypothalamus | MMT00015104   |        |  |  |
| C3 | 19267 | hypothalamus | Olfr341       | 258952 |  |  |
| C3 | 19351 | hypothalamus | Prkcsb        | 19089  |  |  |
| C3 | 19420 | hypothalamus | Lcn8          | 78076  |  |  |
| C3 | 19436 | hypothalamus | Dapp1         | 26377  |  |  |
| C3 | 19483 | hypothalamus | Depdc2        | 109294 |  |  |
| C3 | 19645 | hypothalamus | Il12rb2       | 16162  |  |  |
| C3 | 19658 | hypothalamus | Cldnd2        | 74276  |  |  |
| C3 | 19672 | hypothalamus | Cldn19        | 242653 |  |  |
| C3 | 19709 | hypothalamus | 1-Sep         | 54204  |  |  |
| C3 | 19722 | hypothalamus | Pvrl1         | 58235  |  |  |
| C3 | 20089 | hypothalamus | MMT00015975   |        |  |  |
| C3 | 20255 | hypothalamus | Elfn2         | 207393 |  |  |
| C3 | 20319 | hypothalamus | Syne2         | 319565 |  |  |
| C3 | 20324 | hypothalamus | Tppp          | 72948  |  |  |
| C3 | 20406 | hypothalamus | Cacng2        | 12300  |  |  |
| C3 | 20419 | hypothalamus | Adra1b        | 11548  |  |  |
| C3 | 20506 | hypothalamus | 1700011F03Rik | 74221  |  |  |
| C3 | 20532 | hypothalamus | Rnf26         | 213211 |  |  |
| C3 | 20566 | hypothalamus | Tnni2         | 21953  |  |  |
| C3 | 20588 | hypothalamus | Brd2          | 14312  |  |  |
| C3 | 20735 | hypothalamus | Tnrc6b        | 213988 |  |  |
| C3 | 20802 | hypothalamus | Cdc42se2      | 72729  |  |  |
| C3 | 20858 | hypothalamus | Duox1         | 99439  |  |  |
| C3 | 20908 | hypothalamus | Olfr583       | 258752 |  |  |
| C3 | 20925 | hypothalamus | 2810410L24Rik | 76377  |  |  |

|    |       |              |               |        |  |  |
|----|-------|--------------|---------------|--------|--|--|
| C3 | 20944 | hypothalamus | Tmem164       | 209497 |  |  |
| C3 | 21070 | hypothalamus | Cnot8         | 69125  |  |  |
| C3 | 21209 | hypothalamus | Ebf4          | 228598 |  |  |
| C3 | 21261 | hypothalamus | Pax2          | 18504  |  |  |
| C3 | 21291 | hypothalamus | Slc39a4       | 72027  |  |  |
| C3 | 21511 | hypothalamus | MMT00054100   |        |  |  |
| C3 | 21563 | hypothalamus | Arhgap9       | 216445 |  |  |
| C3 | 21595 | hypothalamus | Trpv1         | 193034 |  |  |
| C3 | 21660 | hypothalamus | Il1rn         | 16181  |  |  |
| C3 | 21717 | hypothalamus | EG628893      | 628893 |  |  |
| C3 | 21723 | hypothalamus | Homer1        | 26556  |  |  |
| C3 | 21866 | hypothalamus | Hhip1         | 214305 |  |  |
| C3 | 21923 | hypothalamus | Olfr585       | 259091 |  |  |
| C3 | 21931 | hypothalamus | Nrxn3         | 18191  |  |  |
| C3 | 21996 | hypothalamus | Mme           | 17380  |  |  |
| C3 | 22015 | hypothalamus | 2410127E18Rik | 76788  |  |  |
| C3 | 22073 | hypothalamus | Lrig3         | 320398 |  |  |
| C3 | 22125 | hypothalamus | Gab1          | 14388  |  |  |
| C3 | 22150 | hypothalamus | Fhdc1         | 229474 |  |  |
| C3 | 22271 | hypothalamus | Cyp2c29       | 13095  |  |  |
| C3 | 22366 | hypothalamus | MMT00005283   |        |  |  |
| C3 | 22434 | hypothalamus | Olfr1255      | 258979 |  |  |
| C3 | 22445 | hypothalamus | Prkag3        | 241113 |  |  |
| C3 | 22555 | hypothalamus | Ela2          | 50701  |  |  |
| C3 | 22733 | hypothalamus | Alpk3         | 116904 |  |  |
| C3 | 22750 | hypothalamus | Mupcdh        | 72040  |  |  |
| C3 | 22762 | hypothalamus | Slc6a4        | 15567  |  |  |
| C3 | 22802 | hypothalamus | Svs2          | 53878  |  |  |
| C3 | 22954 | hypothalamus | Slc25a30      | 67554  |  |  |
| C3 | 22966 | hypothalamus | Epha4         | 13838  |  |  |
| C3 | 23056 | hypothalamus | Ccdc135       | 330830 |  |  |
| C3 | 23070 | hypothalamus | BC024659      | 108934 |  |  |
| C3 | 23079 | hypothalamus | Spag17        | 74362  |  |  |
| C3 | 23109 | hypothalamus | A430088P11Rik | 106059 |  |  |
| C3 | 23112 | hypothalamus | Gys1          | 14936  |  |  |
| C3 | 23119 | hypothalamus | Cps1          | 227231 |  |  |
| C3 | 23454 | hypothalamus | Znhit1        | 70103  |  |  |
| C3 | 23528 | hypothalamus | 0610038L08Rik | 74092  |  |  |
| C3 | 23546 | hypothalamus | Zzef1         | 195018 |  |  |
| C3 | 23561 | hypothalamus | Sox14         | 20669  |  |  |
| C3 | 23591 | hypothalamus | Dlg4          | 13385  |  |  |
| C3 | 23651 | hypothalamus | MMT00027295   |        |  |  |
| C3 | 663   | liver        | Muc19         | 239611 |  |  |
| C3 | 3208  | liver        | 493051111Rik  | 67645  |  |  |
| C3 | 5694  | liver        | Sp7           | 170574 |  |  |
| C3 | 7084  | liver        | Spz1          | 79401  |  |  |
| C3 | 7436  | liver        | 1700063K16Rik | 76610  |  |  |
| C3 | 8157  | liver        | MMT00005305   |        |  |  |
| C3 | 8256  | liver        | Tjap1         | 74094  |  |  |
| C3 | 9468  | liver        | Gtf2a1l       | 71828  |  |  |
| C3 | 10055 | liver        | Tpte          | 234129 |  |  |

|    |       |              |               |           |  |  |
|----|-------|--------------|---------------|-----------|--|--|
| C3 | 11966 | liver        | Zfp280b       | 64453     |  |  |
| C3 | 12248 | liver        | Tnp2          | 21959     |  |  |
| C3 | 12651 | liver        | Tsc22d4       | 78829     |  |  |
| C3 | 12861 | liver        | Rhcg          | 56315     |  |  |
| C3 | 13117 | liver        | Tmprss5       | 80893     |  |  |
| C3 | 14407 | liver        | Six3          | 20473     |  |  |
| C3 | 17413 | liver        | MMT00043948   |           |  |  |
| C3 | 19436 | liver        | Dapp1         | 26377     |  |  |
| C3 | 19672 | liver        | Cldn19        | 242653    |  |  |
| C3 | 21723 | liver        | Homer1        | 26556     |  |  |
| C3 | 22125 | liver        | Gab1          | 14388     |  |  |
| C3 | 22555 | liver        | Ela2          | 50701     |  |  |
| C4 | 812   | hypothalamus | En2           | 13799     |  |  |
| C4 | 897   | hypothalamus | Mut           | 17850     |  |  |
| C4 | 1515  | hypothalamus | Med20         | 56771     |  |  |
| C4 | 1960  | hypothalamus | Ubr2          | 224826    |  |  |
| C4 | 2424  | hypothalamus | Unc5cl        | 76589     |  |  |
| C4 | 2801  | hypothalamus | H2-BI         | 14963     |  |  |
| C4 | 2938  | hypothalamus | H2-T23        | 15040     |  |  |
| C4 | 2945  | hypothalamus | MMT00005190   |           |  |  |
| C4 | 3859  | hypothalamus | Fpr2          | 14289     |  |  |
| C4 | 4555  | hypothalamus | Cchcr1        | 240084    |  |  |
| C4 | 5014  | hypothalamus | MMT00017503   |           |  |  |
| C4 | 6070  | hypothalamus | D630003M21Rik | 228846    |  |  |
| C4 | 6406  | hypothalamus | Sh3rf2        | 269016    |  |  |
| C4 | 6437  | hypothalamus | Gnptg         | 214505    |  |  |
| C4 | 6510  | hypothalamus | Plcl2         | 224860    |  |  |
| C4 | 7054  | hypothalamus | Trerf1        | 224829    |  |  |
| C4 | 7088  | hypothalamus | Slc37a1       | 224674    |  |  |
| C4 | 7135  | hypothalamus | Ezr           | 22350     |  |  |
| C4 | 7339  | hypothalamus | Tdp1          | 104884    |  |  |
| C4 | 7386  | hypothalamus | Pex6          | 224824    |  |  |
| C4 | 7603  | hypothalamus | Sod2          | 20656     |  |  |
| C4 | 7909  | hypothalamus | Oas3          | 246727    |  |  |
| C4 | 7965  | hypothalamus | Enpp5         | 83965     |  |  |
| C4 | 8341  | hypothalamus | MMT00017270   |           |  |  |
| C4 | 8750  | hypothalamus | 1700010I14Rik | 66931     |  |  |
| C4 | 8767  | hypothalamus | Rgl2          | 19732     |  |  |
| C4 | 8904  | hypothalamus | Trerf1        | 224829    |  |  |
| C4 | 9191  | hypothalamus | Lbxcor1       | 207667    |  |  |
| C4 | 9230  | hypothalamus | 1700027N10Rik | 75564     |  |  |
| C4 | 9805  | hypothalamus | Tagap         | 72536     |  |  |
| C4 | 10203 | hypothalamus | Cyp4f16       | 70101     |  |  |
| C4 | 10374 | hypothalamus | Trim15        | 69097     |  |  |
| C4 | 10667 | hypothalamus | H2-Eb1        | 14969     |  |  |
| C4 | 10729 | hypothalamus | Fgd2          | 26382     |  |  |
| C4 | 10931 | hypothalamus | Pkn3          | 263803    |  |  |
| C4 | 11291 | hypothalamus | 1110018H23Rik | 68509     |  |  |
| C4 | 11435 | hypothalamus | Rnaset2a      | 100037283 |  |  |
| C4 | 11475 | hypothalamus | H2-D1         | 14964     |  |  |
| C4 | 12168 | hypothalamus | H2-Ke6        | 14979     |  |  |

|    |       |              |               |           |  |  |
|----|-------|--------------|---------------|-----------|--|--|
| C4 | 12405 | hypothalamus | Cyp4f14       | 64385     |  |  |
| C4 | 12694 | hypothalamus | Riok2         | 67045     |  |  |
| C4 | 12943 | hypothalamus | Slc25a27      | 74011     |  |  |
| C4 | 13117 | hypothalamus | Tmprss5       | 80893     |  |  |
| C4 | 13493 | hypothalamus | Ring1         | 19763     |  |  |
| C4 | 13946 | hypothalamus | Slc35b2       | 73836     |  |  |
| C4 | 14027 | hypothalamus | Rpo1-1        | 20016     |  |  |
| C4 | 14132 | hypothalamus | Glo1          | 109801    |  |  |
| C4 | 14190 | hypothalamus | Ppil1         | 68816     |  |  |
| C4 | 14322 | hypothalamus | Bat1a         | 53817     |  |  |
| C4 | 15318 | hypothalamus | Aars2         | 224805    |  |  |
| C4 | 15580 | hypothalamus | MMT00077001   |           |  |  |
| C4 | 16067 | hypothalamus | Pcaf          | 18519     |  |  |
| C4 | 16392 | hypothalamus | EG627648      | 627648    |  |  |
| C4 | 16692 | hypothalamus | Bat4          | 81845     |  |  |
| C4 | 17322 | hypothalamus | Zfp758        | 224598    |  |  |
| C4 | 17412 | hypothalamus | Aif1          | 11629     |  |  |
| C4 | 17646 | hypothalamus | C4b           | 12268     |  |  |
| C4 | 17707 | hypothalamus | Rshl2b        | 100037282 |  |  |
| C4 | 17760 | hypothalamus | Ccr6          | 12458     |  |  |
| C4 | 18577 | hypothalamus | Btdb9         | 224671    |  |  |
| C4 | 18772 | hypothalamus | BC048355      | 381101    |  |  |
| C4 | 18871 | hypothalamus | AI314976      | 106821    |  |  |
| C4 | 19011 | hypothalamus | Rpl3l         | 66211     |  |  |
| C4 | 19519 | hypothalamus | BC011248      | 224823    |  |  |
| C4 | 20100 | hypothalamus | Guca1b        | 107477    |  |  |
| C4 | 20238 | hypothalamus | H2-T9         | 15051     |  |  |
| C4 | 20511 | hypothalamus | Decr2         | 26378     |  |  |
| C4 | 21295 | hypothalamus | Snf1lk        | 17691     |  |  |
| C4 | 21415 | hypothalamus | Has1          | 15116     |  |  |
| C4 | 21952 | hypothalamus | Tfb1m         | 224481    |  |  |
| C4 | 22104 | hypothalamus | Rnf123        | 84585     |  |  |
| C4 | 23250 | hypothalamus | Plcl2         | 224860    |  |  |
| C4 | 23371 | hypothalamus | Cfb           | 14962     |  |  |
| C4 | 327   | liver        | H2-Ea         | 14968     |  |  |
| C4 | 510   | liver        | Neu1          | 18010     |  |  |
| C4 | 763   | liver        | 4933406E20Rik | 74443     |  |  |
| C4 | 1340  | liver        | Tap2          | 21355     |  |  |
| C4 | 1515  | liver        | Med20         | 56771     |  |  |
| C4 | 1960  | liver        | Ubr2          | 224826    |  |  |
| C4 | 2325  | liver        | H2-K1         | 14972     |  |  |
| C4 | 2522  | liver        | Olfrl442      | 258692    |  |  |
| C4 | 2801  | liver        | H2-BI         | 14963     |  |  |
| C4 | 2938  | liver        | H2-T23        | 15040     |  |  |
| C4 | 2945  | liver        | MMT00005190   |           |  |  |
| C4 | 3265  | liver        | Dntt          | 21673     |  |  |
| C4 | 3430  | liver        | Rhof          | 23912     |  |  |
| C4 | 3599  | liver        | MMT00035426   |           |  |  |
| C4 | 3704  | liver        | H2-Q7         | 15018     |  |  |
| C4 | 3857  | liver        | 1700001C19Rik | 75462     |  |  |
| C4 | 4001  | liver        | Apoa4         | 11808     |  |  |

|    |       |       |               |           |  |  |
|----|-------|-------|---------------|-----------|--|--|
| C4 | 4004  | liver | Thbs2         | 21826     |  |  |
| C4 | 4411  | liver | 2310039H08Rik | 67101     |  |  |
| C4 | 4526  | liver | Satb1         | 20230     |  |  |
| C4 | 4958  | liver | Ndufa7        | 66416     |  |  |
| C4 | 5014  | liver | MMT00017503   |           |  |  |
| C4 | 5410  | liver | Cyp4f15       | 106648    |  |  |
| C4 | 5645  | liver | Tmem8         | 60455     |  |  |
| C4 | 5648  | liver | Zfp213        | 449521    |  |  |
| C4 | 5968  | liver | MMT00012419   |           |  |  |
| C4 | 6360  | liver | D17H6S56E-3   | 27762     |  |  |
| C4 | 6510  | liver | Plcl2         | 224860    |  |  |
| C4 | 7088  | liver | Slc37a1       | 224674    |  |  |
| C4 | 7135  | liver | Ezr           | 22350     |  |  |
| C4 | 7191  | liver | Fgfr1op       | 75296     |  |  |
| C4 | 7909  | liver | Oas3          | 246727    |  |  |
| C4 | 8341  | liver | MMT00017270   |           |  |  |
| C4 | 8649  | liver | MMT00072863   | 77652     |  |  |
| C4 | 8750  | liver | 1700010I14Rik | 66931     |  |  |
| C4 | 8767  | liver | Rgl2          | 19732     |  |  |
| C4 | 9158  | liver | Pde9a         | 18585     |  |  |
| C4 | 9230  | liver | 1700027N10Rik | 75564     |  |  |
| C4 | 9717  | liver | Psmb9         | 16912     |  |  |
| C4 | 9909  | liver | MMT00077883   |           |  |  |
| C4 | 10376 | liver | C920025E04Rik | 667803    |  |  |
| C4 | 10394 | liver | MMT00028435   |           |  |  |
| C4 | 10667 | liver | H2-Eb1        | 14969     |  |  |
| C4 | 11435 | liver | Rnaset2a      | 100037283 |  |  |
| C4 | 11459 | liver | Mas1          | 17171     |  |  |
| C4 | 11803 | liver | 1500032D16Rik | 78330     |  |  |
| C4 | 12168 | liver | H2-Ke6        | 14979     |  |  |
| C4 | 12335 | liver | Plcb4         | 18798     |  |  |
| C4 | 12355 | liver | A1507611      | 245884    |  |  |
| C4 | 12694 | liver | Riok2         | 67045     |  |  |
| C4 | 13438 | liver | Btg3          | 12228     |  |  |
| C4 | 13493 | liver | Ring1         | 19763     |  |  |
| C4 | 13667 | liver | Cbs           | 12411     |  |  |
| C4 | 13789 | liver | H2-Q8         | 15019     |  |  |
| C4 | 14027 | liver | Rpo1-1        | 20016     |  |  |
| C4 | 14132 | liver | Glo1          | 109801    |  |  |
| C4 | 14209 | liver | Btg3          | 12228     |  |  |
| C4 | 14322 | liver | Bat1a         | 53817     |  |  |
| C4 | 14924 | liver | Hn1l          | 52009     |  |  |
| C4 | 15181 | liver | Enpp4         | 224794    |  |  |
| C4 | 15318 | liver | Aars2         | 224805    |  |  |
| C4 | 15322 | liver | Rasl12        | 70784     |  |  |
| C4 | 15531 | liver | Prickle4      | 66119     |  |  |
| C4 | 15540 | liver | C2            | 12263     |  |  |
| C4 | 15645 | liver | Mrpl18        | 67681     |  |  |
| C4 | 15864 | liver | Rps6ka2       | 20112     |  |  |
| C4 | 16153 | liver | Syngn1        | 20972     |  |  |
| C4 | 16692 | liver | Bat4          | 81845     |  |  |

|    |       |              |               |           |  |  |
|----|-------|--------------|---------------|-----------|--|--|
| C4 | 17691 | liver        | Kank3         | 80880     |  |  |
| C4 | 17707 | liver        | Rsh12b        | 100037282 |  |  |
| C4 | 17760 | liver        | Ccr6          | 12458     |  |  |
| C4 | 18003 | liver        | Tff3          | 21786     |  |  |
| C4 | 18251 | liver        | Susd4         | 96935     |  |  |
| C4 | 18574 | liver        | Parc          | 78309     |  |  |
| C4 | 18577 | liver        | Btbd9         | 224671    |  |  |
| C4 | 18772 | liver        | BC048355      | 381101    |  |  |
| C4 | 18906 | liver        | Zfand3        | 21769     |  |  |
| C4 | 19064 | liver        | MMT00004867   |           |  |  |
| C4 | 20100 | liver        | Guca1b        | 107477    |  |  |
| C4 | 20238 | liver        | H2-T9         | 15051     |  |  |
| C4 | 20346 | liver        | Gna-rs1       | 14670     |  |  |
| C4 | 20421 | liver        | Cdkn2c        | 12580     |  |  |
| C4 | 20511 | liver        | Decr2         | 26378     |  |  |
| C4 | 20966 | liver        | MMT00014378   |           |  |  |
| C4 | 21075 | liver        | Gtf2h5        | 66467     |  |  |
| C4 | 21295 | liver        | Snf1lk        | 17691     |  |  |
| C4 | 21478 | liver        | Loxhd1        | 240411    |  |  |
| C4 | 21754 | liver        | Synj2         | 20975     |  |  |
| C4 | 21952 | liver        | Tfb1m         | 224481    |  |  |
| C4 | 22104 | liver        | Rnf123        | 84585     |  |  |
| C4 | 22822 | liver        | MMT00013433   |           |  |  |
| C4 | 23250 | liver        | Plcl2         | 224860    |  |  |
| C4 | 23401 | liver        | H2-Q2         | 15013     |  |  |
| C5 | 153   | hypothalamus | 2010011I20Rik | 67017     |  |  |
| C5 | 290   | hypothalamus | B230118H07Rik | 68170     |  |  |
| C5 | 678   | hypothalamus | Ncaph         | 215387    |  |  |
| C5 | 1510  | hypothalamus | A530058N18Rik | 320846    |  |  |
| C5 | 1806  | hypothalamus | Nola3         | 66181     |  |  |
| C5 | 2351  | hypothalamus | 1110008F13Rik | 67388     |  |  |
| C5 | 2472  | hypothalamus | MMT00014056   |           |  |  |
| C5 | 2915  | hypothalamus | Nfs1          | 18041     |  |  |
| C5 | 3156  | hypothalamus | Usp13         | 72607     |  |  |
| C5 | 4195  | hypothalamus | Csrp2bp       | 228714    |  |  |
| C5 | 4626  | hypothalamus | 2310046K01Rik | 69698     |  |  |
| C5 | 4628  | hypothalamus | MMT00040865   |           |  |  |
| C5 | 4897  | hypothalamus | Ciao1         | 26371     |  |  |
| C5 | 5603  | hypothalamus | BC020535      | 228788    |  |  |
| C5 | 5737  | hypothalamus | Nkx2-2        | 18088     |  |  |
| C5 | 6059  | hypothalamus | Dsn1          | 66934     |  |  |
| C5 | 6188  | hypothalamus | Myh7b         | 668940    |  |  |
| C5 | 6202  | hypothalamus | Hrk           | 12123     |  |  |
| C5 | 6250  | hypothalamus | Csnk2a1       | 12995     |  |  |
| C5 | 6648  | hypothalamus | Cenpl         | 70454     |  |  |
| C5 | 6805  | hypothalamus | Rrbp1         | 81910     |  |  |
| C5 | 9361  | hypothalamus | Hand1         | 15110     |  |  |
| C5 | 9547  | hypothalamus | MMT00006479   |           |  |  |
| C5 | 9762  | hypothalamus | Snx5          | 69178     |  |  |
| C5 | 11166 | hypothalamus | Uqcc          | 56046     |  |  |
| C5 | 11705 | hypothalamus | Polr3f        | 70408     |  |  |

|    |       |              |               |           |  |  |
|----|-------|--------------|---------------|-----------|--|--|
| C5 | 12388 | hypothalamus | 8430406I07Rik | 74528     |  |  |
| C5 | 12866 | hypothalamus | 4921517L17Rik | 70873     |  |  |
| C5 | 13355 | hypothalamus | Foxs1         | 14239     |  |  |
| C5 | 13554 | hypothalamus | Aqr           | 11834     |  |  |
| C5 | 13581 | hypothalamus | Srxn1         | 76650     |  |  |
| C5 | 14399 | hypothalamus | Csnk2a1       | 12995     |  |  |
| C5 | 14403 | hypothalamus | S100g         | 12309     |  |  |
| C5 | 14647 | hypothalamus | Cst3          | 13010     |  |  |
| C5 | 14649 | hypothalamus | 5430405G05Rik | 108832    |  |  |
| C5 | 14734 | hypothalamus | Nrsn2         | 228777    |  |  |
| C5 | 14740 | hypothalamus | Mfap1b        | 100034361 |  |  |
| C5 | 14757 | hypothalamus | Hdx           | 245596    |  |  |
| C5 | 15760 | hypothalamus | Trib3         | 228775    |  |  |
| C5 | 16327 | hypothalamus | Ubfd1         | 28018     |  |  |
| C5 | 16715 | hypothalamus | 2610034M16Rik | 69239     |  |  |
| C5 | 16881 | hypothalamus | MMT00031504   |           |  |  |
| C5 | 17295 | hypothalamus | MMT00082577   |           |  |  |
| C5 | 17814 | hypothalamus | Napb          | 17957     |  |  |
| C5 | 18368 | hypothalamus | Mpped2        | 77015     |  |  |
| C5 | 18534 | hypothalamus | Ovol2         | 107586    |  |  |
| C5 | 18555 | hypothalamus | Sdcbp2        | 228765    |  |  |
| C5 | 18835 | hypothalamus | Dtwd1         | 69185     |  |  |
| C5 | 19763 | hypothalamus | Acp2          | 11432     |  |  |
| C5 | 19803 | hypothalamus | BC003993      | 80744     |  |  |
| C5 | 19826 | hypothalamus | Nanp          | 67311     |  |  |
| C5 | 19946 | hypothalamus | Elf5          | 13711     |  |  |
| C5 | 19971 | hypothalamus | B930046C15Rik | 544998    |  |  |
| C5 | 20505 | hypothalamus | Tll9          | 74711     |  |  |
| C5 | 20837 | hypothalamus | Dlgap4        | 228836    |  |  |
| C5 | 22320 | hypothalamus | MMT00047284   |           |  |  |
| C5 | 23005 | hypothalamus | 4930405A21Rik | 74846     |  |  |
| C5 | 23474 | hypothalamus | MMT00011721   |           |  |  |
| C5 | 153   | liver        | 2010011I20Rik | 67017     |  |  |
| C5 | 1956  | liver        | Usp50         | 75083     |  |  |
| C5 | 2472  | liver        | MMT00014056   |           |  |  |
| C5 | 2915  | liver        | Nfs1          | 18041     |  |  |
| C5 | 4336  | liver        | Rbbp9         | 26450     |  |  |
| C5 | 4626  | liver        | 2310046K01Rik | 69698     |  |  |
| C5 | 4833  | liver        | Synpo2        | 118449    |  |  |
| C5 | 5098  | liver        | 1700029J11Rik | 76426     |  |  |
| C5 | 5450  | liver        | Nrbp1         | 192292    |  |  |
| C5 | 5761  | liver        | Ralgps2       | 78255     |  |  |
| C5 | 6016  | liver        | A530057A03Rik | 215456    |  |  |
| C5 | 6059  | liver        | Dsn1          | 66934     |  |  |
| C5 | 6117  | liver        | Atp9a         | 11981     |  |  |
| C5 | 6157  | liver        | MMT00041452   |           |  |  |
| C5 | 6231  | liver        | 9030622O22Rik | 71570     |  |  |
| C5 | 6250  | liver        | Csnk2a1       | 12995     |  |  |
| C5 | 6797  | liver        | Blvra         | 109778    |  |  |
| C5 | 6820  | liver        | MMT00046996   |           |  |  |
| C5 | 7192  | liver        | Ttc21b        | 73668     |  |  |



|    |       |              |               |           |  |  |
|----|-------|--------------|---------------|-----------|--|--|
| C5 | 7355  | liver        | Procr         | 19124     |  |  |
| C5 | 7527  | liver        | Rnase10       | 75019     |  |  |
| C5 | 7610  | liver        | Scand1        | 19018     |  |  |
| C5 | 7654  | liver        | Ptpmt1        | 66461     |  |  |
| C5 | 7991  | liver        | Gpr115        | 78249     |  |  |
| C5 | 8337  | liver        | Lgr4          | 107515    |  |  |
| C5 | 9361  | liver        | Hand1         | 15110     |  |  |
| C5 | 9547  | liver        | MMT00006479   |           |  |  |
| C5 | 9762  | liver        | Snx5          | 69178     |  |  |
| C5 | 10028 | liver        | Chchd6        | 66098     |  |  |
| C5 | 11348 | liver        | Med20         | 56771     |  |  |
| C5 | 11705 | liver        | Polr3f        | 70408     |  |  |
| C5 | 12388 | liver        | 8430406I07Rik | 74528     |  |  |
| C5 | 12402 | liver        | Th1l          | 57314     |  |  |
| C5 | 12916 | liver        | Fkbp1a        | 14225     |  |  |
| C5 | 13355 | liver        | Foxs1         | 14239     |  |  |
| C5 | 13554 | liver        | Aqr           | 11834     |  |  |
| C5 | 13581 | liver        | Srxn1         | 76650     |  |  |
| C5 | 14399 | liver        | Csnk2a1       | 12995     |  |  |
| C5 | 14647 | liver        | Cst3          | 13010     |  |  |
| C5 | 14740 | liver        | Mfap1b        | 100034361 |  |  |
| C5 | 14757 | liver        | Hdx           | 245596    |  |  |
| C5 | 14816 | liver        | Pcdhb9        | 93880     |  |  |
| C5 | 15365 | liver        | Ext2          | 14043     |  |  |
| C5 | 15565 | liver        | 2310001A20Rik | 71881     |  |  |
| C5 | 16052 | liver        | Tsg101        | 22088     |  |  |
| C5 | 16863 | liver        | 2410001C21Rik | 66404     |  |  |
| C5 | 16881 | liver        | MMT00031504   |           |  |  |
| C5 | 17043 | liver        | Tmem127       | 69470     |  |  |
| C5 | 17221 | liver        | Zfp264        | 116812    |  |  |
| C5 | 17295 | liver        | MMT00082577   |           |  |  |
| C5 | 17514 | liver        | Thbd          | 21824     |  |  |
| C5 | 18835 | liver        | Dtwd1         | 69185     |  |  |
| C5 | 19560 | liver        | Trmt6         | 66926     |  |  |
| C5 | 19763 | liver        | Acp2          | 11432     |  |  |
| C5 | 19803 | liver        | BC003993      | 80744     |  |  |
| C5 | 20221 | liver        | Ift57         | 73916     |  |  |
| C5 | 21665 | liver        | Nat5          | 67877     |  |  |
| C5 | 21729 | liver        | Hdc           | 15186     |  |  |
| C5 | 22184 | liver        | MMT00033856   |           |  |  |
| C5 | 22320 | liver        | MMT00047284   |           |  |  |
| C5 | 22592 | liver        | MMT00055028   |           |  |  |
| C5 | 22740 | liver        | Manbal        | 69161     |  |  |
| C5 | 22857 | liver        | Fahd2a        | 68126     |  |  |
| C5 | 23005 | liver        | 4930405A21Rik | 74846     |  |  |
| C5 | 23008 | liver        | Ctsz          | 64138     |  |  |
| C5 | 23353 | liver        | Slmo2         | 66390     |  |  |
| C5 | 23474 | liver        | MMT00011721   |           |  |  |
| C5 | 23599 | liver        | Ndr3          | 29812     |  |  |
| C5 | 23609 | liver        | Trim44        | 80985     |  |  |
| C6 | 283   | hypothalamus | Gmcl1l        | 71847     |  |  |

|    |       |              |               |           |  |  |
|----|-------|--------------|---------------|-----------|--|--|
| C6 | 403   | hypothalamus | Leprotl1      | 68192     |  |  |
| C6 | 1097  | hypothalamus | Dctn6         | 22428     |  |  |
| C6 | 1336  | hypothalamus | MMT00069537   |           |  |  |
| C6 | 1604  | hypothalamus | Ssbp4         | 76900     |  |  |
| C6 | 1629  | hypothalamus | Gcsh          | 68133     |  |  |
| C6 | 1755  | hypothalamus | Ocel1         | 77090     |  |  |
| C6 | 1947  | hypothalamus | Myo9b         | 17925     |  |  |
| C6 | 2243  | hypothalamus | Gcsh          | 68133     |  |  |
| C6 | 2749  | hypothalamus | Naf1          | 234344    |  |  |
| C6 | 3052  | hypothalamus | 9130404D08Rik | 74549     |  |  |
| C6 | 3609  | hypothalamus | Plvap         | 84094     |  |  |
| C6 | 3865  | hypothalamus | Acta1         | 11459     |  |  |
| C6 | 5433  | hypothalamus | 2410004L22Rik | 76478     |  |  |
| C6 | 5925  | hypothalamus | Tmem59l       | 67937     |  |  |
| C6 | 6035  | hypothalamus | Nkd1          | 93960     |  |  |
| C6 | 6065  | hypothalamus | Plce1         | 74055     |  |  |
| C6 | 6760  | hypothalamus | 2810428I15Rik | 66462     |  |  |
| C6 | 7910  | hypothalamus | AK122209      | 382038    |  |  |
| C6 | 8951  | hypothalamus | Cd97          | 26364     |  |  |
| C6 | 9075  | hypothalamus | MMT00018252   |           |  |  |
| C6 | 9304  | hypothalamus | AI449175      | 234362    |  |  |
| C6 | 9569  | hypothalamus | Dda1          | 66498     |  |  |
| C6 | 9729  | hypothalamus | Got1l1        | 76615     |  |  |
| C6 | 10273 | hypothalamus | Gpt2          | 108682    |  |  |
| C6 | 10308 | hypothalamus | Fuk           | 234730    |  |  |
| C6 | 10373 | hypothalamus | Tmem141       | 51875     |  |  |
| C6 | 10497 | hypothalamus | Man2b1        | 17159     |  |  |
| C6 | 10758 | hypothalamus | Gdf1          | 14559     |  |  |
| C6 | 11057 | hypothalamus | MMT00032844   | 353287    |  |  |
| C6 | 11109 | hypothalamus | AI931714      | 102182    |  |  |
| C6 | 12440 | hypothalamus | Sult5a1       | 57429     |  |  |
| C6 | 12966 | hypothalamus | Slc39a1       | 30791     |  |  |
| C6 | 13218 | hypothalamus | C330043M08Rik | 330323    |  |  |
| C6 | 13732 | hypothalamus | Tpm4          | 326618    |  |  |
| C6 | 13862 | hypothalamus | Myh15         | 667772    |  |  |
| C6 | 14391 | hypothalamus | MMT00017335   | 100043120 |  |  |
| C6 | 14951 | hypothalamus | Dpep3         | 71854     |  |  |
| C6 | 15094 | hypothalamus | Pbx4          | 80720     |  |  |
| C6 | 15296 | hypothalamus | Mier3         | 218613    |  |  |
| C6 | 15455 | hypothalamus | Lsm4          | 50783     |  |  |
| C6 | 15953 | hypothalamus | Acsf3         | 257633    |  |  |
| C6 | 16617 | hypothalamus | Sh2d4a        | 72281     |  |  |
| C6 | 16702 | hypothalamus | 2810422J05Rik | 75620     |  |  |
| C6 | 16849 | hypothalamus | Trmt1         | 212528    |  |  |
| C6 | 16858 | hypothalamus | Tmem38a       | 74166     |  |  |
| C6 | 17553 | hypothalamus | Eif4ebp1      | 13685     |  |  |
| C6 | 17703 | hypothalamus | Large         | 16795     |  |  |
| C6 | 18700 | hypothalamus | Trappc2l      | 59005     |  |  |
| C6 | 18775 | hypothalamus | Best2         | 212989    |  |  |
| C6 | 18886 | hypothalamus | Slc18a1       | 110877    |  |  |
| C6 | 19286 | hypothalamus | 1110012M11Rik | 73711     |  |  |

|    |       |              |               |           |  |  |
|----|-------|--------------|---------------|-----------|--|--|
| C6 | 19808 | hypothalamus | Fetub         | 59083     |  |  |
| C6 | 20690 | hypothalamus | Zfp276        | 57247     |  |  |
| C6 | 20721 | hypothalamus | 4432412L15Rik | 74337     |  |  |
| C6 | 21433 | hypothalamus | Ubx6          | 108159    |  |  |
| C6 | 21681 | hypothalamus | 9130011J15Rik | 66818     |  |  |
| C6 | 21840 | hypothalamus | Tmie          | 20776     |  |  |
| C6 | 22201 | hypothalamus | Pard3         | 93742     |  |  |
| C6 | 22351 | hypothalamus | Fanca         | 14087     |  |  |
| C6 | 22408 | hypothalamus | Calr3         | 73316     |  |  |
| C6 | 23445 | hypothalamus | Crif1         | 12931     |  |  |
| C6 | 23636 | hypothalamus | Bst2          | 69550     |  |  |
| C6 | 286   | liver        | MMT00070509   | 100037278 |  |  |
| C6 | 403   | liver        | Lepro1        | 68192     |  |  |
| C6 | 769   | liver        | 5430437P03Rik | 68251     |  |  |
| C6 | 1052  | liver        | Cog4          | 102339    |  |  |
| C6 | 1097  | liver        | Dctn6         | 22428     |  |  |
| C6 | 1336  | liver        | MMT00069537   |           |  |  |
| C6 | 1676  | liver        | Tmem170       | 66817     |  |  |
| C6 | 1755  | liver        | Ocel1         | 77090     |  |  |
| C6 | 2082  | liver        | AU018778      | 234564    |  |  |
| C6 | 2243  | liver        | Gcsh          | 68133     |  |  |
| C6 | 2671  | liver        | Sh3rf1        | 59009     |  |  |
| C6 | 2703  | liver        | MMT00073763   |           |  |  |
| C6 | 2749  | liver        | Naf1          | 234344    |  |  |
| C6 | 3052  | liver        | 9130404D08Rik | 74549     |  |  |
| C6 | 3055  | liver        | Pde4c         | 110385    |  |  |
| C6 | 3329  | liver        | Car5a         | 12352     |  |  |
| C6 | 5433  | liver        | 2410004L22Rik | 76478     |  |  |
| C6 | 6760  | liver        | 2810428I15Rik | 66462     |  |  |
| C6 | 7861  | liver        | Klhdc4        | 234825    |  |  |
| C6 | 7910  | liver        | AK122209      | 382038    |  |  |
| C6 | 8114  | liver        | Kcnn1         | 84036     |  |  |
| C6 | 9304  | liver        | AI449175      | 234362    |  |  |
| C6 | 9770  | liver        | Bcmo1         | 63857     |  |  |
| C6 | 9931  | liver        | Glt25d1       | 234407    |  |  |
| C6 | 10195 | liver        | Klf1          | 16596     |  |  |
| C6 | 10273 | liver        | Gpt2          | 108682    |  |  |
| C6 | 10668 | liver        | Kars          | 85305     |  |  |
| C6 | 11128 | liver        | Aars          | 234734    |  |  |
| C6 | 11212 | liver        | 1300018I17Rik | 72325     |  |  |
| C6 | 11404 | liver        | Gnpat         | 14712     |  |  |
| C6 | 11560 | liver        | MMT00001695   |           |  |  |
| C6 | 11787 | liver        | Rsf1          | 233532    |  |  |
| C6 | 12915 | liver        | Slc7a5        | 20539     |  |  |
| C6 | 13004 | liver        | Arhgef10      | 234094    |  |  |
| C6 | 13218 | liver        | C330043M08Rik | 330323    |  |  |
| C6 | 13495 | liver        | Abcb10        | 56199     |  |  |
| C6 | 13732 | liver        | Tpm4          | 326618    |  |  |
| C6 | 13774 | liver        | Gdf15         | 23886     |  |  |
| C6 | 14391 | liver        | MMT00017335   | 100043120 |  |  |
| C6 | 14455 | liver        | 2700029M09Rik | 72612     |  |  |

|    |       |              |             |        |  |  |
|----|-------|--------------|-------------|--------|--|--|
| C6 | 14511 | liver        | Sostdc1     | 66042  |  |  |
| C6 | 14845 | liver        | Tmem188     | 382030 |  |  |
| C6 | 15094 | liver        | Pbx4        | 80720  |  |  |
| C6 | 15455 | liver        | Lsm4        | 50783  |  |  |
| C6 | 15953 | liver        | Acsf3       | 257633 |  |  |
| C6 | 16371 | liver        | Ppp2cb      | 19053  |  |  |
| C6 | 16557 | liver        | Rbpms       | 19663  |  |  |
| C6 | 16617 | liver        | Sh2d4a      | 72281  |  |  |
| C6 | 16802 | liver        | Def8        | 23854  |  |  |
| C6 | 16849 | liver        | Trmt1       | 212528 |  |  |
| C6 | 16858 | liver        | Tmem38a     | 74166  |  |  |
| C6 | 17403 | liver        | N4bp1       | 80750  |  |  |
| C6 | 17553 | liver        | Eif4ebp1    | 13685  |  |  |
| C6 | 17703 | liver        | Large       | 16795  |  |  |
| C6 | 18697 | liver        | Afg3l1      | 114896 |  |  |
| C6 | 18886 | liver        | Slc18a1     | 110877 |  |  |
| C6 | 20484 | liver        | Ces1        | 12623  |  |  |
| C6 | 21394 | liver        | Cdh15       | 12555  |  |  |
| C6 | 21632 | liver        | MMT00046455 |        |  |  |
| C6 | 22351 | liver        | Fanca       | 14087  |  |  |
| C6 | 22776 | liver        | Gsr         | 14782  |  |  |
| C6 | 22894 | liver        | MMT00016059 |        |  |  |
| C6 | 22909 | liver        | Nup133      | 234865 |  |  |
| C7 | 1014  | hypothalamus | Rtcd1       | 66368  |  |  |
| C7 | 1466  | hypothalamus | Ubap2l      | 74383  |  |  |
| C7 | 1867  | hypothalamus | Bcas2       | 68183  |  |  |
| C7 | 2012  | hypothalamus | Cetn4       | 207175 |  |  |
| C7 | 2632  | hypothalamus | Aph1a       | 226548 |  |  |
| C7 | 2752  | hypothalamus | Fcgr1       | 14129  |  |  |
| C7 | 3159  | hypothalamus | Pld1        | 18805  |  |  |
| C7 | 3206  | hypothalamus | Gpr160      | 71862  |  |  |
| C7 | 3314  | hypothalamus | Wars2       | 70560  |  |  |
| C7 | 3874  | hypothalamus | Slitrk3     | 386750 |  |  |
| C7 | 4666  | hypothalamus | Exosc9      | 50911  |  |  |
| C7 | 4864  | hypothalamus | S100a16     | 67860  |  |  |
| C7 | 5021  | hypothalamus | Gdap2       | 14547  |  |  |
| C7 | 5508  | hypothalamus | Lrig2       | 269473 |  |  |
| C7 | 5687  | hypothalamus | Klf11       | 194655 |  |  |
| C7 | 5762  | hypothalamus | Trpc3       | 22065  |  |  |
| C7 | 6206  | hypothalamus | MMT00063701 |        |  |  |
| C7 | 6283  | hypothalamus | Ptpn22      | 19260  |  |  |
| C7 | 6470  | hypothalamus | Arnt        | 11863  |  |  |
| C7 | 6708  | hypothalamus | Serpini2    | 67931  |  |  |
| C7 | 7173  | hypothalamus | Trim59      | 66949  |  |  |
| C7 | 8679  | hypothalamus | Tiparp      | 99929  |  |  |
| C7 | 9360  | hypothalamus | Taf1c       | 21341  |  |  |
| C7 | 9408  | hypothalamus | Hmgcs2      | 15360  |  |  |
| C7 | 9519  | hypothalamus | Fstl5       | 213262 |  |  |
| C7 | 10521 | hypothalamus | Ttf2        | 74044  |  |  |
| C7 | 11121 | hypothalamus | Mttr11      | 194126 |  |  |
| C7 | 12367 | hypothalamus | MMT00072365 |        |  |  |

|    |       |              |                    |        |  |  |
|----|-------|--------------|--------------------|--------|--|--|
| C7 | 12716 | hypothalamus | 5830417110Rik      | 76022  |  |  |
| C7 | 12824 | hypothalamus | Dbt                | 13171  |  |  |
| C7 | 13527 | hypothalamus | Ctss               | 13040  |  |  |
| C7 | 14559 | hypothalamus | Frrs1              | 20321  |  |  |
| C7 | 15276 | hypothalamus | Eif4e              | 13684  |  |  |
| C7 | 15299 | hypothalamus | Mrps21             | 66292  |  |  |
| C7 | 15550 | hypothalamus | 2010200O16Rik      | 67495  |  |  |
| C7 | 15901 | hypothalamus | Tpm3               | 59069  |  |  |
| C7 | 16170 | hypothalamus | S100a11            | 20195  |  |  |
| C7 | 16283 | hypothalamus | EG627427           | 627427 |  |  |
| C7 | 16416 | hypothalamus | Commd2             | 52245  |  |  |
| C7 | 16618 | hypothalamus | Hps3               | 12807  |  |  |
| C7 | 17669 | hypothalamus | 2310007A19Rik      | 66353  |  |  |
| C7 | 17837 | hypothalamus | Polr3gl            | 69870  |  |  |
| C7 | 18376 | hypothalamus | Pex11b             | 18632  |  |  |
| C7 | 18738 | hypothalamus | Hadha              | 97212  |  |  |
| C7 | 19700 | hypothalamus | E030011K20Rik      | 208613 |  |  |
| C7 | 20385 | hypothalamus | Chd1l              | 68058  |  |  |
| C7 | 20661 | hypothalamus | Tuft1              | 22156  |  |  |
| C7 | 20810 | hypothalamus | Mttp               | 17777  |  |  |
| C7 | 20890 | hypothalamus | Psmb4              | 19172  |  |  |
| C7 | 21650 | hypothalamus | Ap4b1              | 67489  |  |  |
| C7 | 21780 | hypothalamus | Ankrd35            | 213121 |  |  |
| C7 | 22202 | hypothalamus | OTTMUSG00000021274 | 545539 |  |  |
| C7 | 22570 | hypothalamus | Phtf1              | 18685  |  |  |
| C7 | 23037 | hypothalamus | Thbs3              | 21827  |  |  |
| C7 | 524   | liver        | Hsd3b2             | 15493  |  |  |
| C7 | 673   | liver        | Tchh               | 99681  |  |  |
| C7 | 1014  | liver        | Rtcd1              | 66368  |  |  |
| C7 | 1466  | liver        | Ubap2l             | 74383  |  |  |
| C7 | 1867  | liver        | Bcas2              | 68183  |  |  |
| C7 | 1963  | liver        | MMT00039783        |        |  |  |
| C7 | 2521  | liver        | Olfml3             | 99543  |  |  |
| C7 | 2752  | liver        | Fcgr1              | 14129  |  |  |
| C7 | 3159  | liver        | Pld1               | 18805  |  |  |
| C7 | 3206  | liver        | Gpr160             | 71862  |  |  |
| C7 | 3753  | liver        | Setdb1             | 84505  |  |  |
| C7 | 3823  | liver        | Slc22a15           | 242126 |  |  |
| C7 | 3859  | liver        | Fpr2               | 14289  |  |  |
| C7 | 5021  | liver        | Gdap2              | 14547  |  |  |
| C7 | 5114  | liver        | Fbxo33             | 70611  |  |  |
| C7 | 5822  | liver        | Car2               | 12349  |  |  |
| C7 | 5938  | liver        | Pfn2               | 18645  |  |  |
| C7 | 6206  | liver        | MMT00063701        |        |  |  |
| C7 | 7519  | liver        | Gstm1              | 14862  |  |  |
| C7 | 7572  | liver        | Ppm1l              | 242083 |  |  |
| C7 | 7810  | liver        | Trim45             | 229644 |  |  |
| C7 | 8568  | liver        | Tnik               | 665113 |  |  |
| C7 | 8738  | liver        | Reg4               | 67709  |  |  |
| C7 | 9408  | liver        | Hmgcs2             | 15360  |  |  |
| C7 | 10521 | liver        | Ttf2               | 74044  |  |  |

|    |       |              |                    |        |  |  |
|----|-------|--------------|--------------------|--------|--|--|
| C7 | 10681 | liver        | Dgkz               | 104418 |  |  |
| C7 | 11121 | liver        | Mtmr11             | 194126 |  |  |
| C7 | 11257 | liver        | Trem3              | 58218  |  |  |
| C7 | 11585 | liver        | Bdp1               | 544971 |  |  |
| C7 | 11611 | liver        | S100a13            | 20196  |  |  |
| C7 | 11758 | liver        | S100a1             | 20193  |  |  |
| C7 | 12250 | liver        | P2ry14             | 140795 |  |  |
| C7 | 12367 | liver        | MMT00072365        |        |  |  |
| C7 | 12784 | liver        | Nudt6              | 229228 |  |  |
| C7 | 13134 | liver        | Lipg               | 16891  |  |  |
| C7 | 13202 | liver        | Sass6              | 72776  |  |  |
| C7 | 13302 | liver        | Bche               | 12038  |  |  |
| C7 | 13423 | liver        | ENSMUSG00000053749 | 791337 |  |  |
| C7 | 13512 | liver        | Tmem144            | 70652  |  |  |
| C7 | 14559 | liver        | Frrs1              | 20321  |  |  |
| C7 | 15276 | liver        | Eif4e              | 13684  |  |  |
| C7 | 15508 | liver        | 4632415L05Rik      | 70808  |  |  |
| C7 | 15901 | liver        | Tpm3               | 59069  |  |  |
| C7 | 16416 | liver        | Commd2             | 52245  |  |  |
| C7 | 16679 | liver        | Ctsk               | 13038  |  |  |
| C7 | 16753 | liver        | Hfe2               | 69585  |  |  |
| C7 | 18138 | liver        | MMT00000385        |        |  |  |
| C7 | 18754 | liver        | Rbm8a              | 60365  |  |  |
| C7 | 18790 | liver        | Car3               | 12350  |  |  |
| C7 | 18911 | liver        | Selenbp2           | 20342  |  |  |
| C7 | 20385 | liver        | Chd1l              | 68058  |  |  |
| C7 | 20661 | liver        | Tuft1              | 22156  |  |  |
| C7 | 20810 | liver        | Mttp               | 17777  |  |  |
| C7 | 20917 | liver        | Gstm6              | 14867  |  |  |
| C7 | 21323 | liver        | MMT00074228        |        |  |  |
| C7 | 21650 | liver        | Ap4b1              | 67489  |  |  |
| C7 | 21814 | liver        | Accn5              | 58170  |  |  |
| C7 | 22202 | liver        | OTTMUSG00000021274 | 545539 |  |  |
| C7 | 22570 | liver        | Phtf1              | 18685  |  |  |
| C7 | 22640 | liver        | Bud13              | 215051 |  |  |
| C7 | 23457 | liver        | Selenbp2           | 20342  |  |  |
| C8 | 143   | hypothalamus | Gvin1              | 74558  |  |  |
| C8 | 2224  | hypothalamus | Oasl2              | 23962  |  |  |
| C8 | 3683  | hypothalamus | Oas2               | 246728 |  |  |
| C8 | 4426  | hypothalamus | Iigp2              | 54396  |  |  |
| C8 | 5853  | hypothalamus | Trim30             | 20128  |  |  |
| C8 | 6824  | hypothalamus | Irf7               | 54123  |  |  |
| C8 | 7069  | hypothalamus | Ube1l              | 74153  |  |  |
| C8 | 7105  | hypothalamus | Plac8              | 231507 |  |  |
| C8 | 8800  | hypothalamus | Rnf213             | 629974 |  |  |
| C8 | 9616  | hypothalamus | AI451557           | 102084 |  |  |
| C8 | 9847  | hypothalamus | Ifi27              | 76933  |  |  |
| C8 | 12398 | hypothalamus | Ifi44              | 99899  |  |  |
| C8 | 13309 | hypothalamus | Tgtp               | 21822  |  |  |
| C8 | 14258 | hypothalamus | Ifi47              | 15953  |  |  |
| C8 | 15074 | hypothalamus | Usp18              | 24110  |  |  |

|    |       |              |             |        |  |  |
|----|-------|--------------|-------------|--------|--|--|
| C8 | 16949 | hypothalamus | ligp1       | 60440  |  |  |
| C8 | 18186 | hypothalamus | Parp14      | 547253 |  |  |
| C8 | 19189 | hypothalamus | Sp100       | 20684  |  |  |
| C8 | 21549 | hypothalamus | Rtp4        | 67775  |  |  |
| C8 | 23450 | hypothalamus | D12Ert647e  | 52668  |  |  |
| C8 | 143   | liver        | Gvin1       | 74558  |  |  |
| C8 | 1180  | liver        | Clec4a3     | 73149  |  |  |
| C8 | 1533  | liver        | BC013712    | 230787 |  |  |
| C8 | 2058  | liver        | Hk3         | 212032 |  |  |
| C8 | 2200  | liver        | BC006779    | 229003 |  |  |
| C8 | 2224  | liver        | Oasl2       | 23962  |  |  |
| C8 | 2550  | liver        | MMT00036681 |        |  |  |
| C8 | 3426  | liver        | Hap1        | 15114  |  |  |
| C8 | 3523  | liver        | Trim34      | 94094  |  |  |
| C8 | 3594  | liver        | Rasa4       | 54153  |  |  |
| C8 | 3659  | liver        | EG236451    | 236451 |  |  |
| C8 | 3683  | liver        | Oas2        | 246728 |  |  |
| C8 | 4114  | liver        | Parp12      | 243771 |  |  |
| C8 | 4426  | liver        | ligp2       | 54396  |  |  |
| C8 | 4508  | liver        | Ifit1       | 15957  |  |  |
| C8 | 5002  | liver        | Ifi202b     | 26388  |  |  |
| C8 | 5216  | liver        | Spnb5       | 640524 |  |  |
| C8 | 5250  | liver        | Ifit2       | 15958  |  |  |
| C8 | 5853  | liver        | Trim30      | 20128  |  |  |
| C8 | 6072  | liver        | C1qc        | 12262  |  |  |
| C8 | 6098  | liver        | Ncf4        | 17972  |  |  |
| C8 | 6595  | liver        | Oas1a       | 246730 |  |  |
| C8 | 6824  | liver        | Irf7        | 54123  |  |  |
| C8 | 7069  | liver        | Ube1l       | 74153  |  |  |
| C8 | 7105  | liver        | Plac8       | 231507 |  |  |
| C8 | 7284  | liver        | MMT00008674 |        |  |  |
| C8 | 7316  | liver        | Ifi204      | 15951  |  |  |
| C8 | 7336  | liver        | Cd5l        | 11801  |  |  |
| C8 | 8659  | liver        | Psmb8       | 16913  |  |  |
| C8 | 8800  | liver        | Rnf213      | 629974 |  |  |
| C8 | 9401  | liver        | Fcgr4       | 246256 |  |  |
| C8 | 9820  | liver        | BC023105    | 207269 |  |  |
| C8 | 9847  | liver        | Ifi27       | 76933  |  |  |
| C8 | 10109 | liver        | Gbp3        | 55932  |  |  |
| C8 | 10504 | liver        | Ripk3       | 56532  |  |  |
| C8 | 11009 | liver        | MMT00008885 | 330256 |  |  |
| C8 | 11204 | liver        | Al451617    | 209387 |  |  |
| C8 | 11265 | liver        | Irgm        | 15944  |  |  |
| C8 | 11701 | liver        | Oas1c       | 114643 |  |  |
| C8 | 12126 | liver        | Znfx1       | 98999  |  |  |
| C8 | 12312 | liver        | Ms4a6d      | 68774  |  |  |
| C8 | 12398 | liver        | Ifi44       | 99899  |  |  |
| C8 | 12600 | liver        | Ifi204      | 15951  |  |  |
| C8 | 12969 | liver        | Xaf1        | 327959 |  |  |
| C8 | 13156 | liver        | Ifit3       | 15959  |  |  |
| C8 | 13181 | liver        | Lcp2        | 16822  |  |  |

|    |       |              |               |        |  |  |
|----|-------|--------------|---------------|--------|--|--|
| C8 | 13309 | liver        | Tgtp          | 21822  |  |  |
| C8 | 13514 | liver        | Apol9b        | 71898  |  |  |
| C8 | 13522 | liver        | Slfn5         | 327978 |  |  |
| C8 | 13527 | liver        | Ctss          | 13040  |  |  |
| C8 | 13654 | liver        | Stat1         | 20846  |  |  |
| C8 | 14258 | liver        | Ifi47         | 15953  |  |  |
| C8 | 14506 | liver        | Slc15a3       | 65221  |  |  |
| C8 | 14611 | liver        | Ddx60         | 234311 |  |  |
| C8 | 14880 | liver        | Ms4a4c        | 64380  |  |  |
| C8 | 14883 | liver        | Ilgal         | 16408  |  |  |
| C8 | 15074 | liver        | Usp18         | 24110  |  |  |
| C8 | 15504 | liver        | Mx2           | 17858  |  |  |
| C8 | 16102 | liver        | Cd72          | 12517  |  |  |
| C8 | 16182 | liver        | Oasl1         | 231655 |  |  |
| C8 | 16199 | liver        | Samhd1        | 56045  |  |  |
| C8 | 16521 | liver        | Adar          | 56417  |  |  |
| C8 | 16572 | liver        | D14Ert668e    | 219132 |  |  |
| C8 | 16988 | liver        | Clec4f        | 51811  |  |  |
| C8 | 17197 | liver        | Igtp          | 16145  |  |  |
| C8 | 17412 | liver        | Aif1          | 11629  |  |  |
| C8 | 18174 | liver        | Stat2         | 20847  |  |  |
| C8 | 18186 | liver        | Parp14        | 547253 |  |  |
| C8 | 19189 | liver        | Sp100         | 20684  |  |  |
| C8 | 19738 | liver        | Lgals3bp      | 19039  |  |  |
| C8 | 20321 | liver        | Ms4a6b        | 69774  |  |  |
| C8 | 20431 | liver        | Slc7a7        | 20540  |  |  |
| C8 | 20791 | liver        | MMT00014813   | 667370 |  |  |
| C8 | 20997 | liver        | MMT00028135   | 631323 |  |  |
| C8 | 21351 | liver        | Shisa5        | 66940  |  |  |
| C8 | 21549 | liver        | Rtp4          | 67775  |  |  |
| C8 | 21824 | liver        | 5830443L24Rik | 76074  |  |  |
| C8 | 22037 | liver        | Oas1g         | 23960  |  |  |
| C8 | 23208 | liver        | Hck           | 15162  |  |  |
| C8 | 23450 | liver        | D12Ert647e    | 52668  |  |  |
| C9 | 1040  | hypothalamus | Dnhd1         | 77505  |  |  |
| C9 | 1522  | hypothalamus | Nfkbib        | 18036  |  |  |
| C9 | 1690  | hypothalamus | Nlrp5         | 23968  |  |  |
| C9 | 2118  | hypothalamus | Kptn          | 70394  |  |  |
| C9 | 2449  | hypothalamus | Mybpc2        | 233199 |  |  |
| C9 | 2599  | hypothalamus | Lsm14a        | 67070  |  |  |
| C9 | 3698  | hypothalamus | 1600014C10Rik | 72244  |  |  |
| C9 | 4729  | hypothalamus | Slc7a10       | 53896  |  |  |
| C9 | 6513  | hypothalamus | Qpctl         | 67369  |  |  |
| C9 | 7761  | hypothalamus | Nudt19        | 110959 |  |  |
| C9 | 7803  | hypothalamus | Ttyh1         | 57776  |  |  |
| C9 | 8394  | hypothalamus | Dpy19l3       | 233115 |  |  |
| C9 | 9122  | hypothalamus | Sepw1         | 20364  |  |  |
| C9 | 9263  | hypothalamus | Fbxo27        | 233040 |  |  |
| C9 | 9376  | hypothalamus | Zscan18       | 232875 |  |  |
| C9 | 9413  | hypothalamus | 1190020J12Rik | 233038 |  |  |
| C9 | 9454  | hypothalamus | 2810426N06Rik | 67607  |  |  |



|    |       |              |               |        |  |  |
|----|-------|--------------|---------------|--------|--|--|
| C9 | 9655  | hypothalamus | Sult2b1       | 54200  |  |  |
| C9 | 11321 | hypothalamus | 2310014L17Rik | 381845 |  |  |
| C9 | 11800 | hypothalamus | Clip3         | 76686  |  |  |
| C9 | 11888 | hypothalamus | Myadm         | 50918  |  |  |
| C9 | 11982 | hypothalamus | MMT00035514   |        |  |  |
| C9 | 12004 | hypothalamus | Lgals6        | 16857  |  |  |
| C9 | 14842 | hypothalamus | Gipr          | 381853 |  |  |
| C9 | 15670 | hypothalamus | Pnmal1        | 71691  |  |  |
| C9 | 15722 | hypothalamus | Ccdc9         | 243846 |  |  |
| C9 | 16931 | hypothalamus | Actn4         | 60595  |  |  |
| C9 | 17314 | hypothalamus | Napa          | 108124 |  |  |
| C9 | 17389 | hypothalamus | Pop4          | 66161  |  |  |
| C9 | 17632 | hypothalamus | Lypd3         | 72434  |  |  |
| C9 | 18053 | hypothalamus | Psmc4         | 23996  |  |  |
| C9 | 18165 | hypothalamus | 5830482F20Rik | 320435 |  |  |
| C9 | 18365 | hypothalamus | Bcl2l12       | 75736  |  |  |
| C9 | 19142 | hypothalamus | Gpatch1       | 67471  |  |  |
| C9 | 19306 | hypothalamus | Al428936      | 233066 |  |  |
| C9 | 19462 | hypothalamus | 4933439C20Rik | 66776  |  |  |
| C9 | 20490 | hypothalamus | Tmem143       | 70209  |  |  |
| C9 | 20606 | hypothalamus | MMT00042166   |        |  |  |
| C9 | 21223 | hypothalamus | Pira1         | 18722  |  |  |
| C9 | 21853 | hypothalamus | 5430432N15Rik | 74490  |  |  |
| C9 | 23283 | hypothalamus | Mrps12        | 24030  |  |  |
| C9 | 126   | liver        | 0610012D14Rik | 68352  |  |  |
| C9 | 187   | liver        | Wdr62         | 233064 |  |  |
| C9 | 486   | liver        | Josd2         | 66124  |  |  |
| C9 | 1985  | liver        | Pepd          | 18624  |  |  |
| C9 | 2388  | liver        | Dot1l         | 208266 |  |  |
| C9 | 2599  | liver        | Lsm14a        | 67070  |  |  |
| C9 | 2912  | liver        | Wtip          | 101543 |  |  |
| C9 | 3698  | liver        | 1600014C10Rik | 72244  |  |  |
| C9 | 4697  | liver        | Cyp2a12       | 13085  |  |  |
| C9 | 5352  | liver        | Pdcd2l        | 68079  |  |  |
| C9 | 6371  | liver        | Dedd2         | 67379  |  |  |
| C9 | 6396  | liver        | Zfp105        | 22646  |  |  |
| C9 | 6513  | liver        | Qpctl         | 67369  |  |  |
| C9 | 6519  | liver        | Phldb3        | 232970 |  |  |
| C9 | 7761  | liver        | Nudt19        | 110959 |  |  |
| C9 | 8521  | liver        | Ceacam1       | 26365  |  |  |
| C9 | 9122  | liver        | Sepw1         | 20364  |  |  |
| C9 | 9322  | liver        | Relt          | 320100 |  |  |
| C9 | 9359  | liver        | Dhx34         | 71723  |  |  |
| C9 | 9454  | liver        | 2810426N06Rik | 67607  |  |  |
| C9 | 10545 | liver        | Tmem147       | 69804  |  |  |
| C9 | 11321 | liver        | 2310014L17Rik | 381845 |  |  |
| C9 | 11465 | liver        | Eif3k         | 73830  |  |  |
| C9 | 11888 | liver        | Myadm         | 50918  |  |  |
| C9 | 12004 | liver        | Lgals6        | 16857  |  |  |
| C9 | 12423 | liver        | Cyp2g1        | 13108  |  |  |
| C9 | 14208 | liver        | Ech1          | 51798  |  |  |

|     |       |              |               |        |  |
|-----|-------|--------------|---------------|--------|--|
| C9  | 16639 | liver        | MMT00078937   |        |  |
| C9  | 17314 | liver        | Napa          | 108124 |  |
| C9  | 17389 | liver        | Pop4          | 66161  |  |
| C9  | 18053 | liver        | Psmc4         | 23996  |  |
| C9  | 18088 | liver        | Alkbh6        | 233065 |  |
| C9  | 18165 | liver        | 5830482F20Rik | 320435 |  |
| C9  | 18365 | liver        | Bcl2l12       | 75736  |  |
| C9  | 19142 | liver        | Gpatch1       | 67471  |  |
| C9  | 19462 | liver        | 4933439C20Rik | 66776  |  |
| C9  | 19762 | liver        | Pih1d1        | 68845  |  |
| C9  | 19854 | liver        | Kcnj14        | 211480 |  |
| C9  | 20490 | liver        | Tmem143       | 70209  |  |
| C9  | 20606 | liver        | MMT00042166   |        |  |
| C9  | 21438 | liver        | Plekha4       | 69217  |  |
| C9  | 23247 | liver        | Erc1          | 13870  |  |
| C9  | 23283 | liver        | Mrps12        | 24030  |  |
| C9  | 23595 | liver        | Gm550         | 225852 |  |
| C10 | 1270  | hypothalamus | 1700029I01Rik | 70005  |  |
| C10 | 2011  | hypothalamus | Slc2a5        | 56485  |  |
| C10 | 2372  | hypothalamus | Stx12         | 100226 |  |
| C10 | 2533  | hypothalamus | Arhgef19      | 213649 |  |
| C10 | 2883  | hypothalamus | MMT00048540   |        |  |
| C10 | 2902  | hypothalamus | D4Ert196e     | 52174  |  |
| C10 | 3475  | hypothalamus | 2610305D13Rik | 112422 |  |
| C10 | 4305  | hypothalamus | Tmem51        | 214359 |  |
| C10 | 5064  | hypothalamus | Tekt2         | 24084  |  |
| C10 | 6191  | hypothalamus | Ddost         | 13200  |  |
| C10 | 8610  | hypothalamus | Padi4         | 18602  |  |
| C10 | 10366 | hypothalamus | 4931403E03Rik | 75718  |  |
| C10 | 10407 | hypothalamus | Gpatch3       | 242691 |  |
| C10 | 11870 | hypothalamus | Apitd1        | 69928  |  |
| C10 | 12097 | hypothalamus | 9430015G10Rik | 230996 |  |
| C10 | 14397 | hypothalamus | Padi2         | 18600  |  |
| C10 | 15664 | hypothalamus | Masp2         | 17175  |  |
| C10 | 15700 | hypothalamus | Crocc         | 230872 |  |
| C10 | 18338 | hypothalamus | Akr1e1        | 56043  |  |
| C10 | 18548 | hypothalamus | 1700012P22Rik | 69364  |  |
| C10 | 19633 | hypothalamus | Gm694         | 277744 |  |
| C10 | 19647 | hypothalamus | Cort          | 12854  |  |
| C10 | 19924 | hypothalamus | Ubiad1        | 71707  |  |
| C10 | 22499 | hypothalamus | 9030409G11Rik | 71529  |  |
| C10 | 1270  | liver        | 1700029I01Rik | 70005  |  |
| C10 | 2372  | liver        | Stx12         | 100226 |  |
| C10 | 2533  | liver        | Arhgef19      | 213649 |  |
| C10 | 2889  | liver        | Pqlc2         | 212555 |  |
| C10 | 2902  | liver        | D4Ert196e     | 52174  |  |
| C10 | 3475  | liver        | 2610305D13Rik | 112422 |  |
| C10 | 3616  | liver        | Dnajc16       | 214063 |  |
| C10 | 4305  | liver        | Tmem51        | 214359 |  |
| C10 | 4657  | liver        | C230096C10Rik | 230866 |  |
| C10 | 4885  | liver        | Fhad1         | 329977 |  |

|     |       |              |               |        |  |  |
|-----|-------|--------------|---------------|--------|--|--|
| C10 | 6191  | liver        | Ddost         | 13200  |  |  |
| C10 | 6394  | liver        | Fbxo6         | 50762  |  |  |
| C10 | 6830  | liver        | Rsc1a1        | 69994  |  |  |
| C10 | 7307  | liver        | Agmat         | 75986  |  |  |
| C10 | 7524  | liver        | Aldh4a1       | 212647 |  |  |
| C10 | 8610  | liver        | Padi4         | 18602  |  |  |
| C10 | 9634  | liver        | Atp13a2       | 74772  |  |  |
| C10 | 10407 | liver        | Gpatch3       | 242691 |  |  |
| C10 | 12097 | liver        | 9430015G10Rik | 230996 |  |  |
| C10 | 16287 | liver        | Extl1         | 56219  |  |  |
| C10 | 18338 | liver        | Akr1e1        | 56043  |  |  |
| C10 | 19924 | liver        | Ubiad1        | 71707  |  |  |
| C10 | 20045 | liver        | D4Wsu114e     | 28010  |  |  |
| C11 | 1041  | hypothalamus | 3110049J23Rik | 67307  |  |  |
| C11 | 1135  | hypothalamus | Akap12        | 83397  |  |  |
| C11 | 2511  | hypothalamus | Ltv1          | 353258 |  |  |
| C11 | 2571  | hypothalamus | Rmnd1         | 66084  |  |  |
| C11 | 3195  | hypothalamus | Mypn          | 68802  |  |  |
| C11 | 3401  | hypothalamus | BB146404      | 103511 |  |  |
| C11 | 3545  | hypothalamus | Mtrf1l        | 108853 |  |  |
| C11 | 3744  | hypothalamus | Rmnd1         | 66084  |  |  |
| C11 | 6363  | hypothalamus | 9130014G24Rik | 215772 |  |  |
| C11 | 8786  | hypothalamus | Rmnd1         | 66084  |  |  |
| C11 | 11162 | hypothalamus | Hkdc1         | 216019 |  |  |
| C11 | 12070 | hypothalamus | Adat2         | 66757  |  |  |
| C11 | 15971 | hypothalamus | Aifm2         | 71361  |  |  |
| C11 | 19115 | hypothalamus | Rab32         | 67844  |  |  |
| C11 | 19392 | hypothalamus | Slc25a16      | 73132  |  |  |
| C11 | 20136 | hypothalamus | Col13a1       | 12817  |  |  |
| C11 | 20705 | hypothalamus | Supv3l1       | 338359 |  |  |
| C11 | 21258 | hypothalamus | 2010003K15Rik | 75606  |  |  |
| C11 | 22333 | hypothalamus | Hnrnp3        | 432467 |  |  |
| C11 | 22598 | hypothalamus | 4930402H24Rik | 228602 |  |  |
| C11 | 1041  | liver        | 3110049J23Rik | 67307  |  |  |
| C11 | 1135  | liver        | Akap12        | 83397  |  |  |
| C11 | 2571  | liver        | Rmnd1         | 66084  |  |  |
| C11 | 2662  | liver        | Sgpl1         | 20397  |  |  |
| C11 | 2827  | liver        | Raet1d        | 56554  |  |  |
| C11 | 3744  | liver        | Rmnd1         | 66084  |  |  |
| C11 | 5965  | liver        | Pbld          | 68371  |  |  |
| C11 | 7620  | liver        | Foxo3         | 219038 |  |  |
| C11 | 8786  | liver        | Rmnd1         | 66084  |  |  |
| C11 | 12070 | liver        | Adat2         | 66757  |  |  |
| C11 | 13348 | liver        | Ank3          | 11735  |  |  |
| C11 | 13688 | liver        | Ppa1          | 67895  |  |  |
| C11 | 14169 | liver        | 1700052N19Rik | 73419  |  |  |
| C11 | 14989 | liver        | Map3k5        | 26408  |  |  |
| C11 | 15971 | liver        | Aifm2         | 71361  |  |  |
| C11 | 18300 | liver        | Arg1          | 11846  |  |  |
| C11 | 18893 | liver        | Lace1         | 215951 |  |  |
| C11 | 19115 | liver        | Rab32         | 67844  |  |  |

|     |       |              |               |           |  |  |
|-----|-------|--------------|---------------|-----------|--|--|
| C11 | 19392 | liver        | Slc25a16      | 73132     |  |  |
| C11 | 21105 | liver        | Pex26         | 74043     |  |  |
| C11 | 21258 | liver        | 2010003K15Rik | 75606     |  |  |
| C11 | 22146 | liver        | Aifm2         | 71361     |  |  |
| C12 | 3411  | hypothalamus | Rabl2a        | 68708     |  |  |
| C12 | 3654  | hypothalamus | St13          | 70356     |  |  |
| C12 | 6733  | hypothalamus | Mfng          | 17305     |  |  |
| C12 | 6804  | hypothalamus | Cyp2d22       | 56448     |  |  |
| C12 | 6974  | hypothalamus | Tmem65        | 74868     |  |  |
| C12 | 7021  | hypothalamus | Slc16a8       | 57274     |  |  |
| C12 | 7100  | hypothalamus | Tomm22        | 223696    |  |  |
| C12 | 8653  | hypothalamus | AW124722      | 239570    |  |  |
| C12 | 9540  | hypothalamus | Csnk1e        | 27373     |  |  |
| C12 | 10482 | hypothalamus | Mcat          | 223722    |  |  |
| C12 | 14084 | hypothalamus | D530033C11Rik | 78581     |  |  |
| C12 | 14145 | hypothalamus | Sgsm3         | 105835    |  |  |
| C12 | 16153 | hypothalamus | Syng1         | 20972     |  |  |
| C12 | 16295 | hypothalamus | Nlrp14        | 76858     |  |  |
| C12 | 16467 | hypothalamus | Card10        | 105844    |  |  |
| C12 | 16522 | hypothalamus | Ccdc85a       | 216613    |  |  |
| C12 | 17831 | hypothalamus | Ndufa6        | 67130     |  |  |
| C12 | 19955 | hypothalamus | Cbx2          | 12416     |  |  |
| C12 | 21526 | hypothalamus | Mkl1          | 223701    |  |  |
| C12 | 2805  | liver        | Rhog          | 56212     |  |  |
| C12 | 3411  | liver        | Rabl2a        | 68708     |  |  |
| C12 | 3654  | liver        | St13          | 70356     |  |  |
| C12 | 5910  | liver        | 1110014J01Rik | 74778     |  |  |
| C12 | 6183  | liver        | Atxn10        | 54138     |  |  |
| C12 | 6804  | liver        | Cyp2d22       | 56448     |  |  |
| C12 | 6974  | liver        | Tmem65        | 74868     |  |  |
| C12 | 7100  | liver        | Tomm22        | 223696    |  |  |
| C12 | 8653  | liver        | AW124722      | 239570    |  |  |
| C12 | 9822  | liver        | Celsr1        | 12614     |  |  |
| C12 | 10482 | liver        | Mcat          | 223722    |  |  |
| C12 | 10558 | liver        | Cyp2d40       | 71754     |  |  |
| C12 | 11503 | liver        | Rangap1       | 19387     |  |  |
| C12 | 11968 | liver        | Cenpm         | 66570     |  |  |
| C12 | 12185 | liver        | Cyp2d10       | 13101     |  |  |
| C12 | 12468 | liver        | Cyp2d13       | 68444     |  |  |
| C12 | 12965 | liver        | Pmm1          | 29858     |  |  |
| C12 | 14185 | liver        | Poldip3       | 73826     |  |  |
| C12 | 16295 | liver        | Nlrp14        | 76858     |  |  |
| C12 | 17147 | liver        | Till12        | 223723    |  |  |
| C12 | 19216 | liver        | Bik           | 12124     |  |  |
| C12 | 21095 | liver        | 9130401M01Rik | 75758     |  |  |
| C13 | 1177  | hypothalamus | EG545391      | 545391    |  |  |
| C13 | 3164  | hypothalamus | Hsd11b1       | 15483     |  |  |
| C13 | 5456  | hypothalamus | Rabgap1l      | 29809     |  |  |
| C13 | 6484  | hypothalamus | A130010J15Rik | 319266    |  |  |
| C13 | 6498  | hypothalamus | MMT00016809   | 100048067 |  |  |
| C13 | 7449  | hypothalamus | Creg1         | 433375    |  |  |

|     |       |              |               |           |  |  |
|-----|-------|--------------|---------------|-----------|--|--|
| C13 | 7963  | hypothalamus | Rxrg          | 20183     |  |  |
| C13 | 9449  | hypothalamus | Sft2d2        | 108735    |  |  |
| C13 | 11167 | hypothalamus | Dars2         | 226539    |  |  |
| C13 | 11406 | hypothalamus | Ifi203        | 15950     |  |  |
| C13 | 11445 | hypothalamus | Atp1a2        | 98660     |  |  |
| C13 | 11571 | hypothalamus | Bpnt1         | 23827     |  |  |
| C13 | 11593 | hypothalamus | Usf1          | 22278     |  |  |
| C13 | 11741 | hypothalamus | Slc30a10      | 226781    |  |  |
| C13 | 13149 | hypothalamus | Ifi203        | 15950     |  |  |
| C13 | 16163 | hypothalamus | Tmco1         | 68944     |  |  |
| C13 | 19332 | hypothalamus | Bpnt1         | 23827     |  |  |
| C13 | 19835 | hypothalamus | Iars2         | 381314    |  |  |
| C13 | 1177  | liver        | EG545391      | 545391    |  |  |
| C13 | 1374  | liver        | Mdn1          | 100019    |  |  |
| C13 | 6498  | liver        | MMT00016809   | 100048067 |  |  |
| C13 | 6648  | liver        | Cenpl         | 70454     |  |  |
| C13 | 7449  | liver        | Creg1         | 433375    |  |  |
| C13 | 8372  | liver        | Uap1          | 107652    |  |  |
| C13 | 9449  | liver        | Sft2d2        | 108735    |  |  |
| C13 | 11167 | liver        | Dars2         | 226539    |  |  |
| C13 | 11406 | liver        | Ifi203        | 15950     |  |  |
| C13 | 11571 | liver        | Bpnt1         | 23827     |  |  |
| C13 | 13149 | liver        | Ifi203        | 15950     |  |  |
| C13 | 15844 | liver        | Klhdc9        | 68874     |  |  |
| C13 | 16361 | liver        | Olfir703      | 258589    |  |  |
| C13 | 16972 | liver        | Nenf          | 66208     |  |  |
| C13 | 18276 | liver        | Apoa2         | 11807     |  |  |
| C13 | 19332 | liver        | Bpnt1         | 23827     |  |  |
| C13 | 19520 | liver        | Uck2          | 80914     |  |  |
| C13 | 19835 | liver        | Iars2         | 381314    |  |  |
| C13 | 23466 | liver        | Pou2f1        | 18986     |  |  |
| C14 | 1371  | hypothalamus | 1200009I06Rik | 74190     |  |  |
| C14 | 3889  | hypothalamus | Wasf3         | 245880    |  |  |
| C14 | 4414  | hypothalamus | 5033406O09Rik | 77675     |  |  |
| C14 | 6357  | hypothalamus | Ankrd9        | 74251     |  |  |
| C14 | 7388  | hypothalamus | Amn           | 93835     |  |  |
| C14 | 8155  | hypothalamus | Mark3         | 17169     |  |  |
| C14 | 10526 | hypothalamus | MMT00036239   |           |  |  |
| C14 | 10788 | hypothalamus | D430019H16Rik | 268595    |  |  |
| C14 | 12517 | hypothalamus | 4930573I19Rik | 104859    |  |  |
| C14 | 14188 | hypothalamus | Ttc8          | 76260     |  |  |
| C14 | 15277 | hypothalamus | 2810002N01Rik | 68020     |  |  |
| C14 | 15984 | hypothalamus | MMT00075074   |           |  |  |
| C14 | 18140 | hypothalamus | Atg2b         | 76559     |  |  |
| C14 | 20068 | hypothalamus | 2610204M08Rik | 70435     |  |  |
| C14 | 21149 | hypothalamus | A230065H16Rik | 380787    |  |  |
| C14 | 23462 | hypothalamus | Bag5          | 70369     |  |  |
| C14 | 23693 | hypothalamus | A530016L24Rik | 319942    |  |  |
| C14 | 397   | liver        | Ak7           | 78801     |  |  |
| C14 | 1371  | liver        | 1200009I06Rik | 74190     |  |  |
| C14 | 1702  | liver        | Galc          | 14420     |  |  |

|     |       |              |               |        |  |  |
|-----|-------|--------------|---------------|--------|--|--|
| C14 | 4414  | liver        | 5033406O09Rik | 77675  |  |  |
| C14 | 5829  | liver        | 2810455K09Rik | 72805  |  |  |
| C14 | 7099  | liver        | Kcnk10        | 72258  |  |  |
| C14 | 7388  | liver        | Amn           | 93835  |  |  |
| C14 | 8155  | liver        | Mark3         | 17169  |  |  |
| C14 | 8925  | liver        | MMT00026932   |        |  |  |
| C14 | 9678  | liver        | AW555464      | 217882 |  |  |
| C14 | 9832  | liver        | Brf1          | 72308  |  |  |
| C14 | 12238 | liver        | Traf3         | 22031  |  |  |
| C14 | 13027 | liver        | Ppp2r5c       | 26931  |  |  |
| C14 | 14188 | liver        | Ttc8          | 76260  |  |  |
| C14 | 15984 | liver        | MMT00075074   |        |  |  |
| C14 | 16191 | liver        | Klc1          | 16593  |  |  |
| C14 | 18140 | liver        | Atg2b         | 76559  |  |  |
| C14 | 23693 | liver        | A530016L24Rik | 319942 |  |  |
| C15 | 2128  | hypothalamus | 4930447K03Rik | 432745 |  |  |
| C15 | 3491  | hypothalamus | Btn1a1        | 12231  |  |  |
| C15 | 3938  | hypothalamus | Abt1          | 30946  |  |  |
| C15 | 10189 | hypothalamus | Cage1         | 71213  |  |  |
| C15 | 11306 | hypothalamus | 1700016G14Rik | 193386 |  |  |
| C15 | 11649 | hypothalamus | Hfe           | 15216  |  |  |
| C15 | 13656 | hypothalamus | Ly86          | 17084  |  |  |
| C15 | 14822 | hypothalamus | Nrsn1         | 22360  |  |  |
| C15 | 15698 | hypothalamus | Them2         | 66834  |  |  |
| C15 | 16491 | hypothalamus | 6330500D04Rik | 193385 |  |  |
| C15 | 17528 | hypothalamus | Gmnn          | 57441  |  |  |
| C15 | 19192 | hypothalamus | Hist1h1c      | 50708  |  |  |
| C15 | 23118 | hypothalamus | Ttrap         | 56196  |  |  |
| C15 | 1580  | liver        | Mrs2          | 380836 |  |  |
| C15 | 1957  | liver        | Mansc1        | 67729  |  |  |
| C15 | 3938  | liver        | Abt1          | 30946  |  |  |
| C15 | 6605  | liver        | Gpld1         | 14756  |  |  |
| C15 | 10189 | liver        | Cage1         | 71213  |  |  |
| C15 | 11094 | liver        | Slc17a3       | 105355 |  |  |
| C15 | 11649 | liver        | Hfe           | 15216  |  |  |
| C15 | 14770 | liver        | Cops7a        | 26894  |  |  |
| C15 | 15698 | liver        | Them2         | 66834  |  |  |
| C15 | 17528 | liver        | Gmnn          | 57441  |  |  |
| C15 | 19192 | liver        | Hist1h1c      | 50708  |  |  |
| C15 | 19713 | liver        | BC048599      | 232717 |  |  |
| C15 | 20759 | liver        | Slc17a1       | 20504  |  |  |
| C15 | 23118 | liver        | Ttrap         | 56196  |  |  |
| C16 | 2023  | hypothalamus | MMT00072215   |        |  |  |
| C16 | 5360  | hypothalamus | Cep76         | 225659 |  |  |
| C16 | 5681  | hypothalamus | Mbd1          | 17190  |  |  |
| C16 | 12109 | hypothalamus | Smad4         | 17128  |  |  |
| C16 | 12984 | hypothalamus | Cyb5          | 109672 |  |  |
| C16 | 18592 | hypothalamus | Txn14a        | 27366  |  |  |
| C16 | 19689 | hypothalamus | 1110032A13Rik | 68731  |  |  |
| C16 | 20942 | hypothalamus | MMT00006980   |        |  |  |
| C16 | 22930 | hypothalamus | Mro           | 71263  |  |  |

|     |       |              |               |        |  |  |
|-----|-------|--------------|---------------|--------|--|--|
| C16 | 22961 | hypothalamus | MMT00055950   | 665565 |  |  |
| C16 | 2023  | liver        | MMT00072215   |        |  |  |
| C16 | 2674  | liver        | 1810005K13Rik | 66255  |  |  |
| C16 | 3167  | liver        | Dym           | 69190  |  |  |
| C16 | 3721  | liver        | Me2           | 107029 |  |  |
| C16 | 4415  | liver        | B230399E16Rik | 240479 |  |  |
| C16 | 5360  | liver        | Cep76         | 225659 |  |  |
| C16 | 5681  | liver        | Mbd1          | 17190  |  |  |
| C16 | 8269  | liver        | Ccdc11        | 74453  |  |  |
| C16 | 8871  | liver        | Gm443         | 242891 |  |  |
| C16 | 9192  | liver        | MMT00042303   |        |  |  |
| C16 | 12109 | liver        | Smad4         | 17128  |  |  |
| C16 | 12984 | liver        | Cyb5          | 109672 |  |  |
| C16 | 18592 | liver        | Txn14a        | 27366  |  |  |
| C16 | 19689 | liver        | 1110032A13Rik | 68731  |  |  |
| C16 | 21162 | liver        | MMT00008728   |        |  |  |
| C16 | 22961 | liver        | MMT00055950   | 665565 |  |  |
| C17 | 2456  | hypothalamus | Mrpl10        | 107732 |  |  |
| C17 | 3480  | hypothalamus | Pnp0          | 103711 |  |  |
| C17 | 4272  | hypothalamus | Hsd17b6       | 27400  |  |  |
| C17 | 5661  | hypothalamus | Lrrc46        | 69297  |  |  |
| C17 | 10498 | hypothalamus | Ube2z         | 268470 |  |  |
| C17 | 12302 | hypothalamus | Cbx1          | 12412  |  |  |
| C17 | 13810 | hypothalamus | 1110036O03Rik | 66180  |  |  |
| C17 | 14384 | hypothalamus | Dnajc7        | 56354  |  |  |
| C17 | 18448 | hypothalamus | Klhl11        | 217194 |  |  |
| C17 | 19196 | hypothalamus | Nfe2l1        | 18023  |  |  |
| C17 | 23295 | hypothalamus | Snx11         | 74479  |  |  |
| C17 | 1241  | liver        | Meox1         | 17285  |  |  |
| C17 | 1654  | liver        | Dhx58         | 80861  |  |  |
| C17 | 2456  | liver        | Mrpl10        | 107732 |  |  |
| C17 | 3480  | liver        | Pnp0          | 103711 |  |  |
| C17 | 5661  | liver        | Lrrc46        | 69297  |  |  |
| C17 | 12302 | liver        | Cbx1          | 12412  |  |  |
| C17 | 12736 | liver        | Stat3         | 20848  |  |  |
| C17 | 13810 | liver        | 1110036O03Rik | 66180  |  |  |
| C17 | 13983 | liver        | Copz2         | 56358  |  |  |
| C17 | 14384 | liver        | Dnajc7        | 56354  |  |  |
| C17 | 16340 | liver        | Scrn2         | 217140 |  |  |
| C17 | 19092 | liver        | MMT00045362   |        |  |  |
| C17 | 23295 | liver        | Snx11         | 74479  |  |  |
| C18 | 2705  | hypothalamus | Hrbl          | 231801 |  |  |
| C18 | 7945  | hypothalamus | Gpc2          | 71951  |  |  |
| C18 | 8992  | hypothalamus | Trfr2         | 50765  |  |  |
| C18 | 9077  | hypothalamus | Cnpy4         | 66455  |  |  |
| C18 | 10995 | hypothalamus | Ap4m1         | 11781  |  |  |
| C18 | 11264 | hypothalamus | Zcwpw1        | 381678 |  |  |
| C18 | 12907 | hypothalamus | Zkscan1       | 74570  |  |  |
| C18 | 13780 | hypothalamus | Pilra         | 231805 |  |  |
| C18 | 14631 | hypothalamus | Stag3         | 50878  |  |  |
| C18 | 15587 | hypothalamus | Act16b        | 83766  |  |  |

|     |       |              |               |        |  |  |
|-----|-------|--------------|---------------|--------|--|--|
| C18 | 19502 | hypothalamus | Fbxo24        | 71176  |  |  |
| C18 | 4469  | liver        | Cyp3a13       | 13113  |  |  |
| C18 | 5511  | liver        | BC055004      | 381680 |  |  |
| C18 | 9077  | liver        | Cnpy4         | 66455  |  |  |
| C18 | 10995 | liver        | Ap4m1         | 11781  |  |  |
| C18 | 12885 | liver        | Ccl24         | 56221  |  |  |
| C18 | 13780 | liver        | Pilra         | 231805 |  |  |
| C18 | 14631 | liver        | Stag3         | 50878  |  |  |
| C18 | 15219 | liver        | 0910001L09Rik | 66096  |  |  |
| C18 | 16451 | liver        | 2010007H12Rik | 69871  |  |  |
| C18 | 17089 | liver        | Pilrb1        | 170741 |  |  |
| C18 | 17158 | liver        | Zfp113        | 56314  |  |  |
| C18 | 18881 | liver        | Cops6         | 26893  |  |  |
| C18 | 19502 | liver        | Fbxo24        | 71176  |  |  |
| C19 | 1162  | hypothalamus | Cpsf4         | 54188  |  |  |
| C19 | 3542  | hypothalamus | Atp5j2        | 57423  |  |  |
| C19 | 7083  | hypothalamus | MMT00044154   |        |  |  |
| C19 | 7116  | hypothalamus | Katnal1       | 231912 |  |  |
| C19 | 7821  | hypothalamus | MMT00042003   |        |  |  |
| C19 | 15297 | hypothalamus | MMT00048291   |        |  |  |
| C19 | 17535 | hypothalamus | MMT00008110   |        |  |  |
| C19 | 17616 | hypothalamus | Flt1          | 14254  |  |  |
| C19 | 19717 | hypothalamus | Ccdc27        | 381580 |  |  |
| C19 | 1162  | liver        | Cpsf4         | 54188  |  |  |
| C19 | 2115  | liver        | Gpr12         | 14738  |  |  |
| C19 | 2755  | liver        | EG382421      | 382421 |  |  |
| C19 | 3598  | liver        | Rpo1-3        | 20018  |  |  |
| C19 | 7083  | liver        | MMT00044154   |        |  |  |
| C19 | 7116  | liver        | Katnal1       | 231912 |  |  |
| C19 | 8022  | liver        | MMT00004959   |        |  |  |
| C19 | 8906  | liver        | MMT00004929   |        |  |  |
| C19 | 12377 | liver        | MMT00050540   |        |  |  |
| C19 | 15480 | liver        | MMT00078167   |        |  |  |
| C19 | 17535 | liver        | MMT00008110   |        |  |  |
| C19 | 17676 | liver        | Amz1          | 231842 |  |  |
| C19 | 19565 | liver        | EG385454      | 385454 |  |  |
| C19 | 21125 | liver        | Mtif3         | 76366  |  |  |
| C20 | 2485  | hypothalamus | Adck1         | 72113  |  |  |
| C20 | 3812  | hypothalamus | Zfyve26       | 211978 |  |  |
| C20 | 8724  | hypothalamus | Tgfb3         | 21809  |  |  |
| C20 | 9022  | hypothalamus | Plek2         | 27260  |  |  |
| C20 | 12676 | hypothalamus | Nrxn3         | 18191  |  |  |
| C20 | 13389 | hypothalamus | Six6os1       | 75801  |  |  |
| C20 | 14621 | hypothalamus | Six4          | 20474  |  |  |
| C20 | 14862 | hypothalamus | Dhrs7         | 66375  |  |  |
| C20 | 15378 | hypothalamus | Exdl2         | 97827  |  |  |
| C20 | 21442 | hypothalamus | Rad5111       | 19363  |  |  |
| C20 | 22256 | hypothalamus | Arg2          | 11847  |  |  |
| C20 | 2485  | liver        | Adck1         | 72113  |  |  |
| C20 | 3512  | liver        | 6530401N04Rik | 328092 |  |  |
| C20 | 6755  | liver        | Wdr22         | 320808 |  |  |



|     |       |              |               |        |  |  |
|-----|-------|--------------|---------------|--------|--|--|
| C20 | 9022  | liver        | Plek2         | 27260  |  |  |
| C20 | 13988 | liver        | Cntnap2       | 66797  |  |  |
| C20 | 20187 | liver        | Gphn          | 268566 |  |  |
| C20 | 20292 | liver        | 1810048J11Rik | 67708  |  |  |
| C20 | 20393 | liver        | 1110018G07Rik | 68497  |  |  |
| C20 | 22918 | liver        | MMT00002192   |        |  |  |
| C21 | 5597  | hypothalamus | Tll4          | 67534  |  |  |
| C21 | 7975  | hypothalamus | Lancl1        | 14768  |  |  |
| C21 | 10130 | hypothalamus | MMT00043239   |        |  |  |
| C21 | 11621 | hypothalamus | Mixl1         | 27217  |  |  |
| C21 | 14597 | hypothalamus | Col19a1       | 12823  |  |  |
| C21 | 15266 | hypothalamus | Cnnm4         | 94220  |  |  |
| C21 | 17729 | hypothalamus | Prim2         | 19076  |  |  |
| C21 | 19578 | hypothalamus | Aox1          | 11761  |  |  |
| C21 | 20077 | hypothalamus | Ccdc115       | 69668  |  |  |
| C21 | 7975  | liver        | Lancl1        | 14768  |  |  |
| C21 | 8664  | liver        | MMT00014895   |        |  |  |
| C21 | 12380 | liver        | Rftn2         | 74013  |  |  |
| C21 | 12744 | liver        | 1110034B05Rik | 68736  |  |  |
| C21 | 17729 | liver        | Prim2         | 19076  |  |  |
| C21 | 18606 | liver        | A230074B11Rik | 215413 |  |  |
| C21 | 19578 | liver        | Aox1          | 11761  |  |  |
| C21 | 20077 | liver        | Ccdc115       | 69668  |  |  |
| C21 | 22333 | liver        | Hnrnp3        | 432467 |  |  |
| C21 | 23119 | liver        | Cps1          | 227231 |  |  |
| C21 | 23306 | liver        | Bag2          | 213539 |  |  |
| C22 | 3354  | hypothalamus | Ropn1l        | 252967 |  |  |
| C22 | 6931  | hypothalamus | Hrsp12        | 15473  |  |  |
| C22 | 11549 | hypothalamus | Depdc6        | 97998  |  |  |
| C22 | 11620 | hypothalamus | Zfr           | 22763  |  |  |
| C22 | 12091 | hypothalamus | 1810015C04Rik | 66270  |  |  |
| C22 | 12655 | hypothalamus | Tmem180       | 75146  |  |  |
| C22 | 13648 | hypothalamus | Dap           | 223453 |  |  |
| C22 | 18939 | hypothalamus | Matn2         | 17181  |  |  |
| C22 | 19345 | hypothalamus | Ssh2          | 237860 |  |  |
| C22 | 20871 | hypothalamus | Pop1          | 67724  |  |  |
| C22 | 6931  | liver        | Hrsp12        | 15473  |  |  |
| C22 | 9195  | liver        | Sub1          | 20024  |  |  |
| C22 | 11620 | liver        | Zfr           | 22763  |  |  |
| C22 | 11992 | liver        | Mrpl19        | 56284  |  |  |
| C22 | 13648 | liver        | Dap           | 223453 |  |  |
| C22 | 17082 | liver        | MMT00013155   |        |  |  |
| C22 | 20209 | liver        | 5730557B15Rik | 67434  |  |  |
| C22 | 20871 | liver        | Pop1          | 67724  |  |  |
| C22 | 22362 | liver        | Laptm4b       | 114128 |  |  |
| C23 | 3970  | hypothalamus | 4931414P19Rik | 74359  |  |  |
| C23 | 4566  | hypothalamus | MMT00078134   | 547323 |  |  |
| C23 | 8472  | hypothalamus | Txndc16       | 70561  |  |  |
| C23 | 11423 | hypothalamus | 6720463M24Rik | 77744  |  |  |
| C23 | 13137 | hypothalamus | 2610301G19Rik | 219158 |  |  |
| C23 | 14281 | hypothalamus | 5031414D18Rik | 271221 |  |  |

|     |       |              |               |        |  |  |
|-----|-------|--------------|---------------|--------|--|--|
| C23 | 15353 | hypothalamus | Ednrb         | 13618  |  |  |
| C23 | 17321 | hypothalamus | Hepacam       | 72927  |  |  |
| C23 | 1648  | liver        | Gnpnat1       | 54342  |  |  |
| C23 | 4203  | liver        | Fermt2        | 218952 |  |  |
| C23 | 4837  | liver        | Ear2          | 13587  |  |  |
| C23 | 6587  | liver        | Irf9          | 16391  |  |  |
| C23 | 10711 | liver        | 1700108F19Rik | 73272  |  |  |
| C23 | 11423 | liver        | 6720463M24Rik | 77744  |  |  |
| C23 | 12280 | liver        | Cln5          | 211286 |  |  |
| C23 | 13550 | liver        | Mbnl2         | 105559 |  |  |
| C23 | 13588 | liver        | MMT00042387   |        |  |  |
| C23 | 13617 | liver        | Acin1         | 56215  |  |  |
| C23 | 17321 | liver        | Hepacam       | 72927  |  |  |
| C24 | 246   | hypothalamus | MMT00053742   |        |  |  |
| C24 | 1625  | hypothalamus | AW146154      | 101835 |  |  |
| C24 | 8933  | hypothalamus | Arpc5         | 67771  |  |  |
| C24 | 9611  | hypothalamus | Ncf2          | 17970  |  |  |
| C24 | 13417 | hypothalamus | 1700025G04Rik | 69399  |  |  |
| C24 | 15569 | hypothalamus | BC003331      | 226499 |  |  |
| C24 | 17463 | hypothalamus | Rgl1          | 19731  |  |  |
| C24 | 246   | liver        | MMT00053742   |        |  |  |
| C24 | 9611  | liver        | Ncf2          | 17970  |  |  |
| C24 | 15569 | liver        | BC003331      | 226499 |  |  |
| C24 | 17463 | liver        | Rgl1          | 19731  |  |  |
| C24 | 17850 | liver        | Prg4          | 96875  |  |  |
| C24 | 23262 | liver        | C530043G21Rik | 215015 |  |  |
| C25 | 2832  | hypothalamus | 2810021J22Rik | 69944  |  |  |
| C25 | 6376  | hypothalamus | Nle1          | 217011 |  |  |
| C25 | 10539 | hypothalamus | Unc45b        | 217012 |  |  |
| C25 | 11164 | hypothalamus | Odf4          | 252868 |  |  |
| C25 | 14558 | hypothalamus | Arhgef15      | 442801 |  |  |
| C25 | 15127 | hypothalamus | Cct6b         | 12467  |  |  |
| C25 | 22612 | hypothalamus | 1500010J02Rik | 68964  |  |  |
| C25 | 1368  | liver        | Pctp          | 18559  |  |  |
| C25 | 1745  | liver        | Gas7          | 14457  |  |  |
| C25 | 6376  | liver        | Nle1          | 217011 |  |  |
| C25 | 10539 | liver        | Unc45b        | 217012 |  |  |
| C25 | 15127 | liver        | Cct6b         | 12467  |  |  |
| C26 | 5795  | hypothalamus | MMT00057992   |        |  |  |
| C26 | 9827  | hypothalamus | Pam           | 18484  |  |  |
| C26 | 16137 | hypothalamus | Xrcc5         | 22596  |  |  |
| C26 | 18714 | hypothalamus | Farsb         | 23874  |  |  |
| C26 | 22984 | hypothalamus | Tnnt2         | 21956  |  |  |
| C26 | 6079  | liver        | Tmem169       | 271711 |  |  |
| C26 | 7043  | liver        | Cyp11b2       | 13072  |  |  |
| C26 | 9707  | liver        | Golt1a        | 68338  |  |  |
| C26 | 9827  | liver        | Pam           | 18484  |  |  |
| C26 | 12053 | liver        | 2310005L22Rik | 69471  |  |  |
| C26 | 18714 | liver        | Farsb         | 23874  |  |  |
| C26 | 23361 | liver        | Bivm          | 246229 |  |  |



**Table T12: AL Subnetworks**

| Subnetwork | Probe_id | Tissue  | Gene_Symbol   | Entrez_ID |
|------------|----------|---------|---------------|-----------|
| C1         | 185      | adipose | Ap2b1         | 71770     |
| C1         | 213      | adipose | Rgs16         | 19734     |
| C1         | 255      | adipose | Twf2          | 23999     |
| C1         | 274      | adipose | Trit1         | 66966     |
| C1         | 342      | adipose | Nrbf2         | 641340    |
| C1         | 402      | adipose | Timp3         | 21859     |
| C1         | 443      | adipose | Xpo5          | 72322     |
| C1         | 511      | adipose | Itpa          | 16434     |
| C1         | 525      | adipose | Lyl1          | 17095     |
| C1         | 533      | adipose | MMT00040762   |           |
| C1         | 538      | adipose | Mpp2          | 50997     |
| C1         | 544      | adipose | Il16          | 16170     |
| C1         | 605      | adipose | Unc119b       | 106840    |
| C1         | 609      | adipose | MMT00060868   |           |
| C1         | 633      | adipose | Ap1b1         | 11764     |
| C1         | 662      | adipose | Mid1ip1       | 68041     |
| C1         | 677      | adipose | Ace2          | 70008     |
| C1         | 719      | adipose | Usp2          | 53376     |
| C1         | 791      | adipose | Il18r1        | 16182     |
| C1         | 817      | adipose | C130039O16Rik | 238317    |
| C1         | 830      | adipose | Socs1         | 12703     |
| C1         | 873      | adipose | Slc22a3       | 20519     |
| C1         | 894      | adipose | Ddit4         | 74747     |
| C1         | 929      | adipose | Dusp4         | 319520    |
| C1         | 942      | adipose | Kcna5         | 16493     |
| C1         | 1055     | adipose | Gm525         | 217071    |
| C1         | 1280     | adipose | Mesdc2        | 67943     |
| C1         | 1344     | adipose | Marcks        | 17118     |
| C1         | 1361     | adipose | 2010001M06Rik | 69812     |
| C1         | 1396     | adipose | Rassf7        | 66985     |
| C1         | 1397     | adipose | 2900009I07Rik | 68034     |
| C1         | 1424     | adipose | Dapk1         | 69635     |
| C1         | 1438     | adipose | Dclre1b       | 140917    |
| C1         | 1470     | adipose | Kcns3         | 238076    |
| C1         | 1476     | adipose | 2610020H08Rik | 434234    |
| C1         | 1485     | adipose | Plek          | 56193     |
| C1         | 1582     | adipose | Srr           | 27364     |
| C1         | 1585     | adipose | Mif4gd        | 69674     |
| C1         | 1635     | adipose | 8430427H17Rik | 329540    |
| C1         | 1705     | adipose | Gltpd1        | 79554     |
| C1         | 1745     | adipose | Gas7          | 14457     |
| C1         | 1751     | adipose | Xdh           | 22436     |
| C1         | 1790     | adipose | Hic1          | 15248     |
| C1         | 1887     | adipose | Mapkapk3      | 102626    |
| C1         | 1889     | adipose | Dcun1d3       | 233805    |
| C1         | 1890     | adipose | Nanp          | 67311     |
| C1         | 1930     | adipose | Ccdc109b      | 66815     |
| C1         | 2013     | adipose | Il15ra        | 16169     |
| C1         | 2058     | adipose | Hk3           | 212032    |

|    |      |         |               |        |
|----|------|---------|---------------|--------|
| C1 | 2110 | adipose | Gtf2ird1      | 57080  |
| C1 | 2142 | adipose | Phldb1        | 102693 |
| C1 | 2146 | adipose | MMT00044046   |        |
| C1 | 2166 | adipose | Amd1          | 11702  |
| C1 | 2199 | adipose | Aff1          | 17355  |
| C1 | 2218 | adipose | D15Mgi27      | 106073 |
| C1 | 2223 | adipose | Slc28a2       | 269346 |
| C1 | 2262 | adipose | Papss2        | 23972  |
| C1 | 2266 | adipose | Angptl2       | 26360  |
| C1 | 2294 | adipose | AU040829      | 216831 |
| C1 | 2370 | adipose | 8430408G22Rik | 213393 |
| C1 | 2420 | adipose | 2010016I18Rik | 69206  |
| C1 | 2461 | adipose | Appbp2        | 66884  |
| C1 | 2486 | adipose | Ephb1         | 270190 |
| C1 | 2501 | adipose | lsx           | 71597  |
| C1 | 2578 | adipose | Csf2rb2       | 12984  |
| C1 | 2608 | adipose | Clcn2         | 12724  |
| C1 | 2619 | adipose | Zfp622        | 52521  |
| C1 | 2625 | adipose | MMT00077446   |        |
| C1 | 2708 | adipose | Sgk1          | 20393  |
| C1 | 2766 | adipose | Elp4          | 77766  |
| C1 | 2775 | adipose | Sec61a2       | 57743  |
| C1 | 2780 | adipose | Fes           | 14159  |
| C1 | 2794 | adipose | Map3k6        | 53608  |
| C1 | 2823 | adipose | Sipa1l2       | 244668 |
| C1 | 2830 | adipose | 4632417K18Rik | 107373 |
| C1 | 2850 | adipose | Slc16a6       | 104681 |
| C1 | 2853 | adipose | Glipr2        | 384009 |
| C1 | 2858 | adipose | Arhgap20      | 244867 |
| C1 | 2880 | adipose | Cd93          | 17064  |
| C1 | 2881 | adipose | Hlf           | 217082 |
| C1 | 2969 | adipose | Ptpro         | 19277  |
| C1 | 2973 | adipose | 4-Sep         | 18952  |
| C1 | 2998 | adipose | Lzic          | 69151  |
| C1 | 3012 | adipose | Actl6a        | 56456  |
| C1 | 3031 | adipose | Rab10         | 19325  |
| C1 | 3040 | adipose | Bcl3          | 12051  |
| C1 | 3046 | adipose | 6430573F11Rik | 319582 |
| C1 | 3111 | adipose | Ddefl1        | 230837 |
| C1 | 3182 | adipose | Stau1         | 20853  |
| C1 | 3288 | adipose | Slc26a6       | 171429 |
| C1 | 3357 | adipose | Rev1          | 56210  |
| C1 | 3381 | adipose | Ctdspl        | 69274  |
| C1 | 3391 | adipose | Mfap3         | 216760 |
| C1 | 3394 | adipose | Als2cr13      | 72750  |
| C1 | 3448 | adipose | Apobec3       | 80287  |
| C1 | 3513 | adipose | Aloxe3        | 23801  |
| C1 | 3594 | adipose | Rasa4         | 54153  |
| C1 | 3603 | adipose | BC027231      | 212547 |
| C1 | 3631 | adipose | Vps37b        | 330192 |
| C1 | 3687 | adipose | Bcl9          | 77578  |

|    |      |         |               |        |
|----|------|---------|---------------|--------|
| C1 | 3689 | adipose | Adh1          | 11522  |
| C1 | 3699 | adipose | Dscr3         | 13185  |
| C1 | 3794 | adipose | Ywhab         | 54401  |
| C1 | 3806 | adipose | MMT00063223   |        |
| C1 | 3825 | adipose | Uaca          | 72565  |
| C1 | 3913 | adipose | Mrpl15        | 27395  |
| C1 | 4009 | adipose | Cotl1         | 72042  |
| C1 | 4038 | adipose | 1200009O22Rik | 66873  |
| C1 | 4074 | adipose | Ush2a         | 22283  |
| C1 | 4084 | adipose | Asah3l        | 230379 |
| C1 | 4122 | adipose | Ehbp111       | 114601 |
| C1 | 4152 | adipose | Lrrc33        | 224109 |
| C1 | 4186 | adipose | Car7          | 12354  |
| C1 | 4188 | adipose | Sult1a1       | 20887  |
| C1 | 4303 | adipose | Phkg1         | 18682  |
| C1 | 4306 | adipose | Cpeb1         | 12877  |
| C1 | 4340 | adipose | Sdk2          | 237979 |
| C1 | 4369 | adipose | Acot4         | 171282 |
| C1 | 4379 | adipose | Glrx          | 93692  |
| C1 | 4454 | adipose | BC055107      | 268709 |
| C1 | 4462 | adipose | Cyp1a1        | 13076  |
| C1 | 4493 | adipose | Ptgir         | 19222  |
| C1 | 4549 | adipose | 9930012K11Rik | 268759 |
| C1 | 4580 | adipose | Impact        | 16210  |
| C1 | 4586 | adipose | Zfp618        | 72701  |
| C1 | 4617 | adipose | Agpat9        | 231510 |
| C1 | 4682 | adipose | Sertad4       | 214791 |
| C1 | 4708 | adipose | Traf3ip2      | 103213 |
| C1 | 4745 | adipose | Lhfp          | 108927 |
| C1 | 4810 | adipose | Vsig8         | 240916 |
| C1 | 4843 | adipose | Oma1          | 67013  |
| C1 | 4851 | adipose | Gpn2          | 100210 |
| C1 | 4864 | adipose | S100a16       | 67860  |
| C1 | 4868 | adipose | Mertk         | 17289  |
| C1 | 4906 | adipose | A830059I20Rik | 58238  |
| C1 | 5003 | adipose | 2410081M15Rik | 73680  |
| C1 | 5017 | adipose | Plat          | 18791  |
| C1 | 5027 | adipose | Pde4b         | 18578  |
| C1 | 5068 | adipose | Afap1l2       | 226250 |
| C1 | 5076 | adipose | Tmem57        | 66146  |
| C1 | 5113 | adipose | Nxn1          | 234404 |
| C1 | 5227 | adipose | 2310008M10Rik | 66357  |
| C1 | 5242 | adipose | Gata3         | 14462  |
| C1 | 5270 | adipose | Rnf8          | 58230  |
| C1 | 5306 | adipose | Ywhag         | 22628  |
| C1 | 5425 | adipose | Ung           | 22256  |
| C1 | 5434 | adipose | Inpp5b        | 16330  |
| C1 | 5552 | adipose | Rasgrp3       | 240168 |
| C1 | 5588 | adipose | Snx20         | 71607  |
| C1 | 5611 | adipose | Rapgef3       | 223864 |
| C1 | 5686 | adipose | Cys1          | 12879  |

|    |      |         |                    |        |
|----|------|---------|--------------------|--------|
| C1 | 5693 | adipose | Zfp809             | 235047 |
| C1 | 5700 | adipose | Tenc1              | 209039 |
| C1 | 5715 | adipose | ENSMUSG00000052976 | 433237 |
| C1 | 5729 | adipose | 2310016C08Rik      | 69573  |
| C1 | 5758 | adipose | Tpst1              | 22021  |
| C1 | 5806 | adipose | Prrx2              | 20204  |
| C1 | 5870 | adipose | Limd1              | 29806  |
| C1 | 5889 | adipose | Errfi1             | 74155  |
| C1 | 5974 | adipose | Arntl              | 11865  |
| C1 | 5982 | adipose | Rab3gap1           | 226407 |
| C1 | 5991 | adipose | Tsc22d2            | 72033  |
| C1 | 6002 | adipose | Med24              | 23989  |
| C1 | 6019 | adipose | Gdap10             | 14546  |
| C1 | 6063 | adipose | Kif21a             | 16564  |
| C1 | 6092 | adipose | Phlda3             | 27280  |
| C1 | 6098 | adipose | Ncf4               | 17972  |
| C1 | 6218 | adipose | Hnrnpc             | 15381  |
| C1 | 6353 | adipose | Spata13            | 219140 |
| C1 | 6384 | adipose | Rbm12              | 75710  |
| C1 | 6386 | adipose | Por                | 18984  |
| C1 | 6393 | adipose | 3110043O21Rik      | 73205  |
| C1 | 6564 | adipose | Cebpd              | 12609  |
| C1 | 6614 | adipose | Cd300lg            | 52685  |
| C1 | 6616 | adipose | Prmt3              | 71974  |
| C1 | 6621 | adipose | Zfp521             | 225207 |
| C1 | 6716 | adipose | Cd180              | 17079  |
| C1 | 6733 | adipose | Mfng               | 17305  |
| C1 | 6771 | adipose | Insc               | 233752 |
| C1 | 6774 | adipose | Cilp               | 214425 |
| C1 | 6921 | adipose | Olfml1             | 244198 |
| C1 | 6935 | adipose | Arsj               | 271970 |
| C1 | 6959 | adipose | Slc1a5             | 20514  |
| C1 | 6994 | adipose | Glul               | 14645  |
| C1 | 7012 | adipose | Dennd4a            | 102442 |
| C1 | 7029 | adipose | MMT00072012        |        |
| C1 | 7057 | adipose | Stk10              | 20868  |
| C1 | 7136 | adipose | Id3                | 15903  |
| C1 | 7143 | adipose | Cxcr7              | 12778  |
| C1 | 7163 | adipose | Ptplb              | 70757  |
| C1 | 7396 | adipose | Lao1               | 100470 |
| C1 | 7400 | adipose | Cars2              | 71941  |
| C1 | 7479 | adipose | Mcf2l              | 17207  |
| C1 | 7480 | adipose | 4930506M07Rik      | 71653  |
| C1 | 7496 | adipose | Arsi               | 545260 |
| C1 | 7513 | adipose | Nr5a2              | 26424  |
| C1 | 7524 | adipose | Aldh4a1            | 212647 |
| C1 | 7546 | adipose | Ddhd1              | 114874 |
| C1 | 7550 | adipose | Rab11fip5          | 52055  |
| C1 | 7659 | adipose | Rab30              | 75985  |
| C1 | 7662 | adipose | Lyz1               | 17110  |
| C1 | 7756 | adipose | Edc3               | 353190 |

|    |      |         |               |        |
|----|------|---------|---------------|--------|
| C1 | 7791 | adipose | Dtx4          | 207521 |
| C1 | 7813 | adipose | Stac          | 20840  |
| C1 | 7842 | adipose | Pdk2          | 18604  |
| C1 | 7873 | adipose | Steap4        | 117167 |
| C1 | 7888 | adipose | Pigz          | 239827 |
| C1 | 7918 | adipose | Rtn4ip1       | 170728 |
| C1 | 8020 | adipose | Nope          | 56741  |
| C1 | 8088 | adipose | Negr1         | 320840 |
| C1 | 8127 | adipose | Hmg20b        | 15353  |
| C1 | 8234 | adipose | Tbpl1         | 237336 |
| C1 | 8252 | adipose | Plcl1         | 227120 |
| C1 | 8314 | adipose | Armc6         | 76813  |
| C1 | 8340 | adipose | Pde1a         | 18573  |
| C1 | 8399 | adipose | Herpud1       | 64209  |
| C1 | 8432 | adipose | Fgf18         | 14172  |
| C1 | 8439 | adipose | Slc25a33      | 70556  |
| C1 | 8524 | adipose | Cbr1          | 12408  |
| C1 | 8588 | adipose | Notch4        | 18132  |
| C1 | 8642 | adipose | Serpib9       | 20723  |
| C1 | 8652 | adipose | Krt7          | 110310 |
| C1 | 8658 | adipose | Fmo2          | 55990  |
| C1 | 8687 | adipose | AB041803      | 232685 |
| C1 | 8711 | adipose | 5430432M24Rik | 73847  |
| C1 | 8717 | adipose | Litaf         | 56722  |
| C1 | 8727 | adipose | Slc27a3       | 26568  |
| C1 | 8740 | adipose | Car5b         | 56078  |
| C1 | 8766 | adipose | Irs3          | 16369  |
| C1 | 8797 | adipose | Snrk          | 20623  |
| C1 | 8816 | adipose | Nfkbia        | 18035  |
| C1 | 8817 | adipose | Ptpn1         | 19246  |
| C1 | 8826 | adipose | 4933406C10Rik | 74076  |
| C1 | 8855 | adipose | Psph          | 100678 |
| C1 | 8882 | adipose | Adarb1        | 110532 |
| C1 | 8949 | adipose | Prkcd         | 18753  |
| C1 | 8980 | adipose | Plekhf1       | 72287  |
| C1 | 9097 | adipose | Endod1        | 71946  |
| C1 | 9157 | adipose | Txnrd1        | 50493  |
| C1 | 9175 | adipose | MMT00081793   |        |
| C1 | 9255 | adipose | Emp3          | 13732  |
| C1 | 9260 | adipose | Cmtm6         | 67213  |
| C1 | 9318 | adipose | C79267        | 212632 |
| C1 | 9330 | adipose | Tapt1         | 231225 |
| C1 | 9540 | adipose | Csnk1e        | 27373  |
| C1 | 9629 | adipose | Spnb3         | 20743  |
| C1 | 9651 | adipose | Cxxc5         | 67393  |
| C1 | 9655 | adipose | Sult2b1       | 54200  |
| C1 | 9658 | adipose | Abr           | 109934 |
| C1 | 9672 | adipose | Tmem101       | 76547  |
| C1 | 9829 | adipose | Stoml1        | 69106  |
| C1 | 9839 | adipose | Ift20         | 55978  |
| C1 | 9856 | adipose | Tnf           | 21926  |



|    |       |         |               |        |
|----|-------|---------|---------------|--------|
| C1 | 9899  | adipose | D13Wsu177e    | 28126  |
| C1 | 9910  | adipose | EG666644      | 666644 |
| C1 | 9926  | adipose | Snx18         | 170625 |
| C1 | 9934  | adipose | MMT00002304   |        |
| C1 | 9996  | adipose | Rassf9        | 237504 |
| C1 | 10073 | adipose | 2010321M09Rik | 69882  |
| C1 | 10112 | adipose | Kcns1         | 16538  |
| C1 | 10190 | adipose | Pcdh7         | 54216  |
| C1 | 10210 | adipose | Sgms1         | 208449 |
| C1 | 10215 | adipose | Nampt         | 59027  |
| C1 | 10273 | adipose | Gpt2          | 108682 |
| C1 | 10345 | adipose | Camkk1        | 55984  |
| C1 | 10395 | adipose | Abcg2         | 26357  |
| C1 | 10396 | adipose | MMT00072312   |        |
| C1 | 10408 | adipose | Per1          | 18626  |
| C1 | 10421 | adipose | MMT00016905   |        |
| C1 | 10499 | adipose | Camkk2        | 207565 |
| C1 | 10576 | adipose | Xrcc3         | 74335  |
| C1 | 10641 | adipose | Hpd1          | 242642 |
| C1 | 10663 | adipose | Sytl2         | 83671  |
| C1 | 10672 | adipose | BC031353      | 235493 |
| C1 | 10686 | adipose | MMT00001732   |        |
| C1 | 10712 | adipose | Fchsd2        | 207278 |
| C1 | 10733 | adipose | Kctd6         | 71393  |
| C1 | 10745 | adipose | Gale          | 74246  |
| C1 | 10775 | adipose | Slc16a1       | 20501  |
| C1 | 10808 | adipose | Rab711        | 226422 |
| C1 | 10851 | adipose | Tax1bp3       | 76281  |
| C1 | 10889 | adipose | Adamts15      | 235130 |
| C1 | 10901 | adipose | 2810051F02Rik | 72704  |
| C1 | 10941 | adipose | Pcdh18        | 73173  |
| C1 | 11002 | adipose | Smg5          | 229512 |
| C1 | 11056 | adipose | Surf4         | 20932  |
| C1 | 11259 | adipose | Ccdc69        | 52570  |
| C1 | 11340 | adipose | Syn2          | 20965  |
| C1 | 11393 | adipose | A830007P12Rik | 227612 |
| C1 | 11409 | adipose | Phf16         | 382207 |
| C1 | 11521 | adipose | Dnaja1        | 15502  |
| C1 | 11682 | adipose | Nutf2         | 68051  |
| C1 | 11718 | adipose | Nmb           | 68039  |
| C1 | 11740 | adipose | Cpm           | 70574  |
| C1 | 11761 | adipose | Ankrd37       | 654824 |
| C1 | 11817 | adipose | Dpysl3        | 22240  |
| C1 | 11820 | adipose | Abcg4         | 192663 |
| C1 | 11886 | adipose | Cep250        | 16328  |
| C1 | 11923 | adipose | Pde3b         | 18576  |
| C1 | 11926 | adipose | Ampd2         | 109674 |
| C1 | 11955 | adipose | Ccl6          | 20305  |
| C1 | 11957 | adipose | Elmod1        | 270162 |
| C1 | 11974 | adipose | 1700023B02Rik | 66935  |
| C1 | 12156 | adipose | Setd4         | 224440 |

|    |       |         |               |        |
|----|-------|---------|---------------|--------|
| C1 | 12157 | adipose | Gal3st4       | 330217 |
| C1 | 12204 | adipose | Ankmy2        | 217473 |
| C1 | 12208 | adipose | Pnpla7        | 241274 |
| C1 | 12225 | adipose | Tsr1          | 104662 |
| C1 | 12229 | adipose | Sash1         | 70097  |
| C1 | 12238 | adipose | Traf3         | 22031  |
| C1 | 12278 | adipose | Plxna4        | 243743 |
| C1 | 12281 | adipose | Tacc2         | 57752  |
| C1 | 12289 | adipose | Ext1          | 14042  |
| C1 | 12296 | adipose | Rrad          | 56437  |
| C1 | 12297 | adipose | Upk1b         | 22268  |
| C1 | 12299 | adipose | Thbs1         | 21825  |
| C1 | 12460 | adipose | Pnpla2        | 66853  |
| C1 | 12483 | adipose | 5133401N09Rik | 75731  |
| C1 | 12489 | adipose | Wdr8          | 59002  |
| C1 | 12619 | adipose | Igf2r         | 16004  |
| C1 | 12707 | adipose | Dmrt2         | 226049 |
| C1 | 12761 | adipose | Tsc22d3       | 14605  |
| C1 | 12778 | adipose | 1700024P16Rik | 242594 |
| C1 | 12799 | adipose | Spon2         | 100689 |
| C1 | 12823 | adipose | Rab3il1       | 74760  |
| C1 | 12834 | adipose | Fabp7         | 12140  |
| C1 | 12864 | adipose | Myh10         | 77579  |
| C1 | 12904 | adipose | MMT00040704   | 676923 |
| C1 | 12905 | adipose | Nfil3         | 18030  |
| C1 | 12908 | adipose | Jdp2          | 81703  |
| C1 | 12926 | adipose | Lrmp          | 16970  |
| C1 | 12934 | adipose | Rbp7          | 63954  |
| C1 | 12974 | adipose | Slc1a6        | 20513  |
| C1 | 13028 | adipose | Mesp1         | 17292  |
| C1 | 13049 | adipose | Sh3tc1        | 231147 |
| C1 | 13164 | adipose | Il4ra         | 16190  |
| C1 | 13181 | adipose | Lcp2          | 16822  |
| C1 | 13238 | adipose | Nr1h3         | 22259  |
| C1 | 13253 | adipose | Mtvr2         | 17826  |
| C1 | 13266 | adipose | Man1c1        | 230815 |
| C1 | 13269 | adipose | MMT00039476   |        |
| C1 | 13289 | adipose | Dusp10        | 63953  |
| C1 | 13377 | adipose | Nod1          | 107607 |
| C1 | 13449 | adipose | Tmem103       | 72341  |
| C1 | 13471 | adipose | Cln8          | 26889  |
| C1 | 13489 | adipose | D230025D16Rik | 234678 |
| C1 | 13491 | adipose | Plk2          | 20620  |
| C1 | 13564 | adipose | Qrs1          | 76563  |
| C1 | 13630 | adipose | Cdkn1a        | 12575  |
| C1 | 13758 | adipose | Ubtd2         | 327900 |
| C1 | 13839 | adipose | Gypc          | 71683  |
| C1 | 13954 | adipose | Chst1         | 76969  |
| C1 | 13964 | adipose | Lpcat2        | 270084 |
| C1 | 13982 | adipose | Tnfaip6       | 21930  |
| C1 | 14100 | adipose | Ccnk          | 12454  |

|    |       |         |               |        |
|----|-------|---------|---------------|--------|
| C1 | 14102 | adipose | Evi2a         | 14017  |
| C1 | 14117 | adipose | C1qb          | 12260  |
| C1 | 14142 | adipose | MMT00021961   |        |
| C1 | 14237 | adipose | Rac2          | 19354  |
| C1 | 14261 | adipose | 2310066E14Rik | 75687  |
| C1 | 14263 | adipose | Arrdc3        | 105171 |
| C1 | 14358 | adipose | Wdr1          | 22388  |
| C1 | 14408 | adipose | 1100001H23Rik | 66857  |
| C1 | 14418 | adipose | Vcan          | 13003  |
| C1 | 14431 | adipose | Piwil1        | 57749  |
| C1 | 14524 | adipose | Rarres2       | 71660  |
| C1 | 14546 | adipose | 1810011H11Rik | 69069  |
| C1 | 14621 | adipose | Six4          | 20474  |
| C1 | 14657 | adipose | Mefv          | 54483  |
| C1 | 14737 | adipose | Cldn12        | 64945  |
| C1 | 14815 | adipose | Lpin3         | 64899  |
| C1 | 14894 | adipose | G0s2          | 14373  |
| C1 | 14917 | adipose | Gjb5          | 14622  |
| C1 | 14966 | adipose | Ddx51         | 69663  |
| C1 | 15000 | adipose | Tbx18         | 76365  |
| C1 | 15062 | adipose | P2ry5         | 67168  |
| C1 | 15160 | adipose | Vezf1         | 22344  |
| C1 | 15161 | adipose | Ppp4r1        | 70351  |
| C1 | 15273 | adipose | Relb          | 19698  |
| C1 | 15303 | adipose | Spcs3         | 76687  |
| C1 | 15316 | adipose | MMT00077385   |        |
| C1 | 15322 | adipose | Rasl12        | 70784  |
| C1 | 15360 | adipose | Tcf3          | 209446 |
| C1 | 15367 | adipose | Vegfc         | 22341  |
| C1 | 15414 | adipose | Arhgap18      | 73910  |
| C1 | 15483 | adipose | Il17rb        | 50905  |
| C1 | 15522 | adipose | 1810011O10Rik | 69068  |
| C1 | 15533 | adipose | Olfml2b       | 320078 |
| C1 | 15560 | adipose | Lrrc25        | 211228 |
| C1 | 15566 | adipose | Snn           | 20621  |
| C1 | 15578 | adipose | Lrrc3b        | 218763 |
| C1 | 15631 | adipose | Lpin1         | 14245  |
| C1 | 15709 | adipose | Tceal1        | 237052 |
| C1 | 15720 | adipose | Trp53i11      | 277414 |
| C1 | 15743 | adipose | Hoxc6         | 15425  |
| C1 | 15801 | adipose | Efna2         | 13637  |
| C1 | 15883 | adipose | Tulp3         | 22158  |
| C1 | 15896 | adipose | Pdgfrb        | 18596  |
| C1 | 15937 | adipose | Adamts4       | 240913 |
| C1 | 16047 | adipose | Irf8          | 15900  |
| C1 | 16073 | adipose | Car11         | 12348  |
| C1 | 16080 | adipose | Prkcdp        | 109042 |
| C1 | 16093 | adipose | 4732473B16Rik | 100342 |
| C1 | 16131 | adipose | Ptpre         | 19267  |
| C1 | 16147 | adipose | Tlr2          | 24088  |
| C1 | 16179 | adipose | Gulo          | 268756 |

|    |       |         |               |        |
|----|-------|---------|---------------|--------|
| C1 | 16208 | adipose | Ppara         | 19013  |
| C1 | 16284 | adipose | Rasl11a       | 68895  |
| C1 | 16294 | adipose | Chst7         | 60322  |
| C1 | 16363 | adipose | Adh5          | 11532  |
| C1 | 16379 | adipose | Tppp3         | 67971  |
| C1 | 16454 | adipose | 2310038H17Rik | 67099  |
| C1 | 16474 | adipose | Bhlhb2        | 20893  |
| C1 | 16479 | adipose | Pcsk7         | 18554  |
| C1 | 16492 | adipose | Hk2           | 15277  |
| C1 | 16502 | adipose | Chsy1         | 269941 |
| C1 | 16510 | adipose | Tspyl4        | 72480  |
| C1 | 16515 | adipose | Gramd4        | 223752 |
| C1 | 16571 | adipose | Pqlc1         | 66943  |
| C1 | 16607 | adipose | Gpx2          | 14776  |
| C1 | 16615 | adipose | Chdh          | 218865 |
| C1 | 16719 | adipose | Slc43a3       | 58207  |
| C1 | 16776 | adipose | 1110032O16Rik | 68742  |
| C1 | 16811 | adipose | Rere          | 68703  |
| C1 | 16823 | adipose | Inhbb         | 16324  |
| C1 | 16859 | adipose | 0610007L01Rik | 71667  |
| C1 | 16954 | adipose | Sh3glb1       | 54673  |
| C1 | 17078 | adipose | Syde2         | 214804 |
| C1 | 17109 | adipose | C430049B03Rik | 72575  |
| C1 | 17178 | adipose | Ifnar2        | 15976  |
| C1 | 17223 | adipose | 4933426M11Rik | 217684 |
| C1 | 17233 | adipose | Nmur1         | 14767  |
| C1 | 17243 | adipose | Bcl6b         | 12029  |
| C1 | 17342 | adipose | Dhx32         | 101437 |
| C1 | 17385 | adipose | Asah3         | 171168 |
| C1 | 17393 | adipose | MMT00063804   |        |
| C1 | 17406 | adipose | 4933428G09Rik | 66768  |
| C1 | 17422 | adipose | Dctd          | 320685 |
| C1 | 17525 | adipose | Ctgf          | 14219  |
| C1 | 17542 | adipose | MMT00044805   | 240219 |
| C1 | 17583 | adipose | Per2          | 18627  |
| C1 | 17584 | adipose | F11r          | 16456  |
| C1 | 17600 | adipose | Kcnq5         | 226922 |
| C1 | 17621 | adipose | D930001I22Rik | 228859 |
| C1 | 17622 | adipose | Foxo1         | 56458  |
| C1 | 17694 | adipose | Ppp1r14b      | 18938  |
| C1 | 17720 | adipose | Rap2b         | 74012  |
| C1 | 17752 | adipose | Chac1         | 69065  |
| C1 | 17776 | adipose | BC043118      | 224273 |
| C1 | 17827 | adipose | Klhl13        | 67455  |
| C1 | 17840 | adipose | 1110029L17Rik | 68722  |
| C1 | 17862 | adipose | Fbxo21        | 231670 |
| C1 | 17884 | adipose | Lnx2          | 140887 |
| C1 | 17909 | adipose | Mesdc1        | 80889  |
| C1 | 17940 | adipose | Zfp706        | 68036  |
| C1 | 18037 | adipose | Klf9          | 16601  |
| C1 | 18083 | adipose | Gadd45a       | 13197  |

|    |       |         |                    |           |
|----|-------|---------|--------------------|-----------|
| C1 | 18148 | adipose | Cables1            | 63955     |
| C1 | 18151 | adipose | Naip2              | 17948     |
| C1 | 18179 | adipose | Dbp                | 13170     |
| C1 | 18271 | adipose | MMT00007507        |           |
| C1 | 18359 | adipose | Otop2              | 237987    |
| C1 | 18384 | adipose | Klf6               | 23849     |
| C1 | 18388 | adipose | Lnx1               | 16924     |
| C1 | 18427 | adipose | Serpib1a           | 66222     |
| C1 | 18439 | adipose | Cd209f             | 69142     |
| C1 | 18496 | adipose | Mbd4               | 17193     |
| C1 | 18498 | adipose | Slc5a6             | 330064    |
| C1 | 18552 | adipose | Nr2c2ap            | 75692     |
| C1 | 18555 | adipose | Sdcbp2             | 228765    |
| C1 | 18594 | adipose | 1200002N14Rik      | 71712     |
| C1 | 18611 | adipose | C1qtnf3            | 81799     |
| C1 | 18655 | adipose | Angpt2             | 11601     |
| C1 | 18713 | adipose | 3110037I16Rik      | 73172     |
| C1 | 18876 | adipose | Klf16              | 118445    |
| C1 | 18983 | adipose | lfrd2              | 15983     |
| C1 | 18984 | adipose | Pias3              | 229615    |
| C1 | 19040 | adipose | Cdk2ap1            | 13445     |
| C1 | 19063 | adipose | Evl                | 14026     |
| C1 | 19077 | adipose | Has2               | 15117     |
| C1 | 19204 | adipose | Prr13              | 66151     |
| C1 | 19216 | adipose | Bik                | 12124     |
| C1 | 19234 | adipose | Nrg4               | 83961     |
| C1 | 19262 | adipose | Cd274              | 60533     |
| C1 | 19282 | adipose | Tbx3               | 21386     |
| C1 | 19451 | adipose | Armc7              | 276905    |
| C1 | 19487 | adipose | Adh5               | 11532     |
| C1 | 19556 | adipose | Efna1              | 13636     |
| C1 | 19573 | adipose | Serpine1           | 18787     |
| C1 | 19621 | adipose | Cldn5              | 12741     |
| C1 | 19670 | adipose | Fbxl14             | 101358    |
| C1 | 19728 | adipose | 1110007L15Rik      | 67604     |
| C1 | 19734 | adipose | Dchs1              | 233651    |
| C1 | 19757 | adipose | Fkbp5              | 14229     |
| C1 | 19794 | adipose | Rgs2               | 19735     |
| C1 | 19798 | adipose | Tnk2               | 51789     |
| C1 | 19812 | adipose | Armcx2             | 67416     |
| C1 | 19826 | adipose | Nanp               | 67311     |
| C1 | 19851 | adipose | Gnb4               | 14696     |
| C1 | 19982 | adipose | ENSMUSG00000071036 | 100038711 |
| C1 | 20149 | adipose | Cabyr              | 71132     |
| C1 | 20150 | adipose | Ptpcr              | 19264     |
| C1 | 20230 | adipose | Ppp1r14b           | 18938     |
| C1 | 20333 | adipose | Calca              | 12310     |
| C1 | 20337 | adipose | St6galnac4         | 20448     |
| C1 | 20343 | adipose | Ttc19              | 72795     |
| C1 | 20361 | adipose | Mttr14             | 97287     |
| C1 | 20363 | adipose | Dcun1d2            | 102323    |

|    |       |         |               |        |
|----|-------|---------|---------------|--------|
| C1 | 20381 | adipose | Vtn           | 22370  |
| C1 | 20413 | adipose | Wdr86         | 269633 |
| C1 | 20431 | adipose | Slc7a7        | 20540  |
| C1 | 20461 | adipose | H2-Ab1        | 14961  |
| C1 | 20485 | adipose | 6430520M22Rik | 319716 |
| C1 | 20500 | adipose | 2810441K11Rik | 68642  |
| C1 | 20534 | adipose | Stk24         | 223255 |
| C1 | 20537 | adipose | Mmp13         | 17386  |
| C1 | 20726 | adipose | Ei24          | 13663  |
| C1 | 20907 | adipose | Lims2         | 225341 |
| C1 | 20983 | adipose | Hlx           | 15284  |
| C1 | 21019 | adipose | Picalm        | 233489 |
| C1 | 21030 | adipose | Ccdc80        | 67896  |
| C1 | 21039 | adipose | Pcnx12        | 270109 |
| C1 | 21062 | adipose | Rpl7l1        | 66229  |
| C1 | 21102 | adipose | Cmtm7         | 102545 |
| C1 | 21134 | adipose | Ppp2r2a       | 71978  |
| C1 | 21142 | adipose | Gm129         | 229599 |
| C1 | 21167 | adipose | Irf5          | 27056  |
| C1 | 21253 | adipose | MMT00068187   |        |
| C1 | 21331 | adipose | Slc10a6       | 75750  |
| C1 | 21354 | adipose | Xpa           | 22590  |
| C1 | 21380 | adipose | Ier5          | 15939  |
| C1 | 21381 | adipose | Rilpl2        | 80291  |
| C1 | 21465 | adipose | Nxn           | 18230  |
| C1 | 21662 | adipose | A530088I07Rik | 212167 |
| C1 | 21733 | adipose | Rhebl1        | 69159  |
| C1 | 21750 | adipose | Rab31         | 106572 |
| C1 | 21849 | adipose | Icam2         | 15896  |
| C1 | 21863 | adipose | Dok2          | 13449  |
| C1 | 21889 | adipose | Mgat3         | 17309  |
| C1 | 21975 | adipose | MMT00008417   |        |
| C1 | 22103 | adipose | Hvcn1         | 74096  |
| C1 | 22106 | adipose | Mmp15         | 17388  |
| C1 | 22151 | adipose | Plxnd1        | 67784  |
| C1 | 22199 | adipose | Acsm5         | 272428 |
| C1 | 22213 | adipose | Adora1        | 11539  |
| C1 | 22290 | adipose | Tubb2a        | 22151  |
| C1 | 22403 | adipose | Bank1         | 242248 |
| C1 | 22407 | adipose | Rhbdf2        | 217344 |
| C1 | 22435 | adipose | Tmem98        | 103743 |
| C1 | 22476 | adipose | Tspan4        | 64540  |
| C1 | 22560 | adipose | Gpr56         | 14766  |
| C1 | 22621 | adipose | Cklf          | 75458  |
| C1 | 22647 | adipose | Pkib          | 18768  |
| C1 | 22688 | adipose | 4930432K21Rik | 74666  |
| C1 | 22852 | adipose | Nepn          | 66650  |
| C1 | 22860 | adipose | Dtx2          | 74198  |
| C1 | 22876 | adipose | Sash3         | 74131  |
| C1 | 22880 | adipose | Slc45a4       | 106068 |
| C1 | 22989 | adipose | Lmcd1         | 30937  |

|    |       |         |               |        |
|----|-------|---------|---------------|--------|
| C1 | 23201 | adipose | S1pr1         | 13609  |
| C1 | 23247 | adipose | Ercc1         | 13870  |
| C1 | 23274 | adipose | 1700054O13Rik | 67334  |
| C1 | 23351 | adipose | Zfp598        | 213753 |
| C1 | 23377 | adipose | Pdxk          | 216134 |
| C1 | 23457 | adipose | Selenbp2      | 20342  |
| C1 | 23463 | adipose | Gimap1        | 16205  |
| C1 | 23548 | adipose | Crtac1        | 72832  |
| C1 | 23584 | adipose | Adamts5       | 23794  |
| C1 | 23663 | adipose | Dab2ip        | 69601  |
| C1 | 23682 | adipose | Trim8         | 93679  |
| C1 | 131   | liver   | Irx3          | 16373  |
| C1 | 147   | liver   | Uox           | 22262  |
| C1 | 192   | liver   | Eif3d         | 55944  |
| C1 | 212   | liver   | 1700026J04Rik | 71864  |
| C1 | 213   | liver   | Rgs16         | 19734  |
| C1 | 250   | liver   | Tubb2a-ps2    | 627110 |
| C1 | 252   | liver   | C730027P07Rik | 245050 |
| C1 | 269   | liver   | Tuba1b        | 22143  |
| C1 | 309   | liver   | Slc25a11      | 67863  |
| C1 | 337   | liver   | Rasgef1b      | 320292 |
| C1 | 339   | liver   | Hmgcs1        | 208715 |
| C1 | 354   | liver   | MMT00007996   |        |
| C1 | 402   | liver   | Timp3         | 21859  |
| C1 | 407   | liver   | Serpina6      | 12401  |
| C1 | 413   | liver   | Acy1          | 109652 |
| C1 | 415   | liver   | Ypel2         | 77864  |
| C1 | 433   | liver   | Pla2g12b      | 69836  |
| C1 | 437   | liver   | Ndrp1         | 17988  |
| C1 | 470   | liver   | MMT00076063   |        |
| C1 | 530   | liver   | Mest          | 17294  |
| C1 | 534   | liver   | Plrg1         | 53317  |
| C1 | 547   | liver   | Mknk2         | 17347  |
| C1 | 563   | liver   | D4Bwg0951e    | 52829  |
| C1 | 577   | liver   | Rrp12         | 107094 |
| C1 | 604   | liver   | Ppp1r15b      | 108954 |
| C1 | 609   | liver   | MMT00060868   |        |
| C1 | 620   | liver   | Prpf31        | 68988  |
| C1 | 633   | liver   | Ap1b1         | 11764  |
| C1 | 659   | liver   | Bace1         | 23821  |
| C1 | 662   | liver   | Mid1ip1       | 68041  |
| C1 | 719   | liver   | Usp2          | 53376  |
| C1 | 739   | liver   | Ric8b         | 237422 |
| C1 | 771   | liver   | Zbtb45        | 232879 |
| C1 | 784   | liver   | Actg1         | 11465  |
| C1 | 793   | liver   | Morc3         | 338467 |
| C1 | 827   | liver   | Flcn          | 216805 |
| C1 | 849   | liver   | Pxmp4         | 59038  |
| C1 | 864   | liver   | MMT00031865   | 329122 |
| C1 | 865   | liver   | Npc1          | 18145  |
| C1 | 937   | liver   | Pi4ka         | 224020 |

|    |      |       |               |        |
|----|------|-------|---------------|--------|
| C1 | 958  | liver | Ppp2r5e       | 26932  |
| C1 | 961  | liver | Rwdd4a        | 192174 |
| C1 | 972  | liver | Sri           | 109552 |
| C1 | 1026 | liver | Ftsj2         | 68017  |
| C1 | 1031 | liver | Uros          | 22276  |
| C1 | 1145 | liver | Arhgap6       | 11856  |
| C1 | 1201 | liver | Ptger3        | 19218  |
| C1 | 1244 | liver | Tmem150       | 232086 |
| C1 | 1257 | liver | Slc25a45      | 107375 |
| C1 | 1276 | liver | Col4a1        | 12826  |
| C1 | 1310 | liver | Cabc1         | 67426  |
| C1 | 1326 | liver | Tox           | 252838 |
| C1 | 1362 | liver | Avpr1a        | 54140  |
| C1 | 1363 | liver | BC021767      | 545551 |
| C1 | 1424 | liver | Dapk1         | 69635  |
| C1 | 1438 | liver | Dclre1b       | 140917 |
| C1 | 1445 | liver | Ssbp2         | 66970  |
| C1 | 1453 | liver | Gfod2         | 70575  |
| C1 | 1501 | liver | Rnf145        | 74315  |
| C1 | 1537 | liver | 1700052K11Rik | 73431  |
| C1 | 1585 | liver | Mif4gd        | 69674  |
| C1 | 1615 | liver | Timm10        | 30059  |
| C1 | 1646 | liver | Slc15a4       | 100561 |
| C1 | 1650 | liver | Ctdsp2        | 52468  |
| C1 | 1655 | liver | Mgrn1         | 17237  |
| C1 | 1709 | liver | Mt2           | 17750  |
| C1 | 1719 | liver | Trak2         | 70827  |
| C1 | 1736 | liver | Elovl3        | 12686  |
| C1 | 1767 | liver | BC016495      | 225994 |
| C1 | 1772 | liver | Stampb        | 70527  |
| C1 | 1790 | liver | Hic1          | 15248  |
| C1 | 1793 | liver | D3Ucla1       | 28146  |
| C1 | 1805 | liver | Tmem204       | 407831 |
| C1 | 1827 | liver | Gnb1l         | 13972  |
| C1 | 1829 | liver | MMT00030026   |        |
| C1 | 1853 | liver | Stat5a        | 20850  |
| C1 | 1876 | liver | Amdhd1        | 71761  |
| C1 | 1877 | liver | Amica1        | 270152 |
| C1 | 1892 | liver | A1bg          | 117586 |
| C1 | 1911 | liver | 1300007F04Rik | 67477  |
| C1 | 1935 | liver | 2810439F02Rik | 72747  |
| C1 | 1941 | liver | MMT00079618   |        |
| C1 | 2003 | liver | Ppapdc1       | 71910  |
| C1 | 2011 | liver | Slc2a5        | 56485  |
| C1 | 2013 | liver | Il15ra        | 16169  |
| C1 | 2050 | liver | Lpl           | 16956  |
| C1 | 2054 | liver | Acaa1a        | 113868 |
| C1 | 2110 | liver | Gtf2ird1      | 57080  |
| C1 | 2126 | liver | Dgat2         | 67800  |
| C1 | 2150 | liver | Rragc         | 54170  |
| C1 | 2256 | liver | Serpina9      | 71907  |



|    |      |       |               |        |
|----|------|-------|---------------|--------|
| C1 | 2262 | liver | Papss2        | 23972  |
| C1 | 2276 | liver | Nelf          | 56876  |
| C1 | 2294 | liver | AU040829      | 216831 |
| C1 | 2305 | liver | 2610002M06Rik | 67028  |
| C1 | 2317 | liver | Ankar         | 319695 |
| C1 | 2322 | liver | Tuba4a        | 22145  |
| C1 | 2334 | liver | Gch1          | 14528  |
| C1 | 2384 | liver | Micalcl       | 70877  |
| C1 | 2399 | liver | MMT00060167   |        |
| C1 | 2447 | liver | Ubac1         | 98766  |
| C1 | 2471 | liver | Ccdc134       | 76457  |
| C1 | 2483 | liver | Gmeb1         | 56809  |
| C1 | 2507 | liver | Oaf           | 102644 |
| C1 | 2523 | liver | Pgs1          | 74451  |
| C1 | 2529 | liver | Hmcn2         | 665700 |
| C1 | 2615 | liver | EG624862      | 624862 |
| C1 | 2636 | liver | Tars          | 110960 |
| C1 | 2651 | liver | Ttc7          | 225049 |
| C1 | 2681 | liver | Hectd1        | 207304 |
| C1 | 2725 | liver | Gm1614        | 381148 |
| C1 | 2730 | liver | Bcor          | 71458  |
| C1 | 2756 | liver | Pmvk          | 68603  |
| C1 | 2766 | liver | Elp4          | 77766  |
| C1 | 2794 | liver | Map3k6        | 53608  |
| C1 | 2823 | liver | Sipa1l2       | 244668 |
| C1 | 2829 | liver | Lrfn3         | 233067 |
| C1 | 2850 | liver | Slc16a6       | 104681 |
| C1 | 2862 | liver | MMT00068885   |        |
| C1 | 2868 | liver | Hbp1          | 73389  |
| C1 | 2881 | liver | Hlf           | 217082 |
| C1 | 2917 | liver | Scly          | 50880  |
| C1 | 3037 | liver | MMT00017312   |        |
| C1 | 3040 | liver | Bcl3          | 12051  |
| C1 | 3079 | liver | Gstt3         | 103140 |
| C1 | 3097 | liver | Ppp1r3g       | 76487  |
| C1 | 3135 | liver | Gcdh          | 270076 |
| C1 | 3149 | liver | 1190005I06Rik | 68918  |
| C1 | 3170 | liver | Mcart1        | 230125 |
| C1 | 3196 | liver | Tat           | 234724 |
| C1 | 3201 | liver | Ptcd2         | 68927  |
| C1 | 3209 | liver | Lmna          | 16905  |
| C1 | 3214 | liver | Dnmt3b        | 13436  |
| C1 | 3222 | liver | Zbtb10        | 229055 |
| C1 | 3235 | liver | BC029214      | 227622 |
| C1 | 3246 | liver | Prei4         | 74182  |
| C1 | 3253 | liver | Tbc1d20       | 67231  |
| C1 | 3259 | liver | Chrna6        | 11440  |
| C1 | 3309 | liver | Grpel2        | 17714  |
| C1 | 3326 | liver | Lysmd2        | 70082  |
| C1 | 3344 | liver | Rad1          | 19355  |
| C1 | 3357 | liver | Rev1          | 56210  |

|    |      |       |               |        |
|----|------|-------|---------------|--------|
| C1 | 3410 | liver | Paqr9         | 75552  |
| C1 | 3452 | liver | Ccrn4l        | 12457  |
| C1 | 3468 | liver | MMT00009124   |        |
| C1 | 3502 | liver | Gde1          | 56209  |
| C1 | 3559 | liver | 4933433P14Rik | 66787  |
| C1 | 3564 | liver | Spcs2         | 66624  |
| C1 | 3584 | liver | Foxp1         | 108655 |
| C1 | 3603 | liver | BC027231      | 212547 |
| C1 | 3631 | liver | Vps37b        | 330192 |
| C1 | 3652 | liver | Adm           | 11535  |
| C1 | 3686 | liver | Psmc9         | 67151  |
| C1 | 3720 | liver | Zbtb44        | 235132 |
| C1 | 3746 | liver | Osbpl5        | 79196  |
| C1 | 3789 | liver | 4833442J19Rik | 320204 |
| C1 | 3790 | liver | Mtss1         | 211401 |
| C1 | 3804 | liver | MMT00015534   |        |
| C1 | 3818 | liver | Cep192        | 70799  |
| C1 | 3838 | liver | Trim32        | 69807  |
| C1 | 3868 | liver | Ebpl          | 68177  |
| C1 | 3967 | liver | Tysnd1        | 71767  |
| C1 | 3980 | liver | Gkap1         | 56278  |
| C1 | 4084 | liver | Asah3l        | 230379 |
| C1 | 4090 | liver | Orai3         | 269999 |
| C1 | 4095 | liver | Trub2         | 227682 |
| C1 | 4106 | liver | MMT00041409   |        |
| C1 | 4192 | liver | Zranb1        | 360216 |
| C1 | 4201 | liver | Tubb2c        | 227613 |
| C1 | 4205 | liver | Rgs1          | 50778  |
| C1 | 4235 | liver | Pfkfb3        | 170768 |
| C1 | 4285 | liver | Dnajc19       | 67713  |
| C1 | 4286 | liver | Ptp4a1        | 19243  |
| C1 | 4298 | liver | St3gal1       | 20442  |
| C1 | 4327 | liver | Klf10         | 21847  |
| C1 | 4333 | liver | Sumo3         | 20610  |
| C1 | 4352 | liver | Rtn4rl1       | 237847 |
| C1 | 4369 | liver | Acot4         | 171282 |
| C1 | 4379 | liver | Glx           | 93692  |
| C1 | 4380 | liver | Smarca1       | 20587  |
| C1 | 4392 | liver | 1810055G02Rik | 72056  |
| C1 | 4463 | liver | Ncoa5         | 228869 |
| C1 | 4499 | liver | Enpp2         | 18606  |
| C1 | 4512 | liver | Esrra         | 26379  |
| C1 | 4534 | liver | Ndel1         | 83431  |
| C1 | 4551 | liver | Cyp2e1        | 13106  |
| C1 | 4576 | liver | Chchd7        | 66433  |
| C1 | 4590 | liver | Arhgap21      | 71435  |
| C1 | 4678 | liver | Kank1         | 107351 |
| C1 | 4686 | liver | BC021785      | 215928 |
| C1 | 4708 | liver | Traf3ip2      | 103213 |
| C1 | 4715 | liver | Tmem120a      | 215210 |
| C1 | 4797 | liver | Fbxo25        | 66822  |

|    |      |       |                    |        |
|----|------|-------|--------------------|--------|
| C1 | 4813 | liver | Agpat6             | 102247 |
| C1 | 4836 | liver | Gtf2h3             | 209357 |
| C1 | 4851 | liver | Gpn2               | 100210 |
| C1 | 4897 | liver | Ciao1              | 26371  |
| C1 | 4959 | liver | Optn               | 71648  |
| C1 | 4983 | liver | Rabgef1            | 56715  |
| C1 | 4988 | liver | 2400001E08Rik      | 66508  |
| C1 | 4993 | liver | Tsc22d1            | 21807  |
| C1 | 5027 | liver | Pde4b              | 18578  |
| C1 | 5048 | liver | Mgll               | 23945  |
| C1 | 5068 | liver | Afap1l2            | 226250 |
| C1 | 5120 | liver | Alkbh7             | 66400  |
| C1 | 5142 | liver | Eppk1              | 223650 |
| C1 | 5172 | liver | Sumo1              | 22218  |
| C1 | 5183 | liver | St5                | 76954  |
| C1 | 5185 | liver | Dus2l              | 66369  |
| C1 | 5187 | liver | Speer4f            | 70935  |
| C1 | 5224 | liver | MMT00071383        |        |
| C1 | 5247 | liver | Irak2              | 108960 |
| C1 | 5259 | liver | Mat1a              | 11720  |
| C1 | 5262 | liver | Mecp2              | 17257  |
| C1 | 5294 | liver | C730048C13Rik      | 319800 |
| C1 | 5296 | liver | Rnf181             | 66510  |
| C1 | 5313 | liver | 9630058J23Rik      | 226744 |
| C1 | 5334 | liver | MMT00021505        |        |
| C1 | 5345 | liver | MMT00023326        | 57435  |
| C1 | 5372 | liver | Tor1a              | 30931  |
| C1 | 5374 | liver | Chka               | 12660  |
| C1 | 5375 | liver | Sec23b             | 27054  |
| C1 | 5382 | liver | Fbn1               | 14118  |
| C1 | 5414 | liver | Etnk2              | 214253 |
| C1 | 5416 | liver | Jhdm1d             | 338523 |
| C1 | 5456 | liver | Rabgap1l           | 29809  |
| C1 | 5487 | liver | Palmd              | 114301 |
| C1 | 5492 | liver | MMT00039914        |        |
| C1 | 5569 | liver | Pdgfc              | 54635  |
| C1 | 5574 | liver | Hsd3b7             | 101502 |
| C1 | 5587 | liver | Rmnd5b             | 66089  |
| C1 | 5591 | liver | Igsf8              | 140559 |
| C1 | 5594 | liver | Erbp3              | 13867  |
| C1 | 5629 | liver | Als2               | 74018  |
| C1 | 5700 | liver | Tenc1              | 209039 |
| C1 | 5715 | liver | ENSMUSG00000052976 | 433237 |
| C1 | 5727 | liver | Camk2g             | 12325  |
| C1 | 5729 | liver | 2310016C08Rik      | 69573  |
| C1 | 5734 | liver | EG619653           | 619653 |
| C1 | 5791 | liver | Baiap2l1           | 66898  |
| C1 | 5802 | liver | Mad2l2             | 71890  |
| C1 | 5804 | liver | Thrsp              | 21835  |
| C1 | 5814 | liver | Nrbp2              | 223649 |
| C1 | 5831 | liver | Sh2b3              | 16923  |

|    |      |       |               |        |
|----|------|-------|---------------|--------|
| C1 | 5849 | liver | 2310031A18Rik | 69627  |
| C1 | 5856 | liver | Mfsd2         | 76574  |
| C1 | 5858 | liver | Itch          | 16396  |
| C1 | 5878 | liver | Iqgap2        | 544963 |
| C1 | 5889 | liver | Errfi1        | 74155  |
| C1 | 5892 | liver | MMT00038457   |        |
| C1 | 5934 | liver | S100a10       | 20194  |
| C1 | 5974 | liver | Arntl         | 11865  |
| C1 | 5994 | liver | Olfr609       | 259086 |
| C1 | 6002 | liver | Med24         | 23989  |
| C1 | 6019 | liver | Gdap10        | 14546  |
| C1 | 6023 | liver | Saa4          | 20211  |
| C1 | 6028 | liver | Alas1         | 11655  |
| C1 | 6030 | liver | As3mt         | 57344  |
| C1 | 6043 | liver | Cyp2ab1       | 224044 |
| C1 | 6048 | liver | Psmc9         | 67151  |
| C1 | 6070 | liver | D630003M21Rik | 228846 |
| C1 | 6073 | liver | Mthfd2        | 17768  |
| C1 | 6077 | liver | Pik3cb        | 74769  |
| C1 | 6096 | liver | Acot3         | 171281 |
| C1 | 6118 | liver | Slc1a4        | 55963  |
| C1 | 6171 | liver | Abtb2         | 99382  |
| C1 | 6197 | liver | Lss           | 16987  |
| C1 | 6211 | liver | Arhgap24      | 231532 |
| C1 | 6216 | liver | Gm944         | 381126 |
| C1 | 6260 | liver | MMT00002928   |        |
| C1 | 6268 | liver | Slc45a3       | 212980 |
| C1 | 6282 | liver | Them4         | 75778  |
| C1 | 6308 | liver | 2410075B13Rik | 223648 |
| C1 | 6338 | liver | Setd3         | 52690  |
| C1 | 6343 | liver | Slc20a1       | 20515  |
| C1 | 6370 | liver | Aqp8          | 11833  |
| C1 | 6377 | liver | D18Ert653e    | 52662  |
| C1 | 6380 | liver | 6330569M22Rik | 229707 |
| C1 | 6386 | liver | Por           | 18984  |
| C1 | 6394 | liver | Fbxo6         | 50762  |
| C1 | 6397 | liver | Slc2a9        | 117591 |
| C1 | 6490 | liver | Il1r1         | 16177  |
| C1 | 6523 | liver | Hapln1        | 12950  |
| C1 | 6542 | liver | Epor          | 13857  |
| C1 | 6544 | liver | A1790298      | 107239 |
| C1 | 6551 | liver | Slc35b4       | 58246  |
| C1 | 6564 | liver | Cebpd         | 12609  |
| C1 | 6589 | liver | Mafb          | 16658  |
| C1 | 6639 | liver | Fads3         | 60527  |
| C1 | 6657 | liver | Irf6          | 54139  |
| C1 | 6661 | liver | Hdac1         | 433759 |
| C1 | 6675 | liver | Sfrs4         | 57317  |
| C1 | 6696 | liver | Zfp740        | 68744  |
| C1 | 6705 | liver | Sorbs2        | 234214 |
| C1 | 6714 | liver | Lima1         | 65970  |

|    |      |       |               |        |
|----|------|-------|---------------|--------|
| C1 | 6756 | liver | Sds           | 231691 |
| C1 | 6771 | liver | Insc          | 233752 |
| C1 | 6788 | liver | Psen2         | 19165  |
| C1 | 6798 | liver | Tcea3         | 21401  |
| C1 | 6823 | liver | Yars          | 107271 |
| C1 | 6928 | liver | Klhl8         | 246293 |
| C1 | 6966 | liver | Mia3          | 338366 |
| C1 | 6975 | liver | Wdr67         | 210544 |
| C1 | 6990 | liver | Nr1i2         | 18171  |
| C1 | 7061 | liver | Spsb3         | 79043  |
| C1 | 7066 | liver | Agtr1b        | 11608  |
| C1 | 7095 | liver | Timm8a1       | 30058  |
| C1 | 7112 | liver | Apbb3         | 225372 |
| C1 | 7128 | liver | Gemin8        | 237221 |
| C1 | 7136 | liver | Id3           | 15903  |
| C1 | 7151 | liver | MMT00007982   |        |
| C1 | 7165 | liver | Nt5m          | 103850 |
| C1 | 7199 | liver | Wee1          | 22390  |
| C1 | 7308 | liver | Tmem52        | 69671  |
| C1 | 7397 | liver | MMT00020969   |        |
| C1 | 7407 | liver | Slc9a3r1      | 26941  |
| C1 | 7414 | liver | Clpx          | 270166 |
| C1 | 7457 | liver | Mrpl22        | 216767 |
| C1 | 7482 | liver | Tdg           | 21665  |
| C1 | 7510 | liver | Gins3         | 78833  |
| C1 | 7520 | liver | MMT00070057   |        |
| C1 | 7560 | liver | Cyp2r1        | 244209 |
| C1 | 7619 | liver | Pik3ip1       | 216505 |
| C1 | 7734 | liver | Cyp2b23       | 243881 |
| C1 | 7745 | liver | C330016O10Rik | 212706 |
| C1 | 7751 | liver | Sgk2          | 27219  |
| C1 | 7770 | liver | Galt          | 14430  |
| C1 | 7795 | liver | MMT00071427   |        |
| C1 | 7839 | liver | Asl           | 109900 |
| C1 | 7842 | liver | Pdk2          | 18604  |
| C1 | 7862 | liver | Cpsf4l        | 52670  |
| C1 | 7901 | liver | Slc41a1       | 98396  |
| C1 | 7944 | liver | Al132487      | 104910 |
| C1 | 7954 | liver | Ccdc12        | 72654  |
| C1 | 7963 | liver | Rxrg          | 20183  |
| C1 | 7973 | liver | Lgals9        | 16859  |
| C1 | 8054 | liver | Smarca2       | 67155  |
| C1 | 8084 | liver | Psmc10        | 53380  |
| C1 | 8156 | liver | Tll1          | 319953 |
| C1 | 8200 | liver | Dfna5h        | 54722  |
| C1 | 8237 | liver | Caprin1       | 53872  |
| C1 | 8255 | liver | Prkar1a       | 19084  |
| C1 | 8268 | liver | Kctd7         | 212919 |
| C1 | 8328 | liver | Klhdc8a       | 213417 |
| C1 | 8329 | liver | Pipox         | 19193  |
| C1 | 8342 | liver | Cwf1911       | 72502  |

|    |      |       |               |        |
|----|------|-------|---------------|--------|
| C1 | 8388 | liver | Zfyve21       | 68520  |
| C1 | 8399 | liver | Herpud1       | 64209  |
| C1 | 8404 | liver | Fa2h          | 338521 |
| C1 | 8408 | liver | Nr1i3         | 12355  |
| C1 | 8428 | liver | Sorbs3        | 20410  |
| C1 | 8469 | liver | Sfrs6         | 67996  |
| C1 | 8541 | liver | Tubb5         | 22154  |
| C1 | 8595 | liver | MMT00019109   |        |
| C1 | 8639 | liver | Map1lc3b      | 67443  |
| C1 | 8641 | liver | Slc7a2        | 11988  |
| C1 | 8658 | liver | Fmo2          | 55990  |
| C1 | 8683 | liver | 3110002H16Rik | 76482  |
| C1 | 8711 | liver | 5430432M24Rik | 73847  |
| C1 | 8717 | liver | Litaf         | 56722  |
| C1 | 8747 | liver | Nme6          | 54369  |
| C1 | 8787 | liver | Sdf2l1        | 64136  |
| C1 | 8797 | liver | Snrk          | 20623  |
| C1 | 8816 | liver | Nfkbia        | 18035  |
| C1 | 8843 | liver | Eil2          | 192657 |
| C1 | 8867 | liver | Shcbp1        | 20419  |
| C1 | 8870 | liver | Arid3a        | 13496  |
| C1 | 8882 | liver | Adarb1        | 110532 |
| C1 | 8896 | liver | Fasn          | 14104  |
| C1 | 8965 | liver | Ahcy          | 269378 |
| C1 | 8980 | liver | Plekhf1       | 72287  |
| C1 | 9033 | liver | 1810013L24Rik | 69053  |
| C1 | 9052 | liver | A730037C10Rik | 320604 |
| C1 | 9065 | liver | Reep4         | 72549  |
| C1 | 9127 | liver | Mtfmt         | 69606  |
| C1 | 9154 | liver | Tfg           | 21787  |
| C1 | 9172 | liver | Tmem131       | 56030  |
| C1 | 9181 | liver | 1700060H10Rik | 73390  |
| C1 | 9213 | liver | Osgin1        | 71839  |
| C1 | 9260 | liver | Cmtm6         | 67213  |
| C1 | 9275 | liver | Aass          | 30956  |
| C1 | 9309 | liver | MMT00035904   |        |
| C1 | 9379 | liver | Ypel2         | 77864  |
| C1 | 9406 | liver | Calcoco1      | 67488  |
| C1 | 9438 | liver | Pctk3         | 18557  |
| C1 | 9467 | liver | Aoah          | 27052  |
| C1 | 9476 | liver | 9130005N14Rik | 68303  |
| C1 | 9481 | liver | Ppl           | 19041  |
| C1 | 9495 | liver | Srms          | 20811  |
| C1 | 9507 | liver | Trip6         | 22051  |
| C1 | 9517 | liver | Med7          | 66213  |
| C1 | 9576 | liver | Polr1e        | 64424  |
| C1 | 9585 | liver | Neu3          | 50877  |
| C1 | 9587 | liver | Bri3bp        | 76809  |
| C1 | 9594 | liver | Asb13         | 142688 |
| C1 | 9610 | liver | Narf          | 67608  |
| C1 | 9630 | liver | 5830417C01Rik | 78825  |

|    |       |       |               |        |
|----|-------|-------|---------------|--------|
| C1 | 9635  | liver | Rabggtb       | 19352  |
| C1 | 9686  | liver | Nek4          | 23955  |
| C1 | 9718  | liver | Fmo5          | 14263  |
| C1 | 9763  | liver | Tuba3b        | 22147  |
| C1 | 9831  | liver | Nedd4l        | 83814  |
| C1 | 9867  | liver | Psrc1         | 56742  |
| C1 | 9892  | liver | AU022252      | 230696 |
| C1 | 9907  | liver | 4932442K08Rik | 67544  |
| C1 | 9910  | liver | EG666644      | 666644 |
| C1 | 9913  | liver | Tbc1d25       | 209815 |
| C1 | 10029 | liver | Trak1         | 67095  |
| C1 | 10042 | liver | MMT00028111   |        |
| C1 | 10088 | liver | Ddc           | 13195  |
| C1 | 10140 | liver | Cdc2l6        | 78334  |
| C1 | 10166 | liver | Rhbdd2        | 215160 |
| C1 | 10207 | liver | MMT00012324   | 328192 |
| C1 | 10215 | liver | Nampt         | 59027  |
| C1 | 10384 | liver | Chic2         | 74277  |
| C1 | 10408 | liver | Per1          | 18626  |
| C1 | 10444 | liver | 1810020D17Rik | 66273  |
| C1 | 10468 | liver | Tspan33       | 232670 |
| C1 | 10483 | liver | Crot          | 74114  |
| C1 | 10486 | liver | 1300002K09Rik | 74152  |
| C1 | 10499 | liver | Camkk2        | 207565 |
| C1 | 10502 | liver | Axud1         | 215418 |
| C1 | 10541 | liver | Ap2a2         | 11772  |
| C1 | 10612 | liver | Slc24a6       | 170756 |
| C1 | 10621 | liver | 4833420G17Rik | 67392  |
| C1 | 10641 | liver | Hpd1          | 242642 |
| C1 | 10642 | liver | Ngef          | 53972  |
| C1 | 10712 | liver | Fchsd2        | 207278 |
| C1 | 10745 | liver | Gale          | 74246  |
| C1 | 10775 | liver | Slc16a1       | 20501  |
| C1 | 10802 | liver | Kcnn2         | 140492 |
| C1 | 10803 | liver | Wnt5a         | 22418  |
| C1 | 10842 | liver | Slc25a25      | 227731 |
| C1 | 10863 | liver | Tssc1         | 380752 |
| C1 | 10883 | liver | Pols          | 210106 |
| C1 | 10911 | liver | Mcl1          | 17210  |
| C1 | 10928 | liver | Arid1a        | 93760  |
| C1 | 11013 | liver | Zfand2b       | 68818  |
| C1 | 11024 | liver | MMT00049098   |        |
| C1 | 11056 | liver | Surf4         | 20932  |
| C1 | 11071 | liver | Pcbp1         | 23983  |
| C1 | 11075 | liver | Xrcc6bp1      | 68876  |
| C1 | 11093 | liver | Zdhhc1        | 70796  |
| C1 | 11102 | liver | Gtf2h2        | 23894  |
| C1 | 11129 | liver | Ankhd1        | 108857 |
| C1 | 11149 | liver | MMT00050488   |        |
| C1 | 11154 | liver | MMT00037611   |        |
| C1 | 11193 | liver | Tsc22d1       | 21807  |

|    |       |       |               |        |
|----|-------|-------|---------------|--------|
| C1 | 11233 | liver | Tef           | 21685  |
| C1 | 11240 | liver | Ppm1d         | 53892  |
| C1 | 11248 | liver | Glt1d1        | 319804 |
| C1 | 11356 | liver | Med27         | 68975  |
| C1 | 11412 | liver | Abcg5         | 27409  |
| C1 | 11436 | liver | Mapre1        | 13589  |
| C1 | 11444 | liver | Rnpep         | 215615 |
| C1 | 11447 | liver | Nr1h4         | 20186  |
| C1 | 11506 | liver | Rfxank        | 19727  |
| C1 | 11540 | liver | Ctps          | 51797  |
| C1 | 11545 | liver | Ppcs          | 106564 |
| C1 | 11574 | liver | Gne           | 50798  |
| C1 | 11576 | liver | Gm1381        | 384198 |
| C1 | 11599 | liver | Coq10b        | 67876  |
| C1 | 11614 | liver | Sult1e1       | 20860  |
| C1 | 11633 | liver | Ier3          | 15937  |
| C1 | 11662 | liver | Mre11a        | 17535  |
| C1 | 11724 | liver | Tuba3a        | 22144  |
| C1 | 11729 | liver | Ncr1          | 17086  |
| C1 | 11735 | liver | Thoc5         | 107829 |
| C1 | 11740 | liver | Cpm           | 70574  |
| C1 | 11741 | liver | Slc30a10      | 226781 |
| C1 | 11744 | liver | Ctnnb1        | 66642  |
| C1 | 11762 | liver | Ggt5          | 23887  |
| C1 | 11797 | liver | Sbk1          | 104175 |
| C1 | 11807 | liver | Fbxo31        | 76454  |
| C1 | 11808 | liver | Pck1          | 18534  |
| C1 | 11893 | liver | Cdc40         | 71713  |
| C1 | 11926 | liver | Ampd2         | 109674 |
| C1 | 11937 | liver | Snx10         | 71982  |
| C1 | 11949 | liver | Cldn3         | 12739  |
| C1 | 11984 | liver | N6amt2        | 68043  |
| C1 | 12038 | liver | Tnks1bp1      | 228140 |
| C1 | 12040 | liver | Commd10       | 69456  |
| C1 | 12059 | liver | 2700049P18Rik | 108900 |
| C1 | 12091 | liver | 1810015C04Rik | 66270  |
| C1 | 12114 | liver | Homer2        | 26557  |
| C1 | 12118 | liver | Mtrr          | 210009 |
| C1 | 12151 | liver | MMT00082650   |        |
| C1 | 12156 | liver | Setd4         | 224440 |
| C1 | 12165 | liver | Ppp2r1b       | 73699  |
| C1 | 12193 | liver | Aco2          | 11429  |
| C1 | 12204 | liver | Ankmy2        | 217473 |
| C1 | 12208 | liver | Pnpla7        | 241274 |
| C1 | 12256 | liver | Atp10d        | 231287 |
| C1 | 12298 | liver | Lad1          | 16763  |
| C1 | 12386 | liver | 4930579G24Rik | 75939  |
| C1 | 12417 | liver | Mtap7d1       | 245877 |
| C1 | 12420 | liver | Kihl21        | 242785 |
| C1 | 12433 | liver | 5033413D22Rik | 75973  |
| C1 | 12436 | liver | Serinc3       | 26943  |



|    |       |       |               |        |
|----|-------|-------|---------------|--------|
| C1 | 12460 | liver | Pnpla2        | 66853  |
| C1 | 12479 | liver | Ifrd1         | 15982  |
| C1 | 12484 | liver | Tcfap2e       | 332937 |
| C1 | 12489 | liver | Wdr8          | 59002  |
| C1 | 12513 | liver | Whsc2         | 24116  |
| C1 | 12553 | liver | Kpnb1         | 16211  |
| C1 | 12570 | liver | Wsb1          | 78889  |
| C1 | 12571 | liver | Cdkn2d        | 12581  |
| C1 | 12687 | liver | Zc3h8         | 57432  |
| C1 | 12761 | liver | Tsc22d3       | 14605  |
| C1 | 12799 | liver | Spon2         | 100689 |
| C1 | 12807 | liver | Faim          | 23873  |
| C1 | 12813 | liver | MMT00041243   |        |
| C1 | 12839 | liver | Fh1           | 14194  |
| C1 | 12858 | liver | Lepre1        | 56401  |
| C1 | 12904 | liver | MMT00040704   | 676923 |
| C1 | 12905 | liver | Nfil3         | 18030  |
| C1 | 12907 | liver | Zkscan1       | 74570  |
| C1 | 12925 | liver | Farp1         | 223254 |
| C1 | 12941 | liver | Elovl5        | 68801  |
| C1 | 12981 | liver | Nek6          | 59126  |
| C1 | 12982 | liver | Cars          | 27267  |
| C1 | 12995 | liver | Tmed9         | 67511  |
| C1 | 13000 | liver | 9130404D14Rik | 227737 |
| C1 | 13018 | liver | AW544981      | 213956 |
| C1 | 13025 | liver | Irf2          | 16363  |
| C1 | 13052 | liver | Tnfrsf19      | 29820  |
| C1 | 13078 | liver | Eps8l2        | 98845  |
| C1 | 13094 | liver | Cnn3          | 71994  |
| C1 | 13200 | liver | 5730449L18Rik | 66637  |
| C1 | 13210 | liver | Nudt1         | 17766  |
| C1 | 13216 | liver | Ccdc106       | 232821 |
| C1 | 13263 | liver | Chchd5        | 66170  |
| C1 | 13281 | liver | Tmcc2         | 68875  |
| C1 | 13289 | liver | Dusp10        | 63953  |
| C1 | 13339 | liver | D630042F21Rik | 330428 |
| C1 | 13351 | liver | Zrsr1         | 22183  |
| C1 | 13376 | liver | Alg2          | 56737  |
| C1 | 13471 | liver | Cln8          | 26889  |
| C1 | 13489 | liver | D230025D16Rik | 234678 |
| C1 | 13491 | liver | Plk2          | 20620  |
| C1 | 13545 | liver | Tmie          | 20776  |
| C1 | 13564 | liver | Qrs1          | 76563  |
| C1 | 13630 | liver | Cdkn1a        | 12575  |
| C1 | 13705 | liver | Osbpl1a       | 64291  |
| C1 | 13731 | liver | 2210408F21Rik | 73652  |
| C1 | 13733 | liver | Setd3         | 52690  |
| C1 | 13770 | liver | D5Wsu178e     | 28042  |
| C1 | 13844 | liver | Trib1         | 211770 |
| C1 | 13886 | liver | Hnrpd1        | 50926  |
| C1 | 13889 | liver | Agpat2        | 67512  |

|    |       |       |               |        |
|----|-------|-------|---------------|--------|
| C1 | 13947 | liver | Crip2         | 68337  |
| C1 | 13962 | liver | Chd7          | 320790 |
| C1 | 13989 | liver | Foxp3         | 20371  |
| C1 | 13990 | liver | MMT00040357   |        |
| C1 | 14041 | liver | Cldn1         | 12737  |
| C1 | 14050 | liver | Ii12rb1       | 16161  |
| C1 | 14099 | liver | Nfe2          | 18022  |
| C1 | 14176 | liver | 1500011H22Rik | 68948  |
| C1 | 14183 | liver | Gng11         | 66066  |
| C1 | 14225 | liver | Sva           | 20939  |
| C1 | 14235 | liver | MMT00002524   |        |
| C1 | 14279 | liver | 3930402G23Rik | 74027  |
| C1 | 14347 | liver | Dact2         | 240025 |
| C1 | 14357 | liver | Ing4          | 28019  |
| C1 | 14380 | liver | MMT00051866   |        |
| C1 | 14400 | liver | Scd2          | 20250  |
| C1 | 14418 | liver | Vcan          | 13003  |
| C1 | 14431 | liver | Piwil1        | 57749  |
| C1 | 14442 | liver | Ethe1         | 66071  |
| C1 | 14462 | liver | Zfp385b       | 241494 |
| C1 | 14471 | liver | Pdgfrl        | 68797  |
| C1 | 14473 | liver | 6330534C20Rik | 434778 |
| C1 | 14582 | liver | Mt1           | 17748  |
| C1 | 14620 | liver | Tbc1d8        | 54610  |
| C1 | 14626 | liver | Zbtb2         | 381990 |
| C1 | 14705 | liver | Slc43a1       | 72401  |
| C1 | 14726 | liver | Slc19a1       | 20509  |
| C1 | 14785 | liver | F3            | 14066  |
| C1 | 14829 | liver | 1110007M04Rik | 68493  |
| C1 | 14838 | liver | MMT00070887   |        |
| C1 | 14888 | liver | Abca8b        | 27404  |
| C1 | 14894 | liver | G0s2          | 14373  |
| C1 | 14928 | liver | Eme2          | 193838 |
| C1 | 14929 | liver | 2810432D09Rik | 69961  |
| C1 | 14946 | liver | Txndc5        | 105245 |
| C1 | 14973 | liver | Shf           | 435684 |
| C1 | 14989 | liver | Map3k5        | 26408  |
| C1 | 15008 | liver | Chrdl2        | 69121  |
| C1 | 15021 | liver | Ppargc1a      | 19017  |
| C1 | 15046 | liver | Arl6ip2       | 56298  |
| C1 | 15049 | liver | Rnf125        | 67664  |
| C1 | 15051 | liver | Nin           | 18080  |
| C1 | 15224 | liver | Cyp2a4        | 13086  |
| C1 | 15252 | liver | MMT00019402   |        |
| C1 | 15273 | liver | Relb          | 19698  |
| C1 | 15284 | liver | EG632778      | 632778 |
| C1 | 15304 | liver | Kin           | 16588  |
| C1 | 15320 | liver | MMT00017479   |        |
| C1 | 15425 | liver | Adprh         | 11544  |
| C1 | 15447 | liver | Eif4a3        | 192170 |
| C1 | 15481 | liver | 1110067D22Rik | 216551 |

|    |       |       |               |        |
|----|-------|-------|---------------|--------|
| C1 | 15521 | liver | Mast3         | 546071 |
| C1 | 15522 | liver | 1810011O10Rik | 69068  |
| C1 | 15567 | liver | 1600002H07Rik | 72016  |
| C1 | 15607 | liver | Klf13         | 50794  |
| C1 | 15609 | liver | Mreg          | 381269 |
| C1 | 15624 | liver | Crcp          | 12909  |
| C1 | 15631 | liver | Lpin1         | 14245  |
| C1 | 15659 | liver | MMT00074093   |        |
| C1 | 15665 | liver | Blcap         | 53619  |
| C1 | 15668 | liver | 1810032O08Rik | 66293  |
| C1 | 15695 | liver | Tead4         | 21679  |
| C1 | 15696 | liver | Pycr2         | 69051  |
| C1 | 15704 | liver | MMT00038941   |        |
| C1 | 15709 | liver | Tceal1        | 237052 |
| C1 | 15720 | liver | Trp53i11      | 277414 |
| C1 | 15758 | liver | Stx4a         | 20909  |
| C1 | 15800 | liver | MMT00023224   | 66449  |
| C1 | 15824 | liver | D19Erd721e    | 225896 |
| C1 | 15860 | liver | BC004004      | 80748  |
| C1 | 15862 | liver | Mrap          | 77037  |
| C1 | 15882 | liver | AA986860      | 212439 |
| C1 | 15892 | liver | Slc22a5       | 20520  |
| C1 | 15914 | liver | Dapk2         | 13143  |
| C1 | 15990 | liver | Dnmbp         | 71972  |
| C1 | 15996 | liver | Grtp1         | 66790  |
| C1 | 16013 | liver | Nt5c3         | 107569 |
| C1 | 16027 | liver | Ppp2r2d       | 52432  |
| C1 | 16048 | liver | Nsfl1c        | 386649 |
| C1 | 16060 | liver | Gys2          | 232493 |
| C1 | 16117 | liver | Id4           | 15904  |
| C1 | 16131 | liver | Ptpre         | 19267  |
| C1 | 16167 | liver | Stbd1         | 52331  |
| C1 | 16176 | liver | St3gal5       | 20454  |
| C1 | 16187 | liver | 6530403A03Rik | 67797  |
| C1 | 16212 | liver | Med19         | 381379 |
| C1 | 16250 | liver | MMT00069147   | 329858 |
| C1 | 16292 | liver | Prpf18        | 67229  |
| C1 | 16327 | liver | Ubfd1         | 28018  |
| C1 | 16334 | liver | Parp2         | 11546  |
| C1 | 16339 | liver | Bach1         | 12013  |
| C1 | 16343 | liver | Dgkh          | 380921 |
| C1 | 16356 | liver | 9030607L17Rik | 71564  |
| C1 | 16474 | liver | Bhlhb2        | 20893  |
| C1 | 16515 | liver | Gramd4        | 223752 |
| C1 | 16517 | liver | D4Wsu53e      | 27981  |
| C1 | 16526 | liver | Sftpa1        | 20387  |
| C1 | 16571 | liver | Pqlc1         | 66943  |
| C1 | 16580 | liver | Tnfaip2       | 21928  |
| C1 | 16584 | liver | Nup35         | 69482  |
| C1 | 16647 | liver | D16H22S680E   | 27883  |
| C1 | 16657 | liver | Atpif1        | 11983  |

|    |       |       |               |        |
|----|-------|-------|---------------|--------|
| C1 | 16669 | liver | Tjp2          | 21873  |
| C1 | 16676 | liver | Aspa          | 11484  |
| C1 | 16690 | liver | Tjp3          | 27375  |
| C1 | 16692 | liver | Bat4          | 81845  |
| C1 | 16698 | liver | Sumo1         | 22218  |
| C1 | 16704 | liver | Ppif          | 105675 |
| C1 | 16712 | liver | Pnrc1         | 108767 |
| C1 | 16719 | liver | Slc43a3       | 58207  |
| C1 | 16792 | liver | Sh3yl1        | 24057  |
| C1 | 16796 | liver | Agt           | 11606  |
| C1 | 16851 | liver | Slc34a2       | 20531  |
| C1 | 16860 | liver | Cdc42bpa      | 226751 |
| C1 | 16888 | liver | H6pd          | 100198 |
| C1 | 16904 | liver | Sphk2         | 56632  |
| C1 | 16915 | liver | MMT00019508   |        |
| C1 | 16946 | liver | lvns1abp      | 117198 |
| C1 | 16947 | liver | Wfs1          | 22393  |
| C1 | 16965 | liver | Gstt2         | 14872  |
| C1 | 17022 | liver | MMT00055891   |        |
| C1 | 17078 | liver | Syde2         | 214804 |
| C1 | 17083 | liver | Atp1b1        | 11931  |
| C1 | 17091 | liver | Slc38a3       | 76257  |
| C1 | 17130 | liver | Baiap2        | 108100 |
| C1 | 17143 | liver | 2010002N04Rik | 106878 |
| C1 | 17152 | liver | Scfd2         | 212986 |
| C1 | 17215 | liver | Mvd           | 192156 |
| C1 | 17223 | liver | 4933426M11Rik | 217684 |
| C1 | 17224 | liver | 5430407P10Rik | 227545 |
| C1 | 17247 | liver | A030007L17Rik | 68252  |
| C1 | 17323 | liver | Tubb6         | 67951  |
| C1 | 17338 | liver | Mocos         | 68591  |
| C1 | 17342 | liver | Dhx32         | 101437 |
| C1 | 17343 | liver | Timm8a1       | 30058  |
| C1 | 17352 | liver | Cebpb         | 12608  |
| C1 | 17418 | liver | D1Ert622e     | 52392  |
| C1 | 17444 | liver | Tuba1a        | 22142  |
| C1 | 17493 | liver | Rfx4          | 71137  |
| C1 | 17512 | liver | EG433216      | 433216 |
| C1 | 17525 | liver | Ctgf          | 14219  |
| C1 | 17530 | liver | MMT00041792   |        |
| C1 | 17583 | liver | Per2          | 18627  |
| C1 | 17593 | liver | Gfer          | 11692  |
| C1 | 17609 | liver | Ptpn9         | 56294  |
| C1 | 17617 | liver | Atp5sl        | 66349  |
| C1 | 17622 | liver | Foxo1         | 56458  |
| C1 | 17656 | liver | Hdhd3         | 72748  |
| C1 | 17660 | liver | Nlrp12        | 378425 |
| C1 | 17697 | liver | 1300014I06Rik | 66895  |
| C1 | 17752 | liver | Chac1         | 69065  |
| C1 | 17818 | liver | Chchd4        | 72170  |
| C1 | 17862 | liver | Fbxo21        | 231670 |

|    |       |       |               |        |
|----|-------|-------|---------------|--------|
| C1 | 17876 | liver | Tubb4         | 22153  |
| C1 | 17878 | liver | Brap          | 72399  |
| C1 | 17884 | liver | Ln timer      | 140887 |
| C1 | 17928 | liver | Pex11a        | 18631  |
| C1 | 17935 | liver | Pde6c         | 110855 |
| C1 | 17952 | liver | Ripk2         | 192656 |
| C1 | 17991 | liver | Fbxl20        | 72194  |
| C1 | 17992 | liver | Gmpr          | 66355  |
| C1 | 17999 | liver | A730017L22Rik | 613258 |
| C1 | 18027 | liver | 5730403B10Rik | 66626  |
| C1 | 18038 | liver | Sec24c        | 218811 |
| C1 | 18069 | liver | Gpt           | 76282  |
| C1 | 18096 | liver | Slc39a6       | 106957 |
| C1 | 18122 | liver | Snx21         | 101113 |
| C1 | 18144 | liver | Dmap1         | 66233  |
| C1 | 18147 | liver | Nhlrc2        | 66866  |
| C1 | 18176 | liver | Aqp11         | 66333  |
| C1 | 18179 | liver | Dbp           | 13170  |
| C1 | 18213 | liver | Tomm40        | 53333  |
| C1 | 18250 | liver | Mmp14         | 17387  |
| C1 | 18275 | liver | D730039F16Rik | 77996  |
| C1 | 18282 | liver | Tbcc          | 72726  |
| C1 | 18286 | liver | Slc41a3       | 71699  |
| C1 | 18296 | liver | Pcgf5         | 76073  |
| C1 | 18314 | liver | 4631416L12Rik | 622434 |
| C1 | 18403 | liver | Itpr1         | 16438  |
| C1 | 18428 | liver | Sfrs2         | 20382  |
| C1 | 18438 | liver | Map3k7ip2     | 68652  |
| C1 | 18455 | liver | Mtnr1a        | 17773  |
| C1 | 18498 | liver | Slc5a6        | 330064 |
| C1 | 18506 | liver | Otub2         | 68149  |
| C1 | 18542 | liver | Ankra2        | 68558  |
| C1 | 18552 | liver | Nr2c2ap       | 75692  |
| C1 | 18572 | liver | Stx18         | 71116  |
| C1 | 18586 | liver | Tns1          | 21961  |
| C1 | 18591 | liver | MMT00034813   |        |
| C1 | 18606 | liver | A230074B11Rik | 215413 |
| C1 | 18607 | liver | Acat3         | 224530 |
| C1 | 18649 | liver | Ccne1         | 12447  |
| C1 | 18653 | liver | MMT00072901   |        |
| C1 | 18665 | liver | Hs6st1        | 50785  |
| C1 | 18688 | liver | Leap2         | 259301 |
| C1 | 18742 | liver | Rnf217        | 268291 |
| C1 | 18756 | liver | Tspan14       | 52588  |
| C1 | 18785 | liver | Angptl4       | 57875  |
| C1 | 18802 | liver | Nit2          | 52633  |
| C1 | 18804 | liver | Plip          | 67801  |
| C1 | 18827 | liver | Oprs1         | 18391  |
| C1 | 18884 | liver | Eil           | 13716  |
| C1 | 18905 | liver | Prmt2         | 15468  |
| C1 | 18983 | liver | lfrd2         | 15983  |

|    |       |       |               |        |
|----|-------|-------|---------------|--------|
| C1 | 18990 | liver | Hal           | 15109  |
| C1 | 19004 | liver | Pdk4          | 27273  |
| C1 | 19025 | liver | Slc37a4       | 14385  |
| C1 | 19032 | liver | Tymp          | 72962  |
| C1 | 19089 | liver | Peci          | 23986  |
| C1 | 19124 | liver | Pim3          | 223775 |
| C1 | 19136 | liver | Trim13        | 66597  |
| C1 | 19141 | liver | Gorasp1       | 74498  |
| C1 | 19146 | liver | N4bp2l1       | 100637 |
| C1 | 19148 | liver | Rnf144b       | 218215 |
| C1 | 19157 | liver | Rps19bp1      | 66538  |
| C1 | 19217 | liver | Cyr61         | 16007  |
| C1 | 19234 | liver | Nrg4          | 83961  |
| C1 | 19277 | liver | MMT00044927   |        |
| C1 | 19305 | liver | Azin1         | 54375  |
| C1 | 19323 | liver | Bnip3         | 12176  |
| C1 | 19360 | liver | Aco1          | 11428  |
| C1 | 19375 | liver | Inhba         | 16323  |
| C1 | 19410 | liver | Glb1          | 12091  |
| C1 | 19453 | liver | Cdk2ap2       | 52004  |
| C1 | 19465 | liver | Hacl1         | 56794  |
| C1 | 19466 | liver | Pptc7         | 320717 |
| C1 | 19478 | liver | Rnaseh2b      | 67153  |
| C1 | 19528 | liver | Zfp503        | 218820 |
| C1 | 19532 | liver | Med8          | 80509  |
| C1 | 19556 | liver | Efna1         | 13636  |
| C1 | 19611 | liver | Cog8          | 97484  |
| C1 | 19655 | liver | 3110040N11Rik | 67290  |
| C1 | 19660 | liver | Gkap1         | 56278  |
| C1 | 19671 | liver | Upp2          | 76654  |
| C1 | 19701 | liver | 9930021J17Rik | 229488 |
| C1 | 19723 | liver | Pfkfb1        | 18639  |
| C1 | 19726 | liver | Erp29         | 67397  |
| C1 | 19757 | liver | Fkbp5         | 14229  |
| C1 | 19790 | liver | Polg2         | 50776  |
| C1 | 19798 | liver | Tnk2          | 51789  |
| C1 | 19912 | liver | Inpp1         | 16329  |
| C1 | 19970 | liver | Mrpl36        | 94066  |
| C1 | 19997 | liver | Ikbke         | 56489  |
| C1 | 20049 | liver | 2310044G17Rik | 217732 |
| C1 | 20085 | liver | Lpin2         | 64898  |
| C1 | 20217 | liver | Rab3ip        | 216363 |
| C1 | 20219 | liver | MMT00076423   |        |
| C1 | 20227 | liver | Kras          | 16653  |
| C1 | 20266 | liver | Insig2        | 72999  |
| C1 | 20273 | liver | 4733401H18Rik | 66706  |
| C1 | 20370 | liver | Sccpdh        | 109232 |
| C1 | 20390 | liver | Cd9           | 12527  |
| C1 | 20405 | liver | Clip1         | 56430  |
| C1 | 20488 | liver | Bok           | 51800  |
| C1 | 20519 | liver | Col1a1        | 12842  |

|    |       |       |               |        |
|----|-------|-------|---------------|--------|
| C1 | 20611 | liver | Map2k3        | 26397  |
| C1 | 20613 | liver | 4930431B09Rik | 74645  |
| C1 | 20635 | liver | Jmjd6         | 107817 |
| C1 | 20689 | liver | Cnksr3        | 215748 |
| C1 | 20690 | liver | Zfp276        | 57247  |
| C1 | 20744 | liver | lpmk          | 69718  |
| C1 | 20745 | liver | Sord          | 20322  |
| C1 | 20798 | liver | Ccpg1         | 72278  |
| C1 | 20803 | liver | Tmem50a       | 71817  |
| C1 | 20830 | liver | MMT00057509   |        |
| C1 | 20854 | liver | Commd7        | 99311  |
| C1 | 20896 | liver | Rasa3         | 19414  |
| C1 | 20907 | liver | Lims2         | 225341 |
| C1 | 20960 | liver | Abcc3         | 76408  |
| C1 | 20980 | liver | Taf12         | 66464  |
| C1 | 21000 | liver | Vmo1          | 327956 |
| C1 | 21062 | liver | Rpl7l1        | 66229  |
| C1 | 21142 | liver | Gm129         | 229599 |
| C1 | 21163 | liver | Slc16a5       | 217316 |
| C1 | 21167 | liver | Irf5          | 27056  |
| C1 | 21188 | liver | Pnkp          | 59047  |
| C1 | 21192 | liver | 2310047A01Rik | 71918  |
| C1 | 21251 | liver | Cpt1a         | 12894  |
| C1 | 21288 | liver | Tcp11l2       | 216198 |
| C1 | 21306 | liver | Pvrl1         | 58235  |
| C1 | 21313 | liver | Rhou          | 69581  |
| C1 | 21331 | liver | Slc10a6       | 75750  |
| C1 | 21375 | liver | MMT00043149   |        |
| C1 | 21380 | liver | Ier5          | 15939  |
| C1 | 21409 | liver | Gldc          | 104174 |
| C1 | 21531 | liver | Ttc23         | 67009  |
| C1 | 21565 | liver | Pde6h         | 78600  |
| C1 | 21604 | liver | Klhl24        | 75785  |
| C1 | 21620 | liver | Tmem166       | 232146 |
| C1 | 21664 | liver | Insig1        | 231070 |
| C1 | 21666 | liver | Ncor1         | 20185  |
| C1 | 21675 | liver | Mosc2         | 67247  |
| C1 | 21733 | liver | Rhebl1        | 69159  |
| C1 | 21739 | liver | Epb4.1        | 269587 |
| C1 | 21743 | liver | Ccno          | 218630 |
| C1 | 21795 | liver | 0610009B22Rik | 66050  |
| C1 | 21805 | liver | Plk3          | 12795  |
| C1 | 21811 | liver | Ak3l1         | 11639  |
| C1 | 21901 | liver | BC035537      | 212326 |
| C1 | 21918 | liver | Snx24         | 69226  |
| C1 | 21934 | liver | Id2           | 15902  |
| C1 | 21969 | liver | Tk1           | 21877  |
| C1 | 21981 | liver | Ormdl2        | 66844  |
| C1 | 22012 | liver | Ilgae         | 16407  |
| C1 | 22031 | liver | Vcam1         | 22329  |
| C1 | 22038 | liver | Tnip1         | 57783  |

|    |       |       |               |        |
|----|-------|-------|---------------|--------|
| C1 | 22076 | liver | Pgm2l1        | 70974  |
| C1 | 22130 | liver | Cks1b         | 54124  |
| C1 | 22197 | liver | Ankrd28       | 105522 |
| C1 | 22213 | liver | Adora1        | 11539  |
| C1 | 22218 | liver | Rfc3          | 69263  |
| C1 | 22244 | liver | Slc16a7       | 20503  |
| C1 | 22250 | liver | Wdr45l        | 66840  |
| C1 | 22290 | liver | Tubb2a        | 22151  |
| C1 | 22324 | liver | MMT00060741   |        |
| C1 | 22334 | liver | 9430023L20Rik | 68118  |
| C1 | 22336 | liver | Hsd3b5        | 15496  |
| C1 | 22340 | liver | Lnx2          | 140887 |
| C1 | 22373 | liver | Txnip         | 56338  |
| C1 | 22388 | liver | 2410018M08Rik | 71970  |
| C1 | 22443 | liver | Tuba1c        | 22146  |
| C1 | 22463 | liver | Gorasp2       | 70231  |
| C1 | 22470 | liver | Ppargc1b      | 170826 |
| C1 | 22476 | liver | Tspan4        | 64540  |
| C1 | 22627 | liver | Adck5         | 268822 |
| C1 | 22630 | liver | MMT00034355   |        |
| C1 | 22636 | liver | Trim2         | 80890  |
| C1 | 22641 | liver | Kif1c         | 16562  |
| C1 | 22653 | liver | Ric3          | 320360 |
| C1 | 22669 | liver | Ahctf1        | 226747 |
| C1 | 22681 | liver | Gm88          | 224813 |
| C1 | 22715 | liver | Ap3m1         | 55946  |
| C1 | 22730 | liver | Glt8d1        | 76485  |
| C1 | 22744 | liver | 9-Sep         | 53860  |
| C1 | 22863 | liver | Prkd2         | 101540 |
| C1 | 22869 | liver | Tceal8        | 66684  |
| C1 | 22873 | liver | Slc38a2       | 67760  |
| C1 | 22880 | liver | Slc45a4       | 106068 |
| C1 | 22933 | liver | Tssc4         | 56844  |
| C1 | 22936 | liver | Rhobtb1       | 69288  |
| C1 | 23007 | liver | 2410015N17Rik | 66422  |
| C1 | 23150 | liver | EG622657      | 622657 |
| C1 | 23161 | liver | Gclc          | 14629  |
| C1 | 23180 | liver | Sult1d1       | 53315  |
| C1 | 23183 | liver | Nnmt          | 18113  |
| C1 | 23201 | liver | S1pr1         | 13609  |
| C1 | 23202 | liver | Olfr559       | 259116 |
| C1 | 23211 | liver | Pscd3         | 19159  |
| C1 | 23246 | liver | Cited2        | 17684  |
| C1 | 23248 | liver | Tesk2         | 230661 |
| C1 | 23252 | liver | Snrpd1        | 20641  |
| C1 | 23253 | liver | D030011O10Rik | 320560 |
| C1 | 23377 | liver | Pdxk          | 216134 |
| C1 | 23419 | liver | Tipin         | 66131  |
| C1 | 23437 | liver | Efhd2         | 27984  |
| C1 | 23458 | liver | Clic4         | 29876  |
| C1 | 23552 | liver | Rasl11b       | 68939  |



|    |       |         |               |        |
|----|-------|---------|---------------|--------|
| C1 | 23558 | liver   | MMT00030937   |        |
| C1 | 23606 | liver   | Cmtm8         | 70031  |
| C1 | 23626 | liver   | MMT00003764   |        |
| C1 | 23680 | liver   | 5730419I09Rik | 74741  |
| C2 | 177   | adipose | Appl2         | 216190 |
| C2 | 183   | adipose | Bmp4          | 12159  |
| C2 | 184   | adipose | Sorbs1        | 20411  |
| C2 | 227   | adipose | B4galt1       | 14595  |
| C2 | 242   | adipose | 4732471D19Rik | 319719 |
| C2 | 245   | adipose | Sqrdl         | 59010  |
| C2 | 263   | adipose | Akr1b3        | 11677  |
| C2 | 265   | adipose | Taf9          | 108143 |
| C2 | 284   | adipose | Osr2          | 107587 |
| C2 | 329   | adipose | Lmod1         | 93689  |
| C2 | 339   | adipose | Hmgcs1        | 208715 |
| C2 | 354   | adipose | MMT00007996   |        |
| C2 | 361   | adipose | Fign          | 60344  |
| C2 | 371   | adipose | MMT00058786   |        |
| C2 | 392   | adipose | Sec22b        | 20333  |
| C2 | 409   | adipose | Lxn           | 17035  |
| C2 | 434   | adipose | Psmc1         | 70247  |
| C2 | 491   | adipose | MMT00030239   |        |
| C2 | 548   | adipose | Gpr109a       | 80885  |
| C2 | 575   | adipose | Edn1          | 13614  |
| C2 | 589   | adipose | Epb4.1I4b     | 54357  |
| C2 | 602   | adipose | 9630041N07Rik | 214779 |
| C2 | 607   | adipose | Me1           | 17436  |
| C2 | 612   | adipose | Ccr1          | 12768  |
| C2 | 614   | adipose | C8g           | 69379  |
| C2 | 617   | adipose | MMT00077405   |        |
| C2 | 626   | adipose | D19Ert386e    | 52013  |
| C2 | 679   | adipose | Lrpprc        | 72416  |
| C2 | 701   | adipose | Polr3g        | 67486  |
| C2 | 708   | adipose | Ophn1         | 94190  |
| C2 | 709   | adipose | Pparg         | 19016  |
| C2 | 738   | adipose | Rbp4          | 19662  |
| C2 | 763   | adipose | 4933406E20Rik | 74443  |
| C2 | 814   | adipose | Gpr64         | 237175 |
| C2 | 877   | adipose | MMT00015473   |        |
| C2 | 982   | adipose | Ccl7          | 20306  |
| C2 | 1017  | adipose | Dync2li1      | 213575 |
| C2 | 1061  | adipose | Krt20         | 66809  |
| C2 | 1074  | adipose | Acsm3         | 20216  |
| C2 | 1105  | adipose | Crls1         | 66586  |
| C2 | 1108  | adipose | MMT00067207   |        |
| C2 | 1114  | adipose | Cdca7l        | 217946 |
| C2 | 1120  | adipose | Rbpms2        | 71973  |
| C2 | 1129  | adipose | Gsta4         | 14860  |
| C2 | 1203  | adipose | Enah          | 13800  |
| C2 | 1250  | adipose | Nol6          | 230082 |
| C2 | 1255  | adipose | Grhpr         | 76238  |

|    |      |         |               |        |
|----|------|---------|---------------|--------|
| C2 | 1272 | adipose | 1110008P14Rik | 73737  |
| C2 | 1281 | adipose | Alkbh3        | 69113  |
| C2 | 1287 | adipose | Acss3         | 380660 |
| C2 | 1290 | adipose | Zscan12       | 22758  |
| C2 | 1323 | adipose | Orc2l         | 18393  |
| C2 | 1329 | adipose | 5730494N06Rik | 70612  |
| C2 | 1363 | adipose | BC021767      | 545551 |
| C2 | 1380 | adipose | Sycp3         | 20962  |
| C2 | 1383 | adipose | Bhlhb9        | 70237  |
| C2 | 1406 | adipose | Clic3         | 69454  |
| C2 | 1433 | adipose | Deb1          | 26901  |
| C2 | 1451 | adipose | 2010300C02Rik | 72097  |
| C2 | 1458 | adipose | Cpsf2         | 51786  |
| C2 | 1462 | adipose | Rpusd4        | 71989  |
| C2 | 1464 | adipose | Taf13         | 99730  |
| C2 | 1471 | adipose | Igfbp7        | 29817  |
| C2 | 1480 | adipose | Plekhh3       | 217198 |
| C2 | 1505 | adipose | Dusp9         | 75590  |
| C2 | 1550 | adipose | Chst12        | 59031  |
| C2 | 1607 | adipose | Memo1         | 76890  |
| C2 | 1615 | adipose | Timm10        | 30059  |
| C2 | 1650 | adipose | Ctdsp2        | 52468  |
| C2 | 1661 | adipose | Duoxa1        | 213696 |
| C2 | 1700 | adipose | Ccdc64        | 75665  |
| C2 | 1711 | adipose | Grhl1         | 195733 |
| C2 | 1748 | adipose | Rbp1          | 19659  |
| C2 | 1761 | adipose | 2010110K16Rik | 67899  |
| C2 | 1770 | adipose | BC054059      | 246747 |
| C2 | 1783 | adipose | Arcn1         | 213827 |
| C2 | 1828 | adipose | Elmo3         | 234683 |
| C2 | 1858 | adipose | 2810432L12Rik | 67063  |
| C2 | 1862 | adipose | Vdac1         | 22333  |
| C2 | 1866 | adipose | 2010012O05Rik | 66439  |
| C2 | 1928 | adipose | Triml2        | 622117 |
| C2 | 1941 | adipose | MMT00079618   |        |
| C2 | 1982 | adipose | EG668192      | 668192 |
| C2 | 1991 | adipose | Ttc17         | 74569  |
| C2 | 2002 | adipose | Hapln3        | 67666  |
| C2 | 2028 | adipose | Isca2         | 74316  |
| C2 | 2051 | adipose | Ddx27         | 228889 |
| C2 | 2062 | adipose | EG668830      | 668830 |
| C2 | 2126 | adipose | Dgat2         | 67800  |
| C2 | 2145 | adipose | MMT00075271   |        |
| C2 | 2150 | adipose | Rragc         | 54170  |
| C2 | 2214 | adipose | Larp6         | 67557  |
| C2 | 2222 | adipose | Tagln         | 21345  |
| C2 | 2241 | adipose | Trim7         | 94089  |
| C2 | 2270 | adipose | Pter          | 19212  |
| C2 | 2301 | adipose | Pcyox1        | 66881  |
| C2 | 2322 | adipose | Tuba4a        | 22145  |
| C2 | 2330 | adipose | Ccdc28b       | 66264  |

|    |      |         |               |        |
|----|------|---------|---------------|--------|
| C2 | 2344 | adipose | Ogt           | 108155 |
| C2 | 2350 | adipose | Ruvbl1        | 56505  |
| C2 | 2356 | adipose | Dnajc13       | 235567 |
| C2 | 2365 | adipose | BC031181      | 407819 |
| C2 | 2377 | adipose | Mmd           | 67468  |
| C2 | 2403 | adipose | Cfl1          | 12631  |
| C2 | 2421 | adipose | Itgb5         | 16419  |
| C2 | 2439 | adipose | Pitpnm2       | 19679  |
| C2 | 2469 | adipose | Coasy         | 71743  |
| C2 | 2489 | adipose | Npr3          | 18162  |
| C2 | 2511 | adipose | Ltv1          | 353258 |
| C2 | 2583 | adipose | Runx1         | 12394  |
| C2 | 2595 | adipose | Acbd4         | 67131  |
| C2 | 2631 | adipose | Aldh1l1       | 107747 |
| C2 | 2635 | adipose | Tmem126a      | 66271  |
| C2 | 2669 | adipose | Ier2          | 15936  |
| C2 | 2721 | adipose | Inmt          | 21743  |
| C2 | 2727 | adipose | Stc2          | 20856  |
| C2 | 2756 | adipose | Pmvk          | 68603  |
| C2 | 2800 | adipose | Dusp11        | 72102  |
| C2 | 2874 | adipose | Nol3          | 78688  |
| C2 | 2907 | adipose | MMT00010854   |        |
| C2 | 2970 | adipose | MMT00022996   |        |
| C2 | 3009 | adipose | Serpina1c     | 20702  |
| C2 | 3022 | adipose | Als2cr12      | 108812 |
| C2 | 3079 | adipose | Gstt3         | 103140 |
| C2 | 3130 | adipose | Mrpl20        | 66448  |
| C2 | 3145 | adipose | Idi1          | 319554 |
| C2 | 3147 | adipose | Higd2a        | 67044  |
| C2 | 3150 | adipose | Syne2         | 319565 |
| C2 | 3162 | adipose | Lep           | 16846  |
| C2 | 3198 | adipose | Fbxw4         | 30838  |
| C2 | 3202 | adipose | Boc           | 117606 |
| C2 | 3206 | adipose | Gpr160        | 71862  |
| C2 | 3209 | adipose | Lmna          | 16905  |
| C2 | 3213 | adipose | Prdx6         | 11758  |
| C2 | 3250 | adipose | Olfm1         | 56177  |
| C2 | 3297 | adipose | Trappc4       | 60409  |
| C2 | 3318 | adipose | 2310003F16Rik | 67693  |
| C2 | 3332 | adipose | Lrrc59        | 98238  |
| C2 | 3345 | adipose | EG620934      | 620934 |
| C2 | 3379 | adipose | Cdo1          | 12583  |
| C2 | 3414 | adipose | MMT00059380   |        |
| C2 | 3428 | adipose | Il1r2         | 16178  |
| C2 | 3446 | adipose | Eno1          | 13806  |
| C2 | 3524 | adipose | Erc1          | 111173 |
| C2 | 3560 | adipose | Usp5          | 22225  |
| C2 | 3563 | adipose | MMT00045357   |        |
| C2 | 3598 | adipose | Rpo1-3        | 20018  |
| C2 | 3617 | adipose | Rasl10b       | 276952 |
| C2 | 3696 | adipose | Elovl6        | 170439 |

|    |      |         |               |        |
|----|------|---------|---------------|--------|
| C2 | 3780 | adipose | Ryk           | 20187  |
| C2 | 3781 | adipose | Arpc2         | 76709  |
| C2 | 3799 | adipose | Serpinh1      | 12406  |
| C2 | 3807 | adipose | Vmn2r83       | 625029 |
| C2 | 3833 | adipose | Atxn7l1       | 380753 |
| C2 | 3862 | adipose | Gpd1          | 14555  |
| C2 | 3907 | adipose | Dkk3          | 50781  |
| C2 | 3927 | adipose | MMT00021352   |        |
| C2 | 3943 | adipose | Atoh1         | 11921  |
| C2 | 4004 | adipose | Thbs2         | 21826  |
| C2 | 4022 | adipose | Gdpd5         | 233552 |
| C2 | 4039 | adipose | Klc3          | 232943 |
| C2 | 4133 | adipose | Cbr3          | 109857 |
| C2 | 4143 | adipose | Zfp286        | 192651 |
| C2 | 4165 | adipose | Cux1          | 13047  |
| C2 | 4258 | adipose | Rpl5          | 19983  |
| C2 | 4321 | adipose | MMT00066182   |        |
| C2 | 4345 | adipose | MMT00074600   |        |
| C2 | 4348 | adipose | Nedd9         | 18003  |
| C2 | 4352 | adipose | Rtn4r1        | 237847 |
| C2 | 4359 | adipose | Tmem208       | 66320  |
| C2 | 4384 | adipose | Gamt          | 14431  |
| C2 | 4388 | adipose | MMT00019672   |        |
| C2 | 4487 | adipose | Gdpd2         | 71584  |
| C2 | 4492 | adipose | Suv420h1      | 225888 |
| C2 | 4499 | adipose | Enpp2         | 18606  |
| C2 | 4504 | adipose | 1700113l22Rik | 73635  |
| C2 | 4524 | adipose | Usp12         | 22217  |
| C2 | 4550 | adipose | Stard10       | 56018  |
| C2 | 4551 | adipose | Cyp2e1        | 13106  |
| C2 | 4557 | adipose | MMT00031263   |        |
| C2 | 4558 | adipose | Alg3          | 208624 |
| C2 | 4625 | adipose | Cwc15         | 66070  |
| C2 | 4642 | adipose | Dact3         | 629378 |
| C2 | 4654 | adipose | Myl9          | 98932  |
| C2 | 4671 | adipose | Itga7         | 16404  |
| C2 | 4674 | adipose | Cxcl12        | 20315  |
| C2 | 4686 | adipose | BC021785      | 215928 |
| C2 | 4709 | adipose | Prune2        | 77754  |
| C2 | 4785 | adipose | ORF63         | 224419 |
| C2 | 4801 | adipose | MMT00057721   |        |
| C2 | 4802 | adipose | 5430433G21Rik | 319909 |
| C2 | 4832 | adipose | Nxn12         | 75124  |
| C2 | 4848 | adipose | Flt3          | 14255  |
| C2 | 4988 | adipose | 2400001E08Rik | 66508  |
| C2 | 4996 | adipose | Echdc3        | 67856  |
| C2 | 5011 | adipose | A930016P21Rik | 68073  |
| C2 | 5051 | adipose | Angpt1        | 11600  |
| C2 | 5054 | adipose | Zfp821        | 75871  |
| C2 | 5132 | adipose | 1600016N20Rik | 72000  |
| C2 | 5159 | adipose | MMT00020962   |        |

|    |      |         |                    |        |
|----|------|---------|--------------------|--------|
| C2 | 5183 | adipose | St5                | 76954  |
| C2 | 5215 | adipose | Col6a1             | 12833  |
| C2 | 5220 | adipose | MMT00037083        |        |
| C2 | 5229 | adipose | Katna1             | 23924  |
| C2 | 5232 | adipose | Arhgef16           | 230972 |
| C2 | 5233 | adipose | Pcbd1              | 13180  |
| C2 | 5247 | adipose | Irak2              | 108960 |
| C2 | 5272 | adipose | Grk4               | 14772  |
| C2 | 5295 | adipose | F2r                | 14062  |
| C2 | 5303 | adipose | Ndufv2             | 72900  |
| C2 | 5355 | adipose | Gpsm2              | 76123  |
| C2 | 5440 | adipose | 1810020G14Rik      | 66272  |
| C2 | 5450 | adipose | Nrbp1              | 192292 |
| C2 | 5452 | adipose | Mogat2             | 233549 |
| C2 | 5453 | adipose | Odf3l1             | 382075 |
| C2 | 5477 | adipose | 2210412D01Rik      | 70178  |
| C2 | 5517 | adipose | Stx17              | 67727  |
| C2 | 5574 | adipose | Hsd3b7             | 101502 |
| C2 | 5586 | adipose | OTTMUSG00000001246 | 433719 |
| C2 | 5594 | adipose | Erbp3              | 13867  |
| C2 | 5601 | adipose | 4933417O08Rik      | 71146  |
| C2 | 5613 | adipose | Mrpl12             | 56282  |
| C2 | 5619 | adipose | Rap1gds1           | 229877 |
| C2 | 5664 | adipose | Fez2               | 225020 |
| C2 | 5747 | adipose | Fbxl16             | 214931 |
| C2 | 5804 | adipose | Thrsp              | 21835  |
| C2 | 5831 | adipose | Sh2b3              | 16923  |
| C2 | 5841 | adipose | Atg12              | 67526  |
| C2 | 5849 | adipose | 2310031A18Rik      | 69627  |
| C2 | 5869 | adipose | MMT00058347        |        |
| C2 | 5881 | adipose | Fzd4               | 14366  |
| C2 | 5905 | adipose | Nos2               | 18126  |
| C2 | 5922 | adipose | Hyal2              | 15587  |
| C2 | 5979 | adipose | Lmo2               | 16909  |
| C2 | 6044 | adipose | Sucnr1             | 84112  |
| C2 | 6085 | adipose | MMT00007454        |        |
| C2 | 6101 | adipose | Vmn2r71            | 233445 |
| C2 | 6112 | adipose | Tmem183a           | 57439  |
| C2 | 6134 | adipose | Hspb8              | 80888  |
| C2 | 6135 | adipose | Nrg1               | 211323 |
| C2 | 6177 | adipose | Thpo               | 21832  |
| C2 | 6193 | adipose | Lactb2             | 212442 |
| C2 | 6197 | adipose | Lss                | 16987  |
| C2 | 6211 | adipose | Arhgap24           | 231532 |
| C2 | 6213 | adipose | Ccl2               | 20296  |
| C2 | 6214 | adipose | Mmd2               | 75104  |
| C2 | 6236 | adipose | MMT00024286        |        |
| C2 | 6284 | adipose | Cacnb2             | 12296  |
| C2 | 6338 | adipose | Setd3              | 52690  |
| C2 | 6343 | adipose | Slc20a1            | 20515  |
| C2 | 6362 | adipose | Crispld2           | 78892  |

|    |      |         |               |        |
|----|------|---------|---------------|--------|
| C2 | 6432 | adipose | 2010109K11Rik | 72123  |
| C2 | 6462 | adipose | Brip1         | 237911 |
| C2 | 6476 | adipose | Sntg2         | 268534 |
| C2 | 6491 | adipose | Rpl5          | 19983  |
| C2 | 6502 | adipose | Col15a1       | 12819  |
| C2 | 6531 | adipose | EG629557      | 629557 |
| C2 | 6569 | adipose | Itih1         | 16424  |
| C2 | 6581 | adipose | Cdc42ep1      | 104445 |
| C2 | 6594 | adipose | Zfyve27       | 319740 |
| C2 | 6597 | adipose | Slc9a5        | 277973 |
| C2 | 6607 | adipose | Reln          | 19699  |
| C2 | 6651 | adipose | Gpx7          | 67305  |
| C2 | 6675 | adipose | Sfrs4         | 57317  |
| C2 | 6683 | adipose | Cd59a         | 12509  |
| C2 | 6759 | adipose | Sqle          | 20775  |
| C2 | 6766 | adipose | Sspn          | 16651  |
| C2 | 6777 | adipose | B3gatl1       | 381694 |
| C2 | 6797 | adipose | Blvra         | 109778 |
| C2 | 6805 | adipose | Rrbp1         | 81910  |
| C2 | 6962 | adipose | Cyp1b1        | 13078  |
| C2 | 7020 | adipose | Fbln5         | 23876  |
| C2 | 7047 | adipose | MMT00019310   |        |
| C2 | 7049 | adipose | Psmc14        | 59029  |
| C2 | 7095 | adipose | Timm8a1       | 30058  |
| C2 | 7108 | adipose | Adamts1       | 77739  |
| C2 | 7112 | adipose | Apbb3         | 225372 |
| C2 | 7128 | adipose | Gemin8        | 237221 |
| C2 | 7151 | adipose | MMT00007982   |        |
| C2 | 7153 | adipose | Glt6d1        | 71103  |
| C2 | 7156 | adipose | Tmem1         | 216131 |
| C2 | 7165 | adipose | Nt5m          | 103850 |
| C2 | 7185 | adipose | Ostf1         | 20409  |
| C2 | 7224 | adipose | Pafah2        | 100163 |
| C2 | 7241 | adipose | Ptpn11        | 19247  |
| C2 | 7251 | adipose | MMT00018228   |        |
| C2 | 7261 | adipose | Ttc7b         | 104718 |
| C2 | 7286 | adipose | Noxo1         | 71893  |
| C2 | 7303 | adipose | Tmem182       | 381339 |
| C2 | 7315 | adipose | EG624219      | 624219 |
| C2 | 7362 | adipose | Rrm2          | 20135  |
| C2 | 7368 | adipose | Adam8         | 11501  |
| C2 | 7424 | adipose | Cdkn1c        | 12577  |
| C2 | 7499 | adipose | Nipa1         | 233280 |
| C2 | 7507 | adipose | Ccdc136       | 232664 |
| C2 | 7543 | adipose | Cct5          | 12465  |
| C2 | 7560 | adipose | Cyp2r1        | 244209 |
| C2 | 7590 | adipose | Ankrd40       | 71452  |
| C2 | 7601 | adipose | Kcne3         | 57442  |
| C2 | 7643 | adipose | Mrps28        | 66230  |
| C2 | 7674 | adipose | Spata7        | 104871 |
| C2 | 7755 | adipose | B230317C12Rik | 56279  |

|    |      |         |               |           |
|----|------|---------|---------------|-----------|
| C2 | 7788 | adipose | 1600021P15Rik | 239796    |
| C2 | 7797 | adipose | Ddx47         | 67755     |
| C2 | 7802 | adipose | Adcy4         | 104110    |
| C2 | 7824 | adipose | MMT00001823   | 100044551 |
| C2 | 7894 | adipose | MMT00029319   | 100039284 |
| C2 | 8045 | adipose | Pgam5         | 72542     |
| C2 | 8049 | adipose | Pon1          | 18979     |
| C2 | 8058 | adipose | Epb4.9        | 13829     |
| C2 | 8085 | adipose | MMT00057439   |           |
| C2 | 8102 | adipose | Hivep2        | 15273     |
| C2 | 8129 | adipose | Gtse1         | 29870     |
| C2 | 8147 | adipose | 1700029J07Rik | 69479     |
| C2 | 8161 | adipose | MMT00031928   |           |
| C2 | 8187 | adipose | Gins1         | 69270     |
| C2 | 8193 | adipose | Pi4k2a        | 84095     |
| C2 | 8200 | adipose | Dfna5h        | 54722     |
| C2 | 8209 | adipose | MMT00072546   |           |
| C2 | 8223 | adipose | Pdlim3        | 53318     |
| C2 | 8254 | adipose | Bbs2          | 67378     |
| C2 | 8279 | adipose | Kif13a        | 16553     |
| C2 | 8319 | adipose | MMT00062477   |           |
| C2 | 8320 | adipose | Nme3          | 79059     |
| C2 | 8356 | adipose | Fbxl12        | 30843     |
| C2 | 8392 | adipose | Asf1b         | 66929     |
| C2 | 8458 | adipose | MMT00063985   |           |
| C2 | 8516 | adipose | Plxnb2        | 140570    |
| C2 | 8554 | adipose | Letm2         | 270035    |
| C2 | 8559 | adipose | Rangrf        | 57785     |
| C2 | 8578 | adipose | Wdr19         | 213081    |
| C2 | 8582 | adipose | Igsf10        | 242050    |
| C2 | 8634 | adipose | MMT00047654   | 100041686 |
| C2 | 8639 | adipose | Map1lc3b      | 67443     |
| C2 | 8680 | adipose | C1qtnf9       | 239126    |
| C2 | 8743 | adipose | Pkp4          | 227937    |
| C2 | 8770 | adipose | Cpxm2         | 55987     |
| C2 | 8773 | adipose | MMT00027093   |           |
| C2 | 8776 | adipose | Aox3          | 71724     |
| C2 | 8792 | adipose | Bop1          | 12181     |
| C2 | 8795 | adipose | EG629966      | 629966    |
| C2 | 8851 | adipose | Pdcd4         | 18569     |
| C2 | 8896 | adipose | Fasn          | 14104     |
| C2 | 9049 | adipose | 1810046J19Rik | 103742    |
| C2 | 9081 | adipose | EG229746      | 229746    |
| C2 | 9107 | adipose | Lrrc20        | 216011    |
| C2 | 9127 | adipose | Mtfmt         | 69606     |
| C2 | 9137 | adipose | Hunk          | 26559     |
| C2 | 9154 | adipose | Tfg           | 21787     |
| C2 | 9164 | adipose | Uba5          | 66663     |
| C2 | 9233 | adipose | Acss3         | 380660    |
| C2 | 9252 | adipose | Slc22a2       | 20518     |
| C2 | 9290 | adipose | Cd1d1         | 12479     |

|    |       |         |               |        |
|----|-------|---------|---------------|--------|
| C2 | 9306  | adipose | Spon1         | 233744 |
| C2 | 9338  | adipose | Zfp313        | 81018  |
| C2 | 9385  | adipose | Hmg20a        | 66867  |
| C2 | 9427  | adipose | Nqo2          | 18105  |
| C2 | 9451  | adipose | Gpr180        | 58245  |
| C2 | 9473  | adipose | Gfra3         | 14587  |
| C2 | 9480  | adipose | A430107O13Rik | 214642 |
| C2 | 9494  | adipose | Cib2          | 56506  |
| C2 | 9514  | adipose | Vps37a        | 52348  |
| C2 | 9534  | adipose | MMT00042032   |        |
| C2 | 9552  | adipose | Dnmt3a        | 13435  |
| C2 | 9586  | adipose | Mrpl53        | 68499  |
| C2 | 9587  | adipose | Bri3bp        | 76809  |
| C2 | 9627  | adipose | Cbx6          | 494448 |
| C2 | 9674  | adipose | Pea15a        | 18611  |
| C2 | 9685  | adipose | Bcl9l         | 80288  |
| C2 | 9697  | adipose | Mterf         | 545725 |
| C2 | 9763  | adipose | Tuba3b        | 22147  |
| C2 | 9766  | adipose | MMT00050414   |        |
| C2 | 9782  | adipose | Dnase2a       | 13423  |
| C2 | 9800  | adipose | Phf7          | 71838  |
| C2 | 9825  | adipose | MMT00007741   |        |
| C2 | 9852  | adipose | Ilkap         | 67444  |
| C2 | 9886  | adipose | Degs1         | 13244  |
| C2 | 9887  | adipose | MMT00062394   |        |
| C2 | 9904  | adipose | Hbegf         | 15200  |
| C2 | 9907  | adipose | 4932442K08Rik | 67544  |
| C2 | 9928  | adipose | Lgmn          | 19141  |
| C2 | 9935  | adipose | Prnd          | 26434  |
| C2 | 9963  | adipose | Rcn3          | 52377  |
| C2 | 9981  | adipose | Snrpn         | 20646  |
| C2 | 9982  | adipose | MMT00002004   |        |
| C2 | 10002 | adipose | Krt79         | 223917 |
| C2 | 10003 | adipose | B4galt7       | 218271 |
| C2 | 10006 | adipose | Ephx2         | 13850  |
| C2 | 10011 | adipose | Brp44         | 70456  |
| C2 | 10017 | adipose | Wdr73         | 71968  |
| C2 | 10052 | adipose | 6530404N21Rik | 67795  |
| C2 | 10061 | adipose | Nsd1          | 18193  |
| C2 | 10099 | adipose | Smyd3         | 69726  |
| C2 | 10108 | adipose | Ctsh          | 13036  |
| C2 | 10116 | adipose | Mettl7b       | 71664  |
| C2 | 10147 | adipose | Itgax         | 16411  |
| C2 | 10199 | adipose | MMT00050019   | 675135 |
| C2 | 10218 | adipose | Vps41         | 218035 |
| C2 | 10236 | adipose | EG665033      | 665033 |
| C2 | 10359 | adipose | Foxf2         | 14238  |
| C2 | 10367 | adipose | Coq7          | 12850  |
| C2 | 10434 | adipose | Ppp2r5a       | 226849 |
| C2 | 10444 | adipose | 1810020D17Rik | 66273  |
| C2 | 10490 | adipose | Peg3          | 18616  |



|    |       |         |               |        |
|----|-------|---------|---------------|--------|
| C2 | 10532 | adipose | MMT00057790   |        |
| C2 | 10591 | adipose | Pmp22         | 18858  |
| C2 | 10710 | adipose | Smoc1         | 64075  |
| C2 | 10774 | adipose | Ehd3          | 57440  |
| C2 | 10812 | adipose | 9330101J02Rik | 664857 |
| C2 | 10863 | adipose | Tssc1         | 380752 |
| C2 | 10879 | adipose | Slc9a6        | 236794 |
| C2 | 10888 | adipose | Eya2          | 14049  |
| C2 | 10938 | adipose | Zbtb5         | 230119 |
| C2 | 10961 | adipose | Pgd           | 110208 |
| C2 | 10986 | adipose | Pappa         | 18491  |
| C2 | 10998 | adipose | 2310061C15Rik | 66531  |
| C2 | 11034 | adipose | Kcnh2         | 16511  |
| C2 | 11074 | adipose | Lpgat1        | 226856 |
| C2 | 11083 | adipose | Kctd3         | 226823 |
| C2 | 11086 | adipose | Pnpla5        | 75772  |
| C2 | 11099 | adipose | Klhdc8b       | 78267  |
| C2 | 11125 | adipose | Trim39        | 79263  |
| C2 | 11129 | adipose | Ankhd1        | 108857 |
| C2 | 11183 | adipose | Pank3         | 211347 |
| C2 | 11235 | adipose | Itga2b        | 16399  |
| C2 | 11246 | adipose | Apex1         | 11792  |
| C2 | 11376 | adipose | Slc7a11       | 26570  |
| C2 | 11403 | adipose | 2210016F16Rik | 70153  |
| C2 | 11432 | adipose | Dynll2        | 68097  |
| C2 | 11445 | adipose | Atp1a2        | 98660  |
| C2 | 11449 | adipose | Ppap2a        | 19012  |
| C2 | 11481 | adipose | Morn1         | 76866  |
| C2 | 11515 | adipose | EG544707      | 544707 |
| C2 | 11534 | adipose | Ndufs4        | 17993  |
| C2 | 11542 | adipose | Taz           | 66826  |
| C2 | 11581 | adipose | Cast          | 12380  |
| C2 | 11590 | adipose | Cbx4          | 12418  |
| C2 | 11610 | adipose | Hey1          | 15213  |
| C2 | 11709 | adipose | Asb2          | 65256  |
| C2 | 11724 | adipose | Tuba3a        | 22144  |
| C2 | 11762 | adipose | Ggt5          | 23887  |
| C2 | 11785 | adipose | MMT00075578   |        |
| C2 | 11797 | adipose | Sbk1          | 104175 |
| C2 | 11807 | adipose | Fbxo31        | 76454  |
| C2 | 11808 | adipose | Pck1          | 18534  |
| C2 | 11825 | adipose | MMT00024508   |        |
| C2 | 11859 | adipose | Poln          | 272158 |
| C2 | 11869 | adipose | Pcsk5         | 18552  |
| C2 | 11873 | adipose | Mmp2          | 17390  |
| C2 | 11880 | adipose | Svep1         | 64817  |
| C2 | 11891 | adipose | Rtn2          | 20167  |
| C2 | 11892 | adipose | D430042O09Rik | 233865 |
| C2 | 11915 | adipose | Calm1         | 12313  |
| C2 | 11922 | adipose | Cox19         | 68033  |
| C2 | 11930 | adipose | Igh-VJ558     | 16061  |

|    |       |         |               |        |
|----|-------|---------|---------------|--------|
| C2 | 11951 | adipose | Denr          | 68184  |
| C2 | 11956 | adipose | Bmper         | 73230  |
| C2 | 11984 | adipose | N6amt2        | 68043  |
| C2 | 11992 | adipose | Mrpl19        | 56284  |
| C2 | 12000 | adipose | Tmem16h       | 382014 |
| C2 | 12035 | adipose | Ncoa1         | 17977  |
| C2 | 12053 | adipose | 2310005L22Rik | 69471  |
| C2 | 12104 | adipose | MMT00063115   | 231872 |
| C2 | 12143 | adipose | Thyn1         | 77862  |
| C2 | 12168 | adipose | H2-Ke6        | 14979  |
| C2 | 12169 | adipose | MMT00013125   |        |
| C2 | 12178 | adipose | Slc16a2       | 20502  |
| C2 | 12180 | adipose | Ank           | 11732  |
| C2 | 12181 | adipose | Bcl2l10       | 12049  |
| C2 | 12182 | adipose | Immt          | 76614  |
| C2 | 12191 | adipose | Zfp704        | 170753 |
| C2 | 12219 | adipose | Cyb5b         | 66427  |
| C2 | 12259 | adipose | MMT00080137   |        |
| C2 | 12270 | adipose | Slc7a6        | 330836 |
| C2 | 12405 | adipose | Cyp4f14       | 64385  |
| C2 | 12417 | adipose | Mtap7d1       | 245877 |
| C2 | 12420 | adipose | Klhl21        | 242785 |
| C2 | 12478 | adipose | Rhot2         | 214952 |
| C2 | 12520 | adipose | MMT00057426   |        |
| C2 | 12540 | adipose | Smarca1       | 93761  |
| C2 | 12552 | adipose | Gm967         | 381217 |
| C2 | 12553 | adipose | Kpnb1         | 16211  |
| C2 | 12565 | adipose | Grem2         | 23893  |
| C2 | 12581 | adipose | Mpp3          | 13384  |
| C2 | 12654 | adipose | 4930485B16Rik | 380654 |
| C2 | 12711 | adipose | Nap1l4        | 17955  |
| C2 | 12770 | adipose | Nola2         | 52530  |
| C2 | 12869 | adipose | 0610011F06Rik | 68347  |
| C2 | 12879 | adipose | Ermp1         | 226090 |
| C2 | 12881 | adipose | Lgals8        | 56048  |
| C2 | 12917 | adipose | Nubp1         | 26425  |
| C2 | 12922 | adipose | Lilrb4        | 14728  |
| C2 | 12954 | adipose | Gli2          | 14633  |
| C2 | 12976 | adipose | MMT00066041   |        |
| C2 | 12981 | adipose | Nek6          | 59126  |
| C2 | 12986 | adipose | Cox4i2        | 84682  |
| C2 | 13004 | adipose | Arhgef10      | 234094 |
| C2 | 13037 | adipose | Serpib3b      | 383548 |
| C2 | 13058 | adipose | Gpx3          | 14778  |
| C2 | 13087 | adipose | Cxadr         | 13052  |
| C2 | 13143 | adipose | Zmym6         | 100177 |
| C2 | 13159 | adipose | Map4k4        | 26921  |
| C2 | 13167 | adipose | Idi1          | 319554 |
| C2 | 13219 | adipose | Trhde         | 237553 |
| C2 | 13236 | adipose | Pak1ip1       | 68083  |
| C2 | 13282 | adipose | 2310005N03Rik | 66359  |

|    |       |         |               |           |
|----|-------|---------|---------------|-----------|
| C2 | 13351 | adipose | Zrsr1         | 22183     |
| C2 | 13356 | adipose | Aldh3b2       | 621603    |
| C2 | 13422 | adipose | Usp3          | 235441    |
| C2 | 13431 | adipose | MMT00038058   |           |
| C2 | 13451 | adipose | Tbcb          | 66411     |
| C2 | 13459 | adipose | Rgs4          | 19736     |
| C2 | 13640 | adipose | Atp6v0a1      | 11975     |
| C2 | 13650 | adipose | Cntn1         | 12805     |
| C2 | 13657 | adipose | MMT00065461   | 100040887 |
| C2 | 13693 | adipose | Copb2         | 50797     |
| C2 | 13714 | adipose | Igfals        | 16005     |
| C2 | 13720 | adipose | Serpina11     | 380780    |
| C2 | 13746 | adipose | E330013P04Rik | 107376    |
| C2 | 13767 | adipose | Kcnk15        | 241769    |
| C2 | 13792 | adipose | Slc25a35      | 71998     |
| C2 | 13794 | adipose | Higd1a        | 56295     |
| C2 | 13847 | adipose | Tmigd1        | 66601     |
| C2 | 13889 | adipose | Agpat2        | 67512     |
| C2 | 13919 | adipose | Synpo         | 104027    |
| C2 | 13937 | adipose | A230107C01Rik | 320225    |
| C2 | 13966 | adipose | Aatk          | 11302     |
| C2 | 13984 | adipose | Thap3         | 69876     |
| C2 | 14009 | adipose | 2310030G06Rik | 66952     |
| C2 | 14030 | adipose | Csrp2         | 13008     |
| C2 | 14147 | adipose | Acss2         | 60525     |
| C2 | 14151 | adipose | Slc44a1       | 100434    |
| C2 | 14156 | adipose | Med9          | 192191    |
| C2 | 14213 | adipose | Rcor2         | 104383    |
| C2 | 14227 | adipose | Lrrc39        | 109245    |
| C2 | 14241 | adipose | C130074G19Rik | 226777    |
| C2 | 14314 | adipose | 2810405K02Rik | 66469     |
| C2 | 14333 | adipose | Zcchc17       | 619605    |
| C2 | 14359 | adipose | Hist2h2bb     | 319189    |
| C2 | 14368 | adipose | 9330128J19Rik | 271144    |
| C2 | 14400 | adipose | Scd2          | 20250     |
| C2 | 14470 | adipose | Taf1a         | 21339     |
| C2 | 14476 | adipose | Akr1b8        | 14187     |
| C2 | 14507 | adipose | Ttc13         | 234875    |
| C2 | 14512 | adipose | Tubg1         | 103733    |
| C2 | 14540 | adipose | Tmem140       | 68487     |
| C2 | 14554 | adipose | Dll4          | 54485     |
| C2 | 14556 | adipose | Txndc14       | 66958     |
| C2 | 14563 | adipose | Dna2          | 327762    |
| C2 | 14571 | adipose | MMT00079617   |           |
| C2 | 14579 | adipose | 2610015P09Rik | 212153    |
| C2 | 14617 | adipose | MMT00033859   | 26930     |
| C2 | 14629 | adipose | Nfkb2         | 18034     |
| C2 | 14640 | adipose | Tmem97        | 69071     |
| C2 | 14662 | adipose | MMT00070823   |           |
| C2 | 14753 | adipose | Slc25a19      | 67283     |
| C2 | 14838 | adipose | MMT00070887   |           |

|    |       |         |               |        |
|----|-------|---------|---------------|--------|
| C2 | 14850 | adipose | MMT00057793   |        |
| C2 | 14858 | adipose | Itpr3         | 16440  |
| C2 | 14862 | adipose | Dhrs7         | 66375  |
| C2 | 14879 | adipose | EG636544      | 636544 |
| C2 | 14884 | adipose | Mrps22        | 64655  |
| C2 | 14898 | adipose | Orm1          | 18405  |
| C2 | 15049 | adipose | Rnf125        | 67664  |
| C2 | 15079 | adipose | Plcd3         | 72469  |
| C2 | 15108 | adipose | Fuca1         | 71665  |
| C2 | 15127 | adipose | Cct6b         | 12467  |
| C2 | 15131 | adipose | Atf6          | 226641 |
| C2 | 15135 | adipose | Col5a3        | 53867  |
| C2 | 15157 | adipose | Eno1          | 13806  |
| C2 | 15189 | adipose | BC005764      | 216152 |
| C2 | 15195 | adipose | Slc25a1       | 13358  |
| C2 | 15205 | adipose | MMT00030262   |        |
| C2 | 15208 | adipose | Tmem70        | 70397  |
| C2 | 15210 | adipose | Osr1          | 23967  |
| C2 | 15287 | adipose | St6galnac5    | 26938  |
| C2 | 15288 | adipose | Pet112l       | 229487 |
| C2 | 15293 | adipose | MMT00001423   |        |
| C2 | 15340 | adipose | Cdk5rap1      | 66971  |
| C2 | 15393 | adipose | Sec22a        | 317717 |
| C2 | 15403 | adipose | C330046G03Rik | 252974 |
| C2 | 15406 | adipose | Mdfi          | 17240  |
| C2 | 15413 | adipose | Brp44l        | 55951  |
| C2 | 15427 | adipose | MMT00009375   |        |
| C2 | 15436 | adipose | 3000002C10Rik | 378954 |
| C2 | 15489 | adipose | Tmem158       | 72309  |
| C2 | 15499 | adipose | Dact1         | 59036  |
| C2 | 15500 | adipose | MMT00081411   |        |
| C2 | 15536 | adipose | Garnl4        | 380711 |
| C2 | 15540 | adipose | C2            | 12263  |
| C2 | 15594 | adipose | Gm1967        | 381411 |
| C2 | 15602 | adipose | Sctr          | 319229 |
| C2 | 15632 | adipose | Gsc           | 14836  |
| C2 | 15668 | adipose | 1810032O08Rik | 66293  |
| C2 | 15672 | adipose | Ahi1          | 52906  |
| C2 | 15711 | adipose | Anxa1         | 16952  |
| C2 | 15718 | adipose | MacroD2       | 72899  |
| C2 | 15740 | adipose | 1810010H24Rik | 69066  |
| C2 | 15742 | adipose | 2900062L11Rik | 76976  |
| C2 | 15800 | adipose | MMT00023224   | 66449  |
| C2 | 15830 | adipose | Sema5a        | 20356  |
| C2 | 15839 | adipose | MMT00045078   |        |
| C2 | 15841 | adipose | Ndufb6        | 230075 |
| C2 | 15862 | adipose | Mrap          | 77037  |
| C2 | 15882 | adipose | AA986860      | 212439 |
| C2 | 15892 | adipose | Slc22a5       | 20520  |
| C2 | 15907 | adipose | Hyou1         | 12282  |
| C2 | 15926 | adipose | Kctd20        | 66989  |

|    |       |         |               |        |
|----|-------|---------|---------------|--------|
| C2 | 15931 | adipose | Ces3          | 104158 |
| C2 | 15996 | adipose | Grtp1         | 66790  |
| C2 | 16006 | adipose | Anxa2         | 12306  |
| C2 | 16032 | adipose | Cyp27a1       | 104086 |
| C2 | 16052 | adipose | Tsg101        | 22088  |
| C2 | 16077 | adipose | Mocs2         | 17434  |
| C2 | 16097 | adipose | Dnmt3l        | 54427  |
| C2 | 16104 | adipose | Ugt3a2        | 223337 |
| C2 | 16115 | adipose | Mup3          | 17842  |
| C2 | 16130 | adipose | Gosr2         | 56494  |
| C2 | 16164 | adipose | Fdps          | 110196 |
| C2 | 16212 | adipose | Med19         | 381379 |
| C2 | 16248 | adipose | Cdr2          | 12585  |
| C2 | 16270 | adipose | Lgals12       | 56072  |
| C2 | 16331 | adipose | Setd8         | 67956  |
| C2 | 16335 | adipose | Otop1         | 21906  |
| C2 | 16366 | adipose | Glis3         | 226075 |
| C2 | 16380 | adipose | Vasn          | 246154 |
| C2 | 16385 | adipose | MMT00073590   |        |
| C2 | 16397 | adipose | 1700112E06Rik | 76633  |
| C2 | 16412 | adipose | Tank          | 21353  |
| C2 | 16430 | adipose | Vac14         | 234729 |
| C2 | 16437 | adipose | Tkt           | 21881  |
| C2 | 16449 | adipose | BC004044      | 80752  |
| C2 | 16456 | adipose | Il33          | 77125  |
| C2 | 16517 | adipose | D4Wsu53e      | 27981  |
| C2 | 16525 | adipose | Lbp           | 16803  |
| C2 | 16535 | adipose | Kctd9         | 105440 |
| C2 | 16547 | adipose | 1500002O20Rik | 71997  |
| C2 | 16559 | adipose | MMT00001400   |        |
| C2 | 16586 | adipose | Adamts8       | 30806  |
| C2 | 16606 | adipose | 4930579G22Rik | 69034  |
| C2 | 16636 | adipose | Tmem189       | 407243 |
| C2 | 16704 | adipose | Ppif          | 105675 |
| C2 | 16730 | adipose | Osbpl3        | 71720  |
| C2 | 16761 | adipose | MMT00018149   |        |
| C2 | 16777 | adipose | MMT00053707   |        |
| C2 | 16788 | adipose | Imp3          | 102462 |
| C2 | 16796 | adipose | Agt           | 11606  |
| C2 | 16857 | adipose | Perp          | 64058  |
| C2 | 16946 | adipose | lvns1abp      | 117198 |
| C2 | 16958 | adipose | Gpc1          | 14733  |
| C2 | 16965 | adipose | Gstt2         | 14872  |
| C2 | 16990 | adipose | Sc4mol        | 66234  |
| C2 | 16994 | adipose | Trove2        | 20822  |
| C2 | 17022 | adipose | MMT00055891   |        |
| C2 | 17036 | adipose | Tctn3         | 67590  |
| C2 | 17136 | adipose | Slc35a4       | 67843  |
| C2 | 17137 | adipose | Nudt4         | 71207  |
| C2 | 17189 | adipose | Gm263         | 238333 |
| C2 | 17269 | adipose | Spsb1         | 74646  |

|    |       |         |               |           |
|----|-------|---------|---------------|-----------|
| C2 | 17282 | adipose | Pdhb          | 68263     |
| C2 | 17292 | adipose | Atp6v1b2      | 11966     |
| C2 | 17328 | adipose | H2afv         | 77605     |
| C2 | 17329 | adipose | MMT00035807   |           |
| C2 | 17333 | adipose | Slc25a10      | 27376     |
| C2 | 17343 | adipose | Timm8a1       | 30058     |
| C2 | 17344 | adipose | Lonrf2        | 381338    |
| C2 | 17376 | adipose | MMT00032526   |           |
| C2 | 17421 | adipose | MMT00002048   |           |
| C2 | 17429 | adipose | Tpi1          | 21991     |
| C2 | 17444 | adipose | Tuba1a        | 22142     |
| C2 | 17485 | adipose | Ndufab1       | 70316     |
| C2 | 17497 | adipose | Ptges         | 64292     |
| C2 | 17503 | adipose | Cnnm2         | 94219     |
| C2 | 17512 | adipose | EG433216      | 433216    |
| C2 | 17568 | adipose | Rexo2         | 104444    |
| C2 | 17569 | adipose | 1810058l24Rik | 67705     |
| C2 | 17646 | adipose | C4b           | 12268     |
| C2 | 17690 | adipose | Mtap7d3       | 320923    |
| C2 | 17703 | adipose | Large         | 16795     |
| C2 | 17801 | adipose | Syt12         | 171180    |
| C2 | 17811 | adipose | D10ErtD761e   | 52706     |
| C2 | 17826 | adipose | 3300001G02Rik | 78372     |
| C2 | 17837 | adipose | Polr3gl       | 69870     |
| C2 | 17852 | adipose | Cpeb2         | 231207    |
| C2 | 17857 | adipose | C1qtnf7       | 109323    |
| C2 | 17882 | adipose | Ddx26b        | 236790    |
| C2 | 17888 | adipose | MMT00075624   | 70772     |
| C2 | 17900 | adipose | lft81         | 12589     |
| C2 | 17956 | adipose | Serpina1d     | 20703     |
| C2 | 17981 | adipose | MMT00036029   | 268527    |
| C2 | 18045 | adipose | Klk10         | 69540     |
| C2 | 18049 | adipose | Ribc1         | 66611     |
| C2 | 18061 | adipose | MMT00002521   |           |
| C2 | 18065 | adipose | Peo1          | 226153    |
| C2 | 18069 | adipose | Gpt           | 76282     |
| C2 | 18100 | adipose | Sdsl          | 257635    |
| C2 | 18103 | adipose | Spaca1        | 67652     |
| C2 | 18113 | adipose | MMT00034400   | 100047043 |
| C2 | 18114 | adipose | Lmtk2         | 231876    |
| C2 | 18128 | adipose | Tpi1          | 21991     |
| C2 | 18173 | adipose | Arpp19        | 59046     |
| C2 | 18176 | adipose | Aqp11         | 66333     |
| C2 | 18201 | adipose | MMT00060232   |           |
| C2 | 18212 | adipose | Ttc3          | 22129     |
| C2 | 18213 | adipose | Tomm40        | 53333     |
| C2 | 18218 | adipose | Sepx1         | 27361     |
| C2 | 18260 | adipose | Nid2          | 18074     |
| C2 | 18286 | adipose | Slc41a3       | 71699     |
| C2 | 18299 | adipose | MMT00035424   |           |
| C2 | 18397 | adipose | Ccng1         | 12450     |

|    |       |         |             |        |
|----|-------|---------|-------------|--------|
| C2 | 18474 | adipose | MMT00070175 | 671232 |
| C2 | 18483 | adipose | Mthfd1      | 108156 |
| C2 | 18495 | adipose | C2cd3       | 277939 |
| C2 | 18509 | adipose | MMT00038317 |        |
| C2 | 18513 | adipose | MMT00044275 |        |
| C2 | 18541 | adipose | Rab15       | 104886 |
| C2 | 18557 | adipose | Limch1      | 77569  |
| C2 | 18582 | adipose | Krtap6-2    | 16701  |
| C2 | 18586 | adipose | Tns1        | 21961  |
| C2 | 18609 | adipose | Lrrc1       | 214345 |
| C2 | 18642 | adipose | Hdac11      | 232232 |
| C2 | 18649 | adipose | Ccne1       | 12447  |
| C2 | 18693 | adipose | Klf4        | 16600  |
| C2 | 18711 | adipose | Usp10       | 22224  |
| C2 | 18743 | adipose | Ruvbl1      | 56505  |
| C2 | 18774 | adipose | MMT00054062 |        |
| C2 | 18778 | adipose | Prickle1    | 106042 |
| C2 | 18785 | adipose | Angptl4     | 57875  |
| C2 | 18789 | adipose | MMT00071096 |        |
| C2 | 18827 | adipose | Oprs1       | 18391  |
| C2 | 18851 | adipose | Apip        | 56369  |
| C2 | 18866 | adipose | MMT00038112 | 670717 |
| C2 | 18875 | adipose | EG636756    | 636756 |
| C2 | 18889 | adipose | Shq1        | 72171  |
| C2 | 18911 | adipose | Selenbp2    | 20342  |
| C2 | 18928 | adipose | Ttc28       | 209683 |
| C2 | 19004 | adipose | Pdk4        | 27273  |
| C2 | 19027 | adipose | MMT00058026 |        |
| C2 | 19030 | adipose | MMT00011246 |        |
| C2 | 19034 | adipose | Bag4        | 67384  |
| C2 | 19066 | adipose | MMT00012632 |        |
| C2 | 19067 | adipose | BC023882    | 231123 |
| C2 | 19071 | adipose | Actr10      | 56444  |
| C2 | 19094 | adipose | Fscn1       | 14086  |
| C2 | 19143 | adipose | Mrpl40      | 18100  |
| C2 | 19163 | adipose | Cadps2      | 320405 |
| C2 | 19169 | adipose | Atp10a      | 11982  |
| C2 | 19182 | adipose | Igsf2       | 630146 |
| C2 | 19195 | adipose | Reep6       | 70335  |
| C2 | 19226 | adipose | Nras        | 18176  |
| C2 | 19238 | adipose | Ttc35       | 66736  |
| C2 | 19244 | adipose | Impdh2      | 23918  |
| C2 | 19360 | adipose | Aco1        | 11428  |
| C2 | 19394 | adipose | Decr1       | 67460  |
| C2 | 19410 | adipose | Glb1        | 12091  |
| C2 | 19414 | adipose | MMT00065577 |        |
| C2 | 19465 | adipose | Hacl1       | 56794  |
| C2 | 19590 | adipose | MMT00026015 |        |
| C2 | 19620 | adipose | Zfand2a     | 100494 |
| C2 | 19661 | adipose | Epb4.1l2    | 13822  |
| C2 | 19675 | adipose | Rer1        | 67830  |

|    |       |         |               |        |
|----|-------|---------|---------------|--------|
| C2 | 19698 | adipose | Sema3c        | 20348  |
| C2 | 19701 | adipose | 9930021J17Rik | 229488 |
| C2 | 19730 | adipose | Mamdc2        | 71738  |
| C2 | 19748 | adipose | Cpa2          | 232680 |
| C2 | 19814 | adipose | 4930458L03Rik | 78124  |
| C2 | 19840 | adipose | Kcnip3        | 56461  |
| C2 | 19854 | adipose | Kcnj14        | 211480 |
| C2 | 19952 | adipose | Tlcd1         | 68385  |
| C2 | 19966 | adipose | Thap4         | 67026  |
| C2 | 19987 | adipose | Tspan13       | 66109  |
| C2 | 20017 | adipose | MMT00006294   |        |
| C2 | 20024 | adipose | Lrrc32        | 434215 |
| C2 | 20087 | adipose | Cd44          | 12505  |
| C2 | 20122 | adipose | Tmem86a       | 67893  |
| C2 | 20124 | adipose | 1700021F05Rik | 67851  |
| C2 | 20135 | adipose | Gramd3        | 107022 |
| C2 | 20191 | adipose | Clca5         | 229933 |
| C2 | 20220 | adipose | MMT00080766   | 664870 |
| C2 | 20223 | adipose | Sc5d          | 235293 |
| C2 | 20267 | adipose | Lgals1        | 16852  |
| C2 | 20312 | adipose | Htt           | 15194  |
| C2 | 20362 | adipose | Sh3bp5l       | 79566  |
| C2 | 20416 | adipose | Cnn1          | 12797  |
| C2 | 20421 | adipose | Cdkn2c        | 12580  |
| C2 | 20460 | adipose | Emcn          | 59308  |
| C2 | 20473 | adipose | Gpr137b-ps    | 664862 |
| C2 | 20482 | adipose | Vwa1          | 246228 |
| C2 | 20498 | adipose | Porcn         | 53627  |
| C2 | 20541 | adipose | Vapa          | 30960  |
| C2 | 20553 | adipose | Echdc2        | 52430  |
| C2 | 20572 | adipose | Rdh5          | 19682  |
| C2 | 20585 | adipose | Snx7          | 76561  |
| C2 | 20648 | adipose | B430212C06Rik | 338360 |
| C2 | 20705 | adipose | Supv3l1       | 338359 |
| C2 | 20729 | adipose | Ttc28         | 209683 |
| C2 | 20740 | adipose | Ola1          | 67059  |
| C2 | 20742 | adipose | Birc2         | 11797  |
| C2 | 20784 | adipose | Csad          | 246277 |
| C2 | 20796 | adipose | E130113E03Rik | 319433 |
| C2 | 20804 | adipose | Eno1          | 13806  |
| C2 | 20811 | adipose | Dlst          | 78920  |
| C2 | 20831 | adipose | MMT00057242   |        |
| C2 | 20867 | adipose | Cnih          | 12793  |
| C2 | 20880 | adipose | Raf1          | 110157 |
| C2 | 20946 | adipose | Nufip2        | 68564  |
| C2 | 20973 | adipose | Stx2          | 13852  |
| C2 | 20991 | adipose | 2900093K20Rik | 68037  |
| C2 | 21003 | adipose | Uckl1         | 68556  |
| C2 | 21013 | adipose | Vnn3          | 26464  |
| C2 | 21014 | adipose | Usp54         | 78787  |
| C2 | 21078 | adipose | MMT00067065   |        |



|    |       |         |               |           |
|----|-------|---------|---------------|-----------|
| C2 | 21084 | adipose | Nkiras2       | 71966     |
| C2 | 21109 | adipose | Col8a2        | 329941    |
| C2 | 21111 | adipose | Tmem132c      | 208213    |
| C2 | 21130 | adipose | MMT00011706   | 66449     |
| C2 | 21143 | adipose | Ypel3         | 66090     |
| C2 | 21173 | adipose | Rassf6        | 73246     |
| C2 | 21195 | adipose | Tbc1d7        | 67046     |
| C2 | 21202 | adipose | Acly          | 104112    |
| C2 | 21236 | adipose | Glrx5         | 73046     |
| C2 | 21237 | adipose | Poli          | 26447     |
| C2 | 21313 | adipose | Rhou          | 69581     |
| C2 | 21314 | adipose | Mycbp2        | 105689    |
| C2 | 21320 | adipose | Kcne1l        | 66240     |
| C2 | 21364 | adipose | Ppm1h         | 319468    |
| C2 | 21388 | adipose | Gbe1          | 74185     |
| C2 | 21412 | adipose | Afap1l1       | 106877    |
| C2 | 21448 | adipose | Paqr7         | 71904     |
| C2 | 21471 | adipose | Stmn2         | 20257     |
| C2 | 21506 | adipose | St7           | 64213     |
| C2 | 21583 | adipose | Gstz1         | 14874     |
| C2 | 21609 | adipose | MMT00039978   |           |
| C2 | 21640 | adipose | Hspa14        | 50497     |
| C2 | 21666 | adipose | Ncor1         | 20185     |
| C2 | 21703 | adipose | Tmem38b       | 52076     |
| C2 | 21765 | adipose | Arpp19        | 59046     |
| C2 | 21794 | adipose | Pfkip         | 56421     |
| C2 | 21799 | adipose | Cops5         | 26754     |
| C2 | 21823 | adipose | Atp6v0d1      | 11972     |
| C2 | 21827 | adipose | MMT00010458   | 403088    |
| C2 | 21839 | adipose | Gprasp1       | 67298     |
| C2 | 21881 | adipose | MMT00038325   |           |
| C2 | 21937 | adipose | MMT00015325   |           |
| C2 | 21966 | adipose | Pcp4l1        | 66425     |
| C2 | 21970 | adipose | Eif3f         | 66085     |
| C2 | 21983 | adipose | C130022K22Rik | 232236    |
| C2 | 21998 | adipose | Nomo1         | 211548    |
| C2 | 22012 | adipose | Itgae         | 16407     |
| C2 | 22135 | adipose | MMT00033583   |           |
| C2 | 22147 | adipose | Ap1s1         | 11769     |
| C2 | 22161 | adipose | Tmem132a      | 98170     |
| C2 | 22171 | adipose | MMT00012636   | 100042265 |
| C2 | 22208 | adipose | Me3           | 109264    |
| C2 | 22217 | adipose | Flvcr2        | 217721    |
| C2 | 22238 | adipose | Sardh         | 192166    |
| C2 | 22260 | adipose | Slc38a4       | 69354     |
| C2 | 22286 | adipose | Mmachc        | 67096     |
| C2 | 22302 | adipose | MMT00041810   |           |
| C2 | 22338 | adipose | Unc119        | 22248     |
| C2 | 22361 | adipose | Sephs2        | 20768     |
| C2 | 22371 | adipose | 1810063B05Rik | 67892     |
| C2 | 22390 | adipose | Dhcr7         | 13360     |

|    |       |         |               |        |
|----|-------|---------|---------------|--------|
| C2 | 22406 | adipose | Vnn1          | 22361  |
| C2 | 22409 | adipose | Larp2         | 214048 |
| C2 | 22463 | adipose | Gorasp2       | 70231  |
| C2 | 22470 | adipose | Ppargc1b      | 170826 |
| C2 | 22478 | adipose | Tanc1         | 66860  |
| C2 | 22493 | adipose | Slc35a2       | 22232  |
| C2 | 22508 | adipose | Setd8         | 67956  |
| C2 | 22520 | adipose | Sec13         | 110379 |
| C2 | 22534 | adipose | Pik3r2        | 18709  |
| C2 | 22579 | adipose | Eif4a2        | 13682  |
| C2 | 22624 | adipose | Kcnj15        | 16516  |
| C2 | 22627 | adipose | Adck5         | 268822 |
| C2 | 22631 | adipose | MMT00054932   |        |
| C2 | 22732 | adipose | Cyb5b         | 66427  |
| C2 | 22744 | adipose | 9-Sep         | 53860  |
| C2 | 22759 | adipose | Btbd10        | 68815  |
| C2 | 22763 | adipose | Alcam         | 11658  |
| C2 | 22771 | adipose | Dhx37         | 208144 |
| C2 | 22781 | adipose | Hibch         | 227095 |
| C2 | 22821 | adipose | Tmem135       | 72759  |
| C2 | 22833 | adipose | Acat2         | 110460 |
| C2 | 22871 | adipose | Pgrmc2        | 70804  |
| C2 | 22907 | adipose | MMT00054594   |        |
| C2 | 22927 | adipose | 1700001L05Rik | 69291  |
| C2 | 22943 | adipose | Tpd5211       | 21987  |
| C2 | 22981 | adipose | Bcar3         | 29815  |
| C2 | 23022 | adipose | Kif3a         | 16568  |
| C2 | 23059 | adipose | Fbxl20        | 72194  |
| C2 | 23088 | adipose | 1700009N14Rik | 75471  |
| C2 | 23141 | adipose | Ebf2          | 13592  |
| C2 | 23149 | adipose | Nln           | 75805  |
| C2 | 23183 | adipose | Nnmt          | 18113  |
| C2 | 23189 | adipose | Rbm28         | 68272  |
| C2 | 23217 | adipose | Acyp2         | 75572  |
| C2 | 23245 | adipose | Nfib          | 18028  |
| C2 | 23267 | adipose | Hsd17b11      | 114664 |
| C2 | 23324 | adipose | Prdx6         | 11758  |
| C2 | 23430 | adipose | Aifm3         | 72168  |
| C2 | 23445 | adipose | Crlf1         | 12931  |
| C2 | 23465 | adipose | Afp           | 11576  |
| C2 | 23563 | adipose | MMT00004841   |        |
| C2 | 23604 | adipose | Ephb3         | 13845  |
| C2 | 23623 | adipose | 2010305C02Rik | 380712 |
| C2 | 23626 | adipose | MMT00003764   |        |
| C2 | 23638 | adipose | Ddr1          | 12305  |
| C2 | 23640 | adipose | Bdh1          | 71911  |
| C2 | 294   | liver   | Ehhadh        | 74147  |
| C2 | 482   | liver   | Rnf43         | 207742 |
| C2 | 607   | liver   | Me1           | 17436  |
| C2 | 760   | liver   | Akr1c19       | 432720 |
| C2 | 874   | liver   | Aldh1a7       | 26358  |

|    |      |       |               |        |
|----|------|-------|---------------|--------|
| C2 | 1112 | liver | Ccdc56        | 52469  |
| C2 | 1126 | liver | Slc25a14      | 20523  |
| C2 | 1129 | liver | Gsta4         | 14860  |
| C2 | 1185 | liver | Atxn2         | 20239  |
| C2 | 1359 | liver | 4931406C07Rik | 70984  |
| C2 | 1637 | liver | MMT00071316   |        |
| C2 | 1717 | liver | Ndufs2        | 226646 |
| C2 | 1748 | liver | Rbp1          | 19659  |
| C2 | 2049 | liver | Gsta3         | 14859  |
| C2 | 2051 | liver | Ddx27         | 228889 |
| C2 | 2127 | liver | Ldha          | 16828  |
| C2 | 2282 | liver | Cbx8          | 30951  |
| C2 | 2314 | liver | Zswim6        | 67263  |
| C2 | 2631 | liver | Aldh1l1       | 107747 |
| C2 | 2721 | liver | Inmt          | 21743  |
| C2 | 2741 | liver | 3230401D17Rik | 66680  |
| C2 | 3282 | liver | Ndufs6        | 407785 |
| C2 | 3345 | liver | EG620934      | 620934 |
| C2 | 3354 | liver | Ropn1l        | 252967 |
| C2 | 3356 | liver | Adhfe1        | 76187  |
| C2 | 3377 | liver | Cs            | 12974  |
| C2 | 3446 | liver | Eno1          | 13806  |
| C2 | 3449 | liver | Hes6          | 55927  |
| C2 | 3504 | liver | Anpep         | 16790  |
| C2 | 3556 | liver | AI661453      | 224833 |
| C2 | 3562 | liver | MMT00011909   |        |
| C2 | 3565 | liver | MMT00045908   |        |
| C2 | 3696 | liver | Elovl6        | 170439 |
| C2 | 3754 | liver | Dock6         | 319899 |
| C2 | 3756 | liver | Chrne         | 11448  |
| C2 | 3832 | liver | Sdhb          | 67680  |
| C2 | 3952 | liver | Bcar1         | 12927  |
| C2 | 4056 | liver | Tnfaip8l1     | 66443  |
| C2 | 4141 | liver | Pank4         | 269614 |
| C2 | 4351 | liver | Plxnb1        | 235611 |
| C2 | 4517 | liver | Itih3         | 16426  |
| C2 | 4579 | liver | Dpys          | 64705  |
| C2 | 4619 | liver | Htra3         | 78558  |
| C2 | 4674 | liver | Cxcl12        | 20315  |
| C2 | 4752 | liver | Pik3r4        | 75669  |
| C2 | 5133 | liver | 6430517E21Rik | 240843 |
| C2 | 5425 | liver | Ung           | 22256  |
| C2 | 5435 | liver | Lins2         | 72635  |
| C2 | 5680 | liver | Lrg1          | 76905  |
| C2 | 5801 | liver | MMT00042142   |        |
| C2 | 5884 | liver | Gstm2         | 14863  |
| C2 | 6044 | liver | Sucnr1        | 84112  |
| C2 | 6085 | liver | MMT00007454   |        |
| C2 | 6086 | liver | Fgl1          | 234199 |
| C2 | 6189 | liver | MMT00020987   |        |
| C2 | 6193 | liver | Lactb2        | 212442 |

|    |       |       |                    |           |
|----|-------|-------|--------------------|-----------|
| C2 | 6263  | liver | Slc7a4             | 224022    |
| C2 | 6329  | liver | Cyp2b10            | 13088     |
| C2 | 6392  | liver | Pdcl3              | 68833     |
| C2 | 6420  | liver | Mipep              | 70478     |
| C2 | 6461  | liver | Mttr3              | 74302     |
| C2 | 6482  | liver | Nudt2              | 66401     |
| C2 | 6502  | liver | Col15a1            | 12819     |
| C2 | 6573  | liver | Pecr               | 111175    |
| C2 | 6581  | liver | Cdc42ep1           | 104445    |
| C2 | 6597  | liver | Slc9a5             | 277973    |
| C2 | 6759  | liver | Sqle               | 20775     |
| C2 | 6767  | liver | Erc2               | 238988    |
| C2 | 6812  | liver | MMT00040104        |           |
| C2 | 6816  | liver | Slc46a3            | 71706     |
| C2 | 7320  | liver | MMT00051732        |           |
| C2 | 7430  | liver | Gpr137             | 107173    |
| C2 | 7602  | liver | Pcca               | 110821    |
| C2 | 7659  | liver | Rab30              | 75985     |
| C2 | 7725  | liver | 3230401D17Rik      | 66680     |
| C2 | 7753  | liver | Gfm1               | 28030     |
| C2 | 7887  | liver | 4930418G15Rik      | 69312     |
| C2 | 7888  | liver | Pigz               | 239827    |
| C2 | 7957  | liver | MMT00074126        |           |
| C2 | 8067  | liver | Taok3              | 330177    |
| C2 | 8217  | liver | Bhmt               | 12116     |
| C2 | 8439  | liver | Slc25a33           | 70556     |
| C2 | 8444  | liver | Rdh16              | 19683     |
| C2 | 8477  | liver | MMT00002146        | 100041835 |
| C2 | 8632  | liver | Igfbp1             | 16006     |
| C2 | 8773  | liver | MMT00027093        |           |
| C2 | 8815  | liver | Mx1                | 17857     |
| C2 | 8957  | liver | Zfp511             | 69752     |
| C2 | 9408  | liver | Hmgcs2             | 15360     |
| C2 | 9427  | liver | Nqo2               | 18105     |
| C2 | 9474  | liver | Cops7b             | 26895     |
| C2 | 9713  | liver | Ykt6               | 56418     |
| C2 | 9842  | liver | Qdpr               | 110391    |
| C2 | 9981  | liver | Snrpn              | 20646     |
| C2 | 9999  | liver | Zswim3             | 67538     |
| C2 | 10100 | liver | Mterfd2            | 69821     |
| C2 | 10132 | liver | Ces2               | 234671    |
| C2 | 10299 | liver | Rad52              | 19365     |
| C2 | 10367 | liver | Coq7               | 12850     |
| C2 | 10532 | liver | MMT00057790        |           |
| C2 | 10554 | liver | ENSMUSG00000074179 | 100042314 |
| C2 | 10598 | liver | MMT00011231        |           |
| C2 | 10961 | liver | Pgd                | 110208    |
| C2 | 11014 | liver | Hibadh             | 58875     |
| C2 | 11086 | liver | Pnpla5             | 75772     |
| C2 | 11104 | liver | MMT00014375        |           |
| C2 | 11234 | liver | Pygl               | 110095    |

|    |       |       |               |        |
|----|-------|-------|---------------|--------|
| C2 | 11375 | liver | Derl2         | 116891 |
| C2 | 11385 | liver | MMT00081444   |        |
| C2 | 11462 | liver | Gpam          | 14732  |
| C2 | 11590 | liver | Cbx4          | 12418  |
| C2 | 11663 | liver | Dusp5         | 240672 |
| C2 | 11946 | liver | MMT00030953   |        |
| C2 | 11981 | liver | Sh3bp2        | 24055  |
| C2 | 12032 | liver | Cdca7         | 66953  |
| C2 | 12143 | liver | Thyn1         | 77862  |
| C2 | 12219 | liver | Cyb5b         | 66427  |
| C2 | 12315 | liver | Srebf1        | 20787  |
| C2 | 12499 | liver | Avpi1         | 69534  |
| C2 | 12556 | liver | Ass1          | 11898  |
| C2 | 12910 | liver | 1110028A07Rik | 68680  |
| C2 | 12938 | liver | Fhod3         | 225288 |
| C2 | 12955 | liver | Atp5o         | 28080  |
| C2 | 13120 | liver | Lactb         | 80907  |
| C2 | 13142 | liver | Wdr81         | 192652 |
| C2 | 13286 | liver | Slc23a1       | 20522  |
| C2 | 13293 | liver | Gsta2         | 14858  |
| C2 | 13304 | liver | Gadd45b       | 17873  |
| C2 | 13341 | liver | Tnip2         | 231130 |
| C2 | 13431 | liver | MMT00038058   |        |
| C2 | 13512 | liver | Tmem144       | 70652  |
| C2 | 13513 | liver | Trim25        | 217069 |
| C2 | 13716 | liver | D5Ert579e     | 320661 |
| C2 | 14017 | liver | Ces5          | 234673 |
| C2 | 14055 | liver | MMT00050438   |        |
| C2 | 14138 | liver | Anks4b        | 72074  |
| C2 | 14147 | liver | Acss2         | 60525  |
| C2 | 14151 | liver | Slc44a1       | 100434 |
| C2 | 14285 | liver | C1qbp         | 12261  |
| C2 | 14288 | liver | Atmin         | 234776 |
| C2 | 14314 | liver | 2810405K02Rik | 66469  |
| C2 | 14323 | liver | Scarb1        | 20778  |
| C2 | 14690 | liver | Atf4          | 11911  |
| C2 | 15059 | liver | Mogat1        | 68393  |
| C2 | 15205 | liver | MMT00030262   |        |
| C2 | 15367 | liver | Vegfc         | 22341  |
| C2 | 15500 | liver | MMT00081411   |        |
| C2 | 15849 | liver | Pacs2         | 217893 |
| C2 | 16114 | liver | Lyplal1       | 226791 |
| C2 | 16222 | liver | Adipor2       | 68465  |
| C2 | 16328 | liver | Slc10a2       | 20494  |
| C2 | 16336 | liver | 2310040A07Rik | 69638  |
| C2 | 16486 | liver | Slc25a22      | 68267  |
| C2 | 16525 | liver | Lbp           | 16803  |
| C2 | 16661 | liver | Tmprss4       | 214523 |
| C2 | 16823 | liver | Inhbb         | 16324  |
| C2 | 16824 | liver | 2310076L09Rik | 66968  |
| C2 | 16842 | liver | 2310003L22Rik | 69487  |

|    |       |       |             |           |
|----|-------|-------|-------------|-----------|
| C2 | 17046 | liver | Fggy        | 75578     |
| C2 | 17090 | liver | Lass2       | 76893     |
| C2 | 17225 | liver | Impa2       | 114663    |
| C2 | 17244 | liver | Myef2       | 17876     |
| C2 | 17282 | liver | Pdhb        | 68263     |
| C2 | 17398 | liver | MMT00045090 |           |
| C2 | 17408 | liver | lqwd1       | 74106     |
| C2 | 17486 | liver | Cnn2        | 12798     |
| C2 | 17563 | liver | Aldh1l1     | 107747    |
| C2 | 17800 | liver | Lrtm1       | 319476    |
| C2 | 17852 | liver | Cpeb2       | 231207    |
| C2 | 17887 | liver | Cryl1       | 68631     |
| C2 | 17995 | liver | Hist1h4d    | 319156    |
| C2 | 17996 | liver | Igfbp2      | 16008     |
| C2 | 18113 | liver | MMT00034400 | 100047043 |
| C2 | 18148 | liver | Cables1     | 63955     |
| C2 | 18173 | liver | Arpp19      | 59046     |
| C2 | 18201 | liver | MMT00060232 |           |
| C2 | 18461 | liver | Klra5       | 16636     |
| C2 | 18495 | liver | C2cd3       | 277939    |
| C2 | 18515 | liver | Ddx28       | 71986     |
| C2 | 18549 | liver | Robo1       | 19876     |
| C2 | 18631 | liver | Gja1        | 14609     |
| C2 | 18683 | liver | Ctsa        | 19025     |
| C2 | 18738 | liver | Hadha       | 97212     |
| C2 | 19010 | liver | Bhmt        | 12116     |
| C2 | 19056 | liver | Zfp7        | 223669    |
| C2 | 19066 | liver | MMT00012632 |           |
| C2 | 19200 | liver | Hemk1       | 69536     |
| C2 | 19573 | liver | Serpine1    | 18787     |
| C2 | 19737 | liver | Enpp1       | 18605     |
| C2 | 19766 | liver | Slc26a4     | 23985     |
| C2 | 20019 | liver | Qdpr        | 110391    |
| C2 | 20058 | liver | Dnaic1      | 68922     |
| C2 | 20079 | liver | MMT00019254 |           |
| C2 | 20246 | liver | Pdia5       | 72599     |
| C2 | 20279 | liver | Apoa1bp     | 246703    |
| C2 | 20328 | liver | Csl         | 71832     |
| C2 | 20498 | liver | Porcn       | 53627     |
| C2 | 20567 | liver | Ggt6        | 71522     |
| C2 | 20715 | liver | Tmem179b    | 67706     |
| C2 | 20740 | liver | Ola1        | 67059     |
| C2 | 20804 | liver | Eno1        | 13806     |
| C2 | 21160 | liver | Irs2        | 384783    |
| C2 | 21202 | liver | Acly        | 104112    |
| C2 | 21214 | liver | Scd1        | 20249     |
| C2 | 21239 | liver | Ctdp1       | 67655     |
| C2 | 21369 | liver | Cd4         | 12504     |
| C2 | 21388 | liver | Gbe1        | 74185     |
| C2 | 21508 | liver | Echdc1      | 52665     |
| C2 | 21575 | liver | Cyp2c55     | 72082     |

|    |       |         |               |           |
|----|-------|---------|---------------|-----------|
| C2 | 21607 | liver   | Aldh1a1       | 11668     |
| C2 | 21727 | liver   | Khk           | 16548     |
| C2 | 21765 | liver   | Arpp19        | 59046     |
| C2 | 21793 | liver   | Pla2g12a      | 66350     |
| C2 | 21937 | liver   | MMT00015325   |           |
| C2 | 21966 | liver   | Pcp411        | 66425     |
| C2 | 22046 | liver   | Cml4          | 68396     |
| C2 | 22111 | liver   | Ttn           | 22138     |
| C2 | 22137 | liver   | Nudt7         | 67528     |
| C2 | 22138 | liver   | Ang           | 11727     |
| C2 | 22217 | liver   | Flvcr2        | 217721    |
| C2 | 22321 | liver   | Apol7a        | 75761     |
| C2 | 22406 | liver   | Vnn1          | 22361     |
| C2 | 22462 | liver   | MMT00026054   | 100041835 |
| C2 | 22562 | liver   | Sdha          | 66945     |
| C2 | 22732 | liver   | Cyb5b         | 66427     |
| C2 | 22770 | liver   | Slc27a2       | 26458     |
| C2 | 22821 | liver   | Tmem135       | 72759     |
| C2 | 22907 | liver   | MMT00054594   |           |
| C2 | 22954 | liver   | Slc25a30      | 67554     |
| C2 | 22978 | liver   | MMT00043176   |           |
| C2 | 22998 | liver   | Ass1          | 11898     |
| C2 | 23008 | liver   | Ctsz          | 64138     |
| C2 | 23026 | liver   | Apom          | 55938     |
| C2 | 23549 | liver   | Es22          | 13897     |
| C2 | 23555 | liver   | BC026585      | 226527    |
| C2 | 23623 | liver   | 2010305C02Rik | 380712    |
| C2 | 23640 | liver   | Bdh1          | 71911     |
| C2 | 23648 | liver   | Pigy          | 66459     |
| C2 | 23668 | liver   | Gse1          | 382034    |
| C3 | 143   | adipose | Gvin1         | 74558     |
| C3 | 860   | adipose | Psmb10        | 19171     |
| C3 | 1091  | adipose | Acsl5         | 433256    |
| C3 | 1513  | adipose | Gzmb          | 14939     |
| C3 | 1654  | adipose | Dhx58         | 80861     |
| C3 | 1797  | adipose | Batf2         | 74481     |
| C3 | 2200  | adipose | BC006779      | 229003    |
| C3 | 2224  | adipose | Oasl2         | 23962     |
| C3 | 2550  | adipose | MMT00036681   |           |
| C3 | 2627  | adipose | Ccl12         | 20293     |
| C3 | 2752  | adipose | Fcgr1         | 14129     |
| C3 | 2801  | adipose | H2-BI         | 14963     |
| C3 | 3036  | adipose | Slamf9        | 98365     |
| C3 | 3523  | adipose | Trim34        | 94094     |
| C3 | 3659  | adipose | EG236451      | 236451    |
| C3 | 3683  | adipose | Oas2          | 246728    |
| C3 | 3704  | adipose | H2-Q7         | 15018     |
| C3 | 4114  | adipose | Parp12        | 243771    |
| C3 | 4284  | adipose | Irf1          | 16362     |
| C3 | 4413  | adipose | MMT00030347   |           |
| C3 | 4426  | adipose | ligp2         | 54396     |

|    |       |         |                    |           |
|----|-------|---------|--------------------|-----------|
| C3 | 4508  | adipose | lfit1              | 15957     |
| C3 | 4516  | adipose | Rsad2              | 58185     |
| C3 | 4694  | adipose | MMT00046622        |           |
| C3 | 5044  | adipose | lfi35              | 70110     |
| C3 | 5216  | adipose | Spnb5              | 640524    |
| C3 | 5250  | adipose | lfit2              | 15958     |
| C3 | 5336  | adipose | Timeless           | 21853     |
| C3 | 5556  | adipose | Ccl4               | 20303     |
| C3 | 5765  | adipose | lfitm2             | 80876     |
| C3 | 5845  | adipose | l18bp              | 16068     |
| C3 | 5853  | adipose | Trim30             | 20128     |
| C3 | 5949  | adipose | Zbp1               | 58203     |
| C3 | 6072  | adipose | C1qc               | 12262     |
| C3 | 6383  | adipose | Gbp2               | 14469     |
| C3 | 6576  | adipose | Slfn2              | 20556     |
| C3 | 6587  | adipose | lrf9               | 16391     |
| C3 | 6595  | adipose | Oas1a              | 246730    |
| C3 | 6615  | adipose | 1810023F06Rik      | 217845    |
| C3 | 6779  | adipose | Gbp6               | 229900    |
| C3 | 6806  | adipose | Agrn               | 11603     |
| C3 | 6824  | adipose | lrf7               | 54123     |
| C3 | 6866  | adipose | Gls                | 14660     |
| C3 | 6910  | adipose | Ly6c2              | 100093633 |
| C3 | 7069  | adipose | Ube1l              | 74153     |
| C3 | 7105  | adipose | Plac8              | 231507    |
| C3 | 7284  | adipose | MMT00008674        |           |
| C3 | 7879  | adipose | lfitm3             | 66141     |
| C3 | 7945  | adipose | Gpc2               | 71951     |
| C3 | 7973  | adipose | Lgals9             | 16859     |
| C3 | 8325  | adipose | Psme2              | 19188     |
| C3 | 8547  | adipose | Gbp4               | 17472     |
| C3 | 8555  | adipose | H2-M3              | 14991     |
| C3 | 8659  | adipose | Psmb8              | 16913     |
| C3 | 8800  | adipose | Rnf213             | 629974    |
| C3 | 9100  | adipose | Ms4a6c             | 73656     |
| C3 | 9200  | adipose | Sdc1               | 20969     |
| C3 | 9320  | adipose | Rnf31              | 268749    |
| C3 | 9401  | adipose | Fcgr4              | 246256    |
| C3 | 9616  | adipose | AI451557           | 102084    |
| C3 | 9717  | adipose | Psmb9              | 16912     |
| C3 | 9820  | adipose | BC023105           | 207269    |
| C3 | 9862  | adipose | AW112010           | 107350    |
| C3 | 10109 | adipose | Gbp3               | 55932     |
| C3 | 10426 | adipose | Ly6f               | 17071     |
| C3 | 11009 | adipose | MMT00008885        | 330256    |
| C3 | 11198 | adipose | Gbp1               | 14468     |
| C3 | 11204 | adipose | AI451617           | 209387    |
| C3 | 11265 | adipose | Irgm               | 15944     |
| C3 | 11701 | adipose | Oas1c              | 114643    |
| C3 | 11845 | adipose | Psme1              | 19186     |
| C3 | 12024 | adipose | OTTMUSG00000016644 | 667373    |



|    |       |         |                    |        |
|----|-------|---------|--------------------|--------|
| C3 | 12126 | adipose | Znfx1              | 98999  |
| C3 | 12398 | adipose | lfi44              | 99899  |
| C3 | 12493 | adipose | Ankfy1             | 11736  |
| C3 | 12495 | adipose | Casp1              | 12362  |
| C3 | 12600 | adipose | lfi204             | 15951  |
| C3 | 12969 | adipose | Xaf1               | 327959 |
| C3 | 13156 | adipose | lfit3              | 15959  |
| C3 | 13309 | adipose | Tgtp               | 21822  |
| C3 | 13513 | adipose | Trim25             | 217069 |
| C3 | 13514 | adipose | Apol9b             | 71898  |
| C3 | 13654 | adipose | Stat1              | 20846  |
| C3 | 13656 | adipose | Ly86               | 17084  |
| C3 | 13749 | adipose | Parp9              | 80285  |
| C3 | 14002 | adipose | 1700055M20Rik      | 73407  |
| C3 | 14029 | adipose | 2810022L02Rik      | 67198  |
| C3 | 14258 | adipose | lfi47              | 15953  |
| C3 | 14260 | adipose | Mkl                | 74568  |
| C3 | 14506 | adipose | Slc15a3            | 65221  |
| C3 | 14603 | adipose | Ly6e               | 17069  |
| C3 | 14611 | adipose | Ddx60              | 234311 |
| C3 | 14880 | adipose | Ms4a4c             | 64380  |
| C3 | 14883 | adipose | ltgal              | 16408  |
| C3 | 15074 | adipose | Usp18              | 24110  |
| C3 | 15280 | adipose | Cxcl10             | 15945  |
| C3 | 15348 | adipose | Eif2ak2            | 19106  |
| C3 | 15449 | adipose | Mitd1              | 69028  |
| C3 | 15504 | adipose | Mx2                | 17858  |
| C3 | 15572 | adipose | Dtx3l              | 209200 |
| C3 | 15658 | adipose | Slfn8              | 276950 |
| C3 | 16102 | adipose | Cd72               | 12517  |
| C3 | 16182 | adipose | Oasl1              | 231655 |
| C3 | 16199 | adipose | Samhd1             | 56045  |
| C3 | 16238 | adipose | Nmi                | 64685  |
| C3 | 16521 | adipose | Adar               | 56417  |
| C3 | 16572 | adipose | D14Erttd668e       | 219132 |
| C3 | 16949 | adipose | ligp1              | 60440  |
| C3 | 17071 | adipose | Samd9l             | 209086 |
| C3 | 17197 | adipose | Igtp               | 16145  |
| C3 | 17412 | adipose | Aif1               | 11629  |
| C3 | 17920 | adipose | Nlgn2              | 216856 |
| C3 | 18164 | adipose | Gdf10              | 14560  |
| C3 | 18174 | adipose | Stat2              | 20847  |
| C3 | 18186 | adipose | Parp14             | 547253 |
| C3 | 18235 | adipose | Epsti1             | 108670 |
| C3 | 18289 | adipose | Tap1               | 21354  |
| C3 | 18762 | adipose | Herc5              | 67138  |
| C3 | 19026 | adipose | Isg15              | 53606  |
| C3 | 19189 | adipose | Sp100              | 20684  |
| C3 | 19708 | adipose | Ly6a               | 110454 |
| C3 | 19738 | adipose | Lgals3bp           | 19039  |
| C3 | 20083 | adipose | ENSMUSG00000073403 | 69717  |

|    |       |         |               |        |
|----|-------|---------|---------------|--------|
| C3 | 20791 | adipose | MMT00014813   | 667370 |
| C3 | 20997 | adipose | MMT00028135   | 631323 |
| C3 | 21351 | adipose | Shisa5        | 66940  |
| C3 | 21438 | adipose | Plekha4       | 69217  |
| C3 | 21446 | adipose | Ccl12         | 20293  |
| C3 | 21483 | adipose | Ippk          | 75678  |
| C3 | 21547 | adipose | Ii10          | 16153  |
| C3 | 21549 | adipose | Rtp4          | 67775  |
| C3 | 21685 | adipose | Gzma          | 14938  |
| C3 | 21824 | adipose | 5830443L24Rik | 76074  |
| C3 | 22037 | adipose | Oas1g         | 23960  |
| C3 | 22077 | adipose | MMT00057550   | 677168 |
| C3 | 22115 | adipose | Ccl5          | 20304  |
| C3 | 22496 | adipose | Slfn1         | 20555  |
| C3 | 22712 | adipose | Phf11         | 219131 |
| C3 | 23092 | adipose | Ifih1         | 71586  |
| C3 | 23174 | adipose | Psme2         | 19188  |
| C3 | 23208 | adipose | Hck           | 15162  |
| C3 | 23410 | adipose | C1qa          | 12259  |
| C3 | 23636 | adipose | Bst2          | 69550  |
| C3 | 143   | liver   | Gvin1         | 74558  |
| C3 | 300   | liver   | Kcnk13        | 217826 |
| C3 | 387   | liver   | Rgs10         | 67865  |
| C3 | 405   | liver   | Emr4          | 52614  |
| C3 | 701   | liver   | Polr3g        | 67486  |
| C3 | 830   | liver   | Socs1         | 12703  |
| C3 | 860   | liver   | Psmb10        | 19171  |
| C3 | 917   | liver   | Kal1          | 14038  |
| C3 | 939   | liver   | Daxx          | 13163  |
| C3 | 982   | liver   | Ccl7          | 20306  |
| C3 | 1180  | liver   | Clec4a3       | 73149  |
| C3 | 1353  | liver   | Plcg2         | 234779 |
| C3 | 1447  | liver   | Naaa          | 67111  |
| C3 | 1513  | liver   | Gzmb          | 14939  |
| C3 | 1533  | liver   | BC013712      | 230787 |
| C3 | 1612  | liver   | Clec1b        | 56760  |
| C3 | 1722  | liver   | Iqgap1        | 29875  |
| C3 | 1764  | liver   | Tifab         | 212937 |
| C3 | 1840  | liver   | Fpr1          | 14293  |
| C3 | 1908  | liver   | Rnf213        | 629974 |
| C3 | 1967  | liver   | Brwd1         | 93871  |
| C3 | 1986  | liver   | Crebl2        | 232430 |
| C3 | 2058  | liver   | Hk3           | 212032 |
| C3 | 2178  | liver   | Slc8a1        | 20541  |
| C3 | 2200  | liver   | BC006779      | 229003 |
| C3 | 2224  | liver   | Oasl2         | 23962  |
| C3 | 2490  | liver   | MMT00070880   |        |
| C3 | 2550  | liver   | MMT00036681   |        |
| C3 | 2578  | liver   | Csf2rb2       | 12984  |
| C3 | 2659  | liver   | Kcng2         | 240444 |
| C3 | 2752  | liver   | Fcgr1         | 14129  |

|    |      |       |               |        |
|----|------|-------|---------------|--------|
| C3 | 2830 | liver | 4632417K18Rik | 107373 |
| C3 | 2969 | liver | Ptpro         | 19277  |
| C3 | 3028 | liver | Uhrf1         | 18140  |
| C3 | 3036 | liver | Slamf9        | 98365  |
| C3 | 3103 | liver | MMT00062748   | 625360 |
| C3 | 3286 | liver | Alox5ap       | 11690  |
| C3 | 3426 | liver | Hap1          | 15114  |
| C3 | 3523 | liver | Trim34        | 94094  |
| C3 | 3572 | liver | Ebi3          | 50498  |
| C3 | 3577 | liver | Ptplad2       | 66775  |
| C3 | 3594 | liver | Rasa4         | 54153  |
| C3 | 3659 | liver | EG236451      | 236451 |
| C3 | 3683 | liver | Oas2          | 246728 |
| C3 | 3721 | liver | Me2           | 107029 |
| C3 | 3905 | liver | H2-Q1         | 15006  |
| C3 | 4114 | liver | Parp12        | 243771 |
| C3 | 4152 | liver | Lrrc33        | 224109 |
| C3 | 4185 | liver | Hmgb2         | 97165  |
| C3 | 4284 | liver | Irf1          | 16362  |
| C3 | 4310 | liver | B3gnt8        | 232984 |
| C3 | 4409 | liver | 5430435G22Rik | 226421 |
| C3 | 4426 | liver | Ilgp2         | 54396  |
| C3 | 4508 | liver | Ifit1         | 15957  |
| C3 | 4516 | liver | Rsad2         | 58185  |
| C3 | 4518 | liver | Gpr65         | 14744  |
| C3 | 4901 | liver | MMT00073557   | 171504 |
| C3 | 4920 | liver | Rbl1          | 19650  |
| C3 | 5002 | liver | Ifi202b       | 26388  |
| C3 | 5044 | liver | Ifi35         | 70110  |
| C3 | 5216 | liver | Spnb5         | 640524 |
| C3 | 5250 | liver | Ifit2         | 15958  |
| C3 | 5332 | liver | Pdlim4        | 30794  |
| C3 | 5406 | liver | Cd207         | 246278 |
| C3 | 5465 | liver | Slamf8        | 74748  |
| C3 | 5554 | liver | Emr1          | 13733  |
| C3 | 5556 | liver | Ccl4          | 20303  |
| C3 | 5588 | liver | Snx20         | 71607  |
| C3 | 5765 | liver | Ifitm2        | 80876  |
| C3 | 5766 | liver | 5033414D02Rik | 67759  |
| C3 | 5845 | liver | Il18bp        | 16068  |
| C3 | 5853 | liver | Trim30        | 20128  |
| C3 | 5875 | liver | Cd86          | 12524  |
| C3 | 5949 | liver | Zbp1          | 58203  |
| C3 | 5975 | liver | Car13         | 71934  |
| C3 | 6036 | liver | Pram1         | 378460 |
| C3 | 6072 | liver | C1qc          | 12262  |
| C3 | 6098 | liver | Ncf4          | 17972  |
| C3 | 6154 | liver | 1700030G06Rik | 69507  |
| C3 | 6213 | liver | Ccl2          | 20296  |
| C3 | 6383 | liver | Gbp2          | 14469  |
| C3 | 6576 | liver | Slfn2         | 20556  |

|    |       |       |               |           |
|----|-------|-------|---------------|-----------|
| C3 | 6587  | liver | Irf9          | 16391     |
| C3 | 6595  | liver | Oas1a         | 246730    |
| C3 | 6734  | liver | Ehd4          | 98878     |
| C3 | 6779  | liver | Gbp6          | 229900    |
| C3 | 6806  | liver | Agrn          | 11603     |
| C3 | 6824  | liver | Irf7          | 54123     |
| C3 | 6866  | liver | Gls           | 14660     |
| C3 | 6888  | liver | Cxcl9         | 17329     |
| C3 | 6910  | liver | Ly6c2         | 100093633 |
| C3 | 7057  | liver | Stk10         | 20868     |
| C3 | 7069  | liver | Ube1l         | 74153     |
| C3 | 7073  | liver | Arhgap4       | 171207    |
| C3 | 7105  | liver | Plac8         | 231507    |
| C3 | 7173  | liver | Trim59        | 66949     |
| C3 | 7238  | liver | Pycard        | 66824     |
| C3 | 7265  | liver | Dok1          | 13448     |
| C3 | 7284  | liver | MMT00008674   |           |
| C3 | 7316  | liver | Ifi204        | 15951     |
| C3 | 7336  | liver | Cd5l          | 11801     |
| C3 | 7879  | liver | Ifitm3        | 66141     |
| C3 | 8270  | liver | Clspn         | 269582    |
| C3 | 8325  | liver | Psme2         | 19188     |
| C3 | 8392  | liver | Asf1b         | 66929     |
| C3 | 8533  | liver | Ptprcap       | 19265     |
| C3 | 8555  | liver | H2-M3         | 14991     |
| C3 | 8564  | liver | Pld4          | 104759    |
| C3 | 8659  | liver | Psmb8         | 16913     |
| C3 | 8800  | liver | Rnf213        | 629974    |
| C3 | 8922  | liver | Il10ra        | 16154     |
| C3 | 8951  | liver | Cd97          | 26364     |
| C3 | 8952  | liver | Marco         | 17167     |
| C3 | 9100  | liver | Ms4a6c        | 73656     |
| C3 | 9320  | liver | Rnf31         | 268749    |
| C3 | 9353  | liver | Emilin2       | 246707    |
| C3 | 9393  | liver | Cd300a        | 217303    |
| C3 | 9401  | liver | Fcgr4         | 246256    |
| C3 | 9616  | liver | AI451557      | 102084    |
| C3 | 9717  | liver | Psmb9         | 16912     |
| C3 | 9779  | liver | Laptm5        | 16792     |
| C3 | 9820  | liver | BC023105      | 207269    |
| C3 | 9821  | liver | Pmaip1        | 58801     |
| C3 | 9829  | liver | Stoml1        | 69106     |
| C3 | 9835  | liver | Fastkd1       | 320720    |
| C3 | 9847  | liver | Ifi27         | 76933     |
| C3 | 9920  | liver | Syk           | 20963     |
| C3 | 9928  | liver | Lgmn          | 19141     |
| C3 | 10109 | liver | Gbp3          | 55932     |
| C3 | 10245 | liver | Dus1l         | 68730     |
| C3 | 10356 | liver | 2810417H13Rik | 68026     |
| C3 | 10393 | liver | Slc7a8        | 50934     |
| C3 | 10426 | liver | Ly6f          | 17071     |

|    |       |       |               |        |
|----|-------|-------|---------------|--------|
| C3 | 10442 | liver | Pla2g4a       | 18783  |
| C3 | 10504 | liver | Ripk3         | 56532  |
| C3 | 10606 | liver | Apbb1ip       | 54519  |
| C3 | 10736 | liver | Cyba          | 13057  |
| C3 | 10796 | liver | Spic          | 20728  |
| C3 | 10926 | liver | P2ry13        | 74191  |
| C3 | 11009 | liver | MMT00008885   | 330256 |
| C3 | 11119 | liver | Frmd4a        | 209630 |
| C3 | 11198 | liver | Gbp1          | 14468  |
| C3 | 11204 | liver | Al451617      | 209387 |
| C3 | 11265 | liver | Irgm          | 15944  |
| C3 | 11275 | liver | Fanci         | 208836 |
| C3 | 11437 | liver | Gatm          | 67092  |
| C3 | 11486 | liver | Tacc3         | 21335  |
| C3 | 11701 | liver | Oas1c         | 114643 |
| C3 | 11836 | liver | Csf1r         | 12978  |
| C3 | 11845 | liver | Psme1         | 19186  |
| C3 | 11959 | liver | 4631422O05Rik | 78749  |
| C3 | 12126 | liver | Znfx1         | 98999  |
| C3 | 12312 | liver | Ms4a6d        | 68774  |
| C3 | 12316 | liver | Mpa2l         | 100702 |
| C3 | 12363 | liver | Ifitm6        | 213002 |
| C3 | 12398 | liver | Ifi44         | 99899  |
| C3 | 12469 | liver | Dock10        | 210293 |
| C3 | 12486 | liver | Aldh18a1      | 56454  |
| C3 | 12491 | liver | Ptma          | 19231  |
| C3 | 12493 | liver | Ankfy1        | 11736  |
| C3 | 12495 | liver | Casp1         | 12362  |
| C3 | 12572 | liver | Zfp90         | 22751  |
| C3 | 12600 | liver | Ifi204        | 15951  |
| C3 | 12969 | liver | Xaf1          | 327959 |
| C3 | 13019 | liver | Als2cr2       | 227154 |
| C3 | 13156 | liver | Ifit3         | 15959  |
| C3 | 13172 | liver | Epb4.1l3      | 13823  |
| C3 | 13181 | liver | Lcp2          | 16822  |
| C3 | 13261 | liver | Aldh7a1       | 110695 |
| C3 | 13309 | liver | Tgtp          | 21822  |
| C3 | 13367 | liver | MMT00060916   | 624083 |
| C3 | 13372 | liver | Slc11a1       | 18173  |
| C3 | 13455 | liver | Cenpe         | 229841 |
| C3 | 13501 | liver | Prkx          | 19108  |
| C3 | 13504 | liver | Lair1         | 52855  |
| C3 | 13514 | liver | Apol9b        | 71898  |
| C3 | 13522 | liver | Slfn5         | 327978 |
| C3 | 13527 | liver | Ctss          | 13040  |
| C3 | 13528 | liver | Capn12        | 60594  |
| C3 | 13585 | liver | Nckap1l       | 105855 |
| C3 | 13654 | liver | Stat1         | 20846  |
| C3 | 13656 | liver | Ly86          | 17084  |
| C3 | 13749 | liver | Parp9         | 80285  |
| C3 | 13780 | liver | Pilra         | 231805 |

|    |       |       |               |        |
|----|-------|-------|---------------|--------|
| C3 | 13826 | liver | Melk          | 17279  |
| C3 | 13867 | liver | Sgcb          | 24051  |
| C3 | 13885 | liver | Clec7a        | 56644  |
| C3 | 13964 | liver | Lpcat2        | 270084 |
| C3 | 14029 | liver | 2810022L02Rik | 67198  |
| C3 | 14102 | liver | Evi2a         | 14017  |
| C3 | 14117 | liver | C1qb          | 12260  |
| C3 | 14192 | liver | Trpv2         | 22368  |
| C3 | 14237 | liver | Rac2          | 19354  |
| C3 | 14258 | liver | Ifi47         | 15953  |
| C3 | 14260 | liver | Mkl           | 74568  |
| C3 | 14453 | liver | Inpp5d        | 16331  |
| C3 | 14475 | liver | Abcg1         | 11307  |
| C3 | 14506 | liver | Slc15a3       | 65221  |
| C3 | 14603 | liver | Ly6e          | 17069  |
| C3 | 14611 | liver | Ddx60         | 234311 |
| C3 | 14880 | liver | Ms4a4c        | 64380  |
| C3 | 14883 | liver | Itgal         | 16408  |
| C3 | 14954 | liver | Rab19         | 19331  |
| C3 | 15057 | liver | Atad2         | 70472  |
| C3 | 15074 | liver | Usp18         | 24110  |
| C3 | 15084 | liver | Ccl3          | 20302  |
| C3 | 15159 | liver | Timd4         | 276891 |
| C3 | 15255 | liver | Ccl8          | 20307  |
| C3 | 15280 | liver | Cxcl10        | 15945  |
| C3 | 15348 | liver | Eif2ak2       | 19106  |
| C3 | 15387 | liver | Mgl1          | 17312  |
| C3 | 15449 | liver | Mitd1         | 69028  |
| C3 | 15504 | liver | Mx2           | 17858  |
| C3 | 15572 | liver | Dtx3l         | 209200 |
| C3 | 15582 | liver | Klrk1         | 27007  |
| C3 | 15677 | liver | Slc9a9        | 331004 |
| C3 | 15749 | liver | Cd22          | 12483  |
| C3 | 15825 | liver | Fermt3        | 108101 |
| C3 | 16047 | liver | Irf8          | 15900  |
| C3 | 16102 | liver | Cd72          | 12517  |
| C3 | 16129 | liver | Trafd1        | 231712 |
| C3 | 16147 | liver | Tlr2          | 24088  |
| C3 | 16182 | liver | Oasl1         | 231655 |
| C3 | 16186 | liver | Cfp           | 18636  |
| C3 | 16199 | liver | Samhd1        | 56045  |
| C3 | 16238 | liver | Nmi           | 64685  |
| C3 | 16378 | liver | Ccl8          | 20307  |
| C3 | 16492 | liver | Hk2           | 15277  |
| C3 | 16521 | liver | Adar          | 56417  |
| C3 | 16572 | liver | D14Ert668e    | 219132 |
| C3 | 16650 | liver | Cd300a        | 217303 |
| C3 | 16827 | liver | Arhgdib       | 11857  |
| C3 | 16854 | liver | Kif15         | 209737 |
| C3 | 16874 | liver | Fcer1g        | 14127  |
| C3 | 16913 | liver | Pira3         | 18726  |

|    |       |       |                    |        |
|----|-------|-------|--------------------|--------|
| C3 | 16949 | liver | ligp1              | 60440  |
| C3 | 16988 | liver | Clec4f             | 51811  |
| C3 | 17071 | liver | Samd9l             | 209086 |
| C3 | 17197 | liver | Igtp               | 16145  |
| C3 | 17312 | liver | Sirpa              | 19261  |
| C3 | 17412 | liver | Aif1               | 11629  |
| C3 | 17472 | liver | Cd53               | 12508  |
| C3 | 17577 | liver | Med28              | 66999  |
| C3 | 17720 | liver | Rap2b              | 74012  |
| C3 | 17806 | liver | Gpsm3              | 106512 |
| C3 | 17832 | liver | MMT00043412        |        |
| C3 | 17883 | liver | D730040F13Rik      | 242474 |
| C3 | 17904 | liver | Cds1               | 74596  |
| C3 | 18064 | liver | MMT00035925        |        |
| C3 | 18174 | liver | Stat2              | 20847  |
| C3 | 18186 | liver | Parp14             | 547253 |
| C3 | 18211 | liver | Folr2              | 14276  |
| C3 | 18235 | liver | Epsti1             | 108670 |
| C3 | 18279 | liver | Ogfr               | 72075  |
| C3 | 18289 | liver | Tap1               | 21354  |
| C3 | 18594 | liver | 1200002N14Rik      | 71712  |
| C3 | 18662 | liver | Batf3              | 381319 |
| C3 | 18686 | liver | Zfp143             | 20841  |
| C3 | 18762 | liver | Herc5              | 67138  |
| C3 | 18868 | liver | Mpeg1              | 17476  |
| C3 | 18901 | liver | Hpx                | 15458  |
| C3 | 19026 | liver | Isg15              | 53606  |
| C3 | 19063 | liver | Evl                | 14026  |
| C3 | 19153 | liver | Ptgs1              | 19224  |
| C3 | 19189 | liver | Sp100              | 20684  |
| C3 | 19252 | liver | Tmsb4x             | 19241  |
| C3 | 19262 | liver | Cd274              | 60533  |
| C3 | 19298 | liver | Unc93b1            | 54445  |
| C3 | 19382 | liver | Slc2a6             | 227659 |
| C3 | 19553 | liver | Chtf18             | 214901 |
| C3 | 19589 | liver | Slc16a9            | 66859  |
| C3 | 19708 | liver | Ly6a               | 110454 |
| C3 | 19738 | liver | Lgals3bp           | 19039  |
| C3 | 19758 | liver | Snx1               | 56440  |
| C3 | 19794 | liver | Rgs2               | 19735  |
| C3 | 20047 | liver | Dysf               | 26903  |
| C3 | 20083 | liver | ENSMUSG00000073403 | 69717  |
| C3 | 20150 | liver | Ptprc              | 19264  |
| C3 | 20321 | liver | Ms4a6b             | 69774  |
| C3 | 20335 | liver | Srgn               | 19073  |
| C3 | 20431 | liver | Slc7a7             | 20540  |
| C3 | 20432 | liver | Smc1b              | 140557 |
| C3 | 20474 | liver | Gnb3               | 14695  |
| C3 | 20791 | liver | MMT00014813        | 667370 |
| C3 | 20814 | liver | Ptpn18             | 19253  |
| C3 | 20997 | liver | MMT00028135        | 631323 |

|    |       |         |               |        |
|----|-------|---------|---------------|--------|
| C3 | 21223 | liver   | Pira1         | 18722  |
| C3 | 21351 | liver   | Shisa5        | 66940  |
| C3 | 21364 | liver   | Ppm1h         | 319468 |
| C3 | 21440 | liver   | Tmsb10        | 19240  |
| C3 | 21497 | liver   | Pias2         | 17344  |
| C3 | 21549 | liver   | Rtp4          | 67775  |
| C3 | 21685 | liver   | Gzma          | 14938  |
| C3 | 21751 | liver   | Ptpn6         | 15170  |
| C3 | 21794 | liver   | Pfkp          | 56421  |
| C3 | 21824 | liver   | 5830443L24Rik | 76074  |
| C3 | 21837 | liver   | BC052328      | 223433 |
| C3 | 21863 | liver   | Dok2          | 13449  |
| C3 | 21988 | liver   | MMT00015654   | 675749 |
| C3 | 22037 | liver   | Oas1g         | 23960  |
| C3 | 22077 | liver   | MMT00057550   | 677168 |
| C3 | 22089 | liver   | Niban         | 63913  |
| C3 | 22115 | liver   | Ccl5          | 20304  |
| C3 | 22188 | liver   | Top2a         | 21973  |
| C3 | 22327 | liver   | Tyrobp        | 22177  |
| C3 | 22496 | liver   | Slfn1         | 20555  |
| C3 | 22553 | liver   | Ms4a8a        | 64381  |
| C3 | 22647 | liver   | Pkib          | 18768  |
| C3 | 22670 | liver   | Clec4a1       | 269799 |
| C3 | 22712 | liver   | Phf11         | 219131 |
| C3 | 22876 | liver   | Sash3         | 74131  |
| C3 | 22957 | liver   | 1300018I05Rik | 74157  |
| C3 | 23038 | liver   | Casp4         | 12363  |
| C3 | 23084 | liver   | Vsig4         | 278180 |
| C3 | 23092 | liver   | Ifih1         | 71586  |
| C3 | 23174 | liver   | Psme2         | 19188  |
| C3 | 23208 | liver   | Hck           | 15162  |
| C3 | 23242 | liver   | Gngt2         | 14710  |
| C3 | 23276 | liver   | Evi2b         | 216984 |
| C3 | 23394 | liver   | Psd4          | 215632 |
| C3 | 23403 | liver   | Ndc80         | 67052  |
| C3 | 23410 | liver   | C1qa          | 12259  |
| C3 | 23450 | liver   | D12Ert647e    | 52668  |
| C4 | 204   | adipose | EG432649      | 432649 |
| C4 | 250   | adipose | Tubb2a-ps2    | 627110 |
| C4 | 301   | adipose | AU014645      | 433702 |
| C4 | 577   | adipose | Rrp12         | 107094 |
| C4 | 790   | adipose | MMT00026414   | 83701  |
| C4 | 949   | adipose | Plekha6       | 240753 |
| C4 | 1587  | adipose | MMT00044543   |        |
| C4 | 1646  | adipose | Slc15a4       | 100561 |
| C4 | 2113  | adipose | Rasd1         | 19416  |
| C4 | 2362  | adipose | Mkks          | 59030  |
| C4 | 2818  | adipose | Egr1          | 13653  |
| C4 | 3015  | adipose | Arhgef6       | 73341  |
| C4 | 3226  | adipose | Tnfrsf17      | 21935  |
| C4 | 3291  | adipose | Ptk2          | 14083  |



|    |       |         |               |        |
|----|-------|---------|---------------|--------|
| C4 | 3587  | adipose | MMT00041940   |        |
| C4 | 3665  | adipose | Zfp61         | 22719  |
| C4 | 3706  | adipose | 2410002O22Rik | 66975  |
| C4 | 3713  | adipose | Acot6         | 217700 |
| C4 | 3768  | adipose | Cyp2c44       | 226143 |
| C4 | 3796  | adipose | D19Bwg1357e   | 52874  |
| C4 | 3804  | adipose | MMT00015534   |        |
| C4 | 3849  | adipose | MMT00047578   |        |
| C4 | 3988  | adipose | 4933427G17Rik | 74466  |
| C4 | 4048  | adipose | BC002230      | 217827 |
| C4 | 4120  | adipose | Mrpl3         | 94062  |
| C4 | 4298  | adipose | St3gal1       | 20442  |
| C4 | 4308  | adipose | Nphp3         | 74025  |
| C4 | 4612  | adipose | Hspa5         | 14828  |
| C4 | 4665  | adipose | Dynll1        | 56455  |
| C4 | 4933  | adipose | Clec14a       | 66864  |
| C4 | 4950  | adipose | Dnajb10       | 56812  |
| C4 | 5487  | adipose | Palmd         | 114301 |
| C4 | 6021  | adipose | MMT00008784   |        |
| C4 | 6397  | adipose | Slc2a9        | 117591 |
| C4 | 6485  | adipose | Map3k7ip1     | 66513  |
| C4 | 6639  | adipose | Fads3         | 60527  |
| C4 | 6769  | adipose | Banp          | 53325  |
| C4 | 7619  | adipose | Pik3ip1       | 216505 |
| C4 | 8037  | adipose | MMT00052151   |        |
| C4 | 8541  | adipose | Tubb5         | 22154  |
| C4 | 8670  | adipose | MMT00051613   |        |
| C4 | 8891  | adipose | MMT00071061   |        |
| C4 | 9513  | adipose | Tardbp        | 230908 |
| C4 | 9712  | adipose | Cct3          | 12462  |
| C4 | 10484 | adipose | Dnajb11       | 67838  |
| C4 | 10782 | adipose | 4933403O08Rik | 71030  |
| C4 | 10849 | adipose | 9330159F19Rik | 212448 |
| C4 | 11043 | adipose | Hsph1         | 15505  |
| C4 | 11214 | adipose | MMT00049207   |        |
| C4 | 11633 | adipose | Ier3          | 15937  |
| C4 | 11867 | adipose | Rcor3         | 214742 |
| C4 | 11895 | adipose | 2810405J04Rik | 72722  |
| C4 | 12419 | adipose | MMT00081393   |        |
| C4 | 12572 | adipose | Zfp90         | 22751  |
| C4 | 12960 | adipose | Arrdc4        | 66412  |
| C4 | 13018 | adipose | AW544981      | 213956 |
| C4 | 13390 | adipose | Ddx31         | 227674 |
| C4 | 13883 | adipose | EG627788      | 627788 |
| C4 | 13884 | adipose | Aven          | 74268  |
| C4 | 14307 | adipose | Kcnj8         | 16523  |
| C4 | 14427 | adipose | Hoxa1         | 15394  |
| C4 | 14585 | adipose | Bxdc1         | 67239  |
| C4 | 15476 | adipose | Fem1b         | 14155  |
| C4 | 15538 | adipose | B130024G19Rik | 434198 |
| C4 | 15675 | adipose | MMT00077535   | 641192 |

|    |       |         |               |        |
|----|-------|---------|---------------|--------|
| C4 | 15870 | adipose | Aqp5          | 11830  |
| C4 | 15872 | adipose | 4933424B01Rik | 71177  |
| C4 | 16190 | adipose | Osbpl11       | 106326 |
| C4 | 16299 | adipose | Creld2        | 76737  |
| C4 | 16619 | adipose | Anks1         | 224650 |
| C4 | 17667 | adipose | Phactr1       | 218194 |
| C4 | 17682 | adipose | Zfp386        | 56220  |
| C4 | 17876 | adipose | Tubb4         | 22153  |
| C4 | 18185 | adipose | Ndufb2        | 68198  |
| C4 | 18324 | adipose | 4930546H06Rik | 75202  |
| C4 | 18332 | adipose | Gpr19         | 14760  |
| C4 | 18373 | adipose | Dnajb1        | 81489  |
| C4 | 18632 | adipose | Asxl1         | 228790 |
| C4 | 19108 | adipose | Armet         | 74840  |
| C4 | 19356 | adipose | Herc1         | 235439 |
| C4 | 19362 | adipose | Gper          | 76854  |
| C4 | 19830 | adipose | Irf4          | 16364  |
| C4 | 20004 | adipose | 1190005F20Rik | 98685  |
| C4 | 20172 | adipose | 4930502E18Rik | 75013  |
| C4 | 20372 | adipose | Heatr1        | 217995 |
| C4 | 20774 | adipose | Atp6v1c2      | 68775  |
| C4 | 20912 | adipose | Chordc1       | 66917  |
| C4 | 20980 | adipose | Taf12         | 66464  |
| C4 | 21255 | adipose | Kif18a        | 228421 |
| C4 | 21643 | adipose | Agtr1a        | 11607  |
| C4 | 21797 | adipose | Dst           | 13518  |
| C4 | 21903 | adipose | Nr1d1         | 217166 |
| C4 | 22010 | adipose | Ccdc41        | 77048  |
| C4 | 22085 | adipose | MMT00036089   |        |
| C4 | 22139 | adipose | Stip1         | 20867  |
| C4 | 22365 | adipose | Jun           | 16476  |
| C4 | 22474 | adipose | Ubqln1        | 56085  |
| C4 | 22521 | adipose | Hsp90b1       | 22027  |
| C4 | 22598 | adipose | 4930402H24Rik | 228602 |
| C4 | 22727 | adipose | Pdgfra        | 18595  |
| C4 | 23032 | adipose | Mett10d       | 67493  |
| C4 | 202   | liver   | Naif1         | 71254  |
| C4 | 214   | liver   | Lrp1          | 16971  |
| C4 | 217   | liver   | Ubx2          | 67812  |
| C4 | 381   | liver   | Rbmxt         | 19656  |
| C4 | 392   | liver   | Sec22b        | 20333  |
| C4 | 624   | liver   | 4931406I20Rik | 66743  |
| C4 | 703   | liver   | Spryd4        | 66701  |
| C4 | 740   | liver   | Txnrd3        | 232223 |
| C4 | 902   | liver   | Slc30a1       | 22782  |
| C4 | 1156  | liver   | Rbj           | 217378 |
| C4 | 1311  | liver   | Mpp4          | 227157 |
| C4 | 1386  | liver   | Ppid          | 67738  |
| C4 | 1412  | liver   | Phf17         | 269424 |
| C4 | 1569  | liver   | Tmco4         | 77056  |
| C4 | 1697  | liver   | Sf4           | 70616  |

|    |      |       |               |        |
|----|------|-------|---------------|--------|
| C4 | 1828 | liver | Elmo3         | 234683 |
| C4 | 1849 | liver | MMT00063181   |        |
| C4 | 1957 | liver | Mansc1        | 67729  |
| C4 | 2041 | liver | Cct7          | 12468  |
| C4 | 2043 | liver | Arl2bp        | 107566 |
| C4 | 2329 | liver | Wdr6          | 83669  |
| C4 | 2339 | liver | 5730449L18Rik | 66637  |
| C4 | 2433 | liver | Armc10        | 67211  |
| C4 | 2570 | liver | Tmod4         | 50874  |
| C4 | 2718 | liver | Scrn3         | 74616  |
| C4 | 2918 | liver | Mtmr10        | 233315 |
| C4 | 3393 | liver | Snhg8         | 66487  |
| C4 | 3462 | liver | Nmnat3        | 74080  |
| C4 | 3587 | liver | MMT00041940   |        |
| C4 | 3799 | liver | Serpinh1      | 12406  |
| C4 | 3808 | liver | 2010209O12Rik | 100910 |
| C4 | 3837 | liver | Tradd         | 71609  |
| C4 | 3849 | liver | MMT00047578   |        |
| C4 | 3913 | liver | Mrpl15        | 27395  |
| C4 | 4391 | liver | Zfp467        | 68910  |
| C4 | 4510 | liver | Ttf1          | 22130  |
| C4 | 4612 | liver | Hspa5         | 14828  |
| C4 | 4748 | liver | Xylt2         | 217119 |
| C4 | 4819 | liver | MMT00082285   |        |
| C4 | 4950 | liver | Dnajib10      | 56812  |
| C4 | 4966 | liver | Zscan20       | 269585 |
| C4 | 5689 | liver | Dsg2          | 13511  |
| C4 | 5953 | liver | MMT00008178   |        |
| C4 | 6021 | liver | MMT00008784   |        |
| C4 | 6126 | liver | MMT00067575   |        |
| C4 | 6218 | liver | Hnrnpc        | 15381  |
| C4 | 6286 | liver | Rfc1          | 19687  |
| C4 | 6464 | liver | Pcbp4         | 59092  |
| C4 | 6769 | liver | Banp          | 53325  |
| C4 | 6972 | liver | Trspap1       | 71787  |
| C4 | 6976 | liver | Rbm35b        | 77411  |
| C4 | 7398 | liver | Rbmxrt        | 19656  |
| C4 | 7674 | liver | Spata7        | 104871 |
| C4 | 7731 | liver | 1500001M20Rik | 68971  |
| C4 | 7798 | liver | MMT00077178   |        |
| C4 | 8037 | liver | MMT00052151   |        |
| C4 | 8122 | liver | Hexim1        | 192231 |
| C4 | 8319 | liver | MMT00062477   |        |
| C4 | 8464 | liver | Snapin        | 20615  |
| C4 | 8499 | liver | C430048L16Rik | 77604  |
| C4 | 8662 | liver | Brca2         | 12190  |
| C4 | 8670 | liver | MMT00051613   |        |
| C4 | 8684 | liver | Il15          | 16168  |
| C4 | 8891 | liver | MMT00071061   |        |
| C4 | 9067 | liver | Tra2a         | 101214 |
| C4 | 9258 | liver | P4ha1         | 18451  |

|    |       |       |               |        |
|----|-------|-------|---------------|--------|
| C4 | 9513  | liver | Tardbp        | 230908 |
| C4 | 9514  | liver | Vps37a        | 52348  |
| C4 | 9629  | liver | Spnb3         | 20743  |
| C4 | 9680  | liver | Ahsa1         | 217737 |
| C4 | 9899  | liver | D13Wsu177e    | 28126  |
| C4 | 10027 | liver | Mcm9          | 71567  |
| C4 | 10267 | liver | Setdb2        | 239122 |
| C4 | 10435 | liver | Nab2          | 17937  |
| C4 | 10769 | liver | Hnrnpd        | 11991  |
| C4 | 10938 | liver | Zbtb5         | 230119 |
| C4 | 10994 | liver | EG625253      | 625253 |
| C4 | 11043 | liver | Hsph1         | 15505  |
| C4 | 11051 | liver | A130042E20Rik | 216119 |
| C4 | 11095 | liver | Bag3          | 29810  |
| C4 | 11201 | liver | Sunc1         | 194974 |
| C4 | 11214 | liver | MMT00049207   |        |
| C4 | 11379 | liver | Dnttip1       | 76233  |
| C4 | 11481 | liver | Morn1         | 76866  |
| C4 | 11697 | liver | Rasl2-9       | 19428  |
| C4 | 11818 | liver | MMT00048396   |        |
| C4 | 11843 | liver | Dusp22        | 105352 |
| C4 | 12112 | liver | Tmem53        | 68777  |
| C4 | 12329 | liver | Sox6          | 20679  |
| C4 | 12419 | liver | MMT00081393   |        |
| C4 | 12487 | liver | Tbc1d10a      | 103724 |
| C4 | 12795 | liver | Slc20a2       | 20516  |
| C4 | 12960 | liver | Arrdc4        | 66412  |
| C4 | 12968 | liver | Fbxw9         | 68628  |
| C4 | 13087 | liver | Cxadr         | 13052  |
| C4 | 13189 | liver | Dnajb4        | 67035  |
| C4 | 13521 | liver | Ears2         | 67417  |
| C4 | 13568 | liver | Cad           | 69719  |
| C4 | 13741 | liver | Hspa4l        | 18415  |
| C4 | 13839 | liver | Gypc          | 71683  |
| C4 | 14014 | liver | MMT00008376   |        |
| C4 | 14049 | liver | Fdft1         | 14137  |
| C4 | 14135 | liver | Eepd1         | 67484  |
| C4 | 14233 | liver | Fgfr1         | 116701 |
| C4 | 14263 | liver | Arrdc3        | 105171 |
| C4 | 14298 | liver | Atp2a2        | 11938  |
| C4 | 14333 | liver | Zcchc17       | 619605 |
| C4 | 14681 | liver | Alg12         | 223774 |
| C4 | 14859 | liver | Hspa1a        | 193740 |
| C4 | 15024 | liver | 2310061J03Rik | 66391  |
| C4 | 15177 | liver | Bmpr2         | 12168  |
| C4 | 15476 | liver | Fem1b         | 14155  |
| C4 | 15484 | liver | Lrrc42        | 77809  |
| C4 | 15576 | liver | Mboat5        | 14792  |
| C4 | 15675 | liver | MMT00077535   | 641192 |
| C4 | 15740 | liver | 1810010H24Rik | 69066  |
| C4 | 16043 | liver | Sult1c2       | 69083  |

|    |       |       |               |        |
|----|-------|-------|---------------|--------|
| C4 | 16130 | liver | Gosr2         | 56494  |
| C4 | 16219 | liver | 4932415G12Rik | 67723  |
| C4 | 16251 | liver | G6pc          | 14377  |
| C4 | 16299 | liver | Creld2        | 76737  |
| C4 | 16344 | liver | Arpc5l        | 74192  |
| C4 | 16585 | liver | Syvn1         | 74126  |
| C4 | 16754 | liver | Hsp90aa1      | 15519  |
| C4 | 16843 | liver | Cry1          | 12952  |
| C4 | 16898 | liver | Invs          | 16348  |
| C4 | 16990 | liver | Sc4mol        | 66234  |
| C4 | 17160 | liver | Ccdc127       | 67433  |
| C4 | 17449 | liver | Zfp296        | 63872  |
| C4 | 17468 | liver | Anubl1        | 67492  |
| C4 | 17536 | liver | Chn2          | 69993  |
| C4 | 17595 | liver | MMT00048325   |        |
| C4 | 18083 | liver | Gadd45a       | 13197  |
| C4 | 18099 | liver | Nfx1          | 74164  |
| C4 | 18135 | liver | Tmed3         | 66111  |
| C4 | 18203 | liver | Ablim3        | 319713 |
| C4 | 18215 | liver | Gpr146        | 80290  |
| C4 | 18336 | liver | Lrpap1        | 16976  |
| C4 | 18373 | liver | Dnajib1       | 81489  |
| C4 | 18418 | liver | Hspa1b        | 15511  |
| C4 | 18454 | liver | Tor1aip1      | 208263 |
| C4 | 18903 | liver | Crem          | 12916  |
| C4 | 19108 | liver | Armet         | 74840  |
| C4 | 19540 | liver | Zfp428        | 232969 |
| C4 | 19728 | liver | 1110007L15Rik | 67604  |
| C4 | 19866 | liver | Uso1          | 56041  |
| C4 | 20045 | liver | D4Wsu114e     | 28010  |
| C4 | 20148 | liver | Pttg1         | 30939  |
| C4 | 20194 | liver | Pnlcd1        | 240023 |
| C4 | 20332 | liver | Stau2         | 29819  |
| C4 | 20457 | liver | Gtf2a2        | 235459 |
| C4 | 20535 | liver | Rbm4          | 19653  |
| C4 | 20792 | liver | MMT00032790   |        |
| C4 | 20828 | liver | MMT00007878   |        |
| C4 | 20912 | liver | Chordc1       | 66917  |
| C4 | 20965 | liver | Usp28         | 235323 |
| C4 | 21322 | liver | Uspl1         | 231915 |
| C4 | 21333 | liver | Cirbp         | 12696  |
| C4 | 21389 | liver | Odf2          | 18286  |
| C4 | 21591 | liver | Hectd3        | 76608  |
| C4 | 21643 | liver | Agtr1a        | 11607  |
| C4 | 21775 | liver | MMT00051649   |        |
| C4 | 21903 | liver | Nr1d1         | 217166 |
| C4 | 21955 | liver | Atxn7l1       | 380753 |
| C4 | 21995 | liver | Nktr          | 18087  |
| C4 | 22139 | liver | Stip1         | 20867  |
| C4 | 22216 | liver | Sp5           | 64406  |
| C4 | 22272 | liver | Vpreb1        | 22362  |

|    |       |         |               |        |
|----|-------|---------|---------------|--------|
| C4 | 22303 | liver   | Cdt1          | 67177  |
| C4 | 22474 | liver   | Ubqln1        | 56085  |
| C4 | 22697 | liver   | Skil          | 20482  |
| C4 | 22751 | liver   | Nosip         | 66394  |
| C4 | 22943 | liver   | Tpd5211       | 21987  |
| C4 | 23032 | liver   | Mett10d       | 67493  |
| C4 | 23646 | liver   | Hsp90ab1      | 15516  |
| C5 | 127   | adipose | Clic1         | 114584 |
| C5 | 280   | adipose | Snai2         | 20583  |
| C5 | 387   | adipose | Rgs10         | 67865  |
| C5 | 405   | adipose | Emr4          | 52614  |
| C5 | 740   | adipose | Txnrd3        | 232223 |
| C5 | 1084  | adipose | Pros1         | 19128  |
| C5 | 1085  | adipose | Col5a2        | 12832  |
| C5 | 1180  | adipose | Clec4a3       | 73149  |
| C5 | 1214  | adipose | Trip13        | 69716  |
| C5 | 1254  | adipose | Lum           | 17022  |
| C5 | 1311  | adipose | Mpp4          | 227157 |
| C5 | 1353  | adipose | Plcg2         | 234779 |
| C5 | 1416  | adipose | 6720460F02Rik | 109212 |
| C5 | 1448  | adipose | Zwilch        | 68014  |
| C5 | 1500  | adipose | Leprel1       | 210530 |
| C5 | 1531  | adipose | Uqcrc2        | 67003  |
| C5 | 1533  | adipose | BC013712      | 230787 |
| C5 | 1549  | adipose | Gmfg          | 63986  |
| C5 | 1561  | adipose | Aurka         | 20878  |
| C5 | 1649  | adipose | Pcolce        | 18542  |
| C5 | 1739  | adipose | Lrrc17        | 74511  |
| C5 | 1764  | adipose | Tifab         | 212937 |
| C5 | 1800  | adipose | Retn          | 57264  |
| C5 | 1932  | adipose | Racgap1       | 26934  |
| C5 | 2054  | adipose | Acaa1a        | 113868 |
| C5 | 2081  | adipose | Dlat          | 235339 |
| C5 | 2167  | adipose | Pif1          | 208084 |
| C5 | 2178  | adipose | Slc8a1        | 20541  |
| C5 | 2227  | adipose | Cenpa         | 12615  |
| C5 | 2387  | adipose | Dscc1         | 72107  |
| C5 | 2598  | adipose | Naglu         | 27419  |
| C5 | 2788  | adipose | Galnt10       | 171212 |
| C5 | 2962  | adipose | AW146154      | 101835 |
| C5 | 3028  | adipose | Uhrf1         | 18140  |
| C5 | 3138  | adipose | Espl1         | 105988 |
| C5 | 3164  | adipose | Hsd11b1       | 15483  |
| C5 | 3223  | adipose | Ak2           | 11637  |
| C5 | 3504  | adipose | Anpep         | 16790  |
| C5 | 3577  | adipose | Ptplad2       | 66775  |
| C5 | 3923  | adipose | D9Ert402e     | 382117 |
| C5 | 4029  | adipose | Samsn1        | 67742  |
| C5 | 4191  | adipose | Fbln2         | 14115  |
| C5 | 4409  | adipose | 5430435G22Rik | 226421 |
| C5 | 4457  | adipose | Cks2          | 66197  |

|    |       |         |               |        |
|----|-------|---------|---------------|--------|
| C5 | 4531  | adipose | EG434175      | 434175 |
| C5 | 4605  | adipose | Myo1f         | 17916  |
| C5 | 4676  | adipose | Cenph         | 26886  |
| C5 | 5092  | adipose | Ydjc          | 69101  |
| C5 | 5127  | adipose | Kif20b        | 240641 |
| C5 | 5208  | adipose | Plod2         | 26432  |
| C5 | 5364  | adipose | Kif22         | 110033 |
| C5 | 5680  | adipose | Lrg1          | 76905  |
| C5 | 5734  | adipose | EG619653      | 619653 |
| C5 | 5854  | adipose | Kif11         | 16551  |
| C5 | 5976  | adipose | Col6a3        | 12835  |
| C5 | 6066  | adipose | Ppp1r1a       | 58200  |
| C5 | 6293  | adipose | Pggt1b        | 225467 |
| C5 | 6500  | adipose | MMT00069546   |        |
| C5 | 6504  | adipose | Alad          | 17025  |
| C5 | 6571  | adipose | 3000004C01Rik | 70218  |
| C5 | 6734  | adipose | Ehd4          | 98878  |
| C5 | 6746  | adipose | E2f8          | 108961 |
| C5 | 6818  | adipose | BC030183      | 230766 |
| C5 | 7238  | adipose | Pycard        | 66824  |
| C5 | 7367  | adipose | Gchfr         | 320415 |
| C5 | 8270  | adipose | Cispn         | 269582 |
| C5 | 8416  | adipose | Cdc20         | 107995 |
| C5 | 8449  | adipose | Vash2         | 226841 |
| C5 | 8564  | adipose | Pld4          | 104759 |
| C5 | 8690  | adipose | Cd84          | 12523  |
| C5 | 8867  | adipose | Shcbp1        | 20419  |
| C5 | 8870  | adipose | Arid3a        | 13496  |
| C5 | 8922  | adipose | Il10ra        | 16154  |
| C5 | 8996  | adipose | Timp1         | 21857  |
| C5 | 9263  | adipose | Fbxo27        | 233040 |
| C5 | 9759  | adipose | Cenpn         | 72155  |
| C5 | 9827  | adipose | Pam           | 18484  |
| C5 | 9867  | adipose | Psrc1         | 56742  |
| C5 | 9877  | adipose | Cdc2a         | 12534  |
| C5 | 9918  | adipose | Mki67         | 17345  |
| C5 | 9920  | adipose | Syk           | 20963  |
| C5 | 10056 | adipose | Cmtm3         | 68119  |
| C5 | 10166 | adipose | Rhbdd2        | 215160 |
| C5 | 10356 | adipose | 2810417H13Rik | 68026  |
| C5 | 10475 | adipose | Ccna2         | 12428  |
| C5 | 10504 | adipose | Ripk3         | 56532  |
| C5 | 10732 | adipose | lars2         | 381314 |
| C5 | 10852 | adipose | Sgol1         | 72415  |
| C5 | 10865 | adipose | Cd248         | 70445  |
| C5 | 11154 | adipose | MMT00037611   |        |
| C5 | 11255 | adipose | Srpx          | 51795  |
| C5 | 11275 | adipose | Fanci         | 208836 |
| C5 | 11382 | adipose | Cdca3         | 14793  |
| C5 | 11422 | adipose | Pltp          | 18830  |
| C5 | 11486 | adipose | Tacc3         | 21335  |

|    |       |         |               |        |
|----|-------|---------|---------------|--------|
| C5 | 11557 | adipose | Blnk          | 17060  |
| C5 | 11836 | adipose | Csf1r         | 12978  |
| C5 | 11968 | adipose | Cenpm         | 66570  |
| C5 | 12029 | adipose | Tcf19         | 106795 |
| C5 | 12115 | adipose | Hist1h2an     | 319170 |
| C5 | 12120 | adipose | Rad51         | 19361  |
| C5 | 12177 | adipose | Tmem35        | 67564  |
| C5 | 12250 | adipose | P2ry14        | 140795 |
| C5 | 12263 | adipose | Atp6v0d2      | 242341 |
| C5 | 12319 | adipose | Mfap2         | 17150  |
| C5 | 12404 | adipose | Col16a1       | 107581 |
| C5 | 12486 | adipose | Aldh18a1      | 56454  |
| C5 | 12592 | adipose | F13a1         | 74145  |
| C5 | 12626 | adipose | Fut7          | 14347  |
| C5 | 13127 | adipose | Col5a1        | 12831  |
| C5 | 13455 | adipose | Cenpe         | 229841 |
| C5 | 13588 | adipose | MMT00042387   |        |
| C5 | 13780 | adipose | Pilra         | 231805 |
| C5 | 13826 | adipose | Melk          | 17279  |
| C5 | 14167 | adipose | Exo1          | 26909  |
| C5 | 14350 | adipose | Adamts2       | 216725 |
| C5 | 14439 | adipose | Ubd           | 24108  |
| C5 | 14581 | adipose | Casc5         | 76464  |
| C5 | 14650 | adipose | 2810433K01Rik | 66468  |
| C5 | 14797 | adipose | Ecsit         | 26940  |
| C5 | 14804 | adipose | Naalad2       | 72560  |
| C5 | 14877 | adipose | Ptx3          | 19288  |
| C5 | 15002 | adipose | Ncapg         | 54392  |
| C5 | 15021 | adipose | Ppargc1a      | 19017  |
| C5 | 15271 | adipose | Dbf4          | 27214  |
| C5 | 15387 | adipose | Mgl1          | 17312  |
| C5 | 15677 | adipose | Slc9a9        | 331004 |
| C5 | 15977 | adipose | Phca          | 66190  |
| C5 | 16024 | adipose | P2ry6         | 233571 |
| C5 | 16143 | adipose | Cd209d        | 170779 |
| C5 | 16186 | adipose | Cfp           | 18636  |
| C5 | 16203 | adipose | Tspan6        | 56496  |
| C5 | 16210 | adipose | Metrn1        | 210029 |
| C5 | 16457 | adipose | BC106175      | 724112 |
| C5 | 16854 | adipose | Kif15         | 209737 |
| C5 | 16866 | adipose | Scara3        | 219151 |
| C5 | 16874 | adipose | Fcer1g        | 14127  |
| C5 | 16880 | adipose | Depdc1b       | 218581 |
| C5 | 17064 | adipose | Cd48          | 12506  |
| C5 | 17216 | adipose | Nuf2          | 66977  |
| C5 | 17348 | adipose | Pf4           | 56744  |
| C5 | 17351 | adipose | Rtkn2         | 170799 |
| C5 | 17472 | adipose | Cd53          | 12508  |
| C5 | 17661 | adipose | Birc5         | 11799  |
| C5 | 17806 | adipose | Gpsm3         | 106512 |
| C5 | 17823 | adipose | D2ErtD750e    | 51944  |



|    |       |         |               |        |
|----|-------|---------|---------------|--------|
| C5 | 18042 | adipose | Aph1c         | 68318  |
| C5 | 18160 | adipose | Bace2         | 56175  |
| C5 | 18211 | adipose | Folr2         | 14276  |
| C5 | 18278 | adipose | Aspm          | 12316  |
| C5 | 18394 | adipose | Cxcr3         | 12766  |
| C5 | 18517 | adipose | Klc2          | 16594  |
| C5 | 18625 | adipose | Cit           | 12704  |
| C5 | 18868 | adipose | Mpeg1         | 17476  |
| C5 | 19022 | adipose | Ccnb2         | 12442  |
| C5 | 19298 | adipose | Unc93b1       | 54445  |
| C5 | 19318 | adipose | Plk1          | 18817  |
| C5 | 19350 | adipose | Siglec5       | 233186 |
| C5 | 19553 | adipose | Chtf18        | 214901 |
| C5 | 19688 | adipose | Fap           | 14089  |
| C5 | 19797 | adipose | Coq9          | 67914  |
| C5 | 20148 | adipose | Pttg1         | 30939  |
| C5 | 20216 | adipose | BC028528      | 229600 |
| C5 | 20246 | adipose | Pdia5         | 72599  |
| C5 | 20370 | adipose | Sccpdh        | 109232 |
| C5 | 20433 | adipose | Cdca5         | 67849  |
| C5 | 20519 | adipose | Col1a1        | 12842  |
| C5 | 20814 | adipose | Ptpn18        | 19253  |
| C5 | 21079 | adipose | Tfpi2         | 21789  |
| C5 | 21251 | adipose | Cpt1a         | 12894  |
| C5 | 21266 | adipose | Cercam        | 99151  |
| C5 | 21424 | adipose | Supt3h        | 109115 |
| C5 | 21512 | adipose | Gas6          | 14456  |
| C5 | 21563 | adipose | Arhgap9       | 216445 |
| C5 | 21801 | adipose | Serpinb6a     | 20719  |
| C5 | 21837 | adipose | BC052328      | 223433 |
| C5 | 21858 | adipose | Neil3         | 234258 |
| C5 | 21947 | adipose | Cdca8         | 52276  |
| C5 | 21969 | adipose | Tk1           | 21877  |
| C5 | 22157 | adipose | Mxra8         | 74761  |
| C5 | 22166 | adipose | Traf1         | 22029  |
| C5 | 22188 | adipose | Top2a         | 21973  |
| C5 | 22258 | adipose | Ttk           | 22137  |
| C5 | 22327 | adipose | Tyrobp        | 22177  |
| C5 | 22486 | adipose | Sh3bgrl3      | 73723  |
| C5 | 22660 | adipose | Kif4          | 16571  |
| C5 | 22691 | adipose | Ercc6l        | 236930 |
| C5 | 22827 | adipose | Clec4a2       | 26888  |
| C5 | 23077 | adipose | Daam2         | 76441  |
| C5 | 23087 | adipose | Nusap1        | 108907 |
| C5 | 23131 | adipose | Pla1a         | 85031  |
| C5 | 23276 | adipose | Evi2b         | 216984 |
| C5 | 23403 | adipose | Ndc80         | 67052  |
| C5 | 23500 | adipose | BC055004      | 381680 |
| C5 | 1416  | liver   | 6720460F02Rik | 109212 |
| C5 | 1561  | liver   | Aurka         | 20878  |
| C5 | 1932  | liver   | Racgap1       | 26934  |

|    |       |         |               |        |
|----|-------|---------|---------------|--------|
| C5 | 2235  | liver   | Ndufv1        | 17995  |
| C5 | 2428  | liver   | Car1          | 12346  |
| C5 | 3836  | liver   | 2200001I15Rik | 69134  |
| C5 | 4469  | liver   | Cyp3a13       | 13113  |
| C5 | 4531  | liver   | EG434175      | 434175 |
| C5 | 5364  | liver   | Kif22         | 110033 |
| C5 | 5983  | liver   | Pcolce2       | 76477  |
| C5 | 8416  | liver   | Cdc20         | 107995 |
| C5 | 9329  | liver   | Serpina3m     | 20717  |
| C5 | 9759  | liver   | Cenpn         | 72155  |
| C5 | 10164 | liver   | 2310004N24Rik | 69535  |
| C5 | 11382 | liver   | Cdca3         | 14793  |
| C5 | 11422 | liver   | Pltp          | 18830  |
| C5 | 11870 | liver   | Apitd1        | 69928  |
| C5 | 13054 | liver   | Mcm4          | 17217  |
| C5 | 13271 | liver   | ldh2          | 269951 |
| C5 | 14472 | liver   | Ahcy          | 269378 |
| C5 | 15271 | liver   | Dbf4          | 27214  |
| C5 | 16123 | liver   | Sec11c        | 66286  |
| C5 | 16202 | liver   | Ccnd1         | 12443  |
| C5 | 17216 | liver   | Nuf2          | 66977  |
| C5 | 17661 | liver   | Birc5         | 11799  |
| C5 | 17823 | liver   | D2Ert750e     | 51944  |
| C5 | 18299 | liver   | MMT00035424   |        |
| C5 | 18483 | liver   | Mthfd1        | 108156 |
| C5 | 19022 | liver   | Ccnb2         | 12442  |
| C5 | 19318 | liver   | Plk1          | 18817  |
| C5 | 20171 | liver   | 1700008G05Rik | 75497  |
| C5 | 20433 | liver   | Cdca5         | 67849  |
| C5 | 21205 | liver   | Pkmyt1        | 268930 |
| C5 | 21692 | liver   | MMT00013924   |        |
| C5 | 21947 | liver   | Cdca8         | 52276  |
| C5 | 22238 | liver   | Sardh         | 192166 |
| C5 | 22258 | liver   | Ttk           | 22137  |
| C5 | 22635 | liver   | Nrn1          | 68404  |
| C6 | 230   | adipose | MMT00000744   |        |
| C6 | 451   | adipose | Mllt11        | 56772  |
| C6 | 963   | adipose | Lrrfip2       | 71268  |
| C6 | 1014  | adipose | Rtcd1         | 66368  |
| C6 | 1201  | adipose | Ptger3        | 19218  |
| C6 | 1466  | adipose | Ubap2l        | 74383  |
| C6 | 1554  | adipose | Rph3al        | 380714 |
| C6 | 1867  | adipose | Bcas2         | 68183  |
| C6 | 2012  | adipose | Cetn4         | 207175 |
| C6 | 2084  | adipose | Pftk1         | 18647  |
| C6 | 2245  | adipose | Sh2d4b        | 328381 |
| C6 | 2457  | adipose | 1110032E23Rik | 68659  |
| C6 | 2632  | adipose | Aph1a         | 226548 |
| C6 | 2694  | adipose | Siah2         | 20439  |
| C6 | 3314  | adipose | Wars2         | 70560  |
| C6 | 3432  | adipose | EG330963      | 330963 |

|    |       |         |               |        |
|----|-------|---------|---------------|--------|
| C6 | 3532  | adipose | S100a5        | 20199  |
| C6 | 3753  | adipose | Setdb1        | 84505  |
| C6 | 4608  | adipose | Lag3          | 16768  |
| C6 | 5021  | adipose | Gdap2         | 14547  |
| C6 | 5508  | adipose | Lrig2         | 269473 |
| C6 | 5752  | adipose | Dffa          | 13347  |
| C6 | 5762  | adipose | Trpc3         | 22065  |
| C6 | 5822  | adipose | Car2          | 12349  |
| C6 | 5884  | adipose | Gstm2         | 14863  |
| C6 | 5938  | adipose | Pfn2          | 18645  |
| C6 | 6206  | adipose | MMT00063701   |        |
| C6 | 6283  | adipose | Ptpn22        | 19260  |
| C6 | 6428  | adipose | MMT00035510   |        |
| C6 | 6470  | adipose | Arnt          | 11863  |
| C6 | 6697  | adipose | Serpini1      | 20713  |
| C6 | 6934  | adipose | Panx3         | 208098 |
| C6 | 7173  | adipose | Trim59        | 66949  |
| C6 | 7240  | adipose | C730007P19Rik | 20865  |
| C6 | 7495  | adipose | Ugt2b5        | 22238  |
| C6 | 7519  | adipose | Gstm1         | 14862  |
| C6 | 8864  | adipose | MMT00046672   |        |
| C6 | 9026  | adipose | Cep135        | 381644 |
| C6 | 9408  | adipose | Hmgcs2        | 15360  |
| C6 | 9718  | adipose | Fmo5          | 14263  |
| C6 | 10247 | adipose | V1rc20        | 171193 |
| C6 | 10521 | adipose | Ttf2          | 74044  |
| C6 | 10926 | adipose | P2ry13        | 74191  |
| C6 | 11798 | adipose | A530082C11Rik | 320541 |
| C6 | 12139 | adipose | Cmtm4         | 97487  |
| C6 | 12316 | adipose | Mpa2l         | 100702 |
| C6 | 12367 | adipose | MMT00072365   |        |
| C6 | 12716 | adipose | 5830417110Rik | 76022  |
| C6 | 12784 | adipose | Nudt6         | 229228 |
| C6 | 12863 | adipose | Fgg           | 99571  |
| C6 | 13224 | adipose | Cp            | 12870  |
| C6 | 13347 | adipose | Abi3          | 66610  |
| C6 | 13511 | adipose | Aytl1b        | 70902  |
| C6 | 14369 | adipose | MMT00057201   |        |
| C6 | 14559 | adipose | Frrs1         | 20321  |
| C6 | 15456 | adipose | Chi3l3        | 12655  |
| C6 | 15508 | adipose | 4632415L05Rik | 70808  |
| C6 | 15573 | adipose | Aipl1         | 114230 |
| C6 | 15842 | adipose | Med12l        | 329650 |
| C6 | 15915 | adipose | Spata21       | 329972 |
| C6 | 16146 | adipose | Gucy1a3       | 60596  |
| C6 | 16222 | adipose | Adipor2       | 68465  |
| C6 | 16283 | adipose | EG627427      | 627427 |
| C6 | 16333 | adipose | Wdr64         | 75820  |
| C6 | 16416 | adipose | Commd2        | 52245  |
| C6 | 16679 | adipose | Ctsk          | 13038  |
| C6 | 16973 | adipose | MMT00027196   |        |

|    |       |         |                    |        |
|----|-------|---------|--------------------|--------|
| C6 | 17090 | adipose | Lass2              | 76893  |
| C6 | 17371 | adipose | Emx2               | 13797  |
| C6 | 18673 | adipose | Muc1               | 17829  |
| C6 | 18752 | adipose | Fgf7               | 14178  |
| C6 | 18754 | adipose | Rbm8a              | 60365  |
| C6 | 18878 | adipose | Pde4dip            | 83679  |
| C6 | 19187 | adipose | Chrm3              | 12671  |
| C6 | 19440 | adipose | Anxa9              | 71790  |
| C6 | 20385 | adipose | Chd1l              | 68058  |
| C6 | 20661 | adipose | Tuft1              | 22156  |
| C6 | 20861 | adipose | Dcst1              | 77772  |
| C6 | 21664 | adipose | Insig1             | 231070 |
| C6 | 21780 | adipose | Ankrd35            | 213121 |
| C6 | 22202 | adipose | OTTMUSG00000021274 | 545539 |
| C6 | 22570 | adipose | Phtf1              | 18685  |
| C6 | 22573 | adipose | Kif2c              | 73804  |
| C6 | 22782 | adipose | Frrs1              | 20321  |
| C6 | 23012 | adipose | Spg20              | 229285 |
| C6 | 524   | liver   | Hsd3b2             | 15493  |
| C6 | 673   | liver   | Tchh               | 99681  |
| C6 | 1014  | liver   | Rtcd1              | 66368  |
| C6 | 1466  | liver   | Ubap2l             | 74383  |
| C6 | 1867  | liver   | Bcas2              | 68183  |
| C6 | 1963  | liver   | MMT00039783        |        |
| C6 | 3159  | liver   | Pld1               | 18805  |
| C6 | 3206  | liver   | Gpr160             | 71862  |
| C6 | 3753  | liver   | Setdb1             | 84505  |
| C6 | 3823  | liver   | Slc22a15           | 242126 |
| C6 | 4967  | liver   | Plekhn1            | 353047 |
| C6 | 5021  | liver   | Gdap2              | 14547  |
| C6 | 5762  | liver   | Trpc3              | 22065  |
| C6 | 5822  | liver   | Car2               | 12349  |
| C6 | 5938  | liver   | Pfn2               | 18645  |
| C6 | 6206  | liver   | MMT00063701        |        |
| C6 | 7519  | liver   | Gstm1              | 14862  |
| C6 | 7810  | liver   | Trim45             | 229644 |
| C6 | 8568  | liver   | Tnik               | 665113 |
| C6 | 8738  | liver   | Reg4               | 67709  |
| C6 | 10521 | liver   | Ttf2               | 74044  |
| C6 | 10681 | liver   | Dgkz               | 104418 |
| C6 | 11121 | liver   | Mttnr11            | 194126 |
| C6 | 11611 | liver   | S100a13            | 20196  |
| C6 | 12250 | liver   | P2ry14             | 140795 |
| C6 | 12367 | liver   | MMT00072365        |        |
| C6 | 12784 | liver   | Nudt6              | 229228 |
| C6 | 12886 | liver   | Acp6               | 66659  |
| C6 | 13134 | liver   | Lipg               | 16891  |
| C6 | 13423 | liver   | ENSMUSG00000053749 | 791337 |
| C6 | 14559 | liver   | Frrs1              | 20321  |
| C6 | 15456 | liver   | Chi3l3             | 12655  |
| C6 | 15508 | liver   | 4632415L05Rik      | 70808  |

|    |       |         |                    |        |
|----|-------|---------|--------------------|--------|
| C6 | 15901 | liver   | Tpm3               | 59069  |
| C6 | 16416 | liver   | Commd2             | 52245  |
| C6 | 16679 | liver   | Ctsk               | 13038  |
| C6 | 16753 | liver   | Hfe2               | 69585  |
| C6 | 18138 | liver   | MMT00000385        |        |
| C6 | 18754 | liver   | Rbm8a              | 60365  |
| C6 | 18790 | liver   | Car3               | 12350  |
| C6 | 18911 | liver   | Selenbp2           | 20342  |
| C6 | 19084 | liver   | Mmab               | 77697  |
| C6 | 20385 | liver   | Chd1l              | 68058  |
| C6 | 20661 | liver   | Tuft1              | 22156  |
| C6 | 20917 | liver   | Gstm6              | 14867  |
| C6 | 21323 | liver   | MMT00074228        |        |
| C6 | 21650 | liver   | Ap4b1              | 67489  |
| C6 | 21814 | liver   | Accn5              | 58170  |
| C6 | 22202 | liver   | OTTMUSG00000021274 | 545539 |
| C6 | 22570 | liver   | Phtf1              | 18685  |
| C6 | 23457 | liver   | Selenbp2           | 20342  |
| C7 | 327   | adipose | H2-Ea              | 14968  |
| C7 | 1515  | adipose | Med20              | 56771  |
| C7 | 1960  | adipose | Ubr2               | 224826 |
| C7 | 1972  | adipose | Ly6g6e             | 70274  |
| C7 | 2938  | adipose | H2-T23             | 15040  |
| C7 | 3905  | adipose | H2-Q1              | 15006  |
| C7 | 4032  | adipose | MMT00008594        |        |
| C7 | 4387  | adipose | Frs3               | 107971 |
| C7 | 4411  | adipose | 2310039H08Rik      | 67101  |
| C7 | 4526  | adipose | Satb1              | 20230  |
| C7 | 4695  | adipose | D330027H18Rik      | 101359 |
| C7 | 5482  | adipose | Cdsn               | 386463 |
| C7 | 5786  | adipose | Lta                | 16992  |
| C7 | 6036  | adipose | Pram1              | 378460 |
| C7 | 6360  | adipose | D17H6S56E-3        | 27762  |
| C7 | 6555  | adipose | Aadacl2            | 639634 |
| C7 | 7088  | adipose | Slc37a1            | 224674 |
| C7 | 7321  | adipose | Rdbp               | 27632  |
| C7 | 7580  | adipose | Slc22a20           | 381203 |
| C7 | 7637  | adipose | MMT00056309        | 382035 |
| C7 | 7991  | adipose | Gpr115             | 78249  |
| C7 | 8649  | adipose | MMT00072863        | 77652  |
| C7 | 8750  | adipose | 1700010I14Rik      | 66931  |
| C7 | 9951  | adipose | Rpp21              | 67676  |
| C7 | 10376 | adipose | C920025E04Rik      | 667803 |
| C7 | 10667 | adipose | H2-Eb1             | 14969  |
| C7 | 11500 | adipose | 3300001P08Rik      | 67684  |
| C7 | 12355 | adipose | Al507611           | 245884 |
| C7 | 12694 | adipose | Riok2              | 67045  |
| C7 | 13329 | adipose | Osbp2              | 74309  |
| C7 | 13493 | adipose | Ring1              | 19763  |
| C7 | 13682 | adipose | BC051142           | 407788 |
| C7 | 13789 | adipose | H2-Q8              | 15019  |

|    |       |         |               |        |
|----|-------|---------|---------------|--------|
| C7 | 14375 | adipose | D17H6S56E-5   | 110956 |
| C7 | 15181 | adipose | Enpp4         | 224794 |
| C7 | 15531 | adipose | Prickle4      | 66119  |
| C7 | 16692 | adipose | Bat4          | 81845  |
| C7 | 16890 | adipose | H2-Eb2        | 381091 |
| C7 | 17322 | adipose | Zfp758        | 224598 |
| C7 | 18577 | adipose | Btbd9         | 224671 |
| C7 | 18906 | adipose | Zfand3        | 21769  |
| C7 | 20100 | adipose | Guca1b        | 107477 |
| C7 | 20238 | adipose | H2-T9         | 15051  |
| C7 | 20346 | adipose | Gna-rs1       | 14670  |
| C7 | 20511 | adipose | Decr2         | 26378  |
| C7 | 21295 | adipose | Snf1lk        | 17691  |
| C7 | 21585 | adipose | Hipk1         | 15257  |
| C7 | 22743 | adipose | Igh-2         | 238447 |
| C7 | 22822 | adipose | MMT00013433   |        |
| C7 | 22867 | adipose | Vps52         | 224705 |
| C7 | 23000 | adipose | Faim2         | 72393  |
| C7 | 327   | liver   | H2-Ea         | 14968  |
| C7 | 510   | liver   | Neu1          | 18010  |
| C7 | 763   | liver   | 4933406E20Rik | 74443  |
| C7 | 1340  | liver   | Tap2          | 21355  |
| C7 | 1515  | liver   | Med20         | 56771  |
| C7 | 1960  | liver   | Ubr2          | 224826 |
| C7 | 2325  | liver   | H2-K1         | 14972  |
| C7 | 2801  | liver   | H2-BI         | 14963  |
| C7 | 2938  | liver   | H2-T23        | 15040  |
| C7 | 3599  | liver   | MMT00035426   |        |
| C7 | 3704  | liver   | H2-Q7         | 15018  |
| C7 | 3857  | liver   | 1700001C19Rik | 75462  |
| C7 | 4001  | liver   | Apoa4         | 11808  |
| C7 | 4004  | liver   | Thbs2         | 21826  |
| C7 | 4411  | liver   | 2310039H08Rik | 67101  |
| C7 | 4555  | liver   | Cchcr1        | 240084 |
| C7 | 4958  | liver   | Ndufa7        | 66416  |
| C7 | 4960  | liver   | MMT00067115   |        |
| C7 | 5410  | liver   | Cyp4f15       | 106648 |
| C7 | 5645  | liver   | Tmem8         | 60455  |
| C7 | 5648  | liver   | Zfp213        | 449521 |
| C7 | 6360  | liver   | D17H6S56E-3   | 27762  |
| C7 | 6510  | liver   | Plcl2         | 224860 |
| C7 | 7088  | liver   | Slc37a1       | 224674 |
| C7 | 8649  | liver   | MMT00072863   | 77652  |
| C7 | 8750  | liver   | 1700010I14Rik | 66931  |
| C7 | 8767  | liver   | Rgl2          | 19732  |
| C7 | 9158  | liver   | Pde9a         | 18585  |
| C7 | 10376 | liver   | C920025E04Rik | 667803 |
| C7 | 10394 | liver   | MMT00028435   |        |
| C7 | 10667 | liver   | H2-Eb1        | 14969  |
| C7 | 12335 | liver   | Plcb4         | 18798  |
| C7 | 12355 | liver   | AI507611      | 245884 |

|    |       |         |               |           |
|----|-------|---------|---------------|-----------|
| C7 | 12694 | liver   | Riok2         | 67045     |
| C7 | 13438 | liver   | Btg3          | 12228     |
| C7 | 13493 | liver   | Ring1         | 19763     |
| C7 | 13667 | liver   | Cbs           | 12411     |
| C7 | 13789 | liver   | H2-Q8         | 15019     |
| C7 | 14322 | liver   | Bat1a         | 53817     |
| C7 | 15181 | liver   | Enpp4         | 224794    |
| C7 | 15531 | liver   | Prickle4      | 66119     |
| C7 | 15540 | liver   | C2            | 12263     |
| C7 | 16153 | liver   | Syngn1        | 20972     |
| C7 | 16348 | liver   | Tubgcp3       | 259279    |
| C7 | 16629 | liver   | Sall2         | 50524     |
| C7 | 17691 | liver   | Kank3         | 80880     |
| C7 | 17788 | liver   | Xrcc1         | 22594     |
| C7 | 18003 | liver   | Tff3          | 21786     |
| C7 | 18251 | liver   | Susd4         | 96935     |
| C7 | 18577 | liver   | Btbd9         | 224671    |
| C7 | 18906 | liver   | Zfand3        | 21769     |
| C7 | 19833 | liver   | Ddah2         | 51793     |
| C7 | 20100 | liver   | Guca1b        | 107477    |
| C7 | 20238 | liver   | H2-T9         | 15051     |
| C7 | 20346 | liver   | Gna-rs1       | 14670     |
| C7 | 20421 | liver   | Cdkn2c        | 12580     |
| C7 | 20511 | liver   | Decr2         | 26378     |
| C7 | 20966 | liver   | MMT00014378   |           |
| C7 | 21295 | liver   | Snf1lk        | 17691     |
| C7 | 21478 | liver   | Loxhd1        | 240411    |
| C7 | 22822 | liver   | MMT00013433   |           |
| C7 | 23250 | liver   | Plcl2         | 224860    |
| C7 | 23401 | liver   | H2-Q2         | 15013     |
| C8 | 286   | adipose | MMT00070509   | 100037278 |
| C8 | 403   | adipose | Leprot1       | 68192     |
| C8 | 700   | adipose | 4930529C04Rik | 619677    |
| C8 | 1755  | adipose | Ocel1         | 77090     |
| C8 | 2749  | adipose | Naf1          | 234344    |
| C8 | 3052  | adipose | 9130404D08Rik | 74549     |
| C8 | 4655  | adipose | 1810029B16Rik | 66282     |
| C8 | 6035  | adipose | Nkd1          | 93960     |
| C8 | 7311  | adipose | Lsm6          | 78651     |
| C8 | 7503  | adipose | Rab11fip1     | 75767     |
| C8 | 8114  | adipose | Kcnn1         | 84036     |
| C8 | 9304  | adipose | A1449175      | 234362    |
| C8 | 9729  | adipose | Got111        | 76615     |
| C8 | 9930  | adipose | Phyhip        | 105653    |
| C8 | 9931  | adipose | Glt25d1       | 234407    |
| C8 | 10497 | adipose | Man2b1        | 17159     |
| C8 | 10758 | adipose | Gdf1          | 14559     |
| C8 | 11292 | adipose | Nr2f6         | 13864     |
| C8 | 11776 | adipose | Ifi30         | 65972     |
| C8 | 12854 | adipose | Ndufa13       | 67184     |
| C8 | 13732 | adipose | Tpm4          | 326618    |

|    |       |         |               |           |
|----|-------|---------|---------------|-----------|
| C8 | 14059 | adipose | Cyp4f18       | 72054     |
| C8 | 14279 | adipose | 3930402G23Rik | 74027     |
| C8 | 14455 | adipose | 2700029M09Rik | 72612     |
| C8 | 15296 | adipose | Mier3         | 218613    |
| C8 | 15455 | adipose | Lsm4          | 50783     |
| C8 | 15792 | adipose | Use1          | 67023     |
| C8 | 16557 | adipose | Rbpms         | 19663     |
| C8 | 16617 | adipose | Sh2d4a        | 72281     |
| C8 | 16702 | adipose | 2810422J05Rik | 75620     |
| C8 | 16849 | adipose | Trmt1         | 212528    |
| C8 | 16858 | adipose | Tmem38a       | 74166     |
| C8 | 17403 | adipose | N4bp1         | 80750     |
| C8 | 19051 | adipose | Podn1         | 244550    |
| C8 | 20484 | adipose | Ces1          | 12623     |
| C8 | 20721 | adipose | 4432412L15Rik | 74337     |
| C8 | 21541 | adipose | Brf2          | 66653     |
| C8 | 22408 | adipose | Calr3         | 73316     |
| C8 | 22776 | adipose | Gsr           | 14782     |
| C8 | 23599 | adipose | Ndr3          | 29812     |
| C8 | 286   | liver   | MMT00070509   | 100037278 |
| C8 | 403   | liver   | Leprot1       | 68192     |
| C8 | 769   | liver   | 5430437P03Rik | 68251     |
| C8 | 1097  | liver   | Dctn6         | 22428     |
| C8 | 1099  | liver   | Ap1m1         | 11767     |
| C8 | 1755  | liver   | Ocel1         | 77090     |
| C8 | 2082  | liver   | AU018778      | 234564    |
| C8 | 2297  | liver   | Syce2         | 71846     |
| C8 | 2671  | liver   | Sh3rf1        | 59009     |
| C8 | 2703  | liver   | MMT00073763   |           |
| C8 | 2749  | liver   | Naf1          | 234344    |
| C8 | 3052  | liver   | 9130404D08Rik | 74549     |
| C8 | 3055  | liver   | Pde4c         | 110385    |
| C8 | 5433  | liver   | 2410004L22Rik | 76478     |
| C8 | 6760  | liver   | 2810428I15Rik | 66462     |
| C8 | 7503  | liver   | Rab11fp1      | 75767     |
| C8 | 8114  | liver   | Kcnn1         | 84036     |
| C8 | 9304  | liver   | AI449175      | 234362    |
| C8 | 9931  | liver   | GlT25d1       | 234407    |
| C8 | 10195 | liver   | Klf1          | 16596     |
| C8 | 10273 | liver   | Gpt2          | 108682    |
| C8 | 13004 | liver   | Arhgef10      | 234094    |
| C8 | 13732 | liver   | Tpm4          | 326618    |
| C8 | 13774 | liver   | Gdf15         | 23886     |
| C8 | 14455 | liver   | 2700029M09Rik | 72612     |
| C8 | 14845 | liver   | Tmem188       | 382030    |
| C8 | 15094 | liver   | Pbx4          | 80720     |
| C8 | 15455 | liver   | Lsm4          | 50783     |
| C8 | 16557 | liver   | Rbpms         | 19663     |
| C8 | 16617 | liver   | Sh2d4a        | 72281     |
| C8 | 16849 | liver   | Trmt1         | 212528    |
| C8 | 16858 | liver   | Tmem38a       | 74166     |



|    |       |         |               |        |
|----|-------|---------|---------------|--------|
| C8 | 17403 | liver   | N4bp1         | 80750  |
| C8 | 17553 | liver   | Eif4ebp1      | 13685  |
| C8 | 17703 | liver   | Large         | 16795  |
| C8 | 18886 | liver   | Slc18a1       | 110877 |
| C8 | 20484 | liver   | Ces1          | 12623  |
| C8 | 22776 | liver   | Gsr           | 14782  |
| C8 | 23636 | liver   | Bst2          | 69550  |
| C9 | 187   | adipose | Wdr62         | 233064 |
| C9 | 1401  | adipose | Klk8          | 259277 |
| C9 | 1566  | adipose | Kctd15        | 233107 |
| C9 | 1690  | adipose | Nlrp5         | 23968  |
| C9 | 2599  | adipose | Lsm14a        | 67070  |
| C9 | 2912  | adipose | Wtip          | 101543 |
| C9 | 3685  | adipose | Apoc1         | 11812  |
| C9 | 4729  | adipose | Slc7a10       | 53896  |
| C9 | 5230  | adipose | MMT00077995   |        |
| C9 | 5352  | adipose | Pdcd2l        | 68079  |
| C9 | 5918  | adipose | Ccl9          | 20308  |
| C9 | 6396  | adipose | Zfp105        | 22646  |
| C9 | 6513  | adipose | Qpctl         | 67369  |
| C9 | 6922  | adipose | Tmem86b       | 68255  |
| C9 | 7761  | adipose | Nudt19        | 110959 |
| C9 | 8394  | adipose | Dpy19l3       | 233115 |
| C9 | 8563  | adipose | Leng1         | 69757  |
| C9 | 9122  | adipose | Sepw1         | 20364  |
| C9 | 9322  | adipose | Relt          | 320100 |
| C9 | 9454  | adipose | 2810426N06Rik | 67607  |
| C9 | 10443 | adipose | Pvrl2         | 19294  |
| C9 | 11465 | adipose | Eif3k         | 73830  |
| C9 | 11888 | adipose | Myadm         | 50918  |
| C9 | 12775 | adipose | Vstm2b        | 58188  |
| C9 | 13504 | adipose | Lair1         | 52855  |
| C9 | 14334 | adipose | Fxyd3         | 17178  |
| C9 | 14842 | adipose | Gipr          | 381853 |
| C9 | 15722 | adipose | Ccdc9         | 243846 |
| C9 | 16913 | adipose | Pira3         | 18726  |
| C9 | 17314 | adipose | Napa          | 108124 |
| C9 | 17585 | adipose | Gramd1a       | 52857  |
| C9 | 17619 | adipose | Zfp551        | 619331 |
| C9 | 18088 | adipose | Alkbh6        | 233065 |
| C9 | 19142 | adipose | Gpatch1       | 67471  |
| C9 | 19462 | adipose | 4933439C20Rik | 66776  |
| C9 | 20490 | adipose | Tmem143       | 70209  |
| C9 | 20606 | adipose | MMT00042166   |        |
| C9 | 21209 | adipose | Ebf4          | 228598 |
| C9 | 21223 | adipose | Pira1         | 18722  |
| C9 | 21296 | adipose | Rpl14         | 67115  |
| C9 | 21853 | adipose | 5430432N15Rik | 74490  |
| C9 | 21988 | adipose | MMT00015654   | 675749 |
| C9 | 126   | liver   | 0610012D14Rik | 68352  |
| C9 | 1985  | liver   | Pepd          | 18624  |

|     |       |         |               |        |
|-----|-------|---------|---------------|--------|
| C9  | 2388  | liver   | Dot1l         | 208266 |
| C9  | 2599  | liver   | Lsm14a        | 67070  |
| C9  | 2912  | liver   | Wtip          | 101543 |
| C9  | 4697  | liver   | Cyp2a12       | 13085  |
| C9  | 5352  | liver   | Pdcd2l        | 68079  |
| C9  | 6371  | liver   | Dedd2         | 67379  |
| C9  | 6396  | liver   | Zfp105        | 22646  |
| C9  | 6513  | liver   | Qpctl         | 67369  |
| C9  | 6519  | liver   | Phldb3        | 232970 |
| C9  | 7761  | liver   | Nudt19        | 110959 |
| C9  | 8521  | liver   | Ceacam1       | 26365  |
| C9  | 9122  | liver   | Sepw1         | 20364  |
| C9  | 9322  | liver   | Relt          | 320100 |
| C9  | 9359  | liver   | Dhx34         | 71723  |
| C9  | 9454  | liver   | 2810426N06Rik | 67607  |
| C9  | 10545 | liver   | Tmem147       | 69804  |
| C9  | 11321 | liver   | 2310014L17Rik | 381845 |
| C9  | 11465 | liver   | Eif3k         | 73830  |
| C9  | 11888 | liver   | Myadm         | 50918  |
| C9  | 12423 | liver   | Cyp2g1        | 13108  |
| C9  | 16639 | liver   | MMT00078937   |        |
| C9  | 17314 | liver   | Napa          | 108124 |
| C9  | 18088 | liver   | Alkbh6        | 233065 |
| C9  | 19462 | liver   | 4933439C20Rik | 66776  |
| C9  | 19762 | liver   | Pih1d1        | 68845  |
| C9  | 19854 | liver   | Kcnj14        | 211480 |
| C9  | 20490 | liver   | Tmem143       | 70209  |
| C9  | 20606 | liver   | MMT00042166   |        |
| C9  | 21438 | liver   | Plekha4       | 69217  |
| C9  | 23247 | liver   | Erc1          | 13870  |
| C9  | 23557 | liver   | Ppp1r12c      | 232807 |
| C9  | 23595 | liver   | Gm550         | 225852 |
| C10 | 141   | adipose | Jag1          | 16449  |
| C10 | 223   | adipose | Trp53inp2     | 68728  |
| C10 | 1678  | adipose | Tcf15         | 21407  |
| C10 | 2915  | adipose | Nfs1          | 18041  |
| C10 | 3214  | adipose | Dnmt3b        | 13436  |
| C10 | 3257  | adipose | Map1lc3a      | 66734  |
| C10 | 4195  | adipose | Csrp2bp       | 228714 |
| C10 | 4915  | adipose | Asb18         | 208372 |
| C10 | 6059  | adipose | Dsn1          | 66934  |
| C10 | 6250  | adipose | Csnk2a1       | 12995  |
| C10 | 6648  | adipose | Cenpl         | 70454  |
| C10 | 7610  | adipose | Scand1        | 19018  |
| C10 | 8499  | adipose | C430048L16Rik | 77604  |
| C10 | 9762  | adipose | Snx5          | 69178  |
| C10 | 11166 | adipose | Uqcc          | 56046  |
| C10 | 12388 | adipose | 8430406I07Rik | 74528  |
| C10 | 12866 | adipose | 4921517L17Rik | 70873  |
| C10 | 13355 | adipose | Foxs1         | 14239  |
| C10 | 14399 | adipose | Csnk2a1       | 12995  |

|     |       |         |               |           |
|-----|-------|---------|---------------|-----------|
| C10 | 14647 | adipose | Cst3          | 13010     |
| C10 | 14740 | adipose | Mfap1b        | 100034361 |
| C10 | 16494 | adipose | 2310007D09Rik | 71878     |
| C10 | 17053 | adipose | MMT00068622   |           |
| C10 | 17221 | adipose | Zfp264        | 116812    |
| C10 | 18835 | adipose | Dtwd1         | 69185     |
| C10 | 19560 | adipose | Trmt6         | 66926     |
| C10 | 20837 | adipose | Dlgap4        | 228836    |
| C10 | 21665 | adipose | Nat5          | 67877     |
| C10 | 21729 | adipose | Hdc           | 15186     |
| C10 | 21907 | adipose | Dynlrb1       | 67068     |
| C10 | 22740 | adipose | Manbal        | 69161     |
| C10 | 23005 | adipose | 4930405A21Rik | 74846     |
| C10 | 1325  | liver   | Pigu          | 228812    |
| C10 | 1956  | liver   | Usp50         | 75083     |
| C10 | 2915  | liver   | Nfs1          | 18041     |
| C10 | 4336  | liver   | Rbbp9         | 26450     |
| C10 | 4833  | liver   | Synpo2        | 118449    |
| C10 | 5450  | liver   | Nrbp1         | 192292    |
| C10 | 5504  | liver   | Itsn1         | 16443     |
| C10 | 6016  | liver   | A530057A03Rik | 215456    |
| C10 | 6059  | liver   | Dsn1          | 66934     |
| C10 | 6231  | liver   | 9030622O22Rik | 71570     |
| C10 | 6250  | liver   | Csnk2a1       | 12995     |
| C10 | 6797  | liver   | Blvra         | 109778    |
| C10 | 6820  | liver   | MMT00046996   |           |
| C10 | 7610  | liver   | Scand1        | 19018     |
| C10 | 7991  | liver   | Gpr115        | 78249     |
| C10 | 9762  | liver   | Snx5          | 69178     |
| C10 | 10028 | liver   | Chchd6        | 66098     |
| C10 | 11705 | liver   | Polr3f        | 70408     |
| C10 | 12388 | liver   | 8430406I07Rik | 74528     |
| C10 | 13355 | liver   | Foxs1         | 14239     |
| C10 | 14399 | liver   | Csnk2a1       | 12995     |
| C10 | 14445 | liver   | Arl6          | 56297     |
| C10 | 14647 | liver   | Cst3          | 13010     |
| C10 | 14740 | liver   | Mfap1b        | 100034361 |
| C10 | 14816 | liver   | Pcdhb9        | 93880     |
| C10 | 15565 | liver   | 2310001A20Rik | 71881     |
| C10 | 17043 | liver   | Tmem127       | 69470     |
| C10 | 17221 | liver   | Zfp264        | 116812    |
| C10 | 18835 | liver   | Dtwd1         | 69185     |
| C10 | 19560 | liver   | Trmt6         | 66926     |
| C10 | 20221 | liver   | Ift57         | 73916     |
| C10 | 21665 | liver   | Nat5          | 67877     |
| C10 | 21729 | liver   | Hdc           | 15186     |
| C10 | 22740 | liver   | Manbal        | 69161     |
| C10 | 22857 | liver   | Fahd2a        | 68126     |
| C10 | 23005 | liver   | 4930405A21Rik | 74846     |
| C10 | 23599 | liver   | Ndr3          | 29812     |
| C11 | 530   | adipose | Mest          | 17294     |

|     |       |         |                    |           |
|-----|-------|---------|--------------------|-----------|
| C11 | 820   | adipose | 3200002M19Rik      | 75430     |
| C11 | 972   | adipose | Sri                | 109552    |
| C11 | 1271  | adipose | 2810403A07Rik      | 74200     |
| C11 | 1620  | adipose | Htra1              | 56213     |
| C11 | 1653  | adipose | Anxa5              | 11747     |
| C11 | 1766  | adipose | Srpx2              | 68792     |
| C11 | 1978  | adipose | Ublcp1             | 79560     |
| C11 | 2082  | adipose | AU018778           | 234564    |
| C11 | 3286  | adipose | Alox5ap            | 11690     |
| C11 | 3315  | adipose | Serf2              | 378702    |
| C11 | 3882  | adipose | Itfg3              | 106581    |
| C11 | 4030  | adipose | Prps1              | 19139     |
| C11 | 5725  | adipose | 2-Mar              | 224703    |
| C11 | 5811  | adipose | Col4a2             | 12827     |
| C11 | 5983  | adipose | Pcolce2            | 76477     |
| C11 | 6091  | adipose | Rbbp4              | 19646     |
| C11 | 7074  | adipose | Dcbld2             | 73379     |
| C11 | 7139  | adipose | Pld3               | 18807     |
| C11 | 9476  | adipose | 9130005N14Rik      | 68303     |
| C11 | 9715  | adipose | OTTMUSG00000004551 | 100038514 |
| C11 | 10674 | adipose | Antxr2             | 71914     |
| C11 | 10972 | adipose | Lrig1              | 16206     |
| C11 | 11513 | adipose | Serpinf1           | 20317     |
| C11 | 12360 | adipose | EG630825           | 630825    |
| C11 | 12687 | adipose | Zc3h8              | 57432     |
| C11 | 12795 | adipose | Slc20a2            | 20516     |
| C11 | 13168 | adipose | Col8a1             | 12837     |
| C11 | 13223 | adipose | BC022651           | 330460    |
| C11 | 14951 | adipose | Dpep3              | 71854     |
| C11 | 15170 | adipose | Tspan17            | 74257     |
| C11 | 15247 | adipose | Cstb               | 13014     |
| C11 | 15657 | adipose | Zfyve28            | 231125    |
| C11 | 15994 | adipose | 9130213B05Rik      | 231440    |
| C11 | 16793 | adipose | Arl11              | 219144    |
| C11 | 16888 | adipose | H6pd               | 100198    |
| C11 | 16919 | adipose | Pea15a             | 18611     |
| C11 | 17404 | adipose | Ctsb               | 13030     |
| C11 | 17606 | adipose | Tmem90a            | 627191    |
| C11 | 18135 | adipose | Tmed3              | 66111     |
| C11 | 18669 | adipose | Fxyd5              | 18301     |
| C11 | 18798 | adipose | Ndufa4l2           | 407790    |
| C11 | 19129 | adipose | Serf2              | 378702    |
| C11 | 19247 | adipose | Prep               | 116847    |
| C11 | 19317 | adipose | EG626952           | 626952    |
| C11 | 20281 | adipose | Naip1              | 17940     |
| C11 | 20486 | adipose | C1qtnf1            | 56745     |
| C11 | 20644 | adipose | Lct                | 226413    |
| C11 | 21440 | adipose | Tmsb10             | 19240     |
| C11 | 21459 | adipose | Hpse               | 15442     |
| C11 | 21762 | adipose | Lage3              | 66192     |
| C11 | 21872 | adipose | Stambpl1           | 76630     |

|     |       |         |               |           |
|-----|-------|---------|---------------|-----------|
| C11 | 22039 | adipose | Npc2          | 67963     |
| C11 | 22192 | adipose | 9030205A07Rik | 217843    |
| C11 | 23185 | adipose | Ndufs1        | 227197    |
| C11 | 23367 | adipose | Tm2d2         | 69742     |
| C11 | 3038  | liver   | Serpina12     | 68054     |
| C11 | 3265  | liver   | Dntt          | 21673     |
| C11 | 4578  | liver   | Pglyrp2       | 57757     |
| C11 | 8154  | liver   | Neb           | 17996     |
| C11 | 12879 | liver   | Ermp1         | 226090    |
| C11 | 16510 | liver   | Tspyl4        | 72480     |
| C11 | 17746 | liver   | Prlr          | 19116     |
| C11 | 19740 | liver   | Gpr98         | 110789    |
| C11 | 20967 | liver   | Fabp2         | 14079     |
| C11 | 22085 | liver   | MMT00036089   |           |
| C11 | 22912 | liver   | Stap1         | 56792     |
| C12 | 715   | adipose | Padi3         | 18601     |
| C12 | 737   | adipose | MMT00023716   |           |
| C12 | 1270  | adipose | 1700029I01Rik | 70005     |
| C12 | 1968  | adipose | Nudc          | 18221     |
| C12 | 2372  | adipose | Stx12         | 100226    |
| C12 | 3475  | adipose | 2610305D13Rik | 112422    |
| C12 | 3921  | adipose | 2300002D11Rik | 69539     |
| C12 | 5522  | adipose | Pink1         | 68943     |
| C12 | 6191  | adipose | Ddost         | 13200     |
| C12 | 6394  | adipose | Fbxo6         | 50762     |
| C12 | 8610  | adipose | Padi4         | 18602     |
| C12 | 8677  | adipose | Zbtb8os       | 67106     |
| C12 | 9301  | adipose | MMT00050551   |           |
| C12 | 9541  | adipose | Npal3         | 74552     |
| C12 | 9634  | adipose | Atp13a2       | 74772     |
| C12 | 10407 | adipose | Gpatch3       | 242691    |
| C12 | 12097 | adipose | 9430015G10Rik | 230996    |
| C12 | 12174 | adipose | 2610027C15Rik | 230752    |
| C12 | 12794 | adipose | MMT00082139   | 100048814 |
| C12 | 18338 | adipose | Akr1e1        | 56043     |
| C12 | 19447 | adipose | MMT00004670   |           |
| C12 | 19633 | adipose | Gm694         | 277744    |
| C12 | 19924 | adipose | Ubiad1        | 71707     |
| C12 | 20999 | adipose | 1110049F12Rik | 66193     |
| C12 | 737   | liver   | MMT00023716   |           |
| C12 | 2372  | liver   | Stx12         | 100226    |
| C12 | 2902  | liver   | D4Ert196e     | 52174     |
| C12 | 3475  | liver   | 2610305D13Rik | 112422    |
| C12 | 3616  | liver   | Dnajc16       | 214063    |
| C12 | 4305  | liver   | Tmem51        | 214359    |
| C12 | 4768  | liver   | Lsm10         | 116748    |
| C12 | 4885  | liver   | Fhad1         | 329977    |
| C12 | 5788  | liver   | Smpd13b       | 100340    |
| C12 | 6191  | liver   | Ddost         | 13200     |
| C12 | 6830  | liver   | Rsc1a1        | 69994     |
| C12 | 6857  | liver   | Serinc2       | 230779    |

|     |       |         |               |        |
|-----|-------|---------|---------------|--------|
| C12 | 7307  | liver   | Agmat         | 75986  |
| C12 | 8610  | liver   | Padi4         | 18602  |
| C12 | 8654  | liver   | Fbxl13        | 320118 |
| C12 | 8705  | liver   | Ahdc1         | 230793 |
| C12 | 9301  | liver   | MMT00050551   |        |
| C12 | 9634  | liver   | Atp13a2       | 74772  |
| C12 | 12097 | liver   | 9430015G10Rik | 230996 |
| C12 | 13626 | liver   | RP23-395H4.4  | 13706  |
| C12 | 14676 | liver   | Mecr          | 26922  |
| C12 | 16287 | liver   | Extl1         | 56219  |
| C12 | 18338 | liver   | Akr1e1        | 56043  |
| C12 | 19924 | liver   | Ubiad1        | 71707  |
| C13 | 1660  | adipose | Zfp33b        | 69623  |
| C13 | 3261  | adipose | Rpap2         | 231571 |
| C13 | 4010  | adipose | Alkbh2        | 231642 |
| C13 | 4723  | adipose | Art3          | 109979 |
| C13 | 6116  | adipose | Pcgf5         | 76073  |
| C13 | 6330  | adipose | Dgkq          | 110524 |
| C13 | 6888  | adipose | Cxcl9         | 17329  |
| C13 | 7258  | adipose | Bmp2k         | 140780 |
| C13 | 7377  | adipose | Suds3         | 71954  |
| C13 | 8794  | adipose | 1500011B03Rik | 66236  |
| C13 | 10978 | adipose | MMT00078322   |        |
| C13 | 12656 | adipose | Coq5          | 52064  |
| C13 | 14085 | adipose | Cdkl2         | 53886  |
| C13 | 15466 | adipose | Gm136         | 214568 |
| C13 | 16066 | adipose | Coq2          | 71883  |
| C13 | 17716 | adipose | Rnf10         | 50849  |
| C13 | 19443 | adipose | Prkab1        | 19079  |
| C13 | 19719 | adipose | EG634650      | 634650 |
| C13 | 20118 | adipose | Tmem175       | 72392  |
| C13 | 23625 | adipose | Pkd2          | 18764  |
| C13 | 665   | liver   | Slc26a1       | 231583 |
| C13 | 1660  | liver   | Zfp33b        | 69623  |
| C13 | 4617  | liver   | Agpat9        | 231510 |
| C13 | 4675  | liver   | Sparcl1       | 13602  |
| C13 | 5100  | liver   | Pebp1         | 23980  |
| C13 | 5728  | liver   | MMT00044077   |        |
| C13 | 6116  | liver   | Pcgf5         | 76073  |
| C13 | 6330  | liver   | Dgkq          | 110524 |
| C13 | 7258  | liver   | Bmp2k         | 140780 |
| C13 | 8547  | liver   | Gbp4          | 17472  |
| C13 | 8807  | liver   | Ankrd56       | 78088  |
| C13 | 9057  | liver   | Spp1          | 20750  |
| C13 | 10550 | liver   | Rchy1         | 68098  |
| C13 | 10978 | liver   | MMT00078322   |        |
| C13 | 12656 | liver   | Coq5          | 52064  |
| C13 | 14085 | liver   | Cdkl2         | 53886  |
| C13 | 15908 | liver   | Pebp1         | 23980  |
| C13 | 17716 | liver   | Rnf10         | 50849  |
| C13 | 17807 | liver   | Pebp1         | 23980  |

|     |       |         |               |        |
|-----|-------|---------|---------------|--------|
| C13 | 19443 | liver   | Prkab1        | 19079  |
| C13 | 19719 | liver   | EG634650      | 634650 |
| C13 | 20118 | liver   | Tmem175       | 72392  |
| C13 | 20269 | liver   | Hsd17b13      | 243168 |
| C13 | 21652 | liver   | Olfr700       | 258593 |
| C13 | 23625 | liver   | Pkd2          | 18764  |
| C14 | 2507  | adipose | Oaf           | 102644 |
| C14 | 2764  | adipose | Ffar2         | 233079 |
| C14 | 3869  | adipose | Zadh2         | 225791 |
| C14 | 4057  | adipose | Slc2a4        | 20528  |
| C14 | 4512  | adipose | Esrra         | 26379  |
| C14 | 6077  | adipose | Pik3cb        | 74769  |
| C14 | 7285  | adipose | Tbc1d4        | 210789 |
| C14 | 7419  | adipose | Arid5a        | 214855 |
| C14 | 8300  | adipose | MMT00043905   |        |
| C14 | 9393  | adipose | Cd300a        | 217303 |
| C14 | 10029 | adipose | Trak1         | 67095  |
| C14 | 10541 | adipose | Ap2a2         | 11772  |
| C14 | 12886 | adipose | Acp6          | 66659  |
| C14 | 12965 | adipose | Pmm1          | 29858  |
| C14 | 13457 | adipose | Hexa          | 15211  |
| C14 | 14262 | adipose | Tcfec         | 21426  |
| C14 | 14363 | adipose | Cxcl16        | 66102  |
| C14 | 14479 | adipose | Ada           | 11486  |
| C14 | 15310 | adipose | Mlxipl        | 58805  |
| C14 | 15352 | adipose | Socs2         | 216233 |
| C14 | 15918 | adipose | Fkbp11        | 66120  |
| C14 | 15924 | adipose | Rbm38         | 56190  |
| C14 | 17666 | adipose | Fstl1         | 14314  |
| C14 | 18593 | adipose | Rgs7bp        | 52882  |
| C14 | 19890 | adipose | Tmem119       | 231633 |
| C14 | 20885 | adipose | MMT0004673    |        |
| C14 | 21591 | adipose | Hectd3        | 76608  |
| C14 | 22668 | adipose | Rai14         | 75646  |
| C14 | 22786 | adipose | Mterfd3       | 74238  |
| C14 | 23685 | adipose | Tbxas1        | 21391  |
| C14 | 1600  | liver   | Csrp1         | 13007  |
| C14 | 2643  | liver   | Inhbe         | 16326  |
| C14 | 5691  | liver   | Csrp3         | 13009  |
| C14 | 6746  | liver   | E2f8          | 108961 |
| C14 | 7492  | liver   | Adfp          | 11520  |
| C14 | 9700  | liver   | Prodh         | 19125  |
| C14 | 10710 | liver   | Smoc1         | 64075  |
| C14 | 13374 | liver   | Wipi1         | 52639  |
| C14 | 17638 | liver   | Adssl1        | 11565  |
| C14 | 17816 | liver   | 3110003A17Rik | 73112  |
| C14 | 22925 | liver   | Parp16        | 214424 |
| C15 | 1041  | adipose | 3110049J23Rik | 67307  |
| C15 | 1135  | adipose | Akap12        | 83397  |
| C15 | 2571  | adipose | Rmnd1         | 66084  |
| C15 | 2885  | adipose | Hebp2         | 56016  |

|     |       |         |               |           |
|-----|-------|---------|---------------|-----------|
| C15 | 3744  | adipose | Rmnd1         | 66084     |
| C15 | 5188  | adipose | Cma1          | 17228     |
| C15 | 5899  | adipose | Cpa3          | 12873     |
| C15 | 5965  | adipose | Pbld          | 68371     |
| C15 | 6363  | adipose | 9130014G24Rik | 215772    |
| C15 | 6506  | adipose | Scyl2         | 213326    |
| C15 | 8786  | adipose | Rmnd1         | 66084     |
| C15 | 12239 | adipose | A630077B13Rik | 215900    |
| C15 | 14169 | adipose | 1700052N19Rik | 73419     |
| C15 | 14989 | adipose | Map3k5        | 26408     |
| C15 | 15971 | adipose | Aifm2         | 71361     |
| C15 | 19115 | adipose | Rab32         | 67844     |
| C15 | 19392 | adipose | Slc25a16      | 73132     |
| C15 | 20335 | adipose | Srgn          | 19073     |
| C15 | 22146 | adipose | Aifm2         | 71361     |
| C15 | 22333 | adipose | Hnrnp3        | 432467    |
| C15 | 1041  | liver   | 3110049J23Rik | 67307     |
| C15 | 1135  | liver   | Akap12        | 83397     |
| C15 | 2571  | liver   | Rmnd1         | 66084     |
| C15 | 2662  | liver   | Sgpl1         | 20397     |
| C15 | 3744  | liver   | Rmnd1         | 66084     |
| C15 | 5965  | liver   | Pbld          | 68371     |
| C15 | 7620  | liver   | Foxo3         | 219038    |
| C15 | 8786  | liver   | Rmnd1         | 66084     |
| C15 | 12239 | liver   | A630077B13Rik | 215900    |
| C15 | 13348 | liver   | Ank3          | 11735     |
| C15 | 13688 | liver   | Ppa1          | 67895     |
| C15 | 14169 | liver   | 1700052N19Rik | 73419     |
| C15 | 15971 | liver   | Aifm2         | 71361     |
| C15 | 18300 | liver   | Arg1          | 11846     |
| C15 | 18893 | liver   | Lace1         | 215951    |
| C15 | 19115 | liver   | Rab32         | 67844     |
| C15 | 19392 | liver   | Slc25a16      | 73132     |
| C15 | 21105 | liver   | Pex26         | 74043     |
| C15 | 21258 | liver   | 2010003K15Rik | 75606     |
| C15 | 22146 | liver   | Aifm2         | 71361     |
| C16 | 1177  | adipose | EG545391      | 545391    |
| C16 | 1374  | adipose | Mdn1          | 100019    |
| C16 | 2044  | adipose | Hsd17b7       | 15490     |
| C16 | 4116  | adipose | Ifi205        | 226695    |
| C16 | 5002  | adipose | Ifi202b       | 26388     |
| C16 | 5357  | adipose | MMT00021917   |           |
| C16 | 6498  | adipose | MMT00016809   | 100048067 |
| C16 | 7936  | adipose | MMT00061970   |           |
| C16 | 8372  | adipose | Uap1          | 107652    |
| C16 | 11167 | adipose | Dars2         | 226539    |
| C16 | 11406 | adipose | Ifi203        | 15950     |
| C16 | 11571 | adipose | Bpnt1         | 23827     |
| C16 | 11593 | adipose | Usf1          | 22278     |
| C16 | 11725 | adipose | Itln1         | 16429     |
| C16 | 13149 | adipose | Ifi203        | 15950     |



|     |       |         |               |           |
|-----|-------|---------|---------------|-----------|
| C16 | 15121 | adipose | Itln1         | 16429     |
| C16 | 15844 | adipose | Klhdc9        | 68874     |
| C16 | 16528 | adipose | Ddr2          | 18214     |
| C16 | 19332 | adipose | Bpnt1         | 23827     |
| C16 | 22312 | adipose | Itln1         | 16429     |
| C16 | 23466 | adipose | Pou2f1        | 18986     |
| C16 | 23522 | adipose | Adcy10        | 271639    |
| C16 | 1374  | liver   | Mdn1          | 100019    |
| C16 | 6498  | liver   | MMT00016809   | 100048067 |
| C16 | 6648  | liver   | Cenpl         | 70454     |
| C16 | 7449  | liver   | Creg1         | 433375    |
| C16 | 8372  | liver   | Uap1          | 107652    |
| C16 | 9449  | liver   | Sft2d2        | 108735    |
| C16 | 11167 | liver   | Dars2         | 226539    |
| C16 | 11406 | liver   | Ifi203        | 15950     |
| C16 | 13149 | liver   | Ifi203        | 15950     |
| C16 | 14052 | liver   | EG226654      | 226654    |
| C16 | 15235 | liver   | Ankrd13d      | 68423     |
| C16 | 15844 | liver   | Klhdc9        | 68874     |
| C16 | 16361 | liver   | Olfr703       | 258589    |
| C16 | 18276 | liver   | Apoa2         | 11807     |
| C16 | 19520 | liver   | Uck2          | 80914     |
| C16 | 19844 | liver   | Ngf           | 18049     |
| C16 | 22043 | liver   | Rdh8          | 235033    |
| C16 | 23466 | liver   | Pou2f1        | 18986     |
| C17 | 3411  | adipose | Rabl2a        | 68708     |
| C17 | 3654  | adipose | St13          | 70356     |
| C17 | 5636  | adipose | Trmu          | 72026     |
| C17 | 5910  | adipose | 1110014J01Rik | 74778     |
| C17 | 6804  | adipose | Cyp2d22       | 56448     |
| C17 | 6974  | adipose | Tmem65        | 74868     |
| C17 | 7100  | adipose | Tomm22        | 223696    |
| C17 | 8156  | adipose | Tll1          | 319953    |
| C17 | 8653  | adipose | AW124722      | 239570    |
| C17 | 10482 | adipose | Mcat          | 223722    |
| C17 | 15935 | adipose | Pnpla3        | 116939    |
| C17 | 17147 | adipose | Tll12         | 223723    |
| C17 | 17529 | adipose | Tnfrsf13c     | 72049     |
| C17 | 18520 | adipose | MMT00005421   |           |
| C17 | 19933 | adipose | Pi16          | 74116     |
| C17 | 20119 | adipose | Polr3h        | 78929     |
| C17 | 23547 | adipose | Tmed7         | 66676     |
| C17 | 2719  | liver   | St6galnac2    | 20446     |
| C17 | 2805  | liver   | Rhog          | 56212     |
| C17 | 3411  | liver   | Rabl2a        | 68708     |
| C17 | 3654  | liver   | St13          | 70356     |
| C17 | 5910  | liver   | 1110014J01Rik | 74778     |
| C17 | 6183  | liver   | Atxn10        | 54138     |
| C17 | 6804  | liver   | Cyp2d22       | 56448     |
| C17 | 6974  | liver   | Tmem65        | 74868     |
| C17 | 7100  | liver   | Tomm22        | 223696    |

|     |       |         |             |        |
|-----|-------|---------|-------------|--------|
| C17 | 8653  | liver   | AW124722    | 239570 |
| C17 | 9822  | liver   | Celsr1      | 12614  |
| C17 | 10482 | liver   | Mcat        | 223722 |
| C17 | 10558 | liver   | Cyp2d40     | 71754  |
| C17 | 11503 | liver   | Rangap1     | 19387  |
| C17 | 11968 | liver   | Cenpm       | 66570  |
| C17 | 12468 | liver   | Cyp2d13     | 68444  |
| C17 | 12965 | liver   | Pmm1        | 29858  |
| C17 | 14185 | liver   | Poldip3     | 73826  |
| C17 | 17147 | liver   | Tll12       | 223723 |
| C17 | 19216 | liver   | Bik         | 12124  |
| C18 | 2743  | adipose | Tcf3        | 21415  |
| C18 | 2815  | adipose | Eif2ak3     | 13666  |
| C18 | 3703  | adipose | Ggcx        | 56316  |
| C18 | 5296  | adipose | Rnf181      | 66510  |
| C18 | 8055  | adipose | Ptcd3       | 69956  |
| C18 | 11872 | adipose | Vamp5       | 53620  |
| C18 | 12948 | adipose | MMT00009927 |        |
| C18 | 15384 | adipose | Mat2a       | 232087 |
| C18 | 15625 | adipose | Capg        | 12332  |
| C18 | 15708 | adipose | Retsat      | 67442  |
| C18 | 16176 | adipose | St3gal5     | 20454  |
| C18 | 17317 | adipose | Jmjd1a      | 104263 |
| C18 | 17562 | adipose | Rbed1       | 232089 |
| C18 | 18948 | adipose | Olfr1270    | 258987 |
| C18 | 20174 | adipose | Ctnna2      | 12386  |
| C18 | 20757 | adipose | Suclg1      | 56451  |
| C18 | 20903 | adipose | Rpia        | 19895  |
| C18 | 21307 | adipose | Krcc1       | 57896  |
| C18 | 1140  | liver   | Rmnd5a      | 68477  |
| C18 | 2743  | liver   | Tcf3        | 21415  |
| C18 | 3703  | liver   | Ggcx        | 56316  |
| C18 | 4086  | liver   | Adamts8     | 30806  |
| C18 | 4093  | liver   | Akp5        | 11650  |
| C18 | 7273  | liver   | Rnf103      | 22644  |
| C18 | 11338 | liver   | Vamp8       | 22320  |
| C18 | 11872 | liver   | Vamp5       | 53620  |
| C18 | 12182 | liver   | Immt        | 76614  |
| C18 | 13666 | liver   | MMT00039363 |        |
| C18 | 15384 | liver   | Mat2a       | 232087 |
| C18 | 15625 | liver   | Capg        | 12332  |
| C18 | 15708 | liver   | Retsat      | 67442  |
| C18 | 16670 | liver   | Csmd2       | 329942 |
| C18 | 17317 | liver   | Jmjd1a      | 104263 |
| C18 | 17562 | liver   | Rbed1       | 232089 |
| C18 | 18658 | liver   | Gstk1       | 76263  |
| C18 | 22695 | liver   | Tgoln2      | 22135  |
| C19 | 419   | adipose | Foxk2       | 68837  |
| C19 | 2877  | adipose | Pcyt2       | 68671  |
| C19 | 6846  | adipose | Olfr1402    | 258272 |
| C19 | 11199 | adipose | Sirt7       | 209011 |

|     |       |         |               |        |
|-----|-------|---------|---------------|--------|
| C19 | 12546 | adipose | Cd7           | 12516  |
| C19 | 13615 | adipose | Arl16         | 70317  |
| C19 | 15016 | adipose | MMT00074608   |        |
| C19 | 16613 | adipose | 1110031I02Rik | 66179  |
| C19 | 17073 | adipose | 1810049H13Rik | 66431  |
| C19 | 17164 | adipose | Slc38a10      | 72055  |
| C19 | 17897 | adipose | Gm1019        | 368202 |
| C19 | 19134 | adipose | Fn3k          | 63828  |
| C19 | 21655 | adipose | Rab40b        | 217371 |
| C19 | 22021 | adipose | Csnk1d        | 104318 |
| C19 | 22551 | adipose | Anapc11       | 66156  |
| C19 | 22557 | adipose | P4hb          | 18453  |
| C19 | 3061  | liver   | Scarf2        | 224024 |
| C19 | 3119  | liver   | Mapk10        | 26414  |
| C19 | 3339  | liver   | Dip2a         | 64451  |
| C19 | 3892  | liver   | D0H6S2654E    | 108161 |
| C19 | 6017  | liver   | MMT00018015   | 667716 |
| C19 | 6426  | liver   | Mfsd4         | 213006 |
| C19 | 6846  | liver   | Olf1402       | 258272 |
| C19 | 8791  | liver   | Sectm1a       | 209588 |
| C19 | 10214 | liver   | Sectm1b       | 58210  |
| C19 | 12546 | liver   | Cd7           | 12516  |
| C19 | 13615 | liver   | Arl16         | 70317  |
| C19 | 15016 | liver   | MMT00074608   |        |
| C19 | 16613 | liver   | 1110031I02Rik | 66179  |
| C19 | 17333 | liver   | Slc25a10      | 27376  |
| C19 | 17680 | liver   | 1700069L16Rik | 73476  |
| C19 | 17792 | liver   | Vmn2r79       | 621430 |
| C19 | 17897 | liver   | Gm1019        | 368202 |
| C19 | 21655 | liver   | Rab40b        | 217371 |
| C19 | 22557 | liver   | P4hb          | 18453  |
| C20 | 468   | adipose | 2610020C07Rik | 69918  |
| C20 | 630   | adipose | C1s           | 50908  |
| C20 | 1444  | adipose | C1r           | 50909  |
| C20 | 1568  | adipose | Frmd4b        | 232288 |
| C20 | 2668  | adipose | C3ar1         | 12267  |
| C20 | 8194  | adipose | MMT00077789   |        |
| C20 | 9010  | adipose | 8430419L09Rik | 74525  |
| C20 | 9417  | adipose | Cd163         | 93671  |
| C20 | 12856 | adipose | Clstn3        | 232370 |
| C20 | 17093 | adipose | Opa1          | 74143  |
| C20 | 17363 | adipose | Aebp2         | 11569  |
| C20 | 17391 | adipose | C530028O21Rik | 319352 |
| C20 | 17743 | adipose | Phb2          | 12034  |
| C20 | 18333 | adipose | Rassf8        | 71323  |
| C20 | 19964 | adipose | Ndufa9        | 66108  |
| C20 | 19999 | adipose | Ift122        | 81896  |
| C20 | 20127 | adipose | Ipo8          | 320727 |
| C20 | 20423 | adipose | 8-Mar         | 71779  |
| C20 | 22075 | adipose | C1s           | 50908  |
| C20 | 22395 | adipose | Kcna1         | 16485  |

|     |       |         |               |        |
|-----|-------|---------|---------------|--------|
| C20 | 630   | liver   | C1s           | 50908  |
| C20 | 1444  | liver   | C1r           | 50909  |
| C20 | 3078  | liver   | 9630033F20Rik | 319801 |
| C20 | 6625  | liver   | C1s           | 50908  |
| C20 | 7678  | liver   | Ltbr          | 17000  |
| C20 | 8194  | liver   | MMT00077789   |        |
| C20 | 9010  | liver   | 8430419L09Rik | 74525  |
| C20 | 9417  | liver   | Cd163         | 93671  |
| C20 | 16322 | liver   | Lmod3         | 320502 |
| C20 | 17391 | liver   | C530028O21Rik | 319352 |
| C20 | 17743 | liver   | Phb2          | 12034  |
| C20 | 19964 | liver   | Ndufa9        | 66108  |
| C20 | 19999 | liver   | Ift122        | 81896  |
| C20 | 20127 | liver   | Ipo8          | 320727 |
| C20 | 22075 | liver   | C1s           | 50908  |
| C21 | 1371  | adipose | 1200009I06Rik | 74190  |
| C21 | 4414  | adipose | 5033406O09Rik | 77675  |
| C21 | 7556  | adipose | A530050D06Rik | 104816 |
| C21 | 8155  | adipose | Mark3         | 17169  |
| C21 | 8925  | adipose | MMT00026932   |        |
| C21 | 9832  | adipose | Brf1          | 72308  |
| C21 | 10526 | adipose | MMT00036239   |        |
| C21 | 13027 | adipose | Ppp2r5c       | 26931  |
| C21 | 13072 | adipose | BC022687      | 217887 |
| C21 | 15088 | adipose | 2810452K22Rik | 67236  |
| C21 | 15277 | adipose | 2810002N01Rik | 68020  |
| C21 | 16191 | adipose | Klc1          | 16593  |
| C21 | 16580 | adipose | Tnfaip2       | 21928  |
| C21 | 20068 | adipose | 2610204M08Rik | 70435  |
| C21 | 23462 | adipose | Bag5          | 70369  |
| C21 | 23693 | adipose | A530016L24Rik | 319942 |
| C21 | 1371  | liver   | 1200009I06Rik | 74190  |
| C21 | 2454  | liver   | MMT00045890   |        |
| C21 | 4414  | liver   | 5033406O09Rik | 77675  |
| C21 | 5829  | liver   | 2810455K09Rik | 72805  |
| C21 | 7099  | liver   | Kcnk10        | 72258  |
| C21 | 7388  | liver   | Amn           | 93835  |
| C21 | 8155  | liver   | Mark3         | 17169  |
| C21 | 8357  | liver   | Siva1         | 30954  |
| C21 | 8925  | liver   | MMT00026932   |        |
| C21 | 9678  | liver   | AW555464      | 217882 |
| C21 | 10526 | liver   | MMT00036239   |        |
| C21 | 12084 | liver   | Siva1         | 30954  |
| C21 | 12238 | liver   | Traf3         | 22031  |
| C21 | 13027 | liver   | Ppp2r5c       | 26931  |
| C21 | 13072 | liver   | BC022687      | 217887 |
| C21 | 15984 | liver   | MMT00075074   |        |
| C21 | 16191 | liver   | Klc1          | 16593  |
| C21 | 23693 | liver   | A530016L24Rik | 319942 |
| C22 | 1453  | adipose | Gfod2         | 70575  |
| C22 | 13624 | adipose | Ubc           | 22190  |

|     |       |         |               |        |
|-----|-------|---------|---------------|--------|
| C22 | 16000 | adipose | Nol10         | 217431 |
| C22 | 18486 | adipose | Lrnf4         | 225875 |
| C22 | 443   | liver   | Xpo5          | 72322  |
| C22 | 1443  | liver   | Znhit2        | 29805  |
| C22 | 2328  | liver   | Traf3ip1      | 74019  |
| C22 | 3965  | liver   | Pwp2          | 110816 |
| C22 | 6035  | liver   | Nkd1          | 93960  |
| C22 | 7039  | liver   | Zmat3         | 22401  |
| C22 | 8920  | liver   | Nol5a         | 67134  |
| C22 | 9544  | liver   | 2410018C17Rik | 74504  |
| C22 | 10546 | liver   | Prpf6         | 68879  |
| C22 | 10700 | liver   | Grwd1         | 101612 |
| C22 | 12111 | liver   | AA474455      | 231151 |
| C22 | 12838 | liver   | Tec           | 21682  |
| C22 | 14526 | liver   | Pacsin3       | 80708  |
| C22 | 14935 | liver   | Ppfia1        | 233977 |
| C22 | 14966 | liver   | Ddx51         | 69663  |
| C22 | 15815 | liver   | MMT00080242   |        |
| C22 | 16000 | liver   | Nol10         | 217431 |
| C22 | 16380 | liver   | Vasn          | 246154 |
| C22 | 16974 | liver   | Eif2b4        | 13667  |
| C22 | 17808 | liver   | Ncor2         | 20602  |
| C22 | 18622 | liver   | Pwp2          | 110816 |
| C22 | 20102 | liver   | Caskin2       | 140721 |
| C22 | 21888 | liver   | Kti12         | 100087 |
| C22 | 22116 | liver   | Fbxo42        | 213499 |
| C22 | 22289 | liver   | Smn1          | 20595  |
| C22 | 22689 | liver   | 2610028A01Rik | 72400  |
| C23 | 2456  | adipose | Mrpl10        | 107732 |
| C23 | 3086  | adipose | Tubg2         | 103768 |
| C23 | 3480  | adipose | Pnpo          | 103711 |
| C23 | 7209  | adipose | Gpa33         | 59290  |
| C23 | 7370  | adipose | Spop          | 20747  |
| C23 | 9875  | adipose | Cdk5rap3      | 80280  |
| C23 | 12302 | adipose | Cbx1          | 12412  |
| C23 | 12480 | adipose | Cdc42bpg      | 240505 |
| C23 | 13810 | adipose | 1110036O03Rik | 66180  |
| C23 | 14296 | adipose | Slc35b1       | 110172 |
| C23 | 14384 | adipose | Dnajc7        | 56354  |
| C23 | 16340 | adipose | Scrn2         | 217140 |
| C23 | 19092 | adipose | MMT00045362   |        |
| C23 | 20918 | adipose | Nxph3         | 104079 |
| C23 | 22232 | adipose | Krt19         | 16669  |
| C23 | 1241  | liver   | Meox1         | 17285  |
| C23 | 1654  | liver   | Dhx58         | 80861  |
| C23 | 2456  | liver   | Mrpl10        | 107732 |
| C23 | 3480  | liver   | Pnpo          | 103711 |
| C23 | 5661  | liver   | Lrrc46        | 69297  |
| C23 | 7370  | liver   | Spop          | 20747  |
| C23 | 9875  | liver   | Cdk5rap3      | 80280  |
| C23 | 12302 | liver   | Cbx1          | 12412  |

|     |       |         |               |           |
|-----|-------|---------|---------------|-----------|
| C23 | 13810 | liver   | 1110036O03Rik | 66180     |
| C23 | 13983 | liver   | Copz2         | 56358     |
| C23 | 14384 | liver   | Dnajc7        | 56354     |
| C23 | 16340 | liver   | Scrn2         | 217140    |
| C23 | 19092 | liver   | MMT00045362   |           |
| C23 | 23295 | liver   | Snx11         | 74479     |
| C24 | 1562  | adipose | Btg2          | 12227     |
| C24 | 1940  | adipose | MMT00002367   |           |
| C24 | 3811  | adipose | MMT00052318   |           |
| C24 | 4533  | adipose | Itgb1         | 16412     |
| C24 | 5466  | adipose | 2310047D13Rik | 116972    |
| C24 | 5842  | adipose | Cldn6         | 54419     |
| C24 | 6126  | adipose | MMT00067575   |           |
| C24 | 6295  | adipose | Parl          | 381038    |
| C24 | 6422  | adipose | Grk5          | 14773     |
| C24 | 7229  | adipose | H2-DMb1       | 14999     |
| C24 | 7612  | adipose | MMT00014216   |           |
| C24 | 9212  | adipose | Pde6d         | 18582     |
| C24 | 9224  | adipose | MMT00013510   | 227885    |
| C24 | 9234  | adipose | Arf1          | 11840     |
| C24 | 9279  | adipose | MMT00066808   |           |
| C24 | 9680  | adipose | Ahsa1         | 217737    |
| C24 | 9860  | adipose | MMT00060113   |           |
| C24 | 10593 | adipose | Wdr53         | 68980     |
| C24 | 10885 | adipose | Bri3          | 55950     |
| C24 | 11169 | adipose | MMT00078034   |           |
| C24 | 12146 | adipose | Hddc2         | 69692     |
| C24 | 13470 | adipose | Actr3         | 74117     |
| C24 | 15013 | adipose | Nfkb1         | 18033     |
| C24 | 20717 | adipose | Snf8          | 27681     |
| C24 | 21375 | adipose | MMT00043149   |           |
| C24 | 21722 | adipose | MMT00054655   |           |
| C24 | 22630 | adipose | MMT00034355   |           |
| C24 | 12565 | liver   | Grem2         | 23893     |
| C25 | 1336  | adipose | MMT00069537   |           |
| C25 | 1629  | adipose | Gcsh          | 68133     |
| C25 | 8790  | adipose | Galnt2        | 108148    |
| C25 | 8887  | adipose | Dpep1         | 13479     |
| C25 | 10668 | adipose | Kars          | 85305     |
| C25 | 12440 | adipose | Sult5a1       | 57429     |
| C25 | 14391 | adipose | MMT00017335   | 100043120 |
| C25 | 15953 | adipose | Acsf3         | 257633    |
| C25 | 16802 | adipose | Def8          | 23854     |
| C25 | 18700 | adipose | Trappc2l      | 59005     |
| C25 | 20690 | adipose | Zfp276        | 57247     |
| C25 | 22351 | adipose | Fanca         | 14087     |
| C25 | 22909 | adipose | Nup133        | 234865    |
| C25 | 1052  | liver   | Cog4          | 102339    |
| C25 | 1336  | liver   | MMT00069537   |           |
| C25 | 2243  | liver   | Gcsh          | 68133     |
| C25 | 7910  | liver   | AK122209      | 382038    |

|     |       |         |               |           |
|-----|-------|---------|---------------|-----------|
| C25 | 9770  | liver   | Bcmo1         | 63857     |
| C25 | 10668 | liver   | Kars          | 85305     |
| C25 | 11128 | liver   | Aars          | 234734    |
| C25 | 11404 | liver   | Gnpat         | 14712     |
| C25 | 14391 | liver   | MMT00017335   | 100043120 |
| C25 | 15953 | liver   | Acsf3         | 257633    |
| C25 | 18697 | liver   | Afg3l1        | 114896    |
| C25 | 21394 | liver   | Cdh15         | 12555     |
| C25 | 22351 | liver   | Fanca         | 14087     |
| C25 | 22909 | liver   | Nup133        | 234865    |
| C26 | 2472  | adipose | MMT00014056   |           |
| C26 | 7654  | adipose | Ptpmt1        | 66461     |
| C26 | 9547  | adipose | MMT00006479   |           |
| C26 | 9702  | adipose | Stk39         | 53416     |
| C26 | 12892 | adipose | 1700019L03Rik | 227736    |
| C26 | 14526 | adipose | Pacsin3       | 80708     |
| C26 | 14757 | adipose | Hdx           | 245596    |
| C26 | 16881 | adipose | MMT00031504   |           |
| C26 | 17295 | adipose | MMT00082577   |           |
| C26 | 19763 | adipose | Acp2          | 11432     |
| C26 | 19803 | adipose | BC003993      | 80744     |
| C26 | 20515 | adipose | Dimt1         | 66254     |
| C26 | 22320 | adipose | MMT00047284   |           |
| C26 | 23474 | adipose | MMT00011721   |           |
| C26 | 2472  | liver   | MMT00014056   |           |
| C26 | 7192  | liver   | Ttc21b        | 73668     |
| C26 | 7654  | liver   | Ptpmt1        | 66461     |
| C26 | 9547  | liver   | MMT00006479   |           |
| C26 | 14757 | liver   | Hdx           | 245596    |
| C26 | 15365 | liver   | Ext2          | 14043     |
| C26 | 16881 | liver   | MMT00031504   |           |
| C26 | 17295 | liver   | MMT00082577   |           |
| C26 | 19763 | liver   | Acp2          | 11432     |
| C26 | 19803 | liver   | BC003993      | 80744     |
| C26 | 22320 | liver   | MMT00047284   |           |
| C26 | 23474 | liver   | MMT00011721   |           |
| C27 | 205   | adipose | Cnksr1        | 194231    |
| C27 | 1027  | adipose | Accs          | 329470    |
| C27 | 3376  | adipose | Trip4         | 56404     |
| C27 | 15024 | adipose | 2310061J03Rik | 66391     |
| C27 | 16827 | adipose | Arhgdib       | 11857     |
| C27 | 17356 | adipose | Rgref         | 110596    |
| C27 | 18099 | adipose | Nfx1          | 74164     |
| C27 | 18283 | adipose | 5730593F17Rik | 215512    |
| C27 | 19382 | adipose | Slc2a6        | 227659    |
| C27 | 19520 | adipose | Uck2          | 80914     |
| C27 | 21739 | adipose | Epb4.1        | 269587    |
| C27 | 185   | liver   | Ap2b1         | 71770     |
| C27 | 1806  | liver   | Nola3         | 66181     |
| C27 | 3332  | liver   | Lrrc59        | 98238     |
| C27 | 4635  | liver   | MMT00023332   |           |

|     |       |         |               |        |
|-----|-------|---------|---------------|--------|
| C27 | 5227  | liver   | 2310008M10Rik | 66357  |
| C27 | 6012  | liver   | Chid1         | 68038  |
| C27 | 6261  | liver   | 2810026P18Rik | 72655  |
| C27 | 8597  | liver   | Papss1        | 23971  |
| C27 | 9164  | liver   | Uba5          | 66663  |
| C27 | 15154 | liver   | Dhx29         | 218629 |
| C27 | 16393 | liver   | MMT00023354   |        |
| C27 | 16788 | liver   | Imp3          | 102462 |
| C27 | 18419 | liver   | Srprb         | 20818  |
| C27 | 19743 | liver   | Atg16l1       | 77040  |
| C27 | 23617 | liver   | Nme1          | 18102  |
| C28 | 623   | adipose | Lmf1          | 76483  |
| C28 | 2945  | adipose | MMT00005190   |        |
| C28 | 5014  | adipose | MMT00017503   |        |
| C28 | 5968  | adipose | MMT00012419   |        |
| C28 | 8341  | adipose | MMT00017270   |        |
| C28 | 9909  | adipose | MMT00077883   |        |
| C28 | 10729 | adipose | Fgd2          | 26382  |
| C28 | 14132 | adipose | Glo1          | 109801 |
| C28 | 14190 | adipose | Ppil1         | 68816  |
| C28 | 19064 | adipose | MMT00004867   |        |
| C28 | 19929 | adipose | MMT00079667   |        |
| C28 | 23233 | adipose | Npw           | 381073 |
| C28 | 2945  | liver   | MMT00005190   |        |
| C28 | 3430  | liver   | Rhof          | 23912  |
| C28 | 3998  | liver   | 4930528F23Rik | 75178  |
| C28 | 5014  | liver   | MMT00017503   |        |
| C28 | 5968  | liver   | MMT00012419   |        |
| C28 | 8341  | liver   | MMT00017270   |        |
| C28 | 9909  | liver   | MMT00077883   |        |
| C28 | 14132 | liver   | Glo1          | 109801 |
| C28 | 14190 | liver   | Ppil1         | 68816  |
| C28 | 14924 | liver   | Hn1l          | 52009  |
| C28 | 19064 | liver   | MMT00004867   |        |
| C28 | 19929 | liver   | MMT00079667   |        |
| C29 | 1253  | adipose | Scel          | 64929  |
| C29 | 3850  | adipose | Dach1         | 13134  |
| C29 | 8448  | adipose | Sucla2        | 20916  |
| C29 | 10393 | adipose | Slc7a8        | 50934  |
| C29 | 10711 | adipose | 1700108F19Rik | 73272  |
| C29 | 12280 | adipose | Cln5          | 211286 |
| C29 | 17321 | adipose | Hepacam       | 72927  |
| C29 | 19160 | adipose | MMT00042532   |        |
| C29 | 20573 | adipose | MMT00040001   |        |
| C29 | 23342 | adipose | Ndfip2        | 76273  |
| C29 | 2179  | liver   | Trim3         | 55992  |
| C29 | 4203  | liver   | Fermt2        | 218952 |
| C29 | 4796  | liver   | Rcbtb2        | 105670 |
| C29 | 4837  | liver   | Ear2          | 13587  |
| C29 | 4918  | liver   | Scara5        | 71145  |
| C29 | 7802  | liver   | Adcy4         | 104110 |



|     |       |         |               |        |
|-----|-------|---------|---------------|--------|
| C29 | 10711 | liver   | 1700108F19Rik | 73272  |
| C29 | 12280 | liver   | Cln5          | 211286 |
| C29 | 13588 | liver   | MMT00042387   |        |
| C29 | 13617 | liver   | Acin1         | 56215  |
| C29 | 15353 | liver   | Ednrb         | 13618  |
| C29 | 17321 | liver   | Hepacam       | 72927  |
| C29 | 23342 | liver   | Ndfip2        | 76273  |
| C30 | 1162  | adipose | Cpsf4         | 54188  |
| C30 | 7083  | adipose | MMT00044154   |        |
| C30 | 7116  | adipose | Katnal1       | 231912 |
| C30 | 8906  | adipose | MMT00004929   |        |
| C30 | 9755  | adipose | MMT00066614   | 667386 |
| C30 | 12885 | adipose | Ccl24         | 56221  |
| C30 | 14062 | adipose | Pan3          | 72587  |
| C30 | 15480 | adipose | MMT00078167   |        |
| C30 | 17535 | adipose | MMT00008110   |        |
| C30 | 21125 | adipose | Mtif3         | 76366  |
| C30 | 1162  | liver   | Cpsf4         | 54188  |
| C30 | 2115  | liver   | Gpr12         | 14738  |
| C30 | 7116  | liver   | Katnal1       | 231912 |
| C30 | 7483  | liver   | Cyp3a25       | 56388  |
| C30 | 8022  | liver   | MMT00004959   |        |
| C30 | 8906  | liver   | MMT00004929   |        |
| C30 | 12885 | liver   | Ccl24         | 56221  |
| C30 | 14062 | liver   | Pan3          | 72587  |
| C30 | 15480 | liver   | MMT00078167   |        |
| C30 | 17535 | liver   | MMT00008110   |        |
| C30 | 17676 | liver   | Amz1          | 231842 |
| C30 | 21125 | liver   | Mtif3         | 76366  |
| C31 | 2021  | adipose | Atf7ip        | 54343  |
| C31 | 6765  | adipose | Ldhb          | 16832  |
| C31 | 7452  | adipose | Abcc9         | 20928  |
| C31 | 14557 | adipose | Pyroxd1       | 232491 |
| C31 | 16060 | adipose | Gys2          | 232493 |
| C31 | 16347 | adipose | Mgp           | 17313  |
| C31 | 21126 | adipose | Dera          | 232449 |
| C31 | 22095 | adipose | Mgst1         | 56615  |
| C31 | 2021  | liver   | Atf7ip        | 54343  |
| C31 | 2932  | liver   | Slco1a1       | 28248  |
| C31 | 5902  | liver   | 4930563P21Rik | 75275  |
| C31 | 6765  | liver   | Ldhb          | 16832  |
| C31 | 7452  | liver   | Abcc9         | 20928  |
| C31 | 7911  | liver   | Pik3c2g       | 18705  |
| C31 | 12213 | liver   | Entpd5        | 12499  |
| C31 | 13488 | liver   | Art4          | 109978 |
| C31 | 14307 | liver   | Kcnj8         | 16523  |
| C31 | 14557 | liver   | Pyroxd1       | 232491 |
| C31 | 19041 | liver   | 9830102E05Rik | 277898 |
| C31 | 21126 | liver   | Dera          | 232449 |
| C31 | 22095 | liver   | Mgst1         | 56615  |
| C32 | 3006  | adipose | Alas2         | 11656  |

|     |       |         |               |        |
|-----|-------|---------|---------------|--------|
| C32 | 5919  | adipose | B930041F14Rik | 230991 |
| C32 | 7292  | adipose | Spna1         | 20739  |
| C32 | 8530  | adipose | Snca          | 20617  |
| C32 | 15132 | adipose | MMT00007672   |        |
| C32 | 15529 | adipose | MMT00011590   |        |
| C32 | 17834 | adipose | Hemgn         | 93966  |
| C32 | 18298 | adipose | Slc25a37      | 67712  |
| C32 | 21335 | adipose | Trp53rk       | 76367  |
| C32 | 21356 | adipose | Nkx2-6        | 18092  |
| C32 | 1258  | liver   | Hba-a1        | 15122  |
| C32 | 1379  | liver   | A930041C12Rik | 78443  |
| C32 | 5919  | liver   | B930041F14Rik | 230991 |
| C32 | 8530  | liver   | Snca          | 20617  |
| C32 | 15132 | liver   | MMT00007672   |        |
| C32 | 15529 | liver   | MMT00011590   |        |
| C32 | 17664 | liver   | Jup           | 16480  |
| C32 | 21335 | liver   | Trp53rk       | 76367  |
| C32 | 21356 | liver   | Nkx2-6        | 18092  |
| C32 | 21387 | liver   | Cnot7         | 18983  |
| C33 | 716   | adipose | Dbpht1        | 20749  |
| C33 | 3938  | adipose | Abt1          | 30946  |
| C33 | 9861  | adipose | Serpib6b      | 20708  |
| C33 | 11649 | adipose | Hfe           | 15216  |
| C33 | 12245 | adipose | Zfp322a       | 218100 |
| C33 | 15698 | adipose | Them2         | 66834  |
| C33 | 17528 | adipose | Gmnn          | 57441  |
| C33 | 19192 | adipose | Hist1h1c      | 50708  |
| C33 | 19713 | adipose | BC048599      | 232717 |
| C33 | 23118 | adipose | Ttrap         | 56196  |
| C33 | 1580  | liver   | Mrs2          | 380836 |
| C33 | 3938  | liver   | Abt1          | 30946  |
| C33 | 10189 | liver   | Cage1         | 71213  |
| C33 | 11094 | liver   | Slc17a3       | 105355 |
| C33 | 11649 | liver   | Hfe           | 15216  |
| C33 | 15698 | liver   | Them2         | 66834  |
| C33 | 17528 | liver   | Gmnn          | 57441  |
| C33 | 19192 | liver   | Hist1h1c      | 50708  |
| C33 | 20759 | liver   | Slc17a1       | 20504  |
| C33 | 23118 | liver   | Ttrap         | 56196  |
| C34 | 8210  | adipose | Hspa12a       | 73442  |
| C34 | 10387 | adipose | 4933427D06Rik | 232217 |
| C34 | 11598 | adipose | MMT00031533   | 628236 |
| C34 | 13277 | adipose | 9530015I07Rik | 619310 |
| C34 | 20628 | adipose | Hoxd10        | 15430  |
| C34 | 21099 | adipose | Rapgef6       | 192786 |
| C34 | 8210  | liver   | Hspa12a       | 73442  |
| C34 | 10115 | liver   | Ptk2          | 14083  |
| C34 | 10387 | liver   | 4933427D06Rik | 232217 |
| C34 | 10466 | liver   | S1pr5         | 94226  |
| C34 | 11598 | liver   | MMT00031533   | 628236 |
| C34 | 13219 | liver   | Trhde         | 237553 |

|     |       |         |               |           |
|-----|-------|---------|---------------|-----------|
| C34 | 14550 | liver   | Acot7         | 70025     |
| C34 | 19629 | liver   | Smarcd3       | 66993     |
| C34 | 20628 | liver   | Hoxd10        | 15430     |
| C34 | 21017 | liver   | Gstz1         | 14874     |
| C34 | 21099 | liver   | Rapgef6       | 192786    |
| C34 | 21218 | liver   | Col9a2        | 12840     |
| C34 | 23034 | liver   | Slc25a29      | 214663    |
| C35 | 7135  | adipose | Ezr           | 22350     |
| C35 | 7909  | adipose | Oas3          | 246727    |
| C35 | 9805  | adipose | Tagap         | 72536     |
| C35 | 11435 | adipose | Rnaset2a      | 100037283 |
| C35 | 15864 | adipose | Rps6ka2       | 20112     |
| C35 | 17707 | adipose | Rshl2b        | 100037282 |
| C35 | 21075 | adipose | Gtf2h5        | 66467     |
| C35 | 21952 | adipose | Tfb1m         | 224481    |
| C35 | 22104 | adipose | Rnf123        | 84585     |
| C35 | 7135  | liver   | Ezr           | 22350     |
| C35 | 7909  | liver   | Oas3          | 246727    |
| C35 | 11435 | liver   | Rnaset2a      | 100037283 |
| C35 | 15864 | liver   | Rps6ka2       | 20112     |
| C35 | 17707 | liver   | Rshl2b        | 100037282 |
| C35 | 17760 | liver   | Ccr6          | 12458     |
| C35 | 21754 | liver   | Synj2         | 20975     |
| C35 | 21952 | liver   | Tfb1m         | 224481    |
| C35 | 22104 | liver   | Rnf123        | 84585     |
| C36 | 1894  | adipose | Lrp4          | 228357    |
| C36 | 5511  | adipose | BC055004      | 381680    |
| C36 | 5827  | adipose | 6332401O19Rik | 319832    |
| C36 | 9077  | adipose | Cnpy4         | 66455     |
| C36 | 10995 | adipose | Ap4m1         | 11781     |
| C36 | 16451 | adipose | 2010007H12Rik | 69871     |
| C36 | 17158 | adipose | Zfp113        | 56314     |
| C36 | 19502 | adipose | Fbxo24        | 71176     |
| C36 | 5511  | liver   | BC055004      | 381680    |
| C36 | 9077  | liver   | Cnpy4         | 66455     |
| C36 | 10995 | liver   | Ap4m1         | 11781     |
| C36 | 13875 | liver   | Hsd17b10      | 15108     |
| C36 | 15219 | liver   | 0910001L09Rik | 66096     |
| C36 | 16451 | liver   | 2010007H12Rik | 69871     |
| C36 | 17089 | liver   | Pilrb1        | 170741    |
| C36 | 17158 | liver   | Zfp113        | 56314     |
| C36 | 18881 | liver   | Cops6         | 26893     |
| C36 | 19502 | liver   | Fbxo24        | 71176     |
| C37 | 9191  | adipose | Lbxcor1       | 207667    |
| C37 | 9219  | adipose | Mad2l1bp      | 66591     |
| C37 | 9230  | adipose | 1700027N10Rik | 75564     |
| C37 | 11219 | adipose | Mrps18a       | 68565     |
| C37 | 13246 | adipose | Klc4          | 74764     |
| C37 | 13507 | adipose | Spats1        | 71020     |
| C37 | 13946 | adipose | Slc35b2       | 73836     |
| C37 | 14027 | adipose | Rpo1-1        | 20016     |

|     |       |         |               |        |
|-----|-------|---------|---------------|--------|
| C37 | 15318 | adipose | Aars2         | 224805 |
| C37 | 18574 | adipose | Parc          | 78309  |
| C37 | 19519 | adipose | BC011248      | 224823 |
| C37 | 9230  | liver   | 1700027N10Rik | 75564  |
| C37 | 14027 | liver   | Rpo1-1        | 20016  |
| C37 | 15318 | liver   | Aars2         | 224805 |
| C37 | 18574 | liver   | Parc          | 78309  |
| C37 | 18772 | liver   | BC048355      | 381101 |
| C37 | 22004 | liver   | Gtpbp2        | 56055  |
| C38 | 1276  | adipose | Col4a1        | 12826  |
| C38 | 4631  | adipose | Itgb2         | 16414  |
| C38 | 6012  | adipose | Chid1         | 68038  |
| C38 | 6426  | adipose | Mfsd4         | 213006 |
| C38 | 6908  | adipose | Mmp12         | 17381  |
| C38 | 8486  | adipose | Plod3         | 26433  |
| C38 | 9425  | adipose | Gusb          | 110006 |
| C38 | 13318 | adipose | Adamtsl2      | 77794  |
| C38 | 13648 | adipose | Dap           | 223453 |
| C38 | 13929 | adipose | Lamb3         | 16780  |
| C38 | 14136 | adipose | F7            | 14068  |
| C38 | 19389 | adipose | lqcb1         | 320299 |
| C38 | 19655 | adipose | 3110040N11Rik | 67290  |
| C38 | 21550 | adipose | Sgcd          | 24052  |
| C38 | 12624 | liver   | Clptm1l       | 218335 |
| C38 | 18042 | liver   | Aph1c         | 68318  |
| C39 | 806   | adipose | Ly96          | 17087  |
| C39 | 10765 | adipose | Retnla        | 57262  |
| C39 | 11231 | adipose | B2m           | 12010  |
| C39 | 11685 | adipose | Cd83          | 12522  |
| C39 | 13190 | adipose | Igsf6         | 80719  |
| C39 | 13527 | adipose | Ctss          | 13040  |
| C39 | 21270 | adipose | V1rg6         | 171241 |
| C39 | 23371 | adipose | Cfb           | 14962  |
| C39 | 1572  | liver   | Saa3          | 20210  |
| C39 | 3228  | liver   | Saa1          | 20208  |
| C39 | 14439 | liver   | Ubd           | 24108  |
| C39 | 15752 | liver   | Cyp4a14       | 13119  |
| C39 | 17629 | liver   | Saa2          | 20209  |
| C39 | 20565 | liver   | MMT00065821   |        |
| C40 | 2485  | adipose | Adck1         | 72113  |
| C40 | 13988 | adipose | Cntnap2       | 66797  |
| C40 | 17285 | adipose | 1700019E19Rik | 76411  |
| C40 | 20292 | adipose | 1810048J11Rik | 67708  |
| C40 | 22297 | adipose | Zfyve1        | 217695 |
| C40 | 2485  | liver   | Adck1         | 72113  |
| C40 | 6755  | liver   | Wdr22         | 320808 |
| C40 | 9022  | liver   | Plek2         | 27260  |
| C40 | 13988 | liver   | Cntnap2       | 66797  |
| C40 | 15618 | liver   | Sel1l         | 20338  |
| C40 | 17285 | liver   | 1700019E19Rik | 76411  |
| C40 | 20292 | liver   | 1810048J11Rik | 67708  |

|     |       |         |               |        |
|-----|-------|---------|---------------|--------|
| C40 | 20393 | liver   | 1110018G07Rik | 68497  |
| C40 | 22297 | liver   | Zfyve1        | 217695 |
| C41 | 1079  | adipose | Hr            | 15460  |
| C41 | 2336  | adipose | Lpar3         | 65086  |
| C41 | 4959  | adipose | Optn          | 71648  |
| C41 | 10788 | adipose | D430019H16Rik | 268595 |
| C41 | 15492 | adipose | Efnb1         | 13641  |
| C41 | 16664 | adipose | Car4          | 12351  |
| C41 | 873   | liver   | Slc22a3       | 20519  |
| C41 | 1711  | liver   | Grhl1         | 195733 |
| C41 | 3495  | liver   | EG633752      | 633752 |
| C41 | 3989  | liver   | Wrnip1        | 78903  |
| C41 | 4349  | liver   | Mrpl27        | 94064  |
| C41 | 13251 | liver   | EG622268      | 622268 |
| C41 | 21583 | liver   | Gstz1         | 14874  |
| C42 | 1427  | adipose | Ahrr          | 11624  |
| C42 | 3535  | adipose | S100a9        | 20202  |
| C42 | 4794  | adipose | Gsdmd         | 69146  |
| C42 | 8117  | adipose | Ngp           | 18054  |
| C42 | 13544 | adipose | Parp8         | 52552  |
| C42 | 18250 | adipose | Mmp14         | 17387  |
| C42 | 20353 | adipose | Antxr1        | 69538  |
| C42 | 23579 | adipose | Gm98          | 225908 |
| C42 | 3535  | liver   | S100a9        | 20202  |
| C42 | 5472  | liver   | Mppe1         | 225651 |
| C42 | 14869 | liver   | S100a8        | 20201  |
| C42 | 17880 | liver   | Ncald         | 52589  |
| C43 | 359   | adipose | Ciita         | 12265  |
| C43 | 2074  | adipose | Sfxn1         | 14057  |
| C43 | 4418  | adipose | H2-Aa         | 14960  |
| C43 | 5465  | adipose | Slamf8        | 74748  |
| C43 | 6837  | adipose | Arhgap25      | 232201 |
| C43 | 6838  | adipose | Nod2          | 257632 |
| C43 | 7749  | adipose | Mul1          | 68350  |
| C43 | 20356 | adipose | Mrps35        | 232536 |
| C43 | 22149 | adipose | MMT00059396   |        |
| C43 | 20678 | liver   | Cyp39a1       | 56050  |
| C43 | 21041 | liver   | Cyp17a1       | 13074  |
| C43 | 22727 | liver   | Pdgfra        | 18595  |
| C44 | 676   | adipose | Ms4a4d        | 66607  |
| C44 | 8703  | adipose | Gstp1         | 14870  |
| C44 | 8721  | adipose | Tbc1d10c      | 108995 |
| C44 | 11369 | adipose | Stx3          | 20908  |
| C44 | 11812 | adipose | Mrpl16        | 94063  |
| C44 | 12312 | adipose | Ms4a6d        | 68774  |
| C44 | 17447 | adipose | Ctsf          | 56464  |
| C44 | 676   | liver   | Ms4a4d        | 66607  |
| C44 | 8721  | liver   | Tbc1d10c      | 108995 |
| C44 | 11369 | liver   | Stx3          | 20908  |
| C44 | 11812 | liver   | Mrpl16        | 94063  |
| C44 | 17447 | liver   | Ctsf          | 56464  |

|     |       |         |               |        |
|-----|-------|---------|---------------|--------|
| C45 | 8268  | adipose | Kctd7         | 212919 |
| C45 | 18923 | adipose | BC025816      | 234796 |
| C45 | 20727 | adipose | Mmp11         | 17385  |
| C45 | 4535  | liver   | MMT00025220   |        |
| C45 | 7612  | liver   | MMT00014216   |        |
| C45 | 9418  | liver   | MMT00034311   |        |
| C45 | 9860  | liver   | MMT00060113   |        |
| C45 | 11169 | liver   | MMT00078034   |        |
| C45 | 12803 | liver   | Ranbp3        | 71810  |
| C45 | 14335 | liver   | Olf33         | 18332  |
| C45 | 20777 | liver   | MMT00010185   |        |
| C45 | 21722 | liver   | MMT00054655   |        |
| C46 | 6918  | adipose | Cog8          | 97484  |
| C46 | 366   | liver   | Adcy6         | 11512  |
| C46 | 1305  | liver   | 4930485B16Rik | 380654 |
| C46 | 5615  | liver   | Sertad2       | 58172  |
| C46 | 7133  | liver   | Hook2         | 170833 |
| C46 | 7900  | liver   | Myo18a        | 360013 |
| C46 | 9135  | liver   | Mbd6          | 110962 |
| C46 | 9696  | liver   | Setd1b        | 208043 |
| C46 | 10450 | liver   | C330006K01Rik | 231855 |
| C46 | 10862 | liver   | Zfp703        | 353310 |
| C46 | 16811 | liver   | Rere          | 68703  |
| C46 | 19031 | liver   | Mms19         | 72199  |
| C47 | 3624  | adipose | Pygb          | 110078 |
| C47 | 4626  | adipose | 2310046K01Rik | 69698  |
| C47 | 13581 | adipose | Srxn1         | 76650  |
| C47 | 15565 | adipose | 2310001A20Rik | 71881  |
| C47 | 16592 | adipose | Psmf1         | 228769 |
| C47 | 17514 | adipose | Thbd          | 21824  |
| C47 | 19971 | adipose | B930046C15Rik | 544998 |
| C47 | 4626  | liver   | 2310046K01Rik | 69698  |
| C47 | 6157  | liver   | MMT00041452   |        |
| C47 | 9361  | liver   | Hand1         | 15110  |
| C47 | 12916 | liver   | Fkbp1a        | 14225  |
| C47 | 13581 | liver   | Srxn1         | 76650  |
| C48 | 703   | adipose | Spryd4        | 66701  |
| C48 | 2282  | adipose | Cbx8          | 30951  |
| C48 | 3531  | adipose | Tslp          | 53603  |
| C48 | 8500  | adipose | Ddit3         | 13198  |
| C48 | 10796 | adipose | Spic          | 20728  |
| C48 | 13885 | adipose | Clec7a        | 56644  |
| C48 | 15084 | adipose | Ccl3          | 20302  |
| C48 | 20175 | adipose | Hoxb2         | 103889 |
| C48 | 23398 | adipose | Adamts5       | 23794  |
| C48 | 7315  | liver   | EG624219      | 624219 |
| C48 | 15826 | liver   | Arl4d         | 80981  |
| C49 | 12862 | adipose | Trem2         | 83433  |
| C49 | 14192 | adipose | Trpv2         | 22368  |
| C49 | 22642 | adipose | Uts2          | 24111  |
| C49 | 786   | liver   | Macrocl1      | 107227 |

|     |       |         |               |        |
|-----|-------|---------|---------------|--------|
| C49 | 11565 | liver   | Serpina3c     | 16625  |
| C49 | 12845 | liver   | F11           | 109821 |
| C49 | 13273 | liver   | MMT00033789   |        |
| C49 | 14408 | liver   | 1100001H23Rik | 66857  |
| C49 | 19340 | liver   | Serpina3k     | 20714  |
| C49 | 19548 | liver   | Mgst3         | 66447  |
| C49 | 22568 | liver   | MMT00033197   |        |
| C50 | 6376  | adipose | Nle1          | 217011 |
| C50 | 8368  | adipose | Rad51l3       | 19364  |
| C50 | 8822  | adipose | Galntl4       | 233733 |
| C50 | 10539 | adipose | Unc45b        | 217012 |
| C50 | 11795 | adipose | Gps2          | 56310  |
| C50 | 16289 | adipose | Myocd         | 214384 |
| C50 | 1745  | liver   | Gas7          | 14457  |
| C50 | 4057  | liver   | Slc2a4        | 20528  |
| C50 | 6376  | liver   | Nle1          | 217011 |
| C50 | 10539 | liver   | Unc45b        | 217012 |
| C50 | 15127 | liver   | Cct6b         | 12467  |
| C51 | 4780  | adipose | Sfrs5         | 20384  |
| C51 | 7389  | adipose | Sfrs5         | 20384  |
| C51 | 8995  | adipose | Pxk           | 218699 |
| C51 | 9256  | adipose | Psmc4         | 19185  |
| C51 | 14355 | adipose | Tle1          | 21885  |
| C51 | 17793 | adipose | MMT00000967   |        |
| C51 | 18501 | adipose | 1700012G19Rik | 67078  |
| C51 | 1357  | liver   | Pabpn1        | 54196  |
| C51 | 4400  | liver   | 9030425E11Rik | 71566  |
| C51 | 14656 | liver   | Grip2         | 243547 |
| C51 | 15052 | liver   | Kifc3         | 16582  |
| C52 | 1183  | adipose | MMT00009390   |        |
| C52 | 2793  | adipose | MMT00005644   | 497266 |
| C52 | 5989  | adipose | 2310042D19Rik | 74183  |
| C52 | 12718 | adipose | Dhrsx         | 236082 |
| C52 | 1183  | liver   | MMT00009390   |        |
| C52 | 2793  | liver   | MMT00005644   | 497266 |
| C52 | 5989  | liver   | 2310042D19Rik | 74183  |
| C52 | 12718 | liver   | Dhrsx         | 236082 |
| C52 | 18033 | liver   | Kihl17        | 231003 |
| C52 | 22122 | liver   | MMT00042954   |        |
| C53 | 13372 | adipose | Slc11a1       | 18173  |
| C53 | 13585 | adipose | Nckap1l       | 105855 |
| C53 | 13625 | adipose | Apobec1       | 11810  |
| C53 | 14683 | adipose | Dennd1c       | 70785  |
| C53 | 15825 | adipose | Fermt3        | 108101 |
| C53 | 18429 | adipose | Hmha1         | 70719  |
| C53 | 19868 | adipose | Was           | 22376  |
| C53 | 21751 | adipose | Ptpn6         | 15170  |
| C53 | 10808 | liver   | Rab711        | 226422 |
| C53 | 11393 | liver   | A830007P12Rik | 227612 |
| C54 | 1985  | adipose | Pepd          | 18624  |
| C54 | 17389 | adipose | Pop4          | 66161  |

|     |       |         |               |        |
|-----|-------|---------|---------------|--------|
| C54 | 18053 | adipose | Psmc4         | 23996  |
| C54 | 18165 | adipose | 5830482F20Rik | 320435 |
| C54 | 23283 | adipose | Mrps12        | 24030  |
| C54 | 3698  | liver   | 1600014C10Rik | 72244  |
| C54 | 14208 | liver   | Ech1          | 51798  |
| C54 | 17389 | liver   | Pop4          | 66161  |
| C54 | 18053 | liver   | Psmc4         | 23996  |
| C54 | 23283 | liver   | Mrps12        | 24030  |
| C55 | 2479  | adipose | Cenpo         | 52504  |
| C55 | 4404  | adipose | Commd5        | 66398  |
| C55 | 13115 | adipose | B230120H23Rik | 65964  |
| C55 | 13405 | adipose | Rabep2        | 70314  |
| C55 | 19528 | adipose | Zfp503        | 218820 |
| C55 | 20035 | adipose | Zbtb46        | 72147  |
| C55 | 1890  | liver   | Nanp          | 67311  |
| C55 | 4404  | liver   | Commd5        | 66398  |
| C55 | 8563  | liver   | Leng1         | 69757  |
| C55 | 16720 | liver   | Mtmr7         | 54384  |
| C56 | 8122  | adipose | Hexim1        | 192231 |
| C56 | 10767 | adipose | Plscr2        | 18828  |
| C56 | 16181 | adipose | MMT00078660   |        |
| C56 | 21620 | adipose | Tmem166       | 232146 |
| C56 | 22090 | adipose | Plscr1        | 22038  |
| C56 | 23138 | adipose | Osbpl6        | 99031  |
| C56 | 4206  | liver   | Nipsnap1      | 18082  |
| C56 | 6476  | liver   | Sntg2         | 268534 |
| C56 | 11065 | liver   | Mccc1         | 72039  |
| C56 | 16695 | liver   | Hs3st6        | 328779 |
| C57 | 874   | adipose | Aldh1a7       | 26358  |
| C57 | 1257  | adipose | Slc25a45      | 107375 |
| C57 | 1936  | adipose | Cbwd1         | 226043 |
| C57 | 7159  | adipose | 1700031F05Rik | 73300  |
| C57 | 11446 | adipose | Dock8         | 76088  |
| C57 | 21607 | adipose | Aldh1a1       | 11668  |
| C57 | 1936  | liver   | Cbwd1         | 226043 |
| C57 | 7159  | liver   | 1700031F05Rik | 73300  |
| C57 | 9326  | liver   | Pgm5          | 226041 |
| C57 | 11446 | liver   | Dock8         | 76088  |



**Table T13: AH Network Backbone**

| Adipose_Probe_ID | Hypothalamus_Probe_ID | Adipose_Gene_Symbol | Hypothalamus_Gene_Symbol |
|------------------|-----------------------|---------------------|--------------------------|
| 230              | 1466                  | MMT00000744         | Ubap2l                   |
| 230              | 2752                  | MMT00000744         | Fcgr1                    |
| 230              | 12716                 | MMT00000744         | 5830417110Rik            |
| 286              | 403                   | MMT00070509         | Leprotl1                 |
| 286              | 1604                  | MMT00070509         | Ssbp4                    |
| 286              | 1755                  | MMT00070509         | Ocel1                    |
| 286              | 2294                  | MMT00070509         | AU040829                 |
| 286              | 5433                  | MMT00070509         | 2410004L22Rik            |
| 286              | 5925                  | MMT00070509         | Tmem59l                  |
| 286              | 9729                  | MMT00070509         | Got11l                   |
| 286              | 13732                 | MMT00070509         | Tpm4                     |
| 286              | 23636                 | MMT00070509         | Bst2                     |
| 290              | 290                   | B230118H07Rik       | B230118H07Rik            |
| 290              | 1510                  | B230118H07Rik       | A530058N18Rik            |
| 327              | 2801                  | H2-Ea               | H2-BI                    |
| 327              | 2938                  | H2-Ea               | H2-T23                   |
| 327              | 7088                  | H2-Ea               | Slc37a1                  |
| 327              | 8750                  | H2-Ea               | 1700010I14Rik            |
| 327              | 8767                  | H2-Ea               | Rgl2                     |
| 327              | 10667                 | H2-Ea               | H2-Eb1                   |
| 327              | 13117                 | H2-Ea               | Tmprss5                  |
| 327              | 16692                 | H2-Ea               | Bat4                     |
| 327              | 20238                 | H2-Ea               | H2-T9                    |
| 403              | 403                   | Leprotl1            | Leprotl1                 |
| 409              | 1416                  | Lxn                 | 6720460F02Rik            |
| 409              | 6133                  | Lxn                 | Agrp                     |
| 468              | 15719                 | 2610020C07Rik       | BC060267                 |
| 623              | 11291                 | Lmf1                | 1110018H23Rik            |
| 623              | 20511                 | Lmf1                | Decr2                    |
| 661              | 661                   | Siglec1             | Siglec1                  |
| 663              | 19265                 | Muc19               | EG546036                 |
| 676              | 676                   | Ms4a4d              | Ms4a4d                   |
| 676              | 1936                  | Ms4a4d              | Cbwd1                    |
| 676              | 11369                 | Ms4a4d              | Stx3                     |
| 715              | 8610                  | Padi3               | Padi4                    |
| 737              | 737                   | MMT00023716         | MMT00023716              |
| 737              | 5064                  | MMT00023716         | Tekt2                    |
| 737              | 8525                  | MMT00023716         | 2510006D16Rik            |
| 737              | 8677                  | MMT00023716         | Zbtb8os                  |
| 830              | 2880                  | Socs1               | Cd93                     |
| 830              | 6038                  | Socs1               | Acot1                    |
| 830              | 12761                 | Socs1               | Tsc22d3                  |
| 866              | 6532                  | Zfp369              | Auh                      |
| 866              | 18492                 | Zfp369              | Dhfr                     |
| 866              | 20847                 | Zfp369              | Pdik1l                   |
| 1014             | 1014                  | Rtcd1               | Rtcd1                    |
| 1041             | 1041                  | 3110049J23Rik       | 3110049J23Rik            |
| 1162             | 7116                  | Cpsf4               | Katnal1                  |
| 1162             | 7378                  | Cpsf4               | 1700001J03Rik            |

|      |       |               |               |
|------|-------|---------------|---------------|
| 1336 | 1336  | MMT00069537   | MMT00069537   |
| 1336 | 1629  | MMT00069537   | Gcsh          |
| 1336 | 2243  | MMT00069537   | Gcsh          |
| 1336 | 11057 | MMT00069537   | MMT00032844   |
| 1336 | 15953 | MMT00069537   | Acsf3         |
| 1336 | 18700 | MMT00069537   | Trappc2l      |
| 1336 | 22351 | MMT00069537   | Fanca         |
| 1371 | 1371  | 1200009I06Rik | 1200009I06Rik |
| 1371 | 6357  | 1200009I06Rik | Ankrd9        |
| 1371 | 7388  | 1200009I06Rik | Amn           |
| 1371 | 8155  | 1200009I06Rik | Mark3         |
| 1371 | 18140 | 1200009I06Rik | Atg2b         |
| 1371 | 21149 | 1200009I06Rik | A230065H16Rik |
| 1371 | 23462 | 1200009I06Rik | Bag5          |
| 1424 | 18179 | Dapk1         | Dbp           |
| 1438 | 1466  | Dclre1b       | Ubap2l        |
| 1438 | 8816  | Dclre1b       | Nfkbia        |
| 1444 | 630   | C1r           | C1s           |
| 1444 | 19964 | C1r           | Ndufa9        |
| 1466 | 1466  | Ubap2l        | Ubap2l        |
| 1466 | 2752  | Ubap2l        | Fcgr1         |
| 1466 | 3314  | Ubap2l        | Wars2         |
| 1466 | 9519  | Ubap2l        | Fstl5         |
| 1502 | 19725 | Preld2        | Dcp2          |
| 1554 | 2012  | Rph3al        | Cetn4         |
| 1554 | 3159  | Rph3al        | Pld1          |
| 1554 | 4666  | Rph3al        | Exosc9        |
| 1554 | 16618 | Rph3al        | Hps3          |
| 1566 | 7761  | Kctd15        | Nudt19        |
| 1603 | 1603  | Lrwd1         | Lrwd1         |
| 1619 | 5342  | Fbxw17        | Eps8l3        |
| 1619 | 15870 | Fbxw17        | Aqp5          |
| 1660 | 1660  | Zfp33b        | Zfp33b        |
| 1660 | 6330  | Zfp33b        | Dgkq          |
| 1690 | 17632 | Nlrp5         | Lypd3         |
| 1709 | 2294  | Mt2           | AU040829      |
| 1755 | 403   | Ocel1         | Leprotl1      |
| 1755 | 1604  | Ocel1         | Ssbp4         |
| 1755 | 1755  | Ocel1         | Ocel1         |
| 1755 | 2294  | Ocel1         | AU040829      |
| 1755 | 9569  | Ocel1         | Dda1          |
| 1755 | 16849 | Ocel1         | Trmt1         |
| 1867 | 3314  | Bcas2         | Wars2         |
| 1936 | 1936  | Cbwd1         | Cbwd1         |
| 1936 | 4678  | Cbwd1         | Kank1         |
| 1960 | 1960  | Ubr2          | Ubr2          |
| 1960 | 2424  | Ubr2          | Unc5cl        |
| 2023 | 2023  | MMT00072215   | MMT00072215   |
| 2079 | 15853 | Mthfs         | D430036J16Rik |
| 2223 | 21142 | Slc28a2       | Gm129         |
| 2224 | 12398 | Oasl2         | Ifi44         |

|      |       |               |               |
|------|-------|---------------|---------------|
| 2224 | 13309 | Oasl2         | Tgtp          |
| 2232 | 8443  | Strn          | Pola2         |
| 2232 | 17447 | Strn          | Ctsf          |
| 2308 | 18462 | A930005I04Rik | Gm1060        |
| 2372 | 6191  | Stx12         | Ddost         |
| 2372 | 12140 | Stx12         | Mrps15        |
| 2472 | 2472  | MMT00014056   | MMT00014056   |
| 2571 | 2571  | Rmnd1         | Rmnd1         |
| 2571 | 3744  | Rmnd1         | Rmnd1         |
| 2571 | 8786  | Rmnd1         | Rmnd1         |
| 2571 | 19115 | Rmnd1         | Rab32         |
| 2599 | 1101  | Lsm14a        | Sec11a        |
| 2599 | 2599  | Lsm14a        | Lsm14a        |
| 2599 | 7761  | Lsm14a        | Nudt19        |
| 2599 | 8394  | Lsm14a        | Dpy19l3       |
| 2599 | 9122  | Lsm14a        | Sepw1         |
| 2599 | 17632 | Lsm14a        | Lypd3         |
| 2599 | 19142 | Lsm14a        | Gpatch1       |
| 2599 | 19462 | Lsm14a        | 4933439C20Rik |
| 2599 | 20606 | Lsm14a        | MMT00042166   |
| 2630 | 18070 | Il17re        | Ogg1          |
| 2743 | 1918  | Tcf3          | Usp39         |
| 2743 | 2743  | Tcf3          | Tcf3          |
| 2743 | 15384 | Tcf3          | Mat2a         |
| 2743 | 16255 | Tcf3          | Reg3b         |
| 2743 | 18948 | Tcf3          | Olf1270       |
| 2793 | 2793  | MMT00005644   | MMT00005644   |
| 2794 | 2294  | Map3k6        | AU040829      |
| 2794 | 2708  | Map3k6        | Sgk1          |
| 2794 | 2794  | Map3k6        | Map3k6        |
| 2794 | 5345  | Map3k6        | MMT00023326   |
| 2794 | 8980  | Map3k6        | Plekhf1       |
| 2794 | 11345 | Map3k6        | Slc40a1       |
| 2794 | 12761 | Map3k6        | Tsc22d3       |
| 2794 | 16494 | Map3k6        | 2310007D09Rik |
| 2794 | 21313 | Map3k6        | Rhou          |
| 2832 | 2832  | 2810021J22Rik | 2810021J22Rik |
| 2832 | 13181 | 2810021J22Rik | Lcp2          |
| 2848 | 5795  | Serpine2      | MMT00057992   |
| 2848 | 9827  | Serpine2      | Pam           |
| 2877 | 21414 | Pcyt2         | BC017643      |
| 2938 | 2801  | H2-T23        | H2-BI         |
| 2938 | 2938  | H2-T23        | H2-T23        |
| 2980 | 2980  | Slc37a2       | Slc37a2       |
| 3006 | 2880  | Alas2         | Cd93          |
| 3006 | 3006  | Alas2         | Alas2         |
| 3006 | 21387 | Alas2         | Cnot7         |
| 3021 | 19032 | Gdf9          | Tymp          |
| 3029 | 8677  | Ybx1          | Zbtb8os       |
| 3029 | 10134 | Ybx1          | Hivep3        |
| 3029 | 12140 | Ybx1          | Mrps15        |

|      |       |               |               |
|------|-------|---------------|---------------|
| 3103 | 16046 | MMT00062748   | Ppwd1         |
| 3103 | 16077 | MMT00062748   | Mocs2         |
| 3214 | 5603  | Dnmt3b        | BC020535      |
| 3214 | 13355 | Dnmt3b        | Foxs1         |
| 3261 | 6330  | Rpap2         | Dgkq          |
| 3261 | 20729 | Rpap2         | Ttc28         |
| 3314 | 1014  | Wars2         | Rtcd1         |
| 3314 | 1466  | Wars2         | Ubap2l        |
| 3314 | 2752  | Wars2         | Fcgr1         |
| 3314 | 3314  | Wars2         | Wars2         |
| 3314 | 9408  | Wars2         | Hmgcs2        |
| 3314 | 10521 | Wars2         | Ttf2          |
| 3314 | 16416 | Wars2         | Commd2        |
| 3432 | 16618 | EG330963      | Hps3          |
| 3475 | 1270  | 2610305D13Rik | 1700029I01Rik |
| 3475 | 3475  | 2610305D13Rik | 2610305D13Rik |
| 3475 | 18338 | 2610305D13Rik | Akr1e1        |
| 3475 | 19924 | 2610305D13Rik | Ubiad1        |
| 3480 | 2456  | Pnpo          | Mrpl10        |
| 3531 | 9745  | Tslp          | Gadd45g       |
| 3624 | 18555 | Pygb          | Sdcbp2        |
| 3649 | 16179 | Zfp395        | Gulo          |
| 3654 | 3411  | St13          | Rabl2a        |
| 3654 | 3654  | St13          | St13          |
| 3654 | 6804  | St13          | Cyp2d22       |
| 3654 | 6974  | St13          | Tmem65        |
| 3654 | 7100  | St13          | Tomm22        |
| 3654 | 9540  | St13          | Csnk1e        |
| 3654 | 19955 | St13          | Cbx2          |
| 3753 | 1466  | Setdb1        | Ubap2l        |
| 3753 | 2752  | Setdb1        | Fcgr1         |
| 3753 | 9519  | Setdb1        | Fstl5         |
| 3753 | 12367 | Setdb1        | MMT00072365   |
| 3753 | 16416 | Setdb1        | Commd2        |
| 3753 | 20661 | Setdb1        | Tuft1         |
| 3812 | 3812  | Zfyve26       | Zfyve26       |
| 3812 | 6828  | Zfyve26       | Pigh          |
| 3849 | 18373 | MMT00047578   | Dnajb1        |
| 3885 | 15485 | Apol7c        | Zfp251        |
| 3921 | 6191  | 2300002D11Rik | Ddost         |
| 3921 | 10407 | 2300002D11Rik | Gpatch3       |
| 4048 | 15476 | BC002230      | Fem1b         |
| 4084 | 12761 | Asah3l        | Tsc22d3       |
| 4124 | 6376  | 1110037F02Rik | Nle1          |
| 4195 | 11705 | Csrp2bp       | Polr3f        |
| 4195 | 14740 | Csrp2bp       | Mfap1b        |
| 4308 | 4106  | Nphp3         | MMT00041409   |
| 4308 | 4443  | Nphp3         | Zfp790        |
| 4308 | 9402  | Nphp3         | 1200016B10Rik |
| 4308 | 15476 | Nphp3         | Fem1b         |
| 4404 | 15485 | Commd5        | Zfp251        |

|      |       |               |               |
|------|-------|---------------|---------------|
| 4411 | 1960  | 2310039H08Rik | Ubr2          |
| 4411 | 18772 | 2310039H08Rik | BC048355      |
| 4454 | 5345  | BC055107      | MMT00023326   |
| 4454 | 12761 | BC055107      | Tsc22d3       |
| 4454 | 19004 | BC055107      | Pdk4          |
| 4493 | 6564  | Ptgir         | Cebpd         |
| 4532 | 3363  | BC034090      | MMT00033159   |
| 4549 | 10606 | 9930012K11Rik | Apbb1ip       |
| 4549 | 11382 | 9930012K11Rik | Cdca3         |
| 4626 | 4626  | 2310046K01Rik | 2310046K01Rik |
| 4626 | 9361  | 2310046K01Rik | Hand1         |
| 4626 | 13581 | 2310046K01Rik | Srxn1         |
| 4626 | 18555 | 2310046K01Rik | Sdcbp2        |
| 4638 | 1603  | Alkbh4        | Lrwd1         |
| 4638 | 13424 | Alkbh4        | MMT00039710   |
| 4695 | 2938  | D330027H18Rik | H2-T23        |
| 4901 | 1297  | MMT00073557   | Phox2a        |
| 4901 | 4901  | MMT00073557   | MMT00073557   |
| 4938 | 4139  | Mccc2         | Sh2d5         |
| 5014 | 6437  | MMT00017503   | Gnptg         |
| 5258 | 5603  | Mcts2         | BC020535      |
| 5352 | 2599  | Pdcd2l        | Lsm14a        |
| 5482 | 2801  | Cdsn          | H2-BI         |
| 5482 | 2938  | Cdsn          | H2-T23        |
| 5482 | 7088  | Cdsn          | Slc37a1       |
| 5482 | 10667 | Cdsn          | H2-Eb1        |
| 5482 | 12694 | Cdsn          | Riok2         |
| 5482 | 12943 | Cdsn          | Slc25a27      |
| 5482 | 16067 | Cdsn          | Pcaf          |
| 5482 | 16692 | Cdsn          | Bat4          |
| 5482 | 17322 | Cdsn          | Zfp758        |
| 5482 | 17412 | Cdsn          | Aif1          |
| 5488 | 6372  | C920009B18Rik | 1110021L09Rik |
| 5488 | 12070 | C920009B18Rik | Adat2         |
| 5511 | 2705  | BC055004      | Hrbl          |
| 5511 | 6330  | BC055004      | Dgkq          |
| 5511 | 8992  | BC055004      | Trfr2         |
| 5511 | 9077  | BC055004      | Cnpy4         |
| 5511 | 13780 | BC055004      | Pilra         |
| 5511 | 14631 | BC055004      | Stag3         |
| 5511 | 18195 | BC055004      | Mafk          |
| 5522 | 10366 | Pink1         | 4931403E03Rik |
| 5522 | 16083 | Pink1         | Pla2g2c       |
| 5644 | 14860 | Spsb2         | MMT00051231   |
| 5681 | 22930 | Mbd1          | Mro           |
| 5692 | 17179 | 2010005H15Rik | Stfa3         |
| 5694 | 23591 | Sp7           | Dlg4          |
| 5762 | 4666  | Trpc3         | Exosc9        |
| 5762 | 15870 | Trpc3         | Aqp5          |
| 5884 | 1466  | Gstm2         | Ubap2l        |
| 5884 | 3314  | Gstm2         | Wars2         |

|      |       |               |               |
|------|-------|---------------|---------------|
| 5884 | 20810 | Gstm2         | Mttp          |
| 5889 | 6564  | Errfi1        | Cebpd         |
| 5889 | 8816  | Errfi1        | Nfkbia        |
| 5889 | 15826 | Errfi1        | Arl4d         |
| 5934 | 2752  | S100a10       | Fcgr1         |
| 5965 | 1041  | Pbld          | 3110049J23Rik |
| 5974 | 5345  | Arntl         | MMT00023326   |
| 5974 | 5974  | Arntl         | Arntl         |
| 5974 | 12157 | Arntl         | Gal3st4       |
| 5974 | 12761 | Arntl         | Tsc22d3       |
| 5974 | 12834 | Arntl         | Fabp7         |
| 5974 | 18179 | Arntl         | Dbp           |
| 5974 | 21142 | Arntl         | Gm129         |
| 5989 | 2793  | 2310042D19Rik | MMT00005644   |
| 5989 | 5989  | 2310042D19Rik | 2310042D19Rik |
| 5989 | 19924 | 2310042D19Rik | Ubiad1        |
| 6016 | 1510  | A530057A03Rik | A530058N18Rik |
| 6019 | 5345  | Gdap10        | MMT00023326   |
| 6021 | 5634  | MMT00008784   | Creb1         |
| 6021 | 11756 | MMT00008784   | 2810011L19Rik |
| 6021 | 15476 | MMT00008784   | Fem1b         |
| 6021 | 15731 | MMT00008784   | Mfhas1        |
| 6021 | 18373 | MMT00008784   | Dnajb1        |
| 6021 | 18418 | MMT00008784   | Hspa1b        |
| 6021 | 20559 | MMT00008784   | Nat13         |
| 6059 | 5603  | Dsn1          | BC020535      |
| 6059 | 6059  | Dsn1          | Dsn1          |
| 6059 | 11166 | Dsn1          | Uqcc          |
| 6059 | 13355 | Dsn1          | Foxs1         |
| 6059 | 14734 | Dsn1          | Nrsn2         |
| 6059 | 23005 | Dsn1          | 4930405A21Rik |
| 6060 | 17135 | Tle6          | Mum1          |
| 6116 | 6330  | Pcgf5         | Dgkq          |
| 6116 | 8807  | Pcgf5         | Ankrd56       |
| 6116 | 10978 | Pcgf5         | MMT00078322   |
| 6116 | 22988 | Pcgf5         | Hscb          |
| 6147 | 17179 | Dirc2         | Stfa3         |
| 6191 | 4305  | Ddost         | Tmem51        |
| 6191 | 6191  | Ddost         | Ddost         |
| 6191 | 8610  | Ddost         | Padi4         |
| 6191 | 10366 | Ddost         | 4931403E03Rik |
| 6191 | 19924 | Ddost         | Ubiad1        |
| 6234 | 6234  | P4ha2         | P4ha2         |
| 6250 | 13355 | Csnk2a1       | Foxs1         |
| 6250 | 14734 | Csnk2a1       | Nrsn2         |
| 6250 | 23005 | Csnk2a1       | 4930405A21Rik |
| 6270 | 11906 | Cysltr1       | Nfe2l3        |
| 6270 | 23397 | Cysltr1       | Ccnjl         |
| 6283 | 2752  | Ptpn22        | Fcgr1         |
| 6330 | 1660  | Dgkq          | Zfp33b        |
| 6330 | 6330  | Dgkq          | Dgkq          |

|      |       |               |               |
|------|-------|---------------|---------------|
| 6330 | 8807  | Dgkq          | Ankrd56       |
| 6330 | 10978 | Dgkq          | MMT00078322   |
| 6330 | 16066 | Dgkq          | Coq2          |
| 6330 | 16168 | Dgkq          | Crlf2         |
| 6376 | 6376  | Nle1          | Nle1          |
| 6394 | 15664 | Fbxo6         | Masp2         |
| 6394 | 18338 | Fbxo6         | Akr1e1        |
| 6498 | 6498  | MMT00016809   | MMT00016809   |
| 6498 | 9449  | MMT00016809   | Sft2d2        |
| 6506 | 20705 | Scyl2         | Supv31        |
| 6564 | 8171  | Cebpd         | Spink8        |
| 6564 | 8816  | Cebpd         | Nfkbia        |
| 6564 | 9745  | Cebpd         | Gadd45g       |
| 6765 | 2021  | Ldhb          | Atf7ip        |
| 6765 | 11130 | Ldhb          | Slco1c1       |
| 6765 | 14557 | Ldhb          | Pyroxd1       |
| 6769 | 1006  | Banp          | 2600011E07Rik |
| 6769 | 6769  | Banp          | Banp          |
| 6769 | 11906 | Banp          | Nfe2l3        |
| 6769 | 14626 | Banp          | Zbtb2         |
| 6824 | 6824  | Irf7          | Irf7          |
| 6824 | 12398 | Irf7          | Ifi44         |
| 6888 | 8807  | Cxcl9         | Ankrd56       |
| 6922 | 19462 | Tmem86b       | 4933439C20Rik |
| 6931 | 18939 | Hrsp12        | Matn2         |
| 6931 | 20871 | Hrsp12        | Pop1          |
| 7083 | 7116  | MMT00044154   | Katnal1       |
| 7083 | 7821  | MMT00044154   | MMT00042003   |
| 7088 | 2801  | Slc37a1       | H2-BI         |
| 7088 | 2938  | Slc37a1       | H2-T23        |
| 7088 | 7088  | Slc37a1       | Slc37a1       |
| 7088 | 8750  | Slc37a1       | 1700010114Rik |
| 7088 | 17707 | Slc37a1       | Rshl2b        |
| 7088 | 20511 | Slc37a1       | Decr2         |
| 7094 | 7084  | Cyp2c54       | Spz1          |
| 7094 | 9946  | Cyp2c54       | Stam2         |
| 7094 | 12248 | Cyp2c54       | Tnp2          |
| 7094 | 23546 | Cyp2c54       | Zzef1         |
| 7100 | 7100  | Tomm22        | Tomm22        |
| 7159 | 7159  | 1700031F05Rik | 1700031F05Rik |
| 7159 | 15334 | 1700031F05Rik | Rnaseh2c      |
| 7159 | 19744 | 1700031F05Rik | Acy3          |
| 7370 | 2456  | Spop          | Mrpl10        |
| 7370 | 10498 | Spop          | Ube2z         |
| 7396 | 2294  | Lao1          | AU040829      |
| 7396 | 5345  | Lao1          | MMT00023326   |
| 7396 | 12761 | Lao1          | Tsc22d3       |
| 7396 | 14233 | Lao1          | Fgfr1         |
| 7436 | 4199  | 1700063K16Rik | B3galt5       |
| 7436 | 12248 | 1700063K16Rik | Tnp2          |
| 7519 | 2752  | Gstm1         | Fcgr1         |

|      |       |               |               |
|------|-------|---------------|---------------|
| 7619 | 15870 | Pik3ip1       | Aqp5          |
| 7619 | 16823 | Pik3ip1       | Inhbb         |
| 7761 | 2599  | Nudt19        | Lsm14a        |
| 7909 | 11435 | Oas3          | Rnaset2a      |
| 7909 | 21075 | Oas3          | Gtf2h5        |
| 7975 | 11621 | Lancl1        | Mixl1         |
| 7991 | 7088  | Gpr115        | Slc37a1       |
| 8073 | 10077 | Irak1bp1      | Cep63         |
| 8073 | 15853 | Irak1bp1      | D430036J16Rik |
| 8155 | 8155  | Mark3         | Mark3         |
| 8210 | 12571 | Hspa12a       | Cdkn2d        |
| 8210 | 17098 | Hspa12a       | Qtrt1         |
| 8256 | 23651 | Tjap1         | MMT00027295   |
| 8284 | 9161  | EG209380      | Mrpl17        |
| 8341 | 6437  | MMT00017270   | Gnptg         |
| 8341 | 11291 | MMT00017270   | 1110018H23Rik |
| 8341 | 19064 | MMT00017270   | MMT00004867   |
| 8372 | 4810  | Uap1          | Vsig8         |
| 8372 | 9449  | Uap1          | Sft2d2        |
| 8372 | 11445 | Uap1          | Atp1a2        |
| 8372 | 11571 | Uap1          | Bpnt1         |
| 8372 | 11741 | Uap1          | Slc30a10      |
| 8499 | 14740 | C430048L16Rik | Mfap1b        |
| 8499 | 18835 | C430048L16Rik | Dtwd1         |
| 8610 | 2883  | Padi4         | MMT00048540   |
| 8610 | 8610  | Padi4         | Padi4         |
| 8653 | 7100  | AW124722      | Tomm22        |
| 8670 | 3706  | MMT00051613   | 2410002O22Rik |
| 8670 | 5385  | MMT00051613   | Tubb2b        |
| 8670 | 15476 | MMT00051613   | Fem1b         |
| 8670 | 18373 | MMT00051613   | Dnajib1       |
| 8677 | 8677  | Zbtb8os       | Zbtb8os       |
| 8703 | 4199  | Gstp1         | B3galt5       |
| 8703 | 8721  | Gstp1         | Tbc1d10c      |
| 8703 | 13676 | Gstp1         | MMT00010979   |
| 8721 | 8721  | Tbc1d10c      | Tbc1d10c      |
| 8721 | 17447 | Tbc1d10c      | Ctsf          |
| 8743 | 5345  | Pkp4          | MMT00023326   |
| 8743 | 6133  | Pkp4          | Agrp          |
| 8743 | 12208 | Pkp4          | Pnpla7        |
| 8750 | 2938  | 1700010I14Rik | H2-T23        |
| 8783 | 4139  | Zfyve16       | Sh2d5         |
| 8783 | 4896  | Zfyve16       | 4930405M20Rik |
| 8786 | 2571  | Rmnd1         | Rmnd1         |
| 8786 | 19115 | Rmnd1         | Rab32         |
| 8790 | 2243  | Galnt2        | Gcsh          |
| 8800 | 143   | Rnf213        | Gvin1         |
| 8800 | 12398 | Rnf213        | Ifi44         |
| 8816 | 8816  | Nfkbia        | Nfkbia        |
| 8816 | 12761 | Nfkbia        | Tsc22d3       |
| 9161 | 9161  | Mrpl17        | Mrpl17        |



|       |       |               |               |
|-------|-------|---------------|---------------|
| 9161  | 22693 | Mrpl17        | Trim68        |
| 9230  | 18772 | 1700027N10Rik | BC048355      |
| 9258  | 14222 | P4ha1         | MMT00076410   |
| 9258  | 15713 | P4ha1         | Rbm3          |
| 9304  | 403   | AI449175      | Leprot11      |
| 9304  | 1755  | AI449175      | Ocel1         |
| 9352  | 13475 | Hnrpll        | Morn2         |
| 9417  | 3141  | Cd163         | Tmf1          |
| 9417  | 9010  | Cd163         | 8430419L09Rik |
| 9417  | 9417  | Cd163         | Cd163         |
| 9417  | 9622  | Cd163         | Rasgef1a      |
| 9417  | 19964 | Cd163         | Ndufa9        |
| 9454  | 2599  | 2810426N06Rik | Lsm14a        |
| 9454  | 7761  | 2810426N06Rik | Nudt19        |
| 9454  | 9454  | 2810426N06Rik | 2810426N06Rik |
| 9454  | 20490 | 2810426N06Rik | Tmem143       |
| 9531  | 18070 | MMT00043554   | Ogg1          |
| 9547  | 2472  | MMT00006479   | MMT00014056   |
| 9558  | 2533  | Akr7a5        | Arhgef19      |
| 9558  | 14397 | Akr7a5        | Padi2         |
| 9729  | 403   | Got111        | Leprot11      |
| 9729  | 9729  | Got111        | Got111        |
| 9762  | 153   | Snx5          | 2010011120Rik |
| 9762  | 5737  | Snx5          | Nkx2-2        |
| 9762  | 11705 | Snx5          | Polr3f        |
| 9912  | 9912  | Ttc27         | Ttc27         |
| 9951  | 2938  | Rpp21         | H2-T23        |
| 10393 | 4566  | Slc7a8        | MMT00078134   |
| 10393 | 16179 | Slc7a8        | Gulo          |
| 10526 | 8155  | MMT00036239   | Mark3         |
| 10553 | 4810  | Dusp23        | Vsig8         |
| 10553 | 5465  | Dusp23        | Slamf8        |
| 10553 | 17463 | Dusp23        | Rgl1          |
| 10667 | 2801  | H2-Eb1        | H2-BI         |
| 10667 | 2938  | H2-Eb1        | H2-T23        |
| 10668 | 11057 | Kars          | MMT00032844   |
| 10672 | 4084  | BC031353      | Asah3l        |
| 10672 | 12761 | BC031353      | Tsc22d3       |
| 10729 | 10729 | Fgd2          | Fgd2          |
| 10782 | 15476 | 4933403O08Rik | Fem1b         |
| 10876 | 13045 | Steap1        | A330021E22Rik |
| 10978 | 6330  | MMT00078322   | Dgkq          |
| 10978 | 10978 | MMT00078322   | MMT00078322   |
| 10978 | 12797 | MMT00078322   | Brdt          |
| 11043 | 1006  | Hsph1         | 2600011E07Rik |
| 11043 | 2362  | Hsph1         | Mkks          |
| 11043 | 2558  | Hsph1         | Tmem132b      |
| 11043 | 3620  | Hsph1         | Bet1          |
| 11043 | 6234  | Hsph1         | P4ha2         |
| 11043 | 6769  | Hsph1         | Banp          |
| 11043 | 6828  | Hsph1         | Pigh          |

|       |       |               |               |
|-------|-------|---------------|---------------|
| 11043 | 9258  | Hsph1         | P4ha1         |
| 11043 | 9514  | Hsph1         | Vps37a        |
| 11043 | 14517 | Hsph1         | Clcn4-2       |
| 11043 | 15476 | Hsph1         | Fem1b         |
| 11043 | 18373 | Hsph1         | Dnajb1        |
| 11043 | 18418 | Hsph1         | Hspa1b        |
| 11043 | 19391 | Hsph1         | Apex2         |
| 11043 | 20535 | Hsph1         | Rbm4          |
| 11043 | 21431 | Hsph1         | Xbp1          |
| 11147 | 4038  | Gng12         | 1200009O22Rik |
| 11199 | 13615 | Sirt7         | Arl16         |
| 11204 | 143   | AI451617      | Gvin1         |
| 11214 | 1281  | MMT00049207   | Alkbh3        |
| 11214 | 18373 | MMT00049207   | Dnajb1        |
| 11369 | 676   | Stx3          | Ms4a4d        |
| 11369 | 11369 | Stx3          | Stx3          |
| 11369 | 11812 | Stx3          | Mrpl16        |
| 11369 | 17447 | Stx3          | Ctsf          |
| 11406 | 9449  | Ifi203        | Sft2d2        |
| 11406 | 11406 | Ifi203        | Ifi203        |
| 11423 | 4566  | 6720463M24Rik | MMT00078134   |
| 11423 | 11423 | 6720463M24Rik | 6720463M24Rik |
| 11423 | 14281 | 6720463M24Rik | 5031414D18Rik |
| 11423 | 15353 | 6720463M24Rik | Ednrb         |
| 11435 | 8750  | Rnaset2a      | 1700010114Rik |
| 11435 | 17707 | Rnaset2a      | Rshl2b        |
| 11467 | 9912  | Ypel5         | Ttc27         |
| 11467 | 16067 | Ypel5         | Pcaf          |
| 11560 | 10308 | MMT00001695   | Fuk           |
| 11571 | 11571 | Bpnt1         | Bpnt1         |
| 11590 | 13117 | Cbx4          | Tmprss5       |
| 11590 | 15476 | Cbx4          | Fem1b         |
| 11620 | 9195  | Zfr           | Sub1          |
| 11620 | 11620 | Zfr           | Zfr           |
| 11620 | 12091 | Zfr           | 1810015C04Rik |
| 11621 | 11621 | Mixl1         | Mixl1         |
| 11648 | 2424  | Lrfn2         | Unc5cl        |
| 11648 | 18871 | Lrfn2         | AI314976      |
| 11776 | 1755  | Ifi30         | Ocel1         |
| 11776 | 9906  | Ifi30         | Ninj2         |
| 11789 | 15022 | Ccdc90a       | Tmem14c       |
| 11795 | 6376  | Gps2          | Nle1          |
| 11812 | 676   | Mrpl16        | Ms4a4d        |
| 11812 | 11369 | Mrpl16        | Stx3          |
| 11816 | 13181 | Ccdc99        | Lcp2          |
| 11888 | 19462 | Myadm         | 4933439C20Rik |
| 11966 | 1907  | Zfp280b       | D230010M03Rik |
| 11966 | 2067  | Zfp280b       | Myo1a         |
| 11966 | 3362  | Zfp280b       | Fgf8          |
| 11966 | 3511  | Zfp280b       | Rnf182        |
| 11966 | 4079  | Zfp280b       | Emilin3       |

|       |       |               |               |
|-------|-------|---------------|---------------|
| 11966 | 4199  | Zfp280b       | B3galt5       |
| 11966 | 7436  | Zfp280b       | 1700063K16Rik |
| 11966 | 7974  | Zfp280b       | Arhgef7       |
| 11966 | 9946  | Zfp280b       | Stam2         |
| 11966 | 10260 | Zfp280b       | Zfp36l2       |
| 11966 | 11507 | Zfp280b       | Adarb2        |
| 11966 | 12248 | Zfp280b       | Tnp2          |
| 11966 | 12568 | Zfp280b       | Lrrc37a       |
| 11966 | 13496 | Zfp280b       | H1fnt         |
| 11966 | 13676 | Zfp280b       | MMT00010979   |
| 11966 | 14313 | Zfp280b       | Tnk1          |
| 11966 | 14754 | Zfp280b       | Atoh8         |
| 11966 | 15743 | Zfp280b       | Hoxc6         |
| 11966 | 16491 | Zfp280b       | 6330500D04Rik |
| 11966 | 19265 | Zfp280b       | EG546036      |
| 11966 | 23546 | Zfp280b       | Zzef1         |
| 11966 | 23591 | Zfp280b       | Dlg4          |
| 11966 | 23651 | Zfp280b       | MMT00027295   |
| 12004 | 7761  | Lgals6        | Nudt19        |
| 12004 | 16931 | Lgals6        | Actn4         |
| 12055 | 19493 | 1810008A18Rik | Icosl         |
| 12055 | 22786 | 1810008A18Rik | Mterfd3       |
| 12070 | 12070 | Adat2         | Adat2         |
| 12097 | 12097 | 9430015G10Rik | 9430015G10Rik |
| 12097 | 18338 | 9430015G10Rik | Akr1e1        |
| 12173 | 3363  | Acbd6         | MMT00033159   |
| 12174 | 5064  | 2610027C15Rik | Tekt2         |
| 12302 | 2456  | Cbx1          | Mrpl10        |
| 12302 | 12302 | Cbx1          | Cbx1          |
| 12367 | 1466  | MMT00072365   | Ubap2l        |
| 12367 | 2752  | MMT00072365   | Fcgr1         |
| 12367 | 3159  | MMT00072365   | Pld1          |
| 12367 | 4666  | MMT00072365   | Exosc9        |
| 12367 | 9519  | MMT00072365   | Fstl5         |
| 12367 | 12367 | MMT00072365   | MMT00072365   |
| 12367 | 16416 | MMT00072365   | Commd2        |
| 12367 | 16618 | MMT00072365   | Hps3          |
| 12367 | 19700 | MMT00072365   | E030011K20Rik |
| 12380 | 10130 | Rftn2         | MMT00043239   |
| 12380 | 19578 | Rftn2         | Aox1          |
| 12385 | 18462 | Mrpl33        | Gm1060        |
| 12388 | 5603  | 8430406I07Rik | BC020535      |
| 12388 | 11705 | 8430406I07Rik | Polr3f        |
| 12412 | 12412 | BC004728      | BC004728      |
| 12412 | 19037 | BC004728      | Slc11a2       |
| 12412 | 21060 | BC004728      | Ela1          |
| 12480 | 13810 | Cdc42bpg      | 1110036O03Rik |
| 12480 | 21189 | Cdc42bpg      | Arl5c         |
| 12546 | 9790  | Cd7           | Tspan10       |
| 12546 | 13615 | Cd7           | Arl16         |
| 12546 | 17193 | Cd7           | Npb           |

|       |       |               |               |
|-------|-------|---------------|---------------|
| 12546 | 21414 | Cd7           | BC017643      |
| 12716 | 1466  | 5830417I10Rik | Ubap2l        |
| 12718 | 2793  | Dhrsx         | MMT00005644   |
| 12730 | 4901  | 9130019O22Rik | MMT00073557   |
| 12730 | 5639  | 9130019O22Rik | Gdpd3         |
| 12761 | 12761 | Tsc22d3       | Tsc22d3       |
| 12778 | 15870 | 1700024P16Rik | Aqp5          |
| 12778 | 17981 | 1700024P16Rik | MMT00036029   |
| 12784 | 3159  | Nudt6         | Pld1          |
| 12866 | 23005 | 4921517L17Rik | 4930405A21Rik |
| 12885 | 6330  | Ccl24         | Dgkq          |
| 12885 | 7378  | Ccl24         | 1700001J03Rik |
| 13149 | 11406 | Ifi203        | Ifi203        |
| 13156 | 6824  | Ifit3         | Irf7          |
| 13164 | 5342  | Il4ra         | Eps8l3        |
| 13164 | 15870 | Il4ra         | Aqp5          |
| 13195 | 13181 | Mtif2         | Lcp2          |
| 13195 | 21444 | Mtif2         | Pnpt1         |
| 13224 | 3159  | Cp            | Pld1          |
| 13224 | 16618 | Cp            | Hps3          |
| 13285 | 13285 | Cd276         | Cd276         |
| 13355 | 5603  | Foxs1         | BC020535      |
| 13355 | 13355 | Foxs1         | Foxs1         |
| 13355 | 23005 | Foxs1         | 4930405A21Rik |
| 13417 | 1625  | 1700025G04Rik | AW146154      |
| 13417 | 9402  | 1700025G04Rik | 1200016B10Rik |
| 13417 | 15569 | 1700025G04Rik | BC003331      |
| 13417 | 17463 | 1700025G04Rik | Rgl1          |
| 13475 | 13475 | Morn2         | Morn2         |
| 13507 | 13946 | Spats1        | Slc35b2       |
| 13507 | 18772 | Spats1        | BC048355      |
| 13513 | 12398 | Trim25        | Ifi44         |
| 13513 | 13513 | Trim25        | Trim25        |
| 13528 | 16931 | Capn12        | Actn4         |
| 13554 | 1510  | Aqr           | A530058N18Rik |
| 13615 | 9790  | Arl16         | Tspan10       |
| 13615 | 13615 | Arl16         | Arl16         |
| 13617 | 4566  | Acin1         | MMT00078134   |
| 13648 | 1297  | Dap           | Phox2a        |
| 13648 | 13648 | Dap           | Dap           |
| 13732 | 1755  | Tpm4          | Ocel1         |
| 13801 | 20810 | Adh4          | Mttp          |
| 13810 | 4272  | 1110036O03Rik | Hsd17b6       |
| 13813 | 13813 | Ktelc1        | Ktelc1        |
| 13813 | 14043 | Ktelc1        | 4930455C21Rik |
| 13813 | 19433 | Ktelc1        | Mex3b         |
| 13929 | 11741 | Lamb3         | Slc30a10      |
| 13946 | 18772 | Slc35b2       | BC048355      |
| 14014 | 14222 | MMT00008376   | MMT00076410   |
| 14014 | 22600 | MMT00008376   | 2410018C20Rik |
| 14132 | 10729 | Glo1          | Fgd2          |

|       |       |             |               |
|-------|-------|-------------|---------------|
| 14132 | 17707 | Glo1        | Rshl2b        |
| 14307 | 575   | Kcnj8       | Edn1          |
| 14307 | 4084  | Kcnj8       | Asah3l        |
| 14307 | 8399  | Kcnj8       | Herpud1       |
| 14307 | 10606 | Kcnj8       | Apbb1ip       |
| 14307 | 14577 | Kcnj8       | Cdc37l1       |
| 14307 | 14860 | Kcnj8       | MMT00051231   |
| 14307 | 15476 | Kcnj8       | Fem1b         |
| 14343 | 11403 | Hnrnpa0     | 2210016F16Rik |
| 14343 | 20847 | Hnrnpa0     | Pdik1l        |
| 14379 | 15870 | Car12       | Aqp5          |
| 14384 | 2456  | Dnajc7      | Mrpl10        |
| 14384 | 4272  | Dnajc7      | Hsd17b6       |
| 14384 | 6376  | Dnajc7      | Nle1          |
| 14384 | 13810 | Dnajc7      | 1110036O03Rik |
| 14384 | 15826 | Dnajc7      | Arl4d         |
| 14391 | 2243  | MMT00017335 | Gcsh          |
| 14391 | 10308 | MMT00017335 | Fuk           |
| 14391 | 15953 | MMT00017335 | Acsf3         |
| 14391 | 18700 | MMT00017335 | Trappc2l      |
| 14391 | 22351 | MMT00017335 | Fanca         |
| 14526 | 9547  | Pacsin3     | MMT00006479   |
| 14559 | 1014  | Frrs1       | Rtcd1         |
| 14570 | 640   | Erdr1       | MMT00065211   |
| 14570 | 5284  | Erdr1       | Npffr1        |
| 14570 | 23014 | Erdr1       | MMT00077643   |
| 14603 | 6824  | Ly6e        | Irf7          |
| 14603 | 16949 | Ly6e        | Iigp1         |
| 14611 | 1755  | Ddx60       | Ocel1         |
| 14631 | 14631 | Stag3       | Stag3         |
| 14647 | 5737  | Cst3        | Nkx2-2        |
| 14647 | 9361  | Cst3        | Hand1         |
| 14667 | 17046 | Fggy        | Fggy          |
| 14677 | 3079  | S100b       | Gstt3         |
| 14677 | 22786 | S100b       | Mterfd3       |
| 14714 | 11382 | Ccdc102a    | Cdca3         |
| 14733 | 14733 | Fhit        | Fhit          |
| 14733 | 18526 | Fhit        | Dydc2         |
| 14757 | 2472  | Hdx         | MMT00014056   |
| 14757 | 19843 | Hdx         | Rbm45         |
| 14877 | 5271  | Ptx3        | Npy           |
| 14877 | 6133  | Ptx3        | Agrp          |
| 14989 | 19115 | Map3k5      | Rab32         |
| 15016 | 21414 | MMT00074608 | BC017643      |
| 15074 | 12398 | Usp18       | Ilf144        |
| 15160 | 2708  | Vezf1       | Sgk1          |
| 15258 | 13513 | Coil        | Trim25        |
| 15318 | 13946 | Aars2       | Slc35b2       |
| 15318 | 18772 | Aars2       | BC048355      |
| 15334 | 8902  | Rnaseh2c    | Aldh3b1       |
| 15334 | 15334 | Rnaseh2c    | Rnaseh2c      |

|       |       |               |               |
|-------|-------|---------------|---------------|
| 15352 | 15870 | Socs2         | Aqp5          |
| 15384 | 2743  | Mat2a         | Tcf3          |
| 15384 | 13355 | Mat2a         | Foxs1         |
| 15384 | 15384 | Mat2a         | Mat2a         |
| 15504 | 6824  | Mx2           | Irf7          |
| 15504 | 12398 | Mx2           | Irf4          |
| 15508 | 3159  | 4632415L05Rik | Pld1          |
| 15508 | 16618 | 4632415L05Rik | Hps3          |
| 15531 | 1515  | Prickle4      | Med20         |
| 15531 | 2424  | Prickle4      | Unc5cl        |
| 15531 | 7088  | Prickle4      | Slc37a1       |
| 15569 | 15569 | BC003331      | BC003331      |
| 15569 | 17463 | BC003331      | Rgl1          |
| 15631 | 12761 | Lpin1         | Tsc22d3       |
| 15675 | 10054 | MMT00077535   | Fsip1         |
| 15675 | 13285 | MMT00077535   | Cd276         |
| 15675 | 15476 | MMT00077535   | Fem1b         |
| 15708 | 2743  | Retsat        | Tcf3          |
| 15708 | 15384 | Retsat        | Mat2a         |
| 15708 | 20507 | Retsat        | Sh2d6         |
| 15720 | 12761 | Trp53i11      | Tsc22d3       |
| 15720 | 13355 | Trp53i11      | Foxs1         |
| 15870 | 15870 | Aqp5          | Aqp5          |
| 15920 | 11759 | A630001G21Rik | 3110079O15Rik |
| 15937 | 15713 | Adamts4       | Rbm3          |
| 15937 | 18179 | Adamts4       | Dbp           |
| 15937 | 18785 | Adamts4       | Angptl4       |
| 15971 | 1041  | Aifm2         | 3110049J23Rik |
| 15971 | 19115 | Aifm2         | Rab32         |
| 15971 | 20705 | Aifm2         | Supv3l1       |
| 16093 | 2708  | 4732473B16Rik | Sgk1          |
| 16093 | 8980  | 4732473B16Rik | Plekhf1       |
| 16131 | 1297  | Ptpre         | Phox2a        |
| 16131 | 12761 | Ptpre         | Tsc22d3       |
| 16182 | 12398 | Oasl1         | Irf4          |
| 16191 | 7388  | Klc1          | Amn           |
| 16191 | 15277 | Klc1          | 2810002N01Rik |
| 16289 | 2832  | Myocd         | 2810021J22Rik |
| 16289 | 6376  | Myocd         | Nle1          |
| 16289 | 19032 | Myocd         | Tymp          |
| 16299 | 18036 | Crel2         | Tmem100       |
| 16299 | 18418 | Crel2         | Hspa1b        |
| 16356 | 17135 | 9030607L17Rik | Mum1          |
| 16356 | 19493 | 9030607L17Rik | Icosl         |
| 16416 | 1466  | Commd2        | Ubap2l        |
| 16613 | 21414 | 1110031I02Rik | BC017643      |
| 16617 | 283   | Sh2d4a        | Gmcl1l        |
| 16617 | 403   | Sh2d4a        | Leprotl1      |
| 16617 | 1604  | Sh2d4a        | Ssbp4         |
| 16617 | 1755  | Sh2d4a        | Ocel1         |
| 16624 | 18371 | Psma8         | Sap130        |

|       |       |               |               |
|-------|-------|---------------|---------------|
| 16719 | 12761 | Slc43a3       | Tsc22d3       |
| 16802 | 15953 | Def8          | Acsf3         |
| 16849 | 403   | Trmt1         | Leprotl1      |
| 16849 | 1604  | Trmt1         | Ssbp4         |
| 16849 | 1755  | Trmt1         | Ocel1         |
| 16849 | 2243  | Trmt1         | Gcsh          |
| 16849 | 6035  | Trmt1         | Nkd1          |
| 16849 | 10497 | Trmt1         | Man2b1        |
| 16849 | 16849 | Trmt1         | Trmt1         |
| 16886 | 9912  | Dpy30         | Ttc27         |
| 16919 | 1297  | Pea15a        | Phox2a        |
| 16919 | 15255 | Pea15a        | Ccl8          |
| 16972 | 11741 | Nenf          | Slc30a10      |
| 17046 | 17046 | Fggy          | Fggy          |
| 17081 | 14733 | 3830406C13Rik | Fhit          |
| 17081 | 21075 | 3830406C13Rik | Gtf2h5        |
| 17135 | 17135 | Mum1          | Mum1          |
| 17147 | 3654  | Tll12         | St13          |
| 17243 | 2708  | Bcl6b         | Sgk1          |
| 17285 | 3812  | 1700019E19Rik | Zfyve26       |
| 17285 | 8155  | 1700019E19Rik | Mark3         |
| 17285 | 8724  | 1700019E19Rik | Tgfb3         |
| 17285 | 13389 | 1700019E19Rik | Six6os1       |
| 17285 | 19214 | 1700019E19Rik | Snpc1         |
| 17285 | 22297 | 1700019E19Rik | Zfyve1        |
| 17295 | 1510  | MMT00082577   | A530058N18Rik |
| 17295 | 2472  | MMT00082577   | MMT00014056   |
| 17295 | 9547  | MMT00082577   | MMT00006479   |
| 17295 | 22320 | MMT00082577   | MMT00047284   |
| 17321 | 14281 | Hepacam       | 5031414D18Rik |
| 17363 | 17363 | Aebp2         | Aebp2         |
| 17363 | 18333 | Aebp2         | Rassf8        |
| 17389 | 3698  | Pop4          | 1600014C10Rik |
| 17389 | 17389 | Pop4          | Pop4          |
| 17391 | 8141  | C530028O21Rik | Scnn1a        |
| 17391 | 9010  | C530028O21Rik | 8430419L09Rik |
| 17391 | 9622  | C530028O21Rik | Rasgef1a      |
| 17391 | 15719 | C530028O21Rik | BC060267      |
| 17391 | 16255 | C530028O21Rik | Reg3b         |
| 17391 | 17363 | C530028O21Rik | Aebp2         |
| 17391 | 19964 | C530028O21Rik | Ndufa9        |
| 17413 | 4199  | MMT00043948   | B3galt5       |
| 17413 | 23546 | MMT00043948   | Zzef1         |
| 17420 | 7100  | Vps13b        | Tomm22        |
| 17420 | 11549 | Vps13b        | Depdc6        |
| 17420 | 12091 | Vps13b        | 1810015C04Rik |
| 17420 | 13648 | Vps13b        | Dap           |
| 17420 | 18939 | Vps13b        | Matn2         |
| 17420 | 20871 | Vps13b        | Pop1          |
| 17447 | 8721  | Ctsf          | Tbc1d10c      |
| 17447 | 8902  | Ctsf          | Aldh3b1       |

|       |       |               |               |
|-------|-------|---------------|---------------|
| 17447 | 11369 | Ctsf          | Stx3          |
| 17447 | 17447 | Ctsf          | Ctsf          |
| 17449 | 15713 | Zfp296        | Rbm3          |
| 17461 | 22226 | Ripk5         | Pm20d1        |
| 17463 | 15569 | Rgl1          | BC003331      |
| 17463 | 17463 | Rgl1          | Rgl1          |
| 17528 | 16491 | Gmnn          | 6330500D04Rik |
| 17528 | 17528 | Gmnn          | Gmnn          |
| 17535 | 7116  | MMT00008110   | Katnal1       |
| 17535 | 7821  | MMT00008110   | MMT00042003   |
| 17583 | 12761 | Per2          | Tsc22d3       |
| 17585 | 2599  | Gramd1a       | Lsm14a        |
| 17619 | 19462 | Zfp551        | 4933439C20Rik |
| 17707 | 7088  | Rshl2b        | Slc37a1       |
| 17716 | 6330  | Rnf10         | Dgkq          |
| 17716 | 10978 | Rnf10         | MMT00078322   |
| 17729 | 10130 | Prim2         | MMT00043239   |
| 17729 | 17729 | Prim2         | Prim2         |
| 17991 | 21189 | Fbxl20        | Arl5c         |
| 18140 | 18140 | Atg2b         | Atg2b         |
| 18143 | 23259 | Dnajc1        | Dnajc1        |
| 18165 | 9413  | 5830482F20Rik | 1190020J12Rik |
| 18179 | 18179 | Dbp           | Dbp           |
| 18184 | 10635 | Klrb1b        | Itfg2         |
| 18561 | 9980  | Ngly1         | MMT00008758   |
| 18592 | 12984 | Txnl4a        | Cyb5          |
| 18592 | 22930 | Txnl4a        | Mro           |
| 18632 | 15476 | Asxl1         | Fem1b         |
| 18673 | 1466  | Muc1          | Ubap2l        |
| 18673 | 9519  | Muc1          | Fstl5         |
| 18673 | 12716 | Muc1          | 5830417110Rik |
| 18680 | 9519  | EG633285      | Fstl5         |
| 18702 | 17805 | Mrc1          | Slc39a12      |
| 18709 | 18709 | Srp68         | Srp68         |
| 18714 | 5795  | Farsb         | MMT00057992   |
| 18714 | 11621 | Farsb         | Mixl1         |
| 18754 | 1466  | Rbm8a         | Ubap2l        |
| 18754 | 2752  | Rbm8a         | Fcgr1         |
| 18754 | 9408  | Rbm8a         | Hmgcs2        |
| 18754 | 9519  | Rbm8a         | Fstl5         |
| 18835 | 1510  | Dtwd1         | A530058N18Rik |
| 18835 | 14740 | Dtwd1         | Mfap1b        |
| 18939 | 13648 | Matn2         | Dap           |
| 18939 | 20871 | Matn2         | Pop1          |
| 19037 | 19037 | Slc11a2       | Slc11a2       |
| 19064 | 2644  | MMT00004867   | Srrm2         |
| 19064 | 11291 | MMT00004867   | 1110018H23Rik |
| 19115 | 2571  | Rab32         | Rmnd1         |
| 19115 | 12070 | Rab32         | Adat2         |
| 19115 | 19115 | Rab32         | Rab32         |
| 19134 | 13810 | Fn3k          | 1110036O03Rik |



|       |       |                    |               |
|-------|-------|--------------------|---------------|
| 19134 | 21414 | Fn3k               | BC017643      |
| 19214 | 19214 | Snapc1             | Snapc1        |
| 19223 | 16077 | Ercc8              | Mocs2         |
| 19392 | 1041  | Slc25a16           | 3110049J23Rik |
| 19421 | 20958 | Mbd2               | 4933403F05Rik |
| 19447 | 12097 | MMT00004670        | 9430015G10Rik |
| 19462 | 2118  | 4933439C20Rik      | Kptn          |
| 19462 | 2599  | 4933439C20Rik      | Lsm14a        |
| 19462 | 7761  | 4933439C20Rik      | Nudt19        |
| 19462 | 9122  | 4933439C20Rik      | Sepw1         |
| 19462 | 9413  | 4933439C20Rik      | 1190020J12Rik |
| 19462 | 17632 | 4933439C20Rik      | Lypd3         |
| 19462 | 19462 | 4933439C20Rik      | 4933439C20Rik |
| 19502 | 3701  | Fbxo24             | Zfp68         |
| 19502 | 8992  | Fbxo24             | Trfr2         |
| 19522 | 15870 | Tcf21              | Aqp5          |
| 19578 | 11621 | Aox1               | Mixl1         |
| 19578 | 19578 | Aox1               | Aox1          |
| 19672 | 661   | Cldn19             | Siglec1       |
| 19672 | 23546 | Cldn19             | Zzef1         |
| 19725 | 18371 | Dcp2               | Sap130        |
| 19725 | 19725 | Dcp2               | Dcp2          |
| 19734 | 1371  | Dchs1              | 1200009I06Rik |
| 19734 | 9161  | Dchs1              | Mrpl17        |
| 19757 | 5345  | Fkbp5              | MMT00023326   |
| 19835 | 1177  | lars2              | EG545391      |
| 19835 | 11571 | lars2              | Bpnt1         |
| 19835 | 11741 | lars2              | Slc30a10      |
| 19843 | 4778  | Rbm45              | Cyct          |
| 19843 | 19843 | Rbm45              | Rbm45         |
| 19924 | 3475  | Ubiad1             | 2610305D13Rik |
| 19924 | 6191  | Ubiad1             | Ddost         |
| 19924 | 11870 | Ubiad1             | Apitd1        |
| 19924 | 14397 | Ubiad1             | Padi2         |
| 19924 | 18338 | Ubiad1             | Akr1e1        |
| 19924 | 19924 | Ubiad1             | Ubiad1        |
| 19964 | 8141  | Ndufa9             | Scnn1a        |
| 19964 | 9622  | Ndufa9             | Rasgef1a      |
| 19964 | 14557 | Ndufa9             | Pyroxd1       |
| 19971 | 18555 | B930046C15Rik      | Sdcbp2        |
| 19971 | 19971 | B930046C15Rik      | B930046C15Rik |
| 19982 | 5345  | ENSMUSG00000071036 | MMT00023326   |
| 19995 | 22786 | Pwp1               | Mterfd3       |
| 20077 | 10130 | Ccdc115            | MMT00043239   |
| 20077 | 17729 | Ccdc115            | Prim2         |
| 20100 | 897   | Guca1b             | Mut           |
| 20100 | 1960  | Guca1b             | Ubr2          |
| 20100 | 2424  | Guca1b             | Unc5cl        |
| 20100 | 20100 | Guca1b             | Guca1b        |
| 20118 | 6330  | Tmem175            | Dgkq          |
| 20174 | 2743  | Ctnna2             | Tcf3          |

|       |       |               |               |
|-------|-------|---------------|---------------|
| 20174 | 4038  | Ctnna2        | 1200009O22Rik |
| 20174 | 13569 | Ctnna2        | 1190003M12Rik |
| 20174 | 16255 | Ctnna2        | Reg3b         |
| 20238 | 2938  | H2-T9         | H2-T23        |
| 20292 | 13389 | 1810048J11Rik | Six6os1       |
| 20490 | 20490 | Tmem143       | Tmem143       |
| 20511 | 7088  | Decr2         | Slc37a1       |
| 20511 | 20511 | Decr2         | Decr2         |
| 20661 | 20661 | Tuft1         | Tuft1         |
| 20703 | 15870 | Itga11        | Aqp5          |
| 20801 | 19142 | Mrps11        | Gpatch1       |
| 20871 | 18939 | Pop1          | Matn2         |
| 20912 | 8939  | Chordc1       | MMT00024195   |
| 20912 | 18373 | Chordc1       | Dnajb1        |
| 20918 | 2456  | Nxph3         | Mrpl10        |
| 20918 | 10498 | Nxph3         | Ube2z         |
| 20980 | 15476 | Taf12         | Fem1b         |
| 20980 | 22012 | Taf12         | Itgae         |
| 21125 | 7116  | Mtif3         | Katnal1       |
| 21142 | 4678  | Gm129         | Kank1         |
| 21142 | 21142 | Gm129         | Gm129         |
| 21425 | 21425 | Rab6          | Rab6          |
| 21444 | 21444 | Pnpt1         | Pnpt1         |
| 21519 | 21519 | 1700012B15Rik | 1700012B15Rik |
| 21549 | 12398 | Rtp4          | Ifi44         |
| 21549 | 19189 | Rtp4          | Sp100         |
| 21733 | 15476 | Rhebl1        | Fem1b         |
| 21780 | 1466  | Ankrd35       | Ubap2l        |
| 21824 | 1660  | 5830443L24Rik | Zfp33b        |
| 21824 | 8547  | 5830443L24Rik | Gbp4          |
| 21824 | 13309 | 5830443L24Rik | Tgtp          |
| 21853 | 18365 | 5430432N15Rik | Bcl2l12       |
| 21853 | 20490 | 5430432N15Rik | Tmem143       |
| 21903 | 15476 | Nr1d1         | Fem1b         |
| 21903 | 21903 | Nr1d1         | Nr1d1         |
| 21952 | 7088  | Tfb1m         | Slc37a1       |
| 21952 | 17707 | Tfb1m         | Rshl2b        |
| 22010 | 18373 | Ccdc41        | Dnajb1        |
| 22037 | 12398 | Oas1g         | Ifi44         |
| 22075 | 630   | C1s           | C1s           |
| 22104 | 7088  | Rnf123        | Slc37a1       |
| 22104 | 11435 | Rnf123        | Rnaset2a      |
| 22104 | 17707 | Rnf123        | Rshl2b        |
| 22139 | 18373 | Stip1         | Dnajb1        |
| 22297 | 22297 | Zfyve1        | Zfyve1        |
| 22337 | 22337 | Nlk           | Nlk           |
| 22411 | 14342 | Reck          | 4930412F15Rik |
| 22411 | 18514 | Reck          | 4930412F15Rik |
| 22412 | 15870 | Ptpn5         | Aqp5          |
| 22412 | 22982 | Ptpn5         | Mug2          |
| 22496 | 12398 | Slfn1         | Ifi44         |

|       |       |               |               |
|-------|-------|---------------|---------------|
| 22961 | 2023  | MMT00055950   | MMT00072215   |
| 22961 | 22930 | MMT00055950   | Mro           |
| 23005 | 13355 | 4930405A21Rik | Foxs1         |
| 23005 | 14734 | 4930405A21Rik | Nrsn2         |
| 23012 | 2752  | Spg20         | Fcgr1         |
| 23191 | 4566  | 3632451O06Rik | MMT00078134   |
| 23191 | 23191 | 3632451O06Rik | 3632451O06Rik |
| 23259 | 23259 | Dnajc1        | Dnajc1        |
| 23283 | 9413  | Mrps12        | 1190020J12Rik |
| 23283 | 17389 | Mrps12        | Pop4          |
| 23283 | 23283 | Mrps12        | Mrps12        |
| 23301 | 4139  | Scamp1        | Sh2d5         |
| 23301 | 18492 | Scamp1        | Dhfr          |
| 23342 | 15353 | Ndfip2        | Ednrb         |
| 23353 | 153   | Slmo2         | 2010011I20Rik |
| 23353 | 23008 | Slmo2         | Ctsz          |
| 23474 | 2472  | MMT00011721   | MMT00014056   |
| 23495 | 15162 | Cryab         | Il18          |
| 23500 | 8992  | BC055004      | Trfr2         |
| 23500 | 12157 | BC055004      | Gal3st4       |
| 23625 | 1660  | Pkd2          | Zfp33b        |
| 23625 | 6330  | Pkd2          | Dgkq          |
| 23625 | 8807  | Pkd2          | Ankrd56       |

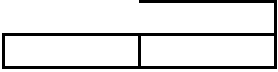

**Table T14: HL Network Backbone**

| Hypothalamus_Probe_ID | Liver_Probe_ID | Hypothalamus_Gene_Symbol | Liver_Gene_Symbol |
|-----------------------|----------------|--------------------------|-------------------|
| 153                   | 22740          | 2010011I20Rik            | Manbal            |
| 265                   | 15675          | Taf9                     | MMT00077535       |
| 286                   | 286            | MMT00070509              | MMT00070509       |
| 286                   | 8670           | MMT00070509              | MMT00051613       |
| 286                   | 11043          | MMT00070509              | Hsph1             |
| 403                   | 403            | Leprotl1                 | Leprotl1          |
| 403                   | 13004          | Leprotl1                 | Arhgef10          |
| 630                   | 630            | C1s                      | C1s               |
| 630                   | 1444           | C1s                      | C1r               |
| 661                   | 661            | Siglec1                  | Siglec1           |
| 676                   | 676            | Ms4a4d                   | Ms4a4d            |
| 678                   | 4833           | Ncaph                    | Synpo2            |
| 678                   | 6797           | Ncaph                    | Blvra             |
| 678                   | 21729          | Ncaph                    | Hdc               |
| 680                   | 16658          | Loxl4                    | MMT00011796       |
| 684                   | 3913           | 1700102P08Rik            | Mrpl15            |
| 684                   | 9258           | 1700102P08Rik            | P4ha1             |
| 684                   | 11043          | 1700102P08Rik            | Hsph1             |
| 719                   | 22630          | Usp2                     | MMT00034355       |
| 737                   | 737            | MMT00023716              | MMT00023716       |
| 737                   | 6857           | MMT00023716              | Serinc2           |
| 737                   | 20147          | MMT00023716              | Ybx1              |
| 801                   | 16658          | Olfr295                  | MMT00011796       |
| 804                   | 16654          | 2210407C18Rik            | Oas1f             |
| 804                   | 16658          | 2210407C18Rik            | MMT00011796       |
| 863                   | 6021           | Dnajc14                  | MMT00008784       |
| 863                   | 8670           | Dnajc14                  | MMT00051613       |
| 863                   | 11043          | Dnajc14                  | Hsph1             |
| 863                   | 11214          | Dnajc14                  | MMT00049207       |
| 863                   | 15675          | Dnajc14                  | MMT00077535       |
| 1006                  | 3587           | 2600011E07Rik            | MMT00041940       |
| 1006                  | 6021           | 2600011E07Rik            | MMT00008784       |
| 1006                  | 6769           | 2600011E07Rik            | Banp              |
| 1006                  | 7619           | 2600011E07Rik            | Pik3ip1           |
| 1006                  | 8670           | 2600011E07Rik            | MMT00051613       |
| 1006                  | 11214          | 2600011E07Rik            | MMT00049207       |
| 1006                  | 15675          | 2600011E07Rik            | MMT00077535       |
| 1006                  | 18373          | 2600011E07Rik            | Dnajb1            |
| 1006                  | 18418          | 2600011E07Rik            | Hspa1b            |
| 1014                  | 1014           | Rtcd1                    | Rtcd1             |
| 1014                  | 1867           | Rtcd1                    | Bcas2             |
| 1027                  | 22139          | Accs                     | Stip1             |
| 1041                  | 1041           | 3110049J23Rik            | 3110049J23Rik     |
| 1041                  | 5965           | 3110049J23Rik            | Pbld              |
| 1041                  | 19115          | 3110049J23Rik            | Rab32             |
| 1041                  | 19392          | 3110049J23Rik            | Slc25a16          |
| 1101                  | 22841          | Sec11a                   | Cib1              |
| 1214                  | 3587           | Trip13                   | MMT00041940       |
| 1214                  | 6021           | Trip13                   | MMT00008784       |

|      |       |               |               |
|------|-------|---------------|---------------|
| 1214 | 11043 | Trip13        | Hsph1         |
| 1214 | 11214 | Trip13        | MMT00049207   |
| 1214 | 15675 | Trip13        | MMT00077535   |
| 1232 | 11859 | Abhd1         | Poln          |
| 1241 | 1241  | Meox1         | Meox1         |
| 1241 | 6756  | Meox1         | Sds           |
| 1270 | 3475  | 1700029I01Rik | 2610305D13Rik |
| 1351 | 6021  | Whsc1I1       | MMT00008784   |
| 1351 | 18099 | Whsc1I1       | Nfx1          |
| 1351 | 18336 | Whsc1I1       | Lrpap1        |
| 1351 | 21333 | Whsc1I1       | Cirbp         |
| 1423 | 12451 | Spdya         | Srd5a2        |
| 1466 | 524   | Ubap2I        | Hsd3b2        |
| 1466 | 1466  | Ubap2I        | Ubap2I        |
| 1466 | 1867  | Ubap2I        | Bcas2         |
| 1466 | 3753  | Ubap2I        | Setdb1        |
| 1466 | 6206  | Ubap2I        | MMT00063701   |
| 1466 | 10521 | Ubap2I        | Ttf2          |
| 1466 | 11611 | Ubap2I        | S100a13       |
| 1466 | 16416 | Ubap2I        | Commd2        |
| 1466 | 18754 | Ubap2I        | Rbm8a         |
| 1510 | 4833  | A530058N18Rik | Synpo2        |
| 1510 | 13554 | A530058N18Rik | Aqr           |
| 1510 | 19763 | A530058N18Rik | Acp2          |
| 1510 | 22184 | A530058N18Rik | MMT00033856   |
| 1510 | 23609 | A530058N18Rik | Trim44        |
| 1603 | 1603  | Lrwd1         | Lrwd1         |
| 1604 | 286   | Ssbp4         | MMT00070509   |
| 1604 | 1755  | Ssbp4         | Ocel1         |
| 1604 | 9304  | Ssbp4         | Al449175      |
| 1604 | 15455 | Ssbp4         | Lsm4          |
| 1604 | 16617 | Ssbp4         | Sh2d4a        |
| 1604 | 18886 | Ssbp4         | Slc18a1       |
| 1660 | 1660  | Zfp33b        | Zfp33b        |
| 1660 | 9057  | Zfp33b        | Spp1          |
| 1755 | 286   | Ocel1         | MMT00070509   |
| 1755 | 1755  | Ocel1         | Ocel1         |
| 1755 | 9304  | Ocel1         | Al449175      |
| 1755 | 15455 | Ocel1         | Lsm4          |
| 1755 | 16617 | Ocel1         | Sh2d4a        |
| 1755 | 16849 | Ocel1         | Trmt1         |
| 1755 | 18886 | Ocel1         | Slc18a1       |
| 1918 | 2743  | Usp39         | Tcf3          |
| 1918 | 3703  | Usp39         | Ggcx          |
| 1918 | 15708 | Usp39         | Retsat        |
| 1960 | 3857  | Ubr2          | 1700001C19Rik |
| 1960 | 20100 | Ubr2          | Guca1b        |
| 2021 | 6765  | Atf7ip        | Ldhd          |
| 2023 | 2023  | MMT00072215   | MMT00072215   |
| 2023 | 22961 | MMT00072215   | MMT00055950   |
| 2210 | 9831  | Chn1          | Nedd4I        |

|      |       |             |               |
|------|-------|-------------|---------------|
| 2243 | 1336  | Gcsh        | MMT00069537   |
| 2243 | 2243  | Gcsh        | Gcsh          |
| 2243 | 16849 | Gcsh        | Trmt1         |
| 2243 | 21394 | Gcsh        | Cdh15         |
| 2372 | 16287 | Stx12       | Extl1         |
| 2424 | 15531 | Unc5cl      | Prickle4      |
| 2456 | 12302 | Mrpl10      | Cbx1          |
| 2456 | 13810 | Mrpl10      | 1110036O03Rik |
| 2472 | 9547  | MMT00014056 | MMT00006479   |
| 2472 | 19763 | MMT00014056 | Acp2          |
| 2472 | 23474 | MMT00014056 | MMT00011721   |
| 2558 | 3587  | Tmem132b    | MMT00041940   |
| 2558 | 6021  | Tmem132b    | MMT00008784   |
| 2558 | 8670  | Tmem132b    | MMT00051613   |
| 2558 | 9258  | Tmem132b    | P4ha1         |
| 2558 | 11043 | Tmem132b    | Hsph1         |
| 2558 | 11214 | Tmem132b    | MMT00049207   |
| 2558 | 15675 | Tmem132b    | MMT00077535   |
| 2558 | 18373 | Tmem132b    | Dnajb1        |
| 2571 | 2571  | Rmnd1       | Rmnd1         |
| 2571 | 3744  | Rmnd1       | Rmnd1         |
| 2599 | 187   | Lsm14a      | Wdr62         |
| 2599 | 1985  | Lsm14a      | Pepd          |
| 2599 | 2388  | Lsm14a      | Dot1l         |
| 2599 | 2599  | Lsm14a      | Lsm14a        |
| 2599 | 4697  | Lsm14a      | Cyp2a12       |
| 2599 | 5352  | Lsm14a      | Pdcd2l        |
| 2599 | 6513  | Lsm14a      | Qpctl         |
| 2599 | 12004 | Lsm14a      | Lgals6        |
| 2599 | 16639 | Lsm14a      | MMT00078937   |
| 2599 | 19462 | Lsm14a      | 4933439C20Rik |
| 2708 | 337   | Sgk1        | Rasgef1b      |
| 2708 | 2294  | Sgk1        | AU040829      |
| 2708 | 15631 | Sgk1        | Lpin1         |
| 2708 | 17525 | Sgk1        | Ctgf          |
| 2708 | 21331 | Sgk1        | Slc10a6       |
| 2743 | 2743  | Tcf3        | Tcf3          |
| 2743 | 3703  | Tcf3        | Ggcx          |
| 2743 | 15708 | Tcf3        | Retsat        |
| 2752 | 524   | Fcgr1       | Hsd3b2        |
| 2752 | 1867  | Fcgr1       | Bcas2         |
| 2752 | 3753  | Fcgr1       | Setdb1        |
| 2752 | 5938  | Fcgr1       | Pfn2          |
| 2752 | 10681 | Fcgr1       | Dgkz          |
| 2752 | 11611 | Fcgr1       | S100a13       |
| 2752 | 12367 | Fcgr1       | MMT00072365   |
| 2752 | 16753 | Fcgr1       | Hfe2          |
| 2793 | 2793  | MMT00005644 | MMT00005644   |
| 2793 | 5989  | MMT00005644 | 2310042D19Rik |
| 2794 | 15631 | Map3k6      | Lpin1         |
| 2801 | 2938  | H2-BI       | H2-T23        |

|      |       |               |               |
|------|-------|---------------|---------------|
| 2880 | 6756  | Cd93          | Sds           |
| 2883 | 3616  | MMT00048540   | Dnajc16       |
| 2883 | 8610  | MMT00048540   | Padi4         |
| 2902 | 16287 | D4Ert196e     | Extl1         |
| 2938 | 327   | H2-T23        | H2-Ea         |
| 2938 | 2938  | H2-T23        | H2-T23        |
| 2980 | 2980  | Slc37a2       | Slc37a2       |
| 3016 | 15476 | Bsdc1         | Fem1b         |
| 3079 | 12055 | Gstt3         | 1810008A18Rik |
| 3159 | 3159  | Pld1          | Pld1          |
| 3159 | 12367 | Pld1          | MMT00072365   |
| 3159 | 15508 | Pld1          | 4632415L05Rik |
| 3314 | 524   | Wars2         | Hsd3b2        |
| 3314 | 3753  | Wars2         | Setdb1        |
| 3411 | 3654  | Rabl2a        | St13          |
| 3475 | 3475  | 2610305D13Rik | 2610305D13Rik |
| 3475 | 18338 | 2610305D13Rik | Akr1e1        |
| 3475 | 19924 | 2610305D13Rik | Ubiad1        |
| 3654 | 3654  | St13          | St13          |
| 3654 | 3799  | St13          | Serpinh1      |
| 3654 | 19216 | St13          | Bik           |
| 3675 | 16654 | Pglyrp4       | Oas1f         |
| 3675 | 17702 | Pglyrp4       | Ccdc40        |
| 3683 | 12398 | Oas2          | Ifi44         |
| 3744 | 3744  | Rmnd1         | Rmnd1         |
| 3812 | 6755  | Zfyve26       | Wdr22         |
| 3812 | 9022  | Zfyve26       | Plek2         |
| 3812 | 20187 | Zfyve26       | Gphn          |
| 3986 | 11966 | Ep400         | Zfp280b       |
| 3986 | 19436 | Ep400         | Dapp1         |
| 4038 | 4093  | 1200009O22Rik | Akp5          |
| 4084 | 18785 | Asah3l        | Angptl4       |
| 4139 | 4938  | Sh2d5         | Mccc2         |
| 4139 | 8967  | Sh2d5         | Acot12        |
| 4139 | 18492 | Sh2d5         | Dhfr          |
| 4443 | 15476 | Zfp790        | Fem1b         |
| 4480 | 16035 | Bahcc1        | Chd8          |
| 4480 | 17144 | Bahcc1        | B3gat2        |
| 4566 | 4837  | MMT00078134   | Ear2          |
| 4566 | 6587  | MMT00078134   | Irf9          |
| 4566 | 10711 | MMT00078134   | 1700108F19Rik |
| 4566 | 12280 | MMT00078134   | Cln5          |
| 4612 | 3587  | Hspa5         | MMT00041940   |
| 4612 | 3799  | Hspa5         | Serpinh1      |
| 4612 | 7731  | Hspa5         | 1500001M20Rik |
| 4612 | 11043 | Hspa5         | Hsph1         |
| 4626 | 4626  | 2310046K01Rik | 2310046K01Rik |
| 4626 | 13581 | 2310046K01Rik | Srxn1         |
| 4737 | 16654 | Olfr449       | Oas1f         |
| 4805 | 11043 | Hspb1         | Hsph1         |
| 4805 | 22139 | Hspb1         | Stip1         |



|      |       |               |               |
|------|-------|---------------|---------------|
| 4901 | 12730 | MMT00073557   | 9130019O22Rik |
| 5021 | 6206  | Gdap2         | MMT00063701   |
| 5021 | 11585 | Gdap2         | Bdp1          |
| 5345 | 1709  | MMT00023326   | Mt2           |
| 5345 | 2794  | MMT00023326   | Map3k6        |
| 5345 | 4286  | MMT00023326   | Ptp4a1        |
| 5345 | 6386  | MMT00023326   | Por           |
| 5345 | 6490  | MMT00023326   | Il1r1         |
| 5345 | 6756  | MMT00023326   | Sds           |
| 5345 | 11129 | MMT00023326   | Ankhd1        |
| 5345 | 13140 | MMT00023326   | MMT00005814   |
| 5345 | 14989 | MMT00023326   | Map3k5        |
| 5345 | 15631 | MMT00023326   | Lpin1         |
| 5345 | 16176 | MMT00023326   | St3gal5       |
| 5345 | 16647 | MMT00023326   | D16H22S680E   |
| 5345 | 18027 | MMT00023326   | 5730403B10Rik |
| 5345 | 18606 | MMT00023326   | A230074B11Rik |
| 5345 | 19723 | MMT00023326   | Pfkfb1        |
| 5345 | 23183 | MMT00023326   | Nnmt          |
| 5360 | 5360  | Cep76         | Cep76         |
| 5360 | 18373 | Cep76         | Dnajb1        |
| 5410 | 23183 | Cyp4f15       | Nnmt          |
| 5639 | 12730 | Gdpd3         | 9130019O22Rik |
| 5687 | 16416 | Klf11         | Commd2        |
| 5795 | 9827  | MMT00057992   | Pam           |
| 5795 | 18714 | MMT00057992   | Farsb         |
| 5925 | 286   | Tmem59l       | MMT00070509   |
| 5925 | 1755  | Tmem59l       | Ocel1         |
| 5925 | 15455 | Tmem59l       | Lsm4          |
| 5925 | 16849 | Tmem59l       | Trmt1         |
| 5925 | 18886 | Tmem59l       | Slc18a1       |
| 5989 | 2793  | 2310042D19Rik | MMT00005644   |
| 5989 | 5989  | 2310042D19Rik | 2310042D19Rik |
| 6038 | 609   | Acot1         | MMT00060868   |
| 6038 | 20292 | Acot1         | 1810048J11Rik |
| 6133 | 6109  | Agrp          | Hsd17b2       |
| 6191 | 3475  | Ddost         | 2610305D13Rik |
| 6191 | 20045 | Ddost         | D4Wsu114e     |
| 6234 | 11043 | P4ha2         | Hsph1         |
| 6330 | 1660  | Dgkq          | Zfp33b        |
| 6330 | 5100  | Dgkq          | Pebp1         |
| 6330 | 6330  | Dgkq          | Dgkq          |
| 6330 | 8807  | Dgkq          | Ankrd56       |
| 6330 | 15908 | Dgkq          | Pebp1         |
| 6330 | 23625 | Dgkq          | Pkd2          |
| 6376 | 1745  | Nle1          | Gas7          |
| 6376 | 6376  | Nle1          | Nle1          |
| 6376 | 10539 | Nle1          | Unc45b        |
| 6445 | 8670  | Mlit3         | MMT00051613   |
| 6456 | 12385 | Tyms          | Mrpl33        |
| 6498 | 6498  | MMT00016809   | MMT00016809   |

|      |       |               |               |
|------|-------|---------------|---------------|
| 6498 | 15844 | MMT00016809   | Klhdc9        |
| 6542 | 8210  | Epor          | Hspa12a       |
| 6564 | 337   | Cebpd         | Rasgef1b      |
| 6564 | 17525 | Cebpd         | Ctgf          |
| 6564 | 18083 | Cebpd         | Gadd45a       |
| 6680 | 17926 | Olfr393       | Nptx1         |
| 6680 | 18731 | Olfr393       | Fgf17         |
| 6766 | 9010  | Sspn          | 8430419L09Rik |
| 6769 | 3587  | Banp          | MMT00041940   |
| 6769 | 6021  | Banp          | MMT00008784   |
| 6769 | 6769  | Banp          | Banp          |
| 6769 | 8670  | Banp          | MMT00051613   |
| 6769 | 15675 | Banp          | MMT00077535   |
| 6769 | 18373 | Banp          | Dnajb1        |
| 6824 | 2224  | Irf7          | Oasl2         |
| 6824 | 12398 | Irf7          | Ifi44         |
| 6824 | 12600 | Irf7          | Ifi204        |
| 6824 | 13156 | Irf7          | Ifit3         |
| 6824 | 21549 | Irf7          | Rtp4          |
| 6828 | 15476 | Pigh          | Fem1b         |
| 6974 | 3654  | Tmem65        | St13          |
| 7084 | 19436 | Spz1          | Dapp1         |
| 7088 | 327   | Slc37a1       | H2-Ea         |
| 7088 | 2938  | Slc37a1       | H2-T23        |
| 7088 | 7088  | Slc37a1       | Slc37a1       |
| 7088 | 8750  | Slc37a1       | 1700010I14Rik |
| 7088 | 10667 | Slc37a1       | H2-Eb1        |
| 7088 | 13493 | Slc37a1       | Ring1         |
| 7088 | 15531 | Slc37a1       | Prickle4      |
| 7088 | 20511 | Slc37a1       | Decr2         |
| 7088 | 21295 | Slc37a1       | Snf1lk        |
| 7088 | 22822 | Slc37a1       | MMT00013433   |
| 7088 | 23250 | Slc37a1       | Plcl2         |
| 7100 | 3654  | Tomm22        | St13          |
| 7100 | 8653  | Tomm22        | AW124722      |
| 7105 | 6824  | Plac8         | Irf7          |
| 7116 | 1162  | Katnal1       | Cpsf4         |
| 7116 | 2115  | Katnal1       | Gpr12         |
| 7116 | 8906  | Katnal1       | MMT00004929   |
| 7149 | 11214 | 9530077C05Rik | MMT00049207   |
| 7173 | 12367 | Trim59        | MMT00072365   |
| 7372 | 20413 | Fastk         | Wdr86         |
| 7378 | 2115  | 1700001J03Rik | Gpr12         |
| 7378 | 15675 | 1700001J03Rik | MMT00077535   |
| 7388 | 1371  | Amn           | 1200009I06Rik |
| 7388 | 7388  | Amn           | Amn           |
| 7388 | 16191 | Amn           | Klc1          |
| 7751 | 3587  | Sgk2          | MMT00041940   |
| 7751 | 6021  | Sgk2          | MMT00008784   |
| 7751 | 8670  | Sgk2          | MMT00051613   |
| 7761 | 2388  | Nudt19        | Dot1l         |

|      |       |               |               |
|------|-------|---------------|---------------|
| 7761 | 2599  | Nudt19        | Lsm14a        |
| 7761 | 19854 | Nudt19        | Kcnj14        |
| 8016 | 3703  | Mrpl35        | Ggcx          |
| 8155 | 1371  | Mark3         | 1200009I06Rik |
| 8155 | 7099  | Mark3         | Kcnk10        |
| 8155 | 7388  | Mark3         | Amn           |
| 8155 | 8155  | Mark3         | Mark3         |
| 8155 | 10526 | Mark3         | MMT00036239   |
| 8155 | 13988 | Mark3         | Cntnap2       |
| 8155 | 23693 | Mark3         | A530016L24Rik |
| 8399 | 3170  | Herpud1       | Mcart1        |
| 8399 | 18373 | Herpud1       | Dnajb1        |
| 8472 | 1648  | Txndc16       | Gnpnat1       |
| 8472 | 4837  | Txndc16       | Ear2          |
| 8610 | 3616  | Padi4         | Dnajc16       |
| 8610 | 8610  | Padi4         | Padi4         |
| 8610 | 16287 | Padi4         | Extl1         |
| 8644 | 5694  | V1rg11        | Sp7           |
| 8644 | 19436 | V1rg11        | Dapp1         |
| 8677 | 6857  | Zbtb8os       | Serinc2       |
| 8677 | 8654  | Zbtb8os       | Fbxl13        |
| 8724 | 6755  | Tgfb3         | Wdr22         |
| 8724 | 13988 | Tgfb3         | Cntnap2       |
| 8750 | 2938  | 1700010I14Rik | H2-T23        |
| 8750 | 8649  | 1700010I14Rik | MMT00072863   |
| 8767 | 327   | Rgl2          | H2-Ea         |
| 8783 | 18492 | Zfyve16       | Dhfr          |
| 8783 | 23301 | Zfyve16       | Scamp1        |
| 8787 | 2329  | Sdf211        | Wdr6          |
| 8787 | 6021  | Sdf211        | MMT00008784   |
| 8787 | 11043 | Sdf211        | Hsph1         |
| 8807 | 1660  | Ankrd56       | Zfp33b        |
| 8807 | 6330  | Ankrd56       | Dgkq          |
| 8807 | 8807  | Ankrd56       | Ankrd56       |
| 8816 | 337   | Nfkb1a        | Rasgef1b      |
| 8828 | 15461 | Slc30a2       | Galnt2        |
| 8828 | 17702 | Slc30a2       | Ccdc40        |
| 8828 | 17926 | Slc30a2       | Nptx1         |
| 8902 | 8902  | Aldh3b1       | Aldh3b1       |
| 8939 | 15476 | MMT00024195   | Fem1b         |
| 8980 | 337   | Plekhf1       | Rasgef1b      |
| 8980 | 15631 | Plekhf1       | Lpin1         |
| 8992 | 9077  | Trfr2         | Cnpy4         |
| 8992 | 13780 | Trfr2         | Pilra         |
| 8992 | 17089 | Trfr2         | Pilrb1        |
| 9010 | 9010  | 8430419L09Rik | 8430419L09Rik |
| 9010 | 17391 | 8430419L09Rik | C530028O21Rik |
| 9057 | 9057  | Spp1          | Spp1          |
| 9077 | 9077  | Cnpy4         | Cnpy4         |
| 9077 | 13780 | Cnpy4         | Pilra         |
| 9077 | 16451 | Cnpy4         | 2010007H12Rik |

|      |       |               |                    |
|------|-------|---------------|--------------------|
| 9077 | 19502 | Cnpy4         | Fbxo24             |
| 9161 | 9161  | Mrpl17        | Mrpl17             |
| 9161 | 22693 | Mrpl17        | Trim68             |
| 9161 | 22841 | Mrpl17        | Cib1               |
| 9230 | 18772 | 1700027N10Rik | BC048355           |
| 9258 | 4805  | P4ha1         | Hspb1              |
| 9258 | 7731  | P4ha1         | 1500001M20Rik      |
| 9258 | 8670  | P4ha1         | MMT00051613        |
| 9258 | 9067  | P4ha1         | Tra2a              |
| 9258 | 9258  | P4ha1         | P4ha1              |
| 9258 | 11043 | P4ha1         | Hsph1              |
| 9258 | 12498 | P4ha1         | Abcg8              |
| 9276 | 20147 | MMT00008480   | Ybx1               |
| 9276 | 20548 | MMT00008480   | 1700041C02Rik      |
| 9361 | 4626  | Hand1         | 2310046K01Rik      |
| 9361 | 6231  | Hand1         | 9030622O22Rik      |
| 9402 | 15569 | 1200016B10Rik | BC003331           |
| 9402 | 18083 | 1200016B10Rik | Gadd45a            |
| 9408 | 10681 | Hmgcs2        | Dgkz               |
| 9413 | 1985  | 1190020J12Rik | Pepd               |
| 9413 | 18053 | 1190020J12Rik | Psmc4              |
| 9413 | 23283 | 1190020J12Rik | Mrps12             |
| 9449 | 1177  | Sft2d2        | EG545391           |
| 9449 | 9449  | Sft2d2        | Sft2d2             |
| 9449 | 11406 | Sft2d2        | Ifi203             |
| 9449 | 16361 | Sft2d2        | Olf703             |
| 9449 | 19520 | Sft2d2        | Uck2               |
| 9454 | 2599  | 2810426N06Rik | Lsm14a             |
| 9513 | 6021  | Tardbp        | MMT00008784        |
| 9513 | 11043 | Tardbp        | Hsph1              |
| 9513 | 20194 | Tardbp        | Pnlcd1             |
| 9514 | 1849  | Vps37a        | MMT00063181        |
| 9514 | 3587  | Vps37a        | MMT00041940        |
| 9514 | 3799  | Vps37a        | Serpinh1           |
| 9514 | 6021  | Vps37a        | MMT00008784        |
| 9514 | 8670  | Vps37a        | MMT00051613        |
| 9514 | 9224  | Vps37a        | MMT00013510        |
| 9514 | 9258  | Vps37a        | P4ha1              |
| 9514 | 11043 | Vps37a        | Hsph1              |
| 9514 | 11214 | Vps37a        | MMT00049207        |
| 9514 | 22139 | Vps37a        | Stip1              |
| 9514 | 23646 | Vps37a        | Hsp90ab1           |
| 9519 | 524   | Fstl5         | Hsd3b2             |
| 9519 | 3753  | Fstl5         | Setdb1             |
| 9519 | 5938  | Fstl5         | Pfn2               |
| 9519 | 6206  | Fstl5         | MMT00063701        |
| 9519 | 12367 | Fstl5         | MMT00072365        |
| 9519 | 20661 | Fstl5         | Tuft1              |
| 9519 | 22202 | Fstl5         | OTTMUSG00000021274 |
| 9547 | 19763 | MMT00006479   | Acp2               |
| 9622 | 17391 | Rasgef1a      | C530028O21Rik      |

|       |       |               |               |
|-------|-------|---------------|---------------|
| 9622  | 19964 | Rasgef1a      | Ndufa9        |
| 9729  | 9304  | Got111        | Al449175      |
| 9729  | 13004 | Got111        | Arhgef10      |
| 9729  | 16617 | Got111        | Sh2d4a        |
| 9729  | 17553 | Got111        | Eif4ebp1      |
| 9745  | 15826 | Gadd45g       | Arl4d         |
| 9745  | 17525 | Gadd45g       | Ctgf          |
| 9805  | 7088  | Tagap         | Slc37a1       |
| 9827  | 9707  | Pam           | Golt1a        |
| 9827  | 9827  | Pam           | Pam           |
| 9827  | 23361 | Pam           | Bivm          |
| 9912  | 9912  | Ttc27         | Ttc27         |
| 9912  | 12451 | Ttc27         | Srd5a2        |
| 9999  | 8499  | Zswim3        | C430048L16Rik |
| 9999  | 9067  | Zswim3        | Tra2a         |
| 10077 | 3780  | Cep63         | Ryk           |
| 10130 | 17729 | MMT00043239   | Prim2         |
| 10130 | 20077 | MMT00043239   | Ccdc115       |
| 10134 | 12140 | Hivep3        | Mrps15        |
| 10134 | 12492 | Hivep3        | Ybx1          |
| 10189 | 10189 | Cage1         | Cage1         |
| 10189 | 11094 | Cage1         | Slc17a3       |
| 10189 | 17528 | Cage1         | Gmn           |
| 10308 | 2243  | Fuk           | Gcsh          |
| 10482 | 3654  | Mcat          | St13          |
| 10482 | 6804  | Mcat          | Cyp2d22       |
| 10482 | 12468 | Mcat          | Cyp2d13       |
| 10497 | 2703  | Man2b1        | MMT00073763   |
| 10497 | 10195 | Man2b1        | Klf1          |
| 10497 | 10273 | Man2b1        | Gpt2          |
| 10667 | 327   | H2-Eb1        | H2-Ea         |
| 10667 | 3857  | H2-Eb1        | 1700001C19Rik |
| 10672 | 11379 | BC031353      | Dnttip1       |
| 10672 | 18373 | BC031353      | Dnajb1        |
| 10729 | 7088  | Fgd2          | Slc37a1       |
| 10729 | 8341  | Fgd2          | MMT00017270   |
| 10729 | 14132 | Fgd2          | Glo1          |
| 10876 | 13045 | Steap1        | A330021E22Rik |
| 10978 | 5100  | MMT00078322   | Pebp1         |
| 10978 | 10978 | MMT00078322   | MMT00078322   |
| 10978 | 12656 | MMT00078322   | Coq5          |
| 10978 | 15908 | MMT00078322   | Pebp1         |
| 11057 | 2243  | MMT00032844   | Gcsh          |
| 11063 | 18373 | Phf8          | Dnajb1        |
| 11167 | 6498  | Dars2         | MMT00016809   |
| 11240 | 18083 | Ppm1d         | Gadd45a       |
| 11291 | 8341  | 1110018H23Rik | MMT00017270   |
| 11345 | 3170  | Slc40a1       | Mcart1        |
| 11345 | 12930 | Slc40a1       | Pthr1         |
| 11369 | 676   | Stx3          | Ms4a4d        |
| 11369 | 11812 | Stx3          | Mrpl16        |

|       |       |               |               |
|-------|-------|---------------|---------------|
| 11369 | 17447 | Stx3          | Ctsf          |
| 11388 | 17926 | Tdrd9         | Nptx1         |
| 11406 | 11406 | Ifi203        | Ifi203        |
| 11406 | 13149 | Ifi203        | Ifi203        |
| 11406 | 15844 | Ifi203        | Klhdc9        |
| 11423 | 12280 | 6720463M24Rik | Cln5          |
| 11435 | 7909  | Rnaset2a      | Oas3          |
| 11549 | 3654  | Depdc6        | St13          |
| 11549 | 20871 | Depdc6        | Pop1          |
| 11571 | 16361 | Bpnt1         | Olf703        |
| 11620 | 11620 | Zfr           | Zfr           |
| 11621 | 19578 | Mixl1         | Aox1          |
| 11621 | 22333 | Mixl1         | Hnrnp3        |
| 11621 | 23119 | Mixl1         | Cps1          |
| 11665 | 8157  | Hyal1         | MMT00005305   |
| 11665 | 19436 | Hyal1         | Dapp1         |
| 11705 | 4833  | Polr3f        | Synpo2        |
| 11705 | 6231  | Polr3f        | 9030622O22Rik |
| 11705 | 12388 | Polr3f        | 8430406I07Rik |
| 11705 | 14647 | Polr3f        | Cst3          |
| 11705 | 21665 | Polr3f        | Nat5          |
| 11812 | 676   | Mrpl16        | Ms4a4d        |
| 11812 | 11812 | Mrpl16        | Mrpl16        |
| 12070 | 2827  | Adat2         | Raet1d        |
| 12070 | 12070 | Adat2         | Adat2         |
| 12091 | 11620 | 1810015C04Rik | Zfr           |
| 12091 | 20871 | 1810015C04Rik | Pop1          |
| 12157 | 6386  | Gal3st4       | Por           |
| 12157 | 13780 | Gal3st4       | Pilra         |
| 12208 | 1851  | Pnpla7        | Tmem41a       |
| 12208 | 11129 | Pnpla7        | Ankhd1        |
| 12272 | 12861 | Fshr          | Rhcg          |
| 12272 | 19436 | Fshr          | Dapp1         |
| 12302 | 2456  | Cbx1          | Mrpl10        |
| 12302 | 12302 | Cbx1          | Cbx1          |
| 12367 | 5938  | MMT00072365   | Pfn2          |
| 12367 | 12367 | MMT00072365   | MMT00072365   |
| 12398 | 2224  | Ifi44         | Oasl2         |
| 12398 | 6587  | Ifi44         | Irf9          |
| 12398 | 6824  | Ifi44         | Irf7          |
| 12398 | 12398 | Ifi44         | Ifi44         |
| 12571 | 8210  | Cdkn2d        | Hspa12a       |
| 12571 | 10387 | Cdkn2d        | 4933427D06Rik |
| 12571 | 21099 | Cdkn2d        | Rapgef6       |
| 12599 | 7911  | Golt1b        | Pik3c2g       |
| 12602 | 2329  | Filip1        | Wdr6          |
| 12649 | 6490  | Ilgad         | Il1r1         |
| 12681 | 18336 | Eif2c2        | Lrpap1        |
| 12694 | 2938  | Riok2         | H2-T23        |
| 12694 | 5410  | Riok2         | Cyp4f15       |
| 12694 | 13493 | Riok2         | Ring1         |

|       |       |               |               |
|-------|-------|---------------|---------------|
| 12716 | 6206  | 5830417110Rik | MMT00063701   |
| 12716 | 10521 | 5830417110Rik | Ttf2          |
| 12716 | 11611 | 5830417110Rik | S100a13       |
| 12730 | 12730 | 9130019O22Rik | 9130019O22Rik |
| 12761 | 2794  | Tsc22d3       | Map3k6        |
| 12761 | 3686  | Tsc22d3       | Psm9          |
| 12761 | 4286  | Tsc22d3       | Ptp4a1        |
| 12761 | 6211  | Tsc22d3       | Arhgap24      |
| 12761 | 6386  | Tsc22d3       | Por           |
| 12761 | 8399  | Tsc22d3       | Herpud1       |
| 12761 | 15258 | Tsc22d3       | Coil          |
| 12761 | 15631 | Tsc22d3       | Lpin1         |
| 12761 | 16176 | Tsc22d3       | St3gal5       |
| 12761 | 18027 | Tsc22d3       | 5730403B10Rik |
| 12761 | 18785 | Tsc22d3       | Angptl4       |
| 12761 | 21331 | Tsc22d3       | Slc10a6       |
| 12769 | 20332 | Tmem177       | Stau2         |
| 12834 | 609   | Fabp7         | MMT00060868   |
| 12834 | 2110  | Fabp7         | Gtf2ird1      |
| 12834 | 4286  | Fabp7         | Ptp4a1        |
| 12834 | 5183  | Fabp7         | St5           |
| 12834 | 5374  | Fabp7         | Chka          |
| 12834 | 5974  | Fabp7         | Arntl         |
| 12834 | 6109  | Fabp7         | Hsd17b2       |
| 12834 | 6386  | Fabp7         | Por           |
| 12834 | 11741 | Fabp7         | Slc30a10      |
| 12834 | 19234 | Fabp7         | Nrg4          |
| 12834 | 19671 | Fabp7         | Upp2          |
| 12834 | 21295 | Fabp7         | Snf1lk        |
| 12984 | 18592 | Cyb5          | Txn14a        |
| 12989 | 15631 | 1190002H23Rik | Lpin1         |
| 13218 | 13218 | C330043M08Rik | C330043M08Rik |
| 13285 | 18373 | Cd276         | Dnajb1        |
| 13309 | 2224  | Tgtp          | Oasl2         |
| 13355 | 6820  | Foxs1         | MMT00046996   |
| 13389 | 13988 | Six6os1       | Cntnap2       |
| 13389 | 20292 | Six6os1       | 1810048J11Rik |
| 13581 | 4626  | Srxn1         | 2310046K01Rik |
| 13581 | 13581 | Srxn1         | Srxn1         |
| 13615 | 3061  | Arl16         | Scarf2        |
| 13615 | 6017  | Arl16         | MMT00018015   |
| 13615 | 13615 | Arl16         | Arl16         |
| 13615 | 15016 | Arl16         | MMT00074608   |
| 13615 | 17792 | Arl16         | Vmn2r79       |
| 13615 | 17897 | Arl16         | Gm1019        |
| 13648 | 6931  | Dap           | Hrsp12        |
| 13648 | 13648 | Dap           | Dap           |
| 13648 | 20871 | Dap           | Pop1          |
| 13656 | 10189 | Ly86          | Cage1         |
| 13741 | 11043 | Hspa4l        | Hsph1         |
| 13741 | 21352 | Hspa4l        | Dtnbp1        |

|       |       |               |               |
|-------|-------|---------------|---------------|
| 13780 | 16451 | Pilra         | 2010007H12Rik |
| 13810 | 1241  | 1110036O03Rik | Meox1         |
| 13810 | 6376  | 1110036O03Rik | Nle1          |
| 13810 | 13810 | 1110036O03Rik | 1110036O03Rik |
| 13813 | 13813 | Ktelc1        | Ktelc1        |
| 13946 | 15318 | Slc35b2       | Aars2         |
| 13946 | 18772 | Slc35b2       | BC048355      |
| 14014 | 11043 | MMT00008376   | Hsph1         |
| 14043 | 13813 | 4930455C21Rik | Ktelc1        |
| 14134 | 3587  | Phf10         | MMT00041940   |
| 14149 | 19436 | BC048562      | Dapp1         |
| 14188 | 7099  | Ttc8          | Kcnk10        |
| 14222 | 13052 | MMT00076410   | Tnfrsf19      |
| 14222 | 14222 | MMT00076410   | MMT00076410   |
| 14222 | 15713 | MMT00076410   | Rbm3          |
| 14266 | 12173 | Sox13         | Acbd6         |
| 14281 | 10711 | 5031414D18Rik | 1700108F19Rik |
| 14281 | 17321 | 5031414D18Rik | Hepacam       |
| 14342 | 3139  | 4930412F15Rik | Gba2          |
| 14391 | 1336  | MMT00017335   | MMT00069537   |
| 14397 | 2533  | Padi2         | Arhgef19      |
| 14397 | 19924 | Padi2         | Ubiad1        |
| 14557 | 2932  | Pyroxd1       | Slco1a1       |
| 14557 | 6765  | Pyroxd1       | Ldhd          |
| 14557 | 7911  | Pyroxd1       | Pik3c2g       |
| 14557 | 14557 | Pyroxd1       | Pyroxd1       |
| 14557 | 20127 | Pyroxd1       | Ipo8          |
| 14577 | 11214 | Cdc37l1       | MMT00049207   |
| 14626 | 6769  | Zbtb2         | Banp          |
| 14626 | 11585 | Zbtb2         | Bdp1          |
| 14631 | 19502 | Stag3         | Fbxo24        |
| 14733 | 13357 | Fhit          | Rpp14         |
| 14734 | 14647 | Nrsn2         | Cst3          |
| 14734 | 22740 | Nrsn2         | Manbal        |
| 14734 | 23005 | Nrsn2         | 4930405A21Rik |
| 14740 | 4833  | Mfap1b        | Synpo2        |
| 14740 | 6231  | Mfap1b        | 9030622O22Rik |
| 14740 | 21729 | Mfap1b        | Hdc           |
| 15266 | 18606 | Cnnm4         | A230074B11Rik |
| 15266 | 20077 | Cnnm4         | Ccdc115       |
| 15266 | 22333 | Cnnm4         | Hnrnp3        |
| 15266 | 23361 | Cnnm4         | Bivm          |
| 15277 | 16191 | 2810002N01Rik | Klc1          |
| 15352 | 1851  | Socs2         | Tmem41a       |
| 15353 | 12280 | Ednrb         | Cln5          |
| 15476 | 3587  | Fem1b         | MMT00041940   |
| 15476 | 5352  | Fem1b         | Pdcd2l        |
| 15476 | 6021  | Fem1b         | MMT00008784   |
| 15476 | 6769  | Fem1b         | Banp          |
| 15476 | 8670  | Fem1b         | MMT00051613   |
| 15476 | 9258  | Fem1b         | P4ha1         |



|       |       |               |               |
|-------|-------|---------------|---------------|
| 15476 | 10769 | Fem1b         | Hnrnpd        |
| 15476 | 11043 | Fem1b         | Hsph1         |
| 15476 | 11214 | Fem1b         | MMT00049207   |
| 15476 | 15476 | Fem1b         | Fem1b         |
| 15476 | 15675 | Fem1b         | MMT00077535   |
| 15476 | 18083 | Fem1b         | Gadd45a       |
| 15476 | 18373 | Fem1b         | Dnajb1        |
| 15476 | 18418 | Fem1b         | Hspa1b        |
| 15476 | 20535 | Fem1b         | Rbm4          |
| 15476 | 21389 | Fem1b         | Odf2          |
| 15476 | 22139 | Fem1b         | Stip1         |
| 15539 | 12861 | MMT00028325   | Rhcg          |
| 15569 | 15569 | BC003331      | BC003331      |
| 15697 | 19436 | Tbc1d8b       | Dapp1         |
| 15698 | 11094 | Them2         | Slc17a3       |
| 15713 | 523   | Rbm3          | 1700040L02Rik |
| 15713 | 14222 | Rbm3          | MMT00076410   |
| 15713 | 15713 | Rbm3          | Rbm3          |
| 15731 | 16251 | Mfhas1        | G6pc          |
| 15731 | 18373 | Mfhas1        | Dnajb1        |
| 15853 | 2079  | D430036J16Rik | Mthfs         |
| 15853 | 3642  | D430036J16Rik | Spsb4         |
| 15853 | 3780  | D430036J16Rik | Ryk           |
| 15853 | 8073  | D430036J16Rik | Irak1bp1      |
| 15853 | 10236 | D430036J16Rik | EG665033      |
| 15901 | 11611 | Tpm3          | S100a13       |
| 15924 | 1453  | Rbm38         | Gfod2         |
| 16066 | 8807  | Coq2          | Ankrd56       |
| 16098 | 6021  | Rps20         | MMT00008784   |
| 16128 | 15775 | Agbl1         | Nat11         |
| 16128 | 17702 | Agbl1         | Ccdc40        |
| 16137 | 18714 | Xrcc5         | Farsb         |
| 16168 | 6330  | Crlf2         | Dgkq          |
| 16197 | 11966 | MMT00065977   | Zfp280b       |
| 16255 | 3703  | Reg3b         | Ggcx          |
| 16255 | 4093  | Reg3b         | Akp5          |
| 16255 | 8194  | Reg3b         | MMT00077789   |
| 16295 | 12468 | Nlrp14        | Cyp2d13       |
| 16295 | 16295 | Nlrp14        | Nlrp14        |
| 16390 | 7436  | Plb1          | 1700063K16Rik |
| 16390 | 19436 | Plb1          | Dapp1         |
| 16416 | 5938  | Commd2        | Pfn2          |
| 16416 | 6206  | Commd2        | MMT00063701   |
| 16416 | 12367 | Commd2        | MMT00072365   |
| 16467 | 8653  | Card10        | AW124722      |
| 16491 | 11094 | 6330500D04Rik | Slc17a3       |
| 16491 | 19436 | 6330500D04Rik | Dapp1         |
| 16494 | 4286  | 2310007D09Rik | Ptp4a1        |
| 16494 | 6490  | 2310007D09Rik | Il1r1         |
| 16494 | 11937 | 2310007D09Rik | Snx10         |
| 16494 | 15631 | 2310007D09Rik | Lpin1         |

|       |       |               |               |
|-------|-------|---------------|---------------|
| 16494 | 18314 | 2310007D09Rik | 4631416L12Rik |
| 16501 | 2980  | Loh11cr2a     | Slc37a2       |
| 16618 | 15508 | Hps3          | 4632415L05Rik |
| 16692 | 327   | Bat4          | H2-Ea         |
| 16692 | 2938  | Bat4          | H2-T23        |
| 16692 | 3599  | Bat4          | MMT00035426   |
| 16692 | 3857  | Bat4          | 1700001C19Rik |
| 16692 | 10667 | Bat4          | H2-Eb1        |
| 16692 | 13493 | Bat4          | Ring1         |
| 16849 | 1755  | Trmt1         | Ocel1         |
| 16849 | 2703  | Trmt1         | MMT00073763   |
| 16849 | 9304  | Trmt1         | Al449175      |
| 16849 | 10195 | Trmt1         | Klf1          |
| 16849 | 16617 | Trmt1         | Sh2d4a        |
| 16849 | 16849 | Trmt1         | Trmt1         |
| 16849 | 18886 | Trmt1         | Slc18a1       |
| 16881 | 19763 | MMT00031504   | Acp2          |
| 16949 | 21549 | ligp1         | Rtp4          |
| 16957 | 3208  | MMT00046108   | 4930511111Rik |
| 16957 | 19436 | MMT00046108   | Dapp1         |
| 17135 | 17135 | Mum1          | Mum1          |
| 17193 | 8791  | Npb           | Sectm1a       |
| 17193 | 17897 | Npb           | Gm1019        |
| 17389 | 1985  | Pop4          | Pepd          |
| 17389 | 3698  | Pop4          | 1600014C10Rik |
| 17396 | 14077 | Myoz3         | Trpv5         |
| 17447 | 8902  | Ctsf          | Aldh3b1       |
| 17447 | 17447 | Ctsf          | Ctsf          |
| 17463 | 9611  | Rgl1          | Ncf2          |
| 17463 | 15569 | Rgl1          | BC003331      |
| 17463 | 17463 | Rgl1          | Rgl1          |
| 17515 | 17702 | Itln1         | Ccdc40        |
| 17528 | 10189 | Gmnn          | Cage1         |
| 17528 | 11094 | Gmnn          | Slc17a3       |
| 17528 | 15698 | Gmnn          | Them2         |
| 17528 | 17528 | Gmnn          | Gmnn          |
| 17528 | 19192 | Gmnn          | Hist1h1c      |
| 17528 | 20759 | Gmnn          | Slc17a1       |
| 17528 | 23118 | Gmnn          | Ttrap         |
| 17616 | 2115  | Flt1          | Gpr12         |
| 17632 | 2599  | Lypd3         | Lsm14a        |
| 17707 | 7088  | Rshl2b        | Slc37a1       |
| 17707 | 7135  | Rshl2b        | Ezr           |
| 17707 | 7909  | Rshl2b        | Oas3          |
| 17707 | 11435 | Rshl2b        | Rnaset2a      |
| 17707 | 17707 | Rshl2b        | Rshl2b        |
| 17729 | 20077 | Prim2         | Ccdc115       |
| 17750 | 19436 | Hs6st2        | Dapp1         |
| 18140 | 8155  | Atg2b         | Mark3         |
| 18140 | 18140 | Atg2b         | Atg2b         |
| 18179 | 2011  | Dbp           | Slc2a5        |

|       |       |               |               |
|-------|-------|---------------|---------------|
| 18179 | 5804  | Dbp           | Thrsp         |
| 18179 | 9831  | Dbp           | Nedd4l        |
| 18179 | 17528 | Dbp           | Gmnn          |
| 18179 | 19671 | Dbp           | Upp2          |
| 18179 | 22630 | Dbp           | MMT00034355   |
| 18333 | 19964 | Rassf8        | Ndufa9        |
| 18333 | 20127 | Rassf8        | Ipo8          |
| 18365 | 19854 | Bcl2l12       | Kcnj14        |
| 18371 | 19725 | Sap130        | Dcp2          |
| 18373 | 3587  | Dnajb1        | MMT00041940   |
| 18373 | 5727  | Dnajb1        | Camk2g        |
| 18373 | 6021  | Dnajb1        | MMT00008784   |
| 18373 | 8670  | Dnajb1        | MMT00051613   |
| 18373 | 11043 | Dnajb1        | Hsph1         |
| 18373 | 15675 | Dnajb1        | MMT00077535   |
| 18373 | 18373 | Dnajb1        | Dnajb1        |
| 18418 | 1849  | Hspa1b        | MMT00063181   |
| 18418 | 3587  | Hspa1b        | MMT00041940   |
| 18418 | 6021  | Hspa1b        | MMT00008784   |
| 18418 | 8670  | Hspa1b        | MMT00051613   |
| 18418 | 9258  | Hspa1b        | P4ha1         |
| 18418 | 11043 | Hspa1b        | Hsph1         |
| 18418 | 15675 | Hspa1b        | MMT00077535   |
| 18418 | 20332 | Hspa1b        | Stau2         |
| 18418 | 22139 | Hspa1b        | Stip1         |
| 18462 | 11859 | Gm1060        | Poln          |
| 18462 | 12385 | Gm1060        | Mrpl33        |
| 18514 | 3139  | 4930412F15Rik | Gba2          |
| 18555 | 6157  | Sdcbp2        | MMT00041452   |
| 18555 | 13581 | Sdcbp2        | Srxn1         |
| 18592 | 18592 | Txnl4a        | Txnl4a        |
| 18619 | 11043 | 2810406K13Rik | Hsph1         |
| 18700 | 2243  | Trappc2l      | Gcsh          |
| 18709 | 18709 | Srp68         | Srp68         |
| 18726 | 18373 | D630004A14Rik | Dnajb1        |
| 18772 | 9230  | BC048355      | 1700027N10Rik |
| 18772 | 14027 | BC048355      | Rpo1-1        |
| 18772 | 18772 | BC048355      | BC048355      |
| 18772 | 20100 | BC048355      | Guca1b        |
| 18785 | 5804  | Angptl4       | Thrsp         |
| 18835 | 4833  | Dtwd1         | Synpo2        |
| 18846 | 11214 | Ikbkg         | MMT00049207   |
| 18939 | 20871 | Matn2         | Pop1          |
| 18948 | 3703  | Olfr1270      | Ggcx          |
| 18980 | 19436 | Ii7           | Dapp1         |
| 19037 | 12412 | Slc11a2       | BC004728      |
| 19115 | 1041  | Rab32         | 3110049J23Rik |
| 19115 | 2571  | Rab32         | Rmnd1         |
| 19115 | 3744  | Rab32         | Rmnd1         |
| 19115 | 18300 | Rab32         | Arg1          |
| 19115 | 19115 | Rab32         | Rab32         |

|       |       |                |               |
|-------|-------|----------------|---------------|
| 19389 | 3196  | lqcb1          | Tat           |
| 19389 | 18083 | lqcb1          | Gadd45a       |
| 19462 | 2599  | 4933439C20Rik  | Lsm14a        |
| 19462 | 6513  | 4933439C20Rik  | Qpctl         |
| 19462 | 11321 | 4933439C20Rik  | 2310014L17Rik |
| 19462 | 19462 | 4933439C20Rik  | 4933439C20Rik |
| 19502 | 16451 | Fbxo24         | 2010007H12Rik |
| 19578 | 19578 | Aox1           | Aox1          |
| 19700 | 3159  | E030011K20Rik  | Pld1          |
| 19700 | 8568  | E030011K20Rik  | Tnik          |
| 19700 | 15508 | E030011K20Rik  | 4632415L05Rik |
| 19924 | 3475  | Ubiad1         | 2610305D13Rik |
| 19924 | 3616  | Ubiad1         | Dnajc16       |
| 19924 | 4305  | Ubiad1         | Tmem51        |
| 19924 | 6830  | Ubiad1         | Rsc1a1        |
| 19924 | 12097 | Ubiad1         | 9430015G10Rik |
| 19924 | 18338 | Ubiad1         | Akr1e1        |
| 19924 | 19924 | Ubiad1         | Ubiad1        |
| 19955 | 3654  | Cbx2           | St13          |
| 19955 | 6804  | Cbx2           | Cyp2d22       |
| 19955 | 11503 | Cbx2           | Rangap1       |
| 19955 | 12468 | Cbx2           | Cyp2d13       |
| 19955 | 19216 | Cbx2           | Bik           |
| 19964 | 630   | Ndufa9         | C1s           |
| 19964 | 8194  | Ndufa9         | MMT00077789   |
| 19964 | 9417  | Ndufa9         | Cd163         |
| 19964 | 17391 | Ndufa9         | C530028O21Rik |
| 19964 | 19964 | Ndufa9         | Ndufa9        |
| 19999 | 17391 | lft122         | C530028O21Rik |
| 20037 | 14077 | Extl3          | Trpv5         |
| 20100 | 3857  | Guca1b         | 1700001C19Rik |
| 20100 | 20100 | Guca1b         | Guca1b        |
| 20147 | 12492 | Ybx1           | Ybx1          |
| 20147 | 20548 | Ybx1           | 1700041C02Rik |
| 20237 | 4833  | RP23-433P19.11 | Synpo2        |
| 20237 | 18373 | RP23-433P19.11 | Dnajb1        |
| 20238 | 327   | H2-T9          | H2-Ea         |
| 20238 | 2938  | H2-T9          | H2-T23        |
| 20490 | 19854 | Tmem143        | Kcnj14        |
| 20511 | 20511 | Decr2          | Decr2         |
| 20810 | 3753  | Mttp           | Setdb1        |
| 20810 | 22640 | Mttp           | Bud13         |
| 20890 | 3753  | Psmb4          | Setdb1        |
| 20958 | 19421 | 4933403F05Rik  | Mbd2          |
| 21142 | 250   | Gm129          | Tubb2a-ps2    |
| 21142 | 1453  | Gm129          | Gfod2         |
| 21142 | 19671 | Gm129          | Upp2          |
| 21258 | 2827  | 2010003K15Rik  | Raet1d        |
| 21258 | 14989 | 2010003K15Rik  | Map3k5        |
| 21258 | 18300 | 2010003K15Rik  | Arg1          |
| 21258 | 19115 | 2010003K15Rik  | Rab32         |

|       |       |               |               |
|-------|-------|---------------|---------------|
| 21313 | 15631 | Rhou          | Lpin1         |
| 21333 | 523   | Cirbp         | 1700040L02Rik |
| 21333 | 7731  | Cirbp         | 1500001M20Rik |
| 21333 | 14222 | Cirbp         | MMT00076410   |
| 21333 | 15713 | Cirbp         | Rbm3          |
| 21333 | 17887 | Cirbp         | Cryl1         |
| 21414 | 16613 | BC017643      | 1110031102Rik |
| 21414 | 17792 | BC017643      | Vmn2r79       |
| 21414 | 17897 | BC017643      | Gm1019        |
| 21425 | 21425 | Rab6          | Rab6          |
| 21431 | 3587  | Xbp1          | MMT00041940   |
| 21483 | 18083 | Ippk          | Gadd45a       |
| 21549 | 21549 | Rtp4          | Rtp4          |
| 21620 | 21331 | Tmem166       | Slc10a6       |
| 21903 | 3587  | Nr1d1         | MMT00041940   |
| 21903 | 6021  | Nr1d1         | MMT00008784   |
| 21903 | 15675 | Nr1d1         | MMT00077535   |
| 21903 | 22216 | Nr1d1         | Sp5           |
| 21992 | 250   | Lap3          | Tubb2a-ps2    |
| 22079 | 13140 | Tmem81        | MMT00005814   |
| 22079 | 18947 | Tmem81        | Ctse          |
| 22141 | 13156 | Rorb          | Ifit3         |
| 22141 | 18373 | Rorb          | Dnajb1        |
| 22201 | 13218 | Pard3         | C330043M08Rik |
| 22201 | 21394 | Pard3         | Cdh15         |
| 22219 | 14969 | Cyp11b1       | EG245506      |
| 22219 | 17702 | Cyp11b1       | Ccdc40        |
| 22226 | 18947 | Pm20d1        | Ctse          |
| 22297 | 15618 | Zfyve1        | Sel1l         |
| 22320 | 19763 | MMT00047284   | Acp2          |
| 22320 | 23474 | MMT00047284   | MMT00011721   |
| 22333 | 1041  | Hnrnp3        | 3110049J23Rik |
| 22337 | 3279  | Nik           | Slc46a1       |
| 22351 | 1336  | Fanca         | MMT00069537   |
| 22351 | 2243  | Fanca         | Gcsh          |
| 22351 | 15953 | Fanca         | Acsf3         |
| 22351 | 21394 | Fanca         | Cdh15         |
| 22395 | 17391 | Kcna1         | C530028O21Rik |
| 22499 | 18099 | 9030409G11Rik | Nfx1          |
| 22499 | 20045 | 9030409G11Rik | D4Wsu114e     |
| 22570 | 1867  | Phtf1         | Bcas2         |
| 22570 | 22570 | Phtf1         | Phtf1         |
| 22600 | 7731  | 2410018C20Rik | 1500001M20Rik |
| 22693 | 22693 | Trim68        | Trim68        |
| 22786 | 3496  | Mterfd3       | Slc41a2       |
| 22786 | 12055 | Mterfd3       | 1810008A18Rik |
| 22802 | 19436 | Svs2          | Dapp1         |
| 22930 | 5360  | Mro           | Cep76         |
| 22930 | 12109 | Mro           | Smad4         |
| 22930 | 18592 | Mro           | Txnl4a        |
| 22930 | 22961 | Mro           | MMT00055950   |

|       |       |               |               |
|-------|-------|---------------|---------------|
| 22984 | 6498  | Tnnt2         | MMT00016809   |
| 22984 | 9707  | Tnnt2         | Golt1a        |
| 22988 | 10978 | Hscb          | MMT00078322   |
| 22989 | 15631 | Lmcd1         | Lpin1         |
| 23005 | 6820  | 4930405A21Rik | MMT00046996   |
| 23005 | 7610  | 4930405A21Rik | Scand1        |
| 23005 | 14647 | 4930405A21Rik | Cst3          |
| 23005 | 23005 | 4930405A21Rik | 4930405A21Rik |
| 23094 | 3196  | Sap30         | Tat           |
| 23295 | 12302 | Snx11         | Cbx1          |
| 23377 | 1453  | Pdxk          | Gfod2         |
| 23482 | 19725 | Syt4          | Dcp2          |

**Table T15: AL Network Backbone**

| Adipose_Probe_ID | Liver_Probe_ID | Adipose_Gene_Symbol | Liver_Gene_Symbol  |
|------------------|----------------|---------------------|--------------------|
| 143              | 2224           | Gvin1               | Oasl2              |
| 214              | 13293          | Lrp1                | Gsta2              |
| 223              | 12910          | Trp53inp2           | 1110028A07Rik      |
| 223              | 23005          | Trp53inp2           | 4930405A21Rik      |
| 250              | 1036           | Tubb2a-ps2          | Dusp19             |
| 250              | 3393           | Tubb2a-ps2          | Snhg8              |
| 250              | 3620           | Tubb2a-ps2          | Bet1               |
| 250              | 5227           | Tubb2a-ps2          | 2310008M10Rik      |
| 250              | 16251          | Tubb2a-ps2          | G6pc               |
| 268              | 268            | Sys1                | Sys1               |
| 268              | 21909          | Sys1                | Neurl2             |
| 286              | 1755           | MMT00070509         | Ocel1              |
| 286              | 9931           | MMT00070509         | Gl25d1             |
| 301              | 1594           | AU014645            | Mrpl24             |
| 301              | 8662           | AU014645            | Brca2              |
| 327              | 327            | H2-Ea               | H2-Ea              |
| 327              | 2325           | H2-Ea               | H2-K1              |
| 327              | 13493          | H2-Ea               | Ring1              |
| 387              | 3228           | Rgs10               | Saa1               |
| 387              | 5364           | Rgs10               | Kif22              |
| 387              | 11382          | Rgs10               | Cdca3              |
| 387              | 17629          | Rgs10               | Saa2               |
| 403              | 403            | Leprot1             | Leprot1            |
| 403              | 13004          | Leprot1             | Arhgef10           |
| 403              | 16617          | Leprot1             | Sh2d4a             |
| 419              | 16613          | Foxk2               | 1110031I02Rik      |
| 419              | 17897          | Foxk2               | Gm1019             |
| 445              | 22138          | 2610029I01Rik       | Ang                |
| 451              | 3753           | Mllt11              | Setdb1             |
| 548              | 12315          | Gpr109a             | Srebf1             |
| 577              | 22303          | Rrp12               | Cdt1               |
| 607              | 3446           | Me1                 | Eno1               |
| 607              | 10554          | Me1                 | ENSMUSG00000074179 |
| 630              | 1444           | C1s                 | C1r                |
| 661              | 14498          | Siglec1             | Layn               |
| 662              | 10612          | Mid1ip1             | Slc24a6            |
| 676              | 676            | Ms4a4d              | Ms4a4d             |
| 708              | 21202          | Ophn1               | Acly               |
| 709              | 8439           | Pparg               | Slc25a33           |
| 715              | 3616           | Padi3               | Dnajc16            |
| 715              | 8610           | Padi3               | Padi4              |
| 737              | 6857           | MMT00023716         | Serinc2            |
| 737              | 8654           | MMT00023716         | Fbxl13             |
| 817              | 17660          | C130039O16Rik       | Nlrp12             |
| 830              | 250            | Socs1               | Tubb2a-ps2         |
| 830              | 719            | Socs1               | Usp2               |
| 830              | 2200           | Socs1               | BC006779           |
| 830              | 2850           | Socs1               | Slc16a6            |
| 830              | 3214           | Socs1               | Dnmt3b             |

|      |       |               |               |
|------|-------|---------------|---------------|
| 830  | 4286  | Socs1         | Ptp4a1        |
| 830  | 6177  | Socs1         | Thpo          |
| 830  | 8328  | Socs1         | Klhdc8a       |
| 830  | 11741 | Socs1         | Slc30a10      |
| 830  | 15631 | Socs1         | Lpin1         |
| 830  | 16580 | Socs1         | Tnfaip2       |
| 830  | 18250 | Socs1         | Mmp14         |
| 860  | 21824 | Psemb10       | 5830443L24Rik |
| 866  | 10189 | Zfp369        | Cage1         |
| 866  | 14343 | Zfp369        | Hnrnpa0       |
| 874  | 7159  | Aldh1a7       | 1700031F05Rik |
| 874  | 11446 | Aldh1a7       | Dock8         |
| 905  | 21214 | Fyco1         | Scd1          |
| 939  | 14017 | Daxx          | Ces5          |
| 942  | 12761 | Kcna5         | Tsc22d3       |
| 958  | 4391  | Ppp2r5e       | Zfp467        |
| 1014 | 1014  | Rtcd1         | Rtcd1         |
| 1027 | 185   | Accs          | Ap2b1         |
| 1027 | 8597  | Accs          | Papss1        |
| 1027 | 18419 | Accs          | Srprb         |
| 1074 | 22138 | Acsm3         | Ang           |
| 1079 | 5804  | Hr            | Thrsp         |
| 1101 | 22841 | Sec11a        | Cib1          |
| 1162 | 1162  | Cpsf4         | Cpsf4         |
| 1162 | 2115  | Cpsf4         | Gpr12         |
| 1254 | 5364  | Lum           | Kif22         |
| 1255 | 6370  | Grhpr         | Aqp8          |
| 1307 | 11807 | Tmem116       | Fbxo31        |
| 1336 | 1336  | MMT00069537   | MMT00069537   |
| 1371 | 1371  | 1200009I06Rik | 1200009I06Rik |
| 1371 | 7388  | 1200009I06Rik | Amn           |
| 1371 | 8155  | 1200009I06Rik | Mark3         |
| 1371 | 13988 | 1200009I06Rik | Cntnap2       |
| 1371 | 16191 | 1200009I06Rik | Klc1          |
| 1371 | 23693 | 1200009I06Rik | A530016L24Rik |
| 1424 | 719   | Dapk1         | Usp2          |
| 1424 | 1767  | Dapk1         | BC016495      |
| 1424 | 5974  | Dapk1         | Arntl         |
| 1424 | 6171  | Dapk1         | Abtb2         |
| 1424 | 12905 | Dapk1         | Nfil3         |
| 1424 | 16060 | Dapk1         | Gys2          |
| 1424 | 16690 | Dapk1         | Tjp3          |
| 1444 | 630   | C1r           | C1s           |
| 1444 | 1444  | C1r           | C1r           |
| 1444 | 19964 | C1r           | Ndufa9        |
| 1466 | 524   | Ubap2l        | Hsd3b2        |
| 1466 | 1466  | Ubap2l        | Ubap2l        |
| 1466 | 1867  | Ubap2l        | Bcas2         |
| 1466 | 6206  | Ubap2l        | MMT00063701   |
| 1466 | 10521 | Ubap2l        | Ttf2          |
| 1466 | 11611 | Ubap2l        | S100a13       |



|      |       |               |                    |
|------|-------|---------------|--------------------|
| 1466 | 22570 | Ubap2l        | Phtf1              |
| 1476 | 11462 | 2610020H08Rik | Gpam               |
| 1476 | 12315 | 2610020H08Rik | Srebf1             |
| 1515 | 15531 | Med20         | Prickle4           |
| 1536 | 12219 | Hopx          | Cyb5b              |
| 1554 | 12367 | Rph3al        | MMT00072365        |
| 1554 | 13423 | Rph3al        | ENSMUSG00000053749 |
| 1554 | 18790 | Rph3al        | Car3               |
| 1582 | 5804  | Srr           | Thrsp              |
| 1602 | 21214 | Mina          | Scd1               |
| 1603 | 1603  | Lrwd1         | Lrwd1              |
| 1620 | 5364  | Htra1         | Kif22              |
| 1635 | 11808 | 8430427H17Rik | Pck1               |
| 1654 | 13810 | Dhx58         | 1110036O03Rik      |
| 1654 | 16182 | Dhx58         | Oasl1              |
| 1660 | 1660  | Zfp33b        | Zfp33b             |
| 1711 | 662   | Grhl1         | Mid1ip1            |
| 1711 | 12315 | Grhl1         | Srebf1             |
| 1711 | 18785 | Grhl1         | Angptl4            |
| 1755 | 1755  | Ocel1         | Ocel1              |
| 1755 | 15455 | Ocel1         | Lsm4               |
| 1755 | 16617 | Ocel1         | Sh2d4a             |
| 1755 | 16858 | Ocel1         | Tmem38a            |
| 1755 | 18886 | Ocel1         | Slc18a1            |
| 1758 | 15059 | Cadps2        | Mogat1             |
| 1759 | 18785 | Rgs3          | Angptl4            |
| 1766 | 5364  | Srpx2         | Kif22              |
| 1766 | 20967 | Srpx2         | Fabp2              |
| 1790 | 17525 | Hic1          | Ctgf               |
| 1797 | 7238  | Batf2         | Pycard             |
| 1797 | 23208 | Batf2         | Hck                |
| 1855 | 7954  | Prss12        | Ccdc12             |
| 1867 | 1867  | Bcas2         | Bcas2              |
| 1930 | 5934  | Ccdc109b      | S100a10            |
| 1936 | 11446 | Cbwd1         | Dock8              |
| 1960 | 3857  | Ubr2          | 1700001C19Rik      |
| 1960 | 20100 | Ubr2          | Guca1b             |
| 2023 | 22961 | MMT00072215   | MMT00055950        |
| 2110 | 6211  | Gtf2ird1      | Arhgap24           |
| 2126 | 607   | Dgat2         | Me1                |
| 2126 | 20019 | Dgat2         | Qdpr               |
| 2126 | 21202 | Dgat2         | Acly               |
| 2200 | 2224  | BC006779      | Oasl2              |
| 2223 | 19671 | Slc28a2       | Upp2               |
| 2224 | 1533  | Oasl2         | BC013712           |
| 2224 | 2200  | Oasl2         | BC006779           |
| 2224 | 2224  | Oasl2         | Oasl2              |
| 2224 | 3659  | Oasl2         | EG236451           |
| 2224 | 4508  | Oasl2         | Ifit1              |
| 2224 | 5044  | Oasl2         | Ifi35              |
| 2224 | 6587  | Oasl2         | Irf9               |

|      |       |               |                    |
|------|-------|---------------|--------------------|
| 2224 | 8800  | Oasl2         | Rnf213             |
| 2224 | 9847  | Oasl2         | Ifi27              |
| 2224 | 11009 | Oasl2         | MMT00008885        |
| 2224 | 11265 | Oasl2         | Irgm               |
| 2224 | 11701 | Oasl2         | Oas1c              |
| 2224 | 12600 | Oasl2         | Ifi204             |
| 2224 | 12969 | Oasl2         | Xaf1               |
| 2224 | 13156 | Oasl2         | Ifit3              |
| 2224 | 13309 | Oasl2         | Tgtp               |
| 2224 | 13527 | Oasl2         | Ctss               |
| 2224 | 13780 | Oasl2         | Pilra              |
| 2224 | 14506 | Oasl2         | Slc15a3            |
| 2224 | 14880 | Oasl2         | Ms4a4c             |
| 2224 | 16182 | Oasl2         | Oasl1              |
| 2224 | 21549 | Oasl2         | Rtp4               |
| 2224 | 21824 | Oasl2         | 5830443L24Rik      |
| 2224 | 22037 | Oasl2         | Oas1g              |
| 2224 | 23208 | Oasl2         | Hck                |
| 2262 | 5804  | Papss2        | Thrsp              |
| 2308 | 11859 | A930005I04Rik | Poln               |
| 2308 | 12385 | A930005I04Rik | Mrpl33             |
| 2322 | 18201 | Tuba4a        | MMT00060232        |
| 2362 | 3196  | Mkks          | Tat                |
| 2370 | 8816  | 8430408G22Rik | Nfkbia             |
| 2372 | 6191  | Stx12         | Ddost              |
| 2485 | 13988 | Adck1         | Cntnap2            |
| 2571 | 2571  | Rmnd1         | Rmnd1              |
| 2571 | 3744  | Rmnd1         | Rmnd1              |
| 2578 | 17818 | Csf2rb2       | Chchd4             |
| 2578 | 18147 | Csf2rb2       | Nhlrc2             |
| 2599 | 1985  | Lsm14a        | Pepd               |
| 2599 | 2388  | Lsm14a        | Dot1l              |
| 2599 | 2599  | Lsm14a        | Lsm14a             |
| 2599 | 4697  | Lsm14a        | Cyp2a12            |
| 2599 | 5352  | Lsm14a        | Pdcd2l             |
| 2599 | 6513  | Lsm14a        | Qpctl              |
| 2599 | 11465 | Lsm14a        | Eif3k              |
| 2599 | 12004 | Lsm14a        | Lgals6             |
| 2599 | 19462 | Lsm14a        | 4933439C20Rik      |
| 2625 | 19723 | MMT00077446   | Pfkfb1             |
| 2721 | 6370  | Inmt          | Aqp8               |
| 2727 | 10554 | Stc2          | ENSMUSG00000074179 |
| 2727 | 18549 | Stc2          | Robo1              |
| 2743 | 2743  | Tcf3          | Tcf3               |
| 2743 | 3703  | Tcf3          | Ggcx               |
| 2743 | 15708 | Tcf3          | Retsat             |
| 2752 | 2752  | Fcgr1         | Fcgr1              |
| 2793 | 5989  | MMT00005644   | 2310042D19Rik      |
| 2794 | 250   | Map3k6        | Tubb2a-ps2         |
| 2794 | 719   | Map3k6        | Usp2               |
| 2794 | 2794  | Map3k6        | Map3k6             |

|      |       |               |               |
|------|-------|---------------|---------------|
| 2794 | 4235  | Map3k6        | Pfkfb3        |
| 2794 | 4286  | Map3k6        | Ptp4a1        |
| 2794 | 4392  | Map3k6        | 1810055G02Rik |
| 2794 | 5849  | Map3k6        | 2310031A18Rik |
| 2794 | 6211  | Map3k6        | Arhgap24      |
| 2794 | 6386  | Map3k6        | Por           |
| 2794 | 6675  | Map3k6        | Sfrs4         |
| 2794 | 6756  | Map3k6        | Sds           |
| 2794 | 8399  | Map3k6        | Herpud1       |
| 2794 | 8641  | Map3k6        | Slc7a2        |
| 2794 | 11129 | Map3k6        | Ankhd1        |
| 2794 | 11807 | Map3k6        | Fbxo31        |
| 2794 | 11808 | Map3k6        | Pck1          |
| 2794 | 12799 | Map3k6        | Spon2         |
| 2794 | 14806 | Map3k6        | Ccdc45        |
| 2794 | 14989 | Map3k6        | Map3k5        |
| 2794 | 15008 | Map3k6        | Chrdl2        |
| 2794 | 15021 | Map3k6        | Ppargc1a      |
| 2794 | 15624 | Map3k6        | Crcp          |
| 2794 | 15631 | Map3k6        | Lpin1         |
| 2794 | 15882 | Map3k6        | AA986860      |
| 2794 | 16176 | Map3k6        | St3gal5       |
| 2794 | 16580 | Map3k6        | Tnfaip2       |
| 2794 | 16647 | Map3k6        | D16H22S680E   |
| 2794 | 16690 | Map3k6        | Tjp3          |
| 2794 | 18027 | Map3k6        | 5730403B10Rik |
| 2794 | 18314 | Map3k6        | 4631416L12Rik |
| 2794 | 18827 | Map3k6        | Oprs1         |
| 2794 | 19466 | Map3k6        | Pptc7         |
| 2794 | 19757 | Map3k6        | Fkbp5         |
| 2794 | 21142 | Map3k6        | Gm129         |
| 2794 | 21331 | Map3k6        | Slc10a6       |
| 2794 | 22936 | Map3k6        | Rhobtb1       |
| 2830 | 2850  | 4632417K18Rik | Slc16a6       |
| 2881 | 250   | Hlf           | Tubb2a-ps2    |
| 2881 | 407   | Hlf           | Serpina6      |
| 2881 | 437   | Hlf           | Ndrp1         |
| 2881 | 604   | Hlf           | Ppp1r15b      |
| 2881 | 719   | Hlf           | Usp2          |
| 2881 | 2399  | Hlf           | MMT00060167   |
| 2881 | 2636  | Hlf           | Tars          |
| 2881 | 2850  | Hlf           | Slc16a6       |
| 2881 | 2963  | Hlf           | Tmem64        |
| 2881 | 3214  | Hlf           | Dnmt3b        |
| 2881 | 5804  | Hlf           | Thrsp         |
| 2881 | 5849  | Hlf           | 2310031A18Rik |
| 2881 | 5974  | Hlf           | Arntl         |
| 2881 | 6386  | Hlf           | Por           |
| 2881 | 6529  | Hlf           | Apeh          |
| 2881 | 6657  | Hlf           | Irf6          |
| 2881 | 7414  | Hlf           | Clpx          |

|      |       |               |               |
|------|-------|---------------|---------------|
| 2881 | 10775 | Hlf           | Slc16a1       |
| 2881 | 11741 | Hlf           | Slc30a10      |
| 2881 | 15049 | Hlf           | Rnf125        |
| 2881 | 15709 | Hlf           | Tceal1        |
| 2881 | 16772 | Hlf           | MMT00010554   |
| 2881 | 18069 | Hlf           | Gpt           |
| 2881 | 18179 | Hlf           | Dbp           |
| 2881 | 18438 | Hlf           | Map3k7ip2     |
| 2881 | 19701 | Hlf           | 9930021J17Rik |
| 2881 | 19790 | Hlf           | Polg2         |
| 2881 | 20068 | Hlf           | 2610204M08Rik |
| 2881 | 20266 | Hlf           | Insig2        |
| 2881 | 21142 | Hlf           | Gm129         |
| 2928 | 6109  | Igf1          | Hsd17b2       |
| 2938 | 327   | H2-T23        | H2-Ea         |
| 2938 | 2325  | H2-T23        | H2-K1         |
| 2938 | 2938  | H2-T23        | H2-T23        |
| 2938 | 3857  | H2-T23        | 1700001C19Rik |
| 2945 | 8341  | MMT00005190   | MMT00017270   |
| 2945 | 19064 | MMT00005190   | MMT00004867   |
| 2973 | 11129 | 4-Sep         | Ankhd1        |
| 2980 | 2980  | Slc37a2       | Slc37a2       |
| 2980 | 5364  | Slc37a2       | Kif22         |
| 2980 | 20468 | Slc37a2       | Spa17         |
| 3022 | 5884  | Als2cr12      | Gstm2         |
| 3022 | 18201 | Als2cr12      | MMT00060232   |
| 3029 | 8654  | Ybx1          | Fbxl13        |
| 3040 | 4286  | Bcl3          | Ptp4a1        |
| 3046 | 17862 | 6430573F11Rik | Fbxo21        |
| 3111 | 7066  | Ddefl1        | Agtr1b        |
| 3111 | 15021 | Ddefl1        | Ppargc1a      |
| 3111 | 18785 | Ddefl1        | Angptl4       |
| 3162 | 6044  | Lep           | Sucnr1        |
| 3162 | 17090 | Lep           | Lass2         |
| 3250 | 8444  | Olfm1         | Rdh16         |
| 3250 | 20058 | Olfm1         | Dnaic1        |
| 3250 | 21214 | Olfm1         | Scd1          |
| 3253 | 14647 | Tbc1d20       | Cst3          |
| 3297 | 4351  | Trappc4       | Plxnb1        |
| 3297 | 20058 | Trappc4       | Dnaic1        |
| 3314 | 524   | Wars2         | Hsd3b2        |
| 3314 | 1867  | Wars2         | Bcas2         |
| 3314 | 3753  | Wars2         | Setdb1        |
| 3314 | 11611 | Wars2         | S100a13       |
| 3315 | 20967 | Serf2         | Fabp2         |
| 3357 | 2636  | Rev1          | Tars          |
| 3357 | 6163  | Rev1          | Nudt13        |
| 3432 | 15508 | EG330963      | 4632415L05Rik |
| 3432 | 18790 | EG330963      | Car3          |
| 3475 | 3475  | 2610305D13Rik | 2610305D13Rik |
| 3475 | 18338 | 2610305D13Rik | Akr1e1        |

|      |       |               |                    |
|------|-------|---------------|--------------------|
| 3535 | 3535  | S100a9        | S100a9             |
| 3587 | 3587  | MMT00041940   | MMT00041940        |
| 3654 | 3411  | St13          | Rabl2a             |
| 3654 | 3654  | St13          | St13               |
| 3654 | 6804  | St13          | Cyp2d22            |
| 3654 | 6974  | St13          | Tmem65             |
| 3654 | 8653  | St13          | AW124722           |
| 3654 | 11503 | St13          | Rangap1            |
| 3654 | 12468 | St13          | Cyp2d13            |
| 3654 | 17147 | St13          | Ttll12             |
| 3654 | 19216 | St13          | Bik                |
| 3659 | 1533  | EG236451      | BC013712           |
| 3659 | 2200  | EG236451      | BC006779           |
| 3659 | 2224  | EG236451      | Oasl2              |
| 3659 | 7238  | EG236451      | Pycard             |
| 3659 | 8800  | EG236451      | Rnf213             |
| 3659 | 9847  | EG236451      | Ifi27              |
| 3659 | 12398 | EG236451      | Ifi44              |
| 3659 | 13309 | EG236451      | Tgtp               |
| 3659 | 14258 | EG236451      | Ifi47              |
| 3659 | 14880 | EG236451      | Ms4a4c             |
| 3659 | 16182 | EG236451      | Oasl1              |
| 3659 | 18174 | EG236451      | Stat2              |
| 3659 | 21549 | EG236451      | Rtp4               |
| 3659 | 21824 | EG236451      | 5830443L24Rik      |
| 3659 | 23208 | EG236451      | Hck                |
| 3665 | 1156  | Zfp61         | Rbj                |
| 3683 | 2224  | Oas2          | Oasl2              |
| 3683 | 5002  | Oas2          | Ifi202b            |
| 3703 | 3703  | Ggcx          | Ggcx               |
| 3744 | 2571  | Rmnd1         | Rmnd1              |
| 3753 | 524   | Setdb1        | Hsd3b2             |
| 3753 | 3753  | Setdb1        | Setdb1             |
| 3753 | 11121 | Setdb1        | Mtmr11             |
| 3753 | 11611 | Setdb1        | S100a13            |
| 3753 | 12367 | Setdb1        | MMT00072365        |
| 3753 | 16679 | Setdb1        | Ctsk               |
| 3753 | 18754 | Setdb1        | Rbm8a              |
| 3753 | 20661 | Setdb1        | Tuft1              |
| 3753 | 21814 | Setdb1        | Accn5              |
| 3753 | 22202 | Setdb1        | OTTMUSG00000021274 |
| 3799 | 14017 | Serpinh1      | Ces5               |
| 3799 | 18201 | Serpinh1      | MMT00060232        |
| 3807 | 21214 | Vmn2r83       | Scd1               |
| 3860 | 10612 | Mlx           | Slc24a6            |
| 3876 | 3907  | Zeb2          | Dkk3               |
| 3876 | 14989 | Zeb2          | Map3k5             |
| 3901 | 14825 | F730047E07Rik | Ube2h              |
| 3901 | 21947 | F730047E07Rik | Cdca8              |
| 3921 | 6191  | 2300002D11Rik | Ddost              |
| 3923 | 14472 | D9Ertd402e    | Ahcy               |

|      |       |               |               |
|------|-------|---------------|---------------|
| 3923 | 14656 | D9Ertd402e    | Grip2         |
| 4084 | 15631 | Asah3l        | Lpin1         |
| 4114 | 2224  | Parp12        | Oasl2         |
| 4188 | 23183 | Sult1a1       | Nnmt          |
| 4195 | 6231  | Csrp2bp       | 9030622O22Rik |
| 4195 | 19560 | Csrp2bp       | Trmt6         |
| 4286 | 7492  | Ptp4a1        | Adfp          |
| 4305 | 2533  | Tmem51        | Arhgef19      |
| 4305 | 16690 | Tmem51        | Tjp3          |
| 4306 | 2348  | Cpeb1         | Irak1         |
| 4306 | 18438 | Cpeb1         | Map3k7ip2     |
| 4359 | 21214 | Tmem208       | Scd1          |
| 4369 | 18827 | Acot4         | Oprs1         |
| 4391 | 6816  | Zfp467        | Slc46a3       |
| 4391 | 22561 | Zfp467        | Whdc1         |
| 4404 | 4404  | Commd5        | Commd5        |
| 4426 | 143   | ligp2         | Gvin1         |
| 4426 | 1533  | ligp2         | BC013712      |
| 4426 | 2224  | ligp2         | Oasl2         |
| 4426 | 3847  | ligp2         | Tdrd7         |
| 4426 | 7238  | ligp2         | Pycard        |
| 4426 | 8791  | ligp2         | Sectm1a       |
| 4426 | 9847  | ligp2         | Ifi27         |
| 4426 | 16147 | ligp2         | Tlr2          |
| 4426 | 21549 | ligp2         | Rtp4          |
| 4426 | 21824 | ligp2         | 5830443L24Rik |
| 4426 | 23208 | ligp2         | Hck           |
| 4454 | 2794  | BC055107      | Map3k6        |
| 4454 | 6490  | BC055107      | Il1r1         |
| 4454 | 11129 | BC055107      | Ankhd1        |
| 4454 | 15631 | BC055107      | Lpin1         |
| 4454 | 18785 | BC055107      | Angptl4       |
| 4493 | 8632  | Ptgir         | Igfbp1        |
| 4508 | 1533  | Ifit1         | BC013712      |
| 4508 | 2224  | Ifit1         | Oasl2         |
| 4508 | 2550  | Ifit1         | MMT00036681   |
| 4508 | 6824  | Ifit1         | Irf7          |
| 4508 | 9847  | Ifit1         | Ifi27         |
| 4508 | 16182 | Ifit1         | Oasl1         |
| 4508 | 21549 | Ifit1         | Rtp4          |
| 4626 | 6157  | 2310046K01Rik | MMT00041452   |
| 4626 | 13581 | 2310046K01Rik | Srxn1         |
| 4674 | 4056  | Cxcl12        | Tnfaip8l1     |
| 4695 | 327   | D330027H18Rik | H2-Ea         |
| 4708 | 7590  | Traf3ip2      | Ankrd40       |
| 4708 | 7944  | Traf3ip2      | A1132487      |
| 4708 | 17530 | Traf3ip2      | MMT00041792   |
| 4794 | 5766  | Gsdmd         | 5033414D02Rik |
| 4868 | 15631 | Mertk         | Lpin1         |
| 4901 | 12730 | MMT00073557   | 9130019O22Rik |
| 4901 | 22138 | MMT00073557   | Ang           |

|      |       |                    |                    |
|------|-------|--------------------|--------------------|
| 4938 | 4938  | Mccc2              | Mccc2              |
| 4959 | 20058 | Optn               | Dnaic1             |
| 5014 | 8341  | MMT00017503        | MMT00017270        |
| 5014 | 19064 | MMT00017503        | MMT00004867        |
| 5068 | 15631 | Afap1l2            | Lpin1              |
| 5068 | 20803 | Afap1l2            | Tmem50a            |
| 5113 | 11462 | Nxn1               | Gpam               |
| 5113 | 14870 | Nxn1               | Capn2              |
| 5270 | 16712 | Rnf8               | Pnrc1              |
| 5306 | 8328  | Ywhag              | Klhdc8a            |
| 5352 | 2599  | Pdcd2l             | Lsm14a             |
| 5352 | 5352  | Pdcd2l             | Pdcd2l             |
| 5352 | 6513  | Pdcd2l             | Qpctl              |
| 5357 | 15844 | MMT00021917        | Klhdc9             |
| 5357 | 16361 | MMT00021917        | Olf703             |
| 5357 | 19520 | MMT00021917        | Uck2               |
| 5452 | 607   | Mogat2             | Me1                |
| 5452 | 7602  | Mogat2             | Pcca               |
| 5452 | 8815  | Mogat2             | Mx1                |
| 5452 | 18201 | Mogat2             | MMT00060232        |
| 5452 | 21214 | Mogat2             | Scd1               |
| 5452 | 21575 | Mogat2             | Cyp2c55            |
| 5453 | 1129  | Odf3l1             | Gsta4              |
| 5453 | 6420  | Odf3l1             | Mipep              |
| 5453 | 10554 | Odf3l1             | ENSMUSG00000074179 |
| 5453 | 13293 | Odf3l1             | Gsta2              |
| 5453 | 20058 | Odf3l1             | Dnaic1             |
| 5453 | 21214 | Odf3l1             | Scd1               |
| 5453 | 21727 | Odf3l1             | Khk                |
| 5482 | 327   | Cdsn               | H2-Ea              |
| 5482 | 2938  | Cdsn               | H2-T23             |
| 5482 | 10667 | Cdsn               | H2-Eb1             |
| 5482 | 13493 | Cdsn               | Ring1              |
| 5488 | 5488  | C920009B18Rik      | C920009B18Rik      |
| 5508 | 22570 | Lrig2              | Phtf1              |
| 5511 | 9077  | BC055004           | Cnpy4              |
| 5511 | 16451 | BC055004           | 2010007H12Rik      |
| 5511 | 19502 | BC055004           | Fbxo24             |
| 5639 | 5639  | Gdpd3              | Gdpd3              |
| 5639 | 13206 | Gdpd3              | Qprt               |
| 5681 | 22961 | Mbd1               | MMT00055950        |
| 5686 | 12799 | Cys1               | Spon2              |
| 5715 | 23183 | ENSMUSG00000052976 | Nnmt               |
| 5806 | 760   | Prrx2              | Akr1c19            |
| 5806 | 2639  | Prrx2              | Abhd2              |
| 5806 | 5364  | Prrx2              | Kif22              |
| 5806 | 6085  | Prrx2              | MMT00007454        |
| 5806 | 13431 | Prrx2              | MMT00038058        |
| 5814 | 5934  | Nrbp2              | S100a10            |
| 5845 | 13309 | Il18bp             | Tgtp               |
| 5884 | 524   | Gstm2              | Hsd3b2             |

|      |       |        |               |
|------|-------|--------|---------------|
| 5884 | 7519  | Gstm2  | Gstm1         |
| 5884 | 10521 | Gstm2  | Ttf2          |
| 5889 | 337   | Errfi1 | Rasgef1b      |
| 5889 | 15826 | Errfi1 | Arl4d         |
| 5930 | 4454  | Mst1r  | BC055107      |
| 5965 | 1041  | Pbld   | 3110049J23Rik |
| 5974 | 250   | Arntl  | Tubb2a-ps2    |
| 5974 | 402   | Arntl  | Timp3         |
| 5974 | 407   | Arntl  | Serpina6      |
| 5974 | 415   | Arntl  | Ypel2         |
| 5974 | 437   | Arntl  | Ndrp1         |
| 5974 | 609   | Arntl  | MMT00060868   |
| 5974 | 719   | Arntl  | Usp2          |
| 5974 | 1310  | Arntl  | Cabc1         |
| 5974 | 1453  | Arntl  | Gfod2         |
| 5974 | 1646  | Arntl  | Slc15a4       |
| 5974 | 1655  | Arntl  | Mgrn1         |
| 5974 | 1767  | Arntl  | BC016495      |
| 5974 | 2011  | Arntl  | Slc2a5        |
| 5974 | 2399  | Arntl  | MMT00060167   |
| 5974 | 2636  | Arntl  | Tars          |
| 5974 | 2766  | Arntl  | Elp4          |
| 5974 | 2829  | Arntl  | Lrfr3         |
| 5974 | 2850  | Arntl  | Slc16a6       |
| 5974 | 3214  | Arntl  | Dnmt3b        |
| 5974 | 3410  | Arntl  | Paqr9         |
| 5974 | 3502  | Arntl  | Gde1          |
| 5974 | 3804  | Arntl  | MMT00015534   |
| 5974 | 4286  | Arntl  | Ptp4a1        |
| 5974 | 4298  | Arntl  | St3gal1       |
| 5974 | 4534  | Arntl  | Ndel1         |
| 5974 | 5574  | Arntl  | Hsd3b7        |
| 5974 | 5802  | Arntl  | Mad2l2        |
| 5974 | 5804  | Arntl  | Thrsp         |
| 5974 | 5849  | Arntl  | 2310031A18Rik |
| 5974 | 5934  | Arntl  | S100a10       |
| 5974 | 5974  | Arntl  | Arntl         |
| 5974 | 6370  | Arntl  | Aqp8          |
| 5974 | 6372  | Arntl  | 1110021L09Rik |
| 5974 | 6386  | Arntl  | Por           |
| 5974 | 6771  | Arntl  | Insc          |
| 5974 | 7414  | Arntl  | Clpx          |
| 5974 | 7619  | Arntl  | Pik3ip1       |
| 5974 | 7862  | Arntl  | Cpsf4l        |
| 5974 | 7973  | Arntl  | Lgals9        |
| 5974 | 8054  | Arntl  | Smarca2       |
| 5974 | 8328  | Arntl  | Klhdc8a       |
| 5974 | 8399  | Arntl  | Herpud1       |
| 5974 | 9158  | Arntl  | Pde9a         |
| 5974 | 9495  | Arntl  | Srms          |
| 5974 | 9910  | Arntl  | EG666644      |



|      |       |               |               |
|------|-------|---------------|---------------|
| 5974 | 10166 | Arntl         | Rhbdd2        |
| 5974 | 10486 | Arntl         | 1300002K09Rik |
| 5974 | 11075 | Arntl         | Xrcc6bp1      |
| 5974 | 11129 | Arntl         | Ankhd1        |
| 5974 | 11633 | Arntl         | Ier3          |
| 5974 | 11741 | Arntl         | Slc30a10      |
| 5974 | 11807 | Arntl         | Fbxo31        |
| 5974 | 12204 | Arntl         | Ankmy2        |
| 5974 | 12343 | Arntl         | Atf5          |
| 5974 | 12420 | Arntl         | Klhl21        |
| 5974 | 12433 | Arntl         | 5033413D22Rik |
| 5974 | 12565 | Arntl         | Grem2         |
| 5974 | 12799 | Arntl         | Spon2         |
| 5974 | 12904 | Arntl         | MMT00040704   |
| 5974 | 12905 | Arntl         | Nfil3         |
| 5974 | 12941 | Arntl         | Elov5         |
| 5974 | 12982 | Arntl         | Cars          |
| 5974 | 14431 | Arntl         | Piwil1        |
| 5974 | 14442 | Arntl         | Ethe1         |
| 5974 | 15631 | Arntl         | Lpin1         |
| 5974 | 15709 | Arntl         | Tceal1        |
| 5974 | 16060 | Arntl         | Gys2          |
| 5974 | 16176 | Arntl         | St3gal5       |
| 5974 | 16510 | Arntl         | Tspyl4        |
| 5974 | 16580 | Arntl         | Tnfaip2       |
| 5974 | 16690 | Arntl         | Tjp3          |
| 5974 | 16712 | Arntl         | Pnrc1         |
| 5974 | 16851 | Arntl         | Slc34a2       |
| 5974 | 18147 | Arntl         | Nhlrc2        |
| 5974 | 18179 | Arntl         | Dbp           |
| 5974 | 18286 | Arntl         | Slc41a3       |
| 5974 | 18438 | Arntl         | Map3k7ip2     |
| 5974 | 18455 | Arntl         | Mtnr1a        |
| 5974 | 18706 | Arntl         | Lect1         |
| 5974 | 18827 | Arntl         | Oprs1         |
| 5974 | 19234 | Arntl         | Nrg4          |
| 5974 | 19671 | Arntl         | Upp2          |
| 5974 | 19790 | Arntl         | Polg2         |
| 5974 | 20745 | Arntl         | Sord          |
| 5974 | 21142 | Arntl         | Gm129         |
| 5974 | 21251 | Arntl         | Cpt1a         |
| 5974 | 21733 | Arntl         | Rhebl1        |
| 5974 | 21811 | Arntl         | Ak3l1         |
| 5974 | 22290 | Arntl         | Tubb2a        |
| 5974 | 22630 | Arntl         | MMT00034355   |
| 5974 | 23437 | Arntl         | Efh2          |
| 5976 | 21692 | Col6a3        | MMT00013924   |
| 5983 | 5364  | Pcolce2       | Kif22         |
| 5983 | 6030  | Pcolce2       | As3mt         |
| 5989 | 2793  | 2310042D19Rik | MMT00005644   |
| 6019 | 337   | Gdap10        | Rasgef1b      |

|      |       |               |               |
|------|-------|---------------|---------------|
| 6021 | 3587  | MMT00008784   | MMT00041940   |
| 6021 | 9258  | MMT00008784   | P4ha1         |
| 6021 | 11043 | MMT00008784   | Hsph1         |
| 6021 | 15675 | MMT00008784   | MMT00077535   |
| 6028 | 17862 | Alas1         | Fbxo21        |
| 6059 | 6059  | Dsn1          | Dsn1          |
| 6059 | 14647 | Dsn1          | Cst3          |
| 6059 | 23005 | Dsn1          | 4930405A21Rik |
| 6060 | 17135 | Tle6          | Mum1          |
| 6092 | 5804  | Phlda3        | Thrsp         |
| 6092 | 6816  | Phlda3        | Slc46a3       |
| 6092 | 11576 | Phlda3        | Gm1381        |
| 6092 | 14100 | Phlda3        | Ccnk          |
| 6116 | 5100  | Pcgf5         | Pebp1         |
| 6116 | 10978 | Pcgf5         | MMT00078322   |
| 6116 | 15908 | Pcgf5         | Pebp1         |
| 6191 | 3475  | Ddost         | 2610305D13Rik |
| 6191 | 6191  | Ddost         | Ddost         |
| 6191 | 6857  | Ddost         | Serinc2       |
| 6211 | 4056  | Arhgap24      | Tnfaip81      |
| 6211 | 7492  | Arhgap24      | Adfp          |
| 6213 | 12910 | Ccl2          | 1110028A07Rik |
| 6213 | 18042 | Ccl2          | Aph1c         |
| 6330 | 1660  | Dgkq          | Zfp33b        |
| 6330 | 5100  | Dgkq          | Pebp1         |
| 6330 | 6330  | Dgkq          | Dgkq          |
| 6330 | 10978 | Dgkq          | MMT00078322   |
| 6330 | 15908 | Dgkq          | Pebp1         |
| 6343 | 2370  | Slc20a1       | 8430408G22Rik |
| 6343 | 12315 | Slc20a1       | Srebf1        |
| 6360 | 13493 | D17H6S56E-3   | Ring1         |
| 6372 | 5488  | 1110021L09Rik | C920009B18Rik |
| 6372 | 6372  | 1110021L09Rik | 1110021L09Rik |
| 6376 | 6376  | Nle1          | Nle1          |
| 6376 | 10539 | Nle1          | Unc45b        |
| 6383 | 5845  | Gbp2          | Il18bp        |
| 6476 | 1600  | Sntg2         | Csrp1         |
| 6476 | 15205 | Sntg2         | MMT00030262   |
| 6498 | 6498  | MMT00016809   | MMT00016809   |
| 6498 | 6648  | MMT00016809   | Cenpl         |
| 6498 | 15844 | MMT00016809   | Klhdc9        |
| 6513 | 2599  | Qpctl         | Lsm14a        |
| 6513 | 11321 | Qpctl         | 2310014L17Rik |
| 6542 | 3170  | Epor          | Mcart1        |
| 6564 | 337   | Cebpd         | Rasgef1b      |
| 6564 | 6564  | Cebpd         | Cebpd         |
| 6564 | 7315  | Cebpd         | EG624219      |
| 6564 | 9745  | Cebpd         | Gadd45g       |
| 6564 | 17525 | Cebpd         | Ctgf          |
| 6576 | 13309 | Sifn2         | Tgtp          |
| 6581 | 12315 | Cdc42ep1      | Srebf1        |

|      |       |               |               |
|------|-------|---------------|---------------|
| 6587 | 6587  | Irf9          | Irf9          |
| 6759 | 6193  | Sqle          | Lactb2        |
| 6760 | 7753  | 2810428115Rik | Gfm1          |
| 6765 | 2932  | Ldhb          | Slco1a1       |
| 6765 | 6765  | Ldhb          | Ldhb          |
| 6765 | 14557 | Ldhb          | Pyroxd1       |
| 6765 | 20127 | Ldhb          | Ipo8          |
| 6768 | 1627  | Plekhf2       | 2310030N02Rik |
| 6768 | 6768  | Plekhf2       | Plekhf2       |
| 6769 | 18418 | Banp          | Hspa1b        |
| 6824 | 1533  | Irf7          | BC013712      |
| 6824 | 2224  | Irf7          | Oasl2         |
| 6824 | 9847  | Irf7          | Ifi27         |
| 6824 | 21549 | Irf7          | Rtp4          |
| 6888 | 8807  | Cxcl9         | Ankrd56       |
| 6910 | 8800  | Ly6c2         | Rnf213        |
| 6918 | 10612 | Cog8          | Slc24a6       |
| 6931 | 20871 | Hrsp12        | Pop1          |
| 6994 | 4286  | Glul          | Ptp4a1        |
| 6994 | 7954  | Glul          | Ccdc12        |
| 6994 | 8965  | Glul          | Ahcy          |
| 6994 | 11129 | Glul          | Ankhd1        |
| 6994 | 14472 | Glul          | Ahcy          |
| 6994 | 15320 | Glul          | MMT00017479   |
| 6994 | 23180 | Glul          | Sult1d1       |
| 7069 | 1533  | Ube1l         | BC013712      |
| 7069 | 2200  | Ube1l         | BC006779      |
| 7069 | 2224  | Ube1l         | Oasl2         |
| 7069 | 5766  | Ube1l         | 5033414D02Rik |
| 7069 | 9847  | Ube1l         | Ifi27         |
| 7069 | 9920  | Ube1l         | Syk           |
| 7069 | 10393 | Ube1l         | Slc7a8        |
| 7069 | 15749 | Ube1l         | Cd22          |
| 7069 | 19794 | Ube1l         | Rgs2          |
| 7088 | 327   | Slc37a1       | H2-Ea         |
| 7088 | 2938  | Slc37a1       | H2-T23        |
| 7088 | 7088  | Slc37a1       | Slc37a1       |
| 7088 | 8750  | Slc37a1       | 1700010I14Rik |
| 7088 | 9158  | Slc37a1       | Pde9a         |
| 7088 | 10667 | Slc37a1       | H2-Eb1        |
| 7088 | 13493 | Slc37a1       | Ring1         |
| 7088 | 18906 | Slc37a1       | Zfand3        |
| 7088 | 20238 | Slc37a1       | H2-T9         |
| 7088 | 22822 | Slc37a1       | MMT00013433   |
| 7100 | 11503 | Tomm22        | Rangap1       |
| 7105 | 9847  | Plac8         | Ifi27         |
| 7116 | 2115  | Katnal1       | Gpr12         |
| 7120 | 9745  | Dusp1         | Gadd45g       |
| 7136 | 7136  | Id3           | Id3           |
| 7136 | 8554  | Id3           | Letm2         |
| 7136 | 8632  | Id3           | Igfbp1        |

|      |       |               |               |
|------|-------|---------------|---------------|
| 7136 | 16517 | Id3           | D4Wsu53e      |
| 7136 | 17525 | Id3           | Ctgf          |
| 7136 | 22216 | Id3           | Sp5           |
| 7159 | 7159  | 1700031F05Rik | 1700031F05Rik |
| 7159 | 17447 | 1700031F05Rik | Ctsf          |
| 7163 | 9587  | Ptplb         | Bri3bp        |
| 7163 | 12982 | Ptplb         | Cars          |
| 7225 | 12910 | Tiam1         | 1110028A07Rik |
| 7225 | 15135 | Tiam1         | Col5a3        |
| 7258 | 5100  | Bmp2k         | Pebp1         |
| 7292 | 1258  | Spna1         | Hba-a1        |
| 7292 | 5364  | Spna1         | Kif22         |
| 7370 | 12302 | Spop          | Cbx1          |
| 7378 | 10612 | 1700001J03Rik | Slc24a6       |
| 7396 | 250   | Lao1          | Tubb2a-ps2    |
| 7396 | 719   | Lao1          | Usp2          |
| 7396 | 2529  | Lao1          | Hmcn2         |
| 7396 | 2794  | Lao1          | Map3k6        |
| 7396 | 15631 | Lao1          | Lpin1         |
| 7479 | 15631 | Mcf2l         | Lpin1         |
| 7590 | 21202 | Ankrd40       | Acly          |
| 7619 | 7619  | Pik3ip1       | Pik3ip1       |
| 7619 | 18846 | Pik3ip1       | Ikbkg         |
| 7654 | 7654  | Ptpmt1        | Ptpmt1        |
| 7659 | 1941  | Rab30         | MMT00079618   |
| 7659 | 6918  | Rab30         | Cog8          |
| 7659 | 9763  | Rab30         | Tuba3b        |
| 7659 | 10911 | Rab30         | Mcl1          |
| 7755 | 17660 | B230317C12Rik | Nlrp12        |
| 7761 | 2599  | Nudt19        | Lsm14a        |
| 7761 | 7761  | Nudt19        | Nudt19        |
| 7761 | 22841 | Nudt19        | Cib1          |
| 7813 | 250   | Stac          | Tubb2a-ps2    |
| 7813 | 269   | Stac          | Tuba1b        |
| 7813 | 1941  | Stac          | MMT00079618   |
| 7813 | 7151  | Stac          | MMT00007982   |
| 7813 | 9763  | Stac          | Tuba3b        |
| 7813 | 11724 | Stac          | Tuba3a        |
| 7813 | 15862 | Stac          | Mrap          |
| 7813 | 16060 | Stac          | Gys2          |
| 7813 | 17444 | Stac          | Tuba1a        |
| 7813 | 22388 | Stac          | 2410018M08Rik |
| 7813 | 22443 | Stac          | Tuba1c        |
| 7813 | 22470 | Stac          | Ppargc1b      |
| 7842 | 6370  | Pdk2          | Aqp8          |
| 8055 | 3703  | Ptcd3         | Ggcx          |
| 8088 | 5934  | Negr1         | S100a10       |
| 8155 | 1371  | Mark3         | 1200009I06Rik |
| 8155 | 7099  | Mark3         | Kcnk10        |
| 8194 | 17391 | MMT00077789   | C530028O21Rik |
| 8200 | 8444  | Dfna5h        | Rdh16         |

|      |       |               |               |
|------|-------|---------------|---------------|
| 8200 | 8815  | Dfna5h        | Mx1           |
| 8200 | 20058 | Dfna5h        | Dnaic1        |
| 8210 | 8210  | Hspa12a       | Hspa12a       |
| 8210 | 10387 | Hspa12a       | 4933427D06Rik |
| 8210 | 10466 | Hspa12a       | S1pr5         |
| 8210 | 15135 | Hspa12a       | Col5a3        |
| 8254 | 21214 | Bbs2          | Scd1          |
| 8268 | 18785 | Kctd7         | Angptl4       |
| 8274 | 17461 | Zc3h11a       | Ripk5         |
| 8284 | 9161  | EG209380      | Mrpl17        |
| 8284 | 13206 | EG209380      | Qprt          |
| 8300 | 9700  | MMT00043905   | Prodh         |
| 8304 | 3449  | Fubp1         | Hes6          |
| 8341 | 8341  | MMT00017270   | MMT00017270   |
| 8341 | 19064 | MMT00017270   | MMT00004867   |
| 8368 | 6376  | Rad51l3       | Nle1          |
| 8372 | 19520 | Uap1          | Uck2          |
| 8372 | 23466 | Uap1          | Pou2f1        |
| 8399 | 2766  | Herpud1       | Elp4          |
| 8439 | 604   | Slc25a33      | Ppp1r15b      |
| 8439 | 719   | Slc25a33      | Usp2          |
| 8439 | 21142 | Slc25a33      | Gm129         |
| 8499 | 4833  | C430048L16Rik | Synpo2        |
| 8530 | 1258  | Snca          | Hba-a1        |
| 8530 | 5919  | Snca          | B930041F14Rik |
| 8530 | 21335 | Snca          | Trp53rk       |
| 8530 | 21356 | Snca          | Nkx2-6        |
| 8547 | 9847  | Gbp4          | Ifi27         |
| 8555 | 1533  | H2-M3         | BC013712      |
| 8555 | 9847  | H2-M3         | Ifi27         |
| 8610 | 3616  | Padi4         | Dnajc16       |
| 8637 | 8637  | Tnpo2         | Tnpo2         |
| 8637 | 14043 | Tnpo2         | 4930455C21Rik |
| 8653 | 8653  | AW124722      | AW124722      |
| 8659 | 13527 | Psmb8         | Ctss          |
| 8659 | 23208 | Psmb8         | Hck           |
| 8670 | 3587  | MMT00051613   | MMT00041940   |
| 8684 | 18785 | Il15          | Angptl4       |
| 8721 | 17447 | Tbc1d10c      | Ctsf          |
| 8740 | 14472 | Car5b         | Ahcy          |
| 8740 | 19342 | Car5b         | Cth           |
| 8740 | 21512 | Car5b         | Gas6          |
| 8743 | 6193  | Pkp4          | Lactb2        |
| 8743 | 12219 | Pkp4          | Cyb5b         |
| 8743 | 21202 | Pkp4          | Acly          |
| 8743 | 22137 | Pkp4          | Nudt7         |
| 8743 | 22732 | Pkp4          | Cyb5b         |
| 8750 | 8750  | 1700010I14Rik | 1700010I14Rik |
| 8750 | 12694 | 1700010I14Rik | Riok2         |
| 8783 | 4938  | Zfyve16       | Mccc2         |
| 8786 | 2571  | Rmnd1         | Rmnd1         |

|      |       |               |               |
|------|-------|---------------|---------------|
| 8786 | 3744  | Rmnd1         | Rmnd1         |
| 8786 | 19115 | Rmnd1         | Rab32         |
| 8790 | 2243  | Galnt2        | Gcsh          |
| 8800 | 2224  | Rnf213        | Oasl2         |
| 8816 | 337   | Nfkbia        | Rasgef1b      |
| 8816 | 4205  | Nfkbia        | Rgs1          |
| 8816 | 6564  | Nfkbia        | Cebpd         |
| 8816 | 8816  | Nfkbia        | Nfkbia        |
| 8849 | 10772 | Cachd1        | Aacs          |
| 8887 | 2243  | Dpep1         | Gcsh          |
| 8902 | 8902  | Aldh3b1       | Aldh3b1       |
| 8902 | 10629 | Aldh3b1       | BC021614      |
| 9066 | 2013  | 2210020M01Rik | Il15ra        |
| 9066 | 18709 | 2210020M01Rik | Srp68         |
| 9077 | 9077  | Cnpy4         | Cnpy4         |
| 9077 | 13780 | Cnpy4         | Pilra         |
| 9077 | 17089 | Cnpy4         | Pilrb1        |
| 9116 | 2320  | M6prbp1       | Spc24         |
| 9161 | 6912  | Mrpl17        | Crym          |
| 9161 | 9161  | Mrpl17        | Mrpl17        |
| 9260 | 1767  | Cmtm6         | BC016495      |
| 9260 | 4286  | Cmtm6         | Ptp4a1        |
| 9304 | 1755  | Al449175      | Ocel1         |
| 9306 | 20058 | Spon1         | Dnaic1        |
| 9306 | 22271 | Spon1         | Cyp2c29       |
| 9320 | 12600 | Rnf31         | Ifi204        |
| 9401 | 21824 | Fcgr4         | 5830443L24Rik |
| 9408 | 21214 | Hmgcs2        | Scd1          |
| 9417 | 9417  | Cd163         | Cd163         |
| 9417 | 17391 | Cd163         | C530028O21Rik |
| 9417 | 19964 | Cd163         | Ndufa9        |
| 9454 | 2599  | 2810426N06Rik | Lsm14a        |
| 9454 | 19854 | 2810426N06Rik | Kcnj14        |
| 9513 | 16750 | Tardbp        | Casp6         |
| 9513 | 20194 | Tardbp        | Pnlc1         |
| 9541 | 8610  | Npal3         | Padi4         |
| 9547 | 2472  | MMT00006479   | MMT00014056   |
| 9547 | 9547  | MMT00006479   | MMT00006479   |
| 9547 | 19763 | MMT00006479   | Acp2          |
| 9547 | 23474 | MMT00006479   | MMT00011721   |
| 9558 | 2533  | Akr7a5        | Arhgef19      |
| 9558 | 2889  | Akr7a5        | Pqlc2         |
| 9597 | 10393 | Tnfsf13b      | Slc7a8        |
| 9597 | 20341 | Tnfsf13b      | Srebf2        |
| 9629 | 15709 | Spnb3         | Tceal1        |
| 9651 | 662   | Cxxc5         | Mid1ip1       |
| 9651 | 16695 | Cxxc5         | Hs3st6        |
| 9717 | 23208 | Psmb9         | Hck           |
| 9729 | 13004 | Got111        | Arhgef10      |
| 9745 | 9745  | Gadd45g       | Gadd45g       |
| 9762 | 4833  | Snx5          | Synpo2        |

|       |       |               |               |
|-------|-------|---------------|---------------|
| 9762  | 6231  | Snx5          | 9030622O22Rik |
| 9886  | 18201 | Degs1         | MMT00060232   |
| 9912  | 12451 | Ttc27         | Srd5a2        |
| 9935  | 21575 | Prnd          | Cyp2c55       |
| 9935  | 23549 | Prnd          | Es22          |
| 9951  | 2938  | Rpp21         | H2-T23        |
| 9996  | 16580 | Rassf9        | Tnfaip2       |
| 10006 | 14151 | Ephx2         | Slc44a1       |
| 10006 | 21214 | Ephx2         | Scd1          |
| 10108 | 13271 | Ctsh          | Idh2          |
| 10108 | 15205 | Ctsh          | MMT00030262   |
| 10109 | 1533  | Gbp3          | BC013712      |
| 10109 | 2224  | Gbp3          | Oasl2         |
| 10109 | 2752  | Gbp3          | Fcgr1         |
| 10109 | 9821  | Gbp3          | Pmaip1        |
| 10109 | 9847  | Gbp3          | Ifi27         |
| 10189 | 20079 | Cage1         | MMT00019254   |
| 10273 | 14472 | Gpt2          | Ahcy          |
| 10273 | 16958 | Gpt2          | Gpc1          |
| 10356 | 9759  | 2810417H13Rik | Cenpn         |
| 10356 | 20433 | 2810417H13Rik | Cdca5         |
| 10376 | 327   | C920025E04Rik | H2-Ea         |
| 10376 | 9158  | C920025E04Rik | Pde9a         |
| 10387 | 8210  | 4933427D06Rik | Hspa12a       |
| 10393 | 10711 | Slc7a8        | 1700108F19Rik |
| 10393 | 22138 | Slc7a8        | Ang           |
| 10396 | 11129 | MMT00072312   | Ankhd1        |
| 10396 | 20678 | MMT00072312   | Cyp39a1       |
| 10408 | 337   | Per1          | Rasgef1b      |
| 10408 | 3452  | Per1          | Ccrn4l        |
| 10408 | 4235  | Per1          | Pfkfb3        |
| 10408 | 9213  | Per1          | Osgin1        |
| 10408 | 16580 | Per1          | Tnfaip2       |
| 10408 | 17525 | Per1          | Ctgf          |
| 10408 | 19556 | Per1          | Efna1         |
| 10426 | 9847  | Ly6f          | Ifi27         |
| 10467 | 10638 | MMT00074572   | Gpr97         |
| 10467 | 18785 | MMT00074572   | Angptl4       |
| 10482 | 6804  | Mcat          | Cyp2d22       |
| 10482 | 19216 | Mcat          | Bik           |
| 10499 | 2051  | Camkk2        | Ddx27         |
| 10576 | 18179 | Xrcc3         | Dbp           |
| 10663 | 8328  | Sytl2         | Klhdc8a       |
| 10667 | 327   | H2-Eb1        | H2-Ea         |
| 10667 | 10667 | H2-Eb1        | H2-Eb1        |
| 10668 | 2243  | Kars          | Gcsh          |
| 10672 | 269   | BC031353      | Tuba1b        |
| 10672 | 563   | BC031353      | D4Bwg0951e    |
| 10672 | 3686  | BC031353      | Psmc9         |
| 10672 | 6916  | BC031353      | Wdr5b         |
| 10672 | 7944  | BC031353      | AI132487      |

|       |       |               |               |
|-------|-------|---------------|---------------|
| 10672 | 8399  | BC031353      | Herpud1       |
| 10672 | 9127  | BC031353      | Mtfmt         |
| 10672 | 11129 | BC031353      | Ankhd1        |
| 10672 | 11807 | BC031353      | Fbxo31        |
| 10672 | 11808 | BC031353      | Pck1          |
| 10672 | 11984 | BC031353      | N6amt2        |
| 10672 | 13581 | BC031353      | Srxn1         |
| 10672 | 15021 | BC031353      | Ppargc1a      |
| 10672 | 15631 | BC031353      | Lpin1         |
| 10672 | 17656 | BC031353      | Hdhd3         |
| 10672 | 18027 | BC031353      | 5730403B10Rik |
| 10672 | 18785 | BC031353      | Angpt4        |
| 10672 | 21408 | BC031353      | Svil          |
| 10672 | 23201 | BC031353      | S1pr1         |
| 10710 | 4454  | Smoc1         | BC055107      |
| 10710 | 12556 | Smoc1         | Ass1          |
| 10710 | 12955 | Smoc1         | Atp5o         |
| 10710 | 23640 | Smoc1         | Bdh1          |
| 10711 | 10711 | 1700108F19Rik | 1700108F19Rik |
| 10808 | 5364  | Rab711        | Kif22         |
| 10978 | 4617  | MMT00078322   | Agpat9        |
| 10978 | 5100  | MMT00078322   | Pebp1         |
| 10978 | 10978 | MMT00078322   | MMT00078322   |
| 10978 | 15908 | MMT00078322   | Pebp1         |
| 10995 | 13780 | Ap4m1         | Pilra         |
| 10995 | 13875 | Ap4m1         | Hsd17b10      |
| 11043 | 499   | Hsph1         | 2310057J16Rik |
| 11043 | 3587  | Hsph1         | MMT00041940   |
| 11043 | 4966  | Hsph1         | Zscan20       |
| 11043 | 6021  | Hsph1         | MMT00008784   |
| 11043 | 8670  | Hsph1         | MMT00051613   |
| 11043 | 9067  | Hsph1         | Tra2a         |
| 11043 | 9258  | Hsph1         | P4ha1         |
| 11043 | 11043 | Hsph1         | Hsph1         |
| 11043 | 14298 | Hsph1         | Atp2a2        |
| 11043 | 15476 | Hsph1         | Fem1b         |
| 11043 | 15675 | Hsph1         | MMT00077535   |
| 11043 | 18099 | Hsph1         | Nfx1          |
| 11043 | 18373 | Hsph1         | Dnajb1        |
| 11043 | 18418 | Hsph1         | Hspa1b        |
| 11043 | 18903 | Hsph1         | Crem          |
| 11043 | 20965 | Hsph1         | Usp28         |
| 11043 | 21389 | Hsph1         | Odf2          |
| 11145 | 12112 | Dctn3         | Tmem53        |
| 11145 | 18250 | Dctn3         | Mmp14         |
| 11148 | 13293 | Htra4         | Gsta2         |
| 11198 | 3535  | Gbp1          | S100a9        |
| 11198 | 7238  | Gbp1          | Pycard        |
| 11214 | 3587  | MMT00049207   | MMT00041940   |
| 11214 | 6021  | MMT00049207   | MMT00008784   |
| 11214 | 15675 | MMT00049207   | MMT00077535   |



|       |       |             |                    |
|-------|-------|-------------|--------------------|
| 11214 | 18215 | MMT00049207 | Gpr146             |
| 11214 | 21322 | MMT00049207 | Uspl1              |
| 11231 | 17629 | B2m         | Saa2               |
| 11235 | 13293 | Itga2b      | Gsta2              |
| 11255 | 21692 | Srpx        | MMT00013924        |
| 11265 | 9847  | Irgm        | Ifi27              |
| 11275 | 1416  | Fanci       | 6720460F02Rik      |
| 11275 | 21205 | Fanci       | Pkmyt1             |
| 11369 | 676   | Stx3        | Ms4a4d             |
| 11369 | 11812 | Stx3        | Mrpl16             |
| 11369 | 17447 | Stx3        | Ctsf               |
| 11406 | 11406 | Ifi203      | Ifi203             |
| 11409 | 15631 | Phf16       | Lpin1              |
| 11435 | 7909  | Rnaset2a    | Oas3               |
| 11435 | 11435 | Rnaset2a    | Rnaset2a           |
| 11445 | 14017 | Atp1a2      | Ces5               |
| 11445 | 21966 | Atp1a2      | Pcp4l1             |
| 11446 | 8632  | Dock8       | Igfbp1             |
| 11446 | 11446 | Dock8       | Dock8              |
| 11448 | 1985  | Arl1        | Pepd               |
| 11448 | 21211 | Arl1        | 2010301N04Rik      |
| 11590 | 482   | Cbx4        | Rnf43              |
| 11590 | 4391  | Cbx4        | Zfp467             |
| 11590 | 6393  | Cbx4        | 3110043O21Rik      |
| 11590 | 8632  | Cbx4        | Igfbp1             |
| 11590 | 21160 | Cbx4        | Irs2               |
| 11621 | 7975  | Mixl1       | Lancl1             |
| 11621 | 18714 | Mixl1       | Farsb              |
| 11648 | 7088  | Lrfn2       | Slc37a1            |
| 11685 | 17629 | Cd83        | Saa2               |
| 11701 | 5044  | Oas1c       | Ifi35              |
| 11701 | 7963  | Oas1c       | Rxrg               |
| 11701 | 21549 | Oas1c       | Rtp4               |
| 11718 | 6213  | Nmb         | Ccl2               |
| 11718 | 15631 | Nmb         | Lpin1              |
| 11724 | 18201 | Tuba3a      | MMT00060232        |
| 11724 | 21214 | Tuba3a      | Scd1               |
| 11724 | 22138 | Tuba3a      | Ang                |
| 11725 | 15844 | Itln1       | Klhdc9             |
| 11762 | 18113 | Ggt5        | MMT00034400        |
| 11762 | 21727 | Ggt5        | Khk                |
| 11797 | 21727 | Sbk1        | Khk                |
| 11807 | 12219 | Fbxo31      | Cyb5b              |
| 11812 | 676   | Mrpl16      | Ms4a4d             |
| 11812 | 11812 | Mrpl16      | Mrpl16             |
| 11859 | 10554 | Poln        | ENSMUSG00000074179 |
| 11859 | 11859 | Poln        | Poln               |
| 11859 | 13293 | Poln        | Gsta2              |
| 11867 | 11201 | Rcor3       | Sunc1              |
| 11867 | 20194 | Rcor3       | Pnlcd1             |
| 12032 | 20058 | Cdca7       | Dnaic1             |

|       |       |               |               |
|-------|-------|---------------|---------------|
| 12055 | 12055 | 1810008A18Rik | 1810008A18Rik |
| 12055 | 19995 | 1810008A18Rik | Pwp1          |
| 12097 | 3616  | 9430015G10Rik | Dnajc16       |
| 12097 | 12097 | 9430015G10Rik | 9430015G10Rik |
| 12156 | 2051  | Setd4         | Ddx27         |
| 12156 | 3696  | Setd4         | Elovl6        |
| 12156 | 5684  | Setd4         | Ranbp10       |
| 12156 | 6193  | Setd4         | Lactb2        |
| 12156 | 10612 | Setd4         | Slc24a6       |
| 12156 | 12143 | Setd4         | Thyn1         |
| 12156 | 12219 | Setd4         | Cyb5b         |
| 12156 | 15892 | Setd4         | Slc22a5       |
| 12156 | 16616 | Setd4         | Paox          |
| 12156 | 17862 | Setd4         | Fbxo21        |
| 12156 | 21143 | Setd4         | Ypel3         |
| 12156 | 21202 | Setd4         | Acly          |
| 12156 | 21251 | Setd4         | Cpt1a         |
| 12156 | 22732 | Setd4         | Cyb5b         |
| 12157 | 21811 | Gal3st4       | Ak3l1         |
| 12173 | 12173 | Acbd6         | Acbd6         |
| 12174 | 8654  | 2610027C15Rik | Fbxl13        |
| 12208 | 21251 | Pnpla7        | Cpt1a         |
| 12239 | 18300 | A630077B13Rik | Arg1          |
| 12280 | 12280 | Cln5          | Cln5          |
| 12302 | 2456  | Cbx1          | Mrpl10        |
| 12302 | 12302 | Cbx1          | Cbx1          |
| 12302 | 19092 | Cbx1          | MMT00045362   |
| 12341 | 1627  | EG330731      | 2310030N02Rik |
| 12367 | 5938  | MMT00072365   | Pfn2          |
| 12367 | 12367 | MMT00072365   | MMT00072365   |
| 12367 | 16416 | MMT00072365   | Commd2        |
| 12380 | 12380 | Rftn2         | Rftn2         |
| 12380 | 22333 | Rftn2         | Hnrnp3        |
| 12385 | 11859 | Mrpl33        | Poln          |
| 12385 | 12385 | Mrpl33        | Mrpl33        |
| 12388 | 6231  | 8430406I07Rik | 9030622O22Rik |
| 12398 | 2224  | Ifi44         | Oasl2         |
| 12398 | 19276 | Ifi44         | H28           |
| 12412 | 12412 | BC004728      | BC004728      |
| 12412 | 19216 | BC004728      | Bik           |
| 12420 | 21251 | Klhl21        | Cpt1a         |
| 12489 | 21251 | Wdr8          | Cpt1a         |
| 12546 | 3061  | Cd7           | Scarf2        |
| 12546 | 6846  | Cd7           | Olfir1402     |
| 12546 | 8791  | Cd7           | Sectm1a       |
| 12546 | 10214 | Cd7           | Sectm1b       |
| 12546 | 15016 | Cd7           | MMT00074608   |
| 12546 | 17792 | Cd7           | Vmn2r79       |
| 12546 | 17897 | Cd7           | Gm1019        |
| 12552 | 5804  | Gm967         | Thrsp         |
| 12599 | 7911  | Golt1b        | Pik3c2g       |

|       |       |               |               |
|-------|-------|---------------|---------------|
| 12649 | 2875  | Itgad         | Wfdc2         |
| 12649 | 20194 | Itgad         | PnlDC1        |
| 12718 | 2793  | Dhrsx         | MMT00005644   |
| 12718 | 5989  | Dhrsx         | 2310042D19Rik |
| 12718 | 19026 | Dhrsx         | Isg15         |
| 12730 | 12730 | 9130019O22Rik | 9130019O22Rik |
| 12751 | 2980  | Sorl1         | Slc37a2       |
| 12761 | 2294  | Tsc22d3       | AU040829      |
| 12761 | 2529  | Tsc22d3       | Hmcn2         |
| 12761 | 3170  | Tsc22d3       | Mcart1        |
| 12761 | 3196  | Tsc22d3       | Tat           |
| 12761 | 5849  | Tsc22d3       | 2310031A18Rik |
| 12761 | 6756  | Tsc22d3       | Sds           |
| 12761 | 7550  | Tsc22d3       | Rab11fip5     |
| 12761 | 12761 | Tsc22d3       | Tsc22d3       |
| 12761 | 15631 | Tsc22d3       | Lpin1         |
| 12761 | 16580 | Tsc22d3       | Tnfaip2       |
| 12761 | 17525 | Tsc22d3       | Ctgf          |
| 12761 | 21934 | Tsc22d3       | Id2           |
| 12778 | 11129 | 1700024P16Rik | Ankhd1        |
| 12778 | 20087 | 1700024P16Rik | Cd44          |
| 12784 | 18790 | Nudt6         | Car3          |
| 12795 | 3265  | Slc20a2       | Dntt          |
| 12795 | 6370  | Slc20a2       | Aqp8          |
| 12799 | 719   | Spon2         | Usp2          |
| 12799 | 3214  | Spon2         | Dnmt3b        |
| 12799 | 4057  | Spon2         | Slc2a4        |
| 12799 | 5068  | Spon2         | Afap1l2       |
| 12823 | 662   | Rab3il1       | Mid1ip1       |
| 12862 | 11565 | Trem2         | Serpina3c     |
| 12885 | 1162  | Ccl24         | Cpsf4         |
| 12885 | 6330  | Ccl24         | Dgkq          |
| 12904 | 250   | MMT00040704   | Tubb2a-ps2    |
| 12904 | 719   | MMT00040704   | Usp2          |
| 12904 | 19192 | MMT00040704   | Hist1h1c      |
| 12905 | 8742  | Nfil3         | Tmem39a       |
| 12905 | 16060 | Nfil3         | Gys2          |
| 12905 | 18179 | Nfil3         | Dbp           |
| 12934 | 662   | Rbp7          | Mid1ip1       |
| 12934 | 7659  | Rbp7          | Rab30         |
| 12934 | 8439  | Rbp7          | Slc25a33      |
| 12934 | 8896  | Rbp7          | Fasn          |
| 12934 | 10772 | Rbp7          | Aacs          |
| 12934 | 12315 | Rbp7          | Srebf1        |
| 12934 | 18785 | Rbp7          | Angptl4       |
| 12954 | 12315 | Gli2          | Srebf1        |
| 12954 | 17730 | Gli2          | MMT00058199   |
| 12965 | 7492  | Pmm1          | Adfp          |
| 12974 | 11576 | Slc1a6        | Gm1381        |
| 12981 | 23026 | Nek6          | Apom          |
| 12984 | 18592 | Cyb5          | Txnl4a        |

|       |       |               |               |
|-------|-------|---------------|---------------|
| 13072 | 23693 | BC022687      | A530016L24Rik |
| 13149 | 11406 | Ifi203        | Ifi203        |
| 13149 | 13149 | Ifi203        | Ifi203        |
| 13149 | 15844 | Ifi203        | Klhdc9        |
| 13156 | 2224  | Ifit3         | Oasl2         |
| 13156 | 2550  | Ifit3         | MMT00036681   |
| 13156 | 23174 | Ifit3         | Psme2         |
| 13218 | 7861  | C330043M08Rik | Klhdc4        |
| 13218 | 13218 | C330043M08Rik | C330043M08Rik |
| 13224 | 5822  | Cp            | Car2          |
| 13224 | 15508 | Cp            | 4632415L05Rik |
| 13285 | 5364  | Cd276         | Kif22         |
| 13285 | 13285 | Cd276         | Cd276         |
| 13289 | 250   | Dusp10        | Tubb2a-ps2    |
| 13289 | 269   | Dusp10        | Tuba1b        |
| 13289 | 354   | Dusp10        | MMT00007996   |
| 13289 | 563   | Dusp10        | D4Bwg0951e    |
| 13289 | 1709  | Dusp10        | Mt2           |
| 13289 | 1941  | Dusp10        | MMT00079618   |
| 13289 | 3804  | Dusp10        | MMT00015534   |
| 13289 | 5587  | Dusp10        | Rmnd5b        |
| 13289 | 6380  | Dusp10        | 6330569M22Rik |
| 13289 | 7151  | Dusp10        | MMT00007982   |
| 13289 | 9763  | Dusp10        | Tuba3b        |
| 13289 | 11129 | Dusp10        | Ankhd1        |
| 13289 | 11724 | Dusp10        | Tuba3a        |
| 13289 | 15052 | Dusp10        | Kifc3         |
| 13289 | 17323 | Dusp10        | Tubb6         |
| 13289 | 22443 | Dusp10        | Tuba1c        |
| 13309 | 1533  | Tgtp          | BC013712      |
| 13309 | 2224  | Tgtp          | Oasl2         |
| 13309 | 5845  | Tgtp          | Il18bp        |
| 13309 | 9847  | Tgtp          | Ifi27         |
| 13309 | 11198 | Tgtp          | Gbp1          |
| 13355 | 22740 | Foxs1         | Manbal        |
| 13355 | 23005 | Foxs1         | 4930405A21Rik |
| 13356 | 8902  | Aldh3b2       | Aldh3b1       |
| 13356 | 21214 | Aldh3b2       | Scd1          |
| 13372 | 18455 | Slc11a1       | Mtnr1a        |
| 13417 | 15569 | 1700025G04Rik | BC003331      |
| 13431 | 21214 | MMT00038058   | Scd1          |
| 13489 | 15029 | D230025D16Rik | Nudt16l1      |
| 13489 | 15862 | D230025D16Rik | Mrap          |
| 13491 | 1941  | Plk2          | MMT00079618   |
| 13491 | 12910 | Plk2          | 1110028A07Rik |
| 13507 | 18772 | Spats1        | BC048355      |
| 13513 | 2224  | Trim25        | Oasl2         |
| 13514 | 4508  | Apol9b        | Ifit1         |
| 13514 | 8800  | Apol9b        | Rnf213        |
| 13514 | 16949 | Apol9b        | Iigp1         |
| 13554 | 14647 | Aqr           | Cst3          |

|       |       |               |               |
|-------|-------|---------------|---------------|
| 13585 | 5364  | Nckap1l       | Kif22         |
| 13585 | 11393 | Nckap1l       | A830007P12Rik |
| 13615 | 3061  | Arl16         | Scarf2        |
| 13615 | 6017  | Arl16         | MMT00018015   |
| 13615 | 13615 | Arl16         | Arl16         |
| 13615 | 17897 | Arl16         | Gm1019        |
| 13624 | 13376 | Ubc           | Alg2          |
| 13624 | 16000 | Ubc           | Nol10         |
| 13624 | 20363 | Ubc           | Dcun1d2       |
| 13677 | 7659  | Tinagl        | Rab30         |
| 13677 | 18050 | Tinagl        | MMT00003408   |
| 13732 | 1755  | Tpm4          | Ocel1         |
| 13801 | 22640 | Adh4          | Bud13         |
| 13810 | 13810 | 1110036O03Rik | 1110036O03Rik |
| 13813 | 13813 | Ktelc1        | Ktelc1        |
| 13813 | 14043 | Ktelc1        | 4930455C21Rik |
| 13826 | 20433 | Melk          | Cdca5         |
| 13826 | 21947 | Melk          | Cdca8         |
| 13839 | 3754  | Gypc          | Dock6         |
| 13839 | 18286 | Gypc          | Slc41a3       |
| 13839 | 21202 | Gypc          | Acly          |
| 13839 | 21251 | Gypc          | Cpt1a         |
| 13919 | 7659  | Synpo         | Rab30         |
| 13919 | 22009 | Synpo         | Tmem14a       |
| 13954 | 6370  | Chst1         | Aqp8          |
| 14014 | 1453  | MMT00008376   | Gfod2         |
| 14049 | 6912  | Fdft1         | Crym          |
| 14049 | 7761  | Fdft1         | Nudt19        |
| 14062 | 2115  | Pan3          | Gpr12         |
| 14102 | 16182 | Evi2a         | Oasl1         |
| 14102 | 23253 | Evi2a         | D030011O10Rik |
| 14132 | 7088  | Glo1          | Slc37a1       |
| 14132 | 8341  | Glo1          | MMT00017270   |
| 14132 | 14132 | Glo1          | Glo1          |
| 14132 | 15318 | Glo1          | Aars2         |
| 14188 | 7099  | Ttc8          | Kcnk10        |
| 14192 | 2721  | Trpv2         | Inmt          |
| 14227 | 13293 | Lrrc39        | Gsta2         |
| 14258 | 1533  | Ifi47         | BC013712      |
| 14258 | 2200  | Ifi47         | BC006779      |
| 14258 | 2224  | Ifi47         | Oasl2         |
| 14258 | 5845  | Ifi47         | Il18bp        |
| 14258 | 7238  | Ifi47         | Pycard        |
| 14258 | 9847  | Ifi47         | Ifi27         |
| 14307 | 3587  | Kcnj8         | MMT00041940   |
| 14307 | 6021  | Kcnj8         | MMT00008784   |
| 14307 | 6976  | Kcnj8         | Rbm35b        |
| 14307 | 7140  | Kcnj8         | Mtbp          |
| 14307 | 10769 | Kcnj8         | Hnrnpd        |
| 14307 | 13087 | Kcnj8         | Cxadr         |
| 14307 | 13304 | Kcnj8         | Gadd45b       |

|       |       |             |               |
|-------|-------|-------------|---------------|
| 14307 | 14135 | Kcnj8       | Eepd1         |
| 14307 | 15675 | Kcnj8       | MMT00077535   |
| 14307 | 18373 | Kcnj8       | Dnajb1        |
| 14307 | 18418 | Kcnj8       | Hspa1b        |
| 14307 | 18785 | Kcnj8       | Angptl4       |
| 14333 | 4674  | Zcchc17     | Cxcl12        |
| 14333 | 21214 | Zcchc17     | Scd1          |
| 14343 | 14343 | Hnrnpa0     | Hnrnpa0       |
| 14355 | 15052 | Tle1        | Kifc3         |
| 14355 | 17135 | Tle1        | Mum1          |
| 14384 | 1241  | Dnajc7      | Meox1         |
| 14384 | 2456  | Dnajc7      | Mrpl10        |
| 14384 | 6376  | Dnajc7      | Nle1          |
| 14384 | 13810 | Dnajc7      | 1110036O03Rik |
| 14391 | 1336  | MMT00017335 | MMT00069537   |
| 14391 | 2243  | MMT00017335 | Gcsh          |
| 14391 | 15953 | MMT00017335 | Acsf3         |
| 14391 | 20484 | MMT00017335 | Ces1          |
| 14391 | 21394 | MMT00017335 | Cdh15         |
| 14399 | 23005 | Csnk2a1     | 4930405A21Rik |
| 14400 | 607   | Scd2        | Me1           |
| 14470 | 8815  | Taf1a       | Mx1           |
| 14512 | 7753  | Tubg1       | Gfm1          |
| 14512 | 21214 | Tubg1       | Scd1          |
| 14554 | 662   | Dll4        | Mid1ip1       |
| 14554 | 17660 | Dll4        | Nlrp12        |
| 14554 | 20567 | Dll4        | Ggt6          |
| 14554 | 21202 | Dll4        | Acly          |
| 14554 | 22321 | Dll4        | Apol7a        |
| 14557 | 6765  | Pyroxd1     | Ldhb          |
| 14557 | 7911  | Pyroxd1     | Pik3c2g       |
| 14559 | 1014  | Frrs1       | Rtcd1         |
| 14559 | 10681 | Frrs1       | Dgkz          |
| 14577 | 2433  | Cdc3711     | Armc10        |
| 14577 | 3317  | Cdc3711     | Ak3           |
| 14611 | 14611 | Ddx60       | Ddx60         |
| 14677 | 3496  | S100b       | Slc41a2       |
| 14677 | 12055 | S100b       | 1810008A18Rik |
| 14740 | 4833  | Mfap1b      | Synpo2        |
| 14740 | 14740 | Mfap1b      | Mfap1b        |
| 14740 | 23609 | Mfap1b      | Trim44        |
| 14757 | 7192  | Hdx         | Ttc21b        |
| 14757 | 9547  | Hdx         | MMT00006479   |
| 14838 | 21214 | MMT00070887 | Scd1          |
| 14894 | 269   | G0s2        | Tuba1b        |
| 14894 | 1941  | G0s2        | MMT00079618   |
| 14894 | 3097  | G0s2        | Ppp1r3g       |
| 14894 | 4993  | G0s2        | Tsc22d1       |
| 14894 | 11724 | G0s2        | Tuba3a        |
| 14894 | 12981 | G0s2        | Nek6          |
| 14894 | 13376 | G0s2        | Alg2          |

|       |       |               |               |
|-------|-------|---------------|---------------|
| 14894 | 17656 | G0s2          | Hdhd3         |
| 14898 | 8815  | Orm1          | Mx1           |
| 14898 | 16336 | Orm1          | 2310040A07Rik |
| 15002 | 18299 | Ncapg         | MMT00035424   |
| 15022 | 15022 | Tmem14c       | Tmem14c       |
| 15024 | 21202 | 2310061J03Rik | Acly          |
| 15049 | 12315 | Rnf125        | Srebf1        |
| 15074 | 1533  | Usp18         | BC013712      |
| 15074 | 2224  | Usp18         | Oasl2         |
| 15074 | 9847  | Usp18         | Ifi27         |
| 15074 | 13156 | Usp18         | Ifit3         |
| 15074 | 21549 | Usp18         | Rtp4          |
| 15121 | 15844 | Itln1         | Klhdc9        |
| 15208 | 13431 | Tmem70        | MMT00038058   |
| 15277 | 16191 | 2810002N01Rik | Klc1          |
| 15280 | 16182 | Cxcl10        | Oasl1         |
| 15301 | 662   | Dyrk2         | Mid1ip1       |
| 15306 | 12451 | Dpy30         | Srd5a2        |
| 15318 | 9230  | Aars2         | 1700027N10Rik |
| 15318 | 15318 | Aars2         | Aars2         |
| 15318 | 18574 | Aars2         | Parc          |
| 15318 | 18772 | Aars2         | BC048355      |
| 15321 | 15321 | Pus7          | Pus7          |
| 15340 | 5804  | Cdk5rap1      | Thrsp         |
| 15340 | 7492  | Cdk5rap1      | Adfp          |
| 15340 | 23130 | Cdk5rap1      | Hps4          |
| 15345 | 2348  | Tcstv3        | Irak1         |
| 15367 | 16176 | Vegfc         | St3gal5       |
| 15456 | 3753  | Chi3l3        | Setdb1        |
| 15492 | 5804  | Efnb1         | Thrsp         |
| 15508 | 15508 | 4632415L05Rik | 4632415L05Rik |
| 15531 | 7088  | Prickle4      | Slc37a1       |
| 15531 | 15531 | Prickle4      | Prickle4      |
| 15533 | 10486 | Olfml2b       | 1300002K09Rik |
| 15536 | 12910 | Garnl4        | 1110028A07Rik |
| 15536 | 15059 | Garnl4        | Mogat1        |
| 15604 | 12761 | Arl4a         | Tsc22d3       |
| 15604 | 20296 | Arl4a         | C030027H14Rik |
| 15631 | 719   | Lpin1         | Usp2          |
| 15631 | 2529  | Lpin1         | Hmcn2         |
| 15631 | 2850  | Lpin1         | Slc16a6       |
| 15631 | 5259  | Lpin1         | Mat1a         |
| 15631 | 5364  | Lpin1         | Kif22         |
| 15631 | 5849  | Lpin1         | 2310031A18Rik |
| 15631 | 6329  | Lpin1         | Cyp2b10       |
| 15631 | 6756  | Lpin1         | Sds           |
| 15631 | 8428  | Lpin1         | Sorbs3        |
| 15631 | 9718  | Lpin1         | Fmo5          |
| 15631 | 10273 | Lpin1         | Gpt2          |
| 15631 | 10546 | Lpin1         | Prpf6         |
| 15631 | 11614 | Lpin1         | Sult1e1       |

|       |       |               |                    |
|-------|-------|---------------|--------------------|
| 15631 | 15258 | Lpin1         | Coil               |
| 15631 | 15631 | Lpin1         | Lpin1              |
| 15631 | 19723 | Lpin1         | Pfkfb1             |
| 15631 | 19917 | Lpin1         | Nek2               |
| 15631 | 23183 | Lpin1         | Nnmt               |
| 15675 | 1156  | MMT00077535   | Rbj                |
| 15675 | 3587  | MMT00077535   | MMT00041940        |
| 15675 | 5352  | MMT00077535   | Pdcd2l             |
| 15675 | 6021  | MMT00077535   | MMT00008784        |
| 15675 | 8670  | MMT00077535   | MMT00051613        |
| 15675 | 15675 | MMT00077535   | MMT00077535        |
| 15675 | 21909 | MMT00077535   | Neurl2             |
| 15743 | 662   | Hoxc6         | Mid1ip1            |
| 15862 | 10554 | Mrap          | ENSMUSG00000074179 |
| 15883 | 1941  | Tulp3         | MMT00079618        |
| 15883 | 11095 | Tulp3         | Bag3               |
| 15883 | 15015 | Tulp3         | G3bp1              |
| 15935 | 12468 | Pnpla3        | Cyp2d13            |
| 15937 | 407   | Adamts4       | Serpina6           |
| 15937 | 719   | Adamts4       | Usp2               |
| 15937 | 2721  | Adamts4       | Inmt               |
| 15937 | 3689  | Adamts4       | Adh1               |
| 15937 | 5804  | Adamts4       | Thrsp              |
| 15937 | 5849  | Adamts4       | 2310031A18Rik      |
| 15937 | 6746  | Adamts4       | E2f8               |
| 15937 | 8404  | Adamts4       | Fa2h               |
| 15937 | 9700  | Adamts4       | Prodh              |
| 15937 | 14279 | Adamts4       | 3930402G23Rik      |
| 15937 | 17461 | Adamts4       | Ripk5              |
| 15937 | 17638 | Adamts4       | Adssl1             |
| 15937 | 19790 | Adamts4       | Polg2              |
| 15970 | 20058 | Npal1         | Dnaic1             |
| 15971 | 1041  | Aifm2         | 3110049J23Rik      |
| 15971 | 5965  | Aifm2         | Pbld               |
| 15971 | 15971 | Aifm2         | Aifm2              |
| 15971 | 19115 | Aifm2         | Rab32              |
| 16006 | 22138 | Anxa2         | Ang                |
| 16006 | 23026 | Anxa2         | Apom               |
| 16060 | 2932  | Gys2          | Slco1a1            |
| 16060 | 3377  | Gys2          | Cs                 |
| 16060 | 6765  | Gys2          | Ldhb               |
| 16060 | 18201 | Gys2          | MMT00060232        |
| 16080 | 6370  | Prkcdbp       | Aqp8               |
| 16080 | 20079 | Prkcdbp       | MMT00019254        |
| 16093 | 11808 | 4732473B16Rik | Pck1               |
| 16093 | 15631 | 4732473B16Rik | Lpin1              |
| 16093 | 18606 | 4732473B16Rik | A230074B11Rik      |
| 16097 | 10132 | Dnmt3l        | Ces2               |
| 16097 | 18201 | Dnmt3l        | MMT00060232        |
| 16147 | 7066  | Tlr2          | Agtr1b             |
| 16168 | 15292 | Crlf2         | 2010107G23Rik      |



|       |       |               |               |
|-------|-------|---------------|---------------|
| 16168 | 16958 | Crlf2         | Gpc1          |
| 16191 | 16191 | Klc1          | Klc1          |
| 16233 | 22009 | 1600027J07Rik | Tmem14a       |
| 16294 | 11129 | Chst7         | Ankhd1        |
| 16294 | 21041 | Chst7         | Cyp17a1       |
| 16299 | 3799  | Creld2        | Serpinh1      |
| 16299 | 11043 | Creld2        | Hsph1         |
| 16356 | 17135 | 9030607L17Rik | Mum1          |
| 16366 | 23026 | Glis3         | Apom          |
| 16379 | 4686  | Tppp3         | BC021785      |
| 16379 | 7718  | Tppp3         | Pdia6         |
| 16379 | 22290 | Tppp3         | Tubb2a        |
| 16449 | 2320  | BC004044      | Spc24         |
| 16449 | 11576 | BC004044      | Gm1381        |
| 16449 | 20058 | BC004044      | Dnaic1        |
| 16474 | 8632  | Bhlhb2        | Igfbp1        |
| 16474 | 16251 | Bhlhb2        | G6pc          |
| 16474 | 18083 | Bhlhb2        | Gadd45a       |
| 16571 | 11808 | Pqlc1         | Pck1          |
| 16606 | 14147 | 4930579G22Rik | Acss2         |
| 16606 | 21202 | 4930579G22Rik | Acly          |
| 16613 | 16613 | 1110031I02Rik | 1110031I02Rik |
| 16617 | 1755  | Sh2d4a        | Ocel1         |
| 16617 | 9304  | Sh2d4a        | AI449175      |
| 16617 | 16617 | Sh2d4a        | Sh2d4a        |
| 16617 | 18886 | Sh2d4a        | Slc18a1       |
| 16617 | 20484 | Sh2d4a        | Ces1          |
| 16814 | 2850  | AU042651      | Slc16a6       |
| 16849 | 1755  | Trmt1         | Ocel1         |
| 16849 | 9304  | Trmt1         | AI449175      |
| 16849 | 10195 | Trmt1         | Klf1          |
| 16849 | 10273 | Trmt1         | Gpt2          |
| 16849 | 14511 | Trmt1         | Sostdc1       |
| 16849 | 16617 | Trmt1         | Sh2d4a        |
| 16849 | 16849 | Trmt1         | Trmt1         |
| 16849 | 18886 | Trmt1         | Slc18a1       |
| 16849 | 20484 | Trmt1         | Ces1          |
| 16920 | 9910  | Acsl1         | EG666644      |
| 16949 | 1533  | ligp1         | BC013712      |
| 16949 | 2224  | ligp1         | Oasl2         |
| 16949 | 6888  | ligp1         | Cxcl9         |
| 16949 | 7238  | ligp1         | Pycard        |
| 16949 | 9820  | ligp1         | BC023105      |
| 16949 | 9847  | ligp1         | Ifi27         |
| 16949 | 21549 | ligp1         | Rtp4          |
| 17197 | 1533  | Igtp          | BC013712      |
| 17197 | 2224  | Igtp          | Oasl2         |
| 17197 | 8392  | Igtp          | Asf1b         |
| 17197 | 9847  | Igtp          | Ifi27         |
| 17285 | 13988 | 1700019E19Rik | Cntnap2       |
| 17285 | 20292 | 1700019E19Rik | 1810048J11Rik |

|       |       |               |               |
|-------|-------|---------------|---------------|
| 17321 | 10711 | Hepacam       | 1700108F19Rik |
| 17321 | 12280 | Hepacam       | Cln5          |
| 17321 | 17321 | Hepacam       | Hepacam       |
| 17342 | 15935 | Dhx32         | Pnpla3        |
| 17342 | 21251 | Dhx32         | Cpt1a         |
| 17352 | 17591 | Cebpb         | D930015E06Rik |
| 17389 | 1985  | Pop4          | Pepd          |
| 17391 | 7678  | C530028O21Rik | Ltbr          |
| 17391 | 8194  | C530028O21Rik | MMT00077789   |
| 17391 | 9010  | C530028O21Rik | 8430419L09Rik |
| 17391 | 17391 | C530028O21Rik | C530028O21Rik |
| 17391 | 19964 | C530028O21Rik | Ndufa9        |
| 17403 | 10273 | N4bp1         | Gpt2          |
| 17420 | 20871 | Vps13b        | Pop1          |
| 17429 | 18201 | Tpi1          | MMT00060232   |
| 17461 | 17461 | Ripk5         | Ripk5         |
| 17463 | 15569 | Rgl1          | BC003331      |
| 17497 | 13293 | Ptges         | Gsta2         |
| 17497 | 14055 | Ptges         | MMT00050438   |
| 17514 | 13581 | Thbd          | Srxn1         |
| 17525 | 5449  | Ctgf          | Got1          |
| 17525 | 17525 | Ctgf          | Ctgf          |
| 17528 | 10189 | Gmnn          | Cage1         |
| 17528 | 11094 | Gmnn          | Slc17a3       |
| 17528 | 15698 | Gmnn          | Them2         |
| 17528 | 17528 | Gmnn          | Gmnn          |
| 17528 | 20759 | Gmnn          | Slc17a1       |
| 17542 | 11129 | MMT00044805   | Ankhd1        |
| 17583 | 437   | Per2          | Ndrp1         |
| 17583 | 719   | Per2          | Usp2          |
| 17583 | 3214  | Per2          | Dnmt3b        |
| 17583 | 3452  | Per2          | Ccrn4l        |
| 17583 | 3502  | Per2          | Gde1          |
| 17583 | 5804  | Per2          | Thrsp         |
| 17583 | 5849  | Per2          | 2310031A18Rik |
| 17583 | 6386  | Per2          | Por           |
| 17583 | 9554  | Per2          | Hmgb211       |
| 17583 | 11741 | Per2          | Slc30a10      |
| 17583 | 15631 | Per2          | Lpin1         |
| 17583 | 16580 | Per2          | Tnfaip2       |
| 17661 | 1416  | Birc5         | 6720460F02Rik |
| 17661 | 1561  | Birc5         | Aurka         |
| 17661 | 5364  | Birc5         | Kif22         |
| 17667 | 18373 | Phactr1       | Dnajb1        |
| 17707 | 17707 | Rshl2b        | Rshl2b        |
| 17752 | 11129 | Chac1         | Ankhd1        |
| 17793 | 14656 | MMT00000967   | Grip2         |
| 17801 | 4056  | Syt12         | Tnfaip8l1     |
| 17805 | 17805 | Slc39a12      | Slc39a12      |
| 17823 | 5364  | D2Ertd750e    | Kif22         |
| 17823 | 8416  | D2Ertd750e    | Cdc20         |

|       |       |             |               |
|-------|-------|-------------|---------------|
| 17823 | 19318 | D2Erttd750e | Plk1          |
| 17823 | 21947 | D2Erttd750e | Cdca8         |
| 17862 | 2013  | Fbxo21      | Il15ra        |
| 17862 | 5425  | Fbxo21      | Ung           |
| 17862 | 6966  | Fbxo21      | Mia3          |
| 17862 | 21251 | Fbxo21      | Cpt1a         |
| 17862 | 21793 | Fbxo21      | Pla2g12a      |
| 17862 | 22830 | Fbxo21      | MMT00081088   |
| 17884 | 269   | Lnx2        | Tuba1b        |
| 18069 | 3832  | Gpt         | Sdhb          |
| 18069 | 5680  | Gpt         | Lrg1          |
| 18069 | 20058 | Gpt         | Dnaic1        |
| 18099 | 8844  | Nfx1        | 2310037I24Rik |
| 18099 | 21251 | Nfx1        | Cpt1a         |
| 18099 | 23617 | Nfx1        | Nme1          |
| 18114 | 19766 | Lmtk2       | Slc26a4       |
| 18114 | 20058 | Lmtk2       | Dnaic1        |
| 18148 | 18215 | Cables1     | Gpr146        |
| 18172 | 5639  | Nupr1       | Gdpd3         |
| 18174 | 1533  | Stat2       | BC013712      |
| 18174 | 2224  | Stat2       | Oasl2         |
| 18176 | 13293 | Aqp11       | Gsta2         |
| 18176 | 21425 | Aqp11       | Rab6          |
| 18177 | 20058 | Cyp7b1      | Dnaic1        |
| 18177 | 22226 | Cyp7b1      | Pm20d1        |
| 18179 | 250   | Dbp         | Tubb2a-ps2    |
| 18179 | 719   | Dbp         | Usp2          |
| 18179 | 5804  | Dbp         | Thrsp         |
| 18179 | 5974  | Dbp         | Arntl         |
| 18179 | 8684  | Dbp         | Il15          |
| 18179 | 13630 | Dbp         | Cdkn1a        |
| 18179 | 16690 | Dbp         | Tjp3          |
| 18179 | 17528 | Dbp         | Gmn           |
| 18179 | 21531 | Dbp         | Ttc23         |
| 18186 | 143   | Parp14      | Gvin1         |
| 18186 | 1533  | Parp14      | BC013712      |
| 18186 | 2200  | Parp14      | BC006779      |
| 18186 | 2224  | Parp14      | Oasl2         |
| 18186 | 9847  | Parp14      | Ifi27         |
| 18186 | 19026 | Parp14      | Isg15         |
| 18186 | 21549 | Parp14      | Rtp4          |
| 18186 | 21824 | Parp14      | 5830443L24Rik |
| 18186 | 22077 | Parp14      | MMT00057550   |
| 18215 | 415   | Gpr146      | Ypel2         |
| 18308 | 20363 | Zfp672      | Dcun1d2       |
| 18332 | 2051  | Gpr19       | Ddx27         |
| 18332 | 18419 | Gpr19       | Srprb         |
| 18555 | 7659  | Sdcbp2      | Rab30         |
| 18555 | 9408  | Sdcbp2      | Hmgcs2        |
| 18558 | 8554  | Nol11       | Letm2         |
| 18592 | 18592 | Txnl4a      | Txnl4a        |

|       |       |               |               |
|-------|-------|---------------|---------------|
| 18662 | 11129 | Batf3         | Ankhd1        |
| 18662 | 16972 | Batf3         | Nenf          |
| 18702 | 17805 | Mrc1          | Slc39a12      |
| 18709 | 18709 | Srp68         | Srp68         |
| 18714 | 18714 | Farsb         | Farsb         |
| 18754 | 524   | Rbm8a         | Hsd3b2        |
| 18754 | 2752  | Rbm8a         | Fcgr1         |
| 18754 | 3753  | Rbm8a         | Setdb1        |
| 18754 | 10681 | Rbm8a         | Dgkz          |
| 18754 | 11611 | Rbm8a         | S100a13       |
| 18754 | 12367 | Rbm8a         | MMT00072365   |
| 18754 | 18754 | Rbm8a         | Rbm8a         |
| 18756 | 10612 | Tspan14       | Slc24a6       |
| 18835 | 4833  | Dtwd1         | Synpo2        |
| 18835 | 21729 | Dtwd1         | Hdc           |
| 18878 | 3753  | Pde4dip       | Setdb1        |
| 18878 | 20385 | Pde4dip       | Chd1l         |
| 18928 | 11462 | Ttc28         | Gpam          |
| 18939 | 20871 | Matn2         | Pop1          |
| 19004 | 12315 | Pdk4          | Srebf1        |
| 19022 | 18299 | Ccnb2         | MMT00035424   |
| 19037 | 12412 | Slc11a2       | BC004728      |
| 19064 | 15264 | MMT00004867   | Flywch2       |
| 19064 | 19064 | MMT00004867   | MMT00004867   |
| 19108 | 10938 | Armet         | Zbtb5         |
| 19108 | 12905 | Armet         | Nfil3         |
| 19108 | 15740 | Armet         | 1810010H24Rik |
| 19115 | 1041  | Rab32         | 3110049J23Rik |
| 19115 | 2571  | Rab32         | Rmnd1         |
| 19115 | 5965  | Rab32         | Pbld          |
| 19115 | 14989 | Rab32         | Map3k5        |
| 19115 | 18300 | Rab32         | Arg1          |
| 19115 | 19115 | Rab32         | Rab32         |
| 19161 | 13431 | Cav2          | MMT00038058   |
| 19189 | 2224  | Sp100         | Oasl2         |
| 19204 | 6386  | Prr13         | Por           |
| 19262 | 662   | Cd274         | Mid1ip1       |
| 19262 | 2681  | Cd274         | Hectd1        |
| 19362 | 8632  | Gper          | Igfbp1        |
| 19362 | 20194 | Gper          | PnlDC1        |
| 19392 | 5965  | Slc25a16      | Pbld          |
| 19421 | 19421 | Mbd2          | Mbd2          |
| 19462 | 2599  | 4933439C20Rik | Lsm14a        |
| 19462 | 6513  | 4933439C20Rik | Qpctl         |
| 19462 | 19462 | 4933439C20Rik | 4933439C20Rik |
| 19502 | 16451 | Fbxo24        | 2010007H12Rik |
| 19528 | 4404  | Zfp503        | Commd5        |
| 19528 | 16251 | Zfp503        | G6pc          |
| 19573 | 21142 | Serpine1      | Gm129         |
| 19578 | 12380 | Aox1          | Rftn2         |
| 19708 | 13309 | Ly6a          | Tgtp          |

|       |       |               |               |
|-------|-------|---------------|---------------|
| 19738 | 1533  | Lgals3bp      | BC013712      |
| 19738 | 2224  | Lgals3bp      | Oasl2         |
| 19738 | 6824  | Lgals3bp      | Irf7          |
| 19738 | 9847  | Lgals3bp      | Ifi27         |
| 19757 | 8399  | Fkbp5         | Herpud1       |
| 19757 | 12908 | Fkbp5         | Jdp2          |
| 19757 | 15631 | Fkbp5         | Lpin1         |
| 19763 | 2472  | Acp2          | MMT00014056   |
| 19763 | 9547  | Acp2          | MMT00006479   |
| 19763 | 19763 | Acp2          | Acp2          |
| 19763 | 23474 | Acp2          | MMT00011721   |
| 19763 | 23609 | Acp2          | Trim44        |
| 19767 | 20965 | Etv6          | Usp28         |
| 19798 | 11462 | Tnk2          | Gpam          |
| 19830 | 8632  | Irf4          | Igfbp1        |
| 19835 | 16361 | Iars2         | Olf703        |
| 19924 | 2533  | Ubiad1        | Arhgef19      |
| 19924 | 3475  | Ubiad1        | 2610305D13Rik |
| 19924 | 3616  | Ubiad1        | Dnajc16       |
| 19924 | 6191  | Ubiad1        | Ddost         |
| 19924 | 18338 | Ubiad1        | Akr1e1        |
| 19995 | 19995 | Pwp1          | Pwp1          |
| 20077 | 17729 | Ccdc115       | Prim2         |
| 20077 | 18606 | Ccdc115       | A230074B11Rik |
| 20100 | 3857  | Guca1b        | 1700001C19Rik |
| 20100 | 20100 | Guca1b        | Guca1b        |
| 20118 | 6330  | Tmem175       | Dgkq          |
| 20127 | 19964 | Ipo8          | Ndufa9        |
| 20127 | 20127 | Ipo8          | Ipo8          |
| 20156 | 16336 | Apoc2         | 2310040A07Rik |
| 20174 | 2743  | Ctnna2        | Tcf3          |
| 20174 | 3703  | Ctnna2        | Ggcx          |
| 20174 | 8194  | Ctnna2        | MMT00077789   |
| 20292 | 20292 | 1810048J11Rik | 1810048J11Rik |
| 20363 | 6599  | Dcun1d2       | 1700020C11Rik |
| 20363 | 9763  | Dcun1d2       | Tuba3b        |
| 20363 | 11724 | Dcun1d2       | Tuba3a        |
| 20413 | 15021 | Wdr86         | Ppargc1a      |
| 20511 | 7088  | Decr2         | Slc37a1       |
| 20666 | 16361 | Mosc1         | Olf703        |
| 20666 | 18201 | Mosc1         | MMT00060232   |
| 20721 | 10273 | 4432412L15Rik | Gpt2          |
| 20729 | 21202 | Ttc28         | Acly          |
| 20801 | 22841 | Mrps11        | Cib1          |
| 20810 | 22640 | Mttp          | Bud13         |
| 20880 | 274   | Raf1          | Trit1         |
| 20880 | 10612 | Raf1          | Slc24a6       |
| 20880 | 11376 | Raf1          | Slc7a11       |
| 20880 | 17660 | Raf1          | Nlrp12        |
| 20880 | 20589 | Raf1          | Frmd8         |
| 20912 | 2433  | Chordc1       | Armc10        |

|       |       |               |               |
|-------|-------|---------------|---------------|
| 20912 | 3587  | Chordc1       | MMT00041940   |
| 20912 | 6021  | Chordc1       | MMT00008784   |
| 20912 | 18373 | Chordc1       | Dnajb1        |
| 20912 | 22303 | Chordc1       | Cdt1          |
| 20943 | 22406 | 1700113H08Rik | Vnn1          |
| 20980 | 3587  | Taf12         | MMT00041940   |
| 21060 | 10132 | Ela1          | Ces2          |
| 21060 | 12412 | Ela1          | BC004728      |
| 21102 | 11741 | Cmtm7         | Slc30a10      |
| 21125 | 2115  | Mtif3         | Gpr12         |
| 21126 | 6765  | Dera          | Ldhb          |
| 21126 | 14557 | Dera          | Pyroxd1       |
| 21143 | 14147 | Ypel3         | Acss2         |
| 21202 | 8773  | Acly          | MMT00027093   |
| 21202 | 13293 | Acly          | Gsta2         |
| 21253 | 5974  | MMT00068187   | Arntl         |
| 21295 | 8750  | Snf1lk        | 1700010I14Rik |
| 21331 | 12761 | Slc10a6       | Tsc22d3       |
| 21331 | 15522 | Slc10a6       | 1810011O10Rik |
| 21388 | 13293 | Gbe1          | Gsta2         |
| 21388 | 19772 | Gbe1          | Gnmt          |
| 21425 | 20300 | Rab6          | Plekhb1       |
| 21425 | 21425 | Rab6          | Rab6          |
| 21448 | 12315 | Paqr7         | Srebf1        |
| 21448 | 17090 | Paqr7         | Lass2         |
| 21512 | 2256  | Gas6          | Serpina9      |
| 21512 | 3836  | Gas6          | 2200001I15Rik |
| 21512 | 6109  | Gas6          | Hsd17b2       |
| 21512 | 11565 | Gas6          | Serpina3c     |
| 21512 | 13293 | Gas6          | Gsta2         |
| 21512 | 18299 | Gas6          | MMT00035424   |
| 21512 | 20171 | Gas6          | 1700008G05Rik |
| 21512 | 21692 | Gas6          | MMT00013924   |
| 21549 | 1533  | Rtp4          | BC013712      |
| 21549 | 2224  | Rtp4          | Oasl2         |
| 21549 | 4516  | Rtp4          | Rsad2         |
| 21549 | 6587  | Rtp4          | Irf9          |
| 21549 | 6824  | Rtp4          | Irf7          |
| 21549 | 9847  | Rtp4          | Ifi27         |
| 21549 | 12398 | Rtp4          | Ifi44         |
| 21549 | 14611 | Rtp4          | Ddx60         |
| 21549 | 14880 | Rtp4          | Ms4a4c        |
| 21549 | 16182 | Rtp4          | Oasl1         |
| 21549 | 16199 | Rtp4          | Samhd1        |
| 21549 | 21549 | Rtp4          | Rtp4          |
| 21620 | 11065 | Tmem166       | Mccc1         |
| 21640 | 4687  | Hspa14        | Gtpbp8        |
| 21640 | 6193  | Hspa14        | Lactb2        |
| 21640 | 11375 | Hspa14        | Derl2         |
| 21685 | 7238  | Gzma          | Pycard        |
| 21685 | 22115 | Gzma          | Ccl5          |

|       |       |               |               |
|-------|-------|---------------|---------------|
| 21729 | 4833  | Hdc           | Synpo2        |
| 21733 | 958   | Rhebl1        | Ppp2r5e       |
| 21733 | 16251 | Rhebl1        | G6pc          |
| 21780 | 524   | Ankrd35       | Hsd3b2        |
| 21780 | 3753  | Ankrd35       | Setdb1        |
| 21780 | 11611 | Ankrd35       | S100a13       |
| 21794 | 21202 | Pfcp          | Acly          |
| 21824 | 2224  | 5830443L24Rik | Oasl2         |
| 21824 | 8547  | 5830443L24Rik | Gbp4          |
| 21824 | 9847  | 5830443L24Rik | Ifi27         |
| 21824 | 14880 | 5830443L24Rik | Ms4a4c        |
| 21824 | 21824 | 5830443L24Rik | 5830443L24Rik |
| 21844 | 8054  | Ncoa7         | Smarca2       |
| 21853 | 19854 | 5430432N15Rik | Kcnj14        |
| 21858 | 8416  | Neil3         | Cdc20         |
| 21858 | 11422 | Neil3         | Pltp          |
| 21872 | 11129 | Stambpl1      | Ankhd1        |
| 21903 | 22216 | Nr1d1         | Sp5           |
| 21952 | 7088  | Tfb1m         | Slc37a1       |
| 21952 | 17707 | Tfb1m         | Rshl2b        |
| 21986 | 16863 | Cstf1         | 2410001C21Rik |
| 21993 | 11129 | D430015B01Rik | Ankhd1        |
| 22001 | 22001 | Gtlf3b        | Gtlf3b        |
| 22010 | 18083 | Ccdc41        | Gadd45a       |
| 22012 | 21727 | Itgae         | Khk           |
| 22075 | 630   | C1s           | C1s           |
| 22090 | 11065 | Plscr1        | Mccc1         |
| 22090 | 23253 | Plscr1        | D030011O10Rik |
| 22104 | 7909  | Rnf123        | Oas3          |
| 22104 | 11435 | Rnf123        | Rnaset2a      |
| 22104 | 17707 | Rnf123        | Rshl2b        |
| 22151 | 11807 | Plxnd1        | Fbxo31        |
| 22151 | 21202 | Plxnd1        | Acly          |
| 22213 | 2850  | Adora1        | Slc16a6       |
| 22213 | 11741 | Adora1        | Slc30a10      |
| 22226 | 18947 | Pm20d1        | Ctse          |
| 22226 | 22226 | Pm20d1        | Pm20d1        |
| 22290 | 2636  | Tubb2a        | Tars          |
| 22290 | 11054 | Tubb2a        | Rnase4        |
| 22297 | 13988 | Zfyve1        | Cntnap2       |
| 22324 | 8662  | MMT00060741   | Brca2         |
| 22324 | 12315 | MMT00060741   | Srebf1        |
| 22333 | 1041  | Hnrnp3        | 3110049J23Rik |
| 22333 | 22333 | Hnrnp3        | Hnrnp3        |
| 22351 | 15953 | Fanca         | Acsf3         |
| 22403 | 19790 | Bank1         | Polg2         |
| 22403 | 22640 | Bank1         | Bud13         |
| 22406 | 3354  | Vnn1          | Ropn1l        |
| 22406 | 3565  | Vnn1          | MMT00045908   |
| 22406 | 9842  | Vnn1          | Qdpr          |
| 22406 | 12556 | Vnn1          | Ass1          |

|       |       |               |                    |
|-------|-------|---------------|--------------------|
| 22406 | 15205 | Vnn1          | MMT00030262        |
| 22406 | 21214 | Vnn1          | Scd1               |
| 22406 | 22406 | Vnn1          | Vnn1               |
| 22406 | 22998 | Vnn1          | Ass1               |
| 22411 | 3139  | Reck          | Gba2               |
| 22411 | 3847  | Reck          | Tdrd7              |
| 22520 | 874   | Sec13         | Aldh1a7            |
| 22520 | 11946 | Sec13         | MMT00030953        |
| 22520 | 14323 | Sec13         | Scarb1             |
| 22520 | 18201 | Sec13         | MMT00060232        |
| 22520 | 21214 | Sec13         | Scd1               |
| 22521 | 3799  | Hsp90b1       | Serpinh1           |
| 22560 | 6675  | Gpr56         | Sfrs4              |
| 22693 | 9161  | Trim68        | Mrpl17             |
| 22693 | 22693 | Trim68        | Trim68             |
| 22727 | 10554 | Pdgfra        | ENSMUSG00000074179 |
| 22732 | 21251 | Cyb5b         | Cpt1a              |
| 22740 | 6231  | Manbal        | 9030622O22Rik      |
| 22740 | 14647 | Manbal        | Cst3               |
| 22762 | 21214 | Slc6a4        | Scd1               |
| 22852 | 23183 | Nepn          | Nnmt               |
| 22925 | 11576 | Parp16        | Gm1381             |
| 22961 | 2023  | MMT00055950   | MMT00072215        |
| 22961 | 22961 | MMT00055950   | MMT00055950        |
| 23005 | 23005 | 4930405A21Rik | 4930405A21Rik      |
| 23032 | 9258  | Mett10d       | P4ha1              |
| 23032 | 17591 | Mett10d       | D930015E06Rik      |
| 23032 | 18135 | Mett10d       | Tmed3              |
| 23189 | 3449  | Rbm28         | Hes6               |
| 23189 | 5804  | Rbm28         | Thrsp              |
| 23189 | 16525 | Rbm28         | Lbp                |
| 23189 | 22046 | Rbm28         | Cml4               |
| 23267 | 21214 | Hsd17b11      | Scd1               |
| 23283 | 1985  | Mrps12        | Pepd               |
| 23283 | 18053 | Mrps12        | Psmc4              |
| 23324 | 20058 | Prdx6         | Dnaic1             |
| 23328 | 9910  | Rora          | EG666644           |
| 23342 | 12280 | Ndfip2        | Cln5               |
| 23353 | 16863 | Slmo2         | 2410001C21Rik      |
| 23353 | 21727 | Slmo2         | Khk                |
| 23367 | 1031  | Tm2d2         | Uros               |
| 23367 | 16510 | Tm2d2         | Tspsyl4            |
| 23397 | 6370  | Ccnjl         | Aqp8               |
| 23397 | 7950  | Ccnjl         | Efha1              |
| 23403 | 1416  | Ndc80         | 6720460F02Rik      |
| 23474 | 7654  | MMT00011721   | Ptpmt1             |
| 23474 | 9547  | MMT00011721   | MMT00006479        |
| 23495 | 13382 | Cryab         | Bco2               |
| 23495 | 16242 | Cryab         | MMT00053207        |
| 23500 | 13780 | BC055004      | Pilra              |
| 23552 | 21431 | Rasl11b       | Xbp1               |



|       |       |               |               |
|-------|-------|---------------|---------------|
| 23604 | 1357  | Ephb3         | Pabpn1        |
| 23604 | 12315 | Ephb3         | Srebf1        |
| 23625 | 1660  | Pkd2          | Zfp33b        |
| 23625 | 6330  | Pkd2          | Dgkq          |
| 23625 | 8547  | Pkd2          | Gbp4          |
| 23625 | 8807  | Pkd2          | Ankrd56       |
| 23664 | 5764  | Btg1          | Ltb4dh        |
| 23664 | 8684  | Btg1          | Il15          |
| 23693 | 17638 | A530016L24Rik | Adssl1        |
| 23693 | 23693 | A530016L24Rik | A530016L24Rik |

**Table T16:** Adipose cis eQTL genes

| Probe_ID | Gene Symbol   |
|----------|---------------|
| 141      | Jag1          |
| 187      | Wdr62         |
| 191      | Fbp2          |
| 223      | Trp53inp2     |
| 224      | Zhx2          |
| 268      | Sys1          |
| 286      | MMT00070509   |
| 290      | B230118H07Rik |
| 327      | H2-Ea         |
| 333      | Ciapin1       |
| 372      | Txndc1        |
| 380      | Fry           |
| 399      | Cr1l          |
| 403      | Leprotl1      |
| 419      | Foxk2         |
| 420      | Ear11         |
| 451      | Mllt11        |
| 479      | Best1         |
| 530      | Mest          |
| 619      | Fmn12         |
| 622      | Serping1      |
| 623      | Lmf1          |
| 630      | C1s           |
| 676      | Ms4a4d        |
| 678      | Ncaph         |
| 692      | Pelo          |
| 715      | Padi3         |
| 725      | BC005561      |
| 769      | 5430437P03Rik |
| 866      | Zfp369        |
| 868      | Lrrc9         |
| 870      | Rint1         |
| 874      | Aldh1a7       |
| 929      | Dusp4         |
| 930      | Cd55          |
| 944      | Sla2          |
| 949      | Plekha6       |
| 1014     | Rtcd1         |
| 1041     | 3110049J23Rik |
| 1055     | Gm525         |
| 1101     | Sec11a        |
| 1135     | Akap12        |
| 1162     | Cpsf4         |
| 1169     | Centg3        |
| 1177     | EG545391      |
| 1180     | Clec4a3       |
| 1232     | Abhd1         |
| 1241     | Meox1         |
| 1248     | Usp24         |

|      |               |
|------|---------------|
| 1253 | Scel          |
| 1257 | Slc25a45      |
| 1270 | 1700029I01Rik |
| 1287 | Acss3         |
| 1298 | Trim41        |
| 1304 | H2afy         |
| 1321 | AW548124      |
| 1340 | Tap2          |
| 1371 | 1200009I06Rik |
| 1401 | Klk8          |
| 1438 | Dclre1b       |
| 1444 | C1r           |
| 1455 | Smek1         |
| 1466 | Ubap2l        |
| 1502 | Preli2        |
| 1515 | Med20         |
| 1522 | Nfkbib        |
| 1537 | 1700052K11Rik |
| 1547 | Eid1          |
| 1566 | Kctd15        |
| 1568 | Frmd4b        |
| 1602 | Mina          |
| 1603 | Lrwd1         |
| 1613 | Trim26        |
| 1629 | Gcsh          |
| 1653 | Anxa5         |
| 1654 | Dhx58         |
| 1660 | Zfp33b        |
| 1672 | Mlh1          |
| 1678 | Tcf15         |
| 1690 | Nlrp5         |
| 1702 | Galc          |
| 1716 | Git1          |
| 1722 | Iqgap1        |
| 1751 | Xdh           |
| 1755 | Ocel1         |
| 1767 | BC016495      |
| 1788 | Gadd45gip1    |
| 1789 | Pcbp2         |
| 1793 | D3Ucla1       |
| 1797 | Batf2         |
| 1867 | Bcas2         |
| 1877 | Amica1        |
| 1899 | 1110031B06Rik |
| 1936 | Cbwd1         |
| 1960 | Ubr2          |
| 1968 | Nudc          |
| 1985 | Pepd          |
| 1990 | Prkg1         |
| 1991 | Ttc17         |
| 1992 | Arl8b         |

|      |               |
|------|---------------|
| 2002 | Hapln3        |
| 2012 | Cetn4         |
| 2021 | Atf7ip        |
| 2043 | Arl2bp        |
| 2044 | Hsd17b7       |
| 2076 | Rin2          |
| 2121 | Brms1l        |
| 2128 | 4930447K03Rik |
| 2137 | Nexn          |
| 2157 | 0610007C21Rik |
| 2185 | Pef1          |
| 2229 | Gjc1          |
| 2243 | Gcsh          |
| 2297 | Syce2         |
| 2308 | A930005I04Rik |
| 2362 | Mkks          |
| 2372 | Stx12         |
| 2382 | Usp24         |
| 2436 | Fblim1        |
| 2440 | 1500003O22Rik |
| 2456 | Mrpl10        |
| 2457 | 1110032E23Rik |
| 2483 | Gmeb1         |
| 2485 | Adck1         |
| 2490 | MMT00070880   |
| 2523 | Pgs1          |
| 2527 | 1600012F09Rik |
| 2529 | Hmcn2         |
| 2562 | Nhedc2        |
| 2571 | Rmnd1         |
| 2595 | Acbd4         |
| 2599 | Lsm14a        |
| 2630 | Il17re        |
| 2632 | Aph1a         |
| 2651 | Ttc7          |
| 2655 | Adamdec1      |
| 2668 | C3ar1         |
| 2705 | Hrbl          |
| 2719 | St6galnac2    |
| 2722 | Abca5         |
| 2743 | Tcf3          |
| 2749 | Naf1          |
| 2752 | Fcgr1         |
| 2753 | Myo6          |
| 2815 | Eif2ak3       |
| 2832 | 2810021J22Rik |
| 2848 | Serpine2      |
| 2862 | MMT00068885   |
| 2877 | Pcyt2         |
| 2885 | Hebp2         |
| 2889 | Pqlc2         |

|      |               |
|------|---------------|
| 2901 | Tmem132d      |
| 2912 | Wtip          |
| 2938 | H2-T23        |
| 2947 | Bcl2a1b       |
| 2950 | Micall1       |
| 2980 | Slc37a2       |
| 2982 | Mdfic         |
| 2993 | Gm1752        |
| 3014 | Rfwd3         |
| 3017 | Fas           |
| 3021 | Gdf9          |
| 3029 | Ybx1          |
| 3036 | Slamf9        |
| 3052 | 9130404D08Rik |
| 3086 | Tubg2         |
| 3141 | Tmf1          |
| 3159 | Pld1          |
| 3191 | Lamc2         |
| 3214 | Dnmt3b        |
| 3235 | BC029214      |
| 3251 | Thg1l         |
| 3257 | Map1lc3a      |
| 3261 | Rpap2         |
| 3271 | Dis3          |
| 3289 | Adamtsl4      |
| 3314 | Wars2         |
| 3317 | Ak3           |
| 3325 | Plekhj1       |
| 3336 | Gart          |
| 3337 | Klra7         |
| 3401 | BB146404      |
| 3411 | Rabl2a        |
| 3475 | 2610305D13Rik |
| 3480 | Pnpo          |
| 3493 | Wbp4          |
| 3506 | Med13l        |
| 3531 | Tslp          |
| 3559 | 4933433P14Rik |
| 3580 | MMT00008557   |
| 3592 | Twistnb       |
| 3594 | Rasa4         |
| 3616 | Dnajc16       |
| 3622 | Trim21        |
| 3624 | Pygb          |
| 3632 | Lctl          |
| 3637 | D930014E17Rik |
| 3641 | 4930422G04Rik |
| 3649 | Zfp395        |
| 3654 | St13          |
| 3676 | Ucp2          |
| 3685 | Apoc1         |

|      |               |
|------|---------------|
| 3703 | Ggcx          |
| 3728 | Sfxn4         |
| 3744 | Rmnd1         |
| 3753 | Setdb1        |
| 3797 | Nrip2         |
| 3812 | Zfyve26       |
| 3850 | Dach1         |
| 3885 | Apol7c        |
| 3905 | H2-Q1         |
| 3921 | 2300002D11Rik |
| 3988 | 4933427G17Rik |
| 4010 | Alkbh2        |
| 4029 | Samsn1        |
| 4033 | Mgst2         |
| 4034 | Slc6a13       |
| 4038 | 1200009O22Rik |
| 4070 | Chst10        |
| 4082 | Colec11       |
| 4116 | lfi205        |
| 4126 | Vti1a         |
| 4181 | Gzf1          |
| 4186 | Car7          |
| 4191 | Fbln2         |
| 4195 | Csrp2bp       |
| 4203 | Fermt2        |
| 4210 | Cygb          |
| 4276 | Chmp4b        |
| 4305 | Tmem51        |
| 4336 | Rbbp9         |
| 4344 | 1810073G14Rik |
| 4346 | Ccdc46        |
| 4387 | Frs3          |
| 4400 | 9030425E11Rik |
| 4404 | Commd5        |
| 4409 | 5430435G22Rik |
| 4411 | 2310039H08Rik |
| 4414 | 5033406O09Rik |
| 4454 | BC055107      |
| 4466 | MMT00014327   |
| 4491 | E2f6          |
| 4499 | Enpp2         |
| 4526 | Satb1         |
| 4532 | BC034090      |
| 4602 | Pdzrn3        |
| 4604 | Cyfip2        |
| 4617 | Agpat9        |
| 4626 | 2310046K01Rik |
| 4628 | MMT00040865   |
| 4638 | Alkbh4        |
| 4655 | 1810029B16Rik |
| 4669 | H2-M10.5      |

|      |                    |
|------|--------------------|
| 4729 | Slc7a10            |
| 4768 | Lsm10              |
| 4785 | ORF63              |
| 4837 | Ear2               |
| 4896 | 4930405M20Rik      |
| 4901 | MMT00073557        |
| 4933 | Clec14a            |
| 4938 | Mccc2              |
| 4990 | Mmp27              |
| 5002 | Ifi202b            |
| 5003 | 2410081M15Rik      |
| 5008 | Ehd1               |
| 5021 | Gdap2              |
| 5064 | Tekt2              |
| 5113 | Nxn1               |
| 5123 | Zfp191             |
| 5158 | Rtn4               |
| 5166 | Lix1               |
| 5192 | MMT00038487        |
| 5218 | ENSMUSG00000046088 |
| 5252 | Mfsd3              |
| 5258 | Mcts2              |
| 5263 | Anapc13            |
| 5295 | F2r                |
| 5332 | Pdlim4             |
| 5352 | Pdcd2l             |
| 5360 | Cep76              |
| 5375 | Sec23b             |
| 5465 | Slamf8             |
| 5482 | Cdsn               |
| 5488 | C920009B18Rik      |
| 5508 | Lrig2              |
| 5511 | BC055004           |
| 5522 | Pink1              |
| 5525 | Prkca              |
| 5539 | Eif2s2             |
| 5561 | MMT00054702        |
| 5591 | Igsf8              |
| 5597 | Tll4               |
| 5603 | BC020535           |
| 5611 | Rapgef3            |
| 5632 | Reck               |
| 5636 | Trmu               |
| 5639 | Gdpd3              |
| 5645 | Tmem8              |
| 5665 | Nsun2              |
| 5677 | Cmas               |
| 5681 | Mbd1               |
| 5693 | Zfp809             |
| 5733 | B4galnt2           |
| 5762 | Trpc3              |

|      |               |
|------|---------------|
| 5786 | Lta           |
| 5788 | Smpdl3b       |
| 5791 | Baiap2l1      |
| 5792 | Tpd52l2       |
| 5822 | Car2          |
| 5833 | Kcnk7         |
| 5840 | Tbc1d9b       |
| 5858 | Itch          |
| 5884 | Gstm2         |
| 5900 | Igsf21        |
| 5910 | 1110014J01Rik |
| 5912 | Ccbe1         |
| 5923 | Vav1          |
| 5934 | S100a10       |
| 5936 | Pfn1          |
| 5965 | Pbld          |
| 6004 | Klra9         |
| 6016 | A530057A03Rik |
| 6017 | MMT00018015   |
| 6027 | Rtn3          |
| 6035 | Nkd1          |
| 6036 | Pram1         |
| 6059 | Dsn1          |
| 6060 | Tle6          |
| 6129 | Msc           |
| 6147 | Dirc2         |
| 6158 | Msh2          |
| 6183 | Atxn10        |
| 6191 | Ddost         |
| 6217 | MMT00019564   |
| 6234 | P4ha2         |
| 6250 | Csnk2a1       |
| 6283 | Ptpn22        |
| 6309 | Cd209e        |
| 6312 | 1500035H01Rik |
| 6330 | Dgkq          |
| 6331 | Tll1          |
| 6333 | Iqcg          |
| 6360 | D17H6S56E-3   |
| 6363 | 9130014G24Rik |
| 6372 | 1110021L09Rik |
| 6376 | Nle1          |
| 6394 | Fbxo6         |
| 6413 | Fbxo4         |
| 6437 | Gnptg         |
| 6470 | Arnt          |
| 6475 | Sdc4          |
| 6487 | Slc4a4        |
| 6498 | MMT00016809   |
| 6503 | Cep97         |
| 6506 | Scyl2         |



|      |               |
|------|---------------|
| 6513 | Qpctl         |
| 6515 | Eif2a         |
| 6528 | Dusp15        |
| 6532 | Auh           |
| 6534 | Cript         |
| 6587 | Irf9          |
| 6590 | Pds5a         |
| 6607 | Reln          |
| 6691 | Klrb1f        |
| 6697 | Serpini1      |
| 6765 | Ldhb          |
| 6768 | Plekhf2       |
| 6788 | Psen2         |
| 6790 | Zdhhc24       |
| 6804 | Cyp2d22       |
| 6828 | Pigh          |
| 6842 | Amotl2        |
| 6851 | Magohb        |
| 6871 | Neurog2       |
| 6888 | Cxcl9         |
| 6922 | Tmem86b       |
| 6931 | Hrsp12        |
| 6932 | Ckap4         |
| 6962 | Cyp1b1        |
| 6974 | Tmem65        |
| 6977 | Lman1         |
| 7030 | RP23-232H13.5 |
| 7088 | Slc37a1       |
| 7100 | Tomm22        |
| 7116 | Katnal1       |
| 7135 | Ezr           |
| 7173 | Trim59        |
| 7229 | H2-DMb1       |
| 7258 | Bmp2k         |
| 7285 | Tbc1d4        |
| 7311 | Lsm6          |
| 7321 | Rdbp          |
| 7366 | BC008163      |
| 7370 | Spop          |
| 7372 | Fastk         |
| 7377 | Suds3         |
| 7378 | 1700001J03Rik |
| 7407 | Slc9a3r1      |
| 7431 | ldh1          |
| 7466 | Insl6         |
| 7472 | Klra1         |
| 7492 | Adfp          |
| 7503 | Rab11fip1     |
| 7519 | Gstm1         |
| 7556 | A530050D06Rik |
| 7610 | Scand1        |

|      |               |
|------|---------------|
| 7631 | Uhrf1bp1      |
| 7651 | Tmem192       |
| 7654 | Ptpmt1        |
| 7662 | Lyz1          |
| 7666 | Gcgr          |
| 7761 | Nudt19        |
| 7808 | Bnc2          |
| 7812 | Ipo7          |
| 7945 | Gpc2          |
| 7975 | Lancl1        |
| 7991 | Gpr115        |
| 8016 | Mrpl35        |
| 8055 | Ptcd3         |
| 8072 | Zcchc9        |
| 8073 | Irak1bp1      |
| 8079 | Pts           |
| 8114 | Kcnn1         |
| 8131 | Btbd3         |
| 8155 | Mark3         |
| 8156 | Tll1          |
| 8252 | Plcl1         |
| 8274 | Zc3h11a       |
| 8284 | EG209380      |
| 8337 | Lgr4          |
| 8350 | D8Ertd738e    |
| 8368 | Rad51l3       |
| 8372 | Uap1          |
| 8394 | Dpy19l3       |
| 8427 | Mybpc3        |
| 8430 | Pttg1ip       |
| 8438 | Mrpl48        |
| 8443 | Pola2         |
| 8448 | Sucla2        |
| 8485 | Lrrk2         |
| 8547 | Gbp4          |
| 8563 | Leng1         |
| 8610 | Padi4         |
| 8649 | MMT00072863   |
| 8653 | AW124722      |
| 8679 | Tiparp        |
| 8703 | Gstp1         |
| 8705 | Ahdc1         |
| 8711 | 5430432M24Rik |
| 8721 | Tbc1d10c      |
| 8750 | 1700010I14Rik |
| 8769 | Cenpk         |
| 8783 | Zfyve16       |
| 8794 | 1500011B03Rik |
| 8901 | Adamts10      |
| 8902 | Aldh3b1       |
| 8904 | Trerf1        |

|      |               |
|------|---------------|
| 8951 | Cd97          |
| 9005 | Mapk1ip1l     |
| 9010 | 8430419L09Rik |
| 9028 | Unc45a        |
| 9057 | Spp1          |
| 9066 | 2210020M01Rik |
| 9077 | Cnpy4         |
| 9122 | Sepw1         |
| 9156 | Klra23        |
| 9161 | Mrpl17        |
| 9173 | Arhgap15      |
| 9195 | Sub1          |
| 9230 | 1700027N10Rik |
| 9278 | Clec2i        |
| 9304 | AI449175      |
| 9310 | Pdrg1         |
| 9326 | Pgm5          |
| 9352 | Hnrpl         |
| 9359 | Dhx34         |
| 9380 | Spata5        |
| 9386 | Bxdc5         |
| 9408 | Hmgcs2        |
| 9417 | Cd163         |
| 9419 | Acox2         |
| 9431 | Snopc5        |
| 9454 | 2810426N06Rik |
| 9532 | MMT00050594   |
| 9541 | Npal3         |
| 9558 | Akr7a5        |
| 9611 | Ncf2          |
| 9634 | Atp13a2       |
| 9657 | MMT00007450   |
| 9683 | Prdm8         |
| 9702 | Stk39         |
| 9718 | Fmo5          |
| 9729 | Got111        |
| 9755 | MMT00066614   |
| 9762 | Snx5          |
| 9780 | 4930583H14Rik |
| 9789 | Rad51ap1      |
| 9805 | Tagap         |
| 9820 | BC023105      |
| 9827 | Pam           |
| 9830 | Rbks          |
| 9832 | Brf1          |
| 9840 | Dmxl1         |
| 9861 | Serpib6b      |
| 9875 | Cdk5rap3      |
| 9896 | Cdh13         |
| 9912 | Ttc27         |
| 9931 | Glit25d1      |

|       |               |
|-------|---------------|
| 9951  | Rpp21         |
| 9955  | Psmg2         |
| 10052 | 6530404N21Rik |
| 10057 | Sult6b1       |
| 10065 | 9030625A04Rik |
| 10077 | Cep63         |
| 10143 | Uchl1         |
| 10145 | 2700038C09Rik |
| 10222 | AF366264      |
| 10230 | Yme111        |
| 10233 | Abi3bp        |
| 10273 | Gpt2          |
| 10275 | Trim12        |
| 10360 | Nrxn2         |
| 10376 | C920025E04Rik |
| 10393 | Slc7a8        |
| 10407 | Gpatch3       |
| 10419 | Ndufaf2       |
| 10443 | Pvrl2         |
| 10456 | Sbf2          |
| 10467 | MMT00074572   |
| 10473 | Klra8         |
| 10482 | Mcat          |
| 10483 | Crot          |
| 10497 | Man2b1        |
| 10507 | Clec2g        |
| 10521 | Ttf2          |
| 10539 | Unc45b        |
| 10553 | Dusp23        |
| 10595 | 2810422O20Rik |
| 10635 | Itfg2         |
| 10638 | Gpr97         |
| 10667 | H2-Eb1        |
| 10668 | Kars          |
| 10711 | 1700108F19Rik |
| 10727 | Klra3         |
| 10729 | Fgd2          |
| 10747 | Abcf2         |
| 10758 | Gdf1          |
| 10786 | Mrps36        |
| 10788 | D430019H16Rik |
| 10820 | Dsel          |
| 10821 | Pkd2l2        |
| 10846 | Nrp2          |
| 10876 | Steap1        |
| 10880 | Klra8         |
| 10899 | Coro2b        |
| 10906 | Ccdc122       |
| 10995 | Ap4m1         |
| 11109 | AI931714      |
| 11128 | Aars          |

|       |               |
|-------|---------------|
| 11147 | Gng12         |
| 11166 | Uqcc          |
| 11167 | Dars2         |
| 11183 | Pank3         |
| 11193 | Tsc22d1       |
| 11199 | Sirt7         |
| 11220 | AU021092      |
| 11225 | Numbl         |
| 11266 | Gtdc1         |
| 11268 | Nxf1          |
| 11284 | Elac2         |
| 11288 | Cacna1i       |
| 11292 | Nr2f6         |
| 11319 | Exoc7         |
| 11369 | Stx3          |
| 11371 | Amhr2         |
| 11406 | Ifi203        |
| 11423 | 6720463M24Rik |
| 11435 | Rnaset2a      |
| 11446 | Dock8         |
| 11465 | Eif3k         |
| 11467 | Ypel5         |
| 11571 | Bpnt1         |
| 11593 | Usf1          |
| 11619 | Grap          |
| 11620 | Zfr           |
| 11648 | Lrfrn2        |
| 11649 | Hfe           |
| 11650 | 1700021K19Rik |
| 11655 | Cd200r1       |
| 11725 | Itln1         |
| 11775 | Phyh          |
| 11776 | Ifi30         |
| 11780 | Taok1         |
| 11789 | Ccdc90a       |
| 11795 | Gps2          |
| 11812 | Mrpl16        |
| 11816 | Ccdc99        |
| 11820 | Abcg4         |
| 11859 | Poln          |
| 11860 | Hesx1         |
| 11864 | Dis3l         |
| 11870 | Apitd1        |
| 11872 | Vamp5         |
| 11888 | Myadm         |
| 11903 | 4933437F05Rik |
| 11940 | Chi3l1        |
| 11953 | Gtf2b         |
| 11969 | Gbas          |
| 11987 | Dmkn          |
| 12004 | Lgals6        |

|       |               |
|-------|---------------|
| 12055 | 1810008A18Rik |
| 12070 | Adat2         |
| 12095 | Gucy1a2       |
| 12097 | 9430015G10Rik |
| 12109 | Smad4         |
| 12140 | Mrps15        |
| 12168 | H2-Ke6        |
| 12173 | Acbd6         |
| 12174 | 2610027C15Rik |
| 12239 | A630077B13Rik |
| 12245 | Zfp322a       |
| 12280 | Cln5          |
| 12302 | Cbx1          |
| 12312 | Ms4a6d        |
| 12330 | Aldh6a1       |
| 12336 | Timm13        |
| 12380 | Rftn2         |
| 12385 | Mrpl33        |
| 12388 | 8430406I07Rik |
| 12402 | Th1l          |
| 12412 | BC004728      |
| 12420 | Klhl21        |
| 12429 | Slitrk5       |
| 12492 | Ybx1          |
| 12494 | Thnsl1        |
| 12502 | Yy1           |
| 12528 | Zfp30         |
| 12546 | Cd7           |
| 12563 | Col17a1       |
| 12586 | G3bp2         |
| 12599 | Golt1b        |
| 12616 | Asgr2         |
| 12623 | Ccdc123       |
| 12625 | AI597468      |
| 12632 | Ehmt1         |
| 12636 | MMT00000549   |
| 12650 | Klra19        |
| 12656 | Coq5          |
| 12678 | MMT00007486   |
| 12690 | Jak3          |
| 12694 | Riok2         |
| 12716 | 5830417I10Rik |
| 12730 | 9130019O22Rik |
| 12751 | Sorl1         |
| 12774 | Pgm1          |
| 12775 | Vstm2b        |
| 12784 | Nudt6         |
| 12794 | MMT00082139   |
| 12804 | Sugt1         |
| 12827 | Stmn4         |
| 12838 | Tec           |

|       |               |
|-------|---------------|
| 12856 | Clstn3        |
| 12863 | Fgg           |
| 12866 | 4921517L17Rik |
| 12885 | Ccl24         |
| 12888 | AI931714      |
| 12934 | Rbp7          |
| 12984 | Cyb5          |
| 13025 | Irf2          |
| 13027 | Ppp2r5c       |
| 13044 | 5730596K20Rik |
| 13045 | A330021E22Rik |
| 13072 | BC022687      |
| 13076 | Pias4         |
| 13113 | Man2a2        |
| 13127 | Col5a1        |
| 13137 | 2610301G19Rik |
| 13149 | Ifi203        |
| 13175 | 4930432O21Rik |
| 13195 | Mtif2         |
| 13221 | Srd5a3        |
| 13224 | Cp            |
| 13235 | Park7         |
| 13246 | Klc4          |
| 13253 | Mtvr2         |
| 13277 | 9530015I07Rik |
| 13285 | Cd276         |
| 13292 | Sntb2         |
| 13304 | Gadd45b       |
| 13355 | Foxs1         |
| 13356 | Aldh3b2       |
| 13357 | Rpp14         |
| 13359 | BC043098      |
| 13388 | Klra18        |
| 13417 | 1700025G04Rik |
| 13475 | Morn2         |
| 13488 | Art4          |
| 13493 | Ring1         |
| 13504 | Lair1         |
| 13507 | Spats1        |
| 13513 | Trim25        |
| 13528 | Capn12        |
| 13529 | Abi3bp        |
| 13554 | Aqr           |
| 13578 | Asph          |
| 13581 | Srxn1         |
| 13615 | Arl16         |
| 13617 | Acin1         |
| 13719 | Ak5           |
| 13732 | Tpm4          |
| 13780 | Pilra         |
| 13789 | H2-Q8         |

|       |               |
|-------|---------------|
| 13801 | Adh4          |
| 13810 | 1110036O03Rik |
| 13842 | Aurkaip1      |
| 13877 | Btnl9         |
| 13928 | Cdc123        |
| 13929 | Lamb3         |
| 13946 | Slc35b2       |
| 13954 | Chst1         |
| 13983 | Copz2         |
| 14027 | Rpo1-1        |
| 14032 | Cog6          |
| 14045 | Rps4y2        |
| 14046 | Ms4a7         |
| 14059 | Cyp4f18       |
| 14062 | Pan3          |
| 14084 | D530033C11Rik |
| 14085 | Cdkl2         |
| 14101 | Zfp69         |
| 14129 | 5430403G16Rik |
| 14132 | Glo1          |
| 14147 | Acss2         |
| 14166 | Cldn15        |
| 14169 | 1700052N19Rik |
| 14188 | Ttc8          |
| 14190 | Ppil1         |
| 14226 | Rbm47         |
| 14266 | Sox13         |
| 14276 | Cdc42         |
| 14279 | 3930402G23Rik |
| 14281 | 5031414D18Rik |
| 14296 | Slc35b1       |
| 14304 | Mrpl48        |
| 14306 | Gtf3c2        |
| 14307 | Kcnj8         |
| 14334 | Fxyd3         |
| 14343 | Hnrnpa0       |
| 14355 | Tle1          |
| 14375 | D17H6S56E-5   |
| 14384 | Dnajc7        |
| 14387 | Ccdc88c       |
| 14399 | Csnk2a1       |
| 14468 | Tmtc2         |
| 14475 | Abcg1         |
| 14526 | Pacsin3       |
| 14557 | Pyroxd1       |
| 14559 | Frrs1         |
| 14577 | Cdc37l1       |
| 14611 | Ddx60         |
| 14617 | MMT00033859   |
| 14621 | Six4          |
| 14631 | Stag3         |



|       |               |
|-------|---------------|
| 14647 | Cst3          |
| 14650 | 2810433K01Rik |
| 14676 | Mecr          |
| 14677 | S100b         |
| 14691 | Nckap1        |
| 14697 | Mtrf1         |
| 14733 | Fhit          |
| 14740 | Mfap1b        |
| 14781 | Mars2         |
| 14842 | Gipr          |
| 14844 | Gpsn2         |
| 14866 | Kctd2         |
| 14868 | Tmem159       |
| 14877 | Ptx3          |
| 14884 | Mrps22        |
| 14913 | Yipf4         |
| 14924 | Hn1l          |
| 14952 | Tex2          |
| 14968 | Srbd1         |
| 14989 | Map3k5        |
| 15022 | Tmem14c       |
| 15027 | Brd7          |
| 15032 | 2310033P09Rik |
| 15048 | 2310001H12Rik |
| 15072 | Commd9        |
| 15099 | Arhgap10      |
| 15121 | Itln1         |
| 15127 | Cct6b         |
| 15133 | 3110048E14Rik |
| 15174 | 3110001D03Rik |
| 15181 | Enpp4         |
| 15220 | Ddx6          |
| 15235 | Ankrd13d      |
| 15255 | Ccl8          |
| 15258 | Coil          |
| 15264 | Flywch2       |
| 15276 | Eif4e         |
| 15277 | 2810002N01Rik |
| 15306 | Dpy30         |
| 15318 | Aars2         |
| 15321 | Pus7          |
| 15334 | Rnaseh2c      |
| 15352 | Socs2         |
| 15353 | Ednrb         |
| 15384 | Mat2a         |
| 15439 | Cdc14b        |
| 15455 | Lsm4          |
| 15485 | Zfp251        |
| 15508 | 4632415L05Rik |
| 15531 | Prickle4      |
| 15564 | Lix1          |

|       |               |
|-------|---------------|
| 15565 | 2310001A20Rik |
| 15569 | BC003331      |
| 15575 | Bckdhb        |
| 15576 | Mboat5        |
| 15577 | Glt8d4        |
| 15625 | Capg          |
| 15635 | Crkrs         |
| 15664 | Masp2         |
| 15676 | Fads1         |
| 15688 | Tmem71        |
| 15698 | Them2         |
| 15708 | Retsat        |
| 15792 | Use1          |
| 15797 | Ppp2r5c       |
| 15815 | MMT00080242   |
| 15842 | Med12l        |
| 15844 | Klhdc9        |
| 15857 | Itih5         |
| 15864 | Rps6ka2       |
| 15897 | D10Jhu81e     |
| 15917 | 3100002J23Rik |
| 15919 | Fbxl6         |
| 15920 | A630001G21Rik |
| 15935 | Pnpla3        |
| 15971 | Aifm2         |
| 15982 | Syne2         |
| 15997 | Tspan8        |
| 16000 | Nol10         |
| 16034 | Dclk3         |
| 16046 | Ppwd1         |
| 16057 | Vps36         |
| 16060 | Gys2          |
| 16065 | Ldhd          |
| 16066 | Coq2          |
| 16107 | Entpd6        |
| 16146 | Gucy1a3       |
| 16168 | Crif2         |
| 16176 | St3gal5       |
| 16191 | Klc1          |
| 16199 | Samhd1        |
| 16210 | Metrn1        |
| 16227 | Rarres1       |
| 16249 | Lyz2          |
| 16251 | G6pc          |
| 16289 | Myocd         |
| 16290 | Myo5b         |
| 16330 | 2310043J07Rik |
| 16338 | Senp1         |
| 16347 | Mgp           |
| 16356 | 9030607L17Rik |
| 16378 | Ccl8          |

|       |                    |
|-------|--------------------|
| 16405 | Pafah1b1           |
| 16416 | Commd2             |
| 16425 | Agxt2l1            |
| 16440 | Gprc5a             |
| 16443 | Ccdc59             |
| 16451 | 2010007H12Rik      |
| 16494 | 2310007D09Rik      |
| 16501 | Loh11cr2a          |
| 16525 | Lbp                |
| 16528 | Ddr2               |
| 16557 | Rbpms              |
| 16571 | Pqlc1              |
| 16575 | Aff3               |
| 16580 | Tnfaip2            |
| 16590 | C920005C14Rik      |
| 16592 | Psmf1              |
| 16598 | E430018J23Rik      |
| 16610 | Rem1               |
| 16613 | 1110031I02Rik      |
| 16617 | Sh2d4a             |
| 16624 | Psma8              |
| 16679 | Ctsk               |
| 16702 | 2810422J05Rik      |
| 16721 | Stk3               |
| 16814 | AU042651           |
| 16817 | OTTMUSG00000004461 |
| 16849 | Trmt1              |
| 16852 | Vash1              |
| 16858 | Tmem38a            |
| 16861 | Nlrc4              |
| 16886 | Dpy30              |
| 16910 | Ptprr              |
| 16913 | Pira3              |
| 16937 | Ubac2              |
| 16972 | Nenf               |
| 16983 | Pigx               |
| 16985 | Tmem16f            |
| 17009 | Pclo               |
| 17051 | Mrps36             |
| 17073 | 1810049H13Rik      |
| 17081 | 3830406C13Rik      |
| 17135 | Mum1               |
| 17147 | Ttll12             |
| 17158 | Zfp113             |
| 17159 | Gtpbp6             |
| 17160 | Ccdc127            |
| 17163 | Fmo1               |
| 17164 | Slc38a10           |
| 17231 | Cyp2u1             |
| 17285 | 1700019E19Rik      |
| 17302 | Dhcr24             |

|       |               |
|-------|---------------|
| 17304 | Cdc23         |
| 17314 | Napa          |
| 17317 | Jmjd1a        |
| 17322 | Zfp758        |
| 17333 | Slc25a10      |
| 17351 | Rtkn2         |
| 17363 | Aebp2         |
| 17389 | Pop4          |
| 17391 | C530028O21Rik |
| 17401 | Ptgr          |
| 17403 | N4bp1         |
| 17420 | Vps13b        |
| 17447 | Ctsf          |
| 17461 | Ripk5         |
| 17463 | Rgl1          |
| 17514 | Thbd          |
| 17523 | Gdf5          |
| 17528 | Gmn           |
| 17529 | Tnfrsf13c     |
| 17533 | Srd5a1        |
| 17562 | Rbed1         |
| 17574 | Prdm16        |
| 17585 | Gramd1a       |
| 17606 | Tmem90a       |
| 17638 | Adssl1        |
| 17646 | C4b           |
| 17666 | Fstl1         |
| 17676 | Amz1          |
| 17679 | Col3a1        |
| 17692 | Smc6          |
| 17703 | Large         |
| 17707 | Rshl2b        |
| 17716 | Rnf10         |
| 17729 | Prim2         |
| 17736 | Maml3         |
| 17743 | Phb2          |
| 17774 | Ints1         |
| 17776 | BC043118      |
| 17805 | Slc39a12      |
| 17812 | Rnf6          |
| 17819 | C030006K11Rik |
| 17831 | Ndufa6        |
| 17838 | Apoc3         |
| 17842 | Pcdh8         |
| 17854 | Rdh11         |
| 17880 | Ncald         |
| 17968 | 8230402K04Rik |
| 18014 | Dicer1        |
| 18018 | Galnt11       |
| 18020 | D19Ert737e    |
| 18053 | Psmc4         |

|       |               |
|-------|---------------|
| 18054 | Mrps36        |
| 18070 | Ogg1          |
| 18088 | Alkbh6        |
| 18103 | Spaca1        |
| 18120 | Tmem201       |
| 18140 | Atg2b         |
| 18143 | Dnajc1        |
| 18165 | 5830482F20Rik |
| 18172 | Nupr1         |
| 18176 | Aqp11         |
| 18184 | Klrb1b        |
| 18195 | Mafk          |
| 18229 | Syne2         |
| 18267 | 1810021J13Rik |
| 18320 | Fancc         |
| 18333 | Rassf8        |
| 18365 | Bcl2l12       |
| 18371 | Sap130        |
| 18434 | Furin         |
| 18461 | Klra5         |
| 18514 | 4930412F15Rik |
| 18518 | Cap1          |
| 18528 | Mark2         |
| 18537 | Moxd1         |
| 18541 | Rab15         |
| 18561 | Ngly1         |
| 18574 | Parc          |
| 18592 | Txnl4a        |
| 18625 | Cit           |
| 18658 | Gstk1         |
| 18662 | Batf3         |
| 18665 | Hs6st1        |
| 18673 | Muc1          |
| 18680 | EG633285      |
| 18681 | Hexb          |
| 18702 | Mrc1          |
| 18706 | Lect1         |
| 18709 | Srp68         |
| 18714 | Farsb         |
| 18754 | Rbm8a         |
| 18784 | Sdad1         |
| 18790 | Car3          |
| 18835 | Dtwd1         |
| 18849 | MacroD2       |
| 18851 | Apip          |
| 18873 | AB041550      |
| 18878 | Pde4dip       |
| 18905 | Prmt2         |
| 18906 | Zfand3        |
| 18939 | Matn2         |
| 18947 | Ctse          |

|       |               |
|-------|---------------|
| 18972 | Nat5          |
| 19037 | Slc11a2       |
| 19051 | Podnl1        |
| 19068 | 6030408C04Rik |
| 19078 | EG668139      |
| 19092 | MMT00045362   |
| 19102 | Uhrf1bp1l     |
| 19105 | Unc5c         |
| 19115 | Rab32         |
| 19134 | Fn3k          |
| 19169 | Atp10a        |
| 19181 | Slc35a3       |
| 19202 | 1500031L02Rik |
| 19214 | Snapc1        |
| 19223 | Ercc8         |
| 19248 | Txndc9        |
| 19258 | Daf2          |
| 19276 | H28           |
| 19332 | Bpnt1         |
| 19336 | Ap4e1         |
| 19392 | Slc25a16      |
| 19402 | Ddx19a        |
| 19421 | Mbd2          |
| 19440 | Anxa9         |
| 19443 | Prkab1        |
| 19478 | Rnaseh2b      |
| 19482 | Efhc1         |
| 19502 | Fbxo24        |
| 19516 | Ppfia4        |
| 19519 | BC011248      |
| 19520 | Uck2          |
| 19560 | Trmt6         |
| 19578 | Aox1          |
| 19633 | Gm694         |
| 19640 | Tph2          |
| 19688 | Fap           |
| 19689 | 1110032A13Rik |
| 19694 | Grb14         |
| 19719 | EG634650      |
| 19725 | Dcp2          |
| 19734 | Dchs1         |
| 19744 | Acy3          |
| 19763 | Acp2          |
| 19803 | BC003993      |
| 19835 | lars2         |
| 19837 | Angpt4        |
| 19843 | Rbm45         |
| 19854 | Kcnj14        |
| 19876 | 6030443O07Rik |
| 19924 | Ubiad1        |
| 19964 | Ndufa9        |

|       |                    |
|-------|--------------------|
| 19971 | B930046C15Rik      |
| 19982 | ENSMUSG00000071036 |
| 19995 | Pwp1               |
| 19999 | Ift122             |
| 20068 | 2610204M08Rik      |
| 20077 | Ccdc115            |
| 20100 | Guca1b             |
| 20118 | Tmem175            |
| 20119 | Polr3h             |
| 20127 | Ipo8               |
| 20146 | Tm2d1              |
| 20147 | Ybx1               |
| 20174 | Ctnna2             |
| 20191 | Clca5              |
| 20209 | 5730557B15Rik      |
| 20238 | H2-T9              |
| 20275 | Igfbp5             |
| 20292 | 1810048J11Rik      |
| 20300 | Plekhb1            |
| 20337 | St6galnac4         |
| 20384 | BC034069           |
| 20423 | 8-Mar              |
| 20430 | Trio               |
| 20468 | Spa17              |
| 20484 | Ces1               |
| 20490 | Tmem143            |
| 20495 | Tmem41b            |
| 20511 | Decr2              |
| 20521 | BC057079           |
| 20535 | Rbm4               |
| 20560 | Mef2c              |
| 20606 | MMT00042166        |
| 20611 | Map2k3             |
| 20652 | Dlx4               |
| 20661 | Tuft1              |
| 20666 | Mosc1              |
| 20689 | Cnksr3             |
| 20698 | Lman2              |
| 20720 | Ptk2b              |
| 20721 | 4432412L15Rik      |
| 20757 | Suclg1             |
| 20801 | Mrps11             |
| 20810 | Mttp               |
| 20821 | Slco3a1            |
| 20823 | Cradd              |
| 20837 | Dlgap4             |
| 20852 | Extl2              |
| 20861 | Dcst1              |
| 20871 | Pop1               |
| 20903 | Rpia               |
| 20918 | Nxph3              |

|       |               |
|-------|---------------|
| 20948 | Cstf2t        |
| 20949 | Tmem195       |
| 20958 | 4933403F05Rik |
| 20960 | Abcc3         |
| 20961 | Lig3          |
| 20979 | D10Jhu81e     |
| 20999 | 1110049F12Rik |
| 21015 | MMT00014048   |
| 21031 | Slc44a5       |
| 21043 | Gns           |
| 21060 | Ela1          |
| 21075 | Gtf2h5        |
| 21101 | 1110032A03Rik |
| 21102 | Cmtm7         |
| 21125 | Mtif3         |
| 21126 | Dera          |
| 21127 | Triobp        |
| 21189 | Arl5c         |
| 21206 | Supt3h        |
| 21223 | Pira1         |
| 21244 | Nfatc1        |
| 21253 | MMT00068187   |
| 21254 | Bbs7          |
| 21295 | Snf1lk        |
| 21303 | Kcnk2         |
| 21307 | Krcc1         |
| 21314 | Mycbp2        |
| 21371 | Spnb2         |
| 21378 | Havcr2        |
| 21419 | Giyd2         |
| 21425 | Rab6          |
| 21433 | Ubx6          |
| 21438 | Plekha4       |
| 21440 | Tmsb10        |
| 21442 | Rad51l1       |
| 21444 | Pnpt1         |
| 21517 | Sil1          |
| 21541 | Brf2          |
| 21542 | Larp4         |
| 21559 | Rnf219        |
| 21579 | Lsm12         |
| 21598 | Olf353        |
| 21607 | Aldh1a1       |
| 21639 | Hspa9         |
| 21655 | Rab40b        |
| 21665 | Nat5          |
| 21673 | Rbm18         |
| 21675 | Mosc2         |
| 21684 | Cd82          |
| 21721 | Styk1         |
| 21726 | Rsu1          |



|       |                    |
|-------|--------------------|
| 21729 | Hdc                |
| 21761 | D14Ert449e         |
| 21769 | Loxl2              |
| 21780 | Ankrd35            |
| 21805 | Plk3               |
| 21824 | 5830443L24Rik      |
| 21853 | 5430432N15Rik      |
| 21877 | Slitrk6            |
| 21882 | Map2k5             |
| 21907 | Dynlrb1            |
| 21952 | Tfb1m              |
| 21964 | Vwce               |
| 21986 | Cstf1              |
| 21988 | MMT00015654        |
| 21997 | Phf1               |
| 22001 | Gtlf3b             |
| 22021 | Csnk1d             |
| 22075 | C1s                |
| 22095 | Mgst1              |
| 22146 | Aifm2              |
| 22157 | Mxra8              |
| 22202 | OTTMUSG00000021274 |
| 22222 | Gstt1              |
| 22226 | Pm20d1             |
| 22232 | Krt19              |
| 22297 | Zfyve1             |
| 22312 | Itln1              |
| 22333 | Hnrmp3             |
| 22337 | Nlk                |
| 22377 | Gm941              |
| 22395 | Kcna1              |
| 22408 | Calr3              |
| 22411 | Reck               |
| 22416 | Wdr20a             |
| 22437 | Ankrd29            |
| 22445 | Prkag3             |
| 22479 | Ascc2              |
| 22499 | 9030409G11Rik      |
| 22506 | Slc22a4            |
| 22546 | Tnnt1              |
| 22551 | Anapc11            |
| 22557 | P4hb               |
| 22570 | Phtf1              |
| 22621 | Cklf               |
| 22628 | EG626903           |
| 22635 | Nrn1               |
| 22648 | Mpzi1              |
| 22693 | Trim68             |
| 22740 | Manbal             |
| 22762 | Slc6a4             |
| 22776 | Gsr                |

|       |               |
|-------|---------------|
| 22782 | Frrs1         |
| 22786 | Mterfd3       |
| 22793 | Cbr2          |
| 22824 | Hddc3         |
| 22833 | Acat2         |
| 22922 | 2310010M24Rik |
| 22944 | Tmem44        |
| 23005 | 4930405A21Rik |
| 23008 | Ctsz          |
| 23012 | Spg20         |
| 23118 | Ttrap         |
| 23169 | Pla2g2e       |
| 23191 | 3632451O06Rik |
| 23217 | Acyp2         |
| 23259 | Dnajc1        |
| 23262 | C530043G21Rik |
| 23278 | Cd46          |
| 23283 | Mrps12        |
| 23301 | Scamp1        |
| 23306 | Bag2          |
| 23342 | Ndfip2        |
| 23353 | Slmo2         |
| 23354 | Tshr          |
| 23449 | Preli2        |
| 23462 | Bag5          |
| 23466 | Pou2f1        |
| 23474 | MMT00011721   |
| 23493 | Tgs1          |
| 23495 | Cryab         |
| 23500 | BC055004      |
| 23508 | Pdgfd         |
| 23552 | Rasl11b       |
| 23557 | Ppp1r12c      |
| 23606 | Cmtm8         |
| 23622 | Arhgap17      |
| 23625 | Pkd2          |
| 23693 | A530016L24Rik |

**Table T17:** Hypotahlamus cis eQTL genes

| Probe_ID | Gene Symbol   |
|----------|---------------|
| 144      | Krt12         |
| 153      | 2010011I20Rik |
| 169      | Nkx6-2        |
| 175      | Psmb2         |
| 187      | Wdr62         |
| 223      | Trp53inp2     |
| 241      | BC030867      |
| 257      | Sftpc         |
| 264      | Dcakd         |
| 268      | Sys1          |
| 286      | MMT00070509   |
| 290      | B230118H07Rik |
| 298      | 9630013A20Rik |
| 324      | 9830134C10Rik |
| 333      | Ciapi1        |
| 343      | 1700123I01Rik |
| 346      | Olf1484       |
| 372      | Txndc1        |
| 388      | Chst5         |
| 397      | Ak7           |
| 403      | Leprotl1      |
| 436      | Prnp          |
| 478      | Sfrs9         |
| 479      | Best1         |
| 487      | Slc6a15       |
| 589      | Epb4.114b     |
| 607      | Me1           |
| 630      | C1s           |
| 649      | Pop7          |
| 665      | Slc26a1       |
| 676      | Ms4a4d        |
| 678      | Ncaph         |
| 689      | 2010004A03Rik |
| 692      | Pelo          |
| 715      | Padi3         |
| 778      | Galnt3        |
| 794      | Mrps14        |
| 810      | Zzef1         |
| 837      | Rabl5         |
| 842      | Slc29a2       |
| 870      | Rint1         |
| 874      | Aldh1a7       |
| 897      | Mut           |
| 918      | Rpa2          |
| 958      | Ppp2r5e       |
| 963      | Lrrfip2       |
| 977      | Npal2         |
| 1006     | 2600011E07Rik |
| 1014     | Rtcd1         |

|      |               |
|------|---------------|
| 1017 | Dync2li1      |
| 1041 | 3110049J23Rik |
| 1082 | H2afj         |
| 1097 | Dctn6         |
| 1101 | Sec11a        |
| 1106 | Hira          |
| 1135 | Akap12        |
| 1162 | Cpsf4         |
| 1166 | Il21          |
| 1171 | Tmem106a      |
| 1177 | EG545391      |
| 1213 | Stoml3        |
| 1232 | Abhd1         |
| 1241 | Meox1         |
| 1248 | Usp24         |
| 1253 | Scel          |
| 1257 | Slc25a45      |
| 1270 | 1700029I01Rik |
| 1282 | Gm628         |
| 1284 | Serpina3h     |
| 1298 | Trim41        |
| 1321 | AW548124      |
| 1325 | Pigu          |
| 1329 | 5730494N06Rik |
| 1363 | BC021767      |
| 1371 | 1200009I06Rik |
| 1375 | Strap         |
| 1379 | A930041C12Rik |
| 1423 | Spdya         |
| 1424 | Dapk1         |
| 1438 | Dclre1b       |
| 1447 | Naaa          |
| 1466 | Ubp2l         |
| 1489 | MMT00081278   |
| 1510 | A530058N18Rik |
| 1515 | Med20         |
| 1522 | Nfkbib        |
| 1537 | 1700052K11Rik |
| 1549 | Gmfg          |
| 1569 | Tmco4         |
| 1599 | Lats2         |
| 1602 | Mina          |
| 1603 | Lrwd1         |
| 1604 | Ssbp4         |
| 1627 | 2310030N02Rik |
| 1629 | Gcsh          |
| 1633 | Kars          |
| 1653 | Anxa5         |
| 1660 | Zfp33b        |
| 1672 | Mlh1          |
| 1685 | Zcchc7        |

|      |               |
|------|---------------|
| 1690 | Nlrp5         |
| 1705 | Gltpd1        |
| 1712 | Rnf2          |
| 1722 | Iqgap1        |
| 1755 | Ocel1         |
| 1760 | Nek8          |
| 1761 | 2010110K16Rik |
| 1767 | BC016495      |
| 1776 | 4921511C04Rik |
| 1783 | Arcn1         |
| 1806 | Nola3         |
| 1840 | Fpr1          |
| 1847 | Naga          |
| 1867 | Bcas2         |
| 1886 | Tcte1         |
| 1890 | Nanp          |
| 1891 | Sv2a          |
| 1918 | Usp39         |
| 1922 | Rell1         |
| 1936 | Cbwd1         |
| 1947 | Myo9b         |
| 1957 | Mansc1        |
| 1960 | Ubr2          |
| 1968 | Nudc          |
| 1985 | Pepd          |
| 1990 | Prkg1         |
| 1991 | Ttc17         |
| 1992 | Arl8b         |
| 2011 | Slc2a5        |
| 2012 | Cetn4         |
| 2016 | Wdr78         |
| 2021 | Atf7ip        |
| 2032 | 1700007K13Rik |
| 2043 | Arl2bp        |
| 2044 | Hsd17b7       |
| 2061 | Lgi3          |
| 2074 | Sfxn1         |
| 2079 | Mthfs         |
| 2095 | Siglech       |
| 2099 | Ift74         |
| 2106 | 4931406H21Rik |
| 2118 | Kptn          |
| 2121 | Brms1l        |
| 2128 | 4930447K03Rik |
| 2130 | Smcr7         |
| 2157 | 0610007C21Rik |
| 2169 | Lrrc56        |
| 2223 | Slc28a2       |
| 2227 | Cenpa         |
| 2232 | Strn          |
| 2243 | Gcsh          |

|      |               |
|------|---------------|
| 2253 | Lysmd1        |
| 2260 | Spink10       |
| 2270 | Pter          |
| 2278 | Gtf3c1        |
| 2308 | A930005I04Rik |
| 2315 | Abcb1a        |
| 2351 | 1110008F13Rik |
| 2352 | MMT00059848   |
| 2372 | Stx12         |
| 2424 | Unc5cl        |
| 2431 | 1700020L24Rik |
| 2440 | 1500003O22Rik |
| 2449 | Mybpc2        |
| 2456 | Mrpl10        |
| 2464 | A130022J15Rik |
| 2470 | Grb7          |
| 2481 | EG383341      |
| 2483 | Gmeb1         |
| 2485 | Adck1         |
| 2490 | MMT00070880   |
| 2507 | Oaf           |
| 2511 | Ltv1          |
| 2523 | Pgs1          |
| 2527 | 1600012F09Rik |
| 2533 | Arhgef19      |
| 2571 | Rmnd1         |
| 2599 | Lsm14a        |
| 2601 | Dnajc18       |
| 2619 | Zfp622        |
| 2623 | S100a6        |
| 2632 | Aph1a         |
| 2644 | Srrm2         |
| 2651 | Ttc7          |
| 2652 | Immp2l        |
| 2659 | Kcng2         |
| 2660 | 4930558K02Rik |
| 2672 | Soat1         |
| 2694 | Siah2         |
| 2704 | Lrrc49        |
| 2705 | Hrbl          |
| 2719 | St6galnac2    |
| 2742 | Zbed3         |
| 2743 | Tcf3          |
| 2747 | Enc1          |
| 2749 | Naf1          |
| 2752 | Fcgr1         |
| 2753 | Myo6          |
| 2785 | Mtf2          |
| 2801 | H2-BI         |
| 2807 | Cdh4          |
| 2813 | Mrpl55        |

|      |               |
|------|---------------|
| 2815 | Eif2ak3       |
| 2816 | Klhdc3        |
| 2830 | 4632417K18Rik |
| 2832 | 2810021J22Rik |
| 2841 | Kcne4         |
| 2844 | Slc25a12      |
| 2850 | Slc16a6       |
| 2881 | Hlf           |
| 2885 | Hebp2         |
| 2889 | Pqlc2         |
| 2902 | D4Ertd196e    |
| 2915 | Nfs1          |
| 2917 | Scly          |
| 2938 | H2-T23        |
| 2980 | Slc37a2       |
| 2987 | Ppapdc3       |
| 2998 | Lzic          |
| 3017 | Fas           |
| 3021 | Gdf9          |
| 3029 | Ybx1          |
| 3040 | Bcl3          |
| 3052 | 9130404D08Rik |
| 3066 | MMT00035562   |
| 3079 | Gstt3         |
| 3087 | Tmem30c       |
| 3119 | Mapk10        |
| 3141 | Tmf1          |
| 3157 | BC003940      |
| 3159 | Pld1          |
| 3164 | Hsd11b1       |
| 3186 | Kcnj16        |
| 3195 | Mypn          |
| 3206 | Gpr160        |
| 3214 | Dnmt3b        |
| 3232 | Rrh           |
| 3251 | Thg1l         |
| 3257 | Map1lc3a      |
| 3261 | Rpap2         |
| 3286 | Alox5ap       |
| 3312 | 6430704M03Rik |
| 3314 | Wars2         |
| 3320 | Cox18         |
| 3325 | Plekhj1       |
| 3354 | Ropn1l        |
| 3391 | Mfap3         |
| 3392 | Rnf141        |
| 3399 | 4930550C14Rik |
| 3401 | BB146404      |
| 3411 | Rabl2a        |
| 3431 | Lrfn5         |
| 3469 | MMT00053608   |

|      |               |
|------|---------------|
| 3475 | 2610305D13Rik |
| 3480 | Pnpo          |
| 3491 | Btn1a1        |
| 3493 | Wbp4          |
| 3526 | Rccd1         |
| 3531 | Tslp          |
| 3542 | Atp5j2        |
| 3543 | Acsm1         |
| 3545 | Mtrf1l        |
| 3592 | Twistnb       |
| 3609 | Plvap         |
| 3616 | Dnajc16       |
| 3622 | Trim21        |
| 3624 | Pygb          |
| 3642 | Spsb4         |
| 3654 | St13          |
| 3676 | Ucp2          |
| 3698 | 1600014C10Rik |
| 3700 | Nrxn1         |
| 3701 | Zfp68         |
| 3703 | Ggcx          |
| 3708 | Thrap3        |
| 3728 | Sfxn4         |
| 3744 | Rmnd1         |
| 3756 | Chrne         |
| 3797 | Nrip2         |
| 3812 | Zfyve26       |
| 3817 | Aire          |
| 3848 | Mrpl21        |
| 3865 | Acta1         |
| 3869 | Zadh2         |
| 3874 | Slitrk3       |
| 3925 | Akap2         |
| 3938 | Abt1          |
| 3970 | 4931414P19Rik |
| 3985 | Gjb3          |
| 3990 | Trpc6         |
| 4005 | Ccdc19        |
| 4033 | Mgst2         |
| 4038 | 1200009O22Rik |
| 4046 | Phb           |
| 4057 | Slc2a4        |
| 4065 | Igsf5         |
| 4070 | Chst10        |
| 4084 | Asah3l        |
| 4108 | Apobec2       |
| 4122 | Ehbp1l1       |
| 4138 | Cited4        |
| 4152 | Lrrc33        |
| 4153 | Dnahc10       |
| 4180 | 2010015L04Rik |



|      |               |
|------|---------------|
| 4191 | Fbln2         |
| 4195 | Csrp2bp       |
| 4233 | Brpf1         |
| 4245 | Ulk4          |
| 4262 | Stx7          |
| 4305 | Tmem51        |
| 4312 | MMT00014395   |
| 4317 | Spire1        |
| 4333 | Sumo3         |
| 4355 | Pard6a        |
| 4382 | Gtlf3a        |
| 4409 | 5430435G22Rik |
| 4412 | Lrrc27        |
| 4414 | 5033406O09Rik |
| 4454 | BC055107      |
| 4466 | MMT00014327   |
| 4523 | Ptpru         |
| 4532 | BC034090      |
| 4554 | Cer1          |
| 4555 | Cchcr1        |
| 4566 | MMT00078134   |
| 4590 | Arhgap21      |
| 4626 | 2310046K01Rik |
| 4628 | MMT00040865   |
| 4638 | Alkbh4        |
| 4643 | Mbl2          |
| 4655 | 1810029B16Rik |
| 4657 | C230096C10Rik |
| 4666 | Exosc9        |
| 4678 | Kank1         |
| 4703 | Nubpl         |
| 4729 | Slc7a10       |
| 4751 | Map3k4        |
| 4768 | Lsm10         |
| 4778 | Cyct          |
| 4786 | Psg16         |
| 4810 | Vsig8         |
| 4816 | Kcnmb1        |
| 4850 | Fancd2        |
| 4863 | Atad4         |
| 4884 | Cpne2         |
| 4885 | Fhad1         |
| 4896 | 4930405M20Rik |
| 4897 | Ciao1         |
| 4901 | MMT00073557   |
| 4918 | Scara5        |
| 4938 | Mccc2         |
| 4942 | Kcnj12        |
| 4958 | Ndufa7        |
| 4992 | MMT00070169   |
| 5003 | 2410081M15Rik |

|      |               |
|------|---------------|
| 5006 | Enoph1        |
| 5008 | Ehd1          |
| 5021 | Gdap2         |
| 5023 | Spast         |
| 5027 | Pde4b         |
| 5056 | Tmed8         |
| 5064 | Tekt2         |
| 5069 | Cdkn2aipnl    |
| 5123 | Zfp191        |
| 5145 | Scn3b         |
| 5222 | B630005N14Rik |
| 5252 | Mfsd3         |
| 5258 | Mcts2         |
| 5270 | Rnf8          |
| 5295 | F2r           |
| 5296 | Rnf181        |
| 5309 | D19Wsu162e    |
| 5318 | Fbxo45        |
| 5332 | Pdlim4        |
| 5369 | Rag1          |
| 5375 | Sec23b        |
| 5382 | Fbn1          |
| 5390 | Otub1         |
| 5405 | Apbb2         |
| 5425 | Ung           |
| 5428 | Col12a1       |
| 5433 | 2410004L22Rik |
| 5456 | Rabgap1l      |
| 5459 | 2510049I19Rik |
| 5465 | Slamf8        |
| 5502 | Tmem107       |
| 5508 | Lrig2         |
| 5522 | Pink1         |
| 5526 | Ush1c         |
| 5539 | Eif2s2        |
| 5588 | Snx20         |
| 5597 | Ttll4         |
| 5603 | BC020535      |
| 5611 | Rapgef3       |
| 5613 | Mrpl12        |
| 5632 | Reck          |
| 5639 | Gdpd3         |
| 5661 | Lrrc46        |
| 5669 | Fndc1         |
| 5677 | Cmas          |
| 5679 | MMT00002281   |
| 5681 | Mbd1          |
| 5705 | Bmpr1b        |
| 5737 | Nkx2-2        |
| 5739 | Adsl          |
| 5740 | Efemp2        |

|      |               |
|------|---------------|
| 5761 | Ralgps2       |
| 5762 | Trpc3         |
| 5786 | Lta           |
| 5800 | Mta3          |
| 5813 | 1700021K10Rik |
| 5833 | Kcnk7         |
| 5840 | Tbc1d9b       |
| 5858 | Itch          |
| 5925 | Tmem59l       |
| 5934 | S100a10       |
| 5936 | Pfn1          |
| 5952 | Rhoj          |
| 5969 | Rpn2          |
| 5980 | Gabrb1        |
| 5983 | Pcolce2       |
| 6016 | A530057A03Rik |
| 6035 | Nkd1          |
| 6037 | Ccnl2         |
| 6038 | Acot1         |
| 6059 | Dsn1          |
| 6060 | Tle6          |
| 6099 | Rims3         |
| 6104 | Aff4          |
| 6106 | EG627828      |
| 6108 | Ndufa8        |
| 6129 | Msc           |
| 6144 | 1700055N04Rik |
| 6147 | Dirc2         |
| 6158 | Msh2          |
| 6188 | Myh7b         |
| 6191 | Ddost         |
| 6216 | Gm944         |
| 6234 | P4ha2         |
| 6250 | Csnk2a1       |
| 6252 | Mael          |
| 6261 | 2810026P18Rik |
| 6283 | Ptpn22        |
| 6312 | 1500035H01Rik |
| 6320 | 1810055E12Rik |
| 6325 | Cpsf3l        |
| 6330 | Dgkq          |
| 6333 | Iqcg          |
| 6353 | Spata13       |
| 6357 | Ankrd9        |
| 6360 | D17H6S56E-3   |
| 6363 | 9130014G24Rik |
| 6372 | 1110021L09Rik |
| 6376 | Nle1          |
| 6377 | D18Ertd653e   |
| 6391 | Chkb          |
| 6394 | Fbxo6         |

|      |                    |
|------|--------------------|
| 6426 | Mfsd4              |
| 6437 | Gnptg              |
| 6456 | Tyms               |
| 6461 | Mtmr3              |
| 6465 | Zfp474             |
| 6470 | Arnt               |
| 6484 | A130010J15Rik      |
| 6486 | OTTMUSG00000001305 |
| 6487 | Slc4a4             |
| 6498 | MMT00016809        |
| 6503 | Cep97              |
| 6504 | Alad               |
| 6506 | Scyl2              |
| 6510 | Plcl2              |
| 6513 | Qpctl              |
| 6532 | Auh                |
| 6534 | Cript              |
| 6542 | Epor               |
| 6546 | Tsn                |
| 6552 | Ebf1               |
| 6571 | 3000004C01Rik      |
| 6580 | Svs3b              |
| 6590 | Pds5a              |
| 6593 | Samd10             |
| 6636 | Ptchd2             |
| 6637 | MMT00054486        |
| 6663 | MMT00053532        |
| 6708 | Serpini2           |
| 6727 | Dtd1               |
| 6733 | Mfng               |
| 6760 | 2810428115Rik      |
| 6765 | Ldhb               |
| 6766 | Sspn               |
| 6782 | Sh3bp5             |
| 6789 | Trp63              |
| 6790 | Zdhhc24            |
| 6804 | Cyp2d22            |
| 6805 | Rrbp1              |
| 6828 | Pigh               |
| 6838 | Nod2               |
| 6839 | Mrpl46             |
| 6851 | Magohb             |
| 6856 | Tnrc6a             |
| 6857 | Serinc2            |
| 6906 | 2610301B20Rik      |
| 6922 | Tmem86b            |
| 6928 | Klh18              |
| 6931 | Hrsp12             |
| 6932 | Ckap4              |
| 6974 | Tmem65             |
| 7021 | Slc16a8            |

|      |               |
|------|---------------|
| 7052 | Arid4a        |
| 7054 | Trerf1        |
| 7057 | Stk10         |
| 7088 | Slc37a1       |
| 7100 | Tomm22        |
| 7116 | Katnal1       |
| 7118 | BC051019      |
| 7135 | Ezr           |
| 7172 | Nme2          |
| 7173 | Trim59        |
| 7203 | Scmh1         |
| 7213 | MMT00003697   |
| 7257 | Mcf2          |
| 7258 | Bmp2k         |
| 7273 | Rnf103        |
| 7286 | Noxo1         |
| 7307 | Agmat         |
| 7309 | Mpp5          |
| 7310 | Dagla         |
| 7311 | Lsm6          |
| 7321 | Rdbp          |
| 7332 | 1700027L20Rik |
| 7360 | Mfi2          |
| 7372 | Fastk         |
| 7378 | 1700001J03Rik |
| 7386 | Pex6          |
| 7388 | Amn           |
| 7415 | Isoc1         |
| 7444 | Hspe1         |
| 7449 | Creg1         |
| 7466 | Insl6         |
| 7480 | 4930506M07Rik |
| 7492 | Adfp          |
| 7528 | Cadm1         |
| 7541 | Eif3h         |
| 7546 | Ddhd1         |
| 7556 | A530050D06Rik |
| 7571 | Casz1         |
| 7586 | 5730469M10Rik |
| 7593 | Krt28         |
| 7603 | Sod2          |
| 7635 | Syng2         |
| 7651 | Tmem192       |
| 7670 | Ccdc57        |
| 7696 | Pkd2l1        |
| 7712 | Ubx3          |
| 7718 | Pdia6         |
| 7761 | Nudt19        |
| 7803 | Ttyh1         |
| 7810 | Trim45        |
| 7812 | Ipo7          |

|      |               |
|------|---------------|
| 7837 | Pou3f1        |
| 7860 | Bmp6          |
| 7896 | Polr3e        |
| 7926 | Kctd1         |
| 7945 | Gpc2          |
| 7947 | Yif1a         |
| 7965 | Enpp5         |
| 7975 | Lancl1        |
| 7991 | Gpr115        |
| 7997 | Pex5l         |
| 8005 | Omg           |
| 8016 | Mrpl35        |
| 8034 | Gas1          |
| 8035 | Frzb          |
| 8055 | Ptcd3         |
| 8058 | Epb4.9        |
| 8079 | Pts           |
| 8114 | Kcnn1         |
| 8121 | Zfp451        |
| 8122 | Hexim1        |
| 8131 | Btbd3         |
| 8141 | Scnn1a        |
| 8155 | Mark3         |
| 8176 | Stx6          |
| 8231 | Tcfcp2        |
| 8274 | Zc3h11a       |
| 8322 | Dpy19l1       |
| 8331 | BC052688      |
| 8332 | Tmem206       |
| 8394 | Dpy19l3       |
| 8406 | lkbkap        |
| 8434 | Acacb         |
| 8435 | 3110047P20Rik |
| 8443 | Pola2         |
| 8448 | Sucla2        |
| 8464 | Snapi         |
| 8472 | Txndc16       |
| 8514 | Arntl2        |
| 8523 | Ddit4l        |
| 8525 | 2510006D16Rik |
| 8547 | Gbp4          |
| 8563 | Leng1         |
| 8579 | Rngtt         |
| 8602 | Scd3          |
| 8610 | Padi4         |
| 8625 | Gsg1          |
| 8645 | Tcl1b4        |
| 8648 | Flnb          |
| 8653 | AW124722      |
| 8677 | Zbtb8os       |
| 8679 | Tiparp        |

|      |               |
|------|---------------|
| 8680 | C1qtnf9       |
| 8683 | 3110002H16Rik |
| 8699 | Gzmm          |
| 8703 | Gstp1         |
| 8705 | Ahdc1         |
| 8721 | Tbc1d10c      |
| 8724 | Tgfb3         |
| 8750 | 1700010I14Rik |
| 8767 | Rgl2          |
| 8769 | Cenpk         |
| 8783 | Zfyve16       |
| 8794 | 1500011B03Rik |
| 8805 | Glt6d1        |
| 8807 | Ankrd56       |
| 8840 | Tmem18        |
| 8857 | Rab3gap2      |
| 8868 | Nfkbil2       |
| 8882 | Adarb1        |
| 8887 | Dpep1         |
| 8889 | Dnahc6        |
| 8894 | Api5          |
| 8902 | Aldh3b1       |
| 8904 | Trerf1        |
| 8933 | Arpc5         |
| 8951 | Cd97          |
| 8954 | Obscn         |
| 8967 | Acot12        |
| 8987 | F2            |
| 8992 | Trfr2         |
| 8997 | Apol6         |
| 9005 | Mapk1ip1l     |
| 9010 | 8430419L09Rik |
| 9022 | Plek2         |
| 9026 | Cep135        |
| 9057 | Spp1          |
| 9077 | Cnpy4         |
| 9122 | Sepw1         |
| 9161 | Mrpl17        |
| 9189 | Dmgdh         |
| 9195 | Sub1          |
| 9210 | Lmo3          |
| 9230 | 1700027N10Rik |
| 9253 | Metap1        |
| 9263 | Fbxo27        |
| 9272 | Btbd11        |
| 9304 | AI449175      |
| 9322 | Relt          |
| 9340 | Cdc42ep2      |
| 9352 | Hnrpl         |
| 9355 | Reep1         |
| 9356 | Emid2         |

|       |               |
|-------|---------------|
| 9374  | Thbs4         |
| 9376  | Zscan18       |
| 9380  | Spata5        |
| 9395  | Eif4g3        |
| 9402  | 1200016B10Rik |
| 9408  | Hmgcs2        |
| 9413  | 1190020J12Rik |
| 9417  | Cd163         |
| 9431  | Snpc5         |
| 9449  | Sft2d2        |
| 9454  | 2810426N06Rik |
| 9478  | Trim46        |
| 9499  | Gtpbp5        |
| 9519  | Fstl5         |
| 9540  | Csnk1e        |
| 9541  | Npal3         |
| 9542  | Tmed10        |
| 9560  | Slc4a1ap      |
| 9569  | Dda1          |
| 9584  | Ybx2          |
| 9595  | Rftn1         |
| 9611  | Ncf2          |
| 9622  | Rasgef1a      |
| 9634  | Atp13a2       |
| 9655  | Sult2b1       |
| 9684  | Phf21b        |
| 9692  | Ankrd26       |
| 9702  | Stk39         |
| 9729  | Got1l1        |
| 9762  | Snx5          |
| 9780  | 4930583H14Rik |
| 9790  | Tspan10       |
| 9795  | Afg3l2        |
| 9803  | Abcb8         |
| 9805  | Tagap         |
| 9827  | Pam           |
| 9829  | Stoml1        |
| 9830  | Rbks          |
| 9832  | Brf1          |
| 9875  | Cdk5rap3      |
| 9884  | Hp            |
| 9912  | Ttc27         |
| 9998  | Hfm1          |
| 10006 | Ephx2         |
| 10030 | Gba           |
| 10057 | Sult6b1       |
| 10065 | 9030625A04Rik |
| 10077 | Cep63         |
| 10119 | MMT00000256   |
| 10134 | Hivep3        |
| 10172 | Ntf3          |



|       |               |
|-------|---------------|
| 10189 | Cage1         |
| 10203 | Cyp4f16       |
| 10236 | EG665033      |
| 10293 | Cd5           |
| 10308 | Fuk           |
| 10316 | MMT00078795   |
| 10327 | Hint2         |
| 10336 | Sf1           |
| 10346 | Rerg          |
| 10351 | Clcn4-2       |
| 10366 | 4931403E03Rik |
| 10374 | Trim15        |
| 10400 | Pth2          |
| 10407 | Gpatch3       |
| 10466 | S1pr5         |
| 10474 | 2410131K14Rik |
| 10482 | Mcat          |
| 10483 | Crot          |
| 10491 | Acpl2         |
| 10497 | Man2b1        |
| 10498 | Ube2z         |
| 10521 | Ttf2          |
| 10539 | Unc45b        |
| 10553 | Dusp23        |
| 10595 | 2810422O20Rik |
| 10606 | Apbb1ip       |
| 10629 | BC021614      |
| 10635 | Itfg2         |
| 10636 | Mal2          |
| 10667 | H2-Eb1        |
| 10668 | Kars          |
| 10669 | Spry1         |
| 10688 | Mettl3        |
| 10711 | 1700108F19Rik |
| 10718 | Klhl30        |
| 10729 | Fgd2          |
| 10758 | Gdf1          |
| 10780 | Fcgr2b        |
| 10788 | D430019H16Rik |
| 10824 | Vegfa         |
| 10860 | Lrrc8c        |
| 10876 | Steap1        |
| 10899 | Coro2b        |
| 10906 | Ccdc122       |
| 10961 | Pgd           |
| 10980 | C230078M14Rik |
| 10995 | Ap4m1         |
| 11052 | 4930422G04Rik |
| 11057 | MMT00032844   |
| 11065 | Mccc1         |
| 11075 | Xrcc6bp1      |

|       |               |
|-------|---------------|
| 11084 | AF529169      |
| 11109 | AI931714      |
| 11121 | Mtmr11        |
| 11128 | Aars          |
| 11130 | Slco1c1       |
| 11147 | Gng12         |
| 11162 | Hkdc1         |
| 11164 | Odf4          |
| 11166 | Uqcc          |
| 11167 | Dars2         |
| 11199 | Sirt7         |
| 11211 | Tctex1d4      |
| 11234 | Pygl          |
| 11237 | Mycbpap       |
| 11264 | Zcwpw1        |
| 11266 | Gtdc1         |
| 11268 | Nxf1          |
| 11284 | Elac2         |
| 11291 | 1110018H23Rik |
| 11306 | 1700016G14Rik |
| 11321 | 2310014L17Rik |
| 11327 | Mks1          |
| 11338 | Vamp8         |
| 11355 | Csta          |
| 11368 | Sox8          |
| 11369 | Stx3          |
| 11390 | Kctd16        |
| 11403 | 2210016F16Rik |
| 11406 | Ifi203        |
| 11423 | 6720463M24Rik |
| 11435 | Rnaset2a      |
| 11436 | Mapre1        |
| 11445 | Atp1a2        |
| 11467 | Ypel5         |
| 11475 | H2-D1         |
| 11487 | 1200009F10Rik |
| 11536 | Igj           |
| 11549 | Depdc6        |
| 11571 | Bpnt1         |
| 11576 | Gm1381        |
| 11593 | Usf1          |
| 11595 | Zfp14         |
| 11619 | Grap          |
| 11620 | Zfr           |
| 11649 | Hfe           |
| 11691 | Muted         |
| 11705 | Polr3f        |
| 11715 | Lars          |
| 11719 | Clasp1        |
| 11722 | Ccdc104       |
| 11741 | Slc30a10      |

|       |                    |
|-------|--------------------|
| 11758 | S100a1             |
| 11759 | 3110079O15Rik      |
| 11775 | Phyh               |
| 11789 | Ccdc90a            |
| 11792 | Neu2               |
| 11800 | Clip3              |
| 11812 | Mrpl16             |
| 11816 | Ccdc99             |
| 11819 | Mcee               |
| 11859 | Poln               |
| 11860 | Hesx1              |
| 11864 | Dis3l              |
| 11870 | Apitd1             |
| 11879 | Cubn               |
| 11882 | Prdm4              |
| 11888 | Myadm              |
| 11897 | ENSMUSG00000074788 |
| 11940 | Chi3l1             |
| 11941 | Iqch               |
| 11981 | Sh3bp2             |
| 12004 | Lgals6             |
| 12025 | Sdccag3            |
| 12055 | 1810008A18Rik      |
| 12070 | Adat2              |
| 12091 | 1810015C04Rik      |
| 12097 | 9430015G10Rik      |
| 12109 | Smad4              |
| 12140 | Mrps15             |
| 12152 | Trpc2              |
| 12157 | Gal3st4            |
| 12158 | Tmub2              |
| 12168 | H2-Ke6             |
| 12173 | Acbd6              |
| 12182 | Immt               |
| 12216 | Tmem88             |
| 12250 | P2ry14             |
| 12256 | Atp10d             |
| 12280 | Cln5               |
| 12284 | Tnfrsf4            |
| 12298 | Lad1               |
| 12302 | Cbx1               |
| 12311 | Rpp40              |
| 12312 | Ms4a6d             |
| 12319 | Mfap2              |
| 12330 | Aldh6a1            |
| 12336 | Timm13             |
| 12339 | BC025546           |
| 12343 | Atf5               |
| 12354 | Slc26a11           |
| 12385 | Mrpl33             |
| 12388 | 8430406I07Rik      |

|       |               |
|-------|---------------|
| 12405 | Cyp4f14       |
| 12412 | BC004728      |
| 12437 | Six6          |
| 12494 | Thns1         |
| 12496 | Ccl27         |
| 12512 | Eef1e1        |
| 12517 | 4930573119Rik |
| 12528 | Zfp30         |
| 12571 | Cdkn2d        |
| 12599 | Golt1b        |
| 12623 | Ccdc123       |
| 12656 | Coq5          |
| 12676 | Nrxn3         |
| 12690 | Jak3          |
| 12694 | Riok2         |
| 12716 | 5830417110Rik |
| 12730 | 9130019O22Rik |
| 12732 | Hsd17b1       |
| 12739 | Insl5         |
| 12773 | Klh1          |
| 12784 | Nudt6         |
| 12797 | Brdt          |
| 12824 | Dbt           |
| 12838 | Tec           |
| 12839 | Fh1           |
| 12853 | Phc3          |
| 12854 | Ndufa13       |
| 12866 | 4921517L17Rik |
| 12907 | Zkscan1       |
| 12934 | Rbp7          |
| 12943 | Slc25a27      |
| 12960 | Arrdc4        |
| 12984 | Cyb5          |
| 13007 | 4632412N22Rik |
| 13016 | Actn3         |
| 13044 | 5730596K20Rik |
| 13045 | A330021E22Rik |
| 13072 | BC022687      |
| 13127 | Col5a1        |
| 13136 | Itgb1bp3      |
| 13137 | 2610301G19Rik |
| 13149 | Ifi203        |
| 13156 | Ifit3         |
| 13164 | Il4ra         |
| 13168 | Col8a1        |
| 13175 | 4930432O21Rik |
| 13179 | Plxna2        |
| 13181 | Lcp2          |
| 13195 | Mtif2         |
| 13207 | Sptlc2        |
| 13221 | Srd5a3        |

|       |               |
|-------|---------------|
| 13224 | Cp            |
| 13253 | Mtvr2         |
| 13285 | Cd276         |
| 13300 | Pdpn          |
| 13318 | Adamtsl2      |
| 13327 | Vmn2r95       |
| 13339 | D630042F21Rik |
| 13341 | Tnip2         |
| 13345 | Mmrn2         |
| 13355 | Foxs1         |
| 13357 | Rpp14         |
| 13362 | Ddt           |
| 13389 | Six6os1       |
| 13395 | Ube2m         |
| 13417 | 1700025G04Rik |
| 13418 | Lgi4          |
| 13462 | Fbxo3         |
| 13475 | Morn2         |
| 13493 | Ring1         |
| 13507 | Spats1        |
| 13510 | MMT00078434   |
| 13512 | Tmem144       |
| 13513 | Trim25        |
| 13527 | Ctss          |
| 13540 | 6330409N04Rik |
| 13543 | Zfp617        |
| 13544 | Parp8         |
| 13554 | Aqr           |
| 13569 | 1190003M12Rik |
| 13581 | Srxn1         |
| 13599 | Hbs1l         |
| 13603 | Bahd1         |
| 13605 | Osbp10        |
| 13615 | Arl16         |
| 13617 | Acin1         |
| 13640 | Atp6v0a1      |
| 13648 | Dap           |
| 13656 | Ly86          |
| 13663 | Sgip1         |
| 13668 | Skap2         |
| 13682 | BC051142      |
| 13732 | Tpm4          |
| 13747 | Entpd2        |
| 13765 | RP23-45P4.1   |
| 13780 | Pilra         |
| 13810 | 1110036O03Rik |
| 13821 | 10-Mar        |
| 13829 | MMT00014696   |
| 13830 | MMT00030474   |
| 13869 | 6330442E10Rik |
| 13876 | C530008M17Rik |

|       |               |
|-------|---------------|
| 13923 | Nploc4        |
| 13928 | Cdc123        |
| 13939 | Utp15         |
| 13946 | Slc35b2       |
| 13954 | Chst1         |
| 13975 | Slc27a6       |
| 13979 | Ociad2        |
| 13987 | Atp6v1d       |
| 14009 | 2310030G06Rik |
| 14026 | Clcnkb        |
| 14027 | Rpo1-1        |
| 14032 | Cog6          |
| 14043 | 4930455C21Rik |
| 14053 | Zfp418        |
| 14070 | Oaz1          |
| 14084 | D530033C11Rik |
| 14085 | Cdkl2         |
| 14101 | Zfp69         |
| 14108 | Polr3b        |
| 14132 | Glo1          |
| 14145 | Sgsm3         |
| 14147 | Acss2         |
| 14158 | Dld           |
| 14167 | Exo1          |
| 14188 | Ttc8          |
| 14190 | Ppil1         |
| 14192 | Trpv2         |
| 14215 | Rab5a         |
| 14249 | Lzts2         |
| 14266 | Sox13         |
| 14270 | Pigs          |
| 14276 | Cdc42         |
| 14281 | 5031414D18Rik |
| 14286 | Tram1         |
| 14307 | Kcnj8         |
| 14322 | Bat1a         |
| 14342 | 4930412F15Rik |
| 14354 | Aim1l         |
| 14355 | Tle1          |
| 14384 | Dnajc7        |
| 14387 | Ccdc88c       |
| 14397 | Padi2         |
| 14399 | Csnk2a1       |
| 14402 | Mrps27        |
| 14431 | Piwil1        |
| 14443 | C3            |
| 14465 | Hrasls3       |
| 14468 | Tmtc2         |
| 14472 | Ahcy          |
| 14476 | Akr1b8        |
| 14531 | Mmel1         |

|       |               |
|-------|---------------|
| 14550 | Acot7         |
| 14557 | Pyroxd1       |
| 14558 | Arhgef15      |
| 14559 | Frrs1         |
| 14564 | Mrpl49        |
| 14576 | Mcm8          |
| 14577 | Cdc37l1       |
| 14583 | Prss22        |
| 14584 | Vps24         |
| 14597 | Col19a1       |
| 14617 | MMT00033859   |
| 14621 | Six4          |
| 14631 | Stag3         |
| 14647 | Cst3          |
| 14649 | 5430405G05Rik |
| 14700 | Tbc1d17       |
| 14707 | Klk14         |
| 14731 | BC006965      |
| 14733 | Fhit          |
| 14734 | Nrsn2         |
| 14738 | Ccl17         |
| 14740 | Mfap1b        |
| 14764 | Ugt2b34       |
| 14787 | Gca           |
| 14793 | 1700003M02Rik |
| 14794 | Spr2f         |
| 14822 | Nrsn1         |
| 14841 | 2010311D03Rik |
| 14842 | Gipr          |
| 14845 | Tmem188       |
| 14862 | Dhrs7         |
| 14868 | Tmem159       |
| 14876 | C330002I19Rik |
| 14877 | Ptx3          |
| 14882 | Kcnk6         |
| 14884 | Mrps22        |
| 14893 | Wdr36         |
| 14894 | G0s2          |
| 14924 | Hn1l          |
| 14925 | Tagln2        |
| 14952 | Tex2          |
| 14966 | Ddx51         |
| 14988 | Pdzrn4        |
| 14989 | Map3k5        |
| 15016 | MMT00074608   |
| 15022 | Tmem14c       |
| 15027 | Brd7          |
| 15062 | P2ry5         |
| 15075 | Ercc5         |
| 15089 | Pla2g7        |
| 15094 | Pbx4          |

|       |               |
|-------|---------------|
| 15127 | Cct6b         |
| 15131 | Atf6          |
| 15162 | Il18          |
| 15174 | 3110001D03Rik |
| 15189 | BC005764      |
| 15193 | RP23-9A5.1    |
| 15197 | Hmx3          |
| 15258 | Coil          |
| 15266 | Cnm4          |
| 15270 | Serac1        |
| 15276 | Eif4e         |
| 15277 | 2810002N01Rik |
| 15299 | Mrps21        |
| 15304 | Kin           |
| 15318 | Aars2         |
| 15321 | Pus7          |
| 15334 | Rnaseh2c      |
| 15336 | Dpp4          |
| 15352 | Socs2         |
| 15353 | Ednrb         |
| 15366 | Ces7          |
| 15375 | Rnd3          |
| 15378 | Exdl2         |
| 15384 | Mat2a         |
| 15390 | Accn3         |
| 15395 | Tmem63c       |
| 15406 | Mdfi          |
| 15455 | Lsm4          |
| 15485 | Zfp251        |
| 15497 | Ftl1          |
| 15508 | 4632415L05Rik |
| 15531 | Prickle4      |
| 15550 | 2010200O16Rik |
| 15569 | BC003331      |
| 15575 | Bckdhb        |
| 15577 | Glt8d4        |
| 15580 | MMT00077001   |
| 15587 | Actl6b        |
| 15594 | Gm1967        |
| 15625 | Capg          |
| 15631 | Lpin1         |
| 15641 | 5230400G24Rik |
| 15646 | Tatdn3        |
| 15664 | Masp2         |
| 15666 | Xrcc4         |
| 15670 | Pnmal1        |
| 15674 | Riok1         |
| 15698 | Them2         |
| 15700 | Crocc         |
| 15702 | MMT00047561   |
| 15719 | BC060267      |



|       |               |
|-------|---------------|
| 15722 | Ccdc9         |
| 15760 | Trib3         |
| 15766 | Bmp2          |
| 15773 | MMT00069895   |
| 15774 | Ppp1r16b      |
| 15783 | Fasl          |
| 15797 | Ppp2r5c       |
| 15825 | Fermt3        |
| 15826 | Arl4d         |
| 15829 | Hlcs          |
| 15844 | Klhdc9        |
| 15853 | D430036J16Rik |
| 15897 | D10Jhu81e     |
| 15900 | Rasal2        |
| 15901 | Tpm3          |
| 15919 | Fbxl6         |
| 15955 | Inadl         |
| 15975 | Cnm1          |
| 16014 | Banf2         |
| 16042 | Pold4         |
| 16046 | Ppwd1         |
| 16057 | Vps36         |
| 16066 | Coq2          |
| 16067 | Pcaf          |
| 16077 | Mocs2         |
| 16083 | Pla2g2c       |
| 16130 | Gosr2         |
| 16137 | Xrcc5         |
| 16153 | Syng1         |
| 16161 | Lrch4         |
| 16163 | Tmco1         |
| 16168 | Crlf2         |
| 16170 | S100a11       |
| 16179 | Gulo          |
| 16194 | Alg9          |
| 16210 | Metnl         |
| 16214 | Ocln          |
| 16227 | Rarres1       |
| 16237 | Bat5          |
| 16245 | 4930588N13Rik |
| 16255 | Reg3b         |
| 16261 | Olf1337       |
| 16281 | 2600010E01Rik |
| 16287 | Extl1         |
| 16291 | Tbrg1         |
| 16298 | X99384        |
| 16330 | 2310043J07Rik |
| 16338 | Senp1         |
| 16347 | Mgp           |
| 16356 | 9030607L17Rik |
| 16371 | Ppp2cb        |

|       |               |
|-------|---------------|
| 16376 | Thsd1         |
| 16391 | Pde10a        |
| 16416 | Commd2        |
| 16421 | Hrasls        |
| 16423 | Rreb1         |
| 16443 | Ccdc59        |
| 16446 | Taf11         |
| 16451 | 2010007H12Rik |
| 16467 | Card10        |
| 16489 | Olf90         |
| 16491 | 6330500D04Rik |
| 16501 | Loh11cr2a     |
| 16549 | Wtap          |
| 16570 | 2410187C16Rik |
| 16575 | Aff3          |
| 16580 | Tnfaip2       |
| 16590 | C920005C14Rik |
| 16592 | Psmf1         |
| 16595 | Psmb1         |
| 16613 | 1110031I02Rik |
| 16617 | Sh2d4a        |
| 16618 | Hps3          |
| 16624 | Psm8          |
| 16669 | Tjp2          |
| 16692 | Bat4          |
| 16695 | Hs3st6        |
| 16702 | 2810422J05Rik |
| 16744 | Evpl          |
| 16752 | Hapln4        |
| 16753 | Hfe2          |
| 16782 | 1110012N22Rik |
| 16789 | Lpar2         |
| 16814 | AU042651      |
| 16836 | Hip1r         |
| 16849 | Trmt1         |
| 16858 | Tmem38a       |
| 16861 | Nlrc4         |
| 16931 | Actn4         |
| 16954 | Sh3glb1       |
| 16968 | Epha2         |
| 16972 | Nenf          |
| 16983 | Pigx          |
| 16985 | Tmem16f       |
| 17031 | Wdr52         |
| 17043 | Tmem127       |
| 17073 | 1810049H13Rik |
| 17081 | 3830406C13Rik |
| 17098 | Qrt1          |
| 17135 | Mum1          |
| 17149 | Pms2          |
| 17158 | Zfp113        |

|       |               |
|-------|---------------|
| 17159 | Gtpbp6        |
| 17179 | Stfa3         |
| 17193 | Npb           |
| 17216 | Nuf2          |
| 17225 | Impa2         |
| 17232 | Nkx6-1        |
| 17234 | Stk33         |
| 17254 | Cyp2f2        |
| 17285 | 1700019E19Rik |
| 17302 | Dhcr24        |
| 17314 | Napa          |
| 17315 | Nhsl1         |
| 17317 | Jmjd1a        |
| 17322 | Zfp758        |
| 17323 | Tubb6         |
| 17356 | Rgnf          |
| 17363 | Aebp2         |
| 17373 | EG433016      |
| 17389 | Pop4          |
| 17404 | Ctsb          |
| 17412 | Aif1          |
| 17433 | 4932432K03Rik |
| 17447 | Ctsf          |
| 17463 | Rgl1          |
| 17493 | Rfx4          |
| 17495 | Mmaa          |
| 17502 | Gabra4        |
| 17506 | Isy1          |
| 17516 | 1520402A15Rik |
| 17523 | Gdf5          |
| 17528 | Gmnn          |
| 17533 | Srd5a1        |
| 17553 | Eif4ebp1      |
| 17556 | Dcbld1        |
| 17562 | Rbed1         |
| 17567 | Supt16h       |
| 17574 | Prdm16        |
| 17616 | Flt1          |
| 17632 | Lypd3         |
| 17638 | Adssl1        |
| 17646 | C4b           |
| 17648 | Scrg1         |
| 17661 | Birc5         |
| 17669 | 2310007A19Rik |
| 17695 | Rec8          |
| 17703 | Large         |
| 17707 | Rshl2b        |
| 17715 | Ltbp2         |
| 17716 | Rnf10         |
| 17724 | Sdf4          |
| 17726 | Slc25a13      |

|       |               |
|-------|---------------|
| 17729 | Prim2         |
| 17743 | Phb2          |
| 17760 | Ccr6          |
| 17763 | Selplg        |
| 17764 | Ccdc128       |
| 17774 | Ints1         |
| 17801 | Syt12         |
| 17805 | Slc39a12      |
| 17814 | Napb          |
| 17831 | Ndufa6        |
| 17837 | Polr3gl       |
| 17873 | Vrk3          |
| 17878 | Brap          |
| 17881 | Mtg1          |
| 17886 | Foxl1         |
| 17889 | Bbox1         |
| 17897 | Gm1019        |
| 17930 | Cidec         |
| 17933 | Npsr1         |
| 17957 | 1700086L19Rik |
| 18053 | Psmc4         |
| 18070 | Ogg1          |
| 18088 | Alkbh6        |
| 18140 | Atg2b         |
| 18143 | Dnajc1        |
| 18165 | 5830482F20Rik |
| 18195 | Mafk          |
| 18207 | Dnali1        |
| 18217 | Mgat1         |
| 18218 | Sepx1         |
| 18251 | Susd4         |
| 18275 | D730039F16Rik |
| 18286 | Slc41a3       |
| 18303 | Mef2b         |
| 18308 | Zfp672        |
| 18325 | Cst10         |
| 18332 | Gpr19         |
| 18333 | Rassf8        |
| 18344 | Tsc22d4       |
| 18365 | Bcl2l12       |
| 18366 | Morc2a        |
| 18368 | Mpped2        |
| 18371 | Sap130        |
| 18376 | Pex11b        |
| 18442 | Zfp764        |
| 18448 | Klhl11        |
| 18452 | Uts2r         |
| 18462 | Gm1060        |
| 18492 | Dhfr          |
| 18499 | Atp2c2        |
| 18507 | Bfsp2         |

|       |               |
|-------|---------------|
| 18514 | 4930412F15Rik |
| 18518 | Cap1          |
| 18526 | Dydc2         |
| 18534 | Ovol2         |
| 18548 | 1700012P22Rik |
| 18553 | Tekt4         |
| 18555 | Sdcbp2        |
| 18561 | Ngly1         |
| 18574 | Parc          |
| 18577 | Btbd9         |
| 18580 | Phactr4       |
| 18586 | Tns1          |
| 18592 | Txnl4a        |
| 18602 | Wisp1         |
| 18609 | Lrrc1         |
| 18625 | Cit           |
| 18632 | Asxl1         |
| 18658 | Gstk1         |
| 18662 | Batf3         |
| 18672 | Oraov1        |
| 18673 | Muc1          |
| 18681 | Hexb          |
| 18702 | Mrc1          |
| 18709 | Srp68         |
| 18714 | Farsb         |
| 18722 | Polm          |
| 18757 | Vsnl1         |
| 18772 | BC048355      |
| 18775 | Best2         |
| 18776 | Crnk1         |
| 18802 | Nit2          |
| 18803 | Shank1        |
| 18806 | Hist3h2ba     |
| 18835 | Dtwd1         |
| 18841 | C130038G02Rik |
| 18849 | MacroD2       |
| 18868 | Mpeg1         |
| 18871 | AI314976      |
| 18886 | Slc18a1       |
| 18905 | Prmt2         |
| 18908 | Cldn10        |
| 18939 | Matn2         |
| 18947 | Ctse          |
| 18967 | MMT00011087   |
| 19011 | Rpl3l         |
| 19022 | Ccnb2         |
| 19037 | Slc11a2       |
| 19071 | Actr10        |
| 19078 | EG668139      |
| 19081 | 9130011E15Rik |
| 19091 | Micall2       |

|       |               |
|-------|---------------|
| 19092 | MMT00045362   |
| 19094 | Fscn1         |
| 19115 | Rab32         |
| 19124 | Pim3          |
| 19142 | Gpatch1       |
| 19151 | Dmp1          |
| 19153 | Ptgs1         |
| 19161 | Cav2          |
| 19192 | Hist1h1c      |
| 19196 | Nfe2l1        |
| 19214 | Snapc1        |
| 19223 | Ercc8         |
| 19233 | Ankrd23       |
| 19248 | Txndc9        |
| 19286 | 1110012M11Rik |
| 19306 | Al428936      |
| 19322 | Myo15b        |
| 19327 | Phb           |
| 19332 | Bpnt1         |
| 19334 | Gpr44         |
| 19355 | MMT00065736   |
| 19360 | Aco1          |
| 19387 | Nol12         |
| 19392 | Slc25a16      |
| 19402 | Ddx19a        |
| 19411 | Hnrnp1        |
| 19421 | Mbd2          |
| 19451 | Armc7         |
| 19488 | Rnft2         |
| 19493 | Icosl         |
| 19502 | Fbxo24        |
| 19510 | Mysm1         |
| 19519 | BC011248      |
| 19560 | Trmt6         |
| 19578 | Aox1          |
| 19584 | Nav2          |
| 19618 | Snx6          |
| 19622 | Bdh2          |
| 19629 | Smarcd3       |
| 19631 | Nsmce1        |
| 19633 | Gm694         |
| 19647 | Cort          |
| 19671 | Upp2          |
| 19683 | Cox6c         |
| 19689 | 1110032A13Rik |
| 19695 | C330024D12Rik |
| 19696 | Thoc4         |
| 19700 | E030011K20Rik |
| 19725 | Dcp2          |
| 19734 | Dchs1         |
| 19744 | Acy3          |

|       |                    |
|-------|--------------------|
| 19763 | Acp2               |
| 19787 | Tmem9b             |
| 19803 | BC003993           |
| 19804 | Rela               |
| 19826 | Nanp               |
| 19833 | Ddah2              |
| 19835 | lars2              |
| 19843 | Rbm45              |
| 19857 | Rab1b              |
| 19876 | 6030443O07Rik      |
| 19885 | AI427122           |
| 19924 | Ubiad1             |
| 19925 | Arsa               |
| 19952 | Tlcd1              |
| 19964 | Ndufa9             |
| 19999 | lft122             |
| 20004 | 1190005F20Rik      |
| 20035 | Zbtb46             |
| 20043 | Grin1              |
| 20055 | Ghrh               |
| 20068 | 2610204M08Rik      |
| 20077 | Ccdc115            |
| 20087 | Cd44               |
| 20100 | Guca1b             |
| 20118 | Tmem175            |
| 20134 | Ppp1r14c           |
| 20136 | Col13a1            |
| 20147 | Ybx1               |
| 20194 | Pnlcd1             |
| 20217 | Rab3ip             |
| 20237 | RP23-433P19.11     |
| 20238 | H2-T9              |
| 20243 | Wfikkn1            |
| 20264 | Ccdc44             |
| 20265 | Rsph1              |
| 20269 | Hsd17b13           |
| 20275 | Igfbp5             |
| 20292 | 1810048J11Rik      |
| 20300 | Plekhb1            |
| 20329 | Fars2              |
| 20339 | OTTMUSG00000010173 |
| 20354 | Crip3              |
| 20359 | Spata3             |
| 20393 | 1110018G07Rik      |
| 20423 | 8-Mar              |
| 20446 | Acadl              |
| 20468 | Spa17              |
| 20490 | Tmem143            |
| 20505 | Ttll9              |
| 20507 | Sh2d6              |
| 20511 | Decr2              |

|       |               |
|-------|---------------|
| 20584 | Sirt4         |
| 20606 | MMT00042166   |
| 20607 | Cdc5l         |
| 20661 | Tuft1         |
| 20664 | Rpl13a        |
| 20694 | Tbc1d30       |
| 20703 | Itga11        |
| 20705 | Supv3l1       |
| 20721 | 4432412L15Rik |
| 20729 | Ttc28         |
| 20731 | 2010100O12Rik |
| 20755 | Mmp25         |
| 20757 | Suclg1        |
| 20774 | Atp6v1c2      |
| 20801 | Mrps11        |
| 20810 | Mttp          |
| 20837 | Dlgap4        |
| 20851 | Rpusd3        |
| 20852 | Extl2         |
| 20871 | Pop1          |
| 20890 | Psmb4         |
| 20891 | 2810055F11Rik |
| 20892 | C1r           |
| 20900 | Epb4.1l4a     |
| 20911 | Narg1         |
| 20958 | 4933403F05Rik |
| 20960 | Abcc3         |
| 20979 | D10Jhu81e     |
| 21015 | MMT00014048   |
| 21060 | Ela1          |
| 21062 | Rpl7l1        |
| 21075 | Gtf2h5        |
| 21087 | Mepce         |
| 21101 | 1110032A03Rik |
| 21102 | Cmtm7         |
| 21114 | Ints7         |
| 21125 | Mtif3         |
| 21126 | Dera          |
| 21149 | A230065H16Rik |
| 21160 | Irs2          |
| 21165 | Hmbs          |
| 21186 | 4930451G09Rik |
| 21189 | Arl5c         |
| 21206 | Supt3h        |
| 21222 | Fig4          |
| 21223 | Pira1         |
| 21229 | Acss1         |
| 21237 | Poli          |
| 21239 | Ctdp1         |
| 21244 | Nfatc1        |
| 21246 | Telo2         |



|       |               |
|-------|---------------|
| 21254 | Bbs7          |
| 21255 | Kif18a        |
| 21258 | 2010003K15Rik |
| 21295 | Snf1lk        |
| 21329 | Azi2          |
| 21354 | Xpa           |
| 21371 | Spnb2         |
| 21414 | BC017643      |
| 21415 | Has1          |
| 21419 | Giyd2         |
| 21425 | Rab6          |
| 21428 | MMT00012296   |
| 21431 | Xbp1          |
| 21433 | Ubx6          |
| 21442 | Rad51l1       |
| 21444 | Pnpt1         |
| 21479 | Steap2        |
| 21509 | Tekt3         |
| 21517 | Sil1          |
| 21526 | Mkl1          |
| 21528 | Nup85         |
| 21539 | Rbm11         |
| 21541 | Brf2          |
| 21542 | Larp4         |
| 21570 | Gpr116        |
| 21579 | Lsm12         |
| 21599 | AI462493      |
| 21607 | Aldh1a1       |
| 21639 | Hspa9         |
| 21647 | Rnf13         |
| 21650 | Ap4b1         |
| 21662 | A530088I07Rik |
| 21675 | Mosc2         |
| 21681 | 9130011J15Rik |
| 21698 | 1700022C21Rik |
| 21710 | Slc30a6       |
| 21712 | Ttc5          |
| 21721 | Styk1         |
| 21728 | MMT00024565   |
| 21743 | Ccno          |
| 21754 | Synj2         |
| 21761 | D14Ertd449e   |
| 21780 | Ankrd35       |
| 21804 | D4Ertd22e     |
| 21805 | Plk3          |
| 21824 | 5830443L24Rik |
| 21853 | 5430432N15Rik |
| 21882 | Map2k5        |
| 21942 | Fech          |
| 21947 | Cdca8         |
| 21952 | Tfb1m         |

|       |               |
|-------|---------------|
| 21986 | Cstf1         |
| 21994 | Dbnidd2       |
| 21997 | Phf1          |
| 22001 | Gtlf3b        |
| 22021 | Csnk1d        |
| 22075 | C1s           |
| 22079 | Tmem81        |
| 22125 | Gab1          |
| 22226 | Pm20d1        |
| 22233 | Asrgl1        |
| 22237 | Macrocl2      |
| 22239 | Ap3b1         |
| 22243 | Tmem16a       |
| 22247 | Pigyl         |
| 22250 | Wdr45l        |
| 22256 | Arg2          |
| 22297 | Zfyve1        |
| 22317 | Al450540      |
| 22333 | Hnrnp3        |
| 22337 | Nlk           |
| 22341 | Hdhd2         |
| 22395 | Kcna1         |
| 22408 | Calr3         |
| 22411 | Reck          |
| 22466 | Pdyn          |
| 22475 | Sh3bp1        |
| 22487 | Trub1         |
| 22570 | Phtf1         |
| 22576 | Tlr12         |
| 22595 | Mtmr15        |
| 22627 | Adck5         |
| 22645 | Zar1          |
| 22648 | Mpzl1         |
| 22681 | Gm88          |
| 22688 | 4930432K21Rik |
| 22693 | Trim68        |
| 22696 | Ypel4         |
| 22741 | Rbck1         |
| 22786 | Mterfd3       |
| 22807 | Mboat2        |
| 22824 | Hddc3         |
| 22846 | Sel1l         |
| 22857 | Fahd2a        |
| 22861 | E430002G05Rik |
| 22867 | Vps52         |
| 22868 | Krt15         |
| 22874 | Dnaja2        |
| 22907 | MMT00054594   |
| 22908 | Slc29a1       |
| 22918 | MMT00002192   |
| 22930 | Mro           |

|       |               |
|-------|---------------|
| 22942 | Bzrp1         |
| 22944 | Tmem44        |
| 22979 | Edem2         |
| 22984 | Tnnt2         |
| 22988 | Hscb          |
| 23003 | EG209550      |
| 23005 | 4930405A21Rik |
| 23007 | 2410015N17Rik |
| 23008 | Ctsz          |
| 23037 | Thbs3         |
| 23093 | Mical1        |
| 23098 | Wdr4          |
| 23099 | Cyp2d12       |
| 23100 | MMT00027568   |
| 23102 | Fbxo7         |
| 23116 | 2810032G03Rik |
| 23118 | Ttrap         |
| 23130 | Hps4          |
| 23136 | Usp48         |
| 23137 | MMT00015670   |
| 23168 | Tmub1         |
| 23191 | 3632451O06Rik |
| 23221 | MMT00061047   |
| 23233 | Npw           |
| 23242 | Gngt2         |
| 23250 | Plcl2         |
| 23254 | Wdtdc1        |
| 23259 | Dnajc1        |
| 23273 | Glg1          |
| 23278 | Cd46          |
| 23283 | Mrps12        |
| 23295 | Snx11         |
| 23301 | Scamp1        |
| 23307 | Myst2         |
| 23361 | Bivm          |
| 23371 | Cfb           |
| 23376 | Dlk1          |
| 23378 | RP23-357114.1 |
| 23411 | Mtx2          |
| 23415 | Acp5          |
| 23437 | Efhd2         |
| 23441 | Lama3         |
| 23445 | Crif1         |
| 23459 | Mbtd1         |
| 23462 | Bag5          |
| 23466 | Pou2f1        |
| 23474 | MMT00011721   |
| 23482 | Syt4          |
| 23521 | St8sia3       |
| 23522 | Adcy10        |
| 23531 | Foxb2         |

|       |               |
|-------|---------------|
| 23533 | Ccnb1ip1      |
| 23553 | Pcnp          |
| 23555 | BC026585      |
| 23557 | Ppp1r12c      |
| 23558 | MMT00030937   |
| 23560 | Pms2          |
| 23577 | E330001B16Rik |
| 23588 | Anks1b        |
| 23619 | Tmc1          |
| 23620 | Pycr1         |
| 23622 | Arhgap17      |
| 23625 | Pkd2          |
| 23632 | 4930579C15Rik |
| 23636 | Bst2          |
| 23651 | MMT00027295   |
| 23654 | Sox5          |

**Table T18:** Liver cis eQTL genes

| Probe_ID | Gene Symbol   |
|----------|---------------|
| 126      | 0610012D14Rik |
| 153      | 2010011I20Rik |
| 175      | Psmb2         |
| 177      | Appl2         |
| 205      | Cnksr1        |
| 217      | Ubx2          |
| 247      | Clns1a        |
| 263      | Akr1b3        |
| 264      | Dcald         |
| 268      | Sys1          |
| 270      | Mett11d1      |
| 273      | Ulk2          |
| 286      | MMT00070509   |
| 290      | B230118H07Rik |
| 327      | H2-Ea         |
| 333      | Ciapi1        |
| 348      | Ccdc52        |
| 372      | Txndc1        |
| 397      | Ak7           |
| 398      | BC025446      |
| 399      | Cr1l          |
| 403      | Leptol1       |
| 409      | Lxn           |
| 435      | Arpc1a        |
| 486      | Josd2         |
| 510      | Neu1          |
| 524      | Hsd3b2        |
| 546      | Gltscr1       |
| 614      | C8g           |
| 622      | Serping1      |
| 623      | Lmf1          |
| 630      | C1s           |
| 665      | Slc26a1       |
| 673      | Tchh          |
| 676      | Ms4a4d        |
| 692      | Pelo          |
| 693      | Vps13d        |
| 703      | Spryd4        |
| 734      | Lrrc50        |
| 769      | 5430437P03Rik |
| 786      | Macrocl       |
| 794      | Mrps14        |
| 866      | Zfp369        |
| 870      | Rint1         |
| 874      | Aldh1a7       |
| 877      | MMT00015473   |
| 881      | Adi1          |
| 884      | Kif26b        |
| 901      | Ndufs3        |

|      |               |
|------|---------------|
| 910  | Sned1         |
| 930  | Cd55          |
| 963  | Lrrfip2       |
| 993  | Rbm22         |
| 1006 | 2600011E07Rik |
| 1014 | Rtcd1         |
| 1017 | Dync2li1      |
| 1041 | 3110049J23Rik |
| 1052 | Cog4          |
| 1090 | 5730409G15Rik |
| 1092 | MMT00024026   |
| 1097 | Dctn6         |
| 1099 | Ap1m1         |
| 1101 | Sec11a        |
| 1135 | Akap12        |
| 1140 | Rmnd5a        |
| 1162 | Cpsf4         |
| 1177 | EG545391      |
| 1178 | Atp5h         |
| 1201 | Ptger3        |
| 1232 | Abhd1         |
| 1241 | Meox1         |
| 1244 | Tmem150       |
| 1248 | Usp24         |
| 1268 | Cyb5r1        |
| 1270 | 1700029I01Rik |
| 1271 | 2810403A07Rik |
| 1284 | Serpina3h     |
| 1291 | Sft2d1        |
| 1298 | Trim41        |
| 1321 | AW548124      |
| 1325 | Pigu          |
| 1340 | Tap2          |
| 1368 | Pctp          |
| 1371 | 1200009I06Rik |
| 1401 | Klk8          |
| 1444 | C1r           |
| 1447 | Naaa          |
| 1466 | Ubap2l        |
| 1477 | Nfyb          |
| 1515 | Med20         |
| 1536 | Hopx          |
| 1537 | 1700052K11Rik |
| 1566 | Kctd15        |
| 1574 | Nebi          |
| 1579 | Clca1         |
| 1580 | Mrs2          |
| 1602 | Mina          |
| 1603 | Lrwd1         |
| 1613 | Trim26        |
| 1627 | 2310030N02Rik |

|      |               |
|------|---------------|
| 1629 | Gcsh          |
| 1633 | Kars          |
| 1646 | Slc15a4       |
| 1648 | Gnpat1        |
| 1653 | Anxa5         |
| 1660 | Zfp33b        |
| 1672 | Mlh1          |
| 1702 | Galc          |
| 1705 | Gltpd1        |
| 1745 | Gas7          |
| 1755 | Ocel1         |
| 1763 | Mcam          |
| 1788 | Gadd45gip1    |
| 1789 | Pcbp2         |
| 1826 | Acaa2         |
| 1853 | Stat5a        |
| 1866 | 2010012O05Rik |
| 1867 | Bcas2         |
| 1899 | 1110031B06Rik |
| 1901 | Tpp1          |
| 1936 | Cbwd1         |
| 1956 | Usp50         |
| 1960 | Ubr2          |
| 1964 | C730048C13Rik |
| 1985 | Pepd          |
| 2011 | Slc2a5        |
| 2021 | Atf7ip        |
| 2079 | Mthfs         |
| 2082 | AU018778      |
| 2115 | Gpr12         |
| 2118 | Kptn          |
| 2121 | Brms1l        |
| 2130 | Smcr7         |
| 2157 | 0610007C21Rik |
| 2243 | Gcsh          |
| 2270 | Pter          |
| 2275 | Cyp4b1        |
| 2297 | Syce2         |
| 2308 | A930005I04Rik |
| 2320 | Spc24         |
| 2325 | H2-K1         |
| 2372 | Stx12         |
| 2404 | MMT00049822   |
| 2426 | MMT00013085   |
| 2440 | 1500003O22Rik |
| 2456 | Mrpl10        |
| 2476 | Slc4a2        |
| 2485 | Adck1         |
| 2490 | MMT00070880   |
| 2511 | Ltv1          |
| 2521 | Olfml3        |

|      |               |
|------|---------------|
| 2523 | Pgs1          |
| 2527 | 1600012F09Rik |
| 2533 | Arhgef19      |
| 2570 | Tmod4         |
| 2571 | Rmnd1         |
| 2593 | Tbc1d1        |
| 2595 | Acbd4         |
| 2599 | Lsm14a        |
| 2622 | Timd2         |
| 2631 | Aldh1l1       |
| 2651 | Ttc7          |
| 2652 | Immp2l        |
| 2662 | Sgpl1         |
| 2671 | Sh3rf1        |
| 2674 | 1810005K13Rik |
| 2678 | Rbm9          |
| 2694 | Siah2         |
| 2722 | Abca5         |
| 2742 | Zbed3         |
| 2743 | Tcf3          |
| 2749 | Naf1          |
| 2752 | Fcgr1         |
| 2753 | Myo6          |
| 2801 | H2-BI         |
| 2813 | Mrpl55        |
| 2827 | Raet1d        |
| 2848 | Serpine2      |
| 2875 | Wfdc2         |
| 2889 | Pqlc2         |
| 2892 | MMT00046974   |
| 2900 | 6330416L07Rik |
| 2902 | D4Ert196e     |
| 2912 | Wtip          |
| 2915 | Nfs1          |
| 2932 | Slco1a1       |
| 2938 | H2-T23        |
| 2950 | Micall1       |
| 2968 | Rab23         |
| 2980 | Slc37a2       |
| 2993 | Gm1752        |
| 2998 | Lzic          |
| 3008 | Nxt1          |
| 3014 | Rfwd3         |
| 3017 | Fas           |
| 3021 | Gdf9          |
| 3029 | Ybx1          |
| 3047 | Cyp2d26       |
| 3052 | 9130404D08Rik |
| 3055 | Pde4c         |
| 3078 | 9630033F20Rik |
| 3079 | Gstt3         |



|      |               |
|------|---------------|
| 3080 | MMT00014480   |
| 3081 | Dhx38         |
| 3135 | Gcdh          |
| 3139 | Gba2          |
| 3141 | Tmf1          |
| 3159 | Pld1          |
| 3167 | Dym           |
| 3175 | Sulf2         |
| 3235 | BC029214      |
| 3261 | Rpap2         |
| 3279 | Slc46a1       |
| 3286 | Alox5ap       |
| 3314 | Wars2         |
| 3317 | Ak3           |
| 3320 | Cox18         |
| 3325 | Plekhj1       |
| 3347 | Mfsd1         |
| 3391 | Mfap3         |
| 3411 | Rabl2a        |
| 3426 | Hap1          |
| 3460 | Ddb2          |
| 3467 | 1700061I17Rik |
| 3475 | 2610305D13Rik |
| 3480 | Pnpo          |
| 3493 | Wbp4          |
| 3496 | Slc41a2       |
| 3512 | 6530401N04Rik |
| 3540 | MMT00015118   |
| 3545 | Mtrf1l        |
| 3554 | Npas3         |
| 3559 | 4933433P14Rik |
| 3586 | MMT00019611   |
| 3592 | Twistnb       |
| 3598 | Rpo1-3        |
| 3610 | Rnf38         |
| 3616 | Dnajc16       |
| 3622 | Trim21        |
| 3642 | Spsb4         |
| 3652 | Adm           |
| 3654 | St13          |
| 3656 | Hoxb3         |
| 3689 | Adh1          |
| 3698 | 1600014C10Rik |
| 3703 | Ggcx          |
| 3704 | H2-Q7         |
| 3713 | Acot6         |
| 3743 | Corin         |
| 3744 | Rmnd1         |
| 3753 | Setdb1        |
| 3768 | Cyp2c44       |
| 3780 | Ryk           |

|      |               |
|------|---------------|
| 3812 | Zfyve26       |
| 3823 | Slc22a15      |
| 3847 | Tdrd7         |
| 3848 | Mrpl21        |
| 3856 | Slc30a5       |
| 3857 | 1700001C19Rik |
| 3862 | Gpd1          |
| 3869 | Zadh2         |
| 3885 | Apol7c        |
| 3905 | H2-Q1         |
| 3913 | Mrpl15        |
| 3938 | Abt1          |
| 3984 | Dclre1a       |
| 3998 | 4930528F23Rik |
| 4004 | Thbs2         |
| 4010 | Alkbh2        |
| 4019 | Tbk1          |
| 4045 | MMT00072411   |
| 4057 | Slc2a4        |
| 4061 | Apcs          |
| 4073 | Eif4e2        |
| 4082 | Colec11       |
| 4112 | MMT00062664   |
| 4116 | Ifi205        |
| 4126 | Vti1a         |
| 4174 | Unc13b        |
| 4186 | Car7          |
| 4188 | Sult1a1       |
| 4191 | Fbln2         |
| 4195 | Csrp2bp       |
| 4203 | Fermt2        |
| 4210 | Cygb          |
| 4243 | Fbxo38        |
| 4305 | Tmem51        |
| 4333 | Sumo3         |
| 4336 | Rbbp9         |
| 4339 | Gemin6        |
| 4344 | 1810073G14Rik |
| 4346 | Ccdc46        |
| 4347 | Mfn2          |
| 4363 | 2810002I04Rik |
| 4386 | Sptlc1        |
| 4387 | Frs3          |
| 4395 | Tspo          |
| 4411 | 2310039H08Rik |
| 4412 | Lrrc27        |
| 4414 | 5033406O09Rik |
| 4415 | B230399E16Rik |
| 4417 | Stom          |
| 4419 | Alg14         |
| 4466 | MMT00014327   |

|      |               |
|------|---------------|
| 4469 | Cyp3a13       |
| 4491 | E2f6          |
| 4499 | Enpp2         |
| 4519 | Ubash3b       |
| 4520 | Ppp1r11       |
| 4526 | Satb1         |
| 4555 | Cchr1         |
| 4602 | Pdzrn3        |
| 4604 | Cyfp2         |
| 4607 | Acad11        |
| 4617 | Agpat9        |
| 4626 | 2310046K01Rik |
| 4638 | Alkbh4        |
| 4655 | 1810029B16Rik |
| 4657 | C230096C10Rik |
| 4662 | Mpzl2         |
| 4675 | Sparcl1       |
| 4697 | Cyp2a12       |
| 4703 | Nubpl         |
| 4731 | Zmynd12       |
| 4745 | Lhfp          |
| 4768 | Lsm10         |
| 4777 | 2810459M11Rik |
| 4796 | Rcbtb2        |
| 4834 | 4930553D19Rik |
| 4837 | Ear2          |
| 4863 | Atad4         |
| 4885 | Fhad1         |
| 4891 | Atp6v0b       |
| 4896 | 4930405M20Rik |
| 4901 | MMT00073557   |
| 4918 | Scara5        |
| 4933 | Clec14a       |
| 4938 | Mccc2         |
| 4958 | Ndufa7        |
| 4965 | Kl            |
| 4972 | Sec16b        |
| 5021 | Gdap2         |
| 5023 | Spast         |
| 5069 | Cdkn2aipnl    |
| 5098 | 1700029J11Rik |
| 5100 | Pebp1         |
| 5111 | Olf380        |
| 5123 | Zfp191        |
| 5128 | Rfxap         |
| 5232 | Arhgef16      |
| 5252 | Mfsd3         |
| 5258 | Mcts2         |
| 5263 | Anapc13       |
| 5270 | Rnf8          |
| 5294 | C730048C13Rik |

|      |                    |
|------|--------------------|
| 5295 | F2r                |
| 5296 | Rnf181             |
| 5332 | Pdlim4             |
| 5352 | Pdcd2l             |
| 5382 | Fbn1               |
| 5401 | Nlr1               |
| 5410 | Cyp4f15            |
| 5433 | 2410004L22Rik      |
| 5440 | 1810020G14Rik      |
| 5456 | Rabgap1l           |
| 5465 | Slamf8             |
| 5488 | C920009B18Rik      |
| 5502 | Tmem107            |
| 5508 | Lrig2              |
| 5511 | BC055004           |
| 5522 | Pink1              |
| 5525 | Prkca              |
| 5566 | 2610002J02Rik      |
| 5620 | 2700038C09Rik      |
| 5632 | Reck               |
| 5636 | Trmu               |
| 5639 | Gdpd3              |
| 5645 | Tmem8              |
| 5648 | Zfp213             |
| 5661 | Lrrc46             |
| 5664 | Fez2               |
| 5676 | MMT00039774        |
| 5677 | Cmas               |
| 5681 | Mbd1               |
| 5715 | ENSMUSG00000052976 |
| 5739 | Adsl               |
| 5740 | Efemp2             |
| 5762 | Trpc3              |
| 5777 | Dusp16             |
| 5822 | Car2               |
| 5829 | 2810455K09Rik      |
| 5838 | Magi1              |
| 5840 | Tbc1d9b            |
| 5867 | Stk4               |
| 5878 | Iqgap2             |
| 5884 | Gstm2              |
| 5910 | 1110014J01Rik      |
| 5932 | Arfgap2            |
| 5936 | Pfn1               |
| 5938 | Pfn2               |
| 5965 | Pbld               |
| 5999 | RP23-275N21.2      |
| 6016 | A530057A03Rik      |
| 6017 | MMT00018015        |
| 6027 | Rtn3               |
| 6030 | As3mt              |

|      |                    |
|------|--------------------|
| 6037 | Ccnl2              |
| 6059 | Dsn1               |
| 6060 | Tle6               |
| 6079 | Tmem169            |
| 6105 | Cryaa              |
| 6108 | Ndufa8             |
| 6112 | Tmem183a           |
| 6117 | Atp9a              |
| 6128 | 2210418O10Rik      |
| 6147 | Dirc2              |
| 6152 | MMT00016029        |
| 6158 | Msh2               |
| 6170 | Abcc6              |
| 6183 | Atxn10             |
| 6187 | 4930473A06Rik      |
| 6191 | Ddost              |
| 6209 | Dsp                |
| 6216 | Gm944              |
| 6231 | 9030622O22Rik      |
| 6250 | Csnk2a1            |
| 6283 | Ptpn22             |
| 6294 | Wdr20b             |
| 6320 | 1810055E12Rik      |
| 6325 | Cpsf3l             |
| 6330 | Dgkq               |
| 6333 | Iqcg               |
| 6353 | Spata13            |
| 6360 | D17H6S56E-3        |
| 6371 | Dedd2              |
| 6372 | 1110021L09Rik      |
| 6376 | Nle1               |
| 6377 | D18Erttd653e       |
| 6394 | Fbxo6              |
| 6408 | Entpd8             |
| 6413 | Fbxo4              |
| 6475 | Sdc4               |
| 6486 | OTTMUSG00000001305 |
| 6487 | Slc4a4             |
| 6498 | MMT00016809        |
| 6504 | Alad               |
| 6506 | Scyl2              |
| 6510 | Plcl2              |
| 6513 | Qpctl              |
| 6515 | Eif2a              |
| 6519 | Phldb3             |
| 6532 | Auh                |
| 6534 | Cript              |
| 6541 | 1810019J16Rik      |
| 6573 | Pecr               |
| 6587 | Irf9               |
| 6601 | Ttc30b             |

|      |               |
|------|---------------|
| 6605 | Gpld1         |
| 6607 | Reln          |
| 6615 | 1810023F06Rik |
| 6625 | C1s           |
| 6648 | Cenpl         |
| 6657 | Irf6          |
| 6660 | Mrto4         |
| 6671 | Pbxip1        |
| 6727 | Dtd1          |
| 6733 | Mfng          |
| 6755 | Wdr22         |
| 6760 | 2810428I15Rik |
| 6765 | Ldhb          |
| 6766 | Sspn          |
| 6768 | Plekhf2       |
| 6790 | Zdhhc24       |
| 6795 | Cdyl2         |
| 6797 | Blvra         |
| 6804 | Cyp2d22       |
| 6809 | Rorc          |
| 6819 | Cct2          |
| 6828 | Pigh          |
| 6830 | Rsc1a1        |
| 6839 | Mrpl46        |
| 6842 | Amotl2        |
| 6857 | Serinc2       |
| 6910 | Ly6c2         |
| 6912 | Crym          |
| 6921 | Olfml1        |
| 6931 | Hrsp12        |
| 6974 | Tmem65        |
| 6975 | Wdr67         |
| 6977 | Lman1         |
| 7030 | RP23-232H13.5 |
| 7088 | Slc37a1       |
| 7099 | Kcnk10        |
| 7116 | Katnal1       |
| 7135 | Ezr           |
| 7145 | 2810021G02Rik |
| 7173 | Trim59        |
| 7185 | Ostf1         |
| 7191 | Fgfr1op       |
| 7192 | Ttc21b        |
| 7220 | 1110018M03Rik |
| 7257 | Mcf2          |
| 7258 | Bmp2k         |
| 7266 | Olf354        |
| 7273 | Rnf103        |
| 7286 | Noxo1         |
| 7307 | Agmat         |
| 7324 | Mtap          |

|      |               |
|------|---------------|
| 7347 | 1110032A04Rik |
| 7355 | Procr         |
| 7370 | Spop          |
| 7372 | Fastk         |
| 7386 | Pex6          |
| 7388 | Amn           |
| 7415 | Isoc1         |
| 7431 | ldh1          |
| 7449 | Creg1         |
| 7452 | Abcc9         |
| 7466 | Insl6         |
| 7472 | Klra1         |
| 7483 | Cyp3a25       |
| 7503 | Rab11fip1     |
| 7508 | 2210021J22Rik |
| 7519 | Gstm1         |
| 7524 | Aldh4a1       |
| 7546 | Ddhd1         |
| 7556 | A530050D06Rik |
| 7571 | Casz1         |
| 7572 | Ppm1l         |
| 7586 | 5730469M10Rik |
| 7603 | Sod2          |
| 7610 | Scand1        |
| 7633 | Pik3r6        |
| 7635 | Syng2         |
| 7654 | Ptpmt1        |
| 7670 | Ccdc57        |
| 7678 | Ltbr          |
| 7718 | Pdia6         |
| 7732 | Acox1         |
| 7761 | Nudt19        |
| 7792 | 6720467C03Rik |
| 7802 | Adcy4         |
| 7810 | Trim45        |
| 7812 | Ipo7          |
| 7833 | Mcts2         |
| 7861 | Klhdc4        |
| 7897 | MMT00067427   |
| 7900 | Myo18a        |
| 7911 | Pik3c2g       |
| 7926 | Kctd1         |
| 7963 | Rxrg          |
| 7975 | Lancl1        |
| 7991 | Gpr115        |
| 7993 | BC025076      |
| 8016 | Mrpl35        |
| 8029 | Rpap3         |
| 8072 | Zcchc9        |
| 8073 | Irak1bp1      |
| 8079 | Pts           |

|      |               |
|------|---------------|
| 8114 | Kcnn1         |
| 8154 | Neb           |
| 8155 | Mark3         |
| 8156 | Tll1          |
| 8173 | Eif3eip       |
| 8176 | Stx6          |
| 8219 | Nt5e          |
| 8249 | Cyb5r4        |
| 8269 | Ccdc11        |
| 8274 | Zc3h11a       |
| 8322 | Dpy19l1       |
| 8332 | Tmem206       |
| 8337 | Lgr4          |
| 8338 | Atg10         |
| 8340 | Pde1a         |
| 8350 | D8Ert738e     |
| 8357 | Siva1         |
| 8372 | Uap1          |
| 8373 | Cdc7          |
| 8394 | Dpy19l3       |
| 8406 | lkbkap        |
| 8408 | Nr1i3         |
| 8415 | Cyb561        |
| 8418 | MMT00006138   |
| 8439 | Slc25a33      |
| 8443 | Pola2         |
| 8477 | MMT00002146   |
| 8489 | Prdx3         |
| 8521 | Ceacam1       |
| 8547 | Gbp4          |
| 8568 | Tnik          |
| 8610 | Padi4         |
| 8648 | Flnb          |
| 8649 | MMT00072863   |
| 8653 | AW124722      |
| 8683 | 3110002H16Rik |
| 8703 | Gstp1         |
| 8705 | Ahdc1         |
| 8721 | Tbc1d10c      |
| 8723 | Oxsm          |
| 8724 | Tgfb3         |
| 8738 | Reg4          |
| 8750 | 1700010l14Rik |
| 8767 | Rgl2          |
| 8769 | Cenpk         |
| 8783 | Zfyve16       |
| 8791 | Sectm1a       |
| 8807 | Ankrd56       |
| 8840 | Tmem18        |
| 8851 | Pdcd4         |
| 8855 | Psph          |



|      |               |
|------|---------------|
| 8901 | Adamts10      |
| 8902 | Aldh3b1       |
| 8907 | Npr2          |
| 8911 | Ces6          |
| 8933 | Arpc5         |
| 8964 | Smad2         |
| 8967 | Acot12        |
| 8971 | Slc18a2       |
| 8992 | Trfr2         |
| 9005 | Mapk1ip1l     |
| 9010 | 8430419L09Rik |
| 9017 | Tnfrsf14      |
| 9022 | Plek2         |
| 9026 | Cep135        |
| 9049 | 1810046J19Rik |
| 9057 | Spp1          |
| 9077 | Cnpy4         |
| 9104 | Cobra1        |
| 9122 | Sepw1         |
| 9154 | Tfg           |
| 9158 | Pde9a         |
| 9161 | Mrpl17        |
| 9195 | Sub1          |
| 9196 | RP23-330D3.5  |
| 9215 | Tnni1         |
| 9227 | 5730470L24Rik |
| 9230 | 1700027N10Rik |
| 9260 | Cmtm6         |
| 9304 | Al449175      |
| 9310 | Pdrg1         |
| 9326 | Pgm5          |
| 9352 | Hnrpl         |
| 9353 | Emilin2       |
| 9359 | Dhx34         |
| 9391 | MMT00060086   |
| 9395 | Eif4g3        |
| 9408 | Hmgcs2        |
| 9417 | Cd163         |
| 9419 | Acox2         |
| 9448 | Nsun7         |
| 9449 | Sft2d2        |
| 9454 | 2810426N06Rik |
| 9573 | MMT00015549   |
| 9610 | Narf          |
| 9611 | Ncf2          |
| 9634 | Atp13a2       |
| 9674 | Pea15a        |
| 9678 | AW555464      |
| 9689 | 4432416J03Rik |
| 9707 | Golt1a        |
| 9713 | Ykt6          |

|       |               |
|-------|---------------|
| 9717  | Psemb9        |
| 9762  | Snx5          |
| 9770  | Bcmo1         |
| 9795  | Afg3l2        |
| 9805  | Tagap         |
| 9820  | BC023105      |
| 9822  | Celsr1        |
| 9827  | Pam           |
| 9830  | Rbks          |
| 9832  | Brf1          |
| 9842  | Qdpr          |
| 9861  | Serpinb6b     |
| 9875  | Cdk5rap3      |
| 9912  | Ttc27         |
| 9931  | Glt25d1       |
| 9955  | Psmg2         |
| 9959  | Ecm1          |
| 9962  | Krt23         |
| 9963  | Rcn3          |
| 10015 | MMT00065088   |
| 10077 | Cep63         |
| 10088 | Ddc           |
| 10145 | 2700038C09Rik |
| 10159 | Msh3          |
| 10189 | Cage1         |
| 10191 | Ilf3          |
| 10195 | Klf1          |
| 10203 | Cyp4f16       |
| 10214 | Sectm1b       |
| 10236 | EG665033      |
| 10245 | Dus1l         |
| 10256 | Gmds          |
| 10273 | Gpt2          |
| 10292 | Cobl          |
| 10308 | Fuk           |
| 10311 | Cpox          |
| 10327 | Hint2         |
| 10332 | Gnrhr         |
| 10335 | Arsb          |
| 10338 | D630045J12Rik |
| 10340 | Hc            |
| 10376 | C920025E04Rik |
| 10402 | Mia1          |
| 10426 | Ly6f          |
| 10434 | Ppp2r5a       |
| 10456 | Sbf2          |
| 10466 | S1pr5         |
| 10482 | Mcat          |
| 10483 | Crot          |
| 10489 | Aldh1b1       |
| 10511 | Tmem68        |

|       |               |
|-------|---------------|
| 10521 | Ttf2          |
| 10539 | Unc45b        |
| 10542 | Hao3          |
| 10545 | Tmem147       |
| 10553 | Dusp23        |
| 10558 | Cyp2d40       |
| 10576 | Xrcc3         |
| 10629 | BC021614      |
| 10634 | Kitl          |
| 10638 | Gpr97         |
| 10667 | H2-Eb1        |
| 10668 | Kars          |
| 10672 | BC031353      |
| 10674 | Antxr2        |
| 10711 | 1700108F19Rik |
| 10724 | Colec10       |
| 10729 | Fgd2          |
| 10733 | Kctd6         |
| 10738 | Llg1          |
| 10747 | Abcf2         |
| 10786 | Mrps36        |
| 10803 | Wnt5a         |
| 10860 | Lrrc8c        |
| 10876 | Steap1        |
| 10899 | Coro2b        |
| 10906 | Ccdc122       |
| 10995 | Ap4m1         |
| 11023 | Lcn12         |
| 11051 | A130042E20Rik |
| 11074 | Lpgat1        |
| 11080 | Tctn2         |
| 11094 | Slc17a3       |
| 11108 | Ltbp1         |
| 11121 | Mtmr11        |
| 11128 | Aars          |
| 11147 | Gng12         |
| 11162 | Hkdc1         |
| 11166 | Uqcc          |
| 11167 | Dars2         |
| 11186 | Prkg1         |
| 11199 | Sirt7         |
| 11221 | Isca1         |
| 11234 | Pygl          |
| 11248 | Glt1d1        |
| 11268 | Nxf1          |
| 11302 | Bub3          |
| 11312 | 2210016H18Rik |
| 11319 | Exoc7         |
| 11321 | 2310014L17Rik |
| 11338 | Vamp8         |
| 11369 | Stx3          |

|       |               |
|-------|---------------|
| 11374 | Cct6a         |
| 11404 | Gnpat         |
| 11406 | Ilf203        |
| 11419 | Atrnl1        |
| 11423 | 6720463M24Rik |
| 11435 | Rnaset2a      |
| 11446 | Dock8         |
| 11465 | Eif3k         |
| 11467 | Ypel5         |
| 11475 | H2-D1         |
| 11503 | Rangap1       |
| 11571 | Bpnt1         |
| 11593 | Usf1          |
| 11611 | S100a13       |
| 11619 | Grap          |
| 11620 | Zfr           |
| 11642 | Smyd1         |
| 11649 | Hfe           |
| 11705 | Polr3f        |
| 11735 | Thoc5         |
| 11758 | S100a1        |
| 11789 | Ccdc90a       |
| 11790 | Plekha5       |
| 11812 | Mrpl16        |
| 11814 | Pdlim5        |
| 11816 | Ccdc99        |
| 11823 | Mmp7          |
| 11859 | Poln          |
| 11864 | Dis3l         |
| 11869 | Pcsk5         |
| 11872 | Vamp5         |
| 11882 | Prdm4         |
| 11888 | Myadm         |
| 11917 | Fahd1         |
| 11953 | Gtf2b         |
| 11956 | Bmper         |
| 11966 | Zfp280b       |
| 11968 | Cenpm         |
| 11969 | Gbas          |
| 11980 | Otud1         |
| 12000 | Tmem16h       |
| 12004 | Lgals6        |
| 12055 | 1810008A18Rik |
| 12070 | Adat2         |
| 12084 | Siva1         |
| 12097 | 9430015G10Rik |
| 12109 | Smad4         |
| 12134 | Blmh          |
| 12140 | Mrps15        |
| 12168 | H2-Ke6        |
| 12173 | Acbd6         |

|       |               |
|-------|---------------|
| 12180 | Ank           |
| 12185 | Cyp2d10       |
| 12238 | Traf3         |
| 12239 | A630077B13Rik |
| 12250 | P2ry14        |
| 12256 | Atp10d        |
| 12280 | Cln5          |
| 12302 | Cbx1          |
| 12312 | Ms4a6d        |
| 12330 | Aldh6a1       |
| 12336 | Timm13        |
| 12339 | BC025546      |
| 12380 | Rftn2         |
| 12385 | Mrpl33        |
| 12388 | 8430406I07Rik |
| 12391 | Mrpl9         |
| 12402 | Th1l          |
| 12405 | Cyp4f14       |
| 12412 | BC004728      |
| 12423 | Cyp2g1        |
| 12451 | Srd5a2        |
| 12468 | Cyp2d13       |
| 12492 | Ybx1          |
| 12494 | Thns1l        |
| 12528 | Zfp30         |
| 12546 | Cd7           |
| 12599 | Golt1b        |
| 12623 | Ccdc123       |
| 12632 | Ehmt1         |
| 12634 | Olf1372-ps1   |
| 12636 | MMT00000549   |
| 12656 | Coq5          |
| 12661 | 4932438A13Rik |
| 12679 | Cyp4a10       |
| 12690 | Jak3          |
| 12694 | Riok2         |
| 12700 | Nfia          |
| 12716 | 5830417I10Rik |
| 12727 | Dpf2          |
| 12730 | 9130019O22Rik |
| 12732 | Hsd17b1       |
| 12736 | Stat3         |
| 12744 | 1110034B05Rik |
| 12751 | Sorl1         |
| 12769 | Tmem177       |
| 12784 | Nudt6         |
| 12799 | Spon2         |
| 12805 | Bmp7          |
| 12831 | Tm6sf2        |
| 12838 | Tec           |
| 12847 | Sar1b         |

|       |               |
|-------|---------------|
| 12862 | Trem2         |
| 12866 | 4921517L17Rik |
| 12885 | Ccl24         |
| 12886 | Acp6          |
| 12916 | Fkbp1a        |
| 12925 | Farp1         |
| 12929 | 6330578E17Rik |
| 12948 | MMT00009927   |
| 12963 | Erp27         |
| 12965 | Pmm1          |
| 12984 | Cyb5          |
| 13004 | Arhgef10      |
| 13027 | Ppp2r5c       |
| 13044 | 5730596K20Rik |
| 13045 | A330021E22Rik |
| 13100 | Herpud2       |
| 13127 | Col5a1        |
| 13137 | 2610301G19Rik |
| 13149 | Ifi203        |
| 13159 | Map4k4        |
| 13175 | 4930432O21Rik |
| 13179 | Plxna2        |
| 13187 | Slc27a5       |
| 13195 | Mtif2         |
| 13202 | Sass6         |
| 13206 | Qprt          |
| 13207 | Sptlc2        |
| 13221 | Srd5a3        |
| 13277 | 9530015I07Rik |
| 13285 | Cd276         |
| 13300 | Pdpm          |
| 13302 | Bche          |
| 13308 | Kit           |
| 13309 | Tgtp          |
| 13341 | Tnip2         |
| 13345 | Mmrn2         |
| 13348 | Ank3          |
| 13355 | Foxs1         |
| 13357 | Rpp14         |
| 13382 | Bco2          |
| 13462 | Fbxo3         |
| 13475 | Morn2         |
| 13488 | Art4          |
| 13493 | Ring1         |
| 13512 | Tmem144       |
| 13513 | Trim25        |
| 13514 | Apol9b        |
| 13529 | Abi3bp        |
| 13550 | Mbnl2         |
| 13554 | Aqr           |
| 13578 | Asph          |

|       |               |
|-------|---------------|
| 13581 | Srxn1         |
| 13599 | Hbs1l         |
| 13615 | Arl16         |
| 13617 | Acin1         |
| 13626 | RP23-395H4.4  |
| 13648 | Dap           |
| 13667 | Cbs           |
| 13683 | 9030420J04Rik |
| 13688 | Ppa1          |
| 13699 | Fzr1          |
| 13720 | Serpina11     |
| 13732 | Tpm4          |
| 13747 | Entpd2        |
| 13777 | MMT00015864   |
| 13780 | Pilra         |
| 13786 | Tha1          |
| 13789 | H2-Q8         |
| 13810 | 1110036O03Rik |
| 13813 | Ktelc1        |
| 13826 | Melk          |
| 13839 | Gypc          |
| 13842 | Aurkaip1      |
| 13877 | Btnl9         |
| 13899 | Nup54         |
| 13911 | Clec12a       |
| 13929 | Lamb3         |
| 13945 | Hivep1        |
| 13979 | Ociad2        |
| 13983 | Copz2         |
| 14009 | 2310030G06Rik |
| 14027 | Rpo1-1        |
| 14029 | 2810022L02Rik |
| 14032 | Cog6          |
| 14043 | 4930455C21Rik |
| 14045 | Rps4y2        |
| 14052 | EG226654      |
| 14057 | MMT00080613   |
| 14062 | Pan3          |
| 14084 | D530033C11Rik |
| 14085 | Cdkl2         |
| 14086 | 2700097O09Rik |
| 14101 | Zfp69         |
| 14108 | Polr3b        |
| 14132 | Glo1          |
| 14135 | Eepd1         |
| 14147 | Acss2         |
| 14178 | Hgfac         |
| 14185 | Poldip3       |
| 14188 | Ttc8          |
| 14190 | Ppil1         |
| 14198 | Clca2         |

|       |               |
|-------|---------------|
| 14208 | Ech1          |
| 14217 | Gabra1        |
| 14226 | Rbm47         |
| 14245 | H2-Ke2        |
| 14261 | 2310066E14Rik |
| 14266 | Sox13         |
| 14271 | Cox6a1        |
| 14295 | Cnpy2         |
| 14296 | Slc35b1       |
| 14307 | Kcnj8         |
| 14314 | 2810405K02Rik |
| 14322 | Bat1a         |
| 14343 | Hnrnpa0       |
| 14347 | Dact2         |
| 14351 | Polr2g        |
| 14384 | Dnajc7        |
| 14399 | Csnk2a1       |
| 14402 | Mrps27        |
| 14433 | Adipor1       |
| 14442 | Ethe1         |
| 14455 | 2700029M09Rik |
| 14468 | Tmtc2         |
| 14526 | Pacsin3       |
| 14531 | Mmel1         |
| 14557 | Pyroxd1       |
| 14559 | Frrs1         |
| 14564 | Mrpl49        |
| 14577 | Cdc37l1       |
| 14583 | Prss22        |
| 14611 | Ddx60         |
| 14617 | MMT00033859   |
| 14627 | Ern1          |
| 14631 | Stag3         |
| 14647 | Cst3          |
| 14676 | Mecr          |
| 14733 | Fhit          |
| 14740 | Mfap1b        |
| 14753 | Slc25a19      |
| 14781 | Mars2         |
| 14841 | 2010311D03Rik |
| 14845 | Tmem188       |
| 14862 | Dhrs7         |
| 14866 | Kctd2         |
| 14882 | Kcnk6         |
| 14913 | Yipf4         |
| 14924 | Hn1l          |
| 14952 | Tex2          |
| 14955 | Dpp7          |
| 14968 | Srbd1         |
| 14981 | 0610012H03Rik |
| 14989 | Map3k5        |



|       |               |
|-------|---------------|
| 15002 | Ncapg         |
| 15022 | Tmem14c       |
| 15032 | 2310033P09Rik |
| 15072 | Commd9        |
| 15088 | 2810452K22Rik |
| 15094 | Pbx4          |
| 15107 | Cxcl14        |
| 15133 | 3110048E14Rik |
| 15135 | Col5a3        |
| 15153 | Foxm1         |
| 15174 | 3110001D03Rik |
| 15181 | Enpp4         |
| 15219 | 0910001L09Rik |
| 15220 | Ddx6          |
| 15247 | Cstb          |
| 15258 | Coil          |
| 15264 | Flywch2       |
| 15276 | Eif4e         |
| 15277 | 2810002N01Rik |
| 15306 | Dpy30         |
| 15318 | Aars2         |
| 15321 | Pus7          |
| 15331 | Pdk1          |
| 15334 | Rnaseh2c      |
| 15353 | Ednrb         |
| 15365 | Ext2          |
| 15375 | Rnd3          |
| 15384 | Mat2a         |
| 15413 | Brp44l        |
| 15451 | Ftcd          |
| 15455 | Lsm4          |
| 15456 | Chi3l3        |
| 15474 | Wfdc15b       |
| 15487 | Cyp20a1       |
| 15495 | 1700034F02Rik |
| 15508 | 4632415L05Rik |
| 15531 | Prickle4      |
| 15540 | C2            |
| 15550 | 2010200O16Rik |
| 15565 | 2310001A20Rik |
| 15567 | 1600002H07Rik |
| 15569 | BC003331      |
| 15575 | Bckdhb        |
| 15618 | Sel1l         |
| 15625 | Capg          |
| 15641 | 5230400G24Rik |
| 15645 | Mrpl18        |
| 15676 | Fads1         |
| 15698 | Them2         |
| 15702 | MMT00047561   |
| 15708 | Retsat        |

|       |               |
|-------|---------------|
| 15752 | Cyp4a14       |
| 15782 | Eml1          |
| 15791 | Txn1          |
| 15792 | Use1          |
| 15826 | Arl4d         |
| 15844 | Klhdc9        |
| 15857 | Itih5         |
| 15864 | Rps6ka2       |
| 15897 | D10Jhu81e     |
| 15908 | Pebp1         |
| 15919 | Fbxl6         |
| 15933 | Serp2         |
| 15935 | Pnpla3        |
| 15971 | Aifm2         |
| 15975 | Cnnm1         |
| 15979 | Rmi1          |
| 16029 | Igh-VJ558     |
| 16046 | Ppwd1         |
| 16066 | Coq2          |
| 16077 | Mocs2         |
| 16168 | Crlf2         |
| 16183 | 1110002B05Rik |
| 16191 | Klc1          |
| 16194 | Alg9          |
| 16208 | Ppara         |
| 16214 | Ocln          |
| 16218 | Rpgrip1       |
| 16225 | Mak10         |
| 16227 | Rarres1       |
| 16281 | 2600010E01Rik |
| 16287 | Extl1         |
| 16322 | Lmod3         |
| 16337 | Grin2c        |
| 16338 | Senp1         |
| 16340 | Scrn2         |
| 16362 | Lym4          |
| 16407 | Mrpl44        |
| 16416 | Commd2        |
| 16431 | Recql4        |
| 16440 | Gprc5a        |
| 16443 | Ccdc59        |
| 16451 | 2010007H12Rik |
| 16465 | Ccdc130       |
| 16500 | 4921539E11Rik |
| 16501 | Loh11cr2a     |
| 16502 | Chsy1         |
| 16510 | Tspyl4        |
| 16531 | 6330403K07Rik |
| 16557 | Rbpms         |
| 16570 | 2410187C16Rik |
| 16571 | Pqlc1         |

|       |               |
|-------|---------------|
| 16587 | E130112L23Rik |
| 16590 | C920005C14Rik |
| 16592 | Psmf1         |
| 16596 | Ptrf          |
| 16598 | E430018J23Rik |
| 16613 | 1110031I02Rik |
| 16616 | Paox          |
| 16617 | Sh2d4a        |
| 16624 | Psma8         |
| 16672 | Tmem82        |
| 16679 | Ctsk          |
| 16692 | Bat4          |
| 16695 | Hs3st6        |
| 16702 | 2810422J05Rik |
| 16708 | A1846148      |
| 16753 | Hfe2          |
| 16796 | Agt           |
| 16814 | AU042651      |
| 16842 | 2310003L22Rik |
| 16849 | Trmt1         |
| 16857 | Perp          |
| 16858 | Tmem38a       |
| 16863 | 2410001C21Rik |
| 16886 | Dpy30         |
| 16910 | Ptprr         |
| 16937 | Ubac2         |
| 16960 | MMT00008703   |
| 16968 | Epha2         |
| 16972 | Nenf          |
| 16983 | Pigx          |
| 17043 | Tmem127       |
| 17050 | Kmo           |
| 17051 | Mrps36        |
| 17063 | Hoxc8         |
| 17087 | Gulo          |
| 17089 | Pilrb1        |
| 17135 | Mum1          |
| 17147 | Ttll12        |
| 17158 | Zfp113        |
| 17159 | Gtpbp6        |
| 17163 | Fmo1          |
| 17193 | Npb           |
| 17225 | Impa2         |
| 17248 | Rap1gap       |
| 17254 | Cyp2f2        |
| 17256 | MMT00046675   |
| 17276 | Cyp4f13       |
| 17284 | D1Bwg0212e    |
| 17285 | 1700019E19Rik |
| 17304 | Cdc23         |
| 17314 | Napa          |

|       |               |
|-------|---------------|
| 17317 | Jmjd1a        |
| 17326 | Zranb3        |
| 17333 | Slc25a10      |
| 17363 | Aebp2         |
| 17389 | Pop4          |
| 17391 | C530028O21Rik |
| 17403 | N4bp1         |
| 17447 | Ctsf          |
| 17451 | F12           |
| 17461 | Ripk5         |
| 17463 | Rgl1          |
| 17506 | Isy1          |
| 17514 | Thbd          |
| 17528 | Gmnn          |
| 17533 | Srd5a1        |
| 17553 | Eif4ebp1      |
| 17555 | Tspan5        |
| 17562 | Rbed1         |
| 17567 | Supt16h       |
| 17577 | Med28         |
| 17584 | F11r          |
| 17585 | Gramd1a       |
| 17619 | Zfp551        |
| 17676 | Amz1          |
| 17691 | Kank3         |
| 17703 | Large         |
| 17707 | Rshl2b        |
| 17715 | Ltbp2         |
| 17716 | Rnf10         |
| 17726 | Slc25a13      |
| 17729 | Prim2         |
| 17743 | Phb2          |
| 17760 | Ccr6          |
| 17774 | Ints1         |
| 17776 | BC043118      |
| 17779 | D6Wsu116e     |
| 17805 | Slc39a12      |
| 17807 | Pebp1         |
| 17850 | Prg4          |
| 17854 | Rdh11         |
| 17862 | Fbxo21        |
| 17881 | Mtg1          |
| 17889 | Bbox1         |
| 17969 | BC030336      |
| 17992 | Gmpr          |
| 18003 | Tff3          |
| 18018 | Galnt11       |
| 18027 | 5730403B10Rik |
| 18053 | Psmc4         |
| 18054 | Mrps36        |
| 18070 | Ogg1          |

|       |               |
|-------|---------------|
| 18088 | Alkbh6        |
| 18112 | lkzf5         |
| 18120 | Tmem201       |
| 18140 | Atg2b         |
| 18148 | Cables1       |
| 18151 | Naip2         |
| 18162 | BC049352      |
| 18164 | Gdf10         |
| 18165 | 5830482F20Rik |
| 18176 | Aqp11         |
| 18195 | Mafk          |
| 18196 | Camk2b        |
| 18217 | Mgat1         |
| 18275 | D730039F16Rik |
| 18276 | Apoa2         |
| 18300 | Arg1          |
| 18333 | Rassf8        |
| 18365 | Bcl2l12       |
| 18366 | Morc2a        |
| 18368 | Mpped2        |
| 18371 | Sap130        |
| 18453 | RP23-67E6.3   |
| 18454 | Tor1aip1      |
| 18462 | Gm1060        |
| 18487 | Serpina5      |
| 18492 | Dhfr          |
| 18512 | Sult3a1       |
| 18518 | Cap1          |
| 18561 | Ngly1         |
| 18574 | Parc          |
| 18577 | Btbd9         |
| 18582 | Krtap6-2      |
| 18586 | Tns1          |
| 18592 | Txnl4a        |
| 18602 | Wisp1         |
| 18606 | A230074B11Rik |
| 18607 | Acat3         |
| 18658 | Gstk1         |
| 18659 | Ephb6         |
| 18662 | Batf3         |
| 18683 | Ctsa          |
| 18697 | Afg3l1        |
| 18702 | Mrc1          |
| 18706 | Lect1         |
| 18709 | Srp68         |
| 18714 | Farsb         |
| 18754 | Rbm8a         |
| 18772 | BC048355      |
| 18790 | Car3          |
| 18830 | MMT00013368   |
| 18835 | Dtwd1         |

|       |               |
|-------|---------------|
| 18837 | Paox          |
| 18851 | Apip          |
| 18868 | Mpeg1         |
| 18871 | Al314976      |
| 18881 | Cops6         |
| 18885 | Rps11         |
| 18886 | Slc18a1       |
| 18893 | Lace1         |
| 18905 | Prmt2         |
| 18906 | Zfand3        |
| 18911 | Selenbp2      |
| 18947 | Ctse          |
| 19003 | Tmed6         |
| 19037 | Slc11a2       |
| 19078 | EG668139      |
| 19102 | Uhrf1bp1l     |
| 19115 | Rab32         |
| 19142 | Gpatch1       |
| 19163 | Cadps2        |
| 19181 | Slc35a3       |
| 19192 | Hist1h1c      |
| 19202 | 1500031L02Rik |
| 19214 | Snpc1         |
| 19216 | Bik           |
| 19223 | Ercc8         |
| 19276 | H28           |
| 19292 | Pold2         |
| 19298 | Unc93b1       |
| 19309 | Slc9a8        |
| 19332 | Bpnt1         |
| 19342 | Cth           |
| 19392 | Slc25a16      |
| 19411 | Hnrnp1        |
| 19421 | Mbd2          |
| 19440 | Anxa9         |
| 19443 | Prkab1        |
| 19477 | Map2k2        |
| 19502 | Fbxo24        |
| 19519 | BC011248      |
| 19520 | Uck2          |
| 19560 | Trmt6         |
| 19578 | Aox1          |
| 19607 | Birc3         |
| 19618 | Snx6          |
| 19622 | Bdh2          |
| 19631 | Nsmce1        |
| 19683 | Cox6c         |
| 19688 | Fap           |
| 19689 | 1110032A13Rik |
| 19694 | Grb14         |
| 19696 | Thoc4         |

|       |               |
|-------|---------------|
| 19708 | Ly6a          |
| 19719 | EG634650      |
| 19725 | Dcp2          |
| 19742 | Cdc211        |
| 19756 | Pex16         |
| 19762 | Pih1d1        |
| 19763 | Acp2          |
| 19766 | Slc26a4       |
| 19771 | Fbp1          |
| 19777 | Lrit1         |
| 19803 | BC003993      |
| 19804 | Rela          |
| 19833 | Ddah2         |
| 19839 | EG269105      |
| 19843 | Rbm45         |
| 19854 | Kcnj14        |
| 19876 | 6030443O07Rik |
| 19905 | Ccnd3         |
| 19924 | Ubiad1        |
| 19925 | Arsa          |
| 19952 | Tlcd1         |
| 19964 | Ndufa9        |
| 19987 | Tspan13       |
| 19995 | Pwp1          |
| 19999 | Ift122        |
| 20045 | D4Wsu114e     |
| 20059 | 2610528E23Rik |
| 20077 | Ccdc115       |
| 20100 | Guca1b        |
| 20118 | Tmem175       |
| 20127 | Ipo8          |
| 20147 | Ybx1          |
| 20187 | Gphn          |
| 20194 | Pnlcd1        |
| 20209 | 5730557B15Rik |
| 20223 | Sc5d          |
| 20238 | H2-T9         |
| 20267 | Lgals1        |
| 20269 | Hsd17b13      |
| 20292 | 1810048J11Rik |
| 20300 | Plekha1       |
| 20342 | Cerkl         |
| 20346 | Gna-rs1       |
| 20353 | Antxr1        |
| 20370 | Scppdh        |
| 20371 | Scnm1         |
| 20376 | Dnajc10       |
| 20384 | BC034069      |
| 20385 | Chd1l         |
| 20390 | Cd9           |
| 20393 | 1110018G07Rik |

|       |               |
|-------|---------------|
| 20413 | Wdr86         |
| 20430 | Trio          |
| 20434 | Lrp3          |
| 20446 | Acadl         |
| 20461 | H2-Ab1        |
| 20468 | Spa17         |
| 20484 | Ces1          |
| 20485 | 6430520M22Rik |
| 20490 | Tmem143       |
| 20505 | Tll9          |
| 20511 | Decr2         |
| 20521 | BC057079      |
| 20548 | 1700041C02Rik |
| 20576 | 1700066M21Rik |
| 20589 | Frm8          |
| 20593 | Ptbp1         |
| 20601 | Rpo1-4        |
| 20606 | MMT00042166   |
| 20610 | Tll11         |
| 20611 | Map2k3        |
| 20661 | Tuft1         |
| 20666 | Mosc1         |
| 20670 | Khl25         |
| 20720 | Ptk2b         |
| 20723 | Cdh1          |
| 20759 | Slc17a1       |
| 20778 | Arf3          |
| 20801 | Mrps11        |
| 20810 | Mtp           |
| 20871 | Pop1          |
| 20917 | Gstm6         |
| 20948 | Cstf2t        |
| 20958 | 4933403F05Rik |
| 20979 | D10Jhu81e     |
| 20999 | 1110049F12Rik |
| 21015 | MMT00014048   |
| 21030 | Ccdc80        |
| 21041 | Cyp17a1       |
| 21060 | Ela1          |
| 21075 | Gtf2h5        |
| 21095 | 9130401M01Rik |
| 21101 | 1110032A03Rik |
| 21125 | Mtif3         |
| 21126 | Dera          |
| 21127 | Triobp        |
| 21136 | Golga1        |
| 21157 | Efemp1        |
| 21165 | Hmbs          |
| 21188 | Pnkp          |
| 21193 | Lbh           |
| 21206 | Supt3h        |



|       |                    |
|-------|--------------------|
| 21232 | Nkiras1            |
| 21244 | Nfatc1             |
| 21258 | 2010003K15Rik      |
| 21291 | Slc39a4            |
| 21295 | Snf1lk             |
| 21329 | Azi2               |
| 21394 | Cdh15              |
| 21402 | Pigv               |
| 21407 | Slc25a46           |
| 21411 | Lenep              |
| 21419 | Giyd2              |
| 21425 | Rab6               |
| 21438 | Plekha4            |
| 21442 | Rad51l1            |
| 21444 | Pnpt1              |
| 21460 | MMT00008970        |
| 21464 | Pop5               |
| 21514 | Rfk                |
| 21517 | Sil1               |
| 21542 | Larp4              |
| 21560 | Apol7e             |
| 21583 | Gstz1              |
| 21607 | Aldh1a1            |
| 21655 | Rab40b             |
| 21662 | A530088I07Rik      |
| 21665 | Nat5               |
| 21710 | Slc30a6            |
| 21712 | Ttc5               |
| 21729 | Hdc                |
| 21754 | Synj2              |
| 21761 | D14Ert449e         |
| 21814 | Accn5              |
| 21824 | 5830443L24Rik      |
| 21895 | Crygn              |
| 21909 | Neur12             |
| 21942 | Fech               |
| 21952 | Tfb1m              |
| 21959 | Sh3gl1             |
| 21986 | Cstf1              |
| 21997 | Phf1               |
| 22001 | Gtlf3b             |
| 22004 | Gtpbp2             |
| 22021 | Csnk1d             |
| 22061 | MMT00054756        |
| 22075 | C1s                |
| 22095 | Mgst1              |
| 22127 | Pafah1b3           |
| 22138 | Ang                |
| 22160 | Pmpcb              |
| 22202 | OTTMUSG00000021274 |
| 22222 | Gstt1              |

|       |               |
|-------|---------------|
| 22226 | Pm20d1        |
| 22230 | Myh9          |
| 22232 | Krt19         |
| 22250 | Wdr45l        |
| 22256 | Arg2          |
| 22297 | Zfyve1        |
| 22317 | Al450540      |
| 22321 | Apol7a        |
| 22337 | Nlk           |
| 22341 | Hdhd2         |
| 22351 | Fanca         |
| 22353 | A930041I02Rik |
| 22359 | Dhrs7b        |
| 22361 | Sephs2        |
| 22362 | Laptm4b       |
| 22393 | 2310044H10Rik |
| 22394 | Sertad3       |
| 22419 | MMT00078129   |
| 22462 | MMT00026054   |
| 22479 | Ascc2         |
| 22546 | Tnnt1         |
| 22554 | Tectb         |
| 22557 | P4hb          |
| 22570 | Phtf1         |
| 22693 | Trim68        |
| 22714 | Ptpn21        |
| 22724 | Adamts13      |
| 22740 | Manbal        |
| 22776 | Gsr           |
| 22786 | Mterfd3       |
| 22841 | Cib1          |
| 22857 | Fahd2a        |
| 22909 | Nup133        |
| 22912 | Stap1         |
| 22918 | MMT00002192   |
| 22944 | Tmem44        |
| 22964 | C9            |
| 22988 | Hscb          |
| 23005 | 4930405A21Rik |
| 23008 | Ctsz          |
| 23036 | Stk19         |
| 23058 | Prph          |
| 23102 | Fbxo7         |
| 23118 | Ttrap         |
| 23119 | Cps1          |
| 23242 | Gngt2         |
| 23247 | Ercc1         |
| 23250 | Plcl2         |
| 23259 | Dnajc1        |
| 23262 | C530043G21Rik |
| 23266 | Cenpq         |

|       |               |
|-------|---------------|
| 23271 | Isca1         |
| 23283 | Mrps12        |
| 23295 | Snx11         |
| 23301 | Scamp1        |
| 23306 | Bag2          |
| 23342 | Ndfip2        |
| 23344 | Nfkbiz        |
| 23353 | Slmo2         |
| 23361 | Bivm          |
| 23401 | H2-Q2         |
| 23420 | Ehbp1         |
| 23457 | Selenbp2      |
| 23458 | Clic4         |
| 23460 | Rragd         |
| 23466 | Pou2f1        |
| 23474 | MMT00011721   |
| 23494 | Tubal3        |
| 23553 | Pcnp          |
| 23557 | Ppp1r12c      |
| 23583 | Vps45         |
| 23590 | Ptgds         |
| 23599 | Ndr3          |
| 23605 | MMT00077586   |
| 23609 | Trim44        |
| 23625 | Pkd2          |
| 23636 | Bst2          |
| 23645 | 1700041C02Rik |
| 23693 | A530016L24Rik |
